# Supplementary material
Source: PubMed Central journal article supplement (PMC11345869)
Supplement: NIHMS2014975-supplement-Supplementary_Information.pdf [file NIHMS2014975-supplement-Supplementary_Information.pdf]

## Supplementary Figure 1. Gating strategy for flow cytometry data analysis

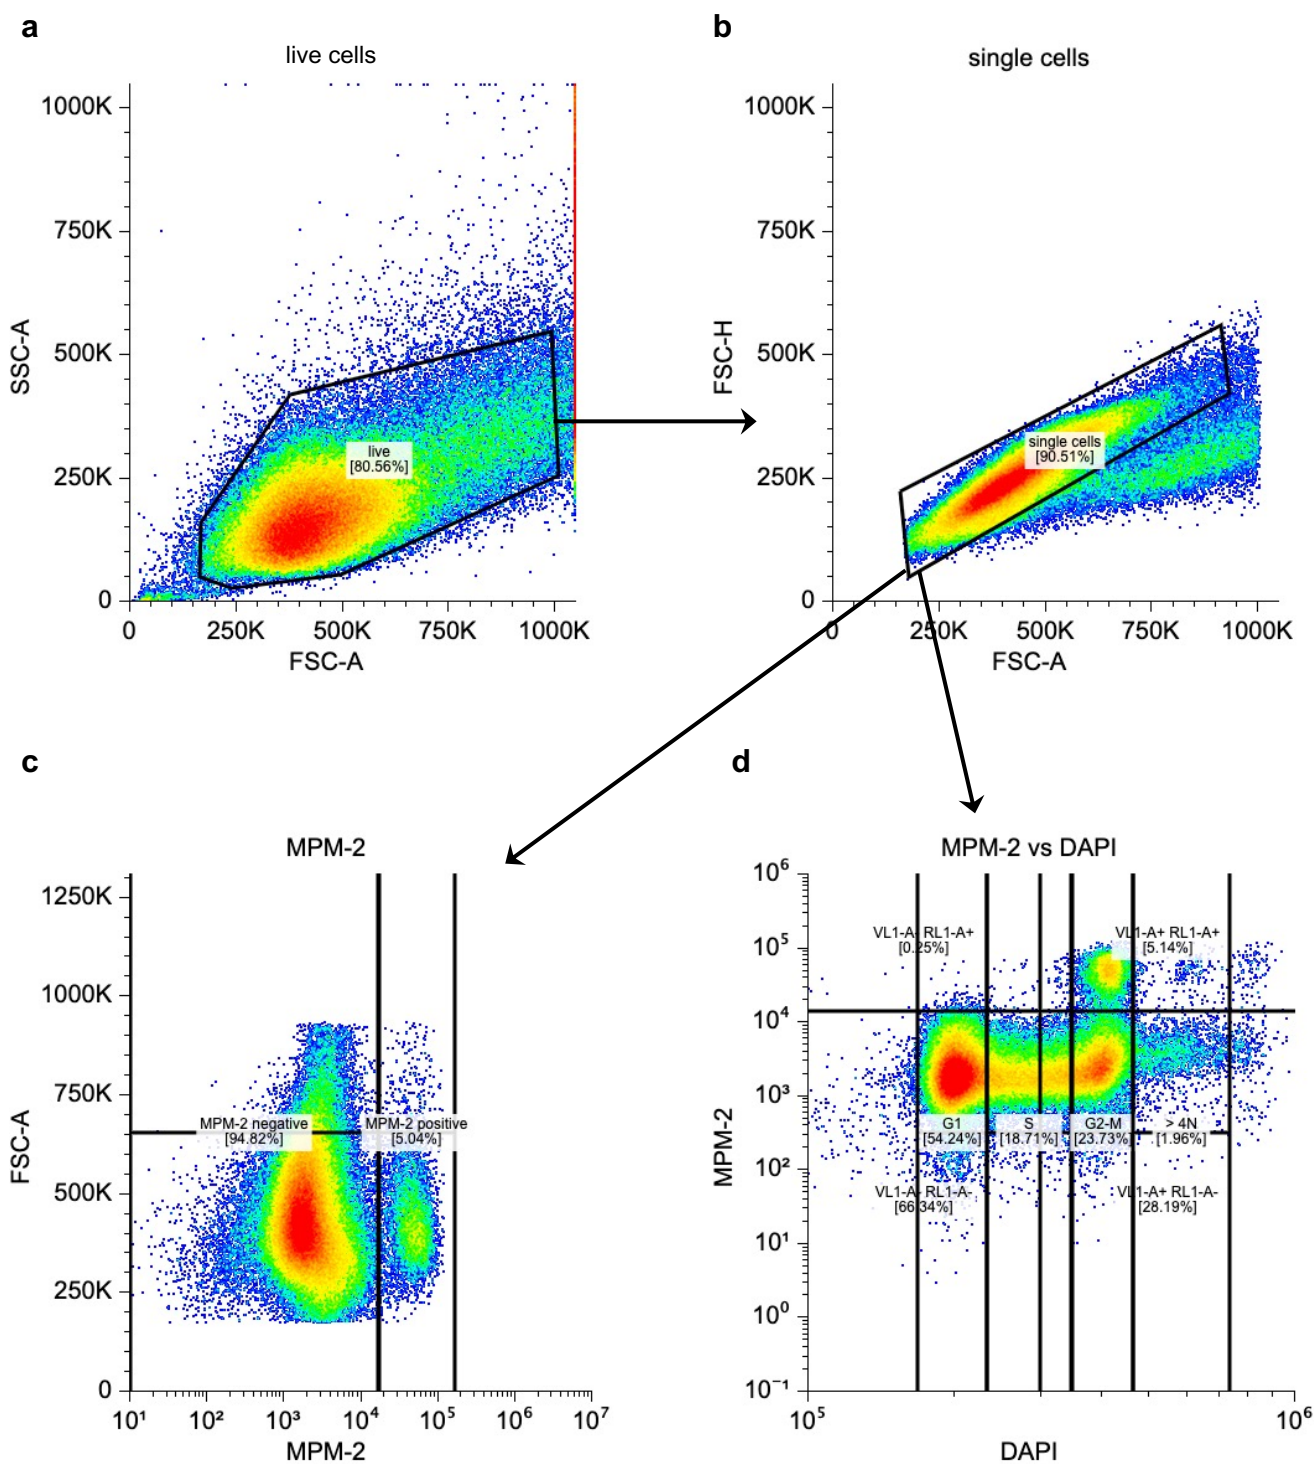

**Supplementary Figure 1. Gating strategy for flow cytometry data analysis.** (a) Total cell population was subjected to live cell gating. FSC-Area/SSC-Area gates were applied to exclude cell debris and select live cells. (b) Live cell population was subjected to singlet gating. FSC-Area/FSC-Height gates were applied to select single cells. (c) MPM-2 positive cells were gated according to the signal intensity compared to unstained sample. (d) MPM-2-DAPI gating were applied for bivariate analysis of cell populations.

**Supplementary Figure 2. Stereo image for crystal structure of MLL1<sup>SET</sup>-Borealin**

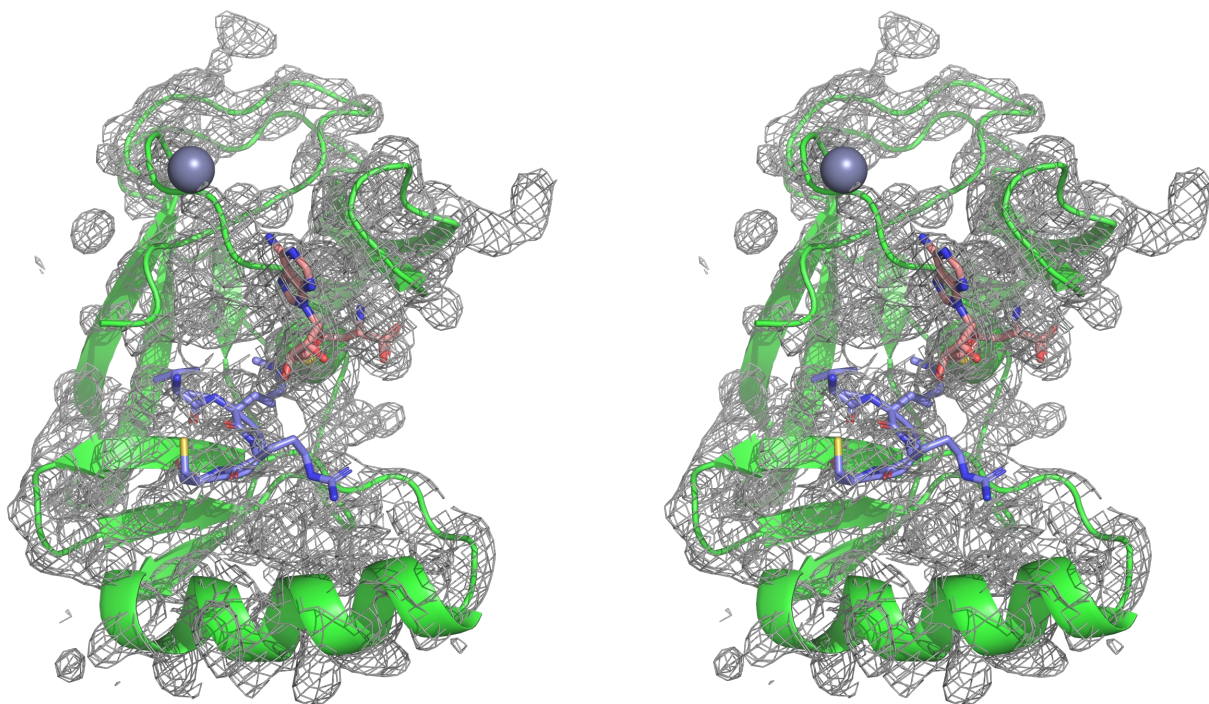

**Supplementary Figure 2. Stereo image for the crystal structure of MLL1<sup>SET</sup>-Borealin.** Stereo image of the electron density map for co-crystallization between MLL1 SET domain and Borealin peptide<sub>137-145</sub> reported in this study.
