# Supplementary material
Source: PubMed Central journal article supplement (PMC11345869)
Supplement: NIHMS2014975-supplement-Supplementary_Table_1.pdf [file NIHMS2014975-supplement-Supplementary_Table_1.pdf]

Supplementary Table 1. Full list of proteins identified by mass spectrometry from SILAC experiment with WT (light) 3xMBT pulldown as compared to O355N mutant (heavy) pulldown assay.

| Protein ID          | Gene Symbol | Description                                                                                    | 55364.8            |                  | 1.7              |                       | 1419987.2             |               | 1.7           |         | Sum    | Corrected_max_ratio_H | Corrected_max_ratio_L |       |      |
|---------------------|-------------|------------------------------------------------------------------------------------------------|--------------------|------------------|------------------|-----------------------|-----------------------|---------------|---------------|---------|--------|-----------------------|-----------------------|-------|------|
|                     |             |                                                                                                | Number of peptides | max_heavy/median | max_light/median | Corrected_max_ratio_H | Corrected_max_ratio_L | max_heavy/sum | max_light/sum |         |        |                       |                       |       |      |
| A2AEV7_A2AEV7_MOUSE | Cdccl20     | Coiled-coil domain containing 120 OS-Mus musculus GN-Cdccl20 PE1 SV-1                          | 1                  | 50.5             | 1.9              | 3.2                   | 26.9                  | 15.07         | 0.06          | 59.1    | 1.9    | 3.2                   | 26.9                  | 15.98 | 0.06 |
| Q8B7V7_STAC3_MOUSE  | Stac3       | SH3 and cysteine-rich domain-containing protein 3 OS-Mus musculus GN-Stac3 PE2 SV-1            | 1                  | 39.1             | 2.5              | 4.2                   | 24.1                  | 14.67         | 0.07          | 59.1    | 2.5    | 4.1                   | 24.1                  | 14.33 | 0.07 |
| Q8B7V7_MORC2_MOUSE  | Morc2       | Cell surface glycoprotein 2 OS-Mus musculus GN-Morc2 PE2 SV-1                                  | 1                  | 31.7             | 1.9              | 15.5                  | 9.6                   | 9.62          | 0.11          | 31.7    | 1.9    | 15.5                  | 9.6                   | 9.62  | 0.11 |
| Q8B7V7_RL32_MOUSE   | Rpl32       | 60S ribosomal protein L22-like OS-Mus musculus GN-Rpl32 PE1 SV-1                               | 1                  | 45.0             | 3.8              | 6.5                   | 14.6                  | 5.53          | 0.12          | 45.0    | 3.8    | 6.5                   | 14.6                  | 5.53  | 0.12 |
| Q8B807_MORC4_MOUSE  | Morc4       | MORC family CW-type zinc finger protein 4 OS-Mus musculus GN-Morc4 PE2 SV-2                    | 1                  | 17.1             | 1.2              | 2.1                   | 13.8                  | 8.07          | 0.12          | 17.1    | 1.2    | 2.1                   | 13.8                  | 8.23  | 0.12 |
| Q1U197_DENN1B_MOUSE | Denn1b      | DENN domain-containing protein 1B OS-Mus musculus GN-Denn1b PE2 SV-2                           | 1                  | 73.3             | 5.6              | 9.7                   | 13.0                  | 7.58          | 0.13          | 73.3    | 5.6    | 9.7                   | 13.0                  | 7.73  | 0.13 |
| Q8P9M1_SFK_MOUSE    | Sfk         | Lytic enzyme OS-Mus musculus GN-Sfk PE1 SV-1                                                   | 2                  | 64.0             | 5.5              | 9.5                   | 11.6                  | 6.76          | 0.15          | 128.0   | 11.6   | 18.6                  | 11.6                  | 6.89  | 0.15 |
| Q8Q2P7_P210L_MOUSE  | Nup210      | Nuclear pore membrane glycoprotein 210-like OS-Mus musculus GN-Nup210 PE2 SV-2                 | 1                  | 25.6             | 2.4              | 4.1                   | 10.8                  | 6.32          | 0.16          | 25.6    | 2.4    | 4.0                   | 10.8                  | 6.45  | 0.16 |
| Q70491_STRAF6_MOUSE | Straf6      | Stimulated by retinoic acid gene 6 protein OS-Mus musculus GN-Straf6 PE1 SV-1                  | 1                  | 15.4             | 1.5              | 2.5                   | 10.5                  | 6.10          | 0.16          | 15.4    | 1.5    | 2.5                   | 10.5                  | 6.22  | 0.16 |
| Q80787_LVY5_MOUSE   | Lvy5        | Lymphocyte antigen 75 OS-Mus musculus GN-Lvy5 PE1 SV-2                                         | 1                  | 25.3             | 2.8              | 4.9                   | 8.9                   | 5.39          | 0.19          | 25.3    | 2.8    | 4.9                   | 8.9                   | 5.29  | 0.19 |
| Q82582_TAK1L_MOUSE  | Tak1l       | Serine/threonine protein kinase TAK1 OS-Mus musculus GN-Tak1L PE1 SV-1                         | 1                  | 9.9              | 1.2              | 2.0                   | 8.5                   | 4.95          | 0.20          | 9.9     | 1.2    | 2.0                   | 8.5                   | 5.05  | 0.20 |
| EP9VDA_EP9VDA_MOUSE | Akap13      | Protein Akap13 (Fragment) OS-Mus musculus GN-Akap13 PE1 SV-1                                   | 1                  | 15.3             | 2.0              | 3.4                   | 7.6                   | 4.45          | 0.22          | 15.3    | 2.0    | 3.4                   | 7.6                   | 4.54  | 0.22 |
| Q9Q0X4_TRIP4_MOUSE  | Tripp4      | Activating signal cointegrator 1 OS-Mus musculus GN-Tripp4 PE1 SV-2                            | 1                  | 48.0             | 6.5              | 11.2                  | 7.4                   | 4.30          | 0.23          | 48.0    | 6.5    | 11.2                  | 7.4                   | 4.38  | 0.23 |
| Q8B81U_LRW01_MOUSE  | LRW01       | Leucine-rich repeat WD repeat-containing protein 1 OS-Mus musculus GN-LRW01 PE1 SV-1           | 2                  | 27.7             | 4.0              | 6.8                   | 7.0                   | 4.07          | 0.25          | 55.3    | 7.9    | 13.0                  | 7.9                   | 4.15  | 0.24 |
| P11087_C0JAL_MOUSE  | C0Jal       | Genes alpha-10 chain OS-Mus musculus GN-C0Jal PE1 SV-1                                         | 2                  | 70.9             | 10.4             | 17.8                  | 6.8                   | 3.99          | 0.25          | 141.7   | 20.7   | 34.8                  | 6.8                   | 4.07  | 0.25 |
| Q6ZWV7_RL35_MOUSE   | Rpl35       | 60S ribosomal protein L35 OS-Mus musculus GN-Rpl35 PE2 SV-1                                    | 5                  | 570.8            | 85.2             | 146.1                 | 6.7                   | 3.91          | 0.26          | 2496.4  | 443.3  | 745.4                 | 5.6                   | 3.35  | 0.30 |
| FRV9P0_FRV9P0_MOUSE | Tc37        | Protein Tc37 OS-Mus musculus GN-Tc37 PE4 SV-1                                                  | 5                  | 12.7             | 2.0              | 3.4                   | 6.4                   | 3.75          | 0.27          | 69.6    | 17.2   | 28.9                  | 4.0                   | 2.41  | 0.27 |
| PE1811_KAPK5_MOUSE  | Kapks5      | CaM-dependent protein kinase catalytic subunit 2 OS-Mus musculus GN-Kapks5 PE1 SV-2            | 1                  | 15.1             | 2.4              | 4.1                   | 6.4                   | 3.73          | 0.27          | 15.1    | 2.4    | 4.0                   | 6.4                   | 3.80  | 0.26 |
| P14148_RL7_MOUSE    | Rpl7        | 60S ribosomal protein L7 OS-Mus musculus GN-Rpl7 PE1 SV-2                                      | 35                 | 167.0            | 26.1             | 44.8                  | 6.4                   | 3.75          | 0.27          | 10436.2 | 1493.9 | 70.0                  | 4.15                  | 2.44  | 0.27 |
| P17981_NARX2_MOUSE  | Arx2a       | T-cell acute-ADP-ribosyltransferase 1 OS-Mus musculus GN-Arx2a PE1 SV-1                        | 1                  | 17.0             | 2.7              | 4.6                   | 6.4                   | 3.71          | 0.27          | 17.0    | 2.7    | 4.5                   | 6.4                   | 3.78  | 0.26 |
| Q61823_P0DC4_MOUSE  | P0dc4       | Progremmed cell death protein 4 OS-Mus musculus GN-P0dc4 PE1 SV-2                              | 4                  | 13.6             | 2.2              | 3.7                   | 6.3                   | 3.66          | 0.27          | 62.6    | 9.3    | 15.7                  | 6.7                   | 3.99  | 0.25 |
| Q8P9V9_P0Y12_MOUSE  | P0y12       | FY corticosteroid 12 OS-Mus musculus GN-P0Y12 PE4 SV-1                                         | 1                  | 17.0             | 2.2              | 3.4                   | 6.2                   | 3.62          | 0.28          | 17.0    | 2.2    | 3.4                   | 6.2                   | 3.69  | 0.27 |
| Q8B8W1_Tbl1R_MOUSE  | Tbl1R       | F-box-like-WD repeat-containing protein Tbl1R1 OS-Mus musculus GN-Tbl1R1 PE1 SV-1              | 3                  | 14.4             | 2.3              | 4.0                   | 6.2                   | 3.60          | 0.28          | 44.4    | 18.4   | 31.0                  | 2.7                   | 1.60  | 0.63 |
| Q6ZWR4_Q6ZWR4_MOUSE | Rpl36       | 60S ribosomal protein L36 OS-Mus musculus GN-Rpl36 PE1 SV-1                                    | 10                 | 21.9             | 3.6              | 6.2                   | 6.0                   | 3.52          | 0.28          | 99.9    | 19.20  | 32.2                  | 9.9                   | 2.94  | 0.34 |
| Q82280_SGT_MOUSE    | Sgt         | Protein SGT OS-Mus musculus GN-Sgt PE1 SV-1                                                    | 1                  | 7.9              | 1.3              | 2.3                   | 4.8                   | 3.57          | 0.28          | 7.9     | 1.3    | 2.3                   | 4.8                   | 3.57  | 0.28 |
| Q8E5U9_Q8E5U9_MOUSE | Sclt5a      | Neuronal amino acid transporter ASCT2 OS-Mus musculus GN-Sclt5a PE1 SV-1                       | 2                  | 11.7             | 2.0              | 3.4                   | 6.0                   | 3.49          | 0.29          | 23.4    | 3.9    | 6.6                   | 6.0                   | 3.56  | 0.28 |
| Q80850_ERR1_MOUSE   | Erra        | Steroid hormone receptor ERR1 OS-Mus musculus GN-Erra PE1 SV-4                                 | 1                  | 8.7              | 1.5              | 2.5                   | 5.9                   | 3.44          | 0.29          | 8.7     | 1.5    | 2.5                   | 5.9                   | 3.51  | 0.28 |
| Q8CH77_RPGF_MOUSE   | Rpgpf       | Rap guanine nucleotide exchange factor 2 OS-Mus musculus GN-Rpgpf PE1 SV-2                     | 1                  | 11.0             | 1.9              | 3.2                   | 5.9                   | 3.43          | 0.29          | 11.0    | 1.9    | 3.1                   | 5.9                   | 3.50  | 0.29 |
| Q70RE1_PA2A_MOUSE   | Pa2a        | Phosphatidylinositol 4-kinase type 2B OS-Mus musculus GN-Pa2a PE1 SV-1                         | 1                  | 9.8              | 1.7              | 3.0                   | 5.9                   | 3.41          | 0.29          | 9.8     | 1.7    | 3.0                   | 5.9                   | 3.57  | 0.29 |
| Q9QAY4_TOM40_MOUSE  | Tom40       | Mitochondrial import receptor subunit TOM40 homolog OS-Mus musculus GN-Tom40 MAJ SV-1          | 1                  | 7.5              | 1.3              | 2.2                   | 5.8                   | 3.37          | 0.30          | 7.5     | 1.3    | 2.2                   | 5.8                   | 3.44  | 0.29 |
| Q90CK7_AP3L1_MOUSE  | Ap3l1       | AP-3 complex subunit sigma 1 OS-Mus musculus GN-AP3L1 PE1 SV-2                                 | 3                  | 49.3             | 7.9              | 13.9                  | 5.7                   | 3.34          | 0.30          | 265.5   | 53.3   | 8.9                   | 5.0                   | 2.97  | 0.34 |
| Q79192_MRC2_MOUSE   | Mrc2        | Mitochondrial carrier MRC2 OS-Mus musculus GN-Mrc2 PE1 SV-1                                    | 3                  | 9.7              | 1.6              | 2.7                   | 5.9                   | 3.33          | 0.30          | 29.1    | 3.6    | 6.2                   | 5.9                   | 3.39  | 0.31 |
| Q82CM0_RL15_MOUSE   | Rpl15       | 60S ribosomal protein L15 OS-Mus musculus GN-Rpl15 PE2 SV-4                                    | 23                 | 123.4            | 21.9             | 37.5                  | 6.6                   | 3.29          | 0.30          | 3531.2  | 623.4  | 1048.3                | 5.7                   | 3.37  | 0.30 |
| Q61194_P3C2A_MOUSE  | P3c2a       | Phosphatidylinositol 4-phosphate 3-kinase C domain-containing subunit alpha OS-Mus musculus    | 1                  | 7.2              | 1.3              | 2.2                   | 5.5                   | 3.21          | 0.31          | 7.2     | 1.3    | 2.2                   | 5.5                   | 3.27  | 0.31 |
| Q61275_RL23A_MOUSE  | Rpl23a      | 60S ribosomal protein L23A OS-Mus musculus GN-Rpl23a PE1 SV-1                                  | 21                 | 131.5            | 24.2             | 41.2                  | 5.4                   | 3.17          | 0.32          | 632.9   | 122.34 | 205.7                 | 5.2                   | 3.08  | 0.32 |
| Q82QW1_P134C_MOUSE  | P134c       | Protein FAM134C OS-Mus musculus GN-P134C PE1 SV-1                                              | 1                  | 15.1             | 2.4              | 4.1                   | 6.4                   | 3.73          | 0.32          | 15.1    | 2.4    | 4.0                   | 6.4                   | 3.80  | 0.31 |
| Q80R72_ZNF768_MOUSE | Znf768      | Zinc finger protein 768 OS-Mus musculus GN-ZNF768 PE2 SV-1                                     | 1                  | 7.2              | 1.3              | 2.3                   | 5.4                   | 3.14          | 0.32          | 7.2     | 1.3    | 2.3                   | 5.4                   | 3.20  | 0.31 |
| Q54988_SUK_MOUSE    | Suk         | IR2C-like serine/threonine protein kinase OS-Mus musculus GN-Suk PE1 SV-2                      | 1                  | 6.8              | 1.3              | 2.2                   | 5.4                   | 3.14          | 0.32          | 6.8     | 1.3    | 2.1                   | 5.4                   | 3.20  | 0.31 |
| Q8400C_PAN3_MOUSE   | Pan3        | PAB-dependent poly(A)-specific ribonuclease subunit PAN3 OS-Mus musculus GN-Pan3 PE2 SV-3      | 1                  | 6.0              | 1.1              | 1.9                   | 5.4                   | 3.12          | 0.32          | 6.0     | 1.1    | 1.9                   | 5.4                   | 3.19  | 0.31 |
| Q82QD0_E9BP8_MOUSE  | E9bp8       | Protein E9BP8 OS-Mus musculus GN-E9BP8 PE1 SV-1                                                | 1                  | 14.9             | 2.8              | 4.8                   | 5.3                   | 3.12          | 0.32          | 13.7    | 1.9    | 3.1                   | 5.6                   | 3.17  | 0.32 |
| Q80B23_RL37_MOUSE   | Rpl37       | 60S ribosomal protein L37 OS-Mus musculus GN-Rpl37 PE2 SV-3                                    | 1                  | 256.9            | 48.3             | 82.8                  | 5.3                   | 3.10          | 0.32          | 256.9   | 48.3   | 81.2                  | 5.3                   | 3.16  | 0.32 |
| Q90KW0_AR6P1_MOUSE  | Ar6p1       | AR6-ribosylation factor-like protein 6-interacting protein 1 OS-Mus musculus GN-Ar6p1 PE1 SV-1 | 2                  | 21.6             | 4.1              | 7.0                   | 5.3                   | 3.10          | 0.32          | 43.1    | 8.1    | 13.7                  | 5.3                   | 3.16  | 0.32 |
| Q82C93_RL14_MOUSE   | Rpl14       | 60S ribosomal protein L14 OS-Mus musculus GN-Rpl14 PE1 SV-1                                    | 1                  | 141.7            | 26.4             | 45.9                  | 6.2                   | 3.09          | 0.32          | 616.2   | 122.73 | 206.2                 | 6.2                   | 3.69  | 0.32 |
| Q90R91_REEP3_MOUSE  | Reep3       | Receptor expression-enhancing protein 3 OS-Mus musculus GN-Reep3 PE1 SV-1                      | 1                  | 7.6              | 1.4              | 2.5                   | 5.3                   | 3.08          | 0.32          | 7.6     | 1.4    | 2.4                   | 5.3                   | 3.14  | 0.32 |
| Q64449_RMR2_MOUSE   | Rmr2        | C-type mannase receptor 2 OS-Mus musculus GN-Rmr2 PE1 SV-3                                     | 1                  | 55.2             | 10.5             | 17.9                  | 5.3                   | 3.08          | 0.32          | 55.2    | 10.5   | 17.6                  | 5.3                   | 3.14  | 0.32 |
| 9P7788_XRN1_MOUSE   | Xrn1        | 5'-3' exonuclease OS-Mus musculus GN-Xrn1 PE1 SV-1                                             | 3                  | 13.4             | 2.6              | 4.4                   | 5.2                   | 3.04          | 0.33          | 40.6    | 8.2    | 13.8                  | 5.0                   | 2.95  | 0.34 |
| Q80R02_WNLC_MOUSE   | Wnlc        | Protein wnlc homolog OS-Mus musculus GN-Wnlc PE2 SV-1                                          | 1                  | 12.9             | 2.5              | 4.3                   | 5.9                   | 3.03          | 0.33          | 10.1    | 1.9    | 3.1                   | 5.9                   | 3.18  | 0.31 |
| Q8B8V9_CHT18_MOUSE  | Chit18      | Chromosome transmission fidelity protein 18 homolog OS-Mus musculus GN-Chit18 PE2 SV-2         | 2                  | 14.2             | 2.8              | 4.7                   | 5.2                   | 3.01          | 0.33          | 28.5    | 5.5    | 9.3                   | 5.2                   | 3.07  | 0.33 |
| Q80F6E_FAM5A_MOUSE  | Fam5a       | Protein FAM5A OS-Mus musculus GN-Fam5a PE1 SV-2                                                | 1                  | 8.2              | 1.6              | 2.7                   | 5.2                   | 3.01          | 0.33          | 8.2     | 1.6    | 2.7                   | 5.2                   | 3.07  | 0.33 |
| P47915_RL29_MOUSE   | Rpl29       | 60S ribosomal protein L29 OS-Mus musculus GN-Rpl29 PE2 SV-2                                    | 10                 | 114.8            | 22.4             | 38.5                  | 5.4                   | 2.99          | 0.33          | 2507.1  | 469.0  | 788.5                 | 5.3                   | 3.18  | 0.31 |
| P10201_VAKH1_MOUSE  | Vakh1       | Vakp1 OS-Mus musculus GN-Vakh1 PE2 SV-4                                                        | 3                  | 17.7             | 3.5              | 5.7                   | 5.1                   | 2.98          | 0.34          | 53.6    | 11.8   | 19.8                  | 5.1                   | 3.04  | 0.33 |
| P20357_MAP2_MOUSE   | Map2        | Microtubule-associated protein 2 OS-Mus musculus GN-Map2 PE1 SV-2                              | 1                  | 24.8             | 4.9              | 8.4                   | 5.1                   | 2.96          | 0.34          | 24.8    | 4.9    | 8.2                   | 5.1                   | 3.02  | 0.33 |
| Q80B79_ZAM1_MOUSE   | Zam1        | Junctional adhesion molecule 4 OS-Mus musculus GN-Zam1 PE1 SV-2                                | 2                  | 16.2             | 3.2              | 5.5                   | 5.0                   | 2.92          | 0.34          | 32.3    | 6.4    | 10.8                  | 5.0                   | 2.98  | 0.34 |
| Q82111_RHB_MOUSE    | Rhb         | CTP-binding protein RHB OS-Mus musculus GN-Rhb PE1 SV-1                                        | 1                  | 23.6             | 4.7              | 8.1                   | 6.2                   | 2.92          | 0.34          | 23.6    | 4.7    | 8.1                   | 6.2                   | 2.98  | 0.34 |
| P84059_RL19_MOUSE   | Rpl19       | 60S ribosomal protein L19 OS-Mus musculus GN-Rpl19 PE4 SV-1                                    | 21                 | 57.0             | 11.5             | 19.6                  | 5.0                   | 2.90          | 0.34          | 5900.9  | 1047.8 | 1761.8                | 5.6                   | 3.35  | 0.30 |
| Q81040_K8951_MOUSE  | Kia08951    | Uncharacterized protein KIA08951-like OS-Mus musculus GN-Kia08951 PE2 SV-1                     | 1                  | 17.2             | 3.5              | 5.9                   | 5.0                   | 2.89          | 0.35          | 17.2    | 3.5    | 5.8                   | 5.0                   | 2.95  | 0.34 |
| Q80730_GEM7B_MOUSE  | Gem7b       | Uncharacterized protein OS-Mus musculus GN-Gem7B PE1 SV-1                                      | 5                  | 112.4            | 22.7             | 38.9                  | 5.0                   | 2.89          | 0.35          | 853.9   | 250.5  | 421.1                 | 3.4                   | 2.03  | 0.49 |
| Q9N902_E4L11_MOUSE  | E4l11       | Band 4, like protein 1 OS-Mus musculus GN-E4L11 PE1 SV-1                                       | 1                  | 15.1             | 2.8              | 4.9                   | 5.0                   | 2.89          | 0.35          | 15.1    | 2.8    | 4.9                   | 5.0                   | 2.96  | 0.34 |
| Q82911_RL32_MOUSE   | Rpl32       | 60S ribosomal protein L32 OS-Mus musculus GN-Rpl32 PE1 SV-2                                    | 10                 | 59.0             | 12.1             | 20.8                  | 4.9                   | 2.84          | 0.35          | 2299.7  | 444.5  | 747.5                 | 5.2                   | 3.08  | 0.33 |
| Q80X95_RAGA_MOUSE   | Raga        | Ras-related GTP-binding protein A OS-Mus musculus GN-Raga PE2 SV-1                             | 1                  | 7.6              | 1.6              | 2.7                   | 4.8                   | 2.82          | 0.35          | 7.6     | 1.6    | 2.7                   | 4.8                   | 2.87  | 0.35 |
| Q51500_SNE1_MOUSE   | Sne1        | Synaptotagmin 1 OS-Mus musculus GN-Sng1 PE1 SV-1                                               | 1                  | 14.9             | 2.8              | 4.8                   | 5.3                   | 2.81          | 0.36          | 14.9    | 2.8    | 4.8                   | 5.3                   | 2.86  | 0.35 |
| Q82W08_RL10_MOUSE   | Rpl10       | 60S ribosomal protein L10 OS-Mus musculus GN-Rpl10 PE1 SV-3                                    | 20                 | 57.2             | 11.9             | 20.4                  | 4.8                   | 2.80          | 0.36          | 1945.8  | 529.9  | 891.0                 | 3.7                   | 2.18  | 0.46 |
| Q90C49_NCBP2_MOUSE  | Ncbp2       | Nuclear cap-binding protein subunit 2 OS-Mus musculus GN-Ncbp2 PE1 SV-1                        | 1                  | 147.2            | 30.6             | 52.5                  | 4.8                   | 2.80          | 0.36          | 147.2   | 30.6   | 51.5                  | 4.8                   | 2.86  | 0.35 |
| Q60775_EF1_MOUSE    | Ef1         | ETS-related transcription factor EF1 OS-Mus musculus GN-Ef1 PE2 SV-1                           | 1                  | 7.1              | 1.5              | 2.5                   | 4.8                   | 2.80          | 0.36          | 7.1     | 1.5    | 2.5                   | 4.8                   | 2.86  | 0.35 |
| P12759_RL3_MOUSE    | Rpl3        | 60S ribosomal protein L3 OS-Mus musculus GN-Rpl3 PE1 SV-1                                      | 47                 | 108.0            | 20.3             | 38.3                  | 5.3                   | 2.79          | 0.36          | 645.8   | 144.58 | 243.8                 | 5.3                   | 3.07  | 0.34 |
| Q1U332_ZF178_MOUSE  | Z           |                                                                                                |                    |                  |                  |                       |                       |               |               |         |        |                       |                       |       |      |

|                     |          |                                                                                              |     |       |      |       |     |      |      |         |        |        |     |      |      |
|---------------------|----------|----------------------------------------------------------------------------------------------|-----|-------|------|-------|-----|------|------|---------|--------|--------|-----|------|------|
| O35125_LRCC2_MOUSE  | Lrrc23   | Leucine-rich repeat-containing protein 23 OS=Mus musculus GN=Lrrc23 PE=2 SV=1                | 1   | 10.4  | 2.6  | 4.4   | 4.0 | 2.36 | 0.42 | 10.4    | 2.6    | 4.3    | 4.0 | 2.40 | 0.42 |
| E9B8R4_E9B8R4_MOUSE | Ard1b3   | Protein Ard1b3 OS=Mus musculus GN=Ard1b3 PE=1 SV=1                                           | 6   | 8.5   | 2.1  | 3.6   | 4.0 | 2.35 | 0.43 | 50.4    | 14.5   | 24.4   | 3.5 | 2.06 | 0.49 |
| P53032_RL10A_MOUSE  | Rpl10a   | 60S ribosomal protein L10 OS=Mus musculus GN=Rpl10a PE=1 SV=3                                | 6   | 16.65 | 36.4 | 4.4   | 4.0 | 2.35 | 0.43 | 5088.3  | 1304.1 | 2159.3 | 2.8 | 1.69 | 0.43 |
| Q8B20D_KPCCD_MOUSE  | Prlkd2   | Serine/threonine protein kinase D2 OS=Mus musculus GN=Prlkd2 PE=1 SV=1                       | 1   | 14.1  | 3.5  | 6.0   | 4.0 | 2.33 | 0.43 | 14.1    | 3.5    | 5.9    | 4.0 | 2.38 | 0.42 |
| Q9Q614_Q9Q614_MOUSE | Chd3     | Protein Chd3 OS=Mus musculus GN=Chd3 PE=1 SV=3                                               | 9   | 11.8  | 3.0  | 5.0   | 4.0 | 2.33 | 0.43 | 128.8   | 43.0   | 72.4   | 3.0 | 1.78 | 0.56 |
| Q92218_SUCB2_MOUSE  | Chd3     | Chromatin ligase (GDP-forming) mitochondrial OS=Mus musculus GN=Sucb2 PE=1 SV=1              | 3   | 7.9   | 2.0  | 3.4   | 4.0 | 2.31 | 0.43 | 7.9     | 2.0    | 3.4    | 4.0 | 2.36 | 0.43 |
| Q8R78_TF3CS_MOUSE   | Gtf3s5   | General transcription factor 3C polypeptide3 OS=Mus musculus GN=Gtf3s5 PE=2 SV=2             | 6   | 16.1  | 4.1  | 7.0   | 4.0 | 2.31 | 0.43 | 148.1   | 24.3   | 40.9   | 3.9 | 2.30 | 0.44 |
| Q9JH55_MTLCL_MOUSE  | Mtcl1    | Mitochondrial subunit 1 OS=Mus musculus GN=Mtcl1 PE=1 SV=1                                   | 7   | 12.0  | 3.0  | 5.2   | 4.0 | 2.31 | 0.43 | 7.5     | 2.21   | 37.2   | 3.4 | 2.02 | 0.49 |
| Q9U3T1_4F2_MOUSE    | Elf1em1  | Eukaryotic translation initiation factor 4E transporter OS=Mus musculus GN=Elf1em1 PE=1 SV=1 | 1   | 7.8   | 2.0  | 3.4   | 4.0 | 2.31 | 0.43 | 7.8     | 2.0    | 3.3    | 4.0 | 2.35 | 0.42 |
| Q9VW72_THA1_MOUSE   | Eif1     | 50S ribosome-related transmembrane protein 1 OS=Mus musculus GN=Eif1 PE=1 SV=1               | 2   | 11.2  | 3.3  | 5.2   | 4.0 | 2.31 | 0.43 | 11.2    | 3.3    | 5.2    | 4.0 | 2.35 | 0.49 |
| Q9R4QD_WDR33_MOUSE  | Wdr33    | Core RNA 3' end processing protein WDR33 OS=Mus musculus GN=Wdr33 PE=1 SV=1                  | 7   | 13.8  | 3.5  | 6.0   | 3.9 | 2.30 | 0.43 | 107.7   | 36.8   | 61.9   | 2.9 | 1.74 | 0.57 |
| Q9R9L4_CSN1_MOUSE   | Gps1     | CCP1 signalosome complex subunit 1 OS=Mus musculus GN=Gps1 PE=1 SV=1                         | 6   | 11.6  | 2.9  | 5.0   | 3.9 | 2.30 | 0.43 | 175.1   | 58.4   | 31.0   | 4.1 | 2.42 | 0.41 |
| Q85C96_PFC1_MOUSE   | Pfc1     | Enhancer of polycomb target 1 OS=Mus musculus GN=Pfc1 PE=2 SV=1                              | 5   | 7.2   | 1.9  | 3.1   | 3.9 | 2.30 | 0.43 | 5.9     | 1.8    | 3.9    | 3.8 | 2.08 | 0.48 |
| Q8R4T9_PFC1_MOUSE   | Sic14a2  | Urea transporter 2 OS=Mus musculus GN=Sic14a2 PE=2 SV=2                                      | 1   | 9.5   | 2.4  | 4.9   | 2.9 | 2.29 | 0.44 | 9.5     | 2.4    | 4.1    | 3.9 | 2.34 | 0.43 |
| PE2281_RS11_MOUSE   | Rps11    | 40S ribosomal protein S11 OS=Mus musculus GN=Rps11 PE=1 SV=3                                 | 7   | 24.5  | 6.2  | 10.7  | 3.9 | 2.29 | 0.44 | 660.4   | 236.5  | 397.6  | 2.8 | 1.66 | 0.60 |
| Q9D101_MBP1_MOUSE   | Mbp1     | MARCKS-12-binding inhibitory protein 1 OS=Mus musculus GN=Mbp1 PE=1 SV=1                     | 2   | 14.3  | 3.6  | 6.3   | 3.9 | 2.29 | 0.44 | 28.6    | 7.3    | 12.3   | 3.9 | 2.34 | 0.43 |
| Q955U6_BRO4_MOUSE   | Bro4     | Bromodomain-containing protein 4 OS=Mus musculus GN=Bro4 PE=1 SV=2                           | 16  | 12.5  | 3.2  | 5.5   | 3.9 | 2.28 | 0.44 | 245.5   | 78.0   | 121.1  | 3.1 | 1.87 | 0.53 |
| Q8R4D1_SCAF8_MOUSE  | Scaf8    | Protein SCAF8 OS=Mus musculus GN=Scaf8 PE=1 SV=1                                             | 12  | 14.3  | 3.6  | 6.2   | 3.9 | 2.28 | 0.44 | 275.8   | 85.9   | 144.5  | 3.2 | 1.91 | 0.52 |
| Q8R4K9_RB1M2_MOUSE  | Rbm12    | Ribosomal protein L2 OS=Mus musculus GN=Rbm12 PE=1 SV=1                                      | 2   | 10.6  | 2.7  | 4.7   | 3.9 | 2.28 | 0.44 | 21.3    | 5.4    | 9.1    | 3.9 | 2.32 | 0.43 |
| Q8VDG3_PARN_MOUSE   | Parn     | Poly(A)-specific ribonuclease PARN OS=Mus musculus GN=Parn PE=1 SV=1                         | 3   | 10.7  | 2.7  | 4.7   | 3.9 | 2.27 | 0.44 | 28.0    | 8.2    | 15.7   | 3.4 | 2.04 | 0.49 |
| PE1255_RL3E_MOUSE   | Rpl3e    | 60S ribosomal protein L24 OS=Mus musculus GN=Rpl3e PE=1 SV=1                                 | 2   | 20.5  | 4.1  | 123.6 | 3.9 | 2.27 | 0.44 | 8359.1  | 2298.7 | 3865.3 | 3.6 | 2.16 | 0.46 |
| Q9G17_FAM21_MOUSE   | Fam21    | WASH complex subunit FAM21 OS=Mus musculus GN=Fam21 PE=1 SV=1                                | 22  | 11.4  | 2.9  | 5.0   | 3.9 | 2.27 | 0.44 | 283.9   | 76.8   | 129.2  | 3.7 | 2.20 | 0.46 |
| AG5H24_E6C6_MOUSE   | Exc6b    | Exonucyst complex component 6 OS=Mus musculus GN=Exc6b PE=2 SV=1                             | 1   | 11.3  | 2.9  | 5.0   | 3.9 | 2.27 | 0.44 | 11.3    | 2.9    | 4.9    | 3.9 | 2.31 | 0.43 |
| PE2918_RL8_MOUSE    | Rpl8     | 60S ribosomal protein L8 OS=Mus musculus GN=Rpl8 PE=1 SV=2                                   | 22  | 12.4  | 3.2  | 5.3   | 3.9 | 2.27 | 0.44 | 75.0    | 1743.6 | 2931.7 | 4.3 | 2.57 | 0.39 |
| Q61543_GSLG_MOUSE   | Glg1     | Golgi apparatus protein 1 OS=Mus musculus GN=Glg1 PE=1 SV=1                                  | 5   | 19.2  | 4.9  | 8.5   | 3.9 | 2.26 | 0.44 | 99.8    | 26.8   | 45.1   | 3.7 | 2.21 | 0.43 |
| A2RSX9_A2RSX9_MOUSE | Arfg1    | ArfGTPase-1 OS=Mus musculus GN=Arfg1 PE=2 SV=1                                               | 1   | 30.4  | 7.8  | 13.4  | 3.9 | 2.26 | 0.44 | 30.4    | 7.8    | 13.2   | 3.9 | 2.31 | 0.43 |
| Q920D3_MED2_MOUSE   | Med28    | Mediator of RNA polymerase II transcription subunit 28 OS=Mus musculus GN=Med28 PE=2 SV=1    | 2   | 9.5   | 2.5  | 4.2   | 3.9 | 2.26 | 0.44 | 19.0    | 4.9    | 8.3    | 3.9 | 2.32 | 0.43 |
| Q9R9Y7_CT12_MOUSE   | Rpl12    | Ribosomal protein L12 OS=Mus musculus GN=Rpl12 PE=2 SV=3                                     | 2   | 8.6   | 2.2  | 3.6   | 3.9 | 2.26 | 0.44 | 8.6     | 2.2    | 3.6    | 3.9 | 2.30 | 0.43 |
| Q9R917_R121_MOUSE   | Rpl21    | 60S ribosomal protein L21 OS=Mus musculus GN=Rpl21 PE=2 SV=2                                 | 19  | 51.5  | 13.3 | 22.7  | 3.9 | 2.26 | 0.44 | 2606.8  | 697.1  | 1172.2 | 3.7 | 2.21 | 0.43 |
| Q9R919_OV9D_MOUSE   | Olfir791 | Olfactory receptor 791 OS=Mus musculus GN=Olfir791 PE=1 SV=1                                 | 1   | 20.8  | 5.4  | 9.2   | 3.9 | 2.26 | 0.44 | 20.8    | 5.4    | 9.0    | 3.9 | 2.30 | 0.43 |
| Q9R9Y7_Q8R9Y7_MOUSE | Arhg151  | Protein Arhg151 OS=Mus musculus GN=Arhg151 PE=1 SV=1                                         | 5   | 13.6  | 3.5  | 6.0   | 3.9 | 2.26 | 0.44 | 17.4    | 5.1    | 9.0    | 3.9 | 2.30 | 0.43 |
| Q9G303_VO2C2_MOUSE  | Voc2     | Voltage-dependent anion-selective channel protein 2 OS=Mus musculus GN=Voc2 PE=1 SV=2        | 6   | 12.5  | 3.6  | 6.3   | 3.9 | 2.26 | 0.44 | 29.1    | 8.7    | 14.2   | 3.5 | 2.07 | 0.48 |
| Q9E16_Q9E16_MOUSE   | Rhnk3    | Protein Rhnk3 OS=Mus musculus GN=Rhnk3 PE=1 SV=1                                             | 166 | 29.9  | 7.7  | 13.3  | 3.9 | 2.25 | 0.44 | 1750.0  | 1718.3 | 2889.4 | 3.4 | 2.62 | 0.38 |
| Q9Y1K2_RRP19_MOUSE  | Rrp19    | Ribosomal RNA processing protein 1 homolog B OS=Mus musculus GN=Rrp19 PE=1 SV=2              | 2   | 11.1  | 2.9  | 4.9   | 3.9 | 2.25 | 0.44 | 72.2    | 5.8    | 9.7    | 3.9 | 2.29 | 0.44 |
| Q9VCR7_AHEH2_MOUSE  | Aheh2    | Alpha-helical coiled-coil domain-containing protein 2 OS=Mus musculus GN=Aheh2 PE=2 SV=1     | 2   | 23.4  | 6.1  | 10.5  | 3.9 | 2.25 | 0.44 | 121.0   | 46.8   | 29.4   | 3.8 | 2.19 | 0.48 |
| P39053_DYNI_MOUSE   | Dnm1     | Dynamin-1 OS=Mus musculus GN=Dnm1 PE=1 SV=2                                                  | 32  | 23.0  | 6.0  | 10.3  | 3.8 | 2.24 | 0.45 | 1081.4  | 584.7  | 981.1  | 1.8 | 1.10 | 0.91 |
| Q9R9L4_RL11_MOUSE   | Rpl11    | 60S ribosomal protein L11 OS=Mus musculus GN=Rpl11 PE=1 SV=4                                 | 15  | 72.9  | 19.0 | 32.6  | 3.8 | 2.24 | 0.45 | 4355.7  | 1357.4 | 2282.4 | 3.2 | 1.91 | 0.52 |
| Q61687_ATRX_MOUSE   | Atrx     | Transcriptional regulator ATRX OS=Mus musculus GN=Atrx PE=1 SV=3                             | 26  | 16.2  | 4.2  | 7.3   | 3.8 | 2.23 | 0.45 | 462.3   | 126.3  | 119.4  | 3.7 | 2.18 | 0.46 |
| Q8R811_TOX4_MOUSE   | Tox4     | TOX high mobility group family member 4 OS=Mus musculus GN=Tox4 PE=1 SV=3                    | 9   | 20.6  | 5.4  | 9.2   | 3.8 | 2.23 | 0.45 | 191.3   | 56.7   | 91.4   | 3.8 | 2.18 | 0.46 |
| E9Q4F1_E9Q4F1_MOUSE | Ankrk11  | Protein Ankrk11 OS=Mus musculus GN=Ankrk11 PE=4 SV=2                                         | 3   | 13.4  | 3.5  | 6.0   | 3.8 | 2.23 | 0.45 | 45.1    | 11.8   | 21.9   | 3.8 | 2.26 | 0.44 |
| QJUEB3_PUF60_MOUSE  | Puf60    | Poly(A)-binding interacting factor PUF60 OS=Mus musculus GN=Puf60 PE=2 SV=2                  | 25  | 30.2  | 7.9  | 13.5  | 3.8 | 2.23 | 0.45 | 85.2    | 23.3   | 37.5   | 1.8 | 1.27 | 0.44 |
| QJ31A1_SPH2_MOUSE   | Spht2    | Sphingosine kinase 2 OS=Mus musculus GN=Spht2 PE=1 SV=1                                      | 3   | 6.7   | 1.9  | 3.2   | 3.8 | 2.23 | 0.45 | 6.7     | 1.9    | 3.5    | 3.8 | 2.23 | 0.45 |
| Q9ZQL0_RIPK3_MOUSE  | Ripk3    | Receptor-interacting serine/threonine protein kinase 3 OS=Mus musculus GN=Ripk3 PE=1 SV=2    | 6   | 13.7  | 3.6  | 6.1   | 3.8 | 2.23 | 0.45 | 75.2    | 23.7   | 39.9   | 3.2 | 1.89 | 0.53 |
| Q9U70_Q9U70_MOUSE   | Nuam1    | Protein Nuam1 OS=Mus musculus GN=Nuam1 PE=1 SV=1                                             | 196 | 53.2  | 13.9 | 23.9  | 3.8 | 2.23 | 0.45 | 16854.2 | 4383.6 | 7370.9 | 3.8 | 2.29 | 0.44 |
| QJ3PH1_PRRC1_MOUSE  | Prrc1    | Protein PRRC1 OS=Mus musculus GN=Prrc1 PE=2 SV=1                                             | 3   | 17.7  | 4.6  | 7.9   | 3.8 | 2.22 | 0.45 | 45.8    | 14.8   | 25.0   | 3.1 | 1.84 | 0.54 |
| PE8372_TB84B_MOUSE  | Tb84b    | Tubulin beta 4b chain OS=Mus musculus GN=Tb84b PE=1 SV=1                                     | 11  | 20.3  | 5.2  | 9.8   | 3.8 | 2.22 | 0.45 | 26.8    | 8.0    | 14.3   | 3.8 | 2.15 | 0.46 |
| QJ343_BAB1_MOUSE    | Babam1   | BRIC9 and BRCA1-A complex member 1 OS=Mus musculus GN=Babam1 PE=2 SV=1                       | 1   | 31.1  | 8.2  | 14.0  | 3.8 | 2.22 | 0.45 | 31.1    | 8.2    | 13.7   | 3.8 | 2.27 | 0.45 |
| Q8R922_CIR1A_MOUSE  | Cir1a    | CIR1A OS=Mus musculus GN=Cir1a PE=2 SV=3                                                     | 3   | 12.1  | 3.2  | 5.5   | 3.8 | 2.22 | 0.45 | 41.6    | 11.5   | 19.4   | 3.6 | 2.15 | 0.47 |
| Q8W0F4_R120B_MOUSE  | R120b    | Kinase-like protein K120B OS=Mus musculus GN=R120B PE=1 SV=2                                 | 3   | 12.1  | 3.2  | 5.5   | 3.8 | 2.21 | 0.45 | 30.5    | 8.2    | 15.0   | 3.8 | 2.18 | 0.46 |
| PE3743_WNK1_MOUSE   | Wnk1     | Serine/threonine protein kinase WNK1 OS=Mus musculus GN=Wnk1 PE=1 SV=2                       | 2   | 9.2   | 2.4  | 4.1   | 3.8 | 2.21 | 0.45 | 18.3    | 4.8    | 8.1    | 3.8 | 2.25 | 0.44 |
| Q90394_RUFY3_MOUSE  | Rufy3    | Protein RUFY3 OS=Mus musculus GN=Rufy3 PE=1 SV=1                                             | 2   | 11.8  | 3.1  | 5.4   | 3.8 | 2.21 | 0.45 | 23.7    | 6.3    | 10.5   | 3.8 | 2.25 | 0.44 |
| Q9DCC5_T1AP1_MOUSE  | T1ap1    | Tight junction-associated protein 1 OS=Mus musculus GN=T1ap1 PE=1 SV=1                       | 7   | 8.8   | 2.3  | 4.0   | 3.8 | 2.21 | 0.45 | 81.3    | 22.5   | 37.8   | 3.6 | 2.15 | 0.47 |
| PE1225_RAP2B_MOUSE  | Rap2b    | Rap guanine nucleotide exchange factor 2 OS=Mus musculus GN=Rap2b PE=1 SV=2                  | 2   | 11.5  | 3.1  | 5.2   | 3.8 | 2.21 | 0.45 | 2.9     | 2.0    | 3.8    | 3.8 | 2.15 | 0.44 |
| Q92115_COG2_MOUSE   | Cog2     | Conserved oligomeric Golgi complex subunit 2 OS=Mus musculus GN=Cog2 PE=1 SV=2               | 4   | 12.2  | 3.2  | 5.5   | 3.8 | 2.20 | 0.46 | 44.1    | 17.4   | 29.3   | 2.5 | 1.50 | 0.61 |
| Q9R912_PSD11_MOUSE  | Pamd11   | 26S proteasome non-ATPase regulatory subunit 11 OS=Mus musculus GN=Pamd11 PE=1 SV=1          | 8   | 18.7  | 5.0  | 8.5   | 3.8 | 2.19 | 0.46 | 146.0   | 46.3   | 77.9   | 3.2 | 1.87 | 0.53 |
| QJ3JH6_AK1_MOUSE    | Aks1     | AK2-associated protein kinase 1 OS=Mus musculus GN=Aks1 PE=1 SV=2                            | 10  | 12.4  | 3.3  | 5.7   | 3.8 | 2.19 | 0.46 | 146.7   | 40.0   | 67.3   | 3.7 | 2.18 | 0.46 |
| P14094_AT1B1_MOUSE  | At1b1    | ATP-binding cassette transporter 1 OS=Mus musculus GN=At1b1 PE=1 SV=1                        | 11  | 11.3  | 8.4  | 14.3  | 3.8 | 2.19 | 0.46 | 11.3    | 8.4    | 14.3   | 3.8 | 2.19 | 0.46 |
| Q9P415_NUCL_MOUSE   | Ncl      | Nucleolin OS=Mus musculus GN=Ncl PE=1 SV=2                                                   | 27  | 57.2  | 15.3 | 26.2  | 3.7 | 2.18 | 0.46 | 1818.1  | 468.0  | 787.0  | 3.9 | 2.31 | 0.43 |
| Q92211_RBP1_MOUSE   | Rbp1     | Arp3 complex subunit beta-1 OS=Mus musculus GN=Rbp1 PE=1 SV=2                                | 18  | 12.5  | 3.5  | 5.7   | 3.7 | 2.18 | 0.46 | 260.4   | 60.5   | 101.8  | 4.3 | 2.56 | 0.39 |
| Q85L13_K072_MOUSE   | K072     | CDK-NOF transcription-inhibiting protein 2 OS=Mus musculus GN=K072 PE=2 SV=2                 | 12  | 16.9  | 4.6  | 8.2   | 3.7 | 2.17 | 0.46 | 92.1    | 24.7   | 52.1   | 3.7 | 2.16 | 0.46 |
| Q8QAK2_ZZZ2_MOUSE   | Zzz2     | ZZZ2 zinc finger-containing protein 1 OS=Mus musculus GN=Zzz2 PE=1 SV=2                      | 2   | 14.5  | 3.9  | 6.7   | 3.7 | 2.17 | 0.46 | 78.8    | 19.8   | 33.3   | 3.8 | 2.27 | 0.44 |
| Q81E0D_STX5_MOUSE   | Stx5     | Syntaxin-5 OS=Mus musculus GN=Stx5 PE=1 SV=3                                                 | 3   | 16.1  | 4.3  | 7.4   | 3.7 | 2.17 | 0.46 | 49.8    | 15.5   | 26.0   | 3.2 | 1.91 | 0.52 |
| Q8Y95E_APA1_MOUSE   | Apa1     | Actin filament-associated protein 1 OS=Mus musculus GN=Apa1 PE=1 SV=1                        | 5   | 13.8  | 3.7  | 6.4   | 3.7 | 2.16 | 0.46 | 72.0    | 24.2   | 47.7   | 2.5 | 1.51 | 0.66 |
| Q83752_SBR4_MOUSE   | Sbr4     | 3-O-phosphotyrosine phosphatase OS=Mus musculus GN=Sbr4 PE=1 SV=1                            | 15  | 19.5  | 5.1  | 8.6   | 3.7 | 2.16 | 0.46 | 221.5   | 61.6   | 105.5  | 3.4 | 2.07 | 0.48 |
| Q692N7_WOYF_MOUSE   | Woyf     | Myoferlin OS=Mus musculus GN=Woyf PE=1 SV=2                                                  | 15  | 13.5  | 3.7  | 6.3   | 3.7 | 2.16 | 0.46 | 216.2   | 66.7   | 112.2  | 3.2 | 1.93 | 0.52 |
| Q93310_PRI2_MOUSE   | Prim2    | DNA primase large subunit OS=Mus musculus GN=Prim2 PE=1 SV=1                                 | 12  | 18.8  | 5.1  | 8.7   | 3.7 | 2.16 | 0.46 | 239.1   | 68.7   | 115.5  | 3.5 | 2.07 | 0.48 |
| Q9J2W1_XTB_MOUSE    | Xtb      | Synaptobrevin homolog XTB OS=Mus musculus GN=Xtb PE=1 SV=1                                   | 3   | 13.9  | 3.8  | 6.5   | 3.7 | 2.15 | 0.46 | 34.1    | 12.6   | 21.2   | 2.7 | 1.61 | 0.62 |
| Q8C9M6_INT4_MOUSE   | Int4     | Integrator complex subunit 4 OS=Mus musculus GN=Int4 PE=1 SV=1                               | 4   | 15.0  | 4.4  | 7.6   | 3.7 | 2.15 | 0.46 | 26.8    | 76.8   | 26.8   | 3.8 | 2.07 | 0.51 |
| PHF10               | PHF10    | PHD finger protein 1 OS=Mus musculus GN=PHF10 PE=1 SV=2                                      | 1   | 5.0   | 3.7  | 6.0   | 3.7 | 2.15 | 0.46 | 89.0    | 25.3   | 42.6   | 3.5 | 2.09 | 0.48 |
| Q80882_GPB1_MOUSE   | Gpbp1    | GTP-binding protein 1 OS=Mus musculus GN=Gpbp1 PE=1 SV=4                                     | 4   | 19.1  | 5.2  | 8.9   | 3.7 | 2.15 | 0.47 | 69.1    | 19.1   | 32.2   | 3.6 | 2.15 | 0.47 |
| Q92473_TF3_MOUSE    | Tf3      | Integrin alpha 3 OS=Mus musculus GN=Itga3 PE=1 SV=1                                          | 7   | 14.7  | 3.9  | 6.7   | 3.7 | 2.15 | 0.47 | 14.7    | 3.8    | 6.8    | 3.4 | 2.02 | 0.49 |
| QJ3U29_LRFL1_MOUSE  | Lrrf1a   | Leucine-rich repeat flightless-interacting protein 1 OS=Mus musculus GN=Lrrf1a PE=1 SV=2     | 1   | 5.5   | 1.5  | 2.6   | 3.7 | 2.15 | 0.47 | 5.5     | 1.5    | 2.5    | 3.7 | 2.19 | 0.46 |
| P41105_RL28_MOUSE   | Rpl28    | 60S ribosomal protein L28 OS=Mus musculus GN=Rpl28 PE=1 SV=2                                 | 19  | 107.2 | 29.1 | 49.9  | 3.7 | 2.15 | 0.47 | 4167.7  | 848.7  | 1427.1 | 4.9 | 2.92 | 0.34 |
| Q9CWC3_C2D2_MOUSE   | C2d2p2   | CD2 antigen cytoplasmic tail-binding protein 2 OS=Mus musculus GN=C2d2p2 PE=1 SV=1           | 2   | 10.2  | 2.8  | 4.    |     |      |      |         |        |        |     |      |      |

|                     |         |                                                                                                                                      |    |       |      |      |     |      |      |        |        |        |     |      |      |
|---------------------|---------|--------------------------------------------------------------------------------------------------------------------------------------|----|-------|------|------|-----|------|------|--------|--------|--------|-----|------|------|
| QB407_YIPF4_MOUSE   | Yipf4   | Protein YIPF4 OS-Mus musculus GN-Yipf4 PE-2 SV-1                                                                                     | 1  | 42.7  | 12.5 | 21.5 | 3.4 | 1.99 | 0.50 | 25.7   | 12.5   | 21.1   | 3.4 | 2.03 | 0.49 |
| Q5187_CKIB_MOUSE    | Ckib    | ES S/MuJ protein ligase CB44 OS-Mus musculus GN-Ckib4 PE-1 SV-2                                                                      | 1  | 10.5  | 3.1  | 5.3  | 3.4 | 1.98 | 0.50 | 10.5   | 3.1    | 5.2    | 3.4 | 2.02 | 0.49 |
| Q9N9W6_GREB3_MOUSE  | Greb3   | Glucocorticoid-inducible protein 3 beta OS-Mus musculus GN-Greb3 PE-1 SV-2                                                           | 1  | 8.0   | 2.3  | 3.4  | 3.4 | 1.98 | 0.50 | 8.0    | 2.3    | 3.4    | 3.4 | 2.02 | 0.49 |
| Q7QTK7_LMT2_MOUSE   | Lmt2    | Integrator complex subunit 7 OS-Mus musculus GN-Lmt2 PE-2 SV-2                                                                       | 18 | 11.7  | 3.4  | 5.9  | 3.4 | 1.98 | 0.50 | 252.9  | 80.8   | 135.9  | 3.1 | 1.86 | 0.54 |
| PE2889_RL30_MOUSE   | Rpl30   | 60S ribosomal protein L30 OS-Mus musculus GN-Rpl30 PE-2 SV-2                                                                         | 17 | 38.7  | 11.4 | 19.5 | 3.4 | 1.98 | 0.50 | 2555.7 | 772.1  | 1298.3 | 3.3 | 1.97 | 0.51 |
| PE1514_RL37A_MOUSE  | Rpl37a  | 60S ribosomal protein L37A OS-Mus musculus GN-Rpl37a PE-2 SV-2                                                                       | 7  | 118.8 | 34.9 | 58.4 | 3.4 | 1.98 | 0.50 | 1440.8 | 424.0  | 679.3  | 3.4 | 1.87 | 0.50 |
| P45766_PSN1_MOUSE   | Psn1    | Presenilin-1 OS-Mus musculus GN-Psn1 PE-1 SV-1                                                                                       | 1  | 6.0   | 1.8  | 3.0  | 3.4 | 1.98 | 0.51 | 6.0    | 1.8    | 3.0    | 3.4 | 2.02 | 0.50 |
| QB867_RL24_MOUSE    | Rpl24   | 60S ribosomal protein L24 OS-Mus musculus GN-Rpl24 PE-1 SV-2                                                                         | 15 | 42.9  | 12.6 | 21.7 | 3.4 | 1.98 | 0.51 | 3018.5 | 743.5  | 1250.1 | 4.1 | 2.41 | 0.41 |
| Q55WV4_MED13_MOUSE  | Med13   | Mediator of RNA polymerase II transcription subunit 13 OS-Mus musculus GN-Med13 PE-2 SV-2                                            | 13 | 10.8  | 3.2  | 5.5  | 3.4 | 1.98 | 0.51 | 170.6  | 46.2   | 77.7   | 3.7 | 1.98 | 0.49 |
| Q55WV6_ACKA_MOUSE   | Acka    | Adrenomedullin-like receptor 1 OS-Mus musculus GN-Acka PE-1 SV-1                                                                     | 1  | 19.5  | 5.6  | 9.8  | 3.4 | 1.98 | 0.51 | 195.3  | 48.1   | 78.9   | 3.7 | 1.98 | 0.49 |
| QBK30_NSL1_MOUSE    | Nsl1    | Kinetochores-associated protein NSL1 homolog OS-Mus musculus GN-Nsl1 PE-2 SV-1                                                       | 1  | 16.6  | 4.9  | 8.4  | 3.4 | 1.98 | 0.51 | 16.6   | 4.9    | 8.2    | 3.4 | 2.02 | 0.50 |
| QBK27_INT10_MOUSE   | Int10   | Integrator complex subunit 10 OS-Mus musculus GN-Int10 PE-1 SV-3                                                                     | 8  | 14.6  | 4.3  | 7.4  | 3.4 | 1.97 | 0.51 | 133.4  | 40.9   | 68.8   | 3.3 | 1.94 | 0.52 |
| QBVB18_BAMP_MOUSE   | Bamp    | Branched-chain amino acid aminotransferase 1 OS-Mus musculus GN-Bamp PE-1 SV-1                                                       | 2  | 5.0   | 2.6  | 4.6  | 3.4 | 1.97 | 0.51 | 5.0    | 2.6    | 4.6    | 3.4 | 1.97 | 0.51 |
| D3D209_D3D209_MOUSE | Dtd23   | MGC18410, isoform CRA a OS-Mus musculus GN-Dtd23 PE-3 SV-3                                                                           | 22 | 15.4  | 4.6  | 7.8  | 3.4 | 1.97 | 0.51 | 105.5  | 183.1  | 307.8  | 2.8 | 1.65 | 0.65 |
| QB8G55_MYP2T_MOUSE  | Ppp1t2b | Protein phosphatase 1 regulatory subunit 12B OS-Mus musculus GN-Ppp1t2b PE-1 SV-2                                                    | 1  | 4.7   | 1.4  | 2.4  | 3.4 | 1.97 | 0.51 | 4.7    | 1.4    | 2.4    | 3.4 | 2.01 | 0.50 |
| Q9DBK5_CNOT6_MOUSE  | Cnot6   | BCRA-NOT transcription complex subunit 8 OS-Mus musculus GN-Cnot6 PE-2 SV-1                                                          | 5  | 12.8  | 3.8  | 6.5  | 3.4 | 1.97 | 0.51 | 60.0   | 18.0   | 30.3   | 3.3 | 1.98 | 0.51 |
| Q9DBV2_VGUL_MOUSE   | Vgula   | Vaginotransmembrane protein 1 OS-Mus musculus GN-Vgula PE-1 SV-1                                                                     | 84 | 43.4  | 12.9 | 22.1 | 3.4 | 1.96 | 0.51 | 4186.9 | 1438.3 | 2418.5 | 2.9 | 1.73 | 0.58 |
| Q9IKX8_AFP3M1_MOUSE | Afp3m1  | AP 3 complex subunit mu-1 OS-Mus musculus GN-Afp3m1 PE-1 SV-1                                                                        | 1  | 16.1  | 4.8  | 8.2  | 3.4 | 1.96 | 0.51 | 16.1   | 4.8    | 8.1    | 3.4 | 2.00 | 0.50 |
| Q9D176_CTF2_MOUSE   | Ctf2    | Transcriptional repressor CTF2 OS-Mus musculus GN-Ctf2 PE-1 SV-2                                                                     | 6  | 21.5  | 6.4  | 11.0 | 3.4 | 1.96 | 0.51 | 122.1  | 41.9   | 70.5   | 2.9 | 1.73 | 0.58 |
| Q9D177_TNCL_MOUSE   | Tncl    | CTX component protein 1 OS-Mus musculus GN-Tncl PE-1 SV-1                                                                            | 1  | 11.6  | 3.5  | 6.0  | 3.4 | 1.96 | 0.51 | 11.6   | 3.5    | 5.8    | 3.4 | 1.99 | 0.50 |
| Q9DBE1_LMAN2_MOUSE  | Lman2   | Neurular integral membrane protein VPS30 OS-Mus musculus GN-Lman2 PE-2 SV-2                                                          | 8  | 21.8  | 6.5  | 11.2 | 3.3 | 1.95 | 0.51 | 166.2  | 62.0   | 104.2  | 2.7 | 1.59 | 0.63 |
| E9QAL5_E9QAL5_MOUSE | Inf2    | Inverted form 2 OS-Mus musculus GN-Inf2 PE-4 SV-1                                                                                    | 23 | 14.2  | 4.3  | 7.3  | 3.3 | 1.95 | 0.51 | 389.0  | 134.5  | 226.2  | 2.9 | 1.72 | 0.58 |
| Q9P9M2_WDR6_MOUSE   | Wdr6    | WD repeat-containing protein 6 OS-Mus musculus GN-Wdr6 PE-2 SV-1                                                                     | 3  | 7.0   | 2.1  | 3.6  | 3.3 | 1.95 | 0.51 | 17.4   | 7.3    | 12.3   | 2.4 | 1.42 | 0.71 |
| Q7D283_WNT2E_MOUSE  | Wnt2b   | Protein Wnt-2b OS-Mus musculus GN-Wnt2b PE-2 SV-2                                                                                    | 1  | 62.8  | 18.8 | 32.2 | 3.3 | 1.95 | 0.51 | 62.8   | 18.8   | 31.6   | 3.3 | 1.99 | 0.50 |
| Q9P1P5_NUDC_MOUSE   | Nudc1   | NudC domain-containing protein 1 OS-Mus musculus GN-Nudc1 PE-2 SV-2                                                                  | 1  | 13.3  | 4.0  | 6.8  | 3.3 | 1.95 | 0.51 | 13.3   | 4.0    | 6.7    | 3.3 | 1.99 | 0.50 |
| Q9R0X0_MED20_MOUSE  | Med20   | Mediator of RNA polymerase II transcription subunit 20 OS-Mus musculus GN-Med20 PE-1 SV-2                                            | 2  | 27.4  | 8.2  | 14.1 | 3.3 | 1.95 | 0.51 | 148.8  | 16.4   | 27.6   | 3.3 | 1.98 | 0.50 |
| Q3JTM9_Q3JTM9_MOUSE | Ghrf3c  | General transcription factor IIIc, polyphosphatase 3 OS-Mus musculus GN-Ghrf3c PE-1 SV-2                                             | 9  | 8.7   | 2.6  | 4.5  | 3.3 | 1.95 | 0.51 | 86.6   | 39.6   | 66.6   | 2.4 | 1.45 | 0.69 |
| Q61161_MAK2_MOUSE   | Mak2    | Tetraspanin-related protein kinase kinase kinase 2 OS-Mus musculus GN-Mak2 PE-1 SV-2                                                 | 1  | 2.0   | 0.7  | 1.2  | 3.3 | 1.95 | 0.51 | 2.0    | 0.7    | 1.2    | 3.3 | 1.99 | 0.50 |
| Q9N2K8_INT2_MOUSE   | Int2    | Integrator complex subunit 2 OS-Mus musculus GN-Int2 PE-2 SV-2                                                                       | 6  | 13.6  | 4.1  | 7.0  | 3.3 | 1.94 | 0.51 | 78.8   | 24.7   | 41.6   | 3.2 | 1.89 | 0.53 |
| QB0111_GNL1_MOUSE   | Gnl1    | Guanine nucleotide-binding protein-like 3 OS-Mus musculus GN-Gnl1 PE-1 SV-2                                                          | 6  | 15.8  | 4.7  | 8.1  | 3.3 | 1.94 | 0.51 | 102.3  | 25.3   | 42.5   | 4.1 | 2.41 | 0.41 |
| Q90707_COPF_MOUSE   | Copf    | Coatomer subunit epsilon OS-Mus musculus GN-Copf PE-2 SV-3                                                                           | 1  | 56.6  | 17.0 | 29.1 | 3.3 | 1.94 | 0.51 | 603.8  | 167.6  | 510.2  | 3.1 | 1.77 | 0.79 |
| Q90C29_C2D3_MOUSE   | C2d3    | COG1 domain-containing protein 43 OS-Mus musculus GN-C2d3 PE-1 SV-1                                                                  | 2  | 16.7  | 4.9  | 8.4  | 3.3 | 1.94 | 0.51 | 16.7   | 4.9    | 8.3    | 3.3 | 1.94 | 0.51 |
| P59429_C2D3_MOUSE   | Cgn     | Cingulin OS-Mus musculus GN-Cgn PE-1 SV-1                                                                                            | 5  | 9.7   | 2.9  | 5.0  | 3.3 | 1.94 | 0.52 | 9.9    | 25.7   | 43.3   | 2.3 | 1.38 | 0.72 |
| Q90708_Q90708_MOUSE | S100A6  | Protein S100A6 OS-Mus musculus GN-S100A6 PE-2 SV-1                                                                                   | 1  | 9.5   | 2.9  | 4.9  | 3.3 | 1.94 | 0.52 | 9.5    | 2.9    | 4.8    | 3.3 | 1.98 | 0.51 |
| Q90121_WNF23_MOUSE  | Wnf23   | Protein Wnf23 OS-Mus musculus GN-Wnf23 PE-1 SV-1                                                                                     | 1  | 9.5   | 2.9  | 4.9  | 3.3 | 1.94 | 0.52 | 9.5    | 2.9    | 4.8    | 3.3 | 1.98 | 0.51 |
| Q91210_AHRG1_MOUSE  | Ahrg1   | Rho guanine nucleotide exchange factor 1 OS-Mus musculus GN-Ahrg1 PE-1 SV-2                                                          | 13 | 10.1  | 3.1  | 5.2  | 3.3 | 1.94 | 0.52 | 137.4  | 45.3   | 76.2   | 3.0 | 1.80 | 0.55 |
| Q919C3_ELF2_MOUSE   | Elf2    | ETS-related transcription factor ELF-2 OS-Mus musculus GN-Elf2 PE-1 SV-1                                                             | 3  | 9.3   | 2.8  | 4.8  | 3.3 | 1.94 | 0.52 | 30.7   | 13.6   | 22.9   | 2.2 | 1.34 | 0.75 |
| QB8845_AKA10_MOUSE  | Akap10  | A kinase anchor protein 10, mitochondrial OS-Mus musculus GN-Akap10 PE-1 SV-3                                                        | 3  | 7.2   | 2.2  | 3.7  | 3.3 | 1.94 | 0.52 | 20.6   | 7.3    | 12.3   | 2.8 | 1.68 | 0.60 |
| Q90447_TFC3_MOUSE   | Tfc3    | Autophagy-related protein 3 OS-Mus musculus GN-Tfc3 PE-1 SV-1                                                                        | 3  | 11.9  | 3.4  | 5.9  | 3.3 | 1.94 | 0.52 | 11.9   | 3.4    | 5.9    | 3.3 | 1.94 | 0.52 |
| Q52K18_SRRM1_MOUSE  | Srrm1   | Serine/arginine repetitive matrix protein 1 OS-Mus musculus GN-Srrm1 PE-1 SV-2                                                       | 24 | 35.2  | 10.6 | 18.2 | 3.3 | 1.93 | 0.52 | 1242.5 | 364.1  | 612.3  | 3.4 | 2.03 | 0.49 |
| QB8453_C5N6_MOUSE   | Copp6   | COP9 signalosome complex subunit 6 OS-Mus musculus GN-Copp6 PE-1 SV-1                                                                | 1  | 22.1  | 6.7  | 11.4 | 3.3 | 1.93 | 0.52 | 22.1   | 6.7    | 11.2   | 3.3 | 1.97 | 0.51 |
| Q319F5_C3HIF5_MOUSE | C3hif5  | A3 subunit of vacuolar-ATPase complex OS-Mus musculus GN-C3hif5 PE-1 SV-1                                                            | 1  | 9.0   | 2.7  | 4.6  | 3.3 | 1.93 | 0.52 | 9.0    | 2.7    | 4.6    | 3.3 | 1.97 | 0.51 |
| QB0203_EBF1_MOUSE   | Ebf1    | Eukaryotic translation initiation factor 3 subunit 1 OS-Mus musculus GN-Ebf1 PE-1 SV-1                                               | 36 | 37.5  | 11.3 | 19.4 | 3.3 | 1.93 | 0.52 | 1476.4 | 463.4  | 779.2  | 3.2 | 1.89 | 0.53 |
| QB9K53_NFKB2_MOUSE  | NfkB2   | Nuclear factor kappa-B p100 subunit OS-Mus musculus GN-NfkB2 PE-1 SV-1                                                               | 23 | 15.1  | 4.6  | 7.8  | 3.3 | 1.93 | 0.52 | 492.5  | 162.8  | 273.7  | 3.0 | 1.80 | 0.56 |
| Q9PFC2_HTB6_MOUSE   | Htb6    | Integrator complex subunit 6 OS-Mus musculus GN-Htb6 PE-2 SV-1                                                                       | 19 | 15.0  | 4.6  | 7.8  | 3.3 | 1.93 | 0.52 | 294.8  | 104.2  | 175.2  | 2.8 | 1.68 | 0.59 |
| P11459_H59B8_MOUSE  | H59b8   | Heat shock protein H59 beta OS-Mus musculus GN-H59b8 PE-1 SV-1                                                                       | 40 | 65.4  | 19.8 | 34.0 | 3.3 | 1.92 | 0.52 | 2473.4 | 1418.8 | 2424.3 | 2.4 | 1.43 | 0.70 |
| Q919C8_ZB2A_MOUSE   | Zb2a    | Translational initiation factor eIF-2B subunit alpha OS-Mus musculus GN-Zb2a PE-2 SV-2                                               | 8  | 15.9  | 4.8  | 8.3  | 3.3 | 1.92 | 0.52 | 126.5  | 54.0   | 90.8   | 2.3 | 1.39 | 0.72 |
| P59805_R171_MOUSE   | Mrp11   | 28S ribosomal protein S21, mitochondrial OS-Mus musculus GN-Mrp11 PE-2 SV-1                                                          | 1  | 9.0   | 2.7  | 4.7  | 3.3 | 1.92 | 0.52 | 9.0    | 2.7    | 4.6    | 3.3 | 1.96 | 0.51 |
| P11279_GH40_MOUSE   | Gh40    | Guanine nucleotide-binding protein G12b subunit alpha OS-Mus musculus GN-Gh40 PE-1 SV-4                                              | 44 | 11.0  | 3.4  | 5.8  | 3.3 | 1.92 | 0.52 | 444.2  | 127.7  | 205.5  | 2.8 | 1.68 | 0.49 |
| Q9P470_F1C2A_MOUSE  | F1c2a   | Autophagy-related protein 2 homolog OS-Mus musculus GN-F1c2a PE-1 SV-1                                                               | 4  | 15.5  | 4.7  | 8.1  | 3.3 | 1.92 | 0.52 | 15.5   | 4.7    | 8.1    | 3.3 | 1.95 | 0.51 |
| Q925M1_MED1_MOUSE   | Med1    | Mediator of RNA polymerase II transcription subunit 1 OS-Mus musculus GN-Med1 PE-1 SV-2                                              | 5  | 8.9   | 2.7  | 4.6  | 3.3 | 1.92 | 0.52 | 44.6   | 18.6   | 31.2   | 2.4 | 1.42 | 0.70 |
| QB0KVA_CNOT3_MOUSE  | Cnot3   | BCRA-NOT transcription complex subunit 3 OS-Mus musculus GN-Cnot3 PE-1 SV-3                                                          | 13 | 11.2  | 3.4  | 5.8  | 3.3 | 1.92 | 0.52 | 304.6  | 144.3  | 242.6  | 2.1 | 1.26 | 0.80 |
| Q31522_PFM6_MOUSE   | Pfm6    | 15S ribosome non-ATPase regulatory subunit 4 OS-Mus musculus GN-Pfm6 PE-1 SV-1                                                       | 12 | 15.0  | 4.3  | 7.4  | 3.3 | 1.92 | 0.52 | 15.0   | 4.3    | 7.4    | 3.3 | 1.98 | 0.51 |
| P72544_MAP4_MOUSE   | Map4    | Microtubule-associated protein 4 OS-Mus musculus GN-Map4 PE-1 SV-3                                                                   | 16 | 15.8  | 4.8  | 8.2  | 3.3 | 1.92 | 0.52 | 277.4  | 89.8   | 150.9  | 3.1 | 1.84 | 0.54 |
| Q919D6_VILL_MOUSE   | Vill    | Villin-like protein OS-Mus musculus GN-Vill PE-1 SV-1                                                                                | 1  | 10.4  | 3.2  | 5.4  | 3.3 | 1.91 | 0.52 | 10.4   | 3.2    | 5.3    | 3.3 | 1.95 | 0.51 |
| Q90XV9_CHOR_MOUSE   | Chor    | Chromodomain-helicase-DNA-binding protein 8 OS-Mus musculus GN-Chor PE-1 SV-1                                                        | 4  | 7.1   | 2.2  | 3.7  | 3.3 | 1.91 | 0.52 | 30.6   | 9.2    | 15.4   | 3.3 | 1.98 | 0.50 |
| Q90QK4_TAF8_MOUSE   | Taf8    | Transcription initiation factor TIIID subunit 8 OS-Mus musculus GN-Taf8 PE-2 SV-1                                                    | 1  | 11.9  | 3.4  | 5.9  | 3.3 | 1.91 | 0.52 | 11.9   | 3.4    | 5.9    | 3.3 | 1.95 | 0.51 |
| Q90713_CUL7_MOUSE   | Cul7    | Cullin-7 nuclear speckle-binding protein OS-Mus musculus GN-Cul7 PE-1 SV-2                                                           | 12 | 16.4  | 5.0  | 8.6  | 3.3 | 1.91 | 0.52 | 195.3  | 110.8  | 186.2  | 1.8 | 1.05 | 0.95 |
| Q90XN9_NBRP1_MOUSE  | Nbrp1   | Nuclear speckle-binding regulatory protein 1 OS-Mus musculus GN-Nbrp1 PE-1 SV-1                                                      | 1  | 4.9   | 1.5  | 2.6  | 3.3 | 1.90 | 0.53 | 4.9    | 1.5    | 2.5    | 3.3 | 1.94 | 0.52 |
| Q51465_SMRD2_MOUSE  | Srmd2   | SWI/SNF-related matrix-associated activator-dependent regulator of chromatin subfamily D member 2 OS-Mus musculus GN-Srmd2 PE-1 SV-1 | 26 | 15.8  | 4.6  | 8.0  | 3.3 | 1.90 | 0.53 | 154.5  | 46.6   | 79.7   | 2.7 | 1.67 | 0.64 |
| Q90C04_GEM2_MOUSE   | Gem2    | Genome-associated protein 2 OS-Mus musculus GN-Gem2 PE-2 SV-1                                                                        | 26 | 17.4  | 5.3  | 9.0  | 3.3 | 1.90 | 0.53 | 17.4   | 5.3    | 9.0    | 3.3 | 1.94 | 0.52 |
| Q90J87_DHX58_MOUSE  | Dhx58   | Probable ATP-dependent RNA helicase DHX58 OS-Mus musculus GN-Dhx58 PE-1 SV-2                                                         | 36 | 21.8  | 6.7  | 11.2 | 3.3 | 1.90 | 0.53 | 904.0  | 262.0  | 440.6  | 3.4 | 2.05 | 0.49 |
| Q90G62_DHX29_MOUSE  | Dhx29   | ATP-dependent RNA helicase DHX29 OS-Mus musculus GN-Dhx29 PE-2 SV-1                                                                  | 4  | 12.7  | 3.9  | 6.7  | 3.3 | 1.90 | 0.53 | 49.0   | 17.8   | 30.0   | 2.8 | 1.64 | 0.61 |
| Q90XW5_COP7_MOUSE   | Cop7    | Protein FAM63 OS-Mus musculus GN-Cop7 PE-1 SV-1                                                                                      | 5  | 18.5  | 5.2  | 8.9  | 3.3 | 1.90 | 0.53 | 18.5   | 5.2    | 8.9    | 3.3 | 1.97 | 0.51 |
| Q90C20_C5N7A_MOUSE  | C5n7a   | COP9 signalosome complex subunit 7 OS-Mus musculus GN-C5n7a PE-1 SV-2                                                                | 3  | 18.5  | 5.7  | 9.7  | 3.3 | 1.90 | 0.53 | 66.4   | 18.2   | 30.5   | 3.7 | 2.18 | 0.46 |
| QB8V27_CSPF7_MOUSE  | Cspf7   | Cleavage and polyadenylation specificity factor subunit 7 OS-Mus musculus GN-Cspf7 PE-1 SV-2                                         | 12 | 22.9  | 7.1  | 12.1 | 3.2 | 1.89 | 0.53 | 351.6  | 103.0  | 173.1  | 3.4 | 2.03 | 0.49 |
| Q70126_DYF16_MOUSE  | Methg1  | Protein Methg1 OS-Mus musculus GN-Methg1 PE-2 SV-1                                                                                   | 1  | 3.4   | 1.1  | 1.8  | 3.2 | 1.89 | 0.53 | 3.4    | 1.1    | 1.8    | 3.2 | 1.99 | 0.52 |
| Q92546_PARV6_MOUSE  | Parv6   | Parvancin OS-Mus musculus GN-Parv6 PE-1 SV-1                                                                                         | 1  | 9.0   | 2.7  | 4.6  | 3.2 | 1.89 | 0.53 | 9.0    | 2.7    | 4.6    | 3.2 | 1.93 | 0.52 |
| P62156_P5MD7_MOUSE  | P5md7   | 26S proteasome non-ATPase regulatory subunit 7 OS-Mus musculus GN-P5md7 PE-1 SV-2                                                    | 2  | 20.1  | 6.2  | 10.6 | 3.2 | 1.89 | 0.53 | 40.2   | 12.4   | 20.9   | 3.2 | 1.93 | 0.52 |
| QB8CF9_PRR31_MOUSE  | Prr31   | UAF16 small nuclear ribonucleoprotein Prr31 OS-Mus musculus GN-Prr31 PE-1 SV-2                                                       | 29 | 36.5  | 11.3 | 19.3 | 3.2 | 1.89 | 0.53 | 1244.2 | 385.6  | 648.4  | 3.2 | 1.92 | 0.52 |
| QB0019_CFL1_MOUSE   | Cfl1    | Transcription initiation factor TIIID subunit 1 OS-Mus musculus GN-Cfl1 PE-1 SV-2                                                    | 1  | 15.4  | 4.5  | 7.8  | 3.2 | 1.89 | 0.53 | 15.4   | 4.5    | 7.8    | 3.2 | 1.89 | 0.53 |
| QB9VNS_FLNC_MOUSE   | Flnc    | Filamin-C OS-Mus musculus GN-Flnc PE-1 SV-1                                                                                          | 78 | 71.4  | 22.1 | 37.8 | 3.2 | 1.89 | 0.53 | 7679.4 | 2517.7 | 4233.5 | 3.1 | 1.81 | 0.55 |
| Q9N1V3_SRL10_MOUSE  | U2surp  | U2 snRNP-associated SURF motif-containing protein OS-Mus musculus GN-U2surp PE-2 SV-3                                                | 41 | 37.1  | 11.5 | 19.7 | 3.2 | 1.88 | 0.53 | 1830.8 | 517.2  | 1273.0 | 1.7 | 1.03 | 0.97 |
| P13132_KAP3_MOUSE   | Kap3b   | eAMF-associated protein kinase type II beta regulatory subunit OS-Mus musculus GN-Kap3b PE-1 SV-1                                    |    |       |      |      |     |      |      |        |        |        |     |      |      |



|                     |          |                                                                                                 |    |       |      |      |     |      |      |        |        |        |      |      |      |
|---------------------|----------|-------------------------------------------------------------------------------------------------|----|-------|------|------|-----|------|------|--------|--------|--------|------|------|------|
| P35979_RL12_MOUSE   | Rpl12    | 60S ribosomal protein L12 OS-Mus musculus GN-Rpl12 PE1 SV-2                                     | 13 | 82.3  | 26.8 | 45.9 | 3.1 | 1.79 | 0.56 | 6069.0 | 1779.9 | 2992.9 | 3.4  | 2.03 | 0.49 |
| P18852_XS6A1_MOUSE  | Rps6a1   | Ribosomal protein S6 kinase alpha-1 OS-Mus musculus GN-Rps6a1 PE1 SV-1                          | 2  | 8.3   | 2.7  | 4.7  | 3.1 | 1.79 | 0.56 | 16.7   | 5.4    | 8.1    | 3.1  | 1.83 | 0.55 |
| QB8AA_SRR6_MOUSE    | Srr6     | Signal recognition particle SRP6 OS-Mus musculus GN-SRP6 PE2 SV-2                               | 1  | 2.1   | 6.1  | 10.4 | 4.1 | 1.79 | 0.56 | 849.5  | 256.3  | 143.7  | 3.1  | 1.87 | 0.51 |
| P58871_TB182_MOUSE  | Trks1bp1 | 182 kDa tyrosine-1-binding protein OS-Mus musculus GN-Trks1bp1 PE1 SV-2                         | 70 | 20.1  | 6.5  | 11.2 | 3.1 | 1.79 | 0.56 | 1804.7 | 615.5  | 1035.9 | 2.9  | 1.74 | 0.57 |
| PE6762_MC4L1_MOUSE  | Morf141  | Mortality factor 4-like protein 1 OS-Mus musculus GN-Morf141 PE1 SV-2                           | 5  | 8.8   | 2.9  | 4.9  | 3.1 | 1.79 | 0.56 | 40.9   | 14.9   | 25.1   | 2.7  | 1.63 | 0.61 |
| QB8925_SBNL1_MOUSE  | Sbnl1    | Protein strobilomyxine OS-Mus musculus GN-Sbnl1 PE1 SV-2                                        | 1  | 5.8   | 3.2  | 5.5  | 3.1 | 1.79 | 0.56 | 12.9   | 4.6    | 140.0  | 2.7  | 1.87 | 0.50 |
| QB0811_ERCC2_MOUSE  | Erc2     | TFIIH basal transcription factor complex helicase XPB subunit OS-Mus musculus GN-Erc2 PE1 SV-2  | 1  | 5.3   | 1.7  | 3.0  | 3.1 | 1.78 | 0.56 | 5.3    | 1.7    | 2.9    | 3.1  | 1.82 | 0.55 |
| QJ3U11_ZSWM8_MOUSE  | Zwim8    | Zinc finger RNA domain-containing protein 8 OS-Mus musculus GN-Zwim8 PE1 SV-1                   | 2  | 10.0  | 3.3  | 5.6  | 3.1 | 1.78 | 0.56 | 20.0   | 6.6    | 11.0   | 3.1  | 1.82 | 0.55 |
| Q13001_RAC1_MOUSE   | Rac1     | Ras-related C3 botulinum toxin substrate 1 OS-Mus musculus GN-Rac1 PE1 SV-1                     | 1  | 12.2  | 4.0  | 6.8  | 3.1 | 1.78 | 0.56 | 12.2   | 4.0    | 6.7    | 3.1  | 1.82 | 0.55 |
| PE3262_R3D3_MOUSE   | Rac3     | RAS-related protein 3 OS-Mus musculus GN-Rac3 PE1 SV-1                                          | 1  | 20.9  | 7.8  | 14.4 | 3.1 | 1.78 | 0.56 | 28.9   | 9.8    | 18.2   | 3.1  | 1.81 | 0.55 |
| QB8ZB_F142_MOUSE    | Fam14a2  | Protein FAM14A2 OS-Mus musculus GN-Fam14a2 PE2 SV-2                                             | 2  | 9.2   | 3.0  | 5.1  | 3.1 | 1.78 | 0.56 | 18.3   | 6.0    | 10.1   | 3.1  | 1.81 | 0.55 |
| QB8ZB_SREK1_MOUSE   | Srek1    | Splicing regulatory glutamine/tyrosine-rich protein 1 OS-Mus musculus GN-Srek1 PE2 SV-2         | 6  | 22.2  | 7.3  | 12.5 | 3.0 | 1.78 | 0.56 | 113.0  | 37.3   | 62.8   | 3.0  | 1.80 | 0.56 |
| Q8V9P7_PSF5_MOUSE   | Cpsf6    | Cleavage and polyadenylation specificity factor subunit 6 OS-Mus musculus GN-Cpsf6 PE2 SV-2     | 7  | 21.4  | 7.4  | 12.0 | 3.0 | 1.78 | 0.56 | 105.6  | 35.0   | 100.8  | 3.0  | 1.79 | 0.56 |
| QB0929_TAF5_MOUSE   | Taf5     | Transcription initiation factor TFIID subunit 5 OS-Mus musculus GN-Taf5 PE2 SV-2                | 6  | 9.7   | 3.2  | 5.5  | 3.0 | 1.78 | 0.56 | 73.4   | 18.6   | 31.2   | 4.0  | 2.35 | 0.43 |
| QB0WU1_LBN2_MOUSE   | Lbn2     | Ubiquitin-2 OS-Mus musculus GN-Lbn2 PE1 SV-2                                                    | 3  | 9.7   | 3.2  | 5.5  | 3.0 | 1.78 | 0.56 | 33.8   | 10.3   | 17.3   | 3.3  | 1.96 | 0.51 |
| Q53256_SFR5_MOUSE   | Sfr5     | Serin/glycine-rich splicing factor 5 OS-Mus musculus GN-Sfr5 PE1 SV-2                           | 6  | 159.3 | 52.4 | 89.9 | 3.0 | 1.77 | 0.56 | 1012.9 | 361.7  | 608.8  | 3.2  | 1.67 | 0.60 |
| Q52926_DCF2_MOUSE   | Dcf2     | m7GpppRNA hydrolyase OS-Mus musculus GN-Dcf2 PE1 SV-2                                           | 2  | 23.5  | 7.7  | 13.3 | 3.0 | 1.77 | 0.57 | 82.3   | 25.2   | 14.0   | 3.1  | 1.81 | 0.55 |
| QB1R17_NBL1_MOUSE   | Fam129b  | Niban-like protein 1 OS-Mus musculus GN-Fam129b PE2 SV-2                                        | 8  | 14.1  | 4.6  | 8.0  | 3.0 | 1.77 | 0.57 | 104.3  | 44.6   | 75.0   | 2.3  | 1.39 | 0.72 |
| QB2H0_RNC_MOUSE     | Drosha   | Ribonuclease 3 OS-Mus musculus GN-Drosha PE1 SV-1                                               | 2  | 10.4  | 3.4  | 5.9  | 3.0 | 1.77 | 0.57 | 20.8   | 6.9    | 11.5   | 3.0  | 1.80 | 0.55 |
| Q525P7_LC7L3_MOUSE  | Luc7l3   | LUC7-like protein 3 OS-Mus musculus GN-Luc7l3 PE1 SV-1                                          | 21 | 32.7  | 10.8 | 18.5 | 3.0 | 1.77 | 0.57 | 754.4  | 318.6  | 535.7  | 3.4  | 1.41 | 0.71 |
| QB1R01_WT02_MOUSE   | Mta2     | Mitotic-associated protein MTA2 OS-Mus musculus GN-Mta2 PE1 SV-1                                | 30 | 27.8  | 9.2  | 15.7 | 3.0 | 1.77 | 0.57 | 618.0  | 187.6  | 315.4  | 3.3  | 1.96 | 0.51 |
| QB108_BIN3_MOUSE    | Bin3     | Bridging integrator 3 OS-Mus musculus GN-Bin3 PE2 SV-1                                          | 2  | 10.5  | 3.5  | 5.9  | 3.0 | 1.77 | 0.57 | 21.0   | 6.9    | 11.6   | 3.0  | 1.80 | 0.55 |
| Q56925_D0X46_MOUSE  | Ddx46    | Probable ATP-dependent RNA helicase DDX46 OS-Mus musculus GN-Ddx46 PE1 SV-2                     | 46 | 34.5  | 11.4 | 19.5 | 3.0 | 1.77 | 0.57 | 2185.7 | 649.5  | 1092.2 | 3.4  | 2.00 | 0.50 |
| Q62276_MDD2_MOUSE   | Mdd2     | Mediator of RNA polymerase II transcription subunit 22 OS-Mus musculus GN-Mdd2 PE2 SV-2         | 2  | 23.5  | 7.7  | 13.3 | 3.0 | 1.77 | 0.57 | 155.5  | 26.0   | 3.0    | 1.80 | 0.56 |      |
| QB042_E90A2_MOUSE   | Ugg2     | Protein Ugg2 OS-Mus musculus GN-Ugg2 PE4 SV-1                                                   | 2  | 6.1   | 2.0  | 3.5  | 3.0 | 1.77 | 0.57 | 12.2   | 4.0    | 6.8    | 3.0  | 1.80 | 0.56 |
| P46633_R8118_MOUSE  | Rab11b   | Ras-related protein Rab-11B OS-Mus musculus GN-Rab11b PE1 SV-3                                  | 2  | 41.9  | 13.8 | 23.7 | 3.0 | 1.77 | 0.57 | 83.8   | 27.7   | 46.5   | 3.0  | 1.80 | 0.56 |
| QC8CA_VP53_MOUSE    | Vp53     | Vacuolar protein sorting-associated protein 53 homolog OS-Mus musculus GN-Vp53 PE2 SV-2         | 6  | 11.5  | 3.8  | 6.5  | 3.0 | 1.77 | 0.57 | 74.7   | 21.7   | 36.6   | 3.4  | 2.04 | 0.49 |
| P15762_C0R1_MOUSE   | C0r1     | COR1 and OS-Mus musculus GN-C0r1 PE1 SV-2                                                       | 1  | 15.9  | 5.4  | 9.8  | 3.0 | 1.76 | 0.57 | 5.2    | 1.7    | 5.2    | 3.0  | 1.80 | 0.56 |
| PE3940_ELOC_MOUSE   | Tceb1    | Transcription elongation factor B polypeptide 1 OS-Mus musculus GN-Tceb1 PE1 SV-1               | 1  | 14.5  | 4.8  | 8.2  | 3.0 | 1.76 | 0.57 | 14.5   | 4.8    | 8.1    | 3.0  | 1.80 | 0.56 |
| QB0CV_PFM1_MOUSE    | Pfm1     | Polyamine-nucleotide factor 1 OS-Mus musculus GN-Pfm1 PE1 SV-1                                  | 3  | 14.8  | 4.9  | 8.4  | 3.0 | 1.76 | 0.57 | 14.4   | 4.8    | 30.2   | 2.6  | 1.57 | 0.64 |
| QB02G3_PSF4_MOUSE   | Cpsf4    | Cleavage and polyadenylation specificity factor subunit 4 OS-Mus musculus GN-Cpsf4 PE2 SV-2     | 6  | 12.4  | 4.1  | 7.1  | 3.0 | 1.76 | 0.57 | 103.1  | 36.6   | 118.2  | 3.6  | 1.67 | 0.63 |
| QB043_MEPCE_MOUSE   | Mepce    | 72kD cytoplasmic capping enzyme OS-Mus musculus GN-Mepce PE1 SV-2                               | 6  | 8.2   | 2.7  | 4.6  | 3.0 | 1.76 | 0.57 | 8.2    | 2.7    | 4.5    | 3.0  | 1.80 | 0.56 |
| QB4V9_NELF6_MOUSE   | Nelf6    | Negative elongation factor 6 OS-Mus musculus GN-Nelf6 PE1 SV-2                                  | 8  | 17.9  | 5.9  | 10.2 | 3.0 | 1.76 | 0.57 | 176.6  | 51.6   | 86.8   | 3.4  | 2.03 | 0.49 |
| FE7N2F_FE7NF_MOUSE  | Lmo7     | Protein Lmo7 [Fragment] OS-Mus musculus GN-Lmo7 PE1 SV-1                                        | 2  | 17.0  | 5.6  | 9.6  | 3.0 | 1.76 | 0.57 | 34.0   | 11.2   | 18.9   | 3.0  | 1.80 | 0.56 |
| PE0222_EF3E_MOUSE   | Ef3e     | Eukaryotic translation initiation factor 3 OS-Mus musculus GN-Ef3e PE1 SV-1                     | 6  | 13.0  | 4.6  | 7.6  | 3.0 | 1.76 | 0.57 | 561.5  | 95.7   | 161.5  | 2.7  | 1.61 | 0.99 |
| QBK30_D0X52_MOUSE   | Ddx52    | Probable ATP-dependent RNA helicase DDX52 OS-Mus musculus GN-Ddx52 PE2 SV-2                     | 22 | 19.9  | 6.6  | 11.3 | 3.0 | 1.76 | 0.57 | 518.0  | 189.1  | 318.0  | 2.7  | 1.63 | 0.61 |
| QB217_FAMN1_MOUSE   | Fmn1     | Formin-like protein 3 OS-Mus musculus GN-Fmn1 PE1 SV-2                                          | 9  | 12.1  | 4.0  | 6.9  | 3.0 | 1.76 | 0.57 | 112.3  | 35.2   | 59.1   | 3.2  | 1.90 | 0.53 |
| QJ3U01_QJ3U01_MOUSE | Srd11    | Protein Srd11 OS-Mus musculus GN-Srd11 PE1 SV-1                                                 | 6  | 39.4  | 13.1 | 22.4 | 3.0 | 1.76 | 0.57 | 357.3  | 300.4  | 505.1  | 1.2  | 0.71 | 1.41 |
| QB1792_LAS1_MOUSE   | Las1     | LAM and SRS domain protein 1 OS-Mus musculus GN-Las1 PE1 SV-1                                   | 1  | 46.8  | 16.3 | 28.6 | 3.0 | 1.76 | 0.57 | 128.5  | 43.7   | 107.5  | 3.0  | 1.77 | 0.56 |
| Q61666_HIRA_MOUSE   | Hira     | Protein HIRA OS-Mus musculus GN-Hira PE1 SV-3                                                   | 3  | 10.5  | 3.5  | 6.0  | 3.0 | 1.76 | 0.57 | 34.9   | 8.2    | 13.8   | 4.3  | 2.54 | 0.39 |
| PR7360_ETV6_MOUSE   | Etv6     | Transcription factor ETV6 OS-Mus musculus GN-Etv6 PE1 SV-1                                      | 5  | 21.5  | 7.1  | 12.3 | 3.0 | 1.76 | 0.57 | 111.1  | 37.3   | 62.8   | 3.0  | 1.77 | 0.57 |
| QC2P7_LBP2_MOUSE    | Lbp2     | DNA replication licensing factor 2 OS-Mus musculus GN-Lbp2 PE1 SV-1                             | 2  | 12.3  | 4.1  | 7.0  | 3.0 | 1.76 | 0.57 | 41.1   | 13.7   | 26.9   | 3.0  | 1.79 | 0.56 |
| Q52126_DYST_MOUSE   | Dyst     | Dystonin OS-Mus musculus GN-Dyst PE1 SV-2                                                       | 4  | 9.0   | 3.0  | 5.1  | 3.0 | 1.76 | 0.57 | 33.1   | 19.0   | 31.9   | 1.7  | 1.04 | 0.96 |
| Tubgcp2             | Tubgcp2  | WASH-tubulin complex component 2 OS-Mus musculus GN-Tubgcp2 PE2 SV-2                            | 11 | 13.6  | 4.5  | 7.7  | 3.0 | 1.76 | 0.57 | 158.9  | 47.2   | 79.3   | 3.4  | 2.00 | 0.50 |
| Q52C77_STRUM_MOUSE  | Klaad196 | YAMA complex subunit strumpelin OS-Mus musculus GN-Klaad196 PE2 SV-2                            | 13 | 12.0  | 4.0  | 6.9  | 3.0 | 1.76 | 0.57 | 202.6  | 67.0   | 112.6  | 3.0  | 1.80 | 0.56 |
| PE3553_C02B_MOUSE   | C02b     | C02B and OS-Mus musculus GN-C02b PE1 SV-1                                                       | 4  | 52.3  | 17.4 | 29.8 | 3.0 | 1.76 | 0.57 | 44.7   | 16.6   | 166.1  | 2.5  | 1.48 | 0.67 |
| P13120_AMP1_MOUSE   | Amp1     | Aminocoyl tRNA synthetase complex-interacting multifunctional protein 1 OS-Mus musculus GN-Amp1 | 1  | 14.4  | 4.8  | 8.2  | 3.0 | 1.76 | 0.57 | 14.4   | 4.8    | 8.1    | 3.0  | 1.79 | 0.56 |
| EQ908E_EQ908H_MOUSE | Plekha5  | Protein Plekha5 OS-Mus musculus GN-Plekha5 PE1 SV-1                                             | 4  | 9.4   | 3.1  | 5.3  | 3.0 | 1.76 | 0.57 | 40.4   | 16.6   | 28.0   | 2.4  | 1.44 | 0.69 |
| Q64512_TFN13_MOUSE  | Tfn13    | Tyrosine protein phosphatase non-receptor type 13 OS-Mus musculus GN-Tfn13 PE1 SV-2             | 4  | 7.5   | 2.4  | 4.3  | 3.0 | 1.75 | 0.57 | 29.9   | 9.9    | 16.8   | 3.0  | 1.60 | 0.56 |
| Q5555A_TRPCC4_MOUSE | Trpcc4   | Transcription regulator 4 OS-Mus musculus GN-Trpcc4 PE1 SV-1                                    | 1  | 5.4   | 1.8  | 3.1  | 3.0 | 1.75 | 0.57 | 5.4    | 1.8    | 3.0    | 3.0  | 1.79 | 0.56 |
| Q6PDN1_MYK_MOUSE    | Myk      | Myosin light chain, smooth muscle OS-Mus musculus GN-Myk PE1 SV-3                               | 2  | 10.4  | 3.5  | 5.9  | 3.0 | 1.75 | 0.57 | 20.9   | 6.9    | 11.6   | 3.0  | 1.79 | 0.56 |
| Q9C0A_RING_MOUSE    | Ring     | E4 ubiquitin-protein ligase RING2 OS-Mus musculus GN-Ring PE1 SV-1                              | 4  | 22.6  | 7.5  | 12.9 | 3.0 | 1.75 | 0.57 | 88.0   | 29.3   | 49.2   | 3.0  | 1.79 | 0.56 |
| PE2841_R24_MOUSE    | R24      | 40S ribosomal protein R24 OS-Mus musculus GN-R24 PE1 SV-1                                       | 1  | 73.7  | 24.4 | 41.4 | 3.0 | 1.75 | 0.57 | 187.2  | 61.6   | 187.2  | 3.4  | 1.87 | 0.48 |
| Q9C9Y_KAD1_MOUSE    | Ak1      | Adenylyl kinase isoenzyme 1 OS-Mus musculus GN-Ak1 PE1 SV-1                                     | 1  | 11.1  | 3.7  | 6.3  | 3.0 | 1.75 | 0.57 | 11.1   | 3.7    | 6.2    | 3.0  | 1.79 | 0.56 |
| FE1012_FE1AL_MOUSE  | Etf1a1   | Elongation factor 1-alpha 1 OS-Mus musculus GN-Etf1a1 PE1 SV-1                                  | 46 | 78.6  | 26.2 | 44.2 | 3.0 | 1.75 | 0.57 | 8351.1 | 3324.0 | 5589.2 | 2.5  | 1.49 | 0.67 |
| OT4046_VAMP8_MOUSE  | Vamp8    | Vesicle-associated membrane protein 8 OS-Mus musculus GN-Vamp8 PE1 SV-1                         | 3  | 45.7  | 15.2 | 26.1 | 3.0 | 1.75 | 0.57 | 129.9  | 46.4   | 78.0   | 2.8  | 1.67 | 0.63 |
| QB9752_GNA2_MOUSE   | Gna2     | GTP-binding protein GNA2 OS-Mus musculus GN-Gna2 PE1 SV-1                                       | 4  | 44.1  | 14.7 | 25.6 | 3.0 | 1.75 | 0.57 | 106.6  | 36.7   | 61.9   | 2.9  | 1.69 | 0.61 |
| Q61292_LAMB2_MOUSE  | Lamb2    | Laminin subunit beta-2 OS-Mus musculus GN-Lamb2 PE2 SV-2                                        | 4  | 10.6  | 3.5  | 6.1  | 3.0 | 1.75 | 0.57 | 40.8   | 14.9   | 25.0   | 2.7  | 1.63 | 0.61 |
| Q9DAW9_CNN3_MOUSE   | Cnn3     | Calponin 3 OS-Mus musculus GN-Cnn3 PE1 SV-1                                                     | 14 | 16.7  | 5.6  | 9.6  | 3.0 | 1.75 | 0.57 | 430.2  | 134.9  | 226.8  | 3.2  | 1.90 | 0.53 |
| PE3307_P7F6_MOUSE   | Ppp1cc   | Serin/threonine-protein phosphatase P7F6 gamma catalytic subunit OS-Mus musculus GN-Ppp1cc      | 1  | 38.7  | 11.6 | 20.4 | 3.0 | 1.74 | 0.57 | 14.9   | 5.2    | 25.1   | 2.6  | 1.51 | 0.65 |
| QB8G10_NELF6_MOUSE  | Nelf6    | Negative elongation factor 6 OS-Mus musculus GN-Nelf6 PE2 SV-2                                  | 9  | 9.8   | 3.3  | 5.6  | 3.0 | 1.74 | 0.57 | 119.7  | 43.5   | 73.2   | 2.8  | 1.64 | 0.61 |
| Q9J914_PSM06_MOUSE  | Psm06    | 26S proteasome non-ATPase regulatory subunit 6 OS-Mus musculus GN-Psm06 PE1 SV-1                | 3  | 14.7  | 4.9  | 8.4  | 3.0 | 1.74 | 0.57 | 19.6   | 17.3   | 29.0   | 5.3  | 3.16 | 0.32 |
| Q9P977_TIR3_MOUSE   | Trim3    | E4 ubiquitin-protein ligase TRIM3 OS-Mus musculus GN-Trim3 PE1 SV-2                             | 4  | 9.1   | 3.1  | 5.2  | 3.0 | 1.74 | 0.57 | 43.7   | 16.6   | 27.9   | 2.6  | 1.57 | 0.64 |
| QB0X11_TK2_MOUSE    | Tk2      | Eukaryotic translation initiation factor 2 OS-Mus musculus GN-Tk2 PE1 SV-1                      | 1  | 18.8  | 6.3  | 10.9 | 3.0 | 1.74 | 0.57 | 12.2   | 4.0    | 12.2   | 3.0  | 1.79 | 0.56 |
| PE5724_PCBP4_MOUSE  | Pcbp4    | Poly(C)binding protein 4 OS-Mus musculus GN-Pcbp4 PE1 SV-2                                      | 2  | 9.5   | 3.2  | 5.5  | 3.0 | 1.74 | 0.57 | 19.3   | 6.4    | 10.7   | 3.0  | 1.78 | 0.56 |
| Q60CE_ASF1A_MOUSE   | Asf1a    | Histone chaperone ASF1A OS-Mus musculus GN-Asf1a PE1 SV-1                                       | 1  | 11.2  | 3.8  | 6.4  | 3.0 | 1.74 | 0.57 | 11.2   | 3.8    | 6.3    | 3.0  | 1.78 | 0.56 |
| QB97F_MED16_MOUSE   | Med16    | Mediator of RNA polymerase II transcription subunit 16 OS-Mus musculus GN-Med16 PE2 SV-2        | 6  | 10.9  | 3.7  | 6.3  | 3.0 | 1.74 | 0.57 | 64.2   | 26.0   | 43.7   | 2.5  | 1.47 | 0.68 |
| Q54931_WAPR1_MOUSE  | Wapr1    |                                                                                                 |    |       |      |      |     |      |      |        |        |        |      |      |      |



|                     |        |                                                                                               |    |      |      |      |     |      |      |        |        |        |     |      |      |
|---------------------|--------|-----------------------------------------------------------------------------------------------|----|------|------|------|-----|------|------|--------|--------|--------|-----|------|------|
| Q3UMG5_LRCH2_MOUSE  | Lrch2  | Leucine-rich repeat and calponin homology domain-containing protein 2 OS=Mus musculus GN      | 3  | 13.0 | 4.9  | 8.4  | 2.7 | 1.56 | 0.64 | 31.8   | 12.8   | 21.5   | 2.5 | 1.48 | 0.63 |
| OB0305_OB11_MOUSE   | Obp11  | Oxytetracycline-resistance-related protein 1 OS=Mus musculus GN=Obp11 PE=1 SV=2               | 2  | 17.6 | 6.6  | 11.3 | 2.7 | 1.56 | 0.64 | 35.1   | 13.2   | 22.2   | 2.7 | 1.59 | 0.63 |
| Q9H9S_P68B_MOUSE    | Prp8   | Transcription factor P68 OS=Mus musculus GN=P68 PE=1 SV=1                                     | 4  | 17.0 | 6.2  | 10.8 | 2.7 | 1.56 | 0.64 | 17.0   | 25.0   | 29.0   | 2.7 | 1.62 | 0.63 |
| Q96R7_E0Q67_MOUSE   | Utrn   | Protein Utrn OS=Mus musculus GN=Utrn PE=1 SV=1                                                | 54 | 22.1 | 8.3  | 14.2 | 2.7 | 1.56 | 0.64 | 1150.3 | 462.3  | 777.3  | 2.5 | 1.48 | 0.68 |
| P30415_NTR_MOUSE    | Ntr    | Nucleo-1 recognition protein OS=Mus musculus GN=Ntr1 PE=1 SV=4                                | 2  | 14.0 | 5.2  | 9.0  | 2.7 | 1.55 | 0.64 | 27.9   | 10.5   | 17.6   | 2.7 | 1.58 | 0.63 |
| Q01231_TFRP2_MOUSE  | Tfrp2  | Polymorphic tract containing protein OS=Mus musculus GN=Tfrp2 PE=1 SV=2                       | 2  | 15.5 | 9.6  | 6.9  | 2.7 | 1.55 | 0.64 | 120.5  | 67.3   | 101.6  | 2.7 | 1.63 | 0.61 |
| Q90270_ARP10_MOUSE  | Actr10 | Actin-related protein 10 OS=Mus musculus GN=Actr10 PE=1 SV=2                                  | 2  | 14.2 | 3.2  | 5.6  | 2.7 | 1.55 | 0.64 | 17.3   | 6.5    | 10.9   | 2.7 | 1.58 | 0.63 |
| Q9P580_RRP12_MOUSE  | Rrp12  | RRP12-like protein OS=Mus musculus GN=RRP12 PE=1 SV=1                                         | 7  | 10.8 | 4.1  | 6.9  | 2.7 | 1.55 | 0.65 | 79.8   | 29.3   | 49.2   | 2.7 | 1.62 | 0.62 |
| Q61545_EVS_MOUSE    | Evs1   | RNA-binding protein EVS OS=Mus musculus GN=Evs1 PE=1 SV=2                                     | 3  | 25.1 | 9.4  | 16.2 | 2.7 | 1.55 | 0.65 | 78.0   | 27.4   | 46.0   | 2.8 | 1.69 | 0.59 |
| Q8B914_TRM2A_MOUSE  | Trm2a  | 2'-O-methyltransferase TRM2A OS=Mus musculus GN=Trm2a PE=2 SV=1                               | 11 | 11.2 | 4.2  | 7.2  | 2.7 | 1.55 | 0.65 | 4.2    | 7.2    | 11.2   | 2.7 | 1.63 | 0.61 |
| Q24448_IF4G2_MOUSE  | If4g2  | Eukaryotic translation initiation factor 4 gamma 2 OS=Mus musculus GN=If4g2 PE=1 SV=2         | 10 | 11.5 | 4.3  | 7.4  | 2.7 | 1.55 | 0.65 | 239.7  | 144.7  | 243.3  | 1.7 | 1.99 | 1.02 |
| Q04690_SMR3_MOUSE   | Smr3   | SWI/SNF-related matrix-associated actin-activated regulator of chromatin subfamily 3 contain  | 1  | 8.5  | 3.2  | 5.5  | 2.7 | 1.55 | 0.65 | 8.5    | 3.2    | 5.4    | 2.7 | 1.58 | 0.63 |
| Q51Y62_IP29_MOUSE   | Ip29   | Interleukin-1 receptor type 2 OS=Mus musculus GN=Ip29 PE=1 SV=3                               | 3  | 8.8  | 3.8  | 4.8  | 2.7 | 1.55 | 0.65 | 6.0    | 4.8    | 15.2   | 2.6 | 1.52 | 0.64 |
| Q9R170_SNP47_MOUSE  | Snp47  | Synaptonemal-associated protein SNP47 OS=Mus musculus GN=Snp47 PE=1 SV=1                      | 3  | 8.2  | 3.1  | 5.3  | 2.7 | 1.55 | 0.65 | 21.4   | 8.4    | 14.2   | 2.5 | 1.51 | 0.66 |
| Q9R181_TRIM3_MOUSE  | Trim3  | Tripartite motif-containing protein 3 OS=Mus musculus GN=Trim3 PE=1 SV=1                      | 5  | 15.7 | 5.9  | 10.7 | 2.7 | 1.55 | 0.65 | 77.0   | 29.1   | 49.0   | 2.6 | 1.57 | 0.64 |
| PE1069_GABP2_MOUSE  | Gabp2  | GAB-binding protein subunit beta 2 OS=Mus musculus GN=Gabp2 PE=2 SV=2                         | 3  | 9.1  | 3.4  | 5.9  | 2.7 | 1.55 | 0.65 | 24.5   | 15.7   | 26.3   | 1.6 | 1.93 | 1.07 |
| Q8V84_NOC3L_MOUSE   | Noc3l  | Nucleolar complex protein 3 homolog OS=Mus musculus GN=Noc3l PE=2 SV=2                        | 2  | 29.5 | 11.1 | 19.1 | 2.6 | 1.55 | 0.65 | 1481.5 | 510.9  | 859.9  | 1.9 | 1.72 | 0.58 |
| P70271_PDL4_MOUSE   | Pdlm4  | PDZ and LIM domain protein 4 OS=Mus musculus GN=Pdlm4 PE=1 SV=3                               | 11 | 31.8 | 12.0 | 20.6 | 2.7 | 1.55 | 0.65 | 379.0  | 150.4  | 253.0  | 2.5 | 1.50 | 0.67 |
| Q61407_GTA_MOUSE    | Gta4   | Golgi to ER traffic protein 4 homolog OS=Mus musculus GN=Gta4 PE=2 SV=2                       | 2  | 16.3 | 6.1  | 10.5 | 2.7 | 1.55 | 0.65 | 32.6   | 12.3   | 20.7   | 2.7 | 1.58 | 0.63 |
| Q80296_GRO295_MOUSE | H16    | H16 histone family, member X OS=Mus musculus GN=H16 PE=1 SV=1                                 | 12 | 74.6 | 28.1 | 48.2 | 2.7 | 1.55 | 0.65 | 1481.5 | 510.9  | 859.9  | 1.9 | 1.72 | 0.58 |
| Q29193_CDR3_MOUSE   | Cdr3   | Cytosine-dependent kinase 3 OS=Mus musculus GN=CDK3 PE=1 SV=1                                 | 1  | 12.8 | 4.8  | 8.2  | 2.7 | 1.55 | 0.65 | 61.9   | 22.5   | 37.8   | 2.8 | 1.64 | 0.61 |
| Q9J94_EIF3M_MOUSE   | Eif3m  | Eukaryotic translation initiation factor 3 subunit M OS=Mus musculus GN=Eif3m PE=2 SV=1       | 6  | 21.2 | 8.0  | 13.7 | 2.7 | 1.55 | 0.65 | 195.8  | 51.5   | 86.5   | 3.8 | 2.26 | 0.44 |
| Q90806_MED1_MOUSE   | Med11  | Mediator of RNA polymerase II transcription subunit 11 OS=Mus musculus GN=Med11 PE=1 SV=3     | 2  | 23.9 | 9.0  | 15.4 | 2.7 | 1.55 | 0.65 | 47.7   | 18.0   | 30.3   | 2.7 | 1.58 | 0.63 |
| PE1620_S6141_MOUSE  | Sec14  | Sec14 nuclear protein subunit alpha isoform 1 OS=Mus musculus GN=Sec14 PE=1 SV=2              | 2  | 29.5 | 11.1 | 19.1 | 2.6 | 1.55 | 0.65 | 21.3   | 59.0   | 22.3   | 2.6 | 1.58 | 0.63 |
| Q5C800_VPS25_MOUSE  | Vps25  | Vacuolar protein-sorting-associated protein 25 OS=Mus musculus GN=Vps25 PE=2 SV=1             | 1  | 8.7  | 3.3  | 5.6  | 2.6 | 1.55 | 0.65 | 8.7    | 3.3    | 5.5    | 2.6 | 1.58 | 0.63 |
| Q8R5C3_ACT1_MOUSE   | Actr1b | Beta-actinin OS=Mus musculus GN=Actr1b PE=1 SV=1                                              | 13 | 24.9 | 9.4  | 16.1 | 2.6 | 1.54 | 0.65 | 568.2  | 275.2  | 462.7  | 2.1 | 1.23 | 0.81 |
| Q61087_LAMB3_MOUSE  | Lamb3  | Laminin subunit beta-3 OS=Mus musculus GN=Lamb3 PE=2 SV=2                                     | 1  | 4.5  | 1.7  | 2.9  | 2.6 | 1.54 | 0.65 | 4.5    | 1.7    | 2.8    | 2.6 | 1.57 | 0.64 |
| Q9P246_RPL35_MOUSE  | Rpl35  | Putative RNA-binding protein 15B OS=Mus musculus GN=Rpl35 PE=1 SV=2                           | 9  | 19.5 | 5.8  | 10.0 | 2.6 | 1.54 | 0.65 | 11.8   | 129.4  | 11.8   | 2.6 | 1.57 | 0.64 |
| Q8BK12_TRMR6_MOUSE  | Trmr6  | Trinucleotide repeat-containing gene 6B protein OS=Mus musculus GN=Trmr6 PE=1 SV=1            | 3  | 8.9  | 3.4  | 5.8  | 2.6 | 1.54 | 0.65 | 27.2   | 11.2   | 18.8   | 2.4 | 1.45 | 0.69 |
| Q904H1_EXOC2_MOUSE  | Exoc2  | Exocyst complex component 2 OS=Mus musculus GN=Exoc2 PE=1 SV=1                                | 8  | 15.6 | 5.9  | 10.6 | 2.6 | 1.54 | 0.65 | 122.8  | 44.6   | 74.7   | 2.8 | 1.64 | 0.61 |
| A2JAV2_VIR_MOUSE    | Vmr1   | Protein vir1 homolog OS=Mus musculus GN=Vmr1 PE=1 SV=1                                        | 7  | 10.1 | 3.7  | 6.0  | 2.6 | 1.54 | 0.65 | 10.1   | 3.7    | 50.3   | 2.4 | 1.41 | 0.71 |
| P43247_MAB2_MOUSE   | Mab2   | DNA mismatch repair protein MAB2 OS=Mus musculus GN=Mab2 PE=1 SV=1                            | 31 | 22.0 | 8.3  | 14.3 | 2.6 | 1.54 | 0.65 | 60.6   | 610.6  | 1026.8 | 1.1 | 0.66 | 1.22 |
| Q53600_SCAMP3_MOUSE | Scamp3 | History carrier-associated membrane protein 3 OS=Mus musculus GN=Scamp3 PE=1 SV=3             | 5  | 35.5 | 13.4 | 23.1 | 2.6 | 1.54 | 0.65 | 155.1  | 50.6   | 85.2   | 3.1 | 1.82 | 0.55 |
| Wd228_HDAC2_MOUSE   | Hdac2  | Histone deacetylase 2 OS=Mus musculus GN=Hdac2 PE=1 SV=1                                      | 7  | 17.8 | 6.7  | 11.6 | 2.6 | 1.54 | 0.65 | 121.6  | 43.0   | 72.3   | 2.8 | 1.68 | 0.59 |
| Q8B207_ANC2_MOUSE   | Ank2   | Anchorin-2 OS=Mus musculus GN=Ank2 PE=2 SV=1                                                  | 1  | 26.9 | 10.2 | 18.5 | 2.6 | 1.54 | 0.65 | 26.9   | 10.2   | 18.5   | 2.6 | 1.57 | 0.64 |
| E9PYH6_ESP9H_MOUSE  | Setd1a | Protein Setd1a OS=Mus musculus GN=Setd1a PE=4 SV=1                                            | 16 | 11.4 | 4.3  | 7.4  | 2.6 | 1.54 | 0.65 | 238.9  | 72.8   | 122.5  | 3.3 | 1.95 | 0.51 |
| PE1750_ARF4_MOUSE   | Arf4   | ADP-ribosylation factor 4 OS=Mus musculus GN=Arf4 PE=1 SV=2                                   | 3  | 16.0 | 6.1  | 10.4 | 2.6 | 1.54 | 0.65 | 44.8   | 20.8   | 35.0   | 2.1 | 1.28 | 0.78 |
| Q4F66_PRC3A_MOUSE   | Prp38a | Pre-rRNA-splicing factor 38A OS=Mus musculus GN=Prp38a PE=1 SV=1                              | 6  | 20.4 | 7.8  | 13.3 | 2.6 | 1.54 | 0.65 | 106.7  | 66.5   | 111.8  | 1.6 | 1.95 | 1.05 |
| Q4K44_C22A2_MOUSE   | Rps24  | 28S ribosomal protein L24, isoform 2 OS=Mus musculus GN=C22A2 PE=1 SV=1                       | 23 | 29.8 | 10.5 | 19.2 | 2.6 | 1.53 | 0.65 | 110.2  | 65.8   | 102.2  | 2.6 | 1.57 | 0.64 |
| R97351_R3A_MOUSE    | Rps3a  | 40S ribosomal protein S3a OS=Mus musculus GN=Rps3a PE=1 SV=1                                  | 22 | 85.2 | 32.4 | 55.5 | 2.6 | 1.54 | 0.65 | 3146.4 | 1214.7 | 2042.5 | 2.6 | 1.54 | 0.65 |
| Q5190_H4L1_MOUSE    | H4-L1  | H-1 class I histone core particle antigen, K-D alpha chain OS=Mus musculus GN=H4-L1 PE=1 SV=1 | 1  | 10.4 | 4.0  | 6.8  | 2.6 | 1.54 | 0.65 | 10.4   | 4.0    | 6.7    | 2.6 | 1.57 | 0.64 |
| Q07417_ACD2_MOUSE   | Acd2   | Actin-specific actin capping protein OS=Mus musculus GN=Acd2 PE=1 SV=1                        | 2  | 8.8  | 3.5  | 6.2  | 2.6 | 1.54 | 0.65 | 8.8    | 3.5    | 6.2    | 2.6 | 1.57 | 0.64 |
| Q58A65_JP4_MOUSE    | Spa9   | C-hu amino-terminal kinase-interacting protein 4 OS=Mus musculus GN=Spa9 PE=1 SV=2            | 1  | 5.6  | 2.1  | 3.6  | 2.6 | 1.53 | 0.65 | 5.6    | 2.1    | 3.6    | 2.6 | 1.56 | 0.64 |
| PGC51_CTR8_MOUSE    | Chtr8  | Chromosome translocation fidelity protein 8 homolog OS=Mus musculus GN=Chtr8 PE=2 SV=1        | 2  | 18.8 | 7.1  | 12.3 | 2.6 | 1.53 | 0.65 | 37.6   | 14.3   | 24.0   | 2.6 | 1.56 | 0.64 |
| PE8373_TBAC1_MOUSE  | Tubac1 | Tubulin alpha 1C chain OS=Mus musculus GN=TBAC1 PE=1 SV=1                                     | 6  | 54.3 | 20.7 | 35.4 | 2.6 | 1.53 | 0.65 | 545.5  | 245.5  | 412.7  | 2.2 | 1.32 | 0.76 |
| P42206_SFPT2_MOUSE  | Sfpt2  | Serine phosphorylation factor 2 OS=Mus musculus GN=Sfpt2 PE=1 SV=1                            | 2  | 19.4 | 7.4  | 12.7 | 2.6 | 1.53 | 0.65 | 16.4   | 10.5   | 16.4   | 2.6 | 1.57 | 0.64 |
| Q62450_WAPL_MOUSE   | Wapl   | Wings apart-like protein homolog OS=Mus musculus GN=Wapl PE=1 SV=2                            | 11 | 11.8 | 4.5  | 7.7  | 2.6 | 1.53 | 0.65 | 149.1  | 52.0   | 87.4   | 2.9 | 1.70 | 0.59 |
| VP372_VAPB_MOUSE    | Vapb   | Vacuolar protein sorting-associated protein 72 homolog OS=Mus musculus GN=Vapb PE=2 SV=2      | 3  | 28.1 | 10.7 | 18.4 | 2.6 | 1.53 | 0.65 | 123.3  | 50.7   | 85.2   | 2.4 | 1.45 | 0.69 |
| Q80B75_WAPR2_MOUSE  | Wapr2  | WAPR2 OS=Mus musculus GN=Wapr2 PE=1 SV=1                                                      | 2  | 7.6  | 2.9  | 5.0  | 2.6 | 1.53 | 0.65 | 7.6    | 2.9    | 5.0    | 2.6 | 1.56 | 0.64 |
| Q8C820_CHERP_MOUSE  | Cherp  | Calcium homeostasis endoplasmic reticulum protein OS=Mus musculus GN=Cherp PE=1 SV=1          | 16 | 29.0 | 11.0 | 18.9 | 2.6 | 1.53 | 0.65 | 769.6  | 231.2  | 388.8  | 3.3 | 1.98 | 0.51 |
| Q8BC18_FERM2_MOUSE  | Ferm2  | Fermitin family homolog OS=Mus musculus GN=Ferm2 PE=1 SV=1                                    | 9  | 20.2 | 7.7  | 13.2 | 2.6 | 1.53 | 0.65 | 164.4  | 58.2   | 97.8   | 2.8 | 1.68 | 0.59 |
| P14575_SRP54_MOUSE  | Srp54  | Signal recognition particle 54 kDa protein OS=Mus musculus GN=Srp54 PE=1 SV=2                 | 22 | 26.1 | 9.9  | 17.0 | 2.6 | 1.53 | 0.65 | 80.3   | 397.2  | 667.9  | 2.1 | 1.28 | 0.78 |
| Q8A273_MMG17_MOUSE  | Mmg17  | Membrane magnesium transporter 17 OS=Mus musculus GN=Mmg17 PE=2 SV=1                          | 9  | 14.9 | 5.3  | 9.3  | 2.6 | 1.53 | 0.65 | 57.5   | 18.7   | 31.6   | 2.6 | 1.66 | 0.64 |
| BRU514_B9E15A_MOUSE | Nup205 | MGC217156, isoform CRA_b OS=Mus musculus GN=Nup205 PE=2 SV=1                                  | 5  | 8.4  | 3.2  | 5.5  | 2.6 | 1.53 | 0.65 | 45.1   | 18.6   | 31.2   | 2.4 | 1.45 | 0.69 |
| P16330_CN3_MOUSE    | Cnp    | 2',3'-cyclic-nucleotide 3'-phosphodiesterase OS=Mus musculus GN=Cnp PE=1 SV=3                 | 1  | 8.0  | 3.1  | 5.2  | 2.6 | 1.53 | 0.65 | 8.0    | 3.1    | 5.1    | 2.6 | 1.56 | 0.64 |
| QJ0201_RBM4_MOUSE   | Rnpc3  | RNA-binding protein 3 OS=Mus musculus GN=Rnpc3 PE=2 SV=2                                      | 1  | 7.2  | 2.8  | 4.7  | 2.6 | 1.53 | 0.65 | 7.2    | 2.8    | 4.6    | 2.6 | 1.56 | 0.64 |
| PC2196_PRS8_MOUSE   | Prs8   | Protein tyrosine phosphatase 8 OS=Mus musculus GN=Prs8 PE=1 SV=1                              | 1  | 8.0  | 3.0  | 4.9  | 2.6 | 1.53 | 0.65 | 28.7   | 10.7   | 14.7   | 2.6 | 1.57 | 0.64 |
| Q62P2V_INO80_MOUSE  | Ino80  | DNA helicase INO80 OS=Mus musculus GN=INO80 PE=2 SV=2                                         | 1  | 4.9  | 1.9  | 3.2  | 2.6 | 1.53 | 0.65 | 4.9    | 1.9    | 3.1    | 2.6 | 1.56 | 0.64 |
| OT7M81_UHRF2_MOUSE  | Uhrf2  | E1 ubiquitin-protein ligase UHRF2 OS=Mus musculus GN=UHRF2 PE=1 SV=1                          | 3  | 5.3  | 2.0  | 3.5  | 2.6 | 1.53 | 0.65 | 14.9   | 8.4    | 14.2   | 1.8 | 1.05 | 0.95 |
| PE0313_TCF2_MOUSE   | Ctcf2  | C-terminal protein 1 subunit alpha OS=Mus musculus GN=Ctcf2 PE=1 SV=3                         | 33 | 19.8 | 7.0  | 12.3 | 2.6 | 1.53 | 0.65 | 334.3  | 129.2  | 212.2  | 2.6 | 1.54 | 0.65 |
| Q8R019_HD43_MOUSE   | Hd43   | Transcriptional adaptor 3 OS=Mus musculus GN=HD43 PE=1 SV=1                                   | 6  | 20.3 | 7.3  | 12.6 | 2.6 | 1.53 | 0.65 | 125.2  | 45.2   | 75.9   | 2.8 | 1.65 | 0.61 |
| Q51510_TRD25_MOUSE  | Trd25  | E1 ubiquitin-protein ligase TRIM25 OS=Mus musculus GN=Trm25 PE=1 SV=2                         | 9  | 12.8 | 4.9  | 8.4  | 2.6 | 1.52 | 0.66 | 120.3  | 62.6   | 105.2  | 1.9 | 1.14 | 0.87 |
| P42567_EP51_MOUSE   | Eps15  | Epidermal growth factor receptor substrate 15 OS=Mus musculus GN=Eps15 PE=1 SV=1              | 2  | 6.2  | 2.4  | 4.1  | 2.6 | 1.52 | 0.66 | 12.4   | 4.7    | 8.0    | 2.6 | 1.55 | 0.64 |
| Q52241_HMRP_MOUSE   | Hmrp   | Progerin-related nuclear protein OS=Mus musculus GN=HMRP PE=1 SV=3                            | 27 | 10.9 | 4.0  | 6.8  | 2.6 | 1.52 | 0.66 | 69.9   | 347.5  | 584.9  | 2.0 | 1.14 | 0.84 |
| Q8C076_GQC76_MOUSE  | Gqc76  | Kinesin light chain 1 OS=Mus musculus GN=GQC76 PE=1 SV=1                                      | 7  | 13.4 | 5.1  | 8.8  | 2.6 | 1.52 | 0.66 | 112.2  | 34.1   | 57.4   | 2.4 | 1.42 | 0.71 |
| D3YVV2_D3YVW2_MOUSE | Golim4 | Golgi integral membrane protein 4 OS=Mus musculus GN=Golim4 PE=1 SV=1                         | 4  | 16.8 | 6.4  | 11.0 | 2.6 | 1.52 | 0.66 | 39.0   | 23.2   | 39.0   | 2.4 | 1.44 | 0.69 |
| Q8V808_AK81_MOUSE   | Prkab1 | 5'-NMP-activated protein kinase subunit beta-1 OS=Mus musculus GN=Prkab1 PE=1 SV=2            | 4  | 11.3 | 4.3  | 7.4  | 2.6 | 1.52 | 0.66 | 57.3   | 21.6   | 36.3   | 2.7 | 1.58 | 0.63 |
| Q52908_R53_MOUSE    | R53    | 52S ribosomal protein OS=Mus musculus GN=R53 PE=1 SV=1                                        | 34 | 46.4 | 17.0 | 32.4 | 2.6 | 1.52 | 0.66 | 5987.8 | 2288.4 | 3864.6 | 2.6 | 1.55 | 0.65 |
| Q7F487_FT87_MOUSE   | Pamd4  | 26S proteasome non-ATPase regulatory subunit 4 (Fragment) OS=Mus musculus GN=Pamd4 PE=1 SV=1  | 2  | 7.1  | 2.7  | 4.7  | 2.6 | 1.52 | 0.66 | 14.2   | 5.4    | 9.2    | 2.6 | 1.55 | 0.64 |
| Q51644_CTR1_MOUSE   | Cent3  | Centrioin-3 OS=Mus musculus GN=Cent3 PE=2 SV=1                                                | 1  | 8.7  | 3.3  | 5.7  | 2.6 | 1.52 | 0.66 | 8.7    | 3.3    | 5.6    | 2.6 | 1.55 | 0.64 |
| Q60932_VDCL1_MOUSE  | Vdcl1  | Vesicle-docking and uncoating protein 1 OS=Mus musculus GN=VDCL1 PE=1 SV=3                    | 1  | 7.8  | 2.9  | 4.6  | 2.6 | 1.52 | 0.66 | 14.7   | 4.6    | 13.9   | 2.6 | 1.65 | 0.66 |
| Q920U4_ZO2_MOUSE    | Tjp2   | Tight junction protein ZO-2 OS=Mus musculus GN=Tjp2 PE=1 SV=2                                 | 55 | 35.3 | 13.5 | 23.2 | 2.6 | 1.52 | 0.66 | 2393.5 | 931.3  | 1566.0 | 2.6 | 1.53 | 0.65 |
| Q9JH8_E0D21_MOUSE   | Kder1  | ER lumen protein-retaining receptor 1 OS=Mus musculus GN=Kder1 PE=2 SV=1                      | 2  | 32.8 | 12.6 | 21.6 | 2.6 | 1.52 | 0.66 | 65.6   | 25.2   | 42.3   | 2.6 | 1.55 | 0.65 |
| G5E8V_G5E8V_MOUSE   | Arf1p1 | MGC18094 OS=Mus musculus GN=Arf1p1 PE=4 SV=1                                                  | 11 | 26.3 | 1    |      |     |      |      |        |        |        |     |      |      |



|                     |          |                                                                                           |    |      |      |      |      |      |      |        |        |        |      |      |      |
|---------------------|----------|-------------------------------------------------------------------------------------------|----|------|------|------|------|------|------|--------|--------|--------|------|------|------|
| O9R1C7_PR40A_MOUSE  | Pripf40a | PremRNA-processing factor 40 homolog A OS-Mus musculus GN:Pripf40a PE1-SV1                | 39 | 35.2 | 14.0 | 24.0 | 2.5  | 1.47 | 0.68 | 2513.8 | 1019.7 | 1714.5 | 2.5  | 1.47 | 0.68 |
| O9D4H2_GCLC1_MOUSE  | Gccl1    | GRIIP and coiled-coil domain-containing protein 1 OS-Mus musculus GN:Gccl1 PE1-SV2        | 3  | 6.8  | 2.7  | 4.7  | 2.5  | 1.47 | 0.68 | 219.9  | 9.2    | 15.4   | 2.4  | 1.42 | 0.70 |
| OT1L4_TLR2_MOUSE    | Tlr2     | Toll-like receptor 2 OS-Mus musculus GN:Tlr2 PE1-SV3                                      | 6  | 10.8 | 7.5  | 10.8 | 2.5  | 1.46 | 0.68 | 486.6  | 150.3  | 44.7   | 2.6  | 1.63 | 0.61 |
| O90877_O9BQ7_MOUSE  | Trim12c  | Protein Trim12c OS-Mus musculus GN:Trim12c PE1-SV1                                        | 10 | 18.9 | 7.5  | 12.9 | 2.5  | 1.46 | 0.68 | 237.6  | 122.1  | 205.3  | 1.9  | 1.16 | 0.86 |
| O95639_UBPS_MOUSE   | Ubp5     | Ubiquitin carboxyl-terminal hydrolase 5 OS-Mus musculus GN:Ubp5 PE1-SV1                   | 11 | 12.2 | 4.8  | 8.3  | 2.5  | 1.46 | 0.68 | 135.8  | 61.8   | 104.0  | 2.2  | 1.31 | 0.77 |
| Q172Z1_E5T72_MOUSE  | E5T72    | Extended synaptotagmin-like protein 1 OS-Mus musculus GN:E5T72 PE1-SV1                    | 14 | 11.6 | 4.6  | 7.9  | 2.5  | 1.46 | 0.68 | 154.2  | 79.4   | 154.8  | 1.6  | 1.58 | 0.67 |
| O99371_TMED9_MOUSE  | Tmed9    | Transmembrane emp24 domain-containing protein 9 OS-Mus musculus GN:Tmed9 PE1-SV2          | 11 | 23.2 | 9.2  | 15.8 | 2.5  | 1.46 | 0.68 | 221.2  | 86.1   | 144.8  | 2.6  | 1.53 | 0.65 |
| O8Q114_INT9_MOUSE   | Int9     | Integrator complex subunit 9 OS-Mus musculus GN:Int9 PE2-SV1                              | 3  | 9.8  | 3.9  | 6.7  | 2.5  | 1.46 | 0.68 | 28.4   | 16.6   | 19.5   | 2.4  | 1.46 | 0.69 |
| O8C181_SF1P1_MOUSE  | Sf1p1    | Septin 11 OS-Mus musculus GN:Sf1p1 PE1-SV1                                                | 7  | 13.9 | 5.5  | 9.5  | 2.5  | 1.46 | 0.68 | 117.0  | 43.6   | 73.3   | 2.7  | 1.60 | 0.69 |
| OT191A_EF3D_MOUSE   | Ef3d     | RNA-dependent protein kinase (RDK) subunit D OS-Mus musculus GN:Ef3d PE1-SV1              | 7  | 13.9 | 5.5  | 9.5  | 2.5  | 1.46 | 0.68 | 117.0  | 43.6   | 73.3   | 2.7  | 1.60 | 0.69 |
| O91W69_EFN3_MOUSE   | Efn3     | Epin-3 OS-Mus musculus GN:Efn3 PE2-SV1                                                    | 3  | 4.3  | 1.7  | 2.9  | 2.5  | 1.46 | 0.68 | 11.7   | 6.6    | 11.1   | 1.8  | 1.06 | 0.94 |
| O8B85A_O8B85A_MOUSE | Znmp6    | Protein Znm6 OS-Mus musculus GN:Znmp6 PE2-SV1                                             | 1  | 4.8  | 1.9  | 3.3  | 2.5  | 1.46 | 0.69 | 4.8    | 1.9    | 3.2    | 2.5  | 1.49 | 0.67 |
| O91W16_UBP3_MOUSE   | Ubp3     | Ubiquitin carboxyl-terminal hydrolase 3 OS-Mus musculus GN:Ubp3 PE2-SV1                   | 12 | 10.7 | 7.2  | 12.5 | 2.5  | 1.46 | 0.69 | 144.8  | 55.4   | 144.4  | 2.5  | 2.49 | 0.67 |
| O9C503_CACTN_MOUSE  | Cactn    | Catenin OS-Mus musculus GN:Cactn PE1-SV2                                                  | 4  | 8.2  | 3.3  | 5.6  | 2.5  | 1.46 | 0.69 | 42.1   | 13.5   | 22.7   | 3.1  | 1.85 | 0.54 |
| OT0743_OTUB1_MOUSE  | Oub1     | Ubiquitin thioesterase OTUB1 OS-Mus musculus GN:Oub1 PE1-SV2                              | 3  | 6.6  | 2.6  | 4.5  | 2.5  | 1.46 | 0.69 | 27.0   | 14.9   | 25.1   | 1.8  | 1.08 | 0.93 |
| O9C2U3_SKL21_MOUSE  | Skl21    | Superkiller viral integrase activity 2-like 2 OS-Mus musculus GN:Skl21 PE1-SV1            | 28 | 20.3 | 8.1  | 13.9 | 2.5  | 1.46 | 0.69 | 707.9  | 297.4  | 500.1  | 2.6  | 1.54 | 0.65 |
| P5115D_NAB7A_MOUSE  | Nab7a    | Ras-related protein Rab-7a OS-Mus musculus GN:Nab7a PE1-SV1                               | 20 | 15.6 | 6.2  | 10.7 | 2.5  | 1.46 | 0.69 | 691.4  | 249.7  | 429.8  | 2.8  | 1.65 | 0.61 |
| O91K7C_AP4M1_MOUSE  | Ap4m1    | AP-4 complex subunit mu-1 OS-Mus musculus GN:Ap4m1 PE2-SV1                                | 1  | 8.0  | 3.2  | 5.4  | 2.5  | 1.46 | 0.69 | 8.0    | 3.2    | 5.4    | 2.5  | 1.49 | 0.67 |
| O9QZD8_LARP1_MOUSE  | Larp1    | Lary-retroviral protein 1 OS-Mus musculus GN:Larp1 PE1-SV3                                | 28 | 15.7 | 6.3  | 10.7 | 2.5  | 1.46 | 0.69 | 570.1  | 231.1  | 388.6  | 2.5  | 1.47 | 0.68 |
| O8D19E_RNKS5_MOUSE  | Rnks5    | Nuclear pore complex protein Nup155 OS-Mus musculus GN:Nup155 PE1-SV1                     | 3  | 9.4  | 3.8  | 6.4  | 2.5  | 1.46 | 0.69 | 26.4   | 9.3    | 15.6   | 2.8  | 1.69 | 0.59 |
| O8C0C0_C92B_MOUSE   | C92b     | Cytosine-rich protein 3 OS-Mus musculus GN:C92b PE1-SV2                                   | 24 | 5.6  | 2.7  | 3.8  | 2.5  | 1.46 | 0.69 | 42.2   | 14.5   | 25.5   | 2.5  | 1.49 | 0.67 |
| O9P9B0_EP9B0_MOUSE  | Ahnak2   | Protein Ahnak2 (Fragment) OS-Mus musculus GN:Ahnak2 PE1-SV4                               | 12 | 17.2 | 6.9  | 11.1 | 2.5  | 1.46 | 0.69 | 446.6  | 150.8  | 253.6  | 3.0  | 1.76 | 0.57 |
| OT6K16_RA3A_MOUSE   | C3baap   | DNA-directed RNA polymerase subunit RP34 OS-Mus musculus GN:C3baap PE1-SV2                | 4  | 10.3 | 4.1  | 7.1  | 2.5  | 1.46 | 0.69 | 42.7   | 18.3   | 30.8   | 2.3  | 1.38 | 0.72 |
| O9P99E_NU155_MOUSE  | Nu155    | Nuclear pore complex protein Nup155 OS-Mus musculus GN:Nu155 PE1-SV1                      | 12 | 14.0 | 5.6  | 9.6  | 2.5  | 1.46 | 0.69 | 176.5  | 109.9  | 128.6  | 2.3  | 1.39 | 0.72 |
| P62835_RAP1A_MOUSE  | Rap1a    | Ras-related protein Rap-1A OS-Mus musculus GN:Rap1a PE2-SV1                               | 8  | 13.3 | 5.3  | 9.2  | 2.5  | 1.46 | 0.69 | 182.3  | 81.2   | 136.5  | 2.2  | 1.34 | 0.75 |
| P70698_PRRG1_MOUSE  | Ctsp1    | CYP synthase 1 OS-Mus musculus GN:Ctsp1 PE1-SV2                                           | 23 | 22.8 | 9.2  | 15.7 | 2.5  | 1.45 | 0.69 | 623.2  | 287.7  | 483.7  | 2.2  | 1.29 | 0.78 |
| O9D743_DUS3_MOUSE   | Dusp3    | Dual specificity tyrosine phosphatase 3 OS-Mus musculus GN:Dusp3 PE1-SV1                  | 1  | 7.3  | 2.9  | 5.0  | 2.5  | 1.45 | 0.69 | 7.3    | 2.9    | 4.9    | 2.5  | 1.48 | 0.64 |
| Q10000_SCR1L_MOUSE  | Scrl1    | Scavenger receptor class member 1 OS-Mus musculus GN:Scrl1 PE1-SV1                        | 2  | 5.2  | 2.7  | 3.7  | 2.5  | 1.45 | 0.69 | 7.4    | 3.2    | 12.0   | 2.6  | 1.47 | 0.68 |
| P13174_KIF4_MOUSE   | Kif4     | Chromosome-associated kinesin KIF4 OS-Mus musculus GN:Kif4 PE1-SV3                        | 21 | 10.2 | 4.1  | 7.0  | 2.5  | 1.45 | 0.69 | 262.0  | 146.0  | 245.5  | 1.8  | 1.07 | 0.94 |
| O92626_SNAP3_MOUSE  | Snap3    | SNARE-associated protein Snap3 OS-Mus musculus GN:Snap3 PE1-SV1                           | 1  | 16.2 | 6.5  | 11.2 | 2.5  | 1.45 | 0.69 | 16.2   | 6.5    | 10.9   | 2.5  | 1.48 | 0.68 |
| Q18865_S5C3_MOUSE   | S5c3     | S5 histone deacetylase corepressor complex component S5C3 OS-Mus musculus GN:S5c3 PE1-SV1 | 2  | 10.7 | 7.4  | 10.5 | 2.5  | 1.45 | 0.69 | 8.6    | 3.6    | 8.6    | 2.5  | 1.58 | 0.68 |
| O95647_APK4_MOUSE   | Pk4a     | 5'-AMP-activated protein kinase catalytic subunit alpha-1 OS-Mus musculus GN:Pk4a PE1-SV1 | 15 | 11.9 | 4.8  | 8.2  | 2.5  | 1.45 | 0.69 | 242.0  | 117.6  | 197.7  | 2.1  | 1.22 | 0.82 |
| O8C0D7_ING4_MOUSE   | Ing4     | Inhibitor of growth factor 4 OS-Mus musculus GN:Ing4 PE1-SV2                              | 1  | 57.0 | 22.9 | 39.2 | 2.5  | 1.45 | 0.69 | 57.0   | 22.9   | 38.5   | 2.5  | 1.48 | 0.68 |
| O91531_SFPT7_MOUSE  | Sfpt7    | Septin 7 OS-Mus musculus GN:Sfpt7 PE1-SV1                                                 | 4  | 7.7  | 3.1  | 5.3  | 2.5  | 1.45 | 0.69 | 30.9   | 12.5   | 21.0   | 2.5  | 1.47 | 0.68 |
| O9P997_SFNP3_MOUSE  | Sfnp3    | Septin-specific protein 3 OS-Mus musculus GN:Sfnp3 PE1-SV1                                | 1  | 10.5 | 4.8  | 8.0  | 2.5  | 1.45 | 0.69 | 11.1   | 4.8    | 12.1   | 2.5  | 1.46 | 0.68 |
| O9Y797_SBRD1_MOUSE  | Sbrd1    | SL RNA-binding domain-containing protein 1 OS-Mus musculus GN:Sbrd1 PE2-SV2               | 1  | 18.5 | 7.4  | 12.7 | 2.5  | 1.45 | 0.69 | 18.5   | 7.4    | 12.5   | 2.5  | 1.48 | 0.68 |
| O8D0D8_WASH1_MOUSE  | Wash1    | WAS protein family homolog 1 OS-Mus musculus GN:Wash1 PE1-SV1                             | 6  | 12.7 | 5.1  | 8.8  | 2.5  | 1.45 | 0.69 | 83.2   | 31.4   | 52.9   | 2.6  | 1.57 | 0.64 |
| O91691_PNN1_MOUSE   | Pnn1     | Pinn OS-Mus musculus GN:Pnn1 PE1-SV4                                                      | 49 | 24.5 | 9.9  | 16.9 | 2.5  | 1.45 | 0.69 | 227.7  | 103.6  | 174.0  | 2.2  | 1.30 | 0.77 |
| O91692_C9Z2_MOUSE   | C9z2     | Calponin 2 OS-Mus musculus GN:C9z2 PE1-SV1                                                | 2  | 5.6  | 2.0  | 2.2  | 2.5  | 1.44 | 0.69 | 40.4   | 97.3   | 104.5  | 2.6  | 1.49 | 0.67 |
| P8R173_FBW1T3_MOUSE | Prrc2b   | Protein PRRC2b OS-Mus musculus GN:Prrc2b PE1-SV1                                          | 5  | 7.3  | 2.9  | 5.0  | 2.5  | 1.44 | 0.69 | 44.9   | 15.5   | 26.1   | 2.9  | 1.72 | 0.58 |
| O9L9L0_ZN281_MOUSE  | Zn281    | Zinc finger protein 281 OS-Mus musculus GN:Zn281 PE1-SV1                                  | 1  | 10.5 | 4.2  | 7.3  | 2.5  | 1.44 | 0.69 | 10.5   | 4.2    | 7.1    | 2.5  | 1.47 | 0.68 |
| O9B0E9_ECSL2_MOUSE  | Ecsl2    | RNA-dependent protein kinase (RDK) subunit 2 OS-Mus musculus GN:Ecsl2 PE1-SV1             | 1  | 6.6  | 3.2  | 5.5  | 2.5  | 1.44 | 0.69 | 5.3    | 2.6    | 4.5    | 2.5  | 1.47 | 0.68 |
| O8QV45_EPM9_MOUSE   | Epm9p2a1 | EPMA2-interacting protein 1 OS-Mus musculus GN:Epm9p2a1 PE2-SV1                           | 1  | 6.1  | 2.5  | 4.2  | 2.5  | 1.44 | 0.69 | 6.1    | 2.5    | 4.2    | 2.5  | 1.47 | 0.68 |
| O91YU8_SF1_MOUSE    | Ppan     | Suppressor of SW14 1 homolog OS-Mus musculus GN:Ppan PE1-SV2                              | 4  | 8.0  | 3.2  | 5.5  | 2.5  | 1.44 | 0.69 | 28.7   | 12.7   | 21.4   | 2.2  | 1.34 | 0.75 |
| O91DCT_SF02_MOUSE   | Sf02     | Stromal cell-derived factor 2 OS-Mus musculus GN:Sf02 PE1-SV1                             | 1  | 5.4  | 2.2  | 3.7  | 2.5  | 1.44 | 0.69 | 5.4    | 2.2    | 3.7    | 2.5  | 1.47 | 0.68 |
| Q10UHQ_NDLB_MOUSE   | Ndlb     | Nucleolar protein 8 OS-Mus musculus GN:Ndlb PE1-SV1                                       | 2  | 5.2  | 2.1  | 3.6  | 2.5  | 1.44 | 0.69 | 4.2    | 2.1    | 3.6    | 2.5  | 1.47 | 0.68 |
| O9B1U0_BKFX5_MOUSE  | Uhrf1bp1 | Protein Uhrf1bp1 OS-Mus musculus GN:Uhrf1bp1 PE1-SV1                                      | 2  | 3.4  | 1.4  | 2.4  | 2.5  | 1.44 | 0.69 | 6.8    | 2.8    | 4.6    | 2.5  | 1.47 | 0.68 |
| P51618_RIP1_MOUSE   | Rip1     | Ribosomal RNA processing protein 1 homolog A OS-Mus musculus GN:Rip1 PE2-SV2              | 4  | 10.0 | 4.1  | 7.0  | 2.5  | 1.44 | 0.69 | 40.1   | 18.7   | 31.5   | 2.1  | 1.27 | 0.79 |
| Q11009_TMED1_MOUSE  | Tmed1    | Transmembrane emp24 domain-containing protein 1 OS-Mus musculus GN:Tmed1 PE2-SV1          | 2  | 10.1 | 7.0  | 4.1  | 7.0  | 2.5  | 1.44 | 6.9    | 12.5   | 11.5   | 2.5  | 1.47 | 0.68 |
| O9CWC4_INT11_MOUSE  | Cpfl1    | Integrator complex subunit 11 OS-Mus musculus GN:Cpfl1 PE2-SV1                            | 6  | 15.7 | 6.4  | 10.9 | 2.5  | 1.44 | 0.69 | 44.8   | 20.8   | 44.4   | 2.6  | 1.29 | 0.77 |
| O9P949_NGI1_MOUSE   | Gtsp4    | Nucleolar GTP-binding protein 1 OS-Mus musculus GN:Gtsp4 PE2-SV3                          | 8  | 11.8 | 4.8  | 8.2  | 2.5  | 1.44 | 0.69 | 128.1  | 62.7   | 105.4  | 2.0  | 1.22 | 0.82 |
| O90B05_PELP1_MOUSE  | Pelp1    | Protein, glutamic acid- and leucine-rich protein 1 OS-Mus musculus GN:Pelp1 PE1-SV2       | 13 | 21.5 | 8.7  | 15.0 | 2.5  | 1.44 | 0.70 | 319.8  | 125.2  | 210.4  | 2.6  | 1.52 | 0.67 |
| O91C91_WDHD4_MOUSE  | Wdhd4    | Winged-helix domain-containing protein 4 OS-Mus musculus GN:Wdhd4 PE2-SV1                 | 2  | 11.4 | 6.0  | 11.4 | 2.5  | 1.44 | 0.70 | 11.4   | 6.0    | 11.4   | 2.5  | 1.47 | 0.68 |
| P29341_PAPB1_MOUSE  | Papb1    | Polymerase II-binding protein 1 OS-Mus musculus GN:Papb1 PE1-SV2                          | 45 | 77.6 | 31.5 | 54.0 | 2.5  | 1.44 | 0.70 | 4665.9 | 2174.0 | 3655.5 | 2.1  | 1.28 | 0.78 |
| O91052_DPML_MOUSE   | Dpm1     | Dolichol phosphate mannosyltransferase subunit 1 OS-Mus musculus GN:Dpm1 PE2-SV1          | 1  | 8.5  | 3.4  | 5.9  | 2.5  | 1.44 | 0.70 | 8.5    | 3.4    | 5.8    | 2.5  | 1.46 | 0.68 |
| EP9F4_P7L_MOUSE     | Lmo7     | Protein Lmo7 OS-Mus musculus GN:Lmo7 PE1-SV1                                              | 35 | 14.1 | 5.7  | 9.8  | 2.5  | 1.44 | 0.70 | 671.0  | 257.0  | 432.1  | 2.6  | 1.55 | 0.64 |
| O90L15_ARHV1_MOUSE  | Arhv17   | Arh guanine nucleotide exchange factor 17 OS-Mus musculus GN:Arhv17 PE2-SV1               | 9  | 10.6 | 4.3  | 7.0  | 2.5  | 1.44 | 0.70 | 91.7   | 45.4   | 70.3   | 2.3  | 1.43 | 0.81 |
| O924C3_XPOS_MOUSE   | Xpos     | Exporin 3 OS-Mus musculus GN:Xpos PE2-SV1                                                 | 2  | 7.4  | 3.0  | 5.1  | 2.5  | 1.43 | 0.70 | 14.7   | 6.0    | 10.1   | 2.5  | 1.46 | 0.68 |
| O90D83_SF2C3_MOUSE  | Sf2c3    | Kinectin ortholog protein Sf2c3 OS-Mus musculus GN:Sf2c3 PE2-SV1                          | 1  | 8.7  | 3.5  | 6.0  | 2.5  | 1.43 | 0.70 | 8.7    | 3.5    | 5.9    | 2.5  | 1.46 | 0.68 |
| O90B48_NELLS_MOUSE  | Nells    | Lymphocyte-specific protein 2 OS-Mus musculus GN:Nells PE2-SV2                            | 16 | 16.2 | 6.6  | 11.3 | 2.5  | 1.43 | 0.70 | 46.0   | 16.2   | 26.0   | 2.6  | 1.56 | 0.68 |
| O9C9C0_TOM2_MOUSE   | Tom22    | Mitochondrial import receptor subunit TOM22 homolog OS-Mus musculus GN:Tom22 PE2-SV1      | 4  | 12.1 | 8.9  | 2.5  | 1.43 | 0.70 | 51.2 | 19.3   | 32.5   | 2.6    | 1.58 | 0.63 |      |
| O91KX5_NUDT5_MOUSE  | Nudt5    | ADP-sugar pyrophosphatase OS-Mus musculus GN:Nudt5 PE1-SV1                                | 1  | 29.1 | 11.9 | 20.3 | 2.5  | 1.43 | 0.70 | 29.1   | 11.9   | 20.0   | 2.5  | 1.46 | 0.69 |
| P70349_HINT1_MOUSE  | Hint1    | Histidine triad nucleotide-binding protein 1 OS-Mus musculus GN:Hint1 PE1-SV3             | 1  | 18.7 | 7.6  | 13.1 | 2.5  | 1.43 | 0.70 | 18.7   | 7.6    | 12.9   | 2.5  | 1.46 | 0.69 |
| O91937_NPM_MOUSE    | Npm      | Nucleophosmin OS-Mus musculus GN:Npm PE1-SV1                                              | 23 | 22.2 | 9.1  | 15.1 | 2.5  | 1.43 | 0.70 | 156.2  | 60.5   | 104.5  | 2.5  | 1.47 | 0.68 |
| P51283_RAB12_MOUSE  | Rab12    | Ras-related protein Rab-12 OS-Mus musculus GN:Rab12 PE1-SV3                               | 1  | 7.9  | 3.2  | 5.6  | 2.5  | 1.43 | 0.70 | 7.9    | 3.2    | 5.4    | 2.5  | 1.46 | 0.69 |
| P19973_LSP1_MOUSE   | Lsp1     | Ras-related protein 1 OS-Mus musculus GN:Lsp1 PE1-SV2                                     | 1  | 5.5  | 2.2  | 3.8  | 2.5  | 1.43 | 0.70 | 5.5    | 2.2    | 3.8    | 2.4  | 1.46 | 0.69 |
| O91910_CTNNL2_MOUSE | Cttnnb2  | CTNNB2 N-terminal-like protein OS-Mus musculus GN:Cttnnb2 PE1-SV1                         | 7  | 8.8  | 3.6  | 6.1  | 2.4  | 1.43 | 0.70 | 66.3   | 22.1   | 37.2   | 3.0  | 1.78 | 0.56 |
| O90R60_RTP4_MOUSE   | Rtp4     |                                                                                           |    |      |      |      |      |      |      |        |        |        |      |      |      |

|                     |          |                                                                                                     |     |       |      |       |     |      |      |         |        |        |     |      |      |
|---------------------|----------|-----------------------------------------------------------------------------------------------------|-----|-------|------|-------|-----|------|------|---------|--------|--------|-----|------|------|
| P25799_NFKB1_MOUSE  | Nfkb1    | Nuclear factor NF-kappa-B p105 subunit OS-Mus musculus GN=Nfkb1 PE=1 Sv=2                           | 11  | 17.6  | 7.4  | 12.8  | 2.4 | 1.38 | 0.72 | 166.2   | 64.1   | 107.8  | 2.6 | 1.54 | 0.65 |
| Q80629_FL2D_MOUSE   | Wtapp    | Pren-mRNA splicing regulator WTAP OS-Mus musculus GN=Wtapp PE=2 Sv=3                                | 6   | 18.0  | 7.6  | 13.0  | 2.4 | 1.38 | 0.72 | 103.8   | 45.0   | 75.7   | 2.3 | 1.37 | 0.73 |
| Q14541_BAKB1_MOUSE  | Bak1     | Bac-related protein Bak1 OS-Mus musculus GN=Bak1 PE=1 Sv=1                                          | 6   | 22.2  | 9.4  | 16.0  | 2.4 | 1.38 | 0.72 | 137.0   | 58.0   | 23.0   | 2.5 | 1.47 | 0.68 |
| P70455_STX4_MOUSE   | Stx4     | Stxintaxin-4 OS-Mus musculus GN=Stx4 PE=1 Sv=1                                                      | 3   | 8.2   | 3.5  | 5.9   | 2.4 | 1.38 | 0.72 | 35.6    | 10.4   | 17.5   | 3.4 | 2.04 | 0.49 |
| Q05120_RSU1_MOUSE   | Rsu1     | Ras suppressor protein 1 OS-Mus musculus GN=Rsu1 PE=2 Sv=3                                          | 6   | 31.0  | 13.1 | 22.4  | 2.4 | 1.38 | 0.72 | 184.6   | 77.8   | 130.8  | 2.4 | 1.41 | 0.71 |
| Q04065_C17B_MOUSE   | C17orf70 | Centrosomal protein of 17 kb OS-Mus musculus GN=C17orf70 PE=1 Sv=2                                  | 5   | 10.0  | 4.2  | 7.0   | 2.4 | 1.38 | 0.72 | 42.7    | 16.2   | 24.0   | 2.3 | 1.47 | 0.73 |
| Q02308_CP131_MOUSE  | Cep131   | Centrosomal protein of 131 kDa OS-Mus musculus GN=Cep131 PE=1 Sv=2                                  | 5   | 12.6  | 5.3  | 9.2   | 2.4 | 1.38 | 0.73 | 56.7    | 23.9   | 40.1   | 2.4 | 1.41 | 0.71 |
| P24655_PESA_MOUSE   | Pik3r1   | Phosphatidylinositol 3-kinase regulator subunit alpha OS-Mus musculus GN=Pik3r1 PE=1 Sv=2           | 1   | 6.2   | 2.6  | 4.5   | 2.4 | 1.38 | 0.73 | 6.2     | 2.6    | 4.4    | 2.4 | 1.41 | 0.71 |
| Q80853_ECHA_MOUSE   | Hadha    | Trihydroxyl enzyme subunit alpha, mitochondrial alpha OS-Mus musculus GN=Hadha PE=1 Sv=1            | 7   | 12.7  | 5.4  | 9.2   | 2.4 | 1.38 | 0.73 | 105.2   | 72.9   | 122.6  | 1.4 | 0.86 | 1.17 |
| Q80871_CARE_MOUSE   | Careap   | Carboxylase alpha OS-Mus musculus GN=Careap PE=1 Sv=1                                               | 6   | 19.0  | 8.1  | 14.0  | 2.4 | 1.38 | 0.73 | 139.8   | 89.0   | 151.8  | 2.4 | 1.47 | 0.68 |
| Q05222_THPP_MOUSE   | L3h3pdp  | Trans-L-3-hydroxyproline dehydratase OS-Mus musculus GN=L3h3pdp PE=1 Sv=1                           | 1   | 152.9 | 64.8 | 111.2 | 2.4 | 1.38 | 0.73 | 152.9   | 64.8   | 109.0  | 2.4 | 1.40 | 0.71 |
| Q05129_TAP1B_MOUSE  | Sap1b    | Inhibitor deacetylase complex subunit SAP1B OS-Mus musculus GN=Sap1B PE=1 Sv=1                      | 18  | 31.5  | 13.4 | 22.9  | 2.4 | 1.37 | 0.73 | 879.0   | 441.8  | 742.8  | 2.0 | 1.18 | 0.85 |
| P11967_AFS1_MOUSE   | Afs1     | AF-1 complex subunit alpha 1 OS-Mus musculus GN=Afs1 PE=1 Sv=1                                      | 41  | 10.6  | 4.5  | 7.7   | 2.4 | 1.37 | 0.73 | 9.8     | 4.0    | 7.3    | 2.8 | 1.40 | 0.71 |
| Q02061_PLEC_MOUSE   | Plec     | Plectin OS-Mus musculus GN=Plec PE=1 Sv=3                                                           | 130 | 23.1  | 9.8  | 16.8  | 2.4 | 1.37 | 0.73 | 3257.4  | 1515.0 | 2547.5 | 2.2 | 1.28 | 0.78 |
| Q80298_PTH2_MOUSE   | Pth2     | Pectinyl-RNA hydrolase 2, mitochondrial OS-Mus musculus GN=Pth2 PE=2 Sv=1                           | 3   | 4.2   | 1.8  | 3.0   | 2.4 | 1.37 | 0.73 | 36.5    | 14.3   | 24.1   | 2.5 | 1.51 | 0.66 |
| Q05071_MTNA_MOUSE   | Mtna     | Methyltransferase L-phosphate isomerase OS-Mus musculus GN=Mtna PE=2 Sv=1                           | 2   | 8.3   | 3.5  | 6.0   | 2.4 | 1.37 | 0.73 | 16.5    | 7.0    | 11.8   | 2.4 | 1.40 | 0.71 |
| Q10301_C1TM_MOUSE   | C1orf101 | Monofunctional C1-epsilon hydroxylase synthase, mitochondrial OS-Mus musculus GN=C1orf101 PE=1 Sv=1 | 2   | 33.8  | 7.0  | 22.0  | 2.4 | 1.37 | 0.73 | 167.3   | 67.0   | 112.7  | 2.5 | 1.48 | 0.67 |
| B05160_B9E1B0_MOUSE | Pdz8     | PDZ domain containing 8 OS-Mus musculus GN=Pdz8 PE=1 Sv=1                                           | 1   | 11.3  | 4.8  | 8.3   | 2.4 | 1.37 | 0.73 | 11.3    | 4.8    | 8.1    | 2.4 | 1.40 | 0.72 |
| Q17700_S2PDH_MOUSE  | Sup20h   | Transcription factor SPT20 homolog OS-Mus musculus GN=Sup20h PE=1 Sv=1                              | 1   | 13.7  | 5.8  | 10.0  | 2.4 | 1.37 | 0.73 | 13.7    | 5.8    | 9.8    | 2.4 | 1.40 | 0.72 |
| P58773_TPM1_MOUSE   | Tpm1     | Tropomyosin alpha 1 chain OS-Mus musculus GN=Tpm1 PE=1 Sv=1                                         | 21  | 70.1  | 28.9 | 51.2  | 2.3 | 1.37 | 0.73 | 1951.9  | 1168.8 | 1967.1 | 1.7 | 0.99 | 1.01 |
| Q10702_ERK6_MOUSE   | Erk6     | Interferon-gamma-inducible double-stranded RNA-dependent protein kinase activator A OS-Mus musculus | 3   | 20.4  | 8.9  | 14.9  | 2.3 | 1.37 | 0.73 | 70.0    | 29.0   | 42.8   | 2.4 | 1.43 | 0.70 |
| Q01926_BAG2_MOUSE   | Bag2     | BAG family molecular chaperone regulator 2 OS-Mus musculus GN=Bag2 PE=1 Sv=1                        | 8   | 22.0  | 9.4  | 16.1  | 2.3 | 1.37 | 0.73 | 180.5   | 86.4   | 145.3  | 2.1 | 1.24 | 0.80 |
| Q01905_P48A_MOUSE   | P48a     | EL SUAD1 protein ligase P48A OS-Mus musculus GN=P48a PE=1 Sv=2                                      | 3   | 7.1   | 3.0  | 5.2   | 2.3 | 1.37 | 0.73 | 38.6    | 14.4   | 24.3   | 2.7 | 1.59 | 0.63 |
| Q80156_VTGA_MOUSE   | Vtga     | Vesicle transport through interaction with 1 SNAREs homolog 1A OS-Mus musculus GN=Vtga11a PE=1 Sv=1 | 2   | 13.8  | 6.0  | 10.2  | 2.3 | 1.37 | 0.73 | 3.0     | 7.1    | 3.0    | 2.1 | 1.40 | 0.71 |
| Q06941_DDX51_MOUSE  | Ddx51    | ATP-dependent RNA helicase DDX51 OS-Mus musculus GN=Ddx51 PE=2 Sv=1                                 | 8   | 10.0  | 4.3  | 7.3   | 2.3 | 1.37 | 0.73 | 80.8    | 38.2   | 64.3   | 2.1 | 1.26 | 0.80 |
| P21121_MCM6_MOUSE   | Mcm6     | DNA replication licensing factor MCM6 OS-Mus musculus GN=Mcm6 PE=1 Sv=1                             | 9   | 11.4  | 4.9  | 8.3   | 2.3 | 1.37 | 0.73 | 133.4   | 65.0   | 109.3  | 2.1 | 1.22 | 0.82 |
| P24455_CAPP_MOUSE   | Capp     | Macrograph-capping protein OS-Mus musculus GN=Capp PE=1 Sv=2                                        | 6   | 13.5  | 5.8  | 9.9   | 2.3 | 1.37 | 0.73 | 173.3   | 70.1   | 117.9  | 2.5 | 1.47 | 0.68 |
| Q05822_NKMC_MOUSE   | Nkmc     | KIF-8 essential regulator OS-Mus musculus GN=Nkmc PE=1 Sv=2                                         | 2   | 13.1  | 5.6  | 9.7   | 2.3 | 1.37 | 0.73 | 17.4    | 84.3   | 144.9  | 2.6 | 1.47 | 0.68 |
| Q05800_AKAP8_MOUSE  | Akap8    | A-kinase anchor protein 8 OS-Mus musculus GN=Akap8 PE=1 Sv=1                                        | 9   | 39.7  | 17.0 | 29.1  | 2.3 | 1.37 | 0.73 | 201.0   | 147.8  | 248.6  | 2.0 | 1.21 | 0.83 |
| Q05924_TBC1D1_MOUSE | Tbc1d1   | TBC1 domain family member 1 OS-Mus musculus GN=Tbc1d1 PE=1 Sv=1                                     | 3   | 7.6   | 3.3  | 5.6   | 2.3 | 1.36 | 0.73 | 24.4    | 9.1    | 15.3   | 2.7 | 1.59 | 0.63 |
| Q05921_SARD1_MOUSE  | Sard1    | SPFH domain family member 1 OS-Mus musculus GN=Sard1 PE=1 Sv=1                                      | 5   | 12.0  | 5.1  | 8.8   | 2.3 | 1.36 | 0.73 | 49.4    | 14.0   | 24.8   | 2.8 | 1.59 | 0.59 |
| Q05974_MED24_MOUSE  | Med24    | Mediator of RNA polymerase II transcription subunit 24 OS-Mus musculus GN=Med24 PE=1 Sv=1           | 8   | 10.5  | 4.5  | 7.7   | 2.3 | 1.36 | 0.73 | 49.9    | 39.9   | 67.0   | 2.3 | 1.36 | 0.73 |
| Q61584_FR1_MOUSE    | Fxr1     | Fragile X mental retardation syndrome-related protein 1 OS-Mus musculus GN=Fxr1 PE=1 Sv=2           | 22  | 23.9  | 10.2 | 17.5  | 2.3 | 1.36 | 0.73 | 1024.7  | 439.2  | 738.5  | 2.3 | 1.39 | 0.72 |
| Q05387_TM6M_MOUSE   | Tmm6     | Mitochondrial import inner membrane translocase subunit TM6M OS-Mus musculus GN=Tmm6                | 3   | 9.9   | 4.2  | 7.3   | 2.3 | 1.36 | 0.73 | 29.6    | 11.9   | 20.1   | 2.5 | 1.48 | 0.68 |
| Q02382_SPTB_MOUSE   | Sptb     | Structural elongation factor SPTB OS-Mus musculus GN=Sptb PE=1 Sv=2                                 | 2   | 15.5  | 7.0  | 12.0  | 2.3 | 1.36 | 0.73 | 89.2    | 40.7   | 68.2   | 2.3 | 1.45 | 0.67 |
| F06559_F06559_MOUSE | Chd8     | Chromodomain-helicase-DNA-binding protein 8 (Fragment) OS-Mus musculus GN=Chd8 PE=4 Sv=1            | 1   | 10.9  | 4.7  | 8.0   | 2.3 | 1.36 | 0.73 | 10.9    | 4.7    | 7.9    | 2.3 | 1.39 | 0.72 |
| Q80851_NUP54_MOUSE  | Nup54    | Nuclear pore complex protein Nup54 OS-Mus musculus GN=Nup54 PE=1 Sv=1                               | 6   | 9.0   | 3.8  | 6.6   | 2.3 | 1.36 | 0.73 | 59.1    | 28.2   | 47.5   | 2.1 | 1.24 | 0.80 |
| P14348_LAMP1_MOUSE  | Lamp1    | Lysosome-associated membrane glycoprotein 1 OS-Mus musculus GN=Lamp1 PE=1 Sv=2                      | 3   | 29.7  | 12.7 | 21.8  | 2.3 | 1.36 | 0.73 | 76.7    | 32.6   | 54.7   | 2.4 | 1.40 | 0.71 |
| P07393_HNDS_MOUSE   | Hnds     | YADP-activating protein OS-Mus musculus GN=Hnds PE=1 Sv=1                                           | 2   | 6.8   | 2.9  | 5.0   | 2.3 | 1.36 | 0.73 | 7.3     | 5.8    | 7.8    | 2.3 | 1.40 | 0.71 |
| P14084_ARF5_MOUSE   | Arf5     | ADP-ribosylation factor 5 OS-Mus musculus GN=Arf5 PE=1 Sv=1                                         | 3   | 11.8  | 5.7  | 8.3   | 2.3 | 1.36 | 0.73 | 53.3    | 20.8   | 34.9   | 2.6 | 1.52 | 0.66 |
| Q35841_ARF5_MOUSE   | Arf5     | Apoptosis inhibitor 5 OS-Mus musculus GN=Arf5 PE=1 Sv=2                                             | 15  | 16.6  | 7.1  | 12.2  | 2.3 | 1.36 | 0.73 | 283.0   | 121.8  | 204.7  | 2.3 | 1.38 | 0.72 |
| P17449_APM1_MOUSE   | Apm1     | Apoptosis inhibitor 1 OS-Mus musculus GN=Apm1 PE=1 Sv=1                                             | 1   | 6.4   | 2.8  | 4.9   | 2.3 | 1.36 | 0.73 | 9.6     | 4.0    | 7.0    | 2.3 | 1.47 | 0.68 |
| Q35845_NOM1_MOUSE   | Nom1     | Nucleolar MFG domain-containing protein 1 OS-Mus musculus GN=Nom1 PE=2 Sv=2                         | 3   | 10.2  | 4.4  | 7.5   | 2.3 | 1.36 | 0.73 | 27.8    | 11.4   | 19.2   | 2.4 | 1.45 | 0.69 |
| P14206_RPSA_MOUSE   | Rpsa     | 40S ribosomal protein SA OS-Mus musculus GN=Rpsa PE=1 Sv=4                                          | 19  | 17.8  | 7.6  | 13.1  | 2.3 | 1.36 | 0.73 | 1078.8  | 624.2  | 1049.6 | 1.7 | 1.03 | 0.97 |
| Q91KPE_CHRC1_MOUSE  | Chrc1    | Chromatin accessibility complex protein 1 OS-Mus musculus GN=Chrc1 PE=1 Sv=1                        | 1   | 13.0  | 5.6  | 9.6   | 2.3 | 1.36 | 0.73 | 13.0    | 5.6    | 9.4    | 2.3 | 1.39 | 0.72 |
| Q91075_HIF1_MOUSE   | Hif1     | Hypoxia-inducible transcription factor 1 OS-Mus musculus GN=Hif1 PE=1 Sv=2                          | 2   | 18.1  | 7.7  | 13.2  | 2.3 | 1.36 | 0.74 | 121.8   | 57.6   | 101.2  | 2.5 | 1.47 | 0.68 |
| Q91961_PP1R1_MOUSE  | Pp1r1    | Pren-mRNA processing factor 19 OS-Mus musculus GN=Pp1r1 PE=1 Sv=1                                   | 14  | 58.2  | 25.0 | 42.8  | 2.3 | 1.36 | 0.74 | 1286.8  | 690.2  | 1160.9 | 1.9 | 1.01 | 0.90 |
| F62888_F62888_MOUSE | Wiz      | Protein WIZ (Fragment) OS-Mus musculus GN=Wiz PE=1 Sv=1                                             | 13  | 25.0  | 10.7 | 18.4  | 2.3 | 1.36 | 0.74 | 306.5   | 173.8  | 292.2  | 1.8 | 1.05 | 0.95 |
| Q90961_R602_MOUSE   | Erc1     | ERC1/R602-interacting/CST1 family member 1 OS-Mus musculus GN=Erc1 PE=1 Sv=1                        | 13  | 8.7   | 3.8  | 6.5   | 2.3 | 1.36 | 0.74 | 155.8   | 132.7  | 204.7  | 2.4 | 1.40 | 0.71 |
| Q05855_RPR8_MOUSE   | Rpr8     | Ribosomal RNA-processing protein 8 OS-Mus musculus GN=Rpr8 PE=1 Sv=1                                | 8   | 11.2  | 4.8  | 8.3   | 2.3 | 1.36 | 0.74 | 9.6     | 16.2   | 23.3   | 2.9 | 1.48 | 0.72 |
| Q60101_DCL1_MOUSE   | Dync1l1  | Cytoplasmic dynein 1 light intermediate chain 2 OS-Mus musculus GN=Dync1l1 PE=1 Sv=2                | 7   | 22.1  | 9.5  | 16.3  | 2.3 | 1.36 | 0.74 | 158.0   | 50.3   | 84.5   | 3.1 | 1.87 | 0.54 |
| P26309_TN1_MOUSE    | Tnfr1    | Tumor necrosis factor receptor type 1 OS-Mus musculus GN=Tnfr1 PE=1 Sv=1                            | 117 | 85.0  | 36.5 | 62.0  | 2.3 | 1.36 | 0.74 | 1424.21 | 588.17 | 899.0  | 2.4 | 1.44 | 0.69 |
| Q05121_ZC11_MOUSE   | Zc11     | Zinc finger CCH domain-containing protein 11 OS-Mus musculus GN=Zc11 PE=2 Sv=1                      | 2   | 14.7  | 6.3  | 11.0  | 2.3 | 1.36 | 0.74 | 183.3   | 83.3   | 143.3  | 2.3 | 1.40 | 0.71 |
| Q05083_LRCD4_MOUSE  | Lrrcd4   | Leucine-rich repeat-containing protein 40 OS-Mus musculus GN=Lrrcd4 PE=2 Sv=1                       | 14  | 16.3  | 7.0  | 12.6  | 2.3 | 1.36 | 0.74 | 263.2   | 115.4  | 194.0  | 2.3 | 1.36 | 0.74 |
| Q07113_BRD2_MOUSE   | Brd2     | Bromodomain-containing protein 2 OS-Mus musculus GN=Brd2 PE=1 Sv=1                                  | 8   | 10.4  | 4.5  | 7.8   | 2.3 | 1.36 | 0.74 | 128.2   | 53.2   | 89.4   | 2.4 | 1.43 | 0.70 |
| Q60436_C1PB_MOUSE   | C1pb     | Cathepsin-like peptidase B1 protein homolog OS-Mus musculus GN=C1pb PE=1 Sv=1                       | 1   | 4.4   | 1.9  | 3.3   | 2.3 | 1.36 | 0.74 | 4.4     | 1.9    | 3.2    | 2.3 | 1.48 | 0.72 |
| Q05804_WDR2_MOUSE   | Wdr2     | WD repeat-containing protein 42 OS-Mus musculus GN=Wdr2 PE=1 Sv=1                                   | 4   | 14.6  | 6.5  | 11.3  | 2.3 | 1.36 | 0.74 | 21.6    | 8.5    | 14.5   | 2.3 | 1.48 | 0.67 |
| Q61768_KIF5_MOUSE   | Kif5b    | Kinesin-1 heavy chain OS-Mus musculus GN=Kif5b PE=1 Sv=2                                            | 6   | 13.5  | 5.8  | 9.9   | 2.3 | 1.36 | 0.74 | 74.1    | 35.3   | 59.3   | 2.2 | 1.38 | 0.72 |
| Q31704_QST1M_MOUSE  | Padi6    | Nucleic acid diester isomerase A6 OS-Mus musculus GN=Padi6 PE=2 Sv=1                                | 19  | 44.2  | 19.0 | 32.6  | 2.3 | 1.35 | 0.74 | 160.5   | 74.94  | 126.0  | 1.9 | 1.11 | 0.90 |
| Q05922_Q9912_MOUSE  | Nr2f1    | GTP-binding protein NR2F1 OS-Mus musculus GN=NR2F1 PE=1 Sv=1                                        | 2   | 23.8  | 10.4 | 17.6  | 2.3 | 1.35 | 0.74 | 205.5   | 104.0  | 181.2  | 2.3 | 1.45 | 0.68 |
| F06543_F06543_MOUSE | Ncwr2    | Nuclear receptor corepressor 2 OS-Mus musculus GN=Ncwr2 PE=1 Sv=1                                   | 20  | 13.6  | 5.9  | 10.3  | 2.3 | 1.35 | 0.74 | 300.2   | 161.2  | 271.1  | 1.9 | 1.11 | 0.90 |
| G58873_G58873_MOUSE | Srp19    | Signal recognition particle 19 kDa protein OS-Mus musculus GN=Srp19 PE=4 Sv=1                       | 3   | 30.0  | 12.9 | 22.2  | 2.3 | 1.35 | 0.74 | 71.8    | 30.8   | 51.9   | 2.3 | 1.38 | 0.72 |
| A24243_CuI4B_MOUSE  | CuI4b    | Cullin-4B OS-Mus musculus GN=CuI4B PE=1 Sv=1                                                        | 2   | 13.6  | 5.9  | 10.1  | 2.3 | 1.35 | 0.74 | 27.2    | 11.7   | 19.3   | 2.3 | 1.38 | 0.73 |
| Q05342_HMA2_MOUSE   | Hma2     | Nucleolar subunit alpha OS-Mus musculus GN=Hma2 PE=1 Sv=1                                           | 3   | 9.5   | 4.2  | 7.3   | 2.3 | 1.35 | 0.74 | 30.3    | 24.0   | 35.6   | 2.3 | 1.39 | 0.72 |
| Q60FV4_NOP58_MOUSE  | Nop58    | Cullin protein 58 OS-Mus musculus GN=Nop58 PE=1 Sv=1                                                | 31  | 22.2  | 9.6  | 16.5  | 2.3 | 1.35 | 0.74 | 777.2   | 366.0  | 615.4  | 2.1 | 1.26 | 0.79 |
| A2AGH6_MED12_MOUSE  | Med12    | Mediator of RNA polymerase II transcription subunit 12 OS-Mus musculus GN=Med12 PE=1 Sv=2           | 5   | 8.8   | 3.8  | 6.6   | 2.3 | 1.35 | 0.74 | 55.0    | 23.5   | 39.5   | 2.3 | 1.39 | 0.72 |



|                       |          |                                                                                            |    |      |      |      |     |      |      |        |        |        |      |      |      |
|-----------------------|----------|--------------------------------------------------------------------------------------------|----|------|------|------|-----|------|------|--------|--------|--------|------|------|------|
| O31314_RPA1_MOUSE     | Poir1a   | DNA-directed RNA polymerase subunit RPA1 OS-Mus musculus GN-Poir1a PE1 SV-2                | 2  | 6.7  | 3.0  | 5.1  | 2.2 | 1.31 | 0.76 | 13.4   | 6.0    | 10.1   | 2.2  | 1.33 | 0.75 |
| Q6A044_LAR4B_MOUSE    | Lar4pb   | Larval protein 4B OS-Mus musculus GN-Lar4pb PE1 SV-2                                       | 6  | 10.9 | 4.9  | 8.3  | 2.2 | 1.31 | 0.76 | 73.3   | 31.9   | 53.7   | 2.3  | 1.37 | 0.73 |
| P62310_SNA3_MOUSE     | Sna3     | Small nuclear ribonucleoprotein S1 OS-Mus musculus GN-Sna3 PE1 SV-1                        | 4  | 10.4 | 21.4 | 36.8 | 2.2 | 1.31 | 0.76 | 231.8  | 390.8  | 1.8    | 1.36 | 0.74 |      |
| P70347_TANK_MOUSE     | Tank     | TRAF family member-associated NF-kappa-B activator OS-Mus musculus GN-Tank PE1 SV-1        | 1  | 4.9  | 2.2  | 3.8  | 2.2 | 1.31 | 0.76 | 4.9    | 2.2    | 3.7    | 2.2  | 1.33 | 0.75 |
| Q8H442_ARHG2_MOUSE    | Arhg2f1  | Rho guanine nucleotide exchange factor 12 OS-Mus musculus GN-Arhg2f1 PE1 SV-2              | 1  | 7.1  | 3.2  | 5.4  | 2.2 | 1.31 | 0.77 | 7.1    | 3.2    | 5.3    | 2.2  | 1.33 | 0.75 |
| Q85B29_CAN2_MOUSE     | Can2     | Catalytic subunit 2 OS-Mus musculus GN-Can2 PE1 SV-2                                       | 4  | 6.5  | 2.9  | 4.6  | 2.2 | 1.31 | 0.77 | 5.8    | 2.9    | 4.7    | 2.2  | 1.33 | 0.75 |
| Q91V81_RBM2_MOUSE     | Rbm2a    | RNA-binding protein 42 OS-Mus musculus GN-Rbm2a PE1 SV-1                                   | 2  | 9.8  | 4.4  | 7.5  | 2.2 | 1.31 | 0.77 | 19.6   | 8.7    | 14.7   | 2.2  | 1.33 | 0.75 |
| O54774_AP3D1_MOUSE    | Ap3d1    | Ap3 complex subunit delta-1 OS-Mus musculus GN-AP3d1 PE1 SV-1                              | 10 | 13.1 | 5.9  | 10.1 | 2.2 | 1.31 | 0.77 | 174.6  | 116.6  | 196.1  | 1.5  | 1.89 | 1.12 |
| R0V011_RUVB1_MOUSE    | Ruvb1    | RuvB-like 1 OS-Mus musculus GN-Ruvb1 PE1 SV-1                                              | 37 | 37.2 | 16.6 | 28.5 | 2.2 | 1.31 | 0.77 | 367.47 | 156.42 | 2630.2 | 2.3  | 1.38 | 0.73 |
| Q8R191_SNA3_MOUSE     | Sna3     | Small nuclear ribonucleoprotein S1 OS-Mus musculus GN-Sna3 PE1 SV-1                        | 4  | 10.4 | 21.4 | 36.8 | 2.2 | 1.31 | 0.77 | 231.8  | 390.8  | 1.8    | 1.36 | 0.74 |      |
| P21617_MGMT_MOUSE     | Mgmt     | Methylated DNA-protein-cysteine methyltransferase OS-Mus musculus GN-Mgmt PE1 SV-1         | 1  | 4.2  | 1.9  | 3.2  | 2.2 | 1.31 | 0.77 | 4.2    | 1.9    | 3.1    | 2.2  | 1.33 | 0.75 |
| Q8R465_BBX_MOUSE      | Bbx      | HMG box transcription factor BBX OS-Mus musculus GN-Bbx PE1 SV-2                           | 1  | 11.3 | 5.0  | 8.7  | 2.2 | 1.30 | 0.77 | 11.3   | 5.0    | 8.5    | 2.2  | 1.33 | 0.75 |
| Q8R141_EHD2_MOUSE     | Ehd2     | ERL1/Ermen protein-retaining receptor OS-Mus musculus GN-Ehd2 PE1 SV-2                     | 1  | 24.9 | 11.1 | 19.9 | 2.2 | 1.30 | 0.77 | 24.9   | 11.1   | 19.9   | 2.2  | 1.33 | 0.75 |
| Q8K284_TFC1_MOUSE     | Gtf1c1   | General transcription factor 3c, polypoid type 1 OS-Mus musculus GN-Gtf1c1 PE1 SV-2        | 2  | 9.6  | 7.3  | 11.1 | 2.2 | 1.30 | 0.77 | 19.1   | 8.5    | 14.4   | 2.2  | 1.33 | 0.75 |
| Q8B771_RF02X_MOUSE    | Rbf2ox   | RNA-binding protein fox-1 homolog 2 OS-Mus musculus GN-Rbf2ox PE1 SV-2                     | 14 | 17.6 | 7.9  | 13.5 | 2.2 | 1.30 | 0.77 | 470.5  | 275.6  | 463.4  | 1.7  | 1.02 | 0.98 |
| QJ3U71_EYTL1_MOUSE    | Eytl1    | Extended synaptotagmin-1 OS-Mus musculus GN-Eytl1 PE1 SV-2                                 | 28 | 16.4 | 7.4  | 12.6 | 2.2 | 1.30 | 0.77 | 598.3  | 258.3  | 434.3  | 2.3  | 1.38 | 0.73 |
| P84076_ARF1_MOUSE     | Arf1     | ADP-ribosylation factor 1 OS-Mus musculus GN-Arf1 PE1 SV-2                                 | 8  | 20.6 | 9.2  | 15.5 | 2.2 | 1.30 | 0.77 | 142.2  | 291.6  | 242.5  | 2.0  | 1.30 | 0.83 |
| Q5D707_KIAA1551_MOUSE | Kiaa1551 | Uncharacterized protein KIAA1551 OS-Mus musculus GN-Kiaa1551 PE-2 SV-2                     | 1  | 3.1  | 1.4  | 2.4  | 2.2 | 1.30 | 0.77 | 3.1    | 1.4    | 2.4    | 2.2  | 1.33 | 0.75 |
| Q8C648_SMC2_MOUSE     | Smc2     | Structural maintenance of chromosomes protein 2 OS-Mus musculus GN-Smc2 PE1 SV-2           | 52 | 29.1 | 13.1 | 22.4 | 2.2 | 1.30 | 0.77 | 1550.4 | 863.2  | 1451.5 | 1.8  | 1.07 | 0.94 |
| Q8V86_NSD2_MOUSE      | Wnt5c1   | Histone H3-lysine methyltransferase NSD2 OS-Mus musculus GN-Wnt5c1 PE1 SV-2                | 8  | 12.4 | 5.5  | 9.5  | 2.2 | 1.30 | 0.77 | 107.4  | 54.7   | 92.0   | 2.0  | 1.17 | 0.86 |
| F7BRW6_FTRPW6_MOUSE   | Sec5a    | Protein Sec5 (Fragment) OS-Mus musculus GN-Sec5a PE1 SV-1                                  | 3  | 7.1  | 3.2  | 5.3  | 2.2 | 1.30 | 0.77 | 30.3   | 20.4   | 34.3   | 1.6  | 0.94 | 0.96 |
| Q99M9_RNPS1_MOUSE     | Rnps1    | RNA-binding protein with serine-rich domain 1 OS-Mus musculus GN-Rnps1 PE1 SV-1            | 11 | 28.9 | 12.9 | 22.2 | 2.2 | 1.30 | 0.77 | 1048.5 | 463.9  | 780.1  | 2.3  | 1.34 | 0.74 |
| Q99BWS_PSD12_MOUSE    | Pamd12   | 26S proteasome non-ATPase regulatory subunit 12 OS-Mus musculus GN-Pamd12 PE1 SV-4         | 4  | 18.7 | 8.4  | 14.4 | 2.2 | 1.30 | 0.77 | 73.7   | 32.7   | 54.9   | 2.3  | 1.34 | 0.75 |
| P21126_U844_MOUSE     | Ubr1a    | Ubiquitin-like protein 4A OS-Mus musculus GN-Ubr1a PE1 SV-1                                | 3  | 14.6 | 6.5  | 11.2 | 2.2 | 1.30 | 0.77 | 39.3   | 21.1   | 35.4   | 1.9  | 1.11 | 0.80 |
| Q7T771_ELP1_MOUSE     | Htkap    | Oligomer complex protein 1 OS-Mus musculus GN-Htkap PE1 SV-2                               | 26 | 19.3 | 8.7  | 14.8 | 2.2 | 1.30 | 0.77 | 628.4  | 240.4  | 404.2  | 2.6  | 1.55 | 0.64 |
| Q9K303_OC3_MOUSE      | Orc3     | Orient recognition complex subunit 3 OS-Mus musculus GN-Orc3 PE1 SV-1                      | 1  | 11.8 | 5.3  | 9.1  | 2.2 | 1.30 | 0.77 | 11.8   | 5.3    | 8.9    | 2.2  | 1.32 | 0.75 |
| Q60212_SCAM1_MOUSE    | Scamp1   | Secretory carrier-associated membrane protein 1 OS-Mus musculus GN-Scamp1 PE1 SV-1         | 2  | 24.9 | 11.2 | 19.2 | 2.2 | 1.30 | 0.77 | 49.8   | 22.7   | 37.6   | 2.2  | 1.32 | 0.76 |
| Q99H0_HNR12_MOUSE     | Hnrp12   | Transcription initiator factor TIE2 OS-Mus musculus GN-Hnrp12 PE1 SV-1                     | 9  | 10.7 | 4.8  | 8.3  | 2.2 | 1.30 | 0.77 | 179.8  | 98.9   | 146.8  | 1.7  | 1.03 | 0.81 |
| Q6A044_F12A2_MOUSE    | Fam120a  | Constitutive-associated of PPAR-gamma-like protein 1 OS-Mus musculus GN-FAM120A PE1 SV-1   | 24 | 28.0 | 12.6 | 21.6 | 2.2 | 1.30 | 0.77 | 608.7  | 288.9  | 485.8  | 2.1  | 1.25 | 0.80 |
| Z3H18                 | Znfx18   | Zinc finger CCHH domain-containing protein 18 OS-Mus musculus GN-Znfx18 PE1 SV-1           | 31 | 34.6 | 15.6 | 26.7 | 2.2 | 1.30 | 0.77 | 3110.9 | 580.8  | 976.7  | 5.4  | 1.39 | 0.71 |
| Q8R224_WAT12_MOUSE    | Wat12    | Wnt12-interfering protein 12 OS-Mus musculus GN-Wat12 PE1 SV-1                             | 2  | 5.8  | 2.6  | 4.5  | 2.2 | 1.30 | 0.77 | 11.7   | 5.2    | 6.7    | 2.2  | 1.32 | 0.75 |
| Q8R0V2_CCL1_MOUSE     | Cacul1   | CCKC-associated and calinin domain-containing protein 1 OS-Mus musculus GN-Cacul1 PE1 SV-2 | 3  | 3.4  | 7.6  | 5.9  | 2.2 | 1.30 | 0.77 | 7.6    | 3.4    | 5.8    | 2.2  | 1.32 | 0.76 |
| Q99104_MYO5A_MOUSE    | Myo5a    | Unconventional myosin-Va OS-Mus musculus GN-Myo5a PE1 SV-2                                 | 10 | 9.2  | 4.2  | 7.1  | 2.2 | 1.29 | 0.77 | 93.6   | 41.6   | 69.9   | 2.3  | 1.34 | 0.75 |
| Q91Y71_RBM5_MOUSE     | Rbm5     | RNA-binding protein 5 OS-Mus musculus GN-Rbm5 PE1 SV-1                                     | 10 | 25.0 | 11.3 | 19.3 | 2.2 | 1.29 | 0.77 | 877.8  | 149.1  | 250.6  | 5.9  | 3.30 | 0.29 |
| Q8B752_ARHG2_MOUSE    | Arhg2    | Rho guanine nucleotide exchange factor 2 OS-Mus musculus GN-Arhg2 PE1 SV-1                 | 4  | 10.7 | 4.8  | 8.3  | 2.2 | 1.29 | 0.77 | 10.7   | 4.8    | 8.3    | 2.2  | 1.34 | 0.74 |
| Q8B677_RBGPR_MOUSE    | Rab3gap2 | Rab3 GTPase-activating protein non-catalytic subunit OS-Mus musculus GN-Rab3gap2 PE1 SV-1  | 3  | 10.8 | 4.9  | 8.3  | 2.2 | 1.29 | 0.77 | 40.6   | 18.4   | 31.0   | 2.2  | 1.31 | 0.76 |
| P62915_TF2B_MOUSE     | Gtf2b    | Transcription initiation factor IIIB OS-Mus musculus GN-Gtf2b PE1 SV-1                     | 6  | 9.8  | 4.4  | 7.6  | 2.2 | 1.29 | 0.77 | 85.6   | 30.6   | 51.5   | 2.8  | 1.66 | 0.60 |
| Q8R371_BRD8_MOUSE     | Brd8     | Bromodomain-containing protein 8 OS-Mus musculus GN-Brd8 PE1 SV-2                          | 7  | 7.3  | 3.3  | 5.7  | 2.2 | 1.29 | 0.77 | 63.9   | 24.1   | 40.5   | 2.7  | 1.58 | 0.63 |
| Q9C001_KAB3_MOUSE     | Kab3     | Structural maintenance of chromosomes protein 3 OS-Mus musculus GN-Kab3 PE1 SV-1           | 11 | 11.7 | 5.4  | 9.3  | 2.2 | 1.29 | 0.77 | 384.5  | 117.3  | 193.6  | 2.0  | 1.34 | 0.77 |
| Q8C647_SMC4_MOUSE     | Smc4     | Structural maintenance of chromosomes protein 4 OS-Mus musculus GN-Smc4 PE1 SV-1           | 44 | 28.0 | 12.6 | 21.7 | 2.2 | 1.29 | 0.77 | 1467.3 | 670.1  | 1126.8 | 2.2  | 1.30 | 0.77 |
| Q62419_SHG3_MOUSE     | Shg3p1   | Endophilin-III OS-Mus musculus GN-Shg3p1 PE1 SV-1                                          | 13 | 43.3 | 19.6 | 33.5 | 2.2 | 1.29 | 0.77 | 674.4  | 689.5  | 1159.0 | 1.0  | 0.58 | 1.72 |
| Q32328_TCL1_MOUSE     | Tcl1a    | Endophilin-associated regulatory protein 1 OS-Mus musculus GN-Tcl1a PE1 SV-1               | 1  | 11.7 | 5.4  | 9.3  | 2.2 | 1.29 | 0.77 | 11.7   | 5.4    | 9.3    | 2.2  | 1.32 | 0.77 |
| P97461_R55_MOUSE      | Rps5     | 40S ribosomal protein S5 OS-Mus musculus GN-Rps5 PE1 SV-3                                  | 9  | 20.1 | 9.1  | 15.5 | 2.2 | 1.29 | 0.77 | 294.5  | 115.6  | 194.3  | 2.5  | 1.52 | 0.66 |
| P53564_CUX1_MOUSE     | Cux1     | Hobox protein cux-1 OS-Mus musculus GN-Cux1 PE1 SV-1                                       | 16 | 11.0 | 5.0  | 8.5  | 2.2 | 1.29 | 0.77 | 182.2  | 98.3   | 165.3  | 1.9  | 1.10 | 0.91 |
| E11089_UBR2N_MOUSE    | Ubr2n    | Ubiquitin-conjugating enzyme E2 N OS-Mus musculus GN-Ubr2n PE1 SV-1                        | 4  | 49.1 | 22.2 | 38.0 | 2.2 | 1.29 | 0.77 | 190.5  | 81.2   | 136.5  | 2.3  | 1.40 | 0.72 |
| Q8R0U9_TAF1_MOUSE     | Taf11    | Transcription initiator factor TIE1 OS-Mus musculus GN-Taf11 PE1 SV-2                      | 2  | 11.7 | 5.4  | 9.3  | 2.2 | 1.29 | 0.77 | 11.7   | 5.4    | 9.3    | 2.2  | 1.32 | 0.77 |
| P62702_R54X_MOUSE     | Rps4x    | 40S ribosomal protein S4, X isoform OS-Mus musculus GN-Rps4x PE1 SV-2                      | 39 | 55.1 | 24.9 | 42.7 | 2.2 | 1.29 | 0.77 | 5364.5 | 1969.0 | 3310.7 | 2.7  | 1.62 | 0.62 |
| Q91V11_CKAP2_MOUSE    | Ckap2    | Cytoskeleton-associated protein 2 OS-Mus musculus GN-CKAP2 PE1 SV-1                        | 5  | 8.4  | 3.8  | 6.5  | 2.2 | 1.29 | 0.78 | 42.0   | 24.1   | 40.5   | 1.7  | 1.03 | 0.97 |
| Q8C0C2_SFPA_MOUSE     | Farsa    | Phenylalanine-tyrosine transferase OS-Mus musculus GN-Farsa PE1 SV-1                       | 6  | 14.8 | 6.7  | 11.2 | 2.2 | 1.29 | 0.78 | 14.8   | 6.7    | 11.2   | 2.2  | 1.31 | 0.76 |
| Q9D0F1_LMAN1_MOUSE    | Lman1    | Protein ERGIC-53 OS-Mus musculus GN-Lman1 PE1 SV-1                                         | 4  | 21.3 | 8.6  | 16.5 | 2.2 | 1.29 | 0.78 | 59.7   | 36.2   | 60.9   | 1.6  | 0.98 | 1.02 |
| Q8RFD1_CHL1_MOUSE     | Ctlc1    | Clathrin heavy chain 1 OS-Mus musculus GN-Ctlc1 PE1 SV-3                                   | 66 | 26.7 | 12.1 | 20.7 | 2.2 | 1.29 | 0.78 | 2484.6 | 1068.9 | 2.3    | 1.38 | 0.72 | 0.72 |
| Q91U75_PHAX_MOUSE     | Phax     | Phosphorylated actin-binding RNA export protein OS-Mus musculus GN-Phax PE1 SV-1           | 1  | 12.4 | 5.6  | 9.6  | 2.2 | 1.29 | 0.78 | 12.4   | 5.6    | 9.4    | 2.2  | 1.31 | 0.76 |
| Q91B42_WPRF_MOUSE     | Wprf     | SMAD3 p55 subfamily member 1 OS-Mus musculus GN-Wprf PE1 SV-1                              | 1  | 16.4 | 7.4  | 12.7 | 2.2 | 1.29 | 0.78 | 16.4   | 7.4    | 12.5   | 2.2  | 1.31 | 0.76 |
| P23607_ZFA_MOUSE      | Zfa      | Zinc finger autoantigen protein OS-Mus musculus GN-Zfa PE1 SV-2                            | 7  | 16.4 | 7.4  | 12.7 | 2.2 | 1.29 | 0.78 | 16.4   | 7.4    | 12.5   | 2.2  | 1.31 | 0.76 |
| Q62D3X_DDX3_MOUSE     | Ddx3x    | ATP-dependent RNA helicase DDX3X OS-Mus musculus GN-DDX3X PE1 SV-3                         | 64 | 56.0 | 25.4 | 43.3 | 2.2 | 1.28 | 0.78 | 6263.2 | 2703.2 | 4545.4 | 2.3  | 1.38 | 0.73 |
| Q8R66E_EOX1_MOUSE     | Eox1     | Early endosome antigen 1 OS-Mus musculus GN-Eox1 PE1 SV-2                                  | 25 | 15.8 | 7.2  | 12.3 | 2.2 | 1.28 | 0.78 | 492.5  | 198.0  | 332.9  | 2.5  | 1.48 | 0.68 |
| P98111_PRR1_MOUSE     | Prr1     | Endoplasmic reticulum protein 1 OS-Mus musculus GN-Prr1 PE1 SV-2                           | 6  | 16.7 | 7.6  | 12.7 | 2.2 | 1.28 | 0.78 | 16.7   | 7.6    | 12.7   | 2.2  | 1.34 | 0.80 |
| Q82B23_STAT5_MOUSE    | Stat5a   | Signal transducer and activator of transcription 5A OS-Mus musculus GN-Stat5a PE1 SV-1     | 4  | 5.6  | 2.6  | 4.4  | 2.2 | 1.28 | 0.78 | 24.3   | 10.5   | 17.7   | 2.3  | 1.37 | 0.73 |
| P48804_NOP58_MOUSE    | Nop58    | Nucleolar protein 9 OS-Mus musculus GN-Nop58 PE1 SV-1                                      | 6  | 14.0 | 6.4  | 10.9 | 2.2 | 1.28 | 0.78 | 92.9   | 36.6   | 61.5   | 2.5  | 1.51 | 0.66 |
| Q9V0M6_HNR11_MOUSE    | Hnrp11   | HnRNP-associated nuclear ribonucleoprotein 11 OS-Mus musculus GN-Hnrp11 PE1 SV-1           | 18 | 31.4 | 14.6 | 25.8 | 2.2 | 1.28 | 0.78 | 288.8  | 118.1  | 181.8  | 2.6  | 1.61 | 0.63 |
| Q53864_CNS1_MOUSE     | Cns1     | Alpha-1 syntrophin OS-Mus musculus GN-Cns1 PE1 SV-1                                        | 7  | 15.5 | 7.1  | 12.1 | 2.2 | 1.28 | 0.78 | 119.1  | 71.0   | 119.4  | 1.7  | 1.00 | 1.00 |
| Q61234_SNTAL_MOUSE    | Sntal    | COP1-1 syntrophin OS-Mus musculus GN-Sntal PE1 SV-1                                        | 2  | 10.5 | 4.8  | 8.2  | 2.2 | 1.28 | 0.78 | 21.0   | 9.6    | 16.1   | 2.2  | 1.30 | 0.77 |
| Q9C211_UHP1_MOUSE     | Uhp11    | Protein UHP-1 small nuclear RNA-associated protein 11 OS-Mus musculus GN-Uhp11 PE1 SV-2    | 1  | 11.6 | 5.9  | 15.3 | 2.2 | 1.28 | 0.78 | 19.5   | 8.9    | 15.0   | 2.2  | 1.30 | 0.77 |
| Q8R8Y6_WTF2_MOUSE     | Wtf2     | Transcription termination factor 2, mitotic OS-Mus musculus GN-Wtf2 PE1 SV-1               | 1  | 19.5 | 8.9  | 15.8 | 2.2 | 1.28 | 0.78 | 119.8  | 51.8   | 81.8   | 2.2  | 1.30 | 0.77 |
| Q91XK7_Y1FA_MOUSE     | Y1fa     | Protein Y1FA OS-Mus musculus GN-Y1fa PE1 SV-1                                              | 2  | 12.6 | 5.8  | 9.9  | 2.2 | 1.28 | 0.78 | 25.2   | 11.5   | 19.4   | 2.2  | 1.30 | 0.77 |
| P11440_CDK1_MOUSE     | Cdk1     | Cyclin-dependent kinase 1 OS-Mus musculus GN-Cdk1 PE1 SV-3                                 | 32 | 31.0 | 14.2 | 24.3 | 2.2 | 1.28 | 0.78 | 1513.3 | 626.6  | 1053.6 | 2.4  | 1.44 | 0.70 |
| Q62072_CAND2_MOUSE    | Cand2    | Cullin-associated NEDD8-associated protein 2 OS-Mus musculus GN-Cand2 PE1 SV-2             | 7  | 8.7  | 4.0  | 6.9  | 2.2 | 1.27 | 0.78 | 59.5   | 23.5   | 39.6   | 2.5  | 1.50 | 0.67 |
| Q9SK91_NOD1_MOUSE     | Nod1     | Protein kinase of 40S OS-Mus musculus GN-Nod1 PE1 SV-1                                     | 2  | 6.4  | 2.9  | 5.1  | 2.2 | 1.27 | 0.78 | 6.4    | 2.9    | 5.0    | 2.2  | 1.32 | 0.77 |
| P51881_ADT2_MOUSE     | Sic25a5  | ADP-RT translocase 2 OS-Mus musculus GN-Sic25a5 PE1 SV-3                                   | 3  | 44.5 | 20.4 | 34.3 | 2.2 | 1.27 | 0.78 | 441.2  | 70.5   | 118.6  | 2.0  | 1.19 | 0.84 |
| Q99N10_ANR1_MOUSE     | Ankr17   | Ankyrin repeat domain-containing protein 17 OS-Mus musculus GN-Ankr17 PE1 SV-2             | 26 | 13.1 | 6.0  | 10.3 | 2.2 | 1.27 | 0.78 | 138.8  | 161.6  | 271.7  | 2.7  | 1.61 | 0.62 |
| Q8R66E_BCL7L_MOUSE    | Bcl7l    | BCL7L lymphoma 4 protein OS-Mus musculus GN-Bcl7l PE1 SV-1                                 | 9  | 10.7 | 4.8  | 8.3  | 2.2 | 1.27 | 0.78 | 110.4  | 41.1   | 69.1   | 2.7  | 1.60 | 0.63 |
| Q53874_SAT1_MOUSE     | Sic14a   | Neutral amino acid transporter 4 OS-Mus musculus GN-Sic14a PE1 SV-1                        | 1  | 7.8  | 3.6  | 6.1  | 2.2 | 1.27 | 0.79 | 7.8    | 3.6    | 6.0    | 2.2  | 1.30 | 0.77 |
| QJ1D17_FOJ1_MOUSE     | Pdim7    | PDZ and LIM domain protein 7 OS-Mus musculus GN-Pdim7 PE1 SV-2                             | 20 | 25.2 | 11.5 | 19.8 | 2.2 | 1.27 | 0.79 | 641.6  | 326.8  | 549.5  | 2.0  | 1.17 | 0.86 |
| Q60716_SAMH1_MOUSE    | Samh1    | Deoxyribose triphosphate triphosphohydrolyase SAMH1 OS-Mus musculus GN-Samh1 PE1 SV-1      | 16 | 26.0 | 11.9 | 20.4 | 2.2 |      |      |        |        |        |      |      |      |

|                      |         |                                                                                                |    |      |      |      |     |      |      |        |        |        |     |      |      |
|----------------------|---------|------------------------------------------------------------------------------------------------|----|------|------|------|-----|------|------|--------|--------|--------|-----|------|------|
| P38647_GRP75_MOUSE   | Hspa9p  | Stress-70 protein, mitochondrial OS-Mus musculus GN-Hspa9 PE1 S-V1-3                           | 11 | 17.2 | 8.1  | 14.0 | 2.1 | 1.23 | 0.81 | 175.1  | 109.9  | 184.7  | 1.6 | 0.95 | 1.05 |
| OSB06_SRCR1_MOUSE    | Rorc1   | Serine/arginine-related protein 5 OS-Mus musculus GN-Rorc1 PE1 S-V1-1                          | 3  | 15.3 | 7.2  | 12.4 | 2.1 | 1.23 | 0.81 | 53.6   | 29.6   | 49.7   | 1.8 | 1.08 | 0.99 |
| OSK46_RBP5_MOUSE     | Rbp5    | Protein ribosomal protein L5 OS-Mus musculus GN-Rbp5 PE1 S-V1-2                                | 1  | 11.5 | 10.2 | 11.6 | 2.1 | 1.23 | 0.81 | 23.2   | 23.2   | 23.2   | 2.0 | 1.14 | 0.66 |
| OSB8N_FLNA_MOUSE     | Flna    | Filamin-B OS-Mus musculus GN-Flna PE1 S-V1-5                                                   | 80 | 66.2 | 31.4 | 53.8 | 2.1 | 1.23 | 0.81 | 7416.9 | 3051.6 | 5131.3 | 2.4 | 1.45 | 0.69 |
| OSU57_GZD1_MOUSE     | Gzrd1n1 | General transcription factor IIH repeat domain-containing protein 1 OS-Mus musculus GN-Gzrd1   | 2  | 10.0 | 4.7  | 8.1  | 2.1 | 1.23 | 0.81 | 19.9   | 9.4    | 15.9   | 2.9 | 1.26 | 0.80 |
| OSB810_U551_MOUSE    | U551    | Small nuclear ribonucleoprotein A2 OS-Mus musculus GN-U551 PE1 S-V1-2                          | 57 | 43.4 | 20.0 | 35.0 | 2.1 | 1.23 | 0.81 | 3226.2 | 1786.6 | 3021.8 | 1.6 | 1.06 | 0.84 |
| OSB87K_HAU5_MOUSE    | Hau5    | HAU5 agmatin-like complex subunit 1 OS-Mus musculus GN-Hau5 PE1 S-V1-2                         | 1  | 7.2  | 3.4  | 5.8  | 2.1 | 1.23 | 0.81 | 7.2    | 3.4    | 5.7    | 2.1 | 1.25 | 0.80 |
| OSQ92Z_HECD1_MOUSE   | Hectd1  | E ubiquitin-protein ligase HECTD1 OS-Mus musculus GN-Hectd1 PE1 S-V1-2                         | 4  | 7.2  | 3.4  | 5.9  | 2.1 | 1.23 | 0.81 | 33.7   | 19.6   | 32.9   | 1.7 | 1.03 | 0.97 |
| OS4933_NEDD4_MOUSE   | Nedd4   | E ubiquitin-protein ligase NEDD4 OS-Mus musculus GN-Nedd4 PE1 S-V1-3                           | 12 | 11.0 | 5.2  | 8.9  | 2.1 | 1.23 | 0.81 | 132.2  | 76.0   | 127.8  | 1.7 | 1.03 | 0.97 |
| P5291_NAA1_MOUSE     | Naa1    | Importin subunit alpha 1 OS-Mus musculus GN-Naa1 PE1 S-V1-2                                    | 19 | 14.3 | 6.8  | 11.6 | 2.1 | 1.23 | 0.81 | 183.1  | 101.0  | 181.1  | 2.0 | 1.14 | 0.84 |
| OS61735_CD47_MOUSE   | Cd47    | Leukocyte surface antigen CD47 OS-Mus musculus GN-CD47 PE1 S-V1-2                              | 2  | 22.0 | 10.5 | 17.9 | 2.1 | 1.23 | 0.81 | 44.0   | 20.9   | 35.2   | 2.1 | 1.25 | 0.80 |
| OS0824_FPI1_MOUSE    | Fpi1    | Protein Rfx19-3 end-processing factor FPI1 OS-Mus musculus GN-Fpi1 PE1 S-V1-1                  | 20 | 29.3 | 13.9 | 23.9 | 2.1 | 1.23 | 0.81 | 880.5  | 389.8  | 655.4  | 2.3 | 1.34 | 0.74 |
| OS5222_Utk_MOUSE     | Utk     | ATP-dependent RNA helicase OS-Mus musculus GN-Utk PE1 S-V1-2                                   | 21 | 18.7 | 15.2 | 16.2 | 2.1 | 1.23 | 0.81 | 454.2  | 245.4  | 364.5  | 2.1 | 1.25 | 0.80 |
| OS09W6_SNL1_MOUSE    | Snl1    | Sorting nexin-1 OS-Mus musculus GN-Snl1 PE1 S-V1-1                                             | 2  | 10.1 | 4.8  | 7.8  | 2.1 | 1.23 | 0.82 | 8.5    | 48.0   | 80.7   | 1.9 | 1.12 | 0.85 |
| OS08734_BAK_MOUSE    | Bak1    | Bcl-2 homologous antagonist/killer OS-Mus musculus GN-Bak1 PE1 S-V1-3                          | 2  | 8.3  | 3.9  | 6.8  | 2.1 | 1.23 | 0.82 | 16.6   | 7.9    | 13.3   | 2.1 | 1.25 | 0.80 |
| PE2844_RP51_MOUSE    | Rp51    | 40S ribosomal protein S15 OS-Mus musculus GN-Rp51 PE2 S-V1-2                                   | 3  | 5.4  | 2.6  | 4.4  | 2.1 | 1.22 | 0.82 | 51.7   | 17.0   | 28.7   | 3.0 | 1.81 | 0.55 |
| OSR202_S55_MOUSE     | S55     | Synaptonemal complex protein S55 OS-Mus musculus GN-S55 PE2 S-V1-1                             | 1  | 9.6  | 4.6  | 7.9  | 2.1 | 1.22 | 0.82 | 71.9   | 48.5   | 120.9  | 0.7 | 0.40 | 2.49 |
| OS6418_LBP7_MOUSE    | Lbp7    | Ubiquitin carboxyl-terminal hydrolase 7 OS-Mus musculus GN-Lbp7 PE1 S-V1-1                     | 12 | 12.4 | 5.9  | 10.1 | 2.1 | 1.22 | 0.82 | 168.5  | 77.9   | 131.1  | 2.2 | 1.29 | 0.78 |
| OS9L48_NMD3_MOUSE    | Nmd3    | 60S ribosomal export protein NMD3 OS-Mus musculus GN-Nmd3 PE2 S-V1-1                           | 2  | 7.8  | 3.7  | 6.4  | 2.1 | 1.22 | 0.82 | 15.5   | 7.4    | 12.5   | 2.1 | 1.25 | 0.80 |
| OS5XAC_O5SK3_MOUSE   | Vertf1  | Protein Vertf1 OS-Mus musculus GN-Vertf1 PE1 S-V1-1                                            | 1  | 17.6 | 8.4  | 14.4 | 2.1 | 1.22 | 0.82 | 17.6   | 8.4    | 14.2   | 2.1 | 1.25 | 0.80 |
| OS9RUB_HCS_MOUSE     | Hcs     | Hepatocyte growth factor-regulated tyrosine kinase substrate OS-Mus musculus GN-Hcs PE1 S-V1-1 | 3  | 9.0  | 4.8  | 8.5  | 2.1 | 1.22 | 0.82 | 12.1   | 20.8   | 22.2   | 2.9 | 0.77 | 1.29 |
| OSCK96_NIP7_MOUSE    | Nip7    | 60S ribosome subunit biogenesis protein NIP7 homolog OS-Mus musculus GN-Nip7 PE2 S-V1-1        | 3  | 8.5  | 4.1  | 7.0  | 2.1 | 1.22 | 0.82 | 34.8   | 26.5   | 44.5   | 1.3 | 0.78 | 1.28 |
| OS0106_HOAC1_MOUSE   | Hdac1   | Histone deacetylase 1 OS-Mus musculus GN-Hdac1 PE1 S-V1-1                                      | 23 | 21.7 | 10.4 | 17.8 | 2.1 | 1.22 | 0.82 | 918.9  | 345.0  | 580.0  | 2.7 | 1.58 | 0.63 |
| OS0205_I7G6_MOUSE    | I7g6    | Synaptonemal complex protein I7G6 OS-Mus musculus GN-I7g6 PE2 S-V1-1                           | 1  | 9.6  | 4.6  | 7.9  | 2.1 | 1.22 | 0.82 | 71.9   | 48.5   | 120.9  | 0.7 | 0.40 | 2.49 |
| OSQ633_LONM_MOUSE    | Lonm1   | Long protease homolog, mitochondrial OS-Mus musculus GN-Lonm1 PE1 S-V1-2                       | 11 | 10.1 | 4.8  | 8.2  | 2.1 | 1.22 | 0.82 | 157.4  | 63.8   | 107.3  | 2.5 | 1.47 | 0.68 |
| OS2104_MME6_MOUSE    | Mme6    | Mediator of RNA polymerase II transcription subunit 6 OS-Mus musculus GN-Mme6 PE1 S-V1-2       | 1  | 23.9 | 11.4 | 19.6 | 2.1 | 1.22 | 0.82 | 23.9   | 11.4   | 19.2   | 2.1 | 1.24 | 0.80 |
| OS08M4_RL1_MOUSE     | Rpl71   | 60S ribosomal protein L7-like 1 OS-Mus musculus GN-Rpl71 PE2 S-V1-1                            | 2  | 10.2 | 4.9  | 8.3  | 2.1 | 1.22 | 0.82 | 20.4   | 9.7    | 16.4   | 2.1 | 1.24 | 0.80 |
| R14471_EIART1_MOUSE  | Eiart1  | EIF4E OS-Mus musculus GN-Eiart1 PE1 S-V1-1                                                     | 1  | 5.1  | 2.5  | 4.1  | 2.1 | 1.22 | 0.82 | 7.5    | 2.5    | 4.1    | 2.1 | 1.24 | 0.80 |
| OS21M4_GCG2_MOUSE    | Gcg2    | Golgi subfamily A member 2 OS-Mus musculus GN-Gcg2 PE2 S-V1-2                                  | 3  | 25.5 | 12.2 | 20.9 | 2.1 | 1.22 | 0.82 | 74.3   | 50.7   | 84.5   | 1.5 | 0.88 | 1.14 |
| OS0207_ZN68_MOUSE    | Znf67   | Zinc finger protein 687 OS-Mus musculus GN-Znf67 PE1 S-V1-1                                    | 2  | 17.0 | 8.1  | 13.9 | 2.1 | 1.22 | 0.82 | 143.8  | 70.5   | 118.6  | 2.0 | 1.21 | 0.83 |
| OS1093_D0V1_MOUSE    | D0v1    | ATP-dependent RNA helicase D0V1 OS-Mus musculus GN-D0V1 PE1 S-V1-1                             | 29 | 25.0 | 12.2 | 20.9 | 2.1 | 1.22 | 0.82 | 562.7  | 245.4  | 412.7  | 2.4 | 1.42 | 0.70 |
| OS8349_CDC16_MOUSE   | Cdc16   | Cdk division cyclin protein 16 homolog OS-Mus musculus GN-Cdc16 PE2 S-V1-1                     | 2  | 5.4  | 2.6  | 4.4  | 2.1 | 1.22 | 0.82 | 10.8   | 5.2    | 8.7    | 2.1 | 1.21 | 0.81 |
| OS6411_TOP2B_MOUSE   | Top2b   | DNA topoisomerase 2-beta OS-Mus musculus GN-Top2b PE1 S-V1-2                                   | 20 | 12.2 | 5.8  | 10.0 | 2.1 | 1.22 | 0.82 | 346.0  | 219.5  | 369.1  | 1.6 | 0.94 | 1.07 |
| OS0423_TRF5_MOUSE    | Trf5    | Transcription factor p65 OS-Mus musculus GN-Trf5 PE1 S-V1-1                                    | 1  | 6.7  | 3.2  | 5.5  | 2.1 | 1.22 | 0.82 | 6.7    | 3.2    | 5.4    | 2.1 | 1.24 | 0.81 |
| OS4190_DTR1L_MOUSE   | Dtr1l   | E3 ubiquitin-protein ligase DTR1L OS-Mus musculus GN-Dtr1l PE2 S-V1-1                          | 2  | 15.8 | 5.4  | 9.2  | 2.1 | 1.22 | 0.82 | 358.1  | 186.9  | 358.1  | 1.9 | 1.19 | 0.84 |
| EQ04M5_HELZ2_MOUSE   | Helz2   | Helicase with zinc finger domain 2 OS-Mus musculus GN-Helz2 PE1 S-V1-1                         | 1  | 9.6  | 4.6  | 7.9  | 2.1 | 1.22 | 0.82 | 9.6    | 4.6    | 7.7    | 2.1 | 1.24 | 0.81 |
| OS1918_FUBP1_MOUSE   | Fubp1   | Far upstream element-binding protein 1 OS-Mus musculus GN-Fubp1 PE1 S-V1-1                     | 2  | 19.4 | 9.3  | 16.0 | 2.1 | 1.22 | 0.82 | 38.8   | 18.6   | 31.3   | 2.1 | 1.24 | 0.81 |
| OS9R07_ABP8L_MOUSE   | Abp8l   | A kinase anchor protein 8-like OS-Mus musculus GN-Abp8l PE1 S-V1-1                             | 4  | 13.7 | 6.6  | 11.3 | 2.1 | 1.22 | 0.82 | 49.4   | 25.6   | 43.1   | 1.9 | 1.15 | 0.87 |
| OS1257_LURCH1_MOUSE  | Lurch1  | Nucleic acid binding protein LURCH1 OS-Mus musculus GN-Lurch1 PE1 S-V1-1                       | 2  | 19.9 | 14.8 | 25.4 | 2.1 | 1.22 | 0.82 | 29.6   | 29.6   | 29.6   | 2.0 | 1.19 | 0.84 |
| OS8909_NU13_MOUSE    | Nup133  | Nucleolar pore complex protein Nup133 OS-Mus musculus GN-Nup133 PE1 S-V1-2                     | 5  | 13.8 | 6.6  | 11.4 | 2.1 | 1.21 | 0.82 | 87.3   | 33.3   | 55.9   | 2.6 | 1.56 | 0.64 |
| OS9237_KCC2_MOUSE    | Kcc2    | Calcium/calmodulin-dependent protein kinase type II subunit gamma OS-Mus musculus GN-Kcc2      | 4  | 9.0  | 4.3  | 7.4  | 2.1 | 1.21 | 0.82 | 47.0   | 18.6   | 31.2   | 2.5 | 1.50 | 0.66 |
| OS1335_VGAC_MOUSE    | Vgac    | Calcium-associated protein VGAC OS-Mus musculus GN-Vgac PE1 S-V1-1                             | 1  | 40.6 | 18.5 | 32.7 | 2.1 | 1.21 | 0.82 | 176.8  | 40.6   | 176.8  | 2.0 | 1.19 | 0.84 |
| P12979_MYOG_MOUSE    | Myog    | Myogenin OS-Mus musculus GN-Myog PE1 S-V1-2                                                    | 1  | 32.8 | 25.1 | 27.1 | 2.1 | 1.21 | 0.82 | 32.8   | 15.8   | 26.5   | 2.1 | 1.24 | 0.81 |
| OS77M4_MB1A_MOUSE    | Myb1a   | Myb-binding protein 1A OS-Mus musculus GN-Myb1a PE1 S-V1-2                                     | 83 | 32.2 | 15.5 | 26.6 | 2.1 | 1.21 | 0.83 | 4263.7 | 1980.2 | 3329.7 | 2.2 | 1.28 | 0.78 |
| OS1065_CAPRIN1_MOUSE | Caprin1 | Caprin-1 OS-Mus musculus GN-Caprin1 PE1 S-V1-1                                                 | 17 | 29.2 | 14.1 | 24.1 | 2.1 | 1.21 | 0.83 | 1009.1 | 388.9  | 653.9  | 2.6 | 1.54 | 0.65 |
| OS10H4_E2B2_MOUSE    | E2b2    | Protein E2B transcription factor 2B subunit OS-Mus musculus GN-E2B2 PE1 S-V1-1                 | 2  | 15.2 | 7.4  | 12.7 | 2.1 | 1.21 | 0.83 | 61.3   | 14.8   | 24.9   | 2.1 | 1.23 | 0.81 |
| OS10H6_TAD2A_MOUSE   | Tad2a   | Transcriptional adapter 2-alpha OS-Mus musculus GN-Tad2a PE1 S-V1-1                            | 1  | 7.1  | 3.4  | 5.9  | 2.1 | 1.21 | 0.83 | 7.1    | 3.4    | 5.7    | 2.1 | 1.23 | 0.81 |
| PE2309_RBP2_MOUSE    | Rbp2    | Small nuclear ribonucleoprotein G OS-Mus musculus GN-Rbp2 PE1 S-V1-1                           | 3  | 19.0 | 9.1  | 15.7 | 2.1 | 1.21 | 0.83 | 61.4   | 26.4   | 44.4   | 2.3 | 1.23 | 0.81 |
| OS9P97_V07_MOUSE     | V07     | Esp1p-7 OS-Mus musculus GN-V07 PE1 S-V1-1                                                      | 10 | 12.4 | 5.3  | 9.2  | 2.1 | 1.21 | 0.83 | 67.0   | 40.0   | 67.0   | 2.0 | 1.23 | 0.72 |
| OS9P92_O5XS_MOUSE    | O5xs    | Serine/threonine protein kinase O5XS OS-Mus musculus GN-O5XS PE1 S-V1-1                        | 8  | 14.0 | 6.8  | 11.6 | 2.1 | 1.21 | 0.83 | 112.0  | 55.8   | 92.1   | 2.0 | 1.22 | 0.82 |
| OS9VEE_LMCD1_MOUSE   | Lmcd1   | LIM and cysteine-rich domain protein 1 OS-Mus musculus GN-Lmcd1 PE1 S-V1-1                     | 2  | 5.8  | 2.8  | 4.8  | 2.1 | 1.21 | 0.83 | 11.5   | 5.6    | 9.3    | 2.1 | 1.23 | 0.81 |
| OS9216_NELF1_MOUSE   | Nelf1   | Negative elongation factor D OS-Mus musculus GN-Nelf1 PE2 S-V1-2                               | 7  | 11.6 | 5.6  | 9.6  | 2.1 | 1.21 | 0.83 | 113.2  | 65.4   | 110.1  | 1.7 | 1.03 | 0.97 |
| OS9151_PNA3_MOUSE    | Pna3    | PRAL family protein 3 OS-Mus musculus GN-Pna3 PE1 S-V1-2                                       | 4  | 10.3 | 4.8  | 8.2  | 2.1 | 1.21 | 0.83 | 27.2   | 13.1   | 23.2   | 2.1 | 1.23 | 0.81 |
| OS9QZ7_A5UN_MOUSE    | A5un    | Protein asunder homolog OS-Mus musculus GN-A5un PE1 S-V1-2                                     | 6  | 18.3 | 8.8  | 15.1 | 2.1 | 1.21 | 0.83 | 115.5  | 44.3   | 74.5   | 2.6 | 1.55 | 0.64 |
| OS88E6_IF74_MOUSE    | If74    | Intraflagellar transport protein 74 homolog OS-Mus musculus GN-If74 PE1 S-V1-1                 | 2  | 8.0  | 3.9  | 6.6  | 2.1 | 1.21 | 0.83 | 16.0   | 7.7    | 13.0   | 2.1 | 1.23 | 0.81 |
| OS9VE9_S5F4_MOUSE    | S5f4    | Serine/threonine kinase S5F4 OS-Mus musculus GN-S5F4 PE1 S-V1-1                                | 8  | 12.2 | 5.8  | 10.1 | 2.1 | 1.21 | 0.83 | 287.0  | 107.9  | 185.8  | 2.7 | 1.58 | 0.63 |
| OS9R48_SNS_MOUSE     | Sns     | Sorting nexin-4 OS-Mus musculus GN-Sns PE1 S-V1-1                                              | 2  | 10.8 | 4.9  | 8.6  | 2.1 | 1.21 | 0.83 | 18.0   | 9.2    | 18.0   | 2.0 | 1.23 | 0.81 |
| OS91Y8_SN4_MOUSE     | Sns4    | Sorting nexin-4 OS-Mus musculus GN-Sns4 PE2 S-V1-2                                             | 6  | 13.9 | 6.7  | 11.5 | 2.1 | 1.21 | 0.83 | 93.1   | 43.5   | 73.3   | 2.1 | 1.27 | 0.79 |
| OS91X6_MMTA2_MOUSE   | Mmta2   | Multiple myeloma tumor-associated protein 2 homolog OS-Mus musculus GN-Mmta2 PE2 S-V1-2        | 2  | 10.8 | 4.7  | 7.7  | 2.1 | 1.21 | 0.83 | 29.3   | 14.2   | 23.8   | 2.1 | 1.23 | 0.81 |
| OS9P71_P9E1_MOUSE    | P9e1    | DNA poly(ADP-ribose) polymerase 1 OS-Mus musculus GN-P9e1 PE1 S-V1-1                           | 2  | 20.8 | 10.0 | 17.3 | 2.1 | 1.21 | 0.83 | 24.1   | 12.1   | 20.1   | 2.1 | 1.23 | 0.81 |
| OS8X22_CND1_MOUSE    | Cnd2    | Condensin complex subunit 1 OS-Mus musculus GN-Cnd2 PE1 S-V1-2                                 | 34 | 18.7 | 9.0  | 15.5 | 2.1 | 1.21 | 0.83 | 783.7  | 358.2  | 602.3  | 2.2 | 1.30 | 0.77 |
| OS8127_A5PM_MOUSE    | A5pm    | Abnormal spindle-like microcephaly-associated protein homolog OS-Mus musculus GN-A5pm          | 2  | 8.4  | 4.1  | 7.1  | 2.1 | 1.21 | 0.83 | 16.8   | 8.1    | 13.7   | 2.1 | 1.23 | 0.81 |
| OS10R3_S1MP_MOUSE    | S1mp    | Sarcolemmal membrane-associated protein OS-Mus musculus GN-S1mp PE1 S-V1-2                     | 2  | 7.1  | 3.4  | 5.9  | 2.1 | 1.21 | 0.83 | 28.4   | 15.9   | 26.7   | 1.8 | 1.06 | 0.94 |
| OS8V7E_PC10_MOUSE    | Pc10    | Cell receptor-associated protein 10 OS-Mus musculus GN-Pc10 PE1 S-V1-1                         | 2  | 19.9 | 6.2  | 11.0 | 2.1 | 1.21 | 0.83 | 60.2   | 16.0   | 31.2   | 2.1 | 1.24 | 0.75 |
| P29037_TBP_MOUSE     | Tbp     | TATA-box-binding protein OS-Mus musculus GN-Tbp PE1 S-V1-1                                     | 2  | 8.9  | 4.3  | 7.4  | 2.1 | 1.21 | 0.83 | 17.9   | 8.6    | 14.5   | 2.1 | 1.23 | 0.81 |
| OS9V8V_NVI_MOUSE     | Nvi     | Nucleolar valosin-containing protein-like OS-Mus musculus GN-Nvi PE1 S-V1-1                    | 16 | 14.6 | 7.1  | 12.1 | 2.1 | 1.20 | 0.83 | 297.1  | 167.6  | 281.9  | 1.8 | 1.05 | 0.95 |
| OS9Y9K_GAK_MOUSE     | Gak     | Cyclin G-associated kinase OS-Mus musculus GN-Gak PE1 S-V1-2                                   | 9  | 9.6  | 4.8  | 8.2  | 2.1 | 1.20 | 0.83 |        |        |        |     |      |      |

|                     |                                                              |                                                                                                |      |       |       |       |      |      |      |        |        |        |      |      |      |
|---------------------|--------------------------------------------------------------|------------------------------------------------------------------------------------------------|------|-------|-------|-------|------|------|------|--------|--------|--------|------|------|------|
| Q90206_TOLIP_MOUSE  | Tollip                                                       | Toll-interacting protein OS=Mus musculus GN= Tollip PE=1 SV=1                                  | 4    | 10.8  | 5.4   | 9.3   | 2.0  | 1.16 | 0.86 | 53.6   | 23.4   | 39.3   | 2.3  | 1.36 | 0.73 |
| Q874_CDC7C_MOUSE    | Apof9b                                                       | Factor VIIIB OS=Mus musculus GN=Apof9b PE=2 SV=1                                               | 5    | 79.9  | 40.3  | 69.1  | 2.0  | 1.16 | 0.86 | 342.7  | 183.8  | 309.1  | 1.9  | 1.11 | 0.90 |
| Q889F1_FB1_MOUSE    | Raf1                                                         | Raf1 OS=Mus musculus GN=Raf1 PE=2 SV=1                                                         | 6    | 7.1   | 3.6   | 7.2   | 1.6  | 1.16 | 0.86 | 7.2    | 3.6    | 7.2    | 1.6  | 1.18 | 0.94 |
| Q05558_FB2_MOUSE    | Fra1                                                         | Factor VIIIb intron 22 protein OS=Mus musculus GN=Fra1 PE=2 SV=1                               | 1    | 6.2   | 3.1   | 5.4   | 2.0  | 1.16 | 0.87 | 6.2    | 3.1    | 5.3    | 2.0  | 1.18 | 0.85 |
| Q987D1_TB83_MOUSE   | Tubb3                                                        | Tubulin beta 3 chain OS=Mus musculus GN=Tubb3 PE=1 SV=1                                        | 25   | 27.7  | 14.0  | 24.0  | 2.0  | 1.16 | 0.87 | 183.7  | 108.51 | 182.6  | 1.8  | 1.09 | 0.92 |
| Q987D1_S1NG_MOUSE   | Sorting nexin 6 OS=Mus musculus GN=Sorting nexin 6 PE=1 SV=1 | 3                                                                                              | 18.1 | 9.4   | 13.2  | 2.0   | 1.16 | 0.87 | 18.1 | 9.4    | 13.2   | 2.0    | 1.18 | 0.92 |      |
| Q139F4_FRMD8_MOUSE  | Frm8                                                         | FERM domain-containing protein 8 OS=Mus musculus GN=Frm8 PE=1 SV=2                             | 1    | 7.6   | 3.8   | 6.0   | 2.0  | 1.16 | 0.87 | 7.6    | 3.8    | 6.5    | 2.0  | 1.18 | 0.85 |
| Q139F4_DCOCS_MOUSE  | Exc5                                                         | Excyst component 5 OS=Mus musculus GN=Exc5 PE=1 SV=2                                           | 2    | 4.6   | 2.3   | 4.0   | 2.0  | 1.15 | 0.87 | 9.1    | 4.6    | 7.8    | 2.0  | 1.18 | 0.85 |
| Q5V5QD_KAT7_MOUSE   | Kat7                                                         | Histone acetyltransferase KAT7 OS=Mus musculus GN=Kat7 PE=1 SV=1                               | 14   | 12.0  | 6.1   | 10.4  | 2.0  | 1.15 | 0.87 | 221.6  | 111.5  | 187.5  | 2.0  | 1.18 | 0.85 |
| Q5V5QD_M45_MOUSE    | Nr4a1                                                        | Nuclear receptor coactivator 5 OS=Mus musculus GN=Nr4a1 PE=1 SV=1                              | 25   | 26.0  | 13.2  | 20.5  | 2.0  | 1.15 | 0.87 | 514.4  | 260.0  | 462.0  | 1.8  | 1.04 | 0.92 |
| Q6R18B_TBORA_MOUSE  | Tor3a                                                        | Tor1A-IP3 OS=Mus musculus GN=Tor3a PE=1 SV=2                                                   | 1    | 4.8   | 2.4   | 4.1   | 2.0  | 1.15 | 0.87 | 4.8    | 2.4    | 4.0    | 2.0  | 1.18 | 0.85 |
| Q6R18B_KIF15_MOUSE  | Kif15                                                        | Kinesin-like protein KIF15 OS=Mus musculus GN=Kif15 PE=1 SV=1                                  | 3    | 4.5   | 2.3   | 3.9   | 2.0  | 1.15 | 0.87 | 13.5   | 13.2   | 22.2   | 1.0  | 0.61 | 0.65 |
| Q5DB83_U2AF1_MOUSE  | U2af1                                                        | Splicing factor U2AF 1 OS=Mus musculus GN=U2af1 PE=1 SV=4                                      | 9    | 20.1  | 10.3  | 20.5  | 2.0  | 1.15 | 0.87 | 1116.2 | 594.1  | 999.0  | 1.9  | 1.12 | 0.90 |
| Q8BK11_BAI2_MOUSE   | Bai2                                                         | Brain-specific angiogenesis inhibitor 1-associated protein 2 OS=Mus musculus GN=Bai2 PE=1 SV=1 | 3    | 5.0   | 2.5   | 4.3   | 2.0  | 1.15 | 0.87 | 4.8    | 2.4    | 12.3   | 2.0  | 1.58 | 0.63 |
| Q80X90_FLNB_MOUSE   | Flnb                                                         | Filamin-B OS=Mus musculus GN=Flnb PE=1 SV=3                                                    | 48   | 32.0  | 16.2  | 27.8  | 2.0  | 1.15 | 0.87 | 1611.3 | 822.4  | 1382.9 | 2.0  | 1.17 | 0.86 |
| A2B2E1_LAS1L_MOUSE  | Las1l                                                        | Ribosomal biogenesis protein LAS1L OS=Mus musculus GN=Las1l PE=1 SV=1                          | 18   | 14.7  | 7.5   | 12.8  | 2.0  | 1.15 | 0.87 | 311.9  | 143.7  | 241.7  | 2.2  | 1.29 | 0.77 |
| P97310_MCM2_MOUSE   | Mcm2                                                         | DNA replication licensing factor MCM2 OS=Mus musculus GN=Mcm2 PE=1 SV=3                        | 33   | 12.1  | 6.1   | 10.5  | 2.0  | 1.15 | 0.87 | 559.4  | 276.6  | 465.0  | 1.8  | 1.10 | 0.91 |
| Q900F4_NKAP_MOUSE   | Nkap                                                         | NR-kappa-B activating protein OS=Mus musculus GN=Nkap PE=2 SV=1                                | 4    | 17.6  | 8.9   | 15.5  | 2.0  | 1.15 | 0.87 | 71.4   | 33.6   | 56.6   | 2.1  | 1.26 | 0.79 |
| Q922N8_NCLG6_MOUSE  | Act16a                                                       | Actin-like protein 6 OS=Mus musculus GN=Act16a PE=1 SV=2                                       | 14   | 28.2  | 14.3  | 24.5  | 2.0  | 1.15 | 0.87 | 889.1  | 319.6  | 537.3  | 2.8  | 1.65 | 0.60 |
| Q9SL55_PWP1_MOUSE   | Pwp1                                                         | Proteolytic tripeptidase protein 1 homolog OS=Mus musculus GN=Pwp1 PE=1 SV=1                   | 1    | 10.1  | 5.1   | 8.8   | 2.0  | 1.15 | 0.87 | 10.1   | 5.1    | 8.6    | 2.0  | 1.17 | 0.85 |
| Q9C2E1_MED18_MOUSE  | Med18                                                        | Mediator of RNA polymerase II transcription subunit 18 OS=Mus musculus GN=Med18 PE=2 SV=1      | 6    | 16.2  | 8.2   | 14.1  | 2.0  | 1.15 | 0.87 | 8.2    | 4.1    | 13.8   | 2.0  | 1.17 | 0.85 |
| Q90787_PP1L2_MOUSE  | Pp1l2                                                        | Peptidyl-prolyl cis-trans isomerase like 2 OS=Mus musculus GN=Pp1l2 PE=1 SV=2                  | 14   | 9.2   | 4.6   | 8.0   | 2.0  | 1.15 | 0.87 | 131.2  | 68.1   | 114.5  | 1.9  | 1.15 | 0.87 |
| Q9C0C0_I5T1_MOUSE   | Ist1                                                         | IST1 homolog OS=Mus musculus GN=Ist1 PE=2 SV=1                                                 | 4    | 21.1  | 10.7  | 18.3  | 2.0  | 1.15 | 0.87 | 163.4  | 47.0   | 79.0   | 3.5  | 2.07 | 0.48 |
| Q9L91F_KTCC8_MOUSE  | Ktcc8                                                        | RNA-splicing ligase Rtt108 homolog OS=Mus musculus GN=Ktcc8 PE=2 SV=1                          | 12   | 17.9  | 9.1   | 15.6  | 2.0  | 1.15 | 0.87 | 259.0  | 117.0  | 230.3  | 1.9  | 1.12 | 0.89 |
| Q43276_H13_MOUSE    | Hist13b1b                                                    | Histone H13.5 OS=Mus musculus GN=Hist13b1b PE=1 SV=2                                           | 13   | 332.2 | 168.7 | 289.2 | 2.0  | 1.15 | 0.87 | 8623.8 | 4396.8 | 7393.1 | 2.0  | 1.17 | 0.86 |
| Q9C0C0_UQCQ2_MOUSE  | Uqcq2                                                        | Ubiquitin-cytochrome c reductase complex assembly factor 2 OS=Mus musculus GN=Uqcq2 PE=1 SV=1  | 1    | 7.1   | 3.6   | 6.2   | 2.0  | 1.15 | 0.87 | 7.1    | 3.6    | 6.1    | 2.0  | 1.17 | 0.85 |
| Q9J028_FL1_MOUSE    | Fl1                                                          | Protein flightless-1 homolog OS=Mus musculus GN=Fl1 PE=1 SV=1                                  | 18   | 12.4  | 6.3   | 10.8  | 2.0  | 1.15 | 0.87 | 247.7  | 124.7  | 209.7  | 2.0  | 1.18 | 0.85 |
| Q50522_PGRC1_MOUSE  | Pgrc1                                                        | Protein phosphatase 1 regulatory subunit 1 OS=Mus musculus GN=Pgrc1 PE=1 SV=1                  | 5    | 16.1  | 8.1   | 12.5  | 2.0  | 1.15 | 0.87 | 100.0  | 39.4   | 66.0   | 2.1  | 1.18 | 0.91 |
| Q90878_ING5_MOUSE   | Ing5                                                         | Inhibitor of growth protein 5 OS=Mus musculus GN=Ing5 PE=1 SV=1                                | 3    | 13.1  | 6.7   | 11.4  | 2.0  | 1.15 | 0.87 | 102.6  | 57.6   | 96.9   | 1.8  | 1.06 | 0.94 |
| Q9L720_MKCKC_MOUSE  | Ctck22bpb                                                    | Kinase/threonine protein kinase MKCK beta OS=Mus musculus GN=Ctck22bpb PE=1 SV=2               | 11   | 11.0  | 5.6   | 9.6   | 2.0  | 1.15 | 0.87 | 157.7  | 59.0   | 99.2   | 2.7  | 1.59 | 0.63 |
| Q139F4_ESRBL2_MOUSE | Ctcfp1                                                       | CTCF-associated protein 1 OS=Mus musculus GN=Ctcfp1 PE=1 SV=2                                  | 24   | 16.1  | 8.1   | 13.2  | 2.0  | 1.15 | 0.87 | 303.4  | 113.7  | 211.2  | 2.7  | 1.59 | 0.63 |
| Q9L720_C42_MOUSE    | Abc2                                                         | ATP-binding cassette sub-family 4 member 2 OS=Mus musculus GN=Abc2 PE=2 SV=1                   | 6    | 13.6  | 6.9   | 11.8  | 2.0  | 1.15 | 0.87 | 65.9   | 40.0   | 62.7   | 1.6  | 0.98 | 0.20 |
| Q9C09U_EF1B_MOUSE   | Ef1b                                                         | Eukaryotic translation initiation factor 1b OS=Mus musculus GN=Ef1b PE=2 SV=2                  | 1    | 5.0   | 2.5   | 4.3   | 2.0  | 1.15 | 0.87 | 5.0    | 2.5    | 4.3    | 2.0  | 1.17 | 0.86 |
| Q61249_IGBP1_MOUSE  | Igbp1                                                        | Immunoglobulin-binding protein 1 OS=Mus musculus GN=Igbp1 PE=1 SV=1                            | 7    | 8.4   | 4.3   | 7.4   | 2.0  | 1.14 | 0.87 | 58.9   | 27.8   | 46.7   | 2.1  | 1.26 | 0.79 |
| Q50702_E9P02_MOUSE  | E9p02                                                        | Tropomyosin alpha 2 OS=Mus musculus GN=E9p02 PE=1 SV=1                                         | 1    | 10.1  | 5.1   | 9.2   | 2.0  | 1.14 | 0.87 | 10.1   | 5.1    | 9.2    | 2.0  | 1.17 | 0.86 |
| D32087_D32087_MOUSE | Katna2                                                       | Kat5 protein 660 ATPase-containing subunit A like 2 OS=Mus musculus GN=Katna2 PE=1 SV=1        | 1    | 5.2   | 2.7   | 4.6   | 2.0  | 1.14 | 0.87 | 5.2    | 2.7    | 4.5    | 2.0  | 1.17 | 0.86 |
| P56873_SAA2_MOUSE   | Saa2                                                         | Kyoto syndrome/erythroderma autoantigen 1 homolog OS=Mus musculus GN=Saa2 PE=2 SV=1            | 2    | 16.4  | 8.4   | 14.3  | 2.0  | 1.14 | 0.88 | 32.8   | 16.7   | 28.1   | 2.0  | 1.17 | 0.86 |
| Q90926_DDA1_MOUSE   | Dda1                                                         | DDA1 and DDB1-associated protein 1 OS=Mus musculus GN=Dda1 PE=2 SV=1                           | 1    | 5.8   | 3.0   | 5.1   | 2.0  | 1.14 | 0.88 | 5.8    | 3.0    | 5.0    | 2.0  | 1.17 | 0.86 |
| Q9C09U_S9P2_MOUSE   | S9p2                                                         | Serine/threonine phosphatase 9 OS=Mus musculus GN=S9p2 PE=1 SV=4                               | 1    | 10.1  | 5.1   | 16.9  | 2.0  | 1.14 | 0.88 | 112.8  | 48.6   | 82.8   | 1.8  | 1.10 | 0.92 |
| Q8C0E2_VP26B_MOUSE  | Vp26b                                                        | Vacuolar protein sorting-associated protein 26B OS=Mus musculus GN=Vp26b PE=1 SV=1             | 2    | 12.1  | 6.2   | 10.6  | 2.0  | 1.14 | 0.88 | 24.2   | 12.4   | 20.8   | 2.0  | 1.16 | 0.86 |
| P28659_CELF1_MOUSE  | Celf1                                                        | CUGBP1 Elav-like family member 1 OS=Mus musculus GN=Celf1 PE=1 SV=2                            | 5    | 12.2  | 6.3   | 10.7  | 2.0  | 1.14 | 0.88 | 54.7   | 28.9   | 48.7   | 1.9  | 1.12 | 0.89 |
| Q5S0Q0_CTC1_MOUSE   | Ctcf                                                         | Cis-acting transcription factor 1 OS=Mus musculus GN=Ctcf PE=1 SV=1                            | 3    | 6.1   | 3.1   | 4.6   | 2.0  | 1.14 | 0.88 | 6.2    | 3.1    | 4.6    | 2.0  | 1.18 | 0.86 |
| P43133_C072_MOUSE   | Nr2f2                                                        | COUP transcription factor 2 OS=Mus musculus GN=Nr2f2 PE=1 SV=1                                 | 8    | 23.5  | 12.0  | 20.6  | 2.0  | 1.14 | 0.88 | 210.4  | 96.9   | 163.0  | 2.2  | 1.29 | 0.77 |
| A2A641_GPAT8_MOUSE  | Gpat8                                                        | Gpat8 domain-containing protein 8 OS=Mus musculus GN=Gpat8 PE=1 SV=1                           | 12   | 14.6  | 7.5   | 12.8  | 2.0  | 1.14 | 0.88 | 217.6  | 105.3  | 177.1  | 2.1  | 1.23 | 0.81 |
| Q87127_TB3_MOUSE    | Tb3                                                          | Transducin beta-like protein 3 OS=Mus musculus GN=Tb3 PE=1 SV=1                                | 5    | 10.2  | 5.2   | 9.0   | 2.0  | 1.14 | 0.88 | 51.6   | 26.8   | 45.0   | 1.9  | 1.15 | 0.87 |
| Q18B80_SF130_MOUSE  | Sf130                                                        | Protein phosphatase 1 regulatory subunit 130 OS=Mus musculus GN=Sf130 PE=1 SV=2                | 1    | 10.6  | 5.4   | 9.3   | 2.0  | 1.14 | 0.88 | 10.6   | 5.4    | 9.3    | 2.0  | 1.15 | 0.87 |
| Q59555_P9B10_MOUSE  | Pim1b10                                                      | Protein kinase subunit beta type-10 OS=Mus musculus GN=Pim1b10 PE=1 SV=1                       | 2    | 12.1  | 6.2   | 10.7  | 1.9  | 1.14 | 0.88 | 24.2   | 12.4   | 20.9   | 1.9  | 1.16 | 0.86 |
| Q91W05_TAF5L_MOUSE  | Taf5l                                                        | TAF5-like RNA polymerase II p300/CBP-associated factor-associated factor 65 kDa subunit 5 OS=  | 5    | 7.2   | 3.7   | 6.7   | 1.9  | 1.14 | 0.88 | 36.8   | 15.9   | 26.7   | 1.3  | 0.78 | 0.73 |
| Q91W05_PHLB2_MOUSE  | Phlb2                                                        | Phlebotomus homology 1 domain-containing protein 2 OS=Mus musculus GN=Phlb2 PE=2 SV=2          | 39   | 22.0  | 11.3  | 18.1  | 2.0  | 1.14 | 0.88 | 916.1  | 531.8  | 864.0  | 1.9  | 1.14 | 0.90 |
| P27441_KRCC3_MOUSE  | Krcc3                                                        | K-rnc repair cross-complementing protein 3 OS=Mus musculus GN=Krc3 PE=2 SV=1                   | 8    | 17.2  | 8.8   | 14.9  | 1.9  | 1.14 | 0.88 | 181.1  | 89.9   | 151.2  | 1.6  | 0.95 | 0.26 |
| Q61624_ZNF48_MOUSE  | Znf48                                                        | Zinc finger protein 148 OS=Mus musculus GN=Znf48 PE=1 SV=2                                     | 11   | 9.3   | 4.8   | 8.1   | 1.9  | 1.14 | 0.88 | 110.0  | 59.9   | 100.7  | 1.8  | 1.09 | 0.92 |
| Q40336_VP26A_MOUSE  | Vp26a                                                        | Vacuolar protein sorting-associated protein 26A OS=Mus musculus GN=Vp26a PE=1 SV=1             | 11   | 17.3  | 8.9   | 15.2  | 1.9  | 1.14 | 0.88 | 231.7  | 123.8  | 208.2  | 1.9  | 1.11 | 0.90 |
| P65113_L13F_MOUSE   | L13f                                                         | L13 protein eta OS=Mus musculus GN=L13f PE=2 SV=1                                              | 5    | 3.3   | 1.6   | 2.8   | 1.9  | 1.14 | 0.88 | 3.8    | 1.6    | 2.6    | 1.9  | 1.14 | 0.89 |
| Q90717_MYO1C_MOUSE  | Myo1c                                                        | Unconventional myosin-1c OS=Mus musculus GN=Myo1c PE=1 SV=1                                    | 49   | 36.5  | 18.8  | 32.2  | 1.9  | 1.13 | 0.88 | 2390.8 | 1266.8 | 2130.1 | 1.9  | 1.12 | 0.89 |
| P48962_AD01_MOUSE   | Sic25a4                                                      | ADP-ATP translocase 1 OS=Mus musculus GN=Sic25a4 PE=1 SV=4                                     | 10   | 37.5  | 18.5  | 31.8  | 1.9  | 1.13 | 0.88 | 423.3  | 252.0  | 423.8  | 1.7  | 1.00 | 1.00 |
| Q92211_PRRF3_MOUSE  | Prrf3                                                        | UAF1/Small nuclear ribonucleoprotein Prrf3 OS=Mus musculus GN=Prrf3 PE=2 SV=1                  | 10   | 17.5  | 9.0   | 15.5  | 1.9  | 1.13 | 0.88 | 205.9  | 126.3  | 212.3  | 1.6  | 0.97 | 1.00 |
| P14424_AKAP4_MOUSE  | Akap4                                                        | Kinase A OS=Mus musculus GN=Akap4 PE=1 SV=1                                                    | 10   | 9.1   | 4.6   | 8.1   | 1.9  | 1.13 | 0.88 | 12.7   | 7.1    | 12.7   | 1.9  | 1.17 | 0.91 |
| Q6Y85_FEE2_MOUSE    | Fee2                                                         | Fasculation and elongation protein nete 2 OS=Mus musculus GN=Fee2 PE=2 SV=1                    | 2    | 10.0  | 5.1   | 8.8   | 1.9  | 1.13 | 0.88 | 19.9   | 10.3   | 17.3   | 1.9  | 1.15 | 0.87 |
| Q91248_NEFL_MOUSE   | Nefl                                                         | Negative elongation factor 1 OS=Mus musculus GN=Nefl PE=1 SV=1                                 | 3    | 7.6   | 3.9   | 6.7   | 1.9  | 1.13 | 0.88 | 27.6   | 20.5   | 34.4   | 1.3  | 0.80 | 1.25 |
| Q6C746_C13A_MOUSE   | C13a                                                         | Cell cycle 13A protein OS=Mus musculus GN=C13a PE=2 SV=1                                       | 9    | 18.1  | 9.1   | 16.8  | 1.9  | 1.13 | 0.88 | 208.0  | 134.0  | 208.0  | 1.9  | 1.12 | 0.89 |
| Q91W14_WPR4_MOUSE   | Wpr4                                                         | WD repeat domain phosphoinositide-interacting protein 4 OS=Mus musculus GN=Wpr4 PE=1 SV=1      | 1    | 12.9  | 6.6   | 11.4  | 1.9  | 1.13 | 0.89 | 12.9   | 6.6    | 11.2   | 1.9  | 1.15 | 0.87 |
| Q8084A_KAN12_MOUSE  | Kan12                                                        | KAT5 regulatory NLS complex subunit 2 OS=Mus musculus GN=Kan12 PE=2 SV=1                       | 2    | 8.4   | 4.3   | 7.4   | 1.9  | 1.13 | 0.89 | 16.7   | 8.6    | 14.5   | 1.9  | 1.15 | 0.87 |
| P61368_DY1_MOUSE    | Dyn1l1                                                       | Dynamin light chain 1, cytoplasmic OS=Mus musculus GN=Dyn1l1 PE=1 SV=1                         | 2    | 52.3  | 27.0  | 46.4  | 1.9  | 1.13 | 0.89 | 104.6  | 54.1   | 90.9   | 1.9  | 1.15 | 0.87 |
| Q909D4_CCR2_MOUSE   | Ccr2                                                         | Chemokine receptor type 2 OS=Mus musculus GN=Ccr2 PE=1 SV=2                                    | 7    | 8.2   | 4.2   | 7.3   | 1.9  | 1.13 | 0.89 | 26.7   | 14.2   | 25.5   | 1.9  | 1.12 | 0.88 |
| Q6NS07_LTV1_MOUSE   | Ltv1                                                         | Protein LTV1 homolog OS=Mus musculus GN=LTV1 PE=2 SV=2                                         | 2    | 9.3   | 4.8   | 8.3   | 1.9  | 1.13 | 0.89 | 18.7   | 9.7    | 16.3   | 1.9  | 1.15 | 0.87 |
| Q63318_TB1F_MOUSE   | Trimb28                                                      | Transcription interactor protein 1-beta OS=Mus musculus GN=Trimb28 PE=1 SV=3                   | 58   | 34.7  | 18.0  | 30.7  | 1.9  | 1.13 | 0.89 | 4303.7 | 2096.3 | 3524.9 | 2.1  | 1.22 | 0.82 |
| Q81248_NTM14_MOUSE  | Ntm14                                                        | N-terminal Xaa-Pro-Lys-N-methyltransferase 1 OS=Mus musculus GN=Ntm14 PE=2 SV=3                | 2    | 7.1   | 3.7   | 6.3   | 1.9  | 1.13 | 0.89 | 14.2   | 7.4    | 12.4   | 1.9  | 1.15 | 0.87 |
| Q88712_CTRP1_MOUSE  | Ctrp1                                                        | Histidine triad domain-containing protein 1 OS=Mus musculus GN=Ctrp1 PE=1 SV=2                 | 3    | 10.6  | 5.4   | 9.3   | 1.9  | 1.14 | 0.88 | 26.7   | 14.0   | 24.2   | 1.9  | 1.12 | 0.88 |
| Q92456_SMC6_MOUSE   | Smc6                                                         | Structural maintenance of chromosomes protein 6 OS=Mus musculus GN=Smc6 PE=2 SV=1              | 2    | 4.7   | 2.4   | 4.2   | 1.9  | 1.13 | 0.89 | 4.9    | 4.9    | 8.2    | 1.9  | 1.15 | 0.87 |
| Q6P458_INT1_MOUSE   | Ints1                                                        | Integrator complex subunit 1 OS=Mus musculus GN=Ints1 PE=2 SV=2                                | 8    | 5.8   | 3.0   | 5.1   | 1.9  | 1.13 | 0.89 | 49.9   | 39.2   | 65.9   | 1.3  | 0.76 | 1.32 |
| P51660_DNR4_MOUSE   | Dnr4                                                         | Perinatal multifunctional protein 4 OS=Mus musculus GN=Dnr4 PE=1 SV=1                          | 3    | 10.6  | 5.4   | 9.3   | 1.9  | 1.12 | 0.89 | 10.6   | 5.4    | 9.3    | 1.9  | 1.10 | 0.89 |
| Q91M93_ABP4_MOUSE   | Abp4                                                         | ADP-ribosylation factor-like protein 6-interacting protein 4 OS=Mus musculus GN=Abp4 PE=1 SV=1 | 9    | 11.0  | 6.0   | 10.3  | 1.9  | 1.12 | 0.89 | 8.0    | 4.2    | 7.0    | 1.9  | 1.15 | 0.87 |
| Q91M93_SAF2_MOUSE   | Saf2                                                         | Scaffold attachment factor 2B OS=Mus musculus GN=Saf2 PE=2 SV=2                                | 9    | 11.6  | 6.0   | 10.3  | 1.9  | 1.12 | 0.89 | 131.7  | 71.2   | 119.7  | 1.8  | 1.10 | 0.91 |
| Q90111_N            |                                                              |                                                                                                |      |       |       |       |      |      |      |        |        |        |      |      |      |



|                     |          |                                                                                                        |     |      |      |      |      |      |      |         |         |         |     |      |      |
|---------------------|----------|--------------------------------------------------------------------------------------------------------|-----|------|------|------|------|------|------|---------|---------|---------|-----|------|------|
| L0N7N1_KIF14_MOUSE  | KIF14    | Kinesin-like protein KIF14 OS=Musculus GN:KIF14 PE=1 SV=1                                              | 2   | 7.3  | 3.9  | 6.7  | 1.9  | 1.08 | 0.92 | 145.5   | 7.8     | 13.2    | 1.9 | 1.10 | 0.91 |
| P58854_GCF3_MOUSE   | Tubgcp3  | Gamma-tubulin complex component 3 OS=Musculus GN:Tubgcp3 PE=2 SV=2                                     | 3   | 9.1  | 4.9  | 8.4  | 1.9  | 1.08 | 0.92 | 32.8    | 32.8    | 20.7    | 2.7 | 1.58 | 0.83 |
| Q5CYV6_IL12_MOUSE   | IL12     | Interleukin enhancer-binding factor 2 OS=Musculus GN:IL12 PE=1 SV=1                                    | 3   | 29.8 | 16.1 | 27.6 | 16.1 | 1.08 | 0.92 | 1564.9  | 469.4   | 759.9   | 3.4 | 2.02 | 1.69 |
| B0K013_TMF1_MOUSE   | Tmf1     | TATA-element modulatory factor OS=Musculus GN:Tmf1 PE=1 SV=1                                           | 6   | 5.4  | 2.9  | 5.0  | 1.9  | 1.08 | 0.92 | 32.6    | 22.0    | 37.0    | 1.5 | 0.88 | 1.14 |
| Q5QWV8_ASAP1_MOUSE  | Asap1    | Arf-GAP with SH3 domain, ANK repeat and PH1 domain-containing protein 1 OS=Musculus GN:Asap1 PE=1 SV=1 | 4   | 8.8  | 4.7  | 8.1  | 1.9  | 1.08 | 0.92 | 40.0    | 19.3    | 32.4    | 2.1 | 1.24 | 0.81 |
| Q52219_TGFL1_MOUSE  | Tgfl1    | Transforming growth factor-beta type 1 OS=Musculus GN:Tgfl1 PE=1 SV=1                                  | 1   | 11.6 | 6.3  | 10.7 | 6.3  | 1.08 | 0.92 | 11.6    | 6.3     | 10.7    | 6.3 | 1.08 | 0.92 |
| Q1UQU0_BRD9_MOUSE   | Brd9     | Bromodomain-containing protein 9 OS=Musculus GN:Brd9 PE=1 SV=1                                         | 3   | 5.8  | 3.1  | 5.3  | 1.9  | 1.08 | 0.92 | 25.6    | 12.2    | 20.6    | 2.1 | 1.25 | 0.80 |
| Q9J956_DERL1_MOUSE  | Derl1    | Derlin-1 OS=Musculus GN:Derl1 PE=1 SV=1                                                                | 3   | 7.4  | 4.0  | 6.8  | 1.9  | 1.08 | 0.92 | 90.9    | 52.6    | 88.4    | 1.9 | 1.12 | 0.89 |
| Q9J846_STRM_MOUSE   | Strm4    | Striatin-4 OS=Musculus GN:Strm4 PE=1 SV=1                                                              | 2   | 11.3 | 6.1  | 10.4 | 1.9  | 1.08 | 0.92 | 22.6    | 12.2    | 20.5    | 1.9 | 1.10 | 0.91 |
| Q10821_AKCC1_MOUSE  | Akcc1    | Actin-binding protein 1 OS=Musculus GN:Akcc1 PE=2 SV=1                                                 | 3   | 8.5  | 4.6  | 8.0  | 1.9  | 1.08 | 0.92 | 12.9    | 6.8     | 11.9    | 2.1 | 1.21 | 0.82 |
| Q10813_CNK7_MOUSE   | Cnkp7    | COP1 signalosome complex subunit 7 OS=Musculus GN:Cnkp7 PE=1 SV=1                                      | 2   | 12.3 | 6.6  | 11.4 | 1.8  | 1.08 | 0.93 | 24.6    | 13.3    | 22.4    | 1.8 | 1.10 | 0.91 |
| Q9CZH7_MKXK1_MOUSE  | Mkxk1    | Motif-remodeling associated protein 1 OS=Musculus GN:Mkxk1 PE=1 SV=1                                   | 1   | 8.8  | 4.8  | 8.2  | 1.8  | 1.08 | 0.93 | 8.8     | 4.8     | 8.0     | 1.8 | 1.10 | 0.91 |
| Q505F1_MKCL1_MOUSE  | Mkcl1    | Mucin receptor subunit 2 group 1 OS=Musculus GN:Mkcl1 PE=1 SV=1                                        | 4   | 8.8  | 4.6  | 8.0  | 1.8  | 1.08 | 0.93 | 43.9    | 22.7    | 43.9    | 2.7 | 1.45 | 1.08 |
| Q51177_PROX1_MOUSE  | Prox2    | Proxemin-2 OS=Musculus GN:Prox2 PE=1 SV=1                                                              | 1   | 7.4  | 4.0  | 6.9  | 1.8  | 1.08 | 0.93 | 7.4     | 4.0     | 6.7     | 1.8 | 1.10 | 0.91 |
| P15279_RAB6A_MOUSE  | Rab6a    | Ras-related protein Rab-6A OS=Musculus GN:Rab6a PE=1 SV=4                                              | 13  | 46.7 | 25.3 | 43.3 | 1.8  | 1.08 | 0.93 | 782.5   | 381.1   | 640.8   | 2.1 | 1.22 | 0.82 |
| Q02059_UBA1_MOUSE   | Uba1     | Ubiquitin-like modifier-activating enzyme 1 OS=Musculus GN:Uba1 PE=1 SV=1                              | 6   | 8.2  | 4.5  | 7.7  | 1.8  | 1.08 | 0.93 | 52.5    | 26.4    | 44.4    | 2.0 | 1.18 | 0.85 |
| Q52186_SRD_MOUSE    | Srd4     | Translocin-associated protein subunit delta2 OS=Musculus GN:Srd4 PE=2 SV=1                             | 2   | 15.4 | 8.2  | 14.3 | 1.8  | 1.08 | 0.95 | 15.4    | 8.2     | 14.3    | 1.8 | 1.10 | 0.91 |
| Q8E18_SMG8_MOUSE    | Smg8     | Protein SMG8 OS=Musculus GN:Smg8 PE=2 SV=1                                                             | 4   | 7.4  | 4.0  | 6.9  | 1.8  | 1.07 | 0.93 | 22.7    | 14.5    | 24.3    | 1.9 | 1.14 | 0.88 |
| Q91011_MPH6_MOUSE   | Mphosph6 | M-phase phosphoprotein 6 OS=Musculus GN:Mphosph6 PE=1 SV=1                                             | 1   | 4.7  | 2.5  | 4.3  | 1.8  | 1.07 | 0.93 | 4.7     | 2.5     | 4.3     | 1.8 | 1.10 | 0.91 |
| P59586_RANBP9_MOUSE | Ranbp9   | Ran-binding protein 9 OS=Musculus GN:Ranbp9 PE=1 SV=1                                                  | 3   | 10.2 | 5.6  | 9.5  | 1.8  | 1.07 | 0.93 | 26.3    | 14.0    | 23.5    | 1.9 | 1.12 | 0.89 |
| Q53850_NUPK2_MOUSE  | Nupk2    | Nuclear pore glycoprotein k2 OS=Musculus GN:Nupk2 PE=1 SV=2                                            | 2   | 8.8  | 4.8  | 8.2  | 1.8  | 1.07 | 0.93 | 8.8     | 4.8     | 8.2     | 1.8 | 1.09 | 0.91 |
| Q88874_CCNK_MOUSE   | Ccnk     | Cyclin-K OS=Musculus GN:Ccnk PE=1 SV=3                                                                 | 3   | 6.4  | 3.5  | 5.9  | 1.8  | 1.07 | 0.93 | 19.8    | 9.9     | 16.6    | 2.0 | 1.19 | 0.84 |
| Q8BMM0_EMV_MOUSE    | Emv1     | Protein EMV1 OS=Musculus GN:Emv1 PE=1 SV=2                                                             | 7   | 9.0  | 4.9  | 8.4  | 1.8  | 1.07 | 0.93 | 60.2    | 30.5    | 51.2    | 2.0 | 1.18 | 0.85 |
| Q529P6_ITIK_MOUSE   | Itik     | Inhibitor of bruton tyrosine kinase OS=Musculus GN:Itik PE=1 SV=3                                      | 1   | 4.8  | 2.6  | 4.5  | 1.8  | 1.07 | 0.93 | 4.8     | 2.6     | 4.4     | 1.8 | 1.09 | 0.92 |
| P63024_VAMP3_MOUSE  | Vamp3    | Vesicle-associated membrane protein 3 OS=Musculus GN:Vamp3 PE=1 SV=1                                   | 2   | 20.4 | 11.1 | 19.1 | 1.8  | 1.07 | 0.93 | 40.8    | 22.2    | 37.4    | 1.8 | 1.09 | 0.92 |
| P97434_MPRIP_MOUSE  | Mprip    | Myosin phosphatase Rho-interacting protein OS=Musculus GN:Mprip PE=1 SV=2                              | 37  | 19.4 | 10.6 | 18.1 | 1.8  | 1.07 | 0.93 | 1068.7  | 441.2   | 741.9   | 2.4 | 1.44 | 0.69 |
| Q5Q299_QM_MOUSE     | Qm       | Protein quaking OS=Musculus GN:Qm PE=1 SV=1                                                            | 9   | 16.3 | 8.9  | 15.6 | 1.8  | 1.07 | 0.93 | 243.8   | 241.3   | 405.7   | 1.0 | 0.60 | 1.66 |
| Q10361_CK2_MOUSE    | Ck2      | Cyclin-dependent kinase 2 OS=Musculus GN:Ck2 PE=1 SV=1                                                 | 2   | 18.8 | 10.2 | 17.4 | 1.8  | 1.07 | 0.94 | 295.0   | 154.2   | 329.6   | 1.8 | 1.08 | 0.93 |
| Q17NCA_LC12_MOUSE   | Luc12    | Putative RNA-binding protein Luc1-like OS=Musculus GN:Luc12 PE=1 SV=1                                  | 25  | 27.4 | 14.9 | 25.2 | 1.8  | 1.07 | 0.94 | 2799.8  | 1239.1  | 2083.5  | 2.3 | 1.34 | 0.72 |
| Q9C6B8_EP308_MOUSE  | Nup153   | Protein Nup153 OS=Musculus GN:Nup153 PE=1 SV=1                                                         | 8   | 8.2  | 4.5  | 7.7  | 1.8  | 1.07 | 0.94 | 79.2    | 35.7    | 60.0    | 2.2 | 1.32 | 0.76 |
| Q9VSL1_FABR8_MOUSE  | Fambr8   | Protein FAMBR8 OS=Musculus GN:Fambr8 PE=1 SV=1                                                         | 1   | 6.7  | 3.8  | 6.7  | 1.8  | 1.07 | 0.94 | 188.6   | 80.1    | 134.2   | 2.4 | 1.40 | 0.71 |
| Q9VSL1_F9S3_MOUSE   | F9s3     | Vamp/Vps39-like protein OS=Musculus GN:F9S3 PE=2 SV=1                                                  | 1   | 6.9  | 3.8  | 6.5  | 1.7  | 1.07 | 0.94 | 3.8     | 2.0     | 6.4     | 1.8 | 1.09 | 0.92 |
| Q88E6_CP20A_MOUSE   | Cyp20a1  | Cytochrome P450 20A1 OS=Musculus GN:Cyp20a1 PE=2 SV=1                                                  | 3   | 5.8  | 3.2  | 5.4  | 1.8  | 1.07 | 0.94 | 17.2    | 9.5     | 15.9    | 1.8 | 1.08 | 0.93 |
| Q8B5G_MAK16_MOUSE   | Mak16    | Protein MAK16 homolog OS=Musculus GN:MAK16 PE=1 SV=1                                                   | 5   | 14.4 | 7.9  | 13.5 | 1.8  | 1.07 | 0.94 | 58.5    | 31.2    | 52.4    | 1.9 | 1.12 | 0.90 |
| Q8B84_F8W8_MOUSE    | F8w8     | F-box-Wip1 repeat-containing protein 8 OS=Musculus GN:F8W8 PE=1 SV=2                                   | 4   | 10.8 | 6.0  | 10.3 | 1.8  | 1.07 | 0.94 | 13.2    | 6.8     | 11.2    | 1.8 | 1.08 | 0.93 |
| Q8CF24_RCOR1_MOUSE  | Rcor1    | REST corepressor 1 OS=Musculus GN:Rcor1 PE=1 SV=1                                                      | 6   | 7.3  | 4.0  | 6.8  | 1.8  | 1.07 | 0.94 | 63.8    | 37.1    | 62.3    | 1.7 | 1.02 | 0.98 |
| Q8C704_RBM4_MOUSE   | Rbm4     | RNA-binding protein 4 OS=Musculus GN:Rbm4 PE=1 SV=1                                                    | 2   | 22.5 | 12.3 | 21.1 | 1.8  | 1.06 | 0.94 | 45.0    | 24.6    | 41.4    | 1.8 | 1.09 | 0.92 |
| Q70493_SNA12_MOUSE  | Sna12    | Sorting nexin-12 OS=Musculus GN:Sna12 PE=1 SV=1                                                        | 3   | 30.6 | 16.7 | 27.8 | 1.8  | 1.06 | 0.94 | 172.0   | 90.8    | 152.6   | 1.9 | 1.13 | 0.89 |
| Q8B7Y1_HAT1_MOUSE   | Hat1     | Homeobox protein HAT1 OS=Musculus GN:HAT1 PE=1 SV=1                                                    | 3   | 10.9 | 6.0  | 10.6 | 1.8  | 1.06 | 0.94 | 14.0    | 12.0    | 18.8    | 1.8 | 1.08 | 0.93 |
| P97367_MEI2_MOUSE   | Mei2     | Homeobox protein Mei2 OS=Musculus GN:Mei2 PE=1 SV=2                                                    | 2   | 8.4  | 4.6  | 7.9  | 1.8  | 1.06 | 0.94 | 17.7    | 9.2     | 15.4    | 1.8 | 1.08 | 0.92 |
| Q55VY1_CYTB_MOUSE   | Spec1    | Cytoskeleton 8 OS=Musculus GN:Spec1 PE=1 SV=2                                                          | 16  | 14.4 | 7.9  | 13.5 | 1.8  | 1.06 | 0.94 | 260.1   | 138.1   | 232.3   | 1.9 | 1.12 | 0.89 |
| Q81811_MUS1_MOUSE   | Mus1     | Protein mus1-complex subunit 1 OS=Musculus GN:MUS1 PE=2 SV=2                                           | 16  | 12.4 | 6.8  | 12.4 | 1.8  | 1.06 | 0.94 | 47.5    | 26.2    | 47.5    | 1.8 | 1.08 | 0.93 |
| Q9P9V0_PRR8_MOUSE   | Prrf8    | Pre-mRNA-processing splicing factor 8 OS=Musculus GN:Prrf8 PE=1 SV=2                                   | 62  | 25.5 | 14.0 | 24.0 | 1.8  | 1.06 | 0.94 | 2040.6  | 1052.5  | 1769.7  | 1.9 | 1.16 | 0.86 |
| Q9WTU0_PHF2_MOUSE   | Phf2     | Lysine-specific demethylase PHF2 OS=Musculus GN:Phf2 PE=1 SV=2                                         | 4   | 7.8  | 4.3  | 7.3  | 1.8  | 1.06 | 0.94 | 19.7    | 10.6    | 34.6    | 9.4 | 5.57 | 0.18 |
| P81839_RAB18_MOUSE  | Rab18    | Ras-related protein Rab-18 OS=Musculus GN:Rab18 PE=1 SV=1                                              | 5   | 25.9 | 14.2 | 24.4 | 1.8  | 1.06 | 0.94 | 132.6   | 64.8    | 108.9   | 2.1 | 1.24 | 0.81 |
| Q03147_C9K7_MOUSE   | C9k7     | Cyclin-dependent kinase 7 OS=Musculus GN:C9K7 PE=2 SV=2                                                | 6   | 10.4 | 5.7  | 9.8  | 1.8  | 1.06 | 0.94 | 35.8    | 19.4    | 35.8    | 1.8 | 1.08 | 0.93 |
| P20029_F9F8_MOUSE   | Hsp65    | 78 kDa glucose-regulated protein OS=Musculus GN:Hsp65 PE=1 SV=1                                        | 48  | 35.7 | 19.7 | 33.7 | 1.8  | 1.06 | 0.94 | 3005.4  | 2002.1  | 3366.5  | 1.5 | 0.89 | 1.12 |
| Q55882_MYADM_MOUSE  | Myadm    | Myoid-associated differentiation marker OS=Musculus GN:Myadm PE=2 SV=2                                 | 4   | 53.7 | 29.6 | 50.8 | 1.8  | 1.06 | 0.95 | 239.0   | 126.7   | 213.1   | 1.9 | 1.12 | 0.89 |
| P10306_TNKS1_MOUSE  | Tnks1    | Tnfr2 transcription factor TNKS1 OS=Musculus GN:Tnks1 PE=1 SV=1                                        | 1   | 10.4 | 5.6  | 9.9  | 1.8  | 1.06 | 0.95 | 10.4    | 5.6     | 9.9     | 1.8 | 1.08 | 0.93 |
| Q51W50_CSDC1_MOUSE  | Csdc1    | CSDC domain-containing protein E1 OS=Musculus GN:CSDC1 PE=2 SV=1                                       | 2   | 9.7  | 5.3  | 9.1  | 1.8  | 1.06 | 0.95 | 19.3    | 10.7    | 17.9    | 1.8 | 1.08 | 0.93 |
| Q5SUH6_GSUNH6_MOUSE | Clim1    | Clathrin interactor 1 OS=Musculus GN:Clim1 PE=1 SV=1                                                   | 9   | 13.2 | 7.3  | 12.5 | 1.8  | 1.06 | 0.95 | 141.5   | 79.9    | 134.4   | 1.8 | 1.05 | 0.95 |
| Q9P810_TDF1_MOUSE   | Dntt1p1  | Deoxyribonucleic acid transferase terminal-interacting protein 1 OS=Musculus GN:Dntt1p1 PE=1 SV=1      | 2   | 11.4 | 6.3  | 10.8 | 1.8  | 1.06 | 0.95 | 22.9    | 12.6    | 21.3    | 1.8 | 1.08 | 0.93 |
| Q108G52_LIMD1_MOUSE | Limd1    | LIM domain-containing protein 1 OS=Musculus GN:LIMD1 PE=2 SV=1                                         | 2   | 16.3 | 8.9  | 15.9 | 1.8  | 1.06 | 0.95 | 35.5    | 19.3    | 35.5    | 1.8 | 1.08 | 0.93 |
| Q9O198_SNF2_MOUSE   | Snf2     | Pre-mRNA-splicing factor SFY2 OS=Musculus GN:Snf2 PE=1 SV=1                                            | 2   | 14.0 | 7.8  | 13.3 | 1.8  | 1.05 | 0.95 | 28.0    | 15.5    | 26.1    | 1.8 | 1.08 | 0.93 |
| Q10JF7_LYPL1_MOUSE  | Lypl1a1  | Lysophospholipase-like protein 1 OS=Musculus GN:Lypl1a1 PE=1 SV=3                                      | 1   | 3.4  | 1.9  | 3.2  | 1.8  | 1.05 | 0.95 | 3.4     | 1.9     | 3.1     | 1.8 | 1.08 | 0.93 |
| Q50665_MPL6_MOUSE   | Mpl6     | Myosin light polypeptide 6 OS=Musculus GN:Mpl6 PE=1 SV=1                                               | 28  | 82.3 | 45.5 | 78.1 | 1.8  | 1.05 | 0.95 | 11198.2 | 6076.7  | 10217.9 | 1.8 | 1.10 | 0.91 |
| Q9C4L1_MED1_MOUSE   | Med1     | Mediator of RNA polymerase II transcription subunit 1 OS=Musculus GN:Med1 PE=1 SV=1                    | 4   | 7.8  | 4.1  | 7.0  | 1.8  | 1.05 | 0.95 | 14.7    | 8.1     | 14.7    | 1.8 | 1.07 | 0.94 |
| Q8VDC5_MED17_MOUSE  | Med17    | Mediator of RNA polymerase II transcription subunit 17 OS=Musculus GN:Med17 PE=1 SV=1                  | 3   | 12.8 | 7.1  | 12.2 | 1.8  | 1.05 | 0.95 | 39.2    | 19.7    | 33.2    | 2.0 | 1.18 | 0.85 |
| Q9V9P1_VPS4A_MOUSE  | Vps4a    | Vacuolar protein sorting associated protein 4A OS=Musculus GN:Vps4a PE=1 SV=1                          | 2   | 13.5 | 7.5  | 12.9 | 1.8  | 1.05 | 0.95 | 27.1    | 15.0    | 25.2    | 1.8 | 1.07 | 0.93 |
| Q90B87_HPTFL1_MOUSE | Hptfl1   | HPTFL phosphatase 1 regulatory subunit 12A OS=Musculus GN:HPTFL1 PE=1 SV=1                             | 30  | 19.6 | 10.9 | 24.7 | 1.8  | 1.05 | 0.95 | 106.5   | 21.1    | 488.5   | 2.1 | 1.25 | 0.80 |
| Q8CE14_Q8CE14_MOUSE | Ppp1r12a | Protein Ppp1r12a OS=Musculus GN:Ppp1r12a PE=2 SV=1                                                     | 4   | 3.6  | 2.0  | 3.6  | 1.8  | 1.05 | 0.95 | 26.1    | 15.5    | 26.1    | 1.7 | 1.00 | 1.00 |
| Q8W0Z2_VAC14_MOUSE  | Vac14    | Protein VAC14 homolog OS=Musculus GN:Vac14 PE=1 SV=1                                                   | 3   | 8.4  | 4.6  | 8.0  | 1.8  | 1.05 | 0.95 | 70.7    | 24.6    | 41.4    | 2.9 | 1.71 | 0.59 |
| Q8VDD5_MHY9_MOUSE   | Mhy9     | Myosin-9 OS=Musculus GN:Mhy9 PE=1 SV=4                                                                 | 187 | 63.9 | 35.5 | 60.8 | 1.8  | 1.05 | 0.95 | 28243.5 | 15673.8 | 26358.5 | 1.8 | 1.07 | 0.93 |
| Q9WT05_AKAP2_MOUSE  | Akap2    | Kinase anchor protein 2 OS=Musculus GN:Akap2 PE=1 SV=1                                                 | 6   | 11.1 | 6.0  | 10.5 | 1.8  | 1.05 | 0.95 | 11.1    | 6.0     | 10.5    | 1.7 | 1.04 | 0.96 |
| Q9OCT8_CRI2_MOUSE   | Crip2    | Cysteine-rich protein 2 OS=Musculus GN:Crip2 PE=1 SV=1                                                 | 2   | 9.2  | 5.1  | 8.8  | 1.8  | 1.05 | 0.95 | 18.4    | 10.2    | 17.2    | 1.8 | 1.07 | 0.94 |
| Q9V9P1_UTP6_MOUSE   | Utp6     | U3 small nuclear RNA-associated protein 6 homolog OS=Musculus GN:Utp6 PE=2 SV=1                        | 2   | 4.6  | 2.6  | 4.4  | 1.8  | 1.05 | 0.95 | 3.3     | 5.2     | 4.7     | 1.8 | 1.07 | 0.94 |
| Q9BCC9_TF3A4_MOUSE  | Tf3a4    | Tripartite motif-containing protein 3A OS=Musculus GN:Tf3a4 PE=2 SV=2                                  | 1   | 6.2  | 3.5  | 5.9  | 1.8  | 1.05 | 0.95 | 6.2     | 3.5     | 5.8     | 1.8 | 1.07 |      |

|                       |              |                                                                                                              |     |       |      |        |     |      |      |         |        |         |     |      |      |
|-----------------------|--------------|--------------------------------------------------------------------------------------------------------------|-----|-------|------|--------|-----|------|------|---------|--------|---------|-----|------|------|
| Q8010_Q8010_MOUSE     | Rhoa         | Transforming protein RhoA:OS-Musculus:GN-RhoA:PE1-SV1                                                        | 2   | 8.0   | 4.6  | 7.9    | 1.7 | 1.01 | 0.99 | 16.0    | 9.3    | 15.6    | 1.7 | 1.03 | 0.97 |
| Q52362_Q52362_MOUSE   | Spz2h        | DNM3-2-related protein polymerase 1, II, and III subunit:PB3D3:OS-Musculus:GN-Polr2h:PE1-SV1                 | 5   | 16.2  | 9.4  | 16.1   | 1.7 | 1.01 | 0.99 | 80.6    | 45.4   | 76.3    | 1.8 | 1.06 | 0.95 |
| PE2414_PE2414_MOUSE   | Phf2         | Serine/threonine protein phosphatase:PE1:beta:cat:subunit:OS-Musculus:GN-Phf2:PE1-SV1                        | 2   | 8.6   | 4.6  | 8.6    | 1.7 | 1.00 | 1.00 | 68.6    | 38.6   | 115.3   | 1.8 | 1.09 | 0.91 |
| A04087W04_Q40087W04_1 | 10A07        | Protein Sctap:OS-Musculus:GN-Sctap:PE1-SV1                                                                   | 10  | 10.6  | 6.2  | 10.6   | 1.7 | 1.00 | 1.00 | 111.5   | 69.6   | 117.0   | 1.6 | 0.95 | 1.05 |
| O9JX1_G0R2_MOUSE      | Gorazp2      | Glycyl assembly-stacking protein 2:OS-Musculus:GN-Gorazp2:PE1-SV1                                            | 2   | 7.5   | 4.3  | 7.4    | 1.7 | 1.00 | 1.00 | 15.0    | 8.7    | 14.6    | 1.7 | 1.02 | 0.98 |
| Q52002_Q52002_MOUSE   | Cy5c1        | Cytochrome c5 type I:beta:Musculus:GN-Cy5c1:PE1-SV1                                                          | 1   | 7.4   | 4.3  | 7.4    | 1.7 | 1.00 | 1.00 | 21.2    | 15.6   | 24.1    | 1.7 | 1.02 | 0.98 |
| Q901W7_Q901W7_MOUSE   | Fkbp11       | Peptidyl-prolyl cis-trans isomerase FKBP11:OS-Musculus:GN-Fkbp11:PE1-SV1                                     | 2   | 10.6  | 6.2  | 10.6   | 1.7 | 1.00 | 1.00 | 12.2    | 12.3   | 10.7    | 1.7 | 1.02 | 0.98 |
| Q62Q33_Q62Q33_MOUSE   | Mlec         | Mallein:OS-Musculus:GN-Mlec:PE2-SV2                                                                          | 4   | 11.1  | 6.4  | 11.1   | 1.7 | 1.00 | 1.00 | 54.5    | 29.5   | 49.5    | 1.8 | 1.10 | 0.91 |
| Q52003_Q52003_MOUSE   | CommD4       | COMM domain-containing protein 4:OS-Musculus:GN-CommD4:PE2-SV1                                               | 1   | 8.1   | 4.7  | 8.1    | 1.7 | 1.00 | 1.00 | 81.2    | 47     | 8.0     | 1.7 | 1.02 | 0.98 |
| Q6L103_Q6L103_MOUSE   | Trio         | Triple function domain protein 1:OS-Musculus:GN-Trio:PE1-SV1                                                 | 4   | 8.0   | 4.7  | 8.0    | 1.7 | 1.00 | 1.00 | 17.5    | 17.9   | 11.1    | 1.8 | 1.01 | 1.00 |
| Q90100_Q90100_MOUSE   | Khrp9        | Far upstream element-binding protein 2:OS-Musculus:GN-Khrp9:PE1-SV1                                          | 11  | 16.5  | 9.6  | 16.5   | 1.7 | 1.00 | 1.00 | 226.5   | 137.8  | 231.7   | 1.6 | 0.98 | 1.02 |
| Q90000_Q90000_MOUSE   | Sra9         | Serine/arginine-rich signaling factor 9:OS-Musculus:GN-Sra9:PE1-SV1                                          | 18  | 52.0  | 30.3 | 51.9   | 1.7 | 1.00 | 1.00 | 1185.0  | 725.2  | 1219.3  | 1.6 | 0.97 | 1.03 |
| PE1021_Q6486_MOUSE    | Rar          | Rar-related protein Rar:beta:OS-Musculus:GN-Rar:PE1-SV1                                                      | 3   | 8.8   | 5.1  | 8.7    | 1.7 | 1.00 | 1.00 | 13.7    | 13.7   | 23.1    | 1.9 | 0.99 | 0.72 |
| P70255_P70255_MOUSE   | Nlc          | Nuclear factor 1 C-type:OS-Musculus:GN-Nlc:PE1-SV1                                                           | 14  | 14.6  | 8.5  | 14.6   | 1.7 | 1.00 | 1.00 | 376.1   | 258.3  | 434.3   | 1.5 | 0.87 | 1.15 |
| EQ90N1_EQ90N1_MOUSE   | Dhv9         | ATP-dependent RNA helicase A:OS-Musculus:GN-Dhv9:PE1-SV1                                                     | 102 | 109.8 | 64.1 | 109.9  | 1.7 | 1.00 | 1.00 | 15243.4 | 8663.5 | 14567.5 | 1.8 | 0.95 | 0.96 |
| O54984_O54984_MOUSE   | Ana1         | ATPase Ana1:OS-Musculus:GN-Ana1:PE1-SV2                                                                      | 3   | 22.8  | 13.3 | 22.8   | 1.7 | 1.00 | 1.00 | 99.3    | 42.3   | 71.0    | 2.3 | 1.40 | 0.72 |
| Q10252_Q10252_MOUSE   | Hmsa2        | Hemesevenase 2:OS-Musculus:GN-Hmsa2:PE2-SV1                                                                  | 3   | 7.6   | 4.8  | 7.6    | 1.7 | 1.00 | 1.00 | 120.7   | 120.2  | 20.2    | 1.4 | 1.02 | 0.70 |
| Q9C7W9_Q9C7W9_MOUSE   | Golga1       | Golgi subfamily A member 1:OS-Musculus:GN-Golga1:PE1-SV2                                                     | 4   | 9.2   | 5.4  | 9.2    | 1.7 | 1.00 | 1.00 | 88.8    | 34.6   | 58.2    | 1.1 | 0.67 | 1.50 |
| Q904H9_Q904H9_MOUSE   | PHF4         | PHD finger protein 14:OS-Musculus:GN-PHF4:PE1-SV1                                                            | 5   | 15.3  | 8.9  | 15.3   | 1.7 | 1.00 | 1.00 | 93.8    | 54.7   | 92.0    | 1.7 | 1.02 | 0.98 |
| EQ3D12_EQ3D12_MOUSE   | Sympo        | Synaptotagmin:OS-Musculus:GN-Sympo:PE1-SV1                                                                   | 13  | 11.7  | 6.9  | 11.8   | 1.7 | 1.00 | 1.00 | 174.7   | 100.2  | 168.4   | 1.7 | 1.04 | 0.96 |
| Q99172_Q99172_MOUSE   | Gcm1         | Glutamine-cysteine ligase regulatory subunit:OS-Musculus:GN-Gcm1:PE2-SV1                                     | 1   | 2.5   | 2.1  | 2.5    | 1.7 | 1.00 | 1.00 | 3.2     | 2.5    | 2.4     | 1.7 | 1.02 | 0.98 |
| Q85222_Q85222_MOUSE   | Endod1       | Endonuclease domain-containing protein 1:OS-Musculus:GN-Endod1:PE1-SV2                                       | 1   | 5.3   | 3.1  | 5.3    | 1.7 | 1.00 | 1.00 | 3.5     | 3.1    | 5.2     | 1.7 | 1.02 | 0.98 |
| F80V29_F80V29_MOUSE   | Igga3        | Protein Igga3:OS-Musculus:GN-Igga3:PE4-SV1                                                                   | 3   | 10.2  | 5.9  | 10.2   | 1.7 | 1.00 | 1.00 | 35.0    | 31.0   | 52.2    | 1.1 | 0.67 | 1.49 |
| Q50155_Q50155_MOUSE   | Lncr57       | Leucine-rich repeat-containing protein 57:OS-Musculus:GN-Lncr57:PE2-SV1                                      | 2   | 4.7   | 2.8  | 4.7    | 1.7 | 1.00 | 1.00 | 9.4     | 5.5    | 9.3     | 1.7 | 1.02 | 0.98 |
| Q9DCA5_Q9DCA5_MOUSE   | Brix1        | Ribosome biogenesis protein BRX1 homolog:OS-Musculus:GN-Brix1:PE2-SV3                                        | 6   | 19.8  | 11.6 | 19.8   | 1.7 | 1.00 | 1.00 | 123.3   | 74.4   | 125.1   | 1.7 | 0.99 | 1.02 |
| Q9Y91_Q9Y91_MOUSE     | Hadhb        | Tripartite oligomer protein beta, mitochondrial:OS-Musculus:GN-Hadhb:PE1-SV1                                 | 6   | 22.9  | 13.4 | 22.9   | 1.7 | 1.00 | 1.00 | 142.7   | 85.6   | 143.9   | 1.7 | 0.99 | 1.01 |
| P41819_P41819_MOUSE   | Epb41        | Protein 4.1:OS-Musculus:GN-Epb41:PE1-SV2                                                                     | 1   | 7.4   | 4.8  | 7.4    | 1.7 | 1.00 | 1.01 | 8.2     | 8.2    | 8.1     | 1.7 | 1.01 | 0.99 |
| Q9XW82_Q9XW82_MOUSE   | G7F          | G7F protein-activating protein:OS-Musculus:GN-G7F:PE1-SV2                                                    | 1   | 8.2   | 4.3  | 8.2    | 1.7 | 1.00 | 1.01 | 12.0    | 12.0   | 12.0    | 1.7 | 1.01 | 0.99 |
| P14873_P14873_MOUSE   | Map1b        | Microtubule-associated protein 1B:OS-Musculus:GN-Map1b:PE1-SV2                                               | 45  | 14.2  | 8.3  | 14.2   | 1.7 | 0.99 | 1.01 | 778.6   | 428.6  | 720.7   | 1.8 | 0.98 | 0.93 |
| Q9D70_Q9D70_MOUSE     | NOSIP        | Nitric oxide synthase interacting protein:OS-Musculus:GN-NOSIP:PE2-SV1                                       | 2   | 14.2  | 8.3  | 14.2   | 1.7 | 0.99 | 1.01 | 28.3    | 16.6   | 28.0    | 1.7 | 1.01 | 0.99 |
| Q9P5D8_Q9P5D8_MOUSE   | Shc4         | Cytoplasmic maintenance of chromosomes fragile hinge domain-containing protein 1:OS-Musculus:GN-Shc4:PE1-SV1 | 2   | 14.3  | 7.8  | 14.3   | 1.7 | 0.99 | 1.01 | 189.4   | 106.7  | 179.4   | 1.8 | 1.06 | 0.95 |
| Q9V823_Q9V823_MOUSE   | Ctlnp1       | Ctlnp1 and subunit transmembrane protein 1 homolog:OS-Musculus:GN-Ctlnp1:PE1-SV2                             | 2   | 5.7   | 3.4  | 5.7    | 1.7 | 0.99 | 1.01 | 6.7     | 6.7    | 11.1    | 1.7 | 1.01 | 0.95 |
| Q9P566_Q9P566_MOUSE   | Ubn7         | UBX domain-containing protein 7:OS-Musculus:GN-Ubn7:PE1-SV2                                                  | 2   | 8.8   | 5.1  | 8.8    | 1.7 | 0.99 | 1.01 | 17.5    | 10.3   | 17.3    | 1.7 | 1.01 | 0.99 |
| A21772_A21772_MOUSE   | Fubp3        | MCG130458:OS-Musculus:GN-Fubp3:PE4-SV1                                                                       | 22  | 19.7  | 11.6 | 19.8   | 1.7 | 0.99 | 1.01 | 622.8   | 271.9  | 457.3   | 2.3 | 1.36 | 0.73 |
| Q52119_Q52119_MOUSE   | Exoc4        | Exosome complex component EXOC4:OS-Musculus:GN-Exoc4:PE2-SV3                                                 | 1   | 22.2  | 13.1 | 22.2   | 1.7 | 0.99 | 1.01 | 23.3    | 12.3   | 23.3    | 1.8 | 1.11 | 0.84 |
| Q6P404_Q6P404_MOUSE   | Rexo4        | RNA exonuclease 4:OS-Musculus:GN-Rexo4:PE2-SV2                                                               | 4   | 12.6  | 7.4  | 12.7   | 1.7 | 0.99 | 1.01 | 50.9    | 30.3   | 50.9    | 1.7 | 1.00 | 1.00 |
| Q9ER00_Q9ER00_MOUSE   | Stx12        | STX12:OS-Musculus:GN-Stx12:PE1-SV1                                                                           | 5   | 15.0  | 8.8  | 15.1   | 1.7 | 0.99 | 1.01 | 111.1   | 60.0   | 100.9   | 1.9 | 1.10 | 0.91 |
| Q92208_Q92208_MOUSE   | Lncr59       | Leucine-rich repeat-containing protein 59:OS-Musculus:GN-Lncr59:PE1-SV1                                      | 5   | 11.2  | 6.6  | 11.2   | 1.7 | 0.99 | 1.01 | 64.0    | 41.0   | 70.0    | 1.5 | 0.91 | 1.09 |
| Q91420_Q91420_MOUSE   | Setd1        | GMP-activated transcription factor 1:OS-Musculus:GN-Setd1:PE1-SV2                                            | 2   | 8.5   | 5.0  | 8.6    | 1.7 | 0.99 | 1.01 | 3.0     | 2.9    | 4.1     | 1.7 | 1.01 | 0.99 |
| Q98974_Q98974_MOUSE   | Setd1b       | Histone-N-lysine methyltransferase SETD1B:OS-Musculus:GN-Setd1b:PE1-SV1                                      | 2   | 8.5   | 5.0  | 8.6    | 1.7 | 0.99 | 1.01 | 17.1    | 10.1   | 16.9    | 1.7 | 1.01 | 0.99 |
| P97312_P97312_MOUSE   | Carp1        | Cysteine and glycine-rich protein 1:OS-Musculus:GN-Carp1:PE1-SV1                                             | 2   | 21.9  | 12.9 | 22.2   | 1.7 | 0.99 | 1.01 | 43.8    | 25.9   | 43.5    | 1.7 | 1.01 | 0.99 |
| Q6C7V9_Q6C7V9_MOUSE   | Utp15        | Utp15:OS-Musculus:GN-Utp15:PE1-SV1                                                                           | 12  | 11.5  | 6.5  | 11.5   | 1.7 | 0.99 | 1.01 | 49.6    | 28.5   | 49.6    | 1.7 | 1.01 | 0.99 |
| EQ924_Q924_MOUSE      | Elna1        | Protein Elna1:OS-Musculus:GN-Elna1:PE1-SV1                                                                   | 1   | 7.8   | 4.6  | 7.8    | 1.7 | 0.99 | 1.01 | 7.8     | 4.6    | 7.8     | 1.7 | 1.01 | 0.99 |
| PE1022_Q9101_MOUSE    | Chp1         | Calcineurin B homologous protein 1:OS-Musculus:GN-Chp1:PE1-SV2                                               | 5   | 18.8  | 11.0 | 19.0   | 1.7 | 0.99 | 1.01 | 75.9    | 52.7   | 88.7    | 1.4 | 0.86 | 1.17 |
| Q8R0F5_Q8R0F5_MOUSE   | Rbm2         | RNA-binding motif protein, X-linked 2:OS-Musculus:GN-Rbm2:PE1-SV1                                            | 4   | 31.5  | 18.6 | 31.9   | 1.7 | 0.99 | 1.01 | 127.9   | 78.9   | 132.7   | 1.6 | 0.96 | 1.04 |
| Q2V0V2_Q2V0V2_MOUSE   | Hm2          | Protein motif homolog:OS-Musculus:GN-Hm2:PE1-SV1                                                             | 12  | 9.9   | 6.5  | 9.9    | 1.7 | 0.99 | 1.01 | 89.9    | 131.6  | 151.2   | 1.5 | 0.98 | 1.14 |
| Q91215_Q91215_MOUSE   | Baz2a        | Bromodomain adjacent to zinc finger domain protein 2A:OS-Musculus:GN-Baz2a:PE1-SV2                           | 6   | 7.6   | 4.5  | 7.7    | 1.7 | 0.99 | 1.02 | 48.1    | 30.4   | 51.0    | 1.6 | 0.94 | 1.06 |
| Q91217_Q91217_MOUSE   | Sic7a5       | Large neutral amino acid transporter small subunit 1:OS-Musculus:GN-Sic7a5:PE1-SV2                           | 8   | 9.0   | 5.3  | 9.1    | 1.7 | 0.98 | 1.02 | 87.6    | 45.5   | 76.4    | 1.9 | 1.15 | 0.87 |
| P18855_P18855_MOUSE   | Pf55         | Protein P55:OS-Musculus:GN-Pf55:PE2-SV1                                                                      | 6   | 11.2  | 6.6  | 11.2   | 1.7 | 0.98 | 1.02 | 11.6    | 11.6   | 11.0    | 1.7 | 1.00 | 1.00 |
| P97452_P97452_MOUSE   | Bop1         | Ribosome biogenesis protein BOP1:OS-Musculus:GN-Bop1:PE1-SV1                                                 | 1   | 5.2   | 3.1  | 5.2    | 1.7 | 0.98 | 1.02 | 3.1     | 3.1    | 5.2     | 1.7 | 1.00 | 1.00 |
| Q91901_Q91901_MOUSE   | H2-k1        | H-2 class I histocompatibility antigen, K-B alpha chain:OS-Musculus:GN-H2-K1:PE1-SV1                         | 10  | 14.0  | 8.3  | 14.3   | 1.7 | 0.98 | 1.02 | 201.3   | 67.2   | 1138.6  | 0.3 | 1.18 | 5.66 |
| EP9W99_EP9W99_MOUSE   | Protein Rdt1 | OS-Musculus:GN-ProRdt1:PE1-SV1                                                                               | 14  | 13.7  | 8.1  | 14.0   | 1.7 | 0.98 | 1.02 | 190.7   | 103.6  | 174.1   | 1.8 | 1.10 | 0.91 |
| Q9R0B7_Q9R0B7_MOUSE   | Ran          | Zinc finger protein 34B:OS-Musculus:GN-Ran:PE1-SV1                                                           | 9   | 9.8   | 5.8  | 10.0   | 1.7 | 0.98 | 1.02 | 11.6    | 11.6   | 11.6    | 1.7 | 1.00 | 1.00 |
| Q9V36_Q9V36_MOUSE     | Pan1         | Paxillin:OS-Musculus:GN-Pan1:PE1-SV1                                                                         | 1   | 13.4  | 7.9  | 13.6   | 1.7 | 0.98 | 1.02 | 13.4    | 7.9    | 13.4    | 1.7 | 1.00 | 1.00 |
| P55122_P55122_MOUSE   | Sic12a2      | Solute carrier family 12 member 2:OS-Musculus:GN-Sic12a2:PE1-SV1                                             | 1   | 5.7   | 3.4  | 5.8    | 1.7 | 0.98 | 1.02 | 5.7     | 3.4    | 5.6     | 1.7 | 1.00 | 1.00 |
| P49717_P49717_MOUSE   | Mcm4         | DNA replication licensing factor MCM4:OS-Musculus:GN-Mcm4:PE1-SV1                                            | 15  | 14.9  | 8.9  | 15.2   | 1.7 | 0.98 | 1.02 | 267.4   | 218.5  | 367.4   | 1.2 | 0.72 | 3.39 |
| Q9L912_Q9L912_MOUSE   | Ubr1         | Transcription initiation factor eIF-2B:OS-Musculus:GN-Ubr1:PE2-SV1                                           | 3   | 19.7  | 11.7 | 19.7   | 1.7 | 0.97 | 1.03 | 48.5    | 28.1   | 48.5    | 1.8 | 0.92 | 1.04 |
| Q9CKG3_Q9CKG3_MOUSE   | Ppil4        | Peptidyl-prolyl cis-trans isomerase-like 4:OS-Musculus:GN-Ppil4:PE1-SV1                                      | 3   | 7.2   | 4.3  | 7.3    | 1.7 | 0.98 | 1.02 | 30.1    | 17.0   | 28.6    | 1.8 | 1.05 | 0.98 |
| C1e1                  | Exp2         | Exp2:OS-Musculus:GN-C1e1:PE1-SV1                                                                             | 4   | 10.4  | 6.2  | 10.4   | 1.7 | 0.98 | 1.02 | 43.5    | 22.7   | 38.2    | 1.9 | 1.14 | 0.88 |
| P10852_P10852_MOUSE   | Utr2         | 472 cell surface antigen:Utr2:OS-Musculus:GN-Utr2:PE1-SV1                                                    | 7   | 20.2  | 12.4 | 20.2   | 1.7 | 0.98 | 1.02 | 183.1   | 109.6  | 307.8   | 1.6 | 0.92 | 0.95 |
| PC00A1_PC00A1_MOUSE   | Chmp6        | Charged multivesicular body protein 6:OS-Musculus:GN-Chmp6:PE2-SV2                                           | 1   | 9.9   | 5.9  | 10.1   | 1.7 | 0.98 | 1.02 | 9.9     | 5.9    | 9.9     | 1.7 | 1.00 | 1.00 |
| P84089_P84089_MOUSE   | Erh          | Enhancer of rudimentary homolog:OS-Musculus:GN-Erh:PE1-SV1                                                   | 3   | 36.1  | 21.5 | 36.9   | 1.7 | 0.98 | 1.02 | 377.7   | 202.8  | 341.1   | 1.9 | 1.11 | 0.90 |
| EQ9ER2_Q99ER2_MOUSE   | Strn3        | Strn3:OS-Musculus:GN-Strn3:PE1-SV1                                                                           | 1   | 9.3   | 5.6  | 9.5    | 1.7 | 0.98 | 1.02 | 3.0     | 2.6    | 3.0     | 1.7 | 1.00 | 1.00 |
| Q922V5_Q922V5_MOUSE   | Pyx1         | Pyx1:OS-Musculus:GN-Pyx1:PE1-SV1                                                                             | 2   | 11.9  | 6.8  | 12.0   | 1.7 | 0.98 | 1.02 | 13.1    | 12.1   | 13.1    | 1.7 | 1.00 | 1.00 |
| G3A303_G3A303_MOUSE   | Nemc4e4      | MCG1618, isoform CRA_c:OS-Musculus:GN-Nemc4e4:PE4-SV1                                                        | 2   | 8.5   | 5.1  | 8.7    | 1.7 | 0.98 | 1.02 | 17.0    | 10.1   | 17.0    | 1.7 | 1.00 | 1.00 |
| P45856_P45856_MOUSE   | Pcy1a1       | Choline phosphatidyltransferase A:OS-Musculus:GN-Pcy1a1:PE1-SV1                                              | 3   | 11.4  | 6.8  | 11.6</ |     |      |      |         |        |         |     |      |      |





|                     |         |                                                                                                                                 |     |      |      |      |     |      |      |         |         |         |     |      |      |
|---------------------|---------|---------------------------------------------------------------------------------------------------------------------------------|-----|------|------|------|-----|------|------|---------|---------|---------|-----|------|------|
| O8K1V1_ADRM1_MOUSE  | Adrm1   | Proteasome ubiquitin receptor ADRM1 OS-Mus musculus GN-Adrm1 PE1 SV-2                                                           | 1   | 5.3  | 3.8  | 6.5  | 1.4 | 0.83 | 1.21 | 5.3     | 3.8     | 6.3     | 1.4 | 0.84 | 1.19 |
| O874W6_TOML_MOUSE   | Tom1    | Target of Myosin 1 OS-Mus musculus GN-Tom1 PE1 SV-1                                                                             | 6   | 8.1  | 5.8  | 9.9  | 1.4 | 0.83 | 1.21 | 80.2    | 36.3    | 63.0    | 1.7 | 0.99 | 1.10 |
| P51455_GPT4_MOUSE   | Gpt4    | GTPase-activating protein 4 OS-Mus musculus GN-Gpt4 PE2 SV-2                                                                    | 1   | 6.4  | 5.7  | 16.7 | 1.4 | 0.82 | 1.21 | 165.3   | 24.8    | 277.9   | 1.6 | 0.87 | 1.18 |
| O8CQ79_TNND9_MOUSE  | Tnnd9   | Threonine domain-containing protein 9 OS-Mus musculus GN-Tnnd9 PE2 SV-1                                                         | 1   | 18.5 | 13.1 | 22.5 | 1.4 | 0.82 | 1.21 | 18.5    | 13.1    | 22.0    | 1.4 | 0.84 | 1.19 |
| O61879_MHYH10_MOUSE | Mhy10   | Myosin-10 OS-Mus musculus GN-Mhy10 PE1 SV-2                                                                                     | 179 | 70.7 | 50.1 | 85.9 | 1.4 | 0.82 | 1.21 | 27248.5 | 18183.8 | 30675.7 | 1.5 | 0.89 | 1.12 |
| O8B0C0_CPS1A_MOUSE  | Cps1a   | Capsulin OS-Mus musculus GN-Cps1a PE1 SV-1                                                                                      | 1   | 6.4  | 4.5  | 7.7  | 1.4 | 0.81 | 1.21 | 6.4     | 4.5     | 7.7     | 1.4 | 0.81 | 1.19 |
| Q10M00_GKAP1_MOUSE  | Gkap1   | G kinase-anchoring protein 1 OS-Mus musculus GN-Gkap1 PE1 SV-1                                                                  | 1   | 3.7  | 2.7  | 4.6  | 1.4 | 0.82 | 1.22 | 3.7     | 2.7     | 4.5     | 1.4 | 0.84 | 1.19 |
| P13020_GELS_MOUSE   | Gels    | Gelsolin OS-Mus musculus GN-Gels PE1 SV-3                                                                                       | 28  | 59.2 | 42.0 | 72.1 | 1.4 | 0.82 | 1.22 | 3036.2  | 2043.0  | 3435.2  | 1.5 | 0.88 | 1.13 |
| O62282_SVDC_MOUSE   | Dars    | Apoptate-RNAI Igase, cytoplasmic OS-Mus musculus GN-Dars PE2 SV-2                                                               | 3   | 5.3  | 3.8  | 6.5  | 1.4 | 0.82 | 1.22 | 117.5   | 11.7    | 19.7    | 1.5 | 0.89 | 1.13 |
| P70377_LAVL_MOUSE   | Gln1    | GLAV-like protein 1 OS-Mus musculus GN-Gln1 PE1 SV-2                                                                            | 1   | 2.9  | 2.1  | 3.6  | 1.4 | 0.82 | 1.23 | 2.9     | 2.1     | 3.5     | 1.4 | 0.83 | 1.08 |
| P28656_NP11_MOUSE   | Nap11   | Nucleosome assembly protein 1-like 1 OS-Mus musculus GN-Nap11 PE1 SV-2                                                          | 1   | 14.2 | 10.1 | 17.3 | 1.4 | 0.82 | 1.22 | 14.2    | 10.1    | 17.0    | 1.4 | 0.84 | 1.20 |
| O5CYN2_SPC23_MOUSE  | Spc23   | Spc23 peptidase complex subunit 2 OS-Mus musculus GN-Spc23 PE1 SV-1                                                             | 1   | 7.7  | 5.4  | 9.3  | 1.4 | 0.82 | 1.22 | 7.7     | 5.4     | 9.2     | 1.4 | 0.84 | 1.20 |
| O8C6Y9_AKOS_MOUSE   | Rbp89   | Actin regulator of STRIP1 OS-Mus musculus GN-Rbp89 PE1 SV-1                                                                     | 6   | 6.6  | 6.3  | 11.8 | 1.4 | 0.82 | 1.22 | 66.3    | 39.1    | 65.8    | 1.8 | 1.05 | 0.85 |
| O8CQ02_MET16_MOUSE  | Met16   | Methyltransferase-like protein 16 OS-Mus musculus GN-Met16 PE2 SV-1                                                             | 1   | 4.2  | 3.0  | 4.4  | 1.4 | 0.82 | 1.22 | 4.2     | 3.0     | 4.1     | 1.4 | 0.83 | 1.20 |
| O900M7_CAF1B_MOUSE  | Chaf1b  | Chromatin assembly factor 1 subunit B OS-Mus musculus GN-Chaf1b PE2 SV-1                                                        | 4   | 8.3  | 5.9  | 10.1 | 1.4 | 0.82 | 1.22 | 4.8     | 3.8     | 25.6    | 4.3 | 0.81 | 1.24 |
| O90B53_AFRG3_MOUSE  | Afrg3p  | ADP-ribosylation factor GTPase-activating protein 3 OS-Mus musculus GN-Afrg3p PE1 SV-1                                          | 11  | 7.8  | 5.6  | 9.5  | 1.4 | 0.82 | 1.22 | 111.9   | 62.7    | 105.5   | 1.9 | 1.12 | 0.89 |
| O90L20_O90L20_MOUSE | GstP9   | Glutathione S-transferase theta 3 OS-Mus musculus GN-GstP9 PE2 SV-1                                                             | 1   | 2.9  | 2.1  | 3.6  | 1.4 | 0.82 | 1.23 | 2.9     | 2.1     | 3.5     | 1.4 | 0.83 | 1.20 |
| O8BVE3_VATH_MOUSE   | Atpev1h | V-type proton ATPase subunit 1 OS-Mus musculus GN-Atpev1h PE1 SV-1                                                              | 3   | 4.4  | 3.1  | 5.4  | 1.4 | 0.82 | 1.23 | 15.7    | 8.3     | 13.9    | 1.9 | 1.13 | 0.89 |
| O64339_ISG15_MOUSE  | Ig15    | Ubiquitin-like protein ISG15 OS-Mus musculus GN-Ig15 PE1 SV-4                                                                   | 14  | 54.5 | 39.0 | 66.9 | 1.4 | 0.82 | 1.23 | 1029.3  | 689.8   | 1159.8  | 1.5 | 0.89 | 1.13 |
| O6P8U0_H11L_MOUSE   | Hif1p1  | Fibronin A-interacting protein 3-like OS-Mus musculus GN-Hif1p1 PE1 SV-2                                                        | 6   | 9.1  | 6.5  | 11.2 | 1.4 | 0.81 | 1.23 | 64.9    | 48.0    | 80.7    | 1.4 | 0.80 | 1.24 |
| O8C5U7_BRMK_MOUSE   | Rbm24   | RNA-binding protein 24 OS-Mus musculus GN-Rbm24 PE1 SV-1                                                                        | 4   | 15.2 | 10.9 | 18.7 | 1.4 | 0.81 | 1.23 | 45.7    | 31.6    | 78.9    | 1.9 | 0.67 | 1.49 |
| O921M1_SF3B3_MOUSE  | Sf3b3   | Dystroglycan 3 subunit 3 OS-Mus musculus GN-Sf3b3 PE2 SV-1                                                                      | 60  | 38.7 | 27.8 | 47.6 | 1.4 | 0.81 | 1.23 | 3060.0  | 2236.7  | 3760.9  | 1.4 | 0.81 | 1.23 |
| O62166_DAG1_MOUSE   | Dag1    | Dystroglycan OS-Mus musculus GN-Dag1 PE1 SV-4                                                                                   | 3   | 6.3  | 4.6  | 7.8  | 1.4 | 0.81 | 1.23 | 33.9    | 12.6    | 21.1    | 2.7 | 0.61 | 0.62 |
| P97376_FG1_MOUSE    | Fg1     | Protein FG1 OS-Mus musculus GN-Fg1 PE1 SV-2                                                                                     | 1   | 14.6 | 10.5 | 17.9 | 1.4 | 0.81 | 1.23 | 14.6    | 10.5    | 17.6    | 1.4 | 0.83 | 1.21 |
| O90D01_HNRP4_MOUSE  | Hnrrp4  | Heterogeneous nuclear ribonucleoprotein M OS-Mus musculus GN-Hnrrp4 PE1 SV-3                                                    | 105 | 36.4 | 26.1 | 44.8 | 1.4 | 0.81 | 1.23 | 12287.0 | 8236.6  | 13849.7 | 1.5 | 0.89 | 1.13 |
| O5U409_THOC6_MOUSE  | Thoc6   | THO complex subunit 6 homolog OS-Mus musculus GN-Thoc6 PE2 SV-1                                                                 | 3   | 10.7 | 7.7  | 13.2 | 1.4 | 0.81 | 1.23 | 45.4    | 22.4    | 37.7    | 2.0 | 1.20 | 0.83 |
| P62204_CALM_MOUSE   | Calm1   | Calmodulin OS-Mus musculus GN-Calm1 PE1 SV-2                                                                                    | 8   | 65.6 | 47.1 | 80.8 | 1.4 | 0.81 | 1.23 | 1736.7  | 1079.8  | 1815.7  | 1.6 | 0.96 | 1.05 |
| O4NVL9_RRP12_MOUSE  | Rrp12   | RNA-binding protein 12 OS-Mus musculus GN-Rrp12 PE1 SV-2                                                                        | 4   | 6.5  | 4.6  | 8.1  | 1.4 | 0.81 | 1.23 | 42.3    | 30.8    | 47.9    | 1.6 | 0.87 | 1.16 |
| O8QK78_PAF1_MOUSE   | Pafl    | RNA polymerase II-associated factor 1 homolog OS-Mus musculus GN-Pafl PE2 SV-1                                                  | 5   | 6.7  | 4.8  | 8.3  | 1.4 | 0.81 | 1.23 | 33.9    | 23.9    | 40.2    | 1.4 | 0.84 | 1.18 |
| O80203_BUD11_MOUSE  | Bud11   | Protein BUD11 homolog OS-Mus musculus GN-Bud11 PE4 SV-1                                                                         | 5   | 13.3 | 9.6  | 16.5 | 1.4 | 0.81 | 1.24 | 129.8   | 67.1    | 112.8   | 1.2 | 0.74 | 1.36 |
| O8LDV9_WP110_MOUSE  | Wp110   | SH2 domain nuclear ribonucleoprotein protein RBP110 OS-Mus musculus GN-Wp110 PE2 SV-1                                           | 103 | 11.9 | 8.6  | 14.7 | 1.4 | 0.81 | 1.24 | 172.3   | 124.8   | 172.3   | 1.2 | 0.84 | 1.21 |
| O80239_CETNC_MOUSE  | Cetnc   | Centrin-3 OS-Mus musculus GN-Cetnc PE4 SV-1                                                                                     | 3   | 4.9  | 3.6  | 6.1  | 1.4 | 0.81 | 1.24 | 15.3    | 9.0     | 15.2    | 1.7 | 1.01 | 0.99 |
| O81U22_TXIP_MOUSE   | Sic25a1 | Tricarbonylate transport protein, mitochondrial OS-Mus musculus GN-Sic25a1 PE2 SV-1                                             | 1   | 6.4  | 4.6  | 7.9  | 1.4 | 0.81 | 1.24 | 6.4     | 4.6     | 7.7     | 1.4 | 0.82 | 1.22 |
| O31T83_GPTCA_MOUSE  | Gpatac4 | Gpatac4 domain-containing protein 4 OS-Mus musculus GN-Gpatac4 PE1 SV-1                                                         | 1   | 9.0  | 6.5  | 11.2 | 1.4 | 0.81 | 1.24 | 9.0     | 6.5     | 11.0    | 1.4 | 0.82 | 1.22 |
| O90113_SAS10_MOUSE  | Sas10   | Somebody about silencing protein 10 OS-Mus musculus GN-Sas10 PE2 SV-1                                                           | 1   | 14.4 | 10.4 | 17.9 | 1.4 | 0.81 | 1.24 | 14.4    | 10.4    | 17.7    | 1.4 | 0.82 | 1.22 |
| O9PM46_O9PM46_MOUSE | Polr2c  | DNA-directed RNA polymerase I subunit RP83 OS-Mus musculus GN-Polr2c PE1 SV-1                                                   | 6   | 24.1 | 17.5 | 30.0 | 1.4 | 0.81 | 1.24 | 197.4   | 168.3   | 283.0   | 1.2 | 0.70 | 1.43 |
| PE2305_RUXE_MOUSE   | Ruxe    | Small nuclear ribonucleoprotein E OS-Mus musculus GN-Ruxe PE2 SV-1                                                              | 10  | 21.7 | 15.7 | 26.9 | 1.4 | 0.80 | 1.24 | 850.3   | 459.0   | 771.9   | 1.9 | 1.10 | 0.91 |
| O92277_BAZ1L_MOUSE  | Baz1b   | Tyrosine-protein kinase BAZ1B OS-Mus musculus GN-Baz1b PE1 SV-2                                                                 | 79  | 19.8 | 14.4 | 24.6 | 1.4 | 0.80 | 1.24 | 2860.7  | 1712.5  | 2879.5  | 1.7 | 0.99 | 1.01 |
| P13864_DNMT1_MOUSE  | Dnmt1   | DNA methyltransferase 1 OS-Mus musculus GN-Dnmt1 PE1 SV-5                                                                       | 32  | 26.6 | 19.3 | 33.1 | 1.4 | 0.80 | 1.24 | 1119.9  | 909.1   | 1529.8  | 1.2 | 0.87 | 1.12 |
| O9NH12_PARD3_MOUSE  | Pard3   | Partitioning defective 3 homolog OS-Mus musculus GN-Pard3 PE1 SV-2                                                              | 2   | 3.7  | 2.7  | 4.6  | 1.4 | 0.80 | 1.24 | 7.4     | 5.4     | 9.1     | 1.4 | 0.82 | 1.22 |
| O9CY57_CHTOP_MOUSE  | Chtop   | Chromatin target of PRMT1 protein OS-Mus musculus GN-Chtop PE1 SV-2                                                             | 8   | 10.5 | 7.7  | 13.2 | 1.4 | 0.80 | 1.25 | 157.4   | 95.5    | 160.6   | 1.6 | 0.98 | 1.02 |
| O8B9V3_VATH_MOUSE   | GstP9   | Glutathione S-transferase theta 3 OS-Mus musculus GN-GstP9 PE2 SV-1                                                             | 1   | 2.9  | 2.1  | 3.6  | 1.4 | 0.81 | 1.25 | 2.9     | 2.1     | 3.6     | 1.4 | 0.83 | 1.08 |
| O8CQ29_POD21_MOUSE  | Pod21   | POD domain-containing protein 11 OS-Mus musculus GN-Pod21 PE1 SV-1                                                              | 2   | 6.9  | 5.0  | 8.7  | 1.4 | 0.80 | 1.25 | 13.9    | 10.1    | 17.0    | 1.4 | 0.82 | 1.22 |
| O8R3C0_MCMBP_MOUSE  | Mcmcbp  | Mini-chromosome maintenance complex-binding protein OS-Mus musculus GN-Mcmcbp PE2 PE1                                           | 1   | 1.7  | 1.2  | 2.1  | 1.4 | 0.80 | 1.25 | 1.7     | 1.2     | 2.1     | 1.4 | 0.82 | 1.23 |
| B2R0C6_B2R0C6_MOUSE | Polr2a  | Polychrome A (RNA III) DNA-directed polypeptide II OS-Mus musculus GN-Polr2a PE2 SV-1                                           | 1   | 4.4  | 3.2  | 5.5  | 1.4 | 0.80 | 1.25 | 4.4     | 3.2     | 5.4     | 1.4 | 0.82 | 1.23 |
| P11522_OAS1_MOUSE   | Oas1    | 2',5'-oligoadenylate synthetase 1 OS-Mus musculus GN-Oas1 PE2 SV-2                                                              | 1   | 4.4  | 3.2  | 5.5  | 1.4 | 0.80 | 1.25 | 4.4     | 3.2     | 5.4     | 1.4 | 0.82 | 1.23 |
| O3QK00_SPAT5_MOUSE  | Spat5a  | Spermatogenesis-associated protein 5 OS-Mus musculus GN-Spat5a PE1 SV-2                                                         | 6   | 11.1 | 8.1  | 13.9 | 1.4 | 0.80 | 1.25 | 71.7    | 43.8    | 73.7    | 1.6 | 0.97 | 1.03 |
| PE6254_I4337_MOUSE  | Whaqa   | 14-3-3 protein theta OS-Mus musculus GN-Whaqa PE1 SV-1                                                                          | 4   | 12.8 | 9.4  | 16.1 | 1.4 | 0.80 | 1.25 | 70.3    | 41.6    | 69.9    | 1.7 | 1.01 | 0.99 |
| O85859_MNKL_MOUSE   | Mnkl    | MLN-1 OS-Mus musculus GN-Mnkl PE1 SV-2                                                                                          | 5   | 14.0 | 9.7  | 16.6 | 1.4 | 0.80 | 1.25 | 52.0    | 3266.9  | 593.1   | 1.6 | 0.66 | 1.04 |
| P98787_COKL_MOUSE   | Low1    | Lysyl oxidase homolog 1 OS-Mus musculus GN-Low1 PE2 SV-3                                                                        | 1   | 12.0 | 8.8  | 15.1 | 1.4 | 0.80 | 1.25 | 8.8     | 12.0    | 14.8    | 1.4 | 0.81 | 1.23 |
| O89299_ZNF512_MOUSE | Znf512  | Zinc finger protein 512 OS-Mus musculus GN-Znf512 PE2 SV-2                                                                      | 6   | 12.6 | 9.2  | 15.8 | 1.4 | 0.80 | 1.26 | 69.9    | 50.9    | 85.6    | 1.4 | 0.82 | 1.22 |
| P53399_O0B2_MOUSE   | Upp1    | Liponamide acyltransferase component of branched-chain alpha-keto acid dehydrogenase complex 3 OS-Mus musculus GN-Upp1 PE1 SV-1 | 3   | 15.8 | 11.5 | 19.8 | 1.4 | 0.80 | 1.26 | 57.9    | 41.8    | 70.3    | 1.4 | 0.82 | 1.21 |
| O85559_MNKL_MOUSE   | Mnkl    | MLN-1 OS-Mus musculus GN-Mnkl PE1 SV-2                                                                                          | 5   | 14.0 | 9.7  | 16.6 | 1.4 | 0.80 | 1.26 | 52.0    | 3266.9  | 593.1   | 1.6 | 0.66 | 1.04 |
| O91YW3_DNaj3_MOUSE  | Dnaj3   | DNA homolog subfamily 3 member C OS-Mus musculus GN-Dnaj3 PE1 SV-1                                                              | 3   | 5.9  | 4.3  | 7.4  | 1.4 | 0.80 | 1.26 | 27.9    | 22.8    | 38.3    | 1.2 | 0.73 | 1.37 |
| O90319_PICAL_MOUSE  | Picalm  | Phosphatidylinositol-binding clathrin assembly protein OS-Mus musculus GN-Picalm PE1 SV-1                                       | 18  | 12.5 | 9.1  | 15.7 | 1.4 | 0.80 | 1.26 | 283.3   | 255.6   | 429.8   | 1.1 | 0.66 | 1.52 |
| O5CNC3_SHW1_MOUSE   | Shw1    | SHW domain-containing protein 4 OS-Mus musculus GN-Shw1 PE1 SV-1                                                                | 18  | 25.2 | 18.5 | 31.6 | 1.4 | 0.79 | 1.26 | 493.3   | 367.4   | 617.7   | 1.3 | 0.80 | 1.25 |
| O9CY72_TTRC_MOUSE   | Ttrc    | Transcription factor 1 OS-Mus musculus GN-Ttrc PE1 SV-1                                                                         | 1   | 9.6  | 7.1  | 12.7 | 1.4 | 0.79 | 1.26 | 9.6     | 7.1     | 11.9    | 1.4 | 0.81 | 1.24 |
| O91X01_ENY2_MOUSE   | Eny2    | Transcription and mRNA export factor ENY2 OS-Mus musculus GN-Eny2 PE2 SV-1                                                      | 1   | 14.8 | 10.9 | 18.7 | 1.4 | 0.79 | 1.27 | 14.8    | 10.9    | 18.4    | 1.4 | 0.80 | 1.24 |
| O91Y11_NEN1_MOUSE   | Nen1    | Neilin OS-Mus musculus GN-Nen1 PE2 SV-3                                                                                         | 4   | 13.3 | 9.8  | 16.8 | 1.4 | 0.79 | 1.27 | 15.2    | 38.2    | 64.2    | 1.4 | 0.86 | 1.16 |
| O91Y11_AKAP9_MOUSE  | Akap9   | 4-kilobase anchor protein OS-Mus musculus GN-Akap9 PE2 SV-1                                                                     | 2   | 4.8  | 3.5  | 5.8  | 1.4 | 0.79 | 1.27 | 27.9    | 17.0    | 28.5    | 1.6 | 0.88 | 1.01 |
| O7TM72_WDR91_MOUSE  | Wdr91   | WD repeat-containing protein 91 OS-Mus musculus GN-Wdr91 PE1 SV-1                                                               | 1   | 5.7  | 4.2  | 7.3  | 1.4 | 0.79 | 1.27 | 5.7     | 4.2     | 7.2     | 1.4 | 0.80 | 1.25 |
| P11352_GPX1_MOUSE   | Gpx1    | Glutathione peroxidase 1 OS-Mus musculus GN-Gpx1 PE1 SV-2                                                                       | 1   | 4.2  | 3.1  | 5.3  | 1.4 | 0.79 | 1.27 | 4.2     | 3.1     | 5.2     | 1.3 | 0.80 | 1.25 |
| O62399_TP052_MOUSE  | Tp052   | Tumor protein D52 OS-Mus musculus GN-Tp052 PE2 SV-2                                                                             | 1   | 11.2 | 8.3  | 14.3 | 1.3 | 0.79 | 1.27 | 11.2    | 8.3     | 14.0    | 1.3 | 0.80 | 1.25 |
| O91059_PT02_MOUSE   | Pt02    | Protein tyrosine phosphatase 2 OS-Mus musculus GN-Pt02 PE2 SV-2                                                                 | 1   | 11.2 | 8.3  | 14.3 | 1.3 | 0.79 | 1.27 | 11.2    | 8.3     | 14.0    | 1.3 | 0.80 | 1.25 |
| O8C156_CN2D_MOUSE   | Cn2ph   | Condensin complex subunit 2 OS-Mus musculus GN-Cn2ph PE2 SV-1                                                                   | 21  | 14.1 | 10.5 | 17.9 | 1.3 | 0.79 | 1.27 | 434.7   | 274.6   | 461.7   | 1.6 | 0.94 | 1.06 |
| P0103_P0103_MOUSE   | P4hb    | Protein disulfide-isomerase OS-Mus musculus GN-P4hb PE1 SV-2                                                                    | 29  | 55.0 | 40.9 | 70.1 | 1.3 | 0.79 | 1.27 | 1796.6  | 1384.8  | 2328.5  | 1.3 | 0.77 | 1.30 |
| O7J123_FAM8A_MOUSE  | Fam8a8  | Protein FAM8A OS-Mus musculus GN-Fam8a8 PE2 SV-1                                                                                | 2   | 10.7 | 7.9  | 13.6 | 1.3 | 0.78 | 1.27 | 89.7    | 51.7    | 86.9    | 1.7 | 1.03 | 0.   |

|                     |         |                                                                                               |      |        |       |       |      |      |       |        |       |        |      |      |      |
|---------------------|---------|-----------------------------------------------------------------------------------------------|------|--------|-------|-------|------|------|-------|--------|-------|--------|------|------|------|
| QB8D9_IF4B_MOUSE    | EIf4b   | Eukaryotic translation initiation factor 4B OS=Mus musculus GN=EIf4b PE=1 SV=1                | 1    | 4.1    | 3.3   | 5.6   | 1.2  | 0.72 | 1.38  | 4.1    | 3.3   | 5.5    | 1.2  | 0.74 | 1.35 |
| QB6JK_FHOP_MOUSE    | Fhfp5p  | FGFR3 oncogene partner OS=Mus musculus GN=Fhfp5p PE=1 SV=1                                    | 1    | 6.7    | 5.4   | 9.3   | 1.2  | 0.72 | 1.38  | 6.7    | 5.4   | 9.1    | 1.2  | 0.74 | 1.35 |
| QD220_HNRH_MOUSE    | Hnrh    | Heterogeneous nuclear ribonucleoprotein A1 C12 OS=Mus musculus GN=Hnrhnc P=1 PE=2             | 80.9 | 65.2   | 111.8 | 1.2   | 0.72 | 1.38 | 75.74 | 558.0  | 439.6 | 1.2    | 0.74 | 1.35 |      |
| Q6131_MD31_MOUSE    | Med13   | Mediator of RNA polymerase II transcription subunit 13-like OS=Mus musculus GN=Med13 P=1 PE=2 | 2    | 16.5   | 13.3  | 22.8  | 1.2  | 0.72 | 1.38  | 33.0   | 26.6  | 44.8   | 1.2  | 0.74 | 1.36 |
| P16460_ASSY_MOUSE   | Ass1    | Argininosuccinate synthase OS=Mus musculus GN=Ass1 PE=1 SV=1                                  | 2    | 4.6    | 3.7   | 6.3   | 1.2  | 0.72 | 1.38  | 9.1    | 7.4   | 12.4   | 1.2  | 0.74 | 1.36 |
| QD987_CWC2_MOUSE    | Cwc2    | Pre-mRNA splicing factor CWC2 OS=Mus musculus GN=Cwc2 P=2 SV=2                                | 2    | 4.6    | 3.7   | 6.3   | 1.2  | 0.72 | 1.38  | 20.5   | 16.0  | 26.0   | 1.2  | 0.74 | 1.33 |
| Q6GCI_F13A_MOUSE    | Fam193a | Protein FAM193A OS=Mus musculus GN=Fam193a P=2 SV=2                                           | 1    | 7.5    | 6.1   | 10.4  | 1.2  | 0.72 | 1.39  | 7.5    | 6.1   | 10.2   | 1.2  | 0.73 | 1.37 |
| QEGP5_F2D2_MOUSE    | Setd2   | Histone lysine N-methyltransferase SETD2 OS=Mus musculus GN=Setd2 P=1 SV=2                    | 10   | 8.4    | 6.8   | 11.7  | 1.2  | 0.72 | 1.39  | 101.5  | 70.8  | 119.1  | 1.4  | 0.85 | 1.17 |
| Q61245_CBDA_MOUSE   | Ccl1a1  | Collagen alpha 1(I) chain OS=Mus musculus GN=Ccl1a1 PE=1 SV=2                                 | 2    | 10.5   | 8.6   | 14.7  | 1.2  | 0.72 | 1.40  | 21.1   | 17.1  | 28.8   | 1.2  | 0.73 | 1.37 |
| P12382_P34L_MOUSE   | P34l    | ATP-dependent RNA helicase P34l OS=Mus musculus GN=P34l PE=1 SV=4                             | 2    | 5.6    | 4.6   | 7.8   | 1.2  | 0.72 | 1.41  | 11.7   | 9.1   | 14.2   | 1.2  | 0.73 | 1.37 |
| QJH93_DHX36_MOUSE   | Dhx36   | ATP-dependent RNA helicase DHX36 OS=Mus musculus GN=Dhx36 PE=1 SV=2                           | 11   | 6.9    | 5.7   | 9.7   | 1.2  | 0.72 | 1.40  | 113.5  | 70.8  | 119.0  | 1.6  | 0.95 | 1.05 |
| AAU401_AZAU1_MOUSE  | Raly    | RNA-binding protein Raly (Fragmin) OS=Mus musculus GN=Raly PE=1 SV=1                          | 2    | 94.2   | 76.9  | 131.9 | 1.2  | 0.71 | 1.40  | 188.3  | 153.9 | 258.7  | 1.2  | 0.73 | 1.37 |
| QD2146_DKX7_MOUSE   | Dkx7    | RNA-binding protein DKX7 OS=Mus musculus GN=Dkx7 P=1 SV=1                                     | 1    | 2.1    | 1.8   | 3.0   | 1.2  | 0.71 | 1.40  | 4.0    | 3.4   | 5.8    | 1.2  | 0.73 | 1.37 |
| QD281_VATB2_MOUSE   | Vatb2   | Y-type protein ATPase subunit B, brain isoform OS=Mus musculus GN=Vatb2 P=1 SV=1              | 2    | 3.6    | 2.9   | 5.1   | 1.2  | 0.71 | 1.40  | 7.2    | 5.9   | 9.9    | 1.2  | 0.73 | 1.38 |
| Q63916_SDRP_MOUSE   | SDrp    | Serine deprivation-response protein OS=Mus musculus GN=SDrp PE=1 SV=3                         | 9    | 25.5   | 20.9  | 34.8  | 1.2  | 0.71 | 1.40  | 229.9  | 160.1 | 269.2  | 1.4  | 0.85 | 1.17 |
| Q58K6_AW3_MOUSE     | Ank3    | Ankyrin-3 OS=Mus musculus GN=Ank3 P=1 SV=1                                                    | 6    | 5.6    | 4.6   | 7.8   | 1.2  | 0.71 | 1.41  | 33.9   | 27.6  | 46.4   | 1.2  | 0.73 | 1.37 |
| P47754_CAD2_MOUSE   | Cad2    | F-actin-capping protein subunit alpha2 OS=Mus musculus GN=Cad2a PE=1 SV=3                     | 2    | 30.7   | 25.2  | 43.2  | 1.2  | 0.71 | 1.41  | 62.1   | 50.8  | 84.7   | 1.2  | 0.73 | 1.36 |
| OS4784_DAPK3_MOUSE  | Dapk3   | Death-associated protein kinase 3 OS=Mus musculus GN=Dapk3 P=1 SV=1                           | 1    | 11.7   | 9.6   | 16.5  | 1.2  | 0.71 | 1.41  | 11.7   | 9.6   | 16.2   | 1.2  | 0.72 | 1.38 |
| Q9910_DPY30_MOUSE   | Dpy30   | Protein dpy-30 homolog OS=Mus musculus GN=Dpy30 P=1 SV=1                                      | 2    | 14.3   | 11.8  | 20.1  | 1.2  | 0.71 | 1.41  | 28.6   | 23.5  | 39.5   | 1.2  | 0.72 | 1.38 |
| Q63871_P9AB_MOUSE   | Polr2k  | DNA-dependent RNA polymerase, II, and III subunit P9AB C4 OS=Mus musculus GN=Polr2k P=2 SV=2  | 1    | 53.6   | 44.1  | 75.6  | 1.2  | 0.71 | 1.41  | 53.6   | 44.1  | 74.1   | 1.2  | 0.72 | 1.38 |
| Q5C9D9_GLK3_MOUSE   | Glrx3   | Glutathione S-transferase K3 OS=Mus musculus GN=Glrx3 PE=1 SV=1                               | 1    | 6.3    | 8.4   | 5.5   | 1.2  | 0.71 | 1.41  | 6.3    | 5.2   | 8.7    | 1.2  | 0.72 | 1.38 |
| Q8VC08_Q8VC08_MOUSE | Cald1   | Caldesmon 1 OS=Mus musculus GN=Cald1 PE=1 SV=1                                                | 16   | 18.5   | 15.2  | 26.1  | 1.2  | 0.71 | 1.41  | 376.1  | 252.3 | 424.3  | 1.5  | 0.89 | 1.13 |
| Q61246_CD2A_MOUSE   | Cdk2na  | Cyclin-dependent kinase inhibitor 2A, isoforms 1/2 OS=Mus musculus GN=Cdk2na P=1 SV=2         | 2    | 10.0   | 8.2   | 14.1  | 1.2  | 0.71 | 1.41  | 20.0   | 16.5  | 27.7   | 1.2  | 0.72 | 1.38 |
| Q13077_Q2U77_MOUSE  | Trim21  | E3 ubiquitin-protein ligase TRIM21 OS=Mus musculus GN=Trim21 P=2 SV=2                         | 18   | 49.5   | 40.7  | 69.9  | 1.2  | 0.71 | 1.41  | 113.7  | 92.1  | 155.2  | 1.2  | 0.72 | 1.38 |
| A2BD00_A2BD00_MOUSE | Adnp    | Actively-dependent neurotrophin/homocysteine protein OS=Mus musculus GN=Adnp PE=1 SV=1        | 13   | 8.1    | 6.6   | 11.4  | 1.2  | 0.71 | 1.41  | 119.9  | 103.3 | 173.8  | 1.2  | 0.69 | 1.40 |
| P37889_FBLN2_MOUSE  | Fbln2   | Fibulin-2 OS=Mus musculus GN=Fbln2 P=1 SV=2                                                   | 17   | 40.3   | 33.2  | 57.0  | 1.2  | 0.71 | 1.41  | 950.6  | 904.1 | 1520.3 | 1.1  | 0.63 | 1.60 |
| P91783_CD4K1_MOUSE  | Cox4k1  | Cytochrome c oxidase subunit 4 isoform 1, mitochondrial OS=Mus musculus GN=Cox4k1 PE=1 SV=1   | 3    | 7.0    | 5.8   | 9.9   | 1.2  | 0.71 | 1.42  | 20.9   | 17.0  | 28.5   | 1.2  | 0.73 | 1.36 |
| QD2142_QD2142_MOUSE | OCAD2   | Oxidation-reduction 2 OS=Mus musculus GN=OCAD2 P=1 SV=1                                       | 3    | 4.4    | 3.7   | 6.2   | 1.2  | 0.71 | 1.42  | 9.7    | 8.2   | 13.1   | 1.2  | 0.73 | 1.36 |
| Q09000_NCOA3_MOUSE  | Ncoa3   | Nuclear receptor coactivator 3 OS=Mus musculus GN=Ncoa3 P=1 SV=2                              | 2    | 56.2   | 46.4  | 79.8  | 1.2  | 0.71 | 1.42  | 112.4  | 92.8  | 156.1  | 1.2  | 0.72 | 1.39 |
| Q91V1L_BAG3_MOUSE   | Bag3    | BAG family molecular chaperone regulator 3 OS=Mus musculus GN=Bag3 PE=1 SV=2                  | 1    | 9.9    | 8.2   | 14.1  | 1.2  | 0.71 | 1.42  | 9.9    | 8.2   | 13.8   | 1.2  | 0.72 | 1.39 |
| Q12M90_ACO1_MOUSE   | ACO1    | Acyloxy-coenzyme A thioesterase 10, mitochondrial OS=Mus musculus GN=ACO1 P=2 SV=1            | 1    | 4.6    | 3.8   | 6.3   | 1.2  | 0.71 | 1.42  | 4.6    | 3.8   | 6.2    | 1.2  | 0.72 | 1.39 |
| QD2209_VCP1_MOUSE   | Vcp1    | Spinnomegal complex protein 1 OS=Mus musculus GN=Vcp1 PE=1 SV=2                               | 1    | 8.6    | 7.2   | 11.6  | 1.2  | 0.70 | 1.42  | 8.5    | 7.2   | 11.4   | 1.2  | 0.72 | 1.39 |
| QD2202_KNOP1_MOUSE  | Knop1   | Lysine-rich nuclear protein 1 OS=Mus musculus GN=Knop1 PE=1 SV=2                              | 2    | 8.7    | 7.2   | 12.4  | 1.2  | 0.70 | 1.42  | 17.4   | 14.5  | 24.3   | 1.2  | 0.72 | 1.39 |
| Q8R120_KNOP1_MOUSE  | Znf330  | Zinc finger protein 830 OS=Mus musculus GN=Znf330 P=1 SV=1                                    | 1    | 11.3   | 9.4   | 16.1  | 1.2  | 0.70 | 1.42  | 11.3   | 9.4   | 15.8   | 1.2  | 0.72 | 1.40 |
| P49871_CAV1_MOUSE   | CAV1    | Caveolin-1 OS=Mus musculus GN=CAV1 PE=1 SV=1                                                  | 2    | 20.4   | 16.9  | 29.0  | 1.2  | 0.70 | 1.42  | 69.8   | 58.0  | 95.2   | 1.2  | 0.72 | 1.40 |
| Q5CQAL_TPPCS_MOUSE  | Trappc5 | Trafficking protein particle complex subunit 5 OS=Mus musculus GN=Trappc5 P=1 SV=1            | 1    | 5.2    | 4.3   | 7.4   | 1.2  | 0.70 | 1.43  | 5.2    | 4.3   | 7.3    | 1.2  | 0.71 | 1.40 |
| Q6P549_SHP2_MOUSE   | Shp2    | Phosphatidylinositol 3,4,5-trisphosphate 5-phosphatase 2 OS=Mus musculus GN=Shp2 P=1 SV=1     | 2    | 9.8    | 8.2   | 14.1  | 1.2  | 0.70 | 1.43  | 19.7   | 16.4  | 27.6   | 1.2  | 0.71 | 1.40 |
| Q5Z0C6_MSH2_MOUSE   | Msh2    | RNA-binding protein Msh2 homolog 2 OS=Mus musculus GN=Msh2 P=1 SV=1                           | 5    | 10.9   | 9.1   | 15.6  | 1.2  | 0.70 | 1.43  | 113.3  | 84.0  | 141.2  | 1.3  | 0.80 | 1.25 |
| Q70435_VSY2_MOUSE   | Vsy2    | Vesicle OS=Mus musculus GN=VSY2 P=1 SV=1                                                      | 1    | 10.9   | 9.1   | 15.6  | 1.2  | 0.70 | 1.44  | 10.9   | 9.1   | 15.6   | 1.2  | 0.71 | 1.40 |
| QD0606_RPN2_MOUSE   | Rpn2    | Dolichyl-3-phosphoglycerol-2-protein glycosyltransferase subunit 2 OS=Mus musculus GN=        | 7    | 16.8   | 14.1  | 24.2  | 1.2  | 0.70 | 1.44  | 145.5  | 98.2  | 165.1  | 1.5  | 0.88 | 1.13 |
| Q59V90_LSM2_MOUSE   | Lsm2    | U5 snRNP-associated Sm-like protein Lsm2 OS=Mus musculus GN=Lsm2 P=3 SV=1                     | 2    | 6.3    | 5.3   | 9.1   | 1.2  | 0.70 | 1.44  | 12.6   | 10.6  | 17.7   | 1.2  | 0.71 | 1.41 |
| Q16016_DKQ4E_MOUSE  | Dkq4e   | Striatin OS=Mus musculus GN=Dkq4e P=1 SV=1                                                    | 1    | 11.4   | 9.4   | 16.1  | 1.2  | 0.70 | 1.44  | 11.4   | 9.4   | 16.1   | 1.2  | 0.72 | 1.40 |
| QVDF2_UHRF1_MOUSE   | Uhrf1   | E3 ubiquitin-protein ligase UHRF1 OS=Mus musculus GN=Uhrf1 P=1 SV=2                           | 6    | 16.2   | 13.7  | 23.4  | 1.2  | 0.69 | 1.44  | 120.6  | 79.5  | 133.7  | 1.3  | 0.76 | 1.31 |
| Q92188_RED_MOUSE    | Ik      | Protein Red OS=Mus musculus GN=Ik P=1 SV=2                                                    | 7    | 20.3   | 17.1  | 29.3  | 1.2  | 0.69 | 1.44  | 167.7  | 132.5 | 222.8  | 1.3  | 0.75 | 1.33 |
| Q51259_P9H2_MOUSE   | P9h2    | Prohibitin-2 OS=Mus musculus GN=P9h2 P=1 SV=1                                                 | 8    | 13.6   | 11.5  | 19.7  | 1.2  | 0.69 | 1.45  | 125.2  | 109.3 | 183.8  | 1.1  | 0.68 | 1.47 |
| Q5C9W6_I2A_MOUSE    | I2a     | Eukaryotic translation initiation factor 2 subunit 1 OS=Mus musculus GN=EIF2L3 P=1 SV=3       | 9    | 10.7   | 9.1   | 15.6  | 1.2  | 0.69 | 1.45  | 138.7  | 114.6 | 192.2  | 1.4  | 0.85 | 1.14 |
| Q5C575_LR42_MOUSE   | Lrrc47  | Lysine-rich repeat-containing protein 47 OS=Mus musculus GN=Lrrc47 P=2 SV=1                   | 3    | 6.7    | 5.6   | 9.6   | 1.2  | 0.69 | 1.45  | 20.6   | 19.2  | 32.2   | 1.1  | 0.64 | 1.57 |
| Q85700_RAEL1_MOUSE  | Rael1   | mRNA export factor OS=Mus musculus GN=Rael1 PE=1 SV=1                                         | 3    | 12.9   | 10.9  | 18.7  | 1.2  | 0.69 | 1.45  | 41.4   | 34.7  | 58.3   | 1.2  | 0.71 | 1.41 |
| Q90207_NBN_MOUSE    | Nbn     | Nibrin OS=Mus musculus GN=NBN PE=1 SV=1                                                       | 2    | 4.7    | 4.0   | 6.8   | 1.2  | 0.69 | 1.45  | 4.7    | 4.0   | 6.7    | 1.2  | 0.70 | 1.43 |
| Q82846_POG2_MOUSE   | Pog2    | Page transposable element with ZNF domain OS=Mus musculus GN=Pog2 PE=2 SV=2                   | 4    | 11.1   | 9.5   | 16.3  | 1.2  | 0.68 | 1.46  | 42.7   | 37.8  | 63.5   | 1.1  | 0.67 | 1.49 |
| Q9Q56_DREB_MOUSE    | Dreb1   | Debrin OS=Mus musculus GN=Dreb1 PE=1 SV=4                                                     | 26   | 24.1   | 20.7  | 35.4  | 1.2  | 0.68 | 1.47  | 1038.1 | 842.1 | 1415.9 | 1.2  | 0.73 | 1.36 |
| P56959_FUS_MOUSE    | Fus     | Transcription factor FUS OS=Mus musculus GN=FUS PE=2 SV=1                                     | 5    | 13.2   | 11.3  | 19.4  | 1.2  | 0.68 | 1.47  | 99.7   | 80.0  | 80.7   | 1.2  | 1.23 | 0.81 |
| Q80UW6_RPB1_MOUSE   | Rpb1    | RNA polymerase I, and II, and III subunit RPB1 OS=Mus musculus GN=Rpb1a2 P=2 SV=2             | 2    | 20.9   | 17.6  | 30.0  | 1.2  | 0.68 | 1.47  | 44.7   | 38.5  | 49.4   | 1.4  | 0.63 | 1.21 |
| Q51V55_PQB1_MOUSE   | Pqb1    | Polyglutamine-binding protein 1 OS=Mus musculus GN=Pqb1 P=1 SV=1                              | 2    | 5.4    | 4.6   | 8.0   | 1.2  | 0.68 | 1.47  | 10.8   | 9.3   | 15.6   | 1.2  | 0.69 | 1.44 |
| Q91406_PRR4_MOUSE   | Prr4    | UAF1 small nuclear ribonucleoprotein Prr4 OS=Mus musculus GN=Prr4 P=1 SV=1                    | 7    | 19.3   | 16.6  | 28.4  | 1.2  | 0.68 | 1.47  | 161.4  | 123.6 | 207.8  | 1.3  | 0.78 | 1.29 |
| Q9D39_SDF2L_MOUSE   | Sdf2l1  | Striatal cell-derived factor 2-like protein 1 OS=Mus musculus GN=SDF2L1 PE=1 SV=2             | 1    | 13.5   | 11.6  | 19.9  | 1.2  | 0.68 | 1.47  | 13.5   | 11.6  | 19.5   | 1.2  | 0.69 | 1.44 |
| Q9D221_NU1L_MOUSE   | Nu1l    | NU1L nuclear cluster factor OS=Mus musculus GN=NU1L PE=1 SV=1                                 | 1    | 10.5   | 9.1   | 15.6  | 1.2  | 0.68 | 1.47  | 10.5   | 9.1   | 15.6   | 1.2  | 0.69 | 1.44 |
| Q99172_APEB3_MOUSE  | Apeb3   | DNA-C/EBP-binding protein APEB3 OS=Mus musculus GN=Apeb3 P=1 SV=2                             | 2    | 20.9   | 18.1  | 31.0  | 1.2  | 0.67 | 1.48  | 41.9   | 36.2  | 60.0   | 1.2  | 0.69 | 1.46 |
| Q91077_QCR2_MOUSE   | Uqc2c   | Cytochrome b-c1 complex subunit 2, mitochondrial OS=Mus musculus GN=Uqc2c P=1 SV=1            | 2    | 9.4    | 8.2   | 14.0  | 1.2  | 0.67 | 1.48  | 18.8   | 16.4  | 27.5   | 1.2  | 0.69 | 1.45 |
| Q5L0L6_GSK3B_MOUSE  | Gsk3b   | Glycogen synthase kinase-3 beta OS=Mus musculus GN=GSK3B P=1 SV=1                             | 2    | 9.4    | 8.2   | 14.0  | 1.2  | 0.67 | 1.48  | 43.5   | 36.8  | 58.8   | 1.2  | 0.70 | 1.42 |
| Q61023_DNB1_MOUSE   | Dnb1    | RNA1 homolog subfamily B member 1 OS=Mus musculus GN=Dnb1 P=2 SV=3                            | 3    | 14.6   | 12.7  | 21.7  | 1.2  | 0.67 | 1.49  | 68.6   | 68.0  | 114.4  | 1.0  | 0.60 | 1.67 |
| Q92102_LAP2B_MOUSE  | Lap2b   | Lamina-associated polypeptide 2, isoforms beta/delta/epsilon/gamma OS=Mus musculus GN=        | 4    | 17.0   | 14.8  | 25.3  | 1.2  | 0.67 | 1.49  | 68.6   | 60.0  | 100.8  | 1.1  | 0.68 | 1.47 |
| Q92121_IMP3_MOUSE   | Imp3    | U3 small nuclear ribonucleoprotein subunit IMP3 OS=Mus musculus GN=Imp3 P=2 SV=1              | 4    | 7.5    | 6.5   | 11.2  | 1.2  | 0.67 | 1.49  | 73.9   | 54.9  | 92.3   | 1.3  | 0.80 | 1.25 |
| Q90B06_VNR1_MOUSE   | Vnr1    | Vesicle OS=Mus musculus GN=VNR1 P=1 SV=1                                                      | 2    | 9.7    | 8.2   | 14.0  | 1.2  | 0.67 | 1.49  | 9.7    | 8.2   | 14.0   | 1.2  | 0.68 | 1.47 |
| PE1117_NUCB2_MOUSE  | Nucb2   | Nucleobindin-2 OS=Mus musculus GN=Nucb2 P=1 SV=1                                              | 2    | 9.3    | 8.1   | 13.9  | 1.2  | 0.67 | 1.50  | 18.6   | 16.2  | 27.3   | 1.1  | 0.68 | 1.47 |
| P31570_PRDX1_MOUSE  | Prdx1   | Peroxiredoxin-1 OS=Mus musculus GN=Prdx1 P=1 SV=1                                             | 5    | 12.4   | 10.8  | 18.5  | 1.1  | 0.67 | 1.50  | 60.9   | 57.4  | 96.6   | 1.1  | 0.63 | 1.59 |
| P126851_PGS1_MOUSE  | Pgs1    | Rhlygan OS=Mus musculus GN=Pgs1 PE=1 SV=1                                                     | 2    | 14.2</ |       |       |      |      |       |        |       |        |      |      |      |

|                     |          |                                                                                                        |    |      |      |      |     |      |      |        |        |        |     |      |      |
|---------------------|----------|--------------------------------------------------------------------------------------------------------|----|------|------|------|-----|------|------|--------|--------|--------|-----|------|------|
| Q90B20_MOUSE        | Ikbbp    | Inhibitor of nuclear factor kappa-B kinase-interacting protein OS-Mus musculus GN-Ikbbp PE-2           | 1  | 7.6  | 7.8  | 7.8  | 1.0 | 0.57 | 1.76 | 7.6    | 7.8    | 13.1   | 1.0 | 0.58 | 1.72 |
| Q90B20_MOUSE        | Atp5o    | ATP synthase subunit O, mitochondrial OS-Mus musculus GN-Atp5o PE1 SV-1                                | 1  | 5.4  | 5.6  | 5.6  | 1.0 | 0.57 | 1.76 | 5.4    | 5.6    | 5.4    | 1.0 | 0.58 | 1.72 |
| GN9593_GN9593_MOUSE | GN9593   | GN9593 OS-Mus musculus GN-GN9593 PE1 SV-1                                                              | 1  | 24.9 | 24.9 | 24.9 | 1.0 | 0.57 | 1.76 | 118.7  | 118.7  | 201.3  | 1.3 | 0.75 | 21.4 |
| OS130_N1_MOUSE      | Emg1     | Ribosomal RNA small subunit methyltransferase NEP1 OS-Mus musculus GN-Emg1 PE2 SV-1                    | 5  | 6.1  | 6.3  | 6.8  | 1.0 | 0.56 | 1.78 | 34.2   | 30.1   | 50.6   | 1.1 | 0.68 | 1.48 |
| Q92105_C1_MOUSE     | Clic1    | Chloride intracellular channel protein 1 OS-Mus musculus GN-Clic1 PE1 SV-3                             | 1  | 3.6  | 3.8  | 4.6  | 1.0 | 0.56 | 1.78 | 3.6    | 3.8    | 6.3    | 1.0 | 0.57 | 1.75 |
| Q94012_RALY_MOUSE   | Ralyl    | RNA-binding protein G1 OS-Mus musculus GN-Ralyl PE2 SV-2                                               | 24 | 31.2 | 31.2 | 31.2 | 1.0 | 0.56 | 1.79 | 316.7  | 295.2  | 487.1  | 1.1 | 0.63 | 1.59 |
| Q90801_HNRP1_MOUSE  | Hnmp1    | Heterogeneous nuclear ribonucleoprotein 1 OS-Mus musculus GN-Hnmp1 PE1 SV-2                            | 19 | 13.3 | 13.9 | 23.8 | 1.0 | 0.56 | 1.79 | 310.5  | 296.7  | 498.1  | 1.0 | 0.62 | 1.61 |
| Q90716_ARPC3_MOUSE  | Arpc3    | Actin-related protein 2/3 complex subunit 3 OS-Mus musculus GN-Arpc3 PE1 SV-2                          | 9  | 9.3  | 9.7  | 16.7 | 1.0 | 0.56 | 1.80 | 146.0  | 124.7  | 209.6  | 1.2 | 0.70 | 1.44 |
| Q92121_TADBP_MOUSE  | Tadbp    | TAR DNA-binding protein 4 OS-Mus musculus GN-Tadbp PE1 SV-1                                            | 30 | 31.8 | 33.5 | 57.4 | 0.9 | 0.55 | 1.81 | 412.23 | 425.72 | 715.83 | 1.0 | 0.58 | 1.74 |
| Q92122_VIME_MOUSE   | Vime     | Vimentin OS-Mus musculus GN-Vime PE1 SV-2                                                              | 3  | 10.3 | 10.3 | 10.3 | 0.9 | 0.55 | 1.81 | 28.0   | 28.0   | 318.0  | 1.0 | 0.57 | 1.87 |
| Q90219_CNPY2_MOUSE  | Cnpy2    | Protein canopy homolog 2 OS-Mus musculus GN-Cnpy2 PE1 SV-1                                             | 2  | 13.2 | 13.9 | 23.9 | 0.9 | 0.55 | 1.82 | 26.3   | 27.9   | 46.8   | 0.9 | 0.56 | 1.78 |
| Q90194_RFA2_MOUSE   | Rfa2     | Replication protein A 32 kDa subunit OS-Mus musculus GN-Rfa2 PE1 SV-1                                  | 4  | 29.4 | 31.1 | 53.4 | 0.9 | 0.55 | 1.82 | 102.9  | 131.7  | 221.4  | 0.8 | 0.46 | 2.15 |
| Q92PML_ARPC5_MOUSE  | Arpc5    | Actin-related protein 2/3 complex subunit 5 OS-Mus musculus GN-Arpc5 PE2 SV-2                          | 3  | 38.5 | 38.5 | 38.5 | 0.9 | 0.55 | 1.82 | 38.8   | 38.8   | 68.4   | 0.9 | 0.52 | 1.79 |
| Q90W54_FACT1_MOUSE  | Fma2e24  | CAAM premyr protease 1 homolog OS-Mus musculus GN-Fma2e24 PE1 SV-2                                     | 1  | 5.6  | 5.9  | 10.2 | 0.9 | 0.55 | 1.83 | 11.1   | 11.9   | 20.0   | 0.9 | 0.56 | 1.79 |
| Q90C51_T176A_MOUSE  | Tmem176a | Transmembrane protein 176A OS-Mus musculus GN-Tmem176a PE2 SV-2                                        | 1  | 2.6  | 2.8  | 4.7  | 0.9 | 0.55 | 1.83 | 2.6    | 2.8    | 4.6    | 0.9 | 0.56 | 1.79 |
| Q90852_KMT2B_MOUSE  | Kmt2b    | Histone-lysine N-methyltransferase 2B OS-Mus musculus GN-Kmt2b PE1 SV-3                                | 1  | 4.3  | 4.6  | 7.8  | 0.9 | 0.55 | 1.83 | 4.3    | 4.6    | 7.7    | 0.9 | 0.56 | 1.80 |
| Q92T72_F038B_MOUSE  | Fam208b  | Protein FAM208B OS-Mus musculus GN-Fam208b PE2 SV-2                                                    | 1  | 7.6  | 8.3  | 14.2 | 0.9 | 0.55 | 1.83 | 6.0    | 6.6    | 10.1   | 0.9 | 0.56 | 1.80 |
| Q90883_CHMB_MOUSE   | Chmbp4   | Charged-methyltransferase body protein 4B OS-Mus musculus GN-Chmbp4 PE1 SV-2                           | 1  | 7.2  | 7.7  | 13.8 | 0.9 | 0.55 | 1.83 | 7.2    | 7.7    | 13.0   | 0.9 | 0.56 | 1.80 |
| P15538_TRD3A_MOUSE  | Trm30a   | Tripartite motif-containing protein 30A OS-Mus musculus GN-Trm30a PE1 SV-2                             | 1  | 6.0  | 6.4  | 11.0 | 0.9 | 0.54 | 1.84 | 6.0    | 6.4    | 10.7   | 0.9 | 0.55 | 1.80 |
| F24261_HKRC2_MOUSE  | Herc6    | HEC15-1 protein ligase Herc6 OS-Mus musculus GN-Herc6 PE2 SV-1                                         | 1  | 2.3  | 2.5  | 4.3  | 0.9 | 0.54 | 1.84 | 2.3    | 2.5    | 4.2    | 0.9 | 0.55 | 1.81 |
| Q98362_TBMA_MOUSE   | Tbma4    | Tubulin alpha 4A chain OS-Mus musculus GN-Tbma4 PE1 SV-1                                               | 4  | 14.7 | 15.8 | 28.1 | 0.9 | 0.54 | 1.85 | 57.7   | 58.7   | 86.9   | 0.9 | 0.68 | 1.48 |
| GX981X_GX981X_MOUSE | Heat1    | HEAT repeat containing 1 OS-Mus musculus GN-Heat1 PE4 SV-1                                             | 2  | 3.7  | 4.0  | 6.9  | 0.9 | 0.54 | 1.85 | 3.7    | 4.0    | 6.9    | 0.9 | 0.55 | 1.81 |
| Q88M11_SVIC_MOUSE   | Lars     | lysine- $\epsilon$ -NH <sub>2</sub> ligase, cytoplasmic OS-Mus musculus GN-Lars PE1 SV-2               | 2  | 9.0  | 9.7  | 16.7 | 0.9 | 0.54 | 1.86 | 17.9   | 19.4   | 32.7   | 0.9 | 0.55 | 1.83 |
| Q925H1_TRPS1_MOUSE  | Trps1    | Zinc finger transcription factor TRPS1 OS-Mus musculus GN-Trps1 PE1 SV-1                               | 4  | 7.6  | 8.3  | 14.2 | 0.9 | 0.54 | 1.86 | 31.3   | 35.0   | 52.6   | 1.1 | 0.66 | 1.50 |
| P52480_KPYM_MOUSE   | Pkm      | Pyruvate kinase PKM OS-Mus musculus GN-Pkm PE1 SV-4                                                    | 2  | 8.7  | 9.5  | 16.2 | 0.9 | 0.54 | 1.87 | 17.4   | 18.9   | 31.8   | 0.9 | 0.55 | 1.83 |
| Q90824_PBB_MOUSE    | Cbfh     | Cerebin-binding factor subunit beta OS-Mus musculus GN-Cbfh PE1 SV-1                                   | 3  | 12.1 | 13.2 | 22.6 | 0.9 | 0.53 | 1.87 | 35.2   | 38.5   | 64.7   | 0.9 | 0.54 | 1.84 |
| Q92G68_HFSA_MOUSE   | Hf25a5   | Intron-activator protein 205-A OS-Mus musculus GN-Hf25a5 PE2 SV-1                                      | 2  | 5.5  | 6.0  | 10.3 | 0.9 | 0.53 | 1.87 | 11.0   | 12.0   | 20.1   | 0.9 | 0.55 | 1.83 |
| Q91481_VKCL1_MOUSE  | Vkcl1    | 5.5 kDa-binding protein OS-Mus musculus GN-Vkcl1 PE2 SV-2                                              | 1  | 4.8  | 5.5  | 9.5  | 0.9 | 0.53 | 1.88 | 4.8    | 5.5    | 9.5    | 0.9 | 0.51 | 1.87 |
| Q91754_VMA21_MOUSE  | Vma21    | Vacuolar ATPase assembly integral membrane protein Vma21 OS-Mus musculus GN-Vma21 PE1 SV-1             | 1  | 5.3  | 5.8  | 9.9  | 0.9 | 0.53 | 1.88 | 5.3    | 5.8    | 9.9    | 0.9 | 0.54 | 1.85 |
| Q85854_MEF2_MOUSE   | Mef2     | Myelin expression factor 2 OS-Mus musculus GN-Mef2 PE1 SV-1                                            | 35 | 26.7 | 29.6 | 50.0 | 0.9 | 0.53 | 1.90 | 1142.0 | 1053.7 | 1771.8 | 1.1 | 0.64 | 1.55 |
| P80801_P044_MOUSE   | P044     | Protein disulfide isomerase A4 OS-Mus musculus GN-P044 PE1 SV-3                                        | 3  | 5.0  | 5.6  | 9.8  | 0.9 | 0.52 | 1.91 | 15.1   | 17.9   | 31.5   | 0.9 | 0.64 | 1.51 |
| P60824_CRRP_MOUSE   | Crrp     | Cdk2-inducible RNA-binding protein OS-Mus musculus GN-Crrp PE1 SV-1                                    | 5  | 16.3 | 16.9 | 29.5 | 0.9 | 0.52 | 1.91 | 84.2   | 85.0   | 160.0  | 0.9 | 0.53 | 1.87 |
| Q90K70_RBM2_MOUSE   | Rbm2     | RNA-binding motif, single-stranded-interacting protein 2 OS-Mus musculus GN-Rbm2 PE2 SV-2              | 5  | 14.7 | 16.4 | 28.2 | 0.9 | 0.52 | 1.92 | 176.5  | 214.1  | 360.0  | 0.8 | 0.49 | 2.04 |
| Q91XK1_STX6_MOUSE   | Stx6     | Syntaxin-6 OS-Mus musculus GN-Stx6 PE1 SV-1                                                            | 1  | 2.3  | 2.6  | 4.5  | 0.9 | 0.52 | 1.93 | 2.3    | 2.6    | 4.4    | 0.9 | 0.53 | 1.90 |
| Q92088_PPH_MOUSE    | Pph      | Peptidyl prolyl 4-cis-transaminase OS-Mus musculus GN-Pph PE2 SV-1                                     | 1  | 13.4 | 15.2 | 26.0 | 0.9 | 0.52 | 1.94 | 14.4   | 16.2   | 29.7   | 1.2 | 0.70 | 1.45 |
| Q91U11_CFA20_MOUSE  | Cfap20   | Cilia- and flagella-associated protein 20 OS-Mus musculus GN-Cfap20 PE2 SV-1                           | 4  | 7.4  | 8.4  | 14.3 | 0.9 | 0.51 | 1.94 | 42.8   | 33.8   | 56.9   | 1.3 | 0.75 | 1.33 |
| Q1U071_SMU1_MOUSE   | Smu1     | WD40 repeat-containing protein SMU1 OS-Mus musculus GN-Smu1 PE2 SV-2                                   | 7  | 14.0 | 15.9 | 27.2 | 0.9 | 0.51 | 1.94 | 107.9  | 125.1  | 210.4  | 0.9 | 0.51 | 1.95 |
| Q92P5C_SMAUG_MOUSE  | Smaug1   | Single-strand selective monofunctional uracil DNA glycosylase OS-Mus musculus GN-Smaug1 PE1 SV-1       | 1  | 6.0  | 6.9  | 11.7 | 0.9 | 0.51 | 1.94 | 6.0    | 6.9    | 11.5   | 0.9 | 0.52 | 1.91 |
| Q91R15_ELP5_MOUSE   | Elp5     | RNA polymerase complex 5 OS-Mus musculus GN-Elp5 PE1 SV-1                                              | 1  | 4.4  | 5.0  | 8.6  | 0.9 | 0.51 | 1.94 | 4.4    | 5.0    | 8.6    | 0.9 | 0.52 | 1.91 |
| Q91K43_PKH3_MOUSE   | Plekha3  | Pleckstrin homolog domain-containing family G member 3 OS-Mus musculus GN-Plekha3 PE1 SV-1             | 1  | 3.6  | 4.1  | 7.0  | 0.9 | 0.51 | 1.95 | 3.6    | 4.1    | 6.9    | 0.9 | 0.52 | 1.91 |
| PE7776_P1B_MOUSE    | P1B      | Prohibitin OS-Mus musculus GN-P1B PE1 SV-1                                                             | 6  | 12.6 | 14.3 | 24.5 | 0.9 | 0.51 | 1.95 | 71.1   | 79.4   | 133.5  | 0.9 | 0.53 | 1.88 |
| Q92P52_SHS7_MOUSE   | Shs7     | SHS7 domain-containing protein OS-Mus musculus GN-Shs7 PE2 SV-2                                        | 1  | 10.7 | 11.6 | 20.6 | 0.9 | 0.51 | 1.95 | 10.7   | 11.6   | 20.6   | 0.9 | 0.53 | 1.88 |
| Q92PFA2_QBPFA_MOUSE | Cita     | Clathrin light chain A OS-Mus musculus GN-Cita PE1 SV-1                                                | 3  | 7.7  | 8.9  | 15.2 | 0.9 | 0.51 | 1.95 | 12.5   | 14.8   | 26.5   | 1.6 | 0.71 | 1.01 |
| Q90B30_SVIC_MOUSE   | Iars     | Isoleucine-tRNA ligase, cytoplasmic OS-Mus musculus GN-Iars PE2 SV-2                                   | 1  | 3.3  | 3.8  | 6.5  | 0.9 | 0.51 | 1.98 | 3.3    | 3.8    | 6.4    | 0.9 | 0.52 | 1.94 |
| Q95142_SFN1_MOUSE   | Sfn1     | Sfn1-like OS-Mus musculus GN-Sfn1 PE1 SV-2                                                             | 3  | 12.7 | 14.7 | 25.2 | 0.9 | 0.50 | 1.98 | 95.9   | 73.3   | 123.2  | 1.3 | 0.78 | 1.28 |
| P20552_C02_MOUSE    | Zcchc9   | Chromatin protein homolog 9 OS-Mus musculus GN-Zcchc9 PE2 SV-2                                         | 1  | 4.8  | 5.5  | 9.5  | 0.9 | 0.50 | 1.98 | 4.8    | 5.5    | 9.3    | 0.9 | 0.51 | 1.95 |
| Q90813_ZC03_MOUSE   | Zcchc9   | Zinc finger CCHC domain-containing protein 9 OS-Mus musculus GN-Zcchc9 PE2 SV-2                        | 3  | 6.3  | 7.3  | 12.5 | 0.9 | 0.50 | 1.99 | 22.4   | 20.0   | 33.6   | 1.1 | 0.67 | 1.50 |
| Q60739_BAG1_MOUSE   | Bag1     | BAG family molecular chaperone regulator 1 OS-Mus musculus GN-Bag1 PE1 SV-3                            | 2  | 4.0  | 4.6  | 7.9  | 0.9 | 0.50 | 1.99 | 7.9    | 9.2    | 15.5   | 0.9 | 0.51 | 1.95 |
| Q91866_MARE_MOUSE   | Mare1    | Microtubule-associated protein RFB family member 1 OS-Mus musculus GN-Mare1 PE1 SV-1                   | 1  | 11.6 | 13.5 | 23.3 | 0.8 | 0.50 | 1.99 | 36.8   | 33.0   | 54.6   | 0.8 | 0.66 | 1.51 |
| Q92305_WBP11_MOUSE  | Wbp11    | WD domain-binding protein 11 OS-Mus musculus GN-Wbp11 PE1 SV-1                                         | 1  | 12.6 | 13.9 | 24.6 | 0.9 | 0.50 | 2.01 | 7.4    | 8.3    | 12.4   | 0.9 | 0.51 | 1.97 |
| P57784_R02A_MOUSE   | Srnpa1   | U2 small nuclear ribonucleoprotein A' OS-Mus musculus GN-Srnpa1 PE1 SV-2                               | 17 | 11.5 | 12.6 | 23.0 | 0.8 | 0.49 | 2.02 | 84.2   | 503.8  | 355.0  | 0.8 | 0.48 | 2.18 |
| Q91009_MP95_MOUSE   | Wdr77    | Methylcrotonyl coenzyme S OS-Mus musculus GN-Wdr77 PE1 SV-1                                            | 3  | 10.0 | 11.8 | 20.3 | 0.8 | 0.49 | 2.03 | 34.6   | 34.5   | 58.0   | 1.0 | 0.60 | 1.67 |
| P10633_THD_MOUSE    | Thd      | Thymine DNA methyltransferase OS-Mus musculus GN-Thd PE1 SV-3                                          | 1  | 14.0 | 16.3 | 28.5 | 0.8 | 0.49 | 2.03 | 146.7  | 166.7  | 284.8  | 0.8 | 0.49 | 2.03 |
| P48678_LHNA_MOUSE   | Lhna     | Prelamin-A/C OS-Mus musculus GN-Lhna PE1 SV-2                                                          | 35 | 33.6 | 33.9 | 68.2 | 0.8 | 0.49 | 2.03 | 1466.8 | 1893.2 | 3183.4 | 0.8 | 0.46 | 2.17 |
| Q62241_R02_MOUSE    | Srnpc    | U1 small nuclear ribonucleoprotein C OS-Mus musculus GN-Srnpc PE2 SV-1                                 | 1  | 15.1 | 18.0 | 30.9 | 0.8 | 0.49 | 2.04 | 15.1   | 18.0   | 30.3   | 0.8 | 0.50 | 2.00 |
| Q81951_Q81951_MOUSE | C1qbp    | Complement component 1 Q subcomponent-binding protein, mitochondrial OS-Mus musculus GN-C1qbp PE1 SV-1 | 2  | 4.2  | 5.1  | 8.7  | 0.8 | 0.49 | 2.05 | 8.5    | 10.2   | 17.1   | 0.8 | 0.50 | 2.01 |
| P21436_P1B_MOUSE    | P1B      | Protein disulfide isomerase A4 OS-Mus musculus GN-P1B PE1 SV-3                                         | 3  | 4.7  | 5.6  | 9.8  | 0.8 | 0.49 | 2.05 | 16.1   | 19.7   | 34.6   | 0.8 | 0.50 | 2.01 |
| Q92QW0_CAF1A_MOUSE  | Chaf1a   | Chromatin assembly factor 1 subunit A OS-Mus musculus GN-Chaf1a PE1 SV-1                               | 2  | 8.3  | 10.0 | 17.1 | 0.8 | 0.49 | 2.06 | 16.6   | 19.9   | 33.5   | 0.8 | 0.50 | 2.02 |
| Q90779_L3BP_MOUSE   | L3bp3    | Galactin-3-binding protein OS-Mus musculus GN-L3bp3 PE1 SV-1                                           | 3  | 6.2  | 7.5  | 12.8 | 0.8 | 0.49 | 2.06 | 18.3   | 20.3   | 34.2   | 0.9 | 0.54 | 1.87 |
| Q92149_P1B_MOUSE    | P1B      | Protein disulfide isomerase A4 OS-Mus musculus GN-P1B PE1 SV-3                                         | 3  | 4.8  | 5.6  | 9.8  | 0.8 | 0.49 | 2.06 | 16.1   | 19.7   | 34.6   | 0.8 | 0.50 | 2.01 |
| P56480_A7P_MOUSE    | A7p      | ATP synthase subunit beta, mitochondrial OS-Mus musculus GN-A7p5b PE1 SV-4                             | 18 | 19.9 | 23.2 | 39.9 | 0.8 | 0.49 | 2.06 | 376.8  | 442.3  | 743.6  | 0.9 | 0.51 | 1.97 |
| Q95K54_DK1_MOUSE    | Dk1      | H/ACA ribonucleoprotein complex subunit 4 OS-Mus musculus GN-Dk1 PE1 SV-4                              | 2  | 7.6  | 9.1  | 15.7 | 0.8 | 0.49 | 2.07 | 15.2   | 18.3   | 30.8   | 0.8 | 0.49 | 2.03 |
| Q92VCE_ARPC2_MOUSE  | Arpc2    | Actin-related protein 2/3 complex subunit 2 OS-Mus musculus GN-Arpc2 PE1 SV-3                          | 9  | 11.3 | 13.9 | 23.6 | 0.8 | 0.48 | 2.08 | 186.5  | 211.3  | 355.3  | 0.9 | 0.52 | 1.91 |
| Q92C86_D04_MOUSE    | D04      | Homocysteine methyltransferase OS-Mus musculus GN-D04 PE1 SV-1                                         | 1  | 6.6  | 8.0  | 14.0 | 0.8 | 0.48 | 2.08 | 64.7   | 74.8   | 128.8  | 0.8 | 0.49 | 2.03 |
| Q91S6M_SELM_MOUSE   | Selm     | Selenenoprotein M OS-Mus musculus GN-Selm PE1 SV-3                                                     | 1  | 6.4  | 7.9  | 13.6 | 0.8 | 0.47 | 2.11 | 6.4    | 7.9    | 13.4   | 0.8 | 0.48 | 2.07 |
| Q81625_C05_MOUSE    | Mbd211   | Cyclic GMP-AMP synthase OS-Mus musculus GN-Mbd211 PE1 SV-1                                             | 2  | 2.7  | 3.3  | 5.7  | 0.8 | 0.47 | 2.13 | 3.3    | 6.6    | 11.1   | 0.8 | 0.48 | 2.09 |
| Q91865_Q91865_MOUSE | Cog1     | Conserved oligomeric Golgi complex subunit 3 OS-Mus musculus GN-Cog1 PE4 SV-1                          | 1  | 7.5  | 9.3  | 16.0 | 0.8 | 0.47 | 2.14 | 7.5    | 9.3    | 15.    |     |      |      |



|                     |              |                                                                                            |    |       |       |        |     |      |       |         |         |         |     |      |       |
|---------------------|--------------|--------------------------------------------------------------------------------------------|----|-------|-------|--------|-----|------|-------|---------|---------|---------|-----|------|-------|
| G3X9A3_G3X9A3_MOUSE | Zbtb21       | Protein zbtb21 OS=Mus musculus GN=Zbtb21 PE=1 SV=1                                         | 1  | 4.9   | 10.8  | 18.5   | 0.5 | 0.27 | 3.76  | 4.9     | 10.8    | 18.1    | 0.5 | 0.27 | 3.68  |
| O5R1P1_P5B81_MOUSE  | Pamrb3       | Probasome subunit beta type-3 OS=Mus musculus GN=Pamrb3 PE=1 SV=1                          | 1  | 2.8   | 6.2   | 10.6   | 0.5 | 0.26 | 3.79  | 2.8     | 6.2     | 10.4    | 0.5 | 0.27 | 3.71  |
| Q5C765_GAR1_MOUSE   | Gar1         | H/ACA ribonucleoprotein complex subunit 1 OS=Mus musculus GN=Gar1 PE=2 SV=1                | 3  | 6.1   | 14.1  | 24.3   | 0.4 | 0.25 | 3.95  | 27.5    | 52.0    | 87.4    | 0.5 | 0.31 | 3.17  |
| P28301_LYOX_MOUSE   | Lox          | Protein-lysine 6-oxidase OS=Mus musculus GN=Lox PE=1 SV=1                                  | 4  | 3.7   | 8.5   | 14.5   | 0.4 | 0.25 | 3.97  | 28.4    | 50.8    | 85.4    | 0.6 | 0.33 | 3.00  |
| Q852W6_Q852W6_MOUSE | H2-M10.3     | Histocompatibility 2, M region locus 10.3 OS=Mus musculus GN=H2-M10.3 PE=2 SV=1            | 1  | 3.4   | 7.8   | 13.4   | 0.4 | 0.25 | 3.97  | 3.4     | 7.8     | 13.1    | 0.4 | 0.26 | 3.89  |
| PE2827_RAN_MOUSE    | Ran          | Binding nuclear protein OS=Mus musculus GN=Ran PE=1 SV=2                                   | 4  | 5.4   | 12.7  | 21.8   | 0.4 | 0.25 | 4.07  | 21.4    | 40.7    | 63.5    | 0.4 | 0.26 | 3.90  |
| B2KFR8_B2KFR8_MOUSE | Ptdtd4       | CaM-specific 3',5'-cyclic phosphodiesterase 4D OS=Mus musculus GN=Ptdtd4 PE=4 SV=1         | 1  | 3.5   | 8.3   | 14.2   | 0.4 | 0.24 | 4.09  | 3.5     | 8.3     | 14.0    | 0.4 | 0.25 | 4.01  |
| P42669_PURA_MOUSE   | Pura         | Transcriptional activator protein Pur-alpha OS=Mus musculus GN=Pura PE=1 SV=1              | 11 | 14.7  | 36.0  | 61.8   | 0.4 | 0.24 | 4.21  | 181.7   | 447.9   | 753.1   | 0.4 | 0.24 | 4.14  |
| Q811F9_RHG32_MOUSE  | Arhgap32     | Rho GTPase-activating protein 32 OS=Mus musculus GN=Arhgap32 PE=1 SV=2                     | 1  | 1.5   | 3.8   | 6.5    | 0.4 | 0.24 | 4.25  | 1.5     | 3.8     | 6.4     | 0.4 | 0.24 | 4.17  |
| Q81V94_LVJ1_MOUSE   | Lvj1         | Lysine-61 OS=Mus musculus GN=Lvj1 PE=1 SV=1                                                | 1  | 5.5   | 13.6  | 23.3   | 0.4 | 0.22 | 4.36  | 5.5     | 13.6    | 22.9    | 0.4 | 0.24 | 4.18  |
| P70314_PITX1_MOUSE  | Pitx1        | Pituitary homeobox 1 OS=Mus musculus GN=Pitx1 PE=2 SV=2                                    | 1  | 13.7  | 34.7  | 59.5   | 0.4 | 0.23 | 4.35  | 13.7    | 34.7    | 58.4    | 0.4 | 0.23 | 4.26  |
| Q99020_RODA_MOUSE   | Hnmpab       | Heterogeneous nuclear ribonucleoprotein A/B OS=Mus musculus GN=Hnmpab PE=1 SV=1            | 11 | 30.8  | 78.5  | 134.7  | 0.4 | 0.23 | 4.38  | 452.3   | 1345.9  | 2263.2  | 0.3 | 0.20 | 5.00  |
| Q80547_HMRB_MOUSE   | Hmrbr        | Hydranion-mediated motility receptor OS=Mus musculus GN=Hmrbr PE=1 SV=4                    | 1  | 3.8   | 16.8  | 30.3   | 0.4 | 0.23 | 4.41  | 3.8     | 9.8     | 16.5    | 0.4 | 0.23 | 4.33  |
| P97432_NBR1_MOUSE   | Nbr1         | Next to BRCA1 gene 1 protein OS=Mus musculus GN=Nbr1 PE=1 SV=1                             | 1  | 1.9   | 4.9   | 8.5    | 0.4 | 0.22 | 4.45  | 1.9     | 4.9     | 8.3     | 0.4 | 0.23 | 4.37  |
| P32020_NLTP_MOUSE   | Scp2         | Non-specific lipid-transfer protein OS=Mus musculus GN=Scp2 PE=1 SV=3                      | 1  | 3.6   | 9.3   | 15.9   | 0.4 | 0.22 | 4.49  | 3.6     | 9.3     | 15.6    | 0.4 | 0.23 | 4.41  |
| P52927_HMG2_MOUSE   | Hmg2a        | High mobility group protein HMG1-C OS=Mus musculus GN=Hmg2a PE=1 SV=1                      | 1  | 2.5   | 6.5   | 11.1   | 0.4 | 0.22 | 4.52  | 2.5     | 6.5     | 10.9    | 0.4 | 0.23 | 4.43  |
| Q81V94_Q81V94_MOUSE | Dax1         | 2',5'-oligoadenylate synthetase protein 1 OS=Mus musculus GN=Dax1 PE=2 SV=1                | 3  | 3.3   | 8.5   | 15.1   | 0.4 | 0.22 | 4.61  | 3.3     | 8.5     | 15.8    | 0.4 | 0.21 | 4.72  |
| Q62011_PDPN_MOUSE   | Pdpn         | Podoplanin OS=Mus musculus GN=Pdpn PE=1 SV=2                                               | 1  | 16.3  | 43.8  | 75.1   | 0.4 | 0.22 | 4.61  | 16.3    | 43.8    | 73.7    | 0.4 | 0.22 | 4.52  |
| P30051_Tead1_MOUSE  | Tead1        | Transcriptional enhancer factor 1 OS=Mus musculus GN=Tead1 PE=1 SV=2                       | 1  | 6.1   | 17.0  | 29.1   | 0.4 | 0.21 | 4.74  | 6.1     | 17.0    | 28.6    | 0.4 | 0.22 | 4.65  |
| Q3JTN6_Q3JTN6_MOUSE | T70001014Rik | Protein T70001014Rik OS=Mus musculus GN=T70001014Rik PE=2 SV=1                             | 1  | 2.9   | 7.9   | 13.6   | 0.4 | 0.21 | 4.75  | 2.9     | 7.9     | 13.4    | 0.4 | 0.21 | 4.66  |
| P28714_MOX_MOUSE    | Mox          | Protein mox OS=Mus musculus GN=Mox PE=1 SV=1                                               | 2  | 2.9   | 8.3   | 14.2   | 0.4 | 0.21 | 4.85  | 2.9     | 8.3     | 15.2    | 0.4 | 0.21 | 4.76  |
| UF8A                | Ufp8a        | MCC3697, isoform CRA_c OS=Mus musculus GN=Ufp8a PE=2 SV=1                                  | 1  | 5.8   | 16.7  | 28.6   | 0.3 | 0.20 | 4.93  | 5.8     | 16.7    | 28.1    | 0.3 | 0.21 | 4.84  |
| Q9PWV4_ASAH1_MOUSE  | Ash1         | ACG ceramidase OS=Mus musculus GN=Ash1 PE=1 SV=1                                           | 2  | 4.7   | 13.6  | 23.3   | 0.3 | 0.20 | 4.94  | 9.4     | 27.1    | 45.6    | 0.3 | 0.21 | 4.84  |
| B180C7_B180C7_MOUSE | Hsp22        | Basement membrane-specific heparan sulfate proteoglycan core protein OS=Mus musculus GN=   | 13 | 4.7   | 13.4  | 23.0   | 0.3 | 0.20 | 4.95  | 63.1    | 165.3   | 278.0   | 0.4 | 0.23 | 4.41  |
| P25976_UBF1_MOUSE   | Ubf1         | Nucleolar transcription factor 1 OS=Mus musculus GN=Ubf1 PE=1 SV=1                         | 1  | 4.6   | 13.3  | 22.8   | 0.3 | 0.20 | 4.99  | 4.6     | 13.3    | 22.3    | 0.3 | 0.20 | 4.89  |
| AP6PW4_WDR76_MOUSE  | Wdr76        | WD repeat-containing protein 76 OS=Mus musculus GN=Wdr76 PE=2 SV=1                         | 2  | 4.7   | 13.9  | 23.8   | 0.3 | 0.20 | 5.04  | 4.5     | 27.8    | 46.7    | 0.3 | 0.20 | 4.94  |
| Q8B8Q3_HNC2_MOUSE   | Hnc2         | Zinc finger protein baszumc1-2 OS=Mus musculus GN=Hnc2 PE=2 SV=3                           | 1  | 2.9   | 8.7   | 14.9   | 0.3 | 0.20 | 5.04  | 2.9     | 8.7     | 14.6    | 0.3 | 0.20 | 4.94  |
| Q80666_HNRP2_MOUSE  | Hnmp2        | Heterogeneous nuclear ribonucleoprotein 2 OS=Mus musculus GN=Hnmp2 PE=1 SV=2               | 1  | 10.0  | 25.4  | 59.4   | 0.3 | 0.20 | 5.04  | 100.4   | 249.4   | 419.7   | 0.4 | 0.21 | 5.00  |
| Q97802_COE1_MOUSE   | Ebf1         | Transcription factor COE1 OS=Mus musculus GN=Ebf1 PE=1 SV=1                                | 1  | 2.2   | 6.5   | 11.1   | 0.3 | 0.19 | 5.13  | 2.2     | 6.5     | 10.9    | 0.3 | 0.20 | 5.03  |
| Q54962_BAF_MOUSE    | Banf1        | Barrier-to-autointegration factor OS=Mus musculus GN=Banf1 PE=1 SV=1                       | 3  | 6.4   | 19.2  | 32.9   | 0.3 | 0.19 | 5.15  | 49.2    | 163.9   | 275.5   | 0.3 | 0.18 | 5.60  |
| G3X9W0_G3X9W0_MOUSE | Hnmp2        | Heterogeneous nuclear ribonucleoprotein 2, isoform CRA_a OS=Mus musculus GN=Hnmp2 PE=      | 1  | 3.1   | 9.3   | 16.0   | 0.3 | 0.19 | 5.23  | 3.1     | 9.3     | 15.7    | 0.3 | 0.19 | 5.13  |
| Q47522_C2NC_MOUSE   | Cnc          | Cyflin-C OS=Mus musculus GN=Cnc PE=2 SV=4                                                  | 1  | 10.3  | 31.8  | 54.5   | 0.3 | 0.19 | 5.27  | 10.3    | 31.8    | 53.5    | 0.3 | 0.19 | 5.17  |
| Q8V101_NAA40_MOUSE  | Naa40        | N-acetyltransferase 40 OS=Mus musculus GN=Naa40 PE=2 SV=1                                  | 4  | 3.1   | 9.8   | 16.9   | 0.3 | 0.19 | 5.38  | 11.8    | 46.8    | 78.7    | 0.3 | 0.15 | 6.67  |
| Q54790_MAFG_MOUSE   | Mafg         | Transcription factor MAFG OS=Mus musculus GN=Magf PE=1 SV=1                                | 2  | 2.9   | 9.1   | 15.6   | 0.3 | 0.19 | 5.39  | 5.8     | 18.2    | 30.6    | 0.3 | 0.19 | 5.29  |
| Q8Y9N6_NMG2_MOUSE   | Nmg2         | Neurotigin-3 OS=Mus musculus GN=Nmg2 PE=1 SV=2                                             | 1  | 1.0   | 3.2   | 5.6    | 0.3 | 0.19 | 5.40  | 1.0     | 3.2     | 5.4     | 0.3 | 0.19 | 5.29  |
| Q99P64_RGS18_MOUSE  | Rgs18        | Regulator of G-protein signaling 18 OS=Mus musculus GN=Rgs18 PE=2 SV=1                     | 1  | 3.5   | 11.0  | 18.9   | 0.3 | 0.18 | 5.48  | 3.5     | 11.0    | 18.5    | 0.3 | 0.19 | 5.34  |
| Q6P1E1_ZMIZ1_MOUSE  | Zmiz1        | Zinc finger LIM domain-containing protein 1 OS=Mus musculus GN=Zmiz1 PE=2 SV=1             | 1  | 6.0   | 19.1  | 32.8   | 0.3 | 0.18 | 5.48  | 6.0     | 19.1    | 32.2    | 0.3 | 0.19 | 5.38  |
| Q8V108_RF1_MOUSE    | Rfap1        | Replication protein A 70 kDa DNA-binding subunit OS=Mus musculus GN=Rfap1 PE=1 SV=1        | 15 | 6.0   | 19.5  | 33.4   | 0.3 | 0.18 | 5.57  | 183.1   | 310.1   | 523.5   | 0.6 | 0.35 | 2.85  |
| P35552_HMGL_MOUSE   | Cpxar        | Cytochrome-dependent cytochrome P450 reductase, mitochondrial OS=Mus musculus GN=Cpxar     | 2  | 3.1   | 10.8  | 18.8   | 0.3 | 0.17 | 5.64  | 7.2     | 21.2    | 35.4    | 0.3 | 0.17 | 5.72  |
| Q8V108_Schistosoma  | Japuncin     | Japuncin (Blood fluke)                                                                     | 2  | 3.1   | 10.8  | 18.8   | 0.3 | 0.17 | 6.02  | 6.2     | 21.7    | 36.4    | 0.3 | 0.17 | 5.91  |
| Q92124_Q92124_MOUSE | Parp1        | Poly (ADP-ribose) polymerase family, member 1 OS=Mus musculus GN=Parp1 PE=1 SV=1           | 21 | 7.8   | 27.3  | 46.7   | 0.3 | 0.17 | 6.02  | 62.7    | 697.9   | 1173.5  | 0.3 | 0.19 | 5.22  |
| Q92204_MCP2_MOUSE   | Mcp2         | Methyl-CpG binding protein 2 OS=Mus musculus GN=Mcp2 PE=1 SV=1                             | 3  | 4.3   | 15.9  | 26.6   | 0.3 | 0.16 | 6.25  | 23.8    | 16.9    | 43.8    | 0.4 | 0.23 | 4.37  |
| P17918_PCNA_MOUSE   | Pcna         | Proliferating cell nuclear antigen OS=Mus musculus GN=Pcna PE=1 SV=2                       | 6  | 5.4   | 20.3  | 34.8   | 0.3 | 0.16 | 6.44  | 42.3    | 162.6   | 273.4   | 0.3 | 0.15 | 6.46  |
| Q61686_CBX5_MOUSE   | Cbx5         | Chromatin protein homolog 5 OS=Mus musculus GN=Cbx5 PE=1 SV=1                              | 4  | 13.8  | 52.3  | 89.7   | 0.3 | 0.15 | 6.48  | 46.9    | 178.5   | 300.2   | 0.3 | 0.16 | 6.40  |
| Q04750_TOP1_MOUSE   | Top1         | DNA topoisomerase 1 OS=Mus musculus GN=Top1 PE=1 SV=2                                      | 5  | 5.6   | 21.4  | 36.7   | 0.3 | 0.15 | 6.52  | 27.8    | 86.1    | 144.7   | 0.3 | 0.19 | 5.20  |
| Q3LJL2_FRDC1_MOUSE  | Frdc1        | Frh2 domain-containing protein 1 OS=Mus musculus GN=Frhc1 PE=2 SV=3                        | 1  | 2.0   | 7.7   | 13.2   | 0.3 | 0.15 | 6.57  | 2.0     | 7.7     | 13.0    | 0.3 | 0.16 | 6.45  |
| PE8433_H31_MOUSE    | Hist1h3a     | Histone H3.1 OS=Mus musculus GN=H3a1 PE=1 SV=2                                             | 20 | 201.4 | 815.9 | 1399.1 | 0.2 | 0.14 | 6.95  | 11787.6 | 39478.7 | 66382.6 | 0.3 | 0.18 | 5.63  |
| EP9PW6_EBPW6_MOUSE  | Gcat         | 2-aminio-3-ketobutyrate coenzyme A ligase, mitochondrial OS=Mus musculus GN=Gcat PE=3 SV=1 | 1  | 1.0   | 4.1   | 7.1    | 0.2 | 0.14 | 6.97  | 1.0     | 4.1     | 6.9     | 0.2 | 0.15 | 6.84  |
| Q8Y9W1_HMG25_MOUSE  | Hmg25        | Rho GTPase-activating protein 25 OS=Mus musculus GN=Hmg25 PE=1 SV=2                        | 1  | 3.6   | 14.9  | 25.6   | 0.2 | 0.14 | 7.09  | 3.6     | 14.9    | 25.1    | 0.2 | 0.14 | 6.96  |
| Q84857_C0S6A1_MOUSE | C0s6a1       | Collagen alpha-1(XI) chain OS=Mus musculus GN=C0s6a1 PE=2 SV=1                             | 1  | 2.0   | 8.2   | 14.1   | 0.2 | 0.14 | 7.15  | 2.0     | 8.2     | 13.8    | 0.2 | 0.14 | 7.01  |
| P08249_MDHM_MOUSE   | Mdh2         | Malate dehydrogenase, mitochondrial OS=Mus musculus GN=Mdh2 PE=1 SV=3                      | 5  | 4.5   | 19.2  | 33.0   | 0.2 | 0.14 | 7.38  | 24.8    | 80.8    | 135.9   | 0.3 | 0.18 | 5.48  |
| Q9CS86_PARB3_MOUSE  | Parb3        | Partitioning defective 3 homolog 8 OS=Mus musculus GN=Parb3 PE=1 SV=2                      | 1  | 6.6   | 29.6  | 50.8   | 0.2 | 0.13 | 7.65  | 6.6     | 29.6    | 49.8    | 0.2 | 0.13 | 7.50  |
| PE2805_H4_MOUSE     | Hist1h4a     | Histone H4 OS=Mus musculus GN=H4a PE=1 SV=2                                                | 22 | 45.5  | 206.3 | 353.7  | 0.2 | 0.13 | 7.78  | 980.4   | 32164.1 | 54083.2 | 0.3 | 0.18 | 5.48  |
| B7ZNU1_B7ZNU1_MOUSE | Fn1          | Fibronectin OS=Mus musculus GN=Fn1 PE=1 SV=1                                               | 1  | 5.9   | 26.8  | 45.9   | 0.2 | 0.13 | 7.84  | 5.9     | 26.8    | 45.0    | 0.2 | 0.13 | 7.68  |
| P23198_CBX3_MOUSE   | Cbx3         | Chromatin protein homolog 3 OS=Mus musculus GN=Cbx3 PE=1 SV=2                              | 11 | 8.8   | 41.8  | 71.6   | 0.2 | 0.12 | 8.16  | 157.3   | 956.9   | 1608.9  | 0.2 | 0.10 | 10.23 |
| O55112_AIF2_MOUSE   | Aif2         | AIF family member 2 OS=Mus musculus GN=Aif2 PE=2 SV=2                                      | 1  | 3.3   | 15.7  | 27.0   | 0.2 | 0.12 | 8.18  | 3.3     | 15.7    | 26.4    | 0.2 | 0.12 | 8.02  |
| P53441_TBP1_MOUSE   | Tbp1         | Thymosin beta 4 OS=Mus musculus GN=Tbp1 PE=1 SV=1                                          | 1  | 1.2   | 5.6   | 9.6    | 0.2 | 0.12 | 8.20  | 1.2     | 5.6     | 9.5     | 0.2 | 0.12 | 8.04  |
| Q8K3C3_L2IC_MOUSE   | Lic          | Protein L2IC OS=Mus musculus GN=Lic PE=1 SV=1                                              | 1  | 6.5   | 31.8  | 54.5   | 0.2 | 0.12 | 8.41  | 6.5     | 31.8    | 53.5    | 0.2 | 0.12 | 8.24  |
| P83917_CBX1_MOUSE   | Cbx1         | Chromatin protein homolog 1 OS=Mus musculus GN=Cbx1 PE=1 SV=1                              | 12 | 5.5   | 27.1  | 46.5   | 0.2 | 0.12 | 8.43  | 42.9    | 222.9   | 1223.0  | 0.3 | 0.18 | 5.49  |
| Q80X32_C2D2_MOUSE   | Hist1h3      | Histone H3.2 OS=Mus musculus GN=H3a2 PE=1 SV=1                                             | 2  | 1.2   | 6.0   | 10.4   | 0.2 | 0.11 | 8.76  | 1.2     | 6.0     | 12.1    | 0.2 | 0.12 | 8.59  |
| Q90Z08_H2AF_MOUSE   | H2afy        | Core histone macro-H2A.1 OS=Mus musculus GN=H2afy PE=1 SV=3                                | 21 | 8.9   | 46.7  | 80.1   | 0.2 | 0.11 | 8.96  | 339.4   | 1278.2  | 2149.2  | 0.3 | 0.16 | 3.33  |
| P27661_H2AX_MOUSE   | H2ax         | Histone H2AX OS=Mus musculus GN=H2afx PE=1 SV=2                                            | 4  | 19.3  | 101.6 | 174.2  | 0.2 | 0.11 | 9.04  | 76.0    | 438.9   | 738.1   | 0.2 | 0.10 | 9.71  |
| Q99M09_NASP_MOUSE   | Nasp         | Nuclear autoantigenic sperm protein OS=Mus musculus GN=Nasp PE=1 SV=2                      | 1  | 1.7   | 9.8   | 16.8   | 0.2 | 0.10 | 10.04 | 1.7     | 9.8     | 16.5    | 0.2 | 0.10 | 9.85  |
| Q62W99_HIS21C_MOUSE | Hist1h2bc    | Histone H2B type 1-C/2/G OS=Mus musculus GN=Hist1h2bc PE=1 SV=2                            | 18 | 31.9  | 151.3 | 238.1  | 0.2 | 0.10 | 10.84 | 3456.8  | 19930.2 | 33512.2 | 0.2 | 0.10 | 9.69  |
| Q64522_H2AZB_MOUSE  | Hist2h2ab    | Histone H2A type 2-B OS=Mus musculus GN=Hist2h2ab PE=1 SV=3                                | 2  | 6.1   | 32.8  | 65.4   | 0.2 | 0.09 | 10.75 | 12.2    | 76.3    | 128.3   | 0.2 | 0.09 | 10.54 |
| Q6QYQ1_SCNAA_MOUSE  | Scn10a       | Sodium channel protein type 10 subunit alpha OS=Mus musculus GN=Scn10a PE=1 SV=2           | 1  | 2.4   | 15.7  | 26.9   | 0.2 | 0.09 | 11.17 | 2.4     | 15.7    | 26.3    | 0.2 | 0.09 | 10.95 |
| P70696_H2B1A_MOUSE  | Hist1h2ba    | Histone H2B type 1-A OS=Mus musculus GN=Hist1h2ba PE=1 SV=4                                | 10 | 169.7 |       |        |     |      |       |         |         |         |     |      |       |
