# Supplementary material
Source: PubMed Central journal article supplement (PMC11345869)
Supplement: NIHMS2014975-supplement-Supplementary_Table_2.pdf [file NIHMS2014975-supplement-Supplementary_Table_2.pdf]

Supplementary Table 2. Full list of peptides identified by mass spectrometry from SILAC experiment with WT (light) 3xMBT pulldown as compared to D355N mutant (heavy) pulldown assay.

| ProteinId           | GeneSymbol    | Description                                                         | PeptideSequence | max_sn_heavy | max_sn_light | Ratio_H_L | Ratio_L_H |
|---------------------|---------------|---------------------------------------------------------------------|-----------------|--------------|--------------|-----------|-----------|
| Q3TTN6_Q3TTN6_MOUSE | 1700010114Rik | Protein 1700010114Rik ( R.KVQQVLALEAHNDK.L                          |                 | 2.87         | 7.95         | 0.36      | 2.77      |
| G5E8E3_G5E8E3_MOUSE | 2310022A10Rik | Protein 2310022A10Rik K.AAUVSEAQDSQVSTK#S                           |                 | 55.91        | 318.42       | 0.18      | 5.70      |
| G5E8E3_G5E8E3_MOUSE | 2310022A10Rik | Protein 2310022A10Rik K.ASAQPALTVKR.A                               |                 | 19.00        | 1.51         | 12.56     | 0.08      |
| G5E8E3_G5E8E3_MOUSE | 2310022A10Rik | Protein 2310022A10Rik K.ATSSATTATTPK#.L                             |                 | 21.37        | 6.89         | 3.10      | 0.32      |
| G3UYI6_G3UYI6_MOUSE | A930009A15Rik | Protein A930009A15Rik R.NSQHLCLSSKR.R                               |                 | 3.16         | 3.09         | 1.02      | 0.98      |
| Q3UHJ0_AAK1_MOUSE   | Aak1          | AP2-associated protein k K.AGQTQPNGLIPIQALTPR@.K                    |                 | 9.57         | 3.29         | 2.90      | 0.34      |
| Q3UHJ0_AAK1_MOUSE   | Aak1          | AP2-associated protein k R.ATVQPLPQAAGPSNQPGLLPSVSQPK#.A            |                 | 9.57         | 2.74         | 3.58      | 0.28      |
| Q3UHJ0_AAK1_MOUSE   | Aak1          | AP2-associated protein k R.DLK#VENILLHDR@.G                         |                 | 11.22        | 2.56         | 4.38      | 0.23      |
| Q3UHJ0_AAK1_MOUSE   | Aak1          | AP2-associated protein k R.LTDPITPTTETSIAPR.Q                       |                 | 20.96        | 6.24         | 3.36      | 0.30      |
| Q3UHJ0_AAK1_MOUSE   | Aak1          | AP2-associated protein k K.AGQTQPNGLIPIQALTPR@.K                    |                 | 10.24        | 2.77         | 3.70      | 0.27      |
| Q3UHJ0_AAK1_MOUSE   | Aak1          | AP2-associated protein k K.AQATPSQPLQSSQPK#.Q                       |                 | 20.97        | 4.03         | 5.20      | 0.19      |
| Q3UHJ0_AAK1_MOUSE   | Aak1          | AP2-associated protein k R.ATVQPLPQAAGPSNQPGLLPSVSQPK#.A            |                 | 13.60        | 2.95         | 4.61      | 0.22      |
| Q3UHJ0_AAK1_MOUSE   | Aak1          | AP2-associated protein k R.DLK#VENILLHDR@.G                         |                 | 19.13        | 3.90         | 4.91      | 0.20      |
| Q3UHJ0_AAK1_MOUSE   | Aak1          | AP2-associated protein k R.LTDPITPTTETSIAPR.Q                       |                 | 24.00        | 8.24         | 2.91      | 0.34      |
| Q3UHJ0_AAK1_MOUSE   | Aak1          | AP2-associated protein k R.R#EQGSSGLGSSGSSGSSGLGSGYIGR@.V           |                 | 7.27         | 3.31         | 2.19      | 0.46      |
| Q9JKX4_AATF_MOUSE   | Aatf          | Protein AATF O5=Mus mu K.ALLTTNQLPQPDVFPVFK#.D                      |                 | 17.25        | 9.58         | 1.80      | 0.56      |
| Q9JKX4_AATF_MOUSE   | Aatf          | Protein AATF O5=Mus mu R.EADPEADPEEATR@.A                           |                 | 15.82        | 8.02         | 1.97      | 0.51      |
| Q9JKX4_AATF_MOUSE   | Aatf          | Protein AATF O5=Mus mu R.FADFTYR@.N                                 |                 | 15.50        | 4.69         | 3.30      | 0.30      |
| Q9JKX4_AATF_MOUSE   | Aatf          | Protein AATF O5=Mus mu K.NQJALWDQLLEGR@.J                           |                 | 14.78        | 11.12        | 1.33      | 0.75      |
| Q9JKX4_AATF_MOUSE   | Aatf          | Protein AATF O5=Mus mu R.SLVDLQELLFYQPDTR@.H                        |                 | 9.91         | 4.37         | 2.26      | 0.44      |
| Q9JKX4_AATF_MOUSE   | Aatf          | Protein AATF O5=Mus mu R.VLGGPEPVPPEVAETLPGPETLPQGPANAHLR.D         |                 | 15.58        | 5.54         | 2.81      | 0.36      |
| Q6P542_ABCF1_MOUSE  | Abcf1         | ATP-binding cassette sub K.STLLLLTGK#.L                             |                 | 9.62         | 1.52         | 6.33      | 0.16      |
| Q6P542_ABCF1_MOUSE  | Abcf1         | ATP-binding cassette sub K.AANAENDFVSQAEVSSR@.Q                     |                 | 21.47        | 8.02         | 2.68      | 0.37      |
| Q6P542_ABCF1_MOUSE  | Abcf1         | ATP-binding cassette sub K.ANDPYANLLSK#.K                           |                 | 8.64         | 4.52         | 1.91      | 0.52      |
| Q6P542_ABCF1_MOUSE  | Abcf1         | ATP-binding cassette sub K.AVAEPPGLR@.S                             |                 | 49.86        | 13.07        | 3.82      | 0.26      |
| Q6P542_ABCF1_MOUSE  | Abcf1         | ATP-binding cassette sub K.GAVIVVSHDAR@.L                           |                 | 21.18        | 6.39         | 3.31      | 0.30      |
| Q6P542_ABCF1_MOUSE  | Abcf1         | ATP-binding cassette sub K.IGFNNQYAEQLHM*EETPTYLQR@.S               |                 | 34.12        | 8.08         | 4.22      | 0.24      |
| Q6P542_ABCF1_MOUSE  | Abcf1         | ATP-binding cassette sub R.LQQDLQEGDDTAEKLEK.V                      |                 | 51.89        | 14.80        | 3.51      | 0.29      |
| Q6P542_ABCF1_MOUSE  | Abcf1         | ATP-binding cassette sub K.NLFDGIDM*DSR@.J                          |                 | 10.96        | 3.30         | 3.32      | 0.30      |
| Q6P542_ABCF1_MOUSE  | Abcf1         | ATP-binding cassette sub K.NQDEESEPPELLK#.K                         |                 | 5.98         | 6.53         | 0.92      | 1.09      |
| Q6P542_ABCF1_MOUSE  | Abcf1         | ATP-binding cassette sub R.QAM*LENASDIKIKLEK#.F                     |                 | 15.63        | 5.37         | 2.91      | 0.34      |
| Q6P542_ABCF1_MOUSE  | Abcf1         | ATP-binding cassette sub K.QLSVPSDEEVEVPAPIPR@.G                    |                 | 4.82         | 1.72         | 2.80      | 0.36      |
| Q6P542_ABCF1_MOUSE  | Abcf1         | ATP-binding cassette sub R.SFNLPHYQDAR@.K                           |                 | 33.21        | 11.47        | 2.90      | 0.35      |
| Q6P542_ABCF1_MOUSE  | Abcf1         | ATP-binding cassette sub K.STLLLLTGK#.L                             |                 | 42.06        | 13.86        | 3.03      | 0.33      |
| Q6P542_ABCF1_MOUSE  | Abcf1         | ATP-binding cassette sub K.TFFEELAVEDK#.Q                           |                 | 13.65        | 5.83         | 2.34      | 0.43      |
| Q6P542_ABCF1_MOUSE  | Abcf1         | ATP-binding cassette sub K.AVAEPPGLR@.S                             |                 | 26.58        | 6.97         | 3.81      | 0.26      |
| Q6P542_ABCF1_MOUSE  | Abcf1         | ATP-binding cassette sub K.GAVIVVSHDAR@.L                           |                 | 9.90         | 2.34         | 4.23      | 0.24      |
| Q6P542_ABCF1_MOUSE  | Abcf1         | ATP-binding cassette sub K.IGFNNQYAEQLHM*EETPTYLQR@.S               |                 | 21.54        | 4.13         | 5.21      | 0.19      |
| Q6P542_ABCF1_MOUSE  | Abcf1         | ATP-binding cassette sub K.NLFDGIDM*DSR@.J                          |                 | 7.11         | 1.64         | 4.33      | 0.23      |
| Q6P542_ABCF1_MOUSE  | Abcf1         | ATP-binding cassette sub K.QLSVPSDEEVEVPAPIPR@.G                    |                 | 4.75         | 2.03         | 2.34      | 0.43      |
| Q6P542_ABCF1_MOUSE  | Abcf1         | ATP-binding cassette sub R.R#LQGLQEQGDDTAEEK#LEK#.V                 |                 | 5.87         | 2.71         | 2.17      | 0.46      |
| Q6P542_ABCF1_MOUSE  | Abcf1         | ATP-binding cassette sub R.SFNLPHYQDAR@.K                           |                 | 13.33        | 4.78         | 2.79      | 0.36      |
| Q6P542_ABCF1_MOUSE  | Abcf1         | ATP-binding cassette sub K.SK#PAADSEGEEDTAK#.E                      |                 | 6.82         | 1.36         | 5.01      | 0.20      |
| Q6P542_ABCF1_MOUSE  | Abcf1         | ATP-binding cassette sub K.STLLLLTGK#.L                             |                 | 25.17        | 4.61         | 5.46      | 0.18      |
| Q6P542_ABCF1_MOUSE  | Abcf1         | ATP-binding cassette sub K.TFFEELAVEDK#.Q                           |                 | 6.68         | 2.77         | 2.41      | 0.41      |
| Q99LE6_ABCF2_MOUSE  | Abcf2         | ATP-binding cassette sub K.IPPVIM*VQNVFK#.Y                         |                 | 5.89         | 3.88         | 1.52      | 0.66      |
| Q99LE6_ABCF2_MOUSE  | Abcf2         | ATP-binding cassette sub K.LLTGELLPTDGM*IR.K                        |                 | 14.66        | 11.03        | 1.33      | 0.75      |
| Q99LE6_ABCF2_MOUSE  | Abcf2         | ATP-binding cassette sub K.M*MS*ASGLTER@.V                          |                 | 13.15        | 9.77         | 1.35      | 0.74      |
| Q99LE6_ABCF2_MOUSE  | Abcf2         | ATP-binding cassette sub K.SM*LLSAGK#.R                             |                 | 13.97        | 4.12         | 3.39      | 0.30      |
| Q99LE6_ABCF2_MOUSE  | Abcf2         | ATP-binding cassette sub K.YYTGNQYQVVK#.T                           |                 | 14.26        | 9.68         | 1.47      | 0.68      |
| Q99LE6_ABCF2_MOUSE  | Abcf2         | ATP-binding cassette sub K.YYTGNQYQVVK#.T                           |                 | 3.94         | 1.49         | 2.64      | 0.38      |
| Q8K268_ABCF3_MOUSE  | Abcf3         | ATP-binding cassette sub R.ALFFAR@PDLLLLDEPTNM*.L DVR@.A            |                 | 13.33        | 5.83         | 2.29      | 0.44      |
| Q8K268_ABCF3_MOUSE  | Abcf3         | ATP-binding cassette sub R.ALFFAR@PDLLLLDEPTNMLDVR@.A               |                 | 5.35         | 1.64         | 3.26      | 0.31      |
| Q8K268_ABCF3_MOUSE  | Abcf3         | ATP-binding cassette sub R.ASVILAGLFTPK#.M                          |                 | 12.88        | 3.79         | 3.40      | 0.29      |
| Q8K268_ABCF3_MOUSE  | Abcf3         | ATP-binding cassette sub R.FSPPLQLDEVDVFDYDPK#.H                    |                 | 4.25         | 2.09         | 2.03      | 0.49      |
| Q8K268_ABCF3_MOUSE  | Abcf3         | ATP-binding cassette sub R.LAEPQNGNSQVLLDAPILQSK#.I                 |                 | 7.29         | 6.91         | 1.06      | 0.95      |
| Q8K268_ABCF3_MOUSE  | Abcf3         | ATP-binding cassette sub K.TSNPLVLEASASQAGSR@.K                     |                 | 7.32         | 2.88         | 2.54      | 0.39      |
| Q8K268_ABCF3_MOUSE  | Abcf3         | ATP-binding cassette sub R.VEGGFDQYR@.A                             |                 | 10.00        | 2.14         | 4.68      | 0.21      |
| Q8K268_ABCF3_MOUSE  | Abcf3         | ATP-binding cassette sub R.VPAHISLHVVEQVAGDDTPALQSVLESQVTR@EDLLR@.Q |                 | 5.15         | 1.52         | 3.38      | 0.30      |
| Q8VCR7_ABHEB_MOUSE  | Abhd14b       | Alpha/beta hydrolase do R.AVADILPGLGR@.S                            |                 | 38.02        | 9.19         | 4.14      | 0.24      |
| Q8VCR7_ABHEB_MOUSE  | Abhd14b       | Alpha/beta hydrolase do R.FSSETWQNLGLTOR@.L                         |                 | 8.73         | 2.94         | 2.97      | 0.34      |
| Q8K4G5_ABLM1_MOUSE  | Abilm1        | Actin-binding LIM protei K.AYDIER@PDLLITPEFYTSYEDK#QER@.Q           |                 | 12.13        | 7.79         | 1.56      | 0.64      |
| Q8K4G5_ABLM1_MOUSE  | Abilm1        | Actin-binding LIM protei R.QLQEQLM*KL.H                             |                 | 4.93         | 3.69         | 1.33      | 0.75      |
| Q8K4G5_ABLM1_MOUSE  | Abilm1        | Actin-binding LIM protei R.STSQGINSVPVYSR@.H                        |                 | 19.01        | 4.64         | 4.09      | 0.24      |
| Q8K4G5_ABLM1_MOUSE  | Abilm1        | Actin-binding LIM protei R.TLSPPTSAEYQDVR@.D                        |                 | 21.87        | 12.63        | 1.73      | 0.58      |
| Q8K4G5_ABLM1_MOUSE  | Abilm1        | Actin-binding LIM protei R.TSSEIYSR@PGSSIPGSPHTIYAK#.V              |                 | 3.12         | 1.22         | 2.55      | 0.39      |
| Q8K4G5_ABLM1_MOUSE  | Abilm1        | Actin-binding LIM protei K.VDNEILDYK#DLAIPK#.V                      |                 | 33.51        | 1.71         | 1.89      | 0.53      |
| Q8K4G5_ABLM1_MOUSE  | Abilm1        | Actin-binding LIM protei R.GVSM*PNM*LEPK#.I                         |                 | 8.95         | 3.82         | 2.34      | 0.43      |
| Q8K4G5_ABLM1_MOUSE  | Abilm1        | Actin-binding LIM protei K.LNSGLQGLLKH#.E                           |                 | 10.69        | 6.16         | 1.73      | 0.58      |
| Q8K4G5_ABLM1_MOUSE  | Abilm1        | Actin-binding LIM protei K.NGLHR@PVSTDFQAQNSYGDISGGVR@.D            |                 | 4.25         | 2.61         | 1.63      | 0.61      |
| Q8K4G5_ABLM1_MOUSE  | Abilm1        | Actin-binding LIM protei R.QLQEQLM*KL.H                             |                 | 22.87        | 9.16         | 2.50      | 0.40      |
| Q8K4G5_ABLM1_MOUSE  | Abilm1        | Actin-binding LIM protei R.SSGR@EEDDEELLR@.R                        |                 | 10.97        | 3.38         | 3.25      | 0.31      |
| Q8K4G5_ABLM1_MOUSE  | Abilm1        | Actin-binding LIM protei R.SSGREDEDEELLR.L                          |                 | 36.91        | 15.70        | 2.35      | 0.43      |
| Q8K4G5_ABLM1_MOUSE  | Abilm1        | Actin-binding LIM protei R.STSQGINSVPVYSR@.H                        |                 | 32.63        | 15.43        | 2.11      | 0.47      |
| Q8K4G5_ABLM1_MOUSE  | Abilm1        | Actin-binding LIM protei R.TLSPPTSAEYQDVR@.D                        |                 | 24.23        | 10.86        | 2.23      | 0.45      |
| Q8K4G5_ABLM1_MOUSE  | Abilm1        | Actin-binding LIM protei K.VDNEILDYK#DLAIPK#.V                      |                 | 45.84        | 18.67        | 2.45      | 0.41      |
| Q5SWU9_ACACA_MOUSE  | Acaca         | Acetyl-CoA carboxylase 1 K.AAEEVGPVM*IK#.A                          |                 | 43.76        | 2.92         | 15.00     | 0.07      |
| Q5SWU9_ACACA_MOUSE  | Acaca         | Acetyl-CoA carboxylase 1 R.DFTVASPEAFVTR@.F                         |                 | 22.39        | 7.24         | 3.09      | 0.32      |
| Q5SWU9_ACACA_MOUSE  | Acaca         | Acetyl-CoA carboxylase 1 R.DIIIVGNDITYR@.J                          |                 | 18.12        | 3.67         | 4.93      | 0.20      |
| Q5SWU9_ACACA_MOUSE  | Acaca         | Acetyl-CoA carboxylase 1 K.EASFVQLQNEGER@.L                         |                 | 14.25        | 3.26         | 4.38      | 0.23      |
| Q5SWU9_ACACA_MOUSE  | Acaca         | Acetyl-CoA carboxylase 1 R.EVFFM*NTQISVQLVQR@.Y                     |                 | 15.18        | 3.34         | 4.55      | 0.22      |
| Q5SWU9_ACACA_MOUSE  | Acaca         | Acetyl-CoA carboxylase 1 K.FGAYIVDGLR@.E                            |                 | 12.38        | 2.59         | 4.78      | 0.21      |
| Q5SWU9_ACACA_MOUSE  | Acaca         | Acetyl-CoA carboxylase 1 R.FIIGSVSDNSDIBSLVK#.L                     |                 | 8.30         | 2.30         | 3.61      | 0.28      |
| Q5SWU9_ACACA_MOUSE  | Acaca         | Acetyl-CoA carboxylase 1 R.FVVM*VTPEDLKR.A                          |                 | 155.99       | 1.12         | 138.67    | 0.01      |
| Q5SWU9_ACACA_MOUSE  | Acaca         | Acetyl-CoA carboxylase 1 R.GGSVVVDIPTNPR@.H                         |                 | 15.46        | 11.26        | 1.37      | 0.73      |
| Q5SWU9_ACACA_MOUSE  | Acaca         | Acetyl-CoA carboxylase 1 R.GGVLPALHTLLNTVDVIELYEGIK#.Y              |                 | 5.75         | 7.61         | 0.76      | 1.32      |
| Q5SWU9_ACACA_MOUSE  | Acaca         | Acetyl-CoA carboxylase 1 R.GSVLEPGEVLIK#.F                          |                 | 19.59        | 6.37         | 3.07      | 0.33      |
| Q5SWU9_ACACA_MOUSE  | Acaca         | Acetyl-CoA carboxylase 1 K.GVINDILWKK#.T                            |                 | 12.59        | 1.65         | 7.63      | 0.13      |
| Q5SWU9_ACACA_MOUSE  | Acaca         | Acetyl-CoA carboxylase 1 R.IGLAEIIR@.H                              |                 | 20.36        | 4.78         | 4.26      | 0.23      |
| Q5SWU9_ACACA_MOUSE  | Acaca         | Acetyl-CoA carboxylase 1 R.IGSFQDQLFLR@.A                           |                 | 44.39        | 10.09        | 4.40      | 0.23      |
| Q5SWU9_ACACA_MOUSE  | Acaca         | Acetyl-CoA carboxylase 1 K.IHNNANPELTDGQIQAM*LR@.R                  |                 | 9.59         | 3.19         | 3.01      | 0.33      |
| Q5SWU9_ACACA_MOUSE  | Acaca         | Acetyl-CoA carboxylase 1 K.IIQAGQVQVFPDSAFK#.T                      |                 | 8.48         | 4.83         | 1.76      | 0.57      |
| Q5SWU9_ACACA_MOUSE  | Acaca         | Acetyl-CoA carboxylase 1 R.ILNVPDQVLEK#.G                           |                 | 12.77        | 3.23         | 3.95      | 0.25      |
| Q5SWU9_ACACA_MOUSE  | Acaca         | Acetyl-CoA carboxylase 1 K.ITDIIK#EELGGAENLR@.G                     |                 | 18.07        | 4.77         | 3.79      | 0.26      |
| Q5SWU9_ACACA_MOUSE  | Acaca         | Acetyl-CoA carboxylase 1 R.ITSENPDEGFK#SSGTVQELNFR@.S               |                 | 17.95        | 5.20         | 3.45      | 0.29      |
| Q5SWU9_ACACA_MOUSE  | Acaca         | Acetyl-CoA carboxylase 1 R.IYVAANSGAR@.I                            |                 | 12.16        | 4.40         | 2.77      | 0.36      |
| Q5SWU9_ACACA_MOUSE  | Acaca         | Acetyl-CoA carboxylase 1 R.LGGIPVGVAVETR@.T                         |                 | 34.34        | 11.44        | 3.00      | 0.33      |
| Q5SWU9_ACACA_MOUSE  | Acaca         | Acetyl-CoA carboxylase 1 R.LGTEPELSTR@.K                            |                 | 18.65        | 53.82        | 0.35      | 2.89      |
| Q5SWU9_ACACA_MOUSE  | Acaca         | Acetyl-CoA carboxylase 1 K.LLETESFQLNR@.I                           |                 | 22.92        | 5.96         | 3.85      | 0.26      |
| Q5SWU9_ACACA_MOUSE  | Acaca         | Acetyl-CoA carboxylase 1 K.LPELLEK#.N                               |                 | 10.72        | 2.13         | 5.02      | 0.20      |

|                     |        |                                                          |         |         |       |      |
|---------------------|--------|----------------------------------------------------------|---------|---------|-------|------|
| Q5SWU9_ACACA_MOUSE  | Acaca  | Acetyl-CoA carboxylase 1 R.LPGGNEIGM**VAWK#M             | 6.47    | 3.57    | 1.81  | 0.55 |
| Q5SWU9_ACACA_MOUSE  | Acaca  | Acetyl-CoA carboxylase 1 R.M**AAEVLVYVR@.R               | 8.33    | 3.10    | 2.69  | 0.37 |
| Q5SWU9_ACACA_MOUSE  | Acaca  | Acetyl-CoA carboxylase 1 K.TLR@DPSLPLLELDQIM**TSVSGR@.I  | 6.66    | 1.96    | 3.41  | 0.29 |
| Q5SWU9_ACACA_MOUSE  | Acaca  | Acetyl-CoA carboxylase 1 K.VEVGTEVDYR@.F                 | 20.64   | 8.28    | 2.49  | 0.40 |
| Q5SWU9_ACACA_MOUSE  | Acaca  | Acetyl-CoA carboxylase 1 R.VLQAEK#J                      | 17.93   | 6.48    | 2.77  | 0.36 |
| Q5SWU9_ACACA_MOUSE  | Acaca  | Acetyl-CoA carboxylase 1 K.VQQAELHTGSLPQIQSTALR@.G       | 15.57   | 4.75    | 3.27  | 0.31 |
| Q07417_ACAD5_MOUSE  | Acad5  | Short-chain specific acyl-R.ITEYEGTSEIQR@.L              | 6.22    | 2.36    | 2.63  | 0.38 |
| P50544_ACADV_MOUSE  | Acadvl | Very long-chain specific z.K.ELGAFGLQVPSLEGGGLSNTQYAR@.L | 8.88    | 3.10    | 2.87  | 0.35 |
| P50544_ACADV_MOUSE  | Acadvl | Very long-chain specific z.R.SGELAVQALDQFATVVEAK#.L      | 6.29    | 1.74    | 3.62  | 0.28 |
| Q8BMP6_GCP60_MOUSE  | Acbd3  | Golgi resident protein GC.R.EPGEAAAEAAEAER.R             | 13.90   | 6.12    | 2.27  | 0.44 |
| Q8BMP6_GCP60_MOUSE  | Acbd3  | Golgi resident protein GC.K.IR@QDASVITVR@.R              | 17.02   | 6.34    | 2.68  | 0.37 |
| Q8BMP6_GCP60_MOUSE  | Acbd3  | Golgi resident protein GC.K.NANK#LLDEIVPVYR@.R           | 12.95   | 6.91    | 1.87  | 0.53 |
| Q8BMP6_GCP60_MOUSE  | Acbd3  | Golgi resident protein GC.K.QQEVVM**AGASLPASSK#.V        | 7.57    | 2.75    | 2.76  | 0.36 |
| Q8BMP6_GCP60_MOUSE  | Acbd3  | Golgi resident protein GC.K.VLEPEAAEALENGPK#.D           | 6.21    | 2.65    | 2.34  | 0.43 |
| Q5EE38_ACD_MOUSE    | Acad   | Adrenocortical dysplasia R.VQVAQDHAPAEFLVQVDR@.F         | 5.37    | 2.83    | 1.90  | 0.53 |
| Q9JIX8_ACINU_MOUSE  | Acin1  | Apoptotic chromatin cor.K.LLDDLFR@.K                     | 31.96   | 21.34   | 1.50  | 0.67 |
| Q9JIX8_ACINU_MOUSE  | Acin1  | Apoptotic chromatin cor.K.SGVSTIDDPVR@.T                 | 26.16   | 17.01   | 1.54  | 0.65 |
| Q9JIX8_ACINU_MOUSE  | Acin1  | Apoptotic chromatin cor.R.TGTLVEEAFWIDK#.I               | 13.45   | 5.11    | 2.63  | 0.38 |
| Q9JIX8_ACINU_MOUSE  | Acin1  | Apoptotic chromatin cor.K.VTLGDTLTR@.R                   | 10.40   | 7.16    | 1.45  | 0.69 |
| Q9JIX8_ACINU_MOUSE  | Acin1  | Apoptotic chromatin cor.K.GVQAGNSDTEGGQPGR@.K            | 82.46   | 34.44   | 2.39  | 0.42 |
| Q9JIX8_ACINU_MOUSE  | Acin1  | Apoptotic chromatin cor.K.GVQAGNSDTEGGQPGR@K#.K          | 4.15    | 1.37    | 3.02  | 0.33 |
| Q9JIX8_ACINU_MOUSE  | Acin1  | Apoptotic chromatin cor.R.K#SVSATK#.G                    | 63.15   | 23.70   | 2.66  | 0.38 |
| Q9JIX8_ACINU_MOUSE  | Acin1  | Apoptotic chromatin cor.K.K#VTLGDTLTR@.R                 | 45.67   | 16.96   | 2.69  | 0.37 |
| Q9JIX8_ACINU_MOUSE  | Acin1  | Apoptotic chromatin cor.K.LLDDLFR@.K                     | 278.42  | 136.20  | 2.04  | 0.49 |
| Q9JIX8_ACINU_MOUSE  | Acin1  | Apoptotic chromatin cor.K.SGVSTIDDPVR@.T                 | 133.68  | 60.46   | 2.21  | 0.45 |
| Q9JIX8_ACINU_MOUSE  | Acin1  | Apoptotic chromatin cor.K.SLIPDIKLAGQEAQVVDLHADDSS.R     | 28.00   | 7.89    | 3.55  | 0.28 |
| Q9JIX8_ACINU_MOUSE  | Acin1  | Apoptotic chromatin cor.R.TALHGVK#.W                     | 18.96   | 12.23   | 1.55  | 0.64 |
| Q9JIX8_ACINU_MOUSE  | Acin1  | Apoptotic chromatin cor.R.TAQVPSPPR@.G                   | 9.24    | 9.35    | 0.99  | 1.01 |
| Q9JIX8_ACINU_MOUSE  | Acin1  | Apoptotic chromatin cor.R.TGTLVEEAFWIDK#.I               | 81.72   | 31.06   | 2.63  | 0.38 |
| Q9JIX8_ACINU_MOUSE  | Acin1  | Apoptotic chromatin cor.R.TGTLVEEAFWIDK#K#.S             | 29.43   | 29.01   | 2.43  | 0.41 |
| Q9JIX8_ACINU_MOUSE  | Acin1  | Apoptotic chromatin cor.R.VSDESVLPLAQK#.S                | 8.72    | 4.43    | 1.97  | 0.51 |
| Q9JIX8_ACINU_MOUSE  | Acin1  | Apoptotic chromatin cor.K.VTLGDTLTR@.R                   | 141.22  | 59.01   | 2.39  | 0.42 |
| Q9JIX8_ACINU_MOUSE  | Acin1  | Apoptotic chromatin cor.R.WGASTAATQK#.K                  | 41.41   | 21.32   | 1.94  | 0.51 |
| Q52KR6_Q52KR6_MOUSE | Acin1  | Acin1 protein OS=Mus m.K.EAVVDLHADDSSR@.J                | 8.29    | 2.34    | 3.54  | 0.28 |
| Q9JIX8_ACINU_MOUSE  | Acin1  | Apoptotic chromatin cor.K.AEEQGAPR@PLHPPPPPPVQPPPHPR@.A  | 14.91   | 6.54    | 2.28  | 0.44 |
| Q9JIX8_ACINU_MOUSE  | Acin1  | Apoptotic chromatin cor.K.APVVLQPEQVSEETPPPLTK#.E        | 39.59   | 14.63   | 2.71  | 0.37 |
| Q9JIX8_ACINU_MOUSE  | Acin1  | Apoptotic chromatin cor.K.APVVLQPEQVSEETPPPLTK#.E        | 3.04    | 1.69    | 1.80  | 0.56 |
| Q9JIX8_ACINU_MOUSE  | Acin1  | Apoptotic chromatin cor.K.ETQVSLPQEEVVK#.S               | 43.15   | 15.08   | 2.86  | 0.35 |
| Q9JIX8_ACINU_MOUSE  | Acin1  | Apoptotic chromatin cor.K.GALM**LENLQK#.H                | 11.85   | 3.60    | 3.29  | 0.30 |
| Q9JIX8_ACINU_MOUSE  | Acin1  | Apoptotic chromatin cor.K.GVQAGNSDTEGGQPGR@.K            | 66.53   | 22.10   | 3.01  | 0.33 |
| Q9JIX8_ACINU_MOUSE  | Acin1  | Apoptotic chromatin cor.R.HLSHPPEQHVQIR@.L               | 61.62   | 16.82   | 3.66  | 0.27 |
| Q9JIX8_ACINU_MOUSE  | Acin1  | Apoptotic chromatin cor.K.HSTPHAAFPQNSQIGEEM**SQNSFIK#.Q | 21.74   | 8.17    | 2.66  | 0.38 |
| Q9JIX8_ACINU_MOUSE  | Acin1  | Apoptotic chromatin cor.R.ISEDETER@.N                    | 10.23   | 2.99    | 3.42  | 0.29 |
| Q9JIX8_ACINU_MOUSE  | Acin1  | Apoptotic chromatin cor.K.LLDDLFR@.K                     | 100.24  | 27.40   | 3.66  | 0.27 |
| Q9JIX8_ACINU_MOUSE  | Acin1  | Apoptotic chromatin cor.K.QFEEGEEER@.T                   | 21.59   | 7.55    | 2.86  | 0.35 |
| Q9JIX8_ACINU_MOUSE  | Acin1  | Apoptotic chromatin cor.K.SAPLPLVEEFAPAK#.G              | 122.56  | 35.16   | 3.49  | 0.29 |
| Q9JIX8_ACINU_MOUSE  | Acin1  | Apoptotic chromatin cor.K.SGVSTIDDPVR@.T                 | 28.28   | 9.71    | 2.91  | 0.34 |
| Q9JIX8_ACINU_MOUSE  | Acin1  | Apoptotic chromatin cor.K.SK#PEYSQTAEEEDQETPSR@.N        | 27.80   | 7.66    | 3.63  | 0.28 |
| Q9JIX8_ACINU_MOUSE  | Acin1  | Apoptotic chromatin cor.K.SQSPSPPLPEDLEK#.A              | 8.57    | 4.38    | 1.96  | 0.51 |
| Q9JIX8_ACINU_MOUSE  | Acin1  | Apoptotic chromatin cor.R.TGTLVEEAFWIDK#.I               | 49.60   | 17.26   | 2.87  | 0.35 |
| Q9JIX8_ACINU_MOUSE  | Acin1  | Apoptotic chromatin cor.R.TGTLVEEAFWIDK#K#.S             | 18.46   | 5.70    | 3.24  | 0.31 |
| Q9JIX8_ACINU_MOUSE  | Acin1  | Apoptotic chromatin cor.R.TVTQVPAEQQENGQR@.E             | 7.29    | 3.60    | 2.03  | 0.49 |
| Q9JIX8_ACINU_MOUSE  | Acin1  | Apoptotic chromatin cor.R.VSDESVLPLAQK#.S                | 74.58   | 20.19   | 3.69  | 0.27 |
| Q9JIX8_ACINU_MOUSE  | Acin1  | Apoptotic chromatin cor.K.VTLGDTLTR@.R                   | 41.00   | 13.86   | 2.96  | 0.34 |
| Q9JIX8_ACINU_MOUSE  | Acin1  | Apoptotic chromatin cor.R.WGASTAATQK#.K                  | 108.11  | 9.65    | 11.20 | 0.09 |
| Q99K10_ACON_MOUSE   | Aco2   | Aconitate hydratase, mit K.SQFITPQSEQR.A                 | 2.40    | 4.44    | 0.54  | 1.85 |
| Q32MW3_ACO10_MOUSE  | Aco10  | Acyl-coenzyme A thioester R.DSYIEVLLPLGTDPELR@.D         | 4.55    | 3.77    | 1.21  | 0.83 |
| Q9CZW4_ACSL3_MOUSE  | Acs13  | Long-chain-fatty-acid-Cr R.LSPDPWPTPETGLVDAFK#.L         | 4.31    | 2.59    | 1.66  | 0.60 |
| Q9QUJ7_ACSL4_MOUSE  | Acs14  | Long-chain-fatty-acid-Cr R.LSPDWPTPETGLVDAFK#.L          | 5.47    | 3.31    | 1.65  | 0.61 |
| P62737_ACTA_MOUSE   | Acta2  | Actin, aortic smooth mu: K.AGFAGDDAPR.A                  | 4366.71 | 4214.43 | 1.04  | 0.97 |
| P62737_ACTA_MOUSE   | Acta2  | Actin, aortic smooth mu: R.AVFPVGRPR@.H                  | 351.14  | 337.12  | 1.04  | 0.96 |
| P62737_ACTA_MOUSE   | Acta2  | Actin, aortic smooth mu: R.DLTDYLM**K#.I                 | 2939.93 | 2703.79 | 1.09  | 0.92 |
| P62737_ACTA_MOUSE   | Acta2  | Actin, aortic smooth mu: R.DLTDYLMK#.I                   | 722.19  | 696.49  | 1.04  | 0.96 |
| P62737_ACTA_MOUSE   | Acta2  | Actin, aortic smooth mu: R.DLTDYLM**K#LTER@.G            | 12.57   | 8.99    | 1.40  | 0.72 |
| P62737_ACTA_MOUSE   | Acta2  | Actin, aortic smooth mu: K.DLYANNVLSGGTTM**YPIADR.M      | 14.10   | 23.08   | 0.61  | 1.64 |
| P62737_ACTA_MOUSE   | Acta2  | Actin, aortic smooth mu: K.DSYVGEAQS#K.R                 | 3905.78 | 3778.19 | 1.03  | 0.97 |
| P62737_ACTA_MOUSE   | Acta2  | Actin, aortic smooth mu: K.DSYVGEAQS#K#R@.G              | 1333.24 | 1022.19 | 1.30  | 0.77 |
| P62737_ACTA_MOUSE   | Acta2  | Actin, aortic smooth mu: K.EITALAPSTM**K#.I              | 2658.19 | 2641.03 | 1.01  | 0.99 |
| P62737_ACTA_MOUSE   | Acta2  | Actin, aortic smooth mu: K.EITALAPSTMK#.I                | 1565.89 | 1361.25 | 1.15  | 0.87 |
| P62737_ACTA_MOUSE   | Acta2  | Actin, aortic smooth mu: R.HQGVMM**VGM**GQK#.D           | 58.67   | 60.10   | 0.98  | 1.02 |
| P62737_ACTA_MOUSE   | Acta2  | Actin, aortic smooth mu: R.HQGVMM**VGM**GQK#.D           | 1309.98 | 1253.55 | 1.05  | 0.96 |
| P62737_ACTA_MOUSE   | Acta2  | Actin, aortic smooth mu: R.HQGVMM**VGM**GQK#.D           | 1367.09 | 1310.16 | 1.04  | 0.96 |
| P62737_ACTA_MOUSE   | Acta2  | Actin, aortic smooth mu: R.HQGVMM**VGM**GQK#.D           | 300.67  | 268.42  | 1.12  | 0.89 |
| P62737_ACTA_MOUSE   | Acta2  | Actin, aortic smooth mu: R.HQGVMM**VGM**GQK#.D           | 274.23  | 269.09  | 1.02  | 0.98 |
| P62737_ACTA_MOUSE   | Acta2  | Actin, aortic smooth mu: R.HQGVMM**VGM**GQK#.D           | 336.59  | 356.29  | 0.94  | 1.06 |
| P62737_ACTA_MOUSE   | Acta2  | Actin, aortic smooth mu: K.IAIPPER@.K                    | 2781.12 | 3356.90 | 0.83  | 1.21 |
| P62737_ACTA_MOUSE   | Acta2  | Actin, aortic smooth mu: K.IAIPPER@K#.Y                  | 692.89  | 598.96  | 1.16  | 0.86 |
| P62737_ACTA_MOUSE   | Acta2  | Actin, aortic smooth mu: K.IK#IIPPER@.K                  | 37.22   | 40.32   | 0.92  | 1.08 |
| P62737_ACTA_MOUSE   | Acta2  | Actin, aortic smooth mu: K.IWHHSFYNELR.V                 | 46.97   | 93.11   | 0.50  | 1.98 |
| P62737_ACTA_MOUSE   | Acta2  | Actin, aortic smooth mu: R.KDLYANNVLSGGTTM**YPIADR.M     | 7.67    | 11.37   | 0.67  | 1.48 |
| P62737_ACTA_MOUSE   | Acta2  | Actin, aortic smooth mu: K.QEYDEAGSPVHR.K                | 36.45   | 77.15   | 0.47  | 2.12 |
| P62737_ACTA_MOUSE   | Acta2  | Actin, aortic smooth mu: K.RGILTLY.K                     | 2579.24 | 1761.26 | 1.46  | 0.68 |
| P62737_ACTA_MOUSE   | Acta2  | Actin, aortic smooth mu: K.SYELPDGQVITIGNER@.F           | 3022.77 | 2822.63 | 1.07  | 0.93 |
| P62737_ACTA_MOUSE   | Acta2  | Actin, aortic smooth mu: K.YPIEHGILITNWDDM**EK#.I        | 1018.74 | 970.20  | 1.05  | 0.95 |
| P62737_ACTA_MOUSE   | Acta2  | Actin, aortic smooth mu: K.YPIEHGILITNWDDMEK#.I          | 1056.08 | 925.48  | 1.14  | 0.88 |
| P62737_ACTA_MOUSE   | Acta2  | Actin, aortic smooth mu: K.YPIEHGILITNWDDMEK#.I          | 61.32   | 55.67   | 1.10  | 0.91 |
| P62737_ACTA_MOUSE   | Acta2  | Actin, aortic smooth mu: K.AGFAGDDAPR.A                  | 53.95   | 368.14  | 0.15  | 6.82 |
| P62737_ACTA_MOUSE   | Acta2  | Actin, aortic smooth mu: R.DLTDYLM**K#.I                 | 17.75   | 26.40   | 0.67  | 1.49 |
| P62737_ACTA_MOUSE   | Acta2  | Actin, aortic smooth mu: K.DSYVGEAQS#K.R                 | 5.44    | 4.03    | 1.35  | 0.74 |
| P62737_ACTA_MOUSE   | Acta2  | Actin, aortic smooth mu: K.EITALAPSTM**K#.I              | 37.47   | 44.42   | 0.84  | 1.19 |
| P62737_ACTA_MOUSE   | Acta2  | Actin, aortic smooth mu: K.SYELPDGQVITIGNER.F            | 44.12   | 110.25  | 0.40  | 2.50 |
| P62737_ACTA_MOUSE   | Acta2  | Actin, aortic smooth mu: K.AGFAGDDAPR@.A                 | 2684.49 | 1628.45 | 1.65  | 0.61 |
| P62737_ACTA_MOUSE   | Acta2  | Actin, aortic smooth mu: R.DLTDYLM**K#.I                 | 2010.93 | 1226.24 | 1.64  | 0.61 |
| P62737_ACTA_MOUSE   | Acta2  | Actin, aortic smooth mu: R.DLTDYLMK#.I                   | 341.08  | 207.91  | 1.64  | 0.61 |
| P62737_ACTA_MOUSE   | Acta2  | Actin, aortic smooth mu: K.DSYVGEAQS#K.R                 | 2264.95 | 1369.06 | 1.65  | 0.60 |
| P62737_ACTA_MOUSE   | Acta2  | Actin, aortic smooth mu: K.DSYVGEAQS#K#R@.G              | 679.70  | 369.59  | 1.84  | 0.54 |
| P62737_ACTA_MOUSE   | Acta2  | Actin, aortic smooth mu: K.EITALAPSTM**K#.I              | 1814.34 | 1109.53 | 1.64  | 0.61 |
| P62737_ACTA_MOUSE   | Acta2  | Actin, aortic smooth mu: K.EITALAPSTMK#.I                | 526.61  | 303.82  | 1.73  | 0.58 |
| P62737_ACTA_MOUSE   | Acta2  | Actin, aortic smooth mu: R.HQGVMM**VGM**GQK#.D           | 881.09  | 491.55  | 1.79  | 0.56 |
| P62737_ACTA_MOUSE   | Acta2  | Actin, aortic smooth mu: R.HQGVMM**VGM**GQK#.D           | 1005.28 | 605.74  | 1.66  | 0.60 |
| P62737_ACTA_MOUSE   | Acta2  | Actin, aortic smooth mu: R.HQGVMM**VGM**GQK#.D           | 104.58  | 64.44   | 1.62  | 0.62 |
| P62737_ACTA_MOUSE   | Acta2  | Actin, aortic smooth mu: R.HQGVMM**VGM**GQK#.D           | 79.27   | 43.74   | 1.81  | 0.55 |
| P62737_ACTA_MOUSE   | Acta2  | Actin, aortic smooth mu: R.HQGVMM**VGM**GQK#.D           | 76.25   | 41.52   | 1.84  | 0.54 |

|                    |        |                                                               |         |         |      |      |
|--------------------|--------|---------------------------------------------------------------|---------|---------|------|------|
| P62737_ACTA_MOUSE  | Acta2  | Actin, aortic smooth mu: K.IIAPPER@.K                         | 2094.43 | 1416.75 | 1.48 | 0.68 |
| P62737_ACTA_MOUSE  | Acta2  | Actin, aortic smooth mu: K.IIAPPERK.Y                         | 410.65  | 230.48  | 1.78 | 0.56 |
| P62737_ACTA_MOUSE  | Acta2  | Actin, aortic smooth mu: K.IK#IIAPPER@K#Y                     | 38.93   | 15.27   | 2.55 | 0.39 |
| P62737_ACTA_MOUSE  | Acta2  | Actin, aortic smooth mu: K.RGILTLK.Y                          | 1227.65 | 500.47  | 2.45 | 0.41 |
| P62737_ACTA_MOUSE  | Acta2  | Actin, aortic smooth mu: K.SYELPDGQVITIGNER@.F                | 2016.19 | 1167.84 | 1.73 | 0.58 |
| P62737_ACTA_MOUSE  | Acta2  | Actin, aortic smooth mu: K.YPIEHGITTNWDDM*EK#.I               | 685.72  | 367.78  | 1.86 | 0.54 |
| P62737_ACTA_MOUSE  | Acta2  | Actin, aortic smooth mu: K.YPIEHGITTNWDDMEK#.I                | 324.52  | 216.26  | 1.50 | 0.67 |
| P62737_ACTA_MOUSE  | Acta2  | Actin, aortic smooth mu: K.AGFAGDDAPR@.A                      | 3666.58 | 1675.39 | 2.19 | 0.46 |
| P62737_ACTA_MOUSE  | Acta2  | Actin, aortic smooth mu: R.DLTDYLM*#K.I                       | 2838.55 | 1230.23 | 2.31 | 0.43 |
| P62737_ACTA_MOUSE  | Acta2  | Actin, aortic smooth mu: R.DLTDYLM*#K.I                       | 351.37  | 179.68  | 1.96 | 0.51 |
| P62737_ACTA_MOUSE  | Acta2  | Actin, aortic smooth mu: K.DLYANNVLSGGTTM*YPIADR.M            | 16.16   | 12.91   | 1.25 | 0.80 |
| P62737_ACTA_MOUSE  | Acta2  | Actin, aortic smooth mu: K.DLYANNVLSGGTTM*YPIADR@.M           | 8.48    | 7.67    | 1.10 | 0.91 |
| P62737_ACTA_MOUSE  | Acta2  | Actin, aortic smooth mu: K.DSYVGDEAQSQR.G                     | 2732.28 | 1054.56 | 2.59 | 0.39 |
| P62737_ACTA_MOUSE  | Acta2  | Actin, aortic smooth mu: K.DSYVGDEAQSQR.G                     | 926.39  | 359.21  | 2.58 | 0.39 |
| P62737_ACTA_MOUSE  | Acta2  | Actin, aortic smooth mu: K.EITALAPSTM*#K#.I                   | 2753.90 | 1280.22 | 2.15 | 0.46 |
| P62737_ACTA_MOUSE  | Acta2  | Actin, aortic smooth mu: K.EITALAPSTM*#K#.I                   | 708.09  | 285.89  | 2.48 | 0.40 |
| P62737_ACTA_MOUSE  | Acta2  | Actin, aortic smooth mu: R.GYSFTTAE.R                         | 40.06   | 36.04   | 1.11 | 0.90 |
| P62737_ACTA_MOUSE  | Acta2  | Actin, aortic smooth mu: R.HQGMV*VGM*GQK#.D                   | 1348.23 | 544.00  | 2.48 | 0.40 |
| P62737_ACTA_MOUSE  | Acta2  | Actin, aortic smooth mu: R.HQGMV*VGM*GQK#.D                   | 1733.72 | 793.80  | 2.18 | 0.46 |
| P62737_ACTA_MOUSE  | Acta2  | Actin, aortic smooth mu: R.HQGMV*VGM*GQK#.D                   | 124.72  | 58.41   | 2.14 | 0.47 |
| P62737_ACTA_MOUSE  | Acta2  | Actin, aortic smooth mu: R.HQGMV*VGM*GQK#.D                   | 111.48  | 51.94   | 2.15 | 0.47 |
| P62737_ACTA_MOUSE  | Acta2  | Actin, aortic smooth mu: K.IIAPPER@.K                         | 2841.04 | 1394.01 | 2.04 | 0.49 |
| P62737_ACTA_MOUSE  | Acta2  | Actin, aortic smooth mu: K.IIAPPER@K#Y                        | 536.55  | 316.43  | 1.70 | 0.59 |
| P62737_ACTA_MOUSE  | Acta2  | Actin, aortic smooth mu: K.IK#IIAPPER@.K                      | 16.47   | 8.51    | 1.94 | 0.52 |
| P62737_ACTA_MOUSE  | Acta2  | Actin, aortic smooth mu: K.QEYDEGSPSIVHR@.K                   | 30.39   | 24.76   | 1.23 | 0.81 |
| P62737_ACTA_MOUSE  | Acta2  | Actin, aortic smooth mu: K.SYELPDGQVITIGNER@.F                | 3382.13 | 1424.53 | 2.37 | 0.42 |
| P62737_ACTA_MOUSE  | Acta2  | Actin, aortic smooth mu: K.SYELPDGQVITIGNER@.F                | 356.56  | 151.07  | 2.36 | 0.42 |
| P62737_ACTA_MOUSE  | Acta2  | Actin, aortic smooth mu: R.VAPEEHPVLLTEAPLNPK#.A              | 84.85   | 94.68   | 0.90 | 1.12 |
| P62737_ACTA_MOUSE  | Acta2  | Actin, aortic smooth mu: K.YPIEHGITTNWDDM*EK#.I               | 1087.03 | 479.32  | 2.27 | 0.44 |
| P62737_ACTA_MOUSE  | Acta2  | Actin, aortic smooth mu: K.YPIEHGITTNWDDMEK#.I                | 601.56  | 245.41  | 2.45 | 0.41 |
| P60710_ACTB_MOUSE  | Actb   | Actin, cytoplasmic 1 OS= K.DLYANTVLSGGTTM*YPIADR@.M           | 990.52  | 882.85  | 1.12 | 0.89 |
| P60710_ACTB_MOUSE  | Actb   | Actin, cytoplasmic 1 OS= K.DLYANTVLSGGTTM*YPIADR.M            | 1315.54 | 1236.64 | 1.06 | 0.94 |
| P60710_ACTB_MOUSE  | Actb   | Actin, cytoplasmic 1 OS= K.DLYANTVLSGGTTM*YPIADR.M            | 159.67  | 134.77  | 1.18 | 0.84 |
| P60710_ACTB_MOUSE  | Actb   | Actin, cytoplasmic 1 OS= K.DLYANTVLSGGTTM*YPIADR@.M           | 209.81  | 195.40  | 1.07 | 0.93 |
| P60710_ACTB_MOUSE  | Actb   | Actin, cytoplasmic 1 OS= R.GYSFTTAE.R                         | 4486.73 | 3863.18 | 1.16 | 0.86 |
| P60710_ACTB_MOUSE  | Actb   | Actin, cytoplasmic 1 OS= K.IWHHTFYNELR@.V                     | 1800.35 | 1676.32 | 1.07 | 0.93 |
| P60710_ACTB_MOUSE  | Actb   | Actin, cytoplasmic 1 OS= K.IWHHTFYNELR.V                      | 105.02  | 101.73  | 1.03 | 0.97 |
| P60710_ACTB_MOUSE  | Actb   | Actin, cytoplasmic 1 OS= R.K#DLYANTVLSGGTTM*YPIADR@.M         | 1036.79 | 961.77  | 1.08 | 0.93 |
| P60710_ACTB_MOUSE  | Actb   | Actin, cytoplasmic 1 OS= R.KDLYANTVLSGGTTM*YPIADR.M           | 138.88  | 138.20  | 1.00 | 1.00 |
| P60710_ACTB_MOUSE  | Actb   | Actin, cytoplasmic 1 OS= K.QEYDEGSPSIVHR@.K                   | 2226.11 | 2175.81 | 1.02 | 0.98 |
| P60710_ACTB_MOUSE  | Actb   | Actin, cytoplasmic 1 OS= K.QEYDEGSPSIVHR.K                    | 243.16  | 209.46  | 1.16 | 0.86 |
| P60710_ACTB_MOUSE  | Actb   | Actin, cytoplasmic 1 OS= R.VAPEEHPVLLTEAPLNPK.A               | 2900.94 | 2600.76 | 1.12 | 0.90 |
| P60710_ACTB_MOUSE  | Actb   | Actin, cytoplasmic 1 OS= R.VAPEEHPVLLTEAPLNPK.A               | 136.75  | 153.71  | 0.89 | 1.12 |
| P60710_ACTB_MOUSE  | Actb   | Actin, cytoplasmic 1 OS= K.YPIEHGITTNWDDM*EK#.I               | 68.79   | 51.24   | 1.34 | 0.74 |
| P60710_ACTB_MOUSE  | Actb   | Actin, cytoplasmic 1 OS= K.YPIEHGITTNWDDM*EK#.I               | 5.99    | 4.15    | 1.44 | 0.69 |
| P60710_ACTB_MOUSE  | Actb   | Actin, cytoplasmic 1 OS= K.YPIEHGITTNWDDMEK#.I                | 34.40   | 27.90   | 1.23 | 0.81 |
| P60710_ACTB_MOUSE  | Actb   | Actin, cytoplasmic 1 OS= K.DLYANTVLSGGTTM*YPIADR.M            | 9.43    | 12.63   | 0.75 | 1.34 |
| P60710_ACTB_MOUSE  | Actb   | Actin, cytoplasmic 1 OS= R.GYSFTTAE.R                         | 19.23   | 22.51   | 0.85 | 1.17 |
| P60710_ACTB_MOUSE  | Actb   | Actin, cytoplasmic 1 OS= R.K#DLYANTVLSGGTTM*YPIADR@.M         | 6.02    | 7.50    | 0.80 | 1.25 |
| P60710_ACTB_MOUSE  | Actb   | Actin, cytoplasmic 1 OS= K.DLYANTVLSGGTTM*YPIADR.M            | 631.15  | 347.89  | 1.81 | 0.55 |
| P60710_ACTB_MOUSE  | Actb   | Actin, cytoplasmic 1 OS= K.DLYANTVLSGGTTM*YPIADR@.M           | 967.53  | 505.91  | 1.91 | 0.52 |
| P60710_ACTB_MOUSE  | Actb   | Actin, cytoplasmic 1 OS= K.DLYANTVLSGGTTM*YPIADR@.M           | 107.82  | 67.07   | 1.61 | 0.62 |
| P60710_ACTB_MOUSE  | Actb   | Actin, cytoplasmic 1 OS= K.DLYANTVLSGGTTM*YPIADR.M            | 92.39   | 55.47   | 1.67 | 0.60 |
| P60710_ACTB_MOUSE  | Actb   | Actin, cytoplasmic 1 OS= R.GYSFTTAE.R                         | 2776.94 | 1518.13 | 1.83 | 0.55 |
| P60710_ACTB_MOUSE  | Actb   | Actin, cytoplasmic 1 OS= K.IWHHTFYNELR@.V                     | 896.74  | 472.94  | 1.90 | 0.53 |
| P60710_ACTB_MOUSE  | Actb   | Actin, cytoplasmic 1 OS= K.IWHHTFYNELR.V                      | 26.23   | 10.74   | 2.44 | 0.41 |
| P60710_ACTB_MOUSE  | Actb   | Actin, cytoplasmic 1 OS= R.K#DLYANTVLSGGTTM*YPIADR@.M         | 516.89  | 302.91  | 1.71 | 0.59 |
| P60710_ACTB_MOUSE  | Actb   | Actin, cytoplasmic 1 OS= R.KDLYANTVLSGGTTM*YPIADR.M           | 42.21   | 21.35   | 1.98 | 0.51 |
| P60710_ACTB_MOUSE  | Actb   | Actin, cytoplasmic 1 OS= K.QEYDEGSPSIVHR@.K                   | 1455.55 | 864.66  | 1.68 | 0.59 |
| P60710_ACTB_MOUSE  | Actb   | Actin, cytoplasmic 1 OS= K.QEYDEGSPSIVHR.K                    | 199.75  | 113.44  | 1.76 | 0.57 |
| P60710_ACTB_MOUSE  | Actb   | Actin, cytoplasmic 1 OS= K.QEYDEGSPSIVHRK.C                   | 75.25   | 34.18   | 2.20 | 0.45 |
| P60710_ACTB_MOUSE  | Actb   | Actin, cytoplasmic 1 OS= R.VAPEEHPVLLTEAPLNPK#.A              | 2371.65 | 1617.88 | 1.47 | 0.68 |
| P60710_ACTB_MOUSE  | Actb   | Actin, cytoplasmic 1 OS= R.VAPEEHPVLLTEAPLNPK.A               | 68.72   | 48.88   | 1.41 | 0.71 |
| P60710_ACTB_MOUSE  | Actb   | Actin, cytoplasmic 1 OS= K.DLYANTVLSGGTTM*YPIADR@.M           | 1451.24 | 563.62  | 2.57 | 0.39 |
| P60710_ACTB_MOUSE  | Actb   | Actin, cytoplasmic 1 OS= K.DLYANTVLSGGTTM*YPIADR.M            | 911.05  | 363.17  | 2.51 | 0.40 |
| P60710_ACTB_MOUSE  | Actb   | Actin, cytoplasmic 1 OS= K.DLYANTVLSGGTTM*YPIADR@.M           | 143.49  | 63.11   | 2.27 | 0.44 |
| P60710_ACTB_MOUSE  | Actb   | Actin, cytoplasmic 1 OS= R.GYSFTTAE.R                         | 2544.13 | 1029.25 | 2.47 | 0.40 |
| P60710_ACTB_MOUSE  | Actb   | Actin, cytoplasmic 1 OS= K.IWHHTFYNELR@.V                     | 224.44  | 100.55  | 2.23 | 0.45 |
| P60710_ACTB_MOUSE  | Actb   | Actin, cytoplasmic 1 OS= R.K#DLYANTVLSGGTTM*YPIADR@.M         | 663.67  | 282.46  | 2.35 | 0.43 |
| P60710_ACTB_MOUSE  | Actb   | Actin, cytoplasmic 1 OS= R.KDLYANTVLSGGTTM*YPIADR@.M          | 53.32   | 23.55   | 2.26 | 0.44 |
| P60710_ACTB_MOUSE  | Actb   | Actin, cytoplasmic 1 OS= K.QEYDEGSPSIVHR@.K                   | 1909.24 | 843.43  | 2.26 | 0.44 |
| P60710_ACTB_MOUSE  | Actb   | Actin, cytoplasmic 1 OS= K.QEYDEGSPSIVHR.K                    | 280.75  | 128.03  | 2.19 | 0.46 |
| P60710_ACTB_MOUSE  | Actb   | Actin, cytoplasmic 1 OS= R.VAPEEHPVLLTEAPLNPK#.A              | 106.47  | 45.91   | 2.32 | 0.43 |
| P60710_ACTB_MOUSE  | Actb   | Actin, cytoplasmic 1 OS= K.YPIEHGITTNWDDM*EK#.I               | 67.18   | 22.74   | 2.95 | 0.34 |
| P60710_ACTB_MOUSE  | Actb   | Actin, cytoplasmic 1 OS= K.YPIEHGITTNWDDMEK#.I                | 11.56   | 4.80    | 2.41 | 0.41 |
| Q8BFZ3_ACTBL_MOUSE | Actbl2 | Beta-actin-like protein 2 R.TTGIVM*DSGDGVHTVPIYEGYALPHAILR@.L | 39.70   | 25.80   | 1.54 | 0.65 |
| Q8BFZ3_ACTBL_MOUSE | Actbl2 | Beta-actin-like protein 2 R.TTGIVM*DSGDGVHTVPIYEGYALPHAILR.L  | 1504.97 | 1303.97 | 1.15 | 0.87 |
| Q8BFZ3_ACTBL_MOUSE | Actbl2 | Beta-actin-like protein 2 R.TTGIVM*DSGDGVHTVPIYEGYALPHAILR@.L | 247.21  | 187.36  | 1.32 | 0.76 |
| Q8BFZ3_ACTBL_MOUSE | Actbl2 | Beta-actin-like protein 2 R.TTGIVMDSGDGVHTVPIYEGYALPHAILR.L   | 157.58  | 126.29  | 1.25 | 0.80 |
| Q8BFZ3_ACTBL_MOUSE | Actbl2 | Beta-actin-like protein 2 R.TTGIVMDSGDGVHTVPIYEGYALPHAILR@.L  | 977.39  | 847.03  | 1.15 | 0.87 |
| Q8BFZ3_ACTBL_MOUSE | Actbl2 | Beta-actin-like protein 2 R.TTGIVM*DSGDGVHTVPIYEGYALPHAILR.L  | 26.17   | 34.69   | 0.75 | 1.33 |
| Q8BFZ3_ACTBL_MOUSE | Actbl2 | Beta-actin-like protein 2 R.TTGIVM*DSGDGVHTVPIYEGYALPHAILR.L  | 3.49    | 2.93    | 1.19 | 0.84 |
| Q8BFZ3_ACTBL_MOUSE | Actbl2 | Beta-actin-like protein 2 R.VAPEDEHPVLLTEAPLNPK.I             | 44.15   | 113.48  | 0.39 | 2.57 |
| Q8BFZ3_ACTBL_MOUSE | Actbl2 | Beta-actin-like protein 2 R.TTGIVM*DSGDGVHTVPIYEGYALPHAILR@.L | 1405.20 | 750.99  | 1.87 | 0.53 |
| Q8BFZ3_ACTBL_MOUSE | Actbl2 | Beta-actin-like protein 2 R.TTGIVM*DSGDGVHTVPIYEGYALPHAILR@.L | 203.59  | 114.03  | 1.79 | 0.56 |
| Q8BFZ3_ACTBL_MOUSE | Actbl2 | Beta-actin-like protein 2 R.TTGIVMDSGDGVHTVPIYEGYALPHAILR@.L  | 591.39  | 325.85  | 1.81 | 0.55 |
| Q8BFZ3_ACTBL_MOUSE | Actbl2 | Beta-actin-like protein 2 R.TTGIVM*DSGDGVHTVPIYEGYALPHAILR@.L | 2137.93 | 873.63  | 2.45 | 0.41 |
| Q8BFZ3_ACTBL_MOUSE | Actbl2 | Beta-actin-like protein 2 R.TTGIVM*DSGDGVHTVPIYEGYALPHAILR@.L | 43.00   | 12.05   | 3.57 | 0.28 |
| Q8BFZ3_ACTBL_MOUSE | Actbl2 | Beta-actin-like protein 2 R.TTGIVM*DSGDGVHTVPIYEGYALPHAILR@.L | 13.92   | 6.50    | 2.14 | 0.47 |
| P68033_ACTC_MOUSE  | Actc1  | Actin, alpha cardiac mus: K.YPIEHGITTNWDDM*EKIWHHTFYNELR.V    | 30.33   | 27.33   | 1.11 | 0.90 |
| Q9Z2N8_ACL6A_MOUSE | Actf6a | Actin-like protein 6A OS= R.DDGSTM*#EIDGDK#.G                 | 1.57    | 1.87    | 0.84 | 1.19 |
| Q9Z2N8_ACL6A_MOUSE | Actf6a | Actin-like protein 6A OS= R.EGSPANWK#.R                       | 49.97   | 19.13   | 2.61 | 0.38 |
| Q9Z2N8_ACL6A_MOUSE | Actf6a | Actin-like protein 6A OS= R.ELFQEM*NELIPPYMIASK#.E            | 5.37    | 3.16    | 1.70 | 0.59 |
| Q9Z2N8_ACL6A_MOUSE | Actf6a | Actin-like protein 6A OS= K.IPEGLDPSNVK#.G                    | 29.19   | 9.00    | 3.24 | 0.31 |
| Q9Z2N8_ACL6A_MOUSE | Actf6a | Actin-like protein 6A OS= K.LIANNTVR@.R                       | 340.49  | 108.49  | 3.14 | 0.32 |
| Q9Z2N8_ACL6A_MOUSE | Actf6a | Actin-like protein 6A OS= R.LK#PEGLDFSPNVK#.G                 | 78.26   | 28.57   | 2.74 | 0.37 |
| Q9Z2N8_ACL6A_MOUSE | Actf6a | Actin-like protein 6A OS= K.NGM*VEDWDSFQALDHTYK#.M            | 27.22   | 28.83   | 0.94 | 1.06 |
| Q9Z2N8_ACL6A_MOUSE | Actf6a | Actin-like protein 6A OS= K.QGGPTYIDTALR@.V                   | 114.50  | 41.53   | 2.76 | 0.36 |
| Q9Z2N8_ACL6A_MOUSE | Actf6a | Actin-like protein 6A OS= K.SEASHPVLM*SEAPWNTR@.A             | 77.55   | 26.28   | 2.95 | 0.34 |
| Q9Z2N8_ACL6A_MOUSE | Actf6a | Actin-like protein 6A OS= K.SEASHPVLM*SEAPWNTR@.A             | 19.63   | 5.35    | 3.67 | 0.27 |
| Q9Z2N8_ACL6A_MOUSE | Actf6a | Actin-like protein 6A OS= R.STGLIDPSGATHTAIPVHDGVLQGGIVK#.S   | 22.41   | 9.45    | 2.37 | 0.42 |
| Q9Z2N8_ACL6A_MOUSE | Actf6a | Actin-like protein 6A OS= K.VDFPTAIGVLER@.D                   | 87.24   | 27.16   | 3.21 | 0.31 |
| Q9Z2N8_ACL6A_MOUSE | Actf6a | Actin-like protein 6A OS= K.LIANNTVR@.R                       | 20.89   | 5.87    | 3.56 | 0.28 |

|                    |        |                                                                 |        |        |      |      |
|--------------------|--------|-----------------------------------------------------------------|--------|--------|------|------|
| Q9Z2N8_ACL6A_MOUSE | Act16a | Actin-like protein 6A OS= K.LIANNTTVER@.R                       | 14.85  | 4.87   | 3.05 | 0.33 |
| Q77PR4_ACTN1_MOUSE | Actn1  | Alpha-actinin-1 OS=Mus   K.AIM*TYVSFYHAFSGAQK#A                 | 17.02  | 13.50  | 1.26 | 0.79 |
| Q77PR4_ACTN1_MOUSE | Actn1  | Alpha-actinin-1 OS=Mus   K.ALDFIASK#G                           | 49.54  | 47.51  | 1.04 | 0.96 |
| Q77PR4_ACTN1_MOUSE | Actn1  | Alpha-actinin-1 OS=Mus   K.ATLPDADKHER@.L                       | 6.69   | 11.50  | 0.58 | 1.72 |
| Q77PR4_ACTN1_MOUSE | Actn1  | Alpha-actinin-1 OS=Mus   K.DDPLTNLNTAFDVAER.F                   | 6.01   | 6.77   | 0.89 | 1.13 |
| Q77PR4_ACTN1_MOUSE | Actn1  | Alpha-actinin-1 OS=Mus   R.ETADTDTADQVM*ASF#K.I                 | 10.62  | 9.06   | 1.17 | 0.85 |
| Q77PR4_ACTN1_MOUSE | Actn1  | Alpha-actinin-1 OS=Mus   R.FAIQDISVEETSAAK#.E                   | 51.05  | 43.63  | 1.17 | 0.85 |
| Q77PR4_ACTN1_MOUSE | Actn1  | Alpha-actinin-1 OS=Mus   K.GISQEQM*NEFR.A                       | 12.10  | 12.27  | 0.99 | 1.01 |
| Q77PR4_ACTN1_MOUSE | Actn1  | Alpha-actinin-1 OS=Mus   K.GYEEWLNLNLR.R                        | 14.58  | 14.92  | 0.98 | 1.02 |
| Q77PR4_ACTN1_MOUSE | Actn1  | Alpha-actinin-1 OS=Mus   R.HRPELIDYK.L                          | 18.85  | 15.09  | 1.25 | 0.80 |
| Q77PR4_ACTN1_MOUSE | Actn1  | Alpha-actinin-1 OS=Mus   K.ILAGDKHNYTEDELR@.R                   | 17.17  | 16.86  | 1.02 | 0.98 |
| Q77PR4_ACTN1_MOUSE | Actn1  | Alpha-actinin-1 OS=Mus   K.LASDLLEWIR@.R                        | 49.36  | 36.50  | 1.35 | 0.74 |
| Q77PR4_ACTN1_MOUSE | Actn1  | Alpha-actinin-1 OS=Mus   K.LLETIDQLYLEYAK#.R                    | 16.92  | 20.47  | 0.83 | 1.21 |
| Q77PR4_ACTN1_MOUSE | Actn1  | Alpha-actinin-1 OS=Mus   K.LM*LLLEVISGER.L                      | 18.58  | 14.58  | 1.27 | 0.78 |
| Q77PR4_ACTN1_MOUSE | Actn1  | Alpha-actinin-1 OS=Mus   K.LVSGAEIVDGNVK#.M                     | 18.75  | 19.37  | 0.97 | 1.03 |
| Q77PR4_ACTN1_MOUSE | Actn1  | Alpha-actinin-1 OS=Mus   K.M*LDLDAEDIVGTARPDEK.A                | 15.13  | 14.83  | 1.02 | 0.98 |
| Q77PR4_ACTN1_MOUSE | Actn1  | Alpha-actinin-1 OS=Mus   K.M*TLGM*WITILR.F                      | 7.91   | 8.77   | 0.90 | 1.11 |
| Q77PR4_ACTN1_MOUSE | Actn1  | Alpha-actinin-1 OS=Mus   R.TINEVENQILTR@.D                      | 34.19  | 28.78  | 1.19 | 0.84 |
| Q77PR4_ACTN1_MOUSE | Actn1  | Alpha-actinin-1 OS=Mus   R.VGWEQLLTIAR.T                        | 102.40 | 109.93 | 0.93 | 1.07 |
| Q77PR4_ACTN1_MOUSE | Actn1  | Alpha-actinin-1 OS=Mus   K.VLAVNQENQLM*EDYEK#.L                 | 5.35   | 7.05   | 0.76 | 1.32 |
| Q77PR4_ACTN1_MOUSE | Actn1  | Alpha-actinin-1 OS=Mus   K.ALDFIASK#G                           | 18.53  | 16.08  | 1.15 | 0.87 |
| Q77PR4_ACTN1_MOUSE | Actn1  | Alpha-actinin-1 OS=Mus   R.FAIQDISVEETSAAK#.E                   | 24.91  | 19.27  | 1.29 | 0.77 |
| Q77PR4_ACTN1_MOUSE | Actn1  | Alpha-actinin-1 OS=Mus   K.GISQEQM*NEFR.A                       | 4.58   | 4.06   | 1.13 | 0.89 |
| Q77PR4_ACTN1_MOUSE | Actn1  | Alpha-actinin-1 OS=Mus   K.LASDLLEWIR@.R                        | 14.82  | 8.79   | 1.69 | 0.59 |
| Q77PR4_ACTN1_MOUSE | Actn1  | Alpha-actinin-1 OS=Mus   R.TINEVENQILTR@.D                      | 7.57   | 8.21   | 0.92 | 1.08 |
| Q77PR4_ACTN1_MOUSE | Actn1  | Alpha-actinin-1 OS=Mus   R.VGWEQLLTIAR@.T                       | 35.06  | 34.91  | 1.00 | 1.00 |
| P57780_ACTN4_MOUSE | Actn4  | Alpha-actinin-4 OS=Mus   K.DDPTNLLNNAFEVAEK#.Y                  | 5.37   | 5.25   | 1.02 | 0.98 |
| P57780_ACTN4_MOUSE | Actn4  | Alpha-actinin-4 OS=Mus   R.DYETATLSDIK#.A                       | 22.40  | 23.14  | 0.97 | 1.03 |
| P57780_ACTN4_MOUSE | Actn4  | Alpha-actinin-4 OS=Mus   R.ETDPTDADQVIAFK#.V                    | 19.82  | 16.50  | 1.20 | 0.83 |
| P57780_ACTN4_MOUSE | Actn4  | Alpha-actinin-4 OS=Mus   K.GISQEQM*QEFR@.A                      | 20.87  | 20.78  | 1.00 | 1.00 |
| P57780_ACTN4_MOUSE | Actn4  | Alpha-actinin-4 OS=Mus   R.HR@PELIEVDK#.L                       | 13.14  | 14.80  | 0.89 | 1.13 |
| P57780_ACTN4_MOUSE | Actn4  | Alpha-actinin-4 OS=Mus   R.KHDDPVTNLLNNAFEVAEK#.Y               | 17.48  | 19.09  | 0.92 | 1.09 |
| P57780_ACTN4_MOUSE | Actn4  | Alpha-actinin-4 OS=Mus   K.LSGSNPTTYTTPQINSK.W                  | 11.11  | 10.53  | 1.06 | 0.95 |
| P57780_ACTN4_MOUSE | Actn4  | Alpha-actinin-4 OS=Mus   K.LVSGAEIVDGNNAK#.M                    | 31.30  | 26.40  | 1.19 | 0.84 |
| P57780_ACTN4_MOUSE | Actn4  | Alpha-actinin-4 OS=Mus   R.M*APYQGDPAAGALDYK#.S                 | 13.84  | 13.78  | 1.00 | 1.00 |
| P57780_ACTN4_MOUSE | Actn4  | Alpha-actinin-4 OS=Mus   K.M*LDLDAEDIVNTAR@.PDEK#.A             | 14.12  | 15.25  | 0.93 | 1.08 |
| P57780_ACTN4_MOUSE | Actn4  | Alpha-actinin-4 OS=Mus   R.SIVDYK#PSDLLLEQHQQLIQEALIFDNK#.H     | 28.35  | 22.54  | 1.26 | 0.80 |
| P57780_ACTN4_MOUSE | Actn4  | Alpha-actinin-4 OS=Mus   R.VEQAAIQELNELDYSHNVNTR.C              | 8.45   | 5.68   | 1.49 | 0.67 |
| P57780_ACTN4_MOUSE | Actn4  | Alpha-actinin-4 OS=Mus   K.VLAGDKHNYTEDELR.R                    | 26.47  | 24.87  | 1.06 | 0.94 |
| P57780_ACTN4_MOUSE | Actn4  | Alpha-actinin-4 OS=Mus   K.VQQLVPR.K                            | 23.62  | 28.10  | 0.84 | 1.19 |
| P57780_ACTN4_MOUSE | Actn4  | Alpha-actinin-4 OS=Mus   K.LVSGAEIVDGNNAK#.M                    | 11.27  | 9.09   | 1.24 | 0.81 |
| Q9QZB7_ARP10_MOUSE | Actr10 | Actin-related protein 10 K.TAVVIDLGEAFTK#.C                     | 9.85   | 3.50   | 2.82 | 0.36 |
| Q9QZB7_ARP10_MOUSE | Actr10 | Actin-related protein 10 K.FNIDGNRPTTPPNVDYPLDGEK.I             | 7.46   | 3.00   | 2.48 | 0.40 |
| P61164_ACT2_MOUSE  | Actr1a | Alpha-centractin OS=Mus   K.AQYLPDGSSTIEGSPR@.F                 | 49.74  | 20.85  | 2.39 | 0.47 |
| P61164_ACT2_MOUSE  | Actr1a | Alpha-centractin OS=Mus   K.DQLQTFSEEHVLLTEAPLNPR@.K            | 106.28 | 41.90  | 2.54 | 0.39 |
| P61164_ACT2_MOUSE  | Actr1a | Alpha-centractin OS=Mus   R.KEGYDFHSSSEFEIK#.A                  | 12.58  | 4.09   | 3.08 | 0.32 |
| P61164_ACT2_MOUSE  | Actr1a | Alpha-centractin OS=Mus   K.AQYLPDGSSTIEGSPR@.F                 | 15.20  | 4.77   | 3.18 | 0.31 |
| P61164_ACT2_MOUSE  | Actr1a | Alpha-centractin OS=Mus   K.DQLQTFSEEHVLLTEAPLNPR@.K            | 31.24  | 6.40   | 4.88 | 0.20 |
| P61164_ACT2_MOUSE  | Actr1a | Alpha-centractin OS=Mus   K.AQYLPDGSSTIEGSPR@.F                 | 23.11  | 6.10   | 3.79 | 0.26 |
| Q8R5C5_ACTY_MOUSE  | Actr1b | Beta-centractin OS=Mus   K.AGFAGDQJPK#.Y                        | 98.73  | 46.03  | 2.14 | 0.47 |
| Q8R5C5_ACTY_MOUSE  | Actr1b | Beta-centractin OS=Mus   K.DQLQTFSEEHVLLTEAPLNPSK#.N            | 58.32  | 30.21  | 1.93 | 0.52 |
| Q8R5C5_ACTY_MOUSE  | Actr1b | Beta-centractin OS=Mus   K.ISAPQER@.L                           | 110.25 | 84.87  | 1.30 | 0.77 |
| Q8R5C5_ACTY_MOUSE  | Actr1b | Beta-centractin OS=Mus   R.IWQYVSK#.D                           | 69.49  | 35.72  | 1.95 | 0.51 |
| Q8R5C5_ACTY_MOUSE  | Actr1b | Beta-centractin OS=Mus   R.TLFSNIVLSGGSTLTK#.G                  | 71.21  | 28.56  | 2.49 | 0.40 |
| Q8R5C5_ACTY_MOUSE  | Actr1b | Beta-centractin OS=Mus   R.TTGVDLSDGSDVTHAVPIYEGFAM*PHSIM*R@.V  | 8.70   | 4.20   | 2.07 | 0.48 |
| Q8R5C5_ACTY_MOUSE  | Actr1b | Beta-centractin OS=Mus   K.VQYTPDGSSTLDVGPAP@.F                 | 14.42  | 12.04  | 1.20 | 0.83 |
| Q8R5C5_ACTY_MOUSE  | Actr1b | Beta-centractin OS=Mus   K.AGFAGDQJPK#.Y                        | 22.03  | 5.68   | 3.88 | 0.26 |
| Q8R5C5_ACTY_MOUSE  | Actr1b | Beta-centractin OS=Mus   K.DQLQTFSEEHVLLTEAPLNPSK#.N            | 9.09   | 2.40   | 3.79 | 0.26 |
| Q8R5C5_ACTY_MOUSE  | Actr1b | Beta-centractin OS=Mus   R.TLFSNIVLSGGSTLTK#.G                  | 23.17  | 5.05   | 4.59 | 0.22 |
| Q8R5C5_ACTY_MOUSE  | Actr1b | Beta-centractin OS=Mus   K.AGFAGDQJPK#.Y                        | 24.86  | 4.90   | 5.07 | 0.20 |
| Q8R5C5_ACTY_MOUSE  | Actr1b | Beta-centractin OS=Mus   K.DQLQTFSEEHVLLTEAPLNPSK#.N            | 16.01  | 6.12   | 2.62 | 0.38 |
| Q8R5C5_ACTY_MOUSE  | Actr1b | Beta-centractin OS=Mus   R.TLFSNIVLSGGSTLTK#.G                  | 41.91  | 9.39   | 4.47 | 0.22 |
| P61161_ARP2_MOUSE  | Actr2  | Actin-related protein 2 C K.DLM*VGDEASELR.S                     | 20.20  | 21.11  | 0.96 | 1.05 |
| P61161_ARP2_MOUSE  | Actr2  | Actin-related protein 2 C R.GYAFNSADEFVTR.M                     | 26.20  | 22.91  | 1.14 | 0.87 |
| P61161_ARP2_MOUSE  | Actr2  | Actin-related protein 2 C K.LLLETPM*NPTK#.N                     | 22.15  | 22.69  | 0.98 | 1.02 |
| P61161_ARP2_MOUSE  | Actr2  | Actin-related protein 2 C K.QLYLER@.V                           | 9.29   | 11.64  | 0.80 | 1.25 |
| P61161_ARP2_MOUSE  | Actr2  | Actin-related protein 2 C K.DLM*VGDEASELR.S                     | 12.34  | 9.03   | 1.37 | 0.73 |
| P61161_ARP2_MOUSE  | Actr2  | Actin-related protein 2 C K.LLLETPM*NPTK#.N                     | 12.05  | 8.89   | 1.36 | 0.74 |
| P61161_ARP2_MOUSE  | Actr2  | Actin-related protein 2 C K.QLYLER@.V                           | 11.36  | 7.94   | 1.43 | 0.70 |
| P61161_ARP2_MOUSE  | Actr2  | Actin-related protein 2 C K.DLM*VGDEASELR@.S                    | 24.12  | 18.33  | 1.32 | 0.76 |
| P61161_ARP2_MOUSE  | Actr2  | Actin-related protein 2 C K.HLWDYTFGPEK#.L                      | 5.19   | 4.73   | 1.10 | 0.91 |
| P61161_ARP2_MOUSE  | Actr2  | Actin-related protein 2 C K.LLLETPM*NPTK#.N                     | 21.82  | 13.84  | 1.58 | 0.63 |
| Q99JY9_ARP3_MOUSE  | Actr3  | Actin-related protein 3 C R.AEPEDHVFLLTEPPLNTPENR.E             | 12.73  | 29.18  | 0.44 | 2.29 |
| Q99JY9_ARP3_MOUSE  | Actr3  | Actin-related protein 3 C K.EFSIDVYER@.F                        | 16.44  | 18.89  | 0.87 | 1.15 |
| Q99JY9_ARP3_MOUSE  | Actr3  | Actin-related protein 3 C R.FM*EQVIFK.Y                         | 19.61  | 24.16  | 0.81 | 1.23 |
| Q99JY9_ARP3_MOUSE  | Actr3  | Actin-related protein 3 C R.FMEQVIFK.Y                          | 6.03   | 9.71   | 0.62 | 1.61 |
| Q99JY9_ARP3_MOUSE  | Actr3  | Actin-related protein 3 C K.GVDDLDFDGGDEAIEK#PTYATK#.W          | 28.84  | 35.23  | 0.82 | 1.22 |
| Q99JY9_ARP3_MOUSE  | Actr3  | Actin-related protein 3 C R.HNPVFGVM*F.S-                       | 22.36  | 22.36  | 1.00 | 1.00 |
| Q99JY9_ARP3_MOUSE  | Actr3  | Actin-related protein 3 C R.FM*EQVIFK.Y                         | 21.29  | 9.34   | 2.28 | 0.44 |
| Q99JY9_ARP3_MOUSE  | Actr3  | Actin-related protein 3 C K.GVDDLDFDGGDEAIEK#PTYATK#.W          | 21.17  | 15.18  | 1.39 | 0.72 |
| Q99JY9_ARP3_MOUSE  | Actr3  | Actin-related protein 3 C K.NIVLSGGSTM*FR@.D                    | 8.88   | 4.84   | 1.83 | 0.55 |
| Q80US4_ARP5_MOUSE  | Actr5  | Actin-related protein 5 C R.INLGGQAQVLR@.L                      | 8.06   | 2.25   | 3.58 | 0.28 |
| Q99MU3_DSRAD_MOUSE | Adar   | Double-stranded RNA-spi   K.ALQEEAASSADDQSGGANTDSLDESMA*APNK#.I | 6.40   | 1.97   | 3.25 | 0.31 |
| Q99MU3_DSRAD_MOUSE | Adar   | Double-stranded RNA-spi   R.DVTSVLIDLER@.Q                      | 14.16  | 15.07  | 0.94 | 1.06 |
| Q99MU3_DSRAD_MOUSE | Adar   | Double-stranded RNA-spi   R.ELISQSPQK.V                         | 14.63  | 20.00  | 0.73 | 1.37 |
| Q99MU3_DSRAD_MOUSE | Adar   | Double-stranded RNA-spi   R.VLIGSEK#AEQLGFAEVPVTVGASLR@.R       | 6.50   | 3.87   | 1.68 | 0.60 |
| Q99MU3_DSRAD_MOUSE | Adar   | Double-stranded RNA-spi   K.AEQLGFAEVPVTVGASLR@.R               | 9.83   | 3.63   | 2.71 | 0.37 |
| Q99MU3_DSRAD_MOUSE | Adar   | Double-stranded RNA-spi   R.AIM*EM*PSFYSPLPR@.C                 | 6.95   | 6.23   | 1.12 | 0.90 |
| Q99MU3_DSRAD_MOUSE | Adar   | Double-stranded RNA-spi   K.ARDVTSVLIDLER.Q                     | 16.06  | 12.20  | 1.32 | 0.76 |
| Q99MU3_DSRAD_MOUSE | Adar   | Double-stranded RNA-spi   R.DLLQSYGAEAK.K                       | 7.34   | 34.35  | 0.21 | 4.68 |
| Q99MU3_DSRAD_MOUSE | Adar   | Double-stranded RNA-spi   R.DVTSVLIDLER.Q                       | 25.23  | 17.86  | 1.41 | 0.71 |
| Q99MU3_DSRAD_MOUSE | Adar   | Double-stranded RNA-spi   R.ELISQSPQK.V                         | 21.04  | 8.88   | 2.37 | 0.42 |
| Q99MU3_DSRAD_MOUSE | Adar   | Double-stranded RNA-spi   K.NSIFELAR.G                          | 10.08  | 10.83  | 0.93 | 1.07 |
| Q99MU3_DSRAD_MOUSE | Adar   | Double-stranded RNA-spi   R.QGATPPWYLLTDK#.K                    | 16.22  | 14.24  | 1.14 | 0.88 |
| Q99MU3_DSRAD_MOUSE | Adar   | Double-stranded RNA-spi   R.SFQLQIEFK#.G                        | 29.46  | 15.66  | 1.88 | 0.53 |
| Q99MU3_DSRAD_MOUSE | Adar   | Double-stranded RNA-spi   R.STHSAPATPTAVPEATR@.S                | 46.61  | 33.50  | 1.39 | 0.72 |
| Q99MU3_DSRAD_MOUSE | Adar   | Double-stranded RNA-spi   K.VLNR@LEELGEGK#.A                    | 20.38  | 9.35   | 2.18 | 0.46 |
| Q99MU3_DSRAD_MOUSE | Adar   | Double-stranded RNA-spi   R.YLNTNPNVGGGLLEYAR@.S                | 31.48  | 21.16  | 1.49 | 0.67 |
| Q99MU3_DSRAD_MOUSE | Adar   | Double-stranded RNA-spi   R.AIM*EM*PSFYSPLPR@.C                 | 4.53   | 1.73   | 2.61 | 0.38 |
| Q99MU3_DSRAD_MOUSE | Adar   | Double-stranded RNA-spi   R.DLLQSYGAEAK.K                       | 16.58  | 13.71  | 1.21 | 0.83 |
| Q99MU3_DSRAD_MOUSE | Adar   | Double-stranded RNA-spi   R.DVTSVLIDLER@.Q                      | 16.74  | 9.13   | 1.83 | 0.55 |
| Q99MU3_DSRAD_MOUSE | Adar   | Double-stranded RNA-spi   K.NSIFELAR@.G                         | 17.23  | 10.69  | 1.61 | 0.62 |
| Q99MU3_DSRAD_MOUSE | Adar   | Double-stranded RNA-spi   R.SFQLQIEFK#.G                        | 15.98  | 9.39   | 1.70 | 0.59 |

|                     |       |                          |                                            |        |       |      |      |
|---------------------|-------|--------------------------|--------------------------------------------|--------|-------|------|------|
| Q99MU3_DS RAD_MOUSE | Adar  | Double-stranded RNA-spi  | R.STHSAPAPPTAVPEATR@.S                     | 17.02  | 7.31  | 2.33 | 0.43 |
| Q99MU3_DS RAD_MOUSE | Adar  | Double-stranded RNA-spi  | R.VLIGESEKAEQLGFAEVTPTVGTASLR              | 8.39   | 4.93  | 1.70 | 0.59 |
| Q99MU3_DS RAD_MOUSE | Adar  | Double-stranded RNA-spi  | R.YLNTNP40QVLEAYR@.S                       | 18.47  | 18.19 | 1.87 | 0.53 |
| Q9QYCO_ADDA_MOUSE   | Add1  | Alpha-adducin OS=Mus n   | R.M*LDNLGVR@.T                             | 18.42  | 3.72  | 4.96 | 0.20 |
| Q9QYCO_ADDA_MOUSE   | Add1  | Alpha-adducin OS=Mus n   | R.SLVQGLVVTASK#.A                          | 17.15  | 9.15  | 1.88 | 0.53 |
| Q9QYCO_ADDA_MOUSE   | Add1  | Alpha-adducin OS=Mus n   | R.TLASAGGPDNLVLDLDPGK#.Y                   | 12.77  | 7.49  | 1.71 | 0.59 |
| Q9QYCO_ADDA_MOUSE   | Add1  | Alpha-adducin OS=Mus n   | K.VNLQGDVDR@.G                             | 21.04  | 7.42  | 2.84 | 0.35 |
| Q9QYCO_ADDA_MOUSE   | Add1  | Alpha-adducin OS=Mus n   | R.YFDR@VDENPEYLR@.E                        | 16.49  | 4.57  | 3.61 | 0.28 |
| Q9QYCO_ADDA_MOUSE   | Add1  | Alpha-adducin OS=Mus n   | R.SPGTTPAGEGSGSPK#.W                       | 10.25  | 3.72  | 2.76 | 0.36 |
| Q9QYCO_ADDA_MOUSE   | Add1  | Alpha-adducin OS=Mus n   | R.TLASAGGPDNLVLDLDPGK#.Y                   | 10.06  | 3.02  | 3.33 | 0.30 |
| Q9QYCO_ADDA_MOUSE   | Add1  | Alpha-adducin OS=Mus n   | R.TSTSAVPLNFVPLNTNPK#.E                    | 8.30   | 3.83  | 2.16 | 0.46 |
| Q9QYCO_ADDA_MOUSE   | Add1  | Alpha-adducin OS=Mus n   | K.VNLQGDVDR@.G                             | 17.52  | 4.51  | 3.88 | 0.26 |
| Q9QYB5_ADDG_MOUSE   | Add3  | Gamma-adducin OS=Mu      | r.K.VSSGTPIK#IEDPNQFVPLNTNPEVLEK#.R        | 1.83   | 1.50  | 1.22 | 0.82 |
| Q9QYB5_ADDG_MOUSE   | Add3  | Gamma-adducin OS=Mu      | r.R.GLFSSEATSLVK#.V                        | 15.20  | 7.03  | 2.16 | 0.46 |
| Q9QYB5_ADDG_MOUSE   | Add3  | Gamma-adducin OS=Mu      | r.K.VNIIIEVDVQSGDTLK#.I                    | 9.74   | 3.48  | 2.80 | 0.36 |
| Q9QYB5_ADDG_MOUSE   | Add3  | Gamma-adducin OS=Mu      | r.R.GLFSSEATSLVK#.V                        | 10.31  | 4.48  | 2.30 | 0.43 |
| A2BDX0_A2BDX0_MOUSE | Adnp  | Activity-dependent neur  | R.DPLYEIVR@.K                              | 10.91  | 6.58  | 1.66 | 0.60 |
| A2BDX0_A2BDX0_MOUSE | Adnp  | Activity-dependent neur  | K.NTTWEDVGLWDPISLTK#.N                     | 7.36   | 3.46  | 2.13 | 0.47 |
| A2BDX0_A2BDX0_MOUSE | Adnp  | Activity-dependent neur  | K.SPVSQSQASR.V                             | 5.86   | 7.94  | 0.74 | 1.35 |
| A2BDX0_A2BDX0_MOUSE | Adnp  | Activity-dependent neur  | K.SVGSYGVGQSVR@.L                          | 14.65  | 9.75  | 1.50 | 0.67 |
| A2BDX0_A2BDX0_MOUSE | Adnp  | Activity-dependent neur  | K.SYEAALVGHVIEDHER@.I                      | 14.65  | 9.48  | 1.55 | 0.65 |
| A2BDX0_A2BDX0_MOUSE | Adnp  | Activity-dependent neur  | K.NTTWEDVGLWDPISLTK#.N                     | 5.20   | 2.59  | 2.01 | 0.50 |
| A2BDX0_A2BDX0_MOUSE | Adnp  | Activity-dependent neur  | K.IPSDNLPEVPPK.V                           | 11.44  | 22.74 | 0.50 | 1.99 |
| A2BDX0_A2BDX0_MOUSE | Adnp  | Activity-dependent neur  | R.LGLGNAPVSIPOQSQSVK#.Q                    | 7.32   | 4.84  | 1.51 | 0.66 |
| A2BDX0_A2BDX0_MOUSE | Adnp  | Activity-dependent neur  | K.SPVSQSQASR.V                             | 11.33  | 12.65 | 0.90 | 1.12 |
| A2BDX0_A2BDX0_MOUSE | Adnp  | Activity-dependent neur  | K.SVGSYGVGQSVR.L                           | 8.07   | 3.16  | 2.56 | 0.39 |
| A2BDX0_A2BDX0_MOUSE | Adnp  | Activity-dependent neur  | R.TYEQM*EFFLLK.K                           | 7.89   | 10.95 | 0.72 | 1.39 |
| A2BDX0_A2BDX0_MOUSE | Adnp  | Activity-dependent neur  | K.SPVSQSQASR@.V                            | 6.65   | 6.64  | 1.00 | 1.00 |
| A2BDX0_A2BDX0_MOUSE | Adnp  | Activity-dependent neur  | K.SVGSYGVGQSVR@.L                          | 8.59   | 2.55  | 3.37 | 0.30 |
| Q9JKV1_ADRM1_MOUSE  | Adrm1 | Proteasomal ubiquitin re | K.YLVEFR@.A                                | 5.32   | 3.76  | 1.42 | 0.71 |
| Q640N1_AEBP1_MOUSE  | Aebp1 | Adipocyte enhancer-binc  | R.YLSPDATVSTEVR.A                          | 5.71   | 7.98  | 0.72 | 1.40 |
| Q640N1_AEBP1_MOUSE  | Aebp1 | Adipocyte enhancer-binc  | R.GEDDGVSEAEQTPDHAIFR@.W                   | 13.11  | 5.70  | 2.30 | 0.43 |
| Q640N1_AEBP1_MOUSE  | Aebp1 | Adipocyte enhancer-binc  | R.YLSPDATVSTEVR.A                          | 15.23  | 9.79  | 1.55 | 0.64 |
| Q80YS6_AFAP1_MOUSE  | Afap1 | Actin filament-associat  | e.K.AVLTNILLR@.L                           | 23.89  | 11.50 | 2.08 | 0.48 |
| Q80YS6_AFAP1_MOUSE  | Afap1 | Actin filament-associat  | e.K.ITQQGTDPILVLAQSK#.E                    | 14.67  | 6.78  | 2.16 | 0.46 |
| Q80YS6_AFAP1_MOUSE  | Afap1 | Actin filament-associat  | e.R.VSLELETEVK#.E                          | 10.60  | 3.41  | 3.11 | 0.32 |
| Q80YS6_AFAP1_MOUSE  | Afap1 | Actin filament-associat  | e.K.AVLTNILLR@.L                           | 13.76  | 3.71  | 3.71 | 0.27 |
| Q80YS6_AFAP1_MOUSE  | Afap1 | Actin filament-associat  | e.K.ITQQGTDPILVLAQSK#.E                    | 9.09   | 2.95  | 3.08 | 0.32 |
| O55112_AFF2_MOUSE   | Aff2  | AF4/FMR2 family membe    | r.K.ETASKPK#.R                             | 3.30   | 15.72 | 0.21 | 4.77 |
| Q80WT5_AFTIN_MOUSE  | Aftph | Aftphilin OS=Mus muscu   | K.EVTLGDSFEDTGNTER@.E                      | 4.39   | 1.67  | 2.62 | 0.38 |
| Q80WT5_AFTIN_MOUSE  | Aftph | Aftphilin OS=Mus muscu   | K.GAVASGLQEPGTSVQTALLNR@.L                 | 15.25  | 4.46  | 3.42 | 0.29 |
| Q80WT5_AFTIN_MOUSE  | Aftph | Aftphilin OS=Mus muscu   | K.QSDVVLSTSK#.E                            | 7.87   | 6.45  | 1.22 | 0.82 |
| Q8VHH5_AGAP3_MOUSE  | Agap3 | Arf-GAP with GTPase, AN  | R.FESVHPNIVDIER@.I                         | 4.31   | 3.95  | 1.09 | 0.92 |
| Q8VHH5_AGAP3_MOUSE  | Agap3 | Arf-GAP with GTPase, AN  | K.LFLAPLSSDVPPLGQQLLR@.A                   | 1.79   | 1.79  | 1.00 | 1.00 |
| Q8K2K6_AGF1_MOUSE   | Afgf1 | Arf-GAP domain and FG r  | K.SSSADGFTSTSQSHQASTVSK#.V                 | 1.79   | 4.46  | 1.49 | 0.67 |
| Q80WC7_AGF2_MOUSE   | Afgf2 | Arf-GAP domain and FG r  | K.IWGLFDAR@.T                              | 11.82  | 5.59  | 2.11 | 0.47 |
| Q80WC7_AGF2_MOUSE   | Afgf2 | Arf-GAP domain and FG r  | K.SISM*TTTFEVLFLQSR@.G                     | 5.51   | 5.17  | 1.07 | 0.94 |
| A2ASQ1_AGRIN_MOUSE  | Agrn  | Agrin OS=Mus musculus r  | R.STAAPSDVASLATAIFR.E                      | 5.50   | 5.08  | 0.69 | 1.45 |
| Q6PAL7_AHDC1_MOUSE  | Ahdc1 | AT-hook DNA-binding mc   | R.AFASTLGESGASGR@.G                        | 5.87   | 3.84  | 1.53 | 0.65 |
| Q6PAL7_AHDC1_MOUSE  | Ahdc1 | AT-hook DNA-binding mc   | K.VGSGLLADFLGR@.T                          | 7.79   | 5.51  | 1.41 | 0.71 |
| Q6PAL7_AHDC1_MOUSE  | Ahdc1 | AT-hook DNA-binding mc   | R.AFASTLGESGASGR@.G                        | 12.59  | 8.70  | 1.45 | 0.69 |
| Q6PAL7_AHDC1_MOUSE  | Ahdc1 | AT-hook DNA-binding mc   | R.GSYAGAPSGQTLQSER@.Q                      | 4.77   | 2.93  | 1.63 | 0.61 |
| Q6PAL7_AHDC1_MOUSE  | Ahdc1 | AT-hook DNA-binding mc   | K.SGFLGPM*AEPHPEDTFTVLSL-                  | 3.80   | 3.80  | 1.00 | 1.00 |
| Q6PAL7_AHDC1_MOUSE  | Ahdc1 | AT-hook DNA-binding mc   | K.VGSGLLADFLGR@.T                          | 10.05  | 11.50 | 1.74 | 0.57 |
| E9Q616_E9Q616_MOUSE | Ahnak | Protein Ahnak OS=Mus m   | r.K.ASLGSLGEVEAEASP#.G                     | 5.74   | 2.80  | 2.05 | 0.49 |
| E9Q616_E9Q616_MOUSE | Ahnak | Protein Ahnak OS=Mus m   | r.R.DDGVFVQEVVM*QNSPAAR@.T                 | 9.24   | 2.43  | 3.81 | 0.26 |
| E9Q616_E9Q616_MOUSE | Ahnak | Protein Ahnak OS=Mus m   | r.K.EDGQVIGATYFDNLQSGEVTQLLNTM*GHHTVGLK#.L | 18.81  | 3.25  | 5.79 | 0.17 |
| E9Q616_E9Q616_MOUSE | Ahnak | Protein Ahnak OS=Mus m   | r.K.FQVTPGAK#.V                            | 37.84  | 10.40 | 3.64 | 0.27 |
| E9Q616_E9Q616_MOUSE | Ahnak | Protein Ahnak OS=Mus m   | r.R.HEVTEISNTDVTQPGK#.T                    | 86.00  | 20.56 | 4.19 | 0.24 |
| E9Q616_E9Q616_MOUSE | Ahnak | Protein Ahnak OS=Mus m   | r.K.IEGSITGSPVEITGPDVDVHGLGK#.L            | 13.08  | 2.00  | 6.55 | 0.15 |
| E9Q616_E9Q616_MOUSE | Ahnak | Protein Ahnak OS=Mus m   | r.K.LK#GPQITGSEGLDGLK#.G                   | 25.19  | 3.88  | 6.50 | 0.15 |
| E9Q616_E9Q616_MOUSE | Ahnak | Protein Ahnak OS=Mus m   | r.R.LPSGSGPASPITGSAVDIR@.A                 | 44.10  | 13.12 | 3.36 | 0.30 |
| E9Q616_E9Q616_MOUSE | Ahnak | Protein Ahnak OS=Mus m   | r.R.LR@SEGVGDDLETQSR@.T                    | 24.15  | 6.51  | 3.71 | 0.27 |
| E9Q616_E9Q616_MOUSE | Ahnak | Protein Ahnak OS=Mus m   | r.R@VTAYTVDTVGR@.E                         | 9.54   | 5.58  | 1.71 | 0.58 |
| E9Q616_E9Q616_MOUSE | Ahnak | Protein Ahnak OS=Mus m   | r.R.SSEVLLSGDDVYQR@.I                      | 65.89  | 14.93 | 4.41 | 0.23 |
| E9Q616_E9Q616_MOUSE | Ahnak | Protein Ahnak OS=Mus m   | r.K.VGSLDVNVK#.A                           | 61.74  | 12.73 | 4.85 | 0.21 |
| E9Q616_E9Q616_MOUSE | Ahnak | Protein Ahnak OS=Mus m   | r.R.VPGVDVSSLLGAGSVEVQASLQSGDIGK#.I        | 7.89   | 3.07  | 2.57 | 0.39 |
| E9Q616_E9Q616_MOUSE | Ahnak | Protein Ahnak OS=Mus m   | r.R.LR@SEGVGDDLETQSR@.T                    | 16.99  | 3.41  | 4.98 | 0.20 |
| E9Q616_E9Q616_MOUSE | Ahnak | Protein Ahnak OS=Mus m   | r.R.SSEVLLSGDDVYQR@.I                      | 18.96  | 4.19  | 4.53 | 0.22 |
| E9Q616_E9Q616_MOUSE | Ahnak | Protein Ahnak OS=Mus m   | r.R.VTAYTVDTVGR@.E                         | 8.04   | 2.63  | 3.06 | 0.33 |
| E9Q616_E9Q616_MOUSE | Ahnak | Protein Ahnak OS=Mus m   | r.K.ADVVISVPK#.I                           | 22.87  | 4.93  | 4.64 | 0.22 |
| E9Q616_E9Q616_MOUSE | Ahnak | Protein Ahnak OS=Mus m   | r.R.AEGEIKVDPVDELK#.S                      | 57.98  | 8.34  | 6.95 | 0.14 |
| E9Q616_E9Q616_MOUSE | Ahnak | Protein Ahnak OS=Mus m   | r.K.AEGPEVQVNLPK#.A                        | 74.22  | 21.74 | 3.41 | 0.29 |
| E9Q616_E9Q616_MOUSE | Ahnak | Protein Ahnak OS=Mus m   | r.K.AESPEM*EVNLPK#.S                       | 12.46  | 1.85  | 6.72 | 0.15 |
| E9Q616_E9Q616_MOUSE | Ahnak | Protein Ahnak OS=Mus m   | r.R.DDGVFVQEVVM*QNSPAAR@.T                 | 14.36  | 2.64  | 5.44 | 0.18 |
| E9Q616_E9Q616_MOUSE | Ahnak | Protein Ahnak OS=Mus m   | r.R.DDGVFVQEVVM*QNSPAAR@.T                 | 6.47   | 1.61  | 4.02 | 0.25 |
| E9Q616_E9Q616_MOUSE | Ahnak | Protein Ahnak OS=Mus m   | r.K.DIDITSPFEM*IK#.I                       | 13.44  | 2.04  | 6.59 | 0.15 |
| E9Q616_E9Q616_MOUSE | Ahnak | Protein Ahnak OS=Mus m   | r.K.EDGQVIGATYFDNLQSGEVTQLLNTM*GHHTVGLK#.L | 47.77  | 7.04  | 6.78 | 0.15 |
| E9Q616_E9Q616_MOUSE | Ahnak | Protein Ahnak OS=Mus m   | r.R.EGVK#DIDITSPFEM*IK#.I                  | 105.39 | 14.91 | 7.07 | 0.14 |
| E9Q616_E9Q616_MOUSE | Ahnak | Protein Ahnak OS=Mus m   | r.R.EGVK#DIDITSPFEM*IK#.I                  | 22.58  | 4.50  | 5.02 | 0.20 |
| E9Q616_E9Q616_MOUSE | Ahnak | Protein Ahnak OS=Mus m   | r.K.FGVSAGLDGQPEVGLSVSAPESVGHK#.G          | 31.48  | 8.69  | 3.62 | 0.28 |
| E9Q616_E9Q616_MOUSE | Ahnak | Protein Ahnak OS=Mus m   | r.K.FQVTPGAK#.V                            | 78.47  | 12.56 | 6.25 | 0.16 |
| E9Q616_E9Q616_MOUSE | Ahnak | Protein Ahnak OS=Mus m   | r.K.FSVPGFK#.G                             | 38.59  | 9.11  | 4.24 | 0.24 |
| E9Q616_E9Q616_MOUSE | Ahnak | Protein Ahnak OS=Mus m   | r.K.FSVPGFK#.G                             | 43.56  | 12.64 | 3.45 | 0.29 |
| E9Q616_E9Q616_MOUSE | Ahnak | Protein Ahnak OS=Mus m   | r.K.GEGLDVNVTLPEGDISISGPK#.V               | 12.46  | 3.90  | 3.19 | 0.31 |
| E9Q616_E9Q616_MOUSE | Ahnak | Protein Ahnak OS=Mus m   | r.K.GEYDVTVPR@.A                           | 22.28  | 5.67  | 3.93 | 0.25 |
| E9Q616_E9Q616_MOUSE | Ahnak | Protein Ahnak OS=Mus m   | r.K.GGVQVILPNVEGK#.A                       | 23.94  | 8.53  | 2.81 | 0.36 |
| E9Q616_E9Q616_MOUSE | Ahnak | Protein Ahnak OS=Mus m   | r.K.GKHGVDVILPNVEGK#.A                     | 42.19  | 8.09  | 5.22 | 0.19 |
| E9Q616_E9Q616_MOUSE | Ahnak | Protein Ahnak OS=Mus m   | r.K.GLEVDVK#.G                             | 41.59  | 7.59  | 5.48 | 0.18 |
| E9Q616_E9Q616_MOUSE | Ahnak | Protein Ahnak OS=Mus m   | r.K.GPSFNVAESPESDFVSLK#.G                  | 6.32   | 2.99  | 2.11 | 0.47 |
| E9Q616_E9Q616_MOUSE | Ahnak | Protein Ahnak OS=Mus m   | r.R.HEVTEISNTDVTQPGK#.T                    | 115.62 | 23.40 | 4.94 | 0.20 |
| E9Q616_E9Q616_MOUSE | Ahnak | Protein Ahnak OS=Mus m   | r.K.IEGSITGSPVEITGPDVDVHGLGK#.L            | 57.15  | 11.21 | 5.10 | 0.20 |
| E9Q616_E9Q616_MOUSE | Ahnak | Protein Ahnak OS=Mus m   | r.K.IK#GDVPSVGLGEPNLDLQGGEGK#.I            | 7.51   | 2.61  | 2.87 | 0.35 |
| E9Q616_E9Q616_MOUSE | Ahnak | Protein Ahnak OS=Mus m   | r.R.ISM*ADVLNVAAPK#.G                      | 41.86  | 9.00  | 4.65 | 0.21 |
| E9Q616_E9Q616_MOUSE | Ahnak | Protein Ahnak OS=Mus m   | r.R.ISMADVDLNVAAAPK#.G                     | 13.04  | 3.63  | 3.59 | 0.28 |
| E9Q616_E9Q616_MOUSE | Ahnak | Protein Ahnak OS=Mus m   | r.K.LDITSDVSLGEPGK#.L                      | 12.60  | 2.17  | 5.80 | 0.17 |
| E9Q616_E9Q616_MOUSE | Ahnak | Protein Ahnak OS=Mus m   | r.K.LDISAPDLNLEGPCK#.L                     | 15.00  | 2.99  | 5.02 | 0.20 |
| E9Q616_E9Q616_MOUSE | Ahnak | Protein Ahnak OS=Mus m   | r.K.LK#GPDVILNPEVSK#.T                     | 78.00  | 19.01 | 4.10 | 0.24 |
| E9Q616_E9Q616_MOUSE | Ahnak | Protein Ahnak OS=Mus m   | r.K.LK#GPQITGSEGLDGLK#.G                   | 83.32  | 15.23 | 5.47 | 0.18 |
| E9Q616_E9Q616_MOUSE | Ahnak | Protein Ahnak OS=Mus m   | r.R.LPSGSGPASPITGSAVDIR@.A                 | 62.67  | 14.74 | 4.25 | 0.24 |
| E9Q616_E9Q616_MOUSE | Ahnak | Protein Ahnak OS=Mus m   | r.R@VTAYTVDTVGR@.E                         | 16.35  | 3.61  | 4.53 | 0.22 |
| E9Q616_E9Q616_MOUSE | Ahnak | Protein Ahnak OS=Mus m   | r.K.SDIDVSGPNVDK#.V                        | 17.86  | 2.00  | 8.92 | 0.11 |
| E9Q616_E9Q616_MOUSE | Ahnak | Protein Ahnak OS=Mus m   | r.R.SEDVGEDLGETQSR@.T                      | 24.03  | 3.18  | 7.55 | 0.13 |

|                     |       |                                                                 |        |       |      |      |
|---------------------|-------|-----------------------------------------------------------------|--------|-------|------|------|
| E9Q616_E9Q616_MOUSE | Ahnak | Protein Ahnak OS=Mus m R.SSEVLSGDDEYQR@.I                       | 109.72 | 20.32 | 5.40 | 0.19 |
| E9Q616_E9Q616_MOUSE | Ahnak | Protein Ahnak OS=Mus m K.VDIDTPQDVHGPDLK#.I                     | 54.24  | 11.11 | 4.88 | 0.20 |
| E9Q616_E9Q616_MOUSE | Ahnak | Protein Ahnak OS=Mus m R.VDIETPNLEGLTGPBK#.I                    | 14.38  | 14.33 | 5.70 | 0.18 |
| E9Q616_E9Q616_MOUSE | Ahnak | Protein Ahnak OS=Mus m K.VGSLDNNV#.A                            | 98.84  | 20.40 | 4.85 | 0.21 |
| E9Q616_E9Q616_MOUSE | Ahnak | Protein Ahnak OS=Mus m K.VNVEAPNVNM*EGLGGK#.L                   | 30.35  | 5.63  | 5.39 | 0.19 |
| E9Q616_E9Q616_MOUSE | Ahnak | Protein Ahnak OS=Mus m K.VNVEAPNVNMEGLGGK#.L                    | 14.16  | 10.62 | 1.33 | 0.75 |
| E9Q616_E9Q616_MOUSE | Ahnak | Protein Ahnak OS=Mus m K.VPDVNIQEPGK#.L                         | 16.88  | 31.09 | 0.54 | 1.84 |
| E9Q616_E9Q616_MOUSE | Ahnak | Protein Ahnak OS=Mus m R.VPGDVSSSLGAGSVEVQAPLSQSGDIGK#.I        | 29.90  | 6.35  | 4.71 | 0.21 |
| E9Q616_E9Q616_MOUSE | Ahnak | Protein Ahnak OS=Mus m K.VQANLDPDINIEGPEAK#.I                   | 3.92   | 2.26  | 1.73 | 0.58 |
| E9Q616_E9Q616_MOUSE | Ahnak | Protein Ahnak OS=Mus m R.VTAYTVDTVTR@.E                         | 55.94  | 9.93  | 5.63 | 0.18 |
| E9Q616_E9Q616_MOUSE | Ahnak | Protein Ahnak OS=Mus m K.ADLDISGTH#.V                           | 28.25  | 7.27  | 3.88 | 0.26 |
| E9Q616_E9Q616_MOUSE | Ahnak | Protein Ahnak OS=Mus m K.ADVVASLPEVEGGVK#.V                     | 25.16  | 3.79  | 6.63 | 0.15 |
| E9Q616_E9Q616_MOUSE | Ahnak | Protein Ahnak OS=Mus m K.ADVVASLPEVEGGVK#VPDVIK#GPK#.V          | 13.10  | 2.03  | 6.46 | 0.15 |
| E9Q616_E9Q616_MOUSE | Ahnak | Protein Ahnak OS=Mus m K.ADVVISVPK#.L                           | 117.73 | 17.70 | 6.65 | 0.15 |
| E9Q616_E9Q616_MOUSE | Ahnak | Protein Ahnak OS=Mus m R.AEGEIK#VPDVELK#.S                      | 144.02 | 29.09 | 4.95 | 0.20 |
| E9Q616_E9Q616_MOUSE | Ahnak | Protein Ahnak OS=Mus m K.AEGPEVDVNLPK#.A                        | 226.27 | 59.07 | 3.83 | 0.26 |
| E9Q616_E9Q616_MOUSE | Ahnak | Protein Ahnak OS=Mus m K.AEGPEVSLPK#.A                          | 58.30  | 12.20 | 4.78 | 0.21 |
| E9Q616_E9Q616_MOUSE | Ahnak | Protein Ahnak OS=Mus m K.AESPEM*EVNLPK#.S                       | 41.49  | 5.97  | 6.95 | 0.14 |
| E9Q616_E9Q616_MOUSE | Ahnak | Protein Ahnak OS=Mus m K.AESPEM*EVNLPK#.S                       | 20.61  | 4.08  | 5.05 | 0.20 |
| E9Q616_E9Q616_MOUSE | Ahnak | Protein Ahnak OS=Mus m K.APAVDIK#.G                             | 40.59  | 19.41 | 2.09 | 0.48 |
| E9Q616_E9Q616_MOUSE | Ahnak | Protein Ahnak OS=Mus m K.APDVQLNAPDQVHGPWLNK#.M                 | 9.59   | 4.07  | 2.36 | 0.42 |
| E9Q616_E9Q616_MOUSE | Ahnak | Protein Ahnak OS=Mus m K.APEVDVQGPVSLK#.M                       | 31.46  | 7.09  | 4.43 | 0.23 |
| E9Q616_E9Q616_MOUSE | Ahnak | Protein Ahnak OS=Mus m K.ASLGSLGVEVEAESSPK#.G                   | 9.00   | 4.57  | 1.97 | 0.51 |
| E9Q616_E9Q616_MOUSE | Ahnak | Protein Ahnak OS=Mus m K.ATIDVSGPK#DIETSDVSLGEPGK#.L            | 16.56  | 7.84  | 2.11 | 0.47 |
| E9Q616_E9Q616_MOUSE | Ahnak | Protein Ahnak OS=Mus m R.DDGVFVQEVN*QNSPAAR@.T                  | 17.00  | 4.01  | 4.24 | 0.24 |
| E9Q616_E9Q616_MOUSE | Ahnak | Protein Ahnak OS=Mus m R.DDGVFVQEVN*QNSPAAR@.T                  | 18.51  | 3.02  | 6.12 | 0.16 |
| E9Q616_E9Q616_MOUSE | Ahnak | Protein Ahnak OS=Mus m R.DDGVFVQEVN*QNSPAAR@.T                  | 7.04   | 2.78  | 2.53 | 0.40 |
| E9Q616_E9Q616_MOUSE | Ahnak | Protein Ahnak OS=Mus m K.EDGQVGIATYFDNLQSGEVTQLLNTM*GHHTVGLK#.L | 53.60  | 6.42  | 8.34 | 0.12 |
| E9Q616_E9Q616_MOUSE | Ahnak | Protein Ahnak OS=Mus m R.EGVK#DIDIT*SPFEM*IK#.I                 | 91.69  | 19.59 | 4.68 | 0.21 |
| E9Q616_E9Q616_MOUSE | Ahnak | Protein Ahnak OS=Mus m K.FGM*PGFK#.A                            | 46.27  | 8.37  | 5.53 | 0.18 |
| E9Q616_E9Q616_MOUSE | Ahnak | Protein Ahnak OS=Mus m K.FGMPGFK#.A                             | 13.81  | 1.51  | 9.15 | 0.11 |
| E9Q616_E9Q616_MOUSE | Ahnak | Protein Ahnak OS=Mus m K.FGVSAGDLQIPEVGLSVSAPESVGHK#.G          | 57.82  | 8.46  | 6.83 | 0.15 |
| E9Q616_E9Q616_MOUSE | Ahnak | Protein Ahnak OS=Mus m K.FK#MPEMNIK#.A                          | 10.06  | 2.38  | 4.24 | 0.24 |
| E9Q616_E9Q616_MOUSE | Ahnak | Protein Ahnak OS=Mus m K.FSM*PGFK#.A                            | 179.44 | 36.51 | 4.91 | 0.20 |
| E9Q616_E9Q616_MOUSE | Ahnak | Protein Ahnak OS=Mus m K.FSM*PGFK#.A                            | 42.15  | 10.19 | 4.14 | 0.24 |
| E9Q616_E9Q616_MOUSE | Ahnak | Protein Ahnak OS=Mus m K.FSM*PGFK#GEGAEVDVNLQK#.A               | 16.89  | 3.41  | 4.96 | 0.20 |
| E9Q616_E9Q616_MOUSE | Ahnak | Protein Ahnak OS=Mus m K.FSM*PSLK#.G                            | 7.30   | 3.43  | 2.13 | 0.47 |
| E9Q616_E9Q616_MOUSE | Ahnak | Protein Ahnak OS=Mus m K.FSM*PTLK#.G                            | 14.15  | 3.59  | 3.95 | 0.25 |
| E9Q616_E9Q616_MOUSE | Ahnak | Protein Ahnak OS=Mus m K.FSVPVGF#.A                             | 99.70  | 17.33 | 5.75 | 0.17 |
| E9Q616_E9Q616_MOUSE | Ahnak | Protein Ahnak OS=Mus m K.GDVSLSLPK#.V                           | 19.60  | 6.73  | 2.91 | 0.34 |
| E9Q616_E9Q616_MOUSE | Ahnak | Protein Ahnak OS=Mus m K.GEGAEVDVNLQK#.A                        | 27.13  | 5.49  | 4.94 | 0.20 |
| E9Q616_E9Q616_MOUSE | Ahnak | Protein Ahnak OS=Mus m K.GEGLDVNVTPEGDISISGPK#.V                | 10.24  | 1.51  | 6.78 | 0.15 |
| E9Q616_E9Q616_MOUSE | Ahnak | Protein Ahnak OS=Mus m K.GEGPDVDSLPK#.A                         | 57.33  | 12.66 | 4.53 | 0.22 |
| E9Q616_E9Q616_MOUSE | Ahnak | Protein Ahnak OS=Mus m K.GEGPELVNMM*PK#.A                       | 29.53  | 7.28  | 4.05 | 0.25 |
| E9Q616_E9Q616_MOUSE | Ahnak | Protein Ahnak OS=Mus m K.GEGPELVNMM*PK#.A                       | 5.81   | 2.26  | 2.57 | 0.39 |
| E9Q616_E9Q616_MOUSE | Ahnak | Protein Ahnak OS=Mus m K.GEGPEVDIPK#.A                          | 39.66  | 10.95 | 3.62 | 0.28 |
| E9Q616_E9Q616_MOUSE | Ahnak | Protein Ahnak OS=Mus m K.GEYDVTVPR@.A                           | 58.21  | 10.20 | 5.71 | 0.18 |
| E9Q616_E9Q616_MOUSE | Ahnak | Protein Ahnak OS=Mus m K.GGQITGLQSGPLSVSGPQGHLESESG#.V          | 6.61   | 2.28  | 2.89 | 0.35 |
| E9Q616_E9Q616_MOUSE | Ahnak | Protein Ahnak OS=Mus m K.GGVDVILPNVEGK#.A                       | 57.76  | 11.81 | 4.89 | 0.20 |
| E9Q616_E9Q616_MOUSE | Ahnak | Protein Ahnak OS=Mus m K.GGVTSPEASISGSK#.G                      | 9.75   | 6.40  | 1.52 | 0.66 |
| E9Q616_E9Q616_MOUSE | Ahnak | Protein Ahnak OS=Mus m K.GLEVVDK#.G                             | 44.09  | 11.69 | 3.77 | 0.27 |
| E9Q616_E9Q616_MOUSE | Ahnak | Protein Ahnak OS=Mus m K.GNLDM*SAK#.I                           | 22.33  | 4.78  | 4.67 | 0.21 |
| E9Q616_E9Q616_MOUSE | Ahnak | Protein Ahnak OS=Mus m K.GPAGIAGLPGISIQGPEGNLQM*PGIK#.A         | 4.03   | 1.88  | 2.14 | 0.47 |
| E9Q616_E9Q616_MOUSE | Ahnak | Protein Ahnak OS=Mus m K.GPDINLPEVSVK#.T                        | 17.06  | 2.50  | 6.83 | 0.15 |
| E9Q616_E9Q616_MOUSE | Ahnak | Protein Ahnak OS=Mus m K.GPGLDFEGPDAK#.L                        | 6.14   | 3.88  | 1.58 | 0.63 |
| E9Q616_E9Q616_MOUSE | Ahnak | Protein Ahnak OS=Mus m K.GPQISAPSM*DFNLEGGPK#.V                 | 7.75   | 3.47  | 2.23 | 0.45 |
| E9Q616_E9Q616_MOUSE | Ahnak | Protein Ahnak OS=Mus m K.GPQITGSPLEGLGLK#.G                     | 29.83  | 7.31  | 4.08 | 0.25 |
| E9Q616_E9Q616_MOUSE | Ahnak | Protein Ahnak OS=Mus m K.GPQVSSLNLDTSK#.L                       | 9.35   | 3.12  | 2.99 | 0.33 |
| E9Q616_E9Q616_MOUSE | Ahnak | Protein Ahnak OS=Mus m K.GPSFNVAQSPDFGVSLLK#.G                  | 8.93   | 3.54  | 2.52 | 0.40 |
| E9Q616_E9Q616_MOUSE | Ahnak | Protein Ahnak OS=Mus m K.GSGLGLHGAAPDVGK#.G                     | 16.21  | 4.13  | 3.92 | 0.25 |
| E9Q616_E9Q616_MOUSE | Ahnak | Protein Ahnak OS=Mus m K.GSR@VDIETPNLEGLTGPBK#.I                | 23.04  | 5.64  | 4.08 | 0.24 |
| E9Q616_E9Q616_MOUSE | Ahnak | Protein Ahnak OS=Mus m R.HEVTEISNTDVTOPGK#.T                    | 165.95 | 22.25 | 7.46 | 0.13 |
| E9Q616_E9Q616_MOUSE | Ahnak | Protein Ahnak OS=Mus m R.HEVTEISNTDVTOPGK#.T                    | 25.79  | 4.79  | 5.38 | 0.19 |
| E9Q616_E9Q616_MOUSE | Ahnak | Protein Ahnak OS=Mus m K.IEGEM*#VPDVIK#.G                       | 58.73  | 9.26  | 6.34 | 0.16 |
| E9Q616_E9Q616_MOUSE | Ahnak | Protein Ahnak OS=Mus m K.IEGISIT#VEIGT#PDVHGLGGK#.L             | 75.96  | 13.33 | 5.70 | 0.18 |
| E9Q616_E9Q616_MOUSE | Ahnak | Protein Ahnak OS=Mus m K.IKHGDIDVSPK#.I                         | 25.44  | 24.09 | 1.06 | 0.95 |
| E9Q616_E9Q616_MOUSE | Ahnak | Protein Ahnak OS=Mus m K.IKHGDVPSVLEGPNIDLQGPGEK#.I             | 16.40  | 8.53  | 1.92 | 0.52 |
| E9Q616_E9Q616_MOUSE | Ahnak | Protein Ahnak OS=Mus m R.ISM*ADVDLNVAAK#.G                      | 107.12 | 19.27 | 5.56 | 0.18 |
| E9Q616_E9Q616_MOUSE | Ahnak | Protein Ahnak OS=Mus m R.ISMADVDLNVAAK#.G                       | 16.79  | 7.22  | 2.32 | 0.43 |
| E9Q616_E9Q616_MOUSE | Ahnak | Protein Ahnak OS=Mus m K.ISM*PDIDLHLK#.S                        | 13.56  | 5.69  | 2.38 | 0.42 |
| E9Q616_E9Q616_MOUSE | Ahnak | Protein Ahnak OS=Mus m K.ISM*PDIDLHLK#.G                        | 56.69  | 13.98 | 4.06 | 0.25 |
| E9Q616_E9Q616_MOUSE | Ahnak | Protein Ahnak OS=Mus m K.ISM*PDVNLNK#.G                         | 27.30  | 6.35  | 4.30 | 0.23 |
| E9Q616_E9Q616_MOUSE | Ahnak | Protein Ahnak OS=Mus m K.ISM*PDVNLNK#.G                         | 24.24  | 37.32 | 0.65 | 1.54 |
| E9Q616_E9Q616_MOUSE | Ahnak | Protein Ahnak OS=Mus m K.ISMPDVLNLK#.G                          | 13.66  | 2.28  | 6.00 | 0.17 |
| E9Q616_E9Q616_MOUSE | Ahnak | Protein Ahnak OS=Mus m K.ISM*PDVNLNK#.G                         | 32.57  | 5.64  | 5.77 | 0.17 |
| E9Q616_E9Q616_MOUSE | Ahnak | Protein Ahnak OS=Mus m K.ISMPDVLNLK#.G                          | 11.01  | 3.03  | 3.63 | 0.28 |
| E9Q616_E9Q616_MOUSE | Ahnak | Protein Ahnak OS=Mus m K.ISM*PEIDLNLK#.G                        | 19.96  | 7.61  | 2.62 | 0.38 |
| E9Q616_E9Q616_MOUSE | Ahnak | Protein Ahnak OS=Mus m K.ISM*PEVDLNLK#.G                        | 20.94  | 7.95  | 2.63 | 0.38 |
| E9Q616_E9Q616_MOUSE | Ahnak | Protein Ahnak OS=Mus m K.LDANIPAEVAVGPEGK#.W                    | 23.67  | 8.08  | 2.93 | 0.34 |
| E9Q616_E9Q616_MOUSE | Ahnak | Protein Ahnak OS=Mus m K.LDIETSDVSLGEPGK#.L                     | 90.09  | 18.77 | 4.80 | 0.21 |
| E9Q616_E9Q616_MOUSE | Ahnak | Protein Ahnak OS=Mus m K.LDISAPDLNLEGPGEK#.L                    | 178.70 | 30.22 | 5.91 | 0.17 |
| E9Q616_E9Q616_MOUSE | Ahnak | Protein Ahnak OS=Mus m K.LK#GPDINLPEVSVK#.T                     | 126.48 | 26.22 | 4.82 | 0.21 |
| E9Q616_E9Q616_MOUSE | Ahnak | Protein Ahnak OS=Mus m K.LK#GPDITGSPLEGLGLK#.G                  | 67.89  | 8.37  | 8.11 | 0.12 |
| E9Q616_E9Q616_MOUSE | Ahnak | Protein Ahnak OS=Mus m R.LPSGSGPASPITGSAVDIR@.A                 | 65.34  | 14.35 | 4.55 | 0.22 |
| E9Q616_E9Q616_MOUSE | Ahnak | Protein Ahnak OS=Mus m K.LSSGQISGPEIK#.G                        | 11.09  | 5.83  | 1.90 | 0.53 |
| E9Q616_E9Q616_MOUSE | Ahnak | Protein Ahnak OS=Mus m K.M*DIAPDM*DVQGPVHLLK#.M                 | 30.34  | 8.16  | 3.72 | 0.27 |
| E9Q616_E9Q616_MOUSE | Ahnak | Protein Ahnak OS=Mus m K.M*DISAPDVEVHGPVWLNK#.M                 | 54.22  | 9.73  | 5.57 | 0.18 |
| E9Q616_E9Q616_MOUSE | Ahnak | Protein Ahnak OS=Mus m R.R@VTAYTVDTVTR@.E                       | 32.32  | 5.84  | 5.53 | 0.18 |
| E9Q616_E9Q616_MOUSE | Ahnak | Protein Ahnak OS=Mus m K.SDIDVSGPNVDVK#.V                       | 61.52  | 9.85  | 6.25 | 0.16 |
| E9Q616_E9Q616_MOUSE | Ahnak | Protein Ahnak OS=Mus m K.SDIDVSGPNVDVK#VPDVNIEGPEGK#.L          | 29.34  | 3.61  | 8.14 | 0.12 |
| E9Q616_E9Q616_MOUSE | Ahnak | Protein Ahnak OS=Mus m R.SEDGVEGLGETQSR@.T                      | 36.08  | 5.70  | 6.33 | 0.16 |
| E9Q616_E9Q616_MOUSE | Ahnak | Protein Ahnak OS=Mus m R.SSEVLSGDDEYQR@.I                       | 142.27 | 22.47 | 6.33 | 0.16 |
| E9Q616_E9Q616_MOUSE | Ahnak | Protein Ahnak OS=Mus m K.TPQISM*SDIDLNLK#.G                     | 6.88   | 3.89  | 1.77 | 0.57 |
| E9Q616_E9Q616_MOUSE | Ahnak | Protein Ahnak OS=Mus m K.TSAPEVK#.G                             | 96.78  | 18.86 | 5.13 | 0.19 |
| E9Q616_E9Q616_MOUSE | Ahnak | Protein Ahnak OS=Mus m K.VDIDTPQDVHGPDLK#.I                     | 104.55 | 17.17 | 6.09 | 0.16 |
| E9Q616_E9Q616_MOUSE | Ahnak | Protein Ahnak OS=Mus m K.VDIDVPLDIEGPEGK#.L                     | 46.07  | 11.88 | 3.88 | 0.26 |
| E9Q616_E9Q616_MOUSE | Ahnak | Protein Ahnak OS=Mus m K.VDIDVDPVNIQEPDITK#.L                   | 56.19  | 10.17 | 5.53 | 0.18 |
| E9Q616_E9Q616_MOUSE | Ahnak | Protein Ahnak OS=Mus m K.VDIDVDPVNIQEPDM*PK#.V                  | 41.29  | 2.55  | 1.63 | 0.61 |
| E9Q616_E9Q616_MOUSE | Ahnak | Protein Ahnak OS=Mus m R.VDIETPNLEGLTGPBK#.I                    | 131.16 | 20.62 | 6.36 | 0.16 |
| E9Q616_E9Q616_MOUSE | Ahnak | Protein Ahnak OS=Mus m R.VDIETPNLEGLTGPBK#.I                    | 71.72  | 3.31  | 6.56 | 0.15 |
| E9Q616_E9Q616_MOUSE | Ahnak | Protein Ahnak OS=Mus m K.VDINAPDQVDR@.G                         | 22.70  | 19.63 | 3.70 | 0.27 |
| E9Q616_E9Q616_MOUSE | Ahnak | Protein Ahnak OS=Mus m K.VDVSVPDQVHGPVWLNK#.M                   | 78.71  | 19.10 | 4.12 | 0.24 |
| E9Q616_E9Q616_MOUSE | Ahnak | Protein Ahnak OS=Mus m K.VEGDLK#GPDIDIK#.G                      | 89.96  | 15.97 | 5.63 | 0.18 |

|                     |          |                                                                   |        |       |      |      |
|---------------------|----------|-------------------------------------------------------------------|--------|-------|------|------|
| E9Q616_E9Q616_MOUSE | Ahnak    | Protein Ahnak OS=Mus m: K.VEVSPADVSIIEGSEK#L                      | 54.38  | 13.38 | 4.06 | 0.25 |
| E9Q616_E9Q616_MOUSE | Ahnak    | Protein Ahnak OS=Mus m: K.VGIDAPDVEVHGPDPWHLK#M                   | 116.97 | 19.79 | 5.91 | 0.17 |
| E9Q616_E9Q616_MOUSE | Ahnak    | Protein Ahnak OS=Mus m: K.VGSLDNNV#A                              | 130.11 | 17.82 | 7.30 | 0.14 |
| E9Q616_E9Q616_MOUSE | Ahnak    | Protein Ahnak OS=Mus m: K.VK#GDM#DVTVPK#I                         | 119.64 | 18.34 | 6.52 | 0.15 |
| E9Q616_E9Q616_MOUSE | Ahnak    | Protein Ahnak OS=Mus m: K.VK#GDDVDVSLPK#V                         | 184.53 | 35.69 | 5.18 | 0.19 |
| E9Q616_E9Q616_MOUSE | Ahnak    | Protein Ahnak OS=Mus m: K.VNVEAPNVNM#EGLGGK#L                     | 56.77  | 14.98 | 3.79 | 0.26 |
| E9Q616_E9Q616_MOUSE | Ahnak    | Protein Ahnak OS=Mus m: K.VNVEAPNVNMEGLGGK#L                      | 24.54  | 7.95  | 3.09 | 0.32 |
| E9Q616_E9Q616_MOUSE | Ahnak    | Protein Ahnak OS=Mus m: K.VPVDVK#G                                | 87.39  | 11.00 | 7.94 | 0.13 |
| E9Q616_E9Q616_MOUSE | Ahnak    | Protein Ahnak OS=Mus m: K.VPVDNIEGEGK#L                           | 43.03  | 70.25 | 0.61 | 1.63 |
| E9Q616_E9Q616_MOUSE | Ahnak    | Protein Ahnak OS=Mus m: R.VPVGDDVSSLAGAGVQAPSLQSGDIGK#I           | 47.06  | 8.83  | 5.33 | 0.19 |
| E9Q616_E9Q616_MOUSE | Ahnak    | Protein Ahnak OS=Mus m: K.VQANLDPDINIEGPEAK#I                     | 12.59  | 5.79  | 2.17 | 0.46 |
| E9Q616_E9Q616_MOUSE | Ahnak    | Protein Ahnak OS=Mus m: K.VSLPDDVLDL#G                            | 48.44  | 10.08 | 4.81 | 0.21 |
| E9Q616_E9Q616_MOUSE | Ahnak    | Protein Ahnak OS=Mus m: K.VSVATPVSLEASGAVK#L                      | 8.14   | 1.80  | 4.51 | 0.22 |
| E9Q616_E9Q616_MOUSE | Ahnak    | Protein Ahnak OS=Mus m: R.VTAYVDVDTGR@E                           | 85.44  | 13.28 | 6.43 | 0.16 |
| F7DBB3_F7DBB3_MOUSE | Ahnak2   | Protein Ahnak2 (Fragmer R.FSFPAPSEADVFPVVR@E                      | 15.15  | 7.04  | 2.15 | 0.46 |
| F7DBB3_F7DBB3_MOUSE | Ahnak2   | Protein Ahnak2 (Fragmer R.SPSTTAEVLR@S                            | 14.59  | 7.15  | 2.04 | 0.49 |
| E9PYB0_E9PYB0_MOUSE | Ahnak2   | Protein Ahnak2 (Fragmer K.VEADVAPPQVQGDLLK#T                      | 6.23   | 2.75  | 2.26 | 0.44 |
| F7DBB3_F7DBB3_MOUSE | Ahnak2   | Protein Ahnak2 (Fragmer R.GESQVALPSR@M                            | 14.05  | 4.08  | 3.44 | 0.29 |
| F7DBB3_F7DBB3_MOUSE | Ahnak2   | Protein Ahnak2 (Fragmer R.TEGFLQPSGR@Q                            | 16.40  | 4.77  | 3.44 | 0.29 |
| E9PYB0_E9PYB0_MOUSE | Ahnak2   | Protein Ahnak2 (Fragmer K.GEVSPADLEVLGVEVDIQAPGAK#L               | 9.22   | 3.12  | 2.95 | 0.34 |
| E9PYB0_E9PYB0_MOUSE | Ahnak2   | Protein Ahnak2 (Fragmer K.LEGELALADKDVAAK#D                       | 171.92 | 52.87 | 3.25 | 0.31 |
| E9PYB0_E9PYB0_MOUSE | Ahnak2   | Protein Ahnak2 (Fragmer K.LPEGLQPEALPAQAAAGAGLK#G                 | 10.11  | 3.91  | 2.59 | 0.39 |
| E9PYB0_E9PYB0_MOUSE | Ahnak2   | Protein Ahnak2 (Fragmer K.M#PSFGVSPAGK#PSLEASLEVGAPK#V            | 14.55  | 8.00  | 1.82 | 0.55 |
| E9PYB0_E9PYB0_MOUSE | Ahnak2   | Protein Ahnak2 (Fragmer K.MPSFGVSPAGK#PSLEASLEVGAPK#V             | 3.97   | 2.43  | 1.63 | 0.61 |
| E9PYB0_E9PYB0_MOUSE | Ahnak2   | Protein Ahnak2 (Fragmer K.TPDLVSLQADLEL#A                         | 54.46  | 18.41 | 2.96 | 0.34 |
| E9PYB0_E9PYB0_MOUSE | Ahnak2   | Protein Ahnak2 (Fragmer K.TPDLVSLQR@S                             | 19.92  | 5.80  | 3.43 | 0.29 |
| E9PYB0_E9PYB0_MOUSE | Ahnak2   | Protein Ahnak2 (Fragmer K.VDLK#GPHVDL#G                           | 34.92  | 11.20 | 3.12 | 0.32 |
| E9PYB0_E9PYB0_MOUSE | Ahnak2   | Protein Ahnak2 (Fragmer K.VEADVAPPQVQGDLLK#T                      | 67.95  | 23.95 | 2.84 | 0.35 |
| E9PYB0_E9PYB0_MOUSE | Ahnak2   | Protein Ahnak2 (Fragmer K.VEADVAPPQVQGDLLK#T                      | 6.54   | 2.91  | 2.25 | 0.44 |
| E9PYB0_E9PYB0_MOUSE | Ahnak2   | Protein Ahnak2 (Fragmer K.VQM#PSL#K#M                             | 46.83  | 15.45 | 3.03 | 0.33 |
| F7CVJ5_F7CVJ5_MOUSE | Ahnak2   | Protein Ahnak2 (Fragmer K.LPEGLQPEALPAQAAAGAGLK#G                 | 20.34  | 8.51  | 2.39 | 0.42 |
| Q8BK64_AHSA1_MOUSE  | Ahsa1    | Activator of 90 kDa heat : K.ETFLSPLELYR@V                        | 16.38  | 6.06  | 2.70 | 0.37 |
| Q8BK64_AHSA1_MOUSE  | Ahsa1    | Activator of 90 kDa heat : K.TLFLAVR@V                            | 20.31  | 5.62  | 3.61 | 0.28 |
| Q8BK64_AHSA1_MOUSE  | Ahsa1    | Activator of 90 kDa heat : R.VFTTQELVQAFTHAPAALADR@G              | 38.34  | 19.62 | 1.95 | 0.51 |
| Q8BK64_AHSA1_MOUSE  | Ahsa1    | Activator of 90 kDa heat : R.VFTTQELVQAFTHAPAALADR@G              | 9.54   | 3.56  | 2.68 | 0.37 |
| Q9EQX4_AIF1L_MOUSE  | Aif1l    | Allograft inflammatory f: K.M#ISEVTGVSVDTSYR.D                    | 5.97   | 5.35  | 1.12 | 0.90 |
| E9PVP1_E9PVP1_MOUSE | Aim1     | Aurora kinase B OS=Mus r: K.SNLPNVGSDVADFLGLFK#A                  | 16.56  | 3.15  | 5.26 | 0.19 |
| E9PVP1_E9PVP1_MOUSE | Aim1     | Aurora kinase B OS=Mus r: K.VFDPNVFTLGLGK#K                       | 13.90  | 5.58  | 2.49 | 0.40 |
| P31230_AIMP1_MOUSE  | Aimp1    | Aminoacyl tRNA synthase: K.GAEADQIEJL#K.Q                         | 14.43  | 4.79  | 3.01 | 0.33 |
| Q8R010_AIMP2_MOUSE  | Aimp2    | Aminoacyl tRNA synthase: R.FLFLFGQK#H                             | 11.66  | 4.03  | 2.89 | 0.35 |
| O08915_AIP_MOUSE    | Aip      | AH receptor-interacting j: R.NIAEGK#DPLEGOR@H                     | 12.49  | 6.65  | 1.88 | 0.53 |
| O08915_AIP_MOUSE    | Aip      | AH receptor-interacting j: R.TLHSDNEGVSDISR@T                     | 16.71  | 7.25  | 2.30 | 0.43 |
| O08915_AIP_MOUSE    | Aip      | AH receptor-interacting j: K.VLELDPALAPVSR@E                      | 37.29  | 38.56 | 0.97 | 1.03 |
| Q9R0Y5_KAD1_MOUSE   | Ak1      | Adenylate kinase isoenzym: K.IIFVGGPSSGK#G                        | 11.05  | 3.68  | 3.00 | 0.33 |
| Q9WTP7_KAD3_MOUSE   | Ak3      | GTP:AMP phosphotransf: R.QNM#LOGTEIGVLK#T                         | 3.42   | 2.55  | 1.34 | 0.75 |
| Q88845_AKA10_MOUSE  | Akap10   | A-kinase anchor protein : K.SIEQDAVNTFTK#Y                        | 6.21   | 2.17  | 2.87 | 0.35 |
| Q88845_AKA10_MOUSE  | Akap10   | A-kinase anchor protein : K.SIEQDAVNTFTK#Y                        | 7.20   | 3.17  | 2.27 | 0.44 |
| Q88845_AKA10_MOUSE  | Akap10   | A-kinase anchor protein : K.VFLPGLFSLNLYK#Y                       | 7.19   | 1.97  | 3.66 | 0.27 |
| Q9WT05_AKA12_MOUSE  | Akap12   | A-kinase anchor protein : R.AQENVELPLQK#G                         | 9.73   | 30.30 | 0.32 | 3.11 |
| Q9WT05_AKA12_MOUSE  | Akap12   | A-kinase anchor protein : R.DVLEPTQLAAGAVPILAK#A                  | 11.09  | 3.59  | 3.09 | 0.32 |
| Q9WT05_AKA12_MOUSE  | Akap12   | A-kinase anchor protein : K.GAVVSEELSK#T                          | 14.09  | 5.16  | 2.73 | 0.37 |
| Q9WT05_AKA12_MOUSE  | Akap12   | A-kinase anchor protein : K.SDVTQLTVK#K                           | 9.42   | 6.47  | 1.46 | 0.69 |
| Q9WT05_AKA12_MOUSE  | Akap12   | A-kinase anchor protein : K.TLVTVSVAVIDGTR@A                      | 19.77  | 6.16  | 3.21 | 0.31 |
| E9PVD4_E9PVD4_MOUSE | Akap13   | Protein Akap13 (Fragmer R.IGDVLVSQFSGESAER@L                      | 15.32  | 2.01  | 7.63 | 0.13 |
| O54931_AKAP2_MOUSE  | Akap2    | A-kinase anchor protein : R.AVLTVK#DEDHGILDQFSR@S                 | 28.84  | 14.76 | 1.95 | 0.51 |
| O54931_AKAP2_MOUSE  | Akap2    | A-kinase anchor protein : K.HLDGIEHTK#EDVTEIQDFSAAR@K             | 3.15   | 1.97  | 1.60 | 0.63 |
| O54931_AKAP2_MOUSE  | Akap2    | A-kinase anchor protein : K.LWAEDGFTSAR@A                         | 22.55  | 8.23  | 2.74 | 0.36 |
| O54931_AKAP2_MOUSE  | Akap2    | A-kinase anchor protein : R.SVNSVLTQEELDSGLDLSVR@S                | 7.82   | 3.75  | 2.09 | 0.48 |
| O54931_AKAP2_MOUSE  | Akap2    | A-kinase anchor protein : R.TLSM#IEEIR@A                          | 9.71   | 3.98  | 2.44 | 0.41 |
| O54931_AKAP2_MOUSE  | Akap2    | A-kinase anchor protein : K.YSEAEALR.S                            | 22.18  | 8.47  | 2.62 | 0.38 |
| O54931_AKAP2_MOUSE  | Akap2    | A-kinase anchor protein : K.LWAEDGFTSAR@A                         | 12.84  | 4.21  | 3.05 | 0.33 |
| O54931_AKAP2_MOUSE  | Akap2    | A-kinase anchor protein : R.SVNSVLTQEELDSGLDLSVR@S                | 19.57  | 9.80  | 2.00 | 0.50 |
| O54931_AKAP2_MOUSE  | Akap2    | A-kinase anchor protein : R.TLSM#IEEIR@A                          | 8.22   | 4.01  | 2.05 | 0.49 |
| O54931_AKAP2_MOUSE  | Akap2    | A-kinase anchor protein : K.YSEAEALR.S                            | 14.99  | 5.13  | 2.92 | 0.34 |
| Q9DBR0_AKAP8_MOUSE  | Akap8    | A-kinase anchor protein : R.GGISSGEGVQDR@D                        | 5.35   | 5.82  | 0.92 | 1.09 |
| Q9DBR0_AKAP8_MOUSE  | Akap8    | A-kinase anchor protein : K.AVEGNEPAAHSDVLTVEGVPVDAEASSDPHTEK#L   | 35.79  | 14.29 | 2.50 | 0.40 |
| Q9DBR0_AKAP8_MOUSE  | Akap8    | A-kinase anchor protein : R.FGPDNM#GR@K                           | 39.71  | 18.98 | 2.09 | 0.48 |
| Q9DBR0_AKAP8_MOUSE  | Akap8    | A-kinase anchor protein : R.GGISSGEGVQDR.D                        | 45.78  | 26.32 | 1.74 | 0.57 |
| Q9DBR0_AKAP8_MOUSE  | Akap8    | A-kinase anchor protein : K.LPDK#TFVLEQYIINR@N                    | 46.85  | 16.96 | 2.76 | 0.36 |
| Q9DBR0_AKAP8_MOUSE  | Akap8    | A-kinase anchor protein : R.NEAM#PTADAGSTLPVIAIPGIM#EDELQGTGAEK#D | 10.85  | 6.58  | 1.65 | 0.61 |
| Q9DBR0_AKAP8_MOUSE  | Akap8    | A-kinase anchor protein : R.SFEDEIQK#H                            | 42.21  | 18.29 | 2.31 | 0.43 |
| Q9DBR0_AKAP8_MOUSE  | Akap8    | A-kinase anchor protein : R.SNSFTIR@S                             | 41.95  | 23.71 | 1.77 | 0.57 |
| Q9DBR0_AKAP8_MOUSE  | Akap8    | A-kinase anchor protein : K.TVEFLQYIINR@N                         | 32.49  | 16.88 | 1.92 | 0.52 |
| Q9R0L7_AKFL8_MOUSE  | Akap8l   | A-kinase anchor protein : K.GALTAQDESSQAK#R                       | 15.04  | 7.82  | 1.92 | 0.52 |
| Q9R0L7_AKFL8_MOUSE  | Akap8l   | A-kinase anchor protein : R.GIPGLDM#EDDEEGGGP.-                   | 6.92   | 6.92  | 1.00 | 1.00 |
| Q9R0L7_AKFL8_MOUSE  | Akap8l   | A-kinase anchor protein : K.TVEDLGLIQYR@D                         | 14.11  | 6.25  | 2.26 | 0.44 |
| Q9R0L7_AKFL8_MOUSE  | Akap8l   | A-kinase anchor protein : K.TWTTADFRR@T                           | 13.33  | 4.66  | 2.86 | 0.35 |
| Q70FJ1_AKAP9_MOUSE  | Akap9    | A-kinase anchor protein : K.LQIQFQHLQANETLQNSTLSR@T               | 4.26   | 2.42  | 1.76 | 0.57 |
| Q70FJ1_AKAP9_MOUSE  | Akap9    | A-kinase anchor protein : K.TTSAEETIGR@H                          | 5.03   | 6.80  | 0.74 | 1.35 |
| Q70FJ1_AKAP9_MOUSE  | Akap9    | A-kinase anchor protein : R.VLEELK#K.Q                            | 13.20  | 4.91  | 2.69 | 0.37 |
| Q70FJ1_AKAP9_MOUSE  | Akap9    | A-kinase anchor protein : K.VTEEGAEALSQR@L                        | 5.44   | 2.85  | 1.91 | 0.52 |
| Q9Z110_P5CS_MOUSE   | Aldh18a1 | Delta-1-pyrroline-5-carb: R.QJAASSQSVGR@V                         | 5.18   | 2.64  | 1.96 | 0.51 |
| Q9Z110_P5CS_MOUSE   | Aldh18a1 | Delta-1-pyrroline-5-carb: R.LASIVQSVLQNGQR@E                      | 6.90   | 4.76  | 1.45 | 0.69 |
| Q9Z110_P5CS_MOUSE   | Aldh18a1 | Delta-1-pyrroline-5-carb: R.AEINHLLADLTDQR@EILLANK#K#D            | 34.77  | 17.31 | 2.01 | 0.50 |
| Q9Z110_P5CS_MOUSE   | Aldh18a1 | Delta-1-pyrroline-5-carb: K.DLEEAEGR@L                            | 14.80  | 9.68  | 1.53 | 0.65 |
| Q9Z110_P5CS_MOUSE   | Aldh18a1 | Delta-1-pyrroline-5-carb: K.FASYLTFSPSEVK#S                       | 18.93  | 13.78 | 1.37 | 0.73 |
| Q9Z110_P5CS_MOUSE   | Aldh18a1 | Delta-1-pyrroline-5-carb: R.GPVGLEGLLTK#W                         | 50.27  | 19.74 | 2.55 | 0.39 |
| Q9Z110_P5CS_MOUSE   | Aldh18a1 | Delta-1-pyrroline-5-carb: K.IIDLIPR@G                             | 20.12  | 8.31  | 2.42 | 0.41 |
| Q9Z110_P5CS_MOUSE   | Aldh18a1 | Delta-1-pyrroline-5-carb: R.LASIVQSVLQNGQR@E                      | 11.16  | 7.62  | 1.46 | 0.68 |
| Q9Z110_P5CS_MOUSE   | Aldh18a1 | Delta-1-pyrroline-5-carb: K.LGSVAVTR@G                            | 24.72  | 12.76 | 1.94 | 0.52 |
| Q9Z110_P5CS_MOUSE   | Aldh18a1 | Delta-1-pyrroline-5-carb: K.LIDIFYPGDQSSVFTGK#S                   | 23.75  | 11.61 | 2.05 | 0.49 |
| Q9Z110_P5CS_MOUSE   | Aldh18a1 | Delta-1-pyrroline-5-carb: K.LNSLAIGLR@Q                           | 47.67  | 27.13 | 1.76 | 0.57 |
| Q9Z110_P5CS_MOUSE   | Aldh18a1 | Delta-1-pyrroline-5-carb: R.LR@HEILLSQSVR@Q                       | 11.63  | 11.53 | 1.01 | 0.99 |
| Q9Z110_P5CS_MOUSE   | Aldh18a1 | Delta-1-pyrroline-5-carb: R.M#LATLEPEQR@A                         | 16.02  | 7.93  | 2.02 | 0.49 |
| Q9Z110_P5CS_MOUSE   | Aldh18a1 | Delta-1-pyrroline-5-carb: R.QJAASSQSVGR@V                         | 24.53  | 13.53 | 1.81 | 0.55 |
| Q9Z110_P5CS_MOUSE   | Aldh18a1 | Delta-1-pyrroline-5-carb: R.TPFLDQIDM#LR@V                        | 16.17  | 17.13 | 2.11 | 0.47 |
| Q9Z110_P5CS_MOUSE   | Aldh18a1 | Delta-1-pyrroline-5-carb: K.VGTFSEVK#PAGPTVEQQGEM#AR@S            | 26.28  | 11.95 | 2.20 | 0.45 |
| Q9Z110_P5CS_MOUSE   | Aldh18a1 | Delta-1-pyrroline-5-carb: K.VSGHVITDIVEGK#K                       | 24.85  | 13.57 | 1.83 | 0.55 |
| Q9Z110_P5CS_MOUSE   | Aldh18a1 | Delta-1-pyrroline-5-carb: R.AEINHLLADLTDQR@EILLANK#K#D            | 15.49  | 3.46  | 4.48 | 0.22 |
| Q9Z110_P5CS_MOUSE   | Aldh18a1 | Delta-1-pyrroline-5-carb: K.FASYLTFSPSEVK#S                       | 16.63  | 4.51  | 3.69 | 0.27 |
| Q9Z110_P5CS_MOUSE   | Aldh18a1 | Delta-1-pyrroline-5-carb: R.GQDHVSDPSEHSLK#Y                      | 14.22  | 3.90  | 3.65 | 0.27 |
| Q9Z110_P5CS_MOUSE   | Aldh18a1 | Delta-1-pyrroline-5-carb: K.IIDLIPR@G                             | 6.61   | 2.51  | 2.64 | 0.38 |
| Q9Z110_P5CS_MOUSE   | Aldh18a1 | Delta-1-pyrroline-5-carb: R.LASIVQSVLQNGQR@E                      | 9.21   | 2.86  | 3.22 | 0.31 |

|                     |          |                          |                                       |       |       |         |      |
|---------------------|----------|--------------------------|---------------------------------------|-------|-------|---------|------|
| Q9Z110_P5CS_MOUSE   | Aldh18a1 | Delta-1-pyrroline-5-carb | L.IDIFYPGDQDSVTFGT#S                  | 18.14 | 5.25  | 3.46    | 0.29 |
| Q9Z110_P5CS_MOUSE   | Aldh18a1 | Delta-1-pyrroline-5-carb | K.LNSLAIGLR@Q                         | 15.02 | 4.05  | 3.71    | 0.27 |
| Q9Z110_P5CS_MOUSE   | Aldh18a1 | Delta-1-pyrroline-5-carb | R.M*LATLEPQR@A                        | 31.82 | 1.42  | 22.37   | 0.04 |
| Q9Z110_P5CS_MOUSE   | Aldh18a1 | Delta-1-pyrroline-5-carb | R.QIQAASSQVGR@V                       | 13.55 | 3.66  | 3.70    | 0.27 |
| Q9Z110_P5CS_MOUSE   | Aldh18a1 | Delta-1-pyrroline-5-carb | R.TPLFDQIDM*LR@V                      | 24.30 | 9.79  | 2.48    | 0.40 |
| Q9Z110_P5CS_MOUSE   | Aldh18a1 | Delta-1-pyrroline-5-carb | R.VGLGGM*EAK#V                        | 18.15 | 5.14  | 3.53    | 0.28 |
| Q9Z110_P5CS_MOUSE   | Aldh18a1 | Delta-1-pyrroline-5-carb | K.VSGHVITDIVEGK#K                     | 16.71 | 4.08  | 4.09    | 0.24 |
| P47738_ALDH2_MOUSE  | Aldh2    | Aldehyde dehydrogenase   | R.GYFIQPTVFGDV#K.D                    | 6.47  | 5.62  | 1.15    | 0.87 |
| P47738_ALDH2_MOUSE  | Aldh2    | Aldehyde dehydrogenase   | K.VAEQPTLATALYVANLIK.E                | 11.84 | 15.53 | 0.76    | 1.31 |
| P47738_ALDH2_MOUSE  | Aldh2    | Aldehyde dehydrogenase   | R.VVGNPFDSR.T                         | 4.26  | 5.98  | 0.71    | 1.40 |
| P47740_AL3A2_MOUSE  | Aldh3a2  | Fatty aldehyde dehydrog  | K.IAFGEM*DEATR@Y                      | 6.12  | 1.40  | 4.37    | 0.23 |
| Q9DBT5_AMPD2_MOUSE  | Ampd2    | AMP deaminase 2 OS=Mu    | R.NPLPEYLSR@G                         | 7.59  | 2.89  | 2.63    | 0.38 |
| P53995_APC1_MOUSE   | Anapc1   | Anaphase-promoting cor   | R.AGQLSYK#EDPM*GWQSLAQTVANR@.N        | 4.32  | 2.28  | 1.89    | 0.53 |
| P53995_APC1_MOUSE   | Anapc1   | Anaphase-promoting cor   | R.GLFINSEFLPVVKR.C                    | 16.71 | 6.43  | 2.60    | 0.39 |
| P53995_APC1_MOUSE   | Anapc1   | Anaphase-promoting cor   | R.GM*FTLSFYHPVPTPLPVPK#L              | 15.14 | 5.94  | 2.55    | 0.39 |
| P53995_APC1_MOUSE   | Anapc1   | Anaphase-promoting cor   | K.LILEFFSSR@.S                        | 11.70 | 4.89  | 2.40    | 0.42 |
| P53995_APC1_MOUSE   | Anapc1   | Anaphase-promoting cor   | K.LLGS*DEVVLLSPVELR@.D                | 12.03 | 2.56  | 4.70    | 0.21 |
| P53995_APC1_MOUSE   | Anapc1   | Anaphase-promoting cor   | R.QLQASELVSSDGAAGLVGSLQEVTHKE#K.Q     | 4.68  | 2.65  | 1.76    | 0.57 |
| P53995_APC1_MOUSE   | Anapc1   | Anaphase-promoting cor   | R.SFDFEGSLSPVIAPK#K                   | 9.37  | 3.44  | 2.72    | 0.37 |
| P53995_APC1_MOUSE   | Anapc1   | Anaphase-promoting cor   | R.VNVVQVPELSDHEFIEE#K.E               | 8.23  | 4.01  | 2.05    | 0.49 |
| P53995_APC1_MOUSE   | Anapc1   | Anaphase-promoting cor   | K.WVDSNVQPIR@.E                       | 6.93  | 2.97  | 2.33    | 0.43 |
| Q9CPV2_APC16_MOUSE  | Anapc16  | Anaphase-promoting cor   | R.FK#FIEQLLGFPPSSG.-                  | 8.54  | 3.83  | 2.23    | 0.45 |
| Q9CPV2_APC16_MOUSE  | Anapc16  | Anaphase-promoting cor   | K.GAGEM*LEDGSR@.F                     | 2.95  | 1.45  | 2.03    | 0.49 |
| Q8BZQ7_ANC2_MOUSE   | Anapc2   | Anaphase-promoting cor   | R.AAAEVLRL@.G                         | 11.74 | 3.52  | 3.34    | 0.30 |
| Q8BZQ7_ANC2_MOUSE   | Anapc2   | Anaphase-promoting cor   | R.GVLFFTPR@.T                         | 8.79  | 3.33  | 2.64    | 0.38 |
| Q8BZQ7_ANC2_MOUSE   | Anapc2   | Anaphase-promoting cor   | R.LGLLM*GAGAQLR@.E                    | 8.58  | 2.73  | 3.15    | 0.32 |
| Q91W96_APC4_MOUSE   | Anapc4   | Anaphase-promoting cor   | K.ANELQVDSM*K#N                       | 9.88  | 4.04  | 2.45    | 0.41 |
| Q91W96_APC4_MOUSE   | Anapc4   | Anaphase-promoting cor   | K.FVQEK#PTTSVQDFM*HLLLVGK#A           | 7.27  | 3.85  | 1.89    | 0.53 |
| Q91W96_APC4_MOUSE   | Anapc4   | Anaphase-promoting cor   | R.LDEQGSIIPTR@.T                      | 12.88 | 5.56  | 2.31    | 0.43 |
| Q91W96_APC4_MOUSE   | Anapc4   | Anaphase-promoting cor   | K.LGQSISSYSIQK#L                      | 7.68  | 1.63  | 4.73    | 0.21 |
| Q91W96_APC4_MOUSE   | Anapc4   | Anaphase-promoting cor   | K.ANELQVDSM*K#N                       | 6.96  | 4.82  | 1.44    | 0.69 |
| Q91W96_APC4_MOUSE   | Anapc4   | Anaphase-promoting cor   | R.LDEQGSIIPTR@.T                      | 8.69  | 3.85  | 2.26    | 0.44 |
| Q91W96_APC4_MOUSE   | Anapc4   | Anaphase-promoting cor   | K.LLAFALADTK#K                        | 15.45 | 4.80  | 3.22    | 0.31 |
| Q8BTZ4_APC5_MOUSE   | Anapc5   | Anaphase-promoting cor   | R.SSSPTIAM*PVILLEALSK#E               | 8.11  | 2.52  | 3.21    | 0.31 |
| Q8BTZ4_APC5_MOUSE   | Anapc5   | Anaphase-promoting cor   | K.TSVVGLFLR@.H                        | 11.68 | 2.12  | 5.52    | 0.18 |
| G5E8K5_ANK3_MOUSE   | Ank3     | Ankyrin-3 OS=Mus muscl   | K.AAALLQNDTNAODVESK#S                 | 5.24  | 4.58  | 1.14    | 0.87 |
| G5E8K5_ANK3_MOUSE   | Ank3     | Ankyrin-3 OS=Mus muscl   | R.DFPQIFAVVSR@.I                      | 10.77 | 6.69  | 1.61    | 0.62 |
| G5E8K5_ANK3_MOUSE   | Ank3     | Ankyrin-3 OS=Mus muscl   | R.IK#QESNQIGPEGGLSSTTVLQVASFPEGALTK#R | 3.79  | 2.44  | 1.55    | 0.64 |
| G5E8K5_ANK3_MOUSE   | Ank3     | Ankyrin-3 OS=Mus muscl   | R.SSYARDSM*MIIELLVPSK.E               | 2.09  | 3.77  | 0.56    | 1.80 |
| G5E8K5_ANK3_MOUSE   | Ank3     | Ankyrin-3 OS=Mus muscl   | K.TLEQQENFEVEAR@.S                    | 6.05  | 5.54  | 1.09    | 0.91 |
| G5E8K5_ANK3_MOUSE   | Ank3     | Ankyrin-3 OS=Mus muscl   | R.YLVQDGAQVEAK#A                      | 5.92  | 4.57  | 1.30    | 0.77 |
| Q810B6_ANFY1_MOUSE  | Ankyf1   | Rabankyrin-5 OS=Mus mi   | R.AAGAGNEAAALFLATSGAHANHR@.N          | 9.95  | 4.07  | 2.44    | 0.41 |
| Q810B6_ANFY1_MOUSE  | Ankyf1   | Rabankyrin-5 OS=Mus mi   | R.FQLQLLR@.E                          | 12.98 | 4.38  | 2.96    | 0.34 |
| Q810B6_ANFY1_MOUSE  | Ankyf1   | Rabankyrin-5 OS=Mus mi   | R.HGLANLTAELLQGGANPNLQTEALPVPK#E      | 9.82  | 4.99  | 1.97    | 0.51 |
| Q810B6_ANFY1_MOUSE  | Ankyf1   | Rabankyrin-5 OS=Mus mi   | R.LLAIAGVLEQEQVSDLK#I                 | 5.14  | 2.79  | 1.84    | 0.54 |
| Q810B6_ANFY1_MOUSE  | Ankyf1   | Rabankyrin-5 OS=Mus mi   | R.AAGAGNEAAALFLATSGAHANHR@.N          | 20.29 | 5.66  | 3.58    | 0.28 |
| Q810B6_ANFY1_MOUSE  | Ankyf1   | Rabankyrin-5 OS=Mus mi   | K.EDFSSLAQLLYK#M                      | 7.51  | 1.65  | 4.54    | 0.22 |
| Q810B6_ANFY1_MOUSE  | Ankyf1   | Rabankyrin-5 OS=Mus mi   | R.ESGAAEQVNDK#K                       | 7.55  | 2.91  | 2.59    | 0.39 |
| Q810B6_ANFY1_MOUSE  | Ankyf1   | Rabankyrin-5 OS=Mus mi   | R.FQLQLLR@.E                          | 24.37 | 9.02  | 2.70    | 0.37 |
| Q810B6_ANFY1_MOUSE  | Ankyf1   | Rabankyrin-5 OS=Mus mi   | R.GDLFASTFLIK#N                       | 39.75 | 8.59  | 4.63    | 0.22 |
| Q810B6_ANFY1_MOUSE  | Ankyf1   | Rabankyrin-5 OS=Mus mi   | K.GVM*SLNVVR@.N                       | 15.44 | 2.80  | 5.50    | 0.18 |
| Q810B6_ANFY1_MOUSE  | Ankyf1   | Rabankyrin-5 OS=Mus mi   | R.HGLANLTAELLQGGANPNLQTEALPVPK#E      | 6.16  | 6.32  | 0.98    | 1.03 |
| Q810B6_ANFY1_MOUSE  | Ankyf1   | Rabankyrin-5 OS=Mus mi   | R.LLAIAGVLEQEQVSDLK#I                 | 7.07  | 1.59  | 4.44    | 0.23 |
| Q810B6_ANFY1_MOUSE  | Ankyf1   | Rabankyrin-5 OS=Mus mi   | K.SALFLLEAQHADVNR@.T                  | 15.64 | 4.95  | 3.16    | 0.32 |
| E9Q1M6_E9Q1M6_MOUSE | Ankhd1   | Protein Ankhd1 OS=Mus    | R.QEVDLLAR@.G                         | 9.75  | 2.70  | 3.61    | 0.28 |
| E9Q1M6_E9Q1M6_MOUSE | Ankhd1   | Protein Ankhd1 OS=Mus    | K.TSEIFLSSTEGADLR@.T                  | 4.72  | 0.00  | #DIV/0! | 0.00 |
| E9Q1M6_E9Q1M6_MOUSE | Ankhd1   | Protein Ankhd1 OS=Mus    | R.LDGEVNSM*STSYK#S                    | 8.07  | 2.24  | 3.60    | 0.28 |
| E9Q1M6_E9Q1M6_MOUSE | Ankhd1   | Protein Ankhd1 OS=Mus    | R.QEVDLLAR@.G                         | 7.84  | 3.72  | 2.11    | 0.47 |
| E9Q4F8_E9Q4F8_MOUSE | Ankrd11  | Protein Ankrd11 OS=Mu    | K.AILLESIDTSNK#K                      | 13.44 | 5.14  | 2.61    | 0.38 |
| E9Q4F8_E9Q4F8_MOUSE | Ankrd11  | Protein Ankrd11 OS=Mu    | R.FSVASSVSENAAGQTPTR@PISITNLYR@.S     | 12.24 | 3.51  | 3.48    | 0.29 |
| E9Q4F8_E9Q4F8_MOUSE | Ankrd11  | Protein Ankrd11 OS=Mu    | K.FVSSIHSEDFSR@.K                     | 12.24 | 3.19  | 6.09    | 0.16 |
| Q99NH0_ANR17_MOUSE  | Ankrd17  | Ankyrin repeat domain-c  | R.APSPAPSSVPLGSEKPSVSDQR.K            | 4.96  | 8.86  | 0.56    | 1.79 |
| Q99NH0_ANR17_MOUSE  | Ankrd17  | Ankyrin repeat domain-c  | K.GADVNPVPSR@.D                       | 13.80 | 6.37  | 2.17    | 0.46 |
| Q99NH0_ANR17_MOUSE  | Ankrd17  | Ankyrin repeat domain-c  | R.GASLEEVNDEGYPLM*EAAR@.E             | 5.99  | 2.33  | 2.57    | 0.39 |
| Q99NH0_ANR17_MOUSE  | Ankrd17  | Ankyrin repeat domain-c  | K.LLNAGAEINR@.T                       | 14.14 | 6.74  | 2.10    | 0.48 |
| Q99NH0_ANR17_MOUSE  | Ankrd17  | Ankyrin repeat domain-c  | K.ITPENQIFDDPLPISYSQPEK#V             | 6.04  | 2.05  | 2.95    | 0.34 |
| Q99NH0_ANR17_MOUSE  | Ankrd17  | Ankyrin repeat domain-c  | R.LEALLEAAGIGK#L                      | 18.84 | 7.18  | 2.63    | 0.38 |
| Q99NH0_ANR17_MOUSE  | Ankrd17  | Ankyrin repeat domain-c  | K.LLLSGTAGDLR@.T                      | 12.22 | 6.01  | 2.03    | 0.49 |
| Q99NH0_ANR17_MOUSE  | Ankrd17  | Ankyrin repeat domain-c  | K.NASILLELLEK#L                       | 7.44  | 6.01  | 1.24    | 0.81 |
| Q99NH0_ANR17_MOUSE  | Ankrd17  | Ankyrin repeat domain-c  | R.NVSDYTPLSLAASGYVNIK#I               | 11.98 | 3.76  | 3.19    | 0.31 |
| Q99NH0_ANR17_MOUSE  | Ankrd17  | Ankyrin repeat domain-c  | R.TEVVSLDR@.K                         | 12.03 | 4.89  | 2.46    | 0.41 |
| Q99NH0_ANR17_MOUSE  | Ankrd17  | Ankyrin repeat domain-c  | K.TGLTPLM*EAASGYAEVGR@.V              | 7.49  | 3.65  | 2.05    | 0.49 |
| Q99NH0_ANR17_MOUSE  | Ankrd17  | Ankyrin repeat domain-c  | K.AFADPEVLR@.R                        | 15.68 | 2.41  | 6.51    | 0.15 |
| Q99NH0_ANR17_MOUSE  | Ankrd17  | Ankyrin repeat domain-c  | R.DTALTIADK#G                         | 12.46 | 4.33  | 2.88    | 0.35 |
| Q99NH0_ANR17_MOUSE  | Ankrd17  | Ankyrin repeat domain-c  | K.GADVNPVPSR@.D                       | 30.33 | 10.12 | 3.00    | 0.33 |
| Q99NH0_ANR17_MOUSE  | Ankrd17  | Ankyrin repeat domain-c  | R.GASLEEVNDEGYPLM*EAAR@.E             | 14.00 | 3.60  | 4.11    | 0.24 |
| Q99NH0_ANR17_MOUSE  | Ankrd17  | Ankyrin repeat domain-c  | K.LLNAGAEINR@.T                       | 28.96 | 4.45  | 6.51    | 0.15 |
| Q99NH0_ANR17_MOUSE  | Ankrd17  | Ankyrin repeat domain-c  | R.LEALLEAAGIGK#L                      | 44.88 | 14.32 | 3.13    | 0.32 |
| Q99NH0_ANR17_MOUSE  | Ankrd17  | Ankyrin repeat domain-c  | K.LLLDM*GSDINAQIETNR@.N               | 7.03  | 2.97  | 2.37    | 0.42 |
| Q99NH0_ANR17_MOUSE  | Ankrd17  | Ankyrin repeat domain-c  | K.LLLSGTAGDLR@.T                      | 24.56 | 6.89  | 3.56    | 0.28 |
| Q99NH0_ANR17_MOUSE  | Ankrd17  | Ankyrin repeat domain-c  | K.NASILLELLEK#L                       | 23.92 | 8.12  | 2.94    | 0.34 |
| Q99NH0_ANR17_MOUSE  | Ankrd17  | Ankyrin repeat domain-c  | R.NVSDYTPLSLAASGYVNIK#I               | 34.11 | 8.01  | 4.26    | 0.23 |
| Q99NH0_ANR17_MOUSE  | Ankrd17  | Ankyrin repeat domain-c  | K.SNSHLPANSQDVQVYTNQSPESIEAQQK#L      | 4.58  | 1.88  | 2.43    | 0.41 |
| Q99NH0_ANR17_MOUSE  | Ankrd17  | Ankyrin repeat domain-c  | R.TEVVSLDR@.K                         | 44.14 | 9.85  | 4.48    | 0.22 |
| Q99NH0_ANR17_MOUSE  | Ankrd17  | Ankyrin repeat domain-c  | K.TGLTPLM*EAASGYAEVGR.V               | 19.80 | 8.10  | 2.45    | 0.41 |
| Q99NH0_ANR17_MOUSE  | Ankrd17  | Ankyrin repeat domain-c  | R.VPQALPM*VVPQPEPK#PANAALATLVR@.S     | 9.83  | 3.21  | 3.06    | 0.33 |
| Q99NH0_ANR17_MOUSE  | Ankrd17  | Ankyrin repeat domain-c  | R.YIATITDK#E                          | 8.74  | 15.47 | 0.56    | 1.77 |
| Q8K298_ANLN_MOUSE   | Anln     | Actin-binding protein an | K.TSVISQSEFAPS#K.G                    | 12.36 | 4.39  | 2.82    | 0.35 |
| P97449_AMPN_MOUSE   | Anpep    | Aminopeptidase N OS=M    | R.M*LSFLTEDLFFK#K                     | 5.37  | 2.97  | 1.81    | 0.55 |
| P97449_AMPN_MOUSE   | Anpep    | Aminopeptidase N OS=M    | K.VVATTQMAAADAR@K#SFPDCEPAMK.A        | 4.83  | 2.03  | 2.39    | 0.42 |
| P97449_AMPN_MOUSE   | Anpep    | Aminopeptidase N OS=M    | R.M*LSFLTEDLFFK#K                     | 8.23  | 2.33  | 3.54    | 0.28 |
| P97449_AMPN_MOUSE   | Anpep    | Aminopeptidase N OS=M    | K.VVATTQ*QAADAR@.K                    | 5.47  | 2.32  | 2.36    | 0.42 |
| P10107_ANXA1_MOUSE  | Anxa1    | Annexin A1 OS=Mus mus    | K.ALTGHLEEVVLA*MK#T                   | 10.42 | 7.66  | 1.36    | 0.74 |
| P10107_ANXA1_MOUSE  | Anxa1    | Annexin A1 OS=Mus mus    | R.ALYEAGER.R                          | 52.18 | 26.80 | 1.95    | 0.51 |
| P10107_ANXA1_MOUSE  | Anxa1    | Annexin A1 OS=Mus mus    | K.DITSDTSDGFR@K#A                     | 16.01 | 7.06  | 2.27    | 0.44 |
| P10107_ANXA1_MOUSE  | Anxa1    | Annexin A1 OS=Mus mus    | R.FLENOEQEYQVAVK#S                    | 50.32 | 20.53 | 2.45    | 0.41 |
| P10107_ANXA1_MOUSE  | Anxa1    | Annexin A1 OS=Mus mus    | K.GLGTDEDTLIELITR@.S                  | 61.46 | 30.84 | 1.99    | 0.50 |
| P10107_ANXA1_MOUSE  | Anxa1    | Annexin A1 OS=Mus mus    | K.GVDEATIDILTK.R                      | 43.85 | 21.11 | 2.08    | 0.48 |
| P10107_ANXA1_MOUSE  | Anxa1    | Annexin A1 OS=Mus mus    | R.R@VFQNYGK#Y                         | 13.25 | 5.56  | 2.38    | 0.42 |
| P10107_ANXA1_MOUSE  | Anxa1    | Annexin A1 OS=Mus mus    | R.SEIDM*NEIK#V                        | 24.33 | 11.38 | 2.14    | 0.47 |
| P10107_ANXA1_MOUSE  | Anxa1    | Annexin A1 OS=Mus mus    | K.TPAQFDADLER@.G                      | 60.58 | 50.83 | 1.19    | 0.84 |
| P10107_ANXA1_MOUSE  | Anxa1    | Annexin A1 OS=Mus mus    | K.TPAQFDADLER@GAM*#K.G                | 21.78 | 11.79 | 1.85    | 0.54 |
| P10107_ANXA1_MOUSE  | Anxa1    | Annexin A1 OS=Mus mus    | K.GLGTDEDTLIELITR@.S                  | 6.07  | 3.13  | 1.94    | 0.52 |



|                    |        |                                                         |        |        |       |      |
|--------------------|--------|---------------------------------------------------------|--------|--------|-------|------|
| P10107_ANXA1_MOUSE | Anxa1  | Annexin A1 OS=Mus mus K.ALLALAK#.G                      | 20.24  | 8.24   | 2.46  | 0.41 |
| P97384_ANX11_MOUSE | Anxa11 | Annexin A11 OS=Mus mu K.TPVLDFVYK#.E                    | 6.92   | 3.94   | 1.76  | 0.57 |
| P07356_ANXA2_MOUSE | Anxa2  | Annexin A2 OS=Mus mus R.AEDGSHDYPYELIDQDAR@.E           | 27.98  | 11.14  | 2.51  | 0.40 |
| P07356_ANXA2_MOUSE | Anxa2  | Annexin A2 OS=Mus mus R.DALNIETAVK#.T                   | 83.94  | 48.97  | 1.71  | 0.58 |
| P07356_ANXA2_MOUSE | Anxa2  | Annexin A2 OS=Mus mus K.GVDEVTVNLTNR.S                  | 121.68 | 46.63  | 2.61  | 0.38 |
| P07356_ANXA2_MOUSE | Anxa2  | Annexin A2 OS=Mus mus K.LM*VALAK#.G                     | 79.22  | 32.94  | 2.41  | 0.42 |
| P07356_ANXA2_MOUSE | Anxa2  | Annexin A2 OS=Mus mus K.LMVALAK#.G                      | 17.20  | 11.09  | 1.55  | 0.64 |
| P07356_ANXA2_MOUSE | Anxa2  | Annexin A2 OS=Mus mus K.LSLEGDHSTPPSAYGSVK#PYNTFDAER@.D | 4.36   | 1.91   | 2.28  | 0.44 |
| P07356_ANXA2_MOUSE | Anxa2  | Annexin A2 OS=Mus mus R.QDIAFYQR@.R                     | 89.60  | 38.48  | 2.33  | 0.43 |
| P07356_ANXA2_MOUSE | Anxa2  | Annexin A2 OS=Mus mus R.RAEDGSHDYPYELIDQDAR.E           | 132.56 | 51.00  | 2.60  | 0.38 |
| P07356_ANXA2_MOUSE | Anxa2  | Annexin A2 OS=Mus mus R.RAEDGSHDYPYELIDQDAR@.E          | 4.78   | 2.95   | 1.62  | 0.62 |
| P07356_ANXA2_MOUSE | Anxa2  | Annexin A2 OS=Mus mus K.SALSGHLETVLGLLK#.T              | 86.51  | 35.89  | 2.41  | 0.41 |
| P07356_ANXA2_MOUSE | Anxa2  | Annexin A2 OS=Mus mus K.SLYYYIQDQTK#.G                  | 85.57  | 36.80  | 2.33  | 0.43 |
| P07356_ANXA2_MOUSE | Anxa2  | Annexin A2 OS=Mus mus K.TDLEK#DIISDTSQDFR@.K            | 48.53  | 19.92  | 2.44  | 0.41 |
| P07356_ANXA2_MOUSE | Anxa2  | Annexin A2 OS=Mus mus K.TDLEK#DIISDTSQDFR@K#.L          | 97.80  | 43.16  | 2.27  | 0.44 |
| P07356_ANXA2_MOUSE | Anxa2  | Annexin A2 OS=Mus mus K.TK#GVDEVTVNLTNR@.S              | 68.43  | 28.77  | 2.38  | 0.42 |
| P07356_ANXA2_MOUSE | Anxa2  | Annexin A2 OS=Mus mus R.TNQEIQEINR@.V                   | 203.54 | 95.90  | 2.12  | 0.47 |
| P07356_ANXA2_MOUSE | Anxa2  | Annexin A2 OS=Mus mus K.TPAQYDASELK#.A                  | 171.19 | 88.45  | 1.94  | 0.52 |
| P07356_ANXA2_MOUSE | Anxa2  | Annexin A2 OS=Mus mus K.GVDEVTVNLTNR@.S                 | 8.55   | 9.80   | 0.87  | 1.15 |
| P07356_ANXA2_MOUSE | Anxa2  | Annexin A2 OS=Mus mus R.RAEDGSHDYPYELIDQDAR.E           | 9.70   | 9.71   | 1.00  | 1.00 |
| P07356_ANXA2_MOUSE | Anxa2  | Annexin A2 OS=Mus mus K.SALSGHLETVLGLLK#.T              | 14.52  | 14.54  | 1.32  | 0.76 |
| P07356_ANXA2_MOUSE | Anxa2  | Annexin A2 OS=Mus mus K.TPAQYDASELK#.A                  | 9.96   | 9.73   | 1.02  | 0.98 |
| P07356_ANXA2_MOUSE | Anxa2  | Annexin A2 OS=Mus mus R.DALNIETAVK#.T                   | 5.45   | 6.97   | 0.78  | 1.28 |
| P07356_ANXA2_MOUSE | Anxa2  | Annexin A2 OS=Mus mus R.RAEDGSHDYPYELIDQDAR.E           | 10.67  | 10.40  | 1.03  | 0.97 |
| P07356_ANXA2_MOUSE | Anxa2  | Annexin A2 OS=Mus mus K.SALSGHLETVLGLLK#.T              | 17.14  | 16.23  | 1.06  | 0.95 |
| P07356_ANXA2_MOUSE | Anxa2  | Annexin A2 OS=Mus mus K.SLYYYIQDQTK#.G                  | 5.73   | 5.75   | 1.00  | 1.00 |
| P07356_ANXA2_MOUSE | Anxa2  | Annexin A2 OS=Mus mus K.TK#GVDEVTVNLTNR.S               | 6.58   | 8.09   | 0.81  | 1.23 |
| P07356_ANXA2_MOUSE | Anxa2  | Annexin A2 OS=Mus mus R.TNQEIQEINR@.V                   | 10.40  | 19.98  | 0.52  | 1.92 |
| P97429_ANXA4_MOUSE | Anxa4  | Annexin A4 OS=Mus mus K.AASGFNATEDAQLTR@.K              | 15.06  | 5.28   | 2.85  | 0.35 |
| P97429_ANXA4_MOUSE | Anxa4  | Annexin A4 OS=Mus mus R.AEIDM*LDIR@.A                   | 5.49   | 3.08   | 1.78  | 0.56 |
| P97429_ANXA4_MOUSE | Anxa4  | Annexin A4 OS=Mus mus K.GLGTDEDAIIGLIYR@.N              | 12.07  | 5.72   | 2.11  | 0.47 |
| P97429_ANXA4_MOUSE | Anxa4  | Annexin A4 OS=Mus mus R.INQTYQQVGR.S                    | 14.52  | 7.51   | 1.93  | 0.52 |
| P48036_ANXA5_MOUSE | Anxa5  | Annexin A5 OS=Mus mus R.DLVLDL#KSELTK#FEK#.L            | 32.02  | 9.98   | 3.21  | 0.31 |
| P48036_ANXA5_MOUSE | Anxa5  | Annexin A5 OS=Mus mus K.FITFGTR@.S                      | 27.12  | 10.56  | 2.57  | 0.39 |
| P48036_ANXA5_MOUSE | Anxa5  | Annexin A5 OS=Mus mus K.GLGTDEDSILNLTNR@.S              | 75.55  | 31.94  | 2.37  | 0.42 |
| P48036_ANXA5_MOUSE | Anxa5  | Annexin A5 OS=Mus mus R.GTVDFFGDFGR@.A                  | 43.66  | 17.17  | 2.58  | 0.39 |
| P48036_ANXA5_MOUSE | Anxa5  | Annexin A5 OS=Mus mus K.QVYEEYGSNLEDDVVGDTSGYQR@.M      | 4.65   | 3.81   | 1.22  | 0.82 |
| P48036_ANXA5_MOUSE | Anxa5  | Annexin A5 OS=Mus mus R.SEIDLNR@.K                      | 44.00  | 20.52  | 2.14  | 0.47 |
| P48036_ANXA5_MOUSE | Anxa5  | Annexin A5 OS=Mus mus R.SIPAYLAETLTYAM*#K.G             | 5.44   | 6.37   | 0.86  | 1.17 |
| P48036_ANXA5_MOUSE | Anxa5  | Annexin A5 OS=Mus mus R.TPELSAIK#.Q                     | 51.15  | 20.79  | 2.46  | 0.41 |
| P48036_ANXA5_MOUSE | Anxa5  | Annexin A5 OS=Mus mus K.VLTIHISR@.T                     | 76.44  | 30.35  | 2.52  | 0.40 |
| P14824_ANXA6_MOUSE | Anxa6  | Annexin A6 OS=Mus mus K.GFGSDKHESILILTSR@.S             | 20.78  | 7.87   | 2.64  | 0.38 |
| P14824_ANXA6_MOUSE | Anxa6  | Annexin A6 OS=Mus mus R.GSVHDFPEFDANQDAEALYTAM*#K.G     | 7.08   | 3.13   | 2.26  | 0.44 |
| P14824_ANXA6_MOUSE | Anxa6  | Annexin A6 OS=Mus mus K.M*LVVLQGR@.E                    | 9.87   | 5.27   | 1.87  | 0.53 |
| P14824_ANXA6_MOUSE | Anxa6  | Annexin A6 OS=Mus mus R.SEIDLNR@.R                      | 18.52  | 11.05  | 1.68  | 0.60 |
| P14824_ANXA6_MOUSE | Anxa6  | Annexin A6 OS=Mus mus K.TLIELTR@.T                      | 21.16  | 8.48   | 2.49  | 0.40 |
| P14824_ANXA6_MOUSE | Anxa6  | Annexin A6 OS=Mus mus K.WGTDEAQFYILGNR@.S               | 8.46   | 5.08   | 1.66  | 0.60 |
| P14824_ANXA6_MOUSE | Anxa6  | Annexin A6 OS=Mus mus K.GFGSDKHESILILTSR@.S             | 9.45   | 3.85   | 2.45  | 0.41 |
| P14824_ANXA6_MOUSE | Anxa6  | Annexin A6 OS=Mus mus R.GSVHDFPEFDANQDAEALYTAM*#K.G     | 6.48   | 3.62   | 1.79  | 0.56 |
| P14824_ANXA6_MOUSE | Anxa6  | Annexin A6 OS=Mus mus R.SEIDLNR@.R                      | 10.52  | 4.37   | 2.41  | 0.42 |
| O35643_AP1B1_MOUSE | Ap1b1  | AP-1 complex subunit be K.DIANENEAQFOIR@.D              | 5.50   | 2.31   | 2.38  | 0.42 |
| O35643_AP1B1_MOUSE | Ap1b1  | AP-1 complex subunit be R.LASQANICQVLAELK#.E            | 24.54  | 8.93   | 2.75  | 0.36 |
| O35643_AP1B1_MOUSE | Ap1b1  | AP-1 complex subunit be R.NINLIVQK#.R                   | 30.17  | 16.33  | 1.85  | 0.54 |
| O35643_AP1B1_MOUSE | Ap1b1  | AP-1 complex subunit be R.NVEGQDM*LYQSLK#.L             | 9.04   | 4.87   | 1.86  | 0.54 |
| O35643_AP1B1_MOUSE | Ap1b1  | AP-1 complex subunit be K.YNDPIYK#.L                    | 14.60  | 8.96   | 1.63  | 0.61 |
| O35643_AP1B1_MOUSE | Ap1b1  | AP-1 complex subunit be R.LASQANICQVLAELK#.E            | 15.23  | 6.70   | 2.28  | 0.44 |
| O35643_AP1B1_MOUSE | Ap1b1  | AP-1 complex subunit be R.NINLIVQK#.R                   | 19.13  | 7.24   | 2.64  | 0.38 |
| O35643_AP1B1_MOUSE | Ap1b1  | AP-1 complex subunit be R.NVEGQDM*LYQSLK#.L             | 6.74   | 2.57   | 2.62  | 0.38 |
| P22892_AP1G1_MOUSE | Ap1g1  | AP-1 complex subunit ga R.VLAINLGR@.F                   | 13.96  | 5.99   | 2.33  | 0.43 |
| P22892_AP1G1_MOUSE | Ap1g1  | AP-1 complex subunit ga R.YVALTSLK#.T                   | 10.21  | 4.69   | 2.18  | 0.46 |
| P61967_AP1S1_MOUSE | Ap1s1  | AP-1 complex subunit sig K.AIEQADLLEEDESPR@.S           | 10.67  | 6.89   | 1.55  | 0.65 |
| P61967_AP1S1_MOUSE | Ap1s1  | AP-1 complex subunit sig R.FM*LLFSR@.Q                  | 10.58  | 2.12   | 4.98  | 0.20 |
| P17426_AP2A1_MOUSE | Ap2a1  | AP-2 complex subunit alj R.ALLLSTYK#.F                  | 13.66  | 6.65   | 2.05  | 0.49 |
| P17426_AP2A1_MOUSE | Ap2a1  | AP-2 complex subunit alj R.IAGDVSEEWYR@.Q               | 11.62  | 7.70   | 1.51  | 0.66 |
| P17426_AP2A1_MOUSE | Ap2a1  | AP-2 complex subunit alj R.LIVAGDSM*DSVK#.Q             | 7.95   | 4.22   | 1.88  | 0.53 |
| P17426_AP2A1_MOUSE | Ap2a1  | AP-2 complex subunit alj R.NADVELQQR.A                  | 200.75 | 145.63 | 1.38  | 0.73 |
| P17426_AP2A1_MOUSE | Ap2a1  | AP-2 complex subunit alj K.NSGVLFENGLLIQGVK#.S          | 9.28   | 2.56   | 3.62  | 0.28 |
| P17426_AP2A1_MOUSE | Ap2a1  | AP-2 complex subunit alj K.VGGYILGEGFNLIAGDPR@.S        | 12.44  | 5.14   | 2.42  | 0.41 |
| P17426_AP2A1_MOUSE | Ap2a1  | AP-2 complex subunit alj R.ALLLSTYK#.F                  | 15.59  | 8.22   | 1.90  | 0.53 |
| P17426_AP2A1_MOUSE | Ap2a1  | AP-2 complex subunit alj R.GLAVFISDIR@.N                | 9.47   | 3.22   | 2.94  | 0.34 |
| P17426_AP2A1_MOUSE | Ap2a1  | AP-2 complex subunit alj K.NSGVLFENGLLIQGVK#.S          | 8.04   | 2.29   | 3.51  | 0.29 |
| P17426_AP2A1_MOUSE | Ap2a1  | AP-2 complex subunit alj K.VGGYILGEGFNLIAGDPR@.S        | 11.19  | 3.03   | 3.70  | 0.27 |
| P17427_AP2A2_MOUSE | Ap2a2  | AP-2 complex subunit alj K.ILVAGDTM*DSVK#.Q             | 9.16   | 4.94   | 1.85  | 0.54 |
| P17427_AP2A2_MOUSE | Ap2a2  | AP-2 complex subunit alj R.LSTVASTDILATVLEEM*PPFPER@.E  | 25.87  | 7.11   | 3.64  | 0.27 |
| Q9DBG3_AP2B1_MOUSE | Ap2b1  | AP-2 complex subunit be K.ALQHM*TDFAIQFNK#.N            | 8.37   | 3.00   | 2.79  | 0.36 |
| Q9DBG3_AP2B1_MOUSE | Ap2b1  | AP-2 complex subunit be R.APEVSCYQVYQVDFILK#.N.         | 5.98   | 3.18   | 1.88  | 0.53 |
| Q9DBG3_AP2B1_MOUSE | Ap2b1  | AP-2 complex subunit be K.LQNNNVIYTK#.R                 | 14.12  | 5.05   | 2.80  | 0.36 |
| Q9DBG3_AP2B1_MOUSE | Ap2b1  | AP-2 complex subunit be K.VNYVQEAIVR@.D                 | 12.22  | 5.12   | 2.39  | 0.42 |
| Q9DBG3_AP2B1_MOUSE | Ap2b1  | AP-2 complex subunit be K.DIPNENELQFOIK#.E              | 10.77  | 6.16   | 1.65  | 0.61 |
| Q9DBG3_AP2B1_MOUSE | Ap2b1  | AP-2 complex subunit be K.K#PSETQELQVQLSLATQDSDNPDLR@.D | 7.83   | 3.01   | 2.61  | 0.38 |
| P84091_AP2M1_MOUSE | Ap2m1  | AP-2 complex subunit m K.ASENAIWK#.I                    | 29.12  | 11.37  | 2.56  | 0.39 |
| P84091_AP2M1_MOUSE | Ap2m1  | AP-2 complex subunit m K.ESQSAEIELLPTNDK#.K             | 10.09  | 2.91   | 3.47  | 0.29 |
| P84091_AP2M1_MOUSE | Ap2m1  | AP-2 complex subunit m K.QNVNAAM*VFEFLYK#.M             | 11.44  | 4.60   | 2.49  | 0.40 |
| P84091_AP2M1_MOUSE | Ap2m1  | AP-2 complex subunit m R.SISFIPDQEFELM*#R@.Y            | 16.96  | 7.91   | 2.14  | 0.47 |
| P84091_AP2M1_MOUSE | Ap2m1  | AP-2 complex subunit m K.SNFK#P#SLAQK#.I                | 9.86   | 4.58   | 2.15  | 0.46 |
| P84091_AP2M1_MOUSE | Ap2m1  | AP-2 complex subunit m R.SNIWLAAVTK#.Q                  | 28.03  | 11.84  | 2.37  | 0.42 |
| P84091_AP2M1_MOUSE | Ap2m1  | AP-2 complex subunit m R.SPVTNIAR@.T                    | 97.20  | 37.41  | 2.60  | 0.38 |
| P84091_AP2M1_MOUSE | Ap2m1  | AP-2 complex subunit m K.WAR@PPISM*NFVFPFAPSGLK#.V      | 23.26  | 11.23  | 2.07  | 0.48 |
| P84091_AP2M1_MOUSE | Ap2m1  | AP-2 complex subunit m K.WAR@PPISMNFVFPFAPSGLK#.V       | 2.96   | 1.11   | 2.66  | 0.38 |
| P62743_AP2S1_MOUSE | Ap2s1  | AP-2 complex subunit sig R.FILIQNR.A                    | 38.43  | 16.78  | 2.29  | 0.44 |
| P62743_AP2S1_MOUSE | Ap2s1  | AP-2 complex subunit sig K.VYTVDEM*FLAGEIR@.E           | 10.16  | 3.24   | 3.13  | 0.32 |
| Q9Z1T1_AP3B1_MOUSE | Ap3b1  | AP-3 complex subunit be K.EGSTAQLIINTEK#.T              | 6.79   | 3.81   | 1.78  | 0.56 |
| Q9Z1T1_AP3B1_MOUSE | Ap3b1  | AP-3 complex subunit be K.EGSTAQLIINTEK#.T              | 7.88   | 4.71   | 1.67  | 0.60 |
| Q9Z1T1_AP3B1_MOUSE | Ap3b1  | AP-3 complex subunit be K.LLDSITVVAR@.A                 | 18.86  | 5.61   | 3.36  | 0.30 |
| Q9Z1T1_AP3B1_MOUSE | Ap3b1  | AP-3 complex subunit be K.LQLJLNAK#.L                   | 22.13  | 4.38   | 5.05  | 0.20 |
| Q9Z1T1_AP3B1_MOUSE | Ap3b1  | AP-3 complex subunit be K.NASELFPVAVK#.N                | 13.98  | 3.28   | 4.26  | 0.23 |
| Q9Z1T1_AP3B1_MOUSE | Ap3b1  | AP-3 complex subunit be K.QFAATITQIGR@.C                | 6.76   | 1.40   | 4.82  | 0.21 |
| Q9Z1T1_AP3B1_MOUSE | Ap3b1  | AP-3 complex subunit be K.VVNVANLGAVPSSQDNVHR@.F        | 13.02  | 3.12   | 4.18  | 0.24 |
| Q9Z1T1_AP3B1_MOUSE | Ap3b1  | AP-3 complex subunit be K.ASGYLESNWPEVAPDPSVR@.N        | 9.91   | 1.60   | 6.20  | 0.16 |
| Q9Z1T1_AP3B1_MOUSE | Ap3b1  | AP-3 complex subunit be K.LLDSITVVAR@.A                 | 36.06  | 3.12   | 11.56 | 0.09 |
| Q9Z1T1_AP3B1_MOUSE | Ap3b1  | AP-3 complex subunit be K.LLQMQ*OPAQHGEIR@.H            | 16.73  | 3.58   | 4.67  | 0.21 |
| Q9Z1T1_AP3B1_MOUSE | Ap3b1  | AP-3 complex subunit be K.LLQVILNLGK#.Y                 | 31.14  | 5.49   | 5.67  | 0.18 |
| Q9Z1T1_AP3B1_MOUSE | Ap3b1  | AP-3 complex subunit be K.LQLJLNAK#.L                   | 14.84  | 2.50   | 5.95  | 0.17 |

|                     |         |                                                           |        |        |      |      |
|---------------------|---------|-----------------------------------------------------------|--------|--------|------|------|
| Q9Z1T1_AP3B1_MOUSE  | Ap3b1   | AP-3 complex subunit be K.LYSLDPEQK#EM*LVIEK#L            | 5.11   | 2.11   | 2.42 | 0.41 |
| Q9Z1T1_AP3B1_MOUSE  | Ap3b1   | AP-3 complex subunit be K.NASELFPVAVK#N                   | 11.91  | 3.40   | 3.50 | 0.29 |
| Q9Z1T1_AP3B1_MOUSE  | Ap3b1   | AP-3 complex subunit be K.QFAAATIQTGR@_C                  | 9.25   | 4.37   | 2.12 | 0.47 |
| Q9Z1T1_AP3B1_MOUSE  | Ap3b1   | AP-3 complex subunit be K.VVNVANLIGAVPSSQDNVHR@_F         | 18.44  | 4.56   | 4.04 | 0.25 |
| Q9Z1T1_AP3B1_MOUSE  | Ap3b1   | AP-3 complex subunit be R.YAEEQQLALLSISTFQR@_A            | 6.45   | 2.06   | 3.12 | 0.32 |
| Q9Z1T1_AP3B1_MOUSE  | Ap3b1   | AP-3 complex subunit be K.YDQNYDIR@_D                     | 11.15  | 1.42   | 7.84 | 0.13 |
| O54774_AP3D1_MOUSE  | Ap3d1   | AP-3 complex subunit de R.LILEDSDQNLK#Y                   | 9.02   | 20.20  | 0.45 | 2.24 |
| O54774_AP3D1_MOUSE  | Ap3d1   | AP-3 complex subunit de R.ALDDLGYM*VSK#K                  | 13.00  | 6.57   | 1.98 | 0.51 |
| O54774_AP3D1_MOUSE  | Ap3d1   | AP-3 complex subunit de K.EQAADTEAAQEVTLQVLR@_L           | 18.60  | 2.42   | 7.70 | 0.13 |
| O54774_AP3D1_MOUSE  | Ap3d1   | AP-3 complex subunit de R.LILEDSDQNLK#Y                   | 62.62  | 11.45  | 5.47 | 0.18 |
| O54774_AP3D1_MOUSE  | Ap3d1   | AP-3 complex subunit de K.LFGALTPLEPR@_L                  | 18.18  | 56.05  | 0.32 | 3.08 |
| O54774_AP3D1_MOUSE  | Ap3d1   | AP-3 complex subunit de R.LPQFVOSADLEVQER@_A              | 10.17  | 2.00   | 5.09 | 0.20 |
| O54774_AP3D1_MOUSE  | Ap3d1   | AP-3 complex subunit de K.LYALISLQK#E                     | 15.96  | 7.46   | 2.14 | 0.47 |
| O54774_AP3D1_MOUSE  | Ap3d1   | AP-3 complex subunit de K.VTYDIQASLQK#D                   | 7.18   | 2.24   | 3.21 | 0.31 |
| O54774_AP3D1_MOUSE  | Ap3d1   | AP-3 complex subunit de K.YLGLLAM*SK#I                    | 13.29  | 5.16   | 2.57 | 0.39 |
| O54774_AP3D1_MOUSE  | Ap3d1   | AP-3 complex subunit de R.YQDAPGVEHIPVQDLSVPLK#V          | 6.64   | 3.08   | 2.16 | 0.46 |
| O9JKC8_AP3M1_MOUSE  | Ap3m1   | AP-3 complex subunit m R.VSSQNLVAIPVVK#H                  | 16.10  | 4.79   | 3.36 | 0.30 |
| O9DCR2_AP3S1_MOUSE  | Ap3s1   | AP-3 complex subunit sig K.FYQPYSEDQQQIR@_E               | 5.77   | 1.68   | 3.43 | 0.29 |
| O9DCR2_AP3S1_MOUSE  | Ap3s1   | AP-3 complex subunit sig K.FYQPYSEDQQQIR@_E               | 9.66   | 2.20   | 4.38 | 0.23 |
| O9DCR2_AP3S1_MOUSE  | Ap3s1   | AP-3 complex subunit sig R.NINIGDISIK#V                   | 11.07  | 1.42   | 7.77 | 0.13 |
| O9JKC7_AP4M1_MOUSE  | Ap4m1   | AP-4 complex subunit m R.GVLSLQESLSPDQK#A                 | 8.04   | 3.21   | 2.50 | 0.40 |
| O35841_API5_MOUSE   | Api5    | Apoptosis inhibitor 5 OS K.ELPQFATGENLPR.V                | 35.55  | 17.46  | 2.04 | 0.49 |
| O35841_API5_MOUSE   | Api5    | Apoptosis inhibitor 5 OS K.EVEELITESK#K                   | 12.89  | 6.81   | 1.89 | 0.53 |
| O35841_API5_MOUSE   | Api5    | Apoptosis inhibitor 5 OS R.GLQVMR@_Q                      | 18.58  | 8.67   | 2.14 | 0.47 |
| O35841_API5_MOUSE   | Api5    | Apoptosis inhibitor 5 OS K.ITNNINVLK#D                    | 16.56  | 7.37   | 2.25 | 0.44 |
| O35841_API5_MOUSE   | Api5    | Apoptosis inhibitor 5 OS R.LAAQFIPK#F                     | 43.07  | 18.16  | 2.37 | 0.42 |
| O35841_API5_MOUSE   | Api5    | Apoptosis inhibitor 5 OS K.R@LAAQFIPK#F                   | 7.46   | 5.02   | 1.49 | 0.67 |
| O35841_API5_MOUSE   | Api5    | Apoptosis inhibitor 5 OS K.VLEDVTGEFVLFM*K#I              | 11.39  | 4.34   | 2.62 | 0.38 |
| O35841_API5_MOUSE   | Api5    | Apoptosis inhibitor 5 OS K.ITNNINVLK#D                    | 10.87  | 5.52   | 1.97 | 0.51 |
| O35841_API5_MOUSE   | Api5    | Apoptosis inhibitor 5 OS K.ELPQFATGENLPR.V                | 27.10  | 9.83   | 2.76 | 0.36 |
| O35841_API5_MOUSE   | Api5    | Apoptosis inhibitor 5 OS K.EVEELITESK#K                   | 16.10  | 4.86   | 3.32 | 0.30 |
| O35841_API5_MOUSE   | Api5    | Apoptosis inhibitor 5 OS K.ITNNINVLK#D                    | 19.75  | 7.10   | 2.78 | 0.36 |
| O35841_API5_MOUSE   | Api5    | Apoptosis inhibitor 5 OS R.KHLPDLTAK#L                    | 18.33  | 10.34  | 1.77 | 0.56 |
| O35841_API5_MOUSE   | Api5    | Apoptosis inhibitor 5 OS R.LAAQFIPK#F                     | 24.73  | 9.78   | 2.53 | 0.40 |
| O35841_API5_MOUSE   | Api5    | Apoptosis inhibitor 5 OS K.TGEALKTEENK#K#V                | 8.36   | 2.26   | 3.70 | 0.27 |
| O35841_API5_MOUSE   | Api5    | Apoptosis inhibitor 5 OS K.VLEDVTGEFVLFM*K#I              | 12.21  | 4.24   | 2.88 | 0.35 |
| O99J72_ABE3_MOUSE   | Apobec3 | DNA dC->dU-editing enzy K.GLEISR.R                        | 16.61  | 12.21  | 1.36 | 0.74 |
| O99J72_ABE3_MOUSE   | Apobec3 | DNA dC->dU-editing enzy R.NLISQETFK#F                     | 25.25  | 23.98  | 1.05 | 0.95 |
| Q8VDU3_Q8VDU3_MOUSE | Apol9a  | Apol9a protein OS=Mus r K.GTPLAM*SNEAR.I                  | 442.75 | 175.51 | 2.52 | 0.40 |
| Q8VDU3_Q8VDU3_MOUSE | Apol9a  | Apol9a protein OS=Mus r R.VLDEVEAAPGTHVLGEGAGSVDR@_I      | 54.72  | 31.16  | 1.76 | 0.57 |
| Q8C714_Q8C714_MOUSE | Apol9b  | Protein Apol9b OS=Mus i R.ELTALAADR@_G                    | 79.92  | 40.29  | 1.98 | 0.50 |
| Q8C714_Q8C714_MOUSE | Apol9b  | Protein Apol9b OS=Mus i R.HLYEGSASEAALR@K#L               | 100.42 | 58.78  | 1.71 | 0.59 |
| Q8C714_Q8C714_MOUSE | Apol9b  | Protein Apol9b OS=Mus i R.LLATTGSIAQR@_A                  | 150.40 | 77.85  | 1.93 | 0.52 |
| Q8C714_Q8C714_MOUSE | Apol9b  | Protein Apol9b OS=Mus i R.LEGTPLAM*SNEAR@_I               | 6.44   | 4.35   | 1.48 | 0.68 |
| Q8C714_Q8C714_MOUSE | Apol9b  | Protein Apol9b OS=Mus i R.LLATTGSIAQR@_A                  | 5.53   | 2.58   | 2.14 | 0.47 |
| P12023_A4_MOUSE     | App     | Amyloid beta A4 protein K.VESLEQEAANER@_Q                 | 4.75   | 3.79   | 1.25 | 0.80 |
| Q8CFQ3_AQR_MOUSE    | Aqr     | Intron-binding protein a R.AAFAHFPELYDFALSNVAEDAR@_D      | 41.79  | 24.66  | 1.69 | 0.59 |
| Q8CFQ3_AQR_MOUSE    | Aqr     | Intron-binding protein a R.AGM*QGLTM*VVGPPGTGK#T          | 11.15  | 6.01   | 1.86 | 0.54 |
| Q8CFQ3_AQR_MOUSE    | Aqr     | Intron-binding protein a K.DADGEEDTEEA#K#T                | 5.25   | 2.84   | 1.85 | 0.54 |
| Q8CFQ3_AQR_MOUSE    | Aqr     | Intron-binding protein a R.EEDGHLFSQLLDM*LK#F             | 8.97   | 5.56   | 1.62 | 0.62 |
| Q8CFQ3_AQR_MOUSE    | Aqr     | Intron-binding protein a K.FWNLK#K                        | 9.75   | 4.48   | 2.18 | 0.46 |
| Q8CFQ3_AQR_MOUSE    | Aqr     | Intron-binding protein a K.FYTGFEINDQGNALNEM*TIHYDR@_I    | 6.53   | 2.20   | 2.97 | 0.34 |
| Q8CFQ3_AQR_MOUSE    | Aqr     | Intron-binding protein a K.IFTQEEFR@_A                    | 49.87  | 24.81  | 2.01 | 0.50 |
| Q8CFQ3_AQR_MOUSE    | Aqr     | Intron-binding protein a K.IM*ALDIER@_H                   | 23.60  | 11.61  | 2.03 | 0.49 |
| Q8CFQ3_AQR_MOUSE    | Aqr     | Intron-binding protein a K.ISILTYNGQK#H                   | 10.47  | 6.12   | 1.71 | 0.58 |
| Q8CFQ3_AQR_MOUSE    | Aqr     | Intron-binding protein a R.ISIQQLNQNM*PLYPTEK#I           | 6.46   | 3.57   | 1.81 | 0.55 |
| Q8CFQ3_AQR_MOUSE    | Aqr     | Intron-binding protein a K.LNLQFLTHDYLRLR@_N              | 26.29  | 13.21  | 1.99 | 0.50 |
| Q8CFQ3_AQR_MOUSE    | Aqr     | Intron-binding protein a R.M*AQPIVAFVVEVAKPNIENGNWPR.V    | 11.55  | 8.51   | 1.36 | 0.74 |
| Q8CFQ3_AQR_MOUSE    | Aqr     | Intron-binding protein a K.M*PNQIATLDFNDFTLSIEHLK#A       | 61.06  | 25.99  | 2.35 | 0.43 |
| Q8CFQ3_AQR_MOUSE    | Aqr     | Intron-binding protein a R.QDIEDVSR@_M                    | 38.01  | 25.30  | 1.50 | 0.67 |
| Q8CFQ3_AQR_MOUSE    | Aqr     | Intron-binding protein a R.RISQQLNQNM*PLYPTEK.I           | 6.71   | 5.33   | 1.26 | 0.79 |
| Q8CFQ3_AQR_MOUSE    | Aqr     | Intron-binding protein a K.R@NTQITHTQIEAIR@_A             | 16.19  | 8.01   | 2.02 | 0.49 |
| Q8CFQ3_AQR_MOUSE    | Aqr     | Intron-binding protein a K.SIPLESPTM*DK#V                 | 20.49  | 12.90  | 1.59 | 0.63 |
| Q8CFQ3_AQR_MOUSE    | Aqr     | Intron-binding protein a R.SOVQLISLPM*WM*GLQPAR@_L        | 12.68  | 7.85   | 1.62 | 0.62 |
| Q8CFQ3_AQR_MOUSE    | Aqr     | Intron-binding protein a K.TDVAQISINIHNFPEQR@_T           | 45.41  | 31.67  | 1.43 | 0.70 |
| Q8CFQ3_AQR_MOUSE    | Aqr     | Intron-binding protein a R.TLIVTHNQALNQLFEK#I             | 51.05  | 39.08  | 1.31 | 0.77 |
| Q8CFQ3_AQR_MOUSE    | Aqr     | Intron-binding protein a R.VNYYLAR@_R                     | 12.57  | 15.22  | 1.57 | 0.64 |
| Q8CFQ3_AQR_MOUSE    | Aqr     | Intron-binding protein a K.VTVSDPALQIPPR.I                | 6.59   | 7.29   | 0.91 | 1.10 |
| Q8CFQ3_AQR_MOUSE    | Aqr     | Intron-binding protein a K.YSNM*EQSLFTR@_F                | 20.09  | 9.90   | 2.03 | 0.49 |
| Q5XJY5_COPD_MOUSE   | Arcn1   | Coatmer subunit delta ( K.APGFGGSSAVGGSTAAM*ITIHETDK#PK#V | 3.92   | 5.31   | 0.74 | 1.36 |
| Q5XJY5_COPD_MOUSE   | Arcn1   | Coatmer subunit delta ( R.FSTETFLVDK#YEL.-                | 25.50  | 20.25  | 2.84 | 0.35 |
| Q5XJY5_COPD_MOUSE   | Arcn1   | Coatmer subunit delta ( K.GK#EVDNFVDK#LKH.S               | 14.93  | 11.95  | 2.09 | 0.48 |
| Q5XJY5_COPD_MOUSE   | Arcn1   | Coatmer subunit delta ( R.IEGLLAAPK#L                     | 32.24  | 14.50  | 2.22 | 0.45 |
| Q5XJY5_COPD_MOUSE   | Arcn1   | Coatmer subunit delta ( R.ISDDK#FGR@_I                    | 13.71  | 8.13   | 1.69 | 0.59 |
| Q5XJY5_COPD_MOUSE   | Arcn1   | Coatmer subunit delta ( K.LFTAESLIGLKH.N                  | 102.16 | 79.92  | 1.28 | 0.78 |
| Q5XJY5_COPD_MOUSE   | Arcn1   | Coatmer subunit delta ( K.LYM*VLITTK#N                    | 14.90  | 43.93  | 0.34 | 2.95 |
| Q5XJY5_COPD_MOUSE   | Arcn1   | Coatmer subunit delta ( K.LYMVLITTK#N                     | 19.65  | 8.49   | 2.32 | 0.43 |
| Q5XJY5_COPD_MOUSE   | Arcn1   | Coatmer subunit delta ( K.NSNILEDLETLR.L                  | 212.34 | 86.81  | 2.45 | 0.41 |
| Q5XJY5_COPD_MOUSE   | Arcn1   | Coatmer subunit delta ( K.QHTFVETSVR@_Y                   | 51.90  | 18.49  | 2.81 | 0.36 |
| Q5XJY5_COPD_MOUSE   | Arcn1   | Coatmer subunit delta ( K.SEGETIM*SSNM*GK#R               | 15.63  | 7.00   | 2.23 | 0.45 |
| Q5XJY5_COPD_MOUSE   | Arcn1   | Coatmer subunit delta ( K.SFPVNSDVGLK#W                   | 41.44  | 19.00  | 2.18 | 0.46 |
| Q5XJY5_COPD_MOUSE   | Arcn1   | Coatmer subunit delta ( R.TFTM*DSHEEK#V                   | 12.13  | 6.13   | 1.98 | 0.50 |
| Q5XJY5_COPD_MOUSE   | Arcn1   | Coatmer subunit delta ( R.TR@IEGLLAAPK#L                  | 34.98  | 23.11  | 1.51 | 0.66 |
| Q5XJY5_COPD_MOUSE   | Arcn1   | Coatmer subunit delta ( K.VTQVDGNSPVR@_F                  | 139.77 | 58.25  | 2.40 | 0.42 |
| Q5XJY5_COPD_MOUSE   | Arcn1   | Coatmer subunit delta ( R.VYVQPM*EK#L                     | 47.84  | 19.95  | 2.40 | 0.42 |
| Q5XJY5_COPD_MOUSE   | Arcn1   | Coatmer subunit delta ( R.ENVNLAQIR@_T                    | 35.15  | 11.24  | 3.13 | 0.32 |
| Q5XJY5_COPD_MOUSE   | Arcn1   | Coatmer subunit delta ( R.IEGLLAAPK#L                     | 39.47  | 10.66  | 3.70 | 0.27 |
| Q5XJY5_COPD_MOUSE   | Arcn1   | Coatmer subunit delta ( K.LYM*VLITTK#N                    | 9.47   | 4.51   | 2.10 | 0.48 |
| Q5XJY5_COPD_MOUSE   | Arcn1   | Coatmer subunit delta ( K.NSNILEDLETLR@_L                 | 100.70 | 33.11  | 3.04 | 0.33 |
| Q5XJY5_COPD_MOUSE   | Arcn1   | Coatmer subunit delta ( R.TR@IEGLLAAPK#L                  | 33.47  | 11.83  | 2.83 | 0.35 |
| Q5XJY5_COPD_MOUSE   | Arcn1   | Coatmer subunit delta ( R.ENVNLAQIR@_T                    | 68.32  | 24.75  | 2.76 | 0.36 |
| Q5XJY5_COPD_MOUSE   | Arcn1   | Coatmer subunit delta ( R.FSTETFLVDK#YEL.-                | 66.08  | 25.20  | 2.62 | 0.38 |
| Q5XJY5_COPD_MOUSE   | Arcn1   | Coatmer subunit delta ( K.GK#EVDNFVDK#LKH.S               | 19.97  | 4.66   | 4.29 | 0.23 |
| Q5XJY5_COPD_MOUSE   | Arcn1   | Coatmer subunit delta ( R.IEGLLAAPK#L                     | 27.63  | 9.36   | 2.95 | 0.34 |
| Q5XJY5_COPD_MOUSE   | Arcn1   | Coatmer subunit delta ( K.LFTAESLIGLKH.N                  | 78.29  | 29.41  | 2.66 | 0.38 |
| Q5XJY5_COPD_MOUSE   | Arcn1   | Coatmer subunit delta ( K.LYMVLITTK#N                     | 20.93  | 7.22   | 2.90 | 0.34 |
| Q5XJY5_COPD_MOUSE   | Arcn1   | Coatmer subunit delta ( K.NSNILEDLETLR@_L                 | 91.36  | 30.69  | 2.98 | 0.34 |
| Q5XJY5_COPD_MOUSE   | Arcn1   | Coatmer subunit delta ( K.QHTFVETSVR@_Y                   | 9.34   | 3.47   | 2.69 | 0.37 |
| Q5XJY5_COPD_MOUSE   | Arcn1   | Coatmer subunit delta ( K.SEGETIM*SSNM*GK#R               | 16.10  | 7.80   | 2.06 | 0.48 |
| Q5XJY5_COPD_MOUSE   | Arcn1   | Coatmer subunit delta ( K.SFPVNSDVGLK#W                   | 60.67  | 15.79  | 3.84 | 0.26 |
| Q5XJY5_COPD_MOUSE   | Arcn1   | Coatmer subunit delta ( R.TFTM*DSHEEK#V                   | 8.20   | 2.61   | 3.15 | 0.32 |
| Q5XJY5_COPD_MOUSE   | Arcn1   | Coatmer subunit delta ( R.TR@IEGLLAAPK#L                  | 31.28  | 11.66  | 2.68 | 0.37 |
| Q5XJY5_COPD_MOUSE   | Arcn1   | Coatmer subunit delta ( K.VTQVDGNSPVR@_F                  | 73.57  | 27.65  | 2.66 | 0.38 |

|                     |          |                                                             |        |       |      |      |
|---------------------|----------|-------------------------------------------------------------|--------|-------|------|------|
| Q5XJY5_COPD_MOUSE   | Arcn1    | Coatomer subunit delta ( R.VYQPM*EK#.L                      | 21.76  | 8.52  | 2.55 | 0.39 |
| Q5XJY5_COPD_MOUSE   | Arcn1    | Coatomer subunit delta ( R.FSTETTLVDK#EYL.-                 | 16.84  | 3.11  | 5.42 | 0.18 |
| Q5XJY5_COPD_MOUSE   | Arcn1    | Coatomer subunit delta ( R.IEGLLAAPFK#.L                    | 12.57  | 2.77  | 4.54 | 0.22 |
| Q5XJY5_COPD_MOUSE   | Arcn1    | Coatomer subunit delta ( K.LFTAESLIGLK#.N                   | 16.90  | 5.17  | 3.27 | 0.31 |
| Q5XJY5_COPD_MOUSE   | Arcn1    | Coatomer subunit delta ( K.NSNILEDLETLR@.L                  | 46.05  | 11.39 | 4.04 | 0.25 |
| Q5XJY5_COPD_MOUSE   | Arcn1    | Coatomer subunit delta ( K.VTQVDGNSPVR@.F                   | 33.65  | 8.17  | 4.12 | 0.24 |
| P84078_ARF1_MOUSE   | Arf1     | ADP-ribosylation factor ( R.DAVLLVFANKR#.Q                  | 126.31 | 78.51 | 1.61 | 0.62 |
| P84078_ARF1_MOUSE   | Arf1     | ADP-ribosylation factor ( R.I.LMVGLDAAAGK#.T                | 24.03  | 10.00 | 2.40 | 0.42 |
| P84078_ARF1_MOUSE   | Arf1     | ADP-ribosylation factor ( R.LGEIVTTIPTIGFNVTEYK#.N          | 17.12  | 8.43  | 2.03 | 0.49 |
| P84078_ARF1_MOUSE   | Arf1     | ADP-ribosylation factor ( R.M*LAEDLR@.D                     | 37.49  | 15.02 | 2.50 | 0.40 |
| P84078_ARF1_MOUSE   | Arf1     | ADP-ribosylation factor ( K.NISFTVWVGGQDK#.I                | 49.58  | 15.53 | 3.19 | 0.31 |
| P84078_ARF1_MOUSE   | Arf1     | ADP-ribosylation factor ( K.QDLPNAM*NAAEITDK#.L             | 12.00  | 6.71  | 1.79 | 0.56 |
| P84078_ARF1_MOUSE   | Arf1     | ADP-ribosylation factor ( K.LGEIVTTIPTIGFNVTEYK#.N          | 13.17  | 5.04  | 2.61 | 0.38 |
| P84078_ARF1_MOUSE   | Arf1     | ADP-ribosylation factor ( K.LGEIVTTIPTIGFNVTEYK#.N          | 11.91  | 4.94  | 2.41 | 0.42 |
| P61750_ARF4_MOUSE   | Arf4     | ADP-ribosylation factor ( R.IQEGAAVLQK#.M                   | 15.95  | 6.06  | 2.63 | 0.38 |
| P61750_ARF4_MOUSE   | Arf4     | ADP-ribosylation factor ( R.IQEGAAVLQK#.M                   | 12.86  | 5.51  | 2.33 | 0.43 |
| P61750_ARF4_MOUSE   | Arf4     | ADP-ribosylation factor ( R.IQEGAAVLQK#.M                   | 15.95  | 9.27  | 1.72 | 0.58 |
| P84084_ARF5_MOUSE   | Arf5     | ADP-ribosylation factor ( R.VQESADELQK#.M                   | 6.25   | 5.05  | 1.24 | 0.81 |
| P84084_ARF5_MOUSE   | Arf5     | ADP-ribosylation factor ( K.M*LOEDEL@.D                     | 11.79  | 2.83  | 4.17 | 0.24 |
| P84084_ARF5_MOUSE   | Arf5     | ADP-ribosylation factor ( R.VQESADELQK#.M                   | 35.21  | 12.90 | 2.73 | 0.37 |
| P62331_ARF6_MOUSE   | Arf6     | ADP-ribosylation factor ( R.DAILIFANK#.Q                    | 52.66  | 13.74 | 3.83 | 0.26 |
| P62331_ARF6_MOUSE   | Arf6     | ADP-ribosylation factor ( R.FNVWVGGQDK#.I                   | 27.43  | 9.72  | 4.88 | 0.20 |
| P62331_ARF6_MOUSE   | Arf6     | ADP-ribosylation factor ( R.LIM*LGDLAAGK#.T                 | 48.94  | 42.36 | 0.68 | 1.46 |
| P62331_ARF6_MOUSE   | Arf6     | ADP-ribosylation factor ( R.LMLGLDAAAGK#.T                  | 14.76  | 3.44  | 4.29 | 0.23 |
| P62331_ARF6_MOUSE   | Arf6     | ADP-ribosylation factor ( K.LGSQVTTIPTIGFNVTEYK#.N          | 14.64  | 8.03  | 1.80 | 0.56 |
| Q9EPJ9_ARFG1_MOUSE  | Arfgap1  | ADP-ribosylation factor ( R.DVTTFFSGK#.A                    | 16.07  | 9.96  | 1.61 | 0.62 |
| Q9EPJ9_ARFG1_MOUSE  | Arfgap1  | ADP-ribosylation factor ( K.FR@EFLETQDDYEPSWSLQDK#.Y        | 11.62  | 6.64  | 1.75 | 0.57 |
| Q99K28_ARFG2_MOUSE  | Arfgap2  | ADP-ribosylation factor ( R.LAYLELQDIR@.K                   | 19.11  | 17.64 | 1.08 | 0.92 |
| Q99K28_ARFG2_MOUSE  | Arfgap2  | ADP-ribosylation factor ( R.SQDLDFDVTGTFASGPPK#.Y           | 8.83   | 4.66  | 1.90 | 0.53 |
| Q99K28_ARFG2_MOUSE  | Arfgap2  | ADP-ribosylation factor ( K.VSNOFTFIEIR#.Q                  | 12.49  | 10.62 | 1.18 | 0.85 |
| Q99K28_ARFG2_MOUSE  | Arfgap2  | ADP-ribosylation factor ( K.KY#DNPFLSGFTGSR@.W              | 10.58  | 10.65 | 0.99 | 1.01 |
| Q99K28_ARFG2_MOUSE  | Arfgap2  | ADP-ribosylation factor ( K.AISSDM*FFGR@.E                  | 8.78   | 2.63  | 3.34 | 0.30 |
| Q99K28_ARFG2_MOUSE  | Arfgap2  | ADP-ribosylation factor ( R.LAYLELQDIR@.K                   | 25.87  | 11.71 | 2.21 | 0.45 |
| Q99K28_ARFG2_MOUSE  | Arfgap2  | ADP-ribosylation factor ( R.LGM*GLVSR@.S                    | 20.67  | 10.28 | 2.01 | 0.50 |
| Q99K28_ARFG2_MOUSE  | Arfgap2  | ADP-ribosylation factor ( K.QAESM*VAM*RR@.L                 | 6.10   | 2.29  | 2.67 | 0.38 |
| Q99K28_ARFG2_MOUSE  | Arfgap2  | ADP-ribosylation factor ( R.SQDLDFDVTGTFASGPPK#.Y           | 16.72  | 16.04 | 1.04 | 0.96 |
| Q99K28_ARFG2_MOUSE  | Arfgap2  | ADP-ribosylation factor ( R.SQDLDFDVTGTFASGPPK#.Y           | 13.36  | 6.78  | 1.97 | 0.51 |
| Q99K28_ARFG2_MOUSE  | Arfgap2  | ADP-ribosylation factor ( R.SSISHSVSESM*QM#IEQETPLSAK#.S    | 3.83   | 3.32  | 1.15 | 0.87 |
| Q99K28_ARFG2_MOUSE  | Arfgap2  | ADP-ribosylation factor ( R.STELSDNSWSWLQLR@.C              | 12.42  | 7.69  | 1.62 | 0.62 |
| Q99K28_ARFG2_MOUSE  | Arfgap2  | ADP-ribosylation factor ( K.TEIQTIFK#.R                     | 14.05  | 5.78  | 2.43 | 0.41 |
| Q99K28_ARFG2_MOUSE  | Arfgap2  | ADP-ribosylation factor ( K.VSNOFTFIEIR#.Q                  | 30.42  | 15.91 | 1.91 | 0.52 |
| Q99K28_ARFG2_MOUSE  | Arfgap2  | ADP-ribosylation factor ( R.LTSSSSSADLDFEQR.K               | 6.92   | 6.06  | 1.14 | 0.88 |
| Q9D8S3_ARFG3_MOUSE  | Arfgap3  | ADP-ribosylation factor ( K.LTNTSFTIEK#.Q                   | 12.63  | 7.74  | 1.63 | 0.61 |
| Q9D8S3_ARFG3_MOUSE  | Arfgap3  | ADP-ribosylation factor ( R.YFDDPM*ELR@.S                   | 7.78   | 5.55  | 1.40 | 0.71 |
| Q9D8S3_ARFG3_MOUSE  | Arfgap3  | ADP-ribosylation factor ( K.YOEDPMSYFSSSK#.W                | 4.73   | 4.43  | 1.07 | 0.94 |
| Q9D8S3_ARFG3_MOUSE  | Arfgap3  | ADP-ribosylation factor ( R.LTSSSSSADLDFEQR@.Q              | 5.58   | 3.04  | 1.84 | 0.54 |
| Q9D8S3_ARFG3_MOUSE  | Arfgap3  | ADP-ribosylation factor ( R.YFDDPM*ELR@.S                   | 5.36   | 3.04  | 1.76 | 0.57 |
| Q9D8S3_ARFG3_MOUSE  | Arfgap3  | ADP-ribosylation factor ( R.LTSSSSSADLDFEQR@.K              | 14.82  | 3.46  | 4.28 | 0.23 |
| Q9D8S3_ARFG3_MOUSE  | Arfgap3  | ADP-ribosylation factor ( K.LTNTSFTIEK#.Q                   | 25.57  | 10.03 | 2.55 | 0.39 |
| Q9D8S3_ARFG3_MOUSE  | Arfgap3  | ADP-ribosylation factor ( R.STELSDNSWSWFQLR@.C              | 11.86  | 3.68  | 3.23 | 0.31 |
| Q9D8S3_ARFG3_MOUSE  | Arfgap3  | ADP-ribosylation factor ( R.YFDDPM*ELR@.S                   | 15.19  | 6.91  | 2.20 | 0.45 |
| Q9D8S3_ARFG3_MOUSE  | Arfgap3  | ADP-ribosylation factor ( K.YOEDPMSYFSSSK#.W                | 7.49   | 8.80  | 0.85 | 1.17 |
| G5E8V9_G5E8V9_MOUSE | Arfp1    | MCG18094 OS=Mus mus R.DANTLPRK#.I                           | 26.31  | 10.10 | 2.60 | 0.38 |
| G5E8V9_G5E8V9_MOUSE | Arfp1    | MCG18094 OS=Mus mus K.GGPVILAEK#.N                          | 9.23   | 4.42  | 2.09 | 0.48 |
| G5E8V9_G5E8V9_MOUSE | Arfp1    | MCG18094 OS=Mus mus K.IEIOSHLLQIHK#.E                       | 51.50  | 13.66 | 3.77 | 0.27 |
| G5E8V9_G5E8V9_MOUSE | Arfp1    | MCG18094 OS=Mus mus K.LAQTLSTQLFQM*VHTQK#.Q                 | 15.05  | 12.15 | 2.88 | 0.35 |
| G5E8V9_G5E8V9_MOUSE | Arfp1    | MCG18094 OS=Mus mus R.KL#TPGDVAPSWLEEQ..                    | 10.08  | 4.81  | 2.10 | 0.48 |
| G5E8V9_G5E8V9_MOUSE | Arfp1    | MCG18094 OS=Mus mus K.LTQQAGDLTPAGGQR@.T                    | 20.00  | 7.54  | 2.65 | 0.38 |
| G5E8V9_G5E8V9_MOUSE | Arfp1    | MCG18094 OS=Mus mus R.NQLVLFHSAVAAYFAGNQK#.Q                | 6.64   | 2.77  | 2.40 | 0.42 |
| G5E8V9_G5E8V9_MOUSE | Arfp1    | MCG18094 OS=Mus mus K.QLGDAFADLKLK#.S                       | 23.54  | 7.95  | 2.96 | 0.34 |
| G5E8V9_G5E8V9_MOUSE | Arfp1    | MCG18094 OS=Mus mus K.SLELHEEGVYADTK#.L                     | 34.80  | 10.49 | 3.32 | 0.30 |
| G5E8V9_G5E8V9_MOUSE | Arfp1    | MCG18094 OS=Mus mus R.TDLEEL.LGPR@.D                        | 47.83  | 19.96 | 2.40 | 0.42 |
| G5E8V9_G5E8V9_MOUSE | Arfp1    | MCG18094 OS=Mus mus R.VEYDAYR@.T                            | 49.16  | 19.88 | 2.47 | 0.40 |
| A2RSX9_A2RSX9_MOUSE | Arfp1    | Arfp1 protein OS=Mus m.K.EGVTEAGAQGGQR@.T                   | 30.38  | 7.83  | 3.88 | 0.26 |
| Q8K221_ARFP2_MOUSE  | Arfp2    | Arfp2 protein OS=Mus mus C.K.EQLTSLQFLK#.L                  | 8.92   | 4.65  | 1.92 | 0.52 |
| Q3UL36_ARGL1_MOUSE  | Arglu1   | Arginine and glutamate- R.IDIFGR@.T                         | 13.85  | 11.88 | 1.17 | 0.86 |
| Q3UL36_ARGL1_MOUSE  | Arglu1   | Arginine and glutamate- R.RVEELVAK.R                        | 126.08 | 77.91 | 1.62 | 0.62 |
| Q5FWK3_RHG01_MOUSE  | Arhgap1  | Rho GTPase-activating pr K.FLLDHQGLFPPSTDAQGV.-             | 27.34  | 27.34 | 1.00 | 1.00 |
| Q5FWK3_RHG01_MOUSE  | Arhgap1  | Rho GTPase-activating pr R.HQIEVAGDQK#YGR@.K                | 33.29  | 11.96 | 2.78 | 0.36 |
| Q5FWK3_RHG01_MOUSE  | Arhgap1  | Rho GTPase-activating pr R.K#FVYVLLVKK#.L                   | 12.22  | 3.30  | 3.70 | 0.27 |
| Q5FWK3_RHG01_MOUSE  | Arhgap1  | Rho GTPase-activating pr K.LEQLGIPR.Q                       | 37.70  | 10.84 | 3.48 | 0.29 |
| Q5FWK3_RHG01_MOUSE  | Arhgap1  | Rho GTPase-activating pr K.SPGQDPIPIVLR@.E                  | 30.52  | 12.13 | 2.52 | 0.40 |
| Q5FWK3_RHG01_MOUSE  | Arhgap1  | Rho GTPase-activating pr K.YDDFLK#.S                        | 20.13  | 5.94  | 3.39 | 0.30 |
| Q5FWK3_RHG01_MOUSE  | Arhgap1  | Rho GTPase-activating pr K.FLLDHQGLFPPSTDAQGV.-             | 13.65  | 13.65 | 1.00 | 1.00 |
| Q5FWK3_RHG01_MOUSE  | Arhgap1  | Rho GTPase-activating pr R.HQIEVAGDQK#YGR@.K                | 12.57  | 4.80  | 2.62 | 0.38 |
| Q5FWK3_RHG01_MOUSE  | Arhgap1  | Rho GTPase-activating pr K.LEQLGIPR@.Q                      | 10.47  | 4.01  | 2.61 | 0.38 |
| Q5FWK3_RHG01_MOUSE  | Arhgap1  | Rho GTPase-activating pr K.SPGQDPIPIVLR@.E                  | 15.68  | 7.33  | 2.14 | 0.47 |
| Q5FWK3_RHG01_MOUSE  | Arhgap1  | Rho GTPase-activating pr K.FLLDHQGLFPPSTDAQGV.-             | 20.72  | 20.72 | 1.00 | 1.00 |
| Q5FWK3_RHG01_MOUSE  | Arhgap1  | Rho GTPase-activating pr K.LEQLGIPR@.Q                      | 9.45   | 5.24  | 1.80 | 0.55 |
| Q5FWK3_RHG01_MOUSE  | Arhgap1  | Rho GTPase-activating pr K.SPGQDPIPIVLR@.E                  | 14.01  | 6.72  | 2.09 | 0.48 |
| Q69ZH9_RHG23_MOUSE  | Arhgap23 | Rho GTPase-activating pr R.TPVDDKHEPQSPVNIPELLNIGR@.T       | 5.92   | 2.87  | 2.06 | 0.48 |
| Q69ZH9_RHG23_MOUSE  | Arhgap23 | Rho GTPase-activating pr R.TPVDDKHEPQSPVNIPELLNIGR@.T       | 5.04   | 2.91  | 1.73 | 0.58 |
| Q88YW1_RHG25_MOUSE  | Arhgap25 | Rho GTPase-activating pr K.SMEKPKTKTDP.-                    | 3.61   | 14.93 | 0.24 | 4.14 |
| Q81P8_RHG32_MOUSE   | Arhgap32 | Rho GTPase-activating pr R.FSQLETPRSDVLK#.D                 | 1.54   | 3.81  | 0.40 | 2.48 |
| P97393_RHG05_MOUSE  | Arhgap5  | Rho GTPase-activating pr R.IPFDLSTLEAEK#.V                  | 6.38   | 3.30  | 1.93 | 0.52 |
| P97393_RHG05_MOUSE  | Arhgap5  | Rho GTPase-activating pr R.TQSTDEYALDGK#.I                  | 7.17   | 2.51  | 2.86 | 0.35 |
| Q61210_ARHG1_MOUSE  | Arhgef1  | Rho guanine nucleotide ( R.FIQEVGOSQAAVSR@.Q                | 14.15  | 4.88  | 2.90 | 0.34 |
| Q61210_ARHG1_MOUSE  | Arhgef1  | Rho guanine nucleotide ( K.K#AFLDFYHSLEK#.T                 | 12.71  | 4.44  | 2.87 | 0.35 |
| Q61210_ARHG1_MOUSE  | Arhgef1  | Rho guanine nucleotide ( R.APGPVHTQBEIENLLSEVAIR@.Q         | 5.48   | 3.05  | 1.80 | 0.56 |
| Q61210_ARHG1_MOUSE  | Arhgef1  | Rho guanine nucleotide ( R.FIQEVGOSQAAVSR@.Q                | 6.09   | 2.24  | 2.71 | 0.37 |
| Q61210_ARHG1_MOUSE  | Arhgef1  | Rho guanine nucleotide ( R.LR@PLLSQLGGTSLPNLAAPER@.S        | 10.14  | 3.17  | 3.20 | 0.31 |
| Q61210_ARHG1_MOUSE  | Arhgef1  | Rho guanine nucleotide ( R.R@QEVSELVTEAAHVR@.M              | 9.48   | 2.67  | 3.56 | 0.28 |
| Q61210_ARHG1_MOUSE  | Arhgef1  | Rho guanine nucleotide ( K.R@QEVSELVTEAAHVR@.M              | 16.71  | 4.07  | 4.11 | 0.24 |
| Q61210_ARHG1_MOUSE  | Arhgef1  | Rho guanine nucleotide ( R.ELVPPDTLSPK#.S                   | 18.38  | 5.33  | 3.45 | 0.29 |
| Q61210_ARHG1_MOUSE  | Arhgef1  | Rho guanine nucleotide ( R.LLSLEETHTSTDEEK#.S               | 6.54   | 2.40  | 2.72 | 0.37 |
| Q61210_ARHG1_MOUSE  | Arhgef1  | Rho guanine nucleotide ( R.LR@PLLSQLGGTSLPNLAAPER@.S        | 14.06  | 2.61  | 5.38 | 0.19 |
| Q61210_ARHG1_MOUSE  | Arhgef1  | Rho guanine nucleotide ( K.QILLSTEEDSGAGPPR@.D              | 4.40   | 5.07  | 0.87 | 1.15 |
| Q61210_ARHG1_MOUSE  | Arhgef1  | Rho guanine nucleotide ( K.R@QEVSELVTEAAHVR@.M              | 10.30  | 2.82  | 3.66 | 0.27 |
| Q61210_ARHG1_MOUSE  | Arhgef1  | Rho guanine nucleotide ( R.VPVPVSAFELDR@.T                  | 8.96   | 2.60  | 3.45 | 0.29 |
| Q68FM7_Q68FM7_MOUSE | Arhgef11 | Protein Arhgef11 OS=Mus m.K.DIWNIKLEK#.N                    | 15.15  | 4.10  | 3.69 | 0.27 |
| Q68FM7_Q68FM7_MOUSE | Arhgef11 | Protein Arhgef11 OS=Mus m.ELLNSLGGSSGGTTPVGSFHTEAAR@.W      | 7.62   | 1.40  | 5.42 | 0.18 |
| Q68FM7_Q68FM7_MOUSE | Arhgef11 | Protein Arhgef11 OS=Mus m.LSVDSQEADSGLDGSTER@FPSISELNVNR@.N | 3.45   | 3.29  | 1.05 | 0.95 |
| Q68FM7_Q68FM7_MOUSE | Arhgef11 | Protein Arhgef11 OS=Mus m.R.TLGLSGLYGENDLLDLDGPLR@ER@.Q     | 14.25  | 5.59  | 2.55 | 0.39 |

|                     |          |                                                                  |        |       |      |      |
|---------------------|----------|------------------------------------------------------------------|--------|-------|------|------|
| Q68FM7_Q68FM7_MOUSE | Arhgef11 | Protein Arhgef11 OS=Mus K.YPLLENIHK.H                            | 13.61  | 3.52  | 3.87 | 0.26 |
| Q8R4H2_ARHG_MOUSE   | Arhgef12 | Rho guanine nucleotide r.K.LSEYPNDLGR@.N                         | 7.11   | 3.17  | 2.24 | 0.45 |
| Q8U035_ARHGH_MOUSE  | Arhgef17 | Rho guanine nucleotide r.K.LPLEDDIIK#.G                          | 11.38  | 9.71  | 1.17 | 0.85 |
| Q8U035_ARHGH_MOUSE  | Arhgef17 | Rho guanine nucleotide r.R.HASVPATFTPIVPEPAM*SVGPPVAAPVPGFVPR@.G | 5.17   | 1.89  | 2.74 | 0.37 |
| Q8U035_ARHGH_MOUSE  | Arhgef17 | Rho guanine nucleotide r.R.HASVPATFTPIVPEPAM*SVGPPVAAPVPGFVPR.G  | 4.00   | 2.24  | 1.79 | 0.56 |
| Q8U035_ARHGH_MOUSE  | Arhgef17 | Rho guanine nucleotide r.R.LGFEQAFDEAK#.R                        | 14.85  | 6.20  | 2.40 | 0.42 |
| Q8U035_ARHGH_MOUSE  | Arhgef17 | Rho guanine nucleotide r.K.LPLEDDIIK#.G                          | 16.72  | 7.23  | 2.31 | 0.43 |
| Q8U035_ARHGH_MOUSE  | Arhgef17 | Rho guanine nucleotide r.R.LESGLPGHQSLD DALR@.D                  | 15.77  | 5.40  | 2.92 | 0.34 |
| Q8U035_ARHGH_MOUSE  | Arhgef17 | Rho guanine nucleotide r.R.LSSGGGSSSETVGR@.D                     | 7.67   | 4.32  | 1.78 | 0.56 |
| Q8U035_ARHGH_MOUSE  | Arhgef17 | Rho guanine nucleotide r.R.R@EEGNQDQTGSLTQTR@.S                  | 10.62  | 4.08  | 2.60 | 0.38 |
| Q8U035_ARHGH_MOUSE  | Arhgef17 | Rho guanine nucleotide r.K.SM*TLGSSQSPITK#.M                     | 7.51   | 4.32  | 1.74 | 0.57 |
| Q60875_ARHG2_MOUSE  | Arhgef2  | Rho guanine nucleotide r.R.ATEAGSLEAR@.L                         | 12.41  | 5.53  | 2.25 | 0.45 |
| Q60875_ARHG2_MOUSE  | Arhgef2  | Rho guanine nucleotide r.R.M*QDIPETESR@.D                        | 11.23  | 5.80  | 1.94 | 0.52 |
| Q60875_ARHG2_MOUSE  | Arhgef2  | Rho guanine nucleotide r.R.ATEAGSLEAR@.L                         | 7.46   | 3.25  | 2.29 | 0.44 |
| Q60875_ARHG2_MOUSE  | Arhgef2  | Rho guanine nucleotide r.R.FLNQLLER.R                            | 42.51  | 23.55 | 1.81 | 0.55 |
| Q60875_ARHG2_MOUSE  | Arhgef2  | Rho guanine nucleotide r.R.GHDR@LDLPLVTVR@.S                     | 21.79  | 11.91 | 1.83 | 0.55 |
| Q60875_ARHG2_MOUSE  | Arhgef2  | Rho guanine nucleotide r.R.LSSLSLAK#.S                           | 15.66  | 6.09  | 2.57 | 0.39 |
| Q60875_ARHG2_MOUSE  | Arhgef2  | Rho guanine nucleotide r.R.ILQNSHGVEEYQDLASALGLVK#.E             | 30.58  | 37.61 | 0.81 | 1.23 |
| Q60875_ARHG2_MOUSE  | Arhgef2  | Rho guanine nucleotide r.R.LGDLISQFSGSNAEQM*R@.K                 | 8.57   | 4.79  | 1.79 | 0.56 |
| Q60875_ARHG2_MOUSE  | Arhgef2  | Rho guanine nucleotide r.R.M*QDIPETESR@.D                        | 8.33   | 4.85  | 1.72 | 0.58 |
| Q60875_ARHG2_MOUSE  | Arhgef2  | Rho guanine nucleotide r.R.NNTALQVSLR@.S                         | 25.03  | 11.59 | 2.16 | 0.46 |
| Q60875_ARHG2_MOUSE  | Arhgef2  | Rho guanine nucleotide r.K.NQALVELLQK#.N                         | 44.03  | 18.53 | 2.38 | 0.42 |
| Q60875_ARHG2_MOUSE  | Arhgef2  | Rho guanine nucleotide r.K.QATELALQR@.Q                          | 22.06  | 8.75  | 2.52 | 0.40 |
| Q60875_ARHG2_MOUSE  | Arhgef2  | Rho guanine nucleotide r.K.QDIVELYQTELHHVIR@.T                   | 22.43  | 8.50  | 2.64 | 0.38 |
| Q60875_ARHG2_MOUSE  | Arhgef2  | Rho guanine nucleotide r.R.SLHR@PFDDR@EAQELGSPEDR@.L             | 16.23  | 7.07  | 2.30 | 0.44 |
| Q60875_ARHG2_MOUSE  | Arhgef2  | Rho guanine nucleotide r.K.YIFTSLDK#PSVSLQNLIVR@.D               | 37.72  | 28.53 | 1.32 | 0.76 |
| Q60875_ARHG2_MOUSE  | Arhgef2  | Rho guanine nucleotide r.K.YPVLINR@.I                            | 22.03  | 11.77 | 1.87 | 0.53 |
| Q60875_ARHG2_MOUSE  | Arhgef2  | Rho guanine nucleotide r.R.AAVASVTEPK#.Q                         | 62.42  | 21.60 | 2.89 | 0.35 |
| Q60875_ARHG2_MOUSE  | Arhgef2  | Rho guanine nucleotide r.K.AGFGVM*PPPALPR@.G                     | 27.07  | 25.60 | 1.06 | 0.95 |
| Q60875_ARHG2_MOUSE  | Arhgef2  | Rho guanine nucleotide r.R.ATEAGSLEAR@.L                         | 63.77  | 20.33 | 3.14 | 0.32 |
| Q60875_ARHG2_MOUSE  | Arhgef2  | Rho guanine nucleotide r.R.EAQELGSPEDR@.L                        | 17.73  | 7.91  | 2.24 | 0.45 |
| Q60875_ARHG2_MOUSE  | Arhgef2  | Rho guanine nucleotide r.R.EDFPLETEDK#.A                         | 16.31  | 7.90  | 2.06 | 0.48 |
| Q60875_ARHG2_MOUSE  | Arhgef2  | Rho guanine nucleotide r.R.FLNQLLER@.R                           | 120.13 | 42.02 | 2.86 | 0.35 |
| Q60875_ARHG2_MOUSE  | Arhgef2  | Rho guanine nucleotide r.R.GHDR@LDLPLVTVR@.S                     | 50.77  | 17.83 | 2.85 | 0.35 |
| Q60875_ARHG2_MOUSE  | Arhgef2  | Rho guanine nucleotide r.R.G.LSSLSLAK#.S                         | 30.72  | 9.34  | 3.29 | 0.30 |
| Q60875_ARHG2_MOUSE  | Arhgef2  | Rho guanine nucleotide r.K.GM*FLSSGPPM*YEVHAASR@.D               | 18.06  | 7.19  | 2.51 | 0.40 |
| Q60875_ARHG2_MOUSE  | Arhgef2  | Rho guanine nucleotide r.R.ILQNSHGVEEYQDLASALGLVK#.E             | 112.78 | 39.33 | 2.87 | 0.35 |
| Q60875_ARHG2_MOUSE  | Arhgef2  | Rho guanine nucleotide r.R.LESFESLR@.G                           | 36.59  | 14.39 | 2.54 | 0.39 |
| Q60875_ARHG2_MOUSE  | Arhgef2  | Rho guanine nucleotide r.R.LGDLISQFSGSNAEQM*R@.K                 | 20.23  | 5.53  | 3.66 | 0.27 |
| Q60875_ARHG2_MOUSE  | Arhgef2  | Rho guanine nucleotide r.R.LGDLISQFSGSNAEQM*R@K#.T               | 39.47  | 10.84 | 3.64 | 0.27 |
| Q60875_ARHG2_MOUSE  | Arhgef2  | Rho guanine nucleotide r.R.LM*EALFPEGPER@.W                      | 37.26  | 12.26 | 3.04 | 0.33 |
| Q60875_ARHG2_MOUSE  | Arhgef2  | Rho guanine nucleotide r.R.LQDSSDPDTSSEEVSSR@.L                  | 9.76   | 3.89  | 2.51 | 0.40 |
| Q60875_ARHG2_MOUSE  | Arhgef2  | Rho guanine nucleotide r.R.NNTALQVSLR@.S                         | 58.40  | 19.16 | 3.05 | 0.33 |
| Q60875_ARHG2_MOUSE  | Arhgef2  | Rho guanine nucleotide r.K.NQALVELLQK#.N                         | 71.01  | 24.49 | 2.90 | 0.34 |
| Q60875_ARHG2_MOUSE  | Arhgef2  | Rho guanine nucleotide r.K.QATELALQR@.Q                          | 41.11  | 15.67 | 2.62 | 0.38 |
| Q60875_ARHG2_MOUSE  | Arhgef2  | Rho guanine nucleotide r.K.QDIVELYQTELHHVIR@.T                   | 21.74  | 7.45  | 2.92 | 0.34 |
| Q60875_ARHG2_MOUSE  | Arhgef2  | Rho guanine nucleotide r.R.QLAALGQNEPLPAEPWAR@.R                 | 13.94  | 4.24  | 3.29 | 0.30 |
| Q60875_ARHG2_MOUSE  | Arhgef2  | Rho guanine nucleotide r.R.QLAALGQNEPLPAEPWAR.R                  | 15.12  | 3.65  | 4.14 | 0.24 |
| Q60875_ARHG2_MOUSE  | Arhgef2  | Rho guanine nucleotide r.R.SLHR@PFDDR@EAQELGSPEDR@.L             | 24.71  | 9.86  | 2.51 | 0.40 |
| Q60875_ARHG2_MOUSE  | Arhgef2  | Rho guanine nucleotide r.K.YIFTSLDK#PSVSLQNLIVR@.D               | 89.60  | 28.28 | 3.17 | 0.32 |
| Q60875_ARHG2_MOUSE  | Arhgef2  | Rho guanine nucleotide r.K.YPVLINR@.I                            | 38.69  | 15.91 | 2.43 | 0.41 |
| Q3UPH7_ARH40_MOUSE  | Arhgef40 | Rho guanine nucleotide r.R.YGQLELLER@.E                          | 7.15   | 2.44  | 2.93 | 0.34 |
| Q3UPH7_ARH40_MOUSE  | Arhgef40 | Rho guanine nucleotide r.R.AAVQLQEQEAR@.G                        | 26.79  | 15.28 | 1.75 | 0.57 |
| Q3UPH7_ARH40_MOUSE  | Arhgef40 | Rho guanine nucleotide r.R.EALAEELDTSQK#.V                       | 23.33  | 13.31 | 1.90 | 0.53 |
| Q3UPH7_ARH40_MOUSE  | Arhgef40 | Rho guanine nucleotide r.R.EALALALR@.R                           | 23.39  | 9.38  | 2.49 | 0.40 |
| Q3UPH7_ARH40_MOUSE  | Arhgef40 | Rho guanine nucleotide r.R.EAYTLQATSPETK#.L                      | 11.05  | 6.11  | 1.81 | 0.55 |
| Q3UPH7_ARH40_MOUSE  | Arhgef40 | Rho guanine nucleotide r.R.FFQAHEWVDEGSAR@.L                     | 14.08  | 7.70  | 1.83 | 0.55 |
| Q3UPH7_ARH40_MOUSE  | Arhgef40 | Rho guanine nucleotide r.R.GSPVDAEASGLSR@.T                      | 17.89  | 8.02  | 2.23 | 0.45 |
| Q3UPH7_ARH40_MOUSE  | Arhgef40 | Rho guanine nucleotide r.R.KHAPPLPALLPALSQDSSGEPPIQR@.L          | 13.73  | 6.83  | 2.01 | 0.50 |
| Q3UPH7_ARH40_MOUSE  | Arhgef40 | Rho guanine nucleotide r.R.NSPSLQPSPSSPTALSGLGLLSR@.Q            | 5.40   | 3.96  | 1.37 | 0.73 |
| Q3UPH7_ARH40_MOUSE  | Arhgef40 | Rho guanine nucleotide r.R.SPGDGHANAPAEPEGEVVELLETVLPR@.G        | 8.58   | 5.63  | 1.52 | 0.66 |
| Q3UPH7_ARH40_MOUSE  | Arhgef40 | Rho guanine nucleotide r.R.TLSALLTGR@.A                          | 18.29  | 12.77 | 1.43 | 0.70 |
| Q3UPH7_ARH40_MOUSE  | Arhgef40 | Rho guanine nucleotide r.K.VLDIFEOR@.L                           | 25.45  | 20.28 | 1.25 | 0.80 |
| Q3UPH7_ARH40_MOUSE  | Arhgef40 | Rho guanine nucleotide r.R.YGQLELLER@.E                          | 35.89  | 17.46 | 2.06 | 0.49 |
| Q3UPH7_ARH40_MOUSE  | Arhgef40 | Rho guanine nucleotide r.R.YTLDFLVPK#.H                          | 17.07  | 9.99  | 1.71 | 0.59 |
| Q9ES28_ARHG7_MOUSE  | Arhgef7  | Rho guanine nucleotide r.K.ELELQITPEIR@.S                        | 9.18   | 4.70  | 1.95 | 0.51 |
| Q9ES28_ARHG7_MOUSE  | Arhgef7  | Rho guanine nucleotide r.K.FNQQTNEDELSFSK#.G                     | 9.36   | 3.17  | 2.95 | 0.34 |
| Q9ES28_ARHG7_MOUSE  | Arhgef7  | Rho guanine nucleotide r.R.LDK#YPTLLK#.E                         | 18.85  | 8.76  | 2.15 | 0.46 |
| Q9ES28_ARHG7_MOUSE  | Arhgef7  | Rho guanine nucleotide r.K.LPTTGM*ITTK#.L                        | 12.88  | 4.75  | 2.71 | 0.37 |
| Q9ES28_ARHG7_MOUSE  | Arhgef7  | Rho guanine nucleotide r.R.NAFESGSM*IER@.I                       | 10.22  | 7.41  | 1.38 | 0.72 |
| Q9ES28_ARHG7_MOUSE  | Arhgef7  | Rho guanine nucleotide r.K.SLVDTVVALK#DQVQLR@.Q                  | 56.07  | 17.16 | 3.27 | 0.31 |
| Q9ES28_ARHG7_MOUSE  | Arhgef7  | Rho guanine nucleotide r.R.STAALEDAQLK#.V                        | 13.48  | 4.75  | 2.84 | 0.35 |
| Q9ES28_ARHG7_MOUSE  | Arhgef7  | Rho guanine nucleotide r.K.SYNNVVLQNILETEHEYSK#.E                | 20.49  | 6.65  | 3.08 | 0.32 |
| A2BH40_AR1A_MOUSE   | Arid1a   | AT-rich interactive doma K.AGPPVPASHIAPTVPQPM*IR@.R              | 9.18   | 2.94  | 3.12 | 0.32 |
| A2BH40_AR1A_MOUSE   | Arid1a   | AT-rich interactive doma K.DIGTPEAWR@.V                          | 10.41  | 4.27  | 2.44 | 0.41 |
| A2BH40_AR1A_MOUSE   | Arid1a   | AT-rich interactive doma R.EM*AVLLANLAGDLSAAR@.A                 | 16.67  | 6.60  | 2.54 | 0.39 |
| A2BH40_AR1A_MOUSE   | Arid1a   | AT-rich interactive doma K.HPGLLLLGK#.L                          | 12.17  | 4.04  | 3.01 | 0.33 |
| A2BH40_AR1A_MOUSE   | Arid1a   | AT-rich interactive doma R.IGGDDTEHQTHFESK#.I                    | 12.08  | 3.93  | 3.08 | 0.33 |
| A2BH40_AR1A_MOUSE   | Arid1a   | AT-rich interactive doma R.ITATM*DDM*LSTR@.S                     | 12.03  | 4.23  | 2.42 | 0.41 |
| A2BH40_AR1A_MOUSE   | Arid1a   | AT-rich interactive doma K.LSIQDNNVDLILATPPFSR@.L                | 19.35  | 8.14  | 2.38 | 0.42 |
| A2BH40_AR1A_MOUSE   | Arid1a   | AT-rich interactive doma R.LVLETSK#.L                            | 33.07  | 15.09 | 2.19 | 0.46 |
| A2BH40_AR1A_MOUSE   | Arid1a   | AT-rich interactive doma K.AGPPVPASHIAPTVPQPM*IR@.R              | 12.81  | 6.34  | 2.02 | 0.49 |
| A2BH40_AR1A_MOUSE   | Arid1a   | AT-rich interactive doma K.AM*GM*TNLPAVGR@.K                     | 11.27  | 2.14  | 5.25 | 0.19 |
| A2BH40_AR1A_MOUSE   | Arid1a   | AT-rich interactive doma K.EIGGLTQVKNK#.N                        | 13.96  | 4.25  | 3.28 | 0.30 |
| A2BH40_AR1A_MOUSE   | Arid1a   | AT-rich interactive doma R.ELATNLVGTSSSAASLK#.K                  | 7.62   | 1.58  | 4.83 | 0.21 |
| A2BH40_AR1A_MOUSE   | Arid1a   | AT-rich interactive doma R.EM*AVLLANLAGDLSAAR@.A                 | 13.98  | 3.67  | 3.81 | 0.26 |
| A2BH40_AR1A_MOUSE   | Arid1a   | AT-rich interactive doma R.ITATM*DDM*LSTR@.S                     | 9.73   | 2.79  | 3.49 | 0.29 |
| A2BH40_AR1A_MOUSE   | Arid1a   | AT-rich interactive doma K.LSIQDNNVDLILATPPFSR@.L                | 34.31  | 10.31 | 3.33 | 0.30 |
| A2BH40_AR1A_MOUSE   | Arid1a   | AT-rich interactive doma R.LVLETSK#.L                            | 31.32  | 5.91  | 5.30 | 0.19 |
| A2BH40_AR1A_MOUSE   | Arid1a   | AT-rich interactive doma R.SNSVGIQDAFPDGSQDPTFK#.R               | 5.24   | 1.65  | 3.17 | 0.32 |
| A2BH40_AR1A_MOUSE   | Arid1a   | AT-rich interactive doma K.VDENHSEFTLYESR@.L                     | 21.68  | 4.87  | 4.45 | 0.22 |
| E9Q6R4_E9Q6R4_MOUSE | Arid1b   | Protein Arid1b OS=Mus n.R.GSPVSSLPVAVGK#.K                       | 9.22   | 2.04  | 4.53 | 0.22 |
| E9Q6R4_E9Q6R4_MOUSE | Arid1b   | Protein Arid1b OS=Mus n.R.NDM*PYPYQSR@.Q                         | 5.02   | 1.18  | 4.27 | 0.23 |
| E9Q6R4_E9Q6R4_MOUSE | Arid1b   | Protein Arid1b OS=Mus n.K.SIIATIDVLSAR@P.GALPEDTNP GPQTDSGK#.F   | 3.36   | 1.19  | 2.83 | 0.35 |
| E9Q6R4_E9Q6R4_MOUSE | Arid1b   | Protein Arid1b OS=Mus n.R.SLSFVPGNDAM*SK#.H                      | 7.73   | 2.17  | 3.56 | 0.28 |
| E9Q6R4_E9Q6R4_MOUSE | Arid1b   | Protein Arid1b OS=Mus n.K.SSPALAAEDASVDPK#.E                     | 15.66  | 3.77  | 4.15 | 0.24 |
| E9Q6R4_E9Q6R4_MOUSE | Arid1b   | Protein Arid1b OS=Mus n.R.TDDM*MYPEQR@.I                         | 9.35   | 4.18  | 2.24 | 0.45 |
| E9Q7E2_E9Q7E2_MOUSE | Arid2    | Protein Arid2 OS=Mus m.R.DFTEKHEGPIPK#.H                         | 3.73   | 2.98  | 1.25 | 0.80 |
| E9Q7E2_E9Q7E2_MOUSE | Arid2    | Protein Arid2 OS=Mus m.R.ALPLPIQM*YQQQPISTPVVR@.V                | 10.39  | 2.61  | 3.98 | 0.25 |
| E9Q7E2_E9Q7E2_MOUSE | Arid2    | Protein Arid2 OS=Mus m.K.DALLAGLRQDPEPGVANQK#.S                  | 6.80   | 2.27  | 3.00 | 0.33 |
| E9Q7E2_E9Q7E2_MOUSE | Arid2    | Protein Arid2 OS=Mus m.R.DFTEKHEGPIPK#.H                         | 5.50   | 1.90  | 2.90 | 0.35 |
| E9Q7E2_E9Q7E2_MOUSE | Arid2    | Protein Arid2 OS=Mus m.K.DIVDNEVNR@.D                            | 14.57  | 4.41  | 3.31 | 0.30 |
| E9Q7E2_E9Q7E2_MOUSE | Arid2    | Protein Arid2 OS=Mus m.K.GLAFDELRL@.Q                            | 25.00  | 6.55  | 3.81 | 0.26 |

|                     |        |                                                          |        |        |      |      |
|---------------------|--------|----------------------------------------------------------|--------|--------|------|------|
| E9Q7E2_E9Q7E2_MOUSE | Arid2  | Protein Arid2 OS=Mus m R.NLSFEESNVK#L                    | 12.78  | 4.81   | 2.66 | 0.38 |
| E9Q7E2_E9Q7E2_MOUSE | Arid2  | Protein Arid2 OS=Mus m K.QPTVGGTGSAPR@A                  | 9.08   | 3.15   | 2.88 | 0.35 |
| E9Q7E2_E9Q7E2_MOUSE | Arid2  | Protein Arid2 OS=Mus m R.VTTLGG6AK#V                     | 16.25  | 6.05   | 2.69 | 0.37 |
| E9Q7E2_E9Q7E2_MOUSE | Arid2  | Protein Arid2 OS=Mus m R.ALPLPIQM*YQQQPISTPVVR@V         | 18.04  | 3.24   | 5.56 | 0.18 |
| E9Q7E2_E9Q7E2_MOUSE | Arid2  | Protein Arid2 OS=Mus m K.GLAFDEL@Q                       | 27.23  | 6.76   | 4.03 | 0.25 |
| E9Q7E2_E9Q7E2_MOUSE | Arid2  | Protein Arid2 OS=Mus m R.NLSFEESNVK#L                    | 21.05  | 3.07   | 6.85 | 0.15 |
| E9Q7E2_E9Q7E2_MOUSE | Arid2  | Protein Arid2 OS=Mus m K.NQWGEVEEFNFR@S                  | 6.43   | 1.84   | 3.51 | 0.29 |
| Q8BM75_AR15B_MOUSE  | Arid5b | AT-rich interactive doma K.VAAAEASTDDQPTDLSLSPK#N        | 3.94   | 3.15   | 1.25 | 0.80 |
| Q9Z1K5_AR1_MOUSE    | Arih1  | E3 ubiquitin-protein liga R.DISQDSLQDIK#Q                | 11.47  | 3.99   | 2.87 | 0.35 |
| Q9Z1K5_AR1_MOUSE    | Arih1  | E3 ubiquitin-protein liga R.EVNEVIQNPATITR@I             | 9.18   | 24.20  | 0.38 | 2.64 |
| Q9Z1K5_AR1_MOUSE    | Arih1  | E3 ubiquitin-protein liga R.EVNEVIQNPATITR@I             | 4.01   | 1.23   | 3.25 | 0.31 |
| Q9Z1K5_AR1_MOUSE    | Arih1  | E3 ubiquitin-protein liga R.DISQDSLQDIK#Q                | 9.11   | 3.59   | 2.54 | 0.39 |
| Q9Z1K5_AR1_MOUSE    | Arih1  | E3 ubiquitin-protein liga R.DISQDSLQDIK#Q                | 8.14   | 3.64   | 2.23 | 0.45 |
| Q9Z1K5_AR1_MOUSE    | Arih1  | E3 ubiquitin-protein liga K.NNQSIFENNQADLENATEVLSGYLER@D | 5.78   | 2.03   | 2.84 | 0.35 |
| P61211_ARL1_MOUSE   | Ar11   | ADP-ribosylation factor-I K.AILVVFANK#Q                  | 18.54  | 6.35   | 2.92 | 0.34 |
| P61211_ARL1_MOUSE   | Ar11   | ADP-ribosylation factor-I K.GTGLDEAM*EWLVETLK#S          | 8.04   | 1.56   | 5.14 | 0.19 |
| P61211_ARL1_MOUSE   | Ar11   | ADP-ribosylation factor-I R.IILGLDGGAGK#T                | 23.28  | 6.37   | 3.66 | 0.27 |
| P61211_ARL1_MOUSE   | Ar11   | ADP-ribosylation factor-I R.IILGLDGGAGK#T                | 13.26  | 2.81   | 4.73 | 0.21 |
| Q9DJ04_ARL2_MOUSE   | Ar12   | ADP-ribosylation factor-I R.LAGATLLIFANK#Q               | 5.03   | 1.17   | 4.29 | 0.23 |
| Q9JKW0_AR6P1_MOUSE  | Ar16p1 | ADP-ribosylation factor-I R.AVGWVWK#R                    | 22.03  | 5.52   | 3.99 | 0.25 |
| Q9JKW0_AR6P1_MOUSE  | Ar16p1 | ADP-ribosylation factor-I K.WTTEWQR@F                    | 21.10  | 2.60   | 8.11 | 0.12 |
| Q9JM93_AR6P4_MOUSE  | Ar16p4 | ADP-ribosylation factor-I R.SAGEDNQPVTDEQK#S             | 8.03   | 4.16   | 1.93 | 0.52 |
| Q8R5J9_PRAF3_MOUSE  | Ar16p5 | PRA1 family protein 3 OS R.AWDDFFPQSDR@F                 | 152.23 | 54.77  | 2.78 | 0.36 |
| Q8R5J9_PRAF3_MOUSE  | Ar16p5 | PRA1 family protein 3 OS K.KHTPM*GILDALEQQEDNINK#F       | 39.16  | 15.88  | 2.47 | 0.41 |
| Q8R5J9_PRAF3_MOUSE  | Ar16p5 | PRA1 family protein 3 OS K.M*EGIGLKK#K                   | 87.60  | 42.50  | 2.06 | 0.49 |
| Q8R5J9_PRAF3_MOUSE  | Ar16p5 | PRA1 family protein 3 OS K.TPM*GILDALEQQEDNINK#F         | 44.93  | 21.67  | 2.07 | 0.48 |
| Q8R5J9_PRAF3_MOUSE  | Ar16p5 | PRA1 family protein 3 OS K.TPM*GILDALEQQEDNINK#F         | 6.51   | 3.26   | 2.00 | 0.50 |
| Q8VEH3_ARL8A_MOUSE  | Ar18a  | ADP-ribosylation factor-I R.GVSAIVM*VDAADQEK#I           | 2.53   | 2.06   | 1.23 | 0.81 |
| Q8VEH3_ARL8A_MOUSE  | Ar18a  | ADP-ribosylation factor-I K.WLDIQQGR@F                   | 16.25  | 4.39   | 3.70 | 0.27 |
| Q8VEH3_ARL8A_MOUSE  | Ar18a  | ADP-ribosylation factor-I K.M*NLAIQDR@E                  | 11.36  | 6.58   | 1.73 | 0.58 |
| Q8VEH3_ARL8A_MOUSE  | Ar18a  | ADP-ribosylation factor-I K.NELHLLDK#QLQGIPVVLGNK#@D     | 23.78  | 6.41   | 3.71 | 0.27 |
| Q9WV32_ARC1B_MOUSE  | Arpc1b | Actin-related protein 2/3 K.NSVSQJSLVSGGK#A              | 16.15  | 28.57  | 0.57 | 1.77 |
| Q9WV32_ARC1B_MOUSE  | Arpc1b | Actin-related protein 2/3 R.TWKPVLVLR#I                  | 20.89  | 21.15  | 0.99 | 1.01 |
| Q9WV32_ARC1B_MOUSE  | Arpc1b | Actin-related protein 2/3 K.NSVSQJSLVSGGK#A              | 8.21   | 7.25   | 1.13 | 0.88 |
| Q9WV32_ARC1B_MOUSE  | Arpc1b | Actin-related protein 2/3 R.TWKPVLVLR@I                  | 9.56   | 4.64   | 2.06 | 0.49 |
| Q9WV32_ARC1B_MOUSE  | Arpc1b | Actin-related protein 2/3 K.NSVSQJSLVSGGK#A              | 11.03  | 9.65   | 1.14 | 0.88 |
| Q9CVB6_ARPC2_MOUSE  | Arpc2  | Actin-related protein 2/3 R.ASHAPQVLFSHR#E               | 7.55   | 15.87  | 0.48 | 2.10 |
| Q9CVB6_ARPC2_MOUSE  | Arpc2  | Actin-related protein 2/3 K.DSIVHQAGM*TK#R               | 8.15   | 8.40   | 0.97 | 1.03 |
| Q9CVB6_ARPC2_MOUSE  | Arpc2  | Actin-related protein 2/3 K.L.IIETLALK#F                 | 64.10  | 85.62  | 0.75 | 1.34 |
| Q9CVB6_ARPC2_MOUSE  | Arpc2  | Actin-related protein 2/3 -M*ILLEVNNR#I                  | 39.26  | 29.52  | 1.33 | 0.75 |
| Q9CVB6_ARPC2_MOUSE  | Arpc2  | Actin-related protein 2/3 -MILLEVNNR#I                   | 11.26  | 13.65  | 0.82 | 1.21 |
| Q9CVB6_ARPC2_MOUSE  | Arpc2  | Actin-related protein 2/3 K.VFM*QEFK#E                   | 23.05  | 24.99  | 0.92 | 1.08 |
| Q9CVB6_ARPC2_MOUSE  | Arpc2  | Actin-related protein 2/3 K.VFMQEFK#E                    | 11.34  | 13.77  | 0.82 | 1.21 |
| Q9CVB6_ARPC2_MOUSE  | Arpc2  | Actin-related protein 2/3 K.YFOQEEGK#E                   | 8.96   | 11.60  | 0.77 | 1.29 |
| Q9CVB6_ARPC2_MOUSE  | Arpc2  | Actin-related protein 2/3 R.IIETLALK#F                   | 12.84  | 7.90   | 1.63 | 0.62 |
| Q9JM76_ARPC3_MOUSE  | Arpc3  | Actin-related protein 2/3 K.DTDIVDEAIYFK#A               | 5.34   | 4.48   | 1.19 | 0.84 |
| Q9JM76_ARPC3_MOUSE  | Arpc3  | Actin-related protein 2/3 K.ANVFFK#N                     | 17.08  | 11.68  | 1.46 | 0.68 |
| Q9JM76_ARPC3_MOUSE  | Arpc3  | Actin-related protein 2/3 K.DTDIVDEAIYFK#A               | 6.45   | 7.10   | 0.91 | 1.10 |
| Q9JM76_ARPC3_MOUSE  | Arpc3  | Actin-related protein 2/3 R.ETK#DTDIVDEAIYFK#A           | 24.40  | 19.07  | 1.28 | 0.78 |
| Q9JM76_ARPC3_MOUSE  | Arpc3  | Actin-related protein 2/3 R.ETK#DTDIVDEAIYFK#A           | 3.98   | 4.29   | 0.93 | 1.08 |
| Q9JM76_ARPC3_MOUSE  | Arpc3  | Actin-related protein 2/3 K.LIGNM*ALLPLR#S               | 42.67  | 41.37  | 1.03 | 0.97 |
| Q9JM76_ARPC3_MOUSE  | Arpc3  | Actin-related protein 2/3 K.DTDIVDEAIYFK#A               | 5.34   | 6.18   | 0.86 | 1.16 |
| Q9JM76_ARPC3_MOUSE  | Arpc3  | Actin-related protein 2/3 R.ETK#DTDIVDEAIYFK#A           | 9.26   | 9.73   | 0.95 | 1.05 |
| Q9JM76_ARPC3_MOUSE  | Arpc3  | Actin-related protein 2/3 K.LIGNM*ALLPLR#S               | 31.47  | 20.79  | 1.51 | 0.66 |
| P59999_ARPC4_MOUSE  | Arpc4  | Actin-related protein 2/3 R.AENFILLR#R                   | 89.10  | 61.31  | 1.45 | 0.69 |
| P59999_ARPC4_MOUSE  | Arpc4  | Actin-related protein 2/3 K.ELLLOPVTISR@N                | 153.26 | 119.44 | 1.28 | 0.78 |
| P59999_ARPC4_MOUSE  | Arpc4  | Actin-related protein 2/3 R.IVAEFLK#N                    | 152.87 | 62.84  | 2.43 | 0.41 |
| P59999_ARPC4_MOUSE  | Arpc4  | Actin-related protein 2/3 K.VLIEGSSNSVR@V                | 132.21 | 104.13 | 1.27 | 0.79 |
| P59999_ARPC4_MOUSE  | Arpc4  | Actin-related protein 2/3 K.ELLLOPVTISR@N                | 11.69  | 10.16  | 1.15 | 0.87 |
| P59999_ARPC4_MOUSE  | Arpc4  | Actin-related protein 2/3 K.ELLLOPVTISR@N                | 11.28  | 8.74   | 1.29 | 0.77 |
| Q9CPW4_ARPC5_MOUSE  | Arpc5  | Actin-related protein 2/3 K.ALAAGVGSIVR#V                | 36.56  | 38.88  | 0.94 | 1.06 |
| Q9D898_ARP5L_MOUSE  | Arpc5l | Actin-related protein 2/3 K.ALAAGVGLSIIR@V               | 50.24  | 36.21  | 1.39 | 0.72 |
| Q9D898_ARP5L_MOUSE  | Arpc5l | Actin-related protein 2/3 K.GFEK#PTENSAVLLQHWK#A         | 2.38   | 3.28   | 0.72 | 1.38 |
| Q9D898_ARP5L_MOUSE  | Arpc5l | Actin-related protein 2/3 K.SSEIEQAQVSLDR@N              | 20.74  | 19.05  | 1.09 | 0.92 |
| Q9DOA0_ARPIN_MOUSE  | Arpin  | Arpin OS=Mus musculus K.GNEIENFNSATR@N                   | 11.85  | 4.19   | 2.83 | 0.35 |
| P17981_NAR2A_MOUSE  | Art2a  | T-cell ecto-ADP-ribosyltr. -MPSNFK#F                     | 16.98  | 2.67   | 6.36 | 0.16 |
| Q9WV54_ASAH1_MOUSE  | Asah1  | Acid ceramidase OS=Mus K.LPGM*IGSLPDPFGEEM*R@G           | 4.95   | 24.74  | 0.20 | 5.00 |
| Q9WV54_ASAH1_MOUSE  | Asah1  | Acid ceramidase OS=Mus R.WYVVQTYNDR@W                    | 4.48   | 2.40   | 1.87 | 0.54 |
| Q9QWY8_ASAP1_MOUSE  | Asap1  | Arf-GAP with SH3 domain K.AIYNSGQDHVQNEENYAQVLDK#F       | 8.09   | 3.47   | 2.33 | 0.43 |
| Q9QWY8_ASAP1_MOUSE  | Asap1  | Arf-GAP with SH3 domain R.GEOSTGENSLEDLTK#A              | 9.04   | 4.33   | 1.82 | 0.55 |
| Q9QWY8_ASAP1_MOUSE  | Asap1  | Arf-GAP with SH3 domain R.IQSLLEDLTK#GSLLELAK#N          | 14.59  | 6.33   | 2.30 | 0.43 |
| Q9QWY8_ASAP1_MOUSE  | Asap1  | Arf-GAP with SH3 domain R.NTVTLLEALDQDR@T                | 9.45   | 5.13   | 1.84 | 0.54 |
| Q9D8Z1_ASCC1_MOUSE  | Ascc1  | Activating signal cointeg K.TFENFYGSLR@L                 | 8.53   | 6.20   | 1.38 | 0.73 |
| Q9D8Z1_ASCC1_MOUSE  | Ascc1  | Activating signal cointeg K.TFENFYGSLR@L                 | 7.04   | 2.07   | 3.40 | 0.29 |
| Q9D8Z1_ASCC1_MOUSE  | Ascc1  | Activating signal cointeg K.TFENFYGSLR@L                 | 10.68  | 4.60   | 2.32 | 0.43 |
| Q91WR3_ASCC2_MOUSE  | Ascc2  | Activating signal cointeg R.LASFYEM*AIPELSAIK#K          | 4.76   | 2.69   | 1.77 | 0.57 |
| E9PZJ8_ASCC3_MOUSE  | Ascc3  | Activating signal cointeg K.FLNEQFQEPYTPELK#PVEK#T       | 7.40   | 9.18   | 0.81 | 1.24 |
| E9PZJ8_ASCC3_MOUSE  | Ascc3  | Activating signal cointeg K.AGEDGEVSGEGLVPDPK#E          | 6.62   | 3.89   | 1.70 | 0.59 |
| E9PZJ8_ASCC3_MOUSE  | Ascc3  | Activating signal cointeg K.ALAAEM*TNYSK#R               | 8.22   | 3.59   | 2.29 | 0.44 |
| E9PZJ8_ASCC3_MOUSE  | Ascc3  | Activating signal cointeg R.ALFEIALR@K                   | 8.85   | 3.91   | 2.26 | 0.44 |
| E9PZJ8_ASCC3_MOUSE  | Ascc3  | Activating signal cointeg K.FLNEQFQEPYTPELK#PVEK#T       | 14.37  | 6.63   | 2.17 | 0.46 |
| E9PZJ8_ASCC3_MOUSE  | Ascc3  | Activating signal cointeg R.IVGLSTALANAR@D               | 27.98  | 13.06  | 2.14 | 0.47 |
| E9PZJ8_ASCC3_MOUSE  | Ascc3  | Activating signal cointeg K.M*QNINDELK#DILQAAK#Q         | 9.89   | 4.09   | 2.42 | 0.41 |
| E9PZJ8_ASCC3_MOUSE  | Ascc3  | Activating signal cointeg K.QDNYNEEADLK#L                | 4.48   | 1.34   | 3.36 | 0.30 |
| E9PZJ8_ASCC3_MOUSE  | Ascc3  | Activating signal cointeg K.R@LEPLGIVVK#E                | 12.81  | 6.98   | 1.84 | 0.54 |
| E9PZJ8_ASCC3_MOUSE  | Ascc3  | Activating signal cointeg K.TEGDIFAVSK#A                 | 9.15   | 10.79  | 0.85 | 1.18 |
| E9PZJ8_ASCC3_MOUSE  | Ascc3  | Activating signal cointeg R.TGYFSSDLDGR@T                | 11.79  | 5.55   | 2.12 | 0.47 |
| E9PZJ8_ASCC3_MOUSE  | Ascc3  | Activating signal cointeg R.YYDFPITDVLQK*MM*GR@A         | 9.34   | 4.97   | 1.88 | 0.53 |
| Q9CQ66_ASF1A_MOUSE  | Asf1a  | Histone chaperone ASF1 R.VGYVNNNEYTETELR@E               | 11.23  | 3.76   | 2.99 | 0.33 |
| Q91X20_ASH2L_MOUSE  | Ash2l  | Set1/Ash2 histone methy R.DIFEGVYFPAISLYK#S              | 22.82  | 8.38   | 2.72 | 0.37 |
| Q91X20_ASH2L_MOUSE  | Ash2l  | Set1/Ash2 histone methy K.FGLLDQDLSNIGPAYDNQK#Q          | 6.23   | 2.46   | 2.53 | 0.39 |
| Q91X20_ASH2L_MOUSE  | Ash2l  | Set1/Ash2 histone methy K.HYSSGQGDVLFYINLPEDTETAK#S      | 10.25  | 3.94   | 2.60 | 0.38 |
| O54984_ASNA_MOUSE   | Asna1  | ATPase Asna1 OS=Mus m K.LEETLPVIR@S                      | 22.81  | 13.32  | 1.71 | 0.58 |
| O54984_ASNA_MOUSE   | Asna1  | ATPase Asna1 OS=Mus m R.LLNFPVIR@G                       | 61.58  | 23.87  | 2.58 | 0.39 |
| O54984_ASNA_MOUSE   | Asna1  | ATPase Asna1 OS=Mus m K.YLDQM*EDLYDFHIVK#L               | 14.89  | 5.06   | 2.94 | 0.34 |
| Q61024_ASNS_MOUSE   | Asns   | Asparagine synthetase [gl K.ELYLFDVLR@A                  | 19.20  | 9.16   | 2.10 | 0.48 |
| Q61024_ASNS_MOUSE   | Asns   | Asparagine synthetase [gl K.HSTTPFLK#V                   | 8.18   | 5.65   | 1.45 | 0.69 |
| Q61024_ASNS_MOUSE   | Asns   | Asparagine synthetase [gl K.ILDQVYVHGVQDDEM*M*SAASQK#F   | 7.27   | 4.43   | 1.64 | 0.61 |
| Q61024_ASNS_MOUSE   | Asns   | Asparagine synthetase [gl R.LAVVDPLFGM*QPIR@V            | 5.39   | 3.72   | 1.45 | 0.69 |
| Q61024_ASNS_MOUSE   | Asns   | Asparagine synthetase [gl K.ELYLFDVLR@A                  | 17.02  | 9.94   | 1.71 | 0.58 |
| Q61024_ASNS_MOUSE   | Asns   | Asparagine synthetase [gl K.ILDQVYVHGVQDDEM*M*SAASQK#F   | 6.45   | 3.37   | 1.91 | 0.52 |
| Q61024_ASNS_MOUSE   | Asns   | Asparagine synthetase [gl R.LAVVDPLFGM*QPIR@V            | 5.29   | 2.47   | 2.15 | 0.47 |
| Q61024_ASNS_MOUSE   | Asns   | Asparagine synthetase [gl K.ELYLFDVLR@A                  | 26.96  | 7.00   | 3.85 | 0.26 |

|                     |        |                           |        |       |      |      |
|---------------------|--------|---------------------------|--------|-------|------|------|
| Q61024_ASNS_MOUSE   | Asns   | Asparagine synthetase [gl | 7.70   | 1.92  | 3.49 | 0.29 |
| Q61024_ASNS_MOUSE   | Asns   | Asparagine synthetase [gl | 18.00  | 6.50  | 2.77 | 0.36 |
| Q8BSY0_ASPH_MOUSE   | Asph   | Aspartyl/asparaginyl bet  | 5.59   | 2.62  | 2.13 | 0.47 |
| Q8CJ27_ASPM_MOUSE   | Aspm   | Abnormal spindle-like mi  | 13.63  | 5.67  | 2.41 | 0.42 |
| Q8CJ27_ASPM_MOUSE   | Aspm   | Abnormal spindle-like mi  | 3.18   | 2.46  | 1.29 | 0.77 |
| P16460_ASSY_MOUSE   | Ass1   | Argininosuccinate synth   | 4.70   | 4.81  | 0.98 | 1.02 |
| P16460_ASSY_MOUSE   | Ass1   | Argininosuccinate synth   | 4.45   | 2.57  | 1.73 | 0.58 |
| Q8QZV7_ASUN_MOUSE   | Asun   | Protein asunder homolo    | 21.40  | 9.22  | 2.32 | 0.43 |
| Q8QZV7_ASUN_MOUSE   | Asun   | Protein asunder homolo    | 15.20  | 9.69  | 1.57 | 0.64 |
| Q8QZV7_ASUN_MOUSE   | Asun   | Protein asunder homolo    | 24.79  | 8.45  | 2.93 | 0.34 |
| Q8QZV7_ASUN_MOUSE   | Asun   | Protein asunder homolo    | 14.05  | 4.72  | 2.97 | 0.34 |
| Q8QZV7_ASUN_MOUSE   | Asun   | Protein asunder homolo    | 31.11  | 11.08 | 2.81 | 0.36 |
| Q8QZV7_ASUN_MOUSE   | Asun   | Protein asunder homolo    | 8.99   | 1.15  | 7.79 | 0.13 |
| G3X963_G3X963_MOUSE | Atad2  | ATPase family AAA domai   | 8.80   | 5.73  | 1.53 | 0.65 |
| G3X963_G3X963_MOUSE | Atad2  | ATPase family AAA domai   | 11.39  | 10.79 | 1.06 | 0.95 |
| G3X963_G3X963_MOUSE | Atad2  | ATPase family AAA domai   | 13.24  | 16.38 | 0.81 | 1.24 |
| G3X963_G3X963_MOUSE | Atad2  | ATPase family AAA domai   | 8.96   | 10.48 | 0.85 | 1.17 |
| G3X963_G3X963_MOUSE | Atad2  | ATPase family AAA domai   | 6.91   | 5.90  | 1.17 | 0.85 |
| G3X963_G3X963_MOUSE | Atad2  | ATPase family AAA domai   | 4.52   | 4.93  | 0.92 | 1.09 |
| G3X963_G3X963_MOUSE | Atad2  | ATPase family AAA domai   | 23.15  | 20.65 | 1.12 | 0.89 |
| G3X963_G3X963_MOUSE | Atad2  | ATPase family AAA domai   | 18.55  | 13.63 | 1.36 | 0.73 |
| G3X963_G3X963_MOUSE | Atad2  | ATPase family AAA domai   | 36.34  | 21.34 | 1.70 | 0.59 |
| G3X963_G3X963_MOUSE | Atad2  | ATPase family AAA domai   | 6.28   | 5.98  | 1.05 | 0.95 |
| G3X963_G3X963_MOUSE | Atad2  | ATPase family AAA domai   | 35.35  | 20.73 | 1.71 | 0.59 |
| G3X963_G3X963_MOUSE | Atad2  | ATPase family AAA domai   | 6.69   | 2.13  | 3.15 | 0.32 |
| G3X963_G3X963_MOUSE | Atad2  | ATPase family AAA domai   | 58.20  | 34.71 | 1.68 | 0.60 |
| G3X963_G3X963_MOUSE | Atad2  | ATPase family AAA domai   | 14.17  | 6.17  | 2.30 | 0.44 |
| G3X963_G3X963_MOUSE | Atad2  | ATPase family AAA domai   | 44.27  | 25.64 | 1.73 | 0.58 |
| G3X963_G3X963_MOUSE | Atad2  | ATPase family AAA domai   | 35.92  | 20.88 | 1.72 | 0.58 |
| G3X963_G3X963_MOUSE | Atad2  | ATPase family AAA domai   | 10.48  | 4.94  | 2.85 | 0.35 |
| G3X963_G3X963_MOUSE | Atad2  | ATPase family AAA domai   | 18.58  | 10.60 | 1.75 | 0.57 |
| G3X963_G3X963_MOUSE | Atad2  | ATPase family AAA domai   | 22.02  | 11.52 | 1.91 | 0.52 |
| G3X963_G3X963_MOUSE | Atad2  | ATPase family AAA domai   | 6.77   | 6.83  | 0.99 | 1.01 |
| G3X963_G3X963_MOUSE | Atad2  | ATPase family AAA domai   | 61.63  | 30.72 | 2.01 | 0.50 |
| G3X963_G3X963_MOUSE | Atad2  | ATPase family AAA domai   | 9.69   | 6.25  | 1.55 | 0.64 |
| G3X963_G3X963_MOUSE | Atad2  | ATPase family AAA domai   | 18.41  | 13.12 | 1.40 | 0.71 |
| G3X963_G3X963_MOUSE | Atad2  | ATPase family AAA domai   | 22.20  | 15.56 | 1.43 | 0.70 |
| G3X963_G3X963_MOUSE | Atad2  | ATPase family AAA domai   | 81.80  | 44.79 | 1.83 | 0.55 |
| G3X963_G3X963_MOUSE | Atad2  | ATPase family AAA domai   | 63.66  | 33.05 | 1.93 | 0.52 |
| G3X963_G3X963_MOUSE | Atad2  | ATPase family AAA domai   | 3.81   | 1.97  | 1.93 | 0.52 |
| G3X963_G3X963_MOUSE | Atad2  | ATPase family AAA domai   | 28.06  | 17.44 | 1.61 | 0.62 |
| G3X963_G3X963_MOUSE | Atad2  | ATPase family AAA domai   | 8.23   | 4.41  | 1.86 | 0.54 |
| G3X963_G3X963_MOUSE | Atad2  | ATPase family AAA domai   | 15.40  | 9.57  | 1.61 | 0.62 |
| G3X963_G3X963_MOUSE | Atad2  | ATPase family AAA domai   | 7.72   | 7.20  | 1.07 | 0.93 |
| G3X963_G3X963_MOUSE | Atad2  | ATPase family AAA domai   | 15.49  | 10.93 | 1.42 | 0.71 |
| G3X963_G3X963_MOUSE | Atad2  | ATPase family AAA domai   | 4.97   | 3.31  | 1.50 | 0.67 |
| G3X963_G3X963_MOUSE | Atad2  | ATPase family AAA domai   | 126.82 | 16.91 | 7.50 | 0.13 |
| G3X963_G3X963_MOUSE | Atad2  | ATPase family AAA domai   | 22.79  | 15.40 | 1.48 | 0.68 |
| G3X963_G3X963_MOUSE | Atad2  | ATPase family AAA domai   | 29.06  | 13.13 | 1.98 | 0.50 |
| G3X963_G3X963_MOUSE | Atad2  | ATPase family AAA domai   | 56.87  | 49.46 | 1.21 | 0.83 |
| E9Q166_E9Q166_MOUSE | Atad2b | Protein Atad2b OS=Mus     | 8.81   | 30.24 | 0.29 | 3.43 |
| E9Q166_E9Q166_MOUSE | Atad2b | Protein Atad2b OS=Mus     | 5.49   | 6.26  | 0.88 | 1.14 |
| E9Q166_E9Q166_MOUSE | Atad2b | Protein Atad2b OS=Mus     | 12.54  | 9.59  | 1.31 | 0.76 |
| E9Q166_E9Q166_MOUSE | Atad2b | Protein Atad2b OS=Mus     | 3.58   | 2.04  | 1.75 | 0.57 |
| E9Q166_E9Q166_MOUSE | Atad2b | Protein Atad2b OS=Mus     | 7.44   | 5.10  | 1.46 | 0.69 |
| Q40Q64_ATAD5_MOUSE  | Atad5  | ATPase family AAA domai   | 10.93  | 4.78  | 2.29 | 0.44 |
| Q8R0S1_ATF7_MOUSE   | Atf7   | Cyclic AMP-dependent tr   | 6.32   | 3.98  | 1.59 | 0.63 |
| Q9D8Z6_ATGA1_MOUSE  | Atg101 | Autophagy-related prote   | 5.21   | 2.71  | 1.92 | 0.52 |
| Q9D8Z6_ATGA1_MOUSE  | Atg101 | Autophagy-related prote   | 2.07   | 2.42  | 0.86 | 1.17 |
| Q6P4T0_ATG2A_MOUSE  | Atg2a  | Autophagy-related prote   | 16.92  | 7.26  | 2.33 | 0.43 |
| Q6P4T0_ATG2A_MOUSE  | Atg2a  | Autophagy-related prote   | 15.51  | 5.64  | 2.93 | 0.34 |
| Q6P4T0_ATG2A_MOUSE  | Atg2a  | Autophagy-related prote   | 14.41  | 3.76  | 3.83 | 0.26 |
| Q6P4T0_ATG2A_MOUSE  | Atg2a  | Autophagy-related prote   | 9.78   | 1.90  | 5.14 | 0.19 |
| Q9CPX6_ATG3_MOUSE   | Atg3   | Ubiquitin-like-conjugati  | 7.32   | 2.72  | 2.69 | 0.37 |
| Q91YH5_ATLA3_MOUSE  | Atl3   | Atlastin-3 OS=Mus musc    | 9.78   | 1.33  | 7.68 | 0.14 |
| Q91YH5_ATLA3_MOUSE  | Atl3   | Atlastin-3 OS=Mus musc    | 15.57  | 4.87  | 3.20 | 0.31 |
| Q91YH5_ATLA3_MOUSE  | Atl3   | Atlastin-3 OS=Mus musc    | 8.52   | 2.75  | 3.10 | 0.32 |
| Q91YH5_ATLA3_MOUSE  | Atl3   | Atlastin-3 OS=Mus musc    | 17.54  | 2.92  | 6.00 | 0.17 |
| Q91YH5_ATLA3_MOUSE  | Atl3   | Atlastin-3 OS=Mus musc    | 9.83   | 2.85  | 3.44 | 0.29 |
| Q91YH5_ATLA3_MOUSE  | Atl3   | Atlastin-3 OS=Mus musc    | 8.61   | 2.54  | 3.39 | 0.29 |
| Q91YH5_ATLA3_MOUSE  | Atl3   | Atlastin-3 OS=Mus musc    | 20.16  | 7.58  | 2.66 | 0.38 |
| Q91YH5_ATLA3_MOUSE  | Atl3   | Atlastin-3 OS=Mus musc    | 20.19  | 9.51  | 2.12 | 0.47 |
| Q91YH5_ATLA3_MOUSE  | Atl3   | Atlastin-3 OS=Mus musc    | 9.79   | 2.60  | 3.76 | 0.27 |
| Q91YH5_ATLA3_MOUSE  | Atl3   | Atlastin-3 OS=Mus musc    | 11.82  | 4.20  | 2.81 | 0.36 |
| Q91YH5_ATLA3_MOUSE  | Atl3   | Atlastin-3 OS=Mus musc    | 9.47   | 0.98  | 9.61 | 0.10 |
| Q91YH5_ATLA3_MOUSE  | Atl3   | Atlastin-3 OS=Mus musc    | 42.24  | 10.51 | 4.02 | 0.25 |
| Q91YH5_ATLA3_MOUSE  | Atl3   | Atlastin-3 OS=Mus musc    | 10.63  | 4.33  | 2.46 | 0.41 |
| Q91YH5_ATLA3_MOUSE  | Atl3   | Atlastin-3 OS=Mus musc    | 28.21  | 8.30  | 3.40 | 0.29 |
| Q91YH5_ATLA3_MOUSE  | Atl3   | Atlastin-3 OS=Mus musc    | 31.13  | 6.95  | 4.48 | 0.22 |
| Q91YH5_ATLA3_MOUSE  | Atl3   | Atlastin-3 OS=Mus musc    | 14.06  | 3.85  | 3.65 | 0.27 |
| O35126_ATN1_MOUSE   | Atn1   | Atrophin-1 OS=Mus mus     | 10.81  | 2.67  | 4.05 | 0.25 |
| Q8VDN2_AT1A1_MOUSE  | Atp1a1 | Sodium/potassium-trans    | 13.42  | 1.42  | 9.46 | 0.11 |
| Q8VDN2_AT1A1_MOUSE  | Atp1a1 | Sodium/potassium-trans    | 93.75  | 21.93 | 4.28 | 0.23 |
| Q8VDN2_AT1A1_MOUSE  | Atp1a1 | Sodium/potassium-trans    | 14.84  | 1.89  | 7.85 | 0.13 |
| Q8VDN2_AT1A1_MOUSE  | Atp1a1 | Sodium/potassium-trans    | 16.61  | 3.21  | 5.18 | 0.19 |
| Q8VDN2_AT1A1_MOUSE  | Atp1a1 | Sodium/potassium-trans    | 18.61  | 5.02  | 3.71 | 0.27 |
| Q8VDN2_AT1A1_MOUSE  | Atp1a1 | Sodium/potassium-trans    | 16.27  | 4.03  | 4.04 | 0.25 |
| Q8VDN2_AT1A1_MOUSE  | Atp1a1 | Sodium/potassium-trans    | 9.61   | 2.70  | 3.56 | 0.28 |
| Q8VDN2_AT1A1_MOUSE  | Atp1a1 | Sodium/potassium-trans    | 11.11  | 3.52  | 3.15 | 0.32 |
| Q8VDN2_AT1A1_MOUSE  | Atp1a1 | Sodium/potassium-trans    | 9.38   | 2.32  | 4.04 | 0.25 |
| Q8VDN2_AT1A1_MOUSE  | Atp1a1 | Sodium/potassium-trans    | 17.76  | 2.60  | 6.84 | 0.15 |
| Q8VDN2_AT1A1_MOUSE  | Atp1a1 | Sodium/potassium-trans    | 13.52  | 13.22 | 5.56 | 0.18 |
| Q8VDN2_AT1A1_MOUSE  | Atp1a1 | Sodium/potassium-trans    | 15.98  | 3.14  | 5.09 | 0.20 |
| Q8VDN2_AT1A1_MOUSE  | Atp1a1 | Sodium/potassium-trans    | 29.03  | 7.77  | 3.74 | 0.27 |
| Q8VDN2_AT1A1_MOUSE  | Atp1a1 | Sodium/potassium-trans    | 42.19  | 12.83 | 3.29 | 0.30 |
| Q8VDN2_AT1A1_MOUSE  | Atp1a1 | Sodium/potassium-trans    | 12.26  | 4.10  | 2.99 | 0.33 |
| Q8VDN2_AT1A1_MOUSE  | Atp1a1 | Sodium/potassium-trans    | 16.57  | 4.35  | 3.81 | 0.26 |
| Q8VDN2_AT1A1_MOUSE  | Atp1a1 | Sodium/potassium-trans    | 9.53   | 2.99  | 3.18 | 0.31 |
| Q8VDN2_AT1A1_MOUSE  | Atp1a1 | Sodium/potassium-trans    | 11.92  | 3.46  | 3.44 | 0.29 |
| Q8VDN2_AT1A1_MOUSE  | Atp1a1 | Sodium/potassium-trans    | 25.52  | 15.02 | 1.70 | 0.59 |
| Q8VDN2_AT1A1_MOUSE  | Atp1a1 | Sodium/potassium-trans    | 15.98  | 5.44  | 2.94 | 0.34 |
| P14094_AT1B1_MOUSE  | Atp1b1 | Sodium/potassium-trans    | 31.33  | 8.35  | 3.75 | 0.27 |
| O55143_AT2A2_MOUSE  | Atp2a2 | Sarcoplasmic/endoplasm    | 7.51   | 2.45  | 3.07 | 0.33 |

|                    |          |                                                                |        |       |         |      |
|--------------------|----------|----------------------------------------------------------------|--------|-------|---------|------|
| O55143_AT2A2_MOUSE | Atp2a2   | Sarcoplasmic/endoplasmic R.IGIFGQDEVDTSK#.A                    | 12.34  | 28.25 | 0.44    | 2.29 |
| O55143_AT2A2_MOUSE | Atp2a2   | Sarcoplasmic/endoplasmic K.IR@DEM*WATEQR@.T                    | 2.28   | 0.00  | #DIV/0! | 0.00 |
| O55143_AT2A2_MOUSE | Atp2a2   | Sarcoplasmic/endoplasmic K.ISLPIVILM*DETLK#.F                  | 7.70   | 4.09  | 1.88    | 0.53 |
| O55143_AT2A2_MOUSE | Atp2a2   | Sarcoplasmic/endoplasmic K.LDFEFGELSK#.V                       | 8.71   | 3.71  | 2.35    | 0.43 |
| O55143_AT2A2_MOUSE | Atp2a2   | Sarcoplasmic/endoplasmic K.M*NVDFTELLK#.G                      | 10.90  | 5.85  | 1.86    | 0.54 |
| O55143_AT2A2_MOUSE | Atp2a2   | Sarcoplasmic/endoplasmic K.NM*LFSGTNIAGGK#.A                   | 8.92   | 3.82  | 2.33    | 0.43 |
| O55143_AT2A2_MOUSE | Atp2a2   | Sarcoplasmic/endoplasmic K.SEIGIAM*GSGTAVAK#.T                 | 6.70   | 5.38  | 1.24    | 0.80 |
| O55143_AT2A2_MOUSE | Atp2a2   | Sarcoplasmic/endoplasmic K.TASEM*VLADNFSTIVAAVEEGR@.A          | 17.40  | 9.32  | 1.87    | 0.54 |
| O55143_AT2A2_MOUSE | Atp2a2   | Sarcoplasmic/endoplasmic K.TVEEVLGHFVNESTGLSEKQV#.K            | 6.52   | 2.46  | 2.64    | 0.38 |
| O55143_AT2A2_MOUSE | Atp2a2   | Sarcoplasmic/endoplasmic R.VDQSLTGESVSVIK#.H                   | 21.08  | 11.89 | 1.77    | 0.56 |
| Q03265_ATPA_MOUSE  | Atp5a1   | ATP synthase subunit alp K.APGIIPR.I                           | 58.66  | 50.96 | 1.15    | 0.87 |
| Q03265_ATPA_MOUSE  | Atp5a1   | ATP synthase subunit alp K.AVDSLVPIGR@.G                       | 59.88  | 35.29 | 1.70    | 0.59 |
| Q03265_ATPA_MOUSE  | Atp5a1   | ATP synthase subunit alp K.EIVTNFLAGFEP.-                      | 34.18  | 34.18 | 1.00    | 1.00 |
| Q03265_ATPA_MOUSE  | Atp5a1   | ATP synthase subunit alp R.ELIIGDR.Q                           | 47.80  | 29.31 | 1.63    | 0.61 |
| Q03265_ATPA_MOUSE  | Atp5a1   | ATP synthase subunit alp R.EVAFAQFGSDLDAAOQLLSR@.G             | 85.59  | 46.23 | 1.85    | 0.54 |
| Q03265_ATPA_MOUSE  | Atp5a1   | ATP synthase subunit alp K.FENAFSLHVSQHSLLGNIR@.S              | 35.83  | 21.55 | 1.66    | 0.60 |
| Q03265_ATPA_MOUSE  | Atp5a1   | ATP synthase subunit alp K.GM*SLNLEPDNNGVVVFGNDK.L             | 10.82  | 6.94  | 1.56    | 0.64 |
| Q03265_ATPA_MOUSE  | Atp5a1   | ATP synthase subunit alp K.GMSLNLEPDNNGVVVFGNDK#.L             | 5.51   | 2.15  | 2.56    | 0.39 |
| Q03265_ATPA_MOUSE  | Atp5a1   | ATP synthase subunit alp K.HALIIYDLSK#.Q                       | 50.01  | 31.74 | 1.58    | 0.63 |
| Q03265_ATPA_MOUSE  | Atp5a1   | ATP synthase subunit alp R.ILGADTSVLEETGR@.V                   | 49.69  | 25.90 | 1.92    | 0.52 |
| Q03265_ATPA_MOUSE  | Atp5a1   | ATP synthase subunit alp K.LK#EIVTNFLAGFEP.-                   | 74.06  | 51.12 | 1.45    | 0.69 |
| Q03265_ATPA_MOUSE  | Atp5a1   | ATP synthase subunit alp R.NVQAEM*VEFSSGLK.G                   | 9.26   | 6.34  | 1.46    | 0.68 |
| Q03265_ATPA_MOUSE  | Atp5a1   | ATP synthase subunit alp K.QGQSPM*AIIEEQAVIVAGVR@.G            | 8.43   | 12.74 | 0.66    | 1.51 |
| Q03265_ATPA_MOUSE  | Atp5a1   | ATP synthase subunit alp K.R@LTDADAM*K#.Y                      | 6.70   | 6.11  | 1.10    | 0.91 |
| Q03265_ATPA_MOUSE  | Atp5a1   | ATP synthase subunit alp R.TGAIIVDPVPGELLGR@.V                 | 96.57  | 63.18 | 1.53    | 0.65 |
| Q03265_ATPA_MOUSE  | Atp5a1   | ATP synthase subunit alp K.TGTAEM*SSILEER.I                    | 42.40  | 26.85 | 1.58    | 0.63 |
| Q03265_ATPA_MOUSE  | Atp5a1   | ATP synthase subunit alp K.TSIAIDTINGK#.R                      | 61.66  | 41.46 | 1.49    | 0.67 |
| Q03265_ATPA_MOUSE  | Atp5a1   | ATP synthase subunit alp R.VLSIGDGIAR@.V                       | 116.59 | 58.64 | 1.99    | 0.50 |
| Q03265_ATPA_MOUSE  | Atp5a1   | ATP synthase subunit alp R.VVDALGNAIDGK#.G                     | 64.23  | 41.44 | 1.55    | 0.65 |
| Q03265_ATPA_MOUSE  | Atp5a1   | ATP synthase subunit alp R.ILGADTSVLEETGR.V                    | 1.59   | 3.85  | 0.41    | 2.42 |
| Q03265_ATPA_MOUSE  | Atp5a1   | ATP synthase subunit alp K.LK#EIVTNFLAGFEP.-                   | 17.22  | 2.37  | 7.27    | 0.14 |
| Q03265_ATPA_MOUSE  | Atp5a1   | ATP synthase subunit alp R.LTELK#.Q                            | 8.61   | 2.08  | 4.14    | 0.24 |
| Q03265_ATPA_MOUSE  | Atp5a1   | ATP synthase subunit alp R.ILGADTSVLEETGR@.V                   | 7.23   | 3.65  | 1.98    | 0.51 |
| Q03265_ATPA_MOUSE  | Atp5a1   | ATP synthase subunit alp K.LK#EIVTNFLAGFEP.-                   | 10.16  | 3.79  | 2.68    | 0.37 |
| Q03265_ATPA_MOUSE  | Atp5a1   | ATP synthase subunit alp R.VVDALGNAIDGK#.G                     | 8.53   | 8.66  | 0.98    | 1.02 |
| Q03265_ATPA_MOUSE  | Atp5a1   | ATP synthase subunit alp K.AVDSLVPIGR@.G                       | 14.01  | 3.95  | 3.54    | 0.28 |
| Q03265_ATPA_MOUSE  | Atp5a1   | ATP synthase subunit alp K.HALIIYDLSK#.Q                       | 4.82   | 3.79  | 1.27    | 0.79 |
| Q03265_ATPA_MOUSE  | Atp5a1   | ATP synthase subunit alp R.ILGADTSVLEETGR@.V                   | 12.04  | 3.26  | 3.69    | 0.27 |
| Q03265_ATPA_MOUSE  | Atp5a1   | ATP synthase subunit alp K.LK#EIVTNFLAGFEP.-                   | 9.74   | 2.80  | 3.48    | 0.29 |
| Q03265_ATPA_MOUSE  | Atp5a1   | ATP synthase subunit alp R.VLSIGDGIAR@.V                       | 13.17  | 2.94  | 4.48    | 0.22 |
| Q03265_ATPA_MOUSE  | Atp5a1   | ATP synthase subunit alp R.VVDALGNAIDGK#.G                     | 9.92   | 7.82  | 1.27    | 0.79 |
| Q03265_ATPA_MOUSE  | Atp5b    | ATP synthase subunit bet K.AHGGSYFVAGVGER.T                    | 20.28  | 24.25 | 0.84    | 1.20 |
| P56480_ATPB_MOUSE  | Atp5b    | ATP synthase subunit bet R.AIAELGYPVAVDPLDSTSR@.I              | 15.28  | 33.35 | 0.46    | 2.18 |
| P56480_ATPB_MOUSE  | Atp5b    | ATP synthase subunit bet R.FTQAGSEVALLGR.I                     | 37.71  | 44.71 | 0.84    | 1.19 |
| P56480_ATPB_MOUSE  | Atp5b    | ATP synthase subunit bet K.GSITSQVIVPADLTDPPAPATTFHLDATTVLSR.A | 2.89   | 2.52  | 1.15    | 0.87 |
| P56480_ATPB_MOUSE  | Atp5b    | ATP synthase subunit bet K.IGLFGGAVGK#.T                       | 33.07  | 38.64 | 0.86    | 1.17 |
| P56480_ATPB_MOUSE  | Atp5b    | ATP synthase subunit bet R.IM*DPNIVNGEHYDVAR.G                 | 28.12  | 43.81 | 0.64    | 1.56 |
| P56480_ATPB_MOUSE  | Atp5b    | ATP synthase subunit bet R.IM*NVIGEPIDER@.G                    | 18.38  | 18.26 | 0.84    | 1.19 |
| P56480_ATPB_MOUSE  | Atp5b    | ATP synthase subunit bet R.IPSAVGYPQLTATDM*GTM*QER.I           | 20.09  | 21.34 | 0.94    | 1.06 |
| P56480_ATPB_MOUSE  | Atp5b    | ATP synthase subunit bet K.IPVGPETLGR.I                        | 7.27   | 15.41 | 0.47    | 2.12 |
| P56480_ATPB_MOUSE  | Atp5b    | ATP synthase subunit bet R.LVLEVAQHLEGSTVR@.T                  | 9.97   | 10.34 | 0.96    | 1.04 |
| P56480_ATPB_MOUSE  | Atp5b    | ATP synthase subunit bet K.SLQDIIALGM*DELSEEDKLTVSR.A          | 31.14  | 30.32 | 1.03    | 0.97 |
| P56480_ATPB_MOUSE  | Atp5b    | ATP synthase subunit bet R.TIAM*DTGETGLVR@.G                   | 18.60  | 18.63 | 1.00    | 1.00 |
| P56480_ATPB_MOUSE  | Atp5b    | ATP synthase subunit bet K.TVLIEMELNNAK#.A                     | 2.26   | 7.27  | 0.31    | 3.22 |
| P56480_ATPB_MOUSE  | Atp5b    | ATP synthase subunit bet R.VALTGLTVAEYFR@.D                    | 24.03  | 25.83 | 0.93    | 1.07 |
| P56480_ATPB_MOUSE  | Atp5b    | ATP synthase subunit bet K.VALVYGMQM*NEPPGAR@.A                | 8.32   | 10.51 | 0.79    | 1.26 |
| P56480_ATPB_MOUSE  | Atp5b    | ATP synthase subunit bet K.VLDSGAPIK.I                         | 42.32  | 22.23 | 1.90    | 0.53 |
| P56480_ATPB_MOUSE  | Atp5b    | ATP synthase subunit bet K.VLDSGAPIK#PVGPETLGR@.I              | 43.41  | 50.37 | 0.86    | 1.16 |
| P56480_ATPB_MOUSE  | Atp5b    | ATP synthase subunit bet K.VVDLAPYAK#.G                        | 16.63  | 24.45 | 0.68    | 1.47 |
| Q91VR2_ATPG_MOUSE  | Atp5c1   | ATP synthase subunit gan K.ELIEISGAALD.-                       | 15.16  | 15.16 | 1.00    | 1.00 |
| Q9D3D9_ATPD_MOUSE  | Atp5d    | ATP synthase subunit del K.AQSELSGADEAAR@.A                    | 5.19   | 10.35 | 0.50    | 2.00 |
| P56135_ATPK_MOUSE  | Atp5j2   | ATP synthase subunit f, r R.DFTPSGIAAGFR@.R                    | 8.04   | 7.26  | 1.11    | 0.90 |
| Q9DB20_ATPO_MOUSE  | Atp5o    | ATP synthase subunit O, r K.LVRPVPQVIGIEGR.Y                   | 5.45   | 5.58  | 0.98    | 1.02 |
| Q9CYN9_RENR_MOUSE  | Atp6ap2  | Renin receptor OS=Mus n K.ILVDALQK.F                           | 5.66   | 7.07  | 0.80    | 1.25 |
| P51863_VAOD1_MOUSE | Atp6v0d1 | V-type proton ATPase sub K.LFEGGASMPGDK#.T                     | 12.88  | 6.59  | 1.96    | 0.56 |
| P51863_VAOD1_MOUSE | Atp6v0d1 | V-type proton ATPase sub R.LYPEGLAQLAR@.A                      | 25.09  | 10.70 | 2.34    | 0.43 |
| P51863_VAOD1_MOUSE | Atp6v0d1 | V-type proton ATPase sub K.NVADYYPEYK#.L                       | 9.12   | 5.99  | 1.52    | 0.66 |
| P51863_VAOD1_MOUSE | Atp6v0d1 | V-type proton ATPase sub R.SIAELVPK#.C                         | 9.30   | 4.06  | 2.29    | 0.44 |
| P62814_VATB2_MOUSE | Atp6v1b2 | V-type proton ATPase sub K.AVVEEALTSDDLLEFLQK#.F               | 5.25   | 3.04  | 1.73    | 0.58 |
| P62814_VATB2_MOUSE | Atp6v1b2 | V-type proton ATPase sub K.AVVEEALTSDDLLEFLQK#.F               | 1.96   | 2.86  | 0.69    | 1.46 |
| P57746_VATD_MOUSE  | Atp6v1d  | V-type proton ATPase sub K.FTAGDFSTTVIYNK#.A                   | 15.98  | 7.36  | 2.09    | 0.48 |
| P57746_VATD_MOUSE  | Atp6v1d  | V-type proton ATPase sub R.TLAVIITELDER@.E                     | 6.31   | 3.16  | 2.18    | 0.46 |
| P50518_VATE1_MOUSE | Atp6v1e1 | V-type proton ATPase sub R.AR@DDTLDLLNEAK#.Q                   | 6.80   | 6.30  | 1.08    | 0.93 |
| P50518_VATE1_MOUSE | Atp6v1e1 | V-type proton ATPase sub K.IQM*SNLM*NOAR@.L                    | 11.05  | 6.19  | 1.79    | 0.56 |
| Q9CR51_VATG1_MOUSE | Atp6v1g1 | V-type proton ATPase sub K.EEAQAEIEQYR@.L                      | 3.23   | 2.48  | 1.30    | 0.77 |
| Q8BVE3_VATH_MOUSE  | Atp6v1h  | V-type proton ATPase sub K.LGESVQDLSFDEYSSELK#.S               | 4.29   | 1.81  | 2.42    | 0.41 |
| Q8BVE3_VATH_MOUSE  | Atp6v1h  | V-type proton ATPase sub R.GAVDAAVPTNIIAAK#.A                  | 7.17   | 3.14  | 2.28    | 0.44 |
| Q8BVE3_VATH_MOUSE  | Atp6v1h  | V-type proton ATPase sub K.LGESVQDLSFDEYSSELK#.S               | 4.11   | 3.31  | 1.24    | 0.80 |
| Q61687_ATRX_MOUSE  | Atrx     | Transcriptional regulator K.AATENSENDITM*QSLPK#.G              | 7.31   | 3.68  | 1.98    | 0.50 |
| Q61687_ATRX_MOUSE  | Atrx     | Transcriptional regulator K.YYM*SDDISR@.D                      | 16.17  | 7.28  | 2.22    | 0.45 |
| Q61687_ATRX_MOUSE  | Atrx     | Transcriptional regulator K.AATENSENDITM*QSLPK#.G              | 16.47  | 5.99  | 2.75    | 0.36 |
| Q61687_ATRX_MOUSE  | Atrx     | Transcriptional regulator K.AATENSENDITMQSLPK#.G               | 5.07   | 2.04  | 2.48    | 0.40 |
| Q61687_ATRX_MOUSE  | Atrx     | Transcriptional regulator K.LIETSNM*NSSYIK#.F                  | 30.43  | 8.38  | 3.63    | 0.28 |
| Q61687_ATRX_MOUSE  | Atrx     | Transcriptional regulator K.LIETSNMNSSYIK#.F                   | 9.21   | 3.32  | 2.77    | 0.36 |
| Q61687_ATRX_MOUSE  | Atrx     | Transcriptional regulator K.STETSISIK#.K                       | 22.09  | 5.51  | 4.01    | 0.25 |
| Q61687_ATRX_MOUSE  | Atrx     | Transcriptional regulator K.YYM*SDDISR@.D                      | 12.50  | 3.67  | 3.41    | 0.29 |
| Q61687_ATRX_MOUSE  | Atrx     | Transcriptional regulator K.AATENSENDITM*QSLPK#.G              | 11.74  | 2.59  | 4.53    | 0.22 |
| Q61687_ATRX_MOUSE  | Atrx     | Transcriptional regulator K.AGSLGINLVAANR@.V                   | 19.43  | 2.57  | 7.55    | 0.13 |
| Q61687_ATRX_MOUSE  | Atrx     | Transcriptional regulator R.EAIYNDVLT#.Q                       | 16.42  | 4.86  | 3.38    | 0.30 |
| Q61687_ATRX_MOUSE  | Atrx     | Transcriptional regulator R.FLAQGTM*EDK#.I                     | 6.49   | 2.76  | 2.35    | 0.42 |
| Q61687_ATRX_MOUSE  | Atrx     | Transcriptional regulator R.GGGDGNVDDTGNPNPVSLSK#.L            | 17.48  | 3.61  | 4.84    | 0.21 |
| Q61687_ATRX_MOUSE  | Atrx     | Transcriptional regulator R.LFIISTK#.A                         | 25.24  | 5.65  | 4.47    | 0.22 |
| Q61687_ATRX_MOUSE  | Atrx     | Transcriptional regulator K.LFQDFQM*LSR@.I                     | 39.99  | 7.66  | 5.22    | 0.19 |
| Q61687_ATRX_MOUSE  | Atrx     | Transcriptional regulator K.LIETSNM*NSSYIK#.F                  | 24.78  | 5.12  | 4.84    | 0.21 |
| Q61687_ATRX_MOUSE  | Atrx     | Transcriptional regulator K.LIETSNMNSSYIK#.F                   | 7.15   | 8.76  | 0.82    | 1.22 |
| Q61687_ATRX_MOUSE  | Atrx     | Transcriptional regulator K.LVLDENETK#EPLVQVHR@.N              | 10.74  | 3.24  | 3.31    | 0.30 |
| Q61687_ATRX_MOUSE  | Atrx     | Transcriptional regulator K.LYQYVLDHITGVNSTEGGR@.G             | 16.24  | 3.92  | 4.15    | 0.24 |
| Q61687_ATRX_MOUSE  | Atrx     | Transcriptional regulator K.M*VLLFEILR@.M                      | 24.07  | 4.54  | 5.30    | 0.19 |
| Q61687_ATRX_MOUSE  | Atrx     | Transcriptional regulator K.STETSISIK#.K                       | 28.86  | 4.64  | 6.22    | 0.16 |
| Q61687_ATRX_MOUSE  | Atrx     | Transcriptional regulator K.SVPATVDDDDDDNDPNNR@.I              | 13.42  | 4.96  | 2.70    | 0.37 |
| Q61687_ATRX_MOUSE  | Atrx     | Transcriptional regulator R.VVDQQQVER@.H                       | 47.89  | 13.54 | 3.54    | 0.28 |
| Q61687_ATRX_MOUSE  | Atrx     | Transcriptional regulator K.VVEATNSM*TAVR@.I                   | 12.31  | 2.19  | 5.61    | 0.18 |
| Q61687_ATRX_MOUSE  | Atrx     | Transcriptional regulator K.WAEFNDENTVNR@.G                    | 8.37   | 2.91  | 2.87    | 0.35 |

|                    |        |                                                               |       |        |      |       |
|--------------------|--------|---------------------------------------------------------------|-------|--------|------|-------|
| Q61687_ATRX_MOUSE  | Atrx   | Transcriptional regulator K.YYM*SDDISR@.D                     | 12.48 | 2.93   | 4.27 | 0.23  |
| P28658_ATX10_MOUSE | Atxn10 | Ataxin-10 OS=Mus muscl. K.HPASEWFLPDISFLK#.S                  | 9.56  | 5.30   | 1.80 | 0.55  |
| P28658_ATX10_MOUSE | Atxn10 | Ataxin-10 OS=Mus muscl. R.ITLLDVIK#.L                         | 25.42 | 12.47  | 2.04 | 0.49  |
| P28658_ATX10_MOUSE | Atxn10 | Ataxin-10 OS=Mus muscl. R.LSGIM*VPAPIQDLEALR@.A               | 7.91  | 6.77   | 1.17 | 0.86  |
| P28658_ATX10_MOUSE | Atxn10 | Ataxin-10 OS=Mus muscl. R.LSGIM*VPAPIQDLEALR.A                | 19.26 | 12.96  | 1.49 | 0.67  |
| P28658_ATX10_MOUSE | Atxn10 | Ataxin-10 OS=Mus muscl. K.LVGEELTKHDDISIFVR@.H                | 15.58 | 7.99   | 1.95 | 0.51  |
| P28658_ATX10_MOUSE | Atxn10 | Ataxin-10 OS=Mus muscl. R.M*KHLEENLNAINVIEAHQK#.H             | 12.76 | 9.78   | 1.30 | 0.77  |
| P28658_ATX10_MOUSE | Atxn10 | Ataxin-10 OS=Mus muscl. R.NLTEDNSQNDVIK#.M                    | 24.74 | 14.29  | 1.73 | 0.58  |
| P28658_ATX10_MOUSE | Atxn10 | Ataxin-10 OS=Mus muscl. K.SPELVEAM*YQK#.L                     | 10.34 | 5.23   | 1.98 | 0.51  |
| P28658_ATX10_MOUSE | Atxn10 | Ataxin-10 OS=Mus muscl. R.ITLLDVIK#.L                         | 13.48 | 6.36   | 2.12 | 0.47  |
| P28658_ATX10_MOUSE | Atxn10 | Ataxin-10 OS=Mus muscl. R.LSGIM*VPAPIQDLEALR@.A               | 8.75  | 3.34   | 2.62 | 0.38  |
| P28658_ATX10_MOUSE | Atxn10 | Ataxin-10 OS=Mus muscl. K.LVGEELTKHDDISIFVR@.H                | 8.72  | 4.10   | 2.13 | 0.47  |
| P28658_ATX10_MOUSE | Atxn10 | Ataxin-10 OS=Mus muscl. R.NLTEDNSQNDVIK#.M                    | 7.99  | 3.81   | 2.10 | 0.48  |
| P28658_ATX10_MOUSE | Atxn10 | Ataxin-10 OS=Mus muscl. R.ALTAFLK#.E                          | 11.91 | 6.15   | 1.94 | 0.52  |
| P28658_ATX10_MOUSE | Atxn10 | Ataxin-10 OS=Mus muscl. R.ITLLDVIK#.L                         | 26.14 | 11.09  | 2.36 | 0.42  |
| P28658_ATX10_MOUSE | Atxn10 | Ataxin-10 OS=Mus muscl. R.LSGIM*VPAPIQDLEALR@.A               | 6.63  | 4.20   | 1.58 | 0.63  |
| P28658_ATX10_MOUSE | Atxn10 | Ataxin-10 OS=Mus muscl. K.LVGEELTKHDDISIFVR@.H                | 16.19 | 4.81   | 3.36 | 0.30  |
| P28658_ATX10_MOUSE | Atxn10 | Ataxin-10 OS=Mus muscl. R.NLTEDNSQNDVIK#.M                    | 10.45 | 6.50   | 1.61 | 0.62  |
| P28658_ATX10_MOUSE | Atxn10 | Ataxin-10 OS=Mus muscl. K.SPELVEAM*YQK#.L                     | 7.55  | 94.13  | 0.08 | 12.47 |
| Q7TQH0_ATX2L_MOUSE | Atxn2l | Ataxin-2-like protein OS= R.EIESPQYR@.L                       | 16.00 | 11.75  | 1.36 | 0.73  |
| Q7TQH0_ATX2L_MOUSE | Atxn2l | Ataxin-2-like protein OS= R.GPHHLNNSPPGPGSEAR@.G              | 15.54 | 3.36   | 4.62 | 0.22  |
| Q7TQH0_ATX2L_MOUSE | Atxn2l | Ataxin-2-like protein OS= K.LQPSSTPETGLDPPSR@.I               | 12.36 | 2.75   | 4.49 | 0.22  |
| Q7TQH0_ATX2L_MOUSE | Atxn2l | Ataxin-2-like protein OS= K.LSLTPTDVK#.E                      | 17.06 | 3.45   | 4.94 | 0.20  |
| Q7TQH0_ATX2L_MOUSE | Atxn2l | Ataxin-2-like protein OS= K.TTYDSSLSVTVLEK#.D                 | 6.12  | 3.01   | 2.03 | 0.49  |
| Q70126_AURK8_MOUSE | Aurkb  | Aurora kinase B OS=Mus i R.DIK#PENLLGLQELK#.I                 | 10.19 | 8.15   | 1.25 | 0.80  |
| P01887_B2MG_MOUSE  | B2m    | Beta-2-microglobulin OS K.TPQIQVYSR.H                         | 78.54 | 73.50  | 1.07 | 0.94  |
| P01887_B2MG_MOUSE  | B2m    | Beta-2-microglobulin OS K.TVYWRDM*.-                          | 14.04 | 12.90  | 1.09 | 0.92  |
| P01887_B2MG_MOUSE  | B2m    | Beta-2-microglobulin OS K.VEM*SDM*SF5K.D                      | 28.88 | 29.15  | 0.99 | 1.01  |
| Q3U143_BAB1_MOUSE  | Babam1 | BRISC and BRCA1-A comp. R.ALGAQAVGSR@.S                       | 31.14 | 8.17   | 3.81 | 0.26  |
| Q60739_BAG1_MOUSE  | Bag1   | BAG family molecular ch. K.ILEIDTM*VLPQK#.D                   | 4.29  | 4.79   | 0.90 | 1.12  |
| Q60739_BAG1_MOUSE  | Bag1   | BAG family molecular ch. K.TEEM*VQTEEM*ETPR.L                 | 3.64  | 4.42   | 0.82 | 1.22  |
| Q91YN9_BAG2_MOUSE  | Bag2   | BAG family molecular ch. R.LLESLDQELR@.V                      | 11.89 | 4.82   | 2.47 | 0.41  |
| Q91YN9_BAG2_MOUSE  | Bag2   | BAG family molecular ch. R.R@LETLR@.N                         | 17.58 | 5.58   | 3.15 | 0.32  |
| Q91YN9_BAG2_MOUSE  | Bag2   | BAG family molecular ch. R.DAATAVEQEKHEILLEMHSIQNSQDM*R@.Q    | 6.03  | 2.09   | 2.88 | 0.35  |
| Q91YN9_BAG2_MOUSE  | Bag2   | BAG family molecular ch. K.FLDDLGNK#.S                        | 26.45 | 12.55  | 2.11 | 0.47  |
| Q91YN9_BAG2_MOUSE  | Bag2   | BAG family molecular ch. R.LLESLDQELR@.V                      | 49.01 | 24.94  | 1.97 | 0.51  |
| Q91YN9_BAG2_MOUSE  | Bag2   | BAG family molecular ch. R.R@LETLR@.N                         | 29.89 | 16.20  | 1.84 | 0.54  |
| Q91YN9_BAG2_MOUSE  | Bag2   | BAG family molecular ch. K.SLQNTDQK#.N                        | 26.50 | 14.02  | 1.89 | 0.53  |
| Q91YN9_BAG2_MOUSE  | Bag2   | BAG family molecular ch. R.TLTVESVETIR@NPQEEESLK#.H           | 13.14 | 6.20   | 2.12 | 0.47  |
| Q91LV1_BAG3_MOUSE  | Bag3   | BAG family molecular ch. K.AAPSPAPAEPAAPK#.S                  | 9.93  | 8.21   | 1.21 | 0.83  |
| Q921R2_BAG6_MOUSE  | Bag6   | Large proline-rich protei R.APPQTQLPSGASSTGSASATHGGAPLPGTR@.G | 17.76 | 8.03   | 2.21 | 0.45  |
| Q921R2_BAG6_MOUSE  | Bag6   | Large proline-rich protei R.DIQTLR@.M                         | 23.03 | 8.16   | 2.82 | 0.35  |
| Q921R2_BAG6_MOUSE  | Bag6   | Large proline-rich protei R.DLEAPEVQESYR@.Q                   | 10.94 | 4.68   | 2.34 | 0.43  |
| Q921R2_BAG6_MOUSE  | Bag6   | Large proline-rich protei R.ENASPAPGTAAEAM*SR@.G              | 4.66  | 2.41   | 1.93 | 0.52  |
| Q921R2_BAG6_MOUSE  | Bag6   | Large proline-rich protei R.ESFSLVQVQGVDIR@.T                 | 19.43 | 7.91   | 2.46 | 0.41  |
| Q921R2_BAG6_MOUSE  | Bag6   | Large proline-rich protei R.LINLVGSLR@.L                      | 24.28 | 9.07   | 2.68 | 0.37  |
| Q921R2_BAG6_MOUSE  | Bag6   | Large proline-rich protei R.LLGNFVALSDLR@.C                   | 31.63 | 12.22  | 2.59 | 0.39  |
| Q921R2_BAG6_MOUSE  | Bag6   | Large proline-rich protei R.LQEYVNGGK#.V                      | 21.21 | 7.47   | 2.84 | 0.35  |
| Q921R2_BAG6_MOUSE  | Bag6   | Large proline-rich protei R.LQVLEHMPVGPDAIR@.Y                | 7.11  | 1.64   | 4.32 | 0.23  |
| Q921R2_BAG6_MOUSE  | Bag6   | Large proline-rich protei R.M*ATHLTLGLEEYVR@.E                | 11.42 | 4.44   | 2.57 | 0.39  |
| Q921R2_BAG6_MOUSE  | Bag6   | Large proline-rich protei R.TFVGAQM*NVK#.E                    | 8.44  | 6.97   | 1.21 | 0.83  |
| Q921R2_BAG6_MOUSE  | Bag6   | Large proline-rich protei R.APPQTQLPSGASSTGSASATHGGAPLPGTR@.G | 7.33  | 6.18   | 1.19 | 0.84  |
| Q921R2_BAG6_MOUSE  | Bag6   | Large proline-rich protei R.DIQTLR@.M                         | 12.18 | 4.21   | 2.90 | 0.35  |
| Q921R2_BAG6_MOUSE  | Bag6   | Large proline-rich protei R.ESFSLVQVQGVDIR@.T                 | 15.35 | 9.38   | 1.64 | 0.61  |
| Q921R2_BAG6_MOUSE  | Bag6   | Large proline-rich protei R.M*ATHLTLGLEEYVR@.E                | 7.21  | 4.30   | 1.68 | 0.60  |
| Q8BKX1_BAIP2_MOUSE | Baip2  | Brain-specific angiogene K.EGDLLTLVPEAR@.D                    | 4.58  | 2.92   | 1.57 | 0.64  |
| Q8BKX1_BAIP2_MOUSE | Baip2  | Brain-specific angiogene K.M*GELASESQGSK#.E                   | 9.85  | 2.53   | 3.89 | 0.26  |
| Q8BKX1_BAIP2_MOUSE | Baip2  | Brain-specific angiogene K.TIM*EQPNFLR@.N                     | 5.00  | 1.88   | 2.67 | 0.38  |
| O08734_BAK_MOUSE   | Bak1   | Bcl-2 homologous antag. R.R@YDFEQNLQLOPTAGNAYELFTK#.I         | 5.13  | 2.87   | 1.79 | 0.56  |
| O08734_BAK_MOUSE   | Bak1   | Bcl-2 homologous antag. R.QLALIGDINR@.R                       | 11.43 | 5.01   | 2.28 | 0.44  |
| O54962_BAF_MOUSE   | Banf1  | Barrier-to-autointegrat K.AYVVLQDFVLK#.K                      | 6.39  | 19.20  | 0.33 | 3.00  |
| O54962_BAF_MOUSE   | Banf1  | Barrier-to-autointegrat R.DFVAEPM*GKPVGSLAGIDVLSK.R           | 40.44 | 134.70 | 0.30 | 3.33  |
| O54962_BAF_MOUSE   | Banf1  | Barrier-to-autointegrat R.DFVAEPMGKPVGSLAGIDVLSK.R            | 2.39  | 9.95   | 0.24 | 4.17  |
| Q8VBUS_BANP_MOUSE  | Banp   | Protein BANP OS=Mus m R.EVOQVNSLGGQK#.H                       | 3.84  | 1.28   | 3.01 | 0.33  |
| Q8VBUS_BANP_MOUSE  | Banp   | Protein BANP OS=Mus m R.EVOQVNSLGGQK#.H                       | 5.05  | 3.01   | 1.67 | 0.60  |
| Q8VBUS_BANP_MOUSE  | Banp   | Protein BANP OS=Mus m R.EVOQVNSLGGQK#.H                       | 8.87  | 1.49   | 5.95 | 0.17  |
| Q9DCT6_BAP18_MOUSE | Bap18  | Chromatin complexes su K.VGEIFSAAGAFTK#.L                     | 8.24  | 3.52   | 2.34 | 0.43  |
| Q9DCT6_BAP18_MOUSE | Bap18  | Chromatin complexes su K.VGEIFSAAGAFTK#.L                     | 35.17 | 12.49  | 2.82 | 0.35  |
| Q07813_BAX_MOUSE   | Bax    | Apoptosis regulator BAX R.IGDELDNSM*ELQR@.M                   | 30.92 | 9.52   | 3.25 | 0.31  |
| Q07813_BAX_MOUSE   | Bax    | Apoptosis regulator BAX R.M*AGETPELTLEQPPQDASTK#.K            | 10.89 | 16.19  | 0.67 | 1.49  |
| Q07813_BAX_MOUSE   | Bax    | Apoptosis regulator BAX R.M*AGETPELTLEQPPQDASTK#.K.L          | 6.77  | 3.82   | 1.77 | 0.57  |
| Q07813_BAX_MOUSE   | Bax    | Apoptosis regulator BAX R.M*ADVDTSPR@.E                       | 44.55 | 21.40  | 2.08 | 0.48  |
| Q07813_BAX_MOUSE   | Bax    | Apoptosis regulator BAX K.TGAFLLQGFQIDR@.A                    | 29.53 | 10.27  | 2.88 | 0.35  |
| Q07813_BAX_MOUSE   | Bax    | Apoptosis regulator BAX R.VAADM*FADGNFNWGR@.V                 | 7.39  | 1.70   | 4.35 | 0.23  |
| Q07813_BAX_MOUSE   | Bax    | Apoptosis regulator BAX R.VVALFYASK#.L                        | 7.80  | 1.81   | 4.31 | 0.23  |
| O88379_BAZ1A_MOUSE | Baz1a  | Bromodomain adjacent I R.HSPSALQDVVFVLLSPHSK#.R               | 7.03  | 4.08   | 1.72 | 0.58  |
| O88379_BAZ1A_MOUSE | Baz1a  | Bromodomain adjacent I R.YFVEETVEVIR.N                        | 3.62  | 2.58   | 1.40 | 0.71  |
| O88379_BAZ1A_MOUSE | Baz1a  | Bromodomain adjacent I R.DFIEDYDVLRL@.Q                       | 11.79 | 9.76   | 1.21 | 0.83  |
| O88379_BAZ1A_MOUSE | Baz1a  | Bromodomain adjacent I R.HSPSALQDVVFVLLSPHSK#.R               | 10.74 | 8.45   | 1.27 | 0.79  |
| O88379_BAZ1A_MOUSE | Baz1a  | Bromodomain adjacent I R.ISFGQEDSIASK#.Q                      | 10.69 | 7.63   | 1.40 | 0.71  |
| O88379_BAZ1A_MOUSE | Baz1a  | Bromodomain adjacent I K.LLTLVSTR@.D                          | 12.98 | 7.39   | 1.76 | 0.57  |
| O88379_BAZ1A_MOUSE | Baz1a  | Bromodomain adjacent I R.LR@DFLLDIEDR@.I                      | 10.55 | 8.61   | 1.23 | 0.82  |
| O88379_BAZ1A_MOUSE | Baz1a  | Bromodomain adjacent I R.LSNPSLVK#.K                          | 13.17 | 8.57   | 1.54 | 0.65  |
| O88379_BAZ1A_MOUSE | Baz1a  | Bromodomain adjacent I K.DAIDPLLR@.Y                          | 11.69 | 5.13   | 2.28 | 0.44  |
| O88379_BAZ1A_MOUSE | Baz1a  | Bromodomain adjacent I R.DFIEDYDVLRL@.Q                       | 43.76 | 12.86  | 3.40 | 0.29  |
| O88379_BAZ1A_MOUSE | Baz1a  | Bromodomain adjacent I K.EM*YESAVK#.A                         | 7.51  | 2.27   | 3.30 | 0.30  |
| O88379_BAZ1A_MOUSE | Baz1a  | Bromodomain adjacent I R.HSPSALQDVVFVLLSPHSK#.R               | 70.92 | 7.98   | 3.88 | 0.26  |
| O88379_BAZ1A_MOUSE | Baz1a  | Bromodomain adjacent I R.HYDDFFER@.T                          | 9.61  | 2.07   | 4.64 | 0.22  |
| O88379_BAZ1A_MOUSE | Baz1a  | Bromodomain adjacent I R.IYQGTLAGK#.V                         | 35.31 | 12.05  | 2.93 | 0.34  |
| O88379_BAZ1A_MOUSE | Baz1a  | Bromodomain adjacent I K.LGLHVPSTVDVQVSTPLAAK#.K              | 24.65 | 8.34   | 2.95 | 0.34  |
| O88379_BAZ1A_MOUSE | Baz1a  | Bromodomain adjacent I R.LHLASGADVTSANAK#.Y                   | 25.94 | 5.74   | 4.52 | 0.22  |
| O88379_BAZ1A_MOUSE | Baz1a  | Bromodomain adjacent I K.LLTLVSTR@.D                          | 31.46 | 9.31   | 3.38 | 0.30  |
| O88379_BAZ1A_MOUSE | Baz1a  | Bromodomain adjacent I R.LR@DFLLDIEDR@.I                      | 31.41 | 8.14   | 3.86 | 0.26  |
| O88379_BAZ1A_MOUSE | Baz1a  | Bromodomain adjacent I R.LSNPSLVK#.K                          | 32.16 | 10.05  | 3.20 | 0.31  |
| O88379_BAZ1A_MOUSE | Baz1a  | Bromodomain adjacent I K.LSSTVYDLPTEK#.M                      | 9.54  | 2.41   | 3.96 | 0.25  |
| O88379_BAZ1A_MOUSE | Baz1a  | Bromodomain adjacent I K.TVNEDEVEM*EM*EQAR@.V                 | 7.47  | 3.07   | 2.44 | 0.41  |
| O88379_BAZ1A_MOUSE | Baz1a  | Bromodomain adjacent I R.YFVEETVEVIR@.N                       | 14.29 | 5.80   | 2.47 | 0.41  |
| Q92277_BAZ1B_MOUSE | Baz1b  | Tyrosine-protein kinase E R.AGTGENAPWVVEDELVK#.K              | 18.55 | 8.83   | 2.10 | 0.48  |
| Q92277_BAZ1B_MOUSE | Baz1b  | Tyrosine-protein kinase E R.DSSLSLSPNPK#.L                    | 19.08 | 15.97  | 1.19 | 0.84  |
| Q92277_BAZ1B_MOUSE | Baz1b  | Tyrosine-protein kinase E K.FLQGFMP*APK.Q                     | 8.89  | 19.23  | 0.46 | 2.16  |
| Q92277_BAZ1B_MOUSE | Baz1b  | Tyrosine-protein kinase E K.FSDFLLDPYK#.Y                     | 62.00 | 30.69  | 2.02 | 0.50  |
| Q92277_BAZ1B_MOUSE | Baz1b  | Tyrosine-protein kinase E K.FSDFLLDPYK#MYM*TLNPSTK#.R         | 16.99 | 5.83   | 2.91 | 0.34  |
| Q92277_BAZ1B_MOUSE | Baz1b  | Tyrosine-protein kinase E K.GGLGYM*EGTSEFEAR.V                | 18.98 | 28.64  | 0.66 | 1.51  |



|                    |         |                                                          |        |        |       |       |
|--------------------|---------|----------------------------------------------------------|--------|--------|-------|-------|
| Q9Z277_BA21B_MOUSE | Baz1b   | Tyrosine-protein kinase E.K.IISNVPADSLIR@.T              | 86.49  | 44.35  | 1.95  | 0.51  |
| Q9Z277_BA21B_MOUSE | Baz1b   | Tyrosine-protein kinase E.R.KPFPVKPLPGEELFTPIHTQEAFR.T   | 57.54  | 36.59  | 1.57  | 0.64  |
| Q9Z277_BA21B_MOUSE | Baz1b   | Tyrosine-protein kinase E.R.LADDEGSDSESVGQSR.G           | 6.82   | 17.86  | 0.38  | 2.62  |
| Q9Z277_BA21B_MOUSE | Baz1b   | Tyrosine-protein kinase E.K.LVDSAWLEIM*TK#.Y             | 20.34  | 11.69  | 1.74  | 0.57  |
| Q9Z277_BA21B_MOUSE | Baz1b   | Tyrosine-protein kinase E.K.LVDSAWLEIMTK#.Y              | 15.22  | 6.07   | 2.51  | 0.40  |
| Q9Z277_BA21B_MOUSE | Baz1b   | Tyrosine-protein kinase E.R.SDLIEVATR.L                  | 23.99  | 41.49  | 0.58  | 1.73  |
| Q9Z277_BA21B_MOUSE | Baz1b   | Tyrosine-protein kinase E.R.SRPKDDPEVDDLVLQTK.R          | 6.57   | 22.11  | 0.30  | 3.37  |
| Q9Z277_BA21B_MOUSE | Baz1b   | Tyrosine-protein kinase E.R.SVQEFITDM*#.Q                | 9.14   | 20.16  | 0.45  | 2.21  |
| Q9Z277_BA21B_MOUSE | Baz1b   | Tyrosine-protein kinase E.R.YWFLSNEVPLFIEK.G             | 4.61   | 7.62   | 0.60  | 1.65  |
| Q9Z277_BA21B_MOUSE | Baz1b   | Tyrosine-protein kinase E.K.FSDFLDPYK#.Y                 | 7.80   | 15.66  | 0.50  | 2.01  |
| Q9Z277_BA21B_MOUSE | Baz1b   | Tyrosine-protein kinase E.K.FSDFLDPYK*Y*TLNPSTK.R        | 5.46   | 7.08   | 0.77  | 1.29  |
| Q9Z277_BA21B_MOUSE | Baz1b   | Tyrosine-protein kinase E.K.GGLGYM*EGTSEFEAR.V           | 2.07   | 2.95   | 0.70  | 1.43  |
| Q9Z277_BA21B_MOUSE | Baz1b   | Tyrosine-protein kinase E.R.KHPFVKPLPGEELFTPIHTQEAFR@.T  | 4.54   | 4.01   | 1.13  | 0.88  |
| Q9Z277_BA21B_MOUSE | Baz1b   | Tyrosine-protein kinase E.R.SDLIEVATR.L                  | 5.64   | 11.72  | 0.48  | 2.08  |
| Q9Z277_BA21B_MOUSE | Baz1b   | Tyrosine-protein kinase E.R.AGTGENAPWVVEDELVK#.K         | 8.87   | 3.76   | 2.36  | 0.42  |
| Q9Z277_BA21B_MOUSE | Baz1b   | Tyrosine-protein kinase E.K.DDPEVDDLVLQTK#.R             | 16.15  | 25.47  | 0.63  | 1.58  |
| Q9Z277_BA21B_MOUSE | Baz1b   | Tyrosine-protein kinase E.R.DEAEDYDVIEHPM*DFQTIQNK#.C    | 20.68  | 10.82  | 1.91  | 0.52  |
| Q9Z277_BA21B_MOUSE | Baz1b   | Tyrosine-protein kinase E.K.EAWEEEEQVAELLK#HEEFPNWYEK#.L | 10.25  | 1.68   | 6.11  | 0.16  |
| Q9Z277_BA21B_MOUSE | Baz1b   | Tyrosine-protein kinase E.R.FEDQLGGR.N                   | 133.40 | 86.84  | 1.54  | 0.65  |
| Q9Z277_BA21B_MOUSE | Baz1b   | Tyrosine-protein kinase E.K.FLQGF*APK#.Q                 | 76.37  | 49.91  | 1.53  | 0.65  |
| Q9Z277_BA21B_MOUSE | Baz1b   | Tyrosine-protein kinase E.K.FSDFLDPYK#.Y                 | 32.00  | 12.15  | 2.63  | 0.38  |
| Q9Z277_BA21B_MOUSE | Baz1b   | Tyrosine-protein kinase E.K.FSDFLDPYK*Y*Y*TLNPSTK#.R     | 9.47   | 3.27   | 2.90  | 0.35  |
| Q9Z277_BA21B_MOUSE | Baz1b   | Tyrosine-protein kinase E.K.GGLGYM*EGTSEFEAR@.V          | 57.39  | 34.10  | 1.68  | 0.59  |
| Q9Z277_BA21B_MOUSE | Baz1b   | Tyrosine-protein kinase E.K.GGLGYM*EGTSEFEAR@.V          | 92.05  | 57.87  | 1.59  | 0.63  |
| Q9Z277_BA21B_MOUSE | Baz1b   | Tyrosine-protein kinase E.K.GGLGYM*EGTSEFEAR@.V          | 8.46   | 5.27   | 1.61  | 0.62  |
| Q9Z277_BA21B_MOUSE | Baz1b   | Tyrosine-protein kinase E.K.HLPPAALHLIAYK#.E             | 17.42  | 14.80  | 1.18  | 0.85  |
| Q9Z277_BA21B_MOUSE | Baz1b   | Tyrosine-protein kinase E.K.IEQQVEVEADDM*ISAVK#.S        | 17.15  | 8.67   | 1.98  | 0.51  |
| Q9Z277_BA21B_MOUSE | Baz1b   | Tyrosine-protein kinase E.K.IEQQVEVEADDM*ISAVK#.S        | 9.09   | 3.59   | 2.53  | 0.40  |
| Q9Z277_BA21B_MOUSE | Baz1b   | Tyrosine-protein kinase E.K.IISNVPADSLIR@.T              | 46.36  | 21.16  | 2.19  | 0.46  |
| Q9Z277_BA21B_MOUSE | Baz1b   | Tyrosine-protein kinase E.R.KHPNLGK#.S                   | 22.95  | 14.37  | 1.60  | 0.63  |
| Q9Z277_BA21B_MOUSE | Baz1b   | Tyrosine-protein kinase E.R.LADDEGSDSESVGQSR@.G          | 76.24  | 42.23  | 1.81  | 0.55  |
| Q9Z277_BA21B_MOUSE | Baz1b   | Tyrosine-protein kinase E.K.LETSEFFLTSEEK#.L             | 57.72  | 30.74  | 1.88  | 0.53  |
| Q9Z277_BA21B_MOUSE | Baz1b   | Tyrosine-protein kinase E.R.LLSNEDR.A                    | 101.02 | 68.73  | 1.47  | 0.68  |
| Q9Z277_BA21B_MOUSE | Baz1b   | Tyrosine-protein kinase E.R.LPEELR@.A                    | 122.38 | 81.32  | 1.50  | 0.66  |
| Q9Z277_BA21B_MOUSE | Baz1b   | Tyrosine-protein kinase E.K.LSEIPLTHSVSELVR@.L           | 144.18 | 104.94 | 1.37  | 0.73  |
| Q9Z277_BA21B_MOUSE | Baz1b   | Tyrosine-protein kinase E.K.LVDSAWLEIM*TK#.Y             | 7.11   | 4.95   | 1.44  | 0.70  |
| Q9Z277_BA21B_MOUSE | Baz1b   | Tyrosine-protein kinase E.K.LVDSAWLEIMTK#.Y              | 9.92   | 3.74   | 2.65  | 0.38  |
| Q9Z277_BA21B_MOUSE | Baz1b   | Tyrosine-protein kinase E.R.QQSAELWK#.E                  | 56.24  | 140.65 | 0.40  | 2.50  |
| Q9Z277_BA21B_MOUSE | Baz1b   | Tyrosine-protein kinase E.K.R@YELLEHK#.K                 | 28.14  | 17.27  | 1.63  | 0.61  |
| Q9Z277_BA21B_MOUSE | Baz1b   | Tyrosine-protein kinase E.R.SDLIEVATR@.L                 | 127.58 | 76.20  | 1.67  | 0.60  |
| Q9Z277_BA21B_MOUSE | Baz1b   | Tyrosine-protein kinase E.R.SRPKDDPEVDDLVLQTK.R          | 67.12  | 43.42  | 1.55  | 0.65  |
| Q9Z277_BA21B_MOUSE | Baz1b   | Tyrosine-protein kinase E.R.SVQEFITDM*#.Q                | 15.32  | 13.85  | 1.11  | 0.90  |
| Q9Z277_BA21B_MOUSE | Baz1b   | Tyrosine-protein kinase E.K.WDM*SAENAR@.C                | 19.82  | 13.17  | 1.51  | 0.66  |
| Q9Z277_BA21B_MOUSE | Baz1b   | Tyrosine-protein kinase E.R.YELLEHK#.K                   | 22.64  | 14.41  | 1.57  | 0.64  |
| Q9Z277_BA21B_MOUSE | Baz1b   | Tyrosine-protein kinase E.R.YWFLSNEVPLFIEK#.G            | 59.78  | 34.29  | 1.74  | 0.57  |
| Q9Z277_BA21B_MOUSE | Baz1b   | Tyrosine-protein kinase E.R.AGTGENAPWVVEDELVK#.K         | 17.61  | 2.11   | 8.36  | 0.12  |
| Q9Z277_BA21B_MOUSE | Baz1b   | Tyrosine-protein kinase E.K.DDPEVDDLVLQTK#.R             | 24.21  | 8.85   | 2.74  | 0.37  |
| Q9Z277_BA21B_MOUSE | Baz1b   | Tyrosine-protein kinase E.R.DEAEDYDVIEHPM*DFQTIQNK#.C    | 16.10  | 5.29   | 3.04  | 0.33  |
| Q9Z277_BA21B_MOUSE | Baz1b   | Tyrosine-protein kinase E.R.DSSSLSPNPK#.L                | 14.82  | 18.33  | 0.81  | 1.24  |
| Q9Z277_BA21B_MOUSE | Baz1b   | Tyrosine-protein kinase E.R.FEDQLGGR@.N                  | 84.86  | 33.79  | 2.51  | 0.40  |
| Q9Z277_BA21B_MOUSE | Baz1b   | Tyrosine-protein kinase E.K.FSDFLDPYK#.Y                 | 70.08  | 9.05   | 7.74  | 0.13  |
| Q9Z277_BA21B_MOUSE | Baz1b   | Tyrosine-protein kinase E.K.FSDFLDPYK*Y*Y*TLNPSTK#.R     | 18.01  | 3.83   | 4.86  | 0.21  |
| Q9Z277_BA21B_MOUSE | Baz1b   | Tyrosine-protein kinase E.K.GGLGYM*EGTSEFEAR@.V          | 46.59  | 15.57  | 2.99  | 0.33  |
| Q9Z277_BA21B_MOUSE | Baz1b   | Tyrosine-protein kinase E.K.GGLGYM*EGTSEFEAR@.V          | 72.59  | 18.45  | 3.94  | 0.25  |
| Q9Z277_BA21B_MOUSE | Baz1b   | Tyrosine-protein kinase E.K.GGLGYM*EGTSEFEAR@.V          | 7.29   | 2.96   | 2.47  | 0.41  |
| Q9Z277_BA21B_MOUSE | Baz1b   | Tyrosine-protein kinase E.K.IEQQVEVEADDM*ISAVK#.S        | 19.21  | 7.80   | 2.46  | 0.41  |
| Q9Z277_BA21B_MOUSE | Baz1b   | Tyrosine-protein kinase E.K.IEQQVEVEADDM*ISAVK#.S        | 5.55   | 3.06   | 1.82  | 0.55  |
| Q9Z277_BA21B_MOUSE | Baz1b   | Tyrosine-protein kinase E.K.IISNVPADSLIR@.T              | 88.48  | 16.58  | 5.34  | 0.19  |
| Q9Z277_BA21B_MOUSE | Baz1b   | Tyrosine-protein kinase E.R.ILM*YSVQDHMM*ETR@.Q          | 8.83   | 2.03   | 2.38  | 0.42  |
| Q9Z277_BA21B_MOUSE | Baz1b   | Tyrosine-protein kinase E.R.KHPFVKPLPGEELFTPIHTQEAFR@.T  | 35.95  | 4.92   | 7.31  | 0.14  |
| Q9Z277_BA21B_MOUSE | Baz1b   | Tyrosine-protein kinase E.R.LADDEGSDSESVGQSR@.G          | 30.12  | 7.20   | 4.19  | 0.24  |
| Q9Z277_BA21B_MOUSE | Baz1b   | Tyrosine-protein kinase E.K.LETSEFFLTSEEK#.L             | 49.38  | 16.90  | 2.92  | 0.34  |
| Q9Z277_BA21B_MOUSE | Baz1b   | Tyrosine-protein kinase E.K.LSEIPLTHSVSELVR.L            | 14.66  | 15.35  | 0.95  | 1.05  |
| Q9Z277_BA21B_MOUSE | Baz1b   | Tyrosine-protein kinase E.R.QQSAELWK#.E                  | 47.94  | 33.64  | 1.42  | 0.70  |
| Q9Z277_BA21B_MOUSE | Baz1b   | Tyrosine-protein kinase E.K.R@DSSSLSPNPK#.L              | 23.69  | 1.90   | 12.44 | 0.08  |
| Q9Z277_BA21B_MOUSE | Baz1b   | Tyrosine-protein kinase E.K.R@FEDQLGGR@.N                | 17.85  | 5.72   | 3.12  | 0.32  |
| Q9Z277_BA21B_MOUSE | Baz1b   | Tyrosine-protein kinase E.R.SDLIEVATR@.L                 | 93.35  | 26.85  | 3.48  | 0.29  |
| Q9Z277_BA21B_MOUSE | Baz1b   | Tyrosine-protein kinase E.R.SR@PKHDPEVDDLVLQTK#.R        | 24.12  | 11.40  | 3.72  | 0.27  |
| Q9Z277_BA21B_MOUSE | Baz1b   | Tyrosine-protein kinase E.R.SVQEFITDM*#.Q                | 48.89  | 14.30  | 3.42  | 0.29  |
| Q9Z277_BA21B_MOUSE | Baz1b   | Tyrosine-protein kinase E.R.SVQEFITDM*#.Q                | 10.25  | 4.14   | 2.47  | 0.40  |
| Q9Z277_BA21B_MOUSE | Baz1b   | Tyrosine-protein kinase E.K.VDEAVEK#.K                   | 13.02  | 2.89   | 4.51  | 0.22  |
| Q9Z277_BA21B_MOUSE | Baz1b   | Tyrosine-protein kinase E.R.WASM*SEEQR@.K                | 7.18   | 2.00   | 3.59  | 0.28  |
| Q9Z277_BA21B_MOUSE | Baz1b   | Tyrosine-protein kinase E.R.YWFLSNEVPLFIEK#.G            | 41.16  | 15.40  | 2.67  | 0.37  |
| Q91Y5_BA22A_MOUSE  | Baz2a   | Bromodomain adjacent 1 R.LAVLEQNVER@.R                   | 7.60   | 4.63   | 1.64  | 0.61  |
| Q91Y5_BA22A_MOUSE  | Baz2a   | Bromodomain adjacent 1 R.VVLSDLQIR@.G                    | 9.98   | 6.27   | 1.59  | 0.63  |
| Q91Y5_BA22A_MOUSE  | Baz2a   | Bromodomain adjacent 1 K.EGEDIVAASSIPELER@.H             | 5.21   | 4.04   | 1.29  | 0.77  |
| Q91Y5_BA22A_MOUSE  | Baz2a   | Bromodomain adjacent 1 R.GESOTPVQGOAR@.N                 | 7.65   | 4.40   | 1.74  | 0.58  |
| Q91Y5_BA22A_MOUSE  | Baz2a   | Bromodomain adjacent 1 R.IM*EETSIGIEEEEEENTTAVHGR@.R     | 5.71   | 4.05   | 1.41  | 0.71  |
| Q91Y5_BA22A_MOUSE  | Baz2a   | Bromodomain adjacent 1 K.K#LETQILSEDDK#AK#.M             | 11.90  | 6.98   | 1.70  | 0.59  |
| Q91Y5_BA22A_MOUSE  | Baz2a   | Bromodomain adjacent 1 K.K#LETQILSEDDK#AK#.M             | 11.29  | 5.05   | 2.24  | 0.45  |
| Q8VBW5_BBX_MOUSE   | Bbx     | HMG box transcription factor I.K.IISGVPSR@.K             | 40.60  | 19.53  | 2.08  | 0.48  |
| Q61335_BAP31_MOUSE | Bcap31  | B-cell receptor-associate K.AEENALAMQK#.Q                | 85.77  | 37.33  | 2.30  | 0.44  |
| Q61335_BAP31_MOUSE | Bcap31  | B-cell receptor-associate K.AEENALAMQK#.Q                | 38.18  | 15.76  | 2.42  | 0.41  |
| Q61335_BAP31_MOUSE | Bcap31  | B-cell receptor-associate K.GAAEDGK#LIDIGNTM*#.L         | 130.28 | 57.76  | 2.26  | 0.44  |
| Q61335_BAP31_MOUSE | Bcap31  | B-cell receptor-associate K.KYM*EENDQLK#.G               | 87.08  | 35.27  | 2.47  | 0.41  |
| Q61335_BAP31_MOUSE | Bcap31  | B-cell receptor-associate K.LK#DELASTK#.K                | 14.39  | 6.70   | 2.15  | 0.47  |
| Q61335_BAP31_MOUSE | Bcap31  | B-cell receptor-associate K.YM*EENDQLK#.G                | 8.65   | 4.50   | 1.93  | 0.52  |
| Q9D287_SPF27_MOUSE | Bcas2   | Pre-mRNA-splicing factor R.EAAAALVEETR@.R                | 6.65   | 4.21   | 1.58  | 0.63  |
| Q9D287_SPF27_MOUSE | Bcas2   | Pre-mRNA-splicing factor K.HIQDLNWQR@.K                  | 8.52   | 6.12   | 1.39  | 0.72  |
| Q9D287_SPF27_MOUSE | Bcas2   | Pre-mRNA-splicing factor K.LR@EM*ESNWSVLSK#.N            | 23.01  | 14.26  | 1.61  | 0.62  |
| Q9D287_SPF27_MOUSE | Bcas2   | Pre-mRNA-splicing factor K.NM*QLTAGSK#.N                 | 9.25   | 6.09   | 1.52  | 0.66  |
| Q9D287_SPF27_MOUSE | Bcas2   | Pre-mRNA-splicing factor K.NYLSYLTAPDYSAFETDIM*#.R@.N    | 2.92   | 2.70   | 1.08  | 0.93  |
| Q9D287_SPF27_MOUSE | Bcas2   | Pre-mRNA-splicing factor K.R@YELPAPSSGQK#.N              | 8.92   | 90.07  | 0.10  | 10.10 |
| Q9D287_SPF27_MOUSE | Bcas2   | Pre-mRNA-splicing factor R.TIVQLENIYQK#.Q                | 71.21  | 41.60  | 1.71  | 0.58  |
| Q9D287_SPF27_MOUSE | Bcas2   | Pre-mRNA-splicing factor R.TIVQLENIYQK#.Q                | 9.29   | 8.19   | 1.13  | 0.88  |
| Q9D287_SPF27_MOUSE | Bcas2   | Pre-mRNA-splicing factor R.EAAAALVEETR@.R                | 5.61   | 3.21   | 1.75  | 0.57  |
| Q9D287_SPF27_MOUSE | Bcas2   | Pre-mRNA-splicing factor R.EM*ESNWSVLSK#.N               | 7.22   | 3.20   | 2.26  | 0.44  |
| Q9D287_SPF27_MOUSE | Bcas2   | Pre-mRNA-splicing factor K.NYLSYLTAPDYSAFETDIM*#.R@.N    | 1.99   | 2.92   | 0.68  | 1.47  |
| Q9D287_SPF27_MOUSE | Bcas2   | Pre-mRNA-splicing factor K.R@YELPAPSSGQK#.N              | 5.59   | 35.25  | 0.16  | 6.31  |
| Q9D287_SPF27_MOUSE | Bcas2   | Pre-mRNA-splicing factor R.TIVQLENIYQK#.Q                | 65.80  | 45.08  | 1.46  | 0.69  |
| Q9D287_SPF27_MOUSE | Bcas2   | Pre-mRNA-splicing factor R.TIVQLENIYQK#.Q                | 12.90  | 6.12   | 2.11  | 0.47  |
| Q9D287_SPF27_MOUSE | Bcas2   | Pre-mRNA-splicing factor R.YELPAPSSGQK#.N                | 13.48  | 10.28  | 1.31  | 0.76  |
| P59017_B2L13_MOUSE | Bcl2l13 | Bcl-2-like protein 13 OS-R.AEGAAQLSEER.A                 | 10.05  | 4.00   | 2.51  | 0.40  |

|                     |         |                                                               |        |        |      |      |
|---------------------|---------|---------------------------------------------------------------|--------|--------|------|------|
| P59017_B2L13_MOUSE  | Bcl2l13 | Bcl-2-like protein 13 OS= K.QQGPSPPGVQLDVAPOSLNPEVLLK#.L      | 9.21   | 3.10   | 2.97 | 0.34 |
| P59017_B2L13_MOUSE  | Bcl2l13 | Bcl-2-like protein 13 OS= K.YVVLVSYLGLLSQEK#.Q                | 10.62  | 5.01   | 2.12 | 0.47 |
| P59017_B2L13_MOUSE  | Bcl2l13 | Bcl-2-like protein 13 OS= R.AEGAALQSEER@.A                    | 15.45  | 3.54   | 4.37 | 0.23 |
| P59017_B2L13_MOUSE  | Bcl2l13 | Bcl-2-like protein 13 OS= R.AEGAALQSEER@.A                    | 7.87   | 2.18   | 3.61 | 0.28 |
| P59017_B2L13_MOUSE  | Bcl2l13 | Bcl-2-like protein 13 OS= K.QQGPSPPGVQLDVAPOSLNPEVLLK#.L      | 10.60  | 1.68   | 6.11 | 0.16 |
| P59017_B2L13_MOUSE  | Bcl2l13 | Bcl-2-like protein 13 OS= K.YVVLVSYLGLLSQEK#.Q                | 10.60  | 3.87   | 2.74 | 0.37 |
| Q921K9_BCL7B_MOUSE  | Bcl7b   | B-cell CLL/lymphoma 7 p R.TDSDQPPLTGQELLEEPSLASEVADEPPTLTK#.E | 1.76   | 2.11   | 0.83 | 1.20 |
| O08664_BCL7C_MOUSE  | Bcl7c   | B-cell CLL/lymphoma 7 p R.GGGPLILLDLNDENSNQSFHSEGSLOK#.G      | 11.74  | 4.86   | 2.41 | 0.41 |
| O08664_BCL7C_MOUSE  | Bcl7c   | B-cell CLL/lymphoma 7 p K.WVVPVDPQEEER@.R                     | 9.71   | 4.96   | 1.96 | 0.51 |
| Q8K019_BCLF1_MOUSE  | Bclaf1  | Bcl-2-associated transcrip K.DR@LLASTLVHSVK#.K                | 12.56  | 9.92   | 1.27 | 0.79 |
| Q8K019_BCLF1_MOUSE  | Bclaf1  | Bcl-2-associated transcrip K.FHDSEGGDTEETEDYR@.Q              | 18.02  | 8.87   | 2.03 | 0.49 |
| Q8K019_BCLF1_MOUSE  | Bclaf1  | Bcl-2-associated transcrip K.KHAEGEPQESPLK#.S                 | 11.26  | 4.01   | 2.81 | 0.36 |
| Q8K019_BCLF1_MOUSE  | Bclaf1  | Bcl-2-associated transcrip K.SATSGDIWPLGSAYDNSPR@.S           | 12.49  | 4.70   | 2.66 | 0.38 |
| Q8K019_BCLF1_MOUSE  | Bclaf1  | Bcl-2-associated transcrip K.SPAVTLNER.F                      | 50.93  | 49.32  | 1.03 | 0.97 |
| Q8K019_BCLF1_MOUSE  | Bclaf1  | Bcl-2-associated transcrip K.SQEEPKDTTFEHDPSIDEFNK#.S         | 21.43  | 4.70   | 4.56 | 0.22 |
| Q8K019_BCLF1_MOUSE  | Bclaf1  | Bcl-2-associated transcrip R.SSFYPEGDQETAK#.T                 | 52.18  | 30.89  | 1.69 | 0.59 |
| Q8K019_BCLF1_MOUSE  | Bclaf1  | Bcl-2-associated transcrip R.VFLDDR@.G                        | 82.08  | 31.57  | 2.60 | 0.38 |
| Q8K019_BCLF1_MOUSE  | Bclaf1  | Bcl-2-associated transcrip K.DR@LLASTLVHSVK#.K                | 48.09  | 14.22  | 3.38 | 0.30 |
| Q8K019_BCLF1_MOUSE  | Bclaf1  | Bcl-2-associated transcrip K.EEEVDPEYTPK#.S                   | 8.50   | 2.43   | 3.50 | 0.29 |
| Q8K019_BCLF1_MOUSE  | Bclaf1  | Bcl-2-associated transcrip K.ETAYIVERPSTAK.D                  | 15.70  | 5.33   | 2.95 | 0.34 |
| Q8K019_BCLF1_MOUSE  | Bclaf1  | Bcl-2-associated transcrip K.EVQSPQVK#.S                      | 55.55  | 18.53  | 3.00 | 0.33 |
| Q8K019_BCLF1_MOUSE  | Bclaf1  | Bcl-2-associated transcrip K.FHDSEGGDTEETEDYR@.Q              | 67.67  | 15.13  | 4.47 | 0.22 |
| Q8K019_BCLF1_MOUSE  | Bclaf1  | Bcl-2-associated transcrip R.FTDEESR@.V                       | 44.19  | 16.74  | 2.64 | 0.38 |
| Q8K019_BCLF1_MOUSE  | Bclaf1  | Bcl-2-associated transcrip R.GFKHEIQK#.G                      | 45.87  | 18.73  | 2.45 | 0.41 |
| Q8K019_BCLF1_MOUSE  | Bclaf1  | Bcl-2-associated transcrip R.GFKHEIQK#.G                      | 73.97  | 19.56  | 3.78 | 0.26 |
| Q8K019_BCLF1_MOUSE  | Bclaf1  | Bcl-2-associated transcrip K.GRADGDWDDQEVLDYFSDKESAK.Q        | 36.94  | 9.26   | 3.99 | 0.25 |
| Q8K019_BCLF1_MOUSE  | Bclaf1  | Bcl-2-associated transcrip K.GR@ADGDWDDQEVLDYFSDK#ESAK#.Q     | 6.88   | 4.48   | 1.54 | 0.65 |
| Q8K019_BCLF1_MOUSE  | Bclaf1  | Bcl-2-associated transcrip R.IDISPNALR@.K                     | 19.82  | 7.65   | 2.59 | 0.39 |
| Q8K019_BCLF1_MOUSE  | Bclaf1  | Bcl-2-associated transcrip R.K#SVLADQK#.S                     | 17.59  | 5.64   | 3.12 | 0.32 |
| Q8K019_BCLF1_MOUSE  | Bclaf1  | Bcl-2-associated transcrip K.QK#FHDSEGGDTEETEDYR@.Q           | 11.55  | 2.80   | 4.13 | 0.24 |
| Q8K019_BCLF1_MOUSE  | Bclaf1  | Bcl-2-associated transcrip K.R@FTDEESR@.V                     | 21.04  | 5.80   | 3.63 | 0.28 |
| Q8K019_BCLF1_MOUSE  | Bclaf1  | Bcl-2-associated transcrip K.R@PK#EEVDPEYTPK#.S               | 10.95  | 4.20   | 2.61 | 0.38 |
| Q8K019_BCLF1_MOUSE  | Bclaf1  | Bcl-2-associated transcrip K.SATSGDIWPLGSAYDNSPR@.S           | 17.92  | 4.01   | 4.46 | 0.22 |
| Q8K019_BCLF1_MOUSE  | Bclaf1  | Bcl-2-associated transcrip R.SIFDHIK#.L                       | 72.88  | 27.94  | 2.61 | 0.38 |
| Q8K019_BCLF1_MOUSE  | Bclaf1  | Bcl-2-associated transcrip K.SPAVTLNER@.F                     | 205.76 | 70.36  | 2.92 | 0.34 |
| Q8K019_BCLF1_MOUSE  | Bclaf1  | Bcl-2-associated transcrip K.SQEEPKDTTFEHDPSIDEFNK#.S         | 30.01  | 9.01   | 3.33 | 0.30 |
| Q8K019_BCLF1_MOUSE  | Bclaf1  | Bcl-2-associated transcrip R.SSFYPEGDQETAK#.T                 | 154.43 | 58.79  | 2.63 | 0.38 |
| Q8K019_BCLF1_MOUSE  | Bclaf1  | Bcl-2-associated transcrip K.SVLADQK#.S                       | 121.34 | 52.84  | 2.30 | 0.44 |
| Q8K019_BCLF1_MOUSE  | Bclaf1  | Bcl-2-associated transcrip K.TITPQNAQR@.E                     | 221.93 | 68.06  | 3.26 | 0.31 |
| Q8K019_BCLF1_MOUSE  | Bclaf1  | Bcl-2-associated transcrip R.VFLDDR@.G                        | 416.44 | 112.77 | 3.69 | 0.27 |
| Q8K019_BCLF1_MOUSE  | Bclaf1  | Bcl-2-associated transcrip K.DR@LLASTLVHSVK#.K                | 8.90   | 4.31   | 2.06 | 0.48 |
| Q8K019_BCLF1_MOUSE  | Bclaf1  | Bcl-2-associated transcrip K.FHDSEGGDTEETEDYR@.Q              | 18.35  | 6.19   | 2.97 | 0.34 |
| Q8K019_BCLF1_MOUSE  | Bclaf1  | Bcl-2-associated transcrip K.SATSGDIWPLGSAYDNSPR@.S           | 5.74   | 2.18   | 2.64 | 0.38 |
| Q8K019_BCLF1_MOUSE  | Bclaf1  | Bcl-2-associated transcrip K.SPAVTLNER.F                      | 51.17  | 24.51  | 2.09 | 0.48 |
| Q8K019_BCLF1_MOUSE  | Bclaf1  | Bcl-2-associated transcrip K.SQEEPKDTTFEHDPSIDEFNK#.S         | 35.79  | 14.59  | 2.45 | 0.41 |
| Q8K019_BCLF1_MOUSE  | Bclaf1  | Bcl-2-associated transcrip R.SSFYPEGDQETAK#.T                 | 39.30  | 12.55  | 3.13 | 0.32 |
| Q8K019_BCLF1_MOUSE  | Bclaf1  | Bcl-2-associated transcrip R.VFLDDR@.G                        | 68.45  | 17.09  | 4.01 | 0.25 |
| Q6PAJ1_BCR_MOUSE    | Bcr     | Breakpoint cluster region R.STLVHLHLK#.H                      | 8.12   | 2.79   | 2.91 | 0.34 |
| Q6PAJ1_BCR_MOUSE    | Bcr     | Breakpoint cluster region K.AAATTSQPVLTSQQTETIFFK#.V          | 6.29   | 2.10   | 2.99 | 0.33 |
| Q6PALO_BEND3_MOUSE  | Bend3   | BEN domain-containing p R.LPELFTTENLR@.L                      | 7.32   | 2.69   | 2.72 | 0.37 |
| O35623_BET1_MOUSE   | Bet1    | BET1 homolog OS=Mus r.K.LLAEM*DSQFDTSTGLGK#.T                 | 23.60  | 9.87   | 2.39 | 0.42 |
| P28653_PGS1_MOUSE   | Bgn     | Biglycan OS=Mus muscul K.IQAIIELELLR@.Y                       | 16.56  | 14.82  | 1.12 | 0.90 |
| P28653_PGS1_MOUSE   | Bgn     | Biglycan OS=Mus muscul K.IQAIIELELLR@.Y                       | 11.89  | 10.01  | 1.19 | 0.84 |
| Q921C5_BICD2_MOUSE  | Bicd2   | Protein bicaudal D homc K.FSDTVAEPNDAEALVNGFEHSGLVK#.S        | 11.89  | 1.93   | 2.82 | 0.35 |
| Q921C5_BICD2_MOUSE  | Bicd2   | Protein bicaudal D homc K.GLLATEVGR@.A                        | 27.95  | 10.24  | 2.73 | 0.37 |
| Q921C5_BICD2_MOUSE  | Bicd2   | Protein bicaudal D homc K.GR@YEAEQALTEK#.I                    | 15.66  | 6.42   | 2.44 | 0.41 |
| Q921C5_BICD2_MOUSE  | Bicd2   | Protein bicaudal D homc R.LLQDYSELEENISLQK#.Q                 | 12.25  | 5.34   | 2.29 | 0.44 |
| Q921C5_BICD2_MOUSE  | Bicd2   | Protein bicaudal D homc R.LTENLSALLR@.R                       | 16.97  | 3.93   | 4.32 | 0.23 |
| Q921C5_BICD2_MOUSE  | Bicd2   | Protein bicaudal D homc R.NVLTNTQSENER.L                      | 21.04  | 8.00   | 2.63 | 0.38 |
| Q921C5_BICD2_MOUSE  | Bicd2   | Protein bicaudal D homc K.VAADGEESR@EESLQESAK#.E              | 8.74   | 4.17   | 2.09 | 0.48 |
| Q921C5_BICD2_MOUSE  | Bicd2   | Protein bicaudal D homc K.VGLLATLQDQTK#.Q                     | 30.45  | 11.97  | 2.54 | 0.39 |
| O08539_BIN1_MOUSE   | Bin1    | Myc box-dependent-inte R.TYLSAVK#.A                           | 9.28   | 9.23   | 1.01 | 0.99 |
| O08539_BIN1_MOUSE   | Bin1    | Myc box-dependent-inte R.VNHPEPEASGASPATIPK#.S                | 20.52  | 9.39   | 2.19 | 0.46 |
| Q9J108_BIN3_MOUSE   | Bin3    | Bridging integrator 3 OS=K.FSSIFPSLNM*AVK#.R                  | 4.97   | 2.46   | 2.02 | 0.50 |
| Q9J108_BIN3_MOUSE   | Bin3    | Bridging integrator 3 OS= R.LDYFQPSFSLIR@.A                   | 16.04  | 4.46   | 3.59 | 0.28 |
| O88738_BIRC6_MOUSE  | Birc6   | Baculoviral IAP repeat-cc K.IDVSVSTEGYDLFITQLK#.D             | 5.59   | 1.81   | 3.09 | 0.32 |
| O88738_BIRC6_MOUSE  | Birc6   | Baculoviral IAP repeat-cc R.TLPLVLLYSIK#.E                    | 10.82  | 4.30   | 2.51 | 0.40 |
| O88738_BIRC6_MOUSE  | Birc6   | Baculoviral IAP repeat-cc K.VLDLSNFELAK#.V                    | 5.77   | 2.69   | 2.15 | 0.47 |
| O55102_BL151_MOUSE  | Bloc1s1 | Biogenesis of lysosome-r K.TIATALEVYVK#.Q                     | 31.35  | 14.48  | 2.16 | 0.47 |
| O55102_BL151_MOUSE  | Bloc1s1 | Biogenesis of lysosome-r K.TLQVQAAQFAK#.G                     | 15.08  | 7.09   | 2.13 | 0.46 |
| Q6PGF5_Q6PGF5_MOUSE | Bms1    | BMS1 homolog, ribosom K.GK#GPTDQSEDEIEEVEVKHEETDPEEESAR@.K    | 8.64   | 7.15   | 1.21 | 0.83 |
| Q6PGF5_Q6PGF5_MOUSE | Bms1    | BMS1 homolog, ribosom R.IAATGVLLDLR#.K                        | 12.13  | 8.27   | 1.47 | 0.68 |
| Q6PGF5_Q6PGF5_MOUSE | Bms1    | BMS1 homolog, ribosom R.K#VALLDALSTHSQK#.M                    | 11.94  | 5.13   | 2.33 | 0.43 |
| Q6PGF5_Q6PGF5_MOUSE | Bms1    | BMS1 homolog, ribosom K.K#GK#GPTDQSEDEIEEVEVKHEETDPEEESAR@.K  | 10.88  | 8.49   | 1.23 | 0.81 |
| Q6PGF5_Q6PGF5_MOUSE | Bms1    | BMS1 homolog, ribosom R.IAATGVLLDLR#.K                        | 23.69  | 7.93   | 2.99 | 0.33 |
| Q6PGF5_Q6PGF5_MOUSE | Bms1    | BMS1 homolog, ribosom K.LAEELVYGFEDLETGDVHK#.G                | 16.69  | 7.44   | 2.28 | 0.44 |
| Q6PGF5_Q6PGF5_MOUSE | Bms1    | BMS1 homolog, ribosom R.K#VALLDALSTHSQK#.M                    | 10.47  | 5.72   | 1.83 | 0.55 |
| Q6PGF5_Q6PGF5_MOUSE | Bms1    | BMS1 homolog, ribosom K.LIYGTVDNEDEDGPAEELGGLFHVSQDPR@.G      | 3.78   | 1.87   | 2.02 | 0.50 |
| Q6PGF5_Q6PGF5_MOUSE | Bms1    | BMS1 homolog, ribosom K.VLALLDALSTHSQK#.M                     | 12.34  | 7.36   | 1.68 | 0.60 |
| P97504_BMX_MOUSE    | Bmx     | Cytoplasmic tyrosine-prc K.GKEGAFVVR@.N                       | 7.36   | 9.50   | 0.78 | 1.29 |
| Q8BMQ3_BNC2_MOUSE   | Bnc2    | Zinc finger protein bason K.EGQAVAVSSK.T                      | 2.95   | 8.66   | 0.34 | 2.94 |
| E9Q6J5_E9Q6J5_MOUSE | Bod1l   | Protein Bod1 OS=Mus m.K.ETVEDTTTSTGLVVK#.G                    | 4.36   | 1.60   | 2.73 | 0.37 |
| P97452_BOP1_MOUSE   | Bop1    | Ribosome biogenesis pro R.VNVDPELDLPK#.L                      | 5.19   | 3.08   | 1.68 | 0.59 |
| A2A654_A2A654_MOUSE | Bptf    | Protein Bptf OS=Mus mu: K.ESASTQVITPR@.A                      | 6.67   | 3.58   | 1.86 | 0.54 |
| A2A654_A2A654_MOUSE | Bptf    | Protein Bptf OS=Mus mu: K.EVLVNSQGEVSR@.L                     | 8.42   | 2.81   | 3.00 | 0.33 |
| A2A654_A2A654_MOUSE | Bptf    | Protein Bptf OS=Mus mu: R.FIAPEQGGESVETSK#.C                  | 4.97   | 3.59   | 1.38 | 0.72 |
| A2A654_A2A654_MOUSE | Bptf    | Protein Bptf OS=Mus mu: R.LIIEEDTNEENIK#.K                    | 6.79   | 3.59   | 1.89 | 0.53 |
| A2A654_A2A654_MOUSE | Bptf    | Protein Bptf OS=Mus mu: K.LTSPDPTGDVTSVK#.E                   | 10.83  | 7.79   | 1.39 | 0.72 |
| A2A654_A2A654_MOUSE | Bptf    | Protein Bptf OS=Mus mu: K.SFLAAANEELDSLIR@.I                  | 20.35  | 9.86   | 2.06 | 0.48 |
| A2A654_A2A654_MOUSE | Bptf    | Protein Bptf OS=Mus mu: R.TETSEITTEIHK#.R                     | 3.31   | 1.89   | 1.75 | 0.57 |
| A2A654_A2A654_MOUSE | Bptf    | Protein Bptf OS=Mus mu: K.VGSPATVTFQKQK#.N                    | 9.17   | 4.53   | 2.02 | 0.49 |
| G5E8P1_G5E8P1_MOUSE | Brd1    | MCG7283 OS=Mus musci: K.ELTGGATSVSR@.K                        | 10.77  | 7.60   | 1.42 | 0.71 |
| G5E8P1_G5E8P1_MOUSE | Brd1    | MCG7283 OS=Mus musci: R.ETLTYAQOR@.M                          | 8.95   | 4.81   | 1.86 | 0.54 |
| G5E8P1_G5E8P1_MOUSE | Brd1    | MCG7283 OS=Mus musci: R.LIIEVYPPASPR@.R                       | 14.50  | 6.43   | 2.25 | 0.44 |
| G5E8P1_G5E8P1_MOUSE | Brd1    | MCG7283 OS=Mus musci: R.LETLQPR@.K                            | 15.78  | 10.15  | 1.56 | 0.64 |
| G5E8P1_G5E8P1_MOUSE | Brd1    | MCG7283 OS=Mus musci: R.LTPLVLLR@.S                           | 65.77  | 32.08  | 2.05 | 0.49 |
| G5E8P1_G5E8P1_MOUSE | Brd1    | MCG7283 OS=Mus musci: R.VHGEPAASLSDID.-                       | 8.77   | 8.77   | 1.00 | 1.00 |
| G5E8P1_G5E8P1_MOUSE | Brd1    | MCG7283 OS=Mus musci: R.LTPLVLLR@.S                           | 24.91  | 10.88  | 2.29 | 0.44 |
| Q7J113_BRD2_MOUSE   | Brd2    | Bromodomain-containing R.AVHEQLAALSQGSPISK#PK#.R              | 11.50  | 4.00   | 2.88 | 0.35 |
| Q7J113_BRD2_MOUSE   | Brd2    | Bromodomain-containing R.DLPSDQQHQSSK#.K                      | 3.47   | 1.67   | 2.07 | 0.48 |
| Q7J113_BRD2_MOUSE   | Brd2    | Bromodomain-containing R.GIDEDKHGPR@.A                        | 9.32   | 4.76   | 1.96 | 0.51 |
| Q7J113_BRD2_MOUSE   | Brd2    | Bromodomain-containing R.K#ADTTTPTTALAPGSPASPSPLEPK#.A        | 6.08   | 4.19   | 1.45 | 0.69 |
| Q7J113_BRD2_MOUSE   | Brd2    | Bromodomain-containing R.LAELEQQLR@.A                         | 37.41  | 12.38  | 3.02 | 0.33 |

|                     |        |                                                          |       |       |       |      |
|---------------------|--------|----------------------------------------------------------|-------|-------|-------|------|
| Q7J113_BRD2_MOUSE   | Brd2   | Bromodomain-containir K.SLHSAGPLLAVAAPPAQPLAK#K          | 43.62 | 19.37 | 2.25  | 0.44 |
| Q7J113_BRD2_MOUSE   | Brd2   | Bromodomain-containir K.VASMP*PQEQLVVTIPK#N              | 11.97 | 5.13  | 2.33  | 0.43 |
| Q7J113_BRD2_MOUSE   | Brd2   | Bromodomain-containir K.VASMP*PQEQLVVTIPK#N              | 4.79  | 1.66  | 2.88  | 0.35 |
| Q9ESU6_BRD4_MOUSE   | Brd4   | Bromodomain-containir R.DAQEFGADV@L                      | 25.03 | 8.95  | 2.80  | 0.36 |
| Q9ESU6_BRD4_MOUSE   | Brd4   | Bromodomain-containir K.HQFAWPFQOPVDAVK#L                | 14.60 | 6.07  | 2.41  | 0.42 |
| Q9ESU6_BRD4_MOUSE   | Brd4   | Bromodomain-containir K.INELPTEETEIM*IVQAK#G             | 16.78 | 7.48  | 2.24  | 0.45 |
| Q9ESU6_BRD4_MOUSE   | Brd4   | Bromodomain-containir K.INELPTEETEIMVQAK#G               | 5.86  | 2.68  | 2.19  | 0.46 |
| Q9ESU6_BRD4_MOUSE   | Brd4   | Bromodomain-containir K.KHEVEENK#K                       | 4.74  | 1.90  | 2.50  | 0.40 |
| Q9ESU6_BRD4_MOUSE   | Brd4   | Bromodomain-containir R.LAELEQELK#A                      | 59.08 | 20.93 | 2.82  | 0.35 |
| Q9ESU6_BRD4_MOUSE   | Brd4   | Bromodomain-containir K.M*PDEPEPVTVSSPAVPPPTK#V          | 8.17  | 3.25  | 2.52  | 0.40 |
| Q9ESU6_BRD4_MOUSE   | Brd4   | Bromodomain-containir K.AVHEQLAALSQOQONK#PK#K            | 16.01 | 1.36  | 11.80 | 0.08 |
| Q9ESU6_BRD4_MOUSE   | Brd4   | Bromodomain-containir R.DAQEFGADV@L                      | 15.83 | 2.60  | 6.09  | 0.16 |
| Q9ESU6_BRD4_MOUSE   | Brd4   | Bromodomain-containir K.DVPDSQHQHPGPEK#S                 | 8.13  | 2.79  | 2.91  | 0.34 |
| Q9ESU6_BRD4_MOUSE   | Brd4   | Bromodomain-containir K.HQFAWPFQOPVDAVK#L                | 6.73  | 3.64  | 1.85  | 0.54 |
| Q9ESU6_BRD4_MOUSE   | Brd4   | Bromodomain-containir K.INELPTEETEIM*IVQAK#G             | 20.22 | 4.16  | 4.87  | 0.21 |
| Q9ESU6_BRD4_MOUSE   | Brd4   | Bromodomain-containir K.INELPTEETEIMVQAK#G               | 6.93  | 2.16  | 3.20  | 0.31 |
| Q9ESU6_BRD4_MOUSE   | Brd4   | Bromodomain-containir R.QTNQLQYLRL@V                     | 10.31 | 3.11  | 3.31  | 0.30 |
| Q9ESU6_BRD4_MOUSE   | Brd4   | Bromodomain-containir R.SR@EDALEQAR@R                    | 10.18 | 2.03  | 5.02  | 0.20 |
| Q9ESU6_BRD4_MOUSE   | Brd4   | Bromodomain-containir K.VDVIAAGSSK#M                     | 16.87 | 4.90  | 3.44  | 0.29 |
| O88665_BRD7_MOUSE   | Brd7   | Bromodomain-containir K.EAEITQEPGTGR@L                   | 21.05 | 6.63  | 3.18  | 0.31 |
| O88665_BRD7_MOUSE   | Brd7   | Bromodomain-containir R.EM*VLAQEPVTLNKLK#E               | 12.69 | 1.81  | 7.01  | 0.14 |
| O88665_BRD7_MOUSE   | Brd7   | Bromodomain-containir R.HFYEVYKPKL#L                     | 27.48 | 6.01  | 4.58  | 0.22 |
| O88665_BRD7_MOUSE   | Brd7   | Bromodomain-containir R.LQSGVNTLQGF#K                    | 28.27 | 4.65  | 6.09  | 0.16 |
| O88665_BRD7_MOUSE   | Brd7   | Bromodomain-containir R.LTALQAVTFGAPAEVDFSEAEVQR@K       | 35.56 | 10.83 | 3.28  | 0.30 |
| O88665_BRD7_MOUSE   | Brd7   | Bromodomain-containir K.QEVEQITPLQELNQLM*#R@Q            | 8.99  | 2.22  | 4.05  | 0.25 |
| O88665_BRD7_MOUSE   | Brd7   | Bromodomain-containir R.SLQDLDM*SSPEDEGQTR@A             | 14.95 | 3.03  | 4.93  | 0.20 |
| Q8R3B7_BRD8_MOUSE   | Brd8   | Bromodomain-containir R.LLEAGTQFTTLPSPFTTVASEPVK#L       | 3.88  | 2.34  | 1.66  | 0.60 |
| Q8R3B7_BRD8_MOUSE   | Brd8   | Bromodomain-containir K.GEVVETVEDVIR@K                   | 7.33  | 3.31  | 2.21  | 0.45 |
| Q8R3B7_BRD8_MOUSE   | Brd8   | Bromodomain-containir K.KHEEEAEV#R                       | 4.70  | 1.15  | 4.08  | 0.25 |
| Q8R3B7_BRD8_MOUSE   | Brd8   | Bromodomain-containir R.SGDQNVVSVSR@A                    | 5.31  | 1.91  | 2.78  | 0.36 |
| Q8R3B7_BRD8_MOUSE   | Brd8   | Bromodomain-containir R.SSAAGDIGEADSSGK#G                | 15.62 | 4.54  | 3.44  | 0.29 |
| Q8R3B7_BRD8_MOUSE   | Brd8   | Bromodomain-containir R.LLEAGTQFTTLPSPFTTVASEPVK#L       | 17.47 | 7.17  | 2.44  | 0.41 |
| Q8R3B7_BRD8_MOUSE   | Brd8   | Bromodomain-containir K.LLSTGPTPWSIR@E                   | 9.65  | 3.69  | 2.61  | 0.38 |
| Q3UQU0_BRD9_MOUSE   | Brd9   | Bromodomain-containir R.GGSR@PSSNLSSLTASER@E             | 5.78  | 3.12  | 1.85  | 0.54 |
| Q3UQU0_BRD9_MOUSE   | Brd9   | Bromodomain-containir R.LSVGEQDVAHDPYEFLLQSPPEPAAPAK#N.- | 5.47  | 2.99  | 1.83  | 0.55 |
| Q3UQU0_BRD9_MOUSE   | Brd9   | Bromodomain-containir R.TQPAENESTPIQR@L                  | 14.38 | 6.13  | 2.35  | 0.43 |
| Q8K3W0_BRE_MOUSE    | Bre    | BRCA1-A complex subun K.LPVDFSNIPTYLK#D                  | 22.08 | 5.82  | 3.80  | 0.26 |
| Q8K3W0_BRE_MOUSE    | Bre    | BRCA1-A complex subun K.LPVDFSNIPTYLK#D                  | 17.58 | 6.76  | 2.60  | 0.38 |
| Q8BXV2_BRI3B_MOUSE  | Bri3bp | BRI3-binding protein OS- R.ATSSFSQSVSLFGEDNVR@A          | 3.26  | 2.21  | 1.47  | 0.68 |
| Q9DCA5_BRX1_MOUSE   | Brix1  | Ribosome biogenesis pro R.FVLNLIK#I                      | 25.84 | 15.77 | 1.64  | 0.61 |
| Q9DCA5_BRX1_MOUSE   | Brix1  | Ribosome biogenesis pro R.LILFSSR@G                      | 19.24 | 10.38 | 1.85  | 0.54 |
| Q9DCA5_BRX1_MOUSE   | Brix1  | Ribosome biogenesis pro R.FVLNLIK#I                      | 18.77 | 8.64  | 2.17  | 0.46 |
| Q9DCA5_BRX1_MOUSE   | Brix1  | Ribosome biogenesis pro K.FLVQNIHTLAELK#M                | 24.02 | 18.13 | 1.32  | 0.75 |
| Q9DCA5_BRX1_MOUSE   | Brix1  | Ribosome biogenesis pro R.FVLNLIK#I                      | 20.44 | 12.85 | 1.59  | 0.63 |
| Q9DCA5_BRX1_MOUSE   | Brix1  | Ribosome biogenesis pro R.LILFSSR@G                      | 14.93 | 8.65  | 1.73  | 0.58 |
| Q3U1T3_BRM1L_MOUSE  | Brms1l | Breast cancer metastasi- K.LLYDVTQSELEK#I                | 24.98 | 11.06 | 2.26  | 0.44 |
| Q3U1T3_BRM1L_MOUSE  | Brms1l | Breast cancer metastasi- R.LYYDGEWYIR@G                  | 6.59  | 3.57  | 1.85  | 0.54 |
| P18572_BASI_MOUSE   | Bsg    | Basigin OS=Mus musculu R.R@K#PQDLEDPPGAAPLK#G            | 5.19  | 4.62  | 1.12  | 0.89 |
| P18572_BASI_MOUSE   | Bsg    | Basigin OS=Mus musculu K.YIVDADDR@S                      | 13.94 | 8.40  | 1.66  | 0.60 |
| P18572_BASI_MOUSE   | Bsg    | Basigin OS=Mus musculu K.YVVVSTPEK#S                     | 16.75 | 9.56  | 1.75  | 0.57 |
| Q8R2Q8_BST2_MOUSE   | Bst2   | Bone marrow stromal an R.IKELENEVTKLNQELNLR.I            | 7.51  | 7.72  | 0.97  | 1.03 |
| Q8R2Q8_BST2_MOUSE   | Bst2   | Bone marrow stromal an K.K#VQALEQOAR@I                   | 15.89 | 16.67 | 1.17  | 0.85 |
| Q8R2Q8_BST2_MOUSE   | Bst2   | Bone marrow stromal an K.LNQELENLR@I                     | 56.09 | 51.61 | 1.09  | 0.92 |
| Q8R2Q8_BST2_MOUSE   | Bst2   | Bone marrow stromal an R.IKELENEVTK#L                    | 24.04 | 9.96  | 2.41  | 0.41 |
| Q8R2Q8_BST2_MOUSE   | Bst2   | Bone marrow stromal an K.LNQELENLR@I                     | 46.86 | 24.67 | 1.90  | 0.53 |
| Q8R2Q8_BST2_MOUSE   | Bst2   | Bone marrow stromal an K.VSQALEQOAR@I                    | 50.07 | 23.45 | 2.48  | 0.40 |
| E9QAE3_E9QAE3_MOUSE | Btaf1  | Protein Btaf1 OS=Mus mi R.IIEGLQDLDDVDR@A                | 6.84  | 2.11  | 3.24  | 0.31 |
| E9QAE3_E9QAE3_MOUSE | Btaf1  | Protein Btaf1 OS=Mus mi K.AQADLPAGSSGTLVELDEGQK#PYLVQR@R | 4.42  | 5.03  | 0.88  | 1.14 |
| E9QAE3_E9QAE3_MOUSE | Btaf1  | Protein Btaf1 OS=Mus mi R.IAAGAVSEIVL#N                  | 15.74 | 4.09  | 3.85  | 0.26 |
| E9QAE3_E9QAE3_MOUSE | Btaf1  | Protein Btaf1 OS=Mus mi K.IATM*ETM*NIIFLEK#V             | 7.12  | 2.82  | 2.53  | 0.40 |
| E9QAE3_E9QAE3_MOUSE | Btaf1  | Protein Btaf1 OS=Mus mi K.QSTLQAEALIDSEFR@A              | 4.14  | 3.93  | 1.05  | 0.95 |
| E9QAE3_E9QAE3_MOUSE | Btaf1  | Protein Btaf1 OS=Mus mi K.VANVINTASDSK#V                 | 5.08  | 3.55  | 1.43  | 0.70 |
| Q8R149_BUD13_MOUSE  | Bud13  | BUD13 homolog OS=Mu: K.KHQDQDITDLDAQFEFTETVFR@D          | 12.10 | 4.01  | 3.02  | 0.33 |
| Q8R149_BUD13_MOUSE  | Bud13  | BUD13 homolog OS=Mu: R.YLSDGTADLEGGPEAGR@K               | 10.65 | 3.22  | 3.30  | 0.30 |
| E0CX20_E0CX20_MOUSE | Bud31  | Protein BUD31 homolog K.APPDGVWELIETLDELQK#M             | 11.49 | 11.49 | 1.02  | 0.98 |
| E0CX20_E0CX20_MOUSE | Bud31  | Protein BUD31 homolog R.K#APPDGVWELIETLDELQK#M           | 34.42 | 30.02 | 1.15  | 0.87 |
| E0CX20_E0CX20_MOUSE | Bud31  | Protein BUD31 homolog R.K#VESLWPIFR@I                    | 13.34 | 9.63  | 1.39  | 0.72 |
| E0CX20_E0CX20_MOUSE | Bud31  | Protein BUD31 homolog K.VESLWPIFR@I                      | 9.90  | 7.83  | 1.26  | 0.79 |
| E0CX20_E0CX20_MOUSE | Bud31  | Protein BUD31 homolog R.YIFDLFK#R                        | 13.56 | 8.09  | 1.68  | 0.60 |
| O54825_BYST_MOUSE   | Bystl  | Bystin OS=Mus musculus K.EALLELR@L                       | 19.90 | 5.42  | 3.67  | 0.27 |
| O54825_BYST_MOUSE   | Bystl  | Bystin OS=Mus musculus R.FYNLVLP@V                       | 16.49 | 6.55  | 2.52  | 0.40 |
| O54825_BYST_MOUSE   | Bystl  | Bystin OS=Mus musculus K.IAEM*EYSGANIFLR@L               | 7.11  | 3.40  | 2.09  | 0.48 |
| O54825_BYST_MOUSE   | Bystl  | Bystin OS=Mus musculus R.TLADIIM*EK#L                    | 7.59  | 57.75 | 0.13  | 7.61 |
| O54825_BYST_MOUSE   | Bystl  | Bystin OS=Mus musculus K.EALLELR@L                       | 16.74 | 6.00  | 2.79  | 0.36 |
| O54825_BYST_MOUSE   | Bystl  | Bystin OS=Mus musculus R.FYNLVLP@V                       | 14.20 | 6.72  | 2.11  | 0.47 |
| Q8R5L1_Q8R5L1_MOUSE | C1qbp  | Complement componen K.AEEQEPILTSTPNFVVEVTK.T             | 3.24  | 3.98  | 0.82  | 1.23 |
| Q8R5L1_Q8R5L1_MOUSE | C1qbp  | Complement componen K.EVSFQATGDSBWR.D                    | 5.23  | 6.18  | 0.85  | 1.18 |
| Q8VDY9_CAA1_MOUSE   | Caap1  | Caspase activity and apoj K.SVNEILGLAESPK#E              | 6.96  | 3.05  | 2.28  | 0.44 |
| Q06138_CAB39_MOUSE  | Cab39  | Calcium-binding protein K.DVAQIFNLR@R                    | 17.03 | 7.36  | 2.31  | 0.43 |
| Q9DB16_CB39L_MOUSE  | Cab39l | Calcium-binding protein K.KTDKASEVSK#S                   | 2.99  | 2.06  | 1.45  | 0.69 |
| Q9CS00_CATIN_MOUSE  | Cactin | Cactin OS=Mus musculus R.AGGPNLDM*GYWESLLQLQR@A          | 8.08  | 3.33  | 2.43  | 0.41 |
| Q9CS00_CATIN_MOUSE  | Cactin | Cactin OS=Mus musculus R.EGVNASVSDVQSVFK#G               | 8.28  | 3.21  | 2.58  | 0.39 |
| Q9CS00_CATIN_MOUSE  | Cactin | Cactin OS=Mus musculus K.FNIFPDLIR@K                     | 20.09 | 4.46  | 4.51  | 0.22 |
| Q9CS00_CATIN_MOUSE  | Cactin | Cactin OS=Mus musculus K.TYNQLQVIFQIEGK#I                | 5.61  | 2.52  | 2.22  | 0.45 |
| Q8ROX2_CAC1L_MOUSE  | Cacl1  | CDK2-associated and cul K.FIPNLPPEAVSELSYEAQDQK#L        | 7.62  | 3.43  | 2.22  | 0.45 |
| B2RQC6_PYR1_MOUSE   | Cad    | CAD protein OS=Mus mu: R.AAFALGGLGSGFASTK#E              | 7.98  | 3.85  | 2.07  | 0.48 |
| B2RQC6_PYR1_MOUSE   | Cad    | CAD protein OS=Mus mu: K.AIVHAVGEQLQVTFPNLQIAK#D         | 4.65  | 2.59  | 1.79  | 0.56 |
| B2RQC6_PYR1_MOUSE   | Cad    | CAD protein OS=Mus mu: R.EAAGNIGGQTVR@E                  | 16.78 | 10.02 | 1.67  | 0.60 |
| B2RQC6_PYR1_MOUSE   | Cad    | CAD protein OS=Mus mu: K.LALGIPLP@L                      | 42.44 | 21.94 | 1.93  | 0.52 |
| B2RQC6_PYR1_MOUSE   | Cad    | CAD protein OS=Mus mu: R.LGGAVLSEFSEATSSVQK#G            | 12.25 | 6.18  | 2.14  | 0.47 |
| B2RQC6_PYR1_MOUSE   | Cad    | CAD protein OS=Mus mu: R.LGYPVLR@A                       | 13.29 | 6.92  | 1.92  | 0.52 |
| B2RQC6_PYR1_MOUSE   | Cad    | CAD protein OS=Mus mu: R.LSLDQLQR@L                      | 16.40 | 8.25  | 1.99  | 0.50 |
| B2RQC6_PYR1_MOUSE   | Cad    | CAD protein OS=Mus mu: R.M*AEIGHVAPSEANSLQAQAAER@L       | 14.52 | 6.65  | 2.19  | 0.46 |
| B2RQC6_PYR1_MOUSE   | Cad    | CAD protein OS=Mus mu: K.SVGEVMP*GIGR@S                  | 6.80  | 4.64  | 1.46  | 0.68 |
| B2RQC6_PYR1_MOUSE   | Cad    | CAD protein OS=Mus mu: K.TLGDVLAVALTR@I                  | 26.24 | 14.11 | 1.86  | 0.54 |
| B2RQC6_PYR1_MOUSE   | Cad    | CAD protein OS=Mus mu: R.VLGTSPSAIDSAENR@F               | 16.54 | 11.80 | 1.40  | 0.71 |
| B2RQC6_PYR1_MOUSE   | Cad    | CAD protein OS=Mus mu: R.VNEISVSDSPR@A                   | 10.12 | 4.57  | 2.21  | 0.45 |
| Q8VCQ8_Q8VCQ8_MOUSE | Cald1  | Caldesmon 1 OS=Mus mu: K.GGSLGENQIKDEK#I                 | 4.44  | 4.25  | 0.95  | 1.05 |
| Q8VCQ8_Q8VCQ8_MOUSE | Cald1  | Caldesmon 1 OS=Mus mu: R.LEQYTNIAEGTK#A                  | 30.07 | 30.85 | 0.97  | 1.03 |
| Q8VCQ8_Q8VCQ8_MOUSE | Cald1  | Caldesmon 1 OS=Mus mu: R.M*QNSAENETAEGEEK#R@E            | 8.25  | 10.30 | 0.80  | 1.25 |
| Q8VCQ8_Q8VCQ8_MOUSE | Cald1  | Caldesmon 1 OS=Mus mu: R.SGR@YEVEETVVK#S                 | 13.75 | 9.15  | 1.50  | 0.67 |
| Q8VCQ8_Q8VCQ8_MOUSE | Cald1  | Caldesmon 1 OS=Mus mu: R.ASGDKEAEGAPQVEAGK.R             | 26.42 | 15.74 | 1.68  | 0.60 |
| Q8VCQ8_Q8VCQ8_MOUSE | Cald1  | Caldesmon 1 OS=Mus mu: R.GETENEFEK#L                     | 4.47  | 3.55  | 1.26  | 0.79 |

|                     |        |                                                                      |        |        |         |      |
|---------------------|--------|----------------------------------------------------------------------|--------|--------|---------|------|
| Q8VC08_Q8VC08_MOUSE | Cald1  | Caldesmon 1 OS=Mus mu K.GGSLGENQKDEK.I                               | 16.97  | 11.49  | 1.48    | 0.68 |
| Q8VC08_Q8VC08_MOUSE | Cald1  | Caldesmon 1 OS=Mus mu K.GSVFAPSASGTPNK#.E                            | 19.03  | 14.85  | 1.28    | 0.78 |
| Q8VC08_Q8VC08_MOUSE | Cald1  | Caldesmon 1 OS=Mus mu R.INEWLTK#.S                                   | 17.99  | 16.17  | 1.11    | 0.90 |
| Q8VC08_Q8VC08_MOUSE | Cald1  | Caldesmon 1 OS=Mus mu R.LEQYNTAIEGTK#.A                              | 63.12  | 39.23  | 1.61    | 0.62 |
| Q8VC08_Q8VC08_MOUSE | Cald1  | Caldesmon 1 OS=Mus mu K.LKHQTEAFSPSR@.S                              | 7.34   | 5.05   | 1.45    | 0.69 |
| Q8VC08_Q8VC08_MOUSE | Cald1  | Caldesmon 1 OS=Mus mu R.M*QNDSAEETAEGEEK#R@.E                        | 45.61  | 26.55  | 1.72    | 0.58 |
| Q8VC08_Q8VC08_MOUSE | Cald1  | Caldesmon 1 OS=Mus mu R.QKHEFDPTITDGLSGPSR@.R                        | 40.18  | 15.61  | 2.57    | 0.39 |
| Q8VC08_Q8VC08_MOUSE | Cald1  | Caldesmon 1 OS=Mus mu K.QTENAFSPSR@.S                                | 12.85  | 7.55   | 1.70    | 0.59 |
| Q8VC08_Q8VC08_MOUSE | Cald1  | Caldesmon 1 OS=Mus mu R.SGR@YEVEEYVVK#.S                             | 33.03  | 21.90  | 1.51    | 0.66 |
| Q8VC08_Q8VC08_MOUSE | Cald1  | Caldesmon 1 OS=Mus mu K.VLEEEQR@.R                                   | 32.97  | 20.07  | 1.64    | 0.61 |
| P62204_CALM_MOUSE   | Calm1  | Calmodulin OS=Mus mus K.DTDSSEIEIR@.E                                | 74.20  | 44.68  | 1.66    | 0.60 |
| P62204_CALM_MOUSE   | Calm1  | Calmodulin OS=Mus mus K.DTDSSEIEIR@.E                                | 20.29  | 12.85  | 1.58    | 0.63 |
| P62204_CALM_MOUSE   | Calm1  | Calmodulin OS=Mus mus R.EADIDGGDQGVNVEFVQM*M*TA#K.-                  | 41.17  | 23.87  | 1.73    | 0.58 |
| P62204_CALM_MOUSE   | Calm1  | Calmodulin OS=Mus mus K.EAFSLFDKHGDDGTITTK#.E                        | 756.30 | 405.16 | 1.87    | 0.54 |
| P62204_CALM_MOUSE   | Calm1  | Calmodulin OS=Mus mus K.ELGTVM*#R.S                                  | 525.71 | 380.27 | 1.38    | 0.72 |
| P62204_CALM_MOUSE   | Calm1  | Calmodulin OS=Mus mus R.KM*KDTSSEIEIR.E                              | 57.10  | 49.61  | 1.15    | 0.87 |
| P62204_CALM_MOUSE   | Calm1  | Calmodulin OS=Mus mus K.M*KDTSSEIEIR@.E                              | 16.66  | 11.03  | 1.51    | 0.66 |
| P62204_CALM_MOUSE   | Calm1  | Calmodulin OS=Mus mus R.VFDKHDGNGYISAELR@.H                          | 245.29 | 152.34 | 1.61    | 0.62 |
| P14211_CALR_MOUSE   | Calr   | Calreticulin OS=Mus mus K.EQFLDGAWTNR.W                              | 15.14  | 30.47  | 0.50    | 2.01 |
| P14211_CALR_MOUSE   | Calr   | Calreticulin OS=Mus mus K.FVLSGGK.F                                  | 105.75 | 61.82  | 1.71    | 0.58 |
| P14211_CALR_MOUSE   | Calr   | Calreticulin OS=Mus mus R.FYALS#K.F                                  | 35.13  | 83.16  | 0.42    | 2.37 |
| P14211_CALR_MOUSE   | Calr   | Calreticulin OS=Mus mus K.GLQTSQDAR@.F                               | 8.62   | 13.87  | 0.62    | 1.61 |
| P14211_CALR_MOUSE   | Calr   | Calreticulin OS=Mus mus K.IDNSQVSGSLDWDWFLPPKK.I                     | 6.17   | 16.67  | 0.37    | 2.70 |
| P14211_CALR_MOUSE   | Calr   | Calreticulin OS=Mus mus K.KPEDWDEEM*DGWEPPVQNPYK.G                   | 9.67   | 22.15  | 0.44    | 2.29 |
| P14211_CALR_MOUSE   | Calr   | Calreticulin OS=Mus mus K.KPEDWDEEMDGWEPPVQNPYK.G                    | 3.34   | 4.07   | 0.82    | 1.22 |
| P14211_CALR_MOUSE   | Calr   | Calreticulin OS=Mus mus R.QIDNPDYK.G                                 | 16.10  | 42.93  | 0.37    | 2.67 |
| P14211_CALR_MOUSE   | Calr   | Calreticulin OS=Mus mus R.AKIDDPDTSKPEDWVKPEHIPDDAK.K                | 7.23   | 10.34  | 0.70    | 1.43 |
| P14211_CALR_MOUSE   | Calr   | Calreticulin OS=Mus mus K.EQFLDGAWTNR.W                              | 12.32  | 17.98  | 0.69    | 1.46 |
| P14211_CALR_MOUSE   | Calr   | Calreticulin OS=Mus mus K.GLQTSQDAR.F                                | 10.37  | 12.58  | 0.82    | 1.21 |
| P14211_CALR_MOUSE   | Calr   | Calreticulin OS=Mus mus K.KPEDWDEEM*DGWEPPVQNPYK.G                   | 5.37   | 8.30   | 0.65    | 1.55 |
| P14211_CALR_MOUSE   | Calr   | Calreticulin OS=Mus mus K.SGTFIDNFLTNDYAEFGNETWGVTK#.A               | 17.13  | 11.14  | 1.59    | 0.63 |
| O35887_CALU_MOUSE   | Calu   | Calumenin OS=Mus musc K.DIVVQETM*EDIDK#.N                            | 13.70  | 9.64   | 1.36    | 0.74 |
| O35887_CALU_MOUSE   | Calu   | Calumenin OS=Mus musc K.DIVVQETM*EDIDK#NADGFLDEYIDGM*YSHDGNADPEWVK.T | 8.81   | 4.12   | 2.14    | 0.47 |
| O35887_CALU_MOUSE   | Calu   | Calumenin OS=Mus musc K.DWILPQSDYDHAEEAER@.H                         | 6.76   | 3.85   | 1.76    | 0.57 |
| O35887_CALU_MOUSE   | Calu   | Calumenin OS=Mus musc K.EEIVDKYDLVFGSQATDFGEALVR.H                   | 228.46 | 168.80 | 1.35    | 0.74 |
| O35887_CALU_MOUSE   | Calu   | Calumenin OS=Mus musc K.EEIVDKYDLVFGSQATDFGEALVR@HDEF.-              | 6.44   | 1.98   | 3.25    | 0.31 |
| O35887_CALU_MOUSE   | Calu   | Calumenin OS=Mus musc R.EQVFEFR@.D                                   | 953.03 | 576.96 | 1.65    | 0.61 |
| O35887_CALU_MOUSE   | Calu   | Calumenin OS=Mus musc K.GHDLNEDGLVSWEEK#.N                           | 75.26  | 55.46  | 1.36    | 0.74 |
| O35887_CALU_MOUSE   | Calu   | Calumenin OS=Mus musc K.GHDLNEDGLVSWEEK#.N                           | 11.09  | 7.15   | 1.55    | 0.64 |
| O35887_CALU_MOUSE   | Calu   | Calumenin OS=Mus musc R.HLVYEDQNK#DGK#.L                             | 846.27 | 473.74 | 1.79    | 0.56 |
| O35887_CALU_MOUSE   | Calu   | Calumenin OS=Mus musc R.HLVYEDQNK#DGK#.L                             | 51.40  | 29.66  | 1.73    | 0.58 |
| O35887_CALU_MOUSE   | Calu   | Calumenin OS=Mus musc K.IDDD#DGGVTVDELK#.G                           | 823.60 | 488.61 | 1.69    | 0.59 |
| O35887_CALU_MOUSE   | Calu   | Calumenin OS=Mus musc K.LTKEIVDKYDLVFGSQATDFGEALVR.H                 | 417.99 | 214.69 | 1.95    | 0.51 |
| O35887_CALU_MOUSE   | Calu   | Calumenin OS=Mus musc K.M*ADKDGDLIATK.E                              | 323.75 | 252.09 | 1.28    | 0.78 |
| O35887_CALU_MOUSE   | Calu   | Calumenin OS=Mus musc K.MADK#DGLIATK#.E                              | 44.34  | 24.05  | 1.84    | 0.54 |
| O35887_CALU_MOUSE   | Calu   | Calumenin OS=Mus musc K.M*DKEETKDWILPQSDYDHAEEAER.H                  | 229.06 | 147.23 | 1.56    | 0.64 |
| O35887_CALU_MOUSE   | Calu   | Calumenin OS=Mus musc K.MDK#EETKDWILPQSDYDHAEEAER@.H                 | 7.00   | 4.06   | 1.72    | 0.58 |
| O35887_CALU_MOUSE   | Calu   | Calumenin OS=Mus musc K.NADGFIDLEIYIGDM*YSHDGNADPEWVK#.T             | 15.00  | 6.83   | 2.20    | 0.46 |
| O35887_CALU_MOUSE   | Calu   | Calumenin OS=Mus musc K.SFDQLTPEESK#.E                               | 143.42 | 98.31  | 1.46    | 0.69 |
| O35887_CALU_MOUSE   | Calu   | Calumenin OS=Mus musc K.SFDQLTPEESK#.E                               | 510.11 | 344.78 | 1.48    | 0.68 |
| O35887_CALU_MOUSE   | Calu   | Calumenin OS=Mus musc K.TER@EQVFEFR@.D                               | 95.11  | 49.51  | 1.92    | 0.52 |
| O35887_CALU_MOUSE   | Calu   | Calumenin OS=Mus musc R.VHHEPQLSOK#.V                                | 278.33 | 187.72 | 1.48    | 0.67 |
| O35887_CALU_MOUSE   | Calu   | Calumenin OS=Mus musc K.VHNDAGNFQYDHDALFGLAEEA.K                     | 50.74  | 37.57  | 1.35    | 0.74 |
| O35887_CALU_MOUSE   | Calu   | Calumenin OS=Mus musc R.WIHEDYER.Q                                   | 97.94  | 60.30  | 1.62    | 0.62 |
| O6XLQ8_Q6XLQ8_MOUSE | Calu   | Calumenin OS=Mus musc K.IDADK#DGFVTEGELK#.S                          | 101.01 | 85.73  | 1.18    | 0.85 |
| O6XLQ8_Q6XLQ8_MOUSE | Calu   | Calumenin OS=Mus musc K.K#YIVDVENVQWQEFDM*NQDGLISWDEYR@.N            | 5.77   | 3.44   | 1.68    | 0.60 |
| O6XLQ8_Q6XLQ8_MOUSE | Calu   | Calumenin OS=Mus musc R.LGM*IVDK#.I                                  | 57.71  | 53.14  | 1.09    | 0.92 |
| O6XLQ8_Q6XLQ8_MOUSE | Calu   | Calumenin OS=Mus musc R.LGM*IVDK#IDADK#DGFVTEGELK.S                  | 249.85 | 212.37 | 1.18    | 0.85 |
| O6XLQ8_Q6XLQ8_MOUSE | Calu   | Calumenin OS=Mus musc R.LGM#IVDK#IDADK#DGFVTEGELK#.S                 | 14.65  | 9.71   | 1.51    | 0.66 |
| O6XLQ8_Q6XLQ8_MOUSE | Calu   | Calumenin OS=Mus musc K.YIVDVENVQWQEFDM*NQDGLISWDEYR.N               | 6.39   | 4.37   | 1.46    | 0.68 |
| O35887_CALU_MOUSE   | Calu   | Calumenin OS=Mus musc K.IDDD#DGGVTVDELK#.G                           | 5.65   | 5.87   | 0.96    | 1.04 |
| O35887_CALU_MOUSE   | Calu   | Calumenin OS=Mus musc K.EEIVDKYDLVFGSQATDFGEALVR.H                   | 6.80   | 2.61   | 2.61    | 0.38 |
| O35887_CALU_MOUSE   | Calu   | Calumenin OS=Mus musc K.IDDD#DGGVTVDELK#.G                           | 12.20  | 4.40   | 2.77    | 0.36 |
| O35887_CALU_MOUSE   | Calu   | Calumenin OS=Mus musc K.LTK#EEIVDK#YDLVFGSQATDFGEALVR@.H             | 9.29   | 6.91   | 1.35    | 0.74 |
| Q6PHZ2_KCC2D_MOUSE  | Camk2d | Calcium/calmodulin-dep R.DLK#PENLILASK#.S                            | 41.68  | 24.25  | 1.72    | 0.58 |
| Q6PHZ2_KCC2D_MOUSE  | Camk2d | Calcium/calmodulin-dep K. ESTESSNTIIEDEVK#.A                         | 29.15  | 14.84  | 1.96    | 0.51 |
| Q6PHZ2_KCC2D_MOUSE  | Camk2d | Calcium/calmodulin-dep R.FYFENALSK#.S                                | 41.21  | 15.98  | 2.58    | 0.39 |
| Q6PHZ2_KCC2D_MOUSE  | Camk2d | Calcium/calmodulin-dep K.GAIIITM*LATR@.N                             | 30.71  | 15.33  | 2.00    | 0.50 |
| Q6PHZ2_KCC2D_MOUSE  | Camk2d | Calcium/calmodulin-dep K.IPTGQYAAK#.I                                | 40.83  | 20.40  | 2.00    | 0.50 |
| Q6PHZ2_KCC2D_MOUSE  | Camk2d | Calcium/calmodulin-dep R.LTQYM*DGSGM*PK#.T                           | 18.75  | 8.27   | 2.27    | 0.44 |
| Q6PHZ2_KCC2D_MOUSE  | Camk2d | Calcium/calmodulin-dep K.VTEQLIEAINNGDFEAYTK#.I                      | 5.33   | 3.29   | 1.62    | 0.62 |
| Q6PHZ2_KCC2D_MOUSE  | Camk2d | Calcium/calmodulin-dep K.VTEQLIEAINNGDFEAYTK#.I                      | 10.33  | 7.35   | 2.46    | 0.41 |
| Q6PHZ2_KCC2D_MOUSE  | Camk2d | Calcium/calmodulin-dep K. ESTESSNTIIEDEVK#.A                         | 6.34   | 2.14   | 2.97    | 0.34 |
| Q6PHZ2_KCC2D_MOUSE  | Camk2d | Calcium/calmodulin-dep R.FYFENALSK#.S                                | 14.11  | 8.14   | 1.73    | 0.58 |
| Q6PHZ2_KCC2D_MOUSE  | Camk2d | Calcium/calmodulin-dep R.LTQYM*DGSGM*PK#.T                           | 4.71   | 3.10   | 1.52    | 0.66 |
| Q6PHZ2_KCC2D_MOUSE  | Camk2d | Calcium/calmodulin-dep R.DLK#PENLILASK#.S                            | 29.96  | 14.82  | 2.02    | 0.49 |
| Q6PHZ2_KCC2D_MOUSE  | Camk2d | Calcium/calmodulin-dep K. ESTESSNTIIEDEVK#.A                         | 9.28   | 6.81   | 1.36    | 0.73 |
| Q6PHZ2_KCC2D_MOUSE  | Camk2d | Calcium/calmodulin-dep R.FYFENALSK#.S                                | 14.84  | 8.23   | 1.80    | 0.55 |
| Q6PHZ2_KCC2D_MOUSE  | Camk2d | Calcium/calmodulin-dep R.LTQYM*DGSGM*PK.T                            | 7.55   | 4.59   | 1.64    | 0.61 |
| Q6PHZ2_KCC2D_MOUSE  | Camk2d | Calcium/calmodulin-dep R.DLK#PENLILASK#.S                            | 57.16  | 26.86  | 2.13    | 0.47 |
| Q6PHZ2_KCC2D_MOUSE  | Camk2d | Calcium/calmodulin-dep K. ESTESSNTIIEDEVK#.A                         | 18.46  | 8.95   | 2.06    | 0.48 |
| Q6PHZ2_KCC2D_MOUSE  | Camk2d | Calcium/calmodulin-dep R.FTDEYQLFEELGK#.G                            | 33.89  | 16.35  | 2.07    | 0.48 |
| Q6PHZ2_KCC2D_MOUSE  | Camk2d | Calcium/calmodulin-dep R.FYFENALSK#.S                                | 29.01  | 16.00  | 1.81    | 0.55 |
| Q6PHZ2_KCC2D_MOUSE  | Camk2d | Calcium/calmodulin-dep K.VTEQLIEAINNGDFEAYTK#.I                      | 14.37  | 8.26   | 1.74    | 0.57 |
| Q923T9_KCC2G_MOUSE  | Camk2g | Calcium/calmodulin-dep R.FTDDYQLFEELGK#.G                            | 6.99   | 3.76   | 1.86    | 0.54 |
| Q923T9_KCC2G_MOUSE  | Camk2g | Calcium/calmodulin-dep K.FYFENLILASK#.N                              | 9.85   | 4.86   | 2.03    | 0.49 |
| Q923T9_KCC2G_MOUSE  | Camk2g | Calcium/calmodulin-dep K.FYFENLILASK#.N                              | 22.06  | 7.30   | 3.02    | 0.33 |
| Q923T9_KCC2G_MOUSE  | Camk2g | Calcium/calmodulin-dep K.ITEQLIEAINNGDFEAYTK#.I                      | 8.07   | 2.65   | 3.04    | 0.33 |
| Q6ZQ73_CAND2_MOUSE  | Cand2  | Cullin-associated NEDD8 K.DSIQLDEDSER@.K                             | 8.73   | 2.42   | 3.60    | 0.28 |
| Q6ZQ73_CAND2_MOUSE  | Cand2  | Cullin-associated NEDD8 K.LVFNPNPYPYLLPR@.F                          | 4.90   | 4.00   | 1.23    | 0.82 |
| Q6ZQ73_CAND2_MOUSE  | Cand2  | Cullin-associated NEDD8 R.AVAALLTN#EVR@.K                            | 14.56  | 5.91   | 2.47    | 0.41 |
| Q6ZQ73_CAND2_MOUSE  | Cand2  | Cullin-associated NEDD8 R.LATLAALDALAQSGGLP#PAVR@.T                  | 6.23   | 2.21   | 2.81    | 0.36 |
| Q6ZQ73_CAND2_MOUSE  | Cand2  | Cullin-associated NEDD8 R.LLDEPEYVGM*STATLAR@.L                      | 4.48   | 0.00   | #DIV/0! | 0.00 |
| Q6ZQ73_CAND2_MOUSE  | Cand2  | Cullin-associated NEDD8 K.LVFNPNPYPYLLPR@.F                          | 10.51  | 4.59   | 2.29    | 0.44 |
| Q6ZQ73_CAND2_MOUSE  | Cand2  | Cullin-associated NEDD8 K.TVLLLEALGPS#EDYR@.A                        | 10.07  | 4.41   | 2.28    | 0.44 |
| P35564_CALX_MOUSE   | Canx   | Calnexin OS=Mus musc R.APVPTGEVYFADSFDR@.G                           | 63.81  | 37.70  | 1.69    | 0.59 |
| P35564_CALX_MOUSE   | Canx   | Calnexin OS=Mus musc R.GSLSGWILSK#.A                                 | 32.79  | 25.77  | 1.27    | 0.79 |
| P35564_CALX_MOUSE   | Canx   | Calnexin OS=Mus musc R.IPNPDFFEDLEPFK#.M                             | 11.66  | 7.83   | 1.49    | 0.67 |
| P35564_CALX_MOUSE   | Canx   | Calnexin OS=Mus musc R.K#IPNPDFFEDLEPFK#.M                           | 38.11  | 26.46  | 1.44    | 0.69 |
| P35564_CALX_MOUSE   | Canx   | Calnexin OS=Mus musc R.TAELSLDQPHDK#.T                               | 13.08  | 9.92   | 1.32    | 0.76 |
| P35564_CALX_MOUSE   | Canx   | Calnexin OS=Mus musc R.TGVYEEK#.H                                    | 18.58  | 12.59  | 1.48    | 0.68 |
| P35564_CALX_MOUSE   | Canx   | Calnexin OS=Mus musc R.TYFTDK#.H                                     | 12.58  | 7.04   | 1.79    | 0.56 |
| P35564_CALX_MOUSE   | Canx   | Calnexin OS=Mus musc R.APVPTGEVYFADSFDR@.G                           | 34.96  | 19.01  | 1.84    | 0.54 |

|                     |         |                                                               |        |        |      |      |
|---------------------|---------|---------------------------------------------------------------|--------|--------|------|------|
| P35564_CALX_MOUSE   | Canx    | Calnexin OS=Mus musculus R.GSLSGWILSK#.A                      | 28.84  | 17.25  | 1.67 | 0.60 |
| P35564_CALX_MOUSE   | Canx    | Calnexin OS=Mus musculus K.IPNPDFFEDLEPFK#.M                  | 16.74  | 13.62  | 1.23 | 0.81 |
| P35564_CALX_MOUSE   | Canx    | Calnexin OS=Mus musculus R.KHPNPDFEEDLEPFK#.M                 | 21.88  | 14.18  | 1.54 | 0.65 |
| P35564_CALX_MOUSE   | Canx    | Calnexin OS=Mus musculus K.SDASTPPSPK#.V                      | 20.80  | 9.82   | 2.12 | 0.47 |
| P40124_CAP1_MOUSE   | Cap1    | Adenylyl cyclase-associat K.KHEPALLELEGK#.K                   | 14.37  | 8.93   | 1.61 | 0.62 |
| P40124_CAP1_MOUSE   | Cap1    | Adenylyl cyclase-associat R.VENQENVSNLVIDDELK.Q               | 5.72   | 6.28   | 0.91 | 1.10 |
| P24452_CAPG_MOUSE   | Capg    | Macrophage-capping prc K.AQVEIITDGEPEAEM*IQVLGPK#PALK#.E      | 13.19  | 4.54   | 2.91 | 0.34 |
| P24452_CAPG_MOUSE   | Capg    | Macrophage-capping prc K.AQVEIITDGEPEAEM*IQVLGPK#PALK#.E      | 13.19  | 5.18   | 2.68 | 0.37 |
| P24452_CAPG_MOUSE   | Capg    | Macrophage-capping prc R.EVQGNESDLFM*SYFPR@.G                 | 12.63  | 5.06   | 2.50 | 0.40 |
| P24452_CAPG_MOUSE   | Capg    | Macrophage-capping prc R.QAALQVADGFSIR@.M                     | 63.44  | 20.87  | 3.04 | 0.33 |
| P24452_CAPG_MOUSE   | Capg    | Macrophage-capping prc K.VSDATGQMNLTK#.V                      | 11.69  | 6.37   | 1.83 | 0.55 |
| P24452_CAPG_MOUSE   | Capg    | Macrophage-capping prc K.VSDATGQMNLTK#.V                      | 58.44  | 28.11  | 2.08 | 0.48 |
| O35350_CAN1_MOUSE   | Capn1   | Calpain-1 catalytic subur K.APSDLYQILK#.A                     | 14.38  | 4.67   | 3.08 | 0.32 |
| O35350_CAN1_MOUSE   | Capn1   | Calpain-1 catalytic subur R.DFFLANASR@.A                      | 11.30  | 5.27   | 2.14 | 0.47 |
| O35350_CAN1_MOUSE   | Capn1   | Calpain-1 catalytic subur K.ELQTLNLR@.I                       | 13.24  | 3.08   | 4.30 | 0.23 |
| O35350_CAN1_MOUSE   | Capn1   | Calpain-1 catalytic subur K.LVFNHSAQGNFWSALLEK#.A             | 8.34   | 4.43   | 1.88 | 0.53 |
| O35350_CAN1_MOUSE   | Capn1   | Calpain-1 catalytic subur K.VLSEEEIDDNF#.T                    | 12.65  | 4.54   | 2.79 | 0.36 |
| O35350_CAN1_MOUSE   | Capn1   | Calpain-1 catalytic subur K.YLQDQYELR@.A                      | 9.68   | 3.07   | 3.15 | 0.32 |
| O35350_CAN1_MOUSE   | Capn1   | Calpain-1 catalytic subur K.APSDLYQILK#.A                     | 17.03  | 4.73   | 3.60 | 0.28 |
| O35350_CAN1_MOUSE   | Capn1   | Calpain-1 catalytic subur R.LPPGEYIVVPTFEPNK#EGDFLLR@.F       | 7.81   | 11.75  | 0.66 | 1.50 |
| O35350_CAN1_MOUSE   | Capn1   | Calpain-1 catalytic subur K.LVFNHSAQGNFWSALLEK#.A             | 7.54   | 1.44   | 5.24 | 0.19 |
| O35350_CAN1_MOUSE   | Capn1   | Calpain-1 catalytic subur K.R@PTELM*SNPQIVDGAIR@.T            | 6.96   | 2.33   | 2.99 | 0.33 |
| O35350_CAN1_MOUSE   | Capn1   | Calpain-1 catalytic subur K.VLSEEEIDDNF#.T                    | 16.01  | 4.36   | 3.67 | 0.27 |
| O08529_CAN2_MOUSE   | Capn2   | Calpain-2 catalytic subur K.DGELLFVHSAQGNFWSALLEK#.A          | 7.40   | 3.17   | 2.33 | 0.43 |
| O08529_CAN2_MOUSE   | Capn2   | Calpain-2 catalytic subur K.KHADYQAVDDEEANIEIDANEEDIDGFR@R@.L | 5.52   | 2.59   | 2.13 | 0.47 |
| O88456_CPNS1_MOUSE  | Capns1  | Calpain small subunit 1 C R.SHYSNIEANSESEVR@.Q                | 16.05  | 4.93   | 3.25 | 0.31 |
| O88456_CPNS1_MOUSE  | Capns1  | Calpain small subunit 1 C R.SM*VAVM*DSDTTGK#.L                | 9.42   | 4.30   | 2.19 | 0.46 |
| O88456_CPNS1_MOUSE  | Capns1  | Calpain small subunit 1 C R.ILGQVISAIEAAQYNEPEPPPR.S          | 16.18  | 10.00  | 1.68 | 0.59 |
| O88456_CPNS1_MOUSE  | Capns1  | Calpain small subunit 1 C R.ILGQVISAIEAAQYNEPEPPPR.S          | 7.64   | 3.41   | 2.24 | 0.45 |
| O88456_CPNS1_MOUSE  | Capns1  | Calpain small subunit 1 C K.LFVQLAGDDM*EVSATELM*NILNK#.V      | 5.76   | 3.68   | 1.57 | 0.64 |
| O88456_CPNS1_MOUSE  | Capns1  | Calpain small subunit 1 C K.LGFEFEK#.Y                        | 18.40  | 9.72   | 1.89 | 0.53 |
| O88456_CPNS1_MOUSE  | Capns1  | Calpain small subunit 1 C R.SHYSNIEANSESEVR@.Q                | 12.85  | 6.59   | 1.95 | 0.51 |
| O88456_CPNS1_MOUSE  | Capns1  | Calpain small subunit 1 C R.SM*VAVM*DSDTTGK#.L                | 7.41   | 2.76   | 2.69 | 0.37 |
| Q60865_CAPR1_MOUSE  | Caprin1 | Caprin-1 OS=Mus musculus R.LNQDQLDAVSK#.Y                     | 24.11  | 14.05  | 1.72 | 0.58 |
| Q60865_CAPR1_MOUSE  | Caprin1 | Caprin-1 OS=Mus musculus R.DGYQQNFK#.R                        | 21.99  | 6.96   | 3.16 | 0.32 |
| Q60865_CAPR1_MOUSE  | Caprin1 | Caprin-1 OS=Mus musculus K.GK#LDDYQER@.M                      | 26.24  | 7.37   | 3.56 | 0.28 |
| Q60865_CAPR1_MOUSE  | Caprin1 | Caprin-1 OS=Mus musculus R.LNEQYEHASHIHLWDLLEGK#.E            | 94.73  | 44.31  | 2.14 | 0.47 |
| Q60865_CAPR1_MOUSE  | Caprin1 | Caprin-1 OS=Mus musculus R.LNQDQLDAVSK#.Y                     | 199.41 | 90.16  | 2.21 | 0.45 |
| Q60865_CAPR1_MOUSE  | Caprin1 | Caprin-1 OS=Mus musculus K.LQGVLDK#K#.L                       | 26.09  | 8.60   | 3.03 | 0.33 |
| Q60865_CAPR1_MOUSE  | Caprin1 | Caprin-1 OS=Mus musculus R.SFM*ALSQDIQK#.T                    | 87.64  | 37.14  | 2.36 | 0.42 |
| Q60865_CAPR1_MOUSE  | Caprin1 | Caprin-1 OS=Mus musculus R.SFMALSQDIQK#.T                     | 22.37  | 7.23   | 3.09 | 0.32 |
| Q60865_CAPR1_MOUSE  | Caprin1 | Caprin-1 OS=Mus musculus K.TVLELQVLDK#.L                      | 63.59  | 25.42  | 2.50 | 0.40 |
| Q60865_CAPR1_MOUSE  | Caprin1 | Caprin-1 OS=Mus musculus K.YQEVNINLEFAK#.E                    | 147.17 | 67.31  | 2.19 | 0.46 |
| Q60865_CAPR1_MOUSE  | Caprin1 | Caprin-1 OS=Mus musculus R.DGYQQNFK#.R                        | 17.10  | 2.49   | 6.87 | 0.15 |
| Q60865_CAPR1_MOUSE  | Caprin1 | Caprin-1 OS=Mus musculus K.GK#LDDYQER@.M                      | 16.23  | 4.72   | 3.44 | 0.29 |
| Q60865_CAPR1_MOUSE  | Caprin1 | Caprin-1 OS=Mus musculus R.LNQDQLDAVSK#.Y                     | 116.92 | 29.79  | 3.92 | 0.25 |
| Q60865_CAPR1_MOUSE  | Caprin1 | Caprin-1 OS=Mus musculus R.SFM*ALSQDIQK#.T                    | 44.40  | 15.34  | 2.89 | 0.35 |
| Q60865_CAPR1_MOUSE  | Caprin1 | Caprin-1 OS=Mus musculus K.TVLELQVLDK#.L                      | 29.19  | 7.94   | 3.68 | 0.27 |
| Q60865_CAPR1_MOUSE  | Caprin1 | Caprin-1 OS=Mus musculus K.TVLELQVLDK#LGDVV@R@TDLK#.Q         | 9.55   | 2.22   | 4.30 | 0.23 |
| Q60865_CAPR1_MOUSE  | Caprin1 | Caprin-1 OS=Mus musculus K.YQEVNINLEFAK#.E                    | 12.47  | 17.82  | 3.50 | 0.29 |
| Q5RKN9_Q5RKN9_MOUSE | Capza1  | Capping protein (Actin fil K.DVQDSVTSNEIQT#K#.E               | 19.40  | 14.34  | 1.35 | 0.74 |
| Q5RKN9_Q5RKN9_MOUSE | Capza1  | Capping protein (Actin fil K.EASDPQPEVDVGGGLK#.S              | 57.63  | 55.11  | 1.05 | 0.96 |
| Q5RKN9_Q5RKN9_MOUSE | Capza1  | Capping protein (Actin fil R.EGAHAFAQYNNM*DOFVVK#.I           | 6.80   | 8.22   | 0.83 | 1.21 |
| Q5RKN9_Q5RKN9_MOUSE | Capza1  | Capping protein (Actin fil K.FITHAPGFEFNVDVR@.L               | 60.73  | 39.58  | 1.53 | 0.65 |
| Q5RKN9_Q5RKN9_MOUSE | Capza1  | Capping protein (Actin fil K.FITTPPSAQVVGILK#.I               | 70.77  | 61.89  | 1.14 | 0.87 |
| Q5RKN9_Q5RKN9_MOUSE | Capza1  | Capping protein (Actin fil K.FITTPPSAQVVGILK#.I               | 12.89  | 15.79  | 0.82 | 1.22 |
| Q5RKN9_Q5RKN9_MOUSE | Capza1  | Capping protein (Actin fil K.IIEAENEYQTAISENYQTM*SDTTFK#.A    | 31.44  | 21.23  | 1.48 | 0.68 |
| Q5RKN9_Q5RKN9_MOUSE | Capza1  | Capping protein (Actin fil K.IIEAENEYQTAISENYQTM*SDTTFK#.A    | 6.06   | 4.00   | 1.51 | 0.66 |
| Q5RKN9_Q5RKN9_MOUSE | Capza1  | Capping protein (Actin fil K.FITHAPGFEFNVDVR@.L               | 11.84  | 8.89   | 1.33 | 0.75 |
| Q5RKN9_Q5RKN9_MOUSE | Capza1  | Capping protein (Actin fil K.FITTPPSAQVVGILK#.I               | 10.65  | 8.16   | 1.30 | 0.77 |
| Q5RKN9_Q5RKN9_MOUSE | Capza1  | Capping protein (Actin fil K.FITHAPGFEFNVDVR@.L               | 7.58   | 5.43   | 1.40 | 0.72 |
| Q5RKN9_Q5RKN9_MOUSE | Capza1  | Capping protein (Actin fil K.FITTPPSAQVVGILK#.I               | 10.72  | 5.66   | 1.89 | 0.53 |
| P47754_CA2A2_MOUSE  | Capza2  | F-actin-capping protein s K.IQDQSLTSVNEVGTAK#.E               | 28.97  | 26.33  | 1.10 | 0.91 |
| P47754_CA2A2_MOUSE  | Capza2  | F-actin-capping protein s K.EATDPRPYEAENAESWR.T               | 56.35  | 49.02  | 1.15 | 0.87 |
| P47754_CA2A2_MOUSE  | Capza2  | F-actin-capping protein s K.FIHAPGFEFNVDVR@.L                 | 66.56  | 48.92  | 1.36 | 0.74 |
| P47754_CA2A2_MOUSE  | Capza2  | F-actin-capping protein s K.FTVTPSTQVVGILK#.I                 | 70.86  | 69.00  | 1.03 | 0.97 |
| P47754_CA2A2_MOUSE  | Capza2  | F-actin-capping protein s K.IQVHYEEDGNQVLVSHK#.D              | 18.37  | 15.68  | 1.17 | 0.85 |
| P47754_CA2A2_MOUSE  | Capza2  | F-actin-capping protein s K.IVEAENEYQTAISENYQTM*SDTTFK#.A     | 21.43  | 19.78  | 1.08 | 0.92 |
| P47754_CA2A2_MOUSE  | Capza2  | F-actin-capping protein s R.LLLNNDNLLR@.E                     | 154.90 | 133.11 | 1.16 | 0.86 |
| P47754_CA2A2_MOUSE  | Capza2  | F-actin-capping protein s R.TK#IDWNK#.I                       | 32.46  | 24.10  | 1.35 | 0.74 |
| P47754_CA2A2_MOUSE  | Capza2  | F-actin-capping protein s R.TSVETALR.A                        | 109.75 | 80.62  | 1.36 | 0.73 |
| P47754_CA2A2_MOUSE  | Capza2  | F-actin-capping protein s R.LLLNNDNLLR@.E                     | 22.63  | 20.85  | 1.09 | 0.92 |
| P47754_CA2A2_MOUSE  | Capza2  | F-actin-capping protein s K.FTVTPSTQVVGILK#.I                 | 11.58  | 4.73   | 2.45 | 0.41 |
| P47754_CA2A2_MOUSE  | Capza2  | F-actin-capping protein s R.LLLNNDNLLR@.E                     | 21.17  | 11.63  | 2.33 | 0.43 |
| A2AMW0_A2AMW0_MOUSE | Capzb   | Capping protein (Actin fil R.KHLEVEANAFDQYR@.D                | 129.82 | 93.75  | 1.38 | 0.72 |
| A2AMW0_A2AMW0_MOUSE | Capzb   | Capping protein (Actin fil K.LEVEANAFDQYR@.D                  | 22.34  | 19.72  | 1.13 | 0.88 |
| A2AMW0_A2AMW0_MOUSE | Capzb   | Capping protein (Actin fil R.LPPQIQEK#.N                      | 32.31  | 31.13  | 1.04 | 0.96 |
| A2AMW0_A2AMW0_MOUSE | Capzb   | Capping protein (Actin fil R.LVEDM*ENK#.I                     | 36.49  | 29.58  | 1.23 | 0.81 |
| A2AMW0_A2AMW0_MOUSE | Capzb   | Capping protein (Actin fil K.NDLVEALKR.K                      | 14.79  | 12.69  | 1.17 | 0.86 |
| A2AMW0_A2AMW0_MOUSE | Capzb   | Capping protein (Actin fil R.R@LPPQIQEK#.N                    | 25.44  | 24.00  | 1.06 | 0.94 |
| A2AMW0_A2AMW0_MOUSE | Capzb   | Capping protein (Actin fil K.SGSGTM*NLGGSGLTR@.Q              | 200.70 | 159.74 | 1.26 | 0.80 |
| A2AMW0_A2AMW0_MOUSE | Capzb   | Capping protein (Actin fil R.SPWSNK*YDPPLEDGAM*PSAR@.L        | 46.89  | 43.39  | 1.08 | 0.93 |
| A2AMW0_A2AMW0_MOUSE | Capzb   | Capping protein (Actin fil R.SPWSNK*YDPPLEDGAM*PSAR@.L        | 13.31  | 13.75  | 0.97 | 1.03 |
| A2AMW0_A2AMW0_MOUSE | Capzb   | Capping protein (Actin fil R.STLNEIFGK#.T                     | 129.33 | 83.45  | 1.55 | 0.65 |
| A2AMW0_A2AMW0_MOUSE | Capzb   | Capping protein (Actin fil R.SVQTFADK.S                       | 151.57 | 123.37 | 1.23 | 0.81 |
| A2AMW0_A2AMW0_MOUSE | Capzb   | Capping protein (Actin fil K.YDPPLEDGAM*PSAR.L                | 7.79   | 8.97   | 0.87 | 1.15 |
| A2AMW0_A2AMW0_MOUSE | Capzb   | Capping protein (Actin fil R.KLEVEANAFDQYR.D                  | 15.85  | 13.32  | 1.19 | 0.84 |
| A2AMW0_A2AMW0_MOUSE | Capzb   | Capping protein (Actin fil K.LEVEANAFDQYR.D                   | 2.25   | 3.79   | 0.59 | 1.68 |
| A2AMW0_A2AMW0_MOUSE | Capzb   | Capping protein (Actin fil K.SGSGTM*NLGGSGLTR@.Q              | 32.46  | 27.88  | 1.16 | 0.86 |
| A2AMW0_A2AMW0_MOUSE | Capzb   | Capping protein (Actin fil R.SPWSNK*YDPPLEDGAM*PSAR.L         | 8.99   | 7.86   | 1.14 | 0.87 |
| A2AMW0_A2AMW0_MOUSE | Capzb   | Capping protein (Actin fil R.STLNEIFGK#.T                     | 52.88  | 49.27  | 1.07 | 0.93 |
| A2AMW0_A2AMW0_MOUSE | Capzb   | Capping protein (Actin fil R.KHLEVEANAFDQYR@.D                | 13.66  | 8.94   | 1.53 | 0.65 |
| A2AMW0_A2AMW0_MOUSE | Capzb   | Capping protein (Actin fil K.SGSGTM*NLGGSGLTR@.Q              | 19.66  | 9.60   | 2.05 | 0.49 |
| A2AMW0_A2AMW0_MOUSE | Capzb   | Capping protein (Actin fil R.STLNEIFGK#.T                     | 33.71  | 23.99  | 1.41 | 0.71 |
| A2AMW0_A2AMW0_MOUSE | Capzb   | Capping protein (Actin fil K.SGSGTM*NLGGSGLTR@.Q              | 15.03  | 6.53   | 2.30 | 0.43 |
| Q9WVG6_CARM1_MOUSE  | Carm1   | Histone-arginine methyl R.GAUVDEYFR@.Q                        | 9.51   | 3.05   | 3.12 | 0.32 |
| O70589_CSKP_MOUSE   | Cask    | Peripheral plasma memb R.VGDIHQIISK#.D                        | 9.70   | 6.83   | 1.42 | 0.70 |
| P51125_ICAL_MOUSE   | Cast    | Calpastatin OS=Mus mus R.SLESEELIGELSDAFDR@.S                 | 14.86  | 4.64   | 3.20 | 0.31 |
| P49817_CAV1_MOUSE   | Cav1    | Caveolin-1 OS=Mus musc K.ASFTTFTVTK#.Y                        | 9.47   | 4.42   | 2.14 | 0.47 |
| P49817_CAV1_MOUSE   | Cav1    | Caveolin-1 OS=Mus musc K.HLNDVVK#.I                           | 73.34  | 28.16  | 2.60 | 0.38 |
| P49817_CAV1_MOUSE   | Cav1    | Caveolin-1 OS=Mus musc K.HLNDVVK#HDFEDVIAEPGTHSFDGIWK#.A      | 18.05  | 31.54  | 0.57 | 1.75 |
| P49817_CAV1_MOUSE   | Cav1    | Caveolin-1 OS=Mus musc K.IDFEDVIAEPGTHSFDGIWK#.A              | 22.72  | 5.67   | 4.01 | 0.25 |
| Q08024_PEBB_MOUSE   | Cbfb    | Core-binding factor subu R.AQQEDALAQQAFFEAR@.R                | 12.07  | 13.17  | 0.92 | 1.09 |

|                     |          |                                                           |        |        |       |      |
|---------------------|----------|-----------------------------------------------------------|--------|--------|-------|------|
| Q08024_PEBB_MOUSE   | Cbfb     | Core-binding factor subu R.AQQEDALAAQAFEEAR.R             | 14.20  | 15.10  | 0.94  | 1.06 |
| Q08024_PEBB_MOUSE   | Cbfb     | Core-binding factor subu R.SKFENEFFFR.K                   | 8.94   | 10.24  | 0.87  | 1.15 |
| P83917_CBX1_MOUSE   | Cbx1     | Chromobox protein hom R.IIGATDSSGELM*FLM*K.W              | 4.68   | 20.48  | 0.23  | 4.38 |
| P83917_CBX1_MOUSE   | Cbx1     | Chromobox protein hom R.IIGATDSSGELM*FLM*K.W              | 3.95   | 12.77  | 0.31  | 3.24 |
| P83917_CBX1_MOUSE   | Cbx1     | Chromobox protein hom R.KKVEEVLEEEEEEYVVEK.V              | 4.50   | 13.88  | 0.32  | 3.09 |
| P83917_CBX1_MOUSE   | Cbx1     | Chromobox protein hom R.IIGATDSSGELM*FLM*K.W              | 65.26  | 257.36 | 0.25  | 3.94 |
| P83917_CBX1_MOUSE   | Cbx1     | Chromobox protein hom R.IIGATDSSGELM*FLM*K.W              | 6.07   | 23.21  | 0.26  | 3.82 |
| P83917_CBX1_MOUSE   | Cbx1     | Chromobox protein hom R.IIGATDSSGELM*FLM*K.W              | 36.02  | 160.54 | 0.22  | 4.46 |
| P83917_CBX1_MOUSE   | Cbx1     | Chromobox protein hom R.IIGATDSSGELM*FLM*K.W              | 4.44   | 15.53  | 0.29  | 3.50 |
| P83917_CBX1_MOUSE   | Cbx1     | Chromobox protein hom R.KKVEEVLEEEEEEYVVEK.V              | 18.04  | 73.27  | 0.25  | 4.06 |
| P83917_CBX1_MOUSE   | Cbx1     | Chromobox protein hom R.KKVEEVLEEEEEEYVVEK.V              | 64.69  | 69.21  | 0.93  | 1.07 |
| P83917_CBX1_MOUSE   | Cbx1     | Chromobox protein hom R.VEEVLEEEEEEYVVEK.V                | 1.95   | 9.11   | 0.21  | 4.68 |
| P83917_CBX1_MOUSE   | Cbx1     | Chromobox protein hom R.VYLLK.W                           | 8.39   | 40.90  | 0.21  | 4.88 |
| P83917_CBX1_MOUSE   | Cbx1     | Chromobox protein hom R.WKNSDEADLVPAK.E                   | 4.97   | 31.05  | 0.16  | 6.25 |
| P30658_CBX2_MOUSE   | Cbx2     | Chromobox protein hom R.K.LPPPLSAPVAGLAAK.A               | 4.77   | 5.52   | 0.86  | 1.16 |
| P23198_CBX3_MOUSE   | Cbx3     | Chromobox protein hom R.KVVEEAPEEFVVEK.V                  | 2.95   | 26.45  | 0.11  | 8.97 |
| P23198_CBX3_MOUSE   | Cbx3     | Chromobox protein hom R.SLSDSESDSK.S                      | 1.63   | 6.42   | 0.25  | 3.95 |
| P23198_CBX3_MOUSE   | Cbx3     | Chromobox protein hom R.WKDSDEADLVPAK.E                   | 7.10   | 36.99  | 0.19  | 5.21 |
| P23198_CBX3_MOUSE   | Cbx3     | Chromobox protein hom R.DSDEADLVPAK.E                     | 8.78   | 41.75  | 0.21  | 4.76 |
| P23198_CBX3_MOUSE   | Cbx3     | Chromobox protein hom R.KVVEEAPEEFVVEK.V                  | 47.35  | 282.94 | 0.17  | 5.98 |
| P23198_CBX3_MOUSE   | Cbx3     | Chromobox protein hom R.KVVEEAPEEFVVEK.V                  | 12.89  | 96.65  | 0.13  | 7.50 |
| P23198_CBX3_MOUSE   | Cbx3     | Chromobox protein hom R.SKKVEEAPEEFVVEK.V                 | 6.28   | 27.94  | 0.22  | 4.45 |
| P23198_CBX3_MOUSE   | Cbx3     | Chromobox protein hom R.SLSDSESDSK.S                      | 3.35   | 22.68  | 0.15  | 6.77 |
| P23198_CBX3_MOUSE   | Cbx3     | Chromobox protein hom R.VEEAPEEFVVEK.V                    | 18.69  | 103.64 | 0.18  | 5.55 |
| P23198_CBX3_MOUSE   | Cbx3     | Chromobox protein hom R.WKNSDEADLVPAK.E                   | 10.79  | 48.82  | 0.22  | 4.52 |
| P23198_CBX3_MOUSE   | Cbx3     | Chromobox protein hom R.WKNSDEADLVPAK.E                   | 37.54  | 262.60 | 0.14  | 7.00 |
| O55187_CBX4_MOUSE   | Cbx4     | E3 SUMO-protein ligase C K.GYLGAVK#PLGGAGAPGK#G           | 10.55  | 3.10   | 3.40  | 0.29 |
| Q61686_CBX5_MOUSE   | Cbx5     | Chromobox protein hom R.GQVEYLLK.W                        | 11.65  | 43.67  | 0.27  | 3.75 |
| Q61686_CBX5_MOUSE   | Cbx5     | Chromobox protein hom R.KSSFNSADDIK.S                     | 2.64   | 10.24  | 0.26  | 3.88 |
| Q61686_CBX5_MOUSE   | Cbx5     | Chromobox protein hom R.SSFNSADDIK.S                      | 16.04  | 60.92  | 0.26  | 3.80 |
| Q61686_CBX5_MOUSE   | Cbx5     | Chromobox protein hom R.WKDTDEADLVPAK.E                   | 16.56  | 63.72  | 0.26  | 3.85 |
| Q9DBY5_CBX6_MOUSE   | Cbx6     | Chromobox protein hom R.VAAGVAGATGGGGTGPSPK#-             | 40.55  | 12.04  | 3.37  | 0.30 |
| Q9DBY5_CBX6_MOUSE   | Cbx6     | Chromobox protein hom R.VFAESIIK.R                        | 16.63  | 5.63   | 2.95  | 0.34 |
| Q9DBY5_CBX6_MOUSE   | Cbx6     | Chromobox protein hom R.VAAGVAGATGGGGTGPSPK#-             | 5.19   | 1.97   | 2.64  | 0.38 |
| Q9QXV1_CBX8_MOUSE   | Cbx8     | Chromobox protein hom R.FPAGHSVIQLAR@.R                   | 9.43   | 7.73   | 1.22  | 0.82 |
| Q9QXV1_CBX8_MOUSE   | Cbx8     | Chromobox protein hom R.GQALDPGGAR@.V                     | 33.17  | 19.59  | 1.69  | 0.59 |
| Q9QXV1_CBX8_MOUSE   | Cbx8     | Chromobox protein hom R.ILGDPEESWSPSLNLEK#V               | 12.71  | 7.07   | 1.80  | 0.56 |
| Q9QXV1_CBX8_MOUSE   | Cbx8     | Chromobox protein hom R.K#EPLDPSQR@PLGEPASAGLGEYK#G       | 27.64  | 15.09  | 1.83  | 0.55 |
| Q9QXV1_CBX8_MOUSE   | Cbx8     | Chromobox protein hom R.LAVDTFPAK@.V                      | 44.70  | 15.36  | 2.91  | 0.34 |
| Q9QXV1_CBX8_MOUSE   | Cbx8     | Chromobox protein hom R.LLAAFEER@.E                       | 70.96  | 26.15  | 2.71  | 0.37 |
| Q9QXV1_CBX8_MOUSE   | Cbx8     | Chromobox protein hom R.R#QDSDLVQVGVTSPPSAEASSK#L         | 50.54  | 16.73  | 3.02  | 0.33 |
| Q9QXV1_CBX8_MOUSE   | Cbx8     | Chromobox protein hom R.SPQDLASTSR@.A                     | 95.82  | 39.31  | 2.44  | 0.41 |
| Q9QXV1_CBX8_MOUSE   | Cbx8     | Chromobox protein hom R.VDDK#PSPGDSK.K                    | 4.37   | 1.74   | 2.52  | 0.40 |
| Q9QXV1_CBX8_MOUSE   | Cbx8     | Chromobox protein hom R.VFAEALLK#R                        | 25.06  | 10.61  | 2.36  | 0.42 |
| Q9QXV1_CBX8_MOUSE   | Cbx8     | Chromobox protein hom R.VVVTDTVSNFLVTIK#E                 | 11.90  | 6.42   | 1.85  | 0.54 |
| Q9QXV1_CBX8_MOUSE   | Cbx8     | Chromobox protein hom R.YSTWPEEENLLR@.L                   | 14.72  | 7.47   | 1.97  | 0.51 |
| Q9D1C2_CBY1_MOUSE   | Cby1     | Protein chibby homolog R.NQQLLEENLLR@.L                   | 15.26  | 5.65   | 2.70  | 0.37 |
| Q8K1A6_C2D1A_MOUSE  | Cc2d1a   | Coiled-coil and C2 doma K.FDPLVLEALS@.G                   | 5.62   | 3.42   | 1.64  | 0.61 |
| Q8CH18_CCAR1_MOUSE  | Ccar1    | Cell division cycle and ap K.AGLLQPPVR@.I                 | 16.42  | 7.68   | 2.14  | 0.47 |
| Q8CH18_CCAR1_MOUSE  | Ccar1    | Cell division cycle and ap K.DLGLQENLEVENM*NLQFENQLNK#T   | 5.63   | 4.29   | 1.31  | 0.76 |
| Q8CH18_CCAR1_MOUSE  | Ccar1    | Cell division cycle and ap R.IQTLPNQNSQTOPLLK#T           | 6.49   | 3.38   | 1.92  | 0.52 |
| Q8CH18_CCAR1_MOUSE  | Ccar1    | Cell division cycle and ap R.IVSPQPAR@.R                  | 40.97  | 14.41  | 2.84  | 0.35 |
| Q8CH18_CCAR1_MOUSE  | Ccar1    | Cell division cycle and ap K.LHDTFGVDEDVFFQLGAVK#G        | 29.19  | 7.20   | 4.05  | 0.25 |
| Q8CH18_CCAR1_MOUSE  | Ccar1    | Cell division cycle and ap K.LQLEEK#TDEGK#FTLNLENLNK#S    | 38.71  | 10.87  | 3.56  | 0.28 |
| Q8CH18_CCAR1_MOUSE  | Ccar1    | Cell division cycle and ap R.VLVEATYNNM*PFK#W             | 16.04  | 5.60   | 2.87  | 0.35 |
| Q8CH18_CCAR1_MOUSE  | Ccar1    | Cell division cycle and ap R.YTVQFSK#F                    | 27.04  | 13.00  | 2.08  | 0.48 |
| Q8CH18_CCAR1_MOUSE  | Ccar1    | Cell division cycle and ap K.AGLLQPPVR@.I                 | 16.50  | 4.93   | 3.34  | 0.30 |
| Q8CH18_CCAR1_MOUSE  | Ccar1    | Cell division cycle and ap K.DLGLQENLEVENM*NLQFENQLNK#T   | 6.03   | 2.91   | 2.07  | 0.48 |
| Q8CH18_CCAR1_MOUSE  | Ccar1    | Cell division cycle and ap K.IEEQ#LEEK#S                  | 20.67  | 6.23   | 3.32  | 0.30 |
| Q8CH18_CCAR1_MOUSE  | Ccar1    | Cell division cycle and ap R.IQTLPNQNSQTOPLLK#T           | 9.77   | 2.47   | 3.97  | 0.25 |
| Q8CH18_CCAR1_MOUSE  | Ccar1    | Cell division cycle and ap K.#HADGEGDEK#HDGVEK#E          | 6.77   | 2.63   | 2.57  | 0.39 |
| Q8CH18_CCAR1_MOUSE  | Ccar1    | Cell division cycle and ap K.#HDLGLQENLEVENM*NLQFENQLNK#T | 2.52   | 2.72   | 0.93  | 1.08 |
| Q8CH18_CCAR1_MOUSE  | Ccar1    | Cell division cycle and ap K.NM*AVLDPDADHLYSAK#V          | 21.62  | 4.38   | 4.94  | 0.20 |
| Q8CH18_CCAR1_MOUSE  | Ccar1    | Cell division cycle and ap R.SEWETLSR@.G                  | 18.35  | 5.62   | 3.26  | 0.31 |
| Q8CH18_CCAR1_MOUSE  | Ccar1    | Cell division cycle and ap K.TDEGK#FTLNLENLNK#S           | 11.94  | 2.92   | 4.08  | 0.24 |
| Q8CH18_CCAR1_MOUSE  | Ccar1    | Cell division cycle and ap R.VFTGVVTK#L                   | 30.09  | 7.00   | 4.30  | 0.23 |
| Q8CH18_CCAR1_MOUSE  | Ccar1    | Cell division cycle and ap R.VLVEATYNNM*PFK#W             | 16.36  | 13.40  | 1.22  | 0.82 |
| Q8VDP4_CCAR2_MOUSE  | Ccar2    | Cell cycle and apoptosis R.FAEFYLPQPPR@.Q                 | 8.00   | 4.30   | 1.86  | 0.54 |
| Q8VDP4_CCAR2_MOUSE  | Ccar2    | Cell cycle and apoptosis R.K#EEAVLVGGWSPSLDGLDQADPQVLR@.T | 3.71   | 2.02   | 1.84  | 0.54 |
| Q8VDP4_CCAR2_MOUSE  | Ccar2    | Cell cycle and apoptosis R.K#GILGAVQQLIFQPHR@.I           | 8.49   | 4.01   | 2.12  | 0.47 |
| Q8VDP4_CCAR2_MOUSE  | Ccar2    | Cell cycle and apoptosis R.KVLLSSPGLLEFYR@.C              | 15.84  | 5.66   | 2.80  | 0.36 |
| Q8VDP4_CCAR2_MOUSE  | Ccar2    | Cell cycle and apoptosis R.KVQTLNQLK#S                    | 13.05  | 5.30   | 2.46  | 0.41 |
| Q8VDP4_CCAR2_MOUSE  | Ccar2    | Cell cycle and apoptosis R.K#EEAVLVGGWSPSLDGLDQADPQVLR@.T | 3.74   | 4.23   | 0.89  | 1.13 |
| Q3TMMW1_C102A_MOUSE | Ccdc102a | Coiled-coil domain-cont R.AQVGLLEALAR@.R                  | 9.44   | 6.26   | 1.51  | 0.66 |
| Q3TMMW1_C102A_MOUSE | Ccdc102a | Coiled-coil domain-cont R.SLDEQTESENQLVQLEHLQSR@.L        | 5.98   | 4.58   | 1.31  | 0.77 |
| Q8R344_CCD12_MOUSE  | Ccdc12   | Coiled-coil domain-cont R.AIAELIR.E                       | 4.58   | 28.39  | 1.57  | 0.64 |
| Q8R344_CCD12_MOUSE  | Ccdc12   | Coiled-coil domain-cont R.EQLEAAK#PEPVEVDLANLAPR@.K       | 9.98   | 3.66   | 2.73  | 0.37 |
| Q8R344_CCD12_MOUSE  | Ccdc12   | Coiled-coil domain-cont R.R#VPQAK#VAVEEK#V                | 82.70  | 49.09  | 1.68  | 0.59 |
| Q8R344_CCD12_MOUSE  | Ccdc12   | Coiled-coil domain-cont R.VK#EQLEAAK#PEPVEVDLANLAPR@.K    | 13.43  | 9.82   | 1.37  | 0.73 |
| A2AEV7_A2AEV7_MOUSE | Ccdc120  | Coiled-coil domain-cont R.TTGPDPVPPR@.A                   | 50.52  | 1.88   | 26.87 | 0.04 |
| Q8C171_CC132_MOUSE  | Ccdc132  | Coiled-coil domain-cont R.DYVDEQDVPVVK#S                  | 7.06   | 4.32   | 1.64  | 0.61 |
| Q8C171_CC132_MOUSE  | Ccdc132  | Coiled-coil domain-cont K.LQDTLEQIEQLDVALSK#I             | 3.94   | 6.38   | 0.62  | 1.62 |
| Q8C171_CC132_MOUSE  | Ccdc132  | Coiled-coil domain-cont K.SPPESLNDLGAFFSLR@.V             | 4.99   | 2.24   | 2.23  | 0.45 |
| Q8C171_CC132_MOUSE  | Ccdc132  | Coiled-coil domain-cont K.VNAPILNTLNVIR@.L                | 4.34   | 0.93   | 4.66  | 0.21 |
| Q8C7V8_CC134_MOUSE  | Ccdc134  | Coiled-coil domain-cont K.LLDVM*LRK.G                     | 102.54 | 50.92  | 2.01  | 0.50 |
| Q8C7V8_CC134_MOUSE  | Ccdc134  | Coiled-coil domain-cont K.NLAQLNDHQYK#J                   | 10.41  | 2.73   | 3.81  | 0.26 |
| Q8C7V8_CC134_MOUSE  | Ccdc134  | Coiled-coil domain-cont K.TDQTEFIPSTDVFPK#A               | 48.50  | 20.74  | 2.34  | 0.43 |
| Q8C7V8_CC134_MOUSE  | Ccdc134  | Coiled-coil domain-cont R.TVLIADVLPDGPVQDEK#L             | 25.88  | 13.60  | 1.90  | 0.53 |
| Q8C7V8_CC134_MOUSE  | Ccdc134  | Coiled-coil domain-cont K.TDQTEFIPSTDVFPK#A               | 9.21   | 3.78   | 2.44  | 0.41 |
| Q8C7V8_CC134_MOUSE  | Ccdc134  | Coiled-coil domain-cont R.TVLIADVLPDGPVQDEK#L             | 9.74   | 5.12   | 1.90  | 0.53 |
| Q8R0K4_CC137_MOUSE  | Ccdc137  | Coiled-coil domain-cont R.K#GESDVAVYQR@.M                 | 7.36   | 3.37   | 2.18  | 0.46 |
| Q8R0K4_CC137_MOUSE  | Ccdc137  | Coiled-coil domain-cont K.M*LLGGGGSPAPATSLAR@.Q           | 10.74  | 4.08   | 2.63  | 0.38 |
| Q8R0K4_CC137_MOUSE  | Ccdc137  | Coiled-coil domain-cont K.NQDEQIPFR@.L                    | 15.51  | 7.93   | 1.95  | 0.51 |
| Q8R0K4_CC137_MOUSE  | Ccdc137  | Coiled-coil domain-cont R.QEM*TPAQPGSSFR@.Q               | 6.01   | 2.27   | 2.64  | 0.38 |
| Q8C9S4_CC186_MOUSE  | Ccdc186  | Coiled-coil domain-cont R.ESELLFTEK#L                     | 9.33   | 3.64   | 2.56  | 0.39 |
| Q9JIG7_CCD22_MOUSE  | Ccdc22   | Coiled-coil domain-cont R.DLLFLAER@.L                     | 14.32  | 7.33   | 1.95  | 0.51 |
| Q9JIG7_CCD22_MOUSE  | Ccdc22   | Coiled-coil domain-cont R.FTFHLEPQVQAQVADVPATSQR@.L       | 11.32  | 5.48   | 2.07  | 0.48 |
| Q9JIG7_CCD22_MOUSE  | Ccdc22   | Coiled-coil domain-cont R.ILEIVGNIR@.K                    | 12.55  | 6.08   | 2.07  | 0.48 |
| Q9JIG7_CCD22_MOUSE  | Ccdc22   | Coiled-coil domain-cont R.LPSDASEADQAPGSAIFLR@.A          | 4.84   | 1.65   | 2.94  | 0.34 |
| Q9JIG7_CCD22_MOUSE  | Ccdc22   | Coiled-coil domain-cont K.LQLVVESSAQR@.L                  | 13.47  | 3.08   | 4.37  | 0.23 |
| Q9JIG7_CCD22_MOUSE  | Ccdc22   | Coiled-coil domain-cont K.QLVSELETPK#D                    | 10.30  | 4.99   | 2.06  | 0.48 |
| Q9JIG7_CCD22_MOUSE  | Ccdc22   | Coiled-coil domain-cont R.QSELSVAEQEQLR@.L                | 6.74   | 4.95   | 1.36  | 0.73 |
| Q9CR29_CCD43_MOUSE  | Ccdc43   | Coiled-coil domain-cont R.LEALGVDR@.A                     | 19.78  | 6.58   | 3.01  | 0.33 |

|                    |         |                                                                 |        |        |      |      |
|--------------------|---------|-----------------------------------------------------------------|--------|--------|------|------|
| Q9CR29_CCD43_MOUSE | Ccdc43  | Coiled-coil domain-cont. R.NTNVEDVLNAR@.K                       | 13.63  | 3.46   | 3.94 | 0.25 |
| Q9CR27_CCD53_MOUSE | Ccdc53  | WASH complex subunit ( R.IQQETLNLIDLAK#.L                       | 3.37   | 4.23   | 0.80 | 1.26 |
| Q5SN20_GRDN_MOUSE  | Ccdc88a | Girdin OS=Mus musculus R.LEESTNYNQLR@.H                         | 9.41   | 14.34  | 0.66 | 1.52 |
| Q5SN20_GRDN_MOUSE  | Ccdc88a | Girdin OS=Mus musculus K.LEM*ENQSLTK#.T                         | 4.20   | 14.24  | 0.29 | 3.40 |
| Q5SN20_GRDN_MOUSE  | Ccdc88a | Girdin OS=Mus musculus R.LEVSYQGLDTEHOR@.L                      | 9.40   | 5.63   | 1.67 | 0.60 |
| Q5SN20_GRDN_MOUSE  | Ccdc88a | Girdin OS=Mus musculus R.LQQENM*NLSDAR@.S                       | 9.40   | 3.36   | 2.80 | 0.36 |
| Q5SN20_GRDN_MOUSE  | Ccdc88a | Girdin OS=Mus musculus R.QAEEYLSLK#.H                           | 8.41   | 3.65   | 2.31 | 0.43 |
| Q5SN20_GRDN_MOUSE  | Ccdc88a | Girdin OS=Mus musculus R.QQAEIKHDTLEENNVK#.I                    | 7.82   | 3.06   | 2.55 | 0.39 |
| Q5SN20_GRDN_MOUSE  | Ccdc88a | Girdin OS=Mus musculus K.SLEQETSQLEK#.D                         | 9.44   | 3.25   | 2.91 | 0.34 |
| Q5SN20_GRDN_MOUSE  | Ccdc88a | Girdin OS=Mus musculus R.TSELAEPQK#.S                           | 20.87  | 5.63   | 3.70 | 0.27 |
| Q77QK5_CCD93_MOUSE | Ccdc93  | Coiled-coil domain-cont. K.EISLNSIHENFSQAM*ASPAAR@.D            | 6.65   | 2.40   | 2.76 | 0.36 |
| Q9DBT3_CCD97_MOUSE | Ccdc97  | Coiled-coil domain-cont. R.APLLVEYQIGQYLTLQELNAR@.T             | 8.26   | 3.64   | 2.27 | 0.44 |
| Q9DBT3_CCD97_MOUSE | Ccdc97  | Coiled-coil domain-cont. R.ELIQGGEYFSDQEM*R@.F                  | 6.05   | 5.02   | 1.21 | 0.83 |
| Q9DBT3_CCD97_MOUSE | Ccdc97  | Coiled-coil domain-cont. R.VVHWGELSQTPIPSGPQEK#.E               | 7.36   | 3.87   | 1.90 | 0.53 |
| Q8K2Y9_CCM2_MOUSE  | Ccm2    | Malcavernin OS=Mus mu K.YLGQLTSIPGYLNPSR@.T                     | 4.27   | 2.25   | 1.90 | 0.53 |
| Q62447_CCNK_MOUSE  | Ccnc    | Cyclin-C OS=Mus muscul K.VEEFVVSNTNR@.L                         | 10.35  | 31.80  | 0.33 | 3.07 |
| O88874_CCNK_MOUSE  | Ccnk    | Cyclin-K OS=Mus muscul K.FDLQVEHPYQFLK#.Y                       | 6.37   | 4.05   | 1.57 | 0.64 |
| O88874_CCNK_MOUSE  | Ccnk    | Cyclin-K OS=Mus muscul R.KHPPLALPGAEATGPVETSDLPK#.V             | 9.84   | 3.46   | 2.84 | 0.35 |
| O88874_CCNK_MOUSE  | Ccnk    | Cyclin-K OS=Mus muscul R.SLLNDVDFQGFDDPK#EEVM*VLER@.I           | 3.56   | 2.34   | 1.52 | 0.66 |
| Q9QWV9_CCNT1_MOUSE | Ccnt1   | Cyclin-T1 OS=Mus muscu R.TSELALIGVDHSLQDGGSSAFSGSQK#.Q          | 7.01   | 4.94   | 1.42 | 0.71 |
| P80314_TCPB_MOUSE  | Cct2    | T-complex protein 1 subunit DAALM*VTNDGATILK#.N                 | 185.54 | 69.61  | 2.67 | 0.38 |
| P80314_TCPB_MOUSE  | Cct2    | T-complex protein 1 subunit DAALM*VTNDGATILK#.N                 | 38.26  | 17.59  | 2.17 | 0.46 |
| P80314_TCPB_MOUSE  | Cct2    | T-complex protein 1 subunit EAESLAK#.K                          | 204.84 | 87.09  | 2.35 | 0.43 |
| P80314_TCPB_MOUSE  | Cct2    | T-complex protein 1 subunit EALLSSADVHGSDEAR.F                  | 33.40  | 14.67  | 2.28 | 0.44 |
| P80314_TCPB_MOUSE  | Cct2    | T-complex protein 1 subunit EAIVAM*ESFAK#.A                     | 151.27 | 60.18  | 2.51 | 0.40 |
| P80314_TCPB_MOUSE  | Cct2    | T-complex protein 1 subunit EGTIGDM*AVLGITESFQVK#.R             | 19.07  | 6.68   | 2.85 | 0.35 |
| P80314_TCPB_MOUSE  | Cct2    | T-complex protein 1 subunit EGTIGDM*AVLGITESFQVK#.R             | 17.46  | 4.84   | 3.61 | 0.28 |
| P80314_TCPB_MOUSE  | Cct2    | T-complex protein 1 subunit FWQDLM*NIAGTLLSSK#.L                | 23.53  | 10.73  | 2.19 | 0.46 |
| P80314_TCPB_MOUSE  | Cct2    | T-complex protein 1 subunit FWQDLM*NIAGTLLSSK#.L                | 12.40  | 5.31   | 2.34 | 0.43 |
| P80314_TCPB_MOUSE  | Cct2    | T-complex protein 1 subunit R.GATQQLDLEAER@.S                   | 309.17 | 110.50 | 2.80 | 0.36 |
| P80314_TCPB_MOUSE  | Cct2    | T-complex protein 1 subunit R.IHPQTIISGWR@.E                    | 58.51  | 16.62  | 3.52 | 0.28 |
| P80314_TCPB_MOUSE  | Cct2    | T-complex protein 1 subunit R.LIANTGM*TDTKI.I                   | 34.22  | 8.29   | 4.13 | 0.24 |
| P80314_TCPB_MOUSE  | Cct2    | T-complex protein 1 subunit R.LIANTGM*TDTKI.I                   | 29.04  | 13.21  | 2.20 | 0.45 |
| P80314_TCPB_MOUSE  | Cct2    | T-complex protein 1 subunit R.LILLSSGR.D                        | 254.24 | 107.55 | 2.36 | 0.42 |
| P80314_TCPB_MOUSE  | Cct2    | T-complex protein 1 subunit R.KIHPQTIISGWR@.E                   | 51.72  | 20.14  | 2.57 | 0.39 |
| P80314_TCPB_MOUSE  | Cct2    | T-complex protein 1 subunit R.KHLGGSLADSVLDEGFLDKK#.I           | 42.76  | 18.63  | 2.30 | 0.44 |
| P80314_TCPB_MOUSE  | Cct2    | T-complex protein 1 subunit R.LALVTGGIEASTFDHPVLVK#.L           | 344.80 | 159.03 | 2.17 | 0.46 |
| P80314_TCPB_MOUSE  | Cct2    | T-complex protein 1 subunit R.LALVTGGIEASTFDHPVLVK#.L           | 9.92   | 3.05   | 3.26 | 0.31 |
| P80314_TCPB_MOUSE  | Cct2    | T-complex protein 1 subunit R.LGGSLADSVLDEGFLDKK#.I             | 5.70   | 2.25   | 2.54 | 0.39 |
| P80314_TCPB_MOUSE  | Cct2    | T-complex protein 1 subunit R.LK#GSGNLEAIHVHK#.K                | 77.17  | 35.96  | 2.15 | 0.47 |
| P80314_TCPB_MOUSE  | Cct2    | T-complex protein 1 subunit R.LSSFGAIAIGDLVK#.S                 | 356.09 | 133.78 | 2.66 | 0.38 |
| P80314_TCPB_MOUSE  | Cct2    | T-complex protein 1 subunit R.M*LP*TIADNAGYDSADLVAQLR@.A        | 148.59 | 51.30  | 2.90 | 0.35 |
| P80314_TCPB_MOUSE  | Cct2    | T-complex protein 1 subunit R.M*LP*TIADNAGYDSADLVAQLR@.A        | 18.87  | 8.98   | 2.10 | 0.48 |
| P80314_TCPB_MOUSE  | Cct2    | T-complex protein 1 subunit R.M*LP*TIADNAGYDSADLVAQLR@.A        | 18.71  | 7.83   | 2.39 | 0.42 |
| P80314_TCPB_MOUSE  | Cct2    | T-complex protein 1 subunit R.NIGVDNPAK#.V                      | 200.66 | 87.24  | 2.30 | 0.43 |
| P80314_TCPB_MOUSE  | Cct2    | T-complex protein 1 subunit R.QLIYNYPEQLFGAAGVMAIEHADFAGVER@.L  | 11.52  | 5.33   | 2.16 | 0.46 |
| P80314_TCPB_MOUSE  | Cct2    | T-complex protein 1 subunit R.QVLLSAAEAEEVLR@.V                 | 110.41 | 43.95  | 2.51 | 0.40 |
| P80314_TCPB_MOUSE  | Cct2    | T-complex protein 1 subunit R.R@QVLLSAAEAEEVLR@.V               | 18.03  | 8.62   | 2.09 | 0.48 |
| P80314_TCPB_MOUSE  | Cct2    | T-complex protein 1 subunit R.TPGK#EAVAM*ESFAK#.A               | 43.52  | 24.68  | 1.76 | 0.57 |
| P80314_TCPB_MOUSE  | Cct2    | T-complex protein 1 subunit R.VAEIEHAEK#E#.M                    | 22.42  | 12.33  | 1.82 | 0.55 |
| P80314_TCPB_MOUSE  | Cct2    | T-complex protein 1 subunit R.KLVLDV*SR@.V                      | 112.31 | 47.55  | 2.36 | 0.42 |
| P80314_TCPB_MOUSE  | Cct2    | T-complex protein 1 subunit R.VQDDVEGDTGTSVTVLAAELLR@.E         | 176.56 | 66.56  | 2.65 | 0.38 |
| P80314_TCPB_MOUSE  | Cct2    | T-complex protein 1 subunit R.VQDDVEGDTGTSVTVLAAELLR@.E         | 95.81  | 38.73  | 2.47 | 0.40 |
| P80314_TCPB_MOUSE  | Cct2    | T-complex protein 1 subunit R.EAVAM*ESFAK#.S                    | 14.00  | 6.12   | 2.29 | 0.44 |
| P80314_TCPB_MOUSE  | Cct2    | T-complex protein 1 subunit R.FWQDLM*NIAGTLLSSK#.L              | 4.40   | 2.71   | 1.62 | 0.62 |
| P80314_TCPB_MOUSE  | Cct2    | T-complex protein 1 subunit R.GATQQLDLEAER@.S                   | 35.12  | 9.90   | 3.55 | 0.28 |
| P80314_TCPB_MOUSE  | Cct2    | T-complex protein 1 subunit R.LSSFGAIAIGDLVK#.S                 | 31.69  | 12.57  | 2.52 | 0.40 |
| P80314_TCPB_MOUSE  | Cct2    | T-complex protein 1 subunit R.M*LP*TIADNAGYDSADLVAQLR@.A        | 16.44  | 6.38   | 2.58 | 0.39 |
| P80314_TCPB_MOUSE  | Cct2    | T-complex protein 1 subunit R.QVLLSAAEAEEVLR@.V                 | 8.99   | 3.51   | 2.56 | 0.39 |
| P80314_TCPB_MOUSE  | Cct2    | T-complex protein 1 subunit R.LSSFGAIAIGDLVK#.S                 | 18.37  | 6.57   | 2.79 | 0.36 |
| P80314_TCPB_MOUSE  | Cct2    | T-complex protein 1 subunit R.VQDDVEGDTGTSVTVLAAELLR@.E         | 11.23  | 3.22   | 3.49 | 0.29 |
| P80318_TCPG_MOUSE  | Cct3    | T-complex protein 1 subunit R.AM*TVGEQWPPYR@.A                  | 35.44  | 16.07  | 2.21 | 0.45 |
| P80318_TCPG_MOUSE  | Cct3    | T-complex protein 1 subunit R.AVAQALEVPR@.T                     | 82.85  | 52.54  | 1.58 | 0.63 |
| P80318_TCPG_MOUSE  | Cct3    | T-complex protein 1 subunit R.EILSEVER@.N                       | 101.59 | 48.33  | 2.10 | 0.48 |
| P80318_TCPG_MOUSE  | Cct3    | T-complex protein 1 subunit R.EIQVQHPAAK#.S                     | 23.48  | 14.38  | 1.63 | 0.61 |
| P80318_TCPG_MOUSE  | Cct3    | T-complex protein 1 subunit R.ELGIWVPLAVK#.L                    | 56.82  | 29.16  | 1.95 | 0.51 |
| P80318_TCPG_MOUSE  | Cct3    | T-complex protein 1 subunit R.EM*ML*LSIINSSITTK#.V              | 24.90  | 14.75  | 1.69 | 0.59 |
| P80318_TCPG_MOUSE  | Cct3    | T-complex protein 1 subunit R.IVLLDSSLEYK#.K                    | 85.32  | 100.97 | 0.85 | 1.18 |
| P80318_TCPG_MOUSE  | Cct3    | T-complex protein 1 subunit R.IVSRPEELREDDVGTGAGLLEIK#.I        | 24.53  | 11.05  | 2.22 | 0.45 |
| P80318_TCPG_MOUSE  | Cct3    | T-complex protein 1 subunit R.K#VQSGNNAAK#.T                    | 16.84  | 9.36   | 1.80 | 0.56 |
| P80318_TCPG_MOUSE  | Cct3    | T-complex protein 1 subunit R.M*ALDDM*ISTLK#.K                  | 20.45  | 7.76   | 2.64 | 0.38 |
| P80318_TCPG_MOUSE  | Cct3    | T-complex protein 1 subunit R.TAVETAVLLLR@.I                    | 106.12 | 49.26  | 2.15 | 0.46 |
| P80318_TCPG_MOUSE  | Cct3    | T-complex protein 1 subunit R.AM*TVGEQWPPYR@.A                  | 33.83  | 16.28  | 2.08 | 0.48 |
| P80318_TCPG_MOUSE  | Cct3    | T-complex protein 1 subunit R.ANVTAIR@.R                        | 159.15 | 67.43  | 2.36 | 0.42 |
| P80318_TCPG_MOUSE  | Cct3    | T-complex protein 1 subunit R.AVAQALEVPR@.T                     | 130.21 | 56.61  | 2.30 | 0.43 |
| P80318_TCPG_MOUSE  | Cct3    | T-complex protein 1 subunit R.EILSEVER@.N                       | 97.01  | 37.97  | 2.55 | 0.39 |
| P80318_TCPG_MOUSE  | Cct3    | T-complex protein 1 subunit R.ELGIWVPLAVK#.L                    | 82.26  | 39.33  | 2.09 | 0.48 |
| P80318_TCPG_MOUSE  | Cct3    | T-complex protein 1 subunit R.EM*ML*LSIINSSITTK#.V              | 35.65  | 13.47  | 2.65 | 0.38 |
| P80318_TCPG_MOUSE  | Cct3    | T-complex protein 1 subunit R.EMML*LSIINSSITTK#.V               | 4.12   | 20.11  | 0.20 | 4.89 |
| P80318_TCPG_MOUSE  | Cct3    | T-complex protein 1 subunit R.IDDIVSGHK#.K                      | 20.10  | 21.31  | 0.94 | 1.06 |
| P80318_TCPG_MOUSE  | Cct3    | T-complex protein 1 subunit R.ISTPVDVWNR.E                      | 61.85  | 27.91  | 2.22 | 0.45 |
| P80318_TCPG_MOUSE  | Cct3    | T-complex protein 1 subunit R.IVLLDSSLEYK#.K                    | 199.11 | 43.54  | 4.57 | 0.22 |
| P80318_TCPG_MOUSE  | Cct3    | T-complex protein 1 subunit R.IVSR@PEELR@EDDVGTGAGLLEIK#.K      | 16.48  | 8.24   | 2.00 | 0.50 |
| P80318_TCPG_MOUSE  | Cct3    | T-complex protein 1 subunit R.IVSRPEELREDDVGTGAGLLEIK#.I        | 17.30  | 9.69   | 1.79 | 0.56 |
| P80318_TCPG_MOUSE  | Cct3    | T-complex protein 1 subunit R.K#VQSGNNAAK#.T                    | 7.88   | 10.83  | 0.73 | 1.37 |
| P80318_TCPG_MOUSE  | Cct3    | T-complex protein 1 subunit R.K#VQSGNNAAK#.T                    | 22.89  | 8.96   | 2.56 | 0.39 |
| P80318_TCPG_MOUSE  | Cct3    | T-complex protein 1 subunit R.M*ALDDM*ISTLK#.K                  | 14.67  | 8.14   | 1.80 | 0.56 |
| P80318_TCPG_MOUSE  | Cct3    | T-complex protein 1 subunit R.NVLLDQLVPGGGASEMAVAHALTEK#.S      | 21.29  | 10.41  | 2.05 | 0.49 |
| P80318_TCPG_MOUSE  | Cct3    | T-complex protein 1 subunit R.TAVETAVLLLR.I                     | 208.75 | 85.17  | 2.45 | 0.41 |
| P80318_TCPG_MOUSE  | Cct3    | T-complex protein 1 subunit R.AM*TVGEQWPPYR@.A                  | 17.64  | 5.75   | 3.07 | 0.33 |
| P80318_TCPG_MOUSE  | Cct3    | T-complex protein 1 subunit R.AVAQALEVPR@.T                     | 69.90  | 13.95  | 5.01 | 0.20 |
| P80318_TCPG_MOUSE  | Cct3    | T-complex protein 1 subunit R.ELGIWVPLAVK#.L                    | 41.94  | 7.71   | 5.44 | 0.18 |
| P80318_TCPG_MOUSE  | Cct3    | T-complex protein 1 subunit R.EM*ML*LSIINSSITTK#.V              | 18.74  | 4.50   | 4.16 | 0.24 |
| P80318_TCPG_MOUSE  | Cct3    | T-complex protein 1 subunit R.ISTPVDVWNR.E                      | 37.19  | 6.36   | 5.85 | 0.17 |
| P80318_TCPG_MOUSE  | Cct3    | T-complex protein 1 subunit R.IVLLDSSLEYK#.K                    | 110.80 | 12.61  | 8.79 | 0.11 |
| P80318_TCPG_MOUSE  | Cct3    | T-complex protein 1 subunit R.K#VQSGNNAAK#.T                    | 10.70  | 4.60   | 2.32 | 0.43 |
| P80318_TCPG_MOUSE  | Cct3    | T-complex protein 1 subunit R.TAVETAVLLLR@.I                    | 101.62 | 18.30  | 5.55 | 0.18 |
| P80315_TCPD_MOUSE  | Cct4    | T-complex protein 1 subunit R.AFADAM*EVI*PSTLAENAGLNPISTVTEL@.N | 8.66   | 4.82   | 1.80 | 0.56 |
| P80315_TCPD_MOUSE  | Cct4    | T-complex protein 1 subunit R.ALIAGGGAPAEIALR@.L                | 183.21 | 89.40  | 2.05 | 0.49 |
| P80315_TCPD_MOUSE  | Cct4    | T-complex protein 1 subunit R.AYLLNVLK#.Q                       | 139.66 | 48.98  | 2.85 | 0.35 |
| P80315_TCPD_MOUSE  | Cct4    | T-complex protein 1 subunit R.DALSDLALHFLNK#.M                  | 70.76  | 26.58  | 2.66 | 0.38 |
| P80315_TCPD_MOUSE  | Cct4    | T-complex protein 1 subunit R.ETLLNSATSLNSK#.V                  | 42.89  | 18.78  | 2.28 | 0.44 |
| P80315_TCPD_MOUSE  | Cct4    | T-complex protein 1 subunit R.FSNISAAK#.A                       | 47.69  | 21.30  | 2.24 | 0.45 |

|                   |       |                                                                          |        |        |      |       |
|-------------------|-------|--------------------------------------------------------------------------|--------|--------|------|-------|
| P80315_TCPD_MOUSE | Cct4  | T-complex protein 1 subunit K.GDVTITNDGATLK#.Q                           | 21.18  | 9.91   | 2.14 | 0.47  |
| P80315_TCPD_MOUSE | Cct4  | T-complex protein 1 subunit K.GHPTIISSEFQK#.A                            | 156.47 | 62.90  | 2.49 | 0.40  |
| P80315_TCPD_MOUSE | Cct4  | T-complex protein 1 subunit K.IDDVNTR@.-                                 | 152.38 | 54.99  | 2.77 | 0.36  |
| P80315_TCPD_MOUSE | Cct4  | T-complex protein 1 subunit K.LVIEEAER.S                                 | 332.27 | 43.52  | 7.63 | 0.13  |
| P80315_TCPD_MOUSE | Cct4  | T-complex protein 1 subunit K.M*IQDGK#GDVITITNDGATLK#.Q                  | 119.15 | 44.71  | 2.67 | 0.38  |
| P80315_TCPD_MOUSE | Cct4  | T-complex protein 1 subunit K.MIQDGK#GDVITITNDGATLK#.Q                   | 10.29  | 3.13   | 3.29 | 0.30  |
| P80315_TCPD_MOUSE | Cct4  | T-complex protein 1 subunit R.M*LVLSK#.A                                 | 64.81  | 30.49  | 2.13 | 0.47  |
| P80315_TCPD_MOUSE | Cct4  | T-complex protein 1 subunit R.MLVLSK#.A                                  | 18.46  | 8.36   | 2.21 | 0.45  |
| P80315_TCPD_MOUSE | Cct4  | T-complex protein 1 subunit R.SGAPTAGPGSR@.G                             | 49.76  | 24.72  | 2.01 | 0.50  |
| P80315_TCPD_MOUSE | Cct4  | T-complex protein 1 subunit K.TDM*DNQIVSDYAQM*DR@.V                      | 32.77  | 14.22  | 2.30 | 0.43  |
| P80315_TCPD_MOUSE | Cct4  | T-complex protein 1 subunit K.TDM*DNQIVSDYAQM*DR@.V                      | 7.18   | 3.32   | 2.16 | 0.46  |
| P80315_TCPD_MOUSE | Cct4  | T-complex protein 1 subunit K.TVTIVR@.G                                  | 69.03  | 26.55  | 2.60 | 0.38  |
| P80315_TCPD_MOUSE | Cct4  | T-complex protein 1 subunit K.VANSGITR@.V                                | 75.75  | 20.90  | 3.63 | 0.28  |
| P80315_TCPD_MOUSE | Cct4  | T-complex protein 1 subunit K.VIDPATATSDVLR.D                            | 182.56 | 76.74  | 2.38 | 0.42  |
| P80315_TCPD_MOUSE | Cct4  | T-complex protein 1 subunit K.VVSYSSLLSPM*SVNAV*#K.V                     | 21.18  | 6.86   | 3.09 | 0.32  |
| P80315_TCPD_MOUSE | Cct4  | T-complex protein 1 subunit R.ALIAGGGAP#EIALR@.L                         | 79.80  | 33.21  | 2.40 | 0.42  |
| P80315_TCPD_MOUSE | Cct4  | T-complex protein 1 subunit R.AYLNLVK#.Q                                 | 54.95  | 14.46  | 3.80 | 0.26  |
| P80315_TCPD_MOUSE | Cct4  | T-complex protein 1 subunit R.ETLLNSATSLNSK#.V                           | 12.65  | 3.38   | 3.75 | 0.27  |
| P80315_TCPD_MOUSE | Cct4  | T-complex protein 1 subunit K.GDVTITNDGATLK#.Q                           | 7.68   | 3.53   | 2.17 | 0.46  |
| P80315_TCPD_MOUSE | Cct4  | T-complex protein 1 subunit K.GHPTIISSEFQK#.A                            | 7.73   | 88.02  | 0.09 | 11.38 |
| P80315_TCPD_MOUSE | Cct4  | T-complex protein 1 subunit K.IDDVNTR@.-                                 | 44.35  | 9.19   | 4.83 | 0.21  |
| P80315_TCPD_MOUSE | Cct4  | T-complex protein 1 subunit K.LVIEEAER@.S                                | 82.06  | 24.74  | 3.32 | 0.30  |
| P80315_TCPD_MOUSE | Cct4  | T-complex protein 1 subunit K.M*IQDGK#GDVITITNDGATLK#.Q                  | 21.80  | 8.69   | 3.31 | 0.30  |
| P80315_TCPD_MOUSE | Cct4  | T-complex protein 1 subunit K.TDM*DNQIVSDYAQM*DR@.V                      | 9.39   | 5.29   | 1.77 | 0.56  |
| P80315_TCPD_MOUSE | Cct4  | T-complex protein 1 subunit K.VIDPATATSDVLR@.D                           | 63.41  | 23.25  | 2.73 | 0.37  |
| P80315_TCPD_MOUSE | Cct4  | T-complex protein 1 subunit R.ALIAGGGAP#EIALR@.L                         | 51.77  | 10.17  | 5.09 | 0.20  |
| P80315_TCPD_MOUSE | Cct4  | T-complex protein 1 subunit R.AYLNLVK#.Q                                 | 18.59  | 4.79   | 3.88 | 0.26  |
| P80315_TCPD_MOUSE | Cct4  | T-complex protein 1 subunit R.ETLLNSATSLNSK#.V                           | 9.11   | 2.00   | 4.56 | 0.22  |
| P80315_TCPD_MOUSE | Cct4  | T-complex protein 1 subunit K.GDVTITNDGATLK#.Q                           | 8.41   | 2.01   | 4.18 | 0.24  |
| P80315_TCPD_MOUSE | Cct4  | T-complex protein 1 subunit K.GHPTIISSEFQK#.A                            | 10.20  | 127.52 | 0.08 | 12.50 |
| P80315_TCPD_MOUSE | Cct4  | T-complex protein 1 subunit K.IDDVNTR@.-                                 | 29.71  | 9.11   | 3.26 | 0.31  |
| P80315_TCPD_MOUSE | Cct4  | T-complex protein 1 subunit K.LVIEEAER@.S                                | 30.02  | 8.99   | 3.34 | 0.30  |
| P80315_TCPD_MOUSE | Cct4  | T-complex protein 1 subunit K.M*IQDGK#GDVITITNDGATLK#.Q                  | 12.64  | 2.92   | 4.33 | 0.23  |
| P80315_TCPD_MOUSE | Cct4  | T-complex protein 1 subunit K.VIDPATATSDVLR@.D                           | 16.61  | 11.31  | 3.15 | 0.32  |
| P80316_TCPD_MOUSE | Cct5  | T-complex protein 1 subunit R.AFADALV#IP#M#L#S#S#G#M#N#P#I#Q#M#T#E#V#R#A | 14.19  | 5.27   | 2.69 | 0.37  |
| P80316_TCPD_MOUSE | Cct5  | T-complex protein 1 subunit R.AVTIFR.G                                   | 120.48 | 43.29  | 2.78 | 0.36  |
| P80316_TCPD_MOUSE | Cct5  | T-complex protein 1 subunit K.DK#M#LVIEK#.C                              | 16.03  | 6.37   | 2.52 | 0.40  |
| P80316_TCPD_MOUSE | Cct5  | T-complex protein 1 subunit R.DVDFELIK#.V                                | 49.58  | 14.50  | 3.42 | 0.29  |
| P80316_TCPD_MOUSE | Cct5  | T-complex protein 1 subunit R.DVDFELIK#VEGK#.V                           | 20.72  | 10.09  | 2.05 | 0.49  |
| P80316_TCPD_MOUSE | Cct5  | T-complex protein 1 subunit R.FSELTSEK#.L                                | 180.94 | 78.65  | 2.30 | 0.43  |
| P80316_TCPD_MOUSE | Cct5  | T-complex protein 1 subunit K.GSNDM*Q#Q#V#I#T#L#I#G#K#.K                 | 43.96  | 13.27  | 3.31 | 0.30  |
| P80316_TCPD_MOUSE | Cct5  | T-complex protein 1 subunit R.IADGYEQAAR.I                               | 216.62 | 75.87  | 2.85 | 0.35  |
| P80316_TCPD_MOUSE | Cct5  | T-complex protein 1 subunit R.IAIQ#L#D#K#.I                              | 29.89  | 11.81  | 2.53 | 0.40  |
| P80316_TCPD_MOUSE | Cct5  | T-complex protein 1 subunit K.IDDIR@K#P#GESEE.-                          | 28.23  | 10.73  | 2.63 | 0.38  |
| P80316_TCPD_MOUSE | Cct5  | T-complex protein 1 subunit K.ISDK#V#L#D#I#N#P#L#I#Q#T#A#K#.T            | 18.81  | 8.81   | 2.13 | 0.47  |
| P80316_TCPD_MOUSE | Cct5  | T-complex protein 1 subunit K.LDVM*SVEDYK#.A                             | 13.97  | 7.72   | 1.81 | 0.55  |
| P80316_TCPD_MOUSE | Cct5  | T-complex protein 1 subunit K.LGFAGV#Q#E#I#S#F#G#T#K#.D                  | 191.66 | 77.01  | 2.49 | 0.40  |
| P80316_TCPD_MOUSE | Cct5  | T-complex protein 1 subunit R.LM*GLEALK#.S                               | 77.53  | 37.52  | 2.07 | 0.48  |
| P80316_TCPD_MOUSE | Cct5  | T-complex protein 1 subunit R.LMGLEALK#.S                                | 15.92  | 5.86   | 2.72 | 0.37  |
| P80316_TCPD_MOUSE | Cct5  | T-complex protein 1 subunit K.LM*VLSK#.S                                 | 58.62  | 21.67  | 2.71 | 0.37  |
| P80316_TCPD_MOUSE | Cct5  | T-complex protein 1 subunit K.LMVELSK#.S                                 | 33.62  | 13.50  | 2.49 | 0.40  |
| P80316_TCPD_MOUSE | Cct5  | T-complex protein 1 subunit K.M*LVIEK#.C                                 | 39.95  | 26.03  | 1.53 | 0.65  |
| P80316_TCPD_MOUSE | Cct5  | T-complex protein 1 subunit R.QM*AEI#V#N#V#L#V#A#D#M*E#R@.R              | 5.70   | 3.21   | 1.77 | 0.56  |
| P80316_TCPD_MOUSE | Cct5  | T-complex protein 1 subunit K.QQISLATQ#M#VR@.M                           | 86.13  | 33.26  | 2.59 | 0.39  |
| P80316_TCPD_MOUSE | Cct5  | T-complex protein 1 subunit R.R@D#V#D#F#E#L#K#V#E#G#K#.V                 | 12.83  | 8.20   | 1.56 | 0.64  |
| P80316_TCPD_MOUSE | Cct5  | T-complex protein 1 subunit K.VLVDINNPE#LIQ#T#A#K#.T                     | 156.60 | 69.50  | 2.25 | 0.44  |
| P80316_TCPD_MOUSE | Cct5  | T-complex protein 1 subunit R.WVGGPE#E#I#A#I#A#T#G#G#R@.I                | 109.65 | 40.62  | 2.70 | 0.37  |
| P80316_TCPD_MOUSE | Cct5  | T-complex protein 1 subunit R.AVTIFR@.G                                  | 61.30  | 21.28  | 2.88 | 0.35  |
| P80316_TCPD_MOUSE | Cct5  | T-complex protein 1 subunit R.DVDFELIK#.V                                | 15.34  | 6.82   | 2.25 | 0.44  |
| P80316_TCPD_MOUSE | Cct5  | T-complex protein 1 subunit R.DVDFELIK#VEGK#.V                           | 18.97  | 4.38   | 4.33 | 0.23  |
| P80316_TCPD_MOUSE | Cct5  | T-complex protein 1 subunit K.GSNDM*Q#Q#V#I#T#L#I#G#K#.K                 | 18.92  | 8.23   | 2.30 | 0.44  |
| P80316_TCPD_MOUSE | Cct5  | T-complex protein 1 subunit R.IADGYEQAAR@.I                              | 86.50  | 26.98  | 3.21 | 0.31  |
| P80316_TCPD_MOUSE | Cct5  | T-complex protein 1 subunit R.IAIQ#L#D#K#.I                              | 25.76  | 10.08  | 2.56 | 0.39  |
| P80316_TCPD_MOUSE | Cct5  | T-complex protein 1 subunit K.IDDIR@K#P#GESEE.-                          | 13.33  | 4.38   | 3.04 | 0.33  |
| P80316_TCPD_MOUSE | Cct5  | T-complex protein 1 subunit K.LDVM*SVEDYK#.A                             | 7.77   | 3.03   | 2.56 | 0.39  |
| P80316_TCPD_MOUSE | Cct5  | T-complex protein 1 subunit K.LGFAGV#Q#E#I#S#F#G#T#K#.D                  | 109.17 | 40.71  | 2.68 | 0.37  |
| P80316_TCPD_MOUSE | Cct5  | T-complex protein 1 subunit R.LM*GLEALK#.S                               | 31.60  | 14.16  | 2.23 | 0.45  |
| P80316_TCPD_MOUSE | Cct5  | T-complex protein 1 subunit K.LMVELSK#.S                                 | 10.29  | 53.96  | 0.19 | 5.24  |
| P80316_TCPD_MOUSE | Cct5  | T-complex protein 1 subunit K.QQISLATQ#M#VR@.M                           | 25.46  | 8.86   | 2.87 | 0.35  |
| P80316_TCPD_MOUSE | Cct5  | T-complex protein 1 subunit K.VLVDINNPE#LIQ#T#A#K#.T                     | 98.73  | 35.56  | 2.78 | 0.36  |
| P80316_TCPD_MOUSE | Cct5  | T-complex protein 1 subunit R.WVGGPE#E#I#A#I#A#T#G#G#R@.I                | 50.28  | 19.62  | 2.56 | 0.39  |
| P80316_TCPD_MOUSE | Cct5  | T-complex protein 1 subunit R.IADGYEQAAR@.I                              | 21.50  | 5.98   | 3.60 | 0.28  |
| P80316_TCPD_MOUSE | Cct5  | T-complex protein 1 subunit K.LGFAGV#Q#E#I#S#F#G#T#K#.D                  | 27.14  | 11.34  | 2.39 | 0.42  |
| P80316_TCPD_MOUSE | Cct5  | T-complex protein 1 subunit K.VLVDINNPE#LIQ#T#A#K#.T                     | 20.34  | 7.64   | 2.66 | 0.38  |
| P80316_TCPD_MOUSE | Cct5  | T-complex protein 1 subunit R.WVGGPE#E#I#A#I#A#T#G#G#R@.I                | 7.05   | 1.89   | 3.73 | 0.27  |
| P80317_TCPZ_MOUSE | Cct6a | T-complex protein 1 subunit R.AGM*SS#K#H#G.-                             | 31.64  | 15.99  | 1.98 | 0.51  |
| P80317_TCPZ_MOUSE | Cct6a | T-complex protein 1 subunit K.ALQ#F#L#E#Q#K#.V                           | 314.86 | 123.54 | 2.55 | 0.39  |
| P80317_TCPZ_MOUSE | Cct6a | T-complex protein 1 subunit R.AQAALAV#N#I#S#A#R@.G                       | 49.88  | 15.17  | 3.29 | 0.30  |
| P80317_TCPZ_MOUSE | Cct6a | T-complex protein 1 subunit K.EGIVALR@.R                                 | 145.17 | 50.05  | 2.90 | 0.34  |
| P80317_TCPZ_MOUSE | Cct6a | T-complex protein 1 subunit K.EM*DR@E#T#L#D#I#V#A#R@.T                   | 156.69 | 59.37  | 2.64 | 0.38  |
| P80317_TCPZ_MOUSE | Cct6a | T-complex protein 1 subunit K.GIDPFSLDALAK#.E                            | 357.73 | 133.44 | 2.68 | 0.37  |
| P80317_TCPZ_MOUSE | Cct6a | T-complex protein 1 subunit R.GLVDLH#G#A#R#.H                            | 79.89  | 25.86  | 3.09 | 0.32  |
| P80317_TCPZ_MOUSE | Cct6a | T-complex protein 1 subunit R.IITEGFEAAK#.E                              | 204.27 | 79.35  | 2.57 | 0.39  |
| P80317_TCPZ_MOUSE | Cct6a | T-complex protein 1 subunit K.M*LVSGAGDIK#.L                             | 283.22 | 105.77 | 2.68 | 0.37  |
| P80317_TCPZ_MOUSE | Cct6a | T-complex protein 1 subunit K.MLVSGAGDIK#.L                              | 26.42  | 13.01  | 2.03 | 0.49  |
| P80317_TCPZ_MOUSE | Cct6a | T-complex protein 1 subunit K.QADL#Y#S#E#L#H#P#R@.I                      | 143.12 | 64.54  | 2.22 | 0.45  |
| P80317_TCPZ_MOUSE | Cct6a | T-complex protein 1 subunit K.QADL#Y#S#E#L#H#P#R@.I                      | 17.67  | 5.76   | 3.07 | 0.33  |
| P80317_TCPZ_MOUSE | Cct6a | T-complex protein 1 subunit K.SETD#S#L#I#R@.G                            | 79.75  | 29.61  | 2.69 | 0.37  |
| P80317_TCPZ_MOUSE | Cct6a | T-complex protein 1 subunit R.SVTL#L#V#K#.G                              | 108.30 | 42.93  | 2.52 | 0.40  |
| P80317_TCPZ_MOUSE | Cct6a | T-complex protein 1 subunit K.TEVNSGFYK#.S                               | 58.64  | 25.90  | 2.26 | 0.44  |
| P80317_TCPZ_MOUSE | Cct6a | T-complex protein 1 subunit K.VATAQD#I#T#G#D#T#S#N#V#L#I#E#L#L#K#.Q      | 185.46 | 76.76  | 2.42 | 0.41  |
| P80317_TCPZ_MOUSE | Cct6a | T-complex protein 1 subunit K.VLAQNS#F#D#L#Q#E#L#V#K#.V                  | 217.69 | 78.08  | 2.79 | 0.36  |
| P80317_TCPZ_MOUSE | Cct6a | T-complex protein 1 subunit K.ALQ#F#L#E#Q#K#.V                           | 83.22  | 34.84  | 2.39 | 0.42  |
| P80317_TCPZ_MOUSE | Cct6a | T-complex protein 1 subunit R.AQAALAV#N#I#S#A#R@.G                       | 21.41  | 7.41   | 2.89 | 0.35  |
| P80317_TCPZ_MOUSE | Cct6a | T-complex protein 1 subunit K.GIDPFSLDALAK#.E                            | 132.10 | 53.65  | 2.46 | 0.41  |
| P80317_TCPZ_MOUSE | Cct6a | T-complex protein 1 subunit R.GLVDLH#G#A#R@.H                            | 65.67  | 23.59  | 2.78 | 0.36  |
| P80317_TCPZ_MOUSE | Cct6a | T-complex protein 1 subunit R.IITEGFEAAK#.E                              | 38.19  | 14.54  | 2.63 | 0.38  |
| P80317_TCPZ_MOUSE | Cct6a | T-complex protein 1 subunit R.IITEGFEAAK#.E                              | 100.95 | 39.08  | 2.58 | 0.39  |
| P80317_TCPZ_MOUSE | Cct6a | T-complex protein 1 subunit K.M*LVSGAGDIK#.L                             | 73.22  | 32.52  | 2.25 | 0.44  |
| P80317_TCPZ_MOUSE | Cct6a | T-complex protein 1 subunit K.QADL#Y#S#E#L#H#P#R@.I                      | 56.65  | 30.47  | 1.86 | 0.54  |
| P80317_TCPZ_MOUSE | Cct6a | T-complex protein 1 subunit K.SETD#S#L#I#R@.G                            | 35.78  | 14.23  | 2.51 | 0.40  |
| P80317_TCPZ_MOUSE | Cct6a | T-complex protein 1 subunit K.VATAQD#I#T#G#D#T#S#N#V#L#I#E#L#L#K#.Q      | 105.30 | 37.01  | 2.85 | 0.35  |
| P80317_TCPZ_MOUSE | Cct6a | T-complex protein 1 subunit K.VLAQNS#F#D#L#Q#E#L#V#K#.V                  | 80.99  | 33.76  | 2.40 | 0.42  |



|                    |          |                                                                 |        |       |       |      |
|--------------------|----------|-----------------------------------------------------------------|--------|-------|-------|------|
| P80317_TCP2_MOUSE  | Cct6a    | T-complex protein 1 subunit K.ALQFLEQVK#.V                      | 24.44  | 5.14  | 4.76  | 0.21 |
| P80317_TCP2_MOUSE  | Cct6a    | T-complex protein 1 subunit K.GIDPFSLDLAAK#.E                   | 20.96  | 4.84  | 4.33  | 0.23 |
| P80317_TCP2_MOUSE  | Cct6a    | T-complex protein 1 subunit K.VATAQDDITDGTSSNLIIGELLK#.Q        | 6.12   | 1.82  | 3.36  | 0.30 |
| P80317_TCP2_MOUSE  | Cct6a    | T-complex protein 1 subunit K.VATAQDDITDGTSSNLIIGELLK#.Q        | 19.86  | 4.70  | 4.22  | 0.24 |
| P80317_TCP2_MOUSE  | Cct6a    | T-complex protein 1 subunit K.VLAQNSGFDLQETLVK#.V               | 18.60  | 8.45  | 2.20  | 0.45 |
| P80313_TCPH_MOUSE  | Cct7     | T-complex protein 1 subunit K.AIK#NDSVVAGGGAEM*ELSK#.Y          | 26.45  | 10.91 | 2.43  | 0.41 |
| P80313_TCPH_MOUSE  | Cct7     | T-complex protein 1 subunit K.AIK#NDSVVAGGGAEMELSK#.Y           | 4.79   | 3.05  | 1.57  | 0.64 |
| P80313_TCPH_MOUSE  | Cct7     | T-complex protein 1 subunit K.ALEIIPR@.Q                        | 108.61 | 44.53 | 2.44  | 0.41 |
| P80313_TCPH_MOUSE  | Cct7     | T-complex protein 1 subunit K.ATISNDGATILK#.L                   | 158.49 | 71.04 | 2.23  | 0.45 |
| P80313_TCPH_MOUSE  | Cct7     | T-complex protein 1 subunit R.GGAEQFM*EETER@.S                  | 107.63 | 47.07 | 2.29  | 0.44 |
| P80313_TCPH_MOUSE  | Cct7     | T-complex protein 1 subunit R.GGAEQFM*EETER@.S                  | 17.69  | 7.84  | 2.26  | 0.44 |
| P80313_TCPH_MOUSE  | Cct7     | T-complex protein 1 subunit K.IALLNVELEK#.A                     | 33.51  | 16.79 | 2.00  | 0.50 |
| P80313_TCPH_MOUSE  | Cct7     | T-complex protein 1 subunit K.KHEIAVTVK#.K                      | 35.34  | 18.70 | 1.89  | 0.53 |
| P80313_TCPH_MOUSE  | Cct7     | T-complex protein 1 subunit K.K#VQGGALEESQLVAGVAFK#.K           | 22.95  | 12.32 | 1.86  | 0.54 |
| P80313_TCPH_MOUSE  | Cct7     | T-complex protein 1 subunit K.LLDVHHPAAK#.T                     | 36.49  | 16.11 | 2.27  | 0.44 |
| P80313_TCPH_MOUSE  | Cct7     | T-complex protein 1 subunit K.LPIGDVATQYFADR@.D                 | 33.78  | 19.77 | 1.71  | 0.59 |
| P80313_TCPH_MOUSE  | Cct7     | T-complex protein 1 subunit K.NDSVVAGGGAEM*ELSK#.Y              | 30.86  | 16.32 | 1.89  | 0.53 |
| P80313_TCPH_MOUSE  | Cct7     | T-complex protein 1 subunit K.NDSVVAGGGAEMELSK#.Y               | 7.47   | 2.79  | 2.68  | 0.37 |
| P80313_TCPH_MOUSE  | Cct7     | T-complex protein 1 subunit K.SQDAEVDGDTSTVTLAAEFLK#.Q          | 95.27  | 40.96 | 2.33  | 0.43 |
| P80313_TCPH_MOUSE  | Cct7     | T-complex protein 1 subunit R.TATQLAVNK#.I                      | 145.60 | 73.45 | 1.98  | 0.50 |
| P80313_TCPH_MOUSE  | Cct7     | T-complex protein 1 subunit K.TFSYAGFEM*QPK#.K                  | 56.43  | 24.36 | 2.32  | 0.43 |
| P80313_TCPH_MOUSE  | Cct7     | T-complex protein 1 subunit K.TFSYAGFEM*QPK#.K                  | 13.60  | 8.54  | 1.59  | 0.63 |
| P80313_TCPH_MOUSE  | Cct7     | T-complex protein 1 subunit R.VHTVEDYQAIQVDAEWNYLYDK#.L         | 8.01   | 4.06  | 1.98  | 0.51 |
| P80313_TCPH_MOUSE  | Cct7     | T-complex protein 1 subunit R.VHTVEDYQAIQVDAEWNYLYDK#.L         | 20.84  | 8.75  | 2.38  | 0.42 |
| P80313_TCPH_MOUSE  | Cct7     | T-complex protein 1 subunit K.VQGGALEESQLVAGVAFK#.K             | 42.88  | 16.24 | 2.64  | 0.38 |
| P80313_TCPH_MOUSE  | Cct7     | T-complex protein 1 subunit R.AIK#NDSVVAGGGAEM*ELSK#.Y          | 8.33   | 2.54  | 3.28  | 0.30 |
| P80313_TCPH_MOUSE  | Cct7     | T-complex protein 1 subunit K.ALEIIPR@.Q                        | 48.61  | 19.47 | 2.50  | 0.40 |
| P80313_TCPH_MOUSE  | Cct7     | T-complex protein 1 subunit K.ATISNDGATILK#.L                   | 43.94  | 15.26 | 2.88  | 0.35 |
| P80313_TCPH_MOUSE  | Cct7     | T-complex protein 1 subunit R.GGAEQFM*EETER@.S                  | 23.77  | 8.19  | 2.90  | 0.34 |
| P80313_TCPH_MOUSE  | Cct7     | T-complex protein 1 subunit K.IALLNVELEK#.A                     | 15.97  | 8.10  | 1.97  | 0.51 |
| P80313_TCPH_MOUSE  | Cct7     | T-complex protein 1 subunit K.LPIGDVATQYFADR@.D                 | 17.93  | 8.14  | 2.20  | 0.45 |
| P80313_TCPH_MOUSE  | Cct7     | T-complex protein 1 subunit K.NDSVVAGGGAEM*ELSK#.Y              | 8.47   | 4.58  | 1.85  | 0.54 |
| P80313_TCPH_MOUSE  | Cct7     | T-complex protein 1 subunit K.QV#HPYEEGLHPQIIR@.A               | 55.90  | 19.01 | 2.94  | 0.34 |
| P80313_TCPH_MOUSE  | Cct7     | T-complex protein 1 subunit K.SQDAEVDGDTSTVTLAAEFLK#.Q          | 33.78  | 10.06 | 3.36  | 0.30 |
| P80313_TCPH_MOUSE  | Cct7     | T-complex protein 1 subunit K.SQDAEVDGDTSTVTLAAEFLK#.Q          | 24.30  | 9.45  | 2.57  | 0.39 |
| P80313_TCPH_MOUSE  | Cct7     | T-complex protein 1 subunit R.TATQLAVNK#.I                      | 37.09  | 14.62 | 2.54  | 0.39 |
| P80313_TCPH_MOUSE  | Cct7     | T-complex protein 1 subunit K.TFSYAGFEM*QPK#.K                  | 20.32  | 9.46  | 2.15  | 0.47 |
| P80313_TCPH_MOUSE  | Cct7     | T-complex protein 1 subunit R.VHTVEDYQAIQVDAEWNYLYDK#.L         | 32.85  | 14.19 | 2.31  | 0.43 |
| P80313_TCPH_MOUSE  | Cct7     | T-complex protein 1 subunit K.VQGGALEESQLVAGVAFK#.K             | 13.14  | 4.24  | 3.10  | 0.32 |
| P80313_TCPH_MOUSE  | Cct7     | T-complex protein 1 subunit R.AIK#NDSVVAGGGAEM*ELSK#.Y          | 5.83   | 2.76  | 2.11  | 0.47 |
| P80313_TCPH_MOUSE  | Cct7     | T-complex protein 1 subunit K.ALEIIPR@.Q                        | 49.32  | 11.38 | 4.33  | 0.23 |
| P80313_TCPH_MOUSE  | Cct7     | T-complex protein 1 subunit K.ATISNDGATILK#.L                   | 26.91  | 5.88  | 4.57  | 0.22 |
| P80313_TCPH_MOUSE  | Cct7     | T-complex protein 1 subunit R.GGAEQFM*EETER@.S                  | 17.04  | 4.84  | 3.52  | 0.28 |
| P80313_TCPH_MOUSE  | Cct7     | T-complex protein 1 subunit K.LPIGDVATQYFADR@.D                 | 11.86  | 4.97  | 2.39  | 0.42 |
| P80313_TCPH_MOUSE  | Cct7     | T-complex protein 1 subunit K.NDSVVAGGGAEM*ELSK#.Y              | 12.41  | 3.60  | 3.45  | 0.29 |
| P80313_TCPH_MOUSE  | Cct7     | T-complex protein 1 subunit K.QQLIGAYAK#.A                      | 30.46  | 5.92  | 5.15  | 0.19 |
| P80313_TCPH_MOUSE  | Cct7     | T-complex protein 1 subunit R.SLHDAIM*IVR@.R                    | 35.50  | 7.03  | 5.05  | 0.20 |
| P80313_TCPH_MOUSE  | Cct7     | T-complex protein 1 subunit K.TFSYAGFEM*QPK#.K                  | 15.26  | 4.94  | 3.09  | 0.32 |
| P80313_TCPH_MOUSE  | Cct7     | T-complex protein 1 subunit K.VQGGALEESQLVAGVAFK#.K             | 15.62  | 5.66  | 2.76  | 0.36 |
| P42932_TCPQ_MOUSE  | Cct8     | T-complex protein 1 subunit K.AIAGTGANVIVTGK#.V                 | 104.10 | 51.47 | 2.02  | 0.49 |
| P42932_TCPQ_MOUSE  | Cct8     | T-complex protein 1 subunit R.ALAENSGVK#.A                      | 47.07  | 70.69 | 0.67  | 1.50 |
| P42932_TCPQ_MOUSE  | Cct8     | T-complex protein 1 subunit K.APGFAQM*LK#.D                     | 77.61  | 45.80 | 1.69  | 0.59 |
| P42932_TCPQ_MOUSE  | Cct8     | T-complex protein 1 subunit R.AVDGVTFFK#.V                      | 73.02  | 37.13 | 1.97  | 0.51 |
| P42932_TCPQ_MOUSE  | Cct8     | T-complex protein 1 subunit R.DVDEVSLLR@.T                      | 89.84  | 45.27 | 1.98  | 0.50 |
| P42932_TCPQ_MOUSE  | Cct8     | T-complex protein 1 subunit K.EDGAISTVLR@.G                     | 19.00  | 8.00  | 2.37  | 0.42 |
| P42932_TCPQ_MOUSE  | Cct8     | T-complex protein 1 subunit K.ETEGDVTSVK#.D                     | 50.51  | 21.47 | 2.35  | 0.43 |
| P42932_TCPQ_MOUSE  | Cct8     | T-complex protein 1 subunit K.FAEAFEIPR@.A                      | 127.48 | 69.09 | 1.85  | 0.54 |
| P42932_TCPQ_MOUSE  | Cct8     | T-complex protein 1 subunit K.GEENLM*DAQVK#.A                   | 14.07  | 7.38  | 1.91  | 0.52 |
| P42932_TCPQ_MOUSE  | Cct8     | T-complex protein 1 subunit R.GSTDNLM*DDIER@.A                  | 29.94  | 10.86 | 2.76  | 0.36 |
| P42932_TCPQ_MOUSE  | Cct8     | T-complex protein 1 subunit K.HEK#HEDGAISTVLR@.G                | 39.95  | 14.57 | 2.74  | 0.36 |
| P42932_TCPQ_MOUSE  | Cct8     | T-complex protein 1 subunit K.LATNAAVTVLR@.V                    | 50.55  | 26.34 | 1.92  | 0.52 |
| P42932_TCPQ_MOUSE  | Cct8     | T-complex protein 1 subunit K.LFVTNDAAITLR@.E                   | 141.49 | 61.81 | 2.29  | 0.44 |
| P42932_TCPQ_MOUSE  | Cct8     | T-complex protein 1 subunit K.NVGLDIEAEVPAVK#HDM*LEASILDYLGK#.Y | 9.73   | 4.78  | 2.03  | 0.49 |
| P42932_TCPQ_MOUSE  | Cct8     | T-complex protein 1 subunit K.QYGSSETFLAK#.L                    | 47.42  | 24.21 | 1.96  | 0.51 |
| P42932_TCPQ_MOUSE  | Cct8     | T-complex protein 1 subunit K.TAEELM*NFASK#.G                   | 12.54  | 4.31  | 2.91  | 0.34 |
| P42932_TCPQ_MOUSE  | Cct8     | T-complex protein 1 subunit K.TAEELM*NFASK#EENLM*DAQVK#.A       | 18.97  | 9.42  | 2.01  | 0.50 |
| P42932_TCPQ_MOUSE  | Cct8     | T-complex protein 1 subunit K.TAEELM*NFASK#EENLM*DAQVK#.A       | 5.53   | 3.46  | 1.60  | 0.63 |
| P42932_TCPQ_MOUSE  | Cct8     | T-complex protein 1 subunit K.TVGATLPK#.L                       | 82.30  | 36.77 | 2.24  | 0.45 |
| P42932_TCPQ_MOUSE  | Cct8     | T-complex protein 1 subunit K.YNIM*LVLR.L                       | 34.08  | 17.35 | 1.96  | 0.51 |
| P42932_TCPQ_MOUSE  | Cct8     | T-complex protein 1 subunit K.YNIM*LVLR@.L                      | 11.15  | 7.55  | 1.48  | 0.68 |
| P42932_TCPQ_MOUSE  | Cct8     | T-complex protein 1 subunit K.AIAGTGANVIVTGK#.V                 | 110.96 | 34.10 | 3.25  | 0.31 |
| P42932_TCPQ_MOUSE  | Cct8     | T-complex protein 1 subunit K.APGFAQM*LK#.D                     | 69.06  | 24.35 | 2.84  | 0.35 |
| P42932_TCPQ_MOUSE  | Cct8     | T-complex protein 1 subunit R.AVDGVTFFK#.V                      | 79.30  | 37.64 | 2.11  | 0.47 |
| P42932_TCPQ_MOUSE  | Cct8     | T-complex protein 1 subunit R.DVDEVSLLR@.T                      | 71.45  | 24.03 | 2.97  | 0.34 |
| P42932_TCPQ_MOUSE  | Cct8     | T-complex protein 1 subunit K.EDGAISTVLR@.G                     | 17.32  | 5.15  | 3.36  | 0.30 |
| P42932_TCPQ_MOUSE  | Cct8     | T-complex protein 1 subunit K.FAEAFEIPR@.A                      | 93.56  | 29.66 | 3.15  | 0.32 |
| P42932_TCPQ_MOUSE  | Cct8     | T-complex protein 1 subunit K.GEENLM*DAQVK#.A                   | 17.22  | 6.94  | 2.48  | 0.40 |
| P42932_TCPQ_MOUSE  | Cct8     | T-complex protein 1 subunit R.GSTDNLM*DDIER@.A                  | 41.16  | 16.05 | 2.56  | 0.39 |
| P42932_TCPQ_MOUSE  | Cct8     | T-complex protein 1 subunit K.HEK#HEDGAISTVLR@.G                | 44.59  | 18.42 | 2.42  | 0.41 |
| P42932_TCPQ_MOUSE  | Cct8     | T-complex protein 1 subunit K.HFSGLEAEVYR.N                     | 28.40  | 11.44 | 2.48  | 0.40 |
| P42932_TCPQ_MOUSE  | Cct8     | T-complex protein 1 subunit K.LATNAAVTVLR@.V                    | 73.25  | 24.57 | 2.98  | 0.34 |
| P42932_TCPQ_MOUSE  | Cct8     | T-complex protein 1 subunit K.LFVTNDAAITLR@.E                   | 118.68 | 47.99 | 2.47  | 0.40 |
| P42932_TCPQ_MOUSE  | Cct8     | T-complex protein 1 subunit K.NVGLDIEAEVPAVK#HDM*LEASILDYLGK#.Y | 13.48  | 4.57  | 2.95  | 0.34 |
| P42932_TCPQ_MOUSE  | Cct8     | T-complex protein 1 subunit K.NVGLDIEAEVPAVK#HDM*LEASILDYLGK#.Y | 11.02  | 5.50  | 2.00  | 0.50 |
| P42932_TCPQ_MOUSE  | Cct8     | T-complex protein 1 subunit K.TAEELM*NFASK#.G                   | 10.44  | 5.12  | 2.04  | 0.49 |
| P42932_TCPQ_MOUSE  | Cct8     | T-complex protein 1 subunit K.TAEELM*NFASK#EENLM*DAQVK#.A       | 15.07  | 5.88  | 2.56  | 0.39 |
| P42932_TCPQ_MOUSE  | Cct8     | T-complex protein 1 subunit K.AIAGTGANVIVTGK#.V                 | 56.27  | 17.00 | 3.31  | 0.30 |
| P42932_TCPQ_MOUSE  | Cct8     | T-complex protein 1 subunit R.AVDGVTFFK#.V                      | 32.81  | 9.16  | 3.58  | 0.28 |
| P42932_TCPQ_MOUSE  | Cct8     | T-complex protein 1 subunit R.DVDEVSLLR@.T                      | 56.63  | 14.05 | 4.03  | 0.25 |
| P42932_TCPQ_MOUSE  | Cct8     | T-complex protein 1 subunit K.EDGAISTVLR@.G                     | 22.31  | 5.42  | 4.12  | 0.24 |
| P42932_TCPQ_MOUSE  | Cct8     | T-complex protein 1 subunit K.FAEAFEIPR@.A                      | 74.20  | 24.26 | 3.06  | 0.33 |
| P42932_TCPQ_MOUSE  | Cct8     | T-complex protein 1 subunit R.GSTDNLM*DDIER@.A                  | 30.13  | 8.13  | 3.70  | 0.27 |
| P42932_TCPQ_MOUSE  | Cct8     | T-complex protein 1 subunit K.HEK#HEDGAISTVLR@.G                | 27.00  | 5.66  | 4.77  | 0.21 |
| P42932_TCPQ_MOUSE  | Cct8     | T-complex protein 1 subunit K.HFSGLEAEVYR.N                     | 23.42  | 8.29  | 2.82  | 0.35 |
| P42932_TCPQ_MOUSE  | Cct8     | T-complex protein 1 subunit K.LATNAAVTVLR@.V                    | 56.98  | 15.79 | 3.61  | 0.28 |
| P42932_TCPQ_MOUSE  | Cct8     | T-complex protein 1 subunit K.LFVTNDAAITLR@.E                   | 66.16  | 18.67 | 3.54  | 0.28 |
| P42932_TCPQ_MOUSE  | Cct8     | T-complex protein 1 subunit K.NVGLDIEAEVPAVK#.D                 | 21.48  | 4.31  | 4.99  | 0.20 |
| P42932_TCPQ_MOUSE  | Cct8     | T-complex protein 1 subunit K.QYGSSETFLAK#.L                    | 14.72  | 6.98  | 2.11  | 0.47 |
| P42932_TCPQ_MOUSE  | Cct8     | T-complex protein 1 subunit K.TAEELM*NFASK#.G                   | 13.44  | 3.52  | 3.82  | 0.26 |
| Q8R422_CD109_MOUSE | Cd109    | CD109 antigen OS=Mus n R.FAEENEANLVDFEASSVNNVHVR@.K             | 9.72   | 4.81  | 2.02  | 0.50 |
| Q8R422_CD109_MOUSE | Cd109    | CD109 antigen OS=Mus n K.IPVQLVFENK#.V                          | 9.36   | 5.86  | 1.60  | 0.63 |
| Q6XJ6_MO2R2_MOUSE  | Cd200r11 | Cell surface glycoprotein K.ETNETCLGR@.N                        | 31.71  | 1.92  | 16.50 | 0.06 |
| Q9CWX3_CD2B2_MOUSE | Cd2bp2   | CD2 antigen cytoplasmic R.LSGADQM*VAR@.G                        | 8.67   | 1.64  | 5.29  | 0.19 |

|                    |          |                                                                      |        |       |      |      |
|--------------------|----------|----------------------------------------------------------------------|--------|-------|------|------|
| Q9CWX3_CD2B2_MOUSE | Cd2bp2   | CD2 antigen cytoplasmic K.VTFQGVGDEDEGEISVPK#.K                      | 11.69  | 3.89  | 3.01 | 0.33 |
| Q76KJ5_RPA34_MOUSE | Cd3eap   | DNA-directed RNA polym R.EATLLASSSEAGGR@.L                           | 15.20  | 5.03  | 3.02 | 0.33 |
| Q76KJ5_RPA34_MOUSE | Cd3eap   | DNA-directed RNA polym R.GTETSQVTEPVAQTEPEPTFLFPTK#.K                | 5.48   | 3.25  | 1.69 | 0.59 |
| Q76KJ5_RPA34_MOUSE | Cd3eap   | DNA-directed RNA polym R.IM*EGPQEVLLSR@.V                            | 3.36   | 2.95  | 1.14 | 0.88 |
| Q76KJ5_RPA34_MOUSE | Cd3eap   | DNA-directed RNA polym R.VFTSSPQAR@.E                                | 18.65  | 7.10  | 2.63 | 0.38 |
| P15379_CD44_MOUSE  | Cd44     | CD44 antigen OS=Mus m R.NLQSDVM*#K.I                                 | 7.55   | 5.05  | 1.50 | 0.67 |
| P15379_CD44_MOUSE  | Cd44     | CD44 antigen OS=Mus m R.YGFIEGNNVPIR@.I                              | 31.58  | 13.10 | 2.41 | 0.41 |
| P15379_CD44_MOUSE  | Cd44     | CD44 antigen OS=Mus m R.YGFIEGNNVPIR@.I                              | 9.49   | 5.34  | 1.78 | 0.56 |
| Q61735_CD47_MOUSE  | Cd47     | Leukocyte surface antigen K.IVSVDLNGIASLK#.M                         | 34.87  | 17.54 | 1.99 | 0.50 |
| Q61735_CD47_MOUSE  | Cd47     | Leukocyte surface antigen R.NVEAQSTIEEMFVK#.W                        | 9.15   | 3.37  | 2.71 | 0.37 |
| P35762_CD81_MOUSE  | Cd81     | CD81 antigen OS=Mus m K.QFYDQALQAVM*DDANNAK#.A                       | 15.89  | 5.25  | 3.03 | 0.33 |
| P40240_CD9_MOUSE   | Cd9      | CD9 antigen OS=Mus m R.SK#DEPQR@ETLK#.A                              | 6.33   | 1.37  | 4.61 | 0.22 |
| Q8R349_CDC16_MOUSE | Cdc16    | Cell division cycle protein K.KHYNK#PSETVIPESVDGLQENLDVVVSLAER@.H    | 4.43   | 1.87  | 2.36 | 0.42 |
| Q8R349_CDC16_MOUSE | Cdc16    | Cell division cycle protein K.YNK#PSETVIPESVDGLQENLDVVVSLAER@.H      | 6.32   | 3.28  | 1.93 | 0.52 |
| Q8BG24_CDC23_MOUSE | Cdc23    | Cell division cycle protein K.ALSIFNELR@.K                           | 11.34  | 3.06  | 3.70 | 0.27 |
| Q8BG24_CDC23_MOUSE | Cdc23    | Cell division cycle protein R.IENM*DTFSNLLYVR@.S                     | 6.13   | 1.80  | 3.40 | 0.29 |
| Q8BG24_CDC23_MOUSE | Cdc23    | Cell division cycle protein K.LNLQVEAK#.K                            | 8.19   | 3.44  | 2.38 | 0.42 |
| Q8BG24_CDC23_MOUSE | Cdc23    | Cell division cycle protein K.NTSAAIQAYR@.H                          | 6.39   | 2.31  | 2.77 | 0.36 |
| Q61081_CDC37_MOUSE | Cdc37    | Hsp90 co-chaperone Cdc K.ELEVAESDGVQLER@.L                           | 7.04   | 3.10  | 2.27 | 0.44 |
| Q9DC48_PRP17_MOUSE | Cdc40    | Pre-mRNA-processing factor K.EVQYNPIYETM*FAPEFGPENPFR.T              | 5.93   | 8.05  | 0.74 | 1.36 |
| Q9DC48_PRP17_MOUSE | Cdc40    | Pre-mRNA-processing factor R.HLGAIVNPIVFDENRR.F                      | 37.41  | 24.34 | 1.54 | 0.65 |
| Q9DC48_PRP17_MOUSE | Cdc40    | Pre-mRNA-processing factor K.LNIWDDWK.T                              | 7.76   | 8.92  | 0.87 | 1.15 |
| Q9DC48_PRP17_MOUSE | Cdc40    | Pre-mRNA-processing factor R.SGEIVQYDR.H                             | 27.56  | 23.81 | 1.16 | 0.86 |
| Q9DC48_PRP17_MOUSE | Cdc40    | Pre-mRNA-processing factor R.SYLHPIQDVGYNLR@.S                       | 20.59  | 15.86 | 1.30 | 0.77 |
| Q9DC48_PRP17_MOUSE | Cdc40    | Pre-mRNA-processing factor R.TFATYGLVLDPSLNDHQQVSAK#.Y               | 16.70  | 13.60 | 1.23 | 0.81 |
| Q9DC48_PRP17_MOUSE | Cdc40    | Pre-mRNA-processing factor R.VWEWDIPVDFK#.Y                          | 21.77  | 19.10 | 1.14 | 0.88 |
| Q9DC48_PRP17_MOUSE | Cdc40    | Pre-mRNA-processing factor K.YIGSVEAEK#NQLGLTVFETGQK#.K              | 17.78  | 19.50 | 0.91 | 1.10 |
| Q9DC48_PRP17_MOUSE | Cdc40    | Pre-mRNA-processing factor K.EVQYNPIYETM*FAPEFGPENPFR@.T             | 7.40   | 2.12  | 3.49 | 0.29 |
| Q9DC48_PRP17_MOUSE | Cdc40    | Pre-mRNA-processing factor K.K#ENDASNDIGFLGPPWAK#.Y                  | 9.72   | 3.62  | 2.68 | 0.37 |
| Q9DC48_PRP17_MOUSE | Cdc40    | Pre-mRNA-processing factor R.SYLHPIQDVGYNLR@.S                       | 28.43  | 5.97  | 4.76 | 0.21 |
| Q9DC48_PRP17_MOUSE | Cdc40    | Pre-mRNA-processing factor R.VWEWDIPVDFK#.Y                          | 15.70  | 7.48  | 2.10 | 0.48 |
| Q9DC48_PRP17_MOUSE | Cdc40    | Pre-mRNA-processing factor K.YIGSVEAEK#NQLGLTVFETGQK#.K              | 20.21  | 7.93  | 2.55 | 0.39 |
| P60766_CDC42_MOUSE | Cdc42    | Cell division control protein K.NVDFEALIALEPPPEK#.K                  | 7.36   | 4.28  | 1.72 | 0.58 |
| P60766_CDC42_MOUSE | Cdc42    | Cell division control protein K.NVDFEALIALEPPPEK#.K                  | 12.73  | 5.58  | 2.28 | 0.44 |
| P60766_CDC42_MOUSE | Cdc42    | Cell division control protein K.TPFLVGTQJDLR@DDPSTIEK#.L             | 20.76  | 6.12  | 3.39 | 0.29 |
| P60766_CDC42_MOUSE | Cdc42    | Cell division control protein K.TPFLVGTQJDLR@DDPSTIEK#.L             | 4.97   | 3.27  | 1.52 | 0.66 |
| P60766_CDC42_MOUSE | Cdc42    | Cell division control protein K.NVDFEALIALEPPPEK#.K                  | 13.48  | 7.37  | 1.83 | 0.55 |
| Q7TT50_MRC8_MOUSE  | Cdc42bpb | Serine/threonine-protein R.GAFGEVAVVK#.L                             | 11.68  | 6.13  | 1.91 | 0.52 |
| Q7TT50_MRC8_MOUSE  | Cdc42bpb | Serine/threonine-protein K.SM*TSQNTLTK#DEDVQR@.D                     | 7.30   | 2.55  | 2.86 | 0.35 |
| Q7TT50_MRC8_MOUSE  | Cdc42bpb | Serine/threonine-protein K.AVLAIAVDDGR@.I                            | 37.66  | 8.52  | 4.42 | 0.23 |
| Q7TT50_MRC8_MOUSE  | Cdc42bpb | Serine/threonine-protein R.GAFGEVAVVK#.L                             | 23.76  | 6.33  | 3.75 | 0.27 |
| Q7TT50_MRC8_MOUSE  | Cdc42bpb | Serine/threonine-protein R.GYLQALASK#.M                              | 10.62  | 5.04  | 2.11 | 0.47 |
| Q7TT50_MRC8_MOUSE  | Cdc42bpb | Serine/threonine-protein R.HSEM*EAEITVK#.D                           | 4.88   | 1.47  | 3.32 | 0.30 |
| Q7TT50_MRC8_MOUSE  | Cdc42bpb | Serine/threonine-protein R.KHLQESTVQVSLHGSTR@.A                      | 16.92  | 4.56  | 3.71 | 0.27 |
| Q7TT50_MRC8_MOUSE  | Cdc42bpb | Serine/threonine-protein R.LEDAAEAASK#.E                             | 16.31  | 6.67  | 2.44 | 0.41 |
| Q7TT50_MRC8_MOUSE  | Cdc42bpb | Serine/threonine-protein R.LEQSALAEIR@.A                             | 11.01  | 6.74  | 1.63 | 0.61 |
| Q7TT50_MRC8_MOUSE  | Cdc42bpb | Serine/threonine-protein K.LFLYDLPEGK#.S                             | 7.68   | 5.40  | 1.42 | 0.70 |
| Q7TT50_MRC8_MOUSE  | Cdc42bpb | Serine/threonine-protein K.R@LNEELER@.M                              | 9.90   | 5.60  | 1.77 | 0.57 |
| Q91W92_BORG5_MOUSE | Cdc42ep1 | Cdc42 effector protein 1 R.EQSSFPSEPTNPELR@.R                        | 4.58   | 3.18  | 1.44 | 0.69 |
| Q91W92_BORG5_MOUSE | Cdc42ep1 | Cdc42 effector protein 1 R.M*ASPAAPSPAPPISPIIK#.N                    | 14.34  | 8.06  | 1.80 | 0.55 |
| Q91W92_BORG5_MOUSE | Cdc42ep1 | Cdc42 effector protein 1 R.M*ASPAAPSPAPPISPIIK#.N                    | 2.45   | 6.08  | 0.40 | 2.48 |
| Q6A068_CDC51_MOUSE | Cdc51    | Cell division cycle 5-like protein K.AQDALVQEM*EVVK#.Q               | 6.37   | 3.47  | 1.84 | 0.54 |
| Q6A068_CDC51_MOUSE | Cdc51    | Cell division cycle 5-like protein R.EIDDTYIEDAADVDAR@.K             | 6.93   | 7.66  | 0.90 | 1.11 |
| Q6A068_CDC51_MOUSE | Cdc51    | Cell division cycle 5-like protein K.ESDLPALQTSVGEFTK#.K             | 5.72   | 4.56  | 1.25 | 0.80 |
| Q6A068_CDC51_MOUSE | Cdc51    | Cell division cycle 5-like protein R.GVDYNAEIPFEK#.K                 | 10.82  | 9.34  | 1.16 | 0.86 |
| Q6A068_CDC51_MOUSE | Cdc51    | Cell division cycle 5-like protein R.LGLLGLPAPK#.N                   | 12.42  | 10.06 | 1.23 | 0.81 |
| Q6A068_CDC51_MOUSE | Cdc51    | Cell division cycle 5-like protein K.LVLPAPQSDALEQEVK#.V             | 11.27  | 9.66  | 1.17 | 0.86 |
| Q6A068_CDC51_MOUSE | Cdc51    | Cell division cycle 5-like protein K.AQDALVQEM*EVVK#.Q               | 5.60   | 4.80  | 1.17 | 0.86 |
| Q6A068_CDC51_MOUSE | Cdc51    | Cell division cycle 5-like protein R.AAGIEIQK#.K                     | 21.03  | 14.13 | 1.49 | 0.67 |
| Q6A068_CDC51_MOUSE | Cdc51    | Cell division cycle 5-like protein K.AQDALVQEM*EVVK#.Q               | 17.59  | 12.33 | 1.43 | 0.70 |
| Q6A068_CDC51_MOUSE | Cdc51    | Cell division cycle 5-like protein K.AQDALVQEM*EVVK#.Q               | 7.41   | 3.83  | 1.94 | 0.52 |
| Q6A068_CDC51_MOUSE | Cdc51    | Cell division cycle 5-like protein R.DK#LNINPEDGM*ADYDPSYVK#.Q       | 15.17  | 4.94  | 3.07 | 0.33 |
| Q6A068_CDC51_MOUSE | Cdc51    | Cell division cycle 5-like protein K.DLPR@PSEVENTLR@PLNVEPPLDLQK#.S  | 57.47  | 35.41 | 1.91 | 0.52 |
| Q6A068_CDC51_MOUSE | Cdc51    | Cell division cycle 5-like protein R.EIDDTYIEDAADVDAR@.K             | 15.37  | 10.35 | 1.49 | 0.67 |
| Q6A068_CDC51_MOUSE | Cdc51    | Cell division cycle 5-like protein K.ESDLPALQTSVGEFTK#.K             | 12.29  | 12.29 | 1.83 | 0.55 |
| Q6A068_CDC51_MOUSE | Cdc51    | Cell division cycle 5-like protein R.GVDYNAEIPFEK#.K                 | 40.97  | 25.62 | 1.60 | 0.63 |
| Q6A068_CDC51_MOUSE | Cdc51    | Cell division cycle 5-like protein K.ILLYGYSR@.A                     | 54.72  | 22.76 | 2.40 | 0.42 |
| Q6A068_CDC51_MOUSE | Cdc51    | Cell division cycle 5-like protein R.ILQEAQNL.M*ALTNVDTPLK#.G        | 19.74  | 15.41 | 1.28 | 0.78 |
| Q6A068_CDC51_MOUSE | Cdc51    | Cell division cycle 5-like protein R.ILQEAQNL.M*ALTNVDTPLK#.G        | 5.88   | 4.96  | 1.19 | 0.84 |
| Q6A068_CDC51_MOUSE | Cdc51    | Cell division cycle 5-like protein K.K#PALGFYDTEENYQALDADF@.K        | 9.65   | 6.52  | 1.45 | 0.69 |
| Q6A068_CDC51_MOUSE | Cdc51    | Cell division cycle 5-like protein K.K#PALGFYDTEENYQALDADF@K#.L      | 4.79   | 3.10  | 1.54 | 0.65 |
| Q6A068_CDC51_MOUSE | Cdc51    | Cell division cycle 5-like protein R.LGLLGLPAPK#.N                   | 56.52  | 28.66 | 1.97 | 0.51 |
| Q6A068_CDC51_MOUSE | Cdc51    | Cell division cycle 5-like protein K.LNINPEDGM*ADYDPSYVK#.Q          | 10.37  | 8.57  | 1.21 | 0.83 |
| Q6A068_CDC51_MOUSE | Cdc51    | Cell division cycle 5-like protein K.LVLPAPQSDALEQEVK#.V             | 40.99  | 24.33 | 1.68 | 0.59 |
| Q6A068_CDC51_MOUSE | Cdc51    | Cell division cycle 5-like protein K.NDFEIVLPENAEKHELEER@.E          | 29.41  | 15.38 | 1.91 | 0.52 |
| Q6A068_CDC51_MOUSE | Cdc51    | Cell division cycle 5-like protein K.NVGFATNNSSEHTLYHSPYEK#.F        | 12.61  | 9.74  | 1.29 | 0.77 |
| Q6A068_CDC51_MOUSE | Cdc51    | Cell division cycle 5-like protein R.QQDLGELR@.S                     | 25.77  | 12.87 | 2.00 | 0.50 |
| Q6A068_CDC51_MOUSE | Cdc51    | Cell division cycle 5-like protein R.QTAESGITNSASLTSLEYNVTNNSIALR@.T | 11.89  | 4.86  | 2.45 | 0.41 |
| Q6A068_CDC51_MOUSE | Cdc51    | Cell division cycle 5-like protein R.SGTPK#PVTNATPGR@.T              | 29.81  | 20.05 | 1.49 | 0.67 |
| Q6A068_CDC51_MOUSE | Cdc51    | Cell division cycle 5-like protein R.SK#LVLPAQSDALEQEVK#.V           | 14.11  | 7.57  | 1.87 | 0.54 |
| Q6A068_CDC51_MOUSE | Cdc51    | Cell division cycle 5-like protein K.VGQASEVAR@.Q                    | 31.96  | 17.39 | 1.84 | 0.54 |
| Q8J2M7_CDC73_MOUSE | Cdc73    | Parafibromin OS=Mus m K.NIFALQSVR#.A                                 | 9.88   | 8.14  | 1.21 | 0.82 |
| Q8J2M7_CDC73_MOUSE | Cdc73    | Parafibromin OS=Mus m R.SAPLEIGLQR@.S                                | 4.89   | 4.10  | 1.20 | 0.84 |
| Q8J2M7_CDC73_MOUSE | Cdc73    | Parafibromin OS=Mus m K.NIFALQSVR#.A                                 | 9.18   | 6.87  | 1.34 | 0.75 |
| Q14B71_CDC2A_MOUSE | Cdca2    | Cell division cycle-associ R.DLENTGLVWVSPSTLQK#PR@.R                 | 2.33   | 1.32  | 1.77 | 0.57 |
| Q8BHX3_BOREA_MOUSE | Cdca8    | Borealin OS=Mus musculus K.ADR@DITEINNLTAEQIPLK#.S                   | 6.40   | 13.03 | 0.49 | 2.04 |
| Q8BHX3_BOREA_MOUSE | Cdca8    | Borealin OS=Mus musculus K.EVENLYNIEIR.L                             | 6.28   | 11.28 | 0.56 | 1.80 |
| Q8BHX3_BOREA_MOUSE | Cdca8    | Borealin OS=Mus musculus R.IDIAQLNPEALGNIR.K                         | 7.38   | 16.21 | 0.46 | 2.19 |
| Q8BHX3_BOREA_MOUSE | Cdca8    | Borealin OS=Mus musculus K.VIEEESIKEEEEEEGGGGGR.T                    | 4.66   | 7.69  | 0.61 | 1.65 |
| Q8VDP6_CDIPT_MOUSE | Cdipt    | CDP-diacylglycerol-inositol R.M*GLWVTAPIALLK#.S                      | 10.67  | 4.81  | 2.09 | 0.48 |
| Q8VDP6_CDIPT_MOUSE | Cdipt    | CDP-diacylglycerol-inositol K.M*IDLSONPVLRR@.I                       | 6.11   | 2.68  | 2.28 | 0.44 |
| Q8VDP6_CDIPT_MOUSE | Cdipt    | CDP-diacylglycerol-inositol R.NM*ALDADADR@.A                         | 8.74   | 5.21  | 1.68 | 0.60 |
| Q8VDP6_CDIPT_MOUSE | Cdipt    | CDP-diacylglycerol-inositol K.SVIVHILTAAR@.N                         | 11.10  | 6.38  | 1.74 | 0.57 |
| P11440_CDK1_MOUSE  | Cdk1     | Cyclin-dependent kinase R.AFGPIR.V                                   | 183.66 | 64.29 | 2.86 | 0.35 |
| P11440_CDK1_MOUSE  | Cdk1     | Cyclin-dependent kinase R.ALGTPNNEVWPEVESLQDYK#.N                    | 28.55  | 9.35  | 3.05 | 0.33 |
| P11440_CDK1_MOUSE  | Cdk1     | Cyclin-dependent kinase R.ALGTPNNEVWPEVESLQDYK#.N                    | 16.80  | 7.73  | 2.17 | 0.46 |
| P11440_CDK1_MOUSE  | Cdk1     | Cyclin-dependent kinase R.DLK#PQNLLIDDK#.G                           | 31.67  | 17.04 | 1.86 | 0.54 |
| P11440_CDK1_MOUSE  | Cdk1     | Cyclin-dependent kinase R.DLK#PQNLLIDDK#GTIK#.L                      | 70.68  | 37.22 | 1.90 | 0.53 |
| P11440_CDK1_MOUSE  | Cdk1     | Cyclin-dependent kinase R.DLK#PQNLLIDDK#GTIK#.L                      | 45.07  | 25.85 | 1.74 | 0.57 |
| P11440_CDK1_MOUSE  | Cdk1     | Cyclin-dependent kinase R.HPNIVSLQDVLV*QDSR@.L                       | 52.24  | 21.27 | 2.46 | 0.41 |
| P11440_CDK1_MOUSE  | Cdk1     | Cyclin-dependent kinase R.HPNIVSLQDVLV*QDSR@.L                       | 6.70   | 2.88  | 2.32 | 0.43 |
| P11440_CDK1_MOUSE  | Cdk1     | Cyclin-dependent kinase K.HPYFDDLDNQK#.K                             | 29.12  | 11.75 | 2.48 | 0.40 |
| P11440_CDK1_MOUSE  | Cdk1     | Cyclin-dependent kinase K.IGEGTYGVVYK#.G                             | 131.82 | 59.25 | 2.22 | 0.45 |

|                     |          |                                                                |        |        |      |      |
|---------------------|----------|----------------------------------------------------------------|--------|--------|------|------|
| P11440_CDK1_MOUSE   | Cdk1     | Cyclin-dependent kinase K.IR@LESEEEVGPSTAIR@.E                 | 154.41 | 48.96  | 3.15 | 0.32 |
| P11440_CDK1_MOUSE   | Cdk1     | Cyclin-dependent kinase K.KPLFHGDSEIDQLFR@.I                   | 52.57  | 17.72  | 2.97 | 0.34 |
| P11440_CDK1_MOUSE   | Cdk1     | Cyclin-dependent kinase R.LESEEEVGPSTAIR@.E                    | 89.46  | 31.44  | 2.85 | 0.35 |
| P11440_CDK1_MOUSE   | Cdk1     | Cyclin-dependent kinase K.NLDENGD.LL.SK#.M                     | 71.00  | 32.19  | 2.21 | 0.45 |
| P11440_CDK1_MOUSE   | Cdk1     | Cyclin-dependent kinase R.SPEVLLGSAR.Y                         | 202.34 | 75.53  | 2.68 | 0.37 |
| P11440_CDK1_MOUSE   | Cdk1     | Cyclin-dependent kinase R.VTGQIVAM*K#.I                        | 9.05   | 2.97   | 3.05 | 0.33 |
| P11440_CDK1_MOUSE   | Cdk1     | Cyclin-dependent kinase R.VYTHEVTLWYR@.S                       | 46.44  | 13.97  | 3.32 | 0.30 |
| P11440_CDK1_MOUSE   | Cdk1     | Cyclin-dependent kinase K.YLDSIPPQQFM*DSSLVK#.S                | 11.84  | 6.01   | 1.97 | 0.51 |
| P11440_CDK1_MOUSE   | Cdk1     | Cyclin-dependent kinase R.DLK#PQNLIDDK#GTIK#.L                 | 14.31  | 6.17   | 2.32 | 0.43 |
| P11440_CDK1_MOUSE   | Cdk1     | Cyclin-dependent kinase R.HPNIVLQDVLVLM*QDSR@.L                | 12.90  | 8.24   | 1.57 | 0.64 |
| P11440_CDK1_MOUSE   | Cdk1     | Cyclin-dependent kinase K.IGEGTYGVVYK#.G                       | 33.87  | 15.24  | 2.22 | 0.45 |
| P11440_CDK1_MOUSE   | Cdk1     | Cyclin-dependent kinase K.KPLFHGDSEIDQLFR@.I                   | 17.59  | 10.90  | 1.61 | 0.62 |
| P11440_CDK1_MOUSE   | Cdk1     | Cyclin-dependent kinase R.LESEEEVGPSTAIR@.E                    | 9.75   | 5.83   | 1.67 | 0.60 |
| P11440_CDK1_MOUSE   | Cdk1     | Cyclin-dependent kinase R.SPEVLLGSAR@.Y                        | 37.21  | 18.62  | 2.00 | 0.50 |
| P11440_CDK1_MOUSE   | Cdk1     | Cyclin-dependent kinase R.VYTHEVTLWYR@.S                       | 10.63  | 3.79   | 2.81 | 0.36 |
| P11440_CDK1_MOUSE   | Cdk1     | Cyclin-dependent kinase R.AFGIPR@.V                            | 30.43  | 14.43  | 2.11 | 0.47 |
| P11440_CDK1_MOUSE   | Cdk1     | Cyclin-dependent kinase R.HPNIVLQDVLVLM*QDSR@.L                | 10.75  | 3.03   | 3.54 | 0.28 |
| P11440_CDK1_MOUSE   | Cdk1     | Cyclin-dependent kinase K.HPYFDDLDNQK#.K                       | 3.83   | 2.72   | 1.41 | 0.71 |
| P11440_CDK1_MOUSE   | Cdk1     | Cyclin-dependent kinase K.IGEGTYGVVYK#.G                       | 36.98  | 19.53  | 1.89 | 0.53 |
| P11440_CDK1_MOUSE   | Cdk1     | Cyclin-dependent kinase K.KPLFHGDSEIDQLFR@.I                   | 8.01   | 6.55   | 1.22 | 0.82 |
| P11440_CDK1_MOUSE   | Cdk1     | Cyclin-dependent kinase R.LESEEEVGPSTAIR@.E                    | 15.43  | 6.89   | 2.24 | 0.45 |
| P11440_CDK1_MOUSE   | Cdk1     | Cyclin-dependent kinase R.SPEVLLGSAR@.Y                        | 38.18  | 19.26  | 1.98 | 0.50 |
| P24788_CD11B_MOUSE  | Cdk11b   | Cyclin-dependent kinase R.APELLGAK#.E                          | 51.91  | 30.65  | 1.69 | 0.59 |
| P24788_CD11B_MOUSE  | Cdk11b   | Cyclin-dependent kinase R.ETPLPIDPSM*FPTWPAK#.S                | 9.41   | 4.74   | 1.99 | 0.50 |
| P24788_CD11B_MOUSE  | Cdk11b   | Cyclin-dependent kinase R.FGALLSQGFOLM*NK#.F                   | 21.85  | 4.95   | 4.41 | 0.23 |
| P24788_CD11B_MOUSE  | Cdk11b   | Cyclin-dependent kinase R.IEETGYGVYR@.A                        | 34.15  | 12.48  | 2.74 | 0.37 |
| P24788_CD11B_MOUSE  | Cdk11b   | Cyclin-dependent kinase K.M*TFSEY*YNNLR@.K                     | 13.98  | 4.89   | 2.86 | 0.35 |
| P24788_CD11B_MOUSE  | Cdk11b   | Cyclin-dependent kinase K.SDIDQNK#.I                           | 36.55  | 11.55  | 3.17 | 0.32 |
| P24788_CD11B_MOUSE  | Cdk11b   | Cyclin-dependent kinase K.TLM*IQLLSGVK#.H                      | 10.46  | 2.95   | 3.55 | 0.28 |
| P24788_CD11B_MOUSE  | Cdk11b   | Cyclin-dependent kinase K.TSNLLSHAGILK#.V                      | 49.44  | 16.53  | 2.99 | 0.33 |
| P24788_CD11B_MOUSE  | Cdk11b   | Cyclin-dependent kinase R.APELLGAK#.E                          | 15.15  | 19.84  | 0.76 | 1.31 |
| P24788_CD11B_MOUSE  | Cdk11b   | Cyclin-dependent kinase R.IEETGYGVYR@.A                        | 10.15  | 3.32   | 3.05 | 0.33 |
| P24788_CD11B_MOUSE  | Cdk11b   | Cyclin-dependent kinase K.TSNLLSHAGILK#.V                      | 26.18  | 7.93   | 3.30 | 0.30 |
| Q692A1_CDK13_MOUSE  | Cdk13    | Cyclin-dependent kinase R.GGDVSPSPYSSSSWR@.R                   | 3.05   | 1.77   | 1.73 | 0.58 |
| Q692A1_CDK13_MOUSE  | Cdk13    | Cyclin-dependent kinase K.KPFIQANQELAEQLISR@.I                 | 6.13   | 5.09   | 1.21 | 0.83 |
| Q692A1_CDK13_MOUSE  | Cdk13    | Cyclin-dependent kinase K.SLGGVQSPDQIPK#.V                     | 4.66   | 2.01   | 2.32 | 0.43 |
| Q692A1_CDK13_MOUSE  | Cdk13    | Cyclin-dependent kinase K.VDNNLTVEK#.A                         | 7.70   | 3.70   | 2.08 | 0.48 |
| P97377_CDK2_MOUSE   | Cdk2     | Cyclin-dependent kinase R.ALFPDSEIDQLFR@.I                     | 39.31  | 15.44  | 2.55 | 0.39 |
| P97377_CDK2_MOUSE   | Cdk2     | Cyclin-dependent kinase R.DLK#PQNLINAEISIK#.L                  | 14.53  | 5.40   | 2.69 | 0.37 |
| P97377_CDK2_MOUSE   | Cdk2     | Cyclin-dependent kinase R.ALFPDSEIDQLFR@.I                     | 17.71  | 3.01   | 5.88 | 0.17 |
| P97377_CDK2_MOUSE   | Cdk2     | Cyclin-dependent kinase R.ALFPDSEIDQLFR@.I                     | 20.00  | 5.53   | 3.62 | 0.28 |
| QK8389_CK2P2_MOUSE  | Cdk5rap2 | CDK5 regulatory subunit K.SQM*ASPDENVSSGELR@.G                 | 4.90   | 1.41   | 3.48 | 0.29 |
| Q03147_CDK7_MOUSE   | Cdk7     | Cyclin-dependent kinase R.APELLGAK#.E                          | 13.69  | 6.42   | 2.13 | 0.47 |
| Q03147_CDK7_MOUSE   | Cdk7     | Cyclin-dependent kinase R.VPFLPGDSDLDQLTR@.I                   | 15.53  | 6.57   | 2.36 | 0.42 |
| Q03147_CDK7_MOUSE   | Cdk7     | Cyclin-dependent kinase R.VPFLPGDSDLDQLTR@.I                   | 9.34   | 4.39   | 2.13 | 0.47 |
| Q03147_CDK7_MOUSE   | Cdk7     | Cyclin-dependent kinase R.APELLGAK#.M                          | 11.40  | 5.01   | 2.28 | 0.44 |
| Q03147_CDK7_MOUSE   | Cdk7     | Cyclin-dependent kinase K.LDFLGEQGFATVYK#.A                    | 6.17   | 9.80   | 0.63 | 1.59 |
| Q03147_CDK7_MOUSE   | Cdk7     | Cyclin-dependent kinase R.VPFLPGDSDLDQLTR@.I                   | 8.84   | 3.58   | 2.47 | 0.41 |
| Q99J95_CDK9_MOUSE   | Cdk9     | Cyclin-dependent kinase K.AYVR@DPYALDLIDK#.L                   | 13.15  | 6.35   | 2.07 | 0.48 |
| Q99J95_CDK9_MOUSE   | Cdk9     | Cyclin-dependent kinase K.IGQTFGEVFK#.A                        | 12.79  | 5.10   | 2.51 | 0.40 |
| Q99J95_CDK9_MOUSE   | Cdk9     | Cyclin-dependent kinase R.NPATTTQTEFER@.V                      | 16.32  | 4.82   | 3.38 | 0.30 |
| Q99J95_CDK9_MOUSE   | Cdk9     | Cyclin-dependent kinase K.AANVLTR@.D                           | 10.86  | 2.75   | 3.95 | 0.25 |
| Q99J95_CDK9_MOUSE   | Cdk9     | Cyclin-dependent kinase R.NPATTTQTEFER@.V                      | 8.74   | 3.47   | 2.52 | 0.40 |
| P46414_CDN1B_MOUSE  | Cdkn1b   | Cyclin-dependent kinase K.VLAQESQDVGSR@.Q                      | 2.70   | 1.25   | 2.17 | 0.46 |
| P51480_CD2A1_MOUSE  | Cdkn2a   | Cyclin-dependent kinase R.ALLEAGVSNAPNSFGR@.T                  | 7.98   | 6.27   | 1.27 | 0.79 |
| P51480_CD2A1_MOUSE  | Cdkn2a   | Cyclin-dependent kinase R.LPLDLAQR@.G                          | 12.01  | 10.19  | 1.18 | 0.85 |
| Q64364_CD2A2_MOUSE  | Cdkn2a   | Cyclin-dependent kinase R.NPGPGDDDGQR@.S                       | 26.88  | 10.21  | 2.63 | 0.38 |
| Q8B172_CARF_MOUSE   | Cdkn2aip | CDKN2A-interacting prot K.SGASLGVSQLAAR#.S                     | 9.43   | 5.81   | 1.62 | 0.62 |
| Q8B172_CARF_MOUSE   | Cdkn2aip | CDKN2A-interacting prot K.SSEANISSVSK#.N                       | 16.65  | 4.93   | 3.38 | 0.30 |
| Q8B172_CARF_MOUSE   | Cdkn2aip | CDKN2A-interacting prot K.STAQVAASLALTK#.S                     | 8.26   | 4.71   | 1.75 | 0.57 |
| Q8B172_CARF_MOUSE   | Cdkn2aip | CDKN2A-interacting prot K.SSEANISSVSK#.N                       | 10.58  | 3.56   | 2.97 | 0.34 |
| Q8B172_CARF_MOUSE   | Cdkn2aip | CDKN2A-interacting prot R.GSEIDLVLLEEAR@PVNLPALK#.H            | 3.81   | 2.36   | 1.61 | 0.62 |
| Q8B172_CARF_MOUSE   | Cdkn2aip | CDKN2A-interacting prot K.SGASLGVSQLAAR#.S                     | 12.67  | 6.42   | 1.98 | 0.51 |
| Q8B172_CARF_MOUSE   | Cdkn2aip | CDKN2A-interacting prot K.SSEANISSVSK#.N                       | 14.38  | 3.77   | 3.82 | 0.26 |
| Q8B172_CARF_MOUSE   | Cdkn2aip | CDKN2A-interacting prot K.SSEATASSGTSK#.S                      | 6.98   | 2.36   | 2.96 | 0.34 |
| Q8R4E9_CDT1_MOUSE   | Cdt1     | DNA replication factor Ct R.AR@PPAEPGSDQAPLAR@.R               | 14.16  | 7.13   | 1.98 | 0.50 |
| Q8R4E9_CDT1_MOUSE   | Cdt1     | DNA replication factor Ct K.AVDLAGLTAAR@.L                     | 248.99 | 103.88 | 2.40 | 0.42 |
| Q8R4E9_CDT1_MOUSE   | Cdt1     | DNA replication factor Ct R.FHALAQPLGLVLPYK#.Y                 | 13.50  | 2.98   | 4.53 | 0.22 |
| Q8R4E9_CDT1_MOUSE   | Cdt1     | DNA replication factor Ct K.STTVYVQQPQK#.I                     | 8.07   | 3.72   | 2.17 | 0.46 |
| Q8R4E9_CDT1_MOUSE   | Cdt1     | DNA replication factor Ct R.VQENAVESPDPAAK#.V                  | 13.69  | 3.43   | 3.99 | 0.25 |
| P28033_CEBPB_MOUSE  | Cebpb    | CCAAT/enhancer-binding K.VLELTAER@.L                           | 11.20  | 11.35  | 0.99 | 1.01 |
| P28033_CEBPB_MOUSE  | Cebpb    | CCAAT/enhancer-binding K.VLELTAER@.L                           | 3.32   | 7.11   | 0.47 | 2.14 |
| P53569_CEBP2_MOUSE  | Cebpz    | CCAAT/enhancer-binding K.EESQIPVDEVFFYR@.Y                     | 9.55   | 7.27   | 1.31 | 0.76 |
| P53569_CEBP2_MOUSE  | Cebpz    | CCAAT/enhancer-binding K.ELLITDLPDRA@.K                        | 13.23  | 20.08  | 0.66 | 1.52 |
| P53569_CEBP2_MOUSE  | Cebpz    | CCAAT/enhancer-binding K.KHGTDLQQGELESFIQNLNLA#.Y              | 11.88  | 7.12   | 1.67 | 0.60 |
| P53569_CEBP2_MOUSE  | Cebpz    | CCAAT/enhancer-binding K.QAM*FLNLVYK#.S                        | 5.34   | 3.32   | 1.61 | 0.62 |
| P53569_CEBP2_MOUSE  | Cebpz    | CCAAT/enhancer-binding K.EESQIPVDEVFFYR@.Y                     | 9.86   | 3.84   | 2.57 | 0.39 |
| P53569_CEBP2_MOUSE  | Cebpz    | CCAAT/enhancer-binding K.K#GTIDLQQGELESFIQNLNLA#.Y             | 16.35  | 6.79   | 2.41 | 0.42 |
| P53569_CEBP2_MOUSE  | Cebpz    | CCAAT/enhancer-binding K.QAM*FLNLVYK#.S                        | 8.54   | 2.74   | 3.11 | 0.32 |
| P28659_CELF1_MOUSE  | Celf1    | CUGBP Elav-like family m K.AALEAQNALHNM*K#.V                   | 8.11   | 4.31   | 1.88 | 0.53 |
| P28659_CELF1_MOUSE  | Celf1    | CUGBP Elav-like family m R.ELFEQYGAVEYINILR@.D                 | 15.25  | 8.75   | 1.74 | 0.57 |
| P28659_CELF1_MOUSE  | Celf1    | CUGBP Elav-like family m R.ELFEQYGAVEYINILR@.D                 | 12.24  | 6.26   | 1.96 | 0.51 |
| P28659_CELF1_MOUSE  | Celf1    | CUGBP Elav-like family m K.M*FVGQVPR@.T                        | 14.30  | 7.84   | 1.83 | 0.55 |
| P28659_CELF1_MOUSE  | Celf1    | CUGBP Elav-like family m K.M*FVGQVPR@.T                        | 4.76   | 1.80   | 2.64 | 0.38 |
| Q6RT24_CENPE_MOUSE  | Centpe   | Centromere-associated p K.SLK#ETTELQSEVYQTLTASQSVHHLPTVQPTR@.D | 2.50   | 2.50   | 1.00 | 1.00 |
| Q9CPO5_CENPQ_MOUSE  | Centpq   | Centromere protein Q O K.IQLTSEVEEEOQV#.Q                      | 5.14   | 1.65   | 3.12 | 0.32 |
| Q3TJM4_CENPT_MOUSE  | Centpt   | Centromere protein T O S R.NILLTAPESSTVM*PDPVVKPAQVPEVAR.S     | 2.05   | 2.75   | 0.74 | 1.34 |
| Q8C4M7_CENPU_MOUSE  | Centpu   | Centromere protein U O R L.HSAQLSPVDETPATQSLK#.K.T             | 8.15   | 4.95   | 1.65 | 0.61 |
| Q8C4M7_CENPU_MOUSE  | Centpu   | Centromere protein U O R N.LDPSDEEASGNESIK#.V                  | 4.85   | 2.63   | 1.85 | 0.54 |
| Q8C4M7_CENPU_MOUSE  | Centpu   | Centromere protein U O K.YDSSSLPALLFK#.A                       | 10.35  | 5.70   | 1.81 | 0.55 |
| Q62036_CP131_MOUSE  | Cep131   | Centrosomal protein of 1 R.ATLDDLLDTLK#.L                      | 13.14  | 7.02   | 1.87 | 0.53 |
| Q62036_CP131_MOUSE  | Cep131   | Centrosomal protein of 1 K.LSAAPGPPDDGTLSEAK#.L                | 6.97   | 3.17   | 2.20 | 0.45 |
| Q62036_CP131_MOUSE  | Cep131   | Centrosomal protein of 1 R.ATLDDLLDTLK#.L                      | 16.32  | 5.51   | 2.96 | 0.34 |
| Q62036_CP131_MOUSE  | Cep131   | Centrosomal protein of 1 K.LSAAPGPPDDGTLSEAK#.L                | 7.65   | 2.80   | 2.74 | 0.37 |
| Q62036_CP131_MOUSE  | Cep131   | Centrosomal protein of 1 R.VK#VELAQAR@.Q                       | 12.65  | 5.35   | 2.36 | 0.42 |
| Q6A065_C1E170_MOUSE | Cep170   | Centrosomal protein of 1 R.DEVM*GDNLLSSVQFSR@.K                | 4.68   | 1.33   | 3.52 | 0.28 |
| Q6A065_C1E170_MOUSE | Cep170   | Centrosomal protein of 1 R.FNPDGEEEDVTVHE.-                    | 19.37  | 19.37  | 1.00 | 1.00 |
| Q6A065_C1E170_MOUSE | Cep170   | Centrosomal protein of 1 R.M*QSTGSAM*PASSFK#.H                 | 7.36   | 3.21   | 2.29 | 0.44 |
| Q6A065_C1E170_MOUSE | Cep170   | Centrosomal protein of 1 R.VFDESLNFR@.K                        | 10.75  | 5.79   | 1.86 | 0.54 |
| Q6A065_C1E170_MOUSE | Cep170   | Centrosomal protein of 1 K.DTEAVMAFLAK#.L                      | 6.02   | 3.33   | 1.81 | 0.55 |
| Q6A065_C1E170_MOUSE | Cep170   | Centrosomal protein of 1 R.FNPDGEEEDVTVHE.-                    | 12.82  | 12.82  | 1.00 | 1.00 |
| Q6A065_C1E170_MOUSE | Cep170   | Centrosomal protein of 1 R.IDLLAQPR@.R                         | 25.16  | 9.06   | 2.78 | 0.36 |
| Q6A065_C1E170_MOUSE | Cep170   | Centrosomal protein of 1 R.ISQDLALIAQ@.E                       | 27.15  | 10.09  | 2.69 | 0.37 |

|                     |         |                                                                    |       |       |      |      |
|---------------------|---------|--------------------------------------------------------------------|-------|-------|------|------|
| Q6A065_CE170_MOUSE  | Cep170  | Centrosomal protein of 1 R.LGEASDSELAADK#A                         | 8.87  | 3.34  | 2.65 | 0.38 |
| Q6A065_CE170_MOUSE  | Cep170  | Centrosomal protein of 1 R.LGEASDSELAADK#HASVASEVSTTSK#PPTGR@.R    | 21.86 | 6.54  | 3.34 | 0.30 |
| Q6A065_CE170_MOUSE  | Cep170  | Centrosomal protein of 1 R.M*QSTGSAM*PASSFK#H                      | 7.90  | 2.58  | 3.06 | 0.33 |
| Q6A065_CE170_MOUSE  | Cep170  | Centrosomal protein of 1 R.SDSLDTSSM*DTTLK#D                       | 7.52  | 2.72  | 2.76 | 0.36 |
| Q6A065_CE170_MOUSE  | Cep170  | Centrosomal protein of 1 K.TSSM*EISSILQELK#R                       | 15.30 | 2.45  | 6.25 | 0.16 |
| Q6A065_CE170_MOUSE  | Cep170  | Centrosomal protein of 1 R.VFDESLNFR@.K                            | 16.99 | 6.66  | 2.55 | 0.39 |
| Q6A065_CE170_MOUSE  | Cep170  | Centrosomal protein of 1 K.ASPGTDQLPGIQTGM*M*APENK#V               | 6.16  | 2.21  | 2.79 | 0.36 |
| Q6A065_CE170_MOUSE  | Cep170  | Centrosomal protein of 1 R.EINDVAGIEDSVTSSGTAPSTTVSTAATPGSAIDTR@.E | 6.61  | 1.94  | 3.41 | 0.29 |
| Q6A065_CE170_MOUSE  | Cep170  | Centrosomal protein of 1 R.FNPDGEEEDVTVHE.-                        | 11.02 | 11.02 | 1.00 | 1.00 |
| Q6A065_CE170_MOUSE  | Cep170  | Centrosomal protein of 1 K.GTDSK#VEAAAEVQPR@.A                     | 9.31  | 4.61  | 2.00 | 0.50 |
| Q6A065_CE170_MOUSE  | Cep170  | Centrosomal protein of 1 R.IDLLAQPR@.R                             | 26.34 | 6.79  | 3.88 | 0.26 |
| Q6A065_CE170_MOUSE  | Cep170  | Centrosomal protein of 1 R.ISQDLALJAR@.E                           | 30.37 | 10.25 | 2.96 | 0.34 |
| Q6A065_CE170_MOUSE  | Cep170  | Centrosomal protein of 1 R.LGEASDSELAADK#A                         | 7.80  | 2.26  | 3.45 | 0.29 |
| Q6A065_CE170_MOUSE  | Cep170  | Centrosomal protein of 1 R.M*QSTGSAM*PASSFK#H                      | 10.00 | 2.72  | 3.68 | 0.27 |
| Q6A065_CE170_MOUSE  | Cep170  | Centrosomal protein of 1 R.SDSEATISR@.S                            | 8.68  | 4.23  | 2.05 | 0.49 |
| Q6A065_CE170_MOUSE  | Cep170  | Centrosomal protein of 1 R.SDSLDTSSM*DTTLK#D                       | 8.41  | 4.42  | 1.90 | 0.53 |
| Q6A065_CE170_MOUSE  | Cep170  | Centrosomal protein of 1 K.TSSM*EISSILQELK#R                       | 13.33 | 3.01  | 4.44 | 0.23 |
| Q80U49_C1708_MOUSE  | Cep170b | Centrosomal protein of 1 K.TASVSGASAEAGQVQR@.L                     | 9.74  | 3.91  | 2.49 | 0.40 |
| Q80U49_C1708_MOUSE  | Cep170b | Centrosomal protein of 1 K.ETTPVETVSAETK#V                         | 6.91  | 2.31  | 2.99 | 0.33 |
| Q8BT07_CEP55_MOUSE  | Cep55   | Centrosomal protein of 5 K.EVEDLNQLLSQR@.K                         | 6.08  | 2.25  | 2.70 | 0.37 |
| Q8BT07_CEP55_MOUSE  | Cep55   | Centrosomal protein of 5 R.ILYDLSL#K.H                             | 52.48 | 16.59 | 3.16 | 0.32 |
| Q8BT07_CEP55_MOUSE  | Cep55   | Centrosomal protein of 5 K.#HESEGLVQEK#Q                           | 25.12 | 9.87  | 2.55 | 0.39 |
| Q8BT07_CEP55_MOUSE  | Cep55   | Centrosomal protein of 5 K.LR@EESIFK#G                             | 10.76 | 4.62  | 2.33 | 0.43 |
| Q8BT07_CEP55_MOUSE  | Cep55   | Centrosomal protein of 5 K.NQQLWLYDQQR@.E                          | 9.71  | 3.09  | 3.14 | 0.32 |
| Q8BT07_CEP55_MOUSE  | Cep55   | Centrosomal protein of 5 K.NVYLLK#D                                | 16.05 | 5.74  | 2.79 | 0.36 |
| Q8BT07_CEP55_MOUSE  | Cep55   | Centrosomal protein of 5 K.QLHGFTTEQPFLQR@.E                       | 12.94 | 5.33  | 2.43 | 0.41 |
| Q8BT07_CEP55_MOUSE  | Cep55   | Centrosomal protein of 5 R.SEELLSQR@.I                             | 21.97 | 8.93  | 2.46 | 0.41 |
| Q8BT07_CEP55_MOUSE  | Cep55   | Centrosomal protein of 5 K.TSLDEITSG#G                             | 22.95 | 7.84  | 2.93 | 0.34 |
| Q8BT07_CEP55_MOUSE  | Cep55   | Centrosomal protein of 5 R.YSSSLFQLKEEK#T                          | 17.18 | 6.80  | 2.53 | 0.40 |
| Q8BT07_CEP55_MOUSE  | Cep55   | Centrosomal protein of 5 K.SQITLQELK#H                             | 10.53 | 2.54  | 4.14 | 0.24 |
| Q8BMK0_CEP85_MOUSE  | Cep85   | Centrosomal protein of 8 K.ELSVQNDLIEK#N                           | 5.91  | 2.57  | 2.30 | 0.44 |
| Q924Z4_CERS2_MOUSE  | Cers2   | Ceramide synthase 2 OS=R.AGTLIM*ALHDASDYLLLESAAK#M                 | 12.02 | 6.38  | 1.88 | 0.53 |
| Q924Z4_CERS2_MOUSE  | Cers2   | Ceramide synthase 2 OS=K.QVEVDLISR@.Q                              | 13.04 | 1.62  | 8.07 | 0.12 |
| Q9R1K9_CETN2_MOUSE  | Cetn2   | Centrin-2 OS=Mus muscu R.EAFDLFDADGTGTDIK#E                        | 7.55  | 3.67  | 2.06 | 0.49 |
| Q9R1K9_CETN2_MOUSE  | Cetn2   | Centrin-2 OS=Mus muscu K.ELGENLDEELQEM*IDEADR@DGGDGEVNEQFLR@.I     | 2.86  | 1.81  | 1.58 | 0.63 |
| Q9R1K9_CETN2_MOUSE  | Cetn2   | Centrin-2 OS=Mus muscu K.M*NFSFLTM*TKQ#M                           | 2.91  | 3.55  | 1.38 | 0.72 |
| Q35648_CETN3_MOUSE  | Cetn3   | Centrin-3 OS=Mus muscu K.DAFELFDTK#DQAIIDYHELK#V                   | 8.72  | 3.34  | 2.61 | 0.38 |
| Q8BTU1_CFA20_MOUSE  | Cfap20  | Cilia- and flagella-associa K.LPFLVM*IK#N                          | 5.68  | 2.60  | 2.18 | 0.46 |
| Q8BTU1_CFA20_MOUSE  | Cfap20  | Cilia- and flagella-associa R.LYSEDLPAEFK#L                        | 22.64 | 14.49 | 1.56 | 0.64 |
| Q8BTU1_CFA20_MOUSE  | Cfap20  | Cilia- and flagella-associa R.LYSEDLPAEFK#L                        | 5.42  | 6.04  | 0.90 | 1.11 |
| Q8BTU1_CFA20_MOUSE  | Cfap20  | Cilia- and flagella-associa R.LYSEDLPAEFK#L                        | 9.10  | 10.69 | 0.85 | 1.17 |
| Q9D439_CFA53_MOUSE  | Cfap53  | Cilia- and flagella-associa K.IESMQR@EYR@.E                        | 8.68  | 1.98  | 4.38 | 0.23 |
| P18760_COF1_MOUSE   | Cfl1    | Cofilin-1 OS=Mus muscu K.ELVGDVGGTVDDPYTTFVK#M                     | 3.66  | 1.73  | 2.11 | 0.47 |
| P18760_COF1_MOUSE   | Cfl1    | Cofilin-1 OS=Mus muscu K.LGGSVAISLEGK#PL.-                         | 29.86 | 19.86 | 1.50 | 0.67 |
| P18760_COF1_MOUSE   | Cfl1    | Cofilin-1 OS=Mus muscu K.NIILEEGKILVGDVGGTVDDPYTTFVK.M             | 12.35 | 10.50 | 1.18 | 0.85 |
| P18760_COF1_MOUSE   | Cfl1    | Cofilin-1 OS=Mus muscu R.YALYDATYETK#E                             | 16.11 | 11.22 | 1.44 | 0.70 |
| Q8BH69_CGBP1_MOUSE  | Cggbp1  | CGG triplet repeat-bindin K.ASVIQDFVK#M                            | 17.84 | 12.47 | 1.43 | 0.70 |
| Q8BH69_CGBP1_MOUSE  | Cggbp1  | CGG triplet repeat-bindin K.TALYVTPDR@.V                           | 19.80 | 17.00 | 1.16 | 0.86 |
| P59242_CING_MOUSE   | Cgn     | Cingulin OS=Mus muscu R.DQVDQLR@.T                                 | 31.53 | 12.54 | 2.52 | 0.40 |
| P59242_CING_MOUSE   | Cgn     | Cingulin OS=Mus muscu R.ELEQQNLQK#K.T                              | 5.51  | 1.93  | 2.85 | 0.35 |
| P59242_CING_MOUSE   | Cgn     | Cingulin OS=Mus muscu R.ELLELELEGK#Q                               | 9.73  | 6.87  | 1.42 | 0.71 |
| P59242_CING_MOUSE   | Cgn     | Cingulin OS=Mus muscu R.GLAEGGAEVAVR@.L                            | 9.11  | 2.92  | 3.33 | 0.30 |
| P59242_CING_MOUSE   | Cgn     | Cingulin OS=Mus muscu R.LASSEGFQK#PSASLSQLESQNLQER@.L              | 3.46  | 1.49  | 2.32 | 0.43 |
| Q6AW69_CGNL1_MOUSE  | Cgn1    | Cingulin-like protein 1 O' R.ELSQVQEQK#E                           | 6.74  | 3.76  | 1.79 | 0.56 |
| Q6AW69_CGNL1_MOUSE  | Cgn1    | Cingulin-like protein 1 O' K.GALIEELQAK#Q                          | 16.27 | 8.37  | 1.94 | 0.51 |
| Q6AW69_CGNL1_MOUSE  | Cgn1    | Cingulin-like protein 1 O' K.GQQELTQQTNEETAK#Q                     | 16.01 | 6.28  | 1.91 | 0.52 |
| Q6AW69_CGNL1_MOUSE  | Cgn1    | Cingulin-like protein 1 O' K.SLEELFQVK#M                           | 9.29  | 5.56  | 1.67 | 0.60 |
| Q6AW69_CGNL1_MOUSE  | Cgn1    | Cingulin-like protein 1 O' R.YIFPLGTGR@.D                          | 8.10  | 5.29  | 1.53 | 0.65 |
| Q6AW69_CGNL1_MOUSE  | Cgn1    | Cingulin-like protein 1 O' K.GALIEELQAK#Q                          | 8.24  | 3.74  | 2.20 | 0.45 |
| Q9QWF0_CAF1A_MOUSE  | Chaf1a  | Chromatin assembly fact K.LVGGQGPIDFRLR@.A                         | 9.90  | 9.85  | 1.00 | 1.00 |
| Q9QWF0_CAF1A_MOUSE  | Chaf1a  | Chromatin assembly fact K.VPVVLELITATKPSIASLPM*M*SLDR.S            | 6.74  | 10.09 | 0.67 | 1.50 |
| Q9D0N7_CAF1B_MOUSE  | Chaf1b  | Chromatin assembly fact K.AIVFSLNLR#A                              | 10.18 | 8.90  | 1.14 | 0.87 |
| Q9D0N7_CAF1B_MOUSE  | Chaf1b  | Chromatin assembly fact R.LASAGVDTAVR@.I                           | 6.36  | 6.90  | 0.92 | 1.09 |
| Q9D0N7_CAF1B_MOUSE  | Chaf1b  | Chromatin assembly fact K.AIVFSLNLR@.H                             | 13.21 | 4.91  | 2.63 | 0.38 |
| Q9D0N7_CAF1B_MOUSE  | Chaf1b  | Chromatin assembly fact R.LASAGVDTAVR@.I                           | 5.36  | 4.86  | 1.10 | 0.91 |
| Q8K327_CHAP1_MOUSE  | Champ1  | Chromosome alignment- K.APELSEELQEAVDNAK#C                         | 4.33  | 4.32  | 1.00 | 1.00 |
| Q8K327_CHAP1_MOUSE  | Champ1  | Chromosome alignment- K.EAFISEEIAK#Y                               | 7.52  | 4.17  | 1.80 | 0.55 |
| Q8K327_CHAP1_MOUSE  | Champ1  | Chromosome alignment- R.K#HVFPLPK#S                                | 12.96 | 5.12  | 2.53 | 0.40 |
| Q8K327_CHAP1_MOUSE  | Champ1  | Chromosome alignment- K.LM*EALSPLEEQI.-                            | 7.18  | 7.18  | 1.00 | 1.00 |
| Q8K327_CHAP1_MOUSE  | Champ1  | Chromosome alignment- K.AFLLESLK#N                                 | 38.85 | 20.46 | 1.90 | 0.53 |
| Q8K327_CHAP1_MOUSE  | Champ1  | Chromosome alignment- K.APELSEELQEAVDNAK#C                         | 8.69  | 6.24  | 1.39 | 0.72 |
| Q8K327_CHAP1_MOUSE  | Champ1  | Chromosome alignment- K.DSQSDEALSSSEYIR@.A                         | 7.20  | 4.26  | 1.69 | 0.59 |
| Q8K327_CHAP1_MOUSE  | Champ1  | Chromosome alignment- R.K#HVFPLPK#S                                | 15.37 | 17.89 | 0.86 | 1.16 |
| Q8K327_CHAP1_MOUSE  | Champ1  | Chromosome alignment- K.LM*EALSPLEEQI.-                            | 16.73 | 16.73 | 1.00 | 1.00 |
| Q8K327_CHAP1_MOUSE  | Champ1  | Chromosome alignment- K.NVLFTEEK#EAFISEEIAK#Y                      | 4.97  | 2.81  | 1.77 | 0.57 |
| Q8K327_CHAP1_MOUSE  | Champ1  | Chromosome alignment- K.SALVSSK#PK#H                               | 10.84 | 6.26  | 1.73 | 0.58 |
| Q8K327_CHAP1_MOUSE  | Champ1  | Chromosome alignment- K.TSPASLDPEPQK#S                             | 11.49 | 6.91  | 1.66 | 0.60 |
| P40201_CHD1_MOUSE   | Chd1    | Chromodomain-helicase K.ELEPFLR@.R                                 | 11.50 | 10.45 | 1.10 | 0.91 |
| P40201_CHD1_MOUSE   | Chd1    | Chromodomain-helicase K.FGAELFKPEEGEEQEQEM*DIDEIK.R                | 8.65  | 3.38  | 2.56 | 0.39 |
| P40201_CHD1_MOUSE   | Chd1    | Chromodomain-helicase K.GSVEEDILR@.A                               | 10.68 | 6.17  | 1.73 | 0.58 |
| P40201_CHD1_MOUSE   | Chd1    | Chromodomain-helicase R.LLITGTPQLQNLK#E                            | 12.72 | 6.66  | 1.91 | 0.52 |
| P40201_CHD1_MOUSE   | Chd1    | Chromodomain-helicase R.M*LDLILAEK#Y                               | 13.26 | 8.62  | 1.54 | 0.65 |
| P40201_CHD1_MOUSE   | Chd1    | Chromodomain-helicase K.SVSDAPVHTASGEPVPIAESEELDQK#T               | 10.79 | 5.71  | 1.89 | 0.53 |
| Q9CXF7_CHD1_MOUSE   | Chd1    | Chromodomain-helicase K.ILSPLEEDR@.R                               | 7.25  | 2.81  | 2.58 | 0.39 |
| E9PZM4_CHD2_MOUSE   | Chd2    | Chromodomain-helicase R.SFHTDK#LGEYKQPMPSLHTALSDPR@.S              | 2.01  | 2.40  | 0.84 | 1.20 |
| E9PZM4_CHD2_MOUSE   | Chd2    | Chromodomain-helicase R.ENEVSTATDELSSQFK#V                         | 5.23  | 5.55  | 0.96 | 1.04 |
| E9PZM4_CHD2_MOUSE   | Chd2    | Chromodomain-helicase K.GTVEEIER@.A                                | 20.32 | 6.15  | 3.29 | 0.30 |
| E9PZM4_CHD2_MOUSE   | Chd2    | Chromodomain-helicase K.SNSVLADEM*GLGK#T                           | 5.69  | 4.33  | 1.31 | 0.76 |
| E9PZM4_CHD2_MOUSE   | Chd2    | Chromodomain-helicase K.VLEPFLR@.R                                 | 10.01 | 4.49  | 2.23 | 0.45 |
| E9Q614_E9Q614_MOUSE | Chd3    | Protein Chd3 OS=Mus mi K.LQGDGPPSSPTNDPTVK#Y                       | 8.30  | 2.15  | 3.87 | 0.26 |
| E9Q614_E9Q614_MOUSE | Chd3    | Protein Chd3 OS=Mus mi R.ENEFSFEDNAIK#G                            | 17.78 | 4.80  | 3.70 | 0.27 |
| E9Q614_E9Q614_MOUSE | Chd3    | Protein Chd3 OS=Mus mi K.FGTEELFK#DENENK#EEDSSVHYDNEAIAR@.L        | 9.86  | 2.96  | 3.33 | 0.30 |
| E9Q614_E9Q614_MOUSE | Chd3    | Protein Chd3 OS=Mus mi R.IDGGITGALR@.Q                             | 24.33 | 7.19  | 3.39 | 0.30 |
| E9Q614_E9Q614_MOUSE | Chd3    | Protein Chd3 OS=Mus mi K.LLEDEAPGVGETEPEPYGR@GDR@.E                | 5.50  | 1.77  | 3.11 | 0.32 |
| E9Q614_E9Q614_MOUSE | Chd3    | Protein Chd3 OS=Mus mi K.LPSGAYEGGALIK#S                           | 26.90 | 13.62 | 1.97 | 0.51 |
| E9Q614_E9Q614_MOUSE | Chd3    | Protein Chd3 OS=Mus mi K.SESGGSEYQTPGR@.K                          | 6.80  | 2.60  | 2.61 | 0.38 |
| E9Q614_E9Q614_MOUSE | Chd3    | Protein Chd3 OS=Mus mi R.TPLDK#DNTENQEK#PEK#N                      | 11.80 | 2.72  | 4.34 | 0.23 |
| E9Q614_E9Q614_MOUSE | Chd3    | Protein Chd3 OS=Mus mi R.VGGNIEVLFNTR@.Q                           | 17.52 | 5.24  | 3.35 | 0.30 |
| Q6PDO2_CHD4_MOUSE   | Chd4    | Chromodomain-helicase R.APEPPQQAQQQ.-                              | 7.20  | 7.20  | 1.00 | 1.00 |
| Q6PDO2_CHD4_MOUSE   | Chd4    | Chromodomain-helicase R.AGGLGINLATADTVHYDSDWPNHNDIQAFSR@.A         | 4.20  | 1.54  | 2.72 | 0.37 |
| Q6PDO2_CHD4_MOUSE   | Chd4    | Chromodomain-helicase R.APEPPQQAQQQ.-                              | 32.99 | 32.99 | 1.00 | 1.00 |
| Q6PDO2_CHD4_MOUSE   | Chd4    | Chromodomain-helicase K.AYVSLFM*#R@.H                              | 46.51 | 16.23 | 2.87 | 0.35 |
| Q6PDO2_CHD4_MOUSE   | Chd4    | Chromodomain-helicase R.ENEFSFEDNAIR@.G                            | 37.73 | 12.59 | 3.00 | 0.33 |

|                     |        |                                                             |        |        |       |      |
|---------------------|--------|-------------------------------------------------------------|--------|--------|-------|------|
| Q6PDQ2_CHD4_MOUSE   | Chd4   | Chromodomain-helicase K.ER*TEPM*EAK#G                       | 7.18   | 4.33   | 1.66  | 0.60 |
| Q6PDQ2_CHD4_MOUSE   | Chd4   | Chromodomain-helicase K.FGTEELFK#DEATDGGDNK#EGEDSSVIHYDDK#A | 8.83   | 5.04   | 1.75  | 0.57 |
| Q6PDQ2_CHD4_MOUSE   | Chd4   | Chromodomain-helicase R.FHNLEGFLEEFADIAK#E                  | 7.91   | 3.81   | 2.07  | 0.48 |
| Q6PDQ2_CHD4_MOUSE   | Chd4   | Chromodomain-helicase R.FHNLEGFLEEFADIAK#EDQIK#K            | 6.62   | 1.53   | 4.32  | 0.23 |
| Q6PDQ2_CHD4_MOUSE   | Chd4   | Chromodomain-helicase R.FM*FNADGGFTELHSLWQNEER@.A           | 2.65   | 9.79   | 2.83  | 0.35 |
| Q6PDQ2_CHD4_MOUSE   | Chd4   | Chromodomain-helicase R.FSWAQGTDTLADDEM*GLGK#T              | 17.20  | 3.80   | 4.27  | 0.23 |
| Q6PDQ2_CHD4_MOUSE   | Chd4   | Chromodomain-helicase R.FSWAQGTDTLADDEM*GLGK#T              | 11.64  | 4.23   | 2.75  | 0.36 |
| Q6PDQ2_CHD4_MOUSE   | Chd4   | Chromodomain-helicase R.GGGNQVSLNVVM*DLK#K.C                | 15.88  | 6.27   | 2.53  | 0.39 |
| Q6PDQ2_CHD4_MOUSE   | Chd4   | Chromodomain-helicase R.GNLEIK#N                            | 38.50  | 19.82  | 1.94  | 0.51 |
| Q6PDQ2_CHD4_MOUSE   | Chd4   | Chromodomain-helicase R.HHYEQQEDLAR@.N                      | 42.16  | 17.58  | 2.40  | 0.42 |
| Q6PDQ2_CHD4_MOUSE   | Chd4   | Chromodomain-helicase R.IDGGITGNM*R@.Q                      | 30.15  | 11.12  | 2.71  | 0.37 |
| Q6PDQ2_CHD4_MOUSE   | Chd4   | Chromodomain-helicase R.IGVMS*SLIR@.K                       | 35.87  | 12.52  | 2.87  | 0.35 |
| Q6PDQ2_CHD4_MOUSE   | Chd4   | Chromodomain-helicase R.KEEEEDEDDDSKEPK.S                   | 3.39   | 2.64   | 1.29  | 0.78 |
| Q6PDQ2_CHD4_MOUSE   | Chd4   | Chromodomain-helicase R.LLDR@NQDETEDTELQGM*NEYLSSF#K.V      | 3.39   | 1.48   | 2.30  | 0.44 |
| Q6PDQ2_CHD4_MOUSE   | Chd4   | Chromodomain-helicase K.LLEQALVIEQLR@.R                     | 36.15  | 11.24  | 3.22  | 0.31 |
| Q6PDQ2_CHD4_MOUSE   | Chd4   | Chromodomain-helicase R.LPATIAR@.I                          | 82.35  | 110.89 | 0.74  | 1.35 |
| Q6PDQ2_CHD4_MOUSE   | Chd4   | Chromodomain-helicase K.M*LDLLEDFLEHEGYK#Y                  | 15.68  | 6.29   | 2.49  | 0.40 |
| Q6PDQ2_CHD4_MOUSE   | Chd4   | Chromodomain-helicase K.M*LDLLEDFLEHEGYK#Y                  | 35.89  | 12.25  | 2.93  | 0.34 |
| Q6PDQ2_CHD4_MOUSE   | Chd4   | Chromodomain-helicase R.NDK#K#PLP#LLAR@.V                   | 35.41  | 20.83  | 1.70  | 0.59 |
| Q6PDQ2_CHD4_MOUSE   | Chd4   | Chromodomain-helicase R.NFEALNAR@.G                         | 36.09  | 12.48  | 2.89  | 0.35 |
| Q6PDQ2_CHD4_MOUSE   | Chd4   | Chromodomain-helicase K.QVNYNDSQEDR@.D                      | 7.23   | 2.12   | 3.41  | 0.29 |
| Q6PDQ2_CHD4_MOUSE   | Chd4   | Chromodomain-helicase R.TEPM*EAK#G                          | 12.09  | 5.18   | 2.34  | 0.43 |
| Q6PDQ2_CHD4_MOUSE   | Chd4   | Chromodomain-helicase K.TVQAVFLSYLK#E                       | 31.69  | 10.89  | 2.91  | 0.34 |
| Q6PDQ2_CHD4_MOUSE   | Chd4   | Chromodomain-helicase R.VGGNIEVGFNAR@.Q                     | 61.19  | 21.08  | 2.90  | 0.34 |
| Q6PDQ2_CHD4_MOUSE   | Chd4   | Chromodomain-helicase R.VLIFSQM*TK#M                        | 31.24  | 9.81   | 3.19  | 0.31 |
| Q6PDQ2_CHD4_MOUSE   | Chd4   | Chromodomain-helicase R.YGM*PPQDAFTTQWLVLR@.D               | 16.09  | 7.36   | 2.19  | 0.46 |
| Q6PDQ2_CHD4_MOUSE   | Chd4   | Chromodomain-helicase R.AAYLNM*SEDPSPSM*ALNTR@.F            | 21.30  | 9.87   | 2.16  | 0.46 |
| Q6PDQ2_CHD4_MOUSE   | Chd4   | Chromodomain-helicase R.AGGLGINLATADTVIYDSDWNPNDIQAFSR@.A   | 8.89   | 4.13   | 2.15  | 0.46 |
| Q6PDQ2_CHD4_MOUSE   | Chd4   | Chromodomain-helicase R.APEPPQVAQQQ.-                       | 34.26  | 34.26  | 1.00  | 1.00 |
| Q6PDQ2_CHD4_MOUSE   | Chd4   | Chromodomain-helicase K.AYVSLM*R@.H                         | 50.54  | 14.77  | 3.42  | 0.29 |
| Q6PDQ2_CHD4_MOUSE   | Chd4   | Chromodomain-helicase R.EEEM*GEEEVER@.E                     | 15.53  | 6.42   | 2.42  | 0.41 |
| Q6PDQ2_CHD4_MOUSE   | Chd4   | Chromodomain-helicase R.ENEFSEDNAIR@.G                      | 156.57 | 46.17  | 3.39  | 0.29 |
| Q6PDQ2_CHD4_MOUSE   | Chd4   | Chromodomain-helicase K.ER*TEPM*EAK#G                       | 9.62   | 2.84   | 3.39  | 0.29 |
| Q6PDQ2_CHD4_MOUSE   | Chd4   | Chromodomain-helicase K.FAEM*EER@.F                         | 85.68  | 28.02  | 3.06  | 0.33 |
| Q6PDQ2_CHD4_MOUSE   | Chd4   | Chromodomain-helicase K.FGTEELFK#DEATDGGDNK#E               | 8.35   | 15.99  | 0.52  | 1.91 |
| Q6PDQ2_CHD4_MOUSE   | Chd4   | Chromodomain-helicase K.FGTEELFK#DEATDGGDNK#EGEDSSVIHYDDK#A | 37.72  | 9.85   | 3.83  | 0.26 |
| Q6PDQ2_CHD4_MOUSE   | Chd4   | Chromodomain-helicase R.FHNLEGFLEEFADIAK#E                  | 14.64  | 5.57   | 2.63  | 0.38 |
| Q6PDQ2_CHD4_MOUSE   | Chd4   | Chromodomain-helicase R.FHNLEGFLEEFADIAK#EDQIK#K#L          | 11.54  | 4.46   | 2.59  | 0.39 |
| Q6PDQ2_CHD4_MOUSE   | Chd4   | Chromodomain-helicase R.FM*FNADGGFTELHSLWQNEER@.A           | 18.39  | 4.67   | 3.93  | 0.25 |
| Q6PDQ2_CHD4_MOUSE   | Chd4   | Chromodomain-helicase R.FSWAQGTDTLADDEM*GLGK#T              | 63.67  | 21.59  | 2.95  | 0.34 |
| Q6PDQ2_CHD4_MOUSE   | Chd4   | Chromodomain-helicase R.GGGNQVSLNVVM*DLK#K                  | 46.53  | 16.63  | 2.80  | 0.36 |
| Q6PDQ2_CHD4_MOUSE   | Chd4   | Chromodomain-helicase R.GGGNQVSLNVVMDL#K.K                  | 22.30  | 6.61   | 3.37  | 0.30 |
| Q6PDQ2_CHD4_MOUSE   | Chd4   | Chromodomain-helicase R.GGGNQVSLNVVM*DLK#K.C                | 13.59  | 14.51  | 3.67  | 0.27 |
| Q6PDQ2_CHD4_MOUSE   | Chd4   | Chromodomain-helicase R.GGGNQVSLNVVMDL#K#K.C                | 12.47  | 1.68   | 7.44  | 0.13 |
| Q6PDQ2_CHD4_MOUSE   | Chd4   | Chromodomain-helicase K.GHVHYLIK#W                          | 14.50  | 5.02   | 2.89  | 0.35 |
| Q6PDQ2_CHD4_MOUSE   | Chd4   | Chromodomain-helicase R.GNLEIK#N                            | 34.85  | 16.96  | 2.05  | 0.49 |
| Q6PDQ2_CHD4_MOUSE   | Chd4   | Chromodomain-helicase K.GPFLVSPASTIINWER@.E                 | 55.87  | 20.32  | 2.75  | 0.36 |
| Q6PDQ2_CHD4_MOUSE   | Chd4   | Chromodomain-helicase R.HHYEQQEDLAR@.N                      | 95.25  | 38.00  | 2.51  | 0.40 |
| Q6PDQ2_CHD4_MOUSE   | Chd4   | Chromodomain-helicase R.IDGGITGNM*R@.Q                      | 170.40 | 56.91  | 2.99  | 0.33 |
| Q6PDQ2_CHD4_MOUSE   | Chd4   | Chromodomain-helicase K.IEENSLK#EESTEGEK#E                  | 12.51  | 5.44   | 2.30  | 0.43 |
| Q6PDQ2_CHD4_MOUSE   | Chd4   | Chromodomain-helicase K.IEENSLK#EESTEGEK#E                  | 8.44   | 4.19   | 2.01  | 0.50 |
| Q6PDQ2_CHD4_MOUSE   | Chd4   | Chromodomain-helicase R.IGVMS*SLIR@.K                       | 52.95  | 23.35  | 2.27  | 0.44 |
| Q6PDQ2_CHD4_MOUSE   | Chd4   | Chromodomain-helicase R.IGVMS*SLIR@.K                       | 17.51  | 6.63   | 2.64  | 0.38 |
| Q6PDQ2_CHD4_MOUSE   | Chd4   | Chromodomain-helicase R.KEEEEDEDDDSKEPK#S                   | 24.75  | 10.21  | 2.42  | 0.41 |
| Q6PDQ2_CHD4_MOUSE   | Chd4   | Chromodomain-helicase R.KHNDM*DEPPSGDFGGDEEK#S              | 30.47  | 13.70  | 2.22  | 0.45 |
| Q6PDQ2_CHD4_MOUSE   | Chd4   | Chromodomain-helicase R.LK#ADVFK#N                          | 44.70  | 13.11  | 3.41  | 0.29 |
| Q6PDQ2_CHD4_MOUSE   | Chd4   | Chromodomain-helicase R.LLDR@NQDETEDTELQGM*NEYLSSF#K.V      | 28.89  | 7.99   | 3.61  | 0.28 |
| Q6PDQ2_CHD4_MOUSE   | Chd4   | Chromodomain-helicase K.LLEQALVIEQLR@.R                     | 52.05  | 18.11  | 2.87  | 0.35 |
| Q6PDQ2_CHD4_MOUSE   | Chd4   | Chromodomain-helicase K.M*LDLLEDFLEHEGYK#Y                  | 105.66 | 35.30  | 2.99  | 0.33 |
| Q6PDQ2_CHD4_MOUSE   | Chd4   | Chromodomain-helicase K.M*LDLLEDFLEHEGYK#Y                  | 74.36  | 23.75  | 3.13  | 0.32 |
| Q6PDQ2_CHD4_MOUSE   | Chd4   | Chromodomain-helicase K.M*PNGM*VDSALIR@.A                   | 10.54  | 5.00   | 2.11  | 0.47 |
| Q6PDQ2_CHD4_MOUSE   | Chd4   | Chromodomain-helicase K.M*SQPSGSP#K.T                       | 17.15  | 6.77   | 2.53  | 0.39 |
| Q6PDQ2_CHD4_MOUSE   | Chd4   | Chromodomain-helicase R.NDK#K#PLP#LLAR.V                    | 46.88  | 24.09  | 1.95  | 0.51 |
| Q6PDQ2_CHD4_MOUSE   | Chd4   | Chromodomain-helicase R.NFEALNAR@.G                         | 170.22 | 51.23  | 3.32  | 0.30 |
| Q6PDQ2_CHD4_MOUSE   | Chd4   | Chromodomain-helicase R.NQDETEDTELQGM*NEYLSSF#K.V           | 13.61  | 6.99   | 1.95  | 0.51 |
| Q6PDQ2_CHD4_MOUSE   | Chd4   | Chromodomain-helicase R.QPEYLDATGTLHPYQMEGLNWLRL@.F         | 5.83   | 2.85   | 2.04  | 0.49 |
| Q6PDQ2_CHD4_MOUSE   | Chd4   | Chromodomain-helicase K.QVNYNDSQEDR@.D                      | 8.57   | 1.79   | 2.79  | 0.36 |
| Q6PDQ2_CHD4_MOUSE   | Chd4   | Chromodomain-helicase R.SDSEGSYTPGK#K                       | 8.57   | 3.05   | 2.81  | 0.36 |
| Q6PDQ2_CHD4_MOUSE   | Chd4   | Chromodomain-helicase K.SSAQLLEDWGM*EDIDHVFSEEDYR@.T        | 95.50  | 22.35  | 4.27  | 0.23 |
| Q6PDQ2_CHD4_MOUSE   | Chd4   | Chromodomain-helicase K.SSAQLLEDWGM*EDIDHVFSEEDYR@.T        | 18.51  | 4.13   | 4.49  | 0.22 |
| Q6PDQ2_CHD4_MOUSE   | Chd4   | Chromodomain-helicase K.TGSM*SK#QELDILK#F                   | 19.86  | 5.92   | 3.36  | 0.30 |
| Q6PDQ2_CHD4_MOUSE   | Chd4   | Chromodomain-helicase K.TPTPTSTQTPNTPAPVPAEDGIK#I           | 8.06   | 4.13   | 1.95  | 0.51 |
| Q6PDQ2_CHD4_MOUSE   | Chd4   | Chromodomain-helicase K.TVQAVFLSYLK#E                       | 111.75 | 28.32  | 3.95  | 0.25 |
| Q6PDQ2_CHD4_MOUSE   | Chd4   | Chromodomain-helicase K.VAQVVR@EEM*GEEEVER@.E               | 19.43  | 5.02   | 3.87  | 0.26 |
| Q6PDQ2_CHD4_MOUSE   | Chd4   | Chromodomain-helicase R.VGGNIEVGFNAR@.Q                     | 67.02  | 20.37  | 3.29  | 0.30 |
| Q6PDQ2_CHD4_MOUSE   | Chd4   | Chromodomain-helicase R.VLIFSQM*TK#M                        | 105.47 | 39.00  | 2.70  | 0.37 |
| Q6PDQ2_CHD4_MOUSE   | Chd4   | Chromodomain-helicase R.WQIQNDP@.Y                          | 18.22  | 8.51   | 2.14  | 0.47 |
| Q6PDQ2_CHD4_MOUSE   | Chd4   | Chromodomain-helicase R.YGM*PPQDAFTTQWLVLR@.D               | 16.12  | 5.08   | 3.17  | 0.32 |
| Q09XV5_CHD8_MOUSE   | Chd8   | Chromodomain-helicase K.ASFVASENR@.T                        | 6.60   | 2.27   | 2.90  | 0.34 |
| Q09XV5_CHD8_MOUSE   | Chd8   | Chromodomain-helicase R.DGNITGQFQSK#K                       | 7.69   | 2.09   | 3.69  | 0.27 |
| Q09XV5_CHD8_MOUSE   | Chd8   | Chromodomain-helicase R.SGSAASM*AEESA AVTAAQFTK#L           | 4.89   | 1.96   | 2.49  | 0.40 |
| Q09XV5_CHD8_MOUSE   | Chd8   | Chromodomain-helicase R.TDISLDDPNFVQK#W                     | 11.38  | 2.84   | 4.01  | 0.25 |
| F6W559_F6W559_MOUSE | Chd8   | Chromodomain-helicase R.VSPFPGLSIPVPR@.G                    | 10.93  | 4.68   | 2.34  | 0.43 |
| Q8CG20_CHERP_MOUSE  | Cherp  | Calcium homeostasis enc R.DEFSTFGTR@.K                      | 30.05  | 9.49   | 3.17  | 0.32 |
| Q8CG20_CHERP_MOUSE  | Cherp  | Calcium homeostasis enc R.ELLAALQK#V                        | 132.27 | 41.03  | 3.22  | 0.31 |
| Q8CG20_CHERP_MOUSE  | Cherp  | Calcium homeostasis enc R.GDPGWNGQR@.D                      | 27.91  | 6.01   | 4.64  | 0.22 |
| Q8CG20_CHERP_MOUSE  | Cherp  | Calcium homeostasis enc K.GVGVALLDDPYENYR@.R                | 20.04  | 4.87   | 4.11  | 0.24 |
| Q8CG20_CHERP_MOUSE  | Cherp  | Calcium homeostasis enc R.ITADGAMFELR@.L                    | 19.24  | 13.48  | 1.43  | 0.70 |
| Q8CG20_CHERP_MOUSE  | Cherp  | Calcium homeostasis enc K.LAQFVAR@.N                        | 113.21 | 36.35  | 3.11  | 0.32 |
| Q8CG20_CHERP_MOUSE  | Cherp  | Calcium homeostasis enc R.LLAAVEFYSPSHDR@PR@.N              | 56.82  | 12.59  | 4.51  | 0.22 |
| Q8CG20_CHERP_MOUSE  | Cherp  | Calcium homeostasis enc R.LLQWEX#N                          | 99.29  | 31.92  | 3.11  | 0.32 |
| Q8CG20_CHERP_MOUSE  | Cherp  | Calcium homeostasis enc K.M*GWSSGSLGAK#E                    | 16.18  | 3.52   | 4.60  | 0.22 |
| Q8CG20_CHERP_MOUSE  | Cherp  | Calcium homeostasis enc R.NSEGWEQNLVEYFR@.A                 | 10.23  | 4.34   | 3.28  | 0.30 |
| Q8CG20_CHERP_MOUSE  | Cherp  | Calcium homeostasis enc R.QEQVTTAAVAHAVEQQM*QK#L            | 54.74  | 19.06  | 2.66  | 0.38 |
| Q8CG20_CHERP_MOUSE  | Cherp  | Calcium homeostasis enc K.SYSFIAR@.M                        | 53.16  | 13.74  | 3.87  | 0.26 |
| Q8CG20_CHERP_MOUSE  | Cherp  | Calcium homeostasis enc K.LAQFVAR@.N                        | 82.88  | 21.39  | 3.88  | 0.26 |
| Q8CG20_CHERP_MOUSE  | Cherp  | Calcium homeostasis enc R.LLAAVEFYSPSHDR@PR@.N              | 20.28  | 1.61   | 12.56 | 0.08 |
| Q8CG20_CHERP_MOUSE  | Cherp  | Calcium homeostasis enc K.M*GWSSGSLGAK#E                    | 6.43   | 2.84   | 2.27  | 0.44 |
| Q8CG20_CHERP_MOUSE  | Cherp  | Calcium homeostasis enc R.NGPEFEK#M                         | 26.81  | 8.95   | 2.99  | 0.33 |
| Q8BF9_CHM2B_MOUSE   | Chmp2b | Charged multivesicular b R.MAGAMSTTAK#TM*QAVNK#K            | 3.59   | 1.90   | 1.88  | 0.53 |
| Q9D8B3_CHM4B_MOUSE  | Chmp4b | Charged multivesicular b R.EALENANTNTVLK.N                  | 7.23   | 7.73   | 0.93  | 1.07 |
| Q9D759_CHMP5_MOUSE  | Chmp5  | Charged multivesicular b R.NKDGVLVDFGLPQIPAS.-              | 3.40   | 3.26   | 1.04  | 0.96 |
| POCOA3_CHMP6_MOUSE  | Chmp6  | Charged multivesicular b R.ILDETQEAVEYQR@.Q                 | 9.92   | 5.91   | 1.68  | 0.60 |

|                     |        |                          |                                  |       |       |       |      |
|---------------------|--------|--------------------------|----------------------------------|-------|-------|-------|------|
| P61022_CHP1_MOUSE   | Chp1   | Calcineurin B homolog    | R.EDFORPELAINPLGDR.I             | 18.77 | 11.09 | 1.69  | 0.59 |
| P61022_CHP1_MOUSE   | Chp1   | Calcineurin B homolog    | R.IINAFSEGEDQVNF@.G              | 20.08 | 13.74 | 1.46  | 0.68 |
| P61022_CHP1_MOUSE   | Chp1   | Calcineurin B homolog    | R.IPELAINPLGDR@.I                | 21.72 | 19.24 | 1.13  | 0.89 |
| P61022_CHP1_MOUSE   | Chp1   | Calcineurin B homolog    | R.M*VGVNISEDEQLGSIADR@.T         | 5.12  | 3.33  | 1.54  | 0.65 |
| P61022_CHP1_MOUSE   | Chp1   | Calcineurin B homolog    | R.TIQEADQDGSASFTEVVK#.V          | 10.19 | 5.35  | 1.91  | 0.52 |
| Q9JKP8_CHRC1_MOUSE  | Chrac1 | Chromatin accessibility  | c.K.SSPEVSSINQALVLTAK#.A         | 13.02 | 5.58  | 2.33  | 0.43 |
| Q8BIW9_CTF18_MOUSE  | Chtf18 | Chromosome transmissi    | R.K#GPGQADQGGTAVAGGR@.R          | 8.46  | 3.08  | 2.74  | 0.36 |
| Q8BIW9_CTF18_MOUSE  | Chtf18 | Chromosome transmissi    | R.VVQGLFDNFLR@.L                 | 20.04 | 2.43  | 8.24  | 0.12 |
| P0CG15_CTF8_MOUSE   | Chtf8  | Chromosome transmissi    | R.GTGTQYLVLTALIK#.N              | 18.34 | 6.56  | 2.80  | 0.36 |
| P0CG15_CTF8_MOUSE   | Chtf8  | Chromosome transmissi    | R.TR@PK#PIITNVPK#.K              | 19.23 | 7.74  | 2.49  | 0.40 |
| Q9CY57_CHTOP_MOUSE  | Chtop  | Chromatin target of PRM  | R.ASM*QQQQQLASAR@.N              | 48.86 | 31.46 | 1.55  | 0.64 |
| Q9CY57_CHTOP_MOUSE  | Chtop  | Chromatin target of PRM  | R.ASMQQQQQLASAR@.N               | 11.86 | 7.49  | 1.58  | 0.63 |
| Q9CY57_CHTOP_MOUSE  | Chtop  | Chromatin target of PRM  | R.EQLDNQLDAYM*SK#.T              | 52.09 | 28.16 | 1.85  | 0.54 |
| Q9CY57_CHTOP_MOUSE  | Chtop  | Chromatin target of PRM  | R.K.GHLDLDAELDAYM*ACQTDPETND.-   | 7.85  | 7.85  | 1.00  | 1.00 |
| Q9CY57_CHTOP_MOUSE  | Chtop  | Chromatin target of PRM  | R.TK#HGLDAELDAYM*ACQTDPETND.-    | 9.23  | 6.21  | 1.49  | 0.67 |
| Q9CY57_CHTOP_MOUSE  | Chtop  | Chromatin target of PRM  | R.ASMQQQQQLASAR@.N               | 2.18  | 1.49  | 1.46  | 0.68 |
| Q9CY57_CHTOP_MOUSE  | Chtop  | Chromatin target of PRM  | R.EQLDNQLDAYM*SK#.T              | 19.63 | 9.70  | 2.02  | 0.49 |
| Q9CY57_CHTOP_MOUSE  | Chtop  | Chromatin target of PRM  | R.TK#HGLDAELDAYM*ACQTDPETND.-    | 5.70  | 3.16  | 1.80  | 0.56 |
| P60824_CIRBP_MOUSE  | Cirbp  | Cold-inducible RNA-bind  | R.K.YGQVSEVVVK#.D                | 8.53  | 9.49  | 0.90  | 1.11 |
| Q8R2N2_CIR1A_MOUSE  | Cirh1a | Cirhin OS=Mus musculus   | R.K.IYK#PLLM*DLLDER@.T           | 12.14 | 5.79  | 2.10  | 0.48 |
| Q8R2N2_CIR1A_MOUSE  | Cirh1a | Cirhin OS=Mus musculus   | R.TDGTVEIYLNLSANYFQEK#.F         | 5.12  | 2.54  | 2.01  | 0.50 |
| Q8R2N2_CIR1A_MOUSE  | Cirh1a | Cirhin OS=Mus musculus   | R.K#MMLDR@.Q                     | 24.35 | 3.19  | 7.63  | 0.13 |
| Q3V1H1_CKAP2_MOUSE  | Ckap2  | Cytoskeleton-associated  | R.HIILDLTKR#.S                   | 9.31  | 8.62  | 1.08  | 0.93 |
| Q3V1H1_CKAP2_MOUSE  | Ckap2  | Cytoskeleton-associated  | R.IEPIITNVPK#.A                  | 10.08 | 7.18  | 1.41  | 0.71 |
| Q3V1H1_CKAP2_MOUSE  | Ckap2  | Cytoskeleton-associated  | R.AILAGAQPIEM*R#.H               | 8.35  | 2.35  | 3.55  | 0.28 |
| Q3V1H1_CKAP2_MOUSE  | Ckap2  | Cytoskeleton-associated  | R.AQSEPAINTVSVK#.A               | 8.40  | 2.16  | 3.90  | 0.26 |
| Q3V1H1_CKAP2_MOUSE  | Ckap2  | Cytoskeleton-associated  | R.IEPIITNVPK#.A                  | 5.80  | 3.80  | 1.53  | 0.66 |
| Q8BMK4_CKAP4_MOUSE  | Ckap4  | Cytoskeleton-associated  | R.LAM*LQEHVGNLGSDDLAVSTR@.S      | 5.52  | 3.42  | 1.61  | 0.62 |
| Q8BMK4_CKAP4_MOUSE  | Ckap4  | Cytoskeleton-associated  | R.DFTSLENTVEER@.L                | 6.65  | 7.46  | 0.89  | 1.12 |
| Q8BMK4_CKAP4_MOUSE  | Ckap4  | Cytoskeleton-associated  | R.GGHGAASPSDK#GAHPGSGADDAVAK#.K  | 4.72  | 3.76  | 1.26  | 0.80 |
| Q8BMK4_CKAP4_MOUSE  | Ckap4  | Cytoskeleton-associated  | R.HTESLESLSK#.S                  | 23.98 | 18.40 | 1.30  | 0.77 |
| Q8BMK4_CKAP4_MOUSE  | Ckap4  | Cytoskeleton-associated  | R.IETNENLESK#.G                  | 33.44 | 22.30 | 1.50  | 0.67 |
| Q8BMK4_CKAP4_MOUSE  | Ckap4  | Cytoskeleton-associated  | R.LALQALTEK#.L                   | 62.84 | 45.36 | 1.39  | 0.72 |
| Q8BMK4_CKAP4_MOUSE  | Ckap4  | Cytoskeleton-associated  | R.LAM*LQEHVGNLGSDDLAVSTR@.S      | 20.70 | 15.05 | 1.38  | 0.73 |
| Q8BMK4_CKAP4_MOUSE  | Ckap4  | Cytoskeleton-associated  | R.LQYVEDVYSVM*QVASAR@.H          | 9.29  | 8.07  | 1.15  | 0.87 |
| Q8BMK4_CKAP4_MOUSE  | Ckap4  | Cytoskeleton-associated  | R.QRDELGQGLQGVQEK.V              | 22.71 | 11.79 | 1.93  | 0.52 |
| Q8BMK4_CKAP4_MOUSE  | Ckap4  | Cytoskeleton-associated  | R.SSLQTM*ESDVYTEVR@.E            | 19.19 | 11.99 | 1.60  | 0.62 |
| Q8BMK4_CKAP4_MOUSE  | Ckap4  | Cytoskeleton-associated  | R.SSLQTMESDVYTEVR@.E             | 5.62  | 6.00  | 0.94  | 1.07 |
| Q8BMK4_CKAP4_MOUSE  | Ckap4  | Cytoskeleton-associated  | R.SSVSQVESLKM#.M                 | 41.09 | 21.26 | 1.93  | 0.52 |
| Q8BMK4_CKAP4_MOUSE  | Ckap4  | Cytoskeleton-associated  | R.KVGAHSGEEGAVFK#.D              | 36.60 | 32.07 | 1.14  | 0.88 |
| Q8BMK4_CKAP4_MOUSE  | Ckap4  | Cytoskeleton-associated  | R.VQSLQATFQTFESLLR@.N            | 24.53 | 20.53 | 1.19  | 0.84 |
| A2AGT5_CKAP5_MOUSE  | Ckap5  | Cytoskeleton-associated  | R.IEDLEEGQVIR@.S                 | 12.47 | 4.81  | 2.59  | 0.39 |
| A2AGT5_CKAP5_MOUSE  | Ckap5  | Cytoskeleton-associated  | R.LDDIFEPVLIPPK#.I               | 5.78  | 3.61  | 1.60  | 0.62 |
| A2AGT5_CKAP5_MOUSE  | Ckap5  | Cytoskeleton-associated  | R.EGLAELYEK#.K                   | 12.76 | 4.87  | 2.62  | 0.38 |
| A2AGT5_CKAP5_MOUSE  | Ckap5  | Cytoskeleton-associated  | R.IEDLEEGQVIR@.S                 | 26.41 | 7.65  | 3.45  | 0.29 |
| A2AGT5_CKAP5_MOUSE  | Ckap5  | Cytoskeleton-associated  | R.LDDIFEPVLIPPK#.I               | 12.13 | 5.67  | 2.14  | 0.47 |
| A2AGT5_CKAP5_MOUSE  | Ckap5  | Cytoskeleton-associated  | R.LLPDTINSINLDR@.I               | 28.70 | 11.02 | 2.60  | 0.38 |
| A2AGT5_CKAP5_MOUSE  | Ckap5  | Cytoskeleton-associated  | R.NSSQFFQSVYER@.G                | 15.68 | 5.36  | 2.92  | 0.34 |
| A2AGT5_CKAP5_MOUSE  | Ckap5  | Cytoskeleton-associated  | R.SVNLVVK#.V                     | 30.87 | 8.92  | 3.46  | 0.29 |
| A2AGT5_CKAP5_MOUSE  | Ckap5  | Cytoskeleton-associated  | R.DQVLAM*LEK#.A                  | 11.38 | 3.34  | 3.41  | 0.29 |
| A2AGT5_CKAP5_MOUSE  | Ckap5  | Cytoskeleton-associated  | R.EALEAVLVK#.N                   | 22.22 | 6.71  | 3.31  | 0.30 |
| A2AGT5_CKAP5_MOUSE  | Ckap5  | Cytoskeleton-associated  | R.EFQDLDEIENDQGTVR@.C            | 4.02  | 1.99  | 2.02  | 0.50 |
| A2AGT5_CKAP5_MOUSE  | Ckap5  | Cytoskeleton-associated  | R.EGLAELYEK#.K                   | 15.82 | 5.00  | 3.16  | 0.32 |
| A2AGT5_CKAP5_MOUSE  | Ckap5  | Cytoskeleton-associated  | R.EGLDEVAGINLEAK#.F              | 25.78 | 16.43 | 1.57  | 0.64 |
| A2AGT5_CKAP5_MOUSE  | Ckap5  | Cytoskeleton-associated  | R.FGQYAGHVVPITLTK#.F             | 29.94 | 11.53 | 2.60  | 0.39 |
| A2AGT5_CKAP5_MOUSE  | Ckap5  | Cytoskeleton-associated  | R.FIQPNIGELPTALK#.G              | 35.29 | 14.81 | 2.38  | 0.42 |
| A2AGT5_CKAP5_MOUSE  | Ckap5  | Cytoskeleton-associated  | R.GLEAALVYVENAHVAGK#.T           | 25.78 | 7.81  | 3.30  | 0.30 |
| A2AGT5_CKAP5_MOUSE  | Ckap5  | Cytoskeleton-associated  | R.HINDSAPEVR.D                   | 12.23 | 4.69  | 2.61  | 0.38 |
| A2AGT5_CKAP5_MOUSE  | Ckap5  | Cytoskeleton-associated  | R.HSTSADDEGEDGEEPEGGNDVDDLPR@.I  | 7.63  | 2.19  | 3.48  | 0.29 |
| A2AGT5_CKAP5_MOUSE  | Ckap5  | Cytoskeleton-associated  | R.IEDLEEGQVIR@.S                 | 33.44 | 11.70 | 2.86  | 0.35 |
| A2AGT5_CKAP5_MOUSE  | Ckap5  | Cytoskeleton-associated  | R.LDDIFEPVLIPPK#.I               | 33.14 | 16.34 | 2.03  | 0.49 |
| A2AGT5_CKAP5_MOUSE  | Ckap5  | Cytoskeleton-associated  | R.LEAGDYADLVK#.A                 | 21.83 | 8.08  | 2.70  | 0.37 |
| A2AGT5_CKAP5_MOUSE  | Ckap5  | Cytoskeleton-associated  | R.LFAIYR@.W                      | 12.63 | 3.27  | 3.86  | 0.26 |
| A2AGT5_CKAP5_MOUSE  | Ckap5  | Cytoskeleton-associated  | R.LLPDTINSINLDR@.I               | 38.04 | 15.74 | 2.42  | 0.41 |
| A2AGT5_CKAP5_MOUSE  | Ckap5  | Cytoskeleton-associated  | R.M*IFEDKHPALLSQDAEFQK#.M        | 15.69 | 5.95  | 2.64  | 0.38 |
| A2AGT5_CKAP5_MOUSE  | Ckap5  | Cytoskeleton-associated  | R.M*QGQSPAPPTR@.G                | 31.24 | 10.29 | 3.04  | 0.33 |
| A2AGT5_CKAP5_MOUSE  | Ckap5  | Cytoskeleton-associated  | R.NLGIPIVTLVGDQSK#.N             | 45.04 | 14.55 | 3.10  | 0.32 |
| A2AGT5_CKAP5_MOUSE  | Ckap5  | Cytoskeleton-associated  | R.NQSETLNWLSNAIK#.E              | 11.83 | 5.41  | 2.19  | 0.46 |
| A2AGT5_CKAP5_MOUSE  | Ckap5  | Cytoskeleton-associated  | R.NSSQFFQSVYER@.G                | 18.52 | 6.54  | 2.83  | 0.35 |
| A2AGT5_CKAP5_MOUSE  | Ckap5  | Cytoskeleton-associated  | R.SVNLVVK#.V                     | 29.75 | 11.61 | 2.56  | 0.39 |
| A2AGT5_CKAP5_MOUSE  | Ckap5  | Cytoskeleton-associated  | R.TALAATNPAVR@.T                 | 19.87 | 6.90  | 2.88  | 0.35 |
| A2AGT5_CKAP5_MOUSE  | Ckap5  | Cytoskeleton-associated  | R.TQINNSANM*LR@.K                | 15.78 | 3.63  | 4.35  | 0.23 |
| A2AGT5_CKAP5_MOUSE  | Ckap5  | Cytoskeleton-associated  | R.TSAQVLDGLVDK#.I                | 20.12 | 4.43  | 4.54  | 0.22 |
| A2AGT5_CKAP5_MOUSE  | Ckap5  | Cytoskeleton-associated  | R.VNDFLAEIF#.K                   | 7.61  | 1.58  | 4.81  | 0.21 |
| A2AGT5_CKAP5_MOUSE  | Ckap5  | Cytoskeleton-associated  | R.YSDTIEPFLK#.N                  | 19.24 | 9.58  | 2.01  | 0.50 |
| E9Q6L0_E9Q6L0_MOUSE | Clasp1 | CLIP-associating protein | R.AQITNSNSSSDVSTHS.-             | 1.96  | 1.96  | 1.00  | 1.00 |
| E9Q6L0_E9Q6L0_MOUSE | Clasp1 | CLIP-associating protein | R.EYNPYPYSDTINTYDK#.T            | 7.58  | 3.51  | 2.16  | 0.46 |
| E9Q6L0_E9Q6L0_MOUSE | Clasp1 | CLIP-associating protein | R.FIVDQTQTPNLK#.V                | 14.83 | 12.10 | 1.23  | 0.82 |
| E9Q6L0_E9Q6L0_MOUSE | Clasp1 | CLIP-associating protein | R.NSSNTGVGSPSNTIGR@.T            | 61.72 | 4.96  | 12.44 | 0.08 |
| E9Q6L0_E9Q6L0_MOUSE | Clasp1 | CLIP-associating protein | R.AQITNSNSSSDVSTHS.-             | 7.43  | 2.23  | 3.33  | 0.30 |
| E9Q6L0_E9Q6L0_MOUSE | Clasp1 | CLIP-associating protein | R.AQITNSNSSSDVSTHS.-             | 1.66  | 1.66  | 1.00  | 1.00 |
| E9Q6L0_E9Q6L0_MOUSE | Clasp1 | CLIP-associating protein | R.DSFPDQVFNILM*F                 | 11.73 | 4.83  | 2.43  | 0.41 |
| E9Q6L0_E9Q6L0_MOUSE | Clasp1 | CLIP-associating protein | R.DSFPDQVFNILM*F                 | 4.88  | 2.95  | 1.65  | 0.61 |
| E9Q6L0_E9Q6L0_MOUSE | Clasp1 | CLIP-associating protein | R.EYNPYPYSDTINTYDK#.T            | 5.11  | 2.56  | 1.99  | 0.50 |
| E9Q6L0_E9Q6L0_MOUSE | Clasp1 | CLIP-associating protein | R.FIVDQTQTPNLK#.V                | 18.84 | 11.05 | 1.71  | 0.59 |
| E9Q6L0_E9Q6L0_MOUSE | Clasp1 | CLIP-associating protein | R.IITWTPEPK#.S                   | 13.32 | 5.94  | 2.24  | 0.45 |
| E9Q6L0_E9Q6L0_MOUSE | Clasp1 | CLIP-associating protein | R.NSSNTGVGSPSNTIGR@.T            | 44.89 | 5.26  | 8.54  | 0.12 |
| E9Q6L0_E9Q6L0_MOUSE | Clasp1 | CLIP-associating protein | R.QM*DPDFVNSSETR@.L              | 4.64  | 3.05  | 1.52  | 0.66 |
| E9Q6L0_E9Q6L0_MOUSE | Clasp1 | CLIP-associating protein | R.AFDVVPVQYSSR@.D                | 4.94  | 2.73  | 1.81  | 0.55 |
| E9Q6L0_E9Q6L0_MOUSE | Clasp1 | CLIP-associating protein | R.AQITNSNSSSDVSTHS.-             | 17.23 | 4.92  | 3.50  | 0.29 |
| E9Q6L0_E9Q6L0_MOUSE | Clasp1 | CLIP-associating protein | R.DAANSLVBYR@.H                  | 7.98  | 3.09  | 2.59  | 0.39 |
| E9Q6L0_E9Q6L0_MOUSE | Clasp1 | CLIP-associating protein | R.DSFPDQVFNILM*F                 | 9.10  | 4.75  | 1.92  | 0.52 |
| E9Q6L0_E9Q6L0_MOUSE | Clasp1 | CLIP-associating protein | R.EGAGAVDEEDFIK#.A               | 7.70  | 3.44  | 2.24  | 0.45 |
| E9Q6L0_E9Q6L0_MOUSE | Clasp1 | CLIP-associating protein | R.FIVDQTQTPNLK#.V                | 18.75 | 7.26  | 2.58  | 0.39 |
| E9Q6L0_E9Q6L0_MOUSE | Clasp1 | CLIP-associating protein | R.IIM*ATSGVAVR@.L                | 6.65  | 5.85  | 1.14  | 0.88 |
| E9Q6L0_E9Q6L0_MOUSE | Clasp1 | CLIP-associating protein | R.LLGSGLAGSSDR@.G                | 14.16 | 4.08  | 3.47  | 0.29 |
| E9Q6L0_E9Q6L0_MOUSE | Clasp1 | CLIP-associating protein | R.NSDSIVSLPQSDR@.S               | 5.77  | 8.61  | 0.67  | 1.49 |
| E9Q6L0_E9Q6L0_MOUSE | Clasp1 | CLIP-associating protein | R.OSSGSTNVASTPDSR@.G             | 5.49  | 3.70  | 1.49  | 0.67 |
| E9Q6L0_E9Q6L0_MOUSE | Clasp1 | CLIP-associating protein | R.VVSQSPGSR@.S                   | 7.09  | 3.22  | 2.20  | 0.45 |
| Q8BRT1_CLAP2_MOUSE  | Clasp2 | CLIP-associating protein | R.AGGDAADGSGPALDNK#.A            | 18.30 | 4.05  | 4.52  | 0.22 |
| Q8BRT1_CLAP2_MOUSE  | Clasp2 | CLIP-associating protein | R.DYNPYNYSISPFNK#.S              | 4.09  | 2.06  | 1.98  | 0.50 |
| Q8BRT1_CLAP2_MOUSE  | Clasp2 | CLIP-associating protein | R.EAM*FDDADQFPDDLSDLSDHVAELLK#.E | 21.00 | 2.06  | 23.31 | 0.04 |
| Q8BRT1_CLAP2_MOUSE  | Clasp2 | CLIP-associating protein | R.FTVDDQTQTPSLK#.V               | 48.05 | 3.92  | 5.36  | 0.19 |

|                     |        |                            |                                   |        |       |      |      |
|---------------------|--------|----------------------------|-----------------------------------|--------|-------|------|------|
| Q8BRT1_CLAP2_MOUSE  | Clasp2 | CLIP-associating protein   | K.NYAELTVM*K#T                    | 9.44   | 2.91  | 3.24 | 0.31 |
| Q8BRT1_CLAP2_MOUSE  | Clasp2 | CLIP-associating protein   | R.SFOPLGPGVIGSQSSR@.L             | 6.83   | 2.94  | 2.32 | 0.43 |
| Q8BRT1_CLAP2_MOUSE  | Clasp2 | CLIP-associating protein   | K.AFTDVPVSVQIYSSR@.E              | 5.88   | 3.06  | 1.92 | 0.52 |
| Q8BRT1_CLAP2_MOUSE  | Clasp2 | CLIP-associating protein   | K.EGGAGAVDEDDFIK#.A               | 11.60  | 2.59  | 4.49 | 0.22 |
| Q8BRT1_CLAP2_MOUSE  | Clasp2 | CLIP-associating protein   | K.EGILLGLQNLK#.S                  | 23.27  | 12.19 | 1.91 | 0.52 |
| Q8BRT1_CLAP2_MOUSE  | Clasp2 | CLIP-associating protein   | R.FTVDQQTQPSLK#.V                 | 6.21   | 1.80  | 3.73 | 0.27 |
| Q8BRT1_CLAP2_MOUSE  | Clasp2 | CLIP-associating protein   | R.SFOPLGPGVIGSQSSR@.L             | 7.24   | 2.12  | 3.42 | 0.29 |
| Q8BRT1_CLAP2_MOUSE  | Clasp2 | CLIP-associating protein   | K.AFTDVPVSVQIYSSR@.E              | 6.49   | 2.12  | 3.07 | 0.33 |
| Q8BRT1_CLAP2_MOUSE  | Clasp2 | CLIP-associating protein   | K.EGGAGAVDEDDFIK#.A               | 11.99  | 4.05  | 2.96 | 0.34 |
| Q8BRT1_CLAP2_MOUSE  | Clasp2 | CLIP-associating protein   | K.EGILLGLQNLK#.S                  | 27.33  | 10.85 | 2.52 | 0.40 |
| Q8BRT1_CLAP2_MOUSE  | Clasp2 | CLIP-associating protein   | R.FTVDQQTQPSLK#.V                 | 11.95  | 2.00  | 5.97 | 0.17 |
| Q8BRT1_CLAP2_MOUSE  | Clasp2 | CLIP-associating protein   | K.SSGSVASLPQSDR@.S                | 8.71   | 3.93  | 2.22 | 0.45 |
| Q8CF7_CLASR_MOUSE   | Claspr | CLK4-associating serine/   | K.ASIGTYEDSTVAEVEK#.V             | 4.94   | 3.70  | 1.33 | 0.75 |
| Q8CF7_CLASR_MOUSE   | Claspr | CLK4-associating serine/   | K.QATTYGM*ADGDFVR@.M              | 6.09   | 3.54  | 1.72 | 0.58 |
| Q921Q5_CLIC1_MOUSE  | Clic1  | Chloride intracellular ch. | K.LAALNPESNTSLDIFAK#.F            | 3.61   | 3.76  | 0.96 | 1.04 |
| Q5SUH6_Q5SUH6_MOUSE | Clint1 | Clathrin interactor 1 OS=  | K.ATNVVM*NYSEISK#.V               | 8.87   | 7.87  | 1.13 | 0.89 |
| Q5SUH6_Q5SUH6_MOUSE | Clint1 | Clathrin interactor 1 OS=  | K.IGSTIDDTSK#.F                   | 23.67  | 17.16 | 1.38 | 0.72 |
| Q5SUH6_Q5SUH6_MOUSE | Clint1 | Clathrin interactor 1 OS=  | K.ATNVVM*NYSEISK#.V               | 15.74  | 6.53  | 2.41 | 0.41 |
| Q5SUH6_Q5SUH6_MOUSE | Clint1 | Clathrin interactor 1 OS=  | K.GEFK#DEEIVTTK#.H                | 10.76  | 6.30  | 1.71 | 0.59 |
| Q5SUH6_Q5SUH6_MOUSE | Clint1 | Clathrin interactor 1 OS=  | K.HIHITQATETTTTR@.H               | 6.15   | 4.46  | 1.38 | 0.73 |
| Q5SUH6_Q5SUH6_MOUSE | Clint1 | Clathrin interactor 1 OS=  | K.IGSTIDDTSK#.F                   | 27.85  | 13.32 | 2.09 | 0.48 |
| Q5SUH6_Q5SUH6_MOUSE | Clint1 | Clathrin interactor 1 OS=  | K.LGELSDK#IGSTIDDTSK#.F           | 13.24  | 7.03  | 1.88 | 0.53 |
| Q5SUH6_Q5SUH6_MOUSE | Clint1 | Clathrin interactor 1 OS=  | K.QDAFANFANFSK#.R                 | 12.34  | 7.31  | 1.69 | 0.59 |
| Q5SUH6_Q5SUH6_MOUSE | Clint1 | Clathrin interactor 1 OS=  | K.YVGVSSDVGGR@.Y                  | 22.93  | 9.95  | 2.30 | 0.43 |
| Q922J3_CLIP1_MOUSE  | Clip1  | CAP-Gly domain-contain     | K.ASGPSSSTQEEFVDFR@.V             | 4.12   | 2.17  | 1.90 | 0.53 |
| Q922J3_CLIP1_MOUSE  | Clip1  | CAP-Gly domain-contain     | K.ATSHVGEIEQELALAR@.D             | 16.80  | 4.28  | 3.93 | 0.25 |
| Q922J3_CLIP1_MOUSE  | Clip1  | CAP-Gly domain-contain     | R.DGHDQHVLELEAK#.M                | 9.46   | 3.97  | 2.38 | 0.42 |
| Q922J3_CLIP1_MOUSE  | Clip1  | CAP-Gly domain-contain     | K.ELVTGLQDLSLQNVQVK#.E            | 4.50   | 2.62  | 1.72 | 0.58 |
| Q922J3_CLIP1_MOUSE  | Clip1  | CAP-Gly domain-contain     | K.GIGTDSAEFAELK#.T                | 11.65  | 10.10 | 1.15 | 0.87 |
| Q922J3_CLIP1_MOUSE  | Clip1  | CAP-Gly domain-contain     | K.SQQLSAGEEAVK#.L                 | 9.84   | 2.26  | 4.34 | 0.23 |
| Q922J3_CLIP1_MOUSE  | Clip1  | CAP-Gly domain-contain     | K.TASESISNLSEAGSVK#.K             | 11.49  | 3.68  | 3.12 | 0.32 |
| Q922J3_CLIP1_MOUSE  | Clip1  | CAP-Gly domain-contain     | K.SQQLSAGEEAVK#.L                 | 9.16   | 3.08  | 2.97 | 0.34 |
| Q922J3_CLIP1_MOUSE  | Clip1  | CAP-Gly domain-contain     | K.TASESISNLSEAGSVK#.K             | 7.27   | 3.25  | 2.23 | 0.45 |
| Q35492_CLK3_MOUSE   | Clk3   | Dual specificity protein k | R.YEIVGNLGEFTGK#.V                | 8.08   | 3.51  | 2.30 | 0.44 |
| Q8C5W0_CLMN_MOUSE   | Clmn   | Calmin OS=Mus muscu        | R.FPELEPEDFVNPDK#HEAPIESTFVR@.J   | 4.35   | 1.51  | 2.88 | 0.35 |
| Q8C5W0_CLMN_MOUSE   | Clmn   | Calmin OS=Mus muscu        | R.FPELEPEDFVNPDK#HEAPIESTFVR@.J   | 14.50  | 5.00  | 2.90 | 0.34 |
| Q8C5W0_CLMN_MOUSE   | Clmn   | Calmin OS=Mus muscu        | R.FPELEPEDFVNPDK#HEAPIESTFVR@.J   | 4.95   | 2.15  | 2.30 | 0.43 |
| Q60649_CLPB_MOUSE   | Clpb   | Caseinolytic peptidase B   | R.IAENLGDVGM*SDDK#.I              | 4.42   | 1.90  | 2.33 | 0.43 |
| Q8VBZ3_CLPT1_MOUSE  | Ciptm1 | Cleft lip and palate trans | R.AQASTAAGALTPAPSTAVSGEDASTVPK#.A | 5.99   | 4.86  | 1.23 | 0.81 |
| Q8VBZ3_CLPT1_MOUSE  | Ciptm1 | Cleft lip and palate trans | R.AQASTAAGALTPAPSTAVSGEDASTVPK#.A | 5.49   | 1.88  | 2.92 | 0.34 |
| Q9JHS4_CLPX_MOUSE   | Clpx   | ATP-dependent Clp prote    | R.LDIEFGM*PEFVGR@.L               | 5.91   | 1.63  | 3.62 | 0.28 |
| Q9JHS4_CLPX_MOUSE   | Clpx   | ATP-dependent Clp prote    | K.LLEGTIVNPEK#.N                  | 11.98  | 9.75  | 1.23 | 0.81 |
| Q9JHS4_CLPX_MOUSE   | Clpx   | ATP-dependent Clp prote    | R.LPVVPLHSLDEK#.T                 | 10.91  | 4.87  | 2.24 | 0.45 |
| Q9JHS4_CLPX_MOUSE   | Clpx   | ATP-dependent Clp prote    | K.SNILLGPTGSGK#.T                 | 11.22  | 4.53  | 2.47 | 0.40 |
| Q9JHS4_CLPX_MOUSE   | Clpx   | ATP-dependent Clp prote    | K.TLVQLTEPR@.N                    | 11.61  | 3.33  | 5.03 | 0.20 |
| Q9JHS4_CLPX_MOUSE   | Clpx   | ATP-dependent Clp prote    | K.LLQDANYNVEK#.A                  | 5.45   | 1.16  | 4.71 | 0.21 |
| Q6PFA2_Q6PFA2_MOUSE | Clt    | Clathrin light chain A OS= | R.LEALDANSR@.K                    | 51.22  | 24.51 | 2.09 | 0.48 |
| Q6PFA2_Q6PFA2_MOUSE | Clt    | Clathrin light chain A OS= | R.AEEAFVNDIDESSPGTEWER.V          | 3.54   | 3.23  | 1.10 | 0.91 |
| Q6PFA2_Q6PFA2_MOUSE | Clt    | Clathrin light chain A OS= | R.LEALDANSR@.K                    | 7.69   | 8.87  | 0.87 | 1.15 |
| Q68FD5_CLH1_MOUSE   | Cltc   | Clathrin heavy chain 1 O=  | R.ALEHFTLDYDK#.R                  | 13.57  | 5.16  | 2.63 | 0.38 |
| Q68FD5_CLH1_MOUSE   | Cltc   | Clathrin heavy chain 1 O=  | R.ESVYVTELFALAK#.T                | 16.13  | 4.07  | 3.96 | 0.25 |
| Q68FD5_CLH1_MOUSE   | Cltc   | Clathrin heavy chain 1 O=  | K.HDVVFLITK#.Y                    | 15.29  | 7.15  | 2.14 | 0.47 |
| Q68FD5_CLH1_MOUSE   | Cltc   | Clathrin heavy chain 1 O=  | K.HELIEFR@.R                      | 15.74  | 3.74  | 4.21 | 0.24 |
| Q68FD5_CLH1_MOUSE   | Cltc   | Clathrin heavy chain 1 O=  | R.ISGETFVTPHATAGIIGVNR@.K         | 34.65  | 9.91  | 3.50 | 0.29 |
| Q68FD5_CLH1_MOUSE   | Cltc   | Clathrin heavy chain 1 O=  | K.IYIDSNNNPER@.F                  | 16.32  | 5.12  | 3.19 | 0.31 |
| Q68FD5_CLH1_MOUSE   | Cltc   | Clathrin heavy chain 1 O=  | R.K#FDVNTSAVQVLIHIGNLDR@.A        | 20.92  | 6.61  | 3.16 | 0.32 |
| Q68FD5_CLH1_MOUSE   | Cltc   | Clathrin heavy chain 1 O=  | K.#VGYTPDWIFLLR@.N                | 19.02  | 4.24  | 4.49 | 0.22 |
| Q68FD5_CLH1_MOUSE   | Cltc   | Clathrin heavy chain 1 O=  | R.LAELEEFINGPNNAIHQVGDGR@.C       | 7.26   | 2.32  | 3.13 | 0.32 |
| Q68FD5_CLH1_MOUSE   | Cltc   | Clathrin heavy chain 1 O=  | K.LLLPWLEAR.I                     | 8.78   | 12.27 | 4.55 | 0.22 |
| Q68FD5_CLH1_MOUSE   | Cltc   | Clathrin heavy chain 1 O=  | K.LLYNNVSNFGR@.L                  | 22.35  | 39.12 | 0.57 | 1.75 |
| Q68FD5_CLH1_MOUSE   | Cltc   | Clathrin heavy chain 1 O=  | R.NLQNLLLITAK#.A                  | 32.41  | 6.46  | 5.02 | 0.20 |
| Q68FD5_CLH1_MOUSE   | Cltc   | Clathrin heavy chain 1 O=  | R.NNLGAEELFAR@.K                  | 27.47  | 6.11  | 4.49 | 0.22 |
| Q68FD5_CLH1_MOUSE   | Cltc   | Clathrin heavy chain 1 O=  | R.R@PLIDQVQTALSETQDPEEVSVTK#.A    | 19.46  | 3.72  | 4.02 | 0.25 |
| Q68FD5_CLH1_MOUSE   | Cltc   | Clathrin heavy chain 1 O=  | K.SVNESLNNLITTEEDYQALR@.T         | 14.47  | 4.78  | 3.02 | 0.33 |
| Q68FD5_CLH1_MOUSE   | Cltc   | Clathrin heavy chain 1 O=  | K.TLQFNIEF#K#.S                   | 12.35  | 5.11  | 2.42 | 0.41 |
| Q68FD5_CLH1_MOUSE   | Cltc   | Clathrin heavy chain 1 O=  | R.TSIDAYDNFDNISLAQR@.L            | 15.29  | 4.43  | 3.45 | 0.29 |
| Q68FD5_CLH1_MOUSE   | Cltc   | Clathrin heavy chain 1 O=  | K.VANVELYK#.A                     | 16.84  | 4.68  | 3.60 | 0.28 |
| Q68FD5_CLH1_MOUSE   | Cltc   | Clathrin heavy chain 1 O=  | K.VGYTPDWIFLLR@.N                 | 13.74  | 4.94  | 2.78 | 0.36 |
| Q68FD5_CLH1_MOUSE   | Cltc   | Clathrin heavy chain 1 O=  | K.WLLTGISAQNR@.F                  | 8.27   | 2.01  | 4.12 | 0.24 |
| Q68FD5_CLH1_MOUSE   | Cltc   | Clathrin heavy chain 1 O=  | R.AHM*GM*FTELALYSK#.F             | 47.19  | 30.52 | 1.55 | 0.65 |
| Q68FD5_CLH1_MOUSE   | Cltc   | Clathrin heavy chain 1 O=  | R.ALEHFTLDYDK#.R                  | 33.56  | 14.07 | 2.39 | 0.42 |
| Q68FD5_CLH1_MOUSE   | Cltc   | Clathrin heavy chain 1 O=  | R.ALEHFTLDYDK#.R                  | 32.97  | 11.86 | 2.78 | 0.36 |
| Q68FD5_CLH1_MOUSE   | Cltc   | Clathrin heavy chain 1 O=  | R.AVNVFSK#.V                      | 33.85  | 17.64 | 1.92 | 0.52 |
| Q68FD5_CLH1_MOUSE   | Cltc   | Clathrin heavy chain 1 O=  | R.AYEAER@.C                       | 45.26  | 17.47 | 2.59 | 0.39 |
| Q68FD5_CLH1_MOUSE   | Cltc   | Clathrin heavy chain 1 O=  | K.DAM*QVASEK#.D                   | 13.91  | 5.34  | 2.60 | 0.38 |
| Q68FD5_CLH1_MOUSE   | Cltc   | Clathrin heavy chain 1 O=  | R.ESVYVTELFALAK#.T                | 33.72  | 14.05 | 2.40 | 0.42 |
| Q68FD5_CLH1_MOUSE   | Cltc   | Clathrin heavy chain 1 O=  | K.FDVNTSAVQVLIHIGNLDR@.A          | 18.07  | 7.83  | 2.31 | 0.43 |
| Q68FD5_CLH1_MOUSE   | Cltc   | Clathrin heavy chain 1 O=  | K.FNALFAQGNYSAAK#.V               | 15.61  | 8.07  | 1.93 | 0.52 |
| Q68FD5_CLH1_MOUSE   | Cltc   | Clathrin heavy chain 1 O=  | R.GQFSTDELVAEVEK#.R               | 16.18  | 9.58  | 1.69 | 0.59 |
| Q68FD5_CLH1_MOUSE   | Cltc   | Clathrin heavy chain 1 O=  | K.HDVVFLITK#.Y                    | 57.40  | 26.79 | 2.14 | 0.47 |
| Q68FD5_CLH1_MOUSE   | Cltc   | Clathrin heavy chain 1 O=  | R.HNIM*DFAM*PYFIQVMK#.E           | 6.36   | 2.77  | 2.30 | 0.43 |
| Q68FD5_CLH1_MOUSE   | Cltc   | Clathrin heavy chain 1 O=  | R.ISGETFVTPHATAGIIGVNR@.K         | 121.97 | 62.08 | 1.96 | 0.51 |
| Q68FD5_CLH1_MOUSE   | Cltc   | Clathrin heavy chain 1 O=  | K.IYIDSNNNPER@.F                  | 81.80  | 33.91 | 2.41 | 0.41 |
| Q68FD5_CLH1_MOUSE   | Cltc   | Clathrin heavy chain 1 O=  | K.KAVDVFPFAQNFPPVAM*QISEK.H       | 7.52   | 4.55  | 1.65 | 0.60 |
| Q68FD5_CLH1_MOUSE   | Cltc   | Clathrin heavy chain 1 O=  | R.KHDPVLEHGSVLLSNPYR@.R           | 11.96  | 9.47  | 1.26 | 0.79 |
| Q68FD5_CLH1_MOUSE   | Cltc   | Clathrin heavy chain 1 O=  | R.K#FDVNTSAVQVLIHIGNLDR@.A        | 24.16  | 9.50  | 2.54 | 0.39 |
| Q68FD5_CLH1_MOUSE   | Cltc   | Clathrin heavy chain 1 O=  | R.K#FDVNTSAVQVLIHIGNLDR.A         | 22.39  | 12.78 | 1.75 | 0.57 |
| Q68FD5_CLH1_MOUSE   | Cltc   | Clathrin heavy chain 1 O=  | R.K#FNALFAQGNYSAAK#.V             | 47.22  | 16.45 | 2.87 | 0.35 |
| Q68FD5_CLH1_MOUSE   | Cltc   | Clathrin heavy chain 1 O=  | K.#VGYTPDWIFLLR@.N                | 25.83  | 14.65 | 1.76 | 0.57 |
| Q68FD5_CLH1_MOUSE   | Cltc   | Clathrin heavy chain 1 O=  | R.K#VSOIEGHAAFAQFK#.M             | 16.18  | 11.77 | 1.15 | 0.87 |
| Q68FD5_CLH1_MOUSE   | Cltc   | Clathrin heavy chain 1 O=  | R.LASTLVHLEGEQAAVDGAR@.K          | 150.04 | 53.37 | 2.81 | 0.36 |
| Q68FD5_CLH1_MOUSE   | Cltc   | Clathrin heavy chain 1 O=  | R.LEK#HELIEFR@.R                  | 22.42  | 6.91  | 3.25 | 0.31 |
| Q68FD5_CLH1_MOUSE   | Cltc   | Clathrin heavy chain 1 O=  | K.LLLPWLEAR@.I                    | 153.93 | 70.29 | 2.19 | 0.46 |
| Q68FD5_CLH1_MOUSE   | Cltc   | Clathrin heavy chain 1 O=  | K.LLYNNVSNFGR@.L                  | 94.50  | 32.64 | 2.90 | 0.35 |
| Q68FD5_CLH1_MOUSE   | Cltc   | Clathrin heavy chain 1 O=  | K.NLILVWR@.G                      | 46.50  | 17.97 | 2.59 | 0.39 |
| Q68FD5_CLH1_MOUSE   | Cltc   | Clathrin heavy chain 1 O=  | R.NLQNLLLITAK#.A                  | 123.79 | 51.25 | 2.42 | 0.41 |
| Q68FD5_CLH1_MOUSE   | Cltc   | Clathrin heavy chain 1 O=  | R.NNLGAEELFAR@.K                  | 76.73  | 33.70 | 2.28 | 0.44 |
| Q68FD5_CLH1_MOUSE   | Cltc   | Clathrin heavy chain 1 O=  | K.NNRPSEGLQTR.L                   | 43.23  | 20.67 | 2.09 | 0.48 |
| Q68FD5_CLH1_MOUSE   | Cltc   | Clathrin heavy chain 1 O=  | K.NNR@PSEGLQTR@.L                 | 3.77   | 3.59  | 1.05 | 0.95 |
| Q68FD5_CLH1_MOUSE   | Cltc   | Clathrin heavy chain 1 O=  | R.R@PISADSAIM*NPASK#.V            | 42.60  | 19.07 | 2.23 | 0.45 |
| Q68FD5_CLH1_MOUSE   | Cltc   | Clathrin heavy chain 1 O=  | R.R@PLIDQVQTALSETQDPEEVSVTK#.A    | 58.82  | 28.08 | 2.09 | 0.48 |
| Q68FD5_CLH1_MOUSE   | Cltc   | Clathrin heavy chain 1 O=  | R.R@PLIDQVQTALSETQDPEEVSVTK#.A    | 9.03   | 5.16  | 1.75 | 0.57 |
| Q68FD5_CLH1_MOUSE   | Cltc   | Clathrin heavy chain 1 O=  | K.SVDPDTLALSYYLR.A                | 33.22  | 15.21 | 2.18 | 0.46 |

|                    |        |                                                                       |        |       |      |      |
|--------------------|--------|-----------------------------------------------------------------------|--------|-------|------|------|
| Q68FD5_CLH1_MOUSE  | Cltc   | Clathrin heavy chain 1 O: K.SVNESLNNLFITEEDYQALR@.T                   | 82.36  | 28.92 | 2.85 | 0.35 |
| Q68FD5_CLH1_MOUSE  | Cltc   | Clathrin heavy chain 1 O: K.SVNESLNNLFITEEDYQALR.T                    | 20.82  | 9.67  | 2.15 | 0.46 |
| Q68FD5_CLH1_MOUSE  | Cltc   | Clathrin heavy chain 1 O: K.TLQJFNIEF*K#S                             | 56.48  | 20.08 | 2.81 | 0.36 |
| Q68FD5_CLH1_MOUSE  | Cltc   | Clathrin heavy chain 1 O: R.TSIDAYDNFDNISLAQR@.L                      | 50.15  | 19.40 | 2.59 | 0.39 |
| Q68FD5_CLH1_MOUSE  | Cltc   | Clathrin heavy chain 1 O: K.VANVELYK#A                                | 72.41  | 31.66 | 2.29 | 0.44 |
| Q68FD5_CLH1_MOUSE  | Cltc   | Clathrin heavy chain 1 O: K.VDKLDASELR.K                              | 32.10  | 12.37 | 2.60 | 0.39 |
| Q68FD5_CLH1_MOUSE  | Cltc   | Clathrin heavy chain 1 O: K.VGEGAAQVVIDM*NDPSNPJR                     | 7.30   | 5.72  | 1.28 | 0.78 |
| Q68FD5_CLH1_MOUSE  | Cltc   | Clathrin heavy chain 1 O: K.VGYTPDWIFLLR@.N                           | 40.90  | 20.86 | 1.96 | 0.51 |
| Q68FD5_CLH1_MOUSE  | Cltc   | Clathrin heavy chain 1 O: R.VM*EYINR@.L                               | 36.15  | 16.63 | 2.17 | 0.46 |
| Q68FD5_CLH1_MOUSE  | Cltc   | Clathrin heavy chain 1 O: K.VSQPIEGHAASFAQFK#M                        | 36.15  | 27.83 | 2.56 | 0.39 |
| Q68FD5_CLH1_MOUSE  | Cltc   | Clathrin heavy chain 1 O: R.VVGAM*QYVSVDL@.K                          | 20.67  | 19.09 | 1.08 | 0.92 |
| Q68FD5_CLH1_MOUSE  | Cltc   | Clathrin heavy chain 1 O: K.LWLLTGLISGPDQK#G                          | 32.27  | 15.69 | 2.06 | 0.49 |
| Q9D1A2_CNDP2_MOUSE | Cndp2  | Cytosolic non-specific dij K.AVFQYIDENQDR@.Y                          | 4.64   | 1.65  | 2.81 | 0.36 |
| Q08093_CNN2_MOUSE  | Cnn2   | Calponin-2 OS=Mus musc K.GLQSGVDIGVK#Y                                | 232.83 | 54.95 | 4.24 | 0.24 |
| Q08093_CNN2_MOUSE  | Cnn2   | Calponin-2 OS=Mus musc K.GPSYGLSAEVK#N                                | 237.12 | 76.37 | 3.10 | 0.32 |
| Q08093_CNN2_MOUSE  | Cnn2   | Calponin-2 OS=Mus musc R.NFDDATM*K#A                                  | 49.86  | 17.48 | 2.85 | 0.35 |
| Q08093_CNN2_MOUSE  | Cnn2   | Calponin-2 OS=Mus musc R.SM*QNVWHQLENLNFJK#A                          | 66.89  | 18.06 | 3.70 | 0.27 |
| Q08093_CNN2_MOUSE  | Cnn2   | Calponin-2 OS=Mus musc R.SM*QNVWHQLENLNFJK#A                          | 6.24   | 1.81  | 3.44 | 0.29 |
| Q08093_CNN2_MOUSE  | Cnn2   | Calponin-2 OS=Mus musc R.SWIEGLTGLISGPDQK#G                           | 159.67 | 37.26 | 4.29 | 0.23 |
| Q08093_CNN2_MOUSE  | Cnn2   | Calponin-2 OS=Mus musc K.GLQSGVDIGVK#Y                                | 50.19  | 22.92 | 2.19 | 0.46 |
| Q08093_CNN2_MOUSE  | Cnn2   | Calponin-2 OS=Mus musc K.GPSYGLSAEVK#N                                | 41.64  | 17.50 | 2.38 | 0.42 |
| Q08093_CNN2_MOUSE  | Cnn2   | Calponin-2 OS=Mus musc R.SM*QNVWHQLENLNFJK#A                          | 48.65  | 22.28 | 2.18 | 0.46 |
| Q08093_CNN2_MOUSE  | Cnn2   | Calponin-2 OS=Mus musc R.SWIEGLTGLISGPDQK#G                           | 55.01  | 26.41 | 2.08 | 0.48 |
| Q08093_CNN2_MOUSE  | Cnn2   | Calponin-2 OS=Mus musc K.YDPQKFEALR@.S                                | 14.84  | 5.51  | 2.69 | 0.37 |
| Q08093_CNN2_MOUSE  | Cnn2   | Calponin-2 OS=Mus musc R.SWIEGLTGLISGPDQK#G                           | 10.16  | 3.89  | 2.61 | 0.38 |
| Q9DAW9_CNN3_MOUSE  | Cnn3   | Calponin-3 OS=Mus musc K.AGQSVIGLQM*GTNK#.C                           | 38.18  | 13.43 | 2.84 | 0.35 |
| Q9DAW9_CNN3_MOUSE  | Cnn3   | Calponin-3 OS=Mus musc K.GASQAGMLAPGTR@.R                             | 11.09  | 2.97  | 3.73 | 0.27 |
| Q9DAW9_CNN3_MOUSE  | Cnn3   | Calponin-3 OS=Mus musc K.GASQAGM*LAGTR@.R                             | 129.35 | 36.76 | 3.52 | 0.28 |
| Q9DAW9_CNN3_MOUSE  | Cnn3   | Calponin-3 OS=Mus musc K.GM*SVYGLGR@.Q                                | 87.34  | 24.52 | 3.56 | 0.28 |
| Q9DAW9_CNN3_MOUSE  | Cnn3   | Calponin-3 OS=Mus musc K.KHVNESLNNWPLENIGNFIK#A                       | 18.33  | 6.37  | 2.88 | 0.35 |
| Q9DAW9_CNN3_MOUSE  | Cnn3   | Calponin-3 OS=Mus musc K.LTLQPVNSTISLQM*GTNK#.V                       | 15.03  | 3.42  | 4.39 | 0.23 |
| Q9DAW9_CNN3_MOUSE  | Cnn3   | Calponin-3 OS=Mus musc K.M*QTDKPFQDQTTISLQM*GTNK.G                    | 36.07  | 12.22 | 3.02 | 0.33 |
| Q9DAW9_CNN3_MOUSE  | Cnn3   | Calponin-3 OS=Mus musc K.MQTDKPFQDQTTISLQM*GTNK#.G                    | 3.71   | 2.02  | 1.84 | 0.54 |
| Q9DAW9_CNN3_MOUSE  | Cnn3   | Calponin-3 OS=Mus musc K.VNNESSLNNWPLENIGNFIK#A                       | 15.14  | 4.82  | 3.14 | 0.32 |
| Q9DAW9_CNN3_MOUSE  | Cnn3   | Calponin-3 OS=Mus musc K.VNNESSLNNWPLENIGNFIK#A                       | 27.96  | 9.02  | 3.10 | 0.32 |
| Q9DAW9_CNN3_MOUSE  | Cnn3   | Calponin-3 OS=Mus musc K.YDQAEEDLR@.N                                 | 28.43  | 6.95  | 4.09 | 0.24 |
| Q9DAW9_CNN3_MOUSE  | Cnn3   | Calponin-3 OS=Mus musc K.AGQSVIGLQM*GTNK#.C                           | 9.29   | 4.35  | 2.13 | 0.47 |
| Q9DAW9_CNN3_MOUSE  | Cnn3   | Calponin-3 OS=Mus musc K.GM*SVYGLGR@.Q                                | 5.77   | 4.59  | 1.26 | 0.79 |
| Q9DAW9_CNN3_MOUSE  | Cnn3   | Calponin-3 OS=Mus musc K.LTLQPVNSTISLQM*GTNK#.V                       | 3.72   | 3.41  | 1.09 | 0.92 |
| Q6ZQ08_CN0T1_MOUSE | Cnot1  | CCR4-NOT transcription R.LAEVQGEQVK#Q                                 | 13.42  | 2.67  | 5.03 | 0.20 |
| Q6ZQ08_CN0T1_MOUSE | Cnot1  | CCR4-NOT transcription R.SLDLIESLLR@.L                                | 12.03  | 4.72  | 2.55 | 0.39 |
| Q6ZQ08_CN0T1_MOUSE | Cnot1  | CCR4-NOT transcription K.GAFQVGEQDQFALK#.T                            | 10.48  | 3.31  | 3.17 | 0.32 |
| Q6ZQ08_CN0T1_MOUSE | Cnot1  | CCR4-NOT transcription R.IVEPPENIQEK#I                                | 6.95   | 1.30  | 5.36 | 0.19 |
| Q6ZQ08_CN0T1_MOUSE | Cnot1  | CCR4-NOT transcription R.LAEVQGEQVK#Q                                 | 18.37  | 7.55  | 2.43 | 0.41 |
| Q6ZQ08_CN0T1_MOUSE | Cnot1  | CCR4-NOT transcription R.SLDLIESLLR@.L                                | 23.94  | 9.59  | 2.50 | 0.40 |
| Q6ZQ08_CN0T1_MOUSE | Cnot1  | CCR4-NOT transcription R.SLLEVVLSR@.N                                 | 8.27   | 1.34  | 6.17 | 0.16 |
| Q6ZQ08_CN0T1_MOUSE | Cnot1  | CCR4-NOT transcription R.AQAEQHNPAANPTM*IR@.A                         | 9.47   | 9.28  | 3.18 | 0.31 |
| Q6ZQ08_CN0T1_MOUSE | Cnot1  | CCR4-NOT transcription K.AVEGLLDATSGADALLR@.Y                         | 42.59  | 10.43 | 4.08 | 0.24 |
| Q6ZQ08_CN0T1_MOUSE | Cnot1  | CCR4-NOT transcription R.DAIAALGLLQK#A                                | 43.22  | 9.69  | 4.46 | 0.22 |
| Q6ZQ08_CN0T1_MOUSE | Cnot1  | CCR4-NOT transcription K.DVPPSINTNTDITLLVATDQTER@.I                   | 23.04  | 4.93  | 4.68 | 0.21 |
| Q6ZQ08_CN0T1_MOUSE | Cnot1  | CCR4-NOT transcription K.EIDDEANSYFQR@.I                              | 34.52  | 7.31  | 4.72 | 0.21 |
| Q6ZQ08_CN0T1_MOUSE | Cnot1  | CCR4-NOT transcription K.ELNPSLNF#E                                   | 22.99  | 5.60  | 4.11 | 0.24 |
| Q6ZQ08_CN0T1_MOUSE | Cnot1  | CCR4-NOT transcription K.GLHNVVYQIR@.G                                | 20.04  | 4.96  | 4.04 | 0.25 |
| Q6ZQ08_CN0T1_MOUSE | Cnot1  | CCR4-NOT transcription K.GQJELLYVYVPAK#V                              | 56.55  | 10.90 | 5.19 | 0.19 |
| Q6ZQ08_CN0T1_MOUSE | Cnot1  | CCR4-NOT transcription K.GSTPSM*STITHSAHM*DFQNLAVLDTEGR@.Y            | 10.66  | 4.23  | 3.46 | 0.29 |
| Q6ZQ08_CN0T1_MOUSE | Cnot1  | CCR4-NOT transcription K.IAFIFNLSQSNM*TOQ#V                           | 24.62  | 4.65  | 4.43 | 0.23 |
| Q6ZQ08_CN0T1_MOUSE | Cnot1  | CCR4-NOT transcription R.IVEPPENIQEK#I                                | 55.20  | 14.07 | 3.92 | 0.25 |
| Q6ZQ08_CN0T1_MOUSE | Cnot1  | CCR4-NOT transcription R.KHDFALDESESR@.M                              | 19.29  | 4.49  | 4.29 | 0.23 |
| Q6ZQ08_CN0T1_MOUSE | Cnot1  | CCR4-NOT transcription K.KHDPVPSINTNTDITLLVATDQTER@.I                 | 4.79   | 2.13  | 2.25 | 0.44 |
| Q6ZQ08_CN0T1_MOUSE | Cnot1  | CCR4-NOT transcription R.LAEVQGEQVK#Q                                 | 43.04  | 12.53 | 3.43 | 0.29 |
| Q6ZQ08_CN0T1_MOUSE | Cnot1  | CCR4-NOT transcription R.LATEFELR@.K                                  | 15.49  | 4.99  | 3.11 | 0.32 |
| Q6ZQ08_CN0T1_MOUSE | Cnot1  | CCR4-NOT transcription K.LGTSGLNQPTFQSK#M                             | 15.13  | 2.77  | 5.46 | 0.18 |
| Q6ZQ08_CN0T1_MOUSE | Cnot1  | CCR4-NOT transcription R.LIALLVK#H                                    | 24.14  | 5.98  | 4.04 | 0.25 |
| Q6ZQ08_CN0T1_MOUSE | Cnot1  | CCR4-NOT transcription R.LK#NLDLQSLAPK#K                              | 11.31  | 1.56  | 7.24 | 0.14 |
| Q6ZQ08_CN0T1_MOUSE | Cnot1  | CCR4-NOT transcription R.LPDPFTPLK#V                                  | 33.04  | 10.05 | 3.29 | 0.30 |
| Q6ZQ08_CN0T1_MOUSE | Cnot1  | CCR4-NOT transcription K.M*QGSITPFGSIALQAQAQVPAK#A                    | 35.22  | 8.14  | 4.33 | 0.23 |
| Q6ZQ08_CN0T1_MOUSE | Cnot1  | CCR4-NOT transcription K.M*VLNETYR@.N                                 | 35.85  | 9.80  | 3.66 | 0.27 |
| Q6ZQ08_CN0T1_MOUSE | Cnot1  | CCR4-NOT transcription K.M*YFYGIALDR@.F                               | 18.99  | 5.72  | 3.32 | 0.30 |
| Q6ZQ08_CN0T1_MOUSE | Cnot1  | CCR4-NOT transcription R.NIIM*QFVGR@.E                                | 16.57  | 5.80  | 2.86 | 0.35 |
| Q6ZQ08_CN0T1_MOUSE | Cnot1  | CCR4-NOT transcription K.NLDEQLSAPK#K                                 | 42.30  | 20.57 | 2.06 | 0.49 |
| Q6ZQ08_CN0T1_MOUSE | Cnot1  | CCR4-NOT transcription R.NLFEYR@.F                                    | 29.63  | 6.01  | 4.93 | 0.20 |
| Q6ZQ08_CN0T1_MOUSE | Cnot1  | CCR4-NOT transcription R.NLISAFPR@.N                                  | 67.02  | 21.34 | 3.14 | 0.32 |
| Q6ZQ08_CN0T1_MOUSE | Cnot1  | CCR4-NOT transcription K.NSFASALR@.T                                  | 28.61  | 8.20  | 3.49 | 0.29 |
| Q6ZQ08_CN0T1_MOUSE | Cnot1  | CCR4-NOT transcription R.NVPFLPTNDLSQPTGFQAQM*K#Q                     | 40.79  | 13.20 | 3.09 | 0.32 |
| Q6ZQ08_CN0T1_MOUSE | Cnot1  | CCR4-NOT transcription K.SLDLIESLLR@.L                                | 129.63 | 37.15 | 3.49 | 0.29 |
| Q6ZQ08_CN0T1_MOUSE | Cnot1  | CCR4-NOT transcription R.SLLEVVLSR@.N                                 | 53.48  | 12.61 | 4.24 | 0.24 |
| Q6ZQ08_CN0T1_MOUSE | Cnot1  | CCR4-NOT transcription K.SLLEAVYK#G                                   | 32.57  | 7.62  | 4.27 | 0.23 |
| Q6ZQ08_CN0T1_MOUSE | Cnot1  | CCR4-NOT transcription R.SNLQVSNPEGNR@.Y                              | 18.32  | 6.71  | 2.73 | 0.37 |
| Q6ZQ08_CN0T1_MOUSE | Cnot1  | CCR4-NOT transcription R.SNYEAM*IDR@.A                                | 26.41  | 7.03  | 3.76 | 0.27 |
| Q6ZQ08_CN0T1_MOUSE | Cnot1  | CCR4-NOT transcription R.SPVFSLDLR@.S                                 | 84.18  | 20.32 | 4.14 | 0.24 |
| Q6ZQ08_CN0T1_MOUSE | Cnot1  | CCR4-NOT transcription R.SVAHTEADLFHTIETLM*R@.I                       | 34.99  | 4.86  | 7.20 | 0.14 |
| Q6ZQ08_CN0T1_MOUSE | Cnot1  | CCR4-NOT transcription R.SVAHTEADLFHTIETLM*R@.I                       | 15.51  | 7.03  | 2.21 | 0.45 |
| Q6ZQ08_CN0T1_MOUSE | Cnot1  | CCR4-NOT transcription K.VQEVIFGLALLNSSPDLR@.G                        | 5.11   | 1.37  | 3.71 | 0.27 |
| Q6ZQ08_CN0T1_MOUSE | Cnot1  | CCR4-NOT transcription R.VSIEPNFHSYLNFDLTK#N                          | 13.46  | 3.91  | 3.44 | 0.29 |
| Q6ZQ08_CN0T1_MOUSE | Cnot1  | CCR4-NOT transcription K.YLAPFLR@.N                                   | 15.38  | 7.31  | 2.10 | 0.48 |
| Q6ZQ08_CN0T1_MOUSE | Cnot1  | CCR4-NOT transcription R.YLFLNAIANQLR@.Y                              | 50.40  | 11.73 | 4.30 | 0.23 |
| Q6ZQ08_CN0T1_MOUSE | Cnot1  | CCR4-NOT transcription K.YNVEAVELIR.N                                 | 26.80  | 6.25  | 4.29 | 0.23 |
| Q8BH15_CN010_MOUSE | Cnot10 | CCR4-NOT transcription K.IILNTVAEYK#N                                 | 41.14  | 16.16 | 2.55 | 0.39 |
| Q8BH15_CN010_MOUSE | Cnot10 | CCR4-NOT transcription K.LYQFIEPFEK#F                                 | 7.98   | 2.30  | 3.46 | 0.29 |
| Q8BH15_CN010_MOUSE | Cnot10 | CCR4-NOT transcription R.QYTEAISVGEK#L                                | 5.80   | 4.80  | 1.21 | 0.83 |
| Q8BH15_CN010_MOUSE | Cnot10 | CCR4-NOT transcription K.FLGHLYAAEALISLDR@.I                          | 7.64   | 2.37  | 3.22 | 0.31 |
| Q8BH15_CN010_MOUSE | Cnot10 | CCR4-NOT transcription K.IILNTVAEYK#N                                 | 50.53  | 9.25  | 5.46 | 0.18 |
| Q8BH15_CN010_MOUSE | Cnot10 | CCR4-NOT transcription R.ISDAITHLNPENVTDLVSLGSEQDQGSDK#GENEAM*ESSGK#R | 4.74   | 2.23  | 2.13 | 0.47 |
| Q8BH15_CN010_MOUSE | Cnot10 | CCR4-NOT transcription K.TVFPVPHIQIQM*PAFTVQR@.K                      | 4.13   | 2.04  | 2.03 | 0.49 |
| Q8BH15_CN010_MOUSE | Cnot10 | CCR4-NOT transcription K.AESAALIAEAK#S                                | 18.07  | 3.58  | 5.05 | 0.20 |
| Q8BH15_CN010_MOUSE | Cnot10 | CCR4-NOT transcription K.HNLGIFYK#K                                   | 6.85   | 3.45  | 1.99 | 0.50 |
| Q8BH15_CN010_MOUSE | Cnot10 | CCR4-NOT transcription K.IILNTVAEYK#N                                 | 52.01  | 10.36 | 5.02 | 0.20 |
| Q8BH15_CN010_MOUSE | Cnot10 | CCR4-NOT transcription K.NNQTITDNLRR@.Q                               | 12.01  | 3.49  | 3.44 | 0.29 |
| Q8BH15_CN010_MOUSE | Cnot10 | CCR4-NOT transcription K.SNFEYLR@.G                                   | 15.09  | 3.24  | 4.65 | 0.22 |
| Q9CWN7_CN011_MOUSE | Cnot11 | CCR4-NOT transcription K.FFLSGM*LAAPR@.E                              | 16.84  | 7.93  | 2.12 | 0.47 |
| Q9CWN7_CN011_MOUSE | Cnot11 | CCR4-NOT transcription R.GGAGGPGPIGGPAGR@.M                           | 6.33   | 3.21  | 1.97 | 0.51 |
| Q9CWN7_CN011_MOUSE | Cnot11 | CCR4-NOT transcription R.GGQEPDR@PPLSGFLPITPEK#F                      | 21.45  | 8.29  | 2.59 | 0.39 |
| Q9CWN7_CN011_MOUSE | Cnot11 | CCR4-NOT transcription R.LGSLVLM*LLQDPLLSAAQR@.L                      | 23.57  | 7.00  | 3.37 | 0.30 |



|                     |          |                                                                           |        |       |       |      |
|---------------------|----------|---------------------------------------------------------------------------|--------|-------|-------|------|
| Q9CWN7_CNO11_MOUSE  | Cnot11   | CCR4-NOT transcription: K.LVYHIGLTPAK#.L                                  | 34.63  | 7.59  | 4.56  | 0.22 |
| Q9CWN7_CNO11_MOUSE  | Cnot11   | CCR4-NOT transcription: K.TLDTGETPSETK#.I                                 | 50.81  | 18.10 | 2.81  | 0.36 |
| Q9CWN7_CNO11_MOUSE  | Cnot11   | CCR4-NOT transcription: R.LGSLVLM*LLQQDPLPSAAQR@.L                        | 8.41   | 1.09  | 7.69  | 0.13 |
| Q9CWN7_CNO11_MOUSE  | Cnot11   | CCR4-NOT transcription: K.TLDTGETPSETK#.I                                 | 15.72  | 3.72  | 4.22  | 0.24 |
| Q9CWN7_CNO11_MOUSE  | Cnot11   | CCR4-NOT transcription: K.TLDTGETPSETK#.I                                 | 19.45  | 3.47  | 5.60  | 0.18 |
| Q8C5L3_CN0T2_MOUSE  | Cnot2    | CCR4-NOT transcription: R.APYVGMVTK#PANEQSQDFSHNDFPALPGSSYK#DPTSSNDDSK#.S | 4.81   | 1.66  | 2.90  | 0.35 |
| Q8C5L3_CN0T2_MOUSE  | Cnot2    | CCR4-NOT transcription: R.EGSGNPTPLINPLAGR@.A                             | 32.93  | 15.07 | 2.19  | 0.46 |
| Q8C5L3_CN0T2_MOUSE  | Cnot2    | CCR4-NOT transcription: K.GIQVLPDGR@.V                                    | 34.98  | 21.29 | 1.64  | 0.61 |
| Q8C5L3_CN0T2_MOUSE  | Cnot2    | CCR4-NOT transcription: R.GM*SNNTPLQNR@.S                                 | 18.53  | 5.99  | 3.09  | 0.32 |
| Q8C5L3_CN0T2_MOUSE  | Cnot2    | CCR4-NOT transcription: R.NM*NM*NHSQVGGQIGIPSR@.T                         | 15.22  | 3.68  | 4.14  | 0.24 |
| Q8C5L3_CN0T2_MOUSE  | Cnot2    | CCR4-NOT transcription: R.AAETDPGM*VHLALGSDLTLLGLNLNSPENLYPK#.F           | 13.43  | 3.99  | 3.37  | 0.30 |
| Q8C5L3_CN0T2_MOUSE  | Cnot2    | CCR4-NOT transcription: R.EGSGNPTPLINPLAGR@.A                             | 56.50  | 10.67 | 5.30  | 0.19 |
| Q8C5L3_CN0T2_MOUSE  | Cnot2    | CCR4-NOT transcription: K.GIQVLPDGR@.V                                    | 23.63  | 18.54 | 1.27  | 0.78 |
| Q8C5L3_CN0T2_MOUSE  | Cnot2    | CCR4-NOT transcription: R.NM*NM*NHSQVGGQIGIPSR@.T                         | 21.58  | 5.06  | 4.26  | 0.23 |
| Q8C5L3_CN0T2_MOUSE  | Cnot2    | CCR4-NOT transcription: R.AAETDPGM*VHLALGSDLTLLGLNLNSPENLYPK#.F           | 4.19   | 1.73  | 2.42  | 0.41 |
| Q8C5L3_CN0T2_MOUSE  | Cnot2    | CCR4-NOT transcription: R.EGSGNPTPLINPLAGR@.A                             | 12.67  | 3.14  | 4.03  | 0.25 |
| Q8C5L3_CN0T2_MOUSE  | Cnot2    | CCR4-NOT transcription: R.TNSM*SSSGLGSPNR@.S                              | 8.73   | 1.26  | 6.95  | 0.14 |
| Q8KOV4_CN0T3_MOUSE  | Cnot3    | CCR4-NOT transcription: K.AAGTLLNGPPOFSTTPEIK#.A                          | 9.40   | 3.50  | 2.68  | 0.37 |
| Q8KOV4_CN0T3_MOUSE  | Cnot3    | CCR4-NOT transcription: K.EGFTFEYR@.Y                                     | 11.64  | 4.29  | 2.71  | 0.37 |
| Q8KOV4_CN0T3_MOUSE  | Cnot3    | CCR4-NOT transcription: K.TITDEFEGQTYFYDYEK#.W                            | 7.54   | 1.83  | 4.11  | 0.24 |
| Q8KOV4_CN0T3_MOUSE  | Cnot3    | CCR4-NOT transcription: R.YLEDR@DLQ..                                     | 153.16 | 92.25 | 1.66  | 0.60 |
| Q8KOV4_CN0T3_MOUSE  | Cnot3    | CCR4-NOT transcription: K.AAGTLLNGPPOFSTTPEIK#.A                          | 12.78  | 2.65  | 4.83  | 0.21 |
| Q8KOV4_CN0T3_MOUSE  | Cnot3    | CCR4-NOT transcription: R.AAISGIEDPVPVTLHLTDR@.D                          | 11.74  | 2.77  | 4.24  | 0.24 |
| Q8KOV4_CN0T3_MOUSE  | Cnot3    | CCR4-NOT transcription: K.APEPLSSK#.S                                     | 38.78  | 6.46  | 6.00  | 0.17 |
| Q8KOV4_CN0T3_MOUSE  | Cnot3    | CCR4-NOT transcription: K.EGFTFEYR@.Y                                     | 16.08  | 4.30  | 3.74  | 0.27 |
| Q8KOV4_CN0T3_MOUSE  | Cnot3    | CCR4-NOT transcription: R.STDSEVSQPAK#.N                                  | 10.00  | 3.28  | 3.05  | 0.33 |
| Q8KOV4_CN0T3_MOUSE  | Cnot3    | CCR4-NOT transcription: K.TITDEFEGQTYFYDYEK#.W                            | 6.47   | 2.28  | 2.84  | 0.35 |
| Q8KOV4_CN0T3_MOUSE  | Cnot3    | CCR4-NOT transcription: K.YM*Y*WFRQ@.H                                    | 11.21  | 3.41  | 3.29  | 0.30 |
| Q8KOV4_CN0T3_MOUSE  | Cnot3    | CCR4-NOT transcription: R.M*LDNDSLIVDAI@.K                                | 7.82   | 14.93 | 0.52  | 1.91 |
| Q8KOV4_CN0T3_MOUSE  | Cnot3    | CCR4-NOT transcription: R.STDSEVSQPAK#.N                                  | 8.00   | 2.34  | 3.42  | 0.29 |
| Q8K3P5_CN0T6_MOUSE  | Cnot6    | CCR4-NOT transcription: K.LFQLQTLK#.G                                     | 11.47  | 3.21  | 3.57  | 0.28 |
| Q8VEG6_CN061_MOUSE  | Cnot61   | CCR4-NOT transcription: K.HTVFNVQAM*ANSDGSEAM*LNR@.V                      | 3.39   | 1.96  | 1.74  | 0.58 |
| Q8VEG6_CN061_MOUSE  | Cnot61   | CCR4-NOT transcription: R.ELLNNDNYLR@.V                                   | 7.08   | 3.08  | 2.30  | 0.43 |
| Q8VEG6_CN061_MOUSE  | Cnot61   | CCR4-NOT transcription: K.GWIDYFYK#.T                                     | 4.93   | 1.40  | 3.53  | 0.28 |
| Q8VEG6_CN061_MOUSE  | Cnot61   | CCR4-NOT transcription: K.HTVFNVQAM*ANSDGSEAM*LNR@.V                      | 5.73   | 2.43  | 2.36  | 0.42 |
| Q60809_CN0T7_MOUSE  | Cnot7    | CCR4-NOT transcription: K.GGLQEAQELER@.I                                  | 5.63   | 14.50 | 3.56  | 0.28 |
| Q60809_CN0T7_MOUSE  | Cnot7    | CCR4-NOT transcription: R.IGPQHQAGSDSLTGM*AFFK#.M                         | 14.36  | 5.85  | 2.45  | 0.41 |
| Q60809_CN0T7_MOUSE  | Cnot7    | CCR4-NOT transcription: R.LFFPVIYDV#.Y                                    | 79.96  | 20.60 | 3.88  | 0.26 |
| Q60809_CN0T7_MOUSE  | Cnot7    | CCR4-NOT transcription: K.GGLQEAQELER@.I                                  | 20.00  | 5.55  | 3.61  | 0.28 |
| Q60809_CN0T7_MOUSE  | Cnot7    | CCR4-NOT transcription: R.IGPQHQAGSDSLTGM*AFFK#.M                         | 7.69   | 2.52  | 3.05  | 0.33 |
| Q60809_CN0T7_MOUSE  | Cnot7    | CCR4-NOT transcription: R.LFFPVIYDV#.Y                                    | 25.14  | 7.96  | 3.16  | 0.32 |
| Q60809_CN0T7_MOUSE  | Cnot7    | CCR4-NOT transcription: K.GGLQEAQELER@.I                                  | 18.24  | 7.31  | 2.50  | 0.40 |
| Q60809_CN0T7_MOUSE  | Cnot7    | CCR4-NOT transcription: R.IGPQHQAGSDSLTGM*AFFK#.M                         | 11.44  | 1.99  | 5.75  | 0.17 |
| Q60809_CN0T7_MOUSE  | Cnot7    | CCR4-NOT transcription: R.LFFPVIYDV#.Y                                    | 42.31  | 10.70 | 3.96  | 0.25 |
| Q9D8X5_CN0T8_MOUSE  | Cnot8    | CCR4-NOT transcription: K.GGLQEAQELER@.I                                  | 12.81  | 3.80  | 3.37  | 0.30 |
| Q9D8X5_CN0T8_MOUSE  | Cnot8    | CCR4-NOT transcription: R.YLGLGTGVAQK#.Q                                  | 17.31  | 5.93  | 2.92  | 0.34 |
| Q9D8X5_CN0T8_MOUSE  | Cnot8    | CCR4-NOT transcription: R.YLGLGTGVAQK#.Q                                  | 8.25   | 2.75  | 3.00  | 0.33 |
| Q9D8X5_CN0T8_MOUSE  | Cnot8    | CCR4-NOT transcription: K.FNLTEDM*YSQDSIDLLANSGLQFQK#.H                   | 5.65   | 1.54  | 3.66  | 0.27 |
| Q9D8X5_CN0T8_MOUSE  | Cnot8    | CCR4-NOT transcription: R.YLGLGTGVAQK#.Q                                  | 15.97  | 4.00  | 3.99  | 0.25 |
| P16330_CN37_MOUSE   | Cnp      | 2',3'-cyclic-nucleotide 3'-                                               | 8.01   | 3.06  | 2.62  | 0.38 |
| Q9QXT0_CNPY2_MOUSE  | Cnpy2    | Protein canopy homolog R.ALVDLEWEIAR@.V                                   | 16.89  | 21.01 | 0.80  | 1.24 |
| Q9QXT0_CNPY2_MOUSE  | Cnpy2    | Protein canopy homolog R.INPDGSGSVVPEVYAR@.S                              | 9.41   | 6.84  | 1.38  | 0.73 |
| Q8BQ47_CNPY4_MOUSE  | Cnpy4    | Protein canopy homolog K.LLSM*ELQALSRS@.T                                 | 7.43   | 5.14  | 1.44  | 0.69 |
| Q9Z160_COG1_MOUSE   | Cog1     | Conserved oligomeric Gc R.ALQLYDLR@.Y                                     | 11.26  | 3.26  | 3.46  | 0.29 |
| Q9Z160_COG1_MOUSE   | Cog1     | Conserved oligomeric Gc R.HLPTSIIFQPTLR@.T                                | 9.22   | 4.20  | 2.20  | 0.46 |
| Q9Z160_COG1_MOUSE   | Cog1     | Conserved oligomeric Gc R.SVETQAQVGPALSRS@.V                              | 5.76   | 2.29  | 2.52  | 0.40 |
| Q9Z160_COG1_MOUSE   | Cog1     | Conserved oligomeric Gc R.TSVLFGLVGTENQFASR@.S                            | 6.59   | 1.51  | 4.38  | 0.23 |
| Q9Z160_COG1_MOUSE   | Cog1     | Conserved oligomeric Gc K.VK#LDDLALYPSDTPLLK#.D                           | 17.08  | 6.08  | 2.81  | 0.36 |
| Q9Z1L5_COG2_MOUSE   | Cog2     | Conserved oligomeric Gc K.DVSSQEAASPLTQVLER@.I                            | 5.99   | 2.39  | 2.51  | 0.40 |
| Q9Z1L5_COG2_MOUSE   | Cog2     | Conserved oligomeric Gc K.LPSLFGPDDFAHQK#.Y                               | 13.79  | 8.60  | 1.60  | 0.62 |
| Q9Z1L5_COG2_MOUSE   | Cog2     | Conserved oligomeric Gc R.LQEWLPLDLETVK#.Q                                | 12.06  | 2.59  | 4.65  | 0.22 |
| Q9Z1L5_COG2_MOUSE   | Cog2     | Conserved oligomeric Gc R.SSVSEGLAVDER@.M                                 | 12.27  | 3.87  | 3.17  | 0.32 |
| E9QL65_E9QL65_MOUSE | Cog3     | Conserved oligomeric Gc R.LFVEQLEEFM*TK#.Y                                | 7.48   | 9.31  | 0.80  | 1.25 |
| Q8R1U1_COG4_MOUSE   | Cog4     | Conserved oligomeric Gc K.LFSQIGGEEQAQK#.F                                | 6.72   | 5.88  | 1.14  | 0.88 |
| Q8R1U1_COG4_MOUSE   | Cog4     | Conserved oligomeric Gc R.LSQM*ATLINLR@.V                                 | 14.56  | 3.42  | 4.26  | 0.23 |
| Q8COL8_COG5_MOUSE   | Cog5     | Conserved oligomeric Gc R.LLEQGVETQPTQVGTALQVFNHGLTK#.E                   | 3.17   | 1.58  | 2.01  | 0.50 |
| Q8R313_COG6_MOUSE   | Cog6     | Conserved oligomeric Gc K.ALSAFFVENSLSR@.T                                | 10.21  | 18.06 | 0.58  | 1.71 |
| Q8R313_COG6_MOUSE   | Cog6     | Conserved oligomeric Gc K.ALSAFFVENSLSR@.T                                | 5.99   | 2.79  | 2.15  | 0.47 |
| Q8R313_COG6_MOUSE   | Cog6     | Conserved oligomeric Gc R.IEQVLAEPGAVLYK#.I                               | 10.24  | 3.21  | 3.19  | 0.31 |
| Q8R313_COG6_MOUSE   | Cog6     | Conserved oligomeric Gc K.TTLALFEFTDR@.R                                  | 6.17   | 2.23  | 2.77  | 0.36 |
| Q5SU73_COIL_MOUSE   | Coil     | Coilin OS=Mus musculus K.LM*EDEETDQGYK#.S                                 | 4.74   | 1.52  | 3.12  | 0.32 |
| Q5SU73_COIL_MOUSE   | Coil     | Coilin OS=Mus musculus R.VVTDLISLR@.Q                                     | 14.77  | 6.23  | 2.37  | 0.42 |
| Q5SU73_COIL_MOUSE   | Coil     | Coilin OS=Mus musculus R.VVTDLISLR@.Q                                     | 16.51  | 5.25  | 3.15  | 0.32 |
| Q5SU73_COIL_MOUSE   | Coil     | Coilin OS=Mus musculus K.LM*EDEETDQGYK#.S                                 | 9.26   | 2.43  | 3.82  | 0.26 |
| Q61245_COBA1_MOUSE  | Col11a1  | Collagen alpha-1(XI) chain R.ILETDFVQGDIIQQLFLITGDPK#.A                   | 9.42   | 8.60  | 1.10  | 0.91 |
| Q61245_COBA1_MOUSE  | Col11a1  | Collagen alpha-1(XI) chain R.VTEEAQISAPTK#.Q                              | 11.63  | 8.54  | 1.36  | 0.73 |
| P11087_CO1A1_MOUSE  | Col1a1   | Collagen alpha-1(I) chain R.DRDLEVDTLK.S                                  | 3.10   | 10.08 | 0.31  | 3.26 |
| P11087_CO1A1_MOUSE  | Col1a1   | Collagen alpha-1(I) chain K.SLSQIENIR.S                                   | 138.62 | 10.63 | 13.04 | 0.08 |
| Q30D77_COA1_MOUSE   | Col24a1  | Collagen alpha-1(XXIV) c1 K.GFR@GETGPQGR@.G                               | 5.46   | 2.04  | 2.68  | 0.37 |
| Q3U962_CO5A2_MOUSE  | Col5a2   | Collagen alpha-2(V) chair R.NTVGYM*DDQAK.N                                | 4.96   | 8.26  | 0.60  | 1.66 |
| Q04857_CO6A1_MOUSE  | Col6a1   | Collagen alpha-1(VI) chair K.TAEYDVAFGR.H                                 | 1.97   | 8.22  | 0.24  | 4.17 |
| Q8K297_GT251_MOUSE  | Colgalt1 | Procollagen galactosyltr: K.NSDVLQSPLDSTARDEL-                            | 3.20   | 4.34  | 0.74  | 1.36 |
| Q8K4M5_COMD1_MOUSE  | Comm1    | COMM domain-containii: K.SIASADM*DFNQLAEFLTAQTK#.K                        | 9.09   | 2.61  | 3.48  | 0.29 |
| Q8JZY2_COMDA_MOUSE  | Comm10   | COMM domain-containii: K.AVPLINIAIDTGR@.F                                 | 12.17  | 4.77  | 2.55  | 0.39 |
| Q8JZY2_COMDA_MOUSE  | Comm10   | COMM domain-containii: K.DK#AEAFASAWSAM*GQETVEK#.F                        | 5.24   | 2.87  | 1.83  | 0.55 |
| Q8BXC6_COMD2_MOUSE  | Comm2    | COMM domain-containii: R.IAVEFLR.R                                        | 36.59  | 19.13 | 1.91  | 0.52 |
| Q8BXC6_COMD2_MOUSE  | Comm2    | COMM domain-containii: R.LDVQLASR@.S                                      | 12.81  | 30.70 | 0.42  | 2.40 |
| Q8BXC6_COMD2_MOUSE  | Comm2    | COMM domain-containii: R.TILNELAPR@.L                                     | 29.00  | 13.96 | 2.08  | 0.48 |
| Q63829_COMD3_MOUSE  | Comm3    | COMM domain-containii: K.NSLETLGSGIR.S                                    | 28.71  | 8.98  | 3.20  | 0.31 |
| Q9CQ02_COMD4_MOUSE  | Comm4    | COMM domain-containii: K.ELLGQIGIYK#.I                                    | 8.12   | 4.73  | 1.72  | 0.58 |
| Q8R395_COMD5_MOUSE  | Comm5    | COMM domain-containii: R.LAVLLAGHTLTLQALR@.L                              | 2.88   | 2.51  | 1.15  | 0.87 |
| Q8R395_COMD5_MOUSE  | Comm5    | COMM domain-containii: R.YSVALVLK#.E                                      | 7.69   | 3.17  | 2.43  | 0.41 |
| Q3V4B5_COMD6_MOUSE  | Comm6    | COMM domain-containii: K.SEVTQLIDFQWK#.L                                  | 13.25  | 8.30  | 1.60  | 0.63 |
| Q3V4B5_COMD6_MOUSE  | Comm6    | COMM domain-containii: K.SIEM*TIPIQFQNFYK#.Q                              | 10.17  | 6.14  | 1.66  | 0.60 |
| Q8BG94_COMD7_MOUSE  | Comm7    | COMM domain-containii: R.FGVTSGSSELEK#.A                                  | 8.23   | 4.20  | 1.96  | 0.51 |
| Q8BG94_COMD7_MOUSE  | Comm7    | COMM domain-containii: R.TDLQTLGLSEEK#.A                                  | 7.90   | 4.18  | 1.89  | 0.53 |
| Q9CZG3_COMD8_MOUSE  | Comm8    | COMM domain-containii: K.HVLEDVITFFK#.A                                   | 12.88  | 3.72  | 3.46  | 0.29 |
| Q8K2Q0_COMD9_MOUSE  | Comm9    | COMM domain-containii: R.AEAQANQJSLPR@.L                                  | 8.66   | 2.92  | 2.97  | 0.34 |
| Q8K2Q0_COMD9_MOUSE  | Comm9    | COMM domain-containii: K.ETLDTM*LDLGLGR@.I                                | 7.50   | 4.38  | 1.72  | 0.58 |
| Q8K2Q0_COMD9_MOUSE  | Comm9    | COMM domain-containii: R.IR@DQLSAVANK#.I                                  | 7.01   | 1.48  | 4.75  | 0.21 |
| Q8K2Q0_COMD9_MOUSE  | Comm9    | COMM domain-containii: R.LVDLDR@.V                                        | 7.64   | 3.38  | 2.26  | 0.44 |
| Q8CIE6_COPA_MOUSE   | Copa     | Coatomer subunit alpha R.ASNLENSTYDLYTIPK#.D                              | 21.42  | 12.73 | 1.68  | 0.59 |

|                    |       |                                                                  |        |       |      |      |
|--------------------|-------|------------------------------------------------------------------|--------|-------|------|------|
| Q8CIE6_COPA_MOUSE  | Copa  | Coatomer subunit alpha R.DAD5ITLFDVQK#R                          | 29.21  | 16.62 | 1.76 | 0.57 |
| Q8CIE6_COPA_MOUSE  | Copa  | Coatomer subunit alpha R.DAD5QNPDAPEGK#R                         | 8.18   | 4.47  | 1.83 | 0.55 |
| Q8CIE6_COPA_MOUSE  | Copa  | Coatomer subunit alpha R.FAVLDR@.M                               | 17.98  | 11.22 | 1.60 | 0.62 |
| Q8CIE6_COPA_MOUSE  | Copa  | Coatomer subunit alpha R.GFFEGSIASK#.G                           | 27.84  | 13.55 | 2.05 | 0.49 |
| Q8CIE6_COPA_MOUSE  | Copa  | Coatomer subunit alpha R.GITGVDLFGTTDAVVK#.H                     | 38.48  | 18.36 | 2.10 | 0.48 |
| Q8CIE6_COPA_MOUSE  | Copa  | Coatomer subunit alpha R.GVNWAAAFHPTM*PLIVSGADDR@.Q              | 23.39  | 8.98  | 2.61 | 0.38 |
| Q8CIE6_COPA_MOUSE  | Copa  | Coatomer subunit alpha R.LLELGP#EVAQQTR@.K                       | 25.45  | 16.29 | 1.56 | 0.64 |
| Q8CIE6_COPA_MOUSE  | Copa  | Coatomer subunit alpha R.LLHDQVGIQFGPYK#.Q                       | 31.76  | 15.58 | 2.04 | 0.49 |
| Q8CIE6_COPA_MOUSE  | Copa  | Coatomer subunit alpha R.KLVGQSIAYLQK#.K                         | 45.09  | 17.93 | 2.51 | 0.40 |
| Q8CIE6_COPA_MOUSE  | Copa  | Coatomer subunit alpha R.NLSPGAVESDVR@.G                         | 31.21  | 13.51 | 2.31 | 0.43 |
| Q8CIE6_COPA_MOUSE  | Copa  | Coatomer subunit alpha R.QQPLFVSGDDYK.I                          | 8.05   | 6.37  | 1.26 | 0.79 |
| Q8CIE6_COPA_MOUSE  | Copa  | Coatomer subunit alpha R.SGAWDESGVFYITTSNHIK#.Y                  | 10.15  | 5.34  | 1.90 | 0.53 |
| Q8CIE6_COPA_MOUSE  | Copa  | Coatomer subunit alpha R.SILLSVPLLVDNK#.Q                        | 22.70  | 10.99 | 2.07 | 0.48 |
| Q8CIE6_COPA_MOUSE  | Copa  | Coatomer subunit alpha R.SLAYLSAATHGLDEEASLKETFDPEKETIPDIDPNAK.L | 6.62   | 2.82  | 2.35 | 0.43 |
| Q8CIE6_COPA_MOUSE  | Copa  | Coatomer subunit alpha R.SSGLTAVWVAR@.N                          | 9.12   | 4.46  | 2.05 | 0.49 |
| Q8CIE6_COPA_MOUSE  | Copa  | Coatomer subunit alpha R.TALNLFK#.L                              | 33.67  | 18.60 | 1.81 | 0.55 |
| Q8CIE6_COPA_MOUSE  | Copa  | Coatomer subunit alpha R.TLDLPIVTR@.V                            | 42.04  | 22.06 | 1.91 | 0.52 |
| Q8CIE6_COPA_MOUSE  | Copa  | Coatomer subunit alpha R.VLTDIPEFK#.F                            | 33.99  | 19.96 | 1.70 | 0.59 |
| Q8CIE6_COPA_MOUSE  | Copa  | Coatomer subunit alpha R.VTTVTEIGK#HDVIGLR@.J                    | 78.72  | 35.48 | 2.22 | 0.45 |
| Q8CIE6_COPA_MOUSE  | Copa  | Coatomer subunit alpha R.VVWDISGLR@.K                            | 23.71  | 11.04 | 2.15 | 0.47 |
| Q8CIE6_COPA_MOUSE  | Copa  | Coatomer subunit alpha R.ASNLENSTYDLYTIK#.D                      | 75.35  | 19.78 | 3.81 | 0.26 |
| Q8CIE6_COPA_MOUSE  | Copa  | Coatomer subunit alpha R.DAD5ITLFDVQK#R                          | 74.66  | 23.58 | 3.17 | 0.32 |
| Q8CIE6_COPA_MOUSE  | Copa  | Coatomer subunit alpha R.DAD5QNPDAPEGK#R                         | 34.50  | 13.43 | 2.57 | 0.39 |
| Q8CIE6_COPA_MOUSE  | Copa  | Coatomer subunit alpha R.KDVAVM*QLR@.S                           | 116.01 | 39.54 | 2.93 | 0.34 |
| Q8CIE6_COPA_MOUSE  | Copa  | Coatomer subunit alpha R.FAVLDR@.M                               | 59.39  | 19.35 | 3.07 | 0.33 |
| Q8CIE6_COPA_MOUSE  | Copa  | Coatomer subunit alpha K.GFFEGSIASK#.G                           | 86.09  | 27.49 | 3.13 | 0.32 |
| Q8CIE6_COPA_MOUSE  | Copa  | Coatomer subunit alpha R.GITGVDLFGTTDAVVK#.H                     | 147.31 | 49.15 | 3.00 | 0.33 |
| Q8CIE6_COPA_MOUSE  | Copa  | Coatomer subunit alpha R.GVNWAAAFHPTM*PLIVSGADDR@.Q              | 55.58  | 17.31 | 3.21 | 0.31 |
| Q8CIE6_COPA_MOUSE  | Copa  | Coatomer subunit alpha R.GVNWAAAFHPTM*PLIVSGADDR@.Q              | 9.13   | 2.53  | 3.61 | 0.28 |
| Q8CIE6_COPA_MOUSE  | Copa  | Coatomer subunit alpha R.KHDM*SGHYNALYLGDSVSR@.V                 | 21.12  | 8.90  | 2.37 | 0.42 |
| Q8CIE6_COPA_MOUSE  | Copa  | Coatomer subunit alpha R.K#YDEVLHM*VR@.N                         | 37.82  | 8.60  | 4.40 | 0.23 |
| Q8CIE6_COPA_MOUSE  | Copa  | Coatomer subunit alpha R.LLELGP#EVAQQTR@.K                       | 98.95  | 32.28 | 3.07 | 0.33 |
| Q8CIE6_COPA_MOUSE  | Copa  | Coatomer subunit alpha R.LLHDQVGIQFGPYK#.Q                       | 85.76  | 30.85 | 2.78 | 0.36 |
| Q8CIE6_COPA_MOUSE  | Copa  | Coatomer subunit alpha R.LLQPPAPIM*PLDNTWPLLVSK#.G               | 48.67  | 16.86 | 2.89 | 0.35 |
| Q8CIE6_COPA_MOUSE  | Copa  | Coatomer subunit alpha K.LVGSIIAYLQK#.K                          | 152.95 | 53.14 | 2.88 | 0.35 |
| Q8CIE6_COPA_MOUSE  | Copa  | Coatomer subunit alpha R.NLSPGAVESDVR@.G                         | 98.85  | 31.96 | 3.09 | 0.32 |
| Q8CIE6_COPA_MOUSE  | Copa  | Coatomer subunit alpha R.QELLSNSEDK#.S                           | 64.17  | 20.38 | 3.15 | 0.32 |
| Q8CIE6_COPA_MOUSE  | Copa  | Coatomer subunit alpha R.QLFLQYAR@.G                             | 39.31  | 12.77 | 3.08 | 0.32 |
| Q8CIE6_COPA_MOUSE  | Copa  | Coatomer subunit alpha K.QQPLFVSGDDYK#.I                         | 38.92  | 14.62 | 2.66 | 0.38 |
| Q8CIE6_COPA_MOUSE  | Copa  | Coatomer subunit alpha R.SGAWDESGVFYITTSNHIK#.Y                  | 38.31  | 13.18 | 2.91 | 0.34 |
| Q8CIE6_COPA_MOUSE  | Copa  | Coatomer subunit alpha R.SILLSVPLLVDNK#.Q                        | 88.00  | 31.97 | 2.75 | 0.36 |
| Q8CIE6_COPA_MOUSE  | Copa  | Coatomer subunit alpha R.SSGLTAVWVAR@.N                          | 21.47  | 6.35  | 3.38 | 0.30 |
| Q8CIE6_COPA_MOUSE  | Copa  | Coatomer subunit alpha R.TALNLFK#.L                              | 83.61  | 29.24 | 2.86 | 0.35 |
| Q8CIE6_COPA_MOUSE  | Copa  | Coatomer subunit alpha R.TGVQTR@.R                               | 75.33  | 26.26 | 2.87 | 0.35 |
| Q8CIE6_COPA_MOUSE  | Copa  | Coatomer subunit alpha R.TLDLPIVTR@.V                            | 176.53 | 55.60 | 3.18 | 0.31 |
| Q8CIE6_COPA_MOUSE  | Copa  | Coatomer subunit alpha R.VLTDIPEFK#.F                            | 158.64 | 51.29 | 3.09 | 0.32 |
| Q8CIE6_COPA_MOUSE  | Copa  | Coatomer subunit alpha R.VVWDISGLR@.K                            | 78.71  | 22.94 | 3.43 | 0.29 |
| Q9JF7_COPB_MOUSE   | Copb1 | Coatomer subunit beta C.K.LVEK#PSPLTAPHDFANIK#.A                 | 6.73   | 4.13  | 1.63 | 0.61 |
| Q9JF7_COPB_MOUSE   | Copb1 | Coatomer subunit beta C.K.EAELEPLM*PAIR@.A                       | 9.21   | 11.20 | 0.82 | 1.22 |
| Q9JF7_COPB_MOUSE   | Copb1 | Coatomer subunit beta C.K.EAGEL#PEEETVGPVQK#.L                   | 61.00  | 35.28 | 1.73 | 0.58 |
| Q9JF7_COPB_MOUSE   | Copb1 | Coatomer subunit beta C.K.L#EAELEPLM*PAIR@.A                     | 29.71  | 16.93 | 1.75 | 0.57 |
| Q9JF7_COPB_MOUSE   | Copb1 | Coatomer subunit beta C.K.L#EAELEPLM*PAIR@.A                     | 10.02  | 4.25  | 2.36 | 0.42 |
| Q9JF7_COPB_MOUSE   | Copb1 | Coatomer subunit beta C.K.LVEK#PSPLTAPHDFANIK#.A                 | 53.88  | 31.06 | 1.74 | 0.58 |
| Q9JF7_COPB_MOUSE   | Copb1 | Coatomer subunit beta C.K.LVEK#PSPLTAPHDFANIK#.A                 | 10.92  | 6.77  | 1.61 | 0.62 |
| Q9JF7_COPB_MOUSE   | Copb1 | Coatomer subunit beta C.R.NAVLAIYTR@.N                           | 25.89  | 10.45 | 2.48 | 0.40 |
| Q9JF7_COPB_MOUSE   | Copb1 | Coatomer subunit beta C.R.NVEELVILK#.K                           | 24.19  | 9.20  | 2.63 | 0.38 |
| Q9JF7_COPB_MOUSE   | Copb1 | Coatomer subunit beta C.R.NVTVQDDPISFM*QLTAK#.N                  | 12.01  | 2.75  | 4.36 | 0.23 |
| Q9JF7_COPB_MOUSE   | Copb1 | Coatomer subunit beta C.R.QLSLQML*LSAK#.L                        | 23.87  | 6.91  | 3.46 | 0.29 |
| Q9JF7_COPB_MOUSE   | Copb1 | Coatomer subunit beta C.K.TLQALDLVSSR@.N                         | 26.25  | 14.20 | 1.85 | 0.54 |
| Q9JF7_COPB_MOUSE   | Copb1 | Coatomer subunit beta C.K.TNNVSEHEDTK#YR@.Q                      | 1.71   | 2.15  | 0.79 | 1.26 |
| Q9JF7_COPB_MOUSE   | Copb1 | Coatomer subunit beta C.R.VLQDLVM*DLR@.V                         | 53.86  | 23.63 | 2.28 | 0.44 |
| Q9JF7_COPB_MOUSE   | Copb1 | Coatomer subunit beta C.R.VLQDLVMDILR@.V                         | 14.86  | 5.91  | 2.51 | 0.40 |
| Q9JF7_COPB_MOUSE   | Copb1 | Coatomer subunit beta C.R.VLSTPDLVLR@.K                          | 81.77  | 35.38 | 2.31 | 0.43 |
| Q9JF7_COPB_MOUSE   | Copb1 | Coatomer subunit beta C.R.YVALVQEK#.K                            | 52.67  | 21.57 | 2.44 | 0.41 |
| Q9JF7_COPB_MOUSE   | Copb1 | Coatomer subunit beta C.K.EAELEPLM*PAIR@.A                       | 18.80  | 24.77 | 0.76 | 1.32 |
| Q9JF7_COPB_MOUSE   | Copb1 | Coatomer subunit beta C.K.EAGEL#PEEETVGPVQK#.L                   | 116.13 | 37.51 | 3.10 | 0.32 |
| Q9JF7_COPB_MOUSE   | Copb1 | Coatomer subunit beta C.K.EDIQSVMT*TEVR@.R                       | 15.76  | 2.80  | 5.62 | 0.18 |
| Q9JF7_COPB_MOUSE   | Copb1 | Coatomer subunit beta C.K.LEEK#LSQK#.K                           | 8.34   | 5.43  | 1.54 | 0.65 |
| Q9JF7_COPB_MOUSE   | Copb1 | Coatomer subunit beta C.K.L#EAELEPLM*PAIR@.A                     | 47.61  | 14.06 | 3.39 | 0.30 |
| Q9JF7_COPB_MOUSE   | Copb1 | Coatomer subunit beta C.K.LVEK#PSPLTAPHDFANIK#.A                 | 94.60  | 30.00 | 3.15 | 0.32 |
| Q9JF7_COPB_MOUSE   | Copb1 | Coatomer subunit beta C.K.LVEK#PSPLTAPHDFANIK#.A                 | 17.88  | 9.83  | 1.82 | 0.55 |
| Q9JF7_COPB_MOUSE   | Copb1 | Coatomer subunit beta C.R.NFEHLIPDAPELIHDFLVNEK#.D               | 10.08  | 4.50  | 2.24 | 0.45 |
| Q9JF7_COPB_MOUSE   | Copb1 | Coatomer subunit beta C.R.NVEELVILK#.K                           | 31.28  | 15.90 | 1.97 | 0.51 |
| Q9JF7_COPB_MOUSE   | Copb1 | Coatomer subunit beta C.R.NVTVQDDPISFM*QLTAK#.N                  | 17.34  | 7.32  | 2.37 | 0.42 |
| Q9JF7_COPB_MOUSE   | Copb1 | Coatomer subunit beta C.R.NVTVQDDPISFM*QLTAK#.N                  | 7.51   | 5.01  | 1.50 | 0.67 |
| Q9JF7_COPB_MOUSE   | Copb1 | Coatomer subunit beta C.R.QLSLQML*LSAK#.L                        | 38.52  | 15.87 | 2.43 | 0.41 |
| Q9JF7_COPB_MOUSE   | Copb1 | Coatomer subunit beta C.R.R@SLGPIPIVESEIK#.K.E                   | 10.06  | 1.57  | 6.40 | 0.16 |
| Q9JF7_COPB_MOUSE   | Copb1 | Coatomer subunit beta C.R.SLGEIPIVESEIK#.K                       | 47.82  | 5.37  | 3.32 | 0.30 |
| Q9JF7_COPB_MOUSE   | Copb1 | Coatomer subunit beta C.K.TLQALDLVSSR@.N                         | 12.83  | 15.36 | 2.79 | 0.36 |
| Q9JF7_COPB_MOUSE   | Copb1 | Coatomer subunit beta C.K.TNNVSEHEDTK#YR@.Q                      | 48.25  | 11.72 | 4.12 | 0.24 |
| Q9JF7_COPB_MOUSE   | Copb1 | Coatomer subunit beta C.K.VASTENGIFGNIVDVSGAASDR@.N              | 12.61  | 3.91  | 3.22 | 0.31 |
| Q9JF7_COPB_MOUSE   | Copb1 | Coatomer subunit beta C.R.VLQDLVM*DLR@.V                         | 114.73 | 37.76 | 3.04 | 0.33 |
| Q9JF7_COPB_MOUSE   | Copb1 | Coatomer subunit beta C.R.VLQDLVMDILR@.V                         | 19.19  | 4.09  | 4.69 | 0.21 |
| Q9JF7_COPB_MOUSE   | Copb1 | Coatomer subunit beta C.R.VLSTPDLVLR@.K                          | 88.04  | 36.00 | 2.45 | 0.41 |
| Q9JF7_COPB_MOUSE   | Copb1 | Coatomer subunit beta C.K.YEAAGTLVLSAPATAIK#.A                   | 52.50  | 15.13 | 3.47 | 0.29 |
| Q9JF7_COPB_MOUSE   | Copb1 | Coatomer subunit beta C.R.YVALVQEK#.K                            | 51.47  | 14.64 | 3.52 | 0.28 |
| O55029_COPB2_MOUSE | Copb2 | Coatomer subunit beta' ( C.K.AM*GDETEIK#DGER@.L                  | 5.81   | 1.72  | 3.37 | 0.30 |
| O55029_COPB2_MOUSE | Copb2 | Coatomer subunit beta' ( C.D.NNQFASASLDR@.T                      | 63.09  | 19.33 | 3.26 | 0.31 |
| O55029_COPB2_MOUSE | Copb2 | Coatomer subunit beta' ( R.FELALQLGELK#.I                        | 10.56  | 5.10  | 2.07 | 0.48 |
| O55029_COPB2_MOUSE | Copb2 | Coatomer subunit beta' ( K.HSEVQANLKH#.A                         | 37.91  | 10.67 | 3.55 | 0.28 |
| O55029_COPB2_MOUSE | Copb2 | Coatomer subunit beta' ( C.K.IAYQLAVEAESQK#.W                    | 18.23  | 6.32  | 2.88 | 0.35 |
| O55029_COPB2_MOUSE | Copb2 | Coatomer subunit beta' ( C.K.IWDYQKH#.T                          | 22.24  | 10.88 | 2.04 | 0.49 |
| O55029_COPB2_MOUSE | Copb2 | Coatomer subunit beta' ( R.K#N#WVVTGADDM*QIR@.V                  | 11.53  | 3.93  | 2.94 | 0.34 |
| O55029_COPB2_MOUSE | Copb2 | Coatomer subunit beta' ( R.LESTLNYGM*ER.V                        | 42.82  | 12.51 | 3.42 | 0.29 |
| O55029_COPB2_MOUSE | Copb2 | Coatomer subunit beta' ( R.LPEAALFAR.T                           | 99.09  | 31.64 | 3.13 | 0.32 |
| O55029_COPB2_MOUSE | Copb2 | Coatomer subunit beta' ( C.QLAEALASK#.C                          | 33.85  | 13.16 | 2.57 | 0.39 |
| O55029_COPB2_MOUSE | Copb2 | Coatomer subunit beta' ( C.K.QQALTVSTDPDEHR@.F                   | 3.90   | 1.97  | 1.98 | 0.50 |
| O55029_COPB2_MOUSE | Copb2 | Coatomer subunit beta' ( C.K.QYPLVNEER@.N                        | 22.42  | 11.82 | 1.90 | 0.53 |
| O55029_COPB2_MOUSE | Copb2 | Coatomer subunit beta' ( C.SFK#PDFGAEISYGGFLLGVR@.S              | 31.23  | 12.51 | 2.50 | 0.40 |
| O55029_COPB2_MOUSE | Copb2 | Coatomer subunit beta' ( R.SVNGLAFYDWELENLIR@.R                  | 11.54  | 4.61  | 2.50 | 0.40 |
| O55029_COPB2_MOUSE | Copb2 | Coatomer subunit beta' ( R.TM*YLLGIYK#.D                         | 19.85  | 7.92  | 2.51 | 0.40 |
| O55029_COPB2_MOUSE | Copb2 | Coatomer subunit beta' ( R.TMYLLGIYK#.D                          | 13.53  | 5.22  | 2.59 | 0.39 |
| O55029_COPB2_MOUSE | Copb2 | Coatomer subunit beta' ( R.TYLPQVSR.V                            | 77.31  | 27.42 | 2.82 | 0.35 |

|                    |        |                                                             |        |        |      |      |
|--------------------|--------|-------------------------------------------------------------|--------|--------|------|------|
| O55029_COPB2_MOUSE | Copb2  | Coatomer subunit beta' ( R.VFNYNTLER@.V                     | 58.17  | 18.64  | 3.12 | 0.32 |
| O55029_COPB2_MOUSE | Copb2  | Coatomer subunit beta' ( K.AM*GDTEIK#DGER@.L                | 7.86   | 2.38   | 3.30 | 0.30 |
| O55029_COPB2_MOUSE | Copb2  | Coatomer subunit beta' ( K.DNNQFASASLDR@.T                  | 119.75 | 39.40  | 3.04 | 0.33 |
| O55029_COPB2_MOUSE | Copb2  | Coatomer subunit beta' ( K.EAFVVEWVK#E                      | 64.82  | 17.57  | 3.69 | 0.27 |
| O55029_COPB2_MOUSE | Copb2  | Coatomer subunit beta' ( R.FELALQLGELK#I                    | 29.20  | 10.71  | 2.73 | 0.37 |
| O55029_COPB2_MOUSE | Copb2  | Coatomer subunit beta' ( R.GSNVALGYDEGSIVK#.L               | 144.73 | 63.42  | 2.28 | 0.44 |
| O55029_COPB2_MOUSE | Copb2  | Coatomer subunit beta' ( K.HSEVQQAANK#.A                    | 165.96 | 51.96  | 3.19 | 0.31 |
| O55029_COPB2_MOUSE | Copb2  | Coatomer subunit beta' ( K.IAYQLVAEAESEQ#.W                 | 18.42  | 118.34 | 0.16 | 6.43 |
| O55029_COPB2_MOUSE | Copb2  | Coatomer subunit beta' ( K.IWDYQNK#.T                       | 35.38  | 13.16  | 2.69 | 0.37 |
| O55029_COPB2_MOUSE | Copb2  | Coatomer subunit beta' ( R.KHNWVVTGADDM*QIR@.V              | 24.82  | 8.23   | 3.02 | 0.33 |
| O55029_COPB2_MOUSE | Copb2  | Coatomer subunit beta' ( R.LESTLVNMG*ER@.V                  | 61.31  | 21.71  | 2.82 | 0.35 |
| O55029_COPB2_MOUSE | Copb2  | Coatomer subunit beta' ( R.LPEAFLAR@.T                      | 201.11 | 66.22  | 3.04 | 0.33 |
| O55029_COPB2_MOUSE | Copb2  | Coatomer subunit beta' ( K.NWVVTGADDM*QIR@.V                | 10.27  | 3.26   | 3.15 | 0.32 |
| O55029_COPB2_MOUSE | Copb2  | Coatomer subunit beta' ( K.QLAELASK#.C                      | 62.00  | 15.71  | 3.95 | 0.25 |
| O55029_COPB2_MOUSE | Copb2  | Coatomer subunit beta' ( K.QQALVSTDPFHR@.F                  | 53.17  | 17.74  | 3.00 | 0.33 |
| O55029_COPB2_MOUSE | Copb2  | Coatomer subunit beta' ( K.QYPLVTPNEER@.N                   | 43.99  | 16.60  | 2.65 | 0.38 |
| O55029_COPB2_MOUSE | Copb2  | Coatomer subunit beta' ( K.SFK#PDFGAEIYGGFLGVR@.S           | 31.08  | 10.21  | 3.04 | 0.33 |
| O55029_COPB2_MOUSE | Copb2  | Coatomer subunit beta' ( R.SVNGLAFYDWENTELIR@.R             | 23.57  | 8.44   | 2.79 | 0.36 |
| O55029_COPB2_MOUSE | Copb2  | Coatomer subunit beta' ( R.TM*YLLGYPK#.D                    | 36.21  | 11.78  | 3.07 | 0.33 |
| O55029_COPB2_MOUSE | Copb2  | Coatomer subunit beta' ( R.TMYLLGYVPK#.D                    | 27.62  | 10.29  | 2.69 | 0.37 |
| O55029_COPB2_MOUSE | Copb2  | Coatomer subunit beta' ( R.TYLPQSQR@.V                      | 100.51 | 34.54  | 2.91 | 0.34 |
| O55029_COPB2_MOUSE | Copb2  | Coatomer subunit beta' ( R.VFNYNTLER@.V                     | 154.23 | 44.88  | 3.44 | 0.29 |
| O89079_COPE_MOUSE  | Cope   | Coatomer subunit epsilon R.DSIVLELDR@.S                     | 25.37  | 12.36  | 2.05 | 0.49 |
| O89079_COPE_MOUSE  | Cope   | Coatomer subunit epsilon R.DSIVLELDR@EM*SR@.S               | 56.62  | 17.00  | 3.33 | 0.30 |
| O89079_COPE_MOUSE  | Cope   | Coatomer subunit epsilon R.KYGVVLDLDEIKHSSAPELQAVR@.M       | 202.14 | 73.50  | 2.75 | 0.36 |
| O89079_COPE_MOUSE  | Cope   | Coatomer subunit epsilon R.LAM*QYAPSA.-                     | 86.95  | 86.95  | 1.00 | 1.00 |
| O89079_COPE_MOUSE  | Cope   | Coatomer subunit epsilon R.LQEAYYFQELADK#.C                 | 17.97  | 4.87   | 3.69 | 0.27 |
| O89079_COPE_MOUSE  | Cope   | Coatomer subunit epsilon R.M*FAEYLAENQR@.D                  | 79.44  | 30.01  | 2.65 | 0.38 |
| O89079_COPE_MOUSE  | Cope   | Coatomer subunit epsilon R.MFAEYLAENQR@.D                   | 29.71  | 10.90  | 2.73 | 0.37 |
| O89079_COPE_MOUSE  | Cope   | Coatomer subunit epsilon R.SVDVNTTITLLM*AAIYFHQDNPDALR@.T   | 35.10  | 12.89  | 2.72 | 0.37 |
| O89079_COPE_MOUSE  | Cope   | Coatomer subunit epsilon R.YGVVLDLDEIKHSSAPELQAVR@.M        | 114.24 | 55.33  | 2.06 | 0.48 |
| O9QZES_COPG1_MOUSE | Copg1  | Coatomer subunit gamma R.SIATLITLLK#.T                      | 20.40  | 3.59   | 5.68 | 0.18 |
| O9QZES_COPG1_MOUSE | Copg1  | Coatomer subunit gamma R.VFNETPINPR@.K                      | 7.33   | 1.99   | 3.69 | 0.27 |
| O9QZES_COPG1_MOUSE | Copg1  | Coatomer subunit gamma K.ALQYQLVEPSEK#PFDLK#.S              | 65.96  | 34.16  | 1.93 | 0.52 |
| O9QZES_COPG1_MOUSE | Copg1  | Coatomer subunit gamma R.ATFVNLVLEQK#.Q                     | 44.77  | 16.30  | 2.75 | 0.36 |
| O9QZES_COPG1_MOUSE | Copg1  | Coatomer subunit gamma K.FGAQNEEM*LPISLVLLK#.R              | 14.16  | 9.03   | 1.57 | 0.64 |
| O9QZES_COPG1_MOUSE | Copg1  | Coatomer subunit gamma R.IHLHLLGQEGPK#.T                    | 64.69  | 53.24  | 1.22 | 0.82 |
| O9QZES_COPG1_MOUSE | Copg1  | Coatomer subunit gamma K.ILYLNQGEHLGTTATEAFFAM*TK#.L        | 32.35  | 11.65  | 2.78 | 0.36 |
| O9QZES_COPG1_MOUSE | Copg1  | Coatomer subunit gamma K.ILYLNQGEHLGTTATEAFFAMTK#.L         | 9.13   | 5.48   | 1.67 | 0.60 |
| O9QZES_COPG1_MOUSE | Copg1  | Coatomer subunit gamma K.KHDEESGGSNPLQHLEK#.S               | 8.24   | 3.32   | 2.48 | 0.40 |
| O9QZES_COPG1_MOUSE | Copg1  | Coatomer subunit gamma K.LFQSNPTLR@.R                       | 37.73  | 8.47   | 4.46 | 0.22 |
| O9QZES_COPG1_MOUSE | Copg1  | Coatomer subunit gamma R.LLLLDVTM*QVTAR@.S                  | 29.59  | 8.04   | 3.68 | 0.27 |
| O9QZES_COPG1_MOUSE | Copg1  | Coatomer subunit gamma K.NTHLLLAGVFR@.G                     | 31.43  | 11.41  | 2.76 | 0.36 |
| O9QZES_COPG1_MOUSE | Copg1  | Coatomer subunit gamma K.QJSSFM*SEISDEFK#.V                 | 6.88   | 2.85   | 2.42 | 0.41 |
| O9QZES_COPG1_MOUSE | Copg1  | Coatomer subunit gamma R.SIATLITLLK#.T                      | 90.86  | 31.76  | 2.86 | 0.35 |
| O9QZES_COPG1_MOUSE | Copg1  | Coatomer subunit gamma K.SSPEVALTESETEYVIR@.C               | 34.11  | 16.08  | 2.12 | 0.47 |
| O9QZES_COPG1_MOUSE | Copg1  | Coatomer subunit gamma K.TLEEAVGNIVK#.F                     | 66.25  | 23.43  | 2.83 | 0.35 |
| O9QZES_COPG1_MOUSE | Copg1  | Coatomer subunit gamma R.VFNETPINPR@.K                      | 41.19  | 16.90  | 2.44 | 0.41 |
| O9QZES_COPG1_MOUSE | Copg1  | Coatomer subunit gamma K.VPSVSSSALVSSLHLLK#.C               | 12.70  | 4.32   | 2.94 | 0.34 |
| O9QZES_COPG1_MOUSE | Copg1  | Coatomer subunit gamma R.AGAVSALAK#.F                       | 104.13 | 26.89  | 3.87 | 0.26 |
| O9QZES_COPG1_MOUSE | Copg1  | Coatomer subunit gamma K.ALNAGYLNGLVTSIPGLEK#.A             | 18.27  | 2.49   | 7.34 | 0.14 |
| O9QZES_COPG1_MOUSE | Copg1  | Coatomer subunit gamma K.ALQYQLVEPSEK#PFDLK#.S              | 114.64 | 39.70  | 2.89 | 0.35 |
| O9QZES_COPG1_MOUSE | Copg1  | Coatomer subunit gamma R.ATFVNLVLEQK#.Q                     | 75.08  | 18.66  | 4.02 | 0.25 |
| O9QZES_COPG1_MOUSE | Copg1  | Coatomer subunit gamma K.FGAQNEEM*LPISLVLLK#.R              | 12.23  | 6.94   | 3.85 | 0.26 |
| O9QZES_COPG1_MOUSE | Copg1  | Coatomer subunit gamma K.FGAQNEEM*LPISLVLLK#.R@.C           | 9.23   | 3.26   | 2.83 | 0.35 |
| O9QZES_COPG1_MOUSE | Copg1  | Coatomer subunit gamma R.GGHDLVIR@.S                        | 21.19  | 4.59   | 4.62 | 0.22 |
| O9QZES_COPG1_MOUSE | Copg1  | Coatomer subunit gamma R.IHLHLLGQEGPK#.T                    | 125.32 | 36.08  | 3.47 | 0.29 |
| O9QZES_COPG1_MOUSE | Copg1  | Coatomer subunit gamma K.ILYLNQGEHLGTTATEAFFAM*TK#.L        | 52.32  | 13.47  | 3.89 | 0.26 |
| O9QZES_COPG1_MOUSE | Copg1  | Coatomer subunit gamma K.ILYLNQGEHLGTTATEAFFAMTK#.L         | 10.11  | 5.54   | 1.82 | 0.55 |
| O9QZES_COPG1_MOUSE | Copg1  | Coatomer subunit gamma K.LFQSNPTLR@.R                       | 52.55  | 14.91  | 3.52 | 0.28 |
| O9QZES_COPG1_MOUSE | Copg1  | Coatomer subunit gamma R.LLLLDVTM*QVTAR@.S                  | 52.22  | 16.22  | 3.22 | 0.31 |
| O9QZES_COPG1_MOUSE | Copg1  | Coatomer subunit gamma K.NTHLLLAGVFR@.G                     | 37.15  | 7.58   | 4.90 | 0.20 |
| O9QZES_COPG1_MOUSE | Copg1  | Coatomer subunit gamma K.QAIVDKVPSVSSSALVSSLHLLK#.C         | 41.88  | 9.90   | 4.23 | 0.24 |
| O9QZES_COPG1_MOUSE | Copg1  | Coatomer subunit gamma K.QJSSFM*SEISDEFK#.V                 | 127.38 | 65.58  | 1.94 | 0.51 |
| O9QZES_COPG1_MOUSE | Copg1  | Coatomer subunit gamma K.SAVLQEAR@.V                        | 130.31 | 37.21  | 3.50 | 0.29 |
| O9QZES_COPG1_MOUSE | Copg1  | Coatomer subunit gamma R.SIATLITLLK#.T                      | 249.89 | 63.77  | 3.92 | 0.26 |
| O9QZES_COPG1_MOUSE | Copg1  | Coatomer subunit gamma R.SSEELPVDILASVG.-                   | 19.03  | 19.03  | 1.00 | 1.00 |
| O9QZES_COPG1_MOUSE | Copg1  | Coatomer subunit gamma K.SSPEVALTESETEYVIR@.C               | 59.39  | 18.87  | 3.15 | 0.32 |
| O9QZES_COPG1_MOUSE | Copg1  | Coatomer subunit gamma K.TLEEAVGNIVK#.F                     | 131.08 | 49.15  | 2.67 | 0.37 |
| O9QZES_COPG1_MOUSE | Copg1  | Coatomer subunit gamma R.VFNETPINPR@.K                      | 79.44  | 22.02  | 3.61 | 0.28 |
| O9QZES_COPG1_MOUSE | Copg1  | Coatomer subunit gamma K.VPSVSSSALVSSLHLLK#.C               | 21.40  | 7.62   | 2.81 | 0.36 |
| O9QXK3_COPG2_MOUSE | Copg2  | Coatomer subunit gamma K.IJK#PFAAAWEEVGDFAFEK#EETFALSSTK#.T | 8.07   | 4.05   | 1.99 | 0.50 |
| O9QXK3_COPG2_MOUSE | Copg2  | Coatomer subunit gamma R.IFNETPINPR@.R                      | 14.62  | 6.32   | 2.31 | 0.43 |
| O9QXK3_COPG2_MOUSE | Copg2  | Coatomer subunit gamma R.ITDGTM*LOAVER@.Y                   | 9.25   | 3.39   | 2.73 | 0.37 |
| O9QXK3_COPG2_MOUSE | Copg2  | Coatomer subunit gamma K.SIPLAM*APVFEQK#.S                  | 16.22  | 4.96   | 3.27 | 0.31 |
| O9QXK3_COPG2_MOUSE | Copg2  | Coatomer subunit gamma K.SSEPVQLTEAETEYVIR@.C               | 8.20   | 3.34   | 2.45 | 0.41 |
| P61202_CSN2_MOUSE  | Cops2  | COP9 signalosome comp K.AALSSFOK#.V                         | 25.46  | 14.22  | 1.79 | 0.56 |
| P61202_CSN2_MOUSE  | Cops2  | COP9 signalosome comp K.LTNFPEM*TM*NR@.Y                    | 8.64   | 3.10   | 2.79 | 0.36 |
| P61202_CSN2_MOUSE  | Cops2  | COP9 signalosome comp K.SINSILDYISTSK#.Q                    | 20.96  | 6.67   | 3.14 | 0.32 |
| P61202_CSN2_MOUSE  | Cops2  | COP9 signalosome comp K.SINSILDYISTSK#.Q                    | 9.64   | 3.88   | 2.49 | 0.40 |
| O88543_CSN3_MOUSE  | Cops3  | COP9 signalosome comp K.AM*DQETVNPQFVQK#.S                  | 7.06   | 3.62   | 1.95 | 0.51 |
| O88543_CSN3_MOUSE  | Cops3  | COP9 signalosome comp K.SM*GSQEDDSGNK#PSSYS.-               | 3.26   | 1.48   | 2.21 | 0.45 |
| O88544_CSN4_MOUSE  | Cops4  | COP9 signalosome comp K.AIQLSGTEQLALK#.A                    | 31.76  | 14.86  | 2.14 | 0.47 |
| O88544_CSN4_MOUSE  | Cops4  | COP9 signalosome comp K.ATTADGSSILDR@.A                     | 28.79  | 11.80  | 2.44 | 0.41 |
| O88544_CSN4_MOUSE  | Cops4  | COP9 signalosome comp K.IASQM*ITEGR@.M                      | 55.44  | 20.97  | 2.64 | 0.38 |
| O88544_CSN4_MOUSE  | Cops4  | COP9 signalosome comp R.KHFIEAQR@.Y                         | 15.50  | 13.90  | 1.12 | 0.90 |
| O88544_CSN4_MOUSE  | Cops4  | COP9 signalosome comp R.LYLEDPPVQVQAEAYINR@.A               | 15.68  | 3.45   | 4.55 | 0.22 |
| O88544_CSN4_MOUSE  | Cops4  | COP9 signalosome comp R.NAAQVLVPILETGQK#.Q                  | 29.73  | 10.39  | 2.86 | 0.35 |
| O88544_CSN4_MOUSE  | Cops4  | COP9 signalosome comp R.VISFEQVQASIR@.Q                     | 56.00  | 18.40  | 3.04 | 0.33 |
| O35864_CSN5_MOUSE  | Cops5  | COP9 signalosome comp K.GYKPPDEGPESEYQITPLNK.I              | 12.88  | 7.06   | 1.82 | 0.55 |
| O35864_CSN5_MOUSE  | Cops5  | COP9 signalosome comp K.ISALALLK#.M                         | 19.43  | 6.60   | 2.94 | 0.34 |
| O35864_CSN5_MOUSE  | Cops5  | COP9 signalosome comp K.LEQSEALQGR@.G                       | 22.70  | 8.28   | 2.74 | 0.36 |
| O35864_CSN5_MOUSE  | Cops5  | COP9 signalosome comp K.LFNQINVA.-                          | 15.48  | 15.48  | 1.00 | 1.00 |
| O35864_CSN5_MOUSE  | Cops5  | COP9 signalosome comp K.LLELLWNNK#.Y                        | 9.56   | 4.71   | 2.03 | 0.49 |
| O35864_CSN5_MOUSE  | Cops5  | COP9 signalosome comp K.QQQEILAAK#PWTK#.D                   | 13.52  | 23.02  | 0.59 | 1.70 |
| O35864_CSN5_MOUSE  | Cops5  | COP9 signalosome comp K.VNLGAFR@.T                          | 15.58  | 5.86   | 4.36 | 0.23 |
| O88545_CSN6_MOUSE  | Cops6  | COP9 signalosome comp K.FNVLVYDR@.Q                         | 22.08  | 6.66   | 3.32 | 0.30 |
| O9CZ04_CSN7A_MOUSE | Cops7a | COP9 signalosome comp R.ELAESDFASTFR@.L                     | 33.39  | 8.16   | 4.09 | 0.24 |
| O9CZ04_CSN7A_MOUSE | Cops7a | COP9 signalosome comp R.LLTVFAYGTIYDLAEAR@.N                | 14.55  | 4.31   | 3.37 | 0.30 |
| O9CZ04_CSN7A_MOUSE | Cops7a | COP9 signalosome comp K.VTGNQEQFLLLAK#.S                    | 18.48  | 5.69   | 3.25 | 0.31 |
| O8BV13_CSN7B_MOUSE | Cops7b | COP9 signalosome comp K.ESLPELSVAQCNK#.L                    | 8.95   | 6.57   | 1.36 | 0.73 |
| O8BV13_CSN7B_MOUSE | Cops7b | COP9 signalosome comp R.TQQQVQAEVSNIKH#.T                   | 15.64  | 6.72   | 2.33 | 0.43 |
| O8VBV7_CSN8_MOUSE  | Cops8  | COP9 signalosome comp R.FIPLSEAPAVPPIPEEQQLAR@.L            | 10.23  | 4.81   | 2.12 | 0.47 |

|                    |        |                                                                     |        |        |      |      |
|--------------------|--------|---------------------------------------------------------------------|--------|--------|------|------|
| Q8VBV7_CS8_MOUSE   | Cops8  | COP9 signalosome comp R.FIPLSEPAVPPINPNEQLAR@.L                     | 36.60  | 11.30  | 3.24 | 0.31 |
| Q8VBV7_CS8_MOUSE   | Cops8  | COP9 signalosome comp K.GVLEQGWQADSTR@.M                            | 17.33  | 6.71   | 2.58 | 0.39 |
| Q8VBV7_CS8_MOUSE   | Cops8  | COP9 signalosome comp K.SANSELGGIWSVQGR@.J                          | 23.45  | 8.11   | 2.89 | 0.35 |
| P61924_COPZ1_MOUSE | Copz1  | Coatomer subunit zeta-1 R.VALR@GEDVPLTEQTVSQVLSQSAK#.E              | 9.36   | 2.94   | 3.18 | 0.31 |
| P61924_COPZ1_MOUSE | Copz1  | Coatomer subunit zeta-1 K.YYDTPSPVK#.E                              | 9.53   | 2.49   | 3.83 | 0.26 |
| P61924_COPZ1_MOUSE | Copz1  | Coatomer subunit zeta-1 K.AILILDNDGDR.L                             | 142.40 | 46.22  | 3.08 | 0.32 |
| P61924_COPZ1_MOUSE | Copz1  | Coatomer subunit zeta-1 R.GEDVPLTEQTVSQVLSQSAK#.E                   | 57.80  | 19.98  | 2.89 | 0.35 |
| P61924_COPZ1_MOUSE | Copz1  | Coatomer subunit zeta-1 R.TDSEIALLEGVLTVVYK#.S                      | 31.61  | 12.38  | 2.55 | 0.39 |
| P61924_COPZ1_MOUSE | Copz1  | Coatomer subunit zeta-1 R.VALR@GEDVPLTEQTVSQVLSQSAK#.E              | 394.12 | 108.27 | 3.64 | 0.27 |
| P61924_COPZ1_MOUSE | Copz1  | Coatomer subunit zeta-1 K.YYDTPSPVK#.E                              | 136.58 | 45.62  | 2.99 | 0.33 |
| P61924_COPZ1_MOUSE | Copz1  | Coatomer subunit zeta-1 R.VALR@GEDVPLTEQTVSQVLSQSAK#.E              | 20.95  | 4.37   | 4.79 | 0.21 |
| P61924_COPZ1_MOUSE | Copz1  | Coatomer subunit zeta-1 K.AILILDNDGDR.L                             | 8.92   | 4.29   | 2.08 | 0.48 |
| P61924_COPZ1_MOUSE | Copz1  | Coatomer subunit zeta-1 R.VALR@GEDVPLTEQTVSQVLSQSAK#.E              | 12.73  | 7.03   | 1.81 | 0.55 |
| Q91HH9_COPZ2_MOUSE | Copz2  | Coatomer subunit zeta-2 R.TDSDGLTEQVAVQLVLSQSAK#.E                  | 36.84  | 13.18  | 2.80 | 0.36 |
| Q91HH9_COPZ2_MOUSE | Copz2  | Coatomer subunit zeta-2 K.YYDTPSPVK#.E                              | 37.67  | 8.49   | 4.44 | 0.23 |
| P19783_COX41_MOUSE | Cox41  | Cytochrome c oxidase su K.ADWSSLSR.D                                | 6.96   | 5.75   | 1.21 | 0.83 |
| P19783_COX41_MOUSE | Cox41  | Cytochrome c oxidase su R.IQFNESFAEM*NR.G                           | 10.36  | 8.97   | 1.16 | 0.87 |
| P19783_COX41_MOUSE | Cox41  | Cytochrome c oxidase su K.SEDYAFPTYADR@.R                           | 3.59   | 2.24   | 1.60 | 0.62 |
| P12787_COX5A_MOUSE | Cox5a  | Cytochrome c oxidase su K.GM*NTLVGDYLVPEPK#.I                       | 8.02   | 10.54  | 0.76 | 1.31 |
| P36552_HEM6_MOUSE  | Cpox   | Oxygen-dependent copr K.K#HCCDSYTPRDK#.L                            | 1.24   | 4.23   | 0.29 | 3.40 |
| Q9EPU4_CPSF1_MOUSE | Cpsf1  | Cleavage and polyadenyl: R.DALLLSFK#.D                              | 18.80  | 5.73   | 3.28 | 0.30 |
| Q9EPU4_CPSF1_MOUSE | Cpsf1  | Cleavage and polyadenyl: R.DVSGM*FTTESR@.L                          | 5.34   | 2.89   | 1.85 | 0.54 |
| Q9EPU4_CPSF1_MOUSE | Cpsf1  | Cleavage and polyadenyl: K.EVLLVALGSR@.Q                            | 35.25  | 16.64  | 2.12 | 0.47 |
| Q9EPU4_CPSF1_MOUSE | Cpsf1  | Cleavage and polyadenyl: K.GGEIVLTLITDGM*R@.S                       | 9.55   | 3.39   | 2.82 | 0.36 |
| Q9EPU4_CPSF1_MOUSE | Cpsf1  | Cleavage and polyadenyl: R.HGFLILSR@.E                              | 38.64  | 14.00  | 2.76 | 0.36 |
| Q9EPU4_CPSF1_MOUSE | Cpsf1  | Cleavage and polyadenyl: K.IGTTPDILDDLLETDR@.V                      | 10.30  | 4.82   | 2.14 | 0.47 |
| Q9EPU4_CPSF1_MOUSE | Cpsf1  | Cleavage and polyadenyl: R.ISVLPAYLSVDAWVPR@.K                      | 12.17  | 5.83   | 2.09 | 0.48 |
| Q9EPU4_CPSF1_MOUSE | Cpsf1  | Cleavage and polyadenyl: R.LGNSLLKK.Y                               | 32.76  | 11.26  | 2.91 | 0.34 |
| Q9EPU4_CPSF1_MOUSE | Cpsf1  | Cleavage and polyadenyl: K.LQEPASSVR@.E                             | 16.94  | 7.35   | 2.30 | 0.43 |
| Q9EPU4_CPSF1_MOUSE | Cpsf1  | Cleavage and polyadenyl: R.LVFLVKR.N                                | 23.28  | 8.72   | 2.67 | 0.37 |
| Q9EPU4_CPSF1_MOUSE | Cpsf1  | Cleavage and polyadenyl: R.LVLPFR@.R                                | 22.08  | 8.85   | 2.49 | 0.40 |
| Q9EPU4_CPSF1_MOUSE | Cpsf1  | Cleavage and polyadenyl: R.NVLDGELLNR@.Y                            | 30.40  | 13.46  | 2.26 | 0.44 |
| Q9EPU4_CPSF1_MOUSE | Cpsf1  | Cleavage and polyadenyl: R.SSFLPSYIDVR@.A                           | 39.29  | 17.15  | 2.29 | 0.44 |
| Q9EPU4_CPSF1_MOUSE | Cpsf1  | Cleavage and polyadenyl: K.TLSLHYFEELR@.D                           | 55.38  | 21.23  | 2.61 | 0.38 |
| Q9EPU4_CPSF1_MOUSE | Cpsf1  | Cleavage and polyadenyl: R.VLVDSSFGOPTTQGEVR@.K                     | 38.31  | 12.38  | 3.10 | 0.32 |
| Q9EPU4_CPSF1_MOUSE | Cpsf1  | Cleavage and polyadenyl: R.YIVQVPLGIR@.L                            | 42.85  | 15.02  | 2.85 | 0.35 |
| Q9EPU4_CPSF1_MOUSE | Cpsf1  | Cleavage and polyadenyl: R.YLVTM*ER@.S                              | 14.68  | 9.16   | 1.60 | 0.62 |
| Q9EPU4_CPSF1_MOUSE | Cpsf1  | Cleavage and polyadenyl: K.AAASVLTSM*VTM*EPGYFLGSR@.L               | 44.74  | 10.62  | 4.21 | 0.24 |
| Q9EPU4_CPSF1_MOUSE | Cpsf1  | Cleavage and polyadenyl: K.AESTEQSPAPK#.A                           | 15.22  | 6.50   | 2.34 | 0.43 |
| Q9EPU4_CPSF1_MOUSE | Cpsf1  | Cleavage and polyadenyl: R.DALLLSFK#.D                              | 47.93  | 9.18   | 5.22 | 0.19 |
| Q9EPU4_CPSF1_MOUSE | Cpsf1  | Cleavage and polyadenyl: R.DVSGM*FTTESR@.L                          | 24.80  | 7.38   | 3.36 | 0.30 |
| Q9EPU4_CPSF1_MOUSE | Cpsf1  | Cleavage and polyadenyl: R.EADK#EPPPSK#.K                           | 6.93   | 1.37   | 5.05 | 0.20 |
| Q9EPU4_CPSF1_MOUSE | Cpsf1  | Cleavage and polyadenyl: R.ESLAEHEGLM*GEGQR@.S                      | 50.32  | 12.11  | 4.16 | 0.24 |
| Q9EPU4_CPSF1_MOUSE | Cpsf1  | Cleavage and polyadenyl: K.EVLLVALGSR@.Q                            | 116.12 | 28.04  | 4.14 | 0.24 |
| Q9EPU4_CPSF1_MOUSE | Cpsf1  | Cleavage and polyadenyl: R.GFLYFNR@.Q                               | 36.46  | 6.64   | 5.49 | 0.18 |
| Q9EPU4_CPSF1_MOUSE | Cpsf1  | Cleavage and polyadenyl: K.GGEIVLTLITDGM*R@.S                       | 25.02  | 3.32   | 7.54 | 0.13 |
| Q9EPU4_CPSF1_MOUSE | Cpsf1  | Cleavage and polyadenyl: R.HGFLILSR@.E                              | 102.64 | 28.08  | 3.66 | 0.27 |
| Q9EPU4_CPSF1_MOUSE | Cpsf1  | Cleavage and polyadenyl: K.IGTTPDILDDLLETDR@.V                      | 67.63  | 24.54  | 2.76 | 0.36 |
| Q9EPU4_CPSF1_MOUSE | Cpsf1  | Cleavage and polyadenyl: R.LILM*DVIEVPEPQPLTK#.N                    | 13.30  | 4.81   | 2.76 | 0.36 |
| Q9EPU4_CPSF1_MOUSE | Cpsf1  | Cleavage and polyadenyl: R.LILMDVIEVPEPQPLTK#.N                     | 14.29  | 2.49   | 5.74 | 0.17 |
| Q9EPU4_CPSF1_MOUSE | Cpsf1  | Cleavage and polyadenyl: R.ISVLPAYLSVDAWVPR@.K                      | 38.30  | 12.25  | 3.12 | 0.32 |
| Q9EPU4_CPSF1_MOUSE | Cpsf1  | Cleavage and polyadenyl: K.K#HGTTPDILDDLLETDR@.VTAHF.-              | 35.61  | 15.68  | 2.27 | 0.44 |
| Q9EPU4_CPSF1_MOUSE | Cpsf1  | Cleavage and polyadenyl: R.LGNSLLKK.Y                               | 87.63  | 20.06  | 4.37 | 0.23 |
| Q9EPU4_CPSF1_MOUSE | Cpsf1  | Cleavage and polyadenyl: K.LQEPASSVR@.E                             | 53.73  | 16.86  | 3.19 | 0.31 |
| Q9EPU4_CPSF1_MOUSE | Cpsf1  | Cleavage and polyadenyl: K.LSVYEDPGTHDLK#.T                         | 92.78  | 32.32  | 2.87 | 0.35 |
| Q9EPU4_CPSF1_MOUSE | Cpsf1  | Cleavage and polyadenyl: R.LVFLVKR.N                                | 69.62  | 16.17  | 4.81 | 0.23 |
| Q9EPU4_CPSF1_MOUSE | Cpsf1  | Cleavage and polyadenyl: R.LVLPFR@.R                                | 91.12  | 27.71  | 3.29 | 0.30 |
| Q9EPU4_CPSF1_MOUSE | Cpsf1  | Cleavage and polyadenyl: K.NFILAADM*K#.S                            | 41.32  | 16.91  | 2.44 | 0.41 |
| Q9EPU4_CPSF1_MOUSE | Cpsf1  | Cleavage and polyadenyl: R.NLM*YVM*YLPK#.E                          | 7.20   | 4.40   | 1.63 | 0.61 |
| Q9EPU4_CPSF1_MOUSE | Cpsf1  | Cleavage and polyadenyl: R.NLM*YVM*YLPK#.E                          | 6.66   | 4.98   | 1.34 | 0.75 |
| Q9EPU4_CPSF1_MOUSE | Cpsf1  | Cleavage and polyadenyl: R.NVLDGELLNR@.Y                            | 135.98 | 43.88  | 3.10 | 0.32 |
| Q9EPU4_CPSF1_MOUSE | Cpsf1  | Cleavage and polyadenyl: K.R@DALLLSFK#.D                            | 13.74  | 1.67   | 8.20 | 0.12 |
| Q9EPU4_CPSF1_MOUSE | Cpsf1  | Cleavage and polyadenyl: R.SEETVSGLK#.G                             | 54.57  | 17.72  | 3.08 | 0.32 |
| Q9EPU4_CPSF1_MOUSE | Cpsf1  | Cleavage and polyadenyl: R.SSFLPSYIDVR@.A                           | 142.91 | 44.39  | 3.22 | 0.31 |
| Q9EPU4_CPSF1_MOUSE | Cpsf1  | Cleavage and polyadenyl: K.TLSLHYFEELR@.D                           | 95.63  | 29.20  | 3.27 | 0.31 |
| Q9EPU4_CPSF1_MOUSE | Cpsf1  | Cleavage and polyadenyl: R.VLVDSSFGOPTTQGEVR@.K                     | 103.56 | 28.56  | 3.63 | 0.28 |
| Q9EPU4_CPSF1_MOUSE | Cpsf1  | Cleavage and polyadenyl: R.YIVQVPLGIR@.L                            | 101.01 | 28.28  | 3.57 | 0.28 |
| Q9EPU4_CPSF1_MOUSE | Cpsf1  | Cleavage and polyadenyl: R.YLVTM*ER@.S                              | 47.30  | 11.40  | 4.15 | 0.24 |
| Q9EPU4_CPSF1_MOUSE | Cpsf1  | Cleavage and polyadenyl: R.DEQLTNVLETLR@.G                          | 28.72  | 10.55  | 2.72 | 0.37 |
| Q9EPU4_CPSF1_MOUSE | Cpsf1  | Cleavage and polyadenyl: R.FLIDNPTEK#.V                             | 37.05  | 21.42  | 1.73 | 0.58 |
| Q9EPU4_CPSF1_MOUSE | Cpsf1  | Cleavage and polyadenyl: K.FSQVNLK#.G                               | 39.84  | 15.89  | 2.51 | 0.40 |
| Q9EPU4_CPSF1_MOUSE | Cpsf1  | Cleavage and polyadenyl: R.HNTEDFTLDDVDAADF#.I                      | 19.89  | 9.57   | 1.89 | 0.53 |
| Q9EPU4_CPSF1_MOUSE | Cpsf1  | Cleavage and polyadenyl: R.HNTEDFTLDDVDAADF#.I                      | 10.91  | 4.20   | 2.60 | 0.38 |
| Q9EPU4_CPSF1_MOUSE | Cpsf1  | Cleavage and polyadenyl: K.HVHQIDAVLHSHDPPLHGALPFAVGK#.L            | 13.26  | 8.39   | 1.58 | 0.63 |
| Q9EPU4_CPSF1_MOUSE | Cpsf1  | Cleavage and polyadenyl: R.IR@DLLEYQAVI.-                           | 42.38  | 13.04  | 3.25 | 0.31 |
| Q9EPU4_CPSF1_MOUSE | Cpsf1  | Cleavage and polyadenyl: K.IVK#DGEIEVAVDFNHK#.R                     | 9.26   | 4.18   | 2.22 | 0.45 |
| Q9EPU4_CPSF1_MOUSE | Cpsf1  | Cleavage and polyadenyl: K.NSILTYR@.T                               | 22.54  | 12.88  | 1.75 | 0.57 |
| Q9EPU4_CPSF1_MOUSE | Cpsf1  | Cleavage and polyadenyl: K.QR@DEQLTNVLETLR@.G                       | 12.74  | 4.72   | 2.70 | 0.37 |
| Q9EPU4_CPSF1_MOUSE | Cpsf1  | Cleavage and polyadenyl: K.VTEIELR@.K                               | 42.39  | 14.95  | 2.84 | 0.35 |
| Q9EPU4_CPSF1_MOUSE | Cpsf1  | Cleavage and polyadenyl: R.VTYIDYEGR@.S                             | 41.68  | 16.34  | 2.55 | 0.39 |
| Q9EPU4_CPSF1_MOUSE | Cpsf1  | Cleavage and polyadenyl: R.DEQLTNVLETLR@.G                          | 28.42  | 6.69   | 4.25 | 0.24 |
| Q9EPU4_CPSF1_MOUSE | Cpsf1  | Cleavage and polyadenyl: R.FLIDNPTEK#.V                             | 29.96  | 10.90  | 2.75 | 0.36 |
| Q9EPU4_CPSF1_MOUSE | Cpsf1  | Cleavage and polyadenyl: K.FSQVNLK#.G                               | 24.58  | 6.08   | 4.05 | 0.25 |
| Q9EPU4_CPSF1_MOUSE | Cpsf1  | Cleavage and polyadenyl: R.GDGNVLIADTAGR@.V                         | 20.83  | 5.53   | 3.77 | 0.27 |
| Q9EPU4_CPSF1_MOUSE | Cpsf1  | Cleavage and polyadenyl: K.NSILTYR@.T                               | 20.47  | 130.75 | 0.16 | 6.39 |
| Q9EPU4_CPSF1_MOUSE | Cpsf1  | Cleavage and polyadenyl: K.QR@DEQLTNVLETLR@.G                       | 14.18  | 2.36   | 6.02 | 0.17 |
| Q9EPU4_CPSF1_MOUSE | Cpsf1  | Cleavage and polyadenyl: K.SLFGDEKHELGETEIPLELPPHEVPHGOSVFM*NEPR@.L | 2.23   | 2.74   | 0.81 | 1.23 |
| Q9EPU4_CPSF1_MOUSE | Cpsf1  | Cleavage and polyadenyl: K.VTEIELR@.K                               | 32.84  | 6.55   | 5.01 | 0.20 |
| Q9EPU4_CPSF1_MOUSE | Cpsf1  | Cleavage and polyadenyl: R.VTYIDYEGR@.S                             | 15.37  | 3.92   | 3.92 | 0.25 |
| Q9EPU4_CPSF1_MOUSE | Cpsf1  | Cleavage and polyadenyl: R.GLIPVFLGR@.A                             | 193.84 | 64.55  | 3.00 | 0.33 |
| Q9EPU4_CPSF1_MOUSE | Cpsf1  | Cleavage and polyadenyl: R.K#QININNFVFK#.H                          | 17.25  | 4.28   | 4.03 | 0.25 |
| Q9EPU4_CPSF1_MOUSE | Cpsf1  | Cleavage and polyadenyl: K.LLYTGFDR@.Q                              | 70.83  | 21.85  | 3.24 | 0.31 |
| Q9EPU4_CPSF1_MOUSE | Cpsf1  | Cleavage and polyadenyl: R.LYEALTPVH.-                              | 89.45  | 89.45  | 1.00 | 1.00 |
| Q9EPU4_CPSF1_MOUSE | Cpsf1  | Cleavage and polyadenyl: K.M*SVDYIFSAHTDYQQTSEFIR@.A                | 9.14   | 4.72   | 1.93 | 0.52 |
| Q9EPU4_CPSF1_MOUSE | Cpsf1  | Cleavage and polyadenyl: R.NTEAVTLNFR@.G                            | 36.07  | 13.79  | 2.62 | 0.38 |
| Q9EPU4_CPSF1_MOUSE | Cpsf1  | Cleavage and polyadenyl: K.QININNFVFK#.H                            | 11.91  | 5.03   | 2.37 | 0.42 |
| Q9EPU4_CPSF1_MOUSE | Cpsf1  | Cleavage and polyadenyl: K.TANINLETR@.A                             | 63.27  | 22.20  | 2.85 | 0.35 |
| Q9EPU4_CPSF1_MOUSE | Cpsf1  | Cleavage and polyadenyl: R.VSGILVK#.R                               | 40.28  | 16.68  | 2.41 | 0.41 |
| Q9EPU4_CPSF1_MOUSE | Cpsf1  | Cleavage and polyadenyl: R.WLLSDYV#.V                               | 37.13  | 13.87  | 2.68 | 0.37 |
| Q9EPU4_CPSF1_MOUSE | Cpsf1  | Cleavage and polyadenyl: R.GLIPVFLGR@.A                             | 17.56  | 8.42   | 2.09 | 0.48 |
| Q9EPU4_CPSF1_MOUSE | Cpsf1  | Cleavage and polyadenyl: K.LLYTGFDR@.Q                              | 11.53  | 5.38   | 2.15 | 0.47 |
| Q9EPU4_CPSF1_MOUSE | Cpsf1  | Cleavage and polyadenyl: R.LYEALTPVH.-                              | 19.85  | 19.85  | 1.00 | 1.00 |
| Q9CWS4_INT11_MOUSE | Cpsf31 | Integrator complex subu K.VLIPVFLGR@.A                              | 13.98  | 7.10   | 1.97 | 0.51 |

|                    |         |                           |                                         |        |       |      |      |
|--------------------|---------|---------------------------|-----------------------------------------|--------|-------|------|------|
| Q9CWS4_INT11_MOUSE | Cpsf31  | Integrator complex subu   | R.VTPLGAGQDVGR@.S                       | 21.69  | 15.74 | 1.38 | 0.73 |
| Q9CWS4_INT11_MOUSE | Cpsf31  | Integrator complex subu   | K.VLIPVFLGR@.A                          | 16.28  | 5.62  | 2.90 | 0.35 |
| Q9CWS4_INT11_MOUSE | Cpsf31  | Integrator complex subu   | K.VGSESVYTDGYNM*TPDR@.H                 | 5.17   | 2.52  | 2.05 | 0.49 |
| Q9CWS4_INT11_MOUSE | Cpsf31  | Integrator complex subu   | K.VLIPVFLGR@.A                          | 24.32  | 7.99  | 3.04 | 0.33 |
| Q9CWS4_INT11_MOUSE | Cpsf31  | Integrator complex subu   | R.VTPLGAGQDVGR@.S                       | 15.14  | 5.40  | 2.81 | 0.36 |
| Q8BQZ5_CPSF4_MOUSE | Cpsf4   | Cleavage and polyadenyl   | R.APQVIGVM*QSQNSSAGNR@.G                | 17.18  | 5.62  | 3.05 | 0.33 |
| Q8BQZ5_CPSF4_MOUSE | Cpsf4   | Cleavage and polyadenyl   | K.HLAFSLGG.-                            | 39.92  | 39.92 | 1.00 | 1.00 |
| Q8BQZ5_CPSF4_MOUSE | Cpsf4   | Cleavage and polyadenyl   | K.R@APQVIGVM*QSQNSSAGNR@.G              | 7.69   | 2.60  | 2.96 | 0.34 |
| Q8BQZ5_CPSF4_MOUSE | Cpsf4   | Cleavage and polyadenyl   | R.APQVIGVM*QSQNSSAGNR@.G                | 6.43   | 2.50  | 2.57 | 0.39 |
| Q8BQZ5_CPSF4_MOUSE | Cpsf4   | Cleavage and polyadenyl   | R.FELPM*GTTEQPLPQQTPPTK#.R              | 36.75  | 17.54 | 2.10 | 0.48 |
| Q8BQZ5_CPSF4_MOUSE | Cpsf4   | Cleavage and polyadenyl   | K.R@APQVIGVM*QSQNSSAGNR@.G              | 6.97   | 2.14  | 3.26 | 0.31 |
| Q6NVF9_CPSF6_MOUSE | Cpsf6   | Cleavage and polyadenyl   | K.GAAPNVVYTYGK#.R                       | 10.93  | 5.04  | 2.17 | 0.46 |
| Q6NVF9_CPSF6_MOUSE | Cpsf6   | Cleavage and polyadenyl   | R.AVSDASAGDYSAIETLVTAISLKH.Q            | 46.78  | 17.66 | 2.65 | 0.38 |
| Q6NVF9_CPSF6_MOUSE | Cpsf6   | Cleavage and polyadenyl   | K.GAAPNVVYTYGK#.R                       | 37.11  | 10.19 | 3.64 | 0.27 |
| Q6NVF9_CPSF6_MOUSE | Cpsf6   | Cleavage and polyadenyl   | K.GFALVGVGSEASSK#.K                     | 42.01  | 13.01 | 3.23 | 0.31 |
| Q6NVF9_CPSF6_MOUSE | Cpsf6   | Cleavage and polyadenyl   | K.K*MLM*DLLPK#.R                        | 12.26  | 4.89  | 2.51 | 0.40 |
| Q6NVF9_CPSF6_MOUSE | Cpsf6   | Cleavage and polyadenyl   | K.QFLSQFEM*QSR@.K                       | 7.79   | 1.69  | 4.60 | 0.22 |
| Q6NVF9_CPSF6_MOUSE | Cpsf6   | Cleavage and polyadenyl   | R.TPLSEAEFEIM*NR@.N                     | 21.40  | 7.02  | 3.05 | 0.33 |
| Q8BT2_CPSF7_MOUSE  | Cpsf7   | Cleavage and polyadenyl   | R.AISSAISK#.A                           | 60.87  | 18.60 | 3.27 | 0.31 |
| Q8BT2_CPSF7_MOUSE  | Cpsf7   | Cleavage and polyadenyl   | K.LLELLPGK#.V                           | 22.91  | 6.73  | 3.40 | 0.29 |
| Q8BT2_CPSF7_MOUSE  | Cpsf7   | Cleavage and polyadenyl   | R.QNLSQFAEQAR@.K                        | 51.50  | 15.03 | 3.43 | 0.29 |
| Q8BT2_CPSF7_MOUSE  | Cpsf7   | Cleavage and polyadenyl   | R.SIGVYDVWLK#.F                         | 33.75  | 12.41 | 2.72 | 0.37 |
| Q8BT2_CPSF7_MOUSE  | Cpsf7   | Cleavage and polyadenyl   | R.SSSTPEPPYTR@.Q                        | 22.79  | 6.76  | 3.37 | 0.30 |
| Q8BT2_CPSF7_MOUSE  | Cpsf7   | Cleavage and polyadenyl   | K.TPAILTYSGLR@.S                        | 37.02  | 7.56  | 4.90 | 0.20 |
| Q8BT2_CPSF7_MOUSE  | Cpsf7   | Cleavage and polyadenyl   | R.ATPSENLVPSRAR@.V                      | 23.77  | 5.26  | 4.52 | 0.22 |
| Q8BT2_CPSF7_MOUSE  | Cpsf7   | Cleavage and polyadenyl   | K.LLELLPGK#.V                           | 22.68  | 7.37  | 3.08 | 0.32 |
| Q8BT2_CPSF7_MOUSE  | Cpsf7   | Cleavage and polyadenyl   | R.QNLSQFAEQAR@.K                        | 17.12  | 2.83  | 6.06 | 0.17 |
| Q8BT2_CPSF7_MOUSE  | Cpsf7   | Cleavage and polyadenyl   | R.SIGVYDVWLK#.F                         | 21.74  | 6.31  | 3.45 | 0.29 |
| Q8BT2_CPSF7_MOUSE  | Cpsf7   | Cleavage and polyadenyl   | K.SYSVGASGSSSR@.K                       | 14.49  | 6.30  | 2.30 | 0.43 |
| Q8BT2_CPSF7_MOUSE  | Cpsf7   | Cleavage and polyadenyl   | K.TPAILTYSGLR@.S                        | 22.93  | 7.83  | 2.93 | 0.34 |
| Q9DCT8_CRIP2_MOUSE | Crip2   | Cysteine-rich protein 2 C | K.GVNIIGGAGSIYIEK#PQTEAPQVTGPIEVPVVR@.T | 8.72   | 5.05  | 1.73 | 0.58 |
| Q9DCT8_CRIP2_MOUSE | Crip2   | Cysteine-rich protein 2 C | K.GVNIIGGAGSIYIEK#PQTEAPQVTGPIEVPVVR@.T | 9.66   | 5.17  | 1.87 | 0.54 |
| P63154_CRNL1_MOUSE | Crnk1   | Crooked neck-like protei  | R.AIVLAIQPR@.L                          | 39.28  | 24.54 | 1.60 | 0.62 |
| P63154_CRNL1_MOUSE | Crnk1   | Crooked neck-like protei  | R.ALDDYR@.N                             | 31.52  | 21.84 | 1.44 | 0.69 |
| P63154_CRNL1_MOUSE | Crnk1   | Crooked neck-like protei  | K.ANPHNYDAWFYLR@.L                      | 11.87  | 6.55  | 1.81 | 0.55 |
| P63154_CRNL1_MOUSE | Crnk1   | Crooked neck-like protei  | K.FAELETLDGIER@.A                       | 39.90  | 20.30 | 1.97 | 0.51 |
| P63154_CRNL1_MOUSE | Crnk1   | Crooked neck-like protei  | R.LDM*PEVLWK#.S                         | 8.10   | 4.57  | 1.77 | 0.56 |
| P63154_CRNL1_MOUSE | Crnk1   | Crooked neck-like protei  | R.LM*LLESWR@.S                          | 17.17  | 10.58 | 1.62 | 0.62 |
| P63154_CRNL1_MOUSE | Crnk1   | Crooked neck-like protei  | R.LVESDAEADTVR@.E                       | 26.02  | 16.48 | 1.58 | 0.63 |
| P63154_CRNL1_MOUSE | Crnk1   | Crooked neck-like protei  | K.SYIDFEIQEETER@.T                      | 9.42   | 6.22  | 1.51 | 0.66 |
| P63154_CRNL1_MOUSE | Crnk1   | Crooked neck-like protei  | K.VVIFQAEFLSSGK#.E                      | 5.96   | 2.87  | 2.08 | 0.48 |
| P63154_CRNL1_MOUSE | Crnk1   | Crooked neck-like protei  | K.YTYM*EEM*LVNAGAR@.Q                   | 9.57   | 3.15  | 3.04 | 0.33 |
| P63154_CRNL1_MOUSE | Crnk1   | Crooked neck-like protei  | K.APAEVQTAQLLR@.E                       | 13.09  | 8.80  | 1.49 | 0.67 |
| P63154_CRNL1_MOUSE | Crnk1   | Crooked neck-like protei  | K.FAELETLDGIER.A                        | 44.46  | 26.58 | 1.67 | 0.60 |
| P63154_CRNL1_MOUSE | Crnk1   | Crooked neck-like protei  | R.LDM*PEVLWK#.S                         | 11.06  | 5.62  | 1.97 | 0.51 |
| P63154_CRNL1_MOUSE | Crnk1   | Crooked neck-like protei  | R.LM*LLESWR@.S                          | 16.26  | 9.10  | 1.79 | 0.56 |
| P63154_CRNL1_MOUSE | Crnk1   | Crooked neck-like protei  | R.LVESDAEADTVR@.E                       | 26.21  | 14.59 | 1.80 | 0.56 |
| P63154_CRNL1_MOUSE | Crnk1   | Crooked neck-like protei  | K.NK#APEVQTAQLLR@.E                     | 13.25  | 10.90 | 1.22 | 0.82 |
| P63154_CRNL1_MOUSE | Crnk1   | Crooked neck-like protei  | K.SYIDFEIQEETER@.T                      | 13.92  | 6.30  | 2.21 | 0.45 |
| P63154_CRNL1_MOUSE | Crnk1   | Crooked neck-like protei  | R.TVSNWIK#.Y                            | 17.87  | 11.08 | 1.61 | 0.62 |
| P63154_CRNL1_MOUSE | Crnk1   | Crooked neck-like protei  | K.YTYM*EEM*LVNAGAR@.Q                   | 6.81   | 1.78  | 3.82 | 0.26 |
| Q9CYD3_CRTAP_MOUSE | Crtap   | Cartilage-associated prot | K.SYELFVR@.A                            | 19.15  | 12.35 | 1.55 | 0.64 |
| Q91W50_CSDE1_MOUSE | Csde1   | Cold shock domain-cont    | K.EAFGFIER@.G                           | 11.96  | 5.99  | 2.00 | 0.50 |
| Q91W50_CSDE1_MOUSE | Csde1   | Cold shock domain-cont    | R.GPDNSM*GFGAER@.K                      | 7.37   | 4.68  | 1.57 | 0.63 |
| Q9ERK4_XPO2_MOUSE  | Cse1    | Exportin-2 OS=Mus musc    | R.GSSTIATAAADK#PGLLGVFQK#.L             | 12.45  | 6.24  | 2.00 | 0.50 |
| Q9ERK4_XPO2_MOUSE  | Cse1    | Exportin-2 OS=Mus musc    | K.ALTLPSSSENEYIM*#.A                    | 8.33   | 3.37  | 2.47 | 0.40 |
| Q9ERK4_XPO2_MOUSE  | Cse1    | Exportin-2 OS=Mus musc    | R.GSSTIATAAADK#PGLLGVFQK#.L             | 14.28  | 6.96  | 2.05 | 0.49 |
| Q9ERK4_XPO2_MOUSE  | Cse1    | Exportin-2 OS=Mus musc    | K.LLQTDDEEAGLLELLK#.S                   | 8.40   | 6.18  | 1.36 | 0.74 |
| P41241_CSK_MOUSE   | Csk     | Tyrosine-protein kinase C | R.LYYPETGLFLVR@.E                       | 3.86   | 3.45  | 1.12 | 0.89 |
| Q60737_CSK21_MOUSE | Csnk2a1 | Casein kinase II subunit  | R.EYWDYSHVVEWGNQDDYQLVR@.K              | 14.57  | 3.95  | 3.69 | 0.27 |
| Q60737_CSK21_MOUSE | Csnk2a1 | Casein kinase II subunit  | R.FNDILGR@.H                            | 68.58  | 23.22 | 2.95 | 0.34 |
| Q60737_CSK21_MOUSE | Csnk2a1 | Casein kinase II subunit  | R.GGPNITLADIVKH.D                       | 19.31  | 11.86 | 1.63 | 0.61 |
| Q60737_CSK21_MOUSE | Csnk2a1 | Casein kinase II subunit  | R.GKYEVFEINNTNEK.V                      | 46.07  | 15.58 | 2.96 | 0.34 |
| Q60737_CSK21_MOUSE | Csnk2a1 | Casein kinase II subunit  | R.LIDWGLAEFYHPQEVNVR@.V                 | 66.30  | 20.06 | 3.30 | 0.30 |
| Q60737_CSK21_MOUSE | Csnk2a1 | Casein kinase II subunit  | K.QLYQLTYDIDR.F                         | 34.66  | 16.55 | 2.09 | 0.48 |
| Q60737_CSK21_MOUSE | Csnk2a1 | Casein kinase II subunit  | R.TPALVFHVNNTDFK#.Q                     | 104.65 | 32.98 | 3.17 | 0.32 |
| Q60737_CSK21_MOUSE | Csnk2a1 | Casein kinase II subunit  | K.VLGTEDLYDYIDK#.Y                      | 6.95   | 3.44  | 2.02 | 0.50 |
| Q60737_CSK21_MOUSE | Csnk2a1 | Casein kinase II subunit  | K.VLGTEDLYDYIDK#NIELDPR.F               | 78.73  | 25.34 | 3.11 | 0.32 |
| O54833_CSK22_MOUSE | Csnk2a2 | Casein kinase II subunit  | K.EAM*EHYFYFVVK#.E                      | 11.79  | 3.66  | 3.22 | 0.31 |
| O54833_CSK22_MOUSE | Csnk2a2 | Casein kinase II subunit  | R.LIDWGLAEFYHPQEVNVR@.V                 | 19.48  | 10.04 | 1.94 | 0.52 |
| O54833_CSK22_MOUSE | Csnk2a2 | Casein kinase II subunit  | K.TPALVFHVNNTDFK#.Q                     | 14.30  | 9.97  | 1.44 | 0.70 |
| O54833_CSK22_MOUSE | Csnk2a2 | Casein kinase II subunit  | K.VLGTEDLYDYIDK#.K                      | 26.00  | 6.48  | 4.01 | 0.25 |
| O54833_CSK22_MOUSE | Csnk2a2 | Casein kinase II subunit  | R.VYAEVNSLR@.S                          | 46.53  | 11.71 | 3.97 | 0.25 |
| O54833_CSK22_MOUSE | Csnk2a2 | Casein kinase II subunit  | K.YSEVFEINNTNER@.V                      | 7.39   | 2.96  | 2.50 | 0.40 |
| P67871_CSK2B_MOUSE | Csnk2b  | Casein kinase II subunit  | R.GIAQM*LEK#.Y                          | 38.78  | 15.49 | 2.50 | 0.40 |
| P67871_CSK2B_MOUSE | Csnk2b  | Casein kinase II subunit  | K.R@PANOFVPR@.L                         | 35.56  | 13.52 | 2.63 | 0.38 |
| P67871_CSK2B_MOUSE | Csnk2b  | Casein kinase II subunit  | K.FNLTGLNEQVPHYR@.Q                     | 26.16  | 10.62 | 2.46 | 0.41 |
| P67871_CSK2B_MOUSE | Csnk2b  | Casein kinase II subunit  | R.GIAQM*LEK#.Y                          | 53.05  | 21.70 | 2.44 | 0.41 |
| P67871_CSK2B_MOUSE | Csnk2b  | Casein kinase II subunit  | K.IHPM*AYQLQQAASNFK#.S                  | 16.47  | 9.94  | 1.66 | 0.60 |
| P67871_CSK2B_MOUSE | Csnk2b  | Casein kinase II subunit  | K.R@PANOFVPR@.L                         | 64.33  | 23.56 | 2.73 | 0.37 |
| Q99388_CSPRS_MOUSE | Csprs   | Component of Sp100-rs (   | R.SLVPVDR@.L                            | 66.20  | 34.65 | 1.91 | 0.52 |
| Q99388_CSPRS_MOUSE | Csprs   | Component of Sp100-rs (   | K.VAISNAIR.S                            | 27.79  | 22.57 | 1.23 | 0.81 |
| P97315_CSRP1_MOUSE | Csrp1   | Cysteine and glycine-rich | K.GFGGQAGALVHSE.-                       | 13.38  | 13.38 | 1.00 | 1.00 |
| P97315_CSRP1_MOUSE | Csrp1   | Cysteine and glycine-rich | K.GYGGQAGTLSTDKGESLGIK.H                | 30.45  | 12.48 | 2.44 | 0.41 |
| P97314_CSRP2_MOUSE | Csrp2   | Cysteine and glycine-rich | K.GYGGQAGALVHAQ.-                       | 12.03  | 12.03 | 1.00 | 1.00 |
| P97314_CSRP2_MOUSE | Csrp2   | Cysteine and glycine-rich | K.GYGGQAGTLNM*DR@.G                     | 40.58  | 27.95 | 1.45 | 0.69 |
| P97314_CSRP2_MOUSE | Csrp2   | Cysteine and glycine-rich | K.SLESTLTK#.E                           | 132.39 | 98.11 | 1.35 | 0.74 |
| Q8CID0_CSR2B_MOUSE | Csrp2bp | Cysteine-rich protein 2-b | R.LVGSDELAVDQISIPYTSR@.I                | 3.25   | 2.04  | 1.59 | 0.63 |
| Q8CID0_CSR2B_MOUSE | Csrp2bp | Cysteine-rich protein 2-b | R.NPVESAM*ELK#.E                        | 7.96   | 2.45  | 3.25 | 0.31 |
| Q99LC2_CSTF1_MOUSE | Cstf1   | Cleavage stimulation fact | R.DGQLI41GASADASI#.I                    | 64.41  | 80.05 | 0.80 | 1.24 |
| Q99LC2_CSTF1_MOUSE | Cstf1   | Cleavage stimulation fact | K.LGM*ENDDTAVQYAIR@.S                   | 19.65  | 8.16  | 2.41 | 0.42 |
| Q99LC2_CSTF1_MOUSE | Cstf1   | Cleavage stimulation fact | R.SISFHPSGDILVGTQHPTLR@.L               | 3.11   | 2.19  | 1.42 | 0.70 |
| Q99LC2_CSTF1_MOUSE | Cstf1   | Cleavage stimulation fact | R.TQAVFNHTEDVILLPDER@.T                 | 23.64  | 12.33 | 1.92 | 0.52 |
| Q99LC2_CSTF1_MOUSE | Cstf1   | Cleavage stimulation fact | K.YIQEAM*LR@.S                          | 20.31  | 6.93  | 2.93 | 0.34 |
| Q99LC2_CSTF1_MOUSE | Cstf1   | Cleavage stimulation fact | K.LGM*ENDDTAVQYAIR@.S                   | 10.74  | 2.68  | 4.01 | 0.25 |
| Q99LC2_CSTF1_MOUSE | Cstf1   | Cleavage stimulation fact | R.TQAVFNHTEDVILLPDER@.T                 | 15.61  | 5.43  | 2.88 | 0.35 |
| Q99LC2_CSTF1_MOUSE | Cstf1   | Cleavage stimulation fact | K.LGM*ENDDTAVQYAIR@.S                   | 6.82   | 1.54  | 4.43 | 0.23 |
| Q99LC2_CSTF1_MOUSE | Cstf1   | Cleavage stimulation fact | R.TQAVFNHTEDVILLPDER@.T                 | 11.36  | 2.51  | 4.53 | 0.22 |
| Q99L17_CSTF3_MOUSE | Cstf3   | Cleavage stimulation fact | R.DYNK#EEGIIHLAK#.K                     | 17.67  | 6.83  | 2.59 | 0.39 |
| Q99L17_CSTF3_MOUSE | Cstf3   | Cleavage stimulation fact | K.GVEAVGSYAEINQR@.I                     | 29.95  | 7.81  | 3.84 | 0.26 |
| Q99L17_CSTF3_MOUSE | Cstf3   | Cleavage stimulation fact | R.IITGGAPLAVEGNPVESSAVLTK#.A            | 22.82  | 6.15  | 3.71 | 0.27 |
| Q99L17_CSTF3_MOUSE | Cstf3   | Cleavage stimulation fact | K.IPNVVEAVR@.I                          | 15.72  | 5.00  | 3.14 | 0.32 |
| Q99L17_CSTF3_MOUSE | Cstf3   | Cleavage stimulation fact | K.K#EENPYDLDVAISILIR@.E                 | 65.32  | 22.42 | 2.91 | 0.34 |

|                    |           |                                                                    |       |       |       |      |
|--------------------|-----------|--------------------------------------------------------------------|-------|-------|-------|------|
| Q99L17_CSTF3_MOUSE | Cstf3     | Cleavage stimulation fact K.LFSDEAAANIYER@.A                       | 49.08 | 15.52 | 3.16  | 0.32 |
| Q99L17_CSTF3_MOUSE | Cstf3     | Cleavage stimulation fact R.LLAEIDIDPLTVIYQYM*K#.F                 | 15.84 | 3.64  | 4.36  | 0.23 |
| Q99L17_CSTF3_MOUSE | Cstf3     | Cleavage stimulation fact R.LVAQFPPSSGR@.F                         | 44.03 | 13.25 | 3.32  | 0.30 |
| Q99L17_CSTF3_MOUSE | Cstf3     | Cleavage stimulation fact K.M*AAQVDFALDK#.I                        | 17.49 | 6.93  | 2.52  | 0.40 |
| Q99L17_CSTF3_MOUSE | Cstf3     | Cleavage stimulation fact K.NM*LLYFAVADYEESR@.M                    | 6.03  | 3.10  | 1.94  | 0.51 |
| Q99L17_CSTF3_MOUSE | Cstf3     | Cleavage stimulation fact R.TEDQTLITK#.R                           | 31.15 | 7.87  | 3.96  | 0.25 |
| Q99L17_CSTF3_MOUSE | Cstf3     | Cleavage stimulation fact R.VLTSGSLPPEK#.S                         | 10.10 | 4.00  | 2.52  | 0.40 |
| Q99L17_CSTF3_MOUSE | Cstf3     | Cleavage stimulation fact K.GVEAVGSYAEANQR@.I                      | 5.60  | 2.80  | 2.00  | 0.50 |
| Q99L17_CSTF3_MOUSE | Cstf3     | Cleavage stimulation fact K.KHEENPYDLDAWSILIR@.E                   | 5.63  | 4.39  | 1.28  | 0.78 |
| O88712_CTBP1_MOUSE | Ctbp1     | C-terminal-binding prote K.ALAQALK#.E                              | 38.54 | 20.58 | 1.87  | 0.53 |
| O88712_CTBP1_MOUSE | Ctbp1     | C-terminal-binding prote R.GAALDVHESEPFSSQGLPK#.D                  | 32.34 | 19.97 | 1.62  | 0.62 |
| O88712_CTBP1_MOUSE | Ctbp1     | C-terminal-binding prote R.IGSGFDNIDIK#.S                          | 50.00 | 29.05 | 1.72  | 0.58 |
| O88712_CTBP1_MOUSE | Ctbp1     | C-terminal-binding prote R.IRGETLGIIGLGR.V                         | 55.82 | 26.54 | 2.10  | 0.48 |
| O88712_CTBP1_MOUSE | Ctbp1     | C-terminal-binding prote R.QGAFVNTAR@.G                            | 43.27 | 18.35 | 2.36  | 0.42 |
| O88712_CTBP1_MOUSE | Ctbp1     | C-terminal-binding prote R.VGQAVALLR@.A                            | 36.36 | 17.43 | 2.09  | 0.48 |
| O88712_CTBP1_MOUSE | Ctbp1     | C-terminal-binding prote K.VLNEAVGALMHTITLTR@.E                    | 11.38 | 8.42  | 1.35  | 0.74 |
| P56546_CTBP2_MOUSE | Ctbp2     | C-terminal-binding prote R.GAALDVHESEPFSSQGLPK#.D                  | 18.15 | 9.13  | 1.99  | 0.50 |
| P56546_CTBP2_MOUSE | Ctbp2     | C-terminal-binding prote R.IGSGYDNDVIDK#.A                         | 15.11 | 7.98  | 1.89  | 0.53 |
| P56546_CTBP2_MOUSE | Ctbp2     | C-terminal-binding prote R.IRGETLGIIGLGR.T                         | 29.01 | 8.84  | 3.28  | 0.30 |
| P56546_CTBP2_MOUSE | Ctbp2     | C-terminal-binding prote R.QGAFVNAAR@.G                            | 18.51 | 10.84 | 1.71  | 0.59 |
| Q5SU09_CTC1_MOUSE  | Ctc1      | CST complex subunit CTC R.VALQFTLGGGQTESASK#.T                     | 4.58  | 3.66  | 1.25  | 0.80 |
| Q5SU09_CTC1_MOUSE  | Ctc1      | CST complex subunit CTC R.VALQFTLGGGQTESASK#.T                     | 7.59  | 2.56  | 2.96  | 0.34 |
| Q61164_CTCF_MOUSE  | Ctcf      | Transcriptional repressor R.YTEEGKHVDVSVYDFEEOEQGLLSEVNAEK#.V      | 4.81  | 1.79  | 2.68  | 0.37 |
| Q61164_CTCF_MOUSE  | Ctcf      | Transcriptional repressor R.KHSDLVHLIR@.K                          | 20.51 | 6.27  | 3.27  | 0.31 |
| Q61164_CTCF_MOUSE  | Ctcf      | Transcriptional repressor K.QNQPATIQVEDQNTGAIENIIVEVK#.K           | 22.58 | 6.57  | 3.44  | 0.29 |
| Q61164_CTCF_MOUSE  | Ctcf      | Transcriptional repressor R.YALIQHK#.S                             | 35.45 | 12.26 | 2.89  | 0.35 |
| Q61164_CTCF_MOUSE  | Ctcf      | Transcriptional repressor R.YTEEGKHVDVSVYDFEEOEQGLLSEVNAEK#.V      | 28.42 | 10.90 | 2.61  | 0.38 |
| Q61164_CTCF_MOUSE  | Ctcf      | Transcriptional repressor R.YTEEGKHVDVSVYDFEEOEQGLLSEVNAEK#.V      | 10.30 | 4.13  | 2.50  | 0.40 |
| P26231_CTN1_MOUSE  | Ctnna1    | Catenin alpha-1 OS=Mus R.AIM*AQLPQEQK#.A                           | 18.60 | 7.91  | 2.35  | 0.43 |
| P26231_CTN1_MOUSE  | Ctnna1    | Catenin alpha-1 OS=Mus R.ALLSAVTR@.L                               | 23.06 | 9.62  | 2.40  | 0.42 |
| P26231_CTN1_MOUSE  | Ctnna1    | Catenin alpha-1 OS=Mus K.ESQFLKHEELVAVEDVR@.K                      | 15.98 | 5.78  | 2.76  | 0.36 |
| P26231_CTN1_MOUSE  | Ctnna1    | Catenin alpha-1 OS=Mus K.ESQFLKHEELVAVEDVR@K#.Q                    | 5.15  | 3.22  | 1.60  | 0.63 |
| P26231_CTN1_MOUSE  | Ctnna1    | Catenin alpha-1 OS=Mus R.FTEQVEAAVLESSDPAQPM*DENEFIDASR@.L         | 5.18  | 2.27  | 2.28  | 0.44 |
| P26231_CTN1_MOUSE  | Ctnna1    | Catenin alpha-1 OS=Mus K.IAEQVAFSEEEK#.S                           | 30.08 | 15.93 | 1.89  | 0.53 |
| P26231_CTN1_MOUSE  | Ctnna1    | Catenin alpha-1 OS=Mus R.LLILADM*ADVYK#.L                          | 11.37 | 4.37  | 2.60  | 0.38 |
| P26231_CTN1_MOUSE  | Ctnna1    | Catenin alpha-1 OS=Mus K.LLSNTVM*PRR@.F                            | 12.96 | 7.23  | 1.79  | 0.56 |
| P26231_CTN1_MOUSE  | Ctnna1    | Catenin alpha-1 OS=Mus R.NAGNEQDLGIQYK#.A                          | 24.14 | 9.93  | 2.43  | 0.41 |
| P26231_CTN1_MOUSE  | Ctnna1    | Catenin alpha-1 OS=Mus K.QIVDPLSFSSEER@.F                          | 17.78 | 8.52  | 2.09  | 0.48 |
| P26231_CTN1_MOUSE  | Ctnna1    | Catenin alpha-1 OS=Mus R.SDALNSAIDK#.M                             | 16.60 | 8.93  | 1.86  | 0.54 |
| P26231_CTN1_MOUSE  | Ctnna1    | Catenin alpha-1 OS=Mus R.TSVQTEDDQLIAGQSR@.A                       | 15.65 | 7.02  | 2.23  | 0.45 |
| P26231_CTN1_MOUSE  | Ctnna1    | Catenin alpha-1 OS=Mus R.VIHVVTSEM*DNYPEGVYTEK#.V                  | 25.28 | 11.21 | 2.26  | 0.44 |
| P26231_CTN1_MOUSE  | Ctnna1    | Catenin alpha-1 OS=Mus K.KHAEVQLNGELVSVGSDSAM*SLIQAAK#.N           | 9.86  | 7.12  | 1.38  | 0.72 |
| Q02248_CTNB1_MOUSE | Ctnnb1    | Catenin beta-1 OS=Mus n R.HAVVNLINQDDELATR@.A                      | 9.72  | 9.16  | 1.06  | 0.94 |
| Q02248_CTNB1_MOUSE | Ctnnb1    | Catenin beta-1 OS=Mus n K.LLNDEDQVNVNK#.A                          | 14.37 | 6.77  | 2.12  | 0.47 |
| Q02248_CTNB1_MOUSE | Ctnnb1    | Catenin beta-1 OS=Mus n R.LVQLVLR@.M                               | 17.31 | 8.18  | 2.12  | 0.47 |
| Q02248_CTNB1_MOUSE | Ctnnb1    | Catenin beta-1 OS=Mus n K.SGGIPALVK#.M                             | 11.73 | 2.27  | 5.18  | 0.19 |
| Q02248_CTNB1_MOUSE | Ctnnb1    | Catenin beta-1 OS=Mus n R.TM*QNTNDVETAR@.C                         | 10.38 | 3.56  | 2.91  | 0.34 |
| P30999_CTN1_MOUSE  | Ctnnd1    | Catenin delta-1 OS=Mus r R.QDVYGPQPQVR@.V                          | 6.95  | 6.86  | 1.01  | 0.99 |
| P30999_CTN1_MOUSE  | Ctnnd1    | Catenin delta-1 OS=Mus r R.AAALVLQITWGYK#.E                        | 11.04 | 4.74  | 2.33  | 0.43 |
| P30999_CTN1_MOUSE  | Ctnnd1    | Catenin delta-1 OS=Mus r R.GK#K#PTEDPANDTVDFPK#.R                  | 4.28  | 3.80  | 1.12  | 0.89 |
| P30999_CTN1_MOUSE  | Ctnnd1    | Catenin delta-1 OS=Mus r R.GYELLFQPEVVR@.I                         | 25.63 | 11.20 | 2.29  | 0.44 |
| P30999_CTN1_MOUSE  | Ctnnd1    | Catenin delta-1 OS=Mus r R.HYEDGYGGSDNYGSLSR@.V                    | 11.17 | 7.11  | 1.57  | 0.64 |
| P30999_CTN1_MOUSE  | Ctnnd1    | Catenin delta-1 OS=Mus r R.QDVYGPQPQVR@.V                          | 20.67 | 9.83  | 2.10  | 0.48 |
| P30999_CTN1_MOUSE  | Ctnnd1    | Catenin delta-1 OS=Mus r K.SDFQVNLNNAISR@.S                        | 14.90 | 5.53  | 2.69  | 0.37 |
| P30999_CTN1_MOUSE  | Ctnnd1    | Catenin delta-1 OS=Mus r K.SLDNYSYTLNER@.G                         | 7.34  | 2.03  | 3.62  | 0.28 |
| P30999_CTN1_MOUSE  | Ctnnd1    | Catenin delta-1 OS=Mus r R.GYELLFQPEVVR@.I                         | 15.47 | 8.62  | 1.79  | 0.56 |
| P30999_CTN1_MOUSE  | Ctnnd1    | Catenin delta-1 OS=Mus r K.HAIPNLVK#.N                             | 14.59 | 3.91  | 3.73  | 0.27 |
| P30999_CTN1_MOUSE  | Ctnnd1    | Catenin delta-1 OS=Mus r R.HYEDGYGGSDNYGSLSR@.V                    | 8.25  | 2.90  | 2.85  | 0.35 |
| P30999_CTN1_MOUSE  | Ctnnd1    | Catenin delta-1 OS=Mus r R.IYISLKH#.E                              | 25.42 | 5.26  | 4.83  | 0.21 |
| P30999_CTN1_MOUSE  | Ctnnd1    | Catenin delta-1 OS=Mus r R.QDVYGPQPQVR@.V                          | 10.05 | 4.98  | 2.02  | 0.50 |
| P70698_PYRG1_MOUSE | Ctsp1     | CTP synthase 1 OS=Mus n K.FSDSYASVIK#.A                            | 23.81 | 13.83 | 1.72  | 0.58 |
| P70698_PYRG1_MOUSE | Ctsp1     | CTP synthase 1 OS=Mus n K.FVGQDVEGER@.M                            | 20.77 | 9.15  | 2.27  | 0.44 |
| P70698_PYRG1_MOUSE | Ctsp1     | CTP synthase 1 OS=Mus n R.NVLGWQDANSTFDPK#.T                       | 8.39  | 3.31  | 2.54  | 0.39 |
| P70698_PYRG1_MOUSE | Ctsp1     | CTP synthase 1 OS=Mus n R.RLDLPIER@.Q                              | 21.23 | 8.73  | 2.43  | 0.41 |
| P70698_PYRG1_MOUSE | Ctsp1     | CTP synthase 1 OS=Mus n K.TVQVPHITDAIQEWMV*#R@.Q                   | 18.40 | 5.42  | 15.02 | 0.07 |
| P70698_PYRG1_MOUSE | Ctsp1     | CTP synthase 1 OS=Mus n K.YIDSTLEPSTLQEEPVR@.Y                     | 11.18 | 7.95  | 1.41  | 0.71 |
| P70698_PYRG1_MOUSE | Ctsp1     | CTP synthase 1 OS=Mus n K.GVIASSVGTILK.S                           | 2.99  | 3.68  | 0.81  | 1.23 |
| P70698_PYRG1_MOUSE | Ctsp1     | CTP synthase 1 OS=Mus n K.FSDSYASVIK#.A                            | 58.16 | 31.71 | 1.83  | 0.55 |
| P70698_PYRG1_MOUSE | Ctsp1     | CTP synthase 1 OS=Mus n K.FVGQDVEGER@.M                            | 50.83 | 28.18 | 1.80  | 0.55 |
| P70698_PYRG1_MOUSE | Ctsp1     | CTP synthase 1 OS=Mus n K.GVIASSVGTILK#.S                          | 9.83  | 10.38 | 0.95  | 1.06 |
| P70698_PYRG1_MOUSE | Ctsp1     | CTP synthase 1 OS=Mus n K.IYQVINK#.E                               | 48.45 | 26.83 | 1.81  | 0.55 |
| P70698_PYRG1_MOUSE | Ctsp1     | CTP synthase 1 OS=Mus n R.K.HLYGDTDYLEER@.H                        | 23.32 | 19.99 | 1.17  | 0.86 |
| P70698_PYRG1_MOUSE | Ctsp1     | CTP synthase 1 OS=Mus n K.LYGDYDYLEER@.H                           | 28.63 | 18.17 | 1.58  | 0.63 |
| P70698_PYRG1_MOUSE | Ctsp1     | CTP synthase 1 OS=Mus n R.NVLGWQDANSTFDPK#.T                       | 21.10 | 9.59  | 2.20  | 0.45 |
| P70698_PYRG1_MOUSE | Ctsp1     | CTP synthase 1 OS=Mus n R.R@LDLPIER@.Q                             | 49.81 | 27.40 | 1.82  | 0.55 |
| P70698_PYRG1_MOUSE | Ctsp1     | CTP synthase 1 OS=Mus n K.YIDSTLEPSTLQEEPVR@.Y                     | 26.41 | 13.18 | 2.00  | 0.50 |
| P70698_PYRG1_MOUSE | Ctsp1     | CTP synthase 1 OS=Mus n K.FVGQDVEGER@.M                            | 22.82 | 6.94  | 3.29  | 0.30 |
| P70698_PYRG1_MOUSE | Ctsp1     | CTP synthase 1 OS=Mus n K.IYQVINK#.E                               | 15.99 | 5.13  | 3.12  | 0.32 |
| P70698_PYRG1_MOUSE | Ctsp1     | CTP synthase 1 OS=Mus n K.LYGDYDYLEER@.H                           | 15.46 | 4.40  | 3.51  | 0.28 |
| P70698_PYRG1_MOUSE | Ctsp1     | CTP synthase 1 OS=Mus n R.NVLGWQDANSTFDPK#.T                       | 11.40 | 3.23  | 3.53  | 0.28 |
| P70698_PYRG1_MOUSE | Ctsp1     | CTP synthase 1 OS=Mus n R.R@LDLPIER@.Q                             | 27.38 | 6.48  | 4.23  | 0.24 |
| P70698_PYRG1_MOUSE | Ctsp1     | CTP synthase 1 OS=Mus n K.TVQVPHITDAIQEWMV*#R@.Q                   | 26.30 | 18.10 | 1.45  | 0.69 |
| P70698_PYRG1_MOUSE | Ctsp1     | CTP synthase 1 OS=Mus n K.YIDSTLEPSTLQEEPVR@.Y                     | 17.57 | 5.93  | 2.96  | 0.34 |
| Q60598_SRC8_MOUSE  | Cttn      | Src substrate cortactin O K.ASAGHAVSIQDDGGADDWETDPDFVNDVSEK#.E     | 2.51  | 1.70  | 1.47  | 0.68 |
| Q60598_SRC8_MOUSE  | Cttn      | Src substrate cortactin O K.SAVGFYQGK#.T                           | 15.43 | 15.06 | 1.02  | 0.98 |
| Q60598_SRC8_MOUSE  | Cttn      | Src substrate cortactin O R.ANFENLAK#.E                            | 83.50 | 44.82 | 1.86  | 0.54 |
| Q60598_SRC8_MOUSE  | Cttn      | Src substrate cortactin O K.ASAGHAVSIQDDGGADDWETDPDFVNDVSEK#EQR@.W | 14.34 | 7.98  | 1.80  | 0.56 |
| Q60598_SRC8_MOUSE  | Cttn      | Src substrate cortactin O K.EKHELETGPK#.A                          | 14.05 | 18.28 | 0.77  | 1.30 |
| Q60598_SRC8_MOUSE  | Cttn      | Src substrate cortactin O K.FGVQM*DR@.V                            | 43.18 | 17.87 | 2.42  | 0.41 |
| Q60598_SRC8_MOUSE  | Cttn      | Src substrate cortactin O K.FGVQTRD.Q                              | 80.50 | 42.60 | 1.89  | 0.53 |
| Q60598_SRC8_MOUSE  | Cttn      | Src substrate cortactin O K.HESQDQYAK#.G                           | 9.29  | 4.53  | 2.05  | 0.49 |
| Q60598_SRC8_MOUSE  | Cttn      | Src substrate cortactin O K.LR@ENVFQEHQTLK#.E                      | 46.16 | 18.67 | 2.47  | 0.40 |
| Q60598_SRC8_MOUSE  | Cttn      | Src substrate cortactin O K.NASTFEEVQVPSAYQK#.T                    | 33.87 | 15.64 | 2.17  | 0.46 |
| Q60598_SRC8_MOUSE  | Cttn      | Src substrate cortactin O R.QDSSAVGFQDYK#.E                        | 38.81 | 15.85 | 2.45  | 0.41 |
| Q60598_SRC8_MOUSE  | Cttn      | Src substrate cortactin O K.SAVGFYQGK#.T                           | 74.82 | 33.58 | 2.23  | 0.45 |
| Q60598_SRC8_MOUSE  | Cttn      | Src substrate cortactin O K.SAVGFYQGK#.T                           | 90.59 | 52.94 | 1.71  | 0.58 |
| Q60598_SRC8_MOUSE  | Cttn      | Src substrate cortactin O R.SAVGHEVYQSK#.L                         | 12.95 | 7.00  | 1.85  | 0.54 |
| Q60598_SRC8_MOUSE  | Cttn      | Src substrate cortactin O R.YGLFPANVYELR@.Q                        | 60.19 | 25.20 | 2.39  | 0.42 |
| Q60598_SRC8_MOUSE  | Cttn      | Src substrate cortactin O R.YGLFPANVYELR@Q.-                       | 41.62 | 15.66 | 2.66  | 0.38 |
| Q60598_SRC8_MOUSE  | Cttn      | Src substrate cortactin O K.YGLQADR@VDK#.S                         | 25.50 | 19.87 | 1.28  | 0.78 |
| Q60598_SRC8_MOUSE  | Cttn      | Src substrate cortactin O K.NASTFEEVQVPSAYQK#.T                    | 4.80  | 1.93  | 2.48  | 0.40 |
| Q99L10_CT2NL_MOUSE | Cttnbp2nl | CTTNBP2 N-terminal-like R.ELTSDSSTENQGGPR@.E                       | 6.99  | 2.49  | 2.80  | 0.36 |
| Q99L10_CT2NL_MOUSE | Cttnbp2nl | CTTNBP2 N-terminal-like K.LTDTGLGPTTAAYSIAK#.A                     | 6.39  | 4.25  | 1.50  | 0.67 |

|                    |           |                                                               |        |       |      |       |
|--------------------|-----------|---------------------------------------------------------------|--------|-------|------|-------|
| Q99LJ0_CT2NL_MOUSE | Cttnbp2nl | CTTNBP2 N-terminal-like R.DLVEALK#A                           | 15.14  | 3.58  | 4.23 | 0.24  |
| Q99LJ0_CT2NL_MOUSE | Cttnbp2nl | CTTNBP2 N-terminal-like R.ELTSDSSTENQGGPPR@.E                 | 13.36  | 3.63  | 3.68 | 0.27  |
| Q99LJ0_CT2NL_MOUSE | Cttnbp2nl | CTTNBP2 N-terminal-like R.GLQTEAQEK#K.Q                       | 8.78   | 2.46  | 3.56 | 0.28  |
| Q99LJ0_CT2NL_MOUSE | Cttnbp2nl | CTTNBP2 N-terminal-like R.LTDTGLPGPTTAASYAK#A                 | 10.22  | 3.77  | 2.71 | 0.37  |
| Q99LJ0_CT2NL_MOUSE | Cttnbp2nl | CTTNBP2 N-terminal-like K.VSSPLSLSPGIK#S                      | 5.41   | 1.96  | 2.76 | 0.36  |
| A2A432_CUL4B_MOUSE | Cul4b     | Cullin-4B OS=Mus muscu K.ETVEEQASTER@.V                       | 13.62  | 3.29  | 4.14 | 0.24  |
| A2A432_CUL4B_MOUSE | Cul4b     | Cullin-4B OS=Mus muscu K.TIDGILLIER@.E                        | 13.57  | 8.44  | 1.61 | 0.62  |
| Q8VE73_CUL7_MOUSE  | Cul7      | Cullin-7 OS=Mus musculi R.EAAPPVVAIPR@.S                      | 20.87  | 8.83  | 2.36 | 0.42  |
| Q8VE73_CUL7_MOUSE  | Cul7      | Cullin-7 OS=Mus musculi K.ELNTVNM*PSASR@.V                    | 9.33   | 5.80  | 1.61 | 0.62  |
| Q8VE73_CUL7_MOUSE  | Cul7      | Cullin-7 OS=Mus musculi R.FLDPM*EAAQALS#K.T                   | 12.16  | 5.15  | 2.36 | 0.42  |
| Q8VE73_CUL7_MOUSE  | Cul7      | Cullin-7 OS=Mus musculi R.GLEVLPK#PTFWPVFR@.E                 | 8.29   | 3.04  | 2.73 | 0.37  |
| Q8VE73_CUL7_MOUSE  | Cul7      | Cullin-7 OS=Mus musculi R.GPLDLQEQK#N                         | 12.53  | 4.86  | 2.58 | 0.39  |
| Q8VE73_CUL7_MOUSE  | Cul7      | Cullin-7 OS=Mus musculi R.HEQNFAER@.F                         | 4.35   | 52.65 | 0.08 | 12.09 |
| Q8VE73_CUL7_MOUSE  | Cul7      | Cullin-7 OS=Mus musculi R.LHIVDLDLQDHLLEER@.V                 | 18.31  | 4.02  | 4.56 | 0.22  |
| Q8VE73_CUL7_MOUSE  | Cul7      | Cullin-7 OS=Mus musculi K.SSSELFGR@.A                         | 17.98  | 3.60  | 5.00 | 0.20  |
| Q8VE73_CUL7_MOUSE  | Cul7      | Cullin-7 OS=Mus musculi R.TQILLSLQEQAEIK#H                    | 14.74  | 4.05  | 3.63 | 0.28  |
| Q8VE73_CUL7_MOUSE  | Cul7      | Cullin-7 OS=Mus musculi K.VEVSSNPQR@.A                        | 19.63  | 3.48  | 5.63 | 0.18  |
| Q8VE73_CUL7_MOUSE  | Cul7      | Cullin-7 OS=Mus musculi R.VPLGPGHLHAYPDELIR@.Q                | 35.15  | 9.69  | 3.63 | 0.28  |
| Q8VE73_CUL7_MOUSE  | Cul7      | Cullin-7 OS=Mus musculi R.VTLENLTR@.F                         | 21.95  | 5.58  | 3.93 | 0.25  |
| P53564_CUX1_MOUSE  | Cux1      | Homeobox protein cut-li R.LIDVDPDPVPLDVGQLEIK#V               | 3.11   | 1.84  | 1.69 | 0.59  |
| P53564_CUX1_MOUSE  | Cux1      | Homeobox protein cut-li K.APDVAVELVTR@.S                      | 10.12  | 6.56  | 1.54 | 0.65  |
| P53564_CUX1_MOUSE  | Cux1      | Homeobox protein cut-li R.ASETGSDAN#K.S                       | 11.17  | 30.25 | 0.37 | 2.71  |
| P53564_CUX1_MOUSE  | Cux1      | Homeobox protein cut-li R.ELDATATVLANR@.Q                     | 17.91  | 4.06  | 4.41 | 0.23  |
| P53564_CUX1_MOUSE  | Cux1      | Homeobox protein cut-li R.ISNSDLSGASR@.R                      | 11.87  | 6.08  | 1.95 | 0.51  |
| P53564_CUX1_MOUSE  | Cux1      | Homeobox protein cut-li R.LIDVDPDPVPLDVGQLEIK#V               | 7.70   | 3.77  | 2.04 | 0.49  |
| P53564_CUX1_MOUSE  | Cux1      | Homeobox protein cut-li K.LQTLQTALEK#T                        | 17.05  | 5.83  | 2.92 | 0.34  |
| P53564_CUX1_MOUSE  | Cux1      | Homeobox protein cut-li K.LR@ENSASQSLQEQLN#N                  | 10.68  | 6.57  | 1.63 | 0.62  |
| P53564_CUX1_MOUSE  | Cux1      | Homeobox protein cut-li R.SLQSENATL.R                         | 13.30  | 4.48  | 2.97 | 0.34  |
| P53564_CUX1_MOUSE  | Cux1      | Homeobox protein cut-li K.SM*EFAPSEGAGTQDSTK#PLEVLLLEK#N      | 16.10  | 7.05  | 2.28 | 0.44  |
| P53564_CUX1_MOUSE  | Cux1      | Homeobox protein cut-li K.SQGGLAEVAAPADR@EEATQPAEK#A          | 23.89  | 5.47  | 4.37 | 0.23  |
| P53564_CUX1_MOUSE  | Cux1      | Homeobox protein cut-li R.SLQGGPSASAAYWK#E                    | 5.77   | 2.97  | 1.94 | 0.51  |
| P53564_CUX1_MOUSE  | Cux1      | Homeobox protein cut-li R.SSALPTSPAPANAPAR@.R                 | 3.99   | 3.59  | 3.31 | 0.30  |
| P53564_CUX1_MOUSE  | Cux1      | Homeobox protein cut-li K.TAEPVQTSSTSSGNSDPAIR@.S             | 8.65   | 2.07  | 4.19 | 0.24  |
| P53564_CUX1_MOUSE  | Cux1      | Homeobox protein cut-li K.TPAAPETSTAALPSAPALK#K               | 2.17   | 2.20  | 0.99 | 1.01  |
| P53564_CUX1_MOUSE  | Cux1      | Homeobox protein cut-li K.TPAAPETSTAALPSAPALK#K#E             | 10.85  | 5.54  | 1.96 | 0.51  |
| Q9JH59_CWC15_MOUSE | Cwc15     | Spliceosome-associated j R.FVNDLTR@.S                         | 52.11  | 25.12 | 2.07 | 0.48  |
| Q9JH59_CWC15_MOUSE | Cwc15     | Spliceosome-associated j R.GKGGDLSQLSK.Q                      | 10.07  | 6.81  | 1.48 | 0.68  |
| Q9JH59_CWC15_MOUSE | Cwc15     | Spliceosome-associated j R.IR@M*ENILSGNPLNLTGSPQANFK#V        | 17.55  | 11.94 | 1.47 | 0.68  |
| Q9JH59_CWC15_MOUSE | Cwc15     | Spliceosome-associated j R.M*ENILSGNPLNLTGSPQANFK#K           | 9.77   | 7.65  | 1.28 | 0.78  |
| Q9JH59_CWC15_MOUSE | Cwc15     | Spliceosome-associated j R.MENILSGNPLNLTGSPQANFK#V            | 9.85   | 2.99  | 3.29 | 0.30  |
| Q9JH59_CWC15_MOUSE | Cwc15     | Spliceosome-associated j R.QTQDQPEVVR@.N                      | 29.39  | 22.65 | 1.30 | 0.77  |
| Q9JH59_CWC15_MOUSE | Cwc15     | Spliceosome-associated j R.IRM*ENILSGNPLNLTGSPQANFK.V         | 1.49   | 4.20  | 0.35 | 2.83  |
| Q8C5N3_CWC22_MOUSE | Cwc22     | Pre-mRNA-splicing factor K.EYM*ESFESIFK#E                     | 11.48  | 2.77  | 4.15 | 0.24  |
| Q8C5N3_CWC22_MOUSE | Cwc22     | Pre-mRNA-splicing factor K.FFGLLAGR@.F                        | 30.44  | 8.88  | 3.43 | 0.29  |
| Q8C5N3_CWC22_MOUSE | Cwc22     | Pre-mRNA-splicing factor R.GINAFER@.L                         | 45.58  | 15.32 | 2.98 | 0.34  |
| Q8C5N3_CWC22_MOUSE | Cwc22     | Pre-mRNA-splicing factor R.GYSYDSSM*ESR@.S                    | 10.25  | 2.98  | 3.44 | 0.29  |
| Q8C5N3_CWC22_MOUSE | Cwc22     | Pre-mRNA-splicing factor R.LK#DETLQPFEGLLPR@.D                | 88.99  | 25.97 | 3.22 | 0.31  |
| Q8C5N3_CWC22_MOUSE | Cwc22     | Pre-mRNA-splicing factor K.LTQVSPR@.Q                         | 23.92  | 9.75  | 2.96 | 0.34  |
| Q8C5N3_CWC22_MOUSE | Cwc22     | Pre-mRNA-splicing factor K.M*EFAESQTKR#E                      | 20.19  | 5.72  | 3.53 | 0.28  |
| Q8C5N3_CWC22_MOUSE | Cwc22     | Pre-mRNA-splicing factor R.NILHESEIDK#R@.V                    | 32.31  | 15.49 | 2.09 | 0.48  |
| Q8C5N3_CWC22_MOUSE | Cwc22     | Pre-mRNA-splicing factor K.TEINLVSR@.R                        | 18.36  | 6.40  | 2.87 | 0.35  |
| Q8C5N3_CWC22_MOUSE | Cwc22     | Pre-mRNA-splicing factor K.VIVAQK#PEAQK#K                     | 14.82  | 3.67  | 4.04 | 0.25  |
| Q8C5N3_CWC22_MOUSE | Cwc22     | Pre-mRNA-splicing factor R.GINAFER@.L                         | 27.17  | 8.38  | 3.24 | 0.31  |
| Q8C5N3_CWC22_MOUSE | Cwc22     | Pre-mRNA-splicing factor R.HQEGRTER@.A                        | 9.47   | 1.09  | 8.71 | 0.11  |
| Q8C5N3_CWC22_MOUSE | Cwc22     | Pre-mRNA-splicing factor R.LILNFR@.K                          | 33.06  | 10.08 | 3.28 | 0.30  |
| Q8C5N3_CWC22_MOUSE | Cwc22     | Pre-mRNA-splicing factor R.LK#DETLQPFEGLLPR@.D                | 67.70  | 28.08 | 2.41 | 0.41  |
| Q8C5N3_CWC22_MOUSE | Cwc22     | Pre-mRNA-splicing factor R.M*M*EQQJTDK#S                      | 19.20  | 9.64  | 1.99 | 0.50  |
| Q8C5N3_CWC22_MOUSE | Cwc22     | Pre-mRNA-splicing factor K.TEINLVSR@.R                        | 18.40  | 5.52  | 3.33 | 0.30  |
| Q9DBF7_CWC25_MOUSE | Cwc25     | Pre-mRNA-splicing factor R.EVLNPNVK#M                         | 37.37  | 25.41 | 1.47 | 0.68  |
| Q9DBF7_CWC25_MOUSE | Cwc25     | Pre-mRNA-splicing factor R.GLQGSLEGQR@.A                      | 51.16  | 34.04 | 1.50 | 0.67  |
| Q9DBF7_CWC25_MOUSE | Cwc25     | Pre-mRNA-splicing factor K.IR@EDPLIFR@.K                      | 30.12  | 24.32 | 1.24 | 0.81  |
| Q9DBF7_CWC25_MOUSE | Cwc25     | Pre-mRNA-splicing factor R.KLSAEELER.K                        | 23.27  | 22.02 | 1.06 | 0.95  |
| Q9DBF7_CWC25_MOUSE | Cwc25     | Pre-mRNA-splicing factor K.VPVGGLQVR@.D                       | 38.02  | 29.00 | 1.31 | 0.76  |
| Q9DBF7_CWC25_MOUSE | Cwc25     | Pre-mRNA-splicing factor R.YAEDVGAVK#K                        | 20.03  | 15.93 | 1.26 | 0.80  |
| Q9DBF7_CWC25_MOUSE | Cwc25     | Pre-mRNA-splicing factor R.KLSAEELER.K                        | 2.58   | 9.77  | 0.26 | 3.79  |
| Q3TKY6_CWC27_MOUSE | Cwc27     | Peptidyl-prolyl cis-trans i R.EDQTLALLSQFK#S                  | 19.54  | 9.34  | 2.09 | 0.48  |
| Q3TKY6_CWC27_MOUSE | Cwc27     | Peptidyl-prolyl cis-trans i R.ETAIHVEEGR@EEEEAAPDGAVAEYR@.R   | 5.89   | 2.57  | 2.29 | 0.44  |
| Q3TKY6_CWC27_MOUSE | Cwc27     | Peptidyl-prolyl cis-trans i K.NFSLSGEEEEEEVNR@.V              | 7.76   | 3.12  | 2.49 | 0.40  |
| Q3TKY6_CWC27_MOUSE | Cwc27     | Peptidyl-prolyl cis-trans i K.VEEGR@EEEEAAPDGAVAEYR@.R        | 10.24  | 7.62  | 1.34 | 0.74  |
| Q3TKY6_CWC27_MOUSE | Cwc27     | Peptidyl-prolyl cis-trans i K.VTGDVTYNN*LR@.L                 | 9.11   | 4.89  | 1.86 | 0.54  |
| Q9CQX2_CYB5B_MOUSE | Cyb5b     | Cytochrome b5 type B O: R.FLSEHPGEEVLEQAAGADATESFDVGHSPDAR@.E | 6.45   | 8.28  | 2.95 | 0.34  |
| Q9CQX2_CYB5B_MOUSE | Cyb5b     | Cytochrome b5 type B O: K.VEGSEPVTYR@.L                       | 24.21  | 4.29  | 1.45 | 0.69  |
| Q9CQX2_CYB5B_MOUSE | Cyb5b     | Cytochrome b5 type B O: K.VEGSEPVTYR@.L                       | 7.37   | 3.05  | 2.42 | 0.41  |
| Q9DCN2_NB5R3_MOUSE | Cyb5r3    | NADH-cytochrome b5 re R.GPNGLLVYQK#G                          | 22.67  | 9.72  | 2.33 | 0.43  |
| Q9DCN2_NB5R3_MOUSE | Cyb5r3    | NADH-cytochrome b5 re R.IDGNLVRIPYVSSDDDKGFVLDLVK.V           | 9.28   | 1.99  | 4.67 | 0.21  |
| Q9DCN2_NB5R3_MOUSE | Cyb5r3    | NADH-cytochrome b5 re R.IGDITFR.G                             | 124.52 | 31.95 | 3.90 | 0.26  |
| Q9DCN2_NB5R3_MOUSE | Cyb5r3    | NADH-cytochrome b5 re R.LIDKHEVISPDR@.R                       | 80.98  | 24.26 | 3.34 | 0.30  |
| Q9DCN2_NB5R3_MOUSE | Cyb5r3    | NADH-cytochrome b5 re R.LIDKHEVISPDR@R@.F                     | 26.12  | 9.58  | 2.73 | 0.37  |
| Q9DCN2_NB5R3_MOUSE | Cyb5r3    | NADH-cytochrome b5 re K.LWYTVDK#APDAWVYSQGFVNEEM*IR@.D        | 4.31   | 2.83  | 1.52 | 0.66  |
| Q9DCN2_NB5R3_MOUSE | Cyb5r3    | NADH-cytochrome b5 re R.STPAITLENPIK#Y                        | 31.53  | 11.37 | 2.77 | 0.36  |
| Q9DCN2_NB5R3_MOUSE | Cyb5r3    | NADH-cytochrome b5 re R.STPAITLENPIK#YPLR@.L                  | 13.06  | 10.57 | 3.13 | 0.32  |
| Q9DCN2_NB5R3_MOUSE | Cyb5r3    | NADH-cytochrome b5 re K.SVGM*LAGTGITPM*LVQIR@.A               | 24.04  | 5.92  | 4.06 | 0.25  |
| Q9DCN2_NB5R3_MOUSE | Cyb5r3    | NADH-cytochrome b5 re K.SVGM*LAGTGITPM*LVQIR@.A               | 6.99   | 1.94  | 3.59 | 0.28  |
| Q9DCN2_NB5R3_MOUSE | Cyb5r3    | NADH-cytochrome b5 re R.IDGNLVRIPYVSSDDDKGFVLDLVK#V           | 22.47  | 8.86  | 2.54 | 0.39  |
| Q9DCN2_NB5R3_MOUSE | Cyb5r3    | NADH-cytochrome b5 re R.LIDKHEVISPDR@.R                       | 25.32  | 11.61 | 2.18 | 0.46  |
| Q9DCN2_NB5R3_MOUSE | Cyb5r3    | NADH-cytochrome b5 re R.STPAITLENPIK#Y                        | 8.67   | 4.88  | 1.78 | 0.56  |
| Q9DCN2_NB5R3_MOUSE | Cyb5r3    | NADH-cytochrome b5 re R.LIDKHEVISPDR@.R                       | 35.07  | 14.93 | 2.35 | 0.43  |
| Q9DCN2_NB5R3_MOUSE | Cyb5r3    | NADH-cytochrome b5 re K.M*SQYLENM*KK.I                        | 11.25  | 6.17  | 1.82 | 0.55  |
| Q9DCN2_NB5R3_MOUSE | Cyb5r3    | NADH-cytochrome b5 re R.STPAITLENPIK#Y                        | 12.65  | 6.83  | 1.85 | 0.54  |
| Q9DCN2_NB5R3_MOUSE | Cyb5r3    | NADH-cytochrome b5 re K.SVGM*LAGTGITPM*LVQIR@.A               | 7.86   | 3.63  | 2.16 | 0.46  |
| Q8BKE6_CP20A_MOUSE | Cyp20a1   | Cytochrome P450 20A1 R.M*VLSGTFDEQEIVR@.F                     | 6.42   | 2.91  | 2.21 | 0.45  |
| Q8BKE6_CP20A_MOUSE | Cyp20a1   | Cytochrome P450 20A1 R.LVLSGLTDDLVK#Q                         | 5.78   | 3.16  | 1.83 | 0.55  |
| Q8BKE6_CP20A_MOUSE | Cyp20a1   | Cytochrome P450 20A1 R.M*VLSGTFDEQEIVR@.F                     | 4.98   | 3.39  | 1.47 | 0.68  |
| Q8KOC4_CP51A_MOUSE | Cyp51a1   | Lanosterol 14-alpha dem K.SPIEFLENAYEK#K                      | 6.35   | 4.50  | 1.41 | 0.71  |
| Q9D172_ES1_MOUSE   | D10Jhu81e | ES1 protein homolog, mi K.ITSALQLNAANHDAIFPFGFGAAK#N          | 5.63   | 3.18  | 1.77 | 0.56  |
| P61804_DAD1_MOUSE  | Dad1      | Dolichyl-diphosphooligc K.ADFQSPER.A                          | 23.85  | 19.86 | 1.20 | 0.83  |
| P61804_DAD1_MOUSE  | Dad1      | Dolichyl-diphosphooligc R.FLEEYLSSTPQR@.L                     | 25.46  | 14.60 | 1.74 | 0.57  |
| Q62165_DAG1_MOUSE  | Dag1      | Dyroglycan OS=Mus ml K.LTLEDAQATFIK#K                         | 6.35   | 4.55  | 1.39 | 0.72  |
| Q62165_DAG1_MOUSE  | Dag1      | Dyroglycan OS=Mus ml K.LTLEDAQATFIK#K.G                       | 21.61  | 4.77  | 4.53 | 0.22  |
| Q62165_DAG1_MOUSE  | Dag1      | Dyroglycan OS=Mus ml K.LTLEDAQATFIK#K                         | 5.98   | 3.23  | 1.85 | 0.54  |
| Q80YE7_DAPK1_MOUSE | Dapk1     | Death-associated protein R.LLDPDPFMG#K.D                      | 13.15  | 3.66  | 3.59 | 0.28  |
| Q54784_DAPK3_MOUSE | Dapk3     | Death-associated protein R.VLEDVAAEQGLR@.E                    | 11.73  | 9.64  | 1.22 | 0.82  |
| Q922B2_SYDC_MOUSE  | Dars      | Aspartate-tRNA ligase, cy R.EVDAEADYAK#E                      | 7.68   | 6.28  | 1.22 | 0.82  |

|                     |        |                                                                |        |        |      |      |
|---------------------|--------|----------------------------------------------------------------|--------|--------|------|------|
| Q92B22_SYDC_MOUSE   | Dars   | Aspartate--tRNA ligase, cy K.ESIIDVEGVVR@.K                    | 4.54   | 3.76   | 1.21 | 0.83 |
| Q92B22_SYDC_MOUSE   | Dars   | Aspartate--tRNA ligase, cy K.IISAASEGGANVFTSYFK#.N             | 5.30   | 1.69   | 3.13 | 0.32 |
| Q3UKRO_Q3UKRO_MOUSE | Daxx   | Death domain-associatc K.ELDSELDPPDSSYLQEAR@.L                 | 7.61   | 2.79   | 2.72 | 0.37 |
| Q3UKRO_Q3UKRO_MOUSE | Daxx   | Death domain-associatc R.LEQLLALVYAEIR@.R                      | 12.02  | 3.68   | 3.27 | 0.31 |
| Q3UKRO_Q3UKRO_MOUSE | Daxx   | Death domain-associatc R.LINK#PGLDTPDYGVDVLR@.A                | 23.02  | 14.63  | 1.57 | 0.64 |
| Q3UKRO_Q3UKRO_MOUSE | Daxx   | Death domain-associatc R.LLGTAPQSPDPPK#.A                      | 8.55   | 3.82   | 2.24 | 0.45 |
| Q9JH15_DAZP1_MOUSE  | Dazap1 | DAZ-associated protein 1 K.FGVVTEVVM*YDAEK.Q                   | 3.66   | 5.04   | 0.73 | 1.38 |
| Q9QX56_DREB_MOUSE   | Dbrn1  | Drebrin OS=Mus muscul. K.SESEVEEAAAIIAQR@.E                    | 16.46  | 17.21  | 0.96 | 1.05 |
| Q9QX56_DREB_MOUSE   | Dbrn1  | Drebrin OS=Mus muscul. R.SPDSSTASTPIAEQER@.A                   | 7.30   | 6.60   | 1.11 | 0.90 |
| Q9QX56_DREB_MOUSE   | Dbrn1  | Drebrin OS=Mus muscul. K.VAEFFQGVIVNASSVEDIDAGAIGQR.L          | 6.91   | 10.68  | 0.65 | 1.55 |
| Q9QX56_DREB_MOUSE   | Dbrn1  | Drebrin OS=Mus muscul. K.YVLINWVGEDVPPDAR@.K                   | 10.75  | 10.19  | 1.05 | 0.95 |
| Q9QX56_DREB_MOUSE   | Dbrn1  | Drebrin OS=Mus muscul. K.DSQAALPK#.Y                           | 80.30  | 73.20  | 1.11 | 0.90 |
| Q9QX56_DREB_MOUSE   | Dbrn1  | Drebrin OS=Mus muscul. R.EESAADWALYTYEGSDDLK.L                 | 6.21   | 5.95   | 1.04 | 0.96 |
| Q9QX56_DREB_MOUSE   | Dbrn1  | Drebrin OS=Mus muscul. R.EQFWEQAK#.K                           | 32.31  | 31.32  | 1.03 | 0.97 |
| Q9QX56_DREB_MOUSE   | Dbrn1  | Drebrin OS=Mus muscul. R.KHQQLSEAEAAK#.R                       | 15.47  | 12.38  | 1.25 | 0.80 |
| Q9QX56_DREB_MOUSE   | Dbrn1  | Drebrin OS=Mus muscul. K.K#SESEVEEAAAIIAQR@.PDNPR@.E           | 28.01  | 24.42  | 1.15 | 0.87 |
| Q9QX56_DREB_MOUSE   | Dbrn1  | Drebrin OS=Mus muscul. K.LAASGEGGLQELSGHFENQK#.V               | 140.07 | 104.96 | 1.33 | 0.75 |
| Q9QX56_DREB_MOUSE   | Dbrn1  | Drebrin OS=Mus muscul. K.LAASGEGGLQELSGHFENQK#.V               | 5.50   | 3.06   | 1.80 | 0.56 |
| Q9QX56_DREB_MOUSE   | Dbrn1  | Drebrin OS=Mus muscul. R.LELLAAVEEYIR@.E                       | 45.53  | 34.07  | 1.34 | 0.75 |
| Q9QX56_DREB_MOUSE   | Dbrn1  | Drebrin OS=Mus muscul. R.LR@EDENAEVPGVTYQK#.T                  | 29.38  | 22.57  | 1.30 | 0.77 |
| Q9QX56_DREB_MOUSE   | Dbrn1  | Drebrin OS=Mus muscul. R.M*APPTIPTR@.S                         | 107.11 | 89.34  | 1.20 | 0.83 |
| Q9QX56_DREB_MOUSE   | Dbrn1  | Drebrin OS=Mus muscul. K.QQSLSEAEAAK#.R                        | 60.37  | 42.02  | 1.44 | 0.70 |
| Q9QX56_DREB_MOUSE   | Dbrn1  | Drebrin OS=Mus muscul. K.SESEVEEAAAIIAQR@.PDNPR@.E             | 133.21 | 105.15 | 1.27 | 0.79 |
| Q9QX56_DREB_MOUSE   | Dbrn1  | Drebrin OS=Mus muscul. R.SPDSSTASTPIAEQER@.A                   | 102.00 | 87.24  | 1.17 | 0.86 |
| Q9QX56_DREB_MOUSE   | Dbrn1  | Drebrin OS=Mus muscul. K.TDAVEN**KIR@.I                        | 16.93  | 12.39  | 1.37 | 0.73 |
| Q9QX56_DREB_MOUSE   | Dbrn1  | Drebrin OS=Mus muscul. K.VAEFFQGVIVNASSVEDIDAGAIGQR@.L         | 35.73  | 23.16  | 1.54 | 0.65 |
| Q9QX56_DREB_MOUSE   | Dbrn1  | Drebrin OS=Mus muscul. K.YVLINWVGEDVPPDAR.K                    | 57.08  | 44.39  | 1.29 | 0.78 |
| Q9QX56_DREB_MOUSE   | Dbrn1  | Drebrin OS=Mus muscul. K.DSQAALPK#.Y                           | 16.21  | 10.38  | 1.56 | 0.64 |
| Q9QX56_DREB_MOUSE   | Dbrn1  | Drebrin OS=Mus muscul. R.REDENAEVPVTYQK.T                      | 25.66  | 20.83  | 1.23 | 0.81 |
| Q9QX56_DREB_MOUSE   | Dbrn1  | Drebrin OS=Mus muscul. R.M*APPTIPTR.S                          | 10.56  | 9.41   | 1.12 | 0.89 |
| Q9QX56_DREB_MOUSE   | Dbrn1  | Drebrin OS=Mus muscul. K.SESEVEEAAAIIAQR@.PDNPR@.E             | 22.63  | 20.51  | 1.10 | 0.91 |
| Q9QX56_DREB_MOUSE   | Dbrn1  | Drebrin OS=Mus muscul. R.SPDSSTASTPIAEQER@.A                   | 13.97  | 12.80  | 1.09 | 0.92 |
| Q9QX56_DREB_MOUSE   | Dbrn1  | Drebrin OS=Mus muscul. K.YVLINWVGEDVPPDAR@.K                   | 11.39  | 7.84   | 1.45 | 0.69 |
| P53395_ODB2_MOUSE   | Dbt    | Lipoamide acyltransferas R.ILK#EDILSFLEK#.Q                    | 28.30  | 11.55  | 2.49 | 0.40 |
| P53395_ODB2_MOUSE   | Dbt    | Lipoamide acyltransferas L.LSDIGEGIR@.E                        | 15.77  | 27.05  | 0.58 | 1.72 |
| P53395_ODB2_MOUSE   | Dbt    | Lipoamide acyltransferas R.SVFEIAM*ELNR@.L                     | 13.37  | 3.23   | 4.15 | 0.24 |
| P61963_DCAF7_MOUSE  | Dcaf7  | DBB1- and CUL4-associat R.DM*FASVGADGSVR@.M                    | 9.11   | 5.56   | 1.64 | 0.61 |
| P61963_DCAF7_MOUSE  | Dcaf7  | DBB1- and CUL4-associat K.GVYDPLATSDGVLRL@.V                   | 17.73  | 9.44   | 1.88 | 0.53 |
| Q80VB6_Q80VB6_MOUSE | Dcl1k  | Dcl1k protein OS=Mus m R.AVSSLATAK#.G                          | 59.20  | 13.63  | 4.34 | 0.23 |
| Q80VB6_Q80VB6_MOUSE | Dcl1k  | Dcl1k protein OS=Mus m R.DLYR@PLSSDLDVSGDSV.-                  | 22.65  | 5.27   | 4.30 | 0.23 |
| Q80VB6_Q80VB6_MOUSE | Dcl1k  | Dcl1k protein OS=Mus m K.GIVYAIIPDR@.S                         | 59.20  | 12.24  | 4.17 | 0.24 |
| Q80VB6_Q80VB6_MOUSE | Dcl1k  | Dcl1k protein OS=Mus m R.LYTLDGK#.Q                            | 32.85  | 7.45   | 4.41 | 0.23 |
| Q80VB6_Q80VB6_MOUSE | Dcl1k  | Dcl1k protein OS=Mus m K.NVNPVNSVNVK#.T                        | 29.04  | 6.92   | 4.20 | 0.24 |
| Q80VB6_Q80VB6_MOUSE | Dcl1k  | Dcl1k protein OS=Mus m R.SFEALLDLTR@.T                         | 141.72 | 30.75  | 4.61 | 0.22 |
| Q80VB6_Q80VB6_MOUSE | Dcl1k  | Dcl1k protein OS=Mus m K.TAHSEFQVLTIDITDAIK#.L                 | 39.08  | 7.91   | 4.94 | 0.20 |
| Q80VB6_Q80VB6_MOUSE | Dcl1k  | Dcl1k protein OS=Mus m R.TLSDNVNL PQGVR@.T                     | 72.43  | 18.84  | 3.84 | 0.26 |
| Q80VB6_Q80VB6_MOUSE | Dcl1k  | Dcl1k protein OS=Mus m R.SFEALLDLTR@.T                         | 7.17   | 3.20   | 2.24 | 0.45 |
| Q80VB6_Q80VB6_MOUSE | Dcl1k  | Dcl1k protein OS=Mus m R.SFEALLDLTR@.T                         | 13.83  | 4.83   | 2.87 | 0.35 |
| Q80VB6_Q80VB6_MOUSE | Dcl1k  | Dcl1k protein OS=Mus m K.TAHSEFQVLTIDITDAIK#.L                 | 8.05   | 5.89   | 1.37 | 0.73 |
| Q80VB6_Q80VB6_MOUSE | Dcl1k  | Dcl1k protein OS=Mus m R.TLSDNVNL PQGVR@.T                     | 6.53   | 2.19   | 2.98 | 0.34 |
| Q91YD3_DCP1A_MOUSE  | Dcp1a  | mRNA-decapping enzyme R.APVSLANPAGTALPSVDLLQK#.L               | 7.87   | 2.23   | 3.53 | 0.28 |
| Q91YD3_DCP1A_MOUSE  | Dcp1a  | mRNA-decapping enzyme K.SQLQDTHLILK#.N                         | 7.97   | 1.40   | 5.69 | 0.18 |
| Q91YD3_DCP1A_MOUSE  | Dcp1a  | mRNA-decapping enzyme K.TDIEGLTVFVR@.R                         | 12.53  | 7.71   | 1.62 | 0.62 |
| Q9CYC6_DCP2_MOUSE   | Dcp2   | m7GpppN-mRNA hydrol: K.SHSNVSVDLKK#.A                          | 25.25  | 8.31   | 3.04 | 0.33 |
| E9Q586_E9Q586_MOUSE | Dctn1  | Dynactin subunit 1 OS=N R.AEITDAEGLGLK#.L                      | 38.31  | 21.90  | 1.75 | 0.57 |
| E9Q586_E9Q586_MOUSE | Dctn1  | Dynactin subunit 1 OS=N R.AFLQGGQEATDIALLR@.D                  | 30.16  | 12.33  | 2.45 | 0.41 |
| E9Q586_E9Q586_MOUSE | Dctn1  | Dynactin subunit 1 OS=N K.ASLAALPPLHVAK#.L                     | 27.48  | 15.31  | 1.79 | 0.56 |
| E9Q586_E9Q586_MOUSE | Dctn1  | Dynactin subunit 1 OS=N K.DFEETM*DALQADIDQLEAEK#AELK#.G        | 11.92  | 4.81   | 2.48 | 0.40 |
| E9Q586_E9Q586_MOUSE | Dctn1  | Dynactin subunit 1 OS=N R.DLEEK#LETLR@.L                       | 11.22  | 3.87   | 2.90 | 0.34 |
| E9Q586_E9Q586_MOUSE | Dctn1  | Dynactin subunit 1 OS=N R.ELTNQQAESVER@.Q                      | 49.60  | 18.43  | 2.69 | 0.37 |
| E9Q586_E9Q586_MOUSE | Dctn1  | Dynactin subunit 1 OS=N R.ETVQDLEAM**NEM*NDELQENAR@.E          | 6.10   | 2.70   | 2.26 | 0.44 |
| E9Q586_E9Q586_MOUSE | Dctn1  | Dynactin subunit 1 OS=N K.ETVQR@GATVPTDFATFSSAFLR.A            | 48.20  | 13.96  | 3.45 | 0.29 |
| E9Q586_E9Q586_MOUSE | Dctn1  | Dynactin subunit 1 OS=N R.PPPPISGIALTVSGIAGGGAPQAPGALPGPLVK#.D | 24.46  | 13.09  | 1.87 | 0.54 |
| E9Q586_E9Q586_MOUSE | Dctn1  | Dynactin subunit 1 OS=N K.GSDGAASSYQLK#.Q                      | 21.58  | 9.62   | 2.24 | 0.45 |
| E9Q586_E9Q586_MOUSE | Dctn1  | Dynactin subunit 1 OS=N K.IK#GEELSEANVR@.L                     | 56.08  | 19.81  | 2.83 | 0.35 |
| E9Q586_E9Q586_MOUSE | Dctn1  | Dynactin subunit 1 OS=N K.IQLQEQVQWV#.S                        | 18.61  | 5.90   | 3.15 | 0.32 |
| E9Q586_E9Q586_MOUSE | Dctn1  | Dynactin subunit 1 OS=N K.K#NQELEVVR@.Q                        | 8.63   | 4.80   | 1.80 | 0.56 |
| E9Q586_E9Q586_MOUSE | Dctn1  | Dynactin subunit 1 OS=N R.LDETQTLR@.K                          | 45.65  | 19.12  | 2.39 | 0.42 |
| E9Q586_E9Q586_MOUSE | Dctn1  | Dynactin subunit 1 OS=N K.LNQLSTHVVHVDITR@.S                   | 10.56  | 6.88   | 1.54 | 0.65 |
| E9Q586_E9Q586_MOUSE | Dctn1  | Dynactin subunit 1 OS=N K.M*EQEQDQLQR@.R                       | 11.52  | 7.24   | 1.59 | 0.63 |
| E9Q586_E9Q586_MOUSE | Dctn1  | Dynactin subunit 1 OS=N K.NQLEVVR@.Q                           | 21.80  | 10.34  | 2.11 | 0.47 |
| E9Q586_E9Q586_MOUSE | Dctn1  | Dynactin subunit 1 OS=N R.QQQPPPTDFFK#.I                       | 9.73   | 5.58   | 1.74 | 0.57 |
| E9Q586_E9Q586_MOUSE | Dctn1  | Dynactin subunit 1 OS=N R.QSQQVQFEDGADTSPETPDSSASK#.V          | 9.68   | 5.11   | 1.89 | 0.53 |
| E9Q586_E9Q586_MOUSE | Dctn1  | Dynactin subunit 1 OS=N K.R@VEAAQETVADYQQTIK#.K#.Y             | 16.90  | 4.40   | 3.84 | 0.26 |
| E9Q586_E9Q586_MOUSE | Dctn1  | Dynactin subunit 1 OS=N K.SPSAQLM*EQVAQLK#.S                   | 15.80  | 10.72  | 1.48 | 0.68 |
| E9Q586_E9Q586_MOUSE | Dctn1  | Dynactin subunit 1 OS=N R.VDELTTDLILK#.A                       | 6.87   | 4.21   | 1.63 | 0.61 |
| E9Q586_E9Q586_MOUSE | Dctn1  | Dynactin subunit 1 OS=N R.VDELTTDLILK#AIEEK#.G                 | 53.48  | 21.58  | 2.48 | 0.40 |
| E9Q586_E9Q586_MOUSE | Dctn1  | Dynactin subunit 1 OS=N R.VEAQETVADYQQTIK#.K                   | 6.90   | 2.83   | 2.44 | 0.41 |
| E9Q586_E9Q586_MOUSE | Dctn1  | Dynactin subunit 1 OS=N K.WVGILVEVR@.G                         | 19.67  | 9.13   | 2.16 | 0.46 |
| E9Q586_E9Q586_MOUSE | Dctn1  | Dynactin subunit 1 OS=N R.AEITDAEGLGLK#.L                      | 31.07  | 39.24  | 0.79 | 1.26 |
| E9Q586_E9Q586_MOUSE | Dctn1  | Dynactin subunit 1 OS=N R.AFLQGGQEATDIALLR@.D                  | 38.39  | 14.45  | 2.66 | 0.38 |
| E9Q586_E9Q586_MOUSE | Dctn1  | Dynactin subunit 1 OS=N K.ASLAALPPLHVAK#.L                     | 52.27  | 16.03  | 3.26 | 0.31 |
| E9Q586_E9Q586_MOUSE | Dctn1  | Dynactin subunit 1 OS=N K.DFEETM*DALQADIDQLEAEK#AELK#.G        | 6.18   | 2.98   | 2.08 | 0.48 |
| E9Q586_E9Q586_MOUSE | Dctn1  | Dynactin subunit 1 OS=N R.ELTNQQAESVER@.Q                      | 55.29  | 17.41  | 3.18 | 0.31 |
| E9Q586_E9Q586_MOUSE | Dctn1  | Dynactin subunit 1 OS=N R.ETVQDLEAM**NEM*NDELQENAR@.E          | 7.25   | 3.98   | 1.82 | 0.55 |
| E9Q586_E9Q586_MOUSE | Dctn1  | Dynactin subunit 1 OS=N K.ETVQR@GATVPTDFATFSSAFLR@.A           | 26.76  | 10.19  | 2.63 | 0.38 |
| E9Q586_E9Q586_MOUSE | Dctn1  | Dynactin subunit 1 OS=N K.GSDGAASSYQLK#.Q                      | 21.31  | 8.39   | 2.54 | 0.39 |
| E9Q586_E9Q586_MOUSE | Dctn1  | Dynactin subunit 1 OS=N K.IK#GEELSEANVR.L                      | 60.77  | 21.10  | 2.88 | 0.35 |
| E9Q586_E9Q586_MOUSE | Dctn1  | Dynactin subunit 1 OS=N K.IK#GEELSEANVR@.L                     | 12.46  | 2.76   | 4.51 | 0.22 |
| E9Q586_E9Q586_MOUSE | Dctn1  | Dynactin subunit 1 OS=N K.K#NQELEVVR@.Q                        | 8.59   | 2.32   | 3.71 | 0.27 |
| E9Q586_E9Q586_MOUSE | Dctn1  | Dynactin subunit 1 OS=N R.LDETQTLR@.K                          | 53.57  | 14.02  | 3.82 | 0.26 |
| E9Q586_E9Q586_MOUSE | Dctn1  | Dynactin subunit 1 OS=N K.M*EQEQDQLQR@.R                       | 25.85  | 7.57   | 3.41 | 0.29 |
| E9Q586_E9Q586_MOUSE | Dctn1  | Dynactin subunit 1 OS=N K.NQLEVVR@.Q                           | 20.04  | 3.65   | 5.49 | 0.18 |
| E9Q586_E9Q586_MOUSE | Dctn1  | Dynactin subunit 1 OS=N R.QQQPPPTDFFK#.I                       | 13.40  | 3.34   | 4.01 | 0.25 |
| E9Q586_E9Q586_MOUSE | Dctn1  | Dynactin subunit 1 OS=N R.QSQQVQFEDGADTSPETPDSSASK#.V          | 10.40  | 4.10   | 2.45 | 0.41 |
| E9Q586_E9Q586_MOUSE | Dctn1  | Dynactin subunit 1 OS=N K.R@VEAAQETVADYQQTIK#.K                | 12.05  | 4.81   | 2.58 | 0.39 |
| E9Q586_E9Q586_MOUSE | Dctn1  | Dynactin subunit 1 OS=N K.R@VEAAQETVADYQQTIK#.K#.Y             | 12.50  | 3.31   | 3.78 | 0.26 |
| E9Q586_E9Q586_MOUSE | Dctn1  | Dynactin subunit 1 OS=N K.SPSAQLM*EQVAQLK#.S                   | 17.65  | 6.44   | 2.74 | 0.37 |
| E9Q586_E9Q586_MOUSE | Dctn1  | Dynactin subunit 1 OS=N R.VDELTTDLILK#.A                       | 8.85   | 2.65   | 3.33 | 0.30 |
| E9Q586_E9Q586_MOUSE | Dctn1  | Dynactin subunit 1 OS=N R.VDELTTDLILK#AIEEK#.G                 | 82.59  | 21.53  | 3.84 | 0.26 |
| E9Q586_E9Q586_MOUSE | Dctn1  | Dynactin subunit 1 OS=N K.WVGILVEVR@.G                         | 18.10  | 5.76   | 3.14 | 0.32 |
| Q99KJ8_DCTN2_MOUSE  | Dctn2  | Dynactin subunit 2 OS=N K.ASVEDADTQNK#.V                       | 38.17  | 13.29  | 2.87 | 0.35 |
| Q99KJ8_DCTN2_MOUSE  | Dctn2  | Dynactin subunit 2 OS=N K.ASVEDADTQNK#VHQLYETQR@.W             | 13.25  | 3.94   | 3.36 | 0.30 |



|                    |        |                                                                     |        |        |      |      |
|--------------------|--------|---------------------------------------------------------------------|--------|--------|------|------|
| Q99KJ8_DCTN2_MOUSE | Dctn2  | Dynactin subunit 2 OS=N.K.DNTALLTQVQTTM*R@.E                        | 46.43  | 18.66  | 2.49 | 0.40 |
| Q99KJ8_DCTN2_MOUSE | Dctn2  | Dynactin subunit 2 OS=N.K.DNTALLTQVQTTMR@.E                         | 10.12  | 4.68   | 2.16 | 0.46 |
| Q99KJ8_DCTN2_MOUSE | Dctn2  | Dynactin subunit 2 OS=N.R.ENLATVGNFASDIAR@.M                        | 96.43  | 33.78  | 2.85 | 0.35 |
| Q99KJ8_DCTN2_MOUSE | Dctn2  | Dynactin subunit 2 OS=N.K.GLDFSDR@.I                                | 97.24  | 30.68  | 3.17 | 0.32 |
| Q99KJ8_DCTN2_MOUSE | Dctn2  | Dynactin subunit 2 OS=N.K.LLPGDAAINLADPDGALAK#.R                    | 90.50  | 41.67  | 2.17 | 0.46 |
| Q99KJ8_DCTN2_MOUSE | Dctn2  | Dynactin subunit 2 OS=N.K.LLPGDAAINLADPDGALAK#.R                    | 17.01  | 8.59   | 1.98 | 0.51 |
| Q99KJ8_DCTN2_MOUSE | Dctn2  | Dynactin subunit 2 OS=N.K.LLPGDAAINLADPDGALAK#.L                    | 33.60  | 15.26  | 2.20 | 0.45 |
| Q99KJ8_DCTN2_MOUSE | Dctn2  | Dynactin subunit 2 OS=N.R.LLHEVQLTEPEVK#.I                          | 68.83  | 24.78  | 2.78 | 0.36 |
| Q99KJ8_DCTN2_MOUSE | Dctn2  | Dynactin subunit 2 OS=N.R.LLLEQLAATK#.S                             | 129.67 | 41.16  | 3.15 | 0.32 |
| Q99KJ8_DCTN2_MOUSE | Dctn2  | Dynactin subunit 2 OS=N.R.LQSLVGR#.V                                | 132.42 | 49.90  | 2.65 | 0.38 |
| Q99KJ8_DCTN2_MOUSE | Dctn2  | Dynactin subunit 2 OS=N.R.LTELEAVR@.C                               | 141.27 | 49.01  | 2.88 | 0.35 |
| Q99KJ8_DCTN2_MOUSE | Dctn2  | Dynactin subunit 2 OS=N.K.R@LLLQLEATK#.S                            | 16.90  | 5.63   | 3.00 | 0.33 |
| Q99KJ8_DCTN2_MOUSE | Dctn2  | Dynactin subunit 2 OS=N.K.R@LLELEAVR@.C                             | 13.16  | 4.24   | 3.11 | 0.32 |
| Q99KJ8_DCTN2_MOUSE | Dctn2  | Dynactin subunit 2 OS=N.K.R@TGYESGDYEM*LGEGLGVK#.E                  | 14.73  | 4.74   | 3.11 | 0.32 |
| Q99KJ8_DCTN2_MOUSE | Dctn2  | Dynactin subunit 2 OS=N.R.TGYESGDYEM*LGEGLGVK#.E                    | 54.84  | 18.52  | 2.96 | 0.34 |
| Q99KJ8_DCTN2_MOUSE | Dctn2  | Dynactin subunit 2 OS=N.R.TGYESGDYEM*LGEGLGVK#.E                    | 10.49  | 4.58   | 2.29 | 0.44 |
| Q99KJ8_DCTN2_MOUSE | Dctn2  | Dynactin subunit 2 OS=N.K.VHQLYETIQR@.W                             | 71.49  | 25.77  | 2.77 | 0.36 |
| Q99KJ8_DCTN2_MOUSE | Dctn2  | Dynactin subunit 2 OS=N.K.VHQLYETIQR.W                              | 23.89  | 8.32   | 2.87 | 0.35 |
| Q99KJ8_DCTN2_MOUSE | Dctn2  | Dynactin subunit 2 OS=N.K.VSALDLAVLDQVEAR@.L                        | 115.01 | 44.08  | 2.61 | 0.38 |
| Q99KJ8_DCTN2_MOUSE | Dctn2  | Dynactin subunit 2 OS=N.R.WSPVASTLPELVQR@.L                         | 83.93  | 26.10  | 3.22 | 0.31 |
| Q99KJ8_DCTN2_MOUSE | Dctn2  | Dynactin subunit 2 OS=N.K.YADLPGIAR@.N                              | 152.56 | 61.91  | 2.46 | 0.41 |
| Q99KJ8_DCTN2_MOUSE | Dctn2  | Dynactin subunit 2 OS=N.K.LLPGDAAINLADPDGALAK#.R                    | 4.29   | 1.88   | 2.29 | 0.44 |
| Q920Y1_DCTN3_MOUSE | Dctn3  | Dynactin subunit 3 OS=N.K.VQVALGINASIK#.R                           | 34.14  | 11.44  | 2.98 | 0.34 |
| Q920Y1_DCTN3_MOUSE | Dctn3  | Dynactin subunit 3 OS=N.K.YLDEPEYDR@.J                              | 29.94  | 10.93  | 2.74 | 0.36 |
| Q8CBY8_DCTN4_MOUSE | Dctn4  | Dynactin subunit 4 OS=N.R.AGASISTLAGLSLR@.E                         | 8.67   | 3.67   | 2.36 | 0.42 |
| Q8CBY8_DCTN4_MOUSE | Dctn4  | Dynactin subunit 4 OS=N.R.ATSIQQLPDDPAK#.T                          | 13.56  | 8.93   | 1.52 | 0.66 |
| Q8CBY8_DCTN4_MOUSE | Dctn4  | Dynactin subunit 4 OS=N.K.IEPAQVAEVEPLPEYYTR@PVNLTEVTLQQR@.L        | 7.31   | 4.64   | 1.58 | 0.63 |
| Q8CBY8_DCTN4_MOUSE | Dctn4  | Dynactin subunit 4 OS=N.K.IQLVAVNPIVPR@.I                           | 16.10  | 7.48   | 2.15 | 0.46 |
| Q8CBY8_DCTN4_MOUSE | Dctn4  | Dynactin subunit 4 OS=N.K.LIEYQQLAQK#.E                             | 20.77  | 11.22  | 1.85 | 0.54 |
| Q8CBY8_DCTN4_MOUSE | Dctn4  | Dynactin subunit 4 OS=N.R.LLQPDLOPVASASQLYPR@.H                     | 10.14  | 9.20   | 1.10 | 0.91 |
| Q8CBY8_DCTN4_MOUSE | Dctn4  | Dynactin subunit 4 OS=N.R.LLQPDLOPVASASQLYPR.H                      | 11.16  | 4.99   | 2.24 | 0.45 |
| Q8CBY8_DCTN4_MOUSE | Dctn4  | Dynactin subunit 4 OS=N.K.IQLVAVNPIVPR@.I                           | 9.06   | 4.20   | 2.16 | 0.46 |
| Q8CBY8_DCTN4_MOUSE | Dctn4  | Dynactin subunit 4 OS=N.K.LIEYQQLAQK#.E                             | 12.29  | 3.86   | 3.18 | 0.31 |
| Q8CBY8_DCTN4_MOUSE | Dctn4  | Dynactin subunit 4 OS=N.R.LLQPDLOPVASASQLYPR@.H                     | 9.36   | 4.52   | 2.07 | 0.48 |
| Q8CBY8_DCTN4_MOUSE | Dctn4  | Dynactin subunit 4 OS=N.R.VLYLVQGEK#.K                              | 10.46  | 4.31   | 2.43 | 0.41 |
| Q8CBY8_DCTN4_MOUSE | Dctn4  | Dynactin subunit 4 OS=N.R.ATSIQQLPDDPAK#.T                          | 7.26   | 7.11   | 1.02 | 0.98 |
| Q9CXV9_DCNL5_MOUSE | Dcn1d5 | DCN1-like protein 5 OS=P.K.SM*LALLGR@.T                             | 12.16  | 13.08  | 0.93 | 1.08 |
| Q9CXV9_DCNL5_MOUSE | Dcn1d5 | DCN1-like protein 5 OS=P.R.SQLNDISSFK#.N                            | 10.13  | 18.39  | 0.55 | 1.82 |
| Q9D925_DDA1_MOUSE  | Dda1   | DET1-and DDB1-associat R.EYPSQIVTEK#.T                              | 5.80   | 2.96   | 1.96 | 0.51 |
| Q3U1J4_DDB1_MOUSE  | Ddb1   | DNA damage-binding prc K.DLLFLITAK#.Y                               | 24.64  | 14.11  | 1.75 | 0.57 |
| Q3U1J4_DDB1_MOUSE  | Ddb1   | DNA damage-binding prc R.EATADDLIK#.V                               | 16.75  | 9.70   | 1.73 | 0.58 |
| Q3U1J4_DDB1_MOUSE  | Ddb1   | DNA damage-binding prc K.EM*LGGIIPR@.S                              | 18.06  | 6.29   | 2.87 | 0.35 |
| Q3U1J4_DDB1_MOUSE  | Ddb1   | DNA damage-binding prc K.GAVYSM*VEFNGK#.L                           | 5.54   | 2.48   | 2.24 | 0.45 |
| Q3U1J4_DDB1_MOUSE  | Ddb1   | DNA damage-binding prc R.IEVQDSSGGTTALR@PSASTQALSSVSSSK#.L          | 39.78  | 16.98  | 2.34 | 0.43 |
| Q3U1J4_DDB1_MOUSE  | Ddb1   | DNA damage-binding prc R.IVVFQYSDGK#.L                              | 33.33  | 20.66  | 1.61 | 0.62 |
| Q3U1J4_DDB1_MOUSE  | Ddb1   | DNA damage-binding prc R.KHTEPATGFIDGLIESFLDISR@PK#.M               | 26.00  | 15.64  | 1.66 | 0.60 |
| Q3U1J4_DDB1_MOUSE  | Ddb1   | DNA damage-binding prc R.LGDSQLVK#.L                                | 54.74  | 21.30  | 2.57 | 0.39 |
| Q3U1J4_DDB1_MOUSE  | Ddb1   | DNA damage-binding prc K.LGK#DPTNYFIVGTAM*VYPEAEAPK#.Q              | 14.31  | 6.72   | 2.13 | 0.47 |
| Q3U1J4_DDB1_MOUSE  | Ddb1   | DNA damage-binding prc K.LLASINSTVR@.L                              | 34.72  | 17.97  | 1.93 | 0.52 |
| Q3U1J4_DDB1_MOUSE  | Ddb1   | DNA damage-binding prc K.LPSEFLLHK#.E                               | 24.60  | 9.82   | 2.51 | 0.40 |
| Q3U1J4_DDB1_MOUSE  | Ddb1   | DNA damage-binding prc K.LVFSNVNLK#.E                               | 43.52  | 19.62  | 2.22 | 0.45 |
| Q3U1J4_DDB1_MOUSE  | Ddb1   | DNA damage-binding prc R.SDPGR@ETDDTLVLSVFGQTR@.V                   | 30.34  | 17.11  | 1.77 | 0.56 |
| Q3U1J4_DDB1_MOUSE  | Ddb1   | DNA damage-binding prc R.SVLLLXK#PM*EGNFEEIAR@.D                    | 28.85  | 12.15  | 2.37 | 0.42 |
| Q3U1J4_DDB1_MOUSE  | Ddb1   | DNA damage-binding prc K.VTLGTQPTVLR.T                              | 32.06  | 13.35  | 2.40 | 0.42 |
| Q3U1J4_DDB1_MOUSE  | Ddb1   | DNA damage-binding prc K.VVEELTR@.I                                 | 28.22  | 17.01  | 1.66 | 0.60 |
| Q3U1J4_DDB1_MOUSE  | Ddb1   | DNA damage-binding prc K.YLAIAPPIIK#.Q                              | 22.81  | 12.71  | 1.79 | 0.56 |
| Q3U1J4_DDB1_MOUSE  | Ddb1   | DNA damage-binding prc R.YLGDME*EGR@.L                              | 10.53  | 3.77   | 2.79 | 0.36 |
| Q3U1J4_DDB1_MOUSE  | Ddb1   | DNA damage-binding prc R.IEVQDSSGGTTALR@PSASTQALSSVSSSK#.L          | 15.89  | 7.20   | 2.21 | 0.45 |
| Q3U1J4_DDB1_MOUSE  | Ddb1   | DNA damage-binding prc R.IVVFQYSDGK#.L                              | 15.22  | 8.76   | 1.74 | 0.58 |
| Q3U1J4_DDB1_MOUSE  | Ddb1   | DNA damage-binding prc K.LGDDPNTYFIVGTAM*VYPEAEAPK#.Q               | 3.80   | 3.13   | 1.21 | 0.82 |
| Q3U1J4_DDB1_MOUSE  | Ddb1   | DNA damage-binding prc K.LLASINSTVR@.L                              | 13.84  | 4.93   | 2.81 | 0.36 |
| Q3U1J4_DDB1_MOUSE  | Ddb1   | DNA damage-binding prc R.SDPGR@ETDDTLVLSVFGQTR@.V                   | 15.98  | 10.49  | 1.52 | 0.66 |
| Q3U1J4_DDB1_MOUSE  | Ddb1   | DNA damage-binding prc R.SVLLLXK#PM*EGNFEEIAR@.D                    | 12.19  | 4.90   | 2.49 | 0.40 |
| Q3U1J4_DDB1_MOUSE  | Ddb1   | DNA damage-binding prc K.VTLGTQPTVLR@.T                             | 10.72  | 5.41   | 1.98 | 0.51 |
| Q3U1J4_DDB1_MOUSE  | Ddb1   | DNA damage-binding prc K.YLAIAPPIIK#.Q                              | 9.03   | 6.02   | 1.50 | 0.67 |
| Q54734_OST48_MOUSE | Ddost  | Dolichyl-diphosphooligc R.GFELTFK#.T                                | 22.85  | 17.56  | 1.30 | 0.77 |
| Q54734_OST48_MOUSE | Ddost  | Dolichyl-diphosphooligc R.GVGM*VADPNPLVDILTGSSSTSYFFDPKPTQYPHAVGR.N | 6.87   | 4.18   | 1.64 | 0.61 |
| Q54734_OST48_MOUSE | Ddost  | Dolichyl-diphosphooligc R.LPDVYGVQFK#.V                             | 18.48  | 10.00  | 1.85 | 0.54 |
| Q54734_OST48_MOUSE | Ddost  | Dolichyl-diphosphooligc R.NTLIAGLQAR@.N                             | 25.38  | 11.59  | 2.19 | 0.46 |
| Q54734_OST48_MOUSE | Ddost  | Dolichyl-diphosphooligc K.SSLNPIIFLR@.G                             | 29.71  | 23.66  | 1.26 | 0.80 |
| Q54734_OST48_MOUSE | Ddost  | Dolichyl-diphosphooligc K.TADDPSLSLIK#.Y                            | 17.18  | 12.58  | 1.37 | 0.73 |
| Q54734_OST48_MOUSE | Ddost  | Dolichyl-diphosphooligc K.TAVIDHNNVDSVLDGQHTLIVADTENLLK#.A          | 12.40  | 5.71   | 2.17 | 0.46 |
| Q54734_OST48_MOUSE | Ddost  | Dolichyl-diphosphooligc R.TLVLDLMLNVR@.D                            | 34.67  | 26.21  | 1.32 | 0.76 |
| Q54734_OST48_MOUSE | Ddost  | Dolichyl-diphosphooligc K.WVPFDGDDIQLEFVR@.I                        | 7.67   | 6.06   | 1.28 | 0.78 |
| Q54734_OST48_MOUSE | Ddost  | Dolichyl-diphosphooligc R.YSQGTGNYELVAISR@.W                        | 8.82   | 13.47  | 0.65 | 1.53 |
| Q91VR5_DDX1_MOUSE  | Ddx1   | ATP-dependent RNA helix K.ALIVEPSR@ELAEQTLNNVK#.Q                   | 25.49  | 12.24  | 2.08 | 0.48 |
| Q91VR5_DDX1_MOUSE  | Ddx1   | ATP-dependent RNA helix K.APNDYIVK#.S                               | 53.59  | 20.95  | 2.56 | 0.39 |
| Q91VR5_DDX1_MOUSE  | Ddx1   | ATP-dependent RNA helix K.DGFVASK#.A                                | 26.60  | 11.78  | 2.26 | 0.44 |
| Q91VR5_DDX1_MOUSE  | Ddx1   | ATP-dependent RNA helix K.DLGLAFEPAPIHK#.N                          | 33.48  | 13.86  | 2.41 | 0.41 |
| Q91VR5_DDX1_MOUSE  | Ddx1   | ATP-dependent RNA helix K.EAQTSFLHLYLPLNQLFR@.T                     | 37.90  | 13.89  | 2.73 | 0.37 |
| Q91VR5_DDX1_MOUSE  | Ddx1   | ATP-dependent RNA helix R.ELAEQTLNNVK#.Q                            | 50.68  | 16.91  | 3.00 | 0.33 |
| Q91VR5_DDX1_MOUSE  | Ddx1   | ATP-dependent RNA helix R.ELLIIGVVAAR@.D                            | 68.70  | 31.80  | 2.16 | 0.46 |
| Q91VR5_DDX1_MOUSE  | Ddx1   | ATP-dependent RNA helix R.FVLVDEADGLLSQYSDFINR@.M                   | 48.91  | 19.22  | 2.54 | 0.39 |
| Q91VR5_DDX1_MOUSE  | Ddx1   | ATP-dependent RNA helix K.GHVDVLPVQQLAALAK#.E                       | 68.47  | 32.70  | 2.09 | 0.48 |
| Q91VR5_DDX1_MOUSE  | Ddx1   | ATP-dependent RNA helix R.GIDIHGVVIVNVLTPDEK#.Q                     | 59.07  | 29.30  | 2.02 | 0.50 |
| Q91VR5_DDX1_MOUSE  | Ddx1   | ATP-dependent RNA helix R.M*GLAISLVAATEK#.E                         | 14.58  | 1.57   | 9.27 | 0.11 |
| Q91VR5_DDX1_MOUSE  | Ddx1   | ATP-dependent RNA helix K.SQHTGNAQVSDTK#.F                          | 3.43   | 1.49   | 2.31 | 0.43 |
| Q91VR5_DDX1_MOUSE  | Ddx1   | ATP-dependent RNA helix R.VGVSTM*QASLDLGTDK#.F                      | 9.13   | 5.86   | 1.56 | 0.64 |
| Q91VR5_DDX1_MOUSE  | Ddx1   | ATP-dependent RNA helix K.VPVDFEDGK#.V                              | 24.34  | 12.21  | 1.99 | 0.50 |
| Q91VR5_DDX1_MOUSE  | Ddx1   | ATP-dependent RNA helix K.EAQTSFLHLYLPLNQLFR@.T                     | 7.84   | 3.76   | 2.08 | 0.48 |
| Q91VR5_DDX1_MOUSE  | Ddx1   | ATP-dependent RNA helix R.ELAEQTLNNVK#.Q                            | 8.68   | 2.68   | 3.23 | 0.31 |
| Q91VR5_DDX1_MOUSE  | Ddx1   | ATP-dependent RNA helix R.ELLIIGVVAAR@.D                            | 10.96  | 4.24   | 2.59 | 0.39 |
| Q91VR5_DDX1_MOUSE  | Ddx1   | ATP-dependent RNA helix R.FVLVDEADGLLSQYSDFINR@.M                   | 21.90  | 8.20   | 2.67 | 0.37 |
| Q91VR5_DDX1_MOUSE  | Ddx1   | ATP-dependent RNA helix K.GHVDVLPVQQLAALAK#.E                       | 12.25  | 2.75   | 4.46 | 0.22 |
| Q80Y44_DDX10_MOUSE | Ddx10  | Probable ATP-dependent R.ELAYQTEVLR@.K                              | 12.91  | 4.28   | 3.02 | 0.33 |
| Q80Y44_DDX10_MOUSE | Ddx10  | Probable ATP-dependent R.YK#EDGALLLILPSEEQGM*VQQLLQK#.K             | 4.64   | 1.77   | 2.62 | 0.38 |
| Q501J6_DDX17_MOUSE | Ddx17  | Probable ATP-dependent R.APILIAVDASR@.G                             | 928.96 | 512.73 | 1.81 | 0.55 |
| Q501J6_DDX17_MOUSE | Ddx17  | Probable ATP-dependent R.ELAQVQVQVADDYDGK#.C                        | 12.11  | 7.70   | 1.57 | 0.64 |
| Q501J6_DDX17_MOUSE | Ddx17  | Probable ATP-dependent R.GLDVEDVK#.F                                | 408.43 | 219.00 | 1.86 | 0.54 |
| Q501J6_DDX17_MOUSE | Ddx17  | Probable ATP-dependent R.M*LDM*GFEPQIR@.K                           | 115.42 | 60.29  | 1.91 | 0.52 |
| Q501J6_DDX17_MOUSE | Ddx17  | Probable ATP-dependent R.MLDM*GFEPQIR@.K                            | 9.40   | 5.32   | 1.77 | 0.57 |
| Q501J6_DDX17_MOUSE | Ddx17  | Probable ATP-dependent R.QTLM*WSATWPK#.E                            | 68.71  | 32.42  | 2.12 | 0.47 |
| Q501J6_DDX17_MOUSE | Ddx17  | Probable ATP-dependent R.QTLMWSATWPK#.E                             | 10.39  | 19.48  | 0.53 | 1.88 |

|                    |        |                                                        |         |        |      |      |
|--------------------|--------|--------------------------------------------------------|---------|--------|------|------|
| Q501J6_DDX17_MOUSE | Ddx17  | Probable ATP-dependent K.VLEEANQAINPK#L                | 7.49    | 9.48   | 0.79 | 1.27 |
| Q501J6_DDX17_MOUSE | Ddx17  | Probable ATP-dependent R.SSOSSSQFSGIGR@.S              | 9.96    | 4.78   | 2.09 | 0.48 |
| Q501J6_DDX17_MOUSE | Ddx17  | Probable ATP-dependent K.APILIATDVASR@.G               | 1108.81 | 431.75 | 2.57 | 0.39 |
| Q501J6_DDX17_MOUSE | Ddx17  | Probable ATP-dependent R.DM*VGIQAGSGK#.T               | 53.13   | 27.08  | 1.96 | 0.51 |
| Q501J6_DDX17_MOUSE | Ddx17  | Probable ATP-dependent R.DWVNLNFR@.S                   | 31.53   | 16.67  | 1.89 | 0.53 |
| Q501J6_DDX17_MOUSE | Ddx17  | Probable ATP-dependent R.ELAQVQVQVADDYK#.C             | 95.50   | 56.93  | 1.68 | 0.60 |
| Q501J6_DDX17_MOUSE | Ddx17  | Probable ATP-dependent K.FVINYPNNSDEDVYHR@.I           | 92.28   | 48.49  | 1.90 | 0.53 |
| Q501J6_DDX17_MOUSE | Ddx17  | Probable ATP-dependent R.GLVNDEVKK#.F                  | 474.22  | 220.28 | 2.15 | 0.46 |
| Q501J6_DDX17_MOUSE | Ddx17  | Probable ATP-dependent K.GTAYFFTPGNLK#.Q               | 103.37  | 63.41  | 1.63 | 0.61 |
| Q501J6_DDX17_MOUSE | Ddx17  | Probable ATP-dependent K.IVDQIRPRD#.R                  | 98.65   | 37.23  | 2.65 | 0.38 |
| Q501J6_DDX17_MOUSE | Ddx17  | Probable ATP-dependent K.K#K#WDLSELPK#.F               | 19.64   | 6.69   | 2.94 | 0.34 |
| Q501J6_DDX17_MOUSE | Ddx17  | Probable ATP-dependent K.KWDLSELPK#.F                  | 10.36   | 17.18  | 0.60 | 1.66 |
| Q501J6_DDX17_MOUSE | Ddx17  | Probable ATP-dependent R.LIDFLESQK#.T                  | 143.28  | 74.99  | 1.91 | 0.52 |
| Q501J6_DDX17_MOUSE | Ddx17  | Probable ATP-dependent K.LIQLM*EEM#AEK#.E              | 10.48   | 5.73   | 1.83 | 0.55 |
| Q501J6_DDX17_MOUSE | Ddx17  | Probable ATP-dependent K.LM*QLVDHR@.G                  | 21.76   | 10.04  | 2.17 | 0.46 |
| Q501J6_DDX17_MOUSE | Ddx17  | Probable ATP-dependent R.M*LDM*GFEPQIR@.K              | 151.87  | 64.64  | 2.35 | 0.43 |
| Q501J6_DDX17_MOUSE | Ddx17  | Probable ATP-dependent R.MLDM*GFEPQIR@.K               | 29.81   | 11.29  | 2.64 | 0.38 |
| Q501J6_DDX17_MOUSE | Ddx17  | Probable ATP-dependent R.M*LDMGFEPQIR@.K               | 12.60   | 5.24   | 2.41 | 0.42 |
| Q501J6_DDX17_MOUSE | Ddx17  | Probable ATP-dependent R.MLDMGFEPQIR@.K                | 9.90    | 4.98   | 1.99 | 0.50 |
| Q501J6_DDX17_MOUSE | Ddx17  | Probable ATP-dependent R.QLAEDFLR@.D                   | 88.09   | 38.92  | 2.26 | 0.44 |
| Q501J6_DDX17_MOUSE | Ddx17  | Probable ATP-dependent R.QTLM*WATWPK#.E                | 87.40   | 36.16  | 2.42 | 0.41 |
| Q501J6_DDX17_MOUSE | Ddx17  | Probable ATP-dependent R.SGK#APILIATDVASR@.G           | 14.09   | 6.99   | 2.02 | 0.50 |
| Q501J6_DDX17_MOUSE | Ddx17  | Probable ATP-dependent K.SQPER@DWVNLNFR@.S             | 26.51   | 12.73  | 2.08 | 0.48 |
| Q501J6_DDX17_MOUSE | Ddx17  | Probable ATP-dependent R.SSOSSSQFSGIGR@.S              | 89.30   | 45.82  | 1.95 | 0.51 |
| Q501J6_DDX17_MOUSE | Ddx17  | Probable ATP-dependent K.TIIFETK#.R                    | 129.36  | 69.04  | 1.87 | 0.53 |
| Q501J6_DDX17_MOUSE | Ddx17  | Probable ATP-dependent K.VLEEANQAINPK#L                | 140.18  | 77.17  | 1.82 | 0.55 |
| Q501J6_DDX17_MOUSE | Ddx17  | Probable ATP-dependent K.WDLSELPK#.F                   | 27.91   | 19.19  | 1.45 | 0.69 |
| Q501J6_DDX17_MOUSE | Ddx17  | Probable ATP-dependent K.APILIATDVASR@.G               | 188.70  | 53.64  | 3.52 | 0.28 |
| Q501J6_DDX17_MOUSE | Ddx17  | Probable ATP-dependent R.GLVNDEVKK#.F                  | 72.56   | 19.50  | 3.72 | 0.27 |
| Q501J6_DDX17_MOUSE | Ddx17  | Probable ATP-dependent K.GTAYFFTPGNLK#.Q               | 11.41   | 3.64   | 3.14 | 0.32 |
| Q501J6_DDX17_MOUSE | Ddx17  | Probable ATP-dependent R.LIDFLESQK#.T                  | 10.54   | 4.50   | 2.34 | 0.43 |
| Q501J6_DDX17_MOUSE | Ddx17  | Probable ATP-dependent R.M*LDM*GFEPQIR@.K              | 23.83   | 9.48   | 2.51 | 0.40 |
| Q501J6_DDX17_MOUSE | Ddx17  | Probable ATP-dependent R.QTLM*WATWPK#.E                | 9.63    | 3.70   | 2.60 | 0.38 |
| Q501J6_DDX17_MOUSE | Ddx17  | Probable ATP-dependent R.SSOSSSQFSGIGR@.S              | 7.42    | 6.55   | 1.13 | 0.88 |
| Q501J6_DDX17_MOUSE | Ddx17  | Probable ATP-dependent K.VLEEANQAINPK#L                | 14.92   | 8.04   | 1.85 | 0.54 |
| Q8K363_DDX18_MOUSE | Ddx18  | ATP-dependent RNA helix K.VSDIQSQLEK#.L                | 22.87   | 13.26  | 1.73 | 0.58 |
| Q8K363_DDX18_MOUSE | Ddx18  | ATP-dependent RNA helix K.VSDIQSQLEK#.L                | 17.32   | 8.25   | 2.10 | 0.48 |
| Q61655_DD19A_MOUSE | Ddx19A | ATP-dependent RNA helix R.DPSSPLYSVK#.S                | 61.09   | 25.47  | 2.40 | 0.42 |
| Q61655_DD19A_MOUSE | Ddx19A | ATP-dependent RNA helix R.EEETLDTIK#.Q                 | 66.84   | 20.13  | 3.32 | 0.30 |
| Q61655_DD19A_MOUSE | Ddx19A | ATP-dependent RNA helix K.EGHQVALLSGEM**VEQR@.A        | 60.11   | 20.78  | 2.89 | 0.35 |
| Q61655_DD19A_MOUSE | Ddx19A | ATP-dependent RNA helix R.GLAVNM**VDSK#.H              | 13.30   | 6.23   | 2.77 | 0.36 |
| Q61655_DD19A_MOUSE | Ddx19A | ATP-dependent RNA helix R.GLAVNMVDSK#.H                | 5.59    | 2.70   | 2.07 | 0.48 |
| Q61655_DD19A_MOUSE | Ddx19A | ATP-dependent RNA helix K.HSM*NILNR@.I                 | 82.96   | 30.86  | 2.69 | 0.37 |
| Q61655_DD19A_MOUSE | Ddx19A | ATP-dependent RNA helix K.IER@LDTDDLDEIEK#.I           | 14.72   | 4.74   | 3.11 | 0.32 |
| Q61655_DD19A_MOUSE | Ddx19A | ATP-dependent RNA helix R.KHTASWLAELSK#.E              | 14.08   | 4.67   | 3.02 | 0.33 |
| Q61655_DD19A_MOUSE | Ddx19A | ATP-dependent RNA helix R.LDITDDLDEIEK#.I              | 93.13   | 39.87  | 2.34 | 0.43 |
| Q61655_DD19A_MOUSE | Ddx19A | ATP-dependent RNA helix R.LDITDDLDEIEK#.AN.-           | 13.79   | 7.43   | 1.85 | 0.54 |
| Q61655_DD19A_MOUSE | Ddx19A | ATP-dependent RNA helix K.LR#R@EETLDTIK#.Q             | 23.10   | 10.23  | 2.26 | 0.44 |
| Q61655_DD19A_MOUSE | Ddx19A | ATP-dependent RNA helix R.SNLVNTNQVLEQLR@.D            | 65.56   | 22.31  | 2.94 | 0.34 |
| Q61655_DD19A_MOUSE | Ddx19A | ATP-dependent RNA helix R.SNLVNTNQVLEQLR@DPSSPLYSVK#.S | 7.65    | 1.85   | 4.15 | 0.24 |
| Q61655_DD19A_MOUSE | Ddx19A | ATP-dependent RNA helix K.TAAFLVLM*LSR@.V              | 45.25   | 17.13  | 2.64 | 0.38 |
| Q61655_DD19A_MOUSE | Ddx19A | ATP-dependent RNA helix K.TAAFLVLM*LSR@.V              | 14.85   | 4.57   | 3.25 | 0.31 |
| Q61655_DD19A_MOUSE | Ddx19A | ATP-dependent RNA helix K.TASWLAELSK#.E                | 34.34   | 22.34  | 1.54 | 0.65 |
| Q61655_DD19A_MOUSE | Ddx19A | ATP-dependent RNA helix K.TSTTAEK#EIEEK#EDR@.A         | 54.12   | 19.12  | 2.83 | 0.35 |
| Q61655_DD19A_MOUSE | Ddx19A | ATP-dependent RNA helix K.TSTTAEK#EIEEK#EDR@.A         | 3.26    | 2.56   | 1.27 | 0.79 |
| Q61655_DD19A_MOUSE | Ddx19A | ATP-dependent RNA helix K.VFVLDEADVM*JATQGHQDOSIR@.I   | 44.81   | 16.97  | 2.64 | 0.38 |
| Q61655_DD19A_MOUSE | Ddx19A | ATP-dependent RNA helix R.DPSSPLYSVK#.S                | 17.55   | 7.15   | 2.45 | 0.41 |
| Q61655_DD19A_MOUSE | Ddx19A | ATP-dependent RNA helix K.EGHQVALLSGEM**VEQR@.A        | 12.96   | 6.14   | 2.11 | 0.47 |
| Q61655_DD19A_MOUSE | Ddx19A | ATP-dependent RNA helix R.GLAVNM**VDSK#.H              | 9.60    | 6.98   | 1.38 | 0.73 |
| Q61655_DD19A_MOUSE | Ddx19A | ATP-dependent RNA helix K.HSM*NILNR@.I                 | 16.64   | 6.57   | 2.53 | 0.40 |
| Q61655_DD19A_MOUSE | Ddx19A | ATP-dependent RNA helix R.LDITDDLDEIEK#.I              | 24.48   | 11.88  | 2.06 | 0.49 |
| Q61655_DD19A_MOUSE | Ddx19A | ATP-dependent RNA helix R.SNLVNTNQVLEQLR@.D            | 23.41   | 7.70   | 3.04 | 0.33 |
| Q61655_DD19A_MOUSE | Ddx19A | ATP-dependent RNA helix R.SNLVNTNQVLEQLR@.D            | 8.08    | 1.52   | 5.32 | 0.19 |
| Q61655_DD19A_MOUSE | Ddx19A | ATP-dependent RNA helix K.TAAFLVLM*LSR@.V              | 20.82   | 5.99   | 3.48 | 0.29 |
| Q61655_DD19A_MOUSE | Ddx19A | ATP-dependent RNA helix K.TSTTAEK#EIEEK#EDR@.A         | 24.11   | 7.53   | 3.20 | 0.31 |
| Q61655_DD19A_MOUSE | Ddx19A | ATP-dependent RNA helix K.VFVLDEADVM*JATQGHQDOSIR@.I   | 14.98   | 6.32   | 2.37 | 0.42 |
| Q61655_DD19A_MOUSE | Ddx19A | ATP-dependent RNA helix R.DPSSPLYSVK#.S                | 13.28   | 10.53  | 1.25 | 0.80 |
| Q61655_DD19A_MOUSE | Ddx19A | ATP-dependent RNA helix K.EGHQVALLSGEM**VEQR@.A        | 14.12   | 3.34   | 4.26 | 0.23 |
| Q61655_DD19A_MOUSE | Ddx19A | ATP-dependent RNA helix R.LDITDDLDEIEK#.I              | 21.09   | 6.39   | 3.30 | 0.30 |
| Q61655_DD19A_MOUSE | Ddx19A | ATP-dependent RNA helix R.SNLVNTNQVLEQLR@.D            | 18.60   | 3.75   | 4.96 | 0.20 |
| Q61655_DD19A_MOUSE | Ddx19A | ATP-dependent RNA helix K.TAAFLVLM*LSR@.V              | 15.51   | 15.72  | 0.99 | 1.01 |
| Q61655_DD19A_MOUSE | Ddx19A | ATP-dependent RNA helix K.VFVLDEADVM*JATQGHQDOSIR@.I   | 18.17   | 6.03   | 3.01 | 0.33 |
| Q9JJY4_DDX20_MOUSE | Ddx20  | Probable ATP-dependent K.TQHLEQFSK#.V                  | 6.64    | 6.25   | 1.06 | 0.94 |
| Q9JJY4_DDX20_MOUSE | Ddx20  | Probable ATP-dependent R.VLITDLSR@.G                   | 9.77    | 3.41   | 2.86 | 0.35 |
| Q9JJY4_DDX20_MOUSE | Ddx20  | Probable ATP-dependent K.VPFNQALVFSNLHSR@.A            | 7.83    | 3.92   | 2.00 | 0.50 |
| Q9JJY4_DDX20_MOUSE | Ddx20  | Probable ATP-dependent R.VLITDLSR@.G                   | 10.91   | 2.93   | 3.72 | 0.27 |
| Q9JJY4_DDX20_MOUSE | Ddx20  | Probable ATP-dependent K.VPFNQALVFSNLHSR@.A            | 12.77   | 3.15   | 4.06 | 0.25 |
| Q9JJY4_DDX20_MOUSE | Ddx20  | Probable ATP-dependent K.QLIEYDLYNPGSIR@.L             | 8.03    | 1.00   | 8.07 | 0.12 |
| Q9JJY4_DDX20_MOUSE | Ddx20  | Probable ATP-dependent K.VPFNQALVFSNLHSR@.A            | 12.51   | 2.50   | 5.01 | 0.20 |
| Q9JIK5_DDX21_MOUSE | Ddx21  | Nucleolar RNA helicase 2 K.GAFANFPISSETVK#.L           | 3.96    | 3.67   | 1.08 | 0.93 |
| Q9JIK5_DDX21_MOUSE | Ddx21  | Nucleolar RNA helicase 2 K.GAVEAALAAHISGATSVDQR@.S     | 17.14   | 12.85  | 1.33 | 0.75 |
| Q9JIK5_DDX21_MOUSE | Ddx21  | Nucleolar RNA helicase 2 K.TFSFALIEK#.L                | 11.76   | 13.82  | 0.85 | 1.18 |
| Q9JIK5_DDX21_MOUSE | Ddx21  | Nucleolar RNA helicase 2 R.AAVIGDVIR@.V                | 250.35  | 106.78 | 2.34 | 0.43 |
| Q9JIK5_DDX21_MOUSE | Ddx21  | Nucleolar RNA helicase 2 R.APQVLVLA PTR@.E             | 114.40  | 52.98  | 2.16 | 0.46 |
| Q9JIK5_DDX21_MOUSE | Ddx21  | Nucleolar RNA helicase 2 K.DFSFALIEK#.L                | 36.52   | 21.08  | 1.73 | 0.58 |
| Q9JIK5_DDX21_MOUSE | Ddx21  | Nucleolar RNA helicase 2 K.GAFANFPISSETVK#.L           | 146.61  | 71.90  | 2.04 | 0.49 |
| Q9JIK5_DDX21_MOUSE | Ddx21  | Nucleolar RNA helicase 2 R.ELANQVSK#.D                 | 142.59  | 65.28  | 2.18 | 0.46 |
| Q9JIK5_DDX21_MOUSE | Ddx21  | Nucleolar RNA helicase 2 K.ELK#EQLGESIDAK#.V           | 83.45   | 48.66  | 1.72 | 0.58 |
| Q9JIK5_DDX21_MOUSE | Ddx21  | Nucleolar RNA helicase 2 K.EQLGESIDAK#.V               | 55.20   | 19.24  | 2.87 | 0.35 |
| Q9JIK5_DDX21_MOUSE | Ddx21  | Nucleolar RNA helicase 2 K.GAVEAALAAHISGATSVDQR@.S     | 66.11   | 31.58  | 2.09 | 0.48 |
| Q9JIK5_DDX21_MOUSE | Ddx21  | Nucleolar RNA helicase 2 K.GAVEAALAAHISGATSVDQR.S      | 13.98   | 6.15   | 2.27 | 0.44 |
| Q9JIK5_DDX21_MOUSE | Ddx21  | Nucleolar RNA helicase 2 K.GM*VFLK#.G                  | 38.77   | 13.11  | 2.96 | 0.34 |
| Q9JIK5_DDX21_MOUSE | Ddx21  | Nucleolar RNA helicase 2 K.GPSEDDVDPK#.S               | 10.10   | 5.02   | 2.01 | 0.50 |
| Q9JIK5_DDX21_MOUSE | Ddx21  | Nucleolar RNA helicase 2 R.GR@APQVLVLA PTR@.E          | 76.83   | 28.06  | 2.74 | 0.37 |
| Q9JIK5_DDX21_MOUSE | Ddx21  | Nucleolar RNA helicase 2 R.GVNFIFPIQAK#.T              | 262.56  | 128.91 | 2.04 | 0.49 |
| Q9JIK5_DDX21_MOUSE | Ddx21  | Nucleolar RNA helicase 2 R.IGVPSFALIEK#.A              | 136.32  | 70.28  | 1.94 | 0.52 |
| Q9JIK5_DDX21_MOUSE | Ddx21  | Nucleolar RNA helicase 2 K.GPSEDDVDPK#.S               | 49.64   | 27.43  | 1.81 | 0.55 |
| Q9JIK5_DDX21_MOUSE | Ddx21  | Nucleolar RNA helicase 2 K.QEPEEQDDTASTK#.T            | 11.86   | 9.00   | 1.32 | 0.76 |
| Q9JIK5_DDX21_MOUSE | Ddx21  | Nucleolar RNA helicase 2 K.LGSDGAEESM*ETLPK#PSEK#.K    | 68.17   | 27.66  | 2.46 | 0.41 |
| Q9JIK5_DDX21_MOUSE | Ddx21  | Nucleolar RNA helicase 2 R.LK#DGLSQSEP#K.S             | 150.77  | 78.16  | 1.93 | 0.52 |
| Q9JIK5_DDX21_MOUSE | Ddx21  | Nucleolar RNA helicase 2 R.LLDSVPTAISHFK#.Q            | 72.65   | 40.07  | 1.81 | 0.55 |
| Q9JIK5_DDX21_MOUSE | Ddx21  | Nucleolar RNA helicase 2 R.R@WQLVATEQPELEGGPDGGR@.G    | 6.95    | 3.56   | 1.95 | 0.51 |
| Q9JIK5_DDX21_MOUSE | Ddx21  | Nucleolar RNA helicase 2 R.SGIDILVGTGPR@.I             | 140.74  | 66.14  | 2.13 | 0.47 |

|                     |        |                                                               |        |        |      |      |
|---------------------|--------|---------------------------------------------------------------|--------|--------|------|------|
| Q9JIK5_DDX21_MOUSE  | Ddx21  | Nucleolar RNA helicase 2 K.SK#TEATEGMEAAVSSK#.A               | 14.96  | 7.59   | 1.97 | 0.51 |
| Q9JIK5_DDX21_MOUSE  | Ddx21  | Nucleolar RNA helicase 2 R.SLINSQAGFVTM*ILR@.C                | 31.12  | 16.15  | 1.93 | 0.52 |
| Q9JIK5_DDX21_MOUSE  | Ddx21  | Nucleolar RNA helicase 2 R.SLINSQAGFVTMILR@.C                 | 27.79  | 11.39  | 2.44 | 0.41 |
| Q9JIK5_DDX21_MOUSE  | Ddx21  | Nucleolar RNA helicase 2 K.SN5SDAPGEESSETEK#EIPVQE#K.E        | 71.27  | 29.40  | 2.42 | 0.41 |
| Q9JIK5_DDX21_MOUSE  | Ddx21  | Nucleolar RNA helicase 2 K.STYEQVLDLGG#.K                     | 71.16  | 27.95  | 2.55 | 0.39 |
| Q9JIK5_DDX21_MOUSE  | Ddx21  | Nucleolar RNA helicase 2 R.TEAVTIEQEK#.W                      | 180.05 | 81.27  | 2.22 | 0.45 |
| Q9JIK5_DDX21_MOUSE  | Ddx21  | Nucleolar RNA helicase 2 K.TEATEGMEAAVSSK#.A                  | 3.88   | 1.79   | 2.17 | 0.46 |
| Q9JIK5_DDX21_MOUSE  | Ddx21  | Nucleolar RNA helicase 2 K.TEATEGTM*EEAVSSK#.A                | 18.13  | 7.95   | 2.28 | 0.44 |
| Q9JIK5_DDX21_MOUSE  | Ddx21  | Nucleolar RNA helicase 2 K.TFHHSYSGK#.D                       | 110.37 | 56.31  | 1.96 | 0.51 |
| Q9JIK5_DDX21_MOUSE  | Ddx21  | Nucleolar RNA helicase 2 K.TFSFAPILEK#.K                      | 371.48 | 200.97 | 1.85 | 0.54 |
| Q9JIK5_DDX21_MOUSE  | Ddx21  | Nucleolar RNA helicase 2 R.WQLTVATEQPELEGGPPDGYR@.G           | 14.46  | 9.33   | 1.55 | 0.65 |
| Q9JIK5_DDX21_MOUSE  | Ddx21  | Nucleolar RNA helicase 2 K.AAIVTVEHLAIK#.C                    | 8.52   | 2.36   | 3.61 | 0.28 |
| Q9JIK5_DDX21_MOUSE  | Ddx21  | Nucleolar RNA helicase 2 R.AAVIGDVIR@.V                       | 87.39  | 28.31  | 3.09 | 0.32 |
| Q9JIK5_DDX21_MOUSE  | Ddx21  | Nucleolar RNA helicase 2 K.EEYQLAQVEQK#.A                     | 8.36   | 8.51   | 0.98 | 1.02 |
| Q9JIK5_DDX21_MOUSE  | Ddx21  | Nucleolar RNA helicase 2 K.EGAFSNFPISEETVK#.L                 | 49.06  | 15.79  | 3.11 | 0.32 |
| Q9JIK5_DDX21_MOUSE  | Ddx21  | Nucleolar RNA helicase 2 K.EQLGESIDAK#.V                      | 15.17  | 9.89   | 1.53 | 0.65 |
| Q9JIK5_DDX21_MOUSE  | Ddx21  | Nucleolar RNA helicase 2 K.GAVEALAAALAHISGATSVDDQR@.S         | 115.11 | 29.55  | 3.90 | 0.26 |
| Q9JIK5_DDX21_MOUSE  | Ddx21  | Nucleolar RNA helicase 2 R.GR@APQVLVLAPTR@.E                  | 23.17  | 7.38   | 3.14 | 0.32 |
| Q9JIK5_DDX21_MOUSE  | Ddx21  | Nucleolar RNA helicase 2 R.GVNFLLPQAK#.L                      | 91.41  | 31.24  | 2.93 | 0.34 |
| Q9JIK5_DDX21_MOUSE  | Ddx21  | Nucleolar RNA helicase 2 R.IGVPSATEIK#.K                      | 33.28  | 9.30   | 3.58 | 0.28 |
| Q9JIK5_DDX21_MOUSE  | Ddx21  | Nucleolar RNA helicase 2 K.KHQEEEPQDPTASTSK#.T                | 4.12   | 1.45   | 2.84 | 0.35 |
| Q9JIK5_DDX21_MOUSE  | Ddx21  | Nucleolar RNA helicase 2 K.KHQEEEPQDPTASTSK#.T                | 17.45  | 5.05   | 3.46 | 0.29 |
| Q9JIK5_DDX21_MOUSE  | Ddx21  | Nucleolar RNA helicase 2 K.LGSDGAESM*ETLPK#PSEK#.K            | 24.48  | 8.55   | 2.86 | 0.35 |
| Q9JIK5_DDX21_MOUSE  | Ddx21  | Nucleolar RNA helicase 2 K.LQGGLOER.K                         | 61.84  | 18.79  | 3.29 | 0.30 |
| Q9JIK5_DDX21_MOUSE  | Ddx21  | Nucleolar RNA helicase 2 R.SGIDILVGTTPR@.I                    | 22.41  | 22.41  | 2.55 | 0.39 |
| Q9JIK5_DDX21_MOUSE  | Ddx21  | Nucleolar RNA helicase 2 K.SK#TEATEGTM*EEAVSSK#.A             | 9.75   | 2.79   | 3.50 | 0.29 |
| Q9JIK5_DDX21_MOUSE  | Ddx21  | Nucleolar RNA helicase 2 K.SK#TEATEGTM*EEAVSSK#.A             | 64.13  | 20.33  | 3.16 | 0.32 |
| Q9JIK5_DDX21_MOUSE  | Ddx21  | Nucleolar RNA helicase 2 R.SLINSQAGFVTM*ILR@.C                | 6.46   | 4.51   | 1.43 | 0.70 |
| Q9JIK5_DDX21_MOUSE  | Ddx21  | Nucleolar RNA helicase 2 R.SLINSQAGFVTMILR@.C                 | 8.94   | 2.19   | 4.09 | 0.24 |
| Q9JIK5_DDX21_MOUSE  | Ddx21  | Nucleolar RNA helicase 2 K.STYEQVLDLGG#.K                     | 23.64  | 9.83   | 2.40 | 0.42 |
| Q9JIK5_DDX21_MOUSE  | Ddx21  | Nucleolar RNA helicase 2 R.TEAVTIEQEK#.W                      | 45.68  | 17.94  | 2.55 | 0.39 |
| Q9JIK5_DDX21_MOUSE  | Ddx21  | Nucleolar RNA helicase 2 K.TEATEGTM*EEAVSSK#.A                | 105.82 | 2.85   | 3.79 | 0.26 |
| Q9JIK5_DDX21_MOUSE  | Ddx21  | Nucleolar RNA helicase 2 K.TFSFAPILEK#.L                      | 124.06 | 45.41  | 2.73 | 0.37 |
| D3Z0M9_D3Z0M9_MOUSE | Ddx23  | MCG18410, isoform CRA R.DIIGVAETGSGK#.T                       | 39.16  | 12.37  | 3.16 | 0.32 |
| D3Z0M9_D3Z0M9_MOUSE | Ddx23  | MCG18410, isoform CRA R.DILVATDVAGR@.G                        | 22.48  | 9.08   | 2.47 | 0.40 |
| D3Z0M9_D3Z0M9_MOUSE | Ddx23  | MCG18410, isoform CRA R.ELAQQJEEITK#.F                        | 51.29  | 13.68  | 3.75 | 0.27 |
| D3Z0M9_D3Z0M9_MOUSE | Ddx23  | MCG18410, isoform CRA R.GFIAGIDLK#.Q                          | 36.91  | 15.80  | 2.34 | 0.43 |
| D3Z0M9_D3Z0M9_MOUSE | Ddx23  | MCG18410, isoform CRA R.GIDIQDVSMM*VVNYDM*AK#.N               | 5.93   | 3.18   | 1.86 | 0.54 |
| D3Z0M9_D3Z0M9_MOUSE | Ddx23  | MCG18410, isoform CRA R.IDR@IEESDQGPYAILAPTR@.E               | 26.99  | 7.86   | 3.43 | 0.29 |
| D3Z0M9_D3Z0M9_MOUSE | Ddx23  | MCG18410, isoform CRA R.IEESDQGPYAILAPTR@.E                   | 11.32  | 3.32   | 3.41 | 0.29 |
| D3Z0M9_D3Z0M9_MOUSE | Ddx23  | MCG18410, isoform CRA R.IFR@EDVITTK#.G                        | 13.32  | 12.33  | 3.11 | 0.32 |
| D3Z0M9_D3Z0M9_MOUSE | Ddx23  | MCG18410, isoform CRA R.LIDVLENR@.Y                           | 53.99  | 19.67  | 2.74 | 0.36 |
| D3Z0M9_D3Z0M9_MOUSE | Ddx23  | MCG18410, isoform CRA R.K.M*LEDPQER@.E                        | 9.77   | 3.91   | 2.50 | 0.40 |
| D3Z0M9_D3Z0M9_MOUSE | Ddx23  | MCG18410, isoform CRA R.QTVM*FATM*PPAVER@.L                   | 6.73   | 2.85   | 2.36 | 0.42 |
| D3Z0M9_D3Z0M9_MOUSE | Ddx23  | MCG18410, isoform CRA R.SGVAITFLTK#.E                         | 61.66  | 27.94  | 2.21 | 0.45 |
| D3Z0M9_D3Z0M9_MOUSE | Ddx23  | MCG18410, isoform CRA R.TLEEKEQEAR.L                          | 9.21   | 5.94   | 1.55 | 0.65 |
| D3Z0M9_D3Z0M9_MOUSE | Ddx23  | MCG18410, isoform CRA R.TVAVIGGIR@.E                          | 47.25  | 17.48  | 2.70 | 0.37 |
| D3Z0M9_D3Z0M9_MOUSE | Ddx23  | MCG18410, isoform CRA R.VFLM*SESEK#.R                         | 9.45   | 3.80   | 2.48 | 0.40 |
| D3Z0M9_D3Z0M9_MOUSE | Ddx23  | MCG18410, isoform CRA R.DIIGVAETGSGK#.T                       | 15.50  | 4.07   | 3.81 | 0.26 |
| D3Z0M9_D3Z0M9_MOUSE | Ddx23  | MCG18410, isoform CRA R.EDSAVFYELK#.Q                         | 8.69   | 3.66   | 2.37 | 0.42 |
| D3Z0M9_D3Z0M9_MOUSE | Ddx23  | MCG18410, isoform CRA R.GFIAGIDLK#.Q                          | 15.29  | 5.05   | 3.03 | 0.33 |
| D3Z0M9_D3Z0M9_MOUSE | Ddx23  | MCG18410, isoform CRA R.HQVQLGR@.G                            | 17.32  | 3.45   | 5.03 | 0.20 |
| D3Z0M9_D3Z0M9_MOUSE | Ddx23  | MCG18410, isoform CRA R.IDR@IEESDQGPYAILAPTR@.E               | 8.94   | 3.11   | 2.87 | 0.35 |
| D3Z0M9_D3Z0M9_MOUSE | Ddx23  | MCG18410, isoform CRA R.IEESDQGPYAILAPTR@.E                   | 5.66   | 2.06   | 2.74 | 0.36 |
| D3Z0M9_D3Z0M9_MOUSE | Ddx23  | MCG18410, isoform CRA R.TLEEKEQEAR.L                          | 4.68   | 2.44   | 1.92 | 0.52 |
| Q9ESV0_DDX24_MOUSE  | Ddx24  | ATP-dependent RNA helicase R.AAEGAAQNEVEYK#.A                 | 7.60   | 2.19   | 3.48 | 0.29 |
| Q9ESV0_DDX24_MOUSE  | Ddx24  | ATP-dependent RNA helicase R.NEGTVETLTETK.I                   | 10.13  | 9.04   | 1.12 | 0.89 |
| Q9ESV0_DDX24_MOUSE  | Ddx24  | ATP-dependent RNA helicase R.SESLAQAAPR.K                     | 6.54   | 10.54  | 0.62 | 1.61 |
| Q9ESV0_DDX24_MOUSE  | Ddx24  | ATP-dependent RNA helicase R.TLQK#EDLPLPVPQSK#.Y              | 7.80   | 7.53   | 1.04 | 0.97 |
| Q9ESV0_DDX24_MOUSE  | Ddx24  | ATP-dependent RNA helicase R.AAEGAAQNEVEYK#.A                 | 10.80  | 2.99   | 3.61 | 0.28 |
| Q9ESV0_DDX24_MOUSE  | Ddx24  | ATP-dependent RNA helicase R.AAEGSLSLM*LIGPDEVINFKK.I         | 4.73   | 4.67   | 1.01 | 0.99 |
| Q921N6_DDX27_MOUSE  | Ddx27  | Probable ATP-dependent R.IFVNSNTDVAPFLR.Q                     | 7.06   | 5.77   | 1.22 | 0.82 |
| Q6NZO2_Q6NZO2_MOUSE | Ddx31  | DEAD/H (Asp-Glu-Ala-Asp R.SDGPYALVLPFR@.E                     | 9.13   | 2.14   | 4.27 | 0.23 |
| Q8VDW0_DX39A_MOUSE  | Ddx39A | ATP-dependent RNA helicase R.DVQEIR@.L                        | 372.12 | 143.67 | 2.59 | 0.39 |
| Q8VDW0_DX39A_MOUSE  | Ddx39A | ATP-dependent RNA helicase R.FEVNVAELPEIDISTYEQSR@.-          | 16.41  | 6.58   | 2.49 | 0.40 |
| Q8VDW0_DX39A_MOUSE  | Ddx39A | ATP-dependent RNA helicase R.FM*QDPM*EFVVDDETK#.L             | 7.68   | 3.39   | 2.26 | 0.44 |
| Q8VDW0_DX39A_MOUSE  | Ddx39A | ATP-dependent RNA helicase R.GLAVTFVSDENDAK#.I                | 155.49 | 56.06  | 2.77 | 0.36 |
| Q8VDW0_DX39A_MOUSE  | Ddx39A | ATP-dependent RNA helicase R.K.SYVSIHSSGFR.D                  | 92.65  | 42.17  | 2.20 | 0.46 |
| Q8VDW0_DX39A_MOUSE  | Ddx39A | ATP-dependent RNA helicase R.ILNDVQDR@.F                      | 101.09 | 36.67  | 2.76 | 0.36 |
| Q8VDW0_DX39A_MOUSE  | Ddx39A | ATP-dependent RNA helicase R.ILNDVQDR@FEVNVAELPEIDISTYEQSR@.- | 20.04  | 3.31   | 6.06 | 0.16 |
| Q8VDW0_DX39A_MOUSE  | Ddx39A | ATP-dependent RNA helicase R.ILVATNLFGR@.G                    | 779.04 | 325.29 | 2.39 | 0.42 |
| Q8VDW0_DX39A_MOUSE  | Ddx39A | ATP-dependent RNA helicase R.LTLHLGQVYK#.L                    | 255.13 | 103.02 | 2.48 | 0.40 |
| Q8VDW0_DX39A_MOUSE  | Ddx39A | ATP-dependent RNA helicase R.R@ILVATNLFGR@.G                  | 57.69  | 24.52  | 2.35 | 0.43 |
| Q8VDW0_DX39A_MOUSE  | Ddx39A | ATP-dependent RNA helicase R.VNIVFNVDMM*PEDSDTYLHR@.V         | 49.98  | 22.64  | 2.21 | 0.45 |
| Q8VDW0_DX39A_MOUSE  | Ddx39A | ATP-dependent RNA helicase R.VSVFFGLSIIK#.K                   | 65.84  | 24.48  | 2.69 | 0.37 |
| Q8VDW0_DX39A_MOUSE  | Ddx39A | ATP-dependent RNA helicase R.GLAVTFVSDENDAK#.I                | 11.20  | 2.11   | 5.30 | 0.19 |
| Q8VDW0_DX39A_MOUSE  | Ddx39A | ATP-dependent RNA helicase R.ILVATNLFGR@.G                    | 58.95  | 15.38  | 3.83 | 0.26 |
| Q8VDW0_DX39A_MOUSE  | Ddx39A | ATP-dependent RNA helicase R.DVQEIR@.L                        | 195.98 | 68.12  | 2.88 | 0.35 |
| Q8VDW0_DX39A_MOUSE  | Ddx39A | ATP-dependent RNA helicase R.GLAVTFVSDENDAK#.I                | 93.49  | 29.37  | 3.18 | 0.31 |
| Q8VDW0_DX39A_MOUSE  | Ddx39A | ATP-dependent RNA helicase R.ILVATNLFGR@.G                    | 326.53 | 106.49 | 3.07 | 0.33 |
| Q8VDW0_DX39A_MOUSE  | Ddx39A | ATP-dependent RNA helicase R.LTLHLGQVYK#.L                    | 151.56 | 49.85  | 3.04 | 0.33 |
| Q8VDW0_DX39A_MOUSE  | Ddx39A | ATP-dependent RNA helicase R.VNIVFNVDMM*PEDSDTYLHR@.V         | 30.46  | 13.22  | 2.30 | 0.43 |
| Q8VDW0_DX39A_MOUSE  | Ddx39A | ATP-dependent RNA helicase R.VSVFFGLSIIK#.K                   | 58.57  | 18.74  | 3.13 | 0.32 |
| Q8VDW0_DX39A_MOUSE  | Ddx39A | ATP-dependent RNA helicase R.DVQEIR@.L                        | 234.50 | 65.25  | 3.59 | 0.28 |
| Q8VDW0_DX39A_MOUSE  | Ddx39A | ATP-dependent RNA helicase R.ELAFQISK#.E                      | 197.27 | 57.29  | 3.44 | 0.29 |
| Q8VDW0_DX39A_MOUSE  | Ddx39A | ATP-dependent RNA helicase R.FM*QDPM*EFVVDDETK#.L             | 8.02   | 2.37   | 3.38 | 0.30 |
| Q8VDW0_DX39A_MOUSE  | Ddx39A | ATP-dependent RNA helicase R.GLAVTFVSDENDAK#.I                | 105.86 | 27.72  | 3.82 | 0.26 |
| Q8VDW0_DX39A_MOUSE  | Ddx39A | ATP-dependent RNA helicase R.ILNDVQDR@.F                      | 64.47  | 15.94  | 4.04 | 0.25 |
| Q8VDW0_DX39A_MOUSE  | Ddx39A | ATP-dependent RNA helicase R.ILVATNLFGR@.G                    | 381.06 | 106.79 | 3.57 | 0.28 |
| Q8VDW0_DX39A_MOUSE  | Ddx39A | ATP-dependent RNA helicase R.LTLHLGQVYK#.L                    | 141.27 | 43.73  | 3.23 | 0.31 |
| Q8VDW0_DX39A_MOUSE  | Ddx39A | ATP-dependent RNA helicase R.R@ILVATNLFGR@.G                  | 18.77  | 6.02   | 3.12 | 0.32 |
| Q8VDW0_DX39A_MOUSE  | Ddx39A | ATP-dependent RNA helicase R.VNIVFNVDMM*PEDSDTYLHR@.V         | 55.46  | 16.49  | 3.36 | 0.30 |
| Q8VDW0_DX39A_MOUSE  | Ddx39A | ATP-dependent RNA helicase R.VSVFFGLSIIK#.K                   | 67.91  | 13.52  | 5.02 | 0.20 |
| Q9Z1N5_DX39B_MOUSE  | Ddx39B | Spliceosome RNA helicase R.FEVNISELPEDISSIEQTR@.-             | 6.35   | 5.08   | 1.25 | 0.80 |
| Q9Z1N5_DX39B_MOUSE  | Ddx39B | Spliceosome RNA helicase R.FM*QDPM*EFVVDDETK#.L               | 24.52  | 9.96   | 2.46 | 0.41 |
| Q9Z1N5_DX39B_MOUSE  | Ddx39B | Spliceosome RNA helicase R.GLAVTFVSDENDAK#.I                  | 426.55 | 178.86 | 2.38 | 0.42 |
| Q9Z1N5_DX39B_MOUSE  | Ddx39B | Spliceosome RNA helicase R.ILNDVQDR@FEVNISELPEDISSIEQTR@.-    | 56.87  | 18.90  | 3.01 | 0.33 |
| Q9Z1N5_DX39B_MOUSE  | Ddx39B | Spliceosome RNA helicase R.K.HDEVLKIR#.N                      | 10.45  | 5.50   | 1.90 | 0.53 |
| Q9Z1N5_DX39B_MOUSE  | Ddx39B | Spliceosome RNA helicase R.K.FM*QDPM*EFVVDDETK#.L             | 23.35  | 10.46  | 2.23 | 0.45 |
| Q9Z1N5_DX39B_MOUSE  | Ddx39B | Spliceosome RNA helicase R.QVM*MF*SFATLSK#.E                  | 102.73 | 50.59  | 2.03 | 0.49 |
| Q9Z1N5_DX39B_MOUSE  | Ddx39B | Spliceosome RNA helicase R.VAVFFGLSIIK#.K                     | 222.70 | 73.32  | 3.04 | 0.33 |
| Q9Z1N5_DX39B_MOUSE  | Ddx39B | Spliceosome RNA helicase R.VNIAFNVDMM*PEDSDTYLHR@.V           | 217.14 | 92.00  | 2.36 | 0.42 |
| Q9Z1N5_DX39B_MOUSE  | Ddx39B | Spliceosome RNA helicase R.VNIAFNVDMPEDSDTYLHR@.V             | 24.69  | 12.13  | 2.04 | 0.49 |

|                    |        |                                                               |        |        |      |      |
|--------------------|--------|---------------------------------------------------------------|--------|--------|------|------|
| Q9Z1N5_DX398_MOUSE | Ddx39b | Spliceosome RNA helicase K.GLAITFVSDENDAK#.I                  | 20.64  | 3.64   | 5.68 | 0.18 |
| Q9Z1N5_DX398_MOUSE | Ddx39b | Spliceosome RNA helicase K.VAVFFGGLSIIK#.K                    | 4.53   | 1.76   | 2.57 | 0.39 |
| Q9Z1N5_DX398_MOUSE | Ddx39b | Spliceosome RNA helicase R.VNIAFNVDYDMPEDSDTYLHR@.V           | 5.57   | 2.27   | 2.46 | 0.41 |
| Q9Z1N5_DX398_MOUSE | Ddx39b | Spliceosome RNA helicase R.FEVNISELPDEIDISSYEQTR@.-           | 24.08  | 3.20   | 7.53 | 0.13 |
| Q9Z1N5_DX398_MOUSE | Ddx39b | Spliceosome RNA helicase K.FM*QDPM*EIFVDDETK#.L               | 6.90   | 3.29   | 2.10 | 0.48 |
| Q9Z1N5_DX398_MOUSE | Ddx39b | Spliceosome RNA helicase K.GLAITFVSDENDAK#.I                  | 180.76 | 67.11  | 2.69 | 0.37 |
| Q9Z1N5_DX398_MOUSE | Ddx39b | Spliceosome RNA helicase K.I.LNDVQDR@FEVNISELPDEIDISSYEQTR@.- | 17.41  | 19.73  | 0.88 | 1.13 |
| Q9Z1N5_DX398_MOUSE | Ddx39b | Spliceosome RNA helicase K.QVM*DM*FSATLSK#.E                  | 20.58  | 8.93   | 2.30 | 0.43 |
| Q9Z1N5_DX398_MOUSE | Ddx39b | Spliceosome RNA helicase K.VAVFFGGLSIIK#.K                    | 104.84 | 32.46  | 3.23 | 0.31 |
| Q9Z1N5_DX398_MOUSE | Ddx39b | Spliceosome RNA helicase R.VNIAFNVDYDMPEDSDTYLHR@.V           | 73.48  | 22.89  | 3.21 | 0.31 |
| Q9Z1N5_DX398_MOUSE | Ddx39b | Spliceosome RNA helicase R.FEVNISELPDEIDISSYEQTR@.-           | 36.59  | 12.64  | 2.90 | 0.35 |
| Q9Z1N5_DX398_MOUSE | Ddx39b | Spliceosome RNA helicase K.FM*QDPM*EIFVDDETK#.L               | 23.90  | 8.97   | 2.67 | 0.38 |
| Q9Z1N5_DX398_MOUSE | Ddx39b | Spliceosome RNA helicase K.GLAITFVSDENDAK#.I                  | 247.39 | 71.27  | 3.47 | 0.29 |
| Q9Z1N5_DX398_MOUSE | Ddx39b | Spliceosome RNA helicase K.QVM*DM*FSATLSK#.E                  | 31.03  | 9.77   | 3.17 | 0.32 |
| Q9Z1N5_DX398_MOUSE | Ddx39b | Spliceosome RNA helicase K.VAVFFGGLSIIK#.K                    | 80.57  | 23.50  | 3.43 | 0.29 |
| Q9Z1N5_DX398_MOUSE | Ddx39b | Spliceosome RNA helicase R.VNIAFNVDYDMPEDSDTYLHR@.V           | 89.40  | 24.61  | 3.63 | 0.28 |
| Q9Z1N5_DX398_MOUSE | Ddx39b | Spliceosome RNA helicase R.VNIAFNVDYDMPEDSDTYLHR@.V           | 11.52  | 2.81   | 4.10 | 0.24 |
| Q9Z1N5_DX398_MOUSE | Ddx39b | Spliceosome RNA helicase K.YM*PNVK#.V                         | 67.85  | 30.23  | 2.24 | 0.45 |
| Q62167_DDX3X_MOUSE | Ddx3x  | ATP-dependent RNA helicase K.D.LDLLLVEAK#.K                   | 167.49 | 105.61 | 1.59 | 0.63 |
| Q62167_DDX3X_MOUSE | Ddx3x  | ATP-dependent RNA helicase R.DR@EALHQFR@.S                    | 86.31  | 55.75  | 1.55 | 0.65 |
| Q62167_DDX3X_MOUSE | Ddx3x  | ATP-dependent RNA helicase R.ELAVQVEEAR@.K                    | 33.56  | 64.16  | 0.52 | 1.91 |
| Q62167_DDX3X_MOUSE | Ddx3x  | ATP-dependent RNA helicase R.FSGFGGAR@.D                      | 94.05  | 65.08  | 1.45 | 0.69 |
| Q62167_DDX3X_MOUSE | Ddx3x  | ATP-dependent RNA helicase R.GLDISNVK#.H                      | 52.49  | 35.24  | 1.49 | 0.67 |
| Q62167_DDX3X_MOUSE | Ddx3x  | ATP-dependent RNA helicase K.HAIPK#.E                         | 51.99  | 38.12  | 1.36 | 0.73 |
| Q62167_DDX3X_MOUSE | Ddx3x  | ATP-dependent RNA helicase R.HTM*DM*FSATFPK#.E                | 21.30  | 18.11  | 1.18 | 0.85 |
| Q62167_DDX3X_MOUSE | Ddx3x  | ATP-dependent RNA helicase R.HVINFDLPDIEEYVHR@.I              | 78.04  | 42.67  | 1.83 | 0.55 |
| Q62167_DDX3X_MOUSE | Ddx3x  | ATP-dependent RNA helicase R.IVEQDTM*PPK#.G                   | 57.91  | 38.66  | 1.50 | 0.67 |
| Q62167_DDX3X_MOUSE | Ddx3x  | ATP-dependent RNA helicase R.LEQELFSGGTGINFEK#.Y              | 11.81  | 10.50  | 1.12 | 0.89 |
| Q62167_DDX3X_MOUSE | Ddx3x  | ATP-dependent RNA helicase R.LVDM*DM*ER#.G                    | 38.02  | 19.96  | 1.91 | 0.52 |
| Q62167_DDX3X_MOUSE | Ddx3x  | ATP-dependent RNA helicase R.QSSGASSSFSSR@.A                  | 23.16  | 15.59  | 1.49 | 0.67 |
| Q62167_DDX3X_MOUSE | Ddx3x  | ATP-dependent RNA helicase K.QYPISLVAPTR@.E                   | 50.08  | 46.94  | 1.07 | 0.94 |
| Q62167_DDX3X_MOUSE | Ddx3x  | ATP-dependent RNA helicase R.RIVEQDTM*PPK#.G                  | 5.27   | 2.19   | 2.41 | 0.42 |
| Q62167_DDX3X_MOUSE | Ddx3x  | ATP-dependent RNA helicase R.SFLDLLNATGK#.D                   | 163.49 | 126.85 | 1.29 | 0.78 |
| Q62167_DDX3X_MOUSE | Ddx3x  | ATP-dependent RNA helicase K.SPILVATAVAAR@.G                  | 137.84 | 80.50  | 1.71 | 0.58 |
| Q62167_DDX3X_MOUSE | Ddx3x  | ATP-dependent RNA helicase R.VGNLGLATSFNNER@.N                | 107.84 | 76.09  | 1.42 | 0.71 |
| Q62167_DDX3X_MOUSE | Ddx3x  | ATP-dependent RNA helicase R.VGTSSEMITQK#.V                   | 103.32 | 78.86  | 1.31 | 0.76 |
| Q62167_DDX3X_MOUSE | Ddx3x  | ATP-dependent RNA helicase K.YLVLDEADR@.M                     | 59.78  | 38.64  | 1.55 | 0.65 |
| Q62167_DDX3X_MOUSE | Ddx3x  | ATP-dependent RNA helicase K.YLVLDEADR*LDM*GFEPQIR.R          | 24.04  | 14.97  | 1.61 | 0.62 |
| Q62167_DDX3X_MOUSE | Ddx3x  | ATP-dependent RNA helicase R.LEQELFSGGTGINFEK#.Y              | 4.00   | 6.09   | 0.66 | 1.52 |
| Q62167_DDX3X_MOUSE | Ddx3x  | ATP-dependent RNA helicase K.DKDAYSSFGS#.S                    | 49.75  | 14.51  | 3.43 | 0.29 |
| Q62167_DDX3X_MOUSE | Ddx3x  | ATP-dependent RNA helicase K.D.LDLLLVEAK#.K                   | 489.66 | 175.46 | 2.79 | 0.36 |
| Q62167_DDX3X_MOUSE | Ddx3x  | ATP-dependent RNA helicase R.DR@EALHQFR@.S                    | 333.97 | 104.96 | 3.18 | 0.31 |
| Q62167_DDX3X_MOUSE | Ddx3x  | ATP-dependent RNA helicase K.DSLLVLFVETK#.K                   | 54.17  | 25.89  | 2.09 | 0.48 |
| Q62167_DDX3X_MOUSE | Ddx3x  | ATP-dependent RNA helicase K.DSLLVLFVETK#.K.G                 | 17.62  | 4.26   | 4.13 | 0.24 |
| Q62167_DDX3X_MOUSE | Ddx3x  | ATP-dependent RNA helicase K.EIQM*LAR@.D                      | 97.52  | 33.74  | 2.89 | 0.35 |
| Q62167_DDX3X_MOUSE | Ddx3x  | ATP-dependent RNA helicase R.ELAVQVEEAR@.K                    | 169.24 | 53.30  | 3.18 | 0.31 |
| Q62167_DDX3X_MOUSE | Ddx3x  | ATP-dependent RNA helicase R.FSGFGGAR@.D                      | 205.05 | 75.07  | 2.73 | 0.37 |
| Q62167_DDX3X_MOUSE | Ddx3x  | ATP-dependent RNA helicase R.GLDISNVK#.H                      | 161.29 | 48.47  | 3.33 | 0.30 |
| Q62167_DDX3X_MOUSE | Ddx3x  | ATP-dependent RNA helicase R.GR@GDYDYGIGGR@.G                 | 17.77  | 6.34   | 2.80 | 0.36 |
| Q62167_DDX3X_MOUSE | Ddx3x  | ATP-dependent RNA helicase K.HAIPK#.E                         | 201.44 | 88.86  | 2.27 | 0.44 |
| Q62167_DDX3X_MOUSE | Ddx3x  | ATP-dependent RNA helicase R.HTM*DM*FSATFPK#.E                | 38.35  | 17.78  | 2.16 | 0.46 |
| Q62167_DDX3X_MOUSE | Ddx3x  | ATP-dependent RNA helicase R.HVINFDLPDIEEYVHR@.I              | 189.97 | 73.42  | 2.59 | 0.39 |
| Q62167_DDX3X_MOUSE | Ddx3x  | ATP-dependent RNA helicase R.IVEQDTM*PPK#.G                   | 90.37  | 43.63  | 2.07 | 0.48 |
| Q62167_DDX3X_MOUSE | Ddx3x  | ATP-dependent RNA helicase R.KHQYPSLVAPTR@.E                  | 8.19   | 4.52   | 1.81 | 0.55 |
| Q62167_DDX3X_MOUSE | Ddx3x  | ATP-dependent RNA helicase R.KQYPSLVAPTR@.E                   | 30.82  | 12.99  | 2.37 | 0.42 |
| Q62167_DDX3X_MOUSE | Ddx3x  | ATP-dependent RNA helicase R.LEQELFSGGTGINFEK#.Y              | 51.62  | 21.77  | 2.37 | 0.42 |
| Q62167_DDX3X_MOUSE | Ddx3x  | ATP-dependent RNA helicase R.LVDM*DM*ER#.G                    | 61.92  | 22.84  | 2.71 | 0.37 |
| Q62167_DDX3X_MOUSE | Ddx3x  | ATP-dependent RNA helicase R.QSSGASSSFSSR@.A                  | 38.17  | 9.65   | 3.96 | 0.25 |
| Q62167_DDX3X_MOUSE | Ddx3x  | ATP-dependent RNA helicase K.QYPISLVAPTR@.E                   | 142.66 | 58.81  | 2.43 | 0.41 |
| Q62167_DDX3X_MOUSE | Ddx3x  | ATP-dependent RNA helicase R.RIVEQDTM*PPK#.G                  | 11.56  | 5.84   | 1.98 | 0.51 |
| Q62167_DDX3X_MOUSE | Ddx3x  | ATP-dependent RNA helicase R.SFLDLLNATGK#.D                   | 438.17 | 128.40 | 3.41 | 0.29 |
| Q62167_DDX3X_MOUSE | Ddx3x  | ATP-dependent RNA helicase R.SGFGK#FER@.G                     | 16.32  | 5.17   | 3.15 | 0.32 |
| Q62167_DDX3X_MOUSE | Ddx3x  | ATP-dependent RNA helicase K.SPILVATAVAAR@.G                  | 400.59 | 165.74 | 2.42 | 0.41 |
| Q62167_DDX3X_MOUSE | Ddx3x  | ATP-dependent RNA helicase R.VGNLGLATSFNNER@.N                | 352.96 | 119.71 | 2.95 | 0.34 |
| Q62167_DDX3X_MOUSE | Ddx3x  | ATP-dependent RNA helicase R.VGTSSEMITQK#.V                   | 338.33 | 124.17 | 2.72 | 0.37 |
| Q62167_DDX3X_MOUSE | Ddx3x  | ATP-dependent RNA helicase K.YLVLDEADR@.M                     | 97.17  | 38.52  | 2.52 | 0.40 |
| Q62167_DDX3X_MOUSE | Ddx3x  | ATP-dependent RNA helicase K.YLVLDEADR*LDM*GFEPQIR.R          | 70.56  | 24.98  | 2.83 | 0.35 |
| Q62167_DDX3X_MOUSE | Ddx3x  | ATP-dependent RNA helicase K.D.LDLLLVEAK#.K                   | 145.36 | 42.21  | 3.44 | 0.29 |
| Q62167_DDX3X_MOUSE | Ddx3x  | ATP-dependent RNA helicase R.DR@EALHQFR@.S                    | 68.77  | 17.32  | 3.97 | 0.25 |
| Q62167_DDX3X_MOUSE | Ddx3x  | ATP-dependent RNA helicase K.DSLLVLFVETK#.K                   | 11.60  | 4.57   | 2.54 | 0.39 |
| Q62167_DDX3X_MOUSE | Ddx3x  | ATP-dependent RNA helicase R.ELAVQVEEAR@.K                    | 37.41  | 9.70   | 3.85 | 0.26 |
| Q62167_DDX3X_MOUSE | Ddx3x  | ATP-dependent RNA helicase R.GLDISNVK#.H                      | 28.97  | 9.37   | 3.09 | 0.32 |
| Q62167_DDX3X_MOUSE | Ddx3x  | ATP-dependent RNA helicase R.HTM*DM*FSATFPK#.E                | 10.22  | 3.86   | 2.65 | 0.38 |
| Q62167_DDX3X_MOUSE | Ddx3x  | ATP-dependent RNA helicase R.HVINFDLPDIEEYVHR@.I              | 43.42  | 11.29  | 3.85 | 0.26 |
| Q62167_DDX3X_MOUSE | Ddx3x  | ATP-dependent RNA helicase R.IVEQDTM*PPK#.G                   | 5.69   | 4.13   | 1.38 | 0.73 |
| Q62167_DDX3X_MOUSE | Ddx3x  | ATP-dependent RNA helicase R.LEQELFSGGTGINFEK#.Y              | 12.09  | 5.35   | 2.26 | 0.44 |
| Q62167_DDX3X_MOUSE | Ddx3x  | ATP-dependent RNA helicase R.QSSGASSSFSSR@.A                  | 15.13  | 6.07   | 2.49 | 0.40 |
| Q62167_DDX3X_MOUSE | Ddx3x  | ATP-dependent RNA helicase K.QYPISLVAPTR@.E                   | 31.99  | 11.72  | 2.73 | 0.37 |
| Q62167_DDX3X_MOUSE | Ddx3x  | ATP-dependent RNA helicase R.SFLDLLNATGK#.D                   | 101.63 | 36.19  | 2.81 | 0.36 |
| Q62167_DDX3X_MOUSE | Ddx3x  | ATP-dependent RNA helicase K.SPILVATAVAAR@.G                  | 69.95  | 17.70  | 3.95 | 0.25 |
| Q62167_DDX3X_MOUSE | Ddx3x  | ATP-dependent RNA helicase R.VGNLGLATSFNNER@.N                | 82.44  | 21.34  | 3.86 | 0.26 |
| Q62167_DDX3X_MOUSE | Ddx3x  | ATP-dependent RNA helicase R.VGTSSEMITQK#.V                   | 51.50  | 12.98  | 3.97 | 0.25 |
| Q91VN6_DDX41_MOUSE | Ddx41  | Probable ATP-dependent R.LLQEDSSPLLRR@.C                      | 5.16   | 3.45   | 1.50 | 0.67 |
| Q91VN6_DDX41_MOUSE | Ddx41  | Probable ATP-dependent K.DVLVATDVAASK#.G                      | 20.70  | 11.71  | 1.77 | 0.57 |
| Q91VN6_DDX41_MOUSE | Ddx41  | Probable ATP-dependent K.VYLAHSSM*DF.-                        | 12.62  | 12.62  | 1.00 | 1.00 |
| Q91VN6_DDX41_MOUSE | Ddx41  | Probable ATP-dependent K.FPAALR@.G                            | 13.10  | 8.35   | 1.57 | 0.64 |
| Q91VN6_DDX41_MOUSE | Ddx41  | Probable ATP-dependent K.ILESVAEGR@.A                         | 32.05  | 19.34  | 1.66 | 0.60 |
| Q91VN6_DDX41_MOUSE | Ddx41  | Probable ATP-dependent K.K#ADVDIAHEYLLK#.G                    | 40.55  | 19.97  | 2.03 | 0.49 |
| Q91VN6_DDX41_MOUSE | Ddx41  | Probable ATP-dependent R.LLQEDSSPLLRR.C                       | 23.54  | 14.23  | 1.65 | 0.60 |
| Q91VN6_DDX41_MOUSE | Ddx41  | Probable ATP-dependent R.QTLLFSATM*PK#.K                      | 7.83   | 6.94   | 1.13 | 0.89 |
| Q91VN6_DDX41_MOUSE | Ddx41  | Probable ATP-dependent K.SALVK#PVTINVGR@.A                    | 41.92  | 16.96  | 2.47 | 0.40 |
| Q91VN6_DDX41_MOUSE | Ddx41  | Probable ATP-dependent R.SEDEDEDDYVYVPLR@.Q                   | 7.14   | 4.99   | 1.43 | 0.70 |
| Q91VN6_DDX41_MOUSE | Ddx41  | Probable ATP-dependent R.SGNTGIATTFINIK#.A                    | 16.14  | 9.07   | 1.78 | 0.56 |
| Q91VN6_DDX41_MOUSE | Ddx41  | Probable ATP-dependent K.TPPYVLIFAEK#.K                       | 24.30  | 13.56  | 1.79 | 0.56 |
| Q91VN6_DDX41_MOUSE | Ddx41  | Probable ATP-dependent R.YLALDEADR@.M                         | 11.63  | 6.15   | 1.89 | 0.53 |
| Q91VN6_DDX41_MOUSE | Ddx41  | Probable ATP-dependent K.K#ADVDIAHEYLLK#.G                    | 13.61  | 6.75   | 2.02 | 0.50 |
| Q91VN6_DDX41_MOUSE | Ddx41  | Probable ATP-dependent K.SALVK#PVTINVGR@.A                    | 18.45  | 4.31   | 4.28 | 0.23 |
| Q810A7_DDX42_MOUSE | Ddx42  | ATP-dependent RNA helicase R.DILIDPIR@.V                      | 42.02  | 17.55  | 2.39 | 0.42 |
| Q810A7_DDX42_MOUSE | Ddx42  | ATP-dependent RNA helicase R.DIPVLVATDVAAR@.G                 | 62.88  | 25.68  | 2.45 | 0.41 |
| Q810A7_DDX42_MOUSE | Ddx42  | ATP-dependent RNA helicase R.DM*IGIAK#.T                      | 28.55  | 9.90   | 2.88 | 0.35 |
| Q810A7_DDX42_MOUSE | Ddx42  | ATP-dependent RNA helicase K.DSNFAGDLVR@.N                    | 33.88  | 16.76  | 2.02 | 0.49 |
| Q810A7_DDX42_MOUSE | Ddx42  | ATP-dependent RNA helicase R.GFGFGGFAISAGK#.K                 | 14.25  | 5.72   | 2.49 | 0.40 |
| Q810A7_DDX42_MOUSE | Ddx42  | ATP-dependent RNA helicase K.GIRDEEEDDQEAYFR.Y                | 34.84  | 11.99  | 2.91 | 0.34 |

|                    |       |                                                                |        |        |      |      |
|--------------------|-------|----------------------------------------------------------------|--------|--------|------|------|
| Q810A7_DDX42_MOUSE | Ddx42 | ATP-dependent RNA helic R.GLDPISIK#.T                          | 32.18  | 15.20  | 2.12 | 0.47 |
| Q810A7_DDX42_MOUSE | Ddx42 | ATP-dependent RNA helic K.GVAYTLTPK#.D                         | 38.68  | 18.32  | 2.11 | 0.47 |
| Q810A7_DDX42_MOUSE | Ddx42 | ATP-dependent RNA helic K.NFYNEHEEITLPTQDLDIR@.H               | 40.99  | 16.41  | 2.50 | 0.40 |
| Q810A7_DDX42_MOUSE | Ddx42 | ATP-dependent RNA helic R.QTLTFSATFR@.K                        | 12.32  | 5.89   | 2.09 | 0.48 |
| Q810A7_DDX42_MOUSE | Ddx42 | ATP-dependent RNA helic K.SHFVAASLSNGK#.A                      | 7.33   | 4.23   | 1.73 | 0.58 |
| Q810A7_DDX42_MOUSE | Ddx42 | ATP-dependent RNA helic R.SVAVYGGGSM*WEQAK#.A                  | 6.59   | 2.33   | 2.83 | 0.35 |
| Q810A7_DDX42_MOUSE | Ddx42 | ATP-dependent RNA helic K.TVINYDVAR@.D                         | 45.73  | 18.67  | 2.45 | 0.41 |
| Q810A7_DDX42_MOUSE | Ddx42 | ATP-dependent RNA helic R.VVQGGIDGEANEDVTQVEILHSGPSK#.W        | 48.01  | 18.01  | 2.67 | 0.38 |
| Q810A7_DDX42_MOUSE | Ddx42 | ATP-dependent RNA helic K.DIPVLVATDVAAR@.G                     | 11.80  | 6.28   | 1.88 | 0.53 |
| Q810A7_DDX42_MOUSE | Ddx42 | ATP-dependent RNA helic R.VVQGGIDGEANEDVTQVEILHSGPSK#.W        | 14.89  | 4.42   | 3.37 | 0.30 |
| Q569Z5_DDX46_MOUSE | Ddx46 | Probable ATP-dependent K.AALGLQSDDEDAADIDEQESM*FNSK#.K         | 4.04   | 1.58   | 2.56 | 0.39 |
| Q569Z5_DDX46_MOUSE | Ddx46 | Probable ATP-dependent K.ALELSGTAVPPDLEK#.L                    | 20.29  | 7.46   | 2.72 | 0.37 |
| Q569Z5_DDX46_MOUSE | Ddx46 | Probable ATP-dependent R.DLIGIAK#.T                            | 83.76  | 23.98  | 3.49 | 0.29 |
| Q569Z5_DDX46_MOUSE | Ddx46 | Probable ATP-dependent R.ELALQITK#.E                           | 250.35 | 27.41  | 9.13 | 0.11 |
| Q569Z5_DDX46_MOUSE | Ddx46 | Probable ATP-dependent K.FDETEQALANER@.K                       | 32.60  | 10.64  | 3.06 | 0.33 |
| Q569Z5_DDX46_MOUSE | Ddx46 | Probable ATP-dependent K.GFK#FDETEQALANER@.K                   | 81.01  | 21.22  | 3.82 | 0.26 |
| Q569Z5_DDX46_MOUSE | Ddx46 | Probable ATP-dependent R.GGTLAPLTVSAK#.T                       | 95.92  | 29.04  | 3.30 | 0.30 |
| Q569Z5_DDX46_MOUSE | Ddx46 | Probable ATP-dependent K.GYAYTFITDQAR@.Y                       | 126.92 | 30.69  | 4.14 | 0.24 |
| Q569Z5_DDX46_MOUSE | Ddx46 | Probable ATP-dependent K.HGVEK#PTPIQTAIPAIM*SGR@.D             | 8.50   | 2.80   | 3.03 | 0.33 |
| Q569Z5_DDX46_MOUSE | Ddx46 | Probable ATP-dependent R.ILSK#PIEVQVGG@.S                      | 99.15  | 33.42  | 2.97 | 0.34 |
| Q569Z5_DDX46_MOUSE | Ddx46 | Probable ATP-dependent R.ISEYEAATIR@.G                         | 34.43  | 9.57   | 3.60 | 0.28 |
| Q569Z5_DDX46_MOUSE | Ddx46 | Probable ATP-dependent K.IYLAIESANELAVQK#.A                    | 14.25  | 12.05  | 1.18 | 0.85 |
| Q569Z5_DDX46_MOUSE | Ddx46 | Probable ATP-dependent R.KHYLAIESANELAVQK#.A                   | 14.25  | 5.62   | 2.85 | 0.35 |
| Q569Z5_DDX46_MOUSE | Ddx46 | Probable ATP-dependent R.KHLLPEVDHGK#.I                        | 51.62  | 27.92  | 1.85 | 0.54 |
| Q569Z5_DDX46_MOUSE | Ddx46 | Probable ATP-dependent R.LEM*EGITVK#.G                         | 46.29  | 12.98  | 3.56 | 0.28 |
| Q569Z5_DDX46_MOUSE | Ddx46 | Probable ATP-dependent R.LIK#ELIR@.L                           | 13.47  | 4.13   | 3.26 | 0.31 |
| Q569Z5_DDX46_MOUSE | Ddx46 | Probable ATP-dependent K.LLVATSVAAAR@.G                        | 115.52 | 32.13  | 3.60 | 0.28 |
| Q569Z5_DDX46_MOUSE | Ddx46 | Probable ATP-dependent K.LNVVPLEK#.Q                           | 64.42  | 18.92  | 3.40 | 0.29 |
| Q569Z5_DDX46_MOUSE | Ddx46 | Probable ATP-dependent R.LQNSYQPTNK#.G                         | 59.79  | 19.54  | 3.06 | 0.33 |
| Q569Z5_DDX46_MOUSE | Ddx46 | Probable ATP-dependent R.M*IDM*LAANSGR@.V                      | 23.86  | 8.24   | 2.90 | 0.35 |
| Q569Z5_DDX46_MOUSE | Ddx46 | Probable ATP-dependent K.M*SQEEVNVFR@.L                        | 61.49  | 21.69  | 2.83 | 0.35 |
| Q569Z5_DDX46_MOUSE | Ddx46 | Probable ATP-dependent K.NFYVEVPELAK#.M                        | 88.44  | 30.11  | 2.94 | 0.34 |
| Q569Z5_DDX46_MOUSE | Ddx46 | Probable ATP-dependent K.NLIGESQVDM*QATNAILR@.G                | 20.66  | 5.52   | 3.74 | 0.27 |
| Q569Z5_DDX46_MOUSE | Ddx46 | Probable ATP-dependent R.QTVM*FSATFFR@.A                       | 38.05  | 11.67  | 3.26 | 0.31 |
| Q569Z5_DDX46_MOUSE | Ddx46 | Probable ATP-dependent R.RILSK#PIEVQVGG@.S                     | 34.63  | 11.64  | 2.98 | 0.34 |
| Q569Z5_DDX46_MOUSE | Ddx46 | Probable ATP-dependent K.R@YEELEINDFPQTAR@.W                   | 42.27  | 10.55  | 4.01 | 0.25 |
| Q569Z5_DDX46_MOUSE | Ddx46 | Probable ATP-dependent R.SLEEGEGPIAVIM*TPTR@.E                 | 44.39  | 22.92  | 1.94 | 0.52 |
| Q569Z5_DDX46_MOUSE | Ddx46 | Probable ATP-dependent R.SLEEGEGPIAVIM*TPTR@.E                 | 13.75  | 6.68   | 2.06 | 0.49 |
| Q569Z5_DDX46_MOUSE | Ddx46 | Probable ATP-dependent K.TIAEQALEK#.I                          | 91.38  | 27.02  | 3.38 | 0.30 |
| Q569Z5_DDX46_MOUSE | Ddx46 | Probable ATP-dependent K.TIAFLPM*FR@.H                         | 96.68  | 28.50  | 3.39 | 0.29 |
| Q569Z5_DDX46_MOUSE | Ddx46 | Probable ATP-dependent R.VK#DM*AAPTSSVPPTAGNAEK#.L             | 36.17  | 13.92  | 2.60 | 0.38 |
| Q569Z5_DDX46_MOUSE | Ddx46 | Probable ATP-dependent R.VTVVLDADR@.M                          | 30.63  | 14.30  | 2.14 | 0.47 |
| Q569Z5_DDX46_MOUSE | Ddx46 | Probable ATP-dependent K.VVTVVTK#.K                            | 80.31  | 19.69  | 4.08 | 0.25 |
| Q569Z5_DDX46_MOUSE | Ddx46 | Probable ATP-dependent R.YEELEINDFPQTAR@.W                     | 13.19  | 4.93   | 2.67 | 0.37 |
| Q569Z5_DDX46_MOUSE | Ddx46 | Probable ATP-dependent R.GGTLAPLTVSAK#.T                       | 32.55  | 8.94   | 3.64 | 0.27 |
| Q569Z5_DDX46_MOUSE | Ddx46 | Probable ATP-dependent K.GYAYTFITDQAR@.Y                       | 22.55  | 6.95   | 3.24 | 0.31 |
| Q569Z5_DDX46_MOUSE | Ddx46 | Probable ATP-dependent R.ISEYEAATIR@.G                         | 8.98   | 3.02   | 2.97 | 0.34 |
| Q569Z5_DDX46_MOUSE | Ddx46 | Probable ATP-dependent R.M*IDM*LAANSGR@.V                      | 8.38   | 3.52   | 2.38 | 0.42 |
| Q569Z5_DDX46_MOUSE | Ddx46 | Probable ATP-dependent K.M*SQEEVNVFR@.L                        | 19.09  | 5.92   | 3.23 | 0.31 |
| Q569Z5_DDX46_MOUSE | Ddx46 | Probable ATP-dependent K.NFYVEVPELAK#.M                        | 35.09  | 7.57   | 4.64 | 0.22 |
| Q569Z5_DDX46_MOUSE | Ddx46 | Probable ATP-dependent K.NLIGESQVDM*QATNAILR@.G                | 4.72   | 11.43  | 0.41 | 2.42 |
| Q569Z5_DDX46_MOUSE | Ddx46 | Probable ATP-dependent R.QTVM*FSATFFR@.A                       | 17.36  | 5.73   | 3.03 | 0.33 |
| Q569Z5_DDX46_MOUSE | Ddx46 | Probable ATP-dependent R.SLEEGEGPIAVIM*TPTR@.E                 | 12.70  | 5.93   | 2.14 | 0.47 |
| Q569Z5_DDX46_MOUSE | Ddx46 | Probable ATP-dependent K.TIAEQALEK#.I                          | 26.85  | 4.90   | 5.48 | 0.18 |
| Q569Z5_DDX46_MOUSE | Ddx46 | Probable ATP-dependent K.TIAFLPM*FR@.H                         | 35.62  | 11.35  | 3.14 | 0.32 |
| Q569Z5_DDX46_MOUSE | Ddx46 | Probable ATP-dependent K.VVTVVTK#.K                            | 27.51  | 5.79   | 4.75 | 0.21 |
| Q9CWX9_DDX47_MOUSE | Ddx47 | Probable ATP-dependent R.DIIQLAETGSGK#.T                       | 13.61  | 9.25   | 1.47 | 0.68 |
| Q9CWX9_DDX47_MOUSE | Ddx47 | Probable ATP-dependent K.IQIEAIPLALQGR@.D                      | 22.57  | 15.59  | 1.45 | 0.69 |
| Q9CWX9_DDX47_MOUSE | Ddx47 | Probable ATP-dependent R.FALVLPTR@.E                           | 14.94  | 11.87  | 1.26 | 0.79 |
| Q4FZF3_DDX49_MOUSE | Ddx49 | Probable ATP-dependent R.ELAYQIAEQAR@.V                        | 4.81   | 2.84   | 1.69 | 0.59 |
| Q4FZF3_DDX49_MOUSE | Ddx49 | Probable ATP-dependent K.TAAFVLPILQK#.L                        | 7.04   | 7.81   | 0.90 | 1.11 |
| Q61656_DDX5_MOUSE  | Ddx5  | Probable ATP-dependent R.DWVLENEFK#.H                          | 140.05 | 72.99  | 1.92 | 0.52 |
| Q61656_DDX5_MOUSE  | Ddx5  | Probable ATP-dependent R.EANQAINPK#.L                          | 81.13  | 39.83  | 2.04 | 0.49 |
| Q61656_DDX5_MOUSE  | Ddx5  | Probable ATP-dependent K.FGNPGEK#.L                            | 95.89  | 49.63  | 1.93 | 0.52 |
| Q61656_DDX5_MOUSE  | Ddx5  | Probable ATP-dependent K.FVINYDYPNSEDYIHR@.I                   | 309.00 | 167.08 | 1.85 | 0.54 |
| Q61656_DDX5_MOUSE  | Ddx5  | Probable ATP-dependent R.GYSNLLK#.R                            | 142.31 | 75.92  | 1.87 | 0.53 |
| Q61656_DDX5_MOUSE  | Ddx5  | Probable ATP-dependent K.K#K#WNLDELPK#.F                       | 16.30  | 13.05  | 1.25 | 0.80 |
| Q61656_DDX5_MOUSE  | Ddx5  | Probable ATP-dependent K.LLQLVEDR@.G                           | 299.10 | 153.13 | 1.95 | 0.51 |
| Q61656_DDX5_MOUSE  | Ddx5  | Probable ATP-dependent R.LMEEMSEK#.E                           | 6.85   | 3.06   | 2.24 | 0.45 |
| Q61656_DDX5_MOUSE  | Ddx5  | Probable ATP-dependent R.LM*EEM*SEK#.E                         | 80.37  | 44.61  | 1.80 | 0.56 |
| Q61656_DDX5_MOUSE  | Ddx5  | Probable ATP-dependent R.LM*EEM*SEKEN.T                        | 17.53  | 9.49   | 1.85 | 0.54 |
| Q61656_DDX5_MOUSE  | Ddx5  | Probable ATP-dependent R.QNFTEPTAIQAQGWVVALSGLDM*VGVAQTGSGK#.T | 18.11  | 9.72   | 2.89 | 0.35 |
| Q61656_DDX5_MOUSE  | Ddx5  | Probable ATP-dependent K.QVSDIISVLR@.E                         | 377.00 | 172.55 | 2.18 | 0.46 |
| Q61656_DDX5_MOUSE  | Ddx5  | Probable ATP-dependent K.R@GGFTFR@.D                           | 41.19  | 21.14  | 1.95 | 0.51 |
| Q61656_DDX5_MOUSE  | Ddx5  | Probable ATP-dependent K.SQQR@DWVLENEFK#.H                     | 27.40  | 17.69  | 1.55 | 0.65 |
| Q61656_DDX5_MOUSE  | Ddx5  | Probable ATP-dependent R.TAQEVDTYR@.R                          | 31.24  | 31.24  | 1.82 | 0.55 |
| Q61656_DDX5_MOUSE  | Ddx5  | Probable ATP-dependent K.TGTAYTFPTNPNK#.Q                      | 104.11 | 54.39  | 1.91 | 0.52 |
| Q61656_DDX5_MOUSE  | Ddx5  | Probable ATP-dependent K.TIVFVETK#.R                           | 200.94 | 102.58 | 1.96 | 0.51 |
| Q61656_DDX5_MOUSE  | Ddx5  | Probable ATP-dependent K.TIVFVETK#R@.R                         | 7.63   | 3.63   | 2.10 | 0.48 |
| Q61656_DDX5_MOUSE  | Ddx5  | Probable ATP-dependent R.TTYLDEADR@.M                          | 168.65 | 79.20  | 2.13 | 0.47 |
| Q61656_DDX5_MOUSE  | Ddx5  | Probable ATP-dependent R.TTYLDEADR*LDM*GFEPQJ.R                | 78.77  | 42.43  | 1.86 | 0.54 |
| Q61656_DDX5_MOUSE  | Ddx5  | Probable ATP-dependent K.WNLDELPK#.F                           | 41.52  | 28.72  | 1.45 | 0.69 |
| Q61656_DDX5_MOUSE  | Ddx5  | Probable ATP-dependent K.WNLDELPK#FEK#.N                       | 39.23  | 25.09  | 1.56 | 0.64 |
| Q61656_DDX5_MOUSE  | Ddx5  | Probable ATP-dependent R.DWVLENEFK#.H                          | 239.86 | 102.24 | 2.35 | 0.43 |
| Q61656_DDX5_MOUSE  | Ddx5  | Probable ATP-dependent R.EANQAINPK#.L                          | 127.07 | 45.77  | 2.78 | 0.36 |
| Q61656_DDX5_MOUSE  | Ddx5  | Probable ATP-dependent K.FGNPGEK#.L                            | 159.13 | 66.81  | 2.38 | 0.42 |
| Q61656_DDX5_MOUSE  | Ddx5  | Probable ATP-dependent K.FVINYDYPNSEDYIHR@.I                   | 437.68 | 165.05 | 2.65 | 0.38 |
| Q61656_DDX5_MOUSE  | Ddx5  | Probable ATP-dependent K.FVINYDYPNSEDYIHR.I                    | 11.41  | 4.15   | 2.75 | 0.36 |
| Q61656_DDX5_MOUSE  | Ddx5  | Probable ATP-dependent R.GGFNTR@.D                             | 98.30  | 45.76  | 2.15 | 0.47 |
| Q61656_DDX5_MOUSE  | Ddx5  | Probable ATP-dependent R.GYSNLLK#.R                            | 282.25 | 112.44 | 2.51 | 0.40 |
| Q61656_DDX5_MOUSE  | Ddx5  | Probable ATP-dependent K.K#K#WNLDELPK#.F                       | 25.63  | 9.65   | 2.66 | 0.38 |
| Q61656_DDX5_MOUSE  | Ddx5  | Probable ATP-dependent K.K#WNLDELPK#.F                         | 9.87   | 5.35   | 1.84 | 0.54 |
| Q61656_DDX5_MOUSE  | Ddx5  | Probable ATP-dependent K.K#WNLDELPK#FEK#.N                     | 15.55  | 5.37   | 2.89 | 0.35 |
| Q61656_DDX5_MOUSE  | Ddx5  | Probable ATP-dependent K.LLQLVEDR@.G                           | 579.28 | 199.69 | 2.90 | 0.34 |
| Q61656_DDX5_MOUSE  | Ddx5  | Probable ATP-dependent R.LM*EEM*SEK#.E                         | 67.36  | 27.79  | 2.42 | 0.41 |
| Q61656_DDX5_MOUSE  | Ddx5  | Probable ATP-dependent R.QLAEDFLK#.D                           | 62.87  | 20.30  | 3.10 | 0.32 |
| Q61656_DDX5_MOUSE  | Ddx5  | Probable ATP-dependent R.QNFTEPTAIQAQGWVVALSGLDM*VGVAQTGSGK#.T | 49.02  | 12.53  | 3.91 | 0.26 |
| Q61656_DDX5_MOUSE  | Ddx5  | Probable ATP-dependent K.QVSDIISVLR@.E                         | 405.70 | 144.37 | 2.81 | 0.36 |
| Q61656_DDX5_MOUSE  | Ddx5  | Probable ATP-dependent K.SQQR@DWVLENEFK#.H                     | 40.93  | 10.52  | 3.89 | 0.26 |
| Q61656_DDX5_MOUSE  | Ddx5  | Probable ATP-dependent R.TAQEVDTYR@.R                          | 79.71  | 29.62  | 2.69 | 0.37 |
| Q61656_DDX5_MOUSE  | Ddx5  | Probable ATP-dependent K.TGTAYTFPTNPNK#.Q                      | 306.81 | 112.29 | 2.73 | 0.37 |
| Q61656_DDX5_MOUSE  | Ddx5  | Probable ATP-dependent K.TIVFVETK#.R                           | 369.96 | 143.01 | 2.59 | 0.39 |
| Q61656_DDX5_MOUSE  | Ddx5  | Probable ATP-dependent R.TTYLDEADR@.M                          | 187.83 | 73.15  | 2.57 | 0.39 |

|                    |         |                                                             |        |        |       |      |
|--------------------|---------|-------------------------------------------------------------|--------|--------|-------|------|
| Q61656_DDX5_MOUSE  | Ddx5    | Probable ATP-dependent R.TTYLVLEADRM*LDM*GFEPQJR.K          | 142.07 | 45.42  | 3.13  | 0.32 |
| Q61656_DDX5_MOUSE  | Ddx5    | Probable ATP-dependent R.TTYLVLEADRM*LDM*GFEPQJR@.K         | 3.77   | 1.86   | 2.03  | 0.49 |
| Q61656_DDX5_MOUSE  | Ddx5    | Probable ATP-dependent K.WNLDELPK#.F                        | 107.98 | 39.46  | 2.74  | 0.37 |
| Q61656_DDX5_MOUSE  | Ddx5    | Probable ATP-dependent K.WNLDELPKFEK.N                      | 121.34 | 46.94  | 2.58  | 0.39 |
| Q61656_DDX5_MOUSE  | Ddx5    | Probable ATP-dependent R.DWVLFNFKH#.H                       | 28.90  | 9.50   | 3.04  | 0.33 |
| Q61656_DDX5_MOUSE  | Ddx5    | Probable ATP-dependent R.EANQAINPK#.L                       | 35.82  | 9.66   | 3.71  | 0.27 |
| Q61656_DDX5_MOUSE  | Ddx5    | Probable ATP-dependent R.LM*EEM*SEK#.E                      | 10.06  | 3.67   | 2.74  | 0.37 |
| Q61656_DDX5_MOUSE  | Ddx5    | Probable ATP-dependent K.QVSDLISLVR#.L                      | 50.45  | 13.84  | 3.65  | 0.27 |
| Q61656_DDX5_MOUSE  | Ddx5    | Probable ATP-dependent K.TGTAYTFPNNIK#.Q                    | 29.85  | 7.63   | 3.91  | 0.26 |
| Q61656_DDX5_MOUSE  | Ddx5    | Probable ATP-dependent K.TIVFVETK#.R                        | 54.68  | 21.85  | 2.50  | 0.40 |
| Q61656_DDX5_MOUSE  | Ddx5    | Probable ATP-dependent K.WNLDELPK#.F                        | 10.13  | 1.13   | 8.97  | 0.11 |
| Q99MJ9_DDX50_MOUSE | Ddx50   | ATP-dependent RNA helic K.EGAFSNFSISETIK#.L                 | 30.63  | 13.40  | 2.29  | 0.44 |
| Q99MJ9_DDX50_MOUSE | Ddx50   | ATP-dependent RNA helic R.ELANQVAK#.D                       | 27.01  | 17.13  | 1.58  | 0.63 |
| Q99MJ9_DDX50_MOUSE | Ddx50   | ATP-dependent RNA helic K.GAVDALAALAHISGASSFEP@.S           | 54.63  | 37.39  | 1.46  | 0.68 |
| Q99MJ9_DDX50_MOUSE | Ddx50   | ATP-dependent RNA helic R.GVTYLFPIQVK#.T                    | 33.93  | 23.00  | 1.47  | 0.68 |
| Q99MJ9_DDX50_MOUSE | Ddx50   | ATP-dependent RNA helic R.LQAEWHSDSIVLSPAK#.L               | 6.89   | 4.42   | 1.56  | 0.64 |
| Q99MJ9_DDX50_MOUSE | Ddx50   | ATP-dependent RNA helic R.NGIDILVGTGPR@.I                   | 6.86   | 7.38   | 0.93  | 1.08 |
| Q99MJ9_DDX50_MOUSE | Ddx50   | ATP-dependent RNA helic R.SLASVSYAAVDFRR@PSAQR@.L           | 35.37  | 19.39  | 1.82  | 0.55 |
| Q99MJ9_DDX50_MOUSE | Ddx50   | ATP-dependent RNA helic K.TFSFAILIER@.L                     | 82.94  | 44.69  | 1.86  | 0.54 |
| Q99MJ9_DDX50_MOUSE | Ddx50   | ATP-dependent RNA helic R.VGVVSTM*DLVK#.S                   | 526.61 | 303.82 | 1.73  | 0.58 |
| Q99MJ9_DDX50_MOUSE | Ddx50   | ATP-dependent RNA helic K.VLVATNVAAR@.G                     | 35.30  | 23.79  | 1.48  | 0.67 |
| Q99MJ9_DDX50_MOUSE | Ddx50   | ATP-dependent RNA helic K.VLVAPTR@.E                        | 43.00  | 30.43  | 1.41  | 0.71 |
| Q99MJ9_DDX50_MOUSE | Ddx50   | ATP-dependent RNA helic K.GAVDALAALAHISGASSFEP@.S           | 11.35  | 5.52   | 2.06  | 0.49 |
| Q99MJ9_DDX50_MOUSE | Ddx50   | ATP-dependent RNA helic K.TFSFAILIER@.L                     | 23.19  | 9.45   | 2.45  | 0.41 |
| Q6P9R1_DDX51_MOUSE | Ddx51   | ATP-dependent RNA helic K.SVTEDLTPIDIEVHPDLQK#.Q            | 11.62  | 7.45   | 1.56  | 0.64 |
| Q6P9R1_DDX51_MOUSE | Ddx51   | ATP-dependent RNA helic K.TGQAFTLLK#.V                      | 9.57   | 2.98   | 3.21  | 0.31 |
| Q6P9R1_DDX51_MOUSE | Ddx51   | ATP-dependent RNA helic R.YAGPEAAGQDTEAEGSR@.A              | 5.08   | 2.33   | 2.18  | 0.46 |
| Q6P9R1_DDX51_MOUSE | Ddx51   | ATP-dependent RNA helic K.EQESLVQK#.T                       | 8.51   | 4.53   | 1.88  | 0.53 |
| Q6P9R1_DDX51_MOUSE | Ddx51   | ATP-dependent RNA helic K.LLFSALTQDPEK#.L                   | 10.45  | 4.00   | 2.61  | 0.38 |
| Q6P9R1_DDX51_MOUSE | Ddx51   | ATP-dependent RNA helic K.SVTEDLTPIDIEVHPDLQK#.Q            | 11.40  | 7.86   | 1.45  | 0.69 |
| Q6P9R1_DDX51_MOUSE | Ddx51   | ATP-dependent RNA helic K.TGQAFTLLK#.V                      | 17.13  | 6.95   | 2.46  | 0.41 |
| Q6P9R1_DDX51_MOUSE | Ddx51   | ATP-dependent RNA helic R.YAGPEAAGQDTEAEGSR@.A              | 7.02   | 2.13   | 3.30  | 0.30 |
| Q8K301_DDX52_MOUSE | Ddx52   | Probable ATP-dependent K.IHVQGTDLDPPIATFQQLDQEK#.I          | 4.37   | 1.80   | 2.43  | 0.41 |
| Q8K301_DDX52_MOUSE | Ddx52   | Probable ATP-dependent R.NSAVETVEQELLFVGSSETGK#.L           | 8.35   | 4.00   | 2.09  | 0.48 |
| Q8K301_DDX52_MOUSE | Ddx52   | Probable ATP-dependent K.TLAFSIPILM*QLK#.Q                  | 6.52   | 1.05   | 6.18  | 0.16 |
| Q8K301_DDX52_MOUSE | Ddx52   | Probable ATP-dependent R.ALVISPTR@.E                        | 34.10  | 15.78  | 2.16  | 0.46 |
| Q8K301_DDX52_MOUSE | Ddx52   | Probable ATP-dependent R.DNTVHSFR@.A                        | 15.38  | 4.15   | 3.70  | 0.27 |
| Q8K301_DDX52_MOUSE | Ddx52   | Probable ATP-dependent K.ELFHELIEGINVDVHAER@.T              | 3.13   | 1.92   | 1.63  | 0.61 |
| Q8K301_DDX52_MOUSE | Ddx52   | Probable ATP-dependent R.ELLASAPGSGK#.T                     | 41.70  | 13.77  | 3.03  | 0.33 |
| Q8K301_DDX52_MOUSE | Ddx52   | Probable ATP-dependent K.GFK#PPVLFVFSQIER@.A                | 21.11  | 10.47  | 2.02  | 0.50 |
| Q8K301_DDX52_MOUSE | Ddx52   | Probable ATP-dependent K.IHVQGTDLDPPIATFQQLDQEK#.I          | 33.39  | 14.78  | 2.26  | 0.44 |
| Q8K301_DDX52_MOUSE | Ddx52   | Probable ATP-dependent K.ISEGTFR@.I                         | 38.91  | 13.46  | 2.89  | 0.35 |
| Q8K301_DDX52_MOUSE | Ddx52   | Probable ATP-dependent R.KHGFSESLVVK#.G                     | 15.81  | 4.50   | 3.51  | 0.28 |
| Q8K301_DDX52_MOUSE | Ddx52   | Probable ATP-dependent K.KHGF#PPVLFVFSQIER@.A               | 9.14   | 3.39   | 2.70  | 0.37 |
| Q8K301_DDX52_MOUSE | Ddx52   | Probable ATP-dependent R.LIVLLK#.Q                          | 33.77  | 7.76   | 4.35  | 0.23 |
| Q8K301_DDX52_MOUSE | Ddx52   | Probable ATP-dependent R.NSAVETVEQELLFVGSSETGK#.L           | 57.38  | 18.60  | 3.08  | 0.32 |
| Q8K301_DDX52_MOUSE | Ddx52   | Probable ATP-dependent R.NSAVETVEQELLFVGSSETGK#.L           | 21.29  | 8.75   | 2.43  | 0.41 |
| Q8K301_DDX52_MOUSE | Ddx52   | Probable ATP-dependent K.TLAFSIPILM*QLK#.Q                  | 56.46  | 18.98  | 2.98  | 0.34 |
| Q8K301_DDX52_MOUSE | Ddx52   | Probable ATP-dependent K.YFLEQAK#.Q                         | 28.81  | 16.73  | 1.72  | 0.58 |
| Q8K301_DDX52_MOUSE | Ddx52   | Probable ATP-dependent R.ELLASAPGSGK#.T                     | 18.77  | 4.62   | 4.06  | 0.25 |
| Q8K301_DDX52_MOUSE | Ddx52   | Probable ATP-dependent R.LLQNLIDAGFQVPTPIQM*QAIPVM*HGR@.E   | 5.19   | 2.12   | 2.45  | 0.41 |
| Q8K301_DDX52_MOUSE | Ddx52   | Probable ATP-dependent R.NSAVETVEQELLFVGSSETGK#.L           | 12.24  | 5.26   | 2.33  | 0.43 |
| Q8K301_DDX52_MOUSE | Ddx52   | Probable ATP-dependent R.NSAVETVEQELLFVGSSETGK#.L           | 38.02  | 11.81  | 3.22  | 0.31 |
| Q8K301_DDX52_MOUSE | Ddx52   | Probable ATP-dependent K.TLAFSIPILM*QLK#.Q                  | 14.14  | 5.44   | 2.60  | 0.38 |
| Q8K40_DDX54_MOUSE  | Ddx54   | ATP-dependent RNA helic R.AGLTEPVLIR@.L                     | 19.22  | 7.07   | 2.72  | 0.37 |
| Q8K40_DDX54_MOUSE  | Ddx54   | ATP-dependent RNA helic R.ELPQEEEEE*VETVEGVFTEVVGQK#.R      | 5.79   | 3.00   | 1.93  | 0.52 |
| Q8K40_DDX54_MOUSE  | Ddx54   | ATP-dependent RNA helic K.LLVEFAR.A                         | 39.62  | 14.29  | 2.77  | 0.36 |
| Q8K40_DDX54_MOUSE  | Ddx54   | ATP-dependent RNA helic K.SGGFQSM*GLSYVFK#.G                | 10.48  | 2.62   | 3.99  | 0.25 |
| Q8K40_DDX54_MOUSE  | Ddx54   | ATP-dependent RNA helic R.VANNAQQQYVR@.S                    | 16.00  | 6.36   | 2.52  | 0.40 |
| Q8K40_DDX54_MOUSE  | Ddx54   | ATP-dependent RNA helic R.VPQSVVDDESSLQTAM*GASLDLQGLHR@.V   | 6.21   | 2.68   | 2.32  | 0.43 |
| Q8K40_DDX54_MOUSE  | Ddx54   | ATP-dependent RNA helic R.AGLTEPVLIR@.L                     | 14.80  | 5.07   | 2.92  | 0.34 |
| Q8K40_DDX54_MOUSE  | Ddx54   | ATP-dependent RNA helic R.ELPQEEEEE*VETVEGVFTEVVGQK#.R      | 7.80   | 3.05   | 2.56  | 0.39 |
| Q8K40_DDX54_MOUSE  | Ddx54   | ATP-dependent RNA helic R.QEGPADPAPQR@.E                    | 9.00   | 4.51   | 2.00  | 0.50 |
| Q8K40_DDX54_MOUSE  | Ddx54   | ATP-dependent RNA helic R.VPQSVVDDESSLQTAM*GASLDLQGLHR@.V   | 8.63   | 2.21   | 3.90  | 0.26 |
| Q6ZPL9_DDX55_MOUSE | Ddx55   | ATP-dependent RNA helic R.TVQLTDLGVSDLEEDS.-                | 3.18   | 3.18   | 1.00  | 1.00 |
| Q9D0R4_DDX56_MOUSE | Ddx56   | Probable ATP-dependent K.ALLFVNTLER@.G                      | 10.63  | 4.74   | 2.24  | 0.45 |
| Q9D0R4_DDX56_MOUSE | Ddx56   | Probable ATP-dependent R.VANVSAEDSASQR@.A                   | 14.55  | 6.00   | 2.43  | 0.41 |
| Q9D0R4_DDX56_MOUSE | Ddx56   | Probable ATP-dependent K.ALLFVNTLER@.G                      | 11.41  | 4.30   | 2.65  | 0.38 |
| Q6Q899_DDX58_MOUSE | Ddx58   | Probable ATP-dependent K.FSELWIVDK#.G                       | 9.99   | 7.94   | 1.26  | 0.79 |
| Q6Q899_DDX58_MOUSE | Ddx58   | Probable ATP-dependent K.VVFFANQIPVYEQQATVFSR@.Y            | 11.14  | 6.17   | 1.80  | 0.55 |
| P54823_DDX6_MOUSE  | Ddx6    | Probable ATP-dependent K.DNIQAM*VIVPTR@.E                   | 73.56  | 23.13  | 3.18  | 0.31 |
| P54823_DDX6_MOUSE  | Ddx6    | Probable ATP-dependent K.DNIQAM*VIVPTR@.E                   | 16.00  | 3.85   | 4.15  | 0.24 |
| P54823_DDX6_MOUSE  | Ddx6    | Probable ATP-dependent R.ELLM*GIFEM*GWKEKPSPIQEEIPIALSGR.D  | 15.17  | 4.21   | 3.60  | 0.28 |
| P54823_DDX6_MOUSE  | Ddx6    | Probable ATP-dependent R.ELLM*GIFEM*GWKEKPSPIQEEIPIALSGR@.D | 9.23   | 4.13   | 2.24  | 0.45 |
| P54823_DDX6_MOUSE  | Ddx6    | Probable ATP-dependent K.GVTQYAYYTER@.Q                     | 81.99  | 24.56  | 3.34  | 0.30 |
| P54823_DDX6_MOUSE  | Ddx6    | Probable ATP-dependent K.KHDNIQAM*VIVPTR@.E                 | 21.18  | 8.71   | 2.43  | 0.41 |
| P54823_DDX6_MOUSE  | Ddx6    | Probable ATP-dependent K.LAETYLHR@.I                        | 55.02  | 36.36  | 1.51  | 0.66 |
| P54823_DDX6_MOUSE  | Ddx6    | Probable ATP-dependent R.QILLYSATFPLSVQK#.F                 | 80.82  | 32.08  | 2.52  | 0.40 |
| P54823_DDX6_MOUSE  | Ddx6    | Probable ATP-dependent K.SGAYLIPLLER@.L                     | 375.66 | 120.29 | 3.12  | 0.32 |
| P54823_DDX6_MOUSE  | Ddx6    | Probable ATP-dependent K.SIEEQLGTEIK#PISNIDK#.S             | 116.91 | 30.09  | 3.89  | 0.26 |
| P54823_DDX6_MOUSE  | Ddx6    | Probable ATP-dependent K.SLYVAEYHSEPAEKE#P.-                | 162.50 | 66.81  | 2.43  | 0.41 |
| P54823_DDX6_MOUSE  | Ddx6    | Probable ATP-dependent K.VM*ATTGGNLR.D                      | 69.80  | 25.39  | 2.75  | 0.36 |
| P54823_DDX6_MOUSE  | Ddx6    | Probable ATP-dependent K.DNIQAM*VIVPTR@.E                   | 8.95   | 4.76   | 1.88  | 0.53 |
| P54823_DDX6_MOUSE  | Ddx6    | Probable ATP-dependent R.LDDTVHVIATPGR@.I                   | 26.48  | 12.56  | 2.11  | 0.47 |
| P54823_DDX6_MOUSE  | Ddx6    | Probable ATP-dependent K.SGAYLIPLLER@.L                     | 39.16  | 14.48  | 2.71  | 0.37 |
| P54823_DDX6_MOUSE  | Ddx6    | Probable ATP-dependent K.DNIQAM*VIVPTR@.E                   | 11.04  | 4.68   | 2.36  | 0.42 |
| P54823_DDX6_MOUSE  | Ddx6    | Probable ATP-dependent R.QILLYSATFPLSVQK#.F                 | 16.89  | 6.57   | 2.57  | 0.39 |
| P54823_DDX6_MOUSE  | Ddx6    | Probable ATP-dependent K.SGAYLIPLLER@.L                     | 34.55  | 21.22  | 1.63  | 0.61 |
| P54823_DDX6_MOUSE  | Ddx6    | Probable ATP-dependent K.SLYVAEYHSEPAEKE#P.-                | 15.90  | 6.40   | 2.49  | 0.40 |
| Q3U1T9_DEN18_MOUSE | Dennd1b | DENN domain-containing K.ELEEDLNETLKR.S                     | 73.28  | 5.64   | 12.99 | 0.08 |
| Q8C4S8_DEN2A_MOUSE | Dennd2a | DENN domain-containing R.K#LQVALEHLEQR@.N                   | 10.43  | 6.76   | 1.54  | 0.65 |
| Q8C4S8_DEN2A_MOUSE | Dennd2a | DENN domain-containing R.LEHVDFELFSLSVSR@.H                 | 11.26  | 6.85   | 1.64  | 0.61 |
| Q9J156_DERL1_MOUSE | Derl1   | Derlin-1 OS=Mus musculu R.GGVSFGVPPASMR@.R                  | 6.07   | 3.82   | 1.59  | 0.63 |
| Q9J156_DERL1_MOUSE | Derl1   | Derlin-1 OS=Mus musculu R.HNWGGQFR@.L                       | 7.39   | 3.98   | 1.85  | 0.54 |
| Q9J156_DERL1_MOUSE | Derl1   | Derlin-1 OS=Mus musculu R.NFLSTPQFYLR@.W                    | 85.56  | 44.77  | 1.91  | 0.52 |
| Q9EQM6_DGCR8_MOUSE | Dgcr8   | Microprocessor complex R.ATLELIPDFVK#.Q                     | 12.83  | 5.15   | 2.49  | 0.40 |
| Q9EQM6_DGCR8_MOUSE | Dgcr8   | Microprocessor complex R.ATLELIPDFVK#.Q                     | 18.22  | 5.63   | 3.24  | 0.31 |
| Q99L04_DHR51_MOUSE | Dhrs1   | Dehydrogenase/reductas R.ATAEQDLSGGGR@.C                    | 7.28   | 4.57   | 1.59  | 0.63 |
| Q99L82_DHR54_MOUSE | Dhrs4   | Dehydrogenase/reductas K.VALVTASTDGIGFAIAR.R                | 3.68   | 4.43   | 0.83  | 1.21 |
| Q99L82_DHR54_MOUSE | Dhrs4   | Dehydrogenase/reductas K.TALLGLTK.N                         | 7.18   | 10.48  | 0.68  | 1.46 |
| Q99L82_DHR54_MOUSE | Dhrs4   | Dehydrogenase/reductas K.VALVTASTDGIGFAIAR.R                | 4.18   | 8.24   | 0.51  | 1.97 |
| O35286_DHX15_MOUSE | Dhx15   | Putative pre-mRNA-splic K.ALVTGYFMQVAHLER@.T                | 8.93   | 7.79   | 1.15  | 0.87 |
| O35286_DHX15_MOUSE | Dhx15   | Putative pre-mRNA-splic R.EAM*NDPLLER@.Y                    | 28.89  | 18.29  | 1.58  | 0.63 |

|                     |       |                           |                                |        |        |         |      |
|---------------------|-------|---------------------------|--------------------------------|--------|--------|---------|------|
| 035286_DHX15_MOUSE  | Dhx15 | Putative pre-mRNA-splici  | R.EVDDLGPEVGDIK#.I             | 64.06  | 48.55  | 1.32    | 0.76 |
| 035286_DHX15_MOUSE  | Dhx15 | Putative pre-mRNA-splici  | R.FAHIDGHDHLLNVYHAFK#.Q        | 30.59  | 22.59  | 1.35    | 0.74 |
| 035286_DHX15_MOUSE  | Dhx15 | Putative pre-mRNA-splici  | R.FTDILVR.H                    | 78.28  | 47.13  | 1.66    | 0.60 |
| 035286_DHX15_MOUSE  | Dhx15 | Putative pre-mRNA-splici  | R.HQSFLVVGEGSGK#.T             | 37.95  | 31.63  | 1.20    | 0.83 |
| 035286_DHX15_MOUSE  | Dhx15 | Putative pre-mRNA-splici  | R.HR@LDLGEDYPSGK#.K            | 56.60  | 32.93  | 1.72    | 0.58 |
| 035286_DHX15_MOUSE  | Dhx15 | Putative pre-mRNA-splici  | R.IFEPPPP#.K                   | 41.50  | 31.72  | 1.31    | 0.76 |
| 035286_DHX15_MOUSE  | Dhx15 | Putative pre-mRNA-splici  | K.IIPLYSTLPPQQQQR@.I           | 13.00  | 8.30   | 1.57    | 0.64 |
| 035286_DHX15_MOUSE  | Dhx15 | Putative pre-mRNA-splici  | R.IR@VESLLVTAISK#.A            | 40.76  | 24.00  | 1.70    | 0.59 |
| 035286_DHX15_MOUSE  | Dhx15 | Putative pre-mRNA-splici  | K.LGIDDLVHDFM*DPPAPETLM*#R@.A  | 17.60  | 15.40  | 1.14    | 0.88 |
| 035286_DHX15_MOUSE  | Dhx15 | Putative pre-mRNA-splici  | R.LQLPVVWEYK#.D                | 31.53  | 22.41  | 1.41    | 0.71 |
| 035286_DHX15_MOUSE  | Dhx15 | Putative pre-mRNA-splici  | R.SLM*SADNVR@.Q                | 38.03  | 26.81  | 1.42    | 0.70 |
| 035286_DHX15_MOUSE  | Dhx15 | Putative pre-mRNA-splici  | R.SNLGSSVLQK#.K                | 69.27  | 55.56  | 1.25    | 0.80 |
| 035286_DHX15_MOUSE  | Dhx15 | Putative pre-mRNA-splici  | K.TEM*QDNTYPELR@.S             | 19.31  | 13.86  | 1.39    | 0.72 |
| 035286_DHX15_MOUSE  | Dhx15 | Putative pre-mRNA-splici  | R.TLATDILM*GVLK#.E             | 187.82 | 136.30 | 1.38    | 0.73 |
| 035286_DHX15_MOUSE  | Dhx15 | Putative pre-mRNA-splici  | R.TLATDILM*GVLK#.E             | 16.30  | 14.08  | 1.16    | 0.86 |
| 035286_DHX15_MOUSE  | Dhx15 | Putative pre-mRNA-splici  | R.VADEM*DVM*LGQEVGYSIR@.F      | 9.83   | 6.41   | 1.53    | 0.65 |
| 035286_DHX15_MOUSE  | Dhx15 | Putative pre-mRNA-splici  | R.VESLLVTAISK#.A               | 8.42   | 4.43   | 1.90    | 0.53 |
| 035286_DHX15_MOUSE  | Dhx15 | Putative pre-mRNA-splici  | K.VIVM*SATLDAGK#.F             | 12.96  | 8.85   | 1.46    | 0.68 |
| 035286_DHX15_MOUSE  | Dhx15 | Putative pre-mRNA-splici  | R.YGVIIIDEAHER@.T              | 72.92  | 64.93  | 1.12    | 0.89 |
| 035286_DHX15_MOUSE  | Dhx15 | Putative pre-mRNA-splici  | K.YM*TDGM*LLR@.E               | 12.39  | 9.92   | 1.25    | 0.80 |
| 035286_DHX15_MOUSE  | Dhx15 | Putative pre-mRNA-splici  | R.ASTNAM*LISAGLPLPK#.A         | 13.99  | 6.87   | 2.02    | 0.49 |
| 035286_DHX15_MOUSE  | Dhx15 | Putative pre-mRNA-splici  | R.EVDDLGPEVGDIK#.I             | 42.41  | 23.08  | 1.84    | 0.54 |
| 035286_DHX15_MOUSE  | Dhx15 | Putative pre-mRNA-splici  | R.FTDILVR@.H                   | 49.98  | 24.69  | 2.02    | 0.49 |
| 035286_DHX15_MOUSE  | Dhx15 | Putative pre-mRNA-splici  | R.IFEPPPP#.K                   | 12.86  | 8.09   | 1.59    | 0.63 |
| 035286_DHX15_MOUSE  | Dhx15 | Putative pre-mRNA-splici  | K.IIPLYSTLPPQQQQR@.I           | 6.73   | 4.32   | 1.56    | 0.64 |
| 035286_DHX15_MOUSE  | Dhx15 | Putative pre-mRNA-splici  | R.IR@VESLLVTAISK#.A            | 12.40  | 8.16   | 1.52    | 0.66 |
| 035286_DHX15_MOUSE  | Dhx15 | Putative pre-mRNA-splici  | K.LGIDDLVHDFM*DPPAPETLM*#R@.A  | 16.59  | 8.71   | 1.91    | 0.52 |
| 035286_DHX15_MOUSE  | Dhx15 | Putative pre-mRNA-splici  | R.SNLGSSVLQK#.K                | 51.26  | 28.47  | 1.80    | 0.56 |
| 035286_DHX15_MOUSE  | Dhx15 | Putative pre-mRNA-splici  | K.TEM*QDNTYPELR@.S             | 10.76  | 4.28   | 2.52    | 0.40 |
| 035286_DHX15_MOUSE  | Dhx15 | Putative pre-mRNA-splici  | R.TLATDILM*GVLK#.E             | 10.60  | 64.77  | 1.54    | 0.65 |
| 035286_DHX15_MOUSE  | Dhx15 | Putative pre-mRNA-splici  | R.TLATDILM*GVLK#.E             | 11.91  | 6.18   | 1.93    | 0.52 |
| 035286_DHX15_MOUSE  | Dhx15 | Putative pre-mRNA-splici  | R.VADEM*DVM*LGQEVGYSIR@.F      | 6.15   | 5.42   | 1.13    | 0.88 |
| 035286_DHX15_MOUSE  | Dhx15 | Putative pre-mRNA-splici  | R.YGVIIIDEAHER@.T              | 54.82  | 24.46  | 2.24    | 0.45 |
| G3X8X0_G3X8X0_MOUSE | Dhx16 | DEAH (Asp-Glu-Ala-His) bi | R.TSLGNVLLK#.S                 | 11.00  | 5.95   | 1.85    | 0.54 |
| G3X8X0_G3X8X0_MOUSE | Dhx16 | DEAH (Asp-Glu-Ala-His) bi | R.AAQQDEEPSGPPLSAQQAQK#.E      | 4.09   | 3.65   | 1.12    | 0.89 |
| G3X8X0_G3X8X0_MOUSE | Dhx16 | DEAH (Asp-Glu-Ala-His) bi | R.FSAFFDAPVFR@.I               | 14.82  | 5.88   | 2.52    | 0.40 |
| G3X8X0_G3X8X0_MOUSE | Dhx16 | DEAH (Asp-Glu-Ala-His) bi | R.VLVSATLDTAR@.F               | 7.05   | 5.96   | 1.18    | 0.85 |
| Q6PGC1_DHX29_MOUSE  | Dhx29 | ATP-dependent RNA helic   | R.K#LQEDGLADVSHVIVDEVHER@.S    | 14.22  | 4.99   | 2.85    | 0.35 |
| Q6PGC1_DHX29_MOUSE  | Dhx29 | ATP-dependent RNA helic   | R.DLQTYGWLQYQK#.V              | 5.53   | 2.81   | 1.97    | 0.51 |
| Q6PGC1_DHX29_MOUSE  | Dhx29 | ATP-dependent RNA helic   | K.LQEDGLADVSHVIVDEVHER@.S      | 11.13  | 2.27   | 4.91    | 0.20 |
| Q6PGC1_DHX29_MOUSE  | Dhx29 | ATP-dependent RNA helic   | K.SPFIPIGR@.K                  | 18.13  | 7.76   | 2.34    | 0.43 |
| Q99PU8_DHX30_MOUSE  | Dhx30 | Putative ATP-dependent    | R.ATISLSDLLR@.L                | 13.11  | 16.44  | 0.80    | 1.25 |
| Q99PU8_DHX30_MOUSE  | Dhx30 | Putative ATP-dependent    | R.ENYLEENLLYAPSLR@.F           | 9.03   | 5.03   | 1.79    | 0.56 |
| Q99PU8_DHX30_MOUSE  | Dhx30 | Putative ATP-dependent    | R.GGSFEM*TDSDAIR@.A            | 6.96   | 2.78   | 2.50    | 0.40 |
| Q99PU8_DHX30_MOUSE  | Dhx30 | Putative ATP-dependent    | K.GVLM*AGLYPLNIQVR@.Q          | 3.92   | 2.36   | 15.23   | 0.07 |
| Q99PU8_DHX30_MOUSE  | Dhx30 | Putative ATP-dependent    | R.IPQLLER@.Y                   | 19.98  | 7.05   | 2.83    | 0.35 |
| Q99PU8_DHX30_MOUSE  | Dhx30 | Putative ATP-dependent    | R.LQSDDILPGK#.D                | 16.36  | 8.53   | 1.92    | 0.52 |
| Q99PU8_DHX30_MOUSE  | Dhx30 | Putative ATP-dependent    | R.LSQSLELWR@.R                 | 13.32  | 6.97   | 1.91    | 0.52 |
| Q99PU8_DHX30_MOUSE  | Dhx30 | Putative ATP-dependent    | K.TAVEFLSK#.A                  | 20.48  | 5.13   | 3.99    | 0.25 |
| Q99PU8_DHX30_MOUSE  | Dhx30 | Putative ATP-dependent    | R.TPLENLVLAQK#.I               | 12.93  | 5.77   | 2.24    | 0.45 |
| Q99PU8_DHX30_MOUSE  | Dhx30 | Putative ATP-dependent    | R.DSSQVHPLAVLLDGDVHIR@.D       | 7.65   | 3.78   | 2.02    | 0.49 |
| Q99PU8_DHX30_MOUSE  | Dhx30 | Putative ATP-dependent    | R.LSQSLELWR@.R                 | 11.60  | 3.43   | 3.39    | 0.30 |
| Q99PU8_DHX30_MOUSE  | Dhx30 | Putative ATP-dependent    | K.M*VPFQVPELR@.T               | 6.66   | 5.60   | 1.19    | 0.84 |
| Q99PU8_DHX30_MOUSE  | Dhx30 | Putative ATP-dependent    | K.NLLNSVIR@.A                  | 11.15  | 4.91   | 2.27    | 0.44 |
| Q99PU8_DHX30_MOUSE  | Dhx30 | Putative ATP-dependent    | R.TPLENLVLAQK#.I               | 13.44  | 4.78   | 2.81    | 0.36 |
| Q99PU8_DHX30_MOUSE  | Dhx30 | Putative ATP-dependent    | K.VIQATSSATAK#.N               | 10.14  | 3.75   | 2.71    | 0.37 |
| Q8VHK9_DHX36_MOUSE  | Dhx36 | ATP-dependent RNA helic   | R.ASLDDYQLPELR@.T              | 21.36  | 12.62  | 1.69    | 0.59 |
| Q8VHK9_DHX36_MOUSE  | Dhx36 | ATP-dependent RNA helic   | R.DSEYLLQENPNLSDQHLLLEDLQR@.K  | 3.42   | 3.05   | 1.12    | 0.89 |
| Q8VHK9_DHX36_MOUSE  | Dhx36 | ATP-dependent RNA helic   | K.HLM*ELSALDK#QEELTPLGVHAR@.L  | 6.72   | 6.04   | 1.11    | 0.90 |
| Q8VHK9_DHX36_MOUSE  | Dhx36 | ATP-dependent RNA helic   | R.ISAISVAER@.V                 | 12.74  | 7.72   | 1.65    | 0.61 |
| Q8VHK9_DHX36_MOUSE  | Dhx36 | ATP-dependent RNA helic   | R.LGGIAYFLSR@.L                | 19.97  | 9.99   | 2.00    | 0.50 |
| Q8VHK9_DHX36_MOUSE  | Dhx36 | ATP-dependent RNA helic   | R.LM*DPPSNEAVLSIK#.H           | 6.42   | 4.44   | 1.44    | 0.69 |
| Q8VHK9_DHX36_MOUSE  | Dhx36 | ATP-dependent RNA helic   | R.NLQSDVLM*TVIK#.D             | 6.62   | 5.21   | 1.27    | 0.79 |
| Q8VHK9_DHX36_MOUSE  | Dhx36 | ATP-dependent RNA helic   | K.TTQVTFILDNIER@.G             | 6.93   | 10.03  | 0.69    | 1.45 |
| Q8VHK9_DHX36_MOUSE  | Dhx36 | ATP-dependent RNA helic   | R.ASLDDYQLPELR@.T              | 14.66  | 5.65   | 2.59    | 0.39 |
| Q8VHK9_DHX36_MOUSE  | Dhx36 | ATP-dependent RNA helic   | R.LGGIAYFLSR@.L                | 10.35  | 4.20   | 2.47    | 0.41 |
| Q8VHK9_DHX36_MOUSE  | Dhx36 | ATP-dependent RNA helic   | R.LM*DPPSNEAVLSIK#.H           | 4.31   | 1.83   | 2.36    | 0.42 |
| Q6NZL1_Q6NZL1_MOUSE | Dhx37 | DEAH (Asp-Glu-Ala-His) bi | R.TPLDDPVHIPPSSVLFK#.E         | 16.22  | 6.44   | 2.52    | 0.40 |
| Q80X98_Q80X98_MOUSE | Dhx38 | DEAH (Asp-Glu-Ala-His) bi | R.SLNTDVLGFLR@.E               | 10.93  | 2.48   | 4.40    | 0.23 |
| Q6P5D3_DHX57_MOUSE  | Dhx57 | Putative ATP-dependent    | R.LSELEADEDGEPASIHVENESVNLK#.K | 2.93   | 3.35   | 0.88    | 1.14 |
| Q99J87_DHX58_MOUSE  | Dhx58 | Probable ATP-dependent    | K.DAAEAGLQEQR.V                | 13.07  | 8.74   | 1.50    | 0.67 |
| Q99J87_DHX58_MOUSE  | Dhx58 | Probable ATP-dependent    | K.NIIHLPVTGAGK#.T              | 15.63  | 6.44   | 2.43    | 0.41 |
| Q99J87_DHX58_MOUSE  | Dhx58 | Probable ATP-dependent    | K.VVVLVNR@.V                   | 16.77  | 5.34   | 3.14    | 0.32 |
| Q99J87_DHX58_MOUSE  | Dhx58 | Probable ATP-dependent    | R.YGLLTNEISIM*VQAR@.G          | 4.23   | 2.59   | 1.63    | 0.61 |
| Q99J87_DHX58_MOUSE  | Dhx58 | Probable ATP-dependent    | K.AEPLPQVLGLTASPTGGATK#.L      | 3.07   | 0.00   | #DIV/0! | 0.00 |
| Q99J87_DHX58_MOUSE  | Dhx58 | Probable ATP-dependent    | R.ELTNEALEVLM*EK#.A            | 9.57   | 4.08   | 2.34    | 0.43 |
| Q99J87_DHX58_MOUSE  | Dhx58 | Probable ATP-dependent    | K.VVVLVNR@.V                   | 8.21   | 1.59   | 5.16    | 0.19 |
| Q99J87_DHX58_MOUSE  | Dhx58 | Probable ATP-dependent    | K.AEPLPQVLGLTASPTGGATK#.L      | 6.22   | 5.17   | 1.20    | 0.83 |
| Q99J87_DHX58_MOUSE  | Dhx58 | Probable ATP-dependent    | R.AESWLLK#.L                   | 27.06  | 3.36   | 8.05    | 0.12 |
| Q99J87_DHX58_MOUSE  | Dhx58 | Probable ATP-dependent    | R.AGFGLM*AR@.S                 | 26.05  | 8.60   | 3.03    | 0.33 |
| Q99J87_DHX58_MOUSE  | Dhx58 | Probable ATP-dependent    | R.AGQSVSFLATEGSR@.E            | 28.28  | 8.37   | 3.38    | 0.30 |
| Q99J87_DHX58_MOUSE  | Dhx58 | Probable ATP-dependent    | R.AQDPFGDLIK#.K                | 17.97  | 14.84  | 1.21    | 0.83 |
| Q99J87_DHX58_MOUSE  | Dhx58 | Probable ATP-dependent    | R.DLQQAASLVK#.R                | 8.89   | 3.13   | 2.84    | 0.35 |
| Q99J87_DHX58_MOUSE  | Dhx58 | Probable ATP-dependent    | K.DQQEQVIEFR@.D                | 35.04  | 10.85  | 3.23    | 0.31 |
| Q99J87_DHX58_MOUSE  | Dhx58 | Probable ATP-dependent    | R.ELTNEALEVLM*EK#.A            | 27.48  | 8.55   | 3.21    | 0.31 |
| Q99J87_DHX58_MOUSE  | Dhx58 | Probable ATP-dependent    | R.ELTNEALEVLM*EK#.A            | 12.19  | 4.98   | 2.45    | 0.41 |
| Q99J87_DHX58_MOUSE  | Dhx58 | Probable ATP-dependent    | K.IGSILLETTR@.G                | 73.64  | 19.61  | 3.75    | 0.27 |
| Q99J87_DHX58_MOUSE  | Dhx58 | Probable ATP-dependent    | K.IR@DLQQAASLVK#.R             | 41.46  | 13.04  | 3.18    | 0.31 |
| Q99J87_DHX58_MOUSE  | Dhx58 | Probable ATP-dependent    | K.K#AEPLPQVLGLTASPTGGATK#.L    | 16.54  | 5.94   | 2.78    | 0.36 |
| Q99J87_DHX58_MOUSE  | Dhx58 | Probable ATP-dependent    | K.NIIHLPVTGAGK#.T              | 34.83  | 11.44  | 3.05    | 0.33 |
| Q99J87_DHX58_MOUSE  | Dhx58 | Probable ATP-dependent    | K.VVVLVNR@.V                   | 53.54  | 13.69  | 3.91    | 0.26 |
| Q99J87_DHX58_MOUSE  | Dhx58 | Probable ATP-dependent    | R.YNDALFHDVTR@.A               | 28.30  | 9.52   | 2.97    | 0.34 |
| Q99J87_DHX58_MOUSE  | Dhx58 | Probable ATP-dependent    | K.AEPLPQVLGLTASPTGGATK#.L      | 7.79   | 3.07   | 2.54    | 0.39 |
| Q99J87_DHX58_MOUSE  | Dhx58 | Probable ATP-dependent    | R.AGQSVSFLATEGSR@.E            | 26.54  | 7.99   | 3.32    | 0.30 |
| Q99J87_DHX58_MOUSE  | Dhx58 | Probable ATP-dependent    | K.DAAEAGLQEQR@.V               | 20.84  | 7.23   | 2.88    | 0.35 |
| Q99J87_DHX58_MOUSE  | Dhx58 | Probable ATP-dependent    | K.DQQEQVIEFR@.D                | 31.63  | 7.53   | 4.20    | 0.24 |
| Q99J87_DHX58_MOUSE  | Dhx58 | Probable ATP-dependent    | K.DTYVNTLSR@.Y                 | 14.80  | 4.27   | 3.47    | 0.29 |
| Q99J87_DHX58_MOUSE  | Dhx58 | Probable ATP-dependent    | R.ELTNEALEVLM*EK#.A            | 25.50  | 5.29   | 4.82    | 0.21 |
| Q99J87_DHX58_MOUSE  | Dhx58 | Probable ATP-dependent    | K.IGSILLETTR@.G                | 54.67  | 9.47   | 5.77    | 0.17 |
| Q99J87_DHX58_MOUSE  | Dhx58 | Probable ATP-dependent    | K.IR@DLQQAASLVK#.R             | 22.85  | 4.22   | 5.42    | 0.18 |
| Q99J87_DHX58_MOUSE  | Dhx58 | Probable ATP-dependent    | K.K#AEPLPQVLGLTASPTGGATK#.L    | 12.44  | 2.68   | 4.65    | 0.22 |
| Q99J87_DHX58_MOUSE  | Dhx58 | Probable ATP-dependent    | K.NIIHLPVTGAGK#.T              | 49.69  | 9.42   | 5.28    | 0.19 |
| Q99J87_DHX58_MOUSE  | Dhx58 | Probable ATP-dependent    | K.NVLGQLAAR@.G                 | 17.06  | 2.14   | 7.99    | 0.13 |

|                     |       |                                                             |        |        |      |       |
|---------------------|-------|-------------------------------------------------------------|--------|--------|------|-------|
| Q99J87_DHX58_MOUSE  | Dhx58 | Probable ATP-dependent K.VVVLVNR@.V                         | 44.25  | 6.56   | 6.74 | 0.15  |
| Q99J87_DHX58_MOUSE  | Dhx58 | Probable ATP-dependent R.YGLLTNEISM*VQAR@.G                 | 47.00  | 15.43  | 3.05 | 0.33  |
| Q99J87_DHX58_MOUSE  | Dhx58 | Probable ATP-dependent R.YNDALFHDTVR@.A                     | 20.83  | 6.86   | 3.04 | 0.33  |
| A2A4P0_DHX8_MOUSE   | Dhx8  | ATP-dependent RNA helix K.LIVTSATLDAVK#.F                   | 17.69  | 6.27   | 2.82 | 0.35  |
| A2A4P0_DHX8_MOUSE   | Dhx8  | ATP-dependent RNA helix K.TGIDQLVTPISQAQAK#.Q               | 8.18   | 7.63   | 1.07 | 0.93  |
| A2A4P0_DHX8_MOUSE   | Dhx8  | ATP-dependent RNA helix R.VANVADVSK#.G                      | 15.75  | 6.87   | 2.29 | 0.44  |
| A2A4P0_DHX8_MOUSE   | Dhx8  | ATP-dependent RNA helix R.WLVEFAPAFF#.V                     | 9.55   | 6.19   | 1.54 | 0.65  |
| A2A4P0_DHX8_MOUSE   | Dhx8  | ATP-dependent RNA helix K.FSQYEFAPFITPGR@.T                 | 5.78   | 3.42   | 1.69 | 0.59  |
| A2A4P0_DHX8_MOUSE   | Dhx8  | ATP-dependent RNA helix K.LIVTSATLDAVK#.F                   | 11.84  | 4.56   | 2.60 | 0.38  |
| A2A4P0_DHX8_MOUSE   | Dhx8  | ATP-dependent RNA helix K.TGIDQLVTPISQAQAK#.Q               | 7.05   | 5.45   | 1.29 | 0.77  |
| A2A4P0_DHX8_MOUSE   | Dhx8  | ATP-dependent RNA helix R.TLIDQQVVIHPSALLFNR@.Q             | 5.96   | 5.88   | 1.01 | 0.99  |
| A2A4P0_DHX8_MOUSE   | Dhx8  | ATP-dependent RNA helix R.TNLASTVLSLK#.A                    | 11.93  | 7.47   | 1.60 | 0.63  |
| E9QNN1_E9QNN1_MOUSE | Dhx9  | ATP-dependent RNA helix K.KHFEAIELEISSNSVVIIR@.G            | 14.43  | 10.91  | 1.32 | 0.76  |
| E9QNN1_E9QNN1_MOUSE | Dhx9  | ATP-dependent RNA helix R.DFVNVLYVR@.I                      | 10.74  | 11.34  | 0.95 | 1.06  |
| E9QNN1_E9QNN1_MOUSE | Dhx9  | ATP-dependent RNA helix R.AAM*EALVVEVSK#.Q                  | 123.66 | 77.04  | 1.61 | 0.62  |
| E9QNN1_E9QNN1_MOUSE | Dhx9  | ATP-dependent RNA helix R.AAMEALVVEVSK#.Q                   | 71.64  | 39.31  | 1.82 | 0.55  |
| E9QNN1_E9QNN1_MOUSE | Dhx9  | ATP-dependent RNA helix K.AEAENSGVESSGYSGPTWDR@.G           | 24.92  | 15.19  | 1.64 | 0.61  |
| E9QNN1_E9QNN1_MOUSE | Dhx9  | ATP-dependent RNA helix K.AEAENSGVESSGYSGPTWDR.G            | 14.90  | 8.36   | 1.78 | 0.56  |
| E9QNN1_E9QNN1_MOUSE | Dhx9  | ATP-dependent RNA helix K.AIEPPDLDAVIEAHTLR.E               | 9.35   | 6.41   | 1.46 | 0.69  |
| E9QNN1_E9QNN1_MOUSE | Dhx9  | ATP-dependent RNA helix R.DFVNVLYVR@.I                      | 347.95 | 185.99 | 1.87 | 0.53  |
| E9QNN1_E9QNN1_MOUSE | Dhx9  | ATP-dependent RNA helix R.DVVLVPEVR@.I                      | 258.89 | 147.19 | 1.76 | 0.57  |
| E9QNN1_E9QNN1_MOUSE | Dhx9  | ATP-dependent RNA helix R.ELDALDANDELTPLR@.I                | 257.03 | 171.53 | 1.50 | 0.67  |
| E9QNN1_E9QNN1_MOUSE | Dhx9  | ATP-dependent RNA helix K.FEAEILEISSNSVVIIR@.G              | 19.29  | 6.61   | 2.92 | 0.34  |
| E9QNN1_E9QNN1_MOUSE | Dhx9  | ATP-dependent RNA helix R.FSDHVALLSVFQAWDDAR@.M             | 152.00 | 93.43  | 1.63 | 0.61  |
| E9QNN1_E9QNN1_MOUSE | Dhx9  | ATP-dependent RNA helix R.GANLKDYYSR@.K                     | 68.48  | 33.44  | 2.05 | 0.49  |
| E9QNN1_E9QNN1_MOUSE | Dhx9  | ATP-dependent RNA helix R.GANLKDYYSR.K                      | 23.42  | 14.80  | 1.58 | 0.63  |
| E9QNN1_E9QNN1_MOUSE | Dhx9  | ATP-dependent RNA helix R.GISHVIVDEIHER@.D                  | 426.12 | 230.60 | 1.85 | 0.54  |
| E9QNN1_E9QNN1_MOUSE | Dhx9  | ATP-dependent RNA helix K.HLENNSHFGSHR.Y                    | 4.77   | 3.57   | 1.34 | 0.75  |
| E9QNN1_E9QNN1_MOUSE | Dhx9  | ATP-dependent RNA helix K.HLENNSHFGSHR@.Y                   | 83.34  | 49.75  | 1.68 | 0.60  |
| E9QNN1_E9QNN1_MOUSE | Dhx9  | ATP-dependent RNA helix R.ISAVAVAEVR@.V                     | 317.18 | 195.95 | 1.62 | 0.62  |
| E9QNN1_E9QNN1_MOUSE | Dhx9  | ATP-dependent RNA helix R.KHEEQVQATLESEEDLNAGLHGNWTLLENK#.A | 15.78  | 10.71  | 1.47 | 0.68  |
| E9QNN1_E9QNN1_MOUSE | Dhx9  | ATP-dependent RNA helix K.KHFEAIELEISSNSVVIIR@.G            | 110.62 | 66.94  | 1.65 | 0.61  |
| E9QNN1_E9QNN1_MOUSE | Dhx9  | ATP-dependent RNA helix R.KHM*TPAYEIR@.A                    | 27.15  | 15.05  | 1.80 | 0.55  |
| E9QNN1_E9QNN1_MOUSE | Dhx9  | ATP-dependent RNA helix R.KVFDVVPDGVTK.V                    | 47.67  | 32.88  | 1.45 | 0.69  |
| E9QNN1_E9QNN1_MOUSE | Dhx9  | ATP-dependent RNA helix K.KVQSDGQVIFDWDWR.L                 | 129.68 | 62.03  | 2.09 | 0.48  |
| E9QNN1_E9QNN1_MOUSE | Dhx9  | ATP-dependent RNA helix K.LAHFEPQRS.Q                       | 56.56  | 32.06  | 1.76 | 0.57  |
| E9QNN1_E9QNN1_MOUSE | Dhx9  | ATP-dependent RNA helix K.LFTAHNMM*TNATVWASK#.T             | 109.03 | 53.47  | 2.04 | 0.49  |
| E9QNN1_E9QNN1_MOUSE | Dhx9  | ATP-dependent RNA helix K.LFTAHNMMTNATVWASK#.T              | 10.64  | 9.89   | 1.08 | 0.93  |
| E9QNN1_E9QNN1_MOUSE | Dhx9  | ATP-dependent RNA helix R.LGGIGQFLAKR.A                     | 365.88 | 235.81 | 1.55 | 0.64  |
| E9QNN1_E9QNN1_MOUSE | Dhx9  | ATP-dependent RNA helix R.LGYIHR@.N                         | 117.19 | 70.87  | 1.65 | 0.60  |
| E9QNN1_E9QNN1_MOUSE | Dhx9  | ATP-dependent RNA helix R.LNM*ATLR@.M                       | 123.58 | 72.80  | 1.70 | 0.59  |
| E9QNN1_E9QNN1_MOUSE | Dhx9  | ATP-dependent RNA helix R.LNMMATLR@.M                       | 30.19  | 15.67  | 1.93 | 0.52  |
| E9QNN1_E9QNN1_MOUSE | Dhx9  | ATP-dependent RNA helix R.LNQYFQR#.E                        | 218.24 | 140.02 | 1.56 | 0.64  |
| E9QNN1_E9QNN1_MOUSE | Dhx9  | ATP-dependent RNA helix K.LPIEIR@.F                         | 333.48 | 241.06 | 1.38 | 0.72  |
| E9QNN1_E9QNN1_MOUSE | Dhx9  | ATP-dependent RNA helix K.LSM*SQLNEKH.E                     | 67.11  | 39.85  | 1.68 | 0.59  |
| E9QNN1_E9QNN1_MOUSE | Dhx9  | ATP-dependent RNA helix R.M*SGEAEIR@.F                      | 141.05 | 88.64  | 1.59 | 0.63  |
| E9QNN1_E9QNN1_MOUSE | Dhx9  | ATP-dependent RNA helix K.NELTYQM*EQDHNLSVQLQER@.E          | 132.45 | 81.22  | 1.63 | 0.61  |
| E9QNN1_E9QNN1_MOUSE | Dhx9  | ATP-dependent RNA helix K.NELTYQMEDHNLSVQLQER@.E            | 20.59  | 10.48  | 1.96 | 0.51  |
| E9QNN1_E9QNN1_MOUSE | Dhx9  | ATP-dependent RNA helix R.NNFGDYR@.G                        | 23.96  | 18.88  | 1.27 | 0.79  |
| E9QNN1_E9QNN1_MOUSE | Dhx9  | ATP-dependent RNA helix R.QISRPSAAGINLM*IGSVR.Y             | 60.67  | 30.71  | 1.98 | 0.51  |
| E9QNN1_E9QNN1_MOUSE | Dhx9  | ATP-dependent RNA helix R.QLYHGLVIEAYSLTK#.K                | 254.09 | 136.83 | 1.86 | 0.54  |
| E9QNN1_E9QNN1_MOUSE | Dhx9  | ATP-dependent RNA helix R.RISAVAVAEVR.V                     | 155.95 | 92.79  | 1.68 | 0.60  |
| E9QNN1_E9QNN1_MOUSE | Dhx9  | ATP-dependent RNA helix R.SFIAEM*TIYIK#.Q                   | 63.87  | 31.56  | 2.02 | 0.49  |
| E9QNN1_E9QNN1_MOUSE | Dhx9  | ATP-dependent RNA helix R.TPLIEALSIR#.L                     | 299.93 | 237.14 | 1.26 | 0.79  |
| E9QNN1_E9QNN1_MOUSE | Dhx9  | ATP-dependent RNA helix K.TTQVQVILDDFIQNDR@.A               | 90.05  | 63.59  | 1.42 | 0.71  |
| E9QNN1_E9QNN1_MOUSE | Dhx9  | ATP-dependent RNA helix K.TTQVQVILDDFIQNDR@.A               | 150.59 | 92.51  | 1.63 | 0.61  |
| E9QNN1_E9QNN1_MOUSE | Dhx9  | ATP-dependent RNA helix R.VEGFNYAGM*GNSTNK#.K               | 22.30  | 9.93   | 2.24 | 0.45  |
| E9QNN1_E9QNN1_MOUSE | Dhx9  | ATP-dependent RNA helix K.VFDPVPGVTK#.V                     | 155.09 | 107.43 | 1.44 | 0.69  |
| E9QNN1_E9QNN1_MOUSE | Dhx9  | ATP-dependent RNA helix K.VQSDGQVIFDWDWR@.L                 | 45.85  | 27.75  | 1.65 | 0.61  |
| E9QNN1_E9QNN1_MOUSE | Dhx9  | ATP-dependent RNA helix R.YGDGPRPPK.M                       | 24.15  | 18.41  | 1.31 | 0.76  |
| E9QNN1_E9QNN1_MOUSE | Dhx9  | ATP-dependent RNA helix K.YSPFFVFGKEK.I                     | 108.98 | 79.02  | 1.38 | 0.73  |
| E9QNN1_E9QNN1_MOUSE | Dhx9  | ATP-dependent RNA helix R.YQJLPLHSQIPR@.E                   | 280.43 | 194.18 | 1.44 | 0.69  |
| E9QNN1_E9QNN1_MOUSE | Dhx9  | ATP-dependent RNA helix R.YQJLPLHSQIPR.E                    | 20.26  | 11.06  | 1.83 | 0.55  |
| E9QNN1_E9QNN1_MOUSE | Dhx9  | ATP-dependent RNA helix K.YTQVGPDPNR.S                      | 40.69  | 26.29  | 1.55 | 0.65  |
| E9QNN1_E9QNN1_MOUSE | Dhx9  | ATP-dependent RNA helix R.AAM*EALVVEVSK#.Q                  | 96.79  | 90.85  | 1.86 | 0.54  |
| E9QNN1_E9QNN1_MOUSE | Dhx9  | ATP-dependent RNA helix R.AAMEALVVEVSK#.Q                   | 91.67  | 50.08  | 1.83 | 0.55  |
| E9QNN1_E9QNN1_MOUSE | Dhx9  | ATP-dependent RNA helix K.AEAENSGVESSGYSGPTWDR@.G           | 57.32  | 24.21  | 2.37 | 0.42  |
| E9QNN1_E9QNN1_MOUSE | Dhx9  | ATP-dependent RNA helix K.AIEPPDLDAVIEAHTLR.E               | 11.60  | 6.37   | 1.82 | 0.55  |
| E9QNN1_E9QNN1_MOUSE | Dhx9  | ATP-dependent RNA helix K.DAQNSAAR@.D                       | 12.05  | 6.42   | 1.88 | 0.53  |
| E9QNN1_E9QNN1_MOUSE | Dhx9  | ATP-dependent RNA helix R.DFVNVLYVR@.I                      | 418.58 | 183.60 | 2.28 | 0.44  |
| E9QNN1_E9QNN1_MOUSE | Dhx9  | ATP-dependent RNA helix R.DVVLVPEVR@.I                      | 321.02 | 152.19 | 2.11 | 0.47  |
| E9QNN1_E9QNN1_MOUSE | Dhx9  | ATP-dependent RNA helix R.ELDALDANDELTPLR@.I                | 458.51 | 230.17 | 1.99 | 0.50  |
| E9QNN1_E9QNN1_MOUSE | Dhx9  | ATP-dependent RNA helix K.ETPFLEIALLK#.Y                    | 213.76 | 118.77 | 1.80 | 0.56  |
| E9QNN1_E9QNN1_MOUSE | Dhx9  | ATP-dependent RNA helix K.FEAEILEISSNSVVIIR@.G              | 21.01  | 11.72  | 1.79 | 0.56  |
| E9QNN1_E9QNN1_MOUSE | Dhx9  | ATP-dependent RNA helix R.FSDHVALLSVFQAWDDAR@.M             | 156.41 | 69.14  | 2.26 | 0.44  |
| E9QNN1_E9QNN1_MOUSE | Dhx9  | ATP-dependent RNA helix R.GANLKDYYSR@.K                     | 121.18 | 65.34  | 1.85 | 0.54  |
| E9QNN1_E9QNN1_MOUSE | Dhx9  | ATP-dependent RNA helix R.GISHVIVDEIHER@.D                  | 557.10 | 256.81 | 2.17 | 0.46  |
| E9QNN1_E9QNN1_MOUSE | Dhx9  | ATP-dependent RNA helix K.GM*TLVTQLQLLFFASK#.K              | 157.35 | 72.83  | 2.16 | 0.46  |
| E9QNN1_E9QNN1_MOUSE | Dhx9  | ATP-dependent RNA helix K.HLENNSHFGSHR@.Y                   | 128.83 | 57.83  | 2.23 | 0.45  |
| E9QNN1_E9QNN1_MOUSE | Dhx9  | ATP-dependent RNA helix K.ILTEGR@.N                         | 404.00 | 211.65 | 1.91 | 0.52  |
| E9QNN1_E9QNN1_MOUSE | Dhx9  | ATP-dependent RNA helix R.ISAVAVAEVR@.V                     | 296.87 | 135.16 | 2.20 | 0.46  |
| E9QNN1_E9QNN1_MOUSE | Dhx9  | ATP-dependent RNA helix R.KHEEQVQATLESEEDLNAGLHGNWTLLENK#.A | 11.61  | 6.44   | 1.80 | 0.55  |
| E9QNN1_E9QNN1_MOUSE | Dhx9  | ATP-dependent RNA helix K.KHFEAIELEISSNSVVIIR@.G            | 50.04  | 22.27  | 2.25 | 0.44  |
| E9QNN1_E9QNN1_MOUSE | Dhx9  | ATP-dependent RNA helix R.KHLEAGR@.G                        | 204.76 | 122.90 | 1.67 | 0.60  |
| E9QNN1_E9QNN1_MOUSE | Dhx9  | ATP-dependent RNA helix R.KHM*TPAYEIR@.A                    | 31.44  | 10.54  | 2.98 | 0.34  |
| E9QNN1_E9QNN1_MOUSE | Dhx9  | ATP-dependent RNA helix R.KVFDVVPDGVTK.V                    | 63.84  | 34.86  | 1.83 | 0.55  |
| E9QNN1_E9QNN1_MOUSE | Dhx9  | ATP-dependent RNA helix K.KVQSDGQVIFDWDWR@.L                | 111.70 | 129.26 | 0.86 | 1.16  |
| E9QNN1_E9QNN1_MOUSE | Dhx9  | ATP-dependent RNA helix K.KVQSDGQVIFDWDWR@.L                | 13.05  | 302.91 | 0.04 | 23.21 |
| E9QNN1_E9QNN1_MOUSE | Dhx9  | ATP-dependent RNA helix K.LAHFEPQRS.Q                       | 136.21 | 65.37  | 2.08 | 0.48  |
| E9QNN1_E9QNN1_MOUSE | Dhx9  | ATP-dependent RNA helix R.LETHM*TPEM*FR.T                   | 8.17   | 3.89   | 2.10 | 0.48  |
| E9QNN1_E9QNN1_MOUSE | Dhx9  | ATP-dependent RNA helix K.LFTAHNMM*TNATVWASK#.T             | 145.95 | 64.63  | 2.26 | 0.44  |
| E9QNN1_E9QNN1_MOUSE | Dhx9  | ATP-dependent RNA helix R.LGGIGQFLAKR.A                     | 476.31 | 241.86 | 1.97 | 0.51  |
| E9QNN1_E9QNN1_MOUSE | Dhx9  | ATP-dependent RNA helix R.LGYIHR@.N                         | 90.66  | 28.16  | 3.22 | 0.31  |
| E9QNN1_E9QNN1_MOUSE | Dhx9  | ATP-dependent RNA helix R.LNM*ATLR@.M                       | 233.39 | 113.90 | 2.05 | 0.49  |
| E9QNN1_E9QNN1_MOUSE | Dhx9  | ATP-dependent RNA helix R.LNQYFQR#.E                        | 286.17 | 166.73 | 1.72 | 0.58  |
| E9QNN1_E9QNN1_MOUSE | Dhx9  | ATP-dependent RNA helix K.LPIEIR@.F                         | 700.52 | 333.10 | 2.10 | 0.48  |
| E9QNN1_E9QNN1_MOUSE | Dhx9  | ATP-dependent RNA helix K.LSM*SQLNEKH.E                     | 88.63  | 45.51  | 1.95 | 0.51  |
| E9QNN1_E9QNN1_MOUSE | Dhx9  | ATP-dependent RNA helix R.M*SGEAEIR@.F                      | 178.89 | 92.13  | 1.94 | 0.51  |
| E9QNN1_E9QNN1_MOUSE | Dhx9  | ATP-dependent RNA helix R.MSGEAEIR@.F                       | 17.53  | 10.14  | 1.73 | 0.58  |
| E9QNN1_E9QNN1_MOUSE | Dhx9  | ATP-dependent RNA helix K.NELTYQM*EQDHNLSVQLQER@.E          | 210.65 | 90.84  | 2.32 | 0.43  |
| E9QNN1_E9QNN1_MOUSE | Dhx9  | ATP-dependent RNA helix R.NNFGDYR@.G                        | 45.68  | 24.88  | 1.84 | 0.54  |
| E9QNN1_E9QNN1_MOUSE | Dhx9  | ATP-dependent RNA helix R.QISR@PSAAGINLM*IGSVR@.Y           | 58.73  | 24.44  | 2.40 | 0.42  |
| E9QNN1_E9QNN1_MOUSE | Dhx9  | ATP-dependent RNA helix R.QLYHGLVIEAYSLTK#.K                | 297.09 | 142.97 | 2.08 | 0.48  |



|                     |        |                                                                 |        |        |      |      |
|---------------------|--------|-----------------------------------------------------------------|--------|--------|------|------|
| E9QNN1_E9QNN1_MOUSE | Dhx9   | ATP-dependent RNA helic R.R@ISAVAVAER@.V                        | 200.83 | 91.97  | 2.18 | 0.46 |
| E9QNN1_E9QNN1_MOUSE | Dhx9   | ATP-dependent RNA helic R.SFIAEM*TVIK#.Q                        | 87.45  | 48.83  | 1.79 | 0.56 |
| E9QNN1_E9QNN1_MOUSE | Dhx9   | ATP-dependent RNA helic R.TPLHLEJLSIK#.L                        | 350.07 | 187.65 | 1.87 | 0.54 |
| E9QNN1_E9QNN1_MOUSE | Dhx9   | ATP-dependent RNA helic K.TTQVQVILDDFIQNDR@.A                   | 289.58 | 135.82 | 2.13 | 0.47 |
| E9QNN1_E9QNN1_MOUSE | Dhx9   | ATP-dependent RNA helic R.VEGFNYAGM*GNSTNK#.K                   | 44.06  | 20.03  | 2.20 | 0.45 |
| E9QNN1_E9QNN1_MOUSE | Dhx9   | ATP-dependent RNA helic K.VFDPVPDGVTK#.V                        | 225.48 | 126.31 | 1.79 | 0.56 |
| E9QNN1_E9QNN1_MOUSE | Dhx9   | ATP-dependent RNA helic K.VGSDGQVVIDDWIR@.L                     | 98.42  | 46.40  | 2.12 | 0.47 |
| E9QNN1_E9QNN1_MOUSE | Dhx9   | ATP-dependent RNA helic R.YDGGPRPPK.M                           | 48.33  | 27.82  | 1.74 | 0.58 |
| E9QNN1_E9QNN1_MOUSE | Dhx9   | ATP-dependent RNA helic K.YSPFFVFGKK#.I                         | 165.82 | 88.29  | 1.88 | 0.53 |
| E9QNN1_E9QNN1_MOUSE | Dhx9   | ATP-dependent RNA helic R.YQLPLHSQIPR@.E                        | 525.08 | 274.08 | 1.92 | 0.52 |
| E9QNN1_E9QNN1_MOUSE | Dhx9   | ATP-dependent RNA helic K.YTQVGPDPNR.S                          | 69.37  | 36.51  | 1.90 | 0.53 |
| Q9Z207_DIAF3_MOUSE  | Diaph3 | Protein diaphanous hom K.INELQELQAFK#.S                         | 10.71  | 9.54   | 1.12 | 0.89 |
| Q8C9B9_DID01_MOUSE  | Dido1  | Death-inducer obliteratc K.AK#GEDTM*SAAPLLDPVQQFGQFSK#.D        | 6.45   | 2.05   | 3.14 | 0.32 |
| Q8C9B9_DID01_MOUSE  | Dido1  | Death-inducer obliteratc R.K#PM*SANVPAAASPAPGR@.L               | 10.88  | 1.19   | 9.12 | 0.11 |
| Q8C9B9_DID01_MOUSE  | Dido1  | Death-inducer obliteratc R.LGVPVSPQSPNSQIR@.Q                   | 15.31  | 1.91   | 8.03 | 0.12 |
| Q8C9B9_DID01_MOUSE  | Dido1  | Death-inducer obliteratc R.LQEELETSVYPK#.V                      | 7.50   | 2.05   | 3.67 | 0.27 |
| Q8C9B9_DID01_MOUSE  | Dido1  | Death-inducer obliteratc K.SAAPLLDVFSSM*LK#.D                   | 10.10  | 3.27   | 3.09 | 0.32 |
| Q8C9B9_DID01_MOUSE  | Dido1  | Death-inducer obliteratc R.SPPEGDTLFLSR@.L                      | 6.07   | 2.93   | 2.07 | 0.48 |
| Q8C9B9_DID01_MOUSE  | Dido1  | Death-inducer obliteratc R.VEEFLTIVR@.R                         | 6.41   | 22.93  | 0.28 | 3.58 |
| Q8C9B9_DID01_MOUSE  | Dido1  | Death-inducer obliteratc R.VNDSDDLIM*#TENEVGG#.I                | 4.06   | 1.98   | 2.05 | 0.49 |
| Q8C9B9_DID01_MOUSE  | Dido1  | Death-inducer obliteratc K.AK#GEDTM*SAAPLLDPVQQFGQFSK#.D        | 9.25   | 2.51   | 3.69 | 0.27 |
| Q8C9B9_DID01_MOUSE  | Dido1  | Death-inducer obliteratc R.APTGSTPQGGLPAR@.E                    | 5.70   | 2.33   | 2.45 | 0.41 |
| Q8C9B9_DID01_MOUSE  | Dido1  | Death-inducer obliteratc R.EGAGTEVDPSEQPPQQHNLRLR@.R            | 13.03  | 1.33   | 9.78 | 0.10 |
| Q8C9B9_DID01_MOUSE  | Dido1  | Death-inducer obliteratc K.GFINM*QSVAK#.F                       | 12.15  | 1.30   | 9.32 | 0.11 |
| Q8C9B9_DID01_MOUSE  | Dido1  | Death-inducer obliteratc R.LGVPVSPQSPNSQIR@.Q                   | 22.03  | 3.34   | 6.59 | 0.15 |
| Q8C9B9_DID01_MOUSE  | Dido1  | Death-inducer obliteratc K.SAAPLLDVFSSM*LK#.D                   | 17.37  | 4.14   | 4.20 | 0.24 |
| Q8C9B9_DID01_MOUSE  | Dido1  | Death-inducer obliteratc R.SPPEGDTLFLSR@.L                      | 13.75  | 2.73   | 5.04 | 0.20 |
| Q8C9B9_DID01_MOUSE  | Dido1  | Death-inducer obliteratc R.VEEFLTIVR@.R                         | 12.62  | 21.15  | 0.60 | 1.68 |
| Q8C9B9_DID01_MOUSE  | Dido1  | Death-inducer obliteratc K.VSATER@PADFTDASSASVEQQK#.M           | 8.74   | 2.01   | 4.34 | 0.23 |
| Q9D0D4_DIM1_MOUSE   | Dimt1  | Probable dimethyladeno K.AALR@PTDVVLEVGPGTGNM*TVK#.L            | 11.35  | 4.90   | 2.32 | 0.43 |
| Q9D0D4_DIM1_MOUSE   | Dimt1  | Probable dimethyladeno K.SSAAVQQLLEK#.N                         | 10.75  | 3.38   | 3.19 | 0.31 |
| Q9D0D4_DIM1_MOUSE   | Dimt1  | Probable dimethyladeno K.AALR@PTDVVLEVGPGTGNM*TVK#.L            | 5.58   | 2.96   | 1.88 | 0.53 |
| Q9D0D4_DIM1_MOUSE   | Dimt1  | Probable dimethyladeno K.AALR@PTDVVLEVGPGTGNM*TVK#.L            | 8.08   | 3.66   | 2.21 | 0.45 |
| Q9D0D4_DIM1_MOUSE   | Dimt1  | Probable dimethyladeno R.LLHGFINAEIGHF#.S                       | 15.27  | 15.27  | 1.00 | 1.00 |
| Q9D0D4_DIM1_MOUSE   | Dimt1  | Probable dimethyladeno K.LQVLVGVDLK#.S                          | 18.34  | 8.58   | 2.14 | 0.47 |
| Q9D0D4_DIM1_MOUSE   | Dimt1  | Probable dimethyladeno R.SINTQLAR@.V                            | 11.95  | 3.66   | 3.26 | 0.31 |
| Q9CSH3_RRP44_MOUSE  | Dis3   | Exosome complex exonu R.AESDPFYLNLTLLR@.I                       | 11.65  | 4.97   | 2.35 | 0.43 |
| Q9CSH3_RRP44_MOUSE  | Dis3   | Exosome complex exonu K.ASLTYEAQAM*TR@.I                        | 12.29  | 6.16   | 2.00 | 0.50 |
| Q9CSH3_RRP44_MOUSE  | Dis3   | Exosome complex exonu R.AVHEDIVAVVLELPR@.S                      | 20.67  | 12.57  | 1.64 | 0.61 |
| Q9CSH3_RRP44_MOUSE  | Dis3   | Exosome complex exonu K.GALTLSSPEIR@.F                          | 24.23  | 10.91  | 2.22 | 0.45 |
| Q9CSH3_RRP44_MOUSE  | Dis3   | Exosome complex exonu K.GIVSEAVLIVR@.K                          | 16.53  | 13.71  | 1.21 | 0.83 |
| Q9CSH3_RRP44_MOUSE  | Dis3   | Exosome complex exonu R.IDSAAM*NDITSLR@.G                       | 18.46  | 11.24  | 1.64 | 0.61 |
| Q9CSH3_RRP44_MOUSE  | Dis3   | Exosome complex exonu R.IEGTVFHFVK#.V                           | 12.56  | 5.10   | 2.46 | 0.41 |
| Q9CSH3_RRP44_MOUSE  | Dis3   | Exosome complex exonu R.LAYDDEIPLSR@.J                          | 30.34  | 18.98  | 1.60 | 0.63 |
| Q9CSH3_RRP44_MOUSE  | Dis3   | Exosome complex exonu K.NAIVLIPK#.Y                             | 15.20  | 11.86  | 1.28 | 0.78 |
| Q9CSH3_RRP44_MOUSE  | Dis3   | Exosome complex exonu R.NVIVLQIVM*QEVN@.N                       | 12.56  | 4.37   | 2.88 | 0.35 |
| Q9CSH3_RRP44_MOUSE  | Dis3   | Exosome complex exonu R.NVIVLQIVMQEVR@.N                        | 5.62   | 3.57   | 1.57 | 0.64 |
| Q9CSH3_RRP44_MOUSE  | Dis3   | Exosome complex exonu K.SLADSLDR@AESDPFYLNLTLLR@.I              | 14.45  | 9.10   | 1.59 | 0.63 |
| Q9CSH3_RRP44_MOUSE  | Dis3   | Exosome complex exonu K.SLTANPELIDR@.L                          | 25.87  | 12.59  | 2.06 | 0.49 |
| Q9CSH3_RRP44_MOUSE  | Dis3   | Exosome complex exonu R.SQWVAPVSVVLDDEGQNEDDVEKDEER.E           | 8.22   | 5.01   | 1.64 | 0.61 |
| Q9CSH3_RRP44_MOUSE  | Dis3   | Exosome complex exonu K.YGLEGTVFEEK#.D                          | 6.99   | 2.59   | 2.70 | 0.37 |
| Q9CSH3_RRP44_MOUSE  | Dis3   | Exosome complex exonu R.AESDPFYLNLTLLR@.I                       | 11.97  | 7.27   | 2.62 | 0.38 |
| Q9CSH3_RRP44_MOUSE  | Dis3   | Exosome complex exonu K.ASLTYEAQAM*TR@.I                        | 21.10  | 8.21   | 2.57 | 0.39 |
| Q9CSH3_RRP44_MOUSE  | Dis3   | Exosome complex exonu R.FHM*DEETHDIPDLQTK#.E                    | 10.13  | 2.92   | 3.47 | 0.29 |
| Q9CSH3_RRP44_MOUSE  | Dis3   | Exosome complex exonu K.GALTLSSPEIR@.F                          | 24.34  | 8.36   | 2.91 | 0.34 |
| Q9CSH3_RRP44_MOUSE  | Dis3   | Exosome complex exonu K.GIVSEAVLIVR@.K                          | 14.54  | 16.58  | 0.88 | 1.14 |
| Q9CSH3_RRP44_MOUSE  | Dis3   | Exosome complex exonu R.IDSAAM*NDITSLR@.G                       | 29.79  | 10.47  | 2.85 | 0.35 |
| Q9CSH3_RRP44_MOUSE  | Dis3   | Exosome complex exonu R.IIVADGWPR@.N                            | 25.36  | 8.47   | 2.99 | 0.33 |
| Q9CSH3_RRP44_MOUSE  | Dis3   | Exosome complex exonu R.LAYLSDIM*NEIESGK#.I                     | 16.66  | 5.53   | 3.01 | 0.33 |
| Q9CSH3_RRP44_MOUSE  | Dis3   | Exosome complex exonu K.NAIVLIPK#.Y                             | 29.92  | 8.98   | 3.33 | 0.30 |
| Q9CSH3_RRP44_MOUSE  | Dis3   | Exosome complex exonu K.NLGDVGEKHEHETEVLLLEHDVHPQFSQAVLSFLPR@.M | 4.17   | 1.78   | 2.35 | 0.43 |
| Q9CSH3_RRP44_MOUSE  | Dis3   | Exosome complex exonu R.NVIVLQIVM*QEVN@.N                       | 20.71  | 7.46   | 2.78 | 0.36 |
| Q9CSH3_RRP44_MOUSE  | Dis3   | Exosome complex exonu R.NVIVLQIVMQEVR@.N                        | 8.10   | 4.50   | 1.80 | 0.56 |
| Q9CSH3_RRP44_MOUSE  | Dis3   | Exosome complex exonu K.SGSYLQGTFR@.A                           | 25.94  | 7.37   | 3.52 | 0.28 |
| Q9CSH3_RRP44_MOUSE  | Dis3   | Exosome complex exonu K.SLADSLDR@AESDPFYLNLTLLR@.I              | 26.56  | 9.58   | 2.77 | 0.36 |
| Q9CSH3_RRP44_MOUSE  | Dis3   | Exosome complex exonu K.SLTANPELIDR@.L                          | 50.31  | 15.03  | 3.35 | 0.30 |
| Q9CSH3_RRP44_MOUSE  | Dis3   | Exosome complex exonu K.YGLEGTVFEEK#.D                          | 14.77  | 4.44   | 3.33 | 0.30 |
| Q9ESX5_DKC1_MOUSE   | Dkc1   | H/ACA ribonucleoprotein R.ALETLTGALFRPPLIAAVK.R                 | 8.31   | 10.79  | 0.77 | 1.30 |
| Q9ESX5_DKC1_MOUSE   | Dkc1   | H/ACA ribonucleoprotein K.NTLVTEAVQAPQLAAEAVNVK#.R              | 6.87   | 7.51   | 0.92 | 1.09 |
| Q8BMF4_ODP2_MOUSE   | Dlat   | Dihydrolypo lysine-resic K.GIDLTVK#.G                           | 17.05  | 8.47   | 2.01 | 0.50 |
| Q8BMF4_ODP2_MOUSE   | Dlat   | Dihydrolypo lysine-resic K.GLETIASDVVSLASK#.A                   | 34.71  | 13.05  | 2.66 | 0.38 |
| Q8BMF4_ODP2_MOUSE   | Dlat   | Dihydrolypo lysine-resic K.ISVNDIFK#.G                          | 20.34  | 4.05   | 5.02 | 0.20 |
| Q8BMF4_ODP2_MOUSE   | Dlat   | Dihydrolypo lysine-resic R.VAPAPAGVFTDIPISNIR@.R                | 20.82  | 9.29   | 2.24 | 0.45 |
| Q8BMF4_ODP2_MOUSE   | Dlat   | Dihydrolypo lysine-resic K.VPEANSSVM*DTIVR@.Q                   | 5.13   | 9.07   | 0.57 | 1.77 |
| Q8BMF4_ODP2_MOUSE   | Dlat   | Dihydrolypo lysine-resic K.YLEK#PITM*LL-                        | 12.46  | 7.05   | 1.77 | 0.57 |
| Q8BMF4_ODP2_MOUSE   | Dlat   | Dihydrolypo lysine-resic K.GLETIASDVVSLASK#.A                   | 10.45  | 3.04   | 3.44 | 0.29 |
| Q8BMF4_ODP2_MOUSE   | Dlat   | Dihydrolypo lysine-resic R.VAPAPAGVFTDIPISNIR@.R                | 8.17   | 1.98   | 4.12 | 0.24 |
| Q811D0_DLG1_MOUSE   | Dlg1   | Disks large homolog 1 OS R.EQM*#N#SSVSSGSSLR@.T                 | 5.65   | 2.43   | 2.33 | 0.43 |
| Q811D0_DLG1_MOUSE   | Dlg1   | Disks large homolog 1 OS R.FGDILHVINASDDEWQAR@.Q                | 11.72  | 5.02   | 2.33 | 0.43 |
| Q811D0_DLG1_MOUSE   | Dlg1   | Disks large homolog 1 OS R.GNSGLGFSIAGGTDNPHIGDSSIFITK#.I       | 7.60   | 3.80   | 2.00 | 0.50 |
| Q811D0_DLG1_MOUSE   | Dlg1   | Disks large homolog 1 OS K.NAGQVPTIVAQYR@.PEEYSR@.F             | 20.28  | 8.97   | 2.26 | 0.44 |
| Q811D0_DLG1_MOUSE   | Dlg1   | Disks large homolog 1 OS R.YQDEEVLPEHISQVTVNEVLPVHVSSEK#.N      | 4.98   | 3.25   | 1.53 | 0.65 |
| Q9J144_DMAP1_MOUSE  | Dmap1  | DNA methyltransferase 1 K.DAPLLPSDTGQGYR@.T                     | 28.62  | 11.53  | 2.48 | 0.40 |
| Q9J144_DMAP1_MOUSE  | Dmap1  | DNA methyltransferase 1 R.DILELGGPEGDAASGTISK#.K                | 13.06  | 5.91   | 2.21 | 0.45 |
| Q9J144_DMAP1_MOUSE  | Dmap1  | DNA methyltransferase 1 K.LITAAADTAEQR@.R                       | 37.83  | 14.63  | 2.59 | 0.39 |
| Q9J144_DMAP1_MOUSE  | Dmap1  | DNA methyltransferase 1 R.SDLVLLYELK#.Q                         | 47.80  | 18.14  | 2.64 | 0.38 |
| Q9J144_DMAP1_MOUSE  | Dmap1  | DNA methyltransferase 1 R.TPEQVAEEYLLQLR@.K                     | 30.73  | 9.93   | 3.10 | 0.32 |
| Q9J144_DMAP1_MOUSE  | Dmap1  | DNA methyltransferase 1 R.TPEQVAEEYLLQLR@K#.I                   | 10.47  | 7.99   | 1.31 | 0.76 |
| Q9J144_DMAP1_MOUSE  | Dmap1  | DNA methyltransferase 1 K.WM*PFTNPAR@.K                         | 8.88   | 5.03   | 1.77 | 0.57 |
| Q9J144_DMAP1_MOUSE  | Dmap1  | DNA methyltransferase 1 K.DAPLLPSDTGQGYR@.T                     | 18.43  | 9.60   | 1.92 | 0.52 |
| Q9J144_DMAP1_MOUSE  | Dmap1  | DNA methyltransferase 1 R.DILELGGPEGDAASGTISK#.K                | 14.36  | 6.54   | 2.19 | 0.46 |
| Q9J144_DMAP1_MOUSE  | Dmap1  | DNA methyltransferase 1 K.LITAAADTAEQR@.R                       | 43.26  | 18.98  | 2.28 | 0.44 |
| Q9J144_DMAP1_MOUSE  | Dmap1  | DNA methyltransferase 1 R.SDLVLLYELK#.Q                         | 34.34  | 9.56   | 3.59 | 0.28 |
| Q9J144_DMAP1_MOUSE  | Dmap1  | DNA methyltransferase 1 R.TPEQVAEEYLLQLR@.K                     | 25.19  | 12.11  | 2.08 | 0.48 |
| Q9J144_DMAP1_MOUSE  | Dmap1  | DNA methyltransferase 1 R.TPEQVAEEYLLQLR@.K                     | 10.14  | 6.32   | 3.06 | 0.33 |
| Q9J144_DMAP1_MOUSE  | Dmap1  | DNA methyltransferase 1 R.TPEQVAEEYLLQLR@K#.I                   | 8.46   | 3.30   | 1.34 | 0.74 |
| P63037_DNAI1_MOUSE  | Dnaja1 | Dnal homolog subfamily K.EGGAGGGFGSPM*DFDM*FFGGGGR@.M           | 45.89  | 8.27   | 5.55 | 0.18 |
| P63037_DNAI1_MOUSE  | Dnaja1 | Dnal homolog subfamily K.EGGAGGGFGSPM*DFDM*FFGGGGR.M            | 4.11   | 5.20   | 0.79 | 1.27 |
| P63037_DNAI1_MOUSE  | Dnaja1 | Dnal homolog subfamily R.ELYDKGGEQAIK.E                         | 30.74  | 15.74  | 1.95 | 0.51 |
| P63037_DNAI1_MOUSE  | Dnaja1 | Dnal homolog subfamily K.EVEETDEM*DOVELVDFPNQER@.R              | 44.98  | 26.93  | 1.67 | 0.60 |
| P63037_DNAI1_MOUSE  | Dnaja1 | Dnal homolog subfamily K.ILEVHIDK#.G                            | 26.09  | 11.94  | 2.19 | 0.46 |
| P63037_DNAI1_MOUSE  | Dnaja1 | Dnal homolog subfamily K.ITFHGEGDQEPGLEPGDIIIVLQK#.D            | 118.52 | 65.98  | 1.80 | 0.56 |
| P63037_DNAI1_MOUSE  | Dnaja1 | Dnal homolog subfamily R.K#VEEETDEM*DOVELVDFPNQER@.R            | 10.59  | 7.59   | 1.40 | 0.72 |

|                     |         |                                                                |        |        |      |      |
|---------------------|---------|----------------------------------------------------------------|--------|--------|------|------|
| P63037_DN1A1_MOUSE  | Dnaja1  | Dnal homolog subfamily K.QISQAYEVLDKSK#.K                      | 130.36 | 59.22  | 2.20 | 0.45 |
| P63037_DN1A1_MOUSE  | Dnaja1  | Dnal homolog subfamily K.QISQAYEVLDKSK#.K                      | 10.55  | 6.15   | 1.72 | 0.58 |
| Q9QV10_DN1A2_MOUSE  | Dnaja2  | Dnal homolog subfamily R.EGSGEADQAPGDDVIFSHIFGGGLFGFM*GNQSR@.S | 77.95  | 32.27  | 2.42 | 0.41 |
| Q9QV10_DN1A2_MOUSE  | Dnaja2  | Dnal homolog subfamily K.EISFAYEVLSNPK#.R                      | 11.37  | 7.86   | 1.45 | 0.69 |
| Q9QV10_DN1A2_MOUSE  | Dnaja2  | Dnal homolog subfamily K.FDVQFPENNWINPK#.L                     | 8.55   | 2.73   | 3.13 | 0.32 |
| Q9QV10_DN1A2_MOUSE  | Dnaja2  | Dnal homolog subfamily K.GDLYIK#.F                             | 49.67  | 32.93  | 1.51 | 0.66 |
| Q9QV10_DN1A2_MOUSE  | Dnaja2  | Dnal homolog subfamily R.GEGM*PQR@.N                           | 26.98  | 11.20  | 2.41 | 0.41 |
| Q9QV10_DN1A2_MOUSE  | Dnaja2  | Dnal homolog subfamily R.ITFTGEADQAPGVEPGDIVLLQEK#.E           | 138.80 | 68.30  | 2.03 | 0.49 |
| Q9QV10_DN1A2_MOUSE  | Dnaja2  | Dnal homolog subfamily K.LSELEDLPSRPEVNVIGETEVELQEFDSTR.G      | 11.24  | 2.68   | 4.19 | 0.24 |
| Q9QV10_DN1A2_MOUSE  | Dnaja2  | Dnal homolog subfamily K.LYDILVPPGASENLK#.A                    | 40.37  | 15.03  | 2.69 | 0.37 |
| Q9QV10_DN1A2_MOUSE  | Dnaja2  | Dnal homolog subfamily K.VSLEDLYNGK#.T                         | 58.98  | 23.93  | 2.46 | 0.41 |
| Q9QV10_DN1A2_MOUSE  | Dnaja2  | Dnal homolog subfamily R.YGEGCLR@.E                            | 91.82  | 43.49  | 2.11 | 0.47 |
| Q9QV10_DN1A2_MOUSE  | Dnaja2  | Dnal homolog subfamily R.ITFTGEADQAPGVEPGDIVLLQEK#.E           | 7.32   | 2.34   | 3.12 | 0.32 |
| Q9M87_DN1A3_MOUSE   | Dnaja3  | Dnal homolog subfamily R.EIFVTR@.V                             | 11.52  | 5.86   | 1.97 | 0.51 |
| Q9M87_DN1A3_MOUSE   | Dnaja3  | Dnal homolog subfamily K.FSQLAEAYEVLDSEVK#.R@.K                | 6.21   | 4.14   | 1.50 | 0.67 |
| Q9QY13_DN1B1_MOUSE  | Dnajb1  | Dnal homolog subfamily R.DGSDVIYPAR@.I                         | 14.57  | 12.67  | 1.15 | 0.87 |
| Q9QY13_DN1B1_MOUSE  | Dnajb1  | Dnal homolog subfamily K.ILTEVKK#.R                            | 8.99   | 10.31  | 0.87 | 1.15 |
| Q9QY13_DN1B1_MOUSE  | Dnajb1  | Dnal homolog subfamily R.TILEQVLI@.P                           | 45.07  | 45.07  | 1.00 | 1.00 |
| Q99KV1_DN1B1_MOUSE  | Dnajb11 | Dnal homolog subfamily R.DGM*EYPIFEGEPHVDDGEPGLR@.F            | 14.53  | 14.71  | 0.99 | 1.01 |
| Q99KV1_DN1B1_MOUSE  | Dnajb11 | Dnal homolog subfamily K.FQDLGAAYEVLDSEK#.R                    | 19.45  | 17.93  | 1.08 | 0.92 |
| Q99KV1_DN1B1_MOUSE  | Dnajb11 | Dnal homolog subfamily R.TLEVEIEPVVR@.D                        | 27.59  | 19.06  | 1.45 | 0.69 |
| Q99KV1_DN1B1_MOUSE  | Dnajb11 | Dnal homolog subfamily R.TTQLGPR@.F                            | 45.55  | 28.82  | 1.58 | 0.63 |
| O54946_DN1B6_MOUSE  | Dnajb6  | Dnal homolog subfamily R.GQPTPALAPGPAPAPVR@.V                  | 4.54   | 4.99   | 0.91 | 1.10 |
| O54946_DN1B6_MOUSE  | Dnajb6  | Dnal homolog subfamily K.QVAEAYEVLDSEK#.K                      | 8.85   | 3.90   | 2.27 | 0.44 |
| Q9DC23_DJ1C10_MOUSE | Dnajc10 | Dnal homolog subfamily K.LYDILAFKA#.E                          | 11.11  | 5.40   | 2.21 | 0.45 |
| Q9DC23_DJ1C10_MOUSE | Dnajc10 | Dnal homolog subfamily R.YDFGIYDDPEITLER@.R                    | 6.05   | 2.81   | 2.15 | 0.47 |
| Q9DC23_DJ1C10_MOUSE | Dnajc10 | Dnal homolog subfamily R.YDFGIYDDPEITLER@.R                    | 4.67   | 2.45   | 1.91 | 0.52 |
| G3X922_G3X922_MOUSE | Dnajc13 | MCG115602 OS=Mus mu R.AELLELESQENM*IK#.K                       | 9.21   | 4.61   | 2.00 | 0.50 |
| G3X922_G3X922_MOUSE | Dnajc13 | MCG115602 OS=Mus mu R.DSLLASLDDGVR@.A                          | 25.05  | 9.63   | 2.60 | 0.38 |
| G3X922_G3X922_MOUSE | Dnajc13 | MCG115602 OS=Mus mu K.ELIVGEIFVR@.V                            | 11.62  | 5.55   | 2.10 | 0.48 |
| G3X922_G3X922_MOUSE | Dnajc13 | MCG115602 OS=Mus mu R.FLAAPPNGFADAVFR@.F                       | 3.25   | 2.65   | 1.23 | 0.82 |
| G3X922_G3X922_MOUSE | Dnajc13 | MCG115602 OS=Mus mu R.FIFIAAPPVWLR@.K                          | 9.28   | 4.86   | 1.91 | 0.52 |
| G3X922_G3X922_MOUSE | Dnajc13 | MCG115602 OS=Mus mu K.IVDGPPDENIILK#.T                         | 21.87  | 12.29  | 1.78 | 0.56 |
| G3X922_G3X922_MOUSE | Dnajc13 | MCG115602 OS=Mus mu K.KPVVLEVTGGDFQINPVTRN.V                   | 14.47  | 6.26   | 2.31 | 0.43 |
| G3X922_G3X922_MOUSE | Dnajc13 | MCG115602 OS=Mus mu R.LGGVLESDQATPEPNTVR@.K                    | 6.96   | 4.93   | 1.41 | 0.71 |
| G3X922_G3X922_MOUSE | Dnajc13 | MCG115602 OS=Mus mu K.LLEGVLENLDDSPAATK#.A                     | 14.42  | 5.88   | 2.45 | 0.41 |
| G3X922_G3X922_MOUSE | Dnajc13 | MCG115602 OS=Mus mu R.LLLEEDENEESGSIK#.R                       | 6.29   | 1.81   | 3.48 | 0.29 |
| G3X922_G3X922_MOUSE | Dnajc13 | MCG115602 OS=Mus mu K.NEETNQEVANSIAK#.L                        | 5.08   | 5.01   | 1.01 | 0.99 |
| G3X922_G3X922_MOUSE | Dnajc13 | MCG115602 OS=Mus mu R.TELLTEALR@.F                             | 12.63  | 3.84   | 3.29 | 0.30 |
| G3X922_G3X922_MOUSE | Dnajc13 | MCG115602 OS=Mus mu R.TITM*ETSDLLFSK#.I                        | 8.76   | 4.36   | 2.01 | 0.50 |
| G3X922_G3X922_MOUSE | Dnajc13 | MCG115602 OS=Mus mu K.YSTDESITSLAEVQK#.E                       | 7.20   | 3.48   | 2.07 | 0.48 |
| Q91YW3_DN1C3_MOUSE  | Dnajc3  | Dnal homolog subfamily K.LIESAEELIR@.D                         | 17.50  | 14.35  | 1.22 | 0.82 |
| Q91YW3_DN1C3_MOUSE  | Dnajc3  | Dnal homolog subfamily R.SOALDAFDGADYTAITFLDK#.I               | 5.89   | 4.11   | 1.43 | 0.70 |
| Q91YW3_DN1C3_MOUSE  | Dnajc3  | Dnal homolog subfamily R.SOALDAFDGADYTAITFLDK#.I               | 4.55   | 4.31   | 1.06 | 0.95 |
| Q91WN1_DN1C9_MOUSE  | Dnajc9  | Dnal homolog subfamily K.AVYDEQSTVDEDSAGLNQDRDWDAYWR.L         | 10.59  | 10.95  | 0.97 | 1.03 |
| Q91WN1_DN1C9_MOUSE  | Dnajc9  | Dnal homolog subfamily K.ELGEEGVNLIK.A                         | 56.15  | 60.41  | 0.93 | 1.08 |
| Q91WN1_DN1C9_MOUSE  | Dnajc9  | Dnal homolog subfamily K.GSEELNDIK.K                           | 15.15  | 28.91  | 0.52 | 1.91 |
| Q91WN1_DN1C9_MOUSE  | Dnajc9  | Dnal homolog subfamily K.ISLEDIQAFK#.T                         | 23.07  | 45.45  | 0.51 | 1.97 |
| Q91WN1_DN1C9_MOUSE  | Dnajc9  | Dnal homolog subfamily R.KELGLEEVNLIK.A                        | 9.68   | 14.85  | 0.65 | 1.53 |
| Q91WN1_DN1C9_MOUSE  | Dnajc9  | Dnal homolog subfamily K.KISLEDIQAFK#.T                        | 6.19   | 9.82   | 0.63 | 1.59 |
| P39053_DYN1_MOUSE   | Dnm1    | Dynamin-1 OS=Mus mus R.EISYAIK#.N                              | 27.53  | 64.39  | 0.43 | 2.34 |
| P39053_DYN1_MOUSE   | Dnm1    | Dynamin-1 OS=Mus mus R.LQDAFSAIQNADLDLPQAVVGGQSAGK#.S          | 4.40   | 2.08   | 2.11 | 0.47 |
| P39053_DYN1_MOUSE   | Dnm1    | Dynamin-1 OS=Mus mus R.TGLFTPDIM*AFETIVK#.K                    | 4.06   | 3.24   | 1.25 | 0.80 |
| P39053_DYN1_MOUSE   | Dnm1    | Dynamin-1 OS=Mus mus R.VYSPHVLNLTLDVLPGM*TK#.V                 | 7.99   | 2.74   | 2.91 | 0.34 |
| P39053_DYN1_MOUSE   | Dnm1    | Dynamin-1 OS=Mus mus R.SSVLENFVGR@.D                           | 6.76   | 2.41   | 2.81 | 0.36 |
| P39053_DYN1_MOUSE   | Dnm1    | Dynamin-1 OS=Mus mus R.AGVYPER@.V                              | 25.25  | 4.97   | 5.08 | 0.20 |
| P39053_DYN1_MOUSE   | Dnm1    | Dynamin-1 OS=Mus mus R.KALLQM*VQQFAVDFEK#.R                    | 18.32  | 4.56   | 4.02 | 0.25 |
| P39053_DYN1_MOUSE   | Dnm1    | Dynamin-1 OS=Mus mus R.ASETEENSGSD*FSM*DPQLER@.Q               | 7.46   | 3.20   | 2.33 | 0.43 |
| P39053_DYN1_MOUSE   | Dnm1    | Dynamin-1 OS=Mus mus R.EISYAIK#.N                              | 51.11  | 226.94 | 0.25 | 3.97 |
| P39053_DYN1_MOUSE   | Dnm1    | Dynamin-1 OS=Mus mus R.GISVPVNLNLR@.V                          | 115.23 | 42.55  | 2.71 | 0.37 |
| P39053_DYN1_MOUSE   | Dnm1    | Dynamin-1 OS=Mus mus R.GM*EDLPLVNR@.L                          | 28.64  | 9.99   | 2.87 | 0.35 |
| P39053_DYN1_MOUSE   | Dnm1    | Dynamin-1 OS=Mus mus R.GYGVVNR@.S                              | 103.67 | 37.06  | 2.80 | 0.36 |
| P39053_DYN1_MOUSE   | Dnm1    | Dynamin-1 OS=Mus mus R.IEGSGDQIDYELSGGAR@.I                    | 16.81  | 3.61   | 4.66 | 0.21 |
| P39053_DYN1_MOUSE   | Dnm1    | Dynamin-1 OS=Mus mus K.LDLM*DEGTDAR@.D                         | 25.46  | 8.28   | 3.07 | 0.33 |
| P39053_DYN1_MOUSE   | Dnm1    | Dynamin-1 OS=Mus mus K.LDLM*DEGTDAR@.D                         | 41.48  | 11.32  | 3.67 | 0.27 |
| P39053_DYN1_MOUSE   | Dnm1    | Dynamin-1 OS=Mus mus R.M*GTPYQLK#.V                            | 18.13  | 4.91   | 3.69 | 0.27 |
| P39053_DYN1_MOUSE   | Dnm1    | Dynamin-1 OS=Mus mus R.NLVDVSYM*AVNKH#.T                       | 19.62  | 5.22   | 3.76 | 0.27 |
| P39053_DYN1_MOUSE   | Dnm1    | Dynamin-1 OS=Mus mus R.KR@IEGSGDQIDYELSGGAR@.I                 | 21.44  | 7.02   | 3.05 | 0.33 |
| P39053_DYN1_MOUSE   | Dnm1    | Dynamin-1 OS=Mus mus K.SSVLENFVGR@.D                           | 123.31 | 42.37  | 2.91 | 0.34 |
| P39053_DYN1_MOUSE   | Dnm1    | Dynamin-1 OS=Mus mus R.TGLFTPDIM*AFETIVK#.K                    | 38.03  | 11.11  | 3.42 | 0.29 |
| P39053_DYN1_MOUSE   | Dnm1    | Dynamin-1 OS=Mus mus K.VPVGDDPPIEFQIR@.D                       | 31.99  | 8.01   | 3.99 | 0.25 |
| P39053_DYN1_MOUSE   | Dnm1    | Dynamin-1 OS=Mus mus R.VYSPHVLNLTLDVLPGM*TK#.V                 | 12.96  | 12.59  | 3.49 | 0.29 |
| P39053_DYN1_MOUSE   | Dnm1    | Dynamin-1 OS=Mus mus K.YM*LSVNDLK#.L                           | 17.67  | 6.10   | 2.90 | 0.35 |
| P39053_DYN1_MOUSE   | Dnm1    | Dynamin-1 OS=Mus mus K.GISVPVNLNLR@.V                          | 64.30  | 14.00  | 4.59 | 0.22 |
| P39053_DYN1_MOUSE   | Dnm1    | Dynamin-1 OS=Mus mus R.GM*EDLPLVNR@.L                          | 15.30  | 1.90   | 8.04 | 0.12 |
| P39053_DYN1_MOUSE   | Dnm1    | Dynamin-1 OS=Mus mus R.GYGVVNR@.S                              | 44.87  | 10.81  | 4.15 | 0.24 |
| P39053_DYN1_MOUSE   | Dnm1    | Dynamin-1 OS=Mus mus R.IEGSGDQIDYELSGGAR@.I                    | 12.33  | 1.82   | 6.77 | 0.15 |
| P39053_DYN1_MOUSE   | Dnm1    | Dynamin-1 OS=Mus mus K.LDLM*DEGTDAR@.D                         | 16.41  | 2.51   | 6.53 | 0.15 |
| P39053_DYN1_MOUSE   | Dnm1    | Dynamin-1 OS=Mus mus K.LDLM*DEGTDAR@.D                         | 24.59  | 5.88   | 4.18 | 0.24 |
| P39053_DYN1_MOUSE   | Dnm1    | Dynamin-1 OS=Mus mus K.SSVLENFVGR@.D                           | 73.58  | 15.05  | 4.89 | 0.20 |
| P39053_DYN1_MOUSE   | Dnm1    | Dynamin-1 OS=Mus mus R.TGLFTPDIM*AFETIVK#.K                    | 12.25  | 3.22   | 3.81 | 0.26 |
| P39053_DYN1_MOUSE   | Dnm1    | Dynamin-1 OS=Mus mus K.VPVGDDPPIEFQIR@.D                       | 13.42  | 4.77   | 2.81 | 0.36 |
| E9PUD2_E9PUD2_MOUSE | Dnm11   | Dynamin-1-like protein C.R.FISNPNSILAVTAANTDM*ATSEALK#.I       | 8.62   | 4.23   | 2.04 | 0.49 |
| E9PUD2_E9PUD2_MOUSE | Dnm11   | Dynamin-1-like protein C.K.SSVLESVGR@.D                        | 13.04  | 6.13   | 2.13 | 0.47 |
| E9PUD2_E9PUD2_MOUSE | Dnm11   | Dynamin-1-like protein C.K.VFSPNVLNLTLDVLPGM*TK#.V             | 6.63   | 2.61   | 2.54 | 0.39 |
| E9PUD2_E9PUD2_MOUSE | Dnm11   | Dynamin-1-like protein C.K.ALQASQIAIEIR@.E                     | 31.49  | 14.88  | 2.12 | 0.47 |
| E9PUD2_E9PUD2_MOUSE | Dnm11   | Dynamin-1-like protein C.K.DTQLSELVQLYK#.S                     | 13.85  | 6.92   | 2.00 | 0.50 |
| E9PUD2_E9PUD2_MOUSE | Dnm11   | Dynamin-1-like protein C.K.SSLLDILLTESEDMAQR@.R                | 3.18   | 1.33   | 2.40 | 0.42 |
| E9PUD2_E9PUD2_MOUSE | Dnm11   | Dynamin-1-like protein C.K.SYFLVIR@.K                          | 17.24  | 7.67   | 2.25 | 0.44 |
| E9PUD2_E9PUD2_MOUSE | Dnm11   | Dynamin-1-like protein C.K.AEELLAEK#.S                         | 17.25  | 5.45   | 3.17 | 0.32 |
| E9PUD2_E9PUD2_MOUSE | Dnm11   | Dynamin-1-like protein C.K.ALQASQIAIEIR.E                      | 29.19  | 10.59  | 2.76 | 0.36 |
| E9PUD2_E9PUD2_MOUSE | Dnm11   | Dynamin-1-like protein C.R.DKH#PSAGGIGDGGQEPPTGNWR@.G          | 7.09   | 4.90   | 1.45 | 0.69 |
| E9PUD2_E9PUD2_MOUSE | Dnm11   | Dynamin-1-like protein C.K.DTQLSELVQLYK#.S                     | 31.69  | 21.84  | 1.45 | 0.69 |
| E9PUD2_E9PUD2_MOUSE | Dnm11   | Dynamin-1-like protein C.R.FISNPNSILAVTAANTDM*ATSEALK#.I       | 6.12   | 1.39   | 4.42 | 0.23 |
| E9PUD2_E9PUD2_MOUSE | Dnm11   | Dynamin-1-like protein C.K.LYTFDEIR@QEIENETER@.J               | 21.32  | 4.05   | 5.26 | 0.19 |
| E9PUD2_E9PUD2_MOUSE | Dnm11   | Dynamin-1-like protein C.R.R@PULILQVHSPEDK#.R                  | 21.23  | 11.55  | 1.83 | 0.55 |
| E9PUD2_E9PUD2_MOUSE | Dnm11   | Dynamin-1-like protein C.K.SATLLQLITK#.F                       | 10.08  | 3.73   | 2.70 | 0.37 |
| E9PUD2_E9PUD2_MOUSE | Dnm11   | Dynamin-1-like protein C.K.SSLLDILLTESEDMAQR@.R                | 10.20  | 2.56   | 3.98 | 0.25 |
| E9PUD2_E9PUD2_MOUSE | Dnm11   | Dynamin-1-like protein C.K.SSVLESVGR@.D                        | 32.75  | 6.79   | 4.83 | 0.21 |
| E9PUD2_E9PUD2_MOUSE | Dnm11   | Dynamin-1-like protein C.K.SYFLVIR@.K                          | 22.26  | 5.53   | 4.03 | 0.25 |
| E9PUD2_E9PUD2_MOUSE | Dnm11   | Dynamin-1-like protein C.K.TSK#AEELLAEK#.S                     | 16.80  | 7.00   | 2.40 | 0.42 |
| E9PUD2_E9PUD2_MOUSE | Dnm11   | Dynamin-1-like protein C.K.VFSPNVLNLTLDVLPGM*TK#.V             | 16.70  | 8.03   | 2.08 | 0.48 |
| E9PUD2_E9PUD2_MOUSE | Dnm11   | Dynamin-1-like protein C.R.DKH#PSAGGIGDGGQEPPTGNWR@.G          | 5.31   | 2.22   | 2.39 | 0.42 |

|                     |        |                                                           |        |        |      |      |
|---------------------|--------|-----------------------------------------------------------|--------|--------|------|------|
| E9PUD2_E9PUD2_MOUSE | Dnm11  | Dynamin-1-like protein C.K.TLQSELVQLYK#.S                 | 16.87  | 23.00  | 0.73 | 1.36 |
| E9PUD2_E9PUD2_MOUSE | Dnm11  | Dynamin-1-like protein C.R.FISPNNSILVLAANTDM*ATSEALK#.I   | 17.61  | 5.14   | 3.42 | 0.29 |
| E9PUD2_E9PUD2_MOUSE | Dnm11  | Dynamin-1-like protein C.K.LIGIVVNR@.S                    | 30.73  | 9.35   | 3.29 | 0.30 |
| E9PUD2_E9PUD2_MOUSE | Dnm11  | Dynamin-1-like protein C.R.R@PULILQVHVSPEDK#.R            | 17.88  | 3.09   | 5.78 | 0.17 |
| E9PUD2_E9PUD2_MOUSE | Dnm11  | Dynamin-1-like protein C.K.SSVLESIVGR@.D                  | 22.40  | 3.51   | 6.39 | 0.16 |
| E9PUD2_E9PUD2_MOUSE | Dnm11  | Dynamin-1-like protein C.R.TLAVITK#.L                     | 17.25  | 4.74   | 3.64 | 0.27 |
| E9PUD2_E9PUD2_MOUSE | Dnm11  | Dynamin-1-like protein C.K.VPSFNWNLTLVDLPGM*TK#.V         | 15.37  | 3.86   | 3.98 | 0.25 |
| P39054_DYN2_MOUSE   | Dnm2   | Dynamin-2 OS=Mus musc R.AGVVPEK#DQAEEDGAQENTFSM*DPQLER@.Q | 8.34   | 2.39   | 3.49 | 0.29 |
| P39054_DYN2_MOUSE   | Dnm2   | Dynamin-2 OS=Mus musc R.GM*EELIPLVNK#.L                   | 20.59  | 10.04  | 2.05 | 0.49 |
| P39054_DYN2_MOUSE   | Dnm2   | Dynamin-2 OS=Mus musc R.IEGSGDQVDTLELGGAR@.I              | 15.57  | 2.98   | 5.23 | 0.19 |
| P39054_DYN2_MOUSE   | Dnm2   | Dynamin-2 OS=Mus musc R.IVTTYIR@.E                        | 14.48  | 5.20   | 2.79 | 0.36 |
| P39054_DYN2_MOUSE   | Dnm2   | Dynamin-2 OS=Mus musc R.KHFLLSHPAYR@.H                    | 14.44  | 6.07   | 2.38 | 0.42 |
| P39054_DYN2_MOUSE   | Dnm2   | Dynamin-2 OS=Mus musc R.NLVDSYVAIINK#.S                   | 37.84  | 8.12   | 4.66 | 0.21 |
| P39054_DYN2_MOUSE   | Dnm2   | Dynamin-2 OS=Mus musc R.R@IEGSGDQVDTLELGGAR@.I            | 16.76  | 2.25   | 7.44 | 0.13 |
| P39054_DYN2_MOUSE   | Dnm2   | Dynamin-2 OS=Mus musc R.TGLFPTDLAFEAVK#.K                 | 23.35  | 4.49   | 5.19 | 0.19 |
| P39054_DYN2_MOUSE   | Dnm2   | Dynamin-2 OS=Mus musc R.VPVGDPDPDIEYQIK#.D                | 12.15  | 3.09   | 3.94 | 0.25 |
| P39054_DYN2_MOUSE   | Dnm2   | Dynamin-2 OS=Mus musc R.VYSPHVLNLTLDLPGITK#.V             | 29.19  | 7.13   | 4.09 | 0.24 |
| P39054_DYN2_MOUSE   | Dnm2   | Dynamin-2 OS=Mus musc R.AFIHHELLAVLYSSADQSSLM*EESAQAQR@.R | 6.18   | 2.33   | 2.65 | 0.38 |
| P39054_DYN2_MOUSE   | Dnm2   | Dynamin-2 OS=Mus musc R.AGVVPEK#DQAEEDGAQENTFSM*DPQLER@.Q | 28.26  | 9.87   | 2.86 | 0.35 |
| P39054_DYN2_MOUSE   | Dnm2   | Dynamin-2 OS=Mus musc K.ALLQM*VQFGVDFEK#.R                | 19.26  | 7.27   | 2.65 | 0.38 |
| P39054_DYN2_MOUSE   | Dnm2   | Dynamin-2 OS=Mus musc K.DM*ILQFISR@.E                     | 23.65  | 11.00  | 2.15 | 0.47 |
| P39054_DYN2_MOUSE   | Dnm2   | Dynamin-2 OS=Mus musc K.DMILQFISR@.E                      | 10.85  | 3.71   | 2.92 | 0.34 |
| P39054_DYN2_MOUSE   | Dnm2   | Dynamin-2 OS=Mus musc R.ESSLILAVTPANIMDLANSALK#.L         | 5.50   | 1.78   | 3.10 | 0.32 |
| P39054_DYN2_MOUSE   | Dnm2   | Dynamin-2 OS=Mus musc K.EVDPQGLR@.T                       | 75.44  | 26.14  | 2.89 | 0.35 |
| P39054_DYN2_MOUSE   | Dnm2   | Dynamin-2 OS=Mus musc K.FTDFEVR@.Q                        | 14.74  | 5.89   | 2.50 | 0.40 |
| P39054_DYN2_MOUSE   | Dnm2   | Dynamin-2 OS=Mus musc K.FTDFEVRQIEAETDR.V                 | 25.88  | 9.53   | 2.72 | 0.37 |
| P39054_DYN2_MOUSE   | Dnm2   | Dynamin-2 OS=Mus musc R.GM*EELIPLVNK#.L                   | 60.99  | 16.61  | 3.67 | 0.27 |
| P39054_DYN2_MOUSE   | Dnm2   | Dynamin-2 OS=Mus musc R.GWLTINNLSLM*K#.G                  | 6.12   | 3.54   | 1.72 | 0.58 |
| P39054_DYN2_MOUSE   | Dnm2   | Dynamin-2 OS=Mus musc R.IEGSGDQVDTLELGGAR@.I              | 38.94  | 14.16  | 2.75 | 0.36 |
| P39054_DYN2_MOUSE   | Dnm2   | Dynamin-2 OS=Mus musc R.IVTTYIR@.E                        | 80.51  | 26.75  | 3.01 | 0.33 |
| P39054_DYN2_MOUSE   | Dnm2   | Dynamin-2 OS=Mus musc R.KHFLLSHPAYR@.H                    | 33.02  | 7.36   | 4.49 | 0.22 |
| P39054_DYN2_MOUSE   | Dnm2   | Dynamin-2 OS=Mus musc R.NLVDSYVAIINK#.S                   | 79.23  | 32.97  | 2.40 | 0.42 |
| P39054_DYN2_MOUSE   | Dnm2   | Dynamin-2 OS=Mus musc R.R@GWLVTINNLSLM*K#.G               | 12.75  | 4.19   | 3.04 | 0.33 |
| P39054_DYN2_MOUSE   | Dnm2   | Dynamin-2 OS=Mus musc R.R@IEGSGDQVDTLELGGAR@.I            | 36.59  | 8.46   | 4.33 | 0.23 |
| P39054_DYN2_MOUSE   | Dnm2   | Dynamin-2 OS=Mus musc R.R@PULILQFISK#.T                   | 23.42  | 5.75   | 4.07 | 0.25 |
| P39054_DYN2_MOUSE   | Dnm2   | Dynamin-2 OS=Mus musc R.SK#LQSLQSLSEK#.E                  | 15.45  | 7.26   | 2.13 | 0.47 |
| P39054_DYN2_MOUSE   | Dnm2   | Dynamin-2 OS=Mus musc R.TGLFPTDLAFEAVK#.K                 | 61.06  | 19.55  | 3.12 | 0.32 |
| P39054_DYN2_MOUSE   | Dnm2   | Dynamin-2 OS=Mus musc K.VPVGDPDPDIEYQIK#.D                | 33.61  | 14.84  | 2.26 | 0.44 |
| P39054_DYN2_MOUSE   | Dnm2   | Dynamin-2 OS=Mus musc K.VPVGDPDPDIEYQIK#DM*ILQFISR@.E     | 21.14  | 10.91  | 1.94 | 0.52 |
| P39054_DYN2_MOUSE   | Dnm2   | Dynamin-2 OS=Mus musc R.VYSPHVLNLTLDLPGITK#.V             | 111.22 | 42.59  | 2.61 | 0.38 |
| P39054_DYN2_MOUSE   | Dnm2   | Dynamin-2 OS=Mus musc K.YM*PLDNLKK#.I                     | 24.04  | 9.85   | 2.44 | 0.41 |
| P39054_DYN2_MOUSE   | Dnm2   | Dynamin-2 OS=Mus musc K.ALLQM*VQFGVDFEK#.R                | 12.85  | 3.00   | 4.28 | 0.23 |
| P39054_DYN2_MOUSE   | Dnm2   | Dynamin-2 OS=Mus musc K.DM*ILQFISR@.E                     | 11.30  | 3.21   | 3.53 | 0.28 |
| P39054_DYN2_MOUSE   | Dnm2   | Dynamin-2 OS=Mus musc K.FTDFEVR@QIEAETDR@.V               | 13.42  | 3.92   | 3.42 | 0.29 |
| P39054_DYN2_MOUSE   | Dnm2   | Dynamin-2 OS=Mus musc R.GM*EELIPLVNK#.L                   | 35.38  | 10.01  | 3.53 | 0.28 |
| P39054_DYN2_MOUSE   | Dnm2   | Dynamin-2 OS=Mus musc R.IEGSGDQVDTLELGGAR@.I              | 24.75  | 4.41   | 5.61 | 0.18 |
| P39054_DYN2_MOUSE   | Dnm2   | Dynamin-2 OS=Mus musc R.NLVDSYVAIINK#.S                   | 62.43  | 15.58  | 4.01 | 0.25 |
| P39054_DYN2_MOUSE   | Dnm2   | Dynamin-2 OS=Mus musc R.R@IEGSGDQVDTLELGGAR@.I            | 17.08  | 3.06   | 5.59 | 0.18 |
| P39054_DYN2_MOUSE   | Dnm2   | Dynamin-2 OS=Mus musc R.SK#LQSLQSLSEK#.E                  | 14.29  | 1.57   | 9.08 | 0.11 |
| P39054_DYN2_MOUSE   | Dnm2   | Dynamin-2 OS=Mus musc R.TGLFPTDLAFEAVK#.K                 | 42.19  | 9.84   | 4.29 | 0.23 |
| P39054_DYN2_MOUSE   | Dnm2   | Dynamin-2 OS=Mus musc K.VPVGDPDPDIEYQIK#.D                | 19.61  | 4.64   | 4.23 | 0.24 |
| P39054_DYN2_MOUSE   | Dnm2   | Dynamin-2 OS=Mus musc K.VPVGDPDPDIEYQIK#DM*ILQFISR@.E     | 9.67   | 3.13   | 3.09 | 0.32 |
| P39054_DYN2_MOUSE   | Dnm2   | Dynamin-2 OS=Mus musc R.VYSPHVLNLTLDLPGITK#.V             | 48.16  | 13.64  | 3.53 | 0.28 |
| P39054_DYN2_MOUSE   | Dnm2   | Dynamin-2 OS=Mus musc K.YM*PLDNLKK#.I                     | 13.22  | 5.54   | 2.39 | 0.42 |
| P39054_DYN2_MOUSE   | Dnm3   | Dynamin-3 OS=Mus musc R.TGLFPTDM*AFEAVK#.K                | 10.16  | 5.31   | 1.91 | 0.52 |
| P13864_DNMT1_MOUSE  | Dnmt1  | DNA (cytosine-5)-methyl  K.NLGPINQWVLSFGDGGK.V            | 3.08   | 6.42   | 0.48 | 2.09 |
| P13864_DNMT1_MOUSE  | Dnmt1  | DNA (cytosine-5)-methyl  R.AIIAAAPGEK#.L                  | 33.66  | 29.26  | 1.15 | 0.87 |
| P13864_DNMT1_MOUSE  | Dnmt1  | DNA (cytosine-5)-methyl  R.AIIHLAGVLSGQR@.R               | 54.04  | 39.11  | 1.38 | 0.72 |
| P13864_DNMT1_MOUSE  | Dnmt1  | DNA (cytosine-5)-methyl  R.DLPNIQVIR@.L                   | 57.77  | 51.68  | 1.12 | 0.89 |
| P13864_DNMT1_MOUSE  | Dnmt1  | DNA (cytosine-5)-methyl  K.EADDDEAADDVSEM*PSPK#.K         | 8.30   | 6.67   | 1.24 | 0.80 |
| P13864_DNMT1_MOUSE  | Dnmt1  | DNA (cytosine-5)-methyl  K.EAEPEQVAPTEPDR@.D              | 6.82   | 6.43   | 1.06 | 0.94 |
| P13864_DNMT1_MOUSE  | Dnmt1  | DNA (cytosine-5)-methyl  K.EAEPEQVAPTEPDR@DEDER@EEK#.R    | 7.01   | 7.45   | 0.94 | 1.06 |
| P13864_DNMT1_MOUSE  | Dnmt1  | DNA (cytosine-5)-methyl  R.EAR@PETHLEDYKIGK#K#.D          | 6.24   | 10.64  | 0.59 | 1.71 |
| P13864_DNMT1_MOUSE  | Dnmt1  | DNA (cytosine-5)-methyl  K.EESEEGNSAESAEER@.D             | 12.88  | 6.92   | 1.86 | 0.54 |
| P13864_DNMT1_MOUSE  | Dnmt1  | DNA (cytosine-5)-methyl  R.FFGNLDIR@.H                    | 5.85   | 32.38  | 1.81 | 0.55 |
| P13864_DNMT1_MOUSE  | Dnmt1  | DNA (cytosine-5)-methyl  R.FFLENVIR@.N                    | 91.29  | 73.15  | 1.25 | 0.80 |
| P13864_DNMT1_MOUSE  | Dnmt1  | DNA (cytosine-5)-methyl  R.FTEDSLIR@.H                    | 75.06  | 53.74  | 1.40 | 0.72 |
| P13864_DNMT1_MOUSE  | Dnmt1  | DNA (cytosine-5)-methyl  R.FYFLAENYK#.T                   | 44.90  | 33.40  | 1.34 | 0.74 |
| P13864_DNMT1_MOUSE  | Dnmt1  | DNA (cytosine-5)-methyl  K.GSNLDAPEPYR.I                  | 50.42  | 47.35  | 1.06 | 0.94 |
| P13864_DNMT1_MOUSE  | Dnmt1  | DNA (cytosine-5)-methyl  K.IVVEFLQNPDAVYEDLINK#.I         | 50.47  | 23.18  | 1.15 | 0.87 |
| P13864_DNMT1_MOUSE  | Dnmt1  | DNA (cytosine-5)-methyl  K.IVVEFLQNPDAVYEDLINK.I          | 8.80   | 5.30   | 1.66 | 0.60 |
| P13864_DNMT1_MOUSE  | Dnmt1  | DNA (cytosine-5)-methyl  K.KDPVFNLTYPHVR.K                | 5.96   | 27.37  | 0.95 | 1.05 |
| P13864_DNMT1_MOUSE  | Dnmt1  | DNA (cytosine-5)-methyl  R.LEWDGFTTIVNPEPM*GK#.Q          | 9.12   | 7.44   | 1.23 | 0.82 |
| P13864_DNMT1_MOUSE  | Dnmt1  | DNA (cytosine-5)-methyl  R.LGDGVIAR#.K                    | 18.64  | 15.16  | 1.23 | 0.81 |
| P13864_DNMT1_MOUSE  | Dnmt1  | DNA (cytosine-5)-methyl  R.LGDSVYLPPEAFTFNK.V             | 47.43  | 36.61  | 1.32 | 0.76 |
| P13864_DNMT1_MOUSE  | Dnmt1  | DNA (cytosine-5)-methyl  K.LNLLHFLQTEIK#.S                | 28.34  | 8.61   | 3.18 | 0.31 |
| P13864_DNMT1_MOUSE  | Dnmt1  | DNA (cytosine-5)-methyl  K.LPLFPEPLHVFAPR.A               | 144.77 | 147.20 | 0.98 | 1.02 |
| P13864_DNMT1_MOUSE  | Dnmt1  | DNA (cytosine-5)-methyl  K.LVM*AGEVTNSLQGR@.L             | 32.10  | 21.32  | 1.51 | 0.66 |
| P13864_DNMT1_MOUSE  | Dnmt1  | DNA (cytosine-5)-methyl  K.LVMAGEVTNSLQGR@.L              | 7.31   | 5.02   | 1.45 | 0.69 |
| P13864_DNMT1_MOUSE  | Dnmt1  | DNA (cytosine-5)-methyl  K.NGVSYSGALR@.G                  | 5.09   | 6.15   | 0.83 | 1.21 |
| P13864_DNMT1_MOUSE  | Dnmt1  | DNA (cytosine-5)-methyl  K.NLGPINQWVLSFGDGGK#.V           | 26.53  | 17.30  | 1.53 | 0.65 |
| P13864_DNMT1_MOUSE  | Dnmt1  | DNA (cytosine-5)-methyl  K.SDSDTLSVETSPSSVATR@.R          | 15.49  | 8.33   | 1.86 | 0.54 |
| P13864_DNMT1_MOUSE  | Dnmt1  | DNA (cytosine-5)-methyl  R.SKSDSDTLVETSPSSVATR.R          | 15.36  | 11.17  | 1.37 | 0.73 |
| P13864_DNMT1_MOUSE  | Dnmt1  | DNA (cytosine-5)-methyl  R.SQGFPPDSYR@.F                  | 20.57  | 13.15  | 1.56 | 0.64 |
| P13864_DNMT1_MOUSE  | Dnmt1  | DNA (cytosine-5)-methyl  K.VLEQIEEDGR.V                   | 87.51  | 87.86  | 1.00 | 1.00 |
| P13864_DNMT1_MOUSE  | Dnmt1  | DNA (cytosine-5)-methyl  R.VVDTESGAAAIVK#.L               | 34.88  | 22.14  | 1.58 | 0.63 |
| P13864_DNMT1_MOUSE  | Dnmt1  | DNA (cytosine-5)-methyl  K.YQHPEDADVEPQM*LTSEK#.L         | 55.34  | 41.14  | 1.35 | 0.74 |
| J3QNWO_J3QNWO_MOUSE | Dnmt1  | DNA (cytosine-5)-methyl  K.SDSDTLFTSPSSVATR@.R            | 8.80   | 7.62   | 1.15 | 0.87 |
| J3QNWO_J3QNWO_MOUSE | Dnmt1  | DNA (cytosine-5)-methyl  R.SK#SDSDTLFTSPSSVATR@.R         | 11.60  | 5.71   | 2.03 | 0.49 |
| Q922W0_DNPEP_MOUSE  | Dnpep  | Aspartyl aminopeptidase R.EVAGQVGLPQDLM*VIR@.N            | 11.08  | 5.39   | 2.06 | 0.49 |
| Q922W0_DNPEP_MOUSE  | Dnpep  | Aspartyl aminopeptidase K.GFFFLPVSRSR@.N                  | 32.06  | 20.51  | 1.56 | 0.64 |
| Q922W0_DNPEP_MOUSE  | Dnpep  | Aspartyl aminopeptidase K.GTPEPGLWATER@.H                 | 27.54  | 23.95  | 1.15 | 0.87 |
| Q922W0_DNPEP_MOUSE  | Dnpep  | Aspartyl aminopeptidase R.LTAFAEAIK#.S                    | 49.61  | 30.34  | 1.64 | 0.61 |
| Q922W0_DNPEP_MOUSE  | Dnpep  | Aspartyl aminopeptidase R.YASNAVESM*VIR@.E                | 12.79  | 10.87  | 1.18 | 0.85 |
| Q922W0_DNPEP_MOUSE  | Dnpep  | Aspartyl aminopeptidase K.GFFFLPVSRSR@.N                  | 21.35  | 5.49   | 3.89 | 0.26 |
| Q922W0_DNPEP_MOUSE  | Dnpep  | Aspartyl aminopeptidase R.LTAFAEAIK#.S                    | 29.80  | 6.38   | 4.67 | 0.21 |
| Q99180_TDIF1_MOUSE  | Dnntp1 | Deoxynucleotidyltransferase R.AVLQPSINEIIOGVFNK#.Y        | 10.76  | 10.28  | 1.05 | 0.96 |
| Q99180_TDIF1_MOUSE  | Dnntp1 | Deoxynucleotidyltransferase R.LNSETTFLVLSR@.A             | 12.14  | 2.37   | 5.12 | 0.20 |
| Q8R2M2_TDIF2_MOUSE  | Dnntp2 | Deoxynucleotidyltransferase K.LTSSSIDPLNLIK.Q             | 5.22   | 32.27  | 0.16 | 6.18 |
| Q8R2M2_TDIF2_MOUSE  | Dnntp2 | Deoxynucleotidyltransferase K.FAVNVVER@.W                 | 11.66  | 4.62   | 2.53 | 0.40 |
| Q8VDR9_DOCK6_MOUSE  | Dock6  | Dedicator of cytokinesis   K.EILEFFAR@.E                  | 33.88  | 18.66  | 1.82 | 0.55 |
| Q8VDR9_DOCK6_MOUSE  | Dock6  | Dedicator of cytokinesis   R.NLAADSLPTLLEQAAPVDVR@R@.N    | 8.56   | 3.74   | 2.29 | 0.44 |
| Q8R1A4_DOCK7_MOUSE  | Dock7  | Dedicator of cytokinesis   K.LGTGFNPTLDK#.Q               | 11.09  | 50.70  | 0.22 | 4.57 |

|                    |        |                                                             |       |       |      |      |
|--------------------|--------|-------------------------------------------------------------|-------|-------|------|------|
| Q8R1A4_DOCK7_MOUSE | Dock7  | Dedicator of cytokinesis1   K.NSLPDALLPNLLDR@.T             | 6.26  | 5.63  | 1.11 | 0.90 |
| Q8R1A4_DOCK7_MOUSE | Dock7  | Dedicator of cytokinesis1   R.AKHEEALGSGAR@.Q               | 5.43  | 2.69  | 2.02 | 0.50 |
| Q8R1A4_DOCK7_MOUSE | Dock7  | Dedicator of cytokinesis1   R.DLVEFPDDIEVYVPSR@.D           | 9.05  | 4.03  | 2.37 | 0.42 |
| Q8R1A4_DOCK7_MOUSE | Dock7  | Dedicator of cytokinesis1   R.DSTEVEISTGER@.K               | 14.26 | 7.21  | 1.98 | 0.51 |
| Q8R1A4_DOCK7_MOUSE | Dock7  | Dedicator of cytokinesis1   R.DVYVNPNTYR@.N                 | 23.35 | 10.43 | 2.24 | 0.45 |
| Q8R1A4_DOCK7_MOUSE | Dock7  | Dedicator of cytokinesis1   K.EAYTAVVYHNR@.S                | 8.94  | 3.95  | 2.27 | 0.44 |
| Q8R1A4_DOCK7_MOUSE | Dock7  | Dedicator of cytokinesis1   K.ESILGGVLLK#V                  | 25.78 | 11.75 | 2.19 | 0.46 |
| Q8R1A4_DOCK7_MOUSE | Dock7  | Dedicator of cytokinesis1   R.KGDLDEQEFVYKHEPAITK#.L        | 43.97 | 31.65 | 1.39 | 0.72 |
| Q8R1A4_DOCK7_MOUSE | Dock7  | Dedicator of cytokinesis1   R.GVFVSLIK#.S                   | 15.28 | 5.53  | 2.76 | 0.36 |
| Q8R1A4_DOCK7_MOUSE | Dock7  | Dedicator of cytokinesis1   K.GYQVSPDLR@.L                  | 25.39 | 9.42  | 2.69 | 0.37 |
| Q8R1A4_DOCK7_MOUSE | Dock7  | Dedicator of cytokinesis1   K.IANM*FELSPLFR@.Q              | 22.88 | 10.65 | 2.15 | 0.47 |
| Q8R1A4_DOCK7_MOUSE | Dock7  | Dedicator of cytokinesis1   K.ISENFYDLNSEQM*K#.G            | 9.07  | 3.92  | 2.31 | 0.43 |
| Q8R1A4_DOCK7_MOUSE | Dock7  | Dedicator of cytokinesis1   R.LEGFYGER@.F                   | 17.44 | 8.94  | 1.95 | 0.51 |
| Q8R1A4_DOCK7_MOUSE | Dock7  | Dedicator of cytokinesis1   K.LGTGFNPNTLDK#.Q               | 23.36 | 11.60 | 2.01 | 0.50 |
| Q8R1A4_DOCK7_MOUSE | Dock7  | Dedicator of cytokinesis1   R.LPNTYPNPSPGGGLGGSVHYATM*AR@.S | 3.45  | 3.48  | 0.99 | 1.01 |
| Q8R1A4_DOCK7_MOUSE | Dock7  | Dedicator of cytokinesis1   K.M*QVTM*SLSLVGTSGNFNEEFLR@.R   | 4.89  | 2.10  | 2.33 | 0.43 |
| Q8R1A4_DOCK7_MOUSE | Dock7  | Dedicator of cytokinesis1   R.NLLIYYPQSLNFANR@.Q            | 20.92 | 10.12 | 2.07 | 0.48 |
| Q8R1A4_DOCK7_MOUSE | Dock7  | Dedicator of cytokinesis1   K.QJSGQYSGSQLK#.N               | 7.32  | 14.18 | 0.52 | 1.94 |
| Q8R1A4_DOCK7_MOUSE | Dock7  | Dedicator of cytokinesis1   R.QNFEIGNNFAR@.V                | 14.61 | 5.86  | 2.49 | 0.40 |
| Q8R1A4_DOCK7_MOUSE | Dock7  | Dedicator of cytokinesis1   R.QVFDEAPDGGSSQDEQDDLK#R@.R     | 4.50  | 2.56  | 1.76 | 0.57 |
| Q8R1A4_DOCK7_MOUSE | Dock7  | Dedicator of cytokinesis1   K.SLIGPDQK#.E                   | 7.74  | 14.38 | 0.54 | 1.86 |
| Q8R1A4_DOCK7_MOUSE | Dock7  | Dedicator of cytokinesis1   R.SPSSAFSGQENLR@.W              | 28.77 | 14.35 | 2.00 | 0.50 |
| Q8R1A4_DOCK7_MOUSE | Dock7  | Dedicator of cytokinesis1   K.TILTYAEDLELR@.E               | 20.61 | 12.21 | 1.69 | 0.59 |
| Q8R1A4_DOCK7_MOUSE | Dock7  | Dedicator of cytokinesis1   R.TPNEIDHQNDDQR@.K              | 30.53 | 13.71 | 2.23 | 0.45 |
| Q8R1A4_DOCK7_MOUSE | Dock7  | Dedicator of cytokinesis1   K.WFTDLSVLQLNR@.L               | 6.42  | 2.35  | 2.73 | 0.37 |
| Q8R1A4_DOCK7_MOUSE | Dock7  | Dedicator of cytokinesis1   R.YSDPQIK#.A                    | 46.58 | 22.91 | 2.03 | 0.49 |
| P97465_DOK1_MOUSE  | Dok1   | Docking protein 1 OS=M   R.GLYDLPQEPFR@.D                   | 5.69  | 3.83  | 1.48 | 0.67 |
| P97465_DOK1_MOUSE  | Dok1   | Docking protein 1 OS=M   K.LTDSK#EDPIYDEPEGLAPAPPR@.G       | 4.12  | 2.80  | 1.47 | 0.68 |
| Q61103_REQU_MOUSE  | Dpf2   | Zinc finger protein ubi-d-   K.ASIYQNGSS-.S                 | 14.79 | 14.79 | 1.00 | 1.00 |
| Q61103_REQU_MOUSE  | Dpf2   | Zinc finger protein ubi-d-   K.EGLISQDGSSEALLR.T            | 60.54 | 18.86 | 3.21 | 0.31 |
| Q61103_REQU_MOUSE  | Dpf2   | Zinc finger protein ubi-d-   K.EGLISQDGSSEALLR@.T           | 13.73 | 3.71  | 3.70 | 0.27 |
| Q61103_REQU_MOUSE  | Dpf2   | Zinc finger protein ubi-d-   R.GPLASQGLYSYPAR@.R            | 37.93 | 13.92 | 2.72 | 0.37 |
| Q61103_REQU_MOUSE  | Dpf2   | Zinc finger protein ubi-d-   R.IIEPDDFLDLDLDDYEDTPK#.R      | 19.94 | 8.69  | 2.29 | 0.44 |
| Q61103_REQU_MOUSE  | Dpf2   | Zinc finger protein ubi-d-   R.KHK#DLASLEDR@.D              | 37.14 | 11.58 | 3.21 | 0.31 |
| Q61103_REQU_MOUSE  | Dpf2   | Zinc finger protein ubi-d-   K.LLGEQYK#.D                   | 53.05 | 21.45 | 2.47 | 0.40 |
| Q61103_REQU_MOUSE  | Dpf2   | Zinc finger protein ubi-d-   R.VDDDSLGEFVPSNSR@.A           | 39.29 | 12.60 | 3.12 | 0.32 |
| Q61103_REQU_MOUSE  | Dpf2   | Zinc finger protein ubi-d-   K.EGLISQDGSSEALLR.T            | 29.14 | 9.55  | 3.05 | 0.33 |
| Q61103_REQU_MOUSE  | Dpf2   | Zinc finger protein ubi-d-   R.GPLASQGLYSYPAR@.R            | 5.73  | 1.89  | 3.03 | 0.33 |
| Q61103_REQU_MOUSE  | Dpf2   | Zinc finger protein ubi-d-   K.EGLISQDGSSEALLR@.T           | 4.58  | 1.88  | 2.43 | 0.41 |
| Q70152_DPM1_MOUSE  | Dpm1   | Dolichol-phosphate man   K.LGGNEIVSFK#.S                    | 8.48  | 3.45  | 2.46 | 0.41 |
| Q99LTO_DPY30_MOUSE | Dpy30  | Protein dpy-30 homolog   R.IVENEKHINAEK#.S                  | 11.82 | 5.06  | 2.33 | 0.43 |
| Q99LTO_DPY30_MOUSE | Dpy30  | Protein dpy-30 homolog   K.VDLSLPTR@.A                      | 16.79 | 18.44 | 0.91 | 1.10 |
| Q91WV0_NC2A_MOUSE  | Dr1    | Protein Dr1 OS=Mus mus   R.LENLGIPPEELLR@.Q                 | 47.80 | 27.12 | 1.76 | 0.57 |
| Q9D6N5_NC2A_MOUSE  | Drap1  | Dr1-associated corepress   K.VAAAVPVIISR@.A                 | 32.64 | 15.88 | 2.05 | 0.49 |
| P32233_DRG1_MOUSE  | Drg1   | Developmentally-regulat   K.GGGGGPGEGFVAK#.T                | 17.65 | 7.38  | 2.39 | 0.42 |
| P32233_DRG1_MOUSE  | Drg1   | Developmentally-regulat   K.GQLPDYTPVLPYSR@.T               | 19.30 | 13.03 | 1.48 | 0.68 |
| P32233_DRG1_MOUSE  | Drg1   | Developmentally-regulat   K.IAEIEAEM*AR@.T                  | 29.50 | 14.96 | 1.97 | 0.51 |
| P32233_DRG1_MOUSE  | Drg1   | Developmentally-regulat   K.IAEIEAMAR@.T                    | 15.84 | 3.27  | 4.84 | 0.21 |
| P32233_DRG1_MOUSE  | Drg1   | Developmentally-regulat   K.IDQJSEELDIYK#.V                 | 9.28  | 1.14  | 8.13 | 0.12 |
| P32233_DRG1_MOUSE  | Drg1   | Developmentally-regulat   R.IGFVGFPSVGK#.S                  | 44.96 | 16.90 | 2.66 | 0.38 |
| P32233_DRG1_MOUSE  | Drg1   | Developmentally-regulat   K.IIENELEGGIR@.L                  | 30.26 | 11.37 | 2.66 | 0.38 |
| P32233_DRG1_MOUSE  | Drg1   | Developmentally-regulat   K.IQLLDLPGIEGAK#.D                | 88.18 | 44.22 | 1.99 | 0.50 |
| P32233_DRG1_MOUSE  | Drg1   | Developmentally-regulat   R.SDATADDLIDVVEGNNR@.V            | 17.75 | 12.62 | 1.42 | 0.71 |
| P32233_DRG1_MOUSE  | Drg1   | Developmentally-regulat   K.VGKHDTLLEDDVVIQVK#.K            | 11.09 | 4.58  | 2.42 | 0.41 |
| P32233_DRG1_MOUSE  | Drg1   | Developmentally-regulat   R.WNFDDLLEK#.I                    | 7.37  | 6.27  | 1.18 | 0.85 |
| P32233_DRG1_MOUSE  | Drg1   | Developmentally-regulat   K.GGGGGPGEGFVAK#.T                | 14.90 | 6.24  | 2.39 | 0.42 |
| P32233_DRG1_MOUSE  | Drg1   | Developmentally-regulat   R.IGFVGFPSVGK#.S                  | 35.59 | 16.86 | 2.11 | 0.47 |
| P32233_DRG1_MOUSE  | Drg1   | Developmentally-regulat   K.IIENELEGGIR@.L                  | 18.65 | 6.43  | 2.90 | 0.34 |
| P32233_DRG1_MOUSE  | Drg1   | Developmentally-regulat   K.IQLLDLPGIEGAK#.D                | 37.16 | 15.67 | 2.37 | 0.42 |
| P32233_DRG1_MOUSE  | Drg1   | Developmentally-regulat   R.SDATADDLIDVVEGNNR@.V            | 16.21 | 2.50  | 6.47 | 0.15 |
| P32233_DRG1_MOUSE  | Drg1   | Developmentally-regulat   K.DHTLEDDVVIQVK#.K                | 7.31  | 1.64  | 4.46 | 0.22 |
| P32233_DRG1_MOUSE  | Drg1   | Developmentally-regulat   K.GGGGGPGEGFVAK#.T                | 17.55 | 8.63  | 2.03 | 0.49 |
| P32233_DRG1_MOUSE  | Drg1   | Developmentally-regulat   R.IGFVGFPSVGK#.S                  | 42.95 | 14.85 | 2.89 | 0.35 |
| P32233_DRG1_MOUSE  | Drg1   | Developmentally-regulat   K.IIENELEGGIR@.L                  | 34.45 | 9.32  | 3.70 | 0.27 |
| P32233_DRG1_MOUSE  | Drg1   | Developmentally-regulat   K.IQLLDLPGIEGAK#.D                | 92.69 | 28.94 | 3.20 | 0.31 |
| P32233_DRG1_MOUSE  | Drg1   | Developmentally-regulat   R.SDATADDLIDVVEGNNR.V             | 20.63 | 6.75  | 3.06 | 0.33 |
| Q9QX89_DRG2_MOUSE  | Drg2   | Developmentally-regulat   K.GANIQLDLPGLIEGAAQGR@.G          | 14.12 | 3.36  | 4.21 | 0.24 |
| Q9QX89_DRG2_MOUSE  | Drg2   | Developmentally-regulat   R.GQR@PDFTDAILR@.K                | 12.87 | 5.00  | 2.57 | 0.39 |
| Q9QX89_DRG2_MOUSE  | Drg2   | Developmentally-regulat   K.IDQJSM*EEDVR@.L                 | 10.53 | 3.32  | 3.18 | 0.31 |
| Q9QX89_DRG2_MOUSE  | Drg2   | Developmentally-regulat   R.VALLGFPVSGK#.S                  | 20.91 | 8.79  | 2.38 | 0.42 |
| Q9QX89_DRG2_MOUSE  | Drg2   | Developmentally-regulat   K.GANIQLDLPGLIEGAAQGR@.G          | 6.41  | 2.90  | 2.21 | 0.45 |
| Q9QX89_DRG2_MOUSE  | Drg2   | Developmentally-regulat   R.VALLGFPVSGK#.S                  | 11.47 | 4.13  | 2.83 | 0.35 |
| Q9QX89_DRG2_MOUSE  | Drg2   | Developmentally-regulat   K.GANIQLDLPGLIEGAAQGR@.G          | 9.65  | 4.52  | 2.13 | 0.47 |
| Q9QX89_DRG2_MOUSE  | Drg2   | Developmentally-regulat   K.IDQJSM*EEDVR@.L                 | 8.47  | 2.05  | 4.13 | 0.24 |
| Q9QX89_DRG2_MOUSE  | Drg2   | Developmentally-regulat   R.VALLGFPVSGK#.S                  | 18.47 | 9.52  | 1.94 | 0.52 |
| Q5HZ10_RNC_MOUSE   | Drosha | Ribonuclease 3 OS=Mus r   R.LLFNDPDLR@.E                    | 8.08  | 3.17  | 2.55 | 0.39 |
| Q5HZ10_RNC_MOUSE   | Drosha | Ribonuclease 3 OS=Mus r   K.LTFEEAIGVIFTHVR@.L              | 12.75 | 3.70  | 3.45 | 0.29 |
| Q14A10_DCC1_MOUSE  | DSCC1  | Sister chromatid cohesio   R.FNSLSLR@.E                     | 9.57  | 4.06  | 2.36 | 0.42 |
| Q14A10_DCC1_MOUSE  | DSCC1  | Sister chromatid cohesio   R.ILEFDYK#.L                     | 19.66 | 10.02 | 1.96 | 0.51 |
| Q14A10_DCC1_MOUSE  | DSCC1  | Sister chromatid cohesio   R.LLM*ENTYEGPDSQ#HEEDASR@.S      | 14.94 | 4.82  | 3.10 | 0.32 |
| O35075_DSCR3_MOUSE | Dscr3  | Down syndrome critical   R.SIELQLVR@.V                      | 7.49  | 3.50  | 2.14 | 0.47 |
| O35075_DSCR3_MOUSE | Dscr3  | Down syndrome critical   K.TEVFPEPPLVK#.G                   | 13.39 | 8.24  | 1.62 | 0.62 |
| O35075_DSCR3_MOUSE | Dscr3  | Down syndrome critical   K.TEVFPEPPLVK#.G                   | 7.89  | 4.10  | 1.92 | 0.52 |
| O35075_DSCR3_MOUSE | Dscr3  | Down syndrome critical   K.TEVFPEPPLVK#.G                   | 6.65  | 4.64  | 1.43 | 0.70 |
| O9CYC5_DSN1_MOUSE  | Dsn1   | Kinetochore-associated   K.AADFSLEASVAEVK#.E                | 7.62  | 4.55  | 1.67 | 0.60 |
| E9Q557_DESP_MOUSE  | Dsp    | Desmoplakin OS=Mus ml   K.AEYEEAKR.R                        | 8.98  | 15.95 | 0.56 | 1.78 |
| Q91ZU6_DYST_MOUSE  | Dst    | Dystonin OS=Mus muscu   R.FFLGNQGDSSQQLR@.L                 | 8.84  | 2.23  | 3.96 | 0.25 |
| Q91ZU6_DYST_MOUSE  | Dst    | Dystonin OS=Mus muscu   R.LLDPEDVDVSSPDEK#.S                | 4.41  | 1.77  | 2.49 | 0.40 |
| Q91ZU6_DYST_MOUSE  | Dst    | Dystonin OS=Mus muscu   R.LVSDTITQ#HVEEIDAAILR@.S           | 9.16  | 11.21 | 0.82 | 1.22 |
| Q91ZU6_DYST_MOUSE  | Dst    | Dystonin OS=Mus muscu   R.VGGGWM*ALDEFVVK#.N                | 10.12 | 3.74  | 2.86 | 0.35 |
| Q91W28_DTBP1_MOUSE | Dtnbp1 | Dysbindin OS=Mus musc   R.LLSVQDFTSGLK#.T                   | 28.97 | 4.67  | 4.06 | 0.25 |
| Q3UIR3_DTX3L_MOUSE | Dtx3l  | E3 ubiquitin-protein liga   R.ATGVSVDVITWNDIHHK#.T          | 19.79 | 16.86 | 1.77 | 0.57 |
| Q3UIR3_DTX3L_MOUSE | Dtx3l  | E3 ubiquitin-protein liga   K.DKHDLDSVQSYGTFDAFQR@.A        | 41.83 | 15.35 | 2.73 | 0.37 |
| Q3UIR3_DTX3L_MOUSE | Dtx3l  | E3 ubiquitin-protein liga   K.FGGPANGFYPPDYLK#.R            | 11.96 | 8.99  | 1.33 | 0.75 |
| Q3UIR3_DTX3L_MOUSE | Dtx3l  | E3 ubiquitin-protein liga   K.FGGPANGFYPPDYLK#R@.V          | 32.46 | 14.23 | 2.28 | 0.44 |
| Q3UIR3_DTX3L_MOUSE | Dtx3l  | E3 ubiquitin-protein liga   K.GNQPETM*SYSTQK#.G             | 13.48 | 10.59 | 1.27 | 0.79 |
| Q3UIR3_DTX3L_MOUSE | Dtx3l  | E3 ubiquitin-protein liga   K.HTPPDVEREPDQSIQVPLVLLLYFK.H   | 93.81 | 54.16 | 1.73 | 0.58 |
| Q3UIR3_DTX3L_MOUSE | Dtx3l  | E3 ubiquitin-protein liga   K.IHHFLSEQLLR@.E                | 55.18 | 22.94 | 2.41 | 0.42 |
| Q3UIR3_DTX3L_MOUSE | Dtx3l  | E3 ubiquitin-protein liga   K.ITASGYTTEIUVSTR@.F            | 68.06 | 33.96 | 2.00 | 0.50 |
| Q3UIR3_DTX3L_MOUSE | Dtx3l  | E3 ubiquitin-protein liga   R.K#VLDLLEAFK#.H                | 13.37 | 8.67  | 1.54 | 0.65 |
| Q3UIR3_DTX3L_MOUSE | Dtx3l  | E3 ubiquitin-protein liga   K.LLEPELLQEISEIQK#.F            | 65.76 | 16.68 | 1.68 | 0.59 |
| Q3UIR3_DTX3L_MOUSE | Dtx3l  | E3 ubiquitin-protein liga   R.M*GLAPSSGEK#.L                | 42.83 | 19.94 | 2.15 | 0.47 |
| Q3UIR3_DTX3L_MOUSE | Dtx3l  | E3 ubiquitin-protein liga   R.TEVLSLK#.G                    | 50.86 | 23.82 | 2.14 | 0.47 |



|                    |        |                                                                    |         |        |      |      |
|--------------------|--------|--------------------------------------------------------------------|---------|--------|------|------|
| Q3UB9_EDC4_MOUSE   | Edc4   | Enhancer of mRNA-decap: K.IQEELVHIR@.Q                             | 23.84   | 5.70   | 4.19 | 0.24 |
| Q3UB9_EDC4_MOUSE   | Edc4   | Enhancer of mRNA-decap: K.LFQELQADPHNLSK#.A                        | 70.31   | 21.13  | 3.33 | 0.30 |
| Q3UB9_EDC4_MOUSE   | Edc4   | Enhancer of mRNA-decap: R.LGTQELVQLQESHM#.K#.S                     | 72.51   | 21.78  | 3.33 | 0.30 |
| Q3UB9_EDC4_MOUSE   | Edc4   | Enhancer of mRNA-decap: K.LQLDGSITLNSSSSLQASPR@.S                  | 8.83    | 3.41   | 2.59 | 0.39 |
| Q3UB9_EDC4_MOUSE   | Edc4   | Enhancer of mRNA-decap: R.LSLM*.LHGLVTPSLP.-                       | 7.76    | 7.76   | 1.00 | 1.00 |
| Q3UB9_EDC4_MOUSE   | Edc4   | Enhancer of mRNA-decap: K.LTAVEGSM#.K#.E                           | 22.04   | 7.71   | 2.86 | 0.35 |
| Q3UB9_EDC4_MOUSE   | Edc4   | Enhancer of mRNA-decap: R.LTHEQVAPPEWDPALIWQQQR@.E                 | 23.15   | 9.58   | 2.42 | 0.41 |
| Q3UB9_EDC4_MOUSE   | Edc4   | Enhancer of mRNA-decap: K.QGFVVK#.G                                | 15.62   | 4.65   | 3.36 | 0.30 |
| Q3UB9_EDC4_MOUSE   | Edc4   | Enhancer of mRNA-decap: R.QGPELGSQQLDGGPGDGR@.H                    | 9.98    | 3.86   | 2.58 | 0.39 |
| Q3UB9_EDC4_MOUSE   | Edc4   | Enhancer of mRNA-decap: R.SLEPVAGLSNSVATK#.L                       | 87.10   | 27.34  | 3.19 | 0.31 |
| Q3UB9_EDC4_MOUSE   | Edc4   | Enhancer of mRNA-decap: R.SLEPVAGLSNSVATK#.L                       | 17.64   | 3.59   | 4.91 | 0.20 |
| Q3UB9_EDC4_MOUSE   | Edc4   | Enhancer of mRNA-decap: R.SLLPLGPPADK#.L                           | 49.19   | 20.58  | 2.91 | 0.42 |
| Q3UB9_EDC4_MOUSE   | Edc4   | Enhancer of mRNA-decap: R.AAADTLQGP.M*QAAYR@.E                     | 17.71   | 6.05   | 2.93 | 0.34 |
| Q3UB9_EDC4_MOUSE   | Edc4   | Enhancer of mRNA-decap: R.AEVQHLQHVAVSGLQESLAQVQR@.I               | 17.71   | 13.04  | 1.37 | 0.73 |
| Q3UB9_EDC4_MOUSE   | Edc4   | Enhancer of mRNA-decap: R.AEVWDLDM*.L.R@.S                         | 19.94   | 6.76   | 2.95 | 0.34 |
| Q3UB9_EDC4_MOUSE   | Edc4   | Enhancer of mRNA-decap: K.ALQDVQIR@.F                              | 41.39   | 10.68  | 3.87 | 0.26 |
| Q3UB9_EDC4_MOUSE   | Edc4   | Enhancer of mRNA-decap: R.DHM*.GSM*.AQVR@.Q                        | 13.56   | 3.62   | 3.74 | 0.27 |
| Q3UB9_EDC4_MOUSE   | Edc4   | Enhancer of mRNA-decap: R.EAFQSVLPAFEK#.S                          | 59.87   | 15.54  | 3.85 | 0.26 |
| Q3UB9_EDC4_MOUSE   | Edc4   | Enhancer of mRNA-decap: R.ELAEWHNQELQLR@.L                         | 30.43   | 7.58   | 4.02 | 0.25 |
| Q3UB9_EDC4_MOUSE   | Edc4   | Enhancer of mRNA-decap: R.EPVLAQLR.G                               | 38.43   | 15.72  | 2.44 | 0.41 |
| Q3UB9_EDC4_MOUSE   | Edc4   | Enhancer of mRNA-decap: K.EQQATVTSIM*.QAM#.R@.S                    | 5.20    | 2.94   | 1.77 | 0.57 |
| Q3UB9_EDC4_MOUSE   | Edc4   | Enhancer of mRNA-decap: K.EVEIVASSDSSISK#.A                        | 14.40   | 4.83   | 2.98 | 0.34 |
| Q3UB9_EDC4_MOUSE   | Edc4   | Enhancer of mRNA-decap: K.FWQIYEGQDEPR@.C                          | 10.88   | 4.78   | 2.28 | 0.44 |
| Q3UB9_EDC4_MOUSE   | Edc4   | Enhancer of mRNA-decap: R.GGQLQEQLTQQLSQALSSAVAGR@.L               | 109.14  | 24.76  | 4.41 | 0.23 |
| Q3UB9_EDC4_MOUSE   | Edc4   | Enhancer of mRNA-decap: R.GGQLQEQLTQQLSQALSSAVAGR@.L               | 7.08    | 2.53   | 2.80 | 0.36 |
| Q3UB9_EDC4_MOUSE   | Edc4   | Enhancer of mRNA-decap: R.GLVSTLQASATQEQM*.AATVSSVR@.A             | 27.80   | 9.46   | 2.94 | 0.34 |
| Q3UB9_EDC4_MOUSE   | Edc4   | Enhancer of mRNA-decap: K.GPGQVSTAASALSLDLQVEPLGLPQASPSR@.T        | 18.77   | 7.39   | 2.54 | 0.39 |
| Q3UB9_EDC4_MOUSE   | Edc4   | Enhancer of mRNA-decap: R.HSTPSLLEALATQEVATPDSQVWPTAPDITR@.E       | 10.03   | 1.69   | 5.94 | 0.17 |
| Q3UB9_EDC4_MOUSE   | Edc4   | Enhancer of mRNA-decap: K.IQEELVHIR@.Q                             | 31.55   | 33.32  | 0.95 | 1.06 |
| Q3UB9_EDC4_MOUSE   | Edc4   | Enhancer of mRNA-decap: K.LFQELQADPHNLSK#.A                        | 51.39   | 16.02  | 3.21 | 0.31 |
| Q3UB9_EDC4_MOUSE   | Edc4   | Enhancer of mRNA-decap: R.LTHEQVAPPEWDPALIWQQQR@.E                 | 19.20   | 6.33   | 3.03 | 0.33 |
| Q3UB9_EDC4_MOUSE   | Edc4   | Enhancer of mRNA-decap: R.QGPELGSQQLDGGPGDGR@.H                    | 13.78   | 5.13   | 2.69 | 0.37 |
| Q3UB9_EDC4_MOUSE   | Edc4   | Enhancer of mRNA-decap: R.SLEPVAGLSNSVATK#.L                       | 58.24   | 19.36  | 3.01 | 0.33 |
| Q3UB9_EDC4_MOUSE   | Edc4   | Enhancer of mRNA-decap: R.SLLPLGPPADK#.L                           | 91.52   | 31.89  | 2.87 | 0.35 |
| Q3UB9_EDC4_MOUSE   | Edc4   | Enhancer of mRNA-decap: R.VISVSTSER@.T                             | 52.44   | 15.37  | 3.41 | 0.29 |
| Q8BL66_EEA1_MOUSE  | Eea1   | Early endosome antigen : K.IQAGEGETAVLNQLQEK#.N                    | 5.19    | 3.27   | 1.58 | 0.63 |
| Q8BL66_EEA1_MOUSE  | Eea1   | Early endosome antigen : K.LTLAQEDLISNR@.N                         | 8.17    | 3.61   | 2.26 | 0.44 |
| Q8BL66_EEA1_MOUSE  | Eea1   | Early endosome antigen : R.VLSLETSELSLQESLNESK#.E                  | 3.99    | 2.16   | 1.85 | 0.54 |
| Q8BL66_EEA1_MOUSE  | Eea1   | Early endosome antigen : K.AAQALTEIAIDK#.S                         | 27.42   | 12.15  | 2.26 | 0.44 |
| Q8BL66_EEA1_MOUSE  | Eea1   | Early endosome antigen : R.ADLQNHLDTAQHALQDK#.Q                    | 12.82   | 4.61   | 2.78 | 0.36 |
| Q8BL66_EEA1_MOUSE  | Eea1   | Early endosome antigen : K.DALLAELSTK#.E                           | 25.81   | 8.54   | 3.02 | 0.33 |
| Q8BL66_EEA1_MOUSE  | Eea1   | Early endosome antigen : K.EQALQSQQR@.Q                            | 15.77   | 5.25   | 3.00 | 0.33 |
| Q8BL66_EEA1_MOUSE  | Eea1   | Early endosome antigen : K.HYQAVHDAGNSDGHGGEAGLALTR@.D             | 18.86   | 4.19   | 4.51 | 0.22 |
| Q8BL66_EEA1_MOUSE  | Eea1   | Early endosome antigen : K.IQAGEGETAVLNQLQEK#.N                    | 12.02   | 20.49  | 0.59 | 1.70 |
| Q8BL66_EEA1_MOUSE  | Eea1   | Early endosome antigen : K.IQNLEALQK#.G                            | 22.28   | 12.09  | 1.84 | 0.54 |
| Q8BL66_EEA1_MOUSE  | Eea1   | Early endosome antigen : K.KHEENVLKHQEFK#.L                        | 12.19   | 4.68   | 2.60 | 0.38 |
| Q8BL66_EEA1_MOUSE  | Eea1   | Early endosome antigen : K.KLEADALEVK#.A                           | 12.62   | 7.25   | 1.74 | 0.57 |
| Q8BL66_EEA1_MOUSE  | Eea1   | Early endosome antigen : K.LQQQSSQAQELAAEK#.G                      | 23.77   | 8.58   | 2.77 | 0.36 |
| Q8BL66_EEA1_MOUSE  | Eea1   | Early endosome antigen : K.LQSEHAHLEATINQLR@.S                     | 5.82    | 2.67   | 2.18 | 0.46 |
| Q8BL66_EEA1_MOUSE  | Eea1   | Early endosome antigen : K.LSALQSNYK#.C                            | 9.44    | 7.16   | 1.32 | 0.76 |
| Q8BL66_EEA1_MOUSE  | Eea1   | Early endosome antigen : R.LTASESSLQR@.A                           | 25.75   | 9.91   | 2.60 | 0.38 |
| Q8BL66_EEA1_MOUSE  | Eea1   | Early endosome antigen : K.LTLAQEDLISNR@.N                         | 29.83   | 8.04   | 3.71 | 0.27 |
| Q8BL66_EEA1_MOUSE  | Eea1   | Early endosome antigen : K.LTM*.QVTLNENLGVK#.K                     | 7.15    | 6.10   | 1.17 | 0.85 |
| Q8BL66_EEA1_MOUSE  | Eea1   | Early endosome antigen : R.M*.QAATLTAVK#.A                         | 19.12   | 9.11   | 2.10 | 0.48 |
| Q8BL66_EEA1_MOUSE  | Eea1   | Early endosome antigen : K.QQHQQALQASATK#.L                        | 16.41   | 7.94   | 2.07 | 0.48 |
| Q8BL66_EEA1_MOUSE  | Eea1   | Early endosome antigen : K.QTDDL@.GEIIVLEATVQNNODER@.R             | 8.33    | 2.16   | 3.86 | 0.26 |
| Q8BL66_EEA1_MOUSE  | Eea1   | Early endosome antigen : K.SEILENIK#.Q                             | 114.72  | 26.18  | 4.38 | 0.23 |
| Q8BL66_EEA1_MOUSE  | Eea1   | Early endosome antigen : R.VLSLETSELSLQESLNESK#.E                  | 7.00    | 4.00   | 1.75 | 0.57 |
| Q8BL66_EEA1_MOUSE  | Eea1   | Early endosome antigen : K.VSVLQDLQK.TAK#.F                        | 42.02   | 10.70  | 2.25 | 0.45 |
| Q8BL66_EEA1_MOUSE  | Eea1   | Early endosome antigen : K.VTHLTEDLNK#.Q                           | 23.95   | 7.12   | 3.37 | 0.30 |
| Q921E6_EED_MOUSE   | Eed    | Polycomb protein EED O: R.DPNLLESVSK#.D                            | 11.86   | 9.23   | 1.28 | 0.78 |
| Q921E6_EED_MOUSE   | Eed    | Polycomb protein EED O: K.EGDPVFATVGSNR.V                          | 6.10    | 10.04  | 0.61 | 1.65 |
| Q921E6_EED_MOUSE   | Eed    | Polycomb protein EED O: K.TNR@.PFISQK#.I                           | 6.93    | 12.66  | 0.55 | 1.83 |
| Q921E6_EED_MOUSE   | Eed    | Polycomb protein EED O: R.WLQDLK#.S                                | 8.07    | 11.48  | 0.70 | 1.42 |
| Q921E6_EED_MOUSE   | Eed    | Polycomb protein EED O: R.EVSTAPAGDM*.PAAK#.K                      | 3.80    | 1.66   | 2.28 | 0.44 |
| P10126_EF1A1_MOUSE | Eef1a1 | Elongation factor 1-alpha: R.EHALLAYTLGVK#.Q                       | 230.25  | 85.84  | 2.68 | 0.37 |
| P10126_EF1A1_MOUSE | Eef1a1 | Elongation factor 1-alpha: K.EVSTYIKK#.I                           | 83.85   | 36.89  | 2.27 | 0.44 |
| P10126_EF1A1_MOUSE | Eef1a1 | Elongation factor 1-alpha: K.IGGITVPVGR@.V                         | 1276.32 | 551.94 | 2.31 | 0.43 |
| P10126_EF1A1_MOUSE | Eef1a1 | Elongation factor 1-alpha: K.KIGVNPVTFAPVIGWNGDNM*.LEPSANM*.PWFK.G | 10.88   | 4.75   | 2.29 | 0.44 |
| P10126_EF1A1_MOUSE | Eef1a1 | Elongation factor 1-alpha: K.KHLEDGPK#.F                           | 112.03  | 65.28  | 1.72 | 0.58 |
| P10126_EF1A1_MOUSE | Eef1a1 | Elongation factor 1-alpha: R.LPLQDVVK#.I                           | 729.23  | 319.84 | 2.28 | 0.44 |
| P10126_EF1A1_MOUSE | Eef1a1 | Elongation factor 1-alpha: K.M*.DSTEPYSQK#.R                       | 245.49  | 93.50  | 2.63 | 0.38 |
| P10126_EF1A1_MOUSE | Eef1a1 | Elongation factor 1-alpha: K.QLIVGNK#.M                            | 607.09  | 216.09 | 2.81 | 0.36 |
| P10126_EF1A1_MOUSE | Eef1a1 | Elongation factor 1-alpha: K.QLIVGNK#.M*.DSTEPYSQK#.R              | 97.85   | 35.95  | 2.72 | 0.37 |
| P10126_EF1A1_MOUSE | Eef1a1 | Elongation factor 1-alpha: K.QLIVGNK#.M*.DSTEPYSQK#.R              | 1.79    | 1.84   | 0.97 | 1.03 |
| P10126_EF1A1_MOUSE | Eef1a1 | Elongation factor 1-alpha: K.R@.YEIVK#.E                           | 1215.77 | 393.98 | 3.09 | 0.32 |
| P10126_EF1A1_MOUSE | Eef1a1 | Elongation factor 1-alpha: K.STTGHLYK#.C                           | 269.13  | 136.22 | 1.98 | 0.51 |
| P10126_EF1A1_MOUSE | Eef1a1 | Elongation factor 1-alpha: K.THINIVVIGHVDSGK#.S                    | 151.05  | 58.22  | 2.59 | 0.39 |
| P10126_EF1A1_MOUSE | Eef1a1 | Elongation factor 1-alpha: R.TIEK#.FEK#.E                          | 155.07  | 61.43  | 2.52 | 0.40 |
| P10126_EF1A1_MOUSE | Eef1a1 | Elongation factor 1-alpha: R.VETGVLK#.PGM*.VVFAPVNVTEVK#.S         | 452.00  | 178.52 | 2.53 | 0.39 |
| P10126_EF1A1_MOUSE | Eef1a1 | Elongation factor 1-alpha: R.VETGVLK#.PGMVVTFAPVNVTEVK#.S          | 310.48  | 147.64 | 2.10 | 0.48 |
| P10126_EF1A1_MOUSE | Eef1a1 | Elongation factor 1-alpha: R.YEIVK#.EVSTYIKK#.I                    | 45.33   | 20.39  | 2.22 | 0.45 |
| P10126_EF1A1_MOUSE | Eef1a1 | Elongation factor 1-alpha: K.YYVITDAPGHR@.D                        | 665.91  | 292.45 | 2.28 | 0.44 |
| P10126_EF1A1_MOUSE | Eef1a1 | Elongation factor 1-alpha: K.YYVITDAPGHR.D                         | 82.29   | 29.98  | 2.74 | 0.36 |
| P10126_EF1A1_MOUSE | Eef1a1 | Elongation factor 1-alpha: K.YYVITDAPGHRDFI.N                      | 25.97   | 8.00   | 3.24 | 0.31 |
| P10126_EF1A1_MOUSE | Eef1a1 | Elongation factor 1-alpha: R.EHALLAYTLGVK#.Q                       | 9.43    | 3.20   | 2.95 | 0.34 |
| P10126_EF1A1_MOUSE | Eef1a1 | Elongation factor 1-alpha: R.LPLQDVVK#.I                           | 12.39   | 6.36   | 1.95 | 0.51 |
| P10126_EF1A1_MOUSE | Eef1a1 | Elongation factor 1-alpha: K.M*.DSTEPYSQK#.R                       | 7.68    | 5.35   | 1.44 | 0.70 |
| P10126_EF1A1_MOUSE | Eef1a1 | Elongation factor 1-alpha: K.STTGHLYK#.C                           | 9.36    | 9.08   | 1.03 | 0.97 |
| P10126_EF1A1_MOUSE | Eef1a1 | Elongation factor 1-alpha: R.VETGVLK#.PGM*.VVFAPVNVTEVK#.S         | 11.93   | 7.80   | 1.53 | 0.65 |
| P10126_EF1A1_MOUSE | Eef1a1 | Elongation factor 1-alpha: K.IGGITVPVGR@.V                         | 246.90  | 89.10  | 2.77 | 0.36 |
| P10126_EF1A1_MOUSE | Eef1a1 | Elongation factor 1-alpha: K.KHLEDGPK#.F                           | 21.38   | 10.83  | 1.97 | 0.51 |
| P10126_EF1A1_MOUSE | Eef1a1 | Elongation factor 1-alpha: R.LPLQDVVK#.I                           | 134.72  | 55.32  | 2.44 | 0.41 |
| P10126_EF1A1_MOUSE | Eef1a1 | Elongation factor 1-alpha: K.M*.DSTEPYSQK#.R                       | 41.87   | 14.86  | 2.82 | 0.35 |
| P10126_EF1A1_MOUSE | Eef1a1 | Elongation factor 1-alpha: K.QLIVGNK#.M*.DSTEPYSQK#.R              | 19.37   | 4.76   | 4.07 | 0.25 |
| P10126_EF1A1_MOUSE | Eef1a1 | Elongation factor 1-alpha: K.R@.YEIVK#.E                           | 109.76  | 52.70  | 2.08 | 0.48 |
| P10126_EF1A1_MOUSE | Eef1a1 | Elongation factor 1-alpha: K.STTGHLYK#.C                           | 60.95   | 21.85  | 2.79 | 0.36 |
| P10126_EF1A1_MOUSE | Eef1a1 | Elongation factor 1-alpha: K.THINIVVIGHVDSGK#.S                    | 33.02   | 11.73  | 2.81 | 0.36 |
| P10126_EF1A1_MOUSE | Eef1a1 | Elongation factor 1-alpha: R.VETGVLK#.PGM*.VVFAPVNVTEVK#.S         | 84.74   | 32.41  | 2.61 | 0.38 |
| P10126_EF1A1_MOUSE | Eef1a1 | Elongation factor 1-alpha: R.VETGVLK#.PGMVVTFAPVNVTEVK#.S          | 45.67   | 18.61  | 2.45 | 0.41 |
| P10126_EF1A1_MOUSE | Eef1a1 | Elongation factor 1-alpha: R.EHALLAYTLGVK#.Q                       | 74.91   | 22.38  | 3.35 | 0.30 |
| P10126_EF1A1_MOUSE | Eef1a1 | Elongation factor 1-alpha: K.IGGITVPVGR@.V                         | 243.17  | 77.02  | 3.16 | 0.32 |
| P10126_EF1A1_MOUSE | Eef1a1 | Elongation factor 1-alpha: K.KHLEDGPK#.F                           | 26.76   | 15.18  | 1.76 | 0.57 |

|                    |        |                                                              |        |        |      |      |
|--------------------|--------|--------------------------------------------------------------|--------|--------|------|------|
| P10126_EF1A1_MOUSE | Eef1a1 | Elongation factor 1-alpha: R.LPLQDVYK#I                      | 109.85 | 38.56  | 2.85 | 0.35 |
| P10126_EF1A1_MOUSE | Eef1a1 | Elongation factor 1-alpha: K.M*DSTPEPPYSQK#R                 | 12.97  | 4.05   | 3.21 | 0.31 |
| P10126_EF1A1_MOUSE | Eef1a1 | Elongation factor 1-alpha: K.QLIVGNPK#M                      | 60.92  | 17.20  | 3.54 | 0.28 |
| P10126_EF1A1_MOUSE | Eef1a1 | Elongation factor 1-alpha: K.STTTGHLVYK#C                    | 54.03  | 19.77  | 2.73 | 0.37 |
| P10126_EF1A1_MOUSE | Eef1a1 | Elongation factor 1-alpha: K.THINIVVGHVDSGK#S                | 20.61  | 4.04   | 5.10 | 0.20 |
| P10126_EF1A1_MOUSE | Eef1a1 | Elongation factor 1-alpha: R.VETGVLK#PGM*VVTFAPVNVVTEVK#S    | 90.32  | 30.69  | 2.94 | 0.34 |
| P10126_EF1A1_MOUSE | Eef1a1 | Elongation factor 1-alpha: R.VETGVLK#PGM*VVTFAPVNVVTEVK#S    | 28.34  | 8.67   | 3.27 | 0.31 |
| P10126_EF1A1_MOUSE | Eef1a1 | Elongation factor 1-alpha: K.YYVITDAPGHR@.D                  | 12.31  | 3.72   | 3.31 | 0.30 |
| O70251_EF1B_MOUSE  | Eef1b  | Elongation factor 1-beta: K.LVPVGVGKIK#K                     | 26.87  | 20.00  | 1.34 | 0.74 |
| P57776_EF1D_MOUSE  | Eef1d  | Elongation factor 1-delta: R.FYEQM*NGPVTSGR@.Q               | 17.35  | 6.63   | 2.62 | 0.38 |
| P57776_EF1D_MOUSE  | Eef1d  | Elongation factor 1-delta: R.GVVQDLQQAISK#L                  | 85.61  | 42.76  | 2.00 | 0.50 |
| P57776_EF1D_MOUSE  | Eef1d  | Elongation factor 1-delta: R.ITSLVENQNLR@.G                  | 81.05  | 37.30  | 2.17 | 0.46 |
| P57776_EF1D_MOUSE  | Eef1d  | Elongation factor 1-delta: R.SIQLDGLVWVGASK#L                | 32.71  | 12.30  | 2.66 | 0.38 |
| P57776_EF1D_MOUSE  | Eef1d  | Elongation factor 1-delta: K.SLAGSSGPGASSGPGGDHSELIVR@.I     | 63.55  | 29.46  | 2.16 | 0.46 |
| Q9D8N0_EF1G_MOUSE  | Eef1g  | Elongation factor 1-gamma: R.ALIAAQYSGAQVLR@.V               | 40.79  | 24.47  | 1.67 | 0.60 |
| Q9D8N0_EF1G_MOUSE  | Eef1g  | Elongation factor 1-gamma: R.FPEELTQTFM*SCNLITGMFQR@LDK#R.LK | 2.50   | 4.90   | 0.51 | 1.96 |
| Q9D8N0_EF1G_MOUSE  | Eef1g  | Elongation factor 1-gamma: R.IJLGLDTHLK#T                    | 14.79  | 5.67   | 2.61 | 0.38 |
| Q9D8N0_EF1G_MOUSE  | Eef1g  | Elongation factor 1-gamma: R.K#LDLPGSEETQLTVR@.E             | 25.32  | 10.95  | 2.31 | 0.43 |
| P58252_EF2_MOUSE   | Eef2   | Elongation factor 2 OS=N: R.ALLELQEPPEELYQTFQR@.I            | 45.64  | 28.72  | 1.59 | 0.63 |
| P58252_EF2_MOUSE   | Eef2   | Elongation factor 2 OS=N: K.AYLPVNESFGFTADLR.S               | 26.35  | 15.66  | 1.68 | 0.59 |
| P58252_EF2_MOUSE   | Eef2   | Elongation factor 2 OS=N: K.FSVSPVVR@.V                      | 50.89  | 28.63  | 1.78 | 0.56 |
| P58252_EF2_MOUSE   | Eef2   | Elongation factor 2 OS=N: K.GEGQLSAER@.R                     | 50.09  | 31.02  | 1.61 | 0.62 |
| P58252_EF2_MOUSE   | Eef2   | Elongation factor 2 OS=N: R.GGGQIIPTR@.R                     | 120.74 | 74.73  | 1.62 | 0.62 |
| P58252_EF2_MOUSE   | Eef2   | Elongation factor 2 OS=N: R.GHVFEESQVAGTPM*FVVK#A            | 21.35  | 10.16  | 2.10 | 0.48 |
| P58252_EF2_MOUSE   | Eef2   | Elongation factor 2 OS=N: K.GVQVLEIK#HDSVAVGFQWATK#E         | 11.78  | 8.15   | 1.45 | 0.69 |
| P58252_EF2_MOUSE   | Eef2   | Elongation factor 2 OS=N: R.IM*GPNYTPGK#K                    | 12.80  | 7.47   | 1.71 | 0.58 |
| P58252_EF2_MOUSE   | Eef2   | Elongation factor 2 OS=N: K.NPADLPK#L                        | 34.86  | 26.25  | 1.33 | 0.75 |
| P58252_EF2_MOUSE   | Eef2   | Elongation factor 2 OS=N: K.SDPVSVVR@.E                      | 34.04  | 18.34  | 1.86 | 0.54 |
| P58252_EF2_MOUSE   | Eef2   | Elongation factor 2 OS=N: K.VFDAIM*NFR@.K                    | 31.02  | 16.73  | 1.85 | 0.54 |
| P58252_EF2_MOUSE   | Eef2   | Elongation factor 2 OS=N: R.VFSGVSTGLK#V                     | 39.50  | 32.17  | 1.23 | 0.81 |
| P58252_EF2_MOUSE   | Eef2   | Elongation factor 2 OS=N: K.YEWDVAEAR@.K                     | 15.28  | 7.77   | 1.97 | 0.51 |
| P58252_EF2_MOUSE   | Eef2   | Elongation factor 2 OS=N: R.YLAEK#YEWVDAEAR@.K               | 13.52  | 4.34   | 3.12 | 0.32 |
| P58252_EF2_MOUSE   | Eef2   | Elongation factor 2 OS=N: K.AGIASAR@.R                       | 30.12  | 13.03  | 2.31 | 0.43 |
| P58252_EF2_MOUSE   | Eef2   | Elongation factor 2 OS=N: R.ALLELQEPPEELYQTFQR@.I            | 31.98  | 13.84  | 2.31 | 0.43 |
| P58252_EF2_MOUSE   | Eef2   | Elongation factor 2 OS=N: K.GEGQLSAER@.A                     | 20.33  | 7.42   | 2.74 | 0.36 |
| P58252_EF2_MOUSE   | Eef2   | Elongation factor 2 OS=N: R.GGGQIIPTR@.R                     | 53.60  | 27.54  | 1.95 | 0.51 |
| P58252_EF2_MOUSE   | Eef2   | Elongation factor 2 OS=N: K.GVQVLEIK#HDSVAVGFQWATK#E         | 6.82   | 5.75   | 1.19 | 0.84 |
| P58252_EF2_MOUSE   | Eef2   | Elongation factor 2 OS=N: K.K#HEDLVK#PIQR@.T                 | 14.92  | 3.63   | 4.11 | 0.24 |
| P58252_EF2_MOUSE   | Eef2   | Elongation factor 2 OS=N: K.NPADLPK#L                        | 31.15  | 16.60  | 1.88 | 0.53 |
| P58252_EF2_MOUSE   | Eef2   | Elongation factor 2 OS=N: K.VFDAIM*NFR@.K                    | 14.60  | 6.23   | 2.34 | 0.43 |
| P58252_EF2_MOUSE   | Eef2   | Elongation factor 2 OS=N: R.VFSGVSTGLK#V                     | 40.33  | 13.13  | 3.06 | 0.33 |
| P58252_EF2_MOUSE   | Eef2   | Elongation factor 2 OS=N: K.YEWDVAEAR@.K                     | 12.08  | 3.55   | 3.41 | 0.29 |
| Q9D8Y0_EFH2_MOUSE  | Efh2   | EF-hand domain-contain: R.ADLNQGIGEPQSPSR.R                  | 18.08  | 24.17  | 0.75 | 1.34 |
| Q9D8Y0_EFH2_MOUSE  | Efh2   | EF-hand domain-contain: R.DGFDLDM*ELK#L                      | 32.47  | 40.75  | 0.80 | 1.26 |
| Q9D8Y0_EFH2_MOUSE  | Efh2   | EF-hand domain-contain: R.DGFDLDMELK.L                       | 19.77  | 20.73  | 0.95 | 1.05 |
| Q9D8Y0_EFH2_MOUSE  | Efh2   | EF-hand domain-contain: R.EFLIFR@.K                          | 67.15  | 84.86  | 0.79 | 1.26 |
| Q9D8Y0_EFH2_MOUSE  | Efh2   | EF-hand domain-contain: K.LGAPQTHLGLK#S                      | 78.80  | 90.53  | 0.87 | 1.15 |
| Q9D8Y0_EFH2_MOUSE  | Efh2   | EF-hand domain-contain: R.LSEIDVSTEGVK#G                     | 78.88  | 115.58 | 0.68 | 1.47 |
| Q9D8Y0_EFH2_MOUSE  | Efh2   | EF-hand domain-contain: R.RADLNQIGEPQSPSR.R                  | 21.66  | 29.61  | 0.73 | 1.37 |
| Q9D8Y0_EFH2_MOUSE  | Efh2   | EF-hand domain-contain: R.R@ADLNQIGEPQSPSR@.R                | 4.33   | 3.89   | 1.11 | 0.90 |
| Q9D8Y0_EFH2_MOUSE  | Efh2   | EF-hand domain-contain: R.RVFNPYTEK.E                        | 10.72  | 10.05  | 1.07 | 0.94 |
| Q9D8Y0_EFH2_MOUSE  | Efh2   | EF-hand domain-contain: K.SM*IQEDEDVDFSK.L                   | 33.88  | 42.04  | 0.81 | 1.24 |
| Q9D8Y0_EFH2_MOUSE  | Efh2   | EF-hand domain-contain: K.SMQEDEDVDFSK.L                     | 5.36   | 9.30   | 0.58 | 1.73 |
| Q9D8Y0_EFH2_MOUSE  | Efh2   | EF-hand domain-contain: R.VFNPYTEK.E                         | 56.82  | 74.72  | 0.76 | 1.32 |
| Q9D8Y0_EFH2_MOUSE  | Efh2   | EF-hand domain-contain: K.VQAINVSSR@.F                       | 83.99  | 98.03  | 0.86 | 1.17 |
| Q8C0D5_ETUD1_MOUSE | Eftud1 | Elongation factor Tu GTP: K.IVTLGLK#I                        | 44.30  | 20.67  | 2.14 | 0.47 |
| O08810_U5S1_MOUSE  | Eftud2 | 116 kDa U5 small nuclea: K.AFIPADSFGFTDLR@.T                 | 32.56  | 19.36  | 1.68 | 0.59 |
| O08810_U5S1_MOUSE  | Eftud2 | 116 kDa U5 small nuclea: K.AFIPADSFGFTDLR.T                  | 115.42 | 59.36  | 1.94 | 0.51 |
| O08810_U5S1_MOUSE  | Eftud2 | 116 kDa U5 small nuclea: K.DSIVQGFQWTR@.E                    | 43.44  | 20.16  | 2.15 | 0.46 |
| O08810_U5S1_MOUSE  | Eftud2 | 116 kDa U5 small nuclea: K.FFDDPM*LLELAK#Q                   | 79.38  | 42.09  | 1.89 | 0.53 |
| O08810_U5S1_MOUSE  | Eftud2 | 116 kDa U5 small nuclea: K.FNTT5VVK#I                        | 56.63  | 30.15  | 1.88 | 0.53 |
| O08810_U5S1_MOUSE  | Eftud2 | 116 kDa U5 small nuclea: R.GHVTQDAPIPGSPLYTIK#A              | 71.14  | 44.92  | 1.58 | 0.63 |
| O08810_U5S1_MOUSE  | Eftud2 | 116 kDa U5 small nuclea: K.GLAEDIENNVQITWNR@.K               | 90.19  | 49.45  | 1.82 | 0.55 |
| O08810_U5S1_MOUSE  | Eftud2 | 116 kDa U5 small nuclea: K.GLSEDSVSIK#F                      | 73.61  | 44.18  | 1.67 | 0.60 |
| O08810_U5S1_MOUSE  | Eftud2 | 116 kDa U5 small nuclea: K.IAVEPVNPSELPK#M                   | 180.22 | 111.24 | 1.62 | 0.62 |
| O08810_U5S1_MOUSE  | Eftud2 | 116 kDa U5 small nuclea: K.ILAQVVDVDTSLPR@.T                 | 93.75  | 49.82  | 1.88 | 0.53 |
| O08810_U5S1_MOUSE  | Eftud2 | 116 kDa U5 small nuclea: K.ILDVAWAQEPLHR@.G                  | 231.50 | 124.01 | 1.87 | 0.54 |
| O08810_U5S1_MOUSE  | Eftud2 | 116 kDa U5 small nuclea: K.ILDVAWAQEPLHR.G                   | 22.99  | 13.85  | 1.66 | 0.60 |
| O08810_U5S1_MOUSE  | Eftud2 | 116 kDa U5 small nuclea: R.ISDGVVLHDAAGVGM*LNTER@.L          | 23.06  | 16.28  | 1.42 | 0.71 |
| O08810_U5S1_MOUSE  | Eftud2 | 116 kDa U5 small nuclea: K.ITM*IAEPLK#G                      | 62.80  | 36.30  | 1.73 | 0.58 |
| O08810_U5S1_MOUSE  | Eftud2 | 116 kDa U5 small nuclea: K.ITMIAEPLK#G                       | 19.02  | 11.44  | 1.49 | 0.67 |
| O08810_U5S1_MOUSE  | Eftud2 | 116 kDa U5 small nuclea: K.IYADTFGDINYOQFAK#R                | 17.57  | 54.14  | 1.77 | 0.57 |
| O08810_U5S1_MOUSE  | Eftud2 | 116 kDa U5 small nuclea: R.K#GLSEDSVSIK#F                    | 17.82  | 14.23  | 1.25 | 0.80 |
| O08810_U5S1_MOUSE  | Eftud2 | 116 kDa U5 small nuclea: K.LGEFFQTK#Y                        | 95.60  | 58.77  | 1.63 | 0.61 |
| O08810_U5S1_MOUSE  | Eftud2 | 116 kDa U5 small nuclea: R.LWGDYIYFNPK#T                     | 33.88  | 21.01  | 1.61 | 0.62 |
| O08810_U5S1_MOUSE  | Eftud2 | 116 kDa U5 small nuclea: R.LWISVAR.Y                         | 103.90 | 61.80  | 1.68 | 0.59 |
| O08810_U5S1_MOUSE  | Eftud2 | 116 kDa U5 small nuclea: K.M*YSEIDIK#V                       | 32.94  | 20.50  | 1.61 | 0.62 |
| O08810_U5S1_MOUSE  | Eftud2 | 116 kDa U5 small nuclea: K.QDVVLYNPM*.-                      | 16.48  | 16.48  | 1.00 | 1.00 |
| O08810_U5S1_MOUSE  | Eftud2 | 116 kDa U5 small nuclea: K.R@LVGDYIFNPK#T                    | 12.89  | 4.89   | 2.64 | 0.38 |
| O08810_U5S1_MOUSE  | Eftud2 | 116 kDa U5 small nuclea: K.SIVIR@PLEPQAPHLAR@.E              | 29.47  | 19.43  | 1.52 | 0.66 |
| O08810_U5S1_MOUSE  | Eftud2 | 116 kDa U5 small nuclea: R.SIWAFGPDATGPNILVDDTLPSVDK#A       | 4.41   | 2.59   | 1.70 | 0.59 |
| O08810_U5S1_MOUSE  | Eftud2 | 116 kDa U5 small nuclea: K.STPVTVLPDTR#G                     | 118.18 | 90.15  | 1.31 | 0.76 |
| O08810_U5S1_MOUSE  | Eftud2 | 116 kDa U5 small nuclea: K.SYLFNIM*DTPGHVNFSDVETAGLR@.I      | 83.93  | 41.05  | 2.04 | 0.49 |
| O08810_U5S1_MOUSE  | Eftud2 | 116 kDa U5 small nuclea: K.TATITEPR@.G                       | 114.11 | 71.42  | 1.60 | 0.63 |
| O08810_U5S1_MOUSE  | Eftud2 | 116 kDa U5 small nuclea: R.THITQGOAFLSFFVHHWQIVPGDPLDK#S     | 6.82   | 4.03   | 1.69 | 0.59 |
| O08810_U5S1_MOUSE  | Eftud2 | 116 kDa U5 small nuclea: R.TLDELGHILTKELK.L                  | 70.45  | 29.63  | 2.38 | 0.42 |
| O08810_U5S1_MOUSE  | Eftud2 | 116 kDa U5 small nuclea: R.VPAGNVLVIEGVDDQPIVK#T             | 58.63  | 38.17  | 1.54 | 0.65 |
| O08810_U5S1_MOUSE  | Eftud2 | 116 kDa U5 small nuclea: R.VVYSAFIM*ATPR@.L                  | 26.96  | 26.48  | 1.02 | 0.98 |
| O08810_U5S1_MOUSE  | Eftud2 | 116 kDa U5 small nuclea: K.YDWDLLAAR@.S                      | 100.25 | 50.35  | 1.99 | 0.50 |
| O08810_U5S1_MOUSE  | Eftud2 | 116 kDa U5 small nuclea: R.YHIEVNR@.V                        | 41.75  | 22.50  | 1.86 | 0.54 |
| O08810_U5S1_MOUSE  | Eftud2 | 116 kDa U5 small nuclea: K.YYPTAEVYGPVEVITQEDTOPLTEPIK#PVK#T | 27.70  | 12.27  | 2.26 | 0.44 |
| O08810_U5S1_MOUSE  | Eftud2 | 116 kDa U5 small nuclea: K.AFIPADSFGFTDLR.T                  | 80.22  | 36.54  | 2.20 | 0.46 |
| O08810_U5S1_MOUSE  | Eftud2 | 116 kDa U5 small nuclea: K.DLDEDEDEDVGEHDDHPGM*EVLVHEDKHK#Y  | 4.71   | 1.44   | 3.26 | 0.31 |
| O08810_U5S1_MOUSE  | Eftud2 | 116 kDa U5 small nuclea: K.DSIVQGFQWTR@.E                    | 47.61  | 13.05  | 2.12 | 0.47 |
| O08810_U5S1_MOUSE  | Eftud2 | 116 kDa U5 small nuclea: K.FFDDPM*LLELAK#Q                   | 39.30  | 14.41  | 2.73 | 0.37 |
| O08810_U5S1_MOUSE  | Eftud2 | 116 kDa U5 small nuclea: K.GLAEDIENNVQITWNR@.K               | 9.20   | 2.53   | 3.64 | 0.27 |
| O08810_U5S1_MOUSE  | Eftud2 | 116 kDa U5 small nuclea: K.IAVEPVNPSELPK#M                   | 115.46 | 52.05  | 2.22 | 0.45 |
| O08810_U5S1_MOUSE  | Eftud2 | 116 kDa U5 small nuclea: K.ILAQVVDVDTSLPR.T                  | 73.52  | 18.82  | 3.91 | 0.26 |
| O08810_U5S1_MOUSE  | Eftud2 | 116 kDa U5 small nuclea: K.ILDVAWAQEPLHR@.G                  | 119.99 | 54.52  | 2.20 | 0.45 |
| O08810_U5S1_MOUSE  | Eftud2 | 116 kDa U5 small nuclea: R.ISDGVVLHDAAGVGM*LNTER@.L          | 4.04   | 3.79   | 1.07 | 0.94 |
| O08810_U5S1_MOUSE  | Eftud2 | 116 kDa U5 small nuclea: K.ITM*IAEPLK#G                      | 32.58  | 13.08  | 2.49 | 0.40 |
| O08810_U5S1_MOUSE  | Eftud2 | 116 kDa U5 small nuclea: K.ITMIAEPLK#G                       | 11.43  | 5.46   | 2.09 | 0.48 |
| O08810_U5S1_MOUSE  | Eftud2 | 116 kDa U5 small nuclea: K.IYADTFGDINYOQFAK#R                | 56.80  | 20.59  | 2.76 | 0.36 |

|                     |         |                                                                |       |       |      |      |
|---------------------|---------|----------------------------------------------------------------|-------|-------|------|------|
| O08810_U5S1_MOUSE   | Eftud2  | 116 kDa U5 small nuclea R.KHGLSEDSVSK#.F                       | 7.98  | 63.73 | 0.13 | 7.99 |
| O08810_U5S1_MOUSE   | Eftud2  | 116 kDa U5 small nuclea K.LGFEFQTK.Y                           | 51.76 | 19.92 | 2.60 | 0.38 |
| O08810_U5S1_MOUSE   | Eftud2  | 116 kDa U5 small nuclea R.LWGDYVFNPK#.T                        | 14.83 | 7.55  | 1.96 | 0.51 |
| O08810_U5S1_MOUSE   | Eftud2  | 116 kDa U5 small nuclea K.M*YSEIDIK#.V                         | 16.59 | 9.65  | 1.72 | 0.58 |
| O08810_U5S1_MOUSE   | Eftud2  | 116 kDa U5 small nuclea K.STPVTVPLPDTK#.G                      | 80.35 | 47.30 | 1.70 | 0.59 |
| O08810_U5S1_MOUSE   | Eftud2  | 116 kDa U5 small nuclea K.SYLFNIM*DTPGHVNFSDVETAGLR@.I         | 50.74 | 21.72 | 2.34 | 0.43 |
| O08810_U5S1_MOUSE   | Eftud2  | 116 kDa U5 small nuclea R.VPAGNWLVEIGVDQPIVK#.T                | 38.41 | 18.52 | 2.07 | 0.48 |
| O08810_U5S1_MOUSE   | Eftud2  | 116 kDa U5 small nuclea R.VVYSAFIM*ATPR@.L                     | 14.35 | 8.71  | 1.65 | 0.61 |
| O08810_U5S1_MOUSE   | Eftud2  | 116 kDa U5 small nuclea K.YDWDLLAAR@.S                         | 46.76 | 20.08 | 2.33 | 0.43 |
| O08810_U5S1_MOUSE   | Eftud2  | 116 kDa U5 small nuclea K.YYPTAEVYGPVEVETIQEEDTOPLEIHKPVK.T    | 20.29 | 10.62 | 1.91 | 0.52 |
| P08046_EGR1_MOUSE   | Egr1    | Early growth response pr K.AFATQSGSGLK#.A                      | 21.08 | 7.55  | 2.79 | 0.36 |
| P08046_EGR1_MOUSE   | Egr1    | Early growth response pr K.AFATQSGSGLK#.A                      | 16.36 | 8.86  | 1.85 | 0.54 |
| P08046_EGR1_MOUSE   | Egr1    | Early growth response pr R.TQOQSLTPLSTIK#.A                    | 11.58 | 8.61  | 1.34 | 0.74 |
| Q9WVK4_EHD1_MOUSE   | Ehd1    | EH domain-containing pr K.ELVNNLGEIQK#.I                       | 23.18 | 6.19  | 3.75 | 0.27 |
| Q9WVK4_EHD1_MOUSE   | Ehd1    | EH domain-containing pr R.IGPEPTTDSFIAVM*HGPTEGVVPGNALVDPDR@.R | 4.38  | 1.82  | 2.41 | 0.42 |
| Q9WVK4_EHD1_MOUSE   | Ehd1    | EH domain-containing pr R.IILLFDAHKHLDISDFSEVVK#.A             | 14.91 | 6.86  | 2.17 | 0.46 |
| Q9WVK4_EHD1_MOUSE   | Ehd1    | EH domain-containing pr K.IINTPEVVR@.V                         | 23.58 | 9.74  | 2.42 | 0.41 |
| Q9WVK4_EHD1_MOUSE   | Ehd1    | EH domain-containing pr K.LDISDFSEVVK#.A                       | 9.06  | 9.45  | 0.96 | 1.04 |
| Q9WVK4_EHD1_MOUSE   | Ehd1    | EH domain-containing pr K.LFEAEQDLFK#DIQSLPR@.N                | 12.97 | 2.93  | 4.43 | 0.23 |
| Q9WVK4_EHD1_MOUSE   | Ehd1    | EH domain-containing pr K.LLDTVDDM*LANDIAR@.L                  | 6.59  | 2.91  | 2.27 | 0.44 |
| Q9WVK4_EHD1_MOUSE   | Ehd1    | EH domain-containing pr K.M*QELLQTDQFSK#.F                     | 7.30  | 2.62  | 2.78 | 0.36 |
| Q9WVK4_EHD1_MOUSE   | Ehd1    | EH domain-containing pr R.QEESLM*PSQAVK#.G                     | 8.80  | 4.12  | 2.14 | 0.47 |
| Q9WVK4_EHD1_MOUSE   | Ehd1    | EH domain-containing pr K.ADJQLMQLM*RV                         | 18.64 | 5.92  | 3.15 | 0.32 |
| Q9WVK4_EHD1_MOUSE   | Ehd1    | EH domain-containing pr K.ELVNNLGEIQK#.I                       | 31.12 | 10.32 | 3.02 | 0.33 |
| Q9WVK4_EHD1_MOUSE   | Ehd1    | EH domain-containing pr R.FHEFHSALAEADDFKN#PM*VLLVGQYSGK#.T    | 7.22  | 2.55  | 2.83 | 0.35 |
| Q9WVK4_EHD1_MOUSE   | Ehd1    | EH domain-containing pr K.FOALK#PK#.L                          | 17.51 | 6.35  | 2.76 | 0.36 |
| Q9WVK4_EHD1_MOUSE   | Ehd1    | EH domain-containing pr R.IGPEPTTDSFIAVM*HGPTEGVVPGNALVDPDR@.R | 6.44  | 2.27  | 2.84 | 0.35 |
| Q9WVK4_EHD1_MOUSE   | Ehd1    | EH domain-containing pr R.IILLFDAHKH.L                         | 13.63 | 4.01  | 3.40 | 0.29 |
| Q9WVK4_EHD1_MOUSE   | Ehd1    | EH domain-containing pr R.IILLFDAHKHLDISDFSEVVK#.A             | 11.77 | 2.85  | 4.13 | 0.24 |
| Q9WVK4_EHD1_MOUSE   | Ehd1    | EH domain-containing pr K.IINTPEVVR@.V                         | 30.95 | 11.58 | 2.67 | 0.37 |
| Q9WVK4_EHD1_MOUSE   | Ehd1    | EH domain-containing pr R.KHNLDIK#.R                           | 16.93 | 7.27  | 2.33 | 0.43 |
| Q9WVK4_EHD1_MOUSE   | Ehd1    | EH domain-containing pr K.LFEAEQDLFK#DIQSLPR@.N                | 17.96 | 6.44  | 2.79 | 0.36 |
| Q9WVK4_EHD1_MOUSE   | Ehd1    | EH domain-containing pr K.LLDTVDDM*LANDIAR@.L                  | 10.68 | 2.80  | 3.81 | 0.26 |
| Q9WVK4_EHD1_MOUSE   | Ehd1    | EH domain-containing pr K.M*QELLQTDQFSK#.F                     | 9.88  | 4.08  | 2.42 | 0.41 |
| Q9WVK4_EHD1_MOUSE   | Ehd1    | EH domain-containing pr R.QEESLM*PSQAVK#.G                     | 14.25 | 4.07  | 3.50 | 0.29 |
| Q9WVK4_EHD1_MOUSE   | Ehd1    | EH domain-containing pr K.ELVNNLGEIQK#.I                       | 11.89 | 3.29  | 3.61 | 0.28 |
| Q9WVK4_EHD1_MOUSE   | Ehd1    | EH domain-containing pr K.IINTPEVVR@.V                         | 8.68  | 3.35  | 2.59 | 0.39 |
| Q9WVK4_EHD1_MOUSE   | Ehd1    | EH domain-containing pr K.LFEAEQDLFK#DIQSLPR@.N                | 7.18  | 2.36  | 3.04 | 0.33 |
| Q9WVK4_EHD1_MOUSE   | Ehd1    | EH domain-containing pr K.M*QELLQTDQFSK#.F                     | 4.00  | 2.41  | 1.66 | 0.60 |
| Q8BH64_EHD2_MOUSE   | Ehd2    | EH domain-containing pr K.ADM*VETQQLM*RV                       | 8.82  | 3.57  | 2.47 | 0.40 |
| Q8BH64_EHD2_MOUSE   | Ehd2    | EH domain-containing pr R.FGFSHSALEADDFDKG#PM*VLVAGQYSGK#.T    | 11.12 | 6.02  | 1.85 | 0.54 |
| Q8BH64_EHD2_MOUSE   | Ehd2    | EH domain-containing pr K.LEGHLPTLNR@.R                        | 32.45 | 18.89 | 1.72 | 0.58 |
| Q8BH64_EHD2_MOUSE   | Ehd2    | EH domain-containing pr R.LFEAEQDLFR@.D                        | 43.65 | 22.84 | 1.91 | 0.52 |
| Q8BH64_EHD2_MOUSE   | Ehd2    | EH domain-containing pr K.LLEALDDM*LAQDIK#.L                   | 16.20 | 7.62  | 1.75 | 0.57 |
| Q8BH64_EHD2_MOUSE   | Ehd2    | EH domain-containing pr K.LNPFNGTFLNR@.F                       | 13.36 | 9.44  | 1.72 | 0.58 |
| Q8BH64_EHD2_MOUSE   | Ehd2    | EH domain-containing pr K.LPNSVLGR@.I                          | 26.63 | 14.62 | 1.82 | 0.55 |
| Q8BH64_EHD2_MOUSE   | Ehd2    | EH domain-containing pr K.LPVIK#.I                             | 24.35 | 14.02 | 1.74 | 0.58 |
| Q8BH64_EHD2_MOUSE   | Ehd2    | EH domain-containing pr R.QEELSEVAGVQGFEGTR@.M                 | 2.95  | 1.99  | 1.48 | 0.67 |
| Q8BH64_EHD2_MOUSE   | Ehd2    | EH domain-containing pr K.SQAEDEIFYNLAPADGK#.L                 | 13.65 | 7.56  | 1.81 | 0.55 |
| Q8BH64_EHD2_MOUSE   | Ehd2    | EH domain-containing pr K.TSFIQLLEQVPGSR@.V                    | 27.70 | 13.71 | 2.02 | 0.50 |
| Q8BH64_EHD2_MOUSE   | Ehd2    | EH domain-containing pr K.LLEALDDM*LAQDIK#.L                   | 6.62  | 3.68  | 1.80 | 0.56 |
| Q8BH64_EHD2_MOUSE   | Ehd2    | EH domain-containing pr K.LPNSVLGR@.I                          | 13.63 | 6.80  | 2.01 | 0.50 |
| Q8BH64_EHD2_MOUSE   | Ehd2    | EH domain-containing pr K.TSFIQLLEQVPGSR@.V                    | 16.68 | 11.03 | 1.51 | 0.66 |
| Q9EQP2_EHD4_MOUSE   | Ehd4    | EH domain-containing pr R.LFEAEQDLFR@.D                        | 5.82  | 4.53  | 1.28 | 0.78 |
| Q9EQP2_EHD4_MOUSE   | Ehd4    | EH domain-containing pr K.AM*QEQLENYDFTK#.F                    | 14.65 | 7.71  | 1.90 | 0.53 |
| Q9EQP2_EHD4_MOUSE   | Ehd4    | EH domain-containing pr R.DIQSLPK#.A                           | 23.86 | 10.77 | 2.22 | 0.45 |
| Q9EQP2_EHD4_MOUSE   | Ehd4    | EH domain-containing pr R.EYQJAGDFPEVK#.A                      | 25.47 | 9.83  | 2.59 | 0.39 |
| Q9EQP2_EHD4_MOUSE   | Ehd4    | EH domain-containing pr R.FGNFLNR@.F                           | 23.50 | 7.39  | 3.18 | 0.31 |
| Q9EQP2_EHD4_MOUSE   | Ehd4    | EH domain-containing pr R.FHEFHSALAEADDFDKG#PM*ILLVQYSGK#.T    | 8.62  | 2.28  | 3.77 | 0.26 |
| Q9EQP2_EHD4_MOUSE   | Ehd4    | EH domain-containing pr R.LFEAEQDLFR@.D                        | 36.90 | 12.78 | 2.89 | 0.35 |
| Q9EQP2_EHD4_MOUSE   | Ehd4    | EH domain-containing pr K.LIEAVDMM*LTNK#.I                     | 15.40 | 8.04  | 1.92 | 0.52 |
| Q9EQP2_EHD4_MOUSE   | Ehd4    | EH domain-containing pr R.LPEIYVQLQR@.E                        | 10.95 | 3.72  | 2.94 | 0.34 |
| Q9EQP2_EHD4_MOUSE   | Ehd4    | EH domain-containing pr R.SGGM*DAVQVTGGLR@.S                   | 13.84 | 8.80  | 1.57 | 0.64 |
| Q9EQP2_EHD4_MOUSE   | Ehd4    | EH domain-containing pr K.SISIDSPGILSSEK#.Q                    | 32.15 | 13.45 | 2.39 | 0.42 |
| Q9EQP2_EHD4_MOUSE   | Ehd4    | EH domain-containing pr K.AM*QEQLENYDFTK#.F                    | 5.59  | 3.11  | 1.80 | 0.56 |
| Q9EQP2_EHD4_MOUSE   | Ehd4    | EH domain-containing pr R.LFEAEQDLFR@.D                        | 13.34 | 4.28  | 3.12 | 0.32 |
| Q9EQP2_EHD4_MOUSE   | Ehd4    | EH domain-containing pr R.SGGM*DAVQVTGGLR@.S                   | 8.82  | 2.78  | 3.17 | 0.32 |
| Q9EQP2_EHD4_MOUSE   | Ehd4    | EH domain-containing pr K.SISIDSPGILSSEK#.Q                    | 12.07 | 4.77  | 2.53 | 0.40 |
| Q5DW34_EHMT1_MOUSE  | Ehmt1   | Histone-lysine N-methyl K.ADTTSTVTLAPGQEK#.S                   | 22.35 | 6.53  | 3.42 | 0.29 |
| Q5DW34_EHMT1_MOUSE  | Ehmt1   | Histone-lysine N-methyl R.ADTTSTVTLAPGQEK#.S                   | 14.33 | 9.73  | 1.47 | 0.68 |
| Q5DW34_EHMT1_MOUSE  | Ehmt1   | Histone-lysine N-methyl R.DSAPDK#PVAVEK#.T                     | 13.99 | 6.61  | 2.12 | 0.47 |
| Q5DW34_EHMT1_MOUSE  | Ehmt1   | Histone-lysine N-methyl R.IAFSSTR@.L                           | 18.43 | 8.28  | 2.22 | 0.45 |
| Q5DW34_EHMT1_MOUSE  | Ehmt1   | Histone-lysine N-methyl R.LIQAGEQLGFDYGER@.F                   | 15.10 | 4.62  | 3.27 | 0.31 |
| Q5DW34_EHMT1_MOUSE  | Ehmt1   | Histone-lysine N-methyl K.VLLM*LVGDVFNPK#.M                    | 6.87  | 4.72  | 1.46 | 0.69 |
| Q5DW34_EHMT1_MOUSE  | Ehmt1   | Histone-lysine N-methyl K.ADTTSTVTLAPGQEK#.S                   | 14.67 | 4.37  | 3.36 | 0.30 |
| Q5DW34_EHMT1_MOUSE  | Ehmt1   | Histone-lysine N-methyl R.ADTTSTVTLAPGAPEDER@.S                | 9.11  | 5.23  | 1.74 | 0.57 |
| Q5DW34_EHMT1_MOUSE  | Ehmt1   | Histone-lysine N-methyl R.DSAPDK#PVAVEK#.T                     | 12.04 | 3.57  | 3.37 | 0.30 |
| Q5DW34_EHMT1_MOUSE  | Ehmt1   | Histone-lysine N-methyl R.LIQAGEQLGFDYGER@.F                   | 12.84 | 4.67  | 2.75 | 0.36 |
| A2CG76_A2CG76_MOUSE | Ehmt2   | Histone-lysine N-methyl R.GVSNDTSSLETER@.G                     | 8.49  | 2.91  | 2.92 | 0.34 |
| A2CG76_A2CG76_MOUSE | Ehmt2   | Histone-lysine N-methyl R.LDPPELLLDLSSLPINT.-                  | 13.46 | 13.46 | 1.00 | 1.00 |
| A2CG76_A2CG76_MOUSE | Ehmt2   | Histone-lysine N-methyl R.TGEELGFDYDRFWDIK.S                   | 11.53 | 4.01  | 2.87 | 0.35 |
| A2CG76_A2CG76_MOUSE | Ehmt2   | Histone-lysine N-methyl R.TPLM*EAVVNNHLEVAR@.Y                 | 11.77 | 5.51  | 2.14 | 0.47 |
| A2CG76_A2CG76_MOUSE | Ehmt2   | Histone-lysine N-methyl K.VILM*LDLNDLPNFQSDQSK#.R              | 2.35  | 3.66  | 0.64 | 1.56 |
| A2CG76_A2CG76_MOUSE | Ehmt2   | Histone-lysine N-methyl K.VILM*LDLNDLPNFQSDQSK#.R              | 11.05 | 4.68  | 2.36 | 0.42 |
| A2CG76_A2CG76_MOUSE | Ehmt2   | Histone-lysine N-methyl R.GVSNDTSSLETER@.G                     | 6.78  | 1.40  | 4.84 | 0.21 |
| A2CG76_A2CG76_MOUSE | Ehmt2   | Histone-lysine N-methyl R.LDPPELLLDLSSLPINT.-                  | 16.47 | 16.47 | 1.00 | 1.00 |
| A2CG76_A2CG76_MOUSE | Ehmt2   | Histone-lysine N-methyl R.NKHEGDTAWDLTPER@.S                   | 8.18  | 3.07  | 2.66 | 0.38 |
| A2CG76_A2CG76_MOUSE | Ehmt2   | Histone-lysine N-methyl R.TPLM*EAVVNNHLEVAR@.Y                 | 13.41 | 5.15  | 2.61 | 0.38 |
| A2CG76_A2CG76_MOUSE | Ehmt2   | Histone-lysine N-methyl K.VILM*LDLNDLPNFQSDQSK#.R              | 10.93 | 3.47  | 3.15 | 0.32 |
| Q9CXU9_EIF1B_MOUSE  | Eif1b   | Eukaryotic translation in K.TLTTVQGIADYDK#.K                   | 4.97  | 2.53  | 1.96 | 0.51 |
| Q03963_E2AK2_MOUSE  | Eif2ak2 | Interferon-induced, doul R.DLK#PGNIFLVDER@.H                   | 32.93 | 22.57 | 1.46 | 0.59 |
| Q03963_E2AK2_MOUSE  | Eif2ak2 | Interferon-induced, doul K.GDFSNDIFDNK#.E                      | 4.12  | 2.12  | 1.95 | 0.61 |
| Q03963_E2AK2_MOUSE  | Eif2ak2 | Interferon-induced, doul K.IGDGFLATALENDGK#.S                  | 40.94 | 25.97 | 1.58 | 0.63 |
| Q03963_E2AK2_MOUSE  | Eif2ak2 | Interferon-induced, doul K.IGQTM*YGTSGVYTK#.Q                  | 37.66 | 48.25 | 0.78 | 1.28 |
| Q03963_E2AK2_MOUSE  | Eif2ak2 | Interferon-induced, doul R.TGTLQYM*SPQLFLK#.H                  | 12.01 | 6.68  | 1.80 | 0.56 |
| Q03963_E2AK2_MOUSE  | Eif2ak2 | Interferon-induced, doul R.DLK#PGNIFLVDER@.H                   | 38.62 | 14.02 | 2.75 | 0.36 |
| Q03963_E2AK2_MOUSE  | Eif2ak2 | Interferon-induced, doul K.DR@PETSILK#.T                       | 18.52 | 11.96 | 1.55 | 0.65 |
| Q03963_E2AK2_MOUSE  | Eif2ak2 | Interferon-induced, doul R.FTFQVLIDK#EFPK#.G                   | 9.05  | 4.98  | 1.82 | 0.55 |
| Q03963_E2AK2_MOUSE  | Eif2ak2 | Interferon-induced, doul K.IGDGFLATALENDGK#.S                  | 30.21 | 14.17 | 2.13 | 0.47 |
| Q03963_E2AK2_MOUSE  | Eif2ak2 | Interferon-induced, doul K.IGQTM*YGTSGVYTK#.Q                  | 13.40 | 23.25 | 0.58 | 1.73 |
| Q03963_E2AK2_MOUSE  | Eif2ak2 | Interferon-induced, doul R.TGTLQYM*SPQLFLK#.H                  | 11.32 | 4.49  | 2.52 | 0.40 |
| Q03963_E2AK2_MOUSE  | Eif2ak2 | Interferon-induced, doul R.DLK#PGNIFLVDER@.H                   | 19.07 | 8.54  | 2.23 | 0.45 |
| Q03963_E2AK2_MOUSE  | Eif2ak2 | Interferon-induced, doul K.IGDGFLATALENDGK#.S                  | 21.48 | 4.91  | 4.37 | 0.23 |



|                     |         |                                                                           |        |       |       |      |
|---------------------|---------|---------------------------------------------------------------------------|--------|-------|-------|------|
| Q03963_E2AK2_MOUSE  | Eif2ak2 | Interferon-induced, doul R.TGTLQYM*SPEQLFK#.H                             | 5.66   | 2.31  | 2.45  | 0.41 |
| Q99LC8_EI2BA_MOUSE  | Eif2b1  | Translation initiation fac K.ADLVIVGAEGVWENGIIINK#.I                      | 4.97   | 1.57  | 3.17  | 0.32 |
| Q99LC8_EI2BA_MOUSE  | Eif2b1  | Translation initiation fac R.ANLTVAIK#.T                                  | 16.79  | 5.84  | 2.87  | 0.35 |
| Q99LC8_EI2BA_MOUSE  | Eif2b1  | Translation initiation fac K.AQNK#PYYVAESFK#.F                            | 16.67  | 9.58  | 1.74  | 0.57 |
| Q99LC8_EI2BA_MOUSE  | Eif2b1  | Translation initiation fac R.VLEEAVAAK#.K                                 | 39.37  | 17.54 | 2.25  | 0.45 |
| Q99LC8_EI2BA_MOUSE  | Eif2b1  | Translation initiation fac K.AQNK#PYYVAESFK#.F                            | 6.40   | 2.72  | 2.36  | 0.42 |
| Q99LC8_EI2BA_MOUSE  | Eif2b1  | Translation initiation fac R.FISLTSLEYSOYSKR.C                            | 6.03   | 3.68  | 1.64  | 0.61 |
| Q99LC8_EI2BA_MOUSE  | Eif2b1  | Translation initiation fac K.AQNK#PYYVAESFK#.F                            | 15.03  | 3.78  | 3.97  | 0.25 |
| Q99LC8_EI2BA_MOUSE  | Eif2b1  | Translation initiation fac R.VLEEAVAAK#.K                                 | 21.25  | 9.32  | 2.28  | 0.44 |
| Q99LD9_EI2BB_MOUSE  | Eif2b2  | Translation initiation fac K.FVAPEEVLPTFEGDILEK#.V                        | 20.34  | 15.48 | 1.96  | 0.51 |
| Q99LD9_EI2BB_MOUSE  | Eif2b2  | Translation initiation fac K.FVAPEEVLPTFEGDILEK#.V                        | 24.91  | 14.53 | 1.71  | 0.58 |
| Q99LD9_EI2BB_MOUSE  | Eif2b2  | Translation initiation fac R.M*TAQPSSETVGNM*VR@.R                         | 19.69  | 11.72 | 1.68  | 0.60 |
| Q99LD9_EI2BB_MOUSE  | Eif2b2  | Translation initiation fac R.SDESDQQLSHK#.L                               | 5.33   | 3.06  | 1.74  | 0.57 |
| Q99LD9_EI2BB_MOUSE  | Eif2b2  | Translation initiation fac K.FVAPEEVLPTFEGDILEK#.V                        | 10.84  | 3.70  | 2.93  | 0.34 |
| Q3UKV0_Q3UKV0_MOUSE | Eif2b3  | Protein Eif2b3 OS=Mus m R.SELIYPLVR@.K                                    | 15.03  | 10.09 | 1.49  | 0.67 |
| Q3UKV0_Q3UKV0_MOUSE | Eif2b3  | Protein Eif2b3 OS=Mus m R.SLDIYFIK#.K                                     | 11.26  | 6.33  | 1.78  | 0.56 |
| Q61749_EI2BD_MOUSE  | Eif2b4  | Translation initiation fac R.AGVPTSLLIPAAASYVLEPVSK#.V                    | 25.41  | 22.75 | 1.12  | 0.90 |
| Q61749_EI2BD_MOUSE  | Eif2b4  | Translation initiation fac R.AGVPTSLLIPAAASYVLEPVSK#.V                    | 5.85   | 7.88  | 0.74  | 1.35 |
| Q61749_EI2BD_MOUSE  | Eif2b4  | Translation initiation fac K.GADQEIIGSAVSAQAQR.Q                          | 17.19  | 13.10 | 1.31  | 0.76 |
| Q61749_EI2BD_MOUSE  | Eif2b4  | Translation initiation fac K.IVLAQAQNSR@.F                                | 23.96  | 21.12 | 1.13  | 0.88 |
| Q61749_EI2BD_MOUSE  | Eif2b4  | Translation initiation fac R.LGLQYSQGLISGSNAR.C                           | 20.32  | 8.41  | 2.42  | 0.41 |
| Q61749_EI2BD_MOUSE  | Eif2b4  | Translation initiation fac R.VGTAQLALVAR@.A                               | 15.12  | 7.80  | 1.94  | 0.52 |
| Q61749_EI2BD_MOUSE  | Eif2b4  | Translation initiation fac K.VLSFLSHLPQYSR@.Q                             | 18.71  | 10.33 | 1.81  | 0.55 |
| Q61749_EI2BD_MOUSE  | Eif2b4  | Translation initiation fac R.AGVPTSLLIPAAASYVLEPVSK#.V                    | 23.97  | 9.86  | 2.43  | 0.41 |
| Q61749_EI2BD_MOUSE  | Eif2b4  | Translation initiation fac R.AGVPTSLLIPAAASYVLEPVSK#.V                    | 7.07   | 4.97  | 1.42  | 0.70 |
| Q61749_EI2BD_MOUSE  | Eif2b4  | Translation initiation fac K.GADQEIIGSAVSAQAQR@.Q                         | 10.87  | 6.57  | 1.65  | 0.60 |
| Q61749_EI2BD_MOUSE  | Eif2b4  | Translation initiation fac K.IVLAQAQNSR@.F                                | 28.26  | 12.13 | 2.33  | 0.43 |
| Q61749_EI2BD_MOUSE  | Eif2b4  | Translation initiation fac R.LGLQYSQGLISGSNAR@.C                          | 10.04  | 6.52  | 1.54  | 0.65 |
| Q61749_EI2BD_MOUSE  | Eif2b4  | Translation initiation fac R.VGTAQLALVAR@.A                               | 13.39  | 8.20  | 1.63  | 0.61 |
| Q61749_EI2BD_MOUSE  | Eif2b4  | Translation initiation fac R.AGVPTSLLIPAAASYVLEPVSK#.V                    | 14.95  | 4.29  | 3.49  | 0.29 |
| Q61749_EI2BD_MOUSE  | Eif2b4  | Translation initiation fac R.ELPQGGQLGTAQEK#.L                            | 6.56   | 3.21  | 2.04  | 0.49 |
| Q61749_EI2BD_MOUSE  | Eif2b4  | Translation initiation fac K.GADQEIIGSAVSAQAQR@.Q                         | 10.66  | 5.90  | 1.81  | 0.55 |
| Q61749_EI2BD_MOUSE  | Eif2b4  | Translation initiation fac R.LGLQYSQGLISGSNAR@.C                          | 9.13   | 4.17  | 2.19  | 0.46 |
| Q61749_EI2BD_MOUSE  | Eif2b4  | Translation initiation fac R.VGTAQLALVAR@.A                               | 16.84  | 6.07  | 2.78  | 0.36 |
| Q8CHW4_EI2BE_MOUSE  | Eif2b5  | Translation initiation fac R.VFQNEVLGTLQR@.G                              | 20.14  | 11.06 | 1.82  | 0.55 |
| Q8CHW4_EI2BE_MOUSE  | Eif2b5  | Translation initiation fac R.VFQNEVLGTLQR@.G                              | 10.54  | 3.72  | 2.84  | 0.35 |
| Q6ZWX6_IF2A_MOUSE   | Eif2s1  | Eukaryotic translation in R.ENAEVDGDDDAEEM*EAK#.A                         | 6.94   | 2.48  | 2.80  | 0.36 |
| Q6ZWX6_IF2A_MOUSE   | Eif2s1  | Eukaryotic translation in R.EVLININNR@.R                                  | 7.74   | 36.10 | 0.21  | 4.66 |
| Q6ZWX6_IF2A_MOUSE   | Eif2s1  | Eukaryotic translation in R.GVFNQVM*EPK#.V                                | 11.59  | 7.92  | 1.46  | 0.68 |
| Q6ZWX6_IF2A_MOUSE   | Eif2s1  | Eukaryotic translation in R.LER@ENAEVDGDDDAEEM*EAK#.A                     | 9.42   | 4.74  | 1.99  | 0.50 |
| Q6ZWX6_IF2A_MOUSE   | Eif2s1  | Eukaryotic translation in K.R@PGYGVADAFK#.H                               | 10.74  | 9.07  | 1.18  | 0.84 |
| Q6ZWX6_IF2A_MOUSE   | Eif2s1  | Eukaryotic translation in R.TEGLSVLQAM*AVIK#.E                            | 23.82  | 9.23  | 2.58  | 0.39 |
| Q6ZWX6_IF2A_MOUSE   | Eif2s1  | Eukaryotic translation in R.TEGLSVLQAM*AVIK#.E                            | 8.94   | 5.37  | 1.66  | 0.60 |
| Q6ZWX6_IF2A_MOUSE   | Eif2s1  | Eukaryotic translation in K.VVTDTEDELAR.Q                                 | 99.74  | 52.57 | 1.90  | 0.53 |
| Q6ZWX6_IF2A_MOUSE   | Eif2s1  | Eukaryotic translation in R.YVM*TTTTLR@.T                                 | 11.92  | 11.18 | 1.60  | 0.62 |
| Q99L45_IF2B_MOUSE   | Eif2s2  | Eukaryotic translation in K.DASDLDLDFNFFNQK#.K                            | 14.13  | 6.04  | 2.34  | 0.43 |
| Q99L45_IF2B_MOUSE   | Eif2s2  | Eukaryotic translation in R.DTYTELLNR.V                                   | 38.26  | 23.61 | 1.62  | 0.62 |
| Q99L45_IF2B_MOUSE   | Eif2s2  | Eukaryotic translation in K.IESDAQEPAEPEDDLDIM*LGNKHK#.K                  | 11.43  | 6.64  | 1.72  | 0.58 |
| Q99L45_IF2B_MOUSE   | Eif2s2  | Eukaryotic translation in R.KHK#DASDLDLDFNFFNQK#.K                        | 13.62  | 1.24  | 10.49 | 0.10 |
| Q99L45_IF2B_MOUSE   | Eif2s2  | Eukaryotic translation in K.QIENVLR@.R                                    | 18.02  | 19.54 | 1.98  | 0.51 |
| Q99L45_IF2B_MOUSE   | Eif2s2  | Eukaryotic translation in R.SPDTLQK#.D                                    | 57.22  | 29.13 | 1.96  | 0.51 |
| Q99L45_IF2B_MOUSE   | Eif2s2  | Eukaryotic translation in K.TGFQAVTGR#.R                                  | 67.25  | 38.44 | 1.75  | 0.57 |
| Q99L45_IF2B_MOUSE   | Eif2s2  | Eukaryotic translation in R.VFNIM*QR@.E                                   | 62.32  | 24.21 | 2.57  | 0.39 |
| Q9Z0N1_IF2G_MOUSE   | Eif2s3x | Eukaryotic translation in K.HILILQNK#.I                                   | 22.66  | 9.99  | 2.27  | 0.44 |
| Q9Z0N1_IF2G_MOUSE   | Eif2s3x | Eukaryotic translation in K.IVSLFAENHDLQYAAPGLGVGTK#.I                    | 27.13  | 12.97 | 2.09  | 0.48 |
| Q9Z0N1_IF2G_MOUSE   | Eif2s3x | Eukaryotic translation in K.VGQIEVLR@PGIVSK#.D                            | 70.39  | 39.31 | 1.79  | 0.56 |
| Q9Z0N1_IF2G_MOUSE   | Eif2s3x | Eukaryotic translation in R.QDLATLDVTK#.L                                 | 11.64  | 4.28  | 2.72  | 0.37 |
| P23116_EIF3A_MOUSE  | Eif3a   | Eukaryotic translation in K.AFK#DIDIELELDPDFIM*AK#.Q                      | 20.27  | 7.80  | 2.60  | 0.38 |
| P23116_EIF3A_MOUSE  | Eif3a   | Eukaryotic translation in K.DIDIELELDPDFIM*AK#.Q                          | 16.72  | 6.72  | 2.49  | 0.40 |
| P23116_EIF3A_MOUSE  | Eif3a   | Eukaryotic translation in R.EDAPGVPHLQSM*PEQIR@.N                         | 28.61  | 12.97 | 2.21  | 0.45 |
| P23116_EIF3A_MOUSE  | Eif3a   | Eukaryotic translation in R.EQPEK#EPELQYVPPQLQNTLR@.L                     | 22.31  | 9.24  | 2.41  | 0.41 |
| P23116_EIF3A_MOUSE  | Eif3a   | Eukaryotic translation in R.FSVLQYVPEVK#.D                                | 49.86  | 24.55 | 2.03  | 0.49 |
| P23116_EIF3A_MOUSE  | Eif3a   | Eukaryotic translation in R.IGLINDM*VR@.F                                 | 30.57  | 10.93 | 2.80  | 0.36 |
| P23116_EIF3A_MOUSE  | Eif3a   | Eukaryotic translation in R.ILOQHEQK#.K                                   | 13.05  | 8.06  | 1.62  | 0.62 |
| P23116_EIF3A_MOUSE  | Eif3a   | Eukaryotic translation in R.ITTM*QLER@.E                                  | 36.23  | 17.67 | 2.05  | 0.49 |
| P23116_EIF3A_MOUSE  | Eif3a   | Eukaryotic translation in K.KHIDYFER@.A                                   | 37.17  | 12.84 | 2.89  | 0.35 |
| P23116_EIF3A_MOUSE  | Eif3a   | Eukaryotic translation in R.LEEIPLIK#.S                                   | 26.54  | 13.02 | 2.04  | 0.49 |
| P23116_EIF3A_MOUSE  | Eif3a   | Eukaryotic translation in R.LLDM*DGIVEK#.Q                                | 50.25  | 10.77 | 4.67  | 0.21 |
| P23116_EIF3A_MOUSE  | Eif3a   | Eukaryotic translation in R.LLLTPWVK#.F                                   | 44.73  | 14.70 | 3.04  | 0.33 |
| P23116_EIF3A_MOUSE  | Eif3a   | Eukaryotic translation in R.LLQVQVQIQSIEFSR@.L                            | 58.40  | 48.62 | 1.20  | 0.83 |
| P23116_EIF3A_MOUSE  | Eif3a   | Eukaryotic translation in R.RTSLVPPVDAFQLER@.A                            | 99.18  | 34.71 | 2.86  | 0.35 |
| P23116_EIF3A_MOUSE  | Eif3a   | Eukaryotic translation in R.LVQLDSASIM*ELWQEAFF#.A                        | 12.27  | 4.22  | 2.91  | 0.34 |
| P23116_EIF3A_MOUSE  | Eif3a   | Eukaryotic translation in R.NQLTAM*SSVLAK#.A                              | 26.14  | 10.42 | 2.51  | 0.40 |
| P23116_EIF3A_MOUSE  | Eif3a   | Eukaryotic translation in R.TLSFGSDLNAYATR@.E                             | 47.94  | 17.27 | 2.78  | 0.36 |
| P23116_EIF3A_MOUSE  | Eif3a   | Eukaryotic translation in R.VLLATLSPITPER@.T                              | 59.40  | 26.23 | 2.26  | 0.44 |
| P23116_EIF3A_MOUSE  | Eif3a   | Eukaryotic translation in K.AFK#DIDIELELDPDFIM*AK#.Q                      | 52.16  | 11.94 | 4.37  | 0.23 |
| P23116_EIF3A_MOUSE  | Eif3a   | Eukaryotic translation in R.ANEFLEVGK#.K                                  | 47.47  | 10.43 | 4.55  | 0.22 |
| P23116_EIF3A_MOUSE  | Eif3a   | Eukaryotic translation in K.DIDIELELDPDFIM*AK#.Q                          | 29.60  | 8.44  | 3.51  | 0.29 |
| P23116_EIF3A_MOUSE  | Eif3a   | Eukaryotic translation in R.DNQR@EENDK#DLER@.D                            | 6.47   | 1.44  | 4.49  | 0.22 |
| P23116_EIF3A_MOUSE  | Eif3a   | Eukaryotic translation in R.EQPEK#EPELQYVPPQLQNTLR@.L                     | 56.99  | 18.91 | 3.01  | 0.33 |
| P23116_EIF3A_MOUSE  | Eif3a   | Eukaryotic translation in R.FSVLQYVPEVK#.D                                | 95.40  | 27.19 | 3.51  | 0.29 |
| P23116_EIF3A_MOUSE  | Eif3a   | Eukaryotic translation in R.GPAEISSWR@.D                                  | 8.64   | 2.26  | 3.83  | 0.26 |
| P23116_EIF3A_MOUSE  | Eif3a   | Eukaryotic translation in R.IGLINDM*VR@.F                                 | 64.78  | 13.51 | 4.80  | 0.21 |
| P23116_EIF3A_MOUSE  | Eif3a   | Eukaryotic translation in R.ILOQHEQK#.K                                   | 33.71  | 7.56  | 4.46  | 0.22 |
| P23116_EIF3A_MOUSE  | Eif3a   | Eukaryotic translation in R.ITTM*QLER@.E                                  | 46.22  | 14.63 | 3.16  | 0.32 |
| P23116_EIF3A_MOUSE  | Eif3a   | Eukaryotic translation in R.KHGPEADSEWR@.R                                | 11.11  | 3.18  | 3.49  | 0.29 |
| P23116_EIF3A_MOUSE  | Eif3a   | Eukaryotic translation in K.KHIDYFER@.A                                   | 34.41  | 15.50 | 2.22  | 0.45 |
| P23116_EIF3A_MOUSE  | Eif3a   | Eukaryotic translation in K.K#QPALDLYDVNM*K#.S                            | 13.52  | 5.15  | 2.63  | 0.38 |
| P23116_EIF3A_MOUSE  | Eif3a   | Eukaryotic translation in R.LATLLGLQAPPTR@.I                              | 41.18  | 12.49 | 3.30  | 0.30 |
| P23116_EIF3A_MOUSE  | Eif3a   | Eukaryotic translation in R.LEEIPLIK#.S                                   | 50.00  | 13.57 | 3.69  | 0.27 |
| P23116_EIF3A_MOUSE  | Eif3a   | Eukaryotic translation in R.LESLNIQR@.E                                   | 96.34  | 20.59 | 4.68  | 0.21 |
| P23116_EIF3A_MOUSE  | Eif3a   | Eukaryotic translation in R.LLDM*DGIVEK#.Q                                | 52.90  | 15.46 | 3.42  | 0.29 |
| P23116_EIF3A_MOUSE  | Eif3a   | Eukaryotic translation in R.LLLTPWVK#.F                                   | 72.77  | 22.69 | 3.21  | 0.31 |
| P23116_EIF3A_MOUSE  | Eif3a   | Eukaryotic translation in R.LLQVQVQIQSIEFSR@.L                            | 94.31  | 25.29 | 3.73  | 0.27 |
| P23116_EIF3A_MOUSE  | Eif3a   | Eukaryotic translation in R.RTSLVPPVDAFQLER@.A                            | 165.50 | 46.18 | 3.58  | 0.28 |
| P23116_EIF3A_MOUSE  | Eif3a   | Eukaryotic translation in R.LVQLDSASIM*ELWQEAFF#.A                        | 49.61  | 11.87 | 4.18  | 0.24 |
| P23116_EIF3A_MOUSE  | Eif3a   | Eukaryotic translation in R.M*HLSQIR@.H                                   | 26.97  | 6.13  | 4.40  | 0.23 |
| P23116_EIF3A_MOUSE  | Eif3a   | Eukaryotic translation in K.NLTQEM*QR@.M                                  | 44.23  | 13.22 | 3.35  | 0.30 |
| P23116_EIF3A_MOUSE  | Eif3a   | Eukaryotic translation in R.NQLTAM*SSVLAK#.A                              | 55.10  | 13.55 | 4.07  | 0.25 |
| P23116_EIF3A_MOUSE  | Eif3a   | Eukaryotic translation in K.LEEIPLIK#.S                                   | 48.07  | 14.75 | 3.26  | 0.31 |
| P23116_EIF3A_MOUSE  | Eif3a   | Eukaryotic translation in K.SGNALFHASTLHR@.L                              | 28.95  | 6.17  | 4.70  | 0.21 |
| P23116_EIF3A_MOUSE  | Eif3a   | Eukaryotic translation in K.TEAAK#EESQMM*VLDIEDLDNIQTPESVLLSAVSGEDTQDR@.T | 11.32  | 2.11  | 5.36  | 0.19 |
| P23116_EIF3A_MOUSE  | Eif3a   | Eukaryotic translation in R.TLSFGSDLNAYATR@.E                             | 108.08 | 31.74 | 3.41  | 0.29 |

|                    |       |                                                              |        |        |      |       |
|--------------------|-------|--------------------------------------------------------------|--------|--------|------|-------|
| P23116_EIF3A_MOUSE | Eif3a | Eukaryotic translation in R.VK#DM*DLWEQEEER@.J               | 20.72  | 3.85   | 5.38 | 0.19  |
| P23116_EIF3A_MOUSE | Eif3a | Eukaryotic translation in R.VLLATLSPITPER@.T                 | 120.66 | 33.04  | 3.65 | 0.27  |
| P23116_EIF3A_MOUSE | Eif3a | Eukaryotic translation in K.VSTVFWK#.S                       | 46.82  | 12.36  | 3.79 | 0.26  |
| Q8JZQ9_EIF3B_MOUSE | Eif3b | Eukaryotic translation in K.AEAVGEQAR@.G                     | 37.11  | 11.82  | 3.14 | 0.32  |
| Q8JZQ9_EIF3B_MOUSE | Eif3b | Eukaryotic translation in R.AK#PAQSEETATSPAASPTQSAER@.S      | 55.80  | 23.18  | 2.41 | 0.42  |
| Q8JZQ9_EIF3B_MOUSE | Eif3b | Eukaryotic translation in R.DQYSVIFESGDR@.T                  | 36.74  | 10.67  | 3.44 | 0.29  |
| Q8JZQ9_EIF3B_MOUSE | Eif3b | Eukaryotic translation in K.DR@PQEAADGIDSIVVDNVPQGPDR@.L     | 71.66  | 17.46  | 4.10 | 0.24  |
| Q8JZQ9_EIF3B_MOUSE | Eif3b | Eukaryotic translation in K.DR@PQEAADGIDSIVVDNVPQGPDR@LEK#.L | 12.20  | 3.24   | 3.76 | 0.27  |
| Q8JZQ9_EIF3B_MOUSE | Eif3b | Eukaryotic translation in K.ETIIAFWEPNGSK#.F                 | 11.06  | 4.86   | 2.28 | 0.44  |
| Q8JZQ9_EIF3B_MOUSE | Eif3b | Eukaryotic translation in R.GHPSAGAEEGSDGSAEAEPR@.A          | 53.71  | 16.33  | 3.29 | 0.30  |
| Q8JZQ9_EIF3B_MOUSE | Eif3b | Eukaryotic translation in R.GIALWGGDK#.F                     | 30.26  | 12.39  | 2.44 | 0.41  |
| Q8JZQ9_EIF3B_MOUSE | Eif3b | Eukaryotic translation in K.GTQGVVTFEIFR@.M                  | 194.56 | 50.70  | 3.84 | 0.26  |
| Q8JZQ9_EIF3B_MOUSE | Eif3b | Eukaryotic translation in K.GYIFLEYASPAHVAVDK#.N             | 179.34 | 42.84  | 4.19 | 0.24  |
| Q8JZQ9_EIF3B_MOUSE | Eif3b | Eukaryotic translation in K.IINDYYPEEDGK#.T                  | 21.54  | 6.19   | 3.48 | 0.29  |
| Q8JZQ9_EIF3B_MOUSE | Eif3b | Eukaryotic translation in K.M*AQELYM*K#.Q                    | 32.53  | 11.49  | 2.83 | 0.35  |
| Q8JZQ9_EIF3B_MOUSE | Eif3b | Eukaryotic translation in R.M*TLDTLSIYETPSMGLLDK#K#.S        | 6.36   | 2.12   | 3.00 | 0.33  |
| Q8JZQ9_EIF3B_MOUSE | Eif3b | Eukaryotic translation in K.NADGYRHLDK#.Q                    | 37.96  | 38.81  | 0.98 | 1.02  |
| Q8JZQ9_EIF3B_MOUSE | Eif3b | Eukaryotic translation in K.QQANTIFWSPQGFVVLGLR@.S           | 20.35  | 3.80   | 5.35 | 0.19  |
| Q8JZQ9_EIF3B_MOUSE | Eif3b | Eukaryotic translation in R.SPSQEPSAPGK#.A                   | 52.42  | 18.62  | 2.81 | 0.36  |
| Q8JZQ9_EIF3B_MOUSE | Eif3b | Eukaryotic translation in R.SPSQEPSAPG#AEAVGEQAR@.G          | 57.55  | 15.73  | 3.66 | 0.27  |
| Q8JZQ9_EIF3B_MOUSE | Eif3b | Eukaryotic translation in R.TM*M*EDFR@.Q                     | 96.37  | 29.50  | 3.27 | 0.31  |
| Q8JZQ9_EIF3B_MOUSE | Eif3b | Eukaryotic translation in R.TSIFWVNDVK#DPVSIER@.A            | 142.40 | 38.76  | 3.67 | 0.27  |
| Q8JZQ9_EIF3B_MOUSE | Eif3b | Eukaryotic translation in K.VDNAYVNLVWTFQGR.L                | 43.14  | 11.17  | 3.86 | 0.26  |
| Q8JZQ9_EIF3B_MOUSE | Eif3b | Eukaryotic translation in R.VNLFDTDFDK#.Y                    | 19.95  | 5.87   | 3.40 | 0.29  |
| Q8JZQ9_EIF3B_MOUSE | Eif3b | Eukaryotic translation in R.VNLFDTDFDK#M*TSIWEVDIPEK#.Q      | 13.91  | 3.64   | 3.82 | 0.26  |
| Q8JZQ9_EIF3B_MOUSE | Eif3b | Eukaryotic translation in R.VTLM*QLPTR@.Q                    | 91.96  | 30.37  | 3.03 | 0.33  |
| Q8JZQ9_EIF3B_MOUSE | Eif3b | Eukaryotic translation in R.VTLMQLPTR@.W                     | 33.04  | 11.61  | 2.84 | 0.35  |
| Q8JZQ9_EIF3B_MOUSE | Eif3b | Eukaryotic translation in R.WTETVVR@.W                       | 91.11  | 24.43  | 3.73 | 0.27  |
| Q8JZQ9_EIF3B_MOUSE | Eif3b | Eukaryotic translation in R.AK#PAQSEETATSPAASPTQSAER@.S      | 11.64  | 2.43   | 4.80 | 0.21  |
| Q8JZQ9_EIF3B_MOUSE | Eif3b | Eukaryotic translation in K.DR@PQEAADGIDSIVVDNVPQGPDR@.L     | 13.65  | 5.68   | 2.40 | 0.42  |
| Q8JZQ9_EIF3B_MOUSE | Eif3b | Eukaryotic translation in R.GHPSAGAEEGSDGSAEAEPR@.A          | 28.23  | 12.23  | 1.57 | 0.64  |
| Q8JZQ9_EIF3B_MOUSE | Eif3b | Eukaryotic translation in K.GTQGVVTFEIFR@.M                  | 19.23  | 5.66   | 4.99 | 0.20  |
| Q8JZQ9_EIF3B_MOUSE | Eif3b | Eukaryotic translation in K.GYIFLEYASPAHVAVDK#.N             | 46.72  | 10.24  | 4.56 | 0.22  |
| Q8JZQ9_EIF3B_MOUSE | Eif3b | Eukaryotic translation in R.TSIFWVNDVK#DPVSIER@.A            | 16.81  | 7.11   | 2.37 | 0.42  |
| Q8R1B4_EIF3C_MOUSE | Eif3c | Eukaryotic translation in R.AK#HELLGQGLLR@.S                 | 44.62  | 12.43  | 3.59 | 0.28  |
| Q8R1B4_EIF3C_MOUSE | Eif3c | Eukaryotic translation in R.DL1M*LM*SHLQDNIHQHADPPVQLYNR@.T  | 8.07   | 4.09   | 1.97 | 0.51  |
| Q8R1B4_EIF3C_MOUSE | Eif3c | Eukaryotic translation in R.ELLGQGLLR@.S                     | 29.16  | 9.61   | 3.03 | 0.33  |
| Q8R1B4_EIF3C_MOUSE | Eif3c | Eukaryotic translation in R.FEELTNLIR@.T                     | 57.47  | 17.06  | 3.37 | 0.30  |
| Q8R1B4_EIF3C_MOUSE | Eif3c | Eukaryotic translation in K.LGSLVENNER@.V                    | 40.89  | 5.22   | 7.84 | 0.13  |
| Q8R1B4_EIF3C_MOUSE | Eif3c | Eukaryotic translation in K.LNELQVR@.G                       | 30.42  | 10.62  | 2.86 | 0.35  |
| Q8R1B4_EIF3C_MOUSE | Eif3c | Eukaryotic translation in K.QGTGGYFR@.D                      | 20.73  | 6.71   | 3.09 | 0.32  |
| Q8R1B4_EIF3C_MOUSE | Eif3c | Eukaryotic translation in R.QPLPPEPESM*RR@.E                 | 7.67   | 3.48   | 2.20 | 0.45  |
| Q8R1B4_EIF3C_MOUSE | Eif3c | Eukaryotic translation in K.SEQDQAENEGEDSAVLM*ER@.L          | 19.22  | 5.77   | 3.33 | 0.30  |
| Q8R1B4_EIF3C_MOUSE | Eif3c | Eukaryotic translation in R.TEPTAQQLALQLAEK#.L               | 32.74  | 10.77  | 3.04 | 0.33  |
| Q8R1B4_EIF3C_MOUSE | Eif3c | Eukaryotic translation in K.VVDFLPEADK#HVR@.T                | 22.14  | 6.42   | 3.45 | 0.29  |
| Q8R1B4_EIF3C_MOUSE | Eif3c | Eukaryotic translation in R.AK#HELLGQGLLR@.S                 | 65.21  | 19.81  | 3.29 | 0.30  |
| Q8R1B4_EIF3C_MOUSE | Eif3c | Eukaryotic translation in K.DAHNALLDIQSSGR@.A                | 59.46  | 15.65  | 3.80 | 0.26  |
| Q8R1B4_EIF3C_MOUSE | Eif3c | Eukaryotic translation in K.ELLGQGLLR@.S                     | 56.15  | 11.14  | 5.04 | 0.20  |
| Q8R1B4_EIF3C_MOUSE | Eif3c | Eukaryotic translation in R.FEELTNLIR@.T                     | 84.30  | 21.46  | 3.93 | 0.25  |
| Q8R1B4_EIF3C_MOUSE | Eif3c | Eukaryotic translation in R.FFTTGSDSESESLGELVTK#PVSNGYK#.Q   | 11.87  | 1.65   | 7.17 | 0.14  |
| Q8R1B4_EIF3C_MOUSE | Eif3c | Eukaryotic translation in K.LGSLVENNER@.V                    | 46.99  | 16.48  | 2.85 | 0.35  |
| Q8R1B4_EIF3C_MOUSE | Eif3c | Eukaryotic translation in K.R@LDEEEDNEGGEWER@.V              | 20.26  | 5.41   | 3.75 | 0.27  |
| Q8R1B4_EIF3C_MOUSE | Eif3c | Eukaryotic translation in K.SEQDQAENEGEDSAVLM*ER@.L          | 33.95  | 11.85  | 2.86 | 0.35  |
| Q8R1B4_EIF3C_MOUSE | Eif3c | Eukaryotic translation in K.SIVDK#GVPR@.F                    | 16.34  | 5.21   | 3.14 | 0.32  |
| Q8R1B4_EIF3C_MOUSE | Eif3c | Eukaryotic translation in R.TEPTAQQLALQLAEK#.L               | 48.59  | 14.87  | 3.27 | 0.31  |
| O70194_EIF3D_MOUSE | Eif3d | Eukaryotic translation in R.DNSDFLLTVSETANEPQDEGNSFNSPR@.N   | 7.38   | 1.55   | 4.76 | 0.21  |
| O70194_EIF3D_MOUSE | Eif3d | Eukaryotic translation in R.IFHVTITDDPVIR@.K                 | 20.78  | 11.31  | 1.84 | 0.54  |
| O70194_EIF3D_MOUSE | Eif3d | Eukaryotic translation in R.NM*VQNLQTLPK#.S                  | 14.40  | 7.89   | 1.82 | 0.55  |
| O70194_EIF3D_MOUSE | Eif3d | Eukaryotic translation in R.YNFPNPNPVEDDM*DK#NEIASVAYR@.Y    | 9.15   | 3.56   | 2.57 | 0.39  |
| O70194_EIF3D_MOUSE | Eif3d | Eukaryotic translation in K.YSSQFGGSSQYAFHFEEDTSFQLVDTAR@.T  | 5.35   | 1.83   | 2.93 | 0.34  |
| O70194_EIF3D_MOUSE | Eif3d | Eukaryotic translation in R.IFHVTITDDPVIR@.K                 | 11.87  | 20.25  | 2.62 | 0.38  |
| O70194_EIF3D_MOUSE | Eif3d | Eukaryotic translation in K.LGGDDILVR@.C                     | 39.04  | 14.36  | 2.72 | 0.37  |
| O70194_EIF3D_MOUSE | Eif3d | Eukaryotic translation in R.NM*VQNLQTLPK#.S                  | 48.62  | 21.48  | 2.26 | 0.44  |
| O70194_EIF3D_MOUSE | Eif3d | Eukaryotic translation in R.SVYSWDIVQR@.V                    | 33.93  | 12.57  | 2.70 | 0.37  |
| O70194_EIF3D_MOUSE | Eif3d | Eukaryotic translation in K.TLNEWDSR@.H                      | 19.72  | 9.91   | 1.99 | 0.50  |
| O70194_EIF3D_MOUSE | Eif3d | Eukaryotic translation in K.VADWTGATYQDK#.R                  | 8.61   | 8.29   | 1.04 | 0.96  |
| O70194_EIF3D_MOUSE | Eif3d | Eukaryotic translation in K.YSSQFGGSSQYAFHFEEDTSFQLVDTAR@.T  | 10.79  | 5.30   | 2.04 | 0.49  |
| O70194_EIF3D_MOUSE | Eif3d | Eukaryotic translation in R.DNSDFLLTVSETANEPQDEGNSFNSPR@.N   | 15.68  | 2.80   | 5.61 | 0.18  |
| O70194_EIF3D_MOUSE | Eif3d | Eukaryotic translation in R.IFHVTITDDPVIR@.K                 | 36.46  | 8.08   | 4.51 | 0.22  |
| O70194_EIF3D_MOUSE | Eif3d | Eukaryotic translation in K.LGGDDILVR@.C                     | 28.34  | 11.05  | 2.56 | 0.39  |
| O70194_EIF3D_MOUSE | Eif3d | Eukaryotic translation in R.NM*VQNLQTLPK#.S                  | 29.08  | 8.83   | 3.29 | 0.30  |
| O70194_EIF3D_MOUSE | Eif3d | Eukaryotic translation in R.SVYSWDIVQR@.V                    | 21.15  | 5.98   | 3.54 | 0.28  |
| P60229_EIF3E_MOUSE | Eif3e | Eukaryotic translation in K.LASEILM*QNWDAAM*EDLTR@.L         | 8.20   | 7.90   | 1.04 | 0.96  |
| P60229_EIF3E_MOUSE | Eif3e | Eukaryotic translation in K.LASEILM*QNWDAAM*EDLTR@.L         | 2.95   | 1.98   | 1.49 | 0.67  |
| P60229_EIF3E_MOUSE | Eif3e | Eukaryotic translation in K.LASEILM*QNWDAAM*EDLTR@.L         | 5.68   | 2.74   | 2.07 | 0.48  |
| P60229_EIF3E_MOUSE | Eif3e | Eukaryotic translation in K.LDLSSTNM*VDFAM*DVYK#.N           | 18.31  | 8.85   | 2.07 | 0.48  |
| P60229_EIF3E_MOUSE | Eif3e | Eukaryotic translation in K.LGHVVM*GNNAVSPYQVQIEK#.T         | 37.53  | 18.75  | 2.00 | 0.50  |
| P60229_EIF3E_MOUSE | Eif3e | Eukaryotic translation in R.LK#ETIDNNSVSSPLQSLQQR@.T         | 58.91  | 18.82  | 3.13 | 0.32  |
| P60229_EIF3E_MOUSE | Eif3e | Eukaryotic translation in K.LNM*PEEAER@.W                    | 13.06  | 238.91 | 0.05 | 18.30 |
| P60229_EIF3E_MOUSE | Eif3e | Eukaryotic translation in K.M*FEDPETTR@.Q                    | 25.55  | 9.83   | 2.60 | 0.38  |
| P60229_EIF3E_MOUSE | Eif3e | Eukaryotic translation in R.M*LFEDLADK#.H                    | 49.42  | 14.45  | 3.42 | 0.29  |
| P60229_EIF3E_MOUSE | Eif3e | Eukaryotic translation in R.NALSSLVGK#.L                     | 30.92  | 11.13  | 2.78 | 0.36  |
| P60229_EIF3E_MOUSE | Eif3e | Eukaryotic translation in R.QEYLDLTVR@.Y                     | 34.80  | 13.39  | 2.60 | 0.38  |
| P60229_EIF3E_MOUSE | Eif3e | Eukaryotic translation in K.QLQAEPIVK#.M                     | 59.05  | 24.12  | 2.45 | 0.41  |
| P60229_EIF3E_MOUSE | Eif3e | Eukaryotic translation in R.SEAPNWTQDSGFY.-                  | 7.56   | 7.56   | 1.00 | 1.00  |
| P60229_EIF3E_MOUSE | Eif3e | Eukaryotic translation in R.TTVVAQLK#.Q                      | 45.57  | 13.29  | 3.43 | 0.29  |
| P60229_EIF3E_MOUSE | Eif3e | Eukaryotic translation in R.WIVNLR@.N                        | 22.83  | 5.43   | 4.21 | 0.24  |
| P60229_EIF3E_MOUSE | Eif3e | Eukaryotic translation in R.YLTTAVITNK#.D                    | 72.10  | 22.57  | 3.20 | 0.31  |
| P60229_EIF3E_MOUSE | Eif3e | Eukaryotic translation in K.LDLSSTNM*VDFAM*DVYK#.N           | 11.98  | 2.92   | 4.11 | 0.24  |
| P60229_EIF3E_MOUSE | Eif3e | Eukaryotic translation in K.LGHVVM*GNNAVSPYQVQIEK#.T         | 26.79  | 7.42   | 3.61 | 0.28  |
| P60229_EIF3E_MOUSE | Eif3e | Eukaryotic translation in R.LK#ETIDNNSVSSPLQSLQQR@.T         | 29.83  | 5.99   | 4.98 | 0.20  |
| P60229_EIF3E_MOUSE | Eif3e | Eukaryotic translation in K.M*FEDPETTR@.Q                    | 14.45  | 2.90   | 4.98 | 0.20  |
| P60229_EIF3E_MOUSE | Eif3e | Eukaryotic translation in R.NALSSLVGK#.L                     | 19.73  | 9.17   | 2.15 | 0.46  |
| P60229_EIF3E_MOUSE | Eif3e | Eukaryotic translation in K.QLQAEPIVK#.M                     | 34.22  | 9.12   | 3.75 | 0.27  |
| P60229_EIF3E_MOUSE | Eif3e | Eukaryotic translation in R.SEAPNWTQDSGFY.-                  | 6.50   | 6.50   | 1.00 | 1.00  |
| P60229_EIF3E_MOUSE | Eif3e | Eukaryotic translation in R.SQM*LAM*NIEK#.K                  | 13.78  | 4.96   | 2.78 | 0.36  |
| P60229_EIF3E_MOUSE | Eif3e | Eukaryotic translation in R.WIVNLR@.N                        | 17.85  | 5.18   | 3.45 | 0.29  |
| P60229_EIF3E_MOUSE | Eif3e | Eukaryotic translation in R.YLTTAVITNK#.D                    | 39.04  | 7.08   | 5.52 | 0.18  |
| P60229_EIF3E_MOUSE | Eif3e | Eukaryotic translation in K.LASEILM*QNWDAAM*EDLTR@.L         | 5.18   | 1.25   | 4.13 | 0.24  |
| P60229_EIF3E_MOUSE | Eif3e | Eukaryotic translation in K.LDLSSTNM*VDFAM*DVYK#.N           | 9.80   | 5.59   | 1.75 | 0.57  |
| P60229_EIF3E_MOUSE | Eif3e | Eukaryotic translation in K.LDLSSTNM*VDFAM*DVYK#.N           | 5.76   | 1.92   | 3.01 | 0.33  |
| P60229_EIF3E_MOUSE | Eif3e | Eukaryotic translation in R.LK#ETIDNNSVSSPLQSLQQR@.T         | 28.70  | 8.02   | 3.58 | 0.28  |
| P60229_EIF3E_MOUSE | Eif3e | Eukaryotic translation in K.M*FEDPETTR@.Q                    | 13.53  | 6.14   | 2.20 | 0.45  |

|                    |        |                                                                 |        |       |      |      |
|--------------------|--------|-----------------------------------------------------------------|--------|-------|------|------|
| P60229_EIF3E_MOUSE | Eif3e  | Eukaryotic translation in R.M*LFYDLADK#.H                       | 18.79  | 6.40  | 2.93 | 0.34 |
| P60229_EIF3E_MOUSE | Eif3e  | Eukaryotic translation in R.NALSSLWGK#.L                        | 24.99  | 5.65  | 4.42 | 0.23 |
| P60229_EIF3E_MOUSE | Eif3e  | Eukaryotic translation in K.QLQAETPIVK#.M                       | 32.31  | 9.92  | 3.26 | 0.31 |
| P60229_EIF3E_MOUSE | Eif3e  | Eukaryotic translation in R.SEAPNWTQDSGFY.-                     | 5.51   | 5.51  | 1.00 | 1.00 |
| P60229_EIF3E_MOUSE | Eif3e  | Eukaryotic translation in R.TTVVAQK#.Q                          | 56.81  | 15.92 | 3.57 | 0.28 |
| P60229_EIF3E_MOUSE | Eif3e  | Eukaryotic translation in R.YLTTAVITNK#.D                       | 42.70  | 14.21 | 3.00 | 0.33 |
| Q9DCH4_EIF3F_MOUSE | Eif3f  | Eukaryotic translation in K.AYVSTLM*GVPGR@.T                    | 87.93  | 34.01 | 2.59 | 0.39 |
| Q9DCH4_EIF3F_MOUSE | Eif3f  | Eukaryotic translation in K.AYVSTLM*GVPGR@.T                    | 8.21   | 2.42  | 3.39 | 0.30 |
| Q9DCH4_EIF3F_MOUSE | Eif3f  | Eukaryotic translation in R.FLM*SLNVQVPK#.I                     | 45.92  | 20.89 | 2.20 | 0.45 |
| Q9DCH4_EIF3F_MOUSE | Eif3f  | Eukaryotic translation in R.IGVDLIM*#.T                         | 62.50  | 26.98 | 2.32 | 0.43 |
| Q9DCH4_EIF3F_MOUSE | Eif3f  | Eukaryotic translation in R.LHPVLASIVDSYER@.R                   | 111.08 | 41.17 | 2.70 | 0.37 |
| Q9DCH4_EIF3F_MOUSE | Eif3f  | Eukaryotic translation in R.TM*GVM*FTPLTVK#.Y                   | 51.11  | 20.52 | 2.49 | 0.40 |
| Q9DCH4_EIF3F_MOUSE | Eif3f  | Eukaryotic translation in R.TMGVM*FTPLTVK#.Y                    | 7.63   | 2.30  | 3.31 | 0.30 |
| Q9DCH4_EIF3F_MOUSE | Eif3f  | Eukaryotic translation in R.TM*GVM*FTPLTVK#.Y                   | 10.80  | 3.93  | 2.74 | 0.36 |
| Q9DCH4_EIF3F_MOUSE | Eif3f  | Eukaryotic translation in R.VIGLSSDQQVGGASAR@.I                 | 131.17 | 48.43 | 2.71 | 0.37 |
| Q9DCH4_EIF3F_MOUSE | Eif3f  | Eukaryotic translation in R.VIGTLGTVDK#.H                       | 115.79 | 37.63 | 3.08 | 0.32 |
| Q9DCH4_EIF3F_MOUSE | Eif3f  | Eukaryotic translation in K.VSADNTVGR@.F                        | 56.84  | 18.78 | 3.03 | 0.33 |
| Q9DCH4_EIF3F_MOUSE | Eif3f  | Eukaryotic translation in K.YAYYDTER@.I                         | 44.75  | 14.24 | 3.14 | 0.32 |
| Q9DCH4_EIF3F_MOUSE | Eif3f  | Eukaryotic translation in K.AYVSTLM*GVPGR@.T                    | 20.70  | 6.01  | 3.44 | 0.29 |
| Q9DCH4_EIF3F_MOUSE | Eif3f  | Eukaryotic translation in R.FLM*SLNVQVPK#.I                     | 10.68  | 3.81  | 2.81 | 0.36 |
| Q9DCH4_EIF3F_MOUSE | Eif3f  | Eukaryotic translation in R.LHPVLASIVDSYER@.R                   | 27.64  | 11.05 | 2.50 | 0.40 |
| Q9DCH4_EIF3F_MOUSE | Eif3f  | Eukaryotic translation in R.TM*GVM*FTPLTVK#.Y                   | 15.08  | 3.47  | 4.35 | 0.23 |
| Q9DCH4_EIF3F_MOUSE | Eif3f  | Eukaryotic translation in R.VIGLSSDQQVGGASAR@.I                 | 26.15  | 7.60  | 3.44 | 0.29 |
| Q9DCH4_EIF3F_MOUSE | Eif3f  | Eukaryotic translation in R.VIGTLGTVDK#.H                       | 36.89  | 8.94  | 4.13 | 0.24 |
| Q9DCH4_EIF3F_MOUSE | Eif3f  | Eukaryotic translation in K.AYVSTLM*GVPGR@.T                    | 21.60  | 3.86  | 5.60 | 0.18 |
| Q9DCH4_EIF3F_MOUSE | Eif3f  | Eukaryotic translation in R.IGVDLIM*#.T                         | 12.32  | 1.72  | 7.14 | 0.14 |
| Q9DCH4_EIF3F_MOUSE | Eif3f  | Eukaryotic translation in R.LHPVLASIVDSYER@.R                   | 32.16  | 7.67  | 4.19 | 0.24 |
| Q9DCH4_EIF3F_MOUSE | Eif3f  | Eukaryotic translation in R.TM*GVM*FTPLTVK#.Y                   | 11.36  | 2.78  | 4.08 | 0.25 |
| Q9DCH4_EIF3F_MOUSE | Eif3f  | Eukaryotic translation in R.VIGLSSDQQVGGASAR@.I                 | 30.93  | 4.96  | 6.23 | 0.16 |
| Q9DCH4_EIF3F_MOUSE | Eif3f  | Eukaryotic translation in R.VIGTLGTVDK#.H                       | 17.48  | 3.18  | 5.50 | 0.18 |
| Q9DCH4_EIF3F_MOUSE | Eif3f  | Eukaryotic translation in K.VSADNTVGR@.F                        | 15.14  | 10.02 | 1.51 | 0.66 |
| Q9DCH4_EIF3F_MOUSE | Eif3f  | Eukaryotic translation in K.YAYYDTER@.I                         | 9.37   | 2.56  | 3.67 | 0.27 |
| Q9Z1D1_EIF3G_MOUSE | Eif3g  | Eukaryotic translation in K.EKHPGLPELPOVQAQSK#.T                | 48.81  | 13.55 | 3.60 | 0.28 |
| Q9Z1D1_EIF3G_MOUSE | Eif3g  | Eukaryotic translation in K.ELAEQLGLSTGEK#.E                    | 73.56  | 17.99 | 4.09 | 0.24 |
| Q9Z1D1_EIF3G_MOUSE | Eif3g  | Eukaryotic translation in K.ELAEQLGLSTGEK#EHLPLPELEPVQAQSK#.T   | 6.12   | 1.99  | 3.07 | 0.33 |
| Q9Z1D1_EIF3G_MOUSE | Eif3g  | Eukaryotic translation in R.ETDLQELFR@.PFGSISR@.I               | 170.20 | 46.95 | 3.63 | 0.28 |
| Q9Z1D1_EIF3G_MOUSE | Eif3g  | Eukaryotic translation in R.KGNSEFPPGPNVATTVSDVSM*TFITSK#.E     | 5.34   | 2.75  | 1.94 | 0.52 |
| Q9Z1D1_EIF3G_MOUSE | Eif3g  | Eukaryotic translation in K.KFGNSEFDPGPNVATTVSDVSM*TFITSK#.E    | 3.57   | 2.48  | 1.44 | 0.70 |
| Q9Z1D1_EIF3G_MOUSE | Eif3g  | Eukaryotic translation in R.R@ADNATIR@.V                        | 15.08  | 4.01  | 3.76 | 0.27 |
| Q9Z1D1_EIF3G_MOUSE | Eif3g  | Eukaryotic translation in R.VTNLSEDR@.E                         | 112.06 | 30.74 | 3.65 | 0.27 |
| Q91WK2_EIF3H_MOUSE | Eif3h  | Eukaryotic translation in R.ALLDSQFSYHAIIESSVLIYDPIK#.T         | 45.80  | 14.65 | 3.13 | 0.32 |
| Q91WK2_EIF3H_MOUSE | Eif3h  | Eukaryotic translation in K.ASITFEHM*FEVPIVIK#.N                | 80.01  | 25.53 | 3.13 | 0.32 |
| Q91WK2_EIF3H_MOUSE | Eif3h  | Eukaryotic translation in K.ASITFEHM*FEVPIVIK#.N                | 48.07  | 17.73 | 2.71 | 0.37 |
| Q91WK2_EIF3H_MOUSE | Eif3h  | Eukaryotic translation in K.EGTGSTATSSGAGGAVGK#.G               | 148.42 | 48.66 | 3.05 | 0.33 |
| Q91WK2_EIF3H_MOUSE | Eif3h  | Eukaryotic translation in K.HYQEGGQSTVEVQGLLVEDR@.L             | 37.40  | 10.85 | 3.45 | 0.29 |
| Q91WK2_EIF3H_MOUSE | Eif3h  | Eukaryotic translation in R.KHEGTSTATSSGAGGAVGK#.G              | 4.45   | 2.75  | 1.61 | 0.62 |
| Q91WK2_EIF3H_MOUSE | Eif3h  | Eukaryotic translation in K.LFM*AQALQEVN.-                      | 57.20  | 57.20 | 1.00 | 1.00 |
| Q91WK2_EIF3H_MOUSE | Eif3h  | Eukaryotic translation in K.NSHLINVLM*WLEK#.K                   | 5.50   | 8.40  | 0.65 | 1.53 |
| Q91WK2_EIF3H_MOUSE | Eif3h  | Eukaryotic translation in K.NSHLINVLM*WLEK#.S                   | 7.83   | 3.74  | 2.09 | 0.48 |
| Q91WK2_EIF3H_MOUSE | Eif3h  | Eukaryotic translation in K.QVQILVVLK#.I                        | 54.14  | 16.94 | 3.20 | 0.31 |
| Q91WK2_EIF3H_MOUSE | Eif3h  | Eukaryotic translation in K.SLQLLM*DR@.V                        | 19.22  | 9.60  | 2.00 | 0.50 |
| Q91WK2_EIF3H_MOUSE | Eif3h  | Eukaryotic translation in K.SLQLLM*DR@VDEMSQDIK#.Y              | 6.05   | 2.88  | 2.10 | 0.48 |
| Q91WK2_EIF3H_MOUSE | Eif3h  | Eukaryotic translation in K.SLQLLM*DR@VDEMSQDIK#.Y              | 11.15  | 2.74  | 4.07 | 0.25 |
| Q91WK2_EIF3H_MOUSE | Eif3h  | Eukaryotic translation in K.TAQSLK#.A                           | 114.80 | 36.75 | 3.12 | 0.32 |
| Q91WK2_EIF3H_MOUSE | Eif3h  | Eukaryotic translation in R.VDEM*SQDIK#.Y                       | 40.83  | 13.97 | 2.92 | 0.34 |
| Q91WK2_EIF3H_MOUSE | Eif3h  | Eukaryotic translation in K.HYQEGGQSTVEVQGLLVEDR@.L             | 3.68   | 3.15  | 1.17 | 0.85 |
| Q91WK2_EIF3H_MOUSE | Eif3h  | Eukaryotic translation in K.EGTGSTATSSGAGGAVGK#.G               | 12.00  | 2.89  | 4.15 | 0.24 |
| Q9QZD9_EIF3I_MOUSE | Eif3i  | Eukaryotic translation in R.DM*TM*FVTASK#.D                     | 39.68  | 14.17 | 2.80 | 0.36 |
| Q9QZD9_EIF3I_MOUSE | Eif3i  | Eukaryotic translation in R.DPSQIDSNPEYM*#.I                    | 7.85   | 1.37  | 5.71 | 0.18 |
| Q9QZD9_EIF3I_MOUSE | Eif3i  | Eukaryotic translation in R.EGDLFTVAK#.D                        | 25.61  | 13.03 | 1.97 | 0.51 |
| Q9QZD9_EIF3I_MOUSE | Eif3i  | Eukaryotic translation in R.EGDLFTVAK#DPIVNVVWYVNGER@.L         | 16.21  | 4.76  | 3.41 | 0.29 |
| Q9QZD9_EIF3I_MOUSE | Eif3i  | Eukaryotic translation in R.FFHAFEEFR@.V                        | 37.38  | 12.09 | 3.09 | 0.32 |
| Q9QZD9_EIF3I_MOUSE | Eif3i  | Eukaryotic translation in K.GHGFIPINSVAFHPDGK#.S                | 51.14  | 18.75 | 2.73 | 0.37 |
| Q9QZD9_EIF3I_MOUSE | Eif3i  | Eukaryotic translation in R.IHYFDPOYFFEEFA.-                    | 7.38   | 7.38  | 1.00 | 1.00 |
| Q9QZD9_EIF3I_MOUSE | Eif3i  | Eukaryotic translation in K.LFDSTLEHQK#.T                       | 118.07 | 40.39 | 2.92 | 0.34 |
| Q9QZD9_EIF3I_MOUSE | Eif3i  | Eukaryotic translation in -.M*#PILLQGH@.S                       | 58.48  | 22.03 | 2.65 | 0.38 |
| Q9QZD9_EIF3I_MOUSE | Eif3i  | Eukaryotic translation in R.QINDIQLSR@.D                        | 43.17  | 16.61 | 2.60 | 0.38 |
| Q9QZD9_EIF3I_MOUSE | Eif3i  | Eukaryotic translation in K.SYSSGGEDGYR@.I                      | 132.27 | 40.32 | 3.28 | 0.30 |
| Q9QZD9_EIF3I_MOUSE | Eif3i  | Eukaryotic translation in R.TERPNSAALSPPNYHVVLGGQEQAM*DVTTSTR.I | 32.50  | 11.66 | 2.79 | 0.36 |
| Q3UGC7_EI3JA_MOUSE | Eif3j1 | Eukaryotic translation in K.ATM*#KDDLADYGGYEGGVQDYEDFM*.-       | 8.40   | 4.75  | 1.77 | 0.57 |
| Q3UGC7_EI3JA_MOUSE | Eif3j1 | Eukaryotic translation in K.ETFGVNNTVYGDAM*NPSSR@.D             | 7.56   | 4.59  | 1.65 | 0.61 |
| Q3UGC7_EI3JA_MOUSE | Eif3j1 | Eukaryotic translation in K.ETFGVNNTVYGDAM*NPSSR@DDFTEFGK#.L    | 8.23   | 4.64  | 1.78 | 0.56 |
| Q3UGC7_EI3JA_MOUSE | Eif3j1 | Eukaryotic translation in K.K#LQEESSLELAK#.E                    | 12.93  | 5.62  | 2.30 | 0.43 |
| Q3UGC7_EI3JA_MOUSE | Eif3j1 | Eukaryotic translation in K.LQEESSLELAK#.E                      | 68.50  | 38.99 | 1.76 | 0.57 |
| Q3UGC7_EI3JA_MOUSE | Eif3j1 | Eukaryotic translation in K.LQEESSLELAK#ETFGVNNTVYGDAM*NPSSR@.D | 8.65   | 6.20  | 1.40 | 0.72 |
| Q9DBZ5_EIF3K_MOUSE | Eif3k  | Eukaryotic translation in K.ENAYDLEANLAVLK#.L                   | 71.77  | 20.47 | 3.51 | 0.29 |
| Q9DBZ5_EIF3K_MOUSE | Eif3k  | Eukaryotic translation in K.GIDRYNPNLATER.Y                     | 36.84  | 9.13  | 4.03 | 0.25 |
| Q9DBZ5_EIF3K_MOUSE | Eif3k  | Eukaryotic translation in R.YNPNLATER.Y                         | 66.60  | 21.19 | 3.14 | 0.32 |
| Q9DBZ5_EIF3K_MOUSE | Eif3k  | Eukaryotic translation in K.ENAYDLEANLAVLK#.L                   | 14.82  | 7.14  | 2.07 | 0.48 |
| Q8QZY1_EIF3L_MOUSE | Eif3l  | Eukaryotic translation in K.LAGFLDLTEQEFR@.I                    | 9.31   | 2.88  | 3.24 | 0.31 |
| Q8QZY1_EIF3L_MOUSE | Eif3l  | Eukaryotic translation in K.VFSDEVQQAQLSTR@.S                   | 4.50   | 2.02  | 2.23 | 0.45 |
| Q8QZY1_EIF3L_MOUSE | Eif3l  | Eukaryotic translation in R.IQLLVFK#.H                          | 84.95  | 29.27 | 2.90 | 0.34 |
| Q8QZY1_EIF3L_MOUSE | Eif3l  | Eukaryotic translation in K.K#SEGEM*DFLR@.S                     | 31.29  | 12.24 | 2.56 | 0.39 |
| Q8QZY1_EIF3L_MOUSE | Eif3l  | Eukaryotic translation in K.LAGFLDLTEQEFR@.I                    | 104.61 | 30.34 | 3.45 | 0.29 |
| Q8QZY1_EIF3L_MOUSE | Eif3l  | Eukaryotic translation in R.LHSLLDGYQAIK#.V                     | 35.46  | 10.06 | 3.52 | 0.28 |
| Q8QZY1_EIF3L_MOUSE | Eif3l  | Eukaryotic translation in K.LYTTM*PVAK#.L                       | 51.06  | 19.84 | 2.57 | 0.39 |
| Q8QZY1_EIF3L_MOUSE | Eif3l  | Eukaryotic translation in K.M*LYGYSVGLLR@.L                     | 46.96  | 11.89 | 3.95 | 0.25 |
| Q8QZY1_EIF3L_MOUSE | Eif3l  | Eukaryotic translation in K.QDLAYER@.Q                          | 43.51  | 15.25 | 2.85 | 0.35 |
| Q8QZY1_EIF3L_MOUSE | Eif3l  | Eukaryotic translation in R.QLEVYTSGGDPESVAGEYGR@.H             | 25.71  | 8.07  | 3.19 | 0.31 |
| Q8QZY1_EIF3L_MOUSE | Eif3l  | Eukaryotic translation in R.QYEQQYQVPEVVK#.N                    | 12.17  | 4.35  | 2.80 | 0.36 |
| Q8QZY1_EIF3L_MOUSE | Eif3l  | Eukaryotic translation in R.R@YGFDFIR@.Q                        | 26.54  | 9.59  | 2.77 | 0.36 |
| Q8QZY1_EIF3L_MOUSE | Eif3l  | Eukaryotic translation in K.SEGEM*DFLR@.S                       | 10.88  | 3.63  | 2.99 | 0.33 |
| Q8QZY1_EIF3L_MOUSE | Eif3l  | Eukaryotic translation in K.TVSDLDQK#.V                         | 44.72  | 13.78 | 3.25 | 0.31 |
| Q8QZY1_EIF3L_MOUSE | Eif3l  | Eukaryotic translation in K.VFSDEVQQAQLSTR@.S                   | 55.42  | 18.25 | 3.04 | 0.33 |
| Q8QZY1_EIF3L_MOUSE | Eif3l  | Eukaryotic translation in K.VSGGSPLEQR@.F                       | 95.74  | 29.44 | 3.25 | 0.31 |
| Q8QZY1_EIF3L_MOUSE | Eif3l  | Eukaryotic translation in R.VSSDVIDQK#.V                        | 72.72  | 23.18 | 3.14 | 0.32 |
| Q8QZY1_EIF3L_MOUSE | Eif3l  | Eukaryotic translation in K.VYEQIDYENSNTK#.L                    | 37.42  | 11.74 | 3.19 | 0.31 |
| Q8QZY1_EIF3L_MOUSE | Eif3l  | Eukaryotic translation in K.VYELQASR@.V                         | 51.29  | 16.81 | 3.05 | 0.33 |
| Q8QZY1_EIF3L_MOUSE | Eif3l  | Eukaryotic translation in R.YGDFIR@.Q                           | 30.41  | 10.94 | 2.78 | 0.36 |
| Q8QZY1_EIF3L_MOUSE | Eif3l  | Eukaryotic translation in K.EPFLQK#.V                           | 12.01  | 3.91  | 3.07 | 0.33 |
| Q8QZY1_EIF3L_MOUSE | Eif3l  | Eukaryotic translation in R.IQLLVFK#.V                          | 59.31  | 22.23 | 2.67 | 0.37 |
| Q8QZY1_EIF3L_MOUSE | Eif3l  | Eukaryotic translation in K.LAGFLDLTEQEFR@.I                    | 77.48  | 23.27 | 3.33 | 0.30 |
| Q8QZY1_EIF3L_MOUSE | Eif3l  | Eukaryotic translation in R.LHSLLDGYQAIK#.V                     | 39.42  | 10.86 | 3.63 | 0.28 |

|                    |        |                                                          |         |        |      |      |
|--------------------|--------|----------------------------------------------------------|---------|--------|------|------|
| Q8QZ1_EIF3L_MOUSE  | Eif3l  | Eukaryotic translation in K.M*LGYSVFLGRLR@.L             | 24.46   | 3.83   | 6.38 | 0.16 |
| Q8QZ1_EIF3L_MOUSE  | Eif3l  | Eukaryotic translation in K.QDLAYER@.Q                   | 37.55   | 9.22   | 4.07 | 0.25 |
| Q8QZ1_EIF3L_MOUSE  | Eif3l  | Eukaryotic translation in R.QLEVYTSGGDPESVAGEYGR@.H      | 16.42   | 5.55   | 2.96 | 0.34 |
| Q8QZ1_EIF3L_MOUSE  | Eif3l  | Eukaryotic translation in R.QYEQQTQYQVPEVHK.N            | 11.41   | 3.47   | 3.29 | 0.30 |
| Q8QZ1_EIF3L_MOUSE  | Eif3l  | Eukaryotic translation in K.SEGEM*DFLR@.S                | 9.21    | 3.87   | 2.38 | 0.42 |
| Q8QZ1_EIF3L_MOUSE  | Eif3l  | Eukaryotic translation in K.TVSDLLDQK#.V                 | 26.92   | 3.04   | 8.86 | 0.11 |
| Q8QZ1_EIF3L_MOUSE  | Eif3l  | Eukaryotic translation in K.VFSDEVDQQAQLSTR@.S           | 45.71   | 12.48  | 3.66 | 0.27 |
| Q8QZ1_EIF3L_MOUSE  | Eif3l  | Eukaryotic translation in K.VSGVPSLEQR@.F                | 26.40   | 26.76  | 3.49 | 0.29 |
| Q8QZ1_EIF3L_MOUSE  | Eif3l  | Eukaryotic translation in R.VSSDVIDQK#.V                 | 49.40   | 21.67  | 2.28 | 0.44 |
| Q8QZ1_EIF3L_MOUSE  | Eif3l  | Eukaryotic translation in K.VVEIQYFENSWTK#.L             | 24.53   | 7.06   | 3.47 | 0.29 |
| Q8QZ1_EIF3L_MOUSE  | Eif3l  | Eukaryotic translation in K.VYELQASR@.V                  | 46.98   | 15.61  | 3.01 | 0.33 |
| Q8QZ1_EIF3L_MOUSE  | Eif3l  | Eukaryotic translation in R.YGDFFR@.Q                    | 27.51   | 7.02   | 3.92 | 0.26 |
| Q99JX4_EIF3M_MOUSE | Eif3m  | Eukaryotic translation in R.ALK*DPNAPFLDHLTLK#PVK#.F     | 69.46   | 13.90  | 5.00 | 0.20 |
| Q99JX4_EIF3M_MOUSE | Eif3m  | Eukaryotic translation in R.LLTFM*GM*AVENK#.E            | 60.34   | 14.74  | 4.09 | 0.24 |
| Q99JX4_EIF3M_MOUSE | Eif3m  | Eukaryotic translation in K.QQVQQLYDTLNAWK#.Q            | 14.77   | 4.26   | 3.46 | 0.29 |
| Q99JX4_EIF3M_MOUSE | Eif3m  | Eukaryotic translation in K.VM*VELLGSYEDNASQAR@.V        | 17.21   | 6.95   | 2.48 | 0.40 |
| Q99JX4_EIF3M_MOUSE | Eif3m  | Eukaryotic translation in K.VM*VELLGSYEDNASQAR@.V        | 25.18   | 9.04   | 2.79 | 0.36 |
| Q99JX4_EIF3M_MOUSE | Eif3m  | Eukaryotic translation in K.VMVELLGSYEDNASQAR@.V         | 8.86    | 2.56   | 3.46 | 0.29 |
| P60843_IF4A1_MOUSE | Eif4a1 | Eukaryotic initiation fact K.ATQALVAPTR@.E               | 243.66  | 103.15 | 2.36 | 0.42 |
| P60843_IF4A1_MOUSE | Eif4a1 | Eukaryotic initiation fact R.DFTVSAM*HGDMDQK#.E          | 30.90   | 14.23  | 2.17 | 0.46 |
| P60843_IF4A1_MOUSE | Eif4a1 | Eukaryotic initiation fact R.VIETFYNSIEEM*PLNVADLI.-     | 80.82   | 80.82  | 1.00 | 1.00 |
| P60843_IF4A1_MOUSE | Eif4a1 | Eukaryotic initiation fact K.DQYDIFQK#.L                 | 49.80   | 26.56  | 1.88 | 0.53 |
| P60843_IF4A1_MOUSE | Eif4a1 | Eukaryotic initiation fact K.EELTEGIR@.Q                 | 138.23  | 56.56  | 2.44 | 0.41 |
| P60843_IF4A1_MOUSE | Eif4a1 | Eukaryotic initiation fact R.ELAQIQK#.V                  | 645.24  | 236.14 | 2.73 | 0.37 |
| P60843_IF4A1_MOUSE | Eif4a1 | Eukaryotic initiation fact R.GFKDQYDIFQK.L               | 398.42  | 176.03 | 2.26 | 0.44 |
| P60843_IF4A1_MOUSE | Eif4a1 | Eukaryotic initiation fact R.GIDVQVSLVINYLPTNR@.E        | 97.52   | 38.58  | 2.53 | 0.40 |
| P60843_IF4A1_MOUSE | Eif4a1 | Eukaryotic initiation fact R.GIYAGFEK#PSAIQQR@.A         | 1018.68 | 397.71 | 2.56 | 0.39 |
| P60843_IF4A1_MOUSE | Eif4a1 | Eukaryotic initiation fact K.GYDVIQAQSGTGK#.T            | 435.58  | 199.81 | 2.18 | 0.46 |
| P60843_IF4A1_MOUSE | Eif4a1 | Eukaryotic initiation fact R.KHGVAINMVFTEEDK#R@.T        | 76.94   | 29.17  | 2.64 | 0.38 |
| P60843_IF4A1_MOUSE | Eif4a1 | Eukaryotic initiation fact R.K#VDWLTEK#.M                | 368.68  | 180.05 | 2.05 | 0.49 |
| P60843_IF4A1_MOUSE | Eif4a1 | Eukaryotic initiation fact K.LNSNTQVLLSATM*PSDVLVTK#.K   | 88.28   | 33.03  | 2.67 | 0.37 |
| P60843_IF4A1_MOUSE | Eif4a1 | Eukaryotic initiation fact K.LNSNTQVLLSATM*PSDVLVTK#.K   | 9.73    | 3.73   | 2.61 | 0.38 |
| P60843_IF4A1_MOUSE | Eif4a1 | Eukaryotic initiation fact K.LNSNTQVLLSATM*PSDVLVTK#.K   | 30.55   | 18.58  | 1.64 | 0.61 |
| P60843_IF4A1_MOUSE | Eif4a1 | Eukaryotic initiation fact K.LNSNTQVLLSATM*PSDVLVTK#.K.F | 61.77   | 24.24  | 2.55 | 0.39 |
| P60843_IF4A1_MOUSE | Eif4a1 | Eukaryotic initiation fact K.LNSNTQVLLSATM*PSDVLVTK#.K.F | 32.73   | 14.36  | 2.28 | 0.44 |
| P60843_IF4A1_MOUSE | Eif4a1 | Eukaryotic initiation fact K.LQM*EAPHIIVGTPGR@.V         | 438.90  | 201.92 | 2.17 | 0.46 |
| P60843_IF4A1_MOUSE | Eif4a1 | Eukaryotic initiation fact K.M*FVLEADEM*LSR@.G           | 327.81  | 130.45 | 2.51 | 0.40 |
| P60843_IF4A1_MOUSE | Eif4a1 | Eukaryotic initiation fact K.MFVLEADEM*LSR@.G            | 50.56   | 24.64  | 2.05 | 0.49 |
| P60843_IF4A1_MOUSE | Eif4a1 | Eukaryotic initiation fact K.M*FVLEADEM*LSR@.G           | 39.01   | 20.67  | 1.89 | 0.53 |
| P60843_IF4A1_MOUSE | Eif4a1 | Eukaryotic initiation fact K.MFVLEADEM*LSR@.G            | 22.65   | 7.83   | 2.89 | 0.35 |
| P60843_IF4A1_MOUSE | Eif4a1 | Eukaryotic initiation fact R.QFYINVER.E                  | 244.15  | 100.48 | 2.43 | 0.41 |
| P60843_IF4A1_MOUSE | Eif4a1 | Eukaryotic initiation fact R.R@K#VDWLTEK#.M              | 259.83  | 120.24 | 2.16 | 0.46 |
| P60843_IF4A1_MOUSE | Eif4a1 | Eukaryotic initiation fact R.VFDM*LNLR@.R                | 99.79   | 42.67  | 2.34 | 0.43 |
| P60843_IF4A1_MOUSE | Eif4a1 | Eukaryotic initiation fact R.VFDMLNR.R                   | 30.75   | 16.81  | 1.83 | 0.55 |
| P60843_IF4A1_MOUSE | Eif4a1 | Eukaryotic initiation fact R.VLITDLLAR.G                 | 1416.08 | 585.24 | 2.42 | 0.41 |
| P60843_IF4A1_MOUSE | Eif4a1 | Eukaryotic initiation fact K.ATQALVAPTR@.E               | 7.08    | 5.46   | 1.30 | 0.77 |
| P60843_IF4A1_MOUSE | Eif4a1 | Eukaryotic initiation fact R.GIYAGFEK#PSAIQQR@.A         | 33.39   | 13.77  | 2.42 | 0.41 |
| P60843_IF4A1_MOUSE | Eif4a1 | Eukaryotic initiation fact K.GYDVIQAQSGTGK#.T            | 13.40   | 6.41   | 2.09 | 0.48 |
| P60843_IF4A1_MOUSE | Eif4a1 | Eukaryotic initiation fact R.VLITDLLAR@.G                | 41.50   | 10.95  | 3.79 | 0.26 |
| P60843_IF4A1_MOUSE | Eif4a1 | Eukaryotic initiation fact K.ATQALVAPTR@.E               | 90.41   | 33.05  | 2.74 | 0.37 |
| P60843_IF4A1_MOUSE | Eif4a1 | Eukaryotic initiation fact K.DQYDIFQK#.L                 | 21.82   | 10.37  | 2.10 | 0.48 |
| P60843_IF4A1_MOUSE | Eif4a1 | Eukaryotic initiation fact K.EELTEGIR@.Q                 | 34.78   | 12.19  | 2.85 | 0.35 |
| P60843_IF4A1_MOUSE | Eif4a1 | Eukaryotic initiation fact R.ELAQIQK#.V                  | 181.78  | 51.28  | 3.54 | 0.28 |
| P60843_IF4A1_MOUSE | Eif4a1 | Eukaryotic initiation fact R.GFKDQYDIFQK#.L              | 52.83   | 10.41  | 5.07 | 0.20 |
| P60843_IF4A1_MOUSE | Eif4a1 | Eukaryotic initiation fact R.GFKDQYDIFQK.L               | 100.37  | 27.46  | 3.66 | 0.27 |
| P60843_IF4A1_MOUSE | Eif4a1 | Eukaryotic initiation fact R.GIDVQVSLVINYLPTNR@.E        | 48.74   | 35.94  | 1.36 | 0.74 |
| P60843_IF4A1_MOUSE | Eif4a1 | Eukaryotic initiation fact R.GIYAGFEK#PSAIQQR@.A         | 220.48  | 59.19  | 3.73 | 0.27 |
| P60843_IF4A1_MOUSE | Eif4a1 | Eukaryotic initiation fact K.GYDVIQAQSGTGK#.T            | 125.75  | 37.50  | 3.35 | 0.30 |
| P60843_IF4A1_MOUSE | Eif4a1 | Eukaryotic initiation fact K.KHEELTEGIR@.Q               | 120.99  | 29.54  | 4.10 | 0.24 |
| P60843_IF4A1_MOUSE | Eif4a1 | Eukaryotic initiation fact R.K#VDWLTEK#.M                | 65.08   | 21.76  | 2.99 | 0.33 |
| P60843_IF4A1_MOUSE | Eif4a1 | Eukaryotic initiation fact K.LNSNTQVLLSATM*PSDVLVTK#.K   | 24.58   | 8.95   | 2.75 | 0.36 |
| P60843_IF4A1_MOUSE | Eif4a1 | Eukaryotic initiation fact K.LNSNTQVLLSATM*PSDVLVTK#.K   | 5.81    | 2.27   | 2.56 | 0.39 |
| P60843_IF4A1_MOUSE | Eif4a1 | Eukaryotic initiation fact K.LNSNTQVLLSATM*PSDVLVTK#.K.F | 20.21   | 4.49   | 4.50 | 0.22 |
| P60843_IF4A1_MOUSE | Eif4a1 | Eukaryotic initiation fact K.LQM*EAPHIIVGTPGR@.V         | 154.83  | 49.94  | 3.10 | 0.32 |
| P60843_IF4A1_MOUSE | Eif4a1 | Eukaryotic initiation fact K.M*FVLEADEM*LSR@.G           | 107.62  | 35.81  | 3.01 | 0.32 |
| P60843_IF4A1_MOUSE | Eif4a1 | Eukaryotic initiation fact K.MFVLEADEM*LSR@.G            | 9.27    | 3.62   | 2.56 | 0.39 |
| P60843_IF4A1_MOUSE | Eif4a1 | Eukaryotic initiation fact R.QFYINVER.E                  | 65.99   | 21.01  | 3.14 | 0.32 |
| P60843_IF4A1_MOUSE | Eif4a1 | Eukaryotic initiation fact R.VDWLTEK#.M                  | 20.51   | 8.33   | 2.46 | 0.41 |
| P60843_IF4A1_MOUSE | Eif4a1 | Eukaryotic initiation fact R.VFDM*LNLR@.R                | 32.77   | 8.68   | 3.78 | 0.26 |
| P60843_IF4A1_MOUSE | Eif4a1 | Eukaryotic initiation fact R.VLITDLLAR@.G                | 402.18  | 127.81 | 3.15 | 0.32 |
| P60843_IF4A1_MOUSE | Eif4a1 | Eukaryotic initiation fact K.ATQALVAPTR@.E               | 63.28   | 14.17  | 4.46 | 0.22 |
| P60843_IF4A1_MOUSE | Eif4a1 | Eukaryotic initiation fact R.DFTVSAM*HGDMDQK#.E          | 11.67   | 3.74   | 3.12 | 0.32 |
| P60843_IF4A1_MOUSE | Eif4a1 | Eukaryotic initiation fact K.DQYDIFQK#.L                 | 34.74   | 11.55  | 3.01 | 0.33 |
| P60843_IF4A1_MOUSE | Eif4a1 | Eukaryotic initiation fact K.EELTEGIR@.Q                 | 50.47   | 12.95  | 3.90 | 0.26 |
| P60843_IF4A1_MOUSE | Eif4a1 | Eukaryotic initiation fact R.ELAQIQK#.V                  | 294.42  | 54.29  | 5.42 | 0.18 |
| P60843_IF4A1_MOUSE | Eif4a1 | Eukaryotic initiation fact R.GFKDQYDIFQK#.L              | 115.52  | 22.75  | 5.08 | 0.20 |
| P60843_IF4A1_MOUSE | Eif4a1 | Eukaryotic initiation fact R.GIDVQVSLVINYLPTNR@.E        | 91.98   | 26.30  | 3.50 | 0.29 |
| P60843_IF4A1_MOUSE | Eif4a1 | Eukaryotic initiation fact R.GIYAGFEK#PSAIQQR@.A         | 253.14  | 63.31  | 4.00 | 0.25 |
| P60843_IF4A1_MOUSE | Eif4a1 | Eukaryotic initiation fact K.GYDVIQAQSGTGK#.T            | 164.48  | 46.19  | 3.55 | 0.28 |
| P60843_IF4A1_MOUSE | Eif4a1 | Eukaryotic initiation fact R.KHGVAINMVFTEEDK#R@.T        | 18.49   | 7.29   | 2.54 | 0.39 |
| P60843_IF4A1_MOUSE | Eif4a1 | Eukaryotic initiation fact R.K#VDWLTEK#.M                | 66.72   | 15.68  | 4.26 | 0.24 |
| P60843_IF4A1_MOUSE | Eif4a1 | Eukaryotic initiation fact K.LNSNTQVLLSATM*PSDVLVTK#.K   | 41.21   | 9.45   | 4.36 | 0.23 |
| P60843_IF4A1_MOUSE | Eif4a1 | Eukaryotic initiation fact K.LNSNTQVLLSATM*PSDVLVTK#.K.F | 29.43   | 6.78   | 4.34 | 0.23 |
| P60843_IF4A1_MOUSE | Eif4a1 | Eukaryotic initiation fact K.LNSNTQVLLSATM*PSDVLVTK#.K.F | 9.56    | 3.47   | 2.75 | 0.36 |
| P60843_IF4A1_MOUSE | Eif4a1 | Eukaryotic initiation fact K.LQM*EAPHIIVGTPGR@.V         | 190.85  | 46.73  | 4.08 | 0.24 |
| P60843_IF4A1_MOUSE | Eif4a1 | Eukaryotic initiation fact K.M*FVLEADEM*LSR@.G           | 128.92  | 31.63  | 4.08 | 0.25 |
| P60843_IF4A1_MOUSE | Eif4a1 | Eukaryotic initiation fact K.MFVLEADEM*LSR@.G            | 13.22   | 4.50   | 2.94 | 0.34 |
| P60843_IF4A1_MOUSE | Eif4a1 | Eukaryotic initiation fact R.QFYINVER@.E                 | 75.33   | 17.69  | 4.26 | 0.23 |
| P60843_IF4A1_MOUSE | Eif4a1 | Eukaryotic initiation fact R.VFDM*LNLR@.R                | 37.50   | 10.58  | 3.55 | 0.28 |
| P60843_IF4A1_MOUSE | Eif4a1 | Eukaryotic initiation fact R.VLITDLLAR@.G                | 421.33  | 106.33 | 3.96 | 0.25 |
| P10630_IF4A2_MOUSE | Eif4a2 | Eukaryotic initiation fact R.DFTVSALHGDMDQK#.E           | 5.61    | 2.23   | 2.52 | 0.40 |
| P10630_IF4A2_MOUSE | Eif4a2 | Eukaryotic initiation fact K.EELTEGIR@.Q                 | 8.07    | 3.68   | 2.19 | 0.46 |
| P10630_IF4A2_MOUSE | Eif4a2 | Eukaryotic initiation fact K.ETQALVAPTR@.E               | 22.53   | 8.43   | 2.67 | 0.37 |
| P10630_IF4A2_MOUSE | Eif4a2 | Eukaryotic initiation fact R.GFKDQYDIFQK#.L              | 18.50   | 14.70  | 2.66 | 0.38 |
| P10630_IF4A2_MOUSE | Eif4a2 | Eukaryotic initiation fact K.KHEELTEGIR@.Q               | 19.59   | 8.47   | 2.31 | 0.43 |
| P10630_IF4A2_MOUSE | Eif4a2 | Eukaryotic initiation fact R.KHGVAINVFTEEDK#R@.I         | 18.98   | 34.06  | 2.44 | 0.41 |
| P10630_IF4A2_MOUSE | Eif4a2 | Eukaryotic initiation fact K.LNTSIQVLLSATM*PTDVLVTK#.K   | 5.79    | 2.00   | 2.90 | 0.34 |
| P10630_IF4A2_MOUSE | Eif4a2 | Eukaryotic initiation fact R.GFKDQYDIFQK#.L              | 11.31   | 1.79   | 6.33 | 0.16 |
| Q91VC3_IF4A3_MOUSE | Eif4a3 | Eukaryotic initiation fact R.DELTEGIR@.Q                 | 106.99  | 43.46  | 2.46 | 0.41 |
| Q91VC3_IF4A3_MOUSE | Eif4a3 | Eukaryotic initiation fact R.DIEQYYSYQDQEM*PM*NVADLI.-   | 80.36   | 80.36  | 1.00 | 1.00 |
| Q91VC3_IF4A3_MOUSE | Eif4a3 | Eukaryotic initiation fact R.DVIAQSGTGK#.T               | 212.20  | 91.78  | 2.31 | 0.43 |
| Q91VC3_IF4A3_MOUSE | Eif4a3 | Eukaryotic initiation fact R.ELAVQIQK#.G                 | 643.43  | 294.07 | 2.19 | 0.46 |
| Q91VC3_IF4A3_MOUSE | Eif4a3 | Eukaryotic initiation fact K.EQYDQVRR@.Y                 | 288.77  | 110.87 | 2.60 | 0.38 |

|                    |          |                                                                 |        |         |      |      |
|--------------------|----------|-----------------------------------------------------------------|--------|---------|------|------|
| Q91VC3_IF4A3_MOUSE | Eif4a3   | Eukaryotic initiation fact R.ETQALILAPTR@.E                     | 485.90 | 1049.26 | 0.46 | 2.16 |
| Q91VC3_IF4A3_MOUSE | Eif4a3   | Eukaryotic initiation fact K.FM**TDPIR@.I                       | 425.90 | 193.01  | 2.21 | 0.45 |
| Q91VC3_IF4A3_MOUSE | Eif4a3   | Eukaryotic initiation fact K.GFKEQIYDVYR@.Y                     | 137.95 | 56.60   | 2.44 | 0.41 |
| Q91VC3_IF4A3_MOUSE | Eif4a3   | Eukaryotic initiation fact K.GFKEQIYDVYR.Y                      | 46.23  | 19.87   | 2.33 | 0.43 |
| Q91VC3_IF4A3_MOUSE | Eif4a3   | Eukaryotic initiation fact K.GR@DVIAGSOSGTGK#.T                 | 37.34  | 19.92   | 1.88 | 0.53 |
| Q91VC3_IF4A3_MOUSE | Eif4a3   | Eukaryotic initiation fact K.GVAINFVK#.N                        | 102.54 | 50.92   | 2.01 | 0.50 |
| Q91VC3_IF4A3_MOUSE | Eif4a3   | Eukaryotic initiation fact R.KGVAINFVK.N                        | 348.14 | 171.83  | 2.03 | 0.49 |
| Q91VC3_IF4A3_MOUSE | Eif4a3   | Eukaryotic initiation fact R.K.HLDYGHQHVAVAGTPGR@.V             | 349.12 | 146.87  | 2.38 | 0.42 |
| Q91VC3_IF4A3_MOUSE | Eif4a3   | Eukaryotic initiation fact K.LDYGQHVAVAGTPGR@.V                 | 386.70 | 167.59  | 2.31 | 0.43 |
| Q91VC3_IF4A3_MOUSE | Eif4a3   | Eukaryotic initiation fact K.LDYGQHVAVAGTPGR.V                  | 19.55  | 9.41    | 2.08 | 0.48 |
| Q91VC3_IF4A3_MOUSE | Eif4a3   | Eukaryotic initiation fact K.M*LVLEADEM*LNK#.G                  | 191.39 | 90.09   | 2.12 | 0.47 |
| Q91VC3_IF4A3_MOUSE | Eif4a3   | Eukaryotic initiation fact K.MLVLEADEM*LNK#.G                   | 18.02  | 5.65    | 3.19 | 0.31 |
| Q91VC3_IF4A3_MOUSE | Eif4a3   | Eukaryotic initiation fact K.M*LVLEADEMLNK#.G                   | 28.62  | 10.13   | 2.83 | 0.35 |
| Q91VC3_IF4A3_MOUSE | Eif4a3   | Eukaryotic initiation fact K.MLVLEADEMLNK#.G                    | 16.53  | 11.02   | 1.50 | 0.67 |
| Q91VC3_IF4A3_MOUSE | Eif4a3   | Eukaryotic initiation fact K.QFFVAVER@.E                        | 223.88 | 91.39   | 2.45 | 0.41 |
| Q91VC3_IF4A3_MOUSE | Eif4a3   | Eukaryotic initiation fact K.R@DELTLGK#.Q                       | 197.94 | 81.83   | 2.42 | 0.41 |
| Q91VC3_IF4A3_MOUSE | Eif4a3   | Eukaryotic initiation fact K.VEFETSEEDVTPFDTM*GLR.E             | 8.10   | 4.99    | 1.62 | 0.62 |
| Q91VC3_IF4A3_MOUSE | Eif4a3   | Eukaryotic initiation fact K.VEFETSEEDVTPFDTM*GLR@EDLLR@.G      | 14.37  | 5.91    | 2.43 | 0.41 |
| Q91VC3_IF4A3_MOUSE | Eif4a3   | Eukaryotic initiation fact R.VLIVTDVWAR@.G                      | 396.35 | 155.99  | 2.54 | 0.39 |
| Q91VC3_IF4A3_MOUSE | Eif4a3   | Eukaryotic initiation fact R.DELTLGK#.Q                         | 8.56   | 17.26   | 0.50 | 2.02 |
| Q91VC3_IF4A3_MOUSE | Eif4a3   | Eukaryotic initiation fact R.DIEQYYSQIEM*PM*NVADLI.-            | 9.91   | 9.91    | 1.00 | 1.00 |
| Q91VC3_IF4A3_MOUSE | Eif4a3   | Eukaryotic initiation fact R.DIEQYYSQIEM*PM*NVADLI.-            | 3.38   | 3.38    | 1.00 | 1.00 |
| Q91VC3_IF4A3_MOUSE | Eif4a3   | Eukaryotic initiation fact R.ELAVQK#.G                          | 46.63  | 16.67   | 2.80 | 0.36 |
| Q91VC3_IF4A3_MOUSE | Eif4a3   | Eukaryotic initiation fact K.EQIYDVYR@.Y                        | 27.83  | 10.84   | 2.57 | 0.39 |
| Q91VC3_IF4A3_MOUSE | Eif4a3   | Eukaryotic initiation fact R.ETQALILAPTR@.E                     | 50.42  | 21.07   | 2.39 | 0.42 |
| Q91VC3_IF4A3_MOUSE | Eif4a3   | Eukaryotic initiation fact K.FM**TDPIR.I                        | 52.97  | 16.10   | 3.29 | 0.30 |
| Q91VC3_IF4A3_MOUSE | Eif4a3   | Eukaryotic initiation fact K.GFKEQIYDVYR@.Y                     | 14.90  | 6.04    | 2.47 | 0.41 |
| Q91VC3_IF4A3_MOUSE | Eif4a3   | Eukaryotic initiation fact R.K.HLDYGHQHVAVAGTPGR@.V             | 34.66  | 12.67   | 2.74 | 0.37 |
| Q91VC3_IF4A3_MOUSE | Eif4a3   | Eukaryotic initiation fact K.M*LVLEADEM*LNK#.G                  | 38.22  | 13.82   | 2.77 | 0.36 |
| Q91VC3_IF4A3_MOUSE | Eif4a3   | Eukaryotic initiation fact K.M*LVLEADEM*LNK#.G                  | 21.95  | 8.64    | 2.54 | 0.39 |
| Q91VC3_IF4A3_MOUSE | Eif4a3   | Eukaryotic initiation fact K.QFFVAVER@.E                        | 22.44  | 8.16    | 2.75 | 0.36 |
| Q91VC3_IF4A3_MOUSE | Eif4a3   | Eukaryotic initiation fact R.VLIVTDVWAR@.G                      | 42.16  | 12.79   | 3.30 | 0.30 |
| Q91VC3_IF4A3_MOUSE | Eif4a3   | Eukaryotic initiation fact R.DIEQYYSQIEM*PM*NVADLI.-            | 3.49   | 3.49    | 1.00 | 1.00 |
| Q91VC3_IF4A3_MOUSE | Eif4a3   | Eukaryotic initiation fact R.DVIAGSOSGTGK#.T                    | 13.49  | 1.41    | 9.58 | 0.10 |
| Q91VC3_IF4A3_MOUSE | Eif4a3   | Eukaryotic initiation fact R.ELAVQK#.G                          | 51.91  | 9.36    | 5.55 | 0.18 |
| Q91VC3_IF4A3_MOUSE | Eif4a3   | Eukaryotic initiation fact R.ETQALILAPTR@.E                     | 54.95  | 16.40   | 3.35 | 0.30 |
| Q91VC3_IF4A3_MOUSE | Eif4a3   | Eukaryotic initiation fact K.FM**TDPIR@.I                       | 46.32  | 11.22   | 4.13 | 0.24 |
| Q91VC3_IF4A3_MOUSE | Eif4a3   | Eukaryotic initiation fact K.GR@DVIAGSOSGTGK#.T                 | 11.80  | 2.54    | 4.65 | 0.21 |
| Q91VC3_IF4A3_MOUSE | Eif4a3   | Eukaryotic initiation fact K.GVAINFVK#.N                        | 15.25  | 5.32    | 2.87 | 0.35 |
| Q91VC3_IF4A3_MOUSE | Eif4a3   | Eukaryotic initiation fact K.HLDYGHQHVAVAGTPGR@.V               | 39.00  | 9.20    | 4.24 | 0.24 |
| Q91VC3_IF4A3_MOUSE | Eif4a3   | Eukaryotic initiation fact K.M*LVLEADEM*LNK#.G                  | 28.08  | 8.08    | 3.56 | 0.28 |
| Q91VC3_IF4A3_MOUSE | Eif4a3   | Eukaryotic initiation fact K.QFFVAVER@.E                        | 23.17  | 7.87    | 2.94 | 0.34 |
| Q91VC3_IF4A3_MOUSE | Eif4a3   | Eukaryotic initiation fact K.R@DELTLGK#.Q                       | 39.31  | 4.32    | 9.10 | 0.11 |
| Q91VC3_IF4A3_MOUSE | Eif4a3   | Eukaryotic initiation fact R.VLIVTDVWAR@.G                      | 32.06  | 7.17    | 4.47 | 0.22 |
| Q88GD9_IF4B_MOUSE  | Eif4b    | Eukaryotic translation in R.SOSSDTEQSPSTSGGK#.V                 | 4.08   | 3.29    | 1.24 | 0.80 |
| Q88MB3_IF4E2_MOUSE | Eif4e2   | Eukaryotic translation in R.FOEDIISVWKN#.T                      | 40.13  | 12.26   | 3.27 | 0.31 |
| Q88MB3_IF4E2_MOUSE | Eif4e2   | Eukaryotic translation in K.QJGTFAVSEQFVK#.F                    | 21.59  | 2.33    | 9.25 | 0.11 |
| Q88MB3_IF4E2_MOUSE | Eif4e2   | Eukaryotic translation in K.TASDQATTAR@.I                       | 7.43   | 4.64    | 1.60 | 0.62 |
| Q88MB3_IF4E2_MOUSE | Eif4e2   | Eukaryotic translation in R.TPGR@PTSSQSYEQNIK#.Q                | 35.84  | 11.31   | 3.17 | 0.32 |
| Q88MB3_IF4E2_MOUSE | Eif4e2   | Eukaryotic translation in R.VLNLPPNTIM*YK#.T                    | 12.85  | 5.30    | 2.42 | 0.41 |
| Q9EST3_4ET_MOUSE   | Eif4en1f | Eukaryotic translation in K.VDLK#PLLSLSANK#.E                   | 7.81   | 1.97    | 3.96 | 0.25 |
| Q6NZ16_IF4G1_MOUSE | Eif4g1   | Eukaryotic translation in R.EFLAEGQDVSFVAEK#.K                  | 14.50  | 7.61    | 1.90 | 0.53 |
| Q6NZ16_IF4G1_MOUSE | Eif4g1   | Eukaryotic translation in R.GGPGGELPR@.G                        | 15.48  | 10.80   | 1.43 | 0.70 |
| Q6NZ16_IF4G1_MOUSE | Eif4g1   | Eukaryotic translation in R.GLPLVDDGGWNTVPISK#.G                | 9.34   | 6.82    | 1.37 | 0.73 |
| Q6NZ16_IF4G1_MOUSE | Eif4g1   | Eukaryotic translation in K.GVIDLIFEK#.A                        | 13.21  | 8.35    | 1.58 | 0.63 |
| Q6NZ16_IF4G1_MOUSE | Eif4g1   | Eukaryotic translation in K.IISSVIM*TEDIK#.L                    | 11.06  | 3.82    | 2.90 | 0.35 |
| Q6NZ16_IF4G1_MOUSE | Eif4g1   | Eukaryotic translation in K.K#VEYTLGEESEAPGQR@.T                | 9.02   | 7.76    | 1.16 | 0.86 |
| Q6NZ16_IF4G1_MOUSE | Eif4g1   | Eukaryotic translation in R.M*DQYFNQM*EK#.I                     | 8.36   | 6.20    | 1.35 | 0.74 |
| Q6NZ16_IF4G1_MOUSE | Eif4g1   | Eukaryotic translation in R.VFDVIDANLNQEQIASNTLVR@.A            | 5.91   | 4.23    | 1.40 | 0.72 |
| Q6NZ16_IF4G1_MOUSE | Eif4g1   | Eukaryotic translation in K.DITEEM*SGAR@.T                      | 8.69   | 4.23    | 2.06 | 0.49 |
| Q6NZ16_IF4G1_MOUSE | Eif4g1   | Eukaryotic translation in K.EAVGDLLDAFK#.E                      | 43.22  | 10.58   | 4.08 | 0.24 |
| Q6NZ16_IF4G1_MOUSE | Eif4g1   | Eukaryotic translation in R.EFLAEGQDVSFVAEK#.K                  | 33.98  | 9.73    | 3.49 | 0.29 |
| Q6NZ16_IF4G1_MOUSE | Eif4g1   | Eukaryotic translation in K.FIGELFK#.L                          | 35.62  | 12.17   | 2.93 | 0.34 |
| Q6NZ16_IF4G1_MOUSE | Eif4g1   | Eukaryotic translation in R.GGPGGELPR@.G                        | 35.00  | 11.09   | 3.16 | 0.32 |
| Q6NZ16_IF4G1_MOUSE | Eif4g1   | Eukaryotic translation in R.GLPLVDDGGWNTVPISK#.G                | 16.80  | 4.78    | 3.52 | 0.28 |
| Q6NZ16_IF4G1_MOUSE | Eif4g1   | Eukaryotic translation in R.GPAGLPR@.R                          | 17.37  | 6.75    | 2.57 | 0.39 |
| Q6NZ16_IF4G1_MOUSE | Eif4g1   | Eukaryotic translation in K.GSSGSSGAKPSTASEATRLNLR.F            | 23.55  | 9.16    | 2.57 | 0.39 |
| Q6NZ16_IF4G1_MOUSE | Eif4g1   | Eukaryotic translation in K.GVIDLIFEK#.A                        | 49.02  | 15.22   | 3.22 | 0.31 |
| Q6NZ16_IF4G1_MOUSE | Eif4g1   | Eukaryotic translation in K.IHNAENIQPEEQK#.Y                    | 4.25   | 2.50    | 1.70 | 0.59 |
| Q6NZ16_IF4G1_MOUSE | Eif4g1   | Eukaryotic translation in K.IISSVIM*TEDIK#.L                    | 10.74  | 3.46    | 3.10 | 0.32 |
| Q6NZ16_IF4G1_MOUSE | Eif4g1   | Eukaryotic translation in R.K#ISSVIM*TEDIK#.L                   | 17.72  | 8.06    | 2.20 | 0.45 |
| Q6NZ16_IF4G1_MOUSE | Eif4g1   | Eukaryotic translation in R.LGIESTLER@.S                        | 57.45  | 91.59   | 0.63 | 1.59 |
| Q6NZ16_IF4G1_MOUSE | Eif4g1   | Eukaryotic translation in R.LK#GVIDLIFEK#.A                     | 16.36  | 3.97    | 4.12 | 0.24 |
| Q6NZ16_IF4G1_MOUSE | Eif4g1   | Eukaryotic translation in R.LLTTIGK#.D                          | 53.88  | 9.54    | 5.65 | 0.18 |
| Q6NZ16_IF4G1_MOUSE | Eif4g1   | Eukaryotic translation in R.M*DQYFNQM*EK#.I                     | 16.69  | 2.95    | 5.66 | 0.18 |
| Q6NZ16_IF4G1_MOUSE | Eif4g1   | Eukaryotic translation in K.QVTLQADTEER.L                       | 38.98  | 11.67   | 3.34 | 0.30 |
| Q6NZ16_IF4G1_MOUSE | Eif4g1   | Eukaryotic translation in K.SDQVWKNLLEEK#.K                     | 28.72  | 9.40    | 3.05 | 0.33 |
| Q6NZ16_IF4G1_MOUSE | Eif4g1   | Eukaryotic translation in K.SVTAFFNWLNR@.E                      | 24.83  | 5.67    | 4.38 | 0.23 |
| Q6NZ16_IF4G1_MOUSE | Eif4g1   | Eukaryotic translation in R.TASTPTTQPGSLEPPQNGESQVAVIIR@PDDR@.S | 1.70   | 1.99    | 0.85 | 1.17 |
| Q6NZ16_IF4G1_MOUSE | Eif4g1   | Eukaryotic translation in R.VDVQVQLK#.V                         | 15.30  | 3.67    | 4.17 | 0.24 |
| Q6NZ16_IF4G1_MOUSE | Eif4g1   | Eukaryotic translation in R.VFDVIDANLNQEQIASNTLVR@.A            | 22.79  | 9.06    | 2.52 | 0.40 |
| Q6NZ16_IF4G1_MOUSE | Eif4g1   | Eukaryotic translation in K.VPTEKHPTVTVNFNR@.K                  | 45.54  | 11.95   | 3.81 | 0.26 |
| Q6NZ16_IF4G1_MOUSE | Eif4g1   | Eukaryotic translation in K.AALSVDVEKHK#.S                      | 5.38   | 2.79    | 1.93 | 0.52 |
| Q6NZ16_IF4G1_MOUSE | Eif4g1   | Eukaryotic translation in K.EAVGDLLDAFK#.E                      | 27.34  | 9.56    | 2.86 | 0.35 |
| Q6NZ16_IF4G1_MOUSE | Eif4g1   | Eukaryotic translation in R.EFLAEGQDVSFVAEK#.K                  | 40.02  | 15.33   | 2.61 | 0.38 |
| Q6NZ16_IF4G1_MOUSE | Eif4g1   | Eukaryotic translation in R.FSALQTLPAENTDNR@.R                  | 3.62   | 2.51    | 1.44 | 0.69 |
| Q6NZ16_IF4G1_MOUSE | Eif4g1   | Eukaryotic translation in R.GGPGGELPR@.G                        | 45.29  | 11.01   | 4.11 | 0.24 |
| Q6NZ16_IF4G1_MOUSE | Eif4g1   | Eukaryotic translation in R.GGPPGPIINR@.G                       | 24.53  | 9.24    | 2.65 | 0.38 |
| Q6NZ16_IF4G1_MOUSE | Eif4g1   | Eukaryotic translation in R.GLPLVDDGGWNTVPISK#.G                | 23.51  | 6.03    | 3.90 | 0.26 |
| Q6NZ16_IF4G1_MOUSE | Eif4g1   | Eukaryotic translation in K.GSSGSSGAKPSTASEATRLNLR@PATLNR@.F    | 26.90  | 4.89    | 5.50 | 0.18 |
| Q6NZ16_IF4G1_MOUSE | Eif4g1   | Eukaryotic translation in K.IISSVIM*TEDIK#.L                    | 14.27  | 4.75    | 3.00 | 0.33 |
| Q6NZ16_IF4G1_MOUSE | Eif4g1   | Eukaryotic translation in K.ITKPGSIDNSNQLFAPGGR.L               | 57.10  | 13.80   | 4.14 | 0.24 |
| Q6NZ16_IF4G1_MOUSE | Eif4g1   | Eukaryotic translation in R.K#ISSVIM*TEDIK#.L                   | 16.13  | 4.60    | 3.50 | 0.29 |
| Q6NZ16_IF4G1_MOUSE | Eif4g1   | Eukaryotic translation in K.K#VEYTLGEESEAPGQR@.T                | 62.05  | 5.94    | 5.40 | 0.19 |
| Q6NZ16_IF4G1_MOUSE | Eif4g1   | Eukaryotic translation in R.LGIESTLER@.S                        | 41.01  | 10.91   | 2.76 | 0.27 |
| Q6NZ16_IF4G1_MOUSE | Eif4g1   | Eukaryotic translation in R.LK#EELLEAR@.D                       | 16.87  | 5.73    | 3.95 | 0.34 |
| Q6NZ16_IF4G1_MOUSE | Eif4g1   | Eukaryotic translation in R.M*DQYFNQM*EK#.I                     | 16.75  | 4.07    | 4.12 | 0.24 |
| Q6NZ16_IF4G1_MOUSE | Eif4g1   | Eukaryotic translation in K.SVTAFFNWLNR@.E                      | 16.15  | 3.88    | 4.16 | 0.24 |
| Q6NZ16_IF4G1_MOUSE | Eif4g1   | Eukaryotic translation in R.VDVQVQLK#.V                         | 16.42  | 6.85    | 2.40 | 0.42 |
| Q6NZ16_IF4G1_MOUSE | Eif4g1   | Eukaryotic translation in R.VFDVIDANLNQEQIASNTLVR@.A            | 25.09  | 7.66    | 3.28 | 0.31 |
| Q62448_IF4G2_MOUSE | Eif4g2   | Eukaryotic translation in K.ASSLISLLK#.Q                        | 7.46   | 2.87    | 2.60 | 0.39 |
| Q62448_IF4G2_MOUSE | Eif4g2   | Eukaryotic translation in K.ASSLISLLK#.Q                        | 16.73  | 7.66    | 2.18 | 0.46 |
| Q62448_IF4G2_MOUSE | Eif4g2   | Eukaryotic translation in R.ENPLPEEEQR@.A                       | 10.72  | 24.35   | 0.44 | 2.27 |

|                     |         |                                                               |        |        |      |      |
|---------------------|---------|---------------------------------------------------------------|--------|--------|------|------|
| Q62448_IF4G2_MOUSE  | Eif4g2  | Eukaryotic translation in K.LEVDIPLVK#.S                      | 15.50  | 6.23   | 2.49 | 0.40 |
| Q62448_IF4G2_MOUSE  | Eif4g2  | Eukaryotic translation in K.LQDEFENR@.T                       | 133.40 | 86.84  | 1.54 | 0.65 |
| Q62448_IF4G2_MOUSE  | Eif4g2  | Eukaryotic translation in K.LTEAVVTDYLNLSGNANDAVSGVR@.E       | 12.15  | 4.08   | 2.98 | 0.34 |
| Q62448_IF4G2_MOUSE  | Eif4g2  | Eukaryotic translation in K.SQGLSQLYHNQSQGLLSQLQGSQK#.D       | 16.11  | 4.57   | 3.53 | 0.28 |
| Q62448_IF4G2_MOUSE  | Eif4g2  | Eukaryotic translation in K.LEVDIPLVK#.S                      | 10.83  | 3.61   | 3.00 | 0.33 |
| Q62448_IF4G2_MOUSE  | Eif4g2  | Eukaryotic translation in K.LQDEFENR@.T                       | 8.96   | 1.26   | 7.11 | 0.14 |
| Q62448_IF4G2_MOUSE  | Eif4g2  | Eukaryotic translation in K.LTEAVVTDYLNLSGNANDAVSGVR@.E       | 7.80   | 3.20   | 2.44 | 0.41 |
| Q80X13_IF4G3_MOUSE  | Eif4g3  | Eukaryotic translation in R.SPAPVQTATTAPK#.S                  | 8.28   | 4.93   | 1.68 | 0.60 |
| Q80X13_IF4G3_MOUSE  | Eif4g3  | Eukaryotic translation in K.YLDSQTEKHELQALYALQASIVK#.L        | 28.21  | 7.28   | 3.88 | 0.26 |
| Q05D44_IF2P_MOUSE   | Eif5b   | Eukaryotic translation in R.KL#EGDITIVP#GVEGPVITQIR@.G        | 11.15  | 4.36   | 2.56 | 0.39 |
| O55135_IF6_MOUSE    | Eif6    | Eukaryotic translation in R.NSLPDSVQIR.R                      | 17.84  | 10.30  | 1.73 | 0.58 |
| O55135_IF6_MOUSE    | Eif6    | Eukaryotic translation in K.TSIEDQDELSSLQVPLVAGTVNVR@.G       | 24.20  | 10.17  | 2.38 | 0.42 |
| O55135_IF6_MOUSE    | Eif6    | Eukaryotic translation in R.HGLLVNNTTDOELQHIR@.N              | 9.58   | 8.26   | 1.16 | 0.86 |
| O55135_IF6_MOUSE    | Eif6    | Eukaryotic translation in K.LNEAK#PSTIATSM*#R@.D              | 16.04  | 11.41  | 1.41 | 0.71 |
| O55135_IF6_MOUSE    | Eif6    | Eukaryotic translation in R.NSLPDSVQIR@.R                     | 35.68  | 21.48  | 1.66 | 0.60 |
| O55135_IF6_MOUSE    | Eif6    | Eukaryotic translation in K.TSIEDQDELSSLQVPLVAGTVNVR@.G       | 21.15  | 14.97  | 1.41 | 0.71 |
| P70372_ELAV1_MOUSE  | Elavl1  | ELAV-like protein 1 OS=N R.AISTLNGLR@.L                       | 85.17  | 51.00  | 1.67 | 0.60 |
| P70372_ELAV1_MOUSE  | Elavl1  | ELAV-like protein 1 OS=N K.DANL1YISLPR@.T                     | 175.24 | 121.15 | 1.45 | 0.69 |
| P70372_ELAV1_MOUSE  | Elavl1  | ELAV-like protein 1 OS=N R.DK#H#AGHSGLYGVFNVTAK#.D            | 16.75  | 30.34  | 1.52 | 0.66 |
| P70372_ELAV1_MOUSE  | Elavl1  | ELAV-like protein 1 OS=N K.D.VEDM*#FSR.F                      | 113.83 | 74.12  | 1.54 | 0.65 |
| P70372_ELAV1_MOUSE  | Elavl1  | ELAV-like protein 1 OS=N R.K.FAANPNQK#.N                      | 56.10  | 45.66  | 1.23 | 0.81 |
| P70372_ELAV1_MOUSE  | Elavl1  | ELAV-like protein 1 OS=N R.FGGPVHQAQR@.F                      | 8.04   | 3.28   | 2.45 | 0.41 |
| P70372_ELAV1_MOUSE  | Elavl1  | ELAV-like protein 1 OS=N K.GFGFVTM*#TNYEAAAM*AIASLINGYR@.L    | 6.62   | 5.40   | 1.23 | 0.82 |
| P70372_ELAV1_MOUSE  | Elavl1  | ELAV-like protein 1 OS=N K.I.LQVSKF#.T                        | 358.47 | 213.54 | 1.68 | 0.60 |
| P70372_ELAV1_MOUSE  | Elavl1  | ELAV-like protein 1 OS=N K.NM*#ALLSQLYHSPAR.R                 | 14.66  | 10.60  | 1.38 | 0.72 |
| P70372_ELAV1_MOUSE  | Elavl1  | ELAV-like protein 1 OS=N K.NMALLSQLYHSPAR@.R                  | 5.90   | 4.97   | 1.19 | 0.84 |
| P70372_ELAV1_MOUSE  | Elavl1  | ELAV-like protein 1 OS=N R.SEAEEATISFNGHKPPGSSSEPTVK.F        | 13.74  | 12.08  | 1.14 | 0.88 |
| P70372_ELAV1_MOUSE  | Elavl1  | ELAV-like protein 1 OS=N R.SFLSSGVEVSAK#.L                    | 312.30 | 203.62 | 1.53 | 0.65 |
| P70372_ELAV1_MOUSE  | Elavl1  | ELAV-like protein 1 OS=N R.TM*#TQKDVEDM*#FSR.F                | 27.41  | 15.11  | 1.81 | 0.55 |
| P70372_ELAV1_MOUSE  | Elavl1  | ELAV-like protein 1 OS=N R.TNLIWYLPQNM*#TQEELR@.S             | 150.86 | 87.78  | 1.72 | 0.58 |
| P70372_ELAV1_MOUSE  | Elavl1  | ELAV-like protein 1 OS=N R.TNLIWYLPQNM*#TQEELR.S              | 53.25  | 33.64  | 1.58 | 0.63 |
| P70372_ELAV1_MOUSE  | Elavl1  | ELAV-like protein 1 OS=N R.TNLIWYLPQNM*#TQEELR@.S             | 32.59  | 25.81  | 1.26 | 0.79 |
| P70372_ELAV1_MOUSE  | Elavl1  | ELAV-like protein 1 OS=N K.VAGHSGLYGVFNVTAK#.D                | 68.09  | 44.04  | 1.55 | 0.65 |
| P70372_ELAV1_MOUSE  | Elavl1  | ELAV-like protein 1 OS=N K.VAGHSGLYGVFNVTAK#.D                | 5.44   | 5.03   | 1.08 | 0.92 |
| P70372_ELAV1_MOUSE  | Elavl1  | ELAV-like protein 1 OS=N R.VLVDQTTGLSR@.G                     | 728.09 | 475.60 | 1.53 | 0.65 |
| P70372_ELAV1_MOUSE  | Elavl1  | ELAV-like protein 1 OS=N K.VSYAR@PSSSEVIK#.D                  | 21.11  | 10.02  | 2.11 | 0.47 |
| P70372_ELAV1_MOUSE  | Elavl1  | ELAV-like protein 1 OS=N K.I.LQVSKF#.T                        | 17.69  | 11.45  | 1.55 | 0.65 |
| P70372_ELAV1_MOUSE  | Elavl1  | ELAV-like protein 1 OS=N R.TNLIWYLPQNM*#TQEELR@.S             | 7.22   | 3.92   | 1.84 | 0.54 |
| P70372_ELAV1_MOUSE  | Elavl1  | ELAV-like protein 1 OS=N R.VLVDQTTGLSR@.G                     | 27.75  | 17.09  | 1.62 | 0.62 |
| P70372_ELAV1_MOUSE  | Elavl1  | ELAV-like protein 1 OS=N K.I.LQVSKF#.T                        | 16.60  | 6.91   | 2.40 | 0.42 |
| Q60775_ELF1_MOUSE   | Elf1    | ETS-related transcription R.TVQPSQAPYPTQLFR@.T                | 7.14   | 1.48   | 4.81 | 0.21 |
| Q9JHC9_ELF2_MOUSE   | Elf2    | ETS-related transcription R.SPTTAPVAAAAPR@.T                  | 9.33   | 2.65   | 3.52 | 0.28 |
| Q9JHC9_ELF2_MOUSE   | Elf2    | ETS-related transcription R.VLSLAESLLK#.A                     | 8.42   | 8.18   | 1.58 | 0.63 |
| Q9JHC9_ELF2_MOUSE   | Elf2    | ETS-related transcription R.SPTTAPVAAAAPR@.T                  | 8.42   | 2.81   | 3.00 | 0.33 |
| E9Q2I4_E9Q2I4_MOUSE | Elmsan1 | Protein Elmsan1 OS=Mus R.VSQEANLTLAQK#.A                      | 7.82   | 4.62   | 1.69 | 0.59 |
| Q91WG4_ELP2_MOUSE   | Elp2    | Elongator complex prote R.FQVSGADEK#.V                        | 14.35  | 4.80   | 2.99 | 0.33 |
| Q91WG4_ELP2_MOUSE   | Elp2    | Elongator complex prote R.NFVFNFSVSR@.Q                       | 20.12  | 6.19   | 3.25 | 0.31 |
| Q9CZX0_ELP3_MOUSE   | Elp3    | Elongator complex prote R.GTGLYELWK#.S                        | 7.77   | 6.82   | 1.14 | 0.88 |
| Q9CZX0_ELP3_MOUSE   | Elp3    | Elongator complex prote R.I.LALVPPWTR.V                       | 13.83  | 9.03   | 1.53 | 0.65 |
| Q9CZX0_ELP3_MOUSE   | Elp3    | Elongator complex prote R.SYSPSDLIELVAR.I                     | 12.44  | 4.96   | 2.51 | 0.40 |
| Q9CZX0_ELP3_MOUSE   | Elp3    | Elongator complex prote R.I.LALVPPWTR@.V                      | 20.28  | 8.00   | 2.54 | 0.39 |
| Q9CZX0_ELP3_MOUSE   | Elp3    | Elongator complex prote R.LEIGVQSYVEDVAR.D                    | 10.77  | 6.42   | 1.68 | 0.60 |
| Q9CZX0_ELP3_MOUSE   | Elp3    | Elongator complex prote R.SYSPSDLIELVAR@.I                    | 6.25   | 9.36   | 2.99 | 0.33 |
| Q9CZX0_ELP3_MOUSE   | Elp3    | Elongator complex prote K.FQHGQGM*#LLM*#EEAER@.I              | 28.00  | 2.80   | 2.23 | 0.45 |
| Q9CZX0_ELP3_MOUSE   | Elp3    | Elongator complex prote R.I.LALVPPWTR@.V                      | 25.04  | 8.85   | 2.83 | 0.35 |
| Q9CZX0_ELP3_MOUSE   | Elp3    | Elongator complex prote R.LEIGVQSYVEDVAR@.D                   | 15.78  | 4.75   | 3.82 | 0.30 |
| Q9CZX0_ELP3_MOUSE   | Elp3    | Elongator complex prote K.LYPTLVR@.G                          | 20.15  | 6.13   | 3.29 | 0.30 |
| Q9CZX0_ELP3_MOUSE   | Elp3    | Elongator complex prote R.SYSPSDLIELVAR.I                     | 25.33  | 7.35   | 3.45 | 0.29 |
| Q99L85_ELP5_MOUSE   | Elp5    | Elongator complex prote R.DSLTLPFQVSESK#.Q                    | 4.41   | 5.00   | 0.88 | 1.13 |
| P21995_EMB_MOUSE    | Emb     | Embigin OS=Mus musculus K.SLIAYGVDSVTLK#.C                    | 5.03   | 1.86   | 2.70 | 0.37 |
| Q3TAS6_EMC10_MOUSE  | Emc10   | ER membrane protein co R.GLLLVNQDGLTSLATQR@.Q                 | 2.92   | 2.20   | 1.33 | 0.75 |
| Q9CRD2_EMC2_MOUSE   | Emc2    | ER membrane protein co R.I.LQEDPTNTAAR@.K                     | 20.09  | 16.13  | 1.25 | 0.80 |
| Q99K13_EMC3_MOUSE   | Emc3    | ER membrane protein co K.LTQEQVSDYVQLIR@.S                    | 7.17   | 4.68   | 1.53 | 0.65 |
| Q99K13_EMC3_MOUSE   | Emc3    | ER membrane protein co R.SIYSLILGQDNAAQOSR@.M                 | 7.62   | 5.80   | 1.31 | 0.76 |
| Q99K13_EMC3_MOUSE   | Emc3    | ER membrane protein co K.VPFFLTLR.F                           | 9.24   | 7.09   | 1.30 | 0.77 |
| O70378_EMC8_MOUSE   | Emc8    | ER membrane protein co R.SYETLVDFDNHDDIR@.S                   | 1.68   | 2.40   | 0.70 | 1.43 |
| O70378_EMC8_MOUSE   | Emc8    | ER membrane protein co R.VK#DASPQNQVAEK#.V                    | 5.42   | 0.76   | 1.32 |      |
| O08579_EMD_MOUSE    | Emd     | Emerin OS=Mus musculus K.DYNDYEEYSYLTTR#.T                    | 6.85   | 5.93   | 1.15 | 0.87 |
| O08579_EMD_MOUSE    | Emd     | Emerin OS=Mus musculus K.QAPAAAGQDR@.Q                        | 13.41  | 10.22  | 1.31 | 0.76 |
| O08579_EMD_MOUSE    | Emd     | Emerin OS=Mus musculus K.TYGEPEVSGM*#SK#.S                    | 20.70  | 13.64  | 1.52 | 0.66 |
| O35130_NEP1_MOUSE   | Emg1    | Ribosomal RNA small subunit K.IGTSFVSDISDIR@.E                | 6.08   | 5.06   | 1.20 | 0.83 |
| O35130_NEP1_MOUSE   | Emg1    | Ribosomal RNA small subunit K.VTTFAEEVWGI.V                   | 9.02   | 9.02   | 1.00 | 1.00 |
| O35130_NEP1_MOUSE   | Emg1    | Ribosomal RNA small subunit K.IGTSFVSDISDIR@.E                | 8.24   | 7.14   | 1.15 | 0.87 |
| O35130_NEP1_MOUSE   | Emg1    | Ribosomal RNA small subunit K.NVLIEVNPQTR@.I                  | 8.00   | 6.32   | 0.79 | 1.26 |
| O35130_NEP1_MOUSE   | Emg1    | Ribosomal RNA small subunit R.LIVLEGASLETVK#.V                | 5.84   | 2.56   | 2.28 | 0.44 |
| Q8BM80 EMSY_MOUSE   | Emsy    | Protein EMSY OS=Mus mi K.LSQPQLQEQTLQVQK#.T                   | 1.97   | 6.35   | 1.97 | 0.51 |
| Q8BM80 EMSY_MOUSE   | Emsy    | Protein EMSY OS=Mus mi K.NVVTLLNAGGEK#.T                      | 10.18  | 4.91   | 2.07 | 0.48 |
| Q8BM80 EMSY_MOUSE   | Emsy    | Protein EMSY OS=Mus mi R.QLVTETLQQAQR@.V                      | 14.02  | 3.74   | 3.75 | 0.27 |
| Q8BM80 EMSY_MOUSE   | Emsy    | Protein EMSY OS=Mus mi R.SQPQPSQPQR@.T                        | 5.01   | 6.77   | 0.74 | 1.35 |
| Q8BM80 EMSY_MOUSE   | Emsy    | Protein EMSY OS=Mus mi R.VATTPGAATYVK#.T                      | 9.03   | 5.51   | 1.64 | 0.61 |
| Q8BM80 EMSY_MOUSE   | Emsy    | Protein EMSY OS=Mus mi K.LSQPQLQEQTLQVQK#.T                   | 4.20   | 1.74   | 2.41 | 0.42 |
| Q8BM80 EMSY_MOUSE   | Emsy    | Protein EMSY OS=Mus mi K.SLVSGPTQLAQFPK#.Q                    | 5.28   | 1.44   | 3.67 | 0.27 |
| Q8C522_ENDD1_MOUSE  | Endod1  | Endonuclease domain-cc K.ILEVNVQVDEER@.S                      | 5.30   | 3.10   | 1.71 | 0.58 |
| P17182_ENO4_MOUSE   | Eno1    | Alpha-enolase OS=Mus m K.DATNVGDEGGFAPNILEN.E                 | 1.93   | 5.02   | 0.39 | 2.60 |
| P17182_ENO4_MOUSE   | Eno1    | Alpha-enolase OS=Mus m R.AAVPSGASTGIYEALELR.D                 | 2.25   | 2.24   | 1.00 | 1.00 |
| Q9JIX0_ENY2_MOUSE   | Eny2    | Transcription and mRNA K.GLEHVTVDDLVAITPK#.G                  | 14.78  | 10.93  | 1.35 | 0.74 |
| Q8CH18_EP400_MOUSE  | Ep400   | E1A-binding protein p40 K.AIQPQVQAQGAQVQK#.L                  | 4.85   | 2.03   | 2.39 | 0.42 |
| Q8CH18_EP400_MOUSE  | Ep400   | E1A-binding protein p40 K.EAELPLIDL#K#.L                      | 8.00   | 4.60   | 1.74 | 0.58 |
| Q8CH18_EP400_MOUSE  | Ep400   | E1A-binding protein p40 R.IDENANSEQR@.Q                       | 4.67   | 1.46   | 3.20 | 0.31 |
| Q8CH18_EP400_MOUSE  | Ep400   | E1A-binding protein p40 K.LAGTQQVQIQVAK#.L                    | 5.85   | 1.74   | 3.36 | 0.30 |
| Q8CH18_EP400_MOUSE  | Ep400   | E1A-binding protein p40 R.LVQFDSGKHLAALAILQK#.L               | 16.24  | 4.07   | 3.99 | 0.25 |
| Q8CH18_EP400_MOUSE  | Ep400   | E1A-binding protein p40 R.LVSGNSIEEK#.L                       | 11.17  | 7.98   | 1.40 | 0.71 |
| Q8CH18_EP400_MOUSE  | Ep400   | E1A-binding protein p40 R.SLQFPELR@.L                         | 11.90  | 4.11   | 2.89 | 0.35 |
| Q8CH18_EP400_MOUSE  | Ep400   | E1A-binding protein p40 R.SLVTQVQSQATGVLPGK#.T                | 7.39   | 2.13   | 3.47 | 0.29 |
| Q8CH18_EP400_MOUSE  | Ep400   | E1A-binding protein p40 K.TAGGTVVAQPVNVQQLK#.Y                | 5.31   | 1.87   | 2.85 | 0.35 |
| Q8CH18_EP400_MOUSE  | Ep400   | E1A-binding protein p40 R.VAVSAM*#VGEPEGLAK#PASPAAAGPTQEEK#.S | 6.30   | 1.91   | 1.89 | 0.53 |
| Q8CH18_EP400_MOUSE  | Ep400   | E1A-binding protein p40 R.VPGSFAAGSLQVQK#.S                   | 7.99   | 3.69   | 2.16 | 0.46 |
| P48193_41_MOUSE     | Epb41   | Protein 4.1 OS=Mus musculus K.APIAAPPELKK#.T                  | 8.18   | 4.80   | 1.71 | 0.59 |
| O70318_E41L2_MOUSE  | Epb41I2 | Band 4.1-like protein 2 O K.AKEVENEQTPVSEPEEKGSQGPVPER.Q      | 13.00  | 7.68   | 1.69 | 0.59 |
| O70318_E41L2_MOUSE  | Epb41I2 | Band 4.1-like protein 2 O K.DK#EETIQDTEEK#LEGGAAK#.R          | 8.92   | 8.49   | 1.05 | 0.95 |
| O70318_E41L2_MOUSE  | Epb41I2 | Band 4.1-like protein 2 O K.EVPIVQTEK#.T                      | 28.10  | 18.33  | 1.53 | 0.65 |
| O70318_E41L2_MOUSE  | Epb41I2 | Band 4.1-like protein 2 O K.FYPPDPSQLTEDTR@.Y                 | 8.22   | 4.15   | 1.98 | 0.50 |
| O70318_E41L2_MOUSE  | Epb41I2 | Band 4.1-like protein 2 O R.GLSPAAQDSQFLENAK#.R               | 20.75  | 12.58  | 1.65 | 0.61 |

|                     |          |                                                                        |        |        |       |      |
|---------------------|----------|------------------------------------------------------------------------|--------|--------|-------|------|
| O70318_E41L2_MOUSE  | Epb4112  | Band 4.1-like protein 2 C K.HLEVQVEVR@.E                               | 12.41  | 5.85   | 2.12  | 0.47 |
| O70318_E41L2_MOUSE  | Epb4112  | Band 4.1-like protein 2 O R.HSNLM*LELDLQKAEAILK.H                      | 8.19   | 6.05   | 1.35  | 0.74 |
| O70318_E41L2_MOUSE  | Epb4112  | Band 4.1-like protein 2 C K.NLPLWLFVNVK#.F                             | 13.59  | 8.44   | 1.61  | 0.62 |
| O70318_E41L2_MOUSE  | Epb4112  | Band 4.1-like protein 2 O R.QAGASVLPVETAEQHVVAQK#.L                    | 49.24  | 23.28  | 2.12  | 0.47 |
| O70318_E41L2_MOUSE  | Epb4112  | Band 4.1-like protein 2 O K.SSVETQPAEVR@.K                             | 10.06  | 8.08   | 1.25  | 0.80 |
| O70318_E41L2_MOUSE  | Epb4112  | Band 4.1-like protein 2 O R.SYNLVVAK#.D                                | 25.58  | 12.79  | 2.00  | 0.50 |
| O70318_E41L2_MOUSE  | Epb4112  | Band 4.1-like protein 2 O K.TEM*VTISDASQR@.T                           | 14.10  | 9.13   | 1.54  | 0.65 |
| O70318_E41L2_MOUSE  | Epb4112  | Band 4.1-like protein 2 O K.TITYESPDQDGGAGGDSGLVLLQATTSSESATTTTTHTK#.T | 5.55   | 4.37   | 1.27  | 0.79 |
| O70318_E41L2_MOUSE  | Epb4112  | Band 4.1-like protein 2 O R.VDGDNIYVR@.H                               | 26.61  | 14.04  | 1.90  | 0.53 |
| O70318_E41L2_MOUSE  | Epb4112  | Band 4.1-like protein 2 O K.VR@PAELEQFESTIGFK#.L                       | 42.62  | 32.93  | 1.29  | 0.78 |
| O70318_E41L2_MOUSE  | Epb4112  | Band 4.1-like protein 2 O K.VR@PAELEQFESTIGFK#.L                       | 4.81   | 3.78   | 1.27  | 0.79 |
| O70318_E41L2_MOUSE  | Epb4112  | Band 4.1-like protein 2 O K.DK#EETIQDQTEEK#.L                          | 4.04   | 1.43   | 2.83  | 0.35 |
| O70318_E41L2_MOUSE  | Epb4112  | Band 4.1-like protein 2 O K.KD#EETIQDQTEEK#LEGGAAK#.R                  | 11.62  | 3.00   | 3.87  | 0.26 |
| O70318_E41L2_MOUSE  | Epb4112  | Band 4.1-like protein 2 O K.DSEGVDIK#.L                                | 18.54  | 8.11   | 2.29  | 0.44 |
| O70318_E41L2_MOUSE  | Epb4112  | Band 4.1-like protein 2 O K.EVPIVQETK#.L                               | 40.49  | 18.59  | 2.18  | 0.46 |
| O70318_E41L2_MOUSE  | Epb4112  | Band 4.1-like protein 2 O R.GLSPAQADSQFLENK#.R                         | 24.42  | 11.98  | 2.04  | 0.49 |
| O70318_E41L2_MOUSE  | Epb4112  | Band 4.1-like protein 2 O K.HLEVQVEVR@.E                               | 11.20  | 5.22   | 2.15  | 0.47 |
| O70318_E41L2_MOUSE  | Epb4112  | Band 4.1-like protein 2 O R.HSNLM*LELDLQKAEAILK#.H                     | 15.52  | 4.41   | 3.52  | 0.28 |
| O70318_E41L2_MOUSE  | Epb4112  | Band 4.1-like protein 2 O R.IVITGDALDHDQALQAIR@.E                      | 47.31  | 18.04  | 2.62  | 0.38 |
| O70318_E41L2_MOUSE  | Epb4112  | Band 4.1-like protein 2 O R.LVSPQPK#.K                                 | 27.21  | 12.19  | 2.23  | 0.45 |
| O70318_E41L2_MOUSE  | Epb4112  | Band 4.1-like protein 2 O R.QAGASVLPVETAEQHVVAQK#.L                    | 55.30  | 22.17  | 2.49  | 0.40 |
| O70318_E41L2_MOUSE  | Epb4112  | Band 4.1-like protein 2 O R.SLDGAPIGVDQSPPEGESVPGPGVISYTTIQDGR@.R      | 12.44  | 3.96   | 3.14  | 0.32 |
| O70318_E41L2_MOUSE  | Epb4112  | Band 4.1-like protein 2 O R.SLDGAPIGVDQSPPEGESVPGPGVISYTTIQDGR@R@.D    | 5.28   | 2.42   | 2.18  | 0.46 |
| O70318_E41L2_MOUSE  | Epb4112  | Band 4.1-like protein 2 O K.SSVETQPAEVR@.K                             | 21.76  | 7.55   | 2.88  | 0.35 |
| O70318_E41L2_MOUSE  | Epb4112  | Band 4.1-like protein 2 O R.SYNLVVAK#.D                                | 28.22  | 9.58   | 2.95  | 0.34 |
| O70318_E41L2_MOUSE  | Epb4112  | Band 4.1-like protein 2 O K.TEM*VTISDASQR@.T                           | 16.80  | 8.10   | 2.08  | 0.48 |
| O70318_E41L2_MOUSE  | Epb4112  | Band 4.1-like protein 2 O R.VDGDNIYVR@.H                               | 30.70  | 15.00  | 2.05  | 0.49 |
| O70318_E41L2_MOUSE  | Epb4112  | Band 4.1-like protein 2 O K.VR@PAELEQFESTIGFK#.L                       | 62.70  | 28.20  | 2.22  | 0.45 |
| O9WV92_E41L3_MOUSE  | Epb4113  | Band 4.1-like protein 3 O R.GEEVDQSAPEQEPATVSHHEEQASTIR@.T             | 9.26   | 3.35   | 2.76  | 0.36 |
| O9WV92_E41L3_MOUSE  | Epb4113  | Band 4.1-like protein 3 O K.GISQTNLTITVTPK#.K                          | 8.75   | 3.68   | 2.38  | 0.42 |
| O9WV92_E41L3_MOUSE  | Epb4113  | Band 4.1-like protein 3 O K.IR@PGEFQFESTIGFK#.L                        | 26.57  | 2.43   | 10.93 | 0.09 |
| O9WV92_E41L3_MOUSE  | Epb4113  | Band 4.1-like protein 3 O K.TEPVEAEVSTPHQPPLSTEK#.V                    | 10.22  | 6.31   | 2.86  | 0.35 |
| O9WV92_E41L3_MOUSE  | Epb4113  | Band 4.1-like protein 3 O K.VLQETLVEER@.H                              | 24.89  | 6.88   | 3.62  | 0.28 |
| Q8C9X6_EPC1_MOUSE   | Epc1     | Enhancer of polycomb hr R.AISAQQVYGEK#.R                               | 7.18   | 1.42   | 5.05  | 0.20 |
| Q8C9X6_EPC1_MOUSE   | Epc1     | Enhancer of polycomb hr R.DGSSNDPVAFR@.R                               | 6.39   | 1.82   | 3.51  | 0.29 |
| Q8C9X6_EPC1_MOUSE   | Epc1     | Enhancer of polycomb hr K.DLSQLVLDIK#.S                                | 9.07   | 2.67   | 3.40  | 0.29 |
| Q8C014_EPC2_MOUSE   | Epc2     | Enhancer of polycomb hr K.ASSNQLVTLQEAH#.L                             | 7.49   | 3.24   | 2.31  | 0.43 |
| O9D379_HYEP_MOUSE   | Ephx1    | Epoxide hydrolase 1 OS=I R.FLGYTEKDELLELPPFK#.E                        | 10.62  | 3.57   | 2.98  | 0.34 |
| O9D379_HYEP_MOUSE   | Ephx1    | Epoxide hydrolase 1 OS=I R.VFYNI*M#@.E                                 | 6.26   | 4.72   | 1.33  | 0.75 |
| Q8VEH5_EPMIP_MOUSE  | Epm2aip1 | EPM2A-interacting prote K.DLELFSNPF5FK#PEYAPISVR@.V                    | 6.12   | 2.47   | 2.48  | 0.40 |
| O91W69_EPN3_MOUSE   | Epn3     | Epsin-3 OS=Mus musculus R.GSPSPSYTASSSPR@.Y                            | 5.00   | 3.31   | 1.51  | 0.66 |
| O91W69_EPN3_MOUSE   | Epn3     | Epsin-3 OS=Mus musculus R.M*ALEGM*GIGSGQLGYSR@.R                       | 4.26   | 1.56   | 2.73  | 0.37 |
| O91W69_EPN3_MOUSE   | Epn3     | Epsin-3 OS=Mus musculus R.TPESFLGPSASSLVLDLKV#.A                       | 2.45   | 1.70   | 1.44  | 0.69 |
| Q8CGC7_SYEP_MOUSE   | Eprs     | Bifunctional glutamate/r K.ASK#DQDVSVAQELLQK#.A                        | 14.95  | 7.91   | 1.89  | 0.53 |
| Q8CGC7_SYEP_MOUSE   | Eprs     | Bifunctional glutamate/r R.LNLNNTLVSK#.R                               | 7.36   | 2.91   | 2.53  | 0.40 |
| Q8CGC7_SYEP_MOUSE   | Eprs     | Bifunctional glutamate/r K.SQSSGLSSGAGEGQPK#.K                         | 8.50   | 3.76   | 2.26  | 0.44 |
| Q8CGC7_SYEP_MOUSE   | Eprs     | Bifunctional glutamate/r R.VSETVAFTDVSILR@.Y                           | 8.50   | 2.94   | 2.89  | 0.35 |
| P42567_EPS15_MOUSE  | Eps15    | Epidermal growth factor R.LQEQETADEESVESGK#.A                          | 6.06   | 3.08   | 1.97  | 0.51 |
| P42567_EPS15_MOUSE  | Eps15    | Epidermal growth factor R.TSEVDLQDVEVR@.E                              | 6.33   | 1.66   | 3.82  | 0.26 |
| Q60902_EP15R_MOUSE  | Eps15l1  | Epidermal growth factor R.AQLETLR@.S                                   | 26.43  | 10.28  | 2.57  | 0.39 |
| Q60902_EP15R_MOUSE  | Eps15l1  | Epidermal growth factor K.ELDDISQEIQAQR@.R                             | 9.58   | 3.79   | 2.52  | 0.40 |
| Q60902_EP15R_MOUSE  | Eps15l1  | Epidermal growth factor K.LDPFESSDPFSSSSISK#.G                         | 6.23   | 2.11   | 2.95  | 0.34 |
| Q60902_EP15R_MOUSE  | Eps15l1  | Epidermal growth factor R.LQEQETLQEQIQAGR@.A                           | 17.43  | 2.69   | 6.48  | 0.15 |
| Q60902_EP15R_MOUSE  | Eps15l1  | Epidermal growth factor K.NDPFSDPFTK#.N                                | 8.00   | 2.66   | 3.00  | 0.33 |
| Q60902_EP15R_MOUSE  | Eps15l1  | Epidermal growth factor K.QGFFVALR@.J                                  | 11.63  | 4.91   | 2.37  | 0.42 |
| Q60902_EP15R_MOUSE  | Eps15l1  | Epidermal growth factor K.SGLSDIILGK#.I                                | 16.60  | 4.65   | 3.57  | 0.28 |
| Q60902_EP15R_MOUSE  | Eps15l1  | Epidermal growth factor K.TQIQSQESDLK#.S                               | 16.01  | 2.87   | 5.58  | 0.18 |
| Q60902_EP15R_MOUSE  | Eps15l1  | Epidermal growth factor K.TQIQSQESDLK#QEDDLNR@.A                       | 29.41  | 5.83   | 5.04  | 0.20 |
| Q60902_EP15R_MOUSE  | Eps15l1  | Epidermal growth factor R.VGAEALFLK#.K                                 | 23.29  | 4.55   | 5.12  | 0.20 |
| Q60902_EP15R_MOUSE  | Eps15l1  | Epidermal growth factor K.YSLEQDIR@.E                                  | 13.42  | 2.76   | 4.87  | 0.21 |
| D32515_D32515_MOUSE | Eps8     | Epidermal growth factor K.ALYGTDGAYFR@SSK#.Q                           | 1.95   | 2.01   | 0.97  | 1.03 |
| D32515_D32515_MOUSE | Eps8     | Epidermal growth factor K.ANLISEDISEAISDK#.G                           | 7.22   | 4.13   | 1.75  | 0.57 |
| D32515_D32515_MOUSE | Eps8     | Epidermal growth factor R.DSVSVSDVQYR@.V                               | 6.67   | 4.13   | 1.61  | 0.62 |
| O99K30_ESR12_MOUSE  | Eps8l2   | Epidermal growth factor R.SQPVHLPLTFESGDEV@.A                          | 11.31  | 5.81   | 1.95  | 0.51 |
| O99K30_ESR12_MOUSE  | Eps8l2   | Epidermal growth factor R.SVSSPLSTDAVFLR@.G                            | 9.96   | 2.86   | 3.48  | 0.29 |
| O99K30_ESR12_MOUSE  | Eps8l2   | Epidermal growth factor R.VGLPLPVPFSEPGYR@.R                           | 16.39  | 3.78   | 4.34  | 0.23 |
| O99K30_ESR12_MOUSE  | Eps8l2   | Epidermal growth factor R.VGLPLPVPFSEPGYR@.R                           | 5.88   | 2.24   | 2.62  | 0.38 |
| O99MI1_RB6I2_MOUSE  | Erc1     | ELKS/Rab6-interacting/C R.AAGLQSEIGQVK#.Q                              | 9.33   | 4.04   | 2.31  | 0.43 |
| O99MI1_RB6I2_MOUSE  | Erc1     | ELKS/Rab6-interacting/C R.DNTIM*DLQTLK#.E                              | 9.09   | 4.04   | 2.25  | 0.44 |
| O99MI1_RB6I2_MOUSE  | Erc1     | ELKS/Rab6-interacting/C R.EM*VLAQESAR@.T                               | 8.58   | 3.48   | 2.46  | 0.41 |
| O99MI1_RB6I2_MOUSE  | Erc1     | ELKS/Rab6-interacting/C R.R@FENAPDAAK#.T                               | 9.65   | 3.08   | 3.13  | 0.32 |
| O99MI1_RB6I2_MOUSE  | Erc1     | ELKS/Rab6-interacting/C R.R@R@EDSLSDSSQLQDLSLR@.K                      | 7.43   | 5.24   | 1.42  | 0.70 |
| O99MI1_RB6I2_MOUSE  | Erc1     | ELKS/Rab6-interacting/C K.SAQM*LEEAR@.R                                | 6.17   | 3.14   | 1.96  | 0.51 |
| O99MI1_RB6I2_MOUSE  | Erc1     | ELKS/Rab6-interacting/C K.SLQADTINTDALLTLEALADK#ER@.T                  | 32.52  | 12.94  | 2.51  | 0.40 |
| O99MI1_RB6I2_MOUSE  | Erc1     | ELKS/Rab6-interacting/C R.SNQTNHK#PSPDQIQPLELQDNR@.S                   | 9.25   | 2.58   | 3.58  | 0.28 |
| O99MI1_RB6I2_MOUSE  | Erc1     | ELKS/Rab6-interacting/C R.VVQENQH#QM*TIQALQDLER@.I                     | 8.00   | 3.79   | 2.11  | 0.47 |
| O99MI1_RB6I2_MOUSE  | Erc1     | ELKS/Rab6-interacting/C R.AAGLQSEIGQVK#.Q                              | 6.43   | 2.86   | 2.25  | 0.45 |
| O99MI1_RB6I2_MOUSE  | Erc1     | ELKS/Rab6-interacting/C R.DLNQLFQQDSSSR@.T                             | 8.68   | 4.50   | 1.93  | 0.52 |
| O99MI1_RB6I2_MOUSE  | Erc1     | ELKS/Rab6-interacting/C K.LETLNQGFSK#.Q                                | 10.45  | 3.73   | 2.80  | 0.36 |
| O99MI1_RB6I2_MOUSE  | Erc1     | ELKS/Rab6-interacting/C R.SNQTNHK#PSPDQIQPLELQDNR@.S                   | 7.16   | 2.44   | 2.93  | 0.34 |
| O08811_ERCC2_MOUSE  | Erc2     | TFIIH basal transcription R.EDQLGLSLSLEQLQSEETLQR@.I                   | 5.34   | 1.74   | 3.06  | 0.33 |
| Q8BHK9_ERCC6_MOUSE  | Erc6l    | DNA excision repair prot K.AQFVSESQNTVQR@.Q                            | 5.90   | 2.18   | 2.71  | 0.37 |
| Q8BHK9_ERCC6_MOUSE  | Erc6l    | DNA excision repair prot R.SLINVLDVVEDM*EER@.L                         | 7.24   | 3.12   | 2.32  | 0.43 |
| O9DC16_ERG11_MOUSE  | Ergic1   | Endoplasmic reticulum< R.IIPAIWFR.Y                                    | 46.16  | 15.88  | 2.91  | 0.34 |
| O9DC16_ERG11_MOUSE  | Ergic1   | Endoplasmic reticulum< R.YSYQTVANK#.E                                  | 28.83  | 8.30   | 3.47  | 0.29 |
| O9CR89_ERG12_MOUSE  | Ergic2   | Endoplasmic reticulum< R.IDHLSFGLVPGIINPLDGTGTEK#.I                    | 9.89   | 3.49   | 2.83  | 0.35 |
| P84089_ERH_MOUSE    | Erh      | Enhancer of rudimentary R.ADTQTYQPNK#.D                                | 36.06  | 21.50  | 1.68  | 0.60 |
| P84089_ERH_MOUSE    | Erh      | Enhancer of rudimentary R.ADTQTYQPNKDWIK.E                             | 8.50   | 3.50   | 2.43  | 0.41 |
| P84089_ERH_MOUSE    | Erh      | Enhancer of rudimentary K.IYVLLR@.R                                    | 333.17 | 177.84 | 1.87  | 0.53 |
| P57759_ERP29_MOUSE  | Erp29    | Endoplasmic reticulum r K.LLDQDGFPAASEM*AR.I                           | 5.58   | 7.16   | 0.78  | 1.28 |
| P57759_ERP29_MOUSE  | Erp29    | Endoplasmic reticulum r K.SLNLTAFR@.K                                  | 7.43   | 10.58  | 0.70  | 1.42 |
| P57759_ERP29_MOUSE  | Erp29    | Endoplasmic reticulum r K.WASQYLK#.I                                   | 40.71  | 13.58  | 3.00  | 0.33 |
| P57759_ERP29_MOUSE  | Erp29    | Endoplasmic reticulum r K.WASQYLK#.I                                   | 21.11  | 3.00   | 7.03  | 0.14 |
| O08580_ERR1_MOUSE   | Esrra    | Steroid hormone receptor R.LLLTLLPLR@.Q                                | 8.69   | 1.47   | 5.90  | 0.17 |
| Q3U7R1_ESY1_MOUSE   | Esy1     | Extended synaptotagmin R.ALTGALTLPLAR@.L                               | 90.55  | 37.89  | 2.39  | 0.42 |
| Q3U7R1_ESY1_MOUSE   | Esy1     | Extended synaptotagmin K.ATYSTNSPWVEEAFR@.F                            | 16.69  | 9.87   | 1.69  | 0.59 |
| Q3U7R1_ESY1_MOUSE   | Esy1     | Extended synaptotagmin R.DLPDPYVSLLPDK#.N                              | 9.06   | 4.09   | 2.21  | 0.45 |
| Q3U7R1_ESY1_MOUSE   | Esy1     | Extended synaptotagmin R.FEWDLPLDGLTR@.R                               | 15.94  | 6.14   | 2.60  | 0.39 |
| Q3U7R1_ESY1_MOUSE   | Esy1     | Extended synaptotagmin R.GITSRPEPPSAAILVWYLD.R.A                       | 28.72  | 15.64  | 1.84  | 0.54 |
| Q3U7R1_ESY1_MOUSE   | Esy1     | Extended synaptotagmin R.IHVLEAQLIAK#.D                                | 26.15  | 10.16  | 2.57  | 0.39 |
| Q3U7R1_ESY1_MOUSE   | Esy1     | Extended synaptotagmin K.IVAQVWPFLLGQYM*EK#.L                          | 6.73   | 6.61   | 1.02  | 0.98 |
| Q3U7R1_ESY1_MOUSE   | Esy1     | Extended synaptotagmin R.K#PHAESLELQVR@.G                              | 22.72  | 10.30  | 2.20  | 0.45 |
| Q3U7R1_ESY1_MOUSE   | Esy1     | Extended synaptotagmin K.LLAETVAPAVR@.G                                | 37.36  | 15.80  | 2.36  | 0.42 |

|                    |         |                                                            |       |       |       |      |
|--------------------|---------|------------------------------------------------------------|-------|-------|-------|------|
| Q3U7R1_ESYT1_MOUSE | Esy1    | Extended synaptotagmin R.LLTASELTDLQWFQLSSGPNR@.L          | 8.50  | 4.68  | 1.82  | 0.55 |
| Q3U7R1_ESYT1_MOUSE | Esy1    | Extended synaptotagmin R.LTHGDSPEAFVPLGQVK#.L              | 22.84 | 10.74 | 2.13  | 0.47 |
| Q3U7R1_ESYT1_MOUSE | Esy1    | Extended synaptotagmin R.LTPR@PTAAEEVLQVNSLIQTQK#.S        | 26.57 | 7.52  | 3.53  | 0.28 |
| Q3U7R1_ESYT1_MOUSE | Esy1    | Extended synaptotagmin R.SQELDVQVK#.D                      | 22.35 | 7.35  | 3.04  | 0.33 |
| Q3U7R1_ESYT1_MOUSE | Esy1    | Extended synaptotagmin K.TVSOSSAPWVEESAFILR@.K             | 6.98  | 5.17  | 1.35  | 0.74 |
| Q3U7R1_ESYT1_MOUSE | Esy1    | Extended synaptotagmin K.VLQAGVLDNWYPLQGGQGVHLR@.L         | 15.05 | 7.74  | 1.94  | 0.51 |
| Q3U7R1_ESYT1_MOUSE | Esy1    | Extended synaptotagmin K.VQLDLAELIDSGAAGWYDLM*DDR@DK#GGG.- | 3.93  | 1.46  | 2.69  | 0.37 |
| Q3U7R1_ESYT1_MOUSE | Esy1    | Extended synaptotagmin R.ALTLGALTLPLAR@.L                  | 52.11 | 22.61 | 2.30  | 0.43 |
| Q3U7R1_ESYT1_MOUSE | Esy1    | Extended synaptotagmin K.ATYSTNSPVWEAFR@.F                 | 15.28 | 7.36  | 2.08  | 0.48 |
| Q3U7R1_ESYT1_MOUSE | Esy1    | Extended synaptotagmin R.DLPDPYVSVLLPLDK#.N                | 14.22 | 7.47  | 1.90  | 0.53 |
| Q3U7R1_ESYT1_MOUSE | Esy1    | Extended synaptotagmin R.FFLQDPR@.S                        | 19.40 | 5.15  | 3.77  | 0.27 |
| Q3U7R1_ESYT1_MOUSE | Esy1    | Extended synaptotagmin R.GITSR@PEPPSAAILVVYLDLDR@.A        | 12.32 | 5.01  | 2.46  | 0.41 |
| Q3U7R1_ESYT1_MOUSE | Esy1    | Extended synaptotagmin R.LVLDYSEIR@.F                      | 16.18 | 5.95  | 2.72  | 0.37 |
| Q3U7R1_ESYT1_MOUSE | Esy1    | Extended synaptotagmin R.KPHAESELELQVR@.G                  | 13.75 | 5.51  | 2.50  | 0.40 |
| Q3U7R1_ESYT1_MOUSE | Esy1    | Extended synaptotagmin K.LLAETVAPAVR@.G                    | 33.16 | 14.04 | 2.36  | 0.42 |
| Q3U7R1_ESYT1_MOUSE | Esy1    | Extended synaptotagmin R.LTPR@PTAAEEVLQVNSLIQTQK#.S        | 24.63 | 9.83  | 2.50  | 0.40 |
| Q3U7R1_ESYT1_MOUSE | Esy1    | Extended synaptotagmin R.SQELDVQVK#.D                      | 18.26 | 5.53  | 3.30  | 0.30 |
| Q3U7R1_ESYT1_MOUSE | Esy1    | Extended synaptotagmin K.TVSOSSAPWVEESAFILR@.K             | 8.65  | 4.10  | 2.11  | 0.47 |
| Q3U7R1_ESYT1_MOUSE | Esy1    | Extended synaptotagmin K.VLQAGVLDNWYPLQGGQGVHLR@.L         | 10.99 | 4.59  | 2.22  | 0.45 |
| Q3TZZ7_ESYT2_MOUSE | Esy2    | Extended synaptotagmin R.ADKHQDASDGLSALLLILYDSAR@.N        | 12.32 | 4.99  | 2.47  | 0.40 |
| Q3TZZ7_ESYT2_MOUSE | Esy2    | Extended synaptotagmin R.ALALLEDEEQAVR@.L                  | 12.07 | 3.29  | 3.67  | 0.27 |
| Q3TZZ7_ESYT2_MOUSE | Esy2    | Extended synaptotagmin R.FQLSNSGPNSTLKH#.M                 | 9.61  | 5.25  | 1.83  | 0.55 |
| Q3TZZ7_ESYT2_MOUSE | Esy2    | Extended synaptotagmin R.ITVPLVSEVQJALQR@.F                | 15.48 | 3.86  | 4.02  | 0.25 |
| Q3TZZ7_ESYT2_MOUSE | Esy2    | Extended synaptotagmin R.LLDEWFLDVEPK#.G                   | 9.67  | 4.44  | 2.18  | 0.46 |
| Q3TZZ7_ESYT2_MOUSE | Esy2    | Extended synaptotagmin K.VDVGQQLR@.V                       | 10.24 | 3.96  | 2.59  | 0.39 |
| Q3TZZ7_ESYT2_MOUSE | Esy2    | Extended synaptotagmin R.VGNQJFQSK#.V                      | 16.78 | 7.94  | 2.11  | 0.47 |
| Q3TZZ7_ESYT2_MOUSE | Esy2    | Extended synaptotagmin R.ALALLEDEEQAVR@.L                  | 9.98  | 4.79  | 2.08  | 0.48 |
| Q3TZZ7_ESYT2_MOUSE | Esy2    | Extended synaptotagmin R.FQLSNSGPNSTLKH#.M                 | 7.47  | 2.75  | 2.72  | 0.37 |
| Q3TZZ7_ESYT2_MOUSE | Esy2    | Extended synaptotagmin R.IPLSQLTSDNNM*TINQR@.F             | 11.09 | 6.76  | 1.64  | 0.61 |
| Q3TZZ7_ESYT2_MOUSE | Esy2    | Extended synaptotagmin R.ITVPLVSEVQJALQR@.F                | 12.61 | 5.24  | 2.41  | 0.42 |
| Q3TZZ7_ESYT2_MOUSE | Esy2    | Extended synaptotagmin R.VGNQJFQSK#.V                      | 12.57 | 5.24  | 2.40  | 0.42 |
| Q3TZZ7_ESYT2_MOUSE | Esy2    | Extended synaptotagmin K.VLVVLAEEELAK#.G                   | 13.10 | 3.16  | 4.15  | 0.24 |
| Q3TZZ7_ESYT2_MOUSE | Esy2    | Extended synaptotagmin K.VYTVNDVKHR@.Q                     | 5.16  | 1.73  | 2.99  | 0.33 |
| Q8BWY3_ERF1_MOUSE  | Etf1    | Eukaryotic peptide chain K.GFGGIGILR@.Y                    | 17.94 | 13.06 | 1.37  | 0.73 |
| Q8BWY3_ERF1_MOUSE  | Etf1    | Eukaryotic peptide chain R.LSVLGAITSVQQR@.L                | 27.48 | 15.24 | 1.80  | 0.55 |
| Q8BWY3_ERF1_MOUSE  | Etf1    | Eukaryotic peptide chain K.TELSQSDM*FDQR@.L                | 7.15  | 5.31  | 1.35  | 0.74 |
| P97360_ETV6_MOUSE  | Etv6    | Transcription factor ETV6.K.ALLLTK#.E                      | 39.18 | 7.15  | 5.48  | 0.18 |
| P97360_ETV6_MOUSE  | Etv6    | Transcription factor ETV6.K.TPDEIM*SGR@.T                  | 27.18 | 12.03 | 2.26  | 0.44 |
| P97360_ETV6_MOUSE  | Etv6    | Transcription factor ETV6.K.ALLLTK#.E                      | 21.53 | 8.28  | 2.60  | 0.38 |
| P97360_ETV6_MOUSE  | Etv6    | Transcription factor ETV6.R.DDVAQWLK#.W                    | 9.17  | 3.98  | 2.31  | 0.43 |
| P97360_ETV6_MOUSE  | Etv6    | Transcription factor ETV6.K.TPDEIM*SGR@.T                  | 14.03 | 5.91  | 2.37  | 0.42 |
| Q61545_EWS_MOUSE   | Ewsr1   | RNA-binding protein EW.R.QDHPSSM*GVYQESGGFSGPGENR@.S       | 6.15  | 1.25  | 4.91  | 0.20 |
| Q61545_EWS_MOUSE   | Ewsr1   | RNA-binding protein EW.K.GDATSYEDPPTAK#.A                  | 46.77 | 16.69 | 2.80  | 0.36 |
| Q61545_EWS_MOUSE   | Ewsr1   | RNA-binding protein EW.R.QDHPSSM*GVYQESGGFSGPGENR@.S       | 25.09 | 9.44  | 2.66  | 0.38 |
| Q8R356_EXOC1_MOUSE | Exoc1   | Exocyst complex compo R.YAKLMEWLKHSYDYGK#.Y                | 3.87  | 31.00 | 0.12  | 8.02 |
| Q8R356_EXOC1_MOUSE | Exoc1   | Exocyst complex compo K.ALQEGDLVSSR@.G                     | 13.97 | 5.95  | 2.35  | 0.43 |
| Q8R356_EXOC1_MOUSE | Exoc1   | Exocyst complex compo K.DAIK#ENPFDLHFEK#.V                 | 11.86 | 7.74  | 1.53  | 0.65 |
| Q8R356_EXOC1_MOUSE | Exoc1   | Exocyst complex compo R.GVFNVK#.V                          | 13.25 | 9.36  | 1.42  | 0.71 |
| Q8R356_EXOC1_MOUSE | Exoc1   | Exocyst complex compo K.LQQHQNM*SASM*TEAEDLDGGSLLR@.Q      | 7.88  | 4.85  | 1.63  | 0.62 |
| Q8R356_EXOC1_MOUSE | Exoc1   | Exocyst complex compo K.ALQEGDLVSSR@.G                     | 11.87 | 3.58  | 3.31  | 0.30 |
| Q8R356_EXOC1_MOUSE | Exoc1   | Exocyst complex compo R.ELQVLDGANIQSIM*ASEK#.Q             | 4.02  | 2.38  | 1.69  | 0.59 |
| Q8R356_EXOC1_MOUSE | Exoc1   | Exocyst complex compo K.LNHFFGEVQAVR@.V                    | 23.96 | 8.08  | 2.96  | 0.34 |
| Q8R356_EXOC1_MOUSE | Exoc1   | Exocyst complex compo K.LQQHQNM*SASM*TEAEDLDGGSLLR@.Q      | 52.81 | 15.51 | 3.41  | 0.29 |
| Q8R356_EXOC1_MOUSE | Exoc1   | Exocyst complex compo K.LSSYEEM*LSQVK#.E                   | 11.00 | 6.04  | 1.82  | 0.55 |
| Q8R356_EXOC1_MOUSE | Exoc1   | Exocyst complex compo K.LTGSTSSLNK#.L                      | 10.22 | 2.55  | 4.02  | 0.25 |
| Q8R356_EXOC1_MOUSE | Exoc1   | Exocyst complex compo R.VAQGIR@EEESVQLAFNK#.Q              | 9.20  | 4.46  | 2.06  | 0.49 |
| Q9D4H1_EXOC2_MOUSE | Exoc2   | Exocyst complex compo K.ITQVSM*ASLK#.E                     | 8.98  | 4.27  | 2.10  | 0.48 |
| Q9D4H1_EXOC2_MOUSE | Exoc2   | Exocyst complex compo R.LFENYIELK#.A                       | 11.36 | 6.82  | 1.67  | 0.60 |
| Q9D4H1_EXOC2_MOUSE | Exoc2   | Exocyst complex compo R.NALNVLQR@.F                        | 21.55 | 1.98  | 10.90 | 0.09 |
| Q9D4H1_EXOC2_MOUSE | Exoc2   | Exocyst complex compo R.VVEAVSELSR@.L                      | 13.85 | 6.11  | 2.27  | 0.44 |
| Q9D4H1_EXOC2_MOUSE | Exoc2   | Exocyst complex compo R.ASNTADTLFQEVLRG@.K                 | 17.65 | 6.23  | 2.83  | 0.35 |
| Q9D4H1_EXOC2_MOUSE | Exoc2   | Exocyst complex compo K.ITQVSM*ASLK#.E                     | 12.64 | 5.48  | 2.31  | 0.43 |
| Q9D4H1_EXOC2_MOUSE | Exoc2   | Exocyst complex compo R.LFENYIELK#.A                       | 17.44 | 5.73  | 3.05  | 0.33 |
| Q9D4H1_EXOC2_MOUSE | Exoc2   | Exocyst complex compo R.VVEAVSELSR@.L                      | 19.36 | 7.84  | 2.47  | 0.40 |
| Q6KAR6_EXOC3_MOUSE | Exoc3   | Exocyst complex compo K.NIFSVPEIVR@.E                      | 14.33 | 8.42  | 1.70  | 0.59 |
| Q6KAR6_EXOC3_MOUSE | Exoc3   | Exocyst complex compo R.R@DPTLLVSVVR@.I                    | 8.44  | 3.34  | 2.53  | 0.40 |
| Q6KAR6_EXOC3_MOUSE | Exoc3   | Exocyst complex compo K.YPDIR@DDHIGALLLR@.G                | 15.55 | 5.43  | 2.86  | 0.35 |
| Q6KAR6_EXOC3_MOUSE | Exoc3   | Exocyst complex compo R.DM*TLHGFYGTQGLSDELAK#.Q            | 9.66  | 2.20  | 4.38  | 0.23 |
| Q6KAR6_EXOC3_MOUSE | Exoc3   | Exocyst complex compo K.NIFSVPEIVR@.E                      | 15.99 | 2.77  | 5.78  | 0.17 |
| O35382_EXOC4_MOUSE | Exoc4   | Exocyst complex compo R.GESLTVDNQPR@.L                     | 19.29 | 4.97  | 2.88  | 0.35 |
| O35382_EXOC4_MOUSE | Exoc4   | Exocyst complex compo R.K#FLDASQYSAAGSSVR@.E               | 8.24  | 3.43  | 2.40  | 0.42 |
| O35382_EXOC4_MOUSE | Exoc4   | Exocyst complex compo K.SK#DPSGLISVIR@.T                   | 15.78 | 6.93  | 2.28  | 0.44 |
| O35382_EXOC4_MOUSE | Exoc4   | Exocyst complex compo R.STTQVADSAVQR.G                     | 26.72 | 6.55  | 4.08  | 0.25 |
| O35382_EXOC4_MOUSE | Exoc4   | Exocyst complex compo R.TYQSITER@.I                        | 18.46 | 6.90  | 2.68  | 0.37 |
| O35382_EXOC4_MOUSE | Exoc4   | Exocyst complex compo K.ESEVLIGNLGDK#.L                    | 17.86 | 3.30  | 5.41  | 0.18 |
| O35382_EXOC4_MOUSE | Exoc4   | Exocyst complex compo R.SGELQGGPDDNIEGGGK#.F               | 5.86  | 2.06  | 2.85  | 0.35 |
| O35382_EXOC4_MOUSE | Exoc4   | Exocyst complex compo R.SQTQVGDQITQTR@.L                   | 5.46  | 1.57  | 3.48  | 0.29 |
| O35382_EXOC4_MOUSE | Exoc4   | Exocyst complex compo K.ALANM*HSELEWLAGR@.T                | 7.22  | 2.54  | 2.84  | 0.35 |
| O35382_EXOC4_MOUSE | Exoc4   | Exocyst complex compo K.ESEVLIGNLGDK#.L                    | 14.19 | 4.85  | 2.93  | 0.34 |
| O35382_EXOC4_MOUSE | Exoc4   | Exocyst complex compo R.SGELQGGPDDNIEGGGK#.F               | 12.01 | 3.52  | 3.41  | 0.29 |
| O35382_EXOC4_MOUSE | Exoc4   | Exocyst complex compo R.STTQVADSAVQR.G                     | 10.10 | 3.83  | 2.64  | 0.38 |
| O35382_EXOC4_MOUSE | Exoc4   | Exocyst complex compo R.TASEPSAQSYASTGR@.E                 | 8.13  | 2.58  | 3.14  | 0.32 |
| Q3TPX4_EXOC5_MOUSE | Exoc5   | Exocyst complex compo K.QVGDIFSNPEAVLAK#.L                 | 3.25  | 2.91  | 1.12  | 0.89 |
| Q3TPX4_EXOC5_MOUSE | Exoc5   | Exocyst complex compo K.QVGDIFSNPEAVLAK#.L                 | 5.89  | 1.70  | 3.46  | 0.29 |
| A6H5Z3_EXC6B_MOUSE | Exoc6b  | Exocyst complex compo R.VNVPITATLLEK#.M                    | 11.26 | 2.89  | 3.89  | 0.26 |
| O35250_EXOC7_MOUSE | Exoc7   | Exocyst complex compo K.AVEYFQDNSPDPENK#.V                 | 4.22  | 2.65  | 1.59  | 0.63 |
| O35250_EXOC7_MOUSE | Exoc7   | Exocyst complex compo R.HDFSTLTVFPIRL@.H                   | 10.69 | 2.65  | 4.03  | 0.25 |
| O35250_EXOC7_MOUSE | Exoc7   | Exocyst complex compo R.LEEYLGSM*AK#.I                     | 10.11 | 67.68 | 0.15  | 6.69 |
| O35250_EXOC7_MOUSE | Exoc7   | Exocyst complex compo K.SELIQLVAVTQK#.T                    | 9.60  | 5.77  | 1.66  | 0.60 |
| O35250_EXOC7_MOUSE | Exoc7   | Exocyst complex compo K.VLGNLQLNLSK#.S                     | 7.22  | 3.44  | 2.10  | 0.48 |
| O35250_EXOC7_MOUSE | Exoc7   | Exocyst complex compo K.SELIQLVAVTQK#.T                    | 8.00  | 1.35  | 5.92  | 0.17 |
| Q6PGF7_EXOC8_MOUSE | Exoc8   | Exocyst complex compo R.GAVQAGFLPGPAGVPR@.E                | 12.32 | 2.99  | 4.12  | 0.24 |
| Q6PGF7_EXOC8_MOUSE | Exoc8   | Exocyst complex compo R.GAVQAGFLPGPAGVPR@.E                | 12.07 | 4.04  | 2.99  | 0.33 |
| P56960_EXOSX_MOUSE | Exosc10 | Exosome component 10 K.FALGSVAVTK#.A                       | 7.27  | 6.02  | 1.21  | 0.83 |
| P56960_EXOSX_MOUSE | Exosc10 | Exosome component 10 K.ASGGLPFGDEYDFYR@.S                  | 9.23  | 4.61  | 2.00  | 0.50 |
| P56960_EXOSX_MOUSE | Exosc10 | Exosome component 10 R.ER@PQDR@PEDLDVPPALADFIHQQR@.T       | 7.72  | 3.12  | 2.47  | 0.40 |
| P56960_EXOSX_MOUSE | Exosc10 | Exosome component 10 K.FALGSVAVTK#.A                       | 11.68 | 4.97  | 2.35  | 0.43 |
| P56960_EXOSX_MOUSE | Exosc10 | Exosome component 10 R.SDM*YLNESLTDPAVK#.V                 | 4.45  | 3.37  | 1.32  | 0.76 |
| P56960_EXOSX_MOUSE | Exosc10 | Exosome component 10 R.TEDFIVDTLELR.S                      | 16.85 | 7.97  | 2.11  | 0.47 |
| P56960_EXOSX_MOUSE | Exosc10 | Exosome component 10 K.VTELEDK#DLLVDNTDILVER@.V            | 4.66  | 4.95  | 0.94  | 1.06 |
| P56960_EXOSX_MOUSE | Exosc10 | Exosome component 10 K.ASGGLPFGDEYDFYR@.S                  | 12.73 | 3.27  | 3.89  | 0.26 |
| P56960_EXOSX_MOUSE | Exosc10 | Exosome component 10 R.ER@PQDR@PEDLDVPPALADFIHQQR@.T       | 11.78 | 3.72  | 3.16  | 0.32 |
| P56960_EXOSX_MOUSE | Exosc10 | Exosome component 10 K.FVK#PIFDESYLEYR@.K                  | 16.37 | 3.52  | 4.65  | 0.22 |



|                    |          |                                                            |       |       |      |      |
|--------------------|----------|------------------------------------------------------------|-------|-------|------|------|
| P56960_EXOSX_MOUSE | Exosc10  | Exosome component 10 K.HQQPVLPLAGLQVPK#.T                  | 24.23 | 6.64  | 3.65 | 0.27 |
| P56960_EXOSX_MOUSE | Exosc10  | Exosome component 10 R.SDM*YLINLSLTDPAIVK#.V               | 9.44  | 2.19  | 4.30 | 0.23 |
| P56960_EXOSX_MOUSE | Exosc10  | Exosome component 10 R.TEDFIVDTLELR@.S                     | 35.56 | 9.86  | 3.61 | 0.28 |
| P56960_EXOSX_MOUSE | Exosc10  | Exosome component 10 R.VGM*LLDEASGVNKH.H                   | 8.27  | 21.96 | 0.38 | 2.66 |
| P56960_EXOSX_MOUSE | Exosc10  | Exosome component 10 K.VTELEDK#DLLVDTNDVILR@.V             | 8.61  | 3.63  | 2.37 | 0.42 |
| Q8VBV3_EXOS2_MOUSE | Exosc2   | Exosome complex compr R.LDSVLLSSM*NLPGGELR@.R              | 6.57  | 2.49  | 2.63 | 0.38 |
| Q8VBV3_EXOS2_MOUSE | Exosc2   | Exosome complex compr K.LGQGVLVQVSPSLV.R                   | 2.94  | 3.81  | 0.77 | 1.30 |
| Q8VBV3_EXOS2_MOUSE | Exosc2   | Exosome complex compr K.LIASVAGSVER@.V                     | 7.69  | 2.71  | 2.84 | 0.35 |
| Q92119_EXOS4_MOUSE | Exosc4   | Exosome complex compr R.LHEDHLEQLVAAQAAR@.G                | 11.78 | 4.71  | 2.50 | 0.40 |
| Q92119_EXOS4_MOUSE | Exosc4   | Exosome complex compr R.QHVQEAQVSLGD.-                     | 11.66 | 11.66 | 1.00 | 1.00 |
| Q92119_EXOS4_MOUSE | Exosc4   | Exosome complex compr R.QTFEAILTLQHPR@.S                   | 18.89 | 6.92  | 2.73 | 0.37 |
| Q8BTW3_EXOS6_MOUSE | Exosc6   | Exosome complex compr R.GSGPAGAGGAPALR@.G                  | 23.73 | 12.20 | 1.95 | 0.51 |
| Q8BTW3_EXOS6_MOUSE | Exosc6   | Exosome complex compr R.IR@GPEEQPQLYAAEDDETPAAR@.D         | 9.69  | 4.29  | 2.26 | 0.44 |
| Q9D753_EXOS8_MOUSE | Exosc8   | Exosome complex compr R.ATTVINGISLTDGSLVK#.L               | 5.87  | 2.33  | 2.52 | 0.40 |
| Q9D753_EXOS8_MOUSE | Exosc8   | Exosome complex compr K.LLDEVIQSM*#R@.H                    | 7.33  | 3.38  | 2.17 | 0.46 |
| Q9D753_EXOS8_MOUSE | Exosc8   | Exosome complex compr K.NVQLPEVTINEETALAEVNLK#.K           | 4.44  | 3.82  | 1.16 | 0.86 |
| Q9JH17_EXOS9_MOUSE | Exosc9   | Exosome complex compr K.M*ETAPIDTINSIEER@.A                | 8.03  | 3.74  | 2.15 | 0.47 |
| Q9JH17_EXOS9_MOUSE | Exosc9   | Exosome complex compr K.VAEITELIQK#.A                      | 10.38 | 4.02  | 2.59 | 0.39 |
| P26040_EZR_MOUSE   | Ezr      | Ezrin OS=Mus musculus C.K.IGFPVSEIR@.N                     | 9.61  | 5.51  | 1.74 | 0.57 |
| O88792_JAM1_MOUSE  | F11r     | Junctional adhesion mol K.VIYQSPSTR@.S                     | 25.11 | 3.60  | 6.97 | 0.14 |
| O88792_JAM1_MOUSE  | F11r     | Junctional adhesion mol R.VTFSSGIFTFSSVTR@.K               | 7.20  | 2.84  | 2.53 | 0.39 |
| Q00558_F8I2_MOUSE  | F8a1     | Factor VIII intron 22 prot R.DYTGALALFTR@.M                | 6.23  | 3.14  | 1.98 | 0.50 |
| P54731_FAF1_MOUSE  | Faf1     | FAS-associated factor 1 O R.EYNLNFSGSSTVQEVK#.R            | 7.94  | 7.16  | 1.11 | 0.90 |
| P54731_FAF1_MOUSE  | Faf1     | FAS-associated factor 1 O R.NVYDLYTSPVIR@.H                | 11.58 | 17.74 | 0.65 | 1.53 |
| Q3TDN2_FAF2_MOUSE  | Faf2     | FAS-associated factor 2 O R.QQDQEAVALSLR@.A                | 7.88  | 4.81  | 1.64 | 0.61 |
| Q9D281_NXP20_MOUSE | Fam114a1 | Protein Noxp20 OS=Mus R.LAQQLTVER@.T                       | 9.96  | 4.09  | 2.43 | 0.41 |
| Q9D281_NXP20_MOUSE | Fam114a1 | Protein Noxp20 OS=Mus K.SVLTGGDLALFEGK#.K                  | 9.02  | 1.61  | 5.59 | 0.18 |
| Q8VE88_F1142_MOUSE | Fam114a2 | Protein FAM114A2 OS=N K.SLSSLSGELQTR@.L                    | 7.78  | 1.89  | 4.12 | 0.24 |
| Q8VE88_F1142_MOUSE | Fam114a2 | Protein FAM114A2 OS=N K.SLSSASATVATVGGQISNVIEK#.A          | 10.53 | 4.11  | 2.56 | 0.39 |
| Q3U3E2_F117B_MOUSE | Fam117b  | Protein FAM117B OS=M L.RTSPVATQIGASVSTR@.G                 | 6.56  | 1.37  | 4.78 | 0.21 |
| Q6A0A9_F120A_MOUSE | FAM120A  | Constitutive coactivator R.EAAEAVALNKHEE.-                 | 11.19 | 5.69  | 1.97 | 0.51 |
| Q6A0A9_F120A_MOUSE | FAM120A  | Constitutive coactivator R.GVSTPVR.T                       | 29.85 | 16.09 | 1.86 | 0.54 |
| Q6A0A9_F120A_MOUSE | FAM120A  | Constitutive coactivator K.LYEPDQLQELK#.I                  | 25.82 | 16.76 | 1.54 | 0.65 |
| Q6A0A9_F120A_MOUSE | FAM120A  | Constitutive coactivator R.NIHDTSDLDIAAK#.D                | 22.15 | 19.52 | 1.13 | 0.88 |
| Q6A0A9_F120A_MOUSE | FAM120A  | Constitutive coactivator R.QNHPLPPPPPAPFPYSPVPR@.H         | 14.84 | 11.33 | 1.31 | 0.76 |
| Q6A0A9_F120A_MOUSE | FAM120A  | Constitutive coactivator R.QSILEGFSFSR@.Q                  | 13.50 | 7.56  | 1.79 | 0.56 |
| Q6A0A9_F120A_MOUSE | FAM120A  | Constitutive coactivator K.SPQTPPELVEALFR@.E               | 22.96 | 13.61 | 1.69 | 0.59 |
| Q6A0A9_F120A_MOUSE | FAM120A  | Constitutive coactivator K.SQGAIQRRPPYAASAEVAK.E           | 30.29 | 14.44 | 2.10 | 0.48 |
| Q6A0A9_F120A_MOUSE | FAM120A  | Constitutive coactivator K.SQGGVQPIPSQGGK#.L               | 16.93 | 8.46  | 2.00 | 0.50 |
| Q6A0A9_F120A_MOUSE | FAM120A  | Constitutive coactivator K.VEGSSSTAGSGLAEGK#.G             | 31.97 | 13.28 | 2.41 | 0.42 |
| Q6A0A9_F120A_MOUSE | FAM120A  | Constitutive coactivator K.AVADVYR@.N                      | 33.42 | 15.27 | 2.19 | 0.46 |
| Q6A0A9_F120A_MOUSE | FAM120A  | Constitutive coactivator R.EAAEAVALNKHEE.-                 | 22.29 | 9.39  | 2.37 | 0.42 |
| Q6A0A9_F120A_MOUSE | FAM120A  | Constitutive coactivator K.IDNLDPR@.G                      | 15.92 | 8.67  | 1.84 | 0.54 |
| Q6A0A9_F120A_MOUSE | FAM120A  | Constitutive coactivator R.LPEPFSPLIK#.E                   | 16.95 | 6.84  | 2.48 | 0.40 |
| Q6A0A9_F120A_MOUSE | FAM120A  | Constitutive coactivator K.LYEPDQLQELK#.I                  | 45.52 | 16.11 | 2.83 | 0.35 |
| Q6A0A9_F120A_MOUSE | FAM120A  | Constitutive coactivator R.NIHDTSDLDIAAK#.D                | 28.10 | 15.27 | 1.84 | 0.54 |
| Q6A0A9_F120A_MOUSE | FAM120A  | Constitutive coactivator K.NLTEQNSYNIPHEGK#.H              | 30.57 | 11.86 | 2.58 | 0.39 |
| Q6A0A9_F120A_MOUSE | FAM120A  | Constitutive coactivator K.NR@LPEPFSPLIK#.E                | 10.83 | 4.54  | 2.39 | 0.42 |
| Q6A0A9_F120A_MOUSE | FAM120A  | Constitutive coactivator R.QNHPLPPPPPAPFPYSPVPR@.H         | 27.84 | 15.88 | 1.75 | 0.57 |
| Q6A0A9_F120A_MOUSE | FAM120A  | Constitutive coactivator R.QSILEGFSFSR@.Q                  | 28.13 | 11.08 | 2.54 | 0.39 |
| Q6A0A9_F120A_MOUSE | FAM120A  | Constitutive coactivator K.SPQTPPELVEALFR@.E               | 34.27 | 14.34 | 2.39 | 0.42 |
| Q6A0A9_F120A_MOUSE | FAM120A  | Constitutive coactivator K.SQGAIQRR@PPYAASAEVAK#.E         | 31.59 | 7.49  | 4.22 | 0.24 |
| Q6A0A9_F120A_MOUSE | FAM120A  | Constitutive coactivator K.SQGGVQPIPSQGGK#.L               | 33.70 | 14.60 | 2.31 | 0.43 |
| Q6A0A9_F120A_MOUSE | FAM120A  | Constitutive coactivator K.VEGSSSTAGSGLAEGK#.G             | 30.04 | 10.86 | 2.77 | 0.36 |
| Q8C3F2_F120C_MOUSE | Fam120c  | Constitutive coactivator K.LSSLVPGVPSLGFRR@.N              | 16.22 | 5.61  | 2.89 | 0.35 |
| Q8R1F1_NIBL1_MOUSE | Fam129b  | Niban-like protein 1 OS=I R.FOELIFEDFAR@.F                 | 18.61 | 13.08 | 1.42 | 0.70 |
| Q8R1F1_NIBL1_MOUSE | Fam129b  | Niban-like protein 1 OS=I R.FSLVPHNYGLVLYENK#.V            | 20.78 | 4.01  | 5.18 | 0.19 |
| Q8R1F1_NIBL1_MOUSE | Fam129b  | Niban-like protein 1 OS=I R.FDVSSVSVFK#.F                  | 15.44 | 8.12  | 1.90 | 0.53 |
| Q8R1F1_NIBL1_MOUSE | Fam129b  | Niban-like protein 1 OS=I R.FOELIFEDFAR@.F                 | 19.04 | 5.01  | 3.80 | 0.26 |
| Q8R1F1_NIBL1_MOUSE | Fam129b  | Niban-like protein 1 OS=I R.FYEDQYVSLFNSM*#R@.H            | 4.38  | 2.64  | 1.66 | 0.60 |
| Q8R1F1_NIBL1_MOUSE | Fam129b  | Niban-like protein 1 OS=I R.HEIEGTGPPQAQLWVR@.K            | 6.49  | 4.28  | 1.52 | 0.66 |
| Q8R1F1_NIBL1_MOUSE | Fam129b  | Niban-like protein 1 OS=I R.NHVQPIPSILEALM*#VPTSQGFTEVR@.D | 6.86  | 1.44  | 4.77 | 0.21 |
| Q8R1F1_NIBL1_MOUSE | Fam129b  | Niban-like protein 1 OS=I K.VLTSVDTSSGSLVGNLSLPGTTSK#.S    | 12.73 | 6.04  | 2.11 | 0.47 |
| Q9CQV4_F134C_MOUSE | Fam134c  | Protein FAM134C OS=M L.RTLVEVLGPEYELLSR@.V                 | 14.23 | 2.64  | 5.39 | 0.19 |
| Q8BPZ8_F175A_MOUSE | Fam175a  | BRCA1-A complex subunit K.LLM*DVNLK#.E                     | 9.51  | 3.69  | 2.58 | 0.39 |
| Q8BPZ8_F175A_MOUSE | Fam175a  | BRCA1-A complex subunit R.VPLVLTNLGM*#SDQLGYK#.T           | 11.73 | 3.92  | 3.00 | 0.33 |
| Q8BPZ8_F175A_MOUSE | Fam175a  | BRCA1-A complex subunit K.VVYDITQIK#.Y                     | 14.00 | 3.29  | 4.25 | 0.24 |
| Q8BR63_F177A_MOUSE | Fam177a1 | Protein FAM177A1 OS=N K.IASVLGISTPK#.Y                     | 6.97  | 5.25  | 1.33 | 0.75 |
| Q8CG11_F193A_MOUSE | Fam193a  | Protein FAM193A OS=M L.TSSLDLDFLPPK#.D                     | 7.45  | 6.05  | 1.23 | 0.81 |
| P58468_F207A_MOUSE | Fam207a  | Protein FAM207A OS=M L.KLLASPTVR@.A                        | 16.80 | 7.70  | 2.18 | 0.46 |
| P58468_F207A_MOUSE | Fam207a  | Protein FAM207A OS=M L.TQJDPALVQR@.L                       | 12.17 | 6.90  | 1.76 | 0.57 |
| P58468_F207A_MOUSE | Fam207a  | Protein FAM207A OS=M L.R.TQJDPALVQR@.L                     | 5.93  | 4.54  | 1.31 | 0.77 |
| Q69ZR9_F208A_MOUSE | Fam208a  | Protein FAM208A OS=M L.VSEITENTVLGEHFLFSR@.K               | 11.70 | 7.30  | 1.60 | 0.62 |
| Q69ZR9_F208A_MOUSE | Fam208a  | Protein FAM208A OS=M L.R.VVSISSDFSSAK#.E                   | 9.68  | 6.68  | 1.45 | 0.69 |
| Q5DTT3_F208B_MOUSE | Fam208b  | Protein FAM208B OS=M K.ILOQTSFLVFPK#.Q                     | 5.64  | 6.02  | 0.94 | 1.07 |
| Q6PGL7_FAM21_MOUSE | Fam21    | WASH complex subunit F R.LHNVFDFDML*#LNTQFIENR@.V          | 12.09 | 3.47  | 3.49 | 0.29 |
| Q6PGL7_FAM21_MOUSE | Fam21    | WASH complex subunit F K.NQDPLDSTQGSK#.E                   | 4.86  | 2.29  | 2.12 | 0.47 |
| Q6PGL7_FAM21_MOUSE | Fam21    | WASH complex subunit F R.VSPEVGSADVASIAQK#.E               | 10.66 | 1.62  | 6.58 | 0.15 |
| Q6PGL7_FAM21_MOUSE | Fam21    | WASH complex subunit F R.VYDEEVEEQVLK#.A                   | 8.32  | 3.28  | 2.53 | 0.39 |
| Q6PGL7_FAM21_MOUSE | Fam21    | WASH complex subunit F K.DLYDR@PLPLVIGSK#.L                | 18.80 | 4.30  | 4.38 | 0.23 |
| Q6PGL7_FAM21_MOUSE | Fam21    | WASH complex subunit F K.DNDPVDLFAGTK#.K                   | 7.53  | 2.04  | 3.69 | 0.27 |
| Q6PGL7_FAM21_MOUSE | Fam21    | WASH complex subunit F K.EGLLPASDQAGGSPDISFSSSPLDK#.G      | 9.28  | 2.90  | 3.21 | 0.31 |
| Q6PGL7_FAM21_MOUSE | Fam21    | WASH complex subunit F K.EIDLIPK#.V                        | 13.28 | 4.83  | 2.75 | 0.36 |
| Q6PGL7_FAM21_MOUSE | Fam21    | WASH complex subunit F R.GGLFNSGQGLFDDESDLFK#EAPR@.A       | 6.19  | 1.55  | 4.00 | 0.25 |
| Q6PGL7_FAM21_MOUSE | Fam21    | WASH complex subunit F K.IPAGAVSVLGHDPVSGSAPSLSK#.E        | 17.34 | 2.91  | 5.95 | 0.17 |
| Q6PGL7_FAM21_MOUSE | Fam21    | WASH complex subunit F K.KHTNLFEDDDDEVDFLAIK#.D            | 6.83  | 2.71  | 2.52 | 0.40 |
| Q6PGL7_FAM21_MOUSE | Fam21    | WASH complex subunit F R.LHNVFDFDML*#LNTQFIENR@.V          | 9.48  | 4.24  | 2.23 | 0.45 |
| Q6PGL7_FAM21_MOUSE | Fam21    | WASH complex subunit F K.NQDPLDSTQGSK#.E                   | 13.84 | 4.08  | 3.39 | 0.29 |
| Q6PGL7_FAM21_MOUSE | Fam21    | WASH complex subunit F K.QVDGLIQTK#.A                      | 9.48  | 2.30  | 4.12 | 0.24 |
| Q6PGL7_FAM21_MOUSE | Fam21    | WASH complex subunit F K.SM*#FDDTDDIFSSGLQAK#.A            | 6.37  | 2.10  | 3.04 | 0.33 |
| Q6PGL7_FAM21_MOUSE | Fam21    | WASH complex subunit F K.SR@PQTGMNEALFDSGDIFPK#.S          | 13.88 | 3.78  | 3.67 | 0.27 |
| Q6PGL7_FAM21_MOUSE | Fam21    | WASH complex subunit F R.SVPSGSLFGDDEDDLFSSAK#.T           | 12.65 | 1.92  | 6.59 | 0.15 |
| Q6PGL7_FAM21_MOUSE | Fam21    | WASH complex subunit F K.TEPAQDSSGLTPFK#.S                 | 12.61 | 4.17  | 3.02 | 0.33 |
| Q6PGL7_FAM21_MOUSE | Fam21    | WASH complex subunit F K.TNLFEDDDDEVDFLAIK#.D              | 12.24 | 2.09  | 5.86 | 0.17 |
| Q6PGL7_FAM21_MOUSE | Fam21    | WASH complex subunit F K.VPLFDEEDEVSPGVK#PEDLK#.V          | 45.49 | 14.11 | 3.22 | 0.31 |
| Q6PGL7_FAM21_MOUSE | Fam21    | WASH complex subunit F R.VSPEVGSADVASIAQK#.E               | 21.99 | 3.20  | 6.87 | 0.15 |
| Q6PGL7_FAM21_MOUSE | Fam21    | WASH complex subunit F R.VYDEEVEEQVLK#.A                   | 10.69 | 2.94  | 3.63 | 0.28 |
| Q9CYH2_F213A_MOUSE | Fam213a  | Redox-regulatory protei K.LDELGVPLVAVYK#.E                 | 5.03  | 1.79  | 2.81 | 0.36 |
| Q91VU0_FAM3C_MOUSE | Fam3c    | Protein FAM3C OS=Mus r R.LIAELGSTSLSLGFRR@.D               | 16.80 | 5.16  | 3.25 | 0.31 |
| Q91VU0_FAM3C_MOUSE | Fam3c    | Protein FAM3C OS=Mus r K.M*#ASGAANVVGPK#.I                 | 23.13 | 7.98  | 2.90 | 0.35 |
| Q91VU0_FAM3C_MOUSE | Fam3c    | Protein FAM3C OS=Mus r K.M*#DASLGNLFRAR@.S                 | 7.72  | 4.49  | 1.72 | 0.58 |
| Q9D8N2_FA45A_MOUSE | Fam45a   | Protein FAM45A OS=Mus K.EIGQLIVQSAEDPEKSDSQVQDIALK.T       | 3.05  | 2.32  | 1.32 | 0.76 |
| Q9D8N2_FA45A_MOUSE | Fam45a   | Protein FAM45A OS=Mus K.EIGQLIVQSAEDPEKSDSQVQDIALK#.T      | 3.58  | 2.85  | 1.26 | 0.80 |

|                    |         |                                                                   |        |        |      |      |
|--------------------|---------|-------------------------------------------------------------------|--------|--------|------|------|
| Q68FE6_FA65A_MOUSE | Fam65a  | Protein FAM65A OS=Mus R.LGFLYDLDK#.Q                              | 8.20   | 1.59   | 5.16 | 0.19 |
| Q922G2_FA76A_MOUSE | Fam76a  | Protein FAM76A OS=Mus K.TLTSSTSIQNEIP#.K                          | 7.83   | 7.51   | 1.04 | 0.96 |
| Q80XP8_FA76B_MOUSE | Fam76b  | Protein FAM76B OS=Mus K.ADFQYQESNLR@.T                            | 21.88  | 10.62  | 2.06 | 0.49 |
| Q80XP8_FA76B_MOUSE | Fam76b  | Protein FAM76B OS=Mus K.SSAAIQNETPK#.K                            | 35.72  | 19.18  | 1.86 | 0.54 |
| Q80XP8_FA76B_MOUSE | Fam76b  | Protein FAM76B OS=Mus K.ADFQYQESNLR@.T                            | 6.97   | 1.26   | 5.53 | 0.18 |
| Q80XP8_FA76B_MOUSE | Fam76b  | Protein FAM76B OS=Mus K.SSAAIQNETPK#.K                            | 8.39   | 2.79   | 3.01 | 0.33 |
| Q148V8_FA83H_MOUSE | Fam83h  | Protein FAM83H OS=Mus R.ILFACSEPLVPSGAGALAR@.M                    | 9.09   | 4.76   | 1.91 | 0.52 |
| Q148V8_FA83H_MOUSE | Fam83h  | Protein FAM83H OS=Mus R.LAVDALTEGGPEAYNR@.F                       | 10.74  | 3.60   | 2.98 | 0.34 |
| Q148V8_FA83H_MOUSE | Fam83h  | Protein FAM83H OS=Mus K.EQTVSETLGPSPGEAVR@.S                      | 5.40   | 3.65   | 1.48 | 0.67 |
| Q148V8_FA83H_MOUSE | Fam83h  | Protein FAM83H OS=Mus R.ILFACSEPLVPSGAGALAR@.M                    | 7.34   | 3.51   | 2.09 | 0.48 |
| Q148V8_FA83H_MOUSE | Fam83h  | Protein FAM83H OS=Mus R.LAVDALTEGGPEAYNR@.F                       | 6.16   | 3.94   | 1.56 | 0.64 |
| Q3UVG3_F91A1_MOUSE | Fam91a1 | Protein FAM91A1 OS=M L.KLSDSELDLDFLIELEK#.V                       | 11.43  | 10.77  | 1.06 | 0.94 |
| Q3UVG3_F91A1_MOUSE | Fam91a1 | Protein FAM91A1 OS=M L.R.SPSSLIIASLHL.-                           | 21.74  | 21.74  | 1.00 | 1.00 |
| Q3UVG3_F91A1_MOUSE | Fam91a1 | Protein FAM91A1 OS=M L.R.VQGDYFETLLYK#.I                          | 13.82  | 6.42   | 2.15 | 0.46 |
| Q3UVG3_F91A1_MOUSE | Fam91a1 | Protein FAM91A1 OS=M L.K.IIDSGPOLSGSLDYNVHSLYNK#.G                | 15.90  | 6.23   | 2.55 | 0.39 |
| Q3UVG3_F91A1_MOUSE | Fam91a1 | Protein FAM91A1 OS=M L.K.LSDELDLDFLIELEK#.V                       | 16.47  | 6.90   | 2.39 | 0.42 |
| Q3UVG3_F91A1_MOUSE | Fam91a1 | Protein FAM91A1 OS=M L.R.SPSSLIIASLHL.-                           | 26.24  | 26.24  | 1.00 | 1.00 |
| Q3UVG3_F91A1_MOUSE | Fam91a1 | Protein FAM91A1 OS=M L.R.VQGDYFETLLYK#.I                          | 11.13  | 7.78   | 1.43 | 0.70 |
| Q3TIZ6_FA98A_MOUSE | Fam98a  | Protein FAM98A OS=Mus K.AQEGGGSEVDFQELK#.G                        | 13.54  | 8.60   | 1.57 | 0.64 |
| Q3TIZ6_FA98A_MOUSE | Fam98a  | Protein FAM98A OS=Mus R.GGRPNIEPPPPPEM*PPWQK.R                    | 20.41  | 9.54   | 2.14 | 0.47 |
| Q3TIZ6_FA98A_MOUSE | Fam98a  | Protein FAM98A OS=Mus K.KHAQEGGGSEVDFQELK#.G                      | 9.91   | 8.77   | 1.13 | 0.89 |
| Q3TIZ6_FA98A_MOUSE | Fam98a  | Protein FAM98A OS=Mus R.LDVTVQSGFWSDR@.A                          | 10.68  | 6.07   | 1.76 | 0.57 |
| Q3TIZ6_FA98A_MOUSE | Fam98a  | Protein FAM98A OS=Mus K.R@LDVTVQSGFWSDR@.A                        | 19.74  | 6.83   | 2.89 | 0.35 |
| Q3TIZ6_FA98A_MOUSE | Fam98a  | Protein FAM98A OS=Mus K.AQEGGGSEVDFQELK#.G                        | 4.91   | 3.96   | 1.24 | 0.81 |
| Q3TIZ6_FA98A_MOUSE | Fam98a  | Protein FAM98A OS=Mus K.IEAINQAIANEVEVR@.R                        | 10.50  | 7.93   | 1.32 | 0.76 |
| Q80VD1_FA98B_MOUSE | Fam98b  | Protein FAM98B OS=Mus R.DDLESFQLEISGLK#.E                         | 5.63   | 2.49   | 2.26 | 0.44 |
| Q80VD1_FA98B_MOUSE | Fam98b  | Protein FAM98B OS=Mus R.GPELGPETSM*EGDVLDTLEALGYK#.G              | 4.33   | 3.68   | 1.18 | 0.85 |
| Q80VD1_FA98B_MOUSE | Fam98b  | Protein FAM98B OS=Mus K.GPLLEEALSK#.A                             | 93.85  | 40.98  | 2.29 | 0.44 |
| Q80VD1_FA98B_MOUSE | Fam98b  | Protein FAM98B OS=Mus -.M*RGPELGPETSM*EGDVLDTLEALGYK#.G           | 6.74   | 2.64   | 2.55 | 0.39 |
| Q80VD1_FA98B_MOUSE | Fam98b  | Protein FAM98B OS=Mus -.M*R@GPELGPETSM*EGDVLDTLEALGYK#.G          | 5.52   | 1.05   | 4.29 | 0.23 |
| Q80VD1_FA98B_MOUSE | Fam98b  | Protein FAM98B OS=Mus K.SDTSIDPILLLSQVESK#.V                      | 15.97  | 24.30  | 2.37 | 0.42 |
| Q80VD1_FA98B_MOUSE | Fam98b  | Protein FAM98B OS=Mus K.TTVTLAHLAAR@.E                            | 57.57  | 4.94   | 3.23 | 0.31 |
| F8VPU2_FARP1_MOUSE | Farp1   | FERM, RhoGEF and pleck K.D.LIGIDNLTVPGR@.E                        | 25.39  | 10.55  | 2.41 | 0.42 |
| F8VPU2_FARP1_MOUSE | Farp1   | FERM, RhoGEF and pleck K.HSEALEALETSIK#.G                         | 11.43  | 5.09   | 2.24 | 0.45 |
| F8VPU2_FARP1_MOUSE | Farp1   | FERM, RhoGEF and pleck R.I.M*EFHSHVGGTPAESDFQLLEVAR@.R            | 5.70   | 3.32   | 1.71 | 0.58 |
| F8VPU2_FARP1_MOUSE | Farp1   | FERM, RhoGEF and pleck R.LGAPENSGISTLER@.G                        | 12.56  | 11.46  | 2.29 | 0.44 |
| F8VPU2_FARP1_MOUSE | Farp1   | FERM, RhoGEF and pleck K.LR@PDVNSYQDTLEFLM*AGR@.D                 | 12.56  | 4.72   | 2.66 | 0.38 |
| F8VPU2_FARP1_MOUSE | Farp1   | FERM, RhoGEF and pleck R.SLVSQPTAPNSEVPPK#.Q                      | 16.75  | 7.57   | 2.21 | 0.45 |
| F8VPU2_FARP1_MOUSE | Farp1   | FERM, RhoGEF and pleck R.AALAEITOM*VAQLHGTM*IK#.M                 | 15.00  | 6.71   | 2.23 | 0.45 |
| F8VPU2_FARP1_MOUSE | Farp1   | FERM, RhoGEF and pleck R.AESEYTFER@.W                             | 17.27  | 6.07   | 2.85 | 0.35 |
| F8VPU2_FARP1_MOUSE | Farp1   | FERM, RhoGEF and pleck K.D.LIGIDNLTVPGR@.E                        | 62.82  | 22.00  | 2.86 | 0.35 |
| F8VPU2_FARP1_MOUSE | Farp1   | FERM, RhoGEF and pleck R.GLTASNQFK#.V                             | 29.35  | 8.28   | 3.55 | 0.28 |
| F8VPU2_FARP1_MOUSE | Farp1   | FERM, RhoGEF and pleck K.HSEALEALETSIK#.G                         | 26.75  | 10.48  | 2.55 | 0.39 |
| F8VPU2_FARP1_MOUSE | Farp1   | FERM, RhoGEF and pleck K.INAFNWAQ#.V                              | 17.71  | 5.17   | 3.42 | 0.29 |
| F8VPU2_FARP1_MOUSE | Farp1   | FERM, RhoGEF and pleck K.IQM*LDTOEAFVPPQR@.A                      | 7.60   | 2.57   | 2.95 | 0.34 |
| F8VPU2_FARP1_MOUSE | Farp1   | FERM, RhoGEF and pleck R.LALWEGR@.S                               | 19.92  | 8.21   | 2.43 | 0.41 |
| F8VPU2_FARP1_MOUSE | Farp1   | FERM, RhoGEF and pleck R.LGAPENSGISTLER@.G                        | 59.30  | 19.91  | 2.98 | 0.34 |
| F8VPU2_FARP1_MOUSE | Farp1   | FERM, RhoGEF and pleck K.LR@PDVNSYQDTLEFLM*AGR@.D                 | 27.58  | 4.51   | 6.12 | 0.16 |
| F8VPU2_FARP1_MOUSE | Farp1   | FERM, RhoGEF and pleck R.SLVSQPTAPNSEVPPK#.Q                      | 42.07  | 15.95  | 2.64 | 0.38 |
| F8VPU2_FARP1_MOUSE | Farp1   | FERM, RhoGEF and pleck R.YLFAVQK#.Q                               | 20.62  | 7.06   | 2.92 | 0.34 |
| Q91V58_FARP2_MOUSE | Farp2   | FERM, RhoGEF and pleck K.LLDSTVLFDFEPK#.C                         | 6.99   | 2.58   | 2.71 | 0.37 |
| Q99M01_SYFM_MOUSE  | Fars2   | Phenylalanine-tRNA liga R.TVGGDLVEKVDLIDK#.F                      | 5.32   | 48.51  | 0.11 | 9.12 |
| Q8COC7_SYFA_MOUSE  | Farsa   | Phenylalanine-tRNA liga K.LGITQLR@.F                              | 14.87  | 6.73   | 2.21 | 0.45 |
| P19096_FAS_MOUSE   | Fasn    | Fatty acid synthase OS=N K.AGLYGLPK#.R                            | 22.93  | 16.16  | 1.42 | 0.70 |
| P19096_FAS_MOUSE   | Fasn    | Fatty acid synthase OS=N R.DHXHNDLFFLLTLGK#.V                     | 20.45  | 10.66  | 1.92 | 0.52 |
| P19096_FAS_MOUSE   | Fasn    | Fatty acid synthase OS=N R.EEPEAVLPGAQPTLISAIK.T                  | 2.49   | 4.40   | 0.56 | 1.77 |
| P19096_FAS_MOUSE   | Fasn    | Fatty acid synthase OS=N K.FDASFFGVHPK#.Q                         | 40.81  | 23.80  | 1.71 | 0.58 |
| P19096_FAS_MOUSE   | Fasn    | Fatty acid synthase OS=N R.FPQLDDTSFANR@.D                        | 22.34  | 15.22  | 1.47 | 0.68 |
| P19096_FAS_MOUSE   | Fasn    | Fatty acid synthase OS=N R.GNAGQTYNGFANSTM*ER@.I                  | 9.68   | 3.47   | 2.79 | 0.36 |
| P19096_FAS_MOUSE   | Fasn    | Fatty acid synthase OS=N K.GVDLVLNLAEEK#.L                        | 41.88  | 18.95  | 2.21 | 0.45 |
| P19096_FAS_MOUSE   | Fasn    | Fatty acid synthase OS=N R.GYTVLQVEGR@.V                          | 42.56  | 12.78  | 3.33 | 0.30 |
| P19096_FAS_MOUSE   | Fasn    | Fatty acid synthase OS=N K.HDLVM*NVYR@.D                          | 11.61  | 5.65   | 2.06 | 0.49 |
| P19096_FAS_MOUSE   | Fasn    | Fatty acid synthase OS=N R.IPALLNTPM*QLQYATADR@.H                 | 9.79   | 6.46   | 1.51 | 0.66 |
| P19096_FAS_MOUSE   | Fasn    | Fatty acid synthase OS=N K.LDPSPELQVVK#.H                         | 28.62  | 15.70  | 1.82 | 0.55 |
| P19096_FAS_MOUSE   | Fasn    | Fatty acid synthase OS=N K.LGVPGGVFNLAM*VLR@.D                    | 70.32  | 42.08  | 1.67 | 0.60 |
| P19096_FAS_MOUSE   | Fasn    | Fatty acid synthase OS=N R.LKHEDTQVADVTTSR@.C                     | 19.49  | 13.01  | 1.50 | 0.67 |
| P19096_FAS_MOUSE   | Fasn    | Fatty acid synthase OS=N R.LLEASHAFVSDTGNLIVSGK#.V                | 13.92  | 17.22  | 1.97 | 0.51 |
| P19096_FAS_MOUSE   | Fasn    | Fatty acid synthase OS=N R.QGIQVLVSTNSVSELEGAR@.A                 | 7.19   | 3.20   | 2.24 | 0.45 |
| P19096_FAS_MOUSE   | Fasn    | Fatty acid synthase OS=N R.RQEQQLVPTLEK.F                         | 15.39  | 11.91  | 1.29 | 0.77 |
| P19096_FAS_MOUSE   | Fasn    | Fatty acid synthase OS=N R.SEAVAVLLTK#.K                          | 23.04  | 12.96  | 1.78 | 0.56 |
| P19096_FAS_MOUSE   | Fasn    | Fatty acid synthase OS=N K.SNM*GHPEPAGSGLAALTK#.V                 | 22.02  | 16.23  | 1.36 | 0.74 |
| P19096_FAS_MOUSE   | Fasn    | Fatty acid synthase OS=N K.SYIITGLGGFGLER@.W                      | 17.75  | 11.08  | 1.60 | 0.62 |
| P19096_FAS_MOUSE   | Fasn    | Fatty acid synthase OS=N K.TGTVALVLR@.L                           | 33.67  | 20.48  | 1.64 | 0.61 |
| P19096_FAS_MOUSE   | Fasn    | Fatty acid synthase OS=N R.TLEAVDLTEQGR@.Q                        | 41.11  | 39.25  | 1.05 | 0.95 |
| P19096_FAS_MOUSE   | Fasn    | Fatty acid synthase OS=N R.VAASVDLTK#.S                           | 26.02  | 13.72  | 1.90 | 0.53 |
| P19096_FAS_MOUSE   | Fasn    | Fatty acid synthase OS=N K.VHLTGINVNPALFPPVEFPAPR@.G              | 44.72  | 27.84  | 1.61 | 0.62 |
| P19096_FAS_MOUSE   | Fasn    | Fatty acid synthase OS=N K.VLEALLPK#.S                            | 22.87  | 13.22  | 1.73 | 0.58 |
| P19096_FAS_MOUSE   | Fasn    | Fatty acid synthase OS=N K.VLVQVREPEAVLPGAQPTLISAIK.T             | 5.58   | 4.74   | 1.18 | 0.85 |
| P19096_FAS_MOUSE   | Fasn    | Fatty acid synthase OS=N R.VTAIYDPATHR@.Q                         | 55.02  | 26.67  | 2.06 | 0.48 |
| P19096_FAS_MOUSE   | Fasn    | Fatty acid synthase OS=N R.VYATILNAGNTDGSK#.E                     | 4.79   | 3.81   | 1.26 | 0.79 |
| P62862_RS30_MOUSE  | Fau     | 40S ribosomal protein S: R.FVNVVPTFGK#.N                          | 299.65 | 98.20  | 3.05 | 0.33 |
| P35550_FBR1_MOUSE  | Fbl     | rRNA 2'-O-methyltransferase R.DHAAVVVGYR@PPP.K.S                  | 219.32 | 139.76 | 1.57 | 0.64 |
| P35550_FBR1_MOUSE  | Fbl     | rRNA 2'-O-methyltransferase R.GK#EDALVTK#.N                       | 149.10 | 88.77  | 1.68 | 0.60 |
| P35550_FBR1_MOUSE  | Fbl     | rRNA 2'-O-methyltransferase R.LAAAILGGVDQIHKPGAK.V                | 167.45 | 69.94  | 2.39 | 0.42 |
| P35550_FBR1_MOUSE  | Fbl     | rRNA 2'-O-methyltransferase R.M*LIAM*VDVIFADVAQPDQTR@.I           | 42.34  | 23.13  | 1.83 | 0.55 |
| P35550_FBR1_MOUSE  | Fbl     | rRNA 2'-O-methyltransferase R.M*LIAM*VDVIFADVAQPDQTR.I            | 6.03   | 2.20   | 2.74 | 0.37 |
| P35550_FBR1_MOUSE  | Fbl     | rRNA 2'-O-methyltransferase K.M*QDENM*KPQEQLTLEPYER.D             | 135.14 | 59.19  | 2.28 | 0.44 |
| P35550_FBR1_MOUSE  | Fbl     | rRNA 2'-O-methyltransferase K.MQENM*KPQEQLTLEPYER@.D              | 9.17   | 4.26   | 2.15 | 0.47 |
| P35550_FBR1_MOUSE  | Fbl     | rRNA 2'-O-methyltransferase K.M*QDENM*KPQEQLTLEPYER@.D            | 15.51  | 6.10   | 2.54 | 0.39 |
| P35550_FBR1_MOUSE  | Fbl     | rRNA 2'-O-methyltransferase K.MQENM*KPQEQLTLEPYER@.D              | 9.03   | 5.76   | 1.57 | 0.64 |
| P35550_FBR1_MOUSE  | Fbl     | rRNA 2'-O-methyltransferase R.RVSISEGGDKIEYR.A                    | 105.98 | 47.72  | 2.22 | 0.45 |
| P35550_FBR1_MOUSE  | Fbl     | rRNA 2'-O-methyltransferase R.GK#EDALVTK#.N                       | 37.57  | 31.92  | 1.18 | 0.85 |
| P35550_FBR1_MOUSE  | Fbl     | rRNA 2'-O-methyltransferase R.LAAAILGGVDQIHKPGAK.V                | 16.25  | 16.31  | 1.00 | 1.00 |
| P35550_FBR1_MOUSE  | Fbl     | rRNA 2'-O-methyltransferase R.M*LIAM*VDVIFADVAQPDQTR@.I           | 9.46   | 7.45   | 1.27 | 0.79 |
| P35550_FBR1_MOUSE  | Fbl     | rRNA 2'-O-methyltransferase K.M*QDENM*KPQEQLTLEPYER.D             | 24.74  | 14.59  | 1.70 | 0.59 |
| P35550_FBR1_MOUSE  | Fbl     | rRNA 2'-O-methyltransferase K.VLVLGAASGTVSHVSDIVGPDGLVAVAFVSHR@.S | 3.62   | 1.65   | 2.19 | 0.46 |
| P35550_FBR1_MOUSE  | Fbl     | rRNA 2'-O-methyltransferase R.VSISEGGDKIEYR@.A                    | 103.03 | 59.78  | 1.72 | 0.58 |
| P35550_FBR1_MOUSE  | Fbl     | rRNA 2'-O-methyltransferase R.GK#EDALVTK#.N                       | 29.92  | 11.83  | 2.53 | 0.40 |
| P35550_FBR1_MOUSE  | Fbl     | rRNA 2'-O-methyltransferase R.M*LIAM*VDVIFADVAQPDQTR@.I           | 9.18   | 3.29   | 2.79 | 0.36 |
| P35550_FBR1_MOUSE  | Fbl     | rRNA 2'-O-methyltransferase K.M*QDENM*KPQEQLTLEPYER.D             | 21.58  | 6.60   | 3.27 | 0.31 |
| P35550_FBR1_MOUSE  | Fbl     | rRNA 2'-O-methyltransferase R.DHAAVVVGYR@PPP.K.S                  | 27.87  | 7.48   | 3.73 | 0.27 |
| P35550_FBR1_MOUSE  | Fbl     | rRNA 2'-O-methyltransferase R.LAAAILGGVDQIHKPGAK#.V               | 27.15  | 7.11   | 3.82 | 0.26 |
| P35550_FBR1_MOUSE  | Fbl     | rRNA 2'-O-methyltransferase R.M*LIAM*VDVIFADVAQPDQTR@.I           | 7.88   | 2.88   | 2.73 | 0.37 |

|                     |         |                                                                 |        |        |      |      |
|---------------------|---------|-----------------------------------------------------------------|--------|--------|------|------|
| Q71FD7_FBL1_MOUSE   | Fblm1   | Filamin-binding LIM prot K.SLISDLEQLHPPPPPPPPQAPSK#.G           | 4.57   | 4.32   | 1.06 | 0.94 |
| P37889_FBLN2_MOUSE  | Fbln2   | Fibulin-2 OS=Mus muscu R.IGPAPAFAGDTSITLTK#.G                   | 17.28  | 26.52  | 0.65 | 1.53 |
| P37889_FBLN2_MOUSE  | Fbln2   | Fibulin-2 OS=Mus muscu R.LNAYTGVVSLQR@.S                        | 9.07   | 9.87   | 0.92 | 1.09 |
| P37889_FBLN2_MOUSE  | Fbln2   | Fibulin-2 OS=Mus muscu R.IGPAPAFAGDTSITLTK#.G                   | 30.71  | 27.72  | 1.11 | 0.90 |
| P37889_FBLN2_MOUSE  | Fbln2   | Fibulin-2 OS=Mus muscu R.LNAYTGVVSLQR@.S                        | 12.14  | 6.34   | 1.92 | 0.52 |
| P37889_FBLN2_MOUSE  | Fbln2   | Fibulin-2 OS=Mus muscu R.SVM*QEGAAPLPR@.S                       | 10.91  | 21.71  | 0.50 | 1.99 |
| P37889_FBLN2_MOUSE  | Fbln2   | Fibulin-2 OS=Mus muscu R.DFALDVEVM*#.L                          | 32.26  | 29.14  | 1.11 | 0.90 |
| P37889_FBLN2_MOUSE  | Fbln2   | Fibulin-2 OS=Mus muscu R.FRAEADIDVNSVHSPVR.G                    | 105.78 | 99.62  | 1.06 | 0.94 |
| P37889_FBLN2_MOUSE  | Fbln2   | Fibulin-2 OS=Mus muscu R.GAPQLDTR@.E                            | 81.45  | 63.44  | 1.28 | 0.78 |
| P37889_FBLN2_MOUSE  | Fbln2   | Fibulin-2 OS=Mus muscu K.GNEEGYVTR.R                            | 95.25  | 87.51  | 1.09 | 0.92 |
| P37889_FBLN2_MOUSE  | Fbln2   | Fibulin-2 OS=Mus muscu R.IGPAPAFAGDTSITLTK#.G                   | 150.21 | 157.99 | 0.95 | 1.05 |
| P37889_FBLN2_MOUSE  | Fbln2   | Fibulin-2 OS=Mus muscu R.LNAYTGVVSLQR@.S                        | 40.32  | 25.85  | 1.56 | 0.64 |
| P37889_FBLN2_MOUSE  | Fbln2   | Fibulin-2 OS=Mus muscu K.M*YIFTFAP.-                            | 33.22  | 33.22  | 1.00 | 1.00 |
| P37889_FBLN2_MOUSE  | Fbln2   | Fibulin-2 OS=Mus muscu R.QGSVTFLLAK#.M                          | 55.91  | 53.50  | 1.05 | 0.96 |
| P37889_FBLN2_MOUSE  | Fbln2   | Fibulin-2 OS=Mus muscu R.R@LNAYTGVVSLQR@.S                      | 34.82  | 30.37  | 1.15 | 0.87 |
| P37889_FBLN2_MOUSE  | Fbln2   | Fibulin-2 OS=Mus muscu R.RPPEEAAPR.R                            | 55.28  | 62.58  | 0.88 | 1.13 |
| P37889_FBLN2_MOUSE  | Fbln2   | Fibulin-2 OS=Mus muscu R.R@PPEEAAPR@.R                          | 122.20 | 113.59 | 1.08 | 0.93 |
| P37889_FBLN2_MOUSE  | Fbln2   | Fibulin-2 OS=Mus muscu R.SVM*QEGAAPLPR@.S                       | 63.80  | 55.15  | 1.16 | 0.86 |
| Q8BIA4_FBXW8_MOUSE  | Fbxw8   | F-box/WD repeat-contain R.DLNELDVPFFDVR@.L                      | 17.27  | 10.20  | 1.69 | 0.59 |
| Q8BIA4_FBXW8_MOUSE  | Fbxw8   | F-box/WD repeat-contain R.YPVAIATAGDLVLLK#.A                    | 6.92   | 3.02   | 2.29 | 0.44 |
| Q3UQN2_FCHO2_MOUSE  | Fcho2   | F-BAR domain only prote K.TK#EVAAGLEAVQAIQNITLQK#.S             | 4.03   | 1.59   | 2.54 | 0.39 |
| Q91250_Q91250_MOUSE | Fen1    | Flap endonuclease 1 OS= K.EAQQLFLEPEVLD PESVELK#.W              | 24.51  | 8.08   | 3.03 | 0.33 |
| Q91250_Q91250_MOUSE | Fen1    | Flap endonuclease 1 OS= R.LDDDFK.V                              | 26.12  | 10.98  | 2.38 | 0.42 |
| Q91250_Q91250_MOUSE | Fen1    | Flap endonuclease 1 OS= K.LIADVAPSAIR@.E                        | 87.76  | 33.63  | 2.61 | 0.38 |
| Q91250_Q91250_MOUSE | Fen1    | Flap endonuclease 1 OS= K.LQ.QLQQAQEGAGM*EEVEK#.F               | 25.29  | 10.12  | 2.50 | 0.40 |
| Q91250_Q91250_MOUSE | Fen1    | Flap endonuclease 1 OS= K.VAIDASM*SIYQLIIVR@.Q                  | 5.43   | 2.41   | 2.25 | 0.44 |
| Q91250_Q91250_MOUSE | Fen1    | Flap endonuclease 1 OS= K.WSEPNLEELVK#.F                        | 23.53  | 7.36   | 3.20 | 0.31 |
| Q8CIB5_FERM2_MOUSE  | Fermt2  | Fermitin family homolog R.EELIGIYNR@.L                          | 10.37  | 3.78   | 2.74 | 0.36 |
| Q8CIB5_FERM2_MOUSE  | Fermt2  | Fermitin family homolog R.FIQAVQSLPEFGITHFIAR@.F                | 24.42  | 11.34  | 2.15 | 0.46 |
| Q8CIB5_FERM2_MOUSE  | Fermt2  | Fermitin family homolog R.ILEAHQNVAAQM*SLIEAK#.M                | 23.81  | 8.01   | 2.97 | 0.34 |
| Q8CIB5_FERM2_MOUSE  | Fermt2  | Fermitin family homolog R.INQLYEQAK#.W                          | 20.25  | 7.72   | 2.62 | 0.38 |
| Q8CIB5_FERM2_MOUSE  | Fermt2  | Fermitin family homolog R.SLM*EQDVR#ENEALLR@.F                  | 33.78  | 8.47   | 3.99 | 0.25 |
| Q8CIB5_FERM2_MOUSE  | Fermt2  | Fermitin family homolog K.TNQGWLDSRR@.S                         | 7.86   | 2.45   | 3.21 | 0.31 |
| Q8CIB5_FERM2_MOUSE  | Fermt2  | Fermitin family homolog R.ILEAHQNVAAQM*SLIEAK#.M                | 24.74  | 10.09  | 2.45 | 0.41 |
| Q8CIB5_FERM2_MOUSE  | Fermt2  | Fermitin family homolog K.KHLDDQSEDALELEGLIM*PGSGSIYSSPLGYSK#.T | 5.75   | 1.70   | 3.39 | 0.30 |
| Q8CIB5_FERM2_MOUSE  | Fermt2  | Fermitin family homolog R.M*DASTGDAIK#.T                        | 13.41  | 4.60   | 2.92 | 0.34 |
| Q6TYB5_FEZ2_MOUSE   | Fez2    | Fasciculation and elonga K.GSPSVEDLQLTK#.I                      | 9.45   | 4.68   | 2.02 | 0.50 |
| Q6TYB5_FEZ2_MOUSE   | Fez2    | Fasciculation and elonga R.TLHLTLNLSEK#.G                       | 10.48  | 5.58   | 1.88 | 0.53 |
| Q66JX5_FR10P_MOUSE  | Fgfr10p | FGFR1 oncogene partner R.IASFSSAVDAR@.D                         | 6.73   | 5.42   | 1.24 | 0.80 |
| Q3ULZ2_FHOD1_MOUSE  | Fhdc1   | FH2 domain-containing j.K.GGSEDSASK.D                           | 2.01   | 7.71   | 0.26 | 3.83 |
| P97447_FHL1_MOUSE   | Fhl1    | Four and a half LIM dome K.AIVAGDQNVYVK#.G                      | 24.34  | 6.63   | 3.67 | 0.27 |
| P97447_FHL1_MOUSE   | Fhl1    | Four and a half LIM dome K.AIVAGDQNVYVK#.G                      | 3.38   | 2.39   | 1.41 | 0.71 |
| Q9R059_FHL3_MOUSE   | Fhl3    | Four and a half LIM dome R.ELFYEDR@.H                           | 10.63  | 12.92  | 1.77 | 0.57 |
| Q9R059_FHL3_MOUSE   | Fhl3    | Four and a half LIM dome K.R@PITGGSGGEGAGLGGGK#.Y               | 10.63  | 8.25   | 1.29 | 0.78 |
| Q9R059_FHL3_MOUSE   | Fhl3    | Four and a half LIM dome K.TLTQGGVYTR.D                         | 46.61  | 29.91  | 1.66 | 0.60 |
| Q9R059_FHL3_MOUSE   | Fhl3    | Four and a half LIM dome K.TPLAGQFTR@.D                         | 31.75  | 21.56  | 1.47 | 0.68 |
| Q9R059_FHL3_MOUSE   | Fhl3    | Four and a half LIM dome K.TLTQGGVYTR@.D                        | 15.16  | 10.96  | 1.38 | 0.72 |
| Q9R059_FHL3_MOUSE   | Fhl3    | Four and a half LIM dome K.TPLAGQFTR@.D                         | 11.91  | 8.60   | 1.39 | 0.72 |
| Q6P9Q4_FHOD1_MOUSE  | Fhod1   | FH1/FH2 domain-contain R.AALLNDFEAVSK#.D                        | 8.33   | 2.39   | 3.48 | 0.29 |
| Q6P9Q4_FHOD1_MOUSE  | Fhod1   | FH1/FH2 domain-contain R.EIAEPLFDL#.V                           | 5.88   | 3.49   | 1.69 | 0.59 |
| Q91WF7_FIG4_MOUSE   | Fig4    | Polyphosphoinositide pt R.FGSPHILNLK#.E                         | 7.71   | 3.84   | 2.01 | 0.50 |
| Q6P6L0_FIL1_MOUSE   | Filip11 | Filamin A-interacting prc K.AIEDDLM*#TEDEYETLER@.R              | 5.66   | 4.65   | 1.20 | 0.84 |
| Q6P6L0_FIL1_MOUSE   | Filip11 | Filamin A-interacting prc R.ITILQNASITPK#.I                     | 10.57  | 6.59   | 1.60 | 0.62 |
| Q6P6L0_FIL1_MOUSE   | Filip11 | Filamin A-interacting prc R.KAAEELQDK#.J                        | 20.48  | 15.00  | 1.37 | 0.73 |
| Q6P6L0_FIL1_MOUSE   | Filip11 | Filamin A-interacting prc K.LQSTSLQAEQNK#.V                     | 7.68   | 6.47   | 1.19 | 0.84 |
| Q6P6L0_FIL1_MOUSE   | Filip11 | Filamin A-interacting prc K.QLSEELSLNAR@.I                      | 15.85  | 10.49  | 1.51 | 0.66 |
| Q6P6L0_FIL1_MOUSE   | Filip11 | Filamin A-interacting prc K.VTSSITITPTATPLR.Q                   | 4.67   | 4.78   | 0.98 | 1.02 |
| Q9D824_FIP1_MOUSE   | Fip111  | Pre-mRNA 3'-end-proces R.ANENSIQVLSDR@.S                        | 22.98  | 13.58  | 1.69 | 0.59 |
| Q9D824_FIP1_MOUSE   | Fip111  | Pre-mRNA 3'-end-proces K.GVDLADPGSINGVPLLEVDLDFEDK#PWR@.K       | 6.76   | 4.77   | 1.42 | 0.71 |
| Q9D824_FIP1_MOUSE   | Fip111  | Pre-mRNA 3'-end-proces R.K#PGADLSDYFNFGNEDTWK#.A                | 12.43  | 5.79   | 2.14 | 0.47 |
| Q9D824_FIP1_MOUSE   | Fip111  | Pre-mRNA 3'-end-proces R.LPGADIVIGQITISR@.V                     | 17.14  | 10.86  | 1.58 | 0.63 |
| Q9D824_FIP1_MOUSE   | Fip111  | Pre-mRNA 3'-end-proces R.M*GLEVIPVSTTNK#.I                      | 29.04  | 17.88  | 1.62 | 0.62 |
| Q9D824_FIP1_MOUSE   | Fip111  | Pre-mRNA 3'-end-proces R.MGLEVIPVSTTNK#.I                       | 12.30  | 4.59   | 2.68 | 0.37 |
| Q9D824_FIP1_MOUSE   | Fip111  | Pre-mRNA 3'-end-proces R.R@LPGADIVIGQITISR@.V                   | 73.26  | 32.69  | 2.24 | 0.45 |
| Q9D824_FIP1_MOUSE   | Fip111  | Pre-mRNA 3'-end-proces K.TGAPQYGSYGTAPVNLNIK#.A                 | 19.61  | 14.30  | 2.07 | 0.48 |
| Q9D824_FIP1_MOUSE   | Fip111  | Pre-mRNA 3'-end-proces R.TGNSEKHEAALPSTK#.A                     | 12.92  | 34.29  | 3.38 | 2.65 |
| Q9D824_FIP1_MOUSE   | Fip111  | Pre-mRNA 3'-end-proces K.VTETEDSDSDSDDEDVHVHTIGDIK#.T           | 5.60   | 1.48   | 3.79 | 0.26 |
| Q9D824_FIP1_MOUSE   | Fip111  | Pre-mRNA 3'-end-proces K.AEFTSPPLFK#.T                          | 123.59 | 50.18  | 2.46 | 0.41 |
| Q9D824_FIP1_MOUSE   | Fip111  | Pre-mRNA 3'-end-proces R.AFPYGNVAFPHLTSAPSWSPLVDTTK#.Q          | 49.93  | 18.44  | 2.71 | 0.37 |
| Q9D824_FIP1_MOUSE   | Fip111  | Pre-mRNA 3'-end-proces R.ANENSIQVLSDR@.S                        | 92.38  | 33.50  | 2.76 | 0.36 |
| Q9D824_FIP1_MOUSE   | Fip111  | Pre-mRNA 3'-end-proces K.GVDLADPGSINGVPLLEVDLDFEDK#PWR@.K       | 22.10  | 6.77   | 3.26 | 0.31 |
| Q9D824_FIP1_MOUSE   | Fip111  | Pre-mRNA 3'-end-proces R.K#PGADLSDYFNFGNEDTWK#.A                | 36.14  | 12.38  | 2.92 | 0.34 |
| Q9D824_FIP1_MOUSE   | Fip111  | Pre-mRNA 3'-end-proces R.LPGADIVIGQITISR@.V                     | 31.50  | 11.45  | 3.28 | 0.31 |
| Q9D824_FIP1_MOUSE   | Fip111  | Pre-mRNA 3'-end-proces R.M*GLEVIPVSTTNK#.I                      | 67.50  | 27.47  | 2.24 | 0.45 |
| Q9D824_FIP1_MOUSE   | Fip111  | Pre-mRNA 3'-end-proces R.R@LPGADIVIGQITISR@.V                   | 140.23 | 57.33  | 2.45 | 0.41 |
| Q9D824_FIP1_MOUSE   | Fip111  | Pre-mRNA 3'-end-proces K.TGAPQYGSYGTAPVNLNIK#.A                 | 75.41  | 28.29  | 2.67 | 0.38 |
| Q9D824_FIP1_MOUSE   | Fip111  | Pre-mRNA 3'-end-proces K.VTETEDSDSDSDDEDVHVHTIGDIK#.T           | 19.67  | 3.73   | 5.28 | 0.19 |
| Q9CQ92_FIS1_MOUSE   | Fis1    | Mitochondrial fission 1 p K.FQSEAAQGSVSK#.S                     | 9.98   | 3.51   | 2.85 | 0.35 |
| Q9CQ92_FIS1_MOUSE   | Fis1    | Mitochondrial fission 1 p R.GLLQTEPQNNQAK#.E                    | 27.80  | 10.54  | 2.64 | 0.38 |
| Q61576_FKB10_MOUSE  | Fkbp10  | Peptidyl-prolyl cis-trans i R.EVQM*GDFVR@.Y                     | 11.76  | 6.44   | 1.83 | 0.55 |
| Q61576_FKB10_MOUSE  | Fkbp10  | Peptidyl-prolyl cis-trans i R.GGTYDTIGSGWLK#.G                  | 6.83   | 11.91  | 0.57 | 1.74 |
| Q61576_FKB10_MOUSE  | Fkbp10  | Peptidyl-prolyl cis-trans i K.IGDFIR@.Y                         | 18.69  | 8.21   | 2.28 | 0.44 |
| Q61576_FKB10_MOUSE  | Fkbp10  | Peptidyl-prolyl cis-trans i R.M*VQNSDFVR@.Y                     | 10.02  | 5.65   | 1.77 | 0.56 |
| Q61576_FKB10_MOUSE  | Fkbp10  | Peptidyl-prolyl cis-trans i R.EVQM*GDFVR@.Y                     | 5.86   | 3.40   | 1.73 | 0.58 |
| Q9D1M7_FKB11_MOUSE  | Fkbp11  | Peptidyl-prolyl cis-trans i R.DPLVIELGQK#.Q                     | 4.99   | 3.52   | 1.42 | 0.71 |
| Q9D1M7_FKB11_MOUSE  | Fkbp11  | Peptidyl-prolyl cis-trans i R.IIDTSLTR@DPLVIELGQK#.Q            | 16.18  | 8.81   | 1.84 | 0.54 |
| Q6P9Q6_FKB15_MOUSE  | Fkbp15  | FK506-binding protein 1 R.GEFLEESYDGGTLR@.T                     | 9.89   | 3.60   | 2.75 | 0.36 |
| Q6P9Q6_FKB15_MOUSE  | Fkbp15  | FK506-binding protein 1 R.IIQENER@.L                            | 10.70  | 2.56   | 4.19 | 0.24 |
| Q6P9Q6_FKB15_MOUSE  | Fkbp15  | FK506-binding protein 1 R.DSAAPSPIPASDSLADPVVTLPLK#PGEPLR@.S    | 10.81  | 3.68   | 2.93 | 0.34 |
| Q6P9Q6_FKB15_MOUSE  | Fkbp15  | FK506-binding protein 1 R.GEFLEESYDGGTLR@.T                     | 7.80   | 3.87   | 2.02 | 0.50 |
| Q6P9Q6_FKB15_MOUSE  | Fkbp15  | FK506-binding protein 1 R.LQADLSELR@.E                          | 18.20  | 6.64   | 2.74 | 0.37 |
| Q6P9Q6_FKB15_MOUSE  | Fkbp15  | FK506-binding protein 1 K.VPR@PTAQEEDEEDEVSM*#.K.G              | 5.56   | 3.04   | 1.83 | 0.55 |
| Q6P9Q6_FKB15_MOUSE  | Fkbp15  | FK506-binding protein 1 R.VVEQSLM*#.M*#.K.R                     | 8.39   | 4.12   | 2.04 | 0.49 |
| O35465_FKBP8_MOUSE  | Fkbp8   | Peptidyl-prolyl cis-trans i K.TAEDGPLEMLSGQER@.V                | 5.31   | 5.34   | 0.99 | 1.01 |
| Q9J128_FLII_MOUSE   | Flii    | Protein flightless-1 homc K.ADLTALPLR@.Q                        | 22.49  | 11.99  | 1.88 | 0.53 |
| Q9J128_FLII_MOUSE   | Flii    | Protein flightless-1 homc R.GAQATLSNTTK#.A                      | 19.31  | 10.65  | 1.81 | 0.55 |
| Q9J128_FLII_MOUSE   | Flii    | Protein flightless-1 homc R.LLQSLDTR@.C                         | 12.41  | 6.08   | 2.04 | 0.49 |
| Q9J128_FLII_MOUSE   | Flii    | Protein flightless-1 homc K.LYLSNKN#LDFGLPSGIGK#.L              | 6.79   | 7.02   | 0.97 | 1.03 |
| Q9J128_FLII_MOUSE   | Flii    | Protein flightless-1 homc R.NAEAVLQGGQLSGK#.V                   | 14.35  | 8.67   | 1.66 | 0.60 |
| Q9J128_FLII_MOUSE   | Flii    | Protein flightless-1 homc R.TAEVYNDLFLQQLR@.L                   | 5.47   | 4.43   | 1.23 | 0.81 |
| Q9J128_FLII_MOUSE   | Flii    | Protein flightless-1 homc K.VGLGLLGLLELPQINYK#.L                | 14.38  | 9.52   | 1.51 | 0.66 |
| Q9J128_FLII_MOUSE   | Flii    | Protein flightless-1 homc K.VPFESENDQGIYVAVGR@.A                | 5.60   | 3.54   | 1.58 | 0.63 |
| Q9J128_FLII_MOUSE   | Flii    | Protein flightless-1 homc K.VTQGLTOPLTVQIR@.T                   | 7.33   | 4.64   | 1.58 | 0.63 |

|                   |      |                                                             |        |        |      |      |
|-------------------|------|-------------------------------------------------------------|--------|--------|------|------|
| Q9J128_FLII_MOUSE | Flii | Protein flightless-1 homc K.ADLTALFLPR@.Q                   | 32.60  | 16.30  | 2.00 | 0.50 |
| Q9J128_FLII_MOUSE | Flii | Protein flightless-1 homc R.EGEEAAAEAEK#.Q                  | 10.21  | 2.55   | 4.01 | 0.25 |
| Q9J128_FLII_MOUSE | Flii | Protein flightless-1 homc R.GAQAATLSNTTK#.A                 | 12.35  | 4.28   | 2.88 | 0.35 |
| Q9J128_FLII_MOUSE | Flii | Protein flightless-1 homc R.GVDLSGNDFK#.G                   | 11.04  | 2.84   | 3.88 | 0.26 |
| Q9J128_FLII_MOUSE | Flii | Protein flightless-1 homc R.LLQSLDTR@.C                     | 15.08  | 6.50   | 2.32 | 0.43 |
| Q9J128_FLII_MOUSE | Flii | Protein flightless-1 homc R.NAEAVLQGGQSLGK#.V               | 23.01  | 8.13   | 2.83 | 0.35 |
| Q9J128_FLII_MOUSE | Flii | Protein flightless-1 homc K.VGLGLGVLPELQPNYK#.L             | 22.62  | 9.41   | 2.40 | 0.42 |
| Q9J128_FLII_MOUSE | Flii | Protein flightless-1 homc K.VPFESEDNQGIYVAVVGR@.A           | 5.67   | 2.73   | 2.07 | 0.48 |
| Q9J128_FLII_MOUSE | Flii | Protein flightless-1 homc K.VTQGTLOPTLQYR@.T                | 6.99   | 5.42   | 1.29 | 0.77 |
| Q8BTM8_FLNA_MOUSE | Flna | Filamin-A OS=Mus muscu K.DAGEGLLAVQITDPEGPKK#.T             | 2.96   | 1.44   | 2.05 | 0.49 |
| Q8BTM8_FLNA_MOUSE | Flna | Filamin-A OS=Mus muscu R.LIALLEVLSSQK#.K                    | 12.40  | 8.23   | 1.51 | 0.66 |
| Q8BTM8_FLNA_MOUSE | Flna | Filamin-A OS=Mus muscu R.LIALLEVLSSQK#.K                    | 11.76  | 5.91   | 1.99 | 0.50 |
| Q8BTM8_FLNA_MOUSE | Flna | Filamin-A OS=Mus muscu K.VATVPQHATSGPGPADVSK#.V             | 11.50  | 7.20   | 1.60 | 0.63 |
| Q8BTM8_FLNA_MOUSE | Flna | Filamin-A OS=Mus muscu R.AEFTVTR@.S                         | 32.80  | 13.42  | 2.44 | 0.41 |
| Q8BTM8_FLNA_MOUSE | Flna | Filamin-A OS=Mus muscu K.AEISFEDR@.K                        | 15.68  | 5.78   | 2.71 | 0.37 |
| Q8BTM8_FLNA_MOUSE | Flna | Filamin-A OS=Mus muscu R.AEVGVPFAEFGIWRTR.E                 | 152.83 | 62.40  | 2.45 | 0.41 |
| Q8BTM8_FLNA_MOUSE | Flna | Filamin-A OS=Mus muscu K.AFGPGLQGGNAGSPAR@.F                | 180.29 | 60.13  | 2.17 | 0.46 |
| Q8BTM8_FLNA_MOUSE | Flna | Filamin-A OS=Mus muscu R.AGGPGLER@.A                        | 132.73 | 54.54  | 2.43 | 0.41 |
| Q8BTM8_FLNA_MOUSE | Flna | Filamin-A OS=Mus muscu K.AGNMNM*LLVGVHGR@.T                 | 61.93  | 28.67  | 2.16 | 0.46 |
| Q8BTM8_FLNA_MOUSE | Flna | Filamin-A OS=Mus muscu K.AGVAPLQVK#.V                       | 120.70 | 48.42  | 2.49 | 0.40 |
| Q8BTM8_FLNA_MOUSE | Flna | Filamin-A OS=Mus muscu K.AIVDNLK#.D                         | 236.32 | 79.39  | 2.98 | 0.34 |
| Q8BTM8_FLNA_MOUSE | Flna | Filamin-A OS=Mus muscu R.ALTQTGGPHVK#.A                     | 40.15  | 18.21  | 2.21 | 0.45 |
| Q8BTM8_FLNA_MOUSE | Flna | Filamin-A OS=Mus muscu R.ANLPQSQVDTSK#.A                    | 163.15 | 69.14  | 2.36 | 0.42 |
| Q8BTM8_FLNA_MOUSE | Flna | Filamin-A OS=Mus muscu K.ASGPGLNTTGPVAPSLPVEFTDAK#.D        | 103.95 | 49.35  | 2.11 | 0.47 |
| Q8BTM8_FLNA_MOUSE | Flna | Filamin-A OS=Mus muscu R.AWGPGLGGVVGK#.S                    | 129.90 | 56.14  | 2.31 | 0.43 |
| Q8BTM8_FLNA_MOUSE | Flna | Filamin-A OS=Mus muscu R.AYGPGEPTGNM*VK#.K                  | 63.90  | 32.44  | 1.97 | 0.51 |
| Q8BTM8_FLNA_MOUSE | Flna | Filamin-A OS=Mus muscu R.AYGPGEPTGNM*VK#.K                  | 15.70  | 7.29   | 2.16 | 0.46 |
| Q8BTM8_FLNA_MOUSE | Flna | Filamin-A OS=Mus muscu K.DAGEGLLSLAIEGPKK#.A                | 79.63  | 32.99  | 2.41 | 0.41 |
| Q8BTM8_FLNA_MOUSE | Flna | Filamin-A OS=Mus muscu R.DAGYGLLSLIEGPKK#.V                 | 25.46  | 15.26  | 1.67 | 0.60 |
| Q8BTM8_FLNA_MOUSE | Flna | Filamin-A OS=Mus muscu K.DKGEYLVVK#.W                       | 54.85  | 23.18  | 2.37 | 0.42 |
| Q8BTM8_FLNA_MOUSE | Flna | Filamin-A OS=Mus muscu R.DVDIHDHNTYTVK#.Y                   | 130.57 | 51.59  | 2.53 | 0.40 |
| Q8BTM8_FLNA_MOUSE | Flna | Filamin-A OS=Mus muscu R.EAGAGGLLAIEGPKK#.A                 | 78.80  | 33.10  | 2.38 | 0.42 |
| Q8BTM8_FLNA_MOUSE | Flna | Filamin-A OS=Mus muscu R.EAPQDFPHDR@.V                      | 25.58  | 11.77  | 2.17 | 0.46 |
| Q8BTM8_FLNA_MOUSE | Flna | Filamin-A OS=Mus muscu R.EATTFEVDAR@.A                      | 143.36 | 61.92  | 2.32 | 0.43 |
| Q8BTM8_FLNA_MOUSE | Flna | Filamin-A OS=Mus muscu R.EEYVEVYTDGVPVSPFPLEAVAPTK#PSK#.V   | 25.55  | 15.95  | 1.60 | 0.62 |
| Q8BTM8_FLNA_MOUSE | Flna | Filamin-A OS=Mus muscu R.EGYSYISVLYGEEVPR.S                 | 95.70  | 40.97  | 2.34 | 0.43 |
| Q8BTM8_FLNA_MOUSE | Flna | Filamin-A OS=Mus muscu R.EGYSYISVLYGEEVPR@.S                | 19.77  | 6.21   | 3.22 | 0.31 |
| Q8BTM8_FLNA_MOUSE | Flna | Filamin-A OS=Mus muscu R.ENGIVLIVK#.F                       | 22.28  | 11.31  | 1.97 | 0.51 |
| Q8BTM8_FLNA_MOUSE | Flna | Filamin-A OS=Mus muscu K.ETGEHLVHVKK#.K                     | 20.13  | 10.58  | 1.90 | 0.53 |
| Q8BTM8_FLNA_MOUSE | Flna | Filamin-A OS=Mus muscu K.FADQHPVSPFSVK#.V                   | 76.37  | 30.29  | 2.52 | 0.40 |
| Q8BTM8_FLNA_MOUSE | Flna | Filamin-A OS=Mus muscu R.FGGEHPVNSPQVITAGDQPTQTLR@.S        | 81.61  | 39.91  | 2.04 | 0.49 |
| Q8BTM8_FLNA_MOUSE | Flna | Filamin-A OS=Mus muscu K.FNEEHPDPPVAVSPSGDAR@.R             | 124.54 | 53.33  | 2.34 | 0.43 |
| Q8BTM8_FLNA_MOUSE | Flna | Filamin-A OS=Mus muscu K.FTVEVTR@.G                         | 334.58 | 111.42 | 3.00 | 0.33 |
| Q8BTM8_FLNA_MOUSE | Flna | Filamin-A OS=Mus muscu R.GAGTGLGLAVEGPEAK#.M                | 157.69 | 67.84  | 2.32 | 0.43 |
| Q8BTM8_FLNA_MOUSE | Flna | Filamin-A OS=Mus muscu K.GK#LDVQFSLAK#.G                    | 61.10  | 20.47  | 2.98 | 0.34 |
| Q8BTM8_FLNA_MOUSE | Flna | Filamin-A OS=Mus muscu K.GLVEPVDVNDADGTQTVNVPVSR@.E         | 142.36 | 58.91  | 2.42 | 0.41 |
| Q8BTM8_FLNA_MOUSE | Flna | Filamin-A OS=Mus muscu K.GQHPVGSPPQFTVGLGEGGAHK#.V          | 191.89 | 64.02  | 3.00 | 0.33 |
| Q8BTM8_FLNA_MOUSE | Flna | Filamin-A OS=Mus muscu K.GTVEPQLEAR@.G                      | 162.04 | 65.71  | 2.47 | 0.41 |
| Q8BTM8_FLNA_MOUSE | Flna | Filamin-A OS=Mus muscu K.HTAM*VSWGVSIPNSPFR@.V              | 21.86  | 10.84  | 2.02 | 0.50 |
| Q8BTM8_FLNA_MOUSE | Flna | Filamin-A OS=Mus muscu R.IANLQTLSDGLR@.L                    | 180.61 | 73.32  | 2.46 | 0.41 |
| Q8BTM8_FLNA_MOUSE | Flna | Filamin-A OS=Mus muscu K.IPEISIQDM*TAQVTSVSGK#.T            | 10.50  | 4.80   | 2.19 | 0.46 |
| Q8BTM8_FLNA_MOUSE | Flna | Filamin-A OS=Mus muscu K.IQQNTFTR@.W                        | 266.08 | 83.79  | 3.18 | 0.31 |
| Q8BTM8_FLNA_MOUSE | Flna | Filamin-A OS=Mus muscu K.KGEITVEVR@.M                       | 62.61  | 24.15  | 2.59 | 0.39 |
| Q8BTM8_FLNA_MOUSE | Flna | Filamin-A OS=Mus muscu K.LDVQFSLAK#.G                       | 42.11  | 22.13  | 1.90 | 0.53 |
| Q8BTM8_FLNA_MOUSE | Flna | Filamin-A OS=Mus muscu R.LIALLEVLSSQK#.K                    | 604.74 | 225.17 | 2.69 | 0.37 |
| Q8BTM8_FLNA_MOUSE | Flna | Filamin-A OS=Mus muscu K.LPQLPITVSR@.D                      | 108.56 | 50.98  | 2.13 | 0.47 |
| Q8BTM8_FLNA_MOUSE | Flna | Filamin-A OS=Mus muscu R.LTVSSQLQESGLK#.V                   | 63.39  | 22.65  | 2.80 | 0.36 |
| Q8BTM8_FLNA_MOUSE | Flna | Filamin-A OS=Mus muscu K.LVNSIDSK#.A                        | 298.68 | 102.24 | 2.92 | 0.34 |
| Q8BTM8_FLNA_MOUSE | Flna | Filamin-A OS=Mus muscu R.LVNSHLSHETSJVFVDSLTK#.V            | 66.30  | 25.09  | 2.64 | 0.38 |
| Q8BTM8_FLNA_MOUSE | Flna | Filamin-A OS=Mus muscu R.LYSVSYLLK#.D                       | 118.90 | 41.13  | 2.89 | 0.35 |
| Q8BTM8_FLNA_MOUSE | Flna | Filamin-A OS=Mus muscu R.NDNDTFTV#.Y                        | 24.45  | 9.72   | 2.52 | 0.40 |
| Q8BTM8_FLNA_MOUSE | Flna | Filamin-A OS=Mus muscu K.NGQHVASSPPIVVISQSEIGDASR@.V        | 16.61  | 7.12   | 2.33 | 0.43 |
| Q8BTM8_FLNA_MOUSE | Flna | Filamin-A OS=Mus muscu R.QM*QLENVSVLEFLDR@.E                | 10.11  | 3.66   | 2.76 | 0.36 |
| Q8BTM8_FLNA_MOUSE | Flna | Filamin-A OS=Mus muscu R.QM*QLENVSVLEFLDR@.ESIK#.L          | 61.67  | 24.39  | 2.53 | 0.40 |
| Q8BTM8_FLNA_MOUSE | Flna | Filamin-A OS=Mus muscu R.QMQLNENSVLEFLDR@.ESIK#.L           | 5.59   | 2.33   | 2.40 | 0.42 |
| Q8BTM8_FLNA_MOUSE | Flna | Filamin-A OS=Mus muscu K.R@AEFTVTR@.S                       | 29.22  | 13.72  | 2.13 | 0.47 |
| Q8BTM8_FLNA_MOUSE | Flna | Filamin-A OS=Mus muscu K.SADPVEAIGDDVGTGLGFSVEGSPQAK#.I     | 66.12  | 26.70  | 2.48 | 0.40 |
| Q8BTM8_FLNA_MOUSE | Flna | Filamin-A OS=Mus muscu R.SAGQGEVLYVEDPAGHQEAK#.V            | 158.16 | 71.65  | 2.21 | 0.45 |
| Q8BTM8_FLNA_MOUSE | Flna | Filamin-A OS=Mus muscu R.SPFVVK#.V                          | 66.05  | 33.81  | 1.95 | 0.51 |
| Q8BTM8_FLNA_MOUSE | Flna | Filamin-A OS=Mus muscu K.SPFVEVYDK#.S                       | 104.56 | 47.69  | 2.19 | 0.46 |
| Q8BTM8_FLNA_MOUSE | Flna | Filamin-A OS=Mus muscu K.SPFVEVYDKSQGDASK.V                 | 31.46  | 11.27  | 2.79 | 0.36 |
| Q8BTM8_FLNA_MOUSE | Flna | Filamin-A OS=Mus muscu K.SPFVSGVPSLDSLK#.I                  | 165.68 | 70.65  | 2.35 | 0.43 |
| Q8BTM8_FLNA_MOUSE | Flna | Filamin-A OS=Mus muscu R.TFSVWYVEVITGTH#.V                  | 90.25  | 38.11  | 2.37 | 0.42 |
| Q8BTM8_FLNA_MOUSE | Flna | Filamin-A OS=Mus muscu K.TGVAVN#PAEFTVDAK#.H                | 162.76 | 79.85  | 2.04 | 0.49 |
| Q8BTM8_FLNA_MOUSE | Flna | Filamin-A OS=Mus muscu K.VATVPQHATSGPGPADVSK#.V             | 233.66 | 113.84 | 2.05 | 0.49 |
| Q8BTM8_FLNA_MOUSE | Flna | Filamin-A OS=Mus muscu K.VEPGLGADNSVVR@.F                   | 58.69  | 22.42  | 2.62 | 0.38 |
| Q8BTM8_FLNA_MOUSE | Flna | Filamin-A OS=Mus muscu R.VKHETADF#.V                        | 30.01  | 14.55  | 2.06 | 0.48 |
| Q8BTM8_FLNA_MOUSE | Flna | Filamin-A OS=Mus muscu R.VKVESHADASK.V                      | 14.76  | 6.17   | 2.39 | 0.42 |
| Q8BTM8_FLNA_MOUSE | Flna | Filamin-A OS=Mus muscu K.VNQPASFAVSLNGAK#.G                 | 15.27  | 6.79   | 2.25 | 0.44 |
| Q8BTM8_FLNA_MOUSE | Flna | Filamin-A OS=Mus muscu R.VNQGAGSHPNK#.V                     | 43.80  | 18.46  | 2.37 | 0.42 |
| Q8BTM8_FLNA_MOUSE | Flna | Filamin-A OS=Mus muscu K.VPVHVDVTDASK#.V                    | 109.62 | 57.70  | 1.90 | 0.53 |
| Q8BTM8_FLNA_MOUSE | Flna | Filamin-A OS=Mus muscu R.VSGQLGHEGHTFEPAEFTDTR@.D           | 15.97  | 5.10   | 3.13 | 0.32 |
| Q8BTM8_FLNA_MOUSE | Flna | Filamin-A OS=Mus muscu K.VTAQGPGLSESGNIANK#.T               | 124.09 | 48.44  | 2.56 | 0.39 |
| Q8BTM8_FLNA_MOUSE | Flna | Filamin-A OS=Mus muscu R.VTYTPM*APGSYLSIK#.Y                | 60.73  | 21.26  | 2.86 | 0.35 |
| Q8BTM8_FLNA_MOUSE | Flna | Filamin-A OS=Mus muscu R.VTYTPM*APGSYLSIK#.Y                | 18.86  | 12.69  | 1.49 | 0.67 |
| Q8BTM8_FLNA_MOUSE | Flna | Filamin-A OS=Mus muscu K.YGGEIPEFSPYR@.V                    | 114.07 | 52.49  | 2.17 | 0.46 |
| Q8BTM8_FLNA_MOUSE | Flna | Filamin-A OS=Mus muscu K.YGGEIPEFSPYR#.A                    | 86.50  | 38.44  | 2.25 | 0.44 |
| Q8BTM8_FLNA_MOUSE | Flna | Filamin-A OS=Mus muscu K.YGGEIPEFSPYR#.A                    | 80.93  | 37.92  | 2.13 | 0.47 |
| Q8BTM8_FLNA_MOUSE | Flna | Filamin-A OS=Mus muscu K.YNDQHPGSPFTAR@.V                   | 80.10  | 33.62  | 2.38 | 0.42 |
| Q80X90_FLNB_MOUSE | Flnb | Filamin-B OS=Mus muscu R.IGNLQTLSDGLR.L                     | 10.52  | 9.94   | 1.06 | 0.94 |
| Q80X90_FLNB_MOUSE | Flnb | Filamin-B OS=Mus muscu K.AAGSGELGVTVK#.G                    | 41.47  | 21.65  | 1.91 | 0.52 |
| Q80X90_FLNB_MOUSE | Flnb | Filamin-B OS=Mus muscu K.ADIEM*PDPASK#.V                    | 14.84  | 8.36   | 1.78 | 0.56 |
| Q80X90_FLNB_MOUSE | Flnb | Filamin-B OS=Mus muscu K.AEVSQNK#.D                         | 18.77  | 9.65   | 1.95 | 0.51 |
| Q80X90_FLNB_MOUSE | Flnb | Filamin-B OS=Mus muscu K.AFGPGLER@.A                        | 42.83  | 28.16  | 1.52 | 0.66 |
| Q80X90_FLNB_MOUSE | Flnb | Filamin-B OS=Mus muscu K.AGLAPLEVR@.V                       | 45.92  | 22.21  | 2.07 | 0.48 |
| Q80X90_FLNB_MOUSE | Flnb | Filamin-B OS=Mus muscu K.AHGPGLEGGVVGK#PAEFTDTR#.G          | 45.68  | 23.95  | 1.91 | 0.52 |
| Q80X90_FLNB_MOUSE | Flnb | Filamin-B OS=Mus muscu K.APLNVQFSSPPEAGVK#DLDIDNYDVSHTVK#.Y | 21.63  | 5.07   | 4.26 | 0.23 |
| Q80X90_FLNB_MOUSE | Flnb | Filamin-B OS=Mus muscu R.ATVHDNKHDGTYAVTYIPDK#.T            | 13.74  | 11.41  | 1.20 | 0.83 |
| Q80X90_FLNB_MOUSE | Flnb | Filamin-B OS=Mus muscu R.ATVHDNKDGTYAVTYIPDK#.T             | 11.87  | 6.31   | 1.88 | 0.53 |
| Q80X90_FLNB_MOUSE | Flnb | Filamin-B OS=Mus muscu R.DAGEGLLAVQITDPEGPKK#.A             | 89.46  | 38.06  | 2.35 | 0.43 |
| Q80X90_FLNB_MOUSE | Flnb | Filamin-B OS=Mus muscu R.DAGYGLLSLIEGPKK#.V                 | 16.42  | 10.91  | 1.50 | 0.66 |
| Q80X90_FLNB_MOUSE | Flnb | Filamin-B OS=Mus muscu K.DNADGTQYQVYTPFEK#.G                | 9.35   | 4.52   | 2.07 | 0.48 |
| Q80X90_FLNB_MOUSE | Flnb | Filamin-B OS=Mus muscu R.EAGAGGLSLAVEGPKK#.A                | 145.77 | 55.67  | 2.62 | 0.38 |

|                   |      |                                                                        |        |        |      |      |
|-------------------|------|------------------------------------------------------------------------|--------|--------|------|------|
| Q80X90_FLNB_MOUSE | Flnb | Filamin-B OS=Mus muscu R.EAM*QQADDWLVGPQVTPPEEIHDPDDEHVSMM*TYLSQFPK#.A | 14.73  | 4.57   | 3.22 | 0.31 |
| Q80X90_FLNB_MOUSE | Flnb | Filamin-B OS=Mus muscu K.FADEHVPGPSFTVK#.I                             | 62.85  | 28.57  | 2.20 | 0.45 |
| Q80X90_FLNB_MOUSE | Flnb | Filamin-B OS=Mus muscu K.FTVDITISAGQDVM*VFVEDPEGNK#EEAR@.V             | 7.42   | 5.42   | 1.37 | 0.73 |
| Q80X90_FLNB_MOUSE | Flnb | Filamin-B OS=Mus muscu R.GAGIGGLITVEGSESK#.I                           | 45.05  | 19.75  | 2.28 | 0.44 |
| Q80X90_FLNB_MOUSE | Flnb | Filamin-B OS=Mus muscu R.GEAGIPAEFSIWTR@.E                             | 43.99  | 46.19  | 0.95 | 1.05 |
| Q80X90_FLNB_MOUSE | Flnb | Filamin-B OS=Mus muscu K.GFHVVEVYDDVPVIPSFPK#.V                        | 36.73  | 14.78  | 2.49 | 0.40 |
| Q80X90_FLNB_MOUSE | Flnb | Filamin-B OS=Mus muscu K.GFLDGVVFEYYPSTPGK#.Y                          | 16.76  | 8.45   | 1.98 | 0.50 |
| Q80X90_FLNB_MOUSE | Flnb | Filamin-B OS=Mus muscu K.GLEELVK#.Q                                    | 42.93  | 17.55  | 2.45 | 0.41 |
| Q80X90_FLNB_MOUSE | Flnb | Filamin-B OS=Mus muscu R.GLVEPVNVVDNGDGTHTVYTPSQEGPIYVSK#.Y            | 12.58  | 4.39   | 2.87 | 0.35 |
| Q80X90_FLNB_MOUSE | Flnb | Filamin-B OS=Mus muscu R.GSHIPESLPQFVNVNPSGSVSAYGPGLVGVGANK#.T         | 9.32   | 4.21   | 2.22 | 0.45 |
| Q80X90_FLNB_MOUSE | Flnb | Filamin-B OS=Mus muscu R.IGNLQDLSLDGLR@.L                              | 55.59  | 30.21  | 1.84 | 0.54 |
| Q80X90_FLNB_MOUSE | Flnb | Filamin-B OS=Mus muscu K.ILAQDGEQQPIDIQK#.S                            | 13.81  | 5.56   | 2.49 | 0.40 |
| Q80X90_FLNB_MOUSE | Flnb | Filamin-B OS=Mus muscu K.ILAQDGEQQPIDIQK#.S                            | 7.25   | 5.21   | 1.39 | 0.72 |
| Q80X90_FLNB_MOUSE | Flnb | Filamin-B OS=Mus muscu K.IPYLPITNFNNQWQDQK#.A                          | 9.52   | 5.47   | 1.74 | 0.57 |
| Q80X90_FLNB_MOUSE | Flnb | Filamin-B OS=Mus muscu R.LVSPGSANETSILVSVTR@.S                         | 44.86  | 16.26  | 2.76 | 0.36 |
| Q80X90_FLNB_MOUSE | Flnb | Filamin-B OS=Mus muscu K.NSVELLVEDR@.G                                 | 32.89  | 16.12  | 2.04 | 0.49 |
| Q80X90_FLNB_MOUSE | Flnb | Filamin-B OS=Mus muscu R.SADFPVSEIGSEVTLGFAIEGSPQAK#.I                 | 31.48  | 19.87  | 1.58 | 0.63 |
| Q80X90_FLNB_MOUSE | Flnb | Filamin-B OS=Mus muscu K.SNVFTVTR.G                                    | 42.53  | 21.65  | 1.96 | 0.51 |
| Q80X90_FLNB_MOUSE | Flnb | Filamin-B OS=Mus muscu K.SPFEVGPGEAGM*QK#.V                            | 21.49  | 9.55   | 2.25 | 0.44 |
| Q80X90_FLNB_MOUSE | Flnb | Filamin-B OS=Mus muscu K.SPFTVGAAPLDLSK#.I                             | 63.12  | 32.29  | 1.95 | 0.51 |
| Q80X90_FLNB_MOUSE | Flnb | Filamin-B OS=Mus muscu R.TFEM*SDFIVDTR@.D                              | 12.58  | 12.92  | 1.98 | 0.50 |
| Q80X90_FLNB_MOUSE | Flnb | Filamin-B OS=Mus muscu K.TGEEVGFVDAK#.T                                | 31.50  | 21.08  | 1.49 | 0.67 |
| Q80X90_FLNB_MOUSE | Flnb | Filamin-B OS=Mus muscu K.TYSVEYLPK#.V                                  | 34.34  | 24.35  | 1.41 | 0.71 |
| Q80X90_FLNB_MOUSE | Flnb | Filamin-B OS=Mus muscu R.VEVGK#DQEFADTNGAGGQK#.L                       | 8.20   | 5.64   | 1.45 | 0.69 |
| Q80X90_FLNB_MOUSE | Flnb | Filamin-B OS=Mus muscu K.VLFAEQEIPASPRF@.V                             | 17.79  | 40.88  | 1.76 | 0.57 |
| Q80X90_FLNB_MOUSE | Flnb | Filamin-B OS=Mus muscu R.VLSDDEEDVDFDIHNANDTFTVK#.Y                    | 32.74  | 17.60  | 1.86 | 0.54 |
| Q80X90_FLNB_MOUSE | Flnb | Filamin-B OS=Mus muscu K.VNQPASFAIR@.L                                 | 33.94  | 19.89  | 1.71 | 0.59 |
| Q80X90_FLNB_MOUSE | Flnb | Filamin-B OS=Mus muscu K.VSFGADAIK#.S                                  | 43.48  | 18.94  | 2.30 | 0.44 |
| Q80X90_FLNB_MOUSE | Flnb | Filamin-B OS=Mus muscu K.VSYFTVPGVYVSTK#.F                             | 37.14  | 20.58  | 1.80 | 0.55 |
| Q80X90_FLNB_MOUSE | Flnb | Filamin-B OS=Mus muscu K.VYGGQLESEGR@.T                                | 28.06  | 17.09  | 1.64 | 0.61 |
| Q80X90_FLNB_MOUSE | Flnb | Filamin-B OS=Mus muscu K.YADEEIPR.S                                    | 54.33  | 18.57  | 2.93 | 0.34 |
| Q80X90_FLNB_MOUSE | Flnb | Filamin-B OS=Mus muscu K.YGGELVPHPPAWVK#.V                             | 32.46  | 13.57  | 2.39 | 0.42 |
| Q80X90_FLNB_MOUSE | Flnb | Filamin-B OS=Mus muscu R.YM*IGVYGGDNILSPYR@.I                          | 15.14  | 9.72   | 1.56 | 0.64 |
| Q80X90_FLNB_MOUSE | Flnb | Filamin-B OS=Mus muscu K.YTPTQQGNM*QQLVYGGDPIK#.S                      | 19.33  | 9.65   | 2.00 | 0.50 |
| Q8VHX6_FLNC_MOUSE | FlnC | Filamin-C OS=Mus muscu K.ILVGPEIGDASK#.V                               | 4.39   | 2.99   | 1.47 | 0.68 |
| Q8VHX6_FLNC_MOUSE | FlnC | Filamin-C OS=Mus muscu K.TEAAIEVEGDSAYSVR@.F                           | 5.62   | 2.82   | 2.00 | 0.50 |
| Q8VHX6_FLNC_MOUSE | FlnC | Filamin-C OS=Mus muscu K.AEIAFEDR@.K                                   | 16.08  | 6.76   | 2.38 | 0.42 |
| Q8VHX6_FLNC_MOUSE | FlnC | Filamin-C OS=Mus muscu K.AEIAFEDR@K#.D                                 | 24.22  | 7.53   | 3.22 | 0.31 |
| Q8VHX6_FLNC_MOUSE | FlnC | Filamin-C OS=Mus muscu K.AEVLQNNADGYHYTISPAFPPTYTITIK#.Y               | 4.57   | 4.50   | 1.02 | 0.98 |
| Q8VHX6_FLNC_MOUSE | FlnC | Filamin-C OS=Mus muscu R.AFGPGLLEGLVYK#.A                              | 312.59 | 100.77 | 3.10 | 0.32 |
| Q8VHX6_FLNC_MOUSE | FlnC | Filamin-C OS=Mus muscu R.AGGTGLER@.G                                   | 171.46 | 171.39 | 2.40 | 0.42 |
| Q8VHX6_FLNC_MOUSE | FlnC | Filamin-C OS=Mus muscu K.AKLDVHFAAGAA.G                                | 44.58  | 14.90  | 2.99 | 0.33 |
| Q8VHX6_FLNC_MOUSE | FlnC | Filamin-C OS=Mus muscu R.APLQVAVLGPVGAEPVEVR@.D                        | 75.60  | 22.41  | 3.97 | 0.30 |
| Q8VHX6_FLNC_MOUSE | FlnC | Filamin-C OS=Mus muscu R.ASGPGLNAGIPASLPEVFTIDAR@.D                    | 104.76 | 32.65  | 3.21 | 0.31 |
| Q8VHX6_FLNC_MOUSE | FlnC | Filamin-C OS=Mus muscu R.ASGPGLNAGIPASLPEVFTIDAR.D                     | 19.84  | 7.84   | 2.53 | 0.40 |
| Q8VHX6_FLNC_MOUSE | FlnC | Filamin-C OS=Mus muscu K.ATIQPVDPSK#.V                                 | 127.22 | 48.81  | 2.61 | 0.38 |
| Q8VHX6_FLNC_MOUSE | FlnC | Filamin-C OS=Mus muscu R.AWGPGLTEGQVQK#.S                              | 103.92 | 31.82  | 3.27 | 0.31 |
| Q8VHX6_FLNC_MOUSE | FlnC | Filamin-C OS=Mus muscu K.DAGEGGLSLAVEGPK#.A                            | 68.59  | 23.93  | 2.87 | 0.35 |
| Q8VHX6_FLNC_MOUSE | FlnC | Filamin-C OS=Mus muscu R.DNNGDGTYSVLPDM*SGR@.Y                         | 14.96  | 3.47   | 4.32 | 0.23 |
| Q8VHX6_FLNC_MOUSE | FlnC | Filamin-C OS=Mus muscu R.DTVEVALEDK#.G                                 | 13.62  | 6.15   | 2.22 | 0.45 |
| Q8VHX6_FLNC_MOUSE | FlnC | Filamin-C OS=Mus muscu R.DTVEVALEDK#DNTFR@.C                           | 72.74  | 19.65  | 3.70 | 0.27 |
| Q8VHX6_FLNC_MOUSE | FlnC | Filamin-C OS=Mus muscu K.EK#DYLLVLR#.W                                 | 21.03  | 21.04  | 3.10 | 0.32 |
| Q8VHX6_FLNC_MOUSE | FlnC | Filamin-C OS=Mus muscu K.EVGEHVSVR@.K                                  | 84.48  | 25.96  | 3.25 | 0.31 |
| Q8VHX6_FLNC_MOUSE | FlnC | Filamin-C OS=Mus muscu R.EVTTEFTVDAR@.S                                | 21.71  | 21.71  | 3.66 | 0.27 |
| Q8VHX6_FLNC_MOUSE | FlnC | Filamin-C OS=Mus muscu R.FDDK#HIGSPFTAK#.I                             | 87.47  | 31.97  | 2.74 | 0.37 |
| Q8VHX6_FLNC_MOUSE | FlnC | Filamin-C OS=Mus muscu K.FNDEHIDSPFVVPVAVSLDDAR@.R                     | 227.02 | 183.21 | 2.73 | 0.37 |
| Q8VHX6_FLNC_MOUSE | FlnC | Filamin-C OS=Mus muscu K.FNDEHIDSPFVVPVAVSLDDAR@R@.L                   | 21.46  | 7.92   | 2.71 | 0.37 |
| Q8VHX6_FLNC_MOUSE | FlnC | Filamin-C OS=Mus muscu K.FNGAHIPGPSFPK#.I                              | 50.10  | 15.51  | 3.23 | 0.31 |
| Q8VHX6_FLNC_MOUSE | FlnC | Filamin-C OS=Mus muscu R.GAGGQGLQDVR@.M                                | 278.90 | 78.33  | 3.56 | 0.28 |
| Q8VHX6_FLNC_MOUSE | FlnC | Filamin-C OS=Mus muscu R.GAGTGLGLAIEGSPSEAK#.M                         | 175.47 | 63.90  | 2.75 | 0.36 |
| Q8VHX6_FLNC_MOUSE | FlnC | Filamin-C OS=Mus muscu R.GASYSIPK#.F                                   | 108.71 | 34.94  | 3.11 | 0.32 |
| Q8VHX6_FLNC_MOUSE | FlnC | Filamin-C OS=Mus muscu K.GDYLLVLR#.W                                   | 28.28  | 10.31  | 2.74 | 0.36 |
| Q8VHX6_FLNC_MOUSE | FlnC | Filamin-C OS=Mus muscu K.GEAVR@DFEIDNHDSYTVK#.Y                        | 50.80  | 8.53   | 5.96 | 0.17 |
| Q8VHX6_FLNC_MOUSE | FlnC | Filamin-C OS=Mus muscu K.GGLVGPAPFSDITK#.G                             | 213.48 | 81.34  | 2.62 | 0.38 |
| Q8VHX6_FLNC_MOUSE | FlnC | Filamin-C OS=Mus muscu K.GLHQM*GIK#.Y                                  | 40.69  | 11.54  | 3.53 | 0.28 |
| Q8VHX6_FLNC_MOUSE | FlnC | Filamin-C OS=Mus muscu K.GLSEGTQFQAEFIVDTR@.N                          | 134.76 | 45.20  | 2.98 | 0.34 |
| Q8VHX6_FLNC_MOUSE | FlnC | Filamin-C OS=Mus muscu K.GLSEGTQFQAEFIVDTR.N                           | 77.14  | 24.89  | 3.10 | 0.32 |
| Q8VHX6_FLNC_MOUSE | FlnC | Filamin-C OS=Mus muscu R.GPGLEPVGNVANK#PTYFYDIYAGAGTGDVAVVIVDPQGR@.R   | 21.59  | 6.61   | 3.26 | 0.31 |
| Q8VHX6_FLNC_MOUSE | FlnC | Filamin-C OS=Mus muscu R.GPGLEPVGNVANK#PTYFYDIYAGAGTGDVAVVIVDPQGR.R    | 15.64  | 5.01   | 3.12 | 0.32 |
| Q8VHX6_FLNC_MOUSE | FlnC | Filamin-C OS=Mus muscu R.GPGLQAFVQK#.N                                 | 231.69 | 69.61  | 3.33 | 0.30 |
| Q8VHX6_FLNC_MOUSE | FlnC | Filamin-C OS=Mus muscu R.GVAGVPAEFSIWTR@.E                             | 176.29 | 53.50  | 3.30 | 0.30 |
| Q8VHX6_FLNC_MOUSE | FlnC | Filamin-C OS=Mus muscu R.HIGISFTPK#.E                                  | 247.35 | 77.47  | 3.19 | 0.31 |
| Q8VHX6_FLNC_MOUSE | FlnC | Filamin-C OS=Mus muscu K.HVTNSPFK#.I                                   | 252.54 | 78.71  | 3.21 | 0.31 |
| Q8VHX6_FLNC_MOUSE | FlnC | Filamin-C OS=Mus muscu K.ILVGPEIGDASK#.V                               | 244.24 | 64.51  | 3.79 | 0.26 |
| Q8VHX6_FLNC_MOUSE | FlnC | Filamin-C OS=Mus muscu K.IPGNWFQM*VSAQER@.L                            | 40.13  | 15.06  | 2.66 | 0.38 |
| Q8VHX6_FLNC_MOUSE | FlnC | Filamin-C OS=Mus muscu K.IPGNWFQM*VSAQER@.L                            | 8.92   | 5.35   | 1.67 | 0.60 |
| Q8VHX6_FLNC_MOUSE | FlnC | Filamin-C OS=Mus muscu R.IQIGETEVITVDAK#.A                             | 18.63  | 6.97   | 2.67 | 0.37 |
| Q8VHX6_FLNC_MOUSE | FlnC | Filamin-C OS=Mus muscu K.ITEGDLSQLTASIR@.A                             | 225.60 | 74.24  | 3.04 | 0.33 |
| Q8VHX6_FLNC_MOUSE | FlnC | Filamin-C OS=Mus muscu K.LEPGGGAEAQAVR@.Y                              | 103.41 | 37.93  | 2.73 | 0.37 |
| Q8VHX6_FLNC_MOUSE | FlnC | Filamin-C OS=Mus muscu R.LGSGFSTR@.Q                                   | 201.61 | 117.13 | 1.72 | 0.58 |
| Q8VHX6_FLNC_MOUSE | FlnC | Filamin-C OS=Mus muscu R.LLGGWIQNK#PQLPITNFR@.D                        | 7.27   | 2.22   | 3.28 | 0.30 |
| Q8VHX6_FLNC_MOUSE | FlnC | Filamin-C OS=Mus muscu R.LSGGHSLEHTSTLVLETVK#.S                        | 100.07 | 25.44  | 3.93 | 0.25 |
| Q8VHX6_FLNC_MOUSE | FlnC | Filamin-C OS=Mus muscu R.LTIVTSLQETGLK#.V                              | 114.72 | 35.56  | 3.23 | 0.31 |
| Q8VHX6_FLNC_MOUSE | FlnC | Filamin-C OS=Mus muscu R.LTIVTSLQETGLK#VNPQASFAVOLNGAR@.G              | 7.01   | 2.03   | 3.46 | 0.29 |
| Q8VHX6_FLNC_MOUSE | FlnC | Filamin-C OS=Mus muscu R.NAGYGLGLSLIEGPK#.V                            | 45.85  | 15.37  | 2.98 | 0.34 |
| Q8VHX6_FLNC_MOUSE | FlnC | Filamin-C OS=Mus muscu R.QQEGEASSQDM*TAQVTSPPSK#.T                     | 29.88  | 9.00   | 3.32 | 0.30 |
| Q8VHX6_FLNC_MOUSE | FlnC | Filamin-C OS=Mus muscu R.R@DTVEVALEDK#DNTFR@.C                         | 40.15  | 12.96  | 3.10 | 0.32 |
| Q8VHX6_FLNC_MOUSE | FlnC | Filamin-C OS=Mus muscu R.R@LTVTSLQETGLK#.V                             | 48.39  | 16.23  | 2.98 | 0.34 |
| Q8VHX6_FLNC_MOUSE | FlnC | Filamin-C OS=Mus muscu R.SPFVNVGM*ALGDANK#.V                           | 28.73  | 10.44  | 2.75 | 0.36 |
| Q8VHX6_FLNC_MOUSE | FlnC | Filamin-C OS=Mus muscu K.SPFVNVVAPPLDLSK#.V                            | 284.92 | 106.27 | 2.68 | 0.37 |
| Q8VHX6_FLNC_MOUSE | FlnC | Filamin-C OS=Mus muscu K.TAR@PNITDNK#.D                                | 68.33  | 18.32  | 3.73 | 0.27 |
| Q8VHX6_FLNC_MOUSE | FlnC | Filamin-C OS=Mus muscu K.TDITYVDNGDGTYR@.V                             | 31.13  | 9.96   | 3.13 | 0.32 |
| Q8VHX6_FLNC_MOUSE | FlnC | Filamin-C OS=Mus muscu K.TEAAIEVEGDSAYSVR@.F                           | 226.25 | 65.41  | 3.46 | 0.29 |
| Q8VHX6_FLNC_MOUSE | FlnC | Filamin-C OS=Mus muscu R.TGVEVGN#PTHFTVTKR.G                           | 206.28 | 54.74  | 3.77 | 0.27 |
| Q8VHX6_FLNC_MOUSE | FlnC | Filamin-C OS=Mus muscu R.TSOLNVGTSVLSK#.I                              | 142.46 | 44.23  | 3.22 | 0.31 |
| Q8VHX6_FLNC_MOUSE | FlnC | Filamin-C OS=Mus muscu R.TYAVSYPPK#.V                                  | 33.43  | 12.50  | 2.67 | 0.37 |
| Q8VHX6_FLNC_MOUSE | FlnC | Filamin-C OS=Mus muscu K.VAVGQEQAFVSNTR@.G                             | 242.69 | 71.98  | 3.37 | 0.30 |
| Q8VHX6_FLNC_MOUSE | FlnC | Filamin-C OS=Mus muscu R.VEESTQVGGDPPFVAVGDFLGR@.E                     | 114.74 | 43.30  | 2.65 | 0.38 |
| Q8VHX6_FLNC_MOUSE | FlnC | Filamin-C OS=Mus muscu R.VEESTQVGGDPPFVAVGDFLGR.E                      | 38.12  | 10.81  | 3.53 | 0.28 |
| Q8VHX6_FLNC_MOUSE | FlnC | Filamin-C OS=Mus muscu R.VK#EVADFK#.V                                  | 49.90  | 14.83  | 3.36 | 0.30 |
| Q8VHX6_FLNC_MOUSE | FlnC | Filamin-C OS=Mus muscu K.VNQPASFAVOLNGAR@.G                            | 11.33  | 11.33  | 1.95 | 0.51 |
| Q8VHX6_FLNC_MOUSE | FlnC | Filamin-C OS=Mus muscu K.VPQLPITNFR@.D                                 | 147.92 | 43.98  | 3.36 | 0.30 |
| Q8VHX6_FLNC_MOUSE | FlnC | Filamin-C OS=Mus muscu K.VTVLFAEQNIER@.S                               | 42.58  | 10.61  | 4.01 | 0.25 |

|                     |       |                           |                                             |        |         |      |       |
|---------------------|-------|---------------------------|---------------------------------------------|--------|---------|------|-------|
| Q8VHX6_FLNC_MOUSE   | FlnC  | Filamin-C OS=Mus muscu    | K.VYGPVGEK#.T                               | 16.70  | 6.38    | 2.62 | 0.38  |
| Q8VHX6_FLNC_MOUSE   | FlnC  | Filamin-C OS=Mus muscu    | R.VYNYTVTK#.E                               | 111.92 | 31.19   | 3.59 | 0.28  |
| Q8VHX6_FLNC_MOUSE   | FlnC  | Filamin-C OS=Mus muscu    | K.WGDEVPSPFK#.V                             | 70.02  | 26.36   | 2.66 | 0.38  |
| Q8VHX6_FLNC_MOUSE   | FlnC  | Filamin-C OS=Mus muscu    | K.YADQVPR@.S                                | 135.68 | 46.40   | 2.92 | 0.34  |
| Q8VHX6_FLNC_MOUSE   | FlnC  | Filamin-C OS=Mus muscu    | K.YDGNHPIGPSLQFYDAINS@.H                    | 109.29 | 37.34   | 2.93 | 0.34  |
| Q8VHX6_FLNC_MOUSE   | FlnC  | Filamin-C OS=Mus muscu    | K.YGGDEIPYSPFR@.I                           | 65.61  | 17.09   | 3.84 | 0.26  |
| Q8VHX6_FLNC_MOUSE   | FlnC  | Filamin-C OS=Mus muscu    | K.YGGPQHVGSPPFK#.A                          | 164.99 | 64.09   | 2.57 | 0.39  |
| Q8VHX6_FLNC_MOUSE   | FlnC  | Filamin-C OS=Mus muscu    | K.YTAVQQGNM*AVTVTYGGDVPVK#.S                | 47.83  | 11.29   | 4.24 | 0.24  |
| Q8VHX6_FLNC_MOUSE   | FlnC  | Filamin-C OS=Mus muscu    | K.YVITIR@.F                                 | 188.61 | 43.18   | 4.37 | 0.23  |
| O08917_FLOT1_MOUSE  | Flot1 | Flotillin-1 OS=Mus muscu  | R.AQQVAVQEQEJAR@.R                          | 6.74   | 2.51    | 2.69 | 0.37  |
| Q60634_FLOT2_MOUSE  | Flot2 | Flotillin-2 OS=Mus muscu  | R.DADIGVAEAEAR@.D                           | 6.83   | 4.98    | 1.37 | 0.73  |
| Q60634_FLOT2_MOUSE  | Flot2 | Flotillin-2 OS=Mus muscu  | K.M*ALLVLEALPQIAAK#.I                       | 7.23   | 3.63    | 1.99 | 0.50  |
| Q6ZPF4_FMN13_MOUSE  | Fmn13 | Formin-like protein 3 OS  | K.AAAVLENVLVDVK#.E                          | 8.06   | 1.89    | 4.27 | 0.23  |
| Q6ZPF4_FMN13_MOUSE  | Fmn13 | Formin-like protein 3 OS  | K.LQSLDLLLDTK#.S                            | 9.53   | 1.90    | 5.01 | 0.20  |
| Q6ZPF4_FMN13_MOUSE  | Fmn13 | Formin-like protein 3 OS  | K.AAAVLENVLVDVK#.E                          | 21.59  | 9.03    | 2.39 | 0.42  |
| Q6ZPF4_FMN13_MOUSE  | Fmn13 | Formin-like protein 3 OS  | K.DGTIEDITHVLK#.S                           | 8.54   | 4.17    | 2.05 | 0.49  |
| Q6ZPF4_FMN13_MOUSE  | Fmn13 | Formin-like protein 3 OS  | K.LGLEELQK#.S                               | 13.20  | 4.48    | 2.95 | 0.34  |
| Q6ZPF4_FMN13_MOUSE  | Fmn13 | Formin-like protein 3 OS  | K.LLLENNM*MM*#.R                            | 6.09   | 1.38    | 4.43 | 0.23  |
| Q6ZPF4_FMN13_MOUSE  | Fmn13 | Formin-like protein 3 OS  | K.LQSLDLLLDTK#.S                            | 13.37  | 4.00    | 3.35 | 0.30  |
| Q6ZPF4_FMN13_MOUSE  | Fmn13 | Formin-like protein 3 OS  | K.TAEAYNAVVR@.Y                             | 12.07  | 2.38    | 5.07 | 0.20  |
| Q6ZPF4_FMN13_MOUSE  | Fmn13 | Formin-like protein 3 OS  | K.TTPPSVFPVFR@.F                            | 19.84  | 5.94    | 3.34 | 0.30  |
| E9QNF5_E9QNF5_MOUSE | Fmr1  | Fragile X mental retardat | K.DINESDEVYSR@.A                            | 15.53  | 12.62   | 1.23 | 0.81  |
| E9QNF5_E9QNF5_MOUSE | Fmr1  | Fragile X mental retardat | R.GM*VPFVGTK#.D                             | 10.24  | 5.24    | 1.95 | 0.51  |
| E9QNF5_E9QNF5_MOUSE | Fmr1  | Fragile X mental retardat | R.SFLEAEVQVPR@.N                            | 40.75  | 22.21   | 1.83 | 0.55  |
| E9QNF5_E9QNF5_MOUSE | Fmr1  | Fragile X mental retardat | R.TADGSLQASSEGSR@.L                         | 12.78  | 9.76    | 1.31 | 0.76  |
| E9QNF5_E9QNF5_MOUSE | Fmr1  | Fragile X mental retardat | K.DINESDEVYSR@.A                            | 39.39  | 11.72   | 3.36 | 0.30  |
| E9QNF5_E9QNF5_MOUSE | Fmr1  | Fragile X mental retardat | K.DSIANATVLLDHYLNLYK#.E                     | 44.72  | 12.99   | 3.44 | 0.29  |
| E9QNF5_E9QNF5_MOUSE | Fmr1  | Fragile X mental retardat | K.DVHEDSTVAFENNWQPER@.Q                     | 19.95  | 5.60    | 3.56 | 0.28  |
| E9QNF5_E9QNF5_MOUSE | Fmr1  | Fragile X mental retardat | R.GM*VPFVGTK#.D                             | 25.12  | 8.95    | 2.81 | 0.36  |
| E9QNF5_E9QNF5_MOUSE | Fmr1  | Fragile X mental retardat | R.SFLEAEVQVPR@.N                            | 75.52  | 24.96   | 3.03 | 0.33  |
| E9QNF5_E9QNF5_MOUSE | Fmr1  | Fragile X mental retardat | R.SVNPKNHPATK#.D                            | 9.44   | 10.40   | 0.91 | 1.10  |
| E9QNF5_E9QNF5_MOUSE | Fmr1  | Fragile X mental retardat | R.TADGSLQASSEGSR@.L                         | 61.08  | 16.47   | 3.71 | 0.27  |
| E9QNF5_E9QNF5_MOUSE | Fmr1  | Fragile X mental retardat | K.DINESDEVYSR@.A                            | 3.44   | 1.79    | 1.92 | 0.52  |
| E9QNF5_E9QNF5_MOUSE | Fmr1  | Fragile X mental retardat | R.SFLEAEVQVPR@.N                            | 15.65  | 5.48    | 2.86 | 0.35  |
| E9QNF5_E9QNF5_MOUSE | Fmr1  | Fragile X mental retardat | R.TADGSLQASSEGSR@.L                         | 6.25   | 3.16    | 1.98 | 0.50  |
| P11276_FINC_MOUSE   | Fn1   | Fibronectin OS=Mus mus    | R.GVTYNIIVEALQNR.R                          | 1.81   | 7.73    | 0.23 | 4.28  |
| P11276_FINC_MOUSE   | Fn1   | Fibronectin OS=Mus mus    | R.APITGYIR.H                                | 3.85   | 146.67  | 0.03 | 38.07 |
| P11276_FINC_MOUSE   | Fn1   | Fibronectin OS=Mus mus    | K.ATGVFTLQPLR.S                             | 8.54   | 126.77  | 0.07 | 14.85 |
| P11276_FINC_MOUSE   | Fn1   | Fibronectin OS=Mus mus    | K.EINLSPDSSSVIVSGLM*VATK.Y                  | 2.43   | 4.17    | 0.58 | 1.72  |
| P11276_FINC_MOUSE   | Fn1   | Fibronectin OS=Mus mus    | K.EINLSPDSSSVIVSGLM*VATK.Y                  | 4.11   | 8.52    | 0.48 | 2.07  |
| P11276_FINC_MOUSE   | Fn1   | Fibronectin OS=Mus mus    | K.EINLSPDSSSVIVSGLM*VATK.Y                  | 1.42   | 6.03    | 0.24 | 4.23  |
| P11276_FINC_MOUSE   | Fn1   | Fibronectin OS=Mus mus    | R.ESNLTAQQT.K.L                             | 2.84   | 61.24   | 0.05 | 21.55 |
| P11276_FINC_MOUSE   | Fn1   | Fibronectin OS=Mus mus    | R.EVTSDSGSIIVSGLTPGVEYTYIQLR.D              | 2.48   | 13.27   | 0.19 | 5.36  |
| P11276_FINC_MOUSE   | Fn1   | Fibronectin OS=Mus mus    | R.FLTTPNSLLVSWQAPR.A                        | 1.44   | 19.84   | 0.07 | 13.78 |
| P11276_FINC_MOUSE   | Fn1   | Fibronectin OS=Mus mus    | K.FSQVTPSTAQWIAPSVQLTGYR.V                  | 2.92   | 20.75   | 0.14 | 7.11  |
| P11276_FINC_MOUSE   | Fn1   | Fibronectin OS=Mus mus    | R.FTNIGPDTM*#.R.V                           | 14.54  | 55.91   | 0.26 | 3.85  |
| P11276_FINC_MOUSE   | Fn1   | Fibronectin OS=Mus mus    | K.GLAFTDVEDVDSIK.I                          | 11.43  | 117.53  | 0.10 | 10.28 |
| P11276_FINC_MOUSE   | Fn1   | Fibronectin OS=Mus mus    | R.GVTYNIIVEALQNR.R                          | 7.10   | 54.84   | 0.13 | 7.72  |
| P11276_FINC_MOUSE   | Fn1   | Fibronectin OS=Mus mus    | R.HALQASAGSGSFTDVR.T                        | 13.45  | 103.23  | 0.13 | 7.67  |
| P11276_FINC_MOUSE   | Fn1   | Fibronectin OS=Mus mus    | K.HYQINQWER.T                               | 2.60   | 23.90   | 0.11 | 9.19  |
| P11276_FINC_MOUSE   | Fn1   | Fibronectin OS=Mus mus    | K.IAWESPOGQVSR.Y                            | 1.72   | 48.03   | 0.04 | 27.96 |
| P11276_FINC_MOUSE   | Fn1   | Fibronectin OS=Mus mus    | K.IHLYTLNDRAR.S                             | 5.93   | 53.62   | 0.11 | 9.05  |
| P11276_FINC_MOUSE   | Fn1   | Fibronectin OS=Mus mus    | R.KKTDLPQLVTLPHNPHGPEILDVPSTVQK.T           | 2.94   | 38.19   | 0.08 | 12.99 |
| P11276_FINC_MOUSE   | Fn1   | Fibronectin OS=Mus mus    | K.LGVRPSQGEAPR.E                            | 5.66   | 149.79  | 0.04 | 26.45 |
| P11276_FINC_MOUSE   | Fn1   | Fibronectin OS=Mus mus    | R.LRPRPYP.NVDEEVIQGHVPR.G                   | 2.80   | 17.80   | 0.16 | 6.36  |
| P11276_FINC_MOUSE   | Fn1   | Fibronectin OS=Mus mus    | R.NSITLNLNPGTEYVSIIVAVNGR.E                 | 1.94   | 9.16    | 0.21 | 4.73  |
| P11276_FINC_MOUSE   | Fn1   | Fibronectin OS=Mus mus    | R.NTFAETLSPGVTYLKF.V                        | 8.86   | 76.25   | 0.12 | 8.60  |
| P11276_FINC_MOUSE   | Fn1   | Fibronectin OS=Mus mus    | R.SDNVPPPTDLOFVELTDVK.V                     | 4.14   | 25.99   | 0.16 | 6.28  |
| P11276_FINC_MOUSE   | Fn1   | Fibronectin OS=Mus mus    | R.SSPVIIDASTAIDAPSNLR.F                     | 4.22   | 36.73   | 0.11 | 8.70  |
| P11276_FINC_MOUSE   | Fn1   | Fibronectin OS=Mus mus    | R.SYITGLQPGTDYK.I                           | 5.49   | 62.64   | 0.09 | 11.40 |
| P11276_FINC_MOUSE   | Fn1   | Fibronectin OS=Mus mus    | K.TASPDQETM*TIELQPTVEYVSVYAQNR.N            | 5.66   | 23.01   | 0.25 | 4.07  |
| P11276_FINC_MOUSE   | Fn1   | Fibronectin OS=Mus mus    | K.TDELPLQVTLPHNPHGPEILDVPSTVQK.T            | 10.27  | 18.08   | 0.57 | 1.76  |
| P11276_FINC_MOUSE   | Fn1   | Fibronectin OS=Mus mus    | K.TEIDKPSQM*QVTDVQDINSISVR.W                | 2.03   | 47.67   | 0.04 | 23.52 |
| P11276_FINC_MOUSE   | Fn1   | Fibronectin OS=Mus mus    | K.TEIDKPSQM*QVTDVQDINSISVR.W                | 1.61   | 18.17   | 0.09 | 11.32 |
| P11276_FINC_MOUSE   | Fn1   | Fibronectin OS=Mus mus    | R.TFYQDGSWEK.F                              | 5.12   | 38.48   | 0.13 | 7.51  |
| P11276_FINC_MOUSE   | Fn1   | Fibronectin OS=Mus mus    | K.TGLDSPGFDSSDITANSFTVHVWVAPR.A             | 4.53   | 50.84   | 0.09 | 11.23 |
| P11276_FINC_MOUSE   | Fn1   | Fibronectin OS=Mus mus    | K.TPFTINPGYDTEINGIQLPGTTHQQPSVGGQM*FEEHGF.R | 2.71   | 3.37    | 0.81 | 1.24  |
| P11276_FINC_MOUSE   | Fn1   | Fibronectin OS=Mus mus    | R.TVLVTWTPPR.A                              | 7.54   | 54.41   | 0.14 | 7.22  |
| P11276_FINC_MOUSE   | Fn1   | Fibronectin OS=Mus mus    | K.VFAVHQGR.E                                | 1.73   | 23.53   | 0.07 | 13.57 |
| P11276_FINC_MOUSE   | Fn1   | Fibronectin OS=Mus mus    | K.VGDTYERPK.D                               | 1.38   | 13.14   | 0.11 | 9.49  |
| P11276_FINC_MOUSE   | Fn1   | Fibronectin OS=Mus mus    | K.VTIM*WTPPDSVSVGR.V                        | 9.31   | 15.91   | 0.59 | 1.71  |
| P11276_FINC_MOUSE   | Fn1   | Fibronectin OS=Mus mus    | R.VTWAPPSPIELTLLVR.Y                        | 4.76   | 78.59   | 0.06 | 16.50 |
| P11276_FINC_MOUSE   | Fn1   | Fibronectin OS=Mus mus    | R.VTYSPEDGIR.E                              | 2.34   | 45.46   | 0.05 | 19.41 |
| P11276_FINC_MOUSE   | Fn1   | Fibronectin OS=Mus mus    | R.VVPTLSPPTNLHLEANPDTGLVTSWVSR.S            | 3.39   | 29.67   | 0.11 | 8.76  |
| P11276_FINC_MOUSE   | Fn1   | Fibronectin OS=Mus mus    | R.WSRPQAPITGYR.I                            | 2.98   | 53.08   | 0.06 | 17.82 |
| P11276_FINC_MOUSE   | Fn1   | Fibronectin OS=Mus mus    | K.YEVSVALK.D                                | 3.45   | 51.93   | 0.07 | 15.05 |
| P11276_FINC_MOUSE   | Fn1   | Fibronectin OS=Mus mus    | K.YIVNVQISEEGK.Q                            | 6.93   | 80.99   | 0.09 | 11.69 |
| P11276_FINC_MOUSE   | Fn1   | Fibronectin OS=Mus mus    | R.APITGYIR.H                                | 52.98  | 1052.88 | 0.05 | 19.87 |
| P11276_FINC_MOUSE   | Fn1   | Fibronectin OS=Mus mus    | K.ATGVFTLQPLR.S                             | 43.29  | 774.62  | 0.06 | 17.89 |
| P11276_FINC_MOUSE   | Fn1   | Fibronectin OS=Mus mus    | R.DAPVNR.V                                  | 40.51  | 443.76  | 0.09 | 10.95 |
| P11276_FINC_MOUSE   | Fn1   | Fibronectin OS=Mus mus    | K.DTLTSRPAQGVITLLENVSPR.R                   | 5.22   | 96.42   | 0.05 | 18.47 |
| P11276_FINC_MOUSE   | Fn1   | Fibronectin OS=Mus mus    | R.EESPLIQGQATVSDIPR.D                       | 5.08   | 117.83  | 0.04 | 23.18 |
| P11276_FINC_MOUSE   | Fn1   | Fibronectin OS=Mus mus    | K.EINLSPDSSSVIVSGLM*VATK.Y                  | 12.91  | 48.63   | 0.27 | 3.77  |
| P11276_FINC_MOUSE   | Fn1   | Fibronectin OS=Mus mus    | K.EINLSPDSSSVIVSGLM*VATK.Y                  | 6.79   | 41.21   | 0.16 | 6.07  |
| P11276_FINC_MOUSE   | Fn1   | Fibronectin OS=Mus mus    | K.EINLSPDSSSVIVSGLM*VATK.Y                  | 8.87   | 46.21   | 0.19 | 5.21  |
| P11276_FINC_MOUSE   | Fn1   | Fibronectin OS=Mus mus    | K.EINLSPDSSSVIVSGLM*VATK.Y                  | 4.89   | 33.56   | 0.15 | 6.86  |
| P11276_FINC_MOUSE   | Fn1   | Fibronectin OS=Mus mus    | R.ESNLTAQQT.K.L                             | 23.43  | 376.33  | 0.06 | 16.06 |
| P11276_FINC_MOUSE   | Fn1   | Fibronectin OS=Mus mus    | R.EVTSDSGSIIVSGLTPGVEYTYIQLR.D              | 8.41   | 77.97   | 0.11 | 9.27  |
| P11276_FINC_MOUSE   | Fn1   | Fibronectin OS=Mus mus    | R.EVVP RPRPGVTEATITGLEPTEYTYIYALK.N         | 1.69   | 10.55   | 0.16 | 6.26  |
| P11276_FINC_MOUSE   | Fn1   | Fibronectin OS=Mus mus    | R.FLTTPNSLLVSWQAPR.A                        | 10.72  | 169.68  | 0.06 | 15.83 |
| P11276_FINC_MOUSE   | Fn1   | Fibronectin OS=Mus mus    | K.FSQVTPSTAQWIAPSVQLTGYR.V                  | 19.04  | 131.28  | 0.08 | 12.00 |
| P11276_FINC_MOUSE   | Fn1   | Fibronectin OS=Mus mus    | R.FTNIGPDTM*#.R.V                           | 20.47  | 452.34  | 0.06 | 16.71 |
| P11276_FINC_MOUSE   | Fn1   | Fibronectin OS=Mus mus    | K.GLAFTDVEDVDSIK.I                          | 34.76  | 525.73  | 0.07 | 15.15 |
| P11276_FINC_MOUSE   | Fn1   | Fibronectin OS=Mus mus    | R.GVTYNIIVEALQNR.R                          | 19.52  | 291.92  | 0.07 | 14.92 |
| P11276_FINC_MOUSE   | Fn1   | Fibronectin OS=Mus mus    | R.GVTYNIIVEALQNR@.R                         | 16.89  | 229.14  | 0.07 | 13.57 |
| P11276_FINC_MOUSE   | Fn1   | Fibronectin OS=Mus mus    | R.HALQASAGSGSFTDVR.T                        | 371.45 | 371.39  | 0.06 | 17.32 |
| P11276_FINC_MOUSE   | Fn1   | Fibronectin OS=Mus mus    | K.HYQINQWER.T                               | 9.47   | 118.56  | 0.08 | 12.53 |
| P11276_FINC_MOUSE   | Fn1   | Fibronectin OS=Mus mus    | R.IGDVTSK.K                                 | 7.57   | 196.56  | 0.04 | 25.95 |
| P11276_FINC_MOUSE   | Fn1   | Fibronectin OS=Mus mus    | R.IYGETGNSPVQEFVPGSK.S                      | 32.07  | 160.61  | 0.20 | 5.01  |
| P11276_FINC_MOUSE   | Fn1   | Fibronectin OS=Mus mus    | K.KTDELPLQVTLPHNPHGPEILDVPSTVQK.T           | 2.75   | 47.67   | 0.06 | 17.31 |
| P11276_FINC_MOUSE   | Fn1   | Fibronectin OS=Mus mus    | R.KYIVNVQISEEGK.Q                           | 2.86   | 34.61   | 0.08 | 12.09 |
| P11276_FINC_MOUSE   | Fn1   | Fibronectin OS=Mus mus    | K.LGVRPSQGEAPR.E                            | 70.60  | 1231.77 | 0.06 | 17.45 |

|                     |        |                                                                    |       |         |       |       |
|---------------------|--------|--------------------------------------------------------------------|-------|---------|-------|-------|
| P11276_FINC_MOUSE   | Fn1    | Fibronectin OS=Mus mus R.NLQPSGEYTVLVAVK.G                         | 51.72 | 589.71  | 0.09  | 11.40 |
| P11276_FINC_MOUSE   | Fn1    | Fibronectin OS=Mus mus R.NSITLTLNLPGETVVSIVAVNGR.E                 | 6.48  | 69.83   | 0.09  | 10.78 |
| P11276_FINC_MOUSE   | Fn1    | Fibronectin OS=Mus mus R.NTFAEITGLSPGVLYFK.V                       | 51.38 | 396.18  | 0.13  | 7.71  |
| P11276_FINC_MOUSE   | Fn1    | Fibronectin OS=Mus mus R.QKTGLDSTPGFSSDITANSFTVHWVAPR.A            | 4.98  | 66.21   | 0.08  | 13.31 |
| P11276_FINC_MOUSE   | Fn1    | Fibronectin OS=Mus mus R.QYNVGLASK.Y                               | 13.93 | 280.84  | 0.05  | 20.16 |
| P11276_FINC_MOUSE   | Fn1    | Fibronectin OS=Mus mus R.SDNVPPPTDLQFVELTDVK.V                     | 48.13 | 321.36  | 0.15  | 6.68  |
| P11276_FINC_MOUSE   | Fn1    | Fibronectin OS=Mus mus R.SSPVIIDASTAIDAPSNLR.F                     | 26.75 | 435.21  | 0.06  | 16.27 |
| P11276_FINC_MOUSE   | Fn1    | Fibronectin OS=Mus mus R.STATINNIKPGADYITLVAVTGR.G                 | 5.45  | 93.20   | 0.06  | 17.11 |
| P11276_FINC_MOUSE   | Fn1    | Fibronectin OS=Mus mus R.SYITITGLQPDTGYK.I                         | 36.78 | 473.57  | 0.08  | 12.88 |
| P11276_FINC_MOUSE   | Fn1    | Fibronectin OS=Mus mus K.TASPDQTEM*TIIEGLQPTVEYVSVYAQNR.N          | 24.13 | 153.49  | 0.16  | 6.36  |
| P11276_FINC_MOUSE   | Fn1    | Fibronectin OS=Mus mus K.TASPDQTEM*TIIEGLQPTVEYVSVYAQNR.N          | 6.41  | 50.47   | 0.13  | 7.87  |
| P11276_FINC_MOUSE   | Fn1    | Fibronectin OS=Mus mus K.TEIDKPSQM*QVTDVQDNSISVR.W                 | 16.07 | 258.53  | 0.06  | 16.09 |
| P11276_FINC_MOUSE   | Fn1    | Fibronectin OS=Mus mus K.TEIDKPSQM*QVTDVQDNSISVR.W                 | 4.45  | 87.16   | 0.05  | 19.60 |
| P11276_FINC_MOUSE   | Fn1    | Fibronectin OS=Mus mus K.TETITGFQVDAIPANGQTPVQR.S                  | 1.73  | 12.00   | 0.14  | 6.92  |
| P11276_FINC_MOUSE   | Fn1    | Fibronectin OS=Mus mus R.TFYQIGDSVWK.F                             | 14.36 | 236.46  | 0.06  | 16.46 |
| P11276_FINC_MOUSE   | Fn1    | Fibronectin OS=Mus mus K.TGLDSTPGFSSDITANSFTVHWVAPR.A              | 38.51 | 413.29  | 0.09  | 10.73 |
| P11276_FINC_MOUSE   | Fn1    | Fibronectin OS=Mus mus R.TKTEITIGFQVDAIPANGQTPVQR.S                | 4.40  | 119.24  | 0.04  | 27.07 |
| P11276_FINC_MOUSE   | Fn1    | Fibronectin OS=Mus mus K.TPFIITNPGYDTENGILQPGTHQQPSVGGQM*IFEEHGR.R | 17.31 | 30.65   | 0.56  | 1.77  |
| P11276_FINC_MOUSE   | Fn1    | Fibronectin OS=Mus mus K.TPFIITNPGYDTENGILQPGTHQQPSVGGQM*IFEEHGR.R | 4.01  | 28.80   | 0.14  | 7.18  |
| P11276_FINC_MOUSE   | Fn1    | Fibronectin OS=Mus mus R.TVLVTWTPPR.A                              | 21.20 | 329.90  | 0.06  | 15.56 |
| P11276_FINC_MOUSE   | Fn1    | Fibronectin OS=Mus mus R.VEVLVPSLPGHEGQR.L                         | 47.57 | 1005.92 | 0.05  | 21.15 |
| P11276_FINC_MOUSE   | Fn1    | Fibronectin OS=Mus mus R.VEYELSEGEDEPQLDLPSTATSVNIPDLLPGR.K        | 6.50  | 25.45   | 0.26  | 3.92  |
| P11276_FINC_MOUSE   | Fn1    | Fibronectin OS=Mus mus R.VEYELSEGEDEPQLDLPSTATSVNIPDLLPGR.K        | 3.59  | 47.05   | 0.08  | 13.12 |
| P11276_FINC_MOUSE   | Fn1    | Fibronectin OS=Mus mus K.VFAVHQGR.E                                | 8.26  | 129.26  | 0.06  | 15.65 |
| P11276_FINC_MOUSE   | Fn1    | Fibronectin OS=Mus mus K.VGDTYERPK.D                               | 8.45  | 135.68  | 0.06  | 16.06 |
| P11276_FINC_MOUSE   | Fn1    | Fibronectin OS=Mus mus R.VTDATETITISWR.T                           | 2.62  | 39.72   | 0.07  | 15.17 |
| P11276_FINC_MOUSE   | Fn1    | Fibronectin OS=Mus mus K.VTIM*WTPPDSVSGYR.V                        | 9.14  | 137.13  | 0.07  | 15.01 |
| P11276_FINC_MOUSE   | Fn1    | Fibronectin OS=Mus mus K.VTIM*WTPPDSVSGYR.V                        | 4.21  | 41.58   | 0.10  | 9.88  |
| P11276_FINC_MOUSE   | Fn1    | Fibronectin OS=Mus mus R.VTWAPPSPSIELTLNLR.V                       | 28.07 | 501.46  | 0.06  | 17.87 |
| P11276_FINC_MOUSE   | Fn1    | Fibronectin OS=Mus mus R.VTYVSEPDGIR.E                             | 17.05 | 248.54  | 0.07  | 14.57 |
| P11276_FINC_MOUSE   | Fn1    | Fibronectin OS=Mus mus R.VVTPSPPTNHLHEANPDGVLTVSWER.S              | 26.24 | 275.86  | 0.10  | 10.51 |
| P11276_FINC_MOUSE   | Fn1    | Fibronectin OS=Mus mus R.WLPSPTVPTGYR.V                            | 15.68 | 285.55  | 0.05  | 18.21 |
| P11276_FINC_MOUSE   | Fn1    | Fibronectin OS=Mus mus R.WSRPQAPITGYR.I                            | 30.31 | 471.38  | 0.06  | 15.55 |
| P11276_FINC_MOUSE   | Fn1    | Fibronectin OS=Mus mus K.YEVSVALK.D                                | 9.62  | 222.39  | 0.04  | 23.12 |
| P11276_FINC_MOUSE   | Fn1    | Fibronectin OS=Mus mus K.YIVNVYQSEEGK.Q                            | 31.68 | 350.65  | 0.09  | 11.07 |
| B7ZNU1_B7ZNU1_MOUSE | Fn1    | Fibronectin OS=Mus mus R.NGESQPLVQTAVTIPAPTNLK.F                   | 5.86  | 26.76   | 0.22  | 4.57  |
| Q6ZQ03_FNBPA_MOUSE  | Fnbp4  | Formin-binding protein - R.ALEEGDGSVSGSSPR@.S                      | 17.21 | 1.35    | 12.79 | 0.08  |
| Q6ZQ03_FNBPA_MOUSE  | Fnbp4  | Formin-binding protein - R.EVNEGIALNSSEER@.K                       | 12.54 | 2.97    | 4.22  | 0.24  |
| Q6ZQ03_FNBPA_MOUSE  | Fnbp4  | Formin-binding protein - K.FEFLGIR@.Q                              | 45.47 | 7.04    | 6.46  | 0.15  |
| Q6ZQ03_FNBPA_MOUSE  | Fnbp4  | Formin-binding protein - K.FQJGELANTLTSK#.F                        | 18.89 | 4.54    | 4.16  | 0.24  |
| Q6ZQ03_FNBPA_MOUSE  | Fnbp4  | Formin-binding protein - K.GVAALLPLLPPEGVK#EEEEER@.W               | 10.82 | 2.54    | 4.27  | 0.23  |
| Q6ZQ03_FNBPA_MOUSE  | Fnbp4  | Formin-binding protein - R.SDISQASQDGV@.R                          | 19.94 | 4.18    | 4.77  | 0.21  |
| Q6ZQ03_FNBPA_MOUSE  | Fnbp4  | Formin-binding protein - K.VEEEQDLK#.F                             | 31.15 | 5.45    | 5.71  | 0.18  |
| Q6ZQ03_FNBPA_MOUSE  | Fnbp4  | Formin-binding protein - K.VEEEQDLK#FQJGELANTLTSK#.F               | 10.66 | 2.60    | 4.11  | 0.24  |
| Q6ZQ03_FNBPA_MOUSE  | Fnbp4  | Formin-binding protein - R.ALEEGDGSVSGSSPR@.S                      | 6.72  | 1.79    | 3.76  | 0.27  |
| Q6ZQ03_FNBPA_MOUSE  | Fnbp4  | Formin-binding protein - K.FQJGELANTLTSK#.F                        | 6.36  | 1.23    | 5.16  | 0.19  |
| P47930_FOSL2_MOUSE  | Fosl2  | Fos-related antigen 2 OS= R.GSSGSPAHAESYSSGGGQQK.F                 | 4.30  | 8.17    | 0.53  | 1.90  |
| P47930_FOSL2_MOUSE  | Fosl2  | Fos-related antigen 2 OS= R.GTGSAGVPVVK.Q                          | 6.06  | 11.12   | 0.55  | 1.83  |
| P47930_FOSL2_MOUSE  | Fosl2  | Fos-related antigen 2 OS= R.LQAETEELK.E                            | 6.53  | 13.75   | 0.48  | 2.10  |
| Q61572_FOXC1_MOUSE  | Foxc1  | Forkhead box protein C1 R.AYGPYTPQPQK.D                            | 6.67  | 9.97    | 0.67  | 1.50  |
| P58462_FOXP1_MOUSE  | Foxp1  | Forkhead box protein P1 K.AAPQPLNLVSSVLSK#.S                       | 13.07 | 9.84    | 1.33  | 0.75  |
| P58462_FOXP1_MOUSE  | Foxp1  | Forkhead box protein P1 K.GAVVTVDEVEFOK#.R                         | 13.31 | 7.39    | 1.80  | 0.55  |
| P58462_FOXP1_MOUSE  | Foxp1  | Forkhead box protein P1 R.YSDK#YVNPISADIAQNEFYK#.N                 | 10.77 | 7.12    | 1.51  | 0.66  |
| P58462_FOXP1_MOUSE  | Foxp1  | Forkhead box protein P1 K.AAPQPLNLVSSVLSK#.S                       | 30.77 | 16.55   | 1.86  | 0.54  |
| P58462_FOXP1_MOUSE  | Foxp1  | Forkhead box protein P1 K.GAVVTVDEVEFOK#.R                         | 20.86 | 11.24   | 1.86  | 0.54  |
| P58462_FOXP1_MOUSE  | Foxp1  | Forkhead box protein P1 K.NAEVRPPTYASLIR.Q                         | 29.35 | 11.37   | 2.58  | 0.39  |
| P58462_FOXP1_MOUSE  | Foxp1  | Forkhead box protein P1 R.YSDK#YVNPISADIAQNEFYK#.N                 | 15.22 | 10.71   | 1.42  | 0.70  |
| P97376_FRG1_MOUSE   | Frg1   | Protein FRG1 OS=Mus mu K.YLGINSDGLVGR@.S                           | 14.58 | 10.46   | 1.39  | 0.72  |
| Q3UFK8_FRMD8_MOUSE  | FrmD8  | FERM domain-containing K.TGPGEQGLNAYR@.Q                           | 7.60  | 3.84    | 1.98  | 0.50  |
| F8VQ05_F8VQ05_MOUSE | Fryl   | Protein Fryl OS=Mus mus K.EEAASENEIDISK#.A                         | 4.05  | 2.16    | 1.88  | 0.53  |
| P29391_FERL1_MOUSE  | Ftl1   | Ferritin light chain 1 OS= R.LLEFQNDR@.G                           | 7.77  | 5.14    | 1.51  | 0.66  |
| P29391_FERL1_MOUSE  | Ftl1   | Ferritin light chain 1 OS= K.TQEA*EAALAM*EK#.N                     | 2.85  | 2.23    | 1.28  | 0.78  |
| P29391_FERL1_MOUSE  | Ftl1   | Ferritin light chain 1 OS= K.NLNLQDLHLGALSAR@.T                    | 12.70 | 5.30    | 2.39  | 0.42  |
| Q9DBE9_SPB1_MOUSE   | Ftsj3  | pre-rRNA processing prot K.DGFSGIEDDALEISQALYYK#.S                 | 7.94  | 2.40    | 3.31  | 0.30  |
| Q9DBE9_SPB1_MOUSE   | Ftsj3  | pre-rRNA processing prot R.FTQDDNKHEEGENLPLLEEK#.A                 | 11.21 | 6.95    | 1.61  | 0.62  |
| Q91WJ8_FUBP1_MOUSE  | Fubp1  | Far upstream element-bi K.IQIAPDSGGGLPER@.S                        | 8.54  | 4.58    | 1.86  | 0.54  |
| Q91WJ8_FUBP1_MOUSE  | Fubp1  | Far upstream element-bi K.IQNDAGYR@.I                              | 30.27 | 14.04   | 2.16  | 0.46  |
| A2A172_A2A172_MOUSE | Fubp3  | MCG130458 OS=Mus mu R.EILGLTVTR@.G                                 | 42.41 | 17.24   | 2.46  | 0.41  |
| A2A172_A2A172_MOUSE | Fubp3  | MCG130458 OS=Mus mu K.IDSIPHLNSTPLVDPSPVYGVQK#.R                   | 16.16 | 5.76    | 2.81  | 0.36  |
| A2A172_A2A172_MOUSE | Fubp3  | MCG130458 OS=Mus mu R.IJNELILTAQER@.E                              | 39.95 | 16.70   | 2.09  | 0.48  |
| A2A172_A2A172_MOUSE | Fubp3  | MCG130458 OS=Mus mu R.IQFKPDDGISPER.A                              | 51.59 | 20.95   | 2.46  | 0.41  |
| A2A172_A2A172_MOUSE | Fubp3  | MCG130458 OS=Mus mu K.M*VGIHGR@.G                                  | 13.57 | 5.60    | 2.42  | 0.41  |
| A2A172_A2A172_MOUSE | Fubp3  | MCG130458 OS=Mus mu R.NGPGFHNDM*DNSTIQELLPASK#.V                   | 11.56 | 4.27    | 2.71  | 0.37  |
| A2A172_A2A172_MOUSE | Fubp3  | MCG130458 OS=Mus mu R.NPPPTNDPDLR@.I                               | 9.94  | 8.51    | 1.17  | 0.86  |
| A2A172_A2A172_MOUSE | Fubp3  | MCG130458 OS=Mus mu R.SDWSVGTGGQVEITYVPADK#.C                      | 4.66  | 2.79    | 1.67  | 0.60  |
| A2A172_A2A172_MOUSE | Fubp3  | MCG130458 OS=Mus mu R.AAQVM*GPPDR@.C                               | 23.16 | 10.35   | 2.24  | 0.45  |
| A2A172_A2A172_MOUSE | Fubp3  | MCG130458 OS=Mus mu R.AGGGSIIEVSPR@.F                              | 46.58 | 21.30   | 2.19  | 0.46  |
| A2A172_A2A172_MOUSE | Fubp3  | MCG130458 OS=Mus mu R.EILGLTVTR@.G                                 | 70.02 | 26.34   | 2.66  | 0.38  |
| A2A172_A2A172_MOUSE | Fubp3  | MCG130458 OS=Mus mu R.FVVGIVGR@.N                                  | 11.47 | 4.72    | 2.43  | 0.41  |
| A2A172_A2A172_MOUSE | Fubp3  | MCG130458 OS=Mus mu K.IDSIPHLNSTPLVDPSPVYGVQK#.R                   | 28.44 | 15.72   | 1.81  | 0.55  |
| A2A172_A2A172_MOUSE | Fubp3  | MCG130458 OS=Mus mu R.IJNELILTAQER@.E                              | 48.21 | 18.52   | 2.60  | 0.38  |
| A2A172_A2A172_MOUSE | Fubp3  | MCG130458 OS=Mus mu R.IQFKPDDGISPER@.A                             | 71.65 | 29.60   | 2.42  | 0.41  |
| A2A172_A2A172_MOUSE | Fubp3  | MCG130458 OS=Mus mu R.LLGGIVDR@.C                                  | 58.30 | 20.37   | 2.86  | 0.35  |
| A2A172_A2A172_MOUSE | Fubp3  | MCG130458 OS=Mus mu K.M*VGIHGR@.G                                  | 38.86 | 15.22   | 2.55  | 0.39  |
| A2A172_A2A172_MOUSE | Fubp3  | MCG130458 OS=Mus mu R.NGPGFHNDM*DNSTIQELLPASK#.V                   | 13.45 | 4.29    | 3.14  | 0.32  |
| A2A172_A2A172_MOUSE | Fubp3  | MCG130458 OS=Mus mu R.QQAIFYGDTLGGQAASQEQ.-                        | 12.75 | 12.75   | 1.00  | 1.00  |
| A2A172_A2A172_MOUSE | Fubp3  | MCG130458 OS=Mus mu K.QSHPTSAPQAASSPDTM*AWAEYR@.Q                  | 4.96  | 4.19    | 1.18  | 0.84  |
| A2A172_A2A172_MOUSE | Fubp3  | MCG130458 OS=Mus mu R.SDWSVGTGGQVEITYVPADK#.C                      | 6.72  | 3.55    | 1.90  | 0.53  |
| A2A172_A2A172_MOUSE | Fubp3  | MCG130458 OS=Mus mu K.VGGASLGAPAAQGSFSPQPAHQNTFPPR@.G              | 3.32  | 3.20    | 1.04  | 0.96  |
| Q9D6K8_FUND2_MOUSE  | Fundc2 | FUN14 domain-containing K.SK#AEVSVFVK#.K                           | 8.83  | 3.49    | 2.53  | 0.40  |
| P56959_FUS_MOUSE    | Fus    | RNA-binding protein FUS R.HDSEQDNDNTTIFVQGLGENVTSEVADYFK#.Q        | 4.53  | 1.99    | 2.27  | 0.44  |
| P56959_FUS_MOUSE    | Fus    | RNA-binding protein FUS K.LKGEATVFDPPSAK#.A                        | 13.24 | 11.34   | 1.17  | 0.86  |
| P56959_FUS_MOUSE    | Fus    | RNA-binding protein FUS K.AAIDWFDGK#.E                             | 11.19 | 6.11    | 1.83  | 0.55  |
| P56959_FUS_MOUSE    | Fus    | RNA-binding protein FUS K.GEATVFDPPSAK#.A                          | 50.11 | 16.27   | 3.08  | 0.32  |
| P56959_FUS_MOUSE    | Fus    | RNA-binding protein FUS K.LK#GEATVFDPPSAK#.A                       | 20.60 | 12.30   | 1.68  | 0.60  |
| Q61584_FXR1_MOUSE   | Fxr1   | Fragile X mental retardat R.EDGM*VPFVVGTK#.E                       | 11.49 | 7.70    | 1.49  | 0.67  |
| Q61584_FXR1_MOUSE   | Fxr1   | Fragile X mental retardat R.EISEGDEVEVYSR@.A                       | 11.99 | 8.25    | 1.45  | 0.69  |
| Q61584_FXR1_MOUSE   | Fxr1   | Fragile X mental retardat R.KVPGVTAIJLDEDGTGTR.I                   | 30.26 | 24.63   | 1.23  | 0.81  |
| Q61584_FXR1_MOUSE   | Fxr1   | Fragile X mental retardat R.LQJDEQLR.Q                             | 83.00 | 54.28   | 1.53  | 0.65  |
| Q61584_FXR1_MOUSE   | Fxr1   | Fragile X mental retardat K.VIQEIVDK#.S                            | 26.12 | 14.65   | 1.78  | 0.56  |
| Q61584_FXR1_MOUSE   | Fxr1   | Fragile X mental retardat R.LQJDEQLR.Q                             | 11.51 | 12.03   | 0.96  | 1.05  |
| Q61584_FXR1_MOUSE   | Fxr1   | Fragile X mental retardat K.DVHEDSLTVFENNWQPER@.Q                  | 11.03 | 5.06    | 2.18  | 0.46  |
| Q61584_FXR1_MOUSE   | Fxr1   | Fragile X mental retardat R.EDGM*VPFVVGTK#.E                       | 41.46 | 16.58   | 2.50  | 0.40  |

|                     |               |                           |                                                 |        |       |       |      |
|---------------------|---------------|---------------------------|-------------------------------------------------|--------|-------|-------|------|
| Q61584_FXR1_MOUSE   | Fxr1          | Fragile X mental retardat | R.EDGMVFPVFGTK#.E                               | 10.46  | 4.04  | 2.59  | 0.39 |
| Q61584_FXR1_MOUSE   | Fxr1          | Fragile X mental retardat | R.EDLM*GLAIGHGTHGSIQQAR@.K                      | 28.37  | 9.05  | 3.13  | 0.32 |
| Q61584_FXR1_MOUSE   | Fxr1          | Fragile X mental retardat | K.EISEGDEVEVYSR@.A                              | 79.78  | 27.64 | 2.89  | 0.35 |
| Q61584_FXR1_MOUSE   | Fxr1          | Fragile X mental retardat | K.GYATDESTVSVQGSR@.S                            | 12.13  | 4.53  | 2.68  | 0.37 |
| Q61584_FXR1_MOUSE   | Fxr1          | Fragile X mental retardat | R.IFYHPTETQLM*ILSASEATVK#.R                     | 30.24  | 11.40 | 2.65  | 0.38 |
| Q61584_FXR1_MOUSE   | Fxr1          | Fragile X mental retardat | R.IYGESAEAVK#.K                                 | 35.10  | 12.20 | 2.88  | 0.35 |
| Q61584_FXR1_MOUSE   | Fxr1          | Fragile X mental retardat | R.K#VPGVTAILEDDEGTFR@.I                         | 144.00 | 58.65 | 2.46  | 0.41 |
| Q61584_FXR1_MOUSE   | Fxr1          | Fragile X mental retardat | R.LQJDEQLR.Q                                    | 251.24 | 94.69 | 2.65  | 0.38 |
| Q61584_FXR1_MOUSE   | Fxr1          | Fragile X mental retardat | K.SSISVVK#DOPDSNPVSLLDNTESDQTDADTASESHSTNR@.R   | 8.28   | 2.14  | 3.87  | 0.26 |
| Q61584_FXR1_MOUSE   | Fxr1          | Fragile X mental retardat | K.SSISVVK#DOPDSNPVSLLDNTESDQTDADTASESHSTNR@R@.R | 8.91   | 2.17  | 4.12  | 0.24 |
| Q61584_FXR1_MOUSE   | Fxr1          | Fragile X mental retardat | K.VIQEIVDK#.S                                   | 140.18 | 53.86 | 2.60  | 0.38 |
| Q61584_FXR1_MOUSE   | Fxr1          | Fragile X mental retardat | K.VPGVTAILEDDEGTFR@.I                           | 17.68  | 1.54  | 11.50 | 0.09 |
| Q61584_FXR1_MOUSE   | Fxr1          | Fragile X mental retardat | R.EDGM*VPVFGTK#.E                               | 9.77   | 6.75  | 1.45  | 0.69 |
| Q61584_FXR1_MOUSE   | Fxr1          | Fragile X mental retardat | R.K#VPGVTAILEDDEGTFR@.I                         | 21.74  | 7.35  | 2.96  | 0.34 |
| Q9WVR4_FXR2_MOUSE   | Fxr2          | Fragile X mental retardat | K.DVHEDSVTIFENNWQSR@.Q                          | 16.07  | 7.70  | 2.09  | 0.48 |
| Q9WVR4_FXR2_MOUSE   | Fxr2          | Fragile X mental retardat | R.EDLM*GLAIGHGTHGSIQQAR@.K                      | 40.72  | 15.90 | 2.56  | 0.39 |
| Q9WVR4_FXR2_MOUSE   | Fxr2          | Fragile X mental retardat | R.EDLMGLAIGHGTHGSIQQAR@.K                       | 13.45  | 4.95  | 2.71  | 0.37 |
| Q9WVR4_FXR2_MOUSE   | Fxr2          | Fragile X mental retardat | K.QLAAAFQEEFTYR@.E                              | 6.57   | 4.17  | 1.57  | 0.63 |
| Q9WVR4_FXR2_MOUSE   | Fxr2          | Fragile X mental retardat | R.SYLESEDSVQVPR@.D                              | 32.04  | 16.35 | 1.96  | 0.51 |
| Q9WVR4_FXR2_MOUSE   | Fxr2          | Fragile X mental retardat | R.DTGSISGDR@OPVTVDYISR@.A                       | 13.00  | 3.62  | 3.59  | 0.28 |
| Q9WVR4_FXR2_MOUSE   | Fxr2          | Fragile X mental retardat | R.TGGPAYGSDSPSTASESEK#R@.E                      | 6.88   | 4.55  | 1.51  | 0.66 |
| Q9WVR4_FXR2_MOUSE   | Fxr2          | Fragile X mental retardat | R.SYLESEDSVQVPR@.D                              | 9.34   | 3.63  | 2.57  | 0.39 |
| Q8VDC1_FYCO1_MOUSE  | Fyco1         | FYVE and coiled-coil dom  | R.LQEAQQLR@.G                                   | 7.76   | 2.60  | 2.98  | 0.34 |
| Q91249_UIF_MOUSE    | Fytd1         | UAP56-interacting factor  | R.ANLTFSK#.G                                    | 42.07  | 10.48 | 4.01  | 0.25 |
| Q91249_UIF_MOUSE    | Fytd1         | UAP56-interacting factor  | K.GVPLQFDINSVGK#.Q                              | 51.85  | 17.42 | 2.98  | 0.34 |
| Q91249_UIF_MOUSE    | Fytd1         | UAP56-interacting factor  | R.K#NNIPANFR@.N                                 | 11.62  | 10.88 | 1.07  | 0.94 |
| Q91249_UIF_MOUSE    | Fytd1         | UAP56-interacting factor  | R.LVGATATPPP#PK#.A                              | 31.08  | 15.54 | 2.00  | 0.50 |
| Q91249_UIF_MOUSE    | Fytd1         | UAP56-interacting factor  | R.TAVP5FLTK#.R                                  | 30.49  | 17.07 | 1.79  | 0.56 |
| Q91249_UIF_MOUSE    | Fytd1         | UAP56-interacting factor  | K.VQTQLNTEQLDDVVAK#.R                           | 26.62  | 9.21  | 2.89  | 0.35 |
| Q91249_UIF_MOUSE    | Fytd1         | UAP56-interacting factor  | R.WGIQQNSVGFGR#.T                               | 18.56  | 19.88 | 0.93  | 1.07 |
| Q91249_UIF_MOUSE    | Fytd1         | UAP56-interacting factor  | R.LVGATATPPP#PK#.A                              | 5.70   | 4.01  | 1.42  | 0.70 |
| Q91249_UIF_MOUSE    | Fytd1         | UAP56-interacting factor  | K.VQTQLNTEQLDDVVAK#.R                           | 2.62   | 1.77  | 1.47  | 0.68 |
| P97855_G3BP1_MOUSE  | G3bp1         | Ras GTPase-activating pr  | R.EAGEPGDVEPR@.R                                | 11.63  | 4.81  | 2.42  | 0.41 |
| P97855_G3BP1_MOUSE  | G3bp1         | Ras GTPase-activating pr  | K.LPNFGVFDSEPVQK#.V                             | 12.99  | 6.51  | 1.95  | 0.51 |
| P97855_G3BP1_MOUSE  | G3bp1         | Ras GTPase-activating pr  | K.LPNFGVFDSEPVQK#.V                             | 7.78   | 4.43  | 1.76  | 0.57 |
| P97379_G3BP2_MOUSE  | G3bp2         | Ras GTPase-activating pr  | K.FM*QTLPAEAGSVPNK#.F                           | 3.94   | 2.50  | 1.58  | 0.63 |
| P97379_G3BP2_MOUSE  | G3bp2         | Ras GTPase-activating pr  | K.LPNFGVFDSEPVQK#.V                             | 14.04  | 7.83  | 1.79  | 0.56 |
| P97379_G3BP2_MOUSE  | G3bp2         | Ras GTPase-activating pr  | R.VDAK#BEVQSQPR@.V                              | 27.51  | 10.92 | 2.52  | 0.40 |
| E0CXU4_E0CXU4_MOUSE | G930045G22Rik | Protein G930045G22Rik     | R.ESRMEQPR@.G                                   | 8.15   | 2.57  | 3.17  | 0.32 |
| Q00422_GABPA_MOUSE  | Gabpa         | GA-binding protein alpha  | K.HITTSDETSQVTR@.W                              | 32.35  | 10.19 | 3.17  | 0.32 |
| Q00422_GABPA_MOUSE  | Gabpa         | GA-binding protein alpha  | K.LNILEV#.K                                     | 47.90  | 10.38 | 4.62  | 0.22 |
| Q00422_GABPA_MOUSE  | Gabpa         | GA-binding protein alpha  | K.LNQPELVAQK#.W                                 | 22.64  | 7.20  | 3.14  | 0.32 |
| Q00422_GABPA_MOUSE  | Gabpa         | GA-binding protein alpha  | K.TLIGYSAAELNR@.L                               | 24.03  | 7.00  | 3.43  | 0.29 |
| Q00422_GABPA_MOUSE  | Gabpa         | GA-binding protein alpha  | K.LNILEV#.K                                     | 40.35  | 10.44 | 3.87  | 0.26 |
| P81069_GABP2_MOUSE  | Gabpb2        | GA-binding protein subu   | K.ATSAHLEM*EEGNSLDSSTQVVGSGGQR@.V               | 9.09   | 3.42  | 2.65  | 0.38 |
| P81069_GABP2_MOUSE  | Gabpb2        | GA-binding protein subu   | R.TTEPHTNVIETISS.-                              | 10.22  | 10.22 | 1.00  | 1.00 |
| P81069_GABP2_MOUSE  | Gabpb2        | GA-binding protein subu   | K.YGADVAFSK#.F                                  | 5.23   | 2.01  | 2.60  | 0.38 |
| Q99KY4_GAK_MOUSE    | Gak           | Cyclin-G-associated kina  | R.DQDFVGTVELGELR@.L                             | 4.38   | 3.26  | 1.34  | 0.74 |
| Q99KY4_GAK_MOUSE    | Gak           | Cyclin-G-associated kina  | R.DQDFVGTVELGELR@.L                             | 9.81   | 4.71  | 2.08  | 0.48 |
| Q99KY4_GAK_MOUSE    | Gak           | Cyclin-G-associated kina  | R.IAVM*SFPAEVEISA#.N                            | 6.30   | 8.42  | 0.75  | 1.34 |
| Q99KY4_GAK_MOUSE    | Gak           | Cyclin-G-associated kina  | K.VSENFEDLLPNQGFQSK#.S                          | 3.73   | 2.67  | 1.40  | 0.71 |
| Q99KY4_GAK_MOUSE    | Gak           | Cyclin-G-associated kina  | R.DQDFVGTVELGELR@.L                             | 16.32  | 7.01  | 2.33  | 0.43 |
| Q99KY4_GAK_MOUSE    | Gak           | Cyclin-G-associated kina  | K.GDLDISVTSR@.I                                 | 14.91  | 9.50  | 1.57  | 0.64 |
| Q99KY4_GAK_MOUSE    | Gak           | Cyclin-G-associated kina  | K.SVVM*TPVPLFSK#.Q                              | 50.53  | 18.03 | 2.80  | 0.36 |
| Q99KY4_GAK_MOUSE    | Gak           | Cyclin-G-associated kina  | K.VIQSVANYAK#.G                                 | 12.92  | 4.75  | 2.72  | 0.37 |
| Q99KY4_GAK_MOUSE    | Gak           | Cyclin-G-associated kina  | K.VSENFEDLLPNQGFQSK#.S                          | 5.13   | 3.49  | 1.47  | 0.68 |
| P16858_G3P_MOUSE    | Gapdh         | Glyceraldehyde-3-phospl   | R.GAAQNIIPASTGAAK#.A                            | 69.49  | 38.94 | 1.78  | 0.56 |
| P16858_G3P_MOUSE    | Gapdh         | Glyceraldehyde-3-phospl   | K.LISWYDNEYGYSNR@.V                             | 32.09  | 13.76 | 2.33  | 0.43 |
| P16858_G3P_MOUSE    | Gapdh         | Glyceraldehyde-3-phospl   | K.VHDFNFIQVGLM*TTVHAITATQK#.T                   | 19.41  | 13.92 | 1.39  | 0.72 |
| P16858_G3P_MOUSE    | Gapdh         | Glyceraldehyde-3-phospl   | R.VVDLM*AYM*ASK#.E.-                            | 15.34  | 7.17  | 2.14  | 0.47 |
| P16858_G3P_MOUSE    | Gapdh         | Glyceraldehyde-3-phospl   | K.WGEAEVYVVESTGVFTTM*EK#.A                      | 12.00  | 8.76  | 1.37  | 0.73 |
| P16858_G3P_MOUSE    | Gapdh         | Glyceraldehyde-3-phospl   | R.GAAQNIIPASTGAAK#.A                            | 6.64   | 6.77  | 0.98  | 1.02 |
| P16858_G3P_MOUSE    | Gapdh         | Glyceraldehyde-3-phospl   | K.LISWYDNEYGYSNR.V                              | 3.74   | 3.99  | 0.94  | 1.07 |
| P16858_G3P_MOUSE    | Gapdh         | Glyceraldehyde-3-phospl   | R.GAAQNIIPASTGAAK#.A                            | 5.95   | 4.08  | 1.46  | 0.69 |
| P16858_G3P_MOUSE    | Gapdh         | Glyceraldehyde-3-phospl   | R.GAAQNIIPASTGAAK#.A                            | 5.64   | 3.67  | 1.54  | 0.65 |
| Q9CY66_GAR1_MOUSE   | Gar1          | H/ACA ribonucleoprotei    | K.FODQGPPE.R                                    | 5.36   | 6.35  | 0.84  | 1.19 |
| Q9CY66_GAR1_MOUSE   | Gar1          | H/ACA ribonucleoprotei    | K.FODQGPPE.R                                    | 16.02  | 31.47 | 0.51  | 1.96 |
| Q9CY66_GAR1_MOUSE   | Gar1          | H/ACA ribonucleoprotei    | K.VDEIFGQLR.D                                   | 6.15   | 14.15 | 0.43  | 2.30 |
| Q61169_GATA6_MOUSE  | Gata6         | Transcription factor GAT  | R.GPSTDLLEDLSER@.E                              | 8.37   | 7.37  | 1.14  | 0.88 |
| Q920S3_GATD1_MOUSE  | Gatad1        | GATA zinc finger domain   | R.DQDFPASYIIGPEEDLPR@.K                         | 11.28  | 11.30 | 1.00  | 1.00 |
| Q920S3_GATD1_MOUSE  | Gatad1        | GATA zinc finger domain   | K.GVYQGDVVSVDQDGK#PYAQIR@.G                     | 5.48   | 4.28  | 1.28  | 0.78 |
| Q8CHY6_P66A_MOUSE   | Gatad2a       | Transcriptional represso  | K.ALQEQEM*EQR@.L                                | 17.51  | 6.52  | 2.69  | 0.37 |
| Q8CHY6_P66A_MOUSE   | Gatad2a       | Transcriptional represso  | K.EATAQK#PTASSGSTVTPPLVR@.G                     | 8.19   | 4.31  | 1.90  | 0.53 |
| Q8CHY6_P66A_MOUSE   | Gatad2a       | Transcriptional represso  | R.IPGSIIPLPVR@.G                                | 6.62   | 2.98  | 2.22  | 0.45 |
| Q8CHY6_P66A_MOUSE   | Gatad2a       | Transcriptional represso  | R.LLQGVGTASIK#.A                                | 58.65  | 19.20 | 3.05  | 0.33 |
| Q8CHY6_P66A_MOUSE   | Gatad2a       | Transcriptional represso  | K.LQNASATALVSR@.T                               | 22.78  | 6.22  | 3.66  | 0.27 |
| Q8CHY6_P66A_MOUSE   | Gatad2a       | Transcriptional represso  | R.LLQGVGTASIK#.A                                | 3.97   | 2.50  | 1.59  | 0.63 |
| Q8CHY6_P66A_MOUSE   | Gatad2a       | Transcriptional represso  | K.ALQEQEM*EQR@.L                                | 14.39  | 6.24  | 2.31  | 0.43 |
| Q8CHY6_P66A_MOUSE   | Gatad2a       | Transcriptional represso  | K.EATAQK#PTASSGSTVTPPLVR@.G                     | 18.70  | 6.87  | 2.72  | 0.37 |
| Q8CHY6_P66A_MOUSE   | Gatad2a       | Transcriptional represso  | K.GSSELTVDGDSR@.V                               | 12.62  | 4.15  | 3.04  | 0.33 |
| Q8CHY6_P66A_MOUSE   | Gatad2a       | Transcriptional represso  | R.IIQGLIR@.V                                    | 18.77  | 9.64  | 1.95  | 0.51 |
| Q8CHY6_P66A_MOUSE   | Gatad2a       | Transcriptional represso  | R.IPGSIIPLPVR@.G                                | 13.39  | 6.06  | 2.21  | 0.45 |
| Q8CHY6_P66A_MOUSE   | Gatad2a       | Transcriptional represso  | K.LGPQASSQVVM*PPLVR@.G                          | 4.79   | 4.09  | 1.17  | 0.85 |
| Q8CHY6_P66A_MOUSE   | Gatad2a       | Transcriptional represso  | R.LLQGVGTASIK#.A                                | 35.02  | 13.92 | 2.52  | 0.40 |
| Q8CHY6_P66A_MOUSE   | Gatad2a       | Transcriptional represso  | K.LQNASATALVSR@.T                               | 19.10  | 6.42  | 2.98  | 0.34 |
| Q8CHY6_P66A_MOUSE   | Gatad2a       | Transcriptional represso  | K.TPLSTGTLAFVSPSLVHK#.T                         | 18.83  | 9.20  | 2.05  | 0.49 |
| Q8CHY6_P66A_MOUSE   | Gatad2a       | Transcriptional represso  | K.TSLQTSSTR@.J                                  | 10.01  | 2.43  | 4.11  | 0.24 |
| Q8VHR5_P66B_MOUSE   | Gatad2b       | Transcriptional represso  | K.AANLEM*FK#.G                                  | 8.37   | 4.14  | 2.02  | 0.49 |
| Q8VHR5_P66B_MOUSE   | Gatad2b       | Transcriptional represso  | K.ALQEQEIEQR@.L                                 | 29.10  | 31.85 | 3.11  | 0.32 |
| Q8VHR5_P66B_MOUSE   | Gatad2b       | Transcriptional represso  | K.LPSR@PGAQIEPQNM*#R@.T                         | 44.66  | 14.23 | 1.73  | 0.58 |
| Q8VHR5_P66B_MOUSE   | Gatad2b       | Transcriptional represso  | R.LQQQAALSPPTAPAVSSVK#.Q                        | 22.83  | 8.89  | 2.57  | 0.39 |
| Q8VHR5_P66B_MOUSE   | Gatad2b       | Transcriptional represso  | R.QAPOQSSQLR@.G                                 | 49.84  | 17.81 | 2.80  | 0.36 |
| Q8VHR5_P66B_MOUSE   | Gatad2b       | Transcriptional represso  | R.SISQISGQK#.-                                  | 34.04  | 9.53  | 3.57  | 0.28 |
| Q8VHR5_P66B_MOUSE   | Gatad2b       | Transcriptional represso  | K.TPVVQNASIVQPSPAHVQQLSK#.L                     | 32.82  | 10.82 | 3.03  | 0.33 |
| Q8VHR5_P66B_MOUSE   | Gatad2b       | Transcriptional represso  | R.TSSAIYM*NLASHIQPTVNR@.V                       | 8.02   | 7.35  | 1.09  | 0.92 |
| Q8VHR5_P66B_MOUSE   | Gatad2b       | Transcriptional represso  | R.VIAPNPALQSQR@.G                               | 34.98  | 14.94 | 2.34  | 0.43 |
| Q8VHR5_P66B_MOUSE   | Gatad2b       | Transcriptional represso  | R.VSSPLSPSPAM*SDAANSQAAAK#.L                    | 21.23  | 7.75  | 2.74  | 0.36 |
| Q8VHR5_P66B_MOUSE   | Gatad2b       | Transcriptional represso  | K.ALQEQEIEQR@.L                                 | 12.45  | 4.28  | 2.91  | 0.34 |
| Q8VHR5_P66B_MOUSE   | Gatad2b       | Transcriptional represso  | K.ALQEQEIEQR@.L                                 | 28.46  | 9.36  | 3.04  | 0.33 |
| Q8VHR5_P66B_MOUSE   | Gatad2b       | Transcriptional represso  | K.LPSR@PGAQIEPQNM*#R@.T                         | 21.53  | 5.52  | 3.90  | 0.26 |
| Q8VHR5_P66B_MOUSE   | Gatad2b       | Transcriptional represso  | R.LQQQAALSPPTAPAVSSVK#.Q                        | 9.66   | 3.06  | 3.16  | 0.32 |
| Q8VHR5_P66B_MOUSE   | Gatad2b       | Transcriptional represso  | R.QAPOQSSQLR@.G                                 | 19.84  | 7.27  | 2.73  | 0.37 |
| Q8VHR5_P66B_MOUSE   | Gatad2b       | Transcriptional represso  | R.TSSAIYM*NLASHIQPTVNR@.V                       | 10.34  | 5.49  | 1.88  | 0.53 |



|                     |         |                                                             |       |       |         |      |
|---------------------|---------|-------------------------------------------------------------|-------|-------|---------|------|
| Q8VHR5_P66B_MOUSE   | Gatad2b | Transcriptional repressor R.VIAPNPAQLQGQR.G                 | 34.64 | 12.01 | 2.88    | 0.35 |
| Q8VHR5_P66B_MOUSE   | Gatad2b | Transcriptional repressor R.VSSPLSPSAM*SDAANSQAAAK#.L       | 10.87 | 3.71  | 2.93    | 0.34 |
| P17439_GLCM_MOUSE   | Gba     | Glucosylceramidase OS=R.NFVDDSPVIVDPK.D                     | 5.50  | 4.12  | 1.34    | 0.75 |
| Q6A099_Q6A099_MOUSE | Gbf1    | MKIAA0248 protein (Fraj K.LLENISPADVGGM*EETR@.M             | 5.37  | 3.89  | 1.38    | 0.72 |
| Q6A099_Q6A099_MOUSE | Gbf1    | MKIAA0248 protein (Fraj R.FVGTDPASDEVLLM*KK.I               | 6.93  | 2.58  | 2.69    | 0.37 |
| Q6A099_Q6A099_MOUSE | Gbf1    | MKIAA0248 protein (Fraj R.SEDTTGPTGLTALTSVNN#.F             | 7.33  | 49.80 | 0.15    | 6.80 |
| Q6A099_Q6A099_MOUSE | Gbf1    | MKIAA0248 protein (Fraj R.ADAPDAGAQSDSELPSYHQNDVSLDR@.G     | 6.43  | 2.33  | 2.76    | 0.36 |
| Q6A099_Q6A099_MOUSE | Gbf1    | MKIAA0248 protein (Fraj R.APSSSPSPM*ASSPSK#.L               | 11.22 | 3.25  | 3.45    | 0.29 |
| Q6A099_Q6A099_MOUSE | Gbf1    | MKIAA0248 protein (Fraj R.DLEEAGDSGADKHK#.F                 | 2.63  | 2.02  | 1.30    | 0.77 |
| Q6A099_Q6A099_MOUSE | Gbf1    | MKIAA0248 protein (Fraj K.FLSYALIDPHEGTAEGM*ENM*ADAVTHAR@.F | 8.91  | 3.17  | 2.81    | 0.36 |
| Q6A099_Q6A099_MOUSE | Gbf1    | MKIAA0248 protein (Fraj K.FTALSSESIENLSPVFGSNPK#.A          | 4.88  | 1.53  | 3.19    | 0.31 |
| Q6A099_Q6A099_MOUSE | Gbf1    | MKIAA0248 protein (Fraj R.FVGTDPASDEVLLM*KK.I               | 10.85 | 4.40  | 2.46    | 0.41 |
| Q6A099_Q6A099_MOUSE | Gbf1    | MKIAA0248 protein (Fraj R.GASPEGVFLR@.V                     | 15.02 | 3.98  | 3.78    | 0.26 |
| Q6A099_Q6A099_MOUSE | Gbf1    | MKIAA0248 protein (Fraj K.LLENISPADVGGM*EETR@.M             | 9.62  | 3.24  | 2.97    | 0.34 |
| Q6A099_Q6A099_MOUSE | Gbf1    | MKIAA0248 protein (Fraj R.SEDTTGPTGLTALTSVNN#.F             | 14.12 | 81.28 | 0.17    | 5.75 |
| Q6A099_Q6A099_MOUSE | Gbf1    | MKIAA0248 protein (Fraj K.SLETTIQK#.A                       | 15.79 | 15.51 | 1.02    | 0.98 |
| Q61107_GBP4_MOUSE   | Gbp4    | Guanylate-binding prote R.LLLQIENVPENQLER@.N                | 5.34  | 3.25  | 1.64    | 0.61 |
| Q91240_Q91240_MOUSE | Gbp7    | Gbp6 protein OS=Mus m R.VITADEYLENALKR.L                    | 6.52  | 2.34  | 2.79    | 0.36 |
| E9PWY6_E9PWY6_MOUSE | Gcat    | 2-amino-3-ketobutyrate K.WLTSRTRF@.W                        | 1.01  | 4.11  | 0.25    | 4.07 |
| Q9D4H2_GCC1_MOUSE   | Gcc1    | GRIP and coiled-coil dor R.ALVALAEKHDLEQLR@.S               | 6.83  | 4.22  | 1.62    | 0.62 |
| Q9D4H2_GCC1_MOUSE   | Gcc1    | GRIP and coiled-coil dor R.AYAADQVEGFLQTK#.Q                | 5.42  | 2.72  | 1.99    | 0.50 |
| Q9D4H2_GCC1_MOUSE   | Gcc1    | GRIP and coiled-coil dor R.VAALESQISEVSELLGTYEK#.A          | 9.63  | 2.22  | 4.33    | 0.23 |
| B2RSU7_B2RSU7_MOUSE | Gcc2    | GRIP and coiled-coil dor K.LIQAVGSLVK#.V                    | 9.16  | 3.09  | 2.96    | 0.34 |
| B2RSU7_B2RSU7_MOUSE | Gcc2    | GRIP and coiled-coil dor K.TM*TEDQALSCK#.I                  | 6.68  | 2.09  | 3.20    | 0.31 |
| B2RSU7_B2RSU7_MOUSE | Gcc2    | GRIP and coiled-coil dor K.AEQAAVTSFESYK#.V                 | 34.21 | 9.23  | 3.70    | 0.27 |
| B2RSU7_B2RSU7_MOUSE | Gcc2    | GRIP and coiled-coil dor R.ASILENEEEDVWK#.L                 | 40.73 | 14.16 | 2.88    | 0.35 |
| B2RSU7_B2RSU7_MOUSE | Gcc2    | GRIP and coiled-coil dor R.ATHK#EIVTELTM*SQIETSAK#.E        | 4.37  | 4.53  | 0.97    | 1.04 |
| B2RSU7_B2RSU7_MOUSE | Gcc2    | GRIP and coiled-coil dor K.DINTFQAEILQLR@.A                 | 45.96 | 11.30 | 4.07    | 0.25 |
| B2RSU7_B2RSU7_MOUSE | Gcc2    | GRIP and coiled-coil dor K.DTM*TLQLEAK#.I                   | 10.47 | 4.47  | 2.34    | 0.43 |
| B2RSU7_B2RSU7_MOUSE | Gcc2    | GRIP and coiled-coil dor K.EALQDLLEGM*KN.N                  | 21.07 | 7.39  | 2.85    | 0.35 |
| B2RSU7_B2RSU7_MOUSE | Gcc2    | GRIP and coiled-coil dor K.EAQTLR@EELSVR@.S                 | 35.96 | 7.85  | 4.58    | 0.22 |
| B2RSU7_B2RSU7_MOUSE | Gcc2    | GRIP and coiled-coil dor K.EFLQGAESYK#.S                    | 19.25 | 11.24 | 1.71    | 0.58 |
| B2RSU7_B2RSU7_MOUSE | Gcc2    | GRIP and coiled-coil dor R.EM*MILOTELGESAGK#.I              | 16.03 | 4.03  | 3.98    | 0.25 |
| B2RSU7_B2RSU7_MOUSE | Gcc2    | GRIP and coiled-coil dor R.ETEATNAILM*EQIK#.L               | 15.97 | 4.76  | 3.36    | 0.30 |
| B2RSU7_B2RSU7_MOUSE | Gcc2    | GRIP and coiled-coil dor K.EVSELETIFSGSEK#.E                | 21.81 | 5.18  | 4.21    | 0.24 |
| B2RSU7_B2RSU7_MOUSE | Gcc2    | GRIP and coiled-coil dor K.GELEASQQQVEVYK#.I                | 16.57 | 13.87 | 1.19    | 0.84 |
| B2RSU7_B2RSU7_MOUSE | Gcc2    | GRIP and coiled-coil dor R.IETLQANAK#.L                     | 45.64 | 11.99 | 3.81    | 0.26 |
| B2RSU7_B2RSU7_MOUSE | Gcc2    | GRIP and coiled-coil dor K.INELLAK#.E                       | 26.41 | 8.02  | 3.29    | 0.30 |
| B2RSU7_B2RSU7_MOUSE | Gcc2    | GRIP and coiled-coil dor K.INELLAK#EEOGVVVEK#.L             | 13.49 | 2.98  | 4.52    | 0.22 |
| B2RSU7_B2RSU7_MOUSE | Gcc2    | GRIP and coiled-coil dor K.IQLAEM*TSK#.H                    | 22.01 | 15.82 | 1.39    | 0.72 |
| B2RSU7_B2RSU7_MOUSE | Gcc2    | GRIP and coiled-coil dor K.ISQEFETM*KK#.Q                   | 14.21 | 4.50  | 3.16    | 0.32 |
| B2RSU7_B2RSU7_MOUSE | Gcc2    | GRIP and coiled-coil dor K.LATVAQGEESASR@.S                 | 45.55 | 10.47 | 4.35    | 0.23 |
| B2RSU7_B2RSU7_MOUSE | Gcc2    | GRIP and coiled-coil dor K.LEAQFLQK#.S                      | 47.38 | 10.67 | 4.44    | 0.23 |
| B2RSU7_B2RSU7_MOUSE | Gcc2    | GRIP and coiled-coil dor K.LIQAVGSLVK#.V                    | 54.53 | 15.81 | 3.45    | 0.29 |
| B2RSU7_B2RSU7_MOUSE | Gcc2    | GRIP and coiled-coil dor K.LLEAQILEVQK#.A                   | 65.66 | 20.43 | 3.21    | 0.31 |
| B2RSU7_B2RSU7_MOUSE | Gcc2    | GRIP and coiled-coil dor K.LLENEQVQK#.S                     | 22.51 | 9.19  | 2.45    | 0.41 |
| B2RSU7_B2RSU7_MOUSE | Gcc2    | GRIP and coiled-coil dor R.LLPVIDTM*LLQSPPEK#.G             | 19.37 | 6.44  | 3.01    | 0.33 |
| B2RSU7_B2RSU7_MOUSE | Gcc2    | GRIP and coiled-coil dor K.LLSQQELVPELESTIK#.N              | 36.13 | 9.13  | 3.96    | 0.25 |
| B2RSU7_B2RSU7_MOUSE | Gcc2    | GRIP and coiled-coil dor K.LQDSQNSLQISVSEYQLQAEHDTLLER@.H   | 8.11  | 3.21  | 2.53    | 0.40 |
| B2RSU7_B2RSU7_MOUSE | Gcc2    | GRIP and coiled-coil dor R.LSVLR@.E                         | 26.81 | 9.04  | 2.96    | 0.34 |
| B2RSU7_B2RSU7_MOUSE | Gcc2    | GRIP and coiled-coil dor R.LTSDNEDLLAR@.I                   | 38.63 | 11.58 | 3.34    | 0.30 |
| B2RSU7_B2RSU7_MOUSE | Gcc2    | GRIP and coiled-coil dor R.M*LOETVTR#.E                     | 20.65 | 7.31  | 2.82    | 0.35 |
| B2RSU7_B2RSU7_MOUSE | Gcc2    | GRIP and coiled-coil dor K.NDQLSLVK#.E                      | 27.03 | 7.76  | 3.49    | 0.29 |
| B2RSU7_B2RSU7_MOUSE | Gcc2    | GRIP and coiled-coil dor K.NLQADNSM*YLASLGQK#.D             | 21.10 | 5.66  | 3.73    | 0.27 |
| B2RSU7_B2RSU7_MOUSE | Gcc2    | GRIP and coiled-coil dor K.NSTIEDLEQEM*KK#.I                | 9.51  | 4.02  | 2.36    | 0.42 |
| B2RSU7_B2RSU7_MOUSE | Gcc2    | GRIP and coiled-coil dor K.QEVVLYNESLRL@.E                  | 23.83 | 7.52  | 3.17    | 0.32 |
| B2RSU7_B2RSU7_MOUSE | Gcc2    | GRIP and coiled-coil dor R.SAFNEKHDALLETVNR@.L              | 20.41 | 5.67  | 3.60    | 0.28 |
| B2RSU7_B2RSU7_MOUSE | Gcc2    | GRIP and coiled-coil dor K.SQNDQSTVQM*KK#.T                 | 14.55 | 3.86  | 3.77    | 0.27 |
| B2RSU7_B2RSU7_MOUSE | Gcc2    | GRIP and coiled-coil dor K.SVQVETEGAK#.Q                    | 17.48 | 4.37  | 4.00    | 0.25 |
| B2RSU7_B2RSU7_MOUSE | Gcc2    | GRIP and coiled-coil dor R.TLSAYQQR@.V                      | 23.40 | 10.19 | 2.30    | 0.44 |
| B2RSU7_B2RSU7_MOUSE | Gcc2    | GRIP and coiled-coil dor K.TM*TEDQALSCK#.I                  | 21.51 | 2.97  | 7.23    | 0.14 |
| B2RSU7_B2RSU7_MOUSE | Gcc2    | GRIP and coiled-coil dor K.TQLYELK#.Q                       | 23.90 | 4.05  | 5.90    | 0.17 |
| B2RSU7_B2RSU7_MOUSE | Gcc2    | GRIP and coiled-coil dor R.VVALQEQSR@.A                     | 36.16 | 14.45 | 2.50    | 0.40 |
| Q8BK73_GFC2_MOUSE   | Gfc2    | GC-rich sequence DNA-bi R.VAFEQFASENEVSK#.N                 | 6.87  | 3.10  | 2.22    | 0.42 |
| Q8BK73_GFC2_MOUSE   | Gfc2    | GC-rich sequence DNA-bi K.SIEDDIFILVYPK#.S                  | 6.86  | 2.88  | 2.38    | 0.45 |
| O09172_GSHO_MOUSE   | Gclm    | Glutamate-cysteine ligat K.LFIVGSSSSSTR@.S                  | 5.51  | 3.22  | 1.71    | 0.58 |
| E9PVA8_E9PVA8_MOUSE | Gcn11   | Protein Gcn11 OS=Mus i K.AASQGTQVPTVTEGVAAALLSK#.L          | 11.99 | 5.38  | 2.23    | 0.45 |
| E9PVA8_E9PVA8_MOUSE | Gcn11   | Protein Gcn11 OS=Mus i R.ALQAAIQLAEAQPEATAK#.N              | 14.55 | 2.21  | 4.65    | 0.22 |
| E9PVA8_E9PVA8_MOUSE | Gcn11   | Protein Gcn11 OS=Mus i R.IIIEDLEATR@.S                      | 13.53 | 1.53  | 8.85    | 0.11 |
| E9PVA8_E9PVA8_MOUSE | Gcn11   | Protein Gcn11 OS=Mus i K.VLPLEALVTDAGEVTEM*GK#.T            | 3.75  | 3.75  | 3.89    | 0.26 |
| E9PVA8_E9PVA8_MOUSE | Gcn11   | Protein Gcn11 OS=Mus i K.AASQGTQVPTVTEGVAAALLSK#.L          | 20.39 | 9.42  | 2.16    | 0.46 |
| E9PVA8_E9PVA8_MOUSE | Gcn11   | Protein Gcn11 OS=Mus i K.ALADENEFVR@.D                      | 19.29 | 5.07  | 3.79    | 0.27 |
| E9PVA8_E9PVA8_MOUSE | Gcn11   | Protein Gcn11 OS=Mus i R.ALQAAIQLAEAQPEATAK#.N              | 25.16 | 8.31  | 3.03    | 0.33 |
| E9PVA8_E9PVA8_MOUSE | Gcn11   | Protein Gcn11 OS=Mus i K.ASLDLPVPEVR@.T                     | 18.37 | 6.32  | 2.87    | 0.35 |
| E9PVA8_E9PVA8_MOUSE | Gcn11   | Protein Gcn11 OS=Mus i K.DAPNDASYDVR@.Q                     | 4.02  | 2.17  | 1.85    | 0.54 |
| E9PVA8_E9PVA8_MOUSE | Gcn11   | Protein Gcn11 OS=Mus i R.DAVLFFSESLVPTAR@.K                 | 19.27 | 7.16  | 2.73    | 0.37 |
| E9PVA8_E9PVA8_MOUSE | Gcn11   | Protein Gcn11 OS=Mus i R.EEFSIM*QTPAGELFDK#.S               | 3.94  | 2.03  | 1.94    | 0.51 |
| E9PVA8_E9PVA8_MOUSE | Gcn11   | Protein Gcn11 OS=Mus i K.GLGLSLK#.Q                         | 15.13 | 5.14  | 2.94    | 0.34 |
| E9PVA8_E9PVA8_MOUSE | Gcn11   | Protein Gcn11 OS=Mus i R.GVTSILPVLRL@.E                     | 10.38 | 4.54  | 2.29    | 0.44 |
| E9PVA8_E9PVA8_MOUSE | Gcn11   | Protein Gcn11 OS=Mus i R.IIIEDLEATR@.S                      | 40.62 | 12.73 | 3.66    | 0.27 |
| E9PVA8_E9PVA8_MOUSE | Gcn11   | Protein Gcn11 OS=Mus i K.KHLDAGNQLALIEELHK#.E               | 26.06 | 10.82 | 1.85    | 0.54 |
| E9PVA8_E9PVA8_MOUSE | Gcn11   | Protein Gcn11 OS=Mus i K.LANGLLEDLKH.T                      | 9.03  | 1.64  | 5.52    | 0.18 |
| E9PVA8_E9PVA8_MOUSE | Gcn11   | Protein Gcn11 OS=Mus i K.LDAGNQLALIEELHK#.E                 | 14.24 | 5.13  | 2.78    | 0.36 |
| E9PVA8_E9PVA8_MOUSE | Gcn11   | Protein Gcn11 OS=Mus i R.LM*DEVALRLR@.N                     | 21.08 | 0.00  | #DIV/0! | 0.00 |
| E9PVA8_E9PVA8_MOUSE | Gcn11   | Protein Gcn11 OS=Mus i K.LSGFWLQVLDK#.R                     | 11.22 | 3.63  | 3.09    | 0.32 |
| E9PVA8_E9PVA8_MOUSE | Gcn11   | Protein Gcn11 OS=Mus i K.LTIIAQK#.M                         | 13.82 | 5.74  | 2.41    | 0.42 |
| E9PVA8_E9PVA8_MOUSE | Gcn11   | Protein Gcn11 OS=Mus i K.LYR@PPVLDLALGR@.V                  | 15.07 | 4.48  | 3.36    | 0.30 |
| E9PVA8_E9PVA8_MOUSE | Gcn11   | Protein Gcn11 OS=Mus i R.R@ALQAAIQLAEAQPEATAK#.N            | 10.21 | 4.36  | 2.34    | 0.43 |
| E9PVA8_E9PVA8_MOUSE | Gcn11   | Protein Gcn11 OS=Mus i R.SLVSLGIR@.L                        | 18.38 | 7.26  | 2.53    | 0.39 |
| E9PVA8_E9PVA8_MOUSE | Gcn11   | Protein Gcn11 OS=Mus i K.STLLEFYVK#.N                       | 12.74 | 7.35  | 1.73    | 0.58 |
| E9PVA8_E9PVA8_MOUSE | Gcn11   | Protein Gcn11 OS=Mus i R.VGKHGEPDAAPLSAPAFSLVFPMLK#.M       | 14.36 | 4.00  | 3.59    | 0.28 |
| E9PVA8_E9PVA8_MOUSE | Gcn11   | Protein Gcn11 OS=Mus i R.VISEPPDQWEAR@.C                    | 3.54  | 1.78  | 1.98    | 0.50 |
| E9PVA8_E9PVA8_MOUSE | Gcn11   | Protein Gcn11 OS=Mus i R.VLFLSSVAGDALTR@.H                  | 25.56 | 7.42  | 3.45    | 0.29 |
| E9PVA8_E9PVA8_MOUSE | Gcn11   | Protein Gcn11 OS=Mus i K.VLPLEALVTDAGEVTEM*GK#.T            | 48.85 | 18.16 | 2.69    | 0.37 |
| Q9CQ4_GEM12_MOUSE   | Gemin2  | Gem-associated protein : K.SQQLDSNVAM*PK#.S                 | 17.42 | 5.33  | 3.26    | 0.31 |
| Q6P6L6_Q6P6L6_MOUSE | Gemin4  | Gem (Nuclear organelle) : K.AVASVAHLVILNPEVVK#.K            | 6.68  | 1.35  | 4.94    | 0.20 |
| Q6P6L6_Q6P6L6_MOUSE | Gemin4  | Gem (Nuclear organelle) : K.VLQPSVSPSDTDR@.W                | 6.10  | 1.85  | 3.29    | 0.30 |
| Q6P6L6_Q6P6L6_MOUSE | Gemin4  | Gem (Nuclear organelle) : K.GLEDITASIAM*ALIEQK#.M           | 3.91  | 1.66  | 2.36    | 0.42 |
| Q6P6L6_Q6P6L6_MOUSE | Gemin4  | Gem (Nuclear organelle) : K.SDIWEHVQVPEALK#.E               | 9.43  | 3.70  | 2.55    | 0.39 |
| A2AF09_A2AF09_MOUSE | Gemin5  | Gem-associated protein : K.ELNEDVSADLEER@.F                 | 5.15  | 2.36  | 2.19    | 0.46 |
| A2AF09_A2AF09_MOUSE | Gemin5  | Gem-associated protein : K.VLALGNEDGSEIFQVPLNR@.L           | 24.48 | 6.32  | 3.88    | 0.26 |
| A2AF09_A2AF09_MOUSE | Gemin5  | Gem-associated protein : K.VLALGNEDGSEIFQVPLNR.L            | 8.71  | 2.63  | 3.32    | 0.30 |
| A2AF09_A2AF09_MOUSE | Gemin5  | Gem-associated protein : K.VYEAVELLK#.S                     | 8.65  | 3.05  | 2.84    | 0.35 |

|                     |         |                                                               |        |        |      |       |
|---------------------|---------|---------------------------------------------------------------|--------|--------|------|-------|
| A2AF09_A2AF09_MOUSE | Gemin5  | Gem-associated protein : K.YPSATSNTPFR@.Q                     | 12.38  | 22.37  | 0.55 | 1.81  |
| Q9D1H7_GET4_MOUSE   | Get4    | Golgi to ER traffic protei K.AEVDVADELLENLAK#.V               | 21.96  | 7.39   | 2.97 | 0.34  |
| Q9D1H7_GET4_MOUSE   | Get4    | Golgi to ER traffic protei K.VFSLM*DPNSPER@.V                 | 10.67  | 4.90   | 2.18 | 0.46  |
| P47856_GFPT1_MOUSE  | Gfpt1   | Glutamine-fructose-6-pl K.AVEYFASDASAVIEHTNR@.V               | 37.84  | 10.46  | 3.62 | 0.28  |
| P47856_GFPT1_MOUSE  | Gfpt1   | Glutamine-fructose-6-pl R.AVQTLQM*ELQIM*KK.G                  | 7.06   | 2.50   | 2.82 | 0.35  |
| P47856_GFPT1_MOUSE  | Gfpt1   | Glutamine-fructose-6-pl R.AVQTLQM*ELQIM*KK.G                  | 2.16   | 1.88   | 1.15 | 0.87  |
| P47856_GFPT1_MOUSE  | Gfpt1   | Glutamine-fructose-6-pl K.EIFEQPEVSNVTM*.R.G                  | 27.30  | 13.05  | 2.09 | 0.48  |
| P47856_GFPT1_MOUSE  | Gfpt1   | Glutamine-fructose-6-pl K.EVLSM*DEIQK#.L                      | 29.95  | 8.67   | 3.46 | 0.29  |
| P47856_GFPT1_MOUSE  | Gfpt1   | Glutamine-fructose-6-pl R.GSPLLIGVR@.S                        | 29.94  | 7.56   | 3.96 | 0.25  |
| P47856_GFPT1_MOUSE  | Gfpt1   | Glutamine-fructose-6-pl K.GYDFESEDTETIAK#.L                   | 40.17  | 12.04  | 3.34 | 0.30  |
| P47856_GFPT1_MOUSE  | Gfpt1   | Glutamine-fructose-6-pl R.GYDVFPPR@.N                         | 39.97  | 13.92  | 2.87 | 0.35  |
| P47856_GFPT1_MOUSE  | Gfpt1   | Glutamine-fructose-6-pl K.HGPIALVDK#.L                        | 21.72  | 6.71   | 3.24 | 0.31  |
| P47856_GFPT1_MOUSE  | Gfpt1   | Glutamine-fructose-6-pl R.R@GSPLLIGVR@.S                      | 19.20  | 16.06  | 1.20 | 0.84  |
| P47856_GFPT1_MOUSE  | Gfpt1   | Glutamine-fructose-6-pl R.VIFLEDDVAAVVDGR@.L                  | 42.65  | 14.19  | 3.00 | 0.33  |
| P47856_GFPT1_MOUSE  | Gfpt1   | Glutamine-fructose-6-pl R.VIQLEGFALVFK#.S                     | 31.43  | 8.71   | 3.61 | 0.28  |
| P47856_GFPT1_MOUSE  | Gfpt1   | Glutamine-fructose-6-pl R.VNFDDYTVNLGGLK#.D                   | 7.80   | 3.33   | 2.34 | 0.43  |
| P47856_GFPT1_MOUSE  | Gfpt1   | Glutamine-fructose-6-pl K.AVEYFASDASAVIEHTNR@.V               | 43.17  | 13.01  | 3.32 | 0.30  |
| P47856_GFPT1_MOUSE  | Gfpt1   | Glutamine-fructose-6-pl R.AVQTLQM*ELQIM*KK.G                  | 8.08   | 2.39   | 3.38 | 0.30  |
| P47856_GFPT1_MOUSE  | Gfpt1   | Glutamine-fructose-6-pl K.EVLSM*DEIQK#.L                      | 27.79  | 8.68   | 3.20 | 0.31  |
| P47856_GFPT1_MOUSE  | Gfpt1   | Glutamine-fructose-6-pl K.GNFSFM*QK#.E                        | 8.72   | 4.93   | 1.77 | 0.57  |
| P47856_GFPT1_MOUSE  | Gfpt1   | Glutamine-fructose-6-pl R.GSPLLIGVR@.S                        | 40.60  | 10.87  | 3.74 | 0.27  |
| P47856_GFPT1_MOUSE  | Gfpt1   | Glutamine-fructose-6-pl K.GYDFESEDTETIAK#.L                   | 38.58  | 13.32  | 2.90 | 0.35  |
| P47856_GFPT1_MOUSE  | Gfpt1   | Glutamine-fructose-6-pl R.GYDVFPPR@.N                         | 30.45  | 8.07   | 3.77 | 0.27  |
| P47856_GFPT1_MOUSE  | Gfpt1   | Glutamine-fructose-6-pl K.HGPIALVDK#.L                        | 17.62  | 6.79   | 2.59 | 0.39  |
| P47856_GFPT1_MOUSE  | Gfpt1   | Glutamine-fructose-6-pl R.SDKNNFIVHNGIITNK#.D                 | 5.42   | 23.11  | 0.23 | 4.26  |
| P47856_GFPT1_MOUSE  | Gfpt1   | Glutamine-fructose-6-pl K.SVHFPQAVGTR@.R                      | 39.70  | 8.98   | 4.42 | 0.23  |
| P47856_GFPT1_MOUSE  | Gfpt1   | Glutamine-fructose-6-pl R.VIFLEDDVAAVVDGR@.L                  | 90.35  | 25.44  | 3.55 | 0.28  |
| P47856_GFPT1_MOUSE  | Gfpt1   | Glutamine-fructose-6-pl R.VIQLEGFALVFK#.S                     | 19.79  | 3.35   | 5.92 | 0.17  |
| Q92229_GFPT2_MOUSE  | Gfpt2   | Glutamine-fructose-6-pl K.GYDFESEDTETIAK#.L                   | 5.51   | 2.44   | 2.26 | 0.44  |
| Q92229_GFPT2_MOUSE  | Gfpt2   | Glutamine-fructose-6-pl R.ETEDITFSLVER@.V                     | 12.58  | 1.86   | 6.68 | 0.15  |
| Q8R0H9_GGA1_MOUSE   | Gga1    | ADP-ribosylation factor-1 R.VNAIEEVMNVK#.L                    | 5.86   | 2.04   | 2.87 | 0.35  |
| Q9D7M1_GID8_MOUSE   | Gid8    | Glucose-induced degrad: R.LIMNVLTEGFK#.L                      | 11.02  | 4.51   | 2.45 | 0.41  |
| Q9D7M1_GID8_MOUSE   | Gid8    | Glucose-induced degrad: K.LLLLQAQNELDK#.K                     | 16.44  | 6.95   | 2.37 | 0.42  |
| Q9D7M1_GID8_MOUSE   | Gid8    | Glucose-induced degrad: R.M*ESGIESVILETDER@.J                 | 10.15  | 4.47   | 2.27 | 0.44  |
| Q9D7M1_GID8_MOUSE   | Gid8    | Glucose-induced degrad: R.QK#WSEVNOQVLDYENR@.E                | 3.40   | 2.83   | 1.20 | 0.83  |
| Q9D7M1_GID8_MOUSE   | Gid8    | Glucose-induced degrad: R.QR@ETEALEFAQTQAEQGEESR@.E           | 5.27   | 3.39   | 1.56 | 0.64  |
| Q9D7M1_GID8_MOUSE   | Gid8    | Glucose-induced degrad: R.TLALLAFDSPEESPFGLLHM*MQR@.Q         | 20.45  | 13.83  | 1.48 | 0.68  |
| Q9D7M1_GID8_MOUSE   | Gid8    | Glucose-induced degrad: K.VWSEVNOQVLDYENR@.E                  | 9.74   | 4.04   | 2.41 | 0.41  |
| Q6Y7W8_PERQ2_MOUSE  | Gigyf2  | PERQ amino acid-rich wi: R.ALSSGGSITSPPLSPALPK#.Y             | 4.43   | 2.54   | 1.74 | 0.57  |
| Q6Y7W8_PERQ2_MOUSE  | Gigyf2  | PERQ amino acid-rich wi: K.DVGR@PNFEESGPTSVGR@.K              | 8.36   | 3.89   | 2.15 | 0.47  |
| Q6Y7W8_PERQ2_MOUSE  | Gigyf2  | PERQ amino acid-rich wi: R.NFSM*SVNSAALVR@.L                  | 5.15   | 2.85   | 1.81 | 0.55  |
| Q6Y7W8_PERQ2_MOUSE  | Gigyf2  | PERQ amino acid-rich wi: K.AALSSQOQQALLLQFOALK#.M             | 69.63  | 30.64  | 2.27 | 0.44  |
| Q6Y7W8_PERQ2_MOUSE  | Gigyf2  | PERQ amino acid-rich wi: K.AEENR@SENSLSAK#.V                  | 1.99   | 1.51   | 1.32 | 0.76  |
| Q6Y7W8_PERQ2_MOUSE  | Gigyf2  | PERQ amino acid-rich wi: K.AEQVEKAEENR@SENSLSAK#.V            | 8.15   | 4.28   | 1.90 | 0.53  |
| Q6Y7W8_PERQ2_MOUSE  | Gigyf2  | PERQ amino acid-rich wi: K.ALQOQQOQQOQQK#.L                   | 6.21   | 4.06   | 1.53 | 0.65  |
| Q6Y7W8_PERQ2_MOUSE  | Gigyf2  | PERQ amino acid-rich wi: R.ALSSGGSITSPPLSPALPK#.Y             | 12.30  | 8.40   | 1.46 | 0.68  |
| Q6Y7W8_PERQ2_MOUSE  | Gigyf2  | PERQ amino acid-rich wi: K.DVGRPNFEESGPTSVGR.K                | 22.73  | 11.78  | 1.93 | 0.52  |
| Q6Y7W8_PERQ2_MOUSE  | Gigyf2  | PERQ amino acid-rich wi: K.IPFDLLEK#.E                        | 19.84  | 10.18  | 1.95 | 0.51  |
| Q6Y7W8_PERQ2_MOUSE  | Gigyf2  | PERQ amino acid-rich wi: K.LFQGVNKH#.A                        | 21.31  | 10.50  | 2.03 | 0.49  |
| Q6Y7W8_PERQ2_MOUSE  | Gigyf2  | PERQ amino acid-rich wi: R.LQOQQOQQOQQK#.L                    | 4.70   | 2.60   | 1.81 | 0.55  |
| Q6Y7W8_PERQ2_MOUSE  | Gigyf2  | PERQ amino acid-rich wi: R.M*SDQNIIPVTR@.S                    | 28.44  | 9.84   | 2.89 | 0.35  |
| Q6Y7W8_PERQ2_MOUSE  | Gigyf2  | PERQ amino acid-rich wi: K.M*VAYLQDSALDDER@.L                 | 5.95   | 3.41   | 1.74 | 0.57  |
| Q6Y7W8_PERQ2_MOUSE  | Gigyf2  | PERQ amino acid-rich wi: K.M*VAYLQDSALDDERLTSK.L              | 28.45  | 12.04  | 2.36 | 0.42  |
| Q6Y7W8_PERQ2_MOUSE  | Gigyf2  | PERQ amino acid-rich wi: K.SLLEIQEER@.Q                       | 38.52  | 14.48  | 2.66 | 0.38  |
| Q6Y7W8_PERQ2_MOUSE  | Gigyf2  | PERQ amino acid-rich wi: R.VPFSPPAPP*GELDQER@.L               | 28.10  | 14.41  | 1.95 | 0.51  |
| Q6Y7W8_PERQ2_MOUSE  | Gigyf2  | PERQ amino acid-rich wi: K.AALSSQOQQALLLQFOALK#.M             | 105.35 | 37.38  | 2.82 | 0.35  |
| Q6Y7W8_PERQ2_MOUSE  | Gigyf2  | PERQ amino acid-rich wi: R.ADP*SLGFSVNASSER@.L                | 16.96  | 9.10   | 1.86 | 0.54  |
| Q6Y7W8_PERQ2_MOUSE  | Gigyf2  | PERQ amino acid-rich wi: K.ALQOQQOQQOQQK#.L                   | 11.34  | 2.98   | 3.80 | 0.26  |
| Q6Y7W8_PERQ2_MOUSE  | Gigyf2  | PERQ amino acid-rich wi: R.ALSSGGSITSPPLSPALPK#.Y             | 32.99  | 14.25  | 2.32 | 0.43  |
| Q6Y7W8_PERQ2_MOUSE  | Gigyf2  | PERQ amino acid-rich wi: R.AYLGDTSK#.E                        | 38.44  | 12.16  | 3.16 | 0.32  |
| Q6Y7W8_PERQ2_MOUSE  | Gigyf2  | PERQ amino acid-rich wi: K.DVGRPNFEESGPTSVGR.K                | 53.37  | 17.75  | 3.01 | 0.33  |
| Q6Y7W8_PERQ2_MOUSE  | Gigyf2  | PERQ amino acid-rich wi: R.FEFD*FDR@.D                        | 15.24  | 4.04   | 3.77 | 0.27  |
| Q6Y7W8_PERQ2_MOUSE  | Gigyf2  | PERQ amino acid-rich wi: R.IFR@EEQNGEDGEDGWWR@.L              | 3.66   | 2.34   | 1.56 | 0.64  |
| Q6Y7W8_PERQ2_MOUSE  | Gigyf2  | PERQ amino acid-rich wi: K.IPFDLLEK#.E                        | 42.10  | 16.03  | 2.63 | 0.38  |
| Q6Y7W8_PERQ2_MOUSE  | Gigyf2  | PERQ amino acid-rich wi: R.LNM*G*ETLDDY.-                     | 11.19  | 11.19  | 1.00 | 1.00  |
| Q6Y7W8_PERQ2_MOUSE  | Gigyf2  | PERQ amino acid-rich wi: R.M*SDQNIIPVTR@.S                    | 31.80  | 10.00  | 3.18 | 0.31  |
| Q6Y7W8_PERQ2_MOUSE  | Gigyf2  | PERQ amino acid-rich wi: K.M*VAYLQDSALDDER@.L                 | 9.11   | 2.69   | 3.39 | 0.29  |
| Q6Y7W8_PERQ2_MOUSE  | Gigyf2  | PERQ amino acid-rich wi: R.NFSM*SVNSAALVR@.L                  | 11.99  | 5.00   | 2.40 | 0.42  |
| Q6Y7W8_PERQ2_MOUSE  | Gigyf2  | PERQ amino acid-rich wi: K.NSNM*GFVDDAVK#.E                   | 9.67   | 3.00   | 3.22 | 0.31  |
| Q6Y7W8_PERQ2_MOUSE  | Gigyf2  | PERQ amino acid-rich wi: R.QQEEALR@.R                         | 16.23  | 5.49   | 2.96 | 0.34  |
| Q6Y7W8_PERQ2_MOUSE  | Gigyf2  | PERQ amino acid-rich wi: K.SLLEIQEER@.Q                       | 56.37  | 18.01  | 3.13 | 0.32  |
| Q6Y7W8_PERQ2_MOUSE  | Gigyf2  | PERQ amino acid-rich wi: R.VPFSPPAPP*GELDQER@.L               | 46.53  | 19.54  | 2.38 | 0.42  |
| Q68FF6_GIT1_MOUSE   | Git1    | PERQ amino acid-rich wi: R.YGR@EEM*LAFLK#.D                   | 7.09   | 1.92   | 3.70 | 0.27  |
| Q68FF6_GIT1_MOUSE   | Git1    | ARF GTPase-activating pr K.LQEAENLQR@.Q                       | 9.23   | 4.31   | 2.14 | 0.47  |
| Q68FF6_GIT1_MOUSE   | Git1    | ARF GTPase-activating pr R.SAVPFLPVPNPEYSATR@.N               | 17.03  | 6.09   | 2.79 | 0.36  |
| Q68FF6_GIT1_MOUSE   | Git1    | ARF GTPase-activating pr K.SLSSPTDNLELSAR@.S                  | 12.57  | 9.23   | 1.36 | 0.73  |
| Q68FF6_GIT1_MOUSE   | Git1    | ARF GTPase-activating pr K.SLSSPTDNLELSAR@.S                  | 11.41  | 3.91   | 2.92 | 0.34  |
| Q80XR8_Q80XR8_MOUSE | Git2    | ARF GTPase-activating pr R.ADSSLDLSEALK#.A                    | 8.64   | 4.35   | 1.99 | 0.50  |
| Q80XR8_Q80XR8_MOUSE | Git2    | ARF GTPase-activating pr K.AGQIQLAELLVAVYGADPGTQSSGK#.T       | 7.41   | 4.64   | 1.60 | 0.63  |
| Q80XR8_Q80XR8_MOUSE | Git2    | ARF GTPase-activating pr R.SM*WQGDGLPDTAEPHSVSPSTLPSTEDVIR@.K | 6.21   | 3.01   | 2.07 | 0.48  |
| Q9JMB0_GKAP1_MOUSE  | Gkap1   | G kinase-anchoring prote: K.EQQQSEANL#.R                      | 3.74   | 2.65   | 1.41 | 0.71  |
| Q61543_GSLG1_MOUSE  | Glg1    | Golgi apparatus protein : R.IIIQESALDYR@.L                    | 15.04  | 4.94   | 3.04 | 0.33  |
| Q61543_GSLG1_MOUSE  | Glg1    | Golgi apparatus protein : K.LDPVLYR@.K                        | 27.02  | 6.88   | 3.93 | 0.25  |
| Q61543_GSLG1_MOUSE  | Glg1    | Golgi apparatus protein : R.LLELQYFISR@.D                     | 26.54  | 5.76   | 4.61 | 0.22  |
| Q61543_GSLG1_MOUSE  | Glg1    | Golgi apparatus protein : K.MTALIFSDYR@.L                     | 12.03  | 4.32   | 2.78 | 0.36  |
| Q61543_GSLG1_MOUSE  | Glg1    | Golgi apparatus protein : R.QIQTONTYR@.L                      | 19.20  | 4.94   | 3.88 | 0.26  |
| Q9CYL5_GAPR1_MOUSE  | Glipr2  | Golgi-associated plant pe: K.ASADGSSSVVVAR@.Y                 | 45.67  | 25.84  | 1.77 | 0.57  |
| Q9CYL5_GAPR1_MOUSE  | Glipr2  | Golgi-associated plant pe: R.EAQYSEALASTR@.I                  | 45.02  | 34.22  | 1.32 | 0.76  |
| Q9CYL5_GAPR1_MOUSE  | Glipr2  | Golgi-associated plant pe: K.QFNNEVLK#.A                      | 22.53  | 18.33  | 1.23 | 0.81  |
| Q9CQM9_GLRX3_MOUSE  | Glrx3   | Glutaredoxin-3 OS=Mus: R.GDLVGGLDIVK#.E                       | 6.27   | 5.16   | 1.22 | 0.82  |
| Q80Y14_GLRX3_MOUSE  | Glrx3   | Glutaredoxin-related prc: R.DYAAYNLVDPPELLR@.Q                | 5.77   | 5.60   | 1.03 | 0.97  |
| F8VP29_F8VP29_MOUSE | Gltscr1 | Protein Gltscr1 OS=Mus: K.AFASNLPTLSVAK#.A                    | 6.10   | 1.73   | 3.52 | 0.28  |
| Q922P9_GLYR1_MOUSE  | Glyr1   | Putative oxidoreductase K.ALDQSDNDM*SAVYR@.A                  | 138.94 | 40.65  | 3.42 | 0.29  |
| Q922P9_GLYR1_MOUSE  | Glyr1   | Putative oxidoreductase K.ALDQSDNDM*SAVYR@.A                  | 8.99   | 3.01   | 2.99 | 0.33  |
| Q922P9_GLYR1_MOUSE  | Glyr1   | Putative oxidoreductase R.FLEAPVSNQQLSNDGML*LVILAAGDR@.G      | 48.90  | 18.57  | 2.63 | 0.38  |
| Q922P9_GLYR1_MOUSE  | Glyr1   | Putative oxidoreductase R.FLEAPVSNQQLSNDGML*LVILAAGDR@.G      | 26.14  | 10.89  | 2.40 | 0.42  |
| Q922P9_GLYR1_MOUSE  | Glyr1   | Putative oxidoreductase R.FOQAVDAVEEFLR@.R                    | 71.31  | 23.99  | 2.97 | 0.34  |
| Q922P9_GLYR1_MOUSE  | Glyr1   | Putative oxidoreductase R.KHLSSEK#.V                          | 15.47  | 305.61 | 0.05 | 19.76 |
| Q922P9_GLYR1_MOUSE  | Glyr1   | Putative oxidoreductase R.LAIALGDVANNHPTM*AAAAANEVYK#.R       | 14.58  | 6.88   | 2.12 | 0.47  |
| Q922P9_GLYR1_MOUSE  | Glyr1   | Putative oxidoreductase R.LGDLVWGR#.L                         | 50.49  | 17.94  | 2.81 | 0.36  |
| Q922P9_GLYR1_MOUSE  | Glyr1   | Putative oxidoreductase K.M*GHTVTVWNR@.T                      | 47.95  | 14.41  | 3.33 | 0.30  |
| Q922P9_GLYR1_MOUSE  | Glyr1   | Putative oxidoreductase K.TSFFLGEVGNAAK#.M                    | 95.09  | 32.03  | 2.97 | 0.34  |
| Q922P9_GLYR1_MOUSE  | Glyr1   | Putative oxidoreductase K.ALDQSDNDM*SAVYR@.A                  | 46.40  | 11.80  | 3.93 | 0.25  |

|                             |        |                                                             |        |        |         |      |
|-----------------------------|--------|-------------------------------------------------------------|--------|--------|---------|------|
| Q922P9_GLYR1_MOUSE          | Glyr1  | Putative oxidoreductase K.ALDOQSDNDMSAVYR@.A                | 3.63   | 1.90   | 1.90    | 0.52 |
| Q922P9_GLYR1_MOUSE          | Glyr1  | Putative oxidoreductase R.FLEAPVSGNQQLSNDGM*LVILAAGDR@.G    | 49.60  | 17.82  | 2.78    | 0.36 |
| Q922P9_GLYR1_MOUSE          | Glyr1  | Putative oxidoreductase R.FLEAPVSGNQQLSNDGM*LVILAAGDR@.G    | 14.55  | 4.23   | 3.44    | 0.29 |
| Q922P9_GLYR1_MOUSE          | Glyr1  | Putative oxidoreductase R.FQQAQVDAVEEFLR@.R                 | 51.96  | 12.44  | 4.18    | 0.24 |
| Q922P9_GLYR1_MOUSE          | Glyr1  | Putative oxidoreductase R.KHLSLSEK#.V                       | 16.73  | 21.66  | 0.77    | 1.29 |
| Q922P9_GLYR1_MOUSE          | Glyr1  | Putative oxidoreductase R.LAIALGDVWHPMP*AAAAANEVYK#.R       | 18.96  | 6.17   | 3.07    | 0.33 |
| Q922P9_GLYR1_MOUSE          | Glyr1  | Putative oxidoreductase K.M*GHVTYVWNR@.T                    | 7.38   | 2.27   | 3.24    | 0.31 |
| Q922P9_GLYR1_MOUSE          | Glyr1  | Putative oxidoreductase K.TSFFLGEVGNAAK#.M                  | 65.19  | 15.45  | 4.22    | 0.24 |
| Q922P9_GLYR1_MOUSE          | Glyr1  | Putative oxidoreductase K.ALDOQSDNDM*SAVYR@.A               | 20.38  | 4.85   | 4.20    | 0.24 |
| Q922P9_GLYR1_MOUSE          | Glyr1  | Putative oxidoreductase R.FQQAQVDAVEEFLR@.R                 | 25.16  | 6.02   | 4.18    | 0.24 |
| Q922P9_GLYR1_MOUSE          | Glyr1  | Putative oxidoreductase K.TSFFLGEVGNAAK#.M                  | 13.79  | 2.48   | 5.57    | 0.18 |
| AOA087WPH4_AOA087WPH4_MOUSE | Gm6358 | Protein Gm6358 O5-Mu: -M*VTPR@LK#.K                         | 16.32  | 6.07   | 2.69    | 0.37 |
| E9Q070_E9Q070_MOUSE         | Gm8730 | Uncharacterized protein R.VLALSVEITYFPLAEK#.V               | 444.80 | 136.23 | 3.27    | 0.31 |
| E9Q070_E9Q070_MOUSE         | Gm8730 | Uncharacterized protein R.VLALSVEITYFPLAEK#.V               | 184.80 | 63.35  | 2.92    | 0.34 |
| E9Q070_E9Q070_MOUSE         | Gm8730 | Uncharacterized protein R.VLALSVEITYFPLAEK#.V               | 13.27  | 6.46   | 2.06    | 0.49 |
| E9Q070_E9Q070_MOUSE         | Gm8730 | Uncharacterized protein R.VLALSVEITYFPLAEK#.V               | 98.68  | 22.68  | 4.35    | 0.23 |
| E9Q070_E9Q070_MOUSE         | Gm8730 | Uncharacterized protein R.VLALSVEITYFPLAEK#.V               | 112.36 | 21.75  | 5.17    | 0.19 |
| Q3THK7_GUAA_MOUSE           | Gmps   | GMP synthase [glutamin: K.TLNM**TSPK#.R                     | 5.04   | 3.12   | 1.61    | 0.62 |
| P08752_GNAI2_MOUSE          | Gnai2  | Guanine nucleotide-binc R.IAQSDYIPTQDQVLR@.T                | 9.80   | 4.92   | 1.99    | 0.50 |
| P08752_GNAI2_MOUSE          | Gnai2  | Guanine nucleotide-binc K.AM*GNLQDFADPQR@.A                 | 6.39   | 3.08   | 2.08    | 0.48 |
| P08752_GNAI2_MOUSE          | Gnai2  | Guanine nucleotide-binc R.IAQSDYIPTQDQVLR@.T                | 26.80  | 8.57   | 3.13    | 0.32 |
| P08752_GNAI2_MOUSE          | Gnai2  | Guanine nucleotide-binc K.AM*GNLQDFADPQR@.A                 | 13.72  | 4.48   | 3.06    | 0.33 |
| P08752_GNAI2_MOUSE          | Gnai2  | Guanine nucleotide-binc R.AVVSNTQISIM*AVK#.A                | 14.47  | 4.36   | 3.32    | 0.30 |
| P08752_GNAI2_MOUSE          | Gnai2  | Guanine nucleotide-binc R.EYQLNDSAAAYLNDLER@.I              | 5.81   | 2.11   | 2.75    | 0.36 |
| P08752_GNAI2_MOUSE          | Gnai2  | Guanine nucleotide-binc R.IAQSDYIPTQDQVLR@.T                | 39.07  | 15.14  | 2.58    | 0.39 |
| P08752_GNAI2_MOUSE          | Gnai2  | Guanine nucleotide-binc K.M*FDVGGQR@.S                      | 22.30  | 6.02   | 3.70    | 0.27 |
| P08752_GNAI2_MOUSE          | Gnai2  | Guanine nucleotide-binc R.SR@EYQLNDSAAAYLNDLER@.I           | 6.11   | 2.33   | 2.62    | 0.38 |
| P08752_GNAI2_MOUSE          | Gnai2  | Guanine nucleotide-binc K.YDEAASYIQSK#.F                    | 16.70  | 5.53   | 3.02    | 0.33 |
| Q9DC51_GNAI3_MOUSE          | Gnai3  | Guanine nucleotide-binc R.ISQTYNPTQDQVLR@.T                 | 11.99  | 7.89   | 1.52    | 0.66 |
| P21279_GNAQ_MOUSE           | Gnaq   | Guanine nucleotide-binc K.LLLLGTGSEK#.S                     | 11.82  | 4.10   | 2.88    | 0.35 |
| P21279_GNAQ_MOUSE           | Gnaq   | Guanine nucleotide-binc K.VSAFENPYDAIK#.S                   | 9.65   | 2.61   | 3.70    | 0.27 |
| P21279_GNAQ_MOUSE           | Gnaq   | Guanine nucleotide-binc K.LLLLGTGSEK#.S                     | 10.27  | 1.42   | 7.21    | 0.14 |
| P21279_GNAQ_MOUSE           | Gnaq   | Guanine nucleotide-binc K.LLLLGTGSEK#.S                     | 12.38  | 4.59   | 2.70    | 0.37 |
| Q6R0H7_GNAS1_MOUSE          | Gnas   | Guanine nucleotide-binc R.LQEALNLFK#.S                      | 9.36   | 2.58   | 3.63    | 0.28 |
| Q6R0H7_GNAS1_MOUSE          | Gnas   | Guanine nucleotide-binc R.YTTPEDATPEPGEPR@.V                | 7.68   | 2.86   | 2.68    | 0.37 |
| P62874_GBB1_MOUSE           | Gnb1   | Guanine nucleotide-binc K.LIIWDSYITNNK#.V                   | 65.69  | 42.50  | 1.55    | 0.65 |
| P62874_GBB1_MOUSE           | Gnb1   | Guanine nucleotide-binc R.LLVASQDGK#.L                      | 166.20 | 105.55 | 1.57    | 0.64 |
| P62874_GBB1_MOUSE           | Gnb1   | Guanine nucleotide-binc K.LIIWDSYITNNK#.V                   | 30.37  | 9.63   | 3.15    | 0.32 |
| P62874_GBB1_MOUSE           | Gnb1   | Guanine nucleotide-binc K.LIIWDSYITNNK#.V                   | 42.97  | 16.46  | 2.61    | 0.38 |
| P62874_GBB1_MOUSE           | Gnb1   | Guanine nucleotide-binc R.LLVASQDGK#.L                      | 61.61  | 21.01  | 2.93    | 0.34 |
| P68040_GBLP_MOUSE           | Gnb211 | Guanine nucleotide-binc R.DETNYGIPQR.A                      | 57.93  | 44.76  | 1.29    | 0.77 |
| P68040_GBLP_MOUSE           | Gnb211 | Guanine nucleotide-binc K.DGQAM*LVLDLNEGK#.H                | 7.49   | 4.69   | 1.60    | 0.63 |
| P68040_GBLP_MOUSE           | Gnb211 | Guanine nucleotide-binc K.DVLSVAFSSDNR@.Q                   | 42.10  | 12.13  | 0.88    |      |
| P68040_GBLP_MOUSE           | Gnb211 | Guanine nucleotide-binc K.IIVDELK#QEVISTSSK#.A              | 81.63  | 57.81  | 1.41    | 0.71 |
| P68040_GBLP_MOUSE           | Gnb211 | Guanine nucleotide-binc K.LTRDETNYGIPQR.A                   | 26.69  | 20.09  | 1.33    | 0.75 |
| P68040_GBLP_MOUSE           | Gnb211 | Guanine nucleotide-binc R.LWDLTITGTR@.R                     | 46.56  | 29.96  | 1.55    | 0.64 |
| P68040_GBLP_MOUSE           | Gnb211 | Guanine nucleotide-binc R.VWQVTIGTR@.R                      | 21.26  | 18.94  | 1.12    | 0.89 |
| P68040_GBLP_MOUSE           | Gnb211 | Guanine nucleotide-binc K.IIVDELK#QEVISTSSK#.A              | 4.22   | 3.57   | 1.24    | 0.81 |
| P68040_GBLP_MOUSE           | Gnb211 | Guanine nucleotide-binc R.LWDLTITGTR@.R                     | 4.50   | 4.40   | 1.02    | 0.98 |
| P68040_GBLP_MOUSE           | Gnb211 | Guanine nucleotide-binc K.DVLSVAFSSDNR@.Q                   | 9.69   | 4.40   | 2.20    | 0.45 |
| P68040_GBLP_MOUSE           | Gnb211 | Guanine nucleotide-binc K.IIVDELK#QEVISTSSK#.A              | 6.28   | 5.24   | 1.20    | 0.83 |
| P68040_GBLP_MOUSE           | Gnb211 | Guanine nucleotide-binc K.IIVDELK#QEVISTSSK#.A              | 17.11  | 9.46   | 1.75    | 0.57 |
| P68040_GBLP_MOUSE           | Gnb211 | Guanine nucleotide-binc K.DVLSVAFSSDNR@.Q                   | 17.11  | 5.96   | 2.97    | 0.34 |
| P68040_GBLP_MOUSE           | Gnb211 | Guanine nucleotide-binc K.IIVDELK#QEVISTSSK#.A              | 21.17  | 18.93  | 1.12    | 0.89 |
| P68040_GBLP_MOUSE           | Gnb211 | Guanine nucleotide-binc R.VWQVTIGTR@.R                      | 9.77   | 2.10   | 4.66    | 0.21 |
| Q9DA59_GBG12_MOUSE          | Gng12  | Guanine nucleotide-binc R.SDPLM*GIPTSENPFK#.D               | 7.83   | 2.27   | 3.45    | 0.29 |
| Q9DA59_GBG12_MOUSE          | Gng12  | Guanine nucleotide-binc K.TASTNSIAQAR@.R                    | 18.71  | 8.03   | 2.33    | 0.43 |
| Q8C11_GNL3_MOUSE            | Gnl3   | Guanine nucleotide-binc K.ENLENWLNLYNKK#.E                  | 8.91   | 4.51   | 1.97    | 0.51 |
| Q8C11_GNL3_MOUSE            | Gnl3   | Guanine nucleotide-binc K.K#VIEASDILEVLDAR@.D               | 5.99   | 1.65   | 3.62    | 0.28 |
| Q8C11_GNL3_MOUSE            | Gnl3   | Guanine nucleotide-binc R.NAEISDVAPVETR@.E                  | 13.47  | 4.96   | 2.71    | 0.37 |
| Q8C11_GNL3_MOUSE            | Gnl3   | Guanine nucleotide-binc R.SPASIEELR@PLEAASALISQADNEQVLLK#.Y | 32.69  | 8.40   | 3.89    | 0.26 |
| Q8C11_GNL3_MOUSE            | Gnl3   | Guanine nucleotide-binc K.VIEASDILEVLDAR@.D                 | 18.11  | 0.00   | #DIV/0! | 0.00 |
| Q8C11_GNL3_MOUSE            | Gnl3   | Guanine nucleotide-binc K.YTPEYK#.D                         | 23.15  | 5.73   | 4.04    | 0.25 |
| Q9CW79_GOGA1_MOUSE          | Golga1 | Golgin subfamily A memi R.SLQAAEQLSQSR@.N                   | 9.22   | 21.38  | 0.43    | 2.32 |
| Q9CW79_GOGA1_MOUSE          | Golga1 | Golgin subfamily A memi R.LSDYAEQVR@.N                      | 11.47  | 5.63   | 2.04    | 0.49 |
| Q9CW79_GOGA1_MOUSE          | Golga1 | Golgin subfamily A memi K.M*AEGLALALAR@.K                   | 9.12   | 5.08   | 1.80    | 0.56 |
| Q9CW79_GOGA1_MOUSE          | Golga1 | Golgin subfamily A memi K.TVAEQNLEDTR@.Q                    | 9.02   | 2.51   | 3.60    | 0.28 |
| Q921M4_GOGA2_MOUSE          | Golga2 | Golgin subfamily A memi K.LLELQELVLR@.L                     | 34.43  | 31.35  | 1.10    | 0.91 |
| Q921M4_GOGA2_MOUSE          | Golga2 | Golgin subfamily A memi R.LTNENM*EITSLAQSEHQVK#.K           | 25.46  | 6.70   | 3.80    | 0.26 |
| Q921M4_GOGA2_MOUSE          | Golga2 | Golgin subfamily A memi R.TLSTVSTQK#.L                      | 14.38  | 12.19  | 1.18    | 0.85 |
| P55937_GOGA3_MOUSE          | Golga3 | Golgin subfamily A memi K.AELQAQLAALSTR@.L                  | 11.20  | 3.41   | 3.28    | 0.30 |
| P55937_GOGA3_MOUSE          | Golga3 | Golgin subfamily A memi K.EATDAELNQLR@.A                    | 11.02  | 4.88   | 2.26    | 0.44 |
| P55937_GOGA3_MOUSE          | Golga3 | Golgin subfamily A memi K.EHLVQTLQAEVDELIQDQK#.H            | 10.66  | 3.31   | 3.22    | 0.31 |
| P55937_GOGA3_MOUSE          | Golga3 | Golgin subfamily A memi K.LTGLGOSNAALR@.E                   | 11.72  | 2.54   | 4.61    | 0.22 |
| P55937_GOGA3_MOUSE          | Golga3 | Golgin subfamily A memi K.NASLASSNNDLQVAEEQYQR@.L           | 10.42  | 3.11   | 3.35    | 0.30 |
| P55937_GOGA3_MOUSE          | Golga3 | Golgin subfamily A memi K.LQTSQEQALQAK#.G                   | 7.70   | 2.90   | 2.66    | 0.38 |
| P55937_GOGA3_MOUSE          | Golga3 | Golgin subfamily A memi R.R@LEEDTEETSGLLEQLR@.Q             | 6.33   | 4.13   | 1.53    | 0.65 |
| P55937_GOGA3_MOUSE          | Golga3 | Golgin subfamily A memi R.R@LEEFEGE@EQLQK#.V                | 15.20  | 5.55   | 2.74    | 0.36 |
| P55937_GOGA3_MOUSE          | Golga3 | Golgin subfamily A memi R.R@LEGQVEALSLEASQALQEK#.A          | 10.33  | 4.07   | 2.54    | 0.39 |
| P55937_GOGA3_MOUSE          | Golga3 | Golgin subfamily A memi R.SLADYR@TEDPSDGGGLSTADAVGSSLK#.Q   | 2.70   | 1.50   | 1.80    | 0.56 |
| P55937_GOGA3_MOUSE          | Golga3 | Golgin subfamily A memi K.SNQVEHQEQTALR@.K                  | 11.35  | 6.20   | 1.83    | 0.55 |
| P55937_GOGA3_MOUSE          | Golga3 | Golgin subfamily A memi R.TEDPSDGGGLSTADAVGSSLK#.Q          | 4.71   | 3.21   | 1.47    | 0.68 |
| P55937_GOGA3_MOUSE          | Golga3 | Golgin subfamily A memi K.TLQQNQLK#.L                       | 12.51  | 7.37   | 1.70    | 0.59 |
| P55937_GOGA3_MOUSE          | Golga3 | Golgin subfamily A memi K.VADAASLEEQLEQVK#.L                | 5.68   | 18.09  | 0.31    | 3.19 |
| P55937_GOGA3_MOUSE          | Golga3 | Golgin subfamily A memi K.VLEDELQESR@.G                     | 22.66  | 8.98   | 2.52    | 0.40 |
| P55937_GOGA3_MOUSE          | Golga3 | Golgin subfamily A memi K.AELQAQLAALSTR@.L                  | 9.26   | 3.87   | 2.39    | 0.42 |
| P55937_GOGA3_MOUSE          | Golga3 | Golgin subfamily A memi R.LEVELOQVQOSK#.I                   | 21.74  | 6.92   | 3.14    | 0.32 |
| P55937_GOGA3_MOUSE          | Golga3 | Golgin subfamily A memi R.AM*TDLQSM*LEAK#.N                 | 12.78  | 4.16   | 3.07    | 0.33 |
| P55937_GOGA3_MOUSE          | Golga3 | Golgin subfamily A memi K.DVLQAAAQHQDQNEANGEVYR@.S          | 8.54   | 2.01   | 4.24    | 0.24 |
| P55937_GOGA3_MOUSE          | Golga3 | Golgin subfamily A memi K.EHLVQTLQAEVDELIQDQK#.H            | 28.36  | 8.83   | 3.21    | 0.31 |
| P55937_GOGA3_MOUSE          | Golga3 | Golgin subfamily A memi K.HSQEIAQ@QTELAER@.T                | 15.72  | 5.23   | 3.00    | 0.33 |
| P55937_GOGA3_MOUSE          | Golga3 | Golgin subfamily A memi R.IAVQLQSEIADM*LDQEAFFVQIR@.E       | 8.42   | 2.43   | 3.46    | 0.29 |
| P55937_GOGA3_MOUSE          | Golga3 | Golgin subfamily A memi K.IVLEVALQSAK#.S                    | 14.04  | 5.42   | 2.59    | 0.39 |
| P55937_GOGA3_MOUSE          | Golga3 | Golgin subfamily A memi K.LFSTLDELPM*LNPNLPR@.A             | 9.66   | 2.76   | 2.52    | 0.40 |
| P55937_GOGA3_MOUSE          | Golga3 | Golgin subfamily A memi K.LFSTLDELPM*LNPNLPR@.A             | 8.20   | 1.84   | 4.45    | 0.22 |
| P55937_GOGA3_MOUSE          | Golga3 | Golgin subfamily A memi R.LGSDLTSAQK#.E                     | 9.22   | 9.22   | 2.47    | 0.41 |
| P55937_GOGA3_MOUSE          | Golga3 | Golgin subfamily A memi K.NASLASSNNDLQVAEEQYQR@.L           | 10.98  | 3.93   | 2.79    | 0.36 |
| P55937_GOGA3_MOUSE          | Golga3 | Golgin subfamily A memi K.QDLSSEVDTLKK#.Q                   | 14.26  | 37.06  | 0.38    | 2.60 |
| P55937_GOGA3_MOUSE          | Golga3 | Golgin subfamily A memi K.QLTSTQEQALQAK#.G                  | 13.89  | 4.60   | 3.02    | 0.33 |
| P55937_GOGA3_MOUSE          | Golga3 | Golgin subfamily A memi R.QQM*ALQSQQLQVQLER@.T              | 7.32   | 2.96   | 2.47    | 0.40 |
| P55937_GOGA3_MOUSE          | Golga3 | Golgin subfamily A memi R.R@LEEDTEETSGLLEQLR@.Q             | 12.29  | 4.94   | 2.59    | 0.39 |
| P55937_GOGA3_MOUSE          | Golga3 | Golgin subfamily A memi R.R@LEGQVEALSLEASQALQEK#.A          | 20.12  | 4.05   | 4.97    | 0.20 |
| P55937_GOGA3_MOUSE          | Golga3 | Golgin subfamily A memi R.SLADYR@TEDPSDGGGLSTADAVGSSLK#.Q   | 7.03   | 1.82   | 3.85    | 0.26 |

|                     |         |                                                                 |        |        |       |      |
|---------------------|---------|-----------------------------------------------------------------|--------|--------|-------|------|
| P55937_GOGA3_MOUSE  | Golga3  | Golgin subfamily A memi K.SNQEHLQOQETATLR@.K                    | 19.68  | 4.07   | 4.84  | 0.21 |
| P55937_GOGA3_MOUSE  | Golga3  | Golgin subfamily A memi R.TEDPSDGGGLGSDAVGSSLK#.Q               | 6.71   | 4.52   | 1.49  | 0.67 |
| P55937_GOGA3_MOUSE  | Golga3  | Golgin subfamily A memi R.TQLQLLQK#.K                           | 23.79  | 18.34  | 1.30  | 0.77 |
| P55937_GOGA3_MOUSE  | Golga3  | Golgin subfamily A memi K.VGSLGLLHASK#.E                        | 10.95  | 3.05   | 3.60  | 0.28 |
| P55937_GOGA3_MOUSE  | Golga3  | Golgin subfamily A memi K.VLEDELQESR@.G                         | 33.40  | 11.24  | 2.97  | 0.34 |
| P55937_GOGA3_MOUSE  | Golga3  | Golgin subfamily A memi R.YDELQAR@.L                            | 37.55  | 9.22   | 4.07  | 0.25 |
| Q91VW5_GOGA4_MOUSE  | Golga4  | Golgin subfamily A memi K.AILTESENKRLQELQGEAEAYR@.T             | 12.35  | 4.40   | 2.81  | 0.36 |
| Q91VW5_GOGA4_MOUSE  | Golga4  | Golgin subfamily A memi K.ELENTVLELSQK#.E                       | 13.36  | 1.79   | 7.48  | 0.13 |
| Q91VW5_GOGA4_MOUSE  | Golga4  | Golgin subfamily A memi R.EVGSISEQELTVR@.R                      | 17.80  | 2.07   | 8.62  | 0.12 |
| Q91VW5_GOGA4_MOUSE  | Golga4  | Golgin subfamily A memi R.LEQEESTK#DSDVTLELQTLQAK#.T            | 4.51   | 2.00   | 2.25  | 0.44 |
| Q91VW5_GOGA4_MOUSE  | Golga4  | Golgin subfamily A memi R.LK#EAVSGDQVALAGLQGLQEQK#.S            | 8.20   | 2.37   | 3.45  | 0.29 |
| Q91VW5_GOGA4_MOUSE  | Golga4  | Golgin subfamily A memi K.NSEEQVAALQK#.L                        | 8.57   | 3.57   | 2.40  | 0.42 |
| Q91VW5_GOGA4_MOUSE  | Golga4  | Golgin subfamily A memi K.SAGELQALAK#.L                         | 11.28  | 2.79   | 4.04  | 0.25 |
| Q91VW5_GOGA4_MOUSE  | Golga4  | Golgin subfamily A memi R.VSELTGQVQAAEK#.E                      | 10.53  | 6.16   | 1.71  | 0.58 |
| Q91W53_GOGA7_MOUSE  | Golga7  | Golgin subfamily A memi K.IYAPQGLLLTDPIER@.G                    | 5.10   | 3.44   | 1.48  | 0.68 |
| Q91W53_GOGA7_MOUSE  | Golga7  | Golgin subfamily A memi R.VIETIYEDR@.G                          | 9.71   | 2.10   | 4.62  | 0.22 |
| D3YVW2_D3YVW2_MOUSE | Golim4  | Golgi integral membrane K.DAGFQALEEQQVPEPR@.E                   | 5.42   | 2.92   | 1.86  | 0.54 |
| D3YVW2_D3YVW2_MOUSE | Golim4  | Golgi integral membrane K.LEAQETLNK#.G                          | 17.39  | 7.21   | 2.41  | 0.41 |
| D3YVW2_D3YVW2_MOUSE | Golim4  | Golgi integral membrane K.LTGLQELQVQNHAEGR@.R                   | 16.66  | 7.42   | 2.24  | 0.45 |
| D3YVW2_D3YVW2_MOUSE | Golim4  | Golgi integral membrane K.SALAAQQTQVAEYK#.Q                     | 16.84  | 5.63   | 2.99  | 0.33 |
| Q9CRA5_GOLP3_MOUSE  | Golph3  | Golgi phosphoprotein 3 R.LITLM*EVLILLGLK#.D                     | 9.95   | 5.54   | 1.80  | 0.56 |
| Q9CRA5_GOLP3_MOUSE  | Golph3  | Golgi phosphoprotein 3 R.SDAPGTGVDLLEALK#.H                     | 10.91  | 5.46   | 2.00  | 0.50 |
| Q9CR60_GOT1B_MOUSE  | Golt1b  | Vesicle transport protein R.SFVDK#VGESNNM*V.-                   | 11.38  | 4.44   | 2.56  | 0.39 |
| Q9CR60_GOT1B_MOUSE  | Golt1b  | Vesicle transport protein R.VPVLGSLNLPGR@.S                     | 10.23  | 5.23   | 1.96  | 0.51 |
| Q9CR60_GOT1B_MOUSE  | Golt1b  | Vesicle transport protein R.R@VPVLGSLNLPGR@.S                   | 44.23  | 19.02  | 2.33  | 0.43 |
| Q9CR60_GOT1B_MOUSE  | Golt1b  | Vesicle transport protein R.SFVDK#VGESNNM*V.-                   | 31.92  | 13.95  | 2.29  | 0.44 |
| Q9CR60_GOT1B_MOUSE  | Golt1b  | Vesicle transport protein R.VPVLGSLNLPGR@.S                     | 18.55  | 8.19   | 2.26  | 0.44 |
| Q8BH60_GOPC_MOUSE   | Gopc    | Golgi-associated PDZ anc K.LEAQVLVLR.L                          | 15.40  | 8.39   | 1.84  | 0.54 |
| Q8BH60_GOPC_MOUSE   | Gopc    | Golgi-associated PDZ anc R.VQIQQLGR@.D                          | 16.13  | 7.10   | 2.27  | 0.44 |
| Q99JX3_GORS2_MOUSE  | Gorasp2 | Golgi reassembly-stackin K.ADASSLTVDTVSPASK#.V                  | 8.98   | 5.58   | 1.61  | 0.62 |
| Q99JX3_GORS2_MOUSE  | Gorasp2 | Golgi reassembly-stackin K.ISLPGQM*GTGPIPTL#.D                  | 5.98   | 3.10   | 1.93  | 0.52 |
| O88630_GORS1_MOUSE  | Gosr1   | Golgi SNAP receptor com R.LIETIISIAM*ATK#.E                     | 4.22   | 4.22   | 2.93  | 0.34 |
| P05202_AATM_MOUSE   | Got2    | Aspartate aminotransfer. K.ASAALEGLNNEVLK.S                     | 3.57   | 5.10   | 0.70  | 1.43 |
| Q3TFK5_GPTC4_MOUSE  | Gpatch4 | G patch domain-containi K.ALGTSLPLDSEPSQK.K                     | 9.02   | 6.53   | 1.38  | 0.72 |
| A2A6A1_GPTC8_MOUSE  | Gpatch8 | G patch domain-containi R.M*EM*ELDYAEDATER@.R                   | 4.63   | 2.31   | 2.00  | 0.50 |
| A2A6A1_GPTC8_MOUSE  | Gpatch8 | G patch domain-containi R.EPNK#SQEEDQVLSSEGR@.V                 | 5.15   | 2.27   | 2.27  | 0.44 |
| A2A6A1_GPTC8_MOUSE  | Gpatch8 | G patch domain-containi K.GAGLPSQNSNTGTGR@.G                    | 12.83  | 6.93   | 1.85  | 0.54 |
| A2A6A1_GPTC8_MOUSE  | Gpatch8 | G patch domain-containi K.VGDTGDTGNDLGGK#H#EDEDQDQGGSLASTLKS#.L | 5.49   | 2.16   | 2.55  | 0.39 |
| A2A6A1_GPTC8_MOUSE  | Gpatch8 | G patch domain-containi K.DISQATPATK.A                          | 21.97  | 15.83  | 1.39  | 0.72 |
| A2A6A1_GPTC8_MOUSE  | Gpatch8 | G patch domain-containi K.EAAVAGPSEPGGK#.T                      | 23.76  | 11.97  | 1.99  | 0.50 |
| A2A6A1_GPTC8_MOUSE  | Gpatch8 | G patch domain-containi R.EPNK#SQEEDQVLSSEGR@.V                 | 16.35  | 8.00   | 2.04  | 0.49 |
| A2A6A1_GPTC8_MOUSE  | Gpatch8 | G patch domain-containi K.GAGLPSQNSNTGTGR.G                     | 21.29  | 8.49   | 2.51  | 0.40 |
| A2A6A1_GPTC8_MOUSE  | Gpatch8 | G patch domain-containi K.LQQAAQHIQQLLAK#.Q                     | 47.82  | 20.07  | 2.38  | 0.42 |
| A2A6A1_GPTC8_MOUSE  | Gpatch8 | G patch domain-containi K.SQEEEDQVLSSEGR@.V                     | 7.00   | 5.13   | 1.36  | 0.73 |
| A2A6A1_GPTC8_MOUSE  | Gpatch8 | G patch domain-containi R.SSDAPGHQFSEEAAGPLSDPPPEEPK#.S         | 6.78   | 3.97   | 1.71  | 0.59 |
| A2A6A1_GPTC8_MOUSE  | Gpatch8 | G patch domain-containi R.TVSEASELQK#.E                         | 44.54  | 18.19  | 2.45  | 0.41 |
| P51655_GPC4_MOUSE   | Gpc4    | Glypican-4 OS=Mus musc K.DLFVELK#R@.Y                           | 12.79  | 9.29   | 1.38  | 0.73 |
| P51655_GPC4_MOUSE   | Gpc4    | Glypican-4 OS=Mus musc K.FDEFFKHELLENAEK#.S                     | 27.72  | 22.22  | 1.25  | 0.80 |
| P51655_GPC4_MOUSE   | Gpc4    | Glypican-4 OS=Mus musc K.ISDAIM*NM*QDNSVQVSQK#.V                | 18.04  | 11.48  | 1.31  | 0.76 |
| P51655_GPC4_MOUSE   | Gpc4    | Glypican-4 OS=Mus musc R.LEGPFNIESVM*DPIDVK#.I                  | 25.22  | 22.40  | 1.26  | 0.79 |
| P51655_GPC4_MOUSE   | Gpc4    | Glypican-4 OS=Mus musc R.LEGPFNIESVMDPIDVK#.I                   | 4.68   | 3.50   | 1.34  | 0.75 |
| P51655_GPC4_MOUSE   | Gpc4    | Glypican-4 OS=Mus musc R.TFAQGLAVAR@.D                          | 57.60  | 34.58  | 1.67  | 0.60 |
| P51655_GPC4_MOUSE   | Gpc4    | Glypican-4 OS=Mus musc K.TYGLYLM*QNSLEFK#.D                     | 19.20  | 11.98  | 1.60  | 0.62 |
| P51655_GPC4_MOUSE   | Gpc4    | Glypican-4 OS=Mus musc K.YTEQLK#PFQDVP#R@.K                     | 29.91  | 18.88  | 1.58  | 0.63 |
| P51655_GPC4_MOUSE   | Gpc4    | Glypican-4 OS=Mus musc K.FDEFFKHELLENAEK#.S                     | 8.89   | 3.47   | 2.56  | 0.39 |
| P51655_GPC4_MOUSE   | Gpc4    | Glypican-4 OS=Mus musc R.TFAQGLAVAR@.D                          | 9.71   | 9.71   | 1.25  | 0.80 |
| P51655_GPC4_MOUSE   | Gpc4    | Glypican-4 OS=Mus musc R.YLFAVTGNLANQGNNEVQVDTSK#PDILLR@.Q      | 4.32   | 2.93   | 1.47  | 0.68 |
| P51655_GPC4_MOUSE   | Gpc4    | Glypican-4 OS=Mus musc K.FDEFFKHELLENAEK#.S                     | 7.54   | 7.76   | 0.97  | 1.03 |
| P51655_GPC4_MOUSE   | Gpc4    | Glypican-4 OS=Mus musc R.LEGPFNIESVM*DPIDVK#.I                  | 13.74  | 7.09   | 1.94  | 0.52 |
| Q3UN16_GPR162_MOUSE | Gpr162  | Probable G-protein coup R.QFLESVGLGSGGGPGR.G                    | 3.24   | 25.16  | 0.13  | 7.77 |
| Q5U4C1_GASP1_MOUSE  | Gprasp1 | G-protein coupled recep K.SSM*ESGPK#.A                          | 112.12 | 70.61  | 1.59  | 0.63 |
| Q99LD4_CSNI_MOUSE   | Gps1    | COP9 signalosome comp K.AESTPEIAEQR@.G                          | 18.37  | 4.59   | 4.00  | 0.25 |
| Q99LD4_CSNI_MOUSE   | Gps1    | COP9 signalosome comp R.EGSGELTPANSQSR@.M                       | 16.96  | 5.41   | 3.13  | 0.32 |
| Q99LD4_CSNI_MOUSE   | Gps1    | COP9 signalosome comp K.AESTPEIAEQR@.G                          | 11.74  | 2.80   | 4.18  | 0.24 |
| Q99LD4_CSNI_MOUSE   | Gps1    | COP9 signalosome comp K.LFLEPEQVR@.D                            | 10.95  | 1.09   | 10.02 | 0.10 |
| Q99LD4_CSNI_MOUSE   | Gps1    | COP9 signalosome comp K.AESTPEIAEQR@.G                          | 11.46  | 3.08   | 3.72  | 0.27 |
| Q99LD4_CSNI_MOUSE   | Gps1    | COP9 signalosome comp R.EGSGELTPANSQSR@.M                       | 5.62   | 1.44   | 3.90  | 0.26 |
| P11352_GPX1_MOUSE   | Gpx1    | Glutathione peroxidase J R.NALPTSPDDPTALM*TDPK#.Y               | 4.15   | 3.08   | 1.35  | 0.74 |
| Q60631_GRB2_MOUSE   | Grb2    | Growth factor receptor-1 R.ESESAGDPSLVK#.F                      | 5.04   | 8.89   | 0.57  | 1.76 |
| Q8C5Q4_GRSF1_MOUSE  | Grsf1   | G-rich sequence factor 1 K.LGDEVDVYLR@.A                        | 6.74   | 4.00   | 1.69  | 0.59 |
| Q8C5Q4_GRSF1_MOUSE  | Grsf1   | G-rich sequence factor 1 K.SLQVK#PSPVLSDGVVR@.E                 | 13.55  | 5.00   | 2.71  | 0.37 |
| Q9D8T2_GSDMD_MOUSE  | Gsdmdc1 | Gasdermin-D OS=Mus ml R.SR@GDLFVTEVLQTK#.L                      | 8.74   | 2.79   | 3.13  | 0.32 |
| Q9WV60_GSK3B_MOUSE  | Gsk3b   | Glycogen synthase kinase R.DIK#PQNLLDPTAVLK#.L                  | 7.96   | 2.34   | 3.40  | 0.29 |
| P13020_GELS_MOUSE   | Gsn     | Gelsolin OS=Mus muscul R.EVQGFESTFSGYFK.S                       | 5.39   | 7.30   | 0.74  | 1.35 |
| P13020_GELS_MOUSE   | Gsn     | Gelsolin OS=Mus muscul K.AGKHEPGLQIWR@.V                        | 221.10 | 153.03 | 1.44  | 0.69 |
| P13020_GELS_MOUSE   | Gsn     | Gelsolin OS=Mus muscul R.AQVHVSEEGGPEAM*LQVLGPK#PALPEGTEDAK#.E  | 11.53  | 6.70   | 1.72  | 0.58 |
| P13020_GELS_MOUSE   | Gsn     | Gelsolin OS=Mus muscul R.AVEVMK#.S                              | 35.06  | 32.13  | 1.09  | 0.92 |
| P13020_GELS_MOUSE   | Gsn     | Gelsolin OS=Mus muscul R.DGGQTAPASIR.L                          | 200.75 | 145.63 | 1.38  | 0.73 |
| P13020_GELS_MOUSE   | Gsn     | Gelsolin OS=Mus muscul K.DSQEEK#TEALTSAK#.R                     | 221.63 | 184.39 | 1.20  | 0.83 |
| P13020_GELS_MOUSE   | Gsn     | Gelsolin OS=Mus muscul K.EPGLQIWR.V                             | 36.80  | 37.35  | 0.99  | 1.02 |
| P13020_GELS_MOUSE   | Gsn     | Gelsolin OS=Mus muscul R.EVQGFESTFSGYFK#.S                      | 183.42 | 124.16 | 1.48  | 0.68 |
| P13020_GELS_MOUSE   | Gsn     | Gelsolin OS=Mus muscul K.HVVPNEVVQR@.L                          | 153.01 | 99.41  | 1.54  | 0.65 |
| P13020_GELS_MOUSE   | Gsn     | Gelsolin OS=Mus muscul R.IEGSNK#VPDPATYGFYGDSDVILYNYR@.H        | 50.16  | 28.34  | 1.77  | 0.56 |
| P13020_GELS_MOUSE   | Gsn     | Gelsolin OS=Mus muscul K.NWR@DPQDTPDGLGYSLSHIANVER@.V           | 17.15  | 10.44  | 1.64  | 0.61 |
| P13020_GELS_MOUSE   | Gsn     | Gelsolin OS=Mus muscul R.QTQVSLPEGETLFFK#.Q                     | 158.29 | 109.62 | 1.44  | 0.69 |
| P13020_GELS_MOUSE   | Gsn     | Gelsolin OS=Mus muscul R.R@TPITVVR@.Q                           | 128.38 | 73.09  | 1.76  | 0.57 |
| P13020_GELS_MOUSE   | Gsn     | Gelsolin OS=Mus muscul K.SGALNSNDAFVLK#.T                       | 269.17 | 177.94 | 1.51  | 0.66 |
| P13020_GELS_MOUSE   | Gsn     | Gelsolin OS=Mus muscul R.SQHVQEEGSEPDFAWEALGGK#.T               | 144.16 | 100.55 | 1.43  | 0.70 |
| P13020_GELS_MOUSE   | Gsn     | Gelsolin OS=Mus muscul K.TASDFISK.M                             | 242.82 | 143.88 | 1.69  | 0.59 |
| P13020_GELS_MOUSE   | Gsn     | Gelsolin OS=Mus muscul K.TGAQELLK#.V                            | 423.74 | 280.18 | 1.51  | 0.66 |
| P13020_GELS_MOUSE   | Gsn     | Gelsolin OS=Mus muscul R.TPITVVR@.Q                             | 149.76 | 88.69  | 1.69  | 0.59 |
| P13020_GELS_MOUSE   | Gsn     | Gelsolin OS=Mus muscul K.TPSAAYLWVGAGASEAEK#.T                  | 127.56 | 87.99  | 1.45  | 0.69 |
| P13020_GELS_MOUSE   | Gsn     | Gelsolin OS=Mus muscul R.VPDAATHLSTAMAAQHGM*DDDTGQK#.Q          | 33.80  | 22.76  | 1.48  | 0.67 |
| P13020_GELS_MOUSE   | Gsn     | Gelsolin OS=Mus muscul K.VPDPATYGFYGDSDVILYNYR@.H               | 44.73  | 33.37  | 1.34  | 0.75 |
| P13020_GELS_MOUSE   | Gsn     | Gelsolin OS=Mus muscul R.YIETPANNR@.D                           | 68.14  | 46.70  | 1.46  | 0.69 |
| P13020_GELS_MOUSE   | Gsn     | Gelsolin OS=Mus muscul R.DGGQTAPASIR@.L                         | 12.87  | 12.07  | 2.38  | 0.42 |
| P13020_GELS_MOUSE   | Gsn     | Gelsolin OS=Mus muscul K.DSQEEKTEALTSAK.R                       | 15.33  | 5.98   | 2.56  | 0.39 |
| P13020_GELS_MOUSE   | Gsn     | Gelsolin OS=Mus muscul R.EVQGFESTFSGYFK#.S                      | 15.63  | 9.32   | 1.68  | 0.60 |
| P13020_GELS_MOUSE   | Gsn     | Gelsolin OS=Mus muscul K.NWR@DPQDTPDGLGYSLSHIANVER@.V           | 9.84   | 5.03   | 1.95  | 0.51 |
| P13020_GELS_MOUSE   | Gsn     | Gelsolin OS=Mus muscul K.SGALNSNDAFVLK#.T                       | 24.26  | 10.39  | 2.34  | 0.43 |
| P13020_GELS_MOUSE   | Gsn     | Gelsolin OS=Mus muscul R.SQHVQEEGSEPDFAWEALGGK#.T               | 18.85  | 6.55   | 2.42  | 0.41 |
| P19157_GSTP1_MOUSE  | Gstp1   | Glutathione S-transferas K.ALPGHLKPFETLSQNGGK.A                 | 1.51   | 5.01   | 0.30  | 3.33 |
| P19157_GSTP1_MOUSE  | Gstp1   | Glutathione S-transferas K.FEDGDLTLQYSNLR.H                     | 3.15   | 4.95   | 0.64  | 1.57 |

|                     |          |                                                             |        |       |      |      |
|---------------------|----------|-------------------------------------------------------------|--------|-------|------|------|
| Q99L20_Q99L20_MOUSE | Gstt3    | Glutathione S-transferase K.GQQYDTSFAQVNLPLR@.K             | 2.94   | 2.11  | 1.40 | 0.71 |
| P62915_TF2B_MOUSE   | Gtf2b    | Transcription initiation f K.ALETSDVLTITGDFM*SR@.F          | 7.28   | 3.14  | 2.32 | 0.43 |
| P62915_TF2B_MOUSE   | Gtf2b    | Transcription initiation f K.AVELDLVPGRR@.S                 | 7.64   | 4.92  | 1.55 | 0.64 |
| P62915_TF2B_MOUSE   | Gtf2b    | Transcription initiation f K.EIGDIAGVADVITR@.Q              | 29.81  | 6.63  | 4.49 | 0.22 |
| P62915_TF2B_MOUSE   | Gtf2b    | Transcription initiation f R.SPISVAAAIYVM*ASOQSAEK#.R       | 7.10   | 2.93  | 2.42 | 0.41 |
| P62915_TF2B_MOUSE   | Gtf2b    | Transcription initiation f R.VGDSQNPILLSDGLSTM*IGK#.G       | 11.91  | 3.90  | 3.05 | 0.33 |
| P62915_TF2B_MOUSE   | Gtf2b    | Transcription initiation f R.VIDVGSW.R                      | 21.85  | 9.11  | 2.40 | 0.42 |
| Q9DD05_T2EA_MOUSE   | Gtf2e1   | General transcription fac R.FNEQIEPIYALLR@.E                | 15.16  | 9.18  | 1.65 | 0.61 |
| Q9DD05_T2EA_MOUSE   | Gtf2e1   | General transcription fac R.FNEQIEPIYALLR@.E                | 12.81  | 5.77  | 2.22 | 0.45 |
| Q9D902_T2EB_MOUSE   | Gtf2e2   | General transcription fac R.GLGGILLIEDIEGLPNSQK#.A          | 7.13   | 2.28  | 3.13 | 0.32 |
| Q3UH08_Q3UH08_MOUSE | Gtf2i    | General transcription fac K.AGISFIIK#.R                     | 31.23  | 8.05  | 3.88 | 0.26 |
| Q3UH08_Q3UH08_MOUSE | Gtf2i    | General transcription fac K.APSYLEISSM*R@.R                 | 25.18  | 8.06  | 3.12 | 0.32 |
| Q3UH08_Q3UH08_MOUSE | Gtf2i    | General transcription fac K.APSYLEISSMR@.R                  | 6.08   | 2.68  | 2.27 | 0.44 |
| Q3UH08_Q3UH08_MOUSE | Gtf2i    | General transcription fac R.DQSVAVVQGLPEGVAFK#.H            | 34.70  | 7.98  | 4.35 | 0.23 |
| Q3UH08_Q3UH08_MOUSE | Gtf2i    | General transcription fac R.EQVNDLFSR@.K                    | 43.69  | 12.36 | 3.54 | 0.28 |
| Q3UH08_Q3UH08_MOUSE | Gtf2i    | General transcription fac K.FAEALGSTEAK#.A                  | 11.35  | 22.36 | 0.51 | 1.97 |
| Q3UH08_Q3UH08_MOUSE | Gtf2i    | General transcription fac K.FAQALGLTEAVK#.V                 | 21.66  | 9.87  | 2.19 | 0.46 |
| Q3UH08_Q3UH08_MOUSE | Gtf2i    | General transcription fac K.FGEAIGM*GFPVK#.V                | 6.30   | 56.12 | 0.11 | 8.91 |
| Q3UH08_Q3UH08_MOUSE | Gtf2i    | General transcription fac R.ILDSAEIFK#.F                    | 58.14  | 17.59 | 3.30 | 0.30 |
| Q3UH08_Q3UH08_MOUSE | Gtf2i    | General transcription fac K.KHPM*FETAIK#.E                  | 10.71  | 6.32  | 1.69 | 0.59 |
| Q3UH08_Q3UH08_MOUSE | Gtf2i    | General transcription fac R.M*SVDAVEIELR@.K                 | 13.27  | 4.65  | 2.86 | 0.35 |
| Q3UH08_Q3UH08_MOUSE | Gtf2i    | General transcription fac K.R@PELLTSTTEVTQPR@.T             | 13.51  | 5.89  | 2.29 | 0.44 |
| Q3UH08_Q3UH08_MOUSE | Gtf2i    | General transcription fac K.SPPIFLSGK#.I                    | 18.31  | 8.71  | 2.10 | 0.48 |
| Q3UH08_Q3UH08_MOUSE | Gtf2i    | General transcription fac R.SPTWFGIPR@.L                    | 13.50  | 6.43  | 2.10 | 0.48 |
| Q3UH08_Q3UH08_MOUSE | Gtf2i    | General transcription fac K.STVVPVPEYK#.M                   | 43.63  | 13.63 | 3.20 | 0.31 |
| Q3UH08_Q3UH08_MOUSE | Gtf2i    | General transcription fac R.VLAAEAER@.S                     | 89.15  | 22.95 | 3.88 | 0.26 |
| Q3UH08_Q3UH08_MOUSE | Gtf2i    | General transcription fac K.AGISFIIK#.R                     | 69.84  | 8.42  | 8.30 | 0.12 |
| Q3UH08_Q3UH08_MOUSE | Gtf2i    | General transcription fac K.APSYLEISSM*R@.R                 | 31.00  | 4.30  | 7.21 | 0.14 |
| Q3UH08_Q3UH08_MOUSE | Gtf2i    | General transcription fac K.APSYLEISSMR@.R                  | 13.94  | 4.62  | 3.02 | 0.33 |
| Q3UH08_Q3UH08_MOUSE | Gtf2i    | General transcription fac R.DQSVAVVQGLPEGVAFK#.H            | 18.25  | 12.76 | 6.29 | 0.16 |
| Q3UH08_Q3UH08_MOUSE | Gtf2i    | General transcription fac R.EQVNDLFSR@.K                    | 66.33  | 8.79  | 7.54 | 0.13 |
| Q3UH08_Q3UH08_MOUSE | Gtf2i    | General transcription fac K.FAEALGSTEAK#.A                  | 109.90 | 18.01 | 6.10 | 0.16 |
| Q3UH08_Q3UH08_MOUSE | Gtf2i    | General transcription fac K.FAQALGLTEAVK#.V                 | 130.11 | 24.95 | 5.21 | 0.19 |
| Q3UH08_Q3UH08_MOUSE | Gtf2i    | General transcription fac K.FEAHPNDLVYGLPENIPFR@.S          | 101.08 | 15.05 | 6.72 | 0.15 |
| Q3UH08_Q3UH08_MOUSE | Gtf2i    | General transcription fac R.GR@EFSFAWNAK#.I                 | 22.88  | 5.12  | 4.47 | 0.22 |
| Q3UH08_Q3UH08_MOUSE | Gtf2i    | General transcription fac R.ILDSAEIFK#.F                    | 86.05  | 12.93 | 6.65 | 0.15 |
| Q3UH08_Q3UH08_MOUSE | Gtf2i    | General transcription fac K.INSSPNVNTTASGVDELNIQVTPDDNER@.L | 12.29  | 3.02  | 4.07 | 0.25 |
| Q3UH08_Q3UH08_MOUSE | Gtf2i    | General transcription fac K.K#FAEALGSTEAK#.A                | 10.30  | 4.79  | 2.15 | 0.47 |
| Q3UH08_Q3UH08_MOUSE | Gtf2i    | General transcription fac R.K#FGEAIGM*GFPVK#.V              | 11.90  | 3.79  | 3.14 | 0.32 |
| Q3UH08_Q3UH08_MOUSE | Gtf2i    | General transcription fac K.KHPM*FETAIK#.E                  | 20.97  | 4.86  | 4.32 | 0.23 |
| Q3UH08_Q3UH08_MOUSE | Gtf2i    | General transcription fac R.M*SVDAVEIELR@.K                 | 18.06  | 3.96  | 4.56 | 0.22 |
| Q3UH08_Q3UH08_MOUSE | Gtf2i    | General transcription fac R.M*SVDAVEIELR@.KH.T              | 52.27  | 11.02 | 4.74 | 0.21 |
| Q3UH08_Q3UH08_MOUSE | Gtf2i    | General transcription fac R.R@ILDSAEIFK#.F                  | 17.42  | 4.88  | 3.57 | 0.28 |
| Q3UH08_Q3UH08_MOUSE | Gtf2i    | General transcription fac K.RPELLTSTTEVTQPR.T               | 73.49  | 11.21 | 6.55 | 0.15 |
| Q3UH08_Q3UH08_MOUSE | Gtf2i    | General transcription fac R.R@PSTFGIPR@.L                   | 28.94  | 4.84  | 5.98 | 0.17 |
| Q3UH08_Q3UH08_MOUSE | Gtf2i    | General transcription fac R.R@PSTYGIPIR@.L                  | 47.35  | 10.59 | 4.47 | 0.22 |
| Q3UH08_Q3UH08_MOUSE | Gtf2i    | General transcription fac K.SPPIFLSGK#.I                    | 35.45  | 7.17  | 4.94 | 0.20 |
| Q3UH08_Q3UH08_MOUSE | Gtf2i    | General transcription fac R.SPSWYGIPIR@.L                   | 55.01  | 13.26 | 4.15 | 0.24 |
| Q3UH08_Q3UH08_MOUSE | Gtf2i    | General transcription fac R.SPTWFGIPR@.L                    | 94.41  | 21.64 | 4.36 | 0.23 |
| Q3UH08_Q3UH08_MOUSE | Gtf2i    | General transcription fac K.STVVPVPEYK#.M                   | 84.42  | 16.30 | 5.18 | 0.19 |
| Q3UH08_Q3UH08_MOUSE | Gtf2i    | General transcription fac R.VLAAEAER@.S                     | 114.07 | 20.74 | 5.50 | 0.18 |
| Q3UH08_Q3UH08_MOUSE | Gtf2i    | General transcription fac K.AGISFIIK#.R                     | 26.50  | 3.69  | 7.18 | 0.14 |
| Q3UH08_Q3UH08_MOUSE | Gtf2i    | General transcription fac K.APSYLEISSM*R@.R                 | 18.86  | 4.30  | 4.41 | 0.23 |
| Q3UH08_Q3UH08_MOUSE | Gtf2i    | General transcription fac R.DQSVAVVQGLPEGVAFK#.H            | 39.67  | 4.34  | 8.96 | 0.11 |
| Q3UH08_Q3UH08_MOUSE | Gtf2i    | General transcription fac R.EQVNDLFSR@.K                    | 30.50  | 5.81  | 5.25 | 0.19 |
| Q3UH08_Q3UH08_MOUSE | Gtf2i    | General transcription fac K.FAEALGSTEAK#.A                  | 28.68  | 4.86  | 5.90 | 0.17 |
| Q3UH08_Q3UH08_MOUSE | Gtf2i    | General transcription fac K.FAQALGLTEAVK#.V                 | 58.43  | 13.11 | 4.46 | 0.22 |
| Q3UH08_Q3UH08_MOUSE | Gtf2i    | General transcription fac R.ILDSAEIFK#.F                    | 31.57  | 11.98 | 2.63 | 0.38 |
| Q3UH08_Q3UH08_MOUSE | Gtf2i    | General transcription fac K.KHPM*FETAIK#.E                  | 10.37  | 3.92  | 2.65 | 0.38 |
| Q3UH08_Q3UH08_MOUSE | Gtf2i    | General transcription fac R.K#FGEAIGM*GFPVK#.V              | 6.23   | 2.69  | 2.31 | 0.43 |
| Q3UH08_Q3UH08_MOUSE | Gtf2i    | General transcription fac R.M*SVDAVEIELR@.K                 | 11.28  | 1.86  | 6.05 | 0.17 |
| Q3UH08_Q3UH08_MOUSE | Gtf2i    | General transcription fac K.R@PELLTSTTEVTQPR@.T             | 32.29  | 3.58  | 9.02 | 0.11 |
| Q3UH08_Q3UH08_MOUSE | Gtf2i    | General transcription fac R.SPTWFGIPR@.L                    | 29.27  | 6.29  | 4.65 | 0.21 |
| Q3UH08_Q3UH08_MOUSE | Gtf2i    | General transcription fac K.STEPPPPVPEYK#.R                 | 4.94   | 2.16  | 2.28 | 0.44 |
| Q3UH08_Q3UH08_MOUSE | Gtf2i    | General transcription fac K.STVVPVPEYK#.M                   | 36.64  | 5.95  | 6.16 | 0.16 |
| Q3UH08_Q3UH08_MOUSE | Gtf2i    | General transcription fac R.VLAAEAER@.S                     | 65.53  | 12.23 | 5.36 | 0.19 |
| Q9I57_G72D1_MOUSE   | Gtf2ird1 | General transcription fac K.FLM*HPEELFVLGPEGISLR@.R         | 9.55   | 3.37  | 2.83 | 0.35 |
| Q9I57_G72D1_MOUSE   | Gtf2ird1 | General transcription fac K.YGEALGLNR@PVLVPPYK#.L           | 10.36  | 6.06  | 1.71 | 0.58 |
| Q8K284_TF3C1_MOUSE  | Gtf3c1   | General transcription fac R.NLIIEAVTNLR@.L                  | 12.11  | 4.79  | 2.53 | 0.40 |
| Q8K284_TF3C1_MOUSE  | Gtf3c1   | General transcription fac R.YQDEADQNLR@.M                   | 7.00   | 3.76  | 1.86 | 0.54 |
| Q8BL74_TF3C2_MOUSE  | Gtf3c2   | General transcription fac K.ADLIPYQDSPEQDYSSTPNPK#.A        | 7.62   | 5.35  | 1.42 | 0.70 |
| Q8BL74_TF3C2_MOUSE  | Gtf3c2   | General transcription fac K.AYFTAPR@.K                      | 36.14  | 10.75 | 3.36 | 0.30 |
| Q8BL74_TF3C2_MOUSE  | Gtf3c2   | General transcription fac R.EGIPEDGTIYR@.I                  | 19.35  | 7.00  | 2.76 | 0.36 |
| Q8BL74_TF3C2_MOUSE  | Gtf3c2   | General transcription fac R.FSPNLDYSGWLVSGGQSLVLR@.I        | 18.07  | 3.43  | 2.35 | 0.43 |
| Q8BL74_TF3C2_MOUSE  | Gtf3c2   | General transcription fac R.KPPSTPLVGLLDQSNPLSPM*PK.K       | 12.05  | 7.17  | 1.68 | 0.59 |
| Q8BL74_TF3C2_MOUSE  | Gtf3c2   | General transcription fac R.LEQQDLSSM*SK#.V                 | 13.95  | 4.39  | 3.18 | 0.31 |
| Q8BL74_TF3C2_MOUSE  | Gtf3c2   | General transcription fac K.SPLFSVQR@.E                     | 24.28  | 11.15 | 2.18 | 0.46 |
| Q8BL74_TF3C2_MOUSE  | Gtf3c2   | General transcription fac K.WQLSLEAAPYLQEEK#.S              | 5.10   | 2.69  | 1.90 | 0.53 |
| Q8BL74_TF3C2_MOUSE  | Gtf3c2   | General transcription fac R.EGIPEDGTIYR@.I                  | 7.41   | 1.33  | 5.59 | 0.18 |
| Q8BL74_TF3C2_MOUSE  | Gtf3c2   | General transcription fac R.LEQQDLSSM*SK#.V                 | 6.40   | 2.59  | 2.47 | 0.41 |
| Q8BL74_TF3C2_MOUSE  | Gtf3c2   | General transcription fac K.SPLFSVQR@.E                     | 9.86   | 3.51  | 2.81 | 0.36 |
| Q3TMP1_Q3TMP1_MOUSE | Gtf3c3   | General transcription fac K.AIYTLSDLR@.F                    | 10.28  | 2.32  | 4.44 | 0.23 |
| Q3TMP1_Q3TMP1_MOUSE | Gtf3c3   | General transcription fac K.ALEALEPM*YDPTLAQDANAQQELK#.L    | 11.66  | 2.24  | 5.19 | 0.19 |
| Q3TMP1_Q3TMP1_MOUSE | Gtf3c3   | General transcription fac K.ALEVITDFSGILEK#.E               | 7.46   | 2.02  | 3.69 | 0.27 |
| Q3TMP1_Q3TMP1_MOUSE | Gtf3c3   | General transcription fac R.DK#ISNDNEQETSNYDAK#.A           | 8.71   | 2.51  | 3.47 | 0.29 |
| Q3TMP1_Q3TMP1_MOUSE | Gtf3c3   | General transcription fac K.ETLEEGTSEENK#.A                 | 7.67   | 2.61  | 2.94 | 0.34 |
| Q3TMP1_Q3TMP1_MOUSE | Gtf3c3   | General transcription fac R.LLNLLSPSDGER@.F                 | 14.25  | 15.00 | 0.95 | 1.05 |
| Q3TMP1_Q3TMP1_MOUSE | Gtf3c3   | General transcription fac K.ISFEFER@.R                      | 8.56   | 2.77  | 3.09 | 0.32 |
| Q3TMP1_Q3TMP1_MOUSE | Gtf3c3   | General transcription fac R.LAEM*SLAQDNIK#.Q                | 7.93   | 4.30  | 1.84 | 0.54 |
| Q3TMP1_Q3TMP1_MOUSE | Gtf3c3   | General transcription fac K.VVDLAPLIDLR@.I                  | 20.25  | 5.80  | 3.49 | 0.29 |
| Q8BMQ2_TF3C4_MOUSE  | Gtf3c4   | General transcription fac K.EAAAADAAPGSAFR@.L               | 6.38   | 2.34  | 2.73 | 0.37 |
| Q8BMQ2_TF3C4_MOUSE  | Gtf3c4   | General transcription fac R.LQWVQLVLDLTHEIGDR@.L            | 4.95   | 2.05  | 2.41 | 0.41 |
| Q8BMQ2_TF3C4_MOUSE  | Gtf3c4   | General transcription fac K.LSDVFGSVR@.T                    | 14.48  | 7.41  | 1.95 | 0.51 |
| Q8BMQ2_TF3C4_MOUSE  | Gtf3c4   | General transcription fac K.NYQVQVTLK#.T                    | 13.74  | 4.38  | 3.14 | 0.32 |
| Q8BMQ2_TF3C4_MOUSE  | Gtf3c4   | General transcription fac K.QVDLIDLVR@.W                    | 17.91  | 9.26  | 1.93 | 0.52 |
| Q8BMQ2_TF3C4_MOUSE  | Gtf3c4   | General transcription fac K.SKEGDTTEPEDSLTAGDGTGPREPVEEK.L  | 32.33  | 6.69  | 4.83 | 0.21 |
| Q8BMQ2_TF3C4_MOUSE  | Gtf3c4   | General transcription fac K.LSDVFGSVR@.T                    | 4.21   | 17.17 | 0.25 | 4.07 |
| Q8BMQ2_TF3C4_MOUSE  | Gtf3c4   | General transcription fac K.NEAPENGLDFAEFQR@.R              | 3.53   | 1.76  | 2.01 | 0.50 |
| Q8BMQ2_TF3C4_MOUSE  | Gtf3c4   | General transcription fac K.NYQVQVTLK#.T                    | 9.95   | 1.81  | 5.50 | 0.18 |
| Q8BMQ2_TF3C4_MOUSE  | Gtf3c4   | General transcription fac K.QVDLIDLVR@.W                    | 12.73  | 3.46  | 3.68 | 0.27 |
| Q8R2T8_TF3C5_MOUSE  | Gtf3c5   | General transcription fac R.STYNYSLPITVK#.K                 | 7.31   | 2.66  | 2.75 | 0.36 |
| Q8R2T8_TF3C5_MOUSE  | Gtf3c5   | General transcription fac R.EGYHNPISGENLIGLSR@.A            | 19.24  | 4.10  | 4.69 | 0.21 |
| Q8R2T8_TF3C5_MOUSE  | Gtf3c5   | General transcription fac R.FSTSSLLR@.I                     | 17.52  | 4.91  | 3.57 | 0.28 |

|                     |        |                                                                       |         |         |      |      |
|---------------------|--------|-----------------------------------------------------------------------|---------|---------|------|------|
| Q8R2T8_TF3C5_MOUSE  | Gtf3c5 | General transcription fac K.IYQLVDFR@.I                               | 20.81   | 5.54    | 3.76 | 0.27 |
| Q8R2T8_TF3C5_MOUSE  | Gtf3c5 | General transcription fac K.QGLGPGSTGDGPR@.K                          | 14.67   | 3.11    | 4.71 | 0.21 |
| Q8R2T8_TF3C5_MOUSE  | Gtf3c5 | General transcription fac R.STYNSYSLPITVK#.K                          | 14.52   | 4.02    | 3.61 | 0.28 |
| Q08582_GTPB1_MOUSE  | Gtppb1 | GTP-binding protein 1 O: K.LVLVSPSTEQYDLSLR@.Q                        | 25.73   | 6.76    | 3.81 | 0.26 |
| Q08582_GTPB1_MOUSE  | Gtppb1 | GTP-binding protein 1 O: R.VAVVGNVDAGK#.S                             | 24.97   | 6.27    | 3.99 | 0.25 |
| Q08582_GTPB1_MOUSE  | Gtppb1 | GTP-binding protein 1 O: K.LVLVSPSTEQYDLSLR@.Q                        | 13.28   | 4.11    | 3.23 | 0.31 |
| Q08582_GTPB1_MOUSE  | Gtppb1 | GTP-binding protein 1 O: R.TSYR@EEEPAEFQDIDYSPVGVGTTVSGTTLR@.G        | 5.12    | 2.00    | 2.56 | 0.39 |
| Q99ME9_NOG1_MOUSE   | Gtppb4 | Nucleolar GTP-binding pi R.ADVVDVQYAFATK#.S                           | 8.21    | 2.89    | 2.84 | 0.35 |
| Q99ME9_NOG1_MOUSE   | Gtppb4 | Nucleolar GTP-binding pi K.DFIDLTLISK#.T                              | 13.42   | 4.98    | 2.69 | 0.37 |
| Q99ME9_NOG1_MOUSE   | Gtppb4 | Nucleolar GTP-binding pi R.IAELSEEDQK#.I                              | 13.66   | 3.92    | 3.48 | 0.29 |
| Q99ME9_NOG1_MOUSE   | Gtppb4 | Nucleolar GTP-binding pi K.LALGQNIK#.N                                | 9.68    | 4.56    | 2.13 | 0.47 |
| Q99ME9_NOG1_MOUSE   | Gtppb4 | Nucleolar GTP-binding pi R.LPTIDPNTR@.T                               | 13.76   | 5.62    | 2.45 | 0.41 |
| Q99ME9_NOG1_MOUSE   | Gtppb4 | Nucleolar GTP-binding pi R.LSQLSDFPK#.L                               | 10.12   | 5.19    | 1.95 | 0.51 |
| Q99ME9_NOG1_MOUSE   | Gtppb4 | Nucleolar GTP-binding pi K.VNEVLR@.L                                  | 51.51   | 31.96   | 1.61 | 0.62 |
| Q99ME9_NOG1_MOUSE   | Gtppb4 | Nucleolar GTP-binding pi K.YGDSLVR@.C                                 | 7.78    | 3.55    | 2.19 | 0.46 |
| Q8K2A1_GULP1_MOUSE  | Gulp1  | PTB domain-containing e K.FLGSTVEQPK#.G                               | 42.43   | 30.19   | 1.41 | 0.71 |
| Q8K2A1_GULP1_MOUSE  | Gulp1  | PTB domain-containing e R.IQDLETEN#ELK#.N                             | 18.23   | 11.11   | 1.64 | 0.61 |
| Q8K2A1_GULP1_MOUSE  | Gulp1  | PTB domain-containing e R.IQDLETEN#ELK#.N                             | 5.13    | 3.36    | 1.53 | 0.65 |
| Q8K2A1_GULP1_MOUSE  | Gulp1  | PTB domain-containing e K.LDEM#QEGDK#.M                               | 12.44   | 8.06    | 1.54 | 0.65 |
| Q8K2A1_GULP1_MOUSE  | Gulp1  | PTB domain-containing e R.TTQVSTSPAHGVTVM#SPSTIDFDM#IPFSPISHQSPSAR@.N | 5.49    | 3.12    | 1.76 | 0.57 |
| Q80SU7_GVIN1_MOUSE  | Gvin1  | Interferon-induced very I K.LLDFSQNSVAELQETPR.E                       | 2.41    | 5.21    | 0.46 | 2.16 |
| Q80SU7_GVIN1_MOUSE  | Gvin1  | Interferon-induced very I K.LQEDLGVTSQAQLQLDRNDLQK.L                  | 4.48    | 6.81    | 0.66 | 1.52 |
| Q80SU7_GVIN1_MOUSE  | Gvin1  | Interferon-induced very I R.EVGQYEALEETSSR.D                          | 9.54    | 9.54    | 0.52 | 1.93 |
| Q80SU7_GVIN1_MOUSE  | Gvin1  | Interferon-induced very I K.FTETLNIWIK#.Q                             | 8.82    | 7.37    | 1.20 | 0.83 |
| Q80SU7_GVIN1_MOUSE  | Gvin1  | Interferon-induced very I K.ILTLTNSLLEELSR.K                          | 15.20   | 19.55   | 0.78 | 1.29 |
| Q80SU7_GVIN1_MOUSE  | Gvin1  | Interferon-induced very I R.LGLDNYPK.R                                | 8.73    | 8.91    | 0.98 | 1.02 |
| Q80SU7_GVIN1_MOUSE  | Gvin1  | Interferon-induced very I K.LLDFSQNSVAELQETPR@.E                      | 5.69    | 3.87    | 1.47 | 0.68 |
| Q80SU7_GVIN1_MOUSE  | Gvin1  | Interferon-induced very I K.NEAPETVEAER.T                             | 6.68    | 9.57    | 0.70 | 1.43 |
| Q80SU7_GVIN1_MOUSE  | Gvin1  | Interferon-induced very I R.NEILSTAQNEK.S                             | 7.04    | 7.15    | 0.98 | 1.02 |
| Q80SU7_GVIN1_MOUSE  | Gvin1  | Interferon-induced very I K.NSQEILDQK#.S                              | 9.58    | 16.51   | 0.58 | 1.72 |
| Q80SU7_GVIN1_MOUSE  | Gvin1  | Interferon-induced very I K.SQYENQLLER.S                              | 8.88    | 9.07    | 0.98 | 1.02 |
| Q80SU7_GVIN1_MOUSE  | Gvin1  | Interferon-induced very I R.TATYVTTALSSFLK.Y                          | 9.64    | 15.18   | 0.63 | 1.58 |
| Q80SU7_GVIN1_MOUSE  | Gvin1  | Interferon-induced very I K.VTNFPEAHSIQWQINQSEYEEQVK#.I               | 3.93    | 6.29    | 0.62 | 1.60 |
| Q4VBD9_GZF1_MOUSE   | Gzf1   | GDNF-inducible zinc fing R.CGQCGKGLSSK.T                              | 3.11    | 26.84   | 0.12 | 8.62 |
| P10922_H10_MOUSE    | H1f0   | Histone H1.0 OS=Mus ml K.GVGSFSFR@.L                                  | 2255.47 | 876.46  | 2.57 | 0.39 |
| P10922_H10_MOUSE    | H1f0   | Histone H1.0 OS=Mus ml R.LAK#GDEPK#.R                                 | 46.34   | 18.27   | 2.54 | 0.39 |
| P10922_H10_MOUSE    | H1f0   | Histone H1.0 OS=Mus ml R.LAK#GDEPK#R@.S                               | 13.02   | 4.92    | 2.65 | 0.38 |
| P10922_H10_MOUSE    | H1f0   | Histone H1.0 OS=Mus ml -.#M#TNTSAPAAKPK.R                             | 6.98    | 3.03    | 2.30 | 0.43 |
| P10922_H10_MOUSE    | H1f0   | Histone H1.0 OS=Mus ml K.R@LVTTGVK#.K                                 | 1197.01 | 430.59  | 2.78 | 0.36 |
| P10922_H10_MOUSE    | H1f0   | Histone H1.0 OS=Mus ml K.VGENADSQK#.L                                 | 3069.33 | 1260.54 | 2.43 | 0.41 |
| P10922_H10_MOUSE    | H1f0   | Histone H1.0 OS=Mus ml K.YSDM#IVAAIQAEK#.N                            | 998.19  | 437.30  | 2.28 | 0.44 |
| P10922_H10_MOUSE    | H1f0   | Histone H1.0 OS=Mus ml K.YSDM#IVAAIQAEK#.N                            | 535.13  | 223.13  | 2.40 | 0.42 |
| P10922_H10_MOUSE    | H1f0   | Histone H1.0 OS=Mus ml K.VGENADSQK#.L                                 | 53.34   | 23.73   | 2.25 | 0.44 |
| P10922_H10_MOUSE    | H1f0   | Histone H1.0 OS=Mus ml K.YSDM#IVAAIQAEK#.N                            | 12.85   | 7.53    | 1.71 | 0.59 |
| Q80ZM5_Q80ZM5_MOUSE | H1fx   | H1 histone family, memt K.AGGSAAPTOPK#.R                              | 41.78   | 17.01   | 2.46 | 0.41 |
| Q80ZM5_Q80ZM5_MOUSE | H1fx   | H1 histone family, memt R.ALVQNDTLQVK#.G                              | 132.72  | 46.80   | 2.84 | 0.35 |
| Q80ZM5_Q80ZM5_MOUSE | H1fx   | H1 histone family, memt R.GASAASPAPK#.A                               | 18.83   | 8.61    | 2.19 | 0.46 |
| Q80ZM5_Q80ZM5_MOUSE | H1fx   | H1 histone family, memt R.K#VAWFQDQNGR@.T                             | 16.69   | 2.44    | 6.84 | 0.15 |
| Q80ZM5_Q80ZM5_MOUSE | H1fx   | H1 histone family, memt K.YSQLVETIR@.K                                | 107.47  | 39.24   | 2.74 | 0.37 |
| Q80ZM5_Q80ZM5_MOUSE | H1fx   | H1 histone family, memt K.AGGSAAPTOPK#.R                              | 115.49  | 41.82   | 2.76 | 0.36 |
| Q80ZM5_Q80ZM5_MOUSE | H1fx   | H1 histone family, memt R.ALVQNDTLQVK#.G                              | 505.74  | 163.45  | 3.09 | 0.32 |
| Q80ZM5_Q80ZM5_MOUSE | H1fx   | H1 histone family, memt R.K#VAWFQDQNGR@.T                             | 32.94   | 8.06    | 4.09 | 0.24 |
| Q80ZM5_Q80ZM5_MOUSE | H1fx   | H1 histone family, memt R.R@GASAASPAPK#.A                             | 31.30   | 13.53   | 2.31 | 0.43 |
| Q80ZM5_Q80ZM5_MOUSE | H1fx   | H1 histone family, memt K.VAWFQDQNGR@.T                               | 10.74   | 6.73    | 1.60 | 0.63 |
| Q80ZM5_Q80ZM5_MOUSE | H1fx   | H1 histone family, memt K.YSQLVETIR@.K                                | 351.36  | 120.86  | 2.91 | 0.34 |
| Q80ZM5_Q80ZM5_MOUSE | H1fx   | H1 histone family, memt K.YSQLVETIR@K#.L                              | 116.43  | 42.36   | 2.75 | 0.36 |
| Q3THW5_H2AV_MOUSE   | H2afv  | Histone H2A.V OS=Mus tr R.GDEELDSLK.A                                 | 3.78    | 26.91   | 0.14 | 7.12 |
| Q3THW5_H2AV_MOUSE   | H2afv  | Histone H2A.V OS=Mus tr K.ATIAGGVIPIHIK.S                             | 3.81    | 24.10   | 0.16 | 6.32 |
| Q3THW5_H2AV_MOUSE   | H2afv  | Histone H2A.V OS=Mus tr R.GDEELDSLK.A                                 | 209.38  | 1399.86 | 0.15 | 6.69 |
| Q3THW5_H2AV_MOUSE   | H2afv  | Histone H2A.V OS=Mus tr R.HLQAIAGDEELDSLK.A                           | 84.67   | 592.95  | 0.14 | 7.00 |
| P27661_H2AX_MOUSE   | H2afx  | Histone H2AX OS=Mus m K.KASQASQK.-                                    | 9.02    | 29.57   | 0.31 | 3.28 |
| P27661_H2AX_MOUSE   | H2afx  | Histone H2AX OS=Mus m K.KSSATVGP.K                                    | 34.69   | 228.83  | 0.15 | 6.60 |
| P27661_H2AX_MOUSE   | H2afx  | Histone H2AX OS=Mus m K.LLGGVITAGGGVLPNIQAVLLPKSSATVGP.K.A            | 2.77    | 6.94    | 0.40 | 2.51 |
| P27661_H2AX_MOUSE   | H2afx  | Histone H2AX OS=Mus m K.SSATVGP.K                                     | 29.53   | 173.59  | 0.17 | 5.88 |
| Q9QZ08_H2AY_MOUSE   | H2afy  | Core histone macro-H2A K.AASADSTETGPTDGFVTLSTK.S                      | 67.40   | 67.40   | 0.34 | 2.90 |
| Q9QZ08_H2AY_MOUSE   | H2afy  | Core histone macro-H2A K.AISSYFVSTM#SSSIK.T                           | 16.88   | 72.08   | 0.23 | 4.27 |
| Q9QZ08_H2AY_MOUSE   | H2afy  | Core histone macro-H2A K.EFVEAVLELR.K                                 | 8.01    | 75.50   | 0.11 | 9.43 |
| Q9QZ08_H2AY_MOUSE   | H2afy  | Core histone macro-H2A K.GGKEFVEAVLELR.K                              | 4.06    | 10.95   | 0.37 | 2.69 |
| Q9QZ08_H2AY_MOUSE   | H2afy  | Core histone macro-H2A K.GKLEAITPPPAK.K                               | 8.60    | 47.04   | 0.18 | 5.47 |
| Q9QZ08_H2AY_MOUSE   | H2afy  | Core histone macro-H2A K.GVTIASGGVLPNIHPELLAK.K                       | 55.08   | 200.27  | 0.28 | 3.64 |
| Q9QZ08_H2AY_MOUSE   | H2afy  | Core histone macro-H2A K.KGGKEFVEAVLELR.K                             | 1.33    | 8.16    | 0.16 | 6.11 |
| Q9QZ08_H2AY_MOUSE   | H2afy  | Core histone macro-H2A K.LEAITPPPAK.K                                 | 1.42    | 7.23    | 0.20 | 5.11 |
| Q9QZ08_H2AY_MOUSE   | H2afy  | Core histone macro-H2A K.QTAAQLLK.A                                   | 40.19   | 192.06  | 0.21 | 4.78 |
| Q9QZ08_H2AY_MOUSE   | H2afy  | Core histone macro-H2A K.SIAFPSIGSGR.N                                | 25.31   | 106.34  | 0.24 | 4.20 |
| Q9QZ08_H2AY_MOUSE   | H2afy  | Core histone macro-H2A K.SLFLGQK.L                                    | 37.55   | 137.16  | 0.27 | 3.65 |
| Q9QZ08_H2AY_MOUSE   | H2afy  | Core histone macro-H2A K.AASADSTETGPTDGFVTLSTK.S                      | 6.51    | 22.91   | 0.28 | 3.52 |
| Q9QZ08_H2AY_MOUSE   | H2afy  | Core histone macro-H2A K.EFVEAVLELR.K                                 | 8.94    | 19.93   | 0.45 | 2.23 |
| Q9QZ08_H2AY_MOUSE   | H2afy  | Core histone macro-H2A K.GVTIASGGVLPNIHPELLAK.K                       | 15.59   | 52.42   | 0.30 | 3.36 |
| Q9QZ08_H2AY_MOUSE   | H2afy  | Core histone macro-H2A K.QTAAQLLK.A                                   | 11.65   | 34.50   | 0.34 | 2.96 |
| Q9QZ08_H2AY_MOUSE   | H2afy  | Core histone macro-H2A K.SIAFPSIGSGR.N                                | 8.02    | 28.54   | 0.28 | 3.56 |
| Q9QZ08_H2AY_MOUSE   | H2afy  | Core histone macro-H2A K.AASADSTETGPTDGFVTLSTK.S                      | 7.52    | 17.78   | 0.42 | 2.36 |
| Q9QZ08_H2AY_MOUSE   | H2afy  | Core histone macro-H2A K.AISSYFVSTM#SSSIK.T                           | 7.95    | 19.11   | 0.42 | 2.40 |
| Q9QZ08_H2AY_MOUSE   | H2afy  | Core histone macro-H2A K.EFVEAVLELR.K                                 | 8.60    | 24.33   | 0.35 | 2.83 |
| Q9QZ08_H2AY_MOUSE   | H2afy  | Core histone macro-H2A K.GVTIASGGVLPNIHPELLAK.K                       | 32.11   | 87.72   | 0.37 | 2.73 |
| Q9QZ08_H2AY_MOUSE   | H2afy  | Core histone macro-H2A K.SIAFPSIGSGR.N                                | 10.83   | 46.74   | 0.23 | 4.31 |
| Q8CCK0_H2AW_MOUSE   | H2afy2 | Core histone macro-H2A K.AGGKEFLETVK.E                                | 3.97    | 14.80   | 0.27 | 3.73 |
| Q8CCK0_H2AW_MOUSE   | H2afy2 | Core histone macro-H2A R.AGVIFPVR.L                                   | 53.66   | 255.74  | 0.21 | 4.77 |
| Q8CCK0_H2AW_MOUSE   | H2afy2 | Core histone macro-H2A K.DSDKEGTSNSTEDGPGDGFITLSSK.S                  | 4.26    | 15.10   | 0.28 | 3.55 |
| Q8CCK0_H2AW_MOUSE   | H2afy2 | Core histone macro-H2A K.GVTIASGGVLPNIHPELLAK.K                       | 26.32   | 71.85   | 0.37 | 2.73 |
| Q8CCK0_H2AW_MOUSE   | H2afy2 | Core histone macro-H2A R.HILLAVANDEELNQLLK.G                          | 41.69   | 139.36  | 0.30 | 3.34 |
| Q8CCK0_H2AW_MOUSE   | H2afy2 | Core histone macro-H2A K.KSQGPLVEAAVSSQSSGLAAK.F                      | 5.18    | 14.18   | 0.37 | 2.74 |
| Q8CCK0_H2AW_MOUSE   | H2afy2 | Core histone macro-H2A K.QTAAQLLK.A                                   | 16.30   | 40.96   | 0.40 | 2.51 |
| Q8CCK0_H2AW_MOUSE   | H2afy2 | Core histone macro-H2A K.SQGPLVEAAVSSQSSGLAAK.F                       | 13.31   | 16.99   | 0.78 | 1.28 |
| Q8CCK0_H2AW_MOUSE   | H2afy2 | Core histone macro-H2A K.SVAFPPFSGR.N                                 | 3.07    | 10.01   | 0.31 | 3.26 |
| Q8CCK0_H2AW_MOUSE   | H2afy2 | Core histone macro-H2A R.VEGIVHPPTAEDLKEEIGK.A                        | 21.10   | 58.50   | 0.36 | 2.77 |
| Q8CCK0_H2AW_MOUSE   | H2afy2 | Core histone macro-H2A R.HILLAVANDEELNQLLK.G                          | 5.97    | 13.93   | 0.43 | 2.33 |
| Q8CCK0_H2AW_MOUSE   | H2afy2 | Core histone macro-H2A R.AGVIFPVR.L                                   | 20.83   | 71.41   | 0.29 | 3.43 |
| Q8CCK0_H2AW_MOUSE   | H2afy2 | Core histone macro-H2A K.GVTIASGGVLPNIHPELLAK.K                       | 2.89    | 8.80    | 0.33 | 3.04 |
| Q8CCK0_H2AW_MOUSE   | H2afy2 | Core histone macro-H2A R.HILLAVANDEELNQLLK.G                          | 8.71    | 27.28   | 0.32 | 3.13 |
| Q8CCK0_H2AW_MOUSE   | H2afy2 | Core histone macro-H2A R.AGVIFPVR.L                                   | 30.65   | 95.89   | 0.32 | 3.13 |
| Q8CCK0_H2AW_MOUSE   | H2afy2 | Core histone macro-H2A R.HILLAVANDEELNQLLK.G                          | 13.64   | 44.75   | 0.30 | 3.28 |
| Q8CCK0_H2AW_MOUSE   | H2afy2 | Core histone macro-H2A K.SQGPLVEAAVSSQSSGLAAK.F                       | 2.95    | 4.48    | 0.66 | 1.52 |
| P01899_HA11_MOUSE   | H2-D1  | H-2 class I histocompatil R.APWWM#EQEGPEYWER@.E                       | 10.90   | 4.92    | 2.22 | 0.45 |

|                     |          |                           |                                 |        |        |      |      |
|---------------------|----------|---------------------------|---------------------------------|--------|--------|------|------|
| P01899_HA11_MOUSE   | H2-D1    | H-2 class I histocompatit | R.APWMEQEGPEYWER@.E             | 5.59   | 2.78   | 2.01 | 0.50 |
| P01899_HA11_MOUSE   | H2-D1    | H-2 class I histocompatit | R.DYIALNEDLK#T                  | 63.46  | 32.98  | 1.92 | 0.52 |
| P01899_HA11_MOUSE   | H2-D1    | H-2 class I histocompatit | R.FDSDAENPR.Y                   | 32.06  | 15.24  | 2.10 | 0.48 |
| P01899_HA11_MOUSE   | H2-D1    | H-2 class I histocompatit | R.GGDYALAPGSSQSSM*SLR@.D        | 18.96  | 11.95  | 1.59 | 0.63 |
| P01899_HA11_MOUSE   | H2-D1    | H-2 class I histocompatit | R.GYLFAYEGR.D                   | 78.16  | 29.46  | 2.65 | 0.38 |
| P01899_HA11_MOUSE   | H2-D1    | H-2 class I histocompatit | R.TWTAADM*AAQITR@.R             | 31.84  | 12.20  | 2.61 | 0.38 |
| P01899_HA11_MOUSE   | H2-D1    | H-2 class I histocompatit | R.TWTAADMAAQITR@.R              | 15.48  | 5.92   | 2.61 | 0.38 |
| P01899_HA11_MOUSE   | H2-D1    | H-2 class I histocompatit | R.VYHEGLPEPLTLR@.W              | 63.54  | 30.04  | 2.12 | 0.47 |
| P01899_HA11_MOUSE   | H2-D1    | H-2 class I histocompatit | R.WASVVPLGK#E                   | 40.82  | 17.44  | 2.34 | 0.43 |
| P01899_HA11_MOUSE   | H2-D1    | H-2 class I histocompatit | R.YFETAUSR@PGLLEPR.Y            | 179.61 | 63.98  | 2.81 | 0.36 |
| P01899_HA11_MOUSE   | H2-D1    | H-2 class I histocompatit | R.GYLFAYEGR@.D                  | 11.60  | 6.90   | 1.68 | 0.59 |
| P01899_HA11_MOUSE   | H2-D1    | H-2 class I histocompatit | R.APWWM*EQEGPEYWER@.E           | 3.03   | 3.75   | 0.81 | 1.24 |
| P01899_HA11_MOUSE   | H2-D1    | H-2 class I histocompatit | R.DYIALNEDLK#T                  | 24.49  | 16.94  | 1.45 | 0.69 |
| P01899_HA11_MOUSE   | H2-D1    | H-2 class I histocompatit | R.FDSDAENPR@.Y                  | 19.39  | 16.50  | 1.18 | 0.85 |
| P01899_HA11_MOUSE   | H2-D1    | H-2 class I histocompatit | R.GGDYALAPGSSQSSM*SLR.D         | 13.64  | 8.97   | 1.52 | 0.66 |
| P01899_HA11_MOUSE   | H2-D1    | H-2 class I histocompatit | R.TWTAADM*AAQITR@.R             | 11.95  | 8.07   | 1.48 | 0.68 |
| P01899_HA11_MOUSE   | H2-D1    | H-2 class I histocompatit | R.WASVVPLGK#E                   | 23.41  | 17.86  | 1.31 | 0.76 |
| P01899_HA11_MOUSE   | H2-D1    | H-2 class I histocompatit | R.APWWM*EQEGPEYWER@.E           | 2.68   | 2.81   | 0.95 | 1.05 |
| P01899_HA11_MOUSE   | H2-D1    | H-2 class I histocompatit | R.FDSDAENPR@.Y                  | 45.77  | 38.51  | 1.19 | 0.84 |
| P01899_HA11_MOUSE   | H2-D1    | H-2 class I histocompatit | R.GGDYALAPGSSQSSM*SLR@.D        | 12.80  | 9.88   | 1.30 | 0.77 |
| P01899_HA11_MOUSE   | H2-D1    | H-2 class I histocompatit | R.GQEQWFR.V                     | 11.45  | 9.04   | 1.27 | 0.79 |
| P01899_HA11_MOUSE   | H2-D1    | H-2 class I histocompatit | R.GYLFAYEGR@.D                  | 18.74  | 8.76   | 2.14 | 0.47 |
| P01899_HA11_MOUSE   | H2-D1    | H-2 class I histocompatit | R.TWTAADM*AAQITR.R              | 14.99  | 10.02  | 1.50 | 0.67 |
| P01899_HA11_MOUSE   | H2-D1    | H-2 class I histocompatit | R.VYHEGLPEPLTLR@.W              | 37.23  | 30.79  | 1.21 | 0.83 |
| P01899_HA11_MOUSE   | H2-D1    | H-2 class I histocompatit | R.WASVVPLGK#E                   | 39.96  | 28.25  | 1.41 | 0.71 |
| P01899_HA11_MOUSE   | H2-D1    | H-2 class I histocompatit | R.YFETAUSR@PGLLEPR@.Y           | 58.71  | 38.50  | 1.53 | 0.66 |
| P01902_HA1D_MOUSE   | H2-K1    | H-2 class I histocompatit | R.GYQFAYDGR@.D                  | 10.44  | 3.97   | 2.63 | 0.38 |
| P01901_HA1B_MOUSE   | H2-K1    | H-2 class I histocompatit | R.TWTAADM*AAITK#H               | 15.00  | 6.56   | 2.29 | 0.44 |
| P01901_HA1B_MOUSE   | H2-K1    | H-2 class I histocompatit | R.WM*EQEGPEYWER@.E              | 9.21   | 7.77   | 1.19 | 0.84 |
| P01901_HA1B_MOUSE   | H2-K1    | H-2 class I histocompatit | R.YFETAUSR@PGLLEPR@.Y           | 61.22  | 525.16 | 0.12 | 8.58 |
| P01901_HA1B_MOUSE   | H2-K1    | H-2 class I histocompatit | R.YM*EVGVDDTEFVR.F              | 22.96  | 9.22   | 2.49 | 0.40 |
| P01901_HA1B_MOUSE   | H2-K1    | H-2 class I histocompatit | R.WM*EQEGPEYWER.E               | 1.80   | 2.57   | 0.70 | 1.42 |
| P01901_HA1B_MOUSE   | H2-K1    | H-2 class I histocompatit | R.YFETAUSR@PGLLEPR.Y            | 29.90  | 86.91  | 0.34 | 2.91 |
| P01901_HA1B_MOUSE   | H2-K1    | H-2 class I histocompatit | R.YM*EVGVDDTEFVR@.F             | 10.06  | 6.64   | 1.51 | 0.66 |
| P01901_HA1B_MOUSE   | H2-K1    | H-2 class I histocompatit | R.TWTAADM*AAITK#H               | 6.46   | 4.73   | 1.36 | 0.73 |
| P01901_HA1B_MOUSE   | H2-K1    | H-2 class I histocompatit | R.YFETAUSR@PGLLEPR.Y            | 31.57  | 18.71  | 1.69 | 0.59 |
| P01901_HA1B_MOUSE   | H2-K1    | H-2 class I histocompatit | R.YM*EVGVDDTEFVR@.F             | 13.07  | 8.90   | 1.47 | 0.68 |
| Q85ZW6_Q85ZW6_MOUSE | H2-M10.3 | Histocompatibility 2, M   | K.NRWENM*SEAEAR@.W              | 3.37   | 7.80   | 0.43 | 2.31 |
| Q61425_HCDH_MOUSE   | Hadh     | Hydroxyacyl-coenzyme A    | R.LLVPLYEAVR.L                  | 4.67   | 7.46   | 0.63 | 1.60 |
| Q8BMS1_ECHA_MOUSE   | Hadha    | Trifunctional enzyme sut  | R.AGLEQGSAGYLAESQK#.F           | 11.46  | 5.18   | 2.21 | 0.45 |
| Q8BMS1_ECHA_MOUSE   | Hadha    | Trifunctional enzyme sut  | R.KTTASAVAVGLR@.Q               | 14.95  | 36.30  | 0.41 | 2.43 |
| Q8BMS1_ECHA_MOUSE   | Hadha    | Trifunctional enzyme sut  | R.FGGGSVELLK.Q                  | 20.71  | 9.14   | 2.27 | 0.44 |
| Q8BMS1_ECHA_MOUSE   | Hadha    | Trifunctional enzyme sut  | R.GFYIYQEGSK#.K                 | 8.72   | 5.39   | 1.62 | 0.62 |
| Q8BMS1_ECHA_MOUSE   | Hadha    | Trifunctional enzyme sut  | R.LPAK#PEVSDDEDVQYR@.V          | 28.03  | 7.54   | 3.72 | 0.27 |
| Q8BMS1_ECHA_MOUSE   | Hadha    | Trifunctional enzyme sut  | R.M*QLELITDK#.T                 | 8.64   | 5.19   | 1.66 | 0.60 |
| Q8BMS1_ECHA_MOUSE   | Hadha    | Trifunctional enzyme sut  | R.TIYEEVAVNFAK#.G               | 12.73  | 4.20   | 3.03 | 0.33 |
| Q99JY0_ECHB_MOUSE   | Hadhb    | Trifunctional enzyme sut  | R.K.DQLLGPYATPK#.V              | 8.56   | 5.86   | 1.45 | 0.69 |
| Q99JY0_ECHB_MOUSE   | Hadhb    | Trifunctional enzyme sut  | R.EAALGAGFSDK#.T                | 21.76  | 12.15  | 1.79 | 0.56 |
| Q99JY0_ECHB_MOUSE   | Hadhb    | Trifunctional enzyme sut  | R.LAAFAVSR.M                    | 54.39  | 26.01  | 2.09 | 0.48 |
| Q99JY0_ECHB_MOUSE   | Hadhb    | Trifunctional enzyme sut  | R.M*EQDYALR@.S                  | 24.10  | 11.85  | 2.03 | 0.49 |
| Q99JY0_ECHB_MOUSE   | Hadhb    | Trifunctional enzyme sut  | R.NIVVGEVGR@.I                  | 28.42  | 15.02  | 1.89 | 0.53 |
| Q99JY0_ECHB_MOUSE   | Hadhb    | Trifunctional enzyme sut  | R.IPELLSGTSVK#.D                | 5.55   | 14.71  | 0.38 | 2.65 |
| Q8BY71_HAT1_MOUSE   | Hat1     | Histone acetyltransferase | R.LLVTDI*SDAEQYR@.S             | 17.74  | 8.50   | 2.09 | 0.48 |
| Q8BY71_HAT1_MOUSE   | Hat1     | Histone acetyltransferase | R.LLVTDI*SDAEQYR@.S             | 4.09   | 3.48   | 1.18 | 0.85 |
| Q8BHX1_HAUS1_MOUSE  | Haus1    | HAUS augmin-like compl    | R.AAEEQLSAR@.G                  | 20.36  | 8.80   | 2.31 | 0.43 |
| Q8BHX1_HAUS1_MOUSE  | Haus1    | HAUS augmin-like compl    | R.ALQVAEVLK#.K                  | 7.10   | 3.03   | 2.35 | 0.43 |
| Q8BHX1_HAUS1_MOUSE  | Haus1    | HAUS augmin-like compl    | R.DISLVEDLK#.Q                  | 12.38  | 5.28   | 2.34 | 0.43 |
| Q8BHX1_HAUS1_MOUSE  | Haus1    | HAUS augmin-like compl    | R.DR@DISLVEDLK#.Q               | 11.72  | 5.09   | 2.30 | 0.43 |
| Q8BHX1_HAUS1_MOUSE  | Haus1    | HAUS augmin-like compl    | R.K.HLESYDLM*PSPSLAQLK#.I       | 15.97  | 6.80   | 2.35 | 0.43 |
| Q8BHX1_HAUS1_MOUSE  | Haus1    | HAUS augmin-like compl    | R.NLATLVELEK#.C                 | 12.33  | 8.75   | 1.41 | 0.71 |
| Q8BHX1_HAUS1_MOUSE  | Haus1    | HAUS augmin-like compl    | R.R@LEDPLM*ESVNFSPANLSK#.S      | 17.22  | 9.72   | 1.77 | 0.56 |
| Q9CQ59_HAUS2_MOUSE  | Haus2    | HAUS augmin-like compl    | R.ELQTEIYIPK#.M                 | 16.08  | 5.29   | 3.04 | 0.33 |
| Q9CQ59_HAUS2_MOUSE  | Haus2    | HAUS augmin-like compl    | R.M*DIILNKHTLEAENILK#.W         | 18.82  | 6.95   | 2.71 | 0.37 |
| Q8QZ2_HAUS3_MOUSE   | Haus3    | HAUS augmin-like compl    | R.LDDK#HEIQLDEVTQLQK#.L         | 14.85  | 7.36   | 2.02 | 0.50 |
| Q8QZ2_HAUS3_MOUSE   | Haus3    | HAUS augmin-like compl    | R.LYELLEGDNK#.K                 | 4.91   | 3.75   | 1.31 | 0.76 |
| Q8QZ2_HAUS3_MOUSE   | Haus3    | HAUS augmin-like compl    | R.QELVLENLK#.K                  | 11.51  | 4.75   | 2.42 | 0.41 |
| Q8QZ2_HAUS3_MOUSE   | Haus3    | HAUS augmin-like compl    | R.SGKPILEGTALDEVLR.T            | 15.87  | 9.48   | 1.67 | 0.60 |
| Q8BFT2_HAUS4_MOUSE  | Haus4    | HAUS augmin-like compl    | R.VIQELVDYVVK#.A                | 9.86   | 3.29   | 3.00 | 0.33 |
| Q8BFT2_HAUS4_MOUSE  | Haus4    | HAUS augmin-like compl    | R.VWTLTEVLR@.E                  | 12.70  | 7.75   | 1.64 | 0.61 |
| Q9D786_HAUS5_MOUSE  | Haus5    | HAUS augmin-like compl    | R.ASELLPR@.A                    | 7.15   | 2.98   | 2.40 | 0.42 |
| Q9D786_HAUS5_MOUSE  | Haus5    | HAUS augmin-like compl    | R.ASSILLSHLGLPVGK#.A            | 10.75  | 6.56   | 1.64 | 0.61 |
| Q9D786_HAUS5_MOUSE  | Haus5    | HAUS augmin-like compl    | R.LVPTSEAVAPQSELLR@.C           | 8.92   | 4.49   | 1.99 | 0.50 |
| Q9D786_HAUS5_MOUSE  | Haus5    | HAUS augmin-like compl    | R.VDVTFGPVVASAAPLEPELVGDVR@.A   | 6.67   | 6.37   | 1.05 | 0.95 |
| Q6NV99_Q6NV99_MOUSE | Haus6    | Protein Haus6 OS=Mus r    | R.FLQQLR@.E                     | 9.30   | 4.01   | 2.32 | 0.43 |
| Q6NV99_Q6NV99_MOUSE | Haus6    | Protein Haus6 OS=Mus r    | R.TIADSEEDSPLSDAK#.N            | 5.77   | 3.06   | 1.88 | 0.53 |
| Q8BKT8_HAUS7_MOUSE  | Haus7    | HAUS augmin-like compl    | R.AVM*EIAIDTASAEAM*#.K.A        | 7.17   | 3.40   | 2.11 | 0.47 |
| Q99L00_HAUS8_MOUSE  | Haus8    | HAUS augmin-like compl    | R.LVSVQVELSSQASK#.E             | 24.86  | 15.32  | 1.62 | 0.62 |
| Q61191_HCF1_MOUSE   | Hcf1     | Host cell factor 1 OS=Mu  | R.ANTNSLEVSIGWAVATADSYLLQLQK#.Y | 6.92   | 2.09   | 3.31 | 0.30 |
| Q61191_HCF1_MOUSE   | Hcf1     | Host cell factor 1 OS=Mu  | R.ENQWFDVGVVK#.G                | 12.86  | 2.50   | 5.13 | 0.19 |
| Q61191_HCF1_MOUSE   | Hcf1     | Host cell factor 1 OS=Mu  | R.GPFSEISAFK#.T                 | 12.13  | 4.14   | 2.93 | 0.34 |
| Q61191_HCF1_MOUSE   | Hcf1     | Host cell factor 1 OS=Mu  | R.K.GPLPAGALK#.L                | 29.47  | 6.85   | 4.00 | 0.23 |
| Q61191_HCF1_MOUSE   | Hcf1     | Host cell factor 1 OS=Mu  | R.IATGHGQGVQVQLK#.G             | 45.98  | 6.31   | 7.29 | 0.14 |
| Q61191_HCF1_MOUSE   | Hcf1     | Host cell factor 1 OS=Mu  | R.LGHFSFVGNK#.C                 | 14.31  | 3.60   | 4.14 | 0.24 |
| Q61191_HCF1_MOUSE   | Hcf1     | Host cell factor 1 OS=Mu  | R.LYVSGR@.D                     | 17.38  | 4.70   | 3.70 | 0.27 |
| Q61191_HCF1_MOUSE   | Hcf1     | Host cell factor 1 OS=Mu  | R.M*YVFGVWVPLVM*DDVK#.V         | 8.56   | 4.58   | 1.87 | 0.53 |
| Q61191_HCF1_MOUSE   | Hcf1     | Host cell factor 1 OS=Mu  | R.SPISVPGSALSILGK#.V            | 37.72  | 8.80   | 4.28 | 0.23 |
| Q61191_HCF1_MOUSE   | Hcf1     | Host cell factor 1 OS=Mu  | R.SSTPAQLAFM*#.R@.V             | 7.48   | 2.77   | 2.70 | 0.37 |
| Q61191_HCF1_MOUSE   | Hcf1     | Host cell factor 1 OS=Mu  | R.VASSPVM*VSNPATR@.M            | 31.26  | 6.62   | 4.72 | 0.21 |
| Q61191_HCF1_MOUSE   | Hcf1     | Host cell factor 1 OS=Mu  | R.YSNDLYEQASR@.W                | 22.66  | 6.36   | 3.56 | 0.28 |
| Q61191_HCF1_MOUSE   | Hcf1     | Host cell factor 1 OS=Mu  | R.K.GPLPAGALK#.L                | 15.99  | 4.68   | 3.42 | 0.29 |
| Q61191_HCF1_MOUSE   | Hcf1     | Host cell factor 1 OS=Mu  | R.IATGHGQGVQVQLK#.G             | 17.06  | 4.63   | 3.68 | 0.27 |
| Q61191_HCF1_MOUSE   | Hcf1     | Host cell factor 1 OS=Mu  | R.ITVAPGALER@.V                 | 6.58   | 3.65   | 1.80 | 0.55 |
| Q61191_HCF1_MOUSE   | Hcf1     | Host cell factor 1 OS=Mu  | R.SPISVPGSALSILGK#.V            | 21.81  | 6.65   | 3.28 | 0.30 |
| Q61191_HCF1_MOUSE   | Hcf1     | Host cell factor 1 OS=Mu  | R.VASSPVM*VSNPATR@.M            | 8.96   | 3.07   | 2.92 | 0.34 |
| O09106_HDAC1_MOUSE  | Hdac1    | Histone deacetylase 1 OS  | R.DGIDDESYAIFK#PVM*SK#.V        | 12.64  | 5.61   | 2.25 | 0.44 |
| O09106_HDAC1_MOUSE  | Hdac1    | Histone deacetylase 1 OS  | R.LHSPSNMT*NTQNTNEYLEK#.I       | 43.64  | 19.10  | 2.29 | 0.44 |
| O09106_HDAC1_MOUSE  | Hdac1    | Histone deacetylase 1 OS  | R.LHSPSNMT*NTQNTNEYLEK#.I       | 4.69   | 3.77   | 1.25 | 0.80 |
| O09106_HDAC1_MOUSE  | Hdac1    | Histone deacetylase 1 OS  | R.M*THNLLNLYGLVR@.K             | 21.23  | 10.38  | 2.08 | 0.48 |
| O09106_HDAC1_MOUSE  | Hdac1    | Histone deacetylase 1 OS  | R.SFNLP*LM*LGGGYTR@.N           | 7.62   | 2.52   | 2.87 | 0.35 |
| O09106_HDAC1_MOUSE  | Hdac1    | Histone deacetylase 1 OS  | R.VM*TVSFHK#.Y                  | 9.24   | 15.94  | 0.58 | 1.73 |
| O09106_HDAC1_MOUSE  | Hdac1    | Histone deacetylase 1 OS  | R.YGEPFGTDLR@.D                 | 61.35  | 26.62  | 2.31 | 0.43 |
| O09106_HDAC1_MOUSE  | Hdac1    | Histone deacetylase 1 OS  | R.LFENLR@.M                     | 169.09 | 58.12  | 2.91 | 0.34 |
| O09106_HDAC1_MOUSE  | Hdac1    | Histone deacetylase 1 OS  | R.LHSPSNMT*NTQNTNEYLEK#.I       | 73.47  | 24.98  | 2.94 | 0.34 |

|                    |       |                                                               |        |       |       |      |
|--------------------|-------|---------------------------------------------------------------|--------|-------|-------|------|
| O09106_HDAC1_MOUSE | Hdac1 | Histone deacetylase 1 OS R.M*THNLLNLYGLYR@.K                  | 6.22   | 1.09  | 5.69  | 0.18 |
| O09106_HDAC1_MOUSE | Hdac1 | Histone deacetylase 1 OS K.SFNLPML*LGGGGYTIR@.N               | 16.26  | 6.46  | 2.52  | 0.40 |
| O09106_HDAC1_MOUSE | Hdac1 | Histone deacetylase 1 OS R.VM*TVSFHK#.Y                       | 15.93  | 3.45  | 4.61  | 0.22 |
| O09106_HDAC1_MOUSE | Hdac1 | Histone deacetylase 1 OS K.YGEPFGTDGLR@.D                     | 147.47 | 46.25 | 3.19  | 0.31 |
| O09106_HDAC1_MOUSE | Hdac1 | Histone deacetylase 1 OS K.YHSDDYKIK.F                        | 41.91  | 15.26 | 2.75  | 0.36 |
| O09106_HDAC1_MOUSE | Hdac1 | Histone deacetylase 1 OS K.YYAVNPLR@.D                        | 40.54  | 14.21 | 2.85  | 0.35 |
| O09106_HDAC1_MOUSE | Hdac1 | Histone deacetylase 1 OS R.DGIDDESYEAFK#PVM*SK#.V             | 24.53  | 7.29  | 3.36  | 0.30 |
| O09106_HDAC1_MOUSE | Hdac1 | Histone deacetylase 1 OS K.LHISPSNM*TNQNTNEYLEK#.I            | 49.64  | 19.09 | 2.60  | 0.38 |
| O09106_HDAC1_MOUSE | Hdac1 | Histone deacetylase 1 OS K.LHISPSNM*TNQNTNEYLEK#.I            | 4.81   | 2.11  | 2.28  | 0.44 |
| O09106_HDAC1_MOUSE | Hdac1 | Histone deacetylase 1 OS R.M*THNLLNLYGLYR@.K                  | 33.39  | 13.26 | 2.52  | 0.40 |
| O09106_HDAC1_MOUSE | Hdac1 | Histone deacetylase 1 OS K.SFNLPML*LGGGGYTIR@.N               | 14.34  | 4.91  | 2.92  | 0.34 |
| O09106_HDAC1_MOUSE | Hdac1 | Histone deacetylase 1 OS R.VM*TVSFHK#.Y                       | 12.40  | 5.13  | 2.42  | 0.41 |
| O09106_HDAC1_MOUSE | Hdac1 | Histone deacetylase 1 OS K.YGEPFGTDGLR@.D                     | 86.75  | 30.74 | 2.82  | 0.35 |
| O09106_HDAC1_MOUSE | Hdac1 | Histone deacetylase 1 OS K.YYAVNPLR@.D                        | 21.73  | 8.66  | 2.51  | 0.40 |
| O09106_HDAC1_MOUSE | Hdac1 | Histone deacetylase 1 OS K.LHISPSNM*TNQNTNEYLEK#.I            | 9.84   | 5.51  | 1.79  | 0.56 |
| O09106_HDAC1_MOUSE | Hdac1 | Histone deacetylase 1 OS K.LHISPSNM*TNQNTNEYLEK#.I            | 12.74  | 5.00  | 2.55  | 0.39 |
| O09106_HDAC1_MOUSE | Hdac2 | Histone deacetylase 2 OS K.TFNLPLLM*LGGGGYTIR@.N              | 15.01  | 5.94  | 2.53  | 0.40 |
| O09106_HDAC1_MOUSE | Hdac2 | Histone deacetylase 2 OS R.DGIDDESYGQFK#PIISK#.V              | 22.24  | 7.17  | 3.10  | 0.32 |
| O09106_HDAC1_MOUSE | Hdac2 | Histone deacetylase 2 OS K.LHISPSNM*TNQNTNEYLEK#.I            | 18.34  | 8.00  | 2.29  | 0.44 |
| O09106_HDAC1_MOUSE | Hdac2 | Histone deacetylase 2 OS K.TFNLPLLM*LGGGGYTIR@.N              | 9.74   | 2.50  | 3.90  | 0.26 |
| O09106_HDAC1_MOUSE | Hdac2 | Histone deacetylase 2 OS R.DGIDDESYGQFK#PIISK#.V              | 25.80  | 7.64  | 3.38  | 0.30 |
| O09106_HDAC1_MOUSE | Hdac2 | Histone deacetylase 2 OS K.LHISPSNM*TNQNTNEYLEK#.I            | 17.77  | 6.74  | 2.64  | 0.38 |
| O09106_HDAC1_MOUSE | Hdac6 | Histone deacetylase 6 OS K.AVLAQGSQSEQAQK#.G                  | 5.12   | 2.68  | 1.91  | 0.52 |
| O09106_HDAC1_MOUSE | Hdlbp | Vigilin OS=Mus musculus K.AFHPFIAGPYNR@.L                     | 81.99  | 26.78 | 3.06  | 0.33 |
| O09106_HDAC1_MOUSE | Hdlbp | Vigilin OS=Mus musculus K.AFHPFIAGPYNR@.L                     | 9.02   | 3.89  | 2.32  | 0.43 |
| O09106_HDAC1_MOUSE | Hdlbp | Vigilin OS=Mus musculus K.AR@HEVLISAEQDK#R@.A                 | 28.14  | 6.98  | 4.03  | 0.25 |
| O09106_HDAC1_MOUSE | Hdlbp | Vigilin OS=Mus musculus K.ASVITQVFHPLYLEER@.K                 | 149.99 | 52.55 | 2.85  | 0.35 |
| O09106_HDAC1_MOUSE | Hdlbp | Vigilin OS=Mus musculus K.DAFPPPLPEK#.A                       | 17.26  | 1.49  | 11.56 | 0.09 |
| O09106_HDAC1_MOUSE | Hdlbp | Vigilin OS=Mus musculus R.DAPVTSNSSEK#APDM*SSSEFPFSGAQVAPK#.T | 8.47   | 3.09  | 2.74  | 0.37 |
| O09106_HDAC1_MOUSE | Hdlbp | Vigilin OS=Mus musculus R.DK#PEVIINFDPQAK#.S                  | 74.54  | 30.38 | 2.45  | 0.41 |
| O09106_HDAC1_MOUSE | Hdlbp | Vigilin OS=Mus musculus K.DLANIAEVEVSIPAK#.L                  | 64.63  | 23.35 | 2.77  | 0.36 |
| O09106_HDAC1_MOUSE | Hdlbp | Vigilin OS=Mus musculus K.DM*NOFGEQAK#.I                      | 12.91  | 3.27  | 3.94  | 0.25 |
| O09106_HDAC1_MOUSE | Hdlbp | Vigilin OS=Mus musculus R.DYVQK#.F                            | 85.76  | 33.60 | 2.55  | 0.39 |
| O09106_HDAC1_MOUSE | Hdlbp | Vigilin OS=Mus musculus K.EALEALVPITIEVEVPLDHR@.Y             | 22.94  | 6.90  | 3.33  | 0.30 |
| O09106_HDAC1_MOUSE | Hdlbp | Vigilin OS=Mus musculus R.EIAEYGGVM*VSFPR@.S                  | 72.08  | 22.64 | 3.18  | 0.31 |
| O09106_HDAC1_MOUSE | Hdlbp | Vigilin OS=Mus musculus R.ELLELASR.M                          | 106.52 | 38.09 | 2.80  | 0.36 |
| O09106_HDAC1_MOUSE | Hdlbp | Vigilin OS=Mus musculus K.ELQAEQEDR@.A                        | 47.66  | 5.57  | 8.56  | 0.12 |
| O09106_HDAC1_MOUSE | Hdlbp | Vigilin OS=Mus musculus K.FPDR@EENPVHVSVEPSIQENGEAGEGR@.E     | 15.60  | 83.76 | 0.19  | 5.37 |
| O09106_HDAC1_MOUSE | Hdlbp | Vigilin OS=Mus musculus K.GAVITQR@.L                          | 49.63  | 12.27 | 4.04  | 0.25 |
| O09106_HDAC1_MOUSE | Hdlbp | Vigilin OS=Mus musculus R.GEPEK#GGALTEVYAK#.A                 | 5.40   | 1.57  | 3.44  | 0.29 |
| O09106_HDAC1_MOUSE | Hdlbp | Vigilin OS=Mus musculus K.GNSLQELER@.T                        | 115.33 | 35.59 | 3.24  | 0.31 |
| O09106_HDAC1_MOUSE | Hdlbp | Vigilin OS=Mus musculus R.GPSSDVEK#.A                         | 22.67  | 9.85  | 2.30  | 0.43 |
| O09106_HDAC1_MOUSE | Hdlbp | Vigilin OS=Mus musculus R.HEVLISAEQDK#R@.A                    | 84.16  | 27.64 | 3.05  | 0.33 |
| O09106_HDAC1_MOUSE | Hdlbp | Vigilin OS=Mus musculus K.IDLPAENSNETIITGK#.R                 | 62.69  | 15.64 | 4.01  | 0.25 |
| O09106_HDAC1_MOUSE | Hdlbp | Vigilin OS=Mus musculus R.IEGDPQGVQQAQ#.R                     | 194.81 | 67.25 | 2.90  | 0.35 |
| O09106_HDAC1_MOUSE | Hdlbp | Vigilin OS=Mus musculus R.IIFPAEDK#DQDLITIGK#EDAVR@.E         | 22.33  | 4.41  | 5.07  | 0.20 |
| O09106_HDAC1_MOUSE | Hdlbp | Vigilin OS=Mus musculus R.INIPPPSVNR@.T                       | 43.19  | 18.25 | 2.37  | 0.42 |
| O09106_HDAC1_MOUSE | Hdlbp | Vigilin OS=Mus musculus K.IQIPR@PDDPSNIK#.I                   | 85.91  | 29.94 | 2.87  | 0.35 |
| O09106_HDAC1_MOUSE | Hdlbp | Vigilin OS=Mus musculus R.KGAVITQR.L                          | 32.49  | 12.50 | 2.60  | 0.38 |
| O09106_HDAC1_MOUSE | Hdlbp | Vigilin OS=Mus musculus K.K#QLLHAEK#.Q                        | 22.78  | 8.76  | 2.60  | 0.38 |
| O09106_HDAC1_MOUSE | Hdlbp | Vigilin OS=Mus musculus R.LEHEVNIQFPK#DDGNQPDQDITITIGK#.N     | 42.84  | 14.02 | 3.06  | 0.33 |
| O09106_HDAC1_MOUSE | Hdlbp | Vigilin OS=Mus musculus K.LGQALTEVYAK#.A                      | 145.37 | 46.79 | 3.11  | 0.32 |
| O09106_HDAC1_MOUSE | Hdlbp | Vigilin OS=Mus musculus K.LHNSLITGK#.G                        | 42.80  | 12.24 | 3.50  | 0.29 |
| O09106_HDAC1_MOUSE | Hdlbp | Vigilin OS=Mus musculus R.LQTOASATVPIPK#.E                    | 103.17 | 33.06 | 3.12  | 0.32 |
| O09106_HDAC1_MOUSE | Hdlbp | Vigilin OS=Mus musculus K.LSVTVDPK#.Y                         | 63.16  | 29.44 | 2.15  | 0.47 |
| O09106_HDAC1_MOUSE | Hdlbp | Vigilin OS=Mus musculus R.LVGEIM*QETGTR@.I                    | 95.17  | 27.98 | 3.40  | 0.29 |
| O09106_HDAC1_MOUSE | Hdlbp | Vigilin OS=Mus musculus R.LVGEIMQETGTR@.I                     | 20.59  | 5.21  | 3.95  | 0.25 |
| O09106_HDAC1_MOUSE | Hdlbp | Vigilin OS=Mus musculus R.M*DYVINIDHK#.F                      | 45.92  | 13.29 | 3.46  | 0.29 |
| O09106_HDAC1_MOUSE | Hdlbp | Vigilin OS=Mus musculus K.M*VADLVENSYSVPIFK#.Q                | 37.81  | 37.92 | 3.05  | 0.33 |
| O09106_HDAC1_MOUSE | Hdlbp | Vigilin OS=Mus musculus K.MVADLVENSYSVPIFK#.Q                 | 9.92   | 3.28  | 3.02  | 0.33 |
| O09106_HDAC1_MOUSE | Hdlbp | Vigilin OS=Mus musculus K.SDIVQLR@.L                          | 139.87 | 42.19 | 3.31  | 0.30 |
| O09106_HDAC1_MOUSE | Hdlbp | Vigilin OS=Mus musculus R.SGLVPOQK#.V                         | 87.82  | 24.79 | 3.54  | 0.28 |
| O09106_HDAC1_MOUSE | Hdlbp | Vigilin OS=Mus musculus R.TEIVFTGK#.E                         | 19.49  | 8.18  | 2.38  | 0.42 |
| O09106_HDAC1_MOUSE | Hdlbp | Vigilin OS=Mus musculus R.TEIVFTGK#EQLAQAVAR@.I               | 153.51 | 46.48 | 3.30  | 0.30 |
| O09106_HDAC1_MOUSE | Hdlbp | Vigilin OS=Mus musculus R.TGAELELSLAK#.D                      | 83.00  | 30.44 | 2.73  | 0.37 |
| O09106_HDAC1_MOUSE | Hdlbp | Vigilin OS=Mus musculus R.TGVSVPEIPSDSISSETVLR@.G             | 13.48  | 5.48  | 2.46  | 0.41 |
| O09106_HDAC1_MOUSE | Hdlbp | Vigilin OS=Mus musculus R.TK#DLIEQR@.F                        | 38.40  | 8.70  | 4.41  | 0.23 |
| O09106_HDAC1_MOUSE | Hdlbp | Vigilin OS=Mus musculus K.TTTIAVEK#.K                         | 64.94  | 24.14 | 2.69  | 0.37 |
| O09106_HDAC1_MOUSE | Hdlbp | Vigilin OS=Mus musculus K.VATLNSEENDPPTYK#.D                  | 36.64  | 12.13 | 3.02  | 0.33 |
| O09106_HDAC1_MOUSE | Hdlbp | Vigilin OS=Mus musculus K.VATLNSEENDPPTYK#DAPFPLPEK#.A        | 7.43   | 28.63 | 0.26  | 3.86 |
| O09106_HDAC1_MOUSE | Hdlbp | Vigilin OS=Mus musculus K.VIIEFTGEDK#DTEGTEDEVNAQEQEGM*VK#.D  | 28.26  | 11.32 | 2.50  | 0.40 |
| O09106_HDAC1_MOUSE | Hdlbp | Vigilin OS=Mus musculus R.VKHELQAEQEDR@.A                     | 60.72  | 21.46 | 2.83  | 0.35 |
| O09106_HDAC1_MOUSE | Hdlbp | Vigilin OS=Mus musculus R.YIIGQK#.G                           | 68.78  | 23.73 | 2.90  | 0.35 |
| O09106_HDAC1_MOUSE | Hdlbp | Vigilin OS=Mus musculus K.AFHPFIAGPYNR@.L                     | 45.85  | 12.03 | 3.81  | 0.26 |
| O09106_HDAC1_MOUSE | Hdlbp | Vigilin OS=Mus musculus K.APDM*SSSEFPFSGAQVAPK#.T             | 11.44  | 3.23  | 3.54  | 0.28 |
| O09106_HDAC1_MOUSE | Hdlbp | Vigilin OS=Mus musculus K.APDM*SSSEFPFSGAQVAPK#.T             | 7.57   | 2.72  | 2.78  | 0.36 |
| O09106_HDAC1_MOUSE | Hdlbp | Vigilin OS=Mus musculus R.DAPVTSNSSEK#APDM*SSSEFPFSGAQVAPK#.T | 4.09   | 3.26  | 1.26  | 0.80 |
| O09106_HDAC1_MOUSE | Hdlbp | Vigilin OS=Mus musculus R.DK#PEVIINFDPQAK#.S                  | 39.50  | 11.80 | 3.35  | 0.30 |
| O09106_HDAC1_MOUSE | Hdlbp | Vigilin OS=Mus musculus K.DLANIAEVEVSIPAK#.L                  | 48.05  | 11.71 | 4.10  | 0.24 |
| O09106_HDAC1_MOUSE | Hdlbp | Vigilin OS=Mus musculus R.EIAEYGGVM*VSFPR@.S                  | 43.51  | 13.64 | 3.19  | 0.31 |
| O09106_HDAC1_MOUSE | Hdlbp | Vigilin OS=Mus musculus R.EIAEYGGVM*VSFPR@.S                  | 5.82   | 6.23  | 0.93  | 1.07 |
| O09106_HDAC1_MOUSE | Hdlbp | Vigilin OS=Mus musculus R.ELLELASR.M                          | 53.68  | 17.02 | 3.15  | 0.32 |
| O09106_HDAC1_MOUSE | Hdlbp | Vigilin OS=Mus musculus K.FPDR@EENPVHVSVEPSIQENGEAGEGR@.E     | 6.25   | 5.09  | 1.23  | 0.81 |
| O09106_HDAC1_MOUSE | Hdlbp | Vigilin OS=Mus musculus K.GAVITQR@.L                          | 13.73  | 4.42  | 3.11  | 0.32 |
| O09106_HDAC1_MOUSE | Hdlbp | Vigilin OS=Mus musculus K.GNSLQELER@.T                        | 85.13  | 20.41 | 4.17  | 0.24 |
| O09106_HDAC1_MOUSE | Hdlbp | Vigilin OS=Mus musculus R.HEVLISAEQDK#R@.A                    | 23.00  | 3.72  | 6.19  | 0.16 |
| O09106_HDAC1_MOUSE | Hdlbp | Vigilin OS=Mus musculus K.IDLPAENSNETIITGK#.R                 | 43.92  | 15.69 | 2.80  | 0.36 |
| O09106_HDAC1_MOUSE | Hdlbp | Vigilin OS=Mus musculus R.IEGDPQGVQQAQ#.R                     | 55.58  | 13.76 | 4.04  | 0.25 |
| O09106_HDAC1_MOUSE | Hdlbp | Vigilin OS=Mus musculus R.IIFPAEDK#DQDLITIGK#.E               | 5.17   | 1.60  | 3.23  | 0.31 |
| O09106_HDAC1_MOUSE | Hdlbp | Vigilin OS=Mus musculus R.IIFPAEDK#DQDLITIGK#.E               | 32.46  | 2.91  | 3.46  | 0.34 |
| O09106_HDAC1_MOUSE | Hdlbp | Vigilin OS=Mus musculus K.ITLEGTEDEVNAQEQEGM*VK#.D            | 6.91   | 3.00  | 2.31  | 0.43 |
| O09106_HDAC1_MOUSE | Hdlbp | Vigilin OS=Mus musculus R.LEHEVNIQFPK#DDGNQPDQDITITIGK#.N     | 23.62  | 8.05  | 2.93  | 0.34 |
| O09106_HDAC1_MOUSE | Hdlbp | Vigilin OS=Mus musculus K.LGQALTEVYAK#.A                      | 52.53  | 14.02 | 3.75  | 0.27 |
| O09106_HDAC1_MOUSE | Hdlbp | Vigilin OS=Mus musculus K.LQDELK#.T                           | 55.54  | 9.28  | 5.98  | 0.17 |
| O09106_HDAC1_MOUSE | Hdlbp | Vigilin OS=Mus musculus R.LQTOASATVPIPK#.E                    | 49.12  | 18.27 | 2.69  | 0.37 |
| O09106_HDAC1_MOUSE | Hdlbp | Vigilin OS=Mus musculus K.LSVTVDPK#.Y                         | 31.86  | 11.38 | 2.80  | 0.36 |
| O09106_HDAC1_MOUSE | Hdlbp | Vigilin OS=Mus musculus R.LVGEIM*QETGTR@.I                    | 41.60  | 13.72 | 3.03  | 0.33 |
| O09106_HDAC1_MOUSE | Hdlbp | Vigilin OS=Mus musculus R.LVGEIMQETGTR@.I                     | 11.07  | 2.42  | 4.58  | 0.22 |
| O09106_HDAC1_MOUSE | Hdlbp | Vigilin OS=Mus musculus K.M*VADLVENSYSVPIFK#.Q                | 53.90  | 16.53 | 3.26  | 0.31 |
| O09106_HDAC1_MOUSE | Hdlbp | Vigilin OS=Mus musculus K.MVADLVENSYSVPIFK#.Q                 | 7.04   | 0.93  | 7.56  | 0.13 |
| O09106_HDAC1_MOUSE | Hdlbp | Vigilin OS=Mus musculus K.SDIVQLR.G                           | 61.01  | 17.97 | 3.39  | 0.29 |
| O09106_HDAC1_MOUSE | Hdlbp | Vigilin OS=Mus musculus R.SGLVPOQK#.V                         | 50.40  | 13.29 | 3.79  | 0.26 |
| O09106_HDAC1_MOUSE | Hdlbp | Vigilin OS=Mus musculus R.TEIVFTGK#EQLAQAVAR@.I               | 80.25  | 16.43 | 4.89  | 0.20 |



|                     |          |                                                           |         |         |       |      |
|---------------------|----------|-----------------------------------------------------------|---------|---------|-------|------|
| Q8VDJ3_VIGLN_MOUSE  | Hdlbp    | Vigilin OS=Mus musculus R.TGVSVEIPSPDISSETVLR@.G          | 10.74   | 2.99    | 3.59  | 0.28 |
| Q8VDJ3_VIGLN_MOUSE  | Hdlbp    | Vigilin OS=Mus musculus K.VATLNSEENDPPPTK#.D              | 20.94   | 8.47    | 2.47  | 0.40 |
| Q8VDJ3_VIGLN_MOUSE  | Hdlbp    | Vigilin OS=Mus musculus K.VATLNSEENDPPPTK#DAFPLPEK#.A     | 3.38    | 1.78    | 1.89  | 0.53 |
| Q8VDJ3_VIGLN_MOUSE  | Hdlbp    | Vigilin OS=Mus musculus R.VKHELQAEQEDR@.A                 | 14.31   | 4.03    | 3.55  | 0.28 |
| G3X9B1_G3X9B1_MOUSE | Hear1    | HEAT repeat containing 1 R.EAEDEQAINR.Q                   | 4.79    | 5.43    | 0.88  | 1.13 |
| G3X9B1_G3X9B1_MOUSE | Hear1    | HEAT repeat containing 1 K.M*VIPALIQSDTGDVSVEVTR@.N       | 2.66    | 2.60    | 1.02  | 0.98 |
| Q8BQM4_HEAT3_MOUSE  | Hear3    | HEAT repeat-containing r.K.DIM*TPVALLR@.E                 | 4.67    | 2.48    | 1.89  | 0.53 |
| Q8BQM4_HEAT3_MOUSE  | Hear3    | HEAT repeat-containing r.R.LGPLLLDSSLAVR@.E               | 12.93   | 2.98    | 4.34  | 0.23 |
| Q5QNV8_HEAT9_MOUSE  | Hear9    | Protein HEAT9 OS=Mus K.LM*EAQLMSPDVSADR@.Q                | 6.79    | 3.34    | 2.03  | 0.49 |
| Q69Z2_HECD1_MOUSE   | Hectd1   | E3 ubiquitin-protein liga R.GQVK#PSTSSQPLSAPGPTK#.L       | 7.23    | 4.30    | 1.68  | 0.60 |
| Q69Z2_HECD1_MOUSE   | Hectd1   | E3 ubiquitin-protein liga K.IFLDESPADNVLEVTR@.A           | 7.27    | 2.58    | 2.82  | 0.36 |
| Q69Z2_HECD1_MOUSE   | Hectd1   | E3 ubiquitin-protein liga R.LEDILSR@.D                    | 13.57   | 10.49   | 1.29  | 0.77 |
| Q69Z2_HECD1_MOUSE   | Hectd1   | E3 ubiquitin-protein liga K.TAYEVVNPAAQYLVVTSSEGR@.N      | 5.68    | 2.19    | 2.59  | 0.39 |
| Q60848_HELLS_MOUSE  | Hells    | Lymphocyte-specific heli K.LISQIQEVNRR@.E                 | 6.87    | 2.49    | 2.76  | 0.36 |
| Q60848_HELLS_MOUSE  | Hells    | Lymphocyte-specific heli K.LISQIQEVNRR@.E                 | 29.86   | 11.18   | 2.67  | 0.37 |
| Q60848_HELLS_MOUSE  | Hells    | Lymphocyte-specific heli R.LVTANTIDQK#.I                  | 35.53   | 13.00   | 2.73  | 0.37 |
| Q60848_HELLS_MOUSE  | Hells    | Lymphocyte-specific heli K.M*EQQLLEQK#.K                  | 8.00    | 3.05    | 2.63  | 0.38 |
| Q60848_HELLS_MOUSE  | Hells    | Lymphocyte-specific heli K.QEIFYTAIVNR@.T                 | 10.73   | 3.71    | 2.89  | 0.35 |
| Q60848_HELLS_MOUSE  | Hells    | Lymphocyte-specific heli K.SINSELDQPPSELEK#.L             | 11.17   | 6.43    | 1.74  | 0.58 |
| Q60848_HELLS_MOUSE  | Hells    | Lymphocyte-specific heli R.TVVEGNPIEISEVNLK#.L            | 33.17   | 10.63   | 3.12  | 0.32 |
| Q60848_HELLS_MOUSE  | Hells    | Lymphocyte-specific heli K.VISDEDELELLDR@.S               | 9.68    | 13.36   | 0.72  | 1.38 |
| Q60848_HELLS_MOUSE  | Hells    | Lymphocyte-specific heli K.VISDEDELELLDR@SOLIDQM*K#.A     | 11.39   | 6.63    | 1.72  | 0.58 |
| Q60848_HELLS_MOUSE  | Hells    | Lymphocyte-specific heli K.FFDVPR@.K                      | 13.04   | 4.80    | 2.72  | 0.37 |
| Q60848_HELLS_MOUSE  | Hells    | Lymphocyte-specific heli K.IDEELTVNSGK#.F                 | 24.67   | 10.30   | 2.39  | 0.42 |
| Q60848_HELLS_MOUSE  | Hells    | Lymphocyte-specific heli R.IQGQTK#PVVYR@.L                | 71.20   | 18.14   | 3.93  | 0.25 |
| Q60848_HELLS_MOUSE  | Hells    | Lymphocyte-specific heli R.LDGSMSYSER@.E                  | 15.72   | 4.07    | 3.86  | 0.26 |
| Q60848_HELLS_MOUSE  | Hells    | Lymphocyte-specific heli K.LISQIQEVNRR@.E                 | 51.83   | 14.96   | 3.46  | 0.29 |
| Q60848_HELLS_MOUSE  | Hells    | Lymphocyte-specific heli K.M*EQQLLEQK#.K                  | 16.76   | 6.60    | 2.54  | 0.39 |
| Q60848_HELLS_MOUSE  | Hells    | Lymphocyte-specific heli K.QEIFYTAIVNR@.T                 | 14.73   | 7.23    | 2.04  | 0.49 |
| Q60848_HELLS_MOUSE  | Hells    | Lymphocyte-specific heli R.QGTLQHPVVTSEFIAM*R@.D          | 13.11   | 2.88    | 4.55  | 0.22 |
| Q60848_HELLS_MOUSE  | Hells    | Lymphocyte-specific heli K.SINSELDQPPSELEK#.L             | 18.50   | 6.01    | 3.08  | 0.33 |
| Q60848_HELLS_MOUSE  | Hells    | Lymphocyte-specific heli R.TVVEGNPIEISEVNLK#.L            | 48.14   | 13.91   | 3.46  | 0.29 |
| Q60848_HELLS_MOUSE  | Hells    | Lymphocyte-specific heli K.VISDEDELELLDR@.S               | 17.04   | 6.28    | 2.71  | 0.37 |
| E9QAM5_HELZ2_MOUSE  | Helz2    | Helicase with zinc finger r.K.SVDVLGGLLLR@.R              | 9.57    | 4.59    | 2.08  | 0.48 |
| F2Z461_HERC6_MOUSE  | Herc6    | E3 ISG15-protein ligase I K.VFAWAGSGEQQLGIEFK.E           | 2.34    | 2.52    | 0.93  | 1.07 |
| Q8C3I8_HGH1_MOUSE   | Hgh1     | Protein HGH1 homolog r.R.LLPLTQYDSSVVR@.R                 | 6.88    | 4.76    | 1.45  | 0.69 |
| Q99L18_HGS_MOUSE    | Hgs      | Hepatocyte growth facto K.ESDAM*FAAER@.A                  | 7.32    | 3.73    | 1.96  | 0.51 |
| Q99L18_HGS_MOUSE    | Hgs      | Hepatocyte growth facto K.R@DETALQEEELQLALALQSQAEEK#ER@.M | 7.96    | 3.80    | 2.09  | 0.48 |
| Q99L18_HGS_MOUSE    | Hgs      | Hepatocyte growth facto K.VVQDTYQIM*K#.V                  | 11.04   | 4.60    | 2.40  | 0.42 |
| Q8R1F6_HID1_MOUSE   | Hid1     | Protein HID1 OS=Mus m. R.LLNSPLLQTYLPNSTK#.K              | 3.09    | 3.03    | 1.02  | 0.98 |
| P70349_HINT1_MOUSE  | Hint1    | Histidine triad nucleotid K.AQVAPQGGDTIFGK#.I             | 18.74   | 7.64    | 2.45  | 0.41 |
| Q8VD75_HIP1_MOUSE   | Hip1     | Huntingtin-interacting p K.AINTQEVAVK#.E                  | 11.07   | 7.45    | 1.49  | 0.67 |
| Q8VD75_HIP1_MOUSE   | Hip1     | Huntingtin-interacting p R.EIAASTAQLVAASK#.V              | 27.05   | 12.43   | 2.18  | 0.46 |
| Q8VD75_HIP1_MOUSE   | Hip1     | Huntingtin-interacting p R.EISGLTGQDNNM*K#.I              | 6.83    | 2.63    | 2.59  | 0.39 |
| Q8VD75_HIP1_MOUSE   | Hip1     | Huntingtin-interacting p K.GSLNLTLQQAASR@.G               | 18.44   | 5.77    | 3.20  | 0.31 |
| Q8VD75_HIP1_MOUSE   | Hip1     | Huntingtin-interacting p R.LIQIQLPENPNFLR@.A              | 6.45    | 4.05    | 1.59  | 0.63 |
| Q8VD75_HIP1_MOUSE   | Hip1     | Huntingtin-interacting p R.QELQVLSHNLTSQAQSK#.W           | 17.67   | 9.46    | 1.87  | 0.54 |
| Q8VD75_HIP1_MOUSE   | Hip1     | Huntingtin-interacting p K.TLGEELLPR@.G                   | 18.44   | 8.43    | 2.19  | 0.46 |
| Q8VD75_HIP1_MOUSE   | Hip1     | Huntingtin-interacting p R.VSELEAELEQQHLR@.Q              | 28.73   | 12.36   | 2.32  | 0.43 |
| Q8VD75_HIP1_MOUSE   | Hip1     | Huntingtin-interacting p R.WTEGLSASK#.K                   | 51.69   | 16.22   | 3.19  | 0.31 |
| Q8VD75_HIP1_MOUSE   | Hip1     | Huntingtin-interacting p K.AINTQEVAVK#.E                  | 16.53   | 8.04    | 2.06  | 0.49 |
| Q8VD75_HIP1_MOUSE   | Hip1     | Huntingtin-interacting p R.EIAASTAQLVAASK#.V              | 23.70   | 8.89    | 2.67  | 0.37 |
| Q8VD75_HIP1_MOUSE   | Hip1     | Huntingtin-interacting p R.EISGLTGQDNNM*K#.I              | 6.73    | 2.64    | 2.55  | 0.39 |
| Q8VD75_HIP1_MOUSE   | Hip1     | Huntingtin-interacting p K.GSLNLTLQQAASR@.G               | 18.63   | 5.57    | 3.34  | 0.30 |
| Q8VD75_HIP1_MOUSE   | Hip1     | Huntingtin-interacting p R.LIQIQLPENPNFLR@.A              | 20.11   | 8.76    | 2.29  | 0.44 |
| Q8VD75_HIP1_MOUSE   | Hip1     | Huntingtin-interacting p R.QELQVLSHNLTSQAQSK#.W           | 14.32   | 6.10    | 2.34  | 0.43 |
| Q8VD75_HIP1_MOUSE   | Hip1     | Huntingtin-interacting p R.VLELNDLQK#.E                   | 14.28   | 2.95    | 4.84  | 0.21 |
| Q61666_HIRA_MOUSE   | Hira     | Protein HIRA OS=Mus mu K.FPEILATLR@.G                     | 8.20    | 3.48    | 2.36  | 0.42 |
| Q61666_HIRA_MOUSE   | Hira     | Protein HIRA OS=Mus mu K.ELLPVIGQNLR@.F                   | 16.26   | 1.18    | 13.83 | 0.07 |
| Q61666_HIRA_MOUSE   | Hira     | Protein HIRA OS=Mus mu K.FPEILATLR@.G                     | 10.49   | 3.53    | 2.98  | 0.34 |
| P43275_H11_MOUSE    | Hist1h1a | Histone H1.1 OS=Mus m. K.ER@SGVSLAALK#.K                  | 36.49   | 21.31   | 1.71  | 0.58 |
| P43275_H11_MOUSE    | Hist1h1a | Histone H1.1 OS=Mus m. K.ER@SGVSLAALK#.K.S                | 95.51   | 51.14   | 1.87  | 0.54 |
| P43275_H11_MOUSE    | Hist1h1a | Histone H1.1 OS=Mus m. K.GTGAAGSFK.L                      | 140.36  | 295.01  | 0.48  | 2.10 |
| P43275_H11_MOUSE    | Hist1h1a | Histone H1.1 OS=Mus m. R.K#K#PAGPSVSELIVQAVSSSK#.E        | 275.92  | 302.97  | 0.91  | 1.10 |
| P43275_H11_MOUSE    | Hist1h1a | Histone H1.1 OS=Mus m. K.K#PAGPSVSELIVQAVSSSK#.E          | 24.15   | 39.15   | 0.62  | 1.62 |
| P43275_H11_MOUSE    | Hist1h1a | Histone H1.1 OS=Mus m. K.KSLAAGYDVEK.N                    | 24.95   | 34.21   | 0.73  | 1.37 |
| P43275_H11_MOUSE    | Hist1h1a | Histone H1.1 OS=Mus m. K.KSLAAGYDVEKNSR.I                 | 9.28    | 10.90   | 0.85  | 1.17 |
| P43275_H11_MOUSE    | Hist1h1a | Histone H1.1 OS=Mus m. R.SGVSLAALK#.K                     | 2621.99 | 1428.31 | 1.84  | 0.54 |
| P43275_H11_MOUSE    | Hist1h1a | Histone H1.1 OS=Mus m. R.SGVSLAALK#.K.S                   | 2015.59 | 714.84  | 2.82  | 0.35 |
| P43275_H11_MOUSE    | Hist1h1a | Histone H1.1 OS=Mus m. K.SLAAAGYDVEK#.N                   | 260.11  | 336.60  | 0.77  | 1.29 |
| P43275_H11_MOUSE    | Hist1h1a | Histone H1.1 OS=Mus m. K.SLAAAGYDVEK#NNSR@.I              | 38.04   | 36.71   | 1.04  | 0.96 |
| P43275_H11_MOUSE    | Hist1h1a | Histone H1.1 OS=Mus m. R.K#K#PAGPSVSELIVQAVSSSK#.E        | 9.59    | 3.82    | 2.51  | 0.40 |
| P43275_H11_MOUSE    | Hist1h1a | Histone H1.1 OS=Mus m. R.SGVSLAALK#.K                     | 38.48   | 13.55   | 2.84  | 0.35 |
| P43275_H11_MOUSE    | Hist1h1a | Histone H1.1 OS=Mus m. R.SGVSLAALK#.K.S                   | 29.47   | 6.04    | 4.88  | 0.21 |
| P43275_H11_MOUSE    | Hist1h1a | Histone H1.1 OS=Mus m. R.SGVSLAALK#.K                     | 11.30   | 10.41   | 1.09  | 0.92 |
| P43276_H15_MOUSE    | Hist1h1b | Histone H1.5 OS=Mus m. K.ALAAGYDVEK#.N                    | 2495.13 | 1171.79 | 2.13  | 0.47 |
| P43276_H15_MOUSE    | Hist1h1b | Histone H1.5 OS=Mus m. K.ATGPPVSELITK#.A                  | 1907.48 | 1049.26 | 1.82  | 0.55 |
| P43276_H15_MOUSE    | Hist1h1b | Histone H1.5 OS=Mus m. K.ER@GGVSLPALK#.K                  | 95.09   | 40.04   | 2.37  | 0.42 |
| P43276_H15_MOUSE    | Hist1h1b | Histone H1.5 OS=Mus m. K.ERGGVSLPALK#.K                   | 40.89   | 18.15   | 2.25  | 0.44 |
| P43276_H15_MOUSE    | Hist1h1b | Histone H1.5 OS=Mus m. K.ERGGVSLPALK#.K.A                 | 114.24  | 58.84   | 1.94  | 0.52 |
| P43276_H15_MOUSE    | Hist1h1b | Histone H1.5 OS=Mus m. R.GGVSLPALK#.K                     | 963.31  | 461.24  | 2.09  | 0.48 |
| P43276_H15_MOUSE    | Hist1h1b | Histone H1.5 OS=Mus m. R.GGVSLPALK#.K#.A                  | 601.50  | 244.40  | 2.46  | 0.41 |
| P43276_H15_MOUSE    | Hist1h1b | Histone H1.5 OS=Mus m. K.K#ALAAGYDVEK#.N                  | 332.23  | 180.84  | 1.84  | 0.54 |
| P43276_H15_MOUSE    | Hist1h1b | Histone H1.5 OS=Mus m. K.K#ALAAGYDVEK#NNSR@.I             | 31.95   | 19.17   | 1.67  | 0.60 |
| P43276_H15_MOUSE    | Hist1h1b | Histone H1.5 OS=Mus m. R.K#ATGPPVSELITK#.A                | 1575.71 | 921.97  | 1.71  | 0.59 |
| P43276_H15_MOUSE    | Hist1h1b | Histone H1.5 OS=Mus m. R.KATGPPVSELITK#.A                 | 350.43  | 168.67  | 2.08  | 0.48 |
| P43276_H15_MOUSE    | Hist1h1b | Histone H1.5 OS=Mus m. K.K#PAGATPK#.K                     | 108.51  | 57.53   | 1.89  | 0.53 |
| P43276_H15_MOUSE    | Hist1h1b | Histone H1.5 OS=Mus m. K.ATGPPVSELITK#.A                  | 7.34    | 4.91    | 1.49  | 0.67 |
| P15864_H12_MOUSE    | Hist1h1c | Histone H1.2 OS=Mus m. K.AK#K#AAAAVTK#.K                  | 167.32  | 107.32  | 1.56  | 0.64 |
| P15864_H12_MOUSE    | Hist1h1c | Histone H1.2 OS=Mus m. K.ALAAGYDVEK#.N                    | 3581.73 | 2018.56 | 1.77  | 0.56 |
| P15864_H12_MOUSE    | Hist1h1c | Histone H1.2 OS=Mus m. K.ASGPPVSELITK#.A                  | 3482.80 | 2082.14 | 1.67  | 0.60 |
| P15864_H12_MOUSE    | Hist1h1c | Histone H1.2 OS=Mus m. K.ATGATPK#.K                       | 74.64   | 51.65   | 1.45  | 0.69 |
| P15864_H12_MOUSE    | Hist1h1c | Histone H1.2 OS=Mus m. K.GTGAAGSFK#.L                     | 2248.34 | 1187.46 | 1.89  | 0.53 |
| P15864_H12_MOUSE    | Hist1h1c | Histone H1.2 OS=Mus m. K.K#ALAAGYDVEK#.N                  | 997.78  | 407.27  | 2.45  | 0.41 |
| P15864_H12_MOUSE    | Hist1h1c | Histone H1.2 OS=Mus m. K.KALAAGYDVEKNSR.I                 | 22.09   | 106.83  | 2.14  | 0.47 |
| P15864_H12_MOUSE    | Hist1h1c | Histone H1.2 OS=Mus m. K.K#ALAAGYDVEK#NNSR@.I             | 129.95  | 4.33    | 3.00  | 0.33 |
| P15864_H12_MOUSE    | Hist1h1c | Histone H1.2 OS=Mus m. R.K#ASGPPVSELITK#.A                | 2072.08 | 1179.76 | 1.76  | 0.57 |
| P15864_H12_MOUSE    | Hist1h1c | Histone H1.2 OS=Mus m. R.KASGPPVSELITK#.A                 | 608.18  | 343.67  | 1.77  | 0.57 |
| P15864_H12_MOUSE    | Hist1h1c | Histone H1.2 OS=Mus m. K.K#ATGATPK#.K                     | 496.90  | 292.44  | 1.70  | 0.59 |
| P15864_H12_MOUSE    | Hist1h1c | Histone H1.2 OS=Mus m. K.K#AAAAVTK#.K                     | 593.26  | 471.06  | 1.26  | 0.79 |
| P15864_H12_MOUSE    | Hist1h1c | Histone H1.2 OS=Mus m. K.K#AAAAVTK#.K.V                   | 19.66   | 10.64   | 1.85  | 0.54 |
| P15864_H12_MOUSE    | Hist1h1c | Histone H1.2 OS=Mus m. K.ALAAGYDVEK#.N                    | 45.25   | 15.44   | 2.93  | 0.34 |
| P15864_H12_MOUSE    | Hist1h1c | Histone H1.2 OS=Mus m. K.ASGPPVSELITK#.A                  | 53.68   | 17.72   | 3.03  | 0.33 |

|                    |           |                                                           |         |          |      |       |
|--------------------|-----------|-----------------------------------------------------------|---------|----------|------|-------|
| P15864_H12_MOUSE   | Hist1h1c  | Histone H1.2 OS=Mus ml. R.K#ASGPVSELITK#A                 | 25.74   | 6.15     | 4.19 | 0.24  |
| P15864_H12_MOUSE   | Hist1h1c  | Histone H1.2 OS=Mus ml. K.ALAAGVYVEK#N                    | 25.82   | 13.06    | 1.98 | 0.51  |
| P43274_H14_MOUSE   | Hist1h1e  | Histone H1.4 OS=Mus ml. K.AASGEAK#PK#A                    | 87.16   | 46.79    | 1.86 | 0.54  |
| P43274_H14_MOUSE   | Hist1h1e  | Histone H1.4 OS=Mus ml. K.GTLVQTK#GTGASGSFK#L             | 6.19    | 2.73     | 2.27 | 0.44  |
| P43274_H14_MOUSE   | Hist1h1e  | Histone H1.4 OS=Mus ml. K.K#AAGTATAK#K                    | 103.14  | 58.53    | 1.76 | 0.57  |
| P43274_H14_MOUSE   | Hist1h1e  | Histone H1.4 OS=Mus ml. K.K#AASGEAK#PK#A                  | 15.84   | 13.27    | 1.19 | 0.84  |
| P43274_H14_MOUSE   | Hist1h1e  | Histone H1.4 OS=Mus ml. K.K#PAAAAGAK#K                    | 409.44  | 248.66   | 1.65 | 0.61  |
| P43274_H14_MOUSE   | Hist1h1e  | Histone H1.4 OS=Mus ml. K.K#HTSGPPVSELITK#A               | 938.28  | 548.55   | 1.71 | 0.58  |
| P43274_H14_MOUSE   | Hist1h1e  | Histone H1.4 OS=Mus ml. K.SLVSK#GTLVQTK#G                 | 9.34    | 5.79     | 1.61 | 0.62  |
| P43274_H14_MOUSE   | Hist1h1e  | Histone H1.4 OS=Mus ml. K.TSGPPVSELITK#A                  | 2887.23 | 1521.44  | 1.90 | 0.53  |
| P43274_H14_MOUSE   | Hist1h1e  | Histone H1.4 OS=Mus ml. K.TSGPPVSELITK#A                  | 17.49   | 11.58    | 1.51 | 0.66  |
| P43274_H14_MOUSE   | Hist1h1e  | Histone H1.4 OS=Mus ml. K.TSGPPVSELITK#A                  | 11.99   | 6.21     | 1.93 | 0.52  |
| P43274_H14_MOUSE   | Hist1h1e  | Histone H1.4 OS=Mus ml. K.TSGPPVSELITK#A                  | 10.23   | 6.53     | 1.57 | 0.64  |
| Q8CGP5_H2A1F_MOUSE | Hist1h2af | Histone H2A type 1-F OS= R.AGLQFPVGR.V                    | 110.47  | 767.77   | 0.14 | 6.95  |
| Q8CGP5_H2A1F_MOUSE | Hist1h2af | Histone H2A type 1-F OS= R.HLQLAIR.N                      | 78.43   | 484.72   | 0.16 | 6.18  |
| Q8CGP5_H2A1F_MOUSE | Hist1h2af | Histone H2A type 1-F OS= R.NDEELN.L                       | 6.83    | 54.41    | 0.13 | 7.97  |
| Q8CGP5_H2A1F_MOUSE | Hist1h2af | Histone H2A type 1-F OS= R.VTIAQGGVLPNIQAVLLPK.K          | 75.87   | 407.07   | 0.19 | 5.37  |
| Q8CGP5_H2A1F_MOUSE | Hist1h2af | Histone H2A type 1-F OS= R.AGLQFPVGR.V                    | 1148.77 | 8657.64  | 0.13 | 7.54  |
| Q8CGP5_H2A1F_MOUSE | Hist1h2af | Histone H2A type 1-F OS= R.HLQLAIR.N                      | 547.30  | 4019.10  | 0.14 | 7.34  |
| Q8CGP5_H2A1F_MOUSE | Hist1h2af | Histone H2A type 1-F OS= R.HLQLAIRNDEELN.L                | 67.46   | 553.54   | 0.12 | 8.21  |
| Q8CGP5_H2A1F_MOUSE | Hist1h2af | Histone H2A type 1-F OS= R.HLQLAIRNDEELNLLGR.V            | 34.85   | 274.06   | 0.13 | 7.87  |
| Q8CGP5_H2A1F_MOUSE | Hist1h2af | Histone H2A type 1-F OS= R.HLQLAIR@NDEELN#LLGR@.V         | 4.66    | 35.25    | 0.13 | 7.56  |
| Q8CGP5_H2A1F_MOUSE | Hist1h2af | Histone H2A type 1-F OS= R.K.GINYSER.V                    | 345.07  | 345.07   | 0.13 | 7.79  |
| Q8CGP5_H2A1F_MOUSE | Hist1h2af | Histone H2A type 1-F OS= R.LLGRVTAQGGVLPNIQAVLLPK.K       | 3.48    | 15.37    | 0.23 | 4.42  |
| Q8CGP5_H2A1F_MOUSE | Hist1h2af | Histone H2A type 1-F OS= R.NDEELN.L                       | 232.03  | 1807.71  | 0.13 | 7.79  |
| Q8CGP5_H2A1F_MOUSE | Hist1h2af | Histone H2A type 1-F OS= R.NDEELN#LLGR@.V                 | 504.92  | 4046.77  | 0.12 | 8.01  |
| Q8CGP5_H2A1F_MOUSE | Hist1h2af | Histone H2A type 1-F OS= R.NDEELNLLGRVTAQGGVLPNIQAVLLPK.K | 7.17    | 39.12    | 0.18 | 5.45  |
| Q8CGP5_H2A1F_MOUSE | Hist1h2af | Histone H2A type 1-F OS= R.VTIAQGGVLPNIQAVLLPK.K          | 1036.63 | 5130.43  | 0.20 | 4.95  |
| Q8CGP5_H2A1F_MOUSE | Hist1h2af | Histone H2A type 1-F OS= R.VTIAQGGVLPNIQAVLLPK.T          | 24.96   | 263.91   | 0.09 | 10.57 |
| Q8CGP5_H2A1F_MOUSE | Hist1h2af | Histone H2A type 1-F OS= R.AGLQFPVGR.V                    | 17.56   | 65.30    | 0.27 | 3.72  |
| Q8CGP5_H2A1F_MOUSE | Hist1h2af | Histone H2A type 1-F OS= R.VTIAQGGVLPNIQAVLLPK.K          | 6.45    | 25.18    | 0.26 | 3.91  |
| Q8CGP5_H2A1F_MOUSE | Hist1h2af | Histone H2A type 1-F OS= R.AGLQFPVGR.V                    | 6.72    | 75.49    | 0.09 | 11.23 |
| Q8CGP5_H2A1F_MOUSE | Hist1h2af | Histone H2A type 1-F OS= R.VTIAQGGVLPNIQAVLLPK.K          | 5.82    | 27.37    | 0.21 | 4.71  |
| P70696_H2B1A_MOUSE | Hist1h2ba | Histone H2B type 1-A OS= R.EIQTAVR.L                      | 66.52   | 391.25   | 0.17 | 5.88  |
| P70696_H2B1A_MOUSE | Hist1h2ba | Histone H2B type 1-A OS= R.LLLLGLAK.H                     | 144.50  | 976.74   | 0.15 | 6.76  |
| P70696_H2B1A_MOUSE | Hist1h2ba | Histone H2B type 1-A OS= K.AVTKYTSSK.-                    | 5.94    | 37.32    | 0.16 | 6.28  |
| P70696_H2B1A_MOUSE | Hist1h2ba | Histone H2B type 1-A OS= R.EIQTAVR.L                      | 1313.25 | 9399.08  | 0.14 | 7.16  |
| P70696_H2B1A_MOUSE | Hist1h2ba | Histone H2B type 1-A OS= K.HAVSEGTK.A                     | 194.85  | 1400.15  | 0.14 | 7.19  |
| P70696_H2B1A_MOUSE | Hist1h2ba | Histone H2B type 1-A OS= R.IASEASR.L                      | 324.24  | 2309.19  | 0.14 | 7.12  |
| P70696_H2B1A_MOUSE | Hist1h2ba | Histone H2B type 1-A OS= R.LAHYNNR.S                      | 14.01   | 84.14    | 0.17 | 6.01  |
| P70696_H2B1A_MOUSE | Hist1h2ba | Histone H2B type 1-A OS= R.LAHYNNR.S                      | 36.02   | 248.70   | 0.14 | 6.90  |
| P70696_H2B1A_MOUSE | Hist1h2ba | Histone H2B type 1-A OS= R.LLLLGLAK.H                     | 1803.20 | 10724.40 | 0.17 | 5.95  |
| P70696_H2B1A_MOUSE | Hist1h2ba | Histone H2B type 1-A OS= K.QWHPDGTGSSK.A                  | 470.56  | 2735.54  | 0.17 | 5.81  |
| Q6ZWY9_H2B1C_MOUSE | Hist1h2bc | Histone H2B type 1-C/E/K K.AM*GIM*NSFVNDIFER.I            | 25.67   | 147.77   | 0.17 | 5.76  |
| Q6ZWY9_H2B1C_MOUSE | Hist1h2bc | Histone H2B type 1-C/E/K K.AM*GIM*NSFVNDIFER.I            | 2.98    | 6.81     | 0.44 | 2.28  |
| Q6ZWY9_H2B1C_MOUSE | Hist1h2bc | Histone H2B type 1-C/E/K K.AM*GIM*NSFVNDIFER.I            | 4.60    | 19.62    | 0.23 | 4.27  |
| Q6ZWY9_H2B1C_MOUSE | Hist1h2bc | Histone H2B type 1-C/E/K K.AM*GIM*NSFVNDIFER.I            | 4.61    | 22.18    | 0.21 | 4.81  |
| Q6ZWY9_H2B1C_MOUSE | Hist1h2bc | Histone H2B type 1-C/E/K K.ESYSVYVK.V                     | 43.54   | 234.86   | 0.19 | 5.39  |
| Q6ZWY9_H2B1C_MOUSE | Hist1h2bc | Histone H2B type 1-C/E/K R.KESYSVYVK.V                    | 7.14    | 43.52    | 0.16 | 6.10  |
| Q6ZWY9_H2B1C_MOUSE | Hist1h2bc | Histone H2B type 1-C/E/K K.AM*GIM*NSFVNDIFER.I            | 1103.42 | 7019.56  | 0.16 | 6.36  |
| Q6ZWY9_H2B1C_MOUSE | Hist1h2bc | Histone H2B type 1-C/E/K K.AM*GIM*NSFVNDIFER.I            | 113.93  | 695.14   | 0.16 | 6.10  |
| Q6ZWY9_H2B1C_MOUSE | Hist1h2bc | Histone H2B type 1-C/E/K K.AM*GIM*NSFVNDIFER.I            | 5.00    | 35.09    | 0.14 | 7.02  |
| Q6ZWY9_H2B1C_MOUSE | Hist1h2bc | Histone H2B type 1-C/E/K K.AM*GIM*NSFVNDIFER.I            | 213.58  | 1353.08  | 0.16 | 6.34  |
| Q6ZWY9_H2B1C_MOUSE | Hist1h2bc | Histone H2B type 1-C/E/K K.AM*GIM*NSFVNDIFER.I            | 38.14   | 292.05   | 0.13 | 7.66  |
| Q6ZWY9_H2B1C_MOUSE | Hist1h2bc | Histone H2B type 1-C/E/K K.ESYSVYVK.V                     | 1078.45 | 5325.30  | 0.20 | 4.94  |
| Q6ZWY9_H2B1C_MOUSE | Hist1h2bc | Histone H2B type 1-C/E/K R.IAGEASR.L                      | 293.13  | 2029.01  | 0.14 | 6.92  |
| Q6ZWY9_H2B1C_MOUSE | Hist1h2bc | Histone H2B type 1-C/E/K R.KESYSVYVK.V                    | 416.61  | 2002.65  | 0.21 | 4.81  |
| Q6ZWY9_H2B1C_MOUSE | Hist1h2bc | Histone H2B type 1-C/E/K R.KESYSVYVKV.K.Q                 | 9.91    | 73.70    | 0.13 | 7.44  |
| Q6ZWY9_H2B1C_MOUSE | Hist1h2bc | Histone H2B type 1-C/E/K R.SRRESYVYVK.V                   | 89.46   | 603.27   | 0.15 | 6.74  |
| Q6ZWY9_H2B1C_MOUSE | Hist1h2bc | Histone H2B type 1-C/E/K K.AM*GIM*NSFVNDIFER.I            | 3.13    | 12.17    | 0.26 | 3.89  |
| Q6ZWY9_H2B1C_MOUSE | Hist1h2bc | Histone H2B type 1-C/E/K K.AM*GIM*NSFVNDIFER.I            | 3.45    | 14.47    | 0.24 | 4.19  |
| P68433_H31_MOUSE   | Hist1h3a  | Histone H3.1 OS=Mus ml. R.EIAQDFK.T                       | 242.15  | 945.09   | 0.26 | 3.90  |
| P68433_H31_MOUSE   | Hist1h3a  | Histone H3.1 OS=Mus ml. R.KLPFQR.L                        | 55.90   | 292.01   | 0.19 | 5.22  |
| P68433_H31_MOUSE   | Hist1h3a  | Histone H3.1 OS=Mus ml. K.STELLUR.K                       | 349.33  | 1576.42  | 0.22 | 4.51  |
| P68433_H31_MOUSE   | Hist1h3a  | Histone H3.1 OS=Mus ml. R.YRPGTVVALR.E                    | 213.75  | 964.45   | 0.22 | 4.51  |
| P68433_H31_MOUSE   | Hist1h3a  | Histone H3.1 OS=Mus ml. K.DIQLAR@.R                       | 2352.33 | 8003.12  | 0.29 | 3.40  |
| P68433_H31_MOUSE   | Hist1h3a  | Histone H3.1 OS=Mus ml. R.EIAQDFK.T                       | 1847.47 | 5349.29  | 0.35 | 2.90  |
| P68433_H31_MOUSE   | Hist1h3a  | Histone H3.1 OS=Mus ml. R.KLPFQR.L                        | 1081.19 | 3688.97  | 0.29 | 3.41  |
| P68433_H31_MOUSE   | Hist1h3a  | Histone H3.1 OS=Mus ml. R.KSAPATGGVK.K                    | 26.30   | 106.58   | 0.25 | 4.05  |
| P68433_H31_MOUSE   | Hist1h3a  | Histone H3.1 OS=Mus ml. K.RVTIM*PK.D                      | 1183.69 | 4452.41  | 0.27 | 3.76  |
| P68433_H31_MOUSE   | Hist1h3a  | Histone H3.1 OS=Mus ml. K.RVTIM*PKDIQLAR.R                | 13.99   | 45.61    | 0.31 | 3.26  |
| P68433_H31_MOUSE   | Hist1h3a  | Histone H3.1 OS=Mus ml. K.STELLUR.K                       | 2043.81 | 6073.98  | 0.34 | 2.97  |
| P68433_H31_MOUSE   | Hist1h3a  | Histone H3.1 OS=Mus ml. R.VTAM*PK.D                       | 1293.78 | 4151.55  | 0.31 | 3.21  |
| P68433_H31_MOUSE   | Hist1h3a  | Histone H3.1 OS=Mus ml. R.VTAM*PKDIQLAR.R                 | 14.07   | 62.02    | 0.23 | 4.41  |
| P68433_H31_MOUSE   | Hist1h3a  | Histone H3.1 OS=Mus ml. R.YQKSTELLUR.K                    | 25.06   | 78.40    | 0.32 | 3.13  |
| P68433_H31_MOUSE   | Hist1h3a  | Histone H3.1 OS=Mus ml. R.YRPGTVVALR.E                    | 616.14  | 2118.24  | 0.29 | 3.44  |
| P68433_H31_MOUSE   | Hist1h3a  | Histone H3.1 OS=Mus ml. K.STELLUR.K                       | 189.05  | 686.78   | 0.28 | 3.63  |
| P68433_H31_MOUSE   | Hist1h3a  | Histone H3.1 OS=Mus ml. R.YR@PGTVVALR@.E                  | 62.14   | 255.61   | 0.24 | 4.11  |
| P68433_H31_MOUSE   | Hist1h3a  | Histone H3.1 OS=Mus ml. R.EIAQDFK.T                       | 44.31   | 165.16   | 0.27 | 3.73  |
| P68433_H31_MOUSE   | Hist1h3a  | Histone H3.1 OS=Mus ml. K.STELLUR.K                       | 103.29  | 357.31   | 0.29 | 3.46  |
| P68433_H31_MOUSE   | Hist1h3a  | Histone H3.1 OS=Mus ml. R.YRPGTVVALR.E                    | 29.85   | 105.68   | 0.28 | 3.54  |
| P62806_H4_MOUSE    | Hist1h4a  | Histone H4 OS=Mus musl. R.DAVTYTEHAK.R                    | 4.06    | 15.00    | 0.27 | 3.69  |
| P62806_H4_MOUSE    | Hist1h4a  | Histone H4 OS=Mus musl. R.ISGLIYEETR@.G                   | 13.55   | 50.80    | 0.27 | 3.75  |
| P62806_H4_MOUSE    | Hist1h4a  | Histone H4 OS=Mus musl. R.DAVTYTEHAK.R                    | 939.77  | 3400.54  | 0.28 | 3.62  |
| P62806_H4_MOUSE    | Hist1h4a  | Histone H4 OS=Mus musl. R.DAVTYTEHAKR.K                   | 12.08   | 34.69    | 0.35 | 2.87  |
| P62806_H4_MOUSE    | Hist1h4a  | Histone H4 OS=Mus musl. R.DNIQGITKHPAIR@.R                | 441.59  | 1114.67  | 0.40 | 2.52  |
| P62806_H4_MOUSE    | Hist1h4a  | Histone H4 OS=Mus musl. R.DNIQGITKHPAIR@.R                | 1753.53 | 4499.89  | 0.39 | 2.57  |
| P62806_H4_MOUSE    | Hist1h4a  | Histone H4 OS=Mus musl. R.GVLKHVFLFNWIR@.D                | 11.66   | 38.36    | 0.30 | 3.29  |
| P62806_H4_MOUSE    | Hist1h4a  | Histone H4 OS=Mus musl. R.ISGLIYEETR@.G                   | 1884.62 | 6384.70  | 0.30 | 3.39  |
| P62806_H4_MOUSE    | Hist1h4a  | Histone H4 OS=Mus musl. R.KTVTAM*DVVYALK.R                | 230.48  | 810.69   | 0.28 | 3.52  |
| P62806_H4_MOUSE    | Hist1h4a  | Histone H4 OS=Mus musl. R.KTVTAM*DVVYALK.R                | 32.65   | 120.60   | 0.27 | 3.69  |
| P62806_H4_MOUSE    | Hist1h4a  | Histone H4 OS=Mus musl. R.KTVTAM*DVVYALK.R                | 58.30   | 530.64   | 0.11 | 9.10  |
| P62806_H4_MOUSE    | Hist1h4a  | Histone H4 OS=Mus musl. R.KTVTAM*DVVYALKR.Q               | 348.43  | 1028.65  | 0.34 | 2.95  |
| P62806_H4_MOUSE    | Hist1h4a  | Histone H4 OS=Mus musl. R.KTVTAM*DVVYALKR.Q               | 80.13   | 291.96   | 0.27 | 3.64  |
| P62806_H4_MOUSE    | Hist1h4a  | Histone H4 OS=Mus musl. K.RISGLIYEETR@.G                  | 7.75    | 21.25    | 0.36 | 2.74  |
| P62806_H4_MOUSE    | Hist1h4a  | Histone H4 OS=Mus musl. R.KTVTAM*DVVYALK.R                | 1312.97 | 4035.59  | 0.33 | 3.07  |
| P62806_H4_MOUSE    | Hist1h4a  | Histone H4 OS=Mus musl. K.VTAMDVVYALK.R                   | 317.15  | 1155.57  | 0.27 | 3.64  |
| P62806_H4_MOUSE    | Hist1h4a  | Histone H4 OS=Mus musl. R.VFLFNWIR.D                      | 2362.66 | 8442.61  | 0.28 | 3.57  |
| P62806_H4_MOUSE    | Hist1h4a  | Histone H4 OS=Mus musl. K.VFLFNWIR@.D                     | 30.22   | 110.94   | 0.27 | 3.67  |
| P62806_H4_MOUSE    | Hist1h4a  | Histone H4 OS=Mus musl. K.VLNRDNIQGITKPAIR.R              | 7.85    | 24.28    | 0.32 | 3.09  |
| P62806_H4_MOUSE    | Hist1h4a  | Histone H4 OS=Mus musl. R.ISGLIYEETR.G                    | 4.02    | 15.33    | 0.26 | 3.81  |
| P62806_H4_MOUSE    | Hist1h4a  | Histone H4 OS=Mus musl. R.ISGLIYEETR.G                    | 3.27    | 17.15    | 0.19 | 5.25  |
| P62806_H4_MOUSE    | Hist1h4a  | Histone H4 OS=Mus musl. K.VFLFNWIR.D                      | 4.63    | 20.15    | 0.23 | 4.35  |

|                    |            |                                                                     |         |        |      |      |
|--------------------|------------|---------------------------------------------------------------------|---------|--------|------|------|
| Q6G5S7_H2A2A_MOUSE | Hist2h2aa1 | Histone H2A type 2-A OS: R.NDEELNKLKLG.V                            | 3.09    | 20.31  | 0.15 | 6.57 |
| Q6G5S7_H2A2A_MOUSE | Hist2h2aa1 | Histone H2A type 2-A OS: R.HLQLAIRNDEELNKLKLG.V                     | 42.41   | 208.10 | 0.20 | 4.91 |
| Q6G5S7_H2A2A_MOUSE | Hist2h2aa1 | Histone H2A type 2-A OS: R.HLQLAIR@NDEELNKLKLG#V                    | 4.47    | 29.79  | 0.15 | 6.66 |
| Q6G5S7_H2A2A_MOUSE | Hist2h2aa1 | Histone H2A type 2-A OS: R.KGNYAER.V                                | 33.19   | 210.07 | 0.16 | 6.33 |
| Q6G5S7_H2A2A_MOUSE | Hist2h2aa1 | Histone H2A type 2-A OS: K.LLKGVTIAQGGVLPNIQAVLPLK.K                | 8.78    | 71.88  | 0.12 | 8.19 |
| Q6G5S7_H2A2A_MOUSE | Hist2h2aa1 | Histone H2A type 2-A OS: R.NDEELNKLKGVKVTIAQGGVLPNIQAVLPLK.K        | 15.97   | 134.79 | 0.12 | 8.44 |
| Q64522_H2A2B_MOUSE | Hist2h2ab  | Histone H2A type 2-B OS: R.HLQLAVR.N                                | 7.49    | 45.36  | 0.17 | 6.06 |
| Q64522_H2A2B_MOUSE | Hist2h2ab  | Histone H2A type 2-B OS: K.LLGGVTVIAQGGVLPNIQAVLPLK.K               | 4.68    | 30.92  | 0.15 | 6.61 |
| Q9D8V0_HM13_MOUSE  | Hm13       | Minor histocompatibility R.LVFPDQLEK#G                              | 21.44   | 15.05  | 1.42 | 0.70 |
| Q9D8V0_HM13_MOUSE  | Hm13       | Minor histocompatibility R.QYQLTQGGSGHEEIIINYEFDTK#D                | 3.34    | 2.09   | 1.60 | 0.63 |
| Q9D8V0_HM13_MOUSE  | Hm13       | Minor histocompatibility R.SSSDM*PETITSR@.D                         | 14.96   | 9.65   | 1.55 | 0.65 |
| Q9DC33_HM20A_MOUSE | Hmg20a     | High mobility group prot K.LEVDVIQER@.S                             | 12.53   | 7.23   | 1.73 | 0.58 |
| Q9DC33_HM20A_MOUSE | Hmg20a     | High mobility group prot R.TAVEK#LEVDVIQER@.S                       | 35.44   | 18.33  | 1.93 | 0.52 |
| Q9DC33_HM20A_MOUSE | Hmg20a     | High mobility group prot R.TAVEKLEVDVIQER.S                         | 5.88    | 2.94   | 2.00 | 0.50 |
| P52927_HMG2_MOUSE  | Hmga2      | High mobility group prot R.GEGAGOPSTAQQGPAAPVQK.R                   | 2.46    | 6.48   | 0.38 | 2.64 |
| Q00547_HMMR_MOUSE  | Hmnr       | Hyaluronan mediated R.DVTAQLESVQEK#Y                                | 3.81    | 9.81   | 0.39 | 2.57 |
| P14901_HMOX1_MOUSE | Hmox1      | Heme oxygenase 1 OS=M K.LVM*ASLYHIYTALEEEER@.N                      | 3.36    | 2.56   | 1.31 | 0.76 |
| P14901_HMOX1_MOUSE | Hmox1      | Heme oxygenase 1 OS=M R.M*NTLEM*TPEVK#H                             | 4.47    | 3.59   | 1.25 | 0.80 |
| O70252_HMOX2_MOUSE | Hmox2      | Heme oxygenase 2 OS=M K.LPSTGTEQYFLFHVNDNAOQFK#Q                    | 5.49    | 2.69   | 2.04 | 0.49 |
| O70252_HMOX2_MOUSE | Hmox2      | Heme oxygenase 2 OS=M K.M*ADLSLEK#E                                 | 15.65   | 4.86   | 3.22 | 0.31 |
| O70252_HMOX2_MOUSE | Hmox2      | Heme oxygenase 2 OS=M R.YM*GDLGGQVLLK#K                             | 7.61    | 4.44   | 1.71 | 0.58 |
| Q9CX86_ROA0_MOUSE  | Hnrnpa0    | Heterogeneous nuclear r K.LFIGGLNVQTSSEGLR.G                        | 52.61   | 67.12  | 0.78 | 1.28 |
| Q9CX86_ROA0_MOUSE  | Hnrnpa0    | Heterogeneous nuclear r K.LFIGGLNVQTSSEGLR.G                        | 8.46    | 7.64   | 1.11 | 0.90 |
| P49312_ROA1_MOUSE  | Hnrnpa1    | Heterogeneous nuclear r R.GFGFVTVATVEVDAA*M*NARPHK.V                | 5.78    | 8.25   | 0.70 | 1.43 |
| P49312_ROA1_MOUSE  | Hnrnpa1    | Heterogeneous nuclear r K.IEVEIM*TRD.R                              | 23.93   | 17.98  | 1.33 | 0.75 |
| P49312_ROA1_MOUSE  | Hnrnpa1    | Heterogeneous nuclear r R.K.LFIGGLSFETDESRL.S                       | 2.24    | 6.22   | 0.36 | 2.78 |
| P49312_ROA1_MOUSE  | Hnrnpa1    | Heterogeneous nuclear r K.LFIGGLSFETDESRL.S                         | 12.86   | 17.95  | 0.72 | 1.40 |
| P49312_ROA1_MOUSE  | Hnrnpa1    | Heterogeneous nuclear r R.NQGGVGGSSSSSSVYSGR.R                      | 6.20    | 8.64   | 0.72 | 1.39 |
| P49312_ROA1_MOUSE  | Hnrnpa1    | Heterogeneous nuclear r K.LFIGGLSFETDESRL.S                         | 3.61    | 4.52   | 0.80 | 1.25 |
| O88569_ROA2_MOUSE  | Hnrnpa2b1  | Heterogeneous nuclear r R.DYFEGK#HDTIETIDR@.Q                       | 7.34    | 19.15  | 0.38 | 2.61 |
| O88569_ROA2_MOUSE  | Hnrnpa2b1  | Heterogeneous nuclear r R.GFGFVTFDDHDPVDKIVLQK.Y                    | 13.01   | 22.87  | 0.57 | 1.76 |
| O88569_ROA2_MOUSE  | Hnrnpa2b1  | Heterogeneous nuclear r R.GGGGNFGP*GPGSNFR.G                        | 31.02   | 71.04  | 0.44 | 2.29 |
| O88569_ROA2_MOUSE  | Hnrnpa2b1  | Heterogeneous nuclear r K.IDTIEITDR.Q                               | 29.64   | 49.56  | 0.60 | 1.67 |
| O88569_ROA2_MOUSE  | Hnrnpa2b1  | Heterogeneous nuclear r R.KLFIGGLSFETTESLR.N                        | 10.66   | 18.45  | 0.58 | 1.73 |
| O88569_ROA2_MOUSE  | Hnrnpa2b1  | Heterogeneous nuclear r K.LFIGGLSFETTESLR.N                         | 25.83   | 48.29  | 0.53 | 1.87 |
| O88569_ROA2_MOUSE  | Hnrnpa2b1  | Heterogeneous nuclear r R.NM*GPGYGGNGYGGSGGSGYGGR.S                 | 7.27    | 13.73  | 0.53 | 1.89 |
| O88569_ROA2_MOUSE  | Hnrnpa2b1  | Heterogeneous nuclear r R.NYEQWGX.L                                 | 7.10    | 13.13  | 0.54 | 1.85 |
| O88569_ROA2_MOUSE  | Hnrnpa2b1  | Heterogeneous nuclear r R.QEM*QEVGSR.S                              | 9.08    | 16.06  | 0.57 | 1.77 |
| O88569_ROA2_MOUSE  | Hnrnpa2b1  | Heterogeneous nuclear r K.TLETVPLER.K                               | 5.75    | 16.30  | 0.35 | 2.84 |
| O88569_ROA2_MOUSE  | Hnrnpa2b1  | Heterogeneous nuclear r R.GGGGNFGP*GPGSNFR.G                        | 4.09    | 9.90   | 0.41 | 2.42 |
| O88569_ROA2_MOUSE  | Hnrnpa2b1  | Heterogeneous nuclear r K.IDTIEITDR.Q                               | 2.61    | 4.75   | 0.55 | 1.82 |
| Q8BG05_ROA3_MOUSE  | Hnrnpa3    | Heterogeneous nuclear r R.GFAFVTFDDHDTVDKIVVQK.Y                    | 13.16   | 18.93  | 0.69 | 1.44 |
| Q8BG05_ROA3_MOUSE  | Hnrnpa3    | Heterogeneous nuclear r K.IETIEVM*EDR.Q                             | 22.15   | 29.51  | 0.75 | 1.33 |
| Q8BG05_ROA3_MOUSE  | Hnrnpa3    | Heterogeneous nuclear r K.IETIEVM*EDR.Q                             | 5.26    | 11.29  | 0.47 | 2.15 |
| Q8BG05_ROA3_MOUSE  | Hnrnpa3    | Heterogeneous nuclear r K.IFVGGIK#HDETEYNLR.D                       | 50.16   | 77.27  | 0.78 | 1.28 |
| Q8BG05_ROA3_MOUSE  | Hnrnpa3    | Heterogeneous nuclear r K.HIFVGGIK#HDETEYNLR@.D                     | 6.02    | 9.73   | 0.62 | 1.61 |
| Q8BG05_ROA3_MOUSE  | Hnrnpa3    | Heterogeneous nuclear r K.LFIGGLSFETDDSLR.E                         | 12.80   | 1.99   | 6.42 | 0.16 |
| Q8BG05_ROA3_MOUSE  | Hnrnpa3    | Heterogeneous nuclear r R.SSGSPYGGGSGGSGGSGYGGR.R                   | 9.19    | 17.74  | 0.52 | 1.93 |
| Q8BG05_ROA3_MOUSE  | Hnrnpa3    | Heterogeneous nuclear r K.YGKIEIETVM*EDR.Q                          | 8.82    | 16.77  | 0.53 | 1.90 |
| Q8BG05_ROA3_MOUSE  | Hnrnpa3    | Heterogeneous nuclear r K.IETIEVM*EDR.Q                             | 4.64    | 6.89   | 0.67 | 1.48 |
| Q8BG05_ROA3_MOUSE  | Hnrnpa3    | Heterogeneous nuclear r R.SSGSPYGGGSGGSGGSGYGGR.R                   | 2.09    | 2.24   | 0.94 | 1.07 |
| Q99020_ROA4_MOUSE  | Hnrnpab    | Heterogeneous nuclear r K.DLKDYFTK.G                                | 14.58   | 73.84  | 0.20 | 5.06 |
| Q99020_ROA4_MOUSE  | Hnrnpab    | Heterogeneous nuclear r K.EVYQQQYGGSGR@.G                           | 20.30   | 78.54  | 0.26 | 3.87 |
| Q99020_ROA4_MOUSE  | Hnrnpab    | Heterogeneous nuclear r R.EYFQQQIEAIEPIDPK.L                        | 39.89   | 129.20 | 0.31 | 3.24 |
| Q99020_ROA4_MOUSE  | Hnrnpab    | Heterogeneous nuclear r R.GFGFILF.K                                 | 64.04   | 290.62 | 0.22 | 4.54 |
| Q99020_ROA4_MOUSE  | Hnrnpab    | Heterogeneous nuclear r R.GFVITFK.E                                 | 3.03    | 18.80  | 0.16 | 6.20 |
| Q99020_ROA4_MOUSE  | Hnrnpab    | Heterogeneous nuclear r R.GFVITFK#EEDPVK.K                          | 3.77    | 12.17  | 0.31 | 3.23 |
| Q99020_ROA4_MOUSE  | Hnrnpab    | Heterogeneous nuclear r R.GFVITFK#EEDPVK.V                          | 31.77   | 171.74 | 0.18 | 5.41 |
| Q99020_ROA4_MOUSE  | Hnrnpab    | Heterogeneous nuclear r K.IFVGGLNPEATEEK.I                          | 184.51  | 380.05 | 0.49 | 2.06 |
| Q99020_ROA4_MOUSE  | Hnrnpab    | Heterogeneous nuclear r K.IREYFQGGIEAIEPIDPK.L                      | 30.77   | 139.05 | 0.22 | 4.52 |
| Q99020_ROA4_MOUSE  | Hnrnpab    | Heterogeneous nuclear r K.M*FVGGSLWSDTSK.K                          | 43.05   | 37.36  | 1.15 | 0.87 |
| Q99020_ROA4_MOUSE  | Hnrnpab    | Heterogeneous nuclear r K.IFVGGLNPEATEEK.I                          | 16.61   | 14.56  | 1.14 | 0.88 |
| Q92204_HNRPC_MOUSE | Hnrnpc     | Heterogeneous nuclear r R.AAAGVDEGR@.M                              | 246.15  | 181.40 | 1.36 | 0.74 |
| Q92204_HNRPC_MOUSE | Hnrnpc     | Heterogeneous nuclear r K.DDEK#PEEGEDR@DSANGEDDS.-                  | 4.72    | 5.57   | 0.85 | 1.18 |
| Q92204_HNRPC_MOUSE | Hnrnpc     | Heterogeneous nuclear r K.GDDLQAIK.E                                | 7.27    | 17.97  | 1.27 | 0.79 |
| Q92204_HNRPC_MOUSE | Hnrnpc     | Heterogeneous nuclear r K.GFAFVQVYNER.N                             | 468.15  | 347.78 | 1.35 | 0.74 |
| Q92204_HNRPC_MOUSE | Hnrnpc     | Heterogeneous nuclear r K.K#SDVEAIFSK.Y                             | 557.77  | 407.68 | 1.37 | 0.73 |
| Q92204_HNRPC_MOUSE | Hnrnpc     | Heterogeneous nuclear r K.LK#GDDLQAIK#K                             | 108.64  | 54.43  | 2.00 | 0.50 |
| Q92204_HNRPC_MOUSE | Hnrnpc     | Heterogeneous nuclear r K.LKGGDDLQAIK.K                             | 204.45  | 120.51 | 1.70 | 0.59 |
| Q92204_HNRPC_MOUSE | Hnrnpc     | Heterogeneous nuclear r K.LKGGDDLQAIK.K                             | 1118.55 | 710.58 | 1.57 | 0.64 |
| Q92204_HNRPC_MOUSE | Hnrnpc     | Heterogeneous nuclear r K.M*ESEGADDSAEGLDLDLDDDDNEDRGDDLQELK.D      | 5.38    | 2.48   | 2.17 | 0.46 |
| Q92204_HNRPC_MOUSE | Hnrnpc     | Heterogeneous nuclear r K.M*ESEGADDSAEGLDLDLDDDDNEDRGDDLQELK#DDEK.E | 7.72    | 3.87   | 2.00 | 0.50 |
| Q92204_HNRPC_MOUSE | Hnrnpc     | Heterogeneous nuclear r R.M*IAGQVLDINLAAEPK#V                       | 807.46  | 610.94 | 1.32 | 0.76 |
| Q92204_HNRPC_MOUSE | Hnrnpc     | Heterogeneous nuclear r R.M*IAGQVLDINLAAEPK#V                       | 172.88  | 128.44 | 1.35 | 0.74 |
| Q92204_HNRPC_MOUSE | Hnrnpc     | Heterogeneous nuclear r R.MIAGQVLDINLAAEPK#V                        | 185.31  | 143.34 | 1.29 | 0.77 |
| Q92204_HNRPC_MOUSE | Hnrnpc     | Heterogeneous nuclear r R.MYSYPAR.V                                 | 102.83  | 69.05  | 1.49 | 0.67 |
| Q92204_HNRPC_MOUSE | Hnrnpc     | Heterogeneous nuclear r R.M*YSYPAR@.V                               | 397.24  | 315.64 | 1.26 | 0.79 |
| Q92204_HNRPC_MOUSE | Hnrnpc     | Heterogeneous nuclear r K.NEK#SEEQSSASVK#K                          | 75.62   | 61.38  | 1.23 | 0.81 |
| Q92204_HNRPC_MOUSE | Hnrnpc     | Heterogeneous nuclear r K.NEK#SEEQSSASVK#K                          | 193.27  | 159.27 | 1.21 | 0.82 |
| Q92204_HNRPC_MOUSE | Hnrnpc     | Heterogeneous nuclear r K.QADLSFSSPVEVM*K.N                         | 161.61  | 121.02 | 1.34 | 0.75 |
| Q92204_HNRPC_MOUSE | Hnrnpc     | Heterogeneous nuclear r K.QK#VDSLSLEK.I                             | 212.33  | 160.23 | 1.33 | 0.75 |
| Q92204_HNRPC_MOUSE | Hnrnpc     | Heterogeneous nuclear r K.R@SAAEM*YGSVPEHPSPSLLSSFDLYDFQR@.D        | 5.31    | 4.06   | 1.31 | 0.77 |
| Q92204_HNRPC_MOUSE | Hnrnpc     | Heterogeneous nuclear r R.SAAEM*YGSVPEHPSPSLLSSFDLYDFQR@DYVDR@.M    | 5.12    | 1.82   | 2.82 | 0.36 |
| Q92204_HNRPC_MOUSE | Hnrnpc     | Heterogeneous nuclear r K.SDVEAIFSK.Y                               | 443.30  | 343.62 | 1.29 | 0.78 |
| Q92204_HNRPC_MOUSE | Hnrnpc     | Heterogeneous nuclear r K.SEEEQSSASVK#K                             | 150.40  | 121.66 | 1.24 | 0.81 |
| Q92204_HNRPC_MOUSE | Hnrnpc     | Heterogeneous nuclear r K.VDSLSLEK#I                                | 122.10  | 99.51  | 1.23 | 0.82 |
| Q92204_HNRPC_MOUSE | Hnrnpc     | Heterogeneous nuclear r R.VFIGNLNTLVVK#K                            | 1546.87 | 980.09 | 1.58 | 0.63 |
| Q92204_HNRPC_MOUSE | Hnrnpc     | Heterogeneous nuclear r K.KSDVEAIFSK.Y                              | 4.98    | 11.16  | 0.45 | 2.24 |
| Q92204_HNRPC_MOUSE | Hnrnpc     | Heterogeneous nuclear r K.LK#GDDLQAIK#K#E                           | 86.15   | 110.69 | 0.78 | 1.28 |
| Q92204_HNRPC_MOUSE | Hnrnpc     | Heterogeneous nuclear r R.M*IAGQVLDINLAAEPK.V                       | 17.78   | 45.14  | 0.39 | 2.54 |
| Q92204_HNRPC_MOUSE | Hnrnpc     | Heterogeneous nuclear r K.NEK#SEEQSSASVK#K                          | 5.00    | 9.79   | 0.51 | 1.96 |
| Q92204_HNRPC_MOUSE | Hnrnpc     | Heterogeneous nuclear r K.QADLSFSSPVEVM*K.N                         | 16.09   | 26.68  | 0.60 | 1.66 |
| Q92204_HNRPC_MOUSE | Hnrnpc     | Heterogeneous nuclear r K.QKVDLSLEK.I                               | 43.57   | 83.22  | 0.52 | 1.91 |
| Q92204_HNRPC_MOUSE | Hnrnpc     | Heterogeneous nuclear r K.SDVEAIFSK.Y                               | 3.21    | 6.72   | 0.48 | 2.10 |
| Q92204_HNRPC_MOUSE | Hnrnpc     | Heterogeneous nuclear r K.SEEEQSSASVK#K                             | 8.64    | 17.56  | 0.49 | 2.03 |
| Q92204_HNRPC_MOUSE | Hnrnpc     | Heterogeneous nuclear r K.VDSLSLEK.I                                | 7.60    | 12.72  | 0.60 | 1.67 |
| Q92204_HNRPC_MOUSE | Hnrnpc     | Heterogeneous nuclear r R.VFIGNLNTLVVK#K                            | 13.38   | 26.23  | 0.51 | 1.96 |
| Q92204_HNRPC_MOUSE | Hnrnpc     | Heterogeneous nuclear r R.M*IAGQVLDINLAAEPK.V                       | 11.54   | 16.89  | 0.68 | 1.46 |
| Q92204_HNRPC_MOUSE | Hnrnpc     | Heterogeneous nuclear r K.SEEEQSSASVK#K                             | 3.81    | 4.30   | 0.89 | 1.13 |
| Q92204_HNRPC_MOUSE | Hnrnpc     | Heterogeneous nuclear r R.VFIGNLNTLVVK#K                            | 26.41   | 36.54  | 0.72 | 1.38 |
| Q60668_HNRPD_MOUSE | Hnrnpd     | Heterogeneous nuclear r K.DLKDYFSK.F                                | 38.13   | 125.11 | 0.30 | 3.28 |
| Q60668_HNRPD_MOUSE | Hnrnpd     | Heterogeneous nuclear r K.ESEVDKVM*DKQ.E                            | 19.97   | 64.88  | 0.31 | 3.25 |
| Q60668_HNRPD_MOUSE | Hnrnpd     | Heterogeneous nuclear r R.EYFQGGVESEIPELPM*DNK.T                    | 20.13   | 50.46  | 0.40 | 2.51 |

|                     |        |                                                                  |         |        |      |      |
|---------------------|--------|------------------------------------------------------------------|---------|--------|------|------|
| Q60668_HNRPD_MOUSE  | Hnrnpd | Heterogeneous nuclear ri R.GFGFVLK.D                             | 196.47  | 452.25 | 0.43 | 2.30 |
| Q60668_HNRPD_MOUSE  | Hnrnpd | Heterogeneous nuclear ri K.IDASKNEEDGHSNSSPR.H                   | 16.04   | 59.37  | 0.27 | 3.70 |
| Q60668_HNRPD_MOUSE  | Hnrnpd | Heterogeneous nuclear ri K.IFVGLSPDTPPEK.I                       | 155.29  | 548.90 | 0.28 | 3.53 |
| Q60668_HNRPD_MOUSE  | Hnrnpd | Heterogeneous nuclear ri K.IREYFGGFEVESIELPM*DNK.T               | 28.51   | 107.36 | 0.27 | 3.77 |
| Q60668_HNRPD_MOUSE  | Hnrnpd | Heterogeneous nuclear ri K.IREYFGGFEVESIELPM*DNK.T               | 7.59    | 23.05  | 0.33 | 3.04 |
| Q60668_HNRPD_MOUSE  | Hnrnpd | Heterogeneous nuclear ri K.M*FIGLSWDITK.K                        | 7.29    | 23.87  | 0.31 | 3.27 |
| Q60668_HNRPD_MOUSE  | Hnrnpd | Heterogeneous nuclear ri K.YHNVGLSK.C                            | 5.90    | 17.39  | 0.34 | 2.95 |
| G3X9W0_G3X9W0_MOUSE | Hnrnpd | Heterogeneous nuclear ri K.IDASKNEEDGK.M                         | 3.06    | 9.35   | 0.33 | 3.05 |
| Q60668_HNRPD_MOUSE  | Hnrnpd | Heterogeneous nuclear ri R.GFGFVLK.D                             | 7.12    | 21.72  | 0.33 | 3.05 |
| D3YTQ3_D3YTQ3_MOUSE | Hnrnpd | Heterogeneous nuclear ri R.DAASVDKVLK.E                          | 7.10    | 13.37  | 0.53 | 1.88 |
| D3YTQ3_D3YTQ3_MOUSE | Hnrnpd | Heterogeneous nuclear ri R.DLTYEVL.SR.F                          | 86.21   | 113.38 | 0.76 | 1.32 |
| D3YTQ3_D3YTQ3_MOUSE | Hnrnpd | Heterogeneous nuclear ri R.HVTAQPSR@.L                           | 5.16    | 4.46   | 1.16 | 0.86 |
| D3YTQ3_D3YTQ3_MOUSE | Hnrnpd | Heterogeneous nuclear ri R.KVFGVGLSPDTEEQK.E                     | 10.52   | 15.45  | 0.68 | 1.47 |
| D3YTQ3_D3YTQ3_MOUSE | Hnrnpd | Heterogeneous nuclear ri R.VFVGLSPDTEEQK.EYFAGEIENELPM*DTK.T     | 20.06   | 26.87  | 0.75 | 1.34 |
| Q922X1_HNRPF_MOUSE  | Hnrnpf | Heterogeneous nuclear ri K.HSGPNSADSANDGFVR@.L                   | 583.42  | 325.93 | 1.79 | 0.56 |
| Q922X1_HNRPF_MOUSE  | Hnrnpf | Heterogeneous nuclear ri K.HSGPNSADSANDGFVR@.L                   | 100.11  | 57.65  | 1.74 | 0.58 |
| Q922X1_HNRPF_MOUSE  | Hnrnpf | Heterogeneous nuclear ri K.ITGEAFVQFASQELAEK#.A                  | 1224.32 | 617.43 | 1.98 | 0.50 |
| Q922X1_HNRPF_MOUSE  | Hnrnpf | Heterogeneous nuclear ri -.M**L*GPEGGGVYVK.L                     | 125.73  | 99.80  | 1.26 | 0.79 |
| Q922X1_HNRPF_MOUSE  | Hnrnpf | Heterogeneous nuclear ri R.QSGEAFVLESEDDVK#.L                    | 335.99  | 184.02 | 1.83 | 0.55 |
| Q922X1_HNRPF_MOUSE  | Hnrnpf | Heterogeneous nuclear ri R.QSGEAFVLESEDDVK#LALK#K#.D             | 23.11   | 18.29  | 1.26 | 0.79 |
| Q922X1_HNRPF_MOUSE  | Hnrnpf | Heterogeneous nuclear ri R.SSQEAV@.S                             | 115.05  | 58.24  | 1.98 | 0.51 |
| Q922X1_HNRPF_MOUSE  | Hnrnpf | Heterogeneous nuclear ri R.RSYSDPPLK.K.F                         | 860.24  | 470.48 | 1.83 | 0.55 |
| Q922X1_HNRPF_MOUSE  | Hnrnpf | Heterogeneous nuclear ri R.TEM*DWVLK.H                           | 393.27  | 196.76 | 2.00 | 0.50 |
| Q922X1_HNRPF_MOUSE  | Hnrnpf | Heterogeneous nuclear ri R.TEMDWVLK#.H                           | 207.12  | 99.31  | 2.09 | 0.48 |
| Q922X1_HNRPF_MOUSE  | Hnrnpf | Heterogeneous nuclear ri R.VTGEADVEFATHEEVAAM*SK#.D              | 325.13  | 157.43 | 2.07 | 0.48 |
| Q922X1_HNRPF_MOUSE  | Hnrnpf | Heterogeneous nuclear ri R.VTGEADVEFATHEEVAAM*SK#.D              | 45.25   | 27.61  | 1.64 | 0.61 |
| Q922X1_HNRPF_MOUSE  | Hnrnpf | Heterogeneous nuclear ri R.YIEVFK#.S                             | 1979.36 | 849.26 | 2.33 | 0.43 |
| Q922X1_HNRPF_MOUSE  | Hnrnpf | Heterogeneous nuclear ri K.ITGEAFVQFASQELAEK#.A                  | 3.17    | 3.58   | 0.89 | 1.13 |
| Q922X1_HNRPF_MOUSE  | Hnrnpf | Heterogeneous nuclear ri R.VTGEADVEFATHEEVAAM*SK#.D              | 6.86    | 2.40   | 2.85 | 0.35 |
| Q922X1_HNRPF_MOUSE  | Hnrnpf | Heterogeneous nuclear ri K.HSGPNSADSANDGFVR@.L                   | 14.70   | 6.56   | 2.24 | 0.45 |
| Q922X1_HNRPF_MOUSE  | Hnrnpf | Heterogeneous nuclear ri K.ITGEAFVQFASQELAEK#.A                  | 121.59  | 60.10  | 2.02 | 0.49 |
| Q922X1_HNRPF_MOUSE  | Hnrnpf | Heterogeneous nuclear ri K.ITGEAFVQFASQELAEK#.A                  | 48.01   | 31.38  | 1.53 | 0.65 |
| Q922X1_HNRPF_MOUSE  | Hnrnpf | Heterogeneous nuclear ri R.QSGEAFVLESEDDVK#.L                    | 27.83   | 13.03  | 2.14 | 0.47 |
| Q922X1_HNRPF_MOUSE  | Hnrnpf | Heterogeneous nuclear ri R.TEM*DWVLK.H                           | 15.33   | 6.78   | 2.26 | 0.44 |
| Q922X1_HNRPF_MOUSE  | Hnrnpf | Heterogeneous nuclear ri R.VTGEADVEFATHEEVAAM*SK#.D              | 19.42   | 9.88   | 1.96 | 0.51 |
| Q922X1_HNRPF_MOUSE  | Hnrnpf | Heterogeneous nuclear ri R.YIEVFK#.S                             | 152.26  | 89.03  | 1.71 | 0.58 |
| Q922X1_HNRPF_MOUSE  | Hnrnpf | Heterogeneous nuclear ri K.HSGPNSADSANDGFVR@.L                   | 29.95   | 9.22   | 3.25 | 0.31 |
| Q922X1_HNRPF_MOUSE  | Hnrnpf | Heterogeneous nuclear ri K.ITGEAFVQFASQELAEK#.A                  | 68.93   | 27.41  | 2.51 | 0.40 |
| Q922X1_HNRPF_MOUSE  | Hnrnpf | Heterogeneous nuclear ri R.QSGEAFVLESEDDVK#.L                    | 17.99   | 8.17   | 2.20 | 0.45 |
| Q922X1_HNRPF_MOUSE  | Hnrnpf | Heterogeneous nuclear ri R.VTGEADVEFATHEEVAAM*SK#.D              | 21.22   | 8.35   | 2.54 | 0.39 |
| Q922X1_HNRPF_MOUSE  | Hnrnpf | Heterogeneous nuclear ri R.YIEVFK#.S                             | 108.11  | 38.35  | 2.82 | 0.35 |
| Q922X1_HNRPF_MOUSE  | Hnrnpf | Heterogeneous nuclear ri R.HSGPNSADSANDGFVR@.L                   | 543.00  | 355.35 | 1.53 | 0.65 |
| O35737_HNRH1_MOUSE  | Hnrnp1 | Heterogeneous nuclear ri R.EGR@P5GEAFVLESEDDVK#.L                | 388.07  | 267.12 | 1.45 | 0.69 |
| O35737_HNRH1_MOUSE  | Hnrnp1 | Heterogeneous nuclear ri R.FIYTR@.E                              | 485.31  | 317.81 | 1.53 | 0.65 |
| O35737_HNRH1_MOUSE  | Hnrnp1 | Heterogeneous nuclear ri R.HTGPNSPDANDGFVR.L                     | 537.60  | 405.95 | 1.32 | 0.76 |
| O35737_HNRH1_MOUSE  | Hnrnp1 | Heterogeneous nuclear ri K.HTGPNSPDANDGFVR.L                     | 77.52   | 60.30  | 1.29 | 0.78 |
| O35737_HNRH1_MOUSE  | Hnrnp1 | Heterogeneous nuclear ri K.IQNGAQGIR@.F                          | 61.53   | 43.36  | 1.42 | 0.70 |
| O35737_HNRH1_MOUSE  | Hnrnp1 | Heterogeneous nuclear ri R.SNNVEM*DWVLK#.H                       | 89.43   | 57.12  | 1.57 | 0.64 |
| O35737_HNRH1_MOUSE  | Hnrnp1 | Heterogeneous nuclear ri R.SNNVEMDWVLK#.H                        | 41.95   | 40.77  | 1.03 | 0.97 |
| O35737_HNRH1_MOUSE  | Hnrnp1 | Heterogeneous nuclear ri R.STGEAFVQFASQELAEK#.A                  | 672.48  | 411.01 | 1.64 | 0.61 |
| O35737_HNRH1_MOUSE  | Hnrnp1 | Heterogeneous nuclear ri R.VHIEIGPDR@.V                          | 846.08  | 497.27 | 1.70 | 0.59 |
| O35737_HNRH1_MOUSE  | Hnrnp1 | Heterogeneous nuclear ri R.VHIEIGPDR@.V                          | 512.65  | 280.91 | 1.82 | 0.55 |
| O35737_HNRH1_MOUSE  | Hnrnp1 | Heterogeneous nuclear ri R.VTGEADVEFATHEEVAAM*SK#.D              | 139.74  | 98.80  | 1.41 | 0.71 |
| O35737_HNRH1_MOUSE  | Hnrnp1 | Heterogeneous nuclear ri R.YVELFLNLTAGASGAYEHR.Y                 | 95.68   | 74.27  | 1.29 | 0.78 |
| O35737_HNRH1_MOUSE  | Hnrnp1 | Heterogeneous nuclear ri R.ATENDIYFNSPLNPRV@.V                   | 14.31   | 9.31   | 1.54 | 0.65 |
| O35737_HNRH1_MOUSE  | Hnrnp1 | Heterogeneous nuclear ri R.ATENDIYFNSPLNPRV@.V                   | 16.30   | 14.70  | 1.11 | 0.90 |
| O35737_HNRH1_MOUSE  | Hnrnp1 | Heterogeneous nuclear ri R.STGEAFVQFASQELAEK#.A                  | 3.93    | 4.86   | 0.81 | 1.24 |
| O35737_HNRH1_MOUSE  | Hnrnp1 | Heterogeneous nuclear ri R.VHIEIGPDR@.V                          | 13.05   | 11.55  | 1.13 | 0.89 |
| O35737_HNRH1_MOUSE  | Hnrnp1 | Heterogeneous nuclear ri R.ATENDIYFNSPLNPRV@.V                   | 18.00   | 45.19  | 1.81 | 0.55 |
| O35737_HNRH1_MOUSE  | Hnrnp1 | Heterogeneous nuclear ri R.ATENDIYFNSPLNPRV@.V                   | 49.67   | 27.66  | 1.80 | 0.56 |
| O35737_HNRH1_MOUSE  | Hnrnp1 | Heterogeneous nuclear ri R.EGR@P5GEAFVLESEDDVK#.L                | 32.19   | 24.66  | 1.31 | 0.77 |
| O35737_HNRH1_MOUSE  | Hnrnp1 | Heterogeneous nuclear ri R.HTGPNSPDANDGFVR@.L                    | 9.79    | 6.43   | 1.52 | 0.66 |
| O35737_HNRH1_MOUSE  | Hnrnp1 | Heterogeneous nuclear ri R.STGEAFVQFASQELAEK#.A                  | 63.31   | 39.46  | 1.60 | 0.62 |
| O35737_HNRH1_MOUSE  | Hnrnp1 | Heterogeneous nuclear ri R.VHIEIGPDR@.V                          | 49.88   | 28.76  | 1.73 | 0.58 |
| O35737_HNRH1_MOUSE  | Hnrnp1 | Heterogeneous nuclear ri R.VTGEADVEFATHEEVAAM*SK#.D              | 9.40    | 7.90   | 1.19 | 0.84 |
| O35737_HNRH1_MOUSE  | Hnrnp1 | Heterogeneous nuclear ri R.ATENDIYFNSPLNPRV@.V                   | 36.39   | 17.20  | 2.12 | 0.47 |
| O35737_HNRH1_MOUSE  | Hnrnp1 | Heterogeneous nuclear ri R.VHIEIGPDR@.V                          | 19.76   | 7.83   | 2.52 | 0.40 |
| P70333_HNRH2_MOUSE  | Hnrnp2 | Heterogeneous nuclear ri R.ATENDIYFNSPLNPM*R@.V                  | 57.33   | 32.14  | 1.78 | 0.56 |
| P70333_HNRH2_MOUSE  | Hnrnp2 | Heterogeneous nuclear ri R.ATENDIYFNSPLNPMR@.V                   | 20.24   | 11.11  | 1.82 | 0.55 |
| P70333_HNRH2_MOUSE  | Hnrnp2 | Heterogeneous nuclear ri R.GAYGGYGGYDYGVDYGGYGGSDR@.F            | 10.22   | 3.58   | 2.80 | 0.36 |
| P70333_HNRH2_MOUSE  | Hnrnp2 | Heterogeneous nuclear ri R.R@GAYGGYGGYDYGVDYGGYGGSDR@.F          | 2.97    | 2.28   | 1.30 | 0.77 |
| P70333_HNRH2_MOUSE  | Hnrnp2 | Heterogeneous nuclear ri R.SNSVEM*DWVLK#.H                       | 39.22   | 21.97  | 1.79 | 0.56 |
| P70333_HNRH2_MOUSE  | Hnrnp2 | Heterogeneous nuclear ri R.ATENDIYFNSPLNPM*R@.V                  | 3.27    | 3.03   | 1.08 | 0.92 |
| D3YWT1_D3YWT1_MOUSE | Hnrnp3 | MCG11326, isoform CRA R.ATENDIYFNSPLNPRV@.V                      | 18.92   | 17.22  | 1.10 | 0.91 |
| D3YWT1_D3YWT1_MOUSE | Hnrnp3 | MCG11326, isoform CRA R.ATENDIYFNSPLNPRV@.V                      | 15.60   | 23.59  | 0.66 | 1.51 |
| D3YWT1_D3YWT1_MOUSE | Hnrnp3 | MCG11326, isoform CRA R.DGM*DNQGGYGSVGR.M                        | 17.97   | 17.22  | 1.04 | 0.96 |
| D3YWT1_D3YWT1_MOUSE | Hnrnp3 | MCG11326, isoform CRA R.STGEAFVQFASQELAEK#.A                     | 21.52   | 21.63  | 1.00 | 1.00 |
| D3YWT1_D3YWT1_MOUSE | Hnrnp3 | MCG11326, isoform CRA R.VHIDIGADGR.A                             | 6.47    | 6.33   | 1.02 | 0.98 |
| P61979_HNRPK_MOUSE  | Hnrnpk | Heterogeneous nuclear ri K.DLAGSIIGK#.G                          | 434.55  | 239.96 | 1.81 | 0.55 |
| P61979_HNRPK_MOUSE  | Hnrnpk | Heterogeneous nuclear ri R.YYDDM*SPR@.R                          | 58.97   | 31.07  | 1.90 | 0.53 |
| P61979_HNRPK_MOUSE  | Hnrnpk | Heterogeneous nuclear ri R.ENTQTTIK#.L                           | 62.86   | 36.67  | 1.71 | 0.58 |
| P61979_HNRPK_MOUSE  | Hnrnpk | Heterogeneous nuclear ri R.GGDLTM*AVDR@.R                        | 114.62  | 53.47  | 2.14 | 0.47 |
| P61979_HNRPK_MOUSE  | Hnrnpk | Heterogeneous nuclear ri R.GSYGDLGGPIITQVTPK#.D                  | 198.52  | 108.72 | 1.83 | 0.55 |
| P61979_HNRPK_MOUSE  | Hnrnpk | Heterogeneous nuclear ri K.IDEPLGESDR@.J                         | 203.99  | 108.81 | 1.87 | 0.53 |
| P61979_HNRPK_MOUSE  | Hnrnpk | Heterogeneous nuclear ri K.IDEPLGESDR@IITITGTQDQIQNAQYLLQNSVK#.Q | 9.60    | 5.57   | 1.72 | 0.58 |
| P61979_HNRPK_MOUSE  | Hnrnpk | Heterogeneous nuclear ri K.IILDLSEPIK#.G                         | 492.22  | 266.42 | 1.85 | 0.54 |
| P61979_HNRPK_MOUSE  | Hnrnpk | Heterogeneous nuclear ri R.IITITGTQDQIQNAQYLLQNSVK#.Q            | 405.84  | 208.62 | 1.95 | 0.51 |
| P61979_HNRPK_MOUSE  | Hnrnpk | Heterogeneous nuclear ri R.LLHQLSAGGIGVK#.G                      | 230.48  | 115.75 | 1.99 | 0.50 |
| P61979_HNRPK_MOUSE  | Hnrnpk | Heterogeneous nuclear ri R.NLPLPPPPR@.G                          | 69.89   | 55.60  | 1.26 | 0.80 |
| P61979_HNRPK_MOUSE  | Hnrnpk | Heterogeneous nuclear ri R.NTDEM*VELR@.I                         | 166.71  | 75.88  | 2.20 | 0.46 |
| P61979_HNRPK_MOUSE  | Hnrnpk | Heterogeneous nuclear ri R.NTDEM*VELR@.I                         | 36.41   | 16.14  | 2.26 | 0.44 |
| P61979_HNRPK_MOUSE  | Hnrnpk | Heterogeneous nuclear ri K.R@PAEDM*EEQAFK#.R                     | 14.83   | 7.28   | 2.04 | 0.49 |
| P61979_HNRPK_MOUSE  | Hnrnpk | Heterogeneous nuclear ri K.R@PAEDM*EEQAFK#.R                     | 50.24   | 24.85  | 2.02 | 0.49 |
| P61979_HNRPK_MOUSE  | Hnrnpk | Heterogeneous nuclear ri R.RP@PAEDM*EEQAFK#.S                    | 148.70  | 84.97  | 1.75 | 0.57 |
| P61979_HNRPK_MOUSE  | Hnrnpk | Heterogeneous nuclear ri R.SR@NTDEM*VELR@.I                      | 27.48   | 7.21   | 3.81 | 0.26 |
| P61979_HNRPK_MOUSE  | Hnrnpk | Heterogeneous nuclear ri R.TDYNASVSPDSSGPER@.J                   | 409.65  | 216.48 | 1.89 | 0.53 |
| P61979_HNRPK_MOUSE  | Hnrnpk | Heterogeneous nuclear ri R.GSYGDLGGPIITQVTPK#.D                  | 22.59   | 18.62  | 1.21 | 0.82 |
| P61979_HNRPK_MOUSE  | Hnrnpk | Heterogeneous nuclear ri K.IDEPLGESDR@.J                         | 9.23    | 10.96  | 0.84 | 1.19 |
| P61979_HNRPK_MOUSE  | Hnrnpk | Heterogeneous nuclear ri K.IDEPLGESDRITITGTQDQIQNAQYLLQNSVK#.Q   | 2.14    | 2.50   | 0.86 | 1.17 |
| P61979_HNRPK_MOUSE  | Hnrnpk | Heterogeneous nuclear ri R.IITITGTQDQIQNAQYLLQNSVK#.Q            | 42.59   | 30.72  | 1.39 | 0.72 |
| P61979_HNRPK_MOUSE  | Hnrnpk | Heterogeneous nuclear ri R.TDYNASVSPDSSGPER@.I                   | 7.90    | 6.36   | 1.24 | 0.81 |
| P61979_HNRPK_MOUSE  | Hnrnpk | Heterogeneous nuclear ri R.AQPYDPNFYETYDYGFTM**M*FDDR@.R         | 14.68   | 6.33   | 2.32 | 0.43 |
| P61979_HNRPK_MOUSE  | Hnrnpk | Heterogeneous nuclear ri K.DLAGSIIGK#.G                          | 701.67  | 317.05 | 2.21 | 0.45 |

|                    |         |                                                                        |         |        |       |      |
|--------------------|---------|------------------------------------------------------------------------|---------|--------|-------|------|
| P61979_HNRPK_MOUSE | Hnrnpk  | Heterogeneous nuclear ri R.DYDDM*SPR@_R                                | 115.47  | 61.11  | 1.89  | 0.53 |
| P61979_HNRPK_MOUSE | Hnrnpk  | Heterogeneous nuclear ri R.ENTQTIK#.L                                  | 146.09  | 90.33  | 1.62  | 0.62 |
| P61979_HNRPK_MOUSE | Hnrnpk  | Heterogeneous nuclear ri R.GGDLM*AVDR@_R                               | 175.67  | 66.54  | 2.64  | 0.38 |
| P61979_HNRPK_MOUSE | Hnrnpk  | Heterogeneous nuclear ri R.GSYGLDGGPIITQVTPK#.D                        | 335.24  | 143.80 | 2.33  | 0.43 |
| P61979_HNRPK_MOUSE | Hnrnpk  | Heterogeneous nuclear ri R.HESGASIK#.I                                 | 65.19   | 27.78  | 2.35  | 0.43 |
| P61979_HNRPK_MOUSE | Hnrnpk  | Heterogeneous nuclear ri R.HESGASIK#IDPLEGSEDR.I                       | 82.41   | 30.34  | 2.72  | 0.37 |
| P61979_HNRPK_MOUSE | Hnrnpk  | Heterogeneous nuclear ri R.IDPLEGSEDR@_I                               | 302.97  | 149.61 | 2.03  | 0.49 |
| P61979_HNRPK_MOUSE | Hnrnpk  | Heterogeneous nuclear ri K.IDPLEGSEDRITGTQDQIQNAQYLLQNSVK.Q            | 36.47   | 14.36  | 2.54  | 0.39 |
| P61979_HNRPK_MOUSE | Hnrnpk  | Heterogeneous nuclear ri K.IILDLESPIK#.G                               | 1059.93 | 452.65 | 2.34  | 0.43 |
| P61979_HNRPK_MOUSE | Hnrnpk  | Heterogeneous nuclear ri R.IITITGTQDQIQNAQYLLQNSVK#.Q                  | 1142.59 | 395.50 | 2.89  | 0.35 |
| P61979_HNRPK_MOUSE | Hnrnpk  | Heterogeneous nuclear ri R.LLIHQSLAGGIIVK#.G                           | 423.74  | 172.36 | 2.46  | 0.41 |
| P61979_HNRPK_MOUSE | Hnrnpk  | Heterogeneous nuclear ri K.NAGAVIGK#.G                                 | 293.43  | 113.47 | 2.59  | 0.39 |
| P61979_HNRPK_MOUSE | Hnrnpk  | Heterogeneous nuclear ri R.NLPLPPPPPPR.G                               | 134.92  | 94.96  | 1.42  | 0.70 |
| P61979_HNRPK_MOUSE | Hnrnpk  | Heterogeneous nuclear ri R.NTDEM*VELR@_I                               | 226.41  | 93.17  | 2.43  | 0.41 |
| P61979_HNRPK_MOUSE | Hnrnpk  | Heterogeneous nuclear ri R.NTDEM*VELR@_I                               | 74.04   | 32.20  | 2.30  | 0.43 |
| P61979_HNRPK_MOUSE | Hnrnpk  | Heterogeneous nuclear ri K.R@PAEDM*EEEQAFK#.R                          | 7.03    | 4.70   | 1.50  | 0.67 |
| P61979_HNRPK_MOUSE | Hnrnpk  | Heterogeneous nuclear ri K.R@PAEDM*EEEQAFK#R@_S                        | 43.06   | 20.27  | 2.12  | 0.47 |
| P61979_HNRPK_MOUSE | Hnrnpk  | Heterogeneous nuclear ri K.RPAEDM*EEEQAFK#.S                           | 263.63  | 104.02 | 2.53  | 0.39 |
| P61979_HNRPK_MOUSE | Hnrnpk  | Heterogeneous nuclear ri R.SR@NTDEM*VELR@_I                            | 21.86   | 8.76   | 2.50  | 0.40 |
| P61979_HNRPK_MOUSE | Hnrnpk  | Heterogeneous nuclear ri R.TDYNASVSPDSSGPER@_I                         | 492.76  | 225.53 | 2.18  | 0.46 |
| P61979_HNRPK_MOUSE | Hnrnpk  | Heterogeneous nuclear ri K.DLAGSIIK#.G                                 | 69.35   | 24.44  | 2.84  | 0.35 |
| P61979_HNRPK_MOUSE | Hnrnpk  | Heterogeneous nuclear ri R.GSYGLDGGPIITQVTPK#.D                        | 46.66   | 18.58  | 2.51  | 0.40 |
| P61979_HNRPK_MOUSE | Hnrnpk  | Heterogeneous nuclear ri K.IDPLEGSEDR@_I                               | 35.61   | 14.35  | 2.48  | 0.40 |
| P61979_HNRPK_MOUSE | Hnrnpk  | Heterogeneous nuclear ri K.IILDLESPIK#.G                               | 90.02   | 36.37  | 2.48  | 0.40 |
| P61979_HNRPK_MOUSE | Hnrnpk  | Heterogeneous nuclear ri R.IITITGTQDQIQNAQYLLQNSVK#.Q                  | 27.23   | 31.54  | 2.77  | 0.36 |
| P61979_HNRPK_MOUSE | Hnrnpk  | Heterogeneous nuclear ri R.LLIHQSLAGGIIVK#.G                           | 28.90   | 7.99   | 3.62  | 0.28 |
| P61979_HNRPK_MOUSE | Hnrnpk  | Heterogeneous nuclear ri R.NTDEM*VELR@_I                               | 24.38   | 11.06  | 2.20  | 0.45 |
| P61979_HNRPK_MOUSE | Hnrnpk  | Heterogeneous nuclear ri R.TDYNASVSPDSSGPER@_I                         | 49.05   | 16.58  | 2.96  | 0.34 |
| Q8R081_HNRPL_MOUSE | Hnrnpl  | Heterogeneous nuclear ri R.AITHLNNFM*FGQK.M                            | 18.74   | 24.23  | 0.77  | 1.29 |
| Q8R081_HNRPL_MOUSE | Hnrnpl  | Heterogeneous nuclear ri K.ISR@PGDSDSR@_S                              | 12.97   | 14.77  | 0.88  | 1.14 |
| Q8R081_HNRPL_MOUSE | Hnrnpl  | Heterogeneous nuclear ri R.LKTENAGDQHGGGGGGSGAAGGGGNYDDPHKTPASPVVHIR.G | 5.62    | 4.60   | 1.22  | 0.82 |
| Q8R081_HNRPL_MOUSE | Hnrnpl  | Heterogeneous nuclear ri K.NDQDWTDTYNPLNSGQDGPSPNPKR.Q                 | 8.59    | 16.60  | 0.52  | 1.93 |
| Q8R081_HNRPL_MOUSE | Hnrnpl  | Heterogeneous nuclear ri K.SKPGAA*VEM*ADGYAVDR.A                       | 22.18   | 37.42  | 0.59  | 1.69 |
| Q8R081_HNRPL_MOUSE | Hnrnpl  | Heterogeneous nuclear ri R.YGPOYGHPPPPPPDYGPHADSPVLM*VYGLDQSK.M        | 13.30   | 8.76   | 1.52  | 0.66 |
| Q8R081_HNRPL_MOUSE | Hnrnpl  | Heterogeneous nuclear ri R.AITHLNNFM*FGQK#.M                           | 30.52   | 34.90  | 0.87  | 1.14 |
| Q8R081_HNRPL_MOUSE | Hnrnpl  | Heterogeneous nuclear ri K.ISR@PGDSDSR@_S                              | 23.27   | 19.60  | 1.19  | 0.84 |
| Q8R081_HNRPL_MOUSE | Hnrnpl  | Heterogeneous nuclear ri K.NDQDWTDTYNPLNSGQDGPSPNPKR#@_Q               | 25.75   | 20.27  | 1.27  | 0.79 |
| Q8R081_HNRPL_MOUSE | Hnrnpl  | Heterogeneous nuclear ri K.NGVQAM*VEFDSVSAQR.A                         | 4.45    | 5.88   | 0.76  | 1.32 |
| Q8R081_HNRPL_MOUSE | Hnrnpl  | Heterogeneous nuclear ri K.NPNGPYPTLK.L                                | 15.57   | 18.65  | 0.83  | 1.20 |
| Q8R081_HNRPL_MOUSE | Hnrnpl  | Heterogeneous nuclear ri K.SDALETGLFNHYQM*#.N                          | 8.07    | 6.62   | 1.22  | 0.82 |
| Q8R081_HNRPL_MOUSE | Hnrnpl  | Heterogeneous nuclear ri K.SKPGAA*VEM*ADGYAVDR.A                       | 54.93   | 43.42  | 1.27  | 0.79 |
| Q8R081_HNRPL_MOUSE | Hnrnpl  | Heterogeneous nuclear ri R.SSSGLEWDSK#SDALETGLFNHYQM*#.N               | 2.90    | 2.71   | 1.07  | 0.93 |
| Q8R081_HNRPL_MOUSE | Hnrnpl  | Heterogeneous nuclear ri K.TENAGDQHGGGGGGSGAAGGGGNYDDPHK#.T            | 10.01   | 5.79   | 1.73  | 0.58 |
| Q8R081_HNRPL_MOUSE | Hnrnpl  | Heterogeneous nuclear ri K.TENAGDQHGGGGGGSGAAGGGGNYDDPHKTPASPVVHIR.G   | 1.36    | 3.05   | 0.44  | 2.25 |
| Q8R081_HNRPL_MOUSE | Hnrnpl  | Heterogeneous nuclear ri R.YGPOYGHPPPPPPDYGPHADSPVLM*VYGLDQSK.M        | 27.82   | 13.89  | 2.00  | 0.50 |
| Q8R081_HNRPL_MOUSE | Hnrnpl  | Heterogeneous nuclear ri R.YGPOYGHPPPPPPDYGPHADSPVLM*VYGLDQSK.M        | 13.34   | 8.54   | 1.56  | 0.64 |
| Q8R081_HNRPL_MOUSE | Hnrnpl  | Heterogeneous nuclear ri R.YYGGNGEGR@_A                                | 11.16   | 7.00   | 1.60  | 0.63 |
| Q921F4_HNRLL_MOUSE | Hnrnpil | Heterogeneous nuclear ri K.TDAVEALTALNHYQIR@_V                         | 12.84   | 6.98   | 1.84  | 0.54 |
| Q921F4_HNRLL_MOUSE | Hnrnpil | Heterogeneous nuclear ri K.TIPGTALVEM*GDEYAVR@_A                       | 11.07   | 7.55   | 1.47  | 0.68 |
| Q921F4_HNRLL_MOUSE | Hnrnpil | Heterogeneous nuclear ri R.AVTHLNVK#.L                                 | 25.59   | 5.77   | 4.43  | 0.23 |
| Q921F4_HNRLL_MOUSE | Hnrnpil | Heterogeneous nuclear ri R.FTSAGQASK#.P                                | 20.79   | 7.89   | 2.63  | 0.38 |
| Q921F4_HNRLL_MOUSE | Hnrnpil | Heterogeneous nuclear ri R.HDYGSHGLPLPSR@_Y                            | 58.19   | 20.18  | 2.88  | 0.35 |
| Q921F4_HNRLL_MOUSE | Hnrnpil | Heterogeneous nuclear ri R.ITR@PGNTDDPSGNGK#.V                         | 11.32   | 3.10   | 3.65  | 0.27 |
| Q921F4_HNRLL_MOUSE | Hnrnpil | Heterogeneous nuclear ri R.ITRPGNTDDPSGNGK.V                           | 71.27   | 26.16  | 2.75  | 0.36 |
| Q921F4_HNRLL_MOUSE | Hnrnpil | Heterogeneous nuclear ri R.LK#TEGEEVYSAESEN@_Q                         | 36.55   | 10.98  | 3.33  | 0.30 |
| Q921F4_HNRLL_MOUSE | Hnrnpil | Heterogeneous nuclear ri R.QALVEFENIDSAK#.E                            | 21.77   | 8.98   | 2.42  | 0.41 |
| Q921F4_HNRLL_MOUSE | Hnrnpil | Heterogeneous nuclear ri K.QHSVSPQIFLEDTSSYK#DFAM*SK#.N                | 37.78   | 9.68   | 3.90  | 0.26 |
| Q921F4_HNRLL_MOUSE | Hnrnpil | Heterogeneous nuclear ri K.TDAVEALTALNHYQIR@_V                         | 55.97   | 17.46  | 3.21  | 0.31 |
| Q921F4_HNRLL_MOUSE | Hnrnpil | Heterogeneous nuclear ri K.TIPGTALVEM*GDEYAVR@_A                       | 52.32   | 17.88  | 2.93  | 0.34 |
| Q921F4_HNRLL_MOUSE | Hnrnpil | Heterogeneous nuclear ri K.TLSGLEWK#.C                                 | 47.27   | 17.24  | 2.74  | 0.36 |
| Q921F4_HNRLL_MOUSE | Hnrnpil | Heterogeneous nuclear ri R.HDYGSHGLPLPSR@_Y                            | 12.51   | 5.60   | 2.24  | 0.45 |
| Q921F4_HNRLL_MOUSE | Hnrnpil | Heterogeneous nuclear ri K.TIPGTALVEM*GDEYAVR@_A                       | 10.37   | 2.86   | 3.63  | 0.28 |
| Q9D0E1_HNRPM_MOUSE | Hnrnmp  | Heterogeneous nuclear ri K.AAEVLNK#.H                                  | 214.38  | 16.22  | 13.22 | 0.08 |
| Q9D0E1_HNRPM_MOUSE | Hnrnmp  | Heterogeneous nuclear ri R.ADILED#DGK#.S                               | 38.55   | 36.20  | 1.06  | 0.94 |
| Q9D0E1_HNRPM_MOUSE | Hnrnmp  | Heterogeneous nuclear ri R.AFITNIPFDVK#.W                              | 76.65   | 70.42  | 1.09  | 0.92 |
| Q9D0E1_HNRPM_MOUSE | Hnrnmp  | Heterogeneous nuclear ri K.EK#GEVTVYVLLM*DAEGK#.S                      | 8.56    | 7.52   | 1.14  | 0.88 |
| Q9D0E1_HNRPM_MOUSE | Hnrnmp  | Heterogeneous nuclear ri K.EK#GEVTVYVLLM#DAEGK#.S                      | 3.20    | 5.07   | 0.63  | 1.58 |
| Q9D0E1_HNRPM_MOUSE | Hnrnmp  | Heterogeneous nuclear ri R.EVFSM*AGVVR@_A                              | 8.58    | 8.06   | 1.06  | 0.94 |
| Q9D0E1_HNRPM_MOUSE | Hnrnmp  | Heterogeneous nuclear ri K.GIGM*GNLGPAGM*GM*EGIGFGINK.I                | 10.16   | 8.08   | 1.26  | 0.80 |
| Q9D0E1_HNRPM_MOUSE | Hnrnmp  | Heterogeneous nuclear ri K.IGGM*EGPGGGM*ENM*GR.F                       | 15.40   | 14.89  | 1.03  | 0.97 |
| Q9D0E1_HNRPM_MOUSE | Hnrnmp  | Heterogeneous nuclear ri R.INELISLAK#.R                                | 63.89   | 66.66  | 0.96  | 1.04 |
| Q9D0E1_HNRPM_MOUSE | Hnrnmp  | Heterogeneous nuclear ri K.LK#EVFSM*AGVVR@_A                           | 25.61   | 22.17  | 1.15  | 0.87 |
| Q9D0E1_HNRPM_MOUSE | Hnrnmp  | Heterogeneous nuclear ri R.M*AAPIR.V                                   | 31.89   | 87.48  | 0.36  | 2.74 |
| Q9D0E1_HNRPM_MOUSE | Hnrnmp  | Heterogeneous nuclear ri R.M*GAGLGHM*DR@_V                             | 6.06    | 4.26   | 1.42  | 0.70 |
| Q9D0E1_HNRPM_MOUSE | Hnrnmp  | Heterogeneous nuclear ri R.M*GAGM*GFGLER@_M                            | 36.37   | 28.93  | 1.26  | 0.80 |
| Q9D0E1_HNRPM_MOUSE | Hnrnmp  | Heterogeneous nuclear ri R.M*GLAM*GGAGASFD@_A                          | 14.03   | 10.12  | 1.39  | 0.72 |
| Q9D0E1_HNRPM_MOUSE | Hnrnmp  | Heterogeneous nuclear ri R.M*GLVM*DR@_M                                | 39.62   | 29.93  | 1.32  | 0.76 |
| Q9D0E1_HNRPM_MOUSE | Hnrnmp  | Heterogeneous nuclear ri R.M*GPAIER.M                                  | 50.22   | 41.11  | 1.22  | 0.82 |
| Q9D0E1_HNRPM_MOUSE | Hnrnmp  | Heterogeneous nuclear ri R.M*GPAM*GAPALGAGIER.M                        | 18.91   | 15.30  | 1.24  | 0.81 |
| Q9D0E1_HNRPM_MOUSE | Hnrnmp  | Heterogeneous nuclear ri R.M*VPTGM*GASLER.M                            | 27.46   | 27.03  | 1.02  | 0.98 |
| Q9D0E1_HNRPM_MOUSE | Hnrnmp  | Heterogeneous nuclear ri R.NLPPDFTWK#.M                                | 20.00   | 15.16  | 1.32  | 0.76 |
| Q9D0E1_HNRPM_MOUSE | Hnrnmp  | Heterogeneous nuclear ri K.QGGGGAGGSPVPIER@_M                          | 56.12   | 52.02  | 1.08  | 0.93 |
| Q9D0E1_HNRPM_MOUSE | Hnrnmp  | Heterogeneous nuclear ri K.VGEVTVYVLLM#DAEGK#.S                        | 6.99    | 7.05   | 0.99  | 1.01 |
| Q9D0E1_HNRPM_MOUSE | Hnrnmp  | Heterogeneous nuclear ri R.AFITNIPFDVK.W                               | 3.64    | 4.64   | 0.79  | 1.27 |
| Q9D0E1_HNRPM_MOUSE | Hnrnmp  | Heterogeneous nuclear ri R.M*GLAM*GGAGASFD@_A                          | 5.84    | 6.33   | 0.92  | 1.08 |
| Q9D0E1_HNRPM_MOUSE | Hnrnmp  | Heterogeneous nuclear ri R.M*GPAM*GAPALGAGIER.M                        | 5.55    | 5.45   | 1.02  | 0.98 |
| Q9D0E1_HNRPM_MOUSE | Hnrnmp  | Heterogeneous nuclear ri K.AAEVLNK#.H                                  | 445.97  | 310.35 | 1.44  | 0.70 |
| Q9D0E1_HNRPM_MOUSE | Hnrnmp  | Heterogeneous nuclear ri R.ADILED#DGK#.S                               | 245.61  | 157.25 | 1.56  | 0.64 |
| Q9D0E1_HNRPM_MOUSE | Hnrnmp  | Heterogeneous nuclear ri R.AFITNIPFDVK#.W                              | 940.10  | 635.74 | 1.48  | 0.68 |
| Q9D0E1_HNRPM_MOUSE | Hnrnmp  | Heterogeneous nuclear ri K.EK#GEVTVYVLLM#DAEGK#.S                      | 86.45   | 50.17  | 1.72  | 0.58 |
| Q9D0E1_HNRPM_MOUSE | Hnrnmp  | Heterogeneous nuclear ri K.EK#GEVTVYVLLM#DAEGK#.S                      | 36.73   | 26.74  | 1.37  | 0.73 |
| Q9D0E1_HNRPM_MOUSE | Hnrnmp  | Heterogeneous nuclear ri R.EVFSM*AGVVR@_A                              | 65.41   | 60.84  | 1.08  | 0.93 |
| Q9D0E1_HNRPM_MOUSE | Hnrnmp  | Heterogeneous nuclear ri R.FESPEVIER@_A                                | 360.37  | 264.86 | 1.36  | 0.73 |
| Q9D0E1_HNRPM_MOUSE | Hnrnmp  | Heterogeneous nuclear ri R.FGSGM*NM*GR.I                               | 129.71  | 80.68  | 1.61  | 0.62 |
| Q9D0E1_HNRPM_MOUSE | Hnrnmp  | Heterogeneous nuclear ri K.GDFPPPER@PQQLPHGLGGIGM*GLPGGG@PIANHLSK#.G   | 29.13   | 16.53  | 1.76  | 0.57 |
| Q9D0E1_HNRPM_MOUSE | Hnrnmp  | Heterogeneous nuclear ri K.GEER@PTQNK#.R                               | 15.45   | 14.14  | 1.09  | 0.91 |
| Q9D0E1_HNRPM_MOUSE | Hnrnmp  | Heterogeneous nuclear ri R.GGGR@FEPYSNPK#.R                            | 82.39   | 54.35  | 1.52  | 0.66 |
| Q9D0E1_HNRPM_MOUSE | Hnrnmp  | Heterogeneous nuclear ri K.GIGM*GNLGPAGM*GM*EGIGFGINK.I                | 17.93   | 9.48   | 1.80  | 0.56 |
| Q9D0E1_HNRPM_MOUSE | Hnrnmp  | Heterogeneous nuclear ri K.GIGM*GNLGPAGM*GM*EGIGFGINK.I                | 7.43    | 5.08   | 1.46  | 0.68 |
| Q9D0E1_HNRPM_MOUSE | Hnrnmp  | Heterogeneous nuclear ri K.GIGM*GNLGPAGM*GM*EGIGFGINK.I                | 23.57   | 12.69  | 1.86  | 0.54 |
| Q9D0E1_HNRPM_MOUSE | Hnrnmp  | Heterogeneous nuclear ri K.GIGM*GNLGPAGM*GM*EGIGFGINK.I                | 5.90    | 4.68   | 1.26  | 0.79 |
| Q9D0E1_HNRPM_MOUSE | Hnrnmp  | Heterogeneous nuclear ri K.IGGM*EGPGGGM*ENM*GR.F                       | 178.49  | 121.06 | 1.47  | 0.68 |
| Q9D0E1_HNRPM_MOUSE | Hnrnmp  | Heterogeneous nuclear ri K.IGGM*EGPGGGM*ENMGR@_F                       | 9.89    | 5.32   | 1.86  | 0.54 |

|                     |        |                                                                 |        |        |      |      |
|---------------------|--------|-----------------------------------------------------------------|--------|--------|------|------|
| Q9D0E1_HNRPM_MOUSE  | Hnrnrm | Heterogeneous nuclear ri K.IGGM*EGPFGGGMENM*GR@.F               | 4.99   | 6.36   | 0.79 | 1.27 |
| Q9D0E1_HNRPM_MOUSE  | Hnrnrm | Heterogeneous nuclear ri K.IGGMEGPFGGGM*ENM*GR@.F               | 13.76  | 9.76   | 1.41 | 0.71 |
| Q9D0E1_HNRPM_MOUSE  | Hnrnrm | Heterogeneous nuclear ri R.IGSGVM@.M                            | 295.38 | 191.68 | 1.54 | 0.65 |
| Q9D0E1_HNRPM_MOUSE  | Hnrnrm | Heterogeneous nuclear ri R.INEILSNALK#.R                        | 615.78 | 383.48 | 1.61 | 0.62 |
| Q9D0E1_HNRPM_MOUSE  | Hnrnrm | Heterogeneous nuclear ri R.ISGAGM*ER.M                          | 123.23 | 78.89  | 1.56 | 0.64 |
| Q9D0E1_HNRPM_MOUSE  | Hnrnrm | Heterogeneous nuclear ri R.ISGAGMER@.M                          | 32.90  | 22.57  | 1.46 | 0.69 |
| Q9D0E1_HNRPM_MOUSE  | Hnrnrm | Heterogeneous nuclear ri R.LGTVFVANLDYK#.V                      | 387.64 | 242.63 | 1.60 | 0.63 |
| Q9D0E1_HNRPM_MOUSE  | Hnrnrm | Heterogeneous nuclear ri R.LKEVFSM*AGVVVR.A                     | 291.09 | 158.64 | 1.83 | 0.54 |
| Q9D0E1_HNRPM_MOUSE  | Hnrnrm | Heterogeneous nuclear ri K.LKEVFSMAGVVVR@.A                     | 49.05  | 29.68  | 1.65 | 0.61 |
| Q9D0E1_HNRPM_MOUSE  | Hnrnrm | Heterogeneous nuclear ri R.MAAPIDR@.V                           | 87.25  | 62.77  | 1.39 | 0.72 |
| Q9D0E1_HNRPM_MOUSE  | Hnrnrm | Heterogeneous nuclear ri R.M*AAPIDR.V                           | 436.86 | 321.32 | 1.36 | 0.74 |
| Q9D0E1_HNRPM_MOUSE  | Hnrnrm | Heterogeneous nuclear ri R.M*GAGLGHGM*DR.V                      | 50.93  | 28.07  | 1.81 | 0.55 |
| Q9D0E1_HNRPM_MOUSE  | Hnrnrm | Heterogeneous nuclear ri R.M*GAGLGHGM@.V                        | 7.41   | 5.58   | 1.33 | 0.75 |
| Q9D0E1_HNRPM_MOUSE  | Hnrnrm | Heterogeneous nuclear ri R.M*GAGM*GFGLER@.M                     | 311.22 | 200.93 | 1.55 | 0.65 |
| Q9D0E1_HNRPM_MOUSE  | Hnrnrm | Heterogeneous nuclear ri R.MGAGM*GFGLER@.M                      | 34.22  | 21.22  | 1.61 | 0.62 |
| Q9D0E1_HNRPM_MOUSE  | Hnrnrm | Heterogeneous nuclear ri R.M*GAGM*GFGLER@.M                     | 20.75  | 14.70  | 1.41 | 0.71 |
| Q9D0E1_HNRPM_MOUSE  | Hnrnrm | Heterogeneous nuclear ri R.M*GANNLER.M                          | 158.05 | 103.74 | 1.52 | 0.66 |
| Q9D0E1_HNRPM_MOUSE  | Hnrnrm | Heterogeneous nuclear ri R.MGANNLER@.M                          | 40.85  | 27.61  | 1.48 | 0.68 |
| Q9D0E1_HNRPM_MOUSE  | Hnrnrm | Heterogeneous nuclear ri R.M*GANSLER@.M                         | 348.15 | 219.53 | 1.59 | 0.63 |
| Q9D0E1_HNRPM_MOUSE  | Hnrnrm | Heterogeneous nuclear ri R.MGANSLER@.M                          | 74.12  | 46.75  | 1.59 | 0.63 |
| Q9D0E1_HNRPM_MOUSE  | Hnrnrm | Heterogeneous nuclear ri R.M*GLAM*GGAGGASFD@.A                  | 436.11 | 274.77 | 1.59 | 0.63 |
| Q9D0E1_HNRPM_MOUSE  | Hnrnrm | Heterogeneous nuclear ri R.MGLAM*GGAGGASFD@.A                   | 28.46  | 19.76  | 1.44 | 0.69 |
| Q9D0E1_HNRPM_MOUSE  | Hnrnrm | Heterogeneous nuclear ri R.M*GLAMGGAGGASFD@.A                   | 15.40  | 7.38   | 2.09 | 0.48 |
| Q9D0E1_HNRPM_MOUSE  | Hnrnrm | Heterogeneous nuclear ri R.MGLAMGGAGGASFD@.A                    | 8.79   | 5.01   | 1.75 | 0.57 |
| Q9D0E1_HNRPM_MOUSE  | Hnrnrm | Heterogeneous nuclear ri R.M*GLSM*DR@.M                         | 109.09 | 69.94  | 1.56 | 0.64 |
| Q9D0E1_HNRPM_MOUSE  | Hnrnrm | Heterogeneous nuclear ri R.MGLVM*DR@.M                          | 32.61  | 18.35  | 1.78 | 0.56 |
| Q9D0E1_HNRPM_MOUSE  | Hnrnrm | Heterogeneous nuclear ri R.M*GLVM@.M                            | 18.20  | 10.85  | 1.68 | 0.60 |
| Q9D0E1_HNRPM_MOUSE  | Hnrnrm | Heterogeneous nuclear ri R.M*GLVM*DR.M                          | 195.03 | 127.22 | 1.53 | 0.65 |
| Q9D0E1_HNRPM_MOUSE  | Hnrnrm | Heterogeneous nuclear ri R.M*GP@.M                              | 436.86 | 321.32 | 1.36 | 0.74 |
| Q9D0E1_HNRPM_MOUSE  | Hnrnrm | Heterogeneous nuclear ri R.M*GPALGAGIER@.M                      | 406.36 | 282.03 | 1.44 | 0.69 |
| Q9D0E1_HNRPM_MOUSE  | Hnrnrm | Heterogeneous nuclear ri R.MGPAM*GPALGAGIER@.M                  | 26.65  | 20.31  | 1.31 | 0.76 |
| Q9D0E1_HNRPM_MOUSE  | Hnrnrm | Heterogeneous nuclear ri R.M*GPAMGPALGAGIER@.M                  | 27.23  | 14.25  | 1.91 | 0.52 |
| Q9D0E1_HNRPM_MOUSE  | Hnrnrm | Heterogeneous nuclear ri R.MGPAMGPALGAGIER@.M                   | 15.61  | 8.00   | 1.95 | 0.51 |
| Q9D0E1_HNRPM_MOUSE  | Hnrnrm | Heterogeneous nuclear ri R.MGP@.M                               | 36.80  | 26.11  | 1.41 | 0.71 |
| Q9D0E1_HNRPM_MOUSE  | Hnrnrm | Heterogeneous nuclear ri R.M*GP@.M                              | 325.28 | 233.04 | 1.40 | 0.72 |
| Q9D0E1_HNRPM_MOUSE  | Hnrnrm | Heterogeneous nuclear ri R.M*GPLGLDHM*ASSIER@.M                 | 464.22 | 311.26 | 1.49 | 0.67 |
| Q9D0E1_HNRPM_MOUSE  | Hnrnrm | Heterogeneous nuclear ri R.M*GPLGLDHM*ASSIER.M                  | 24.07  | 15.56  | 1.55 | 0.65 |
| Q9D0E1_HNRPM_MOUSE  | Hnrnrm | Heterogeneous nuclear ri R.M*GPLGLDHM*ASSIER@.M                 | 62.34  | 42.98  | 1.45 | 0.69 |
| Q9D0E1_HNRPM_MOUSE  | Hnrnrm | Heterogeneous nuclear ri R.M*GPVM*DR.M                          | 123.79 | 72.68  | 1.70 | 0.59 |
| Q9D0E1_HNRPM_MOUSE  | Hnrnrm | Heterogeneous nuclear ri R.M*GPVMDR@.M                          | 28.76  | 24.17  | 1.19 | 0.84 |
| Q9D0E1_HNRPM_MOUSE  | Hnrnrm | Heterogeneous nuclear ri R.M*GSSIER@.M                          | 96.42  | 70.42  | 1.37 | 0.73 |
| Q9D0E1_HNRPM_MOUSE  | Hnrnrm | Heterogeneous nuclear ri R.M*VPTGM*GASLER@.M                    | 209.87 | 130.79 | 1.60 | 0.62 |
| Q9D0E1_HNRPM_MOUSE  | Hnrnrm | Heterogeneous nuclear ri R.MVPTGMGASLER@.M                      | 15.43  | 13.91  | 1.11 | 0.90 |
| Q9D0E1_HNRPM_MOUSE  | Hnrnrm | Heterogeneous nuclear ri R.NL@.M                                | 396.12 | 275.20 | 1.44 | 0.69 |
| Q9D0E1_HNRPM_MOUSE  | Hnrnrm | Heterogeneous nuclear ri R.KQGGGAGGSVPGIER@.M                   | 548.06 | 358.48 | 1.53 | 0.65 |
| Q9D0E1_HNRPM_MOUSE  | Hnrnrm | Heterogeneous nuclear ri K.VGEVTVVLLM*DAEGK#.S                  | 151.08 | 90.87  | 1.66 | 0.60 |
| Q9D0E1_HNRPM_MOUSE  | Hnrnrm | Heterogeneous nuclear ri K.VGEVTVVLLM*DAEGK#.S                  | 32.24  | 24.93  | 1.29 | 0.77 |
| Q9D0E1_HNRPM_MOUSE  | Hnrnrm | Heterogeneous nuclear ri K.VGEVTVVLLM*DAEGK#.S                  | 68.83  | 43.00  | 1.60 | 0.62 |
| Q9D0E1_HNRPM_MOUSE  | Hnrnrm | Heterogeneous nuclear ri R.VG@.M                                | 227.61 | 138.21 | 1.65 | 0.61 |
| Q9D0E1_HNRPM_MOUSE  | Hnrnrm | Heterogeneous nuclear ri R.VGSEIER@.M                           | 447.39 | 331.50 | 1.35 | 0.74 |
| Q9D0E1_HNRPM_MOUSE  | Hnrnrm | Heterogeneous nuclear ri K.VKEDPDGEHAR@.R                       | 13.13  | 9.32   | 1.41 | 0.71 |
| Q9D0E1_HNRPM_MOUSE  | Hnrnrm | Heterogeneous nuclear ri K.VKEDPDGEHAR.R                        | 117.84 | 93.06  | 1.27 | 0.79 |
| Q9D0E1_HNRPM_MOUSE  | Hnrnrm | Heterogeneous nuclear ri R.ADILEDKDGK#.S                        | 15.69  | 11.79  | 1.33 | 0.75 |
| Q9D0E1_HNRPM_MOUSE  | Hnrnrm | Heterogeneous nuclear ri R.AFITNIPDK#.M                         | 38.73  | 23.39  | 1.66 | 0.60 |
| Q9D0E1_HNRPM_MOUSE  | Hnrnrm | Heterogeneous nuclear ri K.IGGM*EGPFGGGM*ENM*GR.F               | 12.05  | 6.03   | 2.00 | 0.50 |
| Q9D0E1_HNRPM_MOUSE  | Hnrnrm | Heterogeneous nuclear ri R.INEILSNALK#.R                        | 57.13  | 29.20  | 1.96 | 0.51 |
| Q9D0E1_HNRPM_MOUSE  | Hnrnrm | Heterogeneous nuclear ri R.LGTVFVANLDYK#.V                      | 21.20  | 12.10  | 1.75 | 0.57 |
| Q9D0E1_HNRPM_MOUSE  | Hnrnrm | Heterogeneous nuclear ri R.M*GAGLGHGM*DR@.V                     | 9.86   | 3.95   | 2.50 | 0.40 |
| Q9D0E1_HNRPM_MOUSE  | Hnrnrm | Heterogeneous nuclear ri R.M*GAGM*GFGLER.M                      | 17.43  | 7.56   | 2.31 | 0.43 |
| Q9D0E1_HNRPM_MOUSE  | Hnrnrm | Heterogeneous nuclear ri R.M*GANSLER@.M                         | 26.07  | 14.44  | 1.81 | 0.55 |
| Q9D0E1_HNRPM_MOUSE  | Hnrnrm | Heterogeneous nuclear ri R.M*GLAM*GGAGGASFD@.A                  | 26.55  | 13.04  | 2.04 | 0.49 |
| Q9D0E1_HNRPM_MOUSE  | Hnrnrm | Heterogeneous nuclear ri R.M*VPTGM*GASLER@.M                    | 16.11  | 6.64   | 2.43 | 0.41 |
| Q9D0E1_HNRPM_MOUSE  | Hnrnrm | Heterogeneous nuclear ri K.QGGGAGGSVPGIER@.M                    | 26.59  | 15.63  | 1.70 | 0.59 |
| Q9D0E1_HNRPM_MOUSE  | Hnrnrm | Heterogeneous nuclear ri R.VG@.M                                | 22.98  | 12.22  | 1.88 | 0.53 |
| F7B5B5_F7B5B5_MOUSE | Hnrnrm | Protein Hnrnrm OS=Mus i R.NLATTVTEILEK.S                        | 1.67   | 6.23   | 0.27 | 3.72 |
| F7B5B5_F7B5B5_MOUSE | Hnrnrm | Protein Hnrnrm OS=Mus i R.DLYEDELVLFK.E.A                       | 16.90  | 26.28  | 0.64 | 1.55 |
| F7B5B5_F7B5B5_MOUSE | Hnrnrm | Protein Hnrnrm OS=Mus i R.LLM*MDPLSGQNR@.G                      | 5.80   | 5.34   | 1.09 | 0.92 |
| F7B5B5_F7B5B5_MOUSE | Hnrnrm | Protein Hnrnrm OS=Mus i R.NLATTVTEILEK.S                        | 22.25  | 38.54  | 0.58 | 1.73 |
| Q8VEK3_HNRPU_MOUSE  | Hnrnrm | Heterogeneous nuclear ri R.DIDIEVR@.I                           | 18.30  | 8.35   | 2.19 | 0.46 |
| Q8VEK3_HNRPU_MOUSE  | Hnrnrm | Heterogeneous nuclear ri R.DR@LSASSLTM*ESFAFLWAGGR@.A           | 11.08  | 3.22   | 3.44 | 0.29 |
| Q8VEK3_HNRPU_MOUSE  | Hnrnrm | Heterogeneous nuclear ri R.FIEIAR@.K                            | 61.14  | 34.68  | 1.76 | 0.57 |
| Q8VEK3_HNRPU_MOUSE  | Hnrnrm | Heterogeneous nuclear ri R.LSASSLTM*ESFAFLWAGGR@.A              | 7.45   | 2.88   | 2.59 | 0.39 |
| Q8VEK3_HNRPU_MOUSE  | Hnrnrm | Heterogeneous nuclear ri R.NFLDQTNVSAQAQR@.R                    | 37.13  | 21.62  | 1.72 | 0.58 |
| Q8VEK3_HNRPU_MOUSE  | Hnrnrm | Heterogeneous nuclear ri R.NGQDLGVAFK#.I                        | 14.92  | 8.19   | 1.82 | 0.55 |
| Q8VEK3_HNRPU_MOUSE  | Hnrnrm | Heterogeneous nuclear ri R.YNILGTNTIM*DK.M                      | 17.01  | 9.19   | 1.85 | 0.54 |
| Q8VEK3_HNRPU_MOUSE  | Hnrnrm | Heterogeneous nuclear ri K.DIDIEVR@.I                           | 302.42 | 93.73  | 3.23 | 0.31 |
| Q8VEK3_HNRPU_MOUSE  | Hnrnrm | Heterogeneous nuclear ri K.DLPEHAVLKH#.M                        | 359.61 | 95.75  | 3.76 | 0.27 |
| Q8VEK3_HNRPU_MOUSE  | Hnrnrm | Heterogeneous nuclear ri R.DR@LSASSLTM*ESFAFLWAGGR@.A           | 71.47  | 15.90  | 4.50 | 0.22 |
| Q8VEK3_HNRPU_MOUSE  | Hnrnrm | Heterogeneous nuclear ri R.FIEIAR@.K                            | 569.96 | 176.72 | 3.23 | 0.31 |
| Q8VEK3_HNRPU_MOUSE  | Hnrnrm | Heterogeneous nuclear ri R.YFYEIENK#.Y                          | 80.22  | 24.04  | 3.34 | 0.30 |
| Q8VEK3_HNRPU_MOUSE  | Hnrnrm | Heterogeneous nuclear ri K.HAAENPKGK#.Y                         | 17.00  | 10.05  | 1.69 | 0.59 |
| Q8VEK3_HNRPU_MOUSE  | Hnrnrm | Heterogeneous nuclear ri K.HAAENPKGK#NILGTNTIM*DK#.M            | 10.88  | 3.85   | 2.83 | 0.35 |
| Q8VEK3_HNRPU_MOUSE  | Hnrnrm | Heterogeneous nuclear ri R.IGWSLTTSGM*LLGEEFVSYGSLK#.G          | 12.51  | 5.01   | 2.50 | 0.40 |
| Q8VEK3_HNRPU_MOUSE  | Hnrnrm | Heterogeneous nuclear ri K.LKPVSELK#EELK#.K                     | 33.76  | 6.89   | 4.90 | 0.20 |
| Q8VEK3_HNRPU_MOUSE  | Hnrnrm | Heterogeneous nuclear ri K.LNTLQR@.A                            | 264.81 | 87.98  | 3.01 | 0.33 |
| Q8VEK3_HNRPU_MOUSE  | Hnrnrm | Heterogeneous nuclear ri R.LQAALDNEAGGR@PAM*EPGNGSLDLGGDAAGR@.S | 58.38  | 13.45  | 4.34 | 0.23 |
| Q8VEK3_HNRPU_MOUSE  | Hnrnrm | Heterogeneous nuclear ri R.LQAALDNEAGGR@PAM*EPGNGSLDLGGDAAGR@.S | 10.05  | 3.69   | 2.72 | 0.37 |
| Q8VEK3_HNRPU_MOUSE  | Hnrnrm | Heterogeneous nuclear ri R.LSASSLTM*ESFAFLWAGGR@.A              | 40.86  | 9.13   | 4.48 | 0.22 |
| Q8VEK3_HNRPU_MOUSE  | Hnrnrm | Heterogeneous nuclear ri R.LSASSLTM*ESFAFLWAGGR.A               | 78.22  | 20.59  | 3.80 | 0.26 |
| Q8VEK3_HNRPU_MOUSE  | Hnrnrm | Heterogeneous nuclear ri K.M*M*VAGFKR.K                         | 73.28  | 30.85  | 2.38 | 0.42 |
| Q8VEK3_HNRPU_MOUSE  | Hnrnrm | Heterogeneous nuclear ri R.NFLDQTNVSAQAQR@.R                    | 406.47 | 128.66 | 3.16 | 0.32 |
| Q8VEK3_HNRPU_MOUSE  | Hnrnrm | Heterogeneous nuclear ri R.NGQDLGVAFK#.I                        | 146.35 | 37.84  | 3.87 | 0.26 |
| Q8VEK3_HNRPU_MOUSE  | Hnrnrm | Heterogeneous nuclear ri K.QM*ADTGH#LNTLQR@.A                   | 52.30  | 13.00  | 4.02 | 0.25 |
| Q8VEK3_HNRPU_MOUSE  | Hnrnrm | Heterogeneous nuclear ri R.RNFILDQTNVSAQAQR.R                   | 30.88  | 8.73   | 3.54 | 0.28 |
| Q8VEK3_HNRPU_MOUSE  | Hnrnrm | Heterogeneous nuclear ri R.SSGP@.M                              | 321.73 | 107.34 | 3.00 | 0.33 |
| Q8VEK3_HNRPU_MOUSE  | Hnrnrm | Heterogeneous nuclear ri R.TTWYTK#.H                            | 61.75  | 24.48  | 2.52 | 0.40 |
| Q8VEK3_HNRPU_MOUSE  | Hnrnrm | Heterogeneous nuclear ri K.VSELK#EELK#.K                        | 59.53  | 20.68  | 2.88 | 0.35 |
| Q8VEK3_HNRPU_MOUSE  | Hnrnrm | Heterogeneous nuclear ri K.VTEKH#IPVR@.H                        | 37.57  | 11.92  | 3.15 | 0.32 |
| Q8VEK3_HNRPU_MOUSE  | Hnrnrm | Heterogeneous nuclear ri K.YNILGTNTIM*DK#.M                     | 189.62 | 58.79  | 3.23 | 0.31 |
| Q8VEK3_HNRPU_MOUSE  | Hnrnrm | Heterogeneous nuclear ri K.YNILGTNTIMDK#.M                      | 28.77  | 8.76   | 3.28 | 0.30 |
| Q8VEK3_HNRPU_MOUSE  | Hnrnrm | Heterogeneous nuclear ri K.DLPEHAVLKH#.M                        | 68.13  | 22.23  | 3.07 | 0.33 |
| Q8VEK3_HNRPU_MOUSE  | Hnrnrm | Heterogeneous nuclear ri K.FIEIAR@.K                            | 111.92 | 31.74  | 3.53 | 0.28 |
| Q8VEK3_HNRPU_MOUSE  | Hnrnrm | Heterogeneous nuclear ri K.LNTLQR@.A                            | 62.45  | 17.24  | 3.62 | 0.28 |

|                     |          |                                                                 |        |        |      |      |
|---------------------|----------|-----------------------------------------------------------------|--------|--------|------|------|
| Q8VEK3_HNRPU_MOUSE  | Hnrnpu   | Heterogeneous nuclear ri R.LQAALDNEAGGR@PAM*EPGNGSLDLGGDAAGR@.S | 10.34  | 5.91   | 1.75 | 0.57 |
| Q8VEK3_HNRPU_MOUSE  | Hnrnpu   | Heterogeneous nuclear ri R.NFLDQTNVNSAAQR.R                     | 87.34  | 22.31  | 3.92 | 0.26 |
| Q8VEK3_HNRPU_MOUSE  | Hnrnpu   | Heterogeneous nuclear ri K.NGQDLGVAFK#.I                        | 28.99  | 7.00   | 4.14 | 0.24 |
| Q8VEK3_HNRPU_MOUSE  | Hnrnpu   | Heterogeneous nuclear ri R.KSSGTSLSFAVTVAPPGAR@.Q               | 65.38  | 17.87  | 3.66 | 0.27 |
| Q8VEK3_HNRPU_MOUSE  | Hnrnpu   | Heterogeneous nuclear ri K.VSELK#EELK#.K                        | 25.82  | 7.17   | 3.60 | 0.28 |
| Q8VEK3_HNRPU_MOUSE  | Hnrnpu   | Heterogeneous nuclear ri K.YNILGTNTIM*DK#.M                     | 37.26  | 16.02  | 2.33 | 0.43 |
| Q8VDM6_HNRL1_MOUSE  | Hnrnpul1 | Heterogeneous nuclear ri R.NYLDDQTNVYGSQAQR@.R                  | 6.82   | 4.96   | 1.37 | 0.73 |
| Q8VDM6_HNRL1_MOUSE  | Hnrnpul1 | Heterogeneous nuclear ri K.HLPSTEDP#PHVVR@.I                    | 42.70  | 27.50  | 1.55 | 0.64 |
| Q8VDM6_HNRL1_MOUSE  | Hnrnpul1 | Heterogeneous nuclear ri K.INEEISVK#.H                          | 43.71  | 25.11  | 1.74 | 0.57 |
| Q8VDM6_HNRL1_MOUSE  | Hnrnpul1 | Heterogeneous nuclear ri K.M*R@PFEFGQR@.K                       | 61.37  | 13.54  | 4.53 | 0.22 |
| Q8VDM6_HNRL1_MOUSE  | Hnrnpul1 | Heterogeneous nuclear ri R.NYLDDQTNVYGSQAQR@.R                  | 30.45  | 15.09  | 2.02 | 0.50 |
| Q8VDM6_HNRL1_MOUSE  | Hnrnpul1 | Heterogeneous nuclear ri R.QNOFYTPVIK#.Q                        | 14.21  | 5.37   | 2.64 | 0.38 |
| Q8VDM6_HNRL1_MOUSE  | Hnrnpul1 | Heterogeneous nuclear ri K.TEM*#KQEAFFSLPPEASQLK#.T             | 12.92  | 8.48   | 1.52 | 0.66 |
| Q8VDM6_HNRL1_MOUSE  | Hnrnpul1 | Heterogeneous nuclear ri K.YNILGTNAIM*DK#.M                     | 32.34  | 18.09  | 1.79 | 0.56 |
| Q00P19_HNRL2_MOUSE  | Hnrnpul2 | Heterogeneous nuclear ri R.NYGYQGYR@.-                          | 8.34   | 4.38   | 1.90 | 0.53 |
| Q00P19_HNRL2_MOUSE  | Hnrnpul2 | Heterogeneous nuclear ri K.ANFSLPEK#.C                          | 37.16  | 22.13  | 1.68 | 0.60 |
| Q00P19_HNRL2_MOUSE  | Hnrnpul2 | Heterogeneous nuclear ri K.AVEEQGDDQDSEK#.S                     | 21.00  | 12.74  | 1.65 | 0.61 |
| Q00P19_HNRL2_MOUSE  | Hnrnpul2 | Heterogeneous nuclear ri R.AYYFR@.E                             | 105.58 | 47.83  | 2.21 | 0.45 |
| Q00P19_HNRL2_MOUSE  | Hnrnpul2 | Heterogeneous nuclear ri K.DEEDDQTLVNTYSDLHFQSK#.D              | 14.12  | 4.61   | 3.07 | 0.33 |
| Q00P19_HNRL2_MOUSE  | Hnrnpul2 | Heterogeneous nuclear ri K.EVEGDDVPESIM*LEM*#K.A                | 29.46  | 165.35 | 0.18 | 5.61 |
| Q00P19_HNRL2_MOUSE  | Hnrnpul2 | Heterogeneous nuclear ri K.FPTLVSGAR@.S                         | 141.93 | 18.10  | 1.61 | 0.62 |
| Q00P19_HNRL2_MOUSE  | Hnrnpul2 | Heterogeneous nuclear ri K.GLEPEM*DPK#.S                        | 40.70  | 25.36  | 1.61 | 0.62 |
| Q00P19_HNRL2_MOUSE  | Hnrnpul2 | Heterogeneous nuclear ri R.KVEEGDVPESIM*LEM*#K.A                | 18.26  | 8.62   | 2.12 | 0.47 |
| Q00P19_HNRL2_MOUSE  | Hnrnpul2 | Heterogeneous nuclear ri R.K.HLLFK#.T                           | 32.94  | 14.72  | 2.24 | 0.45 |
| Q00P19_HNRL2_MOUSE  | Hnrnpul2 | Heterogeneous nuclear ri R.K#VVVVPNEEDWK#R@.R                   | 114.44 | 51.37  | 2.23 | 0.45 |
| Q00P19_HNRL2_MOUSE  | Hnrnpul2 | Heterogeneous nuclear ri R.LK#VTEL.R@.S                         | 41.56  | 14.87  | 2.79 | 0.36 |
| Q00P19_HNRL2_MOUSE  | Hnrnpul2 | Heterogeneous nuclear ri K.LVQASR@.S                            | 290.38 | 143.01 | 2.03 | 0.49 |
| Q00P19_HNRL2_MOUSE  | Hnrnpul2 | Heterogeneous nuclear ri R.M*KGLEPEM*DPK.S                      | 19.13  | 10.81  | 1.77 | 0.57 |
| Q00P19_HNRL2_MOUSE  | Hnrnpul2 | Heterogeneous nuclear ri K.NGEDLGVAFR@.I                        | 70.76  | 28.42  | 2.49 | 0.40 |
| Q00P19_HNRL2_MOUSE  | Hnrnpul2 | Heterogeneous nuclear ri R.NYGYQGYR@.-                          | 73.57  | 31.20  | 2.36 | 0.42 |
| Q00P19_HNRL2_MOUSE  | Hnrnpul2 | Heterogeneous nuclear ri R.R@YVNLGAEVLTQM*R@.M                  | 24.16  | 14.79  | 1.63 | 0.61 |
| Q00P19_HNRL2_MOUSE  | Hnrnpul2 | Heterogeneous nuclear ri R.SGDETPGSEAPGDK#.A                    | 35.99  | 20.31  | 1.77 | 0.56 |
| Q00P19_HNRL2_MOUSE  | Hnrnpul2 | Heterogeneous nuclear ri R.SGDETPGSEAPGDK#AVEEQGDDQDSEK#.S      | 95.02  | 44.02  | 2.16 | 0.46 |
| Q00P19_HNRL2_MOUSE  | Hnrnpul2 | Heterogeneous nuclear ri K.TQWALK#.I                            | 77.69  | 40.97  | 1.90 | 0.53 |
| Q00P19_HNRL2_MOUSE  | Hnrnpul2 | Heterogeneous nuclear ri K.VTQQLPM*#K.E                         | 45.99  | 23.97  | 1.92 | 0.52 |
| Q00P19_HNRL2_MOUSE  | Hnrnpul2 | Heterogeneous nuclear ri K.VVVVVPNEEDWK#.R                      | 9.45   | 4.74   | 1.99 | 0.50 |
| Q00P19_HNRL2_MOUSE  | Hnrnpul2 | Heterogeneous nuclear ri R.YGGQPLFSEK#.F                        | 59.55  | 35.60  | 1.67 | 0.60 |
| Q00P19_HNRL2_MOUSE  | Hnrnpul2 | Heterogeneous nuclear ri R.YVNLGAEVLTQM*R@.M                    | 115.69 | 53.86  | 2.15 | 0.47 |
| Q00P19_HNRL2_MOUSE  | Hnrnpul2 | Heterogeneous nuclear ri R.YVNLGAEVLTQM.R.M                     | 19.45  | 8.81   | 2.21 | 0.45 |
| Q00P19_HNRL2_MOUSE  | Hnrnpul2 | Heterogeneous nuclear ri K.AVEEQGDDQDSEK#.S                     | 9.53   | 2.40   | 3.97 | 0.25 |
| Q00P19_HNRL2_MOUSE  | Hnrnpul2 | Heterogeneous nuclear ri K.EVEGDDVPESIM*LEM*#K.A                | 6.37   | 1.59   | 4.01 | 0.25 |
| Q00P19_HNRL2_MOUSE  | Hnrnpul2 | Heterogeneous nuclear ri K.FPTLVSGAR@.S                         | 33.36  | 11.84  | 2.82 | 0.36 |
| Q00P19_HNRL2_MOUSE  | Hnrnpul2 | Heterogeneous nuclear ri R.K#VVVVPNEEDWK#R@.R                   | 29.08  | 11.27  | 2.58 | 0.39 |
| Q00P19_HNRL2_MOUSE  | Hnrnpul2 | Heterogeneous nuclear ri R.NYGYQGYR@.-                          | 14.85  | 4.77   | 3.11 | 0.32 |
| Q00P19_HNRL2_MOUSE  | Hnrnpul2 | Heterogeneous nuclear ri R.SGDETPGSEAPGDK#.A                    | 18.66  | 7.52   | 2.48 | 0.40 |
| Q00P19_HNRL2_MOUSE  | Hnrnpul2 | Heterogeneous nuclear ri R.SGDETPGSEAPGDK#AVEEQGDDQDSEK#.S      | 11.76  | 5.34   | 2.20 | 0.45 |
| Q00P19_HNRL2_MOUSE  | Hnrnpul2 | Heterogeneous nuclear ri K.VVVVVPNEEDWK#.R                      | 13.84  | 3.94   | 3.51 | 0.29 |
| Q00P19_HNRL2_MOUSE  | Hnrnpul2 | Heterogeneous nuclear ri R.YGGQPLFSEK#.F                        | 17.09  | 5.22   | 3.27 | 0.31 |
| Q00P19_HNRL2_MOUSE  | Hnrnpul2 | Heterogeneous nuclear ri R.YVNLGAEVLTQM*R.M                     | 47.00  | 15.43  | 3.05 | 0.33 |
| Q99JP6_HOMES_MOUSE  | Homer3   | Homer protein homolog R.EANAATQWR@.Q                            | 5.53   | 3.16   | 1.75 | 0.57 |
| Q99JP6_HOMES_MOUSE  | Homer3   | Homer protein homolog R.EAPDTAER@EETQQQVQDLETR@.N               | 10.84  | 3.30   | 3.29 | 0.30 |
| Q99JP6_HOMES_MOUSE  | Homer3   | Homer protein homolog K.EATSQVEQL.EAR@.V                        | 11.13  | 7.15   | 1.56 | 0.64 |
| Q99JP6_HOMES_MOUSE  | Homer3   | Homer protein homolog R.NAELEQLR@.S                             | 9.21   | 22.71  | 0.41 | 2.47 |
| Q7TMK6_HOOK2_MOUSE  | Hook2    | Protein Hook homolog 2 R.LNQQLQSELR@.A                          | 5.54   | 4.20   | 1.32 | 0.76 |
| Q8BUK6_HOOK3_MOUSE  | Hook3    | Protein Hook homolog 3 R.HLQLQTLQEQEETFR@.L                     | 12.91  | 7.92   | 2.51 | 0.40 |
| Q8BUK6_HOOK3_MOUSE  | Hook3    | Protein Hook homolog 3 K.IALLQSLDDANLR@.K                       | 19.90  | 6.17   | 2.09 | 0.48 |
| Q8BUK6_HOOK3_MOUSE  | Hook3    | Protein Hook homolog 3 K.IDPVYFDDNWLNR@.I                       | 9.49   | 3.70   | 2.56 | 0.39 |
| Q8BUK6_HOOK3_MOUSE  | Hook3    | Protein Hook homolog 3 R.IEELQEALR.K                            | 18.96  | 8.47   | 2.24 | 0.45 |
| Q8BUK6_HOOK3_MOUSE  | Hook3    | Protein Hook homolog 3 R.LASTGSGQSLAR@.Q                        | 14.03  | 5.06   | 2.77 | 0.36 |
| Q8BUK6_HOOK3_MOUSE  | Hook3    | Protein Hook homolog 3 R.LEVQSQVEELQK#.S                        | 23.77  | 8.88   | 2.68 | 0.37 |
| Q8BUK6_HOOK3_MOUSE  | Hook3    | Protein Hook homolog 3 K.LNQEDSDNEK#ALLQSLDDANLR@.K             | 8.14   | 3.54   | 2.30 | 0.43 |
| Q8BUK6_HOOK3_MOUSE  | Hook3    | Protein Hook homolog 3 R.LNQSDSDNEPSPAGR@.R                     | 8.84   | 3.83   | 2.31 | 0.43 |
| Q8BUK6_HOOK3_MOUSE  | Hook3    | Protein Hook homolog 3 K.QNQGAPELQALK#.N                        | 13.39  | 4.69   | 2.86 | 0.35 |
| Q8BUK6_HOOK3_MOUSE  | Hook3    | Protein Hook homolog 3 R.QQNDLETLDAEQSLK#DEIDVLR@.H             | 12.63  | 8.45   | 1.50 | 0.67 |
| Q8BUK6_HOOK3_MOUSE  | Hook3    | Protein Hook homolog 3 K.SSLAENQILM*ER@.L                       | 11.40  | 5.40   | 2.11 | 0.47 |
| Q8BUK6_HOOK3_MOUSE  | Hook3    | Protein Hook homolog 3 R.LASTGSGQSLAR@.Q                        | 6.05   | 2.13   | 2.84 | 0.35 |
| Q3TEA8_HP1B3_MOUSE  | Hp1bp3   | Heterochromatin protein K.EASYSILR@.K                           | 22.66  | 20.30  | 1.12 | 0.90 |
| Q3TEA8_HP1B3_MOUSE  | Hp1bp3   | Heterochromatin protein K.GASGSFVVQK#.S                         | 16.88  | 12.96  | 1.30 | 0.77 |
| Q3TEA8_HP1B3_MOUSE  | Hp1bp3   | Heterochromatin protein R.GQLEQITGK#.G                          | 36.91  | 23.39  | 1.58 | 0.63 |
| Q3TEA8_HP1B3_MOUSE  | Hp1bp3   | Heterochromatin protein R.KYVSQYYPK.L                           | 6.23   | 8.21   | 0.76 | 1.32 |
| Q3TEA8_HP1B3_MOUSE  | Hp1bp3   | Heterochromatin protein K.LEDVLPLAFTR@.L                        | 34.08  | 22.84  | 1.49 | 0.67 |
| Q3TEA8_HP1B3_MOUSE  | Hp1bp3   | Heterochromatin protein K.M*DAILTEAIK#.A                        | 13.53  | 14.33  | 0.94 | 1.06 |
| Q3TEA8_HP1B3_MOUSE  | Hp1bp3   | Heterochromatin protein K.TGASVVAIR@.K                          | 23.85  | 16.05  | 1.49 | 0.67 |
| Q3TEA8_HP1B3_MOUSE  | Hp1bp3   | Heterochromatin protein R.VDIRPQLL@.K                           | 43.98  | 33.62  | 1.31 | 0.76 |
| Q3TEA8_HP1B3_MOUSE  | Hp1bp3   | Heterochromatin protein K.YPSGLER@.R                            | 15.29  | 8.44   | 1.81 | 0.55 |
| Q3TEA8_HP1B3_MOUSE  | Hp1bp3   | Heterochromatin protein K.AEDTTP*PIR@.R                         | 9.03   | 5.74   | 1.57 | 0.64 |
| Q3TEA8_HP1B3_MOUSE  | Hp1bp3   | Heterochromatin protein K.ARPSPSVIK.K                           | 74.61  | 30.93  | 2.41 | 0.41 |
| Q3TEA8_HP1B3_MOUSE  | Hp1bp3   | Heterochromatin protein K.EASYSILR@.K                           | 93.12  | 43.52  | 2.14 | 0.47 |
| Q3TEA8_HP1B3_MOUSE  | Hp1bp3   | Heterochromatin protein K.GASGSFVVQK#.S                         | 94.40  | 42.26  | 2.23 | 0.45 |
| Q3TEA8_HP1B3_MOUSE  | Hp1bp3   | Heterochromatin protein K.GASGTFQK#.K                           | 90.88  | 51.37  | 1.77 | 0.57 |
| Q3TEA8_HP1B3_MOUSE  | Hp1bp3   | Heterochromatin protein K.GKASGSFVVQK#.S                        | 48.36  | 23.50  | 2.06 | 0.49 |
| Q3TEA8_HP1B3_MOUSE  | Hp1bp3   | Heterochromatin protein R.GQLEQITGK#.G                          | 184.58 | 86.04  | 2.15 | 0.47 |
| Q3TEA8_HP1B3_MOUSE  | Hp1bp3   | Heterochromatin protein R.K#VPAQR@.G                            | 42.63  | 29.71  | 1.44 | 0.70 |
| Q3TEA8_HP1B3_MOUSE  | Hp1bp3   | Heterochromatin protein R.K#VVSQYYPK.L                          | 39.94  | 17.17  | 2.33 | 0.43 |
| Q3TEA8_HP1B3_MOUSE  | Hp1bp3   | Heterochromatin protein K.LEDVLPLAFTR@.L                        | 252.10 | 114.59 | 2.20 | 0.45 |
| Q3TEA8_HP1B3_MOUSE  | Hp1bp3   | Heterochromatin protein K.M*DAILTEAIK#.A                        | 90.98  | 41.31  | 2.20 | 0.45 |
| Q3TEA8_HP1B3_MOUSE  | Hp1bp3   | Heterochromatin protein K.MDAILTEAIK#.A                         | 16.55  | 7.79   | 2.13 | 0.47 |
| Q3TEA8_HP1B3_MOUSE  | Hp1bp3   | Heterochromatin protein K.NGWLEQJSGK#.E                         | 20.79  | 10.34  | 2.01 | 0.50 |
| Q3TEA8_HP1B3_MOUSE  | Hp1bp3   | Heterochromatin protein K.SGKPLGGSLM*EYALSAIAM*NEPK.T           | 39.04  | 19.84  | 1.97 | 0.51 |
| Q3TEA8_HP1B3_MOUSE  | Hp1bp3   | Heterochromatin protein K.TGASVVAIR@.K                          | 137.80 | 61.21  | 2.25 | 0.44 |
| Q3TEA8_HP1B3_MOUSE  | Hp1bp3   | Heterochromatin protein K.YPSGLER@.R                            | 99.11  | 47.19  | 2.10 | 0.48 |
| Q3TEA8_HP1B3_MOUSE  | Hp1bp3   | Heterochromatin protein K.YVSQYYPK.L                            | 34.82  | 17.44  | 2.00 | 0.50 |
| Q3TEA8_HP1B3_MOUSE  | Hp1bp3   | Heterochromatin protein R.GQLEQITGK#.G                          | 27.59  | 9.78   | 2.82 | 0.35 |
| Q3TEA8_HP1B3_MOUSE  | Hp1bp3   | Heterochromatin protein K.#ESGSDDEEDDDDESDSEDEPPPK#R@.S         | 3.57   | 2.45   | 1.46 | 0.69 |
| Q3TEA8_HP1B3_MOUSE  | Hp1bp3   | Heterochromatin protein K.LEDVLPLAFTR@.L                        | 38.53  | 17.82  | 2.16 | 0.46 |
| Q3TEA8_HP1B3_MOUSE  | Hp1bp3   | Heterochromatin protein K.M*DAILTEAIK#.A                        | 18.46  | 6.53   | 2.83 | 0.35 |
| Q3TEA8_HP1B3_MOUSE  | Hp1bp3   | Heterochromatin protein K.YPSGLER@.R                            | 17.05  | 6.50   | 2.62 | 0.38 |
| P62748_HPC11_MOUSE  | Hpcal1   | Hippocalcin-like protein K.LSLEEFK#.G                           | 13.74  | 6.51   | 2.11 | 0.47 |
| P62748_HPC11_MOUSE  | Hpcal1   | Hippocalcin-like protein R.TFDNSDGTIDFR@.E                      | 10.59  | 3.65   | 2.90 | 0.34 |
| Q8R3H7_HS2T_MOUSE   | Hs2st1   | Heparan sulfate 2-O-sulfate R.EK#GDLYLQANFFYEK#.I               | 13.12  | 3.14   | 4.18 | 0.24 |
| Q99N15_Q99N15_MOUSE | Hsd17b10 | 17beta-hydroxysteroid d R.GGIVGM*TLPIAR@.D                      | 13.85  | 4.20   | 3.30 | 0.30 |
| Q99N15_Q99N15_MOUSE | Hsd17b10 | 17beta-hydroxysteroid d R.VLAGEM*GQNEPDGQGR@.G                  | 7.08   | 1.59   | 4.45 | 0.22 |
| Q99N15_Q99N15_MOUSE | Hsd17b10 | 17beta-hydroxysteroid d R.DLAPTAGI@.V                           | 16.39  | 7.51   | 2.18 | 0.46 |

|                     |          |                                                                |        |        |      |      |
|---------------------|----------|----------------------------------------------------------------|--------|--------|------|------|
| Q99N15_Q99N15_MOUSE | Hsd17b10 | 17beta-hydroxysteroid d K.GGIVGM*TLPIAR@.D                     | 17.78  | 7.02   | 2.53 | 0.39 |
| Q99N15_Q99N15_MOUSE | Hsd17b10 | 17beta-hydroxysteroid d K.GLVAVV*GGASGLGATAK#.R                | 15.03  | 5.24   | 2.87 | 0.35 |
| Q99N15_Q99N15_MOUSE | Hsd17b10 | 17beta-hydroxysteroid d R.LVAGEM*GQNEPDGGQR@.G                 | 7.35   | 3.69   | 1.99 | 0.50 |
| Q99N15_Q99N15_MOUSE | Hsd17b10 | 17beta-hydroxysteroid d R.LVGGQATAVLVDVPSGEQAQK#.K             | 14.83  | 4.35   | 3.41 | 0.29 |
| Q99N15_Q99N15_MOUSE | Hsd17b10 | 17beta-hydroxysteroid d R.NFLASQVPPFSR@.L                      | 29.70  | 11.90  | 2.50 | 0.40 |
| Q99N15_Q99N15_MOUSE | Hsd17b10 | 17beta-hydroxysteroid d R.VINVNLTGFVNR@.L                      | 4.35   | 3.22   | 1.35 | 0.74 |
| P51660_DHB4_MOUSE   | Hsd17b4  | Peroxisomal multifuncti R.VVLVTGAGGGGLGR@.A                    | 9.12   | 6.45   | 1.41 | 0.71 |
| P51660_DHB4_MOUSE   | Hsd17b4  | Peroxisomal multifuncti R.IDVVVNNAGFLR@.D                      | 7.41   | 2.48   | 2.98 | 0.34 |
| P51660_DHB4_MOUSE   | Hsd17b4  | Peroxisomal multifuncti R.VVLVTGAGGGGLGR@.A                    | 13.88  | 2.26   | 6.14 | 0.16 |
| P51660_DHB4_MOUSE   | Hsd17b4  | Peroxisomal multifuncti R.GALVIVNDLGGDFK#.G                    | 8.10   | 11.55  | 0.70 | 1.42 |
| P07901_HS90A_MOUSE  | Hsp90aa1 | Heat shock protein HSP 9 K.ADLINNLGTIAK#.S                     | 29.03  | 10.99  | 2.64 | 0.38 |
| P07901_HS90A_MOUSE  | Hsp90aa1 | Heat shock protein HSP 9 K.EDQTEYLEER@.R                       | 6.56   | 2.24   | 2.92 | 0.34 |
| P07901_HS90A_MOUSE  | Hsp90aa1 | Heat shock protein HSP 9 K.HNDDEQYAWESSAGGSFTVR@.T             | 6.67   | 4.76   | 1.40 | 0.71 |
| P07901_HS90A_MOUSE  | Hsp90aa1 | Heat shock protein HSP 9 K.ADLINNLGTIAK#.S                     | 9.33   | 4.74   | 1.97 | 0.51 |
| P07901_HS90A_MOUSE  | Hsp90aa1 | Heat shock protein HSP 9 R.GVVDSDELPLNISR.E                    | 2.79   | 2.86   | 0.98 | 1.02 |
| P07901_HS90A_MOUSE  | Hsp90aa1 | Heat shock protein HSP 9 R.TLTIIVDTGIGM*TK#.A                  | 9.50   | 4.05   | 2.35 | 0.43 |
| P07901_HS90A_MOUSE  | Hsp90aa1 | Heat shock protein HSP 9 K.ADLINNLGTIAK#.S                     | 374.87 | 172.16 | 2.18 | 0.46 |
| P07901_HS90A_MOUSE  | Hsp90aa1 | Heat shock protein HSP 9 R.ALLFVPR@.R                          | 67.03  | 22.25  | 3.01 | 0.33 |
| P07901_HS90A_MOUSE  | Hsp90aa1 | Heat shock protein HSP 9 K.DQVANSFAVER@.L                      | 64.10  | 24.46  | 2.62 | 0.38 |
| P07901_HS90A_MOUSE  | Hsp90aa1 | Heat shock protein HSP 9 K.EDQTEYLEER@.R                       | 54.43  | 31.40  | 1.73 | 0.58 |
| P07901_HS90A_MOUSE  | Hsp90aa1 | Heat shock protein HSP 9 K.EGLELPEDEEEK#.K                     | 12.35  | 6.20   | 1.99 | 0.50 |
| P07901_HS90A_MOUSE  | Hsp90aa1 | Heat shock protein HSP 9 K.FYEQFSK#.N                          | 34.28  | 14.28  | 2.40 | 0.42 |
| P07901_HS90A_MOUSE  | Hsp90aa1 | Heat shock protein HSP 9 K.HFSVGGQLEFR@.A                      | 109.48 | 51.36  | 2.13 | 0.47 |
| P07901_HS90A_MOUSE  | Hsp90aa1 | Heat shock protein HSP 9 K.HFSVGGQLEFR.A                       | 41.01  | 23.10  | 1.78 | 0.56 |
| P07901_HS90A_MOUSE  | Hsp90aa1 | Heat shock protein HSP 9 K.HIYFITGETK#.D                       | 45.44  | 17.04  | 2.67 | 0.37 |
| P07901_HS90A_MOUSE  | Hsp90aa1 | Heat shock protein HSP 9 K.HLEINPDHSIETLR@.Q                   | 46.81  | 23.37  | 2.00 | 0.50 |
| P07901_HS90A_MOUSE  | Hsp90aa1 | Heat shock protein HSP 9 K.HNDDEQYAWESSAGGSFTVR@.T             | 54.50  | 21.74  | 2.51 | 0.40 |
| P07901_HS90A_MOUSE  | Hsp90aa1 | Heat shock protein HSP 9 K.HSQFGIVPITLVEK#.E                   | 37.50  | 13.66  | 2.75 | 0.36 |
| P07901_HS90A_MOUSE  | Hsp90aa1 | Heat shock protein HSP 9 R.NPDDITNEEYGFYK#.S                   | 38.58  | 14.92  | 2.59 | 0.39 |
| P07901_HS90A_MOUSE  | Hsp90aa1 | Heat shock protein HSP 9 R.R@APDFLFENK#.K                      | 23.26  | 11.12  | 2.09 | 0.48 |
| P07901_HS90A_MOUSE  | Hsp90aa1 | Heat shock protein HSP 9 K.TLVSVTK#.E                          | 84.96  | 32.02  | 2.65 | 0.38 |
| P07901_HS90A_MOUSE  | Hsp90aa1 | Heat shock protein HSP 9 K.VILHLKEDQTEYLEER@.R                 | 88.51  | 34.60  | 2.56 | 0.39 |
| P07901_HS90A_MOUSE  | Hsp90aa1 | Heat shock protein HSP 9 R.YESLTDPSK#.L                        | 40.53  | 26.52  | 1.53 | 0.65 |
| P07901_HS90A_MOUSE  | Hsp90aa1 | Heat shock protein HSP 9 K.YIDQELNK#.T                         | 254.25 | 106.13 | 2.40 | 0.42 |
| P07901_HS90A_MOUSE  | Hsp90aa1 | Heat shock protein HSP 9 K.ADLINNLGTIAK#.S                     | 196.15 | 55.17  | 3.56 | 0.28 |
| P07901_HS90A_MOUSE  | Hsp90aa1 | Heat shock protein HSP 9 R.ALLFVPR@.R                          | 17.37  | 5.38   | 3.23 | 0.31 |
| P07901_HS90A_MOUSE  | Hsp90aa1 | Heat shock protein HSP 9 K.DQVANSFAVER@.L                      | 22.01  | 30.16  | 0.73 | 1.37 |
| P07901_HS90A_MOUSE  | Hsp90aa1 | Heat shock protein HSP 9 K.EDQTEYLEER@.R                       | 47.82  | 11.57  | 4.13 | 0.24 |
| P07901_HS90A_MOUSE  | Hsp90aa1 | Heat shock protein HSP 9 K.EGLELPEDEEEK#.K                     | 22.26  | 8.32   | 2.68 | 0.37 |
| P07901_HS90A_MOUSE  | Hsp90aa1 | Heat shock protein HSP 9 K.HFSVGGQLEFR@.A                      | 24.77  | 10.20  | 2.43 | 0.41 |
| P07901_HS90A_MOUSE  | Hsp90aa1 | Heat shock protein HSP 9 K.HLEINPDHSIETLR@.Q                   | 24.19  | 5.67   | 4.27 | 0.23 |
| P07901_HS90A_MOUSE  | Hsp90aa1 | Heat shock protein HSP 9 K.HNDDEQYAWESSAGGSFTVR@.T             | 30.25  | 10.52  | 2.88 | 0.35 |
| P07901_HS90A_MOUSE  | Hsp90aa1 | Heat shock protein HSP 9 R.NPDDITNEEYGFYK#.S                   | 12.96  | 4.18   | 3.10 | 0.32 |
| P07901_HS90A_MOUSE  | Hsp90aa1 | Heat shock protein HSP 9 K.VILHLKEDQTEYLEER@.R                 | 50.63  | 12.87  | 3.93 | 0.25 |
| P07901_HS90A_MOUSE  | Hsp90aa1 | Heat shock protein HSP 9 R.YESLTDPSK#.L                        | 41.85  | 10.17  | 4.11 | 0.24 |
| P07901_HS90A_MOUSE  | Hsp90aa1 | Heat shock protein HSP 9 K.YIDQELNK#.T                         | 123.75 | 39.05  | 3.17 | 0.32 |
| P11499_HS90B_MOUSE  | Hsp90ab1 | Heat shock protein HSP 9 R.ALLFPR.R                            | 11.93  | 13.41  | 0.89 | 1.12 |
| P11499_HS90B_MOUSE  | Hsp90ab1 | Heat shock protein HSP 9 K.EQVANSFAVER@.V                      | 6.43   | 7.44   | 0.86 | 1.16 |
| P11499_HS90B_MOUSE  | Hsp90ab1 | Heat shock protein HSP 9 K.HLEINPDHPVETLR@.Q                   | 12.40  | 8.12   | 1.53 | 0.66 |
| P11499_HS90B_MOUSE  | Hsp90ab1 | Heat shock protein HSP 9 K.IDIIPNQR.T                          | 15.22  | 7.00   | 2.17 | 0.46 |
| P11499_HS90B_MOUSE  | Hsp90ab1 | Heat shock protein HSP 9 R.NPDDITNEEYGFYK#.S                   | 11.38  | 8.77   | 1.30 | 0.77 |
| P11499_HS90B_MOUSE  | Hsp90ab1 | Heat shock protein HSP 9 K.SIYITGESK#.E                        | 10.12  | 7.97   | 1.27 | 0.79 |
| P11499_HS90B_MOUSE  | Hsp90ab1 | Heat shock protein HSP 9 R.YHTSQSGDEM*TLSSEYVSR@.M             | 20.40  | 7.81   | 1.33 | 0.75 |
| P11499_HS90B_MOUSE  | Hsp90ab1 | Heat shock protein HSP 9 R.ADHGEPGR@.G                         | 13.11  | 16.38  | 1.41 | 0.71 |
| P11499_HS90B_MOUSE  | Hsp90ab1 | Heat shock protein HSP 9 R.ALLFPR@.R                           | 318.20 | 148.82 | 2.14 | 0.47 |
| P11499_HS90B_MOUSE  | Hsp90ab1 | Heat shock protein HSP 9 K.EQVANSFAVER@.V                      | 191.77 | 90.21  | 2.13 | 0.47 |
| P11499_HS90B_MOUSE  | Hsp90ab1 | Heat shock protein HSP 9 K.FYEFASK#.N                          | 194.72 | 94.91  | 2.05 | 0.49 |
| P11499_HS90B_MOUSE  | Hsp90ab1 | Heat shock protein HSP 9 K.HLEINPDHPVETLR@.Q                   | 165.64 | 76.99  | 2.15 | 0.46 |
| P11499_HS90B_MOUSE  | Hsp90ab1 | Heat shock protein HSP 9 K.HSQFGIVPITLVEK#.E                   | 157.19 | 76.39  | 2.06 | 0.49 |
| P11499_HS90B_MOUSE  | Hsp90ab1 | Heat shock protein HSP 9 K.HSQFGIVPITLVEK#ER@.E                | 11.67  | 4.44   | 2.63 | 0.38 |
| P11499_HS90B_MOUSE  | Hsp90ab1 | Heat shock protein HSP 9 K.IDIIPNQR@.T                         | 180.24 | 85.47  | 2.11 | 0.47 |
| P11499_HS90B_MOUSE  | Hsp90ab1 | Heat shock protein HSP 9 K.IEDVGSDEEDDSGK#.D                   | 5.71   | 1.55   | 3.69 | 0.27 |
| P11499_HS90B_MOUSE  | Hsp90ab1 | Heat shock protein HSP 9 K.KHLEINPDHPVETLR.Q                   | 169.60 | 74.57  | 2.27 | 0.44 |
| P11499_HS90B_MOUSE  | Hsp90ab1 | Heat shock protein HSP 9 K.LGIHEDSTNR.                         | 67.69  | 30.80  | 2.20 | 0.46 |
| P11499_HS90B_MOUSE  | Hsp90ab1 | Heat shock protein HSP 9 K.LGLGIDIEVTAEEPSAAPPVPEIPLEGDEDSR@.M | 17.59  | 9.27   | 1.90 | 0.53 |
| P11499_HS90B_MOUSE  | Hsp90ab1 | Heat shock protein HSP 9 R.NPDDITNEEYGFYK#.S                   | 163.66 | 86.02  | 1.90 | 0.53 |
| P11499_HS90B_MOUSE  | Hsp90ab1 | Heat shock protein HSP 9 R.R@APDFLFENK#.K                      | 29.85  | 35.80  | 1.92 | 0.52 |
| P11499_HS90B_MOUSE  | Hsp90ab1 | Heat shock protein HSP 9 R.R@APDFLFENK#K.K                     | 68.54  | 19.27  | 1.53 | 0.65 |
| P11499_HS90B_MOUSE  | Hsp90ab1 | Heat shock protein HSP 9 K.SIYITGESK#.E                        | 155.84 | 74.37  | 2.10 | 0.48 |
| P11499_HS90B_MOUSE  | Hsp90ab1 | Heat shock protein HSP 9 K.SLVSVTK#.E                          | 182.81 | 85.63  | 2.14 | 0.47 |
| P11499_HS90B_MOUSE  | Hsp90ab1 | Heat shock protein HSP 9 R.YHTSQSGDEM*TLSSEYVSR@.M             | 135.78 | 61.08  | 2.22 | 0.45 |
| P11499_HS90B_MOUSE  | Hsp90ab1 | Heat shock protein HSP 9 R.YHTSQSGDEM*TLSSEYVSR@.M             | 16.51  | 7.34   | 2.25 | 0.44 |
| P11499_HS90B_MOUSE  | Hsp90ab1 | Heat shock protein HSP 9 R.ALLFPR@.R                           | 292.19 | 69.73  | 4.19 | 0.24 |
| P11499_HS90B_MOUSE  | Hsp90ab1 | Heat shock protein HSP 9 R.APDFLFENK#.K                        | 28.99  | 8.54   | 3.39 | 0.29 |
| P11499_HS90B_MOUSE  | Hsp90ab1 | Heat shock protein HSP 9 K.EQVANSFAVER@.V                      | 87.51  | 21.89  | 4.00 | 0.25 |
| P11499_HS90B_MOUSE  | Hsp90ab1 | Heat shock protein HSP 9 K.HLEINPDHPVETLR@.Q                   | 112.32 | 29.74  | 3.78 | 0.26 |
| P11499_HS90B_MOUSE  | Hsp90ab1 | Heat shock protein HSP 9 K.HSQFGIVPITLVEK#.E                   | 79.79  | 20.42  | 3.91 | 0.26 |
| P11499_HS90B_MOUSE  | Hsp90ab1 | Heat shock protein HSP 9 K.IDIIPNQR@.T                         | 56.54  | 14.54  | 3.89 | 0.26 |
| P11499_HS90B_MOUSE  | Hsp90ab1 | Heat shock protein HSP 9 K.IEDVGSDEEDDSGK#DK#.K                | 32.91  | 9.43   | 3.49 | 0.29 |
| P11499_HS90B_MOUSE  | Hsp90ab1 | Heat shock protein HSP 9 K.KHLEINPDHPVETLR.Q                   | 63.17  | 18.96  | 3.33 | 0.30 |
| P11499_HS90B_MOUSE  | Hsp90ab1 | Heat shock protein HSP 9 R.NPDDITNEEYGFYK#.S                   | 116.19 | 31.50  | 3.69 | 0.27 |
| P11499_HS90B_MOUSE  | Hsp90ab1 | Heat shock protein HSP 9 R.R@APDFLFENK#.K                      | 46.20  | 13.71  | 3.37 | 0.30 |
| P11499_HS90B_MOUSE  | Hsp90ab1 | Heat shock protein HSP 9 R.R@APDFLFENK#K.K                     | 15.00  | 5.35   | 2.80 | 0.36 |
| P11499_HS90B_MOUSE  | Hsp90ab1 | Heat shock protein HSP 9 K.SIYITGESK#.E                        | 94.52  | 26.37  | 3.58 | 0.28 |
| P11499_HS90B_MOUSE  | Hsp90ab1 | Heat shock protein HSP 9 K.SLTNDWEDHLAVK#.H                    | 11.65  | 1.33   | 8.78 | 0.11 |
| P11499_HS90B_MOUSE  | Hsp90ab1 | Heat shock protein HSP 9 R.YHTSQSGDEM*TLSSEYVSR@.M             | 102.35 | 30.44  | 3.36 | 0.30 |
| P08113_ENPL_MOUSE   | Hsp90b1  | Endoplasmic OS=Mus ml R.LISLTDENALAGNEELTVK#.J                 | 10.57  | 3.65   | 1.53 | 0.66 |
| P08113_ENPL_MOUSE   | Hsp90b1  | Endoplasmic OS=Mus ml R.EGSR@TDDVQOR@EEEAQLDGLNASQIR@.E        | 5.40   | 2.40   | 2.25 | 0.44 |
| P08113_ENPL_MOUSE   | Hsp90b1  | Endoplasmic OS=Mus ml R.ELISNASDALDK#.I                        | 14.12  | 4.34   | 3.26 | 0.31 |
| P08113_ENPL_MOUSE   | Hsp90b1  | Endoplasmic OS=Mus ml K.DISTNYYASQK#.K                         | 125.49 | 63.95  | 1.96 | 0.51 |
| P08113_ENPL_MOUSE   | Hsp90b1  | Endoplasmic OS=Mus ml K.EAESSPPVER@.L                          | 142.05 | 75.01  | 1.89 | 0.53 |
| P08113_ENPL_MOUSE   | Hsp90b1  | Endoplasmic OS=Mus ml K.EEASDLELDTIK#.N                        | 44.35  | 20.56  | 2.16 | 0.46 |
| P08113_ENPL_MOUSE   | Hsp90b1  | Endoplasmic OS=Mus ml R.EEEAQLDGLNASQIR@.E                     | 10.52  | 6.07   | 1.73 | 0.58 |
| P08113_ENPL_MOUSE   | Hsp90b1  | Endoplasmic OS=Mus ml K.EESDDEAAVEESEEK#.K                     | 5.79   | 2.24   | 2.58 | 0.39 |
| P08113_ENPL_MOUSE   | Hsp90b1  | Endoplasmic OS=Mus ml R.EGSR@TDDVQOR@EEEAQLDGLNASQIR.E         | 93.04  | 40.46  | 2.30 | 0.43 |
| P08113_ENPL_MOUSE   | Hsp90b1  | Endoplasmic OS=Mus ml R.EGSR@TDDVQOR@EEEAQLDGLNASQIR@.E        | 9.84   | 5.77   | 1.71 | 0.59 |
| P08113_ENPL_MOUSE   | Hsp90b1  | Endoplasmic OS=Mus ml K.EGVKFDSEK.T                            | 23.55  | 12.38  | 1.90 | 0.53 |
| P08113_ENPL_MOUSE   | Hsp90b1  | Endoplasmic OS=Mus ml R.ELISNASDALDK#.I                        | 220.10 | 95.76  | 2.30 | 0.44 |
| P08113_ENPL_MOUSE   | Hsp90b1  | Endoplasmic OS=Mus ml K.EVEDEYK#.A                             | 29.07  | 15.71  | 1.85 | 0.54 |
| P08113_ENPL_MOUSE   | Hsp90b1  | Endoplasmic OS=Mus ml K.FAFQAEVNR@.M                           | 276.13 | 142.30 | 1.94 | 0.52 |
| P08113_ENPL_MOUSE   | Hsp90b1  | Endoplasmic OS=Mus ml R.FQNVAK#.E                              | 128.41 | 55.56  | 2.31 | 0.43 |
| P08113_ENPL_MOUSE   | Hsp90b1  | Endoplasmic OS=Mus ml R.GLFDYEYSK#.K                           | 133.25 | 64.16  | 2.08 | 0.48 |
| P08113_ENPL_MOUSE   | Hsp90b1  | Endoplasmic OS=Mus ml R.GTTITLVLKHEASDYLELDTIK#.N              | 30.56  | 13.73  | 2.23 | 0.45 |



|                    |         |                                                                 |        |        |      |      |
|--------------------|---------|-----------------------------------------------------------------|--------|--------|------|------|
| P08113_ENPL_MOUSE  | Hsp90b1 | Endoplasmin O5=Mus ml. K.GVVDSDLLPLNVSR@.E                      | 387.91 | 188.44 | 2.06 | 0.49 |
| P08113_ENPL_MOUSE  | Hsp90b1 | Endoplasmin O5=Mus ml. K.IYFM*AGSSR@.K                          | 80.43  | 42.76  | 1.88 | 0.53 |
| P08113_ENPL_MOUSE  | Hsp90b1 | Endoplasmin O5=Mus ml. K.IYFMAGSSR@.K                           | 25.14  | 13.84  | 1.82 | 0.55 |
| P08113_ENPL_MOUSE  | Hsp90b1 | Endoplasmin O5=Mus ml. R.K#EAESPFFVER@.L                        | 17.88  | 12.18  | 1.47 | 0.68 |
| P08113_ENPL_MOUSE  | Hsp90b1 | Endoplasmin O5=Mus ml. K.K#TFEINPR@.H                           | 30.46  | 11.14  | 2.73 | 0.37 |
| P08113_ENPL_MOUSE  | Hsp90b1 | Endoplasmin O5=Mus ml. R.K#YSQFINFPIVWSSK#.T                    | 32.61  | 11.54  | 2.83 | 0.35 |
| P08113_ENPL_MOUSE  | Hsp90b1 | Endoplasmin O5=Mus ml. K.LIINSLYK#.H                            | 323.91 | 174.25 | 1.86 | 0.54 |
| P08113_ENPL_MOUSE  | Hsp90b1 | Endoplasmin O5=Mus ml. R.LISLTDENALAGNEELTVK#.I                 | 81.34  | 42.11  | 1.93 | 0.52 |
| P08113_ENPL_MOUSE  | Hsp90b1 | Endoplasmin O5=Mus ml. K.NLLHVTDTGVGM*TR@.E                     | 121.16 | 64.33  | 1.88 | 0.53 |
| P08113_ENPL_MOUSE  | Hsp90b1 | Endoplasmin O5=Mus ml. K.NLLHVTDTGVGM*TR.E                      | 12.19  | 6.79   | 1.79 | 0.56 |
| P08113_ENPL_MOUSE  | Hsp90b1 | Endoplasmin O5=Mus ml. K.NLLHVTDTGVGM*TR.EELVK.N                | 61.07  | 28.03  | 2.18 | 0.46 |
| P08113_ENPL_MOUSE  | Hsp90b1 | Endoplasmin O5=Mus ml. K.SGTSEFLNK#.M                           | 166.01 | 83.84  | 1.98 | 0.51 |
| P08113_ENPL_MOUSE  | Hsp90b1 | Endoplasmin O5=Mus ml. R.SGYLLPDTK#.A                           | 141.50 | 80.52  | 1.76 | 0.57 |
| P08113_ENPL_MOUSE  | Hsp90b1 | Endoplasmin O5=Mus ml. K.SILFVPTSAPR@.G                         | 229.79 | 112.24 | 2.05 | 0.49 |
| P08113_ENPL_MOUSE  | Hsp90b1 | Endoplasmin O5=Mus ml. K.TETVEELEEDEAAK#.E                      | 9.28   | 5.26   | 1.76 | 0.57 |
| P08113_ENPL_MOUSE  | Hsp90b1 | Endoplasmin O5=Mus ml. K.TETVEELEEDEAAK#EEK#.E                  | 96.04  | 52.57  | 1.83 | 0.55 |
| P08113_ENPL_MOUSE  | Hsp90b1 | Endoplasmin O5=Mus ml. K.TETVEELEEDEAAK#EEK#EESD0AAVEEEEEEEK#.K | 3.14   | 2.22   | 1.41 | 0.71 |
| P08113_ENPL_MOUSE  | Hsp90b1 | Endoplasmin O5=Mus ml. K.TFEINPR.H                              | 160.70 | 83.67  | 1.92 | 0.52 |
| P08113_ENPL_MOUSE  | Hsp90b1 | Endoplasmin O5=Mus ml. K.TLDM*IK#K#.I                           | 5.20   | 3.35   | 1.55 | 0.64 |
| P08113_ENPL_MOUSE  | Hsp90b1 | Endoplasmin O5=Mus ml. K.YNDFWFK#.E                             | 42.60  | 19.72  | 2.16 | 0.46 |
| P08113_ENPL_MOUSE  | Hsp90b1 | Endoplasmin O5=Mus ml. K.YSQFINFPIVWSSK#.T                      | 31.29  | 17.62  | 1.78 | 0.56 |
| P08113_ENPL_MOUSE  | Hsp90b1 | Endoplasmin O5=Mus ml. K.DISTNYYASQK#.K                         | 20.66  | 12.52  | 1.65 | 0.61 |
| P08113_ENPL_MOUSE  | Hsp90b1 | Endoplasmin O5=Mus ml. K.EEASVLELDTIK#.N                        | 15.14  | 5.05   | 3.00 | 0.33 |
| P08113_ENPL_MOUSE  | Hsp90b1 | Endoplasmin O5=Mus ml. R.EEEAQLDGLNASQJR@.E                     | 9.38   | 3.73   | 2.52 | 0.40 |
| P08113_ENPL_MOUSE  | Hsp90b1 | Endoplasmin O5=Mus ml. K.EESD0AAVEEEEEEEK#.K                    | 4.55   | 1.64   | 2.78 | 0.36 |
| P08113_ENPL_MOUSE  | Hsp90b1 | Endoplasmin O5=Mus ml. R.EGSR@TDDEVQR@EEEAQLDGLNASQJR@.E        | 20.75  | 8.10   | 2.56 | 0.39 |
| P08113_ENPL_MOUSE  | Hsp90b1 | Endoplasmin O5=Mus ml. R.ELISNASDALDK#.I                        | 107.85 | 34.00  | 3.17 | 0.32 |
| P08113_ENPL_MOUSE  | Hsp90b1 | Endoplasmin O5=Mus ml. K.FAFQAEVNR@.M                           | 60.32  | 30.22  | 2.00 | 0.50 |
| P08113_ENPL_MOUSE  | Hsp90b1 | Endoplasmin O5=Mus ml. R.FQSSHHSTDISLQYQVER@.M                  | 12.57  | 7.67   | 1.64 | 0.61 |
| P08113_ENPL_MOUSE  | Hsp90b1 | Endoplasmin O5=Mus ml. R.GTTITLVLKHEASVLELDTIK#.N               | 4.34   | 2.56   | 1.70 | 0.59 |
| P08113_ENPL_MOUSE  | Hsp90b1 | Endoplasmin O5=Mus ml. K.GVVDSDLLPLNVSR@.E                      | 88.71  | 34.05  | 2.61 | 0.38 |
| P08113_ENPL_MOUSE  | Hsp90b1 | Endoplasmin O5=Mus ml. R.LISLTDENALAGNEELTVK#.I                 | 126.30 | 15.10  | 8.36 | 0.12 |
| P08113_ENPL_MOUSE  | Hsp90b1 | Endoplasmin O5=Mus ml. K.SGTSEFLNK#.M                           | 35.70  | 14.94  | 2.39 | 0.42 |
| P08113_ENPL_MOUSE  | Hsp90b1 | Endoplasmin O5=Mus ml. R.SGYLLPDTK#.A                           | 37.62  | 18.95  | 1.99 | 0.50 |
| P08113_ENPL_MOUSE  | Hsp90b1 | Endoplasmin O5=Mus ml. K.SILFVPTSAPR@.G                         | 61.96  | 25.57  | 2.42 | 0.41 |
| Q99M31_HSP7E_MOUSE | Hspa14  | Heat shock 70 kDa protei R.VLSTNTSDNIGGAHTFLAQVLADEFQR@.L       | 2.88   | 1.75   | 1.65 | 0.61 |
| Q61696_H571A_MOUSE | Hspa1a  | Heat shock 70 kDa protei R.IINEPTAAAIAYGLDR.T                   | 7.94   | 4.68   | 1.70 | 0.59 |
| Q61696_H571A_MOUSE | Hspa1a  | Heat shock 70 kDa protei K.ITITNDKGR@.L                         | 60.99  | 30.28  | 2.01 | 0.50 |
| Q61696_H571A_MOUSE | Hspa1a  | Heat shock 70 kDa protei K.NQVALPONTVFDK#.R                     | 6.85   | 3.75   | 1.83 | 0.55 |
| Q61696_H571A_MOUSE | Hspa1a  | Heat shock 70 kDa protei K.QTQTFTTSDNQPGVLIQVYGER@.A            | 151.34 | 66.62  | 2.27 | 0.44 |
| Q61696_H571A_MOUSE | Hspa1a  | Heat shock 70 kDa protei R.TTPSVAFDTTER@.L                      | 510.86 | 231.76 | 2.20 | 0.45 |
| Q61696_H571A_MOUSE | Hspa1a  | Heat shock 70 kDa protei K.QTQTFTTSDNQPGVLIQVYGER@.A            | 21.52  | 7.70   | 2.79 | 0.36 |
| Q61696_H571A_MOUSE | Hspa1a  | Heat shock 70 kDa protei R.TTPSVAFDTTER@.L                      | 74.67  | 19.68  | 3.79 | 0.26 |
| P20029_GRP78_MOUSE | Hspa5   | 78 kDa glucose-regulatec R.IEIESFFEGEDFSETLTR@.A                | 3.83   | 4.85   | 0.79 | 1.27 |
| P20029_GRP78_MOUSE | Hspa5   | 78 kDa glucose-regulatec R.VEIIANDQGNR@.I                       | 6.07   | 6.26   | 0.97 | 1.03 |
| P20029_GRP78_MOUSE | Hspa5   | 78 kDa glucose-regulatec R.AK#FEELNM*DLFR@.S                    | 124.86 | 86.29  | 1.45 | 0.69 |
| P20029_GRP78_MOUSE | Hspa5   | 78 kDa glucose-regulatec R.AK#FEELNM*DLFR.S                     | 47.80  | 15.81  | 3.02 | 0.33 |
| P20029_GRP78_MOUSE | Hspa5   | 78 kDa glucose-regulatec R.AK#FEELNMDLFR@.S                     | 26.53  | 10.89  | 2.44 | 0.41 |
| P20029_GRP78_MOUSE | Hspa5   | 78 kDa glucose-regulatec R.ALSSQOAR@.I                          | 9.90   | 5.36   | 1.85 | 0.54 |
| P20029_GRP78_MOUSE | Hspa5   | 78 kDa glucose-regulatec K.DAGTAGLNVNMV#R@.I                    | 110.95 | 92.42  | 1.20 | 0.83 |
| P20029_GRP78_MOUSE | Hspa5   | 78 kDa glucose-regulatec K.DAGTAGLNVNMR.I                       | 21.65  | 16.21  | 1.34 | 0.75 |
| P20029_GRP78_MOUSE | Hspa5   | 78 kDa glucose-regulatec K.DNHLGTFDLTGPPAPR@.G                  | 42.98  | 31.81  | 1.35 | 0.74 |
| P20029_GRP78_MOUSE | Hspa5   | 78 kDa glucose-regulatec K.ELEEVQPIISK#.L                       | 72.14  | 63.21  | 1.14 | 0.88 |
| P20029_GRP78_MOUSE | Hspa5   | 78 kDa glucose-regulatec R.IEIESFFEGEDFSETLTR@.A                | 70.80  | 47.66  | 1.49 | 0.67 |
| P20029_GRP78_MOUSE | Hspa5   | 78 kDa glucose-regulatec K.IEWLESHQDADIEDFK#.A                  | 47.32  | 37.94  | 1.25 | 0.80 |
| P20029_GRP78_MOUSE | Hspa5   | 78 kDa glucose-regulatec K.IEWLESHQDADIEDFK#AK#.K               | 41.75  | 33.34  | 1.25 | 0.80 |
| P20029_GRP78_MOUSE | Hspa5   | 78 kDa glucose-regulatec R.IINEPTAAAIAYGLDK#.R                  | 128.75 | 69.02  | 1.87 | 0.54 |
| P20029_GRP78_MOUSE | Hspa5   | 78 kDa glucose-regulatec R.IINEPTAAAIAYGLDK#R@.E                | 224.07 | 158.24 | 1.42 | 0.71 |
| P20029_GRP78_MOUSE | Hspa5   | 78 kDa glucose-regulatec K.ITITNDQNR@.L                         | 120.38 | 89.49  | 1.35 | 0.74 |
| P20029_GRP78_MOUSE | Hspa5   | 78 kDa glucose-regulatec R.ITPSVAFTEGGER@.L                     | 132.14 | 100.89 | 1.31 | 0.76 |
| P20029_GRP78_MOUSE | Hspa5   | 78 kDa glucose-regulatec K.K#K#ELEEVQPIISK#.L                   | 123.73 | 84.74  | 1.46 | 0.68 |
| P20029_GRP78_MOUSE | Hspa5   | 78 kDa glucose-regulatec K.K#SDIENVLGGSTR@.I                    | 91.42  | 70.84  | 1.29 | 0.77 |
| P20029_GRP78_MOUSE | Hspa5   | 78 kDa glucose-regulatec K.K#SQIFSTASDNQPTVTIK#.V               | 19.69  | 11.22  | 1.40 | 0.72 |
| P20029_GRP78_MOUSE | Hspa5   | 78 kDa glucose-regulatec K.K#K#K#QYQVIGGGQTK#.T                 | 10.88  | 11.93  | 0.90 | 1.12 |
| P20029_GRP78_MOUSE | Hspa5   | 78 kDa glucose-regulatec K.KVTHAVVTPAYFNDQQR.Q                  | 5.61   | 9.99   | 0.58 | 1.72 |
| P20029_GRP78_MOUSE | Hspa5   | 78 kDa glucose-regulatec K.LYSGSGPPPTGEEDTSEK#DEL.-             | 36.20  | 27.85  | 1.30 | 0.77 |
| P20029_GRP78_MOUSE | Hspa5   | 78 kDa glucose-regulatec K.M*#KETAEYLVGK.V                      | 40.25  | 25.14  | 1.60 | 0.62 |
| P20029_GRP78_MOUSE | Hspa5   | 78 kDa glucose-regulatec R.NELESYAYSLK#.N                       | 87.98  | 59.89  | 1.47 | 0.68 |
| P20029_GRP78_MOUSE | Hspa5   | 78 kDa glucose-regulatec K.NQLTNSPENTVFDK#.R                    | 107.64 | 91.45  | 1.18 | 0.85 |
| P20029_GRP78_MOUSE | Hspa5   | 78 kDa glucose-regulatec K.SDIEIVLVGGSTR@.I                     | 35.18  | 25.08  | 1.40 | 0.71 |
| P20029_GRP78_MOUSE | Hspa5   | 78 kDa glucose-regulatec K.SQIFSTASDNQPTVTIK#.V                 | 87.59  | 59.85  | 1.46 | 0.68 |
| P20029_GRP78_MOUSE | Hspa5   | 78 kDa glucose-regulatec K.TFAPEISAMVLT#.M                      | 22.02  | 16.51  | 1.33 | 0.75 |
| P20029_GRP78_MOUSE | Hspa5   | 78 kDa glucose-regulatec K.TFAPEISAMVLT#.M                      | 28.08  | 20.68  | 1.36 | 0.74 |
| P20029_GRP78_MOUSE | Hspa5   | 78 kDa glucose-regulatec K.TK#PYQVIGGGQTK#.T                    | 77.04  | 62.13  | 1.24 | 0.81 |
| P20029_GRP78_MOUSE | Hspa5   | 78 kDa glucose-regulatec K.TK#PYQVIGGGQTK.T                     | 7.95   | 6.79   | 1.17 | 0.85 |
| P20029_GRP78_MOUSE | Hspa5   | 78 kDa glucose-regulatec R.TWNPDSVQQDIK#.F                      | 70.63  | 59.97  | 1.27 | 0.79 |
| P20029_GRP78_MOUSE | Hspa5   | 78 kDa glucose-regulatec R.VEIIANDQGNR@.I                       | 515.96 | 245.21 | 2.10 | 0.48 |
| P20029_GRP78_MOUSE | Hspa5   | 78 kDa glucose-regulatec K.VLESDLK#K#.S                         | 22.27  | 18.46  | 1.21 | 0.83 |
| P20029_GRP78_MOUSE | Hspa5   | 78 kDa glucose-regulatec K.VLESDLK#K#SDIEIVLVGGSTR@.I           | 9.70   | 9.20   | 1.05 | 0.95 |
| P20029_GRP78_MOUSE | Hspa5   | 78 kDa glucose-regulatec K.VTHAVVTPAYFNDQQR.Q                   | 106.88 | 70.88  | 1.51 | 0.66 |
| P20029_GRP78_MOUSE | Hspa5   | 78 kDa glucose-regulatec K.ELEEVQPIISK#.L                       | 18.23  | 11.60  | 1.57 | 0.64 |
| P20029_GRP78_MOUSE | Hspa5   | 78 kDa glucose-regulatec R.IEIESFFEGEDFSETLTR@.A                | 19.26  | 8.80   | 2.19 | 0.46 |
| P20029_GRP78_MOUSE | Hspa5   | 78 kDa glucose-regulatec R.IINEPTAAAIAYGLDK#.R                  | 26.91  | 11.08  | 2.43 | 0.41 |
| P20029_GRP78_MOUSE | Hspa5   | 78 kDa glucose-regulatec K.ITITNDQNR@.L                         | 24.74  | 17.52  | 1.41 | 0.71 |
| P20029_GRP78_MOUSE | Hspa5   | 78 kDa glucose-regulatec R.ITPSVAFTEGGER@.L                     | 31.43  | 18.66  | 1.68 | 0.59 |
| P20029_GRP78_MOUSE | Hspa5   | 78 kDa glucose-regulatec K.LYSGSGPPPTGEEDTSEK#DEL.-             | 6.18   | 4.89   | 1.27 | 0.79 |
| P20029_GRP78_MOUSE | Hspa5   | 78 kDa glucose-regulatec K.NQLTNSPENTVFDK#.R                    | 17.74  | 15.92  | 1.11 | 0.90 |
| P20029_GRP78_MOUSE | Hspa5   | 78 kDa glucose-regulatec K.SQIFSTASDNQPTVTIK#.V                 | 16.26  | 11.19  | 1.45 | 0.69 |
| P20029_GRP78_MOUSE | Hspa5   | 78 kDa glucose-regulatec K.TK#PYQVIGGGQTK#.T                    | 15.68  | 8.67   | 1.81 | 0.55 |
| P20029_GRP78_MOUSE | Hspa5   | 78 kDa glucose-regulatec R.VEIIANDQGNR@.I                       | 62.92  | 17.92  | 3.51 | 0.28 |
| P20029_GRP78_MOUSE | Hspa5   | 78 kDa glucose-regulatec K.VTHAVVTPAYFNDQQR@.Q                  | 26.01  | 18.37  | 1.42 | 0.71 |
| P63017_HSP7C_MOUSE | Hspa8   | Heat shock cognate 71 kI R.AR@FEELNADLFR@.G                     | 169.34 | 289    | 0.35 |      |
| P63017_HSP7C_MOUSE | Hspa8   | Heat shock cognate 71 kI K.DAGTAGLNVLR@.I                       | 839.66 | 348.95 | 2.41 | 0.42 |
| P63017_HSP7C_MOUSE | Hspa8   | Heat shock cognate 71 kI K.DISENKR@.A                           | 34.00  | 16.93  | 2.01 | 0.50 |
| P63017_HSP7C_MOUSE | Hspa8   | Heat shock cognate 71 kI K.DNNLKG#.F                            | 235.47 | 98.97  | 2.38 | 0.42 |
| P63017_HSP7C_MOUSE | Hspa8   | Heat shock cognate 71 kI K.EIAEAYLGGK#.T                        | 51.96  | 29.16  | 1.78 | 0.56 |
| P63017_HSP7C_MOUSE | Hspa8   | Heat shock cognate 71 kI R.FDDAVVQSDM*#K#.H                     | 27.97  | 14.72  | 1.90 | 0.53 |
| P63017_HSP7C_MOUSE | Hspa8   | Heat shock cognate 71 kI R.FEELNADLFR@.G                        | 111.79 | 53.39  | 2.09 | 0.48 |
| P63017_HSP7C_MOUSE | Hspa8   | Heat shock cognate 71 kI K.FELTGIPPAPR@.G                       | 20.89  | 17.30  | 1.21 | 0.83 |
| P63017_HSP7C_MOUSE | Hspa8   | Heat shock cognate 71 kI K.HWPFMVVNDAGR@PK#.V                   | 33.59  | 18.87  | 1.78 | 0.56 |
| P63017_HSP7C_MOUSE | Hspa8   | Heat shock cognate 71 kI K.LLQDFGNK#.E                          | 168.01 | 69.02  | 2.43 | 0.41 |
| P63017_HSP7C_MOUSE | Hspa8   | Heat shock cognate 71 kI R.LSK#EDIER@.M                         | 99.07  | 43.04  | 2.30 | 0.43 |
| P63017_HSP7C_MOUSE | Hspa8   | Heat shock cognate 71 kI K.LYQAGGMPGGMPGGGAPPSSGASSPTIEVD.-     | 5.16   | 5.16   | 1.00 | 1.00 |

|                    |       |                                                                    |        |        |      |      |
|--------------------|-------|--------------------------------------------------------------------|--------|--------|------|------|
| P63017_HSP7C_MOUSE | Hspa8 | Heat shock cognate 71 kI K.M*K#HEIAEAYLGK#.T                       | 294.97 | 171.53 | 1.72 | 0.58 |
| P63017_HSP7C_MOUSE | Hspa8 | Heat shock cognate 71 kI K.MK#EIAEAYLGK#.T                         | 91.19  | 42.04  | 2.17 | 0.46 |
| P63017_HSP7C_MOUSE | Hspa8 | Heat shock cognate 71 kI R.M*VNHIAEFK#.R                           | 270.62 | 117.66 | 2.30 | 0.43 |
| P63017_HSP7C_MOUSE | Hspa8 | Heat shock cognate 71 kI R.M*VNHIAEFK#.R@.K                        | 40.59  | 14.66  | 2.77 | 0.36 |
| P63017_HSP7C_MOUSE | Hspa8 | Heat shock cognate 71 kI R.M*VQEAKE#.Y                             | 34.12  | 15.64  | 2.18 | 0.46 |
| P63017_HSP7C_MOUSE | Hspa8 | Heat shock cognate 71 kI R.M*VQEAKE#YK#.A                          | 6.54   | 4.70   | 1.39 | 0.72 |
| P63017_HSP7C_MOUSE | Hspa8 | Heat shock cognate 71 kI K.NQTAKE#EEFEGHQK#.E                      | 2.60   | 1.54   | 1.69 | 0.59 |
| P63017_HSP7C_MOUSE | Hspa8 | Heat shock cognate 71 kI K.NQVAM*NPTNTVFDK#.R                      | 397.73 | 182.81 | 2.18 | 0.46 |
| P63017_HSP7C_MOUSE | Hspa8 | Heat shock cognate 71 kI K.NQVAMNPTNTVFDK#.R                       | 51.63  | 19.24  | 2.68 | 0.37 |
| P63017_HSP7C_MOUSE | Hspa8 | Heat shock cognate 71 kI K.NSLEYAFNM*K#.A                          | 167.21 | 70.00  | 2.39 | 0.42 |
| P63017_HSP7C_MOUSE | Hspa8 | Heat shock cognate 71 kI K.NSLEYAFNMK#.A                           | 77.39  | 33.44  | 2.31 | 0.43 |
| P63017_HSP7C_MOUSE | Hspa8 | Heat shock cognate 71 kI R.R@FDDAVVQSDM*K#.H                       | 179.13 | 84.01  | 2.13 | 0.47 |
| P63017_HSP7C_MOUSE | Hspa8 | Heat shock cognate 71 kI R.R@FDDAVVQSDM#.H                         | 9.86   | 2.96   | 3.33 | 0.30 |
| P63017_HSP7C_MOUSE | Hspa8 | Heat shock cognate 71 kI K.SFYPEVSSM*VLTK#.M                       | 97.62  | 41.30  | 2.36 | 0.42 |
| P63017_HSP7C_MOUSE | Hspa8 | Heat shock cognate 71 kI K.SFYPEVSSMVLTK#.M                        | 46.65  | 19.99  | 2.33 | 0.43 |
| P63017_HSP7C_MOUSE | Hspa8 | Heat shock cognate 71 kI K.SINPDEAVYGAQAAILSGDK#.S                 | 17.91  | 10.20  | 1.76 | 0.57 |
| P63017_HSP7C_MOUSE | Hspa8 | Heat shock cognate 71 kI K.SINPDEAVYGAQAAILSGDK#.S                 | 81.67  | 35.68  | 2.29 | 0.44 |
| P63017_HSP7C_MOUSE | Hspa8 | Heat shock cognate 71 kI K.SQJHDIIVLGGSTR@.I                       | 244.41 | 110.17 | 2.22 | 0.45 |
| P63017_HSP7C_MOUSE | Hspa8 | Heat shock cognate 71 kI K.SQJHDIIVLGGSTR.I                        | 27.94  | 13.41  | 2.08 | 0.48 |
| P63017_HSP7C_MOUSE | Hspa8 | Heat shock cognate 71 kI K.STAGDTHLGGEDFDRN@.M                     | 367.40 | 148.83 | 2.47 | 0.41 |
| P63017_HSP7C_MOUSE | Hspa8 | Heat shock cognate 71 kI K.STAGDTHLGGEDFDRN.M                      | 78.17  | 31.10  | 2.51 | 0.40 |
| P63017_HSP7C_MOUSE | Hspa8 | Heat shock cognate 71 kI K.TVTNAWVTPAYFNDSQR.Q                     | 174.93 | 82.50  | 2.12 | 0.47 |
| P63017_HSP7C_MOUSE | Hspa8 | Heat shock cognate 71 kI K.TVTNAWVTPAYFNDSQR@.Q                    | 178.26 | 83.13  | 2.14 | 0.47 |
| P63017_HSP7C_MOUSE | Hspa8 | Heat shock cognate 71 kI K.VQVEYK#.G                               | 198.36 | 97.86  | 2.03 | 0.49 |
| P63017_HSP7C_MOUSE | Hspa8 | Heat shock cognate 71 kI K.VQVEYKGETK#.S                           | 89.11  | 40.98  | 2.17 | 0.46 |
| P63017_HSP7C_MOUSE | Hspa8 | Heat shock cognate 71 kI K.VQVEYKGETK#.S                           | 418.34 | 191.48 | 2.18 | 0.46 |
| P63017_HSP7C_MOUSE | Hspa8 | Heat shock cognate 71 kI R.AR@FEELNADLFR#.G                        | 81.03  | 20.58  | 3.94 | 0.25 |
| P63017_HSP7C_MOUSE | Hspa8 | Heat shock cognate 71 kI R.AR@FEELNADLFR@.G                        | 10.40  | 5.04   | 2.06 | 0.48 |
| P63017_HSP7C_MOUSE | Hspa8 | Heat shock cognate 71 kI K.DAGTIAGLNLVLR@.I                        | 124.61 | 36.76  | 3.39 | 0.29 |
| P63017_HSP7C_MOUSE | Hspa8 | Heat shock cognate 71 kI K.DNNLLGK#.F                              | 25.66  | 3.93   | 6.53 | 0.15 |
| P63017_HSP7C_MOUSE | Hspa8 | Heat shock cognate 71 kI R.FDDAVVQSDM*K#.H                         | 10.59  | 3.31   | 3.20 | 0.31 |
| P63017_HSP7C_MOUSE | Hspa8 | Heat shock cognate 71 kI R.FEELNADLFR@.G                           | 18.85  | 7.03   | 2.68 | 0.37 |
| P63017_HSP7C_MOUSE | Hspa8 | Heat shock cognate 71 kI R.GTLDVPEK#.A                             | 90.00  | 24.19  | 3.72 | 0.27 |
| P63017_HSP7C_MOUSE | Hspa8 | Heat shock cognate 71 kI K.LLQDFNNGK#.E                            | 21.12  | 7.70   | 2.74 | 0.36 |
| P63017_HSP7C_MOUSE | Hspa8 | Heat shock cognate 71 kI K.M*K#HEIAEAYLGK#.T                       | 36.98  | 12.41  | 2.98 | 0.34 |
| P63017_HSP7C_MOUSE | Hspa8 | Heat shock cognate 71 kI R.M*VNHIAEFK#.R                           | 32.20  | 10.34  | 3.11 | 0.32 |
| P63017_HSP7C_MOUSE | Hspa8 | Heat shock cognate 71 kI K.NQVAM*NPTNTVFDK#.R                      | 45.07  | 14.01  | 3.22 | 0.31 |
| P63017_HSP7C_MOUSE | Hspa8 | Heat shock cognate 71 kI K.NQVAMNPTNTVFDK#.R                       | 6.91   | 2.71   | 2.55 | 0.39 |
| P63017_HSP7C_MOUSE | Hspa8 | Heat shock cognate 71 kI K.NSLEYAFNM*K#.A                          | 24.54  | 7.19   | 3.41 | 0.29 |
| P63017_HSP7C_MOUSE | Hspa8 | Heat shock cognate 71 kI K.NSLEYAFNMK#.A                           | 11.62  | 2.57   | 4.53 | 0.22 |
| P63017_HSP7C_MOUSE | Hspa8 | Heat shock cognate 71 kI R.R@FDDAVVQSDM*K#.H                       | 6.77   | 2.14   | 3.16 | 0.32 |
| P63017_HSP7C_MOUSE | Hspa8 | Heat shock cognate 71 kI K.SQJHDIIVLGGSTR@.I                       | 50.32  | 18.79  | 2.68 | 0.37 |
| P63017_HSP7C_MOUSE | Hspa8 | Heat shock cognate 71 kI K.STAGDTHLGGEDFDRN.M                      | 8.23   | 2.63   | 3.13 | 0.32 |
| P63017_HSP7C_MOUSE | Hspa8 | Heat shock cognate 71 kI K.TVTNAWVTPAYFNDSQR@.Q                    | 18.62  | 4.71   | 3.95 | 0.25 |
| P63017_HSP7C_MOUSE | Hspa8 | Heat shock cognate 71 kI K.VQVEYK#.G                               | 56.98  | 20.04  | 2.84 | 0.35 |
| P38647_GRP75_MOUSE | Hspa9 | Stress-70 protein, mitocl R.AQFGIVYDILK#.R                         | 30.57  | 20.71  | 1.48 | 0.68 |
| P38647_GRP75_MOUSE | Hspa9 | Stress-70 protein, mitocl K.DAGQISGLNLVLR@.V                       | 17.21  | 9.63   | 1.79 | 0.56 |
| P38647_GRP75_MOUSE | Hspa9 | Stress-70 protein, mitocl K.LLQDFNNGK#.F                           | 8.12   | 6.22   | 1.31 | 0.77 |
| P38647_GRP75_MOUSE | Hspa9 | Stress-70 protein, mitocl K.NAVITVPAYFNDSQR@.Q                     | 10.37  | 6.68   | 1.55 | 0.64 |
| P38647_GRP75_MOUSE | Hspa9 | Stress-70 protein, mitocl R.QAVTNPNTFYATK#.R                       | 18.94  | 8.14   | 2.33 | 0.43 |
| P38647_GRP75_MOUSE | Hspa9 | Stress-70 protein, mitocl K.SDIQEVILVGGM*TR@.M                     | 7.27   | 5.72   | 1.27 | 0.79 |
| P38647_GRP75_MOUSE | Hspa9 | Stress-70 protein, mitocl K.SQVFSTADGGTQVEIK#.V                    | 6.78   | 3.55   | 1.91 | 0.52 |
| P38647_GRP75_MOUSE | Hspa9 | Stress-70 protein, mitocl R.TTPSVAFTADGER@.L                       | 21.25  | 16.74  | 1.27 | 0.79 |
| P38647_GRP75_MOUSE | Hspa9 | Stress-70 protein, mitocl R.VINEPTAAAGVLDK#.S                      | 6.68   | 5.36   | 1.25 | 0.80 |
| P38647_GRP75_MOUSE | Hspa9 | Stress-70 protein, mitocl K.VLENAEGAR@.T                           | 22.29  | 12.71  | 1.75 | 0.57 |
| P38647_GRP75_MOUSE | Hspa9 | Stress-70 protein, mitocl K.VQQTVDQLFGR@.A                         | 25.62  | 14.41  | 1.78 | 0.56 |
| P14602_HSPB1_MOUSE | Hspb1 | Heat shock protein beta- K.AVTQSAEITPVTFEAR@.A                     | 13.82  | 17.13  | 0.81 | 1.24 |
| P14602_HSPB1_MOUSE | Hspb1 | Heat shock protein beta- R.KYTLPPGVDPTLVSSLSPEGLTVEAPLPK.A         | 3.32   | 11.00  | 0.30 | 3.31 |
| P14602_HSPB1_MOUSE | Hspb1 | Heat shock protein beta- R.LFDQAFVPR@.L                            | 33.82  | 51.14  | 0.66 | 1.51 |
| P14602_HSPB1_MOUSE | Hspb1 | Heat shock protein beta- K.AVTQSAEITPVTFEAR.A                      | 14.14  | 20.32  | 0.70 | 1.44 |
| P14602_HSPB1_MOUSE | Hspb1 | Heat shock protein beta- R.KYTLPPGVDPTLVSSLSPEGLTVEAPLPK.A         | 3.22   | 3.37   | 0.96 | 1.05 |
| P14602_HSPB1_MOUSE | Hspb1 | Heat shock protein beta- R.LFDQAFVPR.L                             | 21.31  | 33.17  | 0.64 | 1.56 |
| P14602_HSPB1_MOUSE | Hspb1 | Heat shock protein beta- R.VSLDVNHFAPLELTK#.T                      | 24.87  | 39.10  | 0.64 | 1.57 |
| Q9JK92_HSPB8_MOUSE | Hspb8 | Heat shock protein beta- R.FGVPAEGR@.S                             | 14.77  | 8.54   | 1.73 | 0.58 |
| P63038_CH60_MOUSE  | Hspd1 | 60 kDa heat shock protei R.ALK#IPAM*TIAK#.N                        | 64.53  | 16.54  | 3.90 | 0.26 |
| P63038_CH60_MOUSE  | Hspd1 | 60 kDa heat shock protei R.ALK#IPAM*TIAK#.N                        | 159.08 | 38.96  | 4.08 | 0.24 |
| P63038_CH60_MOUSE  | Hspd1 | 60 kDa heat shock protei K.APGFGDNR@.K                             | 33.76  | 9.26   | 3.65 | 0.27 |
| P63038_CH60_MOUSE  | Hspd1 | 60 kDa heat shock protei K.APGFGDNR@K#.N                           | 14.41  | 4.20   | 3.43 | 0.29 |
| P63038_CH60_MOUSE  | Hspd1 | 60 kDa heat shock protei K.DDAM*LLK#.G                             | 22.53  | 4.31   | 5.23 | 0.19 |
| P63038_CH60_MOUSE  | Hspd1 | 60 kDa heat shock protei K.DM*AIATGGAVFEGEGLNINLEDVQAHDLGK#.V      | 43.63  | 6.32   | 6.90 | 0.14 |
| P63038_CH60_MOUSE  | Hspd1 | 60 kDa heat shock protei K.DM*AIATGGAVFEGEGLNINLEDVQAHDLGK#.V      | 10.89  | 2.00   | 5.43 | 0.18 |
| P63038_CH60_MOUSE  | Hspd1 | 60 kDa heat shock protei K.GANPVEIR@.R                             | 166.68 | 37.84  | 4.41 | 0.23 |
| P63038_CH60_MOUSE  | Hspd1 | 60 kDa heat shock protei R.GVM*LAVDVAVIAELK#.K                     | 7.38   | 2.28   | 3.23 | 0.31 |
| P63038_CH60_MOUSE  | Hspd1 | 60 kDa heat shock protei R.GYSPVITK#.G                             | 115.47 | 29.39  | 3.93 | 0.25 |
| P63038_CH60_MOUSE  | Hspd1 | 60 kDa heat shock protei K.ILOQSSSEVGYDAM*LGDFVNM*VEK#.G           | 10.01  | 8.33   | 1.20 | 0.83 |
| P63038_CH60_MOUSE  | Hspd1 | 60 kDa heat shock protei K.IPAM*TIAK#.N                            | 15.95  | 5.42   | 2.94 | 0.34 |
| P63038_CH60_MOUSE  | Hspd1 | 60 kDa heat shock protei R.IQEITEQLDITTSYEK#.E                     | 21.04  | 5.32   | 3.96 | 0.25 |
| P63038_CH60_MOUSE  | Hspd1 | 60 kDa heat shock protei R.IQEITEQLDITTSYEK#E#.L                   | 106.56 | 21.81  | 4.88 | 0.20 |
| P63038_CH60_MOUSE  | Hspd1 | 60 kDa heat shock protei K.ISSVQSVIPALEIANHR@.K                    | 223.12 | 55.18  | 4.04 | 0.25 |
| P63038_CH60_MOUSE  | Hspd1 | 60 kDa heat shock protei R.K#HGVITK#.D                             | 121.34 | 32.56  | 3.73 | 0.27 |
| P63038_CH60_MOUSE  | Hspd1 | 60 kDa heat shock protei K.K#HSSVQSVIPALEIANHR@.K                  | 16.32  | 3.26   | 5.00 | 0.20 |
| P63038_CH60_MOUSE  | Hspd1 | 60 kDa heat shock protei R.K#PLVIAEDVDGALSTLVLNLR@.L               | 149.87 | 37.10  | 4.04 | 0.25 |
| P63038_CH60_MOUSE  | Hspd1 | 60 kDa heat shock protei K.LSDGVAVLK#.V                            | 205.86 | 52.78  | 3.90 | 0.26 |
| P63038_CH60_MOUSE  | Hspd1 | 60 kDa heat shock protei K.LVQDVANNINTEAGDGTTATVLAR@.S             | 158.65 | 41.26  | 3.85 | 0.26 |
| P63038_CH60_MOUSE  | Hspd1 | 60 kDa heat shock protei K.NAGVEGLSIVEK#.I                         | 201.91 | 43.69  | 4.62 | 0.22 |
| P63038_CH60_MOUSE  | Hspd1 | 60 kDa heat shock protei K.NQLK#DM*AIATGGAVFEGEGLNINLEDVQAHDLGK#.V | 30.64  | 6.83   | 4.49 | 0.22 |
| P63038_CH60_MOUSE  | Hspd1 | 60 kDa heat shock protei K.TLNDELEIIEGK#.F                         | 7.76   | 2.31   | 3.37 | 0.30 |
| P63038_CH60_MOUSE  | Hspd1 | 60 kDa heat shock protei K.TLNDELEIIEGK#.F                         | 20.27  | 4.44   | 4.56 | 0.22 |
| P63038_CH60_MOUSE  | Hspd1 | 60 kDa heat shock protei R.TVIEQSWGSPK#.V                          | 46.63  | 11.15  | 4.18 | 0.24 |
| P63038_CH60_MOUSE  | Hspd1 | 60 kDa heat shock protei K.VGVEIVTK#.D                             | 80.72  | 25.80  | 3.13 | 0.32 |
| P63038_CH60_MOUSE  | Hspd1 | 60 kDa heat shock protei K.VGVEIVTK#DDAM*LLK#.G                    | 87.94  | 20.45  | 4.30 | 0.23 |
| P63038_CH60_MOUSE  | Hspd1 | 60 kDa heat shock protei K.VGVEIVTK#DDAM*LLK#.G                    | 41.64  | 11.06  | 3.76 | 0.27 |
| P63038_CH60_MOUSE  | Hspd1 | 60 kDa heat shock protei K.VGVTSDVEVNEK#.G                         | 301.77 | 83.22  | 3.63 | 0.28 |
| P63038_CH60_MOUSE  | Hspd1 | 60 kDa heat shock protei K.VGLVAVAVK#.A                            | 137.60 | 34.49  | 3.99 | 0.25 |
| P63038_CH60_MOUSE  | Hspd1 | 60 kDa heat shock protei R.VTDALNATR@.A                            | 132.67 | 29.59  | 4.48 | 0.22 |
| P63038_CH60_MOUSE  | Hspd1 | 60 kDa heat shock protei R.ALK#IPAM*TIAK#.N                        | 44.82  | 8.72   | 5.14 | 0.19 |
| P63038_CH60_MOUSE  | Hspd1 | 60 kDa heat shock protei R.ALK#IPAM*TIAK#.N                        | 184.95 | 47.61  | 3.88 | 0.26 |
| P63038_CH60_MOUSE  | Hspd1 | 60 kDa heat shock protei K.APGFGDNR@.K                             | 34.99  | 5.57   | 6.29 | 0.16 |
| P63038_CH60_MOUSE  | Hspd1 | 60 kDa heat shock protei K.DDAM*LLK#.G                             | 19.80  | 4.23   | 4.68 | 0.21 |
| P63038_CH60_MOUSE  | Hspd1 | 60 kDa heat shock protei K.DM*AIATGGAVFEGEGLNINLEDVQAHDLGK#.V      | 51.03  | 9.94   | 5.14 | 0.19 |
| P63038_CH60_MOUSE  | Hspd1 | 60 kDa heat shock protei K.DM*AIATGGAVFEGEGLNINLEDVQAHDLGK#.V      | 8.71   | 4.07   | 2.14 | 0.47 |
| P63038_CH60_MOUSE  | Hspd1 | 60 kDa heat shock protei K.GANPVEIR.R                              | 201.57 | 47.99  | 4.20 | 0.24 |
| P63038_CH60_MOUSE  | Hspd1 | 60 kDa heat shock protei K.GIIPDPTK#.V                             | 136.24 | 30.91  | 4.41 | 0.23 |



|                           |         |                                                         |        |        |       |        |
|---------------------------|---------|---------------------------------------------------------|--------|--------|-------|--------|
| Q64282_IFIT1_MOUSE        | ifit1   | Interferon-induced prote K.NPLGM*HNLAYVR.H              | 25.52  | 26.21  | 0.97  | 1.03   |
| Q64282_IFIT1_MOUSE        | ifit1   | Interferon-induced prote R.QDLDNFISLEPLR.K              | 14.58  | 16.09  | 0.91  | 1.10   |
| Q64282_IFIT1_MOUSE        | ifit1   | Interferon-induced prote R.QDLDNFISLEPLR.K.A            | 49.50  | 61.85  | 0.80  | 1.25   |
| Q64282_IFIT1_MOUSE        | ifit1   | Interferon-induced prote R.R@QDNVQELAQQAHEFQETLK#.L     | 99.96  | 81.15  | 1.23  | 0.81   |
| Q64282_IFIT1_MOUSE        | ifit1   | Interferon-induced prote K.TLVAHQDIHLR@.Y               | 34.19  | 28.53  | 1.20  | 0.83   |
| Q64282_IFIT1_MOUSE        | ifit1   | Interferon-induced prote K.VEPENPEYNTGYAVVAYR@.Q        | 4.29   | 7.08   | 0.61  | 1.65   |
| Q64282_IFIT1_MOUSE        | ifit1   | Interferon-induced prote K.EEALIQSEQLSK#.R              | 75.92  | 3.35   | 22.66 | 0.04   |
| Q64282_IFIT1_MOUSE        | ifit1   | Interferon-induced prote K.LLFENNDDIPDLVLR.I            | 7.11   | 8.65   | 0.82  | 1.22   |
| Q64282_IFIT1_MOUSE        | ifit1   | Interferon-induced prote R.RQDNVQELAQQAHEFQETLK.L       | 15.63  | 13.17  | 1.19  | 0.84   |
| Q64282_IFIT1_MOUSE        | ifit1   | Interferon-induced prote R.RQDNVQELAQQAHEFQETLK.L       | 9.36   | 9.87   | 0.95  | 1.05   |
| Q64282_IFIT1_MOUSE        | ifit1   | Interferon-induced prote K.AITLYLK#.G                   | 32.96  | 17.62  | 1.87  | 0.53   |
| Q64282_IFIT1_MOUSE        | ifit1   | Interferon-induced prote K.ALK#VEPENPEYNTGYAVVAYR@.Q    | 36.20  | 17.30  | 2.09  | 0.48   |
| Q64282_IFIT1_MOUSE        | ifit1   | Interferon-induced prote K.EEALIQSEQLSK#.R              | 40.95  | 22.03  | 1.86  | 0.54   |
| Q64282_IFIT1_MOUSE        | ifit1   | Interferon-induced prote K.GQQDEALQSLK#.E               | 29.14  | 14.97  | 1.95  | 0.51   |
| Q64282_IFIT1_MOUSE        | ifit1   | Interferon-induced prote K.GQQDEALQSLK#EAEALIQSEQLSK#.R | 5.59   | 4.38   | 1.28  | 0.78   |
| Q64282_IFIT1_MOUSE        | ifit1   | Interferon-induced prote R.HLK#GQQDEALQSLK#.E           | 16.23  | 7.21   | 2.25  | 0.44   |
| Q64282_IFIT1_MOUSE        | ifit1   | Interferon-induced prote R.ISEQVQLDIIK#.N               | 49.95  | 32.17  | 1.55  | 0.64   |
| Q64282_IFIT1_MOUSE        | ifit1   | Interferon-induced prote K.LLFENNDDIPDLVLR@.I           | 58.98  | 29.70  | 1.99  | 0.50   |
| Q64282_IFIT1_MOUSE        | ifit1   | Interferon-induced prote K.NPLGM*HNLAYVR@.H             | 31.28  | 10.33  | 3.03  | 0.33   |
| Q64282_IFIT1_MOUSE        | ifit1   | Interferon-induced prote R.QDLDNFISLEPLR@.K#.A          | 50.96  | 21.73  | 2.35  | 0.43   |
| Q64282_IFIT1_MOUSE        | ifit1   | Interferon-induced prote R.R@QDNVQELAQQAHEFQETLK#.L     | 54.54  | 23.29  | 2.34  | 0.43   |
| Q64282_IFIT1_MOUSE        | ifit1   | Interferon-induced prote K.VEPENPEYNTGYAVVAYR@.Q        | 5.78   | 3.19   | 1.81  | 0.55   |
| Q64282_IFIT1_MOUSE        | ifit1   | Interferon-induced prote K.AITLYLK#.G                   | 66.40  | 24.49  | 2.71  | 0.37   |
| Q64282_IFIT1_MOUSE        | ifit1   | Interferon-induced prote K.ALK#VEPENPEYNTGYAVVAYR@.Q    | 55.64  | 22.84  | 2.44  | 0.41   |
| Q64282_IFIT1_MOUSE        | ifit1   | Interferon-induced prote K.EEALIQSEQLSK#.R              | 29.14  | 41.56  | 1.90  | 0.53   |
| Q64282_IFIT1_MOUSE        | ifit1   | Interferon-induced prote K.GQQDEALQSLK#.E               | 39.74  | 20.32  | 1.96  | 0.51   |
| Q64282_IFIT1_MOUSE        | ifit1   | Interferon-induced prote K.GQQDEALQSLK#EAEALIQSEQLSK#.R | 14.89  | 4.75   | 3.14  | 0.32   |
| Q64282_IFIT1_MOUSE        | ifit1   | Interferon-induced prote R.GSLAEAQYLDK#VEK#.V           | 56.83  | 40.80  | 1.39  | 0.72   |
| Q64282_IFIT1_MOUSE        | ifit1   | Interferon-induced prote R.ISEQVQLDIIK#.N               | 93.33  | 30.70  | 3.04  | 0.33   |
| Q64282_IFIT1_MOUSE        | ifit1   | Interferon-induced prote R.K.HLLALEK#.V                 | 27.79  | 7.44   | 3.74  | 0.27   |
| Q64282_IFIT1_MOUSE        | ifit1   | Interferon-induced prote K.LLFENNDDIPDLVLR@.I           | 161.58 | 53.07  | 3.04  | 0.33   |
| Q64282_IFIT1_MOUSE        | ifit1   | Interferon-induced prote R.LTGM*NPAF.-                  | 30.02  | 30.02  | 1.00  | 1.00   |
| Q64282_IFIT1_MOUSE        | ifit1   | Interferon-induced prote K.NALFYEK#.A                   | 49.15  | 18.57  | 2.65  | 0.38   |
| Q64282_IFIT1_MOUSE        | ifit1   | Interferon-induced prote K.NPLGM*HNLAYVR@.H             | 52.14  | 18.27  | 2.85  | 0.35   |
| Q64282_IFIT1_MOUSE        | ifit1   | Interferon-induced prote R.QDLDNFISLEPLR@.K             | 20.35  | 9.06   | 2.25  | 0.45   |
| Q64282_IFIT1_MOUSE        | ifit1   | Interferon-induced prote R.QDLDNFISLEPLR@.K#.A          | 56.68  | 23.82  | 2.38  | 0.42   |
| Q64282_IFIT1_MOUSE        | ifit1   | Interferon-induced prote R.QDNVQELAQQAHEFQETLK#.L       | 22.00  | 6.54   | 3.37  | 0.30   |
| Q64282_IFIT1_MOUSE        | ifit1   | Interferon-induced prote R.R@QDNVQELAQQAHEFQETLK#.L     | 116.73 | 40.32  | 2.89  | 0.35   |
| Q64282_IFIT1_MOUSE        | ifit1   | Interferon-induced prote K.TLVAHQDIHLR@.Y               | 58.86  | 17.67  | 3.33  | 0.30   |
| Q64282_IFIT1_MOUSE        | ifit1   | Interferon-induced prote K.VEPENPEYNTGYAVVAYR@.Q        | 11.88  | 5.66   | 2.10  | 0.48   |
| Q99J93_IFM2_MOUSE         | ifitm2  | Interferon-induced trans K.M*VGDVVGAAQAVASTAK#.C        | 3.56   | 2.15   | 1.66  | 0.60   |
| Q99J93_IFM2_MOUSE         | ifitm2  | Interferon-induced trans R.TTVINMPR@.E                  | 20.04  | 7.76   | 2.58  | 0.39   |
| Q99J93_IFM2_MOUSE         | ifitm2  | Interferon-induced trans R.TTVINMPR@.E                  | 83.25  | 48.47  | 1.72  | 0.58   |
| Q9CQW9_IFM3_MOUSE         | ifitm3  | Interferon-induced trans R.IK#EEYEAEM#GAPHSASVR@.T      | 81.03  | 40.27  | 2.01  | 0.50   |
| Q9CQW9_IFM3_MOUSE         | ifitm3  | Interferon-induced trans R.IK#EEYEAEM#GAPHSASVR@.T      | 6.22   | 2.90   | 2.14  | 0.47   |
| Q9CQW9_IFM3_MOUSE         | ifitm3  | Interferon-induced trans K.M*VGDVVGAAQAVASTAK#.C        | 41.66  | 22.54  | 1.85  | 0.54   |
| Q9CQW9_IFM3_MOUSE         | ifitm3  | Interferon-induced trans K.MVGDVVGAAQAVASTAK#.C         | 4.52   | 1.63   | 2.78  | 0.36   |
| Q9D0P8_IFT27_MOUSE        | ift27   | Intraflagellar transport p R.SQTSGLIPGLVGTK#.T          | 9.56   | 3.39   | 2.82  | 0.35   |
| Q8BKE9_IFT74_MOUSE        | ift74   | Intraflagellar transport p R.GGGLTGGVLSQIK#.V           | 8.08   | 2.67   | 3.03  | 0.33   |
| Q8BKE9_IFT74_MOUSE        | ift74   | Intraflagellar transport p K.ISELTEINK#.L               | 7.89   | 5.05   | 1.56  | 0.64   |
| Q61249_IGBP1_MOUSE        | igbp1   | Immunoglobulin-binding R.AAQQQEQQEQ#DEESEK#.A           | 8.45   | 2.63   | 3.21  | 0.31   |
| Q61249_IGBP1_MOUSE        | igbp1   | Immunoglobulin-binding K.LLEDVE12AQVPTGSR@.T            | 12.10  | 4.30   | 2.81  | 0.36   |
| Q61249_IGBP1_MOUSE        | igbp1   | Immunoglobulin-binding R.NEDLEEIASTDLK#.Y               | 12.22  | 5.49   | 2.23  | 0.45   |
| Q61249_IGBP1_MOUSE        | igbp1   | Immunoglobulin-binding K.SAVESGQADDER@.V                | 4.26   | 1.58   | 2.69  | 0.37   |
| Q61249_IGBP1_MOUSE        | igbp1   | Immunoglobulin-binding R.WIAVLSLEESIQEIK#.I             | 6.86   | 6.23   | 1.10  | 0.91   |
| Q61249_IGBP1_MOUSE        | igbp1   | Immunoglobulin-binding K.YGVLPR@.G                      | 10.52  | 4.36   | 2.41  | 0.41   |
| Q61249_IGBP1_MOUSE        | igbp1   | Immunoglobulin-binding R.NEDLEEIASTDLK#.Y               | 4.50   | 3.17   | 1.42  | 0.70   |
| O88477_IF2B1_MOUSE        | igf2bp1 | Insulin-like growth facto R.DILAQR#.Q                   | 14.70  | 5.08   | 2.89  | 0.35   |
| O88477_IF2B1_MOUSE        | igf2bp1 | Insulin-like growth facto R.DQTPDENDDQVIVK#.I           | 23.89  | 6.44   | 3.71  | 0.27   |
| O88477_IF2B1_MOUSE        | igf2bp1 | Insulin-like growth facto R.LLVPTQVGAIGK#.E             | 25.52  | 15.87  | 1.61  | 0.62   |
| O88477_IF2B1_MOUSE        | igf2bp1 | Insulin-like growth facto K.TVNLQNLTAEEVVPR@.D          | 8.99   | 3.25   | 2.74  | 0.36   |
| O88477_IF2B1_MOUSE        | igf2bp1 | Insulin-like growth facto R.DQTPDENDDQVIVK#.I           | 71.46  | 18.80  | 3.80  | 0.26   |
| O88477_IF2B1_MOUSE        | igf2bp1 | Insulin-like growth facto K.IGHFYASQM#ACR@.K            | 31.97  | 8.52   | 3.75  | 0.27   |
| O88477_IF2B1_MOUSE        | igf2bp1 | Insulin-like growth facto R.M*VIITGPPPEAQFK#.A          | 13.09  | 3.95   | 3.31  | 0.30   |
| O88477_IF2B1_MOUSE        | igf2bp1 | Insulin-like growth facto R.MVVIITGPPPEAQFK#.A          | 14.70  | 39.18  | 0.38  | 2.67   |
| O88477_IF2B1_MOUSE        | igf2bp1 | Insulin-like growth facto K.TVNLQNLTAEEVVPR@.D          | 42.04  | 8.83   | 4.76  | 0.21   |
| O88477_IF2B1_MOUSE        | igf2bp1 | Insulin-like growth facto R.DQTPDENDDQVIVK#.I           | 11.92  | 5.36   | 2.22  | 0.45   |
| O88477_IF2B1_MOUSE        | igf2bp1 | Insulin-like growth facto R.LLVPTQVGAIGK#.E             | 23.21  | 15.66  | 1.48  | 0.68   |
| O5SF07_IF2B2_MOUSE        | igf2bp2 | Insulin-like growth facto R.DQTPDENEEVIVR@.I            | 77.54  | 23.93  | 3.24  | 0.31   |
| O5SF07_IF2B2_MOUSE        | igf2bp2 | Insulin-like growth facto R.EIVQQR#.Q                   | 85.28  | 24.06  | 3.54  | 0.28   |
| O5SF07_IF2B2_MOUSE        | igf2bp2 | Insulin-like growth facto K.IAPAEQPDVSR@.M              | 191.03 | 53.47  | 3.57  | 0.28   |
| O5SF07_IF2B2_MOUSE        | igf2bp2 | Insulin-like growth facto R.IGHFFASQTAQR@.K             | 61.22  | 13.72  | 4.46  | 0.22   |
| O5SF07_IF2B2_MOUSE        | igf2bp2 | Insulin-like growth facto K.IIM#EVDVYSVK#.K             | 27.20  | 6.50   | 4.18  | 0.24   |
| O5SF07_IF2B2_MOUSE        | igf2bp2 | Insulin-like growth facto K.IMEVDVYSVK#.K               | 7.57   | 1.89   | 4.01  | 0.25   |
| O5SF07_IF2B2_MOUSE        | igf2bp2 | Insulin-like growth facto K.ITISSQLDLSYNPFR@.T          | 48.13  | 13.64  | 3.53  | 0.28   |
| O5SF07_IF2B2_MOUSE        | igf2bp2 | Insulin-like growth facto R.KHPLAGQVLLK#.S              | 24.28  | 7.22   | 3.36  | 0.30   |
| O5SF07_IF2B2_MOUSE        | igf2bp2 | Insulin-like growth facto K.LAEVPLK#.I                  | 67.87  | 20.73  | 3.27  | 0.31   |
| O5SF07_IF2B2_MOUSE        | igf2bp2 | Insulin-like growth facto K.LYIGNLSPAVTADDLR@.Q         | 46.56  | 12.70  | 3.67  | 0.27   |
| O5SF07_IF2B2_MOUSE        | igf2bp2 | Insulin-like growth facto R.MILEIMQK#.E                 | 9.68   | 2.41   | 4.02  | 0.25   |
| O5SF07_IF2B2_MOUSE        | igf2bp2 | Insulin-like growth facto R.M*VIITGPPPEAQFK#.A          | 44.96  | 15.50  | 2.90  | 0.34   |
| O5SF07_IF2B2_MOUSE        | igf2bp2 | Insulin-like growth facto R.MVIITGPPPEAQFK#.A           | 11.11  | 5.25   | 2.12  | 0.47   |
| O5SF07_IF2B2_MOUSE        | igf2bp2 | Insulin-like growth facto K.SGVAFVDPDQNWAIIR@.A         | 30.69  | 9.21   | 3.33  | 0.30   |
| O5SF07_IF2B2_MOUSE        | igf2bp2 | Insulin-like growth facto K.TVNLQNLTAEEVVPR@.D          | 66.53  | 19.56  | 3.40  | 0.29   |
| O5SF07_IF2B2_MOUSE        | igf2bp2 | Insulin-like growth facto R.YPQVAPQR@.S                 | 107.08 | 26.47  | 4.05  | 0.25   |
| O5SF07_IF2B2_MOUSE        | igf2bp2 | Insulin-like growth facto R.DQTPDENEEVIVR@.I            | 58.62  | 20.57  | 2.85  | 0.35   |
| O5SF07_IF2B2_MOUSE        | igf2bp2 | Insulin-like growth facto K.IAPAEQPDVSR@.M              | 97.12  | 31.99  | 2.82  | 0.35   |
| O5SF07_IF2B2_MOUSE        | igf2bp2 | Insulin-like growth facto R.IGHFFASQTAQR@.K             | 14.46  | 6.61   | 2.64  | 0.38   |
| O5SF07_IF2B2_MOUSE        | igf2bp2 | Insulin-like growth facto R.M*VIITGPPPEAQFK#.A          | 26.96  | 10.29  | 2.62  | 0.38   |
| O5SF07_IF2B2_MOUSE        | igf2bp2 | Insulin-like growth facto R.MVIITGPPPEAQFK#.A           | 16.17  | 5.28   | 3.07  | 0.33   |
| O5SF07_IF2B2_MOUSE        | igf2bp2 | Insulin-like growth facto K.TVNLQNLTAEEVVPR@.D          | 48.23  | 19.75  | 2.44  | 0.41   |
| O5SF07_IF2B2_MOUSE        | igf2bp2 | Insulin-like growth facto K.TVNLQNLTAEEVVPR.D           | 52.20  | 14.76  | 3.54  | 0.28   |
| O5SF07_IF2B2_MOUSE        | igf2bp2 | Insulin-like growth facto R.YPQVAPQR@.S                 | 31.15  | 7.75   | 4.02  | 0.25   |
| O5SF07_IF2B2_MOUSE        | igf2bp2 | Insulin-like growth facto R.DQTPDENEEVIVR.I             | 7.39   | 8.81   | 0.84  | 1.19   |
| O5SF07_IF2B2_MOUSE        | igf2bp2 | Insulin-like growth facto K.IAPAEQPDVSR.M               | 12.84  | 11.99  | 1.07  | 0.93   |
| O5SF07_IF2B2_MOUSE        | igf2bp2 | Insulin-like growth facto K.ITISSQLDLSYNPFR@.T          | 5.65   | 4.96   | 1.14  | 0.88   |
| O5SF07_IF2B2_MOUSE        | igf2bp2 | Insulin-like growth facto K.LYIGNLSPAVTADDLR.Q          | 6.68   | 6.27   | 1.07  | 0.94   |
| O5SF07_IF2B2_MOUSE        | igf2bp2 | Insulin-like growth facto K.TVNLQNLTAEEVVPR.D           | 3.42   | 4.15   | 0.82  | 1.22   |
| A0A06YWR2_A0A06YWR2_MOUSE | lghg1   | Ig gamma-1 chain C regio K.APQVYIYPPPK.E                | 1.28   | 12.00  | 0.11  | 9.35   |
| A0A06YWR2_A0A06YWR2_MOUSE | lghg1   | Ig gamma-1 chain C regio K.DVLTITLTPK.V                 | 2.38   | 52.30  | 0.05  | 21.97  |
| A0A06YWR2_A0A06YWR2_MOUSE | lghg1   | Ig gamma-1 chain C regio K.NTQPIM#TDGYSFYYSK.L          | 3.25   | 18.54  | 0.18  | 5.71   |
| A0A06YWR2_A0A06YWR2_MOUSE | lghg1   | Ig gamma-1 chain C regio K.NTQPIM#TDGYSFYYSK.L          | 15.96  | 136.42 | 0.12  | 8.55   |
| A0A06YWR2_A0A06YWR2_MOUSE | lghg1   | Ig gamma-1 chain C regio K.DVLTITLTPK.V                 | 1.55   | 219.99 | 0.01  | 141.87 |
| A0A06YWR2_A0A06YWR2_MOUSE | lghg1   | Ig gamma-1 chain C regio K.NTQPIM#TDGYSFYYSK.L          | 15.67  | 155.38 | 0.10  | 9.91   |

|                             |        |                                                                |        |        |      |        |
|-----------------------------|--------|----------------------------------------------------------------|--------|--------|------|--------|
| A0A0A6YWR2_A0A0A6YWR2_MOUSE | lghg1  | Ig gamma-1 chain C regio R.VNSAAFPAPIEK.T                      | 5.72   | 232.44 | 0.02 | 40.60  |
| A0A0A6YWR2_A0A0A6YWR2_MOUSE | lghg1  | Ig gamma-1 chain C regio K.DVLTITLTPK.V                        | 1.18   | 124.14 | 0.01 | 105.37 |
| A0A0A6YWR2_A0A0A6YWR2_MOUSE | lghg1  | Ig gamma-1 chain C regio K.NTOPIM*DDGGSFYVYSR.L                | 13.00  | 105.43 | 0.13 | 7.93   |
| A0A0A6YWR2_A0A0A6YWR2_MOUSE | lghg1  | Ig gamma-1 chain C regio R.VNSAAFPAPIEK.T                      | 2.83   | 173.54 | 0.02 | 61.35  |
| Q9DC69_Q9DC69_MOUSE         | lgtp   | Protein lgtp OS=Mus mus R.ALQFQDLIK#.M                         | 6.13   | 4.28   | 1.43 | 0.70   |
| Q9QZ85_IIGP1_MOUSE          | lignp1 | Interferon-inducible GTP K.EIDSSVLNVAVTGETGSGK#.S              | 2.90   | 1.72   | 1.68 | 0.59   |
| Q9QZ85_IIGP1_MOUSE          | lignp1 | Interferon-inducible GTP R.K#IISQELNLIELR@.M                   | 37.12  | 27.90  | 1.33 | 0.75   |
| Q9QZ85_IIGP1_MOUSE          | lignp1 | Interferon-inducible GTP K.LISDLPYK#.R                         | 19.46  | 15.58  | 1.25 | 0.80   |
| Q9QZ85_IIGP1_MOUSE          | lignp1 | Interferon-inducible GTP K.SDENNDLPSSTFTGFK#.K                 | 9.97   | 6.23   | 1.60 | 0.63   |
| Q9QZ85_IIGP1_MOUSE          | lignp1 | Interferon-inducible GTP K.SPAVFKP#DTEITQIER@.L                | 23.85  | 23.21  | 1.03 | 0.97   |
| Q9QZ85_IIGP1_MOUSE          | lignp1 | Interferon-inducible GTP K.SSFINTLR@.G                         | 14.90  | 11.14  | 1.34 | 0.75   |
| Q9QZ85_IIGP1_MOUSE          | lignp1 | Interferon-inducible GTP K.TGVVEVTM*ER@.H                      | 14.50  | 9.87   | 1.47 | 0.68   |
| Q9QZ85_IIGP1_MOUSE          | lignp1 | Interferon-inducible GTP R.TVFGVDETSLQR@.L                     | 18.99  | 26.85  | 0.71 | 1.41   |
| Q9QZ85_IIGP1_MOUSE          | lignp1 | Interferon-inducible GTP K.LISDLPYK#.R                         | 12.98  | 8.13   | 1.60 | 0.63   |
| Q9QZ85_IIGP1_MOUSE          | lignp1 | Interferon-inducible GTP K.SPAVFKP#DTEITQIER.L                 | 14.99  | 14.31  | 1.05 | 0.95   |
| Q9QZ85_IIGP1_MOUSE          | lignp1 | Interferon-inducible GTP R.TKVDSDITNEADGKPKQTFDKEK.V           | 9.52   | 7.05   | 1.35 | 0.74   |
| Q9QZ85_IIGP1_MOUSE          | lignp1 | Interferon-inducible GTP R.TVFGVDETSLQR@.L                     | 21.80  | 11.49  | 1.90 | 0.53   |
| Q9Z1M8_RED_MOUSE            | lk     | Protein Red OS=Mus mus K.AAFQYGIK#.M                           | 25.64  | 18.96  | 1.35 | 0.74   |
| Q9Z1M8_RED_MOUSE            | lk     | Protein Red OS=Mus mus R.EYNEDDEPAAR@.R                        | 17.18  | 14.89  | 1.15 | 0.87   |
| Q9Z1M8_RED_MOUSE            | lk     | Protein Red OS=Mus mus K.FAGSAGWEGTESLK#.K                     | 20.31  | 5.91   | 3.44 | 0.29   |
| Q9Z1M8_RED_MOUSE            | lk     | Protein Red OS=Mus mus K.GLDFALLQK#.V                          | 34.91  | 33.33  | 1.05 | 0.95   |
| Q9Z1M8_RED_MOUSE            | lk     | Protein Red OS=Mus mus K.K#PEADM*NIFEDIQDYPVSTTK#.T            | 14.28  | 17.12  | 0.83 | 1.20   |
| Q9Z1M8_RED_MOUSE            | lk     | Protein Red OS=Mus mus K.LTQLSCLR@.Q                           | 48.65  | 36.91  | 1.32 | 0.76   |
| Q9Z1M8_RED_MOUSE            | lk     | Protein Red OS=Mus mus R.M*AVVWDLDEYADTDIPTLIR@.S              | 6.73   | 5.42   | 1.24 | 0.81   |
| Q9DB21_IKIP_MOUSE           | lkbip  | Inhibitor of nuclear factr R.LLQTESSEFQGLQSK#.I                | 7.62   | 7.80   | 0.98 | 1.02   |
| Q7TT37_ELP1_MOUSE           | lkbkap | Elongator complex prote R.AFESTLQLM*ER@.A                      | 5.84   | 3.15   | 1.85 | 0.54   |
| Q7TT37_ELP1_MOUSE           | lkbkap | Elongator complex prote R.AAM*EAINPR@.K                        | 14.63  | 11.64  | 1.26 | 0.80   |
| Q7TT37_ELP1_MOUSE           | lkbkap | Elongator complex prote R.AEQGTVLIGSER@.G                      | 15.73  | 6.47   | 2.43 | 0.41   |
| Q7TT37_ELP1_MOUSE           | lkbkap | Elongator complex prote R.IVTVVPQDTH#.L                        | 19.94  | 12.45  | 1.60 | 0.62   |
| Q7TT37_ELP1_MOUSE           | lkbkap | Elongator complex prote K.NYM*FDLDESETATFIR@.H                 | 6.05   | 2.92   | 2.08 | 0.48   |
| Q7TT37_ELP1_MOUSE           | lkbkap | Elongator complex prote K.SLAVQLADGQVLK#.Y                     | 15.20  | 6.74   | 2.26 | 0.44   |
| Q7TT37_ELP1_MOUSE           | lkbkap | Elongator complex prote R.SSGSANSIDLANNVAIDGNR@.V              | 6.38   | 4.28   | 1.49 | 0.67   |
| Q7TT37_ELP1_MOUSE           | lkbkap | Elongator complex prote K.VFLENVETFK#.Q                        | 35.21  | 16.09  | 2.19 | 0.46   |
| Q7TT37_ELP1_MOUSE           | lkbkap | Elongator complex prote K.VLFLFEFFEQAK#.E                      | 14.11  | 5.44   | 2.59 | 0.39   |
| Q7TT37_ELP1_MOUSE           | lkbkap | Elongator complex prote R.VLTVVFR@.Q                           | 18.29  | 11.32  | 1.62 | 0.62   |
| Q7TT37_ELP1_MOUSE           | lkbkap | Elongator complex prote R.AAM*EAINPR@.K                        | 26.15  | 6.92   | 3.78 | 0.26   |
| Q7TT37_ELP1_MOUSE           | lkbkap | Elongator complex prote R.AEQGTVLIGSER@.G                      | 30.09  | 8.31   | 3.62 | 0.28   |
| Q7TT37_ELP1_MOUSE           | lkbkap | Elongator complex prote R.AFESTLQLM*ER@.A                      | 12.87  | 3.39   | 3.80 | 0.26   |
| Q7TT37_ELP1_MOUSE           | lkbkap | Elongator complex prote K.DFEVIAEQIHQDDDFGEGK#.F               | 33.89  | 10.15  | 3.34 | 0.30   |
| Q7TT37_ELP1_MOUSE           | lkbkap | Elongator complex prote K.EYLPFLNLT#.K                         | 42.85  | 12.21  | 3.51 | 0.29   |
| Q7TT37_ELP1_MOUSE           | lkbkap | Elongator complex prote R.IVTVVPQDTH#.L                        | 43.86  | 13.24  | 3.31 | 0.30   |
| Q7TT37_ELP1_MOUSE           | lkbkap | Elongator complex prote K.NSEGIPVR@.F                          | 18.60  | 8.99   | 2.07 | 0.48   |
| Q7TT37_ELP1_MOUSE           | lkbkap | Elongator complex prote K.NYM*FDLDESETATFIR@.H                 | 13.06  | 3.78   | 3.45 | 0.29   |
| Q7TT37_ELP1_MOUSE           | lkbkap | Elongator complex prote K.SLAVQLADGQVLK#.Y                     | 44.50  | 13.33  | 3.34 | 0.30   |
| Q7TT37_ELP1_MOUSE           | lkbkap | Elongator complex prote R.SSGSANSIDLANNVAIDGNR@.V              | 16.82  | 6.49   | 2.59 | 0.39   |
| Q7TT37_ELP1_MOUSE           | lkbkap | Elongator complex prote K.SVQVSTHPDQK#.K                       | 14.44  | 3.41   | 4.23 | 0.24   |
| Q7TT37_ELP1_MOUSE           | lkbkap | Elongator complex prote K.TPPELVLQK#.V                         | 21.89  | 7.77   | 2.82 | 0.35   |
| Q7TT37_ELP1_MOUSE           | lkbkap | Elongator complex prote R.VDIETSVP#PSILEAQK#.N                 | 29.80  | 15.54  | 1.92 | 0.52   |
| Q7TT37_ELP1_MOUSE           | lkbkap | Elongator complex prote K.VFLENVETFK#.Q                        | 55.36  | 19.17  | 2.89 | 0.35   |
| Q7TT37_ELP1_MOUSE           | lkbkap | Elongator complex prote R.VLTVVFR@.Q                           | 45.82  | 12.72  | 3.60 | 0.28   |
| Q7TT37_ELP1_MOUSE           | lkbkap | Elongator complex prote K.VQELQGNLPPDFPESVVEEAL#.Y             | 26.99  | 14.41  | 1.87 | 0.53   |
| O88522_NEMO_MOUSE           | lkbkg  | NF-kappa-B essential mox K.AQVTSLLGELQESQSR@.L                 | 12.94  | 4.15   | 3.12 | 0.32   |
| O88522_NEMO_MOUSE           | lkbkg  | NF-kappa-B essential mox K.EYLQEQLEQLQR@.E                     | 11.71  | 3.78   | 3.10 | 0.32   |
| O88522_NEMO_MOUSE           | lkbkg  | NF-kappa-B essential mox K.IVM*ETVPVCLK#.A                     | 8.66   | 3.65   | 2.37 | 0.42   |
| O88522_NEMO_MOUSE           | lkbkg  | NF-kappa-B essential mox K.LAQLQAYHQLFDQYDHSIK#.S              | 13.60  | 7.14   | 1.90 | 0.53   |
| O88522_NEMO_MOUSE           | lkbkg  | NF-kappa-B essential mox R.M*QNQSVSEALR@.M                     | 13.21  | 58.58  | 0.23 | 4.44   |
| O88522_NEMO_MOUSE           | lkbkg  | NF-kappa-B essential mox R.QQLQQAEEALVAK#.Q                    | 14.39  | 7.01   | 2.05 | 0.49   |
| O9CX6_ILF2_MOUSE            | lilf2  | Interleukin enhancer-bin K.GTM*TTGHNVDLVILK#.I                 | 54.24  | 18.41  | 2.95 | 0.34   |
| O9CX6_ILF2_MOUSE            | lilf2  | Interleukin enhancer-bin K.LILITVPPNLR.K                       | 48.52  | 20.54  | 2.36 | 0.42   |
| O9CX6_ILF2_MOUSE            | lilf2  | Interleukin enhancer-bin K.LILPTLEAVALGNK#.V                   | 137.40 | 52.91  | 2.60 | 0.39   |
| O9CX6_ILF2_MOUSE            | lilf2  | Interleukin enhancer-bin K.INNVIDLNI#VAPGTFEVQEEVR.Q           | 8.45   | 1.41   | 5.98 | 0.17   |
| O9CX6_ILF2_MOUSE            | lilf2  | Interleukin enhancer-bin R.NQDLAPNSAEQASISLVTK#.I              | 32.99  | 11.91  | 2.77 | 0.36   |
| O9CX6_ILF2_MOUSE            | lilf2  | Interleukin enhancer-bin R.QPLANNVAYR@.R                       | 79.91  | 31.10  | 2.57 | 0.39   |
| O9CX6_ILF2_MOUSE            | lilf2  | Interleukin enhancer-bin K.R@NQDLAPNSAEQASISLVTK#.I            | 18.39  | 7.24   | 2.54 | 0.39   |
| O9CX6_ILF2_MOUSE            | lilf2  | Interleukin enhancer-bin R.VK#PADTFSSEALLK#R@.N                | 76.08  | 27.29  | 2.79 | 0.36   |
| O9CX6_ILF2_MOUSE            | lilf2  | Interleukin enhancer-bin K.VLQSAALAIR@.H                       | 140.64 | 56.68  | 2.48 | 0.40   |
| O9CX6_ILF2_MOUSE            | lilf2  | Interleukin enhancer-bin R.WFEENASOSTVK#.V                     | 667.23 | 74.25  | 8.99 | 0.11   |
| O9CX6_ILF2_MOUSE            | lilf2  | Interleukin enhancer-bin K.GTM*TTGHNVDLVILK#.I                 | 16.86  | 7.86   | 2.14 | 0.47   |
| O9CX6_ILF2_MOUSE            | lilf2  | Interleukin enhancer-bin K.LILITVPPNLR@.K                      | 9.22   | 5.14   | 1.79 | 0.56   |
| O9CX6_ILF2_MOUSE            | lilf2  | Interleukin enhancer-bin K.LILPTLEAVALGNK#.V                   | 42.50  | 16.97  | 2.51 | 0.40   |
| O9CX6_ILF2_MOUSE            | lilf2  | Interleukin enhancer-bin K.INNVIDLNI#VAPGTFEVQEEVR@.Q          | 21.11  | 9.07   | 2.33 | 0.43   |
| O9CX6_ILF2_MOUSE            | lilf2  | Interleukin enhancer-bin R.NQDLAPNSAEQASISLVTK#.I              | 7.78   | 3.24   | 2.40 | 0.42   |
| O9CX6_ILF2_MOUSE            | lilf2  | Interleukin enhancer-bin K.VLQSAALAIR@.H                       | 28.75  | 10.92  | 2.63 | 0.38   |
| O9CX6_ILF2_MOUSE            | lilf2  | Interleukin enhancer-bin K.GTM*TTGHNVDLVILK#.I                 | 19.02  | 29.51  | 0.64 | 1.55   |
| O9CX6_ILF2_MOUSE            | lilf2  | Interleukin enhancer-bin K.LILITVPPNLR@.K                      | 15.53  | 6.30   | 2.46 | 0.41   |
| O9CX6_ILF2_MOUSE            | lilf2  | Interleukin enhancer-bin K.LILPTLEAVALGNK#.V                   | 15.22  | 3.58   | 4.25 | 0.24   |
| O9CX6_ILF2_MOUSE            | lilf2  | Interleukin enhancer-bin K.INNVIDLNI#VAPGTFEVQEEVR@.Q          | 28.87  | 16.66  | 1.73 | 0.58   |
| O9CX6_ILF2_MOUSE            | lilf2  | Interleukin enhancer-bin R.NQDLAPNSAEQASISLVTK#.I              | 38.18  | 17.28  | 2.21 | 0.45   |
| O9CX6_ILF2_MOUSE            | lilf2  | Interleukin enhancer-bin R.QPLANNVAYR@.R                       | 17.64  | 7.31   | 2.41 | 0.41   |
| O9CX6_ILF2_MOUSE            | lilf2  | Interleukin enhancer-bin R.VK#PADTFSSEALLK#R                   | 30.92  | 15.56  | 1.99 | 0.50   |
| O9CX6_ILF2_MOUSE            | lilf2  | Interleukin enhancer-bin K.VLQSAALAIR.H                        | 40.35  | 18.25  | 2.21 | 0.45   |
| O9Z1X4_ILF3_MOUSE           | lilf3  | Interleukin enhancer-bin K.AYAALALEK#.L                        | 5.30   | 4.30   | 1.23 | 0.81   |
| O9Z1X4_ILF3_MOUSE           | lilf3  | Interleukin enhancer-bin K.GYGHGQGSYSSYSSNSPGGGGSYSDSK#.F      | 6.78   | 2.48   | 2.73 | 0.37   |
| O9Z1X4_ILF3_MOUSE           | lilf3  | Interleukin enhancer-bin R.LNQLK#PGLQVK#.L                     | 14.46  | 6.50   | 2.23 | 0.45   |
| O9Z1X4_ILF3_MOUSE           | lilf3  | Interleukin enhancer-bin K.ADP#QAM*NALM*R@.L                   | 19.45  | 8.90   | 2.18 | 0.46   |
| O9Z1X4_ILF3_MOUSE           | lilf3  | Interleukin enhancer-bin K.AYAALALEK#.L                        | 93.29  | 36.48  | 2.56 | 0.39   |
| O9Z1X4_ILF3_MOUSE           | lilf3  | Interleukin enhancer-bin R.EDITQSAQHALR.L                      | 25.99  | 9.32   | 2.79 | 0.36   |
| O9Z1X4_ILF3_MOUSE           | lilf3  | Interleukin enhancer-bin K.FNYSGSGGR@.S                        | 44.00  | 17.27  | 2.55 | 0.39   |
| O9Z1X4_ILF3_MOUSE           | lilf3  | Interleukin enhancer-bin R.FVMEVSDGQK#.F                       | 33.01  | 16.58  | 1.99 | 0.50   |
| O9Z1X4_ILF3_MOUSE           | lilf3  | Interleukin enhancer-bin R.GLK#YELISFTGGSHDK#R@.F              | 33.04  | 14.14  | 2.34 | 0.43   |
| O9Z1X4_ILF3_MOUSE           | lilf3  | Interleukin enhancer-bin K.GYGHGQGSYSSYSSNSPGGGGSYSDSK#.F      | 3.74   | 2.08   | 1.80 | 0.56   |
| O9Z1X4_ILF3_MOUSE           | lilf3  | Interleukin enhancer-bin K.HSSVYPTQEELAVQNM*VSHTER@.A          | 8.23   | 4.57   | 1.80 | 0.56   |
| O9Z1X4_ILF3_MOUSE           | lilf3  | Interleukin enhancer-bin K.HSSVYPTQEELAVQNMVSHTER@.A           | 5.36   | 1.84   | 2.92 | 0.34   |
| O9Z1X4_ILF3_MOUSE           | lilf3  | Interleukin enhancer-bin R.IFVNDR@.L                           | 37.86  | 13.60  | 2.78 | 0.36   |
| O9Z1X4_ILF3_MOUSE           | lilf3  | Interleukin enhancer-bin R.LAAGQLK#.V                          | 22.47  | 8.35   | 2.69 | 0.37   |
| O9Z1X4_ILF3_MOUSE           | lilf3  | Interleukin enhancer-bin K.LFPDTPLEALEANK#.K                   | 39.30  | 22.14  | 1.78 | 0.56   |
| O9Z1X4_ILF3_MOUSE           | lilf3  | Interleukin enhancer-bin K.LISQTPGVHAFITM*SVEVDGNSFEASGSPSK#.K | 8.60   | 2.29   | 3.75 | 0.27   |
| O9Z1X4_ILF3_MOUSE           | lilf3  | Interleukin enhancer-bin K.VADNLAIQLTTVTEK#YELQSVDDAIVIK#.N    | 7.83   | 4.40   | 1.78 | 0.56   |
| O9Z1X4_ILF3_MOUSE           | lilf3  | Interleukin enhancer-bin K.VADNLAIQLTTVTEK#YELQSVDDAIVIK#.N    | 7.79   | 1.96   | 3.97 | 0.25   |
| O9Z1X4_ILF3_MOUSE           | lilf3  | Interleukin enhancer-bin K.VLAGETLSVNDPPDLDR@.Q                | 53.68  | 25.17  | 2.13 | 0.47   |
| O9Z1X4_ILF3_MOUSE           | lilf3  | Interleukin enhancer-bin K.VLGM*DLPLPSK#.M                     | 87.09  | 42.51  | 2.05 | 0.49   |
| O9Z1X4_ILF3_MOUSE           | lilf3  | Interleukin enhancer-bin K.VLGM*DLPLPSK#.M                     | 8.11   | 5.46   | 1.49 | 0.67   |
| O9Z1X4_ILF3_MOUSE           | lilf3  | Interleukin enhancer-bin K.VLQDM*GLPTGAEGR@.D                  | 92.38  | 33.50  | 2.76 | 0.36   |

|                     |        |                                                              |       |       |      |       |
|---------------------|--------|--------------------------------------------------------------|-------|-------|------|-------|
| Q9Z1X4_ILF3_MOUSE   | Ilf3   | Interleukin enhancer-bin K.VLQDMGLPTGAEGR@.D                 | 18.18 | 9.44  | 1.93 | 0.52  |
| Q9Z1X4_ILF3_MOUSE   | Ilf3   | Interleukin enhancer-bin R.VPTWGPLR@.G                       | 39.43 | 18.06 | 2.18 | 0.46  |
| Q9Z1X4_ILF3_MOUSE   | Ilf3   | Interleukin enhancer-bin K.YELISETGSHDKHR@.F                 | 32.16 | 13.24 | 2.43 | 0.41  |
| Q9Z1X4_ILF3_MOUSE   | Ilf3   | Interleukin enhancer-bin K.ADDPQAM*NALM*R@.L                 | 9.50  | 3.27  | 2.91 | 0.34  |
| Q9Z1X4_ILF3_MOUSE   | Ilf3   | Interleukin enhancer-bin K.AYAAALALEKL.L                     | 30.60 | 9.18  | 3.34 | 0.30  |
| Q9Z1X4_ILF3_MOUSE   | Ilf3   | Interleukin enhancer-bin K.LFPDTPLALEANK#.K                  | 28.84 | 7.05  | 4.09 | 0.24  |
| Q9Z1X4_ILF3_MOUSE   | Ilf3   | Interleukin enhancer-bin K.LISQTPVPHAFITM*SVEVDGNSFEAGSPK#.K | 4.53  | 1.67  | 2.71 | 0.37  |
| Q9Z1X4_ILF3_MOUSE   | Ilf3   | Interleukin enhancer-bin K.VLAGETLSVNDPPDVLDR@.Q             | 21.66 | 8.38  | 2.58 | 0.39  |
| Q9Z1X4_ILF3_MOUSE   | Ilf3   | Interleukin enhancer-bin K.VLGM*DPLPSK#.M                    | 31.69 | 13.02 | 2.43 | 0.41  |
| Q9Z1X4_ILF3_MOUSE   | Ilf3   | Interleukin enhancer-bin K.VLQDM*GLPTGAEGR@.D                | 16.35 | 6.16  | 2.65 | 0.38  |
| O55222_ILK_MOUSE    | Ilk    | Integrin-linked protein k: R.EVFPADLSNM*EIGM*K#.V            | 16.35 | 8.88  | 1.84 | 0.54  |
| O55222_ILK_MOUSE    | Ilk    | Integrin-linked protein k: K.FALDM*AR@.G                     | 22.74 | 13.16 | 1.73 | 0.58  |
| O55222_ILK_MOUSE    | Ilk    | Integrin-linked protein k: K.FDM*IVPILEK#.M                  | 32.41 | 21.30 | 1.52 | 0.66  |
| O55222_ILK_MOUSE    | Ilk    | Integrin-linked protein k: K.FDM*IVPILEK#.M                  | 11.26 | 8.80  | 1.28 | 0.78  |
| O55222_ILK_MOUSE    | Ilk    | Integrin-linked protein k: R.GM*AFHTLEPLIPR@.H               | 36.24 | 27.65 | 1.31 | 0.76  |
| O55222_ILK_MOUSE    | Ilk    | Integrin-linked protein k: K.HSGIDFK#.Q                      | 40.91 | 20.28 | 2.02 | 0.50  |
| O55222_ILK_MOUSE    | Ilk    | Integrin-linked protein k: R.M*YAPAWVAPEALQK#.K              | 13.37 | 9.27  | 1.44 | 0.69  |
| O55222_ILK_MOUSE    | Ilk    | Integrin-linked protein k: R.SAVVEM*LIM*TR@.G                | 17.90 | 12.63 | 1.42 | 0.71  |
| O55222_ILK_MOUSE    | Ilk    | Integrin-linked protein k: R.SAVVEM*LIM*TR@.G                | 7.10  | 4.04  | 1.76 | 0.57  |
| O55222_ILK_MOUSE    | Ilk    | Integrin-linked protein k: R.SVM*IDEDM*TAR#.I                | 24.55 | 15.60 | 1.57 | 0.64  |
| O55222_ILK_MOUSE    | Ilk    | Integrin-linked protein k: R.SVM*IDEDM*TAR#.I                | 3.51  | 2.99  | 1.17 | 0.85  |
| O55222_ILK_MOUSE    | Ilk    | Integrin-linked protein k: K.FDM*IVPILEK#.M                  | 18.68 | 6.67  | 2.80 | 0.36  |
| O55222_ILK_MOUSE    | Ilk    | Integrin-linked protein k: R.GM*AFHTLEPLIPR@.H               | 24.43 | 9.23  | 2.65 | 0.38  |
| O55222_ILK_MOUSE    | Ilk    | Integrin-linked protein k: R.M*YAPAWVAPEALQK#.K              | 6.90  | 4.17  | 1.65 | 0.60  |
| O55222_ILK_MOUSE    | Ilk    | Integrin-linked protein k: R.SVM*IDEDM*TAR#.I                | 11.39 | 4.17  | 2.73 | 0.37  |
| O55222_ILK_MOUSE    | Ilk    | Integrin-linked protein k: R.EVFPADLSNM*EIGM*K#.V            | 13.12 | 4.11  | 3.19 | 0.31  |
| O55222_ILK_MOUSE    | Ilk    | Integrin-linked protein k: K.FDM*IVPILEK#.M                  | 35.28 | 8.74  | 4.04 | 0.25  |
| O55222_ILK_MOUSE    | Ilk    | Integrin-linked protein k: R.GM*AFHTLEPLIPR@.H               | 39.82 | 10.80 | 3.69 | 0.27  |
| O55222_ILK_MOUSE    | Ilk    | Integrin-linked protein k: R.ISM*ADVK#.F                     | 39.11 | 13.01 | 3.01 | 0.33  |
| O55222_ILK_MOUSE    | Ilk    | Integrin-linked protein k: R.SVM*IDEDM*TAR#.I                | 13.13 | 4.55  | 2.89 | 0.35  |
| O55222_ILK_MOUSE    | Ilk    | Integrin-linked protein k: K.YGEM*PVDK#.A                    | 26.03 | 6.12  | 4.25 | 0.24  |
| Q921Y2_IMP3_MOUSE   | Imp3   | U3 small nucleolar ribon R.ASALLDK#.L                        | 10.63 | 9.10  | 1.17 | 0.86  |
| Q921Y2_IMP3_MOUSE   | Imp3   | U3 small nucleolar ribon K.LYAM*GLVPR#.G                     | 4.33  | 3.94  | 1.10 | 0.91  |
| Q921Y2_IMP3_MOUSE   | Imp3   | U3 small nucleolar ribon R.SM*EDFVWVDSK#.I                   | 3.94  | 2.06  | 1.91 | 0.52  |
| Q921Y2_IMP3_MOUSE   | Imp3   | U3 small nucleolar ribon R.VGPDVVDPAFLVTR@.S                 | 55.03 | 39.78 | 1.38 | 0.72  |
| Q8VHZ7_IMP4_MOUSE   | Imp4   | U3 small nucleolar ribon R.VITFANQDDVYSFR@.H                 | 7.50  | 4.73  | 1.59 | 0.63  |
| Q80V26_IMP4_MOUSE   | Imp4d1 | Inositol monophosphata K.VLALLDVPDM*TQEK#.A                  | 9.46  | 3.70  | 2.56 | 0.39  |
| Q9WU62_INCE_MOUSE   | Incenp | Inner centromere protei K.ISVDYGM*DLNSDDSTDDSHPR@.K          | 3.84  | 6.03  | 0.64 | 1.57  |
| Q9WU62_INCE_MOUSE   | Incenp | Inner centromere protei R.LAEQDQEEQAK. K                     | 22.50 | 24.33 | 0.92 | 1.08  |
| Q9WU62_INCE_MOUSE   | Incenp | Inner centromere protei K.NQM*LM*TPTLASR.S                   | 6.23  | 10.41 | 0.60 | 1.67  |
| Q9WU62_INCE_MOUSE   | Incenp | Inner centromere protei R.VLSPILLNNILPTTAK.S                 | 6.65  | 12.82 | 0.52 | 1.93  |
| Q9WU62_INCE_MOUSE   | Incenp | Inner centromere protei R.VLSPILLNNILPTTAK.S                 | 5.82  | 4.25  | 1.37 | 0.73  |
| E9QLA5_E9QLA5_MOUSE | Inf2   | Inverted formin-2 OS=M: K.AEDEELQR@.I                        | 9.61  | 3.69  | 2.60 | 0.38  |
| E9QLA5_E9QLA5_MOUSE | Inf2   | Inverted formin-2 OS=M: K.FDVEVLK#.Q                         | 28.56 | 11.08 | 2.58 | 0.39  |
| E9QLA5_E9QLA5_MOUSE | Inf2   | Inverted formin-2 OS=M: R.LLQM*PSVNVNYSGLR@.K                | 8.55  | 2.80  | 3.05 | 0.33  |
| E9QLA5_E9QLA5_MOUSE | Inf2   | Inverted formin-2 OS=M: R.LQASIEAQELDK#VFDIAEQK#.K           | 24.29 | 8.96  | 2.71 | 0.37  |
| E9QLA5_E9QLA5_MOUSE | Inf2   | Inverted formin-2 OS=M: R.LRDLADLILQLEFAEAK.K                | 15.33 | 5.07  | 3.02 | 0.33  |
| E9QLA5_E9QLA5_MOUSE | Inf2   | Inverted formin-2 OS=M: R.NQEFPVSDDDIK#.A                    | 10.87 | 2.46  | 4.41 | 0.23  |
| E9QLA5_E9QLA5_MOUSE | Inf2   | Inverted formin-2 OS=M: R.QLQALDTSNVVM*VK#.K                 | 7.60  | 2.30  | 3.30 | 0.30  |
| E9QLA5_E9QLA5_MOUSE | Inf2   | Inverted formin-2 OS=M: R.SFSDAVTSSGSGTLPR@.V                | 6.96  | 2.17  | 3.21 | 0.31  |
| E9QLA5_E9QLA5_MOUSE | Inf2   | Inverted formin-2 OS=M: K.SVQNTSNVQNGSSQNTTPTTK#.V           | 5.19  | 1.86  | 2.80 | 0.36  |
| E9QLA5_E9QLA5_MOUSE | Inf2   | Inverted formin-2 OS=M: K.VSASIPERQ#.K                       | 20.82 | 6.79  | 3.06 | 0.33  |
| E9QLA5_E9QLA5_MOUSE | Inf2   | Inverted formin-2 OS=M: R.VTLLHHVLEVEK#.S                    | 32.53 | 13.88 | 2.34 | 0.43  |
| E9QLA5_E9QLA5_MOUSE | Inf2   | Inverted formin-2 OS=M: K.AEDEELQR@.I                        | 6.92  | 3.34  | 2.07 | 0.48  |
| E9QLA5_E9QLA5_MOUSE | Inf2   | Inverted formin-2 OS=M: R.AVM*NSQOGEIYLSNQGYVR@.Q            | 16.50 | 4.27  | 3.86 | 0.26  |
| E9QLA5_E9QLA5_MOUSE | Inf2   | Inverted formin-2 OS=M: R.AVMNSQOGEIYLSNQGYVR@.Q             | 5.34  | 2.81  | 1.90 | 0.53  |
| E9QLA5_E9QLA5_MOUSE | Inf2   | Inverted formin-2 OS=M: K.FDVEVLK#.Q                         | 45.14 | 11.20 | 4.03 | 0.25  |
| E9QLA5_E9QLA5_MOUSE | Inf2   | Inverted formin-2 OS=M: R.LLQM*PSVNVNYSGLR@.K                | 14.24 | 11.89 | 1.20 | 0.83  |
| E9QLA5_E9QLA5_MOUSE | Inf2   | Inverted formin-2 OS=M: R.LQASIEAQELDK#VFDIAEQK#.K           | 40.11 | 10.01 | 4.01 | 0.25  |
| E9QLA5_E9QLA5_MOUSE | Inf2   | Inverted formin-2 OS=M: R.NQEFPVSDDDIK#.A                    | 18.36 | 4.26  | 4.31 | 0.23  |
| E9QLA5_E9QLA5_MOUSE | Inf2   | Inverted formin-2 OS=M: R.QLQALDTSNVVM*VK#.K                 | 8.47  | 4.15  | 2.04 | 0.49  |
| E9QLA5_E9QLA5_MOUSE | Inf2   | Inverted formin-2 OS=M: R.SFSDAVTSSGSGTLPR@.V                | 7.10  | 2.33  | 3.05 | 0.33  |
| E9QLA5_E9QLA5_MOUSE | Inf2   | Inverted formin-2 OS=M: R.TEADSTSEGEPEAQR@.G                 | 9.22  | 3.91  | 2.36 | 0.42  |
| E9QLA5_E9QLA5_MOUSE | Inf2   | Inverted formin-2 OS=M: K.VSASIPERQ#.K                       | 17.47 | 5.77  | 3.03 | 0.33  |
| E9QLA5_E9QLA5_MOUSE | Inf2   | Inverted formin-2 OS=M: R.VTLLHHVLEVEK#.S                    | 29.85 | 9.55  | 3.13 | 0.32  |
| Q8VEK6_ING3_MOUSE   | Ing3   | Inhibitor of growth proti K.VQLANQYDLVDR@.H                  | 10.66 | 3.89  | 2.74 | 0.36  |
| Q8VEK6_ING3_MOUSE   | Ing3   | Inhibitor of growth proti K.ALEDADK#VQLANQYDLVDR@.H          | 6.69  | 2.14  | 3.13 | 0.32  |
| Q8C0D7_ING4_MOUSE   | Ing4   | Inhibitor of growth proti R.RLTDLAR.F                        | 56.96 | 22.89 | 2.49 | 0.40  |
| Q9D8Y8_ING5_MOUSE   | Ing5   | Inhibitor of growth proti K.KAEIDLAAEYISTVK#.T               | 7.99  | 5.64  | 1.42 | 0.71  |
| Q9D8Y8_ING5_MOUSE   | Ing5   | Inhibitor of growth proti R.M*DGSDFSTGAR@.S                  | 13.12 | 6.67  | 1.97 | 0.51  |
| Q9D8Y8_ING5_MOUSE   | Ing5   | Inhibitor of growth proti R.RLDADLAR.F                       | 81.50 | 45.29 | 1.80 | 0.56  |
| Q6ZPV2_INO80_MOUSE  | Ino80  | DNA helicase INO80 OS=I: K.SGSGFGESLANSR@.A                  | 4.86  | 1.86  | 2.62 | 0.32  |
| Q99PT3_INO80_MOUSE  | Ino80b | INO80 complex subunit I: R.AAAPAPAPM*VR@.Y                   | 12.81 | 3.59  | 3.56 | 0.28  |
| Q99PT3_INO80_MOUSE  | Ino80b | INO80 complex subunit I: K.LGGQVLTGK#.S                      | 19.75 | 8.05  | 2.45 | 0.41  |
| Q8BHA0_IN80C_MOUSE  | Ino80c | INO80 complex subunit I: R.FSTVEEFSYR@.R                     | 5.20  | 3.03  | 1.72 | 0.58  |
| Q8BHA0_IN80C_MOUSE  | Ino80c | INO80 complex subunit I: K.LSASGFAQGSVIAEM*NESK#.M           | 3.86  | 1.77  | 2.19 | 0.46  |
| Q8BHA0_IN80C_MOUSE  | Ino80c | INO80 complex subunit I: K.M*ASSELSSGPEK#.K                  | 8.30  | 5.34  | 1.56 | 0.64  |
| Q8BHA0_IN80C_MOUSE  | Ino80c | INO80 complex subunit I: R.R@LPSDVVTGYLALR@.K                | 7.46  | 5.47  | 1.37 | 0.73  |
| Q8BHA0_IN80C_MOUSE  | Ino80c | INO80 complex subunit I: K.YSDISGLLANYDTPQSK#.L              | 6.41  | 2.31  | 2.78 | 0.36  |
| D3Z3H2_D3Z3H2_MOUSE | Ino80e | Coiled-coil domain conti: R.GSGASVGAALPLPPP#.M               | 12.53 | 5.45  | 2.30 | 0.43  |
| Q6P549_SHIP2_MOUSE  | Inpp1  | Phosphatidylinositol 3,4 R.LLQSQSLPQTGEQELSLVVK#.L           | 14.06 | 8.09  | 1.74 | 0.58  |
| Q6P549_SHIP2_MOUSE  | Inpp1  | Phosphatidylinositol 3,4 R.SFENDAQSSDNINFLK#.V               | 5.62  | 8.32  | 0.68 | 1.48  |
| Q6P4S8_INT1_MOUSE   | Ints1  | Integrator complex subu R.AVEDVLETSIDIDEM*SR@.R              | 11.59 | 2.97  | 3.90 | 0.26  |
| Q6P4S8_INT1_MOUSE   | Ints1  | Integrator complex subu R.DASASLSTGSLTGLTK#.R                | 1.72  | 19.67 | 0.09 | 11.43 |
| Q6P4S8_INT1_MOUSE   | Ints1  | Integrator complex subu K.LLQYLQQAQADPQTLEQNIM*DK#.N         | 2.07  | 2.07  | 1.00 | 1.00  |
| Q6P4S8_INT1_MOUSE   | Ints1  | Integrator complex subu R.TFQNIQAAQR@.D                      | 5.24  | 3.33  | 1.57 | 0.64  |
| Q6P4S8_INT1_MOUSE   | Ints1  | Integrator complex subu R.TFVDNIQTAFNTK#.M                   | 4.85  | 3.13  | 1.55 | 0.65  |
| Q6P4S8_INT1_MOUSE   | Ints1  | Integrator complex subu K.TTSTLLK#APSGLPSEK#.K               | 6.29  | 2.58  | 2.44 | 0.41  |
| Q6P4S8_INT1_MOUSE   | Ints1  | Integrator complex subu K.VLTFEQPETYYK#.W                    | 6.62  | 2.45  | 2.70 | 0.37  |
| Q6P4S8_INT1_MOUSE   | Ints1  | Integrator complex subu K.VYIEDSLGER@.I                      | 11.47 | 3.00  | 3.82 | 0.26  |
| Q8K2A7_INT10_MOUSE  | Ints10 | Integrator complex subu K.AAEFYINVTTR@.S                     | 13.55 | 4.28  | 3.17 | 0.32  |
| Q8K2A7_INT10_MOUSE  | Ints10 | Integrator complex subu K.ADLSNSIEVESFK#.L                   | 27.68 | 4.36  | 6.35 | 0.16  |
| Q8K2A7_INT10_MOUSE  | Ints10 | Integrator complex subu R.EIISITSLR@.N                       | 24.11 | 6.73  | 3.58 | 0.28  |
| Q8K2A7_INT10_MOUSE  | Ints10 | Integrator complex subu R.LLYDYM*FVNFDPQPVVWR@.E             | 4.05  | 2.62  | 1.55 | 0.65  |
| Q8K2A7_INT10_MOUSE  | Ints10 | Integrator complex subu R.SLFETLGR@.V                        | 29.45 | 9.66  | 3.05 | 0.33  |
| Q8K2A7_INT10_MOUSE  | Ints10 | Integrator complex subu K.YIEGLTEK#.S                        | 15.71 | 7.27  | 2.16 | 0.46  |
| Q8K2A7_INT10_MOUSE  | Ints10 | Integrator complex subu R.EIISITSLR@.N                       | 10.18 | 3.55  | 2.86 | 0.35  |
| Q8K2A7_INT10_MOUSE  | Ints10 | Integrator complex subu R.SEM*LLLLR@.R                       | 8.66  | 2.44  | 3.54 | 0.28  |
| Q9D168_INT12_MOUSE  | Ints12 | Integrator complex subu R.GIDSSYR@PTQK#.D                    | 10.29 | 2.79  | 3.68 | 0.27  |
| Q9D168_INT12_MOUSE  | Ints12 | Integrator complex subu K.IGSGNSTSPVPLK#PLPPLTLGK#.T         | 9.28  | 1.94  | 4.77 | 0.21  |
| Q80UK8_INT2_MOUSE   | Ints2  | Integrator complex subu R.LASLSDPELR@.L                      | 17.09 | 5.35  | 3.19 | 0.31  |
| Q80UK8_INT2_MOUSE   | Ints2  | Integrator complex subu R.LVLSLAIM*NK#.V                     | 7.94  | 2.50  | 3.17 | 0.32  |
| Q80UK8_INT2_MOUSE   | Ints2  | Integrator complex subu K.YTQNDLM*IDPLVLR@.C                 | 8.11  | 2.51  | 3.23 | 0.31  |

|                   |        |                                                           |       |       |      |      |
|-------------------|--------|-----------------------------------------------------------|-------|-------|------|------|
| Q80UK8_INT2_MOUSE | Ints2  | Integrator complex subu R.LASLSDPELR@.L                   | 18.37 | 6.23  | 2.95 | 0.34 |
| Q80UK8_INT2_MOUSE | Ints2  | Integrator complex subu R.LVSELLAIM*NK#.V                 | 12.66 | 2.90  | 4.37 | 0.23 |
| Q80UK8_INT2_MOUSE | Ints2  | Integrator complex subu K.YTQNDLM*IDPLVLVR@.C             | 14.47 | 5.24  | 2.76 | 0.36 |
| Q77PD0_INT3_MOUSE | Ints3  | Integrator complex subu K.ETVVEEPPDVTPLYDQLDESRL@DK#.V    | 12.06 | 4.60  | 2.62 | 0.38 |
| Q77PD0_INT3_MOUSE | Ints3  | Integrator complex subu K.FSDLFSLAEYEDSSTK#PK#.S          | 38.54 | 16.20 | 2.38 | 0.42 |
| Q77PD0_INT3_MOUSE | Ints3  | Integrator complex subu K.GK#GTVAASAAAGAGGGGAGAGAPGGGR@.L | 39.10 | 11.49 | 3.40 | 0.29 |
| Q77PD0_INT3_MOUSE | Ints3  | Integrator complex subu K.IGYHLLYLRL@.A                   | 11.83 | 6.59  | 1.80 | 0.56 |
| Q77PD0_INT3_MOUSE | Ints3  | Integrator complex subu R.LIVDHHGTALQQLTLR@.Q             | 14.47 | 6.06  | 2.39 | 0.42 |
| Q77PD0_INT3_MOUSE | Ints3  | Integrator complex subu R.QYLSTPDSOSLR@.C                 | 13.66 | 2.84  | 4.81 | 0.21 |
| Q77PD0_INT3_MOUSE | Ints3  | Integrator complex subu R.TQLVWLVR@.E                     | 9.40  | 4.93  | 1.90 | 0.52 |
| Q77PD0_INT3_MOUSE | Ints3  | Integrator complex subu R.VLAHLAPLFDNPK#.L                | 35.08 | 8.99  | 3.90 | 0.26 |
| Q77PD0_INT3_MOUSE | Ints3  | Integrator complex subu R.YQDWFQR@.Q                      | 12.51 | 5.22  | 2.40 | 0.42 |
| Q77PD0_INT3_MOUSE | Ints3  | Integrator complex subu K.ETVVEEPPDVTPLYDQLDESRL@DK#.V    | 14.44 | 5.94  | 2.43 | 0.41 |
| Q77PD0_INT3_MOUSE | Ints3  | Integrator complex subu K.GK#GTVAASAAAGAGGGGAGAGAPGGGR@.L | 12.84 | 4.04  | 3.18 | 0.31 |
| Q77PD0_INT3_MOUSE | Ints3  | Integrator complex subu K.QJAGGDVTA#N                     | 25.56 | 7.68  | 3.33 | 0.30 |
| Q77PD0_INT3_MOUSE | Ints3  | Integrator complex subu R.QYLSTPDSOSLR@.C                 | 15.08 | 2.77  | 5.44 | 0.18 |
| Q77PD0_INT3_MOUSE | Ints3  | Integrator complex subu R.TQLVWLVR@.E                     | 12.60 | 1.63  | 7.75 | 0.13 |
| Q77PD0_INT3_MOUSE | Ints3  | Integrator complex subu R.VLAHLAPLFDNPK#.L                | 12.70 | 7.27  | 1.75 | 0.57 |
| Q77PD0_INT3_MOUSE | Ints3  | Integrator complex subu K.VLQKQK#.G                       | 32.42 | 8.77  | 3.70 | 0.27 |
| Q77PD0_INT3_MOUSE | Ints3  | Integrator complex subu R.YQDWFQR@.Q                      | 8.32  | 2.47  | 3.36 | 0.30 |
| Q8CIM8_INT4_MOUSE | Ints4  | Integrator complex subu K.FLOQVDFQR@.C                    | 9.69  | 2.79  | 3.48 | 0.29 |
| Q8CIM8_INT4_MOUSE | Ints4  | Integrator complex subu K.IASLGLLSK#.T                    | 17.06 | 8.18  | 2.09 | 0.48 |
| Q8CIM8_INT4_MOUSE | Ints4  | Integrator complex subu K.LLSDDYEQVR@.S                   | 11.06 | 2.75  | 4.02 | 0.25 |
| Q8CIM8_INT4_MOUSE | Ints4  | Integrator complex subu K.LPENQATQVR@.L                   | 17.02 | 6.36  | 2.68 | 0.37 |
| Q8CIM8_INT4_MOUSE | Ints4  | Integrator complex subu K.VVQOQEQEATK#.K                  | 10.22 | 2.96  | 3.45 | 0.29 |
| Q8CIM8_INT4_MOUSE | Ints4  | Integrator complex subu R.VYSVQHLDPQGAQELLEFTIR@.D        | 10.30 | 2.97  | 3.47 | 0.29 |
| Q8CIM8_INT4_MOUSE | Ints4  | Integrator complex subu K.ALQIVTAR@.T                     | 14.90 | 4.14  | 3.60 | 0.28 |
| Q8CIM8_INT4_MOUSE | Ints4  | Integrator complex subu K.ASATHEPAGESDNPLR.F              | 18.33 | 4.27  | 4.29 | 0.23 |
| Q8CIM8_INT4_MOUSE | Ints4  | Integrator complex subu K.ELYSSGEFFSGR@.K                 | 9.04  | 2.00  | 4.51 | 0.22 |
| Q8CIM8_INT4_MOUSE | Ints4  | Integrator complex subu K.FLOQVDFQR@.C                    | 23.64 | 6.72  | 3.52 | 0.28 |
| Q8CIM8_INT4_MOUSE | Ints4  | Integrator complex subu K.IASLGLLSK#.T                    | 40.24 | 7.76  | 5.18 | 0.19 |
| Q8CIM8_INT4_MOUSE | Ints4  | Integrator complex subu R.K#LVSSTVSPNITHEDPQQQLQSLER@.V   | 3.93  | 1.94  | 2.02 | 0.49 |
| Q8CIM8_INT4_MOUSE | Ints4  | Integrator complex subu R.K#PVEAESVEGVVR@.I               | 22.82 | 4.37  | 5.22 | 0.19 |
| Q8CIM8_INT4_MOUSE | Ints4  | Integrator complex subu K.LLSDDYEQVR@.S                   | 8.78  | 5.42  | 1.62 | 0.62 |
| Q8CIM8_INT4_MOUSE | Ints4  | Integrator complex subu K.VVQOQEQEATK#.K                  | 19.91 | 6.32  | 3.15 | 0.32 |
| Q8CIM8_INT4_MOUSE | Ints4  | Integrator complex subu R.VYSVQHLDPQGAQELLEFTIR@.D        | 17.99 | 7.91  | 2.28 | 0.44 |
| Q8CIM8_INT4_MOUSE | Ints4  | Integrator complex subu R.FQAPPSTLLR@.Q                   | 12.30 | 5.48  | 2.24 | 0.45 |
| Q8CIM8_INT4_MOUSE | Ints4  | Integrator complex subu K.AFLTGVDPILGHQLSAR@.E            | 45.38 | 11.77 | 3.85 | 0.26 |
| Q8CIM8_INT4_MOUSE | Ints4  | Integrator complex subu K.FIQSER@.G                       | 17.70 | 4.23  | 4.18 | 0.24 |
| Q8CIM8_INT4_MOUSE | Ints4  | Integrator complex subu R.LSQTPSAGLK#.A                   | 16.25 | 3.29  | 4.94 | 0.20 |
| Q8CIM8_INT4_MOUSE | Ints4  | Integrator complex subu K.GAVETFM*#.L                     | 18.18 | 4.18  | 4.35 | 0.23 |
| Q8CIM8_INT4_MOUSE | Ints4  | Integrator complex subu K.GQDEQVHSPVIAQM*GNYQEYLK#.Q      | 9.67  | 3.82  | 2.53 | 0.40 |
| Q8CIM8_INT4_MOUSE | Ints4  | Integrator complex subu R.K#HGFQVQLQGISSEDPVHR@.L         | 11.81 | 4.55  | 2.59 | 0.39 |
| Q8CIM8_INT4_MOUSE | Ints4  | Integrator complex subu R.LFALVLR@.L                      | 22.02 | 6.98  | 3.15 | 0.32 |
| Q8CIM8_INT4_MOUSE | Ints4  | Integrator complex subu R.LIFLQNVK#.E                     | 30.80 | 8.27  | 3.72 | 0.27 |
| Q8CIM8_INT4_MOUSE | Ints4  | Integrator complex subu K.LPFDK#VELEPSLTOFILR@.K          | 9.28  | 3.31  | 2.80 | 0.36 |
| Q8CIM8_INT4_MOUSE | Ints4  | Integrator complex subu R.LVTGIDNYGQGR@.N                 | 22.11 | 9.26  | 2.39 | 0.42 |
| Q8CIM8_INT4_MOUSE | Ints4  | Integrator complex subu K.VQSGVINFEK#.T                   | 17.95 | 4.34  | 4.13 | 0.24 |
| Q8CIM8_INT4_MOUSE | Ints4  | Integrator complex subu K.VVQETGK#.V                      | 16.21 | 9.40  | 1.72 | 0.58 |
| Q8CIM8_INT4_MOUSE | Ints4  | Integrator complex subu R.YM*LVTEEPPYAIK#.A               | 7.04  | 2.12  | 3.31 | 0.30 |
| Q8CIM8_INT4_MOUSE | Ints4  | Integrator complex subu K.YNELGHPFGYLK#.A                 | 17.12 | 6.73  | 2.54 | 0.39 |
| Q8CIM8_INT4_MOUSE | Ints4  | Integrator complex subu R.ANQNHINS#.L                     | 9.38  | 9.38  | 1.00 | 1.00 |
| Q8CIM8_INT4_MOUSE | Ints4  | Integrator complex subu R.ELDPDQPR@.R                     | 15.03 | 4.59  | 3.28 | 0.31 |
| Q8CIM8_INT4_MOUSE | Ints4  | Integrator complex subu K.GAVETFM*#.L                     | 12.49 | 3.00  | 4.16 | 0.24 |
| Q8CIM8_INT4_MOUSE | Ints4  | Integrator complex subu R.LFALVLR@.L                      | 15.69 | 2.84  | 5.52 | 0.18 |
| Q8CIM8_INT4_MOUSE | Ints4  | Integrator complex subu K.NLQAEGLTTLGQSLR@.T              | 14.44 | 3.56  | 4.06 | 0.25 |
| Q8CIM8_INT4_MOUSE | Ints4  | Integrator complex subu R.TAFDILLNLR@.L                   | 23.97 | 6.64  | 3.61 | 0.28 |
| Q8CIM8_INT4_MOUSE | Ints4  | Integrator complex subu K.VVQETGK#.V                      | 12.77 | 9.26  | 1.38 | 0.73 |
| Q8CIM8_INT4_MOUSE | Ints4  | Integrator complex subu R.YM*LVTEEPPYAIK#.A               | 8.86  | 1.97  | 4.50 | 0.22 |
| Q8CIM8_INT4_MOUSE | Ints4  | Integrator complex subu K.I.LNVDEFVK#.R                   | 17.25 | 6.08  | 2.84 | 0.35 |
| Q8CIM8_INT4_MOUSE | Ints4  | Integrator complex subu R.QLQLQVTSYPTSK#.M                | 7.97  | 2.81  | 2.83 | 0.35 |
| Q8CIM8_INT4_MOUSE | Ints4  | Integrator complex subu K.SLEDPYSQIR@.L                   | 14.17 | 5.31  | 2.67 | 0.37 |
| Q8CIM8_INT4_MOUSE | Ints4  | Integrator complex subu R.SPAEPIAVQNNQQLALK#.V            | 6.15  | 2.03  | 3.03 | 0.33 |
| Q8CIM8_INT4_MOUSE | Ints4  | Integrator complex subu R.VLEEVESLNR@.K                   | 12.10 | 5.10  | 2.37 | 0.42 |
| Q8CIM8_INT4_MOUSE | Ints4  | Integrator complex subu K.YPFPILINSFLK#.I                 | 10.44 | 5.93  | 1.76 | 0.57 |
| Q8CIM8_INT4_MOUSE | Ints4  | Integrator complex subu R.YR@DLVQASFDADSATLR@.N           | 9.76  | 2.88  | 3.38 | 0.30 |
| Q8CIM8_INT4_MOUSE | Ints4  | Integrator complex subu R.DLVQASFDADSATLR@.N              | 9.22  | 2.25  | 4.09 | 0.24 |
| Q8CIM8_INT4_MOUSE | Ints4  | Integrator complex subu K.I.LNVDEFVK#.R                   | 17.69 | 6.53  | 2.71 | 0.37 |
| Q8CIM8_INT4_MOUSE | Ints4  | Integrator complex subu K.IPIDSM*TNEM*EQR@.V              | 9.01  | 3.11  | 2.89 | 0.35 |
| Q8CIM8_INT4_MOUSE | Ints4  | Integrator complex subu R.LAVQDLK#.L                      | 16.43 | 2.84  | 5.80 | 0.17 |
| Q8CIM8_INT4_MOUSE | Ints4  | Integrator complex subu R.QLQLQVTSYPTSK#.M                | 11.27 | 2.99  | 3.77 | 0.26 |
| Q8CIM8_INT4_MOUSE | Ints4  | Integrator complex subu K.SLEDPYSQIR@.L                   | 21.23 | 8.47  | 2.51 | 0.40 |
| Q8CIM8_INT4_MOUSE | Ints4  | Integrator complex subu R.SPAEPIAVQNNQQLALK#.V            | 9.29  | 2.92  | 3.18 | 0.31 |
| Q8CIM8_INT4_MOUSE | Ints4  | Integrator complex subu R.SVVDLTLQLHSSQDAAR@.I            | 41.39 | 10.71 | 3.86 | 0.26 |
| Q8CIM8_INT4_MOUSE | Ints4  | Integrator complex subu R.VLEEVESLNR@.K                   | 12.88 | 3.47  | 3.71 | 0.27 |
| Q8CIM8_INT4_MOUSE | Ints4  | Integrator complex subu K.YPFPILINSFLK#.I                 | 10.41 | 3.97  | 2.62 | 0.38 |
| Q8CIM8_INT4_MOUSE | Ints4  | Integrator complex subu R.YR@DLVQASFDADSATLR@.N           | 16.21 | 3.41  | 4.76 | 0.21 |
| Q80V86_INT8_MOUSE | Ints8  | Integrator complex subu R.SELLSFIK#.K                     | 13.64 | 6.66  | 2.05 | 0.49 |
| Q80V86_INT8_MOUSE | Ints8  | Integrator complex subu R.TIVQSSFPVK#.Q                   | 15.98 | 6.45  | 2.48 | 0.40 |
| Q8K114_INT9_MOUSE | Ints9  | Integrator complex subu K.VLK#PLLSGSPVEQFVQTLK#.H         | 7.36  | 3.67  | 2.01 | 0.50 |
| Q8K114_INT9_MOUSE | Ints9  | Integrator complex subu R.LNFIQVSK#.L                     | 9.81  | 4.03  | 2.43 | 0.41 |
| Q8K114_INT9_MOUSE | Ints9  | Integrator complex subu K.VLK#PLLSGSPVEQFVQTLK#.H         | 11.25 | 3.91  | 2.88 | 0.35 |
| Q8VI75_IP04_MOUSE | Ipo4   | Importin-4 OS=Mus mus: K.TEPQVLTALR@.A                    | 7.35  | 3.64  | 2.02 | 0.49 |
| Q8BK5_IP05_MOUSE  | Ipo5   | Importin-5 OS=Mus mus: K.EGFVEYEQVVK#.L                   | 9.25  | 1.27  | 7.29 | 0.14 |
| Q8BK5_IP05_MOUSE  | Ipo5   | Importin-5 OS=Mus mus: R.LLSSAFDEVYPALPSDVQTAIK#.S        | 8.55  | 4.86  | 1.76 | 0.57 |
| Q8BK5_IP05_MOUSE  | Ipo5   | Importin-5 OS=Mus mus: K.SLLIPLYDLNVLK#.H                 | 13.68 | 5.62  | 2.43 | 0.41 |
| Q8BK5_IP05_MOUSE  | Ipo5   | Importin-5 OS=Mus mus: K.SLVEIADTVPK#.Y                   | 18.56 | 6.06  | 3.06 | 0.33 |
| Q8BK5_IP05_MOUSE  | Ipo5   | Importin-5 OS=Mus mus: K.VSDILHSIFSYK#.E                  | 13.40 | 5.84  | 2.29 | 0.44 |
| Q91Y6_IP09_MOUSE  | Ipo9   | Importin-9 OS=Mus mus: K.EALVDLTLGILSPVQEV@.A             | 8.44  | 50.13 | 0.17 | 5.94 |
| Q91Y6_IP09_MOUSE  | Ipo9   | Importin-9 OS=Mus mus: K.LIINLSNMVM*EANAAR@.Q             | 7.37  | 2.77  | 2.66 | 0.38 |
| Q91Y6_IP09_MOUSE  | Ipo9   | Importin-9 OS=Mus mus: K.YSNDPVVASLADQIFK#.E              | 4.15  | 2.34  | 1.77 | 0.56 |
| Q9JKF1_QGA1_MOUSE | Iqgap1 | Ras GTPase-activating-lik K.GVLLIEIDLQANNQPK#.N           | 10.07 | 10.60 | 0.95 | 1.05 |
| Q9JKF1_QGA1_MOUSE | Iqgap1 | Ras GTPase-activating-lik K.NVIEIGTEEVDQFEVK#.A           | 13.80 | 10.04 | 1.37 | 0.73 |
| Q9JKF1_QGA1_MOUSE | Iqgap1 | Ras GTPase-activating-lik K.ALQSLALGK#.Y                  | 15.89 | 13.61 | 1.17 | 0.86 |
| Q9JKF1_QGA1_MOUSE | Iqgap1 | Ras GTPase-activating-lik K.ATFYGEQVYK#.S                 | 23.54 | 9.83  | 2.39 | 0.42 |
| Q9JKF1_QGA1_MOUSE | Iqgap1 | Ras GTPase-activating-lik R.DHINDI#K.I                    | 39.30 | 17.56 | 2.24 | 0.45 |
| Q9JKF1_QGA1_MOUSE | Iqgap1 | Ras GTPase-activating-lik K.DSLHEK#FPDAGEDELLK#.I         | 14.41 | 8.39  | 1.72 | 0.58 |
| Q9JKF1_QGA1_MOUSE | Iqgap1 | Ras GTPase-activating-lik R.EEIQSSISGVTAA#YNR@.E          | 6.36  | 4.59  | 1.39 | 0.72 |
| Q9JKF1_QGA1_MOUSE | Iqgap1 | Ras GTPase-activating-lik R.EEYLLLR@.L                    | 22.56 | 5.56  | 4.06 | 0.25 |
| Q9JKF1_QGA1_MOUSE | Iqgap1 | Ras GTPase-activating-lik R.EK#LEAYQHLFYLLQNTPTYLAK#.L    | 7.61  | 3.23  | 2.35 | 0.42 |
| Q9JKF1_QGA1_MOUSE | Iqgap1 | Ras GTPase-activating-lik R.EQLWLANGLTK.L                 | 7.51  | 6.51  | 1.15 | 0.87 |
| Q9JKF1_QGA1_MOUSE | Iqgap1 | Ras GTPase-activating-lik R.FALGISAINAVDSDGVDGR@.T        | 9.34  | 7.94  | 1.18 | 0.85 |
| Q9JKF1_QGA1_MOUSE | Iqgap1 | Ras GTPase-activating-lik K.FDVPGDENAE#DAR@.T             | 7.76  | 3.76  | 2.07 | 0.48 |





|                     |          |                                                                              |        |        |       |      |
|---------------------|----------|------------------------------------------------------------------------------|--------|--------|-------|------|
| Q9Z1M2_Q9Z1M2_MOUSE | Irgm2    | Interferon-g induced GTP K.SIDEDNLHTEFGISDPGNAIER@.K                         | 4.44   | 3.67   | 1.21  | 0.83 |
| Q64339_ISR15_MOUSE  | Isg15    | Ubiquitin-like protein IS1 R.GHSNIYEVFLTQVTDLK#.K                            | 45.10  | 25.78  | 1.75  | 0.57 |
| Q64339_ISR15_MOUSE  | Isg15    | Ubiquitin-like protein IS1 K.IGVPAFQQR@.L                                    | 52.72  | 48.21  | 1.09  | 0.91 |
| Q64339_ISR15_MOUSE  | Isg15    | Ubiquitin-like protein IS1 R.GHSNIYEVFLTQVTDLK#.K                            | 10.64  | 9.33   | 1.14  | 0.88 |
| Q64339_ISR15_MOUSE  | Isg15    | Ubiquitin-like protein IS1 K.IGVPAFQQR@.L                                    | 34.58  | 39.12  | 0.88  | 1.13 |
| Q64339_ISR15_MOUSE  | Isg15    | Ubiquitin-like protein IS1 R.GHSNIYEVFLTQVTDLK#.K                            | 139.08 | 83.78  | 1.66  | 0.60 |
| Q64339_ISR15_MOUSE  | Isg15    | Ubiquitin-like protein IS1 R.GHSNIYEVFLTQVTDLK#.K                            | 56.27  | 37.53  | 1.50  | 0.67 |
| Q64339_ISR15_MOUSE  | Isg15    | Ubiquitin-like protein IS1 K.IGVPAFQQR@.L                                    | 129.07 | 86.27  | 1.50  | 0.67 |
| Q64339_ISR15_MOUSE  | Isg15    | Ubiquitin-like protein IS1 K.M*LGNDLFSVTSNSM*TVSELK#.Q                       | 78.73  | 59.20  | 1.33  | 0.75 |
| Q64339_ISR15_MOUSE  | Isg15    | Ubiquitin-like protein IS1 K.M*LGNDLFSVTSNSM*TVSELK#.Q                       | 16.27  | 13.75  | 1.18  | 0.84 |
| Q64339_ISR15_MOUSE  | Isg15    | Ubiquitin-like protein IS1 R.GHSNIYEVFLTQVTDLK#.K                            | 158.78 | 92.16  | 1.72  | 0.58 |
| Q64339_ISR15_MOUSE  | Isg15    | Ubiquitin-like protein IS1 R.GHSNIYEVFLTQVTDLK#.K                            | 66.80  | 38.86  | 1.72  | 0.58 |
| Q64339_ISR15_MOUSE  | Isg15    | Ubiquitin-like protein IS1 K.IGVPAFQQR@.L                                    | 223.43 | 144.86 | 1.54  | 0.65 |
| Q64339_ISR15_MOUSE  | Isg15    | Ubiquitin-like protein IS1 K.M*LGNDLFSVTSNSM*TVSELK#.K                       | 4.77   | 3.43   | 1.39  | 0.72 |
| Q64339_ISR15_MOUSE  | Isg15    | Ubiquitin-like protein IS1 K.M*LGNDLFSVTSNSM*TVSELK#.K                       | 13.04  | 7.51   | 1.74  | 0.58 |
| Q9J1L6_ISR20_MOUSE  | Isg20    | Interferon-stimulated ge R.LEILQLL.K.G                                       | 29.72  | 31.59  | 0.94  | 1.06 |
| Q9J1L6_ISR20_MOUSE  | Isg20    | Interferon-stimulated ge K.YIRPEGETIDYR.T                                    | 9.11   | 14.49  | 0.63  | 1.59 |
| Q9J1L6_ISR20_MOUSE  | Isg20    | Interferon-stimulated ge K.YTYDITSTR.L                                       | 10.62  | 14.42  | 0.74  | 1.36 |
| Q3U1G5_I20L2_MOUSE  | Isg20I2  | Interferon-stimulated 20 R.DIQVGNTHSSVEDAQATM*ELYK#.L                        | 7.82   | 3.87   | 2.02  | 0.50 |
| Q3U1G5_I20L2_MOUSE  | Isg20I2  | Interferon-stimulated 20 K.IATENSTQAQSS#.D                                   | 6.58   | 6.26   | 1.05  | 0.95 |
| Q3U1G5_I20L2_MOUSE  | Isg20I2  | Interferon-stimulated 20 K.IDLLGEQSFALPK#.T                                  | 33.18  | 14.26  | 2.33  | 0.43 |
| Q9CX00_ISR1_MOUSE   | Ist1     | IST1 homolog OS=Mus m K.ELDSGLAESVTLIWAAPR@.L                                | 12.01  | 3.48   | 3.45  | 0.29 |
| Q9CX00_ISR1_MOUSE   | Ist1     | IST1 homolog OS=Mus m R.FGLIQSM*#.E                                          | 25.49  | 13.00  | 1.96  | 0.51 |
| Q9CX00_ISR1_MOUSE   | Ist1     | IST1 homolog OS=Mus m K.LSVEAPPK#.I                                          | 16.65  | 8.39   | 1.98  | 0.50 |
| Q9CX00_ISR1_MOUSE   | Ist1     | IST1 homolog OS=Mus m R.TNIGQTVNDR@.L                                        | 109.25 | 22.13  | 4.94  | 0.20 |
| Q69ZQ2_ISR1_MOUSE   | Isy1     | Pre-mRNA-splicing factor K.FIAHVPPVPSQEQEELVLR@.R                            | 43.09  | 26.98  | 1.60  | 0.63 |
| Q69ZQ2_ISR1_MOUSE   | Isy1     | Pre-mRNA-splicing factor R.IKELGGPDYK#.V                                     | 6.97   | 4.82   | 1.45  | 0.69 |
| Q69ZQ2_ISR1_MOUSE   | Isy1     | Pre-mRNA-splicing factor R.IR@DLNDEINK#.L                                    | 47.55  | 26.94  | 1.76  | 0.57 |
| Q69ZQ2_ISR1_MOUSE   | Isy1     | Pre-mRNA-splicing factor K.YASETLQAQSEEA#.R                                  | 8.06   | 4.90   | 1.64  | 0.61 |
| Q62470_ITA3_MOUSE   | Itg3     | Integrin alpha-3 OS=Mus R.AAFSLQEQSLPSR@.L                                   | 20.95  | 6.07   | 3.45  | 0.29 |
| Q62470_ITA3_MOUSE   | Itg3     | Integrin alpha-3 OS=Mus R.#EEVGGVYVFM*NQAGASFDPDQSLLLHGPR@.S                 | 4.93   | 1.62   | 3.05  | 0.33 |
| Q62470_ITA3_MOUSE   | Itg3     | Integrin alpha-3 OS=Mus K.LGPGLATFGVSLSGK#.M                                 | 16.48  | 4.79   | 3.44  | 0.29 |
| Q62470_ITA3_MOUSE   | Itg3     | Integrin alpha-3 OS=Mus R.LQSFVGGVTM*GAAAM*#.T                               | 7.47   | 2.26   | 3.30  | 0.30 |
| Q62470_ITA3_MOUSE   | Itg3     | Integrin alpha-3 OS=Mus R.VDGVWATLFLR@.T                                     | 12.92  | 3.21   | 4.04  | 0.25 |
| Q62470_ITA3_MOUSE   | Itg3     | Integrin alpha-3 OS=Mus R.YLLLAGAPR@.D                                       | 21.65  | 6.90   | 3.14  | 0.32 |
| P11688_ITA5_MOUSE   | Itg5     | Integrin alpha-5 OS=Mus R.DGVSVLVVGAPK#.A                                    | 10.63  | 6.46   | 1.65  | 0.61 |
| P11688_ITA5_MOUSE   | Itg5     | Integrin alpha-5 OS=Mus K.SLQWFGATVR@.A                                      | 11.45  | 6.52   | 1.75  | 0.57 |
| P11688_ITA5_MOUSE   | Itg5     | Integrin alpha-5 OS=Mus R.TPDDFFGALR@.G                                      | 16.72  | 11.54  | 1.45  | 0.69 |
| P11688_ITA5_MOUSE   | Itg5     | Integrin alpha-5 OS=Mus R.VTAPLEAYEYGLVR@.H                                  | 10.78  | 6.04   | 1.79  | 0.56 |
| P11688_ITA5_MOUSE   | Itg5     | Integrin alpha-5 OS=Mus R.VYIYLQR@PAGIDPTPTLLTGQDEF@.F                       | 3.27   | 3.03   | 1.08  | 0.93 |
| P43406_ITAV_MOUSE   | Itgav    | Integrin alpha-V OS=Mus K.IQSSNSFDNPSVPVYK#.V                                | 8.37   | 4.68   | 1.79  | 0.56 |
| P43406_ITAV_MOUSE   | Itgav    | Integrin alpha-V OS=Mus K.IYIGDDNPLTLTVK#.A                                  | 12.71  | 8.73   | 1.45  | 0.69 |
| P43406_ITAV_MOUSE   | Itgav    | Integrin alpha-V OS=Mus K.LQEVGGVSLVLR@.A                                    | 5.37   | 2.54   | 2.12  | 0.47 |
| P09055_ITB1_MOUSE   | Itgbl1   | Integrin beta-1 OS=Mus n R.GEFFNELVQQQR@.I                                   | 12.81  | 6.61   | 1.94  | 0.52 |
| P09055_ITB1_MOUSE   | Itgbl1   | Integrin beta-1 OS=Mus n R.IGFGSFVKE#.T                                      | 68.84  | 30.43  | 2.10  | 0.48 |
| P09055_ITB1_MOUSE   | Itgbl1   | Integrin beta-1 OS=Mus n K.LR@PEDITQIQPQQLL#.L                               | 57.44  | 30.97  | 1.85  | 0.54 |
| P09055_ITB1_MOUSE   | Itgbl1   | Integrin beta-1 OS=Mus n K.LSENNIQTIFAVTEEFQVYK#.E                           | 55.10  | 31.97  | 1.72  | 0.58 |
| P09055_ITB1_MOUSE   | Itgbl1   | Integrin beta-1 OS=Mus n K.NVLSLDR@.G                                        | 17.35  | 11.82  | 1.47  | 0.68 |
| P09055_ITB1_MOUSE   | Itgbl1   | Integrin beta-1 OS=Mus n K.SAVTIVNPK#.Y                                      | 65.30  | 31.94  | 2.04  | 0.49 |
| P09055_ITB1_MOUSE   | Itgbl1   | Integrin beta-1 OS=Mus n K.SLGTDLN*#NEM*#.R                                  | 13.82  | 6.70   | 2.06  | 0.48 |
| P09055_ITB1_MOUSE   | Itgbl1   | Integrin beta-1 OS=Mus n K.TVM*PYISTPAK#.L                                   | 12.47  | 15.80  | 0.79  | 1.27 |
| P09055_ITB1_MOUSE   | Itgbl1   | Integrin beta-1 OS=Mus n K.WDGTGENPK#.S                                      | 12.86  | 8.66   | 1.48  | 0.67 |
| P09055_ITB1_MOUSE   | Itgbl1   | Integrin beta-1 OS=Mus n R.IGFGSFVKE#.T                                      | 18.63  | 12.75  | 1.46  | 0.68 |
| P09055_ITB1_MOUSE   | Itgbl1   | Integrin beta-1 OS=Mus n K.LR@PEDITQIQPQQLL#.L                               | 18.33  | 9.73   | 1.88  | 0.53 |
| P09055_ITB1_MOUSE   | Itgbl1   | Integrin beta-1 OS=Mus n K.LSENNIQTIFAVTEEFQVYK#.E                           | 14.19  | 6.79   | 2.09  | 0.48 |
| P09055_ITB1_MOUSE   | Itgbl1   | Integrin beta-1 OS=Mus n K.NVLSLDR@GEFFNELVQQQR.I                            | 18.35  | 10.17  | 1.80  | 0.55 |
| Q9CQ82_CENPR_MOUSE  | Itgbl3bp | Centromere protein R OS K.NLSSIQALEGNNR@.Q                                   | 8.13   | 4.66   | 1.75  | 0.57 |
| Q9Z0R4_ITSN1_MOUSE  | Itns1    | Intersectin-1 OS=Mus mu R.IAEITHLQQLQEQSQM*LGR@.L                            | 6.80   | 2.85   | 2.39  | 0.42 |
| Q9Z0R4_ITSN1_MOUSE  | Itns1    | Intersectin-1 OS=Mus mu K.IPENEPVTPAKRHPVDTLSAPAPK#.L                        | 5.43   | 2.99   | 1.82  | 0.55 |
| Q9Z0R4_ITSN1_MOUSE  | Itns1    | Intersectin-1 OS=Mus mu R.LPEEPPSEDEEQPEK#.K                                 | 5.39   | 1.49   | 3.62  | 0.28 |
| Q9Z0R4_ITSN1_MOUSE  | Itns1    | Intersectin-1 OS=Mus mu K.LQEIDVFNQLK#.E                                     | 9.43   | 20.54  | 0.46  | 2.18 |
| Q9Z0R4_ITSN1_MOUSE  | Itns1    | Intersectin-1 OS=Mus mu R.SGSGM*SVSSSSVDQR@.L                                | 7.74   | 1.66   | 4.65  | 0.21 |
| P05627_JUN_MOUSE    | Jun      | Transcription factor AP-1 K.NVTEDEQEGFAEFGVLR@.A                             | 9.89   | 5.21   | 1.90  | 0.53 |
| P09450_JUNB_MOUSE   | Junb     | Transcription factor jun- K.AENAGLSAAGLLR@.E                                 | 7.54   | 8.37   | 0.90  | 1.11 |
| P09450_JUNB_MOUSE   | Junb     | Transcription factor jun- R.GASAFGEHPDTPPEAR@.S                              | 22.82  | 21.75  | 1.05  | 0.95 |
| P15066_JUND_MOUSE   | Jund     | Transcription factor jun- K.DALTSLSAEQAGALGK#PGSATAPALR@PDGAPDGLLSDPLGLLK#.L | 3.02   | 3.36   | 0.90  | 1.11 |
| P15066_JUND_MOUSE   | Jund     | Transcription factor jun- K.SQNTLASTASLLR.E                                  | 8.40   | 10.71  | 0.79  | 1.27 |
| P15066_JUND_MOUSE   | Jund     | Transcription factor jun- K.VAASEEQFAEGFVK#.A                                | 10.60  | 10.69  | 0.99  | 1.01 |
| Q8BX02_KANK2_MOUSE  | Kank2    | KN motif and ankyrin rep K.ALTTSGGPENTLVFR@.S                                | 7.59   | 4.79   | 1.58  | 0.63 |
| Q8BX02_KANK2_MOUSE  | Kank2    | KN motif and ankyrin rep K.ALTTSGGPENTLVFR@.S                                | 33.54  | 14.24  | 2.36  | 0.42 |
| Q8BX02_KANK2_MOUSE  | Kank2    | KN motif and ankyrin rep R.AQSLPEYGTGLK#.A                                   | 23.49  | 9.34   | 2.52  | 0.40 |
| Q8BX02_KANK2_MOUSE  | Kank2    | KN motif and ankyrin rep R.DLGIPLDGEAALVAK#.V                                | 9.20   | 4.18   | 2.20  | 0.45 |
| Q8BX02_KANK2_MOUSE  | Kank2    | KN motif and ankyrin rep R.EVEVAASAAAGALQAR.A                                | 22.02  | 6.86   | 3.21  | 0.31 |
| Q8BX02_KANK2_MOUSE  | Kank2    | KN motif and ankyrin rep R.LDLFLK#.Y                                         | 23.80  | 9.66   | 2.46  | 0.41 |
| Q8BX02_KANK2_MOUSE  | Kank2    | KN motif and ankyrin rep K.R@#KHEPADPVEVNR@.N                                | 33.03  | 22.46  | 1.47  | 0.68 |
| Q8BX02_KANK2_MOUSE  | Kank2    | KN motif and ankyrin rep R.RLEDQAAAPSSGLSGLTPSAAGTSSLAGVGLPPTPR.S            | 3.25   | 2.42   | 1.35  | 0.74 |
| Q8BX02_KANK2_MOUSE  | Kank2    | KN motif and ankyrin rep K.VAVLETQLK#.K                                      | 27.95  | 12.50  | 2.24  | 0.45 |
| Q8BX02_KANK2_MOUSE  | Kank2    | KN motif and ankyrin rep K.VAYTVLQEWLR@.L                                    | 18.85  | 9.47   | 1.99  | 0.50 |
| Q8BX02_KANK2_MOUSE  | Kank2    | KN motif and ankyrin rep R.VPAPEVAVSGPDPEEIR@.M                              | 3.46   | 3.66   | 1.48  | 0.68 |
| Q8BX02_KANK2_MOUSE  | Kank2    | KN motif and ankyrin rep K.YLENPNALTEER@.E                                   | 21.04  | 8.04   | 2.62  | 0.38 |
| Q8BX02_KANK2_MOUSE  | Kank2    | KN motif and ankyrin rep K.ALTTSGGPENTLVFR@.S                                | 19.54  | 9.35   | 2.09  | 0.48 |
| Q8BX02_KANK2_MOUSE  | Kank2    | KN motif and ankyrin rep R.DLGIPLDGEAALVAK#.V                                | 6.01   | 3.22   | 1.86  | 0.54 |
| Q8BX02_KANK2_MOUSE  | Kank2    | KN motif and ankyrin rep R.EVEVAASAAAGALQAR@.A                               | 11.20  | 2.97   | 3.78  | 0.26 |
| Q8BX02_KANK2_MOUSE  | Kank2    | KN motif and ankyrin rep R.LDLFLK#.Y                                         | 16.86  | 10.02  | 1.68  | 0.59 |
| Q8BX02_KANK2_MOUSE  | Kank2    | KN motif and ankyrin rep K.VAVLETQLK#.K                                      | 13.51  | 6.36   | 2.13  | 0.47 |
| Q8BX02_KANK2_MOUSE  | Kank2    | KN motif and ankyrin rep K.VAYTVLQEWLR@.L                                    | 11.59  | 4.89   | 2.37  | 0.42 |
| Q8BQR4_KANL2_MOUSE  | Kansl2   | KAT8 regulatory NSL com K.TELGSQTPESSR@.S                                    | 8.58   | 3.34   | 2.57  | 0.39 |
| Q8BQR4_KANL2_MOUSE  | Kansl2   | KAT8 regulatory NSL com K.TELGSQTPESSR@.S                                    | 8.13   | 5.29   | 1.54  | 0.65 |
| A2RSY1_KANL3_MOUSE  | Kansl3   | KAT8 regulatory NSL com K.TGAAGAEALSLLK#.R                                   | 11.29  | 2.12   | 5.32  | 0.19 |
| A2RSY1_KANL3_MOUSE  | Kansl3   | KAT8 regulatory NSL com K.TGAAGAEALSLLK#.R                                   | 15.63  | 4.21   | 3.71  | 0.27 |
| Q99MN1_SYK_MOUSE    | Kars     | Lysine-tRNA ligase OS=M R.LIFDYLR@.G                                         | 18.07  | 6.04   | 2.99  | 0.33 |
| Q99MN1_SYK_MOUSE    | Kars     | Lysine-tRNA ligase OS=M R.YLDLNDVFR@.Q                                       | 109.93 | 5.01   | 21.96 | 0.05 |
| Q8CHK4_KAT5_MOUSE   | Kat5     | Histone acetyltransferase R.NQDNEDEWPLAEILSVK#.D                             | 4.58   | 2.38   | 1.93  | 0.52 |
| Q8CHK4_KAT5_MOUSE   | Kat5     | Histone acetyltransferase K.TGTEPKHPSLGLLSYR@.S                              | 13.73  | 6.25   | 2.20  | 0.46 |
| Q8BZ21_KAT6A_MOUSE  | Kat6a    | Histone acetyltransferase R.AFEGLAETGSGTLK#.S                                | 3.27   | 2.32   | 1.41  | 0.71 |
| Q8BZ21_KAT6A_MOUSE  | Kat6a    | Histone acetyltransferase R.R@YANPIGR@PK#.N                                  | 13.55  | 1.51   | 8.95  | 0.11 |
| Q5SVQ0_KAT7_MOUSE   | Kat7     | Histone acetyltransferase R.EPPLLENLITSEYDLDFR@.R                            | 5.37   | 3.79   | 1.41  | 0.71 |
| Q5SVQ0_KAT7_MOUSE   | Kat7     | Histone acetyltransferase R.LQGGQITEGNSNM*IK#.T                              | 29.07  | 17.09  | 1.70  | 0.59 |
| Q5SVQ0_KAT7_MOUSE   | Kat7     | Histone acetyltransferase K.VGSPER@PLSLDGLISYR@.S                            | 24.69  | 9.75   | 2.53  | 0.39 |
| Q5SVQ0_KAT7_MOUSE   | Kat7     | Histone acetyltransferase R.YELDTWVSHYPPYEAR@.L                              | 5.38   | 2.64   | 2.04  | 0.49 |
| Q5SVQ0_KAT7_MOUSE   | Kat7     | Histone acetyltransferase R.EPPLLENLITSEYDLDFR@.R                            | 8.11   | 3.24   | 2.50  | 0.40 |
| Q5SVQ0_KAT7_MOUSE   | Kat7     | Histone acetyltransferase R.LQGGQITEGNSNM*IK#.T                              | 30.56  | 12.11  | 2.52  | 0.40 |
| Q5SVQ0_KAT7_MOUSE   | Kat7     | Histone acetyltransferase R.LSQSQDSSVPR@.N                                   | 4.42   | 2.82   | 1.57  | 0.64 |

|                     |           |                                                                |        |        |      |      |
|---------------------|-----------|----------------------------------------------------------------|--------|--------|------|------|
| Q55VQ0_KAT7_MOUSE   | Kat7      | Histone acetyltransferase R.NLPSFGTEEPAYSTR@.R                 | 14.26  | 6.82   | 2.09 | 0.48 |
| Q55VQ0_KAT7_MOUSE   | Kat7      | Histone acetyltransferase R.SQQQTPVTPK#.K                      | 18.49  | 10.82  | 1.71 | 0.59 |
| Q55VQ0_KAT7_MOUSE   | Kat7      | Histone acetyltransferase K.VGSPER@PLSDGLISYR@.S               | 40.23  | 18.41  | 2.18 | 0.46 |
| Q55VQ0_KAT7_MOUSE   | Kat7      | Histone acetyltransferase R.YELDTWVHSPYEPYAR@.L                | 9.08   | 3.44   | 2.64 | 0.38 |
| Q55VQ0_KAT7_MOUSE   | Kat7      | Histone acetyltransferase R.LQGQITGSNM*IK#.T                   | 9.72   | 5.29   | 1.84 | 0.54 |
| Q55VQ0_KAT7_MOUSE   | Kat7      | Histone acetyltransferase R.NLPSFGTEEPAYSTR@.R                 | 5.26   | 2.65   | 1.99 | 0.50 |
| Q55VQ0_KAT7_MOUSE   | Kat7      | Histone acetyltransferase K.VGSPER@PLSDGLISYR@.S               | 16.99  | 12.64  | 1.34 | 0.74 |
| Q9WV86_KTNA1_MOUSE  | Katna1    | Katanin p60 ATPase-cont R.TTFNVSSTLTSK#.Y                      | 4.97   | 2.96   | 1.68 | 0.60 |
| Q9WV86_KTNA1_MOUSE  | Katna1    | Katanin p60 ATPase-cont R.WYDIADLVLEAK#.K                      | 5.88   | 3.09   | 1.90 | 0.53 |
| D3Z087_D3Z087_MOUSE | Katnal2   | Katanin p60 ATPase-cont R.VSGAQGP@M*FLER@.G                    | 5.24   | 2.67   | 1.96 | 0.51 |
| Q80UY2_KCMF1_MOUSE  | Kcmf1     | E3 ubiquitin-protein liga R.DLDESSGVR@.H                       | 17.30  | 8.44   | 2.05 | 0.49 |
| Q80UY2_KCMF1_MOUSE  | Kcmf1     | E3 ubiquitin-protein liga R.SAGGQLNSSGSPASQLQQLQM*QLQLER@.Q    | 6.15   | 3.36   | 1.83 | 0.55 |
| Q922M3_BACD3_MOUSE  | Kctd10    | BTB/POZ domain-contair R.EIEELLEAEK#.Y                         | 7.88   | 7.12   | 1.11 | 0.90 |
| Q922M3_BACD3_MOUSE  | Kctd10    | BTB/POZ domain-contair R.GPDNALLEATGGAAGR.S                    | 3.41   | 5.58   | 0.61 | 1.64 |
| Q922M3_BACD3_MOUSE  | Kctd10    | BTB/POZ domain-contair R.IYEETLNILLYEADQGR@GPDNALLEATGGAAGR@.S | 4.28   | 3.47   | 1.24 | 0.81 |
| Q922M3_BACD3_MOUSE  | Kctd10    | BTB/POZ domain-contair R.R@EIEELLEAEK#.Y                       | 15.87  | 9.83   | 1.61 | 0.62 |
| Q922M3_BACD3_MOUSE  | Kctd10    | BTB/POZ domain-contair K.YSYTNSDDNM*LK#.N                      | 11.05  | 7.32   | 1.51 | 0.66 |
| Q99JH8_ERD21_MOUSE  | Kdelr1    | ER lumen protein-retaini K.SQVLFAVVFAR@.Y                      | 7.43   | 3.11   | 2.39 | 0.42 |
| Q99JH8_ERD21_MOUSE  | Kdelr1    | ER lumen protein-retaini K.TGEAETITSHYFALGVYR@.T               | 58.15  | 22.08  | 2.63 | 0.38 |
| Q9CQM2_ERD22_MOUSE  | Kdelr2    | ER lumen protein-retaini R.ALYLVNWIWR@.F                       | 11.37  | 3.57   | 3.19 | 0.31 |
| Q9CQM2_ERD22_MOUSE  | Kdelr2    | ER lumen protein-retaini K.TGEAETITSHYFALGVYR@.A               | 5.82   | 4.09   | 1.42 | 0.70 |
| Q8R1L4_ERD23_MOUSE  | Kdelr3    | ER lumen protein-retaini R.LLYLANWIR@.R                        | 24.85  | 11.11  | 2.24 | 0.45 |
| Q6ZQ88_KDM1A_MOUSE  | Kdm1a     | Lysine-specific histone dr.DITAEFLVK#.S                        | 22.74  | 9.97   | 2.28 | 0.44 |
| Q6ZQ88_KDM1A_MOUSE  | Kdm1a     | Lysine-specific histone dr.K.GIFGSSAVPQPK#.E                   | 13.08  | 9.57   | 1.37 | 0.73 |
| Q6ZQ88_KDM1A_MOUSE  | Kdm1a     | Lysine-specific histone dr.R.HGLINFYIK#.R                      | 15.80  | 4.52   | 3.49 | 0.29 |
| Q6ZQ88_KDM1A_MOUSE  | Kdm1a     | Lysine-specific histone dr.K.HWDQDDDFEFTGSHLTVR@.N             | 13.69  | 7.37   | 1.86 | 0.54 |
| Q6ZQ88_KDM1A_MOUSE  | Kdm1a     | Lysine-specific histone dr.K.IQLTFEATLQQLLEAPYNSDVLVHR@.V      | 7.40   | 3.54   | 2.09 | 0.48 |
| Q6ZQ88_KDM1A_MOUSE  | Kdm1a     | Lysine-specific histone dr.R.QATPVGAQKPSM*.-                   | 10.16  | 10.16  | 1.00 | 1.00 |
| Q6ZQ88_KDM1A_MOUSE  | Kdm1a     | Lysine-specific histone dr.R.STSQTYFK#.C                       | 7.48   | 1.89   | 3.96 | 0.25 |
| Q6ZQ88_KDM1A_MOUSE  | Kdm1a     | Lysine-specific histone dr.K.VFLFR@.N                          | 19.55  | 10.34  | 1.89 | 0.53 |
| Q6ZQ88_KDM1A_MOUSE  | Kdm1a     | Lysine-specific histone dr.K.VIIIIGSVGLAAR@.Q                  | 37.36  | 15.58  | 2.40 | 0.42 |
| Q6ZQ88_KDM1A_MOUSE  | Kdm1a     | Lysine-specific histone dr.K.GIFGSSAVPQPK#.E                   | 6.77   | 3.28   | 2.06 | 0.48 |
| Q6ZQ88_KDM1A_MOUSE  | Kdm1a     | Lysine-specific histone dr.K.HWDQDDDFEFTGSHLTVR@.N             | 4.28   | 1.50   | 2.85 | 0.35 |
| Q6ZQ88_KDM1A_MOUSE  | Kdm1a     | Lysine-specific histone dr.K.QQPVAVQVPLPEWK#.T                 | 2.87   | 2.11   | 1.36 | 0.74 |
| Q6ZQ88_KDM1A_MOUSE  | Kdm1a     | Lysine-specific histone dr.K.VIIIIGSVGLAAR@.Q                  | 17.42  | 5.68   | 3.07 | 0.33 |
| B9EKS2_B9EKS2_MOUSE | Kdm3b     | Jumonji domain containi K.LGLGSVPVPELVDR@.E                    | 26.09  | 7.05   | 3.70 | 0.27 |
| B9EKS2_B9EKS2_MOUSE | Kdm3b     | Jumonji domain containi R.VPVAQWPALTFPLVDK#.L                  | 4.02   | 2.43   | 1.65 | 0.60 |
| B9EKS2_B9EKS2_MOUSE | Kdm3b     | Jumonji domain containi R.ISDTGLAGTGPEK#.Q                     | 9.97   | 33.36  | 0.30 | 3.35 |
| B9EKS2_B9EKS2_MOUSE | Kdm3b     | Jumonji domain containi R.SETEEM*GDEEVFVSLK#.C                 | 4.34   | 1.46   | 2.97 | 0.34 |
| Q3UX29_KDM5A_MOUSE  | Kdm5a     | Lysine-specific demethyl. R.AQEAM*TM*DETPDSSK#.L               | 2.34   | 1.65   | 1.41 | 0.71 |
| Q3UX29_KDM5A_MOUSE  | Kdm5a     | Lysine-specific demethyl. R.LDALPQVSVQVAAR@.A                  | 6.02   | 7.55   | 0.80 | 1.25 |
| Q3UX29_KDM5A_MOUSE  | Kdm5a     | Lysine-specific demethyl. K.NIPAFPLPNVLSLK#.E                  | 13.50  | 7.47   | 1.81 | 0.55 |
| Q3UX29_KDM5A_MOUSE  | Kdm5a     | Lysine-specific demethyl. R.QALATDELSSALAK#.L                  | 6.51   | 6.27   | 1.04 | 0.96 |
| Q3UX29_KDM5A_MOUSE  | Kdm5a     | Lysine-specific demethyl. R.SLEPVLLESPGAK#.A                   | 6.61   | 5.22   | 1.27 | 0.79 |
| Q9Z2X8_KEAP1_MOUSE  | Keap1     | Kelch-like ECH-associatec R.LLYAVGGFDGTNR@.L                   | 8.82   | 2.51   | 3.52 | 0.28 |
| Q60749_KHDR1_MOUSE  | Khdrbs1   | KH domain-containing, F.K.FNFVGGK#.I                           | 84.69  | 34.86  | 2.43 | 0.41 |
| Q60749_KHDR1_MOUSE  | Khdrbs1   | KH domain-containing, F.K.GESKKDDEENYLDLFSHK.N                 | 53.75  | 27.11  | 1.98 | 0.50 |
| Q60749_KHDR1_MOUSE  | Khdrbs1   | KH domain-containing, F.K.IJLPGQNTIK#.R                        | 112.21 | 52.31  | 2.15 | 0.47 |
| Q60749_KHDR1_MOUSE  | Khdrbs1   | KH domain-containing, F.R.DKHA#KEELER@.K                       | 9.97   | 6.57   | 1.52 | 0.66 |
| Q60749_KHDR1_MOUSE  | Khdrbs1   | KH domain-containing, F.K.DPSGAPVSVR@.L                        | 46.83  | 26.24  | 1.78 | 0.56 |
| Q60749_KHDR1_MOUSE  | Khdrbs1   | KH domain-containing, F.K.DSLDPSFTHAMQLLSVEIEK#.I              | 68.46  | 31.23  | 2.19 | 0.46 |
| Q60749_KHDR1_MOUSE  | Khdrbs1   | KH domain-containing, F.K.FNFVGGK#.I                           | 369.86 | 132.56 | 2.79 | 0.36 |
| Q60749_KHDR1_MOUSE  | Khdrbs1   | KH domain-containing, F.K.GESKKDDEENYLDLFSHK.N                 | 289.49 | 107.09 | 2.70 | 0.37 |
| Q60749_KHDR1_MOUSE  | Khdrbs1   | KH domain-containing, F.K.IJLPGQNTIK#.R                        | 873.73 | 373.05 | 2.34 | 0.43 |
| Q60749_KHDR1_MOUSE  | Khdrbs1   | KH domain-containing, F.K.IJLPGQNTIK#.L                        | 46.04  | 17.21  | 2.68 | 0.37 |
| Q60749_KHDR1_MOUSE  | Khdrbs1   | KH domain-containing, F.K.KHDDDEENYLDLFSHK#.N                  | 385.92 | 149.27 | 2.59 | 0.39 |
| Q60749_KHDR1_MOUSE  | Khdrbs1   | KH domain-containing, F.K.R@LQETGAK#.I                         | 59.84  | 25.04  | 2.39 | 0.42 |
| Q60749_KHDR1_MOUSE  | Khdrbs1   | KH domain-containing, F.K.YLPELM*AEKDSLDPSTHAM*QLLSVEIEK#.I    | 19.82  | 6.23   | 3.18 | 0.31 |
| Q60749_KHDR1_MOUSE  | Khdrbs1   | KH domain-containing, F.K.YLPELMAEK#DSLDPSTHAM*QLLSVEIEK#.I    | 3.46   | 2.45   | 1.41 | 0.71 |
| Q60749_KHDR1_MOUSE  | Khdrbs1   | KH domain-containing, F.K.DPSGAPVSVR@.L                        | 27.20  | 11.02  | 2.47 | 0.41 |
| Q60749_KHDR1_MOUSE  | Khdrbs1   | KH domain-containing, F.K.DSLDPSFTHAMQLLSVEIEK#.I              | 52.01  | 10.02  | 5.19 | 0.19 |
| Q60749_KHDR1_MOUSE  | Khdrbs1   | KH domain-containing, F.K.FNFVGGK#.I                           | 152.51 | 52.13  | 2.93 | 0.34 |
| Q60749_KHDR1_MOUSE  | Khdrbs1   | KH domain-containing, F.K.GESKKDDEENYLDLFSHK#.N                | 97.65  | 29.04  | 3.36 | 0.30 |
| Q60749_KHDR1_MOUSE  | Khdrbs1   | KH domain-containing, F.K.IJLPGQNTIK#.R                        | 282.00 | 77.20  | 3.65 | 0.27 |
| Q60749_KHDR1_MOUSE  | Khdrbs1   | KH domain-containing, F.K.KHDDDEENYLDLFSHK#.N                  | 189.87 | 52.89  | 3.59 | 0.28 |
| Q60749_KHDR1_MOUSE  | Khdrbs1   | KH domain-containing, F.K.RLQETGAK#.I                          | 31.23  | 10.58  | 2.95 | 0.34 |
| Q60749_KHDR1_MOUSE  | Khdrbs1   | KH domain-containing, F.K.YLPELMAEK#DSLDPSTHAM*QLLSVEIEK#.I    | 10.01  | 4.36   | 2.30 | 0.44 |
| Q3U0V1_FUBP2_MOUSE  | Khsrp     | Far upstream element-bi K.AINQQTGAFVEISR.Q                     | 8.22   | 7.50   | 1.10 | 0.91 |
| Q3U0V1_FUBP2_MOUSE  | Khsrp     | Far upstream element-bi R.IINDLQSLR.S                          | 15.13  | 9.63   | 1.57 | 0.64 |
| Q3U0V1_FUBP2_MOUSE  | Khsrp     | Far upstream element-bi R.VGGGIDVPVPR@.H                       | 11.49  | 9.17   | 1.25 | 0.80 |
| Q3U0V1_FUBP2_MOUSE  | Khsrp     | Far upstream element-bi K.AINQQTGAFVEISR.Q                     | 19.38  | 10.49  | 1.85 | 0.54 |
| Q3U0V1_FUBP2_MOUSE  | Khsrp     | Far upstream element-bi K.DAFADAVQR@.A                         | 15.43  | 8.01   | 1.92 | 0.52 |
| Q3U0V1_FUBP2_MOUSE  | Khsrp     | Far upstream element-bi R.HSVGVWIGR.S                          | 35.55  | 25.00  | 1.42 | 0.70 |
| Q3U0V1_FUBP2_MOUSE  | Khsrp     | Far upstream element-bi R.IINDLQSLR@.S                         | 38.59  | 21.35  | 1.81 | 0.55 |
| Q3U0V1_FUBP2_MOUSE  | Khsrp     | Far upstream element-bi R.SVSLTGAPESVQK#.A                     | 29.67  | 12.19  | 2.35 | 0.43 |
| Q3U0V1_FUBP2_MOUSE  | Khsrp     | Far upstream element-bi R.VGGGIDVPVPR@.H                       | 28.76  | 22.72  | 1.31 | 0.76 |
| Q3U0V1_FUBP2_MOUSE  | Khsrp     | Far upstream element-bi K.VQISPDSSGGLPER@.S                    | 16.53  | 7.36   | 2.25 | 0.45 |
| Q3U0V1_FUBP2_MOUSE  | Khsrp     | Far upstream element-bi R.IINDLQSLR@.S                         | 7.78   | 4.35   | 1.79 | 0.56 |
| Q8BK59_K0020_MOUSE  | Kiaa0020  | Pumilio domain-contain R.DPAHTVPPELIELLQK#.G                   | 12.96  | 6.54   | 1.98 | 0.50 |
| Q8BK59_K0020_MOUSE  | Kiaa0020  | Pumilio domain-contain R.SELIEAIR@.E                           | 17.45  | 7.97   | 2.19 | 0.46 |
| Q8BK59_K0020_MOUSE  | Kiaa0020  | Pumilio domain-contain R.DPAHTVPPELIELLQK#.G                   | 16.65  | 4.48   | 3.71 | 0.27 |
| Q8C2E7_STRUM_MOUSE  | Kiaa0196  | WASH complex subunit s R.INQANSPLLSVSVQYSGELVSVYR@.K           | 9.21   | 1.64   | 5.61 | 0.18 |
| Q8C2E7_STRUM_MOUSE  | Kiaa0196  | WASH complex subunit s K.LASALDPLLR@.I                         | 27.39  | 8.70   | 3.15 | 0.32 |
| Q8C2E7_STRUM_MOUSE  | Kiaa0196  | WASH complex subunit s R.SFEYQDVSISYGLK#.I                     | 5.09   | 2.36   | 2.16 | 0.46 |
| Q8C2E7_STRUM_MOUSE  | Kiaa0196  | WASH complex subunit s K.TALNNTLDLANVK#.E                      | 9.69   | 4.00   | 2.42 | 0.41 |
| Q8C2E7_STRUM_MOUSE  | Kiaa0196  | WASH complex subunit s K.EGYLR@EVLVLDNIPR@.L                   | 20.35  | 3.33   | 6.12 | 0.16 |
| Q8C2E7_STRUM_MOUSE  | Kiaa0196  | WASH complex subunit s K.FAPVDISITFGR@.L                       | 26.71  | 13.27  | 2.01 | 0.50 |
| Q8C2E7_STRUM_MOUSE  | Kiaa0196  | WASH complex subunit s K.GPEFWEK#.L                            | 10.12  | 3.58   | 2.83 | 0.35 |
| Q8C2E7_STRUM_MOUSE  | Kiaa0196  | WASH complex subunit s K.LASALDPLLR@.I                         | 29.66  | 10.62  | 2.79 | 0.36 |
| Q8C2E7_STRUM_MOUSE  | Kiaa0196  | WASH complex subunit s K.LEAK#PELQDLDEFFR@ENNIEIVTR@.F         | 24.64  | 4.01   | 3.17 | 0.32 |
| Q8C2E7_STRUM_MOUSE  | Kiaa0196  | WASH complex subunit s R.SFEYQDVSISYGLK#.I                     | 7.99   | 2.47   | 3.23 | 0.31 |
| Q8C2E7_STRUM_MOUSE  | Kiaa0196  | WASH complex subunit s K.TALNNTLDLANVK#.E                      | 21.14  | 6.44   | 3.18 | 0.31 |
| Q8C2E7_STRUM_MOUSE  | Kiaa0196  | WASH complex subunit s K.TTLVGIK#.V                            | 12.03  | 4.67   | 2.58 | 0.39 |
| Q8C2E7_STRUM_MOUSE  | Kiaa0196  | WASH complex subunit s R.VPINETISM*VIGR@.L                     | 10.53  | 1.67   | 6.31 | 0.16 |
| Q810A5_K895L_MOUSE  | Kiaa0895l | Uncharacterized protein R.QWVLEGM*LR@.H                        | 17.17  | 3.46   | 4.96 | 0.20 |
| Q3UMB9_WASH7_MOUSE  | Kiaa1033  | WASH complex subunit ; R.FLEEYTSQLR@.R                         | 6.37   | 3.91   | 1.63 | 0.61 |
| Q3UMB9_WASH7_MOUSE  | Kiaa1033  | WASH complex subunit ; R.AVFPYLDYVAVENAVDAAR@.L                | 13.06  | 4.34   | 3.01 | 0.33 |
| Q3UMB9_WASH7_MOUSE  | Kiaa1033  | WASH complex subunit ; K.LGAAFTDDGFAM*GVAYTLK#.L               | 7.08   | 2.45   | 2.89 | 0.35 |
| Q3UMB9_WASH7_MOUSE  | Kiaa1033  | WASH complex subunit ; K.QQNVCSTSQDEK#.L                       | 2.26   | 1.47   | 1.54 | 0.65 |
| Q3UMB9_WASH7_MOUSE  | Kiaa1033  | WASH complex subunit ; K.TFK#DEELFPLOQVM*#K.K                  | 8.52   | 3.76   | 2.27 | 0.44 |
| A2AIV2_VIR_MOUSE    | Kiaa1429  | Protein virilizer homolog K.ALDSDISM*TEGM*EAFLR@.S             | 4.11   | 2.76   | 1.49 | 0.67 |
| A2AIV2_VIR_MOUSE    | Kiaa1429  | Protein virilizer homolog K.EESPESLFELEK#.L                    | 11.13  | 9.55   | 1.17 | 0.86 |
| A2AIV2_VIR_MOUSE    | Kiaa1429  | Protein virilizer homolog R.LLELILLDQTVR@.V                    | 8.83   | 2.74   | 3.22 | 0.31 |

|                     |          |                                                         |       |       |       |       |
|---------------------|----------|---------------------------------------------------------|-------|-------|-------|-------|
| A2A1V2_VIR_MOUSE    | Kiaa1429 | Protein virilizer homolog K.LETLLDLYQEDR@.G             | 10.14 | 4.46  | 2.27  | 0.44  |
| A2A1V2_VIR_MOUSE    | Kiaa1429 | Protein virilizer homolog K.LVLEHSHKDDDSLESLLDNVIGLK#.Q | 14.22 | 3.84  | 3.70  | 0.27  |
| A2A1V2_VIR_MOUSE    | Kiaa1429 | Protein virilizer homolog K.TSAVPNHSPEPQQDDTDAVLER@.A   | 13.24 | 3.84  | 3.45  | 0.29  |
| A2A1V2_VIR_MOUSE    | Kiaa1429 | Protein virilizer homolog K.VNTDGLVLR@.G                | 9.05  | 2.72  | 3.33  | 0.30  |
| A2A7S8_K1522_MOUSE  | Kiaa1522 | Uncharacterized protein K.SYMTTSTAEADALSVR@.S           | 13.44 | 3.64  | 1.14  | 0.88  |
| Q5DTW7_K1551_MOUSE  | Kiaa1551 | Uncharacterized protein K.TSNVSGDSTQDKI#.I              | 3.13  | 1.40  | 2.23  | 0.45  |
| Q6P9P6_KIF11_MOUSE  | Kif11    | Kinesin-like protein KIF1 R.AIDEHNAEAQESFGK#.N          | 25.84 | 11.82 | 2.19  | 0.46  |
| Q6P9P6_KIF11_MOUSE  | Kif11    | Kinesin-like protein KIF1 K.EEYVSSALER@.T               | 15.16 | 5.85  | 2.59  | 0.39  |
| Q6P9P6_KIF11_MOUSE  | Kif11    | Kinesin-like protein KIF1 R.ENTVSSLVESQK#.L             | 15.80 | 3.41  | 4.64  | 0.22  |
| Q6P9P6_KIF11_MOUSE  | Kif11    | Kinesin-like protein KIF1 R.EQLLDLQK#.K                 | 15.18 | 10.86 | 1.40  | 0.72  |
| Q6P9P6_KIF11_MOUSE  | Kif11    | Kinesin-like protein KIF1 K.EYTEIER@.L                  | 17.56 | 9.52  | 1.84  | 0.54  |
| Q6P9P6_KIF11_MOUSE  | Kif11    | Kinesin-like protein KIF1 K.GLEETVHNH#DEVYQILEK#.G      | 22.03 | 8.22  | 2.68  | 0.37  |
| Q6P9P6_KIF11_MOUSE  | Kif11    | Kinesin-like protein KIF1 K.IAVLEELSK#.A                | 26.81 | 17.68 | 1.52  | 0.66  |
| Q6P9P6_KIF11_MOUSE  | Kif11    | Kinesin-like protein KIF1 K.ILAESDGLLQELR@.H            | 22.03 | 12.30 | 1.79  | 0.56  |
| Q6P9P6_KIF11_MOUSE  | Kif11    | Kinesin-like protein KIF1 R.ILQDSLGG@.T                 | 33.86 | 13.64 | 2.48  | 0.40  |
| Q6P9P6_KIF11_MOUSE  | Kif11    | Kinesin-like protein KIF1 K.K#ILAESDGLLQELR@.H          | 15.17 | 7.97  | 1.90  | 0.53  |
| Q6P9P6_KIF11_MOUSE  | Kif11    | Kinesin-like protein KIF1 K.K#YENIQ#PLNSIQENTELR@.S     | 4.91  | 1.70  | 2.88  | 0.35  |
| Q6P9P6_KIF11_MOUSE  | Kif11    | Kinesin-like protein KIF1 K.LNLVLDLAGSENGR@.S           | 28.10 | 11.65 | 2.41  | 0.41  |
| Q6P9P6_KIF11_MOUSE  | Kif11    | Kinesin-like protein KIF1 K.NLNSLFNNM*EELIK#.D          | 10.26 | 7.63  | 1.35  | 0.74  |
| Q6P9P6_KIF11_MOUSE  | Kif11    | Kinesin-like protein KIF1 R.SPNEVYTVEDDPLAGIIPR@.T      | 10.29 | 3.87  | 2.66  | 0.38  |
| Q6P9P6_KIF11_MOUSE  | Kif11    | Kinesin-like protein KIF1 R.SPNEVYTVEDDPLAGIIPR@.T      | 7.51  | 4.99  | 1.50  | 0.67  |
| Q6P9P6_KIF11_MOUSE  | Kif11    | Kinesin-like protein KIF1 K.TIVAPSVSLNIN#.Q             | 17.13 | 8.52  | 2.01  | 0.50  |
| Q6P9P6_KIF11_MOUSE  | Kif11    | Kinesin-like protein KIF1 R.TTAAATL#M#NAVSSR@.S         | 9.78  | 20.10 | 0.49  | 2.06  |
| Q6P9P6_KIF11_MOUSE  | Kif11    | Kinesin-like protein KIF1 R.VITALVER@.T                 | 41.28 | 19.07 | 2.16  | 0.46  |
| Q6P9P6_KIF11_MOUSE  | Kif11    | Kinesin-like protein KIF1 K.YLPTTLVVR@.T                | 19.46 | 8.83  | 2.20  | 0.45  |
| Q6P9P6_KIF11_MOUSE  | Kif11    | Kinesin-like protein KIF1 R.AIDEHNAEAQESFGK#.N          | 16.29 | 4.18  | 3.90  | 0.26  |
| Q6P9P6_KIF11_MOUSE  | Kif11    | Kinesin-like protein KIF1 K.IAVLEELSK#.A                | 18.49 | 3.97  | 4.66  | 0.21  |
| Q6P9P6_KIF11_MOUSE  | Kif11    | Kinesin-like protein KIF1 K.ILAESDGLLQELR@.H            | 12.70 | 3.25  | 3.91  | 0.26  |
| Q6P9P6_KIF11_MOUSE  | Kif11    | Kinesin-like protein KIF1 R.ILQDSLGG@.T                 | 18.12 | 1.89  | 9.58  | 0.10  |
| Q6P9P6_KIF11_MOUSE  | Kif11    | Kinesin-like protein KIF1 K.LNLVLDLAGSENGR@.S           | 20.44 | 5.07  | 4.03  | 0.25  |
| Q6P9P6_KIF11_MOUSE  | Kif11    | Kinesin-like protein KIF1 R.SPNEVYTVEDDPLAGIIPR@.T      | 5.74  | 2.57  | 2.23  | 0.45  |
| Q6P9P6_KIF11_MOUSE  | Kif11    | Kinesin-like protein KIF1 R.SPNEVYTVEDDPLAGIIPR@.T      | 7.83  | 2.70  | 2.90  | 0.34  |
| E9Q4K7_E9Q4K7_MOUSE | Kif13b   | Kinesin-like protein OS=h R.APLLSSEPAVPTSPFR@.J         | 8.01  | 4.01  | 2.00  | 0.50  |
| E9Q4K7_E9Q4K7_MOUSE | Kif13b   | Kinesin-like protein OS=h R.EATLNNLSM*#R@.L             | 6.41  | 1.46  | 4.38  | 0.23  |
| E9Q4K7_E9Q4K7_MOUSE | Kif13b   | Kinesin-like protein OS=h R.GSLLSEPAIQR@.R              | 14.66 | 1.12  | 13.13 | 0.08  |
| E9Q4K7_E9Q4K7_MOUSE | Kif13b   | Kinesin-like protein OS=h K.HIVNHAVNEDPNAR@.I           | 9.27  | 1.39  | 6.68  | 0.15  |
| E9Q4K7_E9Q4K7_MOUSE | Kif13b   | Kinesin-like protein OS=h R.ILVQPTFSDTWATR@.T           | 5.43  | 1.87  | 2.90  | 0.34  |
| E9Q4K7_E9Q4K7_MOUSE | Kif13b   | Kinesin-like protein OS=h R.SVLAVENTLTLDR@.L            | 18.38 | 4.81  | 3.82  | 0.26  |
| E9Q4K7_E9Q4K7_MOUSE | Kif13b   | Kinesin-like protein OS=h R.TVAATN#M#NEESSR@.S          | 7.34  | 2.91  | 2.52  | 0.40  |
| E9Q4K7_E9Q4K7_MOUSE | Kif13b   | Kinesin-like protein OS=h K.VILNPVNTKLS#.G              | 15.92 | 3.24  | 4.91  | 0.20  |
| LON7N1_KIF14_MOUSE  | Kif14    | Kinesin-like protein KIF1 K.SLLDSGLETAQDLR@.Q           | 6.14  | 4.14  | 1.49  | 0.67  |
| LON7N1_KIF14_MOUSE  | Kif14    | Kinesin-like protein KIF1 K.TIADSLINLLR@.L              | 8.40  | 3.70  | 2.27  | 0.44  |
| Q6P9L6_KIF15_MOUSE  | Kif15    | Kinesin-like protein KIF1 K.LLETQEQEIDGR@.A             | 4.49  | 2.10  | 2.14  | 0.47  |
| Q6P9L6_KIF15_MOUSE  | Kif15    | Kinesin-like protein KIF1 K.LLETQEQEIDGR@.A             | 7.16  | 2.27  | 3.15  | 0.32  |
| Q6P9L6_KIF15_MOUSE  | Kif15    | Kinesin-like protein KIF1 K.QLEFLAENGKLVGHQNLHQK#.I     | 1.80  | 8.81  | 0.20  | 4.88  |
| P97329_KI20A_MOUSE  | Kif20a   | Kinesin-like protein KIF2 R.LAASASTQFQEVK#.A            | 12.77 | 6.38  | 2.00  | 0.50  |
| P97329_KI20A_MOUSE  | Kif20a   | Kinesin-like protein KIF2 R.DEK#EELLETLLQEAQ#.Q         | 5.77  | 3.05  | 1.89  | 0.53  |
| P97329_KI20A_MOUSE  | Kif20a   | Kinesin-like protein KIF2 K.ESLTFYQEQIQR@.D             | 4.68  | 2.49  | 1.88  | 0.53  |
| P97329_KI20A_MOUSE  | Kif20a   | Kinesin-like protein KIF2 R.LAASASTQFQEVK#.A            | 9.20  | 3.18  | 2.90  | 0.35  |
| P97329_KI20A_MOUSE  | Kif20a   | Kinesin-like protein KIF2 K.LSLLGGIQQEELSTSVK#.K        | 3.91  | 1.39  | 2.82  | 0.35  |
| P97329_KI20A_MOUSE  | Kif20a   | Kinesin-like protein KIF2 R.VFQGFQFGR@.G                | 10.34 | 6.06  | 1.71  | 0.59  |
| Q80WE4_KI20B_MOUSE  | Kif20b   | Kinesin-like protein KIF2 R.FPK#PELEIQFTPLQPNK#.M       | 5.64  | 1.93  | 2.92  | 0.34  |
| Q80WE4_KI20B_MOUSE  | Kif20b   | Kinesin-like protein KIF2 K.IDLLNLDLSSGAK#.G            | 4.97  | 1.37  | 3.62  | 0.28  |
| Q80WE4_KI20B_MOUSE  | Kif20b   | Kinesin-like protein KIF2 R.LLTIGENELR@.N               | 5.53  | 3.87  | 1.43  | 0.70  |
| Q80WE4_KI20B_MOUSE  | Kif20b   | Kinesin-like protein KIF2 R.ADVQEQIQAQYNSVAVALQEQK#.A   | 12.39 | 7.18  | 1.73  | 0.58  |
| Q80WE4_KI20B_MOUSE  | Kif20b   | Kinesin-like protein KIF2 K.IDLLNLDLSSGAK#.G            | 18.30 | 3.91  | 4.68  | 0.21  |
| Q80WE4_KI20B_MOUSE  | Kif20b   | Kinesin-like protein KIF2 R.LLTIGENELR@.N               | 16.96 | 4.13  | 4.10  | 0.24  |
| Q80WE4_KI20B_MOUSE  | Kif20b   | Kinesin-like protein KIF2 R.SIESNVSQK#.Q                | 7.65  | 1.95  | 3.92  | 0.25  |
| Q80WE4_KI20B_MOUSE  | Kif20b   | Kinesin-like protein KIF2 R.TLNVLFDSLQELR@.L            | 9.33  | 1.69  | 5.51  | 0.18  |
| Q80WE4_KI20B_MOUSE  | Kif20b   | Kinesin-like protein KIF2 R.VQVQLVAER@.E                | 5.98  | 2.24  | 2.66  | 0.38  |
| Q80WE4_KI20B_MOUSE  | Kif20b   | Kinesin-like protein KIF2 R.VYVPDTSLSQEQK#.S            | 9.72  | 2.23  | 4.36  | 0.23  |
| E9Q5G3_KIF23_MOUSE  | Kif23    | Kinesin-like protein KIF2 R.EAGNINOSLM*TLR@.T           | 6.73  | 3.44  | 1.96  | 0.51  |
| E9Q5G3_KIF23_MOUSE  | Kif23    | Kinesin-like protein KIF2 K.LLDINDEETLPK#.L             | 10.82 | 5.22  | 2.07  | 0.48  |
| E9Q5G3_KIF23_MOUSE  | Kif23    | Kinesin-like protein KIF2 K.LVQAPLADAGDNVLQEK#.E        | 7.00  | 3.59  | 1.95  | 0.51  |
| E9Q5G3_KIF23_MOUSE  | Kif23    | Kinesin-like protein KIF2 R.NLQEQLESQK#.L               | 6.26  | 1.43  | 4.38  | 0.23  |
| E9Q5G3_KIF23_MOUSE  | Kif23    | Kinesin-like protein KIF2 K.AEDYEEESLQVM*#R@.F          | 5.83  | 1.99  | 2.92  | 0.34  |
| E9Q5G3_KIF23_MOUSE  | Kif23    | Kinesin-like protein KIF2 R.EAGNINOSLM*TLR@.T           | 6.77  | 1.71  | 3.97  | 0.25  |
| E9Q5G3_KIF23_MOUSE  | Kif23    | Kinesin-like protein KIF2 K.ELFVVANPLVDDLHGHK#.N        | 23.67 | 4.76  | 4.97  | 0.20  |
| E9Q5G3_KIF23_MOUSE  | Kif23    | Kinesin-like protein KIF2 K.LLDINDEETLPK#.L             | 14.09 | 5.95  | 2.37  | 0.42  |
| E9Q5G3_KIF23_MOUSE  | Kif23    | Kinesin-like protein KIF2 K.LVQAPLADAGDNVLQEK#.E        | 8.96  | 2.69  | 3.33  | 0.30  |
| E9Q5G3_KIF23_MOUSE  | Kif23    | Kinesin-like protein KIF2 R.NLQEQLESQK#.L               | 4.20  | 2.41  | 1.74  | 0.57  |
| E9Q5G3_KIF23_MOUSE  | Kif23    | Kinesin-like protein KIF2 R.VAATQLEM*QNK#.L             | 6.18  | 1.56  | 3.95  | 0.25  |
| P28740_KIF2A_MOUSE  | Kif2a    | Kinesin-like protein KIF2 K.FSLIDLGENER@.G              | 10.22 | 5.71  | 1.79  | 0.56  |
| P33174_KIF4_MOUSE   | Kif4     | Chromosome-associated R.EK#EHLVLELQTAQ#.K               | 45.64 | 3.23  | 14.11 | 0.07  |
| P33174_KIF4_MOUSE   | Kif4     | Chromosome-associated R.GLSEAAQTAQM*LER@.I              | 7.17  | 6.17  | 1.16  | 0.86  |
| P33174_KIF4_MOUSE   | Kif4     | Chromosome-associated K.GYNATVLAGYQTSQK#.T              | 10.18 | 4.09  | 2.49  | 0.40  |
| P33174_KIF4_MOUSE   | Kif4     | Chromosome-associated R.HQNQDNSDAIELNQDSSENSFK#.L       | 4.07  | 2.16  | 1.89  | 0.53  |
| P33174_KIF4_MOUSE   | Kif4     | Chromosome-associated K.ILAQDVQQLK#.E                   | 16.38 | 8.06  | 2.03  | 0.49  |
| P33174_KIF4_MOUSE   | Kif4     | Chromosome-associated K.K#M*TONDNQLQPQFYQDNIK#.N        | 5.12  | 3.57  | 1.44  | 0.70  |
| P33174_KIF4_MOUSE   | Kif4     | Chromosome-associated R.LQELGQIADLK#.K                  | 15.93 | 3.59  | 4.43  | 0.23  |
| P33174_KIF4_MOUSE   | Kif4     | Chromosome-associated K.LTLLEQVASK#.Q                   | 9.81  | 4.40  | 2.23  | 0.45  |
| P33174_KIF4_MOUSE   | Kif4     | Chromosome-associated K.NLESEVLSQLR@.E                  | 17.17 | 13.61 | 1.26  | 0.79  |
| P33174_KIF4_MOUSE   | Kif4     | Chromosome-associated R.TVASTAM*NSQSSR@.S               | 12.22 | 5.46  | 2.24  | 0.45  |
| P33174_KIF4_MOUSE   | Kif4     | Chromosome-associated R.TVASTAMNSQSSR@.S                | 2.79  | 54.50 | 0.05  | 19.55 |
| P33174_KIF4_MOUSE   | Kif4     | Chromosome-associated K.TYSM*GGAYTAEQEHSDAIGVIPR@.V     | 9.81  | 3.46  | 2.84  | 0.35  |
| P33174_KIF4_MOUSE   | Kif4     | Chromosome-associated R.VIQLFK#.E                       | 20.59 | 5.31  | 3.88  | 0.26  |
| P33174_KIF4_MOUSE   | Kif4     | Chromosome-associated K.VLYLSQLQSQSQM*TEK#.Q            | 10.46 | 2.62  | 3.99  | 0.25  |
| P33174_KIF4_MOUSE   | Kif4     | Chromosome-associated R.WESIATLEAK#.C                   | 9.83  | 3.05  | 3.22  | 0.31  |
| P33174_KIF4_MOUSE   | Kif4     | Chromosome-associated K.YLVGELVSSK#.I                   | 20.24 | 7.28  | 2.78  | 0.36  |
| P33174_KIF4_MOUSE   | Kif4     | Chromosome-associated R.GLSEAAQTAQM*LER@.I              | 5.04  | 2.31  | 2.18  | 0.46  |
| P33174_KIF4_MOUSE   | Kif4     | Chromosome-associated K.GYNATVLAGYQTSQK#.T              | 5.31  | 1.20  | 4.44  | 0.23  |
| P33174_KIF4_MOUSE   | Kif4     | Chromosome-associated K.ILAQDVQQLK#.E                   | 10.43 | 5.31  | 1.97  | 0.51  |
| P33174_KIF4_MOUSE   | Kif4     | Chromosome-associated R.TVASTAM*NSQSSR@.S               | 9.68  | 2.55  | 3.80  | 0.26  |
| P33174_KIF4_MOUSE   | Kif4     | Chromosome-associated R.VIQLFK#.E                       | 14.08 | 4.11  | 3.42  | 0.29  |
| Q61768_KINH_MOUSE   | Kif5b    | Kinesin-1 heavy chain OS K.ISFLENLEQLTK#.V              | 22.50 | 6.35  | 3.54  | 0.28  |
| Q61768_KINH_MOUSE   | Kif5b    | Kinesin-1 heavy chain OS K.LITLDLQDQNK#.M               | 13.61 | 5.23  | 2.60  | 0.38  |
| Q61768_KINH_MOUSE   | Kif5b    | Kinesin-1 heavy chain OS K.LYLVDLAAGEK#.V               | 13.99 | 6.54  | 2.14  | 0.47  |
| Q61768_KINH_MOUSE   | Kif5b    | Kinesin-1 heavy chain OS K.QLDDK#DEEINQSQSQVEK#.L       | 19.95 | 9.93  | 0.66  | 1.52  |
| Q61768_KINH_MOUSE   | Kif5b    | Kinesin-1 heavy chain OS K.SAEVSDDTGSGAAQK#.Q           | 6.14  | 2.75  | 2.23  | 0.45  |
| Q61768_KINH_MOUSE   | Kif5b    | Kinesin-1 heavy chain OS K.SLTYELQNVQK#.K               | 13.31 | 4.47  | 2.98  | 0.34  |
| Q8CD76_Q8CD76_MOUSE | Klc1     | Kinesin light chain 1 OS= K.DAANLLNDALAIR@.E            | 18.86 | 8.71  | 1.82  | 0.55  |
| Q8CD76_Q8CD76_MOUSE | Klc1     | Kinesin light chain 1 OS= K.DGSAFGYGGVYK#.A             | 7.67  | 2.05  | 3.74  | 0.27  |
| Q8CD76_Q8CD76_MOUSE | Klc1     | Kinesin light chain 1 OS= R.LGPPDPPNVAK#.T              | 13.39 | 4.61  | 2.90  | 0.34  |

|                     |         |                                                             |        |       |         |      |
|---------------------|---------|-------------------------------------------------------------|--------|-------|---------|------|
| Q8CD76_Q8CD76_MOUSE | Klc1    | Kinesin light chain 1 OS= K.LTQDEIISK.T                     | 19.29  | 6.56  | 2.94    | 0.34 |
| Q8CD76_Q8CD76_MOUSE | Klc1    | Kinesin light chain 1 OS= R.VAEVLNPPESM*EK.R                | 6.82   | 5.42  | 1.26    | 0.79 |
| Q8CD76_Q8CD76_MOUSE | Klc1    | Kinesin light chain 1 OS= K.YEEVEYYQR@.A                    | 3.56   | 1.64  | 2.17    | 0.46 |
| Q8CD76_Q8CD76_MOUSE | Klc1    | Kinesin light chain 1 OS= K.YK#DAANLNDLALIR@.E              | 14.64  | 5.13  | 2.85    | 0.35 |
| Q91W40_KLC3_MOUSE   | Klc3    | Kinesin light chain 3 OS= R.ALSYVEALGGPQDPNVAKH.T           | 7.50   | 3.99  | 1.88    | 0.53 |
| Q91W40_KLC3_MOUSE   | Klc3    | Kinesin light chain 3 OS= R.EQTLGPEHPAVALTNLNLAVLYGK#.R     | 11.38  | 4.94  | 2.30    | 0.43 |
| Q91W40_KLC3_MOUSE   | Klc3    | Kinesin light chain 3 OS= R.TQLSQLSTR@.H                    | 8.82   | 25.31 | 0.35    | 2.87 |
| Q9DB55_KLC4_MOUSE   | Klc4    | Kinesin light chain 4 OS= R.DHPVAATLNLNLAVLYGK#.R           | 17.38  | 10.68 | 1.63    | 0.61 |
| Q9DB55_KLC4_MOUSE   | Klc4    | Kinesin light chain 4 OS= R.GGGAAAAQQGGVEIPAR@.L            | 8.54   | 2.13  | 4.00    | 0.25 |
| P55200_KMT2A_MOUSE  | Kmt2a   | Histone-lysine N-methyl R.IFESVTLPSNR@.T                    | 5.02   | 3.33  | 1.51    | 0.66 |
| P55200_KMT2A_MOUSE  | Kmt2a   | Histone-lysine N-methyl K.AQQQESDSSETSQR@.G                 | 5.43   | 2.88  | 1.88    | 0.53 |
| P55200_KMT2A_MOUSE  | Kmt2a   | Histone-lysine N-methyl K.IIQAINSDGQQEQEK#.K                | 8.54   | 3.18  | 2.68    | 0.37 |
| P55200_KMT2A_MOUSE  | Kmt2a   | Histone-lysine N-methyl K.SEEGGAPAPAPAPPEK#.Q               | 10.73  | 8.86  | 1.21    | 0.83 |
| P55200_KMT2A_MOUSE  | Kmt2a   | Histone-lysine N-methyl R.SSVSVSLGTATDPEASAK#.A             | 7.41   | 3.06  | 2.42    | 0.41 |
| P55200_KMT2A_MOUSE  | Kmt2a   | Histone-lysine N-methyl R.VFVDFEGISLR@.R                    | 17.49  | 8.13  | 2.15    | 0.46 |
| O08550_KMT2B_MOUSE  | Kmt2b   | Histone-lysine N-methyl R.NIDAGEMVIEYSIVIR@.S               | 4.27   | 4.56  | 0.94    | 1.07 |
| Q6PDK2_KMT2D_MOUSE  | Kmt2d   | Histone-lysine N-methyl K.AGPLLAHTPLGAGGFPAALPSGPAHELHAK#.V | 7.29   | 2.57  | 2.83    | 0.35 |
| Q6PDK2_KMT2D_MOUSE  | Kmt2d   | Histone-lysine N-methyl K.AYQSTFTGETNTPYK#.Q                | 5.17   | 1.82  | 2.84    | 0.35 |
| Q6PDK2_KMT2D_MOUSE  | Kmt2d   | Histone-lysine N-methyl K.SQLDLISLLK#.Q                     | 26.11  | 5.05  | 5.17    | 0.19 |
| Q6PDK2_KMT2D_MOUSE  | Kmt2d   | Histone-lysine N-methyl K.VIEQGLELDVFTDASPQAVWNR@.I         | 8.60   | 2.76  | 3.11    | 0.32 |
| Q9Z2Q2_KNOP1_MOUSE  | Knop1   | Lysine-rich nucleolar pro K.SEALEFVPIDSPK#.A                | 5.49   | 6.27  | 0.88    | 1.14 |
| Q9Z2Q2_KNOP1_MOUSE  | Knop1   | Lysine-rich nucleolar pro K.SEALEFVPIDSPK#.A                | 11.94  | 8.19  | 1.46    | 0.69 |
| P52293_IMA1_MOUSE   | Krna2   | Importin subunit alpha-1 R.AIGNIVTGTDEQTK#.V                | 37.20  | 24.59 | 1.51    | 0.66 |
| P52293_IMA1_MOUSE   | Krna2   | Importin subunit alpha-1 K.EATWTM*SNITAGR@.Q                | 10.58  | 7.13  | 1.48    | 0.67 |
| P52293_IMA1_MOUSE   | Krna2   | Importin subunit alpha-1 K.GINSNNLESQIQATQAAAR@.K           | 8.97   | 5.71  | 1.57    | 0.64 |
| P52293_IMA1_MOUSE   | Krna2   | Importin subunit alpha-1 K.LLGATELPIVTPALR@.A               | 49.28  | 28.85 | 1.71    | 0.59 |
| P52293_IMA1_MOUSE   | Krna2   | Importin subunit alpha-1 R.NK#NAPPPLDAVEQLPTLVR@.L          | 32.84  | 21.64 | 1.52    | 0.66 |
| P52293_IMA1_MOUSE   | Krna2   | Importin subunit alpha-1 R.NNQGTVNWSVEDIVK#.G               | 7.92   | 5.02  | 1.58    | 0.63 |
| P52293_IMA1_MOUSE   | Krna2   | Importin subunit alpha-1 R.NVSSFPDDATSPLEQNR@.N             | 8.82   | 6.16  | 1.43    | 0.70 |
| P52293_IMA1_MOUSE   | Krna2   | Importin subunit alpha-1 K.VIDAGALAVFSLTNP#K.T              | 29.99  | 16.35 | 1.83    | 0.55 |
| P52293_IMA1_MOUSE   | Krna2   | Importin subunit alpha-1 R.AIGNIVTGTDEQTK#.V                | 18.95  | 6.21  | 3.05    | 0.33 |
| P52293_IMA1_MOUSE   | Krna2   | Importin subunit alpha-1 K.LLGATELPIVTPALR@.A               | 22.30  | 14.56 | 1.53    | 0.65 |
| P52293_IMA1_MOUSE   | Krna2   | Importin subunit alpha-1 R.NK#NAPPPLDAVEQLPTLVR@.L          | 14.29  | 6.56  | 2.18    | 0.46 |
| P52293_IMA1_MOUSE   | Krna2   | Importin subunit alpha-1 R.NVSSFPDDATSPLEQNR@.N             | 4.87   | 2.26  | 2.15    | 0.46 |
| P52293_IMA1_MOUSE   | Krna2   | Importin subunit alpha-1 K.VIDAGALAVFSLTNP#K.T              | 14.23  | 6.79  | 2.10    | 0.48 |
| P52293_IMA1_MOUSE   | Krna2   | Importin subunit alpha-1 R.AIGNIVTGTDEQTK#.V                | 20.05  | 7.17  | 2.80    | 0.36 |
| P52293_IMA1_MOUSE   | Krna2   | Importin subunit alpha-1 K.GINSNNLESQIQATQAAAR@.K           | 5.63   | 0.00  | #DIV/0! | 0.00 |
| P52293_IMA1_MOUSE   | Krna2   | Importin subunit alpha-1 K.LLGATELPIVTPALR@.A               | 32.99  | 11.88 | 2.78    | 0.36 |
| P52293_IMA1_MOUSE   | Krna2   | Importin subunit alpha-1 R.NK#NAPPPLDAVEQLPTLVR@.L          | 25.17  | 7.71  | 3.34    | 0.30 |
| P52293_IMA1_MOUSE   | Krna2   | Importin subunit alpha-1 R.NVSSFPDDATSPLEQNR@.N             | 3.84   | 1.61  | 2.39    | 0.42 |
| P52293_IMA1_MOUSE   | Krna2   | Importin subunit alpha-1 K.VIDAGALAVFSLTNP#K.T              | 10.07  | 2.87  | 3.51    | 0.29 |
| O35344_IMA4_MOUSE   | Krna3   | Importin subunit alpha-1 K.DSQVQVVLVDGLK#.N                 | 46.18  | 21.34 | 2.16    | 0.46 |
| O35344_IMA4_MOUSE   | Krna3   | Importin subunit alpha-1 K.DSQVQVVLVDGLK#.N                 | 4.04   | 2.94  | 1.38    | 0.73 |
| O35344_IMA4_MOUSE   | Krna3   | Importin subunit alpha-1 R.HR@NEVTVELR@.K                   | 55.70  | 21.86 | 2.55    | 0.39 |
| O35344_IMA4_MOUSE   | Krna3   | Importin subunit alpha-1 R.NVQEELESDDVDADF#K#.A             | 22.43  | 11.93 | 1.88    | 0.53 |
| O35344_IMA4_MOUSE   | Krna3   | Importin subunit alpha-1 R.NVQEELESDDVDADF#K#.A             | 8.08   | 4.44  | 1.82    | 0.55 |
| O35344_IMA4_MOUSE   | Krna3   | Importin subunit alpha-1 K.SGILPILVK#.C                     | 80.58  | 45.30 | 1.78    | 0.56 |
| O35344_IMA4_MOUSE   | Krna3   | Importin subunit alpha-1 R.HR@NEVTVELR@.K                   | 52.06  | 17.12 | 3.04    | 0.33 |
| O35344_IMA4_MOUSE   | Krna3   | Importin subunit alpha-1 R.NVQEELESDDVDADF#K#.A             | 11.63  | 4.97  | 2.34    | 0.43 |
| O35344_IMA4_MOUSE   | Krna3   | Importin subunit alpha-1 K.SGILPILVK#.C                     | 71.16  | 29.42 | 2.42    | 0.41 |
| O35344_IMA4_MOUSE   | Krna3   | Importin subunit alpha-1 K.DSQVQVVLVDGLK#.N                 | 36.22  | 14.10 | 2.57    | 0.39 |
| O35344_IMA4_MOUSE   | Krna3   | Importin subunit alpha-1 R.NVQEELESDDVDADF#K#.A             | 10.84  | 4.65  | 2.33    | 0.43 |
| O35344_IMA4_MOUSE   | Krna3   | Importin subunit alpha-1 K.SGILPILVK#.C                     | 28.99  | 13.14 | 2.21    | 0.45 |
| O35343_IMA3_MOUSE   | Krna4   | Importin subunit alpha-1 K.EAAVAISNLTISGR@.K                | 62.88  | 24.32 | 2.59    | 0.39 |
| O35343_IMA3_MOUSE   | Krna4   | Importin subunit alpha-1 R.KHLLSSDR@NPPIDDLIK#.S            | 51.22  | 23.57 | 2.17    | 0.46 |
| O35343_IMA3_MOUSE   | Krna4   | Importin subunit alpha-1 K.LLSSDR@NPPIDDLIK#.S              | 92.16  | 37.72 | 2.44    | 0.41 |
| O35343_IMA3_MOUSE   | Krna4   | Importin subunit alpha-1 R.NEVVELR@.K                       | 22.99  | 10.67 | 2.15    | 0.46 |
| O35343_IMA3_MOUSE   | Krna4   | Importin subunit alpha-1 R.NPPIDDLIK#.S                     | 32.46  | 18.33 | 1.77    | 0.56 |
| O35343_IMA3_MOUSE   | Krna4   | Importin subunit alpha-1 K.IEQNHENEDIYK#.L                  | 40.49  | 14.02 | 2.89    | 0.35 |
| O35343_IMA3_MOUSE   | Krna4   | Importin subunit alpha-1 R.KHLLSSDR@NPPIDDLIK#.S            | 19.82  | 9.47  | 2.09    | 0.48 |
| O35343_IMA3_MOUSE   | Krna4   | Importin subunit alpha-1 R.NPPIDDLIK#.S                     | 23.81  | 12.15 | 1.96    | 0.51 |
| O35343_IMA3_MOUSE   | Krna4   | Importin subunit alpha-1 R.VQNTSLAEIVQNASDNGIQLSAVQAAR@.K   | 18.66  | 5.91  | 3.16    | 0.32 |
| O35345_IMA7_MOUSE   | Krna6   | Importin subunit alpha-1 K.EAAVAISNLTISGR@.K                | 8.26   | 4.89  | 1.69    | 0.59 |
| O35345_IMA7_MOUSE   | Krna6   | Importin subunit alpha-1 K.EPSPIDEVINTPGVDR@.F              | 10.08  | 7.17  | 1.41    | 0.71 |
| O35345_IMA7_MOUSE   | Krna6   | Importin subunit alpha-1 R.FVEFLK#.R                        | 31.04  | 13.07 | 2.38    | 0.42 |
| O35345_IMA7_MOUSE   | Krna6   | Importin subunit alpha-1 K.IVQVALNGLENILR@.L                | 22.67  | 9.72  | 2.33    | 0.43 |
| O35345_IMA7_MOUSE   | Krna6   | Importin subunit alpha-1 K.LLSK#EPPIDEVINTPGVDR@.F          | 5.26   | 5.91  | 0.89    | 1.12 |
| O35345_IMA7_MOUSE   | Krna6   | Importin subunit alpha-1 R.FVEFLK#.R                        | 21.05  | 13.67 | 1.54    | 0.65 |
| O35345_IMA7_MOUSE   | Krna6   | Importin subunit alpha-1 K.IVQVALNGLENILR@.L                | 15.23  | 8.16  | 1.87    | 0.54 |
| O35345_IMA7_MOUSE   | Krna6   | Importin subunit alpha-1 K.IVQVALNGLENILR@.L                | 9.82   | 3.39  | 2.89    | 0.35 |
| P70168_IMB1_MOUSE   | Krnb1   | Importin subunit beta-1 R.AAVENLPTFLVELSR@.V                | 25.49  | 9.26  | 2.75    | 0.36 |
| P70168_IMB1_MOUSE   | Krnb1   | Importin subunit beta-1 K.LAATNALLNSLEFTK#.A                | 39.35  | 18.89 | 2.08    | 0.48 |
| P70168_IMB1_MOUSE   | Krnb1   | Importin subunit beta-1 K.SNEILTAIQGM*#R@.K                 | 19.40  | 1.26  | 15.44   | 0.06 |
| P70168_IMB1_MOUSE   | Krnb1   | Importin subunit beta-1 R.SSAYESLM*EIVK#.N                  | 7.25   | 2.89  | 2.51    | 0.40 |
| P70168_IMB1_MOUSE   | Krnb1   | Importin subunit beta-1 R.VAALQNLVK#.I                      | 16.81  | 6.94  | 2.42    | 0.41 |
| P70168_IMB1_MOUSE   | Krnb1   | Importin subunit beta-1 R.VLANPGNSQVAR@.V                   | 31.17  | 9.58  | 3.25    | 0.31 |
| P70168_IMB1_MOUSE   | Krnb1   | Importin subunit beta-1 R.AAVENLPTFLVELSR@.V                | 41.21  | 13.44 | 3.07    | 0.33 |
| P70168_IMB1_MOUSE   | Krnb1   | Importin subunit beta-1 K.GDQENVHPDVM*LVQPR@.V              | 9.53   | 6.02  | 1.58    | 0.63 |
| P70168_IMB1_MOUSE   | Krnb1   | Importin subunit beta-1 K.LAATNALLNSLEFTK#.A                | 59.30  | 18.73 | 3.17    | 0.32 |
| P70168_IMB1_MOUSE   | Krnb1   | Importin subunit beta-1 R.LQQVQLM*ESHIGSTDR@.I              | 23.02  | 6.81  | 3.38    | 0.30 |
| P70168_IMB1_MOUSE   | Krnb1   | Importin subunit beta-1 R.SSAYESLM*EIVK#.N                  | 11.17  | 3.76  | 2.97    | 0.34 |
| P70168_IMB1_MOUSE   | Krnb1   | Importin subunit beta-1 R.VAALQNLVK#.I                      | 16.78  | 5.29  | 3.17    | 0.32 |
| P70168_IMB1_MOUSE   | Krnb1   | Importin subunit beta-1 R.VAALQNLVK#.I                      | 20.84  | 8.57  | 2.43    | 0.41 |
| P70168_IMB1_MOUSE   | Krnb1   | Importin subunit beta-1 R.VLANPGNSQVAR@.V                   | 38.26  | 10.66 | 3.59    | 0.28 |
| Q8BGA5_KRR1_MOUSE   | Krr1    | KRR1 small subunit proc R.LLEESFATLFPK#.Y                   | 21.35  | 10.52 | 2.03    | 0.49 |
| Q8BGA5_KRR1_MOUSE   | Krr1    | KRR1 small subunit proc R.SVSFEQAVR@.I                      | 22.89  | 9.94  | 2.30    | 0.43 |
| Q5RL79_KTAP2_MOUSE  | Krtcap2 | Keratinocyte-associated I.K.ISSTLYQATAPVLTAK#.I             | 7.24   | 5.41  | 1.34    | 0.75 |
| Q61595_KTN1_MOUSE   | Ktn1    | Kinectin OS=Mus musculus K.AHQLSVTSVQVQLQNLIR@.G            | 6.98   | 4.00  | 1.75    | 0.57 |
| Q61595_KTN1_MOUSE   | Ktn1    | Kinectin OS=Mus musculus R.ASK#EESLQIQVQDLEQNEALK#.A        | 6.18   | 1.65  | 3.75    | 0.27 |
| Q61595_KTN1_MOUSE   | Ktn1    | Kinectin OS=Mus musculus R.DAVSNTNQTLESK#.Q                 | 6.01   | 7.27  | 0.83    | 1.21 |
| Q61595_KTN1_MOUSE   | Ktn1    | Kinectin OS=Mus musculus K.QSDQVSVFSLIEDLKRR@.V             | 6.98   | 5.97  | 1.17    | 0.85 |
| Q61595_KTN1_MOUSE   | Ktn1    | Kinectin OS=Mus musculus R.TVEELTETGLIQVATR@.E              | 4.29   | 4.29  | 2.38    | 0.42 |
| Q9CXA2_T3HPD_MOUSE  | L3h3pdp | Trans-L-3-hydroxyproline R.RLVFEPK#.G                       | 152.95 | 64.85 | 2.36    | 0.42 |
| Q61292_LAMB2_MOUSE  | Lamb2   | Laminin subunit beta-2 C.K.AAQLDLEEAR@.M                    | 11.85  | 3.57  | 3.32    | 0.30 |
| Q61292_LAMB2_MOUSE  | Lamb2   | Laminin subunit beta-2 C.R.LQLEEGTYEENER@.A                 | 7.77   | 4.39  | 1.77    | 0.56 |
| Q61292_LAMB2_MOUSE  | Lamb2   | Laminin subunit beta-2 C.R.VLDISIPASPEQIQR@.L               | 11.74  | 3.43  | 3.42    | 0.29 |
| Q61292_LAMB2_MOUSE  | Lamb2   | Laminin subunit beta-2 C.R.YSEIPESTEGEVYR@.V                | 9.47   | 3.51  | 2.70    | 0.37 |
| Q61087_LAMB3_MOUSE  | Lamb3   | Laminin subunit beta-3 C.K.RMQLDQDIM*#MDFK#.G               | 4.48   | 1.69  | 2.65    | 0.38 |
| P11438_LAMP1_MOUSE  | Lamp1   | Lysosome-associated me K.ALQATVGSNYK#.C                     | 29.67  | 12.69 | 2.34    | 0.43 |
| P11438_LAMP1_MOUSE  | Lamp1   | Lysosome-associated me K.EIYTM*#DSTTDIK#.A                  | 38.87  | 16.32 | 2.38    | 0.42 |
| P11438_LAMP1_MOUSE  | Lamp1   | Lysosome-associated me K.M*LSLNVFVSQVQAFK#.V                | 8.13   | 3.54  | 2.29    | 0.44 |
| P17047_LAMP2_MOUSE  | Lamp2   | Lysosome-associated me R.AFQINTFNLK#.V                      | 64.75  | 25.63 | 2.53    | 0.40 |
| P17047_LAMP2_MOUSE  | Lamp2   | Lysosome-associated me K.TITIAVDPDK#.A                      | 13.49  | 9.51  | 1.42    | 0.71 |

|                    |         |                           |                                      |       |       |      |      |
|--------------------|---------|---------------------------|--------------------------------------|-------|-------|------|------|
| P17047_LAMP2_MOUSE | Lamp2   | Lysosome-associated me    | K.VPLDVFVK.C                         | 55.90 | 32.62 | 1.71 | 0.58 |
| P17047_LAMP2_MOUSE | Lamp2   | Lysosome-associated me    | K.YLDFIHAVKN.K                       | 20.93 | 7.75  | 2.70 | 0.37 |
| P17047_LAMP2_MOUSE | Lamp2   | Lysosome-associated me    | R.AFQINFNFK#.V                       | 33.27 | 10.66 | 3.12 | 0.32 |
| P17047_LAMP2_MOUSE | Lamp2   | Lysosome-associated me    | K.VPLDVFVK.C                         | 22.00 | 13.71 | 1.60 | 0.62 |
| Q9CQ22_TLOR1_MOUSE | Lamtor1 | Regulator complex prote   | R.IAAVAYSALSQIR@.V                   | 5.62  | 3.07  | 1.83 | 0.55 |
| Q9CQ22_TLOR1_MOUSE | Lamtor1 | Regulator complex prote   | R.LAVLSSSLTHWK#.K                    | 10.19 | 3.71  | 2.74 | 0.36 |
| Q9CQ22_TLOR1_MOUSE | Lamtor1 | Regulator complex prote   | R.TDEQALLSSLAK.T                     | 26.35 | 12.60 | 2.09 | 0.48 |
| Q9JH53_TOR2_MOUSE  | Lamtor2 | Regulator complex prote   | R.VTAAIASNIWAAYDR@.N                 | 4.17  | 2.38  | 1.75 | 0.57 |
| Q6ZQ58_LARP1_MOUSE | Larp1   | La-related protein 1 OS-  | R.LGIGSQSEM*NTRFR@.F                 | 7.35  | 12.72 | 0.58 | 1.73 |
| Q6ZQ58_LARP1_MOUSE | Larp1   | La-related protein 1 OS-  | R.DFQEETVKHDEYAGQLYGLEKH.F           | 12.23 | 3.25  | 3.76 | 0.27 |
| Q6ZQ58_LARP1_MOUSE | Larp1   | La-related protein 1 OS-  | R.DFVEAPPK#.V                        | 14.71 | 3.21  | 4.58 | 0.22 |
| Q6ZQ58_LARP1_MOUSE | Larp1   | La-related protein 1 OS-  | R.FQQVPTDALANK#.L                    | 48.69 | 17.50 | 2.78 | 0.36 |
| Q6ZQ58_LARP1_MOUSE | Larp1   | La-related protein 1 OS-  | R.FSHPTALPQQPLPSQQLM*SK#.D           | 43.34 | 15.99 | 2.71 | 0.37 |
| Q6ZQ58_LARP1_MOUSE | Larp1   | La-related protein 1 OS-  | R.KFWAFLK#.Y                         | 28.19 | 7.16  | 3.94 | 0.25 |
| Q6ZQ58_LARP1_MOUSE | Larp1   | La-related protein 1 OS-  | R.FWFSFLR@.D                         | 18.17 | 4.76  | 3.82 | 0.26 |
| Q6ZQ58_LARP1_MOUSE | Larp1   | La-related protein 1 OS-  | R.GLSASLPDLDESSEWIEVK#.K             | 11.80 | 3.75  | 3.14 | 0.32 |
| Q6ZQ58_LARP1_MOUSE | Larp1   | La-related protein 1 OS-  | R.HPVVAGSSEGR@.K                     | 9.30  | 3.68  | 2.53 | 0.40 |
| Q6ZQ58_LARP1_MOUSE | Larp1   | La-related protein 1 OS-  | R.K.LIVTQTPPYM*TR@.R                 | 20.10 | 6.85  | 2.93 | 0.34 |
| Q6ZQ58_LARP1_MOUSE | Larp1   | La-related protein 1 OS-  | R.KHFDGTEGPR@.T                      | 13.33 | 4.44  | 3.00 | 0.33 |
| Q6ZQ58_LARP1_MOUSE | Larp1   | La-related protein 1 OS-  | R.KHM*DAQDGLPITLASFHR@.V             | 10.26 | 5.66  | 1.81 | 0.55 |
| Q6ZQ58_LARP1_MOUSE | Larp1   | La-related protein 1 OS-  | R.LDIFKHDFQEETVKHDEYAGQLYGLEKH.F     | 16.60 | 6.58  | 2.52 | 0.40 |
| Q6ZQ58_LARP1_MOUSE | Larp1   | La-related protein 1 OS-  | R.KLFGAPEPTIAR@.S                    | 69.23 | 27.16 | 2.55 | 0.39 |
| Q6ZQ58_LARP1_MOUSE | Larp1   | La-related protein 1 OS-  | R.LGIGSQSEM*NTRFR@.F                 | 33.27 | 9.59  | 3.47 | 0.29 |
| Q6ZQ58_LARP1_MOUSE | Larp1   | La-related protein 1 OS-  | R.LQELYGLK#.F                        | 41.46 | 13.84 | 3.00 | 0.33 |
| Q6ZQ58_LARP1_MOUSE | Larp1   | La-related protein 1 OS-  | R.KM*DAQDGLPITLASFHR@.V              | 22.55 | 12.62 | 1.79 | 0.56 |
| Q6ZQ58_LARP1_MOUSE | Larp1   | La-related protein 1 OS-  | R.QIEYFVSDNLER@.D                    | 19.57 | 7.60  | 2.57 | 0.39 |
| Q6ZQ58_LARP1_MOUSE | Larp1   | La-related protein 1 OS-  | R.KVDFDGVAVNNWPTPEIAHK#.S            | 12.01 | 6.17  | 1.95 | 0.51 |
| Q6ZQ58_LARP1_MOUSE | Larp1   | La-related protein 1 OS-  | R.K.VVEM*VEEK#.V                     | 34.79 | 8.42  | 4.13 | 0.24 |
| Q6ZQ58_LARP1_MOUSE | Larp1   | La-related protein 1 OS-  | R.YYSYGLEK#.K                        | 17.21 | 23.82 | 0.72 | 1.38 |
| Q6ZQ58_LARP1_MOUSE | Larp1   | La-related protein 1 OS-  | R.FQQVPTDALANK#.L                    | 21.83 | 6.35  | 3.44 | 0.29 |
| Q6ZQ58_LARP1_MOUSE | Larp1   | La-related protein 1 OS-  | R.KLSASLPDLDESSEWIEVK#.K             | 6.13  | 3.58  | 1.71 | 0.58 |
| Q6ZQ58_LARP1_MOUSE | Larp1   | La-related protein 1 OS-  | R.HPVVAGSSEGR@.K                     | 5.36  | 4.17  | 1.33 | 0.75 |
| Q6ZQ58_LARP1_MOUSE | Larp1   | La-related protein 1 OS-  | R.K.LIVTQTPPYM*TR@.R                 | 8.85  | 3.06  | 2.89 | 0.35 |
| Q6ZQ58_LARP1_MOUSE | Larp1   | La-related protein 1 OS-  | R.LGIGSQSEM*NTRFR@.F                 | 9.82  | 4.38  | 2.24 | 0.45 |
| Q6ZQ58_LARP1_MOUSE | Larp1   | La-related protein 1 OS-  | R.QIEYFVSDNLER@.D                    | 7.06  | 3.09  | 2.29 | 0.44 |
| Q6ZQ58_LARP1_MOUSE | Larp1   | La-related protein 1 OS-  | R.KVDFDGVAVNNWPTPEIAHK#.S            | 6.65  | 1.71  | 3.88 | 0.26 |
| Q8BWW4_LARP4_MOUSE | Larp4   | La-related protein 4 OS-  | R.EIPETTPVEEVK#.A                    | 19.33 | 15.39 | 1.26 | 0.80 |
| Q8BWW4_LARP4_MOUSE | Larp4   | La-related protein 4 OS-  | R.LTTNTDILVELR.S                     | 32.91 | 21.17 | 1.55 | 0.64 |
| Q8BWW4_LARP4_MOUSE | Larp4   | La-related protein 4 OS-  | R.K.DLYLSQM*DSDQFPIWTVANM*EIEK.K     | 7.89  | 5.62  | 1.40 | 0.71 |
| Q8BWW4_LARP4_MOUSE | Larp4   | La-related protein 4 OS-  | R.EIPETTPVEEVK#.A                    | 17.41 | 10.17 | 1.74 | 0.57 |
| Q8BWW4_LARP4_MOUSE | Larp4   | La-related protein 4 OS-  | R.LDLLATNFPPLPGSSSR@.V               | 12.70 | 5.57  | 2.23 | 0.45 |
| Q8BWW4_LARP4_MOUSE | Larp4   | La-related protein 4 OS-  | R.HNPTVTGQEQTYLPHK.E                 | 21.51 | 8.67  | 2.48 | 0.40 |
| Q8BWW4_LARP4_MOUSE | Larp4   | La-related protein 4 OS-  | R.LTTNTDILVELR@.S                    | 44.78 | 20.74 | 2.16 | 0.46 |
| Q8BWW4_LARP4_MOUSE | Larp4   | La-related protein 4 OS-  | R.SSSGSEHSTEGSVSLDGGLSR@.S           | 18.58 | 8.25  | 2.25 | 0.44 |
| Q8BWW4_LARP4_MOUSE | Larp4   | La-related protein 4 OS-  | R.VPDELLENR@.M                       | 15.71 | 14.20 | 2.66 | 0.38 |
| Q8BWW4_LARP4_MOUSE | Larp4   | La-related protein 4 OS-  | R.LTTNTDILVELR@.S                    | 5.30  | 2.75  | 1.93 | 0.52 |
| Q6A0A2_LAR4B_MOUSE | Larp4b  | La-related protein 4B OS- | R.AIAINTFLPK#.N                      | 10.43 | 3.71  | 2.81 | 0.36 |
| Q6ADA2_LAR4B_MOUSE | Larp4b  | La-related protein 4B OS- | R.AIAINTFLPK#.N                      | 20.12 | 8.50  | 2.37 | 0.42 |
| Q6ADA2_LAR4B_MOUSE | Larp4b  | La-related protein 4B OS- | R.GPGLLESPINFNTADR@.L                | 11.41 | 6.64  | 1.72 | 0.58 |
| Q6ADA2_LAR4B_MOUSE | Larp4b  | La-related protein 4B OS- | R.LSSLLIGSK#.E                       | 13.09 | 4.75  | 2.76 | 0.36 |
| Q6ADA2_LAR4B_MOUSE | Larp4b  | La-related protein 4B OS- | R.LSTDVDLILEVLR@.S                   | 9.09  | 3.35  | 2.72 | 0.37 |
| Q6ADA2_LAR4B_MOUSE | Larp4b  | La-related protein 4B OS- | R.NLSTDAINTVPPVGP@.E                 | 9.17  | 4.99  | 1.84 | 0.54 |
| Q05CL8_LARP7_MOUSE | Larp7   | La-related protein 7 OS-  | R.AIEFLNNPEEAPR@.K                   | 21.38 | 18.07 | 1.18 | 0.85 |
| Q05CL8_LARP7_MOUSE | Larp7   | La-related protein 7 OS-  | R.DVGGQAASEVSK#.E                    | 30.32 | 17.59 | 1.72 | 0.58 |
| Q05CL8_LARP7_MOUSE | Larp7   | La-related protein 7 OS-  | R.DKH#EASSLPEAR@.A                   | 25.05 | 13.24 | 1.89 | 0.53 |
| Q05CL8_LARP7_MOUSE | Larp7   | La-related protein 7 OS-  | R.FK#TPEDAQAVM*NAQTEIR@.K            | 13.81 | 4.88  | 2.83 | 0.35 |
| Q05CL8_LARP7_MOUSE | Larp7   | La-related protein 7 OS-  | R.KGFAPVEFTK#.E                      | 26.29 | 14.84 | 1.77 | 0.56 |
| Q05CL8_LARP7_MOUSE | Larp7   | La-related protein 7 OS-  | R.HSWNLVLVSGDHEQR@.Y                 | 14.54 | 5.30  | 2.74 | 0.36 |
| Q05CL8_LARP7_MOUSE | Larp7   | La-related protein 7 OS-  | R.IVSGEPLPGR@.K                      | 19.11 | 11.96 | 1.60 | 0.63 |
| Q05CL8_LARP7_MOUSE | Larp7   | La-related protein 7 OS-  | R.K.QVLADIAR#.Q                      | 15.29 | 7.86  | 1.95 | 0.51 |
| Q05CL8_LARP7_MOUSE | Larp7   | La-related protein 7 OS-  | R.K.SSSVVELLLEGR@.I                  | 21.35 | 11.03 | 1.94 | 0.52 |
| Q05CL8_LARP7_MOUSE | Larp7   | La-related protein 7 OS-  | R.TASEGSAETPEAPK#.Q                  | 5.92  | 3.65  | 1.62 | 0.62 |
| Q05CL8_LARP7_MOUSE | Larp7   | La-related protein 7 OS-  | R.TVYVLPK#.N                         | 24.37 | 12.97 | 1.88 | 0.53 |
| Q05CL8_LARP7_MOUSE | Larp7   | La-related protein 7 OS-  | R.KVSAQGFQVTVGVV#.I                  | 19.84 | 9.88  | 2.01 | 0.50 |
| Q8BM12_SYLC_MOUSE  | Lars    | Leucine-trRNA ligase, cyt | R.K.SLGSDDIVK#.F                     | 8.09  | 16.42 | 0.49 | 2.03 |
| Q8BM12_SYLC_MOUSE  | Lars    | Leucine-trRNA ligase, cyt | R.VIASLGSLLPELK#.K                   | 9.82  | 3.02  | 3.25 | 0.31 |
| A2BE28_LAS1L_MOUSE | Las1l   | Ribosomal biogenesis pr   | R.AM*GQVLPDEEKE#.L                   | 8.21  | 3.98  | 2.06 | 0.48 |
| A2BE28_LAS1L_MOUSE | Las1l   | Ribosomal biogenesis pr   | R.EALQGSQAWQVSSDVR@.W                | 7.57  | 4.30  | 1.76 | 0.57 |
| A2BE28_LAS1L_MOUSE | Las1l   | Ribosomal biogenesis pr   | R.FVNLISER@.K                        | 19.02 | 6.29  | 3.02 | 0.33 |
| A2BE28_LAS1L_MOUSE | Las1l   | Ribosomal biogenesis pr   | R.LGNELPLAVASTADLVR.C                | 19.47 | 10.52 | 1.85 | 0.54 |
| A2BE28_LAS1L_MOUSE | Las1l   | Ribosomal biogenesis pr   | R.LIDAAGTLGDEL@.L                    | 27.15 | 13.11 | 2.07 | 0.48 |
| A2BE28_LAS1L_MOUSE | Las1l   | Ribosomal biogenesis pr   | R.LLYGM*ALVR@.F                      | 11.06 | 18.82 | 0.59 | 1.70 |
| A2BE28_LAS1L_MOUSE | Las1l   | Ribosomal biogenesis pr   | R.AIEGSSSSGK#.A                      | 9.75  | 1.48  | 6.61 | 0.15 |
| A2BE28_LAS1L_MOUSE | Las1l   | Ribosomal biogenesis pr   | R.AM*GQVLPDEEKE#.L                   | 15.52 | 5.73  | 2.71 | 0.37 |
| A2BE28_LAS1L_MOUSE | Las1l   | Ribosomal biogenesis pr   | R.AWDGQSF#ENQPESAR@.G                | 8.03  | 2.69  | 2.99 | 0.33 |
| A2BE28_LAS1L_MOUSE | Las1l   | Ribosomal biogenesis pr   | R.EALQGSQAWQVSSDVR@.W                | 12.56 | 5.04  | 2.49 | 0.40 |
| A2BE28_LAS1L_MOUSE | Las1l   | Ribosomal biogenesis pr   | R.ELLSVEEEOF#.V                      | 18.32 | 7.33  | 2.50 | 0.40 |
| A2BE28_LAS1L_MOUSE | Las1l   | Ribosomal biogenesis pr   | R.FVNLISER@.K                        | 35.00 | 11.81 | 2.96 | 0.34 |
| A2BE28_LAS1L_MOUSE | Las1l   | Ribosomal biogenesis pr   | R.LGNELPLAVASTADLVR@.C               | 39.24 | 11.76 | 3.34 | 0.30 |
| A2BE28_LAS1L_MOUSE | Las1l   | Ribosomal biogenesis pr   | R.LIDAAGTLGDEL@.L                    | 31.18 | 12.96 | 2.41 | 0.42 |
| A2BE28_LAS1L_MOUSE | Las1l   | Ribosomal biogenesis pr   | R.LLYGM*ALVR@.F                      | 14.36 | 7.57  | 1.90 | 0.53 |
| A2BE28_LAS1L_MOUSE | Las1l   | Ribosomal biogenesis pr   | R.LPGQTEDPAELM*LDNYDTM*YLDQPVIEHR@.L | 6.74  | 8.84  | 0.76 | 1.31 |
| A2BE28_LAS1L_MOUSE | Las1l   | Ribosomal biogenesis pr   | R.WGTFPLGR@.L                        | 13.68 | 3.16  | 4.32 | 0.23 |
| A2BE28_LAS1L_MOUSE | Las1l   | Ribosomal biogenesis pr   | R.YLAQEVNIPDWIVELR@.H                | 15.07 | 8.33  | 1.81 | 0.55 |
| Q61792_LASP1_MOUSE | Lasp1   | LIM and SH3 domain pr     | R.GFSVADTPELR@.I                     | 65.93 | 27.31 | 2.41 | 0.41 |
| Q61792_LASP1_MOUSE | Lasp1   | LIM and SH3 domain pr     | R.KGHGSVAVDTPELQR@.I                 | 18.60 | 5.18  | 3.59 | 0.28 |
| Q61792_LASP1_MOUSE | Lasp1   | LIM and SH3 domain pr     | R.LK#QQSLQSQVR@.Y                    | 82.00 | 28.93 | 2.83 | 0.35 |
| Q61792_LASP1_MOUSE | Lasp1   | LIM and SH3 domain pr     | R.QQSEMQSQVR.Y                       | 34.66 | 19.21 | 1.80 | 0.55 |
| Q61792_LASP1_MOUSE | Lasp1   | LIM and SH3 domain pr     | R.QSFTM*VADTPENLR@.L                 | 27.57 | 13.20 | 2.09 | 0.48 |
| Q61792_LASP1_MOUSE | Lasp1   | LIM and SH3 domain pr     | R.TQDQSNIK#.Y                        | 68.25 | 17.52 | 3.90 | 0.26 |
| Q61792_LASP1_MOUSE | Lasp1   | LIM and SH3 domain pr     | R.KYHEEFK#.S                         | 58.03 | 8.01  | 7.25 | 0.14 |
| Q61792_LASP1_MOUSE | Lasp1   | LIM and SH3 domain pr     | R.YKHEEFK#.N                         | 27.68 | 9.18  | 3.01 | 0.33 |
| Q5XJES_LEO1_MOUSE  | Leo1    | RNA polymerase associat   | R.GLSASYLPDR@YDEEENEEESVSLAIAK#.N    | 7.29  | 5.21  | 1.40 | 0.71 |
| Q5XJES_LEO1_MOUSE  | Leo1    | RNA polymerase associat   | R.VNTLDNLDFVFK#.L                    | 14.42 | 14.49 | 1.00 | 1.00 |
| Q3V1T4_P3H1_MOUSE  | Leprel1 | Prolyl 3-hydroxylase 1 O: | R.SPYNYLQVAFYK#.I                    | 8.13  | 6.37  | 1.28 | 0.78 |
| Q8CG70_P3H3_MOUSE  | Leprel2 | Prolyl 3-hydroxylase 3 O: | R.AYSAGAWAVALLR@.E                   | 17.55 | 3.58  | 4.95 | 0.20 |
| Q8CG70_P3H3_MOUSE  | Leprel2 | Prolyl 3-hydroxylase 3 O: | R.FEGLTVLK#.A                        | 11.98 | 8.97  | 1.34 | 0.75 |
| Q8CG70_P3H3_MOUSE  | Leprel2 | Prolyl 3-hydroxylase 3 O: | R.SFPVDLLSCLR@.R                     | 6.67  | 4.45  | 1.50 | 0.67 |
| Q8K2B0_SC65_MOUSE  | Leprel4 | Synaptonemal complex r    | R.AVAAYTFLLQR@.N                     | 19.69 | 57.93 | 0.34 | 2.94 |
| Q8K2B0_SC65_MOUSE  | Leprel4 | Synaptonemal complex r    | R.DSVM*QQLNLYVR@.F                   | 10.76 | 3.10  | 3.47 | 0.29 |
| Q8K2B0_SC65_MOUSE  | Leprel4 | Synaptonemal complex r    | R.GDEAEPEPELT.-                      | 5.98  | 5.98  | 1.00 | 1.00 |
| Q8K2B0_SC65_MOUSE  | Leprel4 | Synaptonemal complex r    | R.GM*LIDIGDESILADLEQPEAVFLR@.A       | 12.04 | 4.89  | 2.46 | 0.41 |
| P16045_LEG1_MOUSE  | Lgals1  | Galectin-1 OS-Mus musc    | R.LNM*EAINYM*ADGDGPK#.I              | 9.62  | 7.24  | 1.33 | 0.75 |

|                    |          |                          |                                        |        |        |      |      |
|--------------------|----------|--------------------------|----------------------------------------|--------|--------|------|------|
| P16045_LEG1_MOUSE  | Lgals1   | Galectin-1 OS=Mus musc   | K.SFVNLNGK#D                           | 24.96  | 23.44  | 1.06 | 0.94 |
| Q07797_LG3BP_MOUSE | Lgals3bp | Galectin-3-binding prote | K.SELAVSSEDLK.A                        | 6.24   | 8.18   | 0.76 | 1.31 |
| Q07797_LG3BP_MOUSE | Lgals3bp | Galectin-3-binding prote | R.YNLQYTYGYSVKR.Y                      | 3.88   | 4.68   | 0.83 | 1.20 |
| Q07797_LG3BP_MOUSE | Lgals3bp | Galectin-3-binding prote | K.SELAVSSEDLK.A                        | 8.22   | 7.49   | 1.10 | 0.91 |
| Q08573_LEG9_MOUSE  | Lgals9   | Galectin-9 OS=Mus musc   | R.FNENAVVR.N                           | 21.03  | 20.06  | 1.05 | 0.95 |
| Q08573_LEG9_MOUSE  | Lgals9   | Galectin-9 OS=Mus musc   | R.NTQJNNSWGQER.S                       | 9.39   | 7.55   | 1.24 | 0.80 |
| P37913_DNL1_MOUSE  | Lig1     | DNA ligase 1 OS=Mus mu   | K.DK#QPEQATISNQVSLYR@.K                | 8.61   | 5.60   | 1.54 | 0.65 |
| P37913_DNL1_MOUSE  | Lig1     | DNA ligase 1 OS=Mus mu   | K.DTEQIAEFLQSVK#D                      | 9.88   | 4.16   | 2.37 | 0.42 |
| P37913_DNL1_MOUSE  | Lig1     | DNA ligase 1 OS=Mus mu   | R.LGPPQQQLGELGVGDVLLK#.A               | 10.17  | 5.72   | 1.78 | 0.56 |
| P37913_DNL1_MOUSE  | Lig1     | DNA ligase 1 OS=Mus mu   | K.TLSSFPTPR@.K                         | 10.74  | 5.14   | 2.09 | 0.48 |
| P37913_DNL1_MOUSE  | Lig1     | DNA ligase 1 OS=Mus mu   | R.IDGAVADPHWLDPSIVVEVK#.C              | 4.05   | 3.13   | 1.29 | 0.77 |
| P37913_DNL1_MOUSE  | Lig1     | DNA ligase 1 OS=Mus mu   | R.LGPPQQQLGELGVGDVLLK#.A               | 8.35   | 2.95   | 2.83 | 0.35 |
| Q9ERGO_LIMA1_MOUSE | Lima1    | LIM domain and actin-bi  | R.ELSVQEQK#R@.N                        | 13.15  | 4.47   | 2.94 | 0.34 |
| Q9ERGO_LIMA1_MOUSE | Lima1    | LIM domain and actin-bi  | R.FGSR@PEAVIQSR@.Y                     | 17.40  | 8.10   | 2.15 | 0.47 |
| Q9ERGO_LIMA1_MOUSE | Lima1    | LIM domain and actin-bi  | R.HEAEK#PETSNETSGK#.I                  | 15.06  | 11.77  | 1.28 | 0.78 |
| Q9ERGO_LIMA1_MOUSE | Lima1    | LIM domain and actin-bi  | R.IAWPPPAAELGSGSALIEGK#.V              | 32.89  | 17.17  | 1.92 | 0.52 |
| Q9ERGO_LIMA1_MOUSE | Lima1    | LIM domain and actin-bi  | R.K#GWSESEQSEFFGGGIATM*ER@.K           | 25.98  | 11.70  | 2.22 | 0.45 |
| Q9ERGO_LIMA1_MOUSE | Lima1    | LIM domain and actin-bi  | R.K#GWSESEQSEFFGGGIATMER@.K            | 5.54   | 3.97   | 1.40 | 0.72 |
| Q9ERGO_LIMA1_MOUSE | Lima1    | LIM domain and actin-bi  | K.QSSPASYTNELK#.T                      | 16.88  | 12.24  | 1.35 | 0.74 |
| Q9ERGO_LIMA1_MOUSE | Lima1    | LIM domain and actin-bi  | K.SDNEETLGR@PAOPPNAGSEPHSPGVEDIPIAK#.V | 48.25  | 40.59  | 1.19 | 0.84 |
| Q9ERGO_LIMA1_MOUSE | Lima1    | LIM domain and actin-bi  | K.SQDVGFWEQVVR@.E                      | 51.03  | 20.70  | 2.46 | 0.41 |
| Q9ERGO_LIMA1_MOUSE | Lima1    | LIM domain and actin-bi  | K.VGVLAASM*EAK#.A                      | 115.30 | 65.27  | 1.77 | 0.57 |
| Q9ERGO_LIMA1_MOUSE | Lima1    | LIM domain and actin-bi  | K.VGVLAASM*EAK#.A                      | 28.95  | 22.99  | 1.26 | 0.79 |
| Q9ERGO_LIMA1_MOUSE | Lima1    | LIM domain and actin-bi  | R.WQGEVPR.S                            | 30.69  | 15.76  | 1.95 | 0.51 |
| Q9ERGO_LIMA1_MOUSE | Lima1    | LIM domain and actin-bi  | K.YNVPLNR.L                            | 22.11  | 15.01  | 1.47 | 0.68 |
| Q9ERGO_LIMA1_MOUSE | Lima1    | LIM domain and actin-bi  | K.SQDVGFWEQVVR@.E                      | 5.83   | 1.94   | 3.01 | 0.33 |
| Q9ERGO_LIMA1_MOUSE | Lima1    | LIM domain and actin-bi  | K.EFTTQK#R.S                           | 43.18  | 20.99  | 2.06 | 0.49 |
| Q9ERGO_LIMA1_MOUSE | Lima1    | LIM domain and actin-bi  | R.ELSVQEQK#R                           | 21.62  | 13.61  | 1.59 | 0.63 |
| Q9ERGO_LIMA1_MOUSE | Lima1    | LIM domain and actin-bi  | R.ELSVQEQK#R                           | 29.42  | 14.29  | 2.06 | 0.49 |
| Q9ERGO_LIMA1_MOUSE | Lima1    | LIM domain and actin-bi  | R.FGSR@PEAVIQSR@.Y                     | 51.74  | 27.75  | 1.86 | 0.54 |
| Q9ERGO_LIMA1_MOUSE | Lima1    | LIM domain and actin-bi  | K.GNVDYEGFHG#.Q                        | 17.36  | 14.13  | 1.23 | 0.81 |
| Q9ERGO_LIMA1_MOUSE | Lima1    | LIM domain and actin-bi  | R.HEAEK#PETSNETSGK#.I                  | 96.52  | 55.95  | 1.73 | 0.58 |
| Q9ERGO_LIMA1_MOUSE | Lima1    | LIM domain and actin-bi  | R.HEAEK#PETSNETSGK#.I                  | 3.54   | 2.00   | 1.77 | 0.57 |
| Q9ERGO_LIMA1_MOUSE | Lima1    | LIM domain and actin-bi  | R.HEAEK#PETSNETSGK#.I                  | 21.03  | 43.02  | 0.49 | 2.05 |
| Q9ERGO_LIMA1_MOUSE | Lima1    | LIM domain and actin-bi  | R.IAWPPPAAELGSGSALIEGK#.V              | 58.66  | 37.43  | 1.57 | 0.64 |
| Q9ERGO_LIMA1_MOUSE | Lima1    | LIM domain and actin-bi  | R.K#GWSESEQSEFFGGGIATM*ER@.K           | 38.32  | 22.54  | 1.70 | 0.59 |
| Q9ERGO_LIMA1_MOUSE | Lima1    | LIM domain and actin-bi  | R.K#GWSESEQSEFFGGGIATMER@.K            | 5.16   | 5.18   | 1.00 | 1.00 |
| Q9ERGO_LIMA1_MOUSE | Lima1    | LIM domain and actin-bi  | K.QSSPASYTNELK#.T                      | 94.36  | 58.86  | 1.60 | 0.62 |
| Q9ERGO_LIMA1_MOUSE | Lima1    | LIM domain and actin-bi  | K.SEAQQPM*HPK#PLSPDAR@.T               | 38.52  | 20.98  | 1.84 | 0.54 |
| Q9ERGO_LIMA1_MOUSE | Lima1    | LIM domain and actin-bi  | K.SQDVGFWEQVVR@.E                      | 117.35 | 49.64  | 2.36 | 0.42 |
| Q9ERGO_LIMA1_MOUSE | Lima1    | LIM domain and actin-bi  | R.SRPFTVAASFR.T                        | 42.20  | 24.20  | 1.74 | 0.57 |
| Q9ERGO_LIMA1_MOUSE | Lima1    | LIM domain and actin-bi  | K.SSAIVFESK#.Y                         | 35.82  | 20.28  | 1.77 | 0.57 |
| Q9ERGO_LIMA1_MOUSE | Lima1    | LIM domain and actin-bi  | R.TSSLPESSPK#.T                        | 161.61 | 107.70 | 1.50 | 0.67 |
| Q9ERGO_LIMA1_MOUSE | Lima1    | LIM domain and actin-bi  | K.VGVLAASM*EAK#.A                      | 296.69 | 174.72 | 1.70 | 0.59 |
| Q9ERGO_LIMA1_MOUSE | Lima1    | LIM domain and actin-bi  | K.VGVLAASM*EAK#.A                      | 40.16  | 23.05  | 1.74 | 0.57 |
| Q9ERGO_LIMA1_MOUSE | Lima1    | LIM domain and actin-bi  | R.WQGEVPR@.S                           | 74.57  | 38.98  | 1.91 | 0.52 |
| Q9ERGO_LIMA1_MOUSE | Lima1    | LIM domain and actin-bi  | R.HEAEK#PETSNETSGK#.I                  | 26.99  | 10.50  | 2.57 | 0.39 |
| Q9ERGO_LIMA1_MOUSE | Lima1    | LIM domain and actin-bi  | R.HEAEK#PETSNETSGK#.I                  | 15.84  | 8.11   | 1.95 | 0.51 |
| Q9ERGO_LIMA1_MOUSE | Lima1    | LIM domain and actin-bi  | R.IAWPPPAAELGSGSALIEGK#.V              | 13.91  | 5.75   | 2.42 | 0.41 |
| Q9ERGO_LIMA1_MOUSE | Lima1    | LIM domain and actin-bi  | R.K#GWSESEQSEFFGGGIATM*ER@.K           | 7.37   | 1.30   | 5.69 | 0.18 |
| Q9ERGO_LIMA1_MOUSE | Lima1    | LIM domain and actin-bi  | K.QSSPASYTNELK#.T                      | 12.78  | 5.69   | 2.25 | 0.45 |
| Q9ERGO_LIMA1_MOUSE | Lima1    | LIM domain and actin-bi  | K.SDNEETLGR@PAOPPNAGSEPHSPGVEDIPIAK#.V | 9.19   | 4.50   | 2.04 | 0.49 |
| Q88GB5_LIMD2_MOUSE | Limd2    | LIM domain-containing t  | K.GNVDYEGFGR@.K                        | 6.33   | 3.50   | 1.81 | 0.55 |
| Q99JW4_LIMS1_MOUSE | Lims1    | LIM and senescent cell   | ar K.FPLELX.K                          | 36.36  | 20.32  | 1.79 | 0.56 |
| Q99JW4_LIMS1_MOUSE | Lims1    | LIM and senescent cell   | ar K.GGFAPAEK#.I                       | 106.34 | 49.40  | 2.15 | 0.46 |
| Q99JW4_LIMS1_MOUSE | Lims1    | LIM and senescent cell   | ar K.LSELTGR@.K                        | 140.63 | 50.76  | 2.77 | 0.36 |
| Q99JW4_LIMS1_MOUSE | Lims1    | LIM and senescent cell   | ar R.VIEGDVVSALNK#.A                   | 79.34  | 39.67  | 2.00 | 0.50 |
| Q99JW4_LIMS1_MOUSE | Lims1    | LIM and senescent cell   | ar R.VIEGDVVSALNK#.A                   | 13.61  | 16.47  | 0.83 | 1.21 |
| Q99JW4_LIMS1_MOUSE | Lims1    | LIM and senescent cell   | ar R.VIEGDVVSALNK#.A                   | 7.64   | 3.14   | 2.44 | 0.41 |
| Q99JW4_LIMS1_MOUSE | Lims1    | LIM and senescent cell   | ar R.VIEGDVVSALNK#.A                   | 8.07   | 5.22   | 1.54 | 0.65 |
| Q8CD94_LINS2_MOUSE | Lin52    | Protein lin-52 homolog   | C.R.GLQNLALQGLDESRA@.E                 | 4.07   | 3.18   | 1.28 | 0.78 |
| O88952_LIN7C_MOUSE | Lin7c    | Protein lin-7 homolog    | C.R.EVVEHYVETVDISSPEVR@.A              | 12.48  | 4.75   | 2.63 | 0.38 |
| O88952_LIN7C_MOUSE | Lin7c    | Protein lin-7 homolog    | C.R.VVLPK#PTEGLGNIM*GGK#.E             | 5.06   | 5.28   | 0.96 | 1.04 |
| Q8C735_LIN9_MOUSE  | Lin9     | Protein lin-9 homolog    | O.R.GIHDFGLTGQDADVTLNATYR@.V           | 5.30   | 2.31   | 2.30 | 0.44 |
| Q9DF03_LMAN1_MOUSE | Lman1    | Protein ERGIC-53 OS=M    | u R.DIDSLAQ.R.S                        | 544.67 | 338.03 | 1.61 | 0.62 |
| Q9DF03_LMAN1_MOUSE | Lman1    | Protein ERGIC-53 OS=M    | u K.GHPDLOGQADDFISGDR@.E               | 15.03  | 6.47   | 2.32 | 0.43 |
| Q9DF03_LMAN1_MOUSE | Lman1    | Protein ERGIC-53 OS=M    | u R.R@GAGTGPQGVQVQQELDTVVK#.S          | 10.33  | 5.27   | 1.96 | 0.51 |
| Q9DF03_LMAN1_MOUSE | Lman1    | Protein ERGIC-53 OS=M    | u R.YVSSLTEEISR@.R                     | 27.55  | 12.80  | 2.15 | 0.46 |
| Q9DBH5_LMAN2_MOUSE | Lman2    | Vesicular integral-memb  | K.DNFHGLAIFLDTPYNDETTER@.V             | 20.79  | 9.89   | 2.10 | 0.48 |
| Q9DBH5_LMAN2_MOUSE | Lman2    | Vesicular integral-memb  | K.DNVDPTGNFR@.N                        | 25.77  | 6.42   | 4.02 | 0.25 |
| Q9DBH5_LMAN2_MOUSE | Lman2    | Vesicular integral-memb  | K.LFQLTVQR@.T                          | 29.55  | 8.79   | 3.36 | 0.30 |
| Q9DBH5_LMAN2_MOUSE | Lman2    | Vesicular integral-memb  | R.LPTGYFGASAGTGDLSDNHDIIISIK#.L        | 22.90  | 13.72  | 1.67 | 0.60 |
| Q9DBH5_LMAN2_MOUSE | Lman2    | Vesicular integral-memb  | R.NR@DHTDFLAVR@.Y                      | 24.84  | 6.63   | 3.75 | 0.27 |
| Q9DBH5_LMAN2_MOUSE | Lman2    | Vesicular integral-memb  | R.TPEESIDWTK#.I                        | 17.15  | 6.22   | 2.76 | 0.36 |
| Q9DBH5_LMAN2_MOUSE | Lman2    | Vesicular integral-memb  | K.DNFHGLAIFLDTPYNDETTER@.V             | 12.81  | 6.28   | 2.04 | 0.49 |
| Q9DBH5_LMAN2_MOUSE | Lman2    | Vesicular integral-memb  | K.DNVDPTGNFR@.N                        | 12.37  | 4.05   | 3.06 | 0.33 |
| QBVEE1_LMCD1_MOUSE | Lmcd1    | LIM and cysteine-rich    | do K.GAAPVDSVVVADR@.A                  | 5.93   | 2.94   | 2.02 | 0.50 |
| Q8VEE1_LMCD1_MOUSE | Lmcd1    | LIM and cysteine-rich    | do K.SEALGVGEVALPGQGLPK#.E             | 5.60   | 2.62   | 2.14 | 0.47 |
| P48678_LMNA_MOUSE  | Lmna     | Prelamin-A/C OS=Mus      | mi R.LADALQELR.A                       | 15.43  | 17.67  | 0.87 | 1.14 |
| P48678_LMNA_MOUSE  | Lmna     | Prelamin-A/C OS=Mus      | mi R.M*QQQLDEYQELLDI.K                 | 3.77   | 5.04   | 0.75 | 1.34 |
| P48678_LMNA_MOUSE  | Lmna     | Prelamin-A/C OS=Mus      | mi R.NSNLVGAHAHEEQSR.S                 | 2.05   | 2.64   | 0.78 | 1.29 |
| P48678_LMNA_MOUSE  | Lmna     | Prelamin-A/C OS=Mus      | mi R.SLETENAGRL.L                      | 2.73   | 5.62   | 0.48 | 2.06 |
| P48678_LMNA_MOUSE  | Lmna     | Prelamin-A/C OS=Mus      | mi R.TALINSTGEEVAM*R.K                 | 6.39   | 10.43  | 0.61 | 1.63 |
| P48678_LMNA_MOUSE  | Lmna     | Prelamin-A/C OS=Mus      | mi R.SLETENAGRL.L                      | 3.11   | 13.46  | 0.23 | 4.33 |
| P48678_LMNA_MOUSE  | Lmna     | Prelamin-A/C OS=Mus      | mi R.TALINSTGEEVAM*R.K                 | 2.98   | 8.24   | 0.36 | 2.76 |
| P48678_LMNA_MOUSE  | Lmna     | Prelamin-A/C OS=Mus      | mi K.AAGGAGAGQVGGISSGSASSVTVTR.S       | 17.57  | 15.26  | 1.15 | 0.87 |
| P48678_LMNA_MOUSE  | Lmna     | Prelamin-A/C OS=Mus      | mi K.AGQAVVTIWAASGAGATHSPPTDLVWK.A     | 20.32  | 21.63  | 0.94 | 1.06 |
| P48678_LMNA_MOUSE  | Lmna     | Prelamin-A/C OS=Mus      | mi K.EALSTALSEK#.R                     | 52.76  | 67.53  | 0.78 | 1.28 |
| P48678_LMNA_MOUSE  | Lmna     | Prelamin-A/C OS=Mus      | mi K.EGDLAAQAR@.L                      | 54.48  | 70.29  | 0.78 | 1.29 |
| P48678_LMNA_MOUSE  | Lmna     | Prelamin-A/C OS=Mus      | mi R.IDLSAQLSLOLQK#.Q                  | 44.80  | 59.36  | 0.75 | 1.33 |
| P48678_LMNA_MOUSE  | Lmna     | Prelamin-A/C OS=Mus      | mi R.IRIDSLSAQLSLOLQK#.Q               | 33.57  | 43.84  | 0.77 | 1.31 |
| P48678_LMNA_MOUSE  | Lmna     | Prelamin-A/C OS=Mus      | mi R.ITESEVVS.R.E                      | 107.19 | 143.29 | 0.75 | 1.34 |
| P48678_LMNA_MOUSE  | Lmna     | Prelamin-A/C OS=Mus      | mi R.KLLEGEER.L                        | 8.41   | 11.66  | 0.72 | 1.39 |
| P48678_LMNA_MOUSE  | Lmna     | Prelamin-A/C OS=Mus      | mi R.LADALQELR.A                       | 116.96 | 163.14 | 0.72 | 1.39 |
| P48678_LMNA_MOUSE  | Lmna     | Prelamin-A/C OS=Mus      | mi R.LAVYIDR.V                         | 87.97  | 110.69 | 0.79 | 1.26 |
| P48678_LMNA_MOUSE  | Lmna     | Prelamin-A/C OS=Mus      | mi R.LK#DLEALLNSK#.E                   | 118.75 | 149.79 | 0.79 | 1.26 |
| P48678_LMNA_MOUSE  | Lmna     | Prelamin-A/C OS=Mus      | mi K.LLEGEER.L                         | 78.67  | 109.76 | 0.72 | 1.40 |
| P48678_LMNA_MOUSE  | Lmna     | Prelamin-A/C OS=Mus      | mi R.LQEKEDLQELNDR.L                   | 64.82  | 93.56  | 0.69 | 1.44 |
| P48678_LMNA_MOUSE  | Lmna     | Prelamin-A/C OS=Mus      | mi R.LQEK#EDLQELNDR@.L                 | 14.52  | 15.31  | 0.95 | 1.05 |
| P48678_LMNA_MOUSE  | Lmna     | Prelamin-A/C OS=Mus      | mi K.LRDLDSLAR.E                       | 82.49  | 97.90  | 0.84 | 1.19 |
| P48678_LMNA_MOUSE  | Lmna     | Prelamin-A/C OS=Mus      | mi R.LSPSPTSQR.S                       | 38.21  | 61.61  | 0.62 | 1.61 |
| P48678_LMNA_MOUSE  | Lmna     | Prelamin-A/C OS=Mus      | mi R.M*QQQLDEYQELLDI.K                 | 32.33  | 39.79  | 0.81 | 1.23 |
| P48678_LMNA_MOUSE  | Lmna     | Prelamin-A/C OS=Mus      | mi R.MQQQLDEYQELLDI.K                  | 6.35   | 8.38   | 0.76 | 1.32 |

|                     |        |                                                                                |        |        |       |      |
|---------------------|--------|--------------------------------------------------------------------------------|--------|--------|-------|------|
| P48678_LMNA_MOUSE   | Lmna   | Prelamin-A/C OS=Mus mi R.NSNLVGAHEELQQR@.I                                     | 63.86  | 67.90  | 0.94  | 1.06 |
| P48678_LMNA_MOUSE   | Lmna   | Prelamin-A/C OS=Mus mi R.SGAQASSTPLSPTR.I                                      | 66.72  | 91.18  | 0.73  | 1.37 |
| P48678_LMNA_MOUSE   | Lmna   | Prelamin-A/C OS=Mus mi R.SLETENAGLR@.L                                         | 37.99  | 56.89  | 0.66  | 1.52 |
| P48678_LMNA_MOUSE   | Lmna   | Prelamin-A/C OS=Mus mi K.SNEDQSM*GNWQJR.R                                      | 17.17  | 18.52  | 0.93  | 1.08 |
| P48678_LMNA_MOUSE   | Lmna   | Prelamin-A/C OS=Mus mi K.SNEDQSMGNWQJR.R                                       | 4.09   | 6.85   | 0.60  | 1.68 |
| P48678_LMNA_MOUSE   | Lmna   | Prelamin-A/C OS=Mus mi R.SVGGGGGGSGDNLVTR.S                                    | 33.72  | 36.19  | 0.93  | 1.07 |
| P48678_LMNA_MOUSE   | Lmna   | Prelamin-A/C OS=Mus mi R.TALINSTGEEVAM*R.K                                     | 39.40  | 52.19  | 0.75  | 1.32 |
| P48678_LMNA_MOUSE   | Lmna   | Prelamin-A/C OS=Mus mi R.TLEGEHLDR.G                                           | 30.56  | 13.30  | 2.30  | 0.44 |
| P48678_LMNA_MOUSE   | Lmna   | Prelamin-A/C OS=Mus mi R.VAEEVEDEEGK.F                                         | 17.23  | 28.15  | 0.61  | 1.63 |
| P48678_LMNA_MOUSE   | Lmna   | Prelamin-A/C OS=Mus mi R.VAEEVEDEEGK#FVR@.L                                    | 140.07 | 176.15 | 0.80  | 1.26 |
| P14733_LMNB1_MOUSE  | Lmnb1  | Lamin-B1 OS=Mus muscu K.ALYETELADAR.R                                          | 10.84  | 20.91  | 0.52  | 1.93 |
| P14733_LMNB1_MOUSE  | Lmnb1  | Lamin-B1 OS=Mus muscu K.DAALATALGDKK.S                                         | 9.24   | 29.32  | 0.32  | 3.17 |
| P14733_LMNB1_MOUSE  | Lmnb1  | Lamin-B1 OS=Mus muscu R.DQM*QQQLDSYQLLQDVK.L                                   | 1.53   | 3.94   | 0.39  | 2.57 |
| P14733_LMNB1_MOUSE  | Lmnb1  | Lamin-B1 OS=Mus muscu K.FKAEH2DLMLNAYK.K                                       | 5.28   | 14.46  | 0.37  | 2.74 |
| P14733_LMNB1_MOUSE  | Lmnb1  | Lamin-B1 OS=Mus muscu R.IESLSSQLSNLQK.E                                        | 2.87   | 10.23  | 0.28  | 3.57 |
| P14733_LMNB1_MOUSE  | Lmnb1  | Lamin-B1 OS=Mus muscu R.IQEEDM*LAK.E                                           | 12.71  | 14.43  | 0.88  | 1.14 |
| P14733_LMNB1_MOUSE  | Lmnb1  | Lamin-B1 OS=Mus muscu R.LAVYIDK.V                                              | 9.27   | 25.95  | 0.36  | 2.80 |
| P14733_LMNB1_MOUSE  | Lmnb1  | Lamin-B1 OS=Mus muscu R.LSSEM*NTVSNVARS.E                                      | 4.83   | 14.43  | 0.33  | 2.99 |
| P14733_LMNB1_MOUSE  | Lmnb1  | Lamin-B1 OS=Mus muscu R.LVEVDSDR.G                                             | 12.67  | 19.44  | 0.65  | 1.53 |
| P14733_LMNB1_MOUSE  | Lmnb1  | Lamin-B1 OS=Mus muscu K.TTPEEEEEEEPIGVAVEEER.F                                 | 6.82   | 14.88  | 0.46  | 2.18 |
| P21619_LMNB2_MOUSE  | Lmnb2  | Lamin-B2 OS=Mus muscu R.VELEQTYQAK.L                                           | 4.06   | 6.54   | 0.62  | 1.61 |
| E9PYF4_E9PYF4_MOUSE | Lmo7   | Protein Lmo7 OS=Mus m R.AGEEEDR@QLEDDAVVEDQSQK#.L                              | 14.35  | 6.78   | 2.11  | 0.47 |
| E9PYF4_E9PYF4_MOUSE | Lmo7   | Protein Lmo7 OS=Mus m K.ATFSSM*SGLDSVSDSGEGR@.G                                | 5.91   | 1.83   | 3.23  | 0.31 |
| E9PYF4_E9PYF4_MOUSE | Lmo7   | Protein Lmo7 OS=Mus m R.ATGPK#PDSHFFHSASEK#EVIATEDVASLSSPTLPSSSLSHDR@.A        | 6.33   | 2.25   | 2.81  | 0.36 |
| E9PYF4_E9PYF4_MOUSE | Lmo7   | Protein Lmo7 OS=Mus m R.EPVAATVEATWSEGGSK#.S                                   | 3.75   | 1.38   | 2.71  | 0.37 |
| E9PYF4_E9PYF4_MOUSE | Lmo7   | Protein Lmo7 OS=Mus m R.LSTPIAGLDNINNVFLR@.A                                   | 14.13  | 17.67  | 0.80  | 1.25 |
| E9PYF4_E9PYF4_MOUSE | Lmo7   | Protein Lmo7 OS=Mus m R.QASGSSAEPHQAPLLSTPR@.R                                 | 12.92  | 6.33   | 2.04  | 0.49 |
| E9PYF4_E9PYF4_MOUSE | Lmo7   | Protein Lmo7 OS=Mus m R.R@SQFFEQGSSDVAPDLPVPTLSAPS@.W                          | 2.72   | 1.89   | 1.44  | 0.69 |
| E9PYF4_E9PYF4_MOUSE | Lmo7   | Protein Lmo7 OS=Mus m K.SM*SDVSAEDVQNLR@.Q                                     | 18.08  | 10.11  | 1.86  | 0.54 |
| E9PYF4_E9PYF4_MOUSE | Lmo7   | Protein Lmo7 OS=Mus m R.STTEINDPLIEK#.N                                        | 14.80  | 3.82   | 3.68  | 0.27 |
| E9PYF4_E9PYF4_MOUSE | Lmo7   | Protein Lmo7 OS=Mus m K.WIDTTSIYNSDK#.S                                        | 9.24   | 3.69   | 2.50  | 0.40 |
| F6TFN2_F6TFN2_MOUSE | Lmo7   | Protein Lmo7 (Fragment R.SWASPYTETDGTFR@.S                                     | 7.14   | 2.73   | 2.62  | 0.38 |
| E9PYF4_E9PYF4_MOUSE | Lmo7   | Protein Lmo7 OS=Mus m R.AGEEEDR@QLEDDAVVEDQSQK.L                               | 29.41  | 7.00   | 4.20  | 0.24 |
| E9PYF4_E9PYF4_MOUSE | Lmo7   | Protein Lmo7 OS=Mus m K.AQSNPPYNGPYLNLK#.A                                     | 10.31  | 1.75   | 5.89  | 0.17 |
| E9PYF4_E9PYF4_MOUSE | Lmo7   | Protein Lmo7 OS=Mus m K.ASESISLK#.N                                            | 42.24  | 13.15  | 3.21  | 0.31 |
| E9PYF4_E9PYF4_MOUSE | Lmo7   | Protein Lmo7 OS=Mus m K.ATFSSM*SGLDSVSDSGEGR@.G                                | 12.82  | 4.27   | 3.00  | 0.33 |
| E9PYF4_E9PYF4_MOUSE | Lmo7   | Protein Lmo7 OS=Mus m R.ATGPK#PDSHFFHSASEK#.E                                  | 11.60  | 4.42   | 2.63  | 0.38 |
| E9PYF4_E9PYF4_MOUSE | Lmo7   | Protein Lmo7 OS=Mus m R.EAQAWAEAEAK#.A                                         | 16.31  | 4.67   | 3.49  | 0.29 |
| E9PYF4_E9PYF4_MOUSE | Lmo7   | Protein Lmo7 OS=Mus m R.EDFSLDSLGRS@.S                                         | 11.78  | 7.31   | 1.61  | 0.62 |
| E9PYF4_E9PYF4_MOUSE | Lmo7   | Protein Lmo7 OS=Mus m R.EPVAATVEATWSEGGSK#.S                                   | 5.57   | 1.70   | 3.28  | 0.30 |
| E9PYF4_E9PYF4_MOUSE | Lmo7   | Protein Lmo7 OS=Mus m K.EVIATEDVASLSSPTLPSSSLSHDR@.A                           | 17.74  | 6.76   | 2.62  | 0.38 |
| E9PYF4_E9PYF4_MOUSE | Lmo7   | Protein Lmo7 OS=Mus m R.ISALPR@.S                                              | 57.46  | 22.29  | 2.58  | 0.39 |
| E9PYF4_E9PYF4_MOUSE | Lmo7   | Protein Lmo7 OS=Mus m R.LAPSPSEPR@.Q                                           | 58.59  | 19.93  | 2.94  | 0.34 |
| E9PYF4_E9PYF4_MOUSE | Lmo7   | Protein Lmo7 OS=Mus m R.LSTPIAGLDNINNVFLR.A                                    | 75.90  | 27.31  | 2.78  | 0.36 |
| E9PYF4_E9PYF4_MOUSE | Lmo7   | Protein Lmo7 OS=Mus m K.NFETDFR@.A                                             | 17.47  | 6.07   | 2.88  | 0.35 |
| E9PYF4_E9PYF4_MOUSE | Lmo7   | Protein Lmo7 OS=Mus m R.NPSSAVPPAGSVK#.T                                       | 11.38  | 6.06   | 1.88  | 0.53 |
| E9PYF4_E9PYF4_MOUSE | Lmo7   | Protein Lmo7 OS=Mus m R.QASGSSAEPHQAPLLSTPR@.R                                 | 22.66  | 10.63  | 2.13  | 0.47 |
| E9PYF4_E9PYF4_MOUSE | Lmo7   | Protein Lmo7 OS=Mus m K.R@EDTTSYM*LPDTR@.S                                     | 5.11   | 2.42   | 2.11  | 0.47 |
| E9PYF4_E9PYF4_MOUSE | Lmo7   | Protein Lmo7 OS=Mus m R.R@SQFFEQGSSDVAPDLPVPTLSAPS@.W                          | 8.00   | 1.98   | 4.04  | 0.25 |
| E9PYF4_E9PYF4_MOUSE | Lmo7   | Protein Lmo7 OS=Mus m R.SLQDQFSM*R@.V                                          | 20.13  | 5.90   | 3.41  | 0.29 |
| E9PYF4_E9PYF4_MOUSE | Lmo7   | Protein Lmo7 OS=Mus m K.SLDSSEGR@.A                                            | 13.56  | 5.49   | 2.47  | 0.40 |
| E9PYF4_E9PYF4_MOUSE | Lmo7   | Protein Lmo7 OS=Mus m K.SM*SDVSAEDVQNLR@.Q                                     | 40.90  | 17.65  | 2.54  | 0.39 |
| E9PYF4_E9PYF4_MOUSE | Lmo7   | Protein Lmo7 OS=Mus m K.SMSDVAEDVQNLR@.Q                                       | 4.68   | 1.88   | 2.49  | 0.40 |
| E9PYF4_E9PYF4_MOUSE | Lmo7   | Protein Lmo7 OS=Mus m K.SSSLVSTDFESLQSPYTESK#.E                                | 17.32  | 4.56   | 3.80  | 0.26 |
| E9PYF4_E9PYF4_MOUSE | Lmo7   | Protein Lmo7 OS=Mus m R.STTEINDPLIEK#.N                                        | 28.20  | 9.97   | 2.83  | 0.35 |
| E9PYF4_E9PYF4_MOUSE | Lmo7   | Protein Lmo7 OS=Mus m R.WAWDQEER@.R                                            | 7.29   | 2.31   | 3.15  | 0.32 |
| E9PYF4_E9PYF4_MOUSE | Lmo7   | Protein Lmo7 OS=Mus m K.WIDTTSIYNSDK#.S                                        | 18.34  | 5.72   | 3.20  | 0.31 |
| F6TFN2_F6TFN2_MOUSE | Lmo7   | Protein Lmo7 (Fragment R.SWASPYTETDGTFR@.S                                     | 26.81  | 8.51   | 3.15  | 0.32 |
| Q8CGK3_LONM_MOUSE   | Lonp1  | Lon protease homolog, n K.AQLSAAVTLLIK#.Q                                      | 9.30   | 2.30   | 4.04  | 0.25 |
| Q8CGK3_LONM_MOUSE   | Lonp1  | Lon protease homolog, n K.EVEDELGP#QLEM*VTEAATDTSK#.E                          | 10.58  | 6.28   | 1.69  | 0.59 |
| Q8CGK3_LONM_MOUSE   | Lonp1  | Lon protease homolog, n R.FVSGGM*TDVAEK#.G                                     | 14.50  | 10.21  | 2.40  | 0.42 |
| Q8CGK3_LONM_MOUSE   | Lonp1  | Lon protease homolog, n K.HVM*DVVDEELSK#.L                                     | 8.30   | 2.41   | 3.45  | 0.29 |
| Q8CGK3_LONM_MOUSE   | Lonp1  | Lon protease homolog, n K.IVSGEAQTVQTPENLQDFVGK#PVFTVER@.M                     | 17.95  | 9.77   | 1.84  | 0.54 |
| Q8CGK3_LONM_MOUSE   | Lonp1  | Lon protease homolog, n R.LAQPVGFLK#.R                                         | 23.71  | 9.21   | 2.57  | 0.39 |
| Q8CGK3_LONM_MOUSE   | Lonp1  | Lon protease homolog, n R.M*EM*INVSQVVAQEK#.L                                  | 3.71   | 3.51   | 2.25  | 0.44 |
| Q8CGK3_LONM_MOUSE   | Lonp1  | Lon protease homolog, n R.VLEFIQVQLR@.G                                        | 34.44  | 11.92  | 2.89  | 0.35 |
| Q8CGK3_LONM_MOUSE   | Lonp1  | Lon protease homolog, n R.VVDNIPILSDM*GAALTGAESHELQDVLLEENLK#.R                | 6.72   | 1.64   | 4.09  | 0.24 |
| Q8CGK3_LONM_MOUSE   | Lonp1  | Lon protease homolog, n R.DIFFIAPR@.R                                          | 10.05  | 4.80   | 2.09  | 0.48 |
| Q8CGK3_LONM_MOUSE   | Lonp1  | Lon protease homolog, n K.EVEDELGP#QLEM*VTEAATDTSK#.E                          | 3.97   | 1.74   | 2.29  | 0.44 |
| P28301_LYOX_MOUSE   | Lox    | Protein-lysine 6-oxidase R.M*VGDDPNYPYK.Y                                      | 3.47   | 7.36   | 0.47  | 2.12 |
| P28301_LYOX_MOUSE   | Lox    | Protein-lysine 6-oxidase R.NRPGYGTGYFQYGLPDLVDPDYIQAQSTVYQK.M                  | 2.26   | 2.68   | 0.84  | 1.18 |
| P28301_LYOX_MOUSE   | Lox    | Protein-lysine 6-oxidase R.TPILLR.D                                            | 18.85  | 31.15  | 0.61  | 1.65 |
| P28301_LYOX_MOUSE   | Lox    | Protein-lysine 6-oxidase K.VSVNPSVLPESDYTNVVR.C                                | 3.86   | 9.59   | 0.40  | 2.48 |
| P97873_LOXL1_MOUSE  | Loxl1  | Lysyl oxidase homolog 1 R.VLLAGAPQTSOR@.R                                      | 12.02  | 8.79   | 1.37  | 0.73 |
| Q924C6_LOXL4_MOUSE  | Loxl4  | Lysyl oxidase homolog 4 R.EALFGAQLQGGLPIHLEVR.C                                | 11.01  | 14.39  | 0.77  | 1.31 |
| Q924C6_LOXL4_MOUSE  | Loxl4  | Lysyl oxidase homolog 4 R.VSNALPQGR.R                                          | 5.04   | 5.60   | 0.90  | 1.11 |
| Q91V01_MBOA5_MOUSE  | Lpcat3 | Lysophospholipid acyltri K.VVLFETPR@.F                                         | 12.31  | 6.86   | 1.79  | 0.56 |
| Q8BFW7_LPP_MOUSE    | Lpp    | Lipoma-preferred partne K.SAQSPHYM*AGPSSGQIYGPGPR@.G                           | 3.27   | 2.21   | 1.48  | 0.68 |
| Q8BFW7_LPP_MOUSE    | Lpp    | Lipoma-preferred partne R.YEPPYAAQPSYGGR@.S                                    | 8.78   | 3.96   | 2.22  | 0.45 |
| Q8BFW7_LPP_MOUSE    | Lpp    | Lipoma-preferred partne K.EPIM*PAGQETVEYR@.I                                   | 9.97   | 3.82   | 2.61  | 0.38 |
| Q8BFW7_LPP_MOUSE    | Lpp    | Lipoma-preferred partne K.M*LYDM*ENPPADYFGR@.C                                 | 4.71   | 2.15   | 2.19  | 0.46 |
| Q8BFW7_LPP_MOUSE    | Lpp    | Lipoma-preferred partne K.SAQSPHYM*AGPSSGQIYGPGPR@.G                           | 23.29  | 13.85  | 1.68  | 0.59 |
| Q8BFW7_LPP_MOUSE    | Lpp    | Lipoma-preferred partne R.SEGDTAYGQVQLSPTWK#.R                                 | 8.68   | 3.30   | 2.63  | 0.38 |
| Q8BFW7_LPP_MOUSE    | Lpp    | Lipoma-preferred partne R.YEPPYAAQPSYGGR@.S                                    | 21.97  | 7.40   | 2.97  | 0.34 |
| Q9ESE1_LRBA_MOUSE   | Lrba   | Lipopolysaccharide-resp R.VGVGTSFGLPQTR@.R                                     | 11.15  | 4.92   | 2.26  | 0.44 |
| Q3UMG5_LRCH2_MOUSE  | Lrch2  | Leucine-rich repeat and c R.NDHSITGSK#PDSQK#QEVDFIDPNTEDVAVPEEGDTHISGSFVFLK#.G | 3.29   | 2.80   | 1.17  | 0.85 |
| Q3UMG5_LRCH2_MOUSE  | Lrch2  | Leucine-rich repeat and c R.NNLHVLDPDELGPLVK#.L                                | 15.45  | 5.10   | 3.03  | 0.33 |
| Q3UMG5_LRCH2_MOUSE  | Lrch2  | Leucine-rich repeat and c K.YLFDLPLK#.V                                        | 13.02  | 4.88   | 2.67  | 0.37 |
| Q8BVUO_LRCH3_MOUSE  | Lrch3  | Leucine-rich repeat and c R.ALEAAVTVGLVLSGR@.K                                 | 13.77  | 3.41   | 4.03  | 0.25 |
| Q8BVUO_LRCH3_MOUSE  | Lrch3  | Leucine-rich repeat and c R.ASPDLLSSAPATPDPAITR@.Q                             | 5.32   | 6.36   | 0.84  | 1.20 |
| Q8BVUO_LRCH3_MOUSE  | Lrch3  | Leucine-rich repeat and c K.IAPDLPDYER@.R                                      | 19.17  | 10.34  | 1.85  | 0.54 |
| Q8BVUO_LRCH3_MOUSE  | Lrch3  | Leucine-rich repeat and c R.LPEELAEVPLIR.L                                     | 24.69  | 15.81  | 1.56  | 0.64 |
| Q8BVUO_LRCH3_MOUSE  | Lrch3  | Leucine-rich repeat and c R.WSNGNEPDTDFSDLPLR.V                                | 5.99   | 2.40   | 2.49  | 0.40 |
| Q8BVUO_LRCH3_MOUSE  | Lrch3  | Leucine-rich repeat and c R.ALEAAVTVGLVLSGR@.K                                 | 20.04  | 1.66   | 12.05 | 0.08 |
| Q8BVUO_LRCH3_MOUSE  | Lrch3  | Leucine-rich repeat and c R.LPEELAEVPLIR@.L                                    | 19.24  | 7.84   | 2.45  | 0.41 |
| Q8BVUO_LRCH3_MOUSE  | Lrch3  | Leucine-rich repeat and c R.LPEELAEVPLIR@.L                                    | 14.51  | 5.88   | 2.47  | 0.41 |
| Q91ZX7_LRP1_MOUSE   | Lrp1   | Prolow-density lipoprot R.ETLVQDNIQWPTGLAVDYHNER@.L                            | 6.70   | 3.01   | 2.23  | 0.45 |
| Q91ZX7_LRP1_MOUSE   | Lrp1   | Prolow-density lipoprot K.IETAAM*DGTLR@.E                                      | 10.54  | 3.77   | 2.79  | 0.36 |
| Q91ZX7_LRP1_MOUSE   | Lrp1   | Prolow-density lipoprot K.TLISGM*DEPHAVIVDPLR@.G                               | 14.23  | 9.57   | 1.49  | 0.67 |
| Q91ZX7_LRP1_MOUSE   | Lrp1   | Prolow-density lipoprot R.AALSGANVTLIEK#.D                                     | 21.36  | 5.77   | 3.70  | 0.27 |
| Q91ZX7_LRP1_MOUSE   | Lrp1   | Prolow-density lipoprot K.AVTDEEPFLIFANR@.Y                                    | 14.17  | 6.39   | 2.22  | 0.45 |
| Q91ZX7_LRP1_MOUSE   | Lrp1   | Prolow-density lipoprot K.GDYSLVPGGLR@.N                                       | 6.81   | 2.57   | 2.65  | 0.38 |
| Q91ZX7_LRP1_MOUSE   | Lrp1   | Prolow-density lipoprot K.GPVGLAIDFPESK#.L                                     | 17.12  | 7.19   | 2.38  | 0.42 |

|                     |         |                                                      |        |        |      |      |
|---------------------|---------|------------------------------------------------------|--------|--------|------|------|
| Q91ZK7_LRP1_MOUSE   | Lrp1    | Prolow-density lipoprotein receptor class B member 1 | 12.83  | 3.28   | 3.91 | 0.26 |
| Q91ZK7_LRP1_MOUSE   | Lrp1    | Prolow-density lipoprotein receptor class B member 1 | 12.24  | 2.65   | 4.62 | 0.22 |
| Q91ZK7_LRP1_MOUSE   | Lrp1    | Prolow-density lipoprotein receptor class B member 1 | 15.76  | 1.60   | 9.82 | 0.10 |
| Q91ZK7_LRP1_MOUSE   | Lrp1    | Prolow-density lipoprotein receptor class B member 1 | 13.50  | 6.79   | 1.99 | 0.50 |
| P55302_AMRP_MOUSE   | Lrpap1  | Alpha-2-macroglobulin r                              | 6.69   | 7.02   | 0.95 | 1.05 |
| P55302_AMRP_MOUSE   | Lrpap1  | Alpha-2-macroglobulin r                              | 5.51   | 5.07   | 1.09 | 0.92 |
| Q6PB66_LPPRC_MOUSE  | Lrpprc  | Leucine-rich PPR motif-c                             | 7.85   | 4.99   | 1.57 | 0.64 |
| Q6PB66_LPPRC_MOUSE  | Lrpprc  | Leucine-rich PPR motif-c                             | 11.34  | 4.77   | 2.38 | 0.42 |
| Q6PB66_LPPRC_MOUSE  | Lrpprc  | Leucine-rich PPR motif-c                             | 6.76   | 2.57   | 2.63 | 0.38 |
| Q6PB66_LPPRC_MOUSE  | Lrpprc  | Leucine-rich PPR motif-c                             | 3.96   | 1.96   | 2.02 | 0.50 |
| Q6EDY6_LR16A_MOUSE  | Lrrc16a | Leucine-rich repeat-cont                             | 9.93   | 2.52   | 3.58 | 0.28 |
| Q6EDY6_LR16A_MOUSE  | Lrrc16a | Leucine-rich repeat-cont                             | 9.04   | 2.13   | 4.66 | 0.21 |
| Q35125_LRC23_MOUSE  | Lrrc23  | Leucine-rich repeat-cont                             | 10.37  | 2.56   | 4.04 | 0.25 |
| Q9CRC8_LRC40_MOUSE  | Lrrc40  | Leucine-rich repeat-cont                             | 26.01  | 14.20  | 1.83 | 0.55 |
| Q9CRC8_LRC40_MOUSE  | Lrrc40  | Leucine-rich repeat-cont                             | 17.94  | 7.07   | 2.54 | 0.39 |
| Q9CRC8_LRC40_MOUSE  | Lrrc40  | Leucine-rich repeat-cont                             | 17.14  | 8.71   | 1.97 | 0.51 |
| Q9CRC8_LRC40_MOUSE  | Lrrc40  | Leucine-rich repeat-cont                             | 17.02  | 8.21   | 2.07 | 0.48 |
| Q9CRC8_LRC40_MOUSE  | Lrrc40  | Leucine-rich repeat-cont                             | 37.99  | 14.25  | 2.67 | 0.37 |
| Q9CRC8_LRC40_MOUSE  | Lrrc40  | Leucine-rich repeat-cont                             | 13.56  | 5.82   | 2.33 | 0.43 |
| Q9CRC8_LRC40_MOUSE  | Lrrc40  | Leucine-rich repeat-cont                             | 14.45  | 5.36   | 2.70 | 0.37 |
| Q9CRC8_LRC40_MOUSE  | Lrrc40  | Leucine-rich repeat-cont                             | 15.61  | 6.57   | 2.37 | 0.42 |
| Q9CRC8_LRC40_MOUSE  | Lrrc40  | Leucine-rich repeat-cont                             | 22.46  | 15.00  | 1.50 | 0.67 |
| Q9CRC8_LRC40_MOUSE  | Lrrc40  | Leucine-rich repeat-cont                             | 24.20  | 5.03   | 4.81 | 0.21 |
| Q9CRC8_LRC40_MOUSE  | Lrrc40  | Leucine-rich repeat-cont                             | 15.37  | 3.46   | 4.45 | 0.22 |
| Q9CRC8_LRC40_MOUSE  | Lrrc40  | Leucine-rich repeat-cont                             | 15.59  | 11.82  | 1.32 | 0.76 |
| Q9CRC8_LRC40_MOUSE  | Lrrc40  | Leucine-rich repeat-cont                             | 15.30  | 2.90   | 5.28 | 0.19 |
| Q9CRC8_LRC40_MOUSE  | Lrrc40  | Leucine-rich repeat-cont                             | 10.58  | 6.96   | 1.52 | 0.66 |
| Q505F5_LRC47_MOUSE  | Lrrc47  | Leucine-rich repeat-cont                             | 8.10   | 9.29   | 0.87 | 1.15 |
| Q505F5_LRC47_MOUSE  | Lrrc47  | Leucine-rich repeat-cont                             | 5.82   | 4.25   | 1.37 | 0.73 |
| Q505F5_LRC47_MOUSE  | Lrrc47  | Leucine-rich repeat-cont                             | 6.66   | 5.63   | 1.18 | 0.84 |
| Q505F5_LRC47_MOUSE  | Lrrc47  | Leucine-rich repeat-cont                             | 7.54   | 3.05   | 2.47 | 0.40 |
| Q9D1G5_LRC57_MOUSE  | Lrrc57  | Leucine-rich repeat-cont                             | 1.90   | 2.47   | 0.77 | 1.30 |
| Q922Q8_LRC59_MOUSE  | Lrrc59  | Leucine-rich repeat-cont                             | 11.16  | 6.52   | 1.71 | 0.58 |
| Q922Q8_LRC59_MOUSE  | Lrrc59  | Leucine-rich repeat-cont                             | 15.89  | 11.41  | 1.39 | 0.72 |
| Q922Q8_LRC59_MOUSE  | Lrrc59  | Leucine-rich repeat-cont                             | 18.73  | 13.66  | 1.37 | 0.73 |
| Q922Q8_LRC59_MOUSE  | Lrrc59  | Leucine-rich repeat-cont                             | 9.77   | 6.57   | 1.52 | 0.66 |
| Q922Q8_LRC59_MOUSE  | Lrrc59  | Leucine-rich repeat-cont                             | 8.22   | 3.46   | 2.38 | 0.42 |
| Q3UZ39_LRRF1_MOUSE  | Lrrfp1  | Leucine-rich repeat flight r                         | 5.52   | 1.50   | 3.68 | 0.27 |
| E9QN52_E9QN52_MOUSE | Lrrfp2  | Leucine-rich repeat flight r                         | 4.62   | 3.04   | 1.52 | 0.66 |
| E9QN52_E9QN52_MOUSE | Lrrfp2  | Leucine-rich repeat flight r                         | 7.99   | 3.53   | 2.26 | 0.44 |
| Q5S006_LRRK2_MOUSE  | Lrrk2   | Leucine-rich repeat serin                            | 5.37   | 3.74   | 1.43 | 0.70 |
| Q8BU13_LRWD1_MOUSE  | LRWD1   | Leucine-rich repeat and v                            | 40.41  | 4.29   | 9.43 | 0.11 |
| Q8BU13_LRWD1_MOUSE  | LRWD1   | Leucine-rich repeat and v                            | 14.92  | 3.64   | 4.10 | 0.24 |
| Q3UM18_LSG1_MOUSE   | Lsg1    | Large subunit GTPase 1 h                             | 22.25  | 8.99   | 2.48 | 0.40 |
| Q3UM18_LSG1_MOUSE   | Lsg1    | Large subunit GTPase 1 h                             | 12.07  | 4.21   | 2.87 | 0.35 |
| Q9D0R8_LSM12_MOUSE  | Lsm12   | Protein LSM12 homolog                                | 12.60  | 9.62   | 1.31 | 0.76 |
| Q9D0R8_LSM12_MOUSE  | Lsm12   | Protein LSM12 homolog                                | 4.69   | 2.08   | 2.26 | 0.44 |
| O35900_LSM2_MOUSE   | Lsm2    | U6 snRNA-associated Sm                               | 6.38   | 6.73   | 0.95 | 1.05 |
| O35900_LSM2_MOUSE   | Lsm2    | U6 snRNA-associated Sm                               | 6.20   | 3.83   | 1.62 | 0.62 |
| P62311_LSM3_MOUSE   | Lsm3    | U6 snRNA-associated Sm                               | 31.50  | 19.55  | 1.61 | 0.62 |
| Q9QXA5_LSM4_MOUSE   | Lsm4    | U6 snRNA-associated Sm                               | 7.92   | 6.33   | 1.25 | 0.80 |
| P19973_LSP1_MOUSE   | Lsp1    | Lymphocyte-specific pro                              | 5.47   | 2.23   | 2.45 | 0.41 |
| Q8BLN5_ERG7_MOUSE   | Lss     | Lanosterol synthase OS-t                             | 8.35   | 3.32   | 2.51 | 0.40 |
| Q8BLN5_ERG7_MOUSE   | Lss     | Lanosterol synthase OS-t                             | 11.39  | 6.87   | 1.66 | 0.60 |
| Q8BLN5_ERG7_MOUSE   | Lss     | Lanosterol synthase OS-t                             | 6.29   | 3.74   | 1.68 | 0.59 |
| Q8BLN5_ERG7_MOUSE   | Lss     | Lanosterol synthase OS-t                             | 10.46  | 7.07   | 1.48 | 0.68 |
| Q8CG19_LTBP1_MOUSE  | Ltbp1   | Latent-transforming grov                             | 4.90   | 5.72   | 0.86 | 1.17 |
| Q8CG19_LTBP1_MOUSE  | Ltbp1   | Latent-transforming grov                             | 3.35   | 5.29   | 0.63 | 1.58 |
| Q8CG19_LTBP1_MOUSE  | Ltbp1   | Latent-transforming grov                             | 3.75   | 2.36   | 1.59 | 0.63 |
| Q8CG19_LTBP1_MOUSE  | Ltbp1   | Latent-transforming grov                             | 7.01   | 9.59   | 0.73 | 1.37 |
| Q6NSQ7_LTV1_MOUSE   | Ltv1    | Protein LTV1 homolog O                               | 6.72   | 4.81   | 1.40 | 0.72 |
| Q6NSQ7_LTV1_MOUSE   | Ltv1    | Protein LTV1 homolog O                               | 11.95  | 4.86   | 2.46 | 0.41 |
| Q9CY14_LUC7L_MOUSE  | Luc7l   | Putative RNA-binding pr                              | 183.65 | 86.80  | 2.12 | 0.47 |
| Q9CY14_LUC7L_MOUSE  | Luc7l   | Putative RNA-binding pr                              | 146.53 | 75.99  | 1.93 | 0.52 |
| Q9CY14_LUC7L_MOUSE  | Luc7l   | Putative RNA-binding pr                              | 15.19  | 7.70   | 1.97 | 0.51 |
| Q9CY14_LUC7L_MOUSE  | Luc7l   | Putative RNA-binding pr                              | 25.22  | 13.36  | 1.89 | 0.53 |
| Q9CY14_LUC7L_MOUSE  | Luc7l   | Putative RNA-binding pr                              | 41.16  | 17.38  | 2.37 | 0.42 |
| Q9CY14_LUC7L_MOUSE  | Luc7l   | Putative RNA-binding pr                              | 51.41  | 17.72  | 2.90 | 0.34 |
| Q9CY14_LUC7L_MOUSE  | Luc7l   | Putative RNA-binding pr                              | 14.80  | 4.96   | 2.99 | 0.33 |
| Q9CY14_LUC7L_MOUSE  | Luc7l   | Putative RNA-binding pr                              | 7.03   | 4.10   | 1.72 | 0.58 |
| Q7TNC4_LC7L2_MOUSE  | Luc7l2  | Putative RNA-binding pr                              | 411.93 | 180.63 | 2.28 | 0.44 |
| Q7TNC4_LC7L2_MOUSE  | Luc7l2  | Putative RNA-binding pr                              | 218.99 | 95.99  | 2.28 | 0.44 |
| Q7TNC4_LC7L2_MOUSE  | Luc7l2  | Putative RNA-binding pr                              | 16.41  | 8.31   | 1.98 | 0.51 |
| Q7TNC4_LC7L2_MOUSE  | Luc7l2  | Putative RNA-binding pr                              | 15.98  | 21.04  | 0.76 | 1.32 |
| Q7TNC4_LC7L2_MOUSE  | Luc7l2  | Putative RNA-binding pr                              | 245.69 | 98.66  | 2.49 | 0.40 |
| Q7TNC4_LC7L2_MOUSE  | Luc7l2  | Putative RNA-binding pr                              | 91.02  | 43.41  | 2.10 | 0.48 |
| Q7TNC4_LC7L2_MOUSE  | Luc7l2  | Putative RNA-binding pr                              | 78.18  | 40.38  | 1.94 | 0.52 |
| Q7TNC4_LC7L2_MOUSE  | Luc7l2  | Putative RNA-binding pr                              | 179.57 | 78.55  | 2.29 | 0.44 |
| Q7TNC4_LC7L2_MOUSE  | Luc7l2  | Putative RNA-binding pr                              | 36.76  | 14.92  | 2.46 | 0.41 |
| Q7TNC4_LC7L2_MOUSE  | Luc7l2  | Putative RNA-binding pr                              | 53.26  | 23.75  | 2.24 | 0.45 |
| Q7TNC4_LC7L2_MOUSE  | Luc7l2  | Putative RNA-binding pr                              | 206.29 | 99.31  | 2.08 | 0.48 |
| Q7TNC4_LC7L2_MOUSE  | Luc7l2  | Putative RNA-binding pr                              | 15.24  | 5.59   | 2.73 | 0.37 |
| Q7TNC4_LC7L2_MOUSE  | Luc7l2  | Putative RNA-binding pr                              | 332.58 | 168.25 | 1.98 | 0.51 |
| Q7TNC4_LC7L2_MOUSE  | Luc7l2  | Putative RNA-binding pr                              | 151.55 | 73.89  | 2.05 | 0.49 |
| Q7TNC4_LC7L2_MOUSE  | Luc7l2  | Putative RNA-binding pr                              | 611.35 | 225.91 | 2.71 | 0.37 |
| Q7TNC4_LC7L2_MOUSE  | Luc7l2  | Putative RNA-binding pr                              | 6.91   | 3.38   | 2.04 | 0.49 |
| Q7TNC4_LC7L2_MOUSE  | Luc7l2  | Putative RNA-binding pr                              | 27.37  | 10.18  | 2.69 | 0.37 |
| Q7TNC4_LC7L2_MOUSE  | Luc7l2  | Putative RNA-binding pr                              | 27.17  | 13.73  | 1.98 | 0.51 |
| Q7TNC4_LC7L2_MOUSE  | Luc7l2  | Putative RNA-binding pr                              | 8.62   | 5.47   | 1.58 | 0.63 |
| Q7TNC4_LC7L2_MOUSE  | Luc7l2  | Putative RNA-binding pr                              | 11.31  | 6.57   | 1.72 | 0.58 |
| Q7TNC4_LC7L2_MOUSE  | Luc7l2  | Putative RNA-binding pr                              | 12.29  | 5.79   | 2.12 | 0.47 |
| Q7TNC4_LC7L2_MOUSE  | Luc7l2  | Putative RNA-binding pr                              | 16.35  | 5.05   | 3.24 | 0.31 |
| Q7TNC4_LC7L2_MOUSE  | Luc7l2  | Putative RNA-binding pr                              | 9.85   | 4.03   | 2.44 | 0.41 |
| Q7TNC4_LC7L2_MOUSE  | Luc7l2  | Putative RNA-binding pr                              | 7.29   | 3.25   | 2.24 | 0.45 |
| Q7TNC4_LC7L2_MOUSE  | Luc7l2  | Putative RNA-binding pr                              | 7.80   | 3.07   | 2.54 | 0.39 |
| Q5SUF2_LC7L3_MOUSE  | Luc7l3  | Luc7-like protein 3 OS=N                             | 3.64   | 2.55   | 1.43 | 0.70 |
| Q5SUF2_LC7L3_MOUSE  | Luc7l3  | Luc7-like protein 3 OS=N                             | 32.65  | 15.57  | 2.10 | 0.48 |
| Q5SUF2_LC7L3_MOUSE  | Luc7l3  | Luc7-like protein 3 OS=N                             | 45.44  | 24.01  | 1.89 | 0.53 |
| Q5SUF2_LC7L3_MOUSE  | Luc7l3  | Luc7-like protein 3 OS=N                             | 103.20 | 44.70  | 2.31 | 0.43 |
| Q5SUF2_LC7L3_MOUSE  | Luc7l3  | Luc7-like protein 3 OS=N                             | 115.43 | 56.09  | 2.06 | 0.49 |
| Q5SUF2_LC7L3_MOUSE  | Luc7l3  | Luc7-like protein 3 OS=N                             | 81.45  | 39.79  | 2.05 | 0.49 |
| Q5SUF2_LC7L3_MOUSE  | Luc7l3  | Luc7-like protein 3 OS=N                             | 10.20  | 1.97   | 5.17 | 0.19 |
| Q5SUF2_LC7L3_MOUSE  | Luc7l3  | Luc7-like protein 3 OS=N                             | 6.96   | 5.52   | 1.26 | 0.79 |



|                     |         |                                                               |        |        |      |      |
|---------------------|---------|---------------------------------------------------------------|--------|--------|------|------|
| Q5SUF2_LC7L3_MOUSE  | Luc7l3  | Luc7-like protein 3 OS=N R.YLQSLAEVER@.R                      | 22.26  | 11.96  | 1.86 | 0.54 |
| Q5SUF2_LC7L3_MOUSE  | Luc7l3  | Luc7-like protein 3 OS=N K.ATVEELK#K#.L                       | 22.83  | 10.77  | 2.12 | 0.47 |
| Q5SUF2_LC7L3_MOUSE  | Luc7l3  | Luc7-like protein 3 OS=N K.IK#ATVEELK#K#.L                    | 20.47  | 6.94   | 2.95 | 0.34 |
| Q5SUF2_LC7L3_MOUSE  | Luc7l3  | Luc7-like protein 3 OS=N R.LALSQSQSSGAAGPTGK#.N               | 42.76  | 16.71  | 2.56 | 0.39 |
| Q5SUF2_LC7L3_MOUSE  | Luc7l3  | Luc7-like protein 3 OS=N K.QSEDTNPESK# E                      | 3.46   | 2.31   | 1.50 | 0.67 |
| Q5SUF2_LC7L3_MOUSE  | Luc7l3  | Luc7-like protein 3 OS=N R.STTSTIESFAAQEK#.Q                  | 48.50  | 18.08  | 2.68 | 0.37 |
| Q5SUF2_LC7L3_MOUSE  | Luc7l3  | Luc7-like protein 3 OS=N R.STTSTIESFAAQEK#.Q                  | 33.87  | 9.31   | 3.64 | 0.27 |
| Q5SUF2_LC7L3_MOUSE  | Luc7l3  | Luc7-like protein 3 OS=N R.YLQSLAEVER@.R                      | 51.29  | 21.05  | 2.44 | 0.41 |
| Q5SUF2_LC7L3_MOUSE  | Luc7l3  | Luc7-like protein 3 OS=N K.ESDTR#NEVNGTSEDIK#HSEGDQTSN.-      | 2.46   | 1.55   | 1.59 | 0.63 |
| Q5SUF2_LC7L3_MOUSE  | Luc7l3  | Luc7-like protein 3 OS=N K.IDVLLQQLSGLSEGG#.V                 | 5.99   | 1.47   | 4.06 | 0.25 |
| Q5SUF2_LC7L3_MOUSE  | Luc7l3  | Luc7-like protein 3 OS=N R.LALSQSQSSGAAGPTGK#.N               | 20.22  | 6.15   | 3.29 | 0.30 |
| Q5SUF2_LC7L3_MOUSE  | Luc7l3  | Luc7-like protein 3 OS=N R.STTSTIESFAAQEK#.Q                  | 36.08  | 9.02   | 4.00 | 0.25 |
| Q5SUF2_LC7L3_MOUSE  | Luc7l3  | Luc7-like protein 3 OS=N R.YLQSLAEVER.R                       | 45.26  | 13.04  | 3.47 | 0.29 |
| Q8R4U7_LUZP1_MOUSE  | Luzp1   | Leucine zipper protein 1 K.NNDLQDNYLTELNR.N                   | 3.86   | 3.89   | 0.99 | 1.01 |
| Q8R4U7_LUZP1_MOUSE  | Luzp1   | Leucine zipper protein 1 R.R@LDELEATK#.N                      | 8.42   | 7.08   | 1.19 | 0.84 |
| Q8R4U7_LUZP1_MOUSE  | Luzp1   | Leucine zipper protein 1 K.VTSSITYP#SDSSGPR@.A                | 9.62   | 12.39  | 0.78 | 1.29 |
| Q8R4U7_LUZP1_MOUSE  | Luzp1   | Leucine zipper protein 1 R.AEDELLODQK#.V                      | 10.64  | 2.46   | 4.33 | 0.23 |
| Q8R4U7_LUZP1_MOUSE  | Luzp1   | Leucine zipper protein 1 R.IEDIGSSTLSK#.E                     | 14.71  | 5.49   | 2.68 | 0.37 |
| Q8R4U7_LUZP1_MOUSE  | Luzp1   | Leucine zipper protein 1 K.NNDLQDNYLTELNR@.N                  | 6.18   | 3.22   | 1.92 | 0.52 |
| Q8R4U7_LUZP1_MOUSE  | Luzp1   | Leucine zipper protein 1 K.SLTLFVNER@.K                       | 10.86  | 3.80   | 2.86 | 0.35 |
| Q8R4U7_LUZP1_MOUSE  | Luzp1   | Leucine zipper protein 1 R.SQENILQGFSLPNK#.E                  | 9.65   | 4.30   | 2.25 | 0.45 |
| Q8R4U7_LUZP1_MOUSE  | Luzp1   | Leucine zipper protein 1 K.VIQAGSSTSLAEIVLR@.Q                | 4.53   | 3.09   | 1.46 | 0.68 |
| Q8R4U7_LUZP1_MOUSE  | Luzp1   | Leucine zipper protein 1 K.VTSSITYP#SDSSGPR@.A                | 13.42  | 4.24   | 3.17 | 0.32 |
| Q60767_LY75_MOUSE   | Ly75    | Lymphocyte antigen 75 (K.FLIEDIVNR@.D                         | 25.32  | 2.84   | 8.90 | 0.11 |
| Q08288_LYAR_MOUSE   | Lyar    | Cell growth-regulating n1 R.ELLQQSFAFDNVP#R@.K                | 12.35  | 8.79   | 1.41 | 0.71 |
| Q08288_LYAR_MOUSE   | Lyar    | Cell growth-regulating n1 K.K#AQGGQASEEGADR@NGGPGEDAEEGQTK#.T | 2.41   | 1.68   | 1.43 | 0.70 |
| Q08288_LYAR_MOUSE   | Lyar    | Cell growth-regulating n1 R.NGGP#GDAEAGGQTK.T                 | 2.56   | 2.62   | 0.98 | 1.02 |
| Q08288_LYAR_MOUSE   | Lyar    | Cell growth-regulating n1 K.NQEAAGHEAAGEEAASGPP#K             | 10.32  | 5.55   | 1.86 | 0.54 |
| Q3UFF7_LYP1_MOUSE   | Lyp1al1 | Lysophospholipase-like p1 K.ASVVYQDLQGG#R@.M                  | 3.37   | 1.86   | 1.81 | 0.55 |
| P17897_LYZ1_MOUSE   | Lyz1    | Lyzozyme C-1 OS=Mus m1 R.STDYIGQIN#R.V                        | 5.48   | 13.60  | 0.40 | 2.48 |
| Q8K3C3_LZIC_MOUSE   | Lzic    | Protein LZIC OS=Mus mu: R.TRLAEM#DR@.D                        | 6.49   | 31.81  | 2.20 | 4.90 |
| Q9JH05_LZT1_MOUSE   | Lztf1   | Leucine zipper transcript K.AQDLDELNTVATLR@.S                 | 7.48   | 4.37   | 0.68 | 0.37 |
| Q9JH05_LZT1_MOUSE   | Lztf1   | Leucine zipper transcript K.TIEQAVNALDEK#.S                   | 7.84   | 5.26   | 1.42 | 0.70 |
| P24668_MPRD_MOUSE   | M6pr    | Cation-dependent mann1 R.GVGDQDLGEESEER@.D                    | 20.84  | 5.40   | 3.86 | 0.26 |
| P24668_MPRD_MOUSE   | M6pr    | Cation-dependent mann1 K.NEVALLER@.L                          | 38.77  | 25.49  | 1.52 | 0.66 |
| P24668_MPRD_MOUSE   | M6pr    | Cation-dependent mann1 K.SFESTVQGSQDTSYIFR@.V                 | 36.75  | 5.77   | 4.63 | 0.22 |
| P24668_MPRD_MOUSE   | M6pr    | Cation-dependent mann1 K.SNDK#ETVVGR@.I                       | 9.94   | 2.24   | 4.43 | 0.23 |
| P24668_MPRD_MOUSE   | M6pr    | Cation-dependent mann1 K.NEVALLER@.L                          | 114.72 | 201.61 | 0.57 | 1.76 |
| E9PVY8_E9PVY8_MOUSE | Macf1   | Microtubule-actin cross- R.AGSELLESSAGDDASSLR.S               | 14.35  | 7.01   | 2.05 | 0.49 |
| E9PVY8_E9PVY8_MOUSE | Macf1   | Microtubule-actin cross- R.DQEPPIPQDIR.V                      | 6.87   | 4.33   | 1.59 | 0.63 |
| E9PVY8_E9PVY8_MOUSE | Macf1   | Microtubule-actin cross- R.DQIELDQTGNQLK#.F                   | 8.11   | 3.01   | 2.70 | 0.37 |
| E9PVY8_E9PVY8_MOUSE | Macf1   | Microtubule-actin cross- R.EAEELASGGSQPTGEQIQFQQR@.Q          | 8.32   | 3.44   | 2.42 | 0.41 |
| E9PVY8_E9PVY8_MOUSE | Macf1   | Microtubule-actin cross- K.FLDVLEIAEK#.F                      | 26.49  | 12.77  | 2.07 | 0.48 |
| E9PVY8_E9PVY8_MOUSE | Macf1   | Microtubule-actin cross- K.LDNLGVE#R.D                        | 20.18  | 9.91   | 2.04 | 0.49 |
| E9PVY8_E9PVY8_MOUSE | Macf1   | Microtubule-actin cross- R.LEQQDQTAQLQVQK#.A                  | 6.95   | 3.36   | 2.06 | 0.48 |
| E9PVY8_E9PVY8_MOUSE | Macf1   | Microtubule-actin cross- R.LLDAEDVDVPSPEK#.S                  | 4.93   | 2.39   | 2.06 | 0.48 |
| E9PVY8_E9PVY8_MOUSE | Macf1   | Microtubule-actin cross- K.LVSDANEQYK#.L                      | 12.78  | 4.83   | 2.65 | 0.38 |
| E9PVY8_E9PVY8_MOUSE | Macf1   | Microtubule-actin cross- K.NSVFVLDIEITK#.A                    | 3.97   | 2.09   | 1.90 | 0.53 |
| E9PVY8_E9PVY8_MOUSE | Macf1   | Microtubule-actin cross- K.QFHETAEPI#DLSVTEK#.K               | 6.92   | 3.55   | 1.95 | 0.51 |
| E9PVY8_E9PVY8_MOUSE | Macf1   | Microtubule-actin cross- K.QTTGEEVLLIQEK#.L                   | 7.07   | 4.73   | 1.49 | 0.67 |
| E9PVY8_E9PVY8_MOUSE | Macf1   | Microtubule-actin cross- R.R#GEEILGR@.S                       | 21.51  | 11.96  | 1.80 | 0.56 |
| E9PVY8_E9PVY8_MOUSE | Macf1   | Microtubule-actin cross- K.TEQSVALLEQK#.W                     | 9.12   | 3.01   | 3.03 | 0.33 |
| E9PVY8_E9PVY8_MOUSE | Macf1   | Microtubule-actin cross- R.TSLAGDTSN#SSPASTGAK#.A             | 7.85   | 3.89   | 2.02 | 0.50 |
| E9PVY8_E9PVY8_MOUSE | Macf1   | Microtubule-actin cross- R.VDEIDAIQR@.S                       | 14.79  | 6.61   | 2.24 | 0.45 |
| Q9WTX8_MD11_MOUSE   | Mad11   | Mitotic spindle assembly R.AILGSYSELTOQTEYSQTLQR@.L           | 14.92  | 8.15   | 1.83 | 0.55 |
| Q9WTX8_MD11_MOUSE   | Mad11   | Mitotic spindle assembly R.FVVELQQR@.E                        | 23.68  | 13.07  | 1.81 | 0.55 |
| Q9WTX8_MD11_MOUSE   | Mad11   | Mitotic spindle assembly R.GGP#PADLEAASSLPSK#.E               | 17.97  | 12.40  | 1.45 | 0.69 |
| Q9WTX8_MD11_MOUSE   | Mad11   | Mitotic spindle assembly K.IQELQASQDER@.A                     | 17.75  | 9.56   | 1.86 | 0.54 |
| Q9WTX8_MD11_MOUSE   | Mad11   | Mitotic spindle assembly K.LQSWENLDQTM#GLNLR@.T               | 4.52   | 3.56   | 1.27 | 0.79 |
| Q9WTX8_MD11_MOUSE   | Mad11   | Mitotic spindle assembly K.LTLQGDVQNSR@.T                     | 14.30  | 8.92   | 1.60 | 0.62 |
| Q9WTX8_MD11_MOUSE   | Mad11   | Mitotic spindle assembly R.M#EGTSGLDVSTASGSLQK#.Q             | 8.82   | 5.08   | 1.74 | 0.58 |
| Q9WTX8_MD11_MOUSE   | Mad11   | Mitotic spindle assembly K.M#QLLETFE#R@.S                     | 9.55   | 6.47   | 1.48 | 0.68 |
| Q9WTX8_MD11_MOUSE   | Mad11   | Mitotic spindle assembly K.VQQQLQDEVR@.Q                      | 24.34  | 12.98  | 1.87 | 0.53 |
| Q9WTX8_MD11_MOUSE   | Mad11   | Mitotic spindle assembly R.VSELQ#SAM#DQK#.V                   | 16.05  | 9.32   | 1.72 | 0.58 |
| Q9WTX8_MD11_MOUSE   | Mad11   | Mitotic spindle assembly R.AILGSYSELTOQTEYSQTLQR@.L           | 34.88  | 7.69   | 4.54 | 0.22 |
| Q9WTX8_MD11_MOUSE   | Mad11   | Mitotic spindle assembly R.EM#HETNGLL#TELEGLQR@.K             | 9.33   | 3.21   | 2.91 | 0.34 |
| Q9WTX8_MD11_MOUSE   | Mad11   | Mitotic spindle assembly R.EQEDSLASAR@.E                      | 33.53  | 11.36  | 2.95 | 0.34 |
| Q9WTX8_MD11_MOUSE   | Mad11   | Mitotic spindle assembly R.FVVELQQR@.E                        | 49.51  | 17.88  | 2.77 | 0.36 |
| Q9WTX8_MD11_MOUSE   | Mad11   | Mitotic spindle assembly R.GGP#PADLEAASSLPSK#.E               | 42.35  | 12.88  | 3.29 | 0.30 |
| Q9WTX8_MD11_MOUSE   | Mad11   | Mitotic spindle assembly K.IQELQASQDER@.A                     | 36.43  | 11.14  | 3.27 | 0.31 |
| Q9WTX8_MD11_MOUSE   | Mad11   | Mitotic spindle assembly K.LQSWENLDQTM#GLNLR@.T               | 9.07   | 4.81   | 1.89 | 0.53 |
| Q9WTX8_MD11_MOUSE   | Mad11   | Mitotic spindle assembly K.LTLQGDVQNSR@.T                     | 23.58  | 7.74   | 3.05 | 0.33 |
| Q9WTX8_MD11_MOUSE   | Mad11   | Mitotic spindle assembly R.M#EGTSGLDVSTASGSLQK#.Q             | 26.98  | 7.93   | 3.40 | 0.29 |
| Q9WTX8_MD11_MOUSE   | Mad11   | Mitotic spindle assembly K.M#QALVDVLELEK#K#.L                 | 45.33  | 15.62  | 2.90 | 0.34 |
| Q9WTX8_MD11_MOUSE   | Mad11   | Mitotic spindle assembly K.M#QLLETFE#R@.S                     | 21.88  | 6.63   | 3.30 | 0.30 |
| Q9WTX8_MD11_MOUSE   | Mad11   | Mitotic spindle assembly R.QANALFEER@.K                       | 14.55  | 3.14   | 4.63 | 0.22 |
| Q9WTX8_MD11_MOUSE   | Mad11   | Mitotic spindle assembly K.QNLDV#SQQLR@.E                     | 32.55  | 6.50   | 5.01 | 0.20 |
| Q9WTX8_MD11_MOUSE   | Mad11   | Mitotic spindle assembly K.VHAH#SEM#EAQLSQALEELGVQK#.Q        | 9.35   | 3.98   | 2.35 | 0.43 |
| Q9WTX8_MD11_MOUSE   | Mad11   | Mitotic spindle assembly K.VQQQLQDEVR@.Q                      | 55.78  | 19.30  | 2.89 | 0.35 |
| Q9WTX8_MD11_MOUSE   | Mad11   | Mitotic spindle assembly R.VSELQ#SAM#DQK#.V                   | 21.67  | 6.81   | 3.18 | 0.31 |
| Q9Z1B5_MD2L1_MOUSE  | Mad21   | Mitotic spindle assembly R.GIYPTFE#R.V                        | 29.11  | 13.99  | 2.08 | 0.48 |
| Q9Z1B5_MD2L1_MOUSE  | Mad21   | Mitotic spindle assembly R.SFTTTHK#.V                         | 27.87  | 13.40  | 2.08 | 0.48 |
| Q9Z1B5_MD2L1_MOUSE  | Mad21   | Mitotic spindle assembly K.VNSM#WAYK#.T                       | 15.81  | 9.87   | 1.60 | 0.62 |
| Q9Z1B5_MD2L1_MOUSE  | Mad21   | Mitotic spindle assembly K.YGLTLTTDPELIK#.Y                   | 15.65  | 9.27   | 1.69 | 0.59 |
| Q4VC33_MAEA_MOUSE   | Maea    | Macrophage erythroblasts K.AVESIQAEDES#K#.L                   | 11.19  | 4.21   | 2.66 | 0.38 |
| Q4VC33_MAEA_MOUSE   | Maea    | Macrophage erythroblasts R.IQEFIELVR@.Q                       | 13.98  | 11.70  | 1.19 | 0.84 |
| Q54790_MAFG_MOUSE   | Mafg    | Transcription factor MafR K.GPLAAGLGPLVPGK.V                  | 3.39   | 8.13   | 0.42 | 2.39 |
| Q54790_MAFG_MOUSE   | Mafg    | Transcription factor Maf K.VAATS#VITV#.S                      | 2.40   | 10.10  | 0.24 | 4.20 |
| Q89012_Q89012_MOUSE | Magea8  | MCG115467 OS=Mus mu: K.AFPTKAEMLESIGR@.E                      | 2.40   | 17.65  | 0.14 | 7.36 |
| Q9QYH6_MAGD1_MOUSE  | Maged1  | Melanoma-associated an R.IPFTFWAR@.Y                          | 9.58   | 5.25   | 1.83 | 0.55 |
| Q9QYH6_MAGD1_MOUSE  | Maged1  | Melanoma-associated an K.VPGADATQ#NVNNAK#.M                   | 5.13   | 3.12   | 1.65 | 0.61 |
| Q9CQL1_MGN2_MOUSE   | Magohb  | Protein mago nashi hom: K.GK#GHFELEFFER@PDGK#.L               | 80.89  | 26.21  | 3.09 | 0.32 |
| Q9CQL1_MGN2_MOUSE   | Magohb  | Protein mago nashi hom: K.IGSLD#VQNSK#.D                      | 182.74 | 81.42  | 2.24 | 0.45 |
| Q9CQL1_MGN2_MOUSE   | Magohb  | Protein mago nashi hom: K.IGSLD#VQNSK#DPEGLR.V                | 183.71 | 43.31  | 2.27 | 0.44 |
| Q9CQL1_MGN2_MOUSE   | Magohb  | Protein mago nashi hom: K.IGSLD#VQNSK#DPEGLR@.V               | 5.17   | 1.47   | 1.51 | 0.29 |
| Q9CQL1_MGN2_MOUSE   | Magohb  | Protein mago nashi hom: K.NDVM#IR.K                           | 85.59  | 33.63  | 2.54 | 0.39 |
| Q9CQL1_MGN2_MOUSE   | Magohb  | Protein mago nashi hom: R.VFYLVQDLK#.C                        | 27.27  | 11.38  | 2.40 | 0.42 |
| Q9CQL1_MGN2_MOUSE   | Magohb  | Protein mago nashi hom: R.VGROLEI#V#GDEHISFTTSK.I             | 51.06  | 22.18  | 2.30 | 0.43 |
| Q9CQL1_MGN2_MOUSE   | Magohb  | Protein mago nashi hom: R.YANNSNYK#NDVM#IR@.K                 | 5.02   | 2.17   | 2.31 | 0.43 |
| Q8BGS0_MAK16_MOUSE  | Mak16   | Protein MAK16 homolog K.ALEQIDENLYWPR@.F                      | 8.80   | 3.14   | 2.80 | 0.36 |
| Q8BGS0_MAK16_MOUSE  | Mak16   | Protein MAK16 homolog K.ALIAAQLD#NAIEK#.E                     | 14.72  | 8.82   | 1.67 | 0.60 |
| Q8BGS0_MAK16_MOUSE  | Mak16   | Protein MAK16 homolog K.ALIAAQLD#NAIEK#HELLER@.L              | 14.40  | 7.87   | 1.83 | 0.55 |
| Q8BGS0_MAK16_MOUSE  | Mak16   | Protein MAK16 homolog R.AYVEIEQE#TEP#AK#.V                    | 5.22   | 2.40   | 2.18 | 0.46 |



|                             |        |                          |                                                 |        |        |      |      |
|-----------------------------|--------|--------------------------|-------------------------------------------------|--------|--------|------|------|
| Q8K310_MATR3_MOUSE          | Matr3  | Matrin-3 OS=Mus muscu    | R.YPEDKIPENLPQILLQK.R                           | 35.77  | 115.66 | 0.31 | 3.23 |
| Q8K310_MATR3_MOUSE          | Matr3  | Matrin-3 OS=Mus muscu    | R.GDTDQASNILASFGLSAR.D                          | 13.30  | 9.55   | 1.39 | 0.72 |
| Q8K310_MATR3_MOUSE          | Matr3  | Matrin-3 OS=Mus muscu    | R.IGYPQPNVPGIDYVYIPK#T                          | 18.78  | 34.19  | 1.05 | 0.96 |
| Q8K310_MATR3_MOUSE          | Matr3  | Matrin-3 OS=Mus muscu    | R.SFQSSSLGR@.D                                  | 24.92  | 13.79  | 1.81 | 0.55 |
| Q8K310_MATR3_MOUSE          | Matr3  | Matrin-3 OS=Mus muscu    | R.DLDLSR@.Y                                     | 92.19  | 41.82  | 2.20 | 0.45 |
| Q8K310_MATR3_MOUSE          | Matr3  | Matrin-3 OS=Mus muscu    | R.DLDLSRYPEDKIPENLPQILLQK.R                     | 264.71 | 117.54 | 2.25 | 0.44 |
| Q8K310_MATR3_MOUSE          | Matr3  | Matrin-3 OS=Mus muscu    | R.DLDLSR@YPEDKIPENLPQILLQK#R                    | 46.05  | 23.26  | 1.98 | 0.51 |
| Q8K310_MATR3_MOUSE          | Matr3  | Matrin-3 OS=Mus muscu    | K.FDSEYER@.M                                    | 167.51 | 77.33  | 2.17 | 0.46 |
| Q8K310_MATR3_MOUSE          | Matr3  | Matrin-3 OS=Mus muscu    | R.GAPSSNIEDFHGLLPK#.G                           | 12.77  | 5.91   | 2.16 | 0.46 |
| Q8K310_MATR3_MOUSE          | Matr3  | Matrin-3 OS=Mus muscu    | R.GDTPQASNILASFGLSAR@.D                         | 264.61 | 124.84 | 2.12 | 0.47 |
| Q8K310_MATR3_MOUSE          | Matr3  | Matrin-3 OS=Mus muscu    | R.GNLGAGGNLQGGPR@.H                             | 83.21  | 36.30  | 2.29 | 0.44 |
| Q8K310_MATR3_MOUSE          | Matr3  | Matrin-3 OS=Mus muscu    | R.GPGLQER@.S                                    | 420.05 | 224.35 | 1.87 | 0.53 |
| Q8K310_MATR3_MOUSE          | Matr3  | Matrin-3 OS=Mus muscu    | R.GPLPLSSQHR.G                                  | 78.58  | 38.57  | 2.04 | 0.49 |
| Q8K310_MATR3_MOUSE          | Matr3  | Matrin-3 OS=Mus muscu    | R.IGYPQPNVPGIDYVYIPK#T                          | 442.03 | 201.57 | 2.19 | 0.46 |
| Q8K310_MATR3_MOUSE          | Matr3  | Matrin-3 OS=Mus muscu    | R.IKKPEGKQDK.F                                  | 14.40  | 7.44   | 1.93 | 0.52 |
| Q8K310_MATR3_MOUSE          | Matr3  | Matrin-3 OS=Mus muscu    | K.INEAFIEM*ATTEDAQAADYVYTPALVFGKPV.R            | 38.76  | 13.19  | 2.94 | 0.34 |
| Q8K310_MATR3_MOUSE          | Matr3  | Matrin-3 OS=Mus muscu    | K.INEAFIEMATTEDAQAADYVYTPALVFGKPV.R             | 9.28   | 5.30   | 1.75 | 0.57 |
| Q8K310_MATR3_MOUSE          | Matr3  | Matrin-3 OS=Mus muscu    | K.ITPENLPQILLQK#.R                              | 659.14 | 348.50 | 1.89 | 0.53 |
| Q8K310_MATR3_MOUSE          | Matr3  | Matrin-3 OS=Mus muscu    | K.KHVDK#EELDDQENEALENGIK#.N                     | 4.91   | 3.02   | 1.62 | 0.62 |
| Q8K310_MATR3_MOUSE          | Matr3  | Matrin-3 OS=Mus muscu    | R.LASLM*NLGM*SSSLNQQGAHSAALSSASTSHNLQSFNIGSR@.G | 54.98  | 21.62  | 2.54 | 0.39 |
| Q8K310_MATR3_MOUSE          | Matr3  | Matrin-3 OS=Mus muscu    | R.M*KSQFIEM*ETR.E                               | 37.15  | 13.89  | 2.67 | 0.37 |
| Q8K310_MATR3_MOUSE          | Matr3  | Matrin-3 OS=Mus muscu    | K.NYLMR@.M                                      | 15.68  | 4.86   | 3.23 | 0.31 |
| Q8K310_MATR3_MOUSE          | Matr3  | Matrin-3 OS=Mus muscu    | R.R@GAPSSNIEDFHGLLPK#.G                         | 17.88  | 11.34  | 1.58 | 0.63 |
| Q8K310_MATR3_MOUSE          | Matr3  | Matrin-3 OS=Mus muscu    | R.RRTEEGTSLYGR.D                                | 65.28  | 27.70  | 2.36 | 0.42 |
| Q8K310_MATR3_MOUSE          | Matr3  | Matrin-3 OS=Mus muscu    | K.SFQSSSLGR@.D                                  | 377.01 | 172.40 | 2.19 | 0.46 |
| Q8K310_MATR3_MOUSE          | Matr3  | Matrin-3 OS=Mus muscu    | K.SQAFIEM*ETR@.E                                | 409.13 | 180.86 | 2.26 | 0.44 |
| Q8K310_MATR3_MOUSE          | Matr3  | Matrin-3 OS=Mus muscu    | K.SQAFIEM*ETR@.E                                | 55.92  | 24.77  | 2.26 | 0.44 |
| Q8K310_MATR3_MOUSE          | Matr3  | Matrin-3 OS=Mus muscu    | R.SQESGYDR@.M                                   | 25.33  | 12.61  | 2.01 | 0.50 |
| Q8K310_MATR3_MOUSE          | Matr3  | Matrin-3 OS=Mus muscu    | K.TDAQK#TESPAEGK#EQEEK#.S                       | 20.87  | 10.12  | 2.06 | 0.49 |
| Q8K310_MATR3_MOUSE          | Matr3  | Matrin-3 OS=Mus muscu    | R.TEEGTSLYGR@.D                                 | 303.70 | 140.60 | 2.16 | 0.46 |
| Q8K310_MATR3_MOUSE          | Matr3  | Matrin-3 OS=Mus muscu    | K.TESPAEGK#EQEEK#.S                             | 54.47  | 27.53  | 1.98 | 0.51 |
| Q8K310_MATR3_MOUSE          | Matr3  | Matrin-3 OS=Mus muscu    | R.VHLSQK#.Y                                     | 55.12  | 29.25  | 1.88 | 0.53 |
| Q8K310_MATR3_MOUSE          | Matr3  | Matrin-3 OS=Mus muscu    | R.VVHIM*DFQR@.G                                 | 514.68 | 242.86 | 2.12 | 0.47 |
| Q8K310_MATR3_MOUSE          | Matr3  | Matrin-3 OS=Mus muscu    | R.VVHIMDFQR@.G                                  | 92.53  | 40.67  | 2.28 | 0.44 |
| Q8K310_MATR3_MOUSE          | Matr3  | Matrin-3 OS=Mus muscu    | R.YPEDKIPENLPQILLQK.R                           | 61.97  | 27.79  | 2.23 | 0.45 |
| Q8K310_MATR3_MOUSE          | Matr3  | Matrin-3 OS=Mus muscu    | R.DSFDDR@GPSLNPVLDYDHGSR@.S                     | 10.68  | 10.68  | 1.34 | 0.75 |
| Q8K310_MATR3_MOUSE          | Matr3  | Matrin-3 OS=Mus muscu    | K.FDSEYER@.M                                    | 42.67  | 16.24  | 2.63 | 0.38 |
| Q8K310_MATR3_MOUSE          | Matr3  | Matrin-3 OS=Mus muscu    | R.GDTPQASNILASFGLSAR@.D                         | 66.57  | 31.74  | 2.10 | 0.48 |
| Q8K310_MATR3_MOUSE          | Matr3  | Matrin-3 OS=Mus muscu    | R.GNLGAGGNLQGGPR@.H                             | 11.35  | 5.07   | 2.24 | 0.45 |
| Q8K310_MATR3_MOUSE          | Matr3  | Matrin-3 OS=Mus muscu    | R.GPGLQER@.S                                    | 55.95  | 28.16  | 1.99 | 0.50 |
| Q8K310_MATR3_MOUSE          | Matr3  | Matrin-3 OS=Mus muscu    | R.IGYPQPNVPGIDYVYIPK#T                          | 87.43  | 40.19  | 2.18 | 0.46 |
| Q8K310_MATR3_MOUSE          | Matr3  | Matrin-3 OS=Mus muscu    | K.ITPENLPQILLQK#.R                              | 108.54 | 59.34  | 1.83 | 0.55 |
| Q8K310_MATR3_MOUSE          | Matr3  | Matrin-3 OS=Mus muscu    | R.LASLM*NLGM*SSSLNQQGAHSAALSSASTSHNLQSFNIGSR@.G | 7.56   | 4.07   | 1.86 | 0.54 |
| Q8K310_MATR3_MOUSE          | Matr3  | Matrin-3 OS=Mus muscu    | R.R@TEEGTSLYGR@.D                               | 12.51  | 5.27   | 2.37 | 0.42 |
| Q8K310_MATR3_MOUSE          | Matr3  | Matrin-3 OS=Mus muscu    | R.R@TEEGTSLYGR@.D                               | 7.30   | 4.27   | 1.71 | 0.58 |
| Q8K310_MATR3_MOUSE          | Matr3  | Matrin-3 OS=Mus muscu    | K.SQAFIEM*ETR@.E                                | 34.22  | 16.98  | 2.02 | 0.50 |
| Q8K310_MATR3_MOUSE          | Matr3  | Matrin-3 OS=Mus muscu    | K.TDAQK#TESPAEGK#EQEEK#.S                       | 4.00   | 1.31   | 3.04 | 0.33 |
| Q8K310_MATR3_MOUSE          | Matr3  | Matrin-3 OS=Mus muscu    | R.TEEGTSLYGR@.D                                 | 43.27  | 23.62  | 1.83 | 0.55 |
| Q8K310_MATR3_MOUSE          | Matr3  | Matrin-3 OS=Mus muscu    | K.TESPAEGK#EQEEK#.S                             | 7.68   | 2.47   | 3.11 | 0.32 |
| Q8K310_MATR3_MOUSE          | Matr3  | Matrin-3 OS=Mus muscu    | R.YPEDKIPENLPQILLQK.R                           | 14.21  | 6.58   | 2.16 | 0.46 |
| P28574_MAX_MOUSE            | Max    | Protein max OS=Mus mu    | K.ATEYIQM*RR.R                                  | 3.03   | 6.23   | 0.49 | 2.06 |
| P28574_MAX_MOUSE            | Max    | Protein max OS=Mus mu    | R.QNALLEQV.R.A                                  | 2.82   | 10.31  | 0.27 | 3.65 |
| Q8C6L5_CGAS_MOUSE           | Mb21d1 | Cyclic GMP-AMP synthas   | R.IELQEYETGAFYVYK.F                             | 2.67   | 3.82   | 0.70 | 1.43 |
| Q8C6L5_CGAS_MOUSE           | Mb21d1 | Cyclic GMP-AMP synthas   | R.VPQQALDPELPAV.R.E                             | 2.66   | 2.80   | 0.95 | 1.05 |
| Q922E1_MBD2_MOUSE           | Mbd2   | Methyl-CpG-binding don   | K.AFIVTDEIR@.K                                  | 37.57  | 29.05  | 1.29 | 0.77 |
| Q922E1_MBD2_MOUSE           | Mbd2   | Methyl-CpG-binding don   | K.GLQGVGSGSNDTELLSAVASALHTSSAPITGQVSAVEK#.N     | 6.66   | 2.33   | 2.85 | 0.35 |
| Q922E1_MBD2_MOUSE           | Mbd2   | Methyl-CpG-binding don   | R.LQGLSASDVTEQIJK.T                             | 25.63  | 12.08  | 2.12 | 0.47 |
| Q922E1_MBD2_MOUSE           | Mbd2   | Methyl-CpG-binding don   | R.LR@NDPLNQNK#.G                                | 7.74   | 5.32   | 1.46 | 0.69 |
| Q922E1_MBD2_MOUSE           | Mbd2   | Methyl-CpG-binding don   | R.YLGNVAVLSDFFDR@.T                             | 16.83  | 4.05   | 4.15 | 0.24 |
| Q922D8_MBD3_MOUSE           | Mbd3   | Methyl-CpG-binding don   | K.AFM*VTDDIR@.K                                 | 62.28  | 17.59  | 3.54 | 0.28 |
| Q922D8_MBD3_MOUSE           | Mbd3   | Methyl-CpG-binding don   | K.KHLSGLSAFIAELVR@.T                            | 68.49  | 19.08  | 4.41 | 0.23 |
| Q922D8_MBD3_MOUSE           | Mbd3   | Methyl-CpG-binding don   | R.KHQEVLQVQR@.K                                 | 34.04  | 7.95   | 4.28 | 0.23 |
| Q922D8_MBD3_MOUSE           | Mbd3   | Methyl-CpG-binding don   | K.LSGLSAFIAELVR@.T                              | 131.92 | 39.02  | 3.38 | 0.30 |
| Q922D8_MBD3_MOUSE           | Mbd3   | Methyl-CpG-binding don   | R.YLGGSM*DLSTDFDR@.T                            | 33.81  | 10.25  | 3.30 | 0.30 |
| Q922D8_MBD3_MOUSE           | Mbd3   | Methyl-CpG-binding don   | K.AFM*VTDDIR@.K                                 | 5.31   | 3.44   | 1.54 | 0.65 |
| Q922D8_MBD3_MOUSE           | Mbd3   | Methyl-CpG-binding don   | K.KHLSGLSAFIAELVR@.T                            | 16.33  | 11.05  | 1.48 | 0.68 |
| Q922D8_MBD3_MOUSE           | Mbd3   | Methyl-CpG-binding don   | K.LSGLSAFIAELVR@.T                              | 14.11  | 4.32   | 3.26 | 0.31 |
| Q99LQ1_MBIP1_MOUSE          | Mbip   | MAP3K12-binding inhibi   | K.ILEEGISPEYFQSVNFSGK#R                         | 9.17   | 1.87   | 4.91 | 0.20 |
| Q99LQ1_MBIP1_MOUSE          | Mbip   | MAP3K12-binding inhibi   | K.TQNLDPPEVVOIK#.A                              | 19.46  | 5.42   | 3.59 | 0.28 |
| Q9JKP5_MBNL1_MOUSE          | Mbnl1  | Muscleblind-like protein | K.AAQYVQVQNAQAQAATAAAM*GIPQVPLPK#R              | 8.31   | 3.24   | 2.56 | 0.39 |
| A0A0A6YWBO_A0A0A6YWBO_MOUSE | Mbnl1  | Muscleblind-like protein | K.AAQYVQVQNAQAQAATAAAM*QTSVAVK#.S               | 13.94  | 4.89   | 2.85 | 0.35 |
| A0A0A6YWBO_A0A0A6YWBO_MOUSE | Mbnl1  | Muscleblind-like protein | K.AAQYVQVQNAQAQAATAAAM*QTSVAVK#.S               | 8.32   | 3.95   | 2.11 | 0.47 |
| A0A0A6YWBO_A0A0A6YWBO_MOUSE | Mbnl1  | Muscleblind-like protein | K.RPLEATFDNIGPQAVLPLPK.R                        | 23.03  | 10.74  | 2.14 | 0.47 |
| Q8K5B2_MCFD2_MOUSE          | Mcf2   | Multiple coagulation fac | R.DDDK#NDGVDYAEFAK#.S                           | 34.94  | 15.43  | 2.26 | 0.44 |
| P97310_MCM2_MOUSE           | Mcm2   | DNA replication licensin | K.ESM*ATGSPITVR.H                               | 5.72   | 4.73   | 1.21 | 0.83 |
| P97310_MCM2_MOUSE           | Mcm2   | DNA replication licensin | K.QLVAEQVTYQR@.N                                | 14.42  | 6.13   | 2.35 | 0.43 |
| P97310_MCM2_MOUSE           | Mcm2   | DNA replication licensin | R.VM*MESFDTQK.F                                 | 3.34   | 3.33   | 1.00 | 1.00 |
| P97310_MCM2_MOUSE           | Mcm2   | DNA replication licensin | K.AGIVTSLQAR.C                                  | 29.48  | 16.09  | 1.83 | 0.55 |
| P97310_MCM2_MOUSE           | Mcm2   | DNA replication licensin | R.AIFTTGGASAVGLTAYVQR@.H                        | 12.10  | 5.42   | 2.23 | 0.45 |
| P97310_MCM2_MOUSE           | Mcm2   | DNA replication licensin | R.ATEDGEDEEM*ESIENLEDLK#GHSVR@.E                | 12.99  | 10.17  | 1.28 | 0.78 |
| P97310_MCM2_MOUSE           | Mcm2   | DNA replication licensin | R.DTVDVQDEM*LAR@.F                              | 9.21   | 9.49   | 0.97 | 1.03 |
| P97310_MCM2_MOUSE           | Mcm2   | DNA replication licensin | R.DVVM*EDDVM*AIR@.V                             | 6.97   | 5.60   | 1.24 | 0.80 |
| P97310_MCM2_MOUSE           | Mcm2   | DNA replication licensin | R.ESLVNVEDLAAR@.E                               | 37.68  | 17.08  | 2.21 | 0.45 |
| P97310_MCM2_MOUSE           | Mcm2   | DNA replication licensin | K.ESM*ATGSPITVR.H                               | 23.36  | 14.29  | 1.63 | 0.61 |
| P97310_MCM2_MOUSE           | Mcm2   | DNA replication licensin | R.EWLTAEAGVLADR.G                               | 11.14  | 5.85   | 1.91 | 0.52 |
| P97310_MCM2_MOUSE           | Mcm2   | DNA replication licensin | R.FGAQQDTIEPEKDLM*DK#.A                         | 16.42  | 8.04   | 2.04 | 0.49 |
| P97310_MCM2_MOUSE           | Mcm2   | DNA replication licensin | R.GLALALFGGEPK#.N                               | 33.28  | 17.68  | 1.88 | 0.53 |
| P97310_MCM2_MOUSE           | Mcm2   | DNA replication licensin | K.IFASIAPSIYGHEDIK#R@.G                         | 34.39  | 19.66  | 1.75 | 0.57 |
| P97310_MCM2_MOUSE           | Mcm2   | DNA replication licensin | R.ISDPLTSSPGR.S                                 | 10.14  | 6.71   | 1.51 | 0.66 |
| P97310_MCM2_MOUSE           | Mcm2   | DNA replication licensin | K.KDEGLTNGTLEPAM*PNTYGVPELPQEVK.K               | 1.78   | 2.57   | 0.69 | 1.44 |
| P97310_MCM2_MOUSE           | Mcm2   | DNA replication licensin | R.QINHNLSAFYDSOLF#F                             | 16.20  | 8.10   | 2.00 | 0.50 |
| P97310_MCM2_MOUSE           | Mcm2   | DNA replication licensin | K.QLVAEQVTYQR@.N                                | 15.05  | 10.79  | 1.40 | 0.72 |
| P97310_MCM2_MOUSE           | Mcm2   | DNA replication licensin | R.R@ADALTSPPGR@.D                               | 10.11  | 5.79   | 1.75 | 0.57 |
| P97310_MCM2_MOUSE           | Mcm2   | DNA replication licensin | K.VAVGLEDVDEK#.M                                | 38.93  | 24.43  | 1.59 | 0.63 |
| P97310_MCM2_MOUSE           | Mcm2   | DNA replication licensin | R.VM*MESFDTQK#.F                                | 9.27   | 5.50   | 1.68 | 0.59 |
| P97310_MCM2_MOUSE           | Mcm2   | DNA replication licensin | R.YDPSLTFSENVLDTEPISR@.F                        | 7.49   | 7.10   | 1.06 | 0.95 |
| P97310_MCM2_MOUSE           | Mcm2   | DNA replication licensin | K.AGIVTSLQAR@.C                                 | 11.58  | 5.31   | 2.18 | 0.46 |
| P97310_MCM2_MOUSE           | Mcm2   | DNA replication licensin | R.ATEDGEDEEM*ESIENLEDLK#GHSVR@.E                | 9.06   | 4.14   | 2.19 | 0.46 |
| P97310_MCM2_MOUSE           | Mcm2   | DNA replication licensin | R.DNNDLLLFLK#.Q                                 | 5.45   | 2.20   | 2.47 | 0.40 |
| P97310_MCM2_MOUSE           | Mcm2   | DNA replication licensin | R.DTVDVQDEM*LAR@.F                              | 5.20   | 2.44   | 2.13 | 0.47 |
| P97310_MCM2_MOUSE           | Mcm2   | DNA replication licensin | R.ESLVNVEDLAAR@.E                               | 19.97  | 6.29   | 3.17 | 0.32 |
| P97310_MCM2_MOUSE           | Mcm2   | DNA replication licensin | K.ESM*ATGSPITVR.H                               | 13.80  | 5.57   | 2.48 | 0.40 |
| P97310_MCM2_MOUSE           | Mcm2   | DNA replication licensin | R.GLALALFGGEPK#.N                               | 39.40  | 12.96  | 3.04 | 0.33 |

|                   |        |                                                                   |        |       |      |      |
|-------------------|--------|-------------------------------------------------------------------|--------|-------|------|------|
| P97310_MCM2_MOUSE | Mcm2   | DNA replication licensing R.ISHLPLVEELR@_S                        | 14.15  | 4.67  | 3.03 | 0.33 |
| P97310_MCM2_MOUSE | Mcm2   | DNA replication licensing R.K.VAUGELTDEDVVKR.M                    | 19.78  | 12.87 | 1.54 | 0.65 |
| P97310_MCM2_MOUSE | Mcm2   | DNA replication licensing R.VM*M*EFSFDITQK#.F                     | 7.05   | 2.89  | 2.44 | 0.41 |
| P97310_MCM2_MOUSE | Mcm2   | DNA replication licensing R.YDPSLTFSENVNVLTEPIISR@_F              | 4.44   | 2.65  | 1.68 | 0.60 |
| P25206_MCM3_MOUSE | Mcm3   | DNA replication licensing R.ALK#DFVASIDATYAK#.Q                   | 10.68  | 3.61  | 2.96 | 0.34 |
| P25206_MCM3_MOUSE | Mcm3   | DNA replication licensing R.ALKDFVASIDATYAK.Q                     | 29.47  | 15.78 | 1.87 | 0.54 |
| P25206_MCM3_MOUSE | Mcm3   | DNA replication licensing R.DYLDFLDDEEDQGIYQNK#.V                 | 8.51   | 3.97  | 2.14 | 0.47 |
| P25206_MCM3_MOUSE | Mcm3   | DNA replication licensing R.EAQR@DYLDFLDDEEDQGIYQNK#.V            | 8.77   | 3.68  | 2.38 | 0.42 |
| P25206_MCM3_MOUSE | Mcm3   | DNA replication licensing R.LIVSVNDR@_R                           | 86.43  | 37.06 | 2.33 | 0.43 |
| P25206_MCM3_MOUSE | Mcm3   | DNA replication licensing R.LLNNAFEEVAFQR@_A                      | 5.27   | 1.44  | 3.65 | 0.27 |
| P25206_MCM3_MOUSE | Mcm3   | DNA replication licensing R.AALLEVQEAHEQSVGM*LHLESINR@_N          | 16.16  | 7.92  | 2.04 | 0.49 |
| P25206_MCM3_MOUSE | Mcm3   | DNA replication licensing R.ALK#DFVASIDATYAK#.Q                   | 25.55  | 9.87  | 2.59 | 0.39 |
| P25206_MCM3_MOUSE | Mcm3   | DNA replication licensing R.DIQAFSADDIAR#.I                       | 86.89  | 40.10 | 2.17 | 0.46 |
| P25206_MCM3_MOUSE | Mcm3   | DNA replication licensing R.DYLDFLDDEEDQGIYQNK#.V                 | 7.19   | 3.36  | 2.14 | 0.47 |
| P25206_MCM3_MOUSE | Mcm3   | DNA replication licensing R.EAQRDYLDFLDDEEDQGIYQNK.V              | 13.88  | 5.72  | 2.43 | 0.41 |
| P25206_MCM3_MOUSE | Mcm3   | DNA replication licensing R.ELISDNQYR@_L                          | 39.20  | 24.61 | 1.59 | 0.63 |
| P25206_MCM3_MOUSE | Mcm3   | DNA replication licensing R.GDINILLIGDPSVAK#.S                    | 62.60  | 34.00 | 1.84 | 0.54 |
| P25206_MCM3_MOUSE | Mcm3   | DNA replication licensing R.GSSGVGLTAAVTTDQETGER@_R               | 36.70  | 16.55 | 2.22 | 0.45 |
| P25206_MCM3_MOUSE | Mcm3   | DNA replication licensing R.IIKPTLTQESAAYAEYSR.L                  | 122.60 | 50.44 | 2.43 | 0.41 |
| P25206_MCM3_MOUSE | Mcm3   | DNA replication licensing R.IQVVGYTR@_C                           | 44.88  | 19.00 | 2.36 | 0.42 |
| P25206_MCM3_MOUSE | Mcm3   | DNA replication licensing R.LEAGAM*VLADR@_G                       | 10.16  | 2.87  | 3.54 | 0.28 |
| P25206_MCM3_MOUSE | Mcm3   | DNA replication licensing R.LIVSVNDR@_R                           | 49.75  | 31.06 | 1.60 | 0.62 |
| P25206_MCM3_MOUSE | Mcm3   | DNA replication licensing R.LLNNAFEEVAFQR@_A                      | 29.25  | 14.41 | 2.03 | 0.49 |
| P25206_MCM3_MOUSE | Mcm3   | DNA replication licensing R.K.M*VSAAFM*K#.K                       | 14.05  | 5.68  | 2.47 | 0.40 |
| P25206_MCM3_MOUSE | Mcm3   | DNA replication licensing R.SK#DFVFEQLAR@_S                       | 84.54  | 32.34 | 2.61 | 0.38 |
| P25206_MCM3_MOUSE | Mcm3   | DNA replication licensing R.SQDSM*SSDTAR@_T                       | 3.59   | 2.39  | 1.50 | 0.66 |
| P25206_MCM3_MOUSE | Mcm3   | DNA replication licensing R.SVDVILDDDLVDK#.V                      | 32.38  | 13.73 | 2.36 | 0.42 |
| P25206_MCM3_MOUSE | Mcm3   | DNA replication licensing R.TAIHEVM*EQGR@_V                       | 17.88  | 5.96  | 3.00 | 0.33 |
| P25206_MCM3_MOUSE | Mcm3   | DNA replication licensing R.TDSDQEK#TDSQETQDSQK#.V                | 5.02   | 2.48  | 2.02 | 0.49 |
| P25206_MCM3_MOUSE | Mcm3   | DNA replication licensing R.TLETLIR@_L                            | 40.06  | 34.78 | 2.30 | 0.43 |
| P25206_MCM3_MOUSE | Mcm3   | DNA replication licensing R.TPM*ENIGLQDSLRSR@_F                   | 41.00  | 20.96 | 1.96 | 0.51 |
| P25206_MCM3_MOUSE | Mcm3   | DNA replication licensing R.TVDLQDAAEVLVQYAYFK#.K                 | 59.33  | 29.44 | 2.02 | 0.50 |
| P25206_MCM3_MOUSE | Mcm3   | DNA replication licensing R.APAGQLPR@_S                           | 17.99  | 7.11  | 2.53 | 0.40 |
| P25206_MCM3_MOUSE | Mcm3   | DNA replication licensing R.DIQAFSADDIAR#.I                       | 25.75  | 8.87  | 3.24 | 0.31 |
| P25206_MCM3_MOUSE | Mcm3   | DNA replication licensing R.DYLDFLDDEEDQGIYQNK#.V                 | 9.13   | 2.29  | 3.99 | 0.25 |
| P25206_MCM3_MOUSE | Mcm3   | DNA replication licensing R.ELISDNQYR@_L                          | 17.35  | 5.82  | 2.98 | 0.34 |
| P25206_MCM3_MOUSE | Mcm3   | DNA replication licensing R.GSSGVGLTAAVTTDQETGER@_R               | 14.60  | 5.68  | 2.57 | 0.39 |
| P25206_MCM3_MOUSE | Mcm3   | DNA replication licensing R.IIK#TLTQESAAYAEYSR@_L                 | 40.96  | 12.41 | 3.30 | 0.30 |
| P25206_MCM3_MOUSE | Mcm3   | DNA replication licensing R.LIVSVNDR@_R                           | 38.67  | 15.51 | 2.49 | 0.40 |
| P25206_MCM3_MOUSE | Mcm3   | DNA replication licensing R.LLNNAFEEVAFQR@_A                      | 17.82  | 6.27  | 2.84 | 0.35 |
| P25206_MCM3_MOUSE | Mcm3   | DNA replication licensing R.SK#DFVFEQLAR@_S                       | 25.78  | 9.74  | 2.65 | 0.38 |
| P25206_MCM3_MOUSE | Mcm3   | DNA replication licensing R.SVDVILDDDLVDK#.V                      | 18.28  | 5.12  | 3.57 | 0.28 |
| P25206_MCM3_MOUSE | Mcm3   | DNA replication licensing R.TPM*ENIGLQDSLRSR@_F                   | 17.28  | 6.21  | 2.78 | 0.36 |
| Q9WU09_GANP_MOUSE | Mcm3ap | Germinal-center associat R.LVLVLPDVEEQTPEPGR@_I                   | 3.30   | 2.84  | 1.16 | 0.86 |
| Q9WU09_GANP_MOUSE | Mcm3ap | Germinal-center associat R.STVFPDGVVR@_M                          | 7.44   | 5.51  | 1.35 | 0.74 |
| P49717_MCM4_MOUSE | Mcm4   | DNA replication licensing R.ALADDFLVTGK#.T                        | 36.87  | 15.61 | 2.36 | 0.42 |
| P49717_MCM4_MOUSE | Mcm4   | DNA replication licensing R.GSSAVGLTAYVM*K#MDPETR@_Q              | 24.20  | 68.56 | 0.35 | 2.83 |
| P49717_MCM4_MOUSE | Mcm4   | DNA replication licensing R.K#GLQVLDQSDGAAEDIVPSEQSLGQK#.L        | 17.37  | 6.41  | 2.71 | 0.37 |
| P49717_MCM4_MOUSE | Mcm4   | DNA replication licensing R.LSEASQALIEAVVM*#R@_K                  | 3.68   | 30.05 | 0.12 | 8.16 |
| P49717_MCM4_MOUSE | Mcm4   | DNA replication licensing R.NLNPEIDILQLITISM*VIR@_T               | 10.93  | 8.83  | 1.24 | 0.81 |
| P49717_MCM4_MOUSE | Mcm4   | DNA replication licensing R.K@HLHLEEEAQK#.L                       | 17.37  | 11.15 | 1.56 | 0.64 |
| P49717_MCM4_MOUSE | Mcm4   | DNA replication licensing R.SVLHEVM*EQQLTSLIAK#.A                 | 14.89  | 15.41 | 0.97 | 1.03 |
| P49717_MCM4_MOUSE | Mcm4   | DNA replication licensing R.TGIVDISLITGM*SATSR@_K                 | 14.22  | 8.86  | 1.61 | 0.62 |
| P49717_MCM4_MOUSE | Mcm4   | DNA replication licensing R.TSVLAAANPIESQWNP#.K                   | 13.93  | 6.25  | 2.23 | 0.45 |
| P49717_MCM4_MOUSE | Mcm4   | DNA replication licensing R.TTIENIQLPHTLSR@_F                     | 44.25  | 22.20 | 1.99 | 0.50 |
| P49717_MCM4_MOUSE | Mcm4   | DNA replication licensing R.VNVTGIVR@_A                           | 27.41  | 12.06 | 2.27 | 0.44 |
| P49717_MCM4_MOUSE | Mcm4   | DNA replication licensing R.ALADDFLVTGK#.T                        | 18.44  | 7.29  | 2.53 | 0.40 |
| P49717_MCM4_MOUSE | Mcm4   | DNA replication licensing R.GM*VSAVPR@_Q                          | 4.38   | 1.14  | 3.84 | 0.26 |
| P49717_MCM4_MOUSE | Mcm4   | DNA replication licensing R.K#GLQVLDQSDGAAEDIVPSEQSLGQK#.L        | 7.91   | 2.10  | 3.77 | 0.27 |
| P49717_MCM4_MOUSE | Mcm4   | DNA replication licensing R.LSEASQALIEAVVM*#R@_K                  | 8.49   | 2.59  | 3.28 | 0.30 |
| P49718_MCM5_MOUSE | Mcm5   | DNA replication licensing R.IPGIISASAVR@_A                        | 15.58  | 9.53  | 1.63 | 0.61 |
| P49718_MCM5_MOUSE | Mcm5   | DNA replication licensing R.LAALPNYELISK#.S                       | 30.58  | 15.43 | 1.98 | 0.50 |
| P49718_MCM5_MOUSE | Mcm5   | DNA replication licensing R.LFQVSTLDAALSGNLVSGVEGFTTQEDQEM*LSR@_I | 9.27   | 2.07  | 4.47 | 0.22 |
| P49718_MCM5_MOUSE | Mcm5   | DNA replication licensing R.LQPFATEDVEEALR@_L                     | 13.57  | 6.55  | 2.07 | 0.48 |
| P49718_MCM5_MOUSE | Mcm5   | DNA replication licensing R.IPGIISASAVR@_A                        | 4.13   | 3.15  | 1.31 | 0.76 |
| P49718_MCM5_MOUSE | Mcm5   | DNA replication licensing R.LQPFATEDVEEALR@_L                     | 27.57  | 12.92 | 2.13 | 0.47 |
| P49718_MCM5_MOUSE | Mcm5   | DNA replication licensing R.K.M*#LQPFATEDVEEALR@_L                | 9.13   | 1.31  | 6.97 | 0.14 |
| P49718_MCM5_MOUSE | Mcm5   | DNA replication licensing R.VLQLM*LR@_R                           | 10.78  | 4.41  | 2.45 | 0.41 |
| P49718_MCM5_MOUSE | Mcm5   | DNA replication licensing R.AGITTLSNR@_C                          | 58.11  | 29.00 | 2.00 | 0.50 |
| P49718_MCM5_MOUSE | Mcm5   | DNA replication licensing R.FAIGSQVSEHSIVQDFTK#.Q                 | 9.64   | 3.53  | 2.73 | 0.37 |
| P49718_MCM5_MOUSE | Mcm5   | DNA replication licensing R.FGLNPSK#.G                            | 44.57  | 23.50 | 1.90 | 0.53 |
| P49718_MCM5_MOUSE | Mcm5   | DNA replication licensing R.GSSAAGLTASVIR@_D                      | 19.67  | 8.58  | 2.29 | 0.44 |
| P49718_MCM5_MOUSE | Mcm5   | DNA replication licensing R.GSSAAGLTASVIR@_DPSSR@_N               | 56.22  | 20.74 | 2.71 | 0.37 |
| P49718_MCM5_MOUSE | Mcm5   | DNA replication licensing R.HVM*TLHVSALTQTQAVEEIDLAK#.M           | 3.23   | 1.64  | 1.97 | 0.51 |
| P49718_MCM5_MOUSE | Mcm5   | DNA replication licensing R.IPGIISASAVR@_A                        | 80.03  | 42.48 | 1.88 | 0.53 |
| P49718_MCM5_MOUSE | Mcm5   | DNA replication licensing R.LAALPNYELISK#.S                       | 164.46 | 85.97 | 1.91 | 0.52 |
| P49718_MCM5_MOUSE | Mcm5   | DNA replication licensing R.LQPFATEDVEEALR@_L                     | 44.92  | 29.48 | 1.52 | 0.66 |
| P49718_MCM5_MOUSE | Mcm5   | DNA replication licensing R.K.M*#LQPFATEDVEEALR@_L                | 8.01   | 4.44  | 1.80 | 0.55 |
| P49718_MCM5_MOUSE | Mcm5   | DNA replication licensing R.QPAEHLQLLEAAK#.E                      | 29.06  | 17.62 | 1.65 | 0.61 |
| P49718_MCM5_MOUSE | Mcm5   | DNA replication licensing R.R@GDINLLM*LGDPGTAK#.S                 | 42.76  | 23.24 | 1.84 | 0.54 |
| P49718_MCM5_MOUSE | Mcm5   | DNA replication licensing R.VAIHEAM*EQQLTSLIAK#.A                 | 27.12  | 15.86 | 1.71 | 0.58 |
| P49718_MCM5_MOUSE | Mcm5   | DNA replication licensing R.VLGIQVDTGSSGR@_S                      | 80.58  | 40.20 | 2.00 | 0.50 |
| P49718_MCM5_MOUSE | Mcm5   | DNA replication licensing R.VLQLM*LR@_R                           | 24.17  | 11.87 | 2.04 | 0.49 |
| P49718_MCM5_MOUSE | Mcm5   | DNA replication licensing R.VTIM*GYSIK#.K                         | 10.72  | 7.68  | 1.40 | 0.72 |
| P49718_MCM5_MOUSE | Mcm5   | DNA replication licensing R.WDETKGEDNIDFM*PTLSR@_F                | 13.17  | 16.03 | 0.82 | 1.22 |
| P49718_MCM5_MOUSE | Mcm5   | DNA replication licensing R.AGITTLSNR@_C                          | 77.26  | 20.85 | 3.49 | 0.29 |
| P49718_MCM5_MOUSE | Mcm5   | DNA replication licensing R.EDDR@VAIHEAM*EQQLTSLIAK#.A            | 6.74   | 3.13  | 2.16 | 0.46 |
| P49718_MCM5_MOUSE | Mcm5   | DNA replication licensing R.FAIGSQVSEHSIVQDFTK#.Q                 | 115.36 | 34.25 | 3.37 | 0.30 |
| P49718_MCM5_MOUSE | Mcm5   | DNA replication licensing R.FGLNPSK#.G                            | 46.13  | 18.02 | 2.56 | 0.39 |
| P49718_MCM5_MOUSE | Mcm5   | DNA replication licensing R.GSSAAGLTASVIR@_D                      | 25.03  | 5.99  | 4.18 | 0.24 |
| P49718_MCM5_MOUSE | Mcm5   | DNA replication licensing R.HVM*TLHVSALTQTQAVEEIDLAK#.M           | 5.55   | 2.01  | 2.76 | 0.36 |
| P49718_MCM5_MOUSE | Mcm5   | DNA replication licensing R.IPGIISASAVR@_A                        | 107.05 | 28.51 | 3.76 | 0.27 |
| P49718_MCM5_MOUSE | Mcm5   | DNA replication licensing R.LAALPNYELISK#.S                       | 298.20 | 74.91 | 3.98 | 0.25 |
| P49718_MCM5_MOUSE | Mcm5   | DNA replication licensing R.LFQVSTLDAALSGNLVSGVEGFTTQEDQEM*LSR@_I | 51.27  | 15.45 | 3.32 | 0.30 |
| P49718_MCM5_MOUSE | Mcm5   | DNA replication licensing R.LPDGLTR@_R                            | 41.34  | 11.75 | 3.52 | 0.28 |
| P49718_MCM5_MOUSE | Mcm5   | DNA replication licensing R.LQELPDAVPHGEMPR@_H                    | 14.83  | 4.50  | 3.30 | 0.30 |
| P49718_MCM5_MOUSE | Mcm5   | DNA replication licensing R.LQPFATEDVEEALR@_L                     | 94.68  | 29.93 | 3.16 | 0.32 |
| P49718_MCM5_MOUSE | Mcm5   | DNA replication licensing R.LSAEAEK#.L                            | 67.83  | 15.57 | 3.66 | 0.23 |
| P49718_MCM5_MOUSE | Mcm5   | DNA replication licensing R.K.M*#LQPFATEDVEEALR@_L                | 11.81  | 2.09  | 5.64 | 0.18 |
| P49718_MCM5_MOUSE | Mcm5   | DNA replication licensing R.QLEAIVR.I                             | 52.33  | 12.17 | 4.30 | 0.23 |
| P49718_MCM5_MOUSE | Mcm5   | DNA replication licensing R.R@GDINLLM*LGDPGTAK#.S                 | 59.68  | 17.93 | 3.33 | 0.30 |
| P49718_MCM5_MOUSE | Mcm5   | DNA replication licensing R.R@LPDGLTR@_R                          | 42.79  | 8.72  | 4.91 | 0.20 |
| P49718_MCM5_MOUSE | Mcm5   | DNA replication licensing R.SFAGSVSPQEEFFR@_R                     | 9.19   | 3.98  | 2.31 | 0.43 |

|                    |        |                                                            |       |       |      |      |
|--------------------|--------|------------------------------------------------------------|-------|-------|------|------|
| P49718_MCM5_MOUSE  | Mcm5   | DNA replication licensing K.SISPIFGGM*DM*K#.K              | 18.35 | 4.40  | 4.18 | 0.24 |
| P49718_MCM5_MOUSE  | Mcm5   | DNA replication licensing R.VAIHEAM*EQQTIAK#.A             | 57.57 | 66.85 | 0.86 | 1.16 |
| P49718_MCM5_MOUSE  | Mcm5   | DNA replication licensing R.VLGIQVDTDGSGR@.S               | 97.75 | 24.65 | 3.96 | 0.25 |
| P49718_MCM5_MOUSE  | Mcm5   | DNA replication licensing K.VLQLM*LR@.R                    | 38.61 | 10.65 | 3.63 | 0.28 |
| P49718_MCM5_MOUSE  | Mcm5   | DNA replication licensing R.VTMM*GIYSIK#.K                 | 11.17 | 4.92  | 2.27 | 0.44 |
| P49718_MCM5_MOUSE  | Mcm5   | DNA replication licensing R.WDETKHGEDNIDFM*PTLSR@.F        | 20.09 | 5.45  | 3.69 | 0.27 |
| P97311_MCM6_MOUSE  | Mcm6   | DNA replication licensing K.DFYVAFQDLPLTR@.H               | 15.93 | 10.05 | 1.58 | 0.63 |
| P97311_MCM6_MOUSE  | Mcm6   | DNA replication licensing R.FNGSSEDASQETVSK#PSLR@.L        | 5.43  | 3.67  | 1.48 | 0.67 |
| P97311_MCM6_MOUSE  | Mcm6   | DNA replication licensing K.HVDEFSR@.A                     | 21.12 | 9.60  | 2.20 | 0.45 |
| P97311_MCM6_MOUSE  | Mcm6   | DNA replication licensing R.IQETQELPR@.G                   | 26.56 | 11.98 | 2.22 | 0.45 |
| P97311_MCM6_MOUSE  | Mcm6   | DNA replication licensing R.VSGADGYETEGIR@.G               | 26.63 | 13.47 | 1.98 | 0.51 |
| P97311_MCM6_MOUSE  | Mcm6   | DNA replication licensing K.DFYVAFQDLPLTR@.H               | 7.68  | 4.33  | 1.77 | 0.56 |
| P97311_MCM6_MOUSE  | Mcm6   | DNA replication licensing K.HVDEFSR@.A                     | 9.65  | 3.07  | 3.14 | 0.32 |
| P97311_MCM6_MOUSE  | Mcm6   | DNA replication licensing R.IQETQELPR@.G                   | 11.39 | 3.97  | 2.87 | 0.35 |
| P97311_MCM6_MOUSE  | Mcm6   | DNA replication licensing R.VSGADGYETEGIR@.G               | 9.00  | 4.86  | 1.85 | 0.54 |
| Q61881_MCM7_MOUSE  | Mcm7   | DNA replication licensing K.ALLLLLGGVDQSPQGM*K#.I          | 18.44 | 7.36  | 2.50 | 0.40 |
| Q61881_MCM7_MOUSE  | Mcm7   | DNA replication licensing K.FLQEFYENELGK#.K                | 10.30 | 6.03  | 1.71 | 0.59 |
| Q61881_MCM7_MOUSE  | Mcm7   | DNA replication licensing R.GSSGVGLTAAVLR@.D               | 25.29 | 12.44 | 2.03 | 0.49 |
| Q61881_MCM7_MOUSE  | Mcm7   | DNA replication licensing R.IAQPGDHSVVTGIFLPLVLR@.T        | 40.21 | 20.95 | 1.92 | 0.52 |
| Q61881_MCM7_MOUSE  | Mcm7   | DNA replication licensing R.LFGDQVQELPEYK#.E               | 18.32 | 15.90 | 2.05 | 0.49 |
| Q61881_MCM7_MOUSE  | Mcm7   | DNA replication licensing R.M*VDIKEKHEDEVNEAIR@.L          | 32.57 | 8.07  | 2.27 | 0.44 |
| Q61881_MCM7_MOUSE  | Mcm7   | DNA replication licensing R.NPQNQVPSLMM*R@.R               | 11.35 | 4.55  | 2.49 | 0.40 |
| Q61881_MCM7_MOUSE  | Mcm7   | DNA replication licensing K.SDDDVSGAGELSSSELK#.Q           | 17.22 | 7.07  | 2.44 | 0.41 |
| Q61881_MCM7_MOUSE  | Mcm7   | DNA replication licensing R.SITVLEGENTR@.I                 | 23.37 | 16.91 | 1.38 | 0.72 |
| Q61881_MCM7_MOUSE  | Mcm7   | DNA replication licensing R.SLEQNVQLPAALLSR@.F             | 12.17 | 6.65  | 1.83 | 0.55 |
| Q61881_MCM7_MOUSE  | Mcm7   | DNA replication licensing K.SQLLSYDR@.L                    | 19.92 | 12.71 | 1.57 | 0.64 |
| Q61881_MCM7_MOUSE  | Mcm7   | DNA replication licensing R.TGFQQM*AAQGLLSEYEAHWHVVK#.M    | 11.06 | 4.18  | 2.65 | 0.38 |
| Q61881_MCM7_MOUSE  | Mcm7   | DNA replication licensing R.TLLAILR@.L                     | 44.61 | 19.06 | 2.34 | 0.43 |
| Q61881_MCM7_MOUSE  | Mcm7   | DNA replication licensing K.ALLLLLGGVDQSPQGM*K#.I          | 12.34 | 2.62  | 4.72 | 0.21 |
| Q61881_MCM7_MOUSE  | Mcm7   | DNA replication licensing K.FLQEFYENELGK#.K                | 7.40  | 4.15  | 1.78 | 0.56 |
| Q61881_MCM7_MOUSE  | Mcm7   | DNA replication licensing R.GSSGVGLTAAVLR@.D               | 14.88 | 5.98  | 2.49 | 0.40 |
| Q61881_MCM7_MOUSE  | Mcm7   | DNA replication licensing R.IAQPGDHSVVTGIFLPLVLR@.T        | 10.43 | 10.47 | 2.91 | 0.34 |
| Q61881_MCM7_MOUSE  | Mcm7   | DNA replication licensing R.LFGDQVQELPEYK#.E               | 26.80 | 8.84  | 3.03 | 0.33 |
| Q61881_MCM7_MOUSE  | Mcm7   | DNA replication licensing R.NPQNQVPSLMM*R@.R               | 6.57  | 2.26  | 2.90 | 0.34 |
| Q61881_MCM7_MOUSE  | Mcm7   | DNA replication licensing K.SDDDVSGAGELSSSELK#.Q           | 11.42 | 5.09  | 2.25 | 0.45 |
| Q61881_MCM7_MOUSE  | Mcm7   | DNA replication licensing R.SITVLEGENTR@.I                 | 10.42 | 20.81 | 0.50 | 2.00 |
| Q61881_MCM7_MOUSE  | Mcm7   | DNA replication licensing R.SLEQNVQLPAALLSR@.F             | 10.65 | 3.47  | 3.07 | 0.33 |
| Q61881_MCM7_MOUSE  | Mcm7   | DNA replication licensing K.SQLLSYDR@.L                    | 18.60 | 4.70  | 3.96 | 0.25 |
| Q61881_MCM7_MOUSE  | Mcm7   | DNA replication licensing R.TLLAILR@.L                     | 22.64 | 5.80  | 3.90 | 0.26 |
| Q8R3C0_MCM8P_MOUSE | Mcm8p  | Mini-chromosome maint R.SYEDDEDMDLQPSK#.Q                  | 1.71  | 1.25  | 1.37 | 0.73 |
| Q99L90_MCRS1_MOUSE | Mcrs1  | Microspherule protein 1 K.APSTPVPSPAPTGLTK#.R              | 5.19  | 3.56  | 1.46 | 0.69 |
| Q99L90_MCRS1_MOUSE | Mcrs1  | Microspherule protein 1 R.LSNNSVVEIASLR@.F                 | 12.93 | 3.23  | 4.00 | 0.25 |
| Q99L90_MCRS1_MOUSE | Mcrs1  | Microspherule protein 1 K.WQVLVDSITGM*GSPDFDNQTLAVLR@.G    | 6.58  | 2.54  | 2.59 | 0.39 |
| Q99L90_MCRS1_MOUSE | Mcrs1  | Microspherule protein 1 R.WYALLYDPVIVSK#.L                 | 8.63  | 8.25  | 1.05 | 0.96 |
| Q99L90_MCRS1_MOUSE | Mcrs1  | Microspherule protein 1 R.WYALLYDPVIVSK#.L                 | 3.37  | 3.24  | 1.04 | 0.96 |
| P08249_MDHM_MOUSE  | Mdh2   | Malate dehydrogenase, n K.AGAGSALTSM*AYAGAR.F              | 4.33  | 6.42  | 0.67 | 1.48 |
| P08249_MDHM_MOUSE  | Mdh2   | Malate dehydrogenase, n R.ANTFVAELK.G                      | 4.47  | 14.19 | 0.31 | 3.17 |
| P08249_MDHM_MOUSE  | Mdh2   | Malate dehydrogenase, n K.IFGVITLDIVR.A                    | 5.50  | 21.01 | 0.26 | 3.82 |
| P08249_MDHM_MOUSE  | Mdh2   | Malate dehydrogenase, n R.IQEAETVEVK.A                     | 4.44  | 19.95 | 0.22 | 4.49 |
| P08249_MDHM_MOUSE  | Mdh2   | Malate dehydrogenase, n K.M*IAEAIPELK.A                    | 6.05  | 19.23 | 0.31 | 3.18 |
| Q9D967_MGDP1_MOUSE | Mdp1   | Magnesium-dependent p R.DGM*SLQTLTGLETFAK#.A               | 6.63  | 3.85  | 1.72 | 0.58 |
| Q9D967_MGDP1_MOUSE | Mdp1   | Magnesium-dependent p R.LQSLGVVAAASR@.T                    | 13.81 | 8.86  | 1.56 | 0.64 |
| Q2VPO9_EAF6_MOUSE  | Meaf6  | Chromatin modification R.K@QELAEIANLER@.Q                  | 16.08 | 10.34 | 1.56 | 0.64 |
| Q2VPO9_EAF6_MOUSE  | Meaf6  | Chromatin modification R.QIYAFEGYSVATVLSYGNIR@.G           | 3.59  | 1.86  | 1.93 | 0.52 |
| Q2VPO9_EAF6_MOUSE  | Meaf6  | Chromatin modification K.R@K@QELAEIANLER@.Q                | 35.21 | 14.78 | 2.38 | 0.42 |
| Q2VPO9_EAF6_MOUSE  | Meaf6  | Chromatin modification K.SSVTSAAASVALAGVQDQLEK#.R          | 17.03 | 9.36  | 1.82 | 0.55 |
| Q2VPO9_EAF6_MOUSE  | Meaf6  | Chromatin modification K.SSVTSAAASVALAGVQDQLEK#.R          | 9.56  | 7.15  | 1.34 | 0.75 |
| Q2VPO9_EAF6_MOUSE  | Meaf6  | Chromatin modification K.TAPPQJPDTR@.R                     | 25.81 | 10.33 | 2.50 | 0.40 |
| Q2VPO9_EAF6_MOUSE  | Meaf6  | Chromatin modification K.SSVTSAAASVALAGVQDQLEK#.R          | 23.63 | 10.97 | 2.34 | 0.43 |
| P14404_EV11_MOUSE  | Mecom  | MDS1 and EVI1 complex R.AAAESSAQISIVH.-                    | 16.64 | 16.64 | 1.00 | 1.00 |
| P14404_EV11_MOUSE  | Mecom  | MDS1 and EVI1 complex R.APPNTLPENLLR@.K                    | 11.59 | 6.81  | 1.70 | 0.59 |
| P14404_EV11_MOUSE  | Mecom  | MDS1 and EVI1 complex K.YFGSTLGVGLQDK#.K                   | 7.00  | 5.84  | 1.20 | 0.83 |
| P14404_EV11_MOUSE  | Mecom  | MDS1 and EVI1 complex R.AAAESSAQISIVH.-                    | 8.86  | 8.86  | 1.00 | 1.00 |
| Q9Z2D6_MECP2_MOUSE | Mecp2  | Methyl-CpG-binding pro R.AAAESEGVQV.K                      | 10.49 | 15.65 | 0.67 | 1.49 |
| Q9Z2D6_MECP2_MOUSE | Mecp2  | Methyl-CpG-binding pro R.GRKPSSVVAASAAEA.K                 | 2.09  | 18.11 | 0.12 | 8.65 |
| Q9Z2D6_MECP2_MOUSE | Mecp2  | Methyl-CpG-binding pro K.VGDTSLDPNDFDFTVTGR.G              | 4.29  | 10.11 | 0.42 | 2.35 |
| Q9Z5J9_MED1_MOUSE  | Med1   | Mediator of RNA polyme K.DAPLPDGOSLQGLTVSK#.I              | 7.31  | 4.43  | 1.65 | 0.61 |
| Q9Z5J9_MED1_MOUSE  | Med1   | Mediator of RNA polyme K.GLVNLYNLPDGNK#.L                  | 5.54  | 2.24  | 2.48 | 0.40 |
| Q9Z5J9_MED1_MOUSE  | Med1   | Mediator of RNA polyme R.VPLINM*IR@.H                      | 13.44 | 6.97  | 1.93 | 0.52 |
| Q9Z5J9_MED1_MOUSE  | Med1   | Mediator of RNA polyme K.DAPLPDGOSLQGLTVSK#.I              | 8.87  | 2.25  | 3.94 | 0.25 |
| Q9Z5J9_MED1_MOUSE  | Med1   | Mediator of RNA polyme K.GLVNLYNLPDGNK#.L                  | 9.20  | 2.70  | 3.41 | 0.29 |
| Q9CXU0_MED10_MOUSE | Med10  | Mediator of RNA polyme R.QGLIIVPDPSSQASQK#.L               | 6.35  | 2.22  | 2.86 | 0.35 |
| Q9D8C6_MED11_MOUSE | Med11  | Mediator of RNA polyme R.EIGALIQNAGTALLESK#.E              | 26.24 | 8.69  | 3.02 | 0.33 |
| Q9D8C6_MED11_MOUSE | Med11  | Mediator of RNA polyme R.QAAFTTSSVQHVAEALSAQR@.Y           | 9.10  | 9.31  | 2.31 | 0.43 |
| A2AGH6_MED12_MOUSE | Med12  | Mediator of RNA polyme R.IVDGAVFAVLK#.A                    | 15.95 | 6.72  | 2.38 | 0.42 |
| A2AGH6_MED12_MOUSE | Med12  | Mediator of RNA polyme R.LLDNEDGENPQR@.Q                   | 8.21  | 3.82  | 2.15 | 0.47 |
| A2AGH6_MED12_MOUSE | Med12  | Mediator of RNA polyme R.NISVETASLDVAK#.Y                  | 5.94  | 3.55  | 1.67 | 0.60 |
| A2AGH6_MED12_MOUSE | Med12  | Mediator of RNA polyme K.NTADPFTEWTQITK#.Y                 | 8.84  | 2.62  | 3.38 | 0.30 |
| A2AGH6_MED12_MOUSE | Med12  | Mediator of RNA polyme R.SGVWLVPALIAK#.L                   | 16.10 | 6.80  | 2.37 | 0.42 |
| Q5SWW4_MED13_MOUSE | Med13  | Mediator of RNA polyme K.VSDEIVQQYQIK#.N                   | 5.41  | 2.37  | 2.28 | 0.44 |
| Q5SWW4_MED13_MOUSE | Med13  | Mediator of RNA polyme K.EYGSVDTAPGGTVLEGNSSSVGTQFR@.I     | 10.83 | 2.71  | 4.00 | 0.25 |
| Q5SWW4_MED13_MOUSE | Med13  | Mediator of RNA polyme K.FVTEWFSQAADGNNEAFSK#.L            | 9.48  | 1.62  | 5.84 | 0.17 |
| Q5SWW4_MED13_MOUSE | Med13  | Mediator of RNA polyme K.HK#VEDGTSVAVTVLSHEEDAM*SLFSPSK#.Q | 6.44  | 2.93  | 2.20 | 0.46 |
| Q5SWW4_MED13_MOUSE | Med13  | Mediator of RNA polyme K.LDLSPSGSPM*PFIK#.E                | 20.67 | 4.82  | 4.73 | 0.21 |
| Q5SWW4_MED13_MOUSE | Med13  | Mediator of RNA polyme R.LLSTESHEDVTNLIQQLALGVFSTAK#.A     | 22.71 | 3.07  | 6.72 | 0.15 |
| Q5SWW4_MED13_MOUSE | Med13  | Mediator of RNA polyme R.LYTPFPILAVPK#.D                   | 15.15 | 4.18  | 3.62 | 0.28 |
| Q5SWW4_MED13_MOUSE | Med13  | Mediator of RNA polyme R.M*LLSLOPVLDQAIQK#.K               | 15.42 | 4.85  | 3.16 | 0.32 |
| Q5SWW4_MED13_MOUSE | Med13  | Mediator of RNA polyme K.NQYLSAASDTEQEPK#.I                | 9.14  | 3.31  | 2.77 | 0.36 |
| Q5SWW4_MED13_MOUSE | Med13  | Mediator of RNA polyme K.TLTFGFGPLAM*ETALK#.S              | 17.75 | 3.19  | 5.56 | 0.18 |
| Q5SWW4_MED13_MOUSE | Med13  | Mediator of RNA polyme K.VGSISSNVVR@.V                     | 8.96  | 3.87  | 2.32 | 0.43 |
| Q5SWW4_MED13_MOUSE | Med13  | Mediator of RNA polyme K.VSDEIVQQYQIK#.N                   | 20.32 | 6.12  | 3.32 | 0.30 |
| Q5SWW4_MED13_MOUSE | Med13  | Mediator of RNA polyme R.VSVSDEIGM*DTDSASQR@.L             | 8.43  | 3.18  | 2.65 | 0.38 |
| Q6JPI3_MD13L_MOUSE | Med13l | Mediator of RNA polyme K.NPER@PSPIQLYSSPFIAPIK#DK#.Q       | 9.80  | 4.63  | 2.12 | 0.47 |
| Q6JPI3_MD13L_MOUSE | Med13l | Mediator of RNA polyme K.VDEALVR@.S                        | 23.22 | 22.00 | 1.06 | 0.95 |
| A2ABV5_MED14_MOUSE | Med14  | Mediator of RNA polyme R.AGTSQTM*PTNM*PPRR@.K              | 3.42  | 1.51  | 2.27 | 0.44 |
| A2ABV5_MED14_MOUSE | Med14  | Mediator of RNA polyme R.ABAGYSLDFNSK#.L                   | 8.44  | 2.88  | 2.92 | 0.34 |
| A2ABV5_MED14_MOUSE | Med14  | Mediator of RNA polyme R.HVLYTENLLEPVGGR@.K                | 11.91 | 4.48  | 2.65 | 0.38 |
| A2ABV5_MED14_MOUSE | Med14  | Mediator of RNA polyme R.HIQETQLQINSNEPVM*FK#.T            | 13.26 | 4.60  | 2.88 | 0.35 |
| A2ABV5_MED14_MOUSE | Med14  | Mediator of RNA polyme K.TFLNM*FVDSNQDAR@.R                | 6.08  | 2.96  | 2.05 | 0.49 |
| A2ABV5_MED14_MOUSE | Med14  | Mediator of RNA polyme K.TNQTLQLK#.V                       | 11.46 | 9.86  | 1.16 | 0.86 |
| A2ABV5_MED14_MOUSE | Med14  | Mediator of RNA polyme K.VVEM*FLNDWSSAIR@.L                | 5.16  | 1.64  | 3.14 | 0.32 |
| Q6PGF3_MED16_MOUSE | Med16  | Mediator of RNA polyme K.LFLM*AITSTLK#.S                   | 5.51  | 1.68  | 3.29 | 0.30 |
| Q6PGF3_MED16_MOUSE | Med16  | Mediator of RNA polyme K.LPISLNTDLK#.V                     | 14.66 | 8.19  | 1.79 | 0.56 |





|                     |        |                                                              |        |        |      |       |
|---------------------|--------|--------------------------------------------------------------|--------|--------|------|-------|
| P97434_MPRIP_MOUSE  | Mprip  | Myosin phosphatase Rho R.FGM*LDTIDGPGM*EDTALR@.M             | 4.41   | 4.44   | 0.99 | 1.01  |
| P97434_MPRIP_MOUSE  | Mprip  | Myosin phosphatase Rho R.LLAETAATISAIEAM*K.N                 | 18.05  | 17.15  | 1.05 | 0.95  |
| P97434_MPRIP_MOUSE  | Mprip  | Myosin phosphatase Rho K.M*AVTSSGSSGSSSSIPSAEK#VPPTK#.S      | 15.13  | 8.94   | 1.69 | 0.59  |
| P97434_MPRIP_MOUSE  | Mprip  | Myosin phosphatase Rho K.QEISSLKHDELQTLAR@.D                 | 19.39  | 18.01  | 1.08 | 0.93  |
| P97434_MPRIP_MOUSE  | Mprip  | Myosin phosphatase Rho R.QYLEELQSVQR@.E                      | 7.85   | 6.65   | 1.18 | 0.85  |
| P97434_MPRIP_MOUSE  | Mprip  | Myosin phosphatase Rho K.SPEGTTVSGYDIM*K#.S                  | 17.83  | 12.44  | 1.43 | 0.70  |
| P97434_MPRIP_MOUSE  | Mprip  | Myosin phosphatase Rho K.TFDWAEFR@PIQQALAQER@.A              | 14.32  | 12.87  | 1.11 | 0.90  |
| P97434_MPRIP_MOUSE  | Mprip  | Myosin phosphatase Rho R.TLLTGDGSGESTGLPLTQK#.D              | 12.50  | 11.56  | 1.08 | 0.92  |
| P97434_MPRIP_MOUSE  | Mprip  | Myosin phosphatase Rho K.AATEALGKHSPEGTTVSGYDIM*K#.S         | 17.32  | 6.04   | 2.87 | 0.35  |
| P97434_MPRIP_MOUSE  | Mprip  | Myosin phosphatase Rho R.AEEQLPLPSPPSTPHSR@.R                | 11.34  | 5.31   | 2.10 | 0.48  |
| P97434_MPRIP_MOUSE  | Mprip  | Myosin phosphatase Rho K.DAYELEVELLR@.V                      | 42.82  | 16.76  | 2.56 | 0.39  |
| P97434_MPRIP_MOUSE  | Mprip  | Myosin phosphatase Rho K.DIYTELQSLR#.A                       | 23.29  | 6.02   | 3.87 | 0.26  |
| P97434_MPRIP_MOUSE  | Mprip  | Myosin phosphatase Rho K.EASDLLEQNR@.L                       | 49.59  | 17.69  | 2.80 | 0.36  |
| P97434_MPRIP_MOUSE  | Mprip  | Myosin phosphatase Rho K.EGEFTLSAM*TSQIR@.R                  | 41.71  | 12.41  | 3.36 | 0.30  |
| P97434_MPRIP_MOUSE  | Mprip  | Myosin phosphatase Rho R.FGM*LDTIDGPGM*EDTALR@.M             | 20.69  | 6.96   | 2.97 | 0.34  |
| P97434_MPRIP_MOUSE  | Mprip  | Myosin phosphatase Rho R.GFAAM*EETHQK#.K                     | 13.56  | 4.22   | 3.21 | 0.31  |
| P97434_MPRIP_MOUSE  | Mprip  | Myosin phosphatase Rho K.HVLPASAPDVTSSLPEGK#.N               | 57.05  | 20.78  | 2.75 | 0.36  |
| P97434_MPRIP_MOUSE  | Mprip  | Myosin phosphatase Rho R.LLAETAATISAIEAM*K.N                 | 120.06 | 35.93  | 3.34 | 0.30  |
| P97434_MPRIP_MOUSE  | Mprip  | Myosin phosphatase Rho R.LLAETAATISAIEAMK#.N                 | 18.07  | 8.80   | 2.16 | 0.46  |
| P97434_MPRIP_MOUSE  | Mprip  | Myosin phosphatase Rho R.LSTHELSTLLEK#.E                     | 60.62  | 17.94  | 3.38 | 0.30  |
| P97434_MPRIP_MOUSE  | Mprip  | Myosin phosphatase Rho K.M*AVTSSGSSGSSSSIPSAEK#VPPTK#.S      | 23.57  | 7.22   | 3.26 | 0.31  |
| P97434_MPRIP_MOUSE  | Mprip  | Myosin phosphatase Rho K.MAVTSSGSSGSSSSIPSAEK#VPPTK#.S       | 8.99   | 6.91   | 1.30 | 0.77  |
| P97434_MPRIP_MOUSE  | Mprip  | Myosin phosphatase Rho R.NYGFQIHK#.E                         | 12.00  | 6.93   | 1.73 | 0.58  |
| P97434_MPRIP_MOUSE  | Mprip  | Myosin phosphatase Rho K.QEISSLKHDELQTLAR@.D                 | 67.77  | 20.10  | 3.37 | 0.30  |
| P97434_MPRIP_MOUSE  | Mprip  | Myosin phosphatase Rho R.QYLEELQSVQR@.E                      | 27.54  | 10.57  | 2.61 | 0.38  |
| P97434_MPRIP_MOUSE  | Mprip  | Myosin phosphatase Rho K.SPEGTTVSGYDIM*K#.S                  | 40.60  | 16.51  | 2.46 | 0.41  |
| P97434_MPRIP_MOUSE  | Mprip  | Myosin phosphatase Rho K.SPEGTTVSGYDIMK#.S                   | 6.05   | 2.03   | 2.98 | 0.34  |
| P97434_MPRIP_MOUSE  | Mprip  | Myosin phosphatase Rho R.SPGLLGTPLDK#.T                      | 64.14  | 24.74  | 2.59 | 0.39  |
| P97434_MPRIP_MOUSE  | Mprip  | Myosin phosphatase Rho R.SQISSINSIDIALR@.R                   | 6.45   | 2.14   | 3.02 | 0.33  |
| P97434_MPRIP_MOUSE  | Mprip  | Myosin phosphatase Rho R.STEKHQEAEPGPEPQK#.K#.S              | 6.45   | 9.01   | 2.84 | 0.35  |
| P97434_MPRIP_MOUSE  | Mprip  | Myosin phosphatase Rho R.STESSM*TPDLLNFK#.K                  | 25.82  | 10.78  | 2.40 | 0.42  |
| P97434_MPRIP_MOUSE  | Mprip  | Myosin phosphatase Rho K.SVIEQVSWDN.-                        | 9.67   | 9.67   | 1.00 | 1.00  |
| P97434_MPRIP_MOUSE  | Mprip  | Myosin phosphatase Rho K.TFDWAEFR@PIQQALAQER@.A              | 55.07  | 19.30  | 2.85 | 0.35  |
| P97434_MPRIP_MOUSE  | Mprip  | Myosin phosphatase Rho R.TLLTGDGSGESTGLPLTQK#.D              | 47.24  | 8.19   | 5.77 | 0.17  |
| P97434_MPRIP_MOUSE  | Mprip  | Myosin phosphatase Rho R.VESGYFLEK#.A                        | 41.36  | 14.69  | 2.82 | 0.36  |
| Q5SWZ5_Q5SWZ5_MOUSE | Mprip  | Myosin phosphatase Rho K.ASAYEDLQGHVQVEALQK#.E               | 8.00   | 4.17   | 1.92 | 0.52  |
| Q5SWZ5_Q5SWZ5_MOUSE | Mprip  | Myosin phosphatase Rho R.ASLLQASALASLEQER@.Q                 | 6.06   | 3.67   | 1.65 | 0.61  |
| Q5SWZ5_Q5SWZ5_MOUSE | Mprip  | Myosin phosphatase Rho K.DAKREPLSTPEEGSGILPLGVSVR@.V         | 8.16   | 7.59   | 1.08 | 0.93  |
| Q5SWZ5_Q5SWZ5_MOUSE | Mprip  | Myosin phosphatase Rho R.DLETQQLQR@.D                        | 9.72   | 5.82   | 1.67 | 0.60  |
| Q5SWZ5_Q5SWZ5_MOUSE | Mprip  | Myosin phosphatase Rho R.LESQGQSQEALLALHQWAGTEAQLR@.E        | 4.47   | 2.62   | 1.71 | 0.59  |
| Q5SWZ5_Q5SWZ5_MOUSE | Mprip  | Myosin phosphatase Rho R.VATSDQVLAQEK#.L                     | 11.73  | 5.27   | 2.23 | 0.45  |
| Q5SWZ5_Q5SWZ5_MOUSE | Mprip  | Myosin phosphatase Rho R.VFPGFPHSQPEDEPSAGLGEEGSSLSR@.E      | 3.34   | 7.30   | 0.46 | 2.19  |
| Q5SWZ5_Q5SWZ5_MOUSE | Mprip  | Myosin phosphatase Rho R.VIQQLLETLR.H                        | 11.78  | 11.88  | 0.99 | 1.01  |
| Q64449_MRC2_MOUSE   | Mrc2   | C-type mannose receptor R.TLGDQLSLLGAR.A                     | 55.21  | 10.45  | 5.28 | 0.19  |
| Q61216_MRE11_MOUSE  | Mre11a | Double-strand break rep: K.EDENSWFNLFVHQNRR@.S               | 13.36  | 4.60   | 2.90 | 0.34  |
| Q61216_MRE11_MOUSE  | Mre11a | Double-strand break rep: R.FFIEDVVLANHPNLFNPNPK#.V           | 24.21  | 5.85   | 4.14 | 0.24  |
| Q61216_MRE11_MOUSE  | Mre11a | Double-strand break rep: R.GNDTFVTFDEILR@.L                  | 20.92  | 5.78   | 3.62 | 0.28  |
| Q61216_MRE11_MOUSE  | Mre11a | Double-strand break rep: R.HIDALEDK#DEEVR@R@.F               | 37.55  | 15.50  | 2.42 | 0.41  |
| Q61216_MRE11_MOUSE  | Mre11a | Double-strand break rep: K.IGPK#NEQQLFYVQPGSSVVTSLSPGEAVK#.K | 9.67   | 3.01   | 3.21 | 0.31  |
| Q61216_MRE11_MOUSE  | Mre11a | Double-strand break rep: K.LALYGLGSPIDER@.L                  | 21.19  | 7.34   | 2.89 | 0.35  |
| Q61216_MRE11_MOUSE  | Mre11a | Double-strand break rep: K.NVQLSLLTER@.G                     | 25.80  | 11.08  | 2.33 | 0.43  |
| Q61216_MRE11_MOUSE  | Mre11a | Double-strand break rep: K.VDISPVLQK#.G                      | 32.66  | 11.20  | 2.92 | 0.34  |
| Q9CQT1_MRNA_MOUSE   | Mri1   | Methylthioribose-1-phor: R.AGAGGPGLAALVAFVR@.D               | 9.38   | 4.44   | 2.11 | 0.47  |
| Q9CQT1_MRNA_MOUSE   | Mri1   | Methylthioribose-1-phor: R.DLGGVAAQEAER@.EGATEETVR@.E        | 9.38   | 2.58   | 2.77 | 0.36  |
| P58059_RT21_MOUSE   | Mrps21 | 28S ribosomal protein S2: R.ILTTDGLTEIVSR@.R                 | 8.96   | 2.72   | 3.29 | 0.30  |
| QBVE22_RT23_MOUSE   | Mrps23 | 28S ribosomal protein S2: K.ALLAEGILR@.R                     | 12.00  | 3.41   | 3.52 | 0.28  |
| Q80Z53_RT26_MOUSE   | Mrps26 | 28S ribosomal protein S2: R.LQLEAQAEVQK#.A                   | 9.63   | 4.60   | 2.09 | 0.48  |
| Q80X85_RT07_MOUSE   | Mrps7  | 28S ribosomal protein S7: K.AAAATETSSVFADPVISK#.F            | 3.61   | 2.04   | 1.77 | 0.56  |
| Q9D7N3_RT09_MOUSE   | Mrps9  | 28S ribosomal protein S9: R.AIAVLPFSGLEFK#.R                 | 7.61   | 4.28   | 1.78 | 0.56  |
| Q9D0I8_MRT4_MOUSE   | Mrt04  | mRNA turnover protein < R.GEVGLLFTNR@.T                      | 26.73  | 15.37  | 1.74 | 0.58  |
| Q9D0I8_MRT4_MOUSE   | Mrt04  | mRNA turnover protein < K.LFGYEM*AEFK#.V                     | 30.32  | 11.59  | 2.62 | 0.38  |
| Q9D0I8_MRT4_MOUSE   | Mrt04  | mRNA turnover protein < R.SPDEYK#DNLHQVSK#.K                 | 35.08  | 14.52  | 2.42 | 0.41  |
| Q9D0I8_MRT4_MOUSE   | Mrt04  | mRNA turnover protein < R.TK#HEVNEWFTK#.Y                    | 21.21  | 15.28  | 1.39 | 0.72  |
| Q9D0I8_MRT4_MOUSE   | Mrt04  | mRNA turnover protein < K.YTEM*DFAR@.A                       | 28.45  | 13.82  | 2.06 | 0.49  |
| Q9D0I8_MRT4_MOUSE   | Mrt04  | mRNA turnover protein < K.ATLLVSLDGPGLK.Q                    | 9.43   | 10.88  | 0.87 | 1.15  |
| Q9D0I8_MRT4_MOUSE   | Mrt04  | mRNA turnover protein < R.GEVGLLFTNR.T                       | 6.74   | 5.48   | 1.23 | 0.81  |
| Q9D0I8_MRT4_MOUSE   | Mrt04  | mRNA turnover protein < K.LFGYEM*AEFK#.V                     | 9.52   | 5.97   | 1.59 | 0.63  |
| P43247_MSH2_MOUSE   | Msh2   | DNA mismatch repair prc R.ALNLFQGSVEDTTGSSQLAALLN#.C         | 23.94  | 11.80  | 2.03 | 0.49  |
| P43247_MSH2_MOUSE   | Msh2   | DNA mismatch repair prc K.ASPGNLSQFEDLFGNNDM*SASVGM*GIK#.M   | 6.74   | 4.52   | 1.49 | 0.67  |
| P43247_MSH2_MOUSE   | Msh2   | DNA mismatch repair prc K.DSLIIIDELGR@.G                     | 34.17  | 16.69  | 2.05 | 0.49  |
| P43247_MSH2_MOUSE   | Msh2   | DNA mismatch repair prc K.ETLQEGAAEAGFVR@.F                  | 15.68  | 23.38  | 0.67 | 1.49  |
| P43247_MSH2_MOUSE   | Msh2   | DNA mismatch repair prc K.FTNSELSLNEYTK#.N                   | 23.77  | 7.66   | 3.10 | 0.32  |
| P43247_MSH2_MOUSE   | Msh2   | DNA mismatch repair prc R.GDYFTAHDGALLAAR@.E                 | 16.37  | 7.62   | 2.15 | 0.47  |
| P43247_MSH2_MOUSE   | Msh2   | DNA mismatch repair prc R.HVGVGDVSTQR@.K                     | 12.02  | 4.44   | 2.71 | 0.37  |
| P43247_MSH2_MOUSE   | Msh2   | DNA mismatch repair prc K.IILEFLSK#.V                        | 29.71  | 15.45  | 1.92 | 0.52  |
| P43247_MSH2_MOUSE   | Msh2   | DNA mismatch repair prc K.K#GEGQINSALPEM*ENQVAVSSSAVIK#.F    | 14.36  | 5.37   | 2.68 | 0.37  |
| P43247_MSH2_MOUSE   | Msh2   | DNA mismatch repair prc R.LNLVEAFVDESELR@.Q                  | 20.66  | 10.11  | 2.04 | 0.49  |
| P43247_MSH2_MOUSE   | Msh2   | DNA mismatch repair prc R.LYQINGLPSVQALEK#.Y                 | 8.73   | 3.43   | 2.55 | 0.39  |
| P43247_MSH2_MOUSE   | Msh2   | DNA mismatch repair prc K.M*QSTLINAAR@.G                     | 13.55  | 6.54   | 2.07 | 0.48  |
| P43247_MSH2_MOUSE   | Msh2   | DNA mismatch repair prc K.K#GEGYEEAQAQDAVK#.E                | 6.40   | 3.61   | 1.77 | 0.56  |
| P43247_MSH2_MOUSE   | Msh2   | DNA mismatch repair prc K.NNSFVNEISR@.I                      | 13.18  | 8.94   | 1.47 | 0.68  |
| P43247_MSH2_MOUSE   | Msh2   | DNA mismatch repair prc K.TLQSVLQK#.M                        | 29.09  | 15.99  | 1.82 | 0.55  |
| P43247_MSH2_MOUSE   | Msh2   | DNA mismatch repair prc K.DIYQDLNRR@.L                       | 24.12  | 8.31   | 2.90 | 0.34  |
| P43247_MSH2_MOUSE   | Msh2   | DNA mismatch repair prc K.DSLIIIDELGR@.G                     | 54.16  | 12.49  | 4.34 | 0.23  |
| P43247_MSH2_MOUSE   | Msh2   | DNA mismatch repair prc K.ETLQEGAAEAGFVR@.F                  | 25.11  | 8.69   | 2.89 | 0.35  |
| P43247_MSH2_MOUSE   | Msh2   | DNA mismatch repair prc K.FTNSELSLNEYTK#.N                   | 23.01  | 5.27   | 4.37 | 0.23  |
| P43247_MSH2_MOUSE   | Msh2   | DNA mismatch repair prc R.GDYFTAHDGALLAAR@.E                 | 24.52  | 7.38   | 3.32 | 0.30  |
| P43247_MSH2_MOUSE   | Msh2   | DNA mismatch repair prc R.GGILITER@.K                        | 41.50  | 9.13   | 4.55 | 0.22  |
| P43247_MSH2_MOUSE   | Msh2   | DNA mismatch repair prc K.GVSTFM*AEEM*LETASILR@.S            | 6.93   | 2.77   | 2.50 | 0.40  |
| P43247_MSH2_MOUSE   | Msh2   | DNA mismatch repair prc R.HVGVGDVSTQR@.K                     | 10.63  | 340.90 | 0.03 | 32.08 |
| P43247_MSH2_MOUSE   | Msh2   | DNA mismatch repair prc K.IILEFLSK#.V                        | 28.34  | 10.41  | 1.72 | 0.37  |
| P43247_MSH2_MOUSE   | Msh2   | DNA mismatch repair prc K.K#GEGQINSALPEM*ENQVAVSSSAVIK#.F    | 21.95  | 5.51   | 2.99 | 0.25  |
| P43247_MSH2_MOUSE   | Msh2   | DNA mismatch repair prc K.LDSSAQGYFVR@.V                     | 18.25  | 5.24   | 3.48 | 0.29  |
| P43247_MSH2_MOUSE   | Msh2   | DNA mismatch repair prc R.LNLVEAFVDESELR@.Q                  | 41.41  | 14.58  | 2.84 | 0.35  |
| P43247_MSH2_MOUSE   | Msh2   | DNA mismatch repair prc R.LYQINGLPSVQALEK#.Y                 | 11.77  | 4.12   | 2.85 | 0.35  |
| P43247_MSH2_MOUSE   | Msh2   | DNA mismatch repair prc K.NK#GEGYEEAQAQDAVK#.E               | 18.65  | 8.58   | 2.17 | 0.46  |
| P43247_MSH2_MOUSE   | Msh2   | DNA mismatch repair prc R.OSLQEDLLR@.R                       | 22.33  | 8.29   | 2.69 | 0.37  |
| P43247_MSH2_MOUSE   | Msh2   | DNA mismatch repair prc R.VGAGDSQLK#.G                       | 35.60  | 13.42  | 2.65 | 0.38  |
| P54276_MSH6_MOUSE   | Msh6   | DNA mismatch repair prc R.LANLPEEVIQK#.G                     | 10.31  | 13.17  | 0.78 | 1.28  |
| P54276_MSH6_MOUSE   | Msh6   | DNA mismatch repair prc K.GR@FPDLTAEIQR@.W                   | 20.81  | 8.78   | 2.37 | 0.42  |
| P54276_MSH6_MOUSE   | Msh6   | DNA mismatch repair prc R.GTATFDGTAIANAVVK#.E                | 22.13  | 7.87   | 2.81 | 0.36  |
| P54276_MSH6_MOUSE   | Msh6   | DNA mismatch repair prc K.GTQTVSYLDGDPSENYSR@.Y              | 11.62  | 4.98   | 2.33 | 0.43  |
| P54276_MSH6_MOUSE   | Msh6   | DNA mismatch repair prc R.LANLPEEVIQK#.G                     | 28.84  | 21.37  | 1.35 | 0.74  |



|                     |         |                                                     |         |        |       |      |
|---------------------|---------|-----------------------------------------------------|---------|--------|-------|------|
| P54276_MSH6_MOUSE   | Msh6    | DNA mismatch repair prc R.M*NQSLQFR@.E              | 10.17   | 6.33   | 1.61  | 0.62 |
| P54276_MSH6_MOUSE   | Msh6    | DNA mismatch repair prc R.SAAVSASSPEAK#.D           | 14.17   | 7.22   | 1.96  | 0.51 |
| P54276_MSH6_MOUSE   | Msh6    | DNA mismatch repair prc R.SIVYWGIGR@.N              | 9.34    | 4.54   | 2.06  | 0.49 |
| P54276_MSH6_MOUSE   | Msh6    | DNA mismatch repair prc R.TLVAHYPPVQLFEKH.G         | 12.78   | 9.16   | 1.39  | 0.72 |
| P54276_MSH6_MOUSE   | Msh6    | DNA mismatch repair prc R.VEQITPEM*M*EAR@.C         | 9.31    | 6.88   | 1.35  | 0.74 |
| P54276_MSH6_MOUSE   | Msh6    | DNA mismatch repair prc R.VISDESIDIGSDVEFK#PDTK#.Q  | 8.41    | 5.34   | 1.57  | 0.64 |
| P54276_MSH6_MOUSE   | Msh6    | DNA mismatch repair prc R.VSGLLEEVAGGFYSK#.T        | 33.88   | 15.75  | 2.15  | 0.47 |
| Q61474_MSI1H_MOUSE  | Msi1    | RNA-binding protein Mu: R.GFGVVFVFM*DOAGVDK#.V      | 11.13   | 4.24   | 2.63  | 0.38 |
| Q61474_MSI1H_MOUSE  | Msi1    | RNA-binding protein Mu: R.HYFEQFGK#.V               | 11.02   | 5.70   | 1.94  | 0.52 |
| Q61474_MSI1H_MOUSE  | Msi1    | RNA-binding protein Mu: R.SYTGGLAPGYTYQPFPR@.V      | 16.15   | 5.40   | 2.99  | 0.33 |
| Q920Q6_MSI2H_MOUSE  | Msi2    | RNA-binding protein Mu: R.GFGVVFADPASPDK.V          | 48.68   | 35.93  | 1.35  | 0.74 |
| Q920Q6_MSI2H_MOUSE  | Msi2    | RNA-binding protein Mu: R.GFGVVFENEDVVEK#.V         | 10.91   | 9.11   | 1.20  | 0.84 |
| Q920Q6_MSI2H_MOUSE  | Msi2    | RNA-binding protein Mu: R.IFVGGLSANTVVEDVK#.Q       | 39.73   | 28.94  | 1.37  | 0.73 |
| Q920Q6_MSI2H_MOUSE  | Msi2    | RNA-binding protein Mu: R.K.M*FIGGLSWQTSPLR@.D      | 8.93    | 5.62   | 1.59  | 0.63 |
| Q920Q6_MSI2H_MOUSE  | Msi2    | RNA-binding protein Mu: R.VEDAM*LM*FDK#.T           | 5.09    | 4.38   | 1.16  | 0.86 |
| Q2YDW2_MSTO1_MOUSE  | Msto1   | Protein misato homolog K.GAAVQSIPIVFGALR.S          | 14.84   | 12.80  | 1.16  | 0.86 |
| Q2YDW2_MSTO1_MOUSE  | Msto1   | Protein misato homolog R.GVLTWGLLPGPYSLGEPQK#.N     | 6.75    | 3.47   | 1.95  | 0.51 |
| Q2YDW2_MSTO1_MOUSE  | Msto1   | Protein misato homolog K.NPNLQGLLSAEGVR@.S          | 9.78    | 8.45   | 1.16  | 0.86 |
| Q2YDW2_MSTO1_MOUSE  | Msto1   | Protein misato homolog K.TAELLQDEYAGR.G             | 9.17    | 7.66   | 1.20  | 0.84 |
| Q2YDW2_MSTO1_MOUSE  | Msto1   | Protein misato homolog R.TLGDLAELSR@.L              | 12.64   | 8.14   | 1.55  | 0.64 |
| Q2YDW2_MSTO1_MOUSE  | Msto1   | Protein misato homolog R.YLEELDR@.L                 | 7.51    | 6.15   | 1.22  | 0.82 |
| Q2YDW2_MSTO1_MOUSE  | Msto1   | Protein misato homolog K.NPNLQGLLSAEGVR@.S          | 6.05    | 4.36   | 1.39  | 0.72 |
| Q2YDW2_MSTO1_MOUSE  | Msto1   | Protein misato homolog K.GAAVQSIPIVFGALR@.S         | 16.71   | 1.32   | 12.63 | 0.08 |
| Q2YDW2_MSTO1_MOUSE  | Msto1   | Protein misato homolog R.GVLTWGLLPGPYSLGEPQK#.N     | 7.46    | 2.25   | 3.32  | 0.30 |
| Q2YDW2_MSTO1_MOUSE  | Msto1   | Protein misato homolog K.NPNLQGLLSAEGVR@.S          | 12.68   | 24.71  | 0.51  | 1.95 |
| Q2YDW2_MSTO1_MOUSE  | Msto1   | Protein misato homolog K.TAELLQDEYAGR@.G            | 10.09   | 5.60   | 1.80  | 0.56 |
| Q2YDW2_MSTO1_MOUSE  | Msto1   | Protein misato homolog R.TLGDLAELSR@.L              | 18.89   | 5.00   | 3.78  | 0.26 |
| F8WHY8_F8WHY8_MOUSE | Mta1    | Metastasis-associated prc R.DISSLIADLK.H            | 5.84    | 5.87   | 0.99  | 1.01 |
| F8WHY8_F8WHY8_MOUSE | Mta1    | Metastasis-associated prc R.DISSLIADLK.H            | 30.38   | 10.57  | 2.87  | 0.35 |
| F8WHY8_F8WHY8_MOUSE | Mta1    | Metastasis-associated prc R.EVEEVENPEM*VDLPEK#.L    | 7.42    | 3.72   | 2.00  | 0.50 |
| F8WHY8_F8WHY8_MOUSE | Mta1    | Metastasis-associated prc R.K#PLEAVLR@.Y            | 15.19   | 16.21  | 0.94  | 1.07 |
| F8WHY8_F8WHY8_MOUSE | Mta1    | Metastasis-associated prc R.LPEASQSPVLK#.Q          | 43.37   | 14.62  | 2.97  | 0.34 |
| F8WHY8_F8WHY8_MOUSE | Mta1    | Metastasis-associated prc R.SSSSVLSTPAK#.S          | 18.27   | 8.28   | 2.21  | 0.45 |
| F8WHY8_F8WHY8_MOUSE | Mta1    | Metastasis-associated prc K.SYLER@EDFFYSLVYDPQQK#.T | 5.01    | 2.80   | 1.79  | 0.56 |
| F8WHY8_F8WHY8_MOUSE | Mta1    | Metastasis-associated prc K.YGKHDFDIDQDFLPWK#.S     | 14.28   | 4.61   | 3.10  | 0.32 |
| F8WHY8_F8WHY8_MOUSE | Mta1    | Metastasis-associated prc R.YOADITDLK#.E            | 20.01   | 8.88   | 2.25  | 0.44 |
| F8WHY8_F8WHY8_MOUSE | Mta1    | Metastasis-associated prc R.DISSLIADLK#.H           | 16.12   | 3.44   | 4.68  | 0.21 |
| F8WHY8_F8WHY8_MOUSE | Mta1    | Metastasis-associated prc R.LPEASQSPVLK#.Q          | 12.39   | 3.53   | 3.51  | 0.28 |
| Q9R190_MTA2_MOUSE   | Mta2    | Metastasis-associated prc R.DISSLIADSNAR@.E         | 24.06   | 9.52   | 2.53  | 0.40 |
| Q9R190_MTA2_MOUSE   | Mta2    | Metastasis-associated prc R.EFEESKHQPQVSEQQR@.H     | 25.46   | 12.65  | 2.01  | 0.50 |
| Q9R190_MTA2_MOUSE   | Mta2    | Metastasis-associated prc R.LPLATIV#.D              | 19.64   | 8.74   | 2.25  | 0.45 |
| Q9R190_MTA2_MOUSE   | Mta2    | Metastasis-associated prc K.TPTLEGAAR@.G            | 35.96   | 9.07   | 3.96  | 0.25 |
| Q9R190_MTA2_MOUSE   | Mta2    | Metastasis-associated prc R.VGDVYVFENSSNPYLR@.R     | 20.81   | 7.25   | 2.87  | 0.35 |
| Q9R190_MTA2_MOUSE   | Mta2    | Metastasis-associated prc K.VVWDPNPLTDR@.Q          | 14.43   | 7.53   | 1.92  | 0.52 |
| Q9R190_MTA2_MOUSE   | Mta2    | Metastasis-associated prc R.DISSLIADSNAR@.E         | 40.12   | 10.83  | 3.70  | 0.27 |
| Q9R190_MTA2_MOUSE   | Mta2    | Metastasis-associated prc K.DLVAQPLK#PK#.T          | 32.45   | 9.28   | 3.50  | 0.29 |
| Q9R190_MTA2_MOUSE   | Mta2    | Metastasis-associated prc R.EFEESKHQPQVSEQQR@.H     | 60.03   | 9.71   | 6.18  | 0.16 |
| Q9R190_MTA2_MOUSE   | Mta2    | Metastasis-associated prc K.FQAEIPDR@.L             | 35.04   | 11.54  | 3.04  | 0.33 |
| Q9R190_MTA2_MOUSE   | Mta2    | Metastasis-associated prc R.GHLR@PEAQSLSPTYSANR@.A  | 20.24   | 3.19   | 6.35  | 0.16 |
| Q9R190_MTA2_MOUSE   | Mta2    | Metastasis-associated prc R.GLGGIM*VK#.R            | 30.19   | 7.41   | 4.07  | 0.25 |
| Q9R190_MTA2_MOUSE   | Mta2    | Metastasis-associated prc K.LNPADAPNPVVFVATK#.D     | 32.85   | 10.89  | 3.02  | 0.33 |
| Q9R190_MTA2_MOUSE   | Mta2    | Metastasis-associated prc R.LPLATIV#.D              | 51.13   | 13.10  | 3.90  | 0.26 |
| Q9R190_MTA2_MOUSE   | Mta2    | Metastasis-associated prc R.QK#LNPADAPNPVVFVATK#.D  | 20.52   | 3.98   | 5.15  | 0.19 |
| Q9R190_MTA2_MOUSE   | Mta2    | Metastasis-associated prc K.TPTLEGAAR@.G            | 81.77   | 22.71  | 3.60  | 0.28 |
| Q9R190_MTA2_MOUSE   | Mta2    | Metastasis-associated prc R.VGDVYVFENSSNPYLR@.R     | 24.56   | 6.33   | 3.88  | 0.26 |
| Q9R190_MTA2_MOUSE   | Mta2    | Metastasis-associated prc K.VVWDPNPLTDR@.Q          | 30.29   | 7.36   | 4.11  | 0.24 |
| Q9R190_MTA2_MOUSE   | Mta2    | Metastasis-associated prc R.DISSLIADSNAR@.E         | 6.96    | 2.13   | 3.27  | 0.31 |
| Q9R190_MTA2_MOUSE   | Mta2    | Metastasis-associated prc K.TPTLEGAAR@.G            | 11.46   | 14.36  | 0.80  | 1.25 |
| Q924K8_MTA3_MOUSE   | Mta3    | Metastasis-associated prc K.QIDQFLVVAR@.S           | 37.77   | 12.62  | 2.99  | 0.33 |
| Q924K8_MTA3_MOUSE   | Mta3    | Metastasis-associated prc R.VGDVYVFENSSNPYLR@.R     | 16.57   | 3.39   | 1.94  | 0.52 |
| Q924K8_MTA3_MOUSE   | Mta3    | Metastasis-associated prc K.DFNDR@QDFLPWK#.S        | 6.79    | 3.95   | 4.48  | 0.22 |
| Q924K8_MTA3_MOUSE   | Mta3    | Metastasis-associated prc K.ETEESQVPEADLTK#.Q       | 7.23    | 3.11   | 2.33  | 0.43 |
| Q924K8_MTA3_MOUSE   | Mta3    | Metastasis-associated prc R.HR@ELFLSR@.Q            | 23.82   | 9.75   | 2.44  | 0.41 |
| Q924K8_MTA3_MOUSE   | Mta3    | Metastasis-associated prc K.QIDQFLVVAR@.S           | 71.03   | 22.42  | 3.17  | 0.32 |
| Q924K8_MTA3_MOUSE   | Mta3    | Metastasis-associated prc R.VGDVYVFENSSNPYLR@.R     | 13.04   | 3.27   | 3.99  | 0.25 |
| Q924K8_MTA3_MOUSE   | Mta3    | Metastasis-associated prc K.ETEESQVPEADLTK#.Q       | 9.32    | 2.31   | 4.03  | 0.25 |
| Q924K8_MTA3_MOUSE   | Mta3    | Metastasis-associated prc K.QIDQFLVVAR@.S           | 30.60   | 2.89   | 10.59 | 0.09 |
| Q924K8_MTA3_MOUSE   | Mta3    | Metastasis-associated prc R.VGDVYVFENSSNPYLR@.R     | 9.40    | 3.86   | 2.43  | 0.41 |
| Q9CQ65_MTAP_MOUSE   | Mtap    | S-methyl-S'-thioadenosin R.LIGIGTGLDPELEGR.T        | 2.16    | 3.35   | 0.65  | 1.55 |
| Q791V5_MTCH2_MOUSE  | Mtch2   | Mitochondrial carrier ho R.GLFTLTPR@.L              | 13.42   | 1.74   | 7.72  | 0.13 |
| Q791V5_MTCH2_MOUSE  | Mtch2   | Mitochondrial carrier ho K.VLQYQESK#PEELGSVTVQK#.E  | 10.30   | 2.42   | 4.26  | 0.23 |
| Q3UHU5_MTCL1_MOUSE  | Mtcl1   | Microtubule cross-linkin R.AGPAEPLSR@.V             | 9.82    | 4.83   | 2.03  | 0.49 |
| Q3UHU5_MTCL1_MOUSE  | Mtcl1   | Microtubule cross-linkin K.GPAASVPLQELK#.S          | 13.25   | 2.90   | 4.57  | 0.22 |
| Q3UHU5_MTCL1_MOUSE  | Mtcl1   | Microtubule cross-linkin R.IVDGLSLHLSTSSFLSTVTSR@.D | 11.97   | 3.94   | 3.04  | 0.33 |
| Q3UHU5_MTCL1_MOUSE  | Mtcl1   | Microtubule cross-linkin K.IVELEVENR@.G             | 9.65    | 3.02   | 3.19  | 0.31 |
| Q3UHU5_MTCL1_MOUSE  | Mtcl1   | Microtubule cross-linkin R.LQIDELSGK#.V             | 14.23   | 1.64   | 8.66  | 0.12 |
| Q3UHU5_MTCL1_MOUSE  | Mtcl1   | Microtubule cross-linkin R.QELGPGQETGTSSR@.G        | 2.98    | 1.61   | 1.85  | 0.54 |
| Q3UHU5_MTCL1_MOUSE  | Mtcl1   | Microtubule cross-linkin K.SLGEDSSAEGK#.G           | 13.34   | 4.18   | 3.19  | 0.31 |
| P00405_COX2_MOUSE   | Mtco2   | Cytochrome c oxidase su R.LIYM*M*DEINPVLTK#.T       | 6.61    | 2.25   | 2.94  | 0.34 |
| QB8KY8_MTEF2_MOUSE  | Mterf2  | Transcription terminatio R.AVGELTK#.C               | 1137.64 | 519.76 | 2.19  | 0.46 |
| Q922D8_C1TC_MOUSE   | Mthfd1  | C-1-tetrahydrofolate syn K.AYTEEDLDLVEK#.G          | 18.38   | 7.42   | 2.48  | 0.40 |
| Q922D8_C1TC_MOUSE   | Mthfd1  | C-1-tetrahydrofolate syn R.EIGLLTEEVLGETK#.A        | 10.78   | 3.77   | 2.86  | 0.35 |
| Q922D8_C1TC_MOUSE   | Mthfd1  | C-1-tetrahydrofolate syn K.GVPTGFLPIR@.D            | 21.81   | 12.32  | 1.77  | 0.57 |
| Q922D8_C1TC_MOUSE   | Mthfd1  | C-1-tetrahydrofolate syn R.M*FGVPPVAVNVFK#.T        | 16.55   | 2.93   | 5.64  | 0.18 |
| Q922D8_C1TC_MOUSE   | Mthfd1  | C-1-tetrahydrofolate syn K.STTTGLVQALGAHLR@.Q       | 15.42   | 4.83   | 3.19  | 0.31 |
| Q922D8_C1TC_MOUSE   | Mthfd1  | C-1-tetrahydrofolate syn K.TDPTLLTDINN@.F           | 19.29   | 9.32   | 2.07  | 0.48 |
| Q922D8_C1TC_MOUSE   | Mthfd1  | C-1-tetrahydrofolate syn K.TPVPDSIAISR@.S           | 21.81   | 9.18   | 2.38  | 0.42 |
| Q922D8_C1TC_MOUSE   | Mthfd1  | C-1-tetrahydrofolate syn K.VVGDVAYDEAK#.E           | 7.82    | 4.24   | 1.85  | 0.54 |
| Q922D8_C1TC_MOUSE   | Mthfd1  | C-1-tetrahydrofolate syn R.ASQAPSSFLQLYDLK#.L       | 5.06    | 2.19   | 2.31  | 0.43 |
| Q922D8_C1TC_MOUSE   | Mthfd1  | C-1-tetrahydrofolate syn R.EIGLLTEEVLGETK#.A        | 6.29    | 1.82   | 3.46  | 0.29 |
| Q922D8_C1TC_MOUSE   | Mthfd1  | C-1-tetrahydrofolate syn K.GVPTGFLPIR@.D            | 7.88    | 1.48   | 5.33  | 0.19 |
| Q3V3R1_C1TM_MOUSE   | Mthfd1l | Monofunctional C1-tetra: R.AAELVEK#.S               | 20.74   | 8.71   | 2.38  | 0.42 |
| Q3V3R1_C1TM_MOUSE   | Mthfd1l | Monofunctional C1-tetra: R.FQFLYDQLPIVEK#.I         | 17.67   | 4.24   | 4.17  | 0.24 |
| Q3V3R1_C1TM_MOUSE   | Mthfd1l | Monofunctional C1-tetra: K.LIAEVSLLAALR@.J          | 10.78   | 7.42   | 3.07  | 0.33 |
| Q3V3R1_C1TM_MOUSE   | Mthfd1l | Monofunctional C1-tetra: R.LNIDPATITWQR@.V          | 11.34   | 7.31   | 1.55  | 0.64 |
| Q3V3R1_C1TM_MOUSE   | Mthfd1l | Monofunctional C1-tetra: K.LSGGSPGPVVDK#.L          | 15.81   | 5.70   | 2.77  | 0.36 |
| Q3V3R1_C1TM_MOUSE   | Mthfd1l | Monofunctional C1-tetra: K.M*HGGGSPVTAGVPLK#.E      | 8.26    | 4.27   | 1.94  | 0.52 |
| Q3V3R1_C1TM_MOUSE   | Mthfd1l | Monofunctional C1-tetra: R.VHGLTLQJSEDSLSNK#.V      | 12.49   | 6.73   | 1.86  | 0.54 |
| Q3V3R1_C1TM_MOUSE   | Mthfd1l | Monofunctional C1-tetra: R.VIAQTVYGAK#.D            | 26.60   | 7.81   | 3.40  | 0.29 |
| Q3V3R1_C1TM_MOUSE   | Mthfd1l | Monofunctional C1-tetra: K.VQLSLLER@.L              | 17.21   | 10.08  | 1.71  | 0.59 |
| Q3V3R1_C1TM_MOUSE   | Mthfd1l | Monofunctional C1-tetra: K.YVLVAGITPTLLEGK#.S       | 14.24   | 4.77   | 2.98  | 0.34 |
| Q6D1D5_MUM1_MOUSE   | Mum1    | PWWP domain-containi R.VALDVLNER@.T                 | 13.24   | 5.15   | 2.57  | 0.39 |
| A2AMM0_MURC_MOUSE   | Murc    | Muscle-related coiled-co K.GGYSQEGDPPPEPLK#.V       | 10.80   | 7.22   | 1.50  | 0.67 |

|                    |         |                           |                                    |        |        |         |      |
|--------------------|---------|---------------------------|------------------------------------|--------|--------|---------|------|
| A2AMM0_MURC_MOUSE  | Murc    | Muscle-related coiled-co  | L.SQSHSNTGYVVK#L                   | 67.06  | 28.22  | 2.38    | 0.42 |
| A2AMM0_MURC_MOUSE  | Murc    | Muscle-related coiled-co  | R.LSSVTEDEDDAALITVTLDR@.V          | 22.62  | 11.80  | 1.92    | 0.52 |
| A2AMM0_MURC_MOUSE  | Murc    | Muscle-related coiled-co  | K.SVQIDLLK#L                       | 13.15  | 5.56   | 2.37    | 0.42 |
| A2AMM0_MURC_MOUSE  | Murc    | Muscle-related coiled-co  | R.VASVDSVQASQK#R                   | 60.53  | 18.13  | 3.34    | 0.30 |
| A2AMM0_MURC_MOUSE  | Murc    | Muscle-related coiled-co  | K.VTFK#PQVR@.V                     | 9.58   | 3.66   | 2.62    | 0.38 |
| Q9EQK5_MVP_MOUSE   | Mvp     | Major vault protein OS=h  | K.ALQPLEEGER#V                     | 6.78   | 4.20   | 1.61    | 0.62 |
| Q9EQK5_MVP_MOUSE   | Mvp     | Major vault protein OS=h  | R.GIQDYVYLSEQQGLLLK#.A             | 8.65   | 0.00   | #DIV/0! | 0.00 |
| Q9EQK5_MVP_MOUSE   | Mvp     | Major vault protein OS=h  | R.IEGEGSVLQAK#.L                   | 9.76   | 7.70   | 1.27    | 0.79 |
| Q9EQK5_MVP_MOUSE   | Mvp     | Major vault protein OS=h  | K.ILDQSEAEK#.A                     | 7.73   | 6.47   | 1.19    | 0.84 |
| Q9EQK5_MVP_MOUSE   | Mvp     | Major vault protein OS=h  | K.SFFLPQGER@.L                     | 12.10  | 6.28   | 1.93    | 0.52 |
| Q9EQK5_MVP_MOUSE   | Mvp     | Major vault protein OS=h  | R.VVFGPELVSDPEEQFTVLSLSAGR@PK#.R   | 14.37  | 7.45   | 1.93    | 0.52 |
| Q9CZH7_MXRA7_MOUSE | Mxra7   | Matrix-remodeling-assoc   | R.VAEPEESEAEPPAAGR@.Q              | 8.82   | 4.77   | 1.85    | 0.54 |
| Q35682_MYADM_MOUSE | Myadm   | Myeloid-associated differ | R.TTITTTSSSTVGSAR@.A               | 12.73  | 5.85   | 2.17    | 0.46 |
| Q35682_MYADM_MOUSE | Myadm   | Myeloid-associated differ | R.ALTQPLGLLR@.L                    | 83.68  | 46.65  | 1.79    | 0.56 |
| Q35682_MYADM_MOUSE | Myadm   | Myeloid-associated differ | R.ARPGEITGYM*ATVPGLLK.V            | 23.71  | 12.56  | 1.89    | 0.53 |
| Q35682_MYADM_MOUSE | Myadm   | Myeloid-associated differ | R.TTITTTSSSTVGSAR@.A               | 118.91 | 61.69  | 1.93    | 0.52 |
| Q7TPV4_MBB1A_MOUSE | Mybbp1a | Myb-binding protein 1A    | K.AEPATPAEAASDR@.H                 | 29.20  | 8.98   | 3.25    | 0.31 |
| Q7TPV4_MBB1A_MOUSE | Mybbp1a | Myb-binding protein 1A    | R.ALDLLEIVLTKR.Q                   | 9.75   | 5.05   | 1.93    | 0.52 |
| Q7TPV4_MBB1A_MOUSE | Mybbp1a | Myb-binding protein 1A    | K.ATQTLQTLGEAQSK#.G                | 10.97  | 1.79   | 6.13    | 0.16 |
| Q7TPV4_MBB1A_MOUSE | Mybbp1a | Myb-binding protein 1A    | R.FELFWK#.K                        | 10.72  | 4.37   | 2.46    | 0.41 |
| Q7TPV4_MBB1A_MOUSE | Mybbp1a | Myb-binding protein 1A    | R.LLGASLPLSSEEQLQVM*#R@.G          | 18.37  | 3.34   | 5.49    | 0.18 |
| Q7TPV4_MBB1A_MOUSE | Mybbp1a | Myb-binding protein 1A    | R.LPNVALDLLR@.L                    | 28.28  | 6.74   | 4.19    | 0.24 |
| Q7TPV4_MBB1A_MOUSE | Mybbp1a | Myb-binding protein 1A    | K.LSVDLTAPLGVLSK#.Q                | 7.96   | 4.31   | 1.84    | 0.54 |
| Q7TPV4_MBB1A_MOUSE | Mybbp1a | Myb-binding protein 1A    | K.NAASQDQAVTEGAM*PAATGK#.D         | 6.79   | 5.87   | 1.16    | 0.86 |
| Q7TPV4_MBB1A_MOUSE | Mybbp1a | Myb-binding protein 1A    | R.NVTSVTSLTQQR@.Q                  | 10.99  | 3.53   | 3.11    | 0.32 |
| Q7TPV4_MBB1A_MOUSE | Mybbp1a | Myb-binding protein 1A    | K.SPAPSNPTLSPSTPAK#.T              | 19.83  | 14.91  | 1.33    | 0.75 |
| Q7TPV4_MBB1A_MOUSE | Mybbp1a | Myb-binding protein 1A    | K.TK#HATPQIPETK#.Q                 | 35.66  | 125.78 | 0.28    | 3.53 |
| Q7TPV4_MBB1A_MOUSE | Mybbp1a | Myb-binding protein 1A    | K.YLEFLLAQ#.K                      | 23.68  | 3.70   | 6.40    | 0.16 |
| Q7TPV4_MBB1A_MOUSE | Mybbp1a | Myb-binding protein 1A    | K.AEPATPAEAASDR@.H                 | 25.35  | 14.61  | 1.73    | 0.58 |
| Q7TPV4_MBB1A_MOUSE | Mybbp1a | Myb-binding protein 1A    | R.AQDASLVNPER@.A                   | 18.13  | 14.71  | 1.23    | 0.81 |
| Q7TPV4_MBB1A_MOUSE | Mybbp1a | Myb-binding protein 1A    | R.LLGASLPLSSEEQLQVM*#R@.G          | 18.55  | 1.84   | 10.09   | 0.10 |
| Q7TPV4_MBB1A_MOUSE | Mybbp1a | Myb-binding protein 1A    | R.LPNVALDLLR@.L                    | 25.30  | 4.08   | 6.20    | 0.16 |
| Q7TPV4_MBB1A_MOUSE | Mybbp1a | Myb-binding protein 1A    | K.VLEEGLLK#.N                      | 9.04   | 1.51   | 5.99    | 0.17 |
| Q7TPV4_MBB1A_MOUSE | Mybbp1a | Myb-binding protein 1A    | K.AEPATPAEAASDR@.H                 | 40.11  | 23.77  | 1.69    | 0.59 |
| Q7TPV4_MBB1A_MOUSE | Mybbp1a | Myb-binding protein 1A    | R.ALDLLEIVLTKR.Q                   | 68.56  | 38.33  | 1.79    | 0.56 |
| Q7TPV4_MBB1A_MOUSE | Mybbp1a | Myb-binding protein 1A    | K.ATQTLQTLGEAQSK#.G                | 47.63  | 23.98  | 1.99    | 0.50 |
| Q7TPV4_MBB1A_MOUSE | Mybbp1a | Myb-binding protein 1A    | R.DM*FLQPDNLNSLDFSTANQK#.R         | 17.72  | 10.02  | 1.77    | 0.57 |
| Q7TPV4_MBB1A_MOUSE | Mybbp1a | Myb-binding protein 1A    | R.DM*FLQPDNLNSLDFSTANQK#.R         | 7.89   | 3.88   | 2.04    | 0.49 |
| Q7TPV4_MBB1A_MOUSE | Mybbp1a | Myb-binding protein 1A    | R.EFLDFVDTIAK#PQOETR@.L            | 32.23  | 19.28  | 1.67    | 0.60 |
| Q7TPV4_MBB1A_MOUSE | Mybbp1a | Myb-binding protein 1A    | K.ELSILELTLR@.T                    | 42.11  | 26.16  | 1.61    | 0.62 |
| Q7TPV4_MBB1A_MOUSE | Mybbp1a | Myb-binding protein 1A    | R.FLNAEALQSVVAWLR@.D               | 6.65   | 3.40   | 1.96    | 0.51 |
| Q7TPV4_MBB1A_MOUSE | Mybbp1a | Myb-binding protein 1A    | K.GFLPETK#.K                       | 29.81  | 15.14  | 1.97    | 0.51 |
| Q7TPV4_MBB1A_MOUSE | Mybbp1a | Myb-binding protein 1A    | R.LITLGVGR@.E                      | 70.33  | 38.64  | 1.82    | 0.55 |
| Q7TPV4_MBB1A_MOUSE | Mybbp1a | Myb-binding protein 1A    | K.KL#SEGTPKE#.N                    | 5.68   | 3.40   | 1.67    | 0.60 |
| Q7TPV4_MBB1A_MOUSE | Mybbp1a | Myb-binding protein 1A    | K.LLELYR@.T                        | 52.30  | 25.35  | 2.06    | 0.48 |
| Q7TPV4_MBB1A_MOUSE | Mybbp1a | Myb-binding protein 1A    | R.LLGASLPLSSEEQLQVM*#R@.G          | 11.76  | 5.13   | 2.29    | 0.44 |
| Q7TPV4_MBB1A_MOUSE | Mybbp1a | Myb-binding protein 1A    | R.LPNVALDLLR@.L                    | 90.90  | 49.29  | 1.84    | 0.54 |
| Q7TPV4_MBB1A_MOUSE | Mybbp1a | Myb-binding protein 1A    | K.LQQLSQGNHSSGSNR@.L               | 6.56   | 3.39   | 1.93    | 0.52 |
| Q7TPV4_MBB1A_MOUSE | Mybbp1a | Myb-binding protein 1A    | K.LSVDLTAPLGVLSK#.Q                | 84.92  | 51.66  | 1.64    | 0.61 |
| Q7TPV4_MBB1A_MOUSE | Mybbp1a | Myb-binding protein 1A    | K.NAASQDQAVTEGAM*PAATGK#.D         | 11.71  | 7.83   | 1.50    | 0.67 |
| Q7TPV4_MBB1A_MOUSE | Mybbp1a | Myb-binding protein 1A    | R.NVTSVTSLTQQR@.Q                  | 67.44  | 33.39  | 2.02    | 0.50 |
| Q7TPV4_MBB1A_MOUSE | Mybbp1a | Myb-binding protein 1A    | R.QAWDQM*TM*STLK#.E                | 7.12   | 5.81   | 1.23    | 0.82 |
| Q7TPV4_MBB1A_MOUSE | Mybbp1a | Myb-binding protein 1A    | K.SPAPSNPTLSPSTPAK#.T              | 36.64  | 19.73  | 1.86    | 0.54 |
| Q7TPV4_MBB1A_MOUSE | Mybbp1a | Myb-binding protein 1A    | R.SPSSLQSGVK#.K                    | 33.30  | 16.18  | 2.06    | 0.49 |
| Q7TPV4_MBB1A_MOUSE | Mybbp1a | Myb-binding protein 1A    | K.VLEEGLLK#.N                      | 38.95  | 23.66  | 1.65    | 0.61 |
| Q7TPV4_MBB1A_MOUSE | Mybbp1a | Myb-binding protein 1A    | R.VYSASLESLLTK#.R                  | 68.77  | 28.12  | 2.45    | 0.41 |
| Q7TPV4_MBB1A_MOUSE | Mybbp1a | Myb-binding protein 1A    | K.YLEFLLAQ#.K                      | 58.20  | 29.29  | 1.99    | 0.50 |
| Q7TPV4_MBB1A_MOUSE | Mybbp1a | Myb-binding protein 1A    | K.AEPATPAEAASDR@.H                 | 102.86 | 43.24  | 2.38    | 0.42 |
| Q7TPV4_MBB1A_MOUSE | Mybbp1a | Myb-binding protein 1A    | R.ALDLLEIVLTKR.Q                   | 177.92 | 78.97  | 2.25    | 0.44 |
| Q7TPV4_MBB1A_MOUSE | Mybbp1a | Myb-binding protein 1A    | K.ALVDLSEVPESM*FQELPK#.V           | 21.95  | 12.99  | 1.69    | 0.59 |
| Q7TPV4_MBB1A_MOUSE | Mybbp1a | Myb-binding protein 1A    | R.AQDASLVNPER@.A                   | 191.91 | 85.37  | 2.25    | 0.44 |
| Q7TPV4_MBB1A_MOUSE | Mybbp1a | Myb-binding protein 1A    | K.ATQTLQTLGEAQSK#.G                | 100.21 | 40.81  | 2.46    | 0.41 |
| Q7TPV4_MBB1A_MOUSE | Mybbp1a | Myb-binding protein 1A    | K.DEAVEQIAR@.F                     | 9.42   | 17.09  | 0.55    | 1.81 |
| Q7TPV4_MBB1A_MOUSE | Mybbp1a | Myb-binding protein 1A    | K.DIPSDTQSPVSTK#.R                 | 61.76  | 29.13  | 2.12    | 0.47 |
| Q7TPV4_MBB1A_MOUSE | Mybbp1a | Myb-binding protein 1A    | K.DIPSDTQSPVSTK#.R                 | 8.27   | 3.32   | 2.49    | 0.40 |
| Q7TPV4_MBB1A_MOUSE | Mybbp1a | Myb-binding protein 1A    | R.DM*FLQPDNLNSLDFSTANQK#.R         | 69.31  | 28.08  | 2.47    | 0.41 |
| Q7TPV4_MBB1A_MOUSE | Mybbp1a | Myb-binding protein 1A    | K.EHKHLPNVALDLLR@.L                | 70.18  | 25.60  | 2.74    | 0.36 |
| Q7TPV4_MBB1A_MOUSE | Mybbp1a | Myb-binding protein 1A    | R.FELFWK#.K                        | 35.19  | 23.78  | 1.48    | 0.68 |
| Q7TPV4_MBB1A_MOUSE | Mybbp1a | Myb-binding protein 1A    | R.FLNAEALQSVVAWLR@.D               | 12.68  | 5.74   | 2.21    | 0.45 |
| Q7TPV4_MBB1A_MOUSE | Mybbp1a | Myb-binding protein 1A    | K.GFLPETK#.K                       | 79.80  | 38.91  | 2.05    | 0.49 |
| Q7TPV4_MBB1A_MOUSE | Mybbp1a | Myb-binding protein 1A    | R.HFGENM*WISK#PQNLFK#.I            | 46.34  | 18.26  | 2.54    | 0.39 |
| Q7TPV4_MBB1A_MOUSE | Mybbp1a | Myb-binding protein 1A    | K.HATPQIPETK#.Q                    | 38.97  | 18.27  | 2.13    | 0.47 |
| Q7TPV4_MBB1A_MOUSE | Mybbp1a | Myb-binding protein 1A    | K.KHGLPETK#.K                      | 30.82  | 9.13   | 3.38    | 0.30 |
| Q7TPV4_MBB1A_MOUSE | Mybbp1a | Myb-binding protein 1A    | R.LITLGVGR@.E                      | 197.93 | 81.36  | 2.43    | 0.41 |
| Q7TPV4_MBB1A_MOUSE | Mybbp1a | Myb-binding protein 1A    | K.LLELYR@.T                        | 128.62 | 47.75  | 2.69    | 0.37 |
| Q7TPV4_MBB1A_MOUSE | Mybbp1a | Myb-binding protein 1A    | R.LLGASLPLSSEEQLQVM*#R@.G          | 133.30 | 51.02  | 2.61    | 0.38 |
| Q7TPV4_MBB1A_MOUSE | Mybbp1a | Myb-binding protein 1A    | R.LLGASLPLSSEEQLQVM*#R@.G          | 43.69  | 15.92  | 2.74    | 0.36 |
| Q7TPV4_MBB1A_MOUSE | Mybbp1a | Myb-binding protein 1A    | R.LPNVALDLLR@.L                    | 184.68 | 83.75  | 2.21    | 0.45 |
| Q7TPV4_MBB1A_MOUSE | Mybbp1a | Myb-binding protein 1A    | K.LQQLSQGNHSSGSNR@.L               | 11.82  | 6.53   | 1.81    | 0.55 |
| Q7TPV4_MBB1A_MOUSE | Mybbp1a | Myb-binding protein 1A    | K.LSQVNGATVPSPIESK#.K              | 10.45  | 3.19   | 3.28    | 0.31 |
| Q7TPV4_MBB1A_MOUSE | Mybbp1a | Myb-binding protein 1A    | K.LSVDLTAPLGVLSK#.Q                | 299.87 | 120.64 | 2.49    | 0.40 |
| Q7TPV4_MBB1A_MOUSE | Mybbp1a | Myb-binding protein 1A    | R.VLQADM*LLHNHR.N                  | 16.58  | 6.16   | 2.69    | 0.37 |
| Q7TPV4_MBB1A_MOUSE | Mybbp1a | Myb-binding protein 1A    | R.LYDLYWQAM*#R@.M                  | 14.77  | 6.32   | 2.34    | 0.43 |
| Q7TPV4_MBB1A_MOUSE | Mybbp1a | Myb-binding protein 1A    | R.LYDLYWQAM*#R@.M                  | 9.66   | 4.47   | 2.16    | 0.46 |
| Q7TPV4_MBB1A_MOUSE | Mybbp1a | Myb-binding protein 1A    | R.M*LVGR@PK#.S                     | 19.88  | 10.87  | 1.83    | 0.55 |
| Q7TPV4_MBB1A_MOUSE | Mybbp1a | Myb-binding protein 1A    | K.NAASQDQAVTEGAM*PAATGK#.D         | 37.75  | 14.86  | 2.54    | 0.39 |
| Q7TPV4_MBB1A_MOUSE | Mybbp1a | Myb-binding protein 1A    | K.NAASQDQAVTEGAM*PAATGK#.D         | 26.56  | 15.27  | 1.74    | 0.57 |
| Q7TPV4_MBB1A_MOUSE | Mybbp1a | Myb-binding protein 1A    | K.NAASQDQAVTEGAM*PAATGK#.D         | 6.38   | 4.01   | 1.59    | 0.63 |
| Q7TPV4_MBB1A_MOUSE | Mybbp1a | Myb-binding protein 1A    | K.NAASQDQAVTEGAM*PAATGK#DQPSTGK#.K | 10.26  | 5.68   | 1.80    | 0.55 |
| Q7TPV4_MBB1A_MOUSE | Mybbp1a | Myb-binding protein 1A    | R.NVTSVTSLTQQR@.Q                  | 158.40 | 62.21  | 2.55    | 0.39 |
| Q7TPV4_MBB1A_MOUSE | Mybbp1a | Myb-binding protein 1A    | R.QAWDQM*TM*STLK#.E                | 19.26  | 5.24   | 3.67    | 0.27 |
| Q7TPV4_MBB1A_MOUSE | Mybbp1a | Myb-binding protein 1A    | K.QHFSFPLDR@.N                     | 53.46  | 15.51  | 3.45    | 0.29 |
| Q7TPV4_MBB1A_MOUSE | Mybbp1a | Myb-binding protein 1A    | K.SPAPSNPTLSPSTPAK#.T              | 119.78 | 44.33  | 2.70    | 0.37 |
| Q7TPV4_MBB1A_MOUSE | Mybbp1a | Myb-binding protein 1A    | R.SPSSLQSGVK#.K                    | 103.55 | 32.60  | 3.18    | 0.31 |
| Q7TPV4_MBB1A_MOUSE | Mybbp1a | Myb-binding protein 1A    | K.SPTK#AEPATPAEAASDR@.H            | 11.48  | 4.03   | 2.85    | 0.35 |
| Q7TPV4_MBB1A_MOUSE | Mybbp1a | Myb-binding protein 1A    | K.VLEEGLLK#.N                      | 85.86  | 31.26  | 2.75    | 0.36 |
| Q7TPV4_MBB1A_MOUSE | Mybbp1a | Myb-binding protein 1A    | R.VYSASLESLLTK#.R                  | 152.61 | 56.22  | 2.71    | 0.37 |
| Q7TPV4_MBB1A_MOUSE | Mybbp1a | Myb-binding protein 1A    | K.YLEFLLAQ#.K                      | 43.93  | 19.06  | 2.30    | 0.43 |
| Q7TPV4_MBB1A_MOUSE | Mybbp1a | Myb-binding protein 1A    | K.YSLQAM*#NK#.A                    | 59.75  | 23.30  | 2.56    | 0.39 |
| Q9EQS3_MYCBP_MOUSE | Mycbp   | C-Myc-binding protein O   | K.LVQYEPPEQEK#.R                   | 38.63  | 21.33  | 1.81    | 0.55 |
| Q9EQS3_MYCBP_MOUSE | Mycbp   | C-Myc-binding protein O   | K.SGVLDTLTK#.V                     | 29.51  | 15.77  | 1.87    | 0.53 |
| Q9EQS3_MYCBP_MOUSE | Mycbp   | C-Myc-binding protein O   | K.VLVALYEPPEK#PTALDFLK#.H          | 27.13  | 12.81  | 2.12    | 0.47 |
| Q7TPH6_MYCB2_MOUSE | Mycbp2  | E3 ubiquitin-protein liga | K.NAIAETIALT#.M                    | 10.19  | 2.84   | 3.60    | 0.28 |

|                    |       |                          |                                 |        |        |      |      |
|--------------------|-------|--------------------------|---------------------------------|--------|--------|------|------|
| Q8C854_MYEF2_MOUSE | Myef2 | Myelin expression factor | K.EVFSIAGTVK.R                  | 18.85  | 21.07  | 0.89 | 1.12 |
| Q8C854_MYEF2_MOUSE | Myef2 | Myelin expression factor | R.FESAESA.K                     | 22.49  | 31.31  | 0.72 | 1.39 |
| Q8C854_MYEF2_MOUSE | Myef2 | Myelin expression factor | R.GFGDSFGR@.L                   | 52.17  | 62.66  | 0.83 | 1.20 |
| Q8C854_MYEF2_MOUSE | Myef2 | Myelin expression factor | R.GFLSGPM*GSGM*R.D              | 22.47  | 19.96  | 1.13 | 0.89 |
| Q8C854_MYEF2_MOUSE | Myef2 | Myelin expression factor | R.LGSAM*IGGFAGR@.I              | 29.33  | 33.63  | 0.87 | 1.15 |
| Q8C854_MYEF2_MOUSE | Myef2 | Myelin expression factor | R.LGSTIFVANLDFK#.V              | 39.27  | 36.45  | 1.08 | 0.93 |
| Q8C854_MYEF2_MOUSE | Myef2 | Myelin expression factor | R.M*PGGIGAILER.S                | 41.50  | 47.29  | 0.88 | 1.14 |
| Q8C854_MYEF2_MOUSE | Myef2 | Myelin expression factor | R.MGPGIGAILER.S                 | 3.94   | 6.23   | 0.63 | 1.58 |
| Q8C854_MYEF2_MOUSE | Myef2 | Myelin expression factor | R.NLPFDLWQK#.L                  | 54.69  | 48.46  | 1.13 | 0.89 |
| Q8C854_MYEF2_MOUSE | Myef2 | Myelin expression factor | R.VFISNIPYDM*#.W                | 38.94  | 51.92  | 0.75 | 1.33 |
| Q8C854_MYEF2_MOUSE | Myef2 | Myelin expression factor | R.VFISNIPYDMK.W                 | 8.64   | 13.64  | 0.63 | 1.58 |
| Q8C854_MYEF2_MOUSE | Myef2 | Myelin expression factor | K.VGEVTVYELFK#.D                | 32.17  | 43.36  | 0.74 | 1.35 |
| Q8C854_MYEF2_MOUSE | Myef2 | Myelin expression factor | K.VGEVTVYELFK#DAEGK#.S          | 26.04  | 29.57  | 0.88 | 1.14 |
| Q8C854_MYEF2_MOUSE | Myef2 | Myelin expression factor | K.YDLSGRPLNIKEDPDGENAR.R        | 6.06   | 7.17   | 0.85 | 1.18 |
| Q8C854_MYEF2_MOUSE | Myef2 | Myelin expression factor | R.GFLSGPM*GSGM*R.D              | 4.91   | 6.99   | 0.70 | 1.42 |
| Q8C854_MYEF2_MOUSE | Myef2 | Myelin expression factor | R.LGSAM*IGGFAGR@.I              | 9.49   | 9.60   | 0.99 | 1.01 |
| Q8C854_MYEF2_MOUSE | Myef2 | Myelin expression factor | R.M*PGGIGAILER.S                | 25.49  | 32.79  | 0.78 | 1.29 |
| Q8C854_MYEF2_MOUSE | Myef2 | Myelin expression factor | R.NLPFDLWQK#.L                  | 15.45  | 27.99  | 0.55 | 1.81 |
| Q8C854_MYEF2_MOUSE | Myef2 | Myelin expression factor | R.EK#HGEVTVYELFK#.D             | 18.55  | 11.65  | 1.59 | 0.63 |
| Q8C854_MYEF2_MOUSE | Myef2 | Myelin expression factor | R.EK#HGEVTVYELFK#DAEGK#.S       | 8.48   | 2.37   | 3.58 | 0.28 |
| Q8C854_MYEF2_MOUSE | Myef2 | Myelin expression factor | K.EVFSIAGTVK#.R                 | 40.20  | 26.23  | 1.53 | 0.65 |
| Q8C854_MYEF2_MOUSE | Myef2 | Myelin expression factor | R.FESAESA.K#.A                  | 24.07  | 18.05  | 1.33 | 0.75 |
| Q8C854_MYEF2_MOUSE | Myef2 | Myelin expression factor | R.GFGDSFGR.L                    | 61.23  | 54.27  | 1.13 | 0.89 |
| Q8C854_MYEF2_MOUSE | Myef2 | Myelin expression factor | R.GFLSGPM*GSGM*R@.D             | 26.67  | 19.45  | 1.37 | 0.73 |
| Q8C854_MYEF2_MOUSE | Myef2 | Myelin expression factor | K.GNQIFVR@.N                    | 74.14  | 59.13  | 1.25 | 0.80 |
| Q8C854_MYEF2_MOUSE | Myef2 | Myelin expression factor | R.LGSAM*IGGFAGR@.I              | 33.56  | 24.51  | 1.37 | 0.73 |
| Q8C854_MYEF2_MOUSE | Myef2 | Myelin expression factor | R.LGSTIFVANLDFK#.V              | 59.14  | 38.67  | 1.53 | 0.65 |
| Q8C854_MYEF2_MOUSE | Myef2 | Myelin expression factor | K.LKEVFSIAGTVK.R                | 46.30  | 34.71  | 1.33 | 0.75 |
| Q8C854_MYEF2_MOUSE | Myef2 | Myelin expression factor | K.M*ENDESVK#EEK#.S              | 4.10   | 2.53   | 1.62 | 0.62 |
| Q8C854_MYEF2_MOUSE | Myef2 | Myelin expression factor | R.M*PGGIGAILER@.S               | 76.30  | 58.80  | 1.30 | 0.77 |
| Q8C854_MYEF2_MOUSE | Myef2 | Myelin expression factor | R.NLPFDLWQK#.L                  | 73.53  | 59.27  | 1.24 | 0.81 |
| Q8C854_MYEF2_MOUSE | Myef2 | Myelin expression factor | R.RDTHPGPEPKPPR.S               | 25.70  | 21.55  | 1.19 | 0.84 |
| Q8C854_MYEF2_MOUSE | Myef2 | Myelin expression factor | R.VFISNIPYDM*#.W                | 50.46  | 37.18  | 1.36 | 0.74 |
| Q8C854_MYEF2_MOUSE | Myef2 | Myelin expression factor | K.VGEVTVYELFK#.D                | 59.08  | 47.26  | 1.25 | 0.80 |
| Q8C854_MYEF2_MOUSE | Myef2 | Myelin expression factor | K.YDLSGRPLNIKEDPDGENAR.R        | 8.61   | 7.98   | 1.08 | 0.93 |
| Q61879_MYH10_MOUSE | Myh10 | Myosin-10 OS=Mus musc    | R.LEDDATEANGLSR@.E              | 6.94   | 5.08   | 1.37 | 0.73 |
| Q61879_MYH10_MOUSE | Myh10 | Myosin-10 OS=Mus musc    | R.ALEEALEAK#EEFER@.Q            | 19.22  | 11.51  | 1.67 | 0.60 |
| Q61879_MYH10_MOUSE | Myh10 | Myosin-10 OS=Mus musc    | K.DAAGLESQDQQLQEEETR.Q          | 5.80   | 8.22   | 0.71 | 1.42 |
| Q61879_MYH10_MOUSE | Myh10 | Myosin-10 OS=Mus musc    | R.LEDDATEANGLSR@.E              | 12.70  | 12.70  | 1.27 | 0.79 |
| Q61879_MYH10_MOUSE | Myh10 | Myosin-10 OS=Mus musc    | K.FDQLAAEK#.G                   | 10.92  | 6.85   | 1.59 | 0.63 |
| Q61879_MYH10_MOUSE | Myh10 | Myosin-10 OS=Mus musc    | R.HAEQER@DELADEIANSASGK#.S      | 6.06   | 4.25   | 1.42 | 0.70 |
| Q61879_MYH10_MOUSE | Myh10 | Myosin-10 OS=Mus musc    | K.IGQLEEQLEQEA#.E               | 21.78  | 16.82  | 1.30 | 0.77 |
| Q61879_MYH10_MOUSE | Myh10 | Myosin-10 OS=Mus musc    | K.KFDQLAAEK.G                   | 17.45  | 21.30  | 0.82 | 1.22 |
| Q61879_MYH10_MOUSE | Myh10 | Myosin-10 OS=Mus musc    | K.LDPHLVLDQLR.C                 | 10.16  | 12.09  | 0.84 | 1.19 |
| Q61879_MYH10_MOUSE | Myh10 | Myosin-10 OS=Mus musc    | K.LQQLFNHTM*FILQEYQ.R.E         | 5.86   | 4.65   | 1.26 | 0.79 |
| Q61879_MYH10_MOUSE | Myh10 | Myosin-10 OS=Mus musc    | K.NILAELQQAETLFAEAEM*R@.A       | 12.12  | 7.06   | 1.72 | 0.58 |
| Q61879_MYH10_MOUSE | Myh10 | Myosin-10 OS=Mus musc    | R.QLEEAEEATR@.A                 | 5.11   | 7.24   | 0.70 | 1.42 |
| Q61879_MYH10_MOUSE | Myh10 | Myosin-10 OS=Mus musc    | K.VLALQSLQADLTK.K               | 5.39   | 6.20   | 0.87 | 1.15 |
| Q61879_MYH10_MOUSE | Myh10 | Myosin-10 OS=Mus musc    | R.TQLEELQEDLQATEDAK#.L          | 9.53   | 7.91   | 1.20 | 0.83 |
| Q61879_MYH10_MOUSE | Myh10 | Myosin-10 OS=Mus musc    | K.TTLQVDTLNTLEAER@.S            | 7.78   | 4.99   | 1.56 | 0.64 |
| Q61879_MYH10_MOUSE | Myh10 | Myosin-10 OS=Mus musc    | K.ADEWLM*#.N                    | 69.60  | 43.37  | 1.60 | 0.62 |
| Q61879_MYH10_MOUSE | Myh10 | Myosin-10 OS=Mus musc    | R.ADM*EDLM*SK#.D                | 49.62  | 30.33  | 1.64 | 0.61 |
| Q61879_MYH10_MOUSE | Myh10 | Myosin-10 OS=Mus musc    | R.AGK#LDPHLVLDQLR@.C            | 112.73 | 81.93  | 1.38 | 0.73 |
| Q61879_MYH10_MOUSE | Myh10 | Myosin-10 OS=Mus musc    | R.AGVLAHEER@.D                  | 653.49 | 370.46 | 1.76 | 0.57 |
| Q61879_MYH10_MOUSE | Myh10 | Myosin-10 OS=Mus musc    | R.AGVLAHEER.D                   | 151.01 | 88.75  | 1.70 | 0.59 |
| Q61879_MYH10_MOUSE | Myh10 | Myosin-10 OS=Mus musc    | R.AGVLAHEER@DLK#.I              | 363.90 | 185.45 | 1.96 | 0.51 |
| Q61879_MYH10_MOUSE | Myh10 | Myosin-10 OS=Mus musc    | K.AK#LQLEGAVK#.S                | 69.36  | 63.25  | 1.10 | 0.91 |
| Q61879_MYH10_MOUSE | Myh10 | Myosin-10 OS=Mus musc    | R.ALEEALEAK#.E                  | 95.19  | 81.05  | 1.17 | 0.85 |
| Q61879_MYH10_MOUSE | Myh10 | Myosin-10 OS=Mus musc    | R.ALEEALEAK#EEFER@.Q            | 576.75 | 375.35 | 1.54 | 0.65 |
| Q61879_MYH10_MOUSE | Myh10 | Myosin-10 OS=Mus musc    | R.ALEEDPNLVR@.I                 | 551.26 | 379.96 | 1.45 | 0.69 |
| Q61879_MYH10_MOUSE | Myh10 | Myosin-10 OS=Mus musc    | R.ALEQVQVEEM*R@.T               | 158.33 | 113.20 | 1.40 | 0.71 |
| Q61879_MYH10_MOUSE | Myh10 | Myosin-10 OS=Mus musc    | R.ALEQVQVEEMR@.T                | 49.45  | 33.73  | 1.47 | 0.68 |
| Q61879_MYH10_MOUSE | Myh10 | Myosin-10 OS=Mus musc    | R.ALEQVQVEEM*R@.T               | 79.42  | 50.09  | 1.59 | 0.63 |
| Q61879_MYH10_MOUSE | Myh10 | Myosin-10 OS=Mus musc    | K.AM*VKNDDIQ.K                  | 56.16  | 40.78  | 1.38 | 0.73 |
| Q61879_MYH10_MOUSE | Myh10 | Myosin-10 OS=Mus musc    | K.ANKIQNLELVSTLLEAEK.K          | 20.20  | 12.84  | 1.57 | 0.64 |
| Q61879_MYH10_MOUSE | Myh10 | Myosin-10 OS=Mus musc    | K.ATDK#TFVVK#.L                 | 25.96  | 18.39  | 1.41 | 0.71 |
| Q61879_MYH10_MOUSE | Myh10 | Myosin-10 OS=Mus musc    | K.ATISALEAK#.I                  | 535.64 | 356.51 | 1.50 | 0.67 |
| Q61879_MYH10_MOUSE | Myh10 | Myosin-10 OS=Mus musc    | R.AVIYNPQTADWTKA#.K             | 188.85 | 131.90 | 1.43 | 0.70 |
| Q61879_MYH10_MOUSE | Myh10 | Myosin-10 OS=Mus musc    | K.DAAGLESQDQQLQEEETR@.Q         | 592.61 | 382.01 | 1.55 | 0.64 |
| Q61879_MYH10_MOUSE | Myh10 | Myosin-10 OS=Mus musc    | K.DAAGLESQDQQLQEEETR.Q          | 78.78  | 53.53  | 1.47 | 0.68 |
| Q61879_MYH10_MOUSE | Myh10 | Myosin-10 OS=Mus musc    | K.DDVGK#NVHLEEK#.S              | 65.26  | 39.56  | 1.65 | 0.61 |
| Q61879_MYH10_MOUSE | Myh10 | Myosin-10 OS=Mus musc    | K.DDVGK#NVHLEEK#.S              | 5.69   | 2.54   | 2.24 | 0.45 |
| Q61879_MYH10_MOUSE | Myh10 | Myosin-10 OS=Mus musc    | R.DEIFAQSK#.E                   | 84.19  | 73.55  | 1.14 | 0.87 |
| Q61879_MYH10_MOUSE | Myh10 | Myosin-10 OS=Mus musc    | R.DELADEIANSASGK#.S             | 53.77  | 41.02  | 1.31 | 0.76 |
| Q61879_MYH10_MOUSE | Myh10 | Myosin-10 OS=Mus musc    | K.DHNIPELER@.K                  | 35.02  | 28.45  | 1.23 | 0.81 |
| Q61879_MYH10_MOUSE | Myh10 | Myosin-10 OS=Mus musc    | K.DLEAQIQAANK#.A                | 105.24 | 83.65  | 1.26 | 0.79 |
| Q61879_MYH10_MOUSE | Myh10 | Myosin-10 OS=Mus musc    | R.DLSEELKAL#.T                  | 33.35  | 27.58  | 1.21 | 0.83 |
| Q61879_MYH10_MOUSE | Myh10 | Myosin-10 OS=Mus musc    | R.DR@AEAEAR@.E                  | 25.03  | 14.47  | 1.73 | 0.58 |
| Q61879_MYH10_MOUSE | Myh10 | Myosin-10 OS=Mus musc    | K.DVDR@IVGLDQVTGM*TETAFGSAYK#.T | 4.62   | 3.75   | 1.23 | 0.81 |
| Q61879_MYH10_MOUSE | Myh10 | Myosin-10 OS=Mus musc    | K.DVEALSQR@.L                   | 151.49 | 114.99 | 1.32 | 0.76 |
| Q61879_MYH10_MOUSE | Myh10 | Myosin-10 OS=Mus musc    | K.EEELQALAR@.G                  | 41.45  | 29.83  | 1.39 | 0.72 |
| Q61879_MYH10_MOUSE | Myh10 | Myosin-10 OS=Mus musc    | K.EIFM*QVEDER@.R                | 10.93  | 10.57  | 1.03 | 0.97 |
| Q61879_MYH10_MOUSE | Myh10 | Myosin-10 OS=Mus musc    | R.ELDDATEANGLSR@.E              | 434.90 | 312.13 | 1.39 | 0.72 |
| Q61879_MYH10_MOUSE | Myh10 | Myosin-10 OS=Mus musc    | R.ELEAELEDER@.K                 | 147.79 | 110.40 | 1.34 | 0.75 |
| Q61879_MYH10_MOUSE | Myh10 | Myosin-10 OS=Mus musc    | R.LEAQIJAELQEDFSEK#.A           | 355.94 | 216.53 | 1.64 | 0.61 |
| Q61879_MYH10_MOUSE | Myh10 | Myosin-10 OS=Mus musc    | K.EQADFAVEALAK#.A               | 442.19 | 279.50 | 1.58 | 0.63 |
| Q61879_MYH10_MOUSE | Myh10 | Myosin-10 OS=Mus musc    | R.EQVEALK#.K                    | 44.10  | 34.01  | 1.30 | 0.77 |
| Q61879_MYH10_MOUSE | Myh10 | Myosin-10 OS=Mus musc    | K.ER@NTDQASAM*PENTVAQK#.L       | 18.15  | 8.74   | 2.08 | 0.48 |
| Q61879_MYH10_MOUSE | Myh10 | Myosin-10 OS=Mus musc    | K.FDQLAAEK#.G                   | 241.49 | 160.23 | 1.51 | 0.66 |
| Q61879_MYH10_MOUSE | Myh10 | Myosin-10 OS=Mus musc    | K.FK#ATISALEAK#.I               | 52.75  | 24.30  | 2.17 | 0.46 |
| Q61879_MYH10_MOUSE | Myh10 | Myosin-10 OS=Mus musc    | R.FLSNGYPIPGQDK#.D              | 28.79  | 16.41  | 1.75 | 0.57 |
| Q61879_MYH10_MOUSE | Myh10 | Myosin-10 OS=Mus musc    | R.GDDETLHK#.N                   | 43.96  | 32.77  | 1.34 | 0.75 |
| Q61879_MYH10_MOUSE | Myh10 | Myosin-10 OS=Mus musc    | R.GGPISSSR@.S                   | 128.76 | 95.49  | 1.35 | 0.74 |
| Q61879_MYH10_MOUSE | Myh10 | Myosin-10 OS=Mus musc    | R.HAEQER@DELADEIANSASGK#.S      | 144.84 | 92.34  | 1.57 | 0.64 |
| Q61879_MYH10_MOUSE | Myh10 | Myosin-10 OS=Mus musc    | R.HATALEELSEQLEQAK#.R           | 199.27 | 138.22 | 1.44 | 0.69 |
| Q61879_MYH10_MOUSE | Myh10 | Myosin-10 OS=Mus musc    | R.HATALEELSEQLEQAK#.R           | 13.17  | 8.34   | 1.58 | 0.63 |
| Q61879_MYH10_MOUSE | Myh10 | Myosin-10 OS=Mus musc    | R.HATALEELSEQLEQAK#R@.F         | 119.51 | 66.18  | 1.81 | 0.55 |
| Q61879_MYH10_MOUSE | Myh10 | Myosin-10 OS=Mus musc    | R.HATALEELSEQLEQAKR.F           | 373.99 | 205.40 | 1.82 | 0.55 |
| Q61879_MYH10_MOUSE | Myh10 | Myosin-10 OS=Mus musc    | R.HEM*PPHYIASAYR@.C             | 51.23  | 32.88  | 1.56 | 0.64 |
| Q61879_MYH10_MOUSE | Myh10 | Myosin-10 OS=Mus musc    | R.HGFEAASIK#.E                  | 59.33  | 52.46  | 1.13 | 0.88 |
| Q61879_MYH10_MOUSE | Myh10 | Myosin-10 OS=Mus musc    | R.HGFEAASIK#EER@.G              | 223.83 | 161.16 | 1.39 | 0.72 |
| Q61879_MYH10_MOUSE | Myh10 | Myosin-10 OS=Mus musc    | K.HQQLLEEK#.N                   | 151.94 | 119.95 | 1.27 | 0.79 |
| Q61879_MYH10_MOUSE | Myh10 | Myosin-10 OS=Mus musc    | R.IAQLEELLEEESNUM*ELLNDR@.F     | 172.89 | 133.24 | 1.30 | 0.77 |



|                    |       |                                                         |        |        |      |      |
|--------------------|-------|---------------------------------------------------------|--------|--------|------|------|
| Q61879_MYH10_MOUSE | Myh10 | Myosin-10 OS=Mus musc K.VEGELEEMER@.K                   | 27.00  | 16.28  | 1.66 | 0.60 |
| Q61879_MYH10_MOUSE | Myh10 | Myosin-10 OS=Mus musc K.VEGELEEMER@.K                   | 324.16 | 228.00 | 1.42 | 0.70 |
| Q61879_MYH10_MOUSE | Myh10 | Myosin-10 OS=Mus musc K.VIQLAHVASSHK.G                  | 399.31 | 270.03 | 1.48 | 0.68 |
| Q61879_MYH10_MOUSE | Myh10 | Myosin-10 OS=Mus musc K.VKPLQVTR.Q                      | 227.14 | 151.51 | 1.50 | 0.67 |
| Q61879_MYH10_MOUSE | Myh10 | Myosin-10 OS=Mus musc K.VLAYDKHLEK.T                    | 68.12  | 48.13  | 1.42 | 0.71 |
| Q61879_MYH10_MOUSE | Myh10 | Myosin-10 OS=Mus musc K.VVSSVLFQGNISFK#.K               | 338.89 | 261.07 | 1.30 | 0.77 |
| Q61879_MYH10_MOUSE | Myh10 | Myosin-10 OS=Mus musc R.YEILTPNAPK#.G                   | 122.67 | 86.20  | 1.42 | 0.70 |
| Q61879_MYH10_MOUSE | Myh10 | Myosin-10 OS=Mus musc R.YLFDVDR@.A                      | 379.16 | 235.74 | 1.61 | 0.62 |
| Q8VDD5_MYH9_MOUSE  | Myh9  | Myosin-9 OS=Mus muscu R.ELEDATEADAM#.N.R.E              | 8.29   | 8.43   | 0.98 | 1.02 |
| Q8VDD5_MYH9_MOUSE  | Myh9  | Myosin-9 OS=Mus muscu K.IAQLEQDINETK#.E                 | 8.19   | 9.01   | 0.91 | 1.10 |
| Q8VDD5_MYH9_MOUSE  | Myh9  | Myosin-9 OS=Mus muscu R.QLEEEAEQAQR@.A                  | 9.63   | 26.92  | 0.36 | 2.80 |
| Q8VDD5_MYH9_MOUSE  | Myh9  | Myosin-9 OS=Mus muscu R.RGDLPFVTR.R                     | 11.33  | 4.26   | 2.66 | 0.38 |
| Q8VDD5_MYH9_MOUSE  | Myh9  | Myosin-9 OS=Mus muscu R.ELEDATEADAM#.N.R.E              | 2.04   | 4.07   | 0.50 | 2.00 |
| Q8VDD5_MYH9_MOUSE  | Myh9  | Myosin-9 OS=Mus muscu R.ALEEAM*EQK#.A                   | 6.66   | 4.62   | 1.44 | 0.69 |
| Q8VDD5_MYH9_MOUSE  | Myh9  | Myosin-9 OS=Mus muscu R.ALEQQVEEM*K#TQLEEELELQATEDAK#.L | 5.47   | 8.84   | 0.62 | 1.62 |
| Q8VDD5_MYH9_MOUSE  | Myh9  | Myosin-9 OS=Mus muscu R.ALEQQVEEM*K#TQLEEELELQATEDAK#.L | 4.87   | 7.11   | 0.68 | 1.46 |
| Q8VDD5_MYH9_MOUSE  | Myh9  | Myosin-9 OS=Mus muscu K.ASTIAALEAK#.I                   | 24.87  | 24.32  | 1.02 | 0.98 |
| Q8VDD5_MYH9_MOUSE  | Myh9  | Myosin-9 OS=Mus muscu K.DPSALESQDQTOELLQEENR@.Q         | 13.16  | 12.05  | 1.09 | 0.92 |
| Q8VDD5_MYH9_MOUSE  | Myh9  | Myosin-9 OS=Mus muscu K.DLEAHIOTANK#.N                  | 5.38   | 5.17   | 1.04 | 0.96 |
| Q8VDD5_MYH9_MOUSE  | Myh9  | Myosin-9 OS=Mus muscu K.DLEGLSQR.L                      | 22.14  | 26.68  | 0.83 | 1.20 |
| Q8VDD5_MYH9_MOUSE  | Myh9  | Myosin-9 OS=Mus muscu R.ELEDATEADAM#.N.R.E              | 27.22  | 26.56  | 1.03 | 0.98 |
| Q8VDD5_MYH9_MOUSE  | Myh9  | Myosin-9 OS=Mus muscu K.HSQAVEELADQLEQTK#.V             | 5.92   | 9.03   | 0.66 | 1.53 |
| Q8VDD5_MYH9_MOUSE  | Myh9  | Myosin-9 OS=Mus muscu R.IAQLEEELEEQGNTELINDR@.L         | 31.20  | 27.24  | 1.15 | 0.87 |
| Q8VDD5_MYH9_MOUSE  | Myh9  | Myosin-9 OS=Mus muscu K.IAQLEEQDINETK#.E                | 24.06  | 30.17  | 0.80 | 1.25 |
| Q8VDD5_MYH9_MOUSE  | Myh9  | Myosin-9 OS=Mus muscu R.IIGLDQVAGM*SETALPGAFK.T         | 14.64  | 10.32  | 1.42 | 0.70 |
| Q8VDD5_MYH9_MOUSE  | Myh9  | Myosin-9 OS=Mus muscu K.IRELETSIQSEQLDESER.A            | 9.62   | 7.78   | 1.24 | 0.81 |
| Q8VDD5_MYH9_MOUSE  | Myh9  | Myosin-9 OS=Mus muscu K.K#ANLQIDQINTDLNLER@.S           | 22.94  | 19.39  | 1.18 | 0.85 |
| Q8VDD5_MYH9_MOUSE  | Myh9  | Myosin-9 OS=Mus muscu R.KLEGGDSDLSDQIAELQAQIAELK.M      | 8.81   | 9.85   | 0.89 | 1.12 |
| Q8VDD5_MYH9_MOUSE  | Myh9  | Myosin-9 OS=Mus muscu K.LQEM*ESAVK.S                    | 27.74  | 25.25  | 1.10 | 0.91 |
| Q8VDD5_MYH9_MOUSE  | Myh9  | Myosin-9 OS=Mus muscu R.NAEQFKQADK.A                    | 10.86  | 7.63   | 1.42 | 0.70 |
| Q8VDD5_MYH9_MOUSE  | Myh9  | Myosin-9 OS=Mus muscu K.NLPISEIEM*YK.G                  | 7.17   | 8.67   | 0.83 | 1.21 |
| Q8VDD5_MYH9_MOUSE  | Myh9  | Myosin-9 OS=Mus muscu R.NTDQASMP#DNTAAQK#.V             | 5.56   | 6.13   | 0.91 | 1.10 |
| Q8VDD5_MYH9_MOUSE  | Myh9  | Myosin-9 OS=Mus muscu R.QAQQR@DELADEIANSNGK#.G          | 21.11  | 28.70  | 0.74 | 1.36 |
| Q8VDD5_MYH9_MOUSE  | Myh9  | Myosin-9 OS=Mus muscu R.QLEEEAEQAQR@.A                  | 30.46  | 28.76  | 1.06 | 0.94 |
| Q8VDD5_MYH9_MOUSE  | Myh9  | Myosin-9 OS=Mus muscu K.QLQANPILEAFNGK#.T               | 12.46  | 12.59  | 0.99 | 1.01 |
| Q8VDD5_MYH9_MOUSE  | Myh9  | Myosin-9 OS=Mus muscu R.R@GDLPFVTR@.R                   | 20.80  | 27.87  | 0.75 | 1.34 |
| Q8VDD5_MYH9_MOUSE  | Myh9  | Myosin-9 OS=Mus muscu R.R@K#LEGGDSDLSDQIAELQAQIAELK#.M  | 7.48   | 6.54   | 1.14 | 0.87 |
| Q8VDD5_MYH9_MOUSE  | Myh9  | Myosin-9 OS=Mus muscu K.SM*EAEM*IQLEELAAER@.A           | 4.40   | 4.97   | 0.89 | 1.13 |
| Q8VDD5_MYH9_MOUSE  | Myh9  | Myosin-9 OS=Mus muscu K.SM*EAEM*IQLEELAAER.A            | 2.94   | 3.24   | 0.91 | 1.10 |
| Q8VDD5_MYH9_MOUSE  | Myh9  | Myosin-9 OS=Mus muscu K.SMEAEMIQLEELAAER@.A             | 1.76   | 2.49   | 0.71 | 1.41 |
| Q8VDD5_MYH9_MOUSE  | Myh9  | Myosin-9 OS=Mus muscu K.TDLLLLPYNK.Y                    | 7.25   | 11.27  | 0.64 | 1.55 |
| Q8VDD5_MYH9_MOUSE  | Myh9  | Myosin-9 OS=Mus muscu R.VISGLQLGNIAFK.K                 | 9.93   | 8.68   | 1.14 | 0.87 |
| Q8VDD5_MYH9_MOUSE  | Myh9  | Myosin-9 OS=Mus muscu K.VSHLLGINVDFTR.G                 | 14.73  | 16.50  | 0.89 | 1.12 |
| Q8VDD5_MYH9_MOUSE  | Myh9  | Myosin-9 OS=Mus muscu R.VVFFQFR.Q                       | 11.47  | 12.23  | 0.94 | 1.07 |
| Q8VDD5_MYH9_MOUSE  | Myh9  | Myosin-9 OS=Mus muscu K.AK#LQEM*ESAVK#.S                | 73.65  | 36.00  | 2.05 | 0.49 |
| Q8VDD5_MYH9_MOUSE  | Myh9  | Myosin-9 OS=Mus muscu K.AK#LQEM*ESAVK#.S                | 125.40 | 65.75  | 1.91 | 0.52 |
| Q8VDD5_MYH9_MOUSE  | Myh9  | Myosin-9 OS=Mus muscu R.ALEEAMEQK#.A                    | 40.58  | 21.54  | 1.88 | 0.53 |
| Q8VDD5_MYH9_MOUSE  | Myh9  | Myosin-9 OS=Mus muscu R.ALEEAM*EQK#.A                   | 272.22 | 187.81 | 1.45 | 0.69 |
| Q8VDD5_MYH9_MOUSE  | Myh9  | Myosin-9 OS=Mus muscu R.ALEEAMEQK#AELEER@.L             | 17.97  | 9.54   | 1.88 | 0.53 |
| Q8VDD5_MYH9_MOUSE  | Myh9  | Myosin-9 OS=Mus muscu K.ALEDSLNLNR@.I                   | 854.80 | 444.63 | 1.92 | 0.52 |
| Q8VDD5_MYH9_MOUSE  | Myh9  | Myosin-9 OS=Mus muscu R.ALEQQVEEMK#.T                   | 49.47  | 36.16  | 1.37 | 0.73 |
| Q8VDD5_MYH9_MOUSE  | Myh9  | Myosin-9 OS=Mus muscu R.ALEQQVEEM*K#.T                  | 136.73 | 70.68  | 1.93 | 0.52 |
| Q8VDD5_MYH9_MOUSE  | Myh9  | Myosin-9 OS=Mus muscu R.ALEQQVEEM*K#TQLEEELELQATEDAK#.L | 173.70 | 120.26 | 1.44 | 0.69 |
| Q8VDD5_MYH9_MOUSE  | Myh9  | Myosin-9 OS=Mus muscu R.ALEQQVEEMK#TQLEEELELQATEDAK#.L  | 90.24  | 53.11  | 1.70 | 0.59 |
| Q8VDD5_MYH9_MOUSE  | Myh9  | Myosin-9 OS=Mus muscu K.ANLQIDQINTDLNLER@.S             | 159.47 | 93.40  | 1.71 | 0.59 |
| Q8VDD5_MYH9_MOUSE  | Myh9  | Myosin-9 OS=Mus muscu K.ANLQIDQINTDLNLER.S              | 471.15 | 257.05 | 1.83 | 0.55 |
| Q8VDD5_MYH9_MOUSE  | Myh9  | Myosin-9 OS=Mus muscu K.ASIAALEAK#.I                    | 870.92 | 449.04 | 1.94 | 0.52 |
| Q8VDD5_MYH9_MOUSE  | Myh9  | Myosin-9 OS=Mus muscu K.ATDK#SPVEK#.L                   | 15.72  | 9.21   | 1.71 | 0.59 |
| Q8VDD5_MYH9_MOUSE  | Myh9  | Myosin-9 OS=Mus muscu R.DELADEIANSNGK#.G                | 121.11 | 90.64  | 1.34 | 0.75 |
| Q8VDD5_MYH9_MOUSE  | Myh9  | Myosin-9 OS=Mus muscu K.DPSALESQDQTOELLQEENR@.Q         | 925.03 | 489.20 | 1.89 | 0.53 |
| Q8VDD5_MYH9_MOUSE  | Myh9  | Myosin-9 OS=Mus muscu K.DPSALESQDQTOELLQEENR.Q          | 112.94 | 61.70  | 1.83 | 0.55 |
| Q8VDD5_MYH9_MOUSE  | Myh9  | Myosin-9 OS=Mus muscu K.DPSALESQDQTOELLQEENR@QK#.L      | 76.22  | 37.75  | 2.02 | 0.50 |
| Q8VDD5_MYH9_MOUSE  | Myh9  | Myosin-9 OS=Mus muscu K.DLEAHIOTANK#NR@EEAIK#.Q         | 10.25  | 5.29   | 1.94 | 0.52 |
| Q8VDD5_MYH9_MOUSE  | Myh9  | Myosin-9 OS=Mus muscu K.DLEGLSQR@.L                     | 544.67 | 338.03 | 1.61 | 0.62 |
| Q8VDD5_MYH9_MOUSE  | Myh9  | Myosin-9 OS=Mus muscu R.DLGEELKAL#.T                    | 48.44  | 29.59  | 1.64 | 0.61 |
| Q8VDD5_MYH9_MOUSE  | Myh9  | Myosin-9 OS=Mus muscu R.DLQGR@DEQSEK#.K                 | 57.47  | 35.48  | 1.62 | 0.62 |
| Q8VDD5_MYH9_MOUSE  | Myh9  | Myosin-9 OS=Mus muscu K.DQGLER@.Q                       | 137.55 | 78.92  | 1.74 | 0.57 |
| Q8VDD5_MYH9_MOUSE  | Myh9  | Myosin-9 OS=Mus muscu K.DVLLQVEDER@.R                   | 38.93  | 18.57  | 2.10 | 0.48 |
| Q8VDD5_MYH9_MOUSE  | Myh9  | Myosin-9 OS=Mus muscu R.EEILQAQK#.E                     | 249.97 | 117.95 | 2.12 | 0.47 |
| Q8VDD5_MYH9_MOUSE  | Myh9  | Myosin-9 OS=Mus muscu K.EEVGEEAIVLENGK#.K               | 35.41  | 19.60  | 1.81 | 0.55 |
| Q8VDD5_MYH9_MOUSE  | Myh9  | Myosin-9 OS=Mus muscu R.ELEDATEADAMNR@.E                | 84.76  | 44.88  | 1.89 | 0.53 |
| Q8VDD5_MYH9_MOUSE  | Myh9  | Myosin-9 OS=Mus muscu R.ELEDATEADAM#.N.R.E              | 51.13  | 263.81 | 1.71 | 0.58 |
| Q8VDD5_MYH9_MOUSE  | Myh9  | Myosin-9 OS=Mus muscu R.ELETSIQSEQLDESER@.A             | 282.88 | 137.39 | 2.06 | 0.49 |
| Q8VDD5_MYH9_MOUSE  | Myh9  | Myosin-9 OS=Mus muscu R.ELETSIQSEQLDESER@.A             | 170.45 | 87.18  | 1.96 | 0.51 |
| Q8VDD5_MYH9_MOUSE  | Myh9  | Myosin-9 OS=Mus muscu R.EMEAELDER@.K                    | 25.90  | 9.82   | 2.64 | 0.38 |
| Q8VDD5_MYH9_MOUSE  | Myh9  | Myosin-9 OS=Mus muscu R.EM*EAELDER@.K                   | 243.13 | 138.30 | 1.76 | 0.57 |
| Q8VDD5_MYH9_MOUSE  | Myh9  | Myosin-9 OS=Mus muscu R.EM*EAELDERK.Q                   | 58.54  | 35.72  | 1.64 | 0.61 |
| Q8VDD5_MYH9_MOUSE  | Myh9  | Myosin-9 OS=Mus muscu R.EQEVSILK#.K.T                   | 72.69  | 40.40  | 1.80 | 0.56 |
| Q8VDD5_MYH9_MOUSE  | Myh9  | Myosin-9 OS=Mus muscu R.EQLEEEAEK#R@.N                  | 162.73 | 82.89  | 1.96 | 0.51 |
| Q8VDD5_MYH9_MOUSE  | Myh9  | Myosin-9 OS=Mus muscu K.ERNTDQASMP#DNTAAQK.V            | 37.04  | 21.96  | 1.69 | 0.59 |
| Q8VDD5_MYH9_MOUSE  | Myh9  | Myosin-9 OS=Mus muscu K.FVSELWK#.D                      | 161.61 | 97.28  | 1.66 | 0.60 |
| Q8VDD5_MYH9_MOUSE  | Myh9  | Myosin-9 OS=Mus muscu K.GALALEEK#.R                     | 580.32 | 390.94 | 1.48 | 0.67 |
| Q8VDD5_MYH9_MOUSE  | Myh9  | Myosin-9 OS=Mus muscu K.GALALEEK#R@.R                   | 114.68 | 52.60  | 2.18 | 0.46 |
| Q8VDD5_MYH9_MOUSE  | Myh9  | Myosin-9 OS=Mus muscu R.GDLPFVTR@.R                     | 126.02 | 71.31  | 1.77 | 0.57 |
| Q8VDD5_MYH9_MOUSE  | Myh9  | Myosin-9 OS=Mus muscu K.HEAM*ITDEER@.L                  | 48.94  | 21.67  | 2.26 | 0.44 |
| Q8VDD5_MYH9_MOUSE  | Myh9  | Myosin-9 OS=Mus muscu K.HEAMITDEER@.L                   | 13.31  | 8.48   | 1.57 | 0.64 |
| Q8VDD5_MYH9_MOUSE  | Myh9  | Myosin-9 OS=Mus muscu R.HEDELLAK#.E                     | 455.16 | 226.59 | 2.01 | 0.50 |
| Q8VDD5_MYH9_MOUSE  | Myh9  | Myosin-9 OS=Mus muscu R.HEM*PPHYIATDTAYR@.S             | 70.21  | 45.81  | 1.53 | 0.65 |
| Q8VDD5_MYH9_MOUSE  | Myh9  | Myosin-9 OS=Mus muscu K.HLAAENR.L                       | 84.83  | 46.71  | 1.82 | 0.55 |
| Q8VDD5_MYH9_MOUSE  | Myh9  | Myosin-9 OS=Mus muscu K.HSQAVEELADQLEQTK#.R             | 151.73 | 97.07  | 1.56 | 0.64 |
| Q8VDD5_MYH9_MOUSE  | Myh9  | Myosin-9 OS=Mus muscu K.HSQAVEELADQLEQTK#.R@.V          | 568.49 | 236.51 | 2.40 | 0.42 |
| Q8VDD5_MYH9_MOUSE  | Myh9  | Myosin-9 OS=Mus muscu R.IAQLEEELEEQGNTELINDR@.L         | 459.47 | 283.61 | 1.62 | 0.62 |
| Q8VDD5_MYH9_MOUSE  | Myh9  | Myosin-9 OS=Mus muscu K.IAQLEEQDINETK#.E                | 475.38 | 268.94 | 1.77 | 0.57 |
| Q8VDD5_MYH9_MOUSE  | Myh9  | Myosin-9 OS=Mus muscu R.IIGLDQVAGM*SETALPGAFK#.T        | 425.25 | 226.40 | 1.88 | 0.53 |
| Q8VDD5_MYH9_MOUSE  | Myh9  | Myosin-9 OS=Mus muscu R.IIGLDQVAGM*SETALPGAFK#.T        | 29.75  | 16.94  | 1.76 | 0.57 |
| Q8VDD5_MYH9_MOUSE  | Myh9  | Myosin-9 OS=Mus muscu R.IIM*GIPDEEQM*GLLR@.V            | 30.75  | 181.44 | 1.76 | 0.57 |
| Q8VDD5_MYH9_MOUSE  | Myh9  | Myosin-9 OS=Mus muscu R.IIM*GIPDEEQM*GLLR@.V            | 30.75  | 19.75  | 1.56 | 0.64 |
| Q8VDD5_MYH9_MOUSE  | Myh9  | Myosin-9 OS=Mus muscu R.IIMGIPDEEQM*GLLR.V              | 30.75  | 19.75  | 1.56 | 0.64 |
| Q8VDD5_MYH9_MOUSE  | Myh9  | Myosin-9 OS=Mus muscu K.IRELETSIQSEQLDESER.A            | 368.19 | 163.15 | 2.26 | 0.44 |
| Q8VDD5_MYH9_MOUSE  | Myh9  | Myosin-9 OS=Mus muscu K.IR@ELETQISEQLDESER@.A           | 6.40   | 2.75   | 2.33 | 0.43 |
| Q8VDD5_MYH9_MOUSE  | Myh9  | Myosin-9 OS=Mus muscu K.KANLQIDQINTDLNLER.S             | 410.59 | 221.57 | 1.85 | 0.54 |
| Q8VDD5_MYH9_MOUSE  | Myh9  | Myosin-9 OS=Mus muscu K.K#ANLQIDQINTDLNLER@.S           | 14.76  | 7.80   | 1.89 | 0.53 |
| Q8VDD5_MYH9_MOUSE  | Myh9  | Myosin-9 OS=Mus muscu K.K#EEELQAALAR@.L                 | 259.26 | 141.75 | 1.83 | 0.55 |

|                     |        |                                                      |         |        |      |      |
|---------------------|--------|------------------------------------------------------|---------|--------|------|------|
| Q8VDD5_MYH9_MOUSE   | Myh9   | Myosin-9 OS=Mus muscu K.KKM*QQNIQELEEQLLEESAR.Q      | 8.86    | 4.25   | 2.08 | 0.48 |
| Q8VDD5_MYH9_MOUSE   | Myh9   | Myosin-9 OS=Mus muscu R.KHK#VEAQLQELQV#K.F           | 355.00  | 140.78 | 2.52 | 0.40 |
| Q8VDD5_MYH9_MOUSE   | Myh9   | Myosin-9 OS=Mus muscu R.KHLEGDSTLSDQIAELQAQIAELK#.M  | 335.76  | 176.99 | 1.90 | 0.53 |
| Q8VDD5_MYH9_MOUSE   | Myh9   | Myosin-9 OS=Mus muscu K.KH#LVVWVPSK#.N               | 176.24  | 76.58  | 2.30 | 0.43 |
| Q8VDD5_MYH9_MOUSE   | Myh9   | Myosin-9 OS=Mus muscu K.KM*QQNIQELEEQLLEESAR.Q       | 111.55  | 53.06  | 2.10 | 0.48 |
| Q8VDD5_MYH9_MOUSE   | Myh9   | Myosin-9 OS=Mus muscu K.KMQQNIQELEEQLLEESAR.Q        | 28.53   | 13.43  | 2.12 | 0.47 |
| Q8VDD5_MYH9_MOUSE   | Myh9   | Myosin-9 OS=Mus muscu K.K#TLEDEAK#.T                 | 18.39   | 10.98  | 1.68 | 0.60 |
| Q8VDD5_MYH9_MOUSE   | Myh9   | Myosin-9 OS=Mus muscu K.KH#VEAQLQELQV#K.F            | 154.60  | 81.51  | 1.90 | 0.53 |
| Q8VDD5_MYH9_MOUSE   | Myh9   | Myosin-9 OS=Mus muscu K.LEGDDSTLSDQIAELQAQIAELK#.M   | 122.18  | 59.70  | 2.05 | 0.49 |
| Q8VDD5_MYH9_MOUSE   | Myh9   | Myosin-9 OS=Mus muscu R.LEVNLAQAM*#K#.A              | 202.15  | 118.03 | 1.71 | 0.58 |
| Q8VDD5_MYH9_MOUSE   | Myh9   | Myosin-9 OS=Mus muscu R.LEVNLAQAM#.A                 | 56.12   | 36.07  | 1.56 | 0.64 |
| Q8VDD5_MYH9_MOUSE   | Myh9   | Myosin-9 OS=Mus muscu K.LK#DVLVQVEDER@.R             | 63.88   | 32.84  | 1.95 | 0.51 |
| Q8VDD5_MYH9_MOUSE   | Myh9   | Myosin-9 OS=Mus muscu K.LK#DVLVQVEDER@R@.N           | 353.65  | 185.51 | 1.91 | 0.52 |
| Q8VDD5_MYH9_MOUSE   | Myh9   | Myosin-9 OS=Mus muscu K.LKQM*EEDKNSFR.E              | 86.78   | 46.64  | 1.86 | 0.54 |
| Q8VDD5_MYH9_MOUSE   | Myh9   | Myosin-9 OS=Mus muscu K.LKSM*EAEM*1QLQEELAAEA.R.A    | 56.71   | 30.12  | 1.88 | 0.53 |
| Q8VDD5_MYH9_MOUSE   | Myh9   | Myosin-9 OS=Mus muscu K.LQEMESAVK#.S                 | 106.95  | 51.16  | 2.09 | 0.48 |
| Q8VDD5_MYH9_MOUSE   | Myh9   | Myosin-9 OS=Mus muscu K.LQEM*ESAVK#.S                | 610.60  | 355.58 | 1.72 | 0.58 |
| Q8VDD5_MYH9_MOUSE   | Myh9   | Myosin-9 OS=Mus muscu R.LQQELDDLVLVDLHQR@.Q          | 1164.94 | 705.59 | 1.65 | 0.61 |
| Q8VDD5_MYH9_MOUSE   | Myh9   | Myosin-9 OS=Mus muscu R.LQQELDDLVLVDLHQR.Q           | 438.08  | 21.40  | 2.01 | 0.50 |
| Q8VDD5_MYH9_MOUSE   | Myh9   | Myosin-9 OS=Mus muscu K.LQVELDVLGSLQSDSK#.S          | 609.17  | 302.91 | 2.01 | 0.50 |
| Q8VDD5_MYH9_MOUSE   | Myh9   | Myosin-9 OS=Mus muscu K.LR@LEVNLAQAM*#K#.A           | 202.15  | 22.34  | 1.35 | 0.74 |
| Q8VDD5_MYH9_MOUSE   | Myh9   | Myosin-9 OS=Mus muscu R.LTEM*ETM*QSQMLMAEK#.L        | 26.51   | 12.15  | 2.18 | 0.46 |
| Q8VDD5_MYH9_MOUSE   | Myh9   | Myosin-9 OS=Mus muscu R.LTEMETM*QSQMLMAEK#.L         | 5.54    | 3.75   | 1.48 | 0.68 |
| Q8VDD5_MYH9_MOUSE   | Myh9   | Myosin-9 OS=Mus muscu K.LVVWVPSK#.N                  | 159.13  | 100.75 | 1.58 | 0.63 |
| Q8VDD5_MYH9_MOUSE   | Myh9   | Myosin-9 OS=Mus muscu K.M*QQNIQELEEQLLEESAR@.Q       | 246.05  | 131.67 | 1.87 | 0.54 |
| Q8VDD5_MYH9_MOUSE   | Myh9   | Myosin-9 OS=Mus muscu K.M*QQNIQELEEQLLEESAR.Q        | 33.59   | 18.60  | 1.81 | 0.55 |
| Q8VDD5_MYH9_MOUSE   | Myh9   | Myosin-9 OS=Mus muscu K.MQQNIQELEEQLLEESAR@.Q        | 94.00   | 50.20  | 1.87 | 0.53 |
| Q8VDD5_MYH9_MOUSE   | Myh9   | Myosin-9 OS=Mus muscu K.MQQNIQELEEQLLEESAR.Q         | 10.60   | 5.15   | 2.06 | 0.49 |
| Q8VDD5_MYH9_MOUSE   | Myh9   | Myosin-9 OS=Mus muscu R.NAEQFKHDQAQK#.A              | 145.51  | 89.65  | 1.62 | 0.62 |
| Q8VDD5_MYH9_MOUSE   | Myh9   | Myosin-9 OS=Mus muscu R.NAEQFKHDQAQK#ASTR@.L         | 638.86  | 34.69  | 1.84 | 0.54 |
| Q8VDD5_MYH9_MOUSE   | Myh9   | Myosin-9 OS=Mus muscu K.NFINNLAQADWAAK#.K            | 248.05  | 138.60 | 1.79 | 0.56 |
| Q8VDD5_MYH9_MOUSE   | Myh9   | Myosin-9 OS=Mus muscu K.NGFEPASLKEEVGEEAIVLVENGG.K   | 8.96    | 7.20   | 1.24 | 0.80 |
| Q8VDD5_MYH9_MOUSE   | Myh9   | Myosin-9 OS=Mus muscu K.NGFEPASLKEEVGEEAIVLVENGG.K.V | 6.75    | 2.89   | 2.34 | 0.43 |
| Q8VDD5_MYH9_MOUSE   | Myh9   | Myosin-9 OS=Mus muscu K.NKH#EAM*TDLEER@.L            | 158.33  | 65.27  | 2.43 | 0.41 |
| Q8VDD5_MYH9_MOUSE   | Myh9   | Myosin-9 OS=Mus muscu K.NKH#EAMITDLEER@.L            | 28.43   | 12.08  | 2.35 | 0.42 |
| Q8VDD5_MYH9_MOUSE   | Myh9   | Myosin-9 OS=Mus muscu K.NLPIYSEIEM*YK#.G             | 274.73  | 147.40 | 1.86 | 0.54 |
| Q8VDD5_MYH9_MOUSE   | Myh9   | Myosin-9 OS=Mus muscu K.NLPIYSEIEM*YK#.G             | 63.40   | 34.06  | 1.86 | 0.54 |
| Q8VDD5_MYH9_MOUSE   | Myh9   | Myosin-9 OS=Mus muscu K.NM*DPNDNIATLLHQSSDK#.F       | 177.64  | 91.99  | 1.93 | 0.52 |
| Q8VDD5_MYH9_MOUSE   | Myh9   | Myosin-9 OS=Mus muscu K.NM*DPNDNIATLLHQSSDKFVSELWK.D | 21.51   | 10.55  | 2.04 | 0.49 |
| Q8VDD5_MYH9_MOUSE   | Myh9   | Myosin-9 OS=Mus muscu K.NR@EAAK#.Q                   | 105.02  | 63.56  | 1.65 | 0.61 |
| Q8VDD5_MYH9_MOUSE   | Myh9   | Myosin-9 OS=Mus muscu K.NSFR@ELEEELAAER@.N           | 41.24   | 25.21  | 1.64 | 0.61 |
| Q8VDD5_MYH9_MOUSE   | Myh9   | Myosin-9 OS=Mus muscu R.NTDQASMP*DPNTAAQK#.V         | 328.17  | 186.72 | 1.76 | 0.57 |
| Q8VDD5_MYH9_MOUSE   | Myh9   | Myosin-9 OS=Mus muscu R.NTDQASMP*DPNTAAQK#.V         | 16.88   | 11.86  | 1.42 | 0.70 |
| Q8VDD5_MYH9_MOUSE   | Myh9   | Myosin-9 OS=Mus muscu R.NWQWWR.L                     | 28.82   | 14.73  | 1.96 | 0.51 |
| Q8VDD5_MYH9_MOUSE   | Myh9   | Myosin-9 OS=Mus muscu R.QAQQRDELADIAANSK.G           | 502.16  | 304.21 | 1.65 | 0.61 |
| Q8VDD5_MYH9_MOUSE   | Myh9   | Myosin-9 OS=Mus muscu R.QK#H#SQAVLEADQLEQTK#.R       | 10.96   | 5.14   | 2.13 | 0.47 |
| Q8VDD5_MYH9_MOUSE   | Myh9   | Myosin-9 OS=Mus muscu R.QLEEEAEEAQR@.A               | 416.27  | 242.89 | 1.71 | 0.58 |
| Q8VDD5_MYH9_MOUSE   | Myh9   | Myosin-9 OS=Mus muscu K.LLQANPILLEAFGNK#.T           | 764.71  | 421.81 | 1.81 | 0.55 |
| Q8VDD5_MYH9_MOUSE   | Myh9   | Myosin-9 OS=Mus muscu R.QQQLTAM*#K#.V                | 134.90  | 74.10  | 1.82 | 0.55 |
| Q8VDD5_MYH9_MOUSE   | Myh9   | Myosin-9 OS=Mus muscu R.QRYELTPNSIPK.G               | 177.26  | 106.26 | 1.67 | 0.60 |
| Q8VDD5_MYH9_MOUSE   | Myh9   | Myosin-9 OS=Mus muscu R.QR@YEITLTPNSIPK#.G           | 14.20   | 9.05   | 1.57 | 0.64 |
| Q8VDD5_MYH9_MOUSE   | Myh9   | Myosin-9 OS=Mus muscu R.QSVSLEK#.A                   | 176.62  | 97.46  | 1.81 | 0.55 |
| Q8VDD5_MYH9_MOUSE   | Myh9   | Myosin-9 OS=Mus muscu K.QTLENER@GELANEV#.A           | 24.93   | 10.45  | 2.39 | 0.42 |
| Q8VDD5_MYH9_MOUSE   | Myh9   | Myosin-9 OS=Mus muscu K.R@EQEVLQIHK#.K               | 15.86   | 7.42   | 2.14 | 0.47 |
| Q8VDD5_MYH9_MOUSE   | Myh9   | Myosin-9 OS=Mus muscu R.R@GDLPFVTR@.R                | 478.39  | 277.07 | 1.73 | 0.58 |
| Q8VDD5_MYH9_MOUSE   | Myh9   | Myosin-9 OS=Mus muscu R.RKLEGGDSTLSDQIAELQAQIAELK#.M | 240.16  | 116.13 | 2.13 | 0.47 |
| Q8VDD5_MYH9_MOUSE   | Myh9   | Myosin-9 OS=Mus muscu K.R@QAQQR@DELADIAANSK#.G       | 16.73   | 12.86  | 1.30 | 0.77 |
| Q8VDD5_MYH9_MOUSE   | Myh9   | Myosin-9 OS=Mus muscu K.R@QQTLTAM*#K#.V              | 70.91   | 47.31  | 1.50 | 0.67 |
| Q8VDD5_MYH9_MOUSE   | Myh9   | Myosin-9 OS=Mus muscu K.SM*EAEM*1QLQEELAAEAER@.A     | 124.11  | 71.82  | 1.73 | 0.58 |
| Q8VDD5_MYH9_MOUSE   | Myh9   | Myosin-9 OS=Mus muscu K.SM*EAEM*1QLQEELAAEAER@.A     | 72.23   | 42.91  | 1.68 | 0.59 |
| Q8VDD5_MYH9_MOUSE   | Myh9   | Myosin-9 OS=Mus muscu K.SMEAEEM*1QLQEELAAEAER@.A     | 9.74    | 4.26   | 2.29 | 0.44 |
| Q8VDD5_MYH9_MOUSE   | Myh9   | Myosin-9 OS=Mus muscu K.SM*EAEM1QLQEELAAEAER@.A      | 44.61   | 25.75  | 1.73 | 0.58 |
| Q8VDD5_MYH9_MOUSE   | Myh9   | Myosin-9 OS=Mus muscu K.SM*EAEM1QLQEELAAEAER@.A      | 17.35   | 9.86   | 1.76 | 0.57 |
| Q8VDD5_MYH9_MOUSE   | Myh9   | Myosin-9 OS=Mus muscu K.SMEAEEM1QLQEELAAEAER@.A      | 32.62   | 15.97  | 2.04 | 0.49 |
| Q8VDD5_MYH9_MOUSE   | Myh9   | Myosin-9 OS=Mus muscu K.TDLLLEPYNK#.Y                | 448.39  | 233.17 | 1.92 | 0.52 |
| Q8VDD5_MYH9_MOUSE   | Myh9   | Myosin-9 OS=Mus muscu R.TELADK#VTK#.L                | 102.56  | 41.90  | 2.45 | 0.41 |
| Q8VDD5_MYH9_MOUSE   | Myh9   | Myosin-9 OS=Mus muscu K.TELEDTLSTAAQQELR@.S          | 45.28   | 26.40  | 1.72 | 0.58 |
| Q8VDD5_MYH9_MOUSE   | Myh9   | Myosin-9 OS=Mus muscu K.TELEDTLSTAAQQELR.S           | 59.17   | 28.76  | 2.06 | 0.49 |
| Q8VDD5_MYH9_MOUSE   | Myh9   | Myosin-9 OS=Mus muscu R.TEMEDLMSSK#.D                | 6.12    | 3.67   | 1.67 | 0.60 |
| Q8VDD5_MYH9_MOUSE   | Myh9   | Myosin-9 OS=Mus muscu R.TEM*EDLM*SSK#.D              | 96.04   | 66.39  | 1.45 | 0.69 |
| Q8VDD5_MYH9_MOUSE   | Myh9   | Myosin-9 OS=Mus muscu R.TEMEDLMSSK#DDVGG#.S          | 27.50   | 17.73  | 1.55 | 0.64 |
| Q8VDD5_MYH9_MOUSE   | Myh9   | Myosin-9 OS=Mus muscu K.THEAQIQEMR@.Q                | 93.11   | 53.58  | 1.74 | 0.58 |
| Q8VDD5_MYH9_MOUSE   | Myh9   | Myosin-9 OS=Mus muscu K.THEAQIQEMR@.Q                | 14.97   | 8.65   | 1.73 | 0.58 |
| Q8VDD5_MYH9_MOUSE   | Myh9   | Myosin-9 OS=Mus muscu K.THEAQIQEMR@.Q                | 47.81   | 25.31  | 1.89 | 0.53 |
| Q8VDD5_MYH9_MOUSE   | Myh9   | Myosin-9 OS=Mus muscu K.TLEDEAK#.T                   | 151.35  | 110.59 | 1.37 | 0.73 |
| Q8VDD5_MYH9_MOUSE   | Myh9   | Myosin-9 OS=Mus muscu K.TLEDEAK#THEAQIQEMR@.Q        | 26.90   | 11.30  | 2.38 | 0.42 |
| Q8VDD5_MYH9_MOUSE   | Myh9   | Myosin-9 OS=Mus muscu K.TR@LQELDDLVLVDLHQR@.Q        | 27.40   | 10.14  | 2.70 | 0.37 |
| Q8VDD5_MYH9_MOUSE   | Myh9   | Myosin-9 OS=Mus muscu K.VAAAYDK#LEK#.T               | 177.67  | 77.31  | 2.30 | 0.44 |
| Q8VDD5_MYH9_MOUSE   | Myh9   | Myosin-9 OS=Mus muscu R.VAEFTINLM*#EELK#.S           | 223.56  | 119.25 | 1.87 | 0.53 |
| Q8VDD5_MYH9_MOUSE   | Myh9   | Myosin-9 OS=Mus muscu R.VAEFTINLM#EELK#.S            | 53.43   | 30.31  | 1.76 | 0.57 |
| Q8VDD5_MYH9_MOUSE   | Myh9   | Myosin-9 OS=Mus muscu K.VEAQLQELQV#K.F               | 124.01  | 78.16  | 1.59 | 0.63 |
| Q8VDD5_MYH9_MOUSE   | Myh9   | Myosin-9 OS=Mus muscu R.VEEEAQK#.N                   | 76.80   | 41.25  | 1.86 | 0.54 |
| Q8VDD5_MYH9_MOUSE   | Myh9   | Myosin-9 OS=Mus muscu R.VISGVLQLGIAFK#.K             | 529.34  | 301.46 | 1.76 | 0.57 |
| Q8VDD5_MYH9_MOUSE   | Myh9   | Myosin-9 OS=Mus muscu K.VK#VKNHDDIQK#.M              | 332.67  | 181.71 | 1.83 | 0.55 |
| Q8VDD5_MYH9_MOUSE   | Myh9   | Myosin-9 OS=Mus muscu K.VNKHDDIQK#.M                 | 86.51   | 57.03  | 1.52 | 0.66 |
| Q8VDD5_MYH9_MOUSE   | Myh9   | Myosin-9 OS=Mus muscu R.VR@TELADK#.V                 | 64.16   | 31.86  | 2.01 | 0.50 |
| Q8VDD5_MYH9_MOUSE   | Myh9   | Myosin-9 OS=Mus muscu K.VSHLLGINVDFTR@.G             | 977.68  | 459.62 | 2.13 | 0.47 |
| Q8VDD5_MYH9_MOUSE   | Myh9   | Myosin-9 OS=Mus muscu K.VSHLLGINVDFTR.G              | 128.65  | 61.94  | 2.08 | 0.48 |
| Q8VDD5_MYH9_MOUSE   | Myh9   | Myosin-9 OS=Mus muscu R.VVFQEFR.Q                    | 712.94  | 376.61 | 1.89 | 0.53 |
| Q8VDD5_MYH9_MOUSE   | Myh9   | Myosin-9 OS=Mus muscu R.YEITLTPNSIPK#.G              | 203.72  | 117.09 | 1.74 | 0.57 |
| Q8VDD5_MYH9_MOUSE   | Myh9   | Myosin-9 OS=Mus muscu K.YK#H#SIALEAK#.I              | 76.39   | 9.38   | 2.81 | 0.36 |
| Q8VDD5_MYH9_MOUSE   | Myh9   | Myosin-9 OS=Mus muscu K.YLVYDK#FINNINLAQADWAAK#.K    | 23.27   | 26.88  | 2.69 | 0.37 |
| E9QNY3_E9QNY3_MOUSE | Myl10  | Myosin regulatory light c -.M*FDQSQQEFK.E            | 6.07    | 3.80   | 1.60 | 0.63 |
| Q6ZVQ9_Q6ZVQ9_MOUSE | Myl12a | MCG5400 OS=Mus muscu R.ELLTMM*GDR@FTDEEVDLYR@.E      | 82.08   | 49.71  | 1.65 | 0.61 |
| Q6ZVQ9_Q6ZVQ9_MOUSE | Myl12a | MCG5400 OS=Mus muscu R.FTDEEVDLYR@.E                 | 154.49  | 102.97 | 1.50 | 0.67 |
| Q6ZVQ9_Q6ZVQ9_MOUSE | Myl12a | MCG5400 OS=Mus muscu K.GNFMVIFTR@.J                  | 326.27  | 147.16 | 1.61 | 0.62 |
| Q6ZVQ9_Q6ZVQ9_MOUSE | Myl12a | MCG5400 OS=Mus muscu R.DGFIDKEDLHDM*LASMGK#.N        | 19.30   | 9.61   | 2.01 | 0.50 |
| Q6ZVQ9_Q6ZVQ9_MOUSE | Myl12a | MCG5400 OS=Mus muscu R.DGFIDKEDLHDM*LASMGK#.N        | 63.49   | 37.83  | 1.68 | 0.60 |
| Q6ZVQ9_Q6ZVQ9_MOUSE | Myl12a | MCG5400 OS=Mus muscu R.DGFIDKEDLHDM*LASMGK#.N        | 2.02    | 1.50   | 1.34 | 0.74 |
| Q6ZVQ9_Q6ZVQ9_MOUSE | Myl12a | MCG5400 OS=Mus muscu R.ELLTMM*GDR@FTDEEVDLYR.E       | 464.31  | 232.53 | 2.00 | 0.50 |
| Q6ZVQ9_Q6ZVQ9_MOUSE | Myl12a | MCG5400 OS=Mus muscu R.ELLTMM*GDR@FTDEEVDLYR@.E      | 21.27   | 7.33   | 2.90 | 0.34 |
| Q6ZVQ9_Q6ZVQ9_MOUSE | Myl12a | MCG5400 OS=Mus muscu R.ELLTMMGDR@FTDEEVDLYR@.E       | 174.20  | 96.15  | 1.81 | 0.55 |
| Q6ZVQ9_Q6ZVQ9_MOUSE | Myl12a | MCG5400 OS=Mus muscu R.FTDEEVDLYR@.E                 | 1704.44 | 984.19 | 1.73 | 0.58 |

|                     |        |                           |                                  |         |         |      |      |
|---------------------|--------|---------------------------|----------------------------------|---------|---------|------|------|
| Q6ZW09_Q6ZW09_MOUSE | Myl12a | MCG5400 OS=Mus musci      | R.FTDEEVDELRY@EAPIDK#K.G         | 10.82   | 3.22    | 3.36 | 0.30 |
| Q6ZW09_Q6ZW09_MOUSE | Myl12a | MCG5400 OS=Mus musci      | K.GNFNYEFTR@.J                   | 2695.10 | 1438.48 | 1.87 | 0.53 |
| Q6ZW09_Q6ZW09_MOUSE | Myl12a | MCG5400 OS=Mus musci      | K.HKGNFNYEFTR@.I                 | 138.80  | 63.77   | 2.18 | 0.46 |
| Q6ZW09_Q6ZW09_MOUSE | Myl12a | MCG5400 OS=Mus musci      | K.HKGNFNYEFTR@.I                 | 34.57   | 20.97   | 1.65 | 0.61 |
| Q6ZW09_Q6ZW09_MOUSE | Myl12a | MCG5400 OS=Mus musci      | R.ELLTTM*GDR@FTDEEVDELRY@.E      | 24.55   | 13.57   | 1.81 | 0.55 |
| Q6ZW09_Q6ZW09_MOUSE | Myl12a | MCG5400 OS=Mus musci      | R.FTDEEVDELRY.E                  | 56.82   | 30.10   | 1.89 | 0.53 |
| Q6ZW09_Q6ZW09_MOUSE | Myl12a | MCG5400 OS=Mus musci      | K.GNFNYEFTR@.I                   | 93.96   | 56.10   | 1.67 | 0.60 |
| Q6ZW09_Q6ZW09_MOUSE | Myl12a | MCG5400 OS=Mus musci      | R.ELLTTM*GDR@FTDEEVDELRY@.E      | 13.87   | 7.60    | 1.83 | 0.55 |
| Q6ZW09_Q6ZW09_MOUSE | Myl12a | MCG5400 OS=Mus musci      | R.FTDEEVDELRY@.E                 | 23.34   | 12.88   | 1.81 | 0.55 |
| Q6ZW09_Q6ZW09_MOUSE | Myl12a | MCG5400 OS=Mus musci      | K.GNFNYEFTR.I                    | 53.94   | 28.55   | 1.89 | 0.53 |
| Q60605_MYL6_MOUSE   | Myl6   | Myosin light polypeptide  | K.DQGTYYDVEGLR@.V                | 12.03   | 5.87    | 2.05 | 0.49 |
| Q60605_MYL6_MOUSE   | Myl6   | Myosin light polypeptide  | K.EAFQLFDR@.T                    | 177.75  | 131.97  | 1.35 | 0.74 |
| Q60605_MYL6_MOUSE   | Myl6   | Myosin light polypeptide  | R.HVLVTLGK#M                     | 198.11  | 134.90  | 1.47 | 0.68 |
| Q60605_MYL6_MOUSE   | Myl6   | Myosin light polypeptide  | K.NKDQGTYYDVEGLR.V               | 158.68  | 112.67  | 1.41 | 0.71 |
| Q60605_MYL6_MOUSE   | Myl6   | Myosin light polypeptide  | K.NKHDQGTYYDVEGLR@.V             | 15.17   | 11.23   | 1.35 | 0.74 |
| Q60605_MYL6_MOUSE   | Myl6   | Myosin light polypeptide  | K.VLDFEHLPM*LTQVAK#.N            | 145.04  | 110.81  | 1.31 | 0.76 |
| Q60605_MYL6_MOUSE   | Myl6   | Myosin light polypeptide  | K.VLDFEHLPM*LTQVAK#.N            | 9.28    | 8.45    | 1.10 | 0.91 |
| Q60605_MYL6_MOUSE   | Myl6   | Myosin light polypeptide  | K.VLDFEHLPM*LTQVAK#.N            | 55.19   | 37.06   | 1.49 | 0.67 |
| Q60605_MYL6_MOUSE   | Myl6   | Myosin light polypeptide  | K.DQGTYYDVEGLR@.V                | 238.64  | 131.54  | 1.81 | 0.55 |
| Q60605_MYL6_MOUSE   | Myl6   | Myosin light polypeptide  | K.EAFQLFDR@.T                    | 2824.08 | 1526.49 | 1.85 | 0.54 |
| Q60605_MYL6_MOUSE   | Myl6   | Myosin light polypeptide  | R.HVLVTLGK#M                     | 1157.10 | 580.61  | 1.99 | 0.50 |
| Q60605_MYL6_MOUSE   | Myl6   | Myosin light polypeptide  | K.NKHDQGTYYDVEGLR@.V             | 1759.80 | 925.43  | 1.90 | 0.53 |
| Q60605_MYL6_MOUSE   | Myl6   | Myosin light polypeptide  | K.NKHDQGTYYDVEGLR@.V             | 178.05  | 96.22   | 1.85 | 0.54 |
| Q60605_MYL6_MOUSE   | Myl6   | Myosin light polypeptide  | K.SDEM*NVK#.V                    | 112.12  | 70.61   | 1.59 | 0.63 |
| Q60605_MYL6_MOUSE   | Myl6   | Myosin light polypeptide  | K.SDEM*NVK#.V                    | 63.86   | 40.52   | 1.58 | 0.63 |
| Q60605_MYL6_MOUSE   | Myl6   | Myosin light polypeptide  | K.VLDFEHLPM*LTQVAK#.N            | 2876.61 | 1487.08 | 1.93 | 0.52 |
| Q60605_MYL6_MOUSE   | Myl6   | Myosin light polypeptide  | K.VLDFEHLPM*LTQVAK#.N            | 208.52  | 112.79  | 1.85 | 0.54 |
| Q60605_MYL6_MOUSE   | Myl6   | Myosin light polypeptide  | K.VLDFEHLPM*LTQVAK#.N            | 487.31  | 278.37  | 1.75 | 0.57 |
| Q60605_MYL6_MOUSE   | Myl6   | Myosin light polypeptide  | K.EAFQLFDR@.T                    | 50.80   | 30.05   | 1.69 | 0.59 |
| Q60605_MYL6_MOUSE   | Myl6   | Myosin light polypeptide  | R.HVLVTLGK#.M                    | 81.94   | 46.01   | 1.78 | 0.56 |
| Q60605_MYL6_MOUSE   | Myl6   | Myosin light polypeptide  | K.NKHDQGTYYDVEGLR@.V             | 76.72   | 41.58   | 1.85 | 0.54 |
| Q60605_MYL6_MOUSE   | Myl6   | Myosin light polypeptide  | K.VLDFEHLPM*LTQVAK#.N            | 82.56   | 45.03   | 1.83 | 0.55 |
| Q60605_MYL6_MOUSE   | Myl6   | Myosin light polypeptide  | K.VLDFEHLPM*LTQVAK#.N            | 43.35   | 21.97   | 1.97 | 0.51 |
| Q60605_MYL6_MOUSE   | Myl6   | Myosin light polypeptide  | K.EAFQLFDR@.T                    | 38.12   | 18.15   | 2.10 | 0.48 |
| Q60605_MYL6_MOUSE   | Myl6   | Myosin light polypeptide  | R.HVLVTLGK#M                     | 32.86   | 19.21   | 1.71 | 0.58 |
| Q60605_MYL6_MOUSE   | Myl6   | Myosin light polypeptide  | K.NKDQGTYYDVEGLR.V               | 39.80   | 17.14   | 2.32 | 0.43 |
| Q60605_MYL6_MOUSE   | Myl6   | Myosin light polypeptide  | K.VLDFEHLPM*LTQVAK#.N            | 65.95   | 24.40   | 2.70 | 0.37 |
| Q60605_MYL6_MOUSE   | Myl6   | Myosin light polypeptide  | K.VLDFEHLPM*LTQVAK#.N            | 8.72    | 10.54   | 0.83 | 1.21 |
| Q8C143_MYL6B_MOUSE  | Myl6b  | Myosin light chain 6B OS  | R.ALGNPTNAEVLK#.V                | 278.05  | 192.98  | 1.44 | 0.69 |
| Q8C143_MYL6B_MOUSE  | Myl6b  | Myosin light chain 6B OS  | R.ALGNPTNAEVLK#.V                | 3061.13 | 1456.61 | 2.10 | 0.48 |
| Q8C143_MYL6B_MOUSE  | Myl6b  | Myosin light chain 6B OS  | R.DQGTYYDVEGLR@.V                | 7.19    | 4.04    | 1.78 | 0.56 |
| Q8C143_MYL6B_MOUSE  | Myl6b  | Myosin light chain 6B OS  | K.ILYSQCGDLM*RA                  | 11.93   | 4.40    | 2.72 | 0.37 |
| Q8C143_MYL6B_MOUSE  | Myl6b  | Myosin light chain 6B OS  | K.NRDQGTYYDVEGLR.V               | 9.85    | 5.01    | 1.97 | 0.51 |
| Q8C143_MYL6B_MOUSE  | Myl6b  | Myosin light chain 6B OS  | R.R@VDFEFLPM*LQAVAK#.N           | 16.17   | 9.89    | 1.63 | 0.61 |
| Q8C143_MYL6B_MOUSE  | Myl6b  | Myosin light chain 6B OS  | K.SQEPVDFLPSK#.V                 | 8.93    | 7.27    | 1.23 | 0.81 |
| Q8C143_MYL6B_MOUSE  | Myl6b  | Myosin light chain 6B OS  | R.ALGNPTNAEVLK#.V                | 95.24   | 55.59   | 1.71 | 0.58 |
| Q8C143_MYL6B_MOUSE  | Myl6b  | Myosin light chain 6B OS  | R.ALGNPTNAEVLK#.V                | 63.96   | 31.98   | 2.00 | 0.50 |
| Q9CQ19_MYL9_MOUSE   | Myl9   | Myosin regulatory light p | R.ATSNVFAM*FDOSQIQEFK#.E         | 51.64   | 33.77   | 1.53 | 0.65 |
| Q9CQ19_MYL9_MOUSE   | Myl9   | Myosin regulatory light p | R.ATSNVFAM*FDOSQIQEFK#.E         | 67.93   | 45.08   | 1.51 | 0.66 |
| Q9CQ19_MYL9_MOUSE   | Myl9   | Myosin regulatory light p | R.ATSNVFAM*FDOSQIQEFK#.E         | 10.47   | 9.41    | 1.11 | 0.90 |
| Q9CQ19_MYL9_MOUSE   | Myl9   | Myosin regulatory light p | K.EAFNM*IDQNR@.D                 | 128.76  | 90.90   | 1.42 | 0.71 |
| Q9CQ19_MYL9_MOUSE   | Myl9   | Myosin regulatory light p | K.EAFNM*IDQNR@.D                 | 18.74   | 17.82   | 1.05 | 0.95 |
| Q9CQ19_MYL9_MOUSE   | Myl9   | Myosin regulatory light p | R.ELLTTM*GDR.F                   | 153.16  | 92.25   | 1.66 | 0.60 |
| Q9CQ19_MYL9_MOUSE   | Myl9   | Myosin regulatory light p | R.ELLTTM*GDR@.F                  | 10.85   | 7.60    | 1.43 | 0.70 |
| Q9CQ19_MYL9_MOUSE   | Myl9   | Myosin regulatory light p | K.LNGTDPEDVIR@.N                 | 84.95   | 65.72   | 1.29 | 0.77 |
| Q9CQ19_MYL9_MOUSE   | Myl9   | Myosin regulatory light p | R.ATSNVFAM*FDOSQIQEFK#.E         | 972.83  | 495.46  | 1.96 | 0.51 |
| Q9CQ19_MYL9_MOUSE   | Myl9   | Myosin regulatory light p | R.ATSNVFAM*FDOSQIQEFK#.E         | 820.18  | 418.17  | 1.96 | 0.51 |
| Q9CQ19_MYL9_MOUSE   | Myl9   | Myosin regulatory light p | R.ATSNVFAM*FDOSQIQEFK#.E         | 86.09   | 45.10   | 1.91 | 0.52 |
| Q9CQ19_MYL9_MOUSE   | Myl9   | Myosin regulatory light p | R.ATSNVFAM*FDOSQIQEFK#.E         | 89.18   | 53.12   | 1.68 | 0.60 |
| Q9CQ19_MYL9_MOUSE   | Myl9   | Myosin regulatory light p | R.ATSNVFAM*FDOSQIQEFK#.E         | 59.97   | 29.76   | 2.01 | 0.50 |
| Q9CQ19_MYL9_MOUSE   | Myl9   | Myosin regulatory light p | R.ATSNVFAM*FDOSQIQEFK#.E         | 2.73    | 1.83    | 1.50 | 0.67 |
| Q9CQ19_MYL9_MOUSE   | Myl9   | Myosin regulatory light p | R.DGFIDKEDHDM*LASLGK#.N          | 109.27  | 46.31   | 2.36 | 0.42 |
| Q9CQ19_MYL9_MOUSE   | Myl9   | Myosin regulatory light p | R.DGFIDKEDHDM*LASLGK#.N          | 15.11   | 6.58    | 2.30 | 0.44 |
| Q9CQ19_MYL9_MOUSE   | Myl9   | Myosin regulatory light p | K.EAFNM*IDQNR@.D                 | 919.02  | 505.96  | 1.82 | 0.55 |
| Q9CQ19_MYL9_MOUSE   | Myl9   | Myosin regulatory light p | K.EAFNM*IDQNR@.D                 | 140.94  | 76.63   | 1.84 | 0.54 |
| Q9CQ19_MYL9_MOUSE   | Myl9   | Myosin regulatory light p | K.EAFNM*IDQNR@.D                 | 30.50   | 6.85    | 4.45 | 0.22 |
| Q9CQ19_MYL9_MOUSE   | Myl9   | Myosin regulatory light p | R.EAPIDK.G                       | 111.08  | 71.74   | 1.55 | 0.65 |
| Q9CQ19_MYL9_MOUSE   | Myl9   | Myosin regulatory light p | R.ELLTTM*GDR.F                   | 1237.75 | 680.64  | 1.82 | 0.55 |
| Q9CQ19_MYL9_MOUSE   | Myl9   | Myosin regulatory light p | R.ELLTTM*GDR.F                   | 86.86   | 61.19   | 1.42 | 0.70 |
| Q9CQ19_MYL9_MOUSE   | Myl9   | Myosin regulatory light p | R.FTDEEVDEM*YR@.E                | 34.35   | 13.25   | 2.59 | 0.39 |
| Q9CQ19_MYL9_MOUSE   | Myl9   | Myosin regulatory light p | R.FTDEEVDEM*YR@.E                | 4.63    | 2.12    | 2.18 | 0.46 |
| Q9CQ19_MYL9_MOUSE   | Myl9   | Myosin regulatory light p | K.GNFNYEFTR@.I                   | 72.77   | 36.70   | 1.98 | 0.50 |
| Q9CQ19_MYL9_MOUSE   | Myl9   | Myosin regulatory light p | K.LNGTDPEDVIR@.N                 | 700.37  | 395.39  | 1.77 | 0.56 |
| Q9CQ19_MYL9_MOUSE   | Myl9   | Myosin regulatory light p | R.ATSNVFAM*FDOSQIQEFK#.E         | 30.71   | 22.28   | 1.38 | 0.73 |
| Q9CQ19_MYL9_MOUSE   | Myl9   | Myosin regulatory light p | K.EAFNM*IDQNR.D                  | 32.74   | 22.71   | 1.44 | 0.69 |
| Q9CQ19_MYL9_MOUSE   | Myl9   | Myosin regulatory light p | K.EAFNM*IDQNR@.D                 | 8.06    | 3.51    | 2.30 | 0.44 |
| Q9CQ19_MYL9_MOUSE   | Myl9   | Myosin regulatory light p | R.ELLTTM*GDR@.F                  | 40.05   | 26.35   | 1.52 | 0.66 |
| Q9CQ19_MYL9_MOUSE   | Myl9   | Myosin regulatory light p | K.LNGTDPEDVIR.N                  | 31.22   | 19.12   | 1.63 | 0.61 |
| Q9CQ19_MYL9_MOUSE   | Myl9   | Myosin regulatory light p | R.ATSNVFAM*FDOSQIQEFK#.E         | 23.17   | 8.66    | 2.68 | 0.37 |
| Q9CQ19_MYL9_MOUSE   | Myl9   | Myosin regulatory light p | K.EAFNM*IDQNR@.D                 | 10.17   | 6.97    | 1.46 | 0.69 |
| Q6PDN3_MYLK_MOUSE   | Mylk   | Myosin light chain kinase | R.SK#PIAIFLQGLSDLK#.V            | 13.05   | 4.04    | 3.23 | 0.31 |
| Q6PDN3_MYLK_MOUSE   | Mylk   | Myosin light chain kinase | R.SK#PIAIFLQGLSDLK#.V            | 7.75    | 2.88    | 2.69 | 0.37 |
| Q9JMH9_MYL18A_MOUSE | Myo18a | Unconventional myosin-    | R.AAEINQGVDDDDAGGEWR@.L          | 12.43   | 11.70   | 1.06 | 0.94 |
| Q9JMH9_MYL18A_MOUSE | Myo18a | Unconventional myosin-    | R.AGSAATLVSGSIAGLEGSSQLALR@.R    | 42.25   | 27.75   | 1.52 | 0.66 |
| Q9JMH9_MYL18A_MOUSE | Myo18a | Unconventional myosin-    | R.AGSAATLVSGSIAGLEGSSQLALR.R     | 18.04   | 12.89   | 1.40 | 0.71 |
| Q9JMH9_MYL18A_MOUSE | Myo18a | Unconventional myosin-    | K.AM*EVEN*EDLHLQDDIAK#.A         | 7.56    | 7.95    | 0.95 | 1.05 |
| Q9JMH9_MYL18A_MOUSE | Myo18a | Unconventional myosin-    | R.APEGOAQR@.R                    | 14.94   | 13.04   | 1.15 | 0.87 |
| Q9JMH9_MYL18A_MOUSE | Myo18a | Unconventional myosin-    | R.AVEELLESLEK#.S                 | 53.54   | 36.76   | 1.46 | 0.69 |
| Q9JMH9_MYL18A_MOUSE | Myo18a | Unconventional myosin-    | R.DFESEKRR@.L                    | 7.18    | 5.63    | 1.28 | 0.78 |
| Q9JMH9_MYL18A_MOUSE | Myo18a | Unconventional myosin-    | R.DGFSLASQLK#.S                  | 47.87   | 28.07   | 1.71 | 0.59 |
| Q9JMH9_MYL18A_MOUSE | Myo18a | Unconventional myosin-    | K.DLALGLVPGDR@.L                 | 46.29   | 35.77   | 1.29 | 0.77 |
| Q9JMH9_MYL18A_MOUSE | Myo18a | Unconventional myosin-    | K.DLDIAGFTQK#.V                  | 16.64   | 11.43   | 1.46 | 0.69 |
| Q9JMH9_MYL18A_MOUSE | Myo18a | Unconventional myosin-    | R.DTKEEM*SELA.R.K                | 12.33   | 8.26    | 1.49 | 0.67 |
| Q9JMH9_MYL18A_MOUSE | Myo18a | Unconventional myosin-    | R.EK#DM*LLAEAFSLK#.Q             | 49.39   | 29.30   | 1.69 | 0.59 |
| Q9JMH9_MYL18A_MOUSE | Myo18a | Unconventional myosin-    | R.GFFNLNR@.S                     | 35.99   | 17.77   | 2.03 | 0.49 |
| Q9JMH9_MYL18A_MOUSE | Myo18a | Unconventional myosin-    | R.GSILDSGSLTASSSDLLK#GEGESFR@.G  | 9.05    | 8.54    | 1.06 | 0.94 |
| Q9JMH9_MYL18A_MOUSE | Myo18a | Unconventional myosin-    | K.IISNLFLGR.A                    | 62.10   | 41.12   | 1.51 | 0.66 |
| Q9JMH9_MYL18A_MOUSE | Myo18a | Unconventional myosin-    | R.ISELTSETDERNTGESASQLLDAETAER.L | 26.93   | 15.20   | 1.77 | 0.56 |
| Q9JMH9_MYL18A_MOUSE | Myo18a | Unconventional myosin-    | K.LDHGAILDVEDDEDIEK#.A           | 11.23   | 6.36    | 1.77 | 0.57 |
| Q9JMH9_MYL18A_MOUSE | Myo18a | Unconventional myosin-    | R.LEDLASLVNLESLHTLR.L.Q          | 16.62   | 19.05   | 0.87 | 1.15 |
| Q9JMH9_MYL18A_MOUSE | Myo18a | Unconventional myosin-    | R.LEEDQEDM*NELM*K#.K             | 5.66    | 5.03    | 1.13 | 0.89 |
| Q9JMH9_MYL18A_MOUSE | Myo18a | Unconventional myosin-    | R.LEEQREDTQSR.H                  | 4.69    | 2.58    | 1.82 | 0.55 |
| Q9JMH9_MYL18A_MOUSE | Myo18a | Unconventional myosin-    | R.LEISNPIPK#.V                   | 14.04   | 9.07    | 1.55 | 0.65 |

|                    |        |                                                              |        |       |      |      |
|--------------------|--------|--------------------------------------------------------------|--------|-------|------|------|
| Q9JMH9_MY18A_MOUSE | Myo18a | Unconventional myosin- K.LFTTVR@PLIQVQLSEEQR@.N              | 19.87  | 15.41 | 1.29 | 0.78 |
| Q9JMH9_MY18A_MOUSE | Myo18a | Unconventional myosin- R.LGDLQADSDESQR@.A                    | 20.60  | 15.74 | 1.31 | 0.76 |
| Q9JMH9_MY18A_MOUSE | Myo18a | Unconventional myosin- K.LHLEGGQVR.N                         | 18.52  | 23.56 | 0.79 | 1.27 |
| Q9JMH9_MY18A_MOUSE | Myo18a | Unconventional myosin- R.LKHVQIPELSELSR@.S                   | 23.47  | 16.44 | 1.43 | 0.70 |
| Q9JMH9_MY18A_MOUSE | Myo18a | Unconventional myosin- R.LPALVPPPPALR.E                      | 23.47  | 60.15 | 1.24 | 0.81 |
| Q9JMH9_MY18A_MOUSE | Myo18a | Unconventional myosin- K.LQALQSQVEFLEQSMVDK.S                | 10.95  | 16.14 | 0.68 | 1.47 |
| Q9JMH9_MY18A_MOUSE | Myo18a | Unconventional myosin- R.LQQLLEDKIM*EVEQQR.R                 | 39.03  | 25.49 | 1.53 | 0.65 |
| Q9JMH9_MY18A_MOUSE | Myo18a | Unconventional myosin- K.LQVDALIDTIK.R                       | 16.03  | 9.47  | 1.69 | 0.59 |
| Q9JMH9_MY18A_MOUSE | Myo18a | Unconventional myosin- K.LQVDALIDTIK.R.S                     | 60.36  | 43.39 | 1.39 | 0.72 |
| Q9JMH9_MY18A_MOUSE | Myo18a | Unconventional myosin- K.LSTLSDQVNR@.D                       | 50.50  | 32.86 | 1.54 | 0.65 |
| Q9JMH9_MY18A_MOUSE | Myo18a | Unconventional myosin- R.LTAELQDTK#.L                        | 53.20  | 37.96 | 1.40 | 0.71 |
| Q9JMH9_MY18A_MOUSE | Myo18a | Unconventional myosin- R.LVEINGQNVENK#.S                     | 17.60  | 11.39 | 1.54 | 0.65 |
| Q9JMH9_MY18A_MOUSE | Myo18a | Unconventional myosin- R.NKHDEEIQRL@.S                       | 18.65  | 12.63 | 1.48 | 0.68 |
| Q9JMH9_MY18A_MOUSE | Myo18a | Unconventional myosin- K.NKHLEGDSDVSELEDR@VDGVK#.S           | 5.71   | 5.05  | 1.13 | 0.89 |
| Q9JMH9_MY18A_MOUSE | Myo18a | Unconventional myosin- R.NTGESASQLLDAETAER@.L                | 28.55  | 17.10 | 1.67 | 0.60 |
| Q9JMH9_MY18A_MOUSE | Myo18a | Unconventional myosin- R.NYIVVDEK#.R                         | 15.28  | 16.10 | 0.95 | 1.05 |
| Q9JMH9_MY18A_MOUSE | Myo18a | Unconventional myosin- R.QDQSVILVLSGSSGK#.T                  | 19.10  | 10.74 | 1.78 | 0.56 |
| Q9JMH9_MY18A_MOUSE | Myo18a | Unconventional myosin- R.QGPEESLGGEGTK#.L                    | 35.65  | 24.35 | 1.46 | 0.68 |
| Q9JMH9_MY18A_MOUSE | Myo18a | Unconventional myosin- K.QM*EVLLEEYEDKQK.A                   | 18.41  | 8.96  | 1.72 | 0.58 |
| Q9JMH9_MY18A_MOUSE | Myo18a | Unconventional myosin- K.QNPATQNPAPR@.L                      | 24.52  | 17.60 | 1.39 | 0.72 |
| Q9JMH9_MY18A_MOUSE | Myo18a | Unconventional myosin- R.R@EDM*APHIYAAQTYR@.A                | 4.87   | 5.08  | 0.96 | 1.04 |
| Q9JMH9_MY18A_MOUSE | Myo18a | Unconventional myosin- R.RFDSLSQAHETQR.E                     | 39.54  | 23.71 | 1.67 | 0.60 |
| Q9JMH9_MY18A_MOUSE | Myo18a | Unconventional myosin- R.R@FDVLAPLHTK#.K                     | 33.18  | 19.49 | 1.70 | 0.59 |
| Q9JMH9_MY18A_MOUSE | Myo18a | Unconventional myosin- K.R@LENLASR@.L                        | 54.77  | 34.04 | 1.61 | 0.62 |
| Q9JMH9_MY18A_MOUSE | Myo18a | Unconventional myosin- R.R@PTGDFGFSLR@.R                     | 24.26  | 18.73 | 1.29 | 0.77 |
| Q9JMH9_MY18A_MOUSE | Myo18a | Unconventional myosin- K.SEELSLPEGK#.A                       | 40.77  | 32.03 | 1.27 | 0.79 |
| Q9JMH9_MY18A_MOUSE | Myo18a | Unconventional myosin- R.SLAHADEAR.G                         | 15.93  | 8.12  | 1.96 | 0.51 |
| Q9JMH9_MY18A_MOUSE | Myo18a | Unconventional myosin- R.SR@VPELVTK#.R                       | 22.82  | 12.35 | 1.85 | 0.54 |
| Q9JMH9_MY18A_MOUSE | Myo18a | Unconventional myosin- K.TALEELQSR@.L                        | 65.99  | 42.45 | 1.55 | 0.64 |
| Q9JMH9_MY18A_MOUSE | Myo18a | Unconventional myosin- K.TEEQAAEEAWYETEK#.V                  | 14.49  | 6.65  | 2.18 | 0.46 |
| Q9JMH9_MY18A_MOUSE | Myo18a | Unconventional myosin- R.TFLQELER@.Y                         | 20.92  | 15.37 | 1.36 | 0.73 |
| Q9JMH9_MY18A_MOUSE | Myo18a | Unconventional myosin- K.TR@LEISNPIPIK#.V                    | 49.46  | 35.44 | 1.40 | 0.72 |
| Q9JMH9_MY18A_MOUSE | Myo18a | Unconventional myosin- K.VK#QEELDEEQAGSIQM*LEQAK#.L          | 31.92  | 21.29 | 1.50 | 0.67 |
| Q9JMH9_MY18A_MOUSE | Myo18a | Unconventional myosin- K.VK#QEELDEEQAGSIQMLEQAK#.L           | 9.03   | 5.91  | 1.53 | 0.65 |
| Q9JMH9_MY18A_MOUSE | Myo18a | Unconventional myosin- R.VK#DHDGAILDVDEEDIEK#.A              | 13.73  | 14.82 | 0.93 | 1.08 |
| Q9JMH9_MY18A_MOUSE | Myo18a | Unconventional myosin- K.VLAISPPEQK#.T                       | 31.03  | 20.31 | 1.53 | 0.65 |
| Q9JMH9_MY18A_MOUSE | Myo18a | Unconventional myosin- R.VVHFAEPGAGTK#.D                     | 10.03  | 6.73  | 1.49 | 0.67 |
| Q9JMH9_MY18A_MOUSE | Myo18a | Unconventional myosin- K.VVSLEALQDISSESQK#.D                 | 7.76   | 5.99  | 1.30 | 0.77 |
| Q9JMH9_MY18A_MOUSE | Myo18a | Unconventional myosin- K.VVSLEALQDISSESQK#DEASLAK#.V         | 72.66  | 58.34 | 1.25 | 0.80 |
| Q9JMH9_MY18A_MOUSE | Myo18a | Unconventional myosin- R.YGASLLHYAGPSLLVSTR@.G               | 30.41  | 26.92 | 1.13 | 0.89 |
| Q9JMH9_MY18A_MOUSE | Myo18a | Unconventional myosin- R.YK#EDNIELAFDLPEVADDSVAAVDQASHLVR@.S | 59.86  | 39.88 | 1.50 | 0.67 |
| P46735_MY01B_MOUSE | Myo1b  | Unconventional myosin- R.IFLTNNLLADQK#.S                     | 14.29  | 11.92 | 1.20 | 0.83 |
| P46735_MY01B_MOUSE | Myo1b  | Unconventional myosin- K.IIIAEVNRK#.I                        | 16.99  | 7.76  | 2.19 | 0.46 |
| P46735_MY01B_MOUSE | Myo1b  | Unconventional myosin- R.SGVFVLENEIPEVEHSFGR@.S              | 22.47  | 8.51  | 2.64 | 0.38 |
| Q9WTI7_MY01C_MOUSE | Myo1c  | Unconventional myosin- R.ASFLLNLR@.R                         | 19.92  | 13.51 | 1.47 | 0.68 |
| Q9WTI7_MY01C_MOUSE | Myo1c  | Unconventional myosin- R.DGIIDTSGSELITK#.A                   | 31.08  | 20.91 | 1.49 | 0.67 |
| Q9WTI7_MY01C_MOUSE | Myo1c  | Unconventional myosin- K.DNYPQSVPR@.L                        | 16.90  | 11.94 | 1.42 | 0.71 |
| Q9WTI7_MY01C_MOUSE | Myo1c  | Unconventional myosin- R.DQAVM*ISGESGAGK#.T                  | 11.09  | 7.93  | 1.40 | 0.72 |
| Q9WTI7_MY01C_MOUSE | Myo1c  | Unconventional myosin- K.GAPVGGHLLSYLLEK#.S                  | 6.74   | 4.28  | 1.57 | 0.63 |
| Q9WTI7_MY01C_MOUSE | Myo1c  | Unconventional myosin- K.GEELLSPLNLEQAAYAR.D                 | 16.37  | 14.63 | 1.12 | 0.89 |
| Q9WTI7_MY01C_MOUSE | Myo1c  | Unconventional myosin- R.LGTEEISPR@.V                        | 36.52  | 30.00 | 1.22 | 0.82 |
| Q9WTI7_MY01C_MOUSE | Myo1c  | Unconventional myosin- R.LLGVGEGTLR@.E                       | 50.25  | 33.16 | 1.52 | 0.66 |
| Q9WTI7_MY01C_MOUSE | Myo1c  | Unconventional myosin- R.NFHYFYQLLEGGEETLR@.R                | 13.19  | 7.51  | 1.76 | 0.57 |
| Q9WTI7_MY01C_MOUSE | Myo1c  | Unconventional myosin- R.NPQSYLVYVKH.G                       | 18.48  | 10.82 | 1.71 | 0.59 |
| Q9WTI7_MY01C_MOUSE | Myo1c  | Unconventional myosin- R.NVLDTSWPTPPALR@.E                   | 8.89   | 5.76  | 1.54 | 0.65 |
| Q9WTI7_MY01C_MOUSE | Myo1c  | Unconventional myosin- R.QLLLTSPASVIVVEDAK#.V                | 25.48  | 18.77 | 1.36 | 0.74 |
| Q9WTI7_MY01C_MOUSE | Myo1c  | Unconventional myosin- R.RFTVLVR@.K                          | 21.52  | 12.90 | 1.67 | 0.60 |
| Q9WTI7_MY01C_MOUSE | Myo1c  | Unconventional myosin- K.LTFATEDSLEVR.R                      | 24.14  | 17.71 | 1.36 | 0.73 |
| Q9WTI7_MY01C_MOUSE | Myo1c  | Unconventional myosin- R.VLQSLGSEPIQAVPVVK#.Y                | 27.62  | 18.14 | 1.52 | 0.66 |
| Q9WTI7_MY01C_MOUSE | Myo1c  | Unconventional myosin- R.VNNININQSGITFAGGPGR@.D              | 9.39   | 7.55  | 1.24 | 0.80 |
| Q9WTI7_MY01C_MOUSE | Myo1c  | Unconventional myosin- K.YLGLM*ENLR.V                        | 49.17  | 6.80  | 7.23 | 0.14 |
| Q9WTI7_MY01C_MOUSE | Myo1c  | Unconventional myosin- K.YM*DVQDFDK#.G                       | 15.52  | 11.80 | 1.32 | 0.76 |
| Q9WTI7_MY01C_MOUSE | Myo1c  | Unconventional myosin- R.ASFLLNLR@.R                         | 150.56 | 64.30 | 2.34 | 0.43 |
| Q9WTI7_MY01C_MOUSE | Myo1c  | Unconventional myosin- K.DAESPSWR.S                          | 18.85  | 8.01  | 2.35 | 0.42 |
| Q9WTI7_MY01C_MOUSE | Myo1c  | Unconventional myosin- R.DGIIDTSGSELITK#.A                   | 132.37 | 63.01 | 2.10 | 0.48 |
| Q9WTI7_MY01C_MOUSE | Myo1c  | Unconventional myosin- R.DLQIYSR@.Q                          | 41.68  | 20.22 | 2.06 | 0.49 |
| Q9WTI7_MY01C_MOUSE | Myo1c  | Unconventional myosin- K.DNYPQSVPR.L                         | 77.28  | 47.75 | 1.62 | 0.62 |
| Q9WTI7_MY01C_MOUSE | Myo1c  | Unconventional myosin- R.DQAVM*ISGESGAGK#.T                  | 38.74  | 17.32 | 2.24 | 0.45 |
| Q9WTI7_MY01C_MOUSE | Myo1c  | Unconventional myosin- K.GAPVGGHLLSYLLEK#.S                  | 17.95  | 9.91  | 1.81 | 0.55 |
| Q9WTI7_MY01C_MOUSE | Myo1c  | Unconventional myosin- K.GEELLSPLNLEQAAYAR.D                 | 88.59  | 46.55 | 1.90 | 0.53 |
| Q9WTI7_MY01C_MOUSE | Myo1c  | Unconventional myosin- K.GEELLSPLNLEQAAYAR@.D                | 38.50  | 19.30 | 2.00 | 0.50 |
| Q9WTI7_MY01C_MOUSE | Myo1c  | Unconventional myosin- R.GVSYFVPHLFAADTVYR@.A                | 84.34  | 46.86 | 1.80 | 0.56 |
| Q9WTI7_MY01C_MOUSE | Myo1c  | Unconventional myosin- R.HLGYK#PEEK#.M                       | 46.80  | 26.02 | 1.80 | 0.56 |
| Q9WTI7_MY01C_MOUSE | Myo1c  | Unconventional myosin- K.JIAK#GEELLSPLNLEQAAYAR@.D           | 15.88  | 8.71  | 1.82 | 0.55 |
| Q9WTI7_MY01C_MOUSE | Myo1c  | Unconventional myosin- K.IQAAWR@.G                           | 51.53  | 18.75 | 2.75 | 0.36 |
| Q9WTI7_MY01C_MOUSE | Myo1c  | Unconventional myosin- R.KHYEAFQR@.Y                         | 27.65  | 21.20 | 1.30 | 0.77 |
| Q9WTI7_MY01C_MOUSE | Myo1c  | Unconventional myosin- R.LGTEEISPR@.V                        | 130.58 | 69.25 | 1.89 | 0.53 |
| Q9WTI7_MY01C_MOUSE | Myo1c  | Unconventional myosin- R.LLGVGEGTLR@.E                       | 142.38 | 74.56 | 1.91 | 0.52 |
| Q9WTI7_MY01C_MOUSE | Myo1c  | Unconventional myosin- R.LLQSNPLVLEAFGNAK#.T                 | 106.87 | 54.98 | 1.94 | 0.51 |
| Q9WTI7_MY01C_MOUSE | Myo1c  | Unconventional myosin- R.NFHYFYQLLEGGEETLR@.R                | 19.83  | 10.97 | 1.81 | 0.55 |
| Q9WTI7_MY01C_MOUSE | Myo1c  | Unconventional myosin- K.NNDLLFR@.D                          | 18.71  | 12.51 | 1.49 | 0.67 |
| Q9WTI7_MY01C_MOUSE | Myo1c  | Unconventional myosin- R.NPQSYLVYVKH.G                       | 41.56  | 23.58 | 1.76 | 0.57 |
| Q9WTI7_MY01C_MOUSE | Myo1c  | Unconventional myosin- R.NVLDTSWPTPPALR@.E                   | 45.68  | 31.05 | 1.47 | 0.68 |
| Q9WTI7_MY01C_MOUSE | Myo1c  | Unconventional myosin- K.QK#GDVVLQSDHVIETLTK#.T              | 17.44  | 7.91  | 2.20 | 0.45 |
| Q9WTI7_MY01C_MOUSE | Myo1c  | Unconventional myosin- R.QLLLTSPASVIVVEDAK#.V                | 114.11 | 54.81 | 2.08 | 0.48 |
| Q9WTI7_MY01C_MOUSE | Myo1c  | Unconventional myosin- K.SEQEYEAEGIAWEPVQYFNK#.I             | 18.46  | 11.06 | 1.67 | 0.60 |
| Q9WTI7_MY01C_MOUSE | Myo1c  | Unconventional myosin- R.TFTVLVR@.K                          | 62.73  | 29.66 | 2.11 | 0.47 |
| Q9WTI7_MY01C_MOUSE | Myo1c  | Unconventional myosin- K.LTFATEDSLEVR.R                      | 96.57  | 44.08 | 2.19 | 0.46 |
| Q9WTI7_MY01C_MOUSE | Myo1c  | Unconventional myosin- R.VLQSLGSEPIQAVPVVK#.Y                | 146.79 | 75.28 | 1.95 | 0.51 |
| Q9WTI7_MY01C_MOUSE | Myo1c  | Unconventional myosin- R.VNNININQSGITFAGGPGR.D               | 44.20  | 19.97 | 2.21 | 0.45 |
| Q9WTI7_MY01C_MOUSE | Myo1c  | Unconventional myosin- R.VTM*ESALTAR@.D                      | 33.19  | 15.71 | 2.11 | 0.47 |
| Q9WTI7_MY01C_MOUSE | Myo1c  | Unconventional myosin- K.YLGLM*ENLR.V                        | 61.92  | 23.67 | 2.62 | 0.38 |
| Q9WTI7_MY01C_MOUSE | Myo1c  | Unconventional myosin- K.YM*DVQDFDK#.G                       | 56.80  | 35.72 | 1.59 | 0.63 |
| Q5SYD0_MY01D_MOUSE | Myo1d  | Unconventional myosin- R.IGELVGLVNHFK#.S                     | 8.37   | 9.35  | 0.89 | 1.12 |
| Q5SYD0_MY01D_MOUSE | Myo1d  | Unconventional myosin- R.TLFTLEELR@.A                        | 9.83   | 7.43  | 1.32 | 0.76 |
| Q5SYD0_MY01D_MOUSE | Myo1d  | Unconventional myosin- R.VIVVQPPGER@.S                       | 8.45   | 9.39  | 0.90 | 1.11 |
| Q5SYD0_MY01D_MOUSE | Myo1d  | Unconventional myosin- R.AWEGNVLASK#DTPQTSQTFVPVANELK#.R     | 2.99   | 3.54  | 0.84 | 1.18 |
| Q5SYD0_MY01D_MOUSE | Myo1d  | Unconventional myosin- K.HIDYFNQIIVLVEQHK#.G                 | 5.74   | 3.29  | 1.74 | 0.57 |
| Q5SYD0_MY01D_MOUSE | Myo1d  | Unconventional myosin- R.IGELVGLVNHFK#.S                     | 14.19  | 9.44  | 1.50 | 0.67 |
| Q5SYD0_MY01D_MOUSE | Myo1d  | Unconventional myosin- R.TLFTLEELR@.A                        | 14.99  | 7.77  | 1.93 | 0.52 |
| Q5SYD0_MY01D_MOUSE | Myo1d  | Unconventional myosin- R.VIVVQPPGER@.S                       | 24.88  | 14.17 | 1.76 | 0.57 |
| Q5SYD0_MY01D_MOUSE | Myo1d  | Unconventional myosin- K.VTDGM*FLEALNSK#.L                   | 6.17   | 3.47  | 1.78 | 0.56 |
| Q5SYD0_MY01D_MOUSE | Myo1d  | Unconventional myosin- K.VVSDIAELLSTK#.A                     | 39.83  | 25.10 | 1.59 | 0.63 |



|                    |       |                                                          |        |       |      |      |
|--------------------|-------|----------------------------------------------------------|--------|-------|------|------|
| E9Q634_MY01E_MOUSE | Myo1e | Unconventional myosin- K.DIILQSNPLLEAFGNAK.T             | 14.04  | 12.73 | 1.10 | 0.91 |
| E9Q634_MY01E_MOUSE | Myo1e | Unconventional myosin- K.TEFLSLAKR.R                     | 12.61  | 8.70  | 1.45 | 0.69 |
| E9Q634_MY01E_MOUSE | Myo1e | Unconventional myosin- R.VFDLVDISINK#.A                  | 18.41  | 16.55 | 1.11 | 0.90 |
| E9Q634_MY01E_MOUSE | Myo1e | Unconventional myosin- K.YFEIQSPGPEGDGK#.I               | 4.24   | 4.28  | 0.99 | 1.01 |
| E9Q634_MY01E_MOUSE | Myo1e | Unconventional myosin- K.AEQEYVQEGIR@.W                  | 14.43  | 6.19  | 2.33 | 0.43 |
| E9Q634_MY01E_MOUSE | Myo1e | Unconventional myosin- K.DIILQSNPLLEAFGNAK#.T            | 38.50  | 17.31 | 2.22 | 0.45 |
| E9Q634_MY01E_MOUSE | Myo1e | Unconventional myosin- K.ISNFLK#.S                       | 27.43  | 11.13 | 2.47 | 0.41 |
| E9Q634_MY01E_MOUSE | Myo1e | Unconventional myosin- R.SFHFLYQLIEGASPEQK#.Q            | 8.43   | 6.72  | 1.33 | 0.75 |
| E9Q634_MY01E_MOUSE | Myo1e | Unconventional myosin- R.VFDLVDISINK#.A                  | 38.87  | 17.50 | 2.22 | 0.45 |
| E9Q634_MY01E_MOUSE | Myo1e | Unconventional myosin- K.VLQVSDGLPK#.N                   | 22.03  | 13.91 | 1.58 | 0.63 |
| E9Q634_MY01E_MOUSE | Myo1e | Unconventional myosin- K.YFEIQSPGPEGDGK#.I               | 9.81   | 4.86  | 2.02 | 0.49 |
| Q99104_MY05A_MOUSE | Myo5a | Unconventional myosin- R.YNVSQLEWLR@.D                   | 6.02   | 2.06  | 2.93 | 0.34 |
| Q99104_MY05A_MOUSE | Myo5a | Unconventional myosin- K.ETLEPLQAQQLQVK#.K               | 10.93  | 4.14  | 2.64 | 0.38 |
| Q99104_MY05A_MOUSE | Myo5a | Unconventional myosin- K.VLNLNLYPVNFEFER@.V              | 9.42   | 3.90  | 2.41 | 0.41 |
| Q99104_MY05A_MOUSE | Myo5a | Unconventional myosin- K.AISPTSATSSGR@.T                 | 10.75  | 3.43  | 3.14 | 0.32 |
| Q99104_MY05A_MOUSE | Myo5a | Unconventional myosin- K.LTNLEGVYNETEK#.L                | 8.76   | 4.77  | 1.84 | 0.54 |
| Q99104_MY05A_MOUSE | Myo5a | Unconventional myosin- R.NGSIHVSSEGAGK#.T                | 13.20  | 5.47  | 2.41 | 0.41 |
| Q99104_MY05A_MOUSE | Myo5a | Unconventional myosin- K.SAPEVTAPGAPAYR@.V               | 6.65   | 4.17  | 1.60 | 0.63 |
| Q99104_MY05A_MOUSE | Myo5a | Unconventional myosin- K.VLNLNLYPVNFEFER@.V              | 11.09  | 6.39  | 1.73 | 0.58 |
| Q99104_MY05A_MOUSE | Myo5a | Unconventional myosin- R.YFATVSGASSEANVEEK#.V            | 7.76   | 2.24  | 3.47 | 0.29 |
| Q99104_MY05A_MOUSE | Myo5a | Unconventional myosin- R.YQNLLNFEFR@.L                   | 9.00   | 4.99  | 1.80 | 0.55 |
| Q64331_MY06_MOUSE  | Myo6  | Unconventional myosin- R.IVEANPLLEAFGNAK#.T              | 7.72   | 5.16  | 1.50 | 0.67 |
| P97479_MY07A_MOUSE | Myo7a | Unconventional myosin- K.SGQEDFPYIAGAVK#.L               | 8.97   | 6.40  | 1.40 | 0.71 |
| P97479_MY07A_MOUSE | Myo7a | Unconventional myosin- K.TLLTDSATTAR.E                   | 11.27  | 8.27  | 1.36 | 0.73 |
| P97479_MY07A_MOUSE | Myo7a | Unconventional myosin- R.VDSQDEANIR@.S                   | 4.67   | 2.87  | 1.62 | 0.62 |
| P97479_MY07A_MOUSE | Myo7a | Unconventional myosin- K.VYFPDDTDEAFVESSTK#.A            | 4.85   | 2.29  | 2.12 | 0.47 |
| Q9QY06_MY09B_MOUSE | Myo9b | Unconventional myosin- K.FLDEFLLNK#.V                    | 9.54   | 3.40  | 2.81 | 0.36 |
| Q9QY06_MY09B_MOUSE | Myo9b | Unconventional myosin- K.LILPYLSSEAITAR@.D               | 9.65   | 4.81  | 2.01 | 0.50 |
| Q9QY06_MY09B_MOUSE | Myo9b | Unconventional myosin- R.TILGAGFVLEAFGNAK#.T             | 9.85   | 4.67  | 2.11 | 0.47 |
| Q9QY06_MY09B_MOUSE | Myo9b | Unconventional myosin- K.TPIESLFIATER@.F                 | 29.35  | 11.96 | 2.46 | 0.41 |
| Q692N7_MY0F_MOUSE  | Myof  | Myoferlin OS=Mus muscl. R.AEDIPQM*DDAFSQTVK#.E           | 9.08   | 3.16  | 2.87 | 0.35 |
| Q692N7_MY0F_MOUSE  | Myof  | Myoferlin OS=Mus muscl. K.ANVTLDTQIR@.K                  | 11.60  | 2.56  | 4.52 | 0.22 |
| Q692N7_MY0F_MOUSE  | Myof  | Myoferlin OS=Mus muscl. K.DLTQTASSTAR@.A                 | 12.34  | 5.40  | 2.28 | 0.44 |
| Q692N7_MY0F_MOUSE  | Myof  | Myoferlin OS=Mus muscl. K.GPSGVSEAGLAR@.R                | 17.05  | 6.03  | 2.83 | 0.35 |
| Q692N7_MY0F_MOUSE  | Myof  | Myoferlin OS=Mus muscl. R.IFVNLTFLEK#.K                  | 13.54  | 1.93  | 7.01 | 0.14 |
| Q692N7_MY0F_MOUSE  | Myof  | Myoferlin OS=Mus muscl. K.IPANQLAEVWLK#.L                | 28.53  | 10.60 | 2.69 | 0.37 |
| Q692N7_MY0F_MOUSE  | Myof  | Myoferlin OS=Mus muscl. R.IYPLPDDPVPAPPR@.Q              | 5.32   | 2.39  | 2.23 | 0.45 |
| Q692N7_MY0F_MOUSE  | Myof  | Myoferlin OS=Mus muscl. K.K#LEPISDDLVLVEK#.Y             | 17.08  | 3.66  | 4.67 | 0.21 |
| Q692N7_MY0F_MOUSE  | Myof  | Myoferlin OS=Mus muscl. K.LIDEVIEDTR@.Y                  | 14.39  | 3.45  | 4.18 | 0.24 |
| Q692N7_MY0F_MOUSE  | Myof  | Myoferlin OS=Mus muscl. K.LIDEVIEDTR@YTLPVTEGK#.A        | 11.93  | 2.45  | 4.88 | 0.21 |
| Q692N7_MY0F_MOUSE  | Myof  | Myoferlin OS=Mus muscl. K.LNSEDTITPK#.L                  | 19.28  | 2.99  | 6.61 | 0.15 |
| Q692N7_MY0F_MOUSE  | Myof  | Myoferlin OS=Mus muscl. K.NLVDPFVVEFAGK#.M               | 20.18  | 8.77  | 2.30 | 0.43 |
| Q692N7_MY0F_MOUSE  | Myof  | Myoferlin OS=Mus muscl. R.SLLEADAGHTFEFVQENNR@.Y         | 11.94  | 3.73  | 3.20 | 0.31 |
| Q692N7_MY0F_MOUSE  | Myof  | Myoferlin OS=Mus muscl. R.VIVESATINPK#.T                 | 17.42  | 4.35  | 4.01 | 0.25 |
| Q692N7_MY0F_MOUSE  | Myof  | Myoferlin OS=Mus muscl. K.WLLNDEPDTSSGAK#.G              | 6.01   | 5.28  | 1.14 | 0.88 |
| P12979_MY0G_MOUSE  | Myog  | Myogenin OS=Mus muscl. K.VNFAFEALK#.R                    | 32.77  | 15.77 | 2.08 | 0.48 |
| Q9CQ25_MZT2_MOUSE  | Mzt2  | Mitotic-spindle organizir R.GGPILGNVTSIAER@.G            | 22.79  | 35.80 | 0.64 | 1.57 |
| Q9CQ25_MZT2_MOUSE  | Mzt2  | Mitotic-spindle organizir R.LASDPQSDVPSLSSTSETR@.G       | 6.93   | 2.67  | 2.60 | 0.39 |
| Q8CES0_NAA30_MOUSE | Naa30 | N-alpha-acetyltransferas K.VLSAAEAAPADGASK#.V            | 3.67   | 1.29  | 2.85 | 0.35 |
| Q6PH08_NAA35_MOUSE | Naa35 | N-alpha-acetyltransferas K.FELDEQVR@.G                   | 7.73   | 3.17  | 2.44 | 0.41 |
| Q8VE10_NAA40_MOUSE | Naa40 | N-alpha-acetyltransferas R.LGDPLEAFVFK#.K                | 3.21   | 13.16 | 0.24 | 4.09 |
| Q8VE10_NAA40_MOUSE | Naa40 | N-alpha-acetyltransferas R.VSGLEPATVDWAFDLTK.T           | 6.06   | 6.50  | 0.47 | 2.13 |
| Q8VE10_NAA40_MOUSE | Naa40 | N-alpha-acetyltransferas R.LGDPLEAFVFK#.K                | 4.06   | 22.36 | 0.18 | 5.51 |
| Q8VE10_NAA40_MOUSE | Naa40 | N-alpha-acetyltransferas R.VSGLEPATVDWAFDLTK.T           | 4.66   | 4.76  | 0.31 | 3.26 |
| Q61122_NAB1_MOUSE  | Nab1  | NGFI-A-binding protein 1 R.R@LTAGLYR@.Q                  | 13.61  | 3.87  | 3.52 | 0.28 |
| Q61122_NAB1_MOUSE  | Nab1  | NGFI-A-binding protein 1 K.SEVGSALQSVSDSR@.L             | 21.28  | 5.77  | 3.69 | 0.27 |
| Q61122_NAB1_MOUSE  | Nab1  | NGFI-A-binding protein 1 R.IK#IEDGFPDFQESVPTLFQQR@.A     | 8.83   | 2.30  | 3.84 | 0.26 |
| Q61122_NAB1_MOUSE  | Nab1  | NGFI-A-binding protein 1 R.TLGLQLYR@.I                   | 79.79  | 15.54 | 5.13 | 0.19 |
| Q61127_NAB2_MOUSE  | Nab2  | NGFI-A-binding protein 2 R.DNTLLR@.R                     | 41.54  | 10.89 | 3.81 | 0.26 |
| Q61127_NAB2_MOUSE  | Nab2  | NGFI-A-binding protein 2 R.ESTYLSLKR.G                   | 23.08  | 9.63  | 2.40 | 0.42 |
| Q61127_NAB2_MOUSE  | Nab2  | NGFI-A-binding protein 2 R.M*VVESVER@.I                  | 44.33  | 11.41 | 3.88 | 0.26 |
| Q61127_NAB2_MOUSE  | Nab2  | NGFI-A-binding protein 2 K.SPLEGK#.L                     | 15.98  | 4.96  | 3.22 | 0.31 |
| Q61127_NAB2_MOUSE  | Nab2  | NGFI-A-binding protein 2 R.DNTLLR@.R                     | 36.79  | 8.23  | 4.47 | 0.22 |
| Q61127_NAB2_MOUSE  | Nab2  | NGFI-A-binding protein 2 R.ESTYLSLKR.G                   | 31.05  | 5.01  | 6.20 | 0.16 |
| Q61127_NAB2_MOUSE  | Nab2  | NGFI-A-binding protein 2 R.GDGTGELSLK#.L                 | 50.30  | 9.26  | 5.43 | 0.18 |
| Q61127_NAB2_MOUSE  | Nab2  | NGFI-A-binding protein 2 R.HILQQLM*DEGLR@.L              | 10.56  | 2.17  | 4.85 | 0.21 |
| Q61127_NAB2_MOUSE  | Nab2  | NGFI-A-binding protein 2 K.LSPLPGPGGADPR@.I              | 22.26  | 6.22  | 3.58 | 0.28 |
| Q61127_NAB2_MOUSE  | Nab2  | NGFI-A-binding protein 2 R.M*VVESVER@.I                  | 59.51  | 9.62  | 6.19 | 0.16 |
| Q61127_NAB2_MOUSE  | Nab2  | NGFI-A-binding protein 2 R.R@VELFLSR@.Q                  | 62.40  | 7.36  | 8.48 | 0.12 |
| Q61127_NAB2_MOUSE  | Nab2  | NGFI-A-binding protein 2 R.TPQPR@FK.A                    | 6.46   | 2.86  | 2.26 | 0.44 |
| Q61127_NAB2_MOUSE  | Nab2  | NGFI-A-binding protein 2 R.VELFLSR@.Q                    | 14.84  | 2.59  | 5.72 | 0.17 |
| P70670_NACAM_MOUSE | Naca  | Nascent polypeptide-ass K.DIELVM*SQANVSR@.A              | 10.89  | 5.78  | 1.88 | 0.53 |
| P70670_NACAM_MOUSE | Naca  | Nascent polypeptide-ass K.DIELVMSQANVSR@.A               | 8.46   | 4.66  | 1.82 | 0.55 |
| P70670_NACAM_MOUSE | Naca  | Nascent polypeptide-ass K.IEDLSQQAALAAEK#.F              | 38.27  | 19.25 | 2.03 | 0.49 |
| P70670_NACAM_MOUSE | Naca  | Nascent polypeptide-ass K.SPASDTYIVFGEAK#.I              | 42.63  | 27.45 | 1.55 | 0.64 |
| Q7TS28_NACC1_MOUSE | Nacc1 | Nucleus accumbens-asso R.AVLAASSYFR@.D                   | 10.16  | 6.23  | 1.63 | 0.61 |
| Q7TS28_NACC1_MOUSE | Nacc1 | Nucleus accumbens-asso R.AVLAASSYFR@.D                   | 12.62  | 3.63  | 3.47 | 0.29 |
| Q7TS28_NACC1_MOUSE | Nacc1 | Nucleus accumbens-asso R.AVLAASSYFR@.D                   | 12.75  | 4.64  | 2.75 | 0.36 |
| Q7TS28_NACC1_MOUSE | Nacc1 | Nucleus accumbens-asso R.LLASFFDR@.N                     | 5.96   | 6.03  | 0.99 | 1.01 |
| Q7TS28_NACC1_MOUSE | Nacc1 | Nucleus accumbens-asso K.GTEFFLK#.V                      | 10.71  | 4.20  | 2.55 | 0.39 |
| Q99KQ4_NAMPT_MOUSE | Nampt | Nicotinamide phosphori R.GVSSQETAGIGASAHVNFK#.G          | 76.54  | 60.41 | 1.27 | 0.79 |
| Q99KQ4_NAMPT_MOUSE | Nampt | Nicotinamide phosphori R.GWNVILEK#.Y                     | 38.32  | 13.38 | 2.86 | 0.35 |
| Q99KQ4_NAMPT_MOUSE | Nampt | Nicotinamide phosphori K.LHDFGYR@.G                      | 22.16  | 8.77  | 2.53 | 0.40 |
| Q99KQ4_NAMPT_MOUSE | Nampt | Nicotinamide phosphori K.NAQLNIEQDVAPH.-                 | 65.42  | 65.42 | 1.00 | 1.00 |
| Q99KQ4_NAMPT_MOUSE | Nampt | Nicotinamide phosphori R.STEAPLIR@PDSGNPLDVLK#.V         | 126.99 | 58.25 | 2.18 | 0.46 |
| Q99KQ4_NAMPT_MOUSE | Nampt | Nicotinamide phosphori R.VIQGDGVDINTLQIEVGM*#K#.Q        | 17.44  | 9.77  | 1.78 | 0.56 |
| Q99KQ4_NAMPT_MOUSE | Nampt | Nicotinamide phosphori R.VIQGDGVDINTLQIEVGM*#K#.Q        | 39.43  | 14.92 | 2.64 | 0.38 |
| Q99KQ4_NAMPT_MOUSE | Nampt | Nicotinamide phosphori R.VIQGDGVDINTLQIEVGM*#K#.Q        | 3.87   | 1.75  | 2.21 | 0.45 |
| Q99KQ4_NAMPT_MOUSE | Nampt | Nicotinamide phosphori K.VK#YEETVYGLQYLIN#.Y             | 22.35  | 12.09 | 1.85 | 0.54 |
| Q99KQ4_NAMPT_MOUSE | Nampt | Nicotinamide phosphori K.VLDILGK#.K                      | 64.05  | 29.90 | 2.14 | 0.47 |
| Q99KQ4_NAMPT_MOUSE | Nampt | Nicotinamide phosphori K.WSIENVSFSGGALLQK#.L             | 16.24  | 7.82  | 2.08 | 0.48 |
| Q99KQ4_NAMPT_MOUSE | Nampt | Nicotinamide phosphori K.YDGHLPVVK#.A                    | 56.04  | 24.64 | 2.27 | 0.44 |
| Q99KQ4_NAMPT_MOUSE | Nampt | Nicotinamide phosphori K.YEETVYGLQYLIN#.Y                | 28.55  | 9.69  | 2.95 | 0.34 |
| Q99KQ4_NAMPT_MOUSE | Nampt | Nicotinamide phosphori K.YLLETSGNDGLVYK#.L               | 67.99  | 27.14 | 2.51 | 0.40 |
| Q99KQ4_NAMPT_MOUSE | Nampt | Nicotinamide phosphori R.STEAPLIRPDSGNPLDVLK#.V          | 85.46  | 29.84 | 2.86 | 0.35 |
| Q99KQ4_NAMPT_MOUSE | Nampt | Nicotinamide phosphori K.SYSFDEVR@K#.N                   | 9.85   | 1.33  | 7.39 | 0.14 |
| Q99KQ4_NAMPT_MOUSE | Nampt | Nicotinamide phosphori R.TPAGNFVLEEKGHGDLLEYGHLLHTVFK#.N | 14.96  | 6.88  | 2.17 | 0.46 |
| Q99KQ4_NAMPT_MOUSE | Nampt | Nicotinamide phosphori R.VIQGDGVDINTLQIEVGM*#K#.Q        | 27.24  | 7.00  | 3.89 | 0.26 |
| Q99KQ4_NAMPT_MOUSE | Nampt | Nicotinamide phosphori K.NAQLNIEQDVAPH.-                 | 11.21  | 11.21 | 1.00 | 1.00 |
| Q99KQ4_NAMPT_MOUSE | Nampt | Nicotinamide phosphori R.STEAPLIR@PDSGNPLDVLK#.V         | 29.20  | 10.86 | 2.69 | 0.37 |
| Q99KQ4_NAMPT_MOUSE | Nampt | Nicotinamide phosphori R.VIQGDGVDINTLQIEVGM*#K#.Q        | 7.41   | 7.76  | 0.95 | 1.05 |
| Q99KQ4_NAMPT_MOUSE | Nampt | Nicotinamide phosphori K.WSIENVSFSGGALLQK#.L             | 5.87   | 2.33  | 2.52 | 0.40 |
| Q99KQ4_NAMPT_MOUSE | Nampt | Nicotinamide phosphori K.YLLETSGNDGLVYK#.L               | 9.42   | 5.79  | 1.63 | 0.62 |

|                     |        |                          |                                   |       |       |      |      |
|---------------------|--------|--------------------------|-----------------------------------|-------|-------|------|------|
| Q99K04_NAMPT_MOUSE  | Nampt  | Nicotinamide phosphori   | K.NAQLNIEQDVAPH.-                 | 17.87 | 17.87 | 1.00 | 1.00 |
| Q99K04_NAMPT_MOUSE  | Nampt  | Nicotinamide phosphori   | R.STEAPLIR@PDSGNPLDVLK#.V         | 36.34 | 8.07  | 4.50 | 0.22 |
| Q99K04_NAMPT_MOUSE  | Nampt  | Nicotinamide phosphori   | R.VIQDGDVINTLQIEVEGM*#K.Q         | 21.23 | 5.30  | 4.00 | 0.25 |
| Q99K04_NAMPT_MOUSE  | Nampt  | Nicotinamide phosphori   | K.YDGHLPVEVK#.A                   | 24.63 | 7.31  | 3.37 | 0.30 |
| P28656_NP111_MOUSE  | Nap111 | Nucleosome assembly pr   | R.LDGLVDVTP*GGVIESL.PK#.V         | 14.18 | 10.09 | 1.41 | 0.71 |
| Q9DB05_SNAI_MOUSE   | Napa   | Alpha-soluble NSF attach | K.AIDIEQVQTSAM*DSPLLK#.Y          | 5.95  | 4.92  | 1.21 | 0.83 |
| Q9DB05_SNAI_MOUSE   | Napa   | Alpha-soluble NSF attach | R.AIEIYDTM*GR@.F                  | 21.44 | 14.80 | 1.45 | 0.69 |
| Q9DB05_SNAI_MOUSE   | Napa   | Alpha-soluble NSF attach | K.HHISIAEIVTELVDVEK#.A            | 8.44  | 21.49 | 0.39 | 2.55 |
| Q9DB05_SNAI_MOUSE   | Napa   | Alpha-soluble NSF attach | K.HLLEAHEEQVDSYTEAVK#EYDSISR@.L   | 2.42  | 3.63  | 0.67 | 1.50 |
| Q9DB05_SNAI_MOUSE   | Napa   | Alpha-soluble NSF attach | R.LDQWLVTM*LLR@.J                 | 13.75 | 7.91  | 1.74 | 0.58 |
| Q9DB05_SNAI_MOUSE   | Napa   | Alpha-soluble NSF attach | R.LDQWLVTMLLR@.J                  | 6.05  | 4.15  | 1.46 | 0.69 |
| Q9DB05_SNAI_MOUSE   | Napa   | Alpha-soluble NSF attach | K.LLEAHEEQVDSYTEAVK#.E            | 8.74  | 9.08  | 0.96 | 1.04 |
| Q9DB05_SNAI_MOUSE   | Napa   | Alpha-soluble NSF attach | K.QAEAM*ALLAEAEK.K                | 10.51 | 5.99  | 1.75 | 0.57 |
| Q9DB05_SNAI_MOUSE   | Napa   | Alpha-soluble NSF attach | K.TIQDDEDLR.-                     | 59.10 | 42.25 | 1.40 | 0.71 |
| Q9DB05_SNAI_MOUSE   | Napa   | Alpha-soluble NSF attach | K.VAGVAAQLEQYQK#.A                | 29.21 | 13.77 | 2.12 | 0.47 |
| Q99MD9_NASP_MOUSE   | Nasp   | Nuclear autoantigenic sp | K.IAANETTPERDEQM*#K.E             | 1.67  | 9.79  | 0.17 | 5.86 |
| Q8K224_NAT10_MOUSE  | Nat10  | N-acetyltransferase 10 O | K.FIEGSEK*#T                      | 4.99  | 2.07  | 2.41 | 0.41 |
| Q8K224_NAT10_MOUSE  | Nat10  | N-acetyltransferase 10 O | R.QQSACSQVSTTAENK#.T              | 6.66  | 3.17  | 2.10 | 0.48 |
| Q9R207_NBN_MOUSE    | Nbn    | Nibrin OS=Mus musculus   | K.LLPAAGAAPGEPYR@.L               | 4.68  | 3.97  | 1.18 | 0.85 |
| P97432_NBR1_MOUSE   | Nbr1   | Next to BRCA1 gene 1 prc | K.FMWGNLTASTEK.K                  | 1.90  | 4.95  | 0.38 | 2.60 |
| P13595_NCAMI_MOUSE  | Ncam1  | Neural cell adhesion mol | R.FIVLSNNYQIR@.G                  | 5.81  | 5.78  | 1.00 | 1.00 |
| P13595_NCAMI_MOUSE  | Ncam1  | Neural cell adhesion mol | K.GLGEISATEFK#.T                  | 10.44 | 8.26  | 1.26 | 0.79 |
| P13595_NCAMI_MOUSE  | Ncam1  | Neural cell adhesion mol | K.LEGQM*GDEGNSK#.V                | 7.94  | 6.18  | 1.29 | 0.78 |
| Q8K224_CND1_MOUSE   | Ncapd2 | Condensin complex subu   | K.AIIDFEQK#.L                     | 11.05 | 5.59  | 1.98 | 0.51 |
| Q8K224_CND1_MOUSE   | Ncapd2 | Condensin complex subu   | R.DQFLDLQAHGHDVNSFVR@.S           | 6.37  | 1.95  | 3.26 | 0.31 |
| Q8K224_CND1_MOUSE   | Ncapd2 | Condensin complex subu   | R.EAVLNAYR@.Q                     | 18.36 | 5.26  | 3.49 | 0.29 |
| Q8K224_CND1_MOUSE   | Ncapd2 | Condensin complex subu   | K.GFAAFLTELAER@.I                 | 14.75 | 4.46  | 3.31 | 0.30 |
| Q8K224_CND1_MOUSE   | Ncapd2 | Condensin complex subu   | R.GK#EIVGSNLDALVR@.V              | 9.78  | 8.93  | 1.10 | 0.91 |
| Q8K224_CND1_MOUSE   | Ncapd2 | Condensin complex subu   | R.GM*DGIEFFETGOGGSQR@.A           | 5.65  | 2.17  | 2.60 | 0.38 |
| Q8K224_CND1_MOUSE   | Ncapd2 | Condensin complex subu   | K.GNAINYLDPDIISR@.L               | 11.27 | 4.95  | 2.27 | 0.44 |
| Q8K224_CND1_MOUSE   | Ncapd2 | Condensin complex subu   | K.ITEAIGSK#.M                     | 13.87 | 5.85  | 2.37 | 0.42 |
| Q8K224_CND1_MOUSE   | Ncapd2 | Condensin complex subu   | K.LPQEGDQJADAETAEEVK#.G           | 8.05  | 2.76  | 2.91 | 0.34 |
| Q8K224_CND1_MOUSE   | Ncapd2 | Condensin complex subu   | R.VLQLFAR@.I                      | 11.59 | 4.21  | 2.75 | 0.36 |
| Q8K224_CND1_MOUSE   | Ncapd2 | Condensin complex subu   | K.AIIDFEQK#.L                     | 36.95 | 19.15 | 1.93 | 0.52 |
| Q8K224_CND1_MOUSE   | Ncapd2 | Condensin complex subu   | K.KDQTESLVK#.L                    | 16.07 | 9.13  | 1.76 | 0.57 |
| Q8K224_CND1_MOUSE   | Ncapd2 | Condensin complex subu   | R.DQFLDLQAHGHDVNSFVR@.S           | 19.78 | 10.51 | 1.88 | 0.53 |
| Q8K224_CND1_MOUSE   | Ncapd2 | Condensin complex subu   | K.DSPSVPEEGSQSNDELVK#.Q           | 8.95  | 4.51  | 1.99 | 0.50 |
| Q8K224_CND1_MOUSE   | Ncapd2 | Condensin complex subu   | K.EAIAHLLGVVALVR@.Y               | 38.76 | 16.50 | 2.35 | 0.43 |
| Q8K224_CND1_MOUSE   | Ncapd2 | Condensin complex subu   | R.EAVLNAYR@.Q                     | 35.17 | 13.65 | 2.58 | 0.39 |
| Q8K224_CND1_MOUSE   | Ncapd2 | Condensin complex subu   | R.FPNLVDPPWPHLYAR@.L              | 20.25 | 13.63 | 1.49 | 0.67 |
| Q8K224_CND1_MOUSE   | Ncapd2 | Condensin complex subu   | K.GFAAFLTELAER@.I                 | 16.42 | 19.14 | 2.41 | 0.41 |
| Q8K224_CND1_MOUSE   | Ncapd2 | Condensin complex subu   | K.GFAHDPDWIPFK#.E                 | 11.38 | 7.41  | 1.54 | 0.65 |
| Q8K224_CND1_MOUSE   | Ncapd2 | Condensin complex subu   | R.GK#EIVGSNLDALVR@.V              | 46.59 | 24.85 | 1.87 | 0.53 |
| Q8K224_CND1_MOUSE   | Ncapd2 | Condensin complex subu   | R.GM*DGIEFFETGOGGSQR@.A           | 16.12 | 7.02  | 2.30 | 0.44 |
| Q8K224_CND1_MOUSE   | Ncapd2 | Condensin complex subu   | K.GNAINYLDPDIISR@.L               | 42.29 | 22.76 | 1.86 | 0.54 |
| Q8K224_CND1_MOUSE   | Ncapd2 | Condensin complex subu   | K.ITEAIGSK#.M                     | 46.71 | 17.47 | 2.67 | 0.37 |
| Q8K224_CND1_MOUSE   | Ncapd2 | Condensin complex subu   | R.LLESFENM*TSQSLDLDIGGK#.G        | 15.00 | 5.79  | 2.59 | 0.39 |
| Q8K224_CND1_MOUSE   | Ncapd2 | Condensin complex subu   | R.LLFTM*LEK#.S                    | 29.38 | 10.98 | 2.67 | 0.37 |
| Q8K224_CND1_MOUSE   | Ncapd2 | Condensin complex subu   | K.LPQEGDQJADAETAEEVK#.G           | 41.61 | 20.56 | 2.02 | 0.49 |
| Q8K224_CND1_MOUSE   | Ncapd2 | Condensin complex subu   | R.M*LPILWVSK#.E                   | 20.00 | 7.44  | 2.69 | 0.37 |
| Q8K224_CND1_MOUSE   | Ncapd2 | Condensin complex subu   | K.QLLSVITK#.D                     | 23.88 | 10.78 | 2.22 | 0.45 |
| Q8K224_CND1_MOUSE   | Ncapd2 | Condensin complex subu   | R.SAAATAALPEEEDWAM*LPELK#.S       | 4.18  | 2.24  | 1.86 | 0.54 |
| Q8K224_CND1_MOUSE   | Ncapd2 | Condensin complex subu   | K.SGVGVQYVVR.E                    | 34.25 | 14.53 | 2.36 | 0.42 |
| Q8K224_CND1_MOUSE   | Ncapd2 | Condensin complex subu   | R.SIEPGLK#EDTLEFLK#.K             | 19.00 | 9.57  | 1.99 | 0.50 |
| Q8K224_CND1_MOUSE   | Ncapd2 | Condensin complex subu   | K.STLQQLK#.L                      | 47.71 | 21.79 | 2.19 | 0.46 |
| Q8K224_CND1_MOUSE   | Ncapd2 | Condensin complex subu   | K.VKHGQVSEM*AVLLIDPVPQJAAALAK#.N  | 12.92 | 4.44  | 2.91 | 0.34 |
| Q8K224_CND1_MOUSE   | Ncapd2 | Condensin complex subu   | R.VLQLFAR@.I                      | 39.81 | 18.21 | 2.19 | 0.46 |
| Q6ZQK0_CND3_MOUSE   | Ncapd3 | Condensin-2 complex su   | K.DLEEDVALANVVMQEAQM*#K.I         | 8.15  | 4.42  | 1.84 | 0.54 |
| Q6ZQK0_CND3_MOUSE   | Ncapd3 | Condensin-2 complex su   | R.ELEVSEDAVVR@.N                  | 11.26 | 4.56  | 2.47 | 0.41 |
| Q6ZQK0_CND3_MOUSE   | Ncapd3 | Condensin-2 complex su   | K.FFVQEIFDR@.C                    | 6.75  | 1.38  | 4.90 | 0.20 |
| Q6ZQK0_CND3_MOUSE   | Ncapd3 | Condensin-2 complex su   | K.TVLEEQGLLK#.Q                   | 21.60 | 4.01  | 5.39 | 0.19 |
| E9PWG6_E9PWG6_MOUSE | Ncapg  | Protein Ncapg OS=Mus m   | R.ALSLVELSSNVTK#.D                | 17.63 | 7.55  | 2.34 | 0.43 |
| E9PWG6_E9PWG6_MOUSE | Ncapg  | Protein Ncapg OS=Mus m   | R.APVNVVDPSPDTR@.K                | 33.87 | 12.99 | 2.61 | 0.38 |
| E9PWG6_E9PWG6_MOUSE | Ncapg  | Protein Ncapg OS=Mus m   | R.EFIFQQLILIM*#K.S                | 17.89 | 7.53  | 2.38 | 0.42 |
| E9PWG6_E9PWG6_MOUSE | Ncapg  | Protein Ncapg OS=Mus m   | R.IQVTEIIEIR@.A                   | 34.99 | 12.17 | 2.88 | 0.35 |
| E9PWG6_E9PWG6_MOUSE | Ncapg  | Protein Ncapg OS=Mus m   | R.KLAYQVLAEK#.V                   | 3.56  | 19.10 | 0.19 | 5.36 |
| E9PWG6_E9PWG6_MOUSE | Ncapg  | Protein Ncapg OS=Mus m   | K.LAYQVLAEK#.V                    | 17.00 | 8.61  | 1.97 | 0.51 |
| E9PWG6_E9PWG6_MOUSE | Ncapg  | Protein Ncapg OS=Mus m   | R.LILLWYNPVTEEDVR@.L              | 18.70 | 10.97 | 1.70 | 0.59 |
| E9PWG6_E9PWG6_MOUSE | Ncapg  | Protein Ncapg OS=Mus m   | R.LLSDFLDSEVSELR@.T               | 55.28 | 19.36 | 2.86 | 0.35 |
| E9PWG6_E9PWG6_MOUSE | Ncapg  | Protein Ncapg OS=Mus m   | K.LNLAELFNEDTS.-                  | 10.19 | 10.19 | 1.00 | 1.00 |
| E9PWG6_E9PWG6_MOUSE | Ncapg  | Protein Ncapg OS=Mus m   | K.LVVALSRL@.T                     | 35.76 | 14.66 | 2.44 | 0.41 |
| E9PWG6_E9PWG6_MOUSE | Ncapg  | Protein Ncapg OS=Mus m   | K.SKHLNLAELFNEDTS.-               | 16.21 | 8.21  | 1.97 | 0.51 |
| E9PWG6_E9PWG6_MOUSE | Ncapg  | Protein Ncapg OS=Mus m   | K.SLDTSEEGGR.K                    | 20.21 | 5.94  | 3.40 | 0.29 |
| E9PWG6_E9PWG6_MOUSE | Ncapg  | Protein Ncapg OS=Mus m   | K.AIIDQLM*#MGIEPFK#.T             | 8.48  | 4.24  | 2.00 | 0.50 |
| E9PWG6_E9PWG6_MOUSE | Ncapg  | Protein Ncapg OS=Mus m   | R.ALSLVELSSNVTK#.D                | 15.46 | 7.76  | 1.99 | 0.50 |
| E9PWG6_E9PWG6_MOUSE | Ncapg  | Protein Ncapg OS=Mus m   | R.APVNVVDPSPDTR@.K                | 36.01 | 11.33 | 3.18 | 0.31 |
| E9PWG6_E9PWG6_MOUSE | Ncapg  | Protein Ncapg OS=Mus m   | R.EFIFQQLILIM*#K.S                | 16.72 | 5.29  | 3.16 | 0.32 |
| E9PWG6_E9PWG6_MOUSE | Ncapg  | Protein Ncapg OS=Mus m   | R.ESDPGVTVQDVTNTAVLQNEVYM*TPVR@.D | 6.88  | 2.39  | 2.87 | 0.35 |
| E9PWG6_E9PWG6_MOUSE | Ncapg  | Protein Ncapg OS=Mus m   | R.FTEGNILEFLHR@.L                 | 35.90 | 13.66 | 2.63 | 0.38 |
| E9PWG6_E9PWG6_MOUSE | Ncapg  | Protein Ncapg OS=Mus m   | K.HLLQGWLR@.F                     | 9.77  | 4.20  | 2.33 | 0.43 |
| E9PWG6_E9PWG6_MOUSE | Ncapg  | Protein Ncapg OS=Mus m   | R.IQVTEIIEIR@.A                   | 20.08 | 7.03  | 2.86 | 0.35 |
| E9PWG6_E9PWG6_MOUSE | Ncapg  | Protein Ncapg OS=Mus m   | R.KLAYQVLAEK#.V                   | 8.89  | 2.73  | 3.26 | 0.31 |
| E9PWG6_E9PWG6_MOUSE | Ncapg  | Protein Ncapg OS=Mus m   | K.LAYQVLAEK#.V                    | 16.22 | 6.03  | 2.69 | 0.37 |
| E9PWG6_E9PWG6_MOUSE | Ncapg  | Protein Ncapg OS=Mus m   | R.LLSDFLDSEVSELR@.T               | 74.73 | 24.65 | 3.03 | 0.33 |
| E9PWG6_E9PWG6_MOUSE | Ncapg  | Protein Ncapg OS=Mus m   | K.LNLAELFNEDTS.-                  | 13.18 | 13.18 | 1.00 | 1.00 |
| E9PWG6_E9PWG6_MOUSE | Ncapg  | Protein Ncapg OS=Mus m   | K.LVVALSRL@.T                     | 37.88 | 10.82 | 3.50 | 0.29 |
| E9PWG6_E9PWG6_MOUSE | Ncapg  | Protein Ncapg OS=Mus m   | K.SKHLNLAELFNEDTS.-               | 18.07 | 5.69  | 3.18 | 0.31 |
| E9PWG6_E9PWG6_MOUSE | Ncapg  | Protein Ncapg OS=Mus m   | K.SLDTSEEGGR@.K                   | 14.14 | 4.03  | 3.51 | 0.29 |
| E9PWG6_E9PWG6_MOUSE | Ncapg  | Protein Ncapg OS=Mus m   | R.TGAEEGLAK#.L                    | 14.29 | 6.97  | 2.05 | 0.49 |
| E9PWG6_E9PWG6_MOUSE | Ncapg  | Protein Ncapg OS=Mus m   | R.VLLQLQGLNDR.S                   | 64.86 | 21.94 | 2.96 | 0.34 |
| Q6DFV1_CNDG2_MOUSE  | Ncapg2 | Condensin-2 complex su   | K.FAAVLPYLK#.V                    | 13.87 | 6.89  | 2.01 | 0.50 |
| Q6DFV1_CNDG2_MOUSE  | Ncapg2 | Condensin-2 complex su   | R.LK#DLLTLETLESVPDR@.W            | 13.22 | 4.36  | 3.03 | 0.33 |
| Q6DFV1_CNDG2_MOUSE  | Ncapg2 | Condensin-2 complex su   | R.VAFVDLLK#.I                     | 25.22 | 8.12  | 3.11 | 0.32 |
| Q6DFV1_CNDG2_MOUSE  | Ncapg2 | Condensin-2 complex su   | R.EAFIQAVSK#.E                    | 15.44 | 3.46  | 4.46 | 0.22 |
| Q6DFV1_CNDG2_MOUSE  | Ncapg2 | Condensin-2 complex su   | K.FAAVLPYLK#.V                    | 15.26 | 13.37 | 1.14 | 0.88 |
| Q6DFV1_CNDG2_MOUSE  | Ncapg2 | Condensin-2 complex su   | R.LK#DLLTLETLESVPDR@.W            | 13.80 | 3.59  | 3.84 | 0.26 |
| Q6DFV1_CNDG2_MOUSE  | Ncapg2 | Condensin-2 complex su   | R.VAFVDLLK#.I                     | 30.55 | 9.36  | 3.26 | 0.31 |
| Q6DFV1_CNDG2_MOUSE  | Ncapg2 | Condensin-2 complex su   | K.VLPLLEDQEEELYK#.L               | 10.57 | 2.30  | 4.60 | 0.22 |
| Q8C156_CND2_MOUSE   | Ncaph  | Condensin complex subu   | R.GQQDVLSSPLER@.V                 | 13.22 | 8.16  | 1.62 | 0.62 |
| Q8C156_CND2_MOUSE   | Ncaph  | Condensin complex subu   | R.NIDVSTTK#.F                     | 16.27 | 12.50 | 1.30 | 0.77 |
| Q8C156_CND2_MOUSE   | Ncaph  | Condensin complex subu   | K.TIEQNLNSNINVSADGK#.C            | 8.54  | 1.68  | 5.08 | 0.20 |
| Q8C156_CND2_MOUSE   | Ncaph  | Condensin complex subu   | K.TPVLEDFPQNDKEK#ER@.M            | 14.09 | 8.64  | 1.63 | 0.61 |
| Q8C156_CND2_MOUSE   | Ncaph  | Condensin complex subu   | K.VAAGLTDASTK#.I                  | 32.87 | 13.32 | 2.47 | 0.41 |

|                     |        |                                                             |        |       |      |      |
|---------------------|--------|-------------------------------------------------------------|--------|-------|------|------|
| Q8C156_CND2_MOUSE   | Ncaph  | Condensin complex subu R.VFDLQFSTDSIHLASPNR@.N              | 8.66   | 5.97  | 1.45 | 0.69 |
| Q8C156_CND2_MOUSE   | Ncaph  | Condensin complex subu R.GQQDVLSSPLER@.V                    | 5.69   | 2.78  | 2.04 | 0.49 |
| Q8C156_CND2_MOUSE   | Ncaph  | Condensin complex subu K.TPVLEDFPNQDDEKHER@.M               | 7.83   | 3.19  | 2.46 | 0.41 |
| Q8C156_CND2_MOUSE   | Ncaph  | Condensin complex subu R.VFDLQFSTDSIHLASPNR@.N              | 16.71  | 5.63  | 2.97 | 0.34 |
| Q8C156_CND2_MOUSE   | Ncaph  | Condensin complex subu K.EADTEANHTESGGEGAPEEVADEK#.K        | 11.02  | 5.55  | 1.99 | 0.50 |
| Q8C156_CND2_MOUSE   | Ncaph  | Condensin complex subu R.GQQDVLSSPLER@.V                    | 42.89  | 20.03 | 2.14 | 0.47 |
| Q8C156_CND2_MOUSE   | Ncaph  | Condensin complex subu K.KQDFEINFDLDFDAYFQK#.T              | 4.39   | 4.76  | 0.92 | 1.09 |
| Q8C156_CND2_MOUSE   | Ncaph  | Condensin complex subu K.LEGTEDLSDLVLM*QGD.-                | 10.47  | 10.47 | 1.00 | 1.00 |
| Q8C156_CND2_MOUSE   | Ncaph  | Condensin complex subu K.NAFGLHLIDFM*SEILK#.Q               | 22.57  | 5.04  | 4.48 | 0.22 |
| Q8C156_CND2_MOUSE   | Ncaph  | Condensin complex subu R.NIDVSTTSK#.F                       | 38.71  | 38.71 | 0.94 | 1.07 |
| Q8C156_CND2_MOUSE   | Ncaph  | Condensin complex subu K.TIEQNLNINNVSEADGK#.C               | 27.03  | 10.94 | 2.01 | 0.50 |
| Q8C156_CND2_MOUSE   | Ncaph  | Condensin complex subu K.TPVLEDFPNQDDEKHER@.M               | 32.01  | 18.56 | 1.99 | 0.50 |
| Q8C156_CND2_MOUSE   | Ncaph  | Condensin complex subu K.VAAGTLDAKST#.I                     | 56.27  | 24.21 | 2.32 | 0.43 |
| Q8C156_CND2_MOUSE   | Ncaph  | Condensin complex subu R.VFDLQFSTDSIHLASPNR@.N              | 49.26  | 21.57 | 2.28 | 0.44 |
| Q8C156_CND2_MOUSE   | Ncaph  | Condensin complex subu R.GQQDVLSSPLER@.V                    | 7.48   | 11.81 | 0.63 | 1.58 |
| Q8C156_CND2_MOUSE   | Ncaph  | Condensin complex subu K.TPVLEDFPNQDDEKHER@.M               | 11.17  | 41.07 | 0.27 | 3.68 |
| Q8B5P2_CNDH2_MOUSE  | Ncaph2 | Condensin-2 complex su R.LQETPDVWQSLDPFDSLESK#.V            | 5.68   | 1.25  | 4.56 | 0.22 |
| Q8B5P2_CNDH2_MOUSE  | Ncaph2 | Condensin-2 complex su R.SQK#DPEDAEQPM*EVSRR@.N             | 7.67   | 3.10  | 2.47 | 0.40 |
| Q8B5P2_CNDH2_MOUSE  | Ncaph2 | Condensin-2 complex su R.TSQQSALPR@.R                       | 10.53  | 3.09  | 3.40 | 0.29 |
| Q8B5P2_CNDH2_MOUSE  | Ncaph2 | Condensin-2 complex su K.FIQETLESQR@.I                      | 20.17  | 5.21  | 3.87 | 0.26 |
| Q8B5P2_CNDH2_MOUSE  | Ncaph2 | Condensin-2 complex su R.LQETPDVWQSLDPFDSLESK#.V            | 6.83   | 4.58  | 1.49 | 0.67 |
| Q8B5P2_CNDH2_MOUSE  | Ncaph2 | Condensin-2 complex su R.LQETPDVWQSLDPFDSLESK#.V            | 12.08  | 3.75  | 3.22 | 0.31 |
| Q8B5P2_CNDH2_MOUSE  | Ncaph2 | Condensin-2 complex su R.SQK#DPEDAEQPM*EVSRR@.N             | 8.92   | 3.01  | 2.96 | 0.34 |
| Q8B5P2_CNDH2_MOUSE  | Ncaph2 | Condensin-2 complex su R.TSQQSALPR@.R                       | 33.46  | 10.29 | 3.25 | 0.31 |
| Q3UYV9_NCBP1_MOUSE  | Ncbp1  | Nuclear cap-binding prot K.ANNYNEAVLYR.F                    | 20.77  | 13.78 | 1.51 | 0.66 |
| Q3UYV9_NCBP1_MOUSE  | Ncbp1  | Nuclear cap-binding prot K.ATNDEIFSLK#.D                    | 50.26  | 33.57 | 1.50 | 0.67 |
| Q3UYV9_NCBP1_MOUSE  | Ncbp1  | Nuclear cap-binding prot K.DGALLEEQER.L                     | 22.71  | 12.58 | 1.80 | 0.55 |
| Q3UYV9_NCBP1_MOUSE  | Ncbp1  | Nuclear cap-binding prot K.DVPMNPQVDDDEGFR@.F               | 11.26  | 7.77  | 1.45 | 0.69 |
| Q3UYV9_NCBP1_MOUSE  | Ncbp1  | Nuclear cap-binding prot R.FIM*ILTEHLVLR@.C                 | 12.00  | 5.83  | 2.06 | 0.49 |
| Q3UYV9_NCBP1_MOUSE  | Ncbp1  | Nuclear cap-binding prot R.IFSTESYKLR.R                     | 37.53  | 26.63 | 1.41 | 0.71 |
| Q3UYV9_NCBP1_MOUSE  | Ncbp1  | Nuclear cap-binding prot R.M*FDYTDPEGPVM*PGSHSVR.F          | 7.04   | 6.26  | 1.12 | 0.89 |
| Q3UYV9_NCBP1_MOUSE  | Ncbp1  | Nuclear cap-binding prot K.NLFLVIFQR@.F                     | 18.67  | 9.83  | 1.90 | 0.53 |
| Q3UYV9_NCBP1_MOUSE  | Ncbp1  | Nuclear cap-binding prot K.ANNYNEAVLYR@.F                   | 10.23  | 6.03  | 1.70 | 0.59 |
| Q3UYV9_NCBP1_MOUSE  | Ncbp1  | Nuclear cap-binding prot K.ATNDEIFSLK#.D                    | 34.25  | 24.57 | 1.39 | 0.72 |
| Q3UYV9_NCBP1_MOUSE  | Ncbp1  | Nuclear cap-binding prot K.DGALLEEQER@.L                    | 12.84  | 9.45  | 1.36 | 0.74 |
| Q3UYV9_NCBP1_MOUSE  | Ncbp1  | Nuclear cap-binding prot K.DVPMNPQVDDDEGFR@.F               | 9.46   | 3.55  | 2.66 | 0.38 |
| Q3UYV9_NCBP1_MOUSE  | Ncbp1  | Nuclear cap-binding prot R.IFSTESYKLR.R                     | 21.40  | 14.77 | 1.45 | 0.69 |
| Q3UYV9_NCBP1_MOUSE  | Ncbp1  | Nuclear cap-binding prot R.M*FDYTDPEGPVM*PGSHSVR@.F         | 6.17   | 4.21  | 1.46 | 0.68 |
| Q9CQ49_NCBP2_MOUSE  | Ncbp2  | Nuclear cap-binding prot R.SDYSVELSEYR.D                    | 147.19 | 30.61 | 4.81 | 0.21 |
| P09405_NUCL_MOUSE   | Ncl    | Nucleolin OS=Mus muscl K.FAISELFAK#.N                       | 10.81  | 4.88  | 2.22 | 0.45 |
| P09405_NUCL_MOUSE   | Ncl    | Nucleolin OS=Mus muscl K.GFGFVDFNSEEDAK#.A                  | 4.42   | 1.79  | 2.47 | 0.40 |
| P09405_NUCL_MOUSE   | Ncl    | Nucleolin OS=Mus muscl K.ALELTGLK#.V                        | 100.70 | 23.70 | 4.25 | 0.24 |
| P09405_NUCL_MOUSE   | Ncl    | Nucleolin OS=Mus muscl K.EELEEVEFK#.A                       | 122.92 | 33.62 | 3.66 | 0.27 |
| P09405_NUCL_MOUSE   | Ncl    | Nucleolin OS=Mus muscl K.EVFEDAM*EIR@.L                     | 26.21  | 6.50  | 4.03 | 0.25 |
| P09405_NUCL_MOUSE   | Ncl    | Nucleolin OS=Mus muscl K.FAISELFAK#.N                       | 233.74 | 63.60 | 3.67 | 0.27 |
| P09405_NUCL_MOUSE   | Ncl    | Nucleolin OS=Mus muscl K.FGVDVFESAEDLEK#.A                  | 86.12  | 21.55 | 4.00 | 0.25 |
| P09405_NUCL_MOUSE   | Ncl    | Nucleolin OS=Mus muscl K.GFGFVDFNSEEDAK#.A                  | 103.09 | 24.71 | 4.17 | 0.24 |
| P09405_NUCL_MOUSE   | Ncl    | Nucleolin OS=Mus muscl K.GLSEDTTEETLK#.E                    | 14.30  | 4.16  | 3.44 | 0.29 |
| P09405_NUCL_MOUSE   | Ncl    | Nucleolin OS=Mus muscl K.GLSEDTTEETLK#SEFEGSVR@.A           | 157.16 | 31.19 | 5.04 | 0.20 |
| P09405_NUCL_MOUSE   | Ncl    | Nucleolin OS=Mus muscl K.GYAFIEAFSEDAK#.E                   | 57.16  | 15.07 | 3.79 | 0.26 |
| P09405_NUCL_MOUSE   | Ncl    | Nucleolin OS=Mus muscl R.IVTDR@ETGSSK#.G                    | 12.54  | 3.85  | 3.26 | 0.31 |
| P09405_NUCL_MOUSE   | Ncl    | Nucleolin OS=Mus muscl R.KHFGYVDFESAEDLEK#.A                | 9.53   | 9.53  | 6.07 | 0.16 |
| P09405_NUCL_MOUSE   | Ncl    | Nucleolin OS=Mus muscl R.LELQGSNSR@.S                       | 137.66 | 29.49 | 4.67 | 0.21 |
| P09405_NUCL_MOUSE   | Ncl    | Nucleolin OS=Mus muscl K.NDLAVDVR@.T                        | 143.52 | 39.10 | 3.67 | 0.27 |
| P09405_NUCL_MOUSE   | Ncl    | Nucleolin OS=Mus muscl K.NLSFNITEDELK#.E                    | 43.85  | 16.97 | 2.58 | 0.39 |
| P09405_NUCL_MOUSE   | Ncl    | Nucleolin OS=Mus muscl K.NLSFNITEDELK#EYFEDAM*EIR@.L        | 48.16  | 15.26 | 4.13 | 0.24 |
| P09405_NUCL_MOUSE   | Ncl    | Nucleolin OS=Mus muscl K.QK#VEGSEPTFPNLFIGNLNPNK#.S         | 25.24  | 6.17  | 4.09 | 0.24 |
| P09405_NUCL_MOUSE   | Ncl    | Nucleolin OS=Mus muscl R.SVLSYTGK#.G                        | 92.28  | 21.53 | 4.29 | 0.23 |
| P09405_NUCL_MOUSE   | Ncl    | Nucleolin OS=Mus muscl K.TLVLSNLSYATK#.E                    | 72.34  | 22.11 | 3.27 | 0.31 |
| P09405_NUCL_MOUSE   | Ncl    | Nucleolin OS=Mus muscl K.VEGSEPTFPNLFIGNLNPNK#.S            | 56.78  | 19.09 | 2.97 | 0.34 |
| P09405_NUCL_MOUSE   | Ncl    | Nucleolin OS=Mus muscl K.VFGENEIK#.L                        | 140.79 | 34.14 | 4.12 | 0.24 |
| P09405_NUCL_MOUSE   | Ncl    | Nucleolin OS=Mus muscl K.FAISELFAK#.N                       | 14.49  | 6.17  | 2.35 | 0.43 |
| P09405_NUCL_MOUSE   | Ncl    | Nucleolin OS=Mus muscl K.FGVDVFESAEDLEK#.A                  | 9.29   | 3.48  | 2.67 | 0.38 |
| P09405_NUCL_MOUSE   | Ncl    | Nucleolin OS=Mus muscl K.GFGFVDFNSEEDAK#.A                  | 8.39   | 2.94  | 2.85 | 0.35 |
| P09405_NUCL_MOUSE   | Ncl    | Nucleolin OS=Mus muscl K.GLSEDTTEETLK#SEFEGSVR@.A           | 14.89  | 3.65  | 4.08 | 0.25 |
| P09405_NUCL_MOUSE   | Ncl    | Nucleolin OS=Mus muscl K.NDLAVDVR@.T                        | 8.54   | 3.77  | 2.26 | 0.44 |
| O09000_NCOA3_MOUSE  | Ncoa3  | Nuclear receptor coactiv R.FSLADGTVSQAQK#.S                 | 103.83 | 87.95 | 1.18 | 0.85 |
| O09000_NCOA3_MOUSE  | Ncoa3  | Nuclear receptor coactiv K.VVNIIDTNSLR@.S                   | 8.53   | 4.89  | 1.74 | 0.57 |
| Q91W39_NCOA5_MOUSE  | Ncoa5  | Nuclear receptor coactiv R.GGHPPIAQLINLADNR@.Y              | 57.16  | 39.63 | 1.44 | 0.69 |
| Q91W39_NCOA5_MOUSE  | Ncoa5  | Nuclear receptor coactiv R.GPPGPEQSR@.A                     | 19.54  | 13.19 | 1.48 | 0.67 |
| Q91W39_NCOA5_MOUSE  | Ncoa5  | Nuclear receptor coactiv R.LAPASTM*ASQR@PVSSTGINFDNPSVQK#.A | 5.79   | 5.79  | 1.00 | 1.00 |
| Q91W39_NCOA5_MOUSE  | Ncoa5  | Nuclear receptor coactiv K.M*ANDALQER@.D                    | 27.00  | 21.00 | 2.05 | 0.49 |
| Q91W39_NCOA5_MOUSE  | Ncoa5  | Nuclear receptor coactiv R.SSADSLPGPISR@.Q                  | 20.91  | 20.26 | 1.03 | 0.97 |
| Q91W39_NCOA5_MOUSE  | Ncoa5  | Nuclear receptor coactiv R.YFEEIQR@.R                       | 22.72  | 12.34 | 1.84 | 0.54 |
| Q91W39_NCOA5_MOUSE  | Ncoa5  | Nuclear receptor coactiv R.YLTAETDKIINLYR.E                 | 42.22  | 26.94 | 1.57 | 0.64 |
| B7ZC24_B7ZC24_MOUSE | Ncoa5  | Nuclear receptor coactiv R.SSADSLPGELR@.G                   | 11.25  | 5.34  | 2.14 | 0.47 |
| Q91W39_NCOA5_MOUSE  | Ncoa5  | Nuclear receptor coactiv R.DPYSFGDSR@.D                     | 26.10  | 9.08  | 2.88 | 0.35 |
| Q91W39_NCOA5_MOUSE  | Ncoa5  | Nuclear receptor coactiv R.DSFDR@GPPGPEQSR@.A               | 7.56   | 2.45  | 3.09 | 0.32 |
| Q91W39_NCOA5_MOUSE  | Ncoa5  | Nuclear receptor coactiv K.DYAESVGR.K                       | 43.31  | 19.37 | 2.24 | 0.45 |
| Q91W39_NCOA5_MOUSE  | Ncoa5  | Nuclear receptor coactiv R.GGHPPIAQLINLADNR@.Y              | 115.77 | 65.49 | 1.77 | 0.57 |
| Q91W39_NCOA5_MOUSE  | Ncoa5  | Nuclear receptor coactiv R.GPPGPEQSR@.A                     | 33.89  | 20.04 | 1.69 | 0.59 |
| Q91W39_NCOA5_MOUSE  | Ncoa5  | Nuclear receptor coactiv R.KHDDSYFDR@.Y                     | 6.43   | 4.00  | 1.61 | 0.62 |
| Q91W39_NCOA5_MOUSE  | Ncoa5  | Nuclear receptor coactiv R.LAPASTM*ASQR@PVSSTGINFDNPSVQK#.A | 30.63  | 18.34 | 1.67 | 0.60 |
| Q91W39_NCOA5_MOUSE  | Ncoa5  | Nuclear receptor coactiv K.M*ANDALQER@.D                    | 61.41  | 28.92 | 2.12 | 0.47 |
| Q91W39_NCOA5_MOUSE  | Ncoa5  | Nuclear receptor coactiv R.NM*GPR@PGAPSQFLGQPSRR@.L         | 22.37  | 10.19 | 2.19 | 0.46 |
| Q91W39_NCOA5_MOUSE  | Ncoa5  | Nuclear receptor coactiv R.NM*QADAM*VLVAR@.N                | 21.97  | 10.04 | 2.19 | 0.46 |
| Q91W39_NCOA5_MOUSE  | Ncoa5  | Nuclear receptor coactiv R.OPLGAAGSSSLK#.S                  | 55.35  | 32.96 | 1.68 | 0.60 |
| Q91W39_NCOA5_MOUSE  | Ncoa5  | Nuclear receptor coactiv R.R@DPYSFGDSR@.D                   | 11.12  | 7.23  | 1.54 | 0.65 |
| Q91W39_NCOA5_MOUSE  | Ncoa5  | Nuclear receptor coactiv R.RYFEEIQR.R                       | 16.41  | 11.41 | 1.44 | 0.70 |
| Q91W39_NCOA5_MOUSE  | Ncoa5  | Nuclear receptor coactiv K.SQSPSQPLSQVLPATPAPPAQSSQQLQAK#.I | 16.09  | 11.00 | 1.46 | 0.68 |
| Q91W39_NCOA5_MOUSE  | Ncoa5  | Nuclear receptor coactiv R.SSADSLPGPISR@.Q                  | 69.47  | 40.88 | 1.70 | 0.59 |
| Q91W39_NCOA5_MOUSE  | Ncoa5  | Nuclear receptor coactiv R.YFEEIQR@.R                       | 72.78  | 41.15 | 1.77 | 0.57 |
| Q91W39_NCOA5_MOUSE  | Ncoa5  | Nuclear receptor coactiv R.YLTAETDKIINLYR@.E                | 88.27  | 42.78 | 2.06 | 0.48 |
| Q91W39_NCOA5_MOUSE  | Ncoa5  | Nuclear receptor coactiv R.GGHPPIAQLINLADNR.Y               | 7.86   | 7.70  | 1.02 | 0.98 |
| Q60974_NCOR1_MOUSE  | Ncor1  | Nuclear receptor corepre R.SAASEQQLEQK#.N                   | 6.20   | 2.98  | 2.08 | 0.48 |
| Q60974_NCOR1_MOUSE  | Ncor1  | Nuclear receptor corepre R.GSITQGPALPQAQIPTEALVK#.G         | 2.00   | 2.99  | 1.34 | 0.75 |
| Q60974_NCOR1_MOUSE  | Ncor1  | Nuclear receptor corepre R.SAASEQQLEQK#.N                   | 8.76   | 3.51  | 2.49 | 0.40 |
| Q60974_NCOR1_MOUSE  | Ncor1  | Nuclear receptor corepre R.SONSQPEGLVLR@.A                  | 8.63   | 6.95  | 1.24 | 0.81 |
| Q60974_NCOR1_MOUSE  | Ncor1  | Nuclear receptor corepre R.SYEAEGSIX#.Q                     | 8.22   | 1.57  | 5.24 | 0.19 |
| Q60974_NCOR1_MOUSE  | Ncor1  | Nuclear receptor corepre R.TVLSGSM*QGTPR@.A                 | 3.46   | 2.73  | 1.26 | 0.79 |
| Q60974_NCOR1_MOUSE  | Ncor1  | Nuclear receptor corepre R.YNTAADALAVDAASAPQM*DVSK#.T       | 9.39   | 1.58  | 5.93 | 0.17 |
| E9PY55_E9PY55_MOUSE | Ncor2  | Nuclear receptor corepre R.QLGASIQGM*SVQLR@.V               | 8.21   | 3.38  | 2.43 | 0.41 |
| F8VQL9_F8VQL9_MOUSE | Ncor2  | Nuclear receptor corepre K.APM*GLTLM*GLPLAVDPK#.K           | 8.64   | 6.17  | 1.40 | 0.71 |

|                     |          |                                                                 |       |       |         |      |
|---------------------|----------|-----------------------------------------------------------------|-------|-------|---------|------|
| F8VQL9_F8VQL9_MOUSE | Ncor2    | Nuclear receptor corepre K.EAEK#FAFFAPFTGPK#.L                  | 23.35 | 12.57 | 1.86    | 0.54 |
| F8VQL9_F8VQL9_MOUSE | Ncor2    | Nuclear receptor corepre R.ESSLANVYAGPR@.G                      | 10.81 | 3.71  | 2.91    | 0.34 |
| F8VQL9_F8VQL9_MOUSE | Ncor2    | Nuclear receptor corepre R.GHIFLADPTSIPR@.G                     | 26.24 | 16.44 | 1.60    | 0.63 |
| F8VQL9_F8VQL9_MOUSE | Ncor2    | Nuclear receptor corepre R.GQAGPESLGVPTAQETSVLR@.G              | 8.17  | 4.69  | 1.74    | 0.57 |
| F8VQL9_F8VQL9_MOUSE | Ncor2    | Nuclear receptor corepre K.GTEAETVSEAPLKVVEAGSK.A               | 39.56 | 23.59 | 1.68    | 0.60 |
| F8VQL9_F8VQL9_MOUSE | Ncor2    | Nuclear receptor corepre K.GVTVSEPTPTVLR@.W                     | 18.79 | 7.81  | 2.41    | 0.42 |
| F8VQL9_F8VQL9_MOUSE | Ncor2    | Nuclear receptor corepre R.GYPTAALENR@.Q                        | 18.77 | 12.62 | 1.49    | 0.67 |
| F8VQL9_F8VQL9_MOUSE | Ncor2    | Nuclear receptor corepre R.HSSSPLSPGGPHTLAK#PTATSSSER@.E        | 14.31 | 7.81  | 1.83    | 0.55 |
| F8VQL9_F8VQL9_MOUSE | Ncor2    | Nuclear receptor corepre R.ILEGLGQVQLVPLNQPSSDR@.Q              | 14.55 | 5.53  | 2.63    | 0.38 |
| F8VQL9_F8VQL9_MOUSE | Ncor2    | Nuclear receptor corepre R.LAYLPTAPPFPSSR@.H                    | 17.57 | 10.56 | 1.66    | 0.60 |
| F8VQL9_F8VQL9_MOUSE | Ncor2    | Nuclear receptor corepre R.LELLPDTLLR@PSPLLATGQPSGSEDLTk#.D     | 5.30  | 3.34  | 1.58    | 0.63 |
| F8VQL9_F8VQL9_MOUSE | Ncor2    | Nuclear receptor corepre K.LTESNSAM*VK#.S                       | 10.31 | 4.95  | 2.09    | 0.48 |
| F8VQL9_F8VQL9_MOUSE | Ncor2    | Nuclear receptor corepre K.NFGLIASFLER@.K                       | 11.08 | 2.69  | 4.12    | 0.24 |
| F8VQL9_F8VQL9_MOUSE | Ncor2    | Nuclear receptor corepre R.QLGAISQQGM*SVQLR@.V                  | 5.88  | 3.14  | 1.87    | 0.53 |
| F8VQL9_F8VQL9_MOUSE | Ncor2    | Nuclear receptor corepre K.SEAEEIDVGK#PEPEEASEPPEVK#.S          | 3.56  | 3.30  | 1.08    | 0.93 |
| F8VQL9_F8VQL9_MOUSE | Ncor2    | Nuclear receptor corepre R.SGTSSGAGGSITR@.G                     | 15.87 | 8.43  | 1.88    | 0.53 |
| F8VQL9_F8VQL9_MOUSE | Ncor2    | Nuclear receptor corepre R.TVTSASIEGLM*GR@.A                    | 12.84 | 5.22  | 2.46    | 0.41 |
| F8VQL9_F8VQL9_MOUSE | Ncor2    | Nuclear receptor corepre R.VVTLAQHISEVITQDYTR@.H                | 25.31 | 14.38 | 1.76    | 0.57 |
| F8VQL9_F8VQL9_MOUSE | Ncor2    | Nuclear receptor corepre K.YDSGPSTGK#.K                         | 9.27  | 4.25  | 2.18    | 0.46 |
| Q8BNY6_NCS1_MOUSE   | Ncs1     | Neuronal calcium sensor K.LYLDLNDGVTTR@.N                       | 10.00 | 4.68  | 2.13    | 0.47 |
| P57716_NICA_MOUSE   | Ncstn    | Nicestrin OS=Mus muscu K.ADLVFAVRP@.E                           | 8.77  | 1.50  | 5.87    | 0.17 |
| P57716_NICA_MOUSE   | Ncstn    | Nicestrin OS=Mus muscu R.LENDSVFLGGVALR@.T                      | 9.00  | 5.87  | 1.53    | 0.65 |
| P57716_NICA_MOUSE   | Ncstn    | Nicestrin OS=Mus muscu R.LLYGFLVR@.A                            | 14.21 | 9.00  | 1.58    | 0.63 |
| P57716_NICA_MOUSE   | Ncstn    | Nicestrin OS=Mus muscu K.NQVEDLALTEK#.S                         | 9.97  | 5.84  | 1.71    | 0.59 |
| Q9CZA6_NDE1_MOUSE   | Nde1     | Nuclear distribution prot R.LEQANDDLER@.A                       | 16.40 | 8.66  | 1.89    | 0.53 |
| Q9CZA6_NDE1_MOUSE   | Nde1     | Nuclear distribution prot R.GLDSSTSGTLPAAAR@.I                  | 5.99  | 4.00  | 1.50    | 0.67 |
| Q9CZA6_NDE1_MOUSE   | Nde1     | Nuclear distribution prot R.ISALNIVDGLLR@.K                     | 24.48 | 10.48 | 2.34    | 0.43 |
| Q9CPR8_MAGG1_MOUSE  | Ndn12    | Melanoma-associated an K.VAELVQFLIK#.D                          | 8.81  | 5.45  | 1.62    | 0.62 |
| Q62433_NDRG1_MOUSE  | Ndr1     | Protein NDRG1 OS=Mus r.LNITPNSGATGNAGPK.S                       | 6.54  | 8.76  | 0.75    | 1.34 |
| Q62433_NDRG1_MOUSE  | Ndr1     | Protein NDRG1 OS=Mus r.K.SVIGM*PTGAGAVILTR@.F                   | 8.61  | 2.95  | 2.92    | 0.34 |
| Q62433_NDRG1_MOUSE  | Ndr1     | Protein NDRG1 OS=Mus r.TASGSSVTSLEGTS.S                         | 20.62 | 10.00 | 2.06    | 0.48 |
| Q9QYF9_NDRG3_MOUSE  | Ndr3     | Protein NDRG3 OS=Mus r.K.YFLQGM*GYPASAM*TR@.L                   | 3.33  | 1.90  | 1.75    | 0.57 |
| Q9D1J1_NEC2_MOUSE   | Necap2   | Adaptin ear-binding coat R.ASEWQLDQPSVSGR@.L                    | 5.63  | 2.92  | 1.93    | 0.52 |
| P46935_NEDD4_MOUSE  | Nedd4    | E3 ubiquitin-protein liga R.DDFLGGQDVPLPLPTENPR@.M              | 5.69  | 4.44  | 1.28    | 0.78 |
| P46935_NEDD4_MOUSE  | Nedd4    | E3 ubiquitin-protein liga R.R@PSPDDLTDEDNDDM*QLQAQR@.A          | 12.23 | 5.52  | 2.21    | 0.45 |
| P46935_NEDD4_MOUSE  | Nedd4    | E3 ubiquitin-protein liga K.WNEILFR.V                           | 8.08  | 5.81  | 1.39    | 0.72 |
| P46935_NEDD4_MOUSE  | Nedd4    | E3 ubiquitin-protein liga R.DDFLGGQDVPLPLPTENPR@.M              | 6.93  | 4.03  | 1.72    | 0.58 |
| P46935_NEDD4_MOUSE  | Nedd4    | E3 ubiquitin-protein liga R.DDFLGGQDVPLPLPTENPR@.M              | 10.76 | 5.79  | 1.86    | 0.54 |
| P46935_NEDD4_MOUSE  | Nedd4    | E3 ubiquitin-protein liga K.EGFFELPQDLIK#.I                     | 22.59 | 8.71  | 2.59    | 0.39 |
| P46935_NEDD4_MOUSE  | Nedd4    | E3 ubiquitin-protein liga R.LQNVAITGPVAVYSR@.D                  | 11.14 | 4.88  | 2.28    | 0.44 |
| P46935_NEDD4_MOUSE  | Nedd4    | E3 ubiquitin-protein liga K.R@PSPDDLTDEDNDDM*QLQAQR@.A          | 11.21 | 4.07  | 2.75    | 0.36 |
| P46935_NEDD4_MOUSE  | Nedd4    | E3 ubiquitin-protein liga K.TGGSIEVITNKH.N                      | 8.76  | 4.83  | 1.81    | 0.55 |
| P46935_NEDD4_MOUSE  | Nedd4    | E3 ubiquitin-protein liga R.DDFLGGQDVPLPLPTENPR@.M              | 5.74  | 3.74  | 1.54    | 0.65 |
| P46935_NEDD4_MOUSE  | Nedd4    | E3 ubiquitin-protein liga K.EGFFELPQDLIK#.I                     | 15.28 | 5.95  | 2.57    | 0.39 |
| P46935_NEDD4_MOUSE  | Nedd4    | E3 ubiquitin-protein liga R.LLQFVTSR@.V                         | 13.68 | 18.23 | 0.75    | 1.33 |
| Q8BG30_NELFA_MOUSE  | Nelfa    | Negative elongation factr K.LLDISELNTVAGGR@.E                   | 9.82  | 8.66  | 1.13    | 0.88 |
| Q8BG30_NELFA_MOUSE  | Nelfa    | Negative elongation factr K.ALILGFM*AGSR@.E                     | 6.64  | 1.63  | 4.07    | 0.25 |
| Q8BG30_NELFA_MOUSE  | Nelfa    | Negative elongation factr R.EASR@PPEPSAPSTLPTQFK#.Q             | 16.56 | 9.07  | 1.83    | 0.55 |
| Q8BG30_NELFA_MOUSE  | Nelfa    | Negative elongation factr R.EQM*FAQEM*FK#.T                     | 7.26  | 0.00  | #DIV/0! | 0.00 |
| Q8BG30_NELFA_MOUSE  | Nelfa    | Negative elongation factr K.LLDISELNTVAGGR@.E                   | 40.08 | 11.00 | 3.65    | 0.27 |
| Q8BG30_NELFA_MOUSE  | Nelfa    | Negative elongation factr K.NALTTLAAGLTPPVK#.H                  | 10.95 | 3.28  | 3.33    | 0.30 |
| Q8BG30_NELFA_MOUSE  | Nelfa    | Negative elongation factr K.SFPDTSGLMLD.LEEQNPVQDILGELR@.E      | 5.82  | 2.61  | 2.23    | 0.45 |
| Q8BG30_NELFA_MOUSE  | Nelfa    | Negative elongation factr K.TLDEVEK#TKETKEVENATPDYAAGLVSTQK#.L  | 15.61 | 5.19  | 3.01    | 0.33 |
| Q8BG30_NELFA_MOUSE  | Nelfa    | Negative elongation factr K.LLDISELNTVAGGR@.E                   | 6.99  | 2.08  | 3.36    | 0.30 |
| Q8C4Y3_NELFB_MOUSE  | Nelfb    | Negative elongation factr R.DSPDLLLLR@.L                        | 31.18 | 6.33  | 4.93    | 0.20 |
| Q8C4Y3_NELFB_MOUSE  | Nelfb    | Negative elongation factr K.ALEPTGSGSEAVK#.E                    | 15.59 | 4.90  | 3.18    | 0.31 |
| Q8C4Y3_NELFB_MOUSE  | Nelfb    | Negative elongation factr K.ASVTYPNTLPESTK#.F                   | 17.05 | 6.95  | 2.45    | 0.41 |
| Q8C4Y3_NELFB_MOUSE  | Nelfb    | Negative elongation factr R.DSPDLLLLR@.L                        | 48.42 | 12.57 | 3.85    | 0.26 |
| Q8C4Y3_NELFB_MOUSE  | Nelfb    | Negative elongation factr R.VSAIASEGK#.A                        | 10.96 | 5.13  | 2.14    | 0.47 |
| Q8C4Y3_NELFB_MOUSE  | Nelfb    | Negative elongation factr K.ALEPTGSGSEAVK#.E                    | 18.78 | 5.53  | 3.39    | 0.29 |
| Q8C4Y3_NELFB_MOUSE  | Nelfb    | Negative elongation factr K.ASVTYPNTLPESTK#.F                   | 15.35 | 2.97  | 5.18    | 0.19 |
| Q8C4Y3_NELFB_MOUSE  | Nelfb    | Negative elongation factr R.DSPDLLLLR@.L                        | 19.27 | 7.25  | 2.66    | 0.38 |
| Q922L6_NELFD_MOUSE  | Nelfcd   | Negative elongation factr R.GALNPADITLVFK#.M                    | 8.26  | 4.08  | 2.03    | 0.49 |
| Q922L6_NELFD_MOUSE  | Nelfcd   | Negative elongation factr R.GALNPADITLVFK#.M                    | 18.50 | 8.90  | 2.08    | 0.48 |
| Q922L6_NELFD_MOUSE  | Nelfcd   | Negative elongation factr R.GVPLVVSYR@.K                        | 10.96 | 5.59  | 1.96    | 0.51 |
| Q922L6_NELFD_MOUSE  | Nelfcd   | Negative elongation factr R.TSLATLIDGGEENLEK#.N                 | 11.58 | 5.55  | 2.09    | 0.48 |
| Q922L6_NELFD_MOUSE  | Nelfcd   | Negative elongation factr R.GALNPADITLVFK#.M                    | 9.49  | 9.73  | 3.36    | 0.30 |
| Q922L6_NELFD_MOUSE  | Nelfcd   | Negative elongation factr R.GVPLVVSYR@.K                        | 9.49  | 3.11  | 3.05    | 0.33 |
| Q922L6_NELFD_MOUSE  | Nelfcd   | Negative elongation factr R.TSLATLIDGGEENLEK#.N                 | 21.66 | 28.50 | 0.76    | 1.32 |
| P19426_NELFE_MOUSE  | Nelfe    | Negative elongation factr R.GAFSPGNILDSM*DDPR@.N                | 13.82 | 10.29 | 0.29    | 3.39 |
| P19426_NELFE_MOUSE  | Nelfe    | Negative elongation factr K.SLYESVSSDR@.L                       | 7.58  | 2.73  | 2.77    | 0.36 |
| P19426_NELFE_MOUSE  | Nelfe    | Negative elongation factr R.SM*SADEILQEPSR@.R                   | 15.92 | 3.91  | 4.07    | 0.25 |
| Q77PW1_NEXN_MOUSE   | Nexn     | Nexilin OS=Mus muscu L.KLEINFQLLR@.Q                            | 8.13  | 6.85  | 1.19    | 0.84 |
| Q77PW1_NEXN_MOUSE   | Nexn     | Nexilin OS=Mus muscu R.NTSVDSSEVPR@.F                           | 20.58 | 12.77 | 1.61    | 0.62 |
| Q77PW1_NEXN_MOUSE   | Nexn     | Nexilin OS=Mus muscu R.SM*VLDSDSEIYK#.T                         | 9.80  | 5.73  | 1.71    | 0.58 |
| Q77PW1_NEXN_MOUSE   | Nexn     | Nexilin OS=Mus muscu K.TVQSSELTPGK#LEINFQLLR@.Q                 | 16.71 | 12.86 | 1.30    | 0.77 |
| Q9WV30_NFATS_MOUSE  | Nfat5    | Nuclear factor of activate R.SGDSQPQVNLFSSTK#.N                 | 7.19  | 5.49  | 1.31    | 0.76 |
| Q9WV30_NFATS_MOUSE  | Nfat5    | Nuclear factor of activate R.SHDVQPFYTPDPAAGALNVNKK             | 1.86  | 11.68 | 0.16    | 6.29 |
| Q9WV30_NFATS_MOUSE  | Nfat5    | Nuclear factor of activate K.VIFQENVSDENSWK#.S                  | 7.81  | 2.13  | 3.66    | 0.27 |
| O09130_NF2IP_MOUSE  | Nfatc2ip | NFATC2-interacting prot R.ILLFGESLSEPTATPSTLK#.L                | 12.86 | 4.83  | 2.66    | 0.38 |
| O09130_NF2IP_MOUSE  | Nfatc2ip | NFATC2-interacting prot R.LLDPGAEAPVVPVSGK#.V                   | 3.82  | 2.20  | 1.73    | 0.58 |
| Q8K120_NFAC4_MOUSE  | Nfatc4   | Nuclear factor of activate R.FGLSSLPSPR@.A                      | 8.34  | 7.73  | 1.08    | 0.93 |
| P97863_NFIB_MOUSE   | Nfib     | Nuclear factor 1 B-type C.K.SGVFNSELVR.V                        | 5.07  | 6.93  | 0.73    | 1.37 |
| P97863_NFIB_MOUSE   | Nfib     | Nuclear factor 1 B-type C.K.NPPGYLDESFK#.S                      | 4.03  | 5.49  | 0.73    | 1.36 |
| P97863_NFIB_MOUSE   | Nfib     | Nuclear factor 1 B-type C.K.SGVFNSELVR.V                        | 11.18 | 14.57 | 0.77    | 1.30 |
| P97863_NFIB_MOUSE   | Nfib     | Nuclear factor 1 B-type C.K.SGVFNSELVR.V                        | 7.19  | 12.34 | 0.58    | 1.72 |
| P70255_NFIC_MOUSE   | Nfic     | Nuclear factor 1 C-type C.R.EDFVLAIVTGK#.K                      | 11.06 | 5.64  | 1.96    | 0.51 |
| P70255_NFIC_MOUSE   | Nfic     | Nuclear factor 1 C-type C.K.GIPLSTGGER@.L                       | 58.25 | 44.03 | 1.32    | 0.76 |
| P70255_NFIC_MOUSE   | Nfic     | Nuclear factor 1 C-type C.R.LDLVM*VILFK#.G                      | 8.39  | 6.00  | 1.40    | 0.72 |
| P70255_NFIC_MOUSE   | Nfic     | Nuclear factor 1 C-type C.K.TEM*DK#SPNSPSPQDSR@.L               | 10.66 | 5.70  | 1.87    | 0.53 |
| P70255_NFIC_MOUSE   | Nfic     | Nuclear factor 1 C-type C.R.AFAYTWFNLQAR@.K                     | 7.08  | 4.73  | 1.50    | 0.67 |
| P70255_NFIC_MOUSE   | Nfic     | Nuclear factor 1 C-type C.R.AVK#HDELGEK#.A                      | 18.35 | 8.68  | 2.11    | 0.47 |
| P70255_NFIC_MOUSE   | Nfic     | Nuclear factor 1 C-type C.K.GIPLSTGGER.L                        | 92.49 | 65.83 | 1.41    | 0.71 |
| P70255_NFIC_MOUSE   | Nfic     | Nuclear factor 1 C-type C.R.LDLVM*VILFK#.G                      | 19.69 | 13.39 | 1.47    | 0.68 |
| P70255_NFIC_MOUSE   | Nfic     | Nuclear factor 1 C-type C.K.TEM*DK#SPNSPSPQDSR.L                | 7.19  | 8.35  | 0.86    | 1.16 |
| P70255_NFIC_MOUSE   | Nfic     | Nuclear factor 1 C-type C.R.TPVVGTGPNFSLGELQGLHAYDLNPAAGM*TR@.R | 14.59 | 10.50 | 1.39    | 0.72 |
| P70255_NFIC_MOUSE   | Nfic     | Nuclear factor 1 C-type C.K.GIPLSTGGER.L                        | 84.62 | 65.18 | 1.30    | 0.77 |
| P70255_NFIC_MOUSE   | Nfic     | Nuclear factor 1 C-type C.R.LDLVM*VILFK#.G                      | 9.97  | 6.64  | 1.50    | 0.67 |
| P70255_NFIC_MOUSE   | Nfic     | Nuclear factor 1 C-type C.K.TEM*DK#SPNSPSPQDSR@.L               | 14.59 | 4.93  | 2.96    | 0.34 |
| P70255_NFIC_MOUSE   | Nfic     | Nuclear factor 1 C-type C.R.TPVVGTGPNFSLGELQGLHAYDLNPAAGM*TR@.R | 19.19 | 8.71  | 2.20    | 0.45 |
| O08750_NFIL3_MOUSE  | Nfil3    | Nuclear factor interleuki R.FIATQPSASDR@.-                      | 10.11 | 5.65  | 1.79    | 0.56 |
| O08750_NFIL3_MOUSE  | Nfil3    | Nuclear factor interleuki K.LSNSTAVYFDYQYTK#.A                  | 4.91  | 1.82  | 2.69    | 0.37 |
| P70257_NF1X_MOUSE   | Nfix     | Nuclear factor 1 X-type C.R.AFSYTVFNLQAR@.K                     | 7.06  | 3.38  | 2.09    | 0.48 |



|                     |        |                                                               |        |       |      |      |
|---------------------|--------|---------------------------------------------------------------|--------|-------|------|------|
| Q35309_NMI_MOUSE    | Nmi    | N-myc-interactor OS=Mu K.YQVFAVSK#.K                          | 12.21  | 14.39 | 0.85 | 1.18 |
| Q9EPAT_NMN1_MOUSE   | Nmnat1 | Nicotinamide/nicotinic : K.FIVESDLVLR@.H                      | 9.57   | 4.77  | 2.01 | 0.50 |
| Q9EPAT_NMN1_MOUSE   | Nmnat1 | Nicotinamide/nicotinic : R.NAGVTLAPLQR@.N                     | 11.79  | 11.79 | 1.29 | 0.78 |
| Q8BW10_NOB1_MOUSE   | Nob1   | RNA-binding protein NOI R.QK#TDVAFDPYIAGVSPFAENDISSR@.S       | 8.46   | 2.27  | 3.73 | 0.27 |
| Q8BW10_NOB1_MOUSE   | Nob1   | RNA-binding protein NOI R.TPLPNDR@.E                          | 15.05  | 9.75  | 1.54 | 0.65 |
| Q8BW10_NOB1_MOUSE   | Nob1   | RNA-binding protein NOI R.YSLPTPK#.G                          | 19.54  | 9.39  | 2.08 | 0.48 |
| Q8BW10_NOB1_MOUSE   | Nob1   | RNA-binding protein NOI R.DAPLQDQIG#.N                        | 10.92  | 3.94  | 1.77 | 0.36 |
| Q8BW10_NOB1_MOUSE   | Nob1   | RNA-binding protein NOI R.LAVLPYQLR@.F                        | 28.15  | 17.92 | 2.57 | 0.64 |
| Q9WV70_NOC2L_MOUSE  | Noc2l  | Nucleolar complex prote K.FTSPSTPLISFM*QR@.T                  | 4.42   | 2.08  | 2.13 | 0.47 |
| Q9WV70_NOC2L_MOUSE  | Noc2l  | Nucleolar complex prote R.LFHEVVQAFR@.A                       | 11.48  | 11.48 | 2.49 | 0.40 |
| Q9WV70_NOC2L_MOUSE  | Noc2l  | Nucleolar complex prote R.DR@EIQLEISGK#.E                     | 6.13   | 2.88  | 2.13 | 0.47 |
| Q9WV70_NOC2L_MOUSE  | Noc2l  | Nucleolar complex prote K.FTSPSTPLISFM*QR@.T                  | 6.57   | 5.00  | 1.31 | 0.76 |
| Q9WV70_NOC2L_MOUSE  | Noc2l  | Nucleolar complex prote R.LEDLNFEIK#.R                        | 17.12  | 8.42  | 2.03 | 0.49 |
| Q9WV70_NOC2L_MOUSE  | Noc2l  | Nucleolar complex prote R.LFHEVVQAFR@.A                       | 32.44  | 17.49 | 1.85 | 0.54 |
| Q9WV70_NOC2L_MOUSE  | Noc2l  | Nucleolar complex prote R.M*SSK#PINFSLVK#.L                   | 25.28  | 12.55 | 2.01 | 0.50 |
| Q8V184_NOC3L_MOUSE  | Noc3l  | Nucleolar complex prote K.SPILLPAVEGLAK#.F                    | 22.54  | 8.49  | 2.65 | 0.38 |
| Q8BG17_NOL12_MOUSE  | Nol12  | Nucleolar protein 12 OS: R.EEALEAEDELER@.L                    | 6.63   | 2.42  | 2.74 | 0.37 |
| Q8BG17_NOL12_MOUSE  | Nol12  | Nucleolar protein 12 OS: K.M*LAER@EEALEAEDELER@.L             | 11.06  | 6.36  | 1.74 | 0.58 |
| Q8R5K4_NOL6_MOUSE   | Nol6   | Nucleolar protein 6 OS=h R.EAVVWAELEFEK#.R                    | 12.57  | 5.89  | 2.13 | 0.47 |
| Q8R5K4_NOL6_MOUSE   | Nol6   | Nucleolar protein 6 OS=h R.GLLAEPGSSLM*PVLGYDPPQLVLAQR@.E     | 10.03  | 2.66  | 3.77 | 0.27 |
| Q8R5K4_NOL6_MOUSE   | Nol6   | Nucleolar protein 6 OS=h R.LLWGLEGLPLTVSAVOGAHPVLR@.Y         | 9.31   | 6.38  | 1.46 | 0.68 |
| Q8R5K4_NOL6_MOUSE   | Nol6   | Nucleolar protein 6 OS=h R.LQVEELLK#.E                        | 23.05  | 12.50 | 1.84 | 0.54 |
| Q8R5K4_NOL6_MOUSE   | Nol6   | Nucleolar protein 6 OS=h R.SPEGM*VSLR@.D                      | 14.30  | 5.29  | 2.70 | 0.37 |
| Q8R5K4_NOL6_MOUSE   | Nol6   | Nucleolar protein 6 OS=h R.TEPPAEGLLQPVNLSR@.E                | 11.27  | 5.02  | 2.24 | 0.45 |
| Q8R5K4_NOL6_MOUSE   | Nol6   | Nucleolar protein 6 OS=h R.LQVEELLK#.E                        | 18.75  | 12.25 | 1.53 | 0.65 |
| Q8R5K4_NOL6_MOUSE   | Nol6   | Nucleolar protein 6 OS=h R.TEPPAEGLLQPVNLSR@.E                | 9.56   | 4.25  | 2.25 | 0.44 |
| Q9D723_NOL7_MOUSE   | Nol7   | Nucleolar protein 7 OS=h K.AAAQFLTSTWGAQK#.Q                  | 3.93   | 2.75  | 1.43 | 0.70 |
| Q9D723_NOL7_MOUSE   | Nol7   | Nucleolar protein 7 OS=h K.LLPDAVLEQLTASEADIK#.K              | 9.10   | 3.96  | 2.30 | 0.43 |
| Q9D723_NOL7_MOUSE   | Nol7   | Nucleolar protein 7 OS=h K.VQSGQIESYM*AVR@.L                  | 10.15  | 3.40  | 2.98 | 0.34 |
| Q3UHX0_NOL8_MOUSE   | Nol8   | Nucleolar protein 8 OS=h R.GSNLFWGSM*GGSISR@.N                | 3.94   | 2.20  | 1.80 | 0.56 |
| Q3UHX0_NOL8_MOUSE   | Nol8   | Nucleolar protein 8 OS=h K.LM*DLQSQFSDER@.F                   | 6.54   | 2.04  | 3.20 | 0.31 |
| Q3TZ8_NOL9_MOUSE    | Nol9   | Polynucleotide 5'-hydro: K.FTPTLTSEVELTDGLYTK#.S              | 7.32   | 8.99  | 0.81 | 1.23 |
| Q3TZ8_NOL9_MOUSE    | Nol9   | Polynucleotide 5'-hydro: R.FVDFLKR.T                          | 16.00  | 4.95  | 3.24 | 0.31 |
| Q3TZ8_NOL9_MOUSE    | Nol9   | Polynucleotide 5'-hydro: R.VLSPNYVQLYSDR@.C                   | 13.35  | 4.17  | 3.20 | 0.31 |
| Q3TZ8_NOL9_MOUSE    | Nol9   | Polynucleotide 5'-hydro: K.VSPNVTQPVRR@.D                     | 11.52  | 4.30  | 2.68 | 0.37 |
| Q3TZ8_NOL9_MOUSE    | Nol9   | Polynucleotide 5'-hydro: K.FTPTLTSEVELTDGLYTK#.S              | 10.72  | 4.28  | 2.51 | 0.40 |
| Q3TZ8_NOL9_MOUSE    | Nol9   | Polynucleotide 5'-hydro: R.FVDFLKR.T                          | 5.66   | 1.24  | 4.58 | 0.22 |
| Q3TZ8_NOL9_MOUSE    | Nol9   | Polynucleotide 5'-hydro: R.VLSPNYVQLYSDR@.C                   | 23.56  | 5.32  | 4.42 | 0.23 |
| Q3TZ8_NOL9_MOUSE    | Nol9   | Polynucleotide 5'-hydro: R.VLSPNYVQLYSDR@.C                   | 12.16  | 2.76  | 4.40 | 0.23 |
| Q3TZ8_NOL9_MOUSE    | Nol9   | Polynucleotide 5'-hydro: R.VNSEFTLLK#.K                       | 8.07   | 1.96  | 4.12 | 0.24 |
| Q3TZ8_NOL9_MOUSE    | Nol9   | Polynucleotide 5'-hydro: K.VSPNVTQPVRR@.D                     | 14.56  | 3.96  | 3.68 | 0.27 |
| Q3UFM5_NOM1_MOUSE   | Nom1   | Nucleolar MIF4G domain K.ELITEAQOASGAGNK#.F                   | 10.16  | 4.35  | 2.33 | 0.43 |
| Q3UFM5_NOM1_MOUSE   | Nom1   | Nucleolar MIF4G domain K.TYNPYAFASK#.F                        | 10.34  | 4.85  | 2.13 | 0.47 |
| Q3UFM5_NOM1_MOUSE   | Nom1   | Nucleolar MIF4G domain K.ELITEAQOASGAGNK#.F                   | 7.33   | 2.19  | 3.34 | 0.30 |
| Q99K48_NONO_MOUSE   | Nono   | Non-POU domain-contai K.AFNLEK#.Q                             | 46.16  | 14.88 | 3.10 | 0.32 |
| Q99K48_NONO_MOUSE   | Nono   | Non-POU domain-contai R.AVVVDDR@.G                            | 139.18 | 73.10 | 1.90 | 0.53 |
| Q99K48_NONO_MOUSE   | Nono   | Non-POU domain-contai R.FAQPGSFYEYAM*R@.W                     | 54.75  | 30.60 | 1.79 | 0.56 |
| Q99K48_NONO_MOUSE   | Nono   | Non-POU domain-contai R.FAQPGSFYEYAMR@.W                      | 15.09  | 7.20  | 2.09 | 0.48 |
| Q99K48_NONO_MOUSE   | Nono   | Non-POU domain-contai R.FGQAATM*EGIGAIGTTPAFNR@PAPGAEFAPNK#.R | 3.94   | 1.39  | 2.83 | 0.35 |
| Q99K48_NONO_MOUSE   | Nono   | Non-POU domain-contai R.FGQAATMEGIGAIGTTPAFNR@PAPGAEFAPNK#.R  | 3.71   | 2.74  | 1.36 | 0.74 |
| Q99K48_NONO_MOUSE   | Nono   | Non-POU domain-contai R.LFVGNLPPDITEEM*R@.K                   | 19.52  | 8.95  | 2.18 | 0.46 |
| Q99K48_NONO_MOUSE   | Nono   | Non-POU domain-contai R.LFVGNLPPDITEEMR@.K                    | 6.16   | 4.21  | 1.47 | 0.68 |
| Q99K48_NONO_MOUSE   | Nono   | Non-POU domain-contai R.RM*EELHNQEVQR.K                       | 83.28  | 47.02 | 1.77 | 0.56 |
| Q99K48_NONO_MOUSE   | Nono   | Non-POU domain-contai R.R@M*EELHNQEVQR#.R                     | 2.88   | 1.45  | 1.99 | 0.50 |
| Q99K48_NONO_MOUSE   | Nono   | Non-POU domain-contai K.VELDNM*PLR.G                          | 79.37  | 45.45 | 1.75 | 0.57 |
| Q99K48_NONO_MOUSE   | Nono   | Non-POU domain-contai K.VELDNMPLR@.G                          | 12.60  | 7.67  | 1.64 | 0.61 |
| Q99K48_NONO_MOUSE   | Nono   | Non-POU domain-contai K.AFNLEK#.Q                             | 29.31  | 9.75  | 3.01 | 0.33 |
| Q99K48_NONO_MOUSE   | Nono   | Non-POU domain-contai R.AVVVDDR@.G                            | 166.89 | 79.65 | 2.10 | 0.48 |
| Q99K48_NONO_MOUSE   | Nono   | Non-POU domain-contai R.FAQPGSFYEYAM*R@.W                     | 14.85  | 6.24  | 2.38 | 0.42 |
| Q99K48_NONO_MOUSE   | Nono   | Non-POU domain-contai R.LFVGNLPPDITEEM*R@.K                   | 7.23   | 1.84  | 3.94 | 0.25 |
| Q99K48_NONO_MOUSE   | Nono   | Non-POU domain-contai K.VELDNM*PLR.G                          | 26.08  | 11.65 | 2.24 | 0.45 |
| Q9CQ52_NOP10_MOUSE  | Nop10  | H/ACA ribonucleoprotein- M*FLQYMLNEQDGR.V                     | 2.18   | 7.39  | 0.30 | 3.38 |
| Q9CQ52_NOP10_MOUSE  | Nop10  | H/ACA ribonucleoprotein- L.VLM*TQOQRPVL.-                     | 5.45   | 6.37  | 0.86 | 1.17 |
| Q8R3N1_NOP14_MOUSE  | Nop14  | Nucleolar protein 14 OS: K.AVAEALPYVFAPEFPEELK#.F             | 16.98  | 10.27 | 1.65 | 0.60 |
| Q8R3N1_NOP14_MOUSE  | Nop14  | Nucleolar protein 14 OS: K.ELIEELIAK#.S                       | 14.70  | 5.44  | 2.70 | 0.37 |
| Q9CPT5_NOP16_MOUSE  | Nop16  | Nucleolar protein 16 OS: R.DLIDYVR@.Y                         | 41.09  | 12.88 | 3.19 | 0.31 |
| Q9CPT5_NOP16_MOUSE  | Nop16  | Nucleolar protein 16 OS: K.FGYNVNR@.K                         | 22.59  | 7.12  | 3.17 | 0.32 |
| Q9CPT5_NOP16_MOUSE  | Nop16  | Nucleolar protein 16 OS: R.K#PYVNDLEASLPEK#.G                 | 21.23  | 6.60  | 3.22 | 0.31 |
| E9QN31_E9QN31_MOUSE | Nop2   | Probable 28S rRNA (cyto: K.AQDATAGLVNNEEDTDEDGDDGVSPESHPR@.K  | 5.48   | 3.96  | 1.38 | 0.72 |
| E9QN31_E9QN31_MOUSE | Nop2   | Probable 28S rRNA (cyto: R.DLAALINR@.G                        | 55.72  | 32.72 | 1.70 | 0.59 |
| E9QN31_E9QN31_MOUSE | Nop2   | Probable 28S rRNA (cyto: K.DLATYSSYGDFFLSK#.L                 | 14.45  | 10.54 | 1.37 | 0.73 |
| E9QN31_E9QN31_MOUSE | Nop2   | Probable 28S rRNA (cyto: K.ELLLSAIDSVNAASK#.T                 | 63.88  | 34.80 | 1.84 | 0.54 |
| E9QN31_E9QN31_MOUSE | Nop2   | Probable 28S rRNA (cyto: R.GVNLDPILGK#.W                      | 24.20  | 12.67 | 1.91 | 0.52 |
| E9QN31_E9QN31_MOUSE | Nop2   | Probable 28S rRNA (cyto: R.LVPTGLDFQGEQGFTR@.F                | 55.58  | 28.31 | 1.96 | 0.51 |
| E9QN31_E9QN31_MOUSE | Nop2   | Probable 28S rRNA (cyto: K.NTGVILANDANADR@.L                  | 39.85  | 23.90 | 1.67 | 0.60 |
| E9QN31_E9QN31_MOUSE | Nop2   | Probable 28S rRNA (cyto: R.D.LAQALINR@.G                      | 25.63  | 6.28  | 4.08 | 0.25 |
| E9QN31_E9QN31_MOUSE | Nop2   | Probable 28S rRNA (cyto: K.DLATYSSYGDFFLSK#.L                 | 6.55   | 2.49  | 2.63 | 0.38 |
| E9QN31_E9QN31_MOUSE | Nop2   | Probable 28S rRNA (cyto: K.ELLLSAIDSVNAASK#.T                 | 13.12  | 4.24  | 3.10 | 0.32 |
| E9QN31_E9QN31_MOUSE | Nop2   | Probable 28S rRNA (cyto: R.LGVTNTTISHYDGR@.Q                  | 26.83  | 4.39  | 6.11 | 0.16 |
| Q9D621_NOP56_MOUSE  | Nop56  | Nucleolar protein 56 OS: K.EAVVQAEAAAAEITR@.K                 | 17.53  | 9.67  | 1.81 | 0.55 |
| Q9D621_NOP56_MOUSE  | Nop56  | Nucleolar protein 56 OS: R.LSFYETGPIR@.K                      | 9.40   | 14.62 | 0.64 | 1.56 |
| Q9D621_NOP56_MOUSE  | Nop56  | Nucleolar protein 56 OS: K.M*SQVAPLSALIGEAVGAR@.L             | 10.56  | 5.13  | 2.06 | 0.49 |
| Q9D621_NOP56_MOUSE  | Nop56  | Nucleolar protein 56 OS: R.VVLSSEYR.Q                         | 21.86  | 12.25 | 1.79 | 0.56 |
| Q9D621_NOP56_MOUSE  | Nop56  | Nucleolar protein 56 OS: K.YPASTVQLGAEK#.A                    | 11.14  | 7.33  | 1.52 | 0.66 |
| Q9D621_NOP56_MOUSE  | Nop56  | Nucleolar protein 56 OS: K.EAVVQAEAAAAEITR@.K                 | 37.61  | 20.85 | 1.80 | 0.55 |
| Q9D621_NOP56_MOUSE  | Nop56  | Nucleolar protein 56 OS: R.LAQFIGNRR@.R                       | 29.87  | 12.09 | 2.47 | 0.40 |
| Q9D621_NOP56_MOUSE  | Nop56  | Nucleolar protein 56 OS: K.LEEITM*DGAK#.A                     | 20.09  | 12.73 | 1.58 | 0.63 |
| Q9D621_NOP56_MOUSE  | Nop56  | Nucleolar protein 56 OS: R.LLLETYLPK#.K                       | 31.14  | 16.06 | 1.94 | 0.52 |
| Q9D621_NOP56_MOUSE  | Nop56  | Nucleolar protein 56 OS: R.LLLETYLPK#.K                       | 38.51  | 16.62 | 2.32 | 0.43 |
| Q9D621_NOP56_MOUSE  | Nop56  | Nucleolar protein 56 OS: R.LSFYETGPIR@.K                      | 29.09  | 11.97 | 2.43 | 0.41 |
| Q9D621_NOP56_MOUSE  | Nop56  | Nucleolar protein 56 OS: K.M*SQVAPLSALIGEAVGAR@.L             | 37.22  | 17.15 | 2.21 | 0.45 |
| Q9D621_NOP56_MOUSE  | Nop56  | Nucleolar protein 56 OS: K.NLDVM*KHEAVVQAEAAAAEITR@.K         | 8.28   | 4.78  | 1.73 | 0.58 |
| Q9D621_NOP56_MOUSE  | Nop56  | Nucleolar protein 56 OS: R.SSM*GM*DISAIDLINIESFSSR@.V         | 15.65  | 3.25  | 4.81 | 0.21 |
| Q9D621_NOP56_MOUSE  | Nop56  | Nucleolar protein 56 OS: K.SSPKHEAVSEPEEASPTTPK#.K            | 9.18   | 5.16  | 1.78 | 0.56 |
| Q9D621_NOP56_MOUSE  | Nop56  | Nucleolar protein 56 OS: R.VVR@EWGYHFPPLVK#.I                 | 13.69  | 2.29  | 5.97 | 0.17 |
| Q9D621_NOP56_MOUSE  | Nop56  | Nucleolar protein 56 OS: R.VVLSSEYR@.Q                        | 51.59  | 23.73 | 2.17 | 0.46 |
| Q9D621_NOP56_MOUSE  | Nop56  | Nucleolar protein 56 OS: K.YGLIFHSTFIR@.A                     | 13.83  | 5.99  | 2.31 | 0.43 |
| Q9D621_NOP56_MOUSE  | Nop56  | Nucleolar protein 56 OS: K.YPASTVQLGAEK#.A                    | 32.98  | 18.97 | 1.74 | 0.58 |
| Q9D621_NOP56_MOUSE  | Nop56  | Nucleolar protein 56 OS: K.EAVVQAEAAAAEITR@.K                 | 31.94  | 14.47 | 2.21 | 0.45 |
| Q9D621_NOP56_MOUSE  | Nop56  | Nucleolar protein 56 OS: K.EELASDLEEM*ATSSAK#.R               | 8.53   | 3.84  | 2.22 | 0.45 |
| Q9D621_NOP56_MOUSE  | Nop56  | Nucleolar protein 56 OS: K.FSEEPVAANFTK#.S                    | 11.07  | 6.54  | 3.32 | 0.30 |
| Q9D621_NOP56_MOUSE  | Nop56  | Nucleolar protein 56 OS: R.LAQFIGNRR@.R                       | 42.73  | 27.36 | 1.56 | 0.64 |
| Q9D621_NOP56_MOUSE  | Nop56  | Nucleolar protein 56 OS: K.LEEITM*DGAK#.A                     | 36.90  | 11.04 | 3.34 | 0.30 |











|                     |         |                                                            |       |       |       |      |
|---------------------|---------|------------------------------------------------------------|-------|-------|-------|------|
| Q9Z0W3_NU160_MOUSE  | Nup160  | Nuclear pore complex pr K.GFDPAPQLNVR@.M                   | 10.18 | 4.86  | 2.10  | 0.48 |
| Q9Z0W3_NU160_MOUSE  | Nup160  | Nuclear pore complex pr R.LGDAVILGAGQLFQAQQDLHLR@.T        | 19.66 | 7.31  | 2.69  | 0.37 |
| Q9Z0W3_NU160_MOUSE  | Nup160  | Nuclear pore complex pr R.QEILELEDELEKMEYSLAR@.I           | 14.47 | 5.97  | 2.42  | 0.41 |
| Q9Z0W3_NU160_MOUSE  | Nup160  | Nuclear pore complex pr R.SELVTESQM*OSITFDIGK#.V           | 5.46  | 1.88  | 2.90  | 0.34 |
| Q9Z0W3_NU160_MOUSE  | Nup160  | Nuclear pore complex pr R.SFVELSGAER@.E                    | 13.87 | 4.84  | 2.86  | 0.35 |
| Q9Z0W3_NU160_MOUSE  | Nup160  | Nuclear pore complex pr R.TAPLLLSYYLIK#.W                  | 15.38 | 5.72  | 2.69  | 0.37 |
| B9E154_B9E154_MOUSE | Nup205  | MCG21756, isoform CRA K.ASSEGVAIQGGQQTTR@.L                | 16.35 | 7.86  | 2.08  | 0.48 |
| B9E154_B9E154_MOUSE | Nup205  | MCG21756, isoform CRA K.DLPSADSVQYR@.H                     | 5.18  | 2.92  | 1.77  | 0.56 |
| B9E154_B9E154_MOUSE | Nup205  | MCG21756, isoform CRA R.FTDELM*EQLTYKH#.V                  | 6.61  | 1.12  | 5.91  | 0.17 |
| B9E154_B9E154_MOUSE | Nup205  | MCG21756, isoform CRA K.LLDEIGLYSK#.V                      | 8.56  | 3.43  | 2.49  | 0.40 |
| B9E154_B9E154_MOUSE | Nup205  | MCG21756, isoform CRA R.SGLSQVNHQHDQLQSDAVNAFESLQK#.K      | 8.43  | 3.21  | 2.62  | 0.38 |
| Q9D2F7_P210L_MOUSE  | Nup2101 | Nuclear pore membrane R.DVQNP5R@SGDIK#.V                   | 25.60 | 2.36  | 10.84 | 0.09 |
| Q80U93_NU214_MOUSE  | Nup214  | Nuclear pore complex pr R.AAPGSGTSTSFAPPSK#.G              | 5.49  | 2.68  | 2.05  | 0.49 |
| Q80U93_NU214_MOUSE  | Nup214  | Nuclear pore complex pr K.TTLLEGFAGVEEAR@.E                | 7.66  | 2.11  | 3.63  | 0.28 |
| Q80U93_NU214_MOUSE  | Nup214  | Nuclear pore complex pr K.TVPQVNVNQLR@.S                   | 7.36  | 3.04  | 2.42  | 0.41 |
| Q80U93_NU214_MOUSE  | Nup214  | Nuclear pore complex pr R.AAPGSGTSTSFAPPSK#.G              | 13.54 | 4.85  | 2.79  | 0.36 |
| Q80U93_NU214_MOUSE  | Nup214  | Nuclear pore complex pr K.ALQPVTXK#.Q                      | 16.18 | 4.27  | 3.79  | 0.26 |
| Q80U93_NU214_MOUSE  | Nup214  | Nuclear pore complex pr R.IFDSPEELPK#.E                    | 13.26 | 4.16  | 3.19  | 0.31 |
| Q80U93_NU214_MOUSE  | Nup214  | Nuclear pore complex pr K.SSVSPSPAAGR@.S                   | 21.82 | 16.82 | 1.30  | 0.77 |
| Q80U93_NU214_MOUSE  | Nup214  | Nuclear pore complex pr K.STEEAAPPAVDK#.S                  | 4.40  | 2.65  | 1.66  | 0.60 |
| Q80U93_NU214_MOUSE  | Nup214  | Nuclear pore complex pr R.STQTAAPSAPSTGQK#.S               | 28.26 | 9.89  | 2.86  | 0.35 |
| Q80U93_NU214_MOUSE  | Nup214  | Nuclear pore complex pr K.TLELITSEGER@.Q                   | 13.12 | 3.82  | 3.44  | 0.29 |
| Q80U93_NU214_MOUSE  | Nup214  | Nuclear pore complex pr K.TTLLEGFAGVEEAR@.E                | 28.39 | 8.68  | 3.27  | 0.31 |
| Q80U93_NU214_MOUSE  | Nup214  | Nuclear pore complex pr K.VNSNDASGM*VNDM*K#.W              | 6.45  | 4.09  | 1.58  | 0.63 |
| Q8R4R6_NUP53_MOUSE  | Nup35   | Nucleoporin NUP53 OS= K.ASTSDYQVSDR@.Q                     | 8.12  | 4.24  | 1.92  | 0.52 |
| Q8R4R6_NUP53_MOUSE  | Nup35   | Nucleoporin NUP53 OS= R.SIYDISSPLGSLTPSR.R                 | 5.67  | 6.50  | 0.87  | 1.15 |
| Q8R4R6_NUP53_MOUSE  | Nup35   | Nucleoporin NUP53 OS= K.TGANAGFLPGLM*GDLPAVPYQPQR@.S       | 15.01 | 4.03  | 3.73  | 0.27 |
| Q8R4R6_NUP53_MOUSE  | Nup35   | Nucleoporin NUP53 OS= R.TLGTPTQSGSTPR.V                    | 10.22 | 12.63 | 0.81  | 1.24 |
| Q8R4R6_NUP53_MOUSE  | Nup35   | Nucleoporin NUP53 OS= K.ASTSDYQVSDR@.Q                     | 6.42  | 4.18  | 1.54  | 0.65 |
| Q8R4R6_NUP53_MOUSE  | Nup35   | Nucleoporin NUP53 OS= R.GVLSPLSFLATTPTR@.T                 | 9.02  | 3.40  | 2.65  | 0.38 |
| Q8R4R6_NUP53_MOUSE  | Nup35   | Nucleoporin NUP53 OS= R.TLGTPTQSGSTPR@.V                   | 7.86  | 8.08  | 0.97  | 1.03 |
| Q9CWU9_NUP37_MOUSE  | Nup37   | Nucleoporin Nup37 OS= I.R.VDGIWSPETK#.L                    | 8.78  | 6.01  | 1.46  | 0.69 |
| Q9CWU9_NUP37_MOUSE  | Nup37   | Nucleoporin Nup37 OS= I.K.VGAVAGNDWIHIDTR.S                | 18.96 | 12.91 | 1.47  | 0.68 |
| Q9CWU9_NUP37_MOUSE  | Nup37   | Nucleoporin Nup37 OS= I.K.VLEGHSDFINDLVHPK#.E              | 8.11  | 7.36  | 1.10  | 0.91 |
| Q9CWU9_NUP37_MOUSE  | Nup37   | Nucleoporin Nup37 OS= I.R.WSAIENKATTPYVPGK#.M              | 4.36  | 2.38  | 1.84  | 0.54 |
| Q9JIH2_NUP50_MOUSE  | Nup50   | Nuclear pore complex pr R.ATAGM*PEPSLFGSTK#.L              | 9.52  | 9.03  | 1.05  | 0.95 |
| Q8BTS4_NUP54_MOUSE  | Nup54   | Nuclear pore complex pr R.LDIISEDISELQK#.N                 | 18.96 | 8.36  | 2.27  | 0.44 |
| Q8BTS4_NUP54_MOUSE  | Nup54   | Nuclear pore complex pr R.RNELM*SQR@.M                     | 8.90  | 6.44  | 1.38  | 0.72 |
| Q8BTS4_NUP54_MOUSE  | Nup54   | Nuclear pore complex pr K.VLGGNQTLTVNVEGK#.T               | 7.95  | 3.62  | 2.19  | 0.46 |
| Q8BTS4_NUP54_MOUSE  | Nup54   | Nuclear pore complex pr R.VQLDTIQGLNAPQFQK#.G              | 9.10  | 4.07  | 2.23  | 0.45 |
| Q8BTS4_NUP54_MOUSE  | Nup54   | Nuclear pore complex pr K.VLGGNQTLTVNVEGK#.T               | 4.28  | 2.26  | 1.89  | 0.53 |
| Q8BTS4_NUP54_MOUSE  | Nup54   | Nuclear pore complex pr R.VQLDTIQGLNAPQFQK#.G              | 9.89  | 3.49  | 2.84  | 0.35 |
| Q63850_NUP62_MOUSE  | Nup62   | Nuclear pore glycoprotei K.EDLLEPLLEESVK#.E                | 9.45  | 3.47  | 2.72  | 0.37 |
| Q63850_NUP62_MOUSE  | Nup62   | Nuclear pore glycoprotei K.R@LQDELDFILSQK#.E               | 8.09  | 6.05  | 1.34  | 0.75 |
| Q8CECO_NUP88_MOUSE  | Nup88   | Nuclear pore complex pr K.FLGSDEEDK#DLSQELTAEQK#.C         | 11.00 | 4.62  | 2.44  | 0.41 |
| Q8CECO_NUP88_MOUSE  | Nup88   | Nuclear pore complex pr R.LLAETPDSEFK#.H                   | 12.41 | 6.25  | 1.99  | 0.50 |
| Q8CECO_NUP88_MOUSE  | Nup88   | Nuclear pore complex pr K.VIVLSEAEESLILNK#.G               | 12.78 | 3.24  | 3.95  | 0.25 |
| Q8CECO_NUP88_MOUSE  | Nup88   | Nuclear pore complex pr K.VLSPQK#PTLTLTAQR@.K              | 9.08  | 3.06  | 2.97  | 0.34 |
| Q8CECO_NUP88_MOUSE  | Nup88   | Nuclear pore complex pr R.LLAETPDSEFK#.H                   | 7.90  | 3.15  | 2.51  | 0.40 |
| Q8CECO_NUP88_MOUSE  | Nup88   | Nuclear pore complex pr K.VIVLSEAEESLILNK#.G               | 7.06  | 2.77  | 2.55  | 0.39 |
| Q8BJ71_NUP93_MOUSE  | Nup93   | Nuclear pore complex pr R.AFDIIR@.L                        | 22.53 | 5.74  | 3.93  | 0.25 |
| Q8BJ71_NUP93_MOUSE  | Nup93   | Nuclear pore complex pr R.AQHQLGFFK#.T                     | 7.41  | 4.22  | 1.76  | 0.57 |
| Q8BJ71_NUP93_MOUSE  | Nup93   | Nuclear pore complex pr K.ASVLGSR@.G                       | 20.66 | 5.97  | 3.46  | 0.29 |
| Q8BJ71_NUP93_MOUSE  | Nup93   | Nuclear pore complex pr R.EALQYFVFLR@.D                    | 27.27 | 10.99 | 2.48  | 0.40 |
| Q8BJ71_NUP93_MOUSE  | Nup93   | Nuclear pore complex pr R.LELSAATFEPLVVK#DITDQGLK#.N       | 34.50 | 13.42 | 2.57  | 0.39 |
| Q8BJ71_NUP93_MOUSE  | Nup93   | Nuclear pore complex pr R.LLM*LYTR@.K                      | 11.13 | 4.15  | 2.68  | 0.37 |
| Q8BJ71_NUP93_MOUSE  | Nup93   | Nuclear pore complex pr K.LLSPVVPQISAPQSNK#.E              | 10.92 | 4.86  | 2.25  | 0.44 |
| Q8BJ71_NUP93_MOUSE  | Nup93   | Nuclear pore complex pr K.LVPLNQESVEER@.V                  | 36.60 | 15.15 | 2.42  | 0.41 |
| Q8BJ71_NUP93_MOUSE  | Nup93   | Nuclear pore complex pr K.NEKDNALLSAIEESR.K                | 17.19 | 8.27  | 2.08  | 0.48 |
| Q8BJ71_NUP93_MOUSE  | Nup93   | Nuclear pore complex pr R.NLQEQIAGER@.L                    | 21.89 | 8.72  | 2.51  | 0.40 |
| Q8BJ71_NUP93_MOUSE  | Nup93   | Nuclear pore complex pr K.QM*TDVLTPTATDALK#.S              | 14.43 | 3.80  | 3.73  | 0.27 |
| Q8BJ71_NUP93_MOUSE  | Nup93   | Nuclear pore complex pr R.SSLDSIEMAYAR@.Q                  | 1.78  | 1.96  | 0.91  | 1.10 |
| Q8BJ71_NUP93_MOUSE  | Nup93   | Nuclear pore complex pr K.DNALLSAIEESR@.K                  | 13.64 | 7.82  | 1.74  | 0.57 |
| Q8BJ71_NUP93_MOUSE  | Nup93   | Nuclear pore complex pr R.EALQYFVFLR@.D                    | 18.00 | 6.30  | 2.86  | 0.35 |
| Q8BJ71_NUP93_MOUSE  | Nup93   | Nuclear pore complex pr R.LHLTLASGDELDTQEQSEPSYGOVNPVGR@.S | 5.83  | 3.11  | 1.88  | 0.53 |
| Q8BJ71_NUP93_MOUSE  | Nup93   | Nuclear pore complex pr K.LLSPVVPQISAPQSNK#.E              | 9.91  | 4.19  | 2.37  | 0.42 |
| Q8BJ71_NUP93_MOUSE  | Nup93   | Nuclear pore complex pr R.LTLSQFQK#.Q                      | 18.22 | 10.82 | 1.68  | 0.59 |
| Q8BJ71_NUP93_MOUSE  | Nup93   | Nuclear pore complex pr K.LVPLNQESVEER@.V                  | 25.02 | 12.23 | 2.05  | 0.49 |
| Q8BJ71_NUP93_MOUSE  | Nup93   | Nuclear pore complex pr R.NLQEQIAGER@.L                    | 9.43  | 9.89  | 2.47  | 0.40 |
| Q8BJ71_NUP93_MOUSE  | Nup93   | Nuclear pore complex pr K.QM*TDVLTPTATDALK#.S              | 24.75 | 6.67  | 1.46  | 0.68 |
| Q8BJ71_NUP93_MOUSE  | Nup93   | Nuclear pore complex pr R.SSLDSIEM*AYAR@.Q                 | 9.40  | 4.25  | 2.21  | 0.45 |
| Q6PFD9_NUP98_MOUSE  | Nup98   | Nuclear pore complex pr K.DSPGDFLELPIVK#.H                 | 9.83  | 7.17  | 1.37  | 0.73 |
| Q6PFD9_NUP98_MOUSE  | Nup98   | Nuclear pore complex pr K.EVIVVDDNQK#PPVGEGLNR@.K          | 8.82  | 8.37  | 1.05  | 0.95 |
| Q6PFD9_NUP98_MOUSE  | Nup98   | Nuclear pore complex pr R.FSFLSK#PVDENNQDGEDSDLSR@.F       | 13.78 | 7.76  | 1.78  | 0.56 |
| Q6PFD9_NUP98_MOUSE  | Nup98   | Nuclear pore complex pr R.IFALLAGK#PVWQLSEK#.Q             | 8.03  | 1.64  | 4.90  | 0.20 |
| Q6PFD9_NUP98_MOUSE  | Nup98   | Nuclear pore complex pr R.LALLLSQLVGSQVSR@.E               | 12.97 | 8.59  | 1.51  | 0.66 |
| Q6PFD9_NUP98_MOUSE  | Nup98   | Nuclear pore complex pr R.SITADPLDYR@.L                    | 10.09 | 5.03  | 2.01  | 0.50 |
| Q6PFD9_NUP98_MOUSE  | Nup98   | Nuclear pore complex pr K.SLEELRLDYQANR.K                  | 21.16 | 11.58 | 1.83  | 0.55 |
| Q6PFD9_NUP98_MOUSE  | Nup98   | Nuclear pore complex pr K.DSPGDFLELPIVK#.H                 | 14.73 | 6.10  | 2.42  | 0.41 |
| Q6PFD9_NUP98_MOUSE  | Nup98   | Nuclear pore complex pr R.LALLLSQLVGSQVSR@.E               | 8.08  | 8.43  | 0.96  | 1.04 |
| Q6PFD9_NUP98_MOUSE  | Nup98   | Nuclear pore complex pr R.SITADPLDYR@.L                    | 8.42  | 2.73  | 3.09  | 0.32 |
| Q9DBY8_NVL_MOUSE    | Nvl     | Nuclear valosin-containii K.AVANESGLNFISVK#.G              | 30.83 | 12.35 | 2.50  | 0.40 |
| Q9DBY8_NVL_MOUSE    | Nvl     | Nuclear valosin-containii K.DQVM*YEAQR@.S                  | 6.89  | 6.32  | 1.09  | 0.92 |
| Q9DBY8_NVL_MOUSE    | Nvl     | Nuclear valosin-containii K.ESLPLDSDSQSNK#.S               | 6.43  | 3.58  | 1.80  | 0.56 |
| Q9DBY8_NVL_MOUSE    | Nvl     | Nuclear valosin-containii K.GPELNM*YVGESER@.A              | 10.09 | 7.05  | 1.43  | 0.70 |
| Q9DBY8_NVL_MOUSE    | Nvl     | Nuclear valosin-containii R.KTENLQVDDGEIALLQK.K            | 16.71 | 13.55 | 1.23  | 0.81 |
| Q9DBY8_NVL_MOUSE    | Nvl     | Nuclear valosin-containii R.LGAEPSTEQDELQR@.L              | 41.99 | 24.20 | 1.74  | 0.58 |
| Q9DBY8_NVL_MOUSE    | Nvl     | Nuclear valosin-containii R.LYSVDYGR@.R                    | 12.88 | 6.91  | 1.86  | 0.54 |
| Q9DBY8_NVL_MOUSE    | Nvl     | Nuclear valosin-containii R.STELQSNVK#.F                   | 20.41 | 13.34 | 1.53  | 0.65 |
| Q9DBY8_NVL_MOUSE    | Nvl     | Nuclear valosin-containii K.TLFGVLPVPPADR@.V               | 10.16 | 6.73  | 1.51  | 0.66 |
| Q9DBY8_NVL_MOUSE    | Nvl     | Nuclear valosin-containii K.TLLAHAIAGELDLPILK#.V           | 44.24 | 20.52 | 2.16  | 0.46 |
| Q9DBY8_NVL_MOUSE    | Nvl     | Nuclear valosin-containii K.VAAPVIVSGVSGESEQK#.L           | 27.95 | 15.13 | 1.85  | 0.54 |
| Q9DBY8_NVL_MOUSE    | Nvl     | Nuclear valosin-containii R.VIQVLSNRR@.C                   | 12.86 | 6.08  | 2.12  | 0.47 |
| Q9DBY8_NVL_MOUSE    | Nvl     | Nuclear valosin-containii K.VKPSISIKDQVM*YEAQR.S           | 10.23 | 7.07  | 1.45  | 0.69 |
| Q9DBY8_NVL_MOUSE    | Nvl     | Nuclear valosin-containii R.VLVIATNR@PDSLDPALR@.R          | 24.18 | 15.65 | 1.54  | 0.65 |
| Q9DBY8_NVL_MOUSE    | Nvl     | Nuclear valosin-containii R.VVNQLLTEM*DGLETR@.Q            | 16.30 | 6.70  | 2.43  | 0.41 |
| Q9DBY8_NVL_MOUSE    | Nvl     | Nuclear valosin-containii K.VAAPVIVSGVSGESEQK#.L           | 4.93  | 2.45  | 2.01  | 0.50 |
| Q9JX7_NXF1_MOUSE    | Nxf1    | Nuclear RNA export facte R.LNVVAFNLNPK#.T                  | 7.97  | 3.94  | 2.02  | 0.49 |
| Q9JX7_NXF1_MOUSE    | Nxf1    | Nuclear RNA export facte K.TLNLGSELK#.T                    | 7.98  | 6.85  | 1.16  | 0.86 |
| Q9JX7_NXF1_MOUSE    | Nxf1    | Nuclear RNA export facte R.LNVVAFNLNPK#.T                  | 6.99  | 3.04  | 2.30  | 0.44 |
| P11928_OAS1A_MOUSE  | Oas1a   | 2'-5'-oligoadenylate synti K.AR@PVLDPADPTGNVAGGNPEGWR@.R   | 26.59 | 17.02 | 1.56  | 0.64 |
| P11928_OAS1A_MOUSE  | Oas1a   | 2'-5'-oligoadenylate synti K.AR@PVLDPADPTGNVAGGNPEGWR@.R   | 28.80 | 34.76 | 0.83  | 1.21 |
| P11928_OAS1A_MOUSE  | Oas1a   | 2'-5'-oligoadenylate synti K.FIEDVLPDPTTFGADV#.S           | 28.19 | 20.56 | 1.37  | 0.73 |

|                     |         |                                                                 |       |       |      |      |
|---------------------|---------|-----------------------------------------------------------------|-------|-------|------|------|
| Q8V194_OASL1_MOUSE  | Oasl1   | 2'-5'-oligoadenylate synt I.K.ILSQGYLGLQR.L                     | 3.32  | 12.21 | 0.27 | 3.67 |
| Q8V194_OASL1_MOUSE  | Oasl1   | 2'-5'-oligoadenylate synt K.LDSFVAQWLOPTR.E                     | 4.04  | 9.65  | 0.42 | 2.39 |
| Q8V194_OASL1_MOUSE  | Oasl1   | 2'-5'-oligoadenylate synt R.LEFGHLEDWDFK.S                      | 3.80  | 6.28  | 0.60 | 1.65 |
| Q8V194_OASL1_MOUSE  | Oasl1   | 2'-5'-oligoadenylate synt R.SHAYAIHPDYLNLK.K.Q                  | 2.48  | 7.97  | 0.31 | 3.21 |
| Q8V194_OASL1_MOUSE  | Oasl1   | 2'-5'-oligoadenylate synt K.LDSFVAQWLOPTR.E                     | 3.23  | 6.97  | 0.46 | 2.15 |
| Q8V194_OASL1_MOUSE  | Oasl1   | 2'-5'-oligoadenylate synt K.ILSQGYLGLQR.L                       | 2.98  | 12.68 | 0.23 | 4.26 |
| Q9Z2F2_OASL2_MOUSE  | Oasl2   | 2'-5'-oligoadenylate synt R.DSK#PAPAIYETLIR@.S                  | 75.10 | 68.96 | 1.09 | 0.92 |
| Q9Z2F2_OASL2_MOUSE  | Oasl2   | 2'-5'-oligoadenylate synt R.DWK#EKGQDAWERR@.I                   | 9.89  | 12.75 | 0.78 | 1.29 |
| Q9Z2F2_OASL2_MOUSE  | Oasl2   | 2'-5'-oligoadenylate synt R.EVVISFIK#.K                         | 39.21 | 31.55 | 1.24 | 0.80 |
| Q9Z2F2_OASL2_MOUSE  | Oasl2   | 2'-5'-oligoadenylate synt K.GDR#PILDPADPTNNGR@.R                | 29.50 | 30.24 | 0.98 | 1.03 |
| Q9Z2F2_OASL2_MOUSE  | Oasl2   | 2'-5'-oligoadenylate synt K.GYGFDPSPFTELQR@.H                   | 30.61 | 30.77 | 0.99 | 1.01 |
| Q9Z2F2_OASL2_MOUSE  | Oasl2   | 2'-5'-oligoadenylate synt R.KTDDIIVM#DILPAYDALGPISR.D           | 23.29 | 14.92 | 1.56 | 0.64 |
| Q9Z2F2_OASL2_MOUSE  | Oasl2   | 2'-5'-oligoadenylate synt R.KTLADYGFISK.V                       | 12.29 | 10.72 | 1.15 | 0.87 |
| Q9Z2F2_OASL2_MOUSE  | Oasl2   | 2'-5'-oligoadenylate synt R.NR@EVIWFIK#.K                       | 15.50 | 6.64  | 2.33 | 0.43 |
| Q9Z2F2_OASL2_MOUSE  | Oasl2   | 2'-5'-oligoadenylate synt K.QTGTVDWTLWTPNPSPIR.K                | 5.56  | 4.78  | 1.16 | 0.86 |
| Q9Z2F2_OASL2_MOUSE  | Oasl2   | 2'-5'-oligoadenylate synt R.SKGYGDFSPSFTELQR.H                  | 39.68 | 18.06 | 1.09 | 0.92 |
| Q9Z2F2_OASL2_MOUSE  | Oasl2   | 2'-5'-oligoadenylate synt K.YPGGQSK#PFTIDPDDTILDLK#.E           | 19.20 | 40.41 | 0.97 | 1.03 |
| Q9Z2F2_OASL2_MOUSE  | Oasl2   | 2'-5'-oligoadenylate synt K.YPGGQSK#PFTIDPDDTILDLK#.E           | 17.71 | 19.99 | 0.89 | 1.13 |
| Q9Z2F2_OASL2_MOUSE  | Oasl2   | 2'-5'-oligoadenylate synt K.YPNFQNEVVR@.N                       | 52.70 | 39.55 | 1.33 | 0.75 |
| Q9Z2F2_OASL2_MOUSE  | Oasl2   | 2'-5'-oligoadenylate synt R.DSK#PAPAIYETLIR@.S                  | 59.16 | 56.76 | 1.04 | 0.96 |
| Q9Z2F2_OASL2_MOUSE  | Oasl2   | 2'-5'-oligoadenylate synt R.EVVISFIK#.K                         | 44.77 | 34.98 | 1.28 | 0.78 |
| Q9Z2F2_OASL2_MOUSE  | Oasl2   | 2'-5'-oligoadenylate synt K.GDR#PILDPADPTNNGR@.R                | 30.73 | 34.68 | 0.89 | 1.13 |
| Q9Z2F2_OASL2_MOUSE  | Oasl2   | 2'-5'-oligoadenylate synt K.GYGFDPSPFTELQR@.H                   | 31.89 | 21.99 | 1.45 | 0.69 |
| Q9Z2F2_OASL2_MOUSE  | Oasl2   | 2'-5'-oligoadenylate synt R.KHTDDIIVM#DILPAYDALGPISR@.D         | 22.03 | 16.88 | 1.31 | 0.77 |
| Q9Z2F2_OASL2_MOUSE  | Oasl2   | 2'-5'-oligoadenylate synt K.QTGTVDWTLWTPNPSPIR.K                | 6.73  | 4.57  | 1.47 | 0.68 |
| Q9Z2F2_OASL2_MOUSE  | Oasl2   | 2'-5'-oligoadenylate synt K.YPGGQSK#PFTIDPDDTILDLK#.E           | 34.73 | 28.11 | 1.24 | 0.81 |
| Q9Z2F2_OASL2_MOUSE  | Oasl2   | 2'-5'-oligoadenylate synt K.YPNFQNEVVR@.N                       | 53.94 | 30.02 | 1.80 | 0.56 |
| Q9Z2F2_OASL2_MOUSE  | Oasl2   | 2'-5'-oligoadenylate synt R.DSK#PAPAIYETLIR@.S                  | 36.02 | 31.24 | 1.15 | 0.87 |
| Q9Z2F2_OASL2_MOUSE  | Oasl2   | 2'-5'-oligoadenylate synt K.GDR#PILDPADPTNNGR@.R                | 27.86 | 25.78 | 1.08 | 0.93 |
| Q9Z2F2_OASL2_MOUSE  | Oasl2   | 2'-5'-oligoadenylate synt R.KTDDIIVM#DILPAYDALGPISR.D           | 11.87 | 12.32 | 0.96 | 1.04 |
| Q9Z2F2_OASL2_MOUSE  | Oasl2   | 2'-5'-oligoadenylate synt K.QTGTVDWTLWTPNPSPIR@.K               | 4.85  | 4.52  | 1.07 | 0.93 |
| Q9Z2F2_OASL2_MOUSE  | Oasl2   | 2'-5'-oligoadenylate synt K.YPGGQSK#PFTIDPDDTILDLK#.E           | 22.52 | 16.75 | 1.34 | 0.74 |
| Q9Z2F2_OASL2_MOUSE  | Oasl2   | 2'-5'-oligoadenylate synt K.YPNFQNEVVR@.N                       | 28.93 | 20.22 | 1.43 | 0.70 |
| Q8K2X3_STN1_MOUSE   | Oblf1   | CST complex subunit STN R.IGIGDIR@.V                            | 24.40 | 8.82  | 2.77 | 0.36 |
| Q8K2X3_STN1_MOUSE   | Oblf1   | CST complex subunit STN K.LSNAESSDPAILSTAR@.E                   | 9.70  | 3.95  | 2.45 | 0.41 |
| Q8K2X3_STN1_MOUSE   | Oblf1   | CST complex subunit STN K.VYDQPR@.N                             | 12.30 | 4.85  | 2.54 | 0.39 |
| Q8CGY8_OGT1_MOUSE   | Ogt     | UDP-N-acetylglucosamin K.AFLDSL PDKV#.I                         | 17.95 | 7.87  | 2.28 | 0.44 |
| Q8CGY8_OGT1_MOUSE   | Ogt     | UDP-N-acetylglucosamin K.ALEVFPFAAHSNLASVLQQGK#.L               | 15.70 | 3.58  | 4.39 | 0.23 |
| Q8CGY8_OGT1_MOUSE   | Ogt     | UDP-N-acetylglucosamin R.EQGNIEAVR@.L                           | 24.43 | 10.04 | 2.43 | 0.41 |
| Q8CGY8_OGT1_MOUSE   | Ogt     | UDP-N-acetylglucosamin R.FPAVGEPIIQQAQNM*GLPNR@.I               | 7.72  | 4.62  | 1.67 | 0.60 |
| Q8CGY8_OGT1_MOUSE   | Ogt     | UDP-N-acetylglucosamin K.IDPSTQM#WANILK#.R                      | 6.65  | 4.68  | 1.42 | 0.70 |
| Q8CGY8_OGT1_MOUSE   | Ogt     | UDP-N-acetylglucosamin R.ISPFTADAYSNM#GNTLK#.E                  | 11.43 | 4.21  | 2.71 | 0.37 |
| Q8CGY8_OGT1_MOUSE   | Ogt     | UDP-N-acetylglucosamin K.LVSVAELQEK#.N                          | 18.35 | 8.10  | 2.27 | 0.44 |
| Q8CGY8_OGT1_MOUSE   | Ogt     | UDP-N-acetylglucosamin K.SR@QEVEDIAVK#.L                        | 7.28  | 2.56  | 2.84 | 0.35 |
| Q8CGY8_OGT1_MOUSE   | Ogt     | UDP-N-acetylglucosamin K.AFLDSL PDKV#.I                         | 11.65 | 4.91  | 2.37 | 0.42 |
| Q8CGY8_OGT1_MOUSE   | Ogt     | UDP-N-acetylglucosamin R.AIQNPFAAHSNLASIH#.D                    | 9.60  | 2.68  | 3.58 | 0.28 |
| Q8CGY8_OGT1_MOUSE   | Ogt     | UDP-N-acetylglucosamin K.ALEVFPFAAHSNLASVLQQGK#.L               | 14.33 | 4.41  | 3.25 | 0.31 |
| Q8CGY8_OGT1_MOUSE   | Ogt     | UDP-N-acetylglucosamin R.EQGNIEAVR@.L                           | 10.92 | 2.90  | 3.77 | 0.27 |
| Q8CGY8_OGT1_MOUSE   | Ogt     | UDP-N-acetylglucosamin R.ISPFTADAYSNM#GNTLK#.E                  | 8.12  | 1.87  | 4.35 | 0.23 |
| Q8CGY8_OGT1_MOUSE   | Ogt     | UDP-N-acetylglucosamin K.LVSVAELQEK#.N                          | 14.88 | 5.52  | 2.70 | 0.37 |
| Q8VGI0_Q8VGI0_MOUSE | Olf791  | Olfactory receptor 791 C.K.QAFSDSVKR.R                          | 20.79 | 5.37  | 3.87 | 0.26 |
| Q8K3K8_OPTN_MOUSE   | Optn    | Optineurin OS=Mus mus K.ADLGIVSELQK#.L                          | 10.60 | 2.18  | 4.86 | 0.21 |
| Q8K3K8_OPTN_MOUSE   | Optn    | Optineurin OS=Mus mus K.M*LQLESEKLEAEQALASK#.Q                  | 9.41  | 2.56  | 3.67 | 0.27 |
| Q9Z1N2_ORC1_MOUSE   | Orc1    | Origin recognition comp R.NLAVQEPASALEEAR@.L                    | 4.91  | 2.40  | 2.04 | 0.49 |
| Q60862_ORC2_MOUSE   | Orc2    | Origin recognition comp R.DK#ASDLVEEYFEAHSSSK#.V                | 6.81  | 4.51  | 1.51 | 0.66 |
| Q60862_ORC2_MOUSE   | Orc2    | Origin recognition comp R.DK#ASDLVEEYFEAHSSSK#.V                | 8.53  | 2.72  | 3.14 | 0.32 |
| Q60862_ORC2_MOUSE   | Orc2    | Origin recognition comp K.VPSVQFVGDDVLSHLDR@.E                  | 14.74 | 4.03  | 3.66 | 0.27 |
| Q9JK30_ORC3_MOUSE   | Orc3    | Origin recognition comp R.SPPVLLLK#.S                           | 11.77 | 5.29  | 2.23 | 0.45 |
| Q9WUJ8_ORC6_MOUSE   | Orc6    | Origin recognition comp R.LGLAEPSVLR@.K                         | 26.15 | 7.99  | 3.27 | 0.31 |
| Q9WUJ8_ORC6_MOUSE   | Orc6    | Origin recognition comp R.LGLAEPSVLR@.K                         | 12.95 | 6.06  | 2.14 | 0.47 |
| Q9ERY9_ERG28_MOUSE  | ORF11   | Probable ergosterol bios R.YLEAEPVSR@.Q                         | 12.67 | 17.30 | 0.73 | 1.37 |
| Q8CI95_OSB11_MOUSE  | Osbpl11 | Oxysterol-binding protei R.VVLPTFLEK#.R                         | 15.22 | 6.59  | 2.31 | 0.43 |
| Q8CI95_OSB11_MOUSE  | Osbpl11 | Oxysterol-binding protei R.VVLPTFLEK#.R                         | 19.92 | 6.59  | 3.02 | 0.33 |
| Q7TQJ3_OTUB1_MOUSE  | Otub1   | Ubiquitin thioesterase O' R.IQQEIAVQNPLVSR@.L                   | 6.61  | 2.64  | 2.50 | 0.40 |
| Q7TQJ3_OTUB1_MOUSE  | Otub1   | Ubiquitin thioesterase O' R.LLTSGLYQR@.E                        | 14.51 | 9.92  | 1.46 | 0.68 |
| Q7TQJ3_OTUB1_MOUSE  | Otub1   | Ubiquitin thioesterase O' R.IQQEIAVQNPLVSR@.L                   | 5.93  | 2.36  | 2.51 | 0.40 |
| Q3UJ35_OVOS_MOUSE   | Ovos    | Ovestatin homolog OS=A. K.SNSSDFQTK#.F                          | 15.81 | 5.84  | 2.71 | 0.37 |
| Q6P9R2_OXSR1_MOUSE  | Oxsr1   | Serine/threonine-protein K.IPISLVR@.L                           | 16.15 | 9.58  | 1.68 | 0.59 |
| Q6P9R2_OXSR1_MOUSE  | Oxsr1   | Serine/threonine-protein K.LLSSGGVLDIHK#.H                      | 10.76 | 8.12  | 1.33 | 0.75 |
| Q6P9R2_OXSR1_MOUSE  | Oxsr1   | Serine/threonine-protein K.SGVLDEPTIATLR@.E                     | 15.66 | 6.85  | 2.29 | 0.44 |
| Q6P9R2_OXSR1_MOUSE  | Oxsr1   | Serine/threonine-protein K.IPISLVR@.L                           | 21.54 | 11.97 | 1.80 | 0.56 |
| Q6P9R2_OXSR1_MOUSE  | Oxsr1   | Serine/threonine-protein K.LLSSGGVLDIHK#.H                      | 13.56 | 6.66  | 2.04 | 0.49 |
| Q6P9R2_OXSR1_MOUSE  | Oxsr1   | Serine/threonine-protein K.IPISLVR@.L                           | 14.46 | 4.04  | 3.58 | 0.28 |
| Q6P9R2_OXSR1_MOUSE  | Oxsr1   | Serine/threonine-protein K.IVEEPQSNR@.S                         | 9.83  | 3.55  | 2.77 | 0.36 |
| Q6P9R2_OXSR1_MOUSE  | Oxsr1   | Serine/threonine-protein K.LLSSGGVLDIHK#.H                      | 10.02 | 4.01  | 2.50 | 0.40 |
| Q9CPV9_P2Y12_MOUSE  | P2ry12  | P2Y purinoceptor 12 OS= K.KHGGQEGEPSEETPM.-                     | 12.05 | 1.96  | 6.20 | 0.16 |
| Q60715_P4HA1_MOUSE  | P4ha1   | Prolyl 4-hydroxylase sub R.FHDIISAIEIYK.D                       | 19.35 | 22.03 | 0.88 | 1.14 |
| Q60715_P4HA1_MOUSE  | P4ha1   | Prolyl 4-hydroxylase sub K.GIAVDYLPER.Q                         | 40.85 | 26.84 | 1.52 | 0.66 |
| Q60715_P4HA1_MOUSE  | P4ha1   | Prolyl 4-hydroxylase sub R.IQDLTGLDVTAEELQVANYGVGGQYEPHFDFAR@.K | 5.24  | 3.25  | 1.61 | 0.62 |
| Q60715_P4HA1_MOUSE  | P4ha1   | Prolyl 4-hydroxylase sub R.KHDEPDAFR@.E                         | 7.13  | 9.56  | 0.75 | 1.34 |
| Q60715_P4HA1_MOUSE  | P4ha1   | Prolyl 4-hydroxylase sub R.LNTEWSELENLIK#.D                     | 19.80 | 19.23 | 1.03 | 0.97 |
| Q60715_P4HA1_MOUSE  | P4ha1   | Prolyl 4-hydroxylase sub R.LQDTYNDLNTISK#.G                     | 41.89 | 33.06 | 1.27 | 0.79 |
| Q60715_P4HA1_MOUSE  | P4ha1   | Prolyl 4-hydroxylase sub R.QYFPNDEDDQVGAAR#.A                   | 12.13 | 9.23  | 1.31 | 0.76 |
| Q60715_P4HA1_MOUSE  | P4ha1   | Prolyl 4-hydroxylase sub K.VSVDLYSVAVYQQGLDK#.A                 | 17.72 | 15.22 | 1.16 | 0.86 |
| Q60715_P4HA1_MOUSE  | P4ha1   | Prolyl 4-hydroxylase sub K.DPEGFVGHVFNFAFK#.L                   | 18.81 | 14.78 | 1.27 | 0.79 |
| Q60715_P4HA1_MOUSE  | P4ha1   | Prolyl 4-hydroxylase sub R.FHDIISAIEIYK.D                       | 28.11 | 26.32 | 1.07 | 0.94 |
| Q60715_P4HA1_MOUSE  | P4ha1   | Prolyl 4-hydroxylase sub K.GIAVDYLPER@.Q                        | 61.49 | 38.63 | 1.59 | 0.63 |
| Q60715_P4HA1_MOUSE  | P4ha1   | Prolyl 4-hydroxylase sub R.IQDLTGLDVTAEELQVANYGVGGQYEPHFDFAR@.K | 10.05 | 5.69  | 1.77 | 0.57 |
| Q60715_P4HA1_MOUSE  | P4ha1   | Prolyl 4-hydroxylase sub R.KDEPDAFR.E                           | 24.28 | 34.56 | 0.70 | 1.42 |
| Q60715_P4HA1_MOUSE  | P4ha1   | Prolyl 4-hydroxylase sub K.HLLELDPHQOR@.A                       | 23.47 | 21.97 | 1.07 | 0.94 |
| Q60715_P4HA1_MOUSE  | P4ha1   | Prolyl 4-hydroxylase sub R.LNTEWSELENLIK#.D                     | 30.28 | 23.39 | 1.29 | 0.77 |
| Q60715_P4HA1_MOUSE  | P4ha1   | Prolyl 4-hydroxylase sub R.LQDTYNDLNTISK#.G                     | 43.43 | 39.11 | 1.29 | 0.78 |
| Q60715_P4HA1_MOUSE  | P4ha1   | Prolyl 4-hydroxylase sub R.LTSTATQDEPGEVGHVFNFAFK.L             | 7.67  | 7.30  | 1.05 | 0.95 |
| Q60715_P4HA1_MOUSE  | P4ha1   | Prolyl 4-hydroxylase sub R.QYFPNDEDDQVGAAR#.A                   | 14.10 | 10.75 | 1.31 | 0.76 |
| Q60715_P4HA1_MOUSE  | P4ha1   | Prolyl 4-hydroxylase sub K.RLNTEWSELENLIK#.D                    | 8.03  | 9.57  | 0.84 | 1.19 |
| Q60715_P4HA1_MOUSE  | P4ha1   | Prolyl 4-hydroxylase sub R.LQDTYNDLNTISK#.G                     | 6.70  | 7.11  | 0.94 | 1.06 |
| Q60716_P4HA2_MOUSE  | P4ha2   | Prolyl 4-hydroxylase sub R.QFFPTDEDESGAAR@.A                    | 6.29  | 4.55  | 1.38 | 0.72 |
| Q60716_P4HA2_MOUSE  | P4ha2   | Prolyl 4-hydroxylase sub K.QLDAGEAETVTK#.S                      | 8.57  | 7.56  | 1.13 | 0.88 |
| Q60716_P4HA2_MOUSE  | P4ha2   | Prolyl 4-hydroxylase sub K.SSWLEEDDDPVVVR@.V                    | 3.36  | 3.15  | 1.07 | 0.94 |
| Q60716_P4HA2_MOUSE  | P4ha2   | Prolyl 4-hydroxylase sub K.TAELLQVANYGM#GGQYEPHFDFSR@.S         | 3.49  | 3.06  | 1.14 | 0.88 |
| Q60716_P4HA2_MOUSE  | P4ha2   | Prolyl 4-hydroxylase sub K.TGVLTVASR@.V                         | 7.94  | 7.87  | 1.01 | 0.99 |
| Q60716_P4HA2_MOUSE  | P4ha2   | Prolyl 4-hydroxylase sub R.YYDVM#SDEIER@.I                      | 5.02  | 3.81  | 1.32 | 0.76 |
| Q60716_P4HA2_MOUSE  | P4ha2   | Prolyl 4-hydroxylase sub K.TAELLQVANYGM#GGQYEPHFDFSR@.S         | 4.82  | 1.49  | 3.23 | 0.31 |

|                     |        |                                                         |        |        |      |      |
|---------------------|--------|---------------------------------------------------------|--------|--------|------|------|
| P09103_PDIA1_MOUSE  | P4hb   | Protein disulfide-isomer: R.EADDIVNWLK#.K               | 85.87  | 59.30  | 1.45 | 0.69 |
| P09103_PDIA1_MOUSE  | P4hb   | Protein disulfide-isomer: K.HNQLPLVIEFTQTAPK#.I         | 106.05 | 76.45  | 1.39 | 0.72 |
| P09103_PDIA1_MOUSE  | P4hb   | Protein disulfide-isomer: K.IKPHLM#SQEVPEDWDKQPVK.V     | 40.50  | 37.10  | 1.09 | 0.91 |
| P09103_PDIA1_MOUSE  | P4hb   | Protein disulfide-isomer: R.ILEFFGLK#.K                 | 186.11 | 132.90 | 1.40 | 0.71 |
| P09103_PDIA1_MOUSE  | P4hb   | Protein disulfide-isomer: K.LGETYKDHENIIAK.M            | 67.99  | 51.93  | 1.31 | 0.76 |
| P09103_PDIA1_MOUSE  | P4hb   | Protein disulfide-isomer: R.LITLLEEM*TK#.Y              | 180.10 | 140.56 | 1.28 | 0.78 |
| P09103_PDIA1_MOUSE  | P4hb   | Protein disulfide-isomer: R.LITLLEEMTK#.Y               | 23.43  | 15.57  | 1.50 | 0.66 |
| P09103_PDIA1_MOUSE  | P4hb   | Protein disulfide-isomer: K.M*#DSTANEVEAVK#.V           | 96.37  | 72.12  | 1.34 | 0.75 |
| P09103_PDIA1_MOUSE  | P4hb   | Protein disulfide-isomer: K.MDSTANEVEAVK#.V             | 10.45  | 5.74   | 1.82 | 0.55 |
| P09103_PDIA1_MOUSE  | P4hb   | Protein disulfide-isomer: R.NNFEGETIK#.E                | 75.79  | 60.19  | 1.26 | 0.79 |
| P09103_PDIA1_MOUSE  | P4hb   | Protein disulfide-isomer: K.SNFEEALAAHK#.Y              | 69.11  | 43.14  | 1.60 | 0.62 |
| P09103_PDIA1_MOUSE  | P4hb   | Protein disulfide-isomer: K.THILLFLPK.S                 | 33.84  | 33.64  | 1.01 | 0.99 |
| P09103_PDIA1_MOUSE  | P4hb   | Protein disulfide-isomer: R.TLDGFKK.F                   | 37.11  | 35.73  | 1.04 | 0.96 |
| P09103_PDIA1_MOUSE  | P4hb   | Protein disulfide-isomer: K.VDATEESDLAQYGVVR@.G         | 83.55  | 64.84  | 1.29 | 0.78 |
| P09103_PDIA1_MOUSE  | P4hb   | Protein disulfide-isomer: K.VLVGANFEVAFDEK#.K           | 80.02  | 60.90  | 1.31 | 0.76 |
| P09103_PDIA1_MOUSE  | P4hb   | Protein disulfide-isomer: K.YK#PEDELTAEK#.I             | 64.94  | 55.20  | 1.18 | 0.85 |
| P09103_PDIA1_MOUSE  | P4hb   | Protein disulfide-isomer: K.YQLDKDGVVLFK.K              | 115.09 | 91.94  | 1.25 | 0.80 |
| P09103_PDIA1_MOUSE  | P4hb   | Protein disulfide-isomer: R.EADDIVNWLK#.K               | 30.18  | 25.39  | 1.19 | 0.84 |
| P09103_PDIA1_MOUSE  | P4hb   | Protein disulfide-isomer: K.HNQLPLVIEFTQTAPK#.I         | 27.76  | 27.04  | 0.99 | 1.01 |
| P09103_PDIA1_MOUSE  | P4hb   | Protein disulfide-isomer: R.ILEFFGLK#.K                 | 96.53  | 75.79  | 1.27 | 0.79 |
| P09103_PDIA1_MOUSE  | P4hb   | Protein disulfide-isomer: R.LITLLEEM*TK#.Y              | 46.09  | 35.81  | 1.29 | 0.78 |
| P09103_PDIA1_MOUSE  | P4hb   | Protein disulfide-isomer: K.M*#DSTANEVEAVK#.V           | 30.80  | 23.04  | 1.34 | 0.75 |
| P09103_PDIA1_MOUSE  | P4hb   | Protein disulfide-isomer: R.NNFEGETIK#.E                | 30.77  | 20.86  | 1.48 | 0.68 |
| P09103_PDIA1_MOUSE  | P4hb   | Protein disulfide-isomer: R.TVIDYNGER.T                 | 17.17  | 10.54  | 1.63 | 0.61 |
| P09103_PDIA1_MOUSE  | P4hb   | Protein disulfide-isomer: K.VDATEESDLAQYGVVR@.G         | 32.38  | 23.90  | 1.35 | 0.74 |
| P09103_PDIA1_MOUSE  | P4hb   | Protein disulfide-isomer: K.YK#PEDELTAEK#.I             | 57.39  | 40.86  | 1.40 | 0.71 |
| P09103_PDIA1_MOUSE  | P4hb   | Protein disulfide-isomer: K.YQLDKDGVVLFK.K              | 55.02  | 52.00  | 1.06 | 0.95 |
| P09103_PDIA1_MOUSE  | P4hb   | Protein disulfide-isomer: R.ILEFFGLK#.K                 | 9.77   | 6.24   | 1.57 | 0.64 |
| P09103_PDIA1_MOUSE  | P4hb   | Protein disulfide-isomer: R.LITLLEEM*TK#.Y              | 7.29   | 6.07   | 1.20 | 0.83 |
| P29341_PABP1_MOUSE  | Pabpc1 | Polyadenylate-binding p.R.AKHEFTNVIK#.N                 | 77.57  | 37.70  | 2.06 | 0.49 |
| P29341_PABP1_MOUSE  | Pabpc1 | Polyadenylate-binding p.R.ALDTM#NFVDVIK#.G              | 82.12  | 46.08  | 1.78 | 0.56 |
| P29341_PABP1_MOUSE  | Pabpc1 | Polyadenylate-binding p.R.ALDTMNFVDVIK#.G               | 10.59  | 3.83   | 2.77 | 0.36 |
| P29341_PABP1_MOUSE  | Pabpc1 | Polyadenylate-binding p.K.EFSPFGTITSAAK#.V              | 43.87  | 24.31  | 1.80 | 0.55 |
| P29341_PABP1_MOUSE  | Pabpc1 | Polyadenylate-binding p.K.EFTNVIK#.N                    | 27.69  | 13.68  | 2.02 | 0.49 |
| P29341_PABP1_MOUSE  | Pabpc1 | Polyadenylate-binding p.K.GFPALSVK#.V                   | 82.84  | 44.08  | 1.88 | 0.53 |
| P29341_PABP1_MOUSE  | Pabpc1 | Polyadenylate-binding p.K.FSPAGPLSIR.V                  | 106.73 | 53.83  | 1.98 | 0.50 |
| P29341_PABP1_MOUSE  | Pabpc1 | Polyadenylate-binding p.K.GFGVFSER.H                    | 85.22  | 33.03  | 2.58 | 0.39 |
| P29341_PABP1_MOUSE  | Pabpc1 | Polyadenylate-binding p.K.GYGFVHFQEAER@.A               | 88.16  | 41.06  | 2.15 | 0.47 |
| P29341_PABP1_MOUSE  | Pabpc1 | Polyadenylate-binding p.K.GYGFVHFQEAER.A                | 11.57  | 5.54   | 2.09 | 0.48 |
| P29341_PABP1_MOUSE  | Pabpc1 | Polyadenylate-binding p.R.IVATK#PLYVALAQR@.K            | 80.98  | 44.25  | 1.83 | 0.55 |
| P29341_PABP1_MOUSE  | Pabpc1 | Polyadenylate-binding p.R.KHEFSPFGTITSAAK#.V            | 49.48  | 22.65  | 2.18 | 0.46 |
| P29341_PABP1_MOUSE  | Pabpc1 | Polyadenylate-binding p.R.KVFGVR.F                      | 347.87 | 351.11 | 0.99 | 1.01 |
| P29341_PABP1_MOUSE  | Pabpc1 | Polyadenylate-binding p.K.NFGEDM*DDER@.L                | 19.68  | 10.35  | 1.90 | 0.53 |
| P29341_PABP1_MOUSE  | Pabpc1 | Polyadenylate-binding p.K.NFGEDM*DDER@LK#.E             | 8.16   | 3.14   | 2.60 | 0.38 |
| P29341_PABP1_MOUSE  | Pabpc1 | Polyadenylate-binding p.R.R@SLGYAYVNFQQAADAER@.A        | 11.03  | 5.55   | 1.99 | 0.50 |
| P29341_PABP1_MOUSE  | Pabpc1 | Polyadenylate-binding p.K.SGVGNIFIK#.N                  | 81.17  | 31.49  | 2.58 | 0.39 |
| P29341_PABP1_MOUSE  | Pabpc1 | Polyadenylate-binding p.R.SLGYAYVNFQQAADAER.A           | 56.75  | 30.84  | 1.84 | 0.54 |
| P29341_PABP1_MOUSE  | Pabpc1 | Polyadenylate-binding p.R.YQGVNLYVK#.N                  | 85.44  | 45.86  | 1.86 | 0.54 |
| P29341_PABP1_MOUSE  | Pabpc1 | Polyadenylate-binding p.R.AKHEFTNVIK#.N                 | 173.58 | 65.19  | 2.66 | 0.38 |
| P29341_PABP1_MOUSE  | Pabpc1 | Polyadenylate-binding p.R.ALDTMNFVDVIK#.G               | 406.61 | 144.30 | 2.82 | 0.35 |
| P29341_PABP1_MOUSE  | Pabpc1 | Polyadenylate-binding p.R.ALDTMNFVDVIK#.G               | 28.27  | 12.82  | 2.21 | 0.45 |
| P29341_PABP1_MOUSE  | Pabpc1 | Polyadenylate-binding p.K.EFSPFGTITSAAK#.V              | 133.37 | 60.93  | 2.19 | 0.46 |
| P29341_PABP1_MOUSE  | Pabpc1 | Polyadenylate-binding p.K.GFPALSVK#.V                   | 204.41 | 92.33  | 2.21 | 0.45 |
| P29341_PABP1_MOUSE  | Pabpc1 | Polyadenylate-binding p.K.FSPAGPLSIR@.V                 | 280.52 | 116.30 | 2.41 | 0.41 |
| P29341_PABP1_MOUSE  | Pabpc1 | Polyadenylate-binding p.K.GFGVFSER@.H                   | 245.86 | 102.97 | 2.39 | 0.42 |
| P29341_PABP1_MOUSE  | Pabpc1 | Polyadenylate-binding p.K.GYGFVHFQEAER@.A               | 215.35 | 83.35  | 2.58 | 0.39 |
| P29341_PABP1_MOUSE  | Pabpc1 | Polyadenylate-binding p.K.GYGFVHFQEAER.A                | 21.16  | 8.26   | 2.56 | 0.39 |
| P29341_PABP1_MOUSE  | Pabpc1 | Polyadenylate-binding p.K.ITGM*LEIDNSELHLM*LESPELRL@.S  | 71.74  | 26.07  | 2.75 | 0.36 |
| P29341_PABP1_MOUSE  | Pabpc1 | Polyadenylate-binding p.K.ITGM*LEIDNSELHLM*LESPELRL@.S  | 50.43  | 18.86  | 2.67 | 0.37 |
| P29341_PABP1_MOUSE  | Pabpc1 | Polyadenylate-binding p.K.ITGM*LEIDNSELHLM*LESPELRL@.S  | 63.66  | 29.01  | 2.19 | 0.46 |
| P29341_PABP1_MOUSE  | Pabpc1 | Polyadenylate-binding p.R.IVATK#PLYVALAQR@.K            | 188.66 | 91.15  | 2.07 | 0.48 |
| P29341_PABP1_MOUSE  | Pabpc1 | Polyadenylate-binding p.R.KHEFSPFGTITSAAK#.V            | 30.90  | 17.36  | 1.78 | 0.56 |
| P29341_PABP1_MOUSE  | Pabpc1 | Polyadenylate-binding p.K.NFGEDM*DDER@.L                | 48.03  | 20.49  | 2.34 | 0.43 |
| P29341_PABP1_MOUSE  | Pabpc1 | Polyadenylate-binding p.K.NLDDGIDDER.L                  | 94.86  | 42.16  | 2.25 | 0.44 |
| P29341_PABP1_MOUSE  | Pabpc1 | Polyadenylate-binding p.R.R@SLGYAYVNFQQAADAER@.A        | 32.01  | 11.45  | 2.80 | 0.36 |
| P29341_PABP1_MOUSE  | Pabpc1 | Polyadenylate-binding p.K.SGVGNIFIK#.N                  | 266.73 | 100.05 | 2.67 | 0.38 |
| P29341_PABP1_MOUSE  | Pabpc1 | Polyadenylate-binding p.R.SK#HDEAVAVLQAHQAK#.E          | 244.02 | 88.84  | 2.75 | 0.36 |
| P29341_PABP1_MOUSE  | Pabpc1 | Polyadenylate-binding p.R.SLGYAYVNFQQAADAER@.A          | 155.50 | 66.26  | 2.35 | 0.43 |
| P29341_PABP1_MOUSE  | Pabpc1 | Polyadenylate-binding p.K.VDEAVAVLQAHQAK#.E             | 30.76  | 14.61  | 2.10 | 0.48 |
| P29341_PABP1_MOUSE  | Pabpc1 | Polyadenylate-binding p.R.YQGVNLYVK#.N                  | 226.89 | 81.45  | 2.79 | 0.36 |
| P29341_PABP1_MOUSE  | Pabpc1 | Polyadenylate-binding p.K.GFPALSVK#.V                   | 61.25  | 21.53  | 2.84 | 0.35 |
| P29341_PABP1_MOUSE  | Pabpc1 | Polyadenylate-binding p.K.GFGVFSER@.H                   | 14.58  | 5.42   | 2.69 | 0.37 |
| P29341_PABP1_MOUSE  | Pabpc1 | Polyadenylate-binding p.K.NLDDGIDDER@.L                 | 9.02   | 1.51   | 5.99 | 0.17 |
| P29341_PABP1_MOUSE  | Pabpc1 | Polyadenylate-binding p.R.SLGYAYVNFQQAADAER@.A          | 10.75  | 2.95   | 3.64 | 0.27 |
| Q6PH09_Q6PH09_MOUSE | Pabpc4 | MCG5546, isoform CRA_1.EFSPFGTITSAAK#.V                 | 12.56  | 9.83   | 1.28 | 0.78 |
| Q6PH09_Q6PH09_MOUSE | Pabpc4 | MCG5546, isoform CRA_1.FSPAGPLSIR@.V                    | 18.52  | 19.62  | 0.94 | 1.06 |
| Q6PH09_Q6PH09_MOUSE | Pabpc4 | MCG5546, isoform CRA_1.IVSGKPLYVALAQR.K                 | 13.02  | 9.34   | 1.39 | 0.72 |
| Q6PH09_Q6PH09_MOUSE | Pabpc4 | MCG5546, isoform CRA_1.FSPAGPLSIR@.V                    | 29.70  | 18.92  | 1.57 | 0.64 |
| Q6PH09_Q6PH09_MOUSE | Pabpc4 | MCG5546, isoform CRA_1.GFGVFSER#.H                      | 12.58  | 7.97   | 1.58 | 0.63 |
| Q6PH09_Q6PH09_MOUSE | Pabpc4 | MCG5546, isoform CRA_1.IVSGKPLYVALAQR@.K                | 19.78  | 11.22  | 1.76 | 0.57 |
| Q6PH09_Q6PH09_MOUSE | Pabpc4 | MCG5546, isoform CRA_1.YQGVNLYVK#.N                     | 18.35  | 11.36  | 1.61 | 0.62 |
| Q8CC56_PABP2_MOUSE  | Pabpn1 | Polyadenylate-binding p.K.ELQNEVEK#.Q                   | 142.20 | 67.47  | 2.11 | 0.47 |
| Q8CC56_PABP2_MOUSE  | Pabpn1 | Polyadenylate-binding p.R.EMEEAEKHLKHELQNEVEK#.Q        | 6.42   | 2.53   | 2.54 | 0.39 |
| Q8CC56_PABP2_MOUSE  | Pabpn1 | Polyadenylate-binding p.K.GFAYEFSDDK#.E                 | 52.61  | 23.07  | 2.28 | 0.44 |
| Q8CC56_PABP2_MOUSE  | Pabpn1 | Polyadenylate-binding p.R.TSLALDESFLR@.G                | 374.32 | 159.73 | 2.34 | 0.43 |
| Q8CC56_PABP2_MOUSE  | Pabpn1 | Polyadenylate-binding p.R.TSLALDESFLR@.G                | 67.11  | 27.66  | 2.43 | 0.41 |
| Q8CC56_PABP2_MOUSE  | Pabpn1 | Polyadenylate-binding p.K.GFAYEFSDDK#ESVRL@.T           | 17.11  | 8.08   | 2.12 | 0.47 |
| Q8CC56_PABP2_MOUSE  | Pabpn1 | Polyadenylate-binding p.R.TSLALDESFLR@.G                | 16.51  | 9.71   | 1.70 | 0.59 |
| Q8K212_PAC51_MOUSE  | Pacs1  | Phosphofurin acidic clus.K.DTTSPM*ELAALEK#.V            | 6.56   | 2.33   | 2.81 | 0.36 |
| Q8K212_PAC51_MOUSE  | Pacs1  | Phosphofurin acidic clus.R.FLIIPLGSHPVAK#.Y             | 12.61  | 4.31   | 2.95 | 0.34 |
| Q8K212_PAC51_MOUSE  | Pacs1  | Phosphofurin acidic clus.K.VAAVGSQVLSLIR@.F             | 12.61  | 2.70   | 4.68 | 0.21 |
| Q8K212_PAC51_MOUSE  | Pacs1  | Phosphofurin acidic clus.K.LK#FFEGM*SQSSSQTEIGSLNSK#.G  | 10.97  | 1.10   | 9.93 | 0.10 |
| Q8K212_PAC51_MOUSE  | Pacs1  | Phosphofurin acidic clus.K.VAAVGSQVLSLIR@.F             | 9.11   | 3.10   | 2.94 | 0.34 |
| Q8K278_PAF1_MOUSE   | Paf1   | RNA polymerase II-associ.K.AGVGSQVLSLIR#.H              | 9.85   | 4.84   | 2.04 | 0.49 |
| Q8K278_PAF1_MOUSE   | Paf1   | RNA polymerase II-associ.R.EDGDVYNYLETR@.V              | 6.73   | 5.70   | 1.18 | 0.85 |
| Q8K278_PAF1_MOUSE   | Paf1   | RNA polymerase II-associ.K.GYENYFFIR@.E                 | 6.78   | 5.12   | 1.32 | 0.75 |
| Q8K278_PAF1_MOUSE   | Paf1   | RNA polymerase II-associ.R.IDPNVLLDPADEKHLLEEIQAPTSK#.R | 5.53   | 3.72   | 1.49 | 0.67 |
| Q8K278_PAF1_MOUSE   | Paf1   | RNA polymerase II-associ.R.VTPVEVM*PVFPDFK#.M           | 5.00   | 4.51   | 1.11 | 0.90 |
| Q9DCL9_PUR6_MOUSE   | Paics  | Multifunctional protein.K.EIVLADVIDNDSWR@.L             | 11.40  | 6.94   | 1.64 | 0.61 |
| Q9DCL9_PUR6_MOUSE   | Paics  | Multifunctional protein.K.EVTPGLQM*VKR#.K               | 7.90   | 6.13   | 1.29 | 0.78 |
| Q9DCL9_PUR6_MOUSE   | Paics  | Multifunctional protein.R.IK#AEYEGDGIPTVFVSVAGR@.S      | 12.88  | 7.77   | 1.66 | 0.60 |
| Q9DCL9_PUR6_MOUSE   | Paics  | Multifunctional protein.K.EIVLADVIDNDSWR@.L             | 5.65   | 2.29   | 2.47 | 0.41 |
| Q8VE62_PAIP1_MOUSE  | Paip1  | Polyadenylate-binding p.R.ADLIQVGLR@.E                  | 9.68   | 6.00   | 1.61 | 0.62 |

|                     |        |                                                                |       |        |      |      |
|---------------------|--------|----------------------------------------------------------------|-------|--------|------|------|
| Q640Q5_PAN3_MOUSE   | Pan3   | PAB-dependent poly(A)-s K.NLILVLLTDQNR@.M                      | 5.97  | 1.11   | 5.36 | 0.19 |
| Q61183_PAPOA_MOUSE  | Papola | Poly(A) polymerase alpha K.LFEAPNFQK.V                         | 5.43  | 1.53   | 3.54 | 0.28 |
| Q61183_PAPOA_MOUSE  | Papola | Poly(A) polymerase alpha R.VTDEILHLPVNDINFR@.L                 | 4.24  | 8.18   | 0.52 | 1.93 |
| Q99NH2_PARD3_MOUSE  | Pard3  | Partitioning defective 3 F R.DVTIGGSAPVVK#N                    | 3.79  | 3.66   | 1.04 | 0.97 |
| Q99NH2_PARD3_MOUSE  | Pard3  | Partitioning defective 3 F R.EM*NAEPSQM*QTPK#.E                | 3.64  | 1.73   | 2.10 | 0.48 |
| Q9CSB4_PAR3L_MOUSE  | Pard3b | Partitioning defective 3 F R.AVEISGEGDPLGIHVVVFFSSLSGR@.I      | 6.64  | 29.63  | 0.22 | 4.46 |
| Q99LX0_PARK7_MOUSE  | Park7  | Protein deglycase DJ-1 O'.K.APLVLKRD.~                         | 4.92  | 2.63   | 1.87 | 0.53 |
| Q8VDG3_PARN_MOUSE   | Parn   | Poly(A)-specific ribonuc. K.EQEELNDVAVGFSR@.V                  | 10.88 | 2.74   | 3.97 | 0.25 |
| Q8VDG3_PARN_MOUSE   | Parn   | Poly(A)-specific ribonuc. K.EQEELNDVAVGFSR@.V                  | 10.67 | 1.87   | 5.70 | 0.18 |
| Q8VDG3_PARN_MOUSE   | Parn   | Poly(A)-specific ribonuc. R.VM*DIPVLLEGDPLQPK#.R               | 6.46  | 3.56   | 1.81 | 0.55 |
| Q921K2_Q921K2_MOUSE | Parp1  | Poly (ADP-ribose) poly. K.ELLIFNQQQVPSGESAILDR.V               | 3.13  | 9.42   | 0.33 | 3.01 |
| Q921K2_Q921K2_MOUSE | Parp1  | Poly (ADP-ribose) poly. K.TLGDFLAEVAK.S                        | 8.25  | 29.18  | 0.28 | 3.54 |
| Q921K2_Q921K2_MOUSE | Parp1  | Poly (ADP-ribose) poly. K.ALVYEIDLQK.M                         | 10.32 | 33.01  | 0.31 | 3.20 |
| Q921K2_Q921K2_MOUSE | Parp1  | Poly (ADP-ribose) poly. K.ELLIFNQQQVPSGESAILDR.V               | 8.97  | 35.22  | 0.25 | 3.93 |
| Q921K2_Q921K2_MOUSE | Parp1  | Poly (ADP-ribose) poly. R.GGSDSDSKDPIDVNYEK.L                  | 14.69 | 75.47  | 0.19 | 5.14 |
| Q921K2_Q921K2_MOUSE | Parp1  | Poly (ADP-ribose) poly. K.GYFADM*VSK.S                         | 4.43  | 16.24  | 0.27 | 3.67 |
| Q921K2_Q921K2_MOUSE | Parp1  | Poly (ADP-ribose) poly. K.KFYPLEIDYGDDEAVK.K                   | 6.84  | 16.66  | 0.41 | 2.44 |
| Q921K2_Q921K2_MOUSE | Parp1  | Poly (ADP-ribose) poly. K.KFYPLEIDYGDDEAVK.L                   | 6.77  | 18.71  | 0.36 | 2.76 |
| Q921K2_Q921K2_MOUSE | Parp1  | Poly (ADP-ribose) poly. K.KPPLLNADVSVQAK.V                     | 7.76  | 37.96  | 0.20 | 4.89 |
| Q921K2_Q921K2_MOUSE | Parp1  | Poly (ADP-ribose) poly. R.M*AIM*VQSP*FDGK.V                    | 2.78  | 7.07   | 0.39 | 2.54 |
| Q921K2_Q921K2_MOUSE | Parp1  | Poly (ADP-ribose) poly. K.SLQELLSAHSLSWGAEVK.A                 | 28.83 | 42.00  | 0.68 | 1.47 |
| Q921K2_Q921K2_MOUSE | Parp1  | Poly (ADP-ribose) poly. K.TLGDFLAEVAK.S                        | 25.67 | 94.33  | 0.27 | 3.67 |
| Q921K2_Q921K2_MOUSE | Parp1  | Poly (ADP-ribose) poly. R.TTNFAGILSGQLR.I                      | 15.36 | 45.10  | 0.34 | 2.94 |
| Q921K2_Q921K2_MOUSE | Parp1  | Poly (ADP-ribose) poly. K.VFSATLGLVDVVK.G                      | 31.16 | 101.92 | 0.31 | 3.27 |
| Q921K2_Q921K2_MOUSE | Parp1  | Poly (ADP-ribose) poly. K.VVDRDSEEAIVR.K                       | 10.80 | 40.95  | 0.26 | 3.79 |
| Q921K2_Q921K2_MOUSE | Parp1  | Poly (ADP-ribose) poly. K.ELLIFNQQQVPSGESAILDR.V               | 5.71  | 10.51  | 0.54 | 1.84 |
| Q921K2_Q921K2_MOUSE | Parp1  | Poly (ADP-ribose) poly. R.GGSDSDSKDPIDVNYEK.L                  | 7.48  | 13.67  | 0.55 | 1.83 |
| Q921K2_Q921K2_MOUSE | Parp1  | Poly (ADP-ribose) poly. K.KFYPLEIDYGDDEAVK.L                   | 3.40  | 7.17   | 0.47 | 2.11 |
| Q921K2_Q921K2_MOUSE | Parp1  | Poly (ADP-ribose) poly. K.SLQELLSAHSLSWGAEVK.A                 | 5.02  | 9.35   | 0.54 | 1.86 |
| Q921K2_Q921K2_MOUSE | Parp1  | Poly (ADP-ribose) poly. K.TLGDFLAEVAK.S                        | 10.05 | 27.26  | 0.37 | 2.71 |
| Q921K2_Q921K2_MOUSE | Parp1  | Poly (ADP-ribose) poly. R.TTNFAGILSGQLR@.I                     | 7.27  | 26.31  | 0.28 | 3.62 |
| Q8CIE4_Q8CIE4_MOUSE | Parp10 | Plec1 protein OS=Mus m.R.AGPVWAGQALPVDVSGSR@.I                 | 8.82  | 5.92   | 1.49 | 0.67 |
| Q8CIE4_Q8CIE4_MOUSE | Parp10 | Plec1 protein OS=Mus m.K.AVFAQVLTDGYDQGSR@.G                   | 6.40  | 4.52   | 1.42 | 0.71 |
| Q8CIE4_Q8CIE4_MOUSE | Parp10 | Plec1 protein OS=Mus m.K.EK#GGPGTVEVQEQEIPTELAEFEPPVALSTGAR@.G | 6.40  | 2.48   | 1.81 | 0.55 |
| Q8CIE4_Q8CIE4_MOUSE | Parp10 | Plec1 protein OS=Mus m.R.LEALENSSEFQDVVVR@.A                   | 6.40  | 2.59   | 2.47 | 0.40 |
| Q8BZ20_PAR12_MOUSE  | Parp12 | Poly [ADP-ribose] poly. K.SIPDYWDPAAALPDLGFK.K                 | 3.86  | 2.82   | 1.37 | 0.73 |
| Q8BZ20_PAR12_MOUSE  | Parp12 | Poly [ADP-ribose] poly. K.VSPSPAGPQGSSE@.K                     | 11.59 | 8.28   | 1.40 | 0.71 |
| Q8BZ20_PAR12_MOUSE  | Parp12 | Poly [ADP-ribose] poly. K.YVSPQDQVM*TK#.Q                      | 6.78  | 4.95   | 1.37 | 0.73 |
| Q8BZ20_PAR12_MOUSE  | Parp12 | Poly [ADP-ribose] poly. R.LGSLSDLVSR@.L                        | 28.48 | 5.82   | 4.90 | 0.20 |
| Q8BZ20_PAR12_MOUSE  | Parp12 | Poly [ADP-ribose] poly. R.LVLAVSSLR@.L                         | 12.01 | 3.87   | 3.11 | 0.32 |
| Q8BZ20_PAR12_MOUSE  | Parp12 | Poly [ADP-ribose] poly. R.QSGHPVTTISSDVER@.A                   | 22.69 | 14.61  | 1.55 | 0.64 |
| Q8BZ20_PAR12_MOUSE  | Parp12 | Poly [ADP-ribose] poly. R.SHEFTNSSELEQLER@.L                   | 11.72 | 5.53   | 2.12 | 0.47 |
| Q8BZ20_PAR12_MOUSE  | Parp12 | Poly [ADP-ribose] poly. K.SIPDYWDPAAALPDLGFK#.K                | 7.21  | 3.56   | 2.02 | 0.49 |
| Q8BZ20_PAR12_MOUSE  | Parp12 | Poly [ADP-ribose] poly. R.TSLGTDALER@.L                        | 16.91 | 9.12   | 1.85 | 0.54 |
| Q8BZ20_PAR12_MOUSE  | Parp12 | Poly [ADP-ribose] poly. R.VLVGFDFVR@.G                         | 31.50 | 10.20  | 3.09 | 0.32 |
| Q8BZ20_PAR12_MOUSE  | Parp12 | Poly [ADP-ribose] poly. K.VSPSPAGPQGSSE@.K                     | 26.47 | 13.64  | 1.94 | 0.52 |
| Q8BZ20_PAR12_MOUSE  | Parp12 | Poly [ADP-ribose] poly. R.WQLDGGK#.W                           | 12.45 | 5.49   | 2.27 | 0.44 |
| Q2EMV9_PAR14_MOUSE  | Parp14 | Poly [ADP-ribose] poly. K.AIIDAEFVQK#.K                        | 12.88 | 15.01  | 0.86 | 1.17 |
| Q2EMV9_PAR14_MOUSE  | Parp14 | Poly [ADP-ribose] poly. R.DASAVLSGK#.S                         | 15.89 | 13.27  | 1.20 | 0.83 |
| Q2EMV9_PAR14_MOUSE  | Parp14 | Poly [ADP-ribose] poly. K.DHENIQAQSFDEFDKR.N                   | 9.17  | 9.94   | 0.92 | 1.08 |
| Q2EMV9_PAR14_MOUSE  | Parp14 | Poly [ADP-ribose] poly. K.DVQSVSEFEFLQVDSQR@.L                 | 23.64 | 16.53  | 1.43 | 0.70 |
| Q2EMV9_PAR14_MOUSE  | Parp14 | Poly [ADP-ribose] poly. K.EGQVPLPGNAVISK#.A                    | 18.49 | 15.28  | 1.21 | 0.83 |
| Q2EMV9_PAR14_MOUSE  | Parp14 | Poly [ADP-ribose] poly. R.FPVDVVNAANENLK.H                     | 13.73 | 6.55   | 2.10 | 0.48 |
| Q2EMV9_PAR14_MOUSE  | Parp14 | Poly [ADP-ribose] poly. K.GPLSQQLEK.A                          | 16.27 | 13.35  | 1.22 | 0.82 |
| Q2EMV9_PAR14_MOUSE  | Parp14 | Poly [ADP-ribose] poly. K.GTALFLVGSFK.D                        | 18.27 | 18.51  | 0.99 | 1.01 |
| Q2EMV9_PAR14_MOUSE  | Parp14 | Poly [ADP-ribose] poly. K.HISGLAQLSK.A                         | 8.67  | 12.96  | 0.67 | 1.49 |
| Q2EMV9_PAR14_MOUSE  | Parp14 | Poly [ADP-ribose] poly. K.IKPSLVDYLR.T                         | 19.97 | 22.22  | 0.90 | 1.11 |
| Q2EMV9_PAR14_MOUSE  | Parp14 | Poly [ADP-ribose] poly. K.IYLVLGPAK#.V                         | 16.79 | 15.46  | 1.09 | 0.92 |
| Q2EMV9_PAR14_MOUSE  | Parp14 | Poly [ADP-ribose] poly. R.LLETTNVR@.V                          | 19.89 | 16.31  | 1.22 | 0.82 |
| Q2EMV9_PAR14_MOUSE  | Parp14 | Poly [ADP-ribose] poly. K.LLLNLQTSDEPYNM*VASAFR.Q              | 5.96  | 6.21   | 0.96 | 1.04 |
| Q2EMV9_PAR14_MOUSE  | Parp14 | Poly [ADP-ribose] poly. K.LPASFQSLDLPLWK#.F                    | 9.39  | 7.69   | 1.22 | 0.82 |
| Q2EMV9_PAR14_MOUSE  | Parp14 | Poly [ADP-ribose] poly. K.LQVYFSR@.K                           | 11.49 | 9.01   | 1.28 | 0.78 |
| Q2EMV9_PAR14_MOUSE  | Parp14 | Poly [ADP-ribose] poly. K.M*PLSVPPYPSLGTALYGEK#PLIK#.L         | 14.30 | 19.09  | 0.80 | 1.25 |
| Q2EMV9_PAR14_MOUSE  | Parp14 | Poly [ADP-ribose] poly. K.SLFEANILAIYELK.G                     | 17.06 | 15.44  | 1.11 | 0.90 |
| Q2EMV9_PAR14_MOUSE  | Parp14 | Poly [ADP-ribose] poly. R.SNQQLQLAPR.L                         | 16.42 | 14.48  | 1.13 | 0.88 |
| Q2EMV9_PAR14_MOUSE  | Parp14 | Poly [ADP-ribose] poly. K.TLQEQVFLHFK.D                        | 16.68 | 14.48  | 1.15 | 0.87 |
| Q2EMV9_PAR14_MOUSE  | Parp14 | Poly [ADP-ribose] poly. K.TSIQVSGISR.D                         | 12.21 | 14.01  | 0.87 | 1.15 |
| Q2EMV9_PAR14_MOUSE  | Parp14 | Poly [ADP-ribose] poly. K.TTENLSLQSIAPFAGTGNL.R.F              | 9.66  | 9.52   | 1.01 | 0.99 |
| Q2EMV9_PAR14_MOUSE  | Parp14 | Poly [ADP-ribose] poly. R.VLFPEDVR.Q                           | 14.81 | 12.74  | 1.16 | 0.86 |
| E9PYK3_E9PYK3_MOUSE | Parp4  | Protein Parp4 OS=Mus m.R.SEQPVDLQIFR@.V                        | 4.68  | 2.91   | 1.61 | 0.62 |
| Q8CAS9_PARP9_MOUSE  | Parp9  | Poly [ADP-ribose] poly. R.DLSSWGPPDETDPASTM*TLR@.I             | 11.58 | 3.32   | 3.48 | 0.29 |
| Q8CAS9_PARP9_MOUSE  | Parp9  | Poly [ADP-ribose] poly. R.EIHLVSNDEPTVASFK#.S                  | 6.40  | 4.04   | 1.58 | 0.63 |
| Q8CAS9_PARP9_MOUSE  | Parp9  | Poly [ADP-ribose] poly. R.GGLEAGSAINLM*GVK#.V                  | 22.51 | 10.71  | 2.10 | 0.48 |
| Q8CAS9_PARP9_MOUSE  | Parp9  | Poly [ADP-ribose] poly. K.GPQADLIVAVM*RR@.I                    | 23.85 | 10.48  | 2.28 | 0.44 |
| Q8CAS9_PARP9_MOUSE  | Parp9  | Poly [ADP-ribose] poly. K.HNVFELK#.S                           | 42.86 | 25.37  | 1.69 | 0.59 |
| Q8CAS9_PARP9_MOUSE  | Parp9  | Poly [ADP-ribose] poly. R.HVVDVAVNAANENLLHSGSLAGSLVK#.T        | 27.43 | 10.81  | 2.54 | 0.39 |
| Q8CAS9_PARP9_MOUSE  | Parp9  | Poly [ADP-ribose] poly. K.IFYAEM*TK#.R                         | 9.55  | 8.05   | 1.19 | 0.84 |
| Q8CAS9_PARP9_MOUSE  | Parp9  | Poly [ADP-ribose] poly. K.ISVGAIITGAGR@.L                      | 34.36 | 15.69  | 2.19 | 0.46 |
| Q8CAS9_PARP9_MOUSE  | Parp9  | Poly [ADP-ribose] poly. K.IVIFPVDVETKY#.I                      | 94.33 | 54.88  | 1.72 | 0.58 |
| Q8CAS9_PARP9_MOUSE  | Parp9  | Poly [ADP-ribose] poly. R.M*YSTYVNPVVGAGIFYTK#.S               | 9.98  | 6.50   | 1.54 | 0.65 |
| Q8CAS9_PARP9_MOUSE  | Parp9  | Poly [ADP-ribose] poly. K.SASESILGR@.D                         | 67.58 | 36.01  | 1.88 | 0.53 |
| Q8CAS9_PARP9_MOUSE  | Parp9  | Poly [ADP-ribose] poly. R.VAQSLR@.Q                            | 68.96 | 33.70  | 2.05 | 0.49 |
| Q8CAS9_PARP9_MOUSE  | Parp9  | Poly [ADP-ribose] poly. K.VLLAAFQEK#.K                         | 53.56 | 35.57  | 1.51 | 0.66 |
| Q8CAS9_PARP9_MOUSE  | Parp9  | Poly [ADP-ribose] poly. R.VSISETSPPR@.T                        | 62.78 | 26.53  | 2.37 | 0.42 |
| Q8CAS9_PARP9_MOUSE  | Parp9  | Poly [ADP-ribose] poly. R.WTIVTNSQTIALLK#.F                    | 30.10 | 10.23  | 2.94 | 0.34 |
| Q8CAS9_PARP9_MOUSE  | Parp9  | Poly [ADP-ribose] poly. R.YPASLTQELQDR@.K                      | 40.86 | 18.68  | 2.19 | 0.46 |
| Q8CAS9_PARP9_MOUSE  | Parp9  | Poly [ADP-ribose] poly. R.DLSSWGPPDETDPASTM*TLR@.I             | 7.63  | 2.14   | 3.57 | 0.28 |
| Q8CAS9_PARP9_MOUSE  | Parp9  | Poly [ADP-ribose] poly. K.HNVFELK#.S                           | 35.14 | 20.05  | 1.75 | 0.57 |
| Q8CAS9_PARP9_MOUSE  | Parp9  | Poly [ADP-ribose] poly. R.HVVDVAVNAANENLLHSGSLAGSLVK#.T        | 21.60 | 5.97   | 3.62 | 0.28 |
| Q8CAS9_PARP9_MOUSE  | Parp9  | Poly [ADP-ribose] poly. K.ISVGAIITGAGR@.L                      | 24.66 | 10.27  | 2.40 | 0.42 |
| Q8CAS9_PARP9_MOUSE  | Parp9  | Poly [ADP-ribose] poly. K.IVIFPVDVETKY#.I                      | 61.66 | 24.86  | 2.48 | 0.40 |
| Q8CAS9_PARP9_MOUSE  | Parp9  | Poly [ADP-ribose] poly. R.M*YSTYVNPVVGAGIFYTK#.S               | 6.63  | 3.51   | 1.89 | 0.53 |
| Q8CAS9_PARP9_MOUSE  | Parp9  | Poly [ADP-ribose] poly. R.NILDVTK#.Y                           | 33.42 | 10.85  | 3.08 | 0.32 |
| Q8CAS9_PARP9_MOUSE  | Parp9  | Poly [ADP-ribose] poly. K.TGGFEIQEESK#R@.I                     | 6.58  | 2.89   | 2.27 | 0.44 |
| Q8CAS9_PARP9_MOUSE  | Parp9  | Poly [ADP-ribose] poly. R.VAQSLR@.Q                            | 37.30 | 18.29  | 2.04 | 0.49 |
| Q8CAS9_PARP9_MOUSE  | Parp9  | Poly [ADP-ribose] poly. K.VLLAAFQEK#.K                         | 66.02 | 22.98  | 2.87 | 0.35 |
| Q8CAS9_PARP9_MOUSE  | Parp9  | Poly [ADP-ribose] poly. R.WTIVTNSQTIALLK#.F                    | 15.89 | 7.59   | 2.09 | 0.48 |
| Q8CAS9_PARP9_MOUSE  | Parp9  | Poly [ADP-ribose] poly. R.YPASLTQELQDR@.K                      | 20.60 | 9.85   | 2.09 | 0.48 |
| Q9EPC1_PARVA_MOUSE  | Parva  | Alpha-parvin OS=Mus mu.R.DAFDTLFDHAPDK#NLVVK#.K                | 43.82 | 15.57  | 2.81 | 0.36 |
| Q9EPC1_PARVA_MOUSE  | Parva  | Alpha-parvin OS=Mus mu.K.DLAEDLYDQVLQK#.L                      | 67.25 | 26.06  | 2.58 | 0.39 |
| Q9EPC1_PARVA_MOUSE  | Parva  | Alpha-parvin OS=Mus mu.R.IIVK#DLAEDLYDQVLQK#.L                 | 23.91 | 5.07   | 4.72 | 0.21 |
| Q9EPC1_PARVA_MOUSE  | Parva  | Alpha-parvin OS=Mus mu.K.KHTLTFVNK#.H                          | 10.20 | 3.83   | 2.66 | 0.38 |
| Q9EPC1_PARVA_MOUSE  | Parva  | Alpha-parvin OS=Mus mu.K.LESEK#LNVAETQSEIAQK#.Q                | 71.25 | 25.77  | 2.77 | 0.36 |

|                     |        |                                                                  |        |        |      |      |
|---------------------|--------|------------------------------------------------------------------|--------|--------|------|------|
| Q9EPC1_PARVA_MOUSE  | Parva  | Alpha-parvin OS=Mus mu K.LFEK#ESEK#LNVAEVTQSEIAQK# Q             | 10.56  | 5.53   | 1.91 | 0.52 |
| Q9EPC1_PARVA_MOUSE  | Parva  | Alpha-parvin OS=Mus mu K.LNVAEVTQSEIAQK# Q                       | 66.86  | 20.81  | 3.21 | 0.31 |
| Q9EPC1_PARVA_MOUSE  | Parva  | Alpha-parvin OS=Mus mu R.QJQEITGNTEALSGR# H                      | 12.48  | 16.53  | 3.18 | 0.31 |
| Q9EPC1_PARVA_MOUSE  | Parva  | Alpha-parvin OS=Mus mu K.TLITFVNF#H                              | 63.86  | 19.84  | 3.22 | 0.31 |
| Q9EPC1_PARVA_MOUSE  | Parva  | Alpha-parvin OS=Mus mu R.TM*VDPNSR@ N                            | 25.29  | 9.62   | 2.63 | 0.38 |
| Q9EPC1_PARVA_MOUSE  | Parva  | Alpha-parvin OS=Mus mu K.VLIMWINDVVLGER@ I                       | 76.45  | 26.84  | 2.85 | 0.35 |
| Q9EPC1_PARVA_MOUSE  | Parva  | Alpha-parvin OS=Mus mu R.VLVNLFK# Y                              | 81.29  | 31.05  | 2.62 | 0.38 |
| Q9E546_PARVB_MOUSE  | Parvb  | Beta-parvin OS=Mus mus K.LNVAEVTQSEIQK# Q                        | 5.15   | 1.48   | 3.49 | 0.29 |
| Q9E546_PARVB_MOUSE  | Parvb  | Beta-parvin OS=Mus mus K.SAINSPM*APALVDIHPEDTQLSENER@ T          | 4.39   | 1.47   | 2.99 | 0.33 |
| Q925B0_PAWR_MOUSE   | Pawr   | PRKc apoptosis WT1 regl R.DANAPASFSSTLEK# R                      | 13.40  | 9.11   | 1.47 | 0.68 |
| Q00288_PAX8_MOUSE   | Pax8   | Paired box protein Pax-8 K.ATLTSNTPLGR@ N                        | 16.52  | 9.04   | 1.83 | 0.55 |
| Q00288_PAX8_MOUSE   | Pax8   | Paired box protein Pax-8 R.LSIDSQSSSSTLEK# R                     | 20.41  | 15.15  | 1.35 | 0.74 |
| P58501_PAXB1_MOUSE  | Paxbp1 | PAX3- and PAX7-binding K.AGGAFSNLSSLNVLRPGEIPDAFIIHAAR K         | 18.73  | 9.89   | 1.89 | 0.53 |
| P58501_PAXB1_MOUSE  | Paxbp1 | PAX3- and PAX7-binding R.LSLLSFDQEENEVEFK# V                     | 6.98   | 3.11   | 2.24 | 0.45 |
| P58501_PAXB1_MOUSE  | Paxbp1 | PAX3- and PAX7-binding K.LFNLPLR@ L                              | 17.93  | 8.09   | 2.21 | 0.45 |
| P58501_PAXB1_MOUSE  | Paxbp1 | PAX3- and PAX7-binding R.YLVHLDITYR@ N                           | 13.30  | 4.03   | 3.30 | 0.30 |
| P58501_PAXB1_MOUSE  | Paxbp1 | PAX3- and PAX7-binding K.AGGAFSNLSSLNVLRPGEIPDAFIIHAAR K         | 15.70  | 6.43   | 2.44 | 0.41 |
| P58501_PAXB1_MOUSE  | Paxbp1 | PAX3- and PAX7-binding K.LFNLPLR@ L                              | 10.83  | 5.87   | 1.85 | 0.54 |
| P58501_PAXB1_MOUSE  | Paxbp1 | PAX3- and PAX7-binding R.LQLLTWTPTLEAK# C                        | 19.42  | 8.06   | 2.41 | 0.41 |
| P58501_PAXB1_MOUSE  | Paxbp1 | PAX3- and PAX7-binding K.NSGPYLFFQR@ Q                           | 13.10  | 4.10   | 3.19 | 0.31 |
| P58501_PAXB1_MOUSE  | Paxbp1 | PAX3- and PAX7-binding K.TLQELSIDGLLNR@ Y                        | 16.20  | 3.05   | 5.32 | 0.19 |
| Q6NZ04_PAX1_MOUSE   | Paxip1 | PAX-interacting protein : R.QTFIDQEVYLR@ D                       | 7.13   | 2.80   | 2.55 | 0.39 |
| Q9D086_PBDC1_MOUSE  | Pbdc1  | Protein PBDC1 OS=Mus n K.FEGIVEDYNGYTLR L                        | 9.03   | 4.55   | 1.98 | 0.50 |
| Q9D086_PBDC1_MOUSE  | Pbdc1  | Protein PBDC1 OS=Mus n R.IQFFAEIAR@ N                            | 23.58  | 8.29   | 2.84 | 0.35 |
| Q9D086_PBDC1_MOUSE  | Pbdc1  | Protein PBDC1 OS=Mus n K.LISSVDPQFLK# L                          | 30.55  | 13.10  | 2.33 | 0.43 |
| Q9D086_PBDC1_MOUSE  | Pbdc1  | Protein PBDC1 OS=Mus n K.VDDQYSEFR@ E                            | 22.64  | 6.86   | 3.30 | 0.30 |
| Q9D086_PBDC1_MOUSE  | Pbdc1  | Protein PBDC1 OS=Mus n R.IQFFAEIAR N                             | 15.53  | 8.00   | 1.94 | 0.51 |
| Q9D086_PBDC1_MOUSE  | Pbdc1  | Protein PBDC1 OS=Mus n K.LISSVDPQFLK# L                          | 10.11  | 5.30   | 1.91 | 0.52 |
| Q9D086_PBDC1_MOUSE  | Pbdc1  | Protein PBDC1 OS=Mus n K.VDDQYSEFR@ E                            | 9.46   | 5.08   | 1.86 | 0.54 |
| F8VQD1_F8VQD1_MOUSE | Pbrm1  | Protein polybromo-1 OS K.ILEPMDLK# I                             | 10.76  | 2.73   | 3.94 | 0.25 |
| F8VQD1_F8VQD1_MOUSE | Pbrm1  | Protein polybromo-1 OS K.ILFNVLK# E                              | 12.55  | 4.37   | 2.87 | 0.35 |
| F8VQD1_F8VQD1_MOUSE | Pbrm1  | Protein polybromo-1 OS R.KHPIIQQ#EPSPLLEK# K                     | 17.13  | 4.88   | 3.51 | 0.28 |
| F8VQD1_F8VQD1_MOUSE | Pbrm1  | Protein polybromo-1 OS K.LNEVEYAVK# N                            | 17.12  | 3.91   | 4.38 | 0.23 |
| F8VQD1_F8VQD1_MOUSE | Pbrm1  | Protein polybromo-1 OS R.LSAIFLR@ L                              | 17.51  | 6.20   | 2.82 | 0.35 |
| F8VQD1_F8VQD1_MOUSE | Pbrm1  | Protein polybromo-1 OS K.LWITM*PISSVR@ F                         | 7.69   | 6.04   | 1.27 | 0.79 |
| F8VQD1_F8VQD1_MOUSE | Pbrm1  | Protein polybromo-1 OS R.R@DDIEDGDSM*ISSATSDTGSAK# R             | 8.39   | 4.52   | 1.86 | 0.54 |
| F8VQD1_F8VQD1_MOUSE | Pbrm1  | Protein polybromo-1 OS R.TDSEIYDAVELQQFFIR@ I                    | 15.44  | 4.41   | 3.50 | 0.29 |
| F8VQD1_F8VQD1_MOUSE | Pbrm1  | Protein polybromo-1 OS K.VVDEIYFR@ K                             | 21.85  | 5.86   | 3.73 | 0.27 |
| F8VQD1_F8VQD1_MOUSE | Pbrm1  | Protein polybromo-1 OS R.YEEGESEAESITSM*DVSNPFHQLYDVTVR@ S       | 4.09   | 1.83   | 2.24 | 0.45 |
| F8VQD1_F8VQD1_MOUSE | Pbrm1  | Protein polybromo-1 OS K.YIEGLSAESNISKH W                        | 12.22  | 2.22   | 5.51 | 0.18 |
| F8VQD1_F8VQD1_MOUSE | Pbrm1  | Protein polybromo-1 OS R.AAQQQQPSASPR@ A                         | 18.17  | 4.63   | 3.92 | 0.26 |
| F8VQD1_F8VQD1_MOUSE | Pbrm1  | Protein polybromo-1 OS K.AQHPDYSGELSR@ L                         | 83.18  | 23.48  | 3.54 | 0.28 |
| F8VQD1_F8VQD1_MOUSE | Pbrm1  | Protein polybromo-1 OS R.EAEK#EDSSGTTGLSGLHR@ T                  | 67.51  | 11.44  | 5.90 | 0.17 |
| F8VQD1_F8VQD1_MOUSE | Pbrm1  | Protein polybromo-1 OS R.EAEK#EDSSGTTGLSGLHR T                   | 37.37  | 9.57   | 3.90 | 0.26 |
| F8VQD1_F8VQD1_MOUSE | Pbrm1  | Protein polybromo-1 OS K.EILEQLLEAIIVVATNPSGR@ L                 | 45.81  | 8.50   | 5.39 | 0.19 |
| F8VQD1_F8VQD1_MOUSE | Pbrm1  | Protein polybromo-1 OS K.ELGPLPDDDDM*ASPK# L                     | 87.07  | 22.48  | 3.87 | 0.26 |
| F8VQD1_F8VQD1_MOUSE | Pbrm1  | Protein polybromo-1 OS K.ELGPLPDDDDMASPK# L                      | 6.24   | 2.43   | 2.57 | 0.39 |
| F8VQD1_F8VQD1_MOUSE | Pbrm1  | Protein polybromo-1 OS R.HYNEGQSVYNDHAILEK# L                    | 136.62 | 23.01  | 5.94 | 0.17 |
| F8VQD1_F8VQD1_MOUSE | Pbrm1  | Protein polybromo-1 OS K.ILEPMDLK# I                             | 91.95  | 19.68  | 4.67 | 0.21 |
| F8VQD1_F8VQD1_MOUSE | Pbrm1  | Protein polybromo-1 OS K.ILEPMDLK# I                             | 15.51  | 5.58   | 2.78 | 0.36 |
| F8VQD1_F8VQD1_MOUSE | Pbrm1  | Protein polybromo-1 OS K.ILFNVLK# E                              | 35.75  | 9.39   | 3.81 | 0.26 |
| F8VQD1_F8VQD1_MOUSE | Pbrm1  | Protein polybromo-1 OS K.INM*SGVLSSESM* R@ A                     | 9.69   | 2.97   | 3.26 | 0.31 |
| F8VQD1_F8VQD1_MOUSE | Pbrm1  | Protein polybromo-1 OS K.K.HK#YDYQQK# M                          | 6.34   | 2.65   | 2.40 | 0.42 |
| F8VQD1_F8VQD1_MOUSE | Pbrm1  | Protein polybromo-1 OS R.KHPIIQQ#EPSPLLEK# K                     | 16.26  | 4.48   | 3.63 | 0.28 |
| F8VQD1_F8VQD1_MOUSE | Pbrm1  | Protein polybromo-1 OS R.KHPIIQQ#EPSPLLEK# K                     | 60.08  | 19.58  | 3.07 | 0.33 |
| F8VQD1_F8VQD1_MOUSE | Pbrm1  | Protein polybromo-1 OS R.LISELFOK# L                             | 64.54  | 12.73  | 5.07 | 0.20 |
| F8VQD1_F8VQD1_MOUSE | Pbrm1  | Protein polybromo-1 OS R.LLHSEAFLK# Y                            | 82.31  | 28.27  | 2.91 | 0.34 |
| F8VQD1_F8VQD1_MOUSE | Pbrm1  | Protein polybromo-1 OS K.LNEVEYAVK# N                            | 135.26 | 35.17  | 3.85 | 0.26 |
| F8VQD1_F8VQD1_MOUSE | Pbrm1  | Protein polybromo-1 OS R.LSAIFLR@ L                              | 85.13  | 13.84  | 6.15 | 0.16 |
| F8VQD1_F8VQD1_MOUSE | Pbrm1  | Protein polybromo-1 OS R.LSAITM*ALQYGESEEDAALAAAR@ Y             | 81.16  | 17.26  | 4.70 | 0.21 |
| F8VQD1_F8VQD1_MOUSE | Pbrm1  | Protein polybromo-1 OS K.LWLDLYLR@ T                             | 38.11  | 8.63   | 4.42 | 0.23 |
| F8VQD1_F8VQD1_MOUSE | Pbrm1  | Protein polybromo-1 OS K.LWITM*PISSVR@ F                         | 58.42  | 25.21  | 2.32 | 0.43 |
| F8VQD1_F8VQD1_MOUSE | Pbrm1  | Protein polybromo-1 OS K.LWITMPISSVR@ F                          | 15.72  | 2.58   | 6.09 | 0.16 |
| F8VQD1_F8VQD1_MOUSE | Pbrm1  | Protein polybromo-1 OS K.M*PISLQQIR@ T                           | 134.84 | 31.49  | 4.28 | 0.23 |
| F8VQD1_F8VQD1_MOUSE | Pbrm1  | Protein polybromo-1 OS K.NGEILSPALSYTK# H                        | 26.62  | 7.57   | 3.52 | 0.28 |
| F8VQD1_F8VQD1_MOUSE | Pbrm1  | Protein polybromo-1 OS R.NHQGLLAEFFHLPSK# K                      | 76.21  | 18.68  | 4.08 | 0.25 |
| F8VQD1_F8VQD1_MOUSE | Pbrm1  | Protein polybromo-1 OS R.NQPDYEVVSQPIDLM* K# I                   | 28.94  | 6.76   | 4.28 | 0.23 |
| F8VQD1_F8VQD1_MOUSE | Pbrm1  | Protein polybromo-1 OS R.R@ATSPSSVSGDFDDGHVSPPTGPR@ K            | 20.82  | 3.85   | 5.41 | 0.18 |
| F8VQD1_F8VQD1_MOUSE | Pbrm1  | Protein polybromo-1 OS R.R@DDIEDGDSM*ISSATSDTGSAK# R             | 99.57  | 19.50  | 5.11 | 0.20 |
| F8VQD1_F8VQD1_MOUSE | Pbrm1  | Protein polybromo-1 OS R.R@LSAIFLR@ L                            | 45.07  | 8.40   | 5.37 | 0.19 |
| F8VQD1_F8VQD1_MOUSE | Pbrm1  | Protein polybromo-1 OS K.SDYNNK#PVSX# I                          | 51.97  | 12.69  | 4.09 | 0.24 |
| F8VQD1_F8VQD1_MOUSE | Pbrm1  | Protein polybromo-1 OS R.SELPYYTLTK# K                           | 123.93 | 29.87  | 4.15 | 0.24 |
| F8VQD1_F8VQD1_MOUSE | Pbrm1  | Protein polybromo-1 OS K.SSLGEER@ NPTSK# Y                       | 12.64  | 2.43   | 5.21 | 0.19 |
| F8VQD1_F8VQD1_MOUSE | Pbrm1  | Protein polybromo-1 OS R.TDSEIYDAVELQQFFIR@ I                    | 107.09 | 31.34  | 3.42 | 0.29 |
| F8VQD1_F8VQD1_MOUSE | Pbrm1  | Protein polybromo-1 OS K.TYNEPQSVFK# D                           | 86.34  | 22.72  | 3.80 | 0.26 |
| F8VQD1_F8VQD1_MOUSE | Pbrm1  | Protein polybromo-1 OS K.VLLETR@ R                               | 157.46 | 38.80  | 4.06 | 0.25 |
| F8VQD1_F8VQD1_MOUSE | Pbrm1  | Protein polybromo-1 OS K.VQYDYAIKH# E                            | 18.80  | 3.67   | 5.12 | 0.20 |
| F8VQD1_F8VQD1_MOUSE | Pbrm1  | Protein polybromo-1 OS K.VVDDEIYFR@ K                            | 148.79 | 32.22  | 4.62 | 0.22 |
| F8VQD1_F8VQD1_MOUSE | Pbrm1  | Protein polybromo-1 OS K.WDQLAAR@ R                              | 44.75  | 10.36  | 4.32 | 0.23 |
| F8VQD1_F8VQD1_MOUSE | Pbrm1  | Protein polybromo-1 OS R.YEEGESEAESITSM*DVSNPFHQLYDVTVR@ S       | 17.75  | 5.25   | 3.38 | 0.30 |
| F8VQD1_F8VQD1_MOUSE | Pbrm1  | Protein polybromo-1 OS K.YIEGLSAESNISKH W                        | 86.82  | 21.80  | 3.98 | 0.25 |
| F8VQD1_F8VQD1_MOUSE | Pbrm1  | Protein polybromo-1 OS R.YNDM*WLK# V                             | 18.25  | 5.55   | 3.29 | 0.30 |
| F8VQD1_F8VQD1_MOUSE | Pbrm1  | Protein polybromo-1 OS R.YNVPNSAIYK# R                           | 35.18  | 9.04   | 3.89 | 0.26 |
| F8VQD1_F8VQD1_MOUSE | Pbrm1  | Protein polybromo-1 OS K.YPDYQQK# M                              | 11.58  | 5.15   | 2.25 | 0.44 |
| P41778_PBX1_MOUSE   | Pbx1   | Pre-B-cell leukemia trans K.GGGSAAAAAASGAGSDNSVEHSYDR@ A         | 17.13  | 3.52   | 4.87 | 0.21 |
| P41778_PBX1_MOUSE   | Pbx1   | Pre-B-cell leukemia trans R.KHQDIGIDLQIM*TTIDQSLDEAQAAR@ K       | 2.88   | 2.74   | 1.05 | 0.95 |
| Q35984_PBX2_MOUSE   | Pbx2   | Pre-B-cell leukemia trans K.GGGSAAAAAASGAGSDNSVEHSYDR@ S         | 5.25   | 3.02   | 1.74 | 0.57 |
| Q35984_PBX2_MOUSE   | Pbx2   | Pre-B-cell leukemia trans R.LDNM*LLAEGVAGPEK# G                  | 12.33  | 3.34   | 3.69 | 0.27 |
| Q35317_PBX3_MOUSE   | Pbx3   | Pre-B-cell leukemia trans K.GGGSAAAAAASGAGSDNSVEHSYDR@ A         | 6.83   | 3.95   | 1.73 | 0.58 |
| Q05920_PYC_MOUSE    | Pc     | Pyruvate carboxylase, mi R.LDNASAFQGVISPHYSLLVK# V               | 9.81   | 4.47   | 2.20 | 0.46 |
| Q05920_PYC_MOUSE    | Pc     | Pyruvate carboxylase, mi R.SVVEFLOGYVIGIPHGGFPPEFR@ S            | 6.25   | 4.07   | 1.54 | 0.65 |
| Q05920_PYC_MOUSE    | Pc     | Pyruvate carboxylase, mi R.VVHSYELEENYTR@ A                      | 4.19   | 3.64   | 1.15 | 0.87 |
| Q05920_PYC_MOUSE    | Pc     | Pyruvate carboxylase, mi K.DFTATFGLDLSNTR@ L                     | 4.87   | 3.15   | 1.55 | 0.65 |
| P60335_PCBP1_MOUSE  | Pcbp1  | Poly(rC)-binding protein K.AFAM*IDKLEEDINSSM*TNSTAASRPPVTLR L    | 326.79 | 82.81  | 3.95 | 0.25 |
| P60335_PCBP1_MOUSE  | Pcbp1  | Poly(rC)-binding protein K.AFAM*IDKLEEDINSSM*TNSTAASRPPVTLR L    | 76.41  | 20.74  | 3.68 | 0.27 |
| P60335_PCBP1_MOUSE  | Pcbp1  | Poly(rC)-binding protein K.AFAM*IDKLEEDINSSM*TNSTAASR@ PAVTLR@ L | 5.11   | 3.27   | 1.56 | 0.64 |
| P60335_PCBP1_MOUSE  | Pcbp1  | Poly(rC)-binding protein R.ESSTAQQVAGDM*LPNSTER@ A               | 473.95 | 178.93 | 2.65 | 0.38 |
| P60335_PCBP1_MOUSE  | Pcbp1  | Poly(rC)-binding protein R.ESSTAQQVAGDM*LPNSTER A                | 264.72 | 92.19  | 2.87 | 0.35 |
| P60335_PCBP1_MOUSE  | Pcbp1  | Poly(rC)-binding protein R.ESSTAQQVAGDM*LPNSTER A                | 35.12  | 11.46  | 3.06 | 0.33 |
| P60335_PCBP1_MOUSE  | Pcbp1  | Poly(rC)-binding protein K.IANPEVSSGR@ Q                         | 463.19 | 168.47 | 2.75 | 0.36 |
| P60335_PCBP1_MOUSE  | Pcbp1  | Poly(rC)-binding protein R.IITLTGTNAIFK# A                       | 723.55 | 243.66 | 2.97 | 0.34 |
| P60335_PCBP1_MOUSE  | Pcbp1  | Poly(rC)-binding protein R.IR@EESGAR@ I                          | 23.83  | 8.27   | 2.88 | 0.35 |
| P60335_PCBP1_MOUSE  | Pcbp1  | Poly(rC)-binding protein K.LEEDINSSM*TNSTAASR@ PAVTLR@ L         | 12.15  | 3.44   | 3.53 | 0.28 |





|                     |        |                                                                      |        |        |      |      |
|---------------------|--------|----------------------------------------------------------------------|--------|--------|------|------|
| Q9WU78_PDC6I_MOUSE  | Pdc6ip | Programmed cell death 6 K.ELPELLQR@.N                                | 14.08  | 8.71   | 1.62 | 0.62 |
| Q9WU78_PDC6I_MOUSE  | Pdc6ip | Programmed cell death 6 K.FLTLAQDGVINEEALSVELDR@.I                   | 11.25  | 8.43   | 1.33 | 0.75 |
| Q9WU78_PDC6I_MOUSE  | Pdc6ip | Programmed cell death 6 K.LANQAADYFGDAFK#.Q                          | 10.62  | 5.44   | 1.95 | 0.51 |
| Q9WU78_PDC6I_MOUSE  | Pdc6ip | Programmed cell death 6 R.LLDEEATDNDLR@.A                            | 21.83  | 14.40  | 1.52 | 0.66 |
| Q9WU78_PDC6I_MOUSE  | Pdc6ip | Programmed cell death 6 K.NIQVSHQEFK#.M                              | 7.67   | 4.11   | 1.87 | 0.54 |
| Q9WU78_PDC6I_MOUSE  | Pdc6ip | Programmed cell death 6 K.STSVVEGGIGQIVDQLIK#.E                      | 10.41  | 5.07   | 2.06 | 0.49 |
| Q9WU78_PDC6I_MOUSE  | Pdc6ip | Programmed cell death 6 K.TM*QGSSEVSVLK#.S                           | 12.36  | 9.16   | 1.35 | 0.74 |
| Q9WU78_PDC6I_MOUSE  | Pdc6ip | Programmed cell death 6 K.FLTLAQDGVINEEALSVELDR@.I                   | 12.36  | 12.75  | 1.03 | 0.97 |
| Q9WU78_PDC6I_MOUSE  | Pdc6ip | Programmed cell death 6 K.FYNLTELIVR@.F                              | 142.91 | 44.39  | 3.22 | 0.31 |
| Q9WU78_PDC6I_MOUSE  | Pdc6ip | Programmed cell death 6 R.LLDEEATDNDLR@.A                            | 10.49  | 4.84   | 2.17 | 0.46 |
| Q9WU78_PDC6I_MOUSE  | Pdc6ip | Programmed cell death 6 K.STSVVEGGIGQIVDQLIK#.E                      | 9.38   | 3.54   | 2.65 | 0.38 |
| Q9WU78_PDC6I_MOUSE  | Pdc6ip | Programmed cell death 6 K.TM*QGSSEVSVLK#.S                           | 7.93   | 3.09   | 2.57 | 0.39 |
| Q8BFV2_PDC13_MOUSE  | Pdc13  | Phosducin-like protein 3 K.ELEEEAEKHEEQLLQSVVK#.T                    | 8.91   | 3.98   | 2.24 | 0.45 |
| Q8BFV2_PDC13_MOUSE  | Pdc13  | Phosducin-like protein 3 K.ESLKHLEEEAEKHEEQLLQSVVK#.T                | 20.38  | 9.13   | 2.23 | 0.45 |
| Q8BFV2_PDC13_MOUSE  | Pdc13  | Phosducin-like protein 3 K.FGEVLEISGK#.D                             | 12.44  | 7.12   | 1.75 | 0.57 |
| Q8BFV2_PDC13_MOUSE  | Pdc13  | Phosducin-like protein 3 R.NLPTVFVYR@.E                              | 25.63  | 16.17  | 1.58 | 0.63 |
| B2KF84_B2KF84_MOUSE | Pde4d  | cAMP-specific 3',5'-cyclic R.ITTCNIGDEENINDGR.A                      | 3.48   | 8.30   | 0.42 | 2.39 |
| P27773_PDI3_MOUSE   | Pdia3  | Protein disulfide-isomerase K.ALEQFLQYDFDGNLK.R                      | 16.00  | 27.39  | 0.58 | 1.71 |
| P27773_PDI3_MOUSE   | Pdia3  | Protein disulfide-isomerase K.ALEQFLQYDFDGNLK#.R@.Y                  | 59.65  | 92.57  | 0.64 | 1.55 |
| P27773_PDI3_MOUSE   | Pdia3  | Protein disulfide-isomerase R.DGEEAGAYDGP.R.T                        | 17.50  | 28.88  | 0.61 | 1.65 |
| P27773_PDI3_MOUSE   | Pdia3  | Protein disulfide-isomerase K.DLLTAYDYDYK.N                          | 43.97  | 79.62  | 0.55 | 1.81 |
| P27773_PDI3_MOUSE   | Pdia3  | Protein disulfide-isomerase R.ELNDFISYLQ.R.E                         | 37.53  | 61.07  | 0.61 | 1.63 |
| P27773_PDI3_MOUSE   | Pdia3  | Protein disulfide-isomerase K.FISDKDASVVGFFR.D                       | 46.95  | 90.97  | 0.52 | 1.94 |
| P27773_PDI3_MOUSE   | Pdia3  | Protein disulfide-isomerase K.FVM*QEFESR.D                           | 46.91  | 66.99  | 0.70 | 1.43 |
| P27773_PDI3_MOUSE   | Pdia3  | Protein disulfide-isomerase K.FVMQEFESR.D                            | 8.47   | 13.37  | 0.63 | 1.58 |
| P27773_PDI3_MOUSE   | Pdia3  | Protein disulfide-isomerase K.IFRDGEAGAYDGP.R.T                      | 27.22  | 41.60  | 0.65 | 1.53 |
| P27773_PDI3_MOUSE   | Pdia3  | Protein disulfide-isomerase R.KTFSHLSDFGLESTTGEVPPVAIR.T             | 6.24   | 10.50  | 0.59 | 1.68 |
| P27773_PDI3_MOUSE   | Pdia3  | Protein disulfide-isomerase R.LAPEYEAATR.L                           | 73.70  | 128.51 | 0.57 | 1.74 |
| P27773_PDI3_MOUSE   | Pdia3  | Protein disulfide-isomerase R.KLGIVPLAK.V                            | 6.73   | 10.25  | 0.66 | 1.52 |
| P27773_PDI3_MOUSE   | Pdia3  | Protein disulfide-isomerase K.LNFVAVSR@.K                            | 39.69  | 63.39  | 0.63 | 1.60 |
| P27773_PDI3_MOUSE   | Pdia3  | Protein disulfide-isomerase K.LSK#DPMNIAK#.M                         | 49.23  | 113.26 | 0.43 | 2.30 |
| P27773_PDI3_MOUSE   | Pdia3  | Protein disulfide-isomerase K.M*DATANDVPSPEVK.G                      | 20.26  | 30.18  | 0.67 | 1.49 |
| P27773_PDI3_MOUSE   | Pdia3  | Protein disulfide-isomerase K.MDATANDVPSPEVK.G                       | 4.57   | 7.24   | 0.63 | 1.58 |
| P27773_PDI3_MOUSE   | Pdia3  | Protein disulfide-isomerase K.TFSHLSDFGLESTTGEVPPVAIR.T              | 20.09  | 42.53  | 0.47 | 2.12 |
| P27773_PDI3_MOUSE   | Pdia3  | Protein disulfide-isomerase K.YGVSYPYTK.L.I                          | 47.81  | 80.82  | 0.59 | 1.69 |
| P27773_PDI3_MOUSE   | Pdia3  | Protein disulfide-isomerase K.ALEQFLQYDFDGNLK.R                      | 6.62   | 8.88   | 0.75 | 1.34 |
| P27773_PDI3_MOUSE   | Pdia3  | Protein disulfide-isomerase K.ALEQFLQYDFDGNLK.R                      | 5.94   | 6.76   | 0.88 | 1.14 |
| P27773_PDI3_MOUSE   | Pdia3  | Protein disulfide-isomerase K.DLLTAYDYDYK.N                          | 22.54  | 28.76  | 0.78 | 1.28 |
| P27773_PDI3_MOUSE   | Pdia3  | Protein disulfide-isomerase R.ELNDFISYLQ.R.E                         | 39.11  | 45.41  | 0.86 | 1.16 |
| P27773_PDI3_MOUSE   | Pdia3  | Protein disulfide-isomerase R.FAHTNISLVK.E                           | 23.37  | 28.40  | 0.82 | 1.22 |
| P27773_PDI3_MOUSE   | Pdia3  | Protein disulfide-isomerase K.FISDKDASVVGFFR@.D                      | 39.89  | 46.42  | 0.86 | 1.16 |
| P27773_PDI3_MOUSE   | Pdia3  | Protein disulfide-isomerase K.FVM*QEFESR.D                           | 24.15  | 31.47  | 0.77 | 1.30 |
| P27773_PDI3_MOUSE   | Pdia3  | Protein disulfide-isomerase K.IFRDGEAGAYDGP.R.T                      | 16.04  | 16.84  | 0.95 | 1.05 |
| P27773_PDI3_MOUSE   | Pdia3  | Protein disulfide-isomerase R.KHTFSHLSDFGLESTTGEVPPVAIR@.T           | 4.74   | 4.58   | 1.03 | 0.97 |
| P27773_PDI3_MOUSE   | Pdia3  | Protein disulfide-isomerase K.LSK#DPMNIAK#.M                         | 34.69  | 35.40  | 0.98 | 1.02 |
| P27773_PDI3_MOUSE   | Pdia3  | Protein disulfide-isomerase K.M*DATANDVPSPEVK.G                      | 13.62  | 15.04  | 0.91 | 1.10 |
| P27773_PDI3_MOUSE   | Pdia3  | Protein disulfide-isomerase K.MDATANDVPSPEVK.G                       | 3.12   | 5.43   | 0.58 | 1.74 |
| P27773_PDI3_MOUSE   | Pdia3  | Protein disulfide-isomerase K.YGVSYPYTK.L.I                          | 23.85  | 34.56  | 0.69 | 1.45 |
| P27773_PDI3_MOUSE   | Pdia3  | Protein disulfide-isomerase R.ELNDFISYLQ.R.E                         | 16.47  | 9.96   | 1.65 | 0.60 |
| P27773_PDI3_MOUSE   | Pdia3  | Protein disulfide-isomerase K.FISDKDASVVGFFR@.D                      | 23.74  | 13.35  | 1.78 | 0.56 |
| P27773_PDI3_MOUSE   | Pdia3  | Protein disulfide-isomerase K.FVM*QEFESR@.D                          | 11.94  | 8.87   | 1.35 | 0.74 |
| P27773_PDI3_MOUSE   | Pdia3  | Protein disulfide-isomerase R.LAPEYEAATR@.L                          | 28.26  | 11.47  | 2.46 | 0.41 |
| P27773_PDI3_MOUSE   | Pdia3  | Protein disulfide-isomerase K.M*DATANDVPSPEVK.G                      | 9.46   | 6.71   | 1.41 | 0.71 |
| P27773_PDI3_MOUSE   | Pdia3  | Protein disulfide-isomerase K.SEPIESNEGPVK#.V                        | 23.11  | 12.52  | 1.85 | 0.54 |
| P27773_PDI3_MOUSE   | Pdia3  | Protein disulfide-isomerase K.TFSHLSDFGLESTTGEVPPVAIR@.T             | 12.89  | 8.80   | 1.46 | 0.68 |
| P08003_PDI4_MOUSE   | Pdia4  | Protein disulfide-isomerase K.FAM*EEFFDSOTLR.E                       | 5.05   | 5.61   | 0.90 | 1.11 |
| P08003_PDI4_MOUSE   | Pdia4  | Protein disulfide-isomerase K.M*DATANDITNDQYK.V                      | 2.47   | 4.37   | 0.56 | 1.77 |
| P08003_PDI4_MOUSE   | Pdia4  | Protein disulfide-isomerase K.VDATEQDTLAK.R                          | 7.57   | 27.94  | 0.27 | 3.69 |
| Q3TML0_Q3TML0_MOUSE | Pdia6  | Protein disulfide-isomerase K.AATALKHVVK#.V                          | 44.21  | 27.48  | 1.61 | 0.62 |
| Q3TML0_Q3TML0_MOUSE | Pdia6  | Protein disulfide-isomerase K.DVVLETDITDQK.N                         | 12.68  | 6.69   | 1.89 | 0.53 |
| Q3TML0_Q3TML0_MOUSE | Pdia6  | Protein disulfide-isomerase R.EPWGDKDGLPVEDIDLDVELDLEK.D             | 6.12   | 4.61   | 1.33 | 0.75 |
| Q3TML0_Q3TML0_MOUSE | Pdia6  | Protein disulfide-isomerase R.EPWGDKDGLPVEDIDLDVELDLEKDEL.-          | 26.61  | 17.06  | 1.56 | 0.64 |
| Q3TML0_Q3TML0_MOUSE | Pdia6  | Protein disulfide-isomerase K.GESPVDYDGGR@.L                         | 122.03 | 73.14  | 1.67 | 0.60 |
| Q3TML0_Q3TML0_MOUSE | Pdia6  | Protein disulfide-isomerase K.GSFSEQINEFLR@.E                        | 183.09 | 89.82  | 2.04 | 0.49 |
| Q3TML0_Q3TML0_MOUSE | Pdia6  | Protein disulfide-isomerase R.GSTAPVGGSPFITPR@.E                     | 179.83 | 93.76  | 1.92 | 0.52 |
| Q3TML0_Q3TML0_MOUSE | Pdia6  | Protein disulfide-isomerase K.IFQKHGSPVDYDGGR@.T                     | 35.29  | 15.02  | 2.35 | 0.43 |
| Q3TML0_Q3TML0_MOUSE | Pdia6  | Protein disulfide-isomerase K.LAAVDATM*NQVLASR@.Y                    | 111.54 | 58.30  | 1.91 | 0.52 |
| Q3TML0_Q3TML0_MOUSE | Pdia6  | Protein disulfide-isomerase K.LAAVDATM*NQVLASR@.Y                    | 44.41  | 19.04  | 2.33 | 0.43 |
| Q3TML0_Q3TML0_MOUSE | Pdia6  | Protein disulfide-isomerase K.NLEPEWAAAATEVKR.E                      | 57.97  | 38.73  | 1.50 | 0.67 |
| Q3TML0_Q3TML0_MOUSE | Pdia6  | Protein disulfide-isomerase R.NSYLEVLLK#.L                           | 137.71 | 79.71  | 1.73 | 0.58 |
| Q3TML0_Q3TML0_MOUSE | Pdia6  | Protein disulfide-isomerase R.TGEAIVDAALSALR@.Q                      | 273.93 | 132.83 | 2.06 | 0.48 |
| Q3TML0_Q3TML0_MOUSE | Pdia6  | Protein disulfide-isomerase R.TGEAIVDAALSALR@.Q                      | 111.08 | 56.86  | 1.95 | 0.51 |
| Q3TML0_Q3TML0_MOUSE | Pdia6  | Protein disulfide-isomerase K.VGAVNADKIHQSLGGQYVQGFPTIK#.I           | 26.06  | 15.93  | 1.64 | 0.61 |
| Q3TML0_Q3TML0_MOUSE | Pdia6  | Protein disulfide-isomerase R.GSTAPVGGSPFITPR@.E                     | 10.47  | 8.31   | 1.26 | 0.79 |
| Q3TML0_Q3TML0_MOUSE | Pdia6  | Protein disulfide-isomerase K.LAAVDATM*NQVLASR@.Y                    | 4.62   | 3.50   | 1.32 | 0.76 |
| Q3TML0_Q3TML0_MOUSE | Pdia6  | Protein disulfide-isomerase R.NSYLEVLLK#.L                           | 7.93   | 4.98   | 1.59 | 0.63 |
| Q3TML0_Q3TML0_MOUSE | Pdia6  | Protein disulfide-isomerase R.TGEAIVDAALSALR@.Q                      | 4.84   | 3.57   | 1.35 | 0.74 |
| O70400_PDL1_MOUSE   | Pdlim1 | PDZ and LIM domain pro R.SAM*PFTASAPSTR@.V                           | 8.66   | 10.09  | 0.86 | 1.16 |
| O70400_PDL1_MOUSE   | Pdlim1 | PDZ and LIM domain pro R.VTPPEGVDVTVFR@.E.-                          | 37.16  | 20.84  | 1.78 | 0.56 |
| Q8R1G6_PDL1_MOUSE   | Pdlim2 | PDZ and LIM domain pro R.FSSLDLEEDSEVFK#.M                           | 10.87  | 3.98   | 2.73 | 0.37 |
| P70271_PDL14_MOUSE  | Pdlim4 | PDZ and LIM domain pro R.DFSAPLTISR.V                                | 42.07  | 13.71  | 3.07 | 0.33 |
| P70271_PDL14_MOUSE  | Pdlim4 | PDZ and LIM domain pro R.EPAEPTASEPK#.Q                              | 4.07   | 3.36   | 1.21 | 0.83 |
| P70271_PDL14_MOUSE  | Pdlim4 | PDZ and LIM domain pro R.GPSPVGFGR@.L                                | 24.59  | 8.73   | 2.82 | 0.36 |
| P70271_PDL14_MOUSE  | Pdlim4 | PDZ and LIM domain pro R.GYFFLDER@.L                                 | 21.87  | 6.36   | 3.44 | 0.29 |
| P70271_PDL14_MOUSE  | Pdlim4 | PDZ and LIM domain pro R.M*LR@EPAEPTASEPK#.Q                         | 34.41  | 12.53  | 2.75 | 0.36 |
| P70271_PDL14_MOUSE  | Pdlim4 | PDZ and LIM domain pro R.SGLGSPYQPPR@.L                              | 31.81  | 15.92  | 2.00 | 0.50 |
| P70271_PDL14_MOUSE  | Pdlim4 | PDZ and LIM domain pro R.SSVSGISLEENR@.S                             | 67.98  | 20.52  | 3.31 | 0.30 |
| P70271_PDL14_MOUSE  | Pdlim4 | PDZ and LIM domain pro R.VDLGSEVYR@.M                                | 78.70  | 37.55  | 2.10 | 0.48 |
| P70271_PDL14_MOUSE  | Pdlim4 | PDZ and LIM domain pro R.VK#PEGYDVVAVYVYVNAK#.V                      | 30.47  | 11.99  | 2.54 | 0.39 |
| P70271_PDL14_MOUSE  | Pdlim4 | PDZ and LIM domain pro R.VLQGM*LEAGEGDRPGSGGPR.N                     | 34.66  | 11.95  | 2.90 | 0.34 |
| P70271_PDL14_MOUSE  | Pdlim4 | PDZ and LIM domain pro R.VDLGSEVYR@.M                                | 8.35   | 7.81   | 1.07 | 0.93 |
| Q8C151_PDL15_MOUSE  | Pdlim5 | PDZ and LIM domain pro R.GPFLVALGK#.S                                | 73.65  | 39.61  | 1.86 | 0.54 |
| Q8C151_PDL15_MOUSE  | Pdlim5 | PDZ and LIM domain pro K.ILGEVINALK#.Q                               | 39.07  | 13.58  | 2.88 | 0.35 |
| Q8C151_PDL15_MOUSE  | Pdlim5 | PDZ and LIM domain pro K.K#ANSTQEPSSQPPASSGASPLSASEGPESSR@PSVAGLR@.S | 17.49  | 10.02  | 1.75 | 0.57 |
| Q8C151_PDL15_MOUSE  | Pdlim5 | PDZ and LIM domain pro R.KHILGEVINALK#.Q                             | 6.27   | 3.56   | 1.76 | 0.57 |
| Q8C151_PDL15_MOUSE  | Pdlim5 | PDZ and LIM domain pro K.NTM*AYIGFVEEK#.G                            | 17.25  | 9.79   | 1.76 | 0.57 |
| Q8C151_PDL15_MOUSE  | Pdlim5 | PDZ and LIM domain pro R.SPSWQR@PNQAAPSTGR@.I                        | 32.44  | 10.58  | 3.07 | 0.33 |
| Q8C151_PDL15_MOUSE  | Pdlim5 | PDZ and LIM domain pro R.SSGTGASVGGPPQPSDQDTLQVR@.A                  | 17.25  | 9.07   | 1.90 | 0.53 |
| Q8C151_PDL15_MOUSE  | Pdlim5 | PDZ and LIM domain pro R.GPFLVALGK#.S                                | 31.37  | 21.65  | 1.45 | 0.69 |
| Q8C151_PDL15_MOUSE  | Pdlim5 | PDZ and LIM domain pro K.ILGEVINALK#.Q                               | 13.46  | 9.07   | 1.48 | 0.67 |
| Q8C151_PDL15_MOUSE  | Pdlim5 | PDZ and LIM domain pro K.NTM*AYIGFVEEK#.G                            | 6.89   | 4.46   | 1.54 | 0.65 |
| Q8C151_PDL15_MOUSE  | Pdlim5 | PDZ and LIM domain pro R.SSGTGASVGGPPQPSDQDTLQVR.A                   | 4.29   | 5.01   | 0.86 | 1.17 |
| Q8C151_PDL15_MOUSE  | Pdlim5 | PDZ and LIM domain pro K.EVVKHPVITPSPAVSK#.V                         | 33.06  | 8.98   | 3.68 | 0.27 |

|                     |        |                                                                       |       |       |      |      |
|---------------------|--------|-----------------------------------------------------------------------|-------|-------|------|------|
| Q8C151_PDLI5_MOUSE  | Pdlim5 | PDZ and LIM domain pro R.GPFLVALGK#.S                                 | 57.28 | 20.76 | 2.76 | 0.36 |
| Q8C151_PDLI5_MOUSE  | Pdlim5 | PDZ and LIM domain pro R.IGDVVLSDIGSAGQM*THLEAQNK#.I                  | 14.28 | 2.53  | 5.65 | 0.18 |
| Q8C151_PDLI5_MOUSE  | Pdlim5 | PDZ and LIM domain pro R.IGDVVLSDIGSAGQMTHEAQNK#.I                    | 5.33  | 2.68  | 1.99 | 0.50 |
| Q8C151_PDLI5_MOUSE  | Pdlim5 | PDZ and LIM domain pro K.KANSTQEPSSQPASSGASPLSASEGPEPSSRRPVAGLR.S     | 17.28 | 5.35  | 3.23 | 0.31 |
| Q8C151_PDLI5_MOUSE  | Pdlim5 | PDZ and LIM domain pro R.KHLGVEINALK#.Q                               | 9.39  | 2.09  | 4.50 | 0.22 |
| Q8C151_PDLI5_MOUSE  | Pdlim5 | PDZ and LIM domain pro K.SPSWQR@PNQAAPSTGR@.I                         | 13.34 | 4.08  | 3.27 | 0.31 |
| Q8C151_PDLI5_MOUSE  | Pdlim5 | PDZ and LIM domain pro R.SSGTAGSVGGPPQSDQDLVQR@.A                     | 13.90 | 3.36  | 4.14 | 0.24 |
| Q8C151_PDLI5_MOUSE  | Pdlim5 | PDZ and LIM domain pro R.GPFLVALGK#.S                                 | 40.31 | 13.59 | 2.96 | 0.34 |
| Q8C151_PDLI5_MOUSE  | Pdlim5 | PDZ and LIM domain pro R.ILAQGTGHELTESENDTK#.K                        | 21.77 | 4.76  | 4.58 | 0.22 |
| Q8C151_PDLI5_MOUSE  | Pdlim5 | PDZ and LIM domain pro K.ILGVEINALK#.Q                                | 25.77 | 9.02  | 2.86 | 0.35 |
| Q8C151_PDLI5_MOUSE  | Pdlim5 | PDZ and LIM domain pro K.KHANSTQEPSSQPASSGASPLSASEGPEPSSRR@PSVAGLR@.S | 11.62 | 3.43  | 3.39 | 0.30 |
| Q8C151_PDLI5_MOUSE  | Pdlim5 | PDZ and LIM domain pro K.NTM*AYIGFVEEK#.G                             | 10.86 | 3.46  | 3.14 | 0.30 |
| Q3TJ07_PDLI7_MOUSE  | Pdlim7 | PDZ and LIM domain pro K.DFNPLSISR@.L                                 | 47.62 | 30.74 | 1.55 | 0.65 |
| Q3TJ07_PDLI7_MOUSE  | Pdlim7 | PDZ and LIM domain pro R.HSQPATPTPLQNR@.T                             | 10.98 | 8.77  | 1.25 | 0.80 |
| Q3TJ07_PDLI7_MOUSE  | Pdlim7 | PDZ and LIM domain pro K.ITGEIM*HALK#.M                               | 10.73 | 5.56  | 1.93 | 0.52 |
| Q3TJ07_PDLI7_MOUSE  | Pdlim7 | PDZ and LIM domain pro R.LSLGLSR@.A                                   | 55.14 | 34.72 | 1.59 | 0.63 |
| Q3TJ07_PDLI7_MOUSE  | Pdlim7 | PDZ and LIM domain pro R.TSIVQAAAGGDTGGSSNNGK#.T                      | 9.67  | 5.43  | 1.78 | 0.56 |
| Q3TJ07_PDLI7_MOUSE  | Pdlim7 | PDZ and LIM domain pro K.VLEEGGFEEK#.G                                | 93.59 | 47.13 | 1.99 | 0.50 |
| Q3TJ07_PDLI7_MOUSE  | Pdlim7 | PDZ and LIM domain pro K.VVLEGGPAPWGRF@.L                             | 63.79 | 31.15 | 2.05 | 0.49 |
| Q3TJ07_PDLI7_MOUSE  | Pdlim7 | PDZ and LIM domain pro R.YAPDK#TSTVLTR@.H                             | 11.11 | 5.34  | 2.08 | 0.48 |
| Q3TJ07_PDLI7_MOUSE  | Pdlim7 | PDZ and LIM domain pro R.YTFAPSALNK#.T                                | 72.29 | 36.71 | 1.97 | 0.51 |
| Q3TJ07_PDLI7_MOUSE  | Pdlim7 | PDZ and LIM domain pro K.VLEEGGFEEK#.G                                | 15.25 | 16.48 | 0.93 | 1.08 |
| Q3TJ07_PDLI7_MOUSE  | Pdlim7 | PDZ and LIM domain pro K.AAQAGVAVGDWVNLNIDGENAGSLTHIEAQNK#.I          | 8.66  | 3.27  | 2.65 | 0.38 |
| Q3TJ07_PDLI7_MOUSE  | Pdlim7 | PDZ and LIM domain pro R.HSQPATPTPLQNR@.T                             | 6.80  | 3.69  | 1.84 | 0.54 |
| Q3TJ07_PDLI7_MOUSE  | Pdlim7 | PDZ and LIM domain pro R.LSLGLSR@.A                                   | 28.08 | 11.72 | 2.40 | 0.42 |
| Q3TJ07_PDLI7_MOUSE  | Pdlim7 | PDZ and LIM domain pro K.VLEEGGFEEK#.G                                | 45.48 | 19.71 | 2.31 | 0.43 |
| Q3TJ07_PDLI7_MOUSE  | Pdlim7 | PDZ and LIM domain pro K.VVLEGGPAPWGRF@.L                             | 29.95 | 12.41 | 2.41 | 0.41 |
| Q3TJ07_PDLI7_MOUSE  | Pdlim7 | PDZ and LIM domain pro R.YTFAPSALNK#.T                                | 29.61 | 11.36 | 2.61 | 0.38 |
| Q3TJ07_PDLI7_MOUSE  | Pdlim7 | PDZ and LIM domain pro R.LSLGLSR@.A                                   | 20.94 | 10.13 | 2.07 | 0.48 |
| Q3TJ07_PDLI7_MOUSE  | Pdlim7 | PDZ and LIM domain pro K.TAR@PFGAPPPTDSTLR@.Q                         | 11.37 | 6.12  | 1.86 | 0.54 |
| Q3TJ07_PDLI7_MOUSE  | Pdlim7 | PDZ and LIM domain pro K.VLEEGGFEEK#.G                                | 48.23 | 17.05 | 2.83 | 0.35 |
| Q3TJ07_PDLI7_MOUSE  | Pdlim7 | PDZ and LIM domain pro K.VVLEGGPAPWGRF@.L                             | 22.32 | 9.29  | 2.40 | 0.42 |
| Q62011_PDPN_MOUSE   | Pdpn   | Podoplanin OS=Mus mus R.EHSTTTK#WVTVSHSVDK.K                          | 16.28 | 43.81 | 0.37 | 2.69 |
| Q6A026_PDS5A_MOUSE  | Pds5a  | Sister chromatid cohesio R.DLALVNDQLLGFVR@.E                          | 18.13 | 6.72  | 2.70 | 0.37 |
| Q6A026_PDS5A_MOUSE  | Pds5a  | Sister chromatid cohesio K.LWSPDEEVSPEVLAK#.V                         | 4.49  | 2.49  | 1.80 | 0.55 |
| Q6A026_PDS5A_MOUSE  | Pds5a  | Sister chromatid cohesio K.SIEGTADDEEGVSPDSAIR@.S                     | 7.23  | 4.26  | 1.70 | 0.59 |
| Q6A026_PDS5A_MOUSE  | Pds5a  | Sister chromatid cohesio R.DLALVNDQLLGFVR@.E                          | 40.02 | 18.05 | 2.22 | 0.45 |
| Q6A026_PDS5A_MOUSE  | Pds5a  | Sister chromatid cohesio K.LWSPDEEVSPEVLAK#.V                         | 7.97  | 3.27  | 2.44 | 0.41 |
| Q6A026_PDS5A_MOUSE  | Pds5a  | Sister chromatid cohesio K.NKHEINSDQSTQGNISSDR@.G                     | 10.20 | 2.34  | 4.36 | 0.23 |
| Q6A026_PDS5A_MOUSE  | Pds5a  | Sister chromatid cohesio R.SGLELKK#.V                                 | 17.04 | 5.66  | 3.01 | 0.33 |
| Q6A026_PDS5A_MOUSE  | Pds5a  | Sister chromatid cohesio R.SR@EQSSEASEGVSENEENPVR@.I                  | 3.97  | 2.78  | 1.43 | 0.70 |
| Q6A026_PDS5A_MOUSE  | Pds5a  | Sister chromatid cohesio K.SVVANFVK#.D                                | 18.40 | 5.24  | 3.51 | 0.28 |
| Q6A026_PDS5A_MOUSE  | Pds5a  | Sister chromatid cohesio K.SYISETR@.L                                 | 6.90  | 3.05  | 2.26 | 0.44 |
| Q4VA53_PDS5B_MOUSE  | Pds5b  | Sister chromatid cohesio K.SIDGTADDEEGVPTDQAIR@.A                     | 7.99  | 6.60  | 1.21 | 0.83 |
| Q4VA53_PDS5B_MOUSE  | Pds5b  | Sister chromatid cohesio K.YSLQSAAGK#.D                               | 12.35 | 5.76  | 2.14 | 0.47 |
| Q99K01_PDXD1_MOUSE  | Pdxd1  | Pyridoxal-dependent dec K.ILVEDELSPPVVVFR@.F                          | 8.29  | 5.59  | 1.48 | 0.67 |
| Q99K01_PDXD1_MOUSE  | Pdxd1  | Pyridoxal-dependent dec R.SFNLTAGSLESTEYTVHK#.V                       | 7.86  | 4.45  | 1.77 | 0.57 |
| Q99K01_PDXD1_MOUSE  | Pdxd1  | Pyridoxal-dependent dec K.ILVEDELSPPVVVFR@.F                          | 5.96  | 2.86  | 2.09 | 0.48 |
| Q9CZG9_PDZ11_MOUSE  | Pdzd11 | PDZ domain-containing j R.AGLEQEGDQVLAVNDVDFQDIEHSK#.A                | 5.62  | 6.92  | 0.81 | 1.23 |
| Q9CZG9_PDZ11_MOUSE  | Pdzd11 | PDZ domain-containing j K.ASQLGIFISK#.V                               | 8.25  | 3.18  | 2.60 | 0.38 |
| B9E180_B9E180_MOUSE | Pdzd8  | PDZ domain containing j R.DVFLGDVTPPIK#.T                             | 11.33 | 4.82  | 2.35 | 0.43 |
| Q8BFY6_PEF1_MOUSE   | Pef1   | Peflin OS=Mus musculus R.IDVAGDSLWK#.F                                | 9.23  | 4.91  | 1.88 | 0.53 |
| Q8BFY6_PEF1_MOUSE   | Pef1   | Peflin OS=Mus musculus R.SGSISETLQALSQM*GYNLSPQFTQLVSR@.Y             | 5.00  | 2.27  | 2.21 | 0.45 |
| Q9DBD5_PEL1_MOUSE   | Pelp1  | Proline-, glutamic acid- a R.FGALISR@.L                               | 18.61 | 4.73  | 3.94 | 0.25 |
| Q9DBD5_PEL1_MOUSE   | Pelp1  | Proline-, glutamic acid- a K.LASFFLSR@.L                              | 11.07 | 6.11  | 1.81 | 0.55 |
| Q9DBD5_PEL1_MOUSE   | Pelp1  | Proline-, glutamic acid- a K.LDM*GALAPPSPQR@.K                        | 14.86 | 6.61  | 2.25 | 0.44 |
| Q9DBD5_PEL1_MOUSE   | Pelp1  | Proline-, glutamic acid- a R.LLPQVLANAWSTGR@.D                        | 10.94 | 5.82  | 1.88 | 0.53 |
| Q9DBD5_PEL1_MOUSE   | Pelp1  | Proline-, glutamic acid- a K.NINLGDGPLR.L                             | 21.51 | 10.76 | 2.00 | 0.50 |
| Q9DBD5_PEL1_MOUSE   | Pelp1  | Proline-, glutamic acid- a R.SIQVLQSDSPSTM*ELAVAVLR@.D                | 7.88  | 6.43  | 1.23 | 0.82 |
| Q9DBD5_PEL1_MOUSE   | Pelp1  | Proline-, glutamic acid- a R.FGALISR@.L                               | 45.19 | 13.17 | 3.43 | 0.29 |
| Q9DBD5_PEL1_MOUSE   | Pelp1  | Proline-, glutamic acid- a R.HASQLPTFR@.D                             | 23.15 | 11.79 | 1.96 | 0.51 |
| Q9DBD5_PEL1_MOUSE   | Pelp1  | Proline-, glutamic acid- a K.LASFFLSR@.L                              | 28.83 | 10.16 | 2.84 | 0.35 |
| Q9DBD5_PEL1_MOUSE   | Pelp1  | Proline-, glutamic acid- a R.LLPQVLANAWSTGR@.D                        | 32.05 | 15.00 | 2.14 | 0.47 |
| Q9DBD5_PEL1_MOUSE   | Pelp1  | Proline-, glutamic acid- a R.LPSLQAGVQGLK#.H                          | 32.03 | 8.73  | 3.67 | 0.27 |
| Q9DBD5_PEL1_MOUSE   | Pelp1  | Proline-, glutamic acid- a K.NINLGDGPLR@.L                            | 52.67 | 18.26 | 2.88 | 0.35 |
| Q9DBD5_PEL1_MOUSE   | Pelp1  | Proline-, glutamic acid- a R.SIQVLQSDSPSTM*ELAVAVLR@.D                | 20.96 | 7.59  | 2.76 | 0.36 |
| Q8VC15_PEX19_MOUSE  | Pex19  | Peroxisomal biogenesis f K.FFQELDFSELASQATAEFEK#.A                    | 5.33  | 2.34  | 2.27 | 0.44 |
| O09012_PEX5_MOUSE   | Pex5   | Peroxisomal targeting sig K.IAALQVEFER@.A                             | 12.56 | 5.33  | 2.36 | 0.42 |
| O09012_PEX5_MOUSE   | Pex5   | Peroxisomal targeting sig R.ILGSLSDSLFVKK#.D                          | 7.01  | 1.68  | 4.17 | 0.24 |
| O70591_PFD2_MOUSE   | Pfdn2  | Prefoldin subunit 2 OS=K.GAVSAEQVIAGFNR.L                             | 6.65  | 4.42  | 1.50 | 0.66 |
| O70591_PFD2_MOUSE   | Pfdn2  | Prefoldin subunit 2 OS=K.IIETLSQQLQAK#.G                              | 3.65  | 3.22  | 1.13 | 0.88 |
| Q3UWL8_Q3UWL8_MOUSE | Pfdn4  | Protein Pfdn4 OS=Mus m K.AAAEDVNTVTFEDQK#.I                           | 8.41  | 5.03  | 1.67 | 0.70 |
| Q3UWL8_Q3UWL8_MOUSE | Pfdn4  | Protein Pfdn4 OS=Mus m K.TLQEEIDALERS@.V                              | 8.70  | 5.83  | 1.49 | 0.67 |
| Q9WU28_PFD5_MOUSE   | Pfdn5  | Prefoldin subunit 5 OS=K.IQQLTALGAQAQTVK#.A                           | 5.66  | 2.64  | 2.14 | 0.47 |
| Q9WU28_PFD5_MOUSE   | Pfdn5  | Prefoldin subunit 5 OS=N.K.NQLDQEVFLSTIAQLK#.V                        | 4.16  | 3.52  | 1.18 | 0.84 |
| P12382_PFKAL_MOUSE  | Pfk1   | ATP-dependent 6-phosph K.AIGVLTSGGDAAQGM*NAAVR@.A                     | 6.05  | 3.47  | 1.74 | 0.57 |
| P12382_PFKAL_MOUSE  | Pfk1   | ATP-dependent 6-phosph K.AIGVLTSGGDAAQGM*NAAVR@.A                     | 5.16  | 5.66  | 0.91 | 1.10 |
| Q8BX10_PGAM5_MOUSE  | Pgam5  | Serine/threonine-protein R.AVETDISK#.H                                | 29.44 | 15.60 | 1.89 | 0.53 |
| Q8BX10_PGAM5_MOUSE  | Pgam5  | Serine/threonine-protein R.EPLSLINK#.K                                | 19.28 | 9.92  | 1.94 | 0.51 |
| Q8BX10_PGAM5_MOUSE  | Pgam5  | Serine/threonine-protein R.NVESGEDELSTR@.L                            | 36.96 | 24.12 | 1.53 | 0.65 |
| O55022_PGR1_MOUSE   | Pgrmc1 | Membrane-associated pr K.FYGGEPYGVFAGR@.D                             | 12.13 | 3.35  | 3.62 | 0.28 |
| O55022_PGR1_MOUSE   | Pgrmc1 | Membrane-associated pr R.DFTPAELR.R                                   | 72.29 | 37.06 | 1.95 | 0.51 |
| O55022_PGR1_MOUSE   | Pgrmc1 | Membrane-associated pr K.EGEEPTVYDDEEPK#DETAR@.K                      | 7.48  | 3.09  | 2.42 | 0.41 |
| O55022_PGR1_MOUSE   | Pgrmc1 | Membrane-associated pr R.FDGVQDPR@.I                                  | 31.43 | 18.79 | 1.67 | 0.60 |
| O55022_PGR1_MOUSE   | Pgrmc1 | Membrane-associated pr K.FYGGEPYGVFAGR@.D                             | 90.68 | 38.70 | 2.34 | 0.43 |
| O55022_PGR1_MOUSE   | Pgrmc1 | Membrane-associated pr R.GDQPAGSAGNDDEPPPLPR@.L                       | 12.20 | 5.79  | 2.11 | 0.47 |
| O55022_PGR1_MOUSE   | Pgrmc1 | Membrane-associated pr R.GDQPAGSAGNDDEPPPLPR@.L                       | 11.38 | 7.05  | 1.61 | 0.62 |
| O55022_PGR1_MOUSE   | Pgrmc1 | Membrane-associated pr K.IVR@GDQPAGSAGNDDEPPPLPR@.L                   | 25.97 | 12.41 | 2.09 | 0.48 |
| O55022_PGR1_MOUSE   | Pgrmc1 | Membrane-associated pr R.KFYGGEPYGVFAGR@.D                            | 63.48 | 28.25 | 2.25 | 0.45 |
| O55022_PGR1_MOUSE   | Pgrmc1 | Membrane-associated pr R.R@DFTPAELR@.Q                                | 12.33 | 5.47  | 2.25 | 0.44 |
| Q80UU9_PGR2_MOUSE   | Pgrmc2 | Membrane-associated pr K.LSTLGSSEGGDGGSPGGAGATAAR@.S                  | 11.75 | 7.12  | 1.65 | 0.61 |
| Q80UU9_PGR2_MOUSE   | Pgrmc2 | Membrane-associated pr R.DFSLEQR@.Q                                   | 32.48 | 13.50 | 2.41 | 0.42 |
| Q80UU9_PGR2_MOUSE   | Pgrmc2 | Membrane-associated pr K.FYGGEPYGVFAGR@.D                             | 32.14 | 16.48 | 1.95 | 0.51 |
| Q80UU9_PGR2_MOUSE   | Pgrmc2 | Membrane-associated pr K.LSTLGSSEGGDGGSPGGAGATAAR.S                   | 11.91 | 3.28  | 3.63 | 0.28 |
| Q9J1T9_PHAX_MOUSE   | Phax   | Phosphorylated adapter R.TPQGVLNLLK#.N                                | 12.39 | 5.61  | 2.21 | 0.45 |
| P67778_PHB_MOUSE    | Phb    | Prohibitin OS=Mus musc K.AEELIANSLATAGLIELR@.K                        | 4.07  | 3.32  | 1.22 | 0.82 |
| P67778_PHB_MOUSE    | Phb    | Prohibitin OS=Mus musc K.EFTEAVEAK#.Q                                 | 12.65 | 13.93 | 0.91 | 1.10 |
| P67778_PHB_MOUSE    | Phb    | Prohibitin OS=Mus musc R.FDAGELITQR@.E                                | 12.52 | 18.88 | 0.66 | 1.51 |
| P67778_PHB_MOUSE    | Phb    | Prohibitin OS=Mus musc R.IIFRPVSAQLPR.I                               | 19.93 | 19.24 | 1.04 | 0.97 |
| P67778_PHB_MOUSE    | Phb    | Prohibitin OS=Mus musc R.IYTSIGEDYDER@.V                              | 9.11  | 9.30  | 0.98 | 1.02 |
| P67778_PHB_MOUSE    | Phb    | Prohibitin OS=Mus musc R.VLPSITTEIK.S                                 | 12.87 | 14.69 | 0.88 | 1.14 |
| O35129_PHB2_MOUSE   | Phb2   | Prohibitin-2 OS=Mus mu K.FNASQLTQR@.A                                 | 6.63  | 7.66  | 0.87 | 1.16 |
| O35129_PHB2_MOUSE   | Phb2   | Prohibitin-2 OS=Mus mu R.IGGVQQDTLAEGLHFR@.I                          | 17.20 | 16.03 | 1.07 | 0.93 |

|                     |        |                                                                |        |        |       |      |
|---------------------|--------|----------------------------------------------------------------|--------|--------|-------|------|
| O35129_PHB2_MOUSE   | Phb2   | Prohibitin-2 OS=Mus mu R.IPWVQYPIIDIR@.A                       | 16.62  | 8.02   | 2.07  | 0.48 |
| O35129_PHB2_MOUSE   | Phb2   | Prohibitin-2 OS=Mus mu K.IVQAEAGAEAAK#.M                       | 38.84  | 36.36  | 1.07  | 0.94 |
| O35129_PHB2_MOUSE   | Phb2   | Prohibitin-2 OS=Mus mu R.IYLTDNLVLLKLEESFTR.G                  | 7.55   | 5.45   | 1.39  | 0.72 |
| O35129_PHB2_MOUSE   | Phb2   | Prohibitin-2 OS=Mus mu R.LGLDYEEER@.V                          | 11.20  | 10.62  | 1.05  | 0.95 |
| O35129_PHB2_MOUSE   | Phb2   | Prohibitin-2 OS=Mus mu K.LLLGAGAVAYGVR@.E                      | 11.42  | 12.86  | 0.89  | 1.13 |
| O35129_PHB2_MOUSE   | Phb2   | Prohibitin-2 OS=Mus mu R.VLSRPNAGLEPSM*YQR.L                   | 15.78  | 12.33  | 1.28  | 0.78 |
| Q64028_PHC1_MOUSE   | Phc1   | Polyhomeotic-like prote R.KHGTGVQVPLPAQQTIVTSQGSQTEASAAK#.K    | 6.30   | 2.35   | 2.68  | 0.37 |
| Q9QWH1_PHC2_MOUSE   | Phc2   | Polyhomeotic-like prote R.AQEIQDGLLLK#.E                       | 31.96  | 11.35  | 2.82  | 0.35 |
| Q9QWH1_PHC2_MOUSE   | Phc2   | Polyhomeotic-like prote R.DLVGVGHFLPSEPTK#.W                   | 36.77  | 12.49  | 2.94  | 0.34 |
| Q9QWH1_PHC2_MOUSE   | Phc2   | Polyhomeotic-like prote R.DLVGVGHFLPSEPTK#WNVDEVYEFIR@.S       | 9.90   | 3.86   | 2.57  | 0.39 |
| Q9QWH1_PHC2_MOUSE   | Phc2   | Polyhomeotic-like prote R.SLLVGNL#.K                           | 24.53  | 13.82  | 1.77  | 0.56 |
| Q9QWH1_PHC2_MOUSE   | Phc2   | Polyhomeotic-like prote R.VDFAYK#.F                            | 32.13  | 10.75  | 2.99  | 0.33 |
| Q9QWH1_PHC2_MOUSE   | Phc2   | Polyhomeotic-like prote R.WNVDEVYEFIR@.S                       | 38.66  | 15.20  | 2.54  | 0.39 |
| Q9QWH1_PHC2_MOUSE   | Phc2   | Polyhomeotic-like prote K.YAQGFLEPK#PQDQDHTTTTSEM*EPPYLQESK#.E | 4.15   | 2.65   | 1.57  | 0.64 |
| Q8CHP6_PHC3_MOUSE   | Phc3   | Polyhomeotic-like prote R.GEDLTSEHPLEQLELVAVASVSASVIK#.S       | 5.57   | 1.73   | 3.22  | 0.31 |
| Q9D8M7_PHF10_MOUSE  | Phf10  | PHD finger protein 10 OS R.AYFDLQTHVICVPGQK#.Y                 | 23.99  | 2.66   | 9.03  | 0.11 |
| Q9D8M7_PHF10_MOUSE  | Phf10  | PHD finger protein 10 OS K.HAESVILQEK#.E                       | 9.78   | 7.34   | 1.33  | 0.75 |
| Q9D8M7_PHF10_MOUSE  | Phf10  | PHD finger protein 10 OS R.SDEVIDLM*IK#.E                      | 9.97   | 2.62   | 3.80  | 0.26 |
| Q9D8M7_PHF10_MOUSE  | Phf10  | PHD finger protein 10 OS K.VSSYPVALIPGQFQYKY#.R                | 10.77  | 2.90   | 3.71  | 0.27 |
| Q9D8M7_PHF10_MOUSE  | Phf10  | PHD finger protein 10 OS K.AAEFNSNLNR@.E                       | 13.38  | 2.92   | 4.58  | 0.22 |
| Q9D8M7_PHF10_MOUSE  | Phf10  | PHD finger protein 10 OS K.HAESVILQEK#.E                       | 12.64  | 3.05   | 4.15  | 0.24 |
| Q9D8M7_PHF10_MOUSE  | Phf10  | PHD finger protein 10 OS K.VSSYPVALIPGQFQYKY#.R                | 8.46   | 3.82   | 2.21  | 0.45 |
| A6H5X4_PHF11_MOUSE  | Phf11  | PHD finger protein 11 OS K.KDQAILQVQGNHGTYL.K                  | 17.25  | 17.23  | 0.65  | 1.53 |
| A6H5X4_PHF11_MOUSE  | Phf11  | PHD finger protein 11 OS R.KHFQEVK#.S                          | 28.02  | 31.43  | 0.89  | 1.12 |
| A6H5X4_PHF11_MOUSE  | Phf11  | PHD finger protein 11 OS R.LSSGPPAQPK.T                        | 27.05  | 57.64  | 0.47  | 2.13 |
| A6H5X4_PHF11_MOUSE  | Phf11  | PHD finger protein 11 OS R.LSSGPPAQPK.T                        | 7.85   | 16.71  | 0.47  | 2.13 |
| Q9D4H9_PHF14_MOUSE  | Phf14  | PHD finger protein 14 OS R.KHAELM*GISTDFPVDNDSSTSSVDGR@.R      | 15.28  | 8.92   | 1.71  | 0.58 |
| Q9D4H9_PHF14_MOUSE  | Phf14  | PHD finger protein 14 OS K.LNVPAILR@.A                         | 23.44  | 13.21  | 1.77  | 0.56 |
| Q9D4H9_PHF14_MOUSE  | Phf14  | PHD finger protein 14 OS K.NSTEEIM*PSDK#.Q                     | 13.33  | 5.08   | 2.62  | 0.38 |
| Q9D4H9_PHF14_MOUSE  | Phf14  | PHD finger protein 14 OS R.SEGQGIWALLGR@.I                     | 31.03  | 21.95  | 1.41  | 0.71 |
| Q9D4H9_PHF14_MOUSE  | Phf14  | PHD finger protein 14 OS K.LNVPAILR@.A                         | 10.72  | 5.57   | 1.93  | 0.52 |
| Q9WTU0_PHF2_MOUSE   | Phf2   | Lysine-specific demethyl: R.VASIEGTALAAAK#.L                   | 7.47   | 4.03   | 1.85  | 0.54 |
| Q9WTU0_PHF2_MOUSE   | Phf2   | Lysine-specific demethyl: R.VLNVTLEFSDTR.M                     | 171.56 | 8.01   | 21.42 | 0.05 |
| Q9WTU0_PHF2_MOUSE   | Phf2   | Lysine-specific demethyl: R.VPGSQQLTVGYM*EEHGFTEPILVPK#.K      | 8.07   | 4.53   | 1.78  | 0.56 |
| Q9WTU0_PHF2_MOUSE   | Phf2   | Lysine-specific demethyl: R.VPGSQQLTVGYM*EEHGFTEPILVPK#.K      | 5.48   | 3.99   | 1.37  | 0.73 |
| B2RQG2_B2RQG2_MOUSE | Phf3   | PHD finger protein 3 OS= R.APQFINLK.R                          | 9.74   | 4.62   | 2.11  | 0.47 |
| B2RQG2_B2RQG2_MOUSE | Phf3   | PHD finger protein 3 OS= K.AYPVSGSPEYLEDLPDSIQVGGRR@.I         | 10.06  | 3.93   | 2.56  | 0.39 |
| B2RQG2_B2RQG2_MOUSE | Phf3   | PHD finger protein 3 OS= K.ELFSFRR@.D                          | 13.85  | 3.78   | 3.67  | 0.27 |
| B2RQG2_B2RQG2_MOUSE | Phf3   | PHD finger protein 3 OS= R.LLLQDQENSLQDNR@.T                   | 7.30   | 2.42   | 3.02  | 0.33 |
| B2RQG2_B2RQG2_MOUSE | Phf3   | PHD finger protein 3 OS= R.M*APPIDDLSPK#.T                     | 10.07  | 3.73   | 2.70  | 0.37 |
| B2RQG2_B2RQG2_MOUSE | Phf3   | PHD finger protein 3 OS= R.NK#SQPLQEDLPTAAEPLM*EVTK#.Q         | 5.74   | 5.42   | 1.06  | 0.95 |
| B2RQG2_B2RQG2_MOUSE | Phf3   | PHD finger protein 3 OS= K.NSGEETSSVSSSSIPGLASLSLR@.G          | 3.15   | 1.89   | 1.67  | 0.60 |
| B2RQG2_B2RQG2_MOUSE | Phf3   | PHD finger protein 3 OS= R.SFSLDEPPLPFDNIATVK#.K               | 8.20   | 3.24   | 2.53  | 0.40 |
| B2RQG2_B2RQG2_MOUSE | Phf3   | PHD finger protein 3 OS= K.STFSPTR@PEM*PGTVEVESTFLAR@.L        | 10.09  | 4.27   | 2.36  | 0.42 |
| B2RQG2_B2RQG2_MOUSE | Phf3   | PHD finger protein 3 OS= R.APQFINLK.R                          | 12.31  | 4.72   | 2.61  | 0.38 |
| B2RQG2_B2RQG2_MOUSE | Phf3   | PHD finger protein 3 OS= K.AYPVSGSPEYLEDLPDSIQVGGRR@.I         | 8.46   | 4.04   | 2.09  | 0.48 |
| B2RQG2_B2RQG2_MOUSE | Phf3   | PHD finger protein 3 OS= K.EGSDQTSIESK#.Y                      | 11.01  | 4.74   | 2.32  | 0.43 |
| B2RQG2_B2RQG2_MOUSE | Phf3   | PHD finger protein 3 OS= K.ELFSFRR@.D                          | 16.11  | 4.30   | 3.75  | 0.27 |
| B2RQG2_B2RQG2_MOUSE | Phf3   | PHD finger protein 3 OS= K.ESTALASTGER@.V                      | 21.28  | 5.02   | 4.23  | 0.24 |
| B2RQG2_B2RQG2_MOUSE | Phf3   | PHD finger protein 3 OS= K.GGPNVHPPAAATSK#PSADQIR@.Q           | 4.64   | 5.80   | 0.80  | 1.25 |
| B2RQG2_B2RQG2_MOUSE | Phf3   | PHD finger protein 3 OS= R.LLLQDQENSLQDNR@.T                   | 11.29  | 4.77   | 2.36  | 0.42 |
| B2RQG2_B2RQG2_MOUSE | Phf3   | PHD finger protein 3 OS= R.NK#SQPLQEDLPTAAEPLM*EVTK#.Q         | 12.04  | 3.48   | 3.46  | 0.29 |
| B2RQG2_B2RQG2_MOUSE | Phf3   | PHD finger protein 3 OS= K.NSGEETSSVSSSSIPGLASLSLR@.G          | 5.66   | 2.39   | 2.36  | 0.42 |
| B2RQG2_B2RQG2_MOUSE | Phf3   | PHD finger protein 3 OS= K.STFSPTR@PEM*PGTVEVESTFLAR.L         | 13.95  | 4.48   | 3.11  | 0.32 |
| B2RQG2_B2RQG2_MOUSE | Phf3   | PHD finger protein 3 OS= K.TDILTDFEFAQPIEAHSEDK#R@.M           | 8.54   | 2.11   | 4.05  | 0.25 |
| P83870_PHF5A_MOUSE  | Phf5a  | PHD finger-like domain-c K.IVNLGSSK.T                          | 106.75 | 70.00  | 1.52  | 0.66 |
| P83870_PHF5A_MOUSE  | Phf5a  | PHD finger-like domain-c K.TDLFYER@.K                          | 85.92  | 63.89  | 1.34  | 0.74 |
| Q9D4J7_PHF6_MOUSE   | Phf6   | PHD finger protein 6 OS= R.AEFGDFDIK#.T                        | 40.88  | 21.05  | 1.94  | 0.51 |
| Q9D4J7_PHF6_MOUSE   | Phf6   | PHD finger protein 6 OS= K.TAHNSEADLEESFEHELEPSSPK#.T          | 10.32  | 7.71   | 1.34  | 0.75 |
| Q9D4J7_PHF6_MOUSE   | Phf6   | PHD finger protein 6 OS= R.VAIDQLTQQQLNGN.-                    | 9.48   | 9.48   | 1.00  | 1.00 |
| Q61753_SERA_MOUSE   | Phgdh  | D-3-phosphoglycerate de R.AGTGVNDVLEAATR@.K                    | 237.15 | 92.11  | 2.57  | 0.39 |
| Q61753_SERA_MOUSE   | Phgdh  | D-3-phosphoglycerate de R.GQPLLVFR@.A                          | 144.69 | 65.27  | 2.22  | 0.45 |
| Q61753_SERA_MOUSE   | Phgdh  | D-3-phosphoglycerate de K.GTIQVVTQTSGLK#.N                     | 233.20 | 88.10  | 2.65  | 0.38 |
| Q61753_SERA_MOUSE   | Phgdh  | D-3-phosphoglycerate de K.ILODGGQLVVEK#.Q                      | 209.54 | 95.15  | 2.20  | 0.45 |
| Q61753_SERA_MOUSE   | Phgdh  | D-3-phosphoglycerate de K.QADVNLVNAK#.L                        | 51.61  | 52.96  | 2.22  | 0.45 |
| Q61753_SERA_MOUSE   | Phgdh  | D-3-phosphoglycerate de R.QIQAATASM*#.D                        | 49.54  | 21.64  | 2.29  | 0.44 |
| Q61753_SERA_MOUSE   | Phgdh  | D-3-phosphoglycerate de K.TLGLGLGR@.I                          | 276.28 | 124.65 | 2.22  | 0.45 |
| Q61753_SERA_MOUSE   | Phgdh  | D-3-phosphoglycerate de K.VTADVINAEEK#.L                       | 314.97 | 128.42 | 2.45  | 0.41 |
| Q61753_SERA_MOUSE   | Phgdh  | D-3-phosphoglycerate de R.AGTGVNDVLEAATR@.K                    | 44.31  | 14.75  | 3.00  | 0.33 |
| Q61753_SERA_MOUSE   | Phgdh  | D-3-phosphoglycerate de R.GGIVDEGALLR@.A                       | 41.00  | 1.32   | 34.14 | 0.03 |
| Q61753_SERA_MOUSE   | Phgdh  | D-3-phosphoglycerate de K.GTIQVVTQTSGLK#.N                     | 53.12  | 12.48  | 4.26  | 0.23 |
| Q61753_SERA_MOUSE   | Phgdh  | D-3-phosphoglycerate de K.ILODGGQLVVEK#.Q                      | 31.62  | 13.36  | 2.37  | 0.42 |
| Q61753_SERA_MOUSE   | Phgdh  | D-3-phosphoglycerate de K.QADVNLVNAK#.L                        | 30.12  | 7.29   | 4.13  | 0.24 |
| Q61753_SERA_MOUSE   | Phgdh  | D-3-phosphoglycerate de K.TLGLGLGR@.I                          | 42.26  | 14.66  | 2.88  | 0.35 |
| Q61753_SERA_MOUSE   | Phgdh  | D-3-phosphoglycerate de K.VTADVINAEEK#.L                       | 41.86  | 14.60  | 2.87  | 0.35 |
| Q61753_SERA_MOUSE   | Phgdh  | D-3-phosphoglycerate de R.AGTGVNDVLEAATR@.K                    | 43.48  | 7.50   | 5.80  | 0.17 |
| Q61753_SERA_MOUSE   | Phgdh  | D-3-phosphoglycerate de R.GGIVDEGALLR@.A                       | 64.47  | 13.28  | 4.85  | 0.21 |
| Q61753_SERA_MOUSE   | Phgdh  | D-3-phosphoglycerate de R.GQPLLVFR@.A                          | 33.32  | 5.44   | 6.12  | 0.16 |
| Q61753_SERA_MOUSE   | Phgdh  | D-3-phosphoglycerate de K.GTIQVVTQTSGLK#.N                     | 52.53  | 11.18  | 4.70  | 0.21 |
| Q61753_SERA_MOUSE   | Phgdh  | D-3-phosphoglycerate de K.ILODGGQLVVEK#.Q                      | 31.84  | 9.08   | 3.51  | 0.29 |
| Q61753_SERA_MOUSE   | Phgdh  | D-3-phosphoglycerate de K.QADVNLVNAK#.L                        | 23.47  | 2.83   | 8.29  | 0.12 |
| Q61753_SERA_MOUSE   | Phgdh  | D-3-phosphoglycerate de K.TLGLGLGR@.I                          | 47.44  | 8.36   | 5.68  | 0.18 |
| Q61753_SERA_MOUSE   | Phgdh  | D-3-phosphoglycerate de K.VTADVINAEEK#.L                       | 49.46  | 12.11  | 4.09  | 0.24 |
| Q8VDD9_PHIP_MOUSE   | Phip   | PH-interacting protein O K.SEVSTSPFSIPTR.S                     | 5.42   | 11.69  | 0.46  | 2.16 |
| Q8VDD9_PHIP_MOUSE   | Phip   | PH-interacting protein O R.VAVDPVTEQPSTSSATK.A                 | 4.29   | 6.36   | 0.67  | 1.48 |
| Q8VDD9_PHIP_MOUSE   | Phip   | PH-interacting protein O R.YHDM*PDVDFVLR.Q                     | 7.79   | 14.45  | 0.54  | 1.85 |
| Q8VDD9_PHIP_MOUSE   | Phip   | PH-interacting protein O R.DIIDTPM*DFATVR.E                    | 5.08   | 6.31   | 0.80  | 1.24 |
| Q8VDD9_PHIP_MOUSE   | Phip   | PH-interacting protein O K.SEVSTSPFSIPTR@.S                    | 12.20  | 25.49  | 0.48  | 2.09 |
| Q8VDD9_PHIP_MOUSE   | Phip   | PH-interacting protein O R.VAVDPVTEQPSTSSATK#.A                | 10.43  | 11.71  | 0.89  | 1.12 |
| Q8VDD9_PHIP_MOUSE   | Phip   | PH-interacting protein O R.VVPELSAGVASR@.Q                     | 7.69   | 2.86   | 2.69  | 0.37 |
| Q6PDH0_PHLB1_MOUSE  | Phldb1 | Pleckstrin homology-like R.ADGPGTEGELPSIGEATAALALAGR@.R        | 28.30  | 10.76  | 2.63  | 0.38 |
| Q6PDH0_PHLB1_MOUSE  | Phldb1 | Pleckstrin homology-like R.ADGPGTEGELPSIGEATAALALAGR.R         | 6.53   | 2.50   | 2.61  | 0.38 |
| Q6PDH0_PHLB1_MOUSE  | Phldb1 | Pleckstrin homology-like R.AQAVQESER@.L                        | 10.25  | 6.20   | 1.65  | 0.60 |
| Q6PDH0_PHLB1_MOUSE  | Phldb1 | Pleckstrin homology-like R.DK#EADALETETK#.L                    | 4.79   | 3.21   | 1.49  | 0.67 |
| Q6PDH0_PHLB1_MOUSE  | Phldb1 | Pleckstrin homology-like K.DR@DK#EADALETETK#.L                 | 28.52  | 12.44  | 2.29  | 0.44 |
| Q6PDH0_PHLB1_MOUSE  | Phldb1 | Pleckstrin homology-like R.ELAGQGLR@.S                         | 17.05  | 4.41   | 3.86  | 0.26 |
| Q6PDH0_PHLB1_MOUSE  | Phldb1 | Pleckstrin homology-like K.ELEQQLQEAAR@.E                      | 6.28   | 3.48   | 1.81  | 0.55 |
| Q6PDH0_PHLB1_MOUSE  | Phldb1 | Pleckstrin homology-like R.GLAGAIVVSGR@.C                      | 40.72  | 9.38   | 4.34  | 0.23 |
| Q6PDH0_PHLB1_MOUSE  | Phldb1 | Pleckstrin homology-like K.GPLDLIETGQGLK#.V                    | 14.56  | 8.08   | 1.80  | 0.55 |
| Q6PDH0_PHLB1_MOUSE  | Phldb1 | Pleckstrin homology-like K.HQGEVLVAEEER@.A                     | 30.27  | 13.15  | 2.30  | 0.43 |
| Q6PDH0_PHLB1_MOUSE  | Phldb1 | Pleckstrin homology-like K.HQGEVLVAEEER@.A                     | 10.56  | 4.94   | 2.14  | 0.47 |
| Q6PDH0_PHLB1_MOUSE  | Phldb1 | Pleckstrin homology-like R.LAVLDSQAQIR@.A                      | 37.53  | 16.89  | 2.81  | 0.36 |
| Q6PDH0_PHLB1_MOUSE  | Phldb1 | Pleckstrin homology-like K.LFEDLEFQQLER@.E                     | 49.45  | 14.33  | 2.75  | 0.36 |

|                    |         |                                                                |        |       |      |      |
|--------------------|---------|----------------------------------------------------------------|--------|-------|------|------|
| Q6PDH0_PHLB1_MOUSE | Phldb1  | Pleckstrin homology-like R.LGGQLPVVAISLSEYSSGAR@.S             | 12.95  | 5.61  | 2.31 | 0.43 |
| Q6PDH0_PHLB1_MOUSE | Phldb1  | Pleckstrin homology-like R.LSPAYSLGSLTGASPR@.Q                 | 20.54  | 9.32  | 2.20 | 0.45 |
| Q6PDH0_PHLB1_MOUSE | Phldb1  | Pleckstrin homology-like R.LSTAITLPLEEGR@.T                    | 19.79  | 4.13  | 4.79 | 0.21 |
| Q6PDH0_PHLB1_MOUSE | Phldb1  | Pleckstrin homology-like K.LVALETIQK#.D                        | 45.70  | 16.24 | 2.81 | 0.36 |
| Q6PDH0_PHLB1_MOUSE | Phldb1  | Pleckstrin homology-like R.LYVM*VAPSAEAM*#R@.I                 | 7.29   | 2.77  | 2.63 | 0.38 |
| Q6PDH0_PHLB1_MOUSE | Phldb1  | Pleckstrin homology-like R.NLAATLQDIETK#R@.Q                   | 6.06   | 1.81  | 3.36 | 0.30 |
| Q6PDH0_PHLB1_MOUSE | Phldb1  | Pleckstrin homology-like R.LQALQK#.G                           | 20.64  | 8.73  | 2.36 | 0.42 |
| Q6PDH0_PHLB1_MOUSE | Phldb1  | Pleckstrin homology-like R.TLQPPESPR@.L                        | 9.46   | 5.17  | 1.83 | 0.55 |
| Q6PDH0_PHLB1_MOUSE | Phldb1  | Pleckstrin homology-like R.VEEER@ELAGGQLLR@.S                  | 36.24  | 11.16 | 3.25 | 0.31 |
| Q6PDH0_PHLB1_MOUSE | Phldb1  | Pleckstrin homology-like R.WAAHGTSPEDFSLTLGAR@.G               | 9.53   | 18.54 | 0.51 | 1.94 |
| Q6PDH0_PHLB1_MOUSE | Phldb1  | Pleckstrin homology-like R.ADGGPETGELPSIGEATAALAGR@.R          | 15.94  | 7.25  | 2.20 | 0.45 |
| Q6PDH0_PHLB1_MOUSE | Phldb1  | Pleckstrin homology-like R.AQAVQESER@.L                        | 5.45   | 7.04  | 0.77 | 1.29 |
| Q6PDH0_PHLB1_MOUSE | Phldb1  | Pleckstrin homology-like R.GLAGAIVSGR@.C                       | 17.96  | 2.84  | 6.32 | 0.16 |
| Q6PDH0_PHLB1_MOUSE | Phldb1  | Pleckstrin homology-like K.LFEDLEFQQLER@.E                     | 19.06  | 7.89  | 2.42 | 0.41 |
| Q6PDH0_PHLB1_MOUSE | Phldb1  | Pleckstrin homology-like R.LGGQLPVVAISLSEYSSGAR@.S             | 11.73  | 2.93  | 4.00 | 0.25 |
| Q6PDH0_PHLB1_MOUSE | Phldb1  | Pleckstrin homology-like R.LSPAYSLGSLTGASPR@.Q                 | 9.95   | 4.40  | 2.26 | 0.44 |
| Q6PDH0_PHLB1_MOUSE | Phldb1  | Pleckstrin homology-like R.LSTAITLPLEEGR@.T                    | 20.77  | 6.02  | 3.45 | 0.29 |
| Q6PDH0_PHLB1_MOUSE | Phldb1  | Pleckstrin homology-like K.LVALETIQK#.D                        | 25.12  | 11.20 | 2.24 | 0.45 |
| Q6PDH0_PHLB1_MOUSE | Phldb1  | Pleckstrin homology-like K.NAALQLQK#.E                         | 10.45  | 2.96  | 3.53 | 0.28 |
| Q6PDH0_PHLB1_MOUSE | Phldb1  | Pleckstrin homology-like R.SPSPTLGESLAPR@.K                    | 6.23   | 1.56  | 3.99 | 0.25 |
| Q6PDH0_PHLB1_MOUSE | Phldb1  | Pleckstrin homology-like R.VEEER@ELAGGQLLR@.S                  | 15.68  | 4.76  | 3.29 | 0.30 |
| Q8K1N2_PHLB2_MOUSE | Phldb2  | Pleckstrin homology-like K.SPNPLLVFK#.T                        | 15.53  | 10.38 | 1.50 | 0.67 |
| Q8K1N2_PHLB2_MOUSE | Phldb2  | Pleckstrin homology-like R.ASYSGTSPSHSFISGEPDR@.V              | 17.85  | 12.25 | 1.46 | 0.69 |
| Q8K1N2_PHLB2_MOUSE | Phldb2  | Pleckstrin homology-like K.ATNESSLSLPK#.T                      | 22.99  | 14.42 | 1.59 | 0.63 |
| Q8K1N2_PHLB2_MOUSE | Phldb2  | Pleckstrin homology-like R.DADLLDVESK#.H                       | 28.09  | 12.27 | 2.29 | 0.44 |
| Q8K1N2_PHLB2_MOUSE | Phldb2  | Pleckstrin homology-like K.DLPHSLVDSNLYNFSSLSGASPYK#.T         | 24.03  | 11.20 | 2.15 | 0.47 |
| Q8K1N2_PHLB2_MOUSE | Phldb2  | Pleckstrin homology-like K.EGLYLSDTLPR@.K                      | 30.65  | 14.08 | 2.18 | 0.46 |
| Q8K1N2_PHLB2_MOUSE | Phldb2  | Pleckstrin homology-like K.GFPINPNTLK#.E                       | 33.77  | 21.31 | 1.58 | 0.63 |
| Q8K1N2_PHLB2_MOUSE | Phldb2  | Pleckstrin homology-like K.HFEDLEFQQLHEHSR@.L                  | 31.33  | 22.07 | 1.42 | 0.70 |
| Q8K1N2_PHLB2_MOUSE | Phldb2  | Pleckstrin homology-like K.HFEDLEFQQLHEHSR@LDEEK#ENLTQQLR@.E   | 10.62  | 4.27  | 2.49 | 0.40 |
| Q8K1N2_PHLB2_MOUSE | Phldb2  | Pleckstrin homology-like K.KDINDQM*DESSR@.E                    | 2.35   | 10.91 | 0.22 | 4.65 |
| Q8K1N2_PHLB2_MOUSE | Phldb2  | Pleckstrin homology-like R.IWM*DIVITGAEGYTHLL--                | 6.85   | 6.85  | 1.00 | 1.00 |
| Q8K1N2_PHLB2_MOUSE | Phldb2  | Pleckstrin homology-like R.IYVM*VAPSPPEAM*#R@.I                | 7.94   | 4.28  | 1.86 | 0.54 |
| Q8K1N2_PHLB2_MOUSE | Phldb2  | Pleckstrin homology-like R.KHGSLSQSDVAVAGFNGLGHSASFLAPR@.G     | 15.59  | 10.44 | 1.49 | 0.67 |
| Q8K1N2_PHLB2_MOUSE | Phldb2  | Pleckstrin homology-like R.LDEEK#ENLTQQLR@.E                   | 2.60   | 2.40  | 1.08 | 0.92 |
| Q8K1N2_PHLB2_MOUSE | Phldb2  | Pleckstrin homology-like R.LDEEK#ENLTQQLR@.E                   | 41.58  | 17.77 | 2.34 | 0.43 |
| Q8K1N2_PHLB2_MOUSE | Phldb2  | Pleckstrin homology-like R.LQELYEQK#.T                         | 30.79  | 11.27 | 2.73 | 0.37 |
| Q8K1N2_PHLB2_MOUSE | Phldb2  | Pleckstrin homology-like R.LSAGTVVADVQK#.I                     | 17.32  | 9.91  | 1.75 | 0.57 |
| Q8K1N2_PHLB2_MOUSE | Phldb2  | Pleckstrin homology-like R.M*VILNLEELQK#.I                     | 21.97  | 12.46 | 1.76 | 0.57 |
| Q8K1N2_PHLB2_MOUSE | Phldb2  | Pleckstrin homology-like R.QSSETPQPVLR@.E                      | 30.33  | 18.00 | 1.69 | 0.59 |
| Q8K1N2_PHLB2_MOUSE | Phldb2  | Pleckstrin homology-like R.SDELLGLDTR.T                        | 30.80  | 17.17 | 1.79 | 0.56 |
| Q8K1N2_PHLB2_MOUSE | Phldb2  | Pleckstrin homology-like K.SPNPLLVFK#.T                        | 31.55  | 19.17 | 1.65 | 0.61 |
| Q8K1N2_PHLB2_MOUSE | Phldb2  | Pleckstrin homology-like K.TPEDIGEQR.T                         | 35.08  | 23.14 | 1.52 | 0.66 |
| Q8K1N2_PHLB2_MOUSE | Phldb2  | Pleckstrin homology-like K.TPEDIGEQR@TQELAAM*EDAR@.M           | 10.86  | 7.54  | 1.44 | 0.69 |
| Q8K1N2_PHLB2_MOUSE | Phldb2  | Pleckstrin homology-like R.TQELAAMEDAR@.M                      | 8.86   | 4.62  | 1.92 | 0.52 |
| Q8K1N2_PHLB2_MOUSE | Phldb2  | Pleckstrin homology-like R.TQELAAM*EDAR@.M                     | 13.07  | 7.07  | 1.85 | 0.54 |
| Q8K1N2_PHLB2_MOUSE | Phldb2  | Pleckstrin homology-like R.ASYSGTSPSHSFISGEPDR@.V              | 13.07  | 6.27  | 2.41 | 0.42 |
| Q8K1N2_PHLB2_MOUSE | Phldb2  | Pleckstrin homology-like R.DADLLDVESK.H                        | 9.52   | 9.11  | 1.04 | 0.96 |
| Q8K1N2_PHLB2_MOUSE | Phldb2  | Pleckstrin homology-like K.EGLYLSDTLPR.K                       | 23.34  | 11.39 | 2.05 | 0.49 |
| Q8K1N2_PHLB2_MOUSE | Phldb2  | Pleckstrin homology-like K.HFEDLEFQQLHEHSR@.L                  | 17.42  | 9.95  | 1.75 | 0.57 |
| Q8K1N2_PHLB2_MOUSE | Phldb2  | Pleckstrin homology-like R.HK#EPASENVSVR@.T                    | 46.33  | 17.67 | 2.62 | 0.38 |
| Q8K1N2_PHLB2_MOUSE | Phldb2  | Pleckstrin homology-like R.IYVM*VAPSPPEAM*#R@.I                | 7.22   | 5.32  | 1.36 | 0.74 |
| Q8K1N2_PHLB2_MOUSE | Phldb2  | Pleckstrin homology-like R.LDEEKENLTQQLR.E                     | 33.85  | 15.36 | 2.20 | 0.45 |
| Q8K1N2_PHLB2_MOUSE | Phldb2  | Pleckstrin homology-like R.LSAGTVVADVQK#.I                     | 7.76   | 6.76  | 1.15 | 0.87 |
| Q8K1N2_PHLB2_MOUSE | Phldb2  | Pleckstrin homology-like R.SDELLGLDTR@.T                       | 26.73  | 15.52 | 1.72 | 0.58 |
| Q8K1N2_PHLB2_MOUSE | Phldb2  | Pleckstrin homology-like K.SETAELM*KKEK#.E                     | 5.02   | 4.00  | 1.26 | 0.80 |
| Q8K1N2_PHLB2_MOUSE | Phldb2  | Pleckstrin homology-like K.SPNPLLVFK#.T                        | 29.99  | 18.67 | 1.61 | 0.62 |
| Q8K1N2_PHLB2_MOUSE | Phldb2  | Pleckstrin homology-like K.TPEDIGEQR@.T                        | 22.82  | 16.80 | 1.36 | 0.74 |
| Q8K1N2_PHLB2_MOUSE | Phldb2  | Pleckstrin homology-like K.TPEDIGEQR@TQELAAM*EDAR@.M           | 7.98   | 3.67  | 2.18 | 0.46 |
| Q8K1N2_PHLB2_MOUSE | Phldb2  | Pleckstrin homology-like R.TQELAAM*EDAR@.M                     | 140.60 | 85.99 | 1.64 | 0.61 |
| Q2TB66_P4K2A_MOUSE | Pi4k2a  | Phosphatidylinositol 4-k R.LVLLVDYIR#.S                        | 9.81   | 1.68  | 5.85 | 0.17 |
| Q9JM05_P1A5A_MOUSE | Pias4   | E3 SUMO-protein ligase P.R.TPLSGPTVDYVLYGK#.Y                  | 6.37   | 3.04  | 2.10 | 0.48 |
| Q9JM05_P1A5A_MOUSE | Pias4   | E3 SUMO-protein ligase P.R.LSVPCR@.A                           | 25.13  | 9.33  | 2.69 | 0.37 |
| Q9JM05_P1A5A_MOUSE | Pias4   | E3 SUMO-protein ligase P.R.TPLSGPTVDYVLYGK#.Y                  | 7.14   | 2.06  | 3.46 | 0.29 |
| Q7M6Y3_PICAL_MOUSE | Picalm  | Phosphatidylinositol-bir R.ITAQHSVTGSAVSK#.T                   | 19.53  | 1.37  | 0.73 | 0.73 |
| Q7M6Y3_PICAL_MOUSE | Picalm  | Phosphatidylinositol-bir R.LFAAYNEGILNLEK#.Y                   | 14.17  | 9.73  | 1.46 | 0.69 |
| Q7M6Y3_PICAL_MOUSE | Picalm  | Phosphatidylinositol-bir R.NTLFNLNFDLKK#.S                     | 19.30  | 12.38 | 1.56 | 0.64 |
| Q7M6Y3_PICAL_MOUSE | Picalm  | Phosphatidylinositol-bir K.QAALEEQAR@.L                        | 9.58   | 5.79  | 1.65 | 0.60 |
| Q7M6Y3_PICAL_MOUSE | Picalm  | Phosphatidylinositol-bir K.SGLQGYDM*STFIR@.R                   | 7.28   | 2.96  | 2.46 | 0.41 |
| Q7M6Y3_PICAL_MOUSE | Picalm  | Phosphatidylinositol-bir R.TTNSSWVVVFK#.S                      | 9.96   | 6.83  | 1.46 | 0.69 |
| Q7M6Y3_PICAL_MOUSE | Picalm  | Phosphatidylinositol-bir R.ATTLNVAVSLASTGLSLTK#.V              | 26.76  | 99.83 | 0.27 | 3.73 |
| Q7M6Y3_PICAL_MOUSE | Picalm  | Phosphatidylinositol-bir R.FIQYLASR@.N                         | 25.76  | 14.67 | 1.76 | 0.57 |
| Q7M6Y3_PICAL_MOUSE | Picalm  | Phosphatidylinositol-bir R.LFAAYNEGILNLEK#.Y                   | 24.11  | 11.11 | 2.17 | 0.46 |
| Q7M6Y3_PICAL_MOUSE | Picalm  | Phosphatidylinositol-bir K.LVSDLDLSSLANVGNLGINGTGK#.N          | 3.27   | 2.22  | 1.47 | 0.68 |
| Q7M6Y3_PICAL_MOUSE | Picalm  | Phosphatidylinositol-bir R.NTLFNLNFDLKK#.S                     | 35.61  | 22.95 | 1.55 | 0.64 |
| Q7M6Y3_PICAL_MOUSE | Picalm  | Phosphatidylinositol-bir K.QAALEEQAR@.L                        | 19.87  | 13.16 | 1.51 | 0.66 |
| Q7M6Y3_PICAL_MOUSE | Picalm  | Phosphatidylinositol-bir K.SGLQGYDM*STFIR@.R                   | 10.76  | 8.82  | 1.22 | 0.82 |
| Q7M6Y3_PICAL_MOUSE | Picalm  | Phosphatidylinositol-bir K.STNVAVDSGGFDELGLLK#PTVASQNSLPAVK#.L | 4.13   | 1.98  | 2.08 | 0.48 |
| Q7M6Y3_PICAL_MOUSE | Picalm  | Phosphatidylinositol-bir R.TTNSSWVVVFK#.S                      | 10.78  | 6.51  | 1.66 | 0.60 |
| Q7M6Y3_PICAL_MOUSE | Picalm  | Phosphatidylinositol-bir R.LFAAYNEGILNLEK#.Y                   | 7.42   | 4.94  | 1.50 | 0.66 |
| Q7M6Y3_PICAL_MOUSE | Picalm  | Phosphatidylinositol-bir R.NTLFNLNFDLKK#.S                     | 19.87  | 9.47  | 2.10 | 0.48 |
| Q7M6Y3_PICAL_MOUSE | Picalm  | Phosphatidylinositol-bir K.SGLQGYDM*STFIR@.R                   | 7.88   | 2.71  | 2.91 | 0.34 |
| Q9CQ2_P1HD1_MOUSE  | Pih1d1  | PIH1 domain-containing R.EGLEDK#YGLQLNPEWR@.M                  | 6.57   | 5.69  | 1.16 | 0.87 |
| Q9CQ2_P1HD1_MOUSE  | Pih1d1  | PIH1 domain-containing R.FOELLK#.A                             | 24.60  | 13.11 | 1.88 | 0.53 |
| Q9CQ2_P1HD1_MOUSE  | Pih1d1  | PIH1 domain-containing R.SFLGSISQANIR@.S                       | 20.20  | 7.80  | 2.59 | 0.39 |
| Q61194_P3C2A_MOUSE | Pik3c2a | Phosphatidylinositol 4-p R.LISSLGSIATK#.F                      | 7.19   | 1.31  | 5.50 | 0.18 |
| P26450_P85A_MOUSE  | Pik3r1  | Phosphatidylinositol 3-k R.VLSEIFSPVLFIR@.F                    | 6.22   | 2.63  | 2.36 | 0.42 |
| Q8VD65_P13R4_MOUSE | Pik3r4  | Phosphoinositide 3-kinase K.GVIDLAAALGITGR@.Q                  | 14.53  | 7.63  | 1.91 | 0.52 |
| Q8VD65_P13R4_MOUSE | Pik3r4  | Phosphoinositide 3-kinase K.VTLLSDPENIVK#.Q                    | 14.55  | 5.88  | 2.48 | 0.40 |
| Q9QUR7_P1N1_MOUSE  | Pin1    | Peptidyl-prolyl cis-trans I.R.GQM*QK#PFEDASFALR@.T             | 40.39  | 17.29 | 2.34 | 0.43 |
| Q9QUR7_P1N1_MOUSE  | Pin1    | Peptidyl-prolyl cis-trans I.R.TGEM*SGPVFTDSGHIHLR@.T           | 9.93   | 6.32  | 1.57 | 0.64 |
| Q9CXZ5_P1NX1_MOUSE | Pinx1   | T/TERF1-interacting t.K.NK#QASAPGSDLSETPVER@.K                 | 10.91  | 7.36  | 1.48 | 0.67 |
| P70314_P1TX1_MOUSE | Pitx1   | Pituitary homeobox 1 OC R.THFTSQQLQLEAFTQR@.N                  | 13.70  | 34.72 | 0.39 | 2.54 |
| P52480_KPYM_MOUSE  | Pkm     | Pyruvate kinase PKM OS- R.LAPITSDPTAAAVGAEASF.K                | 3.96   | 4.58  | 0.86 | 1.16 |
| P52480_KPYM_MOUSE  | Pkm     | Pyruvate kinase PKM OS- R.APIIAVTR.N                           | 13.41  | 14.32 | 0.94 | 1.07 |
| P70268_PKN1_MOUSE  | Pkn1    | Serine/threonine-protein R.SLAPVLLR@.G                         | 10.53  | 3.56  | 2.96 | 0.34 |
| Q8BWW9_PKN2_MOUSE  | Pkn2    | Serine/threonine-protein R.ASSLGETDESSEL@.I                    | 12.49  | 2.37  | 5.27 | 0.19 |
| Q8BWW9_PKN2_MOUSE  | Pkn2    | Serine/threonine-protein R.DLKKDLNLLDTEGFVK#.J                 | 13.18  | 4.35  | 3.03 | 0.33 |
| Q8BWW9_PKN2_MOUSE  | Pkn2    | Serine/threonine-protein K.SSVVIELSLVASPTLSPR@.Q               | 12.42  | 4.21  | 2.95 | 0.34 |
| P47713_PA24A_MOUSE | Pla2g4a | Cytosolic phospholipase R.DVPPVAILGGSGGFR@.A                   | 7.88   | 5.79  | 1.36 | 0.73 |
| P47713_PA24A_MOUSE | Pla2g4a | Cytosolic phospholipase R.DVPPVAILGGSGGFR@.A                   | 14.25  | 4.50  | 3.17 | 0.32 |
| Q4KWH5_P1CH1_MOUSE | Plch1   | 1-phosphatidylinositol 4.K.LIDSIYK#.V                          | 35.36  | 16.28 | 2.17 | 0.46 |
| Q9QXS1_PLEC_MOUSE  | Plec    | Plectin OS=Mus musculus K.GLISAEVAR.L                          | 24.00  | 9.22  | 2.60 | 0.38 |

|                   |         |                                                           |       |       |      |      |
|-------------------|---------|-----------------------------------------------------------|-------|-------|------|------|
| Q9QX51_PLEC_MOUSE | Plectin | Plectin OS=Mus musculus R.AEEAEAEAR@EQAER@.E              | 8.59  | 4.26  | 2.02 | 0.50 |
| Q9QX51_PLEC_MOUSE | Plectin | Plectin OS=Mus musculus R.AALASHIEIATQAATK#.A             | 53.42 | 18.63 | 2.87 | 0.35 |
| Q9QX51_PLEC_MOUSE | Plectin | Plectin OS=Mus musculus K.AEELERGR@.J                     | 26.20 | 8.84  | 2.96 | 0.34 |
| Q9QX51_PLEC_MOUSE | Plectin | Plectin OS=Mus musculus R.AEM*EVLLASK#.A                  | 10.28 | 4.83  | 2.13 | 0.47 |
| Q9QX51_PLEC_MOUSE | Plectin | Plectin OS=Mus musculus R.AGLVGPFLHEK#.L                  | 29.74 | 11.03 | 2.69 | 0.37 |
| Q9QX51_PLEC_MOUSE | Plectin | Plectin OS=Mus musculus R.AGTLSITEFADM*LSGNAGGFR@.S       | 4.79  | 1.84  | 2.61 | 0.38 |
| Q9QX51_PLEC_MOUSE | Plectin | Plectin OS=Mus musculus R.AGTLSITEFADM*LSGNAGGFR@.S       | 7.54  | 2.01  | 3.75 | 0.27 |
| Q9QX51_PLEC_MOUSE | Plectin | Plectin OS=Mus musculus K.AGVGAPVTQVTLQSTQR@.R            | 23.12 | 9.11  | 2.54 | 0.39 |
| Q9QX51_PLEC_MOUSE | Plectin | Plectin OS=Mus musculus K.AKLEQLQFQDEVAK#.A               | 13.42 | 5.82  | 2.31 | 0.43 |
| Q9QX51_PLEC_MOUSE | Plectin | Plectin OS=Mus musculus K.AKLEQLQFQDEVAK#.A               | 32.58 | 12.70 | 2.56 | 0.39 |
| Q9QX51_PLEC_MOUSE | Plectin | Plectin OS=Mus musculus K.ALLEIEIR@.H                     | 28.52 | 9.26  | 3.08 | 0.32 |
| Q9QX51_PLEC_MOUSE | Plectin | Plectin OS=Mus musculus R.ALQALDELAR@.L                   | 40.71 | 15.58 | 2.61 | 0.38 |
| Q9QX51_PLEC_MOUSE | Plectin | Plectin OS=Mus musculus K.AQAELEAQLQR@.R                  | 33.89 | 11.68 | 2.90 | 0.34 |
| Q9QX51_PLEC_MOUSE | Plectin | Plectin OS=Mus musculus K.AQAEVEGLGK#.G                   | 32.56 | 13.33 | 2.44 | 0.41 |
| Q9QX51_PLEC_MOUSE | Plectin | Plectin OS=Mus musculus K.AQLEPVASPAK#.K                  | 39.46 | 18.19 | 2.17 | 0.46 |
| Q9QX51_PLEC_MOUSE | Plectin | Plectin OS=Mus musculus K.AQQVEAAER@.S                    | 17.41 | 14.83 | 1.17 | 0.85 |
| Q9QX51_PLEC_MOUSE | Plectin | Plectin OS=Mus musculus K.AQVEQLTLRL@.L                   | 41.65 | 16.27 | 2.56 | 0.39 |
| Q9QX51_PLEC_MOUSE | Plectin | Plectin OS=Mus musculus K.ATVSAPFGK#.F                    | 26.50 | 11.67 | 2.27 | 0.44 |
| Q9QX51_PLEC_MOUSE | Plectin | Plectin OS=Mus musculus R.AVTGYKHDPYTGEEQSLFQAM*K#.K      | 6.22  | 7.53  | 0.83 | 1.21 |
| Q9QX51_PLEC_MOUSE | Plectin | Plectin OS=Mus musculus R.DAPDGPVVEAEYTFEGLR@.Q           | 13.60 | 5.61  | 2.42 | 0.41 |
| Q9QX51_PLEC_MOUSE | Plectin | Plectin OS=Mus musculus K.DLLQPEVAVALLEAQAGTGHIIDPATSR@.L | 17.91 | 5.55  | 3.23 | 0.31 |
| Q9QX51_PLEC_MOUSE | Plectin | Plectin OS=Mus musculus R.DLLQOFR@.T                      | 42.75 | 18.48 | 2.31 | 0.43 |
| Q9QX51_PLEC_MOUSE | Plectin | Plectin OS=Mus musculus R.DSQDAGFGFPEDR@.L                | 18.37 | 11.16 | 1.65 | 0.61 |
| Q9QX51_PLEC_MOUSE | Plectin | Plectin OS=Mus musculus R.EAIAELER@.E                     | 17.20 | 6.75  | 2.55 | 0.39 |
| Q9QX51_PLEC_MOUSE | Plectin | Plectin OS=Mus musculus K.EAQAVPATLQLELQATK#.A            | 27.48 | 9.09  | 3.02 | 0.33 |
| Q9QX51_PLEC_MOUSE | Plectin | Plectin OS=Mus musculus R.EEELQTLQEQNM*LDLR@.L            | 9.56  | 2.75  | 3.47 | 0.29 |
| Q9QX51_PLEC_MOUSE | Plectin | Plectin OS=Mus musculus R.ELAEQLEK#.Q                     | 16.95 | 5.90  | 2.87 | 0.35 |
| Q9QX51_PLEC_MOUSE | Plectin | Plectin OS=Mus musculus K.ELIPAEALR@.L                    | 30.02 | 15.97 | 1.88 | 0.53 |
| Q9QX51_PLEC_MOUSE | Plectin | Plectin OS=Mus musculus K.ELSEVGSVR@.T                    | 24.36 | 13.48 | 1.81 | 0.55 |
| Q9QX51_PLEC_MOUSE | Plectin | Plectin OS=Mus musculus R.ESADPLSAWLQDAK#.R               | 19.13 | 11.75 | 1.63 | 0.61 |
| Q9QX51_PLEC_MOUSE | Plectin | Plectin OS=Mus musculus R.EVAEADSVR@.L                    | 21.40 | 11.26 | 1.90 | 0.53 |
| Q9QX51_PLEC_MOUSE | Plectin | Plectin OS=Mus musculus R.FLEVQYLTGGLIEPDTTPGR@.V         | 25.65 | 12.08 | 2.12 | 0.47 |
| Q9QX51_PLEC_MOUSE | Plectin | Plectin OS=Mus musculus R.FR@ELAEAAAR@.L                  | 26.33 | 10.56 | 2.49 | 0.40 |
| Q9QX51_PLEC_MOUSE | Plectin | Plectin OS=Mus musculus R.FR@ELAEAAAR@.L                  | 6.22  | 2.76  | 2.26 | 0.44 |
| Q9QX51_PLEC_MOUSE | Plectin | Plectin OS=Mus musculus K.GFFDPNTEENLTYLQLM*ER@.C         | 5.97  | 3.09  | 1.93 | 0.52 |
| Q9QX51_PLEC_MOUSE | Plectin | Plectin OS=Mus musculus K.GFFDPNTEENLTYLQLLQR@.C          | 56.16 | 23.00 | 2.44 | 0.41 |
| Q9QX51_PLEC_MOUSE | Plectin | Plectin OS=Mus musculus R.GGAEGELQALR@.A                  | 27.59 | 12.94 | 2.13 | 0.47 |
| Q9QX51_PLEC_MOUSE | Plectin | Plectin OS=Mus musculus K.GGELVYTDTEAR@.D                 | 32.45 | 11.76 | 2.76 | 0.36 |
| Q9QX51_PLEC_MOUSE | Plectin | Plectin OS=Mus musculus K.GIIR@PGTAFALLEAQAGTGYVIDPIK#.G  | 23.36 | 11.15 | 2.09 | 0.48 |
| Q9QX51_PLEC_MOUSE | Plectin | Plectin OS=Mus musculus R.GLFEEM*NEILLDPSDDTK#.G          | 7.84  | 4.75  | 1.65 | 0.61 |
| Q9QX51_PLEC_MOUSE | Plectin | Plectin OS=Mus musculus K.GLLSAEVAR@.L                    | 23.03 | 5.67  | 4.07 | 0.25 |
| Q9QX51_PLEC_MOUSE | Plectin | Plectin OS=Mus musculus K.GLVEDTLR@.Q                     | 26.74 | 11.16 | 2.40 | 0.42 |
| Q9QX51_PLEC_MOUSE | Plectin | Plectin OS=Mus musculus R.GTNVIAQVWLEEAQK#.L              | 14.92 | 5.71  | 2.61 | 0.38 |
| Q9QX51_PLEC_MOUSE | Plectin | Plectin OS=Mus musculus R.GYFDEEM*NR@.J                   | 24.34 | 12.60 | 1.93 | 0.52 |
| Q9QX51_PLEC_MOUSE | Plectin | Plectin OS=Mus musculus K.GYSPYSVSGSGTAGSR@.T             | 10.51 | 4.69  | 2.24 | 0.45 |
| Q9QX51_PLEC_MOUSE | Plectin | Plectin OS=Mus musculus R.HYQQLQSLQEQEESR@.C              | 18.53 | 7.29  | 2.54 | 0.39 |
| Q9QX51_PLEC_MOUSE | Plectin | Plectin OS=Mus musculus R.IDSAEWGVDLPSVEAQLGSHR@.G        | 12.65 | 6.86  | 1.84 | 0.54 |
| Q9QX51_PLEC_MOUSE | Plectin | Plectin OS=Mus musculus R.IISLETYLFRR@.E                  | 43.21 | 20.53 | 2.10 | 0.48 |
| Q9QX51_PLEC_MOUSE | Plectin | Plectin OS=Mus musculus K.IKHEIQNTGDR@.L                  | 5.13  | 1.68  | 3.06 | 0.33 |
| Q9QX51_PLEC_MOUSE | Plectin | Plectin OS=Mus musculus R.IJSDPSDDTK#.G                   | 36.24 | 19.43 | 1.87 | 0.54 |
| Q9QX51_PLEC_MOUSE | Plectin | Plectin OS=Mus musculus R.LAAEQELIR@.L                    | 57.93 | 21.90 | 2.64 | 0.38 |
| Q9QX51_PLEC_MOUSE | Plectin | Plectin OS=Mus musculus K.LAAISEATR@.L                    | 24.90 | 11.25 | 2.21 | 0.45 |
| Q9QX51_PLEC_MOUSE | Plectin | Plectin OS=Mus musculus R.LAEAEAFQR@.R                    | 23.54 | 8.97  | 2.62 | 0.38 |
| Q9QX51_PLEC_MOUSE | Plectin | Plectin OS=Mus musculus R.LAEVEAALR@.Q                    | 56.17 | 21.74 | 2.58 | 0.39 |
| Q9QX51_PLEC_MOUSE | Plectin | Plectin OS=Mus musculus R.LAQGHTVAELTOR@.E                | 21.14 | 6.56  | 3.22 | 0.31 |
| Q9QX51_PLEC_MOUSE | Plectin | Plectin OS=Mus musculus R.LEDLLQDAQDEKHEQLNEYK#.G         | 17.83 | 7.85  | 1.55 | 0.64 |
| Q9QX51_PLEC_MOUSE | Plectin | Plectin OS=Mus musculus R.LEDLLQDAQDEKHEQLNEYK#.G         | 8.83  | 2.70  | 3.27 | 0.31 |
| Q9QX51_PLEC_MOUSE | Plectin | Plectin OS=Mus musculus R.LGFHLPELVAYQR@.G                | 39.00 | 16.43 | 2.37 | 0.42 |
| Q9QX51_PLEC_MOUSE | Plectin | Plectin OS=Mus musculus K.LISLFOAM*K#.K                   | 13.24 | 5.78  | 2.29 | 0.44 |
| Q9QX51_PLEC_MOUSE | Plectin | Plectin OS=Mus musculus R.LK#AEALQLQK#.E                  | 7.90  | 4.08  | 1.94 | 0.52 |
| Q9QX51_PLEC_MOUSE | Plectin | Plectin OS=Mus musculus R.LK#QSAEQAAQAAQAAAEK#.L          | 15.72 | 6.84  | 2.30 | 0.43 |
| Q9QX51_PLEC_MOUSE | Plectin | Plectin OS=Mus musculus K.LLAEENQR.L                      | 42.70 | 15.49 | 2.76 | 0.36 |
| Q9QX51_PLEC_MOUSE | Plectin | Plectin OS=Mus musculus R.LLDAQATGIVDPR@.L                | 14.95 | 6.29  | 2.38 | 0.42 |
| Q9QX51_PLEC_MOUSE | Plectin | Plectin OS=Mus musculus R.LLDAQSLGGVDPK#.S                | 53.35 | 20.26 | 2.63 | 0.38 |
| Q9QX51_PLEC_MOUSE | Plectin | Plectin OS=Mus musculus R.LLDPEVDVPOPEK#.S                | 35.14 | 18.39 | 1.91 | 0.52 |
| Q9QX51_PLEC_MOUSE | Plectin | Plectin OS=Mus musculus R.LLEAQATGDIPEESHR@.L             | 14.26 | 4.13  | 3.46 | 0.29 |
| Q9QX51_PLEC_MOUSE | Plectin | Plectin OS=Mus musculus K.LLLWSQR@.M                      | 16.08 | 8.29  | 1.94 | 0.52 |
| Q9QX51_PLEC_MOUSE | Plectin | Plectin OS=Mus musculus R.LM*ADFQAGR@.V                   | 13.32 | 8.11  | 1.64 | 0.61 |
| Q9QX51_PLEC_MOUSE | Plectin | Plectin OS=Mus musculus R.LPVDVAYQR@.G                    | 37.46 | 15.51 | 2.41 | 0.41 |
| Q9QX51_PLEC_MOUSE | Plectin | Plectin OS=Mus musculus R.LQAEVAQK#.S                     | 54.01 | 20.12 | 2.68 | 0.37 |
| Q9QX51_PLEC_MOUSE | Plectin | Plectin OS=Mus musculus R.LQEDKEQM*AAQLVEETQGFQR.T        | 9.58  | 2.39  | 4.02 | 0.25 |
| Q9QX51_PLEC_MOUSE | Plectin | Plectin OS=Mus musculus R.LQHAEATATK#.R                   | 1.71  | 5.82  | 1.67 | 0.60 |
| Q9QX51_PLEC_MOUSE | Plectin | Plectin OS=Mus musculus R.LQLLETTER@.Q                    | 29.39 | 12.09 | 2.43 | 0.41 |
| Q9QX51_PLEC_MOUSE | Plectin | Plectin OS=Mus musculus K.LQNVAJALDYLR@.H                 | 19.27 | 6.38  | 3.02 | 0.33 |
| Q9QX51_PLEC_MOUSE | Plectin | Plectin OS=Mus musculus R.LR@AETEQGEQR@.Q                 | 22.72 | 80.13 | 0.28 | 3.53 |
| Q9QX51_PLEC_MOUSE | Plectin | Plectin OS=Mus musculus R.LSFSGLR@.A                      | 33.83 | 14.52 | 2.33 | 0.43 |
| Q9QX51_PLEC_MOUSE | Plectin | Plectin OS=Mus musculus R.LSVAQAAR@.L                     | 42.34 | 17.06 | 2.48 | 0.40 |
| Q9QX51_PLEC_MOUSE | Plectin | Plectin OS=Mus musculus R.LSYTLK#.R                       | 23.15 | 12.82 | 1.81 | 0.55 |
| Q9QX51_PLEC_MOUSE | Plectin | Plectin OS=Mus musculus R.LTAEDLYEAR@.I                   | 35.67 | 13.63 | 2.62 | 0.38 |
| Q9QX51_PLEC_MOUSE | Plectin | Plectin OS=Mus musculus R.LTVEAVR@.A                      | 96.70 | 44.65 | 2.17 | 0.46 |
| Q9QX51_PLEC_MOUSE | Plectin | Plectin OS=Mus musculus R.LTVEAVR@.H                      | 25.74 | 19.62 | 1.31 | 0.76 |
| Q9QX51_PLEC_MOUSE | Plectin | Plectin OS=Mus musculus R.LTVEAVR@.E                      | 31.77 | 17.30 | 1.84 | 0.54 |
| Q9QX51_PLEC_MOUSE | Plectin | Plectin OS=Mus musculus R.M*GIVGPEFK#.D                   | 17.23 | 7.42  | 2.32 | 0.43 |
| Q9QX51_PLEC_MOUSE | Plectin | Plectin OS=Mus musculus K.M*QAVQATR@.L                    | 17.02 | 10.11 | 1.68 | 0.59 |
| Q9QX51_PLEC_MOUSE | Plectin | Plectin OS=Mus musculus R.NDESQSPATR@.G                   | 22.62 | 25.58 | 0.88 | 1.13 |
| Q9QX51_PLEC_MOUSE | Plectin | Plectin OS=Mus musculus R.NLVDNITGQR@.L                   | 39.24 | 7.83  | 5.01 | 0.20 |
| Q9QX51_PLEC_MOUSE | Plectin | Plectin OS=Mus musculus R.QAEELAR@.V                      | 26.59 | 10.80 | 2.46 | 0.41 |
| Q9QX51_PLEC_MOUSE | Plectin | Plectin OS=Mus musculus K.QITVEELVR@.S                    | 19.69 | 7.95  | 2.48 | 0.40 |
| Q9QX51_PLEC_MOUSE | Plectin | Plectin OS=Mus musculus R.QLAEEDAR@.Q                     | 22.22 | 8.66  | 2.57 | 0.39 |
| Q9QX51_PLEC_MOUSE | Plectin | Plectin OS=Mus musculus R.QLAEDLAQR@.A                    | 32.09 | 12.78 | 2.51 | 0.40 |
| Q9QX51_PLEC_MOUSE | Plectin | Plectin OS=Mus musculus R.QLEM*SAEAEAR@.L                 | 28.54 | 9.94  | 2.87 | 0.35 |
| Q9QX51_PLEC_MOUSE | Plectin | Plectin OS=Mus musculus R.QQNLAASYDVR@.R                  | 17.64 | 7.58  | 2.33 | 0.43 |
| Q9QX51_PLEC_MOUSE | Plectin | Plectin OS=Mus musculus K.QSAAEQAAQAAQAAAEK#.L            | 14.34 | 5.67  | 2.53 | 0.40 |
| Q9QX51_PLEC_MOUSE | Plectin | Plectin OS=Mus musculus R.QSSEAEIQAQ#.A                   | 23.81 | 6.57  | 3.62 | 0.28 |
| Q9QX51_PLEC_MOUSE | Plectin | Plectin OS=Mus musculus R.QVQVAETAR@.S                    | 24.27 | 8.01  | 3.03 | 0.33 |
| Q9QX51_PLEC_MOUSE | Plectin | Plectin OS=Mus musculus R.QYDIDDAITK#.N                   | 19.09 | 9.57  | 1.99 | 0.50 |
| Q9QX51_PLEC_MOUSE | Plectin | Plectin OS=Mus musculus K.QYINAIKHDLQILTYK#.A             | 10.47 | 4.67  | 2.24 | 0.45 |
| Q9QX51_PLEC_MOUSE | Plectin | Plectin OS=Mus musculus R.R@AAEAEAEAR@EQAER@.E            | 22.31 | 6.35  | 3.51 | 0.28 |
| Q9QX51_PLEC_MOUSE | Plectin | Plectin OS=Mus musculus R.R@DDPSGQM*LLLSAR@.K             | 7.15  | 4.83  | 1.48 | 0.67 |
| Q9QX51_PLEC_MOUSE | Plectin | Plectin OS=Mus musculus R.R@EEAADVDAQQK#.R                | 6.94  | 2.47  | 2.81 | 0.36 |
| Q9QX51_PLEC_MOUSE | Plectin | Plectin OS=Mus musculus R.R@PELEDSTLR@.Y                  | 24.48 | 7.62  | 3.21 | 0.31 |
| Q9QX51_PLEC_MOUSE | Plectin | Plectin OS=Mus musculus R.SDQLTGLSLP.LSEK#.A              | 29.36 | 12.97 | 2.26 | 0.44 |
| Q9QX51_PLEC_MOUSE | Plectin | Plectin OS=Mus musculus K.SSEM*QTVQEQILQEQALQK#.S         | 25.46 | 9.41  | 2.70 | 0.37 |

|                     |         |                                                                    |        |       |      |      |
|---------------------|---------|--------------------------------------------------------------------|--------|-------|------|------|
| Q9QX51_PLEC_MOUSE   | Plec    | Plectin OS=Mus musculus K.SIITYVSSLYDAM*PR@.V                      | 13.04  | 3.82  | 3.41 | 0.29 |
| Q9QX51_PLEC_MOUSE   | Plec    | Plectin OS=Mus musculus K.SILDEELQR@.L                             | 38.74  | 14.18 | 2.73 | 0.37 |
| Q9QX51_PLEC_MOUSE   | Plec    | Plectin OS=Mus musculus R.SLAEEFAER@.Q                             | 45.41  | 19.21 | 2.36 | 0.42 |
| Q9QX51_PLEC_MOUSE   | Plec    | Plectin OS=Mus musculus K.SLAQADAEK*QKHEAER@.E                     | 28.64  | 14.94 | 1.92 | 0.52 |
| Q9QX51_PLEC_MOUSE   | Plec    | Plectin OS=Mus musculus R.SM*VEGTGLR@.L                            | 17.92  | 8.37  | 2.14 | 0.47 |
| Q9QX51_PLEC_MOUSE   | Plec    | Plectin OS=Mus musculus R.SQVEELFSVR@.V                            | 32.79  | 13.20 | 2.48 | 0.40 |
| Q9QX51_PLEC_MOUSE   | Plec    | Plectin OS=Mus musculus R.SSSVSSSSYPISAGPR@.T                      | 19.57  | 12.36 | 1.58 | 0.63 |
| Q9QX51_PLEC_MOUSE   | Plec    | Plectin OS=Mus musculus R.STQGAEVLK#R.T                            | 20.25  | 12.38 | 1.64 | 0.61 |
| Q9QX51_PLEC_MOUSE   | Plec    | Plectin OS=Mus musculus R.SWLVTFRR@.T                              | 21.56  | 12.99 | 1.66 | 0.60 |
| Q9QX51_PLEC_MOUSE   | Plec    | Plectin OS=Mus musculus R.SYVDPTDERR@.L                            | 23.79  | 9.60  | 2.48 | 0.40 |
| Q9QX51_PLEC_MOUSE   | Plec    | Plectin OS=Mus musculus R.TELATQEK#.V                              | 17.08  | 8.83  | 1.94 | 0.52 |
| Q9QX51_PLEC_MOUSE   | Plec    | Plectin OS=Mus musculus R.TQLASWDPTETGPVAGILDTELEK#.V              | 16.70  | 43.28 | 0.39 | 2.59 |
| Q9QX51_PLEC_MOUSE   | Plec    | Plectin OS=Mus musculus K.VALEEVER@.L                              | 16.45  | 6.91  | 2.38 | 0.42 |
| Q9QX51_PLEC_MOUSE   | Plec    | Plectin OS=Mus musculus R.VIVYQSLGAVAGQQLK#.I                      | 20.58  | 7.88  | 2.61 | 0.38 |
| Q9QX51_PLEC_MOUSE   | Plec    | Plectin OS=Mus musculus K.VLALPEPSPAAPTLR@.S                       | 52.28  | 23.94 | 2.18 | 0.46 |
| Q9QX51_PLEC_MOUSE   | Plec    | Plectin OS=Mus musculus K.VPAQQLQEAGILSQEELQR@.L                   | 21.33  | 9.13  | 2.34 | 0.43 |
| Q9QX51_PLEC_MOUSE   | Plec    | Plectin OS=Mus musculus R.VPGAQDQVRR@.A                            | 34.09  | 14.41 | 2.37 | 0.42 |
| Q9QX51_PLEC_MOUSE   | Plec    | Plectin OS=Mus musculus R.VPLDVAVAR@.G                             | 30.83  | 12.10 | 2.55 | 0.39 |
| Q9QX51_PLEC_MOUSE   | Plec    | Plectin OS=Mus musculus R.VPVDVAVAR@.G                             | 19.91  | 11.72 | 1.70 | 0.59 |
| Q9QX51_PLEC_MOUSE   | Plec    | Plectin OS=Mus musculus K.VQSGSESVIQEVDLRL.T                       | 35.30  | 9.70  | 3.64 | 0.27 |
| Q9QX51_PLEC_MOUSE   | Plec    | Plectin OS=Mus musculus R.VTQQLER@.W                               | 33.27  | 14.70 | 2.26 | 0.44 |
| Q9QX51_PLEC_MOUSE   | Plec    | Plectin OS=Mus musculus R.VYHDPTQEPVYSQQLQR@.C                     | 20.81  | 8.19  | 2.54 | 0.39 |
| Q9QX51_PLEC_MOUSE   | Plec    | Plectin OS=Mus musculus R.WQAVLQATDVR@.Q                           | 20.56  | 8.49  | 2.42 | 0.41 |
| Q9QX51_PLEC_MOUSE   | Plec    | Plectin OS=Mus musculus R.YLQDQLLAVVENQR@.R                        | 18.97  | 6.75  | 2.81 | 0.36 |
| Q9QX51_PLEC_MOUSE   | Plec    | Plectin OS=Mus musculus R.VLYGTGAVAGVYLPGRS@.Q                     | 16.65  | 7.64  | 2.18 | 0.46 |
| Q9QX51_PLEC_MOUSE   | Plec    | Plectin OS=Mus musculus R.YSELTLTSQYIK#.F                          | 26.85  | 14.17 | 1.89 | 0.53 |
| E9Q6H8_E9Q6H8_MOUSE | Plekha5 | Protein Plekha5 OS=Mus K.AM*VQVSDQTM*HSIPTSPSHGSAAYQGFSPQR@.T      | 4.24   | 2.84  | 1.49 | 0.67 |
| E9Q6H8_E9Q6H8_MOUSE | Plekha5 | Protein Plekha5 OS=Mus K.AVNNSLADVR@.G                             | 13.74  | 2.06  | 6.67 | 0.15 |
| E9Q6H8_E9Q6H8_MOUSE | Plekha5 | Protein Plekha5 OS=Mus R.GVSYQTLPR@.N                              | 17.46  | 3.39  | 5.16 | 0.19 |
| E9Q6H8_E9Q6H8_MOUSE | Plekha5 | Protein Plekha5 OS=Mus K.YR@PEAGIDAK#.L                            | 4.99   | 8.36  | 0.60 | 1.67 |
| Q4VAC9_PKHG3_MOUSE  | Plekha3 | Pleckstrin homology domain K.VTPDQEQVPSISGLPEEAGLSGGK.A            | 3.59   | 4.08  | 0.88 | 1.14 |
| Q66T02_PKHG5_MOUSE  | Plekha5 | Pleckstrin homology domain R.ALLQPSDFL#.K.G                        | 11.66  | 7.51  | 1.55 | 0.64 |
| Q66T02_PKHG5_MOUSE  | Plekha5 | Pleckstrin homology domain R.FSGFSSPSTSAFRR@.E                     | 6.51   | 3.09  | 2.11 | 0.47 |
| Q66T02_PKHG5_MOUSE  | Plekha5 | Pleckstrin homology domain R.IDAYEVVSGSNDVDEVLK#.E                 | 7.65   | 3.95  | 1.93 | 0.52 |
| Q66T02_PKHG5_MOUSE  | Plekha5 | Pleckstrin homology domain K.SLGEVLLVPFER@.K                       | 13.51  | 8.90  | 1.52 | 0.66 |
| Q66T02_PKHG5_MOUSE  | Plekha5 | Pleckstrin homology domain K.SLGEVLLVPFER@.K                       | 10.87  | 9.73  | 1.12 | 0.90 |
| Q9DBG5_PLIN3_MOUSE  | Plin3   | Perilipin-3 OS=Mus musculus R.LQESLPILQQTPEK#.V                    | 12.47  | 4.77  | 2.62 | 0.38 |
| Q9DBG5_PLIN3_MOUSE  | Plin3   | Perilipin-3 OS=Mus musculus R.SQVNDLQATFSGHSFQDLSAGVLAQTR@.E       | 8.78   | 4.11  | 2.13 | 0.47 |
| Q9DBG5_PLIN3_MOUSE  | Plin3   | Perilipin-3 OS=Mus musculus K.TLTTAAVSTAQPLSK#.L                   | 25.67  | 6.60  | 3.89 | 0.26 |
| Q9DBG5_PLIN3_MOUSE  | Plin3   | Perilipin-3 OS=Mus musculus R.VAGLPLISSTYGM*VSAAYSTK#.E            | 6.51   | 1.07  | 6.09 | 0.16 |
| Q9DBG5_PLIN3_MOUSE  | Plin3   | Perilipin-3 OS=Mus musculus R.SQVNDLQATFSGHSFQDLSAGVLAQTR@.E       | 3.93   | 1.63  | 2.42 | 0.41 |
| Q9ROE1_PLOD3_MOUSE  | Plod3   | Procollagen-lysine,2-oxo K.LVGEPEALSAGEAR.D                        | 4.67   | 6.38  | 0.73 | 1.37 |
| Q9ROE1_PLOD3_MOUSE  | Plod3   | Procollagen-lysine,2-oxo R.VGVVWNPVYSQAVIR.G                       | 2.06   | 3.36  | 0.61 | 1.63 |
| Q922V4_PLRG1_MOUSE  | Plrg1   | Pleiotropic regulator 1 O R.AVVLPHTYFASGSPDNK#.Q                   | 63.25  | 49.00 | 1.29 | 0.77 |
| Q922V4_PLRG1_MOUSE  | Plrg1   | Pleiotropic regulator 1 O K.IWDLASGK#.L                            | 37.58  | 24.44 | 1.54 | 0.65 |
| Q922V4_PLRG1_MOUSE  | Plrg1   | Pleiotropic regulator 1 O R.LWDLVAGK#.T                            | 64.66  | 30.22 | 2.14 | 0.47 |
| Q922V4_PLRG1_MOUSE  | Plrg1   | Pleiotropic regulator 1 O R.M*PSESAQSLAVALPSQTR.V                  | 19.39  | 10.19 | 1.90 | 0.53 |
| Q922V4_PLRG1_MOUSE  | Plrg1   | Pleiotropic regulator 1 O R.MPSESAQSLAVALPSQTR@.V                  | 6.04   | 3.23  | 1.87 | 0.53 |
| Q922V4_PLRG1_MOUSE  | Plrg1   | Pleiotropic regulator 1 O K.QYPANQGDVYELVTGTHPYAGPGVALTADTK#.I     | 18.41  | 9.32  | 1.97 | 0.51 |
| Q922V4_PLRG1_MOUSE  | Plrg1   | Pleiotropic regulator 1 O R.SQPTAM*NSIM*ETGNTK#.N                  | 20.78  | 14.36 | 1.45 | 0.69 |
| Q922V4_PLRG1_MOUSE  | Plrg1   | Pleiotropic regulator 1 O R.TGPAGSEYR@.H                           | 19.07  | 12.34 | 1.55 | 0.65 |
| Q922V4_PLRG1_MOUSE  | Plrg1   | Pleiotropic regulator 1 O R.TGVYFQR@.V                             | 49.29  | 26.85 | 1.84 | 0.54 |
| Q922V4_PLRG1_MOUSE  | Plrg1   | Pleiotropic regulator 1 O K.VYR@EDETATEETHPVSWK#PEIHK#.R           | 11.39  | 8.54  | 1.33 | 0.75 |
| Q91J00_PLI1_MOUSE   | Plscr1  | Phospholipid scramblase K.SLDEESVGGK#.I                            | 12.96  | 3.04  | 4.26 | 0.23 |
| Q91J29_PLI3_MOUSE   | Plscr3  | Phospholipid scramblase R.EALTDADDFGLQFPVLDLVK#.V                  | 5.39   | 3.23  | 1.67 | 0.60 |
| Q9CPV5_PMF1_MOUSE   | Pmf1    | Polyamine-modulated fa K.LLDAIVDTLQK#.L                            | 2.14   | 9.34  | 2.37 | 0.42 |
| Q9CPV5_PMF1_MOUSE   | Pmf1    | Polyamine-modulated fa K.NQELADAVLAGR@.R                           | 10.42  | 4.89  | 2.13 | 0.47 |
| Q9CPV5_PMF1_MOUSE   | Pmf1    | Polyamine-modulated fa K.LLDAIVDTLQK#.L                            | 14.80  | 3.73  | 3.96 | 0.25 |
| Q60953_PML_MOUSE    | Pml     | Protein PML OS=Mus musculus K.ALDESLEAHLDR@.T                      | 58.30  | 13.01 | 4.48 | 0.22 |
| Q60953_PML_MOUSE    | Pml     | Protein PML OS=Mus musculus K.APGQADANGALDNVFFESLQR@.R             | 23.73  | 8.71  | 2.72 | 0.37 |
| Q60953_PML_MOUSE    | Pml     | Protein PML OS=Mus musculus K.AVSEAGLR@.H                          | 24.00  | 9.22  | 2.60 | 0.38 |
| Q60953_PML_MOUSE    | Pml     | Protein PML OS=Mus musculus R.DNSVSSFLDSTR@.K                      | 29.63  | 10.28 | 2.88 | 0.35 |
| Q60953_PML_MOUSE    | Pml     | Protein PML OS=Mus musculus R.ELLEAVNDR@.Y                         | 45.19  | 10.65 | 4.24 | 0.24 |
| Q60953_PML_MOUSE    | Pml     | Protein PML OS=Mus musculus K.EVQSVQQALESK#.T                      | 16.49  | 6.57  | 2.51 | 0.40 |
| Q60953_PML_MOUSE    | Pml     | Protein PML OS=Mus musculus R.LLALHNSVVELLNAYR@.T                  | 13.50  | 7.10  | 1.90 | 0.53 |
| Q60953_PML_MOUSE    | Pml     | Protein PML OS=Mus musculus R.SALASVLAM*#R@.D                      | 9.66   | 3.47  | 2.79 | 0.36 |
| Q60953_PML_MOUSE    | Pml     | Protein PML OS=Mus musculus R.TLVFFDLK#.I                          | 40.58  | 10.93 | 3.71 | 0.27 |
| Q60953_PML_MOUSE    | Pml     | Protein PML OS=Mus musculus R.VLIQPEAFSVYSK#.A                     | 49.04  | 15.38 | 3.19 | 0.31 |
| Q60953_PML_MOUSE    | Pml     | Protein PML OS=Mus musculus K.APGQADANGALDNVFFESLQR@.R             | 24.69  | 10.01 | 2.47 | 0.41 |
| Q60953_PML_MOUSE    | Pml     | Protein PML OS=Mus musculus K.AVSEAGLR@.H                          | 30.53  | 10.12 | 3.02 | 0.33 |
| Q60953_PML_MOUSE    | Pml     | Protein PML OS=Mus musculus R.EEASQTVGSM*#K#.R                     | 8.84   | 6.65  | 1.33 | 0.75 |
| Q60953_PML_MOUSE    | Pml     | Protein PML OS=Mus musculus R.ELLEAVNDR@.Y                         | 62.88  | 26.87 | 2.34 | 0.43 |
| Q60953_PML_MOUSE    | Pml     | Protein PML OS=Mus musculus K.EVQSVQQALESK#.T                      | 50.69  | 20.78 | 2.45 | 0.41 |
| Q60953_PML_MOUSE    | Pml     | Protein PML OS=Mus musculus R.INAAVASPEAASQPEAASHTPVTSTPEDLEQPK#.E | 12.95  | 5.53  | 2.29 | 0.44 |
| Q60953_PML_MOUSE    | Pml     | Protein PML OS=Mus musculus K.ISQLAAVNR@.E                         | 65.24  | 20.44 | 3.19 | 0.31 |
| Q60953_PML_MOUSE    | Pml     | Protein PML OS=Mus musculus R.LLALHNSVVELLNAYR@.T                  | 49.29  | 16.50 | 2.45 | 0.41 |
| Q60953_PML_MOUSE    | Pml     | Protein PML OS=Mus musculus K.LYASDQEVLDN*HSLR@.K                  | 55.91  | 18.49 | 3.02 | 0.33 |
| Q60953_PML_MOUSE    | Pml     | Protein PML OS=Mus musculus R.QVVDYVQAQER@.E                       | 51.03  | 18.05 | 2.83 | 0.35 |
| Q60953_PML_MOUSE    | Pml     | Protein PML OS=Mus musculus R.SALASVLAM*#R@.D                      | 15.45  | 5.36  | 2.88 | 0.35 |
| Q60953_PML_MOUSE    | Pml     | Protein PML OS=Mus musculus R.TLVFFDLK#.I                          | 91.18  | 22.80 | 4.00 | 0.25 |
| Q60953_PML_MOUSE    | Pml     | Protein PML OS=Mus musculus K.TVPGAHVPVYAFSM*QGPTYR@.E             | 25.74  | 14.50 | 1.78 | 0.56 |
| Q60953_PML_MOUSE    | Pml     | Protein PML OS=Mus musculus R.VLIQPEAFSVYSK#.A                     | 54.98  | 17.83 | 3.08 | 0.32 |
| Q60953_PML_MOUSE    | Pml     | Protein PML OS=Mus musculus K.VQLLTR@.G                            | 68.30  | 18.47 | 3.70 | 0.27 |
| Q60953_PML_MOUSE    | Pml     | Protein PML OS=Mus musculus K.ALDESLEAHLDR@.T                      | 116.98 | 41.70 | 2.80 | 0.36 |
| Q60953_PML_MOUSE    | Pml     | Protein PML OS=Mus musculus K.APGQADANGALDNVFFESLQR@.R             | 28.75  | 10.88 | 2.83 | 0.35 |
| Q60953_PML_MOUSE    | Pml     | Protein PML OS=Mus musculus K.AVSEAGLR@.H                          | 50.80  | 14.80 | 3.43 | 0.29 |
| Q60953_PML_MOUSE    | Pml     | Protein PML OS=Mus musculus R.EEASQTVGSM*#K#.R                     | 11.19  | 3.16  | 3.54 | 0.28 |
| Q60953_PML_MOUSE    | Pml     | Protein PML OS=Mus musculus R.ELLEAVNDR@.Y                         | 56.13  | 19.77 | 2.84 | 0.35 |
| Q60953_PML_MOUSE    | Pml     | Protein PML OS=Mus musculus K.EVQSVQQALESK#.T                      | 50.04  | 15.86 | 3.15 | 0.32 |
| Q60953_PML_MOUSE    | Pml     | Protein PML OS=Mus musculus K.ISQLAAVNR@.E                         | 93.48  | 29.57 | 3.16 | 0.32 |
| Q60953_PML_MOUSE    | Pml     | Protein PML OS=Mus musculus R.LLALHNSVVELLNAYR@.T                  | 31.64  | 9.03  | 3.50 | 0.29 |
| Q60953_PML_MOUSE    | Pml     | Protein PML OS=Mus musculus R.QVVDYVQAQER@.E                       | 42.44  | 7.62  | 4.26 | 0.24 |
| Q60953_PML_MOUSE    | Pml     | Protein PML OS=Mus musculus R.SALASVLAM*#R@.D                      | 31.92  | 9.18  | 3.48 | 0.29 |
| Q60953_PML_MOUSE    | Pml     | Protein PML OS=Mus musculus R.TLVFFDLK#.I                          | 115.69 | 32.02 | 3.61 | 0.28 |
| Q60953_PML_MOUSE    | Pml     | Protein PML OS=Mus musculus R.VLIQPEAFSVYSK#.A                     | 114.04 | 32.93 | 3.46 | 0.29 |
| D6RG76_D6RG76_MOUSE | Pmm1    | Phosphomannomutase 1 R.SRLHPGGEEDR@.V                              | 4.91   | 3.45  | 1.42 | 0.70 |
| Q9D1G2_PMKV_MOUSE   | Pmkv    | Phosphomevalonate kinase K.IVEGVSQIWLVSVDTR@.R                     | 4.63   | 4.64  | 1.00 | 1.00 |
| Q9D1G2_PMKV_MOUSE   | Pmkv    | Phosphomevalonate kinase R.LVLLFSGK#.R                             | 9.44   | 7.77  | 1.21 | 0.82 |
| A2A1T4_PNISR_MOUSE  | Pnir    | Arginine/serine-rich protein R.SK#FDSDEEEDAENLEAVSSGK#.V           | 6.53   | 3.06  | 2.13 | 0.47 |
| A2A1T4_PNISR_MOUSE  | Pnir    | Arginine/serine-rich protein R.TPNEAPSVLEPK#.R                     | 15.57  | 11.90 | 1.31 | 0.76 |
| O35691_PININ_MOUSE  | Pnn     | Pinin OS=Mus musculus ( R.ALQEQLK#.A                               | 17.00  | 15.30 | 1.11 | 0.90 |
| O35691_PININ_MOUSE  | Pnn     | Pinin OS=Mus musculus ( R.DLIQDQNM*#DEK#.G                         | 8.07   | 7.62  | 1.06 | 0.94 |
| O35691_PININ_MOUSE  | Pnn     | Pinin OS=Mus musculus ( R.GFSDSGGGPPAK#.Q                          | 8.74   | 7.08  | 1.23 | 0.81 |

|                    |         |                                                          |        |        |         |      |
|--------------------|---------|----------------------------------------------------------|--------|--------|---------|------|
| O35691_PININ_MOUSE | Pnn     | Pinin OS=Mus musculus ( R.IFGLLM*GTLQK#.F                | 6.24   | 5.19   | 1.20    | 0.83 |
| O35691_PININ_MOUSE | Pnn     | Pinin OS=Mus musculus ( K.LEVQAEER@.K                    | 12.81  | 7.66   | 1.67    | 0.60 |
| O35691_PININ_MOUSE | Pnn     | Pinin OS=Mus musculus ( K.TK#PHLYPGR@.M                  | 8.48   | 7.53   | 1.13    | 0.89 |
| O35691_PININ_MOUSE | Pnn     | Pinin OS=Mus musculus ( R.ALQEQEK#.A                     | 177.52 | 91.75  | 1.93    | 0.52 |
| O35691_PININ_MOUSE | Pnn     | Pinin OS=Mus musculus ( R.DLEGAVSR@.L                    | 154.43 | 62.14  | 2.49    | 0.40 |
| O35691_PININ_MOUSE | Pnn     | Pinin OS=Mus musculus ( R.DLIQDQNM*DEK#.G                | 101.43 | 38.39  | 2.64    | 0.38 |
| O35691_PININ_MOUSE | Pnn     | Pinin OS=Mus musculus ( R.DLIQDQNMDEK#.G                 | 16.07  | 8.26   | 1.94    | 0.51 |
| O35691_PININ_MOUSE | Pnn     | Pinin OS=Mus musculus ( R.DLIQDQNM*DEK#.Q                | 14.28  | 6.00   | 2.38    | 0.42 |
| O35691_PININ_MOUSE | Pnn     | Pinin OS=Mus musculus ( K.FK#QESTVATER@.Q                | 81.13  | 33.19  | 2.44    | 0.41 |
| O35691_PININ_MOUSE | Pnn     | Pinin OS=Mus musculus ( R.GFSDSGGGPPAK#.Q                | 72.26  | 27.44  | 2.63    | 0.38 |
| O35691_PININ_MOUSE | Pnn     | Pinin OS=Mus musculus ( K.HVIAEQEVM*ETNQVIESIEPENETSK#.E | 14.79  | 6.82   | 2.17    | 0.46 |
| O35691_PININ_MOUSE | Pnn     | Pinin OS=Mus musculus ( R.IEFAEQNK#.M                    | 33.53  | 12.60  | 2.66    | 0.38 |
| O35691_PININ_MOUSE | Pnn     | Pinin OS=Mus musculus ( R.IFGLLM*GTLQK#.F                | 137.18 | 53.73  | 2.55    | 0.39 |
| O35691_PININ_MOUSE | Pnn     | Pinin OS=Mus musculus ( R.IFGLLMGTLQK#.F                 | 27.48  | 10.99  | 2.50    | 0.40 |
| O35691_PININ_MOUSE | Pnn     | Pinin OS=Mus musculus ( R.KHDFPLESUK#PEVSVPEPLTVHSENK#.S | 7.68   | 56.27  | 0.14    | 7.32 |
| O35691_PININ_MOUSE | Pnn     | Pinin OS=Mus musculus ( R.K#M*NALFEGR@.R                 | 27.69  | 9.67   | 2.86    | 0.35 |
| O35691_PININ_MOUSE | Pnn     | Pinin OS=Mus musculus ( K.LEVQAEER@.K                    | 259.47 | 104.44 | 2.48    | 0.40 |
| O35691_PININ_MOUSE | Pnn     | Pinin OS=Mus musculus ( R.LLALSFGGGGR@.G                 | 108.23 | 54.74  | 1.98    | 0.51 |
| O35691_PININ_MOUSE | Pnn     | Pinin OS=Mus musculus ( K.LPEVSPVPLTVHSENK#.S            | 102.17 | 22.56  | 2.67    | 0.37 |
| O35691_PININ_MOUSE | Pnn     | Pinin OS=Mus musculus ( K.M*NALFEGR@.R                   | 55.39  | 30.10  | 1.84    | 0.54 |
| O35691_PININ_MOUSE | Pnn     | Pinin OS=Mus musculus ( R.NEEQK#AEQEGK#.V                | 15.19  | 7.36   | 2.06    | 0.48 |
| O35691_PININ_MOUSE | Pnn     | Pinin OS=Mus musculus ( R.QESDPEDDVKK#PALQSSWATSK.E      | 10.66  | 2.50   | 4.26    | 0.23 |
| O35691_PININ_MOUSE | Pnn     | Pinin OS=Mus musculus ( K.QQDSQPEEVM*DVLEM*VESVK#.H      | 21.48  | 7.70   | 2.79    | 0.36 |
| O35691_PININ_MOUSE | Pnn     | Pinin OS=Mus musculus ( K.QQDSQPEEVM*DVLEM*VESVK#.H      | 6.11   | 2.74   | 2.23    | 0.45 |
| O35691_PININ_MOUSE | Pnn     | Pinin OS=Mus musculus ( K.QQDSQPEEVM*DVLEM*VESVK#.H      | 7.65   | 4.72   | 1.62    | 0.62 |
| O35691_PININ_MOUSE | Pnn     | Pinin OS=Mus musculus ( K.QQDSQPEEVM*DVLEM*VESVK#.H      | 4.79   | 2.90   | 1.65    | 0.61 |
| O35691_PININ_MOUSE | Pnn     | Pinin OS=Mus musculus ( R.R@IEFAEQNK#.M                  | 129.55 | 55.75  | 2.32    | 0.43 |
| O35691_PININ_MOUSE | Pnn     | Pinin OS=Mus musculus ( K.TEEAEVR@.E                     | 45.33  | 17.31  | 2.62    | 0.38 |
| O35691_PININ_MOUSE | Pnn     | Pinin OS=Mus musculus ( K.K.TK#PHLYPGR@.M                | 131.72 | 51.18  | 2.57    | 0.39 |
| O35691_PININ_MOUSE | Pnn     | Pinin OS=Mus musculus ( K.VEALQEQEWEHNAK#.I              | 8.46   | 3.84   | 2.20    | 0.45 |
| O35691_PININ_MOUSE | Pnn     | Pinin OS=Mus musculus ( R.ALQEQEK#.A                     | 68.00  | 26.73  | 2.54    | 0.39 |
| O35691_PININ_MOUSE | Pnn     | Pinin OS=Mus musculus ( R.DLEGAVSR@.L                    | 50.73  | 22.87  | 2.22    | 0.45 |
| O35691_PININ_MOUSE | Pnn     | Pinin OS=Mus musculus ( R.DLIQDQNM*DEK#.G                | 24.49  | 12.75  | 1.92    | 0.52 |
| O35691_PININ_MOUSE | Pnn     | Pinin OS=Mus musculus ( R.DLIQDQNM*DEK#.Q                | 3.82   | 2.68   | 1.43    | 0.70 |
| O35691_PININ_MOUSE | Pnn     | Pinin OS=Mus musculus ( K.FK#QESTVATER@.Q                | 56.46  | 21.17  | 2.67    | 0.37 |
| O35691_PININ_MOUSE | Pnn     | Pinin OS=Mus musculus ( R.GFSDSGGGPPAK#.Q                | 20.06  | 9.20   | 2.18    | 0.46 |
| O35691_PININ_MOUSE | Pnn     | Pinin OS=Mus musculus ( K.HVIAEQEVM*ETNQVIESIEPENETSK#.E | 12.79  | 3.91   | 3.27    | 0.31 |
| O35691_PININ_MOUSE | Pnn     | Pinin OS=Mus musculus ( R.IEFAEQNK#.M                    | 9.00   | 4.75   | 1.90    | 0.53 |
| O35691_PININ_MOUSE | Pnn     | Pinin OS=Mus musculus ( R.IFGLLM*GTLQK#.F                | 24.67  | 13.26  | 1.86    | 0.54 |
| O35691_PININ_MOUSE | Pnn     | Pinin OS=Mus musculus ( R.IFGLLMGTLQK#.F                 | 8.21   | 5.25   | 1.57    | 0.64 |
| O35691_PININ_MOUSE | Pnn     | Pinin OS=Mus musculus ( K.LEVQAEER@.K                    | 76.76  | 30.54  | 2.51    | 0.40 |
| O35691_PININ_MOUSE | Pnn     | Pinin OS=Mus musculus ( R.LLALSFGGGGR@.G                 | 29.95  | 20.88  | 1.43    | 0.70 |
| O35691_PININ_MOUSE | Pnn     | Pinin OS=Mus musculus ( K.LPEVSPVPLTVHSENK#.S            | 34.14  | 5.13   | 6.65    | 0.15 |
| O35691_PININ_MOUSE | Pnn     | Pinin OS=Mus musculus ( K.M*NALFEGR@.R                   | 23.63  | 9.45   | 2.50    | 0.40 |
| O35691_PININ_MOUSE | Pnn     | Pinin OS=Mus musculus ( R.R@GFSDSGGGPPAK#.Q              | 7.78   | 2.67   | 2.91    | 0.34 |
| O35691_PININ_MOUSE | Pnn     | Pinin OS=Mus musculus ( K.K.TK#PHLYPGR@.M                | 32.22  | 9.87   | 3.27    | 0.31 |
| O35691_PININ_MOUSE | Pnn     | Pinin OS=Mus musculus ( R.FANVPDSILLEAK.D                | 7.98   | 10.86  | 0.74    | 1.36 |
| O35691_PININ_MOUSE | Pogz    | Pogo transposable element R.FANVPDSILLEAK.D              | 12.41  | 8.16   | 1.52    | 0.66 |
| O35691_PININ_MOUSE | Pogz    | Pogo transposable element R.FQASQGENLEK#.Y               | 12.18  | 12.69  | 0.96    | 1.04 |
| O35691_PININ_MOUSE | Pogz    | Pogo transposable element R.FANVPDSILLEAK#.D             | 10.09  | 6.05   | 1.67    | 0.60 |
| O35691_PININ_MOUSE | Pogz    | Pogo transposable element R.FQASQGENLEK#.Y               | 19.34  | 5.28   | 3.66    | 0.27 |
| P33609_DPOLA_MOUSE | Pola1   | DNA polymerase alpha cc: K.ATYAGLVLDPK#.V                | 29.90  | 7.43   | 4.03    | 0.25 |
| P33609_DPOLA_MOUSE | Pola1   | DNA polymerase alpha cc: K.DTGNFVIGLQSDQSR@.D            | 20.78  | 2.60   | 7.98    | 0.13 |
| P33609_DPOLA_MOUSE | Pola1   | DNA polymerase alpha cc: R.FYAK#LALVLYTK#.G              | 20.28  | 1.96   | 11.89   | 0.08 |
| P33609_DPOLA_MOUSE | Pola1   | DNA polymerase alpha cc: K.GETFSHVFGTNLSLEFLM*NR@.K      | 13.28  | 3.74   | 3.56    | 0.28 |
| P33609_DPOLA_MOUSE | Pola1   | DNA polymerase alpha cc: K.LDNLAIQDQYLAQIHPVVAR@.I       | 40.69  | 8.38   | 4.86    | 0.21 |
| P33609_DPOLA_MOUSE | Pola1   | DNA polymerase alpha cc: K.LGDEEEDIGDTNKK#.Y             | 22.57  | 7.34   | 3.08    | 0.33 |
| P33609_DPOLA_MOUSE | Pola1   | DNA polymerase alpha cc: R.NEPLTPIPLK#.R                 | 11.55  | 2.08   | 5.56    | 0.18 |
| P33609_DPOLA_MOUSE | Pola1   | DNA polymerase alpha cc: K.NIAEQFVLSW#GSEVNLK#.L         | 4.12   | 0.00   | #DIV/0! | 0.00 |
| P33609_DPOLA_MOUSE | Pola1   | DNA polymerase alpha cc: K.NYAEFIPDPPEK#SEYLEVR@.Y       | 23.34  | 3.79   | 6.17    | 0.16 |
| P33609_DPOLA_MOUSE | Pola1   | DNA polymerase alpha cc: K.QQDLNPDVLVQDIR@.Q             | 23.34  | 3.39   | 3.56    | 0.28 |
| P33609_DPOLA_MOUSE | Pola1   | DNA polymerase alpha cc: K.SYHSELVQQLK#.T                | 19.84  | 4.65   | 4.27    | 0.23 |
| P33609_DPOLA_MOUSE | Pola1   | DNA polymerase alpha cc: R.TLIGFLAK#.V                   | 26.88  | 6.91   | 3.89    | 0.26 |
| P33609_DPOLA_MOUSE | Pola1   | DNA polymerase alpha cc: R.TLYFLPR@.E                    | 17.76  | 3.33   | 5.34    | 0.19 |
| P33609_DPOLA_MOUSE | Pola1   | DNA polymerase alpha cc: K.TWDOQETPVER@.V                | 5.55   | 15.93  | 0.35    | 2.87 |
| P33609_DPOLA_MOUSE | Pola1   | DNA polymerase alpha cc: K.VEIAATER@.T                   | 24.25  | 15.49  | 1.57    | 0.64 |
| P33609_DPOLA_MOUSE | Pola1   | DNA polymerase alpha cc: K.YAALVPEE#DGNITK#.Q            | 30.51  | 8.55   | 3.57    | 0.28 |
| P33609_DPOLA_MOUSE | Pola1   | DNA polymerase alpha cc: R.YSAEVPQLPQNLK#.G              | 27.45  | 7.20   | 3.81    | 0.26 |
| P33611_DPOA2_MOUSE | Pola2   | DNA polymerase alpha su: K.AM*FQQLM*GVR@.E               | 8.44   | 2.35   | 3.59    | 0.28 |
| P33611_DPOA2_MOUSE | Pola2   | DNA polymerase alpha su: R.DVHHEPVPYPPPTFSELSR@.E        | 11.72  | 2.43   | 4.83    | 0.21 |
| P33611_DPOA2_MOUSE | Pola2   | DNA polymerase alpha su: K.LTSPDFVFK#.Q                  | 11.45  | 11.44  | 1.00    | 1.00 |
| P33611_DPOA2_MOUSE | Pola2   | DNA polymerase alpha su: R.GLTSVAQVVR@.J                 | 15.80  | 4.09   | 3.87    | 0.26 |
| P33611_DPOA2_MOUSE | Pola2   | DNA polymerase alpha su: R.QLLSPSPSPATPSQK#.Y            | 9.26   | 4.68   | 1.98    | 0.51 |
| P33611_DPOA2_MOUSE | Pola2   | DNA polymerase alpha su: R.SSGSHLVFVPSLR@.D              | 9.68   | 7.90   | 3.36    | 0.30 |
| P33611_DPOA2_MOUSE | Pola2   | DNA polymerase alpha su: K.SVILEGQDQHSYGAQIPVLDSELK#.E   | 18.84  | 5.01   | 3.76    | 0.27 |
| P33611_DPOA2_MOUSE | Pola2   | DNA polymerase alpha su: R.VSSTPETLTK#.R                 | 49.68  | 11.27  | 4.41    | 0.23 |
| P33611_DPOA2_MOUSE | Pola2   | DNA polymerase alpha su: K.VVGDPEPLTGSYK#.A              | 26.33  | 6.31   | 4.17    | 0.24 |
| P33611_DPOA2_MOUSE | Pola2   | DNA polymerase alpha su: K.VVGDPEPLTGSYK#.A              | 6.60   | 1.32   | 5.01    | 0.20 |
| P52431_DPOD1_MOUSE | Pold1   | DNA polymerase delta ca: R.VTGVPLGYLLTR@.G               | 11.97  | 9.76   | 1.23    | 0.82 |
| P52431_DPOD1_MOUSE | Pold1   | DNA polymerase delta ca: R.IDISQLVTK#.E                  | 23.04  | 12.96  | 1.78    | 0.56 |
| P52431_DPOD1_MOUSE | Pold1   | DNA polymerase delta ca: R.IFEPILGEGR@.A                 | 10.17  | 4.31   | 2.36    | 0.42 |
| P52431_DPOD1_MOUSE | Pold1   | DNA polymerase delta ca: K.TPTGDEFVK#.S                  | 12.43  | 2.48   | 5.01    | 0.20 |
| Q8B81_PDI3_MOUSE   | Poldip3 | Polymerase delta-interac: K.IGLSDAR@.L                   | 62.23  | 19.88  | 3.13    | 0.32 |
| Q8B81_PDI3_MOUSE   | Poldip3 | Polymerase delta-interac: K.HDDAITAYK#.K                 | 15.20  | 6.79   | 2.24    | 0.45 |
| Q8B81_PDI3_MOUSE   | Poldip3 | Polymerase delta-interac: R.LVHPGVAE#VVFVK#.K            | 32.24  | 14.27  | 2.26    | 0.44 |
| Q8B81_PDI3_MOUSE   | Poldip3 | Polymerase delta-interac: K.QNLYDDED#DIVVPVPPK#.Q        | 3.41   | 2.27   | 1.50    | 0.66 |
| Q8B81_PDI3_MOUSE   | Poldip3 | Polymerase delta-interac: R.R@GNP#ASSNPPAEVDPD#VLR@.A    | 34.02  | 11.31  | 2.92    | 0.34 |
| Q8B81_PDI3_MOUSE   | Poldip3 | Polymerase delta-interac: R.R@SPAFTSPPIGTVPALK#.L        | 22.73  | 8.94   | 2.54    | 0.39 |
| Q8B81_PDI3_MOUSE   | Poldip3 | Polymerase delta-interac: K.SSGASVTQPTEFK#.I             | 35.02  | 14.70  | 2.38    | 0.42 |
| Q8B81_PDI3_MOUSE   | Poldip3 | Polymerase delta-interac: K.TIQVQK#.A                    | 50.92  | 17.81  | 2.86    | 0.35 |
| Q8B81_PDI3_MOUSE   | Poldip3 | Polymerase delta-interac: R.VGIGHSLVNPQPAR@.T            | 81.65  | 25.57  | 3.19    | 0.31 |
| Q8B81_PDI3_MOUSE   | Poldip3 | Polymerase delta-interac: K.VVQNDAYTAPLV#SSVR@.T         | 22.17  | 9.81   | 2.26    | 0.44 |
| Q91KP7_DPOE3_MOUSE | Pole3   | DNA polymerase epsilon: K.EALPDG#VNSK#.E                 | 38.32  | 18.28  | 2.10    | 0.48 |
| Q91KP7_DPOE3_MOUSE | Pole3   | DNA polymerase epsilon: K.TLNASD#VLSAM*EEM*EFQR@.F       | 3.28   | 1.82   | 1.80    | 0.56 |
| O35134_RPA1_MOUSE  | Polr1a  | DNA-directed RNA polym: R.TALSDVAAQR@.E                  | 7.37   | 2.97   | 2.49    | 0.40 |
| O35134_RPA1_MOUSE  | Polr1a  | DNA-directed RNA polym: R.VLEVGALQAV#ELER@.I             | 6.05   | 3.02   | 2.01    | 0.50 |
| P52432_RPAC1_MOUSE | Polr1c  | DNA-directed RNA polym: R.ILLAEVPTM*AVEK#.V              | 17.03  | 4.93   | 3.45    | 0.29 |
| P52432_RPAC1_MOUSE | Polr1c  | DNA-directed RNA polym: R.LGLIPILADPR@.L                 | 45.39  | 14.29  | 3.18    | 0.31 |
| P52432_RPAC1_MOUSE | Polr1c  | DNA-directed RNA polym: R.NQGEETG#IDTLQFR@.L             | 22.85  | 3.11   | 7.35    | 0.14 |
| P52432_RPAC1_MOUSE | Polr1c  | DNA-directed RNA polym: R.VVLEGFEGVR@.N                  | 26.26  | 38.64  | 0.68    | 1.47 |
| P97304_RPAC2_MOUSE | Polr1d  | DNA-directed RNA polym: K.TALEM*VQAAGTDR@.Q              | 2.82   | 1.32   | 2.13    | 0.47 |
| P08775_RPB1_MOUSE  | Polr2a  | DNA-directed RNA polym: R.AEIQLAM*VPR.M                  | 15.73  | 20.04  | 0.78    | 1.27 |
| P08775_RPB1_MOUSE  | Polr2a  | DNA-directed RNA polym: K.AK#QD#VIEK#.A                  | 8.03   | 15.77  | 0.51    | 1.96 |

|                     |        |                                                            |        |       |      |      |
|---------------------|--------|------------------------------------------------------------|--------|-------|------|------|
| P08775_RPB1_MOUSE   | Po1r2a | DNA-directed RNA polym K.ALQEWILETDGVSML*R.V               | 8.60   | 10.61 | 0.81 | 1.23 |
| P08775_RPB1_MOUSE   | Po1r2a | DNA-directed RNA polym R.EGLIDTAVK.T                       | 92.24  | 21.26 | 4.34 | 0.23 |
| P08775_RPB1_MOUSE   | Po1r2a | DNA-directed RNA polym K.FGVGEQPEGDEDLTK#E                 | 7.36   | 11.01 | 0.67 | 1.50 |
| P08775_RPB1_MOUSE   | Po1r2a | DNA-directed RNA polym K.IIITEDGEEK.A                      | 27.42  | 32.51 | 0.84 | 1.19 |
| P08775_RPB1_MOUSE   | Po1r2a | DNA-directed RNA polym K.INISQVIAVVGQNVQVEGK#R             | 43.22  | 51.83 | 0.83 | 1.20 |
| P08775_RPB1_MOUSE   | Po1r2a | DNA-directed RNA polym K.INISQVIAVVGQNVQVEGK.R             | 9.09   | 12.13 | 0.75 | 1.33 |
| P08775_RPB1_MOUSE   | Po1r2a | DNA-directed RNA polym R.K.LTMM*EQJAEK.I                   | 7.87   | 9.98  | 0.79 | 1.27 |
| P08775_RPB1_MOUSE   | Po1r2a | DNA-directed RNA polym K.LLVDSNPK.I                        | 16.88  | 18.81 | 0.90 | 1.11 |
| P08775_RPB1_MOUSE   | Po1r2a | DNA-directed RNA polym R.NSINQVQLR@.Y                      | 20.87  | 24.61 | 0.85 | 1.18 |
| P08775_RPB1_MOUSE   | Po1r2a | DNA-directed RNA polym R.QTFENQVNR.I                       | 27.42  | 43.04 | 0.64 | 1.57 |
| P08775_RPB1_MOUSE   | Po1r2a | DNA-directed RNA polym K.RVDFSAR.T                         | 15.89  | 21.53 | 0.74 | 1.35 |
| P08775_RPB1_MOUSE   | Po1r2a | DNA-directed RNA polym R.SIAANM*TFAEIVTPFNDR@.L            | 7.34   | 29.73 | 0.25 | 4.05 |
| P08775_RPB1_MOUSE   | Po1r2a | DNA-directed RNA polym K.SM*ESVM*VK.Y                      | 7.93   | 13.38 | 0.59 | 1.69 |
| P08775_RPB1_MOUSE   | Po1r2a | DNA-directed RNA polym K.TAETGYIQR.R                       | 30.84  | 40.03 | 0.77 | 1.30 |
| P08775_RPB1_MOUSE   | Po1r2a | DNA-directed RNA polym K.TPSLTVLLGQSR.D                    | 17.61  | 22.84 | 0.77 | 1.30 |
| P08775_RPB1_MOUSE   | Po1r2a | DNA-directed RNA polym R.TVITPDPNLSIDQGVVPR.S              | 23.06  | 36.13 | 0.64 | 1.57 |
| P08775_RPB1_MOUSE   | Po1r2a | DNA-directed RNA polym R.YGEDGLAGESVEFNALTKPSNK.A          | 22.92  | 30.74 | 0.75 | 1.34 |
| P08775_RPB1_MOUSE   | Po1r2a | DNA-directed RNA polym K.YSPTSPTSPTSPK.Y                   | 16.91  | 24.23 | 0.70 | 1.43 |
| P08775_RPB1_MOUSE   | Po1r2a | DNA-directed RNA polym K.YSPTSPTSPTPK#Y                    | 9.54   | 12.46 | 0.77 | 1.31 |
| P08775_RPB1_MOUSE   | Po1r2a | DNA-directed RNA polym R.YTPQSPYTPSSPSYSPSSYSPK.Y          | 4.11   | 5.41  | 0.76 | 1.32 |
| Q8CF17_RPB2_MOUSE   | Po1r2b | DNA-directed RNA polym R.AGVSQVLR.L                        | 18.66  | 18.46 | 1.01 | 0.99 |
| Q8CF17_RPB2_MOUSE   | Po1r2b | DNA-directed RNA polym R.DGAGSPM*TM*PNEAR@.L               | 5.79   | 7.84  | 0.74 | 1.35 |
| Q8CF17_RPB2_MOUSE   | Po1r2b | DNA-directed RNA polym R.GPIQLNR.L                         | 19.56  | 17.54 | 1.12 | 0.90 |
| Q8CF17_RPB2_MOUSE   | Po1r2b | DNA-directed RNA polym K.ISNLLSDYGYHLR@.G                  | 22.18  | 18.70 | 1.19 | 0.84 |
| Q8CF17_RPB2_MOUSE   | Po1r2b | DNA-directed RNA polym R.IVATLPYIKR.Q                      | 11.90  | 15.67 | 0.76 | 1.32 |
| Q8CF17_RPB2_MOUSE   | Po1r2b | DNA-directed RNA polym R.LLLAALGR@.R                       | 14.40  | 10.97 | 1.31 | 0.76 |
| Q8CF17_RPB2_MOUSE   | Po1r2b | DNA-directed RNA polym R.NLTYSAFLYVDITK#T                  | 12.41  | 12.08 | 1.03 | 0.97 |
| Q8CF17_RPB2_MOUSE   | Po1r2b | DNA-directed RNA polym K.QEVPVHIFR@.A                      | 23.76  | 21.95 | 1.08 | 0.92 |
| Q8CF17_RPB2_MOUSE   | Po1r2b | DNA-directed RNA polym K.TVTLPENDELESTNR.R                 | 4.65   | 4.75  | 0.98 | 1.02 |
| Q8CF17_RPB2_MOUSE   | Po1r2b | DNA-directed RNA polym K.VSANAKHGEIGDTPFNDAVNVQK#I         | 11.07  | 9.81  | 1.13 | 0.89 |
| Q8CF17_RPB2_MOUSE   | Po1r2b | DNA-directed RNA polym R.VSGDDVIGK#T                       | 10.96  | 10.95 | 1.00 | 1.00 |
| Q8CF17_RPB2_MOUSE   | Po1r2b | DNA-directed RNA polym R.AGVSQVLR.L                        | 28.79  | 20.55 | 1.40 | 0.71 |
| Q8CF17_RPB2_MOUSE   | Po1r2b | DNA-directed RNA polym R.ELPAGINSVIAASYTGNQEDSVIM*NR@.S    | 6.36   | 3.15  | 2.02 | 0.50 |
| Q8CF17_RPB2_MOUSE   | Po1r2b | DNA-directed RNA polym K.GEIGDTPFNDAVNVQK#I                | 10.07  | 7.20  | 1.40 | 0.71 |
| Q8CF17_RPB2_MOUSE   | Po1r2b | DNA-directed RNA polym R.GPIQLNR@.Q                        | 16.43  | 15.39 | 1.07 | 0.94 |
| Q8CF17_RPB2_MOUSE   | Po1r2b | DNA-directed RNA polym K.ISNLLSDYGYHLR@.G                  | 35.33  | 25.69 | 1.38 | 0.73 |
| Q8CF17_RPB2_MOUSE   | Po1r2b | DNA-directed RNA polym R.IVATLPYIKR.Q                      | 13.43  | 13.37 | 1.00 | 1.00 |
| Q8CF17_RPB2_MOUSE   | Po1r2b | DNA-directed RNA polym K.KHGFQDEEVEFK#PTR@.E               | 8.04   | 8.11  | 0.99 | 1.01 |
| Q8CF17_RPB2_MOUSE   | Po1r2b | DNA-directed RNA polym K.LDDDGLIAPGVR@.V                   | 14.18  | 13.81 | 1.03 | 0.97 |
| Q8CF17_RPB2_MOUSE   | Po1r2b | DNA-directed RNA polym R.LLLAALGR@.R                       | 11.84  | 6.21  | 1.91 | 0.52 |
| Q8CF17_RPB2_MOUSE   | Po1r2b | DNA-directed RNA polym R.NLTYSAFLYVDITK#T                  | 18.37  | 18.21 | 1.01 | 0.99 |
| Q8CF17_RPB2_MOUSE   | Po1r2b | DNA-directed RNA polym K.QEVPVHIFR@.A                      | 21.99  | 19.72 | 1.12 | 0.90 |
| Q8CF17_RPB2_MOUSE   | Po1r2b | DNA-directed RNA polym K.TVTLPENDELESTNR@.R                | 10.91  | 10.02 | 1.09 | 0.92 |
| Q8CF17_RPB2_MOUSE   | Po1r2b | DNA-directed RNA polym K.VSANAKHGEIGDTPFNDAVNVQK#I         | 14.61  | 9.89  | 1.48 | 0.68 |
| Q8CF17_RPB2_MOUSE   | Po1r2b | DNA-directed RNA polym K.FIENTDLAVANSIR@.R                 | 40.32  | 31.55 | 1.28 | 0.78 |
| Q99M46_Q99M46_MOUSE | Po1r2c | DNA-directed RNA polym R.ITELTEENVK#F                      | 80.27  | 74.81 | 1.07 | 0.93 |
| Q99M46_Q99M46_MOUSE | Po1r2c | DNA-directed RNA polym R.LGLIPLTSDDIVDK#L                  | 22.71  | 13.49 | 1.68 | 0.59 |
| Q99M46_Q99M46_MOUSE | Po1r2c | DNA-directed RNA polym R.NR@DNPPNDVYQDDILIVK#L             | 25.58  | 19.19 | 1.33 | 0.75 |
| Q99M46_Q99M46_MOUSE | Po1r2c | DNA-directed RNA polym K.SEYSLEDEESQAYDPNGK#PER@.F         | 12.61  | 13.53 | 0.93 | 1.07 |
| Q99M46_Q99M46_MOUSE | Po1r2c | DNA-directed RNA polym K.WNP2AGVAFYDPDNALR.H               | 15.93  | 15.75 | 1.01 | 0.99 |
| Q9D7M8_RPB4_MOUSE   | Po1r2d | DNA-directed RNA polym R.AGDVEEDASQLIFPK#E                 | 62.42  | 60.98 | 1.02 | 0.98 |
| Q9D7M8_RPB4_MOUSE   | Po1r2d | DNA-directed RNA polym K.ALIPSLGR@.F                       | 17.57  | 16.54 | 1.06 | 0.94 |
| Q9D7M8_RPB4_MOUSE   | Po1r2d | DNA-directed RNA polym K.ALIPSLGR@FEDEELQQLDDIQT#R         | 21.57  | 20.41 | 1.06 | 0.95 |
| Q9D7M8_RPB4_MOUSE   | Po1r2d | DNA-directed RNA polym R.FEDELQQLDDIQT#R                   | 13.17  | 7.58  | 1.74 | 0.58 |
| Q9D7M8_RPB4_MOUSE   | Po1r2d | DNA-directed RNA polym R.KHQONESAEDQEQLSEVFM*K#T           | 13.23  | 14.84 | 0.89 | 1.12 |
| Q9D7M8_RPB4_MOUSE   | Po1r2d | DNA-directed RNA polym K.QONESAEDQEQLSEVFM*K#T             | 11.41  | 3.72  | 1.10 | 0.91 |
| Q80UW8_RPAB1_MOUSE  | Po1r2e | DNA-directed RNA polym R.ALIVVQGGM*TPSAK#Q                 | 13.42  | 6.31  | 2.13 | 0.47 |
| Q80UW8_RPAB1_MOUSE  | Po1r2e | DNA-directed RNA polym K.EEVTELLAR@.Y                      | 10.47  | 8.35  | 1.25 | 0.80 |
| Q80UW8_RPAB1_MOUSE  | Po1r2e | DNA-directed RNA polym R.ALIVVQGGM*TPSAK#Q                 | 54.81  | 42.78 | 1.28 | 0.78 |
| Q80UW8_RPAB1_MOUSE  | Po1r2e | DNA-directed RNA polym R.ALIVVQGGM*TPSAK#Q                 | 8.68   | 5.42  | 1.60 | 0.62 |
| Q80UW8_RPAB1_MOUSE  | Po1r2e | DNA-directed RNA polym K.EEVTELLAR@.Y                      | 47.13  | 29.38 | 1.60 | 0.62 |
| Q80UW8_RPAB1_MOUSE  | Po1r2e | DNA-directed RNA polym R.GYLVTDQELDQLTEEFK#A               | 19.70  | 19.68 | 1.00 | 1.00 |
| Q80UW8_RPAB1_MOUSE  | Po1r2e | DNA-directed RNA polym K.IIR@PSETAGR@.Y                    | 18.25  | 13.83 | 1.32 | 0.76 |
| Q80UW8_RPAB1_MOUSE  | Po1r2e | DNA-directed RNA polym K.IIRPSETAGR.Y                      | 126.59 | 86.11 | 1.47 | 0.68 |
| Q80UW8_RPAB1_MOUSE  | Po1r2e | DNA-directed RNA polym R.IQAGDPVAR@.Y                      | 73.28  | 45.27 | 1.62 | 0.62 |
| Q80UW8_RPAB1_MOUSE  | Po1r2e | DNA-directed RNA polym R.M*QEENITR@.A                      | 28.43  | 30.81 | 0.92 | 1.08 |
| Q80UW8_RPAB1_MOUSE  | Po1r2e | DNA-directed RNA polym R.RTDLTVLVAHNDPTDQM*FVFFPEEPK.V     | 22.03  | 16.08 | 1.37 | 0.73 |
| Q80UW8_RPAB1_MOUSE  | Po1r2e | DNA-directed RNA polym R.RTDLTVLVAHNDPTDQM*FVFFPEEPK.V     | 2.35   | 1.89  | 1.24 | 0.81 |
| Q80UW8_RPAB1_MOUSE  | Po1r2e | DNA-directed RNA polym K.AIVFR@PFK#GEVDAVVTQVKN#V          | 7.98   | 8.16  | 0.98 | 1.02 |
| P62488_RPB7_MOUSE   | Po1r2g | DNA-directed RNA polym R.GFVLYPKR.Y                        | 41.39  | 43.01 | 0.96 | 1.04 |
| P62488_RPB7_MOUSE   | Po1r2g | DNA-directed RNA polym K.TM*DEDIVQDDQ#E.L                  | 10.48  | 9.46  | 1.11 | 0.90 |
| P62488_RPB7_MOUSE   | Po1r2g | DNA-directed RNA polym R.YFGPNLLTQV#Q                      | 55.50  | 63.76 | 0.87 | 1.15 |
| P62488_RPB7_MOUSE   | Po1r2g | DNA-directed RNA polym K.TM*DEDIVQDDQ#E.L                  | 4.13   | 3.31  | 1.25 | 0.80 |
| Q923G2_RPAB3_MOUSE  | Po1r2h | DNA-directed RNA polym R.IEGDETSTEAATR@.L                  | 16.22  | 9.40  | 1.73 | 0.58 |
| Q923G2_RPAB3_MOUSE  | Po1r2h | DNA-directed RNA polym R.LSAYSVYGGLLM*R@.L                 | 17.71  | 10.84 | 1.63 | 0.61 |
| Q923G2_RPAB3_MOUSE  | Po1r2h | DNA-directed RNA polym R.LVIASLTVDLDDGEYNPDDR@PSR@.A       | 13.65  | 8.53  | 1.60 | 0.63 |
| Q923G2_RPAB3_MOUSE  | Po1r2h | DNA-directed RNA polym K.VYR@IEGDETSTEAATR@.L              | 30.30  | 15.03 | 2.02 | 0.50 |
| Q923G2_RPAB3_MOUSE  | Po1r2h | DNA-directed RNA polym K.VYR@IEGDETSTEAATR.L               | 2.67   | 1.55  | 1.72 | 0.58 |
| P60898_RPB9_MOUSE   | Po1r2i | DNA-directed RNA polym K.EAVFQSHSAR@.A                     | 4.18   | 3.45  | 1.21 | 0.83 |
| P60898_RPB9_MOUSE   | Po1r2i | DNA-directed RNA polym K.ITHEVDELQIADVSQDTPR@.T            | 67.73  | 54.04 | 1.25 | 0.80 |
| Q6P163_Q6P163_MOUSE | Po1r2j | DNA-directed RNA polym K.SQLLK#DQVLFVAGYK#V                | 61.35  | 37.57 | 1.63 | 0.61 |
| Q6P163_Q6P163_MOUSE | Po1r2j | DNA-directed RNA polym R.VAIKDKQEGIE.-                     | 16.41  | 10.68 | 1.54 | 0.65 |
| Q63871_RPAB4_MOUSE  | Po1r2k | DNA-directed RNA polym R.LVVFADQ@.-                        | 53.62  | 44.06 | 1.22 | 0.82 |
| B2RXC6_B2RXC6_MOUSE | Po1r3a | Polymerase (RNA) III (DN) R.IPAEDVPLLLM*NPESGK#PSDLILTR@.L | 4.37   | 3.18  | 1.37 | 0.73 |
| Q8K205_Q8K205_MOUSE | Pop1   | Blood vessel epicardial sl K.IPILLIQPQ#K.V                 | 9.58   | 6.22  | 1.54 | 0.65 |
| Q8K205_Q8K205_MOUSE | Pop1   | Blood vessel epicardial sl K.IPILLIQPQ#K.V                 | 9.59   | 3.36  | 2.85 | 0.35 |
| P37040_NCPR_MOUSE   | Por    | NADPH--cytochrome P4: R.FAVFGLGNK#T                        | 15.01  | 7.60  | 1.98 | 0.51 |
| P37040_NCPR_MOUSE   | Por    | NADPH--cytochrome P4: R.LEQLGAQR@.J                        | 14.26  | 7.89  | 1.81 | 0.55 |
| P37040_NCPR_MOUSE   | Por    | NADPH--cytochrome P4: R.NIIVFYSQITGAEFANR@.L               | 5.78   | 2.79  | 2.07 | 0.48 |
| P37040_NCPR_MOUSE   | Por    | NADPH--cytochrome P4: K.NPFLAAYTTNR@.K                     | 20.47  | 11.84 | 1.73 | 0.58 |
| P37040_NCPR_MOUSE   | Por    | NADPH--cytochrome P4: R.TNVLVELAQYASEPEQEHLHK#M            | 14.46  | 9.18  | 1.57 | 0.64 |
| P37040_NCPR_MOUSE   | Por    | NADPH--cytochrome P4: K.FAVFGLGNK#T                        | 20.80  | 10.92 | 2.36 | 0.42 |
| P37040_NCPR_MOUSE   | Por    | NADPH--cytochrome P4: R.GM*SDAPEYDLADLSSLEIDK#S            | 4.75   | 2.28  | 2.09 | 0.48 |
| P37040_NCPR_MOUSE   | Por    | NADPH--cytochrome P4: R.LEQLGAQR@.J                        | 13.07  | 10.26 | 2.34 | 0.43 |
| P37040_NCPR_MOUSE   | Por    | NADPH--cytochrome P4: R.LPFKPTTPVIM*VGPQGTGAVPFM*GFIQER.A  | 12.38  | 3.18  | 3.90 | 0.26 |
| P37040_NCPR_MOUSE   | Por    | NADPH--cytochrome P4: K.NPFLAAYTTNR@.K                     | 23.07  | 12.06 | 1.91 | 0.52 |
| P37040_NCPR_MOUSE   | Por    | NADPH--cytochrome P4: R.TNVLVELAQYASEPEQEHLHK#M            | 24.91  | 24.25 | 1.03 | 0.97 |
| Q91YU8_SSF1_MOUSE   | Ppan   | Suppressor of SWI4 1 hor R.GNM*QAQCSAVR@.L                 | 4.21   | 3.85  | 1.09 | 0.91 |
| Q91YU8_SSF1_MOUSE   | Ppan   | Suppressor of SWI4 1 hor R.QAVGEEDDELFTAAK#R               | 8.48   | 2.65  | 3.20 | 0.31 |
| Q91YU8_SSF1_MOUSE   | Ppan   | Suppressor of SWI4 1 hor R.QNQQAENLQR@.K                   | 8.20   | 3.80  | 2.16 | 0.46 |
| Q91YU8_SSF1_MOUSE   | Ppan   | Suppressor of SWI4 1 hor R.QNQQAENLQR@.K                   | 7.77   | 2.44  | 3.18 | 0.31 |
| B2RXW8_B2RXW8_MOUSE | Ppfa1  | Ppfa1 protein OS=Mus r.R.GLASGSAETLPAANR@.V                | 4.69   | 1.65  | 2.85 | 0.35 |
| B2RXW8_B2RXW8_MOUSE | Ppfa1  | Ppfa1 protein OS=Mus r.R.KAETLPEVEAELQAR@.I                | 8.01   | 3.61  | 2.22 | 0.45 |



|                     |         |                                                              |        |        |      |       |
|---------------------|---------|--------------------------------------------------------------|--------|--------|------|-------|
| B2RXW8_B2RXW8_MOUSE | Ppfa1   | Ppfa1 protein OS=Mus r.R.QLNTALPQEFALTK#.E                   | 5.29   | 2.56   | 2.07 | 0.48  |
| B2RXW8_B2RXW8_MOUSE | Ppfa1   | Ppfa1 protein OS=Mus r.R.VTSSM*SPSPM*QPK#.K                  | 3.56   | 1.71   | 2.09 | 0.48  |
| B2RXW8_B2RXW8_MOUSE | Ppfa1   | Ppfa1 protein OS=Mus r.R.EFNNTLGTDR@.R                       | 9.01   | 3.18   | 2.83 | 0.35  |
| B2RXW8_B2RXW8_MOUSE | Ppfa1   | Ppfa1 protein OS=Mus r.R.ESPQVQVSETENSSQDALGLSK#.L           | 6.97   | 1.97   | 3.54 | 0.28  |
| B2RXW8_B2RXW8_MOUSE | Ppfa1   | Ppfa1 protein OS=Mus r.R.ETQETLALQTK#.L                      | 7.80   | 2.39   | 3.26 | 0.31  |
| B2RXW8_B2RXW8_MOUSE | Ppfa1   | Ppfa1 protein OS=Mus r.R.GLASGSAETLPANFR@.V                  | 7.57   | 2.47   | 3.07 | 0.33  |
| B2RXW8_B2RXW8_MOUSE | Ppfa1   | Ppfa1 protein OS=Mus r.R.NSTGSDQDQVSNPSSNSSQDSLHK#.A         | 3.70   | 2.30   | 1.61 | 0.62  |
| B2RXW8_B2RXW8_MOUSE | Ppfa1   | Ppfa1 protein OS=Mus r.R.QLNTALPQEFALTK#.E                   | 6.50   | 1.95   | 3.34 | 0.30  |
| B2RXW8_B2RXW8_MOUSE | Ppfa1   | Ppfa1 protein OS=Mus r.R.VTSSM*SPSPM*QPK#.K                  | 5.36   | 1.49   | 3.60 | 0.28  |
| Q8C8U0_LIPB1_MOUSE  | Ppfbp1  | Liprin-beta-1 OS=Mus ml.R.DAM*ELPDVYLLLTATAK#.V              | 3.70   | 2.36   | 1.57 | 0.28  |
| Q8C8U0_LIPB1_MOUSE  | Ppfbp1  | Liprin-beta-1 OS=Mus ml.R.FRDTEGLIQLIENLDR.L                 | 16.86  | 7.76   | 2.17 | 0.46  |
| Q8C8U0_LIPB1_MOUSE  | Ppfbp1  | Liprin-beta-1 OS=Mus ml.R.LENDK#ESLVLQVSLTDQVEAQGEK#.I       | 5.42   | 2.23   | 2.44 | 0.41  |
| Q8C8U0_LIPB1_MOUSE  | Ppfbp1  | Liprin-beta-1 OS=Mus ml.R.LYEEDDLDR@LEQM*EDSEGTVR@.Q         | 2.85   | 3.06   | 0.93 | 1.07  |
| Q8C8U0_LIPB1_MOUSE  | Ppfbp1  | Liprin-beta-1 OS=Mus ml.R.STSSTPGM*GSPSR@.D                  | 4.02   | 2.62   | 1.53 | 0.65  |
| Q8C8U0_LIPB1_MOUSE  | Ppfbp1  | Liprin-beta-1 OS=Mus ml.R.AILGAAAEVSLSDGVSTSLQK#.S           | 4.07   | 1.87   | 2.17 | 0.46  |
| Q8C8U0_LIPB1_MOUSE  | Ppfbp1  | Liprin-beta-1 OS=Mus ml.R.ALHLVEDLDR@.G                      | 30.83  | 16.12  | 1.91 | 0.52  |
| Q8C8U0_LIPB1_MOUSE  | Ppfbp1  | Liprin-beta-1 OS=Mus ml.R.AVESLMA#ANEEK#.E                   | 12.41  | 8.16   | 1.52 | 0.66  |
| Q8C8U0_LIPB1_MOUSE  | Ppfbp1  | Liprin-beta-1 OS=Mus ml.R.DLQGSNSLDLM*PFAK#.W                | 15.31  | 8.99   | 1.70 | 0.59  |
| Q8C8U0_LIPB1_MOUSE  | Ppfbp1  | Liprin-beta-1 OS=Mus ml.R.FRDTEGLIQLIENLDR.L                 | 22.84  | 11.47  | 1.99 | 0.50  |
| Q8C8U0_LIPB1_MOUSE  | Ppfbp1  | Liprin-beta-1 OS=Mus ml.K.KHLTFSNFGNLR@.K                    | 11.90  | 4.15   | 2.87 | 0.35  |
| Q8C8U0_LIPB1_MOUSE  | Ppfbp1  | Liprin-beta-1 OS=Mus ml.R.LENDK#ESLVLQVSLTDQVEAQGEK#.I       | 13.47  | 4.64   | 2.81 | 0.36  |
| Q8C8U0_LIPB1_MOUSE  | Ppfbp1  | Liprin-beta-1 OS=Mus ml.K.LNATEEM*LQQLLSR.T                  | 15.51  | 9.96   | 1.56 | 0.64  |
| Q8C8U0_LIPB1_MOUSE  | Ppfbp1  | Liprin-beta-1 OS=Mus ml.K.LPTK#ETSFEEDGDR@.A                 | 31.28  | 15.55  | 2.01 | 0.50  |
| Q8C8U0_LIPB1_MOUSE  | Ppfbp1  | Liprin-beta-1 OS=Mus ml.K.LQLALQALGSEETNYGK#.L               | 4.72   | 3.08   | 1.53 | 0.65  |
| Q8C8U0_LIPB1_MOUSE  | Ppfbp1  | Liprin-beta-1 OS=Mus ml.R.LYEEDDLDR@LEQM*EDSEGTVR@.Q         | 9.13   | 5.06   | 1.80 | 0.55  |
| Q8C8U0_LIPB1_MOUSE  | Ppfbp1  | Liprin-beta-1 OS=Mus ml.R.SPSASITEDSNV.-                     | 10.36  | 10.36  | 1.00 | 1.00  |
| Q8C8U0_LIPB1_MOUSE  | Ppfbp1  | Liprin-beta-1 OS=Mus ml.R.STSSTPGM*GSPSR@.D                  | 12.46  | 8.27   | 1.51 | 0.66  |
| Q8C8U0_LIPB1_MOUSE  | Ppfbp1  | Liprin-beta-1 OS=Mus ml.R.SVDLAEYAPNLR@.G                    | 52.02  | 18.66  | 2.84 | 0.35  |
| Q8C8U0_LIPB1_MOUSE  | Ppfbp1  | Liprin-beta-1 OS=Mus ml.R.TSLETQK#HELM*AEISNLK#.L            | 15.56  | 7.41   | 2.10 | 0.48  |
| Q8C8U0_LIPB1_MOUSE  | Ppfbp1  | Liprin-beta-1 OS=Mus ml.K.VPGEHSAVDDNPGTR@.K                 | 10.55  | 5.86   | 1.71 | 0.58  |
| Q8C8U0_LIPB1_MOUSE  | Ppfbp1  | Liprin-beta-1 OS=Mus ml.R.WLLDGLPQYK#.T                      | 16.30  | 7.78   | 2.09 | 0.48  |
| Q8C8U0_LIPB1_MOUSE  | Ppfbp1  | Liprin-beta-1 OS=Mus ml.R.ALHLVEDLDR@.G                      | 28.42  | 7.36   | 3.86 | 0.26  |
| Q8C8U0_LIPB1_MOUSE  | Ppfbp1  | Liprin-beta-1 OS=Mus ml.R.DLQGSNSLDLM*PFAK#.W                | 11.31  | 4.27   | 2.65 | 0.38  |
| Q8C8U0_LIPB1_MOUSE  | Ppfbp1  | Liprin-beta-1 OS=Mus ml.R.FR@DTGLIQLIENLDR@.L                | 30.20  | 12.31  | 2.45 | 0.41  |
| Q8C8U0_LIPB1_MOUSE  | Ppfbp1  | Liprin-beta-1 OS=Mus ml.R.LENDK#ESLVLQVSLTDQVEAQGEK#.I       | 16.50  | 5.56   | 2.97 | 0.34  |
| Q8C8U0_LIPB1_MOUSE  | Ppfbp1  | Liprin-beta-1 OS=Mus ml.K.LNATEEM*LQQLLSR@.T                 | 10.57  | 3.30   | 3.21 | 0.31  |
| Q8C8U0_LIPB1_MOUSE  | Ppfbp1  | Liprin-beta-1 OS=Mus ml.R.LYEEDDLDR@LEQM*EDSEGTVR@.Q         | 7.08   | 3.10   | 2.28 | 0.44  |
| Q8C8U0_LIPB1_MOUSE  | Ppfbp1  | Liprin-beta-1 OS=Mus ml.R.SPSASITEDSNV.-                     | 8.11   | 8.11   | 1.00 | 1.00  |
| Q8C8U0_LIPB1_MOUSE  | Ppfbp1  | Liprin-beta-1 OS=Mus ml.R.STSSTPGM*GSPSR@.D                  | 14.58  | 3.08   | 4.74 | 0.21  |
| Q8C8U0_LIPB1_MOUSE  | Ppfbp1  | Liprin-beta-1 OS=Mus ml.R.TSLETQK#HELM*AEISNLK#.L            | 12.85  | 2.00   | 6.44 | 0.16  |
| Q8C8U0_LIPB1_MOUSE  | Ppfbp1  | Liprin-beta-1 OS=Mus ml.K.VPGEHSAVDDNPGTR@.K                 | 8.22   | 3.85   | 2.14 | 0.47  |
| Q8C8U0_LIPB1_MOUSE  | Ppfbp1  | Liprin-beta-1 OS=Mus ml.R.WLLDGLPQYK#.T                      | 17.75  | 7.05   | 2.52 | 0.40  |
| G3X959_G3X959_MOUSE | Pphn1   | Periphilin 1, isoform CR#R.DASPSASSAVASSK#.A                 | 17.84  | 13.06  | 1.37 | 0.73  |
| G3X959_G3X959_MOUSE | Pphn1   | Periphilin 1, isoform CR#R.FITEYDNASQDGFDF.-                 | 25.27  | 25.27  | 1.00 | 1.00  |
| G3X959_G3X959_MOUSE | Pphn1   | Periphilin 1, isoform CR#R.M*LEIK#HPLEK#.S                   | 46.21  | 26.21  | 1.78 | 0.56  |
| G3X959_G3X959_MOUSE | Pphn1   | Periphilin 1, isoform CR#R.RPPLDK.R                          | 24.58  | 27.46  | 0.90 | 1.12  |
| G3X959_G3X959_MOUSE | Pphn1   | Periphilin 1, isoform CR#R.SVQFALR@.Q                        | 37.00  | 27.74  | 1.33 | 0.75  |
| P24369_PPIB_MOUSE   | Ppib    | Peptidyl-prolyl cis-trans i.R.TVDNFVALATGEK#.G               | 29.29  | 25.08  | 0.81 | 1.24  |
| P24369_PPIB_MOUSE   | Ppib    | Peptidyl-prolyl cis-trans i.R.VIKDFM*IQGGDFTR.G              | 14.75  | 16.90  | 0.87 | 1.15  |
| P24369_PPIB_MOUSE   | Ppib    | Peptidyl-prolyl cis-trans i.K.VLEGM*DVVR.K                   | 37.03  | 33.73  | 1.10 | 0.91  |
| P24369_PPIB_MOUSE   | Ppib    | Peptidyl-prolyl cis-trans i.K.VYDFLQIGDESVGR@.V              | 9.91   | 10.37  | 0.96 | 1.05  |
| P30412_PPIC_MOUSE   | Ppic    | Peptidyl-prolyl cis-trans i.R.IVIGLFGVNPVK#.T                | 9.68   | 8.92   | 1.08 | 0.92  |
| P30412_PPIC_MOUSE   | Ppic    | Peptidyl-prolyl cis-trans i.K.TVENFVALATGEK#.G               | 10.92  | 10.56  | 1.03 | 0.97  |
| Q9QZH3_PPIE_MOUSE   | Ppie    | Peptidyl-prolyl cis-trans i.K.HVVFGEVTEGLDVLDR@.Q            | 13.36  | 5.98   | 2.23 | 0.45  |
| Q9QZH3_PPIE_MOUSE   | Ppie    | Peptidyl-prolyl cis-trans i.K.HFDDENFLK#.H                   | 31.83  | 20.56  | 1.55 | 0.65  |
| Q9QZH3_PPIE_MOUSE   | Ppie    | Peptidyl-prolyl cis-trans i.R.SDVVPMTAENFR@.C                | 8.37   | 5.68   | 1.47 | 0.68  |
| Q9QZH3_PPIE_MOUSE   | Ppie    | Peptidyl-prolyl cis-trans i.R.SNPQVYM*DIK#.I                 | 10.36  | 105.62 | 0.10 | 10.19 |
| Q9QZH3_PPIE_MOUSE   | Ppie    | Peptidyl-prolyl cis-trans i.K.LEENK#EEGPEPPK#AEAQEGEPATAK#.K | 51.54  | 41.71  | 1.24 | 0.81  |
| Q9QZH3_PPIE_MOUSE   | Ppie    | Peptidyl-prolyl cis-trans i.R.VYVGGVLAEEVDK#.V               | 21.21  | 11.54  | 1.84 | 0.54  |
| A2AR02_PPIG_MOUSE   | Ppig    | Peptidyl-prolyl cis-trans i.R.GGESYIGGFEEDESFAVK#.H          | 31.47  | 11.00  | 2.86 | 0.35  |
| Q9D868_PPIH_MOUSE   | Ppjh    | Peptidyl-prolyl cis-trans i.R.GPFADENFK#.L                   | 13.26  | 15.44  | 0.86 | 1.16  |
| Q9D868_PPIH_MOUSE   | Ppjh    | Peptidyl-prolyl cis-trans i.K.IIDGLLVM*#R@.K                 | 22.39  | 15.19  | 1.47 | 0.68  |
| Q9D868_PPIH_MOUSE   | Ppjh    | Peptidyl-prolyl cis-trans i.R.M*KHLEFADVPK#.T                | 13.42  | 10.81  | 1.24 | 0.81  |
| Q9D0W5_PPII1_MOUSE  | Ppii1   | Peptidyl-prolyl cis-trans i.K.DFM*IQGGDPTGTGR@.G             | 11.99  | 8.52   | 1.41 | 0.71  |
| Q9D0W5_PPII1_MOUSE  | Ppii1   | Peptidyl-prolyl cis-trans i.R.GGASVYK#.Q                     | 112.51 | 63.01  | 1.79 | 0.56  |
| Q9D0W5_PPII1_MOUSE  | Ppii1   | Peptidyl-prolyl cis-trans i.R.IIKDFM*IQGGDPTGTGR.G           | 20.55  | 15.54  | 1.32 | 0.76  |
| Q9D787_PPII2_MOUSE  | Ppii2   | Peptidyl-prolyl cis-trans i.R.DLLTDFPSR@.Q                   | 13.62  | 7.73   | 1.76 | 0.57  |
| Q9D787_PPII2_MOUSE  | Ppii2   | Peptidyl-prolyl cis-trans i.R.QDIITLQDPTNLDK#FNVSFFHVK#.N    | 11.80  | 5.23   | 2.26 | 0.44  |
| Q9D787_PPII2_MOUSE  | Ppii2   | Peptidyl-prolyl cis-trans i.R.SAEEPSTSTATPTAK#.K             | 4.90   | 3.37   | 1.46 | 0.69  |
| Q9D787_PPII2_MOUSE  | Ppii2   | Peptidyl-prolyl cis-trans i.K.SQFFITFR@.S                    | 9.32   | 5.31   | 1.75 | 0.57  |
| Q9D787_PPII2_MOUSE  | Ppii2   | Peptidyl-prolyl cis-trans i.R.TTGNNVYVEAQLNIK#.A             | 5.29   | 2.78   | 1.90 | 0.53  |
| Q9D787_PPII2_MOUSE  | Ppii2   | Peptidyl-prolyl cis-trans i.R.DLLTDFPSR@.Q                   | 13.29  | 7.78   | 1.71 | 0.58  |
| Q9D787_PPII2_MOUSE  | Ppii2   | Peptidyl-prolyl cis-trans i.R.ETLQELYK#.E                    | 13.33  | 5.60   | 2.38 | 0.42  |
| Q9D787_PPII2_MOUSE  | Ppii2   | Peptidyl-prolyl cis-trans i.R.GVLSM*ANSQPNTNK#.S             | 5.95   | 3.23   | 1.84 | 0.54  |
| Q9D787_PPII2_MOUSE  | Ppii2   | Peptidyl-prolyl cis-trans i.K.M*SQPQGNQGPQTYR@.Q             | 5.73   | 2.48   | 2.31 | 0.43  |
| Q9D787_PPII2_MOUSE  | Ppii2   | Peptidyl-prolyl cis-trans i.R.QDIITLQDPTNLDK#FNVSFFHVK#.N    | 5.16   | 3.47   | 1.49 | 0.67  |
| Q9D787_PPII2_MOUSE  | Ppii2   | Peptidyl-prolyl cis-trans i.R.QDIITLQDPTNLDK#FNVSFFHVK#.N    | 17.95  | 7.94   | 2.26 | 0.44  |
| Q9D787_PPII2_MOUSE  | Ppii2   | Peptidyl-prolyl cis-trans i.R.SAEEPSTSTATPTAK#.K             | 10.72  | 6.00   | 1.79 | 0.56  |
| Q9D787_PPII2_MOUSE  | Ppii2   | Peptidyl-prolyl cis-trans i.K.VSASFSTAM*VPETHEAAVIDEVLDR@.Y  | 8.99   | 4.06   | 2.22 | 0.45  |
| Q9D787_PPII2_MOUSE  | Ppii2   | Peptidyl-prolyl cis-trans i.R.VVGGFDLTAM*ENVEDPK#.T          | 5.20   | 3.11   | 1.67 | 0.60  |
| Q9D6L8_PPII3_MOUSE  | Ppii3   | Peptidyl-prolyl cis-trans i.K.GFM*VQTGDPTGTGR@.G             | 7.36   | 3.90   | 1.89 | 0.53  |
| Q9CXG3_PPII4_MOUSE  | Ppii4   | Peptidyl-prolyl cis-trans i.R.IGADEIIDEFK#GR@.S              | 16.48  | 10.39  | 1.59 | 0.63  |
| Q9CXG3_PPII4_MOUSE  | Ppii4   | Peptidyl-prolyl cis-trans i.K.LNPVTTDEDELEIFSR@.F            | 7.17   | 4.27   | 1.68 | 0.60  |
| Q9CXG3_PPII4_MOUSE  | Ppii4   | Peptidyl-prolyl cis-trans i.K.YDLILDEQGEDSK#.S               | 6.42   | 2.33   | 2.75 | 0.36  |
| P62137_PP1A_MOUSE   | Ppp1ca  | Serine/threonine-protein R.AHQVVEDGYEYFAK#.R                 | 48.57  | 34.84  | 1.39 | 0.72  |
| P62137_PP1A_MOUSE   | Ppp1ca  | Serine/threonine-protein K.IRYPENFLLR.G                      | 22.79  | 14.37  | 1.59 | 0.63  |
| P62137_PP1A_MOUSE   | Ppp1ca  | Serine/threonine-protein R.LFEYGGFPFSPNSVFLGDYVDR@.G         | 3.93   | 3.71   | 1.06 | 0.94  |
| P62137_PP1A_MOUSE   | Ppp1ca  | Serine/threonine-protein R.LLEVQGSR@PGK#.N                   | 9.06   | 5.18   | 1.75 | 0.57  |
| P62137_PP1A_MOUSE   | Ppp1ca  | Serine/threonine-protein K.LNLDLSIIGR@.L                     | 19.71  | 10.57  | 1.87 | 0.54  |
| P62137_PP1A_MOUSE   | Ppp1ca  | Serine/threonine-protein R.YPENFLLR@.G                       | 12.61  | 11.30  | 1.12 | 0.90  |
| P62137_PP1A_MOUSE   | Ppp1ca  | Serine/threonine-protein R.AHQVVEDGYEYFAK#.R                 | 17.60  | 6.36   | 2.77 | 0.36  |
| P62137_PP1A_MOUSE   | Ppp1ca  | Serine/threonine-protein R.AHQVVEDGYEYFAK#.R                 | 35.83  | 4.83   | 7.42 | 0.13  |
| P62137_PP1A_MOUSE   | Ppp1ca  | Serine/threonine-protein R.YPENFLLR@.G                       | 8.70   | 3.08   | 2.82 | 0.35  |
| P62141_PP1B_MOUSE   | Ppp1cb  | Serine/threonine-protein K.IK#YPENFLLR@.G                    | 49.57  | 31.08  | 1.60 | 0.63  |
| P62141_PP1B_MOUSE   | Ppp1cb  | Serine/threonine-protein K.IVQM*TEAIVR@.G                    | 36.91  | 27.47  | 1.34 | 0.74  |
| P62141_PP1B_MOUSE   | Ppp1cb  | Serine/threonine-protein K.IK#YPENFLLR@.G                    | 19.28  | 5.71   | 3.37 | 0.30  |
| P62141_PP1B_MOUSE   | Ppp1cb  | Serine/threonine-protein K.IK#YPENFLLR@.G                    | 20.36  | 4.33   | 4.70 | 0.21  |
| P63087_PP1G_MOUSE   | Ppp1cc  | Serine/threonine-protein K.NVQLQENEIR@.G                     | 15.97  | 8.10   | 1.97 | 0.51  |
| P63087_PP1G_MOUSE   | Ppp1cc  | Serine/threonine-protein K.NVQLQENEIR@.G                     | 10.19  | 3.87   | 2.63 | 0.38  |
| P63087_PP1G_MOUSE   | Ppp1cc  | Serine/threonine-protein K.NVQLQENEIR@.G                     | 11.58  | 2.94   | 3.94 | 0.25  |
| Q8W00_PP1RA_MOUSE   | Ppp1r10 | Serine/threonine-protein R.QSATAAPQDAAPAEK#.K                | 2.20   | 1.62   | 1.36 | 0.74  |
| Q8W00_PP1RA_MOUSE   | Ppp1r10 | Serine/threonine-protein R.APEVLVK#.F                        | 53.44  | 11.99  | 4.46 | 0.22  |
| Q8W00_PP1RA_MOUSE   | Ppp1r10 | Serine/threonine-protein K.ESPHEDDPEPEYPIPK#.L               | 8.80   | 2.86   | 3.08 | 0.32  |

|                     |          |                                                            |        |       |      |      |
|---------------------|----------|------------------------------------------------------------|--------|-------|------|------|
| Q80W00_PP1RA_MOUSE  | Ppp1r10  | Serine/threonine-protein R.GGDPFFWDGPGDPM*R@.G             | 7.64   | 5.02  | 1.52 | 0.66 |
| Q80W00_PP1RA_MOUSE  | Ppp1r10  | Serine/threonine-protein K.GILQELFLNK#.E                   | 54.31  | 15.43 | 3.52 | 0.28 |
| Q80W00_PP1RA_MOUSE  | Ppp1r10  | Serine/threonine-protein K.GLDSFLTR@.D                     | 46.75  | 12.74 | 3.67 | 0.27 |
| Q80W00_PP1RA_MOUSE  | Ppp1r10  | Serine/threonine-protein K.IIIPQPM*EGLGFLDALNSAPVPGIK#.I   | 34.40  | 9.75  | 3.53 | 0.28 |
| Q80W00_PP1RA_MOUSE  | Ppp1r10  | Serine/threonine-protein K.LASVLSDWVM*AVIR@.S              | 13.03  | 4.34  | 3.00 | 0.33 |
| Q80W00_PP1RA_MOUSE  | Ppp1r10  | Serine/threonine-protein K.LNNNWLYTSK#.T                   | 25.73  | 6.60  | 3.90 | 0.26 |
| Q80W00_PP1RA_MOUSE  | Ppp1r10  | Serine/threonine-protein K.LPPVLANLML*GSM*GAGK#.S          | 12.69  | 5.15  | 2.47 | 0.41 |
| Q80W00_PP1RA_MOUSE  | Ppp1r10  | Serine/threonine-protein R.QSATAAPGDAAPPAAEK#.K            | 11.24  | 3.38  | 3.32 | 0.30 |
| Q80W00_PP1RA_MOUSE  | Ppp1r10  | Serine/threonine-protein R.STGLELDTPSLVPVK#.K              | 7.36   | 3.24  | 2.27 | 0.44 |
| Q80W00_PP1RA_MOUSE  | Ppp1r10  | Serine/threonine-protein R.STGLELDTPSLVPVK#.N              | 67.99  | 19.49 | 3.49 | 0.29 |
| Q80W00_PP1RA_MOUSE  | Ppp1r10  | Serine/threonine-protein R.APEVLVK#.F                      | 6.93   | 7.18  | 0.97 | 1.04 |
| Q80W00_PP1RA_MOUSE  | Ppp1r10  | Serine/threonine-protein K.IIIPQPM*EGLGFLDALNSAPVPGIK#.I   | 8.02   | 1.80  | 4.46 | 0.22 |
| Q80W00_PP1RA_MOUSE  | Ppp1r10  | Serine/threonine-protein R.STGLELDTPSLVPVK#.K.N            | 16.92  | 3.02  | 5.60 | 0.18 |
| Q9DBR7_MYPT1_MOUSE  | Ppp1r12a | Protein phosphatase 1 re R.SASYSYLEDLR@.K                  | 18.86  | 22.21 | 0.85 | 1.18 |
| Q9DBR7_MYPT1_MOUSE  | Ppp1r12a | Protein phosphatase 1 re R.TYDETYR@.Y                      | 8.85   | 4.90  | 1.81 | 0.55 |
| Q9DBR7_MYPT1_MOUSE  | Ppp1r12a | Protein phosphatase 1 re K.AQLHDTNM*ELTDLK#.L              | 9.36   | 3.33  | 2.81 | 0.36 |
| Q9DBR7_MYPT1_MOUSE  | Ppp1r12a | Protein phosphatase 1 re K.ETLIEPEK#.N                     | 12.70  | 6.93  | 1.83 | 0.55 |
| Q9DBR7_MYPT1_MOUSE  | Ppp1r12a | Protein phosphatase 1 re R.ETQDTSVSR@.Y                    | 24.56  | 12.11 | 2.03 | 0.49 |
| Q9DBR7_MYPT1_MOUSE  | Ppp1r12a | Protein phosphatase 1 re K.KHFPISTTK#.I                    | 34.92  | 16.94 | 2.06 | 0.49 |
| Q9DBR7_MYPT1_MOUSE  | Ppp1r12a | Protein phosphatase 1 re K.KHPLIESTANM*ENNQPQK#.A          | 6.69   | 2.63  | 2.54 | 0.39 |
| Q9DBR7_MYPT1_MOUSE  | Ppp1r12a | Protein phosphatase 1 re K.KFTGSGALAEIASASK#.E             | 16.75  | 10.40 | 1.61 | 0.62 |
| Q9DBR7_MYPT1_MOUSE  | Ppp1r12a | Protein phosphatase 1 re R.LAVVTPTPR@.R                    | 145.76 | 67.91 | 2.15 | 0.47 |
| Q9DBR7_MYPT1_MOUSE  | Ppp1r12a | Protein phosphatase 1 re R.LEK#DDSTDFKHK#.L                | 72.42  | 25.00 | 2.90 | 0.35 |
| Q9DBR7_MYPT1_MOUSE  | Ppp1r12a | Protein phosphatase 1 re R.LK#DENAGLIR@.V                  | 14.95  | 7.36  | 2.03 | 0.49 |
| Q9DBR7_MYPT1_MOUSE  | Ppp1r12a | Protein phosphatase 1 re R.LSSSDLNK#.E                     | 28.82  | 14.75 | 1.95 | 0.51 |
| Q9DBR7_MYPT1_MOUSE  | Ppp1r12a | Protein phosphatase 1 re R.QGVDI EAAR@.K                   | 64.00  | 20.63 | 3.10 | 0.32 |
| Q9DBR7_MYPT1_MOUSE  | Ppp1r12a | Protein phosphatase 1 re R.RLASTSDIEEKENR.E                | 75.29  | 34.18 | 2.20 | 0.45 |
| Q9DBR7_MYPT1_MOUSE  | Ppp1r12a | Protein phosphatase 1 re R.R@LASTSDIEEK#ENR@.E             | 5.11   | 2.66  | 1.92 | 0.52 |
| Q9DBR7_MYPT1_MOUSE  | Ppp1r12a | Protein phosphatase 1 re R.SASYSYLEDLR@.K                  | 130.43 | 64.81 | 2.01 | 0.50 |
| Q9DBR7_MYPT1_MOUSE  | Ppp1r12a | Protein phosphatase 1 re K.SGGTALHVA AAAK#.G               | 42.10  | 17.00 | 2.48 | 0.40 |
| Q9DBR7_MYPT1_MOUSE  | Ppp1r12a | Protein phosphatase 1 re K.SPLIESTANM*ENNQPQK#.A           | 25.08  | 10.74 | 2.34 | 0.43 |
| Q9DBR7_MYPT1_MOUSE  | Ppp1r12a | Protein phosphatase 1 re K.SPLIESTANM*ENNQPQK#.A           | 14.78  | 6.27  | 2.36 | 0.42 |
| Q9DBR7_MYPT1_MOUSE  | Ppp1r12a | Protein phosphatase 1 re K.SPLIESTANM*ENNQPQK#.A           | 3.97   | 1.16  | 3.41 | 0.29 |
| Q9DBR7_MYPT1_MOUSE  | Ppp1r12a | Protein phosphatase 1 re R.SOLEM*EKHR@.E                   | 16.93  | 12.39 | 1.37 | 0.73 |
| Q9DBR7_MYPT1_MOUSE  | Ppp1r12a | Protein phosphatase 1 re R.STGVSVFTQSDENEQER@.Q            | 9.72   | 4.07  | 2.39 | 0.42 |
| Q9DBR7_MYPT1_MOUSE  | Ppp1r12a | Protein phosphatase 1 re R.SYLTTPVPR@DESESQR@K#.A          | 23.09  | 8.50  | 2.72 | 0.37 |
| Q9DBR7_MYPT1_MOUSE  | Ppp1r12a | Protein phosphatase 1 re K.TGSGALAEIASASK#.E               | 60.97  | 27.60 | 2.21 | 0.45 |
| Q9DBR7_MYPT1_MOUSE  | Ppp1r12a | Protein phosphatase 1 re K.TPPGSSSAGTQBSSTSNR@.L           | 20.36  | 11.02 | 1.85 | 0.54 |
| Q9DBR7_MYPT1_MOUSE  | Ppp1r12a | Protein phosphatase 1 re R.TYDETYR@.Y                      | 80.36  | 37.90 | 2.12 | 0.47 |
| Q9DBR7_MYPT1_MOUSE  | Ppp1r12a | Protein phosphatase 1 re R.WIGSETDLEPPVVK#.R               | 17.41  | 6.62  | 2.63 | 0.38 |
| Q9DBR7_MYPT1_MOUSE  | Ppp1r12a | Protein phosphatase 1 re R.LAVVTPTPR@.R                    | 24.98  | 9.98  | 2.50 | 0.40 |
| Q9DBR7_MYPT1_MOUSE  | Ppp1r12a | Protein phosphatase 1 re R.SASYSYLEDLR@.K                  | 9.69   | 14.84 | 0.65 | 1.53 |
| Q9DBR7_MYPT1_MOUSE  | Ppp1r12a | Protein phosphatase 1 re K.TGSGALAEIASASK#.E               | 14.15  | 4.68  | 3.02 | 0.33 |
| Q8BG95_MYPT2_MOUSE  | Ppp1r12b | Protein phosphatase 1 re R.LESGGNTPTSSDSYSDR@.A            | 4.68   | 1.39  | 3.38 | 0.30 |
| Q6R891_NE82_MOUSE   | Ppp1r9b  | Neurabin-2 OS=Mus mus K.AQLEQSV EENK#ER@.M                 | 12.09  | 6.42  | 1.88 | 0.53 |
| Q6R891_NE82_MOUSE   | Ppp1r9b  | Neurabin-2 OS=Mus mus K.DSEGLGISIIMG*GAGADM*GLEK#.L        | 4.11   | 2.84  | 1.45 | 0.69 |
| Q6R891_NE82_MOUSE   | Ppp1r9b  | Neurabin-2 OS=Mus mus R.ER@PGEQSEVAQLIQTLEQER@.W           | 49.52  | 25.75 | 1.92 | 0.52 |
| Q6R891_NE82_MOUSE   | Ppp1r9b  | Neurabin-2 OS=Mus mus R.ETQAQYQALER@.K                     | 28.21  | 12.63 | 2.22 | 0.45 |
| Q6R891_NE82_MOUSE   | Ppp1r9b  | Neurabin-2 OS=Mus mus R.FDSK#PASAQAPP PPHPSR@.L            | 17.91  | 17.26 | 1.04 | 0.96 |
| Q6R891_NE82_MOUSE   | Ppp1r9b  | Neurabin-2 OS=Mus mus R.GPGGQPPQHR@.V                      | 3.74   | 1.72  | 2.17 | 0.46 |
| Q6R891_NE82_MOUSE   | Ppp1r9b  | Neurabin-2 OS=Mus mus K.HAVTAEIQQLKR.K                     | 59.02  | 29.29 | 2.01 | 0.50 |
| Q6R891_NE82_MOUSE   | Ppp1r9b  | Neurabin-2 OS=Mus mus K.ISELEGNLQTLR@.N                    | 22.91  | 13.20 | 1.74 | 0.58 |
| Q6R891_NE82_MOUSE   | Ppp1r9b  | Neurabin-2 OS=Mus mus R.K#LQSELEK#.G                       | 22.31  | 11.16 | 2.00 | 0.50 |
| Q6R891_NE82_MOUSE   | Ppp1r9b  | Neurabin-2 OS=Mus mus R.LELFPVLEK#.D                       | 29.14  | 23.34 | 1.25 | 0.80 |
| Q6R891_NE82_MOUSE   | Ppp1r9b  | Neurabin-2 OS=Mus mus R.NEDVDM*AAASAEYELK#.R               | 10.93  | 8.11  | 1.35 | 0.74 |
| Q6R891_NE82_MOUSE   | Ppp1r9b  | Neurabin-2 OS=Mus mus R.SAYEAGIQLKPPDAPGPEAPK.A            | 12.41  | 6.54  | 1.90 | 0.53 |
| Q6R891_NE82_MOUSE   | Ppp1r9b  | Neurabin-2 OS=Mus mus R.SVPAASGDK#EAVAR@.R                 | 9.41   | 7.56  | 1.25 | 0.80 |
| Q6R891_NE82_MOUSE   | Ppp1r9b  | Neurabin-2 OS=Mus mus R.VLESEELAR@.K                       | 43.89  | 27.30 | 1.61 | 0.62 |
| Q6R891_NE82_MOUSE   | Ppp1r9b  | Neurabin-2 OS=Mus mus R.ER@PGEQSEVAQLIQTLEQER@.W           | 12.31  | 6.09  | 2.02 | 0.49 |
| P63330_PP2AA_MOUSE  | Ppp2ca   | Serine/threonine-protein K.YSFLQDFAPR@.R                   | 6.53   | 8.47  | 1.60 | 0.63 |
| P63330_PP2AA_MOUSE  | Ppp2ca   | Serine/threonine-protein K.SPDTNLFM*GDVVDLR@.G             | 13.12  | 2.04  | 3.00 | 0.33 |
| P63330_PP2AA_MOUSE  | Ppp2ca   | Serine/threonine-protein K.YSFLQDFAPR@.R                   | 10.68  | 6.38  | 1.66 | 0.60 |
| Q76M23_2AAA_MOUSE   | Ppp2r1a  | Serine/threonine-protein K.IGPILDNTLSQSEVKPILEK.L          | 27.59  | 17.62 | 1.57 | 0.64 |
| Q76M23_2AAA_MOUSE   | Ppp2r1a  | Serine/threonine-protein R.LAGGDWFTSR@.T                   | 18.35  | 8.21  | 2.24 | 0.45 |
| Q76M23_2AAA_MOUSE   | Ppp2r1a  | Serine/threonine-protein K.LSTIALALGVER@.T                 | 12.93  | 7.14  | 1.81 | 0.55 |
| Q76M23_2AAA_MOUSE   | Ppp2r1a  | Serine/threonine-protein K.LTQDQDVVK#.Y                    | 52.13  | 35.29 | 1.48 | 0.68 |
| Q76M23_2AAA_MOUSE   | Ppp2r1a  | Serine/threonine-protein R.NEDVQLR@.L                      | 26.60  | 9.77  | 2.72 | 0.37 |
| Q76M23_2AAA_MOUSE   | Ppp2r1a  | Serine/threonine-protein K.SALASVIM*GLSPILGK#.D            | 16.46  | 9.83  | 1.67 | 0.60 |
| Q76M23_2AAA_MOUSE   | Ppp2r1a  | Serine/threonine-protein K.SEIIPM*FNSLASDEQDSVR#.L         | 7.19   | 5.37  | 1.34 | 0.75 |
| Q76M23_2AAA_MOUSE   | Ppp2r1a  | Serine/threonine-protein K.IGPILDNTLSQSEVKPILEK#.L         | 33.60  | 18.27 | 1.84 | 0.54 |
| Q76M23_2AAA_MOUSE   | Ppp2r1a  | Serine/threonine-protein R.LAGGDWFTSR@.T                   | 16.24  | 6.87  | 2.37 | 0.42 |
| Q76M23_2AAA_MOUSE   | Ppp2r1a  | Serine/threonine-protein K.LSTIALALGVER@.T                 | 8.98   | 5.61  | 1.60 | 0.62 |
| Q76M23_2AAA_MOUSE   | Ppp2r1a  | Serine/threonine-protein R.M*AGDPVANVR@.F                  | 10.70  | 8.80  | 1.78 | 0.56 |
| Q76M23_2AAA_MOUSE   | Ppp2r1a  | Serine/threonine-protein K.SALASVIM*GLSPILGK#.D            | 15.67  | 5.37  | 1.99 | 0.50 |
| Q76M23_2AAA_MOUSE   | Ppp2r1a  | Serine/threonine-protein K.SEIIPM*FNSLASDEQDSVR@.L         | 5.29   | 3.31  | 1.60 | 0.63 |
| Q76M23_2AAA_MOUSE   | Ppp2r1a  | Serine/threonine-protein K.IGPILDNTLSQSEVKPILEK#.L         | 43.26  | 13.10 | 3.30 | 0.30 |
| Q76M23_2AAA_MOUSE   | Ppp2r1a  | Serine/threonine-protein R.LAGGDWFTSR@.T                   | 11.36  | 3.41  | 3.33 | 0.30 |
| Q76M23_2AAA_MOUSE   | Ppp2r1a  | Serine/threonine-protein K.LSTIALALGVER@.T                 | 9.46   | 3.02  | 3.13 | 0.32 |
| Q76M23_2AAA_MOUSE   | Ppp2r1a  | Serine/threonine-protein K.LTQDQDVVK#.Y                    | 35.09  | 8.35  | 4.20 | 0.24 |
| Q76M23_2AAA_MOUSE   | Ppp2r1a  | Serine/threonine-protein R.M*AGDPVANVR@.F                  | 18.36  | 12.22 | 1.50 | 0.67 |
| Q76M23_2AAA_MOUSE   | Ppp2r1a  | Serine/threonine-protein K.SALASVIM*GLSPILGK#.D            | 18.32  | 3.84  | 4.77 | 0.21 |
| Q6P1F6_2ABA_MOUSE   | Ppp2r2a  | Serine/threonine-protein R.VVIFQEQENK#.I                   | 7.72   | 4.01  | 1.93 | 0.52 |
| Q91V89_Q91V89_MOUSE | Ppp2r5d  | Protein Ppp2r5d OS=Mus: K.ESSLTEPVIVGLLK#.F                | 5.95   | 3.74  | 1.59 | 0.63 |
| Q91V89_Q91V89_MOUSE | Ppp2r5d  | Protein Ppp2r5d OS=Mus: R.FLESPDFQPIAK#.K                  | 8.35   | 5.66  | 1.48 | 0.68 |
| Q61151_2ASE_MOUSE   | Ppp2r5e  | Serine/threonine-protein R.FLESEQEFPJIAKH.K                | 6.76   | 6.54  | 1.03 | 0.97 |
| Q91VJ5_PQB81_MOUSE  | Pqbp1    | Polyglutamine-binding p K.HLEPEEHEEGLVDYDDPVDYEATR.I       | 4.83   | 4.43  | 1.09 | 0.92 |
| Q91VJ5_PQB81_MOUSE  | Pqbp1    | Polyglutamine-binding p K.TGADTTAAAGLFLQRRPSPGAVLR.A       | 6.00   | 4.85  | 1.24 | 0.81 |
| Q91G8_PRAF2_MOUSE   | Praf2    | PRA1 family protein 2 OS R.ALDDFVLSGAR@.L                  | 41.32  | 12.49 | 3.31 | 0.30 |
| Q91G8_PRAF2_MOUSE   | Praf2    | PRA1 family protein 2 OS K.R@TPM*GLLLEALGQEQEAGS-.S        | 9.29   | 2.32  | 1.89 | 0.53 |
| Q9EQC8_Q9EQC8_MOUSE | Prcr     | Papillary renal cell carcin K.TK#PASPALVLTGTTTTTPSPAIAK#.A | 4.30   | 3.88  | 2.37 | 0.42 |
| P35700_PDX1_MOUSE   | Pdx1     | Peroxiredoxin-1 OS=Mus K.ADEGISFR.G                        | 12.36  | 10.35 | 1.19 | 0.84 |
| P35700_PDX1_MOUSE   | Pdx1     | Peroxiredoxin-1 OS=Mus K.ATAVM*PDGQFK#.D                   | 11.23  | 11.87 | 0.95 | 1.06 |
| P35700_PDX1_MOUSE   | Pdx1     | Peroxiredoxin-1 OS=Mus R.GLFIIDDK#.G                       | 15.79  | 15.50 | 1.02 | 0.98 |
| P35700_PDX1_MOUSE   | Pdx1     | Peroxiredoxin-1 OS=Mus R.SVDIEIR.L                         | 12.93  | 8.94  | 1.45 | 0.69 |
| P35700_PDX1_MOUSE   | Pdx1     | Peroxiredoxin-1 OS=Mus R.TIAQDYGLVK.A                      | 8.55   | 10.79 | 0.79 | 1.26 |
| Q61171_PDX2_MOUSE   | Pdx2     | Peroxiredoxin-2 OS=Mus K.SAPDFTATAVVDGAFK#.E               | 7.39   | 4.00  | 1.85 | 0.54 |
| P20108_PDX3_MOUSE   | Pdx3     | Thioredoxin-dependent j R.DYGVLLSEAGIALR.G                 | 26.66  | 13.97 | 1.91 | 0.52 |
| P20108_PDX3_MOUSE   | Pdx3     | Thioredoxin-dependent j R.GLFIIDPNGVVK#.H                  | 18.15  | 12.98 | 1.40 | 0.72 |
| P20664_PRI1_MOUSE   | Prim1    | DNA primase small subunit K.VFEQFLNLK#.S                   | 8.19   | 1.99  | 4.11 | 0.24 |
| P33610_PRI2_MOUSE   | Prim2    | DNA primase large subunit K.DSHLHEFASDEEK#.T               | 12.51  | 2.83  | 4.42 | 0.23 |
| P33610_PRI2_MOUSE   | Prim2    | DNA primase large subunit R.ENLEDEYPR@.R                   | 11.71  | 1.18  | 9.95 | 0.10 |
| P33610_PRI2_MOUSE   | Prim2    | DNA primase large subunit K.IPASGISQLDLVK#.G               | 36.65  | 12.29 | 2.98 | 0.34 |
| P33610_PRI2_MOUSE   | Prim2    | DNA primase large subunit R.SLPAVQSDER@.L                  | 10.64  | 4.91  | 2.17 | 0.46 |

|                    |         |                                                                             |        |        |      |      |
|--------------------|---------|-----------------------------------------------------------------------------|--------|--------|------|------|
| P33610_PRI2_MOUSE  | Prim2   | DNA primase large subun K.VPFADALDLFR@.G                                    | 30.72  | 11.39  | 2.70 | 0.37 |
| P33610_PRI2_MOUSE  | Prim2   | DNA primase large subun R.EQDIM*ASSPSSLGK#.L                                | 5.93   | 1.62   | 3.67 | 0.27 |
| P33610_PRI2_MOUSE  | Prim2   | DNA primase large subun K.IPASGISQLDLVK#.G                                  | 32.38  | 7.56   | 4.28 | 0.23 |
| P33610_PRI2_MOUSE  | Prim2   | DNA primase large subun K.VPFADALDLFR@.G                                    | 24.27  | 5.79   | 4.19 | 0.24 |
| P33610_PRI2_MOUSE  | Prim2   | DNA primase large subun K.AIENLGVSYVK#.G                                    | 16.58  | 5.09   | 3.26 | 0.31 |
| P33610_PRI2_MOUSE  | Prim2   | DNA primase large subun K.IPASGISQLDLVK#.G                                  | 29.56  | 4.60   | 6.42 | 0.16 |
| P33610_PRI2_MOUSE  | Prim2   | DNA primase large subun R.SLPVAVQSDER@.L                                    | 7.21   | 6.39   | 1.13 | 0.89 |
| P33610_PRI2_MOUSE  | Prim2   | DNA primase large subun K.VPFADALDLFR@.G                                    | 20.96  | 5.06   | 4.14 | 0.24 |
| Q5EG47_AAPK1_MOUSE | Prkaa1  | 5'-AMP-activated protein K.IADFGLSNM*M*SDGEFLR@.T                           | 4.42   | 4.42   | 1.00 | 1.00 |
| Q5EG47_AAPK1_MOUSE | Prkaa1  | 5'-AMP-activated protein K.IGHYLGDTLGVGTFGK#.V                              | 16.58  | 15.80  | 1.05 | 0.95 |
| Q5EG47_AAPK1_MOUSE | Prkaa1  | 5'-AMP-activated protein K.M*SLQLYQVDSR@.T                                  | 8.93   | 2.53   | 3.53 | 0.28 |
| Q5EG47_AAPK1_MOUSE | Prkaa1  | 5'-AMP-activated protein R.NHQDPLAVAYLIIDNR@.R                              | 6.16   | 2.53   | 2.43 | 0.41 |
| Q5EG47_AAPK1_MOUSE | Prkaa1  | 5'-AMP-activated protein R.TYLLDFR@.S                                       | 9.70   | 4.99   | 1.94 | 0.51 |
| Q5EG47_AAPK1_MOUSE | Prkaa1  | 5'-AMP-activated protein R.VPFLVAETPR@.A                                    | 39.82  | 25.82  | 1.54 | 0.65 |
| Q5EG47_AAPK1_MOUSE | Prkaa1  | 5'-AMP-activated protein R.HTLDELNPQK#.S                                    | 9.70   | 4.99   | 1.94 | 0.51 |
| Q5EG47_AAPK1_MOUSE | Prkaa1  | 5'-AMP-activated protein K.IADFGLSNM*M*SDGEFLR@.T                           | 9.57   | 4.16   | 2.30 | 0.44 |
| Q5EG47_AAPK1_MOUSE | Prkaa1  | 5'-AMP-activated protein K.IGHYLGDTLGVGTFGK#.V                              | 18.81  | 7.46   | 2.52 | 0.40 |
| Q5EG47_AAPK1_MOUSE | Prkaa1  | 5'-AMP-activated protein R.TYLLDFR@.S                                       | 11.91  | 4.24   | 2.81 | 0.36 |
| Q5EG47_AAPK1_MOUSE | Prkaa1  | 5'-AMP-activated protein R.VPFLVAETPR@.A                                    | 36.63  | 18.04  | 2.03 | 0.49 |
| Q5EG47_AAPK1_MOUSE | Prkaa1  | 5'-AMP-activated protein K.IADFGLSNM*M*SDGEFLR@.T                           | 7.42   | 3.09   | 2.41 | 0.42 |
| Q5EG47_AAPK1_MOUSE | Prkaa1  | 5'-AMP-activated protein K.IGHYLGDTLGVGTFGK#.V                              | 20.71  | 4.78   | 4.33 | 0.23 |
| Q5EG47_AAPK1_MOUSE | Prkaa1  | 5'-AMP-activated protein R.TYLLDFR@.S                                       | 13.22  | 4.48   | 2.95 | 0.34 |
| Q5EG47_AAPK1_MOUSE | Prkaa1  | 5'-AMP-activated protein R.VPFLVAETPR@.A                                    | 28.47  | 10.23  | 2.78 | 0.36 |
| Q9R078_AAKB1_MOUSE | Prkab1  | 5'-AMP-activated protein K.FFVDGQWTHDPSEPIVTSQLGTVNNIQVK#.K                 | 9.60   | 3.47   | 2.77 | 0.36 |
| Q9R078_AAKB1_MOUSE | Prkab1  | 5'-AMP-activated protein K.KHTDFEVFDALM*VDSQK#.C                            | 12.91  | 4.59   | 2.81 | 0.36 |
| Q9R078_AAKB1_MOUSE | Prkab1  | 5'-AMP-activated protein R.SQNNFVALDPEGEHQK#.F                              | 8.12   | 4.04   | 2.01 | 0.50 |
| Q9R078_AAKB1_MOUSE | Prkab1  | 5'-AMP-activated protein K.YVTLLYK#.F                                       | 26.67  | 9.52   | 2.80 | 0.36 |
| P05132_KAPCA_MOUSE | Prkaca  | cAMP-dependent protein R.ILQAVNPFLLVK#.L                                    | 9.58   | 6.36   | 1.51 | 0.66 |
| P68181_KAPCB_MOUSE | Prkacb  | cAMP-dependent protein R.ILQAVNPFLLVK#.L                                    | 15.12  | 2.36   | 6.40 | 0.16 |
| O54950_AAKG1_MOUSE | Prkag1  | 5'-AMP-activated protein K.FDVINLAEEK#.T                                    | 58.69  | 26.74  | 2.19 | 0.46 |
| O54950_AAKG1_MOUSE | Prkag1  | 5'-AMP-activated protein R.LPVIDPESGNTLYLTHK#.R                             | 27.81  | 12.46  | 2.23 | 0.45 |
| O54950_AAKG1_MOUSE | Prkag1  | 5'-AMP-activated protein K.LVVFDTSLQVK#.K                                   | 14.22  | 8.66   | 1.64 | 0.61 |
| O54950_AAKG1_MOUSE | Prkag1  | 5'-AMP-activated protein K.TYNNLDVSVTK#.A                                   | 28.39  | 12.03  | 2.36 | 0.42 |
| O54950_AAKG1_MOUSE | Prkag1  | 5'-AMP-activated protein R.VVDIYSK#.F                                       | 69.37  | 30.96  | 2.24 | 0.45 |
| O54950_AAKG1_MOUSE | Prkag1  | 5'-AMP-activated protein K.FDVINLAEEK#.T                                    | 11.06  | 4.64   | 2.38 | 0.42 |
| O54950_AAKG1_MOUSE | Prkag1  | 5'-AMP-activated protein R.LPVIDPESGNTLYLTHK#.R                             | 11.52  | 4.60   | 2.50 | 0.40 |
| O54950_AAKG1_MOUSE | Prkag1  | 5'-AMP-activated protein R.VSALPVVDEK#.G                                    | 10.52  | 3.53   | 2.98 | 0.34 |
| O54950_AAKG1_MOUSE | Prkag1  | 5'-AMP-activated protein R.LPVIDPESGNTLYLTHK#.R                             | 15.21  | 7.31   | 2.08 | 0.48 |
| Q9DBC7_KAPO_MOUSE  | Prkar1a | cAMP-dependent protein K.HNIQALLK#.D                                        | 9.84   | 7.14   | 1.38 | 0.73 |
| Q9DBC7_KAPO_MOUSE  | Prkar1a | cAMP-dependent protein R.LTVADALEVQVDFEGQK#.I                               | 15.12  | 6.18   | 2.44 | 0.41 |
| Q9DBC7_KAPO_MOUSE  | Prkar1a | cAMP-dependent protein R.R@SENEEFVEGR@.L                                    | 7.80   | 6.37   | 1.22 | 0.82 |
| Q9DBC7_KAPO_MOUSE  | Prkar1a | cAMP-dependent protein R.SENEFEVGR@.L                                       | 8.20   | 4.26   | 1.92 | 0.52 |
| P12367_KAP2_MOUSE  | Prkar2a | cAMP-dependent protein R.GSFGELALM*YNTPR@.A                                 | 13.50  | 7.12   | 1.90 | 0.53 |
| P12367_KAP2_MOUSE  | Prkar2a | cAMP-dependent protein K.M*FEFIESVPLFK#.S                                   | 10.33  | 3.89   | 2.66 | 0.38 |
| P12367_KAP2_MOUSE  | Prkar2a | cAMP-dependent protein K.LDQEQQLSVQLDAM*FEK#.I                              | 4.94   | 2.19   | 2.26 | 0.44 |
| P12367_KAP2_MOUSE  | Prkar2a | cAMP-dependent protein K.TDEHVIDQGGDDNFYVER@.G                              | 19.20  | 4.99   | 3.85 | 0.26 |
| P13124_KAP3_MOUSE  | Prkar2b | cAMP-dependent protein K.EGEHVIDQGGDDNFYVDR@.G                              | 14.33  | 3.08   | 4.65 | 0.22 |
| P13124_KAP3_MOUSE  | Prkar2b | cAMP-dependent protein R.HQPADLEFALQHFTR@.L                                 | 6.98   | 1.47   | 4.75 | 0.21 |
| P13124_KAP3_MOUSE  | Prkar2b | cAMP-dependent protein R.KHM*YESFIESLPLFK#.S                                | 7.40   | 1.77   | 4.18 | 0.24 |
| P13124_KAP3_MOUSE  | Prkar2b | cAMP-dependent protein K.M*YESFIESLPLFK#.S                                  | 8.80   | 7.46   | 1.18 | 0.85 |
| P13124_KAP3_MOUSE  | Prkar2b | cAMP-dependent protein R.TWGDAAGAGGIPSK#.G                                  | 5.88   | 2.15   | 2.73 | 0.37 |
| P13124_KAP3_MOUSE  | Prkar2b | cAMP-dependent protein K.VYNDGEEQIAQGDLDASFFIVESGEVK#.I                     | 8.11   | 2.65   | 3.06 | 0.33 |
| Q91VJ2_PRDPB_MOUSE | Prkcdpb | Protein kinase C delta-bii K.LATM*LEALR@.E                                  | 9.92   | 2.39   | 4.15 | 0.24 |
| Q62074_KPCI_MOUSE  | Prkci   | Protein kinase C iota typi K.ASSSLGLQDFDLR@.V                               | 18.99  | 7.88   | 2.41 | 0.42 |
| Q62074_KPCI_MOUSE  | Prkci   | Protein kinase C iota typi R.DLKLNDVLLDSEGHK#.L                             | 21.75  | 9.50   | 2.29 | 0.44 |
| Q62074_KPCI_MOUSE  | Prkci   | Protein kinase C iota typi R.DLKLNDVLLDSEGHK#.L                             | 11.02  | 6.15   | 1.79 | 0.56 |
| Q62074_KPCI_MOUSE  | Prkci   | Protein kinase C iota typi K.ELVNDDEDIDVWQTEK#.H                            | 5.18   | 1.82   | 2.84 | 0.35 |
| Q8B203_KCPD2_MOUSE | Prkd2   | Serine/threonine-protein R.SVVGTPAYLAPVLLNQGYNR@.S                          | 14.06  | 3.52   | 4.00 | 0.25 |
| Q9WXT2_PRRKA_MOUSE | Prkra   | Interferon-inducible dou R.EDSGTFLGK#.M                                     | 20.35  | 7.59   | 2.68 | 0.37 |
| Q9WXT2_PRRKA_MOUSE | Prkra   | Interferon-inducible dou R.SDVQVHVPTFFTR@.V                                 | 17.28  | 8.67   | 1.99 | 0.50 |
| Q9WXT2_PRRKA_MOUSE | Prkra   | Interferon-inducible dou K.TPIQLHYEYGM*#.T                                  | 32.33  | 12.75  | 2.54 | 0.39 |
| Q9J1FO_ANM1_MOUSE  | Prmt1   | Protein arginine N-methy R.ATLVTAIEDR@.Q                                    | 15.45  | 3.80   | 4.06 | 0.25 |
| Q8CIG8_ANM5_MOUSE  | Prmt5   | Protein arginine N-methy K.AAILPSTIFLTK#.K                                  | 12.56  | 12.04  | 1.04 | 0.96 |
| Q8CIG8_ANM5_MOUSE  | Prmt5   | Protein arginine N-methy R.GPLVNASLR@.A                                     | 15.55  | 11.51  | 1.35 | 0.74 |
| Q8CIG8_ANM5_MOUSE  | Prmt5   | Protein arginine N-methy R.SDLLSQR@.D                                       | 10.27  | 10.60  | 0.97 | 1.03 |
| Q8CIG8_ANM5_MOUSE  | Prmt5   | Protein arginine N-methy R.VPLVAPEDLR@.D                                    | 29.20  | 16.72  | 1.75 | 0.57 |
| Q8CIG8_ANM5_MOUSE  | Prmt5   | Protein arginine N-methy K.YSQYQQAIVK#.C                                    | 5.43   | 3.47   | 1.57 | 0.64 |
| Q99KP6_PRP19_MOUSE | Prpf19  | Pre-mRNA-processing fac K.ALQDEWDAVM*LHSFTLR@.Q                             | 44.47  | 29.16  | 1.53 | 0.66 |
| Q99KP6_PRP19_MOUSE | Prpf19  | Pre-mRNA-processing fac K.ALQDEWDAVM*LHSFTLR@.Q                             | 86.79  | 48.59  | 1.79 | 0.56 |
| Q99KP6_PRP19_MOUSE | Prpf19  | Pre-mRNA-processing fac K.ATVLTTR@.K                                        | 212.48 | 124.43 | 1.71 | 0.59 |
| Q99KP6_PRP19_MOUSE | Prpf19  | Pre-mRNA-processing fac R.EALATLKH#QAGLIVPQAVPSSQVVGAGEMDLGELVGM*#PEIIQK#.L | 8.09   | 4.82   | 1.68 | 0.60 |
| Q99KP6_PRP19_MOUSE | Prpf19  | Pre-mRNA-processing fac K.FIATGM*DR@.S                                      | 182.13 | 105.66 | 1.72 | 0.58 |
| Q99KP6_PRP19_MOUSE | Prpf19  | Pre-mRNA-processing fac K.ILTGADKRNWVFDK#.S                                 | 173.62 | 107.27 | 1.62 | 0.62 |
| Q99KP6_PRP19_MOUSE | Prpf19  | Pre-mRNA-processing fac K.KWVTSVHFPSQELVFSASPATIR@.I                        | 28.58  | 15.29  | 1.87 | 0.54 |
| Q99KP6_PRP19_MOUSE | Prpf19  | Pre-mRNA-processing fac K.STEQLATLK#.G                                      | 250.77 | 126.38 | 1.98 | 0.50 |
| Q99KP6_PRP19_MOUSE | Prpf19  | Pre-mRNA-processing fac K.TLQLDNNFEVK#.S                                    | 106.86 | 64.16  | 1.67 | 0.60 |
| Q99KP6_PRP19_MOUSE | Prpf19  | Pre-mRNA-processing fac K.ATVLTTR@.K                                        | 57.63  | 20.76  | 2.78 | 0.36 |
| Q99KP6_PRP19_MOUSE | Prpf19  | Pre-mRNA-processing fac K.FIATGM*DR@.S                                      | 32.34  | 14.18  | 2.28 | 0.44 |
| Q99KP6_PRP19_MOUSE | Prpf19  | Pre-mRNA-processing fac K.ILTGADKRNWVFDK#.S                                 | 35.64  | 11.75  | 3.03 | 0.33 |
| Q99KP6_PRP19_MOUSE | Prpf19  | Pre-mRNA-processing fac K.STEQLATLK#.G                                      | 58.76  | 15.10  | 3.89 | 0.26 |
| Q99KP6_PRP19_MOUSE | Prpf19  | Pre-mRNA-processing fac R.TNVANFPHGSPITSIAFSENGYLLATAADSSVK#.L              | 8.63   | 2.68   | 3.22 | 0.31 |
| Q922U1_PRPF3_MOUSE | Prpf3   | U4/U6 small nuclear ribc K.DQTK#PTLPLEDEQGR@.T                              | 19.25  | 9.66   | 1.99 | 0.50 |
| Q922U1_PRPF3_MOUSE | Prpf3   | U4/U6 small nuclear ribc R.LGLTPPEPK#.V                                     | 33.81  | 30.13  | 1.12 | 0.89 |
| Q922U1_PRPF3_MOUSE | Prpf3   | U4/U6 small nuclear ribc K.LQAEISOAAR@.K                                    | 42.15  | 23.46  | 1.80 | 0.56 |
| Q922U1_PRPF3_MOUSE | Prpf3   | U4/U6 small nuclear ribc K.REDYFGITNLVEHPAQLNPPVDNDTPVTLGVYLT.K             | 8.26   | 4.62   | 1.79 | 0.56 |
| Q922U1_PRPF3_MOUSE | Prpf3   | U4/U6 small nuclear ribc R.VLGTAEVQDPTK#.V                                  | 9.35   | 6.78   | 1.38 | 0.73 |
| Q922U1_PRPF3_MOUSE | Prpf3   | U4/U6 small nuclear ribc K.DQTK#PTLPLEDEQGR@.T                              | 15.83  | 8.39   | 1.89 | 0.53 |
| Q922U1_PRPF3_MOUSE | Prpf3   | U4/U6 small nuclear ribc R.FVDKHLFEAVEGR@.S                                 | 15.74  | 6.94   | 2.27 | 0.44 |
| Q922U1_PRPF3_MOUSE | Prpf3   | U4/U6 small nuclear ribc R.LGLTPPEPK#.V                                     | 26.35  | 14.43  | 1.83 | 0.55 |
| Q922U1_PRPF3_MOUSE | Prpf3   | U4/U6 small nuclear ribc K.LQAEISOAAR@.K                                    | 25.98  | 15.12  | 1.72 | 0.58 |
| Q922U1_PRPF3_MOUSE | Prpf3   | U4/U6 small nuclear ribc K.QLSFSPAPQPK#.T                                   | 9.22   | 6.74   | 1.37 | 0.73 |
| Q8CCF0_PRP31_MOUSE | Prpf31  | U4/U6 small nuclear ribc K.IEEVYSK#.Q                                       | 89.29  | 23.98  | 3.46 | 0.29 |
| Q8CCF0_PRP31_MOUSE | Prpf31  | U4/U6 small nuclear ribc K.IM*GVAGGLTNLSK#.M                                | 51.91  | 20.11  | 2.58 | 0.39 |
| Q8CCF0_PRP31_MOUSE | Prpf31  | U4/U6 small nuclear ribc R.IYEVESR@.L                                       | 70.74  | 25.75  | 2.75 | 0.36 |
| Q8CCF0_PRP31_MOUSE | Prpf31  | U4/U6 small nuclear ribc R.LGLTEIR@.K                                       | 40.09  | 17.59  | 2.28 | 0.44 |
| Q8CCF0_PRP31_MOUSE | Prpf31  | U4/U6 small nuclear ribc R.LGLTEIR@.K#.Q                                    | 16.21  | 4.63   | 3.50 | 0.29 |
| Q8CCF0_PRP31_MOUSE | Prpf31  | U4/U6 small nuclear ribc R.M*SGEEDAYQEDLGFSLGLGK#.S                         | 43.20  | 11.65  | 3.71 | 0.27 |
| Q8CCF0_PRP31_MOUSE | Prpf31  | U4/U6 small nuclear ribc R.M*SFIAPNLSIIIGASTAAK#.I                          | 7.70   | 3.55   | 2.17 | 0.46 |
| Q8CCF0_PRP31_MOUSE | Prpf31  | U4/U6 small nuclear ribc R.M*SFIAPNLSIIIGASTAAK#.I                          | 7.94   | 3.45   | 2.30 | 0.43 |
| Q8CCF0_PRP31_MOUSE | Prpf31  | U4/U6 small nuclear ribc K.QANVSEVM*GPEVAPEYR@.V                            | 21.58  | 8.05   | 2.68 | 0.37 |
| Q8CCF0_PRP31_MOUSE | Prpf31  | U4/U6 small nuclear ribc K.OSVYVGGK#.S                                      | 21.22  | 5.64   | 3.76 | 0.27 |
| Q8CCF0_PRP31_MOUSE | Prpf31  | U4/U6 small nuclear ribc K.R@FPELESVFNALDYR@.T                              | 69.19  | 24.53  | 2.82 | 0.35 |
| Q8CCF0_PRP31_MOUSE | Prpf31  | U4/U6 small nuclear ribc R.SSGTASSVAFTPLQGLEIVNPAQAEK#.K                    | 30.45  | 8.86   | 3.44 | 0.29 |

|                    |        |                                                            |        |        |       |      |
|--------------------|--------|------------------------------------------------------------|--------|--------|-------|------|
| Q8CCF0_PRP31_MOUSE | Prp31  | U4/U6 small nuclear ribc R.SSGTASSVAFTPLQGLEIVNPOAAEKHK#.V | 17.36  | 4.63   | 3.75  | 0.27 |
| Q8CCF0_PRP31_MOUSE | Prp31  | U4/U6 small nuclear ribc R.VGYELKHDEIER@.K                 | 114.51 | 39.78  | 2.88  | 0.35 |
| Q8CCF0_PRP31_MOUSE | Prp31  | U4/U6 small nuclear ribc R.VIVDANNLTVIEENLIIHK#.F          | 85.77  | 27.91  | 3.07  | 0.33 |
| Q8CCF0_PRP31_MOUSE | Prp31  | U4/U6 small nuclear ribc K.IEEYVSKR.Q                      | 42.02  | 12.94  | 3.25  | 0.31 |
| Q8CCF0_PRP31_MOUSE | Prp31  | U4/U6 small nuclear ribc K.IIM*GVAGGLTNLSK#.M              | 36.49  | 15.72  | 2.32  | 0.43 |
| Q8CCF0_PRP31_MOUSE | Prp31  | U4/U6 small nuclear ribc R.IEYVESR@.M                      | 42.49  | 11.27  | 3.73  | 0.27 |
| Q8CCF0_PRP31_MOUSE | Prp31  | U4/U6 small nuclear ribc R.M*SFGEIEDAYQEDLGFSLGHLGK#.S     | 57.06  | 13.31  | 4.29  | 0.23 |
| Q8CCF0_PRP31_MOUSE | Prp31  | U4/U6 small nuclear ribc R.M*SFGEIEDAYQEDLGFSLGHLGK#.I     | 11.37  | 3.65   | 3.11  | 0.32 |
| Q8CCF0_PRP31_MOUSE | Prp31  | U4/U6 small nuclear ribc K.QANVSEVM*GPVEAPEYR@.V           | 17.28  | 5.77   | 3.00  | 0.33 |
| Q8CCF0_PRP31_MOUSE | Prp31  | U4/U6 small nuclear ribc R.RFPELNVLPNADYIR.T               | 78.85  | 18.74  | 4.21  | 0.24 |
| Q8CCF0_PRP31_MOUSE | Prp31  | U4/U6 small nuclear ribc R.SSGTASSVAFTPLQGLEIVNPOAAEK#.K   | 26.51  | 6.61   | 4.01  | 0.25 |
| Q8CCF0_PRP31_MOUSE | Prp31  | U4/U6 small nuclear ribc R.SSGTASSVAFTPLQGLEIVNPOAAEKHK#.V | 15.24  | 5.28   | 2.89  | 0.35 |
| Q8CCF0_PRP31_MOUSE | Prp31  | U4/U6 small nuclear ribc K.VGYELKHDEIER@.K                 | 88.11  | 22.69  | 3.88  | 0.26 |
| Q8CCF0_PRP31_MOUSE | Prp31  | U4/U6 small nuclear ribc R.VIVDANNLTVIEENLIIHK#.F          | 81.22  | 25.67  | 3.16  | 0.32 |
| Q8CCF0_PRP31_MOUSE | Prp31  | U4/U6 small nuclear ribc R.IEYVESR@.M                      | 14.86  | 3.29   | 4.52  | 0.22 |
| Q8CCF0_PRP31_MOUSE | Prp31  | U4/U6 small nuclear ribc R.M*SFGEIEDAYQEDLGFSLGHLGK#.S     | 25.13  | 1.96   | 12.85 | 0.08 |
| Q8CCF0_PRP31_MOUSE | Prp31  | U4/U6 small nuclear ribc K.VGYELKHDEIER@.K                 | 27.08  | 8.59   | 3.15  | 0.32 |
| Q4FK66_PR38A_MOUSE | Prp38a | Pre-mRNA-splicing factor K.DAHSIHGTNPQVLEK#.I              | 27.69  | 23.12  | 1.20  | 0.84 |
| Q4FK66_PR38A_MOUSE | Prp38a | Pre-mRNA-splicing factor R.M*LGALYMR@.L                    | 21.16  | 15.11  | 1.40  | 0.71 |
| Q4FK66_PR38A_MOUSE | Prp38a | Pre-mRNA-splicing factor K.M*LQIQPEK#DIIVFIK#.N            | 7.50   | 6.77   | 1.11  | 0.90 |
| Q4FK66_PR38A_MOUSE | Prp38a | Pre-mRNA-splicing factor K.YLEPLNYDYR@.K                   | 8.79   | 7.26   | 1.21  | 0.83 |
| Q4FK66_PR38A_MOUSE | Prp38a | Pre-mRNA-splicing factor K.DAHSIHGTNPQVLEK#.I              | 21.83  | 8.26   | 2.64  | 0.38 |
| Q4FK66_PR38A_MOUSE | Prp38a | Pre-mRNA-splicing factor R.YVLEAEQLFPR@.V                  | 19.70  | 5.96   | 3.31  | 0.30 |
| Q80SY5_PR38B_MOUSE | Prp38b | Pre-mRNA-splicing factor K.LEWFSTLFRP@.I                   | 15.35  | 6.88   | 2.23  | 0.45 |
| Q80SY5_PR38B_MOUSE | Prp38b | Pre-mRNA-splicing factor K.TYHEVVDYFYK#.V                  | 40.11  | 12.68  | 3.16  | 0.32 |
| Q9DAW6_PRP4_MOUSE  | Prp4   | U4/U6 small nuclear ribc R.AGIEAGNINITSGEVFEIEHISER@.Q     | 14.21  | 13.66  | 1.04  | 0.96 |
| Q9DAW6_PRP4_MOUSE  | Prp4   | U4/U6 small nuclear ribc R.ALEGITFLFEGEPAER@.R             | 32.35  | 23.55  | 1.37  | 0.73 |
| Q9DAW6_PRP4_MOUSE  | Prp4   | U4/U6 small nuclear ribc K.FEPIHGDFLLTGAVDNTAK#.I          | 28.87  | 22.08  | 1.31  | 0.76 |
| Q9DAW6_PRP4_MOUSE  | Prp4   | U4/U6 small nuclear ribc R.GHNTNVGVAIFVHPK#.S              | 19.30  | 12.71  | 1.52  | 0.66 |
| Q9DAW6_PRP4_MOUSE  | Prp4   | U4/U6 small nuclear ribc R.LWIANYSLPR@.A                   | 17.01  | 16.56  | 1.03  | 0.97 |
| Q9DAW6_PRP4_MOUSE  | Prp4   | U4/U6 small nuclear ribc K.TK#APDDLVPVVK#.K                | 35.42  | 29.71  | 1.19  | 0.84 |
| Q9DAW6_PRP4_MOUSE  | Prp4   | U4/U6 small nuclear ribc R.ALGEPDILFEGEPAER.R              | 14.21  | 5.34   | 2.66  | 0.38 |
| Q9R1C7_PRA0A_MOUSE | Prp40a | Pre-mRNA-processing fac K.ELEDLEGYQNTVAGGLTK#.S            | 5.35   | 2.71   | 1.98  | 0.51 |
| Q9R1C7_PRA0A_MOUSE | Prp40a | Pre-mRNA-processing fac K.AEQM*FGEM*EVWNAISER@.D           | 13.99  | 7.26   | 1.93  | 0.52 |
| Q9R1C7_PRA0A_MOUSE | Prp40a | Pre-mRNA-processing fac R.ALEKHEEHEEKHQK#.T                | 156.22 | 63.42  | 2.46  | 0.41 |
| Q9R1C7_PRA0A_MOUSE | Prp40a | Pre-mRNA-processing fac K.ELEDLEGYQNTVAGGLTK#.S            | 63.32  | 19.52  | 3.24  | 0.31 |
| Q9R1C7_PRA0A_MOUSE | Prp40a | Pre-mRNA-processing fac K.EPAFEDITLESER@.K                 | 59.96  | 23.98  | 2.50  | 0.40 |
| Q9R1C7_PRA0A_MOUSE | Prp40a | Pre-mRNA-processing fac R.FLENHEK#.M                       | 20.55  | 6.01   | 3.42  | 0.29 |
| Q9R1C7_PRA0A_MOUSE | Prp40a | Pre-mRNA-processing fac R.FTNM*LGQPGSTALDLFK#.F            | 111.20 | 47.76  | 2.33  | 0.43 |
| Q9R1C7_PRA0A_MOUSE | Prp40a | Pre-mRNA-processing fac R.FTNMLGQPGSTALDLFK#.F             | 14.70  | 6.48   | 2.27  | 0.44 |
| Q9R1C7_PRA0A_MOUSE | Prp40a | Pre-mRNA-processing fac R.FVK#EPAFEDITLESER.K              | 271.38 | 94.68  | 2.87  | 0.35 |
| Q9R1C7_PRA0A_MOUSE | Prp40a | Pre-mRNA-processing fac K.FYVEDLK#.A                       | 183.80 | 68.79  | 2.67  | 0.37 |
| Q9R1C7_PRA0A_MOUSE | Prp40a | Pre-mRNA-processing fac R.GGLM*VSEM*ESQPPSR@.G             | 8.57   | 4.08   | 2.10  | 0.48 |
| Q9R1C7_PRA0A_MOUSE | Prp40a | Pre-mRNA-processing fac K.K#AEQMFGEVWNAISER@.D             | 7.31   | 2.64   | 2.76  | 0.36 |
| Q9R1C7_PRA0A_MOUSE | Prp40a | Pre-mRNA-processing fac K.K#AQFNAIK#.V                     | 16.31  | 6.35   | 2.57  | 0.39 |
| Q9R1C7_PRA0A_MOUSE | Prp40a | Pre-mRNA-processing fac K.LAFNSLLEK#.A                     | 324.33 | 114.83 | 2.82  | 0.35 |
| Q9R1C7_PRA0A_MOUSE | Prp40a | Pre-mRNA-processing fac K.MIINDPR@.Y                       | 23.06  | 6.34   | 3.63  | 0.28 |
| Q9R1C7_PRA0A_MOUSE | Prp40a | Pre-mRNA-processing fac K.QAFNAYK#.V                       | 50.60  | 22.81  | 2.22  | 0.45 |
| Q9R1C7_PRA0A_MOUSE | Prp40a | Pre-mRNA-processing fac K.QATPPIELDAVWEDIR@.E              | 31.50  | 11.48  | 2.74  | 0.36 |
| Q9R1C7_PRA0A_MOUSE | Prp40a | Pre-mRNA-processing fac K.QSTWKEK#PDDLKHTPAEQQLSK#.C       | 15.87  | 6.89   | 2.30  | 0.43 |
| Q9R1C7_PRA0A_MOUSE | Prp40a | Pre-mRNA-processing fac K.QSTWKEK#PDDLKHTPAEQQLSK#.C       | 54.75  | 26.98  | 2.03  | 0.49 |
| Q9R1C7_PRA0A_MOUSE | Prp40a | Pre-mRNA-processing fac R.R@TLEQLDDDDQ.-                   | 23.00  | 7.72   | 2.98  | 0.34 |
| Q9R1C7_PRA0A_MOUSE | Prp40a | Pre-mRNA-processing fac K.SDSGK#PYYSQTK#.E                 | 17.53  | 4.14   | 4.23  | 0.24 |
| Q9R1C7_PRA0A_MOUSE | Prp40a | Pre-mRNA-processing fac K.SNLHAM*IK#.A                     | 27.77  | 12.31  | 2.26  | 0.44 |
| Q9R1C7_PRA0A_MOUSE | Prp40a | Pre-mRNA-processing fac R.STTLDAGNIK#.L                    | 180.21 | 70.99  | 2.54  | 0.39 |
| Q9R1C7_PRA0A_MOUSE | Prp40a | Pre-mRNA-processing fac R.TLLEQLDDDDQ.-                    | 120.08 | 120.08 | 1.00  | 1.00 |
| Q9R1C7_PRA0A_MOUSE | Prp40a | Pre-mRNA-processing fac K.TPAEQQLSK#.C                     | 35.19  | 13.98  | 2.52  | 0.40 |
| Q9R1C7_PRA0A_MOUSE | Prp40a | Pre-mRNA-processing fac R.VPSNASWEEQAMK#.M                 | 24.76  | 6.27   | 3.95  | 0.25 |
| Q9R1C7_PRA0A_MOUSE | Prp40a | Pre-mRNA-processing fac K.VQTEK#EKEHEAR@.S                 | 43.46  | 16.14  | 2.69  | 0.37 |
| Q9R1C7_PRA0A_MOUSE | Prp40a | Pre-mRNA-processing fac K.ELEDLEGYQNTVAGGLTK#.S            | 27.86  | 8.53   | 3.27  | 0.31 |
| Q9R1C7_PRA0A_MOUSE | Prp40a | Pre-mRNA-processing fac K.EPAFEDITLESER@.K                 | 29.34  | 7.99   | 3.67  | 0.27 |
| Q9R1C7_PRA0A_MOUSE | Prp40a | Pre-mRNA-processing fac R.FTNM*LGQPGSTALDLFK#.F            | 62.27  | 21.69  | 2.87  | 0.35 |
| Q9R1C7_PRA0A_MOUSE | Prp40a | Pre-mRNA-processing fac R.FVK#EPAFEDITLESER@.K             | 116.87 | 27.40  | 4.27  | 0.23 |
| Q9R1C7_PRA0A_MOUSE | Prp40a | Pre-mRNA-processing fac K.FYVEDLK#.A                       | 74.15  | 20.88  | 3.55  | 0.28 |
| Q9R1C7_PRA0A_MOUSE | Prp40a | Pre-mRNA-processing fac K.LAFNSLLEK#.A                     | 103.09 | 34.12  | 3.02  | 0.33 |
| Q9R1C7_PRA0A_MOUSE | Prp40a | Pre-mRNA-processing fac K.QATPPIELDAVWEDIR@.E              | 8.20   | 3.30   | 2.48  | 0.40 |
| Q9R1C7_PRA0A_MOUSE | Prp40a | Pre-mRNA-processing fac R.R@TLEQLDDDDQ.-                   | 11.21  | 2.54   | 4.41  | 0.23 |
| Q9R1C7_PRA0A_MOUSE | Prp40a | Pre-mRNA-processing fac R.STTLDAGNIK#.L                    | 65.68  | 25.88  | 2.54  | 0.39 |
| Q9R1C7_PRA0A_MOUSE | Prp40a | Pre-mRNA-processing fac R.TLLEQLDDDDQ.-                    | 53.65  | 53.65  | 1.00  | 1.00 |
| Q9R1C7_PRA0A_MOUSE | Prp40a | Pre-mRNA-processing fac K.TPAEQQLSK#.C                     | 14.49  | 3.91   | 3.70  | 0.27 |
| Q9R1C7_PRA0A_MOUSE | Prp40a | Pre-mRNA-processing fac R.TYYNTEK#.Q                       | 42.18  | 15.09  | 2.80  | 0.36 |
| Q61136_PRP4B_MOUSE | Prp4b  | Serine/threonine-protein R.APEIIGK#.S                      | 16.82  | 12.01  | 1.40  | 0.71 |
| Q61136_PRP4B_MOUSE | Prp4b  | Serine/threonine-protein R.ANQEVAVK#.I                     | 13.12  | 4.97   | 2.64  | 0.38 |
| Q61136_PRP4B_MOUSE | Prp4b  | Serine/threonine-protein R.ISINQALQAFIQEK#.I               | 21.21  | 6.18   | 1.43  | 0.29 |
| Q61136_PRP4B_MOUSE | Prp4b  | Serine/threonine-protein R.SYSQQLFLALK#.L                  | 14.66  | 3.46   | 4.24  | 0.24 |
| Q61136_PRP4B_MOUSE | Prp4b  | Serine/threonine-protein R.TKHLDDLLLEDLEK#.Q               | 12.35  | 6.87   | 1.80  | 0.56 |
| Q61136_PRP4B_MOUSE | Prp4b  | Serine/threonine-protein K.VQSGM*GILUQGVESGEEGEIHEK#.A     | 8.76   | 2.35   | 3.73  | 0.27 |
| Q61136_PRP4B_MOUSE | Prp4b  | Serine/threonine-protein R.YNYVYGTGQGVFNWVR@.A             | 13.13  | 7.25   | 1.81  | 0.55 |
| Q91YR7_PRP6_MOUSE  | Prp6   | Pre-mRNA-processing fac R.AAELTDIR@.A                      | 44.64  | 19.04  | 2.34  | 0.43 |
| Q91YR7_PRP6_MOUSE  | Prp6   | Pre-mRNA-processing fac K.AAVELEPEDAR@.I                   | 56.29  | 16.18  | 3.48  | 0.29 |
| Q91YR7_PRP6_MOUSE  | Prp6   | Pre-mRNA-processing fac K.AEVLWLMGAK#.S                    | 8.95   | 1.63   | 5.48  | 0.18 |
| Q91YR7_PRP6_MOUSE  | Prp6   | Pre-mRNA-processing fac R.ESLEALLQR@.A                     | 44.92  | 17.86  | 2.52  | 0.40 |
| Q91YR7_PRP6_MOUSE  | Prp6   | Pre-mRNA-processing fac K.FELQHGTEQEQVEVR@.K               | 40.80  | 14.59  | 2.80  | 0.36 |
| Q91YR7_PRP6_MOUSE  | Prp6   | Pre-mRNA-processing fac K.GQIEEQGELM*EK#.A                 | 22.55  | 8.13   | 2.77  | 0.36 |
| Q91YR7_PRP6_MOUSE  | Prp6   | Pre-mRNA-processing fac R.HIWITAAR#.L                      | 20.26  | 5.72   | 3.54  | 0.28 |
| Q91YR7_PRP6_MOUSE  | Prp6   | Pre-mRNA-processing fac K.IDSDLGDAWAFYK#.F                 | 20.79  | 9.67   | 2.15  | 0.47 |
| Q91YR7_PRP6_MOUSE  | Prp6   | Pre-mRNA-processing fac K.IGEILVVAAR@.I                    | 11.95  | 3.58   | 3.33  | 0.30 |
| Q91YR7_PRP6_MOUSE  | Prp6   | Pre-mRNA-processing fac K.HIGELIVLVAAR@.I                  | 13.45  | 6.65   | 2.02  | 0.49 |
| Q91YR7_PRP6_MOUSE  | Prp6   | Pre-mRNA-processing fac R.K#LAEVTEEEWLSIPEVGDAR@.N         | 8.26   | 4.06   | 2.03  | 0.49 |
| Q91YR7_PRP6_MOUSE  | Prp6   | Pre-mRNA-processing fac K.LEEANGNTQM*VSK#.I                | 5.37   | 1.40   | 3.85  | 0.26 |
| Q91YR7_PRP6_MOUSE  | Prp6   | Pre-mRNA-processing fac R.LEEVTGK#.L                       | 48.63  | 12.72  | 3.82  | 0.26 |
| Q91YR7_PRP6_MOUSE  | Prp6   | Pre-mRNA-processing fac K.LESENNEVER@.A                    | 27.13  | 8.50   | 3.19  | 0.31 |
| Q91YR7_PRP6_MOUSE  | Prp6   | Pre-mRNA-processing fac R.LETYENAR@.K                      | 37.87  | 11.75  | 3.22  | 0.31 |
| Q91YR7_PRP6_MOUSE  | Prp6   | Pre-mRNA-processing fac R.LSQSDSVSGQTVDPK#.G               | 27.76  | 10.06  | 2.76  | 0.36 |
| Q91YR7_PRP6_MOUSE  | Prp6   | Pre-mRNA-processing fac K.NIANTLM*AK#.A                    | 31.89  | 9.80   | 3.25  | 0.31 |
| Q91YR7_PRP6_MOUSE  | Prp6   | Pre-mRNA-processing fac K.NGPLWLKESVR@.L                   | 34.36  | 15.11  | 2.27  | 0.44 |
| Q91YR7_PRP6_MOUSE  | Prp6   | Pre-mRNA-processing fac K.SEDVWLEAAR@.L                    | 11.80  | 6.59   | 1.79  | 0.56 |
| Q91YR7_PRP6_MOUSE  | Prp6   | Pre-mRNA-processing fac R.AAELTDIR@.A                      | 31.67  | 11.50  | 2.75  | 0.36 |
| Q91YR7_PRP6_MOUSE  | Prp6   | Pre-mRNA-processing fac K.AAVELEPEDAR@.I                   | 34.41  | 8.61   | 4.00  | 0.25 |
| Q91YR7_PRP6_MOUSE  | Prp6   | Pre-mRNA-processing fac K.AVVAQAVR@.H                      | 46.86  | 15.15  | 3.09  | 0.32 |
| Q91YR7_PRP6_MOUSE  | Prp6   | Pre-mRNA-processing fac R.ESLEALLQR@.A                     | 35.02  | 8.16   | 4.29  | 0.23 |
| Q91YR7_PRP6_MOUSE  | Prp6   | Pre-mRNA-processing fac K.FELQHGTEQEQVEVR@.K               | 22.98  | 3.98   | 5.78  | 0.17 |
| Q91YR7_PRP6_MOUSE  | Prp6   | Pre-mRNA-processing fac K.GQIEEQGELM*EK#.A                 | 17.52  | 4.62   | 3.79  | 0.26 |

|                     |        |                                                              |        |       |      |      |
|---------------------|--------|--------------------------------------------------------------|--------|-------|------|------|
| Q91YR7_PRP6_MOUSE   | Prpf6  | Pre-mRNA-processing fac R.HIWITAANK.L                        | 16.48  | 8.66  | 1.90 | 0.53 |
| Q91YR7_PRP6_MOUSE   | Prpf6  | Pre-mRNA-processing fac R.HYEDFPK.L                          | 17.81  | 5.33  | 3.34 | 0.30 |
| Q91YR7_PRP6_MOUSE   | Prpf6  | Pre-mRNA-processing fac K.IDSDLDGDAWAFYK.F                   | 23.81  | 7.29  | 3.27 | 0.31 |
| Q91YR7_PRP6_MOUSE   | Prpf6  | Pre-mRNA-processing fac K.LEEANGNTQMVEK.I                    | 7.47   | 2.63  | 2.84 | 0.35 |
| Q91YR7_PRP6_MOUSE   | Prpf6  | Pre-mRNA-processing fac K.LESENNYEYER.A                      | 28.28  | 7.34  | 3.85 | 0.26 |
| Q91YR7_PRP6_MOUSE   | Prpf6  | Pre-mRNA-processing fac R.LSQVSDSVSGQTVVDPK#.G               | 27.45  | 9.78  | 2.81 | 0.36 |
| Q91YR7_PRP6_MOUSE   | Prpf6  | Pre-mRNA-processing fac K.NPGLWLESYVR@.L                     | 20.91  | 10.20 | 2.05 | 0.49 |
| Q91YR7_PRP6_MOUSE   | Prpf6  | Pre-mRNA-processing fac K.SEDVWLEAAR@.L                      | 11.50  | 3.90  | 2.95 | 0.34 |
| Q91YR7_PRP6_MOUSE   | Prpf6  | Pre-mRNA-processing fac K.WLAGDVPAAR@.S                      | 15.30  | 8.86  | 1.73 | 0.58 |
| Q99PVO_PRP8_MOUSE   | Prpf8  | Pre-mRNA-processing-spl R.ALDIPLVK#.N                        | 76.78  | 40.83 | 1.88 | 0.53 |
| Q99PVO_PRP8_MOUSE   | Prpf8  | Pre-mRNA-processing-spl K.ALNM*AIKGPVK#.F                    | 24.10  | 12.76 | 1.89 | 0.53 |
| Q99PVO_PRP8_MOUSE   | Prpf8  | Pre-mRNA-processing-spl K.ANPALYVLR@.E                       | 66.02  | 28.35 | 2.33 | 0.43 |
| Q99PVO_PRP8_MOUSE   | Prpf8  | Pre-mRNA-processing-spl R.AQIAGLYGVSPDPNVQV#.E               | 14.31  | 9.74  | 1.47 | 0.68 |
| Q99PVO_PRP8_MOUSE   | Prpf8  | Pre-mRNA-processing-spl R.ASEM*AGPPQM*PNDFLSQDIATEAHPHPIR@.L | 36.61  | 20.52 | 1.78 | 0.56 |
| Q99PVO_PRP8_MOUSE   | Prpf8  | Pre-mRNA-processing-spl R.AVFWDIK#.N                         | 38.27  | 16.33 | 2.34 | 0.43 |
| Q99PVO_PRP8_MOUSE   | Prpf8  | Pre-mRNA-processing-spl K.DGVVNLQNEVTK#.E                    | 30.93  | 16.44 | 1.88 | 0.53 |
| Q99PVO_PRP8_MOUSE   | Prpf8  | Pre-mRNA-processing-spl R.DIHLGM*EISAPSQQR@.Q                | 30.05  | 14.77 | 2.03 | 0.49 |
| Q99PVO_PRP8_MOUSE   | Prpf8  | Pre-mRNA-processing-spl R.DINLQDEWDWNEFDINK#.I               | 18.48  | 8.99  | 2.06 | 0.49 |
| Q99PVO_PRP8_MOUSE   | Prpf8  | Pre-mRNA-processing-spl K.DVM*DSITTKQ#.I                     | 9.43   | 5.06  | 1.86 | 0.54 |
| Q99PVO_PRP8_MOUSE   | Prpf8  | Pre-mRNA-processing-spl R.EAVVNTQELDLLVK#.C                  | 16.32  | 8.37  | 1.95 | 0.51 |
| Q99PVO_PRP8_MOUSE   | Prpf8  | Pre-mRNA-processing-spl R.EELGLIEQAYDNPHHEALSR@.I            | 62.65  | 29.75 | 2.11 | 0.47 |
| Q99PVO_PRP8_MOUSE   | Prpf8  | Pre-mRNA-processing-spl K.ELGGLGM*LSM*GHVLIPOQDLR@.W         | 48.98  | 20.34 | 2.41 | 0.42 |
| Q99PVO_PRP8_MOUSE   | Prpf8  | Pre-mRNA-processing-spl R.EQSQTATQTR@.T                      | 38.28  | 17.98 | 2.13 | 0.47 |
| Q99PVO_PRP8_MOUSE   | Prpf8  | Pre-mRNA-processing-spl K.ETGYTILPK#.N                       | 32.49  | 20.94 | 1.55 | 0.64 |
| Q99PVO_PRP8_MOUSE   | Prpf8  | Pre-mRNA-processing-spl R.EVGIEFM*DLVSHLVPVYDVEPLEK#.I       | 24.19  | 13.55 | 1.79 | 0.56 |
| Q99PVO_PRP8_MOUSE   | Prpf8  | Pre-mRNA-processing-spl K.FGDILK#.A                          | 71.49  | 24.59 | 2.91 | 0.34 |
| Q99PVO_PRP8_MOUSE   | Prpf8  | Pre-mRNA-processing-spl R.FNTGVPVK#.G                        | 55.38  | 29.81 | 1.86 | 0.54 |
| Q99PVO_PRP8_MOUSE   | Prpf8  | Pre-mRNA-processing-spl R.FPPVVFYTPK#.E                      | 17.55  | 11.42 | 1.54 | 0.65 |
| Q99PVO_PRP8_MOUSE   | Prpf8  | Pre-mRNA-processing-spl R.FSPIFPPLSYK#.H                     | 32.38  | 22.44 | 1.44 | 0.69 |
| Q99PVO_PRP8_MOUSE   | Prpf8  | Pre-mRNA-processing-spl R.FTLWVSPYTK#.A                      | 16.74  | 9.96  | 1.68 | 0.59 |
| Q99PVO_PRP8_MOUSE   | Prpf8  | Pre-mRNA-processing-spl R.GPGNPVPGLAPLPDYM*SEEK#.L           | 6.74   | 4.02  | 1.67 | 0.60 |
| Q99PVO_PRP8_MOUSE   | Prpf8  | Pre-mRNA-processing-spl R.GPGNPVPGLAPLPDYM*SEEKLOEK.A        | 19.17  | 13.27 | 1.44 | 0.69 |
| Q99PVO_PRP8_MOUSE   | Prpf8  | Pre-mRNA-processing-spl K.GTYFTPEWGLFWEK#.A                  | 14.73  | 12.21 | 1.21 | 0.83 |
| Q99PVO_PRP8_MOUSE   | Prpf8  | Pre-mRNA-processing-spl K.HDVNLGR@.A                         | 48.32  | 23.17 | 2.08 | 0.48 |
| Q99PVO_PRP8_MOUSE   | Prpf8  | Pre-mRNA-processing-spl K.HGDEIITSTSNYETQFSSK#.T             | 50.35  | 23.68 | 2.13 | 0.47 |
| Q99PVO_PRP8_MOUSE   | Prpf8  | Pre-mRNA-processing-spl K.HLIYR@.F                           | 25.46  | 10.88 | 2.34 | 0.43 |
| Q99PVO_PRP8_MOUSE   | Prpf8  | Pre-mRNA-processing-spl K.IDLTLNR@.L                         | 81.64  | 43.14 | 1.89 | 0.53 |
| Q99PVO_PRP8_MOUSE   | Prpf8  | Pre-mRNA-processing-spl K.IHTSVWAGQK#.R                      | 14.96  | 5.61  | 2.67 | 0.37 |
| Q99PVO_PRP8_MOUSE   | Prpf8  | Pre-mRNA-processing-spl K.IM*ADNPSWDGEX#.T                   | 12.82  | 5.69  | 2.25 | 0.44 |
| Q99PVO_PRP8_MOUSE   | Prpf8  | Pre-mRNA-processing-spl K.ISLIQIFR@.A                        | 47.31  | 21.13 | 2.24 | 0.45 |
| Q99PVO_PRP8_MOUSE   | Prpf8  | Pre-mRNA-processing-spl K.ITDAYLDQLWVYEAADK#.R               | 5.13   | 3.47  | 1.48 | 0.68 |
| Q99PVO_PRP8_MOUSE   | Prpf8  | Pre-mRNA-processing-spl R.KHGM*LDLIEVHLLDFPNVIK#.G           | 28.36  | 12.81 | 2.21 | 0.45 |
| Q99PVO_PRP8_MOUSE   | Prpf8  | Pre-mRNA-processing-spl R.LIVDHNIADYMTAK#.N                  | 72.69  | 34.86 | 2.09 | 0.48 |
| Q99PVO_PRP8_MOUSE   | Prpf8  | Pre-mRNA-processing-spl K.LLENM*PM*PWEQJR@.D                 | 9.72   | 5.89  | 1.65 | 0.61 |
| Q99PVO_PRP8_MOUSE   | Prpf8  | Pre-mRNA-processing-spl K.LLILALER@.L                        | 74.15  | 40.98 | 1.81 | 0.55 |
| Q99PVO_PRP8_MOUSE   | Prpf8  | Pre-mRNA-processing-spl R.LNQSQR@EELGLIEQAYDNPHHEALSR@.I     | 19.23  | 11.20 | 1.79 | 0.56 |
| Q99PVO_PRP8_MOUSE   | Prpf8  | Pre-mRNA-processing-spl K.LTPSGYEWGR@.Q                      | 19.23  | 6.75  | 2.85 | 0.35 |
| Q99PVO_PRP8_MOUSE   | Prpf8  | Pre-mRNA-processing-spl K.LWNLNNYR@.T                        | 27.08  | 11.87 | 2.28 | 0.44 |
| Q99PVO_PRP8_MOUSE   | Prpf8  | Pre-mRNA-processing-spl K.NNVNVALTQSEIR@.D                   | 25.12  | 14.82 | 1.69 | 0.59 |
| Q99PVO_PRP8_MOUSE   | Prpf8  | Pre-mRNA-processing-spl K.NNVNVALTQSEIR@DILGM*EISAPSQQR@.Q   | 8.06   | 4.43  | 1.82 | 0.55 |
| Q99PVO_PRP8_MOUSE   | Prpf8  | Pre-mRNA-processing-spl R.QILM*ASGSTTFTK#.I                  | 20.90  | 14.45 | 1.45 | 0.69 |
| Q99PVO_PRP8_MOUSE   | Prpf8  | Pre-mRNA-processing-spl R.QQAEIEK#.Q                         | 56.16  | 29.73 | 1.89 | 0.53 |
| Q99PVO_PRP8_MOUSE   | Prpf8  | Pre-mRNA-processing-spl R.R@ALDIPLVK#.N                      | 14.39  | 11.04 | 1.30 | 0.77 |
| Q99PVO_PRP8_MOUSE   | Prpf8  | Pre-mRNA-processing-spl R.R@LTLEDLEDSDWR@.G                  | 17.44  | 6.74  | 2.59 | 0.39 |
| Q99PVO_PRP8_MOUSE   | Prpf8  | Pre-mRNA-processing-spl R.SVTTVQWENSFVYSK#.D                 | 15.55  | 7.29  | 2.13 | 0.47 |
| Q99PVO_PRP8_MOUSE   | Prpf8  | Pre-mRNA-processing-spl K.TAEVAALIR@.S                       | 70.05  | 34.74 | 2.02 | 0.50 |
| Q99PVO_PRP8_MOUSE   | Prpf8  | Pre-mRNA-processing-spl K.TEDPDLAPYFDLIPISHR@.H              | 112.60 | 67.90 | 1.66 | 0.60 |
| Q99PVO_PRP8_MOUSE   | Prpf8  | Pre-mRNA-processing-spl K.TFEGNLTKPIINGAIFINPR@.T            | 6.86   | 4.40  | 1.56 | 0.64 |
| Q99PVO_PRP8_MOUSE   | Prpf8  | Pre-mRNA-processing-spl R.TGQLFLK#.I                         | 37.11  | 19.64 | 1.89 | 0.53 |
| Q99PVO_PRP8_MOUSE   | Prpf8  | Pre-mRNA-processing-spl R.TILQLHSEAWR.C                      | 14.73  | 7.23  | 2.04 | 0.49 |
| Q99PVO_PRP8_MOUSE   | Prpf8  | Pre-mRNA-processing-spl R.TVKN#HGDWIEITSTSNYETQFSSK#.T       | 11.29  | 3.39  | 3.33 | 0.30 |
| Q99PVO_PRP8_MOUSE   | Prpf8  | Pre-mRNA-processing-spl K.VILKHPDK#.T                        | 25.54  | 11.67 | 2.19 | 0.46 |
| Q99PVO_PRP8_MOUSE   | Prpf8  | Pre-mRNA-processing-spl K.VPGLPTPIENM*ILR.Y                  | 27.38  | 15.44 | 1.77 | 0.56 |
| Q99PVO_PRP8_MOUSE   | Prpf8  | Pre-mRNA-processing-spl K.VPGLPTPIENMILR@.Y                  | 7.71   | 4.95  | 1.56 | 0.64 |
| Q99PVO_PRP8_MOUSE   | Prpf8  | Pre-mRNA-processing-spl R.VVAEYAK#.R                         | 38.46  | 17.17 | 2.24 | 0.45 |
| Q99PVO_PRP8_MOUSE   | Prpf8  | Pre-mRNA-processing-spl R.VYLGALK#.Y                         | 58.49  | 25.58 | 2.29 | 0.44 |
| Q99PVO_PRP8_MOUSE   | Prpf8  | Pre-mRNA-processing-spl R.WLGNLRLAR@.Q                       | 25.37  | 14.63 | 1.73 | 0.58 |
| Q99PVO_PRP8_MOUSE   | Prpf8  | Pre-mRNA-processing-spl R.WQFTLPM*MTLYR@.L                   | 17.38  | 8.00  | 2.17 | 0.46 |
| Q99PVO_PRP8_MOUSE   | Prpf8  | Pre-mRNA-processing-spl R.YIQPWESEFDSQR@.V                   | 26.03  | 17.80 | 1.46 | 0.68 |
| Q99PVO_PRP8_MOUSE   | Prpf8  | Pre-mRNA-processing-spl R.YLTHEPDDNENIVSNNK#.K               | 18.64  | 9.05  | 2.06 | 0.49 |
| Q99PVO_PRP8_MOUSE   | Prpf8  | Pre-mRNA-processing-spl K.YVVLNALK#.H                        | 55.07  | 28.79 | 1.91 | 0.52 |
| E9PYL2_E9PYL2_MOUSE | Prr12  | Protein Prr12 OS=Mus m R.ATGPEAGGGAAGGGGGR@PIIQSPGYK#.T      | 3.62   | 3.79  | 0.95 | 1.05 |
| E9PYL2_E9PYL2_MOUSE | Prr12  | Protein Prr12 OS=Mus m K.GLGGSGGAGGAPGTPYELAK#.E             | 6.11   | 4.43  | 1.38 | 0.72 |
| E9PYL2_E9PYL2_MOUSE | Prr12  | Protein Prr12 OS=Mus m R.IR@PLEGPAAM*AGPASITDGAH#.K          | 6.35   | 3.87  | 1.64 | 0.61 |
| E9PYL2_E9PYL2_MOUSE | Prr12  | Protein Prr12 OS=Mus m R.TSGADGLVGEDGPADAH#.G                | 4.14   | 3.97  | 1.04 | 0.96 |
| Q3UPH1_PRRC1_MOUSE  | Prrc1  | Protein PRRC1 OS=Mus n K.SGGELDVIYVSNK#.E                    | 22.86  | 4.63  | 4.93 | 0.20 |
| Q3UPH1_PRRC1_MOUSE  | Prrc1  | Protein PRRC1 OS=Mus n R.WSGLLVTVGVELEK#.S                   | 17.67  | 6.70  | 2.64 | 0.38 |
| Q3UPH1_PRRC1_MOUSE  | Prrc1  | Protein PRRC1 OS=Mus n R.WSGLLVTVGVELEK#.S                   | 5.31   | 3.51  | 1.51 | 0.66 |
| F8WHT3_F8WHT3_MOUSE | Prrc2b | Protein PRRC2B OS=Mus K.FIQSEM*SEAVR@.A                      | 8.51   | 2.93  | 2.90 | 0.34 |
| F8WHT3_F8WHT3_MOUSE | Prrc2b | Protein PRRC2B OS=Mus R.LLSFSPPEEFTLK#.A                     | 15.42  | 4.24  | 3.64 | 0.28 |
| F8WHT3_F8WHT3_MOUSE | Prrc2b | Protein PRRC2B OS=Mus R.SPDEALPGLGSHSPYALER@.T               | 7.25   | 3.62  | 2.00 | 0.50 |
| F8WHT3_F8WHT3_MOUSE | Prrc2b | Protein PRRC2B OS=Mus R.TAVTAFSSTPEPTEGFK#.S                 | 6.48   | 2.84  | 2.28 | 0.44 |
| F8WHT3_F8WHT3_MOUSE | Prrc2b | Protein PRRC2B OS=Mus R.TYTEDQSGIDTR@.S                      | 7.26   | 1.86  | 3.89 | 0.26 |
| Q3TLH4_PRC2C_MOUSE  | Prrc2c | Protein PRRC2C OS=Mus K.AFGSGIDIK#PPIGGR@.G                  | 9.22   | 1.94  | 4.76 | 0.21 |
| P49769_PSN1_MOUSE   | Psen1  | Protein Psen1 OS=Mus m R.AA0VSGSILSTSEDEPER@.S               | 9.27   | 1.76  | 3.40 | 0.29 |
| P49722_PSA2_MOUSE   | Psm2   | Protein Psm2 OS=Mus m R.YNEDLELEDAIHTAILK#.E                 | 6.56   | 9.53  | 0.69 | 1.45 |
| Q922U1_PSA5_MOUSE   | Psm5   | Protein Psm5 OS=Mus m R.AIGSASEGAQSLSQEVYHK#.S               | 22.86  | 8.46  | 2.70 | 0.37 |
| Q922U1_PSA5_MOUSE   | Psm5   | Protein Psm5 OS=Mus m R.LFQVEYAEIAIK#.L                      | 12.68  | 5.89  | 2.15 | 0.46 |
| Q922U1_PSA5_MOUSE   | Psm5   | Protein Psm5 OS=Mus m R.GVNTFSPEGR@.L                        | 17.64  | 10.94 | 1.61 | 0.62 |
| Q922U1_PSA5_MOUSE   | Psm5   | Protein Psm5 OS=Mus m R.LFQVEYAEIAIK#.L                      | 31.58  | 13.56 | 2.33 | 0.43 |
| Q922U1_PSA5_MOUSE   | Psm5   | Protein Psm5 OS=Mus m R.SSLILK#.Q                            | 19.00  | 12.09 | 1.57 | 0.64 |
| O35955_PSB10_MOUSE  | Psm10  | Protein Psm10 OS=Mus m R.ALSTPTEPVQR@.A                      | 11.69  | 7.79  | 1.50 | 0.67 |
| O35955_PSB10_MOUSE  | Psm10  | Protein Psm10 OS=Mus m R.LPFTALGSGGGAVALLEDLR@.F             | 12.55  | 4.65  | 2.70 | 0.37 |
| Q9R1P1_PSB3_MOUSE   | Psm3   | Protein Psm3 OS=Mus m R.FGPPYTPVIAGLDPK#.T                   | 2.79   | 6.16  | 0.45 | 2.21 |
| P62192_PRS4_MOUSE   | Psmc1  | Protein Psmc1 OS=Mus m R.KAPQETYSADGLDNQIQEI#.E              | 5.11   | 2.47  | 2.07 | 0.48 |
| P62192_PRS4_MOUSE   | Psmc1  | Protein Psmc1 OS=Mus m R.AVANQTSATFLR@.V                     | 22.93  | 7.65  | 3.00 | 0.33 |
| P62192_PRS4_MOUSE   | Psmc1  | Protein Psmc1 OS=Mus m R.K.HQEQTEPEGLY.-                     | 8.76   | 3.75  | 2.34 | 0.43 |
| P62192_PRS4_MOUSE   | Psmc1  | Protein Psmc1 OS=Mus m R.M*TLADDVTLDDLLM*AK#.D               | 10.53  | 2.93  | 3.59 | 0.28 |
| P62192_PRS4_MOUSE   | Psmc1  | Protein Psmc1 OS=Mus m R.NQEQM*KPLEEKQEER.S                  | 8.24   | 2.71  | 3.05 | 0.33 |
| P62192_PRS4_MOUSE   | Psmc1  | Protein Psmc1 OS=Mus m R.VAEHAPSVIFIDEIDAIGTK#.R             | 26.40  | 8.59  | 3.07 | 0.33 |
| P62192_PRS4_MOUSE   | Psmc1  | Protein Psmc1 OS=Mus m R.AVANQTSATFLR@.V                     | 10.10  | 4.14  | 2.44 | 0.41 |
| P62192_PRS4_MOUSE   | Psmc1  | Protein Psmc1 OS=Mus m R.VAEHAPSVIFIDEIDAIGTK#.R             | 8.20   | 3.11  | 2.64 | 0.38 |
| P46471_PRS7_MOUSE   | Psmc2  | Protein Psmc2 OS=Mus m R.FDDGAGGDNEVQR@.T                    | 38.90  | 15.50 | 2.51 | 0.40 |

|                     |        |                                                               |        |        |       |      |
|---------------------|--------|---------------------------------------------------------------|--------|--------|-------|------|
| P46471_PRS7_MOUSE   | Psmc2  | 26S protease regulatory : R.FVNLIQPPK#GVLLFGPPGTGK#.T         | 7.85   | 4.75   | 1.65  | 0.61 |
| P46471_PRS7_MOUSE   | Psmc2  | 26S protease regulatory : K.FVVDLSQVAPTDIEGM#R@.V             | 5.40   | 2.70   | 2.00  | 0.50 |
| P46471_PRS7_MOUSE   | Psmc2  | 26S protease regulatory : K.IATEKH#DLEAVANK#.V                | 19.16  | 9.82   | 1.95  | 0.51 |
| P46471_PRS7_MOUSE   | Psmc2  | 26S protease regulatory : R.KIEFSLPLEGR.T                     | 22.06  | 10.73  | 2.06  | 0.49 |
| P46471_PRS7_MOUSE   | Psmc2  | 26S protease regulatory : K.QVEDIDQLLKK#.K                    | 6.38   | 3.19   | 2.00  | 0.50 |
| P46471_PRS7_MOUSE   | Psmc2  | 26S protease regulatory : R.FDDGAGGDNEVQR@.T                  | 2.59   | 1.55   | 1.67  | 0.60 |
| O88685_PRS6A_MOUSE  | Psmc3  | 26S protease regulatory : K.AM#EVDER@PTEQSDIGGLDK#.Q          | 15.99  | 4.81   | 3.32  | 0.30 |
| O88685_PRS6A_MOUSE  | Psmc3  | 26S protease regulatory : K.DSYLILELTPTEYDSR@.V               | 17.23  | 8.53   | 2.02  | 0.49 |
| O88685_PRS6A_MOUSE  | Psmc3  | 26S protease regulatory : K.EK#HAPSIIFDELDAIGTK#.R            | 23.13  | 9.76   | 2.37  | 0.42 |
| O88685_PRS6A_MOUSE  | Psmc3  | 26S protease regulatory : R.GATELHDEYVM#EGILEVQAK#.K          | 8.23   | 5.19   | 1.59  | 0.63 |
| O88685_PRS6A_MOUSE  | Psmc3  | 26S protease regulatory : K.GVLM#YGGPPGTGK#.T                 | 12.79  | 4.06   | 3.15  | 0.32 |
| O88685_PRS6A_MOUSE  | Psmc3  | 26S protease regulatory : R.KHM#NVPSPVNYELAR@.C               | 12.59  | 6.66   | 1.89  | 0.53 |
| O88685_PRS6A_MOUSE  | Psmc3  | 26S protease regulatory : R.LLDSEIK#.I                        | 29.65  | 11.72  | 2.53  | 0.40 |
| O88685_PRS6A_MOUSE  | Psmc3  | 26S protease regulatory : K.M#STEEIVQR@.T                     | 18.26  | 4.12   | 4.43  | 0.23 |
| O88685_PRS6A_MOUSE  | Psmc3  | 26S protease regulatory : R.TM#LELLNLQDGFQNTQVK#.V            | 9.49   | 2.80   | 3.38  | 0.30 |
| O88685_PRS6A_MOUSE  | Psmc3  | 26S protease regulatory : R.VDILDPAALLR@.S                    | 35.50  | 10.29  | 3.44  | 0.29 |
| O88685_PRS6A_MOUSE  | Psmc3  | 26S protease regulatory : K.VIAATNR@VDILDPAALLR@.S            | 12.45  | 5.08   | 2.46  | 0.41 |
| P54775_PRS6B_MOUSE  | Psmc4  | 26S protease regulatory : R.ILELLNLQMD#DGFQDNVNVK#.V          | 33.67  | 8.92   | 3.77  | 0.26 |
| P54775_PRS6B_MOUSE  | Psmc4  | 26S protease regulatory : R.ILELLNLQMDGFDQNVNVK#.V            | 8.24   | 2.71   | 3.05  | 0.33 |
| P54775_PRS6B_MOUSE  | Psmc4  | 26S protease regulatory : K.IQDEIPALSVSRQGTLSFLGPEPELDELYSR.Y | 24.54  | 5.75   | 4.27  | 0.23 |
| P54775_PRS6B_MOUSE  | Psmc4  | 26S protease regulatory : K.R@FDAQTGADR@.E                    | 11.63  | 4.21   | 2.77  | 0.36 |
| P54775_PRS6B_MOUSE  | Psmc4  | 26S protease regulatory : K.R@FDAQTGADR@EVQR@.I               | 11.52  | 3.92   | 2.94  | 0.34 |
| P54775_PRS6B_MOUSE  | Psmc4  | 26S protease regulatory : R.VVGSFEVRQ#.Y                      | 16.87  | 14.43  | 2.56  | 0.39 |
| P62196_PRS8_MOUSE   | Psmc5  | 26S protease regulatory : R.EELQLLQEQGSYVGEVVR@.A             | 2.19   | 2.26   | 0.97  | 1.03 |
| P62196_PRS8_MOUSE   | Psmc5  | 26S protease regulatory : R.EHAPSIIIFM#DEIDISGSSR@.L          | 21.02  | 8.88   | 2.37  | 0.42 |
| P62196_PRS8_MOUSE   | Psmc5  | 26S protease regulatory : K.EVIELPVK#HPELFEALGIAQPK#.G        | 23.82  | 9.47   | 2.51  | 0.40 |
| P62196_PRS8_MOUSE   | Psmc5  | 26S protease regulatory : K.IAELM#PGASGAEVK#.G                | 16.67  | 5.96   | 2.80  | 0.36 |
| P62196_PRS8_MOUSE   | Psmc5  | 26S protease regulatory : R.LEGGSDDSEVQR@.T                   | 53.89  | 13.66  | 3.94  | 0.25 |
| P62196_PRS8_MOUSE   | Psmc5  | 26S protease regulatory : R.LLR@EELQLLQEQGSYVGEVVR@.A         | 48.00  | 10.44  | 4.60  | 0.22 |
| P62196_PRS8_MOUSE   | Psmc5  | 26S protease regulatory : R.R@VHVTFQDFEM#AVAK#.V              | 17.86  | 5.47   | 3.26  | 0.31 |
| P62196_PRS8_MOUSE   | Psmc5  | 26S protease regulatory : R.TM#LELLNLQDGFQNTQVK#.N            | 35.92  | 12.32  | 2.91  | 0.34 |
| P62196_PRS8_MOUSE   | Psmc5  | 26S protease regulatory : R.VHVTFQDFEM#AVAK#.V                | 4.2    | 2.56   | 1.73  | 0.58 |
| P62196_PRS8_MOUSE   | Psmc5  | 26S protease regulatory : K.VPDSTYEM#IGLQDK#.Q                | 23.39  | 9.03   | 2.59  | 0.39 |
| P62196_PRS8_MOUSE   | Psmc5  | 26S protease regulatory : R.LEGGSDDSEVQR@.T                   | 4.63   | 3.57   | 1.30  | 0.77 |
| P62196_PRS8_MOUSE   | Psmc5  | 26S protease regulatory : R.LLR@EELQLLQEQGSYVGEVVR@.A         | 6.85   | 4.10   | 1.67  | 0.60 |
| P62334_PRS10_MOUSE  | Psmc6  | 26S protease regulatory : K.ALQSVGQVGEVLK#.Q                  | 42.69  | 18.55  | 2.30  | 0.43 |
| P62334_PRS10_MOUSE  | Psmc6  | 26S protease regulatory : R.EVDPLVYNN#SHEDPGNVSYSEIGLSEIQR@.E | 10.55  | 4.95   | 2.13  | 0.47 |
| P62334_PRS10_MOUSE  | Psmc6  | 26S protease regulatory : R.EVIELPLTNPELQFR@.V                | 33.19  | 17.53  | 1.89  | 0.53 |
| P62334_PRS10_MOUSE  | Psmc6  | 26S protease regulatory : K.IHIDLPEQAR@.L                     | 16.44  | 6.60   | 2.49  | 0.40 |
| P62334_PRS10_MOUSE  | Psmc6  | 26S protease regulatory : K.LSDGPNADLR.N                      | 14.08  | 9.02   | 1.56  | 0.64 |
| P62334_PRS10_MOUSE  | Psmc6  | 26S protease regulatory : R.VALDM#TLLTIM#R@.Y                 | 9.01   | 4.61   | 1.95  | 0.51 |
| P62334_PRS10_MOUSE  | Psmc6  | 26S protease regulatory : K.ALQSVGQVGEVLK#.Q                  | 6.63   | 1.66   | 3.99  | 0.25 |
| Q3TXS7_PSM1_MOUSE   | Psmc1  | 26S proteasome non-ATP R.AAVESLGFILFR@.T                      | 24.17  | 8.73   | 2.77  | 0.36 |
| Q3TXS7_PSM1_MOUSE   | Psmc1  | 26S proteasome non-ATP K.IEEEQEPPEPPEFYIDD.-                  | 3.05   | 3.05   | 1.00  | 1.00 |
| Q3TXS7_PSM1_MOUSE   | Psmc1  | 26S proteasome non-ATP K.TNLYQDDAVTGEAAGLALGLVM#LGSK#.N       | 7.37   | 2.80   | 2.63  | 0.38 |
| Q3TXS7_PSM1_MOUSE   | Psmc1  | 26S proteasome non-ATP R.AAVESLGFILFR@.T                      | 13.25  | 5.87   | 2.26  | 0.44 |
| Q3TXS7_PSM1_MOUSE   | Psmc1  | 26S proteasome non-ATP K.IEEEQEPPEPPEFYIDD.-                  | 3.72   | 3.72   | 1.00  | 1.00 |
| Q3TXS7_PSM1_MOUSE   | Psmc1  | 26S proteasome non-ATP K.TNLYQDDAVTGEAAGLALGLVM#LGSK#.N       | 6.38   | 1.95   | 3.27  | 0.31 |
| Q8BG32_PSD11_MOUSE  | Psmc11 | 26S proteasome non-ATP K.ALLVEVLLEEK#.T                       | 7.80   | 2.35   | 3.32  | 0.30 |
| Q8BG32_PSD11_MOUSE  | Psmc11 | 26S proteasome non-ATP R.DIQENDEAVQVK#.E                      | 23.97  | 6.77   | 3.54  | 0.28 |
| Q8BG32_PSD11_MOUSE  | Psmc11 | 26S proteasome non-ATP K.EQSILELGLLAK#.T                      | 38.15  | 16.78  | 2.27  | 0.44 |
| Q8BG32_PSD11_MOUSE  | Psmc11 | 26S proteasome non-ATP K.IM#LNTPEVDQALVSGK#.L                 | 17.66  | 4.89   | 3.22  | 0.31 |
| Q8BG32_PSD11_MOUSE  | Psmc11 | 26S proteasome non-ATP R.LVSLYDFTK#.R                         | 21.57  | 5.05   | 4.27  | 0.23 |
| Q8BG32_PSD11_MOUSE  | Psmc11 | 26S proteasome non-ATP K.TAYSFYEFAGYDSDSPK#.A                 | 3.62   | 2.50   | 1.45  | 0.69 |
| Q8BG32_PSD11_MOUSE  | Psmc11 | 26S proteasome non-ATP K.TAYSFYEFAGYDSDSPK#.A                 | 3.13   | 1.55   | 2.01  | 0.50 |
| Q8BG32_PSD11_MOUSE  | Psmc11 | 26S proteasome non-ATP R.VQIEHISLTK#.L                        | 32.01  | 6.44   | 4.97  | 0.20 |
| Q9D8W5_PSD12_MOUSE  | Psmc12 | 26S proteasome non-ATP K.FFQEENTENLKH.L                       | 17.05  | 6.88   | 2.48  | 0.40 |
| Q9D8W5_PSD12_MOUSE  | Psmc12 | 26S proteasome non-ATP K.IYVEIER@.A                           | 20.40  | 11.47  | 1.78  | 0.56 |
| Q9D8W5_PSD12_MOUSE  | Psmc12 | 26S proteasome non-ATP R.LQEVIETLLEEK#.Q                      | 24.78  | 9.91   | 2.50  | 0.40 |
| Q9D8W5_PSD12_MOUSE  | Psmc12 | 26S proteasome non-ATP R.LQEVIETLLEEK#.Q                      | 11.48  | 4.41   | 2.60  | 0.38 |
| Q9WV12_PSD13_MOUSE  | Psmc13 | 26S proteasome non-ATP K.DLPVSEQER@.A                         | 14.97  | 7.01   | 2.14  | 0.47 |
| Q9WV12_PSD13_MOUSE  | Psmc13 | 26S proteasome non-ATP K.LNIGDLOATK#.E                        | 12.89  | 5.30   | 2.43  | 0.41 |
| Q9WV12_PSD13_MOUSE  | Psmc13 | 26S proteasome non-ATP R.VLIDLQK#.G                           | 23.04  | 9.27   | 2.48  | 0.40 |
| O35593_PSD_MOUSE    | Psmc14 | 26S proteasome non-ATP R.AVAVVDDIQSVK#.G                      | 22.30  | 13.88  | 1.61  | 0.62 |
| O35593_PSD_MOUSE    | Psmc14 | 26S proteasome non-ATP R.VIDVFAM#PQSGTGVSEAVDVPVQAK#.M        | 228.46 | 13.90  | 16.44 | 0.06 |
| O35593_PSD_MOUSE    | Psmc14 | 26S proteasome non-ATP R.VIDVFAM#PQSGTGVSEAVDVPVQAK#.M        | 6.83   | 2.90   | 2.36  | 0.42 |
| Q8VDM4_PSM2_MOUSE   | Psmc2  | 26S proteasome non-ATP K.AQR@EPLTLTK#.E                       | 12.93  | 5.00   | 2.59  | 0.39 |
| Q8VDM4_PSM2_MOUSE   | Psmc2  | 26S proteasome non-ATP R.AVPLALALISVSNPR@.L                   | 14.16  | 4.63   | 3.06  | 0.33 |
| Q8VDM4_PSM2_MOUSE   | Psmc2  | 26S proteasome non-ATP R.DK#TPVQSQP#ATTPSGADEK#.S             | 6.01   | 3.63   | 1.65  | 0.60 |
| Q8VDM4_PSM2_MOUSE   | Psmc2  | 26S proteasome non-ATP K.EWQELDDAEK#.A                        | 1.20   | 1.86   | 3.33  | 0.30 |
| Q8VDM4_PSM2_MOUSE   | Psmc2  | 26S proteasome non-ATP R.FGSGSQVDSAR@.M                       | 29.34  | 12.22  | 2.40  | 0.42 |
| Q8VDM4_PSM2_MOUSE   | Psmc2  | 26S proteasome non-ATP R.LNILDTLTK#.F                         | 18.53  | 8.34   | 2.22  | 0.45 |
| Q8VDM4_PSM2_MOUSE   | Psmc2  | 26S proteasome non-ATP K.YLYSSEDIYK#.S                        | 8.38   | 5.40   | 1.55  | 0.65 |
| P14685_PSM3_MOUSE   | Psmc3  | 26S proteasome non-ATP K.FNQVLDQFGEK#.F                       | 6.34   | 2.69   | 2.36  | 0.42 |
| P14685_PSM3_MOUSE   | Psmc3  | 26S proteasome non-ATP R.HDADGQATLLNLLR@.N                    | 11.50  | 3.12   | 3.69  | 0.27 |
| P14685_PSM3_MOUSE   | Psmc3  | 26S proteasome non-ATP K.AIQLEYEAR@.R                         | 9.60   | 2.79   | 3.44  | 0.29 |
| P14685_PSM3_MOUSE   | Psmc3  | 26S proteasome non-ATP R.DGVIEASINHEK#.G                      | 7.65   | 1.35   | 5.69  | 0.18 |
| P14685_PSM3_MOUSE   | Psmc3  | 26S proteasome non-ATP K.FNQVLDQFGEK#.F                       | 14.24  | 6.18   | 2.30  | 0.43 |
| P14685_PSM3_MOUSE   | Psmc3  | 26S proteasome non-ATP K.FQTDGTYLIR@.L                        | 43.84  | 196.00 | 0.22  | 4.47 |
| P14685_PSM3_MOUSE   | Psmc3  | 26S proteasome non-ATP R.HDADGQATLLNLLR@.N                    | 16.38  | 3.90   | 4.20  | 0.24 |
| P14685_PSM3_MOUSE   | Psmc3  | 26S proteasome non-ATP R.ISLADIAQK#.L                         | 13.27  | 5.34   | 2.49  | 0.40 |
| P14685_PSM3_MOUSE   | Psmc3  | 26S proteasome non-ATP K.LQLDSPADEFIVAK#.A                    | 16.12  | 7.44   | 2.17  | 0.46 |
| P14685_PSM3_MOUSE   | Psmc3  | 26S proteasome non-ATP R.SLM#PYELLTQAVR@.T                    | 9.47   | 2.46   | 3.85  | 0.26 |
| P14685_PSM3_MOUSE   | Psmc3  | 26S proteasome non-ATP K.SVFPEQANNNEWAR@.Y                    | 5.66   | 4.49   | 1.26  | 0.79 |
| P14685_PSM3_MOUSE   | Psmc3  | 26S proteasome non-ATP R.VYFELK#LDVVR@.S                      | 16.42  | 4.56   | 3.60  | 0.28 |
| P14685_PSM3_MOUSE   | Psmc3  | 26S proteasome non-ATP R.HDADGQATLLNLLR@.N                    | 10.62  | 3.38   | 3.14  | 0.32 |
| O35226_PSM4_MOUSE   | Psmc4  | 26S proteasome non-ATP R.AAAAASAEAGIATPGETSDALLK#.M           | 18.41  | 4.66   | 3.95  | 0.25 |
| O35226_PSM4_MOUSE   | Psmc4  | 26S proteasome non-ATP K.EK#NVNDIINFGEVNTK#.L                 | 13.53  | 5.06   | 2.67  | 0.37 |
| O35226_PSM4_MOUSE   | Psmc4  | 26S proteasome non-ATP K.LTAVFNTLNGK#.D                       | 6.60   | 4.06   | 1.62  | 0.62 |
| O35226_PSM4_MOUSE   | Psmc4  | 26S proteasome non-ATP R.SVM#GALASQATK#.D                     | 33.80  | 9.93   | 3.40  | 0.29 |
| O35226_PSM4_MOUSE   | Psmc4  | 26S proteasome non-ATP R.SVM#GALASQATK#.D                     | 8.14   | 3.18   | 2.56  | 0.39 |
| O35226_PSM4_MOUSE   | Psmc4  | 26S proteasome non-ATP K.VNVDIINFGEVNTK#.L                    | 8.56   | 2.29   | 4.44  | 0.44 |
| F7AI87_F7AI87_MOUSE | Psmc4  | 26S proteasome non-ATP R.AAAAASAEAGIATPGETGER@.D              | 3.04   | 1.64   | 1.85  | 0.54 |
| F7AI87_F7AI87_MOUSE | Psmc4  | 26S proteasome non-ATP R.AAAAASAEAGIATPGETGER@.D              | 11.17  | 3.81   | 2.93  | 0.34 |
| Q99J14_PSM6_MOUSE   | Psmc6  | 26S proteasome non-ATP K.GAEILEVHLSLPAVR@.Q                   | 14.67  | 4.33   | 3.39  | 0.30 |
| Q99J14_PSM6_MOUSE   | Psmc6  | 26S proteasome non-ATP K.GAEILEVHLSLPAVR@.Q                   | 9.46   | 8.01   | 1.18  | 0.85 |
| Q99J14_PSM6_MOUSE   | Psmc6  | 26S proteasome non-ATP R.IGLFYM#DNDLIR@.N                     | 67.42  | 4.91   | 13.73 | 0.07 |
| P26516_PSM7_MOUSE   | Psmc7  | 26S proteasome non-ATP K.TFEHVTSEIAGEEVEGVHLLR@.D             | 19.17  | 3.39   | 5.66  | 0.18 |
| P26516_PSM7_MOUSE   | Psmc7  | 26S proteasome non-ATP R.VVGVLGWSQW#.K                        | 21.01  | 9.02   | 2.33  | 0.43 |
| Q9CX56_PSM8_MOUSE   | Psmc8  | 26S proteasome non-ATP R.IILFFSTPK#.K                         | 18.46  | 7.02   | 2.63  | 0.38 |
| Q9CX56_PSM8_MOUSE   | Psmc8  | 26S proteasome non-ATP K.LVLELFLPTTGTK#.L                     | 7.36   | 2.25   | 3.27  | 0.31 |
| P97371_PSM1_MOUSE   | Psmc1  | Proteasome activator co K.APLDIPDPVVKHEK#.E                   | 9.64   | 7.27   | 1.33  | 0.75 |
| P97371_PSM1_MOUSE   | Psmc1  | Proteasome activator co R.IEDGNNGVAVQEK#.V                    | 17.43  | 8.82   | 1.98  | 0.51 |



|                     |        |                                                              |        |        |      |      |
|---------------------|--------|--------------------------------------------------------------|--------|--------|------|------|
| Q64512_PTN13_MOUSE  | Ptpn13 | Tyrosine-protein phosph K.TYHSDIFSISSSESPVISEDFR@.Q          | 4.67   | 2.20   | 2.12 | 0.47 |
| Q64512_PTN13_MOUSE  | Ptpn13 | Tyrosine-protein phosph K.VDLASLTAASQEEK#PIEEDATQESR@.N      | 6.47   | 2.63   | 2.46 | 0.41 |
| Q6PB44_PTN23_MOUSE  | Ptpn23 | Tyrosine-protein phosph R.AALPTALPTEDK#A                     | 27.54  | 19.41  | 1.42 | 0.70 |
| Q6PB44_PTN23_MOUSE  | Ptpn23 | Tyrosine-protein phosph K.DIR@DLLEDELEQEQ#L                  | 7.91   | 2.29   | 3.45 | 0.29 |
| Q6PB44_PTN23_MOUSE  | Ptpn23 | Tyrosine-protein phosph R.LEQEAQEHDAAR@.G                    | 6.33   | 1.80   | 3.51 | 0.28 |
| Q6PB44_PTN23_MOUSE  | Ptpn23 | Tyrosine-protein phosph K.GAPLVKPLVNPDPVAVTGPDIK.F.L         | 33.38  | 14.39  | 2.32 | 0.43 |
| Q6PB44_PTN23_MOUSE  | Ptpn23 | Tyrosine-protein phosph R.GQLGDAGALDAIWR@.E                  | 17.30  | 5.17   | 3.35 | 0.30 |
| Q6PB44_PTN23_MOUSE  | Ptpn23 | Tyrosine-protein phosph K.GQPDVTVQDALR@.F                    | 12.67  | 6.22   | 2.04 | 0.49 |
| Q6PB44_PTN23_MOUSE  | Ptpn23 | Tyrosine-protein phosph R.HVEQVLQR@.H                        | 44.78  | 12.07  | 3.71 | 0.27 |
| Q6PB44_PTN23_MOUSE  | Ptpn23 | Tyrosine-protein phosph R.LLSGPLDQVR@.A                      | 31.73  | 8.22   | 3.86 | 0.26 |
| Q6PB44_PTN23_MOUSE  | Ptpn23 | Tyrosine-protein phosph K.LQETLQGAGAGPGPSVAK#A               | 16.36  | 7.25   | 2.26 | 0.44 |
| Q6PB44_PTN23_MOUSE  | Ptpn23 | Tyrosine-protein phosph R.LLQQLQCELEAFR@.G                   | 33.34  | 10.99  | 3.03 | 0.33 |
| Q6PB44_PTN23_MOUSE  | Ptpn23 | Tyrosine-protein phosph K.NHLPQDSQDLVGGDVPISIQATI#K.L        | 28.44  | 7.43   | 3.83 | 0.26 |
| Q6PB44_PTN23_MOUSE  | Ptpn23 | Tyrosine-protein phosph K.NLVQSM*QVLGVFTDVEASL#K.D           | 22.16  | 3.02   | 4.03 | 0.25 |
| Q6PB44_PTN23_MOUSE  | Ptpn23 | Tyrosine-protein phosph K.NYGENPEAVNEEL#K.K                  | 6.86   | 2.15   | 3.19 | 0.31 |
| Q6PB44_PTN23_MOUSE  | Ptpn23 | Tyrosine-protein phosph R.R@EEGVAEAGDTPPELR@.S               | 38.61  | 14.79  | 2.61 | 0.38 |
| Q6PB44_PTN23_MOUSE  | Ptpn23 | Tyrosine-protein phosph K.SQEGK#DFYADLESK#V                  | 16.18  | 2.70   | 5.99 | 0.17 |
| Q6PB44_PTN23_MOUSE  | Ptpn23 | Tyrosine-protein phosph R.VLSLQFR@.D                         | 40.69  | 12.21  | 3.33 | 0.30 |
| Q6PB44_PTN23_MOUSE  | Ptpn23 | Tyrosine-protein phosph R.VPM*GSGQEAIVAVTWFISGK#S            | 18.72  | 6.00   | 3.12 | 0.32 |
| Q6PB44_PTN23_MOUSE  | Ptpn23 | Tyrosine-protein phosph R.VSLEQLR@.E                         | 25.65  | 10.31  | 2.49 | 0.40 |
| Q6PB44_PTN23_MOUSE  | Ptpn23 | Tyrosine-protein phosph K.VYLEQNLAQDNDVLR@.A                 | 15.17  | 4.16   | 3.65 | 0.27 |
| Q6PB44_PTN23_MOUSE  | Ptpn23 | Tyrosine-protein phosph K.WNSTLTLQVASYAYEDLM*#K#K.S          | 6.94   | 2.50   | 2.78 | 0.36 |
| Q54724_PTRF_MOUSE   | Ptrf   | Polymerase I and transcri K.AHATTSNTVSK#.L                   | 24.73  | 11.33  | 2.18 | 0.46 |
| Q54724_PTRF_MOUSE   | Ptrf   | Polymerase I and transcri R.ATEEPSGTGSDDELK#S                | 323.54 | 152.83 | 2.12 | 0.47 |
| Q54724_PTRF_MOUSE   | Ptrf   | Polymerase I and transcri K.ATEM*VEVGPEDDEVGAE@.G            | 52.82  | 26.29  | 2.01 | 0.50 |
| Q54724_PTRF_MOUSE   | Ptrf   | Polymerase I and transcri K.ATEM*VEVGPEDDEVGAE@.G            | 11.75  | 4.83   | 2.43 | 0.41 |
| Q54724_PTRF_MOUSE   | Ptrf   | Polymerase I and transcri K.ATEM*VEVGPEDDEVGAE@.GEATDLLR@.G  | 127.74 | 50.63  | 2.52 | 0.40 |
| Q54724_PTRF_MOUSE   | Ptrf   | Polymerase I and transcri R.EGDEVK#K.A                       | 114.34 | 45.67  | 2.50 | 0.40 |
| Q54724_PTRF_MOUSE   | Ptrf   | Polymerase I and transcri R.GEATDLLR@.G                      | 87.98  | 37.12  | 2.37 | 0.42 |
| Q54724_PTRF_MOUSE   | Ptrf   | Polymerase I and transcri K.IIGAVDQIQLTQAQLEER@.Q            | 542.34 | 232.66 | 2.33 | 0.43 |
| Q54724_PTRF_MOUSE   | Ptrf   | Polymerase I and transcri K.IIGAVDQIQLTQAQLEER.Q             | 130.22 | 51.27  | 2.54 | 0.39 |
| Q54724_PTRF_MOUSE   | Ptrf   | Polymerase I and transcri K.IREGDEVK#.A                      | 232.36 | 87.60  | 2.65 | 0.38 |
| Q54724_PTRF_MOUSE   | Ptrf   | Polymerase I and transcri K.K#LEVNEALLR@.R                   | 475.03 | 180.44 | 2.63 | 0.38 |
| Q54724_PTRF_MOUSE   | Ptrf   | Polymerase I and transcri R.K#SFTPDHVVYAR@.S                 | 160.59 | 76.60  | 2.10 | 0.48 |
| Q54724_PTRF_MOUSE   | Ptrf   | Polymerase I and transcri K.LEVNEALLR@.R                     | 47.70  | 21.14  | 2.26 | 0.44 |
| Q54724_PTRF_MOUSE   | Ptrf   | Polymerase I and transcri R.QAEM*EGAVOSIQGELSK#.L            | 101.90 | 44.67  | 2.28 | 0.44 |
| Q54724_PTRF_MOUSE   | Ptrf   | Polymerase I and transcri R.QAEMEGAVOSIQGELSK#.L             | 14.50  | 5.58   | 2.60 | 0.38 |
| Q54724_PTRF_MOUSE   | Ptrf   | Polymerase I and transcri K.SDQVNGVLVSLDDK#.I                | 187.61 | 80.93  | 2.32 | 0.43 |
| Q54724_PTRF_MOUSE   | Ptrf   | Polymerase I and transcri K.VMYIQDEVK#.L                     | 27.03  | 10.50  | 2.57 | 0.39 |
| Q54724_PTRF_MOUSE   | Ptrf   | Polymerase I and transcri K.VM*YQDEVK#LPAK#.L                | 449.46 | 215.14 | 2.09 | 0.48 |
| Q54724_PTRF_MOUSE   | Ptrf   | Polymerase I and transcri K.AHATTSNTVSK#.L                   | 15.09  | 6.99   | 2.16 | 0.46 |
| Q54724_PTRF_MOUSE   | Ptrf   | Polymerase I and transcri R.ATEEPSGTGSDDELK#S                | 124.83 | 61.36  | 2.03 | 0.49 |
| Q54724_PTRF_MOUSE   | Ptrf   | Polymerase I and transcri K.ATEM*VEVGPEDDEVGAE@.G            | 28.52  | 10.84  | 2.63 | 0.38 |
| Q54724_PTRF_MOUSE   | Ptrf   | Polymerase I and transcri K.ATEM*VEVGPEDDEVGAE@.G            | 9.33   | 4.29   | 2.17 | 0.46 |
| Q54724_PTRF_MOUSE   | Ptrf   | Polymerase I and transcri K.ATEM*VEVGPEDDEVGAE@GEATDLLR@.G   | 62.66  | 29.19  | 2.15 | 0.47 |
| Q54724_PTRF_MOUSE   | Ptrf   | Polymerase I and transcri R.GEATDLLR@.G                      | 24.85  | 10.36  | 2.40 | 0.42 |
| Q54724_PTRF_MOUSE   | Ptrf   | Polymerase I and transcri R.GSSPDVHTLLETSDAVLVDK#SDSD.-      | 5.05   | 2.26   | 2.23 | 0.45 |
| Q54724_PTRF_MOUSE   | Ptrf   | Polymerase I and transcri K.IIGAVDQIQLTQAQLEER@.Q            | 209.79 | 81.29  | 2.58 | 0.39 |
| Q54724_PTRF_MOUSE   | Ptrf   | Polymerase I and transcri K.IIGAVDQIQLTQAQLEER.Q             | 55.09  | 19.00  | 2.90 | 0.34 |
| Q54724_PTRF_MOUSE   | Ptrf   | Polymerase I and transcri K.K#LEVNEALLR@.R                   | 187.90 | 75.41  | 2.49 | 0.40 |
| Q54724_PTRF_MOUSE   | Ptrf   | Polymerase I and transcri K.K#LEVNEALLR.R                    | 43.05  | 17.28  | 2.49 | 0.40 |
| Q54724_PTRF_MOUSE   | Ptrf   | Polymerase I and transcri K.K#LEVNEALLR@R@.R                 | 34.85  | 15.67  | 2.22 | 0.45 |
| Q54724_PTRF_MOUSE   | Ptrf   | Polymerase I and transcri R.K#SFTPDHVVYAR@.S                 | 71.70  | 26.12  | 2.75 | 0.36 |
| Q54724_PTRF_MOUSE   | Ptrf   | Polymerase I and transcri K.LEVNEALLR@.R                     | 28.60  | 11.84  | 2.41 | 0.41 |
| Q54724_PTRF_MOUSE   | Ptrf   | Polymerase I and transcri R.QAEM*EGAVOSIQGELSK#.L            | 55.98  | 23.09  | 2.42 | 0.41 |
| Q54724_PTRF_MOUSE   | Ptrf   | Polymerase I and transcri R.QAEMEGAVOSIQGELSK#.L             | 11.90  | 5.38   | 2.21 | 0.45 |
| Q54724_PTRF_MOUSE   | Ptrf   | Polymerase I and transcri K.SDQVNGVLVSLDDK#.I                | 71.47  | 29.98  | 2.38 | 0.42 |
| Q54724_PTRF_MOUSE   | Ptrf   | Polymerase I and transcri K.VM*YQDEVK#.L                     | 45.16  | 73.67  | 0.61 | 1.63 |
| Q54724_PTRF_MOUSE   | Ptrf   | Polymerase I and transcri K.VM*YQDEVK#LPAK#.L                | 159.49 | 55.81  | 2.86 | 0.35 |
| Q8R2Y8_PTH2_MOUSE   | Pthr2  | Peptidyl-tRNA hydrolase K.APDEDTLIQLLTHAK#.T                 | 3.04   | 1.64   | 1.86 | 0.54 |
| Q8R2Y8_PTH2_MOUSE   | Pthr2  | Peptidyl-tRNA hydrolase K.APDEDTLIQLLTHAK#.T                 | 29.26  | 10.92  | 2.68 | 0.37 |
| Q8R2Y8_PTH2_MOUSE   | Pthr2  | Peptidyl-tRNA hydrolase R.DTETGETASILEGSEYK#.M               | 4.19   | 1.78   | 2.35 | 0.42 |
| Q3UEB3_PUF60_MOUSE  | Puf60  | Poly(U)-binding-splicing K.AVTPMP*PLLTATPGLPAAAIAAAAAATAK#.I | 51.22  | 16.89  | 3.03 | 0.33 |
| Q3UEB3_PUF60_MOUSE  | Puf60  | Poly(U)-binding-splicing K.GFAFVEYEPAAQLAEQM*NSVM*LGGR@.N    | 9.68   | 2.66   | 3.64 | 0.27 |
| Q3UEB3_PUF60_MOUSE  | Puf60  | Poly(U)-binding-splicing K.GYGFIEYK#.A                       | 25.75  | 8.05   | 3.20 | 0.31 |
| Q3UEB3_PUF60_MOUSE  | Puf60  | Poly(U)-binding-splicing R.K#VVAEYDQER@.F                    | 9.58   | 3.28   | 2.92 | 0.34 |
| Q3UEB3_PUF60_MOUSE  | Puf60  | Poly(U)-binding-splicing K.LGLPLPTPEQQEALQK#A                | 39.45  | 11.72  | 2.51 | 0.40 |
| Q3UEB3_PUF60_MOUSE  | Puf60  | Poly(U)-binding-splicing R.QAFAPFGPIK#.S                     | 29.87  | 9.30   | 3.75 | 0.27 |
| Q3UEB3_PUF60_MOUSE  | Puf60  | Poly(U)-binding-splicing K.QGEEDAIEV#I                       | 46.27  | 4.82   | 9.60 | 0.16 |
| Q3UEB3_PUF60_MOUSE  | Puf60  | Poly(U)-binding-splicing K.SIDM*SWDSVTM*#K.H                 | 7.09   | 3.27   | 2.17 | 0.40 |
| Q3UEB3_PUF60_MOUSE  | Puf60  | Poly(U)-binding-splicing K.VGR@PSNIGQAQI#DQLAEAR@.A          | 48.47  | 10.77  | 4.50 | 0.22 |
| Q3UEB3_PUF60_MOUSE  | Puf60  | Poly(U)-binding-splicing R.VYVYSIYVGEDTIR@.Q                 | 30.17  | 7.04   | 4.29 | 0.23 |
| Q3UEB3_PUF60_MOUSE  | Puf60  | Poly(U)-binding-splicing K.AQSSQDAVSSM*NLFDLGGQYLR@.V        | 43.15  | 8.72   | 4.95 | 0.20 |
| Q3UEB3_PUF60_MOUSE  | Puf60  | Poly(U)-binding-splicing K.AQSSQDAVSSM*NLFDLGGQYLR@.V        | 11.96  | 4.33   | 2.76 | 0.36 |
| Q3UEB3_PUF60_MOUSE  | Puf60  | Poly(U)-binding-splicing K.AVTPMP*PLLTATPGLPAAAIAAAAAATAK#.I | 30.54  | 7.89   | 3.87 | 0.26 |
| Q3UEB3_PUF60_MOUSE  | Puf60  | Poly(U)-binding-splicing K.GFAFVEYEPAAQLAEQM*NSVM*LGGR@.N    | 18.12  | 6.30   | 2.88 | 0.35 |
| Q3UEB3_PUF60_MOUSE  | Puf60  | Poly(U)-binding-splicing K.GYGFIEYK#.A                       | 60.78  | 11.94  | 5.09 | 0.20 |
| Q3UEB3_PUF60_MOUSE  | Puf60  | Poly(U)-binding-splicing K.IFVEFSM*ASETHK#.A                 | 5.65   | 3.78   | 1.49 | 0.67 |
| Q3UEB3_PUF60_MOUSE  | Puf60  | Poly(U)-binding-splicing R.K#VVAEYDQER@.F                    | 39.28  | 8.72   | 4.50 | 0.22 |
| Q3UEB3_PUF60_MOUSE  | Puf60  | Poly(U)-binding-splicing R.K#VVAEYDQER@.F                    | 23.11  | 5.66   | 4.09 | 0.24 |
| Q3UEB3_PUF60_MOUSE  | Puf60  | Poly(U)-binding-splicing K.LGLPLPTPEQQEALQK#A                | 61.41  | 19.23  | 3.19 | 0.31 |
| Q3UEB3_PUF60_MOUSE  | Puf60  | Poly(U)-binding-splicing K.QGEEDAIEV#I                       | 64.93  | 19.65  | 3.30 | 0.30 |
| Q3UEB3_PUF60_MOUSE  | Puf60  | Poly(U)-binding-splicing K.SIDM*SWDSVTM*#K.H                 | 13.95  | 1.73   | 8.06 | 0.12 |
| Q3UEB3_PUF60_MOUSE  | Puf60  | Poly(U)-binding-splicing K.VGR@PSNIGQAQI#DQLAEAR.A           | 26.50  | 19.52  | 4.33 | 0.23 |
| Q3UEB3_PUF60_MOUSE  | Puf60  | Poly(U)-binding-splicing K.VVAEYDQER@.F                      | 84.84  | 5.15   | 5.21 | 0.19 |
| Q3UEB3_PUF60_MOUSE  | Puf60  | Poly(U)-binding-splicing K.VVAEYDQER@.F                      | 6.85   | 1.52   | 4.49 | 0.22 |
| Q3UEB3_PUF60_MOUSE  | Puf60  | Poly(U)-binding-splicing R.VYVYSIYVGEDTIR@.Q                 | 68.55  | 21.14  | 3.24 | 0.31 |
| E9Q6M7_E9Q6M7_MOUSE | Pum1   | Pumilio homolog 1 OS=A.KALEFIPSDQDNEM*VR@.E                  | 5.57   | 4.35   | 1.28 | 0.78 |
| E9Q6M7_E9Q6M7_MOUSE | Pum1   | Pumilio homolog 1 OS=R.SM*DELNHFQALALEGR@.A                  | 8.37   | 3.55   | 2.36 | 0.42 |
| E9Q6M7_E9Q6M7_MOUSE | Pum1   | Pumilio homolog 1 OS=A.KALEFIPSDQDNEM*VR@.E                  | 8.64   | 3.48   | 2.49 | 0.40 |
| E9Q6M7_E9Q6M7_MOUSE | Pum1   | Pumilio homolog 1 OS=A.R.QHGELQGGGGGGGGYNTS#K.H              | 7.61   | 1.64   | 4.65 | 0.21 |
| Q3UR91_Q3UR91_MOUSE | Pum2   | Pumilio homolog 2 OS=A.K.DQYANVVQK#.M                        | 9.78   | 13.86  | 0.71 | 1.42 |
| Q3UR91_Q3UR91_MOUSE | Pum2   | Pumilio homolog 2 OS=A.K.ALESISSQDQSEM*VK#.E                 | 7.08   | 5.74   | 1.23 | 0.81 |
| Q3UR91_Q3UR91_MOUSE | Pum2   | Pumilio homolog 2 OS=R.DLIGHIVFESQDQHGSR@.F                  | 10.16  | 10.16  | 2.46 | 0.41 |
| Q3UR91_Q3UR91_MOUSE | Pum2   | Pumilio homolog 2 OS=A.K.DQYANVVQK#.M                        | 27.89  | 17.69  | 1.58 | 0.63 |
| Q3UR91_Q3UR91_MOUSE | Pum2   | Pumilio homolog 2 OS=A.K.FASNVEEK#.C                         | 36.49  | 17.01  | 2.15 | 0.47 |
| Q3UR91_Q3UR91_MOUSE | Pum2   | Pumilio homolog 2 OS=A.K.DQYANVVQK#.M                        | 14.14  | 25.57  | 0.55 | 1.81 |
| Q3UR91_Q3UR91_MOUSE | Pum2   | Pumilio homolog 2 OS=A.K.FASNVEEK#.C                         | 20.35  | 8.31   | 2.45 | 0.41 |
| P42669_PURA_MOUSE   | Pura   | Transcriptional activator R.DYLGDFIEHYAQLGSPQPPDLAQADQDEP.R  | 6.87   | 14.87  | 0.46 | 2.16 |
| P42669_PURA_MOUSE   | Pura   | Transcriptional activator R.FFFDVGSNK#.Y                     | 16.71  | 36.05  | 0.46 | 2.16 |
| P42669_PURA_MOUSE   | Pura   | Transcriptional activator R.GPGLGSGTQSQTIALPAQGLIEFR.D       | 31.35  | 76.96  | 0.41 | 2.45 |
| P42669_PURA_MOUSE   | Pura   | Transcriptional activator R.GPGLGSGTQSQTIALPAQGLIEFR@.D      | 5.80   | 12.71  | 0.46 | 2.19 |
| P42669_PURA_MOUSE   | Pura   | Transcriptional activator K.IAEVAGGK#.S                      | 14.68  | 44.13  | 0.33 | 3.01 |



|                    |          |                                                                  |        |        |      |      |
|--------------------|----------|------------------------------------------------------------------|--------|--------|------|------|
| P42669_PURA_MOUSE  | Pura     | Transcriptional activator K.LIDDYGVVEEPAELPETSITVDNKR.F          | 24.96  | 76.16  | 0.33 | 3.05 |
| P42669_PURA_MOUSE  | Pura     | Transcriptional activator R.NSITVPPYK.V                          | 18.02  | 50.65  | 0.36 | 2.81 |
| P42669_PURA_MOUSE  | Pura     | Transcriptional activator K.SEFLVR.E                             | 40.47  | 91.75  | 0.44 | 2.27 |
| P42669_PURA_MOUSE  | Pura     | Transcriptional activator R.VSEVKPTYYR.N                         | 5.12   | 14.71  | 0.35 | 2.87 |
| P42669_PURA_MOUSE  | Pura     | Transcriptional activator R.GPGLSGTQGTIALPAQGLIEFR@.D            | 10.58  | 15.08  | 0.70 | 1.43 |
| P42669_PURA_MOUSE  | Pura     | Transcriptional activator K.LIDDYGVVEEPAELPETSITVDNKR.F          | 7.15   | 14.83  | 0.48 | 2.07 |
| O35295_PURB_MOUSE  | Purb     | Transcriptional activator R.DSLGDFIEHYAQLPSSPEQLAAGAEEGGPR.R     | 13.05  | 21.44  | 0.61 | 1.64 |
| O35295_PURB_MOUSE  | Purb     | Transcriptional activator R.GGGGGGGGGPQGLQSGGTIALPAQGLIEFR.D     | 32.21  | 82.04  | 0.39 | 2.55 |
| O35295_PURB_MOUSE  | Purb     | Transcriptional activator R.GGGGGGGGGPQFPAPR.G                   | 33.51  | 103.01 | 0.33 | 3.07 |
| O35295_PURB_MOUSE  | Purb     | Transcriptional activator R.GGGGGGGGGPQGLQSGGTIALPAQGLIEFR.D     | 19.80  | 59.48  | 0.33 | 3.00 |
| O35295_PURB_MOUSE  | Purb     | Transcriptional activator R.GGGGGGGGGPQGLQSGGTIALPAQGLIEFR.D     | 8.35   | 17.21  | 0.49 | 2.06 |
| O35295_PURB_MOUSE  | Purb     | Transcriptional activator K.IAEVGGGK.S                           | 47.07  | 70.69  | 0.67 | 1.50 |
| O35295_PURB_MOUSE  | Purb     | Transcriptional activator R.NAITVFFK.A                           | 22.15  | 50.71  | 0.44 | 2.29 |
| O35295_PURB_MOUSE  | Purb     | Transcriptional activator R.RGGGGGGGDESEGEVEDED.-                | 6.05   | 11.80  | 0.51 | 1.95 |
| O35295_PURB_MOUSE  | Purb     | Transcriptional activator K.YGVFLR.V                             | 15.99  | 33.16  | 0.48 | 2.07 |
| O35295_PURB_MOUSE  | Purb     | Transcriptional activator K.YYDLK.E                              | 12.26  | 30.42  | 0.40 | 2.48 |
| O35295_PURB_MOUSE  | Purb     | Transcriptional activator R.GGGGGGGGGPQGLQSGGTIALPAQGLIEFR.D     | 2.62   | 6.52   | 0.40 | 2.49 |
| O99LL5_PWP1_MOUSE  | Pwp1     | Periodic tryptophan pro R.VWVDTSSVSNFNRGR@.R                     | 10.08  | 5.11   | 1.97 | 0.51 |
| O88U03_PWP2_MOUSE  | Pwp2     | Periodic tryptophan pro R.AGQLPVVQFLQK#.G                        | 12.76  | 6.44   | 1.98 | 0.50 |
| O88U03_PWP2_MOUSE  | Pwp2     | Periodic tryptophan pro R.AGQLPVVQFLQK#.G                        | 19.00  | 8.99   | 2.11 | 0.47 |
| O8V136_PAXI_MOUSE  | Pxn      | Paxillin OS=Mus musculus R.ELDELM*ASLSDFK#.M                     | 13.38  | 7.95   | 1.68 | 0.59 |
| O922W5_P5CR1_MOUSE | Pycr1    | Pyrraline-5-carboxylate R.LGAQALLGAAK#.M                         | 21.93  | 13.08  | 1.68 | 0.60 |
| O9DCC4_P5CR3_MOUSE | Pycr1    | Pyrraline-5-carboxylate R.IAAQTLLGTAK#.M                         | 57.96  | 30.12  | 1.92 | 0.52 |
| O9QYS9_QKI_MOUSE   | Oki      | Protein quaking OS=Mus K.EYDFNFVGR@.I                            | 16.30  | 8.89   | 1.83 | 0.55 |
| O9QYS9_QKI_MOUSE   | Oki      | Protein quaking OS=Mus R.IITGPAPLVPPAAR@.T                       | 8.03   | 4.30   | 1.87 | 0.54 |
| O9QYS9_QKI_MOUSE   | Oki      | Protein quaking OS=Mus R.LLDEISR@.V                              | 69.60  | 30.61  | 2.27 | 0.44 |
| O9QYS9_QKI_MOUSE   | Oki      | Protein quaking OS=Mus K.LYVPAAGGK.S                             | 22.78  | 143.57 | 0.16 | 6.30 |
| O9QYS9_QKI_MOUSE   | Oki      | Protein quaking OS=Mus K.LYVPAAGGK.S                             | 14.70  | 5.35   | 2.75 | 0.36 |
| O9QYS9_QKI_MOUSE   | Oki      | Protein quaking OS=Mus K.LYVPAAGGK.S                             | 56.55  | 26.37  | 2.14 | 0.47 |
| O9QYS9_QKI_MOUSE   | Oki      | Protein quaking OS=Mus R.SAELPDVAVGPIVQLQK#.L                    | 41.13  | 15.88  | 2.59 | 0.39 |
| O9QYS9_QKI_MOUSE   | Oki      | Protein quaking OS=Mus R.LLDEISR@.V                              | 8.66   | 2.77   | 3.13 | 0.32 |
| O9QYS9_QKI_MOUSE   | Oki      | Protein quaking OS=Mus R.SAELPDVAVGPIVQLQK#.L                    | 6.04   | 3.55   | 1.70 | 0.59 |
| O9CYK2_QPCT_MOUSE  | Qpct     | Glutamyl-peptide cycl R.SFSNIITLNPAAK#.R                         | 13.59  | 5.68   | 2.40 | 0.42 |
| Q3UA37_QRIC1_MOUSE | Qrich1   | Glutamine-rich protein 1 K.LYDFYLFK#.C                           | 7.59   | 1.64   | 4.63 | 0.22 |
| Q3UA37_QRIC1_MOUSE | Qrich1   | Glutamine-rich protein 1 K.NALEKHDQANR@.L                        | 2.78   | 1.32   | 2.11 | 0.47 |
| P61027_RAB10_MOUSE | Rab10    | Ras-related protein Rab-J K.AFLTAEIDLRL@.K                       | 134.95 | 59.83  | 2.26 | 0.44 |
| P61027_RAB10_MOUSE | Rab10    | Ras-related protein Rab-J K.LLLIGDSVGVK#.T                       | 195.35 | 65.91  | 2.96 | 0.34 |
| P61027_RAB10_MOUSE | Rab10    | Ras-related protein Rab-J K.LQJWDTAGQER@.F                       | 230.93 | 79.70  | 2.90 | 0.35 |
| P61027_RAB10_MOUSE | Rab10    | Ras-related protein Rab-J R.NIDEHANDEVGR@.M                      | 8.36   | 4.39   | 1.90 | 0.53 |
| P61027_RAB10_MOUSE | Rab10    | Ras-related protein Rab-J K.AFLTAEIDLRL@.K                       | 17.26  | 10.95  | 1.58 | 0.63 |
| P62492_RB11A_MOUSE | Rab11a   | Ras-related protein Rab-J K.AQJWDTAGQER@.Y                       | 14.36  | 5.38   | 2.67 | 0.37 |
| P62492_RB11A_MOUSE | Rab11a   | Ras-related protein Rab-J R.GAVGALLVYDIAK#.H                     | 25.53  | 9.74   | 2.62 | 0.38 |
| P62492_RB11A_MOUSE | Rab11a   | Ras-related protein Rab-J K.VVLIIGDSVGVK#.S                      | 31.10  | 8.30   | 3.75 | 0.27 |
| P62492_RB11A_MOUSE | Rab11a   | Ras-related protein Rab-J R.AITSAYR.G                            | 181.11 | 60.65  | 2.99 | 0.33 |
| P62492_RB11A_MOUSE | Rab11a   | Ras-related protein Rab-J K.AQJWDTAGQER@.Y                       | 47.88  | 21.11  | 2.27 | 0.44 |
| P62492_RB11A_MOUSE | Rab11a   | Ras-related protein Rab-J R.DDEYDFLKF#.V                         | 8.52   | 2.78   | 3.06 | 0.33 |
| P62492_RB11A_MOUSE | Rab11a   | Ras-related protein Rab-J R.DHADSNIIVMLVGNK#.S                   | 23.32  | 8.49   | 2.75 | 0.36 |
| P62492_RB11A_MOUSE | Rab11a   | Ras-related protein Rab-J R.DHADSNIIVMLVGNK#.S                   | 21.79  | 9.18   | 2.37 | 0.42 |
| P62492_RB11A_MOUSE | Rab11a   | Ras-related protein Rab-J R.ENDM*SPSNVPIHVPTTENPK#.V             | 4.02   | 1.86   | 2.17 | 0.46 |
| P62492_RB11A_MOUSE | Rab11a   | Ras-related protein Rab-J R.GAVGALLVYDIAK#.H                     | 244.81 | 76.17  | 3.21 | 0.31 |
| P62492_RB11A_MOUSE | Rab11a   | Ras-related protein Rab-J K.HLTYNVER@.W                          | 93.17  | 36.99  | 2.52 | 0.40 |
| P62492_RB11A_MOUSE | Rab11a   | Ras-related protein Rab-J R.NEFNLESK#.S                          | 97.92  | 28.54  | 3.43 | 0.29 |
| P62492_RB11A_MOUSE | Rab11a   | Ras-related protein Rab-J K.STIGVEFATR@.S                        | 242.76 | 91.49  | 2.65 | 0.38 |
| P62492_RB11A_MOUSE | Rab11a   | Ras-related protein Rab-J K.VVLIIGDSVGVK#.S                      | 232.23 | 82.81  | 2.80 | 0.36 |
| P46638_RB11B_MOUSE | Rab11b   | Ras-related protein Rab-J K.NILTEYR@.J                           | 49.70  | 16.28  | 3.05 | 0.33 |
| P46638_RB11B_MOUSE | Rab11b   | Ras-related protein Rab-J K.NNLSFIETASLDSTNVEAFK#.N              | 33.11  | 11.39  | 2.99 | 0.33 |
| O8R361_RFIP5_MOUSE | Rab11fp5 | Rab11 family-interacting R.ATVALDEVFR@.A                         | 19.64  | 6.51   | 3.02 | 0.33 |
| O8R361_RFIP5_MOUSE | Rab11fp5 | Rab11 family-interacting K.KYVDESASALPSSADEPELGSGLGK#.M          | 5.29   | 2.80   | 1.89 | 0.53 |
| P35283_RAB12_MOUSE | Rab12    | Ras-related protein Rab-J K.DNFNVEIFLKL#.L                       | 7.93   | 3.24   | 2.45 | 0.41 |
| O9DD03_RAB13_MOUSE | Rab13    | Ras-related protein Rab-J K.LQVWDTAGQER@.F                       | 4.45   | 2.80   | 1.59 | 0.63 |
| O9DD03_RAB13_MOUSE | Rab13    | Ras-related protein Rab-J K.SSVNVEAFSSILAR@.D                    | 17.21  | 3.89   | 4.43 | 0.23 |
| O9DD03_RAB13_MOUSE | Rab13    | Ras-related protein Rab-J K.TITTYAYR@.G                          | 19.97  | 7.66   | 2.61 | 0.38 |
| O91V41_RAB14_MOUSE | Rab14    | Ras-related protein Rab-J K.IYQNIQDGSLLDNLAAESGVQHK#PSAPQGGRR@.L | 4.75   | 2.34   | 2.03 | 0.49 |
| O91V41_RAB14_MOUSE | Rab14    | Ras-related protein Rab-J R.NLTNPNTVILIGNK#.A                    | 6.93   | 3.35   | 2.07 | 0.48 |
| O91V41_RAB14_MOUSE | Rab14    | Ras-related protein Rab-J R.GAAGALMVYDITR@.R                     | 21.72  | 9.08   | 2.39 | 0.42 |
| O91V41_RAB14_MOUSE | Rab14    | Ras-related protein Rab-J R.GAAGALMVYDITR@.R                     | 4.77   | 5.48   | 0.87 | 1.15 |
| O91V41_RAB14_MOUSE | Rab14    | Ras-related protein Rab-J R.IIEVSGQK#.I                          | 89.56  | 33.53  | 2.67 | 0.37 |
| O91V41_RAB14_MOUSE | Rab14    | Ras-related protein Rab-J K.IYQNIQDGSLLDNLAAESGVQHK#PSAPQGGRR@.L | 22.76  | 9.71   | 2.34 | 0.43 |
| O91V41_RAB14_MOUSE | Rab14    | Ras-related protein Rab-J R.NLTNPNTVILIGNK#.A                    | 79.26  | 34.52  | 2.30 | 0.44 |
| O91V41_RAB14_MOUSE | Rab14    | Ras-related protein Rab-J K.QFAEENGFLFLEAK#.T                    | 6.58   | 1.92   | 3.44 | 0.29 |
| O91V41_RAB14_MOUSE | Rab14    | Ras-related protein Rab-J K.TGENVEDAFLEAK#.H                     | 75.49  | 24.30  | 3.11 | 0.32 |
| O91V41_RAB14_MOUSE | Rab14    | Ras-related protein Rab-J K.YIIIGDM*GVGK#.S                      | 27.79  | 12.71  | 2.19 | 0.46 |
| P35293_RAB18_MOUSE | Rab18    | Ras-related protein Rab-J R.FTDDTFDELAATIGVDFK#.V                | 7.50   | 2.76   | 2.71 | 0.37 |
| P35293_RAB18_MOUSE | Rab18    | Ras-related protein Rab-J R.GAQGLVYDITR@.R                       | 35.28  | 15.80  | 2.23 | 0.45 |
| P35293_RAB18_MOUSE | Rab18    | Ras-related protein Rab-J K.IIQTPGLWESENQNK#.G                   | 17.72  | 9.19   | 1.93 | 0.52 |
| P35293_RAB18_MOUSE | Rab18    | Ras-related protein Rab-J K.LIIGESGK#.S                          | 48.36  | 22.79  | 2.12 | 0.47 |
| P35293_RAB18_MOUSE | Rab18    | Ras-related protein Rab-J K.LAIWDTAGQER.F                        | 25.86  | 14.24  | 1.82 | 0.55 |
| P62821_RAB1A_MOUSE | Rab1A    | Ras-related protein Rab-J K.EFADSLGIPFLETSK#.N                   | 22.78  | 11.52  | 1.98 | 0.51 |
| P62821_RAB1A_MOUSE | Rab1A    | Ras-related protein Rab-J R.FADDTYTESYITIGVDFK#.I                | 9.08   | 2.89   | 3.15 | 0.32 |
| P62821_RAB1A_MOUSE | Rab1A    | Ras-related protein Rab-J R.GAHIIVYVDYDQESFNNVK#.Q               | 11.40  | 5.49   | 2.08 | 0.48 |
| P62821_RAB1A_MOUSE | Rab1A    | Ras-related protein Rab-J K.NATNVEQFSM*TM*AAEIK#.K               | 2.41   | 4.36   | 0.55 | 1.81 |
| P62821_RAB1A_MOUSE | Rab1A    | Ras-related protein Rab-J K.QWLQEDR@.Y                           | 13.11  | 5.24   | 2.50 | 0.40 |
| P62821_RAB1A_MOUSE | Rab1A    | Ras-related protein Rab-J K.EFADSLGIPFLETSK#.N                   | 111.80 | 46.15  | 2.42 | 0.41 |
| P62821_RAB1A_MOUSE | Rab1A    | Ras-related protein Rab-J R.FADDTYTESYITIGVDFK#.I                | 23.79  | 8.56   | 2.78 | 0.36 |
| P62821_RAB1A_MOUSE | Rab1A    | Ras-related protein Rab-J R.GAHIIVYVDYDQESFNNVK#.Q               | 27.03  | 9.95   | 2.72 | 0.37 |
| P62821_RAB1A_MOUSE | Rab1A    | Ras-related protein Rab-J R.M*GPATAGGAEK#.S                      | 20.24  | 10.57  | 1.91 | 0.52 |
| P62821_RAB1A_MOUSE | Rab1A    | Ras-related protein Rab-J K.NATNVEQFSM*TM*AAEIK#.K               | 18.61  | 7.42   | 2.51 | 0.40 |
| P62821_RAB1A_MOUSE | Rab1A    | Ras-related protein Rab-J K.NATNVEQFSM*TM*AAEIK#.K               | 10.76  | 5.76   | 1.87 | 0.54 |
| P62821_RAB1A_MOUSE | Rab1A    | Ras-related protein Rab-J K.QWLQEDR@.Y                           | 39.05  | 9.27   | 4.21 | 0.24 |
| P62821_RAB1A_MOUSE | Rab1A    | Ras-related protein Rab-J K.QWLQEDR@.Y                           | 29.99  | 7.10   | 4.22 | 0.24 |
| P62821_RAB1A_MOUSE | Rab1A    | Ras-related protein Rab-J R.TIELDGK#.T                           | 110.31 | 40.02  | 2.76 | 0.36 |
| P62821_RAB1A_MOUSE | Rab1A    | Ras-related protein Rab-J R.TITSSYR@.G                           | 83.47  | 26.52  | 3.15 | 0.32 |
| P62821_RAB1A_MOUSE | Rab1A    | Ras-related protein Rab-J K.EFADSLGIPFLETSK#.N                   | 18.14  | 11.28  | 1.61 | 0.62 |
| P62821_RAB1A_MOUSE | Rab1A    | Ras-related protein Rab-J R.FADDTYTESYITIGVDFK#.I                | 7.50   | 2.78   | 2.70 | 0.37 |
| P62821_RAB1A_MOUSE | Rab1A    | Ras-related protein Rab-J R.GAHIIVYVDYDQESFNNVK#.Q               | 12.44  | 2.67   | 4.66 | 0.21 |
| P62821_RAB1A_MOUSE | Rab1A    | Ras-related protein Rab-J K.EFADSLGIPFLETSK#.N                   | 25.37  | 14.98  | 1.69 | 0.59 |
| P62821_RAB1A_MOUSE | Rab1A    | Ras-related protein Rab-J R.FADDTYTESYITIGVDFK#.I                | 11.96  | 4.13   | 2.90 | 0.34 |
| O9D1G1_RAB1B_MOUSE | Rab1b    | Ras-related protein Rab-J K.EFADSLGIPFLETSK#.N                   | 76.22  | 22.51  | 3.39 | 0.30 |
| O9D1G1_RAB1B_MOUSE | Rab1b    | Ras-related protein Rab-J R.GAHIIVYVDYDQESYANVK#.Q               | 42.88  | 8.56   | 5.01 | 0.20 |
| O9D1G1_RAB1B_MOUSE | Rab1b    | Ras-related protein Rab-J K.NATNVEQFSM*TM*AAEIK#.K               | 22.04  | 6.20   | 3.55 | 0.28 |
| O9D1G1_RAB1B_MOUSE | Rab1b    | Ras-related protein Rab-J K.NATNVEQFSM*TM*AAEIK#.K               | 5.46   | 1.72   | 3.17 | 0.32 |
| P53994_RAB2A_MOUSE | Rab2a    | Ras-related protein Rab-J K.TASNVEEFINTAK#.E                     | 6.65   | 5.91   | 1.13 | 0.89 |
| P53994_RAB2A_MOUSE | Rab2a    | Ras-related protein Rab-J R.DTFNHLTTLWLEDAR@.Q                   | 19.66  | 12.25  | 1.61 | 0.62 |

|                     |          |                                                         |        |        |      |      |
|---------------------|----------|---------------------------------------------------------|--------|--------|------|------|
| P53994_RAB2A_MOUSE  | Rab2a    | Ras-related protein Rab-; R.FQPVHDLTIGVEFGAR@.M         | 22.57  | 10.77  | 2.10 | 0.48 |
| P53994_RAB2A_MOUSE  | Rab2a    | Ras-related protein Rab-; R.GAAGALLVDITR@.R             | 55.32  | 27.73  | 1.99 | 0.50 |
| P53994_RAB2A_MOUSE  | Rab2a    | Ras-related protein Rab-; K.IQEGVDFDINNEANGK.I          | 21.44  | 9.41   | 2.28 | 0.44 |
| P53994_RAB2A_MOUSE  | Rab2a    | Ras-related protein Rab-; K.LQIWDTAGQESFR@.S            | 30.20  | 19.61  | 1.54 | 0.65 |
| P53994_RAB2A_MOUSE  | Rab2a    | Ras-related protein Rab-; R.M*ITIDGK.K.Q                | 21.64  | 14.76  | 1.47 | 0.68 |
| P53994_RAB2A_MOUSE  | Rab2a    | Ras-related protein Rab-; K.TASNVEEAFINTAK#.E           | 79.01  | 40.98  | 1.93 | 0.52 |
| P53994_RAB2A_MOUSE  | Rab2a    | Ras-related protein Rab-; K.YIIIGDTGVGK.R.S             | 13.85  | 7.33   | 1.89 | 0.53 |
| Q6PHN9_RAB35_MOUSE  | Rab35    | Ras-related protein Rab-; K.FAQGM*GIQLFETSAK#.E         | 10.71  | 4.40   | 2.43 | 0.41 |
| Q6PHN9_RAB35_MOUSE  | Rab35    | Ras-related protein Rab-; K.FAQGM*GIQLFETSAK#.E         | 30.15  | 8.05   | 3.75 | 0.27 |
| Q6PHN9_RAB35_MOUSE  | Rab35    | Ras-related protein Rab-; K.QQQQQQDQVVK#.L              | 10.03  | 2.98   | 3.37 | 0.30 |
| Q80UJ7_RB3GP_MOUSE  | Rab3gap1 | Rab3 GTPase-activating p. R.LAQSSDTSF.-                 | 7.95   | 7.95   | 1.00 | 1.00 |
| Q80UJ7_RB3GP_MOUSE  | Rab3gap1 | Rab3 GTPase-activating p. R.SDEISFADF@.F                | 14.12  | 3.03   | 4.65 | 0.21 |
| Q80UJ7_RB3GP_MOUSE  | Rab3gap1 | Rab3 GTPase-activating p. R.STFEETR@EVADITHALSK#.L      | 10.64  | 5.51   | 1.93 | 0.52 |
| Q80UJ7_RB3GP_MOUSE  | Rab3gap1 | Rab3 GTPase-activating p. R.STFEETR@EVADITHALSK#.L      | 8.92   | 6.11   | 1.46 | 0.68 |
| Q80UJ7_RB3GP_MOUSE  | Rab3gap1 | Rab3 GTPase-activating p. R.TSLSDSTSAYPDGAK#.T          | 10.31  | 3.27   | 3.16 | 0.32 |
| Q88MG7_RBGPR_MOUSE  | Rab3gap2 | Rab3 GTPase-activating p. K.GGFSPPGNTQGPSR@.V           | 8.48   | 4.86   | 1.75 | 0.57 |
| Q88MG7_RBGPR_MOUSE  | Rab3gap2 | Rab3 GTPase-activating p. R.VAQFLVIYAPR@.R              | 10.76  | 3.99   | 2.70 | 0.37 |
| Q88MG7_RBGPR_MOUSE  | Rab3gap2 | Rab3 GTPase-activating p. R.VILLDVAR@.G                 | 21.32  | 9.57   | 2.23 | 0.45 |
| Q91ZR1_RAB4B_MOUSE  | Rab4b    | Ras-related protein Rab-; R.GAAGALLVDITR@.E             | 7.96   | 4.67   | 1.70 | 0.59 |
| Q91ZR1_RAB4B_MOUSE  | Rab4b    | Ras-related protein Rab-; R.M*GSIQYQDLSL@.Q             | 2.59   | 1.88   | 1.38 | 0.73 |
| Q9CQD1_RAB5A_MOUSE  | Rab5a    | Ras-related protein Rab-; K.FEIVDTAGQER@.S              | 5.74   | 3.39   | 1.69 | 0.59 |
| Q9CQD1_RAB5A_MOUSE  | Rab5a    | Ras-related protein Rab-; R.GVLDTEPAQPAR@.S             | 8.67   | 4.46   | 1.95 | 0.51 |
| Q9CQD1_RAB5A_MOUSE  | Rab5a    | Ras-related protein Rab-; K.LVLLGESAVGK#.S              | 41.10  | 15.53  | 2.65 | 0.38 |
| Q9CQD1_RAB5A_MOUSE  | Rab5a    | Ras-related protein Rab-; K.FEIVDTAGQER@.Y              | 12.53  | 5.40   | 2.32 | 0.43 |
| Q9CQD1_RAB5A_MOUSE  | Rab5a    | Ras-related protein Rab-; R.GAQAAIVVDITNTEESFAR@.A      | 10.63  | 5.49   | 1.94 | 0.52 |
| Q9CQD1_RAB5A_MOUSE  | Rab5a    | Ras-related protein Rab-; R.GVLDTEPAQPAR@.S             | 18.58  | 7.33   | 2.54 | 0.39 |
| Q9CQD1_RAB5A_MOUSE  | Rab5a    | Ras-related protein Rab-; K.LVLLGESAVGK#.S              | 103.42 | 38.62  | 2.68 | 0.37 |
| Q9CQD1_RAB5A_MOUSE  | Rab5a    | Ras-related protein Rab-; R.QASPNVIALSGNK#.A            | 11.57  | 6.07   | 1.91 | 0.52 |
| Q9CQD1_RAB5A_MOUSE  | Rab5a    | Ras-related protein Rab-; K.TSM*NVNEIFM*AIK#.K          | 8.96   | 5.02   | 1.78 | 0.56 |
| Q9CQD1_RAB5A_MOUSE  | Rab5a    | Ras-related protein Rab-; K.TSMNVNEIFM*AIK#.K           | 49.82  | 17.73  | 2.81 | 0.36 |
| Q9CQD1_RAB5A_MOUSE  | Rab5a    | Ras-related protein Rab-; R.YHSLAPM*YR@.G               | 21.99  | 4.34   | 5.07 | 0.20 |
| Q9CQD1_RAB5A_MOUSE  | Rab5a    | Ras-related protein Rab-; K.LVLLGESAVGK#.S              | 11.45  | 3.97   | 2.88 | 0.35 |
| P61021_RAB5B_MOUSE  | Rab5b    | Ras-related protein Rab-; K.SEPQNLGGGAAGR@.S            | 17.11  | 5.11   | 3.35 | 0.30 |
| P61021_RAB5B_MOUSE  | Rab5b    | Ras-related protein Rab-; R.GAQAAIVVDITNTEESFAR@.A      | 8.76   | 3.17   | 2.76 | 0.36 |
| P61021_RAB5B_MOUSE  | Rab5b    | Ras-related protein Rab-; R.QASPSVIALAGNK#.A            | 6.26   | 5.45   | 1.15 | 0.87 |
| P35278_RAB5C_MOUSE  | Rab5c    | Ras-related protein Rab-; R.GAQAAIVVDITNTEESFAR@.A      | 7.30   | 3.08   | 2.37 | 0.42 |
| P35278_RAB5C_MOUSE  | Rab5c    | Ras-related protein Rab-; R.GVLDQESNPASR@.S             | 9.75   | 4.36   | 2.24 | 0.45 |
| P35278_RAB5C_MOUSE  | Rab5c    | Ras-related protein Rab-; K.NEPQNAAGAPGR.T              | 8.54   | 4.70   | 1.82 | 0.55 |
| P35278_RAB5C_MOUSE  | Rab5c    | Ras-related protein Rab-; R.QASPNVIALAGNK#.A            | 11.55  | 6.16   | 1.87 | 0.53 |
| P35278_RAB5C_MOUSE  | Rab5c    | Ras-related protein Rab-; R.GAQAAIVVDITNTEESFAR@.A      | 21.51  | 5.75   | 3.74 | 0.27 |
| P35278_RAB5C_MOUSE  | Rab5c    | Ras-related protein Rab-; R.GAQAAIVVDITNTEESFAR@.A      | 14.96  | 5.75   | 2.60 | 0.38 |
| P35278_RAB5C_MOUSE  | Rab5c    | Ras-related protein Rab-; R.GVLDQESNPASR@.S             | 57.96  | 24.19  | 2.40 | 0.42 |
| P35278_RAB5C_MOUSE  | Rab5c    | Ras-related protein Rab-; K.NEPQNAAGAPGR@.T             | 32.70  | 12.58  | 2.60 | 0.38 |
| P35278_RAB5C_MOUSE  | Rab5c    | Ras-related protein Rab-; K.TAM*NVNEIFM*AIK#.K          | 49.82  | 17.73  | 2.81 | 0.36 |
| P35278_RAB5C_MOUSE  | Rab5c    | Ras-related protein Rab-; R.GVLDQESNPASR@.S             | 3.62   | 5.27   | 0.69 | 1.46 |
| D3YV69_D3YV69_MOUSE | Rab6a    | Ras-related protein Rab-; R.DSAAAVVVDITNNSFQQTK#.W      | 15.41  | 6.84   | 2.25 | 0.44 |
| D3YV69_D3YV69_MOUSE | Rab6a    | Ras-related protein Rab-; R.DSAAAVVVDITNNSFQQTK#.W      | 3.17   | 2.51   | 1.26 | 0.79 |
| P35279_RAB6A_MOUSE  | Rab6a    | Ras-related protein Rab-; R.DSTVAIVVDITNNSFQQTK#.W      | 27.11  | 11.63  | 2.33 | 0.43 |
| P35279_RAB6A_MOUSE  | Rab6a    | Ras-related protein Rab-; K.ELNV*FIETSAK#.A             | 71.76  | 29.99  | 2.39 | 0.42 |
| P35279_RAB6A_MOUSE  | Rab6a    | Ras-related protein Rab-; K.ELNV*FIETSAK#.A             | 15.78  | 4.78   | 3.30 | 0.30 |
| P35279_RAB6A_MOUSE  | Rab6a    | Ras-related protein Rab-; K.FK#VFLGQESVGGK#.T           | 18.72  | 7.58   | 2.47 | 0.40 |
| P35279_RAB6A_MOUSE  | Rab6a    | Ras-related protein Rab-; R.FM*YDSVDNTYQATIGIDFLSK#.T   | 2.87   | 2.22   | 1.30 | 0.77 |
| P35279_RAB6A_MOUSE  | Rab6a    | Ras-related protein Rab-; R.GSDVIM*LVGNK#.T             | 46.68  | 25.28  | 1.85 | 0.54 |
| P35279_RAB6A_MOUSE  | Rab6a    | Ras-related protein Rab-; R.GSDVIM*LVGNK#.T             | 63.75  | 27.19  | 2.34 | 0.43 |
| P35279_RAB6A_MOUSE  | Rab6a    | Ras-related protein Rab-; K.LVFLGQESVGGK#.T             | 192.91 | 102.85 | 1.88 | 0.53 |
| P35279_RAB6A_MOUSE  | Rab6a    | Ras-related protein Rab-; R.QVSIIEGK.K                  | 65.94  | 33.78  | 1.95 | 0.51 |
| P35279_RAB6A_MOUSE  | Rab6a    | Ras-related protein Rab-; R.SLIPSYR.D                   | 131.98 | 61.99  | 2.13 | 0.47 |
| P35279_RAB6A_MOUSE  | Rab6a    | Ras-related protein Rab-; K.TM*VLEDR@.T                 | 36.08  | 15.88  | 2.27 | 0.44 |
| P35279_RAB6A_MOUSE  | Rab6a    | Ras-related protein Rab-; R.VAAALPDM*ESTQDR@.S          | 70.50  | 38.63  | 1.83 | 0.55 |
| P35279_RAB6A_MOUSE  | Rab6a    | Ras-related protein Rab-; K.WIDDVR@.T                   | 38.45  | 19.28  | 1.99 | 0.50 |
| P51150_RAB7A_MOUSE  | Rab7a    | Ras-related protein Rab-; K.ATIGADFLTK#.E               | 15.62  | 7.37   | 2.12 | 0.47 |
| P51150_RAB7A_MOUSE  | Rab7a    | Ras-related protein Rab-; R.FQSLGVAFYR@.G               | 13.99  | 5.39   | 2.59 | 0.39 |
| P51150_RAB7A_MOUSE  | Rab7a    | Ras-related protein Rab-; K.VIILGDSVGGK#.T              | 18.24  | 5.52   | 3.30 | 0.30 |
| P51150_RAB7A_MOUSE  | Rab7a    | Ras-related protein Rab-; K.ATIGADFLTK#.E               | 69.49  | 23.85  | 2.91 | 0.34 |
| P51150_RAB7A_MOUSE  | Rab7a    | Ras-related protein Rab-; R.DEFLIQASPR@.D               | 5.85   | 3.77   | 1.55 | 0.64 |
| P51150_RAB7A_MOUSE  | Rab7a    | Ras-related protein Rab-; R.DPENFPFVVLGNK#.I            | 81.81  | 28.37  | 2.88 | 0.35 |
| P51150_RAB7A_MOUSE  | Rab7a    | Ras-related protein Rab-; K.EAINVEQAFQTIAR.N            | 102.06 | 28.69  | 3.56 | 0.28 |
| P51150_RAB7A_MOUSE  | Rab7a    | Ras-related protein Rab-; R.FQSLGVAFYR@.G               | 40.20  | 15.22  | 2.64 | 0.38 |
| P51150_RAB7A_MOUSE  | Rab7a    | Ras-related protein Rab-; R.LVTM*QIWDTAGQER@.F          | 5.46   | 1.88   | 2.90 | 0.35 |
| P51150_RAB7A_MOUSE  | Rab7a    | Ras-related protein Rab-; R.LVTM*QIWDTAGQER@.F          | 12.98  | 5.29   | 2.45 | 0.41 |
| P51150_RAB7A_MOUSE  | Rab7a    | Ras-related protein Rab-; R.NALK#QETEVELYNEFPEIK#.L     | 17.24  | 6.24   | 2.76 | 0.36 |
| P51150_RAB7A_MOUSE  | Rab7a    | Ras-related protein Rab-; R.NALK#QETEVELYNEFPEIK#LDK#.N | 20.50  | 8.68   | 2.36 | 0.42 |
| P51150_RAB7A_MOUSE  | Rab7a    | Ras-related protein Rab-; R.NALK#QETEVELYNEFPEIK#LDK#.N | 11.05  | 4.82   | 2.29 | 0.44 |
| P51150_RAB7A_MOUSE  | Rab7a    | Ras-related protein Rab-; K.TLDSWR@DEFLIQASPR@.D        | 6.13   | 2.21   | 2.78 | 0.36 |
| P51150_RAB7A_MOUSE  | Rab7a    | Ras-related protein Rab-; K.TLDSWR@DEFLIQASPR@.D        | 61.59  | 15.58  | 3.95 | 0.25 |
| P51150_RAB7A_MOUSE  | Rab7a    | Ras-related protein Rab-; K.TSLM*NQVYVK#.K              | 5.87   | 3.47   | 1.69 | 0.59 |
| P51150_RAB7A_MOUSE  | Rab7a    | Ras-related protein Rab-; K.VIILGDSVGGK#.T              | 96.98  | 29.03  | 3.34 | 0.30 |
| P51150_RAB7A_MOUSE  | Rab7a    | Ras-related protein Rab-; K.ATIGADFLTK#.E               | 12.53  | 7.03   | 1.78 | 0.56 |
| P51150_RAB7A_MOUSE  | Rab7a    | Ras-related protein Rab-; R.DPENFPFVVLGNK#.I            | 16.33  | 7.96   | 2.05 | 0.49 |
| P51150_RAB7A_MOUSE  | Rab7a    | Ras-related protein Rab-; R.FQSLGVAFYR@.G               | 9.26   | 4.55   | 2.03 | 0.49 |
| P51150_RAB7A_MOUSE  | Rab7a    | Ras-related protein Rab-; K.TLDSWR@DEFLIQASPR@.D        | 12.17  | 5.35   | 2.28 | 0.44 |
| P51150_RAB7A_MOUSE  | Rab7a    | Ras-related protein Rab-; K.ATIGADFLTK#.E               | 18.72  | 8.54   | 2.19 | 0.46 |
| P51150_RAB7A_MOUSE  | Rab7a    | Ras-related protein Rab-; R.DPENFPFVVLGNK#.I            | 19.67  | 14.08  | 1.40 | 0.72 |
| P51150_RAB7A_MOUSE  | Rab7a    | Ras-related protein Rab-; R.FQSLGVAFYR@.G               | 9.25   | 4.15   | 2.23 | 0.45 |
| P51150_RAB7A_MOUSE  | Rab7a    | Ras-related protein Rab-; K.TLDSWR@DEFLIQASPR@.D        | 8.41   | 2.62   | 3.21 | 0.31 |
| P55258_RAB8A_MOUSE  | Rab8a    | Ras-related protein Rab-; K.ANINVENAFFTLAR@.D           | 13.50  | 4.65   | 2.90 | 0.34 |
| Q9ROM6_RAB9A_MOUSE  | Rab9a    | Ras-related protein Rab-; K.DSTNVAAAFEEAVR@.R           | 10.38  | 4.44   | 2.34 | 0.43 |
| Q9ROM6_RAB9A_MOUSE  | Rab9a    | Ras-related protein Rab-; K.IILLGDSVGGK#.S              | 15.47  | 6.94   | 2.23 | 0.45 |
| Q920S9_PRAF1_MOUSE  | Rabac1   | Prenylated Ras acceptor K.DAEEGLSATTLLPK#.L             | 3.62   | 2.70   | 1.34 | 0.75 |
| P63001_RAC1_MOUSE   | Rac1     | Ras-related C3 botulinum K.LTPIYPOGLAM*AK#.E            | 12.19  | 3.99   | 3.05 | 0.33 |
| Q9WVM1_RGAP1_MOUSE  | Racgap1  | Rac GTPase-activating pr. R.GLTEAGLYR@.I                | 15.51  | 5.61   | 2.77 | 0.36 |
| Q9WVM1_RGAP1_MOUSE  | Racgap1  | Rac GTPase-activating pr. R.TDNLGTPQNTGGM**R@.L         | 7.10   | 2.24   | 3.17 | 0.32 |
| Q9WVM1_RGAP1_MOUSE  | Racgap1  | Rac GTPase-activating pr. K.TPLSSLSQR@.L                | 19.35  | 8.00   | 2.42 | 0.41 |
| Q9WVM1_RGAP1_MOUSE  | Racgap1  | Rac GTPase-activating pr. K.VSLGPTPEFLQVK#.T            | 12.24  | 5.01   | 2.44 | 0.41 |
| Q9WVM1_RGAP1_MOUSE  | Racgap1  | Rac GTPase-activating pr. R.GLTEAGLYR@.I                | 14.85  | 6.21   | 2.39 | 0.42 |
| Q9WVM1_RGAP1_MOUSE  | Racgap1  | Rac GTPase-activating pr. K.SALAFNLR@.G                 | 30.42  | 8.17   | 3.72 | 0.27 |
| Q9WVM1_RGAP1_MOUSE  | Racgap1  | Rac GTPase-activating pr. R.TDNLGTPQNTGGM**R@.L         | 11.96  | 1.48   | 8.07 | 0.12 |
| Q9WVM1_RGAP1_MOUSE  | Racgap1  | Rac GTPase-activating pr. K.TPLSSLSQR@.L                | 19.64  | 4.82   | 4.08 | 0.25 |
| Q9WVM1_RGAP1_MOUSE  | Racgap1  | Rac GTPase-activating pr. K.VSLGPTPEFLQVK#.T            | 24.30  | 3.97   | 6.12 | 0.16 |
| Q61550_RAD21_MOUSE  | Rad21    | Double-strand-break rep. R.AQLSDYSIDVITLTLAPPTK#.K      | 7.05   | 6.58   | 1.07 | 0.93 |
| Q61550_RAD21_MOUSE  | Rad21    | Double-strand-break rep. R.DVIDEPIEELPSR@.L             | 41.28  | 21.87  | 1.89 | 0.53 |
| Q61550_RAD21_MOUSE  | Rad21    | Double-strand-break rep. K.EFENPEVPR@EEOQPPQQQPQR@.D    | 2.55   | 3.84   | 0.66 | 1.51 |
| Q61550_RAD21_MOUSE  | Rad21    | Double-strand-break rep. K.EKEEVEEEDDEAQQGDDQDEER.R     | 2.08   | 2.01   | 1.03 | 0.97 |

|                     |         |                                                                     |        |        |      |      |
|---------------------|---------|---------------------------------------------------------------------|--------|--------|------|------|
| Q61550_RAD21_MOUSE  | Rad21   | Double-strand-break rep. K.EK#EEEEEEEEEDASGGDQDQEER@R@.W            | 2.68   | 2.34   | 1.15 | 0.87 |
| Q61550_RAD21_MOUSE  | Rad21   | Double-strand-break rep. K.EK#E#K#EEEEEDASGGDQDQEER@.R              | 6.94   | 2.69   | 2.58 | 0.39 |
| Q61550_RAD21_MOUSE  | Rad21   | Double-strand-break rep. K.FYSFLV#K#.                               | 50.85  | 14.88  | 3.42 | 0.29 |
| Q61550_RAD21_MOUSE  | Rad21   | Double-strand-break rep. K.GGEADNLD#FLK#EFENPEVPR@EEQQPQQQQPQPQR@.D | 6.74   | 4.01   | 1.68 | 0.59 |
| Q61550_RAD21_MOUSE  | Rad21   | Double-strand-break rep. K.LFFLPAQPLWNNR@.L                         | 34.64  | 20.21  | 1.71 | 0.58 |
| Q61550_RAD21_MOUSE  | Rad21   | Double-strand-break rep. R.LQDSVM*EASR@.T                           | 30.54  | 14.41  | 2.12 | 0.47 |
| Q61550_RAD21_MOUSE  | Rad21   | Double-strand-break rep. K.M*AFR@PGVVDLPEENR@.E                     | 24.80  | 13.23  | 1.88 | 0.53 |
| Q61550_RAD21_MOUSE  | Rad21   | Double-strand-break rep. K.M*NHLEYEDQYK#D#DNFEGEGNDGGLD#K#.         | 14.05  | 5.17   | 2.72 | 0.37 |
| Q61550_RAD21_MOUSE  | Rad21   | Double-strand-break rep. R.TSGHLLLV#V#.                             | 35.06  | 14.96  | 2.34 | 0.43 |
| Q61550_RAD21_MOUSE  | Rad21   | Double-strand-break rep. R.TTIEESAM*PPPP#QGVK#.                     | 8.68   | 5.19   | 1.67 | 0.60 |
| Q61550_RAD21_MOUSE  | Rad21   | Double-strand-break rep. R.AQLSDYSIVITLTLAPPTK#.K                   | 6.61   | 3.08   | 2.14 | 0.47 |
| Q61550_RAD21_MOUSE  | Rad21   | Double-strand-break rep. R.EAAYNAITLPEEFHDFDQPLDLDIDVAQQLSNC#R@.V   | 2.72   | 1.78   | 1.52 | 0.66 |
| Q61550_RAD21_MOUSE  | Rad21   | Double-strand-break rep. K.LFFLPAQPLWNNR@.L                         | 15.66  | 5.40   | 2.90 | 0.35 |
| Q61550_RAD21_MOUSE  | Rad21   | Double-strand-break rep. R.LQDSVM*EASR@.T                           | 10.10  | 48.91  | 0.21 | 4.84 |
| Q61550_RAD21_MOUSE  | Rad21   | Double-strand-break rep. K.M*AFR@PGVVDLPEENR@.E                     | 14.37  | 6.58   | 2.18 | 0.46 |
| Q61550_RAD21_MOUSE  | Rad21   | Double-strand-break rep. R.TTIEESAM*PPPP#QGVK#.                     | 5.90   | 1.74   | 3.39 | 0.29 |
| P70388_RAD50_MOUSE  | Rad50   | DNA repair protein RADS R.DSLIQSLATHLELDGFER@.G                     | 18.55  | 3.89   | 4.77 | 0.21 |
| P70388_RAD50_MOUSE  | Rad50   | DNA repair protein RADS R.EQISPLETALEK#.L                           | 13.94  | 7.06   | 1.98 | 0.51 |
| P70388_RAD50_MOUSE  | Rad50   | DNA repair protein RADS R.GQDIYEI#R@.S                              | 24.09  | 7.46   | 3.23 | 0.31 |
| P70388_RAD50_MOUSE  | Rad50   | DNA repair protein RADS R.ILELDQELTK#.A                             | 22.32  | 5.25   | 4.25 | 0.24 |
| P70388_RAD50_MOUSE  | Rad50   | DNA repair protein RADS R.R@QQM*EQSVLSTEVQSLNR@.E                   | 5.72   | 2.06   | 2.77 | 0.36 |
| P70388_RAD50_MOUSE  | Rad50   | DNA repair protein RADS R.SDADENVSASDK#.R                           | 5.07   | 2.60   | 1.95 | 0.51 |
| P70388_RAD50_MOUSE  | Rad50   | DNA repair protein RADS R.SELQLEQSSDR@.I                            | 17.20  | 4.39   | 3.92 | 0.26 |
| P70388_RAD50_MOUSE  | Rad50   | DNA repair protein RADS R.VFQTAEALQEVISDLSQK#.L                     | 36.97  | 9.69   | 3.81 | 0.26 |
| P70388_RAD50_MOUSE  | Rad50   | DNA repair protein RADS R.AELLVEQGR@.L                              | 16.17  | 7.19   | 2.25 | 0.45 |
| P70388_RAD50_MOUSE  | Rad50   | DNA repair protein RADS K.AEVM*SLQNEK#.A                            | 10.32  | 3.80   | 2.72 | 0.37 |
| P70388_RAD50_MOUSE  | Rad50   | DNA repair protein RADS R.DLDIY#K.T                                 | 14.59  | 2.82   | 5.17 | 0.19 |
| P70388_RAD50_MOUSE  | Rad50   | DNA repair protein RADS R.DSLIQSLATHLELDGFER@.G                     | 19.92  | 8.98   | 2.22 | 0.45 |
| P70388_RAD50_MOUSE  | Rad50   | DNA repair protein RADS K.EAQLASSQIVR@.S                            | 16.43  | 4.66   | 3.52 | 0.28 |
| P70388_RAD50_MOUSE  | Rad50   | DNA repair protein RADS K.GNTFVHPK#.V                               | 10.35  | 3.35   | 3.09 | 0.32 |
| P70388_RAD50_MOUSE  | Rad50   | DNA repair protein RADS R.GQDIYEI#R@.S                              | 28.58  | 10.74  | 2.66 | 0.38 |
| P70388_RAD50_MOUSE  | Rad50   | DNA repair protein RADS R.HSDELTSLGYPNK#K#.Q                        | 39.56  | 11.35  | 3.49 | 0.29 |
| P70388_RAD50_MOUSE  | Rad50   | DNA repair protein RADS R.ILELDQELTK#.A                             | 31.45  | 79.00  | 0.40 | 2.51 |
| P70388_RAD50_MOUSE  | Rad50   | DNA repair protein RADS R.KHILQDQEQIQHLK#.S                         | 11.24  | 6.81   | 1.65 | 0.61 |
| P70388_RAD50_MOUSE  | Rad50   | DNA repair protein RADS K.LEENIDITK#R@.N                            | 20.20  | 8.00   | 2.52 | 0.40 |
| P70388_RAD50_MOUSE  | Rad50   | DNA repair protein RADS R.LK#NDI#EQETLLGTIM*PEESAK#.V               | 4.16   | 1.77   | 2.34 | 0.43 |
| P70388_RAD50_MOUSE  | Rad50   | DNA repair protein RADS K.LQGVLDLR@.T                               | 25.10  | 7.68   | 3.27 | 0.31 |
| P70388_RAD50_MOUSE  | Rad50   | DNA repair protein RADS R.R@QQM*EQSVLSTEVQSLNR@.E                   | 12.68  | 4.03   | 3.15 | 0.32 |
| P70388_RAD50_MOUSE  | Rad50   | DNA repair protein RADS R.SELQLEQSSDR@.I                            | 24.56  | 11.04  | 2.22 | 0.45 |
| P70388_RAD50_MOUSE  | Rad50   | DNA repair protein RADS R.SFGIEDK#DK#.Q                             | 5.32   | 2.99   | 1.78 | 0.56 |
| P70388_RAD50_MOUSE  | Rad50   | DNA repair protein RADS K.TASQLLSLDLTK#EALK#.Q                      | 48.45  | 41.53  | 1.17 | 0.86 |
| P70388_RAD50_MOUSE  | Rad50   | DNA repair protein RADS K.TLDQAIM*#K#.F                             | 18.10  | 4.78   | 3.79 | 0.26 |
| P70388_RAD50_MOUSE  | Rad50   | DNA repair protein RADS R.VFQTAEALQEVISDLSQK#.L                     | 72.66  | 22.43  | 3.24 | 0.31 |
| P70388_RAD50_MOUSE  | Rad50   | DNA repair protein RADS R.VFQTAEALQEVISDLSQK#.L                     | 11.53  | 5.08   | 2.27 | 0.44 |
| Q99NG0_ARIP4_MOUSE  | Rad54I2 | Helicase ARIP4 OS=Mus n K.AAQQEELER@.L                              | 7.73   | 1.19   | 6.52 | 0.15 |
| Q99NG0_ARIP4_MOUSE  | Rad54I2 | Helicase ARIP4 OS=Mus n R.FLYDNLVESLER@.F                           | 8.86   | 3.34   | 2.65 | 0.38 |
| Q8C570_RAE1_MOUSE   | Rae1    | mRNA export factor OS=P R.GLIVYQLENQPS#FR@.R                        | 20.54  | 17.12  | 1.20 | 0.83 |
| Q8C570_RAE1_MOUSE   | Rae1    | mRNA export factor OS=P K.M*WDLNSNQAIQAH#DAPVK#.T                   | 12.90  | 10.92  | 1.18 | 0.85 |
| Q8C570_RAE1_MOUSE   | Rae1    | mRNA export factor OS=P R.SSNP#M*V#LQPER.C                          | 8.00   | 6.61   | 1.21 | 0.83 |
| O08602_RAE1A_MOUSE  | Rae1A   | Retinoic acid early-induc R.SAND#ESGVIM*#K#.W                       | 15.23  | 4.72   | 3.23 | 0.31 |
| Q9EP71_RAI14_MOUSE  | Rai14   | Ankycorbin OS=Mus mus K.AK#EQEVALVQK#.F                             | 31.81  | 22.02  | 1.44 | 0.69 |
| Q9EP71_RAI14_MOUSE  | Rai14   | Ankycorbin OS=Mus mus K.SSPV#VHPAGTSTTDNDVIIR@.Q                    | 18.12  | 11.89  | 1.28 | 0.78 |
| Q9EP71_RAI14_MOUSE  | Rai14   | Ankycorbin OS=Mus mus K.VLNELTQK#.Q                                 | 23.10  | 16.24  | 1.42 | 0.70 |
| Q9EP71_RAI14_MOUSE  | Rai14   | Ankycorbin OS=Mus mus K.YQQAQEIM*#K#.L                              | 17.80  | 11.88  | 1.50 | 0.67 |
| Q9EP71_RAI14_MOUSE  | Rai14   | Ankycorbin OS=Mus mus K.AAVSDAM*VPK#.S                              | 33.07  | 10.96  | 3.02 | 0.33 |
| Q9EP71_RAI14_MOUSE  | Rai14   | Ankycorbin OS=Mus mus K.AEISSIQEN#K#DR@.L                           | 9.59   | 3.24   | 2.96 | 0.34 |
| Q9EP71_RAI14_MOUSE  | Rai14   | Ankycorbin OS=Mus mus K.AFLFEK#.Y                                   | 50.71  | 14.89  | 3.41 | 0.29 |
| Q9EP71_RAI14_MOUSE  | Rai14   | Ankycorbin OS=Mus mus R.AK#SEALSEM*#K#.S                            | 10.60  | 3.35   | 3.17 | 0.32 |
| Q9EP71_RAI14_MOUSE  | Rai14   | Ankycorbin OS=Mus mus R.AQEELAGM#R@.R                               | 24.37  | 6.89   | 3.54 | 0.28 |
| Q9EP71_RAI14_MOUSE  | Rai14   | Ankycorbin OS=Mus mus K.ASDIPSSDAK#.S                               | 41.53  | 9.53   | 4.36 | 0.23 |
| Q9EP71_RAI14_MOUSE  | Rai14   | Ankycorbin OS=Mus mus K.DK#EAEALSFQSFHSTQDQLAPSPGK#.A               | 3.66   | 2.55   | 1.43 | 0.70 |
| Q9EP71_RAI14_MOUSE  | Rai14   | Ankycorbin OS=Mus mus R.EAPADEIDITLK#.Q                             | 15.78  | 5.24   | 3.01 | 0.33 |
| Q9EP71_RAI14_MOUSE  | Rai14   | Ankycorbin OS=Mus mus R.EAQAELEDYR@.K                               | 18.54  | 3.73   | 4.97 | 0.20 |
| Q9EP71_RAI14_MOUSE  | Rai14   | Ankycorbin OS=Mus mus K.K#GADLSVDSGLGNALHYSK#.L                     | 30.46  | 12.04  | 2.53 | 0.40 |
| Q9EP71_RAI14_MOUSE  | Rai14   | Ankycorbin OS=Mus mus K.LGLLSQESADGYSYHLR@.E                        | 139.69 | 31.70  | 4.41 | 0.23 |
| Q9EP71_RAI14_MOUSE  | Rai14   | Ankycorbin OS=Mus mus K.K#EALNSQLSYSTSSK#.R                         | 32.97  | 8.02   | 4.11 | 0.24 |
| Q9EP71_RAI14_MOUSE  | Rai14   | Ankycorbin OS=Mus mus K.LQASLESEVNALATK#.L                          | 78.65  | 21.72  | 3.62 | 0.28 |
| Q9EP71_RAI14_MOUSE  | Rai14   | Ankycorbin OS=Mus mus K.LSENAGIQNLLSK#.I                            | 73.81  | 27.35  | 2.70 | 0.37 |
| Q9EP71_RAI14_MOUSE  | Rai14   | Ankycorbin OS=Mus mus K.LQDQELQSQR@.T                               | 53.14  | 13.98  | 3.80 | 0.26 |
| Q9EP71_RAI14_MOUSE  | Rai14   | Ankycorbin OS=Mus mus K.QVSELSQYR@.L                                | 42.82  | 11.30  | 3.79 | 0.26 |
| Q9EP71_RAI14_MOUSE  | Rai14   | Ankycorbin OS=Mus mus K.SEEALSEM*#K#.S                              | 15.65  | 4.59   | 3.41 | 0.29 |
| Q9EP71_RAI14_MOUSE  | Rai14   | Ankycorbin OS=Mus mus K.SPAENIDNSGK#.T                              | 37.66  | 16.58  | 2.27 | 0.44 |
| Q9EP71_RAI14_MOUSE  | Rai14   | Ankycorbin OS=Mus mus K.SQM*PQEAPDSDGDM*#K#.E                       | 4.19   | 1.42   | 2.95 | 0.34 |
| Q9EP71_RAI14_MOUSE  | Rai14   | Ankycorbin OS=Mus mus K.SSPV#VHPAGTSTTDNDVIIR@.Q                    | 41.10  | 25.24  | 3.37 | 0.30 |
| Q9EP71_RAI14_MOUSE  | Rai14   | Ankycorbin OS=Mus mus K.VASLTLHNK#.E                                | 22.33  | 5.40   | 4.14 | 0.24 |
| Q9EP71_RAI14_MOUSE  | Rai14   | Ankycorbin OS=Mus mus K.VLNELTQK#.Q                                 | 72.12  | 22.14  | 3.26 | 0.31 |
| Q9EP71_RAI14_MOUSE  | Rai14   | Ankycorbin OS=Mus mus K.YEEM*#K#VLSVQK#.Q                           | 22.76  | 10.51  | 2.16 | 0.46 |
| Q9EP71_RAI14_MOUSE  | Rai14   | Ankycorbin OS=Mus mus K.YQQAQEIM*#K#.L                              | 37.38  | 11.21  | 3.33 | 0.30 |
| P63321_RALA_MOUSE   | Rala    | Ras-related protein Ral-A R.ADQWVNVNV#VETSAK#.T                     | 1.21   | 10.08  | 0.12 | 8.33 |
| P63321_RALA_MOUSE   | Rala    | Ras-related protein Ral-A K.VFFDLM#R@.E                             | 16.64  | 8.27   | 2.01 | 0.50 |
| P63321_RALA_MOUSE   | Rala    | Ras-related protein Ral-A K.VIM*VGGGVGK#.S                          | 24.22  | 12.43  | 1.95 | 0.51 |
| P63321_RALA_MOUSE   | Rala    | Ras-related protein Ral-A R.VK#EDENVP#FLVGNK#.S                     | 16.13  | 5.84   | 2.76 | 0.36 |
| Q8BQ24_RLGPB_MOUSE  | Ralgapb | Ral GTPase-activating prc K.ADL#SIPDLHEIVTELEER@.H                  | 5.32   | 2.69   | 1.98 | 0.51 |
| Q8BQ24_RLGPB_MOUSE  | Ralgapb | Ral GTPase-activating prc R.FLHM*LSNV#DLSNPAV#S#PK#.F               | 6.72   | 1.94   | 3.46 | 0.29 |
| A2AU61_A2AU61_MOUSE | Raly    | RNA-binding protein Ral R.AATAIYR@.L                                | 146.26 | 119.23 | 1.23 | 0.82 |
| A2AU61_A2AU61_MOUSE | Raly    | RNA-binding protein Ral K.R@AATAIYR@.L                              | 42.04  | 34.62  | 1.21 | 0.82 |
| Q64012_RALY_MOUSE   | Raly    | RNA-binding protein Ral R.AAVL#GENGR@.V                             | 51.81  | 46.60  | 1.11 | 0.90 |
| Q64012_RALY_MOUSE   | Raly    | RNA-binding protein Ral R.DDGDEGLTHSEEEHSDQTD#D#EALGALQ.-           | 141.94 | 141.94 | 1.00 | 1.00 |
| Q64012_RALY_MOUSE   | Raly    | RNA-binding protein Ral K.GYAFVQYANER@.H                            | 177.37 | 166.61 | 1.06 | 0.94 |
| Q64012_RALY_MOUSE   | Raly    | RNA-binding protein Ral K.IQTSNVTNK#.N                              | 60.47  | 70.00  | 0.86 | 1.16 |
| Q64012_RALY_MOUSE   | Raly    | RNA-binding protein Ral K.#SDVETIFSK#.Y                             | 153.31 | 134.57 | 1.14 | 0.88 |
| Q64012_RALY_MOUSE   | Raly    | RNA-binding protein Ral R.LEQ#AEEQK#.A                              | 299.59 | 272.74 | 1.10 | 0.91 |
| Q64012_RALY_MOUSE   | Raly    | RNA-binding protein Ral R.LEQ#AEEQK#ANPDGK.K                        | 12.43  | 10.20  | 1.22 | 0.82 |
| Q64012_RALY_MOUSE   | Raly    | RNA-binding protein Ral R.LFDYR@.G                                  | 165.42 | 149.00 | 1.11 | 0.90 |
| Q64012_RALY_MOUSE   | Raly    | RNA-binding protein Ral R.LPAPQ#EAT#EAGT#PQGEVQTR@.D                | 49.34  | 39.34  | 1.25 | 0.80 |
| Q64012_RALY_MOUSE   | Raly    | RNA-binding protein Ral K.SDVETIFSK#.Y                              | 85.95  | 71.84  | 1.20 | 0.84 |
| Q64012_RALY_MOUSE   | Raly    | RNA-binding protein Ral K.SNIDALLGR@.L                              | 342.28 | 305.57 | 1.12 | 0.89 |
| Q64012_RALY_MOUSE   | Raly    | RNA-binding protein Ral K.SNIDALLGR@LEQ#AEEQK#.A                    | 6.57   | 4.61   | 1.43 | 0.70 |
| Q64012_RALY_MOUSE   | Raly    | RNA-binding protein Ral K.SSELTQIK#.T                               | 265.18 | 254.09 | 1.04 | 0.96 |
| Q64012_RALY_MOUSE   | Raly    | RNA-binding protein Ral R.STAVITGSAK#.I                             | 63.89  | 61.38  | 1.04 | 0.96 |
| Q64012_RALY_MOUSE   | Raly    | RNA-binding protein Ral R.VFIGNLTA#VVK#.K                           | 455.16 | 409.86 | 1.11 | 0.90 |
| Q64012_RALY_MOUSE   | Raly    | RNA-binding protein Ral R.VLAGQTL#DINM*AGEPK#PNRPK.G                | 130.24 | 114.02 | 1.14 | 0.88 |
| Q64012_RALY_MOUSE   | Raly    | RNA-binding protein Ral R.VLAGQTL#DINMAGEPK#PNR@PK#.G               | 8.67   | 7.80   | 1.11 | 0.90 |

|                    |         |                                                               |        |        |      |       |
|--------------------|---------|---------------------------------------------------------------|--------|--------|------|-------|
| Q64012_RALY_MOUSE  | Raly    | RNA-binding protein RalY R.VTVPLVLR.R                         | 359.33 | 352.30 | 1.02 | 0.98  |
| Q64012_RALY_MOUSE  | Raly    | RNA-binding protein RalY K.GYAFVQYANER.N                      | 9.88   | 13.45  | 0.74 | 1.36  |
| Q64012_RALY_MOUSE  | Raly    | RNA-binding protein RalY K.IQTSTNVTN.K                        | 8.90   | 15.83  | 0.56 | 1.78  |
| Q64012_RALY_MOUSE  | Raly    | RNA-binding protein RalY R.LEQJAEQK.A                         | 13.67  | 21.46  | 0.64 | 1.57  |
| Q64012_RALY_MOUSE  | Raly    | RNA-binding protein RalY R.LPAPQEDTASEAGTPQGEVQTR@.D          | 5.27   | 2.18   | 2.41 | 0.41  |
| Q64012_RALY_MOUSE  | Raly    | RNA-binding protein RalY K.SDVETIFSK.Y                        | 6.02   | 8.50   | 0.71 | 1.41  |
| Q64012_RALY_MOUSE  | Raly    | RNA-binding protein RalY R.VFIGNLNTAVVK.K                     | 29.50  | 53.77  | 0.55 | 1.82  |
| Q64012_RALY_MOUSE  | Raly    | RNA-binding protein RalY R.VLAGQTLDINM*AGEPKPNRPK.G           | 1.86   | 3.37   | 0.55 | 1.81  |
| Q64012_RALY_MOUSE  | Raly    | RNA-binding protein RalY R.VTVPLVLR.R                         | 47.00  | 79.41  | 0.59 | 1.69  |
| Q64012_RALY_MOUSE  | Raly    | RNA-binding protein RalY K.GYAFVQYANER.H                      | 17.37  | 15.49  | 1.12 | 0.89  |
| Q64012_RALY_MOUSE  | Raly    | RNA-binding protein RalY R.LEQJAEQK#.A                        | 22.09  | 17.23  | 1.28 | 0.78  |
| Q64012_RALY_MOUSE  | Raly    | RNA-binding protein RalY R.LPAPQEDTASEAGTPQGEVQTR@.D          | 22.54  | 14.12  | 1.60 | 0.63  |
| Q64012_RALY_MOUSE  | Raly    | RNA-binding protein RalY K.SNIDALLGR.L                        | 21.72  | 18.16  | 1.20 | 0.84  |
| Q64012_RALY_MOUSE  | Raly    | RNA-binding protein RalY K.TELTQIK#.S                         | 25.75  | 25.42  | 1.01 | 0.99  |
| Q64012_RALY_MOUSE  | Raly    | RNA-binding protein RalY R.VFIGNLNTAVVK#.K                    | 32.83  | 25.56  | 1.28 | 0.78  |
| Q64012_RALY_MOUSE  | Raly    | RNA-binding protein RalY R.VLAGQTLDINM*AGEPKPNRPK.G           | 23.25  | 23.06  | 1.01 | 0.99  |
| Q64012_RALY_MOUSE  | Raly    | RNA-binding protein RalY R.LEQJAEQK#.A                        | 14.07  | 9.79   | 1.44 | 0.70  |
| P62827_RAN_MOUSE   | Ran     | GTP-binding nuclear pro: K.FNVVDTAGQK.F                       | 2.46   | 6.50   | 0.38 | 2.65  |
| P62827_RAN_MOUSE   | Ran     | GTP-binding nuclear pro: K.LVLVGDGTGK.T                       | 8.24   | 15.99  | 0.52 | 1.94  |
| P62827_RAN_MOUSE   | Ran     | GTP-binding nuclear pro: K.NLQYDISAK.S                        | 5.39   | 9.40   | 0.57 | 1.74  |
| P62827_RAN_MOUSE   | Ran     | GTP-binding nuclear pro: K.SNYNFKPFLWLAR.K                    | 5.31   | 17.77  | 0.30 | 3.35  |
| Q6VN19_RBP10_MOUSE | Ranbp10 | Ran-binding protein 10 C R.VGEAIETQR@.F                       | 10.76  | 9.20   | 1.17 | 0.86  |
| Q6VN19_RBP10_MOUSE | Ranbp10 | Ran-binding protein 10 C K.VQGVTVHGFPI SAR@.L                 | 8.53   | 6.13   | 1.39 | 0.72  |
| Q6VN19_RBP10_MOUSE | Ranbp10 | Ran-binding protein 10 C R.ELQALSEQLGR@.E                     | 5.90   | 31.88  | 0.19 | 5.40  |
| Q6VN19_RBP10_MOUSE | Ranbp10 | Ran-binding protein 10 C R.M*TEPIQEASIK#.N                    | 5.50   | 2.16   | 2.55 | 0.39  |
| Q6VN19_RBP10_MOUSE | Ranbp10 | Ran-binding protein 10 C R.VGEAIETQR@.F                       | 9.52   | 2.88   | 3.30 | 0.30  |
| Q9ERU9_RBP2_MOUSE  | Ranbp2  | E3 SUMO-protein ligase F R.ELLESFDSALQSIVK#.S                 | 9.47   | 7.52   | 1.26 | 0.79  |
| Q9ERU9_RBP2_MOUSE  | Ranbp2  | E3 SUMO-protein ligase F R.LLDDSDSTNSVQK#.L                   | 9.38   | 6.41   | 1.46 | 0.68  |
| Q9ERU9_RBP2_MOUSE  | Ranbp2  | E3 SUMO-protein ligase F R.YIASVQGSAPSPPR@.E                  | 8.19   | 5.56   | 1.47 | 0.68  |
| Q9ERU9_RBP2_MOUSE  | Ranbp2  | E3 SUMO-protein ligase F R.FGSETTGFNFSPK#.S                   | 10.18  | 3.10   | 3.29 | 0.30  |
| Q9ERU9_RBP2_MOUSE  | Ranbp2  | E3 SUMO-protein ligase F R.FGQGDLPK#.S                        | 8.77   | 5.29   | 1.66 | 0.60  |
| Q9ERU9_RBP2_MOUSE  | Ranbp2  | E3 SUMO-protein ligase F R.FKHPPEAALFK#.C                     | 11.25  | 8.27   | 1.36 | 0.74  |
| Q9ERU9_RBP2_MOUSE  | Ranbp2  | E3 SUMO-protein ligase F R.HLENDPFOAHDTSQK#.N                 | 13.96  | 6.35   | 2.20 | 0.46  |
| Q9ERU9_RBP2_MOUSE  | Ranbp2  | E3 SUMO-protein ligase F R.LLDDSDSTNSVQK#.L                   | 14.92  | 7.30   | 2.04 | 0.49  |
| Q9ERU9_RBP2_MOUSE  | Ranbp2  | E3 SUMO-protein ligase F R.ILQNDVNK#.Q                        | 10.74  | 6.21   | 1.73 | 0.58  |
| Q9ERU9_RBP2_MOUSE  | Ranbp2  | E3 SUMO-protein ligase F R.LPVPLESVK#.E                       | 14.01  | 10.15  | 1.38 | 0.72  |
| Q9ERU9_RBP2_MOUSE  | Ranbp2  | E3 SUMO-protein ligase F K.NLTENM*GPNQQK#.N                   | 9.92   | 5.78   | 1.72 | 0.58  |
| Q9ERU9_RBP2_MOUSE  | Ranbp2  | E3 SUMO-protein ligase F R.SASSFVQTSFKF#.G                    | 15.37  | 11.02  | 1.39 | 0.72  |
| Q9ERU9_RBP2_MOUSE  | Ranbp2  | E3 SUMO-protein ligase F R.SFVWHALDYADELPK#PEQLAIR@.F         | 3.71   | 2.96   | 1.25 | 0.80  |
| Q9ERU9_RBP2_MOUSE  | Ranbp2  | E3 SUMO-protein ligase F R.SFVWHALDYADELPK#PEQLAIR@.F         | 7.00   | 4.78   | 1.47 | 0.68  |
| Q9ERU9_RBP2_MOUSE  | Ranbp2  | E3 SUMO-protein ligase F R.SVTFVAAELANR#.S                    | 22.86  | 10.97  | 2.08 | 0.48  |
| P69566_RANB9_MOUSE | Ranbp9  | Ran-binding protein 9 O: R.LYPAVDQEETPLPR@.S                  | 4.98   | 2.11   | 2.37 | 0.42  |
| P69566_RANB9_MOUSE | Ranbp9  | Ran-binding protein 9 O: R.NPNLFTLK#.V                        | 11.11  | 5.56   | 2.00 | 0.50  |
| P69566_RANB9_MOUSE | Ranbp9  | Ran-binding protein 9 O: R.STDQTLLELASIK#.N                   | 10.24  | 6.30   | 1.63 | 0.61  |
| P46061_RAGP1_MOUSE | Rangap1 | Ran GTPase-activating pr K.GAVAIADAVR@.G                      | 15.29  | 9.15   | 2.84 | 0.35  |
| P46061_RAGP1_MOUSE | Rangap1 | Ran GTPase-activating pr R.LEGNTVGVEAAR.V                     | 12.51  | 8.39   | 1.49 | 0.67  |
| P46061_RAGP1_MOUSE | Rangap1 | Ran GTPase-activating pr K.TQVAGGQLSFK#.G                     | 32.71  | 11.82  | 2.77 | 0.36  |
| P46061_RAGP1_MOUSE | Rangap1 | Ran GTPase-activating pr R.VINLNDNTFTEK#.K                    | 47.68  | 20.19  | 2.36 | 0.42  |
| P46061_RAGP1_MOUSE | Rangap1 | Ran GTPase-activating pr K.TAVLDAIDALM*#.K                    | 9.57   | 4.92   | 1.94 | 0.51  |
| P46061_RAGP1_MOUSE | Rangap1 | Ran GTPase-activating pr K.VSVLIVQQTDSIDPEK#VVSFAFLK#.V       | 7.60   | 5.27   | 1.44 | 0.69  |
| P46061_RAGP1_MOUSE | Rangap1 | Ran GTPase-activating pr R.DAALVAAEAVADK#.A                   | 7.69   | 6.67   | 1.15 | 0.87  |
| P46061_RAGP1_MOUSE | Rangap1 | Ran GTPase-activating pr R.DAALVAAEAVADK#AELEK#.L             | 14.63  | 5.10   | 2.87 | 0.35  |
| P46061_RAGP1_MOUSE | Rangap1 | Ran GTPase-activating pr K.DVVK#EIFEFDGLEALR@.LEGNTVGVEAAR@.V | 4.01   | 2.47   | 1.62 | 0.62  |
| P46061_RAGP1_MOUSE | Rangap1 | Ran GTPase-activating pr K.EIEEFDGLEALR@.L                    | 9.87   | 5.06   | 1.95 | 0.51  |
| P46061_RAGP1_MOUSE | Rangap1 | Ran GTPase-activating pr K.EIEEFDGLEALR@.LEGNTVGVEAAR@.V      | 6.29   | 3.02   | 2.08 | 0.48  |
| P46061_RAGP1_MOUSE | Rangap1 | Ran GTPase-activating pr K.GAVAIADAVR@.G                      | 20.24  | 22.66  | 2.83 | 0.35  |
| P46061_RAGP1_MOUSE | Rangap1 | Ran GTPase-activating pr R.GFEALL#.S                          | 49.68  | 16.73  | 2.97 | 0.34  |
| P46061_RAGP1_MOUSE | Rangap1 | Ran GTPase-activating pr K.GGVAM*AECLK#.T                     | 43.86  | 13.05  | 3.36 | 0.30  |
| P46061_RAGP1_MOUSE | Rangap1 | Ran GTPase-activating pr R.GSGEATPSPR@.K                      | 14.87  | 9.39   | 1.58 | 0.63  |
| P46061_RAGP1_MOUSE | Rangap1 | Ran GTPase-activating pr R.HNLLQTLN#.                         | 64.74  | 64.74  | 1.00 | 1.00  |
| P46061_RAGP1_MOUSE | Rangap1 | Ran GTPase-activating pr R.LEGNTVGVEAAR@.V                    | 39.96  | 24.28  | 1.65 | 0.61  |
| P46061_RAGP1_MOUSE | Rangap1 | Ran GTPase-activating pr K.LNTAEDAKHDKV#EIFEFDGLEALR@.L       | 14.91  | 8.23   | 1.81 | 0.55  |
| P46061_RAGP1_MOUSE | Rangap1 | Ran GTPase-activating pr K.TQVAGGQLSFK#.G                     | 47.67  | 19.31  | 3.48 | 0.29  |
| P46061_RAGP1_MOUSE | Rangap1 | Ran GTPase-activating pr R.VINLNDNTFTEK#.K                    | 99.31  | 30.63  | 3.24 | 0.31  |
| P46061_RAGP1_MOUSE | Rangap1 | Ran GTPase-activating pr K.VSVLIVQQTDSIDPEK#.V                | 28.67  | 10.95  | 2.62 | 0.38  |
| P46061_RAGP1_MOUSE | Rangap1 | Ran GTPase-activating pr K.VSVLIVQQTDSIDPEK#VVSFAFLK#.V       | 38.17  | 13.22  | 2.89 | 0.35  |
| P46061_RAGP1_MOUSE | Rangap1 | Ran GTPase-activating pr K.VVSFAFLK#.V                        | 33.42  | 10.23  | 3.27 | 0.31  |
| P46061_RAGP1_MOUSE | Rangap1 | Ran GTPase-activating pr K.GAVAIADAVR@.G                      | 12.12  | 4.28   | 2.83 | 0.35  |
| P46061_RAGP1_MOUSE | Rangap1 | Ran GTPase-activating pr R.HNLLQTLN#.                         | 13.55  | 13.55  | 1.00 | 1.00  |
| P46061_RAGP1_MOUSE | Rangap1 | Ran GTPase-activating pr K.TAVLDAIDALM*#.K                    | 9.85   | 4.09   | 2.41 | 0.41  |
| P46061_RAGP1_MOUSE | Rangap1 | Ran GTPase-activating pr R.VINLNDNTFTEK#.K                    | 15.87  | 6.89   | 2.30 | 0.43  |
| P46061_RAGP1_MOUSE | Rangap1 | Ran GTPase-activating pr K.VSVLIVQQTDSIDPEK#.V                | 3.73   | 5.91   | 0.63 | 1.58  |
| P62835_RAP1A_MOUSE | Rap1a   | Ras-related protein Rap-1 K.INVNEIFYDLVR@.Q                   | 7.37   | 4.19   | 1.76 | 0.57  |
| P62835_RAP1A_MOUSE | Rap1a   | Ras-related protein Rap-1 K.LVLVGGSGVGK#.S                    | 13.61  | 4.60   | 2.96 | 0.34  |
| P62835_RAP1A_MOUSE | Rap1a   | Ras-related protein Rap-1 K.INVNEIFYDLVR@.Q                   | 52.41  | 26.63  | 1.97 | 0.51  |
| P62835_RAP1A_MOUSE | Rap1a   | Ras-related protein Rap-1 K.LVLVGGSGVGK#.S                    | 54.62  | 24.01  | 2.23 | 0.45  |
| P62835_RAP1A_MOUSE | Rap1a   | Ras-related protein Rap-1 K.SK#INVNEIFYDLVR@.Q                | 24.75  | 8.15   | 3.04 | 0.33  |
| P62835_RAP1A_MOUSE | Rap1a   | Ras-related protein Rap-1 K.YDPTEDSYR@K#.Q                    | 7.53   | 3.10   | 2.43 | 0.41  |
| P62835_RAP1A_MOUSE | Rap1a   | Ras-related protein Rap-1 K.INVNEIFYDLVR@.Q                   | 10.14  | 4.40   | 2.30 | 0.43  |
| P62835_RAP1A_MOUSE | Rap1a   | Ras-related protein Rap-1 K.LVLVGGSGVGK#.S                    | 13.05  | 6.09   | 2.14 | 0.47  |
| P61226_RAP2B_MOUSE | Rap2b   | Ras-related protein Rap-2 K.ASVDELFAEIVR@.Q                   | 7.73   | 2.04   | 3.78 | 0.26  |
| Q8CHG7_RPGF2_MOUSE | Rapgef2 | Rap guanine nucleotide e: R.NIEPTIEDLDFK#.L                   | 10.98  | 1.86   | 5.89 | 0.17  |
| P18911_RARG_MOUSE  | Rarg    | Retinoic acid receptor ga K.EAVRNRDNK.K                       | 1.21   | 37.08  | 0.03 | 30.66 |
| P18911_RARG_MOUSE  | Rarg    | Retinoic acid receptor ga K.LQEPLEALR@.L                      | 11.32  | 3.90   | 2.90 | 0.34  |
| P18911_RARG_MOUSE  | Rarg    | Retinoic acid receptor ga R.YTPEQD*TFSDGLTLNR@.T              | 4.41   | 2.09   | 2.11 | 0.47  |
| Q99MK9_RASF1_MOUSE | Rassf1  | Ras association domain- c: R.ETPDLSQATEEQK#.I                 | 5.78   | 3.34   | 1.73 | 0.58  |
| Q9CW46_RAVR1_MOUSE | Raver1  | Ribonucleoprotein PTB-4 R.ADGQALDQSHLR@.V                     | 34.53  | 14.77  | 2.34 | 0.43  |
| Q9CW46_RAVR1_MOUSE | Raver1  | Ribonucleoprotein PTB-4 K.FAVLELYETAEM*AEAAQER@.A             | 9.20   | 4.12   | 2.23 | 0.45  |
| Q9CW46_RAVR1_MOUSE | Raver1  | Ribonucleoprotein PTB-4 K.GFAVLELYETAEM*AEAAQER@.A            | 7.23   | 2.73   | 2.65 | 0.38  |
| Q9CW46_RAVR1_MOUSE | Raver1  | Ribonucleoprotein PTB-4 K.GFAVLELYETAEM*AEAAQER@.A            | 22.11  | 4.73   | 4.67 | 0.21  |
| Q9CW46_RAVR1_MOUSE | Raver1  | Ribonucleoprotein PTB-4 K.GFAVLELYETAEM*AEAAQER@.A            | 9.74   | 2.15   | 4.52 | 0.22  |
| Q9CW46_RAVR1_MOUSE | Raver1  | Ribonucleoprotein PTB-4 R.R@APEQLPELDPPEIR@K#.R               | 14.75  | 6.25   | 2.36 | 0.42  |
| Q9CW46_RAVR1_MOUSE | Raver1  | Ribonucleoprotein PTB-4 R.SGGSGGPPSLHFYSYTSYTSYGLQAGLK#.Q     | 3.97   | 3.49   | 1.14 | 0.88  |
| Q9CW46_RAVR1_MOUSE | Raver1  | Ribonucleoprotein PTB-4 R.SM*LAALIAQAATLNR@.G                 | 3.97   | 6.52   | 2.56 | 0.39  |
| Q9CW46_RAVR1_MOUSE | Raver1  | Ribonucleoprotein PTB-4 R.TLYVHWDTAGQLTALLHSR@.C              | 20.58  | 4.91   | 4.19 | 0.24  |
| Q9CW46_RAVR1_MOUSE | Raver1  | Ribonucleoprotein PTB-4 R.LPPEPGLPDSYGFYDTPDVGR#.R            | 2.51   | 1.82   | 1.38 | 0.73  |
| Q60972_RBBP4_MOUSE | Rbbp4   | Histone-binding protein K.GFEGFGSGVSGK#.I                     | 44.35  | 19.07  | 2.33 | 0.43  |
| Q60972_RBBP4_MOUSE | Rbbp4   | Histone-binding protein K.IGEEOSPEDAEDGPELLFHGGHTAK#.I        | 188.39 | 85.50  | 2.20 | 0.45  |
| Q60972_RBBP4_MOUSE | Rbbp4   | Histone-binding protein K.INHEGEVNR@.A                        | 29.33  | 17.54  | 1.67 | 0.60  |
| Q60972_RBBP4_MOUSE | Rbbp4   | Histone-binding protein K.LHSFESHKDEEIFQVQSPHNELIASSGTDR@.R   | 15.63  | 3.17   | 4.93 | 0.20  |
| Q60972_RBBP4_MOUSE | Rbbp4   | Histone-binding protein K.LM*WDRTR@.S                         | 81.75  | 34.83  | 2.35 | 0.43  |
| Q60972_RBBP4_MOUSE | Rbbp4   | Histone-binding protein K.LMWDRTR@.S                          | 39.77  | 15.15  | 2.62 | 0.38  |
| Q60972_RBBP4_MOUSE | Rbbp4   | Histone-binding protein R.LNWVDSLK#.I                         | 130.76 | 49.96  | 2.62 | 0.38  |

|                     |         |                           |                                           |        |        |       |      |
|---------------------|---------|---------------------------|-------------------------------------------|--------|--------|-------|------|
| Q60972_RBBP4_MOUSE  | Rbbp4   | Histone-binding protein   | R.LVLGTHSTDEQNLHVIASVQLPNDDAQFDASHYSEK#.G | 10.48  | 2.39   | 4.38  | 0.23 |
| Q60972_RBBP4_MOUSE  | Rbbp4   | Histone-binding protein   | R.R@LNWVDSLK#.I                           | 121.57 | 45.90  | 2.65  | 0.38 |
| Q60972_RBBP4_MOUSE  | Rbbp4   | Histone-binding protein   | K.TIFGTAVVEDVSWHLLHESLFGSVADDQK#.L        | 50.79  | 15.96  | 3.18  | 0.31 |
| Q60972_RBBP4_MOUSE  | Rbbp4   | Histone-binding protein   | K.TPSSDVLVFDYTK#.H                        | 246.53 | 106.93 | 2.31  | 0.43 |
| Q60972_RBBP4_MOUSE  | Rbbp4   | Histone-binding protein   | K.TVALWDLR@.N                             | 273.38 | 99.82  | 2.74  | 0.37 |
| Q60972_RBBP4_MOUSE  | Rbbp4   | Histone-binding protein   | R.VINEEYK#.I                              | 210.87 | 85.60  | 2.46  | 0.41 |
| Q60972_RBBP4_MOUSE  | Rbbp4   | Histone-binding protein   | R.R@LNWVDSLK#.I                           | 9.11   | 7.23   | 1.26  | 0.79 |
| Q60972_RBBP4_MOUSE  | Rbbp4   | Histone-binding protein   | K.TPSSDVLVFDYTK#.H                        | 134.50 | 3.87   | 34.79 | 0.03 |
| Q60972_RBBP4_MOUSE  | Rbbp4   | Histone-binding protein   | K.TVALWDLR@.N                             | 18.90  | 6.15   | 3.07  | 0.33 |
| Q8BX09_RBBP5_MOUSE  | Rbbp5   | Retinoblastoma-binding    | K.ELDENVEEYER@.E                          | 8.07   | 3.02   | 2.67  | 0.37 |
| Q8BX09_RBBP5_MOUSE  | Rbbp5   | Retinoblastoma-binding    | R.FPSPILK#.V                              | 18.49  | 5.58   | 3.31  | 0.30 |
| Q8BX09_RBBP5_MOUSE  | Rbbp5   | Retinoblastoma-binding    | K.HVVLVDDSDLNWVASFDR@.R                   | 21.63  | 7.90   | 2.74  | 0.37 |
| Q8BX09_RBBP5_MOUSE  | Rbbp5   | Retinoblastoma-binding    | R.IVWDLTR@.G                              | 58.29  | 18.10  | 3.22  | 0.31 |
| Q8BX09_RBBP5_MOUSE  | Rbbp5   | Retinoblastoma-binding    | R.QSSADGQSPK#.K                           | 3.74   | 1.41   | 2.64  | 0.38 |
| Q8BX09_RBBP5_MOUSE  | Rbbp5   | Retinoblastoma-binding    | K.SAPVM*LTLSDSK#.H                        | 22.92  | 4.97   | 4.61  | 0.22 |
| Q8BX09_RBBP5_MOUSE  | Rbbp5   | Retinoblastoma-binding    | K.TDSQDLVASF@.V                           | 27.25  | 9.43   | 2.89  | 0.35 |
| Q8BX09_RBBP5_MOUSE  | Rbbp5   | Retinoblastoma-binding    | K.TTNIELQGVNPDEVHPLLGVK#.G                | 22.41  | 6.50   | 3.45  | 0.29 |
| Q8BX09_RBBP5_MOUSE  | Rbbp5   | Retinoblastoma-binding    | R.VTTGTSNTAIK#.S                          | 45.87  | 12.16  | 3.77  | 0.27 |
| P97868_RBBP6_MOUSE  | Rbbp6   | E3 ubiquitin-protein liga | K.AADSDDLQTNATQK#.E                       | 6.11   | 3.23   | 1.89  | 0.53 |
| P97868_RBBP6_MOUSE  | Rbbp6   | E3 ubiquitin-protein liga | K.EEYTDNALIPK#.N                          | 6.19   | 5.71   | 1.08  | 0.92 |
| P97868_RBBP6_MOUSE  | Rbbp6   | E3 ubiquitin-protein liga | K.GASSIATLIM*EEK#.G                       | 19.98  | 8.13   | 2.46  | 0.41 |
| P97868_RBBP6_MOUSE  | Rbbp6   | E3 ubiquitin-protein liga | R.K#GEEESFLNPELETSR@.K                    | 10.51  | 3.84   | 2.74  | 0.37 |
| P97868_RBBP6_MOUSE  | Rbbp6   | E3 ubiquitin-protein liga | K.LGLYVSPQQI@.R                           | 25.92  | 8.64   | 3.00  | 0.33 |
| P97868_RBBP6_MOUSE  | Rbbp6   | E3 ubiquitin-protein liga | K.YAIPITDAEAYAGK#.K                       | 15.88  | 6.25   | 2.54  | 0.39 |
| P97868_RBBP6_MOUSE  | Rbbp6   | E3 ubiquitin-protein liga | K.AADSDDLQTNATQK#.E                       | 6.71   | 1.90   | 3.53  | 0.28 |
| P97868_RBBP6_MOUSE  | Rbbp6   | E3 ubiquitin-protein liga | K.AIDASASISLAQTK#.T                       | 18.71  | 6.38   | 2.93  | 0.34 |
| P97868_RBBP6_MOUSE  | Rbbp6   | E3 ubiquitin-protein liga | R.K#GEEESFLNPELETSR@.K                    | 14.16  | 3.98   | 3.56  | 0.28 |
| P97868_RBBP6_MOUSE  | Rbbp6   | E3 ubiquitin-protein liga | K.LGLYVSPQQI@.R                           | 17.16  | 5.03   | 3.41  | 0.29 |
| Q60973_RBBP7_MOUSE  | Rbbp7   | Histone-binding protein   | K.DYALHWLVLGTHSTDEQNLHVLVAR@.V            | 35.13  | 10.99  | 3.20  | 0.31 |
| Q60973_RBBP7_MOUSE  | Rbbp7   | Histone-binding protein   | K.EM*FEDTVEER@.V                          | 15.67  | 17.43  | 2.96  | 0.34 |
| Q60973_RBBP7_MOUSE  | Rbbp7   | Histone-binding protein   | K.EMFEDTVEER@.V                           | 10.67  | 2.39   | 4.46  | 0.22 |
| Q60973_RBBP7_MOUSE  | Rbbp7   | Histone-binding protein   | K.LHTFESHKDEIFQVHWSPHNETLASSGTR@.R        | 2.61   | 6.93   | 0.38  | 2.66 |
| Q8BP71_RFOX2_MOUSE  | Rbfox2  | RNA binding protein fox-  | R.ESEVELPVP#GAGADGPEPLSK#.R               | 7.46   | 4.95   | 1.51  | 0.66 |
| Q8BP71_RFOX2_MOUSE  | Rbfox2  | RNA binding protein fox-  | K.GFGFVTFENSADADR@.A                      | 113.72 | 73.51  | 1.55  | 0.65 |
| Q8BP71_RFOX2_MOUSE  | Rbfox2  | RNA binding protein fox-  | K.IEVNNATAR.V                             | 11.91  | 6.68   | 1.78  | 0.56 |
| Q8BP71_RFOX2_MOUSE  | Rbfox2  | RNA binding protein fox-  | K.ILDEVEIFNER@.G                          | 63.28  | 35.91  | 1.76  | 0.57 |
| Q8BP71_RFOX2_MOUSE  | Rbfox2  | RNA binding protein fox-  | R.K#IEVNNATAR@.V                          | 69.10  | 43.67  | 1.58  | 0.63 |
| Q8BP71_RFOX2_MOUSE  | Rbfox2  | RNA binding protein fox-  | K.R@LHVSNIFFR@.F                          | 66.44  | 38.25  | 1.74  | 0.58 |
| Q8BP71_RFOX2_MOUSE  | Rbfox2  | RNA binding protein fox-  | R.TEEAADGGM*QNEPLTPGYHGFAR@.D             | 5.83   | 2.96   | 1.97  | 0.51 |
| Q8BP71_RFOX2_MOUSE  | Rbfox2  | RNA binding protein fox-  | R.VYTADPYHALAPAAASVYGVAVASLYR@.G          | 17.82  | 7.36   | 2.42  | 0.41 |
| Q8BP71_RFOX2_MOUSE  | Rbfox2  | RNA binding protein fox-  | R.YAQPATATAAATAAAAAAAYSDGYGR@.V           | 47.40  | 30.78  | 1.54  | 0.65 |
| Q8BP71_RFOX2_MOUSE  | Rbfox2  | RNA binding protein fox-  | R.YAQPATATAAATAAAAAAAYSDGYGR@.V           | 13.74  | 8.46   | 1.62  | 0.62 |
| Q8BP71_RFOX2_MOUSE  | Rbfox2  | RNA binding protein fox-  | R.ESEVELPVP#GAGADGPEPLSK#.R               | 6.16   | 4.69   | 1.31  | 0.76 |
| Q8BP71_RFOX2_MOUSE  | Rbfox2  | RNA binding protein fox-  | K.GFGFVTFENSADADR@.A                      | 17.29  | 5.06   | 3.42  | 0.29 |
| Q8BP71_RFOX2_MOUSE  | Rbfox2  | RNA binding protein fox-  | K.ILDEVEIFNER@.G                          | 20.12  | 4.99   | 4.04  | 0.25 |
| Q8BP71_RFOX2_MOUSE  | Rbfox2  | RNA binding protein fox-  | R.YAQPATATAAATAAAAAAAYSDGYGR@.V           | 10.25  | 8.34   | 1.23  | 0.81 |
| Q64701_RBL1_MOUSE   | Rbl1    | Retinoblastoma-like prot  | K.LSLIQF5K#.M                             | 10.26  | 6.82   | 1.50  | 0.66 |
| Q99KG3_RBM10_MOUSE  | Rbm10   | RNA-binding protein 10    | R.DGLSDNIGSR@.M                           | 11.36  | 5.09   | 2.23  | 0.45 |
| Q99KG3_RBM10_MOUSE  | Rbm10   | RNA-binding protein 10    | R.GFAFVESHLDQATR@.W                       | 10.42  | 6.42   | 1.62  | 0.62 |
| Q99KG3_RBM10_MOUSE  | Rbm10   | RNA-binding protein 10    | K.YGSIATAAATAAAAAAAYSDGYGR@.D             | 6.77   | 2.21   | 3.06  | 0.33 |
| Q99KG3_RBM10_MOUSE  | Rbm10   | RNA-binding protein 10    | R.DGLSDNIGSR@.M                           | 81.44  | 31.17  | 2.61  | 0.38 |
| Q99KG3_RBM10_MOUSE  | Rbm10   | RNA-binding protein 10    | R.ESATADAGYALEK#.K                        | 78.42  | 30.56  | 2.57  | 0.39 |
| Q99KG3_RBM10_MOUSE  | Rbm10   | RNA-binding protein 10    | R.K.GDPAGTGPEALEGADSVLQAFSR@.A            | 33.66  | 12.39  | 2.72  | 0.37 |
| Q99KG3_RBM10_MOUSE  | Rbm10   | RNA-binding protein 10    | R.GFAFVESHLDQATR@.W                       | 122.07 | 44.58  | 2.74  | 0.37 |
| Q99KG3_RBM10_MOUSE  | Rbm10   | RNA-binding protein 10    | R.GFAFVESHLDQATR@.W                       | 20.00  | 9.26   | 2.16  | 0.46 |
| Q99KG3_RBM10_MOUSE  | Rbm10   | RNA-binding protein 10    | R.GLVAAYSGESSEEEQER@.G                    | 10.44  | 6.12   | 1.71  | 0.59 |
| Q99KG3_RBM10_MOUSE  | Rbm10   | RNA-binding protein 10    | R.GQLQSHGVQAR.E                           | 28.07  | 8.93   | 3.14  | 0.32 |
| Q99KG3_RBM10_MOUSE  | Rbm10   | RNA-binding protein 10    | R.K#YGGIATAAATAAAAAAAYSDGYGR@.D           | 32.64  | 11.62  | 2.81  | 0.36 |
| Q99KG3_RBM10_MOUSE  | Rbm10   | RNA-binding protein 10    | R.LDQALPLGRR@.D                           | 145.98 | 63.89  | 2.29  | 0.44 |
| Q99KG3_RBM10_MOUSE  | Rbm10   | RNA-binding protein 10    | R.M*LPQATTEDDR@.G                         | 10.91  | 2.31   | 4.72  | 0.21 |
| Q99KG3_RBM10_MOUSE  | Rbm10   | RNA-binding protein 10    | R.NLNPSTMD*DSILGALAPYLVSSNVR@.V           | 52.55  | 20.27  | 2.59  | 0.39 |
| Q99KG3_RBM10_MOUSE  | Rbm10   | RNA-binding protein 10    | R.NLNPSTMD*DSILGALAPYLVSSNVR@.V           | 20.18  | 5.51   | 3.66  | 0.27 |
| Q99KG3_RBM10_MOUSE  | Rbm10   | RNA-binding protein 10    | K.NSFQIPISALR@.D                          | 59.85  | 70.93  | 0.84  | 1.19 |
| Q99KG3_RBM10_MOUSE  | Rbm10   | RNA-binding protein 10    | K.QGIVTIEAQT@.R                           | 74.15  | 32.37  | 2.29  | 0.44 |
| Q99KG3_RBM10_MOUSE  | Rbm10   | RNA-binding protein 10    | R.TEQEESFEEDDEEKEE#ASNVIM*LR@.M           | 6.56   | 3.44   | 1.91  | 0.52 |
| Q99KG3_RBM10_MOUSE  | Rbm10   | RNA-binding protein 10    | R.K.TINVFASK#.G                           | 117.04 | 49.99  | 2.34  | 0.43 |
| Q99KG3_RBM10_MOUSE  | Rbm10   | RNA-binding protein 10    | K.YGSIATAAATAAAAAAAYSDGYGR@.D             | 64.08  | 21.34  | 3.00  | 0.33 |
| Q99KG3_RBM10_MOUSE  | Rbm10   | RNA-binding protein 10    | R.ESATADAGYALEK#.K                        | 11.29  | 3.04   | 3.72  | 0.27 |
| Q8R4X3_RBM12_MOUSE  | Rbm12   | RNA-binding protein 12    | R.ELVNPGEVSSAK#.V                         | 14.90  | 4.00   | 3.72  | 0.27 |
| Q8R4X3_RBM12_MOUSE  | Rbm12   | RNA-binding protein 12    | K.VTLLSSK#.T                              | 6.37   | 1.43   | 4.44  | 0.23 |
| Q80YR9_R12BA_MOUSE  | Rbm12b1 | RNA-binding protein 12E   | R.LISEEQM*QDFGVK#.S                       | 6.70   | 4.33   | 1.55  | 0.65 |
| Q80YR9_R12BA_MOUSE  | Rbm12b1 | RNA-binding protein 12E   | K.TVLQYR@PVLIDVSR@.K                      | 17.84  | 9.97   | 1.79  | 0.56 |
| Q80YR9_R12BA_MOUSE  | Rbm12b1 | RNA-binding protein 12E   | K.YSQEGFSGGQK#.L                          | 5.97   | 3.98   | 1.50  | 0.67 |
| Q66JV4_R12BB_MOUSE  | Rbm12b2 | RNA-binding protein 12E   | R.LISEEQM*QDFGIK#.S                       | 7.90   | 4.82   | 1.64  | 0.61 |
| Q8C2Q3_RBM14_MOUSE  | Rbm14   | RNA-binding protein 14    | R.AQPSVSLGAAYR@.A                         | 20.37  | 52.43  | 0.39  | 2.57 |
| Q8C2Q3_RBM14_MOUSE  | Rbm14   | RNA-binding protein 14    | R.AQPSVSLGAPYR@.R                         | 27.37  | 17.78  | 1.54  | 0.65 |
| Q8C2Q3_RBM14_MOUSE  | Rbm14   | RNA-binding protein 14    | R.LSESQLSFR@.R                            | 35.35  | 29.88  | 1.18  | 0.85 |
| Q8C2Q3_RBM14_MOUSE  | Rbm14   | RNA-binding protein 14    | R.TQPM*AAQAASYSR@.A                       | 6.22   | 2.45   | 2.54  | 0.39 |
| Q8C2Q3_RBM14_MOUSE  | Rbm14   | RNA-binding protein 14    | R.TQPM*AAQAASYSR@.A                       | 29.28  | 18.79  | 1.56  | 0.64 |
| Q8C2Q3_RBM14_MOUSE  | Rbm14   | RNA-binding protein 14    | R.YSGYNDYLR@.A                            | 19.16  | 19.03  | 1.01  | 0.99 |
| Q8C2Q3_RBM14_MOUSE  | Rbm14   | RNA-binding protein 14    | R.AQPSVSLGAAYR@.A                         | 80.04  | 41.72  | 1.92  | 0.52 |
| Q8C2Q3_RBM14_MOUSE  | Rbm14   | RNA-binding protein 14    | R.AQPSVSLGAPYR@.G                         | 73.27  | 41.01  | 1.79  | 0.56 |
| Q8C2Q3_RBM14_MOUSE  | Rbm14   | RNA-binding protein 14    | R.ASYVAPLTAQPTAYR@.A                      | 83.56  | 47.05  | 1.78  | 0.56 |
| Q8C2Q3_RBM14_MOUSE  | Rbm14   | RNA-binding protein 14    | R.INVELSTK#.G                             | 97.78  | 56.44  | 1.73  | 0.58 |
| Q8C2Q3_RBM14_MOUSE  | Rbm14   | RNA-binding protein 14    | K.KHGPALAQSGDK#.T                         | 41.06  | 19.26  | 2.13  | 0.47 |
| Q8C2Q3_RBM14_MOUSE  | Rbm14   | RNA-binding protein 14    | K.KHGPALAQSGDK#.T                         | 65.17  | 44.60  | 1.46  | 0.68 |
| Q8C2Q3_RBM14_MOUSE  | Rbm14   | RNA-binding protein 14    | K.KHGPALAQSGDK#.K                         | 27.27  | 16.90  | 1.61  | 0.62 |
| Q8C2Q3_RBM14_MOUSE  | Rbm14   | RNA-binding protein 14    | K.K#PAGDTAFPGTGGSATFDYQAFNGSTGDFGQAR@.Q   | 9.00   | 4.06   | 2.22  | 0.45 |
| Q8C2Q3_RBM14_MOUSE  | Rbm14   | RNA-binding protein 14    | R.LAELSDYR.R                              | 24.10  | 14.62  | 1.65  | 0.61 |
| Q8C2Q3_RBM14_MOUSE  | Rbm14   | RNA-binding protein 14    | R.LSESQLSFR@.R                            | 155.45 | 70.78  | 2.20  | 0.46 |
| Q8C2Q3_RBM14_MOUSE  | Rbm14   | RNA-binding protein 14    | K.R@INVELSTK#.G                           | 38.59  | 19.83  | 1.95  | 0.51 |
| Q8C2Q3_RBM14_MOUSE  | Rbm14   | RNA-binding protein 14    | R.TQPM*AAQAASYSR@.A                       | 54.89  | 35.99  | 1.53  | 0.66 |
| Q8C2Q3_RBM14_MOUSE  | Rbm14   | RNA-binding protein 14    | R.TQSSASLAASYAAQHPQAAASYSR@.G             | 119.23 | 63.85  | 1.87  | 0.54 |
| Q8C2Q3_RBM14_MOUSE  | Rbm14   | RNA-binding protein 14    | R.YSGYNDYLR@.A                            | 63.03  | 26.59  | 2.37  | 0.42 |
| Q8C2Q3_RBM14_MOUSE  | Rbm14   | RNA-binding protein 14    | R.LSESQLSFR@.R                            | 90.34  | 3.46   | 2.61  | 0.38 |
| Q0VBL3_Q0VBL3_MOUSE | Rbm15   | Protein Rbm15 OS=Mus      | R.EVDEISPEDDOR@.A                         | 26.37  | 7.01   | 3.76  | 0.27 |
| Q0VBL3_Q0VBL3_MOUSE | Rbm15   | Protein Rbm15 OS=Mus      | R.QDGGTAPVAASP5K#.L                       | 10.93  | 4.08   | 2.68  | 0.37 |
| Q0VBL3_Q0VBL3_MOUSE | Rbm15   | Protein Rbm15 OS=Mus      | R.SSGAASSAPGGGGVEYK#.T                    | 2.62   | 2.55   | 1.03  | 0.97 |
| Q0VBL3_Q0VBL3_MOUSE | Rbm15   | Protein Rbm15 OS=Mus      | R.AATSAVTAYEPLDLDLDR@.R                   | 27.55  | 13.16  | 2.09  | 0.48 |
| Q0VBL3_Q0VBL3_MOUSE | Rbm15   | Protein Rbm15 OS=Mus      | R.EVDEISPEDDOR@.A                         | 13.01  | 7.13   | 1.82  | 0.55 |
| Q0VBL3_Q0VBL3_MOUSE | Rbm15   | Protein Rbm15 OS=Mus      | R.FGVITEVDIK#.R                           | 15.56  | 6.44   | 2.42  | 0.41 |
| Q0VBL3_Q0VBL3_MOUSE | Rbm15   | Protein Rbm15 OS=Mus      | R.ISHLSGSGGSDER@.V                        | 3.21   | 1.40   | 2.30  | 0.43 |
| Q0VBL3_Q0VBL3_MOUSE | Rbm15   | Protein Rbm15 OS=Mus      | R.K.AAGVIVSLPVGGMK#.D                     | 16.69  | 8.11   | 2.06  | 0.49 |

|                    |        |                                                          |        |        |      |      |
|--------------------|--------|----------------------------------------------------------|--------|--------|------|------|
| QOVB3_QOVB3_MOUSE  | Rbm15  | Protein Rbm15 OS=Mus i R.SSGAASSAPGGGDGVEYK#.T           | 13.38  | 7.73   | 1.73 | 0.58 |
| QOVB3_QOVB3_MOUSE  | Rbm15  | Protein Rbm15 OS=Mus i R.VAFVNF.R                        | 24.67  | 14.34  | 1.72 | 0.58 |
| QOVB3_QOVB3_MOUSE  | Rbm15  | Protein Rbm15 OS=Mus i R.VGAGAGAAPFR@_E                  | 19.57  | 10.85  | 1.80 | 0.55 |
| QOVB3_QOVB3_MOUSE  | Rbm15  | Protein Rbm15 OS=Mus i R.VGAGAGAAPFR@EVDISPEDDQR@_A      | 10.91  | 5.03   | 2.17 | 0.46 |
| QOVB3_QOVB3_MOUSE  | Rbm15  | Protein Rbm15 OS=Mus i R.YOQQYLQPLPLTHYELVDTDFGHR@_A     | 20.62  | 9.85   | 3.11 | 0.32 |
| Q6PH25_RB15B_MOUSE | Rbm15b | Putative RNA-binding pr R.NLVSYL#.Q                      | 30.31  | 5.92   | 3.43 | 0.29 |
| Q6PH25_RB15B_MOUSE | Rbm15b | Putative RNA-binding pr R.ALDYGLYDDR@_G                  | 12.34  | 4.22   | 2.92 | 0.34 |
| Q6PH25_RB15B_MOUSE | Rbm15b | Putative RNA-binding pr R.ASPLPVPPPPPGAPGPGSTAAPYK#.T    | 2.56   | 2.51   | 1.02 | 0.98 |
| Q6PH25_RB15B_MOUSE | Rbm15b | Putative RNA-binding pr R.FGEISLR@_L                     | 15.48  | 6.68   | 2.32 | 0.43 |
| Q6PH25_RB15B_MOUSE | Rbm15b | Putative RNA-binding pr R.LWVVGGLPNTLAALAR@_E            | 16.13  | 5.85   | 2.76 | 0.36 |
| Q6PH25_RB15B_MOUSE | Rbm15b | Putative RNA-binding pr R.NLVSYL#.Q                      | 18.73  | 6.01   | 3.12 | 0.32 |
| Q6PH25_RB15B_MOUSE | Rbm15b | Putative RNA-binding pr R.QAAGVSLPVGGSK#.G               | 6.77   | 1.63   | 4.15 | 0.24 |
| Q6PH25_RB15B_MOUSE | Rbm15b | Putative RNA-binding pr R.TFLEGDWTSLSK#.S                | 9.44   | 3.87   | 2.44 | 0.41 |
| Q6PH25_RB15B_MOUSE | Rbm15b | Putative RNA-binding pr R.TLLISLSPALPAHELEDR@_L          | 27.62  | 15.11  | 1.83 | 0.55 |
| Q8JZ4_SPF45_MOUSE  | Rbm17  | Splicing factor 45 OS=Mus R.DFPYEDSR@PR@_S               | 12.58  | 5.44   | 2.31 | 0.43 |
| Q8JZ4_SPF45_MOUSE  | Rbm17  | Splicing factor 45 OS=Mus R.EGQGLGK#HEQGLSTALSVEK#.T     | 32.42  | 11.44  | 2.83 | 0.35 |
| Q8JZ4_SPF45_MOUSE  | Rbm17  | Splicing factor 45 OS=Mus R.LLQSQLVK#.K                  | 124.88 | 49.16  | 2.54 | 0.39 |
| Q8JZ4_SPF45_MOUSE  | Rbm17  | Splicing factor 45 OS=Mus R.NM*VGAGEVDEDEVETK#.E         | 4.91   | 2.99   | 1.64 | 0.61 |
| Q8JZ4_SPF45_MOUSE  | Rbm17  | Splicing factor 45 OS=Mus R.QSTVLPVLDL#.R                | 78.14  | 31.99  | 2.44 | 0.41 |
| Q8JZ4_SPF45_MOUSE  | Rbm17  | Splicing factor 45 OS=Mus R.SDSNPLTEIL#.C                | 16.25  | 6.17   | 2.63 | 0.38 |
| Q8JZ4_SPF45_MOUSE  | Rbm17  | Splicing factor 45 OS=Mus R.SM*GGAAIAPPTSLEK#.D          | 38.44  | 11.36  | 3.38 | 0.30 |
| Q8JZ4_SPF45_MOUSE  | Rbm17  | Splicing factor 45 OS=Mus R.SM*GGAAIAPPTSLEK#DK#.E       | 8.72   | 5.51   | 1.58 | 0.63 |
| Q8JZ4_SPF45_MOUSE  | Rbm17  | Splicing factor 45 OS=Mus R.SPTGPSNFLANM*GGTVAHK#.I      | 17.51  | 6.93   | 2.53 | 0.40 |
| Q8JZ4_SPF45_MOUSE  | Rbm17  | Splicing factor 45 OS=Mus R.TK#QSTVLPVLDL#.R             | 16.87  | 4.22   | 4.00 | 0.25 |
| Q8JZ4_SPF45_MOUSE  | Rbm17  | Splicing factor 45 OS=Mus R.VLDDAEQV.-                   | 56.72  | 56.72  | 1.00 | 1.00 |
| Q8JZ4_SPF45_MOUSE  | Rbm17  | Splicing factor 45 OS=Mus R.QSTVLPVLDL#.R                | 6.04   | 3.64   | 1.66 | 0.60 |
| Q8JZ4_SPF45_MOUSE  | Rbm17  | Splicing factor 45 OS=Mus R.LLQSQLVK#.K                  | 16.37  | 4.05   | 4.04 | 0.25 |
| Q8JZ4_SPF45_MOUSE  | Rbm17  | Splicing factor 45 OS=Mus R.QSTVLPVLDL#.R                | 12.78  | 5.28   | 2.42 | 0.41 |
| Q8R3C6_RBM19_MOUSE | Rbm19  | Probable RNA-binding pr K.ANSSSSHNWNTLFM*GPNVAADAIAQK#.Y | 2.71   | 3.26   | 0.83 | 1.20 |
| Q8R3C6_RBM19_MOUSE | Rbm19  | Probable RNA-binding pr R.ELFTSDILK#.R                   | 16.42  | 7.46   | 2.20 | 0.45 |
| Q8R3C6_RBM19_MOUSE | Rbm19  | Probable RNA-binding pr K.FQELFSLHQR#.Q                  | 14.25  | 7.50   | 1.90 | 0.53 |
| Q8R3C6_RBM19_MOUSE | Rbm19  | Probable RNA-binding pr R.GFGFVDFITK#.R                  | 25.40  | 9.59   | 2.65 | 0.38 |
| Q8R3C6_RBM19_MOUSE | Rbm19  | Probable RNA-binding pr R.TLGENEEDLDSGR@_L               | 13.28  | 6.68   | 1.99 | 0.50 |
| Q8R3C6_RBM19_MOUSE | Rbm19  | Probable RNA-binding pr R.VALGETLVQVQR@_S                | 21.99  | 7.50   | 2.93 | 0.34 |
| Q8BH53_RBM22_MOUSE | Rbm22  | Pre-mRNA-splicing factor K.ATSTSDM*LLK#.L                | 43.59  | 34.74  | 1.25 | 0.80 |
| Q8BH53_RBM22_MOUSE | Rbm22  | Pre-mRNA-splicing factor R.DAGLSFK#DDM*PK#.S             | 12.51  | 10.00  | 1.25 | 0.80 |
| Q8BH53_RBM22_MOUSE | Rbm22  | Pre-mRNA-splicing factor R.NHFYQFGEIR@_T                 | 58.00  | 39.42  | 1.47 | 0.68 |
| Q8BH53_RBM22_MOUSE | Rbm22  | Pre-mRNA-splicing factor K.SDVNKEYYYQNM*E.R              | 9.87   | 6.41   | 1.54 | 0.65 |
| Q8BH53_RBM22_MOUSE | Rbm22  | Pre-mRNA-splicing factor K.TITTLVYGLGDTTETDLR.N          | 36.19  | 27.41  | 1.32 | 0.76 |
| Q8BH53_RBM22_MOUSE | Rbm22  | Pre-mRNA-splicing factor K.TITTLVYGLGDTTETDLR@_N         | 30.63  | 18.27  | 1.68 | 0.60 |
| Q8BH53_RBM22_MOUSE | Rbm22  | Pre-mRNA-splicing factor R.TITVQR@_Q                     | 104.33 | 71.77  | 1.45 | 0.69 |
| Q8BH53_RBM22_MOUSE | Rbm22  | Pre-mRNA-splicing factor R.YYGINPVDK#.L                  | 96.98  | 70.37  | 1.38 | 0.73 |
| B2RY56_RBM25_MOUSE | Rbm25  | RNA-binding protein 25 ( K.K#L#PVDSVFNKFEDESDDVPR@_K     | 6.02   | 2.87   | 2.10 | 0.48 |
| B2RY56_RBM25_MOUSE | Rbm25  | RNA-binding protein 25 ( R.LLIVTEAK#.K                   | 19.37  | 11.25  | 1.72 | 0.58 |
| B2RY56_RBM25_MOUSE | Rbm25  | RNA-binding protein 25 ( K.LPVDVFNKFEDESDDVPR.K          | 31.37  | 17.83  | 1.76 | 0.57 |
| B2RY56_RBM25_MOUSE | Rbm25  | RNA-binding protein 25 ( K.ASDM*LIR@_Q                   | 38.76  | 13.89  | 2.79 | 0.36 |
| B2RY56_RBM25_MOUSE | Rbm25  | RNA-binding protein 25 ( R.DR@EEDEDAYER@_R               | 21.94  | 6.29   | 3.49 | 0.29 |
| B2RY56_RBM25_MOUSE | Rbm25  | RNA-binding protein 25 ( K.EDINAIEI*EEDK#.D              | 16.56  | 7.08   | 2.34 | 0.43 |
| B2RY56_RBM25_MOUSE | Rbm25  | RNA-binding protein 25 ( R.EK#EELIEIR@_Q                 | 56.16  | 20.51  | 2.74 | 0.37 |
| B2RY56_RBM25_MOUSE | Rbm25  | RNA-binding protein 25 ( R.FPVAPLIPYPLITK#.E             | 29.89  | 11.20  | 2.67 | 0.37 |
| B2RY56_RBM25_MOUSE | Rbm25  | RNA-binding protein 25 ( K.GAIEVLR@_E                    | 174.26 | 58.98  | 2.95 | 0.34 |
| B2RY56_RBM25_MOUSE | Rbm25  | RNA-binding protein 25 ( R.K#L#PLDYGEDDK#NATK#.G         | 49.31  | 14.88  | 3.31 | 0.30 |
| B2RY56_RBM25_MOUSE | Rbm25  | RNA-binding protein 25 ( K.LGASNSGQPNVYK#.R              | 65.81  | 13.56  | 4.85 | 0.21 |
| B2RY56_RBM25_MOUSE | Rbm25  | RNA-binding protein 25 ( R.LLHDQLGK#.K                   | 154.28 | 46.55  | 3.31 | 0.30 |
| B2RY56_RBM25_MOUSE | Rbm25  | RNA-binding protein 25 ( K.LPVDVFNKFEDESDDVPR.K          | 35.81  | 7.33   | 4.88 | 0.20 |
| B2RY56_RBM25_MOUSE | Rbm25  | RNA-binding protein 25 ( R.R#FPVAPLIPYPLITK#.E           | 292.22 | 96.75  | 3.02 | 0.33 |
| B2RY56_RBM25_MOUSE | Rbm25  | RNA-binding protein 25 ( K.ASDM*LIR@_Q                   | 22.97  | 5.51   | 4.17 | 0.24 |
| B2RY56_RBM25_MOUSE | Rbm25  | RNA-binding protein 25 ( R.DR@EEDEDAYER@_R               | 12.51  | 3.00   | 4.17 | 0.24 |
| B2RY56_RBM25_MOUSE | Rbm25  | RNA-binding protein 25 ( R.FPVAPLIPYPLITK#.E             | 16.12  | 5.06   | 3.19 | 0.31 |
| B2RY56_RBM25_MOUSE | Rbm25  | RNA-binding protein 25 ( K.GAIEVLR@_E                    | 87.89  | 20.84  | 4.22 | 0.24 |
| B2RY56_RBM25_MOUSE | Rbm25  | RNA-binding protein 25 ( R.K#L#PLDYGEDDK#NATK#.G         | 13.57  | 3.37   | 4.03 | 0.25 |
| B2RY56_RBM25_MOUSE | Rbm25  | RNA-binding protein 25 ( K.LGASNSGQPNVYK#.R              | 5.95   | 1.27   | 4.70 | 0.21 |
| B2RY56_RBM25_MOUSE | Rbm25  | RNA-binding protein 25 ( R.KL#EFLVYEDDR@DDPK#.Y          | 23.59  | 4.58   | 5.15 | 0.19 |
| B2RY56_RBM25_MOUSE | Rbm25  | RNA-binding protein 25 ( R.LLAEGHPDPAELQR@_M             | 96.44  | 25.20  | 3.83 | 0.26 |
| B2RY56_RBM25_MOUSE | Rbm25  | RNA-binding protein 25 ( R.LLHDQLGK#.K                   | 72.01  | 17.20  | 4.19 | 0.24 |
| Q6NZNO_RBM26_MOUSE | Rbm26  | RNA-binding protein 26 ( R.TIGSGEPGVYK#.K                | 6.74   | 3.28   | 2.06 | 0.49 |
| Q6NZNO_RBM26_MOUSE | Rbm26  | RNA-binding protein 26 ( K.VIQVLVQZPILPVK#.Q             | 8.87   | 2.48   | 3.58 | 0.28 |
| Q5SFM8_RBM27_MOUSE | Rbm27  | RNA-binding protein 27 ( R.AISGLEGLTK#.K                 | 13.58  | 3.00   | 4.52 | 0.22 |
| Q5SFM8_RBM27_MOUSE | Rbm27  | RNA-binding protein 27 ( R.AQTR@PMLILGSLGDM*DANPR@_A     | 8.94   | 2.67   | 3.35 | 0.30 |
| Q5SFM8_RBM27_MOUSE | Rbm27  | RNA-binding protein 27 ( R.LQLGTPPLLAAR@_L               | 17.61  | 6.57   | 2.68 | 0.37 |
| Q5SFM8_RBM27_MOUSE | Rbm27  | RNA-binding protein 27 ( R.LSSGEDTELR@_K                 | 7.74   | 4.73   | 1.64 | 0.61 |
| Q8CGC6_RBM28_MOUSE | Rbm28  | RNA-binding protein 28 ( K.AAEGVSLAAM*AK#.R              | 32.89  | 17.97  | 1.83 | 0.55 |
| Q8CGC6_RBM28_MOUSE | Rbm28  | RNA-binding protein 28 ( K.AEVEQVLPDGK#.K                | 29.06  | 14.67  | 1.98 | 0.50 |
| Q8CGC6_RBM28_MOUSE | Rbm28  | RNA-binding protein 28 ( K.AVDKQLR#.K                    | 1.18   | 2.88   | 0.41 | 2.44 |
| Q8CGC6_RBM28_MOUSE | Rbm28  | RNA-binding protein 28 ( K.AVFTHYGVLEVINPK#.K            | 14.81  | 6.61   | 2.24 | 0.45 |
| Q8CGC6_RBM28_MOUSE | Rbm28  | RNA-binding protein 28 ( R.FNQLVEYQ#.K                   | 24.78  | 15.95  | 1.55 | 0.64 |
| Q8CGC6_RBM28_MOUSE | Rbm28  | RNA-binding protein 28 ( R.GFAFVQFK#.N                   | 18.82  | 11.46  | 1.64 | 0.61 |
| Q8CGC6_RBM28_MOUSE | Rbm28  | RNA-binding protein 28 ( R.GFGVYVTFSM*LEDVQR@_A          | 11.02  | 12.47  | 0.88 | 1.13 |
| Q8CGC6_RBM28_MOUSE | Rbm28  | RNA-binding protein 28 ( K.GQSLGYFAEFQK#.H               | 6.20   | 6.40   | 0.97 | 1.03 |
| Q8CGC6_RBM28_MOUSE | Rbm28  | RNA-binding protein 28 ( K.QQLASSVQAPK#.R                | 17.82  | 10.62  | 1.68 | 0.60 |
| Q8CGC6_RBM28_MOUSE | Rbm28  | RNA-binding protein 28 ( K.R#PIVEFSLEDR@_R               | 20.36  | 15.89  | 1.28 | 0.78 |
| Q8CGC6_RBM28_MOUSE | Rbm28  | RNA-binding protein 28 ( R.SDQLLEESVQGVK#.Q              | 19.19  | 8.32   | 2.31 | 0.43 |
| Q8CGC6_RBM28_MOUSE | Rbm28  | RNA-binding protein 28 ( K.VDLAVTR@_D                    | 25.97  | 15.01  | 1.73 | 0.58 |
| Q8CGC6_RBM28_MOUSE | Rbm28  | RNA-binding protein 28 ( K.VVQSTADQSK#.A                 | 10.50  | 8.05   | 1.30 | 0.77 |
| Q9CXK9_RBM33_MOUSE | Rbm33  | RNA-binding protein 33 ( K.AALLEFER@_E                   | 17.60  | 8.53   | 2.06 | 0.48 |
| Q8C5L7_RBM34_MOUSE | Rbm34  | RNA-binding protein 34 ( R.GFGYVLFEMTDAVHLALK#.L         | 12.29  | 6.72   | 1.83 | 0.55 |
| Q8C5L7_RBM34_MOUSE | Rbm34  | RNA-binding protein 34 ( R.K#L#DDDDDEEVSVQTK#.K          | 2.29   | 2.53   | 0.91 | 1.10 |
| Q8C5L7_RBM34_MOUSE | Rbm34  | RNA-binding protein 34 ( R.NPLTVGVR@_G                   | 18.89  | 21.39  | 0.88 | 1.13 |
| Q8C5L7_RBM34_MOUSE | Rbm34  | RNA-binding protein 34 ( K.VADGEALDVLSLAK#.D             | 18.16  | 15.10  | 1.20 | 0.83 |
| Q8VH51_RBM39_MOUSE | Rbm39  | RNA-binding protein 39 ( R.AAAM*ANLQK#.G                 | 40.64  | 16.75  | 2.43 | 0.41 |
| Q8VH51_RBM39_MOUSE | Rbm39  | RNA-binding protein 39 ( R.DLEEFFTVGK#.V                 | 250.08 | 103.71 | 2.41 | 0.41 |
| Q8VH51_RBM39_MOUSE | Rbm39  | RNA-binding protein 39 ( R.GIFEPGR@_I                    | 126.51 | 47.55  | 2.66 | 0.38 |
| Q8VH51_RBM39_MOUSE | Rbm39  | RNA-binding protein 39 ( R.IESIQLM*M*DSSETGR@_S          | 29.31  | 13.43  | 2.18 | 0.46 |
| Q8VH51_RBM39_MOUSE | Rbm39  | RNA-binding protein 39 ( R.IESIQLM*MMSETGR.S             | 5.80   | 3.15   | 1.84 | 0.54 |
| Q8VH51_RBM39_MOUSE | Rbm39  | RNA-binding protein 39 ( K.IGLPHSIK#.L                   | 12.32  | 5.77   | 2.13 | 0.47 |
| Q8VH51_RBM39_MOUSE | Rbm39  | RNA-binding protein 39 ( K.NSAQGNVYK#.C                  | 12.53  | 7.94   | 1.58 | 0.63 |
| Q8VH51_RBM39_MOUSE | Rbm39  | RNA-binding protein 39 ( R.TDASSASSFLDSLEDR@_T           | 139.56 | 62.45  | 2.23 | 0.45 |
| Q8VH51_RBM39_MOUSE | Rbm39  | RNA-binding protein 39 ( R.TGIDLTGTGR@_L                 | 118.63 | 44.57  | 2.66 | 0.38 |
| Q8VH51_RBM39_MOUSE | Rbm39  | RNA-binding protein 39 ( R.VLGVPIIVQASQAEK#.N            | 200.33 | 79.15  | 2.53 | 0.40 |
| Q8VH51_RBM39_MOUSE | Rbm39  | RNA-binding protein 39 ( R.DLEEFFTVGK#.V                 | 7.00   | 7.76   | 0.90 | 1.11 |
| Q8VH51_RBM39_MOUSE | Rbm39  | RNA-binding protein 39 ( R.GIFEPGR@_I                    | 11.26  | 5.17   | 2.18 | 0.46 |
| Q8VH51_RBM39_MOUSE | Rbm39  | RNA-binding protein 39 ( K.HGGVVIHVDK#.N                 | 14.05  | 6.07   | 2.32 | 0.43 |
| Q8VH51_RBM39_MOUSE | Rbm39  | RNA-binding protein 39 ( R.IESIQLM*MM*DSSETGR@_S         | 2.26   | 2.26   | 0.97 | 1.03 |

|                     |       |                                                            |        |        |       |      |
|---------------------|-------|------------------------------------------------------------|--------|--------|-------|------|
| Q8VH51_RBM39_MOUSE  | Rbm39 | RNA-binding protein 39 ( K.NSAQGNVYVK#.C                   | 38.21  | 11.36  | 3.36  | 0.30 |
| Q8VH51_RBM39_MOUSE  | Rbm39 | RNA-binding protein 39 ( R.TDASSASFSDSELER@.T              | 23.34  | 15.80  | 1.48  | 0.68 |
| Q8VH51_RBM39_MOUSE  | Rbm39 | RNA-binding protein 39 ( R.TGIDILGTTGR@.L                  | 22.39  | 8.23   | 2.72  | 0.37 |
| Q8VH51_RBM39_MOUSE  | Rbm39 | RNA-binding protein 39 ( R.VLGVPIIIVQASQAEK#.N             | 14.45  | 11.15  | 1.30  | 0.77 |
| Q8VH51_RBM39_MOUSE  | Rbm39 | RNA-binding protein 39 ( R.AAAM*ANILQK#.G                  | 46.25  | 18.98  | 2.44  | 0.41 |
| Q8VH51_RBM39_MOUSE  | Rbm39 | RNA-binding protein 39 ( R.DLEEFFSTVGK#.V                  | 190.75 | 76.80  | 2.48  | 0.40 |
| Q8VH51_RBM39_MOUSE  | Rbm39 | RNA-binding protein 39 ( R.GIFPFGR@.I                      | 96.60  | 39.09  | 2.47  | 0.40 |
| Q8VH51_RBM39_MOUSE  | Rbm39 | RNA-binding protein 39 ( R.HGGVVIHYDK#.N                   | 21.81  | 12.99  | 1.68  | 0.60 |
| Q8VH51_RBM39_MOUSE  | Rbm39 | RNA-binding protein 39 ( R.IESIQLM*MDSETGR@.S              | 26.24  | 9.60   | 2.73  | 0.37 |
| Q8VH51_RBM39_MOUSE  | Rbm39 | RNA-binding protein 39 ( R.IESIQLM*MDSETGR@.S              | 7.12   | 3.00   | 2.37  | 0.42 |
| Q8VH51_RBM39_MOUSE  | Rbm39 | RNA-binding protein 39 ( K.NSAQGNVYVK#.C                   | 29.88  | 15.10  | 1.98  | 0.51 |
| Q8VH51_RBM39_MOUSE  | Rbm39 | RNA-binding protein 39 ( R.SK#GIAYVFEVDVSSVPLAIGLTGQR@.V   | 14.31  | 5.99   | 2.39  | 0.42 |
| Q8VH51_RBM39_MOUSE  | Rbm39 | RNA-binding protein 39 ( R.TDASSASFSDSELER@.T              | 100.89 | 47.59  | 2.12  | 0.47 |
| Q8VH51_RBM39_MOUSE  | Rbm39 | RNA-binding protein 39 ( R.TGIDILGTTGR@.L                  | 144.11 | 54.75  | 2.63  | 0.38 |
| Q8VH51_RBM39_MOUSE  | Rbm39 | RNA-binding protein 39 ( R.VLGVPIIIVQASQAEK#.N             | 208.64 | 88.62  | 2.35  | 0.42 |
| Q8VH51_RBM39_MOUSE  | Rbm39 | RNA-binding protein 39 ( R.DLEEFFSTVGK#.V                  | 17.30  | 7.89   | 2.19  | 0.46 |
| Q8VH51_RBM39_MOUSE  | Rbm39 | RNA-binding protein 39 ( R.TDASSASFSDSELER@.T              | 10.84  | 5.48   | 1.98  | 0.51 |
| Q8VH51_RBM39_MOUSE  | Rbm39 | RNA-binding protein 39 ( R.VLGVPIIIVQASQAEK#.N             | 15.36  | 8.45   | 1.82  | 0.55 |
| Q8C7Q4_RBM4_MOUSE   | Rbm4  | RNA-binding protein 4 O. R.ATGPVLTGEGYGYGHDSQSASAAR@.N     | 19.33  | 11.45  | 1.69  | 0.59 |
| Q8C7Q4_RBM4_MOUSE   | Rbm4  | RNA-binding protein 4 O. R.VADLTEQYNEQYGAVER@.T            | 25.64  | 13.18  | 1.95  | 0.51 |
| Q91V81_RBM42_MOUSE  | Rbm42 | RNA-binding protein 42 ( R.ELGLGLGLK#.D                    | 9.55   | 4.36   | 2.19  | 0.46 |
| Q91V81_RBM42_MOUSE  | Rbm42 | RNA-binding protein 42 ( R.ELGLGLGLK#.D                    | 10.02  | 4.37   | 2.29  | 0.44 |
| Q8VE92_RBM4B_MOUSE  | Rbm4b | RNA-binding protein 4B ( R.AEDAVEAIR@.G                    | 62.68  | 29.86  | 2.10  | 0.48 |
| Q8VE92_RBM4B_MOUSE  | Rbm4b | RNA-binding protein 4B ( R.GLDNTEFQGK#.R                   | 24.63  | 16.36  | 1.51  | 0.66 |
| Q8VE92_RBM4B_MOUSE  | Rbm4b | RNA-binding protein 4B ( K.LFIGNLR.P.R.E                   | 43.06  | 26.81  | 1.61  | 0.62 |
| Q8VE92_RBM4B_MOUSE  | Rbm4b | RNA-binding protein 4B ( K.NYGFVHIEDK#.T                   | 10.67  | 5.95   | 1.79  | 0.56 |
| Q8VE92_RBM4B_MOUSE  | Rbm4b | RNA-binding protein 4B ( R.VADLTEQYNEQYGAVER@.T            | 18.25  | 6.04   | 3.02  | 0.33 |
| Q91YE7_RBM5_MOUSE   | Rbm5  | RNA-binding protein 5 O. R.DLVLDPGNGR@.V                   | 27.03  | 12.78  | 2.11  | 0.47 |
| Q91YE7_RBM5_MOUSE   | Rbm5  | RNA-binding protein 5 O. R.EM*MFESFGPQADVR.L               | 17.70  | 9.74   | 1.82  | 0.55 |
| Q91YE7_RBM5_MOUSE   | Rbm5  | RNA-binding protein 5 O. R.ESAAAMDAGLFAEK#.K               | 40.32  | 19.59  | 2.06  | 0.49 |
| Q91YE7_RBM5_MOUSE   | Rbm5  | RNA-binding protein 5 O. R.GLPITITSDIR.E                   | 48.65  | 20.44  | 2.38  | 0.42 |
| Q91YE7_RBM5_MOUSE   | Rbm5  | RNA-binding protein 5 O. R.GLVAAYSQSDNEEELVER@.L           | 4.60   | 1.97   | 2.33  | 0.43 |
| Q91YE7_RBM5_MOUSE   | Rbm5  | RNA-binding protein 5 O. R.HQQLSDLHK#.Q                    | 627.21 | 42.71  | 14.69 | 0.07 |
| Q91YE7_RBM5_MOUSE   | Rbm5  | RNA-binding protein 5 O. K.M*LM*QWGR@.E                    | 15.59  | 5.92   | 2.63  | 0.38 |
| Q91YE7_RBM5_MOUSE   | Rbm5  | RNA-binding protein 5 O. R.NIAPHYVDSIM*ITALSPYASLVANNIR@.L | 21.10  | 6.60   | 3.20  | 0.31 |
| Q91YE7_RBM5_MOUSE   | Rbm5  | RNA-binding protein 5 O. K.QFDAGTYVYEQPTK#.D               | 22.91  | 9.27   | 2.47  | 0.40 |
| Q91YE7_RBM5_MOUSE   | Rbm5  | RNA-binding protein 5 O. R.QQLPELVR.N                      | 52.73  | 20.03  | 2.63  | 0.38 |
| Q3ULB0_Q3ULB0_MOUSE | Rbm6  | Protein Rbm6 OS=Mus m R.DAQQLDQDYR@.T                      | 17.42  | 10.06  | 1.73  | 0.58 |
| Q3ULB0_Q3ULB0_MOUSE | Rbm6  | Protein Rbm6 OS=Mus m R.ETSDR@NPVDK#EDTDTSSK#.G            | 10.58  | 4.73   | 2.24  | 0.45 |
| Q3ULB0_Q3ULB0_MOUSE | Rbm6  | Protein Rbm6 OS=Mus m K.FQESTSGK#PLEDVF#.K                 | 19.66  | 8.66   | 2.27  | 0.44 |
| Q3ULB0_Q3ULB0_MOUSE | Rbm6  | Protein Rbm6 OS=Mus m R.GSATTDLDFR@.N                      | 13.30  | 5.27   | 2.53  | 0.40 |
| Q3ULB0_Q3ULB0_MOUSE | Rbm6  | Protein Rbm6 OS=Mus m K.I.LQNLDLPPFDIGK#.M                 | 15.56  | 9.93   | 1.57  | 0.64 |
| Q3ULB0_Q3ULB0_MOUSE | Rbm6  | Protein Rbm6 OS=Mus m K.LSGEQQSDAGLKF#EEGDLDFLGQDQDYR@.S   | 8.26   | 3.51   | 2.35  | 0.43 |
| Q3ULB0_Q3ULB0_MOUSE | Rbm6  | Protein Rbm6 OS=Mus m K.M*VAVNLATGK#.R                     | 8.23   | 4.69   | 1.76  | 0.57 |
| Q3ULB0_Q3ULB0_MOUSE | Rbm6  | Protein Rbm6 OS=Mus m K.QSEELAYLER@.R                      | 9.38   | 6.12   | 1.53  | 0.65 |
| Q3ULB0_Q3ULB0_MOUSE | Rbm6  | Protein Rbm6 OS=Mus m K.VVNPILGLLEGGYDSDYEEEEQAPPVQPR@.T   | 7.28   | 3.07   | 3.48  | 0.29 |
| Q3ULB0_Q3ULB0_MOUSE | Rbm6  | Protein Rbm6 OS=Mus m R.DAQQLDQDYR@.T                      | 10.68  | 5.29   | 1.38  | 0.73 |
| Q3ULB0_Q3ULB0_MOUSE | Rbm6  | Protein Rbm6 OS=Mus m R.ETSDR@NPVDK#EDTDTSSK#.G            | 6.08   | 4.10   | 1.48  | 0.67 |
| Q3ULB0_Q3ULB0_MOUSE | Rbm6  | Protein Rbm6 OS=Mus m K.LSGEQQSDAGLKF#EEGDLDFLGQDQDYR@.S   | 5.44   | 3.42   | 1.59  | 0.63 |
| Q9CQT2_RBM7_MOUSE   | Rbm7  | RNA-binding protein 7 O. R.EDFYDDR#.N                      | 7.48   | 3.44   | 2.18  | 0.46 |
| Q9CQT2_RBM7_MOUSE   | Rbm7  | RNA-binding protein 7 O. R.QAVM*NSVFR@.Q                   | 12.65  | 5.30   | 2.39  | 0.42 |
| Q9CQT2_RBM7_MOUSE   | Rbm7  | RNA-binding protein 7 O. R.SFSPEDYQR@.Q                    | 60.90  | 26.09  | 2.33  | 0.43 |
| Q9CQT2_RBM7_MOUSE   | Rbm7  | RNA-binding protein 7 O. R.TLTVGNLTK#.V                    | 65.94  | 26.20  | 2.52  | 0.40 |
| Q9CQT2_RBM7_MOUSE   | Rbm7  | RNA-binding protein 7 O. R.TVGNVSPQAQM*VQR@.S              | 50.64  | 19.04  | 2.66  | 0.38 |
| Q9CQT2_RBM7_MOUSE   | Rbm7  | RNA-binding protein 7 O. R.TVGNVSPQAQM*VQR@.S              | 2.96   | 1.84   | 1.61  | 0.62 |
| Q9CQT2_RBM7_MOUSE   | Rbm7  | RNA-binding protein 7 O. K.VTEELFLFHQAQVPIK#.V             | 123.15 | 45.98  | 2.68  | 0.37 |
| Q9CQT2_RBM7_MOUSE   | Rbm7  | RNA-binding protein 7 O. R.TVGNVSPQAQM*VQR@.S              | 3.32   | 2.59   | 1.29  | 0.78 |
| Q9CWZ3_RBM8A_MOUSE  | Rbm8a | RNA-binding protein 8A ( K.GYTLVEYTK#.E                    | 9.09   | 5.86   | 1.55  | 0.64 |
| Q9CWZ3_RBM8A_MOUSE  | Rbm8a | RNA-binding protein 8A ( R.M*RE@EDYDSVEQDGEPPQPR@.S        | 17.23  | 17.33  | 0.99  | 1.01 |
| Q9CWZ3_RBM8A_MOUSE  | Rbm8a | RNA-binding protein 8A ( R.MR@EDYDSVEQDGEPPQPR@.S          | 9.27   | 1.84   | 5.04  | 0.20 |
| Q9CWZ3_RBM8A_MOUSE  | Rbm8a | RNA-binding protein 8A ( K.FAEYGEI#.N                      | 62.08  | 36.99  | 1.84  | 0.54 |
| Q9CWZ3_RBM8A_MOUSE  | Rbm8a | RNA-binding protein 8A ( K.GYTLVEYTK#.E                    | 168.14 | 80.73  | 2.08  | 0.48 |
| Q9CWZ3_RBM8A_MOUSE  | Rbm8a | RNA-binding protein 8A ( R.MREDYDSVEQDGEPPQPR@.S           | 9.69   | 4.05   | 2.39  | 0.42 |
| Q9CWZ3_RBM8A_MOUSE  | Rbm8a | RNA-binding protein 8A ( R.M*RE@EDYDSVEQDGEPPQPR@.S        | 186.95 | 100.26 | 1.86  | 0.54 |
| Q91W59_RBM81_MOUSE  | Rbm81 | RNA-binding motif, single K.GYGFVDFDPSAAQA.K.A             | 33.65  | 46.40  | 0.73  | 1.38 |
| Q8VC70_RBM82_MOUSE  | Rbm82 | RNA-binding motif, single K.ASGVQAQMAK#.Q                  | 14.71  | 16.44  | 0.89  | 1.12 |
| Q8VC70_RBM82_MOUSE  | Rbm82 | RNA-binding motif, single K.ASGVQAQMAK#.Q                  | 11.76  | 8.17   | 1.44  | 0.69 |
| Q8VC70_RBM82_MOUSE  | Rbm82 | RNA-binding motif, single R.GLQPGTTDQDLVK#.L               | 82.31  | 107.67 | 0.76  | 1.31 |
| Q8VC70_RBM82_MOUSE  | Rbm82 | RNA-binding motif, single K.GYGFVDFDPSAAQA.K.A             | 57.76  | 68.22  | 0.85  | 1.18 |
| Q8VC70_RBM82_MOUSE  | Rbm82 | RNA-binding motif, single K.LYVAQQM*APPSFR@.N              | 9.94   | 13.63  | 0.73  | 1.37 |
| Q8ROF5_RBMX2_MOUSE  | RbmX2 | RNA-binding motif prote R.APQESEDVDVTR@.E                  | 52.99  | 35.70  | 1.48  | 0.67 |
| Q8ROF5_RBMX2_MOUSE  | RbmX2 | RNA-binding motif prote R.EVQLGVAEK#.V                     | 24.18  | 14.85  | 1.63  | 0.61 |
| Q8ROF5_RBMX2_MOUSE  | RbmX2 | RNA-binding motif prote K.LINELNER@.E                      | 38.78  | 22.38  | 1.73  | 0.58 |
| Q8ROF5_RBMX2_MOUSE  | RbmX2 | RNA-binding motif prote R.STVLAVDFNGFIK#.I                 | 11.95  | 5.99   | 1.99  | 0.50 |
| Q91VM5_RMXL1_MOUSE  | RbmX1 | RNA binding motif prote K.AIK#VEQATK#PSEFSGR@.R            | 201.78 | 142.35 | 1.42  | 0.71 |
| Q91VM5_RMXL1_MOUSE  | RbmX1 | RNA binding motif prote K.ALEAVFGK#.V                      | 206.36 | 167.12 | 1.23  | 0.81 |
| Q91VM5_RMXL1_MOUSE  | RbmX1 | RNA binding motif prote R.DR@DYSDHPHSGGSYR@.D              | 136.34 | 119.45 | 1.14  | 0.88 |
| Q91VM5_RMXL1_MOUSE  | RbmX1 | RNA binding motif prote R.DRDYSDHPHSGGSYR@.D               | 8.37   | 6.99   | 1.20  | 0.83 |
| Q91VM5_RMXL1_MOUSE  | RbmX1 | RNA binding motif prote R.DSYESGNSR.S                      | 59.00  | 51.21  | 1.15  | 0.87 |
| Q91VM5_RMXL1_MOUSE  | RbmX1 | RNA binding motif prote R.DVYLSR@.D                        | 135.33 | 110.87 | 1.22  | 0.82 |
| Q91VM5_RMXL1_MOUSE  | RbmX1 | RNA binding motif prote R.GFAFVTFESPADA#.D                 | 188.78 | 163.06 | 1.16  | 0.86 |
| Q91VM5_RMXL1_MOUSE  | RbmX1 | RNA binding motif prote R.GGYM*DDGYM*NFNM*SSSR.G           | 25.27  | 19.21  | 1.32  | 0.76 |
| Q91VM5_RMXL1_MOUSE  | RbmX1 | RNA binding motif prote R.GYGDYRQVGR.D                     | 6.91   | 4.26   | 1.62  | 0.62 |
| Q91VM5_RMXL1_MOUSE  | RbmX1 | RNA binding motif prote R.IVEILLM*K#.D                     | 100.45 | 67.43  | 1.49  | 0.67 |
| Q91VM5_RMXL1_MOUSE  | RbmX1 | RNA binding motif prote R.IVEILLM*K#.D                     | 31.22  | 22.94  | 1.36  | 0.73 |
| Q91VM5_RMXL1_MOUSE  | RbmX1 | RNA binding motif prote K.LFIFGLLNTETNEK#.A                | 314.67 | 249.13 | 1.26  | 0.79 |
| Q91VM5_RMXL1_MOUSE  | RbmX1 | RNA binding motif prote R.REPLPSR.R                        | 101.49 | 100.56 | 1.01  | 0.99 |
| Q91VM5_RMXL1_MOUSE  | RbmX1 | RNA binding motif prote R.RGPPPPR.S                        | 64.64  | 88.18  | 0.73  | 1.36 |
| Q91VM5_RMXL1_MOUSE  | RbmX1 | RNA binding motif prote K.R@STPSPVPR@.S                    | 11.82  | 7.67   | 1.54  | 0.65 |
| Q91VM5_RMXL1_MOUSE  | RbmX1 | RNA binding motif prote R.SDLVSSGR@.D                      | 177.86 | 154.17 | 1.15  | 0.87 |
| Q91VM5_RMXL1_MOUSE  | RbmX1 | RNA binding motif prote K.VEQATK#PSEFSGR@.R                | 34.84  | 27.13  | 1.28  | 0.78 |
| Q91VM5_RMXL1_MOUSE  | RbmX1 | RNA binding motif prote K.VEQATK#PSEFSGR@.R                | 232.56 | 195.52 | 1.19  | 0.84 |
| Q91VM5_RMXL1_MOUSE  | RbmX1 | RNA binding motif prote R.YDYSSSR@.D                       | 40.68  | 32.28  | 1.26  | 0.79 |
| Q80Y56_RBN55_MOUSE  | Rbsn  | Rabenosyn-5 OS=Mus mu R.EVIFQLAESR@.G                      | 10.48  | 3.75   | 2.79  | 0.36 |
| Q80Y56_RBN55_MOUSE  | Rbsn  | Rabenosyn-5 OS=Mus mu K.I.LTLNLNQDPSPHNTR@.L               | 9.37   | 3.81   | 2.46  | 0.41 |
| Q80Y56_RBN55_MOUSE  | Rbsn  | Rabenosyn-5 OS=Mus mu R.YSATLFLVQEK#.L                     | 6.51   | 1.69   | 3.84  | 0.26 |
| Q4VGL6_RC3H1_MOUSE  | Rc3h1 | Roquin-1 OS=Mus muscu K.LVLLEDGSAK#.K                      | 10.79  | 4.30   | 2.51  | 0.40 |
| Q4VGL6_RC3H1_MOUSE  | Rc3h1 | Roquin-1 OS=Mus muscu R.R@PLASLGLNEVGLPSAPILSDESADVLSNR@.K | 3.50   | 1.60   | 2.18  | 0.46 |
| Q9J1T0_RCL1_MOUSE   | Rcl1  | RNA 3'-terminal phospho R.GVTNDQVPSVDLVK#.A                | 5.76   | 3.22   | 1.79  | 0.56 |
| Q05186_RCN1_MOUSE   | Rcn1  | Reticulocalbin-1 OS=Mu: K.ASDLDGLTATR@.E                   | 120.17 | 59.52  | 2.02  | 0.50 |
| Q05186_RCN1_MOUSE   | Rcn1  | Reticulocalbin-1 OS=Mu: R.HLVYESDK.N                       | 11.55  | 6.46   | 1.79  | 0.56 |
| Q05186_RCN1_MOUSE   | Rcn1  | Reticulocalbin-1 OS=Mu: R.HWILPODYDHAQEAAR@.H              | 42.30  | 20.79  | 2.03  | 0.49 |
| Q05186_RCN1_MOUSE   | Rcn1  | Reticulocalbin-1 OS=Mu: R.IDSDGGLVTTEELK#.L                | 28.39  | 13.54  | 2.10  | 0.48 |

|                     |       |                                                                |        |        |      |      |
|---------------------|-------|----------------------------------------------------------------|--------|--------|------|------|
| Q05186_RCN1_MOUSE   | Rcn1  | Reticulocalbin-1 OS=Mu: K.ISWEEK#Q                             | 52.27  | 25.64  | 2.04 | 0.49 |
| Q05186_RCN1_MOUSE   | Rcn1  | Reticulocalbin-1 OS=Mu: K.IVDR@IDSDDGLVTTEELK#L                | 81.42  | 35.35  | 2.30 | 0.43 |
| Q05186_RCN1_MOUSE   | Rcn1  | Reticulocalbin-1 OS=Mu: K.QATYGYLGNPAEFHDSSDHHFTK#K            | 6.71   | 5.53   | 1.21 | 0.82 |
| Q05186_RCN1_MOUSE   | Rcn1  | Reticulocalbin-1 OS=Mu: K.TFDQLSPDESK#E                        | 14.77  | 9.18   | 1.61 | 0.62 |
| Q05186_RCN1_MOUSE   | Rcn1  | Reticulocalbin-1 OS=Mu: R.VVRPDESELGERPPEDNQSFDYDHEAFLGKEDSK.T | 3.95   | 3.08   | 1.28 | 0.78 |
| Q05186_RCN1_MOUSE   | Rcn1  | Reticulocalbin-1 OS=Mu: K.ASDLDGLTATR@E                        | 7.24   | 4.62   | 1.57 | 0.64 |
| Q05186_RCN1_MOUSE   | Rcn1  | Reticulocalbin-1 OS=Mu: R.IDSDGDLVTTEELK#L                     | 4.19   | 1.57   | 2.68 | 0.37 |
| Q8BP92_RCN2_MOUSE   | Rcn2  | Reticulocalbin-2 OS=Mu: R.ADYDR9ALLGVQEDVDEYK.L                | 91.16  | 53.35  | 1.71 | 0.59 |
| Q8BP92_RCN2_MOUSE   | Rcn2  | Reticulocalbin-2 OS=Mu: R.DPTANEDPEWILVEK#D                    | 18.57  | 12.86  | 1.44 | 0.69 |
| Q8BP92_RCN2_MOUSE   | Rcn2  | Reticulocalbin-2 OS=Mu: R.DPTANEDPEWILVEK#HDR@F                | 13.40  | 9.56   | 1.40 | 0.71 |
| Q8BP92_RCN2_MOUSE   | Rcn2  | Reticulocalbin-2 OS=Mu: R.EALLGVQEDVDEYK#L                     | 114.51 | 70.64  | 1.62 | 0.62 |
| Q8BP92_RCN2_MOUSE   | Rcn2  | Reticulocalbin-2 OS=Mu: R.FVNDYDKNDGR.L                        | 4.55   | 2.77   | 1.64 | 0.61 |
| Q8BP92_RCN2_MOUSE   | Rcn2  | Reticulocalbin-2 OS=Mu: K.HYAM*QEA#K#Q                         | 11.38  | 9.04   | 1.26 | 0.79 |
| Q8BP92_RCN2_MOUSE   | Rcn2  | Reticulocalbin-2 OS=Mu: K.HYAMQEA#K#Q                          | 12.12  | 6.86   | 1.77 | 0.57 |
| Q8BP92_RCN2_MOUSE   | Rcn2  | Reticulocalbin-2 OS=Mu: K.K.HSDSDGFLTENELSQWIQ#SFK#H           | 36.74  | 22.06  | 1.67 | 0.60 |
| Q8BP92_RCN2_MOUSE   | Rcn2  | Reticulocalbin-2 OS=Mu: K.K.HSEELIENQDLFLTEATDYGR@Q            | 51.75  | 26.99  | 1.92 | 0.52 |
| Q8BP92_RCN2_MOUSE   | Rcn2  | Reticulocalbin-2 OS=Mu: K.LSEELIENQDLFLTEATDYGR@Q              | 81.48  | 46.83  | 1.74 | 0.57 |
| Q8BP92_RCN2_MOUSE   | Rcn2  | Reticulocalbin-2 OS=Mu: K.QQFVEYDKNHSDGAVTWDEYNIQM*YDR@V       | 8.12   | 3.23   | 2.51 | 0.40 |
| Q8BP92_RCN2_MOUSE   | Rcn2  | Reticulocalbin-2 OS=Mu: K.QQFVEYDKNHSDGAVTWDEYNIQM*YDR@V       | 4.11   | 2.05   | 2.00 | 0.50 |
| Q8BP92_RCN2_MOUSE   | Rcn2  | Reticulocalbin-2 OS=Mu: R.R@DPTANEDPEWILVEK#D                  | 63.31  | 38.21  | 1.66 | 0.60 |
| Q8BP92_RCN2_MOUSE   | Rcn2  | Reticulocalbin-2 OS=Mu: R.R@DPTANEDPEWILVEK#HDR@F              | 51.05  | 37.64  | 1.36 | 0.74 |
| Q8BP92_RCN2_MOUSE   | Rcn2  | Reticulocalbin-2 OS=Mu: R.VIDFONTALDTEEGSFR@Q                  | 139.00 | 80.95  | 1.72 | 0.58 |
| Q8BP92_RCN2_MOUSE   | Rcn2  | Reticulocalbin-2 OS=Mu: R.EALLGVQEDVDEYK#L                     | 6.77   | 3.01   | 2.25 | 0.44 |
| Q8BP92_RCN2_MOUSE   | Rcn2  | Reticulocalbin-2 OS=Mu: R.VIDFONTALDTEEGSFR@Q                  | 2.69   | 1.73   | 1.55 | 0.65 |
| Q8BH97_RCN3_MOUSE   | Rcn3  | Reticulocalbin-3 OS=Mu: K.AELSNWNM*FVSGQATNYGDLTR@H            | 47.92  | 22.98  | 2.09 | 0.48 |
| Q8BH97_RCN3_MOUSE   | Rcn3  | Reticulocalbin-3 OS=Mu: K.DGVYQVEEYADLYSEEPGEEEPAAVQTER@Q      | 9.00   | 3.80   | 2.37 | 0.42 |
| Q8BH97_RCN3_MOUSE   | Rcn3  | Reticulocalbin-3 OS=Mu: R.DIVVAETLELDDK#N                      | 27.39  | 13.97  | 1.96 | 0.51 |
| Q8BH97_RCN3_MOUSE   | Rcn3  | Reticulocalbin-3 OS=Mu: R.DSVSAAWHYYDTDR@DGR@V                 | 123.81 | 56.23  | 2.20 | 0.45 |
| Q8BH97_RCN3_MOUSE   | Rcn3  | Reticulocalbin-3 OS=Mu: R.DVAKHEFDK#LSPESQAR@L                 | 58.75  | 30.41  | 1.93 | 0.52 |
| Q8BH97_RCN3_MOUSE   | Rcn3  | Reticulocalbin-3 OS=Mu: R.IVDR@M*DLADSDGWWVSLAELR@A            | 34.42  | 20.02  | 1.72 | 0.58 |
| Q8BH97_RCN3_MOUSE   | Rcn3  | Reticulocalbin-3 OS=Mu: R.M*DLADSDGWWVSLAELR@A                 | 33.87  | 24.49  | 1.38 | 0.72 |
| Q8BH97_RCN3_MOUSE   | Rcn3  | Reticulocalbin-3 OS=Mu: R.MDLADSDGWWVSLAELR@A                  | 18.66  | 9.67   | 1.93 | 0.52 |
| Q8BH97_RCN3_MOUSE   | Rcn3  | Reticulocalbin-3 OS=Mu: R.VADQDGS*ATR@E                        | 38.56  | 23.33  | 1.65 | 0.60 |
| Q8BH97_RCN3_MOUSE   | Rcn3  | Reticulocalbin-3 OS=Mu: R.VGWEEELR@N                           | 197.02 | 105.40 | 1.87 | 0.53 |
| Q8CFE3_RCOR1_MOUSE  | Rcor1 | REST corepressor 1 OS=M: R.IQQM*LPDK#V                         | 19.27  | 10.01  | 1.92 | 0.52 |
| Q8CFE3_RCOR1_MOUSE  | Rcor1 | REST corepressor 1 OS=M: K.SLADLPNFPFPDEWTVEDK#V               | 5.91   | 3.13   | 1.89 | 0.53 |
| Q8CFE3_RCOR1_MOUSE  | Rcor1 | REST corepressor 1 OS=M: R.VGPGQAAPVDFDPAK#L                   | 19.89  | 13.02  | 1.53 | 0.65 |
| Q8CFE3_RCOR1_MOUSE  | Rcor1 | REST corepressor 1 OS=M: R.WTTEQLLAVQAR@K                      | 6.40   | 4.57   | 1.40 | 0.71 |
| Q8CFE3_RCOR1_MOUSE  | Rcor1 | REST corepressor 1 OS=M: K.SLADLPNFPFPDEWTVEDK#V               | 4.22   | 2.95   | 1.43 | 0.70 |
| Q8CFE3_RCOR1_MOUSE  | Rcor1 | REST corepressor 1 OS=M: R.VGPGQAAPVDFDPAK#L                   | 8.11   | 3.38   | 2.40 | 0.42 |
| Q9QYF1_RDH11_MOUSE  | Rdh11 | Retinol dehydrogenase 1 K.VAIVGTANTGIGK#E                      | 5.37   | 2.31   | 2.33 | 0.43 |
| Q9QYF1_RDH11_MOUSE  | Rdh11 | Retinol dehydrogenase 1 K.VAIVGTANTGIGK#E                      | 5.67   | 1.40   | 4.03 | 0.25 |
| Q9Z129_RECQ1_MOUSE  | Recq1 | ATP-dependent DNA heli K.SM*ENYQESGR@A                         | 2.71   | 1.74   | 1.56 | 0.64 |
| Q99KK1_REEP3_MOUSE  | Reep3 | Receptor expression-enh R.EIDDYVQAK#E                          | 7.62   | 1.44   | 5.29 | 0.19 |
| G3X8R0_G3X8R0_MOUSE | Reep5 | Receptor accessory prote R.HESQVDSVVK#D                        | 15.28  | 10.67  | 1.43 | 0.70 |
| G3X8R0_G3X8R0_MOUSE | Reep5 | Receptor accessory prote R.HESQVDSVVK#D                        | 85.08  | 37.68  | 2.26 | 0.44 |
| G3X8R0_G3X8R0_MOUSE | Reep5 | Receptor accessory prote R.IIRPIFLK#H                          | 19.48  | 10.53  | 1.85 | 0.54 |
| G3X8R0_G3X8R0_MOUSE | Reep5 | Receptor accessory prote K.KATVNLGDEK#K                        | 15.78  | 8.29   | 1.90 | 0.53 |
| G3X8R0_G3X8R0_MOUSE | Reep5 | Receptor accessory prote K.KATVNLGDEK#K.S                      | 66.29  | 26.21  | 2.53 | 0.40 |
| G3X8R0_G3X8R0_MOUSE | Reep5 | Receptor accessory prote K.KATVNLGDEK#K.S                      | 7.81   | 2.32   | 3.37 | 0.30 |
| G3X8R0_G3X8R0_MOUSE | Reep5 | Receptor accessory prote R.HESQVDSVVK#D                        | 2.68   | 6.00   | 0.45 | 2.24 |
| Q9J1M62_REEP6_MOUSE | Reep6 | Receptor expression-enh R.ALDDAAGITR.D                         | 22.57  | 8.42   | 2.68 | 0.37 |
| Q04207_TF65_MOUSE   | Rela  | Transcription factor p65 R.TPPYADPSLQAPVR@V                    | 6.66   | 3.19   | 2.09 | 0.48 |
| Q04863_RELB_MOUSE   | Relb  | Transcription factor RelB R.SAGSILGSESTGASK#T                  | 23.98  | 5.83   | 4.11 | 0.24 |
| Q04863_RELB_MOUSE   | Relb  | Transcription factor RelB K.TPPYEDLEISEPVTNVFLQR@L             | 7.37   | 3.19   | 2.31 | 0.43 |
| 054916_REP51_MOUSE  | Rep51 | RalBP1-associated Eps dc R.TVASAATANEIR@R                      | 6.95   | 2.47   | 2.81 | 0.36 |
| Q9CQU3_RER1_MOUSE   | Rer1  | Protein RER1 OS=Mus mt: R.LGQIQYSWLDK#S                        | 39.11  | 20.49  | 1.91 | 0.52 |
| Q9CQU3_RER1_MOUSE   | Rer1  | Protein RER1 OS=Mus mt: K.VDPSLM*EDSDGSPSLPTK#Q                | 20.12  | 12.52  | 1.61 | 0.62 |
| Q6PAQ4_REX04_MOUSE  | Rexo4 | RNA exonuclease 4 OS=M: K.ATAPVPGPIR@K                         | 9.88   | 5.94   | 1.66 | 0.60 |
| Q6PAQ4_REX04_MOUSE  | Rexo4 | RNA exonuclease 4 OS=M: K.VLFLDHPK#K                           | 9.72   | 4.22   | 2.30 | 0.43 |
| Q6PAQ4_REX04_MOUSE  | Rexo4 | RNA exonuclease 4 OS=M: R.VSIVNQYK#C                           | 16.02  | 11.27  | 1.42 | 0.70 |
| Q6PAQ4_REX04_MOUSE  | Rexo4 | RNA exonuclease 4 OS=M: K.VYK*PTPVTDYR@T                       | 15.23  | 8.82   | 1.73 | 0.58 |
| P35601_RFC1_MOUSE   | Rfc1  | Replication factor C subu R.DALVR@PLTSGVEGAQHV#K.L             | 10.69  | 5.53   | 1.93 | 0.52 |
| P35601_RFC1_MOUSE   | Rfc1  | Replication factor C subu K.EAHLTPSLQVVK#T                     | 12.45  | 9.23   | 1.35 | 0.74 |
| P35601_RFC1_MOUSE   | Rfc1  | Replication factor C subu R.GGQIELIGLIK#H                      | 30.34  | 13.93  | 2.18 | 0.46 |
| P35601_RFC1_MOUSE   | Rfc1  | Replication factor C subu R.GYM*TOPSFFPSVWLK#H                 | 8.67   | 5.20   | 1.67 | 0.60 |
| P35601_RFC1_MOUSE   | Rfc1  | Replication factor C subu K.ILDEGLDLIR@T                       | 8.92   | 8.02   | 1.11 | 0.90 |
| P35601_RFC1_MOUSE   | Rfc1  | Replication factor C subu K.AVVAESLNNTSIK#G                    | 5.04   | 2.92   | 1.73 | 0.58 |
| P35601_RFC1_MOUSE   | Rfc1  | Replication factor C subu R.GGQIELIGLIK#H                      | 13.37  | 5.62   | 2.38 | 0.42 |
| P35601_RFC1_MOUSE   | Rfc1  | Replication factor C subu K.AALLSGPPGVGK#T                     | 72.64  | 31.26  | 2.32 | 0.43 |
| P35601_RFC1_MOUSE   | Rfc1  | Replication factor C subu K.AKHESSYNETELLAAR@R                 | 62.28  | 21.16  | 2.94 | 0.34 |
| P35601_RFC1_MOUSE   | Rfc1  | Replication factor C subu K.ALTVDQAK#A                         | 41.21  | 14.15  | 2.91 | 0.34 |
| P35601_RFC1_MOUSE   | Rfc1  | Replication factor C subu K.AVVAESLNNTSIK#G                    | 92.40  | 32.68  | 2.83 | 0.35 |
| P35601_RFC1_MOUSE   | Rfc1  | Replication factor C subu R.DALVR@PLTSGVEGAQHV#K.L             | 54.79  | 19.05  | 2.88 | 0.35 |
| P35601_RFC1_MOUSE   | Rfc1  | Replication factor C subu K.DSEEGEESFSSVDLSK#A                 | 6.77   | 1.85   | 3.66 | 0.27 |
| P35601_RFC1_MOUSE   | Rfc1  | Replication factor C subu K.EAHLTPSLQVVK#T                     | 55.57  | 18.57  | 2.99 | 0.33 |
| P35601_RFC1_MOUSE   | Rfc1  | Replication factor C subu K.EGLK#HIPPPAM*NEILGANQDVR@Q         | 3.32   | 2.37   | 1.40 | 0.71 |
| P35601_RFC1_MOUSE   | Rfc1  | Replication factor C subu K.GPYTSGAAPSVSAR@H                   | 79.46  | 30.05  | 2.64 | 0.38 |
| P35601_RFC1_MOUSE   | Rfc1  | Replication factor C subu R.GGQIELIGLIK#H                      | 157.03 | 59.78  | 2.63 | 0.38 |
| P35601_RFC1_MOUSE   | Rfc1  | Replication factor C subu R.GYM*TOPSFFPSVWLK#H                 | 19.85  | 8.82   | 2.25 | 0.44 |
| P35601_RFC1_MOUSE   | Rfc1  | Replication factor C subu R.HALIM*DEVDGM*AGNEDR@G              | 11.47  | 4.28   | 2.68 | 0.37 |
| P35601_RFC1_MOUSE   | Rfc1  | Replication factor C subu K.ILDEGLDLIR.T                       | 139.20 | 48.73  | 2.86 | 0.35 |
| P35601_RFC1_MOUSE   | Rfc1  | Replication factor C subu K.IPPAM*NEILGANQDVR@Q                | 16.51  | 8.49   | 1.94 | 0.51 |
| P35601_RFC1_MOUSE   | Rfc1  | Replication factor C subu K.LTPTSVLDYFGTESVQR@S                | 35.28  | 11.36  | 3.11 | 0.32 |
| P35601_RFC1_MOUSE   | Rfc1  | Replication factor C subu K.QLQLEDAELER@Q                      | 41.19  | 10.15  | 4.06 | 0.25 |
| P35601_RFC1_MOUSE   | Rfc1  | Replication factor C subu K.SAM*LSIAFK#E                       | 24.97  | 21.27  | 1.17 | 0.85 |
| P35601_RFC1_MOUSE   | Rfc1  | Replication factor C subu K.SAMLSIAFK#E                        | 7.35   | 3.82   | 1.92 | 0.52 |
| P35601_RFC1_MOUSE   | Rfc1  | Replication factor C subu R.TLALLDEEPK#I                       | 60.93  | 20.83  | 2.93 | 0.34 |
| P35601_RFC1_MOUSE   | Rfc1  | Replication factor C subu K.AALLSGPPGVGK#T                     | 42.39  | 12.63  | 3.36 | 0.30 |
| P35601_RFC1_MOUSE   | Rfc1  | Replication factor C subu K.AKHESSYNETELLAAR@R                 | 28.59  | 6.10   | 4.69 | 0.21 |
| P35601_RFC1_MOUSE   | Rfc1  | Replication factor C subu K.AVVAESLNNTSIK#G                    | 46.98  | 10.35  | 4.54 | 0.22 |
| P35601_RFC1_MOUSE   | Rfc1  | Replication factor C subu R.DALVR@PLTSGVEGAQHV#K.L             | 17.57  | 4.37   | 4.02 | 0.25 |
| P35601_RFC1_MOUSE   | Rfc1  | Replication factor C subu K.EAHLTPSLQVVK#T                     | 27.47  | 6.06   | 4.53 | 0.22 |
| P35601_RFC1_MOUSE   | Rfc1  | Replication factor C subu K.GPYTSGAAPSVSAR@H                   | 40.06  | 10.12  | 3.96 | 0.25 |
| P35601_RFC1_MOUSE   | Rfc1  | Replication factor C subu R.GGQIELIGLIK#H                      | 83.28  | 20.88  | 3.99 | 0.25 |
| P35601_RFC1_MOUSE   | Rfc1  | Replication factor C subu R.GYM*TOPSFFPSVWLK#H                 | 15.06  | 3.80   | 3.96 | 0.25 |
| P35601_RFC1_MOUSE   | Rfc1  | Replication factor C subu K.ILDEGLDLIR@T                       | 92.56  | 24.83  | 3.73 | 0.27 |
| P35601_RFC1_MOUSE   | Rfc1  | Replication factor C subu K.LTPTSVLDYFGTESVQR@S                | 23.11  | 9.05   | 2.55 | 0.39 |
| P35601_RFC1_MOUSE   | Rfc1  | Replication factor C subu K.QLQLEDAELER@Q                      | 19.14  | 6.45   | 2.97 | 0.34 |
| P35601_RFC1_MOUSE   | Rfc1  | Replication factor C subu K.SAM*LSIAFK#E                       | 10.74  | 13.38  | 0.80 | 1.24 |
| P35601_RFC1_MOUSE   | Rfc1  | Replication factor C subu R.TLALLDEEPK#I                       | 24.62  | 7.45   | 3.30 | 0.30 |
| Q9WUK4_RFC2_MOUSE   | Rfc2  | Replication factor C subu R.ALLGPALK#D                         | 82.90  | 32.66  | 2.54 | 0.39 |
| Q9WUK4_RFC2_MOUSE   | Rfc2  | Replication factor C subu R.ALLGPALK#D                         | 11.86  | 3.22   | 3.69 | 0.27 |



|                    |        |                                                           |        |       |      |      |
|--------------------|--------|-----------------------------------------------------------|--------|-------|------|------|
| Q9WUK4_RFC2_MOUSE  | Rfc2   | Replication factor C subu K.DAVLELNASDR.G                 | 65.87  | 23.54 | 2.80 | 0.36 |
| Q9WUK4_RFC2_MOUSE  | Rfc2   | Replication factor C subu R.EGNVPIIAGPPGTGK#.T            | 91.11  | 38.88 | 2.34 | 0.43 |
| Q9WUK4_RFC2_MOUSE  | Rfc2   | Replication factor C subu K.EK#VPYTDGGLLEAIFTAQGDM*#R@.Q  | 40.66  | 10.56 | 3.85 | 0.26 |
| Q9WUK4_RFC2_MOUSE  | Rfc2   | Replication factor C subu K.EK#VPYTDGGLLEAIFTAQGDMR@.Q    | 10.35  | 3.67  | 2.82 | 0.35 |
| Q9WUK4_RFC2_MOUSE  | Rfc2   | Replication factor C subu K.IIILDEADSM*TDGAQQALR@.R       | 24.21  | 7.31  | 3.31 | 0.30 |
| Q9WUK4_RFC2_MOUSE  | Rfc2   | Replication factor C subu K.IIILDEADSM*TDGAQQALR@.R       | 33.13  | 10.79 | 3.07 | 0.33 |
| Q9WUK4_RFC2_MOUSE  | Rfc2   | Replication factor C subu R.LM*NVIEK#.E                   | 33.55  | 10.61 | 3.16 | 0.32 |
| Q9WUK4_RFC2_MOUSE  | Rfc2   | Replication factor C subu K.LNEIVGNEDEVSR@.L              | 145.20 | 42.89 | 3.39 | 0.30 |
| Q9WUK4_RFC2_MOUSE  | Rfc2   | Replication factor C subu K.LTDAQVLR.L                    | 179.58 | 60.03 | 2.99 | 0.33 |
| Q9WUK4_RFC2_MOUSE  | Rfc2   | Replication factor C subu R.QALNLSQTF5FGYINSENVFK#.V      | 11.63  | 6.10  | 1.91 | 0.52 |
| Q9WUK4_RFC2_MOUSE  | Rfc2   | Replication factor C subu K.TAGHYELPWVEK#.Y               | 39.53  | 16.75 | 2.36 | 0.42 |
| Q9WUK4_RFC2_MOUSE  | Rfc2   | Replication factor C subu K.VAEGVNSLQM*AGLLAR@.L          | 20.57  | 8.13  | 2.53 | 0.40 |
| Q9WUK4_RFC2_MOUSE  | Rfc2   | Replication factor C subu K.VPYTDGGLLEAIFTAQGDM*#R@.Q     | 16.75  | 8.49  | 1.97 | 0.51 |
| Q9WUK4_RFC2_MOUSE  | Rfc2   | Replication factor C subu K.VPYTDGGLLEAIFTAQGDMR@.Q       | 6.19   | 3.72  | 1.67 | 0.60 |
| Q9WUK4_RFC2_MOUSE  | Rfc2   | Replication factor C subu R.EGNVPIIAGPPGTGK#.T            | 7.77   | 2.55  | 3.05 | 0.33 |
| Q9WUK4_RFC2_MOUSE  | Rfc2   | Replication factor C subu K.LNEIVGNEDEVSR@.L              | 12.09  | 2.58  | 4.69 | 0.21 |
| Q9WUK4_RFC2_MOUSE  | Rfc2   | Replication factor C subu R.EGNVPIIAGPPGTGK#.T            | 12.85  | 4.64  | 2.77 | 0.36 |
| Q9WUK4_RFC2_MOUSE  | Rfc2   | Replication factor C subu K.EK#VPYTDGGLLEAIFTAQGDM*#R@.Q  | 8.22   | 1.78  | 4.61 | 0.22 |
| Q9WUK4_RFC2_MOUSE  | Rfc2   | Replication factor C subu K.LNEIVGNEDEVSR@.L              | 11.18  | 3.67  | 3.05 | 0.33 |
| Q9WUK4_RFC2_MOUSE  | Rfc2   | Replication factor C subu K.TAGHYELPWVEK#.Y               | 10.65  | 1.91  | 5.56 | 0.18 |
| Q9WUK4_RFC2_MOUSE  | Rfc2   | Replication factor C subu K.VAEGVNSLQM*AGLLAR@.L          | 5.85   | 2.61  | 2.24 | 0.45 |
| Q8R323_RFC3_MOUSE  | Rfc3   | Replication factor C subu K.EGLALPSTLAR@.R                | 58.23  | 27.61 | 2.11 | 0.47 |
| Q8R323_RFC3_MOUSE  | Rfc3   | Replication factor C subu R.ETANAIVSQTPQR@.L              | 33.99  | 16.70 | 2.04 | 0.49 |
| Q8R323_RFC3_MOUSE  | Rfc3   | Replication factor C subu K.TVAQSQLETSQR@.D               | 66.13  | 21.10 | 3.13 | 0.32 |
| Q8R323_RFC3_MOUSE  | Rfc3   | Replication factor C subu R.VOQYPTFDEQIETDWEVLR@.E        | 13.73  | 5.40  | 2.54 | 0.39 |
| Q8R323_RFC3_MOUSE  | Rfc3   | Replication factor C subu R.VVIQEM*#LK#.T                 | 48.34  | 30.28 | 1.60 | 0.63 |
| Q8R323_RFC3_MOUSE  | Rfc3   | Replication factor C subu K.VVLLTEVDK#LTK#.D              | 4.95   | 3.43  | 1.44 | 0.69 |
| Q8R323_RFC3_MOUSE  | Rfc3   | Replication factor C subu R.ETANAIVSQTPQR@.L              | 15.17  | 4.79  | 3.17 | 0.32 |
| Q8R323_RFC3_MOUSE  | Rfc3   | Replication factor C subu K.K#E#STIASNYHLEVNPSDAGNSDR@.V  | 10.86  | 5.18  | 2.10 | 0.48 |
| Q8R323_RFC3_MOUSE  | Rfc3   | Replication factor C subu K.TVAQSQLETSQR@.D               | 21.24  | 6.76  | 3.14 | 0.32 |
| Q8R323_RFC3_MOUSE  | Rfc3   | Replication factor C subu K.EGLALPSTLAR@.R                | 39.82  | 11.93 | 3.34 | 0.30 |
| Q8R323_RFC3_MOUSE  | Rfc3   | Replication factor C subu R.ETANAIVSQTPQR@.L              | 39.82  | 7.24  | 3.97 | 0.25 |
| Q8R323_RFC3_MOUSE  | Rfc3   | Replication factor C subu K.TVAQSQLETSQR@.D               | 35.40  | 7.28  | 4.86 | 0.21 |
| Q8R323_RFC3_MOUSE  | Rfc3   | Replication factor C subu R.VOQYPTFDEQIETDWEVLR@.E        | 17.66  | 5.18  | 3.41 | 0.29 |
| Q8R323_RFC3_MOUSE  | Rfc3   | Replication factor C subu R.VVIQEM*#LK#.T                 | 30.69  | 9.11  | 3.37 | 0.30 |
| Q99J62_RFC4_MOUSE  | Rfc4   | Replication factor C subu K.AITFLQSATR.L                  | 69.83  | 21.22 | 3.29 | 0.30 |
| Q99J62_RFC4_MOUSE  | Rfc4   | Replication factor C subu R.ELFGPELFR@.L                  | 122.62 | 31.34 | 3.91 | 0.26 |
| Q99J62_RFC4_MOUSE  | Rfc4   | Replication factor C subu R.GTPATAGSSGETK#.K              | 6.98   | 2.52  | 2.77 | 0.36 |
| Q99J62_RFC4_MOUSE  | Rfc4   | Replication factor C subu K.IGNEEIALVKR#.I                | 69.39  | 27.08 | 2.56 | 0.39 |
| Q99J62_RFC4_MOUSE  | Rfc4   | Replication factor C subu K.ISEGLR@.K                     | 103.58 | 42.36 | 2.45 | 0.41 |
| Q99J62_RFC4_MOUSE  | Rfc4   | Replication factor C subu K.IVILDEADSM*#TSAQAALR@.R       | 21.55  | 6.42  | 3.36 | 0.30 |
| Q99J62_RFC4_MOUSE  | Rfc4   | Replication factor C subu K.IVILDEADSM*#TSAQAALR@.R       | 29.47  | 9.31  | 3.17 | 0.32 |
| Q99J62_RFC4_MOUSE  | Rfc4   | Replication factor C subu K.IVILDEADSM*#TSAQAALR@.R       | 11.09  | 4.11  | 2.70 | 0.37 |
| Q99J62_RFC4_MOUSE  | Rfc4   | Replication factor C subu R.K#AIFLQSATR@.L                | 26.03  | 9.84  | 2.65 | 0.38 |
| Q99J62_RFC4_MOUSE  | Rfc4   | Replication factor C subu R.K#SLEGLADLPNLLFYGPPGTGK#.T    | 62.31  | 24.16 | 2.72 | 0.37 |
| Q99J62_RFC4_MOUSE  | Rfc4   | Replication factor C subu K.NFAQLTVSGSR@.S                | 63.36  | 22.78 | 2.78 | 0.36 |
| Q99J62_RFC4_MOUSE  | Rfc4   | Replication factor C subu K.SLEGLADLPNLLFYGPPGTGK#.T      | 42.08  | 19.66 | 2.14 | 0.47 |
| Q99J62_RFC4_MOUSE  | Rfc4   | Replication factor C subu K.TSTLAAAR@.E                   | 97.79  | 23.95 | 4.08 | 0.24 |
| Q99J62_RFC4_MOUSE  | Rfc4   | Replication factor C subu R.VLELNASDR@.G                  | 169.36 | 61.48 | 2.75 | 0.36 |
| Q99J62_RFC4_MOUSE  | Rfc4   | Replication factor C subu R.ELFGPELFR@.L                  | 14.99  | 3.98  | 3.76 | 0.27 |
| Q99J62_RFC4_MOUSE  | Rfc4   | Replication factor C subu K.SLEGLADLPNLLFYGPPGTGK#.T      | 8.53   | 8.33  | 1.02 | 0.98 |
| Q99J62_RFC4_MOUSE  | Rfc4   | Replication factor C subu R.VLELNASDR@.G                  | 13.14  | 3.67  | 3.58 | 0.28 |
| Q99J62_RFC4_MOUSE  | Rfc4   | Replication factor C subu K.AITFLQSATR@.L                 | 8.87   | 2.94  | 3.02 | 0.33 |
| Q99J62_RFC4_MOUSE  | Rfc4   | Replication factor C subu R.ELFGPELFR@.L                  | 11.93  | 3.74  | 3.19 | 0.31 |
| Q99J62_RFC4_MOUSE  | Rfc4   | Replication factor C subu K.IGNEEIALVKR#.I                | 5.35   | 2.18  | 2.45 | 0.41 |
| Q99J62_RFC4_MOUSE  | Rfc4   | Replication factor C subu K.SLEGLADLPNLLFYGPPGTGK#.T      | 12.85  | 2.65  | 4.83 | 0.21 |
| Q9D0F6_RFC5_MOUSE  | Rfc5   | Replication factor C subu K.ALVTSSGDM*#R@.R               | 28.88  | 7.63  | 3.78 | 0.26 |
| Q9D0F6_RFC5_MOUSE  | Rfc5   | Replication factor C subu K.DK#EFGSM*#VLELNASDDR@.G       | 11.14  | 5.81  | 1.92 | 0.52 |
| Q9D0F6_RFC5_MOUSE  | Rfc5   | Replication factor C subu R.FGPLTPELM*#VPR@.L             | 16.25  | 16.25 | 3.31 | 0.30 |
| Q9D0F6_RFC5_MOUSE  | Rfc5   | Replication factor C subu R.FGPLTPELM*#VPR@.L             | 10.69  | 2.86  | 3.73 | 0.27 |
| Q9D0F6_RFC5_MOUSE  | Rfc5   | Replication factor C subu R.GPILSFASTR@.T                 | 94.62  | 29.25 | 3.24 | 0.31 |
| Q9D0F6_RFC5_MOUSE  | Rfc5   | Replication factor C subu K.IQLSSLIAAFQVTR@.D             | 47.80  | 9.42  | 2.95 | 0.34 |
| Q9D0F6_RFC5_MOUSE  | Rfc5   | Replication factor C subu R.LEHVQEENVDSIDEGM*#K#.A        | 25.89  | 13.69 | 3.35 | 0.30 |
| Q9D0F6_RFC5_MOUSE  | Rfc5   | Replication factor C subu R.LSVGTSEK#.I                   | 37.63  | 15.28 | 2.46 | 0.41 |
| Q9D0F6_RFC5_MOUSE  | Rfc5   | Replication factor C subu K.LVILDEADAM*#TQDAQNALR@.R      | 13.31  | 5.95  | 3.08 | 0.32 |
| Q9D0F6_RFC5_MOUSE  | Rfc5   | Replication factor C subu K.LVILDEADAM*#TQDAQNALR@.R      | 8.62   | 4.67  | 1.85 | 0.54 |
| Q9D0F6_RFC5_MOUSE  | Rfc5   | Replication factor C subu K.M*#ADIEYR@.L                  | 46.22  | 16.65 | 2.78 | 0.36 |
| Q9D0F6_RFC5_MOUSE  | Rfc5   | Replication factor C subu R.VDFPSSVR.I                    | 36.63  | 14.46 | 2.53 | 0.39 |
| Q9D0F6_RFC5_MOUSE  | Rfc5   | Replication factor C subu K.YR@PQLADLISHQDILSTIQ#.F       | 27.38  | 4.88  | 5.61 | 0.18 |
| Q9D0F6_RFC5_MOUSE  | Rfc5   | Replication factor C subu K.ALVTSSGDM*#R@.R               | 10.50  | 3.29  | 3.19 | 0.31 |
| Q9D0F6_RFC5_MOUSE  | Rfc5   | Replication factor C subu R.FGPLTPELM*#VPR@.L             | 27.29  | 8.10  | 3.37 | 0.30 |
| Q9D0F6_RFC5_MOUSE  | Rfc5   | Replication factor C subu R.GPILSFASTR@.T                 | 39.24  | 11.57 | 3.39 | 0.29 |
| Q9D0F6_RFC5_MOUSE  | Rfc5   | Replication factor C subu R.LEHVQEENVDSIDEGM*#K#.A        | 15.11  | 4.73  | 3.19 | 0.31 |
| Q9D0F6_RFC5_MOUSE  | Rfc5   | Replication factor C subu K.M*#ADIEYR@.L                  | 10.51  | 1.68  | 6.26 | 0.16 |
| Q9D0F6_RFC5_MOUSE  | Rfc5   | Replication factor C subu K.YR@PQLADLISHQDILSTIQ#.F       | 9.37   | 3.26  | 2.88 | 0.35 |
| Q9D0F6_RFC5_MOUSE  | Rfc5   | Replication factor C subu R.ALNLIQSTNM*#AFGK#.V           | 21.41  | 5.95  | 3.60 | 0.28 |
| Q9D0F6_RFC5_MOUSE  | Rfc5   | Replication factor C subu K.ALVTSSGDM*#R@.R               | 22.22  | 3.14  | 7.07 | 0.14 |
| Q9D0F6_RFC5_MOUSE  | Rfc5   | Replication factor C subu K.DK#EFGSM*#VLELNASDDR@.G       | 15.61  | 6.68  | 2.34 | 0.43 |
| Q9D0F6_RFC5_MOUSE  | Rfc5   | Replication factor C subu R.FGPLTPELM*#VPR@.L             | 47.67  | 14.91 | 3.20 | 0.31 |
| Q9D0F6_RFC5_MOUSE  | Rfc5   | Replication factor C subu R.GPILSFASTR@.T                 | 75.50  | 22.97 | 3.29 | 0.30 |
| Q9D0F6_RFC5_MOUSE  | Rfc5   | Replication factor C subu K.IQLSSLIAAFQVTR@.D             | 21.11  | 6.24  | 3.38 | 0.30 |
| Q9D0F6_RFC5_MOUSE  | Rfc5   | Replication factor C subu R.LPHLLLYGPPGTGK#.T             | 7.38   | 2.64  | 2.79 | 0.36 |
| Q9D0F6_RFC5_MOUSE  | Rfc5   | Replication factor C subu K.LVILDEADAM*#TQDAQNALR@.R      | 11.34  | 3.30  | 3.44 | 0.29 |
| Q9D0F6_RFC5_MOUSE  | Rfc5   | Replication factor C subu K.M*#ADIEYR@.L                  | 18.55  | 5.37  | 3.46 | 0.29 |
| Q9D0F6_RFC5_MOUSE  | Rfc5   | Replication factor C subu K.YR@PQLADLISHQDILSTIQ#.F       | 11.39  | 4.29  | 2.65 | 0.38 |
| P48377_RFX1_MOUSE  | Rfx1   | MHC class II regulatory fa R.ASPATVQWLLDNYETAEGVSLPR@.S   | 10.34  | 5.57  | 1.86 | 0.54 |
| P48377_RFX1_MOUSE  | Rfx1   | MHC class II regulatory fa R.ASPATVQWLLDNYETAEGVSLPR@.S   | 8.31   | 7.72  | 1.08 | 0.93 |
| P48377_RFX1_MOUSE  | Rfx1   | MHC class II regulatory fa R.SVQATPQTK#.A                 | 7.15   | 4.90  | 1.46 | 0.69 |
| P48377_RFX1_MOUSE  | Rfx1   | MHC class II regulatory fa K.TAGTAPATVQQLQVHSVQVSPVQER@.S | 5.07   | 1.98  | 2.56 | 0.39 |
| Q9JL61_RFX5_MOUSE  | Rfx5   | DNA-binding protein Rfx: K.GSESPEN*#GPEVSPAPR@.D          | 8.62   | 2.53  | 3.41 | 0.29 |
| Q9JL61_RFX5_MOUSE  | Rfx5   | DNA-binding protein Rfx: K.NVVSLEGGP#PK#.K                | 7.37   | 4.78  | 1.54 | 0.65 |
| Q9JL61_RFX5_MOUSE  | Rfx5   | DNA-binding protein Rfx: R.SF5SIVQAR@.L                   | 8.00   | 1.95  | 4.10 | 0.24 |
| Q9JL61_RFX5_MOUSE  | Rfx5   | DNA-binding protein Rfx: K.TGAR@PQGGADAGEPTLLQR@.L        | 16.68  | 3.87  | 4.32 | 0.23 |
| Q8VCG9_RFXAP_MOUSE | Rfxap  | Regulatory factor X-assoc K.SDQALGSGGSAASTGNVK#.L         | 6.31   | 1.36  | 4.65 | 0.21 |
| Q99PG4_RGS18_MOUSE | Rgs18  | Regulator of G-protein sij K.EPQJILK.A                    | 3.47   | 11.00 | 0.32 | 3.17 |
| Q8BHC7_RHBL4_MOUSE | Rhbdd1 | Rhomboid-related prote R.NVDVYTAGLSEEEQLER@.A             | 4.42   | 2.70  | 1.63 | 0.61 |
| Q92112_RHEB_MOUSE  | Rheb   | GTP-binding protein Rhe K.ALAESWNAFLSSAK#.E               | 23.60  | 11.27 | 2.09 | 0.48 |
| Q92112_RHEB_MOUSE  | Rheb   | GTP-binding protein Rhe R.IILEAEKIDGAASQK#.S              | 35.14  | 15.57 | 2.26 | 0.44 |
| Q92112_RHEB_MOUSE  | Rheb   | GTP-binding protein Rhe R.K#AIIIGYR@.S                    | 28.79  | 4.11  | 7.00 | 0.14 |
| Q92112_RHEB_MOUSE  | Rheb   | GTP-binding protein Rhe K.SSLTIQVEGQFVDSYDPIETFTK#.L      | 6.02   | 4.72  | 1.28 | 0.78 |
| Q92112_RHEB_MOUSE  | Rheb   | GTP-binding protein Rhe K.VQJIPIM*#LVGNK#.K               | 7.23   | 3.81  | 1.90 | 0.53 |
| Q9QIU0_RHOA_MOUSE  | Rhoa   | Transforming protein Rh: R.EVFEM*#ATR@.A                  | 8.72   | 5.84  | 1.49 | 0.67 |
| Q9QIU0_RHOA_MOUSE  | Rhoa   | Transforming protein Rh: K.QVELALWDTAGQEDYDR@.L           | 7.28   | 3.42  | 2.13 | 0.47 |

|                     |          |                                                                |        |        |      |      |
|---------------------|----------|----------------------------------------------------------------|--------|--------|------|------|
| P84096_RHOG_MOUSE   | Rhog     | Rho-related GTP-binding K.EIPIVFDNYSQAQSAVDGR@.T               | 2.94   | 1.90   | 1.54 | 0.65 |
| P84096_RHOG_MOUSE   | Rhog     | Rho-related GTP-binding R.LK#EQGAPITPQOQALAK#.Q                | 9.62   | 3.89   | 2.47 | 0.40 |
| Q6Q0I6_RICTR_MOUSE  | Rictor   | Rapamycin-insensitive cc R.LSDGFVAEAK#.T                       | 10.28  | 1.55   | 6.76 | 0.15 |
| Q6Q0I6_RICTR_MOUSE  | Rictor   | Rapamycin-insensitive cc R.YLQDSSILQK#.V                       | 16.27  | 2.38   | 6.83 | 0.15 |
| Q6Q0I6_RICTR_MOUSE  | Rictor   | Rapamycin-insensitive cc K.YVYDIEEQLNEALTYR@.K                 | 9.62   | 4.02   | 2.39 | 0.42 |
| Q6PRS4_RIF1_MOUSE   | Rif1     | Telomere-associated pro R.FASDLIEPVLDTPLSK#.N                  | 49.09  | 12.51  | 3.92 | 0.25 |
| Q6PRS4_RIF1_MOUSE   | Rif1     | Telomere-associated pro K.GEIHSAVDFEALNVIIR@.L                 | 7.80   | 3.38   | 2.31 | 0.43 |
| Q6PRS4_RIF1_MOUSE   | Rif1     | Telomere-associated pro K.LGTM*ANSIIR@.N                       | 19.86  | 6.13   | 3.24 | 0.31 |
| Q6PRS4_RIF1_MOUSE   | Rif1     | Telomere-associated pro K.TIGDLSTLTASEIK#.T                    | 25.70  | 5.50   | 4.67 | 0.21 |
| Q6PRS4_RIF1_MOUSE   | Rif1     | Telomere-associated pro R.FASDLIEPVLDTPLSK#.N                  | 5.03   | 2.00   | 2.51 | 0.40 |
| Q6PRS4_RIF1_MOUSE   | Rif1     | Telomere-associated pro K.SGSEVLTLLK#.S                        | 4.50   | 1.67   | 2.69 | 0.37 |
| Q6PRS4_RIF1_MOUSE   | Rif1     | Telomere-associated pro K.AQM*STEIDAR@.V                       | 15.39  | 4.66   | 3.30 | 0.30 |
| Q6PRS4_RIF1_MOUSE   | Rif1     | Telomere-associated pro R.FASDLIEPVLDTPLSK#.N                  | 19.18  | 7.20   | 2.66 | 0.38 |
| Q6PRS4_RIF1_MOUSE   | Rif1     | Telomere-associated pro R.GLEEIPFDISEK#.A                      | 28.19  | 8.35   | 3.38 | 0.30 |
| Q6PRS4_RIF1_MOUSE   | Rif1     | Telomere-associated pro K.LGTM*ANSIIR@.N                       | 9.15   | 3.11   | 2.94 | 0.34 |
| Q6PRS4_RIF1_MOUSE   | Rif1     | Telomere-associated pro K.LTDESPIQENLEK#.G                     | 5.52   | 4.42   | 1.25 | 0.80 |
| Q6PRS4_RIF1_MOUSE   | Rif1     | Telomere-associated pro R.SQEDEISPVNKK#.I                      | 17.63  | 7.87   | 2.24 | 0.45 |
| Q6PRS4_RIF1_MOUSE   | Rif1     | Telomere-associated pro K.TIGDLSTLTASEIK#.T                    | 17.35  | 4.46   | 3.89 | 0.26 |
| Q6PRS4_RIF1_MOUSE   | Rif1     | Telomere-associated pro K.VIAGSSPEGVETM*ELNVR@.N               | 11.36  | 4.25   | 2.67 | 0.37 |
| Q6PRS4_RIF1_MOUSE   | Rif1     | Telomere-associated pro R.VSDSSLSPEK#.F                        | 9.80   | 1.25   | 7.82 | 0.13 |
| Q6PRS4_RIF1_MOUSE   | Rif1     | Telomere-associated pro R.ALWVWIK#.Q                           | 19.57  | 4.80   | 4.07 | 0.25 |
| Q6PRS4_RIF1_MOUSE   | Rif1     | Telomere-associated pro K.AQM*STEIDAR@.V                       | 13.08  | 2.97   | 4.41 | 0.23 |
| Q6PRS4_RIF1_MOUSE   | Rif1     | Telomere-associated pro K.DASDAVDSAIWK#.E                      | 12.01  | 9.16   | 1.31 | 0.76 |
| Q6PRS4_RIF1_MOUSE   | Rif1     | Telomere-associated pro K.DGDKP#PAVENASLEDLITTEEK#.N           | 11.59  | 3.28   | 3.53 | 0.28 |
| Q6PRS4_RIF1_MOUSE   | Rif1     | Telomere-associated pro R.EIFATFR@PLALLEYNSK#.L                | 6.01   | 3.18   | 1.89 | 0.53 |
| Q6PRS4_RIF1_MOUSE   | Rif1     | Telomere-associated pro R.FASDLIEPVLDTPLSK#.N                  | 29.10  | 6.17   | 4.71 | 0.21 |
| Q6PRS4_RIF1_MOUSE   | Rif1     | Telomere-associated pro R.GATALEM*GM*PLLLQK#.Q                 | 10.53  | 4.10   | 3.79 | 0.26 |
| Q6PRS4_RIF1_MOUSE   | Rif1     | Telomere-associated pro K.GEIHSAVDFEALNVIIR@.L                 | 15.31  | 1.54   | 6.68 | 0.15 |
| Q6PRS4_RIF1_MOUSE   | Rif1     | Telomere-associated pro R.GLEEIPFDISEK#.A                      | 35.40  | 7.15   | 4.95 | 0.20 |
| Q6PRS4_RIF1_MOUSE   | Rif1     | Telomere-associated pro K.IVLSLEPLEHPLISSPFSK#.Y               | 33.52  | 13.66  | 2.45 | 0.41 |
| Q6PRS4_RIF1_MOUSE   | Rif1     | Telomere-associated pro K.LGTM*ANSIIR@.N                       | 11.23  | 1.56   | 7.19 | 0.14 |
| Q6PRS4_RIF1_MOUSE   | Rif1     | Telomere-associated pro R.LIEQAPVQM*GEESVR@.W                  | 7.97   | 4.66   | 1.71 | 0.58 |
| Q6PRS4_RIF1_MOUSE   | Rif1     | Telomere-associated pro K.LTDESPIQENLEK#.G                     | 17.28  | 5.98   | 2.89 | 0.35 |
| Q6PRS4_RIF1_MOUSE   | Rif1     | Telomere-associated pro R.M*TGEEK#HEVIAIEK#.N                  | 25.73  | 8.29   | 3.10 | 0.32 |
| Q6PRS4_RIF1_MOUSE   | Rif1     | Telomere-associated pro R.NDAFVAADSEK#.S                       | 15.37  | 3.93   | 3.91 | 0.26 |
| Q6PRS4_RIF1_MOUSE   | Rif1     | Telomere-associated pro R.R@ASQGLISAVENESDSSSEAK#EEVSR@.K      | 9.97   | 1.81   | 5.50 | 0.18 |
| Q6PRS4_RIF1_MOUSE   | Rif1     | Telomere-associated pro K.SDSENLANAGK#.K                       | 5.85   | 1.31   | 4.48 | 0.22 |
| Q6PRS4_RIF1_MOUSE   | Rif1     | Telomere-associated pro K.SGSEVLTLLK#.S                        | 49.18  | 17.39  | 2.83 | 0.35 |
| Q6PRS4_RIF1_MOUSE   | Rif1     | Telomere-associated pro K.TDLQVPEAPTR@.E                       | 6.69   | 4.08   | 1.64 | 0.61 |
| Q6PRS4_RIF1_MOUSE   | Rif1     | Telomere-associated pro R.TEQVNDSSQAALAPNPK#.T                 | 14.11  | 1.88   | 7.50 | 0.13 |
| Q6PRS4_RIF1_MOUSE   | Rif1     | Telomere-associated pro R.TSGEPSVNAEIQDNR@.R                   | 9.51   | 2.35   | 4.05 | 0.25 |
| Q6PRS4_RIF1_MOUSE   | Rif1     | Telomere-associated pro K.VIAGSSPEGVETM*ELNVR@.N               | 13.38  | 4.32   | 3.10 | 0.32 |
| Q6PRS4_RIF1_MOUSE   | Rif1     | Telomere-associated pro R.VILQDSAGPADSLQAPK#GEEK#.S            | 10.17  | 3.05   | 3.33 | 0.30 |
| Q35730_RING1_MOUSE  | Ring1    | E3 ubiquitin-protein liga R.GVAGGEGEPALPSLEGVSEK#.Q            | 7.51   | 4.44   | 1.69 | 0.59 |
| Q35730_RING1_MOUSE  | Ring1    | E3 ubiquitin-protein liga R.LHNNQALSSIEEGLR@.M                 | 23.84  | 9.44   | 2.53 | 0.40 |
| Q35730_RING1_MOUSE  | Ring1    | E3 ubiquitin-protein liga R.SLR@PDPNFDALISK#.I                 | 29.41  | 38.45  | 0.76 | 1.31 |
| Q35730_RING1_MOUSE  | Ring1    | E3 ubiquitin-protein liga R.SLR@PDPNFDALISK#.I                 | 25.09  | 16.61  | 1.51 | 0.66 |
| Q9QZL0_RIPK3_MOUSE  | Ripk3    | Receptor-interacting seri K.GGFGVFR@.A                         | 15.25  | 6.45   | 2.36 | 0.42 |
| Q9QZL0_RIPK3_MOUSE  | Ripk3    | Receptor-interacting seri R.QAQDTSVGPATPAR@.T                  | 16.09  | 3.90   | 4.12 | 0.24 |
| Q9QZL0_RIPK3_MOUSE  | Ripk3    | Receptor-interacting seri R.QAQDTSVGPATPAR@.T                  | 7.19   | 3.32   | 2.17 | 0.46 |
| Q9QZL0_RIPK3_MOUSE  | Ripk3    | Receptor-interacting seri R.DLK#PSNILLDPHAKH#.L                | 15.40  | 3.85   | 4.00 | 0.25 |
| Q9QZL0_RIPK3_MOUSE  | Ripk3    | Receptor-interacting seri K.GGFGVFR@.A                         | 12.14  | 2.90   | 4.18 | 0.24 |
| Q9QZL0_RIPK3_MOUSE  | Ripk3    | Receptor-interacting seri R.QAQDTSVGPATPAR@.T                  | 9.13   | 3.29   | 2.78 | 0.36 |
| Q14801_Q14801_MOUSE | Rnf113a2 | Protein Rnf113a2 OS=M.L K.DTSM*GNASSG*VR@.K                    | 3.69   | 3.16   | 1.17 | 0.85 |
| Q14801_Q14801_MOUSE | Rnf113a2 | Protein Rnf113a2 OS=M.L R.KHAEGGASSTPEDADGI.-                  | 7.56   | 2.76   | 2.73 | 0.37 |
| Q9ET26_RN114_MOUSE  | Rnf114   | E3 ubiquitin-protein liga R.DGAAGSAAK#PASETPLSR@.F             | 14.80  | 10.91  | 1.36 | 0.74 |
| Q9ET26_RN114_MOUSE  | Rnf114   | E3 ubiquitin-protein liga K.QYNIM*EGVK#.A                      | 12.63  | 7.05   | 1.79 | 0.56 |
| Q9CQ0_RN138_MOUSE   | Rnf138   | E3 ubiquitin-protein liga R.ALDENIM*TR@.R                      | 92.44  | 46.43  | 1.99 | 0.50 |
| Q9CQ4_RING2_MOUSE   | Rnf2     | E3 ubiquitin-protein liga K.HNNQALSHSIEEGLK#.I                 | 28.22  | 9.06   | 3.12 | 0.32 |
| Q9CQ4_RING2_MOUSE   | Rnf2     | E3 ubiquitin-protein liga R.TPQEAITDGLIEVVSPPR@.S              | 38.52  | 11.12  | 3.46 | 0.29 |
| Q9CQ4_RING2_MOUSE   | Rnf2     | E3 ubiquitin-protein liga K.TWELSLYEQR@.T                      | 17.03  | 6.00   | 2.84 | 0.35 |
| Q9CQ4_RING2_MOUSE   | Rnf2     | E3 ubiquitin-protein liga R.TPQEAITDGLIEVVSPPR.S               | 4.19   | 3.11   | 1.35 | 0.74 |
| Q5DTM8_BRE1A_MOUSE  | Rnf20    | E3 ubiquitin-protein liga R.AVEEQEYVQK#.K                      | 26.82  | 11.04  | 2.43 | 0.41 |
| Q5DTM8_BRE1A_MOUSE  | Rnf20    | E3 ubiquitin-protein liga R.DK#VQLM*AAEK#.K                    | 7.22   | 3.68   | 1.96 | 0.51 |
| Q5DTM8_BRE1A_MOUSE  | Rnf20    | E3 ubiquitin-protein liga R.ER@GDQEPAFSFLTLASSSSEEM*ESQLQER@.V | 2.92   | 1.99   | 1.46 | 0.68 |
| Q5DTM8_BRE1A_MOUSE  | Rnf20    | E3 ubiquitin-protein liga R.HLAEVLER@.V                        | 30.35  | 8.94   | 3.39 | 0.29 |
| Q5DTM8_BRE1A_MOUSE  | Rnf20    | E3 ubiquitin-protein liga R.IEFEQTLAANEQAQPINR@.E              | 10.27  | 4.04   | 2.54 | 0.39 |
| Q5DTM8_BRE1A_MOUSE  | Rnf20    | E3 ubiquitin-protein liga K.LGGVSSTELDIR@.T                    | 21.55  | 9.44   | 2.28 | 0.44 |
| Q5DTM8_BRE1A_MOUSE  | Rnf20    | E3 ubiquitin-protein liga K.LHDFQDEIVENSVT#.E                  | 10.48  | 4.05   | 2.58 | 0.39 |
| Q5DTM8_BRE1A_MOUSE  | Rnf20    | E3 ubiquitin-protein liga K.LLK#EEKHEALADQVLTLLK#.T            | 22.91  | 9.00   | 2.54 | 0.39 |
| Q5DTM8_BRE1A_MOUSE  | Rnf20    | E3 ubiquitin-protein liga R.LQELTDLQEK#.H                      | 25.91  | 7.61   | 3.40 | 0.29 |
| Q5DTM8_BRE1A_MOUSE  | Rnf20    | E3 ubiquitin-protein liga K.LR@QDFEVTVTQNEK#.L                 | 31.14  | 12.65  | 2.46 | 0.41 |
| Q5DTM8_BRE1A_MOUSE  | Rnf20    | E3 ubiquitin-protein liga K.LR@TEVQLIEDTLAQVR@.K               | 23.86  | 10.51  | 2.27 | 0.44 |
| Q5DTM8_BRE1A_MOUSE  | Rnf20    | E3 ubiquitin-protein liga R.R@AVSQIVTVYDQLEK#.V                | 6.08   | 2.23   | 2.73 | 0.37 |
| Q5DTM8_BRE1A_MOUSE  | Rnf20    | E3 ubiquitin-protein liga K.R@YDLDQGLDGLLTER@.K                | 20.08  | 2.93   | 3.44 | 0.29 |
| Q5DTM8_BRE1A_MOUSE  | Rnf20    | E3 ubiquitin-protein liga K.TAVEDSQTIVETIK#.L                  | 14.51  | 8.79   | 2.79 | 0.36 |
| Q5DTM8_BRE1A_MOUSE  | Rnf20    | E3 ubiquitin-protein liga R.TEVIQLEDTLAQVR@.K                  | 22.28  | 6.31   | 3.53 | 0.28 |
| Q5DTM8_BRE1A_MOUSE  | Rnf20    | E3 ubiquitin-protein liga K.VYAGSSLYGTTINAR@.K                 | 9.92   | 4.15   | 2.39 | 0.42 |
| Q5DTM8_BRE1A_MOUSE  | Rnf20    | E3 ubiquitin-protein liga R.YDLDQGLDGLLTER.K                   | 8.65   | 3.05   | 2.84 | 0.35 |
| Q8BFU3_RN214_MOUSE  | Rnf214   | RING finger protein 214 ( K.TADSEVNTQDIEK#.N                   | 5.32   | 3.42   | 1.55 | 0.64 |
| Q3U319_BRE1B_MOUSE  | Rnf40    | E3 ubiquitin-protein liga R.ALQGLSGVEK#.E                      | 17.45  | 6.34   | 2.75 | 0.36 |
| Q3U319_BRE1B_MOUSE  | Rnf40    | E3 ubiquitin-protein liga R.EGPSLGPAAAASLRSR@.A                | 16.58  | 4.39   | 3.78 | 0.26 |
| Q3U319_BRE1B_MOUSE  | Rnf40    | E3 ubiquitin-protein liga R.GDSEAPGEVAR@.V                     | 13.97  | 4.04   | 3.46 | 0.29 |
| Q3U319_BRE1B_MOUSE  | Rnf40    | E3 ubiquitin-protein liga R.IEFEQTLAANEQAQPINR@.E              | 12.75  | 5.83   | 2.19 | 0.46 |
| Q3U319_BRE1B_MOUSE  | Rnf40    | E3 ubiquitin-protein liga R.ISLSEYSELQDKR.V                    | 12.04  | 5.33   | 2.26 | 0.44 |
| Q3U319_BRE1B_MOUSE  | Rnf40    | E3 ubiquitin-protein liga K.KHEELVESDDAQAALPTVQGLPSR@.G        | 15.04  | 4.43   | 3.40 | 0.29 |
| Q3U319_BRE1B_MOUSE  | Rnf40    | E3 ubiquitin-protein liga R.K#VEVYADAEILQEIK#EYK#.A            | 9.00   | 1.60   | 5.63 | 0.18 |
| Q3U319_BRE1B_MOUSE  | Rnf40    | E3 ubiquitin-protein liga K.LLR@EEK#DELGEQVGLK#.S              | 17.17  | 7.51   | 2.29 | 0.44 |
| Q3U319_BRE1B_MOUSE  | Rnf40    | E3 ubiquitin-protein liga K.LQAEQLQAVR@.T                      | 18.96  | 5.73   | 3.31 | 0.30 |
| Q3U319_BRE1B_MOUSE  | Rnf40    | E3 ubiquitin-protein liga R.QATDATALLVNRR@.Y                   | 7.72   | 4.23   | 1.82 | 0.55 |
| Q3U319_BRE1B_MOUSE  | Rnf40    | E3 ubiquitin-protein liga K.TTTTTIEPIR@.L                      | 23.47  | 6.50   | 3.61 | 0.28 |
| Q9DBU5_RNF6_MOUSE   | Rnf6     | E3 ubiquitin-protein liga R.AK#EQLASQ#GSDSAASDGSSELSR@.A       | 3.71   | 3.23   | 1.15 | 0.87 |
| Q3UZ01_RBM40_MOUSE  | Rnpc3    | RNA-binding protein 40 ( K.IFPK#PNLNIITEEDSDEI#SQFISR@.K       | 7.21   | 2.75   | 2.62 | 0.38 |
| Q99M28_RNPS1_MOUSE  | Rnps1    | RNA-binding protein wit K.DHIM*EINFTYGG#.I                     | 67.37  | 26.55  | 2.54 | 0.39 |
| Q99M28_RNPS1_MOUSE  | Rnps1    | RNA-binding protein wit K.DHIMEIFSTYGG#.I                      | 26.18  | 11.33  | 2.31 | 0.43 |
| Q99M28_RNPS1_MOUSE  | Rnps1    | RNA-binding protein wit K.GYAYFENPDEAEK#.A                     | 410.30 | 194.90 | 2.11 | 0.48 |
| Q99M28_RNPS1_MOUSE  | Rnps1    | RNA-binding protein wit K.MIDM*PVER@.M                         | 28.86  | 12.88  | 2.24 | 0.45 |
| Q99M28_RNPS1_MOUSE  | Rnps1    | RNA-binding protein wit K.M*IDMPVER.M                          | 34.33  | 15.22  | 2.26 | 0.44 |
| Q99M28_RNPS1_MOUSE  | Rnps1    | RNA-binding protein wit K.M*IDM*PVER@.M                        | 272.49 | 117.97 | 2.31 | 0.43 |
| Q99M28_RNPS1_MOUSE  | Rnps1    | RNA-binding protein wit R.NVTK#DHIM*EIFSTYGG#.I                | 156.69 | 55.11  | 2.84 | 0.35 |
| Q99M28_RNPS1_MOUSE  | Rnps1    | RNA-binding protein wit R.NVTK#DHIMEIFSTYGG#.I                 | 23.12  | 5.85   | 3.95 | 0.25 |
| Q99M28_RNPS1_MOUSE  | Rnps1    | RNA-binding protein wit K.GYAYFENPDEAEK#.A                     | 14.03  | 12.94  | 1.08 | 0.92 |
| Q99M28_RNPS1_MOUSE  | Rnps1    | RNA-binding protein wit K.M*IDM*PVER@.M                        | 6.76   | 7.44   | 0.91 | 1.10 |

|                    |        |                          |                               |         |        |      |      |
|--------------------|--------|--------------------------|-------------------------------|---------|--------|------|------|
| Q99M28_RNPS1_MOUSE | Rnps1  | RNA-binding protein wit  | K.GYAYVEFNPDEAEK#.A           | 8.34    | 3.71   | 2.25 | 0.45 |
| P70336_ROCK2_MOUSE | Rock2  | Rho-associated protein k | R.GAFGEVQLVR@.H               | 10.38   | 11.53  | 0.90 | 1.11 |
| P70336_ROCK2_MOUSE | Rock2  | Rho-associated protein k | K.M*QTQQNTRK#.M               | 5.83    | 1.37   | 4.26 | 0.23 |
| Q8VEE4_RFA1_MOUSE  | Rpa1   | Replication protein A 70 | R.ATAFNEQVDK.F                | 11.74   | 13.77  | 0.85 | 1.17 |
| Q8VEE4_RFA1_MOUSE  | Rpa1   | Replication protein A 70 | R.ATAFNEQVDKFFFLIEVKN.V       | 6.00    | 44.65  | 0.13 | 7.44 |
| Q8VEE4_RFA1_MOUSE  | Rpa1   | Replication protein A 70 | K.EKNEQAFEEVFQANFR.S          | 1.78    | 11.89  | 0.15 | 6.69 |
| Q8VEE4_RFA1_MOUSE  | Rpa1   | Replication protein A 70 | K.SENLQGGDKADYFSTVAAVVFLR.K   | 2.64    | 19.73  | 0.13 | 7.47 |
| Q8VEE4_RFA1_MOUSE  | Rpa1   | Replication protein A 70 | R.SLSVLSSTVIVNPDIPAYK.L       | 1.37    | 5.66   | 0.24 | 4.14 |
| Q8VEE4_RFA1_MOUSE  | Rpa1   | Replication protein A 70 | R.VKLETYNDES.R                | 5.13    | 23.27  | 0.22 | 4.53 |
| Q8VEE4_RFA1_MOUSE  | Rpa1   | Replication protein A 70 | K.VVPIASLTPYQSK.W             | 7.06    | 42.11  | 0.17 | 5.96 |
| Q8VEE4_RFA1_MOUSE  | Rpa1   | Replication protein A 70 | R.ATAFNEQVDKFFFLIEVKN.V       | 25.57   | 27.61  | 0.93 | 1.08 |
| Q8VEE4_RFA1_MOUSE  | Rpa1   | Replication protein A 70 | K.FIVNTLK#.D                  | 17.02   | 18.42  | 0.92 | 1.08 |
| Q8VEE4_RFA1_MOUSE  | Rpa1   | Replication protein A 70 | K.FLSLELVDSEGEIR@.A           | 39.20   | 34.15  | 1.15 | 0.87 |
| Q8VEE4_RFA1_MOUSE  | Rpa1   | Replication protein A 70 | K.NEQAFESVQFNANFR.S           | 5.21    | 6.87   | 0.76 | 1.32 |
| Q8VEE4_RFA1_MOUSE  | Rpa1   | Replication protein A 70 | K.SENLQGGDKADYFSTVAAVVFLR@.K  | 20.80   | 19.48  | 1.07 | 0.94 |
| Q8VEE4_RFA1_MOUSE  | Rpa1   | Replication protein A 70 | R.SLSVLSSTVIVNPDIPAYK#.L      | 5.79    | 8.15   | 0.71 | 1.41 |
| Q8VEE4_RFA1_MOUSE  | Rpa1   | Replication protein A 70 | R.VKLETYNDES.R                | 4.86    | 6.18   | 0.79 | 1.27 |
| Q8VEE4_RFA1_MOUSE  | Rpa1   | Replication protein A 70 | K.VVPIASLTPYQSK.W             | 28.95   | 28.19  | 1.03 | 0.97 |
| Q62193_RFA2_MOUSE  | Rpa2   | Replication protein A 32 | K.APTNIVYK#.I                 | 41.64   | 60.50  | 0.69 | 1.45 |
| Q62193_RFA2_MOUSE  | Rpa2   | Replication protein A 32 | K.IDDM*TAPPM*DVR.Q            | 34.22   | 38.84  | 0.88 | 1.14 |
| Q62193_RFA2_MOUSE  | Rpa2   | Replication protein A 32 | R.IGDVEISQVTVIGIR@.H          | 24.52   | 23.42  | 1.05 | 0.95 |
| Q62193_RFA2_MOUSE  | Rpa2   | Replication protein A 32 | K.IDDM*TAPPM*DVR.Q            | 2.47    | 8.93   | 0.28 | 3.61 |
| Q9CQ71_RFA3_MOUSE  | Rpa3   | Replication protein A 14 | K.EDTNRFDLELYNEAVK.I          | 43.58   | 61.32  | 0.71 | 1.41 |
| Q9CQ71_RFA3_MOUSE  | Rpa3   | Replication protein A 14 | K.EDTNRFDLELYNEAVK.I          | 2.72    | 2.83   | 0.96 | 1.04 |
| Q9CQ71_RFA3_MOUSE  | Rpa3   | Replication protein A 14 | K.M*FISLSDGEGK#.N             | 30.10   | 41.49  | 0.73 | 1.38 |
| Q9CQ71_RFA3_MOUSE  | Rpa3   | Replication protein A 14 | K.NGTIELM*EPLDEEISGIVEVVGK.V  | 7.58    | 9.10   | 0.83 | 1.20 |
| Q9D706_RPAP3_MOUSE | Rpap3  | RNA polymerase II-associ | R.EK#PALIFEVLER@.L            | 24.71   | 9.95   | 2.48 | 0.40 |
| Q9D706_RPAP3_MOUSE | Rpap3  | RNA polymerase II-associ | K.GHWDDVFLDSTQR@.H            | 11.67   | 8.07   | 1.45 | 0.69 |
| Q9D706_RPAP3_MOUSE | Rpap3  | RNA polymerase II-associ | K.GM*DADYNNPVLPTNRR@.A        | 4.96    | 11.15  | 0.45 | 2.25 |
| Q9D706_RPAP3_MOUSE | Rpap3  | RNA polymerase II-associ | K.IEAVDSFAPQAQGVK#.Q          | 22.42   | 8.55   | 2.62 | 0.38 |
| Q9D706_RPAP3_MOUSE | Rpap3  | RNA polymerase II-associ | K.NLDPDVFNQIK#.I              | 18.92   | 14.17  | 1.34 | 0.75 |
| Q9D706_RPAP3_MOUSE | Rpap3  | RNA polymerase II-associ | K.VLELEPDNFENLQVR@.K          | 9.52    | 8.81   | 1.08 | 0.93 |
| Q9J180_RPF2_MOUSE  | Rpf2   | Ribosome production fac  | K.NLLIDFRR@.G                 | 18.60   | 9.55   | 1.95 | 0.51 |
| Q9J180_RPF2_MOUSE  | Rpf2   | Ribosome production fac  | R.IELEEM*GPSLQDLVM*R@.R       | 5.43    | 15.28  | 0.36 | 2.81 |
| Q9J180_RPF2_MOUSE  | Rpf2   | Ribosome production fac  | K.NISQDFTGTTFGR@.J            | 6.17    | 1.86   | 3.32 | 0.30 |
| Q6ZWW3_RL10_MOUSE  | Rpl10  | 60S ribosomal protein L3 | K.FNADFEEDM*VAEK#.R           | 25.32   | 6.61   | 3.83 | 0.26 |
| Q6ZWW3_RL10_MOUSE  | Rpl10  | 60S ribosomal protein L3 | K.DGFHIR@.V                   | 62.43   | 24.05  | 2.60 | 0.39 |
| Q6ZWW3_RL10_MOUSE  | Rpl10  | 60S ribosomal protein L3 | K.FK#PGR@.Q                   | 78.88   | 31.89  | 2.47 | 0.40 |
| Q6ZWW3_RL10_MOUSE  | Rpl10  | 60S ribosomal protein L3 | K.FNADFEEDM*VAEK#.R           | 100.64  | 38.94  | 2.58 | 0.39 |
| Q6ZWW3_RL10_MOUSE  | Rpl10  | 60S ribosomal protein L3 | K.FNADFEEDMVAEK#.R            | 7.11    | 1.81   | 3.93 | 0.25 |
| Q6ZWW3_RL10_MOUSE  | Rpl10  | 60S ribosomal protein L3 | K.FNADFEEDM*VAEK#.R           | 178.09  | 47.03  | 3.79 | 0.26 |
| Q6ZWW3_RL10_MOUSE  | Rpl10  | 60S ribosomal protein L3 | K.FNADFEEDM*VAEK#.L           | 13.17   | 2.11   | 6.25 | 0.16 |
| Q6ZWW3_RL10_MOUSE  | Rpl10  | 60S ribosomal protein L3 | R.GAFGPKQGTVAR.V              | 199.57  | 49.26  | 4.05 | 0.25 |
| Q6ZWW3_RL10_MOUSE  | Rpl10  | 60S ribosomal protein L3 | R.IFDLGR.K                    | 461.83  | 142.32 | 3.24 | 0.31 |
| Q6ZWW3_RL10_MOUSE  | Rpl10  | 60S ribosomal protein L3 | R.VHIGQVIM*SIR@.T             | 228.15  | 61.36  | 3.72 | 0.27 |
| Q6ZWW3_RL10_MOUSE  | Rpl10  | 60S ribosomal protein L3 | R.VHIGQVIM*SIR.T              | 52.07   | 14.04  | 3.71 | 0.27 |
| Q6ZWW3_RL10_MOUSE  | Rpl10  | 60S ribosomal protein L3 | K.DGFHIR@.V                   | 32.80   | 6.55   | 5.01 | 0.20 |
| Q6ZWW3_RL10_MOUSE  | Rpl10  | 60S ribosomal protein L3 | K.FNADFEEDM*VAEK#.R           | 21.27   | 4.46   | 4.77 | 0.21 |
| Q6ZWW3_RL10_MOUSE  | Rpl10  | 60S ribosomal protein L3 | R.IFDLGR.K                    | 104.32  | 23.80  | 4.38 | 0.23 |
| Q6ZWW3_RL10_MOUSE  | Rpl10  | 60S ribosomal protein L3 | R.VHIGQVIM*SIR@.T             | 50.92   | 9.78   | 5.21 | 0.19 |
| Q6ZWW3_RL10_MOUSE  | Rpl10  | 60S ribosomal protein L3 | K.DGFHIR@.V                   | 63.67   | 8.74   | 7.28 | 0.14 |
| Q6ZWW3_RL10_MOUSE  | Rpl10  | 60S ribosomal protein L3 | K.EHVIEALR@.R                 | 31.36   | 8.25   | 3.80 | 0.26 |
| Q6ZWW3_RL10_MOUSE  | Rpl10  | 60S ribosomal protein L3 | K.EHVIEALR@.R@.A              | 16.02   | 3.18   | 5.04 | 0.20 |
| Q6ZWW3_RL10_MOUSE  | Rpl10  | 60S ribosomal protein L3 | K.FNADFEEDM*VAEK#.R           | 36.95   | 9.42   | 3.92 | 0.26 |
| Q6ZWW3_RL10_MOUSE  | Rpl10  | 60S ribosomal protein L3 | R.IFDLGR.K                    | 181.24  | 36.28  | 5.00 | 0.20 |
| P53026_RL10A_MOUSE | Rpl10a | 60S ribosomal protein L3 | K.AGK#FPLSLLTHNENM*VAK#.V     | 164.20  | 34.01  | 4.83 | 0.21 |
| P53026_RL10A_MOUSE | Rpl10a | 60S ribosomal protein L3 | R.DTYEAVR.E                   | 337.23  | 77.69  | 4.34 | 0.23 |
| P53026_RL10A_MOUSE | Rpl10a | 60S ribosomal protein L3 | K.FLETVELQSK#.N               | 8.75    | 2.50   | 3.50 | 0.29 |
| P53026_RL10A_MOUSE | Rpl10a | 60S ribosomal protein L3 | R.ILGPNLKNR.A                 | 413.24  | 113.13 | 3.65 | 0.27 |
| P53026_RL10A_MOUSE | Rpl10a | 60S ribosomal protein L3 | K.K#YDAFLASESLIK#.Q           | 357.35  | 73.34  | 4.87 | 0.21 |
| P53026_RL10A_MOUSE | Rpl10a | 60S ribosomal protein L3 | K.YDAFLASESLIK#.Q             | 41.47   | 11.45  | 3.62 | 0.28 |
| P53026_RL10A_MOUSE | Rpl10a | 60S ribosomal protein L3 | R.DTYEAVR@.E                  | 357.91  | 76.91  | 4.65 | 0.21 |
| P53026_RL10A_MOUSE | Rpl10a | 60S ribosomal protein L3 | K.FLETVELQSK#.N               | 12.50   | 4.71   | 2.66 | 0.38 |
| P53026_RL10A_MOUSE | Rpl10a | 60S ribosomal protein L3 | K.FPSSLTHNENM*VAK#.V          | 21.56   | 4.74   | 4.55 | 0.22 |
| P53026_RL10A_MOUSE | Rpl10a | 60S ribosomal protein L3 | R.ILGPNLKNR.A                 | 1225.65 | 369.36 | 3.32 | 0.30 |
| P53026_RL10A_MOUSE | Rpl10a | 60S ribosomal protein L3 | K.K#YDAFLASESLIK#.Q           | 551.37  | 94.14  | 5.86 | 0.17 |
| P53026_RL10A_MOUSE | Rpl10a | 60S ribosomal protein L3 | K.K#YDAFLASESLIK#.Q           | 231.84  | 48.72  | 4.76 | 0.21 |
| P53026_RL10A_MOUSE | Rpl10a | 60S ribosomal protein L3 | K.VSR@DTLYEAVR@.E             | 19.18   | 5.93   | 3.23 | 0.31 |
| P53026_RL10A_MOUSE | Rpl10a | 60S ribosomal protein L3 | K.VSR@DTLYEAVR@.E             | 2.24    | 1.41   | 1.60 | 0.63 |
| P53026_RL10A_MOUSE | Rpl10a | 60S ribosomal protein L3 | K.YDAFLASESLIK#.Q             | 98.71   | 22.05  | 4.48 | 0.22 |
| P53026_RL10A_MOUSE | Rpl10a | 60S ribosomal protein L3 | R.DTYEAVR@.E                  | 166.35  | 48.39  | 3.44 | 0.29 |
| P53026_RL10A_MOUSE | Rpl10a | 60S ribosomal protein L3 | K.FLETVELQSK#.N               | 7.89    | 2.65   | 2.98 | 0.34 |
| P53026_RL10A_MOUSE | Rpl10a | 60S ribosomal protein L3 | R.ILGPNLKNR.A                 | 337.92  | 108.79 | 3.11 | 0.32 |
| P53026_RL10A_MOUSE | Rpl10a | 60S ribosomal protein L3 | K.K#YDAFLASESLIK#.Q           | 146.15  | 37.88  | 3.86 | 0.26 |
| P53026_RL10A_MOUSE | Rpl10a | 60S ribosomal protein L3 | K.YDAFLASESLIK#.Q             | 14.34   | 2.61   | 5.50 | 0.18 |
| P53026_RL10A_MOUSE | Rpl10a | 60S ribosomal protein L3 | K.AVDIPHM*DIKALK#.K           | 37.80   | 11.29  | 3.35 | 0.30 |
| P53026_RL10A_MOUSE | Rpl10a | 60S ribosomal protein L3 | R.DTYEAVR.E                   | 135.11  | 36.38  | 3.71 | 0.27 |
| P53026_RL10A_MOUSE | Rpl10a | 60S ribosomal protein L3 | R.ILGPNLKNR.A                 | 229.62  | 67.11  | 3.42 | 0.29 |
| P53026_RL10A_MOUSE | Rpl10a | 60S ribosomal protein L3 | K.K#YDAFLASESLIK#.Q           | 147.53  | 42.60  | 3.46 | 0.29 |
| P53026_RL10A_MOUSE | Rpl10a | 60S ribosomal protein L3 | K.YDAFLASESLIK#.Q             | 22.65   | 6.52   | 3.48 | 0.29 |
| Q9CXW4_RL11_MOUSE  | Rpl11  | 60S ribosomal protein L3 | K.VLEQLTGQTPVFSK#.A           | 72.93   | 19.00  | 3.84 | 0.26 |
| Q9CXW4_RL11_MOUSE  | Rpl11  | 60S ribosomal protein L3 | K.YDGIPLGK#-.G                | 73.54   | 25.41  | 2.89 | 0.35 |
| Q9CXW4_RL11_MOUSE  | Rpl11  | 60S ribosomal protein L3 | K.AEIELEK#.G                  | 771.85  | 253.33 | 3.05 | 0.33 |
| Q9CXW4_RL11_MOUSE  | Rpl11  | 60S ribosomal protein L3 | R.GAK#AEIELEK#.G              | 64.94   | 15.63  | 4.16 | 0.24 |
| Q9CXW4_RL11_MOUSE  | Rpl11  | 60S ribosomal protein L3 | R.GAK#AEIELEK#.G              | 77.79   | 23.77  | 3.27 | 0.31 |
| Q9CXW4_RL11_MOUSE  | Rpl11  | 60S ribosomal protein L3 | R.K#NNSFSDTGNFGFGIQEHLDGIK#.Y | 8.84    | 2.88   | 3.07 | 0.33 |
| Q9CXW4_RL11_MOUSE  | Rpl11  | 60S ribosomal protein L3 | K.NNSFSDTGNFGFGIQEHLDGIK#.Y   | 33.52   | 10.29  | 3.26 | 0.31 |
| Q9CXW4_RL11_MOUSE  | Rpl11  | 60S ribosomal protein L3 | K.VLEQLTGQTPVFSK#.A           | 1525.86 | 516.78 | 2.95 | 0.34 |
| Q9CXW4_RL11_MOUSE  | Rpl11  | 60S ribosomal protein L3 | K.VR@EYELR@.K                 | 165.43  | 49.48  | 3.34 | 0.30 |
| Q9CXW4_RL11_MOUSE  | Rpl11  | 60S ribosomal protein L3 | R.WFQKQ.Y                     | 558.54  | 91.62  | 6.10 | 0.16 |
| Q9CXW4_RL11_MOUSE  | Rpl11  | 60S ribosomal protein L3 | K.YDGIPLGK#-.G                | 792.01  | 293.08 | 2.70 | 0.37 |
| Q9CXW4_RL11_MOUSE  | Rpl11  | 60S ribosomal protein L3 | K.AEIELEK#.G                  | 49.89   | 15.40  | 3.24 | 0.31 |
| Q9CXW4_RL11_MOUSE  | Rpl11  | 60S ribosomal protein L3 | K.VLEQLTGQTPVFSK#.A           | 43.61   | 11.51  | 3.79 | 0.26 |
| Q9CXW4_RL11_MOUSE  | Rpl11  | 60S ribosomal protein L3 | K.YDGIPLGK#-.G                | 67.97   | 17.30  | 3.93 | 0.25 |
| Q9CXW4_RL11_MOUSE  | Rpl11  | 60S ribosomal protein L3 | K.VLEQLTGQTPVFSK#.A           | 48.97   | 11.88  | 4.12 | 0.24 |
| P35979_RL12_MOUSE  | Rpl12  | 60S ribosomal protein L3 | K.HSGNITFDEIVNIAR@.Q          | 51.10   | 18.48  | 2.77 | 0.36 |
| P35979_RL12_MOUSE  | Rpl12  | 60S ribosomal protein L3 | R.QAQIEVSPASALIHK#.A          | 51.16   | 22.65  | 2.26 | 0.44 |
| P35979_RL12_MOUSE  | Rpl12  | 60S ribosomal protein L3 | R.ELSGTIK#.E                  | 617.08  | 189.54 | 3.26 | 0.31 |
| P35979_RL12_MOUSE  | Rpl12  | 60S ribosomal protein L3 | K.HSGNITFDEIVNIAR@.Q          | 1037.39 | 266.33 | 3.90 | 0.26 |
| P35979_RL12_MOUSE  | Rpl12  | 60S ribosomal protein L3 | K.HSGNITFDEIVNIAR.Q           | 262.05  | 77.52  | 3.38 | 0.30 |
| P35979_RL12_MOUSE  | Rpl12  | 60S ribosomal protein L3 | K.IGLPLGSPK#.K                | 1913.37 | 566.04 | 3.38 | 0.30 |
| P35979_RL12_MOUSE  | Rpl12  | 60S ribosomal protein L3 | K.K#VGGDIAK#.A                | 462.06  | 125.58 | 3.68 | 0.27 |
| P35979_RL12_MOUSE  | Rpl12  | 60S ribosomal protein L3 | R.QAQIEVSPASALIHK#.A          | 1444.37 | 444.55 | 3.25 | 0.31 |

|                    |        |                                                         |         |        |       |      |
|--------------------|--------|---------------------------------------------------------|---------|--------|-------|------|
| P35979_RL12_MOUSE  | Rpl12  | 60S ribosomal protein L1.K.VGDDIAK#.A                   | 82.25   | 26.77  | 3.07  | 0.33 |
| P35979_RL12_MOUSE  | Rpl12  | 60S ribosomal protein L1.K.HSGNITFDEIVNIAR@.Q           | 64.87   | 18.54  | 3.50  | 0.29 |
| P35979_RL12_MOUSE  | Rpl12  | 60S ribosomal protein L1.R.QAQIEVWPSASALIK#.A           | 37.23   | 9.28   | 4.01  | 0.25 |
| P35979_RL12_MOUSE  | Rpl12  | 60S ribosomal protein L1.K.HSGNITFDEIVNIAR@.Q           | 21.34   | 8.34   | 2.56  | 0.39 |
| P35979_RL12_MOUSE  | Rpl12  | 60S ribosomal protein L1.R.QAQIEVWPSASALIK#.A           | 24.67   | 6.33   | 3.90  | 0.26 |
| P47963_RL13_MOUSE  | Rpl13  | 60S ribosomal protein L1.R.AK#EAAEQDVEK#.K              | 133.20  | 26.14  | 5.10  | 0.20 |
| P47963_RL13_MOUSE  | Rpl13  | 60S ribosomal protein L1.R.AK#EAAEQDVEK#.K              | 314.33  | 66.19  | 4.75  | 0.21 |
| P47963_RL13_MOUSE  | Rpl13  | 60S ribosomal protein L1.K.EAAEQDVEK#.K                 | 242.99  | 57.26  | 4.24  | 0.24 |
| P47963_RL13_MOUSE  | Rpl13  | 60S ribosomal protein L1.K.EAAEQDVEK#.K                 | 6.15    | 2.07   | 2.97  | 0.34 |
| P47963_RL13_MOUSE  | Rpl13  | 60S ribosomal protein L1.R.GFSLLELR@.V                  | 1093.92 | 216.99 | 5.04  | 0.20 |
| P47963_RL13_MOUSE  | Rpl13  | 60S ribosomal protein L1.K.KHGDSAEELK.L                 | 305.82  | 67.24  | 4.55  | 0.22 |
| P47963_RL13_MOUSE  | Rpl13  | 60S ribosomal protein L1.K.KHGDSAEELK#LATQLTGPVMPPIR@.N | 18.06   | 4.21   | 4.29  | 0.23 |
| P47963_RL13_MOUSE  | Rpl13  | 60S ribosomal protein L1.K.LATQLTGPVMPPIR@.N            | 922.78  | 179.23 | 5.15  | 0.19 |
| P47963_RL13_MOUSE  | Rpl13  | 60S ribosomal protein L1.K.LATQLTGPVMPPIR@.N            | 127.06  | 29.57  | 4.30  | 0.23 |
| P47963_RL13_MOUSE  | Rpl13  | 60S ribosomal protein L1.K.STESLQANVQR@.L               | 1537.35 | 301.15 | 5.10  | 0.20 |
| P47963_RL13_MOUSE  | Rpl13  | 60S ribosomal protein L1.R.TIGISVDPR@.R                 | 1266.86 | 238.43 | 5.31  | 0.19 |
| P47963_RL13_MOUSE  | Rpl13  | 60S ribosomal protein L1.R.VDTWVFNQPAR@.K               | 479.63  | 96.77  | 4.96  | 0.20 |
| P47963_RL13_MOUSE  | Rpl13  | 60S ribosomal protein L1.R.VITEEEK#.N                   | 246.78  | 54.96  | 4.49  | 0.22 |
| P47963_RL13_MOUSE  | Rpl13  | 60S ribosomal protein L1.R.AK#EAAEQDVEK#.K              | 24.28   | 6.35   | 3.83  | 0.26 |
| P47963_RL13_MOUSE  | Rpl13  | 60S ribosomal protein L1.K.EAAEQDVEK#.K                 | 42.85   | 8.40   | 5.10  | 0.20 |
| P47963_RL13_MOUSE  | Rpl13  | 60S ribosomal protein L1.R.GFSLLELR@.V                  | 315.87  | 67.48  | 4.68  | 0.21 |
| P47963_RL13_MOUSE  | Rpl13  | 60S ribosomal protein L1.K.KHGDSAEELK.L                 | 40.73   | 12.72  | 3.20  | 0.31 |
| P47963_RL13_MOUSE  | Rpl13  | 60S ribosomal protein L1.K.LATQLTGPVMPPIR@.N            | 367.03  | 78.96  | 4.65  | 0.22 |
| P47963_RL13_MOUSE  | Rpl13  | 60S ribosomal protein L1.K.LILFPR@.K                    | 335.66  | 68.56  | 4.90  | 0.20 |
| P47963_RL13_MOUSE  | Rpl13  | 60S ribosomal protein L1.K.STESLQANVQR@.L               | 275.94  | 55.61  | 4.96  | 0.20 |
| P47963_RL13_MOUSE  | Rpl13  | 60S ribosomal protein L1.R.TIGISVDPR@.R                 | 190.94  | 199.72 | 0.96  | 1.05 |
| P47963_RL13_MOUSE  | Rpl13  | 60S ribosomal protein L1.R.VDTWVFNQPAR@.K               | 152.60  | 34.43  | 4.43  | 0.23 |
| P47963_RL13_MOUSE  | Rpl13  | 60S ribosomal protein L1.R.VITEEEK#.N                   | 44.71   | 12.97  | 3.45  | 0.29 |
| P47963_RL13_MOUSE  | Rpl13  | 60S ribosomal protein L1.R.VITEEKNHFK#.A                | 64.79   | 14.17  | 4.57  | 0.22 |
| P47963_RL13_MOUSE  | Rpl13  | 60S ribosomal protein L1.R.AK#EAAEQDVEK#.K              | 10.51   | 1.25   | 8.39  | 0.12 |
| P47963_RL13_MOUSE  | Rpl13  | 60S ribosomal protein L1.K.EAAEQDVEK#.K                 | 11.22   | 4.18   | 2.68  | 0.37 |
| P47963_RL13_MOUSE  | Rpl13  | 60S ribosomal protein L1.R.GFSLLELR@.V                  | 68.50   | 16.86  | 4.06  | 0.25 |
| P47963_RL13_MOUSE  | Rpl13  | 60S ribosomal protein L1.K.KHGDSAEELK.L                 | 14.97   | 9.28   | 1.61  | 0.62 |
| P47963_RL13_MOUSE  | Rpl13  | 60S ribosomal protein L1.K.LATQLTGPVMPPIR@.N            | 7.86    | 7.66   | 1.03  | 0.98 |
| P47963_RL13_MOUSE  | Rpl13  | 60S ribosomal protein L1.K.STESLQANVQR@.L               | 68.55   | 18.99  | 3.61  | 0.28 |
| P47963_RL13_MOUSE  | Rpl13  | 60S ribosomal protein L1.R.TIGISVDPR@.R                 | 60.06   | 17.78  | 3.38  | 0.30 |
| P47963_RL13_MOUSE  | Rpl13  | 60S ribosomal protein L1.R.VDTWVFNQPAR@.K               | 37.78   | 10.16  | 3.72  | 0.27 |
| P47963_RL13_MOUSE  | Rpl13  | 60S ribosomal protein L1.R.GFSLLELR@.V                  | 46.86   | 12.18  | 3.85  | 0.26 |
| P47963_RL13_MOUSE  | Rpl13  | 60S ribosomal protein L1.K.STESLQANVQR@.L               | 28.48   | 7.32   | 3.89  | 0.26 |
| P19253_RL13A_MOUSE | Rpl13a | 60S ribosomal protein L1.K.FAYLGR@.L                    | 111.22  | 16.02  | 6.94  | 0.14 |
| P19253_RL13A_MOUSE | Rpl13a | 60S ribosomal protein L1.R.M*VVPALK#.V                  | 61.29   | 15.70  | 3.90  | 0.26 |
| P19253_RL13A_MOUSE | Rpl13a | 60S ribosomal protein L1.K.R@GQALER@.L                  | 27.72   | 5.75   | 4.82  | 0.21 |
| P19253_RL13A_MOUSE | Rpl13a | 60S ribosomal protein L1.K.VLDGIPPPYDK#.K               | 16.55   | 4.53   | 3.65  | 0.27 |
| P19253_RL13A_MOUSE | Rpl13a | 60S ribosomal protein L1.R.KHFAYLGR@.L                  | 53.90   | 8.73   | 6.18  | 0.16 |
| P19253_RL13A_MOUSE | Rpl13a | 60S ribosomal protein L1.R.M*VVPALK#.V                  | 227.16  | 18.69  | 12.16 | 0.08 |
| P19253_RL13A_MOUSE | Rpl13a | 60S ribosomal protein L1.R.M*VVPALK#.V                  | 12.83   | 3.96   | 3.24  | 0.31 |
| P19253_RL13A_MOUSE | Rpl13a | 60S ribosomal protein L1.K.VLDGIPPPYDK#.K               | 56.42   | 13.49  | 4.18  | 0.24 |
| P19253_RL13A_MOUSE | Rpl13a | 60S ribosomal protein L1.K.YLAFLR@.K                    | 316.38  | 51.90  | 6.10  | 0.16 |
| P19253_RL13A_MOUSE | Rpl13a | 60S ribosomal protein L1.K.YQAVTATLEEK#.R               | 323.24  | 50.08  | 6.45  | 0.15 |
| P19253_RL13A_MOUSE | Rpl13a | 60S ribosomal protein L1.K.FAYLGR@.L                    | 47.33   | 7.81   | 6.06  | 0.16 |
| P19253_RL13A_MOUSE | Rpl13a | 60S ribosomal protein L1.K.VLDGIPPPYDK#.K               | 9.62    | 2.65   | 3.63  | 0.28 |
| P19253_RL13A_MOUSE | Rpl13a | 60S ribosomal protein L1.K.YQAVTATLEEK#.R               | 81.81   | 13.54  | 6.04  | 0.17 |
| P19253_RL13A_MOUSE | Rpl13a | 60S ribosomal protein L1.K.FAYLGR@.L                    | 69.69   | 11.37  | 6.13  | 0.16 |
| P19253_RL13A_MOUSE | Rpl13a | 60S ribosomal protein L1.K.VLDGIPPPYDK#.K               | 14.42   | 3.61   | 4.00  | 0.25 |
| P19253_RL13A_MOUSE | Rpl13a | 60S ribosomal protein L1.K.YQAVTATLEEK#.R               | 73.43   | 13.59  | 5.40  | 0.19 |
| Q9CR57_RL14_MOUSE  | Rpl14  | 60S ribosomal protein L1.K.AAIAAAAAAAAK#.A              | 786.98  | 143.57 | 5.48  | 0.18 |
| Q9CR57_RL14_MOUSE  | Rpl14  | 60S ribosomal protein L1.K.LVAIVDVIDQNR.A               | 647.74  | 132.79 | 4.88  | 0.20 |
| Q9CR57_RL14_MOUSE  | Rpl14  | 60S ribosomal protein L1.K.M*TFDR@FK#.V                 | 39.31   | 7.97   | 4.93  | 0.20 |
| Q9CR57_RL14_MOUSE  | Rpl14  | 60S ribosomal protein L1.R.YVEVGR@.V                    | 307.05  | 67.30  | 4.56  | 0.22 |
| Q9CR57_RL14_MOUSE  | Rpl14  | 60S ribosomal protein L1.K.AAIAAAAAAAAK#.A              | 1310.34 | 244.85 | 5.35  | 0.19 |
| Q9CR57_RL14_MOUSE  | Rpl14  | 60S ribosomal protein L1.K.LVAIVDVIDQNR@.A              | 1618.26 | 351.37 | 4.61  | 0.22 |
| Q9CR57_RL14_MOUSE  | Rpl14  | 60S ribosomal protein L1.K.M*TFDR@.F                    | 104.66  | 28.77  | 3.64  | 0.27 |
| Q9CR57_RL14_MOUSE  | Rpl14  | 60S ribosomal protein L1.K.M*TFDR@FK#.V                 | 100.03  | 19.35  | 5.17  | 0.19 |
| Q9CR57_RL14_MOUSE  | Rpl14  | 60S ribosomal protein L1.R.R@YVEVGR@.V                  | 111.63  | 21.84  | 5.11  | 0.20 |
| Q9CR57_RL14_MOUSE  | Rpl14  | 60S ribosomal protein L1.R.YVEVGR@.V                    | 585.31  | 122.37 | 4.78  | 0.21 |
| Q9CR57_RL14_MOUSE  | Rpl14  | 60S ribosomal protein L1.K.AAIAAAAAAAAK#.A              | 137.42  | 26.75  | 5.14  | 0.19 |
| Q9CR57_RL14_MOUSE  | Rpl14  | 60S ribosomal protein L1.K.LVAIVDVIDQNR@.A              | 148.81  | 23.27  | 6.39  | 0.16 |
| Q9CR57_RL14_MOUSE  | Rpl14  | 60S ribosomal protein L1.K.AAIAAAAAAAAK#.A              | 102.43  | 9.63   | 10.63 | 0.09 |
| Q9CR57_RL14_MOUSE  | Rpl14  | 60S ribosomal protein L1.K.LVAIVDVIDQNR@.A              | 22.36   | 4.10   | 5.46  | 0.18 |
| Q9CR57_RL14_MOUSE  | Rpl14  | 60S ribosomal protein L1.K.LVAIVDVIDQNR.A               | 141.71  | 23.33  | 6.07  | 0.16 |
| Q9CZM2_RL15_MOUSE  | Rpl15  | 60S ribosomal protein L1.K.FFEVILDPFHK#.A               | 203.76  | 27.94  | 7.29  | 0.14 |
| Q9CZM2_RL15_MOUSE  | Rpl15  | 60S ribosomal protein L1.R.NTLQLHR@.Y                   | 113.86  | 23.00  | 4.95  | 0.20 |
| Q9CZM2_RL15_MOUSE  | Rpl15  | 60S ribosomal protein L1.K.QGYVYR@.I                    | 165.60  | 28.25  | 5.86  | 0.17 |
| Q9CZM2_RL15_MOUSE  | Rpl15  | 60S ribosomal protein L1.R.SLQVAER@.A                   | 432.74  | 64.55  | 6.70  | 0.15 |
| Q9CZM2_RL15_MOUSE  | Rpl15  | 60S ribosomal protein L1.R.VLNSYWVGEDSTYK#.F            | 119.79  | 21.88  | 5.48  | 0.18 |
| Q9CZM2_RL15_MOUSE  | Rpl15  | 60S ribosomal protein L1.K.YIQELWR@.K                   | 159.60  | 31.78  | 5.02  | 0.20 |
| Q9CZM2_RL15_MOUSE  | Rpl15  | 60S ribosomal protein L1.K.FFEVILDPFHK#.A               | 47.46   | 8.61   | 5.51  | 0.18 |
| Q9CZM2_RL15_MOUSE  | Rpl15  | 60S ribosomal protein L1.R.SLQVAER@.A                   | 388.31  | 78.93  | 4.92  | 0.20 |
| Q9CZM2_RL15_MOUSE  | Rpl15  | 60S ribosomal protein L1.R.VLNSYWVGEDSTYK#.F            | 83.16   | 14.84  | 5.60  | 0.18 |
| Q9CZM2_RL15_MOUSE  | Rpl15  | 60S ribosomal protein L1.K.YIQELWR@.K                   | 123.35  | 23.57  | 5.23  | 0.19 |
| Q9CZM2_RL15_MOUSE  | Rpl15  | 60S ribosomal protein L1.K.FFEVILDPFHK#.A               | 257.66  | 40.00  | 6.44  | 0.16 |
| Q9CZM2_RL15_MOUSE  | Rpl15  | 60S ribosomal protein L1.R.NTLQLHR@.Y                   | 127.15  | 20.81  | 6.11  | 0.16 |
| Q9CZM2_RL15_MOUSE  | Rpl15  | 60S ribosomal protein L1.K.QGYVYR@.I                    | 145.75  | 20.99  | 6.94  | 0.14 |
| Q9CZM2_RL15_MOUSE  | Rpl15  | 60S ribosomal protein L1.R.R@NPDTQWITK#PHVK#.H          | 18.14   | 1.62   | 11.20 | 0.09 |
| Q9CZM2_RL15_MOUSE  | Rpl15  | 60S ribosomal protein L1.R.SLQVAER@.A                   | 239.62  | 46.83  | 5.12  | 0.20 |
| Q9CZM2_RL15_MOUSE  | Rpl15  | 60S ribosomal protein L1.R.VLNSYWVGEDSTYK#.F            | 119.23  | 21.47  | 5.55  | 0.18 |
| Q9CZM2_RL15_MOUSE  | Rpl15  | 60S ribosomal protein L1.K.YIQELWR@.K                   | 129.41  | 19.35  | 6.69  | 0.15 |
| Q9CZM2_RL15_MOUSE  | Rpl15  | 60S ribosomal protein L1.K.FFEVILDPFHK#.A               | 25.09   | 8.24   | 3.04  | 0.33 |
| Q9CZM2_RL15_MOUSE  | Rpl15  | 60S ribosomal protein L1.K.GATYKGPVHHGVNQLK.F           | 73.87   | 11.44  | 6.46  | 0.15 |
| Q9CZM2_RL15_MOUSE  | Rpl15  | 60S ribosomal protein L1.R.NTLQLHR@.Y                   | 109.45  | 25.06  | 4.37  | 0.23 |
| Q9CZM2_RL15_MOUSE  | Rpl15  | 60S ribosomal protein L1.R.SLQVAER@.A                   | 241.28  | 47.03  | 5.13  | 0.19 |
| Q9CZM2_RL15_MOUSE  | Rpl15  | 60S ribosomal protein L1.R.VLNSYWVGEDSTYK#.F            | 98.97   | 19.34  | 5.12  | 0.20 |
| Q9CZM2_RL15_MOUSE  | Rpl15  | 60S ribosomal protein L1.K.YIQELWR@.K                   | 107.96  | 17.91  | 6.03  | 0.17 |
| Q9CPR4_RL17_MOUSE  | Rpl17  | 60S ribosomal protein L1.K.NAESNAELK#.G                 | 37.96   | 9.44   | 4.02  | 0.25 |
| Q9CPR4_RL17_MOUSE  | Rpl17  | 60S ribosomal protein L1.K.QWGWVQGR@.W                  | 26.38   | 5.75   | 4.59  | 0.22 |
| Q9CPR4_RL17_MOUSE  | Rpl17  | 60S ribosomal protein L1.R.YSLDPENPTK#.S                | 51.00   | 13.93  | 3.66  | 0.27 |
| Q9CPR4_RL17_MOUSE  | Rpl17  | 60S ribosomal protein L1.R.ETAQAIK#.G                   | 308.75  | 80.80  | 3.82  | 0.26 |
| Q9CPR4_RL17_MOUSE  | Rpl17  | 60S ribosomal protein L1.K.K#SAEFLHLM*LK#.N             | 248.75  | 57.01  | 4.36  | 0.23 |
| Q9CPR4_RL17_MOUSE  | Rpl17  | 60S ribosomal protein L1.K.K#SAEFLHLM*LK#.N             | 56.18   | 14.39  | 3.90  | 0.26 |
| Q9CPR4_RL17_MOUSE  | Rpl17  | 60S ribosomal protein L1.K.NAESNAELK#.G                 | 386.19  | 109.03 | 3.54  | 0.28 |
| Q9CPR4_RL17_MOUSE  | Rpl17  | 60S ribosomal protein L1.K.QWGWVQGR@.W                  | 189.09  | 41.98  | 4.50  | 0.22 |
| Q9CPR4_RL17_MOUSE  | Rpl17  | 60S ribosomal protein L1.K.YLK#DVTLLK#.K                | 74.88   | 16.85  | 4.44  | 0.23 |
| Q9CPR4_RL17_MOUSE  | Rpl17  | 60S ribosomal protein L1.K.YLK#DVTLLK#.K                | 157.44  | 29.38  | 5.36  | 0.19 |

|                    |        |                                                         |         |        |       |      |
|--------------------|--------|---------------------------------------------------------|---------|--------|-------|------|
| Q9CPR4_RL17_MOUSE  | Rpl17  | 60S ribosomal protein L1 R.YSLDPENPTK#.S                | 444.01  | 136.02 | 3.26  | 0.31 |
| Q9CPR4_RL17_MOUSE  | Rpl17  | 60S ribosomal protein L1 R.YSLDPENPTK#.S                | 27.48   | 9.22   | 2.98  | 0.34 |
| Q9CPR4_RL17_MOUSE  | Rpl17  | 60S ribosomal protein L1 K.NAESNAELK#.G                 | 13.91   | 5.07   | 2.75  | 0.36 |
| P35980_RL18_MOUSE  | Rpl18  | 60S ribosomal protein L1 R.GTVLLSGPR@.K                 | 161.79  | 28.46  | 5.68  | 0.18 |
| P35980_RL18_MOUSE  | Rpl18  | 60S ribosomal protein L1 K.ILTFDQALAESPK#.G             | 240.17  | 44.80  | 5.36  | 0.19 |
| P35980_RL18_MOUSE  | Rpl18  | 60S ribosomal protein L1 K.SQDIYLR@.L                   | 99.25   | 16.39  | 6.06  | 0.17 |
| P35980_RL18_MOUSE  | Rpl18  | 60S ribosomal protein L1 K.TAVVVGTVTDDVVR@.I            | 265.10  | 47.28  | 5.61  | 0.18 |
| P35980_RL18_MOUSE  | Rpl18  | 60S ribosomal protein L1 R.TNR@PPLSLSR@.M               | 144.20  | 29.15  | 4.95  | 0.20 |
| P35980_RL18_MOUSE  | Rpl18  | 60S ribosomal protein L1 R.TNSTFNQVVLK#.R               | 81.39   | 116.41 | 0.70  | 1.43 |
| P35980_RL18_MOUSE  | Rpl18  | 60S ribosomal protein L1 R.GTVLLSGPR@.K                 | 319.76  | 53.04  | 6.03  | 0.17 |
| P35980_RL18_MOUSE  | Rpl18  | 60S ribosomal protein L1 K.ILTFDQALAESPK#.G             | 380.01  | 53.46  | 7.11  | 0.14 |
| P35980_RL18_MOUSE  | Rpl18  | 60S ribosomal protein L1 R.R@TNSTFNQVVLK#.R             | 15.32   | 2.00   | 7.68  | 0.13 |
| P35980_RL18_MOUSE  | Rpl18  | 60S ribosomal protein L1 K.SQDIYLR@.L                   | 338.57  | 47.02  | 7.20  | 0.14 |
| P35980_RL18_MOUSE  | Rpl18  | 60S ribosomal protein L1 K.TAVVVGTVTDDVVR@.I            | 504.33  | 80.34  | 6.28  | 0.16 |
| P35980_RL18_MOUSE  | Rpl18  | 60S ribosomal protein L1 R.TNR@PPLSLSR@.M               | 1081.91 | 170.85 | 6.33  | 0.16 |
| P35980_RL18_MOUSE  | Rpl18  | 60S ribosomal protein L1 R.TNSTFNQVVLK#.R               | 256.26  | 39.21  | 6.54  | 0.15 |
| P35980_RL18_MOUSE  | Rpl18  | 60S ribosomal protein L1 K.ILTFDQALAESPK#.G             | 111.53  | 26.16  | 4.26  | 0.23 |
| P35980_RL18_MOUSE  | Rpl18  | 60S ribosomal protein L1 K.TAVVVGTVTDDVVR@.I            | 108.76  | 16.54  | 6.58  | 0.15 |
| P35980_RL18_MOUSE  | Rpl18  | 60S ribosomal protein L1 R.TNSTFNQVVLK#.R               | 31.14   | 22.79  | 1.37  | 0.73 |
| P35980_RL18_MOUSE  | Rpl18  | 60S ribosomal protein L1 R.GTVLLSGPR@.K                 | 59.28   | 13.06  | 4.54  | 0.22 |
| P35980_RL18_MOUSE  | Rpl18  | 60S ribosomal protein L1 K.ILTFDQALAESPK#.G             | 165.17  | 37.59  | 4.39  | 0.23 |
| P35980_RL18_MOUSE  | Rpl18  | 60S ribosomal protein L1 K.SQDIYLR@.L                   | 56.20   | 10.01  | 5.62  | 0.18 |
| P35980_RL18_MOUSE  | Rpl18  | 60S ribosomal protein L1 K.TAVVVGTVTDDVVR@.I            | 103.90  | 16.94  | 6.13  | 0.16 |
| P35980_RL18_MOUSE  | Rpl18  | 60S ribosomal protein L1 R.TNR@PPLSLSR@.M               | 96.07   | 14.41  | 6.67  | 0.15 |
| P35980_RL18_MOUSE  | Rpl18  | 60S ribosomal protein L1 R.TNSTFNQVVLK#.R               | 30.34   | 8.29   | 3.66  | 0.27 |
| P62717_RL18A_MOUSE | Rpl18a | 60S ribosomal protein L1 R.IFAPNHVAK#.S                 | 31.88   | 11.29  | 2.82  | 0.35 |
| P62717_RL18A_MOUSE | Rpl18a | 60S ribosomal protein L1 K.NFGIWR@.Y                    | 71.54   | 14.32  | 5.00  | 0.20 |
| P62717_RL18A_MOUSE | Rpl18a | 60S ribosomal protein L1 K.R@PNTFF.-                    | 54.52   | 12.29  | 4.44  | 0.23 |
| P62717_RL18A_MOUSE | Rpl18a | 60S ribosomal protein L1 R.AHSIQIM*#VVEIIAAGK#.C        | 16.78   | 3.47   | 4.84  | 0.21 |
| P62717_RL18A_MOUSE | Rpl18a | 60S ribosomal protein L1 R.FWYFVSLK#.K                  | 27.53   | 11.32  | 2.43  | 0.41 |
| P62717_RL18A_MOUSE | Rpl18a | 60S ribosomal protein L1 R.FWYFVSLK#.M                  | 12.59   | 2.11   | 5.96  | 0.17 |
| P62717_RL18A_MOUSE | Rpl18a | 60S ribosomal protein L1 K.NFGIWR@.Y                    | 196.65  | 40.09  | 4.91  | 0.20 |
| P62717_RL18A_MOUSE | Rpl18a | 60S ribosomal protein L1 K.R@PNTFF.-                    | 77.67   | 16.87  | 4.60  | 0.22 |
| P62717_RL18A_MOUSE | Rpl18a | 60S ribosomal protein L1 K.VEEIIAAGK#.C                 | 144.14  | 39.92  | 3.61  | 0.28 |
| P62717_RL18A_MOUSE | Rpl18a | 60S ribosomal protein L1 K.NFGIWR@.Y                    | 61.76   | 14.28  | 4.32  | 0.23 |
| P62717_RL18A_MOUSE | Rpl18a | 60S ribosomal protein L1 K.VEEIIAAGK#.C                 | 98.36   | 22.21  | 4.43  | 0.23 |
| P62717_RL18A_MOUSE | Rpl18a | 60S ribosomal protein L1 R.AHSIQIM*#K.V                 | 65.27   | 18.10  | 3.61  | 0.28 |
| P62717_RL18A_MOUSE | Rpl18a | 60S ribosomal protein L1 K.NFGIWR@.Y                    | 119.59  | 23.52  | 5.08  | 0.20 |
| P62717_RL18A_MOUSE | Rpl18a | 60S ribosomal protein L1 K.VEEIIAAGK#.C                 | 174.28  | 38.44  | 4.53  | 0.22 |
| P84099_RL19_MOUSE  | Rpl19  | 60S ribosomal protein L1 R.HMYHSLYLK#.V                 | 26.22   | 3.90   | 6.72  | 0.15 |
| P84099_RL19_MOUSE  | Rpl19  | 60S ribosomal protein L1 R.ILM*EHIIH#.L                 | 34.61   | 5.10   | 6.79  | 0.15 |
| P84099_RL19_MOUSE  | Rpl19  | 60S ribosomal protein L1 K.K#WVLDPNETNEIANANSR@.Q       | 68.85   | 11.46  | 6.01  | 0.17 |
| P84099_RL19_MOUSE  | Rpl19  | 60S ribosomal protein L1 R.LASSVLR@.C                   | 808.27  | 138.09 | 5.85  | 0.17 |
| P84099_RL19_MOUSE  | Rpl19  | 60S ribosomal protein L1 K.LLADQAEAR@.R                 | 1361.08 | 229.22 | 5.94  | 0.17 |
| P84099_RL19_MOUSE  | Rpl19  | 60S ribosomal protein L1 K.TLSK#EETK#K#.-               | 14.98   | 3.90   | 3.85  | 0.26 |
| P84099_RL19_MOUSE  | Rpl19  | 60S ribosomal protein L1 K.VVLDPNETNEIANANSR@.Q         | 240.12  | 38.45  | 6.25  | 0.16 |
| P84099_RL19_MOUSE  | Rpl19  | 60S ribosomal protein L1 R.HMYHSLYLK#.V                 | 11.15   | 2.51   | 4.44  | 0.23 |
| P84099_RL19_MOUSE  | Rpl19  | 60S ribosomal protein L1 R.ILM*EHIIH#.L                 | 29.60   | 4.51   | 6.56  | 0.15 |
| P84099_RL19_MOUSE  | Rpl19  | 60S ribosomal protein L1 K.K#LLADQAEAR@.R               | 35.99   | 5.16   | 6.97  | 0.14 |
| P84099_RL19_MOUSE  | Rpl19  | 60S ribosomal protein L1 K.K#WVLDPNETNEIANANSR@.Q       | 118.85  | 21.09  | 5.64  | 0.18 |
| P84099_RL19_MOUSE  | Rpl19  | 60S ribosomal protein L1 R.LASSVLR@.C                   | 1190.53 | 214.52 | 5.55  | 0.18 |
| P84099_RL19_MOUSE  | Rpl19  | 60S ribosomal protein L1 K.LLADQAEAR@.R                 | 1389.72 | 256.61 | 5.42  | 0.18 |
| P84099_RL19_MOUSE  | Rpl19  | 60S ribosomal protein L1 K.TLSK#EETK#K#.-               | 19.75   | 5.23   | 3.78  | 0.26 |
| P84099_RL19_MOUSE  | Rpl19  | 60S ribosomal protein L1 K.K#HGVNFK#.N                  | 128.86  | 28.64  | 4.50  | 0.22 |
| P84099_RL19_MOUSE  | Rpl19  | 60S ribosomal protein L1 K.VVLDPNETNEIANANSR@.Q         | 220.02  | 40.14  | 5.48  | 0.18 |
| P84099_RL19_MOUSE  | Rpl19  | 60S ribosomal protein L1 K.VVLDPNETNEIANANSR@.Q         | 56.95   | 14.77  | 3.86  | 0.26 |
| P84099_RL19_MOUSE  | Rpl19  | 60S ribosomal protein L1 K.LLADQAEAR@.R                 | 88.89   | 14.53  | 6.12  | 0.16 |
| P84099_RL19_MOUSE  | Rpl19  | 60S ribosomal protein L1 K.VVLDPNETNEIANANSR@.Q         | 14.69   | 2.89   | 5.07  | 0.20 |
| P84099_RL19_MOUSE  | Rpl19  | 60S ribosomal protein L1 K.LLADQAEAR@.R                 | 36.22   | 4.90   | 7.50  | 0.13 |
| P84099_RL19_MOUSE  | Rpl19  | 60S ribosomal protein L1 K.VVLDPNETNEIANANSR@.Q         | 5.02    | 2.13   | 2.35  | 0.42 |
| O09167_RL21_MOUSE  | Rpl21  | 60S ribosomal protein L1 K.GDIVDIK#.G                   | 26.97   | 5.68   | 4.75  | 0.21 |
| O09167_RL21_MOUSE  | Rpl21  | 60S ribosomal protein L1 K.GTWVQLK#.R                   | 51.19   | 11.46  | 4.47  | 0.22 |
| O09167_RL21_MOUSE  | Rpl21  | 60S ribosomal protein L1 K.HGVVPLATYMR@.I               | 12.64   | 4.96   | 2.55  | 0.39 |
| O09167_RL21_MOUSE  | Rpl21  | 60S ribosomal protein L1 K.K#HGVNFK#.N                  | 175.23  | 52.41  | 3.34  | 0.30 |
| O09167_RL21_MOUSE  | Rpl21  | 60S ribosomal protein L1 R.TNGK#PELLEPIPYEFM*#A.-       | 19.57   | 4.86   | 3.29  | 0.30 |
| O09167_RL21_MOUSE  | Rpl21  | 60S ribosomal protein L1 R.TNGK#PELLEPIPYEFM*#A.-       | 9.82    | 2.40   | 4.09  | 0.24 |
| O09167_RL21_MOUSE  | Rpl21  | 60S ribosomal protein L1 R.VYVNTQHAVGIIVN#.Q            | 142.34  | 39.91  | 3.57  | 0.28 |
| O09167_RL21_MOUSE  | Rpl21  | 60S ribosomal protein L1 R.R#DLSK#R@.V                  | 587.45  | 150.74 | 3.90  | 0.26 |
| O09167_RL21_MOUSE  | Rpl21  | 60S ribosomal protein L1 K.K#GTWVQLK#.R                 | 31.62   | 6.45   | 4.90  | 0.20 |
| O09167_RL21_MOUSE  | Rpl21  | 60S ribosomal protein L1 K.GDIVDIK#.G                   | 97.65   | 26.83  | 3.64  | 0.27 |
| O09167_RL21_MOUSE  | Rpl21  | 60S ribosomal protein L1 K.GTWVQLK#.R                   | 270.40  | 54.72  | 4.94  | 0.20 |
| O09167_RL21_MOUSE  | Rpl21  | 60S ribosomal protein L1 K.HGVVPLATYMR@.I               | 114.77  | 27.49  | 4.17  | 0.24 |
| O09167_RL21_MOUSE  | Rpl21  | 60S ribosomal protein L1 K.HGVVPLATYMR@.I               | 34.76   | 8.35   | 4.16  | 0.24 |
| O09167_RL21_MOUSE  | Rpl21  | 60S ribosomal protein L1 R.K#HGVVPLATYMR@.I             | 51.31   | 10.06  | 5.10  | 0.20 |
| O09167_RL21_MOUSE  | Rpl21  | 60S ribosomal protein L1 R.TNGK#PELLEPIPYEFM*#A.-       | 113.76  | 35.95  | 3.16  | 0.32 |
| O09167_RL21_MOUSE  | Rpl21  | 60S ribosomal protein L1 R.VYVNTQHAVGIIVN#.Q            | 762.50  | 219.54 | 3.47  | 0.29 |
| O09167_RL21_MOUSE  | Rpl21  | 60S ribosomal protein L1 R.TNGK#PELLEPIPYEFM*#A.-       | 6.99    | 2.27   | 3.08  | 0.32 |
| O09167_RL21_MOUSE  | Rpl21  | 60S ribosomal protein L1 R.VYVNTQHAVGIIVN#.Q            | 69.35   | 19.78  | 3.51  | 0.29 |
| O09167_RL21_MOUSE  | Rpl21  | 60S ribosomal protein L1 R.VYVNTQHAVGIIVN#.Q            | 32.07   | 13.25  | 2.42  | 0.41 |
| P67984_RL22_MOUSE  | Rpl22  | 60S ribosomal protein L1 K.AGNLGGGVVTIER@.S             | 28.84   | 16.21  | 1.78  | 0.56 |
| P67984_RL22_MOUSE  | Rpl22  | 60S ribosomal protein L1 R.YFQI#NDEEEDEED.-             | 6.61    | 6.61   | 1.00  | 1.00 |
| P67984_RL22_MOUSE  | Rpl22  | 60S ribosomal protein L1 K.AGNLGGGVVTIER@.S             | 400.73  | 172.65 | 2.32  | 0.43 |
| P67984_RL22_MOUSE  | Rpl22  | 60S ribosomal protein L1 K.ESEYLR.Y                     | 121.78  | 59.93  | 2.03  | 0.49 |
| P67984_RL22_MOUSE  | Rpl22  | 60S ribosomal protein L1 K.ITVTSEVPFSK#.R               | 281.34  | 128.01 | 2.20  | 0.45 |
| P67984_RL22_MOUSE  | Rpl22  | 60S ribosomal protein L1 K.SK#ITVTSEVPFSK#.R            | 33.35   | 16.74  | 1.99  | 0.50 |
| P67984_RL22_MOUSE  | Rpl22  | 60S ribosomal protein L1 K.SK#ITVTSEVPFSK#.R            | 13.65   | 8.15   | 1.67  | 0.60 |
| P67984_RL22_MOUSE  | Rpl22  | 60S ribosomal protein L1 R.VVANSK#HESYLR@.Y             | 6.76    | 2.35   | 2.88  | 0.35 |
| P67984_RL22_MOUSE  | Rpl22  | 60S ribosomal protein L1 K.AGNLGGGVVTIER@.S             | 9.75    | 6.16   | 1.58  | 0.63 |
| P67984_RL22_MOUSE  | Rpl22  | 60S ribosomal protein L1 K.AGNLGGGVVTIER@.S             | 6.57    | 2.91   | 2.26  | 0.44 |
| Q9D757_RL22L_MOUSE | Rpl22L | 60S ribosomal protein L1 R.FHLDLHPVEDIGDFSGNFEQFLR@.E   | 55.00   | 3.76   | 14.62 | 0.07 |
| Q9D757_RL22L_MOUSE | Rpl22L | 60S ribosomal protein L1 K.TGNLGNV#HIER@.L              | 85.53   | 18.16  | 4.71  | 0.21 |
| Q9D757_RL22L_MOUSE | Rpl22L | 60S ribosomal protein L1 R.VVANSK#HETYL#R@.Y            | 11.03   | 1.49   | 7.42  | 0.13 |
| P62830_RL23_MOUSE  | Rpl23  | 60S ribosomal protein L1 K.GSAIT#PVAK#.E                | 16.93   | 5.59   | 3.03  | 0.33 |
| P62830_RL23_MOUSE  | Rpl23  | 60S ribosomal protein L1 R.LPAAGVGDM*#VM*ATVK#.K        | 15.65   | 6.92   | 2.26  | 0.44 |
| P62830_RL23_MOUSE  | Rpl23  | 60S ribosomal protein L1 K.NLVIYSK#.G                   | 21.24   | 12.35  | 1.72  | 0.58 |
| P62830_RL23_MOUSE  | Rpl23  | 60S ribosomal protein L1 K.DGVFLYFEDNAGVIVN#.K#GEM*#K.G | 13.05   | 6.51   | 2.00  | 0.50 |
| P62830_RL23_MOUSE  | Rpl23  | 60S ribosomal protein L1 K.GSAIT#PVAK#.E                | 208.97  | 110.28 | 1.89  | 0.53 |
| P62830_RL23_MOUSE  | Rpl23  | 60S ribosomal protein L1 R.LNRL#PAAGVGDM*#VM*ATVK#.K    | 219.91  | 87.10  | 2.52  | 0.40 |
| P62830_RL23_MOUSE  | Rpl23  | 60S ribosomal protein L1 R.LNRL#PAAGVGDM*#VM*ATVK#.K    | 7.59    | 3.25   | 2.34  | 0.43 |
| P62830_RL23_MOUSE  | Rpl23  | 60S ribosomal protein L1 R.LNR@LPAAGVGDM#VM*ATVK#.K     | 7.28    | 3.22   | 2.26  | 0.44 |
| P62830_RL23_MOUSE  | Rpl23  | 60S ribosomal protein L1 R.LPAAGVGDM*#VM*ATVK#.K        | 243.87  | 102.26 | 2.38  | 0.42 |
| P62830_RL23_MOUSE  | Rpl23  | 60S ribosomal protein L1 R.LPAAGVGDM#VM*ATVK#.K         | 11.37   | 4.66   | 2.44  | 0.41 |
| P62830_RL23_MOUSE  | Rpl23  | 60S ribosomal protein L1 R.LPAAGVGDM#VM*ATVK#.K         | 11.29   | 4.20   | 2.69  | 0.37 |

|                    |        |                                                         |         |        |      |      |
|--------------------|--------|---------------------------------------------------------|---------|--------|------|------|
| P62830_RL23_MOUSE  | Rpl23  | 60S ribosomal protein L; K.NLVIIVK#.G                   | 442.73  | 161.66 | 2.74 | 0.37 |
| P62830_RL23_MOUSE  | Rpl23  | 60S ribosomal protein L; R.R.#K#DGVLFYEDNAGVIVNNK#.G    | 17.17   | 4.53   | 3.79 | 0.26 |
| P62830_RL23_MOUSE  | Rpl23  | 60S ribosomal protein L; R.LP#AGVGDGM*VM*ATVK#.K        | 11.91   | 6.77   | 1.76 | 0.57 |
| P62830_RL23_MOUSE  | Rpl23  | 60S ribosomal protein L; R.LP#AAGVGDGM*VM*ATVK#.K       | 7.31    | 4.27   | 1.71 | 0.58 |
| P62751_RL23A_MOUSE | Rpl23a | 60S ribosomal protein L; K.FPLTTESAM*#K.K               | 11.73   | 2.49   | 4.72 | 0.21 |
| P62751_RL23A_MOUSE | Rpl23a | 60S ribosomal protein L; K.IEDNNTLVFIVDVK#.A            | 8.21    | 1.13   | 7.25 | 0.14 |
| P62751_RL23A_MOUSE | Rpl23a | 60S ribosomal protein L; K.K#HEDYDIDVAK#.V              | 27.46   | 4.90   | 5.60 | 0.18 |
| P62751_RL23A_MOUSE | Rpl23a | 60S ribosomal protein L; R.LAPDYDALDVANK#.I             | 38.21   | 24.21  | 1.58 | 0.63 |
| P62751_RL23A_MOUSE | Rpl23a | 60S ribosomal protein L; K.EAPAPP#AEAK#.A               | 235.96  | 45.45  | 5.19 | 0.19 |
| P62751_RL23A_MOUSE | Rpl23a | 60S ribosomal protein L; K.FPLTTESAM*#K.K               | 237.43  | 51.52  | 4.61 | 0.22 |
| P62751_RL23A_MOUSE | Rpl23a | 60S ribosomal protein L; K.FPLTTESAM#.K                 | 35.71   | 7.53   | 4.74 | 0.21 |
| P62751_RL23A_MOUSE | Rpl23a | 60S ribosomal protein L; K.FPLTTESAM*#K#.I              | 227.40  | 53.16  | 4.28 | 0.23 |
| P62751_RL23A_MOUSE | Rpl23a | 60S ribosomal protein L; K.IEDNNTLVFIVDVK#.A            | 95.27   | 20.87  | 4.56 | 0.22 |
| P62751_RL23A_MOUSE | Rpl23a | 60S ribosomal protein L; K.K#EAPAPP#K#.A                | 30.89   | 9.64   | 3.20 | 0.31 |
| P62751_RL23A_MOUSE | Rpl23a | 60S ribosomal protein L; K.K#EAPAPP#K#AEAK#.A           | 342.07  | 57.07  | 5.99 | 0.17 |
| P62751_RL23A_MOUSE | Rpl23a | 60S ribosomal protein L; K.K#IEDNNTLVFIVDVK#.A          | 291.36  | 45.23  | 6.44 | 0.16 |
| P62751_RL23A_MOUSE | Rpl23a | 60S ribosomal protein L; K.K#LYDIDVAK#.V                | 498.86  | 96.03  | 5.20 | 0.19 |
| P62751_RL23A_MOUSE | Rpl23a | 60S ribosomal protein L; R.LAPDYDALDVANK#.I             | 2195.93 | 413.27 | 5.31 | 0.19 |
| P62751_RL23A_MOUSE | Rpl23a | 60S ribosomal protein L; R.LAPDYDALDVANK#GIL.-          | 8.46    | 2.81   | 3.01 | 0.33 |
| P62751_RL23A_MOUSE | Rpl23a | 60S ribosomal protein L; K.LDHYAIK#.F                   | 70.55   | 15.21  | 4.64 | 0.22 |
| P62751_RL23A_MOUSE | Rpl23a | 60S ribosomal protein L; K.LYDIDVAK#.V                  | 836.39  | 167.08 | 5.01 | 0.20 |
| P62751_RL23A_MOUSE | Rpl23a | 60S ribosomal protein L; R.NK#LDHYAIK#.F                | 314.66  | 52.31  | 6.02 | 0.17 |
| P62751_RL23A_MOUSE | Rpl23a | 60S ribosomal protein L; R.NK#LDHYAIK#FPLTTESAM#.K      | 9.78    | 3.55   | 2.75 | 0.36 |
| P62751_RL23A_MOUSE | Rpl23a | 60S ribosomal protein L; K.VNLTIR#PDGEK#.K              | 681.73  | 127.33 | 5.35 | 0.19 |
| P62751_RL23A_MOUSE | Rpl23a | 60S ribosomal protein L; K.VNLTIR#PDGEK#.A              | 131.47  | 22.58  | 5.82 | 0.17 |
| Q8BP67_RL24_MOUSE  | Rpl24  | 60S ribosomal protein L; R.AITGASLADIM*AK#.R            | 71.65   | 16.88  | 4.25 | 0.24 |
| Q8BP67_RL24_MOUSE  | Rpl24  | 60S ribosomal protein L; R.AITGASLADIMAK#.R             | 8.61    | 2.03   | 4.23 | 0.24 |
| Q8BP67_RL24_MOUSE  | Rpl24  | 60S ribosomal protein L; R.QJNWTLYR@.R                  | 58.15   | 12.63  | 4.60 | 0.22 |
| Q8BP67_RL24_MOUSE  | Rpl24  | 60S ribosomal protein L; K.VFQFLNAK#.C                  | 42.89   | 9.22   | 4.65 | 0.21 |
| Q8BP67_RL24_MOUSE  | Rpl24  | 60S ribosomal protein L; R.AITGASLADIM*AK#.R            | 915.48  | 207.29 | 4.42 | 0.23 |
| Q8BP67_RL24_MOUSE  | Rpl24  | 60S ribosomal protein L; R.AITGASLADIMAK#.R             | 99.97   | 23.84  | 4.19 | 0.24 |
| Q8BP67_RL24_MOUSE  | Rpl24  | 60S ribosomal protein L; K.GQSEIQK#.K                   | 74.60   | 20.52  | 3.64 | 0.28 |
| Q8BP67_RL24_MOUSE  | Rpl24  | 60S ribosomal protein L; K.K#GQSEIQK#.K                 | 34.23   | 8.63   | 3.96 | 0.25 |
| Q8BP67_RL24_MOUSE  | Rpl24  | 60S ribosomal protein L; R.QJNWTLYR@.R                  | 684.62  | 162.65 | 4.21 | 0.24 |
| Q8BP67_RL24_MOUSE  | Rpl24  | 60S ribosomal protein L; K.VFQFLNAK#.C                  | 907.55  | 233.87 | 3.88 | 0.26 |
| Q8BP67_RL24_MOUSE  | Rpl24  | 60S ribosomal protein L; R.AITGASLADIM*AK#.R            | 41.44   | 24.56  | 1.69 | 0.59 |
| Q8BP67_RL24_MOUSE  | Rpl24  | 60S ribosomal protein L; R.QJNWTLYR@.R                  | 16.71   | 4.57   | 3.66 | 0.27 |
| Q8BP67_RL24_MOUSE  | Rpl24  | 60S ribosomal protein L; K.VFQFLNAK#.C                  | 25.58   | 5.35   | 4.78 | 0.21 |
| Q8BP67_RL24_MOUSE  | Rpl24  | 60S ribosomal protein L; R.AITGASLADIM*AK#.R            | 21.76   | 7.84   | 2.77 | 0.36 |
| Q8BP67_RL24_MOUSE  | Rpl24  | 60S ribosomal protein L; K.VFQFLNAK#.C                  | 15.30   | 3.58   | 4.27 | 0.23 |
| P61255_RL26_MOUSE  | Rpl26  | 60S ribosomal protein L; K.DDVEQVVR@.G                  | 36.96   | 9.92   | 3.72 | 0.27 |
| P61255_RL26_MOUSE  | Rpl26  | 60S ribosomal protein L; R.HFNAPSHR@.R                  | 94.11   | 36.12  | 2.61 | 0.38 |
| P61255_RL26_MOUSE  | Rpl26  | 60S ribosomal protein L; K.YK#EETIEK#.M                 | 8.19    | 3.64   | 2.25 | 0.44 |
| P61255_RL26_MOUSE  | Rpl26  | 60S ribosomal protein L; K.YVYIER@.V                    | 48.43   | 9.89   | 4.90 | 0.20 |
| P61255_RL26_MOUSE  | Rpl26  | 60S ribosomal protein L; K.DDVEQVVR@.G                  | 695.83  | 200.44 | 3.47 | 0.29 |
| P61255_RL26_MOUSE  | Rpl26  | 60S ribosomal protein L; K.FNPFVTSDR@.S                 | 581.89  | 169.71 | 3.43 | 0.29 |
| P61255_RL26_MOUSE  | Rpl26  | 60S ribosomal protein L; K.GKYKEETIEK.M                 | 19.01   | 6.81   | 2.79 | 0.36 |
| P61255_RL26_MOUSE  | Rpl26  | 60S ribosomal protein L; R.HFNAPSHR@.R                  | 50.57   | 11.15  | 4.54 | 0.22 |
| P61255_RL26_MOUSE  | Rpl26  | 60S ribosomal protein L; R.HFNAPSHR@.R                  | 1089.17 | 269.58 | 4.04 | 0.25 |
| P61255_RL26_MOUSE  | Rpl26  | 60S ribosomal protein L; K.IM*SSPLSK#.E                 | 426.64  | 124.41 | 3.43 | 0.29 |
| P61255_RL26_MOUSE  | Rpl26  | 60S ribosomal protein L; R.K#DDVEQVVR@.G                | 280.45  | 81.79  | 3.43 | 0.29 |
| P61255_RL26_MOUSE  | Rpl26  | 60S ribosomal protein L; R.KDDEQVVR@.G                  | 291.44  | 79.70  | 3.66 | 0.27 |
| P61255_RL26_MOUSE  | Rpl26  | 60S ribosomal protein L; R.K#HMSPLSK#.E                 | 14.97   | 6.57   | 2.28 | 0.44 |
| P61255_RL26_MOUSE  | Rpl26  | 60S ribosomal protein L; R.KIM*SSPLSK#.E                | 649.45  | 169.06 | 3.84 | 0.26 |
| P61255_RL26_MOUSE  | Rpl26  | 60S ribosomal protein L; K.K#YVYIER@.V                  | 139.89  | 40.40  | 3.46 | 0.29 |
| P61255_RL26_MOUSE  | Rpl26  | 60S ribosomal protein L; R.LK#LDK#HDR@.K                | 109.10  | 34.96  | 3.12 | 0.32 |
| P61255_RL26_MOUSE  | Rpl26  | 60S ribosomal protein L; -.M*#K#FNPFVTSDR@.S            | 298.32  | 72.08  | 4.14 | 0.24 |
| P61255_RL26_MOUSE  | Rpl26  | 60S ribosomal protein L; K.VVQYR@.K                     | 1703.77 | 448.86 | 3.80 | 0.26 |
| P61255_RL26_MOUSE  | Rpl26  | 60S ribosomal protein L; K.YK#EETIEK#.M                 | 358.29  | 92.72  | 3.86 | 0.26 |
| P61255_RL26_MOUSE  | Rpl26  | 60S ribosomal protein L; K.YK#EETIEK#M*QE.-             | 93.84   | 28.07  | 3.34 | 0.30 |
| P61255_RL26_MOUSE  | Rpl26  | 60S ribosomal protein L; K.YVYIER@.V                    | 1368.79 | 402.85 | 3.40 | 0.29 |
| P61358_RL27_MOUSE  | Rpl27  | 60S ribosomal protein L; K.VVLAAGR@.Y                   | 12.29   | 3.75   | 3.28 | 0.31 |
| P61358_RL27_MOUSE  | Rpl27  | 60S ribosomal protein L; R.YSVDIPLDK#.T                 | 16.13   | 5.27   | 3.06 | 0.33 |
| P61358_RL27_MOUSE  | Rpl27  | 60S ribosomal protein L; K.DVFR@DPALK#.R                | 81.05   | 25.55  | 3.17 | 0.32 |
| P61358_RL27_MOUSE  | Rpl27  | 60S ribosomal protein L; K.NIDDSGDR@PYSHALVAGIDR@.Y     | 12.65   | 19.54  | 3.72 | 0.27 |
| P61358_RL27_MOUSE  | Rpl27  | 60S ribosomal protein L; K.NIDDSGDR@PYSHALVAGIDR@YPR@.K | 29.82   | 8.47   | 3.52 | 0.28 |
| P61358_RL27_MOUSE  | Rpl27  | 60S ribosomal protein L; K.NK#WFFQK#.L                  | 63.40   | 13.65  | 4.64 | 0.22 |
| P61358_RL27_MOUSE  | Rpl27  | 60S ribosomal protein L; K.TVNV#D#VFR@.D                | 21.12   | 5.97   | 3.54 | 0.28 |
| P61358_RL27_MOUSE  | Rpl27  | 60S ribosomal protein L; K.TVNV#D#VFR@DPALK#.R          | 4.86    | 2.16   | 2.25 | 0.44 |
| P61358_RL27_MOUSE  | Rpl27  | 60S ribosomal protein L; K.VK#FEER@.Y                   | 231.02  | 48.50  | 4.76 | 0.21 |
| P61358_RL27_MOUSE  | Rpl27  | 60S ribosomal protein L; K.VVLAAGR@.Y                   | 2719.79 | 734.53 | 3.70 | 0.27 |
| P61358_RL27_MOUSE  | Rpl27  | 60S ribosomal protein L; K.VVNVN#M*PTR.Y                | 108.03  | 26.62  | 4.06 | 0.25 |
| P61358_RL27_MOUSE  | Rpl27  | 60S ribosomal protein L; R.YSVDIPLDK#.T                 | 1527.18 | 451.51 | 3.38 | 0.30 |
| P14115_RL27A_MOUSE | Rpl27a | 60S ribosomal protein L; K.LWTLVSEQTR@.V                | 7.95    | 3.32   | 2.40 | 0.42 |
| P14115_RL27A_MOUSE | Rpl27a | 60S ribosomal protein L; K.TGVAPIIDVVR@.S               | 124.63  | 29.59  | 4.21 | 0.24 |
| P14115_RL27A_MOUSE | Rpl27a | 60S ribosomal protein L; R.INFDK#YH#YFGK#.V             | 61.01   | 16.85  | 3.62 | 0.28 |
| P14115_RL27A_MOUSE | Rpl27a | 60S ribosomal protein L; K.LWTLVSEQTR@.V                | 146.92  | 45.19  | 3.25 | 0.31 |
| P14115_RL27A_MOUSE | Rpl27a | 60S ribosomal protein L; K.NK#TGAPIIDVVR@.S             | 100.23  | 23.21  | 4.32 | 0.23 |
| P14115_RL27A_MOUSE | Rpl27a | 60S ribosomal protein L; K.NKTGVAPIIDVVR@.S             | 15.75   | 4.66   | 3.38 | 0.30 |
| P14115_RL27A_MOUSE | Rpl27a | 60S ribosomal protein L; K.TGVAPIIDVVR@.S               | 2078.33 | 580.81 | 3.58 | 0.28 |
| P14115_RL27A_MOUSE | Rpl27a | 60S ribosomal protein L; K.LWTLVSEQTR@.V                | 9.05    | 2.14   | 4.24 | 0.24 |
| P14115_RL27A_MOUSE | Rpl27a | 60S ribosomal protein L; K.TGVAPIIDVVR@.S               | 66.39   | 12.93  | 5.14 | 0.19 |
| P14115_RL27A_MOUSE | Rpl27a | 60S ribosomal protein L; K.TGVAPIIDVVR@.S               | 40.03   | 10.11  | 3.96 | 0.25 |
| P41105_RL28_MOUSE  | Rpl28  | 60S ribosomal protein L; K.GVVVM*#K#.R                  | 107.21  | 22.98  | 4.67 | 0.21 |
| P41105_RL28_MOUSE  | Rpl28  | 60S ribosomal protein L; R.K#TVGVEPAADGK#.G             | 19.01   | 5.70   | 3.33 | 0.30 |
| P41105_RL28_MOUSE  | Rpl28  | 60S ribosomal protein L; R.NK#QYSTEPN#K#.A              | 29.27   | 4.60   | 6.37 | 0.16 |
| P41105_RL28_MOUSE  | Rpl28  | 60S ribosomal protein L; K.QYSTEPN#K#.A                 | 19.17   | 23.29  | 4.17 | 0.24 |
| P41105_RL28_MOUSE  | Rpl28  | 60S ribosomal protein L; K.TVGVPEAADGK#.G               | 201.23  | 36.99  | 5.44 | 0.18 |
| P41105_RL28_MOUSE  | Rpl28  | 60S ribosomal protein L; R.ATLSIR.H                     | 1051.82 | 186.54 | 5.64 | 0.18 |
| P41105_RL28_MOUSE  | Rpl28  | 60S ribosomal protein L; K.GVVVM#K#.R                   | 40.14   | 8.16   | 4.92 | 0.20 |
| P41105_RL28_MOUSE  | Rpl28  | 60S ribosomal protein L; K.GVVVM*#K#.R                  | 324.65  | 73.56  | 4.41 | 0.23 |
| P41105_RL28_MOUSE  | Rpl28  | 60S ribosomal protein L; R.K#P#TVGVEPAADGK#.G           | 289.19  | 52.37  | 5.52 | 0.18 |
| P41105_RL28_MOUSE  | Rpl28  | 60S ribosomal protein L; R.NK#QYSTEPN#K#.A              | 204.47  | 38.01  | 5.38 | 0.19 |
| P41105_RL28_MOUSE  | Rpl28  | 60S ribosomal protein L; K.QYSTEPN#K#.A                 | 286.23  | 63.24  | 4.53 | 0.22 |
| P41105_RL28_MOUSE  | Rpl28  | 60S ribosomal protein L; R.RASAILR.S                    | 293.57  | 66.37  | 4.42 | 0.23 |
| P41105_RL28_MOUSE  | Rpl28  | 60S ribosomal protein L; R.SQ#P#V#K#.R                  | 101.51  | 29.10  | 3.49 | 0.29 |
| P41105_RL28_MOUSE  | Rpl28  | 60S ribosomal protein L; K.TVGVPEAADGK#.G               | 531.46  | 106.22 | 5.00 | 0.20 |
| P41105_RL28_MOUSE  | Rpl28  | 60S ribosomal protein L; R.YNGLIHR@.K                   | 33.09   | 10.16  | 3.26 | 0.31 |
| P41105_RL28_MOUSE  | Rpl28  | 60S ribosomal protein L; K.YR@PDLR@.M                   | 458.64  | 100.22 | 4.58 | 0.22 |
| P41105_RL28_MOUSE  | Rpl28  | 60S ribosomal protein L; K.TVGVPEAADGK#.G               | 39.94   | 9.87   | 4.05 | 0.25 |
| P41105_RL28_MOUSE  | Rpl28  | 60S ribosomal protein L; K.QYSTEPN#K#.A                 | 17.46   | 3.91   | 4.46 | 0.22 |
| P41105_RL28_MOUSE  | Rpl28  | 60S ribosomal protein L; K.TVGVPEAADGK#.G               | 41.65   | 7.43   | 5.60 | 0.18 |
| P47915_RL29_MOUSE  | Rpl29  | 60S ribosomal protein L; K.AQASAPAAQPK#.G               | 207.22  | 36.64  | 5.66 | 0.18 |

|                    |        |                                                             |         |        |       |      |
|--------------------|--------|-------------------------------------------------------------|---------|--------|-------|------|
| P47915_RL29_MOUSE  | Rpl29  | 60S ribosomal protein L: K.GAQPVK#HAP.-                     | 165.07  | 31.47  | 5.24  | 0.19 |
| P47915_RL29_MOUSE  | Rpl29  | 60S ribosomal protein L: R.LAFIAHPK#L                       | 50.14   | 8.87   | 5.65  | 0.18 |
| P47915_RL29_MOUSE  | Rpl29  | 60S ribosomal protein L: K.AQASAPAQAPK#G                    | 842.73  | 181.43 | 4.64  | 0.22 |
| P47915_RL29_MOUSE  | Rpl29  | 60S ribosomal protein L: K.GAQPVK#HAP.-                     | 748.57  | 128.56 | 5.82  | 0.17 |
| P47915_RL29_MOUSE  | Rpl29  | 60S ribosomal protein L: R.LAFIAHPK#L                       | 371.68  | 46.76  | 7.95  | 0.13 |
| P47915_RL29_MOUSE  | Rpl29  | 60S ribosomal protein L: K.AQASAPAQAPK#G                    | 64.80   | 13.40  | 4.83  | 0.21 |
| P47915_RL29_MOUSE  | Rpl29  | 60S ribosomal protein L: R.LAFIAHPK#L                       | 16.00   | 5.19   | 3.08  | 0.32 |
| P47915_RL29_MOUSE  | Rpl29  | 60S ribosomal protein L: K.AQASAPAQAPK#G                    | 30.54   | 11.59  | 2.64  | 0.38 |
| P47915_RL29_MOUSE  | Rpl29  | 60S ribosomal protein L: R.LAFIAHPK#L                       | 10.49   | 5.09   | 2.06  | 0.49 |
| P27659_RL3_MOUSE   | Rpl3   | 60S ribosomal protein L: K.AFM*GPLK#K#D                     | 55.10   | 14.69  | 3.75  | 0.27 |
| P27659_RL3_MOUSE   | Rpl3   | 60S ribosomal protein L: K.AGM*THIVR@.E                     | 27.39   | 6.55   | 4.18  | 0.24 |
| P27659_RL3_MOUSE   | Rpl3   | 60S ribosomal protein L: K.AHLM*EQVNGGTVAEK#L               | 41.86   | 13.60  | 3.08  | 0.32 |
| P27659_RL3_MOUSE   | Rpl3   | 60S ribosomal protein L: K.DDASKHPVHLTAFGLYK#A              | 183.96  | 50.19  | 3.67  | 0.27 |
| P27659_RL3_MOUSE   | Rpl3   | 60S ribosomal protein L: R.ER@LEQQVPPVNVQVFGQDEM*IDVIGVTK#G | 212.25  | 44.61  | 4.76  | 0.21 |
| P27659_RL3_MOUSE   | Rpl3   | 60S ribosomal protein L: R.ER@LEQQVPPVNVQVFGQDEM*IDVIGVTK#G | 41.52   | 11.01  | 3.77  | 0.27 |
| P27659_RL3_MOUSE   | Rpl3   | 60S ribosomal protein L: K.FIDTTSK#.F                       | 330.95  | 71.51  | 4.63  | 0.22 |
| P27659_RL3_MOUSE   | Rpl3   | 60S ribosomal protein L: R.HGSLGFLPR@.K                     | 490.80  | 118.57 | 3.63  | 0.28 |
| P27659_RL3_MOUSE   | Rpl3   | 60S ribosomal protein L: K.IGQGYLIK#D                       | 612.84  | 144.72 | 4.23  | 0.24 |
| P27659_RL3_MOUSE   | Rpl3   | 60S ribosomal protein L: R.IIAHTQM*#R@.L                    | 55.05   | 13.60  | 4.05  | 0.25 |
| P27659_RL3_MOUSE   | Rpl3   | 60S ribosomal protein L: K.K#AHLM*EQVNGGTVAEK#L             | 16.16   | 3.84   | 4.20  | 0.24 |
| P27659_RL3_MOUSE   | Rpl3   | 60S ribosomal protein L: R.K#HSLVQITK#R                     | 148.98  | 41.00  | 3.63  | 0.28 |
| P27659_RL3_MOUSE   | Rpl3   | 60S ribosomal protein L: R.LEQQVPPVNVQVFGQDEM*IDVIGVTK#G    | 180.32  | 42.09  | 4.28  | 0.23 |
| P27659_RL3_MOUSE   | Rpl3   | 60S ribosomal protein L: R.LEQQVPPVNVQVFGQDEM*IDVIGVTK#G    | 47.03   | 11.25  | 4.18  | 0.24 |
| P27659_RL3_MOUSE   | Rpl3   | 60S ribosomal protein L: K.NNASTDYLSDK#S                    | 269.88  | 78.15  | 3.45  | 0.29 |
| P27659_RL3_MOUSE   | Rpl3   | 60S ribosomal protein L: K.SINPLGGFVHYGEVNTDFIM#LK#G        | 282.75  | 66.36  | 4.26  | 0.23 |
| P27659_RL3_MOUSE   | Rpl3   | 60S ribosomal protein L: K.SINPLGGFVHYGEVNTDFIM#LK#G        | 95.55   | 21.86  | 4.37  | 0.23 |
| P27659_RL3_MOUSE   | Rpl3   | 60S ribosomal protein L: R.VAFSVAR@.A                       | 494.80  | 116.81 | 4.24  | 0.24 |
| P27659_RL3_MOUSE   | Rpl3   | 60S ribosomal protein L: K.AFM*GPLK#K#D                     | 28.17   | 6.73   | 4.19  | 0.24 |
| P27659_RL3_MOUSE   | Rpl3   | 60S ribosomal protein L: K.AHLM*EQVNGGTVAEK#L               | 19.93   | 5.21   | 3.83  | 0.26 |
| P27659_RL3_MOUSE   | Rpl3   | 60S ribosomal protein L: K.DDASKHPVHLTAFGLYK#A              | 122.56  | 22.31  | 5.49  | 0.18 |
| P27659_RL3_MOUSE   | Rpl3   | 60S ribosomal protein L: R.ER@LEQQVPPVNVQVFGQDEM*IDVIGVTK#G | 89.80   | 14.42  | 6.23  | 0.16 |
| P27659_RL3_MOUSE   | Rpl3   | 60S ribosomal protein L: R.ER@LEQQVPPVNVQVFGQDEM*IDVIGVTK#G | 16.38   | 2.36   | 6.95  | 0.14 |
| P27659_RL3_MOUSE   | Rpl3   | 60S ribosomal protein L: K.FIDTTSK#.F                       | 174.31  | 29.49  | 5.91  | 0.17 |
| P27659_RL3_MOUSE   | Rpl3   | 60S ribosomal protein L: R.HGSLGFLPR@.K                     | 194.67  | 34.79  | 5.60  | 0.18 |
| P27659_RL3_MOUSE   | Rpl3   | 60S ribosomal protein L: K.IGQGYLIK#D                       | 232.15  | 53.91  | 4.31  | 0.23 |
| P27659_RL3_MOUSE   | Rpl3   | 60S ribosomal protein L: K.K#AHLM*EQVNGGTVAEK#L             | 5.61    | 26.20  | 0.21  | 4.67 |
| P27659_RL3_MOUSE   | Rpl3   | 60S ribosomal protein L: R.K#HSLVQITK#R                     | 44.10   | 10.90  | 4.04  | 0.25 |
| P27659_RL3_MOUSE   | Rpl3   | 60S ribosomal protein L: R.LEQQVPPVNVQVFGQDEM*IDVIGVTK#G    | 15.12   | 4.83   | 3.13  | 0.32 |
| P27659_RL3_MOUSE   | Rpl3   | 60S ribosomal protein L: K.NNASTDYLSDK#S                    | 127.77  | 24.96  | 5.12  | 0.20 |
| P27659_RL3_MOUSE   | Rpl3   | 60S ribosomal protein L: K.SINPLGGFVHYGEVNTDFIM#LK#G        | 150.35  | 27.14  | 5.54  | 0.18 |
| P27659_RL3_MOUSE   | Rpl3   | 60S ribosomal protein L: K.SINPLGGFVHYGEVNTDFIM#LK#G        | 47.67   | 8.74   | 5.46  | 0.18 |
| P27659_RL3_MOUSE   | Rpl3   | 60S ribosomal protein L: R.VAFSVAR@.A                       | 275.36  | 42.96  | 6.41  | 0.16 |
| P27659_RL3_MOUSE   | Rpl3   | 60S ribosomal protein L: K.DDASKHPVHLTAFGLYK#A              | 125.72  | 31.17  | 4.03  | 0.25 |
| P27659_RL3_MOUSE   | Rpl3   | 60S ribosomal protein L: R.ER@LEQQVPPVNVQVFGQDEM*IDVIGVTK#G | 106.82  | 15.76  | 6.78  | 0.15 |
| P27659_RL3_MOUSE   | Rpl3   | 60S ribosomal protein L: R.ER@LEQQVPPVNVQVFGQDEM*IDVIGVTK#G | 18.66   | 3.30   | 5.65  | 0.18 |
| P27659_RL3_MOUSE   | Rpl3   | 60S ribosomal protein L: R.FQTM*EEK#K#A                     | 6.17    | 2.36   | 2.61  | 0.38 |
| P27659_RL3_MOUSE   | Rpl3   | 60S ribosomal protein L: R.HGSLGFLPR@.K                     | 214.85  | 39.04  | 5.50  | 0.18 |
| P27659_RL3_MOUSE   | Rpl3   | 60S ribosomal protein L: K.IGQGYLIK#D                       | 185.04  | 33.04  | 5.60  | 0.18 |
| P27659_RL3_MOUSE   | Rpl3   | 60S ribosomal protein L: R.IIAHTQM*#R@.L                    | 32.32   | 7.97   | 4.05  | 0.25 |
| P27659_RL3_MOUSE   | Rpl3   | 60S ribosomal protein L: R.K#FSAPR@.H                       | 26.57   | 9.85   | 2.70  | 0.37 |
| P27659_RL3_MOUSE   | Rpl3   | 60S ribosomal protein L: R.K#HSLVQITK#R                     | 47.28   | 7.01   | 6.74  | 0.15 |
| P27659_RL3_MOUSE   | Rpl3   | 60S ribosomal protein L: R.LEQQVPPVNVQVFGQDEM*IDVIGVTK#G    | 95.92   | 18.11  | 5.30  | 0.19 |
| P27659_RL3_MOUSE   | Rpl3   | 60S ribosomal protein L: K.NNASTDYLSDK#S                    | 126.04  | 25.21  | 5.00  | 0.20 |
| P27659_RL3_MOUSE   | Rpl3   | 60S ribosomal protein L: K.SINPLGGFVHYGEVNTDFIM#LK#G        | 193.96  | 36.16  | 5.36  | 0.19 |
| P27659_RL3_MOUSE   | Rpl3   | 60S ribosomal protein L: K.SINPLGGFVHYGEVNTDFIM#LK#G        | 26.27   | 3.67   | 7.16  | 0.14 |
| P27659_RL3_MOUSE   | Rpl3   | 60S ribosomal protein L: R.VAFSVAR@.A                       | 188.39  | 27.78  | 6.78  | 0.15 |
| P62889_RL30_MOUSE  | Rpl30  | 60S ribosomal protein L: R.K#SEIEYAM*LAK#.T                 | 13.75   | 6.16   | 2.23  | 0.45 |
| P62889_RL30_MOUSE  | Rpl30  | 60S ribosomal protein L: R.K#SEIEYAM*LAK#.T                 | 27.15   | 8.68   | 3.13  | 0.32 |
| P62889_RL30_MOUSE  | Rpl30  | 60S ribosomal protein L: R.LQLVM*#K#S                       | 39.26   | 12.18  | 3.22  | 0.31 |
| P62889_RL30_MOUSE  | Rpl30  | 60S ribosomal protein L: R.LQLVMK#S                         | 10.08   | 3.66   | 2.76  | 0.36 |
| P62889_RL30_MOUSE  | Rpl30  | 60S ribosomal protein L: K.SEIEYAM*LAK#.T                   | 10.05   | 5.30   | 1.90  | 0.53 |
| P62889_RL30_MOUSE  | Rpl30  | 60S ribosomal protein L: R.K#SEIEYAM*LAK#.T                 | 74.60   | 19.10  | 3.91  | 0.26 |
| P62889_RL30_MOUSE  | Rpl30  | 60S ribosomal protein L: R.K#SEIEYAM*LAK#.T                 | 99.99   | 26.89  | 3.72  | 0.27 |
| P62889_RL30_MOUSE  | Rpl30  | 60S ribosomal protein L: R.K#SEIEYAM*LAK#.T                 | 28.15   | 6.98   | 4.03  | 0.25 |
| P62889_RL30_MOUSE  | Rpl30  | 60S ribosomal protein L: K.K#SLESINSR@.L                    | 273.37  | 70.72  | 3.87  | 0.26 |
| P62889_RL30_MOUSE  | Rpl30  | 60S ribosomal protein L: R.LQLVM*#K#S                       | 842.55  | 300.18 | 2.81  | 0.36 |
| P62889_RL30_MOUSE  | Rpl30  | 60S ribosomal protein L: R.LQLVMK#S                         | 70.49   | 22.77  | 3.10  | 0.32 |
| P62889_RL30_MOUSE  | Rpl30  | 60S ribosomal protein L: K.SEIEYAM*LAK#.T                   | 197.50  | 54.50  | 3.62  | 0.28 |
| P62889_RL30_MOUSE  | Rpl30  | 60S ribosomal protein L: K.SEIEYAM*LAK#.T                   | 38.67   | 11.38  | 3.40  | 0.29 |
| P62889_RL30_MOUSE  | Rpl30  | 60S ribosomal protein L: K.SLESINSR@.L                      | 784.59  | 210.29 | 3.73  | 0.27 |
| P62889_RL30_MOUSE  | Rpl30  | 60S ribosomal protein L: R.K#SEIEYAM*LAK#.T                 | 14.47   | 4.35   | 3.33  | 0.30 |
| P62889_RL30_MOUSE  | Rpl30  | 60S ribosomal protein L: K.SEIEYAM*LAK#.T                   | 6.40    | 1.89   | 3.39  | 0.30 |
| P62889_RL30_MOUSE  | Rpl30  | 60S ribosomal protein L: K.SLESINSR@.L                      | 24.62   | 7.09   | 3.47  | 0.29 |
| P62900_RL31_MOUSE  | Rpl31  | 60S ribosomal protein L: K.EM*GTPDVR@.J                     | 633.64  | 213.80 | 2.96  | 0.34 |
| P62900_RL31_MOUSE  | Rpl31  | 60S ribosomal protein L: R.EYTINIK#R@.J                     | 39.59   | 22.99  | 1.72  | 0.58 |
| P62900_RL31_MOUSE  | Rpl31  | 60S ribosomal protein L: R.K#HR@NEDEDSPNK#L                 | 3.50    | 1.43   | 2.45  | 0.41 |
| P62900_RL31_MOUSE  | Rpl31  | 60S ribosomal protein L: K.LYLVITYVPVTFK#.N                 | 617.84  | 196.07 | 3.15  | 0.32 |
| P62900_RL31_MOUSE  | Rpl31  | 60S ribosomal protein L: R.NEDEDSPNK#LYLVITYVPVTFK#.N       | 163.17  | 52.00  | 3.14  | 0.32 |
| P62900_RL31_MOUSE  | Rpl31  | 60S ribosomal protein L: K.RNEDEDSPNK#LYLVITYVPVTFK#.N      | 16.30   | 4.99   | 3.26  | 0.31 |
| P62900_RL31_MOUSE  | Rpl31  | 60S ribosomal protein L: R.SAINEVTR@.E                      | 1616.93 | 472.67 | 3.42  | 0.29 |
| P62911_RL32_MOUSE  | Rpl32  | 60S ribosomal protein L: R.AAQAIR@.V                        | 1734.61 | 343.14 | 5.06  | 0.20 |
| P62911_RL32_MOUSE  | Rpl32  | 60S ribosomal protein L: R.K#GQILM*PNIGYGSNK#K              | 78.37   | 20.12  | 3.89  | 0.26 |
| P62911_RL32_MOUSE  | Rpl32  | 60S ribosomal protein L: R.FK#GQILM*PNIGYGSNK#K             | 10.59   | 2.86   | 3.70  | 0.27 |
| P62911_RL32_MOUSE  | Rpl32  | 60S ribosomal protein L: R.FK#GQILM*PNIGYGSNK#K             | 39.73   | 10.73  | 3.70  | 0.27 |
| P62911_RL32_MOUSE  | Rpl32  | 60S ribosomal protein L: K.FLVHNVK#.E                       | 103.71  | 16.37  | 6.34  | 0.16 |
| P62911_RL32_MOUSE  | Rpl32  | 60S ribosomal protein L: K.GQILM*PNIGYGSNK#K                | 29.06   | 7.76   | 3.75  | 0.27 |
| P62911_RL32_MOUSE  | Rpl32  | 60S ribosomal protein L: K.GQILM*PNIGYGSNK#K                | 6.02    | 1.66   | 3.62  | 0.28 |
| P62911_RL32_MOUSE  | Rpl32  | 60S ribosomal protein L: K.GQILM*PNIGYGSNK#K#T              | 6.27    | 1.99   | 3.15  | 0.32 |
| P62911_RL32_MOUSE  | Rpl32  | 60S ribosomal protein L: K.HM*LP5GFR@.K                     | 148.00  | 13.52  | 10.95 | 0.09 |
| P62911_RL32_MOUSE  | Rpl32  | 60S ribosomal protein L: K.HM*LP5GFR@.K#F                   | 143.31  | 26.37  | 5.44  | 0.18 |
| P62911_RL32_MOUSE  | Rpl32  | 60S ribosomal protein L: R.IVLYTK#.K                        | 71.15   | 17.12  | 4.16  | 0.24 |
| Q9D1R9_RL34_MOUSE  | Rpl34  | 60S ribosomal protein L: R.LSYNTASN#K.T                     | 19.88   | 5.14   | 3.86  | 0.26 |
| Q9D1R9_RL34_MOUSE  | Rpl34  | 60S ribosomal protein L: R.AFLIEQK#.I                       | 922.75  | 195.91 | 4.71  | 0.21 |
| Q9D1R9_RL34_MOUSE  | Rpl34  | 60S ribosomal protein L: R.LSYNTASN#K.T                     | 411.75  | 92.30  | 4.46  | 0.22 |
| Q9D1R9_RL34_MOUSE  | Rpl34  | 60S ribosomal protein L: K.R@AFLIEQK#.I                     | 87.47   | 18.43  | 4.75  | 0.21 |
| Q9D1R9_RL34_MOUSE  | Rpl34  | 60S ribosomal protein L: R.R@LSYNTASN#K.T                   | 223.65  | 41.01  | 5.45  | 0.18 |
| Q9D1R9_RL34_MOUSE  | Rpl34  | 60S ribosomal protein L: R.AFLIEQK#.I                       | 25.14   | 9.12   | 2.76  | 0.36 |
| Q6ZVW7_RL35_MOUSE  | Rpl35  | 60S ribosomal protein L: R.VLTVINQTK#.E                     | 22.09   | 4.18   | 5.28  | 0.19 |
| Q6ZVW7_RL35_MOUSE  | Rpl35  | 60S ribosomal protein L: K.K#HELLK#.Q                       | 93.99   | 15.96  | 5.89  | 0.17 |
| Q6ZVW7_RL35_MOUSE  | Rpl35  | 60S ribosomal protein L: K.QLDDLK#VELSQR@.V                 | 570.78  | 121.26 | 4.71  | 0.21 |
| Q6ZVW7_RL35_MOUSE  | Rpl35  | 60S ribosomal protein L: R.VLTVINQTK#.E                     | 1100.92 | 216.72 | 5.08  | 0.20 |
| Q6ZVW7_RL35_MOUSE  | Rpl35  | 60S ribosomal protein L: K.YK#PLDLR@PK#.K                   | 708.57  | 85.19  | 8.32  | 0.12 |
| O55142_RL35A_MOUSE | Rpl35a | 60S ribosomal protein L: R.DETEFYLR@PK#.R                   | 27.11   | 4.74   | 5.72  | 0.17 |

|                     |        |                                                          |         |        |      |      |
|---------------------|--------|----------------------------------------------------------|---------|--------|------|------|
| O55142_RL35A_MOUSE  | Rpl35a | 60S ribosomal protein L: K.IEGVYAR@.D                    | 40.38   | 40.91  | 0.99 | 1.01 |
| O55142_RL35A_MOUSE  | Rpl35a | 60S ribosomal protein L: K.NNVTTPGGK#PNK#.T              | 5.72    | 12.09  | 0.47 | 2.12 |
| O55142_RL35A_MOUSE  | Rpl35a | 60S ribosomal protein L: R.VM*LYPSR@I.-                  | 20.68   | 5.23   | 3.95 | 0.25 |
| O55142_RL35A_MOUSE  | Rpl35a | 60S ribosomal protein L: K.AIFAGYK#.R                    | 177.77  | 55.37  | 3.21 | 0.31 |
| O55142_RL35A_MOUSE  | Rpl35a | 60S ribosomal protein L: K.AIFAGYK#.R                    | 76.33   | 23.04  | 3.31 | 0.30 |
| O55142_RL35A_MOUSE  | Rpl35a | 60S ribosomal protein L: R.DETEFYLGK#.R                  | 123.92  | 44.19  | 2.80 | 0.36 |
| O55142_RL35A_MOUSE  | Rpl35a | 60S ribosomal protein L: R.DETEFYLGK#.R                  | 100.22  | 24.00  | 4.17 | 0.24 |
| O55142_RL35A_MOUSE  | Rpl35a | 60S ribosomal protein L: K.IEGVYAR@.D                    | 561.07  | 149.89 | 3.74 | 0.27 |
| O55142_RL35A_MOUSE  | Rpl35a | 60S ribosomal protein L: K.NNVTTPGGK#PNK.T               | 95.82   | 33.84  | 2.83 | 0.35 |
| O55142_RL35A_MOUSE  | Rpl35a | 60S ribosomal protein L: R.VM*LYPSR@I.-                  | 50.93   | 117.37 | 2.99 | 0.33 |
| O55142_RL35A_MOUSE  | Rpl35a | 60S ribosomal protein L: R.VM*LYPSR@I.-                  | 751.38  | 218.64 | 3.44 | 0.29 |
| O55142_RL35A_MOUSE  | Rpl35a | 60S ribosomal protein L: R.VMLYPSR@I.-                   | 33.16   | 10.08  | 3.29 | 0.30 |
| O55142_RL35A_MOUSE  | Rpl35a | 60S ribosomal protein L: R.VM*LYPSR@I.-                  | 17.55   | 4.55   | 3.86 | 0.26 |
| O55142_RL35A_MOUSE  | Rpl35a | 60S ribosomal protein L: K.NNVTTPGGK#PNK#.T              | 10.63   | 2.38   | 4.47 | 0.22 |
| O62WZ4_Q62WZ4_MOUSE | Rpl36  | 60S ribosomal protein L: R.EELSNVLAAMR@.K                | 17.51   | 2.63   | 6.65 | 0.15 |
| O62WZ4_Q62WZ4_MOUSE | Rpl36  | 60S ribosomal protein L: R.K.#R@EELSNVLAAMR@.K           | 15.92   | 3.16   | 5.04 | 0.20 |
| O62WZ4_Q62WZ4_MOUSE | Rpl36  | 60S ribosomal protein L: R.YPM*AVGLNK#.G                 | 77.56   | 15.48  | 5.01 | 0.20 |
| O62WZ4_Q62WZ4_MOUSE | Rpl36  | 60S ribosomal protein L: R.YPM*AVGLNK#.G                 | 16.03   | 2.86   | 5.60 | 0.18 |
| O62WZ4_Q62WZ4_MOUSE | Rpl36  | 60S ribosomal protein L: R.EELSNVLAAMR*#R@.K             | 227.65  | 43.25  | 5.26 | 0.19 |
| O62WZ4_Q62WZ4_MOUSE | Rpl36  | 60S ribosomal protein L: R.EELSNVLAAMR@.K                | 24.88   | 3.34   | 7.45 | 0.13 |
| O62WZ4_Q62WZ4_MOUSE | Rpl36  | 60S ribosomal protein L: R.KREELSNVLAAMR*#R.K            | 307.18  | 68.45  | 4.49 | 0.22 |
| O62WZ4_Q62WZ4_MOUSE | Rpl36  | 60S ribosomal protein L: R.YPM*AVGLNK#.G                 | 232.01  | 45.69  | 5.08 | 0.20 |
| O62WZ4_Q62WZ4_MOUSE | Rpl36  | 60S ribosomal protein L: R.YPM*AVGLNK#.G                 | 18.91   | 3.24   | 5.84 | 0.17 |
| O62WZ4_Q62WZ4_MOUSE | Rpl36  | 60S ribosomal protein L: R.YPM*AVGLNK#.G                 | 12.02   | 3.91   | 3.07 | 0.33 |
| P83882_RL36A_MOUSE  | Rpl36a | 60S ribosomal protein L: K.HFELGGDK#.K                   | 28.10   | 9.36   | 3.00 | 0.33 |
| P83882_RL36A_MOUSE  | Rpl36a | 60S ribosomal protein L: R.K.#GQVQF.                     | 32.49   | 7.13   | 4.56 | 0.22 |
| P83882_RL36A_MOUSE  | Rpl36a | 60S ribosomal protein L: K.DSLVAQSK#.R                   | 187.17  | 41.80  | 4.48 | 0.22 |
| P83882_RL36A_MOUSE  | Rpl36a | 60S ribosomal protein L: K.GK#DSLVAQSK#.R                | 122.99  | 26.02  | 4.73 | 0.21 |
| P83882_RL36A_MOUSE  | Rpl36a | 60S ribosomal protein L: K.HFELGGDK#.K                   | 87.68   | 18.58  | 4.72 | 0.21 |
| P83882_RL36A_MOUSE  | Rpl36a | 60S ribosomal protein L: R.K.#GQVQF.-                    | 374.55  | 76.17  | 4.92 | 0.20 |
| Q9D823_RL37_MOUSE   | Rpl37  | 60S ribosomal protein L: R.K.#YNSAK#.A                   | 256.92  | 48.28  | 5.32 | 0.19 |
| P61514_RL37A_MOUSE  | Rpl37a | 60S ribosomal protein L: K.TVAGGAWTYNTTSAVTVK#.S         | 5.06    | 1.64   | 3.09 | 0.32 |
| P61514_RL37A_MOUSE  | Rpl37a | 60S ribosomal protein L: K.IEISQ#AK#.Y                   | 72.59   | 27.36  | 2.65 | 0.38 |
| P61514_RL37A_MOUSE  | Rpl37a | 60S ribosomal protein L: K.K.#EISQ#AK#.Y                 | 520.75  | 145.57 | 3.58 | 0.28 |
| P61514_RL37A_MOUSE  | Rpl37a | 60S ribosomal protein L: K.K.#VIGV#K#.Y                  | 352.13  | 100.27 | 3.51 | 0.28 |
| P61514_RL37A_MOUSE  | Rpl37a | 60S ribosomal protein L: K.TVAGGAWTYNTTSAVTVK#.S         | 303.50  | 80.43  | 3.77 | 0.27 |
| P61514_RL37A_MOUSE  | Rpl37a | 60S ribosomal protein L: R.YGASLRK.#M                    | 157.97  | 46.52  | 3.40 | 0.29 |
| P61514_RL37A_MOUSE  | Rpl37a | 60S ribosomal protein L: K.TVAGGAWTYNTTSAVTVK#.S         | 5.60    | 2.19   | 2.55 | 0.39 |
| Q9J18_RL38_MOUSE    | Rpl38  | 60S ribosomal protein L: K.IEEIK#DFLLTAR@.R              | 22.19   | 12.11  | 1.83 | 0.55 |
| Q9J18_RL38_MOUSE    | Rpl38  | 60S ribosomal protein L: R.K.#EIEK#DFLLTAR@.R            | 81.59   | 83.57  | 0.98 | 1.02 |
| Q9D8E6_RL4_MOUSE    | Rpl4   | 60S ribosomal protein L: K.APIR@PDIVNFVHTNLR@.K          | 65.90   | 17.78  | 3.71 | 0.27 |
| Q9D8E6_RL4_MOUSE    | Rpl4   | 60S ribosomal protein L: K.AWINDIK#.V                    | 57.56   | 11.35  | 5.07 | 0.20 |
| Q9D8E6_RL4_MOUSE    | Rpl4   | 60S ribosomal protein L: K.G.TADK#K#PAV#K#.K             | 6.06    | 1.46   | 4.14 | 0.24 |
| Q9D8E6_RL4_MOUSE    | Rpl4   | 60S ribosomal protein L: R.IEEVPELPLVVEDK#.V             | 140.04  | 25.89  | 5.41 | 0.18 |
| Q9D8E6_RL4_MOUSE    | Rpl4   | 60S ribosomal protein L: R.IEEVPELPLVVEDK#VEGYK#K#.T     | 47.71   | 99.82  | 4.77 | 0.21 |
| Q9D8E6_RL4_MOUSE    | Rpl4   | 60S ribosomal protein L: K.K.#LEAAATALATK#.S             | 341.21  | 86.86  | 3.93 | 0.25 |
| Q9D8E6_RL4_MOUSE    | Rpl4   | 60S ribosomal protein L: K.LDELYGTWR@.K                  | 19.95   | 4.34   | 4.59 | 0.22 |
| Q9D8E6_RL4_MOUSE    | Rpl4   | 60S ribosomal protein L: K.LEAAATALATK#.S                | 128.97  | 32.80  | 3.93 | 0.25 |
| Q9D8E6_RL4_MOUSE    | Rpl4   | 60S ribosomal protein L: R.M*FAPT#.T                     | 242.07  | 49.54  | 4.89 | 0.20 |
| Q9D8E6_RL4_MOUSE    | Rpl4   | 60S ribosomal protein L: K.M*#M*#NTLSR@.I                | 209.36  | 41.04  | 5.10 | 0.20 |
| Q9D8E6_RL4_MOUSE    | Rpl4   | 60S ribosomal protein L: K.MM*#NTLSR@.I                  | 13.40   | 3.01   | 4.45 | 0.22 |
| Q9D8E6_RL4_MOUSE    | Rpl4   | 60S ribosomal protein L: R.NIPGILTILNVSK#.L              | 833.50  | 186.36 | 4.47 | 0.22 |
| Q9D8E6_RL4_MOUSE    | Rpl4   | 60S ribosomal protein L: K.NVTLPAVFK#.A                  | 558.98  | 123.97 | 4.51 | 0.22 |
| Q9D8E6_RL4_MOUSE    | Rpl4   | 60S ribosomal protein L: R.QPYAVSELAGHQTSAESWGTGR@.A     | 191.72  | 39.52  | 4.85 | 0.21 |
| Q9D8E6_RL4_MOUSE    | Rpl4   | 60S ribosomal protein L: R.R@NITLR@.Q                    | 56.49   | 13.64  | 4.14 | 0.24 |
| Q9D8E6_RL4_MOUSE    | Rpl4   | 60S ribosomal protein L: K.TK#EAVQLLK#.K                 | 84.31   | 21.62  | 3.90 | 0.26 |
| Q9D8E6_RL4_MOUSE    | Rpl4   | 60S ribosomal protein L: K.APIR@PDIVNFVHTNLR.#K          | 51.15   | 11.27  | 4.54 | 0.22 |
| Q9D8E6_RL4_MOUSE    | Rpl4   | 60S ribosomal protein L: K.EAVQLLK#.K                    | 19.92   | 2.92   | 6.83 | 0.15 |
| Q9D8E6_RL4_MOUSE    | Rpl4   | 60S ribosomal protein L: R.K.LDELYGTWR@.K                | 49.32   | 10.77  | 4.58 | 0.22 |
| Q9D8E6_RL4_MOUSE    | Rpl4   | 60S ribosomal protein L: K.K.#LEAAATALATK#.S             | 129.24  | 27.86  | 4.64 | 0.22 |
| Q9D8E6_RL4_MOUSE    | Rpl4   | 60S ribosomal protein L: K.LDELYGTWR@.K                  | 8.77    | 2.71   | 3.23 | 0.31 |
| Q9D8E6_RL4_MOUSE    | Rpl4   | 60S ribosomal protein L: K.LEAAATALATK#.S                | 100.50  | 18.69  | 5.38 | 0.19 |
| Q9D8E6_RL4_MOUSE    | Rpl4   | 60S ribosomal protein L: K.M*#M*#NTLSR@.I                | 85.78   | 18.02  | 4.76 | 0.21 |
| Q9D8E6_RL4_MOUSE    | Rpl4   | 60S ribosomal protein L: R.NIPGILTILNVSK#.L              | 362.65  | 77.91  | 4.65 | 0.21 |
| Q9D8E6_RL4_MOUSE    | Rpl4   | 60S ribosomal protein L: K.NNR@QPYAVSELAGHQTSAESWGTGR@.A | 9.74    | 1.75   | 5.56 | 0.18 |
| Q9D8E6_RL4_MOUSE    | Rpl4   | 60S ribosomal protein L: K.NVTLPAVFK#.A                  | 188.38  | 44.63  | 4.22 | 0.24 |
| Q9D8E6_RL4_MOUSE    | Rpl4   | 60S ribosomal protein L: R.QPYAVSELAGHQTSAESWGTGR@.A     | 62.75   | 13.70  | 4.58 | 0.22 |
| Q9D8E6_RL4_MOUSE    | Rpl4   | 60S ribosomal protein L: R.IEEVPELPLVVEDK#VEGYK#K#.T     | 102.77  | 19.23  | 5.34 | 0.19 |
| Q9D8E6_RL4_MOUSE    | Rpl4   | 60S ribosomal protein L: K.K.#LEAAATALATK#.S             | 42.20   | 9.66   | 4.37 | 0.23 |
| Q9D8E6_RL4_MOUSE    | Rpl4   | 60S ribosomal protein L: K.LDELYGTWR@.K                  | 10.35   | 2.72   | 3.81 | 0.26 |
| Q9D8E6_RL4_MOUSE    | Rpl4   | 60S ribosomal protein L: K.LEAAATALATK#.S                | 54.32   | 8.23   | 6.60 | 0.15 |
| Q9D8E6_RL4_MOUSE    | Rpl4   | 60S ribosomal protein L: K.M*#M*#NTLSR@.I                | 45.93   | 10.17  | 4.51 | 0.22 |
| Q9D8E6_RL4_MOUSE    | Rpl4   | 60S ribosomal protein L: R.NIPGILTILNVSK#.L              | 161.51  | 27.53  | 5.87 | 0.17 |
| Q9D8E6_RL4_MOUSE    | Rpl4   | 60S ribosomal protein L: K.NVTLPAVFK#.A                  | 87.91   | 16.07  | 5.47 | 0.18 |
| P47962_RL5_MOUSE    | Rpl5   | 60S ribosomal protein L: K.EFNAEVHR@.K                   | 72.21   | 24.42  | 2.96 | 0.34 |
| P47962_RL5_MOUSE    | Rpl5   | 60S ribosomal protein L: R.EFNPVYK#.K                    | 194.26  | 68.64  | 2.83 | 0.35 |
| P47962_RL5_MOUSE    | Rpl5   | 60S ribosomal protein L: R.FPGYDESEK#.E                  | 53.41   | 15.63  | 3.42 | 0.29 |
| P47962_RL5_MOUSE    | Rpl5   | 60S ribosomal protein L: K.HIM*#GQNVADY#M*#R@.Y          | 100.22  | 27.80  | 3.60 | 0.28 |
| P47962_RL5_MOUSE    | Rpl5   | 60S ribosomal protein L: K.NNVTTPMM#EEM*YK#.K            | 12.10   | 4.02   | 3.01 | 0.33 |
| P47962_RL5_MOUSE    | Rpl5   | 60S ribosomal protein L: K.R@FPGYDESEK#.E                | 166.06  | 49.49  | 3.36 | 0.30 |
| P47962_RL5_MOUSE    | Rpl5   | 60S ribosomal protein L: R.YLM#EEDEDAYK#K#.Q             | 571.58  | 179.76 | 3.18 | 0.31 |
| P47962_RL5_MOUSE    | Rpl5   | 60S ribosomal protein L: K.EFNAEVHR@.K                   | 26.28   | 4.77   | 5.51 | 0.18 |
| P47962_RL5_MOUSE    | Rpl5   | 60S ribosomal protein L: K.GAVDGLSIPHSK#.R               | 244.30  | 40.40  | 6.05 | 0.17 |
| P47962_RL5_MOUSE    | Rpl5   | 60S ribosomal protein L: K.HIM*#GQNVADY#M*#R@.Y          | 83.65   | 16.35  | 5.11 | 0.20 |
| P47962_RL5_MOUSE    | Rpl5   | 60S ribosomal protein L: K.HIM*#GQNVADY#M*#R.Y           | 42.86   | 6.04   | 7.09 | 0.14 |
| P47962_RL5_MOUSE    | Rpl5   | 60S ribosomal protein L: K.RFPGYDESEK#.E                 | 54.79   | 12.08  | 4.54 | 0.22 |
| P47962_RL5_MOUSE    | Rpl5   | 60S ribosomal protein L: R.YLM#EEDEDAYK#K#.Q             | 23.41   | 4.57   | 5.12 | 0.20 |
| P47962_RL5_MOUSE    | Rpl5   | 60S ribosomal protein L: K.EFNAEVHR@.K                   | 32.28   | 10.10  | 3.20 | 0.31 |
| P47962_RL5_MOUSE    | Rpl5   | 60S ribosomal protein L: K.HIM*#GQNVADY#M*#R@.Y          | 37.91   | 4.93   | 7.69 | 0.13 |
| P47962_RL5_MOUSE    | Rpl5   | 60S ribosomal protein L: K.K.#ASFLR@.A                   | 37.38   | 16.00  | 2.34 | 0.43 |
| P47962_RL5_MOUSE    | Rpl5   | 60S ribosomal protein L: K.QFSQYK#.N                     | 142.48  | 23.64  | 6.03 | 0.17 |
| P47962_RL5_MOUSE    | Rpl5   | 60S ribosomal protein L: K.R@FPGYDESEK#.E                | 48.62   | 10.36  | 4.69 | 0.21 |
| P47962_RL5_MOUSE    | Rpl5   | 60S ribosomal protein L: K.TDYAR@.K                      | 59.13   | 12.50  | 4.73 | 0.21 |
| P47962_RL5_MOUSE    | Rpl5   | 60S ribosomal protein L: R.YLM#EEDEDAYK#K#.Q             | 165.38  | 33.49  | 4.94 | 0.20 |
| P47911_RL6_MOUSE    | Rpl6   | 60S ribosomal protein L: K.AVLDQILPK#.I                  | 1457.57 | 310.50 | 4.69 | 0.21 |
| P47911_RL6_MOUSE    | Rpl6   | 60S ribosomal protein L: K.AVPLQGLYLR@.S                 | 1065.63 | 201.87 | 5.28 | 0.19 |
| P47911_RL6_MOUSE    | Rpl6   | 60S ribosomal protein L: K.EK#HVLATVTK#.T                | 67.00   | 15.94  | 4.20 | 0.24 |
| P47911_RL6_MOUSE    | Rpl6   | 60S ribosomal protein L: K.FVIATSTK#.V                   | 920.80  | 190.11 | 4.84 | 0.21 |
| P47911_RL6_MOUSE    | Rpl6   | 60S ribosomal protein L: K.HLTDAYFK#.K                   | 739.11  | 150.78 | 4.90 | 0.20 |
| P47911_RL6_MOUSE    | Rpl6   | 60S ribosomal protein L: R.HQEGEFDTEK#.E                 | 83.61   | 19.77  | 4.23 | 0.24 |
| P47911_RL6_MOUSE    | Rpl6   | 60S ribosomal protein L: R.HQEGEFDTEK#.Y                 | 394.44  | 75.72  | 5.21 | 0.19 |
| P47911_RL6_MOUSE    | Rpl6   | 60S ribosomal protein L: R.HQEGEFDTEK#K#VEITEQR@.K       | 706.41  | 129.46 | 5.46 | 0.18 |
| P47911_RL6_MOUSE    | Rpl6   | 60S ribosomal protein L: K.K.#AGSDAAASR@PR@.A            | 9.07    | 2.84   | 3.20 | 0.31 |



|                   |       |                                                      |         |        |      |      |
|-------------------|-------|------------------------------------------------------|---------|--------|------|------|
| P47911_RL6_MOUSE  | Rpl6  | 60S ribosomal protein L6 K.K.HPFSQHVR@.R             | 35.68   | 8.40   | 4.25 | 0.24 |
| P47911_RL6_MOUSE  | Rpl6  | 60S ribosomal protein L6 K.QLDSGLLVTGGLVNR@.V        | 357.02  | 66.97  | 5.33 | 0.19 |
| P47911_RL6_MOUSE  | Rpl6  | 60S ribosomal protein L6 R.SSITPGTVLILTGR@.H         | 775.05  | 158.50 | 4.89 | 0.20 |
| P47911_RL6_MOUSE  | Rpl6  | 60S ribosomal protein L6 K.VDISDVK#.I                | 928.34  | 224.46 | 4.14 | 0.24 |
| P47911_RL6_MOUSE  | Rpl6  | 60S ribosomal protein L6 K.YEITEQR@.K                | 322.51  | 71.89  | 4.49 | 0.22 |
| P47911_RL6_MOUSE  | Rpl6  | 60S ribosomal protein L6 R.YPTEDVPR@.K               | 598.81  | 133.52 | 4.48 | 0.22 |
| P47911_RL6_MOUSE  | Rpl6  | 60S ribosomal protein L6 K.AVDLQILPK#.I              | 221.52  | 58.24  | 3.80 | 0.26 |
| P47911_RL6_MOUSE  | Rpl6  | 60S ribosomal protein L6 K.HLTDAYFK#.K               | 155.53  | 43.74  | 3.56 | 0.28 |
| P47911_RL6_MOUSE  | Rpl6  | 60S ribosomal protein L6 R.HQEGEIFDTEK#.E            | 9.50    | 2.40   | 3.95 | 0.25 |
| P47911_RL6_MOUSE  | Rpl6  | 60S ribosomal protein L6 R.HQEGEIFDTEK#YEITEQR@.K    | 101.58  | 28.15  | 3.61 | 0.28 |
| P47911_RL6_MOUSE  | Rpl6  | 60S ribosomal protein L6 K.QLDSGLLVTGGLVNR@.V        | 46.67   | 11.83  | 3.94 | 0.25 |
| P47911_RL6_MOUSE  | Rpl6  | 60S ribosomal protein L6 R.SSITPGTVLILTGR@.H         | 109.35  | 33.80  | 3.24 | 0.31 |
| P47911_RL6_MOUSE  | Rpl6  | 60S ribosomal protein L6 K.VDISDVK#.I                | 147.57  | 42.11  | 3.50 | 0.29 |
| P47911_RL6_MOUSE  | Rpl6  | 60S ribosomal protein L6 K.VLATVTK#.T                | 116.69  | 40.98  | 2.85 | 0.35 |
| P47911_RL6_MOUSE  | Rpl6  | 60S ribosomal protein L6 K.YEITEQR@.K                | 23.84   | 4.68   | 5.10 | 0.20 |
| P47911_RL6_MOUSE  | Rpl6  | 60S ribosomal protein L6 R.YPTEDVPR@.K               | 105.67  | 31.32  | 3.37 | 0.30 |
| P47911_RL6_MOUSE  | Rpl6  | 60S ribosomal protein L6 K.HLTDAYFK#.K               | 18.10   | 3.37   | 5.38 | 0.19 |
| P47911_RL6_MOUSE  | Rpl6  | 60S ribosomal protein L6 R.SSITPGTVLILTGR@.H         | 11.93   | 3.01   | 3.96 | 0.25 |
| P14148_RL7_MOUSE  | Rpl7  | 60S ribosomal protein L7 K.AGNFVPAEPK#.L             | 342.55  | 45.58  | 7.51 | 0.13 |
| P14148_RL7_MOUSE  | Rpl7  | 60S ribosomal protein L7 K.ASINM*LR@.I               | 781.16  | 105.62 | 7.40 | 0.14 |
| P14148_RL7_MOUSE  | Rpl7  | 60S ribosomal protein L7 K.ASINMLR@.I                | 185.08  | 26.13  | 7.08 | 0.14 |
| P14148_RL7_MOUSE  | Rpl7  | 60S ribosomal protein L7 K.EANNFLWPFK#.L             | 342.82  | 48.21  | 7.11 | 0.14 |
| P14148_RL7_MOUSE  | Rpl7  | 60S ribosomal protein L7 R.FK#EANNFLWPFK#.L          | 353.42  | 46.38  | 7.62 | 0.13 |
| P14148_RL7_MOUSE  | Rpl7  | 60S ribosomal protein L7 R.GINGVSPK#.V               | 181.62  | 21.87  | 8.30 | 0.12 |
| P14148_RL7_MOUSE  | Rpl7  | 60S ribosomal protein L7 R.IALTDNSLIAR@.S            | 2148.24 | 301.46 | 7.13 | 0.14 |
| P14148_RL7_MOUSE  | Rpl7  | 60S ribosomal protein L7 R.IVEPIAWGYPNLK#.S          | 644.52  | 107.08 | 6.02 | 0.17 |
| P14148_RL7_MOUSE  | Rpl7  | 60S ribosomal protein L7 R.K#AGNFVPAEPK#.L           | 110.62  | 21.54  | 5.14 | 0.19 |
| P14148_RL7_MOUSE  | Rpl7  | 60S ribosomal protein L7 K.K#HTHFVEGDDAGNR@EDQINR@.L | 278.68  | 4.14   | 6.69 | 0.15 |
| P14148_RL7_MOUSE  | Rpl7  | 60S ribosomal protein L7 K.K#VATVPGTLK#.K            | 81.24   | 9.01   | 9.02 | 0.11 |
| P14148_RL7_MOUSE  | Rpl7  | 60S ribosomal protein L7 K.K#VATVPGTLK#K#.K          | 214.67  | 45.16  | 4.75 | 0.21 |
| P14148_RL7_MOUSE  | Rpl7  | 60S ribosomal protein L7 R.K#VATVPGTLK#.L            | 571.56  | 58.22  | 9.82 | 0.10 |
| P14148_RL7_MOUSE  | Rpl7  | 60S ribosomal protein L7 K.K#VAVPVLK#.K              | 465.08  | 60.80  | 7.65 | 0.13 |
| P14148_RL7_MOUSE  | Rpl7  | 60S ribosomal protein L7 K.LAFVIR@.I                 | 963.45  | 128.57 | 7.49 | 0.13 |
| P14148_RL7_MOUSE  | Rpl7  | 60S ribosomal protein L7 R.NFAEK#.V                  | 278.86  | 45.82  | 6.09 | 0.16 |
| P14148_RL7_MOUSE  | Rpl7  | 60S ribosomal protein L7 R.QIFNGTFVK#.L              | 263.57  | 38.05  | 6.93 | 0.14 |
| P14148_RL7_MOUSE  | Rpl7  | 60S ribosomal protein L7 K.R@IALTDNSLIAR@.S          | 64.09   | 10.71  | 5.98 | 0.17 |
| P14148_RL7_MOUSE  | Rpl7  | 60S ribosomal protein L7 K.SVNELYK#.R                | 760.02  | 93.13  | 8.16 | 0.12 |
| P14148_RL7_MOUSE  | Rpl7  | 60S ribosomal protein L7 K.TTHFVEGDDAGNR@EDQINR.L    | 429.21  | 44.91  | 9.56 | 0.10 |
| P14148_RL7_MOUSE  | Rpl7  | 60S ribosomal protein L7 K.VATVPGTLK#.K              | 427.61  | 58.30  | 7.33 | 0.14 |
| P14148_RL7_MOUSE  | Rpl7  | 60S ribosomal protein L7 K.VATVPGTLK#K#.K            | 89.82   | 12.96  | 6.93 | 0.14 |
| P14148_RL7_MOUSE  | Rpl7  | 60S ribosomal protein L7 K.K#VAVPVLK#.K              | 166.96  | 26.58  | 6.28 | 0.16 |
| P14148_RL7_MOUSE  | Rpl7  | 60S ribosomal protein L7 K.ASINM*LR@.I               | 18.79   | 7.47   | 2.52 | 0.40 |
| P14148_RL7_MOUSE  | Rpl7  | 60S ribosomal protein L7 K.EANNFLWPFK#.L             | 19.46   | 8.73   | 2.23 | 0.45 |
| P14148_RL7_MOUSE  | Rpl7  | 60S ribosomal protein L7 R.FK#EANNFLWPFK#.L          | 16.42   | 3.97   | 4.14 | 0.24 |
| P14148_RL7_MOUSE  | Rpl7  | 60S ribosomal protein L7 R.IALTDNSLIAR@.S            | 112.01  | 27.95  | 4.01 | 0.25 |
| P14148_RL7_MOUSE  | Rpl7  | 60S ribosomal protein L7 R.IVEPIAWGYPNLK#.S          | 51.38   | 12.39  | 4.15 | 0.24 |
| P14148_RL7_MOUSE  | Rpl7  | 60S ribosomal protein L7 K.LAFVIR@.I                 | 44.41   | 7.90   | 5.62 | 0.18 |
| P14148_RL7_MOUSE  | Rpl7  | 60S ribosomal protein L7 K.SVNELYK#.R                | 35.89   | 7.22   | 4.97 | 0.20 |
| P14148_RL7_MOUSE  | Rpl7  | 60S ribosomal protein L7 K.EANNFLWPFK#.L             | 19.02   | 4.72   | 4.03 | 0.25 |
| P14148_RL7_MOUSE  | Rpl7  | 60S ribosomal protein L7 R.IALTDNSLIAR@.S            | 103.43  | 24.00  | 4.31 | 0.23 |
| P14148_RL7_MOUSE  | Rpl7  | 60S ribosomal protein L7 R.IVEPIAWGYPNLK#.S          | 33.08   | 9.95   | 3.33 | 0.30 |
| P14148_RL7_MOUSE  | Rpl7  | 60S ribosomal protein L7 K.LAFVIR@.I                 | 51.50   | 8.16   | 6.31 | 0.16 |
| P14148_RL7_MOUSE  | Rpl7  | 60S ribosomal protein L7 K.TTHFVEGDDAGNR@EDQINR@.L   | 36.93   | 11.19  | 3.30 | 0.30 |
| P12970_RL7A_MOUSE | Rpl7a | 60S ribosomal protein L7 K.AAGKHGVDVPTK#.R           | 34.76   | 13.21  | 2.63 | 0.38 |
| P12970_RL7A_MOUSE | Rpl7a | 60S ribosomal protein L7 R.AGVNTVTLVENK#.K           | 1545.44 | 371.80 | 4.16 | 0.24 |
| P12970_RL7A_MOUSE | Rpl7a | 60S ribosomal protein L7 R.AGVNTVTLVENK#.K           | 931.97  | 253.11 | 3.68 | 0.27 |
| P12970_RL7A_MOUSE | Rpl7a | 60S ribosomal protein L7 R.HWGGNVLGPK#.S             | 758.55  | 181.46 | 4.18 | 0.24 |
| P12970_RL7A_MOUSE | Rpl7a | 60S ribosomal protein L7 K.K#VAVPAPAVK#.K            | 225.19  | 85.73  | 2.63 | 0.38 |
| P12970_RL7A_MOUSE | Rpl7a | 60S ribosomal protein L7 K.K#VAVPAPAVK#.K            | 775.09  | 215.35 | 3.60 | 0.28 |
| P12970_RL7A_MOUSE | Rpl7a | 60S ribosomal protein L7 R.K#VAVPAINQFTQALDR@.Q      | 1209.56 | 270.77 | 4.47 | 0.22 |
| P12970_RL7A_MOUSE | Rpl7a | 60S ribosomal protein L7 K.NFGIGQDIQPK#.R            | 1156.50 | 286.29 | 4.04 | 0.25 |
| P12970_RL7A_MOUSE | Rpl7a | 60S ribosomal protein L7 R.QTATQLK#.L                | 774.05  | 213.74 | 3.62 | 0.28 |
| P12970_RL7A_MOUSE | Rpl7a | 60S ribosomal protein L7 R.R@HWGGNVLGPK#.S           | 114.14  | 38.60  | 2.96 | 0.34 |
| P12970_RL7A_MOUSE | Rpl7a | 60S ribosomal protein L7 K.RPPLV#.A                  | 854.27  | 214.54 | 3.98 | 0.25 |
| P12970_RL7A_MOUSE | Rpl7a | 60S ribosomal protein L7 K.VPPAINQFTQALDR@.Q         | 242.95  | 71.66  | 3.39 | 0.29 |
| P12970_RL7A_MOUSE | Rpl7a | 60S ribosomal protein L7 K.VVNPVLFK#.R               | 254.09  | 71.15  | 3.57 | 0.28 |
| P12970_RL7A_MOUSE | Rpl7a | 60S ribosomal protein L7 R.AGVNTVTLVENK#.K           | 22.50   | 12.20  | 1.84 | 0.54 |
| P12970_RL7A_MOUSE | Rpl7a | 60S ribosomal protein L7 K.NFGIGQDIQPK#.R            | 17.37   | 5.69   | 3.05 | 0.33 |
| P12970_RL7A_MOUSE | Rpl7a | 60S ribosomal protein L7 R.AGVNTVTLVENK#.K           | 121.13  | 19.40  | 6.24 | 0.16 |
| P12970_RL7A_MOUSE | Rpl7a | 60S ribosomal protein L7 R.AGVNTVTLVENK#K#.A         | 82.42   | 16.71  | 4.93 | 0.20 |
| P12970_RL7A_MOUSE | Rpl7a | 60S ribosomal protein L7 R.HWGGNVLGPK#.S             | 55.91   | 16.21  | 3.45 | 0.29 |
| P12970_RL7A_MOUSE | Rpl7a | 60S ribosomal protein L7 K.K#VAVPAPAVK#.K            | 28.53   | 4.52   | 6.32 | 0.16 |
| P12970_RL7A_MOUSE | Rpl7a | 60S ribosomal protein L7 R.K#VAVPAINQFTQALDR@.Q      | 120.70  | 24.76  | 4.87 | 0.21 |
| P12970_RL7A_MOUSE | Rpl7a | 60S ribosomal protein L7 K.NFGIGQDIQPK#.R            | 110.34  | 26.96  | 4.09 | 0.24 |
| P12970_RL7A_MOUSE | Rpl7a | 60S ribosomal protein L7 K.VVNPVLFK#.R               | 34.01   | 9.72   | 3.50 | 0.29 |
| P12970_RL7A_MOUSE | Rpl7a | 60S ribosomal protein L7 R.AGVNTVTLVENK#.K           | 109.58  | 17.49  | 6.26 | 0.16 |
| P12970_RL7A_MOUSE | Rpl7a | 60S ribosomal protein L7 R.HWGGNVLGPK#.S             | 73.13   | 15.38  | 4.75 | 0.21 |
| P12970_RL7A_MOUSE | Rpl7a | 60S ribosomal protein L7 R.LK#VAVPAINQFTQALDR@.Q     | 133.74  | 27.89  | 4.80 | 0.21 |
| P12970_RL7A_MOUSE | Rpl7a | 60S ribosomal protein L7 K.NFGIGQDIQPK#.R            | 114.68  | 23.51  | 4.88 | 0.20 |
| P12970_RL7A_MOUSE | Rpl7a | 60S ribosomal protein L7 K.VPPAINQFTQALDR@.Q         | 16.58   | 2.89   | 5.74 | 0.17 |
| P12970_RL7A_MOUSE | Rpl7a | 60S ribosomal protein L7 K.VVNPVLFK#.R               | 44.15   | 10.90  | 4.05 | 0.25 |
| P12970_RL7A_MOUSE | Rpl7a | 60S ribosomal protein L7 R.IEGVSLVK#.S               | 13.66   | 5.63   | 2.43 | 0.41 |
| P12970_RL7A_MOUSE | Rpl7a | 60S ribosomal protein L7 R.TVEPYVTWGFPNLK#.S         | 6.70    | 4.10   | 1.63 | 0.61 |
| P62918_RL8_MOUSE  | Rpl8  | 60S ribosomal protein L8 R.AVDFAE@.H                 | 1176.02 | 256.80 | 4.58 | 0.22 |
| P62918_RL8_MOUSE  | Rpl8  | 60S ribosomal protein L8 R.AVGVVWAGGGR@.I            | 2424.23 | 545.79 | 4.44 | 0.23 |
| P62918_RL8_MOUSE  | Rpl8  | 60S ribosomal protein L8 K.DIIHDPGR@.G               | 404.32  | 98.48  | 4.11 | 0.24 |
| P62918_RL8_MOUSE  | Rpl8  | 60S ribosomal protein L8 K.GIVK#DIIHDPGR@.G          | 264.27  | 57.25  | 4.62 | 0.22 |
| P62918_RL8_MOUSE  | Rpl8  | 60S ribosomal protein L8 R.IDK#PILK#.A               | 481.96  | 116.07 | 4.15 | 0.24 |
| P62918_RL8_MOUSE  | Rpl8  | 60S ribosomal protein L8 R.K#GAGSVFR@.A              | 348.34  | 59.40  | 5.86 | 0.17 |
| P62918_RL8_MOUSE  | Rpl8  | 60S ribosomal protein L8 R.K#VGLIAAR@.R              | 535.57  | 103.90 | 5.15 | 0.19 |
| P62918_RL8_MOUSE  | Rpl8  | 60S ribosomal protein L8 K.K#VISSANR@.A              | 59.25   | 16.76  | 5.53 | 0.28 |
| P62918_RL8_MOUSE  | Rpl8  | 60S ribosomal protein L8 K.VGLIAAR@.R                | 651.08  | 125.50 | 3.19 | 0.19 |
| P62918_RL8_MOUSE  | Rpl8  | 60S ribosomal protein L8 R.VK#LPSGK#K#.V             | 28.06   | 18.05  | 1.55 | 0.64 |
| P62918_RL8_MOUSE  | Rpl8  | 60S ribosomal protein L8 R.AVDFAE@.H                 | 187.40  | 57.00  | 3.29 | 0.30 |
| P62918_RL8_MOUSE  | Rpl8  | 60S ribosomal protein L8 R.AVGVVWAGGGR@.I            | 345.57  | 114.15 | 3.03 | 0.33 |
| P62918_RL8_MOUSE  | Rpl8  | 60S ribosomal protein L8 K.DIIHDPGR@.G               | 31.64   | 15.93  | 1.99 | 0.50 |
| P62918_RL8_MOUSE  | Rpl8  | 60S ribosomal protein L8 R.IDK#PILK#.A               | 59.30   | 36.53  | 1.62 | 0.62 |
| P62918_RL8_MOUSE  | Rpl8  | 60S ribosomal protein L8 R.K#GAGSVFR@.A              | 49.19   | 18.66  | 2.64 | 0.38 |
| P62918_RL8_MOUSE  | Rpl8  | 60S ribosomal protein L8 R.K#VGLIAAR@.R              | 111.79  | 27.45  | 4.07 | 0.25 |
| P62918_RL8_MOUSE  | Rpl8  | 60S ribosomal protein L8 K.VGLIAAR@.R                | 50.58   | 9.44   | 5.36 | 0.19 |
| P62918_RL8_MOUSE  | Rpl8  | 60S ribosomal protein L8 R.AVDFAE@.H                 | 53.23   | 14.22  | 3.74 | 0.27 |
| P62918_RL8_MOUSE  | Rpl8  | 60S ribosomal protein L8 R.AVGVVWAGGGR@.I            | 136.98  | 25.50  | 5.37 | 0.19 |
| P62918_RL8_MOUSE  | Rpl8  | 60S ribosomal protein L8 K.DIIHDPGR@.G               | 25.98   | 7.40   | 3.51 | 0.28 |

|                   |       |                                                                    |         |        |      |      |
|-------------------|-------|--------------------------------------------------------------------|---------|--------|------|------|
| P62918_RL8_MOUSE  | Rpl8  | 60S ribosomal protein L6.R.AVDFAEH@.H                              | 34.64   | 8.44   | 4.11 | 0.24 |
| P62918_RL8_MOUSE  | Rpl8  | 60S ribosomal protein L6.R.AVGVVWAGGGR@.I                          | 71.53   | 10.84  | 6.60 | 0.15 |
| P51410_RL9_MOUSE  | Rpl9  | 60S ribosomal protein L6.K.DELILEGNDEIELVSN5AALIQQATTVK#.N         | 57.18   | 57.18  | 0.19 | 5.21 |
| P51410_RL9_MOUSE  | Rpl9  | 60S ribosomal protein L6.R.DFNHINVELSLGK#.K                        | 13.17   | 4.24   | 3.10 | 0.32 |
| P51410_RL9_MOUSE  | Rpl9  | 60S ribosomal protein L6.K.FLDGIYSEK#.G                            | 53.89   | 15.42  | 3.50 | 0.29 |
| P51410_RL9_MOUSE  | Rpl9  | 60S ribosomal protein L6.R.SVYAHFFINVIQENGLVEIR@.N                 | 11.25   | 2.21   | 5.09 | 0.20 |
| P51410_RL9_MOUSE  | Rpl9  | 60S ribosomal protein L6.K.TILSNQTVDIPENVEITLK#.G                  | 23.19   | 5.51   | 4.21 | 0.24 |
| P51410_RL9_MOUSE  | Rpl9  | 60S ribosomal protein L6.K.DELILEGNDEIELVSN5AALIQQATTVK#.N         | 35.49   | 10.52  | 3.77 | 0.30 |
| P51410_RL9_MOUSE  | Rpl9  | 60S ribosomal protein L6.R.DFNHINVELSLGK#.K                        | 180.31  | 56.53  | 3.19 | 0.31 |
| P51410_RL9_MOUSE  | Rpl9  | 60S ribosomal protein L6.R.DFNHINVELSLGK#.K                        | 14.04   | 4.79   | 2.93 | 0.34 |
| P51410_RL9_MOUSE  | Rpl9  | 60S ribosomal protein L6.K.FLDGIYSEK#.G                            | 539.57  | 178.53 | 3.02 | 0.33 |
| P51410_RL9_MOUSE  | Rpl9  | 60S ribosomal protein L6.K.GVTLGFGR@.Y                             | 295.84  | 85.50  | 3.46 | 0.29 |
| P51410_RL9_MOUSE  | Rpl9  | 60S ribosomal protein L6.R.K.FLDGIYSEK#.G                          | 209.51  | 66.52  | 3.15 | 0.32 |
| P51410_RL9_MOUSE  | Rpl9  | 60S ribosomal protein L6.R.K.FLDGIYSEK#.G                          | 115.43  | 36.54  | 3.16 | 0.32 |
| P51410_RL9_MOUSE  | Rpl9  | 60S ribosomal protein L6.-M*K#TILSNQTVDIPENVEITLK#.G               | 43.64   | 8.94   | 4.88 | 0.20 |
| P51410_RL9_MOUSE  | Rpl9  | 60S ribosomal protein L6.R.R@DFNHINVELSLGK#.K                      | 27.98   | 5.89   | 4.75 | 0.21 |
| P51410_RL9_MOUSE  | Rpl9  | 60S ribosomal protein L6.R.SVYAHFFINVIQENGLVEIR@.N                 | 71.73   | 22.47  | 3.19 | 0.31 |
| P51410_RL9_MOUSE  | Rpl9  | 60S ribosomal protein L6.K.TILSNQTVDIPENVEITLK#.G                  | 164.77  | 56.99  | 2.89 | 0.35 |
| P51410_RL9_MOUSE  | Rpl9  | 60S ribosomal protein L6.K.DELILEGNDEIELVSN5AALIQQATTVK#.N         | 8.09    | 3.73   | 2.17 | 0.46 |
| P51410_RL9_MOUSE  | Rpl9  | 60S ribosomal protein L6.R.DFNHINVELSLGK#.K                        | 24.73   | 4.18   | 5.92 | 0.17 |
| P51410_RL9_MOUSE  | Rpl9  | 60S ribosomal protein L6.K.FLDGIYSEK#.G                            | 40.32   | 9.56   | 4.22 | 0.24 |
| P51410_RL9_MOUSE  | Rpl9  | 60S ribosomal protein L6.R.SVYAHFFINVIQENGLVEIR@.N                 | 14.44   | 6.51   | 2.22 | 0.45 |
| P51410_RL9_MOUSE  | Rpl9  | 60S ribosomal protein L6.R.DFNHINVELSLGK#.K                        | 17.39   | 3.40   | 5.12 | 0.20 |
| P51410_RL9_MOUSE  | Rpl9  | 60S ribosomal protein L6.K.FLDGIYSEK#.G                            | 67.00   | 12.94  | 5.18 | 0.19 |
| P51410_RL9_MOUSE  | Rpl9  | 60S ribosomal protein L6.K.GVTLGFGR@.Y                             | 43.14   | 6.21   | 6.95 | 0.14 |
| P51410_RL9_MOUSE  | Rpl9  | 60S ribosomal protein L6.R.SVYAHFFINVIQENGLVEIR@.N                 | 10.57   | 1.91   | 5.54 | 0.18 |
| P51410_RL9_MOUSE  | Rpl9  | 60S ribosomal protein L6.K.TILSNQTVDIPENVEITLK#.G                  | 34.55   | 7.56   | 4.57 | 0.22 |
| P51410_RL9_MOUSE  | Rpl9  | 60S ribosomal protein L6.K.TILSNQTVDIPENVEITLK#.G                  | 38.47   | 6.64   | 5.79 | 0.17 |
| P14869_RLA0_MOUSE | Rplp0 | 60S acidic ribosomal pro K.AEAK#EESSEDEDM*GFGFLD.-                 | 120.94  | 28.09  | 4.31 | 0.23 |
| P14869_RLA0_MOUSE | Rplp0 | 60S acidic ribosomal pro K.AEAK#EESSEDEDMGFGFLD.-                  | 15.20   | 2.71   | 5.61 | 0.18 |
| P14869_RLA0_MOUSE | Rplp0 | 60S acidic ribosomal pro K.AFLADPSAFAAAAAAATAAPAAAAAPAK#.A         | 1029.88 | 326.02 | 3.16 | 0.32 |
| P14869_RLA0_MOUSE | Rplp0 | 60S acidic ribosomal pro K.AFLADPSAFAAAAAAATAAPAAAAAPAK#.A#AEAK#.E | 67.78   | 25.70  | 2.64 | 0.38 |
| P14869_RLA0_MOUSE | Rplp0 | 60S acidic ribosomal pro K.AVVLV#GK#.N                             | 195.98  | 88.71  | 2.21 | 0.45 |
| P14869_RLA0_MOUSE | Rplp0 | 60S acidic ribosomal pro K.AVVLV#GK#.N                             | 31.09   | 9.60   | 3.24 | 0.31 |
| P14869_RLA0_MOUSE | Rplp0 | 60S acidic ribosomal pro R.DMLLANK#V#PAAR@.A                       | 8.07    | 2.81   | 2.87 | 0.35 |
| P14869_RLA0_MOUSE | Rplp0 | 60S acidic ribosomal pro K.EDLTEIR@.D                              | 59.20   | 24.49  | 2.42 | 0.41 |
| P14869_RLA0_MOUSE | Rplp0 | 60S acidic ribosomal pro K.EDLTEIR@DM#LLANK#.V                     | 101.19  | 32.09  | 3.15 | 0.32 |
| P14869_RLA0_MOUSE | Rplp0 | 60S acidic ribosomal pro K.EESESEDEDM*GFGFLD.-                     | 37.40   | 37.40  | 1.00 | 1.00 |
| P14869_RLA0_MOUSE | Rplp0 | 60S acidic ribosomal pro R.GHLENNPALEK#.L                          | 611.32  | 206.42 | 2.96 | 0.34 |
| P14869_RLA0_MOUSE | Rplp0 | 60S acidic ribosomal pro R.GNVGFVFTK#.E                            | 449.44  | 164.63 | 2.73 | 0.37 |
| P14869_RLA0_MOUSE | Rplp0 | 60S acidic ribosomal pro R.GNVGFVFTK#EDLTEIR@.D                    | 170.80  | 48.84  | 3.50 | 0.29 |
| P14869_RLA0_MOUSE | Rplp0 | 60S acidic ribosomal pro R.GNVGFVFTKEDLTERDM#LLANK.V               | 29.32   | 9.78   | 3.00 | 0.33 |
| P14869_RLA0_MOUSE | Rplp0 | 60S acidic ribosomal pro R.GTIEILSDVQLIK#.T                        | 915.28  | 263.56 | 3.47 | 0.29 |
| P14869_RLA0_MOUSE | Rplp0 | 60S acidic ribosomal pro K.IIQLLDDYPK#.C                           | 1025.16 | 280.36 | 3.66 | 0.27 |
| P14869_RLA0_MOUSE | Rplp0 | 60S acidic ribosomal pro K.QM#QIR@.M                               | 88.63   | 30.50  | 2.91 | 0.34 |
| P14869_RLA0_MOUSE | Rplp0 | 60S acidic ribosomal pro K.TSFFQALGITTK#.I                         | 898.50  | 282.06 | 3.19 | 0.31 |
| P14869_RLA0_MOUSE | Rplp0 | 60S acidic ribosomal pro K.AFLADPSAFAAAAAAATAAPAAAAAPAK#.A         | 24.54   | 16.14  | 1.52 | 0.66 |
| P14869_RLA0_MOUSE | Rplp0 | 60S acidic ribosomal pro R.GTIEILSDVQLIK#.T                        | 35.01   | 13.83  | 2.53 | 0.40 |
| P14869_RLA0_MOUSE | Rplp0 | 60S acidic ribosomal pro K.TSFFQALGITTK#.I                         | 52.22   | 19.40  | 2.59 | 0.39 |
| P14869_RLA0_MOUSE | Rplp0 | 60S acidic ribosomal pro K.AEAK#EESSEDEDM*GFGFLD.-                 | 20.30   | 4.90   | 4.55 | 0.22 |
| P14869_RLA0_MOUSE | Rplp0 | 60S acidic ribosomal pro K.AFLADPSAFAAAAAAATAAPAAAAAPAK#.A         | 205.27  | 54.64  | 3.76 | 0.27 |
| P14869_RLA0_MOUSE | Rplp0 | 60S acidic ribosomal pro R.GHLENNPALEK#.L                          | 110.27  | 30.56  | 3.61 | 0.28 |
| P14869_RLA0_MOUSE | Rplp0 | 60S acidic ribosomal pro R.GNVGFVFTK#.E                            | 98.49   | 25.16  | 3.91 | 0.26 |
| P14869_RLA0_MOUSE | Rplp0 | 60S acidic ribosomal pro R.GNVGFVFTK#EDLTEIR@.D                    | 13.70   | 6.60   | 2.08 | 0.48 |
| P14869_RLA0_MOUSE | Rplp0 | 60S acidic ribosomal pro R.GTIEILSDVQLIK#.T                        | 171.89  | 38.10  | 4.51 | 0.22 |
| P14869_RLA0_MOUSE | Rplp0 | 60S acidic ribosomal pro K.IIQLLDDYPK#.C                           | 237.55  | 56.89  | 4.18 | 0.24 |
| P14869_RLA0_MOUSE | Rplp0 | 60S acidic ribosomal pro K.AEAK#EESSEDEDM*GFGFLD.-                 | 21.11   | 3.58   | 5.90 | 0.17 |
| P14869_RLA0_MOUSE | Rplp0 | 60S acidic ribosomal pro K.AFLADPSAFAAAAAAATAAPAAAAAPAK#.A         | 208.59  | 50.41  | 4.14 | 0.24 |
| P14869_RLA0_MOUSE | Rplp0 | 60S acidic ribosomal pro K.EDLTEIR@.D                              | 43.87   | 10.36  | 4.24 | 0.24 |
| P14869_RLA0_MOUSE | Rplp0 | 60S acidic ribosomal pro K.EDLTEIR@DM#LLANK#.V                     | 27.10   | 5.29   | 5.12 | 0.20 |
| P14869_RLA0_MOUSE | Rplp0 | 60S acidic ribosomal pro K.EESESEDEDM*GFGFLD.-                     | 10.66   | 10.66  | 1.00 | 1.00 |
| P14869_RLA0_MOUSE | Rplp0 | 60S acidic ribosomal pro R.GHLENNPALEK#.L                          | 232.04  | 45.39  | 5.11 | 0.20 |
| P14869_RLA0_MOUSE | Rplp0 | 60S acidic ribosomal pro R.GNVGFVFTK#.E                            | 98.40   | 17.81  | 5.53 | 0.18 |
| P14869_RLA0_MOUSE | Rplp0 | 60S acidic ribosomal pro R.GNVGFVFTK#EDLTEIR@.D                    | 24.05   | 4.26   | 5.64 | 0.18 |
| P14869_RLA0_MOUSE | Rplp0 | 60S acidic ribosomal pro R.GTIEILSDVQLIK#.T                        | 200.01  | 37.70  | 5.31 | 0.19 |
| P14869_RLA0_MOUSE | Rplp0 | 60S acidic ribosomal pro K.IIQLLDDYPK#.C                           | 257.69  | 43.24  | 5.96 | 0.17 |
| P14869_RLA0_MOUSE | Rplp0 | 60S acidic ribosomal pro K.TSFFQALGITTK#.I                         | 235.52  | 45.67  | 5.16 | 0.19 |
| P47955_RLA1_MOUSE | Rplp1 | 60S acidic ribosomal pro K.AAGVSPEFPWGLFAK#.A                      | 115.64  | 38.44  | 3.01 | 0.33 |
| P47955_RLA1_MOUSE | Rplp1 | 60S acidic ribosomal pro K.K#EESSEDEDM*GFGFLD.-                    | 31.30   | 6.21   | 5.04 | 0.20 |
| P47955_RLA1_MOUSE | Rplp1 | 60S acidic ribosomal pro K.AAGVSPEFPWGLFAK#.A                      | 2608.42 | 677.09 | 3.85 | 0.26 |
| P47955_RLA1_MOUSE | Rplp1 | 60S acidic ribosomal pro K.K#EESSEDEDM*GFGFLD.-                    | 611.02  | 135.07 | 4.52 | 0.22 |
| P47955_RLA1_MOUSE | Rplp1 | 60S acidic ribosomal pro K.K#EESSEDEDMGFGFLD.-                     | 61.18   | 15.06  | 4.10 | 0.24 |
| P47955_RLA1_MOUSE | Rplp1 | 60S acidic ribosomal pro K.AAGVSPEFPWGLFAK#.A                      | 22.37   | 7.83   | 2.86 | 0.35 |
| P47955_RLA1_MOUSE | Rplp1 | 60S acidic ribosomal pro K.AAGVSPEFPWGLFAK#.A                      | 12.56   | 3.99   | 4.41 | 0.23 |
| P99027_RLA2_MOUSE | Rplp2 | 60S acidic ribosomal pro K.NIEDVIAQGVGK#.L                         | 8.78    | 3.74   | 2.35 | 0.43 |
| P99027_RLA2_MOUSE | Rplp2 | 60S acidic ribosomal pro K.I.LDSVIGIEADDDR@.L                      | 65.08   | 19.34  | 3.36 | 0.30 |
| P99027_RLA2_MOUSE | Rplp2 | 60S acidic ribosomal pro K.I.LDSVIGIEADDDR@.LNK#.V                 | 2494.64 | 701.33 | 3.56 | 0.28 |
| P99027_RLA2_MOUSE | Rplp2 | 60S acidic ribosomal pro K.I.LDSVIGIEADDDR@.LNK#.V                 | 178.63  | 47.43  | 3.77 | 0.27 |
| P99027_RLA2_MOUSE | Rplp2 | 60S acidic ribosomal pro K.K#EESSEDEDM*GFGFLD.-                    | 480.07  | 109.23 | 4.40 | 0.23 |
| P99027_RLA2_MOUSE | Rplp2 | 60S acidic ribosomal pro K.K#EESSEDEDMGFGFLD.-                     | 14.48   | 3.20   | 4.52 | 0.22 |
| P99027_RLA2_MOUSE | Rplp2 | 60S acidic ribosomal pro K.K#H.LDSVIGIEADDDR@.LNK#.V               | 365.45  | 123.13 | 2.97 | 0.34 |
| P99027_RLA2_MOUSE | Rplp2 | 60S acidic ribosomal pro K.LASVPAGGAVAVSAAPGSAAPAGSAPAAAEK#.K      | 1017.18 | 310.56 | 3.28 | 0.31 |
| P99027_RLA2_MOUSE | Rplp2 | 60S acidic ribosomal pro K.LASVPAGGAVAVSAAPGSAAPAGSAPAAAEK#.K      | 38.66   | 12.50  | 3.09 | 0.32 |
| P99027_RLA2_MOUSE | Rplp2 | 60S acidic ribosomal pro K.LASVPAGGAVAVSAAPGSAAPAGSAPAAAEK#.D      | 145.28  | 42.63  | 3.41 | 0.29 |
| P99027_RLA2_MOUSE | Rplp2 | 60S acidic ribosomal pro K.LASVPAGGAVAVSAAPGSAAPAGSAPAAAEK#.D      | 625.94  | 164.83 | 3.80 | 0.26 |
| P99027_RLA2_MOUSE | Rplp2 | 60S acidic ribosomal pro -M*R@YVASYLLAALGNSSPSAK#.D                | 175.66  | 48.89  | 3.59 | 0.28 |
| P99027_RLA2_MOUSE | Rplp2 | 60S acidic ribosomal pro K.NIEDVIAQGVGK#.L                         | 3227.08 | 834.28 | 3.87 | 0.26 |
| P99027_RLA2_MOUSE | Rplp2 | 60S acidic ribosomal pro R.YVASYLLAALGNSSPSAK#.D                   | 593.09  | 173.01 | 3.43 | 0.29 |
| Q91YQ5_RPN1_MOUSE | Rpn1  | Dolichyl-diphosphooligc R.APDELHYTLDTFGR@PVIVAYK#.K                | 18.07   | 9.88   | 1.83 | 0.55 |
| Q91YQ5_RPN1_MOUSE | Rpn1  | Dolichyl-diphosphooligc R.ASSFVLALEPELESR.L                        | 19.63   | 17.85  | 1.10 | 0.91 |
| Q91YQ5_RPN1_MOUSE | Rpn1  | Dolichyl-diphosphooligc R.PPLFGGWK#.T                              | 15.80   | 9.62   | 1.64 | 0.61 |
| Q91YQ5_RPN1_MOUSE | Rpn1  | Dolichyl-diphosphooligc R.FVDHFVDEQVDSLTVK#.I                      | 25.27   | 16.85  | 1.50 | 0.67 |
| Q91YQ5_RPN1_MOUSE | Rpn1  | Dolichyl-diphosphooligc R.FVDHFVDEQVDSLTVK#.I                      | 2.59    | 1.85   | 1.40 | 0.71 |
| Q91YQ5_RPN1_MOUSE | Rpn1  | Dolichyl-diphosphooligc R.HFDETVNRR@.Y                             | 20.85   | 13.87  | 1.50 | 0.67 |
| Q91YQ5_RPN1_MOUSE | Rpn1  | Dolichyl-diphosphooligc K.IDHIDLAL.-                               | 19.71   | 19.71  | 1.00 | 1.00 |
| Q91YQ5_RPN1_MOUSE | Rpn1  | Dolichyl-diphosphooligc K.NLVEQHQIDIVVHYTFNK#.V                    | 17.82   | 18.01  | 0.99 | 1.01 |
| Q91YQ5_RPN1_MOUSE | Rpn1  | Dolichyl-diphosphooligc K.VTAEVLLVHPGGGSTR@.A                      | 17.70   | 12.08  | 1.46 | 0.68 |
| Q91YQ5_RPN1_MOUSE | Rpn1  | Dolichyl-diphosphooligc R.ASSFVLALEPELESR@.L                       | 13.33   | 7.49   | 1.78 | 0.56 |
| Q91YQ5_RPN1_MOUSE | Rpn1  | Dolichyl-diphosphooligc K.VTAEVLLVHPGGGSTR@.A                      | 11.84   | 6.34   | 1.87 | 0.54 |
| Q9DBG6_RPN2_MOUSE | Rpn2  | Dolichyl-diphosphooligc R.LGKEIVTLATVQALQTASHLSQQADLR.N            | 30.42   | 15.47  | 1.97 | 0.51 |
| Q9DBG6_RPN2_MOUSE | Rpn2  | Dolichyl-diphosphooligc R.LQVSNVLSQVLQAQAAV#.L                     | 16.63   | 8.06   | 1.81 | 0.55 |
| Q9DBG6_RPN2_MOUSE | Rpn2  | Dolichyl-diphosphooligc K.NFESLSEFVSASAAALSQNR.Y                   | 16.82   | 14.50  | 1.16 | 0.86 |
| Q9DBG6_RPN2_MOUSE | Rpn2  | Dolichyl-diphosphooligc R.NIVIEEIDLVAR@.L                          | 46.04   | 31.66  | 1.45 | 0.69 |

|                    |        |                                                               |        |        |      |      |
|--------------------|--------|---------------------------------------------------------------|--------|--------|------|------|
| Q9DBG6_RPN2_MOUSE  | Rpn2   | Dolichyl-diphosphooligc K.TGQEVVFAEPDNK#.N                    | 11.32  | 10.23  | 1.11 | 0.90 |
| Q9DBG6_RPN2_MOUSE  | Rpn2   | Dolichyl-diphosphooligc R.YHVPVVWPEGSTDTQEQAILR@.L            | 21.24  | 14.11  | 1.51 | 0.66 |
| Q9DBG6_RPN2_MOUSE  | Rpn2   | Dolichyl-diphosphooligc R.YHVPVVWPEGSTDTQEQAILR@.L            | 5.01   | 4.14   | 1.21 | 0.83 |
| Q99JH1_RP215_MOUSE | Rpp251 | Ribonuclease P protein s R.NLLGLAIGR@.L                       | 24.70  | 15.75  | 1.57 | 0.64 |
| Q8VDS4_RPR1A_MOUSE | Rprd1a | Regulation of nuclear pre R.DFAPVIVEAFK#.H                    | 36.53  | 14.44  | 2.53 | 0.40 |
| Q8VDS4_RPR1A_MOUSE | Rprd1a | Regulation of nuclear pre R.IASLPVEVQEVSLLEK#.I               | 72.32  | 29.70  | 2.44 | 0.41 |
| Q8VDS4_RPR1A_MOUSE | Rprd1a | Regulation of nuclear pre R.IQSLPDLISR@.L                     | 37.02  | 17.91  | 2.07 | 0.48 |
| Q8VDS4_RPR1A_MOUSE | Rprd1a | Regulation of nuclear pre R.KHLTFLYLANDVIQNSK#.R              | 26.12  | 16.25  | 1.61 | 0.62 |
| Q8VDS4_RPR1A_MOUSE | Rprd1a | Regulation of nuclear pre R.LTFLYLANDVIQNSK#.R                | 34.16  | 15.91  | 2.15 | 0.47 |
| Q8VDS4_RPR1A_MOUSE | Rprd1a | Regulation of nuclear pre R.M*LADFLR@.C                       | 30.20  | 11.49  | 2.63 | 0.38 |
| Q8VDS4_RPR1A_MOUSE | Rprd1a | Regulation of nuclear pre R.SVYENDVLEQLK#.H                   | 32.73  | 15.63  | 2.09 | 0.48 |
| Q8VDS4_RPR1A_MOUSE | Rprd1a | Regulation of nuclear pre R.VLSIWEER@.S                       | 28.25  | 15.21  | 1.86 | 0.54 |
| Q9CSUO_RPR1B_MOUSE | Rprd1b | Regulation of nuclear pre R.ALQDLENAASGDATVR@.Q               | 39.91  | 14.66  | 2.72 | 0.37 |
| Q9CSUO_RPR1B_MOUSE | Rprd1b | Regulation of nuclear pre R.IASLPQEVQVDSVLSLEK#.I             | 34.10  | 11.98  | 2.85 | 0.35 |
| Q9CSUO_RPR1B_MOUSE | Rprd1b | Regulation of nuclear pre R.LAALEDR@.R                        | 28.48  | 19.53  | 1.46 | 0.69 |
| Q9CSUO_RPR1B_MOUSE | Rprd1b | Regulation of nuclear pre R.LLNWQER@.S                        | 36.67  | 11.87  | 3.09 | 0.32 |
| Q9CSUO_RPR1B_MOUSE | Rprd1b | Regulation of nuclear pre R.M*LVYEQNQK#.E                     | 33.69  | 13.36  | 2.52 | 0.40 |
| Q9CSUO_RPR1B_MOUSE | Rprd1b | Regulation of nuclear pre R.SVYGFQIQK#.L                      | 30.33  | 21.87  | 1.39 | 0.72 |
| Q6NX16_RPRD2_MOUSE | Rprd2  | Regulation of nuclear pre R.APQFQESVTSFR@.S                   | 9.49   | 1.91   | 4.96 | 0.20 |
| Q6NX16_RPRD2_MOUSE | Rprd2  | Regulation of nuclear pre R.ASSSSASAGALESSDR@.K               | 15.94  | 5.83   | 2.74 | 0.37 |
| Q6NX16_RPRD2_MOUSE | Rprd2  | Regulation of nuclear pre R.ASVGQSPVLPSTTFK#.L                | 21.02  | 6.43   | 3.27 | 0.31 |
| Q6NX16_RPRD2_MOUSE | Rprd2  | Regulation of nuclear pre R.ESFADVLEAAALVK#.D                 | 17.75  | 8.52   | 2.08 | 0.48 |
| Q6NX16_RPRD2_MOUSE | Rprd2  | Regulation of nuclear pre R.GPTSTVSDIDGTPVR@DER@.S            | 34.00  | 15.78  | 2.15 | 0.46 |
| Q6NX16_RPRD2_MOUSE | Rprd2  | Regulation of nuclear pre R.IISPQSSVTSR@.S                    | 7.65   | 2.24   | 3.42 | 0.29 |
| Q6NX16_RPRD2_MOUSE | Rprd2  | Regulation of nuclear pre R.ISSILSLSVSM*K#.N                  | 27.11  | 7.85   | 3.45 | 0.29 |
| Q6NX16_RPRD2_MOUSE | Rprd2  | Regulation of nuclear pre R.ISSILSLSVSMK#.N                   | 50.53  | 9.25   | 5.46 | 0.18 |
| Q6NX16_RPRD2_MOUSE | Rprd2  | Regulation of nuclear pre R.LSDATEYQILSSVYHR@.A               | 17.88  | 7.85   | 2.28 | 0.44 |
| Q6NX16_RPRD2_MOUSE | Rprd2  | Regulation of nuclear pre R.NGSPSLTEALENAGIFYEAQYK#.E         | 12.26  | 3.19   | 3.84 | 0.26 |
| Q6NX16_RPRD2_MOUSE | Rprd2  | Regulation of nuclear pre R.NLLSSTOSFIPK#.S                   | 29.15  | 9.29   | 3.14 | 0.32 |
| Q6NX16_RPRD2_MOUSE | Rprd2  | Regulation of nuclear pre R.K.NTGVSASSAR@PSPGIPSTPSNLSSGLK#.T | 17.13  | 4.16   | 4.11 | 0.24 |
| Q6NX16_RPRD2_MOUSE | Rprd2  | Regulation of nuclear pre R.SEDQIELK#.E                       | 26.19  | 5.83   | 4.50 | 0.22 |
| Q6NX16_RPRD2_MOUSE | Rprd2  | Regulation of nuclear pre R.SQALIEILLM*YK#.R                  | 60.01  | 5.37   | 5.70 | 0.18 |
| Q6NX16_RPRD2_MOUSE | Rprd2  | Regulation of nuclear pre R.TPAPATTPSHNLNLSK#.V               | 20.03  | 10.08  | 1.99 | 0.50 |
| Q6NX16_RPRD2_MOUSE | Rprd2  | Regulation of nuclear pre R.VEITPESLSALSCK.T                  | 49.20  | 16.16  | 3.05 | 0.33 |
| Q6NX16_RPRD2_MOUSE | Rprd2  | Regulation of nuclear pre R.APQFQESVTSFR@.S                   | 13.46  | 5.30   | 2.54 | 0.39 |
| Q6NX16_RPRD2_MOUSE | Rprd2  | Regulation of nuclear pre R.ASVGQSPVLPSTTFK#.L                | 18.89  | 6.86   | 2.75 | 0.36 |
| Q6NX16_RPRD2_MOUSE | Rprd2  | Regulation of nuclear pre R.EAPTHLPSVDSLNPFK#.E               | 25.33  | 7.05   | 3.60 | 0.28 |
| Q6NX16_RPRD2_MOUSE | Rprd2  | Regulation of nuclear pre R.ESFADVLEAAALVK#.D                 | 20.35  | 7.54   | 2.70 | 0.37 |
| Q6NX16_RPRD2_MOUSE | Rprd2  | Regulation of nuclear pre R.GPTSTVSDIDGTPVR@DER@.S            | 29.03  | 16.40  | 1.77 | 0.56 |
| Q6NX16_RPRD2_MOUSE | Rprd2  | Regulation of nuclear pre R.IISPQSSVTSR@.S                    | 8.87   | 3.96   | 2.24 | 0.45 |
| Q6NX16_RPRD2_MOUSE | Rprd2  | Regulation of nuclear pre R.ISSILSLSVSM*K#.N                  | 24.50  | 7.71   | 3.18 | 0.31 |
| Q6NX16_RPRD2_MOUSE | Rprd2  | Regulation of nuclear pre R.LSSPGLFGAFNIR@.G                  | 12.69  | 3.75   | 3.39 | 0.30 |
| Q6NX16_RPRD2_MOUSE | Rprd2  | Regulation of nuclear pre R.NGSPSLTEALENAGIFYEAQYK#.E         | 12.40  | 4.73   | 2.62 | 0.38 |
| Q6NX16_RPRD2_MOUSE | Rprd2  | Regulation of nuclear pre R.K.NTGVSASSAR@PSPGIPSTPSNLSSGLK#.T | 13.40  | 2.81   | 4.77 | 0.21 |
| Q6NX16_RPRD2_MOUSE | Rprd2  | Regulation of nuclear pre R.NVYEDM*IVALR@.E                   | 14.45  | 2.53   | 5.71 | 0.18 |
| Q6NX16_RPRD2_MOUSE | Rprd2  | Regulation of nuclear pre R.SIFSSQSLAAPAGHPPTSGVEK#.V         | 17.58  | 6.01   | 2.92 | 0.34 |
| Q6NX16_RPRD2_MOUSE | Rprd2  | Regulation of nuclear pre R.SQALIEILLM*YK#.R                  | 20.21  | 6.55   | 3.08 | 0.32 |
| Q6NX16_RPRD2_MOUSE | Rprd2  | Regulation of nuclear pre R.TPAPATTPSHNLNLSK#.V               | 8.95   | 7.28   | 1.23 | 0.81 |
| Q6NX16_RPRD2_MOUSE | Rprd2  | Regulation of nuclear pre R.VEITPESLSALSCK.T                  | 46.75  | 10.32  | 4.53 | 0.22 |
| P63325_RS10_MOUSE  | Rps10  | 40S ribosomal protein S1 R.IAIYELFK#.E                        | 23.90  | 8.20   | 2.91 | 0.34 |
| P63325_RS10_MOUSE  | Rps10  | 40S ribosomal protein S1 K.AEAGAGSATEFQFR@.G                  | 183.61 | 69.68  | 2.64 | 0.38 |
| P63325_RS10_MOUSE  | Rps10  | 40S ribosomal protein S1 R.DYHLHPPEIVPATR@.R                  | 95.29  | 39.57  | 2.41 | 0.42 |
| P63325_RS10_MOUSE  | Rps10  | 40S ribosomal protein S1 R.DYHLHPPEIVPATR@R@.S                | 15.16  | 7.59   | 2.00 | 0.50 |
| P63325_RS10_MOUSE  | Rps10  | 40S ribosomal protein S1 R.HFYVLYLNEIGIQLR@.D                 | 23.90  | 11.29  | 2.12 | 0.47 |
| P63325_RS10_MOUSE  | Rps10  | 40S ribosomal protein S1 K.HPELADK#.N                         | 53.53  | 28.72  | 1.86 | 0.54 |
| P63325_RS10_MOUSE  | Rps10  | 40S ribosomal protein S1 K.HPELADK#MNPVLM*YK#.A               | 2.33   | 2.91   | 0.80 | 1.25 |
| P63325_RS10_MOUSE  | Rps10  | 40S ribosomal protein S1 R.IAIYELFK#.E                        | 518.61 | 202.14 | 2.57 | 0.39 |
| P63325_RS10_MOUSE  | Rps10  | 40S ribosomal protein S1 K.K.AEAGAGSATEFQFR@.G                | 181.60 | 63.28  | 2.87 | 0.35 |
| P63325_RS10_MOUSE  | Rps10  | 40S ribosomal protein S1 K.NVPLNLM*YK#.A                      | 37.85  | 14.22  | 2.66 | 0.38 |
| P62281_RS11_MOUSE  | Rps11  | 40S ribosomal protein S1 R.DYLHYR@.K                          | 24.52  | 6.24   | 3.93 | 0.25 |
| P62281_RS11_MOUSE  | Rps11  | 40S ribosomal protein S1 K.EAIEGYDK#K                         | 5.99   | 2.55   | 2.35 | 0.43 |
| P62281_RS11_MOUSE  | Rps11  | 40S ribosomal protein S1 K.EAIEGYDK#K#.C                      | 9.53   | 3.85   | 2.48 | 0.40 |
| P62281_RS11_MOUSE  | Rps11  | 40S ribosomal protein S1 R.DYLHYR@.K                          | 124.43 | 44.28  | 2.81 | 0.36 |
| P62281_RS11_MOUSE  | Rps11  | 40S ribosomal protein S1 K.EAIEGYDK#K#.C                      | 105.32 | 33.06  | 3.19 | 0.31 |
| P62281_RS11_MOUSE  | Rps11  | 40S ribosomal protein S1 R.ILSGVVTK#.M                        | 381.05 | 144.02 | 2.65 | 0.38 |
| P62281_RS11_MOUSE  | Rps11  | 40S ribosomal protein S1 K.EAIEGYDK#K                         | 9.59   | 2.49   | 3.85 | 0.26 |
| P63323_RS12_MOUSE  | Rps12  | 40S ribosomal protein S1 K.DVIEEYK#.C                         | 85.74  | 47.04  | 1.82 | 0.55 |
| P63323_RS12_MOUSE  | Rps12  | 40S ribosomal protein S1 K.ESQAKDIEEYK#.C                     | 6.16   | 4.10   | 1.50 | 0.67 |
| P63323_RS12_MOUSE  | Rps12  | 40S ribosomal protein S1 K.TALIHDLGAR@.G                      | 20.50  | 13.78  | 1.49 | 0.67 |
| P62301_RS13_MOUSE  | Rps13  | 40S ribosomal protein S1 R.DSHGVAQVR@.F                       | 110.44 | 36.70  | 3.01 | 0.33 |
| P62301_RS13_MOUSE  | Rps13  | 40S ribosomal protein S1 K.GLSQSALPYR@.R                      | 421.27 | 151.87 | 2.77 | 0.36 |
| P62301_RS13_MOUSE  | Rps13  | 40S ribosomal protein S1 K.GLTPSQGVILR@.D                     | 232.72 | 92.31  | 2.52 | 0.40 |
| P62301_RS13_MOUSE  | Rps13  | 40S ribosomal protein S1 K.K.HGLTQSQVILR@.D                   | 160.77 | 68.02  | 2.36 | 0.42 |
| P62301_RS13_MOUSE  | Rps13  | 40S ribosomal protein S1 K.KGLTQSQGVILR@.D                    | 39.37  | 12.75  | 3.09 | 0.32 |
| P62301_RS13_MOUSE  | Rps13  | 40S ribosomal protein S1 R.LIULSIR#.I                         | 786.78 | 277.68 | 2.83 | 0.35 |
| P62301_RS13_MOUSE  | Rps13  | 40S ribosomal protein S1 K.R@VLPNNWK#.Y                       | 11.23  | 5.42   | 2.07 | 0.48 |
| P62301_RS13_MOUSE  | Rps13  | 40S ribosomal protein S1 K.K.HGLAPDLPELHYLIK#.K               | 66.24  | 27.51  | 2.41 | 0.42 |
| P62264_RS14_MOUSE  | Rps14  | 40S ribosomal protein S1 K.ADR@DESSPYAAM*LAQDVAQR@.C          | 8.16   | 4.89   | 1.67 | 0.60 |
| P62264_RS14_MOUSE  | Rps14  | 40S ribosomal protein S1 R.IEDVTPIPSDSTR@.R                   | 21.77  | 7.93   | 2.74 | 0.36 |
| P62264_RS14_MOUSE  | Rps14  | 40S ribosomal protein S1 K.ADR@DESSPYAAM*LAQDVAQR@.C          | 101.97 | 35.44  | 2.88 | 0.35 |
| P62264_RS14_MOUSE  | Rps14  | 40S ribosomal protein S1 K.ADR@DESSPYAAM*LAQDVAQR@.C          | 27.41  | 7.84   | 3.50 | 0.29 |
| P62264_RS14_MOUSE  | Rps14  | 40S ribosomal protein S1 R.DESSPYAAM*LAQDVAQR@.C              | 5.35   | 3.04   | 1.76 | 0.57 |
| P62264_RS14_MOUSE  | Rps14  | 40S ribosomal protein S1 R.IEDVTPIPSDSTR.R                    | 238.69 | 99.44  | 2.40 | 0.42 |
| P62264_RS14_MOUSE  | Rps14  | 40S ribosomal protein S1 R.IEDVTPIPSDSTR.K                    | 415.84 | 152.94 | 2.72 | 0.37 |
| P62264_RS14_MOUSE  | Rps14  | 40S ribosomal protein S1 K.IGR@IEDVTPIPSDSTR.R                | 54.83  | 20.14  | 2.72 | 0.37 |
| P62264_RS14_MOUSE  | Rps14  | 40S ribosomal protein S1 K.IGR@IEDVTPIPSDSTR@.R               | 2.56   | 2.10   | 1.22 | 0.82 |
| P62264_RS14_MOUSE  | Rps14  | 40S ribosomal protein S1 K.IGR@IEDVTPIPSDSTR@R@.K             | 14.46  | 5.17   | 2.80 | 0.36 |
| P62264_RS14_MOUSE  | Rps14  | 40S ribosomal protein S1 R.TKHTPFGAQSALR@.A                   | 305.64 | 108.35 | 2.82 | 0.35 |
| P62264_RS14_MOUSE  | Rps14  | 40S ribosomal protein S1 K.TPQGAQSALR@.A                      | 582.10 | 233.64 | 2.49 | 0.40 |
| P62264_RS14_MOUSE  | Rps14  | 40S ribosomal protein S1 K.VKADREDESSPYAAM*LAQDVAQR@.C        | 82.90  | 23.76  | 3.49 | 0.29 |
| P62264_RS14_MOUSE  | Rps14  | 40S ribosomal protein S1 K.TPQGAQSALR@.A                      | 18.64  | 6.94   | 2.68 | 0.37 |
| P62843_RS15_MOUSE  | Rps15  | 40S ribosomal protein S1 R.DMIILLPEM*VGSMM*VGVYNGK#.T         | 3.78   | 2.29   | 1.65 | 0.61 |
| P62843_RS15_MOUSE  | Rps15  | 40S ribosomal protein S1 K.EAPP#EK#PEVVK#.T                   | 42.57  | 12.17  | 3.50 | 0.29 |
| P62843_RS15_MOUSE  | Rps15  | 40S ribosomal protein S1 K.HGR@PPIGATHSSR@.F                  | 5.40   | 2.57   | 2.10 | 0.48 |
| P62245_RS15A_MOUSE | Rps15a | 40S ribosomal protein S1 R.FDVQLKHDLEK#.W                     | 24.00  | 8.45   | 2.84 | 0.35 |
| P62245_RS15A_MOUSE | Rps15a | 40S ribosomal protein S1 K.HGVYGFIEIHDR@.A                    | 84.54  | 29.90  | 2.83 | 0.35 |
| P62245_RS15A_MOUSE | Rps15a | 40S ribosomal protein S1 K.IVNVLTGR#.L                        | 125.65 | 52.95  | 2.37 | 0.42 |
| P62245_RS15A_MOUSE | Rps15a | 40S ribosomal protein S1 R.M*NVLADALK#.S                      | 71.67  | 31.25  | 2.29 | 0.44 |
| P62245_RS15A_MOUSE | Rps15a | 40S ribosomal protein S1 R.QFGFIVLTSAGIM*DHEEAR@.R            | 18.21  | 8.27   | 2.20 | 0.45 |
| P62245_RS15A_MOUSE | Rps15a | 40S ribosomal protein S1 R.QFGFIVLTSAGIMDHEEAR@.R             | 4.42   | 3.55   | 1.24 | 0.80 |
| P62245_RS15A_MOUSE | Rps15a | 40S ribosomal protein S1 K.WQNNLPSR@.Q                        | 40.64  | 18.54  | 2.19 | 0.46 |
| P62245_RS15A_MOUSE | Rps15a | 40S ribosomal protein S1 R.FDVQLKHDLEK#.W                     | 46.61  | 16.32  | 2.86 | 0.35 |
| P62245_RS15A_MOUSE | Rps15a | 40S ribosomal protein S1 K.HGVYGFIEIHDR@.A                    | 78.40  | 24.10  | 3.25 | 0.31 |



|                    |        |                                                        |         |        |      |      |
|--------------------|--------|--------------------------------------------------------|---------|--------|------|------|
| Q9CQR2_RS21_MOUSE  | Rps21  | 40S ribosomal protein S2; R.M*GESDDSLR.L               | 52.77   | 35.73  | 1.48 | 0.68 |
| P62267_RS23_MOUSE  | Rps23  | 40S ribosomal protein S2; K.VANVSLALYK#.G              | 81.84   | 30.05  | 2.72 | 0.37 |
| P62267_RS23_MOUSE  | Rps23  | 40S ribosomal protein S2; K.ANPFGGASGHAK#.G            | 143.04  | 57.09  | 2.51 | 0.40 |
| P62267_RS23_MOUSE  | Rps23  | 40S ribosomal protein S2; K.GHVAVDIPGVRR#.F            | 41.61   | 34.61  | 1.20 | 0.83 |
| P62267_RS23_MOUSE  | Rps23  | 40S ribosomal protein S2; R.KHGHVAVDIPGVRR#.F          | 279.19  | 83.29  | 3.35 | 0.30 |
| P62267_RS23_MOUSE  | Rps23  | 40S ribosomal protein S2; K.VANVSLALYK#.G              | 665.02  | 254.42 | 2.61 | 0.38 |
| P62267_RS23_MOUSE  | Rps23  | 40S ribosomal protein S2; R.KHGHVAVDIPGVRR#.F          | 16.57   | 5.64   | 2.94 | 0.34 |
| P62267_RS23_MOUSE  | Rps23  | 40S ribosomal protein S2; K.VANVSLALYK#.G              | 29.78   | 9.68   | 3.08 | 0.32 |
| P62267_RS23_MOUSE  | Rps23  | 40S ribosomal protein S2; K.VANVSLALYK#.G              | 24.45   | 7.89   | 3.10 | 0.32 |
| P62849_RS24_MOUSE  | Rps24  | 40S ribosomal protein S2; R.HGLYEK#.K                  | 82.12   | 25.89  | 3.17 | 0.32 |
| P62849_RS24_MOUSE  | Rps24  | 40S ribosomal protein S2; R.KHQM*VIDLVHPGK#.A          | 47.98   | 13.03  | 3.68 | 0.27 |
| P62849_RS24_MOUSE  | Rps24  | 40S ribosomal protein S2; R.KHQM*VIDLVHPGK#.A          | 15.18   | 6.63   | 2.29 | 0.44 |
| P62849_RS24_MOUSE  | Rps24  | 40S ribosomal protein S2; K.TTGFGM*YDSDLYAK#.K         | 305.27  | 79.55  | 3.84 | 0.26 |
| P62849_RS24_MOUSE  | Rps24  | 40S ribosomal protein S2; K.TTGFGM*YDSDLYAK#.K         | 65.35   | 23.19  | 2.82 | 0.35 |
| P62852_RS25_MOUSE  | Rps24  | 40S ribosomal protein S2; K.TTPDIVVFGFR#@.T            | 136.25  | 38.94  | 3.50 | 0.29 |
| P62852_RS25_MOUSE  | Rps25  | 40S ribosomal protein S2; R.DKHLNLLVDFDK#.A            | 16.34   | 6.54   | 2.50 | 0.40 |
| P62852_RS25_MOUSE  | Rps25  | 40S ribosomal protein S2; K.LITPAVVSER#@.L             | 59.79   | 25.62  | 2.33 | 0.43 |
| P62852_RS25_MOUSE  | Rps25  | 40S ribosomal protein S2; R.AALQELLSK#.G               | 661.23  | 203.96 | 3.24 | 0.31 |
| P62852_RS25_MOUSE  | Rps25  | 40S ribosomal protein S2; R.AQIVYTR#@.N                | 184.88  | 60.65  | 3.05 | 0.33 |
| P62852_RS25_MOUSE  | Rps25  | 40S ribosomal protein S2; R.DKLNLLVDFDK#.A             | 97.28   | 30.04  | 3.24 | 0.31 |
| P62852_RS25_MOUSE  | Rps25  | 40S ribosomal protein S2; K.LITPAVVSER#@.L             | 545.37  | 182.12 | 2.99 | 0.33 |
| P62852_RS25_MOUSE  | Rps25  | 40S ribosomal protein S2; K.LNLLVDFDK#.A               | 77.56   | 33.57  | 2.32 | 0.43 |
| P62852_RS25_MOUSE  | Rps25  | 40S ribosomal protein S2; K.VR@DKHLNLLVDFDK#.A         | 28.54   | 6.01   | 4.75 | 0.21 |
| P62855_RS26_MOUSE  | Rps26  | 40S ribosomal protein S2; R.NIVEAAVR#@.D               | 85.50   | 26.80  | 3.19 | 0.31 |
| P62855_RS26_MOUSE  | Rps26  | 40S ribosomal protein S2; R.DISEAVFDAYWLPK#.L          | 135.04  | 38.39  | 3.52 | 0.28 |
| P62855_RS26_MOUSE  | Rps26  | 40S ribosomal protein S2; R.NIVEAAVR#@.D               | 538.25  | 168.16 | 3.20 | 0.31 |
| P62855_RS26_MOUSE  | Rps26  | 40S ribosomal protein S2; R.NIVEAAVR#@.D               | 58.57   | 16.40  | 3.57 | 0.28 |
| P62855_RS26_MOUSE  | Rps26  | 40S ribosomal protein S2; R.NIVEAAVR#@.D               | 83.90   | 18.14  | 4.63 | 0.22 |
| Q6ZWW3_RS27L_MOUSE | Rps271 | 40S ribosomal protein S2; R.LVQSPNSYFM*DVVK#.C         | 13.55   | 4.15   | 3.26 | 0.31 |
| Q6ZWW3_RS27L_MOUSE | Rps271 | 40S ribosomal protein S2; R.DLHLPSPSEYEMKHK#.H         | 19.55   | 9.25   | 2.11 | 0.47 |
| Q6ZWW3_RS27L_MOUSE | Rps271 | 40S ribosomal protein S2; R.LVQSPNSYFM*DVVK#.C         | 109.07  | 42.12  | 2.59 | 0.39 |
| Q6ZWW3_RS27L_MOUSE | Rps271 | 40S ribosomal protein S2; R.LVQSPNSYFM*DVVK#.C         | 18.50   | 5.07   | 3.65 | 0.27 |
| Q6ZWW3_RS27L_MOUSE | Rps271 | 40S ribosomal protein S2; R.LVQSPNSYFM*DVVK#.C         | 14.74   | 6.40   | 2.30 | 0.43 |
| Q6ZWW3_RS27L_MOUSE | Rps271 | 40S ribosomal protein S2; R.LVQSPNSYFM*DVVK#.C         | 21.74   | 6.93   | 3.14 | 0.32 |
| P62858_RS28_MOUSE  | Rps28  | 40S ribosomal protein S2; R.EGVDLTLLSEER#@.E           | 302.09  | 130.07 | 2.32 | 0.43 |
| P62858_RS28_MOUSE  | Rps28  | 40S ribosomal protein S2; R.VEFMDDSYR#@.S              | 8.00    | 1.27   | 6.29 | 0.16 |
| P62858_RS28_MOUSE  | Rps28  | 40S ribosomal protein S2; R.VEFM*DDTSR.S               | 78.03   | 27.25  | 2.86 | 0.35 |
| P62858_RS28_MOUSE  | Rps28  | 40S ribosomal protein S2; R.EGVDLTLLSEER#@.E           | 26.62   | 7.52   | 3.54 | 0.28 |
| P62274_RS29_MOUSE  | Rps29  | 40S ribosomal protein S2; K.DIGIFK#.D.-                | 342.05  | 125.79 | 2.72 | 0.37 |
| P62908_RS3_MOUSE   | Rps3   | 40S ribosomal protein S2; K.AELNEFLTR#@.E              | 440.08  | 160.73 | 2.74 | 0.37 |
| P62908_RS3_MOUSE   | Rps3   | 40S ribosomal protein S2; K.DEILPTPISEQK#.G            | 351.81  | 137.07 | 2.57 | 0.39 |
| P62908_RS3_MOUSE   | Rps3   | 40S ribosomal protein S2; R.ELAEDGYSVEVRR#@.V          | 667.23  | 250.61 | 2.66 | 0.38 |
| P62908_RS3_MOUSE   | Rps3   | 40S ribosomal protein S2; R.ELTAVQK#.R                 | 346.62  | 120.72 | 2.87 | 0.35 |
| P62908_RS3_MOUSE   | Rps3   | 40S ribosomal protein S2; R.FGFPEGSVELYAEK#.V          | 401.90  | 157.74 | 2.55 | 0.39 |
| P62908_RS3_MOUSE   | Rps3   | 40S ribosomal protein S2; R.FIM*ESGAK#.G               | 266.70  | 104.43 | 2.55 | 0.39 |
| P62908_RS3_MOUSE   | Rps3   | 40S ribosomal protein S2; K.FVADGIFK#.A                | 300.14  | 117.85 | 2.55 | 0.39 |
| P62908_RS3_MOUSE   | Rps3   | 40S ribosomal protein S2; K.FVADGIFK#AELNEFLTR#@.E     | 20.52   | 8.35   | 2.46 | 0.41 |
| P62908_RS3_MOUSE   | Rps3   | 40S ribosomal protein S2; K.FVDGLM*HSGDPVNYVDATVRR#@.H | 177.32  | 65.25  | 2.72 | 0.37 |
| P62908_RS3_MOUSE   | Rps3   | 40S ribosomal protein S2; K.GGK#PEPPAMP#POPVPTA.-      | 318.83  | 141.88 | 2.25 | 0.44 |
| P62908_RS3_MOUSE   | Rps3   | 40S ribosomal protein S2; K.GGK#PEPPAMP#POPVPTA.-      | 104.15  | 47.27  | 2.20 | 0.45 |
| P62908_RS3_MOUSE   | Rps3   | 40S ribosomal protein S2; K.IM*LPWDPGK#.I              | 111.72  | 40.47  | 2.76 | 0.36 |
| P62908_RS3_MOUSE   | Rps3   | 40S ribosomal protein S2; R.IR@ELTAVQK#.R              | 88.57   | 33.44  | 2.65 | 0.38 |
| P62908_RS3_MOUSE   | Rps3   | 40S ribosomal protein S2; R.IRELTAVQK#.R               | 159.86  | 56.69  | 2.82 | 0.35 |
| P62908_RS3_MOUSE   | Rps3   | 40S ribosomal protein S2; R.KHFVADGIFK#.A              | 217.35  | 86.34  | 2.52 | 0.40 |
| P62908_RS3_MOUSE   | Rps3   | 40S ribosomal protein S2; K.KPLPDHVSIVEPK#.D           | 142.09  | 56.33  | 2.52 | 0.40 |
| P62908_RS3_MOUSE   | Rps3   | 40S ribosomal protein S2; R.QGLVGIK#.V                 | 299.94  | 122.33 | 2.45 | 0.41 |
| P62908_RS3_MOUSE   | Rps3   | 40S ribosomal protein S2; K.R@FGFPEGSVELYAEK#.V        | 41.00   | 13.31  | 3.08 | 0.32 |
| P62908_RS3_MOUSE   | Rps3   | 40S ribosomal protein S2; R.TEIIILATR#@.T              | 637.12  | 214.98 | 2.96 | 0.34 |
| P62908_RS3_MOUSE   | Rps3   | 40S ribosomal protein S2; R.TQNVLGK#.G                 | 588.46  | 236.85 | 2.48 | 0.40 |
| P62908_RS3_MOUSE   | Rps3   | 40S ribosomal protein S2; K.AELNEFLTR#@.E              | 29.80   | 14.26  | 2.09 | 0.48 |
| P62908_RS3_MOUSE   | Rps3   | 40S ribosomal protein S2; R.ELAEDGYSVEVRR#@.V          | 24.32   | 12.18  | 2.00 | 0.50 |
| P62908_RS3_MOUSE   | Rps3   | 40S ribosomal protein S2; R.FGFPEGSVELYAEK#.V          | 20.76   | 9.53   | 2.18 | 0.46 |
| P62908_RS3_MOUSE   | Rps3   | 40S ribosomal protein S2; K.GGK#PEPPAMP#POPVPTA.-      | 16.33   | 6.02   | 2.71 | 0.37 |
| P62908_RS3_MOUSE   | Rps3   | 40S ribosomal protein S2; K.K#PLPDHVSIVEPK#.D          | 12.01   | 4.05   | 2.97 | 0.34 |
| P62908_RS3_MOUSE   | Rps3   | 40S ribosomal protein S2; R.TEIIILATR#@.T              | 19.90   | 7.67   | 2.59 | 0.39 |
| P62908_RS3_MOUSE   | Rps3   | 40S ribosomal protein S2; K.AELNEFLTR#@.E              | 27.80   | 9.64   | 2.89 | 0.35 |
| P62908_RS3_MOUSE   | Rps3   | 40S ribosomal protein S2; K.DEILPTPISEQK#.G            | 21.28   | 7.16   | 2.97 | 0.34 |
| P62908_RS3_MOUSE   | Rps3   | 40S ribosomal protein S2; R.ELAEDGYSVEVRR#@.V          | 35.95   | 13.20  | 2.72 | 0.37 |
| P62908_RS3_MOUSE   | Rps3   | 40S ribosomal protein S2; R.FGFPEGSVELYAEK#.V          | 24.46   | 7.01   | 3.49 | 0.29 |
| P62908_RS3_MOUSE   | Rps3   | 40S ribosomal protein S2; K.FVDGLM*HSGDPVNYVDATVRR#@.H | 16.52   | 8.14   | 2.03 | 0.49 |
| P62908_RS3_MOUSE   | Rps3   | 40S ribosomal protein S2; K.GGK#PEPPAMP#POPVPTA.-      | 22.14   | 8.47   | 2.61 | 0.38 |
| P62908_RS3_MOUSE   | Rps3   | 40S ribosomal protein S2; K.K#PLPDHVSIVEPK#.D          | 8.39    | 5.56   | 1.51 | 0.66 |
| P62908_RS3_MOUSE   | Rps3   | 40S ribosomal protein S2; R.TEIIILATR#@.T              | 26.75   | 12.79  | 2.09 | 0.48 |
| P97351_RS3A_MOUSE  | Rps3a  | 40S ribosomal protein S2; R.ADGYPEPPVQESV.-            | 153.79  | 153.79 | 1.00 | 1.00 |
| P97351_RS3A_MOUSE  | Rps3a  | 40S ribosomal protein S2; K.APAM*FNIR#@.N              | 448.78  | 143.94 | 3.12 | 0.32 |
| P97351_RS3A_MOUSE  | Rps3a  | 40S ribosomal protein S2; K.APAM*FNIR#@.N              | 29.77   | 14.61  | 2.04 | 0.49 |
| P97351_RS3A_MOUSE  | Rps3a  | 40S ribosomal protein S2; K.DWYDVK#.A                  | 127.73  | 45.33  | 2.82 | 0.35 |
| P97351_RS3A_MOUSE  | Rps3a  | 40S ribosomal protein S2; R.EVQINDLK#.E                | 260.85  | 99.32  | 2.63 | 0.38 |
| P97351_RS3A_MOUSE  | Rps3a  | 40S ribosomal protein S2; R.EVQINDLK#EVVKN.L           | 60.22   | 24.76  | 2.43 | 0.41 |
| P97351_RS3A_MOUSE  | Rps3a  | 40S ribosomal protein S2; K.IASDGLK#.G                 | 332.29  | 113.74 | 2.92 | 0.34 |
| P97351_RS3A_MOUSE  | Rps3a  | 40S ribosomal protein S2; K.K#VDPFSK#.K                | 17.50   | 8.75   | 2.00 | 0.50 |
| P97351_RS3A_MOUSE  | Rps3a  | 40S ribosomal protein S2; K.M*M*EIM*TR#.E              | 128.62  | 39.95  | 3.22 | 0.31 |
| P97351_RS3A_MOUSE  | Rps3a  | 40S ribosomal protein S2; K.TSYAQHQVRR#@.Q             | 43.67   | 14.44  | 3.02 | 0.33 |
| P97351_RS3A_MOUSE  | Rps3a  | 40S ribosomal protein S2; K.TTDGILRR#@.L               | 422.22  | 143.40 | 2.94 | 0.34 |
| P97351_RS3A_MOUSE  | Rps3a  | 40S ribosomal protein S2; K.VER@ADGYEPPVQESV.-         | 8.77    | 2.23   | 3.94 | 0.25 |
| P97351_RS3A_MOUSE  | Rps3a  | 40S ribosomal protein S2; R.VFEVSLADLQND#EAVFR#@.K     | 187.90  | 67.56  | 2.78 | 0.36 |
| P97351_RS3A_MOUSE  | Rps3a  | 40S ribosomal protein S2; R.VFEVSLADLQND#EAVFR#@.K     | 110.19  | 56.46  | 1.95 | 0.51 |
| P97351_RS3A_MOUSE  | Rps3a  | 40S ribosomal protein S2; R.VFEVSLADLQND#EAVFR#.F      | 369.26  | 120.23 | 3.07 | 0.33 |
| P97351_RS3A_MOUSE  | Rps3a  | 40S ribosomal protein S2; K.VVDPFSK#.K                 | 299.89  | 120.42 | 2.49 | 0.40 |
| P97351_RS3A_MOUSE  | Rps3a  | 40S ribosomal protein S2; R.ADGYPEPPVQESV.-            | 18.19   | 18.19  | 1.00 | 1.00 |
| P97351_RS3A_MOUSE  | Rps3a  | 40S ribosomal protein S2; K.APAM*FNIR#@.N              | 23.65   | 9.10   | 2.60 | 0.38 |
| P97351_RS3A_MOUSE  | Rps3a  | 40S ribosomal protein S2; R.VFEVSLADLQND#EAVFR#@K#.F   | 29.97   | 6.75   | 4.44 | 0.23 |
| P97351_RS3A_MOUSE  | Rps3a  | 40S ribosomal protein S2; K.APAM*FNIR#@.N              | 27.51   | 4.11   | 6.69 | 0.15 |
| P97351_RS3A_MOUSE  | Rps3a  | 40S ribosomal protein S2; K.LM*ELH#GEGSSGK#.A          | 5.38    | 3.17   | 1.69 | 0.59 |
| P97351_RS3A_MOUSE  | Rps3a  | 40S ribosomal protein S2; R.VFEVSLADLQND#EAVFR#@.K     | 40.21   | 4.46   | 9.01 | 0.11 |
| P62702_RS4X_MOUSE  | Rps4x  | 40S ribosomal protein S2; K.DANGNSFATR#@.L             | 41.65   | 15.16  | 2.75 | 0.36 |
| P62702_RS4X_MOUSE  | Rps4x  | 40S ribosomal protein S2; K.GNKPWVILPR#@.G             | 152.85  | 50.47  | 3.03 | 0.33 |
| P62702_RS4X_MOUSE  | Rps4x  | 40S ribosomal protein S2; R.HPGSFDV#VHVK#.D            | 136.01  | 49.30  | 2.76 | 0.36 |
| P62702_RS4X_MOUSE  | Rps4x  | 40S ribosomal protein S2; R.IGVITNR#@.E                | 1310.98 | 415.05 | 3.16 | 0.32 |
| P62702_RS4X_MOUSE  | Rps4x  | 40S ribosomal protein S2; R.LIYDTR#.G                  | 466.79  | 159.73 | 2.92 | 0.34 |
| P62702_RS4X_MOUSE  | Rps4x  | 40S ribosomal protein S2; R.LSNIFVIGK#.G               | 624.56  | 213.00 | 2.93 | 0.34 |
| P62702_RS4X_MOUSE  | Rps4x  | 40S ribosomal protein S2; R.LTIAER#@.D                 | 359.53  | 130.46 | 2.76 | 0.36 |
| P62702_RS4X_MOUSE  | Rps4x  | 40S ribosomal protein S2; R.TDITYPAGFM*DVISIDK#.T      | 80.28   | 32.01  | 2.51 | 0.40 |

|                    |         |                                                           |         |        |      |      |
|--------------------|---------|-----------------------------------------------------------|---------|--------|------|------|
| P62702_RS4X_MOUSE  | Rps4x   | 40S ribosomal protein S4 R.TDITYPAGFMDVISIDK#.T           | 56.88   | 21.63  | 2.63 | 0.38 |
| P62702_RS4X_MOUSE  | Rps4x   | 40S ribosomal protein S4 R.TIR@YPPDLIK#.V                 | 108.72  | 29.17  | 3.73 | 0.27 |
| P62702_RS4X_MOUSE  | Rps4x   | 40S ribosomal protein S4 K.VNNDTIQDLETGK#.I               | 123.19  | 50.39  | 2.44 | 0.41 |
| P62702_RS4X_MOUSE  | Rps4x   | 40S ribosomal protein S4 K.VNNDTIQDLETGKHITDFIK#.F        | 57.91   | 29.45  | 1.97 | 0.51 |
| P62702_RS4X_MOUSE  | Rps4x   | 40S ribosomal protein S4 K.VR@TDITYPAGFM*DVISIDK#.T       | 19.97   | 13.70  | 1.46 | 0.69 |
| P62702_RS4X_MOUSE  | Rps4x   | 40S ribosomal protein S4 K.VR@TDITYPAGFMDVISIDK#.T        | 13.30   | 4.86   | 2.73 | 0.37 |
| P62702_RS4X_MOUSE  | Rps4x   | 40S ribosomal protein S4 K.YALTDGDEVK#.K                  | 229.86  | 74.30  | 3.09 | 0.32 |
| P62702_RS4X_MOUSE  | Rps4x   | 40S ribosomal protein S4 K.YALTDGDEVK#.#.I                | 214.41  | 61.65  | 3.48 | 0.29 |
| P62702_RS4X_MOUSE  | Rps4x   | 40S ribosomal protein S4 R.YPDLIK#.V                      | 126.09  | 26.43  | 4.77 | 0.21 |
| P62702_RS4X_MOUSE  | Rps4x   | 40S ribosomal protein S4 K.DANGSFAFTR@.L                  | 23.67   | 13.56  | 1.75 | 0.57 |
| P62702_RS4X_MOUSE  | Rps4x   | 40S ribosomal protein S4 K.GNK#PWISLPR@.G                 | 48.59   | 24.90  | 1.95 | 0.51 |
| P62702_RS4X_MOUSE  | Rps4x   | 40S ribosomal protein S4 R.HPGSFDDVHVHVK#.D               | 23.90   | 11.65  | 2.05 | 0.49 |
| P62702_RS4X_MOUSE  | Rps4x   | 40S ribosomal protein S4 R.IGVITNR@.E                     | 199.77  | 93.19  | 2.14 | 0.47 |
| P62702_RS4X_MOUSE  | Rps4x   | 40S ribosomal protein S4 R.LSNI#VIGK#.G                   | 237.48  | 141.70 | 1.68 | 0.60 |
| P62702_RS4X_MOUSE  | Rps4x   | 40S ribosomal protein S4 R.LTIAEER@.D                     | 133.26  | 64.94  | 2.05 | 0.49 |
| P62702_RS4X_MOUSE  | Rps4x   | 40S ribosomal protein S4 R.TDITYPAGFM*DVISIDK#.T          | 28.91   | 13.87  | 2.08 | 0.48 |
| P62702_RS4X_MOUSE  | Rps4x   | 40S ribosomal protein S4 R.TIR@YPPDLIK#.V                 | 49.66   | 31.10  | 1.60 | 0.63 |
| P62702_RS4X_MOUSE  | Rps4x   | 40S ribosomal protein S4 K.VNNDTIQDLETGK#.I               | 55.05   | 34.98  | 1.57 | 0.64 |
| P62702_RS4X_MOUSE  | Rps4x   | 40S ribosomal protein S4 K.VNNDTIQDLETGKHITDFIK#.F        | 61.56   | 32.37  | 1.90 | 0.53 |
| P62702_RS4X_MOUSE  | Rps4x   | 40S ribosomal protein S4 K.VR@TDITYPAGFM*DVISIDK#.T       | 10.52   | 11.88  | 0.89 | 1.13 |
| P62702_RS4X_MOUSE  | Rps4x   | 40S ribosomal protein S4 R.YPDLIK#.V                      | 31.90   | 21.95  | 1.45 | 0.69 |
| P62702_RS4X_MOUSE  | Rps4x   | 40S ribosomal protein S4 K.GNK#PWISLPR@.G                 | 20.72   | 5.81   | 3.57 | 0.28 |
| P62702_RS4X_MOUSE  | Rps4x   | 40S ribosomal protein S4 R.HPGSFDDVHVHVK#.D               | 30.11   | 11.44  | 2.63 | 0.38 |
| P62702_RS4X_MOUSE  | Rps4x   | 40S ribosomal protein S4 R.IGVITNR@.E                     | 71.15   | 18.62  | 3.82 | 0.26 |
| P62702_RS4X_MOUSE  | Rps4x   | 40S ribosomal protein S4 R.LSNI#VIGK#.G                   | 49.84   | 15.80  | 3.15 | 0.32 |
| P62702_RS4X_MOUSE  | Rps4x   | 40S ribosomal protein S4 R.LTIAEER@.D                     | 49.51   | 14.71  | 3.37 | 0.30 |
| P62702_RS4X_MOUSE  | Rps4x   | 40S ribosomal protein S4 R.TDITYPAGFM*DVISIDK#.T          | 8.81    | 3.05   | 2.89 | 0.35 |
| P62702_RS4X_MOUSE  | Rps4x   | 40S ribosomal protein S4 R.IGVITNR@.E                     | 43.97   | 11.36  | 3.87 | 0.26 |
| P62702_RS4X_MOUSE  | Rps4x   | 40S ribosomal protein S4 R.LSNI#VIGK#.G                   | 45.92   | 10.75  | 4.27 | 0.23 |
| P62702_RS4X_MOUSE  | Rps4x   | 40S ribosomal protein S4 R.TDITYPAGFM*DVISIDK#.T          | 8.78    | 2.00   | 4.40 | 0.23 |
| P62702_RS4X_MOUSE  | Rps4x   | 40S ribosomal protein S4 K.VNNDTIQDLETGK#.I               | 8.46    | 2.64   | 3.21 | 0.31 |
| P97461_R55_MOUSE   | Rps5    | 40S ribosomal protein S5 K.GSSNSYAIK#.K                   | 19.88   | 7.64   | 2.60 | 0.38 |
| P97461_R55_MOUSE   | Rps5    | 40S ribosomal protein S5 R.QAVDVSPLR@.R                   | 18.17   | 9.76   | 1.86 | 0.54 |
| P97461_R55_MOUSE   | Rps5    | 40S ribosomal protein S5 K.WSTDVVQINDISLQDYIAVK#.E        | 6.30    | 2.64   | 2.39 | 0.42 |
| P97461_R55_MOUSE   | Rps5    | 40S ribosomal protein S5 K.GSSNSYAIK#.K                   | 133.39  | 50.13  | 2.66 | 0.38 |
| P97461_R55_MOUSE   | Rps5    | 40S ribosomal protein S5 R.QAVDVSPLR@.R                   | 31.58   | 13.31  | 2.67 | 0.42 |
| P97461_R55_MOUSE   | Rps5    | 40S ribosomal protein S5 K.WSTDVVQINDISLQDYIAVK#.E        | 20.11   | 9.09   | 2.21 | 0.45 |
| P97461_R55_MOUSE   | Rps5    | 40S ribosomal protein S5 K.WSTDVVQINDISLQDYIAVK#.E        | 29.50   | 16.32  | 1.81 | 0.55 |
| P97461_R55_MOUSE   | Rps5    | 40S ribosomal protein S5 R.QAVDVSPLR@.R                   | 25.50   | 4.51   | 5.65 | 0.18 |
| P97461_R55_MOUSE   | Rps5    | 40S ribosomal protein S5 K.WSTDVVQINDISLQDYIAVK#.E        | 10.04   | 2.17   | 4.63 | 0.22 |
| P62754_R56_MOUSE   | Rps6    | 40S ribosomal protein S6 K.DIPGLDITVPR@.R                 | 529.27  | 127.69 | 4.15 | 0.24 |
| P62754_R56_MOUSE   | Rps6    | 40S ribosomal protein S6 K.GEK#DIPGLDITVPR@.R             | 21.16   | 6.90   | 5.07 | 0.33 |
| P62754_R56_MOUSE   | Rps6    | 40S ribosomal protein S6 K.KHFNLSK#.E                     | 122.31  | 21.97  | 3.57 | 0.18 |
| P62754_R56_MOUSE   | Rps6    | 40S ribosomal protein S6 R.KHLFNLK#.E                     | 88.71   | 23.52  | 3.77 | 0.27 |
| P62754_R56_MOUSE   | Rps6    | 40S ribosomal protein S6 K.LIEVDDEER@.K                   | 1012.25 | 222.65 | 4.55 | 0.22 |
| P62754_R56_MOUSE   | Rps6    | 40S ribosomal protein S6 K.LIEVDDEER@.K.L                 | 114.85  | 20.94  | 5.48 | 0.18 |
| P62754_R56_MOUSE   | Rps6    | 40S ribosomal protein S6 R.M*ATEVAADALGEEWK#.G            | 220.41  | 50.04  | 4.40 | 0.23 |
| P62754_R56_MOUSE   | Rps6    | 40S ribosomal protein S6 R.MATEVAADALGEEWK#.G             | 36.75   | 12.21  | 3.01 | 0.33 |
| P62754_R56_MOUSE   | Rps6    | 40S ribosomal protein S6 R.M*ATEVAADALGEEWK#GYVVR@.I      | 98.77   | 18.44  | 5.36 | 0.19 |
| P62754_R56_MOUSE   | Rps6    | 40S ribosomal protein S6 K.NK#EAAEYAK#.L                  | 119.20  | 28.51  | 4.18 | 0.24 |
| P62754_R56_MOUSE   | Rps6    | 40S ribosomal protein S6 R.M*ATEVAADALGEEWK#.G            | 12.31   | 3.38   | 3.65 | 0.27 |
| P62754_R56_MOUSE   | Rps6    | 40S ribosomal protein S6 K.DIPGLDITVPR@.R                 | 13.39   | 3.69   | 3.63 | 0.28 |
| P62754_R56_MOUSE   | Rps6    | 40S ribosomal protein S6 R.M*ATEVAADALGEEWK#.G            | 7.51    | 3.57   | 2.11 | 0.47 |
| P18653_KS6A1_MOUSE | Rps6ka1 | Ribosomal protein S6 kir R.KLGEK#DIPGLDITVPR@.R           | 10.92   | 3.53   | 3.09 | 0.32 |
| P18653_KS6A1_MOUSE | Rps6ka1 | Ribosomal protein S6 kir R.LGM*PQFLSTEAQLLR@.A            | 5.76    | 1.90   | 3.03 | 0.33 |
| Q9Z2B9_KS6A4_MOUSE | Rps6ka4 | Ribosomal protein S6 kir R.IGPVAQDLQRR@.L                 | 10.97   | 4.54   | 2.42 | 0.41 |
| Q9Z1M4_KS6B2_MOUSE | Rps6kb2 | Ribosomal protein S6 kir R.IGGGLGDAADVQR@.H               | 8.90    | 14.51  | 0.61 | 1.63 |
| P62082_R57_MOUSE   | Rps7    | 40S ribosomal protein S7 R.TLTAHVADALDVLFPSEIVGK#.R       | 19.81   | 9.84   | 2.01 | 0.50 |
| P62082_R57_MOUSE   | Rps7    | 40S ribosomal protein S7 K.AHFVPPQLK#.S                   | 80.39   | 55.13  | 1.46 | 0.69 |
| P62082_R57_MOUSE   | Rps7    | 40S ribosomal protein S7 K.HVVFIAQR.R                     | 61.30   | 37.11  | 1.65 | 0.61 |
| P62082_R57_MOUSE   | Rps7    | 40S ribosomal protein S7 K.IVKPNGEKPEDEFGISQALLEM*NSDLK.A | 23.65   | 16.27  | 1.45 | 0.69 |
| P62082_R57_MOUSE   | Rps7    | 40S ribosomal protein S7 K.ILTK#HDVNFEPFQL.-              | 14.44   | 7.90   | 1.83 | 0.55 |
| P62082_R57_MOUSE   | Rps7    | 40S ribosomal protein S7 R.TLTAHVADALDVLFPSEIVGK#.R       | 124.41  | 68.42  | 1.82 | 0.55 |
| P62082_R57_MOUSE   | Rps7    | 40S ribosomal protein S7 R.TLTAHVADALDVLFPSEIVGK#.R       | 34.93   | 17.83  | 1.96 | 0.51 |
| P62082_R57_MOUSE   | Rps7    | 40S ribosomal protein S7 K.VETFSGLYK#.K                   | 26.16   | 16.91  | 1.55 | 0.65 |
| P62242_R58_MOUSE   | Rps8    | 40S ribosomal protein S8 R.ADGVYLEGK#.E                   | 537.97  | 133.69 | 4.02 | 0.25 |
| P62242_R58_MOUSE   | Rps8    | 40S ribosomal protein S8 K.ELEFLR@.K                      | 287.92  | 76.72  | 3.75 | 0.27 |
| P62242_R58_MOUSE   | Rps8    | 40S ribosomal protein S8 R.IIDVYVNASNNELVR@.T             | 297.15  | 70.48  | 4.22 | 0.24 |
| P62242_R58_MOUSE   | Rps8    | 40S ribosomal protein S8 K.ISSLEEQFQQGK#.L                | 558.12  | 186.59 | 2.99 | 0.33 |
| P62242_R58_MOUSE   | Rps8    | 40S ribosomal protein S8 R.KYELGR#PAANT#.I                | 9.94    | 2.56   | 3.89 | 0.26 |
| P62242_R58_MOUSE   | Rps8    | 40S ribosomal protein S8 K.LTPEEEEEILNK#.K                | 828.01  | 270.37 | 3.06 | 0.33 |
| P62242_R58_MOUSE   | Rps8    | 40S ribosomal protein S8 R.QWYESHYALPLGR@.K               | 144.20  | 40.32  | 3.58 | 0.28 |
| P62242_R58_MOUSE   | Rps8    | 40S ribosomal protein S8 K.YELGR@PAANT#.I                 | 50.15   | 11.41  | 4.40 | 0.23 |
| P62242_R58_MOUSE   | Rps8    | 40S ribosomal protein S8 R.ADGVYLEGK#.E                   | 106.32  | 27.54  | 3.86 | 0.26 |
| P62242_R58_MOUSE   | Rps8    | 40S ribosomal protein S8 R.ADGVYLEGK#ELEFLR@.K            | 13.82   | 3.50   | 3.95 | 0.25 |
| P62242_R58_MOUSE   | Rps8    | 40S ribosomal protein S8 K.ELEFLR@.K                      | 75.20   | 22.34  | 3.37 | 0.30 |
| P62242_R58_MOUSE   | Rps8    | 40S ribosomal protein S8 R.IIDVYVNASNNELVR@.T             | 198.15  | 54.05  | 3.67 | 0.27 |
| P62242_R58_MOUSE   | Rps8    | 40S ribosomal protein S8 K.ISSLEEQFQQGK#.L                | 270.11  | 73.82  | 3.66 | 0.27 |
| P62242_R58_MOUSE   | Rps8    | 40S ribosomal protein S8 K.LTPEEEEEILNK#.K                | 285.37  | 89.50  | 3.19 | 0.31 |
| P62242_R58_MOUSE   | Rps8    | 40S ribosomal protein S8 R.QWYESHYALPLGR@.K               | 99.49   | 24.80  | 4.01 | 0.25 |
| P62242_R58_MOUSE   | Rps8    | 40S ribosomal protein S8 R.ADGVYLEGK#.E                   | 45.38   | 8.47   | 5.36 | 0.19 |
| P62242_R58_MOUSE   | Rps8    | 40S ribosomal protein S8 K.ELEFLR@.K                      | 48.57   | 10.92  | 4.45 | 0.22 |
| P62242_R58_MOUSE   | Rps8    | 40S ribosomal protein S8 R.IIDVYVNASNNELVR@.T             | 53.43   | 12.47  | 4.28 | 0.23 |
| P62242_R58_MOUSE   | Rps8    | 40S ribosomal protein S8 K.ISSLEEQFQQGK#.L                | 70.53   | 17.34  | 4.07 | 0.25 |
| P62242_R58_MOUSE   | Rps8    | 40S ribosomal protein S8 R.ADGVYLEGK#.E                   | 31.23   | 7.85   | 3.98 | 0.25 |
| P62242_R58_MOUSE   | Rps8    | 40S ribosomal protein S8 K.ELEFLR@.K                      | 35.34   | 7.42   | 4.76 | 0.21 |
| P62242_R58_MOUSE   | Rps8    | 40S ribosomal protein S8 R.IIDVYVNASNNELVR@.T             | 29.57   | 5.86   | 5.05 | 0.20 |
| P62242_R58_MOUSE   | Rps8    | 40S ribosomal protein S8 K.ISSLEEQFQQGK#.L                | 56.48   | 14.59  | 3.87 | 0.26 |
| P62242_R58_MOUSE   | Rps8    | 40S ribosomal protein S8 K.LTPEEEEEILNK#.K                | 78.01   | 22.05  | 3.54 | 0.28 |
| Q6ZWN5_RS9_MOUSE   | Rps9    | 40S ribosomal protein S9 K.IEDFLER@.R                     | 35.51   | 12.70  | 2.80 | 0.36 |
| Q6ZWN5_RS9_MOUSE   | Rps9    | 40S ribosomal protein S9 R.IGVLDGEGK#.M                   | 62.21   | 15.50  | 4.01 | 0.25 |
| Q6ZWN5_RS9_MOUSE   | Rps9    | 40S ribosomal protein S9 K.LDYILGLK#.I                    | 39.21   | 31.55  | 1.24 | 0.80 |
| Q6ZWN5_RS9_MOUSE   | Rps9    | 40S ribosomal protein S9 R.LFEGNALLR@.R                   | 49.30   | 21.69  | 2.27 | 0.44 |
| Q6ZWN5_RS9_MOUSE   | Rps9    | 40S ribosomal protein S9 K.LIGEVGR@.N                     | 66.64   | 20.67  | 3.22 | 0.31 |
| Q6ZWN5_RS9_MOUSE   | Rps9    | 40S ribosomal protein S9 K.M*KLDYILGLK#.I                 | 18.24   | 6.54   | 2.79 | 0.36 |
| Q6ZWN5_RS9_MOUSE   | Rps9    | 40S ribosomal protein S9 K.QV#NIPSFYVLR@.L                | 29.89   | 9.20   | 3.25 | 0.31 |
| Q6ZWN5_RS9_MOUSE   | Rps9    | 40S ribosomal protein S9 R.R@LQTQVFK#.L                   | 44.49   | 11.39  | 3.91 | 0.26 |
| Q6ZWN5_RS9_MOUSE   | Rps9    | 40S ribosomal protein S9 K.HIDFSLR@.S                     | 116.87  | 35.47  | 3.29 | 0.30 |
| Q6ZWN5_RS9_MOUSE   | Rps9    | 40S ribosomal protein S9 K.IEDFLER@.R                     | 194.82  | 45.76  | 4.26 | 0.23 |
| Q6ZWN5_RS9_MOUSE   | Rps9    | 40S ribosomal protein S9 R.IGVLDGEGK#.M                   | 168.85  | 54.04  | 3.12 | 0.32 |
| Q6ZWN5_RS9_MOUSE   | Rps9    | 40S ribosomal protein S9 K.K#GQGAGAGAGDDEEK.-             | 13.99   | 5.84   | 2.40 | 0.42 |
| Q6ZWN5_RS9_MOUSE   | Rps9    | 40S ribosomal protein S9 R.K#QV#NIPSFYVLR@.L              | 271.75  | 61.52  | 4.42 | 0.23 |
| Q6ZWN5_RS9_MOUSE   | Rps9    | 40S ribosomal protein S9 R.KQV#NIPSFYVLR@.L               | 25.89   | 5.93   | 4.37 | 0.23 |

|                     |       |                                                               |        |        |         |      |
|---------------------|-------|---------------------------------------------------------------|--------|--------|---------|------|
| Q6ZWN5_RS9_MOUSE    | Rps9  | 40S ribosomal protein S5: K.LDYILGLKK#I                       | 100.35 | 31.83  | 3.15    | 0.32 |
| Q6ZWN5_RS9_MOUSE    | Rps9  | 40S ribosomal protein S5: R.LFEGNALLR@.R                      | 491.21 | 116.88 | 4.20    | 0.24 |
| Q6ZWN5_RS9_MOUSE    | Rps9  | 40S ribosomal protein S5: K.LIGYGLR@.N                        | 407.06 | 105.34 | 3.86    | 0.26 |
| Q6ZWN5_RS9_MOUSE    | Rps9  | 40S ribosomal protein S5: R.LQTQVFK#.L                        | 103.86 | 55.91  | 1.86    | 0.54 |
| Q6ZWN5_RS9_MOUSE    | Rps9  | 40S ribosomal protein S5: K.M*K#LDYILGLKK#I                   | 95.77  | 29.37  | 3.26    | 0.31 |
| Q6ZWN5_RS9_MOUSE    | Rps9  | 40S ribosomal protein S5: K.QVWNPISFVIR@.L                    | 169.47 | 49.03  | 3.46    | 0.29 |
| Q6ZWN5_RS9_MOUSE    | Rps9  | 40S ribosomal protein S5: R.R@LQVFK#.L                        | 77.00  | 14.90  | 5.17    | 0.19 |
| Q6ZWN5_RS9_MOUSE    | Rps9  | 40S ribosomal protein S5: R.R@LQVFK#.L                        | 219.79 | 49.81  | 4.41    | 0.23 |
| Q6ZWN5_RS9_MOUSE    | Rps9  | 40S ribosomal protein S5: R.SPYGGGR@PGR@.V                    | 41.89  | 10.25  | 4.09    | 0.24 |
| Q6ZWN5_RS9_MOUSE    | Rps9  | 40S ribosomal protein S5: K.SRLDQK.L                          | 191.66 | 40.35  | 4.75    | 0.21 |
| Q6ZWN5_RS9_MOUSE    | Rps9  | 40S ribosomal protein S5: K.IEDFLER@.R                        | 42.71  | 12.14  | 3.52    | 0.28 |
| Q6ZWN5_RS9_MOUSE    | Rps9  | 40S ribosomal protein S5: R.IGVLDGK#.M                        | 37.80  | 10.26  | 3.68    | 0.27 |
| Q6ZWN5_RS9_MOUSE    | Rps9  | 40S ribosomal protein S5: K.KHGQGGAGAGDDEED.-                 | 4.36   | 2.37   | 1.84    | 0.54 |
| Q6ZWN5_RS9_MOUSE    | Rps9  | 40S ribosomal protein S5: K.LDYILGLKK#I                       | 44.77  | 34.98  | 1.28    | 0.78 |
| Q6ZWN5_RS9_MOUSE    | Rps9  | 40S ribosomal protein S5: R.LFEGNALLR@.R                      | 53.76  | 11.63  | 4.62    | 0.22 |
| Q6ZWN5_RS9_MOUSE    | Rps9  | 40S ribosomal protein S5: K.M*K#LDYILGLKK#I                   | 10.53  | 2.27   | 4.65    | 0.22 |
| Q6ZWN5_RS9_MOUSE    | Rps9  | 40S ribosomal protein S5: K.IEDFLER@.R                        | 69.46  | 15.95  | 4.35    | 0.23 |
| Q6ZWN5_RS9_MOUSE    | Rps9  | 40S ribosomal protein S5: R.IGVLDGK#.M                        | 63.66  | 14.78  | 4.31    | 0.23 |
| Q6ZWN5_RS9_MOUSE    | Rps9  | 40S ribosomal protein S5: K.KHGQGGAGAGDDEED.-                 | 7.60   | 2.75   | 2.77    | 0.36 |
| Q6ZWN5_RS9_MOUSE    | Rps9  | 40S ribosomal protein S5: K.LDYILGLKK#I                       | 37.17  | 18.04  | 2.06    | 0.49 |
| Q6ZWN5_RS9_MOUSE    | Rps9  | 40S ribosomal protein S5: R.LFEGNALLR@.R                      | 89.83  | 18.93  | 4.75    | 0.21 |
| Q6ZWN5_RS9_MOUSE    | Rps9  | 40S ribosomal protein S5: K.LIGYGLR@.N                        | 118.38 | 24.90  | 4.76    | 0.21 |
| Q6ZWN5_RS9_MOUSE    | Rps9  | 40S ribosomal protein S5: K.M*K#LDYILGLKK#I                   | 15.47  | 3.13   | 4.94    | 0.20 |
| Q6ZWN5_RS9_MOUSE    | Rps9  | 40S ribosomal protein S5: K.QVWNPISFVIR@.L                    | 43.04  | 8.44   | 5.10    | 0.20 |
| P14206_RSSA_MOUSE   | Rpsa  | 40S ribosomal protein S7: R.AIVAIENPADVSVISSR@.N              | 232.10 | 138.15 | 1.68    | 0.60 |
| P14206_RSSA_MOUSE   | Rpsa  | 40S ribosomal protein S7: R.EHPWVEMPPDYFYR@DPEIEKHEEQAAAEK#.A | 17.17  | 7.36   | 2.33    | 0.43 |
| P14206_RSSA_MOUSE   | Rpsa  | 40S ribosomal protein S7: K.FAAATGATPIAGR@.F                  | 290.46 | 169.24 | 1.72    | 0.58 |
| P14206_RSSA_MOUSE   | Rpsa  | 40S ribosomal protein S7: K.FLAAGTHLGGTNLDFQM*EQYIYK#.R       | 44.78  | 25.91  | 1.73    | 0.58 |
| P14206_RSSA_MOUSE   | Rpsa  | 40S ribosomal protein S7: R.FTPGFTFNTQQAADR@.E                | 61.21  | 32.09  | 1.91    | 0.52 |
| P14206_RSSA_MOUSE   | Rpsa  | 40S ribosomal protein S7: K.GAHVGLM*VWM*LAR@.E                | 11.51  | 4.95   | 2.33    | 0.43 |
| P14206_RSSA_MOUSE   | Rpsa  | 40S ribosomal protein S7: R.#SDGIYINLKH.R                     | 21.50  | 15.17  | 1.42    | 0.71 |
| P14206_RSSA_MOUSE   | Rpsa  | 40S ribosomal protein S7: R.LLVVTDPR@.A                       | 220.51 | 134.47 | 1.64    | 0.61 |
| P14206_RSSA_MOUSE   | Rpsa  | 40S ribosomal protein S7: K.SDGIYINLKH.R                      | 52.06  | 34.19  | 1.52    | 0.66 |
| P14206_RSSA_MOUSE   | Rpsa  | 40S ribosomal protein S7: R.AIVAIENPADVSVISSR@.N              | 11.16  | 7.62   | 1.46    | 0.68 |
| P14206_RSSA_MOUSE   | Rpsa  | 40S ribosomal protein S7: K.FAAATGATPIAGR@.F                  | 19.29  | 14.06  | 1.37    | 0.73 |
| P14206_RSSA_MOUSE   | Rpsa  | 40S ribosomal protein S7: K.FLAAGTHLGGTNLDFQM*EQYIYK#.R       | 48.85  | 2.81   | 1.72    | 0.58 |
| P14206_RSSA_MOUSE   | Rpsa  | 40S ribosomal protein S7: R.FTPGFTFNTQQAADR@.E                | 9.05   | 4.92   | 1.84    | 0.54 |
| P14206_RSSA_MOUSE   | Rpsa  | 40S ribosomal protein S7: R.LLVVTDPR@.A                       | 22.47  | 10.91  | 2.06    | 0.49 |
| P14206_RSSA_MOUSE   | Rpsa  | 40S ribosomal protein S7: R.AIVAIENPADVSVISSR.N               | 14.57  | 7.26   | 2.01    | 0.50 |
| P14206_RSSA_MOUSE   | Rpsa  | 40S ribosomal protein S7: K.FAAATGATPIAGR@.F                  | 17.09  | 6.61   | 2.58    | 0.39 |
| P14206_RSSA_MOUSE   | Rpsa  | 40S ribosomal protein S7: K.FLAAGTHLGGTNLDFQM*EQYIYK#.R       | 5.44   | 1.19   | 4.58    | 0.22 |
| P14206_RSSA_MOUSE   | Rpsa  | 40S ribosomal protein S7: R.FTPGFTFNTQQAADR@.E                | 5.76   | 3.36   | 1.71    | 0.58 |
| P14206_RSSA_MOUSE   | Rpsa  | 40S ribosomal protein S7: R.LLVVTDPR@.A                       | 17.79  | 3.93   | 4.53    | 0.22 |
| Q9JKY0_RCD1_MOUSE   | Rqcd1 | Cell differentiation prote K.DTTFAQVVK#.D                     | 7.84   | 1.80   | 4.36    | 0.23 |
| Q9JKY0_RCD1_MOUSE   | Rqcd1 | Cell differentiation prote R.ENALLESK#.K                      | 95.89  | 12.94  | 7.41    | 0.13 |
| Q9JKY0_RCD1_MOUSE   | Rqcd1 | Cell differentiation prote R.IMESGSELSK#.T                    | 18.37  | 2.83   | 6.48    | 0.15 |
| Q9JKY0_RCD1_MOUSE   | Rqcd1 | Cell differentiation prote R.IM*ESGSELSK#.T                   | 52.32  | 7.15   | 7.32    | 0.14 |
| Q9JKY0_RCD1_MOUSE   | Rqcd1 | Cell differentiation prote K.IYQWINEPSPTR@.E                  | 57.78  | 9.96   | 5.80    | 0.17 |
| Q9JKY0_RCD1_MOUSE   | Rqcd1 | Cell differentiation prote R.LTSLGIVGLVK#.T                   | 234.76 | 35.58  | 6.60    | 0.15 |
| Q9JKY0_RCD1_MOUSE   | Rqcd1 | Cell differentiation prote K.NLQEGQVTDPR@.G                   | 99.35  | 27.46  | 3.62    | 0.28 |
| Q9JKY0_RCD1_MOUSE   | Rqcd1 | Cell differentiation prote K.TVATFILQK#.I                     | 150.50 | 23.75  | 6.34    | 0.16 |
| Q9JKY0_RCD1_MOUSE   | Rqcd1 | Cell differentiation prote R.WLAQLVK#.N                       | 23.37  | 5.00   | 4.67    | 0.21 |
| Q9JKY0_RCD1_MOUSE   | Rqcd1 | Cell differentiation prote R.IM*ESGSELSK#.T                   | 8.24   | 6.26   | 1.32    | 0.76 |
| Q9JKY0_RCD1_MOUSE   | Rqcd1 | Cell differentiation prote K.IYQWINEPSPTR@.E                  | 6.35   | 2.78   | 2.28    | 0.44 |
| Q9JKY0_RCD1_MOUSE   | Rqcd1 | Cell differentiation prote R.LTSLGIVGLVK#.T                   | 24.61  | 15.86  | 1.55    | 0.64 |
| Q9JKY0_RCD1_MOUSE   | Rqcd1 | Cell differentiation prote K.NLQEGQVTDPR@.G                   | 8.93   | 9.08   | 0.98    | 1.02 |
| Q80X95_RRAGA_MOUSE  | Rraga | Ras-related GTP-binding   K.M*DLVQEQR@.D                      | 7.65   | 1.58   | 4.83    | 0.21 |
| P10833_RRAS_MOUSE   | Rras  | Ras-related protein R-Ras K.LR@LNVDFEAFQVLR@.A                | 9.00   | 4.41   | 2.04    | 0.49 |
| P10833_RRAS_MOUSE   | Rras  | Ras-related protein R-Ras R.VK#DR@DDFPVILVGNK#.A              | 9.76   | 5.37   | 1.82    | 0.55 |
| P62071_RRAS2_MOUSE  | Rras2 | Ras-related protein R-Ras R.LDILDTAGQEFGAM*R@.E               | 9.66   | 3.70   | 2.61    | 0.38 |
| P62071_RRAS2_MOUSE  | Rras2 | Ras-related protein R-Ras R.QVTEQQQLAR@.Q                     | 7.63   | 2.68   | 2.85    | 0.35 |
| Q99PL5_RBP1_MOUSE   | Rrbp1 | Ribosome-binding prote K.ETSYEALANQR@.K                       | 3.79   | 3.75   | 1.01    | 0.99 |
| Q99PL5_RBP1_MOUSE   | Rrbp1 | Ribosome-binding prote K.GEGVQNAKKGHVEGAQKQK#.K               | 8.40   | 2.05   | 4.09    | 0.24 |
| Q99PL5_RBP1_MOUSE   | Rrbp1 | Ribosome-binding prote K.LLATEQEDAAVAK#.S                     | 14.51  | 10.21  | 1.42    | 0.70 |
| Q99PL5_RBP1_MOUSE   | Rrbp1 | Ribosome-binding prote R.SIEALEAQDQASHAEANQQQTR@.L            | 2.90   | 2.86   | 1.72    | 0.58 |
| Q99PL5_RBP1_MOUSE   | Rrbp1 | Ribosome-binding prote R.DALNQAQTSQVESK#.Q                    | 7.33   | 2.51   | 2.92    | 0.34 |
| P07742_RIR1_MOUSE   | Rrm1  | Ribonucleoside-diphosph R.YPFESPEAQLLNK.Q                     | 5.04   | 6.86   | 0.73    | 1.36 |
| P07742_RIR1_MOUSE   | Rrm1  | Ribonucleoside-diphosph R.YPFESPEAQLLNK#.Q                    | 8.69   | 10.49  | 0.83    | 1.21 |
| P56183_RRP1_MOUSE   | Rrp1  | Ribosomal RNA processir R.ATGGFTPDLLK#.V                      | 9.43   | 5.21   | 1.81    | 0.55 |
| P56183_RRP1_MOUSE   | Rrp1  | Ribosomal RNA processir K.EAGSEASSADP@PGR@.K                  | 3.36   | 1.54   | 2.18    | 0.46 |
| P56183_RRP1_MOUSE   | Rrp1  | Ribosomal RNA processir R.ATGGFTPDLLK#.V                      | 16.64  | 9.06   | 1.84    | 0.54 |
| P56183_RRP1_MOUSE   | Rrp1  | Ribosomal RNA processir K.EAGSEASSADP@PGR@.K                  | 10.66  | 2.92   | 3.65    | 0.27 |
| Q6P5B0_RRP12_MOUSE  | Rrp12 | RRP12-like protein OS=N R.VLATQPGPPR@.G                       | 7.81   | 2.86   | 2.72    | 0.37 |
| Q6P5B0_RRP12_MOUSE  | Rrp12 | RRP12-like protein OS=N R.ALSAQAEEEEEEEEVPQSK#.G              | 10.77  | 4.12   | 2.61    | 0.38 |
| Q6P5B0_RRP12_MOUSE  | Rrp12 | RRP12-like protein OS=N K.AM*DLAQAGSTVESK#.I                  | 5.04   | 2.74   | 1.84    | 0.54 |
| Q6P5B0_RRP12_MOUSE  | Rrp12 | RRP12-like protein OS=N R.FGNSQEDALQR@.Y                      | 11.33  | 3.60   | 3.15    | 0.32 |
| Q6P5B0_RRP12_MOUSE  | Rrp12 | RRP12-like protein OS=N K.SDLTVDAVK#.L                        | 8.35   | 4.05   | 2.06    | 0.48 |
| Q6P5B0_RRP12_MOUSE  | Rrp12 | RRP12-like protein OS=N R.SWLLPVIR@.D                         | 18.44  | 7.41   | 2.49    | 0.40 |
| Q6P5B0_RRP12_MOUSE  | Rrp12 | RRP12-like protein OS=N K.VLDPASSDPTTR@.L                     | 18.07  | 4.49   | 4.03    | 0.25 |
| Q9CYX7_RRP15_MOUSE  | Rrp15 | RRP15-like protein OS=N R.GVQQLFNAVQK#.H                      | 16.11  | 6.81   | 2.37    | 0.42 |
| Q9CYX7_RRP15_MOUSE  | Rrp15 | RRP15-like protein OS=N R.GVQQLFNAVQK#.H                      | 8.67   | 2.37   | 3.66    | 0.27 |
| Q91YK2_RRP1B_MOUSE  | Rrp1b | Ribosomal RNA processir R.SHFQPDQNLDAVAVPK#.V                 | 12.96  | 1.97   | 6.59    | 0.15 |
| Q91YK2_RRP1B_MOUSE  | Rrp1b | Ribosomal RNA processir K.VPDESEPDQAR@.Q                      | 9.24   | 3.79   | 2.44    | 0.41 |
| Q9D1C9_RRP7A_MOUSE  | Rrp7a | Ribosomal RNA-processir K.TVELQEK@DLAESPTPEK#.S               | 42.50  | 29.01  | 1.47    | 0.68 |
| Q9D1C9_RRP7A_MOUSE  | Rrp7a | Ribosomal RNA-processir R.WISDYEDVDLPEALR.M                   | 6.79   | 5.47   | 1.24    | 0.81 |
| Q9DB85_RRP8_MOUSE   | Rrp8  | Ribosomal RNA-processir R.TSTATIDPSK*PSPESM*SPNSHTLSR@.K      | 9.20   | 3.87   | 2.37    | 0.42 |
| Q9DB85_RRP8_MOUSE   | Rrp8  | Ribosomal RNA-processir R.YLNEQYVSPSSAAR@.R                   | 13.22  | 5.75   | 2.30    | 0.43 |
| Q91WM3_U3IP2_MOUSE  | Rrp9  | U3 small nucleolar RNA-I R.AFEEDQVAGR.L                       | 14.50  | 9.97   | 1.45    | 0.69 |
| Q91WM3_U3IP2_MOUSE  | Rrp9  | U3 small nucleolar RNA-I R.AK#PAPGGAAPVAGK#.R                 | 23.37  | 13.42  | 1.74    | 0.57 |
| Q91WM3_U3IP2_MOUSE  | Rrp9  | U3 small nucleolar RNA-I R.DAVSGLAFR@.K                       | 13.17  | 10.74  | 1.23    | 0.82 |
| Q91WM3_U3IP2_MOUSE  | Rrp9  | U3 small nucleolar RNA-I K.EIQAPAPTDI.R.V                     | 11.49  | 10.82  | 1.06    | 0.94 |
| Q91WM3_U3IP2_MOUSE  | Rrp9  | U3 small nucleolar RNA-I R.K#HEEEEEELLETAQEK#.K               | 10.47  | 6.93   | 1.51    | 0.66 |
| Q91WM3_U3IP2_MOUSE  | Rrp9  | U3 small nucleolar RNA-I K.LYLEQLR.Q                          | 201.96 | 7.61   | 26.54   | 0.04 |
| Q91WM3_U3IP2_MOUSE  | Rrp9  | U3 small nucleolar RNA-I K.VVNAEENSYETFLGQDAVALDALSR@.E       | 5.98   | 3.68   | 1.63    | 0.62 |
| Q9CYH6_RRS1_MOUSE   | Rrs1  | Ribosome biogenesis reg R.DNTQLINLQWR@.L                      | 21.11  | 8.79   | 2.40    | 0.42 |
| Q9CYH6_RRS1_MOUSE   | Rrs1  | Ribosome biogenesis reg K.ELEFDLGNLASDR@NPPTVLR@.Q            | 6.67   | 0.00   | #DIV/0! | 0.00 |
| Q9CYH6_RRS1_MOUSE   | Rrs1  | Ribosome biogenesis reg R.K#FQPLFGDFAAEK#.K                   | 16.75  | 6.96   | 2.41    | 0.42 |
| Q9CYH6_RRS1_MOUSE   | Rrs1  | Ribosome biogenesis reg R.K#FQPLFGDFAAEK#.K#N                 | 5.44   | 2.20   | 2.47    | 0.40 |
| Q9CYH6_RRS1_MOUSE   | Rrs1  | Ribosome biogenesis reg R.QAGSPSEALR@.A                       | 36.31  | 13.44  | 2.70    | 0.37 |
| Q9CYH6_RRS1_MOUSE   | Rrs1  | Ribosome biogenesis reg R.VEEAVARG@.L                         | 59.95  | 24.44  | 2.45    | 0.41 |
| E9PWW9_E9PWW9_MOUSE | Rsf1  | Protein Rsf1 OS=Mus mu: K.GIDSSVPDIIESLQK#.A                  | 11.78  | 5.85   | 2.01    | 0.50 |
| E9PWW9_E9PWW9_MOUSE | Rsf1  | Protein Rsf1 OS=Mus mu: K.LDNAQTSGM*EDTSETK#.G                | 7.69   | 9.53   | 0.81    | 1.24 |
| E9PWW9_E9PWW9_MOUSE | Rsf1  | Protein Rsf1 OS=Mus mu: K.LEEQQLDLDVALK#.K                    | 8.11   | 4.86   | 1.67    | 0.60 |





|                    |       |                                                              |        |        |      |      |
|--------------------|-------|--------------------------------------------------------------|--------|--------|------|------|
| Q99P72_RTN4_MOUSE  | Rtn4  | Reticulon-4 OS=Mus mus R.GPLPAAAPTAPER@_Q                    | 13.31  | 7.57   | 1.76 | 0.57 |
| Q99P72_RTN4_MOUSE  | Rtn4  | Reticulon-4 OS=Mus mus R.HQAQDHYHLGLANK#.F                   | 15.37  | 4.08   | 3.77 | 0.27 |
| Q99P72_RTN4_MOUSE  | Rtn4  | Reticulon-4 OS=Mus mus K.LSTEPSPEFSNYSIAK#.F                 | 10.07  | 4.37   | 2.30 | 0.43 |
| Q99P72_RTN4_MOUSE  | Rtn4  | Reticulon-4 OS=Mus mus R.ATNPFVNR@_E                         | 15.47  | 4.53   | 3.41 | 0.29 |
| Q99P72_RTN4_MOUSE  | Rtn4  | Reticulon-4 OS=Mus mus K.LEPENPPYEEAM*SVALK#.T               | 6.04   | 4.22   | 1.43 | 0.70 |
| Q99P72_RTN4_MOUSE  | Rtn4  | Reticulon-4 OS=Mus mus K.LSTEPSPEFSNYSIAK#.F                 | 16.44  | 5.61   | 2.93 | 0.34 |
| Q99P72_RTN4_MOUSE  | Rtn4  | Reticulon-4 OS=Mus mus K.M*KHESEFSDSSPIEIDFPTVSAK#.D         | 4.12   | 3.04   | 1.35 | 0.74 |
| Q99P72_RTN4_MOUSE  | Rtn4  | Reticulon-4 OS=Mus mus K.TSVVDLLYYWR@_D                      | 12.99  | 1.29   | 9.66 | 0.10 |
| Q99P72_RTN4_MOUSE  | Rtn4  | Reticulon-4 OS=Mus mus K.VLLLLNVALESQIEM*GNIVK#PK#.V         | 23.36  | 4.69   | 4.99 | 0.20 |
| Q9ER80_RTP4_MOUSE  | Rtp4  | Receptor-transferring pr K.IALTSNASLGEK#.V                   | 8.33   | 3.51   | 2.37 | 0.42 |
| Q9ER80_RTP4_MOUSE  | Rtp4  | Receptor-transferring pr K.TFQDFGNR@_T                       | 8.59   | 3.11   | 2.76 | 0.36 |
| Q9ER80_RTP4_MOUSE  | Rtp4  | Receptor-transferring pr K.IALTSNASLGEK#.V                   | 9.67   | 5.32   | 1.82 | 0.55 |
| Q9D394_RUFY3_MOUSE | Rufy3 | Protein RUFY3 OS=Mus m R.NYVELNLR@_H                         | 16.67  | 3.89   | 4.28 | 0.23 |
| Q9D394_RUFY3_MOUSE | Rufy3 | Protein RUFY3 OS=Mus m R.TAEGQALSEAR@_K                      | 7.01   | 2.36   | 2.97 | 0.34 |
| Q64131_RUNX3_MOUSE | Runx3 | Runt-related transcript K.GSLSTSHFSSQAQTPIQSSDLNPFSDPR@_Q    | 8.01   | 6.88   | 1.16 | 0.86 |
| Q64131_RUNX3_MOUSE | Runx3 | Runt-related transcript K.M*GENSGALSAQATAGPGR@_T             | 5.16   | 3.85   | 1.34 | 0.75 |
| Q64131_RUNX3_MOUSE | Runx3 | Runt-related transcript R.SFPTLQSLTESR@_F                    | 3.37   | 3.82   | 0.88 | 1.13 |
| P60122_RUVB1_MOUSE | Ruvb1 | RuvB-like 1 OS=Mus mus R.ALESSIAPVIFASNR@_G                  | 198.34 | 79.89  | 2.48 | 0.40 |
| P60122_RUVB1_MOUSE | Ruvb1 | RuvB-like 1 OS=Mus mus R.AVLLAGPPTGSK#.T                     | 126.90 | 126.90 | 2.49 | 0.40 |
| P60122_RUVB1_MOUSE | Ruvb1 | RuvB-like 1 OS=Mus mus K.DSIEK#EHVEISELYDAK#.S               | 95.26  | 38.86  | 2.45 | 0.41 |
| P60122_RUVB1_MOUSE | Ruvb1 | RuvB-like 1 OS=Mus mus K.GLGLDESLGAK#.F                      | 362.59 | 161.76 | 2.24 | 0.45 |
| P60122_RUVB1_MOUSE | Ruvb1 | RuvB-like 1 OS=Mus mus R.GTEDITSPHIGPLDLLDR@_V               | 205.72 | 93.57  | 2.20 | 0.45 |
| P60122_RUVB1_MOUSE | Ruvb1 | RuvB-like 1 OS=Mus mus R.GTEDITSPHIGPLDLLDR.V                | 10.28  | 6.00   | 1.71 | 0.58 |
| P60122_RUVB1_MOUSE | Ruvb1 | RuvB-like 1 OS=Mus mus K.ILADQDDK#.Y                         | 40.81  | 14.11  | 2.89 | 0.35 |
| P60122_RUVB1_MOUSE | Ruvb1 | RuvB-like 1 OS=Mus mus K.ILADQDDK#K.-                        | 42.17  | 19.64  | 2.11 | 0.47 |
| P60122_RUVB1_MOUSE | Ruvb1 | RuvB-like 1 OS=Mus mus K.K#TEVLM*ENFR@_R                     | 139.89 | 56.43  | 2.48 | 0.40 |
| P60122_RUVB1_MOUSE | Ruvb1 | RuvB-like 1 OS=Mus mus K.K#TEVLM*ENFR                        | 28.64  | 17.08  | 1.68 | 0.60 |
| P60122_RUVB1_MOUSE | Ruvb1 | RuvB-like 1 OS=Mus mus K.LDPSIFESLQK#.E                      | 355.50 | 167.94 | 2.12 | 0.47 |
| P60122_RUVB1_MOUSE | Ruvb1 | RuvB-like 1 OS=Mus mus K.QAASGLVGEQAR@_E                     | 263.01 | 103.89 | 2.53 | 0.39 |
| P60122_RUVB1_MOUSE | Ruvb1 | RuvB-like 1 OS=Mus mus K.TALALAIQELGSK#.V                    | 245.55 | 111.76 | 2.20 | 0.46 |
| P60122_RUVB1_MOUSE | Ruvb1 | RuvB-like 1 OS=Mus mus K.TEVLN*ENFR.R                        | 46.99  | 22.28  | 2.11 | 0.47 |
| P60122_RUVB1_MOUSE | Ruvb1 | RuvB-like 1 OS=Mus mus K.TISHVIGLKH.T                        | 249.62 | 122.23 | 2.04 | 0.49 |
| P60122_RUVB1_MOUSE | Ruvb1 | RuvB-like 1 OS=Mus mus R.TM*LYTPOEM*#K.Q                     | 88.87  | 42.23  | 2.10 | 0.48 |
| P60122_RUVB1_MOUSE | Ruvb1 | RuvB-like 1 OS=Mus mus R.TMLYTPQEM*#K.Q                      | 16.75  | 7.11   | 2.36 | 0.42 |
| P60122_RUVB1_MOUSE | Ruvb1 | RuvB-like 1 OS=Mus mus R.TM*LYTPOEM*#K.Q                     | 14.82  | 6.33   | 2.34 | 0.43 |
| P60122_RUVB1_MOUSE | Ruvb1 | RuvB-like 1 OS=Mus mus R.TMLYTPQEM*#K.Q                      | 19.46  | 5.60   | 3.48 | 0.29 |
| P60122_RUVB1_MOUSE | Ruvb1 | RuvB-like 1 OS=Mus mus R.VEAGDVIYEANSQAVK#.R                 | 87.88  | 36.26  | 2.42 | 0.41 |
| P60122_RUVB1_MOUSE | Ruvb1 | RuvB-like 1 OS=Mus mus R.YSVQLLTPANLAK#.I                    | 384.79 | 158.39 | 2.43 | 0.41 |
| P60122_RUVB1_MOUSE | Ruvb1 | RuvB-like 1 OS=Mus mus R.ALESSIAPVIFASNR@_G                  | 16.78  | 7.91   | 2.12 | 0.47 |
| P60122_RUVB1_MOUSE | Ruvb1 | RuvB-like 1 OS=Mus mus K.DSIEK#EHVEISELYDAK#.S               | 12.69  | 10.72  | 1.18 | 0.85 |
| P60122_RUVB1_MOUSE | Ruvb1 | RuvB-like 1 OS=Mus mus K.GLGLDESLGAK#.F                      | 37.22  | 15.67  | 2.38 | 0.42 |
| P60122_RUVB1_MOUSE | Ruvb1 | RuvB-like 1 OS=Mus mus R.GTEDITSPHIGPLDLLDR@_V               | 31.61  | 10.50  | 3.01 | 0.33 |
| P60122_RUVB1_MOUSE | Ruvb1 | RuvB-like 1 OS=Mus mus K.LDPSIFESLQK#.E                      | 53.48  | 17.76  | 3.01 | 0.33 |
| P60122_RUVB1_MOUSE | Ruvb1 | RuvB-like 1 OS=Mus mus K.QAASGLVGEQAR@_E                     | 21.41  | 7.80   | 2.74 | 0.36 |
| P60122_RUVB1_MOUSE | Ruvb1 | RuvB-like 1 OS=Mus mus K.TALALAIQELGSK#.V                    | 20.93  | 8.24   | 2.54 | 0.39 |
| P60122_RUVB1_MOUSE | Ruvb1 | RuvB-like 1 OS=Mus mus K.TISHVIGLKH.T                        | 30.55  | 7.36   | 4.15 | 0.24 |
| P60122_RUVB1_MOUSE | Ruvb1 | RuvB-like 1 OS=Mus mus R.VEAGDVIYEANSQAVK#.R                 | 10.93  | 23.46  | 0.47 | 2.15 |
| P60122_RUVB1_MOUSE | Ruvb1 | RuvB-like 1 OS=Mus mus R.YSVQLLTPANLAK#.I                    | 52.03  | 16.63  | 3.13 | 0.32 |
| P60122_RUVB1_MOUSE | Ruvb1 | RuvB-like 1 OS=Mus mus R.ALESSIAPVIFASNR@_G                  | 11.10  | 5.08   | 2.18 | 0.46 |
| P60122_RUVB1_MOUSE | Ruvb1 | RuvB-like 1 OS=Mus mus K.GLGLDESLGAK#.Q                      | 22.22  | 7.46   | 2.98 | 0.34 |
| P60122_RUVB1_MOUSE | Ruvb1 | RuvB-like 1 OS=Mus mus R.GTEDITSPHIGPLDLLDR@_V               | 15.11  | 6.55   | 2.31 | 0.43 |
| P60122_RUVB1_MOUSE | Ruvb1 | RuvB-like 1 OS=Mus mus K.LDPSIFESLQK#.E                      | 28.13  | 9.75   | 2.89 | 0.35 |
| P60122_RUVB1_MOUSE | Ruvb1 | RuvB-like 1 OS=Mus mus K.QAASGLVGEQAR@_E                     | 15.95  | 3.65   | 4.36 | 0.23 |
| P60122_RUVB1_MOUSE | Ruvb1 | RuvB-like 1 OS=Mus mus K.TALALAIQELGSK#.V                    | 31.28  | 7.43   | 4.21 | 0.24 |
| Q9W7M5_RUVB2_MOUSE | Ruvb2 | RuvB-like 2 OS=Mus mus R.AAGVLEMI*#R@_E                      | 215.96 | 84.86  | 2.54 | 0.39 |
| Q9W7M5_RUVB2_MOUSE | Ruvb2 | RuvB-like 2 OS=Mus mus R.AAGVLEMI*#R                         | 48.81  | 18.60  | 2.62 | 0.38 |
| Q9W7M5_RUVB2_MOUSE | Ruvb2 | RuvB-like 2 OS=Mus mus R.ALESMD*APVLM*ATNR@_G                | 58.42  | 19.51  | 2.99 | 0.33 |
| Q9W7M5_RUVB2_MOUSE | Ruvb2 | RuvB-like 2 OS=Mus mus R.ALESMD*APVLM*ATNR@_G                | 24.83  | 20.93  | 1.19 | 0.84 |
| Q9W7M5_RUVB2_MOUSE | Ruvb2 | RuvB-like 2 OS=Mus mus R.ALESMD*APVLM*ATNR@_G                | 4.84   | 1.35   | 3.58 | 0.28 |
| Q9W7M5_RUVB2_MOUSE | Ruvb2 | RuvB-like 2 OS=Mus mus R.ALESMD*APVLM*ATNR@_G                | 8.19   | 2.84   | 2.88 | 0.35 |
| Q9W7M5_RUVB2_MOUSE | Ruvb2 | RuvB-like 2 OS=Mus mus R.ALESMD*APVLM*ATNR@_G                | 9.61   | 3.90   | 2.47 | 0.41 |
| Q9W7M5_RUVB2_MOUSE | Ruvb2 | RuvB-like 2 OS=Mus mus R.AVLIAGPPTGSK#.T                     | 528.38 | 216.07 | 2.45 | 0.41 |
| Q9W7M5_RUVB2_MOUSE | Ruvb2 | RuvB-like 2 OS=Mus mus K.DK#HQAQDHYHLGLANK#.F                | 99.31  | 43.09  | 2.30 | 0.43 |
| Q9W7M5_RUVB2_MOUSE | Ruvb2 | RuvB-like 2 OS=Mus mus R.DYDAM*GSQTK#.F                      | 24.23  | 8.97   | 2.70 | 0.37 |
| Q9W7M5_RUVB2_MOUSE | Ruvb2 | RuvB-like 2 OS=Mus mus K.EYQDFLNFELK#GETM*DT.S.-             | 18.23  | 8.97   | 2.03 | 0.49 |
| Q9W7M5_RUVB2_MOUSE | Ruvb2 | RuvB-like 2 OS=Mus mus K.EYQDFLNFELK#GETM*DT.S.-             | 71.21  | 27.51  | 2.59 | 0.39 |
| Q9W7M5_RUVB2_MOUSE | Ruvb2 | RuvB-like 2 OS=Mus mus K.EYQDFLNFELK#GETM*DT.S.-             | 8.56   | 3.03   | 2.82 | 0.35 |
| Q9W7M5_RUVB2_MOUSE | Ruvb2 | RuvB-like 2 OS=Mus mus R.GLGLDDALEPR@_Q                      | 356.22 | 160.84 | 2.21 | 0.45 |
| Q9W7M5_RUVB2_MOUSE | Ruvb2 | RuvB-like 2 OS=Mus mus R.GTSYQSPHIGPLDLLDR.L                 | 9.50   | 4.82   | 1.97 | 0.51 |
| Q9W7M5_RUVB2_MOUSE | Ruvb2 | RuvB-like 2 OS=Mus mus R.IGLETSLR@_Y                         | 499.71 | 180.81 | 2.76 | 0.36 |
| Q9W7M5_RUVB2_MOUSE | Ruvb2 | RuvB-like 2 OS=Mus mus R.IKEETIEEGEVVEIQDRPATGTGSK.V         | 26.88  | 6.43   | 4.18 | 0.24 |
| Q9W7M5_RUVB2_MOUSE | Ruvb2 | RuvB-like 2 OS=Mus mus R.K#HQAQDHYHLGLANK#.F                 | 270.48 | 112.77 | 2.40 | 0.42 |
| Q9W7M5_RUVB2_MOUSE | Ruvb2 | RuvB-like 2 OS=Mus mus K.M*IESLTK#.D                         | 144.85 | 65.28  | 2.22 | 0.45 |
| Q9W7M5_RUVB2_MOUSE | Ruvb2 | RuvB-like 2 OS=Mus mus K.MIESLTK#.D                          | 33.12  | 11.99  | 2.76 | 0.36 |
| Q9W7M5_RUVB2_MOUSE | Ruvb2 | RuvB-like 2 OS=Mus mus R.QASQGM*VGLAAR@_R                    | 205.69 | 79.66  | 2.58 | 0.39 |
| Q9W7M5_RUVB2_MOUSE | Ruvb2 | RuvB-like 2 OS=Mus mus R.QASQGM*VGLAAR@_R                    | 29.03  | 8.78   | 3.31 | 0.30 |
| Q9W7M5_RUVB2_MOUSE | Ruvb2 | RuvB-like 2 OS=Mus mus R.R@AAGVLEMI*#R@_E                    | 135.82 | 57.06  | 2.38 | 0.42 |
| Q9W7M5_RUVB2_MOUSE | Ruvb2 | RuvB-like 2 OS=Mus mus R.R@AAGVLEMI*#R@_E                    | 21.18  | 8.46   | 2.50 | 0.40 |
| Q9W7M5_RUVB2_MOUSE | Ruvb2 | RuvB-like 2 OS=Mus mus K.R@K#EVVTVSLHEIDVINSR@_T             | 15.25  | 2.88   | 5.30 | 0.19 |
| Q9W7M5_RUVB2_MOUSE | Ruvb2 | RuvB-like 2 OS=Mus mus K.TAIAM*GMAAQLPDPPTFAIAGSEIFLEM*SK#.T | 8.88   | 3.59   | 2.47 | 0.40 |
| Q9W7M5_RUVB2_MOUSE | Ruvb2 | RuvB-like 2 OS=Mus mus K.TEALYQAFR@_R                        | 506.30 | 112.18 | 4.51 | 0.22 |
| Q9W7M5_RUVB2_MOUSE | Ruvb2 | RuvB-like 2 OS=Mus mus R.TQGFLLFSGDTGK#.S                    | 281.27 | 100.40 | 2.80 | 0.36 |
| Q9W7M5_RUVB2_MOUSE | Ruvb2 | RuvB-like 2 OS=Mus mus R.TQGFLLFSGDTGK#SEVR@_E               | 112.35 | 43.76  | 2.57 | 0.39 |
| Q9W7M5_RUVB2_MOUSE | Ruvb2 | RuvB-like 2 OS=Mus mus K.TTEM*ETIYDLGK#.M                    | 241.59 | 96.44  | 2.51 | 0.40 |
| Q9W7M5_RUVB2_MOUSE | Ruvb2 | RuvB-like 2 OS=Mus mus K.TTEM*ETIYDLGK#.M                    | 19.68  | 25.99  | 0.76 | 1.32 |
| Q9W7M5_RUVB2_MOUSE | Ruvb2 | RuvB-like 2 OS=Mus mus K.VQAGDVITIDK#.A                      | 78.50  | 34.75  | 2.26 | 0.44 |
| Q9W7M5_RUVB2_MOUSE | Ruvb2 | RuvB-like 2 OS=Mus mus R.VYSLFLEDSR.S                        | 256.13 | 95.14  | 2.69 | 0.37 |
| Q9W7M5_RUVB2_MOUSE | Ruvb2 | RuvB-like 2 OS=Mus mus R.AVLIAGPPTGSK#.T                     | 35.99  | 15.47  | 2.33 | 0.43 |
| Q9W7M5_RUVB2_MOUSE | Ruvb2 | RuvB-like 2 OS=Mus mus K.DK#HQAQDHYHLGLANK#.F                | 19.31  | 7.06   | 2.73 | 0.37 |
| Q9W7M5_RUVB2_MOUSE | Ruvb2 | RuvB-like 2 OS=Mus mus K.EYQDFLNFELK#GETM*DT.S.-             | 3.65   | 2.29   | 1.60 | 0.63 |
| Q9W7M5_RUVB2_MOUSE | Ruvb2 | RuvB-like 2 OS=Mus mus R.K#HQAQDHYHLGLANK#.F                 | 16.49  | 8.12   | 2.03 | 0.49 |
| Q9W7M5_RUVB2_MOUSE | Ruvb2 | RuvB-like 2 OS=Mus mus R.LLIVSTSPYSEK#.D                     | 14.53  | 6.09   | 2.38 | 0.42 |
| Q9W7M5_RUVB2_MOUSE | Ruvb2 | RuvB-like 2 OS=Mus mus R.QASQGM*VGLAAR@_R                    | 10.58  | 5.73   | 1.85 | 0.54 |
| Q9W7M5_RUVB2_MOUSE | Ruvb2 | RuvB-like 2 OS=Mus mus K.TEALYQAFR@_R                        | 70.85  | 9.03   | 7.85 | 0.13 |
| Q9W7M5_RUVB2_MOUSE | Ruvb2 | RuvB-like 2 OS=Mus mus K.TTEM*ETIYDLGK#.M                    | 24.56  | 6.72   | 3.65 | 0.27 |
| Q9W7M5_RUVB2_MOUSE | Ruvb2 | RuvB-like 2 OS=Mus mus K.VQAGDVITIDK#.A                      | 9.32   | 4.87   | 1.92 | 0.52 |
| Q9W7M5_RUVB2_MOUSE | Ruvb2 | RuvB-like 2 OS=Mus mus R.AVLIAGPPTGSK#.T                     | 21.84  | 7.23   | 3.02 | 0.33 |
| Q9W7M5_RUVB2_MOUSE | Ruvb2 | RuvB-like 2 OS=Mus mus R.IGLETSLR@_Y                         | 15.44  | 4.46   | 3.46 | 0.29 |
| Q9W7M5_RUVB2_MOUSE | Ruvb2 | RuvB-like 2 OS=Mus mus R.LLIVSTSPYSEK#.D                     | 9.05   | 4.62   | 1.96 | 0.51 |
| Q9W7M5_RUVB2_MOUSE | Ruvb2 | RuvB-like 2 OS=Mus mus R.QASQGM*VGLAAR@_R                    | 7.61   | 2.19   | 3.47 | 0.29 |
| Q9W7M5_RUVB2_MOUSE | Ruvb2 | RuvB-like 2 OS=Mus mus K.TTEM*ETIYDLGK#.M                    | 16.03  | 6.35   | 2.53 | 0.40 |
| Q9CQK7_RWDD1_MOUSE | Rwdd1 | RWD domain-containing K.FTYSEKPEDETPLEIFSQENLEDNDVSDILK.L    | 9.66   | 3.71   | 2.61 | 0.38 |
| Q9CQK7_RWDD1_MOUSE | Rwdd1 | RWD domain-containing K.LFHGTPVTIENFLSWK#.A                  | 9.78   | 6.01   | 1.63 | 0.61 |

|                     |         |                                                                            |        |        |      |      |
|---------------------|---------|----------------------------------------------------------------------------|--------|--------|------|------|
| Q9CQK7_RWDD1_MOUSE  | Rwdd1   | RWD domain-containing K.LEIVDQIK#.T                                        | 33.40  | 19.60  | 1.70 | 0.59 |
| Q9CQK7_RWDD1_MOUSE  | Rwdd1   | RWD domain-containing K.YPDETLPEYFQJENLEDNDVSDILK#.L                       | 3.46   | 2.45   | 1.41 | 0.71 |
| Q9CPR1_RWDD4_MOUSE  | Rwdd4   | RWD domain-containing R.ELSPVFSQYR#.J                                      | 21.10  | 7.45   | 2.83 | 0.35 |
| Q9CPR1_RWDD4_MOUSE  | Rwdd4   | RWD domain-containing R.GWVWVVDVVK#.H                                      | 8.23   | 4.45   | 1.85 | 0.54 |
| P28700_RXRA_MOUSE   | Rxra    | Retinoic acid receptor R0.R.AGWNELLIASFHR@.S                               | 11.41  | 6.56   | 2.88 | 0.42 |
| P28700_RXRA_MOUSE   | Rxra    | Retinoic acid receptor R0.K.ILEAEVAEPK#.T                                  | 15.60  | 2.91   | 3.91 | 0.26 |
| P28700_RXRA_MOUSE   | Rxra    | Retinoic acid receptor R0.R.IPHFSELPLDDQVILLR@.A                           | 28.08  | 7.49   | 3.75 | 0.27 |
| P28700_RXRA_MOUSE   | Rxra    | Retinoic acid receptor R0.K.LIGDTPIDTFLM*EM*LEAPHQAT.-                     | 9.28   | 9.28   | 1.00 | 1.00 |
| P28700_RXRA_MOUSE   | Rxra    | Retinoic acid receptor R0.K.QLFTLVWAK#.R                                   | 16.46  | 5.36   | 3.07 | 0.33 |
| P28700_RXRA_MOUSE   | Rxra    | Retinoic acid receptor R0.R.AGWNELLIASFHR@.S                               | 7.65   | 1.76   | 4.34 | 0.23 |
| P28700_RXRA_MOUSE   | Rxra    | Retinoic acid receptor R0.R.IPHFSELPLDDQVILLR@.A                           | 7.05   | 3.16   | 2.23 | 0.45 |
| P28700_RXRA_MOUSE   | Rxra    | Retinoic acid receptor R0.K.QLFTLVWAK#.R                                   | 8.21   | 1.56   | 5.28 | 0.19 |
| P28704_RXRB_MOUSE   | Rxrb    | Retinoic acid receptor R0.R.AILFNPDAK#.G                                   | 10.43  | 2.66   | 3.92 | 0.26 |
| P28704_RXRB_MOUSE   | Rxrb    | Retinoic acid receptor R0.K.GLSNPGVEEILR@.E                                | 10.10  | 3.39   | 2.98 | 0.34 |
| P28704_RXRB_MOUSE   | Rxrb    | Retinoic acid receptor R0.R.ILEAEVAEQK#.S                                  | 9.20   | 3.81   | 2.41 | 0.41 |
| P28704_RXRB_MOUSE   | Rxrb    | Retinoic acid receptor R0.R.IPHFSSLPDDQVILLR@.A                            | 9.96   | 3.95   | 2.52 | 0.40 |
| P28704_RXRB_MOUSE   | Rxrb    | Retinoic acid receptor R0.K.GLSNPGVEEILR@.E                                | 10.22  | 1.89   | 5.40 | 0.19 |
| P50543_S10A8_MOUSE  | S100a11 | Protein S100-A11 OS=M.L.K.NQKDPGLVLR.M                                     | 25.79  | 35.65  | 0.72 | 1.38 |
| P50543_S10A8_MOUSE  | S100a11 | Protein S100-A11 OS=M.L.K.TEFLSFM*NTLEAAFTK#.N                             | 11.88  | 30.85  | 0.39 | 2.60 |
| Q9D708_Q9D708_MOUSE | S100a16 | Protein S100a16 OS=M.L.K.AVVVLVFNFK#.Y                                     | 9.54   | 2.87   | 3.33 | 0.30 |
| Q9EP69_SAC1_MOUSE   | Sacm1l  | Phosphatidylinositolide 4-epimerase R0.K.TQLGLLM*DGFSLLR@.Y                | 7.87   | 2.76   | 2.85 | 0.35 |
| Q9EP69_SAC1_MOUSE   | Sacm1l  | Phosphatidylinositolide 4-epimerase R0.K.VVTNQDQVFR@.S                     | 6.77   | 1.94   | 3.49 | 0.29 |
| Q9R1T2_SAE1_MOUSE   | Sae1    | SUMO-activating enzyme R0.AQNLNPM*VDVK#.V                                  | 8.41   | 4.48   | 1.88 | 0.53 |
| D3YXK2_SAFB1_MOUSE  | Safb    | Scaffold attachment factor R0.APTAALSPQDQSK#EDVK#.K.F                      | 24.60  | 16.87  | 1.46 | 0.69 |
| D3YXK2_SAFB1_MOUSE  | Safb    | Scaffold attachment factor R0.EPADAPGGGTGM*DRPVGLEEPVEQSSTAALPEATSQELVR.A  | 11.12  | 4.38   | 2.54 | 0.39 |
| D3YXK2_SAFB1_MOUSE  | Safb    | Scaffold attachment factor R0.LQAQWER@.E                                   | 27.63  | 15.49  | 1.78 | 0.56 |
| D3YXK2_SAFB1_MOUSE  | Safb    | Scaffold attachment factor R0.M*SVSEEDSDTK#R@.L                            | 6.70   | 3.64   | 1.84 | 0.54 |
| D3YXK2_SAFB1_MOUSE  | Safb    | Scaffold attachment factor R0.NFWVSGLSSTR@.A                               | 37.15  | 18.86  | 1.97 | 0.51 |
| D3YXK2_SAFB1_MOUSE  | Safb    | Scaffold attachment factor R0.REPADAPGGGTGM*DRPVGLEEPVEQSSTAALPEATSQELVR.A | 17.20  | 7.93   | 2.17 | 0.46 |
| D3YXK2_SAFB1_MOUSE  | Safb    | Scaffold attachment factor R0.SEPVK#EGSELEOPFAQATSSVGPDR@.K                | 16.25  | 9.50   | 1.71 | 0.58 |
| D3YXK2_SAFB1_MOUSE  | Safb    | Scaffold attachment factor R0.K.SK#DADQK#P#P#SER@.S                        | 17.48  | 13.57  | 1.29 | 0.78 |
| D3YXK2_SAFB1_MOUSE  | Safb    | Scaffold attachment factor R0.NFWVSGLSSTR@.A                               | 13.44  | 5.76   | 2.34 | 0.43 |
| D3YXK2_SAFB1_MOUSE  | Safb    | Scaffold attachment factor R0.REPADAPGGGTGM*DRPVGLEEPVEQSSTAALPEATSQELVR.A | 7.21   | 4.00   | 1.80 | 0.55 |
| D3YXK2_SAFB1_MOUSE  | Safb    | Scaffold attachment factor R0.SEPVK#EGSELEOPFAQATSSVGPDR@.K                | 10.21  | 5.44   | 1.88 | 0.53 |
| Q80YR5_SAFB2_MOUSE  | Safb2   | Scaffold attachment factor R0.AFK#EEGQPEVEGISWGA#K#.R                      | 6.59   | 3.64   | 1.81 | 0.55 |
| Q80YR5_SAFB2_MOUSE  | Safb2   | Scaffold attachment factor R0.ELADAPGGGGTR@.H                              | 24.09  | 9.40   | 2.56 | 0.39 |
| Q80YR5_SAFB2_MOUSE  | Safb2   | Scaffold attachment factor R0.HAVDEEVK#NTEASVSDLK#.V                       | 6.80   | 5.31   | 1.28 | 0.78 |
| Q80YR5_SAFB2_MOUSE  | Safb2   | Scaffold attachment factor R0.LDAFQER@.R                                   | 35.72  | 19.86  | 1.80 | 0.56 |
| Q80YR5_SAFB2_MOUSE  | Safb2   | Scaffold attachment factor R0.LEGGGM*ASDQGG@.V                             | 7.73   | 4.38   | 1.77 | 0.57 |
| Q80YR5_SAFB2_MOUSE  | Safb2   | Scaffold attachment factor R0.NLWVSGLSSTR@.A                               | 14.66  | 9.71   | 1.51 | 0.66 |
| Q80YR5_SAFB2_MOUSE  | Safb2   | Scaffold attachment factor R0.K.NTEASVSDLK#.V                              | 15.54  | 5.88   | 2.64 | 0.38 |
| Q80YR5_SAFB2_MOUSE  | Safb2   | Scaffold attachment factor R0.VTLADEAPM*EPENEK#.I                          | 11.59  | 6.01   | 1.93 | 0.52 |
| Q80YR5_SAFB2_MOUSE  | Safb2   | Scaffold attachment factor R0.ELADAPGGGGTR.H                               | 8.94   | 7.01   | 1.28 | 0.78 |
| D3YXK1_SAMD1_MOUSE  | Samd1   | Atherin OS=Mus musculus K.VLQGHQFEDDDPDGLL.G.-                             | 5.33   | 5.33   | 1.00 | 1.00 |
| G5E8A7_G5E8A7_MOUSE | Samd4b  | Serine/threonine-protein R0.NALQELQIITPIK#.A                               | 5.75   | 2.99   | 1.93 | 0.52 |
| Q60710_SAMH1_MOUSE  | Samhd1  | Deoxynucleoside triphosphate R0.APDVELKAEFIVDIVNDVYGM*EDKNPIDR.V           | 16.81  | 10.85  | 1.55 | 0.67 |
| Q60710_SAMH1_MOUSE  | Samhd1  | Deoxynucleoside triphosphate R0.DFTK#PQDGGIIAPLITLKR.W                     | 32.38  | 21.55  | 1.50 | 0.67 |
| Q60710_SAMH1_MOUSE  | Samhd1  | Deoxynucleoside triphosphate R0.K.FAEQLIR@.V                               | 44.20  | 23.16  | 1.91 | 0.52 |
| Q60710_SAMH1_MOUSE  | Samhd1  | Deoxynucleoside triphosphate R0.IAGSFLPLFLEDRE@.L                          | 13.25  | 8.05   | 1.65 | 0.61 |
| Q60710_SAMH1_MOUSE  | Samhd1  | Deoxynucleoside triphosphate R0.IIDTQFQR@.L                                | 52.32  | 24.40  | 2.14 | 0.47 |
| Q60710_SAMH1_MOUSE  | Samhd1  | Deoxynucleoside triphosphate R0.RINK#EQVQLLPEK#.F                          | 20.54  | 15.67  | 1.31 | 0.76 |
| Q60710_SAMH1_MOUSE  | Samhd1  | Deoxynucleoside triphosphate R0.K.ISNLIDIM*ITDAFLK#.A                      | 15.93  | 8.72   | 1.83 | 0.55 |
| Q60710_SAMH1_MOUSE  | Samhd1  | Deoxynucleoside triphosphate R0.ISTAIIDM*EAFTK#.L                          | 41.73  | 21.86  | 1.91 | 0.52 |
| Q60710_SAMH1_MOUSE  | Samhd1  | Deoxynucleoside triphosphate R0.K.NGLVPEEDITFIK#.E                         | 38.20  | 26.43  | 1.45 | 0.69 |
| Q60710_SAMH1_MOUSE  | Samhd1  | Deoxynucleoside triphosphate R0.ADPYVETGTAGK#.K                            | 22.23  | 4.77   | 4.66 | 0.21 |
| Q60710_SAMH1_MOUSE  | Samhd1  | Deoxynucleoside triphosphate R0.DFTK#PQDGGIIAPLITLKR.W                     | 16.93  | 3.53   | 4.80 | 0.21 |
| Q60710_SAMH1_MOUSE  | Samhd1  | Deoxynucleoside triphosphate R0.K.FAEQLIR@.V                               | 29.67  | 6.67   | 4.45 | 0.22 |
| Q60710_SAMH1_MOUSE  | Samhd1  | Deoxynucleoside triphosphate R0.IAGSFLPLFLEDRE@.L                          | 57.39  | 12.96  | 4.43 | 0.23 |
| Q60710_SAMH1_MOUSE  | Samhd1  | Deoxynucleoside triphosphate R0.IIDTQFQR@.L                                | 27.12  | 5.57   | 4.87 | 0.21 |
| Q60710_SAMH1_MOUSE  | Samhd1  | Deoxynucleoside triphosphate R0.ISTAIIDM*EAFTK#.L                          | 20.70  | 10.50  | 1.97 | 0.51 |
| Q60710_SAMH1_MOUSE  | Samhd1  | Deoxynucleoside triphosphate R0.K.YLGTQPK#.R                               | 24.88  | 15.29  | 1.63 | 0.61 |
| Q8BIH0_SP130_MOUSE  | Sap130  | Histone deacetylase com R0.INELIQGNM*QR@.C                                 | 9.93   | 3.61   | 2.75 | 0.36 |
| Q8BIH0_SP130_MOUSE  | Sap130  | Histone deacetylase com R0.LTNLQEQIIPK#.K                                  | 21.34  | 5.44   | 3.92 | 0.25 |
| Q8BIH0_SP130_MOUSE  | Sap130  | Histone deacetylase com R0.K.LVM*DJQISEAR@.D                               | 10.61  | 5.44   | 1.95 | 0.51 |
| O55128_SAP18_MOUSE  | Sap18   | Histone deacetylase com R0.FQIGDYLDIAITPPNR.A                              | 12.35  | 10.81  | 1.14 | 0.87 |
| O55128_SAP18_MOUSE  | Sap18   | Histone deacetylase com R0.K.GTDDSM*TLQSQK.F                               | 3.02   | 2.81   | 1.07 | 0.93 |
| O55128_SAP18_MOUSE  | Sap18   | Histone deacetylase com R0.EIGSTM*SGR@.K                                   | 33.35  | 18.35  | 1.82 | 0.55 |
| O55128_SAP18_MOUSE  | Sap18   | Histone deacetylase com R0.FQIGDYLDIAITPPNR@.A                             | 198.86 | 110.72 | 1.80 | 0.56 |
| O55128_SAP18_MOUSE  | Sap18   | Histone deacetylase com R0.GNVPSELOIYTWMDATLK#.E                           | 31.79  | 14.35  | 2.22 | 0.45 |
| O55128_SAP18_MOUSE  | Sap18   | Histone deacetylase com R0.GNVPSELOIYTWMDATLK#.E                           | 31.31  | 12.41  | 2.52 | 0.40 |
| O55128_SAP18_MOUSE  | Sap18   | Histone deacetylase com R0.GNVPSELOIYTWMDATLK#.E                           | 7.00   | 3.67   | 1.91 | 0.52 |
| O55128_SAP18_MOUSE  | Sap18   | Histone deacetylase com R0.K.GTDDSM*TLQSQK.F                               | 41.69  | 20.65  | 2.02 | 0.50 |
| O55128_SAP18_MOUSE  | Sap18   | Histone deacetylase com R0.K.GTHFNFAVFM*DLK#.R                             | 8.42   | 3.82   | 2.21 | 0.45 |
| O55128_SAP18_MOUSE  | Sap18   | Histone deacetylase com R0.K.KEPEKPIDR@.E                                  | 7.70   | 7.59   | 1.01 | 0.99 |
| O55128_SAP18_MOUSE  | Sap18   | Histone deacetylase com R0.K.KEPEKPIDR@.E                                  | 4.85   | 1.59   | 3.06 | 0.33 |
| O55128_SAP18_MOUSE  | Sap18   | Histone deacetylase com R0.K.GTDDSM*TLQSQK.F                               | 46.82  | 28.42  | 1.65 | 0.61 |
| O55128_SAP18_MOUSE  | Sap18   | Histone deacetylase com R0.K.GTDDSM*TLQSQK#.F                              | 102.27 | 48.09  | 2.13 | 0.47 |
| O55128_SAP18_MOUSE  | Sap18   | Histone deacetylase com R0.K.GTDDSM*TLQSQK.F                               | 23.01  | 10.66  | 2.16 | 0.46 |
| O55128_SAP18_MOUSE  | Sap18   | Histone deacetylase com R0.M*DEFSR@.G                                      | 104.66 | 28.77  | 3.64 | 0.27 |
| O55128_SAP18_MOUSE  | Sap18   | Histone deacetylase com R0.K.VKEIGSTM*SGR.K                                | 56.71  | 24.62  | 2.30 | 0.43 |
| O55128_SAP18_MOUSE  | Sap18   | Histone deacetylase com R0.VTQEQIK#.K                                      | 157.36 | 88.08  | 1.79 | 0.56 |
| O55128_SAP18_MOUSE  | Sap18   | Histone deacetylase com R0.FQIGDYLDIAITPPNR@.A                             | 7.78   | 6.36   | 1.22 | 0.82 |
| Q02614_S30BP_MOUSE  | Sap30bp | SAP30-binding protein C0.K.EGM*DM*NYIIQR@.K                                | 10.13  | 4.43   | 2.29 | 0.44 |
| Q02614_S30BP_MOUSE  | Sap30bp | SAP30-binding protein C0.K.KHGTTNATATSTASTAVADAQK#.R                       | 6.92   | 4.38   | 1.58 | 0.63 |
| Q02614_S30BP_MOUSE  | Sap30bp | SAP30-binding protein C0.K.TTVISAVGTIVK#.K                                 | 15.96  | 6.34   | 2.52 | 0.40 |
| Q99JZ4_Q99JZ4_MOUSE | Sar1a   | GTP-binding protein SAR0.R.EIFGLYQQTGK#.G                                  | 14.86  | 6.87   | 2.16 | 0.46 |
| Q99JZ4_Q99JZ4_MOUSE | Sar1a   | GTP-binding protein SAR0.K.LVFLGLDNDAGK#.T                                 | 32.80  | 13.66  | 2.40 | 0.42 |
| Q9Z315_SNU11_MOUSE  | Sart1   | U4/U6.U5 tri-snRNP-associating factor R0.EAAGTAAAGTGGTQPPR@.H              | 7.91   | 6.05   | 1.31 | 0.76 |
| Q9Z315_SNU11_MOUSE  | Sart1   | U4/U6.U5 tri-snRNP-associating factor R0.ADDLLPLDQDQDGFGR@.L               | 56.34  | 22.25  | 2.53 | 0.39 |
| Q9Z315_SNU11_MOUSE  | Sart1   | U4/U6.U5 tri-snRNP-associating factor R0.ASSGDASSLSIETNK#.L                | 83.21  | 27.66  | 3.01 | 0.33 |
| Q9Z315_SNU11_MOUSE  | Sart1   | U4/U6.U5 tri-snRNP-associating factor R0.K.DKGLQDGEDVLVNVNM*VDKER.A        | 29.18  | 10.80  | 2.70 | 0.37 |
| Q9Z315_SNU11_MOUSE  | Sart1   | U4/U6.U5 tri-snRNP-associating factor R0.K.HGVLQDGEDVLVNVNM*VDKER@.A       | 8.84   | 2.25   | 3.93 | 0.25 |
| Q9Z315_SNU11_MOUSE  | Sart1   | U4/U6.U5 tri-snRNP-associating factor R0.DLQGLVVEHAIHDSFR.E                | 26.26  | 10.10  | 2.60 | 0.38 |
| Q9Z315_SNU11_MOUSE  | Sart1   | U4/U6.U5 tri-snRNP-associating factor R0.DLQGLVVEHAIHDSFR@.E               | 21.48  | 6.89   | 3.12 | 0.32 |
| Q9Z315_SNU11_MOUSE  | Sart1   | U4/U6.U5 tri-snRNP-associating factor R0.EAAGTAAAGTGGTQPPR@.H              | 90.20  | 31.96  | 2.82 | 0.35 |
| Q9Z315_SNU11_MOUSE  | Sart1   | U4/U6.U5 tri-snRNP-associating factor R0.EAGTK#EAPVAADVINPMALR@.Q          | 11.07  | 24.94  | 1.25 | 0.80 |
| Q9Z315_SNU11_MOUSE  | Sart1   | U4/U6.U5 tri-snRNP-associating factor R0.EEPVAADVINPM*ALR@.Q               | 8.81   | 3.95   | 2.23 | 0.45 |
| Q9Z315_SNU11_MOUSE  | Sart1   | U4/U6.U5 tri-snRNP-associating factor R0.EGETVVLTK#.D                      | 7.09   | 35.83  | 1.96 | 0.51 |
| Q9Z315_SNU11_MOUSE  | Sart1   | U4/U6.U5 tri-snRNP-associating factor R0.GWEEEDPER@.K                      | 7.98   | 3.28   | 2.43 | 0.41 |
| Q9Z315_SNU11_MOUSE  | Sart1   | U4/U6.U5 tri-snRNP-associating factor R0.IEYVDETR@.K                       | 69.04  | 21.86  | 3.16 | 0.32 |
| Q9Z315_SNU11_MOUSE  | Sart1   | U4/U6.U5 tri-snRNP-associating factor R0.IEYVDETR@.K#.L                    | 22.82  | 14.56  | 1.57 | 0.64 |
| Q9Z315_SNU11_MOUSE  | Sart1   | U4/U6.U5 tri-snRNP-associating factor R0.K.HLEDEALLK#.M                    | 110.03 | 37.43  | 2.94 | 0.34 |
| Q9Z315_SNU11_MOUSE  | Sart1   | U4/U6.U5 tri-snRNP-associating factor R0.LASEVLSPEEM*VTFK#.K               | 21.81  | 12.39  | 1.76 | 0.57 |



|                     |         |                                                                   |       |       |      |       |
|---------------------|---------|-------------------------------------------------------------------|-------|-------|------|-------|
| Q80U22_SDA1_MOUSE   | Sdad1   | Protein SDA1 homolog C K.LDSM*PM*EER@.K                           | 5.19  | 2.23  | 2.32 | 0.43  |
| Q35988_SDC4_MOUSE   | Sdc4    | Syndecan-4 OS=Mus mus R.ETEVIDPQDLLEGR@.Y                         | 20.44 | 6.63  | 3.08 | 0.32  |
| Q9DCT5_SDF2_MOUSE   | Sdf2    | Stromal cell-derived fact. R.YGSGEQSVTVGTVSDDNSNSYWR@.I           | 5.40  | 2.18  | 2.48 | 0.40  |
| Q9ESP1_SDF2L_MOUSE  | Sdf2l1  | Stromal cell-derived fact. K.AM*EGIK#HGADLSTGHDEL-                | 13.54 | 11.62 | 1.16 | 0.86  |
| Q61112_CAB45_MOUSE  | Sdf4    | 45 kDa calcium-binding j K.YEFFFGSK.L                             | 8.85  | 13.56 | 0.65 | 1.53  |
| Q63918_SDRP_MOUSE   | Sdrp    | Serum deprivation-respo K.FQHPNTDM*LQEKSPSPM*PSSTPSPNLNGSTEEAIR.D | 2.34  | 1.60  | 1.46 | 0.69  |
| Q63918_SDRP_MOUSE   | Sdrp    | Serum deprivation-respo K.LVNM*LDAVR@.E                           | 32.54 | 24.42 | 1.33 | 0.75  |
| Q63918_SDRP_MOUSE   | Sdrp    | Serum deprivation-respo K.VLIFQESEI PASVFK.E                      | 25.52 | 20.88 | 1.22 | 0.82  |
| Q63918_SDRP_MOUSE   | Sdrp    | Serum deprivation-respo K.YQASTNSVSK#.L                           | 23.94 | 20.74 | 1.15 | 0.87  |
| Q63918_SDRP_MOUSE   | Sdrp    | Serum deprivation-respo K.GIQNDLTK#.L                             | 37.00 | 22.15 | 1.67 | 0.60  |
| Q63918_SDRP_MOUSE   | Sdrp    | Serum deprivation-respo K.QVQPAVLHVDQTA-                          | 42.34 | 42.34 | 1.00 | 1.00  |
| Q63918_SDRP_MOUSE   | Sdrp    | Serum deprivation-respo R.R@GNSAVGNSADLTIEDEEEEPVALQQAQVQR@.Y     | 4.88  | 2.18  | 2.24 | 0.45  |
| Q63918_SDRP_MOUSE   | Sdrp    | Serum deprivation-respo K.VLIFQESEI PASVFK#EPVSAEAGK#HEALADENK#.S | 15.96 | 2.61  | 6.12 | 0.16  |
| Q63918_SDRP_MOUSE   | Sdrp    | Serum deprivation-respo K.YQASTNSVSK#.L                           | 45.37 | 23.19 | 1.96 | 0.51  |
| Q9R0P6_SC11A_MOUSE  | Sec11a  | Signal peptidase complex R.GDLLFLTNR@.V                           | 7.31  | 3.69  | 1.98 | 0.50  |
| Q9R0P6_SC11A_MOUSE  | Sec11a  | Signal peptidase complex R.VGEIVFR.I                              | 20.05 | 14.46 | 1.39 | 0.72  |
| Q9D1M0_SEC13_MOUSE  | Sec13   | Protein SEC13 homolog K.GGGSVSVASIEGQQNEQ-                        | 14.67 | 14.67 | 1.00 | 1.00  |
| Q9D1M0_SEC13_MOUSE  | Sec13   | Protein SEC13 homolog K.R.NGGQILADLR@.G                           | 38.29 | 15.54 | 2.46 | 0.41  |
| F7BPW6_F7BPW6_MOUSE | Sec16a  | Protein Sec16a (Fragmen R.APSLTSDEGK#.K                           | 7.13  | 1.66  | 4.30 | 0.23  |
| F7BPW6_F7BPW6_MOUSE | Sec16a  | Protein Sec16a (Fragmen K.FATNEAIQR@.T                            | 20.56 | 15.57 | 1.32 | 0.76  |
| F7BPW6_F7BPW6_MOUSE | Sec16a  | Protein Sec16a (Fragmen K.SVLTQPGAVSPVLISLQTM*ASQLR@.L            | 4.66  | 3.19  | 1.46 | 0.69  |
| O08547_SC22B_MOUSE  | Sec22b  | Vesicle-trafficking protein K.ANNLSLSSK#.K                        | 12.55 | 45.82 | 0.27 | 3.65  |
| O08547_SC22B_MOUSE  | Sec22b  | Vesicle-trafficking protein R.GEALSALDSK#.A                       | 17.12 | 4.86  | 3.52 | 0.68  |
| O08547_SC22B_MOUSE  | Sec22b  | Vesicle-trafficking protein R.IM*VANIEEVLQR@.G                    | 10.80 | 4.37  | 2.47 | 0.40  |
| O08547_SC22B_MOUSE  | Sec22b  | Vesicle-trafficking protein K.KHLAFAYEDLHSEFDEQHGK#.K             | 11.91 | 5.25  | 2.27 | 0.44  |
| O08547_SC22B_MOUSE  | Sec22b  | Vesicle-trafficking protein R.NLGSINTELQDVQR@.I                   | 15.84 | 5.89  | 2.69 | 0.37  |
| O08547_SC22B_MOUSE  | Sec22b  | Vesicle-trafficking protein R.VADGLPLAASM*QEDEQSGR@.D             | 11.10 | 4.42  | 2.51 | 0.40  |
| O08547_SC22B_MOUSE  | Sec22b  | Vesicle-trafficking protein R.GEALSALDSK#.A                       | 50.60 | 9.91  | 5.10 | 0.20  |
| O08547_SC22B_MOUSE  | Sec22b  | Vesicle-trafficking protein R.IM*VANIEEVLQR@.G                    | 50.83 | 9.12  | 5.58 | 0.18  |
| O08547_SC22B_MOUSE  | Sec22b  | Vesicle-trafficking protein K.KHLAFAYEDLHSEFDEQHGK#.K             | 31.12 | 13.69 | 2.27 | 0.44  |
| O08547_SC22B_MOUSE  | Sec22b  | Vesicle-trafficking protein R.NLGSINTELQDVQR@.I                   | 43.29 | 9.27  | 4.67 | 0.21  |
| O08547_SC22B_MOUSE  | Sec22b  | Vesicle-trafficking protein R.R@NLGSINTELQDVQR@.I                 | 25.10 | 2.79  | 8.99 | 0.11  |
| O08547_SC22B_MOUSE  | Sec22b  | Vesicle-trafficking protein R.VADGLPLAASM*QEDEQSGR@.D             | 21.17 | 5.60  | 3.78 | 0.26  |
| O08547_SC22B_MOUSE  | Sec22b  | Vesicle-trafficking protein R.VADGLPLAASMOEEDQSGR@.D              | 3.22  | 2.00  | 1.61 | 0.62  |
| O08547_SC22B_MOUSE  | Sec22b  | Vesicle-trafficking protein R.VADGLPLAASM*QEDEQSGR@DLQQYQSAK#.Q   | 5.02  | 1.17  | 4.29 | 0.23  |
| O08547_SC22B_MOUSE  | Sec22b  | Vesicle-trafficking protein R.DLQQYQSAK#.Q                        | 9.30  | 8.29  | 1.12 | 0.89  |
| O08547_SC22B_MOUSE  | Sec22b  | Vesicle-trafficking protein R.NLGSINTELQDVQR@.I                   | 9.92  | 4.90  | 2.02 | 0.49  |
| O08547_SC22B_MOUSE  | Sec22b  | Vesicle-trafficking protein R.GEALSALDSK#.A                       | 10.90 | 6.41  | 1.70 | 0.59  |
| O08547_SC22B_MOUSE  | Sec22b  | Vesicle-trafficking protein R.NLGSINTELQDVQR@.I                   | 9.97  | 7.09  | 1.41 | 0.71  |
| O08547_SC22B_MOUSE  | Sec22b  | Vesicle-trafficking protein R.VADGLPLAASM*QEDEQSGR@.D             | 7.34  | 5.56  | 1.32 | 0.76  |
| Q01405_SC23A_MOUSE  | Sec23a  | Protein transport protein R.HLLQAPVDDAQELHSR@.F                   | 13.77 | 12.72 | 1.08 | 0.92  |
| Q01405_SC23A_MOUSE  | Sec23a  | Protein transport protein R.M*VVPVAALFTPLK#.E                     | 8.63  | 5.66  | 1.52 | 0.66  |
| Q01405_SC23A_MOUSE  | Sec23a  | Protein transport protein R.SPFLFVAVNNSPDESSYR@.H                 | 5.58  | 2.67  | 2.09 | 0.48  |
| Q01405_SC23A_MOUSE  | Sec23a  | Protein transport protein R.M*VVPVAALFTPLK#.E                     | 6.88  | 3.83  | 1.80 | 0.56  |
| Q9D662_SC23B_MOUSE  | Sec23b  | Protein transport protein R.AESEEEDVLR@.W                         | 11.69 | 2.68  | 4.36 | 0.23  |
| Q3UPL0_SC31A_MOUSE  | Sec31a  | Protein transport protein K.TTFEDIQR@.C                           | 6.78  | 3.97  | 1.71 | 0.59  |
| Q3UPL0_SC31A_MOUSE  | Sec31a  | Protein transport protein K.AQDGSPLSLQDLIEK#.V                    | 27.95 | 8.75  | 3.20 | 0.31  |
| Q3UPL0_SC31A_MOUSE  | Sec31a  | Protein transport protein K.AVQLTQALDNTVGVALLAEK#.M               | 16.92 | 5.96  | 2.84 | 0.35  |
| Q3UPL0_SC31A_MOUSE  | Sec31a  | Protein transport protein K.IALALNK#.V                            | 9.23  | 4.16  | 2.22 | 0.45  |
| Q3UPL0_SC31A_MOUSE  | Sec31a  | Protein transport protein K.IEASQTEFEK#.V                         | 14.51 | 6.70  | 3.72 | 0.27  |
| Q3UPL0_SC31A_MOUSE  | Sec31a  | Protein transport protein R.K#HAVQIM*GGSIDGLR@.Q                  | 24.93 | 6.44  | 2.26 | 0.44  |
| Q3UPL0_SC31A_MOUSE  | Sec31a  | Protein transport protein K.K#AVQALDNTVGVALLAEK#.M                | 35.87 | 10.74 | 3.34 | 0.30  |
| Q3UPL0_SC31A_MOUSE  | Sec31a  | Protein transport protein K.LVTFESVAVPLQQGAEQQR@.R                | 16.15 | 5.76  | 2.80 | 0.36  |
| Q3UPL0_SC31A_MOUSE  | Sec31a  | Protein transport protein R.LVTFESVAVPLQQGAEQQR@.R                | 39.93 | 15.58 | 2.56 | 0.39  |
| Q3UPL0_SC31A_MOUSE  | Sec31a  | Protein transport protein R.R@QPVFISQVTEKHDFLNR@.S                | 16.04 | 5.74  | 2.80 | 0.36  |
| Q3UPL0_SC31A_MOUSE  | Sec31a  | Protein transport protein K.TTFEDIQR@.C                           | 18.32 | 6.17  | 2.97 | 0.34  |
| Q3UPL0_SC31A_MOUSE  | Sec31a  | Protein transport protein K.VVLSQASK#.L                           | 18.51 | 7.54  | 2.45 | 0.41  |
| Q3UPL0_SC31A_MOUSE  | Sec31a  | Protein transport protein K.YELLELYR@.K                           | 31.53 | 12.07 | 2.61 | 0.38  |
| Q3UPL0_SC31A_MOUSE  | Sec31a  | Protein transport protein K.AQDGSPLSLQDLIEK#.V                    | 21.27 | 7.44  | 2.86 | 0.35  |
| Q3UPL0_SC31A_MOUSE  | Sec31a  | Protein transport protein K.AQK#H#VSGQSSQSPYR@.Q                  | 18.42 | 4.71  | 3.91 | 0.26  |
| Q3UPL0_SC31A_MOUSE  | Sec31a  | Protein transport protein K.AVQLTQALDNTVGVALLAEK#.M               | 11.54 | 3.00  | 3.84 | 0.26  |
| Q3UPL0_SC31A_MOUSE  | Sec31a  | Protein transport protein R.ISVYSIM*GGSIDGLR@.Q                   | 13.92 | 3.16  | 4.41 | 0.23  |
| Q3UPL0_SC31A_MOUSE  | Sec31a  | Protein transport protein R.K#AVQALDNTVGVALLAEK#.M                | 9.86  | 2.81  | 3.51 | 0.28  |
| Q3UPL0_SC31A_MOUSE  | Sec31a  | Protein transport protein K.LVTFESVAVPLQQGAEQQR@.R                | 18.92 | 5.43  | 3.48 | 0.29  |
| Q3UPL0_SC31A_MOUSE  | Sec31a  | Protein transport protein R.R@QPVFISQVTEKHDFLNR@.S                | 8.07  | 1.79  | 4.50 | 0.22  |
| P61620_S61A1_MOUSE  | Sec61a1 | Protein transport protein K.AFSPTTNTGR@.G                         | 38.88 | 13.22 | 2.94 | 0.34  |
| P61620_S61A1_MOUSE  | Sec61a1 | Protein transport protein K.IIEVGDTPK#.D                          | 20.11 | 9.04  | 2.22 | 0.45  |
| P60060_S61G_MOUSE   | Sec61g  | Protein transport protein K.LIHIPINNIVGG-                         | 12.79 | 12.79 | 1.00 | 1.00  |
| Q8BU14_SEC62_MOUSE  | Sec62   | Translocation protein SE K.K#GEDALFTTR@.E                         | 8.60  | 2.40  | 3.59 | 0.28  |
| Q8R2U0_SEH1_MOUSE   | Seh1    | Nucleoporin SEH1 OS=Mus K.VQJFEYNENTR@.K                          | 10.87 | 6.18  | 1.76 | 0.57  |
| Q3UQA7_SELH_MOUSE   | Selh    | Selenoprotein H OS=Mus R.HAAASLQALQLQEAPELVPQVNSPKR.R             | 6.32  | 3.16  | 0.83 | 1.21  |
| Q3UQA7_SELH_MOUSE   | Selh    | Selenoprotein H OS=Mus K.LK#FPQEVVEELK#.Y                         | 16.62 | 12.66 | 0.52 | 1.91  |
| Q3UQA7_SELH_MOUSE   | Selh    | Selenoprotein H OS=Mus R.VELWTGI.K                                | 13.81 | 20.90 | 0.66 | 1.51  |
| Q8VHC3_SELM_MOUSE   | Selm    | Selenoprotein M OS=Mus R.DEINALVQELGFYR@.K                        | 6.44  | 7.94  | 0.81 | 1.23  |
| P62342_SELT_MOUSE   | Selt    | Selenoprotein T OS=Mus R.IEGENYLPQPIVR@.H                         | 4.88  | 3.72  | 1.31 | 0.76  |
| Q9EP97_SENP3_MOUSE  | Senp3   | Sentrin-specific protease R.LGLLGLM*AEDEGM*R@.G                   | 5.01  | 2.32  | 2.16 | 0.46  |
| Q9EP97_SENP3_MOUSE  | Senp3   | Sentrin-specific protease R.LGLLGLM*AEDEGM*R.G                    | 13.33 | 6.43  | 2.07 | 0.48  |
| Q9EP97_SENP3_MOUSE  | Senp3   | Sentrin-specific protease K.SGGGFGPDGSGTTPVTR@.R                  | 12.04 | 5.13  | 2.35 | 0.43  |
| Q9EP97_SENP3_MOUSE  | Senp3   | Sentrin-specific protease K.SLVLQLIQSYQR@.M                       | 8.21  | 2.42  | 3.40 | 0.29  |
| Q9EP97_SENP3_MOUSE  | Senp3   | Sentrin-specific protease R.TITYFDSQR@.T                          | 13.31 | 4.84  | 2.75 | 0.36  |
| Q8BUH8_SENP7_MOUSE  | Senp7   | Sentrin-specific protease R.VILTDIR.Q                             | 1.94  | 19.44 | 0.10 | 10.04 |
| Q8C1B7_SEP11_MOUSE  | Sept11  | Septin-11 OS=Mus muscl. K.AAAQLLQSQQAQSQGAQQT#.K                  | 25.22 | 12.09 | 2.09 | 0.48  |
| Q8C1B7_SEP11_MOUSE  | Sept11  | Septin-11 OS=Mus muscl. K.ELEEEVSNFQK#.K                          | 10.65 | 4.68  | 2.27 | 0.44  |
| Q8C1B7_SEP11_MOUSE  | Sept11  | Septin-11 OS=Mus muscl. R.NLSLSGHVGFDSLPDQLVNR#.S                 | 13.90 | 3.55  | 3.91 | 0.26  |
| Q8C1B7_SEP11_MOUSE  | Sept11  | Septin-11 OS=Mus muscl. K.R@NEFLGDLQK#.K                          | 9.86  | 1.88  | 5.23 | 0.19  |
| Q8C1B7_SEP11_MOUSE  | Sept11  | Septin-11 OS=Mus muscl. K.STLM*DTLFTNK.F                          | 9.29  | 8.92  | 1.04 | 0.96  |
| Q8C1B7_SEP11_MOUSE  | Sept11  | Septin-11 OS=Mus muscl. R.SYELQESNVR@.L                           | 23.42 | 5.54  | 4.22 | 0.24  |
| Q8C1B7_SEP11_MOUSE  | Sept11  | Septin-11 OS=Mus muscl. R.VNM*EDLR@.E                             | 24.66 | 6.94  | 3.55 | 0.28  |
| Q9ERR7_SEP15_MOUSE  | Sept15  | 15 kDa selenoprotein OS R.FPQQAQV.R.S                             | 43.91 | 27.86 | 1.58 | 0.63  |
| Q9ERR7_SEP15_MOUSE  | Sept15  | 15 kDa selenoprotein OS K.LLDDNGNIAEELSILK#.W                     | 24.97 | 20.01 | 1.25 | 0.80  |
| Q9ERR7_SEP15_MOUSE  | Sept15  | 15 kDa selenoprotein OS K.WNTDSVEELSEKHLER@.I                     | 12.45 | 7.88  | 1.58 | 0.63  |
| P42208_SEPT2_MOUSE  | Sept2   | Septin-2 OS=Mus muscl. K.QQPTQFINETPQVYGFANLPNQVHR@.K             | 12.90 | 2.40  | 5.37 | 0.19  |
| P42208_SEPT2_MOUSE  | Sept2   | Septin-2 OS=Mus muscl. K.STLINSFLDLYPER@.I                        | 35.38 | 9.67  | 3.66 | 0.27  |
| P42208_SEPT2_MOUSE  | Sept2   | Septin-2 OS=Mus muscl. K.TIISYDEQFER@.Y                           | 29.41 | 12.87 | 2.29 | 0.44  |
| P42208_SEPT2_MOUSE  | Sept2   | Septin-2 OS=Mus muscl. R.TVQIEASTVEIER@.G                         | 19.41 | 7.39  | 2.63 | 0.38  |
| P42208_SEPT2_MOUSE  | Sept2   | Septin-2 OS=Mus muscl. K.VNIVPIAK#.A                              | 10.40 | 4.06  | 2.56 | 0.39  |
| O55131_SEPT7_MOUSE  | Sept7   | Septin-7 OS=Mus muscl. K.FEDYLNESR@.V                             | 12.59 | 2.67  | 4.71 | 0.21  |
| O55131_SEPT7_MOUSE  | Sept7   | Septin-7 OS=Mus muscl. K.NLEGVYGFANLPNQVYR@.K                     | 11.96 | 2.78  | 4.29 | 0.23  |
| O55131_SEPT7_MOUSE  | Sept7   | Septin-7 OS=Mus muscl. K.SPLAQM*EER@.R                            | 2.99  | 3.38  | 0.89 | 1.13  |
| O55131_SEPT7_MOUSE  | Sept7   | Septin-7 OS=Mus muscl. K.NLEGVYGFANLPNQVYR@.K                     | 3.37  | 3.67  | 0.92 | 1.09  |
| Q80UG5_SEPT9_MOUSE  | Sept9   | Septin-9 OS=Mus muscl. K.ADTLTLER@.V                              | 19.75 | 4.34  | 4.55 | 0.22  |
| Q80UG5_SEPT9_MOUSE  | Sept9   | Septin-9 OS=Mus muscl. K.IPEGSAVPAIDAAPK#.R                       | 17.59 | 3.69  | 4.77 | 0.21  |

|                    |          |                                                         |         |        |      |      |
|--------------------|----------|---------------------------------------------------------|---------|--------|------|------|
| Q80UG5_SEPT9_MOUSE | Sept9    | Septin-9 OS=Mus muscul R.R@TEITIVK#PQESVLR@.R           | 13.54   | 1.42   | 9.55 | 0.10 |
| Q80UG5_SEPT9_MOUSE | Sept9    | Septin-9 OS=Mus muscul K.VVNVIPVIAK#.A                  | 20.62   | 5.08   | 4.06 | 0.25 |
| Q9CYS8_PAIRB_MOUSE | Serbp1   | Plasminogen activator in R.FDQLFDESDPFVLIK#.A           | 26.76   | 12.77  | 2.10 | 0.48 |
| Q9CYS8_PAIRB_MOUSE | Serbp1   | Plasminogen activator in R.R@PQDQLQDGGK#.L              | 16.58   | 9.14   | 1.81 | 0.55 |
| Q9CYS8_PAIRB_MOUSE | Serbp1   | Plasminogen activator in K.SAAQAAQITNSNAAGK#.Q          | 33.22   | 19.79  | 1.68 | 0.60 |
| Q9CYS8_PAIRB_MOUSE | Serbp1   | Plasminogen activator in K.SASAPDVDDPEAFPALA.-          | 19.18   | 19.18  | 1.00 | 1.00 |
| Q9CYS8_PAIRB_MOUSE | Serbp1   | Plasminogen activator in K.SAAQAAQITNSNAAGK#.Q          | 5.50    | 2.92   | 1.89 | 0.53 |
| P19324_SERPH_MOUSE | Serpinh1 | Serpin H1 OS=Mus muscl K.AVAISLPK#.G                    | 876.64  | 476.71 | 1.84 | 0.54 |
| P19324_SERPH_MOUSE | Serpinh1 | Serpin H1 OS=Mus muscl K.AVLSAEK#.L                     | 1137.64 | 519.76 | 2.19 | 0.46 |
| P19324_SERPH_MOUSE | Serpinh1 | Serpin H1 OS=Mus muscl R.DEEVHTGLGELLR@.S               | 14.97   | 5.95   | 2.52 | 0.40 |
| P19324_SERPH_MOUSE | Serpinh1 | Serpin H1 OS=Mus muscl R.DNQGSSLLFGR@.L                 | 1913.80 | 759.92 | 2.52 | 0.40 |
| P19324_SERPH_MOUSE | Serpinh1 | Serpin H1 OS=Mus muscl K.GDK#M#R@DEL.-                  | 100.43  | 40.11  | 2.50 | 0.40 |
| P19324_SERPH_MOUSE | Serpinh1 | Serpin H1 OS=Mus muscl K.GVVEVTHDLOK#.H                 | 946.05  | 439.44 | 2.15 | 0.46 |
| P19324_SERPH_MOUSE | Serpinh1 | Serpin H1 OS=Mus muscl K.HLAGLGLTEAIDK#.N               | 310.23  | 153.62 | 2.02 | 0.49 |
| P19324_SERPH_MOUSE | Serpinh1 | Serpin H1 OS=Mus muscl K.HLAGLGLTEAIDK#.N#.A            | 2193.22 | 762.24 | 2.88 | 0.35 |
| P19324_SERPH_MOUSE | Serpinh1 | Serpin H1 OS=Mus muscl K.HLAGLGLTEAIDK#.N#.ADLSR@.M     | 18.76   | 2.49   | 7.54 | 0.13 |
| P19324_SERPH_MOUSE | Serpinh1 | Serpin H1 OS=Mus muscl K.K#HVAISLPK#.G                  | 774.25  | 340.42 | 2.27 | 0.44 |
| P19324_SERPH_MOUSE | Serpinh1 | Serpin H1 OS=Mus muscl K.K#HVAISLPK#.G                  | 7.81    | 5.37   | 1.46 | 0.69 |
| P19324_SERPH_MOUSE | Serpinh1 | Serpin H1 OS=Mus muscl K.K#HVAISLPK#.G                  | 234.64  | 60.92  | 3.85 | 0.26 |
| P19324_SERPH_MOUSE | Serpinh1 | Serpin H1 OS=Mus muscl K.LFYADHPFIFLVR@.D               | 256.28  | 100.37 | 2.55 | 0.39 |
| P19324_SERPH_MOUSE | Serpinh1 | Serpin H1 OS=Mus muscl K.LFYADHPFIFLVR@.D               | 2152.72 | 900.61 | 2.39 | 0.42 |
| P19324_SERPH_MOUSE | Serpinh1 | Serpin H1 OS=Mus muscl K.LQM#VEM#PLAHK#.L               | 1102.54 | 508.07 | 2.17 | 0.46 |
| P19324_SERPH_MOUSE | Serpinh1 | Serpin H1 OS=Mus muscl K.LQM#VEM#PLAHK#.L               | 90.07   | 37.22  | 2.42 | 0.41 |
| P19324_SERPH_MOUSE | Serpinh1 | Serpin H1 OS=Mus muscl K.LQM#VEM#PLAHK#.L               | 105.22  | 54.21  | 1.94 | 0.52 |
| P19324_SERPH_MOUSE | Serpinh1 | Serpin H1 OS=Mus muscl K.LQM#VEM#PLAHK#.L               | 13.72   | 6.60   | 2.08 | 0.48 |
| P19324_SERPH_MOUSE | Serpinh1 | Serpin H1 OS=Mus muscl K.LQM#VEM#PLAHK#.L               | 91.84   | 38.82  | 2.37 | 0.42 |
| P19324_SERPH_MOUSE | Serpinh1 | Serpin H1 OS=Mus muscl K.LQM#VEM#PLAHK#.L               | 58.53   | 23.49  | 2.49 | 0.40 |
| P19324_SERPH_MOUSE | Serpinh1 | Serpin H1 OS=Mus muscl K.LR@DEEVHTGLGELLR@.S            | 1553.18 | 590.77 | 2.63 | 0.38 |
| P19324_SERPH_MOUSE | Serpinh1 | Serpin H1 OS=Mus muscl K.LR@DEEVHTGLGELLR@.S            | 76.90   | 24.67  | 3.12 | 0.32 |
| P19324_SERPH_MOUSE | Serpinh1 | Serpin H1 OS=Mus muscl K.LSSLILM#PHHVEPLER@.L           | 12.27   | 6.94   | 1.77 | 0.57 |
| P19324_SERPH_MOUSE | Serpinh1 | Serpin H1 OS=Mus muscl K.LSSLILM#PHHVEPLER@.L           | 173.53  | 81.39  | 2.13 | 0.47 |
| P19324_SERPH_MOUSE | Serpinh1 | Serpin H1 OS=Mus muscl K.LSSLILM#PHHVEPLER@.L           | 421.99  | 194.01 | 2.18 | 0.46 |
| P19324_SERPH_MOUSE | Serpinh1 | Serpin H1 OS=Mus muscl R.LYGPSSV#FADDFVR@.S             | 1913.34 | 838.97 | 2.28 | 0.44 |
| P19324_SERPH_MOUSE | Serpinh1 | Serpin H1 OS=Mus muscl R.LYGPSSV#FADDFVR@.S             | 14.81   | 9.00   | 1.65 | 0.61 |
| P19324_SERPH_MOUSE | Serpinh1 | Serpin H1 OS=Mus muscl R.R@SALQISIN#WASQITD#K#LPEVTK#.D | 6.60    | 2.43   | 2.71 | 0.37 |
| P19324_SERPH_MOUSE | Serpinh1 | Serpin H1 OS=Mus muscl R.SALQISIN#WASQITD#K#L           | 100.29  | 42.17  | 2.38 | 0.42 |
| P19324_SERPH_MOUSE | Serpinh1 | Serpin H1 OS=Mus muscl R.SALQISIN#WASQITD#K#L           | 1127.54 | 442.61 | 2.55 | 0.39 |
| P19324_SERPH_MOUSE | Serpinh1 | Serpin H1 OS=Mus muscl R.SALQISIN#WASQITD#K#L           | 822.78  | 363.21 | 2.27 | 0.44 |
| P19324_SERPH_MOUSE | Serpinh1 | Serpin H1 OS=Mus muscl R.SALQISIN#WASQITD#K#L           | 100.87  | 47.68  | 2.12 | 0.47 |
| P19324_SERPH_MOUSE | Serpinh1 | Serpin H1 OS=Mus muscl R.SYTVGVTM#M#HR@.T               | 201.38  | 85.87  | 2.35 | 0.43 |
| P19324_SERPH_MOUSE | Serpinh1 | Serpin H1 OS=Mus muscl R.SYTVGVTM#M#HR@.T               | 331.11  | 16.11  | 2.06 | 0.49 |
| P19324_SERPH_MOUSE | Serpinh1 | Serpin H1 OS=Mus muscl R.SYTVGVTM#M#HR@.T               | 28.39   | 11.40  | 2.49 | 0.40 |
| P19324_SERPH_MOUSE | Serpinh1 | Serpin H1 OS=Mus muscl R.SYTVGVTM#M#HR@.T               | 21.87   | 9.48   | 2.31 | 0.43 |
| P19324_SERPH_MOUSE | Serpinh1 | Serpin H1 OS=Mus muscl R.TD#GALLYNAM#FFK#PHWDEK#.F      | 161.22  | 65.85  | 2.45 | 0.41 |
| P19324_SERPH_MOUSE | Serpinh1 | Serpin H1 OS=Mus muscl R.TD#GALLYNAM#FFK#PHWDEK#.F      | 54.77   | 54.77  | 2.63 | 0.38 |
| P19324_SERPH_MOUSE | Serpinh1 | Serpin H1 OS=Mus muscl R.TGLYNYDDEK#.E                  | 89.95   | 47.16  | 1.91 | 0.52 |
| P19324_SERPH_MOUSE | Serpinh1 | Serpin H1 OS=Mus muscl R.TGLYNYDDEK#.E                  | 1171.55 | 561.22 | 2.09 | 0.48 |
| P19324_SERPH_MOUSE | Serpinh1 | Serpin H1 OS=Mus muscl R.TGLYNYDDEK#.E                  | 168.14  | 62.40  | 2.69 | 0.37 |
| P19324_SERPH_MOUSE | Serpinh1 | Serpin H1 OS=Mus muscl R.TGLYNYDDEK#.E                  | 633.94  | 221.38 | 2.86 | 0.35 |
| P19324_SERPH_MOUSE | Serpinh1 | Serpin H1 OS=Mus muscl K.AVAISLPK#.G                    | 57.42   | 31.10  | 1.85 | 0.54 |
| P19324_SERPH_MOUSE | Serpinh1 | Serpin H1 OS=Mus muscl K.AVLSAEK#.L                     | 1267.72 | 405.33 | 3.13 | 0.32 |
| P19324_SERPH_MOUSE | Serpinh1 | Serpin H1 OS=Mus muscl K.GDK#M#R@DEL.-                  | 46.21   | 15.43  | 2.99 | 0.33 |
| P19324_SERPH_MOUSE | Serpinh1 | Serpin H1 OS=Mus muscl K.GVVEVTHDLOK#.H                 | 243.77  | 63.76  | 3.82 | 0.26 |
| P19324_SERPH_MOUSE | Serpinh1 | Serpin H1 OS=Mus muscl K.HLAGLGLTEAIDK#.N               | 64.14   | 18.52  | 3.46 | 0.29 |
| P19324_SERPH_MOUSE | Serpinh1 | Serpin H1 OS=Mus muscl K.HLAGLGLTEAIDK#.N#.A            | 817.05  | 234.99 | 3.48 | 0.29 |
| P19324_SERPH_MOUSE | Serpinh1 | Serpin H1 OS=Mus muscl K.K#HVAISLPK#.G                  | 302.81  | 91.30  | 3.32 | 0.30 |
| P19324_SERPH_MOUSE | Serpinh1 | Serpin H1 OS=Mus muscl K.K#HVAISLPK#.G                  | 3.92    | 1.25   | 3.14 | 0.32 |
| P19324_SERPH_MOUSE | Serpinh1 | Serpin H1 OS=Mus muscl K.LFYADHPFIFLVR@.D               | 114.94  | 39.62  | 2.90 | 0.34 |
| P19324_SERPH_MOUSE | Serpinh1 | Serpin H1 OS=Mus muscl K.LFYADHPFIFLVR@.D               | 732.92  | 217.66 | 3.37 | 0.30 |
| P19324_SERPH_MOUSE | Serpinh1 | Serpin H1 OS=Mus muscl K.LQM#VEM#PLAHK#.L               | 35.25   | 10.85  | 3.25 | 0.31 |
| P19324_SERPH_MOUSE | Serpinh1 | Serpin H1 OS=Mus muscl K.LQM#VEM#PLAHK#.L               | 249.94  | 75.69  | 3.30 | 0.30 |
| P19324_SERPH_MOUSE | Serpinh1 | Serpin H1 OS=Mus muscl K.LR@DEEVHTGLGELLR@.S            | 80.99   | 45.79  | 1.77 | 0.57 |
| P19324_SERPH_MOUSE | Serpinh1 | Serpin H1 OS=Mus muscl K.LSSLILM#PHHVEPLER@.L           | 82.69   | 36.13  | 2.29 | 0.44 |
| P19324_SERPH_MOUSE | Serpinh1 | Serpin H1 OS=Mus muscl R.LYGPSSV#FADDFVR@.S             | 96.39   | 58.78  | 1.64 | 0.61 |
| P19324_SERPH_MOUSE | Serpinh1 | Serpin H1 OS=Mus muscl R.SALQISIN#WASQITD#K#L           | 21.31   | 13.94  | 1.53 | 0.65 |
| P19324_SERPH_MOUSE | Serpinh1 | Serpin H1 OS=Mus muscl R.SYTVGVTM#M#HR@.T               | 2.93    | 2.52   | 1.16 | 0.86 |
| P19324_SERPH_MOUSE | Serpinh1 | Serpin H1 OS=Mus muscl R.SYTVGVTM#M#HR@.T               | 87.33   | 28.36  | 3.08 | 0.32 |
| P19324_SERPH_MOUSE | Serpinh1 | Serpin H1 OS=Mus muscl R.TGLYNYDDEK#.E                  | 33.83   | 10.43  | 3.24 | 0.31 |
| P19324_SERPH_MOUSE | Serpinh1 | Serpin H1 OS=Mus muscl R.TGLYNYDDEK#.E                  | 335.61  | 98.20  | 3.42 | 0.29 |
| P19324_SERPH_MOUSE | Serpinh1 | Serpin H1 OS=Mus muscl K.AVAISLPK#.G                    | 136.43  | 82.83  | 1.65 | 0.61 |
| P19324_SERPH_MOUSE | Serpinh1 | Serpin H1 OS=Mus muscl R.DNQGSSLLFGR@.L                 | 241.03  | 138.83 | 1.74 | 0.58 |
| P19324_SERPH_MOUSE | Serpinh1 | Serpin H1 OS=Mus muscl K.GVVEVTHDLOK#.H                 | 140.60  | 91.50  | 1.54 | 0.65 |
| P19324_SERPH_MOUSE | Serpinh1 | Serpin H1 OS=Mus muscl K.HLAGLGLTEAIDK#.N               | 75.95   | 39.84  | 1.91 | 0.52 |
| P19324_SERPH_MOUSE | Serpinh1 | Serpin H1 OS=Mus muscl K.HLAGLGLTEAIDK#.N#.A            | 375.25  | 190.04 | 1.97 | 0.51 |
| P19324_SERPH_MOUSE | Serpinh1 | Serpin H1 OS=Mus muscl K.K#HVAISLPK#.G                  | 85.17   | 50.62  | 1.68 | 0.59 |
| P19324_SERPH_MOUSE | Serpinh1 | Serpin H1 OS=Mus muscl K.K#HVAISLPK#.G                  | 16.73   | 5.92   | 2.82 | 0.35 |
| P19324_SERPH_MOUSE | Serpinh1 | Serpin H1 OS=Mus muscl K.LQM#VEM#PLAHK#.L               | 72.68   | 50.46  | 1.44 | 0.69 |
| P19324_SERPH_MOUSE | Serpinh1 | Serpin H1 OS=Mus muscl K.LRDEEVHTGLGELLR@.S             | 230.58  | 114.06 | 2.02 | 0.49 |
| P19324_SERPH_MOUSE | Serpinh1 | Serpin H1 OS=Mus muscl K.LSSLILM#PHHVEPLER@.L           | 110.19  | 61.47  | 1.79 | 0.56 |
| P19324_SERPH_MOUSE | Serpinh1 | Serpin H1 OS=Mus muscl K.LSSLILM#PHHVEPLER@.L           | 53.52   | 27.96  | 1.91 | 0.52 |
| P19324_SERPH_MOUSE | Serpinh1 | Serpin H1 OS=Mus muscl R.LYGPSSV#FADDFVR@.S             | 358.97  | 198.61 | 1.81 | 0.55 |
| P19324_SERPH_MOUSE | Serpinh1 | Serpin H1 OS=Mus muscl R.SALQISIN#WASQITD#K#L           | 8.71    | 5.86   | 1.49 | 0.67 |
| P19324_SERPH_MOUSE | Serpinh1 | Serpin H1 OS=Mus muscl R.SALQISIN#WASQITD#K#L           | 109.84  | 61.45  | 1.79 | 0.56 |
| P19324_SERPH_MOUSE | Serpinh1 | Serpin H1 OS=Mus muscl R.SALQISIN#WASQITD#K#L           | 100.64  | 53.89  | 1.87 | 0.54 |
| P19324_SERPH_MOUSE | Serpinh1 | Serpin H1 OS=Mus muscl R.SALQISIN#WASQITD#K#L           | 15.75   | 7.60   | 2.07 | 0.48 |
| P19324_SERPH_MOUSE | Serpinh1 | Serpin H1 OS=Mus muscl R.SALQISIN#WASQITD#K#L           | 10.27   | 7.74   | 1.33 | 0.75 |
| P19324_SERPH_MOUSE | Serpinh1 | Serpin H1 OS=Mus muscl R.SYTVGVTM#M#HR@.T               | 27.86   | 18.38  | 1.52 | 0.66 |
| P19324_SERPH_MOUSE | Serpinh1 | Serpin H1 OS=Mus muscl R.TD#GALLYNAM#FFK#PHWDEK#.F      | 20.60   | 10.34  | 1.99 | 0.50 |
| P19324_SERPH_MOUSE | Serpinh1 | Serpin H1 OS=Mus muscl R.TGLYNYDDEK#.E                  | 7.22    | 3.87   | 1.87 | 0.54 |
| P19324_SERPH_MOUSE | Serpinh1 | Serpin H1 OS=Mus muscl R.TGLYNYDDEK#.E                  | 190.70  | 124.87 | 1.53 | 0.65 |
| P19324_SERPH_MOUSE | Serpinh1 | Serpin H1 OS=Mus muscl K.AVAISLPK#.G                    | 80.74   | 40.54  | 1.99 | 0.50 |
| P19324_SERPH_MOUSE | Serpinh1 | Serpin H1 OS=Mus muscl R.DNQGSSLLFGR@.L                 | 132.51  | 49.77  | 2.66 | 0.38 |
| P19324_SERPH_MOUSE | Serpinh1 | Serpin H1 OS=Mus muscl K.HLAGLGLTEAIDK#.N               | 51.71   | 24.15  | 2.14 | 0.47 |
| P19324_SERPH_MOUSE | Serpinh1 | Serpin H1 OS=Mus muscl K.HLAGLGLTEAIDK#.N#.A            | 193.12  | 62.74  | 3.08 | 0.32 |
| P19324_SERPH_MOUSE | Serpinh1 | Serpin H1 OS=Mus muscl K.K#HVAISLPK#.G                  | 37.28   | 19.18  | 1.94 | 0.51 |
| P19324_SERPH_MOUSE | Serpinh1 | Serpin H1 OS=Mus muscl K.K#HVAISLPK#.G                  | 11.34   | 3.06   | 3.70 | 0.27 |
| P19324_SERPH_MOUSE | Serpinh1 | Serpin H1 OS=Mus muscl K.LQM#VEM#PLAHK#.L               | 41.39   | 26.69  | 1.55 | 0.64 |
| P19324_SERPH_MOUSE | Serpinh1 | Serpin H1 OS=Mus muscl K.LR@DEEVHTGLGELLR@.S            | 124.54  | 41.94  | 2.97 | 0.34 |
| P19324_SERPH_MOUSE | Serpinh1 | Serpin H1 OS=Mus muscl K.LSSLILM#PHHVEPLER@.L           | 54.49   | 27.87  | 1.96 | 0.51 |
| P19324_SERPH_MOUSE | Serpinh1 | Serpin H1 OS=Mus muscl R.LYGPSSV#FADDFVR@.S             | 214.31  | 86.92  | 2.47 | 0.41 |
| P19324_SERPH_MOUSE | Serpinh1 | Serpin H1 OS=Mus muscl R.SALQISIN#WASQITD#K#L           | 8.96    | 3.06   | 2.93 | 0.34 |
| P19324_SERPH_MOUSE | Serpinh1 | Serpin H1 OS=Mus muscl R.SALQISIN#WASQITD#K#L           | 56.50   | 19.07  | 2.96 | 0.34 |
| P19324_SERPH_MOUSE | Serpinh1 | Serpin H1 OS=Mus muscl R.SALQISIN#WASQITD#K#L           | 50.15   | 18.39  | 2.73 | 0.37 |

|                     |          |                                                             |       |       |       |      |
|---------------------|----------|-------------------------------------------------------------|-------|-------|-------|------|
| P19324_SERPH_MOUSE  | Serpinh1 | Serpin H1 OS=Mus muscl R.SYTVGVMTM*HR@.T                    | 15.16 | 7.22  | 2.10  | 0.48 |
| E9PYH6_E9PYH6_MOUSE | Setd1a   | Protein Setd1a OS=Mus n R.EAYHLPLPM*AAPLPSSSVSGEEAR@.L      | 9.86  | 5.24  | 1.88  | 0.53 |
| E9PYH6_E9PYH6_MOUSE | Setd1a   | Protein Setd1a OS=Mus n K.FKHLDEFYIGQPLK#.E                 | 9.39  | 6.57  | 1.43  | 0.70 |
| E9PYH6_E9PYH6_MOUSE | Setd1a   | Protein Setd1a OS=Mus n K.SGGITGIEAFAGSGGLR@.G              | 4.63  | 1.50  | 3.09  | 0.32 |
| E9PYH6_E9PYH6_MOUSE | Setd1a   | Protein Setd1a OS=Mus n R.VLATLVQEM*#.S                     | 11.66 | 5.55  | 2.10  | 0.48 |
| E9PYH6_E9PYH6_MOUSE | Setd1a   | Protein Setd1a OS=Mus n R.EAYHLPLPM*AAPLPSSSVSGEEAR@.L      | 28.86 | 4.84  | 5.96  | 0.17 |
| E9PYH6_E9PYH6_MOUSE | Setd1a   | Protein Setd1a OS=Mus n K.FKHLDEFYIGQPLK#.E                 | 9.54  | 1.59  | 6.01  | 0.17 |
| E9PYH6_E9PYH6_MOUSE | Setd1a   | Protein Setd1a OS=Mus n K.FQSGGAAETTEAR@.R                  | 14.21 | 3.34  | 4.25  | 0.24 |
| E9PYH6_E9PYH6_MOUSE | Setd1a   | Protein Setd1a OS=Mus n R.KHFTVSAEAEAPVPEPSTAAPLQAK#.S      | 2.50  | 3.79  | 0.66  | 1.52 |
| E9PYH6_E9PYH6_MOUSE | Setd1a   | Protein Setd1a OS=Mus n K.LIVDPALDPALR@.R                   | 22.94 | 6.55  | 3.50  | 0.29 |
| E9PYH6_E9PYH6_MOUSE | Setd1a   | Protein Setd1a OS=Mus n K.LHEPFGM*LSLVDWAK#.S               | 8.96  | 2.84  | 3.15  | 0.32 |
| E9PYH6_E9PYH6_MOUSE | Setd1a   | Protein Setd1a OS=Mus n R.LLSAIGTSAIM*DSDLLK#.L             | 11.08 | 2.50  | 4.42  | 0.23 |
| E9PYH6_E9PYH6_MOUSE | Setd1a   | Protein Setd1a OS=Mus n R.LPHR@EEAIEAESK#.V                 | 31.33 | 7.41  | 4.23  | 0.24 |
| E9PYH6_E9PYH6_MOUSE | Setd1a   | Protein Setd1a OS=Mus n K.SGGITGIEAFAGSGGLR@.G              | 27.36 | 8.76  | 3.12  | 0.32 |
| E9PYH6_E9PYH6_MOUSE | Setd1a   | Protein Setd1a OS=Mus n K.TVFSAAEAPVPEPSTAAPLQAK#.S         | 11.70 | 3.67  | 3.19  | 0.31 |
| E9PYH6_E9PYH6_MOUSE | Setd1a   | Protein Setd1a OS=Mus n R.VLATLVQEM*#.S                     | 28.42 | 6.57  | 4.33  | 0.23 |
| E9PYH6_E9PYH6_MOUSE | Setd1a   | Protein Setd1a OS=Mus n K.YTPVEDLQDPR@.C                    | 6.44  | 2.11  | 3.05  | 0.33 |
| E9Q5F9_SETD2_MOUSE  | Setd2    | Histone-lysine N-methyl K.LFEQVQAQR@.E                      | 10.95 | 10.58 | 1.03  | 0.97 |
| E9Q5F9_SETD2_MOUSE  | Setd2    | Histone-lysine N-methyl K.LPTSEPADTETEPK#.D                 | 3.63  | 2.34  | 1.55  | 0.65 |
| E9Q5F9_SETD2_MOUSE  | Setd2    | Histone-lysine N-methyl K.TAEADTSSELAK#.K                   | 4.73  | 4.28  | 1.11  | 0.90 |
| E9Q5F9_SETD2_MOUSE  | Setd2    | Histone-lysine N-methyl R.HAYEEVESK#.G                      | 4.21  | 5.90  | 0.71  | 1.40 |
| E9Q5F9_SETD2_MOUSE  | Setd2    | Histone-lysine N-methyl K.LFEQVQAQR@.E                      | 8.81  | 5.90  | 1.49  | 0.67 |
| E9Q5F9_SETD2_MOUSE  | Setd2    | Histone-lysine N-methyl R.LQSVVVPK#.N                       | 12.16 | 9.63  | 2.30  | 0.43 |
| E9Q5F9_SETD2_MOUSE  | Setd2    | Histone-lysine N-methyl K.LVPSGSELTDFYQFR.Y                 | 7.94  | 7.72  | 1.03  | 0.97 |
| E9Q5F9_SETD2_MOUSE  | Setd2    | Histone-lysine N-methyl K.TAEADTSSELAK#.K                   | 5.32  | 3.83  | 1.39  | 0.72 |
| E9Q5F9_SETD2_MOUSE  | Setd2    | Histone-lysine N-methyl K.TLEHLPIPTK#.N                     | 11.28 | 7.71  | 1.46  | 0.68 |
| E9Q5F9_SETD2_MOUSE  | Setd2    | Histone-lysine N-methyl K.TSRQELPVYSDDFLPNK.S               | 22.43 | 12.92 | 1.74  | 0.58 |
| O88974_SETB1_MOUSE  | Setdb1   | Histone-lysine N-methyl R.APAEPEYR@.A                       | 8.08  | 5.86  | 1.38  | 0.73 |
| O88974_SETB1_MOUSE  | Setdb1   | Histone-lysine N-methyl R.GK#NPLLVLLYDFR@.R                 | 9.00  | 4.20  | 2.14  | 0.47 |
| A2AKX3_SETX_MOUSE   | Setx     | Probable helicase senata. K.EPMKAD10VLMK.V                  | 15.40 | 1.05  | 14.61 | 0.07 |
| A2AKX3_SETX_MOUSE   | Setx     | Probable helicase senata. R.WAITAR@.R                       | 11.81 | 3.84  | 3.07  | 0.33 |
| A2AKX3_SETX_MOUSE   | Setx     | Probable helicase senata. K.LLTSQDLQQR@.L                   | 6.15  | 2.68  | 2.30  | 0.44 |
| Q64213_SF01_MOUSE   | Sf1      | Splicing factor 1 OS=Mus R.AYIVQLQIEDLTR@.K                 | 14.97 | 10.46 | 1.43  | 0.70 |
| Q64213_SF01_MOUSE   | Sf1      | Splicing factor 1 OS=Mus R.ILR@PWQSETR@.S                   | 22.63 | 8.36  | 2.71  | 0.37 |
| Q64213_SF01_MOUSE   | Sf1      | Splicing factor 1 OS=Mus R.AYIVQLQIEDLTR@.K                 | 24.33 | 15.70 | 1.55  | 0.65 |
| Q64213_SF01_MOUSE   | Sf1      | Splicing factor 1 OS=Mus R.HLTITEMVALNPFKPPADYKPPATR.V      | 13.00 | 6.22  | 2.09  | 0.48 |
| Q64213_SF01_MOUSE   | Sf1      | Splicing factor 1 OS=Mus K.TVIPGM*PTVIPPGLTR@.E             | 9.89  | 5.12  | 1.93  | 0.52 |
| Q8K4Z5_SF3A1_MOUSE  | Sf3a1    | Splicing factor 3A subuni K.ASK#PLPAPADEYLVSPITGEK#.I       | 52.32 | 25.76 | 2.03  | 0.49 |
| Q8K4Z5_SF3A1_MOUSE  | Sf3a1    | Splicing factor 3A subuni K.EDPTPK#PVVGIYPPPEVR@.N          | 13.87 | 6.85  | 2.03  | 0.49 |
| Q8K4Z5_SF3A1_MOUSE  | Sf3a1    | Splicing factor 3A subuni R.EK#QSDDEVYAPGLDISSLK#.Q         | 24.24 | 9.05  | 2.68  | 0.37 |
| Q8K4Z5_SF3A1_MOUSE  | Sf3a1    | Splicing factor 3A subuni K.FNFLNPNPDYHAYR@.H               | 56.05 | 25.42 | 2.21  | 0.45 |
| Q8K4Z5_SF3A1_MOUSE  | Sf3a1    | Splicing factor 3A subuni K.IGEEIQK#PEEK#.V                 | 61.71 | 29.66 | 2.08  | 0.48 |
| Q8K4Z5_SF3A1_MOUSE  | Sf3a1    | Splicing factor 3A subuni R.IGLLDPR@.W                      | 54.68 | 25.72 | 2.13  | 0.47 |
| Q8K4Z5_SF3A1_MOUSE  | Sf3a1    | Splicing factor 3A subuni K.LNGQGLVFLTLDQVSVIK#.V           | 14.49 | 5.68  | 2.55  | 0.39 |
| Q8K4Z5_SF3A1_MOUSE  | Sf3a1    | Splicing factor 3A subuni K.LQYEGIFIK#.D                    | 41.02 | 11.02 | 2.18  | 0.46 |
| Q8K4Z5_SF3A1_MOUSE  | Sf3a1    | Splicing factor 3A subuni K.LTAQFVAR@.E                     | 52.32 | 22.93 | 2.28  | 0.44 |
| Q8K4Z5_SF3A1_MOUSE  | Sf3a1    | Splicing factor 3A subuni R.QFLTQLM*QK#.E                   | 26.54 | 10.30 | 2.58  | 0.39 |
| Q8K4Z5_SF3A1_MOUSE  | Sf3a1    | Splicing factor 3A subuni K.QPIEEASSK#.E                    | 15.74 | 6.49  | 2.43  | 0.41 |
| Q8K4Z5_SF3A1_MOUSE  | Sf3a1    | Splicing factor 3A subuni K.QSDDEVYAPGLDISSLK#.Q            | 12.01 | 6.51  | 1.85  | 0.54 |
| Q8K4Z5_SF3A1_MOUSE  | Sf3a1    | Splicing factor 3A subuni R.R@TDIFGVETAIQK#.K               | 29.00 | 8.78  | 3.30  | 0.30 |
| Q8K4Z5_SF3A1_MOUSE  | Sf3a1    | Splicing factor 3A subuni R.RTDIFGVETAIQK#.I                | 64.40 | 23.11 | 2.35  | 0.42 |
| Q8K4Z5_SF3A1_MOUSE  | Sf3a1    | Splicing factor 3A subuni R.TQQAQAQNTLQEQEAIHK#.A           | 57.45 | 21.17 | 3.20  | 0.31 |
| Q8K4Z5_SF3A1_MOUSE  | Sf3a1    | Splicing factor 3A subuni K.VMQQQQATQQLPQK#.V               | 3.40  | 2.14  | 1.59  | 0.63 |
| Q8K4Z5_SF3A1_MOUSE  | Sf3a1    | Splicing factor 3A subuni K.VM*QQQQATQQLPQK#.V              | 3.40  | 2.14  | 1.59  | 0.63 |
| Q8K4Z5_SF3A1_MOUSE  | Sf3a1    | Splicing factor 3A subuni K.VQAQVQIETVPK#.E                 | 53.71 | 22.66 | 2.37  | 0.42 |
| Q8K4Z5_SF3A1_MOUSE  | Sf3a1    | Splicing factor 3A subuni K.ASK#PLPAPADEYLVSPITGEK#.I       | 75.75 | 39.16 | 1.93  | 0.52 |
| Q8K4Z5_SF3A1_MOUSE  | Sf3a1    | Splicing factor 3A subuni R.IGLLDPR@.W                      | 9.67  | 5.88  | 1.64  | 0.61 |
| Q8K4Z5_SF3A1_MOUSE  | Sf3a1    | Splicing factor 3A subuni K.LTAQFVAR@.E                     | 10.47 | 5.93  | 1.77  | 0.57 |
| Q8K4Z5_SF3A1_MOUSE  | Sf3a1    | Splicing factor 3A subuni K.VQAQVQIETVPK#.E                 | 9.57  | 2.36  | 4.06  | 0.25 |
| Q8K4Z5_SF3A1_MOUSE  | Sf3a1    | Splicing factor 3A subuni K.VQAQVQIETVPK#.E                 | 17.20 | 6.72  | 2.56  | 0.39 |
| Q62203_SF3A2_MOUSE  | Sf3a2    | Splicing factor 3A subuni R.DTEM*GQQLFLQDYPEIAEGIM*PR@.H    | 15.10 | 5.20  | 2.90  | 0.34 |
| Q62203_SF3A2_MOUSE  | Sf3a2    | Splicing factor 3A subuni K.TGSGGVASSSNNR@.D                | 11.11 | 4.86  | 2.29  | 0.44 |
| Q62203_SF3A2_MOUSE  | Sf3a2    | Splicing factor 3A subuni R.WQYLLM*AEPYETIAFK#.V            | 6.59  | 3.20  | 2.06  | 0.48 |
| Q9D554_SF3A3_MOUSE  | Sf3a3    | Splicing factor 3A subuni K.AR@ENPSEEAQNLVEFDEEGYGR@.Y      | 8.65  | 2.67  | 3.24  | 0.31 |
| Q9D554_SF3A3_MOUSE  | Sf3a3    | Splicing factor 3A subuni R.ENPSEEAQNLVEFDEEGYGR@.Y         | 7.78  | 2.58  | 3.02  | 0.33 |
| Q9D554_SF3A3_MOUSE  | Sf3a3    | Splicing factor 3A subuni K.SLESLDSLFAK#.N                  | 32.91 | 16.83 | 1.96  | 0.51 |
| Q9D554_SF3A3_MOUSE  | Sf3a3    | Splicing factor 3A subuni R.VK#LQDQNLFLGK#.I                | 22.17 | 10.37 | 2.14  | 0.47 |
| Q9D554_SF3A3_MOUSE  | Sf3a3    | Splicing factor 3A subuni K.AR@ENPSEEAQNLVEFDEEGYGR@.Y      | 11.02 | 3.94  | 2.80  | 0.36 |
| Q9D554_SF3A3_MOUSE  | Sf3a3    | Splicing factor 3A subuni K.EELNAISGPNFAEYFNR@.L            | 4.56  | 3.81  | 1.20  | 0.84 |
| Q9D554_SF3A3_MOUSE  | Sf3a3    | Splicing factor 3A subuni R.ENPSEEAQNLVEFDEEGYGR@.Y         | 6.26  | 3.82  | 1.64  | 0.61 |
| Q9D554_SF3A3_MOUSE  | Sf3a3    | Splicing factor 3A subuni R.KHEELNAISGPNFAEYFNR@.L          | 5.02  | 1.83  | 2.75  | 0.36 |
| Q9D554_SF3A3_MOUSE  | Sf3a3    | Splicing factor 3A subuni K.SALLALGLK#.C                    | 32.54 | 12.07 | 2.70  | 0.37 |
| Q9D554_SF3A3_MOUSE  | Sf3a3    | Splicing factor 3A subuni K.SLESLDSLFAK#.N                  | 47.45 | 19.72 | 2.41  | 0.42 |
| Q9D554_SF3A3_MOUSE  | Sf3a3    | Splicing factor 3A subuni R.VKPLQDQNLFLGK#.I                | 48.31 | 20.12 | 2.40  | 0.42 |
| Q9D554_SF3A3_MOUSE  | Sf3a3    | Splicing factor 3A subuni R.YLEM*LLYLDQDYTR@.V              | 12.35 | 4.54  | 2.72  | 0.37 |
| Q99NB9_SF3B1_MOUSE  | Sf3b1    | Splicing factor 3B subuni K.AAGLATM*ISTM*RPDIDNM*DEVVR.N    | 27.56 | 15.82 | 1.74  | 0.57 |
| Q99NB9_SF3B1_MOUSE  | Sf3b1    | Splicing factor 3B subuni K.AIGPHDVLATLNLNK#.V              | 51.87 | 40.97 | 1.27  | 0.79 |
| Q99NB9_SF3B1_MOUSE  | Sf3b1    | Splicing factor 3B subuni K.AIGYLIPLM*DAEYANYTR@.E          | 7.93  | 5.95  | 1.33  | 0.75 |
| Q99NB9_SF3B1_MOUSE  | Sf3b1    | Splicing factor 3B subuni R.EVM*LIUR@.E                     | 35.27 | 32.13 | 1.10  | 0.91 |
| Q99NB9_SF3B1_MOUSE  | Sf3b1    | Splicing factor 3B subuni R.GAEYVSAR@.E                     | 38.08 | 30.28 | 1.92  | 0.52 |
| Q99NB9_SF3B1_MOUSE  | Sf3b1    | Splicing factor 3B subuni R.GDPTGHATPGHGATSSAR@.K           | 29.25 | 20.72 | 1.41  | 0.71 |
| Q99NB9_SF3B1_MOUSE  | Sf3b1    | Splicing factor 3B subuni R.GGDSIGETPTPGASK#.R              | 25.07 | 17.45 | 1.44  | 0.70 |
| Q99NB9_SF3B1_MOUSE  | Sf3b1    | Splicing factor 3B subuni K.GLAFLK.A                        | 13.85 | 14.46 | 0.96  | 1.04 |
| Q99NB9_SF3B1_MOUSE  | Sf3b1    | Splicing factor 3B subuni K.GSETPGATPGSK#.I                 | 12.49 | 9.05  | 1.38  | 0.72 |
| Q99NB9_SF3B1_MOUSE  | Sf3b1    | Splicing factor 3B subuni K.IYNSIYGSQDALIAHYPR@.I           | 32.12 | 30.28 | 1.06  | 0.94 |
| Q99NB9_SF3B1_MOUSE  | Sf3b1    | Splicing factor 3B subuni K.KHAALDEAOGVGLDSTGYDQIYGGSDSR@.F | 11.47 | 10.58 | 1.08  | 0.92 |
| Q99NB9_SF3B1_MOUSE  | Sf3b1    | Splicing factor 3B subuni K.LLVDVDESTLSPEEQK.E              | 9.90  | 10.06 | 0.98  | 1.02 |
| Q99NB9_SF3B1_MOUSE  | Sf3b1    | Splicing factor 3B subuni K.LLVDVDESTLSPEEQK#ER@.K          | 67.02 | 56.41 | 1.19  | 0.84 |
| Q99NB9_SF3B1_MOUSE  | Sf3b1    | Splicing factor 3B subuni K.M*VM*ETIEK#.I                   | 28.02 | 15.87 | 1.77  | 0.57 |
| Q99NB9_SF3B1_MOUSE  | Sf3b1    | Splicing factor 3B subuni R.NR@PLSDEELDAM*FPEYK#.V          | 33.81 | 24.49 | 1.38  | 0.72 |
| Q99NB9_SF3B1_MOUSE  | Sf3b1    | Splicing factor 3B subuni K.SLSFLFIEGEM*GK#.D               | 6.61  | 4.16  | 1.59  | 0.63 |
| Q99NB9_SF3B1_MOUSE  | Sf3b1    | Splicing factor 3B subuni R.SLVEIHGLVDEQK#.V                | 93.69 | 61.19 | 1.53  | 0.65 |
| Q99NB9_SF3B1_MOUSE  | Sf3b1    | Splicing factor 3B subuni K.SR@WDETPASQ*GGSTPVLTPGK#.T      | 7.89  | 6.39  | 1.24  | 0.81 |
| Q99NB9_SF3B1_MOUSE  | Sf3b1    | Splicing factor 3B subuni K.TEILPFFK#.H                     | 72.18 | 59.74 | 1.21  | 0.83 |
| Q99NB9_SF3B1_MOUSE  | Sf3b1    | Splicing factor 3B subuni K.THEDIAEQR@.E                    | 30.81 | 18.23 | 1.69  | 0.59 |
| Q99NB9_SF3B1_MOUSE  | Sf3b1    | Splicing factor 3B subuni R.TM*ISPERS@.L                    | 21.69 | 14.32 | 1.52  | 0.66 |
| Q99NB9_SF3B1_MOUSE  | Sf3b1    | Splicing factor 3B subuni K.VGAAEIRSR@.I                    | 79.37 | 68.23 | 1.16  | 0.86 |
| Q99NB9_SF3B1_MOUSE  | Sf3b1    | Splicing factor 3B subuni R.VPELVNQNGLVK#.S                 | 10.64 | 9.40  | 1.13  | 0.88 |
| Q99NB9_SF3B1_MOUSE  | Sf3b1    | Splicing factor 3B subuni R.WDQTAQDTPGATPK#.K               | 7.63  | 7.34  | 1.04  | 0.96 |
| Q99NB9_SF3B1_MOUSE  | Sf3b1    | Splicing factor 3B subuni K.AALDEAOGVGLDSTGYDQIYGGSDSR@.F   | 17.51 | 9.33  | 1.88  | 0.53 |
| Q99NB9_SF3B1_MOUSE  | Sf3b1    | Splicing factor 3B subuni K.AIGPHDVLATLNLNK#.V              | 65.60 | 47.82 | 1.37  | 0.73 |
| Q99NB9_SF3B1_MOUSE  | Sf3b1    | Splicing factor 3B subuni K.AIGYLIPLM*DAEYANYTR@.E          | 10.01 | 5.87  | 1.70  | 0.59 |
| Q99NB9_SF3B1_MOUSE  | Sf3b1    | Splicing factor 3B subuni R.ATVNTFYGIYAK#.A                 | 61.21 | 23.66 | 2.59  | 0.39 |
| Q99NB9_SF3B1_MOUSE  | Sf3b1    | Splicing factor 3B subuni R.EFQSPDEEM*K#.#.I                | 5.74  | 3.96  | 1.45  | 0.69 |

|                     |       |                                                             |        |        |      |      |
|---------------------|-------|-------------------------------------------------------------|--------|--------|------|------|
| Q99NB9_SF3B1_MOUSE  | Sf3b1 | Splicing factor 3B subuni R.EVM*LILIR@.E                    | 46.04  | 22.04  | 2.09 | 0.48 |
| Q99NB9_SF3B1_MOUSE  | Sf3b1 | Splicing factor 3B subuni R.FAGYVTSIAATELEDDDDVSSSTLLGQK#.K | 46.87  | 18.86  | 2.48 | 0.40 |
| Q99NB9_SF3B1_MOUSE  | Sf3b1 | Splicing factor 3B subuni R.GAEYVSAR@.E                     | 32.26  | 13.56  | 2.38 | 0.42 |
| Q99NB9_SF3B1_MOUSE  | Sf3b1 | Splicing factor 3B subuni R.GDTPGHATPGHGATSSAR@.K           | 60.53  | 25.07  | 2.41 | 0.41 |
| Q99NB9_SF3B1_MOUSE  | Sf3b1 | Splicing factor 3B subuni R.GGDSIGETPTPGASK#.R              | 47.11  | 23.48  | 2.01 | 0.50 |
| Q99NB9_SF3B1_MOUSE  | Sf3b1 | Splicing factor 3B subuni K.GLAFLK#.A                       | 46.11  | 23.71  | 1.95 | 0.51 |
| Q99NB9_SF3B1_MOUSE  | Sf3b1 | Splicing factor 3B subuni K.GSETPGATPGSK#.I                 | 19.62  | 8.84   | 2.22 | 0.45 |
| Q99NB9_SF3B1_MOUSE  | Sf3b1 | Splicing factor 3B subuni K.IM*GNLGAADIDHK#.L               | 16.36  | 7.88   | 2.08 | 0.48 |
| Q99NB9_SF3B1_MOUSE  | Sf3b1 | Splicing factor 3B subuni K.IYNSYIGSQDALIHAYPR@.I           | 38.81  | 15.92  | 2.44 | 0.41 |
| Q99NB9_SF3B1_MOUSE  | Sf3b1 | Splicing factor 3B subuni K.KAALDEAQGVGLDSTGYVDELYGGSDSR.F  | 15.13  | 8.83   | 1.71 | 0.58 |
| Q99NB9_SF3B1_MOUSE  | Sf3b1 | Splicing factor 3B subuni K.LLVDVDESTLSPEEQ#.E              | 24.82  | 15.79  | 1.57 | 0.64 |
| Q99NB9_SF3B1_MOUSE  | Sf3b1 | Splicing factor 3B subuni K.LLVDVDESTLSPEEQ#ER@.K           | 56.23  | 30.47  | 1.85 | 0.54 |
| Q99NB9_SF3B1_MOUSE  | Sf3b1 | Splicing factor 3B subuni K.M*VM*ETIEK#.I                   | 34.24  | 17.30  | 1.98 | 0.51 |
| Q99NB9_SF3B1_MOUSE  | Sf3b1 | Splicing factor 3B subuni R.NR@PLSDELDAM*FPEGYK#.V          | 48.60  | 33.84  | 1.44 | 0.70 |
| Q99NB9_SF3B1_MOUSE  | Sf3b1 | Splicing factor 3B subuni R.QLVDTVLANK#.V                   | 38.91  | 19.89  | 1.96 | 0.51 |
| Q99NB9_SF3B1_MOUSE  | Sf3b1 | Splicing factor 3B subuni R.QQAADLISR.T                     | 54.83  | 29.01  | 1.89 | 0.53 |
| Q99NB9_SF3B1_MOUSE  | Sf3b1 | Splicing factor 3B subuni R.SLVEIEHGLVDEQQ#.V               | 137.68 | 77.84  | 1.77 | 0.57 |
| Q99NB9_SF3B1_MOUSE  | Sf3b1 | Splicing factor 3B subuni K.SR@WDETPASQM*GGSTPVLTPGK#.T     | 8.91   | 6.24   | 1.43 | 0.70 |
| Q99NB9_SF3B1_MOUSE  | Sf3b1 | Splicing factor 3B subuni K.SVNDQPSGNLFFLPKDDIQYFDK.L       | 53.36  | 37.30  | 1.43 | 0.70 |
| Q99NB9_SF3B1_MOUSE  | Sf3b1 | Splicing factor 3B subuni R.TDR@GGDSIGETPTPGASK#.R          | 14.75  | 5.32   | 2.77 | 0.36 |
| Q99NB9_SF3B1_MOUSE  | Sf3b1 | Splicing factor 3B subuni K.TEILPFFK#.H                     | 100.73 | 56.58  | 1.78 | 0.56 |
| Q99NB9_SF3B1_MOUSE  | Sf3b1 | Splicing factor 3B subuni K.THEDIAQR#.E                     | 29.27  | 11.61  | 2.52 | 0.40 |
| Q99NB9_SF3B1_MOUSE  | Sf3b1 | Splicing factor 3B subuni R.TM*HISPER@.L                    | 24.16  | 13.94  | 1.73 | 0.58 |
| Q99NB9_SF3B1_MOUSE  | Sf3b1 | Splicing factor 3B subuni K.VGAAEISR@.I                     | 117.73 | 58.28  | 2.02 | 0.50 |
| Q99NB9_SF3B1_MOUSE  | Sf3b1 | Splicing factor 3B subuni K.VLPPPAGYVPIR@.T                 | 43.36  | 29.64  | 1.46 | 0.68 |
| Q99NB9_SF3B1_MOUSE  | Sf3b1 | Splicing factor 3B subuni R.VPELVNQVGLK#.S                  | 30.96  | 19.50  | 1.59 | 0.63 |
| Q99NB9_SF3B1_MOUSE  | Sf3b1 | Splicing factor 3B subuni K.VVNGAAASQPPSK#.R                | 9.77   | 3.68   | 2.65 | 0.38 |
| Q99NB9_SF3B1_MOUSE  | Sf3b1 | Splicing factor 3B subuni R.WDETPASQM*GGSTPVLTPGK#.T        | 5.96   | 5.19   | 1.15 | 0.87 |
| Q3UJBO_Q3UJBO_MOUSE | Sf3b2 | Protein Sf3b2 OS=Mus m R.EALQEK#EEQK#.T                     | 13.66  | 10.83  | 1.26 | 0.79 |
| Q3UJBO_Q3UJBO_MOUSE | Sf3b2 | Protein Sf3b2 OS=Mus m K.ESRQEEM*NSQEEEEEM*ETDTR.S          | 8.63   | 4.83   | 1.79 | 0.56 |
| Q3UJBO_Q3UJBO_MOUSE | Sf3b2 | Protein Sf3b2 OS=Mus m R.FTVALK#.Q                          | 138.02 | 81.95  | 1.68 | 0.59 |
| Q3UJBO_Q3UJBO_MOUSE | Sf3b2 | Protein Sf3b2 OS=Mus m R.GIEK#PFELPDFIK#.R                  | 113.90 | 128.63 | 0.89 | 1.13 |
| Q3UJBO_Q3UJBO_MOUSE | Sf3b2 | Protein Sf3b2 OS=Mus m K.IDIDYQK.L                          | 118.34 | 103.91 | 1.14 | 0.88 |
| Q3UJBO_Q3UJBO_MOUSE | Sf3b2 | Protein Sf3b2 OS=Mus m K.IEEAM*DGSETPQLFTVLPK.R.T           | 36.38  | 29.64  | 1.23 | 0.81 |
| Q3UJBO_Q3UJBO_MOUSE | Sf3b2 | Protein Sf3b2 OS=Mus m R.IFEAFK#.L                          | 85.08  | 54.85  | 1.55 | 0.64 |
| Q3UJBO_Q3UJBO_MOUSE | Sf3b2 | Protein Sf3b2 OS=Mus m K.IPQALEK#.I                         | 118.14 | 96.19  | 1.23 | 0.81 |
| Q3UJBO_Q3UJBO_MOUSE | Sf3b2 | Protein Sf3b2 OS=Mus m R.KGPAPELQGVVALAPELELDPM*AM*TKQ.Y    | 37.95  | 38.10  | 1.00 | 1.00 |
| Q3UJBO_Q3UJBO_MOUSE | Sf3b2 | Protein Sf3b2 OS=Mus m R.KGPAPELQGVVALAPELELDPM*AMTQK.Y     | 4.23   | 5.17   | 0.82 | 1.22 |
| Q3UJBO_Q3UJBO_MOUSE | Sf3b2 | Protein Sf3b2 OS=Mus m R.KGPAPELQGVVALAPELELDPMAM*TKQ.Y     | 5.49   | 4.19   | 1.31 | 0.76 |
| Q3UJBO_Q3UJBO_MOUSE | Sf3b2 | Protein Sf3b2 OS=Mus m R.KGPAPELQGVVALAPELELDPMAMTKQ.Y      | 4.71   | 4.31   | 1.09 | 0.91 |
| Q3UJBO_Q3UJBO_MOUSE | Sf3b2 | Protein Sf3b2 OS=Mus m K.KPGLDDEL.R.I                       | 52.96  | 42.75  | 1.24 | 0.81 |
| Q3UJBO_Q3UJBO_MOUSE | Sf3b2 | Protein Sf3b2 OS=Mus m K.K#PGLDDEL.R.I                      | 101.08 | 76.59  | 1.32 | 0.76 |
| Q3UJBO_Q3UJBO_MOUSE | Sf3b2 | Protein Sf3b2 OS=Mus m R.LAEGAPIQGSR.E                      | 91.42  | 77.94  | 1.17 | 0.85 |
| Q3UJBO_Q3UJBO_MOUSE | Sf3b2 | Protein Sf3b2 OS=Mus m K.LAQQAALLM*QQEER@.A                 | 16.74  | 11.28  | 1.48 | 0.67 |
| Q3UJBO_Q3UJBO_MOUSE | Sf3b2 | Protein Sf3b2 OS=Mus m K.LAQQAALLM*QQEER@.A                 | 14.38  | 10.52  | 1.37 | 0.73 |
| Q3UJBO_Q3UJBO_MOUSE | Sf3b2 | Protein Sf3b2 OS=Mus m K.LLVHLK#.A                          | 32.22  | 23.46  | 1.37 | 0.73 |
| Q3UJBO_Q3UJBO_MOUSE | Sf3b2 | Protein Sf3b2 OS=Mus m K.LTHGDLYEGK#.E                      | 48.42  | 41.94  | 1.15 | 0.87 |
| Q3UJBO_Q3UJBO_MOUSE | Sf3b2 | Protein Sf3b2 OS=Mus m K.M*ESSAVPK.K                        | 14.80  | 15.61  | 0.95 | 1.05 |
| Q3UJBO_Q3UJBO_MOUSE | Sf3b2 | Protein Sf3b2 OS=Mus m K.QAAVLM*QEER@.Q                     | 37.49  | 27.94  | 1.34 | 0.75 |
| Q3UJBO_Q3UJBO_MOUSE | Sf3b2 | Protein Sf3b2 OS=Mus m K.QAAVLM*QEER@.Q                     | 19.76  | 12.57  | 1.57 | 0.64 |
| Q3UJBO_Q3UJBO_MOUSE | Sf3b2 | Protein Sf3b2 OS=Mus m K.RGIEK#PFELPDFIK.R                  | 12.66  | 14.62  | 0.87 | 1.16 |
| Q3UJBO_Q3UJBO_MOUSE | Sf3b2 | Protein Sf3b2 OS=Mus m R.SSLGQSASEETEDVTSISK#.K             | 24.58  | 19.43  | 1.26 | 0.79 |
| Q3UJBO_Q3UJBO_MOUSE | Sf3b2 | Protein Sf3b2 OS=Mus m R.TGIQEM*RR@.E                       | 36.29  | 22.51  | 1.61 | 0.62 |
| Q3UJBO_Q3UJBO_MOUSE | Sf3b2 | Protein Sf3b2 OS=Mus m R.VGPEVVALEER.L                      | 83.88  | 72.50  | 1.16 | 0.86 |
| Q3UJBO_Q3UJBO_MOUSE | Sf3b2 | Protein Sf3b2 OS=Mus m K.VPPPVLIAMQR.Y                      | 11.26  | 10.37  | 1.09 | 0.92 |
| Q3UJBO_Q3UJBO_MOUSE | Sf3b2 | Protein Sf3b2 OS=Mus m R.YGPPSPVNLK#.I                      | 41.09  | 38.66  | 1.06 | 0.94 |
| Q3UJBO_Q3UJBO_MOUSE | Sf3b2 | Protein Sf3b2 OS=Mus m R.GIEK#PFELPDFIK.R                   | 16.49  | 13.48  | 1.22 | 0.82 |
| Q3UJBO_Q3UJBO_MOUSE | Sf3b2 | Protein Sf3b2 OS=Mus m K.IDIDYQK#.L                         | 17.00  | 8.91   | 1.91 | 0.52 |
| Q3UJBO_Q3UJBO_MOUSE | Sf3b2 | Protein Sf3b2 OS=Mus m R.KGPAPELQGVVALAPELELDPM*AM*TKQ.Y    | 5.50   | 4.49   | 1.22 | 0.82 |
| Q3UJBO_Q3UJBO_MOUSE | Sf3b2 | Protein Sf3b2 OS=Mus m K.LAQQAALLM*QQEER@.A                 | 5.64   | 5.42   | 1.04 | 0.96 |
| Q3UJBO_Q3UJBO_MOUSE | Sf3b2 | Protein Sf3b2 OS=Mus m R.SSLGQSASEETEDVTSISK.K              | 4.81   | 4.46   | 1.30 | 0.77 |
| Q3UJBO_Q3UJBO_MOUSE | Sf3b2 | Protein Sf3b2 OS=Mus m R.VGPEVVALEER.L                      | 10.61  | 6.67   | 1.59 | 0.63 |
| Q921M3_SF3B3_MOUSE  | Sf3b3 | Splicing factor 3B subuni K.AEVM*NYHVGETVLTLQK#.T           | 55.56  | 44.21  | 1.26 | 0.80 |
| Q921M3_SF3B3_MOUSE  | Sf3b3 | Splicing factor 3B subuni K.AGNQWASVIR@.V                   | 22.08  | 9.78   | 2.26 | 0.44 |
| Q921M3_SF3B3_MOUSE  | Sf3b3 | Splicing factor 3B subuni R.AVM*ISAEIK#.Q                   | 40.34  | 28.03  | 1.44 | 0.69 |
| Q921M3_SF3B3_MOUSE  | Sf3b3 | Splicing factor 3B subuni K.DVIVGSDSGR.I                    | 64.14  | 38.34  | 1.67 | 0.60 |
| Q921M3_SF3B3_MOUSE  | Sf3b3 | Splicing factor 3B subuni R.ELAAEM*AAFLNENLPESIFGAPK#.A     | 49.19  | 37.49  | 1.32 | 0.76 |
| Q921M3_SF3B3_MOUSE  | Sf3b3 | Splicing factor 3B subuni R.FLAVGLVDNTR@.I                  | 226.13 | 177.41 | 1.27 | 0.78 |
| Q921M3_SF3B3_MOUSE  | Sf3b3 | Splicing factor 3B subuni R.FSNTGEDVYVLVGVAK#.D             | 55.14  | 39.61  | 1.39 | 0.72 |
| Q921M3_SF3B3_MOUSE  | Sf3b3 | Splicing factor 3B subuni R.HGLEVSEM*AVSELPGNPNAVWTVR@.R    | 39.63  | 30.94  | 1.28 | 0.78 |
| Q921M3_SF3B3_MOUSE  | Sf3b3 | Splicing factor 3B subuni K.HIANYSIGIQTGH@.V                | 84.38  | 56.64  | 1.49 | 0.67 |
| Q921M3_SF3B3_MOUSE  | Sf3b3 | Splicing factor 3B subuni K.IHQETFGK#.S                     | 33.40  | 26.45  | 1.26 | 0.79 |
| Q921M3_SF3B3_MOUSE  | Sf3b3 | Splicing factor 3B subuni K.ILELLR@PDPNTGK#.V               | 36.25  | 36.75  | 0.99 | 1.01 |
| Q921M3_SF3B3_MOUSE  | Sf3b3 | Splicing factor 3B subuni K.ITLETDEDM*VTEIR@.L              | 68.31  | 46.69  | 1.46 | 0.68 |
| Q921M3_SF3B3_MOUSE  | Sf3b3 | Splicing factor 3B subuni R.IVILEYQPK#.N                    | 122.67 | 87.46  | 1.40 | 0.71 |
| Q921M3_SF3B3_MOUSE  | Sf3b3 | Splicing factor 3B subuni R.KHFVHPNSNNLIETHDNAYEATK#.A      | 40.43  | 34.99  | 1.16 | 0.87 |
| Q921M3_SF3B3_MOUSE  | Sf3b3 | Splicing factor 3B subuni K.LGAVNFQAFFLQYTPR@.K             | 122.70 | 82.66  | 1.48 | 0.67 |
| Q921M3_SF3B3_MOUSE  | Sf3b3 | Splicing factor 3B subuni R.LPPNTNDEVEDPTGNK#.A             | 24.12  | 24.57  | 0.98 | 1.02 |
| Q921M3_SF3B3_MOUSE  | Sf3b3 | Splicing factor 3B subuni R.LPPNTNDEVEDPTGNK#.A             | 9.14   | 7.55   | 1.21 | 0.83 |
| Q921M3_SF3B3_MOUSE  | Sf3b3 | Splicing factor 3B subuni K.LVYLNLR@.D                      | 152.17 | 106.04 | 1.43 | 0.70 |
| Q921M3_SF3B3_MOUSE  | Sf3b3 | Splicing factor 3B subuni -.M*FLYNLTLQR@.A                  | 42.33  | 32.33  | 1.31 | 0.76 |
| Q921M3_SF3B3_MOUSE  | Sf3b3 | Splicing factor 3B subuni -.M*FLYNLTLQR@.A                  | 15.89  | 11.89  | 1.34 | 0.75 |
| Q921M3_SF3B3_MOUSE  | Sf3b3 | Splicing factor 3B subuni R.M*QGQEAVALAM*SSR@.S             | 37.84  | 27.49  | 1.38 | 0.73 |
| Q921M3_SF3B3_MOUSE  | Sf3b3 | Splicing factor 3B subuni R.NDLDDPER.G                      | 17.95  | 14.38  | 1.25 | 0.80 |
| Q921M3_SF3B3_MOUSE  | Sf3b3 | Splicing factor 3B subuni R.NENQLIFADDYTPR@.W               | 46.57  | 33.13  | 1.41 | 0.71 |
| Q921M3_SF3B3_MOUSE  | Sf3b3 | Splicing factor 3B subuni K.NFGDQDPDR@.C                    | 49.21  | 37.79  | 1.30 | 0.77 |
| Q921M3_SF3B3_MOUSE  | Sf3b3 | Splicing factor 3B subuni R.QVVIATGELGVYFEM*DPSGLNEYTER@.K  | 8.35   | 5.06   | 1.65 | 0.61 |
| Q921M3_SF3B3_MOUSE  | Sf3b3 | Splicing factor 3B subuni K.R@NENQLIFADDYTPR@.W             | 8.22   | 8.94   | 0.92 | 1.09 |
| Q921M3_SF3B3_MOUSE  | Sf3b3 | Splicing factor 3B subuni K.SM*FFLAQIQEQGDFK#.I             | 15.09  | 10.19  | 1.48 | 0.68 |
| Q921M3_SF3B3_MOUSE  | Sf3b3 | Splicing factor 3B subuni K.SMFFLAQIQEQGDFK#.I              | 10.21  | 8.80   | 1.16 | 0.86 |
| Q921M3_SF3B3_MOUSE  | Sf3b3 | Splicing factor 3B subuni R.SVAGGFYTYK#.L                   | 89.01  | 67.42  | 1.32 | 0.76 |
| Q921M3_SF3B3_MOUSE  | Sf3b3 | Splicing factor 3B subuni R.SWLSYSYQSR@.F                   | 32.36  | 18.92  | 1.71 | 0.58 |
| Q921M3_SF3B3_MOUSE  | Sf3b3 | Splicing factor 3B subuni R.SYFFPVK#.N                      | 78.64  | 58.72  | 1.34 | 0.75 |
| Q921M3_SF3B3_MOUSE  | Sf3b3 | Splicing factor 3B subuni K.TPVEVPAAPAFQGR.V                | 90.47  | 70.50  | 1.28 | 0.78 |
| Q921M3_SF3B3_MOUSE  | Sf3b3 | Splicing factor 3B subuni R.TVLDVPTGDLSDTR.T                | 145.95 | 111.18 | 1.31 | 0.76 |
| Q921M3_SF3B3_MOUSE  | Sf3b3 | Splicing factor 3B subuni R.VIVSDVQEVFVWR@.Y                | 101.71 | 66.46  | 1.53 | 0.65 |
| Q921M3_SF3B3_MOUSE  | Sf3b3 | Splicing factor 3B subuni R.WVVTASLLDYDVTAGADK#.F           | 21.57  | 12.38  | 1.74 | 0.57 |
| Q921M3_SF3B3_MOUSE  | Sf3b3 | Splicing factor 3B subuni R.AVM*ISAEIK#.Q                   | 29.17  | 17.00  | 1.72 | 0.58 |
| Q921M3_SF3B3_MOUSE  | Sf3b3 | Splicing factor 3B subuni R.FLAVGLVDNTR@.I                  | 175.21 | 116.31 | 1.51 | 0.66 |
| Q921M3_SF3B3_MOUSE  | Sf3b3 | Splicing factor 3B subuni R.FSNTGEDVYVLVGVAK#.D             | 27.31  | 14.16  | 1.93 | 0.52 |
| Q921M3_SF3B3_MOUSE  | Sf3b3 | Splicing factor 3B subuni R.HGLEVSEM*AVSELPGNPNAVWTVR@.R    | 26.16  | 11.67  | 2.24 | 0.45 |
| Q921M3_SF3B3_MOUSE  | Sf3b3 | Splicing factor 3B subuni K.HIANYSIGIQTGH@.V                | 29.22  | 21.84  | 1.34 | 0.75 |
| Q921M3_SF3B3_MOUSE  | Sf3b3 | Splicing factor 3B subuni K.IHQETFGK#.S                     | 20.32  | 22.78  | 0.89 | 1.12 |

|                     |         |                                                                            |        |        |      |      |
|---------------------|---------|----------------------------------------------------------------------------|--------|--------|------|------|
| Q921M3_SF3B3_MOUSE  | Sf3b3   | Splicing factor 3B subunit K.ITLETEDM*VTEIR@.L                             | 28.36  | 16.60  | 1.71 | 0.59 |
| Q921M3_SF3B3_MOUSE  | Sf3b3   | Splicing factor 3B subunit R.IVPGQFLAVDPK#G                                | 54.17  | 110.80 | 0.49 | 2.05 |
| Q921M3_SF3B3_MOUSE  | Sf3b3   | Splicing factor 3B subunit R.KQQM*AEEM*VEAAGEDERELAEM*AAAFLENLPEISIFGAPK.A | 4.84   | 3.45   | 1.40 | 0.71 |
| Q921M3_SF3B3_MOUSE  | Sf3b3   | Splicing factor 3B subunit K.LGAVFNQVAFPLQYTPR@.K                          | 66.70  | 35.99  | 1.85 | 0.54 |
| Q921M3_SF3B3_MOUSE  | Sf3b3   | Splicing factor 3B subunit R.LPPNNDVEDEDPPTGNK#.A                          | 17.21  | 11.02  | 1.56 | 0.64 |
| Q921M3_SF3B3_MOUSE  | Sf3b3   | Splicing factor 3B subunit R.LTISSPLEAHK#.A                                | 77.02  | 38.23  | 2.01 | 0.50 |
| Q921M3_SF3B3_MOUSE  | Sf3b3   | Splicing factor 3B subunit K.LVYLNNR@.D                                    | 62.78  | 41.27  | 1.52 | 0.66 |
| Q921M3_SF3B3_MOUSE  | Sf3b3   | Splicing factor 3B subunit -.M*FLYNLTQR@.A                                 | 25.64  | 18.17  | 1.41 | 0.71 |
| Q921M3_SF3B3_MOUSE  | Sf3b3   | Splicing factor 3B subunit R.M*QGQEAVALM*SSR@.S                            | 16.55  | 13.72  | 1.21 | 0.83 |
| Q921M3_SF3B3_MOUSE  | Sf3b3   | Splicing factor 3B subunit R.M*QGQEAVALM*SSR@.S                            | 11.93  | 1.24   | 9.58 | 0.10 |
| Q921M3_SF3B3_MOUSE  | Sf3b3   | Splicing factor 3B subunit R.NENQLIFADDTYTPR@.W                            | 24.91  | 20.20  | 1.23 | 0.81 |
| Q921M3_SF3B3_MOUSE  | Sf3b3   | Splicing factor 3B subunit K.NFGDQPIR@.C                                   | 33.70  | 23.43  | 1.44 | 0.70 |
| Q921M3_SF3B3_MOUSE  | Sf3b3   | Splicing factor 3B subunit K.SM*FFLAQTEQGDIFK#.I                           | 23.07  | 10.81  | 2.13 | 0.47 |
| Q921M3_SF3B3_MOUSE  | Sf3b3   | Splicing factor 3B subunit R.SVAGGPFVYTYK#.L                               | 40.83  | 26.97  | 1.51 | 0.66 |
| Q921M3_SF3B3_MOUSE  | Sf3b3   | Splicing factor 3B subunit R.SWLSYSQSR.F                                   | 19.32  | 9.87   | 1.96 | 0.51 |
| Q921M3_SF3B3_MOUSE  | Sf3b3   | Splicing factor 3B subunit R.SYFFPVK#.N                                    | 41.86  | 29.67  | 1.41 | 0.71 |
| Q921M3_SF3B3_MOUSE  | Sf3b3   | Splicing factor 3B subunit K.TPVEEVPAAAPFQGR@.V                            | 50.80  | 48.73  | 1.04 | 0.96 |
| Q921M3_SF3B3_MOUSE  | Sf3b3   | Splicing factor 3B subunit R.TVLDPTVGGDSDTR@.T                             | 86.47  | 54.65  | 1.58 | 0.63 |
| Q921M3_SF3B3_MOUSE  | Sf3b3   | Splicing factor 3B subunit R.WVTATSLLDYDVTAGADK.F                          | 8.92   | 6.87   | 1.30 | 0.77 |
| Q8QZ9_SF3B4_MOUSE   | Sf3b4   | Splicing factor 3B subunit K.NLDVGANIFIGNLDEIDEK#.L                        | 11.53  | 12.71  | 0.91 | 1.10 |
| Q8QZ9_SF3B4_MOUSE   | Sf3b4   | Splicing factor 3B subunit K.NLDVGANIFIGNLDEIDEK#.L                        | 16.69  | 13.15  | 1.27 | 0.79 |
| Q8QZ9_SF3B4_MOUSE   | Sf3b4   | Splicing factor 3B subunit R.NQDATVYVGGDLEK#.V                             | 125.35 | 107.12 | 1.17 | 0.85 |
| Q8QZ9_SF3B4_MOUSE   | Sf3b4   | Splicing factor 3B subunit R.VTQHGQGVFVFLSEEDADYAI.I                       | 78.51  | 52.35  | 1.50 | 0.67 |
| Q923D4_SF3B5_MOUSE  | Sf3b5   | Splicing factor 3B subunit K.M*LOPSPADK#PEEN.-                             | 8.02   | 10.60  | 0.76 | 1.32 |
| Q923D4_SF3B5_MOUSE  | Sf3b5   | Splicing factor 3B subunit K.MLOPSPADK#PEEN.-                              | 12.59  | 5.10   | 2.47 | 0.40 |
| Q923D4_SF3B5_MOUSE  | Sf3b5   | Splicing factor 3B subunit K.M*LOPSPADK#PEEN.-                             | 78.55  | 65.31  | 1.20 | 0.83 |
| Q923D4_SF3B5_MOUSE  | Sf3b5   | Splicing factor 3B subunit R.YTHSQLEHLQSK#.Y                               | 13.52  | 9.09   | 1.49 | 0.67 |
| P59708_SF3B6_MOUSE  | Sf3b6   | Splicing factor 3B subunit R.GTAYVVVEDIFDAK#.N                             | 58.02  | 32.84  | 1.77 | 0.57 |
| P59708_SF3B6_MOUSE  | Sf3b6   | Splicing factor 3B subunit K.ITAEM*YDIFGK#.Y                               | 73.19  | 43.59  | 1.68 | 0.60 |
| P59708_SF3B6_MOUSE  | Sf3b6   | Splicing factor 3B subunit K.ITAEM*YDIFGK#.Y                               | 51.81  | 31.70  | 1.63 | 0.61 |
| P59708_SF3B6_MOUSE  | Sf3b6   | Splicing factor 3B subunit R.VGNTPTETR@.G                                  | 41.49  | 19.61  | 2.12 | 0.47 |
| P59708_SF3B6_MOUSE  | Sf3b6   | Splicing factor 3B subunit R.YLVLYNANR@.A                                  | 19.66  | 12.17  | 1.62 | 0.62 |
| Q8VIJ6_SFPQ_MOUSE   | Sfpq    | Splicing factor, proline-ε K.AELDDTPM*TR@.G                                | 31.16  | 23.63  | 1.32 | 0.76 |
| Q8VIJ6_SFPQ_MOUSE   | Sfpq    | Splicing factor, proline-ε K.DKHLESEM*EDAYHEHOANLLR@.Q                     | 26.36  | 19.91  | 1.32 | 0.76 |
| Q8VIJ6_SFPQ_MOUSE   | Sfpq    | Splicing factor, proline-ε R.FAQHGTFEYESQR@.W                              | 26.29  | 18.88  | 1.39 | 0.72 |
| Q8VIJ6_SFPQ_MOUSE   | Sfpq    | Splicing factor, proline-ε R.FATHAALSVR@.N                                 | 65.69  | 36.11  | 1.82 | 0.55 |
| Q8VIJ6_SFPQ_MOUSE   | Sfpq    | Splicing factor, proline-ε R.FGQGGAGPVGGQGR.P                              | 44.11  | 29.32  | 1.50 | 0.66 |
| Q8VIJ6_SFPQ_MOUSE   | Sfpq    | Splicing factor, proline-ε R.LFVGNLPADITDEFK#.R                            | 8.40   | 10.16  | 0.83 | 1.21 |
| Q8VIJ6_SFPQ_MOUSE   | Sfpq    | Splicing factor, proline-ε K.YGEPGEVFNK#.G                                 | 44.69  | 28.18  | 1.59 | 0.63 |
| Q3USH5_SFSWA_MOUSE  | Sfswap  | Splicing factor, suppressor K.DGQSSAIVSSVQSK#.I                            | 4.45   | 2.72   | 1.64 | 0.61 |
| Q3USH5_SFSWA_MOUSE  | Sfswap  | Splicing factor, suppressor R.NSQDFDLR@.F                                  | 8.02   | 5.08   | 1.58 | 0.63 |
| A2ASV4_A2ASV4_MOUSE | Sh3bp1  | SH3 domain-binding pro R.FLALLAEQDVNK#.M                                   | 26.81  | 8.28   | 3.24 | 0.31 |
| A2ASV4_A2ASV4_MOUSE | Sh3bp1  | SH3 domain-binding pro R.LAAGASVLK#.R                                      | 15.70  | 4.49   | 3.50 | 0.29 |
| A2ASV4_A2ASV4_MOUSE | Sh3bp1  | SH3 domain-binding pro R.LPQENFNLR@.Y                                      | 19.77  | 8.53   | 2.32 | 0.43 |
| A2ASV4_A2ASV4_MOUSE | Sh3bp1  | SH3 domain-binding pro R.NPTETAASADM*TR@.K                                 | 6.97   | 3.18   | 2.19 | 0.46 |
| A2ASV4_A2ASV4_MOUSE | Sh3bp1  | SH3 domain-binding pro K.SLTSLDTALAEALR@.D                                 | 21.51  | 5.07   | 4.24 | 0.24 |
| A2ASV4_A2ASV4_MOUSE | Sh3bp1  | SH3 domain-binding pro R.VSSQVSEELPVTVPAPATTPAPASM*AVR@.E                  | 3.81   | 1.91   | 2.00 | 0.50 |
| A2ASV4_A2ASV4_MOUSE | Sh3bp1  | SH3 domain-binding pro R.DVLPQSLR@.L                                       | 12.81  | 4.16   | 3.08 | 0.32 |
| A2ASV4_A2ASV4_MOUSE | Sh3bp1  | SH3 domain-binding pro R.LIAEFEM*TLER@.D                                   | 8.65   | 4.58   | 1.89 | 0.53 |
| A2ASV4_A2ASV4_MOUSE | Sh3bp1  | SH3 domain-binding pro R.LSEELPAILK#.H                                     | 29.07  | 7.60   | 3.82 | 0.26 |
| A2ASV4_A2ASV4_MOUSE | Sh3bp1  | SH3 domain-binding pro R.TPETAIEFGEDLLQVEQR@.L                             | 31.29  | 12.82  | 2.44 | 0.41 |
| A2ASV4_A2ASV4_MOUSE | Sh3bp1  | SH3 domain-binding pro R.TPETAIEFGEDLLQVEQR@.L                             | 13.24  | 4.67   | 2.83 | 0.35 |
| A2ASV4_A2ASV4_MOUSE | Sh3bp1  | SH3 domain-binding pro R.FLALLAEQDVNK#.M                                   | 69.43  | 16.15  | 4.30 | 0.23 |
| A2ASV4_A2ASV4_MOUSE | Sh3bp1  | SH3 domain-binding pro R.LIAEFEM*TLER@.D                                   | 18.82  | 9.99   | 1.88 | 0.53 |
| A2ASV4_A2ASV4_MOUSE | Sh3bp1  | SH3 domain-binding pro R.LPQENFNLR@.Y                                      | 46.97  | 10.43  | 4.50 | 0.22 |
| A2ASV4_A2ASV4_MOUSE | Sh3bp1  | SH3 domain-binding pro R.NPTETAASADM*TR@.K                                 | 39.17  | 9.01   | 4.35 | 0.23 |
| A2ASV4_A2ASV4_MOUSE | Sh3bp1  | SH3 domain-binding pro R.R@LPASPVISNM*PAQVDQGVATEDR@.G                     | 36.21  | 6.30   | 5.75 | 0.17 |
| A2ASV4_A2ASV4_MOUSE | Sh3bp1  | SH3 domain-binding pro R.R@LPASPVISNM*PAQVDQGVATEDR@.G                     | 7.19   | 2.20   | 3.27 | 0.31 |
| A2ASV4_A2ASV4_MOUSE | Sh3bp1  | SH3 domain-binding pro R.R@LVGTSR@.L                                       | 60.90  | 12.28  | 5.61 | 0.18 |
| A2ASV4_A2ASV4_MOUSE | Sh3bp1  | SH3 domain-binding pro K.SLTSLDTALAEALR@.D                                 | 70.23  | 12.96  | 5.42 | 0.18 |
| A2ASV4_A2ASV4_MOUSE | Sh3bp1  | SH3 domain-binding pro R.THLQDLGR@.D                                       | 30.49  | 6.92   | 4.41 | 0.23 |
| A2ASV4_A2ASV4_MOUSE | Sh3bp1  | SH3 domain-binding pro R.TPETAIEFGEDLLQVEQR@.L                             | 46.08  | 8.40   | 5.49 | 0.18 |
| A2ASV4_A2ASV4_MOUSE | Sh3bp1  | SH3 domain-binding pro R.VSSQVSEELPVTVPAPATTPAPASM*AVR@.E                  | 16.24  | 4.26   | 3.81 | 0.26 |
| A2ASV4_A2ASV4_MOUSE | Sh3bp1  | SH3 domain-binding pro R.VYGVSLR@.T                                        | 45.92  | 12.18  | 3.77 | 0.27 |
| A2ASV4_A2ASV4_MOUSE | Sh3bp1  | SH3 domain-binding pro K.FLALLAEQDVNK#.M                                   | 12.07  | 6.96   | 1.73 | 0.58 |
| A2ASV4_A2ASV4_MOUSE | Sh3bp1  | SH3 domain-binding pro R.LPQENFNLR@.Y                                      | 7.53   | 2.54   | 2.96 | 0.34 |
| A2ASV4_A2ASV4_MOUSE | Sh3bp1  | SH3 domain-binding pro K.SLTSLDTALAEALR@.D                                 | 10.92  | 28.62  | 0.38 | 2.62 |
| A2ASV4_A2ASV4_MOUSE | Sh3bp1  | SH3 domain-binding pro R.TPETAIEFGEDLLQVEQR@.L                             | 14.80  | 2.20   | 6.73 | 0.15 |
| Q62419_SH3G1_MOUSE  | Sh3gl1  | Endophilin-A2 OS=Mus r K.ALYDFEPENDGELGR@.E                                | 43.31  | 19.56  | 2.21 | 0.45 |
| Q62419_SH3G1_MOUSE  | Sh3gl1  | Endophilin-A2 OS=Mus r K.ASQLVSEK#.V                                       | 56.56  | 26.67  | 2.12 | 0.47 |
| Q62419_SH3G1_MOUSE  | Sh3gl1  | Endophilin-A2 OS=Mus r K.AVAELVLR@.T                                       | 93.21  | 415.15 | 0.22 | 4.45 |
| Q62419_SH3G1_MOUSE  | Sh3gl1  | Endophilin-A2 OS=Mus r K.DSLDEVK#.Q                                        | 35.24  | 19.27  | 1.83 | 0.55 |
| Q62419_SH3G1_MOUSE  | Sh3gl1  | Endophilin-A2 OS=Mus r K.ELGGESNFGDALLDAGESM*#K.R                          | 9.08   | 4.88   | 1.86 | 0.54 |
| Q62419_SH3G1_MOUSE  | Sh3gl1  | Endophilin-A2 OS=Mus r K.IPDEELR@.Q                                        | 53.74  | 31.35  | 1.71 | 0.58 |
| Q62419_SH3G1_MOUSE  | Sh3gl1  | Endophilin-A2 OS=Mus r K.ITASSSFR@.S                                       | 116.56 | 47.24  | 2.47 | 0.41 |
| Q62419_SH3G1_MOUSE  | Sh3gl1  | Endophilin-A2 OS=Mus r K.LTM*LVTSK#.I                                      | 33.28  | 19.20  | 1.73 | 0.58 |
| Q62419_SH3G1_MOUSE  | Sh3gl1  | Endophilin-A2 OS=Mus r K.TMLNLTYSK#.J                                      | 11.46  | 4.29   | 2.67 | 0.37 |
| Q62419_SH3G1_MOUSE  | Sh3gl1  | Endophilin-A2 OS=Mus r R.QAVQILEELADK#.L                                   | 10.60  | 15.98  | 2.20 | 0.46 |
| Q62419_SH3G1_MOUSE  | Sh3gl1  | Endophilin-A2 OS=Mus r R.QAVQILEELADK#.K.R                                 | 84.66  | 38.78  | 2.18 | 0.46 |
| Q62419_SH3G1_MOUSE  | Sh3gl1  | Endophilin-A2 OS=Mus r R.TIEYQPNPNSR@.A                                    | 66.22  | 34.05  | 1.94 | 0.51 |
| Q62419_SH3G1_MOUSE  | Sh3gl1  | Endophilin-A2 OS=Mus r K.VGGAEGTKLDDDFKDM*EK.K                             | 35.98  | 13.06  | 2.75 | 0.36 |
| Q9JK48_SHLB1_MOUSE  | Sh3glb1 | Endophilin-B1 OS=Mus r R.AVQTEEK#.L                                        | 35.52  | 23.23  | 1.53 | 0.65 |
| Q9JK48_SHLB1_MOUSE  | Sh3glb1 | Endophilin-B1 OS=Mus r R.ELIQTSALNFTPLR@.N                                 | 21.66  | 10.17  | 2.13 | 0.47 |
| Q9JK48_SHLB1_MOUSE  | Sh3glb1 | Endophilin-B1 OS=Mus r K.GK#PITYLELLN.-                                    | 27.02  | 11.25  | 2.40 | 0.42 |
| Q9JK48_SHLB1_MOUSE  | Sh3glb1 | Endophilin-B1 OS=Mus r K.LAADAGFTLSR.A                                     | 22.38  | 11.82  | 1.89 | 0.53 |
| Q9JK48_SHLB1_MOUSE  | Sh3glb1 | Endophilin-B1 OS=Mus r K.QTEVLLQPNPNAR.I                                   | 7.21   | 4.80   | 1.50 | 0.67 |
| Q91WA6_SHRPN_MOUSE  | Sharpin | Sharpin OS=Mus musculus R.LSQAIAGGDEK#.A                                   | 4.38   | 1.49   | 2.93 | 0.34 |
| P98083_SHC1_MOUSE   | Shc1    | SHC-transforming protein R.ELFDDPSYVNIQNKD#.A                              | 10.69  | 6.73   | 1.59 | 0.63 |
| P98083_SHC1_MOUSE   | Shc1    | SHC-transforming protein R.ESSTTPGQVVLTLGQSGQPK#.H                         | 4.60   | 2.08   | 2.21 | 0.45 |
| P98083_SHC1_MOUSE   | Shc1    | SHC-transforming protein R.VPPPQSM*SM*AEQLQGEVWFHGK#.L                     | 3.50   | 2.93   | 1.19 | 0.84 |
| P98083_SHC1_MOUSE   | Shc1    | SHC-transforming protein R.ESSTTPGQVVLTLGQSGQPK#.H                         | 2.50   | 1.81   | 1.39 | 0.72 |
| Q9CZ7_Q9CZ7_MOUSE   | Shmt2   | Protein Shmt2 OS=Mus n R.EYSLQVLR@.N                                       | 6.88   | 8.16   | 0.84 | 1.19 |
| Q9CZ7_Q9CZ7_MOUSE   | Shmt2   | Protein Shmt2 OS=Mus n K.ISATSIFFESM*PYK.V                                 | 10.26  | 11.17  | 0.92 | 1.09 |
| Q9CZ7_Q9CZ7_MOUSE   | Shmt2   | Protein Shmt2 OS=Mus n R.LGAPALTR.Q                                        | 26.91  | 22.55  | 1.19 | 0.84 |
| Q9CZ7_Q9CZ7_MOUSE   | Shmt2   | Protein Shmt2 OS=Mus n R.LIAGTSAYAR@.L                                     | 36.85  | 32.20  | 1.14 | 0.87 |
| Q9CZ7_Q9CZ7_MOUSE   | Shmt2   | Protein Shmt2 OS=Mus n K.LNPQTGLIDYDQLALTAR@.L                             | 10.47  | 9.73   | 1.08 | 0.93 |
| Q9CZ7_Q9CZ7_MOUSE   | Shmt2   | Protein Shmt2 OS=Mus n K.SFLKDPETSQR.L                                     | 22.29  | 21.11  | 1.06 | 0.95 |
| Q9CZ7_Q9CZ7_MOUSE   | Shmt2   | Protein Shmt2 OS=Mus n R.SGLIFYR.K                                         | 14.61  | 20.74  | 0.70 | 1.42 |
| Q9CZ7_Q9CZ7_MOUSE   | Shmt2   | Protein Shmt2 OS=Mus n R.VLELVITANK#.N                                     | 21.59  | 19.28  | 1.12 | 0.89 |
| Q9CZ7_Q9CZ7_MOUSE   | Shmt2   | Protein Shmt2 OS=Mus n K.YADVVITHTH.T                                      | 3.24   | 5.27   | 0.61 | 1.63 |
| O88520_SHOC2_MOUSE  | Shoc2   | Leucine-rich repeat prot R.ELDLEENKHESLPNEIAYLK#.D                         | 5.61   | 8.00   | 0.70 | 1.43 |
| O88520_SHOC2_MOUSE  | Shoc2   | Leucine-rich repeat prot R.ELDLEENKHESLPNEIAYLK#.D                         | 16.97  | 5.76   | 2.95 | 0.34 |
| O88520_SHOC2_MOUSE  | Shoc2   | Leucine-rich repeat prot K.ELTQLELYLSYNNK.L                                | 8.06   | 2.67   | 3.02 | 0.33 |



|                     |          |                                                              |        |       |       |      |
|---------------------|----------|--------------------------------------------------------------|--------|-------|-------|------|
| O88520_SHOC2_MOUSE  | Shoc2    | Leucine-rich repeat prot: K.ESSAAQPGVAFVSDNTIK#.R            | 8.29   | 3.60  | 2.30  | 0.43 |
| O88520_SHOC2_MOUSE  | Shoc2    | Leucine-rich repeat prot: K.LVLTNNQLSTLPR.G                  | 18.65  | 5.64  | 3.31  | 0.30 |
| O88520_SHOC2_MOUSE  | Shoc2    | Leucine-rich repeat prot: K.ESSAAQPGVAFVSDNTIK#.R            | 12.69  | 2.63  | 4.82  | 0.21 |
| Q60520_SIN3A_MOUSE  | Sin3a    | Paired amphipathic helix R.SLLNEIESYDER@.Q                   | 7.91   | 2.89  | 2.74  | 0.36 |
| Q60520_SIN3A_MOUSE  | Sin3a    | Paired amphipathic helix K.AADIDGLR@.K                       | 10.83  | 1.65  | 6.55  | 0.15 |
| Q60520_SIN3A_MOUSE  | Sin3a    | Paired amphipathic helix R.LK#VEDLSYLQVQK#.L                 | 14.93  | 3.40  | 4.40  | 0.23 |
| Q60520_SIN3A_MOUSE  | Sin3a    | Paired amphipathic helix R.SAEAYENFLR@.C                     | 12.34  | 28.63 | 0.43  | 2.32 |
| Q60520_SIN3A_MOUSE  | Sin3a    | Paired amphipathic helix R.SLLDGNISDSQYEDSLR@.E              | 4.59   | 3.18  | 1.44  | 0.69 |
| Q60520_SIN3A_MOUSE  | Sin3a    | Paired amphipathic helix K.SLLNEIESYDER@.Q                   | 18.73  | 7.13  | 2.63  | 0.38 |
| Q60520_SIN3A_MOUSE  | Sin3a    | Paired amphipathic helix R.YM*SSDTSPELR@.E                   | 11.74  | 3.51  | 3.35  | 0.30 |
| Q62141_SIN3B_MOUSE  | Sin3b    | Paired amphipathic helix R.FGSDPATYNGFLEIM*K#.E              | 3.70   | 2.14  | 1.73  | 0.58 |
| Q62141_SIN3B_MOUSE  | Sin3b    | Paired amphipathic helix K.LPVHVEDALTYLDQVK#.I               | 7.95   | 3.33  | 2.39  | 0.42 |
| Q62141_SIN3B_MOUSE  | Sin3b    | Paired amphipathic helix R.YVEQVYGESESSSTEGFLK#PVFLQR@.N     | 5.17   | 2.41  | 2.14  | 0.47 |
| Q62141_SIN3B_MOUSE  | Sin3b    | Paired amphipathic helix R.GQEDLLSEFGQFLPEAK#.R              | 5.17   | 3.57  | 1.60  | 0.62 |
| Q8VD08_SIR2_MOUSE   | Sirt2    | NAD-dependent protein I R.LLDELTLGVT.R.Y                     | 6.53   | 5.89  | 1.11  | 0.90 |
| Q62231_SIX1_MOUSE   | Six1     | Homeobox protein SIX1 I R.ELAEATGLTTTQVSNWFK.N               | 9.02   | 7.24  | 1.25  | 0.80 |
| Q62231_SIX1_MOUSE   | Six1     | Homeobox protein SIX1 I R.ELAEATGLTTTQVSNWFK.N               | 2.81   | 3.96  | 0.71  | 1.41 |
| Q61321_SIX4_MOUSE   | Six4     | Homeobox protein SIX4 I R.FLWLSLQDSSLR@.G                    | 7.18   | 2.27  | 3.16  | 0.32 |
| Q6NZR5_Q6NZR5_MOUSE | Skiv2l   | Protein Skiv2l OS=Mus m R.DKHGPTAPDVPHPDDLIGFK#.L            | 6.52   | 14.73 | 0.44  | 2.26 |
| Q6NZR5_Q6NZR5_MOUSE | Skiv2l   | Protein Skiv2l OS=Mus m R.FLLSDQSLLLPEYHOR@.V                | 17.43  | 7.77  | 2.24  | 0.45 |
| Q6NZR5_Q6NZR5_MOUSE | Skiv2l   | Protein Skiv2l OS=Mus m R.TLGVYDEAGTVK#.L                    | 7.43   | 2.36  | 1.15  | 0.32 |
| Q6NZR5_Q6NZR5_MOUSE | Skiv2l   | Protein Skiv2l OS=Mus m K.TVVAEYALAAQK#.H                    | 8.65   | 4.25  | 2.03  | 0.49 |
| Q9CZU3_SK2L2_MOUSE  | Skiv2l2  | Superkiller viralicidic act K.AIGNTELENK#.F                  | 53.28  | 16.52 | 3.23  | 0.31 |
| Q9CZU3_SK2L2_MOUSE  | Skiv2l2  | Superkiller viralicidic act R.DLVDVEGTEPIFGK#.K              | 32.72  | 13.34 | 2.45  | 0.41 |
| Q9CZU3_SK2L2_MOUSE  | Skiv2l2  | Superkiller viralicidic act K.ETIEILFSEGLIK#.A               | 24.00  | 7.96  | 3.01  | 0.33 |
| Q9CZU3_SK2L2_MOUSE  | Skiv2l2  | Superkiller viralicidic act K.EYFILDFAFQR@.E                 | 61.78  | 22.59 | 2.73  | 0.37 |
| Q9CZU3_SK2L2_MOUSE  | Skiv2l2  | Superkiller viralicidic act R.GVILM*VDEK#.M                  | 24.26  | 12.05 | 2.01  | 0.50 |
| Q9CZU3_SK2L2_MOUSE  | Skiv2l2  | Superkiller viralicidic act K.GPSNLFV#.I                     | 20.23  | 9.72  | 2.08  | 0.48 |
| Q9CZU3_SK2L2_MOUSE  | Skiv2l2  | Superkiller viralicidic act R.IEDSINEDLSLADLM*PR.V           | 16.47  | 5.81  | 2.84  | 0.35 |
| Q9CZU3_SK2L2_MOUSE  | Skiv2l2  | Superkiller viralicidic act K.IVIPNEENVIYK#.I                | 45.30  | 19.64 | 2.31  | 0.43 |
| Q9CZU3_SK2L2_MOUSE  | Skiv2l2  | Superkiller viralicidic act R.K#AQIALDIK#.S                  | 19.13  | 7.55  | 2.53  | 0.39 |
| Q9CZU3_SK2L2_MOUSE  | Skiv2l2  | Superkiller viralicidic act K.M*TDVFEYSIR@.C                 | 18.60  | 8.10  | 2.30  | 0.44 |
| Q9CZU3_SK2L2_MOUSE  | Skiv2l2  | Superkiller viralicidic act R.TVLQM*DELK#.C                  | 8.89   | 3.90  | 2.28  | 0.44 |
| Q9CZU3_SK2L2_MOUSE  | Skiv2l2  | Superkiller viralicidic act R.VEEINPEYK*LEK#.S               | 20.45  | 8.79  | 2.33  | 0.43 |
| Q9CZU3_SK2L2_MOUSE  | Skiv2l2  | Superkiller viralicidic act R.VIFTSPIK#.A                    | 86.27  | 41.21 | 2.09  | 0.48 |
| Q9CZU3_SK2L2_MOUSE  | Skiv2l2  | Superkiller viralicidic act K.VK#NEGDDFGWGVVNFVSK#.K         | 10.72  | 6.94  | 1.54  | 0.65 |
| Q9CZU3_SK2L2_MOUSE  | Skiv2l2  | Superkiller viralicidic act R.WISSGEYIQM*SGR@.A              | 14.08  | 4.69  | 3.00  | 0.33 |
| Q9CZU3_SK2L2_MOUSE  | Skiv2l2  | Superkiller viralicidic act K.AIGNTELENK#.F                  | 29.78  | 10.16 | 2.93  | 0.34 |
| Q9CZU3_SK2L2_MOUSE  | Skiv2l2  | Superkiller viralicidic act R.DLVDVEGTEPIFGK#.K              | 32.63  | 12.17 | 2.68  | 0.37 |
| Q9CZU3_SK2L2_MOUSE  | Skiv2l2  | Superkiller viralicidic act K.ETIEILFSEGLIK#.A               | 8.77   | 3.65  | 2.40  | 0.42 |
| Q9CZU3_SK2L2_MOUSE  | Skiv2l2  | Superkiller viralicidic act K.EYFILDFAFQR@.E                 | 47.71  | 14.75 | 3.24  | 0.31 |
| Q9CZU3_SK2L2_MOUSE  | Skiv2l2  | Superkiller viralicidic act R.GVILM*VDEK#.M                  | 24.02  | 5.29  | 4.54  | 0.22 |
| Q9CZU3_SK2L2_MOUSE  | Skiv2l2  | Superkiller viralicidic act R.IEDSINEDLSLADLM*PR@.V          | 12.17  | 3.79  | 3.21  | 0.31 |
| Q9CZU3_SK2L2_MOUSE  | Skiv2l2  | Superkiller viralicidic act K.IVIPNEENVIYK#.I                | 31.53  | 14.21 | 2.22  | 0.45 |
| Q9CZU3_SK2L2_MOUSE  | Skiv2l2  | Superkiller viralicidic act R.LGFATSDVIEM*#.G                | 13.79  | 3.39  | 4.07  | 0.25 |
| Q9CZU3_SK2L2_MOUSE  | Skiv2l2  | Superkiller viralicidic act K.LPQVEHLPLLIK#.R                | 14.86  | 8.16  | 1.82  | 0.55 |
| Q9CZU3_SK2L2_MOUSE  | Skiv2l2  | Superkiller viralicidic act R.TVLQM*DELK#.C                  | 12.70  | 3.60  | 3.53  | 0.28 |
| Q9CZU3_SK2L2_MOUSE  | Skiv2l2  | Superkiller viralicidic act R.VEEINPEYK*LEK#.S               | 10.95  | 5.99  | 1.83  | 0.55 |
| Q9CZU3_SK2L2_MOUSE  | Skiv2l2  | Superkiller viralicidic act R.VIFTSPIK#.A                    | 66.58  | 20.36 | 3.27  | 0.31 |
| Q9CZU3_SK2L2_MOUSE  | Skiv2l2  | Superkiller viralicidic act R.WISSGEYIQM*SGR@.A              | 9.24   | 3.11  | 2.97  | 0.34 |
| Q9WTX5_SKP1_MOUSE   | Skp1     | S-phase kinase-associatec K.NDFTFEEEAQVR@.K                  | 7.95   | 3.88  | 2.05  | 0.49 |
| Q9WTX5_SKP1_MOUSE   | Skp1     | S-phase kinase-associatec K.NDFTFEEEAQVR@.K                  | 62.60  | 26.87 | 2.33  | 0.43 |
| Q9WTX5_SKP1_MOUSE   | Skp1     | S-phase kinase-associatec K.R@TDDIPVWQDFELK#.V               | 34.27  | 12.39 | 2.77  | 0.36 |
| Q9WTX5_SKP1_MOUSE   | Skp1     | S-phase kinase-associatec R.TDDIPVWQDFELK#.V                 | 35.05  | 13.72 | 2.56  | 0.39 |
| Q9WTX5_SKP1_MOUSE   | Skp1     | S-phase kinase-associatec K.TFNK#NDFTFEEEAQVR@.K             | 13.15  | 10.93 | 1.20  | 0.83 |
| Q9WTX5_SKP1_MOUSE   | Skp1     | S-phase kinase-associatec K.TM*LEDLGM*DEGDDDPVPLPNVNAAILK#.K | 19.57  | 6.96  | 2.81  | 0.36 |
| Q9WTX5_SKP1_MOUSE   | Skp1     | S-phase kinase-associatec K.TM*LEDLGM*DEGDDDPVPLPNVNAAILK#.V | 7.94   | 2.56  | 3.10  | 0.32 |
| Q8CI08_SLAI2_MOUSE  | Slain2   | SLAIN motif-containing p K.LNDVTDVQLAR@.M                    | 6.78   | 2.18  | 3.10  | 0.32 |
| Q8CI08_SLAI2_MOUSE  | Slain2   | SLAIN motif-containing p R.VGVSTPSSGAASPR@.G                 | 12.81  | 7.08  | 1.81  | 0.55 |
| P55012_S12A2_MOUSE  | Sic12a2  | Solute carrier family 12 n R.EGAQYLM*QAAGLGR@.M              | 5.65   | 3.36  | 1.68  | 0.59 |
| Q8R4T9_UT2_MOUSE    | Sic14a2  | Urea transporter 2 OS=M K.ALSYITGEMK#.H                      | 9.53   | 2.42  | 3.93  | 0.25 |
| P53986_MOT1_MOUSE   | Sic16a1  | Monocarboxylate transp K.AAQSPQHQSSGDPTSEESP.V-              | 23.45  | 23.45 | 1.00  | 1.00 |
| P53986_MOT1_MOUSE   | Sic16a1  | Monocarboxylate transp R.EGK#HDEASTDVDEK#PK#.E               | 13.95  | 7.90  | 1.77  | 0.57 |
| P53986_MOT1_MOUSE   | Sic16a1  | Monocarboxylate transp K.LSVFQTNK#.F                         | 11.54  | 4.88  | 2.36  | 0.42 |
| P53986_MOT1_MOUSE   | Sic16a1  | Monocarboxylate transp K.SDANTDILGSSPK#.G                    | 17.89  | 7.76  | 2.31  | 0.43 |
| Q35874_SATT_MOUSE   | Sic14a   | Neutral amino acid trans K.ETVDSFLDLR@.N                     | 7.81   | 3.58  | 2.18  | 0.46 |
| Q9ESU7_Q9ESU7_MOUSE | Sic1a5   | Neutral amino acid trans K.EVLDSFLDLR@.N                     | 17.10  | 1.45  | 11.77 | 0.08 |
| Q9ESU7_Q9ESU7_MOUSE | Sic1a5   | Neutral amino acid trans K.M*PSSEPELIQVK#.N                  | 6.30   | 2.46  | 2.56  | 0.39 |
| Q8JU2_TXP1_MOUSE    | Sic25a1  | Tricarboxylate transport R.GLSLLYGSIPK#.A                    | 6.35   | 4.59  | 1.38  | 0.72 |
| Q9CR62_M2OM_MOUSE   | Sic25a11 | Mitochondrial 2-oxogluc R.AVVVNAQAQLASYSQSK#.Q               | 6.43   | 1.81  | 3.55  | 0.28 |
| Q8VEM8_MPCC_MOUSE   | Sic25a3  | Phosphate carrier protei K.ALYSNILGEENTYLWR@.T               | 15.16  | 8.43  | 1.80  | 0.56 |
| Q8VEM8_MPCC_MOUSE   | Sic25a3  | Phosphate carrier protei K.FGFYEVFK#.A                       | 11.06  | 10.62 | 1.04  | 0.96 |
| Q8VEM8_MPCC_MOUSE   | Sic25a3  | Phosphate carrier protei K.GSTASQVLQR@.L                     | 42.32  | 21.28 | 1.99  | 0.50 |
| Q8VEM8_MPCC_MOUSE   | Sic25a3  | Phosphate carrier protei R.IQTQPGYANTLR@.E                   | 42.33  | 21.13 | 2.00  | 0.50 |
| Q8VEM8_MPCC_MOUSE   | Sic25a3  | Phosphate carrier protei R.LPR@PPPEM*PESLK#.K                | 12.82  | 15.25 | 0.84  | 1.19 |
| Q8VEM8_MPCC_MOUSE   | Sic25a3  | Phosphate carrier protei K.ALYSNILGEENTYLWR@.T               | 2.62   | 2.90  | 0.90  | 1.11 |
| Q8VEM8_MPCC_MOUSE   | Sic25a3  | Phosphate carrier protei K.FGFYEVFK#.A                       | 8.45   | 6.19  | 1.37  | 0.73 |
| Q8VEM8_MPCC_MOUSE   | Sic25a3  | Phosphate carrier protei R.IQTQPGYANTLR@.E                   | 7.61   | 5.00  | 1.52  | 0.66 |
| P48962_ADT1_MOUSE   | Sic25a4  | ADP/ATP translocase 1 O: K.DFLAGGIAAASK#.T                   | 48.71  | 29.31 | 1.66  | 0.60 |
| P48962_ADT1_MOUSE   | Sic25a4  | ADP/ATP translocase 1 O: K.EQGFSLFWR@.G                      | 37.25  | 16.99 | 2.19  | 0.46 |
| P48962_ADT1_MOUSE   | Sic25a4  | ADP/ATP translocase 1 O: K.GAWSNVLR.G                        | 63.08  | 34.72 | 1.82  | 0.55 |
| P48962_ADT1_MOUSE   | Sic25a4  | ADP/ATP translocase 1 O: R.GM*GGAFLVLYDEIK#.K                | 15.75  | 7.29  | 2.16  | 0.46 |
| P48962_ADT1_MOUSE   | Sic25a4  | ADP/ATP translocase 1 O: K.GM*LPDPK#.N                       | 34.87  | 20.08 | 1.74  | 0.58 |
| P48962_ADT1_MOUSE   | Sic25a4  | ADP/ATP translocase 1 O: R.GNLANNV.RY                        | 83.60  | 50.93 | 1.64  | 0.61 |
| P48962_ADT1_MOUSE   | Sic25a4  | ADP/ATP translocase 1 O: R.M*MQSGRKGADIMYGTLDLDCWR@.K        | 1.77   | 4.00  | 0.44  | 2.27 |
| P48962_ADT1_MOUSE   | Sic25a4  | ADP/ATP translocase 1 O: R.YFPTQALNFAFK#.D                   | 120.17 | 77.62 | 1.55  | 0.65 |
| P48962_ADT1_MOUSE   | Sic25a4  | ADP/ATP translocase 1 O: K.EQGFSLFWR@.G                      | 8.14   | 2.90  | 2.80  | 0.36 |
| P48962_ADT1_MOUSE   | Sic25a4  | ADP/ATP translocase 1 O: R.YFPTQALNFAFK#.D                   | 10.00  | 8.19  | 1.22  | 0.82 |
| P51881_ADT2_MOUSE   | Sic25a5  | ADP/ATP translocase 2 O: R.AAYFYIYDTAK#.G                    | 37.77  | 19.08 | 1.98  | 0.51 |
| P51881_ADT2_MOUSE   | Sic25a5  | ADP/ATP translocase 2 O: K.DFLAGGIAAASK#.T                   | 58.88  | 31.07 | 1.90  | 0.53 |
| P51881_ADT2_MOUSE   | Sic25a5  | ADP/ATP translocase 2 O: K.EQGFSLFWR@.G                      | 44.52  | 20.38 | 2.18  | 0.46 |
| Q9J1M1_S29A1_MOUSE  | Sic29a1  | Equilibrative nucleoside K.ALADPTVALPAR@.S                   | 19.42  | 8.00  | 2.43  | 0.41 |
| P17809_GTR1_MOUSE   | Sic2a1   | Solute carrier family 2, fa R.DLQEM*KEEGR.Q                  | 4.36   | 2.57  | 1.70  | 0.59 |
| P17809_GTR1_MOUSE   | Sic2a1   | Solute carrier family 2, fa K.VTILELFR@.S                    | 31.52  | 20.21 | 1.56  | 0.64 |
| P17809_GTR1_MOUSE   | Sic2a1   | Solute carrier family 2, fa K.VTILELFR@.S                    | 17.69  | 7.38  | 2.40  | 0.42 |
| Q61420_S35A1_MOUSE  | Sic35a1  | CMP-sialic acid transport R.QDTSIQOESATSK#.E                 | 5.02   | 2.96  | 1.70  | 0.59 |
| P97858_S35B1_MOUSE  | Sic35b1  | Solute carrier family 35 n K.LIILQFDDTAR@.T                  | 10.94  | 4.82  | 2.27  | 0.44 |
| Q912N5_S35B2_MOUSE  | Sic35b2  | Adenosine 3'-phospho 5' K.APDEVLLAPR@.V                      | 26.82  | 8.01  | 3.35  | 0.30 |
| Q912N5_S35B2_MOUSE  | Sic35b2  | Adenosine 3'-phospho 5' K.FVSFPQVLAK#.A                      | 17.28  | 8.10  | 2.13  | 0.47 |
| P10852_4F2_MOUSE    | Sic3a2   | 4F2 cell-surface antigen F K.EALSSWLQDQVDFGFQR@.D            | 4.94   | 3.19  | 1.55  | 0.65 |
| P10852_4F2_MOUSE    | Sic3a2   | 4F2 cell-surface antigen F K.QNEDPGSLLTQFR@.R                | 34.00  | 12.36 | 2.75  | 0.36 |
| P10852_4F2_MOUSE    | Sic3a2   | 4F2 cell-surface antigen F R.IGLDQAVFGR@.D                   | 61.10  | 26.72 | 2.29  | 0.44 |
| P10852_4F2_MOUSE    | Sic3a2   | 4F2 cell-surface antigen F K.LLLTDSARSAR@.Q                  | 41.78  | 16.16 | 2.59  | 0.39 |

|                     |          |                                                                |        |       |      |      |
|---------------------|----------|----------------------------------------------------------------|--------|-------|------|------|
| P10852_4F2_MOUSE    | Slc3a2   | 4F2 cell-surface antigen 1 K.M*K#EALSSWLQDGVDFQFR@.D           | 11.36  | 4.40  | 2.58 | 0.39 |
| P10852_4F2_MOUSE    | Slc3a2   | 4F2 cell-surface antigen 1 K.QINPLTGSQDFKMDLLQSAK#.K           | 47.07  | 12.54 | 3.75 | 0.27 |
| P10852_4F2_MOUSE    | Slc3a2   | 4F2 cell-surface antigen 1 K.SHLEYLTLK#.V                      | 20.74  | 8.20  | 2.53 | 0.40 |
| P10852_4F2_MOUSE    | Slc3a2   | 4F2 cell-surface antigen 1 K.VAEDETEAQVK#.F                    | 27.16  | 13.27 | 2.05 | 0.49 |
| P10852_4F2_MOUSE    | Slc3a2   | 4F2 cell-surface antigen 1 R.YLVVLFNFR@.D                      | 16.67  | 7.84  | 2.13 | 0.47 |
| P10852_4F2_MOUSE    | Slc3a2   | 4F2 cell-surface antigen 1 R.IGDLQAFVGR@.D                     | 41.61  | 39.41 | 1.06 | 0.95 |
| P10852_4F2_MOUSE    | Slc3a2   | 4F2 cell-surface antigen 1 K.M*K#EALSSWLQDGVDFQFR@.D           | 9.90   | 5.67  | 1.74 | 0.57 |
| P10852_4F2_MOUSE    | Slc3a2   | 4F2 cell-surface antigen 1 K.VAEDETEAQVK#.F                    | 18.18  | 25.91 | 0.70 | 1.43 |
| P10852_4F2_MOUSE    | Slc3a2   | 4F2 cell-surface antigen 1 R.YLVVLFNFR@.D                      | 8.79   | 7.38  | 1.19 | 0.84 |
| A2AMH5_A2AMH5_MOUSE | Slc44a1  | Choline transporter-like 1 R.ELK#PM*ASGASSA-                   | 6.78   | 3.04  | 2.23 | 0.45 |
| A2AMH5_A2AMH5_MOUSE | Slc44a1  | Choline transporter-like 1 K.LPVPASAPIPFHR@.C                  | 7.82   | 3.80  | 2.06 | 0.49 |
| A2AMH5_A2AMH5_MOUSE | Slc44a1  | Choline transporter-like 1 R.LPVPPTILASVNR@.L                  | 10.20  | 7.52  | 1.36 | 0.74 |
| Q8BY89_CTL2_MOUSE   | Slc44a2  | Choline transporter-like 1 R.KHPDDM*PAFLPFAFGR@.A              | 8.64   | 2.23  | 3.88 | 0.26 |
| Q9Z127_LAT1_MOUSE   | Slc7a5   | Large neutral amino acid K.DM*GQGDASNLQK#.L                    | 2.55   | 1.66  | 1.54 | 0.65 |
| Q9Z127_LAT1_MOUSE   | Slc7a5   | Large neutral amino acid R.AVATPAAAAAEEER@.Q                   | 22.88  | 8.29  | 2.76 | 0.36 |
| Q9Z127_LAT1_MOUSE   | Slc7a5   | Large neutral amino acid K.DM*GQGDASNLQK#.L                    | 7.81   | 3.49  | 2.24 | 0.45 |
| Q9Z127_LAT1_MOUSE   | Slc7a5   | Large neutral amino acid R.LFFVGSR@.E                          | 20.77  | 7.18  | 2.89 | 0.35 |
| Q9Z127_LAT1_MOUSE   | Slc7a5   | Large neutral amino acid R.R@GGDAGPEGEVTLQR@.N                 | 4.70   | 1.40  | 3.37 | 0.30 |
| Q9Z127_LAT1_MOUSE   | Slc7a5   | Large neutral amino acid R.AVATPAAAAAEEER@.Q                   | 15.46  | 12.84 | 1.20 | 0.83 |
| Q9Z127_LAT1_MOUSE   | Slc7a5   | Large neutral amino acid K.DM*GQGDASNLQK#.L                    | 3.30   | 4.55  | 0.73 | 1.38 |
| Q9Z127_LAT1_MOUSE   | Slc7a5   | Large neutral amino acid R.LFFVGSR@.E                          | 10.09  | 6.05  | 1.67 | 0.60 |
| P70441_NHRF1_MOUSE  | Slc9a3r1 | Na(+)/H(+) exchange regu R.LLVVDPELTER@.L                      | 6.47   | 2.68  | 2.41 | 0.41 |
| B1ARD6_B1ARD6_MOUSE | Slnf9    | Protein Slnf9 OS=Mus ml R.FQHIIIEAQNFR@.T                      | 12.75  | 8.48  | 1.50 | 0.67 |
| B1ARD6_B1ARD6_MOUSE | Slnf9    | Protein Slnf9 OS=Mus ml K.GYSPQDIIVLFDSTDR@.E                  | 6.22   | 2.97  | 2.10 | 0.48 |
| B1ARD6_B1ARD6_MOUSE | Slnf9    | Protein Slnf9 OS=Mus ml R.NADK#IAEFLQQLQK#.I                   | 15.93  | 5.57  | 2.86 | 0.35 |
| O54988_SLK_MOUSE    | Slk      | STE20-like serine/threon R.SSEVGTDEALDDTQK#.A                  | 6.84   | 1.27  | 5.38 | 0.19 |
| Q3URD3_SLMAP_MOUSE  | Slmap    | Sarcolemmal membrane K.ELVEAQLAR@.T                            | 6.91   | 3.60  | 1.92 | 0.52 |
| Q3URD3_SLMAP_MOUSE  | Slmap    | Sarcolemmal membrane K.ENVLSSSELQR@.Q                          | 6.47   | 7.01  | 0.92 | 1.08 |
| Q3URD3_SLMAP_MOUSE  | Slmap    | Sarcolemmal membrane R.HVYLDEPIK#.I                            | 7.78   | 3.23  | 2.41 | 0.42 |
| Q3URD3_SLMAP_MOUSE  | Slmap    | Sarcolemmal membrane K.IEALQADNDFTNER@.L                       | 7.21   | 2.07  | 3.49 | 0.29 |
| Q8CH25_SLTM_MOUSE   | Sltm     | SAFB-like transcription r R.AR@FPD2ASVQSSFER@.R                | 10.40  | 5.87  | 1.77 | 0.57 |
| Q8CH25_SLTM_MOUSE   | Sltm     | SAFB-like transcription r R.FPD2ASVQSSFER@.R                   | 4.20   | 2.69  | 1.56 | 0.64 |
| Q8CH25_SLTM_MOUSE   | Sltm     | SAFB-like transcription r K.NIIVWSGLSNTK#.A                    | 9.78   | 9.42  | 1.04 | 0.96 |
| Q8CH25_SLTM_MOUSE   | Sltm     | SAFB-like transcription r R.TELHGLSIVSEK#.V                    | 34.35  | 13.57 | 2.53 | 0.40 |
| Q8CH25_SLTM_MOUSE   | Sltm     | SAFB-like transcription r K.TTQEFVAAEIEDR@.E                   | 5.38   | 3.63  | 1.48 | 0.67 |
| Q8BHJ9_SLU7_MOUSE   | Slu7     | Pre-mRNA-splicing factor K.EIM*QIDER@.K                        | 10.50  | 7.44  | 1.41 | 0.71 |
| Q8BHJ9_SLU7_MOUSE   | Slu7     | Pre-mRNA-splicing factor K.YGQEHLDAPAEALLAQDTVVEYSR@.H         | 4.78   | 1.93  | 2.48 | 0.40 |
| P70340_SMAD1_MOUSE  | Smad1    | Mothers against decapen R.VESPVLPPVLPVR@.H                     | 24.79  | 15.74 | 1.57 | 0.64 |
| Q62432_SMAD2_MOUSE  | Smad2    | Mothers against decapen R.VETPVLPPVLPVR@.H                     | 19.48  | 12.81 | 1.52 | 0.66 |
| Q62432_SMAD2_MOUSE  | Smad2    | Mothers against decapen R.VGETFHAGQPSLVDGTFDPSNSER@.F          | 5.60   | 4.62  | 1.21 | 0.83 |
| Q62432_SMAD2_MOUSE  | Smad2    | Mothers against decapen K.VLTQM*GSPSVR@.C                      | 6.46   | 2.15  | 3.00 | 0.33 |
| Q62432_SMAD2_MOUSE  | Smad2    | Mothers against decapen R.VETPVLPPVLPVR@.H                     | 18.10  | 5.43  | 3.33 | 0.30 |
| Q3TKT4_SMCA4_MOUSE  | Smarca4  | Transcription activator B R.DSEAGSSTPTSTR@.S                   | 4.77   | 1.76  | 2.71 | 0.37 |
| Q3TKT4_SMCA4_MOUSE  | Smarca4  | Transcription activator B R.GLDPVILQER@.E                      | 9.04   | 5.44  | 1.66 | 0.60 |
| Q3TKT4_SMCA4_MOUSE  | Smarca4  | Transcription activator B R.IQELENPGLSAGDLR@.T                 | 5.02   | 3.17  | 1.58 | 0.63 |
| Q3TKT4_SMCA4_MOUSE  | Smarca4  | Transcription activator B K.IVDVAVIK#.Y                        | 14.12  | 6.09  | 2.32 | 0.43 |
| Q3TKT4_SMCA4_MOUSE  | Smarca4  | Transcription activator B R.AGGLGLNLQSDTVIIFSDWNPQDLQQAQR@.A   | 8.68   | 2.77  | 3.13 | 0.32 |
| Q3TKT4_SMCA4_MOUSE  | Smarca4  | Transcription activator B K.AIEEGLEEEVEVR@.Q                   | 36.35  | 10.87 | 3.35 | 0.30 |
| Q3TKT4_SMCA4_MOUSE  | Smarca4  | Transcription activator B R.AQIM*AVK#.M                        | 54.26  | 13.05 | 4.16 | 0.24 |
| Q3TKT4_SMCA4_MOUSE  | Smarca4  | Transcription activator B R.ASGK#FELLDR@.I                     | 58.01  | 12.69 | 4.57 | 0.22 |
| Q3TKT4_SMCA4_MOUSE  | Smarca4  | Transcription activator B R.DSEAGSSTPTSTR@.S                   | 57.91  | 16.10 | 3.60 | 0.28 |
| Q3TKT4_SMCA4_MOUSE  | Smarca4  | Transcription activator B R.DTALETALNAK#.A                     | 95.26  | 25.23 | 3.78 | 0.26 |
| Q3TKT4_SMCA4_MOUSE  | Smarca4  | Transcription activator B K.ELPEYELIR.K                        | 105.42 | 31.68 | 3.33 | 0.30 |
| Q3TKT4_SMCA4_MOUSE  | Smarca4  | Transcription activator B K.EVDYSDSLETK#.Q                     | 59.82  | 21.37 | 2.80 | 0.36 |
| Q3TKT4_SMCA4_MOUSE  | Smarca4  | Transcription activator B K.FELDDR@.I                          | 40.55  | 14.88 | 2.73 | 0.37 |
| Q3TKT4_SMCA4_MOUSE  | Smarca4  | Transcription activator B K.FNVLTTYEVIK#.D                     | 40.26  | 10.64 | 3.78 | 0.26 |
| Q3TKT4_SMCA4_MOUSE  | Smarca4  | Transcription activator B R.GLDPVILQER@.E                      | 122.79 | 34.58 | 3.55 | 0.28 |
| Q3TKT4_SMCA4_MOUSE  | Smarca4  | Transcription activator B R.GLQSYAVAAHAVTER.V                  | 16.79  | 3.97  | 4.22 | 0.24 |
| Q3TKT4_SMCA4_MOUSE  | Smarca4  | Transcription activator B K.GVLLTDGSEKR.D                      | 24.52  | 14.37 | 1.71 | 0.59 |
| Q3TKT4_SMCA4_MOUSE  | Smarca4  | Transcription activator B R.HEEFDFLM*#M                        | 30.87  | 5.09  | 6.07 | 0.16 |
| Q3TKT4_SMCA4_MOUSE  | Smarca4  | Transcription activator B R.HIENAK#QDVDDVEYGSQALAR@.G          | 22.33  | 9.85  | 2.27 | 0.44 |
| Q3TKT4_SMCA4_MOUSE  | Smarca4  | Transcription activator B R.HIENAK#QDVDDVEYGSQALAR@.G          | 24.53  | 4.85  | 5.05 | 0.20 |
| Q3TKT4_SMCA4_MOUSE  | Smarca4  | Transcription activator B K.HQEYLSILQHAH#.D                    | 26.49  | 8.07  | 3.28 | 0.30 |
| Q3TKT4_SMCA4_MOUSE  | Smarca4  | Transcription activator B R.IGQQNEVR@.V                        | 80.09  | 21.08 | 3.80 | 0.26 |
| Q3TKT4_SMCA4_MOUSE  | Smarca4  | Transcription activator B K.IPPDSDSDVSEVDAR@.H                 | 18.46  | 6.04  | 3.22 | 0.31 |
| Q3TKT4_SMCA4_MOUSE  | Smarca4  | Transcription activator B R.IQELENPGLSAGDLR@.T                 | 88.49  | 28.56 | 3.10 | 0.32 |
| Q3TKT4_SMCA4_MOUSE  | Smarca4  | Transcription activator B R.ITPIQK#PR@.G                       | 39.69  | 11.07 | 3.59 | 0.28 |
| Q3TKT4_SMCA4_MOUSE  | Smarca4  | Transcription activator B K.IVDVAVIK#.Y                        | 86.43  | 21.55 | 4.01 | 0.25 |
| Q3TKT4_SMCA4_MOUSE  | Smarca4  | Transcription activator B K.K#AENAGQTPAIGPDGEPLDTSQM*SDLPVK#.V | 10.75  | 3.41  | 3.16 | 0.32 |
| Q3TKT4_SMCA4_MOUSE  | Smarca4  | Transcription activator B K.KIPDPDSDVSEVDAR.H                  | 27.85  | 9.72  | 2.87 | 0.35 |
| Q3TKT4_SMCA4_MOUSE  | Smarca4  | Transcription activator B R.LM*EDELPSWII#.D                    | 5.10   | 3.04  | 1.87 | 0.53 |
| Q3TKT4_SMCA4_MOUSE  | Smarca4  | Transcription activator B K.LNVDQK#.V                          | 21.10  | 5.48  | 3.85 | 0.26 |
| Q3TKT4_SMCA4_MOUSE  | Smarca4  | Transcription activator B K.QDVDDVEYGSQALAR@.G                 | 27.45  | 7.97  | 3.44 | 0.29 |
| Q3TKT4_SMCA4_MOUSE  | Smarca4  | Transcription activator B R.RQ#SEVFLQPSR@.K                    | 44.16  | 12.05 | 3.66 | 0.27 |
| Q3TKT4_SMCA4_MOUSE  | Smarca4  | Transcription activator B R.R@DTALETALNAK#.A                   | 6.17   | 3.25  | 1.90 | 0.53 |
| Q3TKT4_SMCA4_MOUSE  | Smarca4  | Transcription activator B K.IQTIALITYLM*EHK#R@.L               | 15.44  | 4.13  | 3.74 | 0.27 |
| Q3TKT4_SMCA4_MOUSE  | Smarca4  | Transcription activator B K.TLM*NTIM*QLR@.K                    | 34.61  | 13.56 | 2.55 | 0.39 |
| Q3TKT4_SMCA4_MOUSE  | Smarca4  | Transcription activator B R.VDLNEETILIR@.R                     | 94.92  | 29.55 | 3.21 | 0.31 |
| Q3TKT4_SMCA4_MOUSE  | Smarca4  | Transcription activator B K.VIQAGM*FDQK#.S                     | 82.20  | 21.58 | 3.81 | 0.26 |
| Q3TKT4_SMCA4_MOUSE  | Smarca4  | Transcription activator B K.YK#NVDQK#.V                        | 19.10  | 6.16  | 3.10 | 0.32 |
| Q912W3_SMCA5_MOUSE  | Smarca5  | SWI/SNF-related matrix- R.DFNQFIK.A                            | 4.34   | 7.25  | 0.60 | 1.67 |
| Q912W3_SMCA5_MOUSE  | Smarca5  | SWI/SNF-related matrix- R.ANR@FEYLLK#.Q                        | 54.68  | 28.63 | 1.91 | 0.52 |
| Q912W3_SMCA5_MOUSE  | Smarca5  | SWI/SNF-related matrix- K.ANYAVDAYFR#.E                        | 17.39  | 10.44 | 1.67 | 0.60 |
| Q912W3_SMCA5_MOUSE  | Smarca5  | SWI/SNF-related matrix- K.DIDILNSAGK#.M                        | 27.77  | 22.64 | 1.23 | 0.82 |
| Q912W3_SMCA5_MOUSE  | Smarca5  | SWI/SNF-related matrix- K.EIQEPDPYEEK#.M                       | 39.13  | 27.33 | 1.43 | 0.70 |
| Q912W3_SMCA5_MOUSE  | Smarca5  | SWI/SNF-related matrix- R.ENM*ELEEK#.E                         | 9.31   | 8.18  | 1.14 | 0.88 |
| Q912W3_SMCA5_MOUSE  | Smarca5  | SWI/SNF-related matrix- K.ESEITDEIDIGLER@.G                    | 59.29  | 34.61 | 1.71 | 0.58 |
| Q912W3_SMCA5_MOUSE  | Smarca5  | SWI/SNF-related matrix- R.FEDSPSYVK#.W                         | 47.97  | 51.52 | 0.93 | 1.07 |
| Q912W3_SMCA5_MOUSE  | Smarca5  | SWI/SNF-related matrix- R.FEYLLK#.Q                            | 20.00  | 15.82 | 1.26 | 0.79 |
| Q912W3_SMCA5_MOUSE  | Smarca5  | SWI/SNF-related matrix- R.FITDNTVEER@.I                        | 109.09 | 76.43 | 1.43 | 0.70 |
| Q912W3_SMCA5_MOUSE  | Smarca5  | SWI/SNF-related matrix- K.FVFM*LSTR.A                          | 16.10  | 10.47 | 1.54 | 0.65 |
| Q912W3_SMCA5_MOUSE  | Smarca5  | SWI/SNF-related matrix- R.HGATHVFASK#.E                        | 49.95  | 36.84 | 1.36 | 0.74 |
| Q912W3_SMCA5_MOUSE  | Smarca5  | SWI/SNF-related matrix- R.IILM*#DIDILNSAGK#.M                  | 16.85  | 9.61  | 1.75 | 0.57 |
| Q912W3_SMCA5_MOUSE  | Smarca5  | SWI/SNF-related matrix- K.IIM*AQER@.G                          | 48.25  | 34.74 | 1.39 | 0.72 |
| Q912W3_SMCA5_MOUSE  | Smarca5  | SWI/SNF-related matrix- K.IYVGLSK.M                            | 72.36  | 46.47 | 1.56 | 0.64 |
| Q912W3_SMCA5_MOUSE  | Smarca5  | SWI/SNF-related matrix- R.K#HANYADAYFR@.E                      | 28.92  | 17.64 | 1.64 | 0.61 |
| Q912W3_SMCA5_MOUSE  | Smarca5  | SWI/SNF-related matrix- R.LDGGQTHDERQDSINAYNEPNSK.F            | 13.30  | 10.91 | 1.22 | 0.82 |
| Q912W3_SMCA5_MOUSE  | Smarca5  | SWI/SNF-related matrix- R.LDSIVIQQGR@.L                        | 25.73  | 24.51 | 1.05 | 0.95 |
| Q912W3_SMCA5_MOUSE  | Smarca5  | SWI/SNF-related matrix- R.LELLEK#.E                            | 64.67  | 62.79 | 1.03 | 0.97 |
| Q912W3_SMCA5_MOUSE  | Smarca5  | SWI/SNF-related matrix- R.LFELLEK#EILYR@.K                     | 9.98   | 6.60  | 1.51 | 0.66 |
| Q912W3_SMCA5_MOUSE  | Smarca5  | SWI/SNF-related matrix- K.LGDFK#ENYVDLDR@.Q                    | 38.31  | 30.65 | 1.25 | 0.80 |
| Q912W3_SMCA5_MOUSE  | Smarca5  | SWI/SNF-related matrix- R.LLNILM*QLR@.K                        | 73.33  | 55.79 | 1.31 | 0.76 |
| Q912W3_SMCA5_MOUSE  | Smarca5  | SWI/SNF-related matrix- K.LLTQGFNTWV#.R                        | 20.26  | 11.26 | 1.80 | 0.56 |

|                    |          |                                                             |        |        |      |       |
|--------------------|----------|-------------------------------------------------------------|--------|--------|------|-------|
| Q912W3_SMCAS_MOUSE | Smarca5  | SWI/SNF-related matrix-; K.LR@DYQVR@.G                      | 18.61  | 14.02  | 1.33 | 0.75  |
| Q912W3_SMCAS_MOUSE | Smarca5  | SWI/SNF-related matrix-; K.LR@LDSVIVQGR@.L                  | 63.35  | 37.89  | 1.67 | 0.60  |
| Q912W3_SMCAS_MOUSE | Smarca5  | SWI/SNF-related matrix-; R.LVDQNLNK#.I                      | 80.45  | 68.51  | 1.17 | 0.85  |
| Q912W3_SMCAS_MOUSE | Smarca5  | SWI/SNF-related matrix-; R.NFTM*DTSESSVNFYFEGEDYR@EK#.Q     | 36.06  | 23.21  | 1.55 | 0.64  |
| Q912W3_SMCAS_MOUSE | Smarca5  | SWI/SNF-related matrix-; R.QDSINAYNEPNSTK#.F                | 17.47  | 11.06  | 1.58 | 0.63  |
| Q912W3_SMCAS_MOUSE | Smarca5  | SWI/SNF-related matrix-; K.QNLLSVGDYR@.H                    | 40.41  | 23.87  | 1.69 | 0.59  |
| Q912W3_SMCAS_MOUSE | Smarca5  | SWI/SNF-related matrix-; K.QTELFAHFQPAAQK#.T                | 41.61  | 25.55  | 1.63 | 0.61  |
| Q912W3_SMCAS_MOUSE | Smarca5  | SWI/SNF-related matrix-; R.R@TEQEEDELLTESSK#.A              | 42.43  | 16.74  | 1.34 | 0.75  |
| Q912W3_SMCAS_MOUSE | Smarca5  | SWI/SNF-related matrix-; R.SPDLNAAQAQEQQLKIDEAEPLNDEELEEK.E | 10.77  | 3.18   | 3.38 | 0.30  |
| Q912W3_SMCAS_MOUSE | Smarca5  | SWI/SNF-related matrix-; R.TEQEEDELLTESSK#.A                | 30.07  | 25.83  | 1.16 | 0.86  |
| Q912W3_SMCAS_MOUSE | Smarca5  | SWI/SNF-related matrix-; K.TLQTSLLGVMYK#.H                  | 35.50  | 22.86  | 1.55 | 0.64  |
| Q912W3_SMCAS_MOUSE | Smarca5  | SWI/SNF-related matrix-; K.TLQTSLLGVMYK#.H                  | 2.93   | 34.39  | 0.09 | 11.73 |
| Q912W3_SMCAS_MOUSE | Smarca5  | SWI/SNF-related matrix-; K.TPEEVEISAVFWER@.C                | 19.60  | 13.91  | 1.41 | 0.71  |
| Q912W3_SMCAS_MOUSE | Smarca5  | SWI/SNF-related matrix-; R.VLIFSQMTR@.L                     | 45.34  | 37.14  | 1.22 | 0.82  |
| Q912W3_SMCAS_MOUSE | Smarca5  | SWI/SNF-related matrix-; R.VLIFSQMTR@.L                     | 17.48  | 8.08   | 2.16 | 0.46  |
| Q912W3_SMCAS_MOUSE | Smarca5  | SWI/SNF-related matrix-; R.YK#APFHQLR@.I                    | 35.08  | 26.65  | 1.32 | 0.76  |
| Q912W3_SMCAS_MOUSE | Smarca5  | SWI/SNF-related matrix-; R.ANR@FEYLK#.Q                     | 70.13  | 36.43  | 1.93 | 0.52  |
| Q912W3_SMCAS_MOUSE | Smarca5  | SWI/SNF-related matrix-; K.ANYAVDAYFR.E                     | 25.23  | 13.55  | 1.86 | 0.54  |
| Q912W3_SMCAS_MOUSE | Smarca5  | SWI/SNF-related matrix-; R.DDIENIAR@.E                      | 25.66  | 19.03  | 1.35 | 0.74  |
| Q912W3_SMCAS_MOUSE | Smarca5  | SWI/SNF-related matrix-; R.DFNOFK#.A                        | 74.31  | 35.07  | 2.12 | 0.47  |
| Q912W3_SMCAS_MOUSE | Smarca5  | SWI/SNF-related matrix-; K.EIQEPPDYK#.M                     | 46.03  | 34.26  | 1.34 | 0.74  |
| Q912W3_SMCAS_MOUSE | Smarca5  | SWI/SNF-related matrix-; R.ENM*ELEEK#.A                     | 6.71   | 4.07   | 1.65 | 0.61  |
| Q912W3_SMCAS_MOUSE | Smarca5  | SWI/SNF-related matrix-; K.ESEITDIDGLER@.G                  | 134.35 | 72.11  | 1.86 | 0.54  |
| Q912W3_SMCAS_MOUSE | Smarca5  | SWI/SNF-related matrix-; R.FEDSPSVK#.W                      | 70.69  | 49.42  | 1.43 | 0.70  |
| Q912W3_SMCAS_MOUSE | Smarca5  | SWI/SNF-related matrix-; R.FEYLK#.Q                         | 34.90  | 18.56  | 1.88 | 0.53  |
| Q912W3_SMCAS_MOUSE | Smarca5  | SWI/SNF-related matrix-; R.FITDNTVEER@.I                    | 195.72 | 104.58 | 1.87 | 0.53  |
| Q912W3_SMCAS_MOUSE | Smarca5  | SWI/SNF-related matrix-; K.FVFM*LTR@.A                      | 24.86  | 16.73  | 1.49 | 0.67  |
| Q912W3_SMCAS_MOUSE | Smarca5  | SWI/SNF-related matrix-; K.IDEAPLNDEELEEK#.E                | 24.11  | 13.39  | 1.80 | 0.56  |
| Q912W3_SMCAS_MOUSE | Smarca5  | SWI/SNF-related matrix-; R.LIM*KDIDLNSAGK.M                 | 32.95  | 16.41  | 2.01 | 0.50  |
| Q912W3_SMCAS_MOUSE | Smarca5  | SWI/SNF-related matrix-; K.IM*AQER.G                        | 65.10  | 33.73  | 1.93 | 0.52  |
| Q912W3_SMCAS_MOUSE | Smarca5  | SWI/SNF-related matrix-; R.K#ANYAVDAYFR@.E                  | 12.53  | 6.29   | 1.99 | 0.50  |
| Q912W3_SMCAS_MOUSE | Smarca5  | SWI/SNF-related matrix-; R.KANYAVDAYFR.E                    | 34.68  | 14.65  | 2.37 | 0.42  |
| Q912W3_SMCAS_MOUSE | Smarca5  | SWI/SNF-related matrix-; R.LDGGQTPHDER.Q                    | 14.09  | 6.35   | 2.22 | 0.45  |
| Q912W3_SMCAS_MOUSE | Smarca5  | SWI/SNF-related matrix-; R.LDGGQTPHDER@QDSINAYNEPNSTK#.F    | 26.52  | 12.87  | 2.06 | 0.49  |
| Q912W3_SMCAS_MOUSE | Smarca5  | SWI/SNF-related matrix-; R.LDSVIVQGR@.L                     | 62.60  | 36.90  | 1.70 | 0.59  |
| Q912W3_SMCAS_MOUSE | Smarca5  | SWI/SNF-related matrix-; R.LFELLEK#.E                       | 156.73 | 90.75  | 1.73 | 0.58  |
| Q912W3_SMCAS_MOUSE | Smarca5  | SWI/SNF-related matrix-; K.LGFDK#ENVYDLR@.Q                 | 54.05  | 31.65  | 1.71 | 0.59  |
| Q912W3_SMCAS_MOUSE | Smarca5  | SWI/SNF-related matrix-; R.LLNILM*QLR@.K                    | 101.62 | 53.14  | 1.91 | 0.52  |
| Q912W3_SMCAS_MOUSE | Smarca5  | SWI/SNF-related matrix-; K.LLTQGTFTWVWV#.R                  | 34.94  | 19.39  | 1.80 | 0.55  |
| Q912W3_SMCAS_MOUSE | Smarca5  | SWI/SNF-related matrix-; K.LR@LDSVIVQGR@.L                  | 123.57 | 68.18  | 1.81 | 0.55  |
| Q912W3_SMCAS_MOUSE | Smarca5  | SWI/SNF-related matrix-; R.LVDQNLNK#.I                      | 224.56 | 104.30 | 2.15 | 0.46  |
| Q912W3_SMCAS_MOUSE | Smarca5  | SWI/SNF-related matrix-; K.M*VVLK#.L                        | 46.98  | 33.54  | 1.40 | 0.71  |
| Q912W3_SMCAS_MOUSE | Smarca5  | SWI/SNF-related matrix-; R.QDSINAYNEPNSTK#.F                | 28.30  | 13.66  | 2.07 | 0.48  |
| Q912W3_SMCAS_MOUSE | Smarca5  | SWI/SNF-related matrix-; K.QNLLSVGDYR@.H                    | 46.70  | 20.38  | 2.29 | 0.44  |
| Q912W3_SMCAS_MOUSE | Smarca5  | SWI/SNF-related matrix-; K.QPNVQDFOFFPR@.L                  | 11.58  | 7.80   | 1.49 | 0.67  |
| Q912W3_SMCAS_MOUSE | Smarca5  | SWI/SNF-related matrix-; R.R@TEQEEDELLTESSK#.A              | 38.47  | 27.94  | 1.38 | 0.73  |
| Q912W3_SMCAS_MOUSE | Smarca5  | SWI/SNF-related matrix-; R.SPDLNAAQAQK#.E                   | 25.15  | 14.11  | 1.78 | 0.56  |
| Q912W3_SMCAS_MOUSE | Smarca5  | SWI/SNF-related matrix-; R.SPDLNAAQAQK#EEQLK#.I             | 16.82  | 12.02  | 1.40 | 0.71  |
| Q912W3_SMCAS_MOUSE | Smarca5  | SWI/SNF-related matrix-; R.TEQEEDELLTESSK#.A                | 51.38  | 38.54  | 1.33 | 0.75  |
| Q912W3_SMCAS_MOUSE | Smarca5  | SWI/SNF-related matrix-; K.TLQTSLLGVMYK#.H                  | 82.46  | 39.20  | 2.10 | 0.48  |
| Q912W3_SMCAS_MOUSE | Smarca5  | SWI/SNF-related matrix-; K.TLQTSLLGVMYK#.H                  | 12.31  | 48.35  | 0.25 | 3.93  |
| Q912W3_SMCAS_MOUSE | Smarca5  | SWI/SNF-related matrix-; K.TPEEVEISAVFWER@.C                | 22.97  | 13.09  | 1.75 | 0.57  |
| Q912W3_SMCAS_MOUSE | Smarca5  | SWI/SNF-related matrix-; K.TPEEVEISAVFWER.C                 | 17.62  | 15.10  | 1.17 | 0.86  |
| Q912W3_SMCAS_MOUSE | Smarca5  | SWI/SNF-related matrix-; R.VLIFSQMTR@.L                     | 75.10  | 34.84  | 2.16 | 0.46  |
| Q912W3_SMCAS_MOUSE | Smarca5  | SWI/SNF-related matrix-; R.VLIFSQMTR@.L                     | 24.16  | 11.66  | 2.07 | 0.48  |
| Q912W3_SMCAS_MOUSE | Smarca5  | SWI/SNF-related matrix-; R.YK#APFHQLR@.I                    | 63.20  | 35.04  | 1.80 | 0.55  |
| Q04692_SMRCD_MOUSE | Smarcad1 | SWI/SNF-related matrix-; K.LISQGTIEESM*LK#.I                | 8.49   | 3.20   | 2.66 | 0.38  |
| Q920H3_SNF5_MOUSE  | Smarcb1  | SWI/SNF-related matrix-; K.ASEVEELDGNDEK#.Y                 | 17.47  | 5.24   | 3.33 | 0.30  |
| Q920H3_SNF5_MOUSE  | Smarcb1  | SWI/SNF-related matrix-; K.AVSIPTPTLYR@.E                   | 201.79 | 57.13  | 3.53 | 0.28  |
| Q920H3_SNF5_MOUSE  | Smarcb1  | SWI/SNF-related matrix-; K.DHGYTTLATVTLK#.A                 | 26.38  | 6.36   | 4.15 | 0.24  |
| Q920H3_SNF5_MOUSE  | Smarcb1  | SWI/SNF-related matrix-; K.FLEDDGFEYMG#ISEVGNLYR@.M         | 6.64   | 3.98   | 1.67 | 0.60  |
| Q920H3_SNF5_MOUSE  | Smarcb1  | SWI/SNF-related matrix-; R.LDM*EIDGQK#.L                    | 26.45  | 9.95   | 2.66 | 0.38  |
| Q920H3_SNF5_MOUSE  | Smarcb1  | SWI/SNF-related matrix-; K.LNIHVGNISLVDQFEWDM*SEK#.E        | 3.57   | 2.92   | 1.22 | 0.82  |
| Q920H3_SNF5_MOUSE  | Smarcb1  | SWI/SNF-related matrix-; K.LNIHVGNISLVDQFEWDM*SEK#ENSPEK#.F | 7.30   | 3.70   | 1.97 | 0.51  |
| Q920H3_SNF5_MOUSE  | Smarcb1  | SWI/SNF-related matrix-; R.QQIESYPTDILEDQSDOR@.V            | 24.48  | 9.90   | 2.47 | 0.40  |
| Q920H3_SNF5_MOUSE  | Smarcb1  | SWI/SNF-related matrix-; R.QQIESYPTDILEDQSDOR.V             | 8.00   | 4.84   | 1.65 | 0.61  |
| Q920H3_SNF5_MOUSE  | Smarcb1  | SWI/SNF-related matrix-; K.TYAFSENPLPTVEIAR@.N              | 60.68  | 34.77  | 1.75 | 0.57  |
| P97496_SMR1_MOUSE  | Smarcc1  | SWI/SNF complex subunit-; K.AALEEFSR@.V                     | 122.03 | 39.92  | 3.06 | 0.33  |
| P97496_SMR1_MOUSE  | Smarcc1  | SWI/SNF complex subunit-; K.EKPIDLQNFGLR.T                  | 122.43 | 36.26  | 3.38 | 0.30  |
| P97496_SMR1_MOUSE  | Smarcc1  | SWI/SNF complex subunit-; R.FDLQNPISR@.M                    | 25.97  | 14.65  | 1.77 | 0.56  |
| P97496_SMR1_MOUSE  | Smarcc1  | SWI/SNF complex subunit-; K.FWESPDTVSQLDSVR@.V              | 39.88  | 19.38  | 2.06 | 0.49  |
| P97496_SMR1_MOUSE  | Smarcc1  | SWI/SNF complex subunit-; K.GGTVADLEQDEEAVTTGGK#.E          | 5.65   | 1.78   | 3.18 | 0.31  |
| P97496_SMR1_MOUSE  | Smarcc1  | SWI/SNF complex subunit-; R.HFELETIM*DR@.E                  | 37.05  | 11.77  | 3.15 | 0.32  |
| P97496_SMR1_MOUSE  | Smarcc1  | SWI/SNF complex subunit-; R.HFELETIM*DR@.E                  | 28.26  | 9.00   | 3.14 | 0.32  |
| P97496_SMR1_MOUSE  | Smarcc1  | SWI/SNF complex subunit-; K.HLAAVEER@.K                     | 324.80 | 98.13  | 3.31 | 0.30  |
| P97496_SMR1_MOUSE  | Smarcc1  | SWI/SNF complex subunit-; K.HVTNPAFTK#.L                    | 76.75  | 20.94  | 3.67 | 0.27  |
| P97496_SMR1_MOUSE  | Smarcc1  | SWI/SNF complex subunit-; K.KHDSENTPVK#.G                   | 9.08   | 3.09   | 2.94 | 0.34  |
| P97496_SMR1_MOUSE  | Smarcc1  | SWI/SNF complex subunit-; K.K#GQASLYGK#.R                   | 17.75  | 5.17   | 3.44 | 0.29  |
| P97496_SMR1_MOUSE  | Smarcc1  | SWI/SNF complex subunit-; K.K#VEHISEGNVATAAAAAASAATK#.A     | 84.96  | 25.56  | 3.32 | 0.30  |
| P97496_SMR1_MOUSE  | Smarcc1  | SWI/SNF complex subunit-; K.K#YHADAPNTK#.T                  | 35.64  | 13.24  | 2.69 | 0.37  |
| P97496_SMR1_MOUSE  | Smarcc1  | SWI/SNF complex subunit-; K.LR@HFELETIM*DR@.E               | 7.78   | 2.32   | 3.36 | 0.30  |
| P97496_SMR1_MOUSE  | Smarcc1  | SWI/SNF complex subunit-; K.M*ETDPDQGPQK#.A                 | 4.41   | 2.29   | 1.93 | 0.52  |
| P97496_SMR1_MOUSE  | Smarcc1  | SWI/SNF complex subunit-; R.NFM*IDTYR@.L                    | 143.89 | 44.37  | 3.24 | 0.31  |
| P97496_SMR1_MOUSE  | Smarcc1  | SWI/SNF complex subunit-; R.NFMDITYR@.L                     | 32.94  | 7.09   | 4.65 | 0.22  |
| P97496_SMR1_MOUSE  | Smarcc1  | SWI/SNF complex subunit-; K.NTEK#EODSVEDEVK#PEEK#.E         | 2.58   | 1.30   | 1.99 | 0.50  |
| P97496_SMR1_MOUSE  | Smarcc1  | SWI/SNF complex subunit-; R.NVEM*FM*NIK#.T                  | 19.11  | 3.47   | 5.51 | 0.18  |
| P97496_SMR1_MOUSE  | Smarcc1  | SWI/SNF complex subunit-; R.R@FDLQNPISR@.M                  | 30.34  | 6.87   | 4.42 | 0.23  |
| P97496_SMR1_MOUSE  | Smarcc1  | SWI/SNF complex subunit-; K.SK#PEIYLAYR@.N                  | 139.11 | 37.00  | 3.76 | 0.27  |
| P97496_SMR1_MOUSE  | Smarcc1  | SWI/SNF complex subunit-; K.SVALLVETQM*KK#.K                | 142.90 | 45.33  | 3.15 | 0.32  |
| P97496_SMR1_MOUSE  | Smarcc1  | SWI/SNF complex subunit-; K.SVALLVETQM*KK#.K                | 50.50  | 20.47  | 2.47 | 0.41  |
| P97496_SMR1_MOUSE  | Smarcc1  | SWI/SNF complex subunit-; K.SVALLVETQM*KK#.L                | 23.42  | 5.77   | 4.06 | 0.25  |
| P97496_SMR1_MOUSE  | Smarcc1  | SWI/SNF complex subunit-; R.SPQPAAQMQM*LNFEK#.N             | 35.85  | 13.05  | 2.75 | 0.36  |
| P97496_SMR1_MOUSE  | Smarcc1  | SWI/SNF complex subunit-; K.TPEIYLAYR@.N                    | 100.69 | 26.45  | 3.81 | 0.26  |
| P97496_SMR1_MOUSE  | Smarcc1  | SWI/SNF complex subunit-; K.AENK#VENESDEGDK#QDR@.E          | 10.51  | 4.02   | 2.61 | 0.38  |
| P97496_SMR1_MOUSE  | Smarcc1  | SWI/SNF complex subunit-; K.DM*EDPTVPNIEEVLPK#.N            | 6.85   | 1.53   | 4.48 | 0.22  |
| P97496_SMR1_MOUSE  | Smarcc1  | SWI/SNF complex subunit-; R.FDLQNPISR@.M                    | 24.21  | 15.26  | 1.59 | 0.63  |
| P97496_SMR1_MOUSE  | Smarcc1  | SWI/SNF complex subunit-; K.FWESPDTVSQLDSVR.V               | 29.12  | 8.17   | 3.56 | 0.28  |
| P97496_SMR1_MOUSE  | Smarcc1  | SWI/SNF complex subunit-; K.GGTVADLEQDEEAVTTGGK#.E          | 10.57  | 2.70   | 3.91 | 0.26  |
| P97496_SMR1_MOUSE  | Smarcc1  | SWI/SNF complex subunit-; R.HFELETIMDR.E                    | 6.43   | 4.33   | 1.49 | 0.67  |
| P97496_SMR1_MOUSE  | Smarcc1  | SWI/SNF complex subunit-; K.HLAAVEER@.K                     | 147.64 | 32.49  | 4.54 | 0.22  |
| P97496_SMR1_MOUSE  | Smarcc1  | SWI/SNF complex subunit-; K.HVTNPAFTK#.L                    | 58.93  | 12.34  | 4.78 | 0.21  |
| P97496_SMR1_MOUSE  | Smarcc1  | SWI/SNF complex subunit-; K.K#VEHISEGNVATAAAAAASAATK#.A     | 11.67  | 4.13   | 2.82 | 0.35  |
| P97496_SMR1_MOUSE  | Smarcc1  | SWI/SNF complex subunit-; K.LR@HFELETIM*DR@.E               | 6.69   | 2.71   | 2.47 | 0.40  |

|                    |         |                                                                    |        |        |      |      |
|--------------------|---------|--------------------------------------------------------------------|--------|--------|------|------|
| P97496_SMR1_MOUSE  | Smarcc1 | SWI/SNF complex subunit K.M*ETDPDGGQPEK#A                          | 4.35   | 1.31   | 3.32 | 0.30 |
| P97496_SMR1_MOUSE  | Smarcc1 | SWI/SNF complex subunit R.NFM*IDTYR@.L                             | 96.85  | 23.33  | 4.15 | 0.24 |
| P97496_SMR1_MOUSE  | Smarcc1 | SWI/SNF complex subunit R.NFMDTYR@.L                               | 17.33  | 4.75   | 3.65 | 0.27 |
| P97496_SMR1_MOUSE  | Smarcc1 | SWI/SNF complex subunit R.NVEM*FM*NIEK#.T                          | 10.92  | 3.40   | 3.22 | 0.31 |
| P97496_SMR1_MOUSE  | Smarcc1 | SWI/SNF complex subunit R.R@ALPFFNGK#.N                            | 6.53   | 3.76   | 1.74 | 0.58 |
| P97496_SMR1_MOUSE  | Smarcc1 | SWI/SNF complex subunit R.R@FDLQNPSPR@.M                           | 21.61  | 5.12   | 4.22 | 0.24 |
| P97496_SMR1_MOUSE  | Smarcc1 | SWI/SNF complex subunit K.SK#TPPEYLAYR@.N                          | 105.21 | 23.82  | 4.42 | 0.23 |
| P97496_SMR1_MOUSE  | Smarcc1 | SWI/SNF complex subunit K.SLVALLVETQM*#K.K                         | 121.71 | 33.93  | 3.59 | 0.28 |
| P97496_SMR1_MOUSE  | Smarcc1 | SWI/SNF complex subunit K.SLVALLVETQM#K.K                          | 25.97  | 12.92  | 2.01 | 0.50 |
| P97496_SMR1_MOUSE  | Smarcc1 | SWI/SNF complex subunit R.SPQVPAQQM*LNFEK#.N                       | 18.06  | 4.82   | 3.75 | 0.27 |
| P97496_SMR1_MOUSE  | Smarcc1 | SWI/SNF complex subunit K.TPEIYLAYR@.N                             | 65.74  | 18.56  | 3.54 | 0.28 |
| P97496_SMR1_MOUSE  | Smarcc1 | SWI/SNF complex subunit K.VEHEISEGNVATAAAAAASAATK#.A               | 8.52   | 2.98   | 2.86 | 0.35 |
| Q6PDG5_SMR2_MOUSE  | Smarcc2 | SWI/SNF complex subunit R.DIGEGNLSTAAAAAALAAAVK#.A                 | 152.38 | 42.26  | 3.61 | 0.28 |
| Q6PDG5_SMR2_MOUSE  | Smarcc2 | SWI/SNF complex subunit R.DIGEGNLSTAAAAAALAAAVK#.A                 | 75.88  | 23.79  | 3.19 | 0.31 |
| Q6PDG5_SMR2_MOUSE  | Smarcc2 | SWI/SNF complex subunit R.EEEQEDLTK#D#M*DESPVNVVEVTLPK#.T          | 4.84   | 2.33   | 2.07 | 0.48 |
| Q6PDG5_SMR2_MOUSE  | Smarcc2 | SWI/SNF complex subunit K.HVSNAPLTK#.L                             | 39.00  | 8.05   | 4.84 | 0.21 |
| Q6PDG5_SMR2_MOUSE  | Smarcc2 | SWI/SNF complex subunit K.K#GSPPTYK#.S                             | 59.54  | 17.44  | 3.41 | 0.29 |
| Q6PDG5_SMR2_MOUSE  | Smarcc2 | SWI/SNF complex subunit K.M*KEEVPTALVEAHRV.K                       | 66.12  | 16.66  | 3.97 | 0.25 |
| Q6PDG5_SMR2_MOUSE  | Smarcc2 | SWI/SNF complex subunit K.NPDLEDHEDVETQTHIIIIPSYAAWFYDYNVSHAIER@.R | 4.37   | 3.14   | 1.39 | 0.72 |
| Q6PDG5_SMR2_MOUSE  | Smarcc2 | SWI/SNF complex subunit R.NVEM*FM*TIEK#.S                          | 24.35  | 7.16   | 3.40 | 0.29 |
| Q6PDG5_SMR2_MOUSE  | Smarcc2 | SWI/SNF complex subunit R.R@YDFQNPSPR@.M                           | 32.36  | 6.90   | 4.69 | 0.21 |
| Q6PDG5_SMR2_MOUSE  | Smarcc2 | SWI/SNF complex subunit K.SALEEFSK#.M                              | 93.51  | 27.52  | 3.40 | 0.29 |
| Q6PDG5_SMR2_MOUSE  | Smarcc2 | SWI/SNF complex subunit R.YDFQNPSPR@.M                             | 25.18  | 8.36   | 3.01 | 0.33 |
| Q6PDG5_SMR2_MOUSE  | Smarcc2 | SWI/SNF complex subunit K.YIQAEPTNK#.S                             | 50.90  | 14.33  | 3.55 | 0.28 |
| Q6PDG5_SMR2_MOUSE  | Smarcc2 | SWI/SNF complex subunit K.YYEAADVTQFDNVR@.L                        | 53.35  | 10.32  | 5.17 | 0.19 |
| Q6PDG5_SMR2_MOUSE  | Smarcc2 | SWI/SNF complex subunit K.ADPAFGLESSGIAGTASDEPER@.I                | 12.40  | 3.11   | 3.99 | 0.25 |
| Q6PDG5_SMR2_MOUSE  | Smarcc2 | SWI/SNF complex subunit R.DIGEGNLSTAAAAAALAAAVK#.A                 | 185.99 | 53.88  | 3.45 | 0.29 |
| Q6PDG5_SMR2_MOUSE  | Smarcc2 | SWI/SNF complex subunit K.DM*DESPVNVVEVTLPK#.T                     | 14.14  | 8.28   | 1.71 | 0.59 |
| Q6PDG5_SMR2_MOUSE  | Smarcc2 | SWI/SNF complex subunit R.EALEYQR@.Q                               | 85.36  | 18.92  | 4.51 | 0.22 |
| Q6PDG5_SMR2_MOUSE  | Smarcc2 | SWI/SNF complex subunit R.EEEQEDLTK#.D                             | 10.11  | 3.24   | 3.12 | 0.32 |
| Q6PDG5_SMR2_MOUSE  | Smarcc2 | SWI/SNF complex subunit R.EGGGAVVEEAK#EIESEVPK#.K                  | 6.97   | 1.70   | 4.11 | 0.24 |
| Q6PDG5_SMR2_MOUSE  | Smarcc2 | SWI/SNF complex subunit K.HVSNAPLTK#.R                             | 80.57  | 17.98  | 4.48 | 0.22 |
| Q6PDG5_SMR2_MOUSE  | Smarcc2 | SWI/SNF complex subunit K.K#GSPPTYK#.S                             | 79.77  | 21.43  | 3.72 | 0.27 |
| Q6PDG5_SMR2_MOUSE  | Smarcc2 | SWI/SNF complex subunit K.K#YIQAEPTNK#.S                           | 6.19   | 1.31   | 4.71 | 0.21 |
| Q6PDG5_SMR2_MOUSE  | Smarcc2 | SWI/SNF complex subunit R.NVEM*FM*TIEK#.S                          | 51.73  | 9.23   | 5.60 | 0.18 |
| Q6PDG5_SMR2_MOUSE  | Smarcc2 | SWI/SNF complex subunit R.RYDFQNPSPR.M                             | 38.32  | 6.73   | 5.69 | 0.18 |
| Q6PDG5_SMR2_MOUSE  | Smarcc2 | SWI/SNF complex subunit K.SALEEFSK#.M                              | 139.95 | 37.08  | 3.77 | 0.26 |
| Q6PDG5_SMR2_MOUSE  | Smarcc2 | SWI/SNF complex subunit R.SPSPSPTEPK#.K                            | 16.05  | 5.11   | 3.14 | 0.32 |
| Q6PDG5_SMR2_MOUSE  | Smarcc2 | SWI/SNF complex subunit K.WILDTFNEVEM*NEEDYVSDDK#SPVSR@.R          | 12.53  | 2.41   | 5.21 | 0.19 |
| Q6PDG5_SMR2_MOUSE  | Smarcc2 | SWI/SNF complex subunit R.YDFQNPSPR@.M                             | 43.22  | 10.58  | 4.09 | 0.24 |
| Q6PDG5_SMR2_MOUSE  | Smarcc2 | SWI/SNF complex subunit K.YIQAEPTNK#.S                             | 77.53  | 15.94  | 4.86 | 0.21 |
| Q6PDG5_SMR2_MOUSE  | Smarcc2 | SWI/SNF complex subunit K.YYEAADVTQFDNVR@.L                        | 71.50  | 17.41  | 4.11 | 0.24 |
| Q6PDG5_SMR2_MOUSE  | Smarcc2 | SWI/SNF complex subunit K.YYEAADVTQFDNVR@.L                        | 26.82  | 7.56   | 3.55 | 0.28 |
| Q61466_SMRD1_MOUSE | Smarcd1 | SWI/SNF-related matrix: R.ELVPESQAYM*DLAFAER@.K                    | 33.90  | 5.90   | 5.74 | 0.17 |
| Q61466_SMRD1_MOUSE | Smarcd1 | SWI/SNF-related matrix: K.FSEIQR@.L                                | 34.31  | 12.31  | 2.79 | 0.36 |
| Q61466_SMRD1_MOUSE | Smarcd1 | SWI/SNF-related matrix: K.FSSFFK#.S                                | 19.92  | 6.73   | 2.96 | 0.34 |
| Q61466_SMRD1_MOUSE | Smarcd1 | SWI/SNF-related matrix: K.IHETIETINQLK#.T                          | 39.32  | 7.93   | 4.96 | 0.20 |
| Q61466_SMRD1_MOUSE | Smarcd1 | SWI/SNF-related matrix: R.IR@ELVPESQAYM*DLAFAER@.K                 | 30.59  | 5.98   | 5.11 | 0.20 |
| Q61466_SMRD1_MOUSE | Smarcd1 | SWI/SNF-related matrix: R.IR@ELVPESQAYM*DLAFAER@.K                 | 8.08   | 2.48   | 3.26 | 0.31 |
| Q61466_SMRD1_MOUSE | Smarcd1 | SWI/SNF-related matrix: R.LDIOEALK#.R                              | 8.00   | 1.86   | 4.29 | 0.23 |
| Q61466_SMRD1_MOUSE | Smarcd1 | SWI/SNF-related matrix: R.LLEDAALSK#.Y                             | 45.75  | 16.37  | 2.79 | 0.36 |
| Q61466_SMRD1_MOUSE | Smarcd1 | SWI/SNF-related matrix: K.R@LDIOEALK#.R                            | 17.57  | 6.35   | 2.77 | 0.36 |
| Q61466_SMRD1_MOUSE | Smarcd1 | SWI/SNF-related matrix: R.R@QLEEQALGIR@.N                          | 26.59  | 4.52   | 5.89 | 0.17 |
| Q61466_SMRD1_MOUSE | Smarcd1 | SWI/SNF-related matrix: K.SDAEDGEGTVASVWELR@.V                     | 15.77  | 4.42   | 3.57 | 0.28 |
| Q61466_SMRD1_MOUSE | Smarcd1 | SWI/SNF-related matrix: R.TATTQETDGFQVK#.R                         | 40.66  | 12.48  | 3.26 | 0.31 |
| Q61466_SMRD1_MOUSE | Smarcd1 | SWI/SNF-related matrix: K.TM*TDVGNPEEER@.R                         | 24.96  | 8.82   | 2.83 | 0.35 |
| Q61466_SMRD1_MOUSE | Smarcd1 | SWI/SNF-related matrix: R.ELVPESQAYM*DLAFAER@.K                    | 5.95   | 3.26   | 1.83 | 0.55 |
| Q61466_SMRD1_MOUSE | Smarcd1 | SWI/SNF-related matrix: K.FSEIQR@.L                                | 18.89  | 6.37   | 2.97 | 0.34 |
| Q61466_SMRD1_MOUSE | Smarcd1 | SWI/SNF-related matrix: K.FSSFFK#.S                                | 17.67  | 7.28   | 2.43 | 0.41 |
| Q61466_SMRD1_MOUSE | Smarcd1 | SWI/SNF-related matrix: K.IHETIETINQLK#.T                          | 26.65  | 6.31   | 4.22 | 0.24 |
| Q61466_SMRD1_MOUSE | Smarcd1 | SWI/SNF-related matrix: R.IR@ELVPESQAYM*DLAFAER@.K                 | 6.00   | 4.91   | 2.00 | 0.20 |
| Q61466_SMRD1_MOUSE | Smarcd1 | SWI/SNF-related matrix: R.IR@ELVPESQAYM*DLAFAER@.K                 | 8.70   | 2.22   | 3.92 | 0.26 |
| Q61466_SMRD1_MOUSE | Smarcd1 | SWI/SNF-related matrix: R.LDIOEALK#.R                              | 12.43  | 2.78   | 4.48 | 0.22 |
| Q61466_SMRD1_MOUSE | Smarcd1 | SWI/SNF-related matrix: R.LLEDAALSK#.Y                             | 30.68  | 5.28   | 5.81 | 0.17 |
| Q61466_SMRD1_MOUSE | Smarcd1 | SWI/SNF-related matrix: K.R@LDIOEALK#.R                            | 10.41  | 2.77   | 3.76 | 0.27 |
| Q61466_SMRD1_MOUSE | Smarcd1 | SWI/SNF-related matrix: R.R@QLEEQALGIR@.N                          | 26.68  | 8.33   | 3.20 | 0.31 |
| Q61466_SMRD1_MOUSE | Smarcd1 | SWI/SNF-related matrix: K.SDAEDGEGTVASVWELR@.V                     | 11.89  | 3.18   | 3.74 | 0.27 |
| Q61466_SMRD1_MOUSE | Smarcd1 | SWI/SNF-related matrix: R.ELVPESQAYM*DLAFAER@.K                    | 5.85   | 1.61   | 3.64 | 0.27 |
| Q61466_SMRD1_MOUSE | Smarcd1 | SWI/SNF-related matrix: R.IR@ELVPESQAYM*DLAFAER@.K                 | 13.74  | 2.94   | 4.67 | 0.21 |
| Q99J8_SMR2_MOUSE   | Smarcd2 | SWI/SNF-related matrix: R.AAFYHQPWAEAVGR@.H                        | 23.19  | 5.89   | 3.94 | 0.25 |
| Q99J8_SMR2_MOUSE   | Smarcd2 | SWI/SNF-related matrix: K.ADGDNAGTAGTPGGTAAADK#.V                  | 7.04   | 1.39   | 5.08 | 0.20 |
| Q99J8_SMR2_MOUSE   | Smarcd2 | SWI/SNF-related matrix: K.IHETIETINQLK#.T                          | 41.74  | 18.30  | 2.28 | 0.44 |
| Q99J8_SMR2_MOUSE   | Smarcd2 | SWI/SNF-related matrix: R.IYISNTFSPSK#.A                           | 15.61  | 5.35   | 2.92 | 0.34 |
| Q99J8_SMR2_MOUSE   | Smarcd2 | SWI/SNF-related matrix: R.M*PTTQETDGFQVK#.R                        | 10.88  | 3.46   | 3.15 | 0.32 |
| Q99J8_SMR2_MOUSE   | Smarcd2 | SWI/SNF-related matrix: R.R@QLEEQALGIR@.L                          | 42.56  | 17.76  | 2.40 | 0.42 |
| Q99J8_SMR2_MOUSE   | Smarcd2 | SWI/SNF-related matrix: K.ADGDNAGTAGTPGGTAAADK#.V                  | 4.28   | 2.46   | 1.74 | 0.57 |
| Q99J8_SMR2_MOUSE   | Smarcd2 | SWI/SNF-related matrix: K.IHETIETINQLK#.T                          | 50.92  | 14.62  | 3.48 | 0.29 |
| Q99J8_SMR2_MOUSE   | Smarcd2 | SWI/SNF-related matrix: R.IYISNTFSPSK#.A                           | 19.38  | 7.81   | 2.48 | 0.40 |
| Q99J8_SMR2_MOUSE   | Smarcd2 | SWI/SNF-related matrix: R.M*PTTQETDGFQVK#.R                        | 11.67  | 3.86   | 3.02 | 0.33 |
| Q99J8_SMR2_MOUSE   | Smarcd2 | SWI/SNF-related matrix: R.R@QLEEQALGIR@.L                          | 42.00  | 11.35  | 3.70 | 0.27 |
| Q99J8_SMR2_MOUSE   | Smarcd2 | SWI/SNF-related matrix: K.SLVIELDK#ELYGPDNHLVEVHR@.M               | 12.91  | 2.45   | 4.46 | 0.22 |
| Q6P921_SMRD3_MOUSE | Smarcd3 | SWI/SNF-related matrix: R.AAPPQSQAQGGQPVPPTAPAR@.S                 | 11.72  | 6.16   | 1.90 | 0.53 |
| Q6P921_SMRD3_MOUSE | Smarcd3 | SWI/SNF-related matrix: K.GYVQDLLR@.S                              | 27.42  | 7.42   | 3.69 | 0.27 |
| Q6P921_SMRD3_MOUSE | Smarcd3 | SWI/SNF-related matrix: R.LYISNTFNPAK#DAEDSDGSIASWELR@.V           | 8.98   | 2.82   | 3.18 | 0.31 |
| Q6P921_SMRD3_MOUSE | Smarcd3 | SWI/SNF-related matrix: R.R@QLEEQALGIR@.L                          | 25.20  | 8.20   | 3.07 | 0.33 |
| Q6P921_SMRD3_MOUSE | Smarcd3 | SWI/SNF-related matrix: R.TPTTQETDGFQVK#.R                         | 26.16  | 9.82   | 2.66 | 0.38 |
| Q6P921_SMRD3_MOUSE | Smarcd3 | SWI/SNF-related matrix: K.VM*TDVGNPEEER@.R                         | 17.27  | 5.13   | 3.37 | 0.30 |
| Q6P921_SMRD3_MOUSE | Smarcd3 | SWI/SNF-related matrix: R.AAPPQSQAQGGQPVPPTAPAR@.S                 | 3.41   | 2.58   | 1.32 | 0.76 |
| Q6P921_SMRD3_MOUSE | Smarcd3 | SWI/SNF-related matrix: K.GYVQDLLR@.S                              | 12.01  | 4.72   | 2.55 | 0.39 |
| Q6P921_SMRD3_MOUSE | Smarcd3 | SWI/SNF-related matrix: R.SAIVQALWQYVK#.T                          | 8.09   | 2.55   | 3.17 | 0.32 |
| Q6P921_SMRD3_MOUSE | Smarcd3 | SWI/SNF-related matrix: R.AEAALLESER@.Q                            | 36.42  | 11.49  | 3.17 | 0.32 |
| Q54941_SMC1_MOUSE  | Smarce1 | SWI/SNF-related matrix: K.ASNPDLK#.L                               | 26.21  | 10.36  | 2.53 | 0.40 |
| Q54941_SMC1_MOUSE  | Smarce1 | SWI/SNF-related matrix: K.AYHNSPAYLAYINAK#.S                       | 10.20  | 12.11  | 0.84 | 1.19 |
| Q54941_SMC1_MOUSE  | Smarce1 | SWI/SNF-related matrix: R.DLTDDEEKQYLYNEVYAEK.I                    | 19.75  | 5.59   | 3.53 | 0.28 |
| Q54941_SMC1_MOUSE  | Smarce1 | SWI/SNF-related matrix: R.DLTDDEEKQYLYNEVYAEKIEYNESM*K.A           | 32.45  | 8.32   | 3.90 | 0.26 |
| Q54941_SMC1_MOUSE  | Smarce1 | SWI/SNF-related matrix: R.DLTDDEEKQYLYNEVYAEKIEYNESM.K.A           | 20.83  | 5.53   | 3.77 | 0.27 |
| Q54941_SMC1_MOUSE  | Smarce1 | SWI/SNF-related matrix: K.FLESTDSFNELK#.R                          | 37.65  | 12.23  | 3.08 | 0.32 |
| Q54941_SMC1_MOUSE  | Smarce1 | SWI/SNF-related matrix: K.IAIEAIAQAEQAR@.K                         | 142.71 | 306.60 | 4.47 | 2.15 |
| Q54941_SMC1_MOUSE  | Smarce1 | SWI/SNF-related matrix: R.K#LEALLQIEER@.H                          | 123.90 | 35.96  | 3.45 | 0.29 |
| Q54941_SMC1_MOUSE  | Smarce1 | SWI/SNF-related matrix: R.K#VVDQVK#.A                              | 22.69  | 6.12   | 3.71 | 0.27 |
| Q54941_SMC1_MOUSE  | Smarce1 | SWI/SNF-related matrix: R.LGGNPGTNSR@.V                            | 48.16  | 14.42  | 3.34 | 0.30 |
| Q54941_SMC1_MOUSE  | Smarce1 | SWI/SNF-related matrix: R.LISELSESVVDVNR@.S                        | 156.58 | 45.20  | 3.46 | 0.29 |
| Q54941_SMC1_MOUSE  | Smarce1 | SWI/SNF-related matrix: K.LWEIGK#.I                                | 49.62  | 14.84  | 3.34 | 0.30 |

|                    |        |                                                                       |       |        |      |      |
|--------------------|--------|-----------------------------------------------------------------------|-------|--------|------|------|
| O54941_SMCE1_MOUSE | Smrc1e | SWI/SNF-related matrix-; K.R@PSYAPPTPAPATQM*PSTPGFVGVNYPYSHLAYNNYR@.L | 15.29 | 4.05   | 3.77 | 0.26 |
| O54941_SMCE1_MOUSE | Smrc1e | SWI/SNF-related matrix-; R.SQSSM*APEEEQVANK#.A                        | 18.97 | 6.95   | 2.73 | 0.37 |
| O54941_SMCE1_MOUSE | Smrc1e | SWI/SNF-related matrix-; K.SR@AEAALFEESR@.Q                           | 64.13 | 18.64  | 3.44 | 0.29 |
| O54941_SMCE1_MOUSE | Smrc1e | SWI/SNF-related matrix-; K.FLESTDSFNELK#.R                            | 7.14  | 5.81   | 1.23 | 0.81 |
| O54941_SMCE1_MOUSE | Smrc1e | SWI/SNF-related matrix-; K.IAAEIAQAEQAR@.K                            | 59.76 | 80.90  | 0.74 | 1.35 |
| O54941_SMCE1_MOUSE | Smrc1e | SWI/SNF-related matrix-; R.K#LEALLQIEER@.H                            | 30.54 | 11.12  | 2.75 | 0.36 |
| O54941_SMCE1_MOUSE | Smrc1e | SWI/SNF-related matrix-; R.LISELSVVPDVR.S                             | 29.15 | 10.94  | 2.67 | 0.38 |
| O54941_SMCE1_MOUSE | Smrc1e | SWI/SNF-related matrix-; R.LISELSVVPDVR@.S                            | 22.23 | 8.98   | 2.47 | 0.40 |
| O54941_SMCE1_MOUSE | Smrc1e | SWI/SNF-related matrix-; K.R@PSYAPPTPAPATQM*PSTPGFVGVNYPYSHLAYNNYR@.L | 4.62  | 1.84   | 2.51 | 0.40 |
| O54941_SMCE1_MOUSE | Smrc1e | SWI/SNF-related matrix-; R.SQSSM*APEEEQVANK#.A                        | 3.14  | 2.35   | 1.34 | 0.75 |
| O54941_SMCE1_MOUSE | Smrc1e | SWI/SNF-related matrix-; K.SR@AEAALFEESR@.Q                           | 11.18 | 2.28   | 4.90 | 0.20 |
| Q9CU62_SMC1A_MOUSE | Smc1a  | Structural maintenance-; R.AATLAQELK#.F                               | 72.71 | 35.31  | 2.06 | 0.49 |
| Q9CU62_SMC1A_MOUSE | Smc1a  | Structural maintenance-; R.AFVSM*VYSEGAEDR@.T                         | 22.51 | 11.81  | 1.91 | 0.52 |
| Q9CU62_SMC1A_MOUSE | Smc1a  | Structural maintenance-; R.AQVQLQFLK#.L                               | 68.86 | 24.08  | 2.86 | 0.35 |
| Q9CU62_SMC1A_MOUSE | Smc1a  | Structural maintenance-; R.DK#FQETSDEFEAAR@.K                         | 53.97 | 22.49  | 2.40 | 0.42 |
| Q9CU62_SMC1A_MOUSE | Smc1a  | Structural maintenance-; R.DLTLEENQVK#.K                              | 30.14 | 15.04  | 2.00 | 0.50 |
| Q9CU62_SMC1A_MOUSE | Smc1a  | Structural maintenance-; K.ELNQVM*EQLGDAR@.I                          | 7.76  | 6.65   | 1.17 | 0.86 |
| Q9CU62_SMC1A_MOUSE | Smc1a  | Structural maintenance-; K.EVTAIETK#.L                                | 53.57 | 20.68  | 2.59 | 0.39 |
| Q9CU62_SMC1A_MOUSE | Smc1a  | Structural maintenance-; K.FQETSDEFEAAR@.K                            | 7.75  | 5.97   | 1.30 | 0.77 |
| Q9CU62_SMC1A_MOUSE | Smc1a  | Structural maintenance-; R.FR@PM*DNLSGGEK#.T                          | 7.55  | 4.50   | 1.68 | 0.60 |
| Q9CU62_SMC1A_MOUSE | Smc1a  | Structural maintenance-; K.GTM*DDISQEGSSQGEESVSGSQR@.T                | 26.40 | 15.13  | 1.75 | 0.57 |
| Q9CU62_SMC1A_MOUSE | Smc1a  | Structural maintenance-; R.HLALNLQEK#.S                               | 78.81 | 30.95  | 2.55 | 0.39 |
| Q9CU62_SMC1A_MOUSE | Smc1a  | Structural maintenance-; R.DEIN#KELNQVM*EQLGDAR@.I                    | 9.39  | 5.10   | 1.84 | 0.54 |
| Q9CU62_SMC1A_MOUSE | Smc1a  | Structural maintenance-; R.IEK#LEEYITTSK#.Q                           | 50.94 | 21.97  | 2.32 | 0.43 |
| Q9CU62_SMC1A_MOUSE | Smc1a  | Structural maintenance-; K.IIDETM*AOQLDLK#.N                          | 57.52 | 21.93  | 2.62 | 0.38 |
| Q9CU62_SMC1A_MOUSE | Smc1a  | Structural maintenance-; K.IIDETMAQQLDLK#.N                           | 16.92 | 6.71   | 2.52 | 0.40 |
| Q9CU62_SMC1A_MOUSE | Smc1a  | Structural maintenance-; K.K#WDENEIEK#.L                              | 13.77 | 7.73   | 1.78 | 0.56 |
| Q9CU62_SMC1A_MOUSE | Smc1a  | Structural maintenance-; K.K#LEGELEEEVEM*AK#.R                        | 17.29 | 7.24   | 2.39 | 0.42 |
| Q9CU62_SMC1A_MOUSE | Smc1a  | Structural maintenance-; R.LGIQLDFEK#.N                               | 55.40 | 22.25  | 2.49 | 0.40 |
| Q9CU62_SMC1A_MOUSE | Smc1a  | Structural maintenance-; K.LNEQQSVLQR@.I                              | 61.35 | 27.55  | 2.23 | 0.45 |
| Q9CU62_SMC1A_MOUSE | Smc1a  | Structural maintenance-; K.LVIDVIR.Y                                  | 84.15 | 35.46  | 2.37 | 0.42 |
| Q9CU62_SMC1A_MOUSE | Smc1a  | Structural maintenance-; K.LYHNEVEIEK#.L                              | 12.57 | 4.30   | 2.93 | 0.34 |
| Q9CU62_SMC1A_MOUSE | Smc1a  | Structural maintenance-; R.NFLVFGQAVESIAM*#.K#.N                      | 21.16 | 11.03  | 1.92 | 0.52 |
| Q9CU62_SMC1A_MOUSE | Smc1a  | Structural maintenance-; R.NFLVFGQAVESIAM*#.K#.N                      | 13.02 | 6.67   | 1.95 | 0.51 |
| Q9CU62_SMC1A_MOUSE | Smc1a  | Structural maintenance-; R.NFLVFGQAVESIAMK#.N                         | 8.68  | 7.27   | 1.19 | 0.84 |
| Q9CU62_SMC1A_MOUSE | Smc1a  | Structural maintenance-; K.NM*DAIVDSEK#.T                             | 36.34 | 19.62  | 1.85 | 0.54 |
| Q9CU62_SMC1A_MOUSE | Smc1a  | Structural maintenance-; K.R@LEFENQK#.T                               | 31.68 | 13.18  | 2.40 | 0.42 |
| Q9CU62_SMC1A_MOUSE | Smc1a  | Structural maintenance-; R.SGELAQEYDKR@.K                             | 64.92 | 20.52  | 3.16 | 0.32 |
| Q9CU62_SMC1A_MOUSE | Smc1a  | Structural maintenance-; K.SK#LESELANFGPR@.I                          | 56.44 | 24.64  | 2.29 | 0.44 |
| Q9CU62_SMC1A_MOUSE | Smc1a  | Structural maintenance-; K.SNLM*DAISVFLGK#.T                          | 39.18 | 18.50  | 2.12 | 0.47 |
| Q9CU62_SMC1A_MOUSE | Smc1a  | Structural maintenance-; R.TALFEISR.S                                 | 85.36 | 34.25  | 2.49 | 0.40 |
| Q9CU62_SMC1A_MOUSE | Smc1a  | Structural maintenance-; K.TVALDGLTFQK#.S                             | 70.00 | 30.84  | 2.27 | 0.44 |
| Q9CU62_SMC1A_MOUSE | Smc1a  | Structural maintenance-; R.VIVGGSSEYK#.I                              | 61.15 | 24.51  | 2.50 | 0.40 |
| Q9CU62_SMC1A_MOUSE | Smc1a  | Structural maintenance-; K.VLTFDLTKH.Y                                | 19.80 | 6.67   | 2.97 | 0.34 |
| Q9CU62_SMC1A_MOUSE | Smc1a  | Structural maintenance-; K.VLTFDLTKHYPDANPNPNEQ.-                     | 16.56 | 5.45   | 3.04 | 0.33 |
| Q9CU62_SMC1A_MOUSE | Smc1a  | Structural maintenance-; K.VYQQLHEVSEIEK#.L                           | 57.39 | 25.96  | 2.21 | 0.45 |
| Q9CU62_SMC1A_MOUSE | Smc1a  | Structural maintenance-; K.YSQSDLEQTK#.T                              | 59.74 | 23.52  | 2.54 | 0.39 |
| Q9CU62_SMC1A_MOUSE | Smc1a  | Structural maintenance-; R.AFVSM*VYSEGAEDR@.T                         | 10.52 | 4.49   | 2.34 | 0.43 |
| Q9CU62_SMC1A_MOUSE | Smc1a  | Structural maintenance-; R.AFVSM*VYSEGAEDR@.T                         | 5.52  | 2.13   | 2.59 | 0.39 |
| Q9CU62_SMC1A_MOUSE | Smc1a  | Structural maintenance-; R.AQVQLQFLK#.L                               | 22.33 | 7.28   | 3.07 | 0.33 |
| Q9CU62_SMC1A_MOUSE | Smc1a  | Structural maintenance-; R.DK#FQETSDEFEAAR@.K                         | 22.84 | 6.46   | 3.53 | 0.28 |
| Q9CU62_SMC1A_MOUSE | Smc1a  | Structural maintenance-; R.DLTLEENQVK#.K                              | 16.14 | 6.20   | 2.60 | 0.38 |
| Q9CU62_SMC1A_MOUSE | Smc1a  | Structural maintenance-; K.GTM*DDISQEGSSQGEESVSGSQR@.T                | 14.17 | 5.83   | 2.43 | 0.41 |
| Q9CU62_SMC1A_MOUSE | Smc1a  | Structural maintenance-; R.HLALNLQEK#.S                               | 37.55 | 18.55  | 2.02 | 0.49 |
| Q9CU62_SMC1A_MOUSE | Smc1a  | Structural maintenance-; R.IEK#LEEYITTSK#.Q                           | 32.10 | 11.91  | 2.69 | 0.37 |
| Q9CU62_SMC1A_MOUSE | Smc1a  | Structural maintenance-; K.IIDETM*AOQLDLK#.N                          | 25.63 | 9.33   | 2.75 | 0.36 |
| Q9CU62_SMC1A_MOUSE | Smc1a  | Structural maintenance-; K.IIDETMAQQLDLK#.N                           | 7.25  | 3.39   | 2.14 | 0.47 |
| Q9CU62_SMC1A_MOUSE | Smc1a  | Structural maintenance-; K.K#WDENEIEK#.L                              | 8.19  | 3.30   | 2.48 | 0.40 |
| Q9CU62_SMC1A_MOUSE | Smc1a  | Structural maintenance-; K.K#LEGELEEEVEM*AK#.R                        | 8.90  | 3.24   | 2.75 | 0.36 |
| Q9CU62_SMC1A_MOUSE | Smc1a  | Structural maintenance-; R.LGIQLDFEK#.N                               | 24.84 | 8.41   | 2.95 | 0.34 |
| Q9CU62_SMC1A_MOUSE | Smc1a  | Structural maintenance-; K.LIEIENFK#.I                                | 42.16 | 19.86  | 2.12 | 0.47 |
| Q9CU62_SMC1A_MOUSE | Smc1a  | Structural maintenance-; K.LNEQQSVLQR@.I                              | 36.75 | 13.65  | 2.69 | 0.37 |
| Q9CU62_SMC1A_MOUSE | Smc1a  | Structural maintenance-; K.LVIDVIR@.Y                                 | 53.94 | 18.05  | 2.99 | 0.33 |
| Q9CU62_SMC1A_MOUSE | Smc1a  | Structural maintenance-; R.NFLVFGQAVESIAM*#.K#.N                      | 12.46 | 4.01   | 3.11 | 0.32 |
| Q9CU62_SMC1A_MOUSE | Smc1a  | Structural maintenance-; K.NM*DAIVDSEK#.T                             | 38.08 | 8.42   | 2.50 | 0.40 |
| Q9CU62_SMC1A_MOUSE | Smc1a  | Structural maintenance-; K.SGVISGASDLK#.A                             | 44.01 | 10.02  | 4.39 | 0.23 |
| Q9CU62_SMC1A_MOUSE | Smc1a  | Structural maintenance-; K.SK#LESELANFGPR@.I                          | 20.61 | 13.43  | 1.54 | 0.65 |
| Q9CU62_SMC1A_MOUSE | Smc1a  | Structural maintenance-; K.SNLM*DAISVFLGK#.T                          | 38.30 | 10.26  | 3.73 | 0.27 |
| Q9CU62_SMC1A_MOUSE | Smc1a  | Structural maintenance-; R.TALFEISR.S                                 | 77.35 | 14.82  | 5.22 | 0.19 |
| Q9CU62_SMC1A_MOUSE | Smc1a  | Structural maintenance-; K.TVALDGLTFQK#.S                             | 34.70 | 16.00  | 2.17 | 0.46 |
| Q9CU62_SMC1A_MOUSE | Smc1a  | Structural maintenance-; R.VIVGGSSEYK#.I                              | 36.99 | 14.94  | 2.48 | 0.40 |
| Q9CU62_SMC1A_MOUSE | Smc1a  | Structural maintenance-; K.VLTFDLTKHYPDANPNPNEQ.-                     | 4.69  | 2.18   | 2.16 | 0.46 |
| Q9CU62_SMC1A_MOUSE | Smc1a  | Structural maintenance-; K.YSQSDLEQTK#.T                              | 23.49 | 9.50   | 2.47 | 0.40 |
| Q8CG48_SMC2_MOUSE  | Smc2   | Structural maintenance-; R.ALEELAGLK#.N                               | 68.93 | 43.03  | 1.60 | 0.62 |
| Q8CG48_SMC2_MOUSE  | Smc2   | Structural maintenance-; R.AM*NLVTEAER@.Y                             | 25.69 | 13.87  | 1.85 | 0.54 |
| Q8CG48_SMC2_MOUSE  | Smc2   | Structural maintenance-; R.AMNLVTEAER@.Y                              | 9.53  | 3.69   | 2.58 | 0.39 |
| Q8CG48_SMC2_MOUSE  | Smc2   | Structural maintenance-; R.ASNLQDLVYK#.N                              | 37.44 | 19.30  | 1.94 | 0.52 |
| Q8CG48_SMC2_MOUSE  | Smc2   | Structural maintenance-; K.AYEQJQEK#.M                                | 40.16 | 23.35  | 1.72 | 0.58 |
| Q8CG48_SMC2_MOUSE  | Smc2   | Structural maintenance-; K.DNSTATALEVVAGER@.L                         | 49.98 | 21.88  | 1.87 | 0.53 |
| Q8CG48_SMC2_MOUSE  | Smc2   | Structural maintenance-; K.EGM*FNANVLFK#.T                            | 18.42 | 9.47   | 1.95 | 0.51 |
| Q8CG48_SMC2_MOUSE  | Smc2   | Structural maintenance-; R.EHASNEQQLDAVNEAIK#.A                       | 57.94 | 28.78  | 2.01 | 0.50 |
| Q8CG48_SMC2_MOUSE  | Smc2   | Structural maintenance-; K.ELQNSM*AESDK#.A                            | 10.12 | 8.27   | 1.22 | 0.82 |
| Q8CG48_SMC2_MOUSE  | Smc2   | Structural maintenance-; K.ENLTELGGQR@.S                              | 32.72 | 22.88  | 1.43 | 0.70 |
| Q8CG48_SMC2_MOUSE  | Smc2   | Structural maintenance-; K.FVDGVSTVAR@.F                              | 41.45 | 18.43  | 2.25 | 0.44 |
| Q8CG48_SMC2_MOUSE  | Smc2   | Structural maintenance-; K.GLVASLVNK#.D                               | 56.08 | 33.72  | 1.66 | 0.60 |
| Q8CG48_SMC2_MOUSE  | Smc2   | Structural maintenance-; K.LIATIEDLDQK#.K                             | 25.25 | 12.37  | 2.04 | 0.49 |
| Q8CG48_SMC2_MOUSE  | Smc2   | Structural maintenance-; K.IVNLOEVLSENEK#.K                           | 31.14 | 16.89  | 1.84 | 0.54 |
| Q8CG48_SMC2_MOUSE  | Smc2   | Structural maintenance-; K.K#LNVEENK#EEK#.L                           | 30.73 | 19.06  | 1.61 | 0.62 |
| Q8CG48_SMC2_MOUSE  | Smc2   | Structural maintenance-; R.LYIAYQFLR@.A                               | 24.95 | 13.69  | 1.82 | 0.55 |
| Q8CG48_SMC2_MOUSE  | Smc2   | Structural maintenance-; R.LYNNVVDTEVTAK#.K                           | 30.09 | 13.79  | 2.18 | 0.46 |
| Q8CG48_SMC2_MOUSE  | Smc2   | Structural maintenance-; K.M*LSYDWDWVNAEK#.H                          | 17.31 | 15.40  | 1.12 | 0.89 |
| Q8CG48_SMC2_MOUSE  | Smc2   | Structural maintenance-; K.NQALNIWQK#.V                               | 23.41 | 16.96  | 1.38 | 0.72 |
| Q8CG48_SMC2_MOUSE  | Smc2   | Structural maintenance-; K.QITAQDNIIK#.D                              | 15.32 | 7.89   | 1.94 | 0.51 |
| Q8CG48_SMC2_MOUSE  | Smc2   | Structural maintenance-; K.QQVEAITELEELK#.E                           | 42.11 | 21.94  | 1.92 | 0.52 |
| Q8CG48_SMC2_MOUSE  | Smc2   | Structural maintenance-; R.SAGELKHEM*QDK#.I                           | 6.20  | 4.07   | 1.52 | 0.66 |
| Q8CG48_SMC2_MOUSE  | Smc2   | Structural maintenance-; K.SILIEGK#.S                                 | 45.26 | 24.84  | 1.82 | 0.55 |
| Q8CG48_SMC2_MOUSE  | Smc2   | Structural maintenance-; R.SSYLEYQK#.V                                | 21.70 | 168.48 | 0.13 | 7.76 |
| Q8CG48_SMC2_MOUSE  | Smc2   | Structural maintenance-; K.TILEEITPTIQK#.L                            | 59.88 | 32.07  | 1.87 | 0.54 |
| Q8CG48_SMC2_MOUSE  | Smc2   | Structural maintenance-; K.VLNM*KPPEILSM*IEEAAGTR.M                   | 16.83 | 7.96   | 2.11 | 0.47 |
| Q8CG48_SMC2_MOUSE  | Smc2   | Structural maintenance-; K.YEALENK#.M                                 | 8.90  | 3.25   | 2.74 | 0.37 |
| Q8CG48_SMC2_MOUSE  | Smc2   | Structural maintenance-; R.ALEELAGLK#.N                               | 51.76 | 16.88  | 3.07 | 0.33 |
| Q8CG48_SMC2_MOUSE  | Smc2   | Structural maintenance-; R.AM*NLVTEAER@.Y                             | 14.81 | 5.44   | 2.72 | 0.37 |
| Q8CG48_SMC2_MOUSE  | Smc2   | Structural maintenance-; K.DNSTATALEVVAGER@.L                         | 28.15 | 8.61   | 3.27 | 0.31 |

|                   |      |                                                     |       |       |      |      |
|-------------------|------|-----------------------------------------------------|-------|-------|------|------|
| Q8CG48_SMC2_MOUSE | Smc2 | Structural maintenance: K.EGM*FNANVLFK#.T           | 12.00 | 5.33  | 2.25 | 0.44 |
| Q8CG48_SMC2_MOUSE | Smc2 | Structural maintenance: R.EHASNEQLDVAIVEAIK#.A      | 34.77 | 12.41 | 2.80 | 0.36 |
| Q8CG48_SMC2_MOUSE | Smc2 | Structural maintenance: K.ELQNN#AEDSK#.A            | 7.21  | 3.00  | 2.40 | 0.42 |
| Q8CG48_SMC2_MOUSE | Smc2 | Structural maintenance: K.ELQNSMAEDSK#.A            | 5.72  | 2.07  | 2.77 | 0.36 |
| Q8CG48_SMC2_MOUSE | Smc2 | Structural maintenance: K.ENLTELGGQR@.S             | 24.47 | 4.93  | 4.96 | 0.20 |
| Q8CG48_SMC2_MOUSE | Smc2 | Structural maintenance: K.FVDGVSTVAR.F              | 31.77 | 6.97  | 4.56 | 0.22 |
| Q8CG48_SMC2_MOUSE | Smc2 | Structural maintenance: K.KLVASLNVK#.D              | 40.66 | 14.11 | 2.88 | 0.35 |
| Q8CG48_SMC2_MOUSE | Smc2 | Structural maintenance: K.HNLQNNESQLK#.I            | 19.20 | 7.37  | 2.61 | 0.38 |
| Q8CG48_SMC2_MOUSE | Smc2 | Structural maintenance: K.ILATEDLDQK#.K             | 16.36 | 6.75  | 2.43 | 0.41 |
| Q8CG48_SMC2_MOUSE | Smc2 | Structural maintenance: K.IVNLQEVLSENEK#.K          | 24.97 | 6.87  | 3.63 | 0.28 |
| Q8CG48_SMC2_MOUSE | Smc2 | Structural maintenance: K.IVNLQEVLSENEK#.I          | 44.83 | 15.69 | 2.86 | 0.35 |
| Q8CG48_SMC2_MOUSE | Smc2 | Structural maintenance: R.LYIAYQFLR@.A              | 14.75 | 5.26  | 2.81 | 0.36 |
| Q8CG48_SMC2_MOUSE | Smc2 | Structural maintenance: R.LYVNVVDEVTEAK#.K          | 23.52 | 7.98  | 2.95 | 0.34 |
| Q8CG48_SMC2_MOUSE | Smc2 | Structural maintenance: K.M*LSDYDWINAEK#.H          | 17.20 | 6.70  | 2.57 | 0.39 |
| Q8CG48_SMC2_MOUSE | Smc2 | Structural maintenance: K.QQVEAITELEELK#R@.E        | 31.57 | 18.99 | 1.66 | 0.60 |
| Q8CG48_SMC2_MOUSE | Smc2 | Structural maintenance: R.SAGELKHEM*QDK#.I          | 7.97  | 2.27  | 3.52 | 0.28 |
| Q8CG48_SMC2_MOUSE | Smc2 | Structural maintenance: K.SIHLEGF#.S                | 45.71 | 15.29 | 2.99 | 0.33 |
| Q8CG48_SMC2_MOUSE | Smc2 | Structural maintenance: R.SQAASILTK#.F              | 30.93 | 11.69 | 2.65 | 0.38 |
| Q8CG48_SMC2_MOUSE | Smc2 | Structural maintenance: K.TIEESEETLK#.S             | 37.42 | 12.38 | 3.02 | 0.33 |
| Q8CG48_SMC2_MOUSE | Smc2 | Structural maintenance: K.TILEEETPTIQK#.L           | 48.80 | 15.35 | 3.18 | 0.31 |
| Q8CG48_SMC2_MOUSE | Smc2 | Structural maintenance: R.TVTLGGVDFPHGLTGGGAR@.S    | 63.02 | 18.29 | 3.45 | 0.29 |
| Q8CG48_SMC2_MOUSE | Smc2 | Structural maintenance: R.YTIPLNK#.I                | 34.26 | 7.24  | 4.73 | 0.21 |
| Q9CW03_SMC3_MOUSE | Smc3 | Structural maintenance: K.AILNGIDSNK#.V             | 15.85 | 8.72  | 1.82 | 0.55 |
| Q9CW03_SMC3_MOUSE | Smc3 | Structural maintenance: K.KALDQDLQELAGNSEQR@.K      | 27.01 | 13.41 | 2.01 | 0.50 |
| Q9CW03_SMC3_MOUSE | Smc3 | Structural maintenance: R.AKHLDELASAK#.R            | 27.54 | 10.87 | 2.53 | 0.39 |
| Q9CW03_SMC3_MOUSE | Smc3 | Structural maintenance: K.ALDOQVNFSEQK#.E           | 35.84 | 17.52 | 2.05 | 0.49 |
| Q9CW03_SMC3_MOUSE | Smc3 | Structural maintenance: R.ALEYTYNQELNETR@.A         | 36.84 | 11.57 | 3.18 | 0.31 |
| Q9CW03_SMC3_MOUSE | Smc3 | Structural maintenance: K.DFVEDDTHG.-               | 39.62 | 39.62 | 1.00 | 1.00 |
| Q9CW03_SMC3_MOUSE | Smc3 | Structural maintenance: R.KDH#*EDIER@.Q             | 11.83 | 4.22  | 2.80 | 0.36 |
| Q9CW03_SMC3_MOUSE | Smc3 | Structural maintenance: K.DLEDTEANK#EK#.N           | 7.89  | 4.11  | 1.92 | 0.52 |
| Q9CW03_SMC3_MOUSE | Smc3 | Structural maintenance: K.DLQDELQELAGNSEQR@.K       | 20.20 | 8.90  | 2.27 | 0.44 |
| Q9CW03_SMC3_MOUSE | Smc3 | Structural maintenance: R.DSILSEM*#K#.M             | 22.59 | 10.99 | 2.06 | 0.49 |
| Q9CW03_SMC3_MOUSE | Smc3 | Structural maintenance: R.DSILSEM#K#.M              | 10.85 | 3.95  | 2.75 | 0.36 |
| Q9CW03_SMC3_MOUSE | Smc3 | Structural maintenance: R.DTAYPNDIAIPM*ISK#.L       | 15.58 | 7.61  | 2.05 | 0.49 |
| Q9CW03_SMC3_MOUSE | Smc3 | Structural maintenance: R.EENAEQALAAK#.R            | 44.99 | 22.15 | 2.03 | 0.49 |
| Q9CW03_SMC3_MOUSE | Smc3 | Structural maintenance: R.ELGSLPQFAEFK#.Y           | 48.64 | 24.18 | 2.01 | 0.50 |
| Q9CW03_SMC3_MOUSE | Smc3 | Structural maintenance: R.ESLK#AELGTDLLSLSLEDQK#.R  | 7.81  | 5.38  | 1.45 | 0.69 |
| Q9CW03_SMC3_MOUSE | Smc3 | Structural maintenance: R.GALTTGGYDTR@.K            | 51.72 | 24.97 | 2.07 | 0.48 |
| Q9CW03_SMC3_MOUSE | Smc3 | Structural maintenance: R.GSGSSQSPVSDQFTGVGIR@.V    | 48.85 | 22.03 | 2.22 | 0.45 |
| Q9CW03_SMC3_MOUSE | Smc3 | Structural maintenance: K.HNVIVGR@.N                | 43.83 | 33.86 | 1.29 | 0.77 |
| Q9CW03_SMC3_MOUSE | Smc3 | Structural maintenance: R.INNEIDQLM*NQM*QIETQQR@.K  | 10.21 | 6.80  | 1.50 | 0.67 |
| Q9CW03_SMC3_MOUSE | Smc3 | Structural maintenance: R.INNEIDQLM*QIETQQR@.K      | 6.51  | 2.99  | 2.18 | 0.46 |
| Q9CW03_SMC3_MOUSE | Smc3 | Structural maintenance: R.KAEELGELEAK.L             | 22.22 | 13.42 | 1.66 | 0.60 |
| Q9CW03_SMC3_MOUSE | Smc3 | Structural maintenance: R.KHEESISLM*#K#.E           | 20.79 | 10.41 | 2.00 | 0.50 |
| Q9CW03_SMC3_MOUSE | Smc3 | Structural maintenance: K.K#GDEVGSQSDQEGEGSGESER@.G | 27.07 | 15.36 | 1.76 | 0.57 |
| Q9CW03_SMC3_MOUSE | Smc3 | Structural maintenance: K.K#GDEVGSQSDQEGEGSGESER@.G | 2.63  | 1.58  | 1.66 | 0.60 |
| Q9CW03_SMC3_MOUSE | Smc3 | Structural maintenance: R.LAQATQER@.T               | 20.67 | 10.51 | 1.97 | 0.51 |
| Q9CW03_SMC3_MOUSE | Smc3 | Structural maintenance: R.LFYHIVDSDEVSTK#.I         | 69.60 | 27.75 | 2.51 | 0.40 |
| Q9CW03_SMC3_MOUSE | Smc3 | Structural maintenance: R.LHTEEEK#EELAQYQK#.W       | 20.88 | 21.04 | 0.99 | 1.01 |
| Q9CW03_SMC3_MOUSE | Smc3 | Structural maintenance: K.M*NLPGVEVTFPLPNK#.L       | 28.42 | 16.87 | 1.75 | 0.57 |
| Q9CW03_SMC3_MOUSE | Smc3 | Structural maintenance: K.MNLPGEVTFPLPNK#.L         | 7.00  | 3.03  | 2.31 | 0.43 |
| Q9CW03_SMC3_MOUSE | Smc3 | Structural maintenance: K.NDVM*NLLESAGFSR@.S        | 23.36 | 10.59 | 2.21 | 0.45 |
| Q9CW03_SMC3_MOUSE | Smc3 | Structural maintenance: K.NFSEVFKR#.L               | 44.90 | 24.02 | 1.87 | 0.54 |
| Q9CW03_SMC3_MOUSE | Smc3 | Structural maintenance: K.NLEQYNN#LDQDLNEVK#.A      | 50.55 | 27.26 | 1.85 | 0.54 |
| Q9CW03_SMC3_MOUSE | Smc3 | Structural maintenance: K.QVIIQGR@.S                | 58.66 | 19.67 | 2.98 | 0.34 |
| Q9CW03_SMC3_MOUSE | Smc3 | Structural maintenance: R.R@ALEYTYNQELNETR@.A       | 12.63 | 13.78 | 0.92 | 1.09 |
| Q9CW03_SMC3_MOUSE | Smc3 | Structural maintenance: K.R@LDQVEQELNELR@.E         | 4.03  | 2.20  | 1.83 | 0.55 |
| Q9CW03_SMC3_MOUSE | Smc3 | Structural maintenance: R.SEDLNSIDK#TEAGIK#.E       | 5.59  | 2.06  | 2.72 | 0.37 |
| Q9CW03_SMC3_MOUSE | Smc3 | Structural maintenance: K.SIM*ELM*NLLELR@.K         | 18.48 | 8.26  | 2.24 | 0.45 |
| Q9CW03_SMC3_MOUSE | Smc3 | Structural maintenance: K.SLDQAINDK#.K              | 60.18 | 26.72 | 2.25 | 0.44 |
| Q9CW03_SMC3_MOUSE | Smc3 | Structural maintenance: R.SM*EVSTQLAR.A             | 26.86 | 13.32 | 2.02 | 0.50 |
| Q9CW03_SMC3_MOUSE | Smc3 | Structural maintenance: R.SNPYIVK#.Q                | 33.74 | 18.22 | 1.85 | 0.54 |
| Q9CW03_SMC3_MOUSE | Smc3 | Structural maintenance: R.VDALNDEIR.Q               | 50.37 | 26.06 | 1.93 | 0.52 |
| Q9CW03_SMC3_MOUSE | Smc3 | Structural maintenance: R.VETYLNLNR@.K              | 53.53 | 22.27 | 2.40 | 0.42 |
| Q9CW03_SMC3_MOUSE | Smc3 | Structural maintenance: K.VSHIDIVTAEM*AK#.D         | 15.40 | 8.78  | 1.75 | 0.57 |
| Q9CW03_SMC3_MOUSE | Smc3 | Structural maintenance: K.ALDOQVNFSEQK#.E           | 13.51 | 5.68  | 2.38 | 0.42 |
| Q9CW03_SMC3_MOUSE | Smc3 | Structural maintenance: R.ALEYTYNQELNETR@.A         | 20.25 | 7.04  | 2.88 | 0.35 |
| Q9CW03_SMC3_MOUSE | Smc3 | Structural maintenance: K.DFVEDDTHG.-               | 16.60 | 16.60 | 1.00 | 1.00 |
| Q9CW03_SMC3_MOUSE | Smc3 | Structural maintenance: K.DLQDELQELAGNSEQR@.K       | 6.60  | 2.74  | 2.41 | 0.42 |
| Q9CW03_SMC3_MOUSE | Smc3 | Structural maintenance: R.DTAYPNDIAIPM*ISK#.L       | 8.09  | 3.83  | 2.11 | 0.47 |
| Q9CW03_SMC3_MOUSE | Smc3 | Structural maintenance: R.ELGSLPQFAEFK#.Y           | 26.51 | 11.25 | 2.36 | 0.42 |
| Q9CW03_SMC3_MOUSE | Smc3 | Structural maintenance: R.ESLK#AELGTDLLSLSLEDQK#.R  | 8.89  | 3.92  | 2.27 | 0.44 |
| Q9CW03_SMC3_MOUSE | Smc3 | Structural maintenance: R.ETEGTVLTATTSLEAINK#.R     | 6.66  | 1.57  | 4.24 | 0.24 |
| Q9CW03_SMC3_MOUSE | Smc3 | Structural maintenance: R.GSGSSQSPVSDQFTGVGIR@.V    | 22.83 | 7.58  | 3.01 | 0.33 |
| Q9CW03_SMC3_MOUSE | Smc3 | Structural maintenance: R.INNEIDQLM*NQM*QIETQQR@.K  | 3.89  | 3.01  | 1.29 | 0.77 |
| Q9CW03_SMC3_MOUSE | Smc3 | Structural maintenance: K.LINQM*ATAPDSQR@.L         | 43.83 | 15.55 | 2.82 | 0.35 |
| Q9CW03_SMC3_MOUSE | Smc3 | Structural maintenance: R.K#AEELGELEAK#.L           | 18.00 | 5.22  | 3.45 | 0.29 |
| Q9CW03_SMC3_MOUSE | Smc3 | Structural maintenance: K.K#GDEVGSQSDQEGEGSGESER@.G | 17.56 | 4.48  | 3.92 | 0.26 |
| Q9CW03_SMC3_MOUSE | Smc3 | Structural maintenance: R.LAQATQER@.T               | 16.65 | 6.41  | 2.60 | 0.39 |
| Q9CW03_SMC3_MOUSE | Smc3 | Structural maintenance: K.M*NLPGVEVTFPLPNK#.L       | 23.97 | 8.79  | 2.73 | 0.37 |
| Q9CW03_SMC3_MOUSE | Smc3 | Structural maintenance: K.NDVM*NLLESAGFSR@.S        | 9.63  | 6.29  | 1.53 | 0.65 |
| Q9CW03_SMC3_MOUSE | Smc3 | Structural maintenance: K.QVIIQGR@.S                | 24.10 | 10.36 | 2.33 | 0.43 |
| Q9CW03_SMC3_MOUSE | Smc3 | Structural maintenance: K.SIM*ELM*NLLELR@.K         | 13.88 | 12.61 | 1.10 | 0.91 |
| Q9CW03_SMC3_MOUSE | Smc3 | Structural maintenance: K.SLDQAINDK#.K              | 24.84 | 10.23 | 2.43 | 0.41 |
| Q9CW03_SMC3_MOUSE | Smc3 | Structural maintenance: R.SYR@DQITVDVDFSSK#.H       | 9.74  | 5.81  | 1.68 | 0.60 |
| Q9CW03_SMC3_MOUSE | Smc3 | Structural maintenance: R.VDALNDEIR@.Q              | 19.49 | 4.59  | 4.24 | 0.24 |
| Q9CW03_SMC3_MOUSE | Smc3 | Structural maintenance: R.VETYLNLNR.K               | 26.57 | 8.51  | 3.12 | 0.32 |
| Q9CW03_SMC3_MOUSE | Smc3 | Structural maintenance: K.VSHIDIVTAEM*AK#.D         | 6.90  | 5.12  | 1.35 | 0.74 |
| Q8CG47_SMC4_MOUSE | Smc4 | Structural maintenance: R.DSTSVYHISGK#.K            | 7.41  | 5.70  | 1.30 | 0.77 |
| Q8CG47_SMC4_MOUSE | Smc4 | Structural maintenance: R.DTLVANLDAQATR@.V          | 29.93 | 12.61 | 2.37 | 0.42 |
| Q8CG47_SMC4_MOUSE | Smc4 | Structural maintenance: K.FTQLDLEDVQVR@.E           | 32.47 | 18.51 | 1.75 | 0.57 |
| Q8CG47_SMC4_MOUSE | Smc4 | Structural maintenance: R.HNTAVLSK#.A               | 36.19 | 14.63 | 2.47 | 0.40 |
| Q8CG47_SMC4_MOUSE | Smc4 | Structural maintenance: K.HDKEGDDVEVLNPSNFVSR.T     | 19.94 | 7.34  | 2.72 | 0.37 |
| Q8CG47_SMC4_MOUSE | Smc4 | Structural maintenance: R.IPGIYGR@.L                | 21.51 | 9.04  | 2.38 | 0.42 |
| Q8CG47_SMC4_MOUSE | Smc4 | Structural maintenance: R.LGDLGAIDK#.Y              | 17.81 | 8.50  | 2.09 | 0.48 |
| Q8CG47_SMC4_MOUSE | Smc4 | Structural maintenance: K.LTQEINLK#.S               | 28.21 | 11.38 | 2.48 | 0.40 |
| Q8CG47_SMC4_MOUSE | Smc4 | Structural maintenance: K.NIAIEFLTLENEM*FK#.K       | 13.56 | 4.58  | 2.96 | 0.34 |
| Q8CG47_SMC4_MOUSE | Smc4 | Structural maintenance: K.NIAIEFLTLENEM*FK#.K       | 18.83 | 6.39  | 2.94 | 0.34 |
| Q8CG47_SMC4_MOUSE | Smc4 | Structural maintenance: R.QAFYFALR@.D               | 14.02 | 6.37  | 2.20 | 0.45 |
| Q8CG47_SMC4_MOUSE | Smc4 | Structural maintenance: R.SK#M*EVAQSELDIYLSR@.H     | 11.02 | 5.38  | 2.05 | 0.49 |
| Q8CG47_SMC4_MOUSE | Smc4 | Structural maintenance: K.SLVHDLFK#.V               | 8.56  | 6.42  | 1.33 | 0.75 |
| Q8CG47_SMC4_MOUSE | Smc4 | Structural maintenance: K.TAETSLEIQK#.E             | 21.80 | 10.10 | 2.16 | 0.46 |
| Q8CG47_SMC4_MOUSE | Smc4 | Structural maintenance: K.TVINETTR@.N               | 26.06 | 22.07 | 1.18 | 0.85 |



|                    |          |                                                            |        |        |      |      |
|--------------------|----------|------------------------------------------------------------|--------|--------|------|------|
| Q6P4T2_U520_MOUSE  | Snrnp200 | U5 small nuclear ribonuc K.KADEVELEIK.T                    | 26.67  | 15.85  | 1.68 | 0.59 |
| Q6P4T2_U520_MOUSE  | Snrnp200 | U5 small nuclear ribonuc K.KHPVIVFVPSR@.K                  | 22.28  | 12.47  | 1.79 | 0.56 |
| Q6P4T2_U520_MOUSE  | Snrnp200 | U5 small nuclear ribonuc K.LELSVHLQPITR@.S                 | 19.33  | 13.41  | 1.44 | 0.69 |
| Q6P4T2_U520_MOUSE  | Snrnp200 | U5 small nuclear ribonuc R.LIGLSATLPIHYEDVATFLR@.V         | 44.20  | 24.26  | 1.82 | 0.55 |
| Q6P4T2_U520_MOUSE  | Snrnp200 | U5 small nuclear ribonuc K.LPDM*NAEIVLGNVQNAK#.D           | 28.16  | 16.57  | 1.70 | 0.59 |
| Q6P4T2_U520_MOUSE  | Snrnp200 | U5 small nuclear ribonuc R.M*DTDLETM*DLQGGEALAPR@.Q        | 36.41  | 25.45  | 1.43 | 0.70 |
| Q6P4T2_U520_MOUSE  | Snrnp200 | U5 small nuclear ribonuc K.M*EADPELSK.F                    | 46.53  | 30.00  | 1.55 | 0.64 |
| Q6P4T2_U520_MOUSE  | Snrnp200 | U5 small nuclear ribonuc R.MQLSAELQSDTEILSK#.A             | 6.33   | 6.72   | 0.94 | 1.06 |
| Q6P4T2_U520_MOUSE  | Snrnp200 | U5 small nuclear ribonuc R.M*TONPNYNYLQGISHR@.H            | 50.45  | 35.40  | 1.43 | 0.70 |
| Q6P4T2_U520_MOUSE  | Snrnp200 | U5 small nuclear ribonuc R.MTQNPNNYNYLQGISHR@.H            | 8.27   | 4.01   | 2.07 | 0.48 |
| Q6P4T2_U520_MOUSE  | Snrnp200 | U5 small nuclear ribonuc R.NALLQLTDSQIADVAR@.F             | 29.87  | 15.62  | 1.91 | 0.52 |
| Q6P4T2_U520_MOUSE  | Snrnp200 | U5 small nuclear ribonuc R.NIEMTQEDVR@.L                   | 6.42   | 3.20   | 2.01 | 0.50 |
| Q6P4T2_U520_MOUSE  | Snrnp200 | U5 small nuclear ribonuc R.NIEM*TOEDVR.L                   | 140.60 | 85.99  | 1.64 | 0.61 |
| Q6P4T2_U520_MOUSE  | Snrnp200 | U5 small nuclear ribonuc K.QDAVDVLTWTFLYR@.R               | 10.83  | 6.95   | 1.56 | 0.64 |
| Q6P4T2_U520_MOUSE  | Snrnp200 | U5 small nuclear ribonuc R.SGGPVVVLVQLER@.E                | 48.28  | 11.18  | 4.32 | 0.23 |
| Q6P4T2_U520_MOUSE  | Snrnp200 | U5 small nuclear ribonuc R.SLQYFK#.A                       | 44.10  | 18.48  | 2.39 | 0.42 |
| Q6P4T2_U520_MOUSE  | Snrnp200 | U5 small nuclear ribonuc R.SLVQEM*VGSFGK.R                 | 51.24  | 20.30  | 2.52 | 0.40 |
| Q6P4T2_U520_MOUSE  | Snrnp200 | U5 small nuclear ribonuc K.SNSLSIK#.R                      | 70.05  | 28.28  | 2.48 | 0.40 |
| Q6P4T2_U520_MOUSE  | Snrnp200 | U5 small nuclear ribonuc R.SPTLYGISHQDLDK#GDPLLDQR@.R      | 20.16  | 13.20  | 1.53 | 0.65 |
| Q6P4T2_U520_MOUSE  | Snrnp200 | U5 small nuclear ribonuc K.TGNFQVTELGR@.I                  | 86.37  | 42.64  | 2.03 | 0.49 |
| Q6P4T2_U520_MOUSE  | Snrnp200 | U5 small nuclear ribonuc K.TIENK#QDAVDVLTWTFLYR@.R         | 10.64  | 5.90   | 1.80 | 0.55 |
| Q6P4T2_U520_MOUSE  | Snrnp200 | U5 small nuclear ribonuc R.TLVEDLFADK#.H                   | 19.43  | 10.57  | 1.84 | 0.54 |
| Q6P4T2_U520_MOUSE  | Snrnp200 | U5 small nuclear ribonuc R.TR@R@DEPTGEVHSLVKG#.L           | 18.65  | 10.79  | 1.73 | 0.58 |
| Q6P4T2_U520_MOUSE  | Snrnp200 | U5 small nuclear ribonuc R.TYTQLVR@.L                      | 82.83  | 45.66  | 1.81 | 0.55 |
| Q6P4T2_U520_MOUSE  | Snrnp200 | U5 small nuclear ribonuc K.VELTIPDFQWDEK#.V                | 33.42  | 17.51  | 1.91 | 0.52 |
| Q6P4T2_U520_MOUSE  | Snrnp200 | U5 small nuclear ribonuc R.VFSLSEFK#.N                     | 80.89  | 47.41  | 1.71 | 0.59 |
| Q6P4T2_U520_MOUSE  | Snrnp200 | U5 small nuclear ribonuc K.VVLLTGETSTDLK#.L                | 98.95  | 57.41  | 1.72 | 0.58 |
| Q6P4T2_U520_MOUSE  | Snrnp200 | U5 small nuclear ribonuc K.YAQAGFEGFKR.T                   | 72.68  | 38.02  | 1.91 | 0.52 |
| Q6P4T2_U520_MOUSE  | Snrnp200 | U5 small nuclear ribonuc R.YPNIELSVEYVDK#DSIR@.S           | 23.84  | 31.44  | 0.76 | 1.32 |
| Q6P4T2_U520_MOUSE  | Snrnp200 | U5 small nuclear ribonuc K.YPPYTELIDQLPLVPSALR@.N          | 17.86  | 13.19  | 1.35 | 0.74 |
| Q6P4T2_U520_MOUSE  | Snrnp200 | U5 small nuclear ribonuc K.YPPYTELIDQLPLVPSALR.N           | 5.77   | 3.76   | 1.54 | 0.65 |
| Q6PE01_SNR40_MOUSE | Snrnp40  | U5 small nuclear ribonuc R.FVYVWDTSR@.R                    | 93.80  | 63.77  | 1.47 | 0.68 |
| Q6PE01_SNR40_MOUSE | Snrnp40  | U5 small nuclear ribonuc R.GHADSVTGLSSEGSYLLSNAMDNVTR@.V   | 8.44   | 5.07   | 1.66 | 0.60 |
| Q6PE01_SNR40_MOUSE | Snrnp40  | U5 small nuclear ribonuc R.KHGFPLVPMK#.R                   | 30.37  | 27.35  | 1.11 | 0.90 |
| Q6PE01_SNR40_MOUSE | Snrnp40  | U5 small nuclear ribonuc K.TVAVWDSGTGER@.V                 | 74.96  | 48.44  | 1.55 | 0.65 |
| Q6PE01_SNR40_MOUSE | Snrnp40  | U5 small nuclear ribonuc R.FVYVWDTSR@.R                    | 8.19   | 5.77   | 1.42 | 0.70 |
| Q62376_RU17_MOUSE  | Snrnp70  | U1 small nuclear ribonuc R.DPIPYLPLEK#.L                   | 47.34  | 32.11  | 1.47 | 0.68 |
| Q62376_RU17_MOUSE  | Snrnp70  | U1 small nuclear ribonuc R.LGGGLGTR@.R                     | 41.55  | 24.62  | 1.69 | 0.59 |
| Q62376_RU17_MOUSE  | Snrnp70  | U1 small nuclear ribonuc R.RLGGGLGTR@.R                    | 25.42  | 17.21  | 1.48 | 0.68 |
| Q62376_RU17_MOUSE  | Snrnp70  | U1 small nuclear ribonuc R.R@QQEVETELK#.M                  | 13.78  | 8.84   | 1.56 | 0.64 |
| Q62376_RU17_MOUSE  | Snrnp70  | U1 small nuclear ribonuc R.VLVDVER.G                       | 95.82  | 59.24  | 1.62 | 0.62 |
| Q62376_RU17_MOUSE  | Snrnp70  | U1 small nuclear ribonuc R.VNVDTEESK#.L                    | 25.82  | 20.21  | 1.28 | 0.78 |
| Q62189_SNRPA_MOUSE | Snrnpa   | U1 small nuclear ribonuc R.ANHITINIENNEK#.I                | 19.18  | 14.38  | 1.33 | 0.75 |
| Q62189_SNRPA_MOUSE | Snrnpa   | U1 small nuclear ribonuc K.EVTSATNALR@.S                   | 49.28  | 103.28 | 0.48 | 2.10 |
| Q62189_SNRPA_MOUSE | Snrnpa   | U1 small nuclear ribonuc R.HDIAVFEDNVEQGAAR@.D             | 15.08  | 6.95   | 2.17 | 0.46 |
| Q62189_SNRPA_MOUSE | Snrnpa   | U1 small nuclear ribonuc K.KAVQGGAAAPVAVQPVGMP*PPM*PQAPR.I | 9.92   | 6.02   | 1.65 | 0.61 |
| P57784_RU2A_MOUSE  | Snrnpa1  | U2 small nuclear ribonuc K.GGPGAGDVEAIK#.N                 | 66.01  | 51.04  | 1.29 | 0.77 |
| P57784_RU2A_MOUSE  | Snrnpa1  | U2 small nuclear ribonuc K.GLQSGQPGR@.E                    | 71.43  | 50.56  | 1.41 | 0.71 |
| P57784_RU2A_MOUSE  | Snrnpa1  | U2 small nuclear ribonuc K.IPVENLQATLQDQDAIDFSDNEIRK.L     | 6.21   | 3.93   | 1.71 | 0.59 |
| P57784_RU2A_MOUSE  | Snrnpa1  | U2 small nuclear ribonuc K.KHGGPSAGDVEAIK#.N               | 8.72   | 8.56   | 0.96 | 1.04 |
| P57784_RU2A_MOUSE  | Snrnpa1  | U2 small nuclear ribonuc R.KHLDGFLLR@.R                    | 11.54  | 14.02  | 0.82 | 1.21 |
| P57784_RU2A_MOUSE  | Snrnpa1  | U2 small nuclear ribonuc K.LDGFLLR@.R                      | 8.91   | 6.71   | 1.33 | 0.75 |
| P57784_RU2A_MOUSE  | Snrnpa1  | U2 small nuclear ribonuc K.LTAEIEGAAQYTNVAVR@.D            | 31.82  | 21.81  | 1.46 | 0.69 |
| P57784_RU2A_MOUSE  | Snrnpa1  | U2 small nuclear ribonuc K.NAIANASTLAEVER@.L               | 80.36  | 53.47  | 1.50 | 0.67 |
| P57784_RU2A_MOUSE  | Snrnpa1  | U2 small nuclear ribonuc R.SGSPDEGEEIEDTVTNGS.-            | 7.27   | 7.27   | 1.00 | 1.00 |
| P57784_RU2A_MOUSE  | Snrnpa1  | U2 small nuclear ribonuc K.SLTYLSILR@.N                    | 48.28  | 24.49  | 1.97 | 0.51 |
| P57784_RU2A_MOUSE  | Snrnpa1  | U2 small nuclear ribonuc K.TFNPAGLPTDK#.K                  | 47.99  | 40.61  | 1.18 | 0.85 |
| P57784_RU2A_MOUSE  | Snrnpa1  | U2 small nuclear ribonuc K.TLLVNNNR@.I                     | 58.93  | 34.49  | 1.71 | 0.59 |
| P57784_RU2A_MOUSE  | Snrnpa1  | U2 small nuclear ribonuc K.GLQSGQPGR@.E                    | 9.88   | 5.36   | 1.84 | 0.54 |
| P57784_RU2A_MOUSE  | Snrnpa1  | U2 small nuclear ribonuc R.KLDGFLLR@.R                     | 10.58  | 6.82   | 1.55 | 0.64 |
| P57784_RU2A_MOUSE  | Snrnpa1  | U2 small nuclear ribonuc K.LTAEIEGAAQYTNVAVR@.D            | 9.17   | 3.49   | 2.62 | 0.38 |
| P57784_RU2A_MOUSE  | Snrnpa1  | U2 small nuclear ribonuc K.NAIANASTLAEVER@.L               | 15.81  | 13.61  | 1.16 | 0.86 |
| P57784_RU2A_MOUSE  | Snrnpa1  | U2 small nuclear ribonuc K.SLTYLSILR.N                     | 10.89  | 8.69   | 1.25 | 0.80 |
| P27048_RSMB_MOUSE  | Snrnpb   | Small nuclear ribonucle R.GENLVSM*TVGPPPK#.D               | 31.51  | 20.90  | 1.51 | 0.66 |
| P27048_RSMB_MOUSE  | Snrnpb   | Small nuclear ribonucle R.GENLVSM*TVGPPPK#DTGIAR@.V        | 53.24  | 30.83  | 1.73 | 0.58 |
| P27048_RSMB_MOUSE  | Snrnpb   | Small nuclear ribonucle R.GENLVSM*TVGPPPK#DTGIAR@.V        | 14.58  | 50.39  | 0.35 | 2.88 |
| P27048_RSMB_MOUSE  | Snrnpb   | Small nuclear ribonucle R.GIPAGVPM*PQAPAGLAGPVR@.G         | 17.49  | 10.20  | 1.43 | 0.70 |
| P27048_RSMB_MOUSE  | Snrnpb   | Small nuclear ribonucle K.R@VLGLVLLR@.G                    | 62.90  | 37.09  | 1.70 | 0.59 |
| P27048_RSMB_MOUSE  | Snrnpb   | Small nuclear ribonucle R.VLGLVLLR@.G                      | 353.77 | 219.98 | 1.61 | 0.62 |
| P27048_RSMB_MOUSE  | Snrnpb   | Small nuclear ribonucle R.GENLVSM*TVGPPPK#.D               | 15.47  | 11.95  | 1.29 | 0.77 |
| P27048_RSMB_MOUSE  | Snrnpb   | Small nuclear ribonucle R.GENLVSM*TVGPPPK#DTGIAR@.V        | 40.01  | 28.90  | 1.38 | 0.72 |
| P27048_RSMB_MOUSE  | Snrnpb   | Small nuclear ribonucle R.GIPAGVPM*PQAPAGLAGPVR@.G         | 4.20   | 4.38   | 0.96 | 1.04 |
| P27048_RSMB_MOUSE  | Snrnpb   | Small nuclear ribonucle R.GIPAGVPM*PQAPAGLAGPVR.G          | 7.63   | 6.14   | 1.24 | 0.80 |
| P27048_RSMB_MOUSE  | Snrnpb   | Small nuclear ribonucle K.M*LHIDHYR@.G                     | 14.58  | 15.07  | 0.97 | 1.03 |
| P27048_RSMB_MOUSE  | Snrnpb   | Small nuclear ribonucle K.R@VLGLVLLR@.G                    | 115.69 | 89.06  | 1.30 | 0.77 |
| P27048_RSMB_MOUSE  | Snrnpb   | Small nuclear ribonucle R.VLGLVLLR.G                       | 195.06 | 124.39 | 1.57 | 0.64 |
| P27048_RSMB_MOUSE  | Snrnpb   | Small nuclear ribonucle R.GENLVSM*TVGPPPK#.D               | 4.49   | 4.60   | 0.98 | 1.02 |
| P27048_RSMB_MOUSE  | Snrnpb   | Small nuclear ribonucle K.RVLGLVLLR.G                      | 11.27  | 7.96   | 1.42 | 0.71 |
| P27048_RSMB_MOUSE  | Snrnpb   | Small nuclear ribonucle R.VLGLVLLR@.G                      | 70.97  | 35.95  | 1.97 | 0.51 |
| Q9CQ17_RU2B_MOUSE  | Snrnpb2  | U2 small nuclear ribonuc R.DALQGFK#.I                      | 83.16  | 36.18  | 2.30 | 0.44 |
| Q9CQ17_RU2B_MOUSE  | Snrnpb2  | U2 small nuclear ribonuc R.GQAFVFK#.E                      | 46.43  | 20.94  | 2.22 | 0.45 |
| Q9CQ17_RU2B_MOUSE  | Snrnpb2  | U2 small nuclear ribonuc K.TDSDIISK#.M                     | 31.36  | 18.88  | 1.66 | 0.60 |
| Q9CQ17_RU2B_MOUSE  | Snrnpb2  | U2 small nuclear ribonuc K.TM*EQAAAAANK#.K                 | 10.33  | 5.63   | 1.83 | 0.54 |
| Q9CQ17_RU2B_MOUSE  | Snrnpb2  | U2 small nuclear ribonuc K.ELGSSNALR.Q                     | 23.42  | 16.09  | 1.46 | 0.69 |
| Q9CQ17_RU2B_MOUSE  | Snrnpb2  | U2 small nuclear ribonuc K.TM*EQAAAAANK#.K                 | 2.39   | 1.54   | 1.56 | 0.64 |
| Q62241_RU1C_MOUSE  | Snrnp    | U1 small nuclear ribonuc K.TTAAFOGK#.I                     | 15.14  | 18.02  | 0.84 | 1.19 |
| P62315_SMD1_MOUSE  | Snrpd1   | Small nuclear ribonucle K.NR@EPVQLETLSIR@.G                | 19.64  | 6.15   | 3.19 | 0.31 |
| P62315_SMD1_MOUSE  | Snrpd1   | Small nuclear ribonucle R.EPVQLETLSIR@.G                   | 26.79  | 16.25  | 1.65 | 0.61 |
| P62315_SMD1_MOUSE  | Snrpd1   | Small nuclear ribonucle K.LSHETVITLK#.N                    | 150.73 | 64.95  | 2.32 | 0.43 |
| P62315_SMD1_MOUSE  | Snrpd1   | Small nuclear ribonucle K.NR@EPVQLETLSIR@.G                | 311.75 | 159.30 | 1.96 | 0.51 |
| P62315_SMD1_MOUSE  | Snrpd1   | Small nuclear ribonucle K.NREPQLETLSIR.G                   | 45.46  | 29.32  | 1.55 | 0.65 |
| P62315_SMD1_MOUSE  | Snrpd1   | Small nuclear ribonucle K.LSHETVITLK#.N                    | 31.83  | 12.24  | 2.60 | 0.38 |
| P62315_SMD1_MOUSE  | Snrpd1   | Small nuclear ribonucle K.NGTQVHGTTGVDVSM*NTHLK#.A         | 3.91   | 2.49   | 1.57 | 0.64 |
| P62315_SMD1_MOUSE  | Snrpd1   | Small nuclear ribonucle K.NR@EPVQLETLSIR@.G                | 41.03  | 27.90  | 1.47 | 0.68 |
| P62317_SMD2_MOUSE  | Snrpd2   | Small nuclear ribonucle R.EEEEFNTGSLVLTQSVK#.N             | 29.59  | 21.50  | 1.38 | 0.73 |
| P62317_SMD2_MOUSE  | Snrpd2   | Small nuclear ribonucle R.GDSVIVLRL.N                      | 195.15 | 129.77 | 1.50 | 0.66 |
| P62317_SMD2_MOUSE  | Snrpd2   | Small nuclear ribonucle K.M*FLR@GDSVIVLRL@.N               | 6.97   | 3.45   | 2.02 | 0.50 |
| P62317_SMD2_MOUSE  | Snrpd2   | Small nuclear ribonucle R.NPLIAGK#.-                       | 194.91 | 113.31 | 1.72 | 0.58 |
| P62317_SMD2_MOUSE  | Snrpd2   | Small nuclear ribonucle K.REEEEFTGSLVLTQSVK.N              | 111.59 | 55.99  | 1.99 | 0.50 |
| P62317_SMD2_MOUSE  | Snrpd2   | Small nuclear ribonucle K.SEMTPEELQK#.R                    | 22.31  | 10.75  | 2.08 | 0.48 |
| P62317_SMD2_MOUSE  | Snrpd2   | Small nuclear ribonucle K.SEM*TPLEELQK#R@.E                | 10.02  | 6.33   | 1.58 | 0.63 |
| P62317_SMD2_MOUSE  | Snrpd2   | Small nuclear ribonucle K.SEM*TPLEELQK#R@EFTGSLVLTQSVK.N   | 7.59   | 5.21   | 1.46 | 0.69 |
| P62317_SMD2_MOUSE  | Snrpd2   | Small nuclear ribonucle K.SEMTPEELQK#R@EFTGSLVLTQSVK#.N    | 2.68   | 1.79   | 1.50 | 0.67 |



|                     |        |                                                               |        |        |       |      |
|---------------------|--------|---------------------------------------------------------------|--------|--------|-------|------|
| P62317_SMD2_MOUSE   | Snrpd2 | Small nuclear ribonucleic K.SEMTPEELQKREEEFNTGPLSVLTQSVK.N    | 19.33  | 13.20  | 1.46  | 0.68 |
| P62317_SMD2_MOUSE   | Snrpd2 | Small nuclear ribonucleic R.EEEEFNTGPLSVLTQSVK#.N             | 6.64   | 3.98   | 1.67  | 0.60 |
| P62317_SMD2_MOUSE   | Snrpd2 | Small nuclear ribonucleic R.GDSVIVLVR@.N                      | 174.25 | 15.21  | 11.46 | 0.09 |
| P62317_SMD2_MOUSE   | Snrpd2 | Small nuclear ribonucleic K.R@EEEEFTGPLSVLTQSVK#.N            | 8.82   | 4.92   | 1.79  | 0.56 |
| P62317_SMD2_MOUSE   | Snrpd2 | Small nuclear ribonucleic K.SEM*TPEELQK#.R                    | 14.86  | 5.80   | 2.56  | 0.39 |
| P62320_SMD3_MOUSE   | Snrpd3 | Small nuclear ribonucleic R.VAQLEQVYIR@.G                     |        | 9.15   | 1.35  | 0.74 |
| P62320_SMD3_MOUSE   | Snrpd3 | Small nuclear ribonucleic R.VAQLEQVYIR@.G                     | 270.10 | 166.40 | 1.62  | 0.62 |
| P62320_SMD3_MOUSE   | Snrpd3 | Small nuclear ribonucleic R.FLILPDM*LK#.N                     | 69.29  | 26.58  | 2.61  | 0.38 |
| P62320_SMD3_MOUSE   | Snrpd3 | Small nuclear ribonucleic R.FLILPDM*LK#.N                     | 15.07  | 8.36   | 1.80  | 0.55 |
| P62320_SMD3_MOUSE   | Snrpd3 | Small nuclear ribonucleic R.VAQLEQVYIR@.G                     | 48.10  | 21.44  | 2.24  | 0.45 |
| P62305_RUXE_MOUSE   | Snrpe  | Small nuclear ribonucleic K.GDNITLQSVSN.-                     | 11.10  | 11.10  | 1.00  | 1.00 |
| P62305_RUXE_MOUSE   | Snrpe  | Small nuclear ribonucleic K.VM*VQPINLIFR@.Y                   | 26.22  | 19.75  | 1.33  | 0.75 |
| P62305_RUXE_MOUSE   | Snrpe  | Small nuclear ribonucleic R.IM*LK#GDNITLQSVSN.-               | 17.68  | 7.65   | 2.31  | 0.43 |
| P62305_RUXE_MOUSE   | Snrpe  | Small nuclear ribonucleic R.IQVWLK#EQVNM*MR@.I                | 25.65  | 14.78  | 1.74  | 0.58 |
| P62305_RUXE_MOUSE   | Snrpe  | Small nuclear ribonucleic K.VM*VQPINLIFR@.Y                   | 632.19 | 323.17 | 1.96  | 0.51 |
| P62305_RUXE_MOUSE   | Snrpe  | Small nuclear ribonucleic K.VM*VQPINLIFR@.Y                   | 32.71  | 17.65  | 1.85  | 0.54 |
| P62305_RUXE_MOUSE   | Snrpe  | Small nuclear ribonucleic K.GDNITLQSVSN.-                     | 16.63  | 16.63  | 1.00  | 1.00 |
| P62305_RUXE_MOUSE   | Snrpe  | Small nuclear ribonucleic K.VM*VQPINLIFR@.Y                   | 61.58  | 31.65  | 1.95  | 0.51 |
| P62305_RUXE_MOUSE   | Snrpe  | Small nuclear ribonucleic K.VM*VQPINLIFR@.Y                   | 12.40  | 9.12   | 1.36  | 0.74 |
| P62305_RUXE_MOUSE   | Snrpe  | Small nuclear ribonucleic K.VM*VQPINLIFR@.Y                   | 14.11  | 7.55   | 1.87  | 0.54 |
| P62307_RUXF_MOUSE   | Snrpf  | Small nuclear ribonucleic R.GVEEEEDGEM*#R.E                   | 5.95   | 4.45   | 1.34  | 0.75 |
| P62307_RUXF_MOUSE   | Snrpf  | Small nuclear ribonucleic R.GVEEEEDGEM*#R.E-                  | 69.26  | 36.51  | 1.90  | 0.53 |
| P62307_RUXF_MOUSE   | Snrpf  | Small nuclear ribonucleic R.GVEEEEDGEM*#R.E-                  | 4.55   | 3.42   | 1.33  | 0.75 |
| P62307_RUXF_MOUSE   | Snrpf  | Small nuclear ribonucleic R.GVEEEEDGEM*#R.E-                  | 17.13  | 7.97   | 2.15  | 0.47 |
| P62309_RUXG_MOUSE   | Snrpg  | Small nuclear ribonucleic R.GNSIIM*LEALER.V                   | 18.98  | 14.06  | 1.35  | 0.74 |
| P62309_RUXG_MOUSE   | Snrpg  | Small nuclear ribonucleic R.GNSIIM*LEALER@V.-                 | 37.28  | 9.15   | 4.08  | 0.25 |
| P62309_RUXG_MOUSE   | Snrpg  | Small nuclear ribonucleic R.GNSIIM*LEALER@V.-                 | 5.11   | 3.20   | 1.60  | 0.63 |
| Q61234_SNTA1_MOUSE  | Snta1  | Alpha-1-syntrophin OS=h K.GSVPYDAELSAFRL@.T                   | 9.00   | 5.00   | 1.80  | 0.56 |
| Q61234_SNTA1_MOUSE  | Snta1  | Alpha-1-syntrophin OS=h K.M*PILLSIK#.I                        | 12.04  | 4.60   | 2.62  | 0.38 |
| Q61235_SNTB2_MOUSE  | Sntb2  | Beta-2-syntrophin OS=M K.AGLVELLLR@.E                         | 26.80  | 11.90  | 2.25  | 0.44 |
| Q61235_SNTB2_MOUSE  | Sntb2  | Beta-2-syntrophin OS=M R.SPGLSDLTFTATR@.T                     | 20.66  | 26.73  | 0.77  | 1.29 |
| Q61235_SNTB2_MOUSE  | Sntb2  | Beta-2-syntrophin OS=M K.AGLVELLLR@.E                         | 10.85  | 5.72   | 1.90  | 0.53 |
| Q61235_SNTB2_MOUSE  | Sntb2  | Beta-2-syntrophin OS=M K.AGLVELLLR@.E                         | 43.34  | 14.36  | 3.02  | 0.33 |
| Q61235_SNTB2_MOUSE  | Sntb2  | Beta-2-syntrophin OS=M K.IFFPLAADOQR@.A                       | 17.41  | 6.53   | 2.66  | 0.38 |
| Q61235_SNTB2_MOUSE  | Sntb2  | Beta-2-syntrophin OS=M R.LGDAILSVNGTDLR@.Q                    | 10.16  | 3.40   | 2.99  | 0.33 |
| Q61235_SNTB2_MOUSE  | Sntb2  | Beta-2-syntrophin OS=M R.SPGLSDLTFTATR@.T                     | 17.89  | 6.11   | 2.93  | 0.34 |
| Q61235_SNTB2_MOUSE  | Sntb2  | Beta-2-syntrophin OS=M K.AGLVELLLR@.E                         | 44.40  | 13.54  | 3.28  | 0.30 |
| Q61235_SNTB2_MOUSE  | Sntb2  | Beta-2-syntrophin OS=M R.GLGGPPSPAPP@.G                       | 25.71  | 6.45   | 3.98  | 0.25 |
| Q61235_SNTB2_MOUSE  | Sntb2  | Beta-2-syntrophin OS=M K.IFFPLAADOQR@.A                       | 19.69  | 7.46   | 2.64  | 0.38 |
| Q61235_SNTB2_MOUSE  | Sntb2  | Beta-2-syntrophin OS=M K.K#PSLVSIDLPEGASPOSFSGSEDSGSPK#.H     | 8.09   | 2.42   | 3.35  | 0.30 |
| Q61235_SNTB2_MOUSE  | Sntb2  | Beta-2-syntrophin OS=M R.LGDAILSVNGTDLR@.Q                    | 6.59   | 2.45   | 2.69  | 0.37 |
| Q61235_SNTB2_MOUSE  | Sntb2  | Beta-2-syntrophin OS=M R.NLSM*PDLNLR@.L                       | 10.85  | 4.19   | 2.59  | 0.39 |
| Q9CSN1_SNW1_MOUSE   | Snw1   | SNW domain-containing K.LAEALYADR@.K                          | 7.63   | 10.95  | 0.70  | 1.43 |
| Q9CSN1_SNW1_MOUSE   | Snw1   | SNW domain-containing K.LAPAQYIR@.Y                           | 13.96  | 19.60  | 0.71  | 1.40 |
| Q9CSN1_SNW1_MOUSE   | Snw1   | SNW domain-containing R.LLEDFGDGGAFPEIHVAQYPLDM*GR.K          | 10.40  | 16.04  | 0.65  | 1.54 |
| Q9CSN1_SNW1_MOUSE   | Snw1   | SNW domain-containing K.M*SNALAIQVDPGEGK#.I                   | 8.42   | 12.06  | 0.70  | 1.43 |
| Q9CSN1_SNW1_MOUSE   | Snw1   | SNW domain-containing R.SLQTSLVSSR.R                          | 24.09  | 28.99  | 0.83  | 1.20 |
| Q9CSN1_SNW1_MOUSE   | Snw1   | SNW domain-containing R.DISEVIALGVNPNR@.T                     | 29.46  | 22.00  | 1.34  | 0.75 |
| Q9CSN1_SNW1_MOUSE   | Snw1   | SNW domain-containing R.EGVPQFEDDFGLDK.F                      | 6.66   | 3.83   | 1.74  | 0.58 |
| Q9CSN1_SNW1_MOUSE   | Snw1   | SNW domain-containing K.GM*DSGFAGGEDIYVVDQAWR@.G              | 9.88   | 6.40   | 1.54  | 0.65 |
| Q9CSN1_SNW1_MOUSE   | Snw1   | SNW domain-containing K.IK#YDAIAR@.Q                          | 20.63  | 12.37  | 1.67  | 0.60 |
| Q9CSN1_SNW1_MOUSE   | Snw1   | SNW domain-containing K.LAEALYADR@.K                          | 26.29  | 17.05  | 1.54  | 0.65 |
| Q9CSN1_SNW1_MOUSE   | Snw1   | SNW domain-containing K.LAEALYADR@K#.A                        | 28.00  | 17.59  | 1.59  | 0.63 |
| Q9CSN1_SNW1_MOUSE   | Snw1   | SNW domain-containing K.LAPAQYIR@.Y                           | 41.37  | 33.64  | 1.23  | 0.81 |
| Q9CSN1_SNW1_MOUSE   | Snw1   | SNW domain-containing R.LLEDFGDGGAFPEIHVAQYPLDM*GR@.K         | 28.00  | 22.57  | 1.68  | 0.59 |
| Q9CSN1_SNW1_MOUSE   | Snw1   | SNW domain-containing K.M*SNALAIQVDPGEGK#.I                   | 37.10  | 18.61  | 1.46  | 0.69 |
| Q9CSN1_SNW1_MOUSE   | Snw1   | SNW domain-containing R.SLQTSLVSSR.R                          | 88.17  | 51.96  | 1.70  | 0.59 |
| Q9CSN1_SNW1_MOUSE   | Snw1   | SNW domain-containing R.TSNEVQDQQR@.L                         | 31.18  | 18.46  | 1.69  | 0.59 |
| Q9CSN1_SNW1_MOUSE   | Snw1   | SNW domain-containing K.VAAAM*VPR.A                           | 58.89  | 34.24  | 1.72  | 0.58 |
| Q9CSN1_SNW1_MOUSE   | Snw1   | SNW domain-containing K.YTDLVPR#.K                            | 23.15  | 20.98  | 1.10  | 0.91 |
| Q9WV80_SNX1_MOUSE   | Snx1   | Sorting nexin-1 OS=Mus r R.AVGTQALSGAGLLK#.M                  | 11.39  | 11.27  | 1.72  | 0.58 |
| Q9WV80_SNX1_MOUSE   | Snx1   | Sorting nexin-1 OS=Mus r K.ELANTALFAK#.S                      | 6.76   | 4.46   | 1.52  | 0.66 |
| Q9WV80_SNX1_MOUSE   | Snx1   | Sorting nexin-1 OS=Mus r K.SLAM*LGSSDENTALS@.A                | 10.47  | 5.19   | 2.02  | 0.50 |
| Q9WV80_SNX1_MOUSE   | Snx1   | Sorting nexin-1 OS=Mus r K.YWEAFLEPAK#.A                      | 5.99   | 6.74   | 0.89  | 1.13 |
| Q9WV80_SNX1_MOUSE   | Snx1   | Sorting nexin-1 OS=Mus r R.ALSQALAEVEK#.I                     | 18.87  | 8.81   | 2.14  | 0.47 |
| Q9WV80_SNX1_MOUSE   | Snx1   | Sorting nexin-1 OS=Mus r K.ELANTALFAK#.S                      | 8.78   | 4.40   | 2.00  | 0.50 |
| Q9WV80_SNX1_MOUSE   | Snx1   | Sorting nexin-1 OS=Mus r K.SLAM*LGSSDENTALS@.A                | 9.90   | 4.17   | 2.37  | 0.42 |
| Q9WV80_SNX1_MOUSE   | Snx1   | Sorting nexin-1 OS=Mus r K.YWEAFLEPAK#.A                      | 10.39  | 2.97   | 3.49  | 0.29 |
| Q9WV80_SNX1_MOUSE   | Snx1   | Sorting nexin-1 OS=Mus r K.IVVPPLPGK#.A                       | 30.56  | 16.74  | 1.83  | 0.55 |
| O70493_SNX12_MOUSE  | Snx12  | Sorting nexin-12 OS=Mus r K.GLEQLFK#.I                        | 13.90  | 5.51   | 2.52  | 0.40 |
| O70493_SNX12_MOUSE  | Snx12  | Sorting nexin-12 OS=Mus r R.TNLPFK#.L                         | 127.57 | 68.53  | 1.86  | 0.54 |
| Q78ZM0_Q78ZM0_MOUSE | Snx3   | Sorting nexin 3 OS=Mus r R.FTTYEIR@.V                         | 115.35 | 49.04  | 2.35  | 0.43 |
| Q78ZM0_Q78ZM0_MOUSE | Snx3   | Sorting nexin 3 OS=Mus r R.K#HQLQEFQIN#.V                     | 53.91  | 50.36  | 1.07  | 0.93 |
| Q78ZM0_Q78ZM0_MOUSE | Snx3   | Sorting nexin 3 OS=Mus r R.LITK#PQLNDAYGPPSNFLVDISPNQTVGVR@.G | 11.67  | 4.88   | 2.39  | 0.42 |
| Q78ZM0_Q78ZM0_MOUSE | Snx3   | Sorting nexin 3 OS=Mus r R.QLPFR@GDDGIFDDNFIEER@.K            | 15.47  | 6.23   | 2.48  | 0.40 |
| Q78ZM0_Q78ZM0_MOUSE | Snx3   | Sorting nexin 3 OS=Mus r K.VVVPPLPGK#.A                       | 77.02  | 25.80  | 2.99  | 0.34 |
| Q78ZM0_Q78ZM0_MOUSE | Snx3   | Sorting nexin 3 OS=Mus r R.YSDFEWLR@.S                        | 79.99  | 34.23  | 2.34  | 0.43 |
| Q91Y12_SNX4_MOUSE   | Snx4   | Sorting nexin-4 OS=Mus r K.ETVNETGFQK#.A                      | 8.04   | 6.06   | 1.33  | 0.75 |
| Q91Y12_SNX4_MOUSE   | Snx4   | Sorting nexin-4 OS=Mus r K.LFGQETPEQR@.E                      | 16.53  | 7.51   | 2.20  | 0.45 |
| Q91Y12_SNX4_MOUSE   | Snx4   | Sorting nexin-4 OS=Mus r K.LSADNM*DPDFVER@.R                  | 13.87  | 6.70   | 2.07  | 0.48 |
| Q91Y12_SNX4_MOUSE   | Snx4   | Sorting nexin-4 OS=Mus r R.VGLENFLLR@.V                       | 44.84  | 20.83  | 2.15  | 0.46 |
| Q91Y12_SNX4_MOUSE   | Snx4   | Sorting nexin-4 OS=Mus r R.VGLENFLLR@.V                       | 9.87   | 2.45   | 4.03  | 0.25 |
| Q9D8U8_SNX5_MOUSE   | Snx5   | Sorting nexin-5 OS=Mus r K.ALIDYENSNK#.A                      | 16.88  | 8.44   | 2.00  | 0.50 |
| Q9D8U8_SNX5_MOUSE   | Snx5   | Sorting nexin-5 OS=Mus r K.TLTSFQSPFESVTR@.Q                  | 20.30  | 9.53   | 2.13  | 0.47 |
| Q6P8X1_SNX6_MOUSE   | Snx6   | Sorting nexin-6 OS=Mus r K.NLVLEALELKH#.H                     | 23.78  | 10.73  | 2.22  | 0.45 |
| Q6P8X1_SNX6_MOUSE   | Snx6   | Sorting nexin-6 OS=Mus r R.SLVYDENANK#.R                      | 12.39  | 7.52   | 1.65  | 0.61 |
| F8W130_F8W130_MOUSE | Snx7   | Sorting nexin-7 OS=Mus r R.GEFDSSEFVVR@.R                     | 17.63  | 7.66   | 2.30  | 0.43 |
| F8W130_F8W130_MOUSE | Snx7   | Sorting nexin-7 OS=Mus r K.GK#LEEAHTLIPPEK#.F                 | 4.61   | 2.73   | 1.69  | 0.59 |
| F8W130_F8W130_MOUSE | Snx7   | Sorting nexin-7 OS=Mus r R.IADHPTLTFNEDFK#.V                  | 23.88  | 10.30  | 2.32  | 0.43 |
| F8W130_F8W130_MOUSE | Snx7   | Sorting nexin-7 OS=Mus r R.LASGSSELVAGESP.R.G                 | 14.65  | 8.02   | 1.83  | 0.55 |
| F8W130_F8W130_MOUSE | Snx7   | Sorting nexin-7 OS=Mus r K.NRPEEFM*EM*NNFIETFSQ.I             | 5.04   | 3.68   | 1.37  | 0.73 |
| F8W130_F8W130_MOUSE | Snx7   | Sorting nexin-7 OS=Mus r R.SAFTD7AEQNIIR@.Y                   | 27.89  | 14.60  | 1.91  | 0.52 |
| F8W130_F8W130_MOUSE | Snx7   | Sorting nexin-7 OS=Mus r R.YQDFWLK#.G                         | 7.73   | 5.36   | 1.44  | 0.69 |
| Q8CFD4_SNX8_MOUSE   | Snx8   | Sorting nexin-8 OS=Mus r R.AIDNAADLLIFGK#.E                   | 19.12  | 7.52   | 2.54  | 0.39 |
| Q8CFD4_SNX8_MOUSE   | Snx8   | Sorting nexin-8 OS=Mus r R.IVEQENVIQTM*ELR@.N                 | 6.33   | 3.38   | 1.88  | 0.53 |
| Q8CFD4_SNX8_MOUSE   | Snx8   | Sorting nexin-8 OS=Mus r R.IVEQENVIQTM*ELR@.N                 | 3.90   | 1.18   | 3.31  | 0.30 |
| Q8CFD4_SNX8_MOUSE   | Snx8   | Sorting nexin-8 OS=Mus r R.AIDNAADLLIFGK#.E                   | 15.43  | 8.57   | 1.80  | 0.56 |
| E1U8D0_SOGA1_MOUSE  | Soga1  | Protein SOGA1 OS=Mus r R.GLQEQLSQER@.Q                        | 9.35   | 2.20   | 4.25  | 0.24 |
| E1U8D0_SOGA1_MOUSE  | Soga1  | Protein SOGA1 OS=Mus r R.LSVLQQLNAFTR@.K                      | 13.10  | 4.84   | 2.71  | 0.37 |
| Q9QX47_SON_MOUSE    | Son    | Protein SON OS=Mus mu: K.EGNK#EPILVDFPK.T                     | 10.77  | 9.28   | 1.16  | 0.86 |
| Q9QX47_SON_MOUSE    | Son    | Protein SON OS=Mus mu: K.GM*NLGGDENLGPVGM*QETLHPGEEPR@.D      | 3.00   | 1.80   | 1.66  | 0.60 |
| Q9QX47_SON_MOUSE    | Son    | Protein SON OS=Mus mu: K.IEEVLSGLDTELRL@.Y                    | 14.01  | 5.16   | 2.72  | 0.37 |
| Q9QX47_SON_MOUSE    | Son    | Protein SON OS=Mus mu: K.SPEPVVIM*SVYEQK#.S                   | 2.41   | 2.45   | 0.45  | 0.41 |

|                     |         |                                                                      |        |        |      |      |
|---------------------|---------|----------------------------------------------------------------------|--------|--------|------|------|
| Q9QX47_SON_MOUSE    | Son     | Protein SON OS=Mus mu: K.IEEVLSGVLDTLRL@.Y                           | 5.36   | 2.41   | 2.22 | 0.45 |
| Q9QX47_SON_MOUSE    | Son     | Protein SON OS=Mus mu: R.SEGQLNGETNPPIEGNOAGDAAASAR@.S               | 2.90   | 2.55   | 1.13 | 0.88 |
| Q9QX47_SON_MOUSE    | Son     | Protein SON OS=Mus mu: R.AGIEPQLLASEVER@.D                           | 91.90  | 35.59  | 2.58 | 0.39 |
| Q9QX47_SON_MOUSE    | Son     | Protein SON OS=Mus mu: K.AQLLEIAK#.A                                 | 40.80  | 16.16  | 2.52 | 0.40 |
| Q9QX47_SON_MOUSE    | Son     | Protein SON OS=Mus mu: R.ASESSSEKHDYEIFVK#.V                         | 17.81  | 3.68   | 4.84 | 0.21 |
| Q9QX47_SON_MOUSE    | Son     | Protein SON OS=Mus mu: K.ESSDTEVPLPNK#.E                             | 11.97  | 5.66   | 2.12 | 0.47 |
| Q9QX47_SON_MOUSE    | Son     | Protein SON OS=Mus mu: K.GFEFVYASALISEK#.Y                           | 50.58  | 15.30  | 3.31 | 0.30 |
| Q9QX47_SON_MOUSE    | Son     | Protein SON OS=Mus mu: K.GM*NLGGDENLGPVEVGM*QETLLHPGEEPR@.D          | 22.07  | 9.23   | 2.39 | 0.42 |
| Q9QX47_SON_MOUSE    | Son     | Protein SON OS=Mus mu: K.GM*NLGGDENLGPVEVGM*QETLLHPGEEPR@.D          | 3.26   | 1.77   | 1.84 | 0.54 |
| Q9QX47_SON_MOUSE    | Son     | Protein SON OS=Mus mu: K.GM*NLGGDENLGPVEVGM*QETLLHPGEEPR@.D          | 2.79   | 2.25   | 1.24 | 0.81 |
| Q9QX47_SON_MOUSE    | Son     | Protein SON OS=Mus mu: K.LPISEK#.E                                   | 63.98  | 30.10  | 2.13 | 0.47 |
| Q9QX47_SON_MOUSE    | Son     | Protein SON OS=Mus mu: R.LPEQPVEAPSEIADSSM*TR@PQESLELPK#.T           | 6.39   | 3.42   | 1.87 | 0.53 |
| Q9QX47_SON_MOUSE    | Son     | Protein SON OS=Mus mu: R.LTDLKHAQLLEIAK#.A                           | 40.50  | 13.20  | 3.07 | 0.33 |
| Q9QX47_SON_MOUSE    | Son     | Protein SON OS=Mus mu: K.SAASPWVVISIPER@.A                           | 28.56  | 15.77  | 1.81 | 0.55 |
| Q9QX47_SON_MOUSE    | Son     | Protein SON OS=Mus mu: K.SDLYENEDR@.N                                | 15.45  | 7.35   | 2.10 | 0.48 |
| Q9QX47_SON_MOUSE    | Son     | Protein SON OS=Mus mu: R.SLSSQLALELDTVGTSK#.G                        | 23.11  | 7.68   | 3.01 | 0.33 |
| Q9QX47_SON_MOUSE    | Son     | Protein SON OS=Mus mu: K.TTLVELPIAK#.V                               | 15.45  | 12.87  | 1.20 | 0.83 |
| Q9QX47_SON_MOUSE    | Son     | Protein SON OS=Mus mu: K.AAELSVTVSISEQSEQPM*PGM*LPSMTK#.I            | 4.55   | 2.47   | 1.84 | 0.54 |
| Q9QX47_SON_MOUSE    | Son     | Protein SON OS=Mus mu: R.AGIEPQLLASEVER@.D                           | 46.77  | 27.06  | 1.73 | 0.58 |
| Q9QX47_SON_MOUSE    | Son     | Protein SON OS=Mus mu: R.ASESSSEKHDYEIFVK#.V                         | 9.22   | 6.50   | 1.42 | 0.71 |
| Q9QX47_SON_MOUSE    | Son     | Protein SON OS=Mus mu: R.EIQQLSSGR@.S                                | 30.62  | 15.71  | 1.95 | 0.51 |
| Q9QX47_SON_MOUSE    | Son     | Protein SON OS=Mus mu: K.ESSDTEVPLPNK#.E                             | 9.34   | 5.86   | 1.59 | 0.63 |
| Q9QX47_SON_MOUSE    | Son     | Protein SON OS=Mus mu: K.ESSDTEVPLPNK#EIVPESGYSASIDEINLVDLR@PPLLK#.D | 9.63   | 6.17   | 1.56 | 0.64 |
| Q9QX47_SON_MOUSE    | Son     | Protein SON OS=Mus mu: K.FR@EIQQLSSGR@.S                             | 67.42  | 25.39  | 2.66 | 0.38 |
| Q9QX47_SON_MOUSE    | Son     | Protein SON OS=Mus mu: K.IEEVLSGVLDTLRL@.Y                           | 60.12  | 28.78  | 2.09 | 0.48 |
| Q9QX47_SON_MOUSE    | Son     | Protein SON OS=Mus mu: K.I.LDSFTAAPVPM*STAALK#.S                     | 12.21  | 5.17   | 2.36 | 0.42 |
| Q9QX47_SON_MOUSE    | Son     | Protein SON OS=Mus mu: K.I.LDSFTAAPVPM*STAALK#.S                     | 7.25   | 4.29   | 1.69 | 0.59 |
| Q9QX47_SON_MOUSE    | Son     | Protein SON OS=Mus mu: R.LAQDPPYR@.L                                 | 229.74 | 108.33 | 2.12 | 0.47 |
| Q9QX47_SON_MOUSE    | Son     | Protein SON OS=Mus mu: R.LAQDPPYR@.L                                 | 77.65  | 48.16  | 1.61 | 0.62 |
| Q9QX47_SON_MOUSE    | Son     | Protein SON OS=Mus mu: R.LTDLKHAQLLEIAK#.A                           | 23.82  | 10.18  | 2.34 | 0.43 |
| Q9QX47_SON_MOUSE    | Son     | Protein SON OS=Mus mu: K.AAASPWVVISIPER@.A                           | 17.25  | 38.77  | 0.44 | 2.25 |
| Q9QX47_SON_MOUSE    | Son     | Protein SON OS=Mus mu: K.SDLYENEDR@.N                                | 6.25   | 4.36   | 1.43 | 0.70 |
| Q9QX47_SON_MOUSE    | Son     | Protein SON OS=Mus mu: R.SEGQLNGETNPPIEGNOAGDAAASAR@.S               | 21.45  | 9.50   | 2.26 | 0.44 |
| Q9QX47_SON_MOUSE    | Son     | Protein SON OS=Mus mu: K.SLETM*PPETS#.T                              | 34.76  | 21.84  | 1.59 | 0.63 |
| Q9QX47_SON_MOUSE    | Son     | Protein SON OS=Mus mu: R.SLPNEEIQK#.I                                | 25.88  | 15.73  | 1.65 | 0.61 |
| Q9QX47_SON_MOUSE    | Son     | Protein SON OS=Mus mu: R.SLSSQLALELDTVGTSK#.G                        | 15.30  | 10.62  | 1.44 | 0.69 |
| Q9QX47_SON_MOUSE    | Son     | Protein SON OS=Mus mu: R.SM*M*SAYER@.S                               | 83.09  | 37.83  | 2.20 | 0.46 |
| Q9QX47_SON_MOUSE    | Son     | Protein SON OS=Mus mu: R.SM*M*SPM*AER.S                              | 59.81  | 30.45  | 1.96 | 0.51 |
| Q9QX47_SON_MOUSE    | Son     | Protein SON OS=Mus mu: R.SM*M*SPM*AER.S                              | 7.10   | 3.33   | 2.13 | 0.47 |
| Q9QX47_SON_MOUSE    | Son     | Protein SON OS=Mus mu: R.SM*M*SSYER@.S                               | 14.38  | 6.46   | 2.23 | 0.45 |
| Q9QX47_SON_MOUSE    | Son     | Protein SON OS=Mus mu: R.SM*M*SSYAADR@.S                             | 48.93  | 19.41  | 2.52 | 0.40 |
| Q9QX47_SON_MOUSE    | Son     | Protein SON OS=Mus mu: R.SM*M*SSYTRD.S                               | 21.53  | 7.79   | 2.76 | 0.36 |
| Q9QX47_SON_MOUSE    | Son     | Protein SON OS=Mus mu: K.SPEPVVTM*SVYEQK#.S                          | 50.33  | 25.22  | 2.00 | 0.50 |
| Q9QX47_SON_MOUSE    | Son     | Protein SON OS=Mus mu: K.SPEPVVTM*SVYEQK#.S                          | 9.94   | 6.98   | 1.42 | 0.70 |
| Q9QX47_SON_MOUSE    | Son     | Protein SON OS=Mus mu: K.TTLVELPIAK#.V                               | 175.10 | 87.37  | 2.00 | 0.50 |
| Q89090_Sp1_MOUSE    | Sp1     | Transcription factor Sp1 R.VGGLQGSDSLNIQQNTSGGSLQGSQQK#.E            | 12.50  | 6.72   | 1.86 | 0.54 |
| Q58A65_JIP4_MOUSE   | Spag9   | C-Jun-amino-terminal kii K.ER@PISLGFIPLAGDGLLTPDQK#.G                | 5.59   | 2.12   | 2.63 | 0.38 |
| Q9QY8_SPAST_MOUSE   | Spast   | Spastin OS=Mus musculus K.FDDIAGQLAK#.Q                              | 12.53  | 4.30   | 2.91 | 0.34 |
| Q9QY8_SPAST_MOUSE   | Spast   | Spastin OS=Mus musculus R.M*TDGYSGSDTLALAK#.D                        | 7.48   | 2.64   | 2.83 | 0.35 |
| Q3UMCO_SPATS_MOUSE  | Spata5  | Spermatogenesis-associia K.AGEVLLDVTQSPR@.D                          | 13.52  | 12.07  | 1.12 | 0.89 |
| Q3UMCO_SPATS_MOUSE  | Spata5  | Spermatogenesis-associia R.EVAIDVFNVSVDIGLENNK#.L                    | 2.75   | 2.15   | 1.28 | 0.78 |
| Q3UMCO_SPATS_MOUSE  | Spata5  | Spermatogenesis-associia R.IIYVLPDAATR@.R                            | 16.94  | 9.93   | 1.71 | 0.59 |
| Q3UMCO_SPATS_MOUSE  | Spata5  | Spermatogenesis-associia K.VGLSEM*AQK#.N                             | 8.07   | 7.57   | 1.07 | 0.94 |
| Q3UMCO_SPATS_MOUSE  | Spata5  | Spermatogenesis-associia R.VLALQLETM*DGIEQLK#.N                      | 3.46   | 3.46   | 2.51 | 0.40 |
| Q3UMCO_SPATS_MOUSE  | Spata5  | Spermatogenesis-associia R.VLVLGATNR@PQALDAALR@.R                    | 21.77  | 8.64   | 2.52 | 0.40 |
| Q8K1N4_SPAS2_MOUSE  | Spats2  | Spermatogenesis-associia R.ELEDPEFAAETLDR@.T                         | 23.05  | 3.13   | 7.37 | 0.14 |
| Q8K1N4_SPAS2_MOUSE  | Spats2  | Spermatogenesis-associia R.M*SEEQVELR@.A                             | 21.86  | 7.45   | 2.94 | 0.34 |
| Q8K1N4_SPAS2_MOUSE  | Spats2  | Spermatogenesis-associia K.SAPIQEQPASSEK#.G                          | 22.37  | 9.91   | 2.26 | 0.44 |
| Q8K1N4_SPAS2_MOUSE  | Spats2  | Spermatogenesis-associia K.SK#PK#ASEASGSPDSSK#.S                     | 15.95  | 5.16   | 2.62 | 0.38 |
| Q8K1N4_SPAS2_MOUSE  | Spats2  | Spermatogenesis-associia R.ELEDPEFAAETLDR@.T                         | 17.95  | 5.07   | 3.54 | 0.28 |
| Q8K1N4_SPAS2_MOUSE  | Spats2  | Spermatogenesis-associia R.M*SEEQVELR@.A                             | 19.11  | 2.25   | 6.71 | 0.15 |
| Q8K1N4_SPAS2_MOUSE  | Spats2  | Spermatogenesis-associia K.SAPIQEQPASSEK#.G                          | 17.66  | 3.83   | 4.61 | 0.22 |
| Q9D083_SPC24_MOUSE  | Spc24   | Kinetochore protein Spc: R.QLITELQLR@.E                              | 8.66   | 3.53   | 2.45 | 0.41 |
| Q9CYN2_SPC2_MOUSE   | Spc2    | Signal peptidase comple K.FFDHSGTLVIM*DAYEPIR@.L                     | 7.66   | 5.45   | 1.41 | 0.71 |
| Q6ZW07_Q6ZWQ7_MOUSE | Spc3    | Signal peptidase comple K.NNALNQLVLDK#.I                             | 5.86   | 8.13   | 0.72 | 1.39 |
| Q5SXY1_CYT5B_MOUSE  | Specc1  | Cytospin-B OS=Mus musc R.AEQLSQENK#.L                                | 8.75   | 4.49   | 1.95 | 0.51 |
| Q5SXY1_CYT5B_MOUSE  | Specc1  | Cytospin-B OS=Mus musc K.AIEASSTVGTQTAENFEVQEM*LK#.V                 | 11.44  | 11.48  | 1.17 | 0.85 |
| Q5SXY1_CYT5B_MOUSE  | Specc1  | Cytospin-B OS=Mus musc K.ALLEADK#QK#.A                               | 7.65   | 9.53   | 0.80 | 1.25 |
| Q5SXY1_CYT5B_MOUSE  | Specc1  | Cytospin-B OS=Mus musc K.ELADLEENR@.A                                | 22.73  | 10.16  | 2.24 | 0.45 |
| Q5SXY1_CYT5B_MOUSE  | Specc1  | Cytospin-B OS=Mus musc R.LSVTISR@.E                                  | 13.47  | 7.29   | 1.85 | 0.54 |
| Q5SXY1_CYT5B_MOUSE  | Specc1  | Cytospin-B OS=Mus musc K.HVSSLLAK#.M                                 | 26.04  | 14.17  | 1.84 | 0.54 |
| Q5SXY1_CYT5B_MOUSE  | Specc1  | Cytospin-B OS=Mus musc K.LHNNQLSELEGSVIK#.L                          | 20.15  | 8.03   | 2.51 | 0.40 |
| Q5SXY1_CYT5B_MOUSE  | Specc1  | Cytospin-B OS=Mus musc K.LINLQER@.V                                  | 39.28  | 18.32  | 2.14 | 0.47 |
| Q5SXY1_CYT5B_MOUSE  | Specc1  | Cytospin-B OS=Mus musc K.M*EENHSTAEQLQATLQELSDQQQM*VQELTAENK#.L      | 2.67   | 1.34   | 1.99 | 0.50 |
| Q5SXY1_CYT5B_MOUSE  | Specc1  | Cytospin-B OS=Mus musc R.R@DPLAALAR@.E                               | 15.27  | 7.74   | 1.97 | 0.51 |
| Q5SXY1_CYT5B_MOUSE  | Specc1  | Cytospin-B OS=Mus musc R.SPLSGIPVR@.T                                | 22.41  | 12.03  | 1.86 | 0.54 |
| Q5SXY1_CYT5B_MOUSE  | Specc1  | Cytospin-B OS=Mus musc R.TAPAAVSPM*QR@.H                             | 7.15   | 2.69   | 2.66 | 0.38 |
| Q5SXY1_CYT5B_MOUSE  | Specc1  | Cytospin-B OS=Mus musc R.TSPAPSDATVK#.S                              | 26.72  | 15.07  | 1.77 | 0.56 |
| Q5SXY1_CYT5B_MOUSE  | Specc1  | Cytospin-B OS=Mus musc K.TSTSGAISELTER@.L                            | 5.52   | 3.93   | 1.40 | 0.71 |
| Q5SXY1_CYT5B_MOUSE  | Specc1  | Cytospin-B OS=Mus musc K.ELADLEENR@.A                                | 10.43  | 4.64   | 2.25 | 0.44 |
| Q5SXY1_CYT5B_MOUSE  | Specc1  | Cytospin-B OS=Mus musc K.LINLQER@.V                                  | 18.45  | 7.23   | 2.55 | 0.39 |
| Q2KN98_CYTSA_MOUSE  | Specc1l | Cytospin-A OS=Mus musc R.LNALGFLQER@.L                               | 8.08   | 6.30   | 1.28 | 0.78 |
| Q2KN98_CYTSA_MOUSE  | Specc1l | Cytospin-A OS=Mus musc K.AALAATLEEK#ATVVDQJEM*NR@.L                  | 79.99  | 43.95  | 1.82 | 0.55 |
| Q2KN98_CYTSA_MOUSE  | Specc1l | Cytospin-A OS=Mus musc K.AALAATLEEK#ATVVDQJEM*NR@.L                  | 16.82  | 8.61   | 1.95 | 0.51 |
| Q2KN98_CYTSA_MOUSE  | Specc1l | Cytospin-A OS=Mus musc K.AALAATLEEK#ATVVDQJEM*NR@.L                  | 12.45  | 6.96   | 1.79 | 0.56 |
| Q2KN98_CYTSA_MOUSE  | Specc1l | Cytospin-A OS=Mus musc K.AETLASSQLQEDLAHTR.N                         | 9.97   | 2.58   | 3.87 | 0.26 |
| Q2KN98_CYTSA_MOUSE  | Specc1l | Cytospin-A OS=Mus musc K.ATVVDQJEM*NR@.L                             | 43.72  | 28.39  | 1.54 | 0.65 |
| Q2KN98_CYTSA_MOUSE  | Specc1l | Cytospin-A OS=Mus musc K.ATVVDQJEM*NR@.L                             | 19.13  | 11.15  | 1.72 | 0.58 |
| Q2KN98_CYTSA_MOUSE  | Specc1l | Cytospin-A OS=Mus musc R.DISASEGASPSLM*AM*GTTSPQLSSSPASVTPSTR@.S     | 10.43  | 3.55   | 2.94 | 0.34 |
| Q2KN98_CYTSA_MOUSE  | Specc1l | Cytospin-A OS=Mus musc K.ETIAHQPTDVESTLLQLQEQNTAIR@.E                | 11.63  | 9.08   | 1.28 | 0.78 |
| Q2KN98_CYTSA_MOUSE  | Specc1l | Cytospin-A OS=Mus musc R.FEREQLLQVQQLSNLTK.M                         | 28.42  | 17.40  | 1.63 | 0.61 |
| Q2KN98_CYTSA_MOUSE  | Specc1l | Cytospin-A OS=Mus musc R.HSISGPISTSKHPLTALSDK#R@.L                   | 109.58 | 64.34  | 1.70 | 0.59 |
| Q2KN98_CYTSA_MOUSE  | Specc1l | Cytospin-A OS=Mus musc K.K#LPSVSGQGDVALAK#.R                         | 27.32  | 9.17   | 2.98 | 0.34 |
| Q2KN98_CYTSA_MOUSE  | Specc1l | Cytospin-A OS=Mus musc K.LHDNLIISLENTVK#.K                           | 81.93  | 53.82  | 1.52 | 0.66 |
| Q2KN98_CYTSA_MOUSE  | Specc1l | Cytospin-A OS=Mus musc R.K#AQLENEK#.Q                                | 10.20  | 5.80   | 1.76 | 0.57 |
| Q2KN98_CYTSA_MOUSE  | Specc1l | Cytospin-A OS=Mus musc R.LNALGFLQER@.L                               | 64.78  | 38.59  | 1.68 | 0.60 |
| Q2KN98_CYTSA_MOUSE  | Specc1l | Cytospin-A OS=Mus musc K.M*AEQDNKAQEM*IGALK.E                        | 40.58  | 20.78  | 1.95 | 0.51 |
| Q2KN98_CYTSA_MOUSE  | Specc1l | Cytospin-A OS=Mus musc K.SEAQEEIGDLK#R@.R                            | 7.33   | 2.39   | 3.07 | 0.33 |
| Q2KN98_CYTSA_MOUSE  | Specc1l | Cytospin-A OS=Mus musc R.SEELEK#HDER@.S                              | 4.72   | 3.92   | 1.20 | 0.83 |
| Q2KN98_CYTSA_MOUSE  | Specc1l | Cytospin-A OS=Mus musc K.SFDSASQVPAAAAAIPIR@.T                       | 69.03  | 28.36  | 1.73 | 0.58 |
| Q2KN98_CYTSA_MOUSE  | Specc1l | Cytospin-A OS=Mus musc R.SLLEDEHHSIVIEDVK#.S                         | 42.77  | 42.29  | 1.48 | 0.67 |
| Q2KN98_CYTSA_MOUSE  | Specc1l | Cytospin-A OS=Mus musc R.SSTSEPTTVK#.T                               | 69.31  | 40.74  | 1.70 | 0.59 |
| Q2KN98_CYTSA_MOUSE  | Specc1l | Cytospin-A OS=Mus musc K.STLDINEM*AR@.T                              | 70.27  | 70.48  | 1.00 | 1.00 |

|                    |        |                                                               |        |        |      |       |
|--------------------|--------|---------------------------------------------------------------|--------|--------|------|-------|
| Q2KN98_CYTA_MOUSE  | Specc1 | Cytospin-A OS=Mus musc R.TAAEGDIR@.M                          | 39.78  | 17.94  | 2.22 | 0.45  |
| Q2KN98_CYTA_MOUSE  | Specc1 | Cytospin-A OS=Mus musc R.TER@PDWQNM*LVYAIYK#Y                 | 10.81  | 5.57   | 1.94 | 0.51  |
| Q2KN98_CYTA_MOUSE  | Specc1 | Cytospin-A OS=Mus musc R.TER@PDWQNM*LVYAIYK#Y                 | 9.01   | 7.91   | 1.14 | 0.88  |
| Q2KN98_CYTA_MOUSE  | Specc1 | Cytospin-A OS=Mus musc K.TK#DVEIHLR@.N                        | 71.30  | 24.24  | 2.94 | 0.34  |
| Q2KN98_CYTA_MOUSE  | Specc1 | Cytospin-A OS=Mus musc K.TPPAAAVSPM*QR@.H                     | 32.42  | 22.71  | 1.43 | 0.70  |
| Q2KN98_CYTA_MOUSE  | Specc1 | Cytospin-A OS=Mus musc K.TPPAAAVSPMQR@.H                      | 8.23   | 6.08   | 1.35 | 0.74  |
| Q2KN98_CYTA_MOUSE  | Specc1 | Cytospin-A OS=Mus musc K.VAELYSIHNSGDKSDIQDLESVR@.L           | 37.16  | 18.51  | 2.01 | 0.50  |
| Q2KN98_CYTA_MOUSE  | Specc1 | Cytospin-A OS=Mus musc K.VAELYSIHNSGDKSDIQDLESVR.L            | 113.63 | 52.34  | 2.17 | 0.46  |
| Q2KN98_CYTA_MOUSE  | Specc1 | Cytospin-A OS=Mus musc K.VK#DHLTLAK#T                         | 22.41  | 11.83  | 1.89 | 0.53  |
| Q2KN98_CYTA_MOUSE  | Specc1 | Cytospin-A OS=Mus musc R.VVYNM*NAVER@.D                       | 35.20  | 18.60  | 1.89 | 0.53  |
| Q2KN98_CYTA_MOUSE  | Specc1 | Cytospin-A OS=Mus musc R.YM*DLAENAR@.F                        | 68.47  | 43.00  | 1.59 | 0.63  |
| Q2KN98_CYTA_MOUSE  | Specc1 | Cytospin-A OS=Mus musc R.YMDLAENAR@.F                         | 10.64  | 7.12   | 1.49 | 0.67  |
| Q2KN98_CYTA_MOUSE  | Specc1 | Cytospin-A OS=Mus musc R.YM*ELEQR@.Y                          | 69.91  | 39.14  | 1.79 | 0.56  |
| Q2KN98_CYTA_MOUSE  | Specc1 | Cytospin-A OS=Mus musc K.AALAATLEEK#A                         | 39.05  | 32.89  | 1.19 | 0.84  |
| Q2KN98_CYTA_MOUSE  | Specc1 | Cytospin-A OS=Mus musc K.ATVADQJEMNRR@.L                      | 6.76   | 2.05   | 3.30 | 0.30  |
| Q2KN98_CYTA_MOUSE  | Specc1 | Cytospin-A OS=Mus musc K.ATVADQJEM*NR@.L                      | 11.75  | 4.32   | 2.72 | 0.37  |
| Q2KN98_CYTA_MOUSE  | Specc1 | Cytospin-A OS=Mus musc K.ETIIAHQPTDVESTLLQLQEQNTAIR@.E        | 17.06  | 6.07   | 2.81 | 0.36  |
| Q2KN98_CYTA_MOUSE  | Specc1 | Cytospin-A OS=Mus musc K.ETIIAHQPTDVESTLLQLQEQNTAIR@EELNQLK#N | 21.89  | 6.71   | 3.26 | 0.31  |
| Q2KN98_CYTA_MOUSE  | Specc1 | Cytospin-A OS=Mus musc R.HSISGPISTSKPLTALS DK#R               | 7.59   | 3.63   | 2.09 | 0.48  |
| Q2KN98_CYTA_MOUSE  | Specc1 | Cytospin-A OS=Mus musc R.HSISGPISTSKPLTALS DK#R@.S            | 52.14  | 18.84  | 2.77 | 0.36  |
| Q2KN98_CYTA_MOUSE  | Specc1 | Cytospin-A OS=Mus musc R.IIESEQR#G                            | 17.93  | 7.17   | 2.50 | 0.40  |
| Q2KN98_CYTA_MOUSE  | Specc1 | Cytospin-A OS=Mus musc K.LHDNLIISLIDENTVK#K                   | 63.00  | 29.45  | 2.14 | 0.47  |
| Q2KN98_CYTA_MOUSE  | Specc1 | Cytospin-A OS=Mus musc K.M*AEQDNKEAQEM*IGALK.E                | 23.39  | 8.31   | 2.82 | 0.36  |
| Q2KN98_CYTA_MOUSE  | Specc1 | Cytospin-A OS=Mus musc K.QIEDLN*MLEK#L                        | 11.06  | 3.08   | 3.58 | 0.28  |
| Q2KN98_CYTA_MOUSE  | Specc1 | Cytospin-A OS=Mus musc R.SDM*KHETFELEVEQHR@.A                 | 13.04  | 4.96   | 2.63 | 0.38  |
| Q2KN98_CYTA_MOUSE  | Specc1 | Cytospin-A OS=Mus musc K.SEAQEIGDLK#R                         | 12.47  | 5.15   | 2.42 | 0.41  |
| Q2KN98_CYTA_MOUSE  | Specc1 | Cytospin-A OS=Mus musc K.SFDSASQVFNAAAAIPR@.T                 | 23.48  | 10.22  | 2.30 | 0.44  |
| Q2KN98_CYTA_MOUSE  | Specc1 | Cytospin-A OS=Mus musc R.SLLEHHSIVVIDEVK#S                    | 42.79  | 20.36  | 2.10 | 0.48  |
| Q2KN98_CYTA_MOUSE  | Specc1 | Cytospin-A OS=Mus musc R.SSTSEPTTVK#T                         | 31.05  | 15.56  | 2.00 | 0.50  |
| Q2KN98_CYTA_MOUSE  | Specc1 | Cytospin-A OS=Mus musc K.TK#DVEIHLR@.N                        | 29.14  | 7.50   | 3.88 | 0.26  |
| Q2KN98_CYTA_MOUSE  | Specc1 | Cytospin-A OS=Mus musc K.TPPAAAVSPM*QR@.H                     | 16.54  | 9.07   | 1.82 | 0.55  |
| Q2KN98_CYTA_MOUSE  | Specc1 | Cytospin-A OS=Mus musc K.VAELYSIHNSGDKSDIQDLESVR.L            | 60.46  | 23.97  | 2.52 | 0.40  |
| Q2KN98_CYTA_MOUSE  | Specc1 | Cytospin-A OS=Mus musc K.VK#DHLTLAK#T                         | 14.28  | 5.08   | 2.81 | 0.36  |
| Q2KN98_CYTA_MOUSE  | Specc1 | Cytospin-A OS=Mus musc R.VVYNM*NAVER@.D                       | 13.80  | 10.59  | 1.30 | 0.77  |
| Q62504_MINT_MOUSE  | Spn    | Msx2-interacting protein R.GLDETYSIASR@.S                     | 5.58   | 24.21  | 0.23 | 4.34  |
| Q62504_MINT_MOUSE  | Spn    | Msx2-interacting protein K.ITSVISR@.M                         | 44.97  | 11.95  | 3.76 | 0.27  |
| Q62504_MINT_MOUSE  | Spn    | Msx2-interacting protein R.YGLVFFR@.Q                         | 12.23  | 3.72   | 3.29 | 0.30  |
| Q9J1A7_SPHK2_MOUSE | Sphk2  | Sphingosine kinase 2 OS=R.GVPLSGDQETPELLPR@.K                 | 6.00   | 1.99   | 3.02 | 0.33  |
| Q9J1A7_SPHK2_MOUSE | Sphk2  | Sphingosine kinase 2 OS=R.LLILVNPFGGR@.G                      | 7.42   | 1.52   | 4.87 | 0.21  |
| Q61142_SPIN1_MOUSE | Spin1  | Spindlin-1 OS=Mus musc K.GTVLDQVVPVPSLYLK#Y                   | 12.73  | 14.71  | 0.87 | 1.16  |
| Q61142_SPIN1_MOUSE | Spin1  | Spindlin-1 OS=Mus musc R.VSALVLR@.D                           | 78.23  | 50.03  | 1.56 | 0.64  |
| Q61142_SPIN1_MOUSE | Spin1  | Spindlin-1 OS=Mus musc K.GTVLDQVVPVPSLYLK#Y                   | 4.94   | 8.52   | 0.58 | 1.73  |
| Q9WTK8_SP011_MOUSE | Spo11  | Meiotic recombination c R.GAGETAGATR.V                        | 1.68   | 26.25  | 0.06 | 15.59 |
| Q3TFQ1_SPRY7_MOUSE | Spryd7 | SPRY domain-containing K.IQSTGIWGVGATQK#V                     | 6.86   | 1.57   | 4.36 | 0.23  |
| Q3TFQ1_SPRY7_MOUSE | Spryd7 | SPRY domain-containing K.VNLNQLPGR@.D                         | 5.41   | 3.78   | 1.43 | 0.70  |
| P16546_SPTN1_MOUSE | Sptan1 | Spectrin alpha chain, noi R.EAFNTEK#GSDSLDSVEALIK#K           | 10.81  | 2.28   | 4.74 | 0.21  |
| P16546_SPTN1_MOUSE | Sptan1 | Spectrin alpha chain, noi K.IAALQAFADQLJAVDHYAK#G             | 17.35  | 12.37  | 1.40 | 0.71  |
| P16546_SPTN1_MOUSE | Sptan1 | Spectrin alpha chain, noi R.LAALADQWFLVQK#S                   | 6.85   | 11.23  | 0.61 | 1.64  |
| P16546_SPTN1_MOUSE | Sptan1 | Spectrin alpha chain, noi R.LEESLEYQQVAVVEEAWINEK#M           | 6.34   | 2.34   | 2.71 | 0.37  |
| P16546_SPTN1_MOUSE | Sptan1 | Spectrin alpha chain, noi R.SSLSAQADFNQLAELDR@.Q              | 6.85   | 27.21  | 0.25 | 3.97  |
| P16546_SPTN1_MOUSE | Sptan1 | Spectrin alpha chain, noi K.ADVVESWIK#E                       | 38.31  | 17.93  | 2.14 | 0.47  |
| P16546_SPTN1_MOUSE | Sptan1 | Spectrin alpha chain, noi K.AINVOEK#I                         | 106.21 | 71.73  | 1.48 | 0.68  |
| P16546_SPTN1_MOUSE | Sptan1 | Spectrin alpha chain, noi K.AK#LDENSAFLQFNWK#A                | 10.60  | 6.37   | 1.66 | 0.60  |
| P16546_SPTN1_MOUSE | Sptan1 | Spectrin alpha chain, noi K.ALINADELANDVAGAEALLDR@.H          | 239.32 | 100.62 | 2.38 | 0.42  |
| P16546_SPTN1_MOUSE | Sptan1 | Spectrin alpha chain, noi K.ALINADELANDVAGAEALLDR.H           | 116.74 | 42.92  | 2.72 | 0.37  |
| P16546_SPTN1_MOUSE | Sptan1 | Spectrin alpha chain, noi K.ASAFNSWFENAEEDLTPVR@.C            | 8.02   | 5.23   | 1.53 | 0.65  |
| P16546_SPTN1_MOUSE | Sptan1 | Spectrin alpha chain, noi R.DADETK#EWIEEK#N                   | 30.52  | 8.96   | 3.41 | 0.29  |
| P16546_SPTN1_MOUSE | Sptan1 | Spectrin alpha chain, noi R.DAELEK#WIEEK#L                    | 20.25  | 8.65   | 2.34 | 0.43  |
| P16546_SPTN1_MOUSE | Sptan1 | Spectrin alpha chain, noi R.DGHVSLQEYM*AFM*ISR@.E             | 10.31  | 3.98   | 2.59 | 0.39  |
| P16546_SPTN1_MOUSE | Sptan1 | Spectrin alpha chain, noi R.DLAALDK#V                         | 25.28  | 8.20   | 3.08 | 0.32  |
| P16546_SPTN1_MOUSE | Sptan1 | Spectrin alpha chain, noi R.DLAALDK#V#K#A                     | 81.46  | 33.50  | 2.43 | 0.41  |
| P16546_SPTN1_MOUSE | Sptan1 | Spectrin alpha chain, noi R.DLAALDK#V                         | 35.88  | 15.65  | 2.29 | 0.44  |
| P16546_SPTN1_MOUSE | Sptan1 | Spectrin alpha chain, noi R.DLAALDK#VNSLGETAQR@.L             | 128.33 | 45.92  | 2.79 | 0.36  |
| P16546_SPTN1_MOUSE | Sptan1 | Spectrin alpha chain, noi K.DLASVNLK.K                        | 10.89  | 10.12  | 1.08 | 0.93  |
| P16546_SPTN1_MOUSE | Sptan1 | Spectrin alpha chain, noi R.DLASVNLK.R@.K                     | 135.12 | 53.47  | 2.53 | 0.40  |
| P16546_SPTN1_MOUSE | Sptan1 | Spectrin alpha chain, noi K.DLIGVQNLK.K                       | 38.10  | 16.36  | 2.33 | 0.43  |
| P16546_SPTN1_MOUSE | Sptan1 | Spectrin alpha chain, noi K.DLNSQADSLM*TSADFDSQV#K.E          | 31.37  | 15.84  | 1.98 | 0.51  |
| P16546_SPTN1_MOUSE | Sptan1 | Spectrin alpha chain, noi R.DLSSVQTLTK#Q                      | 168.72 | 81.14  | 2.08 | 0.48  |
| P16546_SPTN1_MOUSE | Sptan1 | Spectrin alpha chain, noi R.DLTVQNLK.R@.K                     | 100.51 | 40.94  | 2.45 | 0.41  |
| P16546_SPTN1_MOUSE | Sptan1 | Spectrin alpha chain, noi K.DLTVQNLK.R                        | 30.24  | 16.35  | 1.85 | 0.54  |
| P16546_SPTN1_MOUSE | Sptan1 | Spectrin alpha chain, noi R.DLTSVWTEM*#K#A                    | 47.93  | 20.56  | 2.33 | 0.43  |
| P16546_SPTN1_MOUSE | Sptan1 | Spectrin alpha chain, noi R.DLTSVWTEM*#K#A                    | 15.57  | 4.87   | 3.20 | 0.31  |
| P16546_SPTN1_MOUSE | Sptan1 | Spectrin alpha chain, noi R.DM*DEESWIK#E                      | 17.00  | 10.30  | 1.65 | 0.61  |
| P16546_SPTN1_MOUSE | Sptan1 | Spectrin alpha chain, noi R.DTEQVDNWM*#K#Q                    | 23.22  | 8.94   | 2.60 | 0.38  |
| P16546_SPTN1_MOUSE | Sptan1 | Spectrin alpha chain, noi R.DVDEIEAWISEK#L                    | 96.62  | 46.28  | 2.09 | 0.48  |
| P16546_SPTN1_MOUSE | Sptan1 | Spectrin alpha chain, noi R.DVDEIEAWISEK#L                    | 52.74  | 32.65  | 1.62 | 0.62  |
| P16546_SPTN1_MOUSE | Sptan1 | Spectrin alpha chain, noi R.DVDEIEAWISEK#L                    | 77.76  | 31.73  | 2.45 | 0.41  |
| P16546_SPTN1_MOUSE | Sptan1 | Spectrin alpha chain, noi K.DVTGAELLER@.H                     | 76.59  | 33.73  | 2.27 | 0.44  |
| P16546_SPTN1_MOUSE | Sptan1 | Spectrin alpha chain, noi K.EAALTEVEGADLEQEVVLQK#K            | 119.44 | 53.95  | 2.21 | 0.45  |
| P16546_SPTN1_MOUSE | Sptan1 | Spectrin alpha chain, noi R.EAFNTEK#GSDSLDSVEALIK#K           | 238.90 | 94.12  | 2.54 | 0.39  |
| P16546_SPTN1_MOUSE | Sptan1 | Spectrin alpha chain, noi R.EANELQQWITEK#E                    | 94.16  | 43.12  | 2.18 | 0.46  |
| P16546_SPTN1_MOUSE | Sptan1 | Spectrin alpha chain, noi R.EANQQQFNR@.N                      | 53.74  | 23.38  | 2.30 | 0.43  |
| P16546_SPTN1_MOUSE | Sptan1 | Spectrin alpha chain, noi R.EELTNWQIR@.T                      | 17.72  | 6.03   | 2.94 | 0.34  |
| P16546_SPTN1_MOUSE | Sptan1 | Spectrin alpha chain, noi K.EELYQLTR@.E                       | 50.34  | 21.49  | 2.34 | 0.43  |
| P16546_SPTN1_MOUSE | Sptan1 | Spectrin alpha chain, noi R.EKEPIVSTOYGDDESAELK.K             | 18.24  | 14.19  | 1.29 | 0.78  |
| P16546_SPTN1_MOUSE | Sptan1 | Spectrin alpha chain, noi K.EK#ELM*ASDFGR@.D                  | 8.07   | 4.34   | 1.86 | 0.54  |
| P16546_SPTN1_MOUSE | Sptan1 | Spectrin alpha chain, noi K.EK#ELDIDQER@.T                    | 13.61  | 7.63   | 1.78 | 0.56  |
| P16546_SPTN1_MOUSE | Sptan1 | Spectrin alpha chain, noi R.ELPTAFDYVEFTR@.S                  | 117.70 | 104.53 | 1.13 | 0.89  |
| P16546_SPTN1_MOUSE | Sptan1 | Spectrin alpha chain, noi R.ENLLEQGSIALR@.Q                   | 98.32  | 46.98  | 2.09 | 0.48  |
| P16546_SPTN1_MOUSE | Sptan1 | Spectrin alpha chain, noi K.EQLM*ASDFDGR@.D                   | 24.53  | 9.82   | 2.50 | 0.40  |
| P16546_SPTN1_MOUSE | Sptan1 | Spectrin alpha chain, noi K.EQLM*ASDFDGR@DLASVQALLR@.K        | 17.48  | 5.58   | 3.13 | 0.32  |
| P16546_SPTN1_MOUSE | Sptan1 | Spectrin alpha chain, noi R.FNR@DVDEIEAWISEK#E                | 41.12  | 20.37  | 2.02 | 0.50  |
| P16546_SPTN1_MOUSE | Sptan1 | Spectrin alpha chain, noi K.GEIDAHEDSF#K.S                    | 8.92   | 3.90   | 2.29 | 0.44  |
| P16546_SPTN1_MOUSE | Sptan1 | Spectrin alpha chain, noi R.GK#DLIGVQNLK#K                    | 90.40  | 28.80  | 3.26 | 0.31  |
| P16546_SPTN1_MOUSE | Sptan1 | Spectrin alpha chain, noi R.GK#DLIGVQNLK#K#H                  | 11.10  | 6.06   | 1.83 | 0.55  |
| P16546_SPTN1_MOUSE | Sptan1 | Spectrin alpha chain, noi R.GLVSSDELAK#D                      | 55.34  | 23.53  | 2.35 | 0.43  |
| P16546_SPTN1_MOUSE | Sptan1 | Spectrin alpha chain, noi R.GLVSSDELAK#DVTGAEALLER.H          | 196.09 | 81.50  | 2.41 | 0.42  |
| P16546_SPTN1_MOUSE | Sptan1 | Spectrin alpha chain, noi R.GLVSSDELAK#DVTGAEALLER.H          | 10.07  | 4.12   | 2.44 | 0.41  |
| P16546_SPTN1_MOUSE | Sptan1 | Spectrin alpha chain, noi K.GNAM*VEEGHFAEDVK#A                | 9.37   | 3.93   | 2.38 | 0.42  |
| P16546_SPTN1_MOUSE | Sptan1 | Spectrin alpha chain, noi K.GR@ELPTAFDYVEFTR@.S               | 44.67  | 13.61  | 3.28 | 0.30  |
| P16546_SPTN1_MOUSE | Sptan1 | Spectrin alpha chain, noi R.GVIDM*GNSLIER@.G                  | 69.00  | 30.29  | 2.28 | 0.44  |
| P16546_SPTN1_MOUSE | Sptan1 | Spectrin alpha chain, noi K.HALLEADVAHQQDR@.I                 | 66.51  | 26.70  | 2.49 | 0.40  |
| P16546_SPTN1_MOUSE | Sptan1 | Spectrin alpha chain, noi K.HQAFEAELHANADR@.I                 | 135.69 | 64.60  | 2.10 | 0.48  |

|                     |        |                                                              |        |        |       |      |
|---------------------|--------|--------------------------------------------------------------|--------|--------|-------|------|
| P16546_SPTN1_MOUSE  | Sptn1  | Spectrin alpha chain, nor K.HQAFEAELSANSQR@.I                | 18.45  | 5.29   | 3.49  | 0.29 |
| P16546_SPTN1_MOUSE  | Sptn1  | Spectrin alpha chain, nor K.HQALQAEIAGHEPR@.I                | 67.57  | 31.14  | 2.17  | 0.46 |
| P16546_SPTN1_MOUSE  | Sptn1  | Spectrin alpha chain, nor K.HQLLEADISAHEDR@.L                | 37.50  | 19.32  | 1.94  | 0.52 |
| P16546_SPTN1_MOUSE  | Sptn1  | Spectrin alpha chain, nor K.IAALQAFADQLIADVHYAK#.G           | 377.96 | 170.11 | 2.22  | 0.45 |
| P16546_SPTN1_MOUSE  | Sptn1  | Spectrin alpha chain, nor R.IDGITIQAR@.Q                     | 61.93  | 30.84  | 2.01  | 0.50 |
| P16546_SPTN1_MOUSE  | Sptn1  | Spectrin alpha chain, nor K.IEDLGAAM*EEALILDNK#.Y            | 11.62  | 7.00   | 1.66  | 0.60 |
| P16546_SPTN1_MOUSE  | Sptn1  | Spectrin alpha chain, nor K.IEDLGAAMEALILDNK#.Y              | 6.47   | 4.93   | 1.31  | 0.76 |
| P16546_SPTN1_MOUSE  | Sptn1  | Spectrin alpha chain, nor K.ITALDEFATK#.L                    | 159.01 | 64.92  | 2.45  | 0.41 |
| P16546_SPTN1_MOUSE  | Sptn1  | Spectrin alpha chain, nor K.K#ASAFNSWFENAEEDLTPVR@.C         | 11.25  | 3.80   | 2.96  | 0.34 |
| P16546_SPTN1_MOUSE  | Sptn1  | Spectrin alpha chain, nor K.K#FEFQDILAAHEER@.V               | 29.94  | 29.96  | 2.32  | 0.43 |
| P16546_SPTN1_MOUSE  | Sptn1  | Spectrin alpha chain, nor K.K#HGDILLLNSTNK#.D                | 23.01  | 8.34   | 2.76  | 0.36 |
| P16546_SPTN1_MOUSE  | Sptn1  | Spectrin alpha chain, nor K.K#HGDILLLNSTNK#DWWK#.V           | 29.94  | 17.81  | 1.68  | 0.59 |
| P16546_SPTN1_MOUSE  | Sptn1  | Spectrin alpha chain, nor K.K#HEAFEDFTVHK#.D                 | 32.38  | 17.67  | 1.83  | 0.55 |
| P16546_SPTN1_MOUSE  | Sptn1  | Spectrin alpha chain, nor K.K#HEALM*SDLSAYGSSIQALR@.E        | 13.85  | 3.79   | 3.65  | 0.27 |
| P16546_SPTN1_MOUSE  | Sptn1  | Spectrin alpha chain, nor K.K#HQALQAEIAGHEPR@.I              | 16.54  | 6.37   | 2.60  | 0.39 |
| P16546_SPTN1_MOUSE  | Sptn1  | Spectrin alpha chain, nor K.K#IEDLGAAM*EEALILDNK#.Y          | 64.53  | 23.02  | 2.80  | 0.36 |
| P16546_SPTN1_MOUSE  | Sptn1  | Spectrin alpha chain, nor K.K#IEDLGAAMEALILDNK#.Y            | 21.50  | 12.30  | 1.75  | 0.57 |
| P16546_SPTN1_MOUSE  | Sptn1  | Spectrin alpha chain, nor K.K#LDPAQSASR@.E                   | 85.63  | 45.88  | 1.87  | 0.54 |
| P16546_SPTN1_MOUSE  | Sptn1  | Spectrin alpha chain, nor K.K#LSDNTITGEEIQQR.L               | 26.52  | 11.45  | 2.32  | 0.43 |
| P16546_SPTN1_MOUSE  | Sptn1  | Spectrin alpha chain, nor R.K#VEDLFTFAK#.K                   | 83.11  | 45.51  | 1.83  | 0.55 |
| P16546_SPTN1_MOUSE  | Sptn1  | Spectrin alpha chain, nor R.K#VEDLFTFAK.K                    | 73.65  | 29.78  | 2.47  | 0.40 |
| P16546_SPTN1_MOUSE  | Sptn1  | Spectrin alpha chain, nor R.LAALADQWQFLVQK#.S                | 127.78 | 54.72  | 2.33  | 0.43 |
| P16546_SPTN1_MOUSE  | Sptn1  | Spectrin alpha chain, nor R.LAQFVHWHK.E                      | 119.70 | 55.42  | 2.16  | 0.46 |
| P16546_SPTN1_MOUSE  | Sptn1  | Spectrin alpha chain, nor K.LDENSALQFNW#.A                   | 35.05  | 15.75  | 2.22  | 0.45 |
| P16546_SPTN1_MOUSE  | Sptn1  | Spectrin alpha chain, nor K.LILDQER@.T                       | 19.36  | 8.26   | 2.34  | 0.43 |
| P16546_SPTN1_MOUSE  | Sptn1  | Spectrin alpha chain, nor R.LEAALAAHEPAIQGVLDGK#.K           | 21.07  | 11.35  | 1.86  | 0.54 |
| P16546_SPTN1_MOUSE  | Sptn1  | Spectrin alpha chain, nor R.LEAALAAHEPAIQGVLDGK#.L           | 12.76  | 4.50   | 2.83  | 0.35 |
| P16546_SPTN1_MOUSE  | Sptn1  | Spectrin alpha chain, nor R.LEESLEYQQVANVEEAAWINEK#.M        | 40.75  | 16.64  | 2.45  | 0.41 |
| P16546_SPTN1_MOUSE  | Sptn1  | Spectrin alpha chain, nor K.LFGAAEQR@.F                      | 150.55 | 62.32  | 2.42  | 0.41 |
| P16546_SPTN1_MOUSE  | Sptn1  | Spectrin alpha chain, nor K.LGSDHDLR#.K                      | 45.16  | 19.40  | 2.33  | 0.43 |
| P16546_SPTN1_MOUSE  | Sptn1  | Spectrin alpha chain, nor K.LGESQLQQFSR.D                    | 116.97 | 53.70  | 2.18  | 0.46 |
| P16546_SPTN1_MOUSE  | Sptn1  | Spectrin alpha chain, nor R.R.#DLNSQADSLSM*TSFAFDTSQVK#.E    | 50.63  | 24.26  | 2.42  | 0.41 |
| P16546_SPTN1_MOUSE  | Sptn1  | Spectrin alpha chain, nor R.R.#DLNSQADSLSM*TSFAFDTSQVK#.E    | 7.65   | 4.20   | 1.82  | 0.55 |
| P16546_SPTN1_MOUSE  | Sptn1  | Spectrin alpha chain, nor K.LLVSESDYGR@.D                    | 60.63  | 28.11  | 2.16  | 0.46 |
| P16546_SPTN1_MOUSE  | Sptn1  | Spectrin alpha chain, nor K.LLVSESDYGR@DLTGQVNLR@.K          | 14.46  | 11.52  | 1.26  | 0.80 |
| P16546_SPTN1_MOUSE  | Sptn1  | Spectrin alpha chain, nor R.LM*VHTVATFNSIK#.E                | 48.07  | 15.74  | 3.05  | 0.33 |
| P16546_SPTN1_MOUSE  | Sptn1  | Spectrin alpha chain, nor R.LQQSHPLSASQVQK#.R                | 102.53 | 43.45  | 2.36  | 0.42 |
| P16546_SPTN1_MOUSE  | Sptn1  | Spectrin alpha chain, nor K.LSDNTITGEEIQQR@.L                | 98.36  | 45.69  | 2.15  | 0.46 |
| P16546_SPTN1_MOUSE  | Sptn1  | Spectrin alpha chain, nor K.LSELNQK#.W                       | 42.50  | 23.72  | 1.79  | 0.56 |
| P16546_SPTN1_MOUSE  | Sptn1  | Spectrin alpha chain, nor K.LSILSEER@.T                      | 117.63 | 48.32  | 2.43  | 0.41 |
| P16546_SPTN1_MOUSE  | Sptn1  | Spectrin alpha chain, nor R.M*KRQVEELVLSLLEGEK#.R            | 93.67  | 4.95   | 18.91 | 0.05 |
| P16546_SPTN1_MOUSE  | Sptn1  | Spectrin alpha chain, nor R.M*NEVISLWK#.K                    | 50.79  | 26.76  | 1.90  | 0.53 |
| P16546_SPTN1_MOUSE  | Sptn1  | Spectrin alpha chain, nor R.M#NEVISLWK#.K                    | 13.07  | 4.62   | 2.83  | 0.35 |
| P16546_SPTN1_MOUSE  | Sptn1  | Spectrin alpha chain, nor R.M*QHNLQEQI@.N                    | 67.55  | 24.30  | 2.78  | 0.36 |
| P16546_SPTN1_MOUSE  | Sptn1  | Spectrin alpha chain, nor R.M*QHNLQEQI@.N                    | 13.89  | 5.92   | 2.35  | 0.43 |
| P16546_SPTN1_MOUSE  | Sptn1  | Spectrin alpha chain, nor K.M*TLVASEDYGDTLAAIQGLLK#.K        | 106.20 | 48.38  | 2.20  | 0.46 |
| P16546_SPTN1_MOUSE  | Sptn1  | Spectrin alpha chain, nor R.NTTGVTEALK#.E                    | 47.41  | 21.62  | 2.19  | 0.46 |
| P16546_SPTN1_MOUSE  | Sptn1  | Spectrin alpha chain, nor K.QDEVNAWQR.L                      | 20.90  | 10.62  | 1.97  | 0.51 |
| P16546_SPTN1_MOUSE  | Sptn1  | Spectrin alpha chain, nor R.QEFAAGHANFHQWQI@.T               | 10.42  | 5.25   | 1.99  | 0.50 |
| P16546_SPTN1_MOUSE  | Sptn1  | Spectrin alpha chain, nor R.QFQDAGHFDAENIK#.K                | 88.16  | 40.83  | 2.16  | 0.46 |
| P16546_SPTN1_MOUSE  | Sptn1  | Spectrin alpha chain, nor K.QQNFNTGIX#.D                     | 21.58  | 15.57  | 1.39  | 0.72 |
| P16546_SPTN1_MOUSE  | Sptn1  | Spectrin alpha chain, nor R.QQVAPM*DEDTGHELVLYDYQEK#.S       | 4.92   | 19.11  | 2.50  | 0.40 |
| P16546_SPTN1_MOUSE  | Sptn1  | Spectrin alpha chain, nor K.QVEELYQLLEGEK#.R                 | 4.92   | 2.94   | 1.67  | 0.60 |
| P16546_SPTN1_MOUSE  | Sptn1  | Spectrin alpha chain, nor R.R@AQLADSFLQQFFR@.D               | 9.25   | 9.59   | 3.08  | 0.32 |
| P16546_SPTN1_MOUSE  | Sptn1  | Spectrin alpha chain, nor K.R@EELTNVQEQI@.T                  | 86.97  | 36.28  | 2.40  | 0.42 |
| P16546_SPTN1_MOUSE  | Sptn1  | Spectrin alpha chain, nor K.R@LEAALAAHEPAIQGVLDGK#.K         | 10.08  | 4.19   | 2.41  | 0.42 |
| P16546_SPTN1_MOUSE  | Sptn1  | Spectrin alpha chain, nor K.R@LEAALAAHEPAIQGVLDGK#.L         | 47.45  | 20.29  | 2.34  | 0.43 |
| P16546_SPTN1_MOUSE  | Sptn1  | Spectrin alpha chain, nor R.R@QDEDSLQAOQYFADANAESWVR@.E      | 27.51  | 13.18  | 2.09  | 0.48 |
| P16546_SPTN1_MOUSE  | Sptn1  | Spectrin alpha chain, nor R.R@QDEDSLQAOQYFADANAESWVR@.E      | 6.61   | 2.40   | 2.75  | 0.36 |
| P16546_SPTN1_MOUSE  | Sptn1  | Spectrin alpha chain, nor K.SADESGQALLAASHYASDEV@.E          | 179.69 | 74.36  | 2.42  | 0.41 |
| P16546_SPTN1_MOUSE  | Sptn1  | Spectrin alpha chain, nor K.SADESGQALLAASHYASDEV@.E          | 4.41   | 1.54   | 2.86  | 0.35 |
| P16546_SPTN1_MOUSE  | Sptn1  | Spectrin alpha chain, nor R.SK#GESQLQQFSR@.D                 | 23.83  | 9.02   | 2.64  | 0.38 |
| P16546_SPTN1_MOUSE  | Sptn1  | Spectrin alpha chain, nor R.SLQQLAEER@.L                     | 151.25 | 60.10  | 2.52  | 0.40 |
| P16546_SPTN1_MOUSE  | Sptn1  | Spectrin alpha chain, nor R.SQLLGSHEVQR.F                    | 43.70  | 16.46  | 2.66  | 0.38 |
| P16546_SPTN1_MOUSE  | Sptn1  | Spectrin alpha chain, nor K.SSEIESAFR@.A                     | 105.50 | 47.48  | 2.22  | 0.45 |
| P16546_SPTN1_MOUSE  | Sptn1  | Spectrin alpha chain, nor R.SSLSAQADFNQLAELDR@.Q             | 117.75 | 53.81  | 2.19  | 0.46 |
| P16546_SPTN1_MOUSE  | Sptn1  | Spectrin alpha chain, nor R.TALLELVELR@.R                    | 67.86  | 31.77  | 2.14  | 0.47 |
| P16546_SPTN1_MOUSE  | Sptn1  | Spectrin alpha chain, nor K.TATDEAYK#DPSNLQK#.V              | 124.51 | 66.05  | 1.89  | 0.53 |
| P16546_SPTN1_MOUSE  | Sptn1  | Spectrin alpha chain, nor K.TK#QDEVNAWQR@.L                  | 37.75  | 15.39  | 2.45  | 0.41 |
| P16546_SPTN1_MOUSE  | Sptn1  | Spectrin alpha chain, nor K.VAEDLESEGLM*AEVQAVQQQEVGAM*PR@.D | 40.52  | 17.38  | 2.33  | 0.43 |
| P16546_SPTN1_MOUSE  | Sptn1  | Spectrin alpha chain, nor K.VAEDLESEGLM*AEVQAVQQQEVGAM*PR@.D | 6.85   | 4.11   | 1.67  | 0.60 |
| P16546_SPTN1_MOUSE  | Sptn1  | Spectrin alpha chain, nor R.VASNPYFTM*FALEETWR@.N            | 21.03  | 9.89   | 2.13  | 0.47 |
| P16546_SPTN1_MOUSE  | Sptn1  | Spectrin alpha chain, nor K.VLETAEQI@.R                      | 197.56 | 87.63  | 2.25  | 0.44 |
| P16546_SPTN1_MOUSE  | Sptn1  | Spectrin alpha chain, nor R.VNEVQSFAAK#.L                    | 140.63 | 69.94  | 2.01  | 0.50 |
| P16546_SPTN1_MOUSE  | Sptn1  | Spectrin alpha chain, nor R.WTQLLANSATR@.K                   | 38.30  | 21.35  | 1.79  | 0.56 |
| P16546_SPTN1_MOUSE  | Sptn1  | Spectrin alpha chain, nor K.YTHESTVGLAQWVLDQLDQGLM*PR@.M     | 47.40  | 21.44  | 2.21  | 0.45 |
| E9Q447_E9Q447_MOUSE | Sptn1  | Spectrin alpha chain, nor R.QGQIDNQYQSLLEGEK#.R              | 31.65  | 13.62  | 2.32  | 0.43 |
| E9Q447_E9Q447_MOUSE | Sptn1  | Spectrin alpha chain, nor R.QGQIDNQYQSLLEGEK#.K              | 31.66  | 9.07   | 3.49  | 0.29 |
| Q62261_SPTB2_MOUSE  | Sptbn1 | Spectrin beta chain, non R.AFEDEM*SGR.S                      | 53.48  | 26.87  | 1.99  | 0.50 |
| Q62261_SPTB2_MOUSE  | Sptbn1 | Spectrin beta chain, non R.AK#DEQSAVSM*LK#.K                 | 22.18  | 11.22  | 1.98  | 0.51 |
| Q62261_SPTB2_MOUSE  | Sptbn1 | Spectrin beta chain, non R.AQITLPTSVTITSESSPK#.R             | 307.78 | 11.72  | 2.63  | 0.38 |
| Q62261_SPTB2_MOUSE  | Sptbn1 | Spectrin beta chain, non R.DASVAEAWLLGOEPLSSR.E              | 34.09  | 14.63  | 2.33  | 0.43 |
| Q62261_SPTB2_MOUSE  | Sptbn1 | Spectrin beta chain, non R.DASVAEAWLLGOEPLSSR@.E             | 85.40  | 44.47  | 1.92  | 0.52 |
| Q62261_SPTB2_MOUSE  | Sptbn1 | Spectrin beta chain, non R.DLDDFQSWLSR@.T                    | 81.70  | 39.17  | 2.09  | 0.48 |
| Q62261_SPTB2_MOUSE  | Sptbn1 | Spectrin beta chain, non R.DLM*LVW*EDVIR@.Q                  | 26.46  | 9.67   | 2.74  | 0.37 |
| Q62261_SPTB2_MOUSE  | Sptbn1 | Spectrin beta chain, non R.DLVAEAK#.L                        | 115.92 | 59.17  | 1.96  | 0.51 |
| Q62261_SPTB2_MOUSE  | Sptbn1 | Spectrin beta chain, non R.DQNTVELQR@.M                      | 77.02  | 33.27  | 2.31  | 0.43 |
| Q62261_SPTB2_MOUSE  | Sptbn1 | Spectrin beta chain, non R.DTGNIGQER@.V                      | 49.49  | 22.97  | 2.15  | 0.46 |
| Q62261_SPTB2_MOUSE  | Sptbn1 | Spectrin beta chain, non R.DVEDEILWVGER@.M                   | 66.54  | 32.65  | 2.04  | 0.49 |
| Q62261_SPTB2_MOUSE  | Sptbn1 | Spectrin beta chain, non R.DVSSVELLM*NNHQGK#.A               | 17.95  | 7.35   | 2.44  | 0.41 |
| Q62261_SPTB2_MOUSE  | Sptbn1 | Spectrin beta chain, non R.EAASELLM*TR@.L                    | 48.60  | 19.13  | 2.54  | 0.39 |
| Q62261_SPTB2_MOUSE  | Sptbn1 | Spectrin beta chain, non K.EAEK#LESHVDPQAAQLSR@.L            | 58.62  | 24.25  | 2.42  | 0.41 |
| Q62261_SPTB2_MOUSE  | Sptbn1 | Spectrin beta chain, non R.EASLGEASK#.L                      | 49.53  | 31.03  | 1.60  | 0.63 |
| Q62261_SPTB2_MOUSE  | Sptbn1 | Spectrin beta chain, non K.EIEELQSAQALSSQEGK#.S              | 45.37  | 21.80  | 2.08  | 0.48 |
| Q62261_SPTB2_MOUSE  | Sptbn1 | Spectrin beta chain, non R.EIGQSVDEVEK#.L                    | 102.70 | 40.47  | 2.54  | 0.39 |
| Q62261_SPTB2_MOUSE  | Sptbn1 | Spectrin beta chain, non K.EIQGHQPR@.J                       | 17.79  | 7.57   | 2.35  | 0.43 |
| Q62261_SPTB2_MOUSE  | Sptbn1 | Spectrin beta chain, non R.ENEVLEAWK#.S                      | 76.63  | 32.10  | 2.39  | 0.42 |
| Q62261_SPTB2_MOUSE  | Sptbn1 | Spectrin beta chain, non R.EQWANLEQLSAIR@.K                  | 74.88  | 31.36  | 2.39  | 0.42 |
| Q62261_SPTB2_MOUSE  | Sptbn1 | Spectrin beta chain, non R.ETWLSNQER@.L                      | 35.98  | 16.06  | 2.24  | 0.45 |
| Q62261_SPTB2_MOUSE  | Sptbn1 | Spectrin beta chain, non R.EVDDLEQWI@.E                      | 88.95  | 35.72  | 2.49  | 0.40 |
| Q62261_SPTB2_MOUSE  | Sptbn1 | Spectrin beta chain, non R.EVAVGSHLGGDYEHVTM*LQER@.F         | 31.44  | 13.45  | 2.34  | 0.43 |
| Q62261_SPTB2_MOUSE  | Sptbn1 | Spectrin beta chain, non K.FANSLVGVQQQLQAFNTYR.T             | 14.28  | 6.50   | 2.20  | 0.46 |
| Q62261_SPTB2_MOUSE  | Sptbn1 | Spectrin beta chain, non R.FESLEPEM*NNQASR@.V                | 65.55  | 30.69  | 2.14  | 0.47 |

|                             |          |                                                                   |        |        |      |      |
|-----------------------------|----------|-------------------------------------------------------------------|--------|--------|------|------|
| Q62261_SPTB2_MOUSE          | Sptbn1   | Spectrin beta chain, non-R.FESLEPEMNNQASR@.V                      | 5.17   | 3.31   | 1.56 | 0.64 |
| Q62261_SPTB2_MOUSE          | Sptbn1   | Spectrin beta chain, non-K.GDQVQNGPLPAEQGSPR@.M                   | 4.62   | 2.65   | 1.74 | 0.57 |
| Q62261_SPTB2_MOUSE          | Sptbn1   | Spectrin beta chain, non-K.GNLEVLDTFQSK#.M                        | 95.91  | 39.90  | 2.40 | 0.42 |
| Q62261_SPTB2_MOUSE          | Sptbn1   | Spectrin beta chain, non-K.HKDVAEITNVRPTDTHLQEQASALPOAHAESPDVK#.G | 26.44  | 7.22   | 3.66 | 0.27 |
| Q62261_SPTB2_MOUSE          | Sptbn1   | Spectrin beta chain, non-K.HLLGVDELQCK#.H                         | 92.24  | 38.69  | 2.38 | 0.42 |
| Q62261_SPTB2_MOUSE          | Sptbn1   | Spectrin beta chain, non-K.HQAFM*AEALSNK#.E                       | 7.00   | 2.66   | 2.63 | 0.38 |
| Q62261_SPTB2_MOUSE          | Sptbn1   | Spectrin beta chain, non-K.HQILEQAVEDYAEIVHQLSK#.T                | 136.25 | 62.36  | 2.18 | 0.46 |
| Q62261_SPTB2_MOUSE          | Sptbn1   | Spectrin beta chain, non-K.HR@PDLIDFDK#.L                         | 97.57  | 47.25  | 2.06 | 0.48 |
| Q62261_SPTB2_MOUSE          | Sptbn1   | Spectrin beta chain, non-R.IDDIFER@.S                             | 110.47 | 49.95  | 2.21 | 0.45 |
| Q62261_SPTB2_MOUSE          | Sptbn1   | Spectrin beta chain, non-K.IJSSDDYDK#.D                           | 31.79  | 12.23  | 2.60 | 0.38 |
| Q62261_SPTB2_MOUSE          | Sptbn1   | Spectrin beta chain, non-K.INAVVETGR@.R                           | 54.57  | 20.49  | 2.66 | 0.38 |
| Q62261_SPTB2_MOUSE          | Sptbn1   | Spectrin beta chain, non-R.ITDLYDRLR@.D                           | 82.33  | 39.45  | 2.09 | 0.48 |
| Q62261_SPTB2_MOUSE          | Sptbn1   | Spectrin beta chain, non-K.IVSSNDVGHDEQTSVLVK#.K                  | 159.89 | 73.07  | 2.19 | 0.46 |
| Q62261_SPTB2_MOUSE          | Sptbn1   | Spectrin beta chain, non-K.KHHEAIEDIAAYEER@.V                     | 66.85  | 28.70  | 2.33 | 0.43 |
| Q62261_SPTB2_MOUSE          | Sptbn1   | Spectrin beta chain, non-R.KHHYASEEK#EK#.L                        | 23.66  | 12.88  | 1.84 | 0.54 |
| Q62261_SPTB2_MOUSE          | Sptbn1   | Spectrin beta chain, non-R.KH#EIEELQSOQAQALSQEGK#.S               | 25.99  | 14.29  | 1.82 | 0.55 |
| Q62261_SPTB2_MOUSE          | Sptbn1   | Spectrin beta chain, non-R.K#QALQDTLALYK#.M                       | 6.84   | 2.30   | 2.98 | 0.34 |
| Q62261_SPTB2_MOUSE          | Sptbn1   | Spectrin beta chain, non-R.LAEISDVWEEM*#.T                        | 46.59  | 26.42  | 1.76 | 0.57 |
| Q62261_SPTB2_MOUSE          | Sptbn1   | Spectrin beta chain, non-R.LAEISDVWEEMK#.T                        | 20.89  | 9.92   | 2.11 | 0.47 |
| Q62261_SPTB2_MOUSE          | Sptbn1   | Spectrin beta chain, non-R.LAGIEER@.C                             | 82.73  | 38.36  | 2.16 | 0.46 |
| Q62261_SPTB2_MOUSE          | Sptbn1   | Spectrin beta chain, non-R.LEM*NLGLQK#.I                          | 38.56  | 19.56  | 1.97 | 0.51 |
| Q62261_SPTB2_MOUSE          | Sptbn1   | Spectrin beta chain, non-K.LLDPEDISVDHPDEK.S                      | 10.15  | 5.95   | 1.70 | 0.59 |
| Q62261_SPTB2_MOUSE          | Sptbn1   | Spectrin beta chain, non-K.LLEVLGSR#.L                            | 132.92 | 53.28  | 2.49 | 0.40 |
| Q62261_SPTB2_MOUSE          | Sptbn1   | Spectrin beta chain, non-K.LLTHENIK#NEIDNVEEDYQK#.M               | 97.50  | 50.29  | 1.98 | 0.51 |
| Q62261_SPTB2_MOUSE          | Sptbn1   | Spectrin beta chain, non-K.LLTHENIK#NEIDNVEEDYQK#.M               | 29.30  | 10.15  | 2.69 | 0.37 |
| Q62261_SPTB2_MOUSE          | Sptbn1   | Spectrin beta chain, non-R.LQAAAYAGDK#.A                          | 61.76  | 20.89  | 2.96 | 0.34 |
| Q62261_SPTB2_MOUSE          | Sptbn1   | Spectrin beta chain, non-R.LSDGNEVLFQAK#.D                        | 31.21  | 12.21  | 2.56 | 0.39 |
| Q62261_SPTB2_MOUSE          | Sptbn1   | Spectrin beta chain, non-R.LTTLELVLR@.F                           | 146.58 | 65.64  | 2.23 | 0.45 |
| Q62261_SPTB2_MOUSE          | Sptbn1   | Spectrin beta chain, non-R.LVSDGNJLTK#.M                          | 121.07 | 55.62  | 2.18 | 0.46 |
| Q62261_SPTB2_MOUSE          | Sptbn1   | Spectrin beta chain, non-R.LVSDGNJLTK#.M                          | 107.60 | 54.01  | 1.99 | 0.50 |
| Q62261_SPTB2_MOUSE          | Sptbn1   | Spectrin beta chain, non-K.M*TAQDM*SYDEAR@.N                      | 26.69  | 11.47  | 2.33 | 0.43 |
| Q62261_SPTB2_MOUSE          | Sptbn1   | Spectrin beta chain, non-K.M*WEVLETSQTQK#.A                       | 15.30  | 10.04  | 1.52 | 0.66 |
| Q62261_SPTB2_MOUSE          | Sptbn1   | Spectrin beta chain, non-K.NEIDNVEEDYQK#.M                        | 13.55  | 6.00   | 2.26 | 0.44 |
| Q62261_SPTB2_MOUSE          | Sptbn1   | Spectrin beta chain, non-K.QAEAFLNNOEVLVAHTEM*PTTLEGAAAIK#.K      | 47.24  | 20.92  | 2.26 | 0.44 |
| Q62261_SPTB2_MOUSE          | Sptbn1   | Spectrin beta chain, non-K.QAEAFLNNOEVLVAHTEM*PTTLEGAAAIK#.K      | 13.84  | 6.40   | 2.16 | 0.46 |
| Q62261_SPTB2_MOUSE          | Sptbn1   | Spectrin beta chain, non-K.QALQDTLALYK#.M                         | 73.77  | 31.14  | 2.37 | 0.42 |
| Q62261_SPTB2_MOUSE          | Sptbn1   | Spectrin beta chain, non-R.QLQEDAAR@.L                            | 49.40  | 19.26  | 2.56 | 0.39 |
| Q62261_SPTB2_MOUSE          | Sptbn1   | Spectrin beta chain, non-K.QQM*LENGM*EVR@.K                       | 18.34  | 9.32   | 1.97 | 0.51 |
| Q62261_SPTB2_MOUSE          | Sptbn1   | Spectrin beta chain, non-K.SAATWDER@.F                            | 35.40  | 14.95  | 2.37 | 0.42 |
| Q62261_SPTB2_MOUSE          | Sptbn1   | Spectrin beta chain, non-K.SALPAQSAALPAR@.T                       | 103.49 | 41.57  | 2.49 | 0.40 |
| Q62261_SPTB2_MOUSE          | Sptbn1   | Spectrin beta chain, non-K.SNAHYNLQANFNLAEQHLGLTK#.L              | 13.68  | 4.44   | 3.08 | 0.32 |
| Q62261_SPTB2_MOUSE          | Sptbn1   | Spectrin beta chain, non-R.SQNIITDSSSLNAEAIK@.Q                   | 117.95 | 49.83  | 2.37 | 0.42 |
| Q62261_SPTB2_MOUSE          | Sptbn1   | Spectrin beta chain, non-R.SQNIITDSSSLNAEAIK@.Q                   | 48.65  | 19.60  | 2.48 | 0.40 |
| Q62261_SPTB2_MOUSE          | Sptbn1   | Spectrin beta chain, non-K.T#VLETSQDGLDLAGVM*ALQR@.K              | 22.69  | 12.20  | 1.86 | 0.54 |
| Q62261_SPTB2_MOUSE          | Sptbn1   | Spectrin beta chain, non-R.TLETPAQM*EGLNLR@.K                     | 29.60  | 11.39  | 2.60 | 0.38 |
| Q62261_SPTB2_MOUSE          | Sptbn1   | Spectrin beta chain, non-R.TLETPAQM*EGLNLR@.K                     | 19.24  | 7.69   | 2.50 | 0.40 |
| Q62261_SPTB2_MOUSE          | Sptbn1   | Spectrin beta chain, non-R.TQLAASYELHK#.F                         | 24.48  | 11.42  | 2.14 | 0.47 |
| Q62261_SPTB2_MOUSE          | Sptbn1   | Spectrin beta chain, non-R.TQTAIASEDM*PNLTTEAEK#.L                | 19.39  | 15.07  | 1.29 | 0.78 |
| Q62261_SPTB2_MOUSE          | Sptbn1   | Spectrin beta chain, non-R.TQTAIASEDM*PNLTTEAEK#.L                | 12.84  | 8.07   | 1.59 | 0.63 |
| Q62261_SPTB2_MOUSE          | Sptbn1   | Spectrin beta chain, non-R.VAVVM*ALQR@.K                          | 206.96 | 80.14  | 2.58 | 0.39 |
| Q62261_SPTB2_MOUSE          | Sptbn1   | Spectrin beta chain, non-R.VDVTNNM*ADELINSGHSDAAIAEWK#.D          | 43.36  | 16.26  | 2.67 | 0.37 |
| Q62261_SPTB2_MOUSE          | Sptbn1   | Spectrin beta chain, non-K.VIESTQDGLDLAGVM*ALQR@.K                | 87.31  | 47.67  | 1.83 | 0.55 |
| Q62261_SPTB2_MOUSE          | Sptbn1   | Spectrin beta chain, non-K.VIESTQDGLDLAGVM*ALQR@.K                | 30.43  | 13.93  | 2.18 | 0.46 |
| Q62261_SPTB2_MOUSE          | Sptbn1   | Spectrin beta chain, non-K.VIESTQDGLDLAGVM*ALQR@.K                | 15.76  | 7.49   | 2.10 | 0.48 |
| Q62261_SPTB2_MOUSE          | Sptbn1   | Spectrin beta chain, non-K.VIESTQDGLDLAGVM*ALQR@.K                | 7.08   | 3.45   | 2.05 | 0.49 |
| Q62261_SPTB2_MOUSE          | Sptbn1   | Spectrin beta chain, non-K.VLDNIAETEK#.M                          | 80.49  | 46.75  | 1.72 | 0.58 |
| Q62261_SPTB2_MOUSE          | Sptbn1   | Spectrin beta chain, non-K.VLLSQDYGK#.H                           | 111.98 | 52.26  | 2.14 | 0.47 |
| Q62261_SPTB2_MOUSE          | Sptbn1   | Spectrin beta chain, non-R.VQAVAVAR@.E                            | 205.75 | 95.75  | 2.15 | 0.47 |
| Q62261_SPTB2_MOUSE          | Sptbn1   | Spectrin beta chain, non-R.WDVEDDWDNENSSAR@.L                     | 9.54   | 6.37   | 1.50 | 0.67 |
| Q62261_SPTB2_MOUSE          | Sptbn1   | Spectrin beta chain, non-R.WDVEDDWDNENSSAR@.L                     | 6.19   | 1.09   | 5.70 | 0.18 |
| Q9R112_SQRD_MOUSE           | Sqrdl    | Sulfide:quinone oxidoreductase K.EGNALFTFPNPK#.C                  | 8.82   | 3.41   | 2.59 | 0.39 |
| Q9R112_SQRD_MOUSE           | Sqrdl    | Sulfide:quinone oxidoreductase K.EGNALFTFPNPK#.C                  | 14.44  | 2.99   | 4.82 | 0.21 |
| Q9R112_SQRD_MOUSE           | Sqrdl    | Sulfide:quinone oxidoreductase K.YADALQEIR@.E                     | 9.26   | 8.62   | 1.07 | 0.93 |
| Q64337_SQSTM_MOUSE          | Sqstm1   | Sequestosome-1 OS=Mus K.LTPPTPSSSTGTEK#.S                         | 10.62  | 3.31   | 3.21 | 0.31 |
| Q64337_SQSTM_MOUSE          | Sqstm1   | Sequestosome-1 OS=Mus K.NYDGAALDTIQSK#.H                          | 10.82  | 5.93   | 1.82 | 0.55 |
| Q64337_SQSTM_MOUSE          | Sqstm1   | Sequestosome-1 OS=Mus K.NYDGAALDTIQSK#.H                          | 13.23  | 4.17   | 3.18 | 0.31 |
| Q497V5_SRB1_MOUSE           | Srb1     | S1 RNA-binding domain-K.VLNVDPTR@.S                               | 10.43  | 7.43   | 2.48 | 0.40 |
| A0A087WQ44_A0A087WQ44_MOUSE | Srcap    | Protein Srcap OS=Mus m R.AEQEIAALVEQLTPIER@.Y                     | 18.45  | 7.57   | 1.38 | 0.73 |
| A0A087WQ44_A0A087WQ44_MOUSE | Srcap    | Protein Srcap OS=Mus m R.DLLPVAVDLPESEK#.T                        | 4.12   | 3.00   | 1.37 | 0.73 |
| A0A087WQ44_A0A087WQ44_MOUSE | Srcap    | Protein Srcap OS=Mus m R.SPGPSHPFIFYTEAAR@.R                      | 8.56   | 3.76   | 2.28 | 0.44 |
| A0A087WQ44_A0A087WQ44_MOUSE | Srcap    | Protein Srcap OS=Mus m R.AEQEIAALVEQLTPIER@.Y                     | 17.77  | 5.86   | 3.03 | 0.33 |
| A0A087WQ44_A0A087WQ44_MOUSE | Srcap    | Protein Srcap OS=Mus m K.DLLPVAVDLPESEK#.T                        | 16.70  | 7.02   | 2.38 | 0.42 |
| A0A087WQ44_A0A087WQ44_MOUSE | Srcap    | Protein Srcap OS=Mus m R.FDLGLEGR@.R                              | 8.65   | 4.89   | 1.77 | 0.56 |
| A0A087WQ44_A0A087WQ44_MOUSE | Srcap    | Protein Srcap OS=Mus m R.SPFVLSLEEK#.V                            | 12.39  | 8.92   | 1.39 | 0.72 |
| A0A087WQ44_A0A087WQ44_MOUSE | Srcap    | Protein Srcap OS=Mus m R.SPGPSHPFIFYTEAAR@.R                      | 7.56   | 5.40   | 1.40 | 0.71 |
| A0A087WQ44_A0A087WQ44_MOUSE | Srcap    | Protein Srcap OS=Mus m K.TPIPLLRL@.G                              | 14.41  | 6.50   | 2.22 | 0.45 |
| A0A087WQ44_A0A087WQ44_MOUSE | Srcap    | Protein Srcap OS=Mus m R.VLIFTQM*TR@.M                            | 10.86  | 16.66  | 0.65 | 1.53 |
| Q8B2X4_SREK1_MOUSE          | Srek1    | Splicing regulatory glutamate K.FAFVEFADQNSVPR@.A                 | 20.57  | 8.83   | 2.33 | 0.43 |
| Q8B2X4_SREK1_MOUSE          | Srek1    | Splicing regulatory glutamate R.TVYVGNLNSQTTADQLLEFFK#.Q          | 23.90  | 8.69   | 2.75 | 0.36 |
| Q8B2X4_SREK1_MOUSE          | Srek1    | Splicing regulatory glutamate R.EAQSFISAAIEPEGSK#.S               | 10.87  | 3.35   | 3.24 | 0.31 |
| Q8B2X4_SREK1_MOUSE          | Srek1    | Splicing regulatory glutamate R.FAFVEFADQNSVPR@.A                 | 23.78  | 7.16   | 3.32 | 0.30 |
| Q8B2X4_SREK1_MOUSE          | Srek1    | Splicing regulatory glutamate R.M*AGDETQPTR@.F                    | 7.38   | 1.93   | 3.82 | 0.26 |
| Q8B2X4_SREK1_MOUSE          | Srek1    | Splicing regulatory glutamate R.TVYVGNLNSQTTADQLLEFFK#.Q          | 26.45  | 7.39   | 3.58 | 0.28 |
| Q4V9W2_SR1P_MOUSE           | Srek1ip1 | Protein SREK1IP1 OS=Mus K.R@DIVLNDVSSSTGSDSEENELNK#LQALQEK#.R     | 15.53  | 2.81   | 5.53 | 0.18 |
| Q4V9W2_SR1P_MOUSE           | Srek1ip1 | Protein SREK1IP1 OS=Mus K.R@DIVLNDVSSSTGSDSEENELNK#LQALQEK#.R     | 5.63   | 2.24   | 2.52 | 0.40 |
| Q91267_SRGP2_MOUSE          | Srgap2   | SLIT-ROBO Rho GTPase-activator K.ANQQTEQFYFTK#.M                  | 8.87   | 3.73   | 2.38 | 0.42 |
| Q91267_SRGP2_MOUSE          | Srgap2   | SLIT-ROBO Rho GTPase-activator K.RVQVSDSGR@.L                     | 10.64  | 7.01   | 1.52 | 0.66 |
| Q91267_SRGP2_MOUSE          | Srgap2   | SLIT-ROBO Rho GTPase-activator K.NEYLALAEATNASVFK#.Y              | 8.90   | 3.78   | 2.35 | 0.43 |
| Q91267_SRGP2_MOUSE          | Srgap2   | SLIT-ROBO Rho GTPase-activator K.VLNELYSVM*#.T                    | 8.39   | 13.50  | 0.62 | 1.61 |
| Q91267_SRGP2_MOUSE          | Srgap2   | SLIT-ROBO Rho GTPase-activator K.FVQVSDSGR@.L                     | 6.64   | 8.87   | 0.75 | 1.34 |
| P16254_SRP14_MOUSE          | Srp14    | Signal recognition particle K.FQM*AYSNLLR@.A                      | 12.55  | 3.28   | 3.83 | 0.26 |
| P16254_SRP14_MOUSE          | Srp14    | Signal recognition particle K.FQMAYSNLLR@.A                       | 4.05   | 4.14   | 0.98 | 1.02 |
| P16254_SRP14_MOUSE          | Srp14    | Signal recognition particle K.#HSTVSSK#.E                         | 46.58  | 14.82  | 3.14 | 0.32 |
| P16254_SRP14_MOUSE          | Srp14    | Signal recognition particle K.HSSVGELEPAENK#.C                    | 8.66   | 3.48   | 2.49 | 0.40 |
| G5E8T3_G5E8T3_MOUSE         | Srp19    | Signal recognition particle K.SGGADPSLQGEESK#.K                   | 29.99  | 12.94  | 2.32 | 0.43 |
| G5E8T3_G5E8T3_MOUSE         | Srp19    | Signal recognition particle K.SVM*LYVAEM*IPK#.L                   | 39.19  | 14.79  | 2.65 | 0.38 |
| G5E8T3_G5E8T3_MOUSE         | Srp19    | Signal recognition particle K.SVM*LYVAEM*IPK#.L                   | 2.60   | 3.12   | 0.83 | 1.20 |
| P14576_SRP54_MOUSE          | Srp54    | Signal recognition particle K.AFK#DKHVDVASVIVTK#.L                | 16.03  | 5.29   | 3.03 | 0.33 |
| P14576_SRP54_MOUSE          | Srp54    | Signal recognition particle R.AGAFDQLK#.Q                         | 70.35  | 22.83  | 3.08 | 0.32 |
| P14576_SRP54_MOUSE          | Srp54    | Signal recognition particle K.DKHVDVASVIVTK#.L                    | 23.83  | 7.48   | 3.18 | 0.31 |
| P14576_SRP54_MOUSE          | Srp54    | Signal recognition particle R.DM*YEQFINM*#.M                      | 37.22  | 7.90   | 4.71 | 0.21 |
| P14576_SRP54_MOUSE          | Srp54    | Signal recognition particle R.DVQELLTQTK#.F                       | 44.75  | 128.21 | 0.35 | 2.87 |
| P14576_SRP54_MOUSE          | Srp54    | Signal recognition particle K.FK#NENFEIIVDTSGR@.H                 | 85.64  | 26.82  | 3.19 | 0.31 |

|                     |       |                                                                      |        |       |      |      |
|---------------------|-------|----------------------------------------------------------------------|--------|-------|------|------|
| P14576_SRP54_MOUSE  | Srp54 | Signal recognition partic K.GGGALSAAVAATK#.S                         | 59.92  | 15.48 | 3.87 | 0.26 |
| P14576_SRP54_MOUSE  | Srp54 | Signal recognition partic K.HGQFTLR@.D                               | 92.79  | 34.69 | 2.67 | 0.37 |
| P14576_SRP54_MOUSE  | Srp54 | Signal recognition partic R.IPFYGSYTEM*DPVIIASEGVEK#.F               | 42.73  | 10.23 | 4.18 | 0.24 |
| P14576_SRP54_MOUSE  | Srp54 | Signal recognition partic K.LAYYYQR@.K                               | 51.97  | 18.81 | 2.76 | 0.36 |
| P14576_SRP54_MOUSE  | Srp54 | Signal recognition partic K.LDDNEALIEK#.L                            | 26.46  | 12.32 | 2.15 | 0.47 |
| P14576_SRP54_MOUSE  | Srp54 | Signal recognition partic K.LLGM*GDIEGLIDK#.V                        | 5.17   | 4.20  | 1.23 | 0.81 |
| P14576_SRP54_MOUSE  | Srp54 | Signal recognition partic K.LLGM*GDIEGLIDK#VNELK#.L                  | 22.36  | 13.69 | 1.63 | 0.61 |
| P14576_SRP54_MOUSE  | Srp54 | Signal recognition partic K.SAIDLEEM*ASGLNK#.R                       | 25.68  | 11.28 | 2.28 | 0.44 |
| P14576_SRP54_MOUSE  | Srp54 | Signal recognition partic R.SLSNATINEEVLNAM*LK#.E                    | 8.98   | 3.94  | 2.28 | 0.44 |
| P14576_SRP54_MOUSE  | Srp54 | Signal recognition partic R.SLSNATINEEVLNAMLK#.E                     | 10.11  | 3.05  | 3.31 | 0.30 |
| P14576_SRP54_MOUSE  | Srp54 | Signal recognition partic K.SPIIFITGHEHIDFEPFK#.T                    | 129.57 | 41.41 | 3.13 | 0.32 |
| P14576_SRP54_MOUSE  | Srp54 | Signal recognition partic K.VDVASVIVTK#.L                            | 41.08  | 8.98  | 4.58 | 0.22 |
| P14576_SRP54_MOUSE  | Srp54 | Signal recognition partic R.DVQELLTQYTK#.F                           | 8.44   | 2.79  | 3.02 | 0.33 |
| P14576_SRP54_MOUSE  | Srp54 | Signal recognition partic K.GGGALSAAVAATK#.S                         | 17.57  | 6.33  | 2.78 | 0.36 |
| P14576_SRP54_MOUSE  | Srp54 | Signal recognition partic R.IPFYGSYTEM*DPVIIASEGVEK#.F               | 8.11   | 1.80  | 4.50 | 0.22 |
| P14576_SRP54_MOUSE  | Srp54 | Signal recognition partic K.SPIIFITGHEHIDFEPFK#.T                    | 21.20  | 9.64  | 2.51 | 0.40 |
| Q8BMA6_SRP68_MOUSE  | Srp68 | Signal recognition partic K.ANKHEFGDLSLELQIK#.E                      | 33.31  | 10.71 | 3.11 | 0.32 |
| Q8BMA6_SRP68_MOUSE  | Srp68 | Signal recognition partic R.IFLGLADNEAAIVQAESEETK#.E                 | 12.95  | 5.19  | 2.49 | 0.40 |
| Q8BMA6_SRP68_MOUSE  | Srp68 | Signal recognition partic R.IFLGLADNEAAIVQAESEETK#HER@.L             | 12.95  | 20.70 | 4.46 | 0.22 |
| Q8BMA6_SRP68_MOUSE  | Srp68 | Signal recognition partic K.LASAFTEQAVLYNQR@.V                       | 25.22  | 6.36  | 3.97 | 0.25 |
| Q8BMA6_SRP68_MOUSE  | Srp68 | Signal recognition partic K.NSLK#DLPVQELITQVR@.S                     | 39.86  | 5.67  | 7.04 | 0.14 |
| Q8BMA6_SRP68_MOUSE  | Srp68 | Signal recognition partic K.QAATM*SEVEWR@.G                          | 18.80  | 3.95  | 4.77 | 0.21 |
| Q8BMA6_SRP68_MOUSE  | Srp68 | Signal recognition partic K.QIPGGSGGGSGGGSGGGSGGGR@.S                | 5.91   | 1.93  | 3.06 | 0.33 |
| Q8BMA6_SRP68_MOUSE  | Srp68 | Signal recognition partic R.SGTEGLLAEK#LEALITQTR@.A                  | 16.93  | 6.73  | 2.51 | 0.40 |
| Q8BMA6_SRP68_MOUSE  | Srp68 | Signal recognition partic R.SPR@PQDLIR@.L                            | 43.25  | 6.37  | 6.79 | 0.15 |
| Q8BMA6_SRP68_MOUSE  | Srp68 | Signal recognition partic R.VEEISPNIR@.Y                             | 69.38  | 18.07 | 3.84 | 0.26 |
| Q8BMA6_SRP68_MOUSE  | Srp68 | Signal recognition partic K.VSNLQYLSHYTYIK#.L                        | 33.26  | 6.08  | 5.47 | 0.18 |
| Q8BMA6_SRP68_MOUSE  | Srp68 | Signal recognition partic K.VTEELTDNR@.Y                             | 33.90  | 8.75  | 3.87 | 0.26 |
| Q8BMA6_SRP68_MOUSE  | Srp68 | Signal recognition partic K.WSEALVLYDR@.V                            | 15.34  | 5.25  | 2.92 | 0.34 |
| Q8BMA6_SRP68_MOUSE  | Srp68 | Signal recognition partic R.YLLVLM*DAER@.A                           | 14.62  | 4.99  | 2.93 | 0.34 |
| Q8BMA6_SRP68_MOUSE  | Srp68 | Signal recognition partic K.ANKHEFGDLSLELQIK#.E                      | 18.96  | 6.36  | 2.98 | 0.34 |
| Q8BMA6_SRP68_MOUSE  | Srp68 | Signal recognition partic R.IFLGLADNEAAIVQAESEETK#.E                 | 8.01   | 3.59  | 2.23 | 0.45 |
| Q8BMA6_SRP68_MOUSE  | Srp68 | Signal recognition partic R.IFLGLADNEAAIVQAESEETK#ER.L               | 53.33  | 16.36 | 3.26 | 0.31 |
| Q8BMA6_SRP68_MOUSE  | Srp68 | Signal recognition partic K.LASAFTEQAVLYNQR@.V                       | 7.72   | 2.52  | 3.07 | 0.33 |
| Q8BMA6_SRP68_MOUSE  | Srp68 | Signal recognition partic K.NSLK#DLPVQELITQVR@.S                     | 18.40  | 9.22  | 2.00 | 0.50 |
| Q8BMA6_SRP68_MOUSE  | Srp68 | Signal recognition partic R.SGTEGLLAEK#LEALITQTR@.A                  | 19.48  | 8.97  | 2.17 | 0.46 |
| Q8BMA6_SRP68_MOUSE  | Srp68 | Signal recognition partic K.YANEVSSHGGASK#.N                         | 3.41   | 1.47  | 2.32 | 0.43 |
| Q8BMA6_SRP68_MOUSE  | Srp68 | Signal recognition partic R.YLLVLM*DAER@.A                           | 6.58   | 1.42  | 4.63 | 0.22 |
| Q8BMA6_SRP68_MOUSE  | Srp68 | Signal recognition partic K.ANKHEFGDLSLELQIK#.E                      | 5.75   | 5.75  | 2.16 | 0.46 |
| Q8BMA6_SRP68_MOUSE  | Srp68 | Signal recognition partic K.DLPVQELITQVR@.S                          | 18.64  | 20.18 | 0.92 | 1.08 |
| Q8BMA6_SRP68_MOUSE  | Srp68 | Signal recognition partic R.DYALDGGESGK#.V                           | 16.45  | 5.46  | 3.01 | 0.33 |
| Q8BMA6_SRP68_MOUSE  | Srp68 | Signal recognition partic R.IFLGLADNEAAIVQAESEETK#.E                 | 16.79  | 4.60  | 3.65 | 0.27 |
| Q8BMA6_SRP68_MOUSE  | Srp68 | Signal recognition partic R.IFLGLADNEAAIVQAESEETK#HER@.L             | 72.93  | 19.23 | 3.79 | 0.26 |
| Q8BMA6_SRP68_MOUSE  | Srp68 | Signal recognition partic K.LASAFTEQAVLYNQR@.V                       | 24.04  | 2.97  | 8.09 | 0.12 |
| Q8BMA6_SRP68_MOUSE  | Srp68 | Signal recognition partic K.LEALITQTR@.A                             | 9.63   | 4.63  | 2.08 | 0.48 |
| Q8BMA6_SRP68_MOUSE  | Srp68 | Signal recognition partic K.NSLK#DLPVQELITQVR@.S                     | 34.76  | 10.83 | 3.21 | 0.31 |
| Q8BMA6_SRP68_MOUSE  | Srp68 | Signal recognition partic K.QIPGGSGGGSGGGSGGGSGGGR@.S                | 2.99   | 1.73  | 1.73 | 0.58 |
| Q8BMA6_SRP68_MOUSE  | Srp68 | Signal recognition partic R.SGTEGLLAEK#LEALITQTR@.A                  | 32.29  | 13.99 | 2.31 | 0.43 |
| Q8BMA6_SRP68_MOUSE  | Srp68 | Signal recognition partic R.VEEISPNIR@.Y                             | 17.63  | 6.28  | 2.81 | 0.36 |
| F8VQC1_F8VQC1_MOUSE | Srp72 | Signal recognition partic K.AIELQEFSDQHPENAAEIK#.L                   | 32.72  | 19.66 | 1.66 | 0.60 |
| F8VQC1_F8VQC1_MOUSE | Srp72 | Signal recognition partic K.EAVSDLEQLWK#.Q                           | 11.87  | 5.11  | 2.32 | 0.43 |
| F8VQC1_F8VQC1_MOUSE | Srp72 | Signal recognition partic K.ELYQQLYR@.L                              | 11.69  | 5.37  | 2.18 | 0.46 |
| F8VQC1_F8VQC1_MOUSE | Srp72 | Signal recognition partic K.GTQGATAGASSELDASK#.A                     | 14.49  | 8.51  | 1.70 | 0.59 |
| F8VQC1_F8VQC1_MOUSE | Srp72 | Signal recognition partic K.LTNAEGVEFK#.L                            | 22.88  | 9.52  | 2.40 | 0.42 |
| F8VQC1_F8VQC1_MOUSE | Srp72 | Signal recognition partic R.TEEALQYLNQIK#.L                          | 17.82  | 9.53  | 1.87 | 0.54 |
| F8VQC1_F8VQC1_MOUSE | Srp72 | Signal recognition partic K.VDVEALNESPATYR@.K                        | 11.28  | 5.06  | 2.23 | 0.45 |
| F8VQC1_F8VQC1_MOUSE | Srp72 | Signal recognition partic K.VLANNLSFEK#.A                            | 11.80  | 6.54  | 1.81 | 0.55 |
| F8VQC1_F8VQC1_MOUSE | Srp72 | Signal recognition partic K.ELYQQLYR@.L                              | 6.72   | 2.35  | 2.86 | 0.35 |
| F8VQC1_F8VQC1_MOUSE | Srp72 | Signal recognition partic K.VLANNLSFEK#.A                            | 5.27   | 3.05  | 1.73 | 0.58 |
| F8VQC1_F8VQC1_MOUSE | Srp72 | Signal recognition partic K.DIHITLAQLSAYSLVDPPEK#.A                  | 97.61  | 29.70 | 3.29 | 0.30 |
| F8VQC1_F8VQC1_MOUSE | Srp72 | Signal recognition partic K.DIHITLAQLSAYSLVDPPEK#AK#.A               | 15.02  | 5.99  | 3.24 | 0.31 |
| F8VQC1_F8VQC1_MOUSE | Srp72 | Signal recognition partic K.EAVSDLEQLWK#.Q                           | 34.71  | 12.16 | 2.85 | 0.35 |
| F8VQC1_F8VQC1_MOUSE | Srp72 | Signal recognition partic K.GTQGATAGASSELDASK#.A                     | 59.46  | 17.08 | 3.48 | 0.29 |
| F8VQC1_F8VQC1_MOUSE | Srp72 | Signal recognition partic K.LTNAEGVEFK#.L                            | 48.16  | 12.46 | 3.86 | 0.26 |
| F8VQC1_F8VQC1_MOUSE | Srp72 | Signal recognition partic R.NSQDDYDEER@.K                            | 8.99   | 3.25  | 2.77 | 0.36 |
| F8VQC1_F8VQC1_MOUSE | Srp72 | Signal recognition partic R.TEEALQYLNQIK#.L                          | 62.78  | 18.24 | 3.44 | 0.29 |
| F8VQC1_F8VQC1_MOUSE | Srp72 | Signal recognition partic K.VLANNLSFEK#.A                            | 39.49  | 24.46 | 2.56 | 0.39 |
| F8VQC1_F8VQC1_MOUSE | Srp72 | Signal recognition partic R.YGQNSDFTR@.A                             | 62.69  | 11.47 | 3.44 | 0.29 |
| F8VQC1_F8VQC1_MOUSE | Srp72 | Signal recognition partic K.AIELQEFSDQHPENAAEIK#.L                   | 29.32  | 4.81  | 6.10 | 0.16 |
| F8VQC1_F8VQC1_MOUSE | Srp72 | Signal recognition partic K.DIHITLAQLSAYSLVDPPEK#.A                  | 15.02  | 2.65  | 5.66 | 0.18 |
| F8VQC1_F8VQC1_MOUSE | Srp72 | Signal recognition partic K.DIHITLAQLSAYSLVDPPEK#AK#.A               | 8.66   | 2.15  | 4.03 | 0.25 |
| F8VQC1_F8VQC1_MOUSE | Srp72 | Signal recognition partic K.EAVSDLEQLWK#.Q                           | 10.87  | 4.56  | 2.38 | 0.42 |
| F8VQC1_F8VQC1_MOUSE | Srp72 | Signal recognition partic K.GTQGATAGASSELDASK#.A                     | 18.70  | 3.05  | 6.12 | 0.16 |
| F8VQC1_F8VQC1_MOUSE | Srp72 | Signal recognition partic K.LTNAEGVEFK#.L                            | 12.71  | 6.47  | 1.96 | 0.51 |
| F8VQC1_F8VQC1_MOUSE | Srp72 | Signal recognition partic K.TIESATQTDK#.L                            | 55.71  | 16.09 | 3.46 | 0.29 |
| F8VQC1_F8VQC1_MOUSE | Srp72 | Signal recognition partic K.VLANNLSFEK#.A                            | 17.97  | 12.09 | 1.49 | 0.67 |
| F8VQC1_F8VQC1_MOUSE | Srp72 | Signal recognition partic R.YGQNSDFTR@.A                             | 13.86  | 2.43  | 5.70 | 0.18 |
| O70551_SRPK1_MOUSE  | SrpK1 | SRSF protein kinase 1 OS: K.FSAGNFLINLPEK.N                          | 5.06   | 6.54  | 0.77 | 1.29 |
| O70551_SRPK1_MOUSE  | SrpK1 | SRSF protein kinase 1 OS: K.FSAGNFLINLPEK#.N                         | 9.00   | 2.95  | 3.05 | 0.33 |
| P47758_SRP68_MOUSE  | Srp68 | Signal recognition partic R.AVVVVDSSAAFQR@.E                         | 12.48  | 9.15  | 1.36 | 0.73 |
| P47758_SRP68_MOUSE  | Srp68 | Signal recognition partic R.DTQTSITDSSAIVK#.V                        | 11.27  | 9.47  | 1.19 | 0.84 |
| P47758_SRP68_MOUSE  | Srp68 | Signal recognition partic R.GDGTSAIDQLEK#.W                          | 14.60  | 9.52  | 1.53 | 0.65 |
| P47758_SRP68_MOUSE  | Srp68 | Signal recognition partic R.SAAPSTLSDSSAPQLGK#.K                     | 17.50  | 12.17 | 1.44 | 0.70 |
| P47758_SRP68_MOUSE  | Srp68 | Signal recognition partic R.VGDGAGGAFQPLDLSL.R                       | 9.87   | 5.13  | 1.92 | 0.52 |
| Q52K18_SRRM1_MOUSE  | Srrm1 | Serine/arginine repetitiv R.AASPSPQSVQR@.R                           | 41.05  | 10.89 | 3.77 | 0.27 |
| Q52K18_SRRM1_MOUSE  | Srrm1 | Serine/arginine repetitiv R.APQTSSPPVVR@.R                           | 65.56  | 17.81 | 3.68 | 0.27 |
| Q52K18_SRRM1_MOUSE  | Srrm1 | Serine/arginine repetitiv K.AVTIATPATAAPAAVSAATTSQAQEEPAEAPEPR@.K    | 120.73 | 38.02 | 3.18 | 0.31 |
| Q52K18_SRRM1_MOUSE  | Srrm1 | Serine/arginine repetitiv K.DSSVQATSTSDILK#.A                        | 41.35  | 14.13 | 2.93 | 0.34 |
| Q52K18_SRRM1_MOUSE  | Srrm1 | Serine/arginine repetitiv K.EKHAVTIATPATAAPAAVSAATTSQAQEEPAEAPEPR@.K | 5.10   | 2.37  | 2.15 | 0.46 |
| Q52K18_SRRM1_MOUSE  | Srrm1 | Serine/arginine repetitiv R.K.HETESEAEDNLDLDR@.H                     | 185.70 | 45.53 | 4.08 | 0.25 |
| Q52K18_SRRM1_MOUSE  | Srrm1 | Serine/arginine repetitiv K.KHPPAPPSPVQOSQSPSTNWSPAVPAK#.K           | 18.95  | 5.36  | 3.54 | 0.28 |
| Q52K18_SRRM1_MOUSE  | Srrm1 | Serine/arginine repetitiv K.KHPPAPPSPVQOSQSPSTNWSPAVPAK#K#.K         | 18.67  | 9.37  | 1.99 | 0.50 |
| Q52K18_SRRM1_MOUSE  | Srrm1 | Serine/arginine repetitiv R.K.HVELSEEDK#GSK#.M                       | 53.39  | 20.71 | 2.58 | 0.39 |
| Q52K18_SRRM1_MOUSE  | Srrm1 | Serine/arginine repetitiv K.M*AAADSVQQR@.R                           | 89.44  | 26.71 | 3.35 | 0.30 |
| Q52K18_SRRM1_MOUSE  | Srrm1 | Serine/arginine repetitiv K.MAAADSVQQR@.R                            | 38.34  | 11.02 | 3.03 | 0.33 |
| Q52K18_SRRM1_MOUSE  | Srrm1 | Serine/arginine repetitiv R.M*KHDSVQVQATSTSDILK#.A                   | 93.73  | 27.20 | 3.63 | 0.28 |
| Q52K18_SRRM1_MOUSE  | Srrm1 | Serine/arginine repetitiv R.QNQSSSDGSSSSSEDER@PK#.R                  | 10.64  | 1.51  | 7.06 | 0.14 |
| Q52K18_SRRM1_MOUSE  | Srrm1 | Serine/arginine repetitiv R.R@YSPPIQR@.R                             | 50.47  | 11.85 | 4.26 | 0.23 |
| Q52K18_SRRM1_MOUSE  | Srrm1 | Serine/arginine repetitiv K.SPELPEPSVR@.M                            | 24.02  | 6.05  | 3.97 | 0.25 |
| Q52K18_SRRM1_MOUSE  | Srrm1 | Serine/arginine repetitiv R.SSASLSSGSSSSSSSR@.S                      | 3.77   | 1.60  | 2.96 | 0.42 |
| Q52K18_SRRM1_MOUSE  | Srrm1 | Serine/arginine repetitiv R.TASPPPPPK#.R                             | 7.15   | 2.41  | 2.97 | 0.34 |
| Q52K18_SRRM1_MOUSE  | Srrm1 | Serine/arginine repetitiv K.VNLEVIK#PWITK#.R                         | 197.79 | 61.53 | 3.21 | 0.31 |
| Q52K18_SRRM1_MOUSE  | Srrm1 | Serine/arginine repetitiv R.APQTSSPPVVR@.R                           | 12.18  | 5.15  | 2.36 | 0.42 |

|                    |       |                           |                                                    |        |       |       |      |
|--------------------|-------|---------------------------|----------------------------------------------------|--------|-------|-------|------|
| Q52K18_SRRM1_MOUSE | Srrm1 | Serine/arginine repetitiv | K.AVTIATPATAAAPVSAATTSACQEPPAAPEPR@.K              | 19.29  | 6.29  | 3.07  | 0.33 |
| Q52K18_SRRM1_MOUSE | Srrm1 | Serine/arginine repetitiv | R.KHETESEEDNDLDER@.H                               | 30.66  | 6.64  | 4.61  | 0.22 |
| Q52K18_SRRM1_MOUSE | Srrm1 | Serine/arginine repetitiv | R.KHVELESEEDK#GSK#.M                               | 60.94  | 14.28 | 4.27  | 0.23 |
| Q52K18_SRRM1_MOUSE | Srrm1 | Serine/arginine repetitiv | K.M*AAADSVQQR@.R                                   | 16.51  | 7.39  | 2.23  | 0.45 |
| Q52K18_SRRM1_MOUSE | Srrm1 | Serine/arginine repetitiv | K.VNLEVIK#WITK#.R                                  | 37.02  | 10.32 | 3.59  | 0.28 |
| Q8BT18_SRRM2_MOUSE | Srrm2 | Serine/arginine repetitiv | R.SVVQTPVAGSQSLSSGTVAK#.S                          | 32.42  | 6.64  | 4.88  | 0.20 |
| Q8BT18_SRRM2_MOUSE | Srrm2 | Serine/arginine repetitiv | R.TPM*SVLQQTGGSM*MDGPGPR.I                         | 3.11   | 6.72  | 0.46  | 2.16 |
| Q8BT18_SRRM2_MOUSE | Srrm2 | Serine/arginine repetitiv | R.VPLSAYDR@.V                                      | 47.55  | 8.77  | 5.42  | 0.18 |
| Q8BT18_SRRM2_MOUSE | Srrm2 | Serine/arginine repetitiv | R.AAFGISDYSYVDSGFDPQR@.R                           | 15.54  | 5.78  | 2.69  | 0.37 |
| Q8BT18_SRRM2_MOUSE | Srrm2 | Serine/arginine repetitiv | K.EETPGQR@PVTVETHQLAELNEK#.K                       | 12.17  | 3.82  | 3.18  | 0.31 |
| Q8BT18_SRRM2_MOUSE | Srrm2 | Serine/arginine repetitiv | K.EM*PGSNISSPEVEER@PAVLSALDQSQSQPSK#.A             | 6.43   | 1.74  | 3.70  | 0.27 |
| Q8BT18_SRRM2_MOUSE | Srrm2 | Serine/arginine repetitiv | R.HASSSPESLKH#PTAPGSR@.R                           | 25.70  | 5.59  | 4.60  | 0.22 |
| Q8BT18_SRRM2_MOUSE | Srrm2 | Serine/arginine repetitiv | R.HLEALVK#.R                                       | 61.02  | 28.08 | 2.17  | 0.46 |
| Q8BT18_SRRM2_MOUSE | Srrm2 | Serine/arginine repetitiv | K.IHTTALTGOSPPPLASGHQEGDAPSVPEGATNIQQPSSPAPSTK#.Q  | 9.00   | 2.96  | 3.04  | 0.33 |
| Q8BT18_SRRM2_MOUSE | Srrm2 | Serine/arginine repetitiv | R.IPAASAAAM*NLASAR@.T                              | 23.18  | 10.38 | 2.23  | 0.45 |
| Q8BT18_SRRM2_MOUSE | Srrm2 | Serine/arginine repetitiv | R.M*SQVPAPVPLM*SLR@.T                              | 25.03  | 18.19 | 1.38  | 0.73 |
| Q8BT18_SRRM2_MOUSE | Srrm2 | Serine/arginine repetitiv | R.M*SQVPAPVPLMLSLR@.T                              | 6.96   | 6.39  | 1.09  | 0.92 |
| Q8BT18_SRRM2_MOUSE | Srrm2 | Serine/arginine repetitiv | K.RPNPDLIDHER.K                                    | 38.74  | 17.45 | 2.22  | 0.45 |
| Q8BT18_SRRM2_MOUSE | Srrm2 | Serine/arginine repetitiv | R.SAHGTAPVNIAGSR@.T                                | 21.91  | 3.89  | 5.63  | 0.18 |
| Q8BT18_SRRM2_MOUSE | Srrm2 | Serine/arginine repetitiv | R.SGSSQELDKG#PSASPQER@.S                           | 55.00  | 21.49 | 2.56  | 0.39 |
| Q8BT18_SRRM2_MOUSE | Srrm2 | Serine/arginine repetitiv | R.SHSGSSPEVDSK#.S                                  | 42.49  | 1.48  | 28.63 | 0.03 |
| Q8BT18_SRRM2_MOUSE | Srrm2 | Serine/arginine repetitiv | R.SLSYSPVER@.R                                     | 36.48  | 3.83  | 9.52  | 0.11 |
| Q8BT18_SRRM2_MOUSE | Srrm2 | Serine/arginine repetitiv | K.SM*LQTPDQNLGSK#.S                                | 4.35   | 2.55  | 1.70  | 0.59 |
| Q8BT18_SRRM2_MOUSE | Srrm2 | Serine/arginine repetitiv | R.SPGM*LEPLGSR.T                                   | 34.34  | 17.39 | 1.98  | 0.51 |
| Q8BT18_SRRM2_MOUSE | Srrm2 | Serine/arginine repetitiv | R.SSSASPELK#.D                                     | 47.06  | 17.01 | 2.77  | 0.36 |
| Q8BT18_SRRM2_MOUSE | Srrm2 | Serine/arginine repetitiv | R.SSSELSPEVVEK#.V                                  | 30.07  | 9.30  | 3.23  | 0.31 |
| Q8BT18_SRRM2_MOUSE | Srrm2 | Serine/arginine repetitiv | R.SSTGPELAPPTLLVEQHVDSR@P.LAAIPSSQEPVNPSSASPR@.G   | 8.62   | 3.78  | 2.28  | 0.44 |
| Q8BT18_SRRM2_MOUSE | Srrm2 | Serine/arginine repetitiv | K.STSSASDHNGM*LSGPAPGISHAEGGEPASTGAQQPSTLALQPAK#.E | 3.64   | 1.44  | 2.53  | 0.39 |
| Q8BT18_SRRM2_MOUSE | Srrm2 | Serine/arginine repetitiv | R.SVVQTPVAGSQSLSSGTVAK#.S                          | 45.46  | 5.22  | 8.70  | 0.11 |
| Q8BT18_SRRM2_MOUSE | Srrm2 | Serine/arginine repetitiv | R.TAVAPSAVNLADPR@.T                                | 17.28  | 5.41  | 3.20  | 0.31 |
| Q8BT18_SRRM2_MOUSE | Srrm2 | Serine/arginine repetitiv | R.PTAAAAAM*NLASPR@.T                               | 11.21  | 4.42  | 2.53  | 0.39 |
| Q8BT18_SRRM2_MOUSE | Srrm2 | Serine/arginine repetitiv | R.TPAASAVNLGAGAR@.T                                | 43.21  | 11.40 | 3.79  | 0.26 |
| Q8BT18_SRRM2_MOUSE | Srrm2 | Serine/arginine repetitiv | R.TPAGLAPTLNLSRR@.M                                | 31.46  | 12.14 | 2.59  | 0.39 |
| Q8BT18_SRRM2_MOUSE | Srrm2 | Serine/arginine repetitiv | R.TPM*SVLQQTGGSM*MDGPGPR.I                         | 29.79  | 23.73 | 1.26  | 0.80 |
| Q8BT18_SRRM2_MOUSE | Srrm2 | Serine/arginine repetitiv | R.TPVALSRR@.M                                      | 42.14  | 16.56 | 2.54  | 0.39 |
| Q8BT18_SRRM2_MOUSE | Srrm2 | Serine/arginine repetitiv | R.TSAIPASVNLADSR@.T                                | 32.21  | 14.41 | 2.23  | 0.45 |
| Q8BT18_SRRM2_MOUSE | Srrm2 | Serine/arginine repetitiv | K.VGLFSSQK#.V                                      | 47.25  | 19.47 | 2.43  | 0.41 |
| Q8BT18_SRRM2_MOUSE | Srrm2 | Serine/arginine repetitiv | K.VSSPVLETVQQR@.T                                  | 52.49  | 19.29 | 2.72  | 0.37 |
| Q8BT18_SRRM2_MOUSE | Srrm2 | Serine/arginine repetitiv | R.AAFGISDYSYVDSGFDPQR@.R                           | 53.66  | 17.63 | 3.04  | 0.33 |
| Q8BT18_SRRM2_MOUSE | Srrm2 | Serine/arginine repetitiv | R.AAFGISDYSYVDSGFDPQRR.A                           | 144.82 | 38.37 | 3.77  | 0.26 |
| Q8BT18_SRRM2_MOUSE | Srrm2 | Serine/arginine repetitiv | R.DK#SPTQDR@PESSTVLK#.V                            | 152.22 | 41.19 | 3.05  | 0.33 |
| Q8BT18_SRRM2_MOUSE | Srrm2 | Serine/arginine repetitiv | K.EELNGSFLNQTADPVSMD*#K#.E                         | 5.97   | 3.42  | 1.74  | 0.57 |
| Q8BT18_SRRM2_MOUSE | Srrm2 | Serine/arginine repetitiv | K.EETPGQR@PVTVETHQLAELNEK#.K                       | 23.99  | 7.47  | 3.21  | 0.31 |
| Q8BT18_SRRM2_MOUSE | Srrm2 | Serine/arginine repetitiv | K.EM*PGSNISSPEVEER@PAVLSALDQSQSQPSK#.A             | 41.20  | 11.57 | 3.56  | 0.28 |
| Q8BT18_SRRM2_MOUSE | Srrm2 | Serine/arginine repetitiv | K.EMPGSNISSPEVEER@PAVLSALDQSQSQPSK#.A              | 30.44  | 8.91  | 3.42  | 0.29 |
| Q8BT18_SRRM2_MOUSE | Srrm2 | Serine/arginine repetitiv | K.ER@GPSPEGSSSESSPEHAPK#.S                         | 8.68   | 2.97  | 2.92  | 0.34 |
| Q8BT18_SRRM2_MOUSE | Srrm2 | Serine/arginine repetitiv | K.GHTQIWPDTSSPEVM*QTVESPLLQSK#.S                   | 45.76  | 12.59 | 3.63  | 0.28 |
| Q8BT18_SRRM2_MOUSE | Srrm2 | Serine/arginine repetitiv | K.GHTQIWPDTSSPEVMQTVESPLLQSK#.S                    | 17.23  | 8.26  | 2.09  | 0.48 |
| Q8BT18_SRRM2_MOUSE | Srrm2 | Serine/arginine repetitiv | R.HASSSPESLKH#PTAPGSR@.R                           | 134.25 | 25.12 | 5.34  | 0.19 |
| Q8BT18_SRRM2_MOUSE | Srrm2 | Serine/arginine repetitiv | R.HLEALVK#.R                                       | 238.52 | 60.65 | 3.87  | 0.26 |
| Q8BT18_SRRM2_MOUSE | Srrm2 | Serine/arginine repetitiv | R.HSLSGSSPGM*#K#.D                                 | 38.34  | 9.04  | 4.24  | 0.24 |
| Q8BT18_SRRM2_MOUSE | Srrm2 | Serine/arginine repetitiv | R.HSLSGSSPGM#K.D                                   | 19.33  | 14.25 | 1.36  | 0.74 |
| Q8BT18_SRRM2_MOUSE | Srrm2 | Serine/arginine repetitiv | R.IALALTAISLGTAR@PPPSM*SAAGLAAR@.M                 | 26.79  | 12.03 | 2.23  | 0.45 |
| Q8BT18_SRRM2_MOUSE | Srrm2 | Serine/arginine repetitiv | R.IPAASAAAM*NLASAR@.T                              | 45.45  | 18.41 | 2.47  | 0.41 |
| Q8BT18_SRRM2_MOUSE | Srrm2 | Serine/arginine repetitiv | R.IPAASAAAMNLASAR@.T                               | 14.88  | 2.39  | 6.23  | 0.16 |
| Q8BT18_SRRM2_MOUSE | Srrm2 | Serine/arginine repetitiv | R.LM*LEK#DVNPGAK#.E                                | 24.67  | 8.74  | 2.82  | 0.35 |
| Q8BT18_SRRM2_MOUSE | Srrm2 | Serine/arginine repetitiv | K.M*ELGTPLR@.H                                     | 59.21  | 12.93 | 4.58  | 0.22 |
| Q8BT18_SRRM2_MOUSE | Srrm2 | Serine/arginine repetitiv | K.MELGTPLR@.H                                      | 24.22  | 6.16  | 3.93  | 0.25 |
| Q8BT18_SRRM2_MOUSE | Srrm2 | Serine/arginine repetitiv | R.M*SQVPAPVPLM*SLR@.T                              | 74.87  | 29.66 | 2.52  | 0.40 |
| Q8BT18_SRRM2_MOUSE | Srrm2 | Serine/arginine repetitiv | R.M*SQVPAPVPLMLSLR@.T                              | 15.99  | 17.76 | 0.90  | 1.11 |
| Q8BT18_SRRM2_MOUSE | Srrm2 | Serine/arginine repetitiv | R.MSQVPAPVPLMLSLR@.T                               | 10.56  | 4.98  | 2.12  | 0.47 |
| Q8BT18_SRRM2_MOUSE | Srrm2 | Serine/arginine repetitiv | K.NSGPVSEVNTGSPVVK#.E                              | 111.80 | 35.83 | 3.12  | 0.32 |
| Q8BT18_SRRM2_MOUSE | Srrm2 | Serine/arginine repetitiv | K.NSGPVSEVNTGSPVVK#EELNGSFLNQTADPVSMD*#KEQSR.S     | 7.67   | 3.89  | 1.97  | 0.51 |
| Q8BT18_SRRM2_MOUSE | Srrm2 | Serine/arginine repetitiv | K.R@PNPDLIDHER@.K                                  | 126.00 | 35.03 | 3.60  | 0.28 |
| Q8BT18_SRRM2_MOUSE | Srrm2 | Serine/arginine repetitiv | R.SASSPEIR@.S                                      | 39.95  | 17.60 | 2.27  | 0.44 |
| Q8BT18_SRRM2_MOUSE | Srrm2 | Serine/arginine repetitiv | R.SAVR@PSPSPER@.S                                  | 11.43  | 2.59  | 4.42  | 0.23 |
| Q8BT18_SRRM2_MOUSE | Srrm2 | Serine/arginine repetitiv | K.SEISTDPK#.L                                      | 166.42 | 57.22 | 2.91  | 0.34 |
| Q8BT18_SRRM2_MOUSE | Srrm2 | Serine/arginine repetitiv | R.SESDSSPDK#PK#.T                                  | 2.12   | 1.66  | 1.28  | 0.78 |
| Q8BT18_SRRM2_MOUSE | Srrm2 | Serine/arginine repetitiv | K.SFLVQSR@.L                                       | 124.77 | 40.06 | 3.11  | 0.32 |
| Q8BT18_SRRM2_MOUSE | Srrm2 | Serine/arginine repetitiv | K.SGM*SQEQSK#.T                                    | 4.73   | 2.33  | 2.03  | 0.49 |
| Q8BT18_SRRM2_MOUSE | Srrm2 | Serine/arginine repetitiv | R.SGSSVEQK#.D                                      | 23.89  | 8.08  | 2.96  | 0.34 |
| Q8BT18_SRRM2_MOUSE | Srrm2 | Serine/arginine repetitiv | R.SGSSPGLR@.D                                      | 171.46 | 71.39 | 2.40  | 0.42 |
| Q8BT18_SRRM2_MOUSE | Srrm2 | Serine/arginine repetitiv | R.SGSSQELDKG#PSASPQER@.S                           | 136.07 | 35.27 | 3.86  | 0.26 |
| Q8BT18_SRRM2_MOUSE | Srrm2 | Serine/arginine repetitiv | R.SHSGSSPEVDSK#.S                                  | 9.94   | 2.74  | 3.63  | 0.28 |
| Q8BT18_SRRM2_MOUSE | Srrm2 | Serine/arginine repetitiv | K.SLLPNSSQDEL#EVEK#.S                              | 37.40  | 15.61 | 2.40  | 0.42 |
| Q8BT18_SRRM2_MOUSE | Srrm2 | Serine/arginine repetitiv | K.SLLPNSSQDEL#MEVEK#.S                             | 21.50  | 6.85  | 3.14  | 0.32 |
| Q8BT18_SRRM2_MOUSE | Srrm2 | Serine/arginine repetitiv | K.SLLPNSSQDEL#MEVEK#SEQPLSQVLSLSPHK#.E             | 8.01   | 2.90  | 2.76  | 0.36 |
| Q8BT18_SRRM2_MOUSE | Srrm2 | Serine/arginine repetitiv | K.SM*LQTPDQNLGSK#.S                                | 59.95  | 18.42 | 3.25  | 0.31 |
| Q8BT18_SRRM2_MOUSE | Srrm2 | Serine/arginine repetitiv | K.SMLQTPDQNLGSK#.S                                 | 13.66  | 5.03  | 2.71  | 0.37 |
| Q8BT18_SRRM2_MOUSE | Srrm2 | Serine/arginine repetitiv | R.SPGM*LEPLGSR@.T                                  | 79.87  | 29.95 | 2.67  | 0.37 |
| Q8BT18_SRRM2_MOUSE | Srrm2 | Serine/arginine repetitiv | R.SPSVSSPEPTK#.S                                   | 27.55  | 6.54  | 4.21  | 0.24 |
| Q8BT18_SRRM2_MOUSE | Srrm2 | Serine/arginine repetitiv | R.SSSASPELK#.D                                     | 63.34  | 14.97 | 4.23  | 0.24 |
| Q8BT18_SRRM2_MOUSE | Srrm2 | Serine/arginine repetitiv | R.SSSELSPEVVEK#.V                                  | 126.71 | 32.29 | 3.92  | 0.25 |
| Q8BT18_SRRM2_MOUSE | Srrm2 | Serine/arginine repetitiv | R.SSSPVETLAR.S                                     | 74.85  | 16.66 | 4.49  | 0.22 |
| Q8BT18_SRRM2_MOUSE | Srrm2 | Serine/arginine repetitiv | R.SSTGPELAPPTLLVEQHVDSR@P.LAAIPSSQEPVNPSSASPR@.G   | 20.36  | 8.07  | 2.52  | 0.40 |
| Q8BT18_SRRM2_MOUSE | Srrm2 | Serine/arginine repetitiv | R.SSVENHADSR@.I                                    | 18.04  | 8.61  | 2.10  | 0.48 |
| Q8BT18_SRRM2_MOUSE | Srrm2 | Serine/arginine repetitiv | R.TAPAANLASR.I                                     | 102.97 | 38.58 | 2.67  | 0.37 |
| Q8BT18_SRRM2_MOUSE | Srrm2 | Serine/arginine repetitiv | R.TAVAPSAVNLADPR@.T                                | 63.83  | 11.15 | 5.73  | 0.17 |
| Q8BT18_SRRM2_MOUSE | Srrm2 | Serine/arginine repetitiv | K.TK#PDSSIYPLVDSK#.S                               | 201.83 | 59.25 | 3.41  | 0.29 |
| Q8BT18_SRRM2_MOUSE | Srrm2 | Serine/arginine repetitiv | K.TK#PDSSIYPLVDSK.S                                | 47.37  | 15.49 | 3.06  | 0.33 |
| Q8BT18_SRRM2_MOUSE | Srrm2 | Serine/arginine repetitiv | R.PTAAAAAM*NLASPR@.T                               | 26.81  | 7.81  | 3.43  | 0.29 |
| Q8BT18_SRRM2_MOUSE | Srrm2 | Serine/arginine repetitiv | R.TPAALALSLTGSSTPTTAAANYPSSSR@.T                   | 3.76   | 3.76  | 6.24  | 0.16 |
| Q8BT18_SRRM2_MOUSE | Srrm2 | Serine/arginine repetitiv | R.TPAASAVNLGAGAR@.T                                | 107.87 | 20.27 | 5.32  | 0.19 |
| Q8BT18_SRRM2_MOUSE | Srrm2 | Serine/arginine repetitiv | R.TPAGLAPTLNLSRR@.M                                | 30.20  | 4.15  | 7.28  | 0.14 |
| Q8BT18_SRRM2_MOUSE | Srrm2 | Serine/arginine repetitiv | R.TPM*SVLQQTGGSM*MDGPGPR@.I                        | 3.72   | 2.06  | 1.81  | 0.55 |
| Q8BT18_SRRM2_MOUSE | Srrm2 | Serine/arginine repetitiv | R.TPVALSRR@.M                                      | 55.68  | 16.95 | 3.28  | 0.30 |
| Q8BT18_SRRM2_MOUSE | Srrm2 | Serine/arginine repetitiv | R.TPQAPPTANLVLGPR@.S                               | 29.95  | 5.73  | 5.23  | 0.19 |
| Q8BT18_SRRM2_MOUSE | Srrm2 | Serine/arginine repetitiv | R.TSAIPASVNLADSR.T                                 | 78.56  | 22.20 | 3.54  | 0.28 |
| Q8BT18_SRRM2_MOUSE | Srrm2 | Serine/arginine repetitiv | K.VGLFSSQK#.V                                      | 189.64 | 76.24 | 2.49  | 0.40 |
| Q8BT18_SRRM2_MOUSE | Srrm2 | Serine/arginine repetitiv | K.VSSPVLETVQQR@.T                                  | 187.75 | 52.05 | 3.61  | 0.28 |
| Q99MR6_SRRM_MOUSE  | Srrt  | Serrate RNA effector mol  | R.AGPALGEGERT@.K                                   | 26.98  | 12.41 | 2.17  | 0.46 |
| Q99MR6_SRRM_MOUSE  | Srrt  | Serrate RNA effector mol  | R.DLDAPDDVDF.-                                     | 14.22  | 14.22 | 1.00  | 1.00 |
| Q99MR6_SRRM_MOUSE  | Srrt  | Serrate RNA effector mol  | R.ESLSEEAQK#.M                                     | 36.13  | 15.57 | 2.32  | 0.43 |

|                     |        |                                                            |         |        |      |      |
|---------------------|--------|------------------------------------------------------------|---------|--------|------|------|
| Q99MR6_SRRT_MOUSE   | Srrt   | Serrate RNA effector mol. K.FVTSNTQLGK#D                   | 26.20   | 10.81  | 2.42 | 0.41 |
| Q99MR6_SRRT_MOUSE   | Srrt   | Serrate RNA effector mol. R.ILEQEEEEQAGK#T                 | 46.41   | 21.06  | 2.20 | 0.45 |
| Q99MR6_SRRT_MOUSE   | Srrt   | Serrate RNA effector mol. R.KDPEQEVK.F                     | 14.07   | 8.89   | 1.58 | 0.63 |
| Q99MR6_SRRT_MOUSE   | Srrt   | Serrate RNA effector mol. R.LGSAIEIDLGVPPM*#K.S            | 8.16    | 5.47   | 1.49 | 0.67 |
| Q99MR6_SRRT_MOUSE   | Srrt   | Serrate RNA effector mol. K.LLLYLRI                        | 26.30   | 12.59  | 2.09 | 0.48 |
| Q99MR6_SRRT_MOUSE   | Srrt   | Serrate RNA effector mol. R.ESLSEEAQK#M                    | 9.90    | 4.32   | 2.29 | 0.44 |
| Q99MR6_SRRT_MOUSE   | Srrt   | Serrate RNA effector mol. R.ILEQEEEEQAGK#T                 | 8.63    | 3.91   | 2.21 | 0.45 |
| Q6PDM2_SRSF1_MOUSE  | Srsf1  | Serine/arginine-rich splic. R.DAEDAVYGR@.D                 | 374.11  | 149.59 | 2.50 | 0.40 |
| Q6PDM2_SRSF1_MOUSE  | Srsf1  | Serine/arginine-rich splic. R.DGTGVVFEVFR@.K               | 727.23  | 291.02 | 2.50 | 0.40 |
| Q6PDM2_SRSF1_MOUSE  | Srsf1  | Serine/arginine-rich splic. R.DGYVDYGYR@.L                 | 549.25  | 203.37 | 2.70 | 0.37 |
| Q6PDM2_SRSF1_MOUSE  | Srsf1  | Serine/arginine-rich splic. R.DIEDVFK#Y                    | 251.63  | 100.72 | 2.50 | 0.40 |
| Q6PDM2_SRSF1_MOUSE  | Srsf1  | Serine/arginine-rich splic. R.EDM*TYAVR@.K                 | 95.49   | 41.23  | 2.32 | 0.43 |
| Q6PDM2_SRSF1_MOUSE  | Srsf1  | Serine/arginine-rich splic. R.GGPPFAVFEFEDPR@.D            | 224.16  | 106.26 | 2.11 | 0.47 |
| Q6PDM2_SRSF1_MOUSE  | Srsf1  | Serine/arginine-rich splic. R.GGPPFAVFEFEDPR@DAEDAVYGR@.D  | 5.77    | 2.37   | 2.44 | 0.41 |
| Q6PDM2_SRSF1_MOUSE  | Srsf1  | Serine/arginine-rich splic. R.IYVGNLPPDIR@.T               | 247.14  | 116.84 | 2.12 | 0.47 |
| Q6PDM2_SRSF1_MOUSE  | Srsf1  | Serine/arginine-rich splic. R.K.EDMTYAVR@.K                | 106.22  | 46.38  | 2.29 | 0.44 |
| Q6PDM2_SRSF1_MOUSE  | Srsf1  | Serine/arginine-rich splic. R.K.EDM*TYAVR@.K               | 202.58  | 88.87  | 2.28 | 0.44 |
| Q6PDM2_SRSF1_MOUSE  | Srsf1  | Serine/arginine-rich splic. R.LR@VEFPR@.S                  | 152.95  | 64.85  | 2.36 | 0.42 |
| Q6PDM2_SRSF1_MOUSE  | Srsf1  | Serine/arginine-rich splic. R.R@GGPPFAVFEFEDPR@.D          | 33.12   | 20.82  | 1.59 | 0.63 |
| Q6PDM2_SRSF1_MOUSE  | Srsf1  | Serine/arginine-rich splic. R.RGGPPFAVFEFEDPRDAEDAVYGR.D   | 71.33   | 27.27  | 2.62 | 0.38 |
| Q6PDM2_SRSF1_MOUSE  | Srsf1  | Serine/arginine-rich splic. R.SHEGETAYR@.V                 | 442.75  | 175.51 | 2.52 | 0.40 |
| Q6PDM2_SRSF1_MOUSE  | Srsf1  | Serine/arginine-rich splic. R.TK#DIEDVFK#Y                 | 802.91  | 310.11 | 2.59 | 0.39 |
| Q6PDM2_SRSF1_MOUSE  | Srsf1  | Serine/arginine-rich splic. R.VVVSGLPSSGWQDLK#D            | 138.77  | 58.03  | 2.39 | 0.42 |
| Q6PDM2_SRSF1_MOUSE  | Srsf1  | Serine/arginine-rich splic. R.DGTGVVFEVFR@.K               | 16.48   | 7.50   | 2.20 | 0.45 |
| Q6PDM2_SRSF1_MOUSE  | Srsf1  | Serine/arginine-rich splic. R.SHEGETAYR@.V                 | 4.67    | 11.04  | 0.42 | 2.36 |
| Q9ROU0_SRS10_MOUSE  | Srsf10 | Serine/arginine-rich splic. R.DAEDALHNLDR@.K               | 12.00   | 5.81   | 2.06 | 0.48 |
| Q9ROU0_SRS10_MOUSE  | Srsf10 | Serine/arginine-rich splic. R.GFAYVQFEDVR.D                | 120.40  | 67.56  | 1.78 | 0.56 |
| Q9ROU0_SRS10_MOUSE  | Srsf10 | Serine/arginine-rich splic. R.QIEQFAGQDR@.K                | 71.02   | 32.79  | 2.17 | 0.46 |
| Q9ROU0_SRS10_MOUSE  | Srsf10 | Serine/arginine-rich splic. R.SFDYNYR@.R                   | 63.92   | 25.46  | 2.51 | 0.40 |
| Q9ROU0_SRS10_MOUSE  | Srsf10 | Serine/arginine-rich splic. R.YGPIVDVYVPLDFYTR@.R          | 166.59  | 101.96 | 1.63 | 0.61 |
| Q9ROU0_SRS10_MOUSE  | Srsf10 | Serine/arginine-rich splic. R.YLR@PPNTSLFVR@.N             | 161.13  | 87.29  | 1.85 | 0.54 |
| Q9ROU0_SRS10_MOUSE  | Srsf10 | Serine/arginine-rich splic. R.GFAYVQFEDVR@.D               | 42.88   | 26.43  | 1.62 | 0.62 |
| Q9ROU0_SRS10_MOUSE  | Srsf10 | Serine/arginine-rich splic. R.GFAYVQFEDVR@DAEDALHNLDR@K#W  | 2.48    | 3.08   | 0.81 | 1.24 |
| Q9ROU0_SRS10_MOUSE  | Srsf10 | Serine/arginine-rich splic. R.SFDYNYR.R                    | 51.64   | 25.85  | 2.00 | 0.50 |
| Q9ROU0_SRS10_MOUSE  | Srsf10 | Serine/arginine-rich splic. R.YDDYDR@.Y                    | 17.38   | 10.20  | 1.70 | 0.59 |
| Q9ROU0_SRS10_MOUSE  | Srsf10 | Serine/arginine-rich splic. R.YLRPPNTSLFVR.N               | 187.53  | 116.70 | 1.61 | 0.62 |
| Q9ROU0_SRS10_MOUSE  | Srsf10 | Serine/arginine-rich splic. R.YLRPPNTSLFVR.N               | 16.60   | 8.94   | 1.86 | 0.54 |
| Q9ROU0_SRS10_MOUSE  | Srsf10 | Serine/arginine-rich splic. R.YGPIVDVYVPLDFYTR@.R          | 12.64   | 8.75   | 1.45 | 0.69 |
| Q3UIX4_Q3UIX4_MOUSE | Srsf11 | Protein Srsf11 OS=Mus m R.ALIVVPYAEVGPDET#K.A              | 29.81   | 8.88   | 3.36 | 0.30 |
| Q3UIX4_Q3UIX4_MOUSE | Srsf11 | Protein Srsf11 OS=Mus m R.TLGFGLGK.I                       | 83.60   | 13.38  | 6.25 | 0.16 |
| Q3UIX4_Q3UIX4_MOUSE | Srsf11 | Protein Srsf11 OS=Mus m R.ALIVVPYAEVGPDET#K.A              | 237.78  | 12.72  | 1.87 | 0.53 |
| Q3UIX4_Q3UIX4_MOUSE | Srsf11 | Protein Srsf11 OS=Mus m R.FHDPDVAWAQHLTNTVFDVR@.A          | 10.33   | 3.12   | 3.31 | 0.30 |
| Q3UIX4_Q3UIX4_MOUSE | Srsf11 | Protein Srsf11 OS=Mus m R.LFPPDDSLPVPSSR.V                 | 160.83  | 246.58 | 0.65 | 1.53 |
| Q3UIX4_Q3UIX4_MOUSE | Srsf11 | Protein Srsf11 OS=Mus m R.TLGFGLGK.I                       | 48.98   | 15.70  | 3.12 | 0.32 |
| Q62093_SRSF2_MOUSE  | Srsf2  | Serine/arginine-rich splic. R.DAEDAM*#DAM*DGAVLDGR@.E      | 92.10   | 33.18  | 2.78 | 0.36 |
| Q62093_SRSF2_MOUSE  | Srsf2  | Serine/arginine-rich splic. R.DAEDAM*#DAM*DGAVLDGR@.E      | 13.14   | 5.88   | 2.23 | 0.45 |
| Q62093_SRSF2_MOUSE  | Srsf2  | Serine/arginine-rich splic. R.DAEDAM*#DAM*DGAVLDGR@.E      | 10.22   | 5.30   | 1.93 | 0.52 |
| Q62093_SRSF2_MOUSE  | Srsf2  | Serine/arginine-rich splic. R.DAEDAM*#DAM*DGAVLDGR@.E      | 9.05    | 2.39   | 3.79 | 0.26 |
| Q62093_SRSF2_MOUSE  | Srsf2  | Serine/arginine-rich splic. R.SPPK#PEEFGAVS.-              | 6.87    | 4.74   | 1.45 | 0.69 |
| Q62093_SRSF2_MOUSE  | Srsf2  | Serine/arginine-rich splic. K.VDNLTYR@.D                   | 428.42  | 186.74 | 2.29 | 0.44 |
| Q62093_SRSF2_MOUSE  | Srsf2  | Serine/arginine-rich splic. R.VGDVYPR@.D                   | 510.02  | 223.45 | 2.28 | 0.44 |
| Q62093_SRSF2_MOUSE  | Srsf2  | Serine/arginine-rich splic. R.YGGGGYGR@.C                  | 52.99   | 27.89  | 1.90 | 0.53 |
| P84104_SRSF3_MOUSE  | Srsf3  | Serine/arginine-rich splic. R.AFGYGYPLR@.S                 | 57.75   | 30.41  | 1.90 | 0.53 |
| P84104_SRSF3_MOUSE  | Srsf3  | Serine/arginine-rich splic. R.NPPGFVFEFEDPR@.D             | 211.70  | 111.58 | 1.90 | 0.53 |
| P84104_SRSF3_MOUSE  | Srsf3  | Serine/arginine-rich splic. R.AFGYGYPLR@.S                 | 1509.58 | 701.38 | 2.15 | 0.46 |
| P84104_SRSF3_MOUSE  | Srsf3  | Serine/arginine-rich splic. R.DAADAVR@.E                   | 135.20  | 65.22  | 2.07 | 0.48 |
| P84104_SRSF3_MOUSE  | Srsf3  | Serine/arginine-rich splic. R.GPPSSWGR.R                   | 77.61   | 41.94  | 1.85 | 0.54 |
| P84104_SRSF3_MOUSE  | Srsf3  | Serine/arginine-rich splic. R.NPPGFVFEFEDPR@.D             | 527.55  | 283.49 | 1.86 | 0.54 |
| P84104_SRSF3_MOUSE  | Srsf3  | Serine/arginine-rich splic. R.NRGPSSWGR.R                  | 113.71  | 12.65  | 8.99 | 0.11 |
| P84104_SRSF3_MOUSE  | Srsf3  | Serine/arginine-rich splic. R.VELSNLNGGK#R                 | 18.05   | 12.59  | 1.43 | 0.70 |
| P84104_SRSF3_MOUSE  | Srsf3  | Serine/arginine-rich splic. R.VR@VELSNLNGGK#R              | 124.66  | 45.37  | 2.75 | 0.36 |
| P84104_SRSF3_MOUSE  | Srsf3  | Serine/arginine-rich splic. R.VYVGNLNGGK#T                 | 54.94   | 28.19  | 1.95 | 0.51 |
| Q8VE97_SRSF4_MOUSE  | Srsf4  | Serine/arginine-rich splic. R.LIVENLSSR@.C                 | 2043.95 | 660.69 | 3.09 | 0.32 |
| Q8VE97_SRSF4_MOUSE  | Srsf4  | Serine/arginine-rich splic. R.QAGEVYADAHK#.G               | 122.34  | 42.03  | 2.91 | 0.34 |
| Q8VE97_SRSF4_MOUSE  | Srsf4  | Serine/arginine-rich splic. R.VIVEHAR@.G                   | 128.29  | 75.75  | 1.69 | 0.59 |
| Q8VE97_SRSF4_MOUSE  | Srsf4  | Serine/arginine-rich splic. R.AEGESEAPNPEPR@.A             | 122.69  | 68.80  | 1.78 | 0.56 |
| Q8VE97_SRSF4_MOUSE  | Srsf4  | Serine/arginine-rich splic. K.ILEVLDK#N                    | 91.35   | 49.58  | 1.84 | 0.54 |
| Q8VE97_SRSF4_MOUSE  | Srsf4  | Serine/arginine-rich splic. R.LIVENLSSR@.C                 | 328.23  | 165.88 | 1.98 | 0.51 |
| Q8VE97_SRSF4_MOUSE  | Srsf4  | Serine/arginine-rich splic. K.NEGYVFEVSDMK#R               | 6.73    | 4.75   | 1.42 | 0.71 |
| Q8VE97_SRSF4_MOUSE  | Srsf4  | Serine/arginine-rich splic. K.NGYGVFEFDLRL@.D              | 12.38   | 2.15   | 0.46 |      |
| Q35326_SRSF5_MOUSE  | Srsf5  | Serine/arginine-rich splic. R.DADDAYVELDGK#.E              | 103.57  | 31.46  | 3.29 | 0.30 |
| Q35326_SRSF5_MOUSE  | Srsf5  | Serine/arginine-rich splic. R.GFGVFEFEDPR@.D               | 214.94  | 73.35  | 2.93 | 0.34 |
| Q35326_SRSF5_MOUSE  | Srsf5  | Serine/arginine-rich splic. K.LNEGVFEFASGDLK#N             | 328.04  | 105.33 | 3.11 | 0.32 |
| Q35326_SRSF5_MOUSE  | Srsf5  | Serine/arginine-rich splic. K.R@GFGVFEFEDPR@.D             | 49.29   | 16.20  | 3.04 | 0.33 |
| Q35326_SRSF5_MOUSE  | Srsf5  | Serine/arginine-rich splic. R.VSVDLKL#.D                   | 310.57  | 131.04 | 2.37 | 0.42 |
| Q35326_SRSF5_MOUSE  | Srsf5  | Serine/arginine-rich splic. R.DADDAYVELDGK#.E              | 6.51    | 4.36   | 1.49 | 0.67 |
| Q3TWW8_SRSF6_MOUSE  | Srsf6  | Serine/arginine-rich splic. R.ALKDLHDLGTEINGR@.N           | 161.13  | 48.87  | 3.30 | 0.30 |
| Q3TWW8_SRSF6_MOUSE  | Srsf6  | Serine/arginine-rich splic. R.DADDAYVELNSK#.E              | 243.29  | 83.21  | 2.92 | 0.34 |
| Q3TWW8_SRSF6_MOUSE  | Srsf6  | Serine/arginine-rich splic. R.DK#YGGPPVR@.T                | 164.55  | 58.59  | 2.81 | 0.36 |
| Q3TWW8_SRSF6_MOUSE  | Srsf6  | Serine/arginine-rich splic. R.DR@DGYSYGSR@.S               | 26.31   | 8.11   | 3.24 | 0.31 |
| Q3TWW8_SRSF6_MOUSE  | Srsf6  | Serine/arginine-rich splic. R.FFSGYGR@.L                   | 293.62  | 93.32  | 3.15 | 0.32 |
| Q3TWW8_SRSF6_MOUSE  | Srsf6  | Serine/arginine-rich splic. R.LLEIDLK#.N                   | 620.80  | 189.78 | 3.27 | 0.31 |
| Q3TWW8_SRSF6_MOUSE  | Srsf6  | Serine/arginine-rich splic. K.NGYGVFEFEDSR@.D              | 48.23   | 13.15  | 3.67 | 0.27 |
| Q3TWW8_SRSF6_MOUSE  | Srsf6  | Serine/arginine-rich splic. K.NGYGVFEFEDSRDADDAYVELNSK.E   | 70.79   | 19.55  | 3.62 | 0.28 |
| Q3TWW8_SRSF6_MOUSE  | Srsf6  | Serine/arginine-rich splic. R.TNEGVIER@.S                  | 741.32  | 232.92 | 3.18 | 0.31 |
| Q3TWW8_SRSF6_MOUSE  | Srsf6  | Serine/arginine-rich splic. R.DADDAYVELNSK#.E              | 28.37   | 10.90  | 2.60 | 0.38 |
| Q3TWW8_SRSF6_MOUSE  | Srsf6  | Serine/arginine-rich splic. R.DR@DGYSYGSR@.S               | 4.82    | 1.42   | 3.39 | 0.29 |
| Q3TWW8_SRSF6_MOUSE  | Srsf6  | Serine/arginine-rich splic. R.LLEIDLK#.N                   | 103.65  | 48.29  | 2.15 | 0.47 |
| Q3TWW8_SRSF6_MOUSE  | Srsf6  | Serine/arginine-rich splic. K.NGYGVFEFEDSR@.D              | 7.12    | 3.49   | 2.04 | 0.49 |
| Q3TWW8_SRSF6_MOUSE  | Srsf6  | Serine/arginine-rich splic. K.NGYGVFEFEDSR@DADDAYVELNSK#.E | 9.88    | 5.75   | 1.72 | 0.58 |
| Q3TWW8_SRSF6_MOUSE  | Srsf6  | Serine/arginine-rich splic. R.TNEGVIER@.S                  | 91.20   | 42.92  | 2.12 | 0.47 |
| Q3TWW8_SRSF6_MOUSE  | Srsf6  | Serine/arginine-rich splic. R.LLEIDLK#.N                   | 11.20   | 3.28   | 3.42 | 0.29 |
| Q3TWW8_SRSF6_MOUSE  | Srsf6  | Serine/arginine-rich splic. R.TNEGVIER@.S                  | 9.93    | 3.02   | 3.29 | 0.30 |
| Q8BL97_SRSF7_MOUSE  | Srsf7  | Serine/arginine-rich splic. R.AFSYGYPLR@.T                 | 260.30  | 115.99 | 2.24 | 0.45 |
| Q8BL97_SRSF7_MOUSE  | Srsf7  | Serine/arginine-rich splic. R.NPPGFVFEFEDPR@DAEDAVR@.G     | 6.45    | 3.67   | 1.75 | 0.57 |
| Q8BL97_SRSF7_MOUSE  | Srsf7  | Serine/arginine-rich splic. R.R@PFDPNDR@.C                 | 142.17  | 68.18  | 2.09 | 0.48 |
| Q8BL97_SRSF7_MOUSE  | Srsf7  | Serine/arginine-rich splic. R.SGSIIGSR.Y                   | 112.81  | 39.45  | 2.86 | 0.35 |
| Q8BL97_SRSF7_MOUSE  | Srsf7  | Serine/arginine-rich splic. R.VELSTGM*PR@.R                | 174.86  | 90.55  | 1.93 | 0.52 |
| Q8BL97_SRSF7_MOUSE  | Srsf7  | Serine/arginine-rich splic. R.VELSTGM*PR@.R                | 28.13   | 14.70  | 1.91 | 0.52 |
| Q8BL97_SRSF7_MOUSE  | Srsf7  | Serine/arginine-rich splic. K.VYVGNLTGAGGK#.G              | 548.85  | 252.11 | 2.18 | 0.46 |
| Q8BL97_SRSF7_MOUSE  | Srsf7  | Serine/arginine-rich splic. R.AFSYGYPLR@.T                 | 9.88    | 3.95   | 2.50 | 0.40 |
| Q8BL97_SRSF7_MOUSE  | Srsf7  | Serine/arginine-rich splic. K.VYVGNLTGAGGK#.G              | 11.73   | 7.08   | 1.66 | 0.60 |
| Q9DOB0_SRSF9_MOUSE  | Srsf9  | Serine/arginine-rich splic. R.DAEDAVYGR@.N                 | 69.34   | 39.50  | 1.76 | 0.57 |



|                     |       |                                                             |        |        |       |      |
|---------------------|-------|-------------------------------------------------------------|--------|--------|-------|------|
| Q9D080_SRSF9_MOUSE  | Srsf9 | Serine/arginine-rich splic K.DGM*GM*VEYLR@_K                | 37.72  | 22.89  | 1.65  | 0.61 |
| Q9D080_SRSF9_MOUSE  | Srsf9 | Serine/arginine-rich splic K.DLEDLFYK#_Y                    | 13.33  | 8.70   | 1.53  | 0.65 |
| Q9D080_SRSF9_MOUSE  | Srsf9 | Serine/arginine-rich splic R.EKHDLEDLFYK#_Y                 | 105.41 | 61.89  | 1.70  | 0.59 |
| Q9D080_SRSF9_MOUSE  | Srsf9 | Serine/arginine-rich splic R.FEDPR@DAEDIAYGR@_N             | 84.78  | 55.28  | 1.53  | 0.65 |
| Q9D080_SRSF9_MOUSE  | Srsf9 | Serine/arginine-rich splic R.HGLVPFAFVR@_F                  | 90.23  | 56.03  | 1.61  | 0.62 |
| Q9D080_SRSF9_MOUSE  | Srsf9 | Serine/arginine-rich splic R.IYVGNLPSDVR@_E                 | 223.22 | 134.49 | 1.66  | 0.60 |
| Q9D080_SRSF9_MOUSE  | Srsf9 | Serine/arginine-rich splic R.KHEM*YALR@_K                   | 37.61  | 19.72  | 1.91  | 0.52 |
| Q9D080_SRSF9_MOUSE  | Srsf9 | Serine/arginine-rich splic R.SHEGETSYR#_V                   | 32.87  | 21.48  | 1.53  | 0.65 |
| Q9D080_SRSF9_MOUSE  | Srsf9 | Serine/arginine-rich splic R.SHEGETSYR@_V                   | 66.60  | 37.70  | 1.77  | 0.57 |
| Q9D080_SRSF9_MOUSE  | Srsf9 | Serine/arginine-rich splic R.VLVSGLPPSGSWQDLK#_D            | 18.86  | 13.84  | 1.36  | 0.73 |
| Q9D080_SRSF9_MOUSE  | Srsf9 | Serine/arginine-rich splic R.DAEDIAYGR@_N                   | 16.46  | 8.09   | 2.03  | 0.49 |
| Q9D080_SRSF9_MOUSE  | Srsf9 | Serine/arginine-rich splic K.DGM*GM*VEYLR@_K                | 15.33  | 8.58   | 1.79  | 0.56 |
| Q9D080_SRSF9_MOUSE  | Srsf9 | Serine/arginine-rich splic R.FEDPR@DAEDIAYGR@_N             | 66.24  | 44.05  | 1.50  | 0.66 |
| Q9D080_SRSF9_MOUSE  | Srsf9 | Serine/arginine-rich splic R.HGLVPFAFVR@_F                  | 85.02  | 56.64  | 1.50  | 0.67 |
| Q9D080_SRSF9_MOUSE  | Srsf9 | Serine/arginine-rich splic R.IYVGNLPSDVR@_E                 | 183.61 | 106.38 | 1.73  | 0.58 |
| Q9D080_SRSF9_MOUSE  | Srsf9 | Serine/arginine-rich splic R.SHEGETSYR#_V                   | 22.80  | 17.70  | 1.29  | 0.78 |
| Q9D080_SRSF9_MOUSE  | Srsf9 | Serine/arginine-rich splic R.VLVSGLPPSGSWQDLK#_D            | 15.55  | 12.21  | 1.27  | 0.79 |
| Q62280_SSTX_MOUSE   | Ss18  | Protein SSX OS=Mus mu R.GKHGETPAAIQK#_M                     | 7.93   | 1.32   | 6.02  | 0.17 |
| P32067_LA_MOUSE     | Ssb   | Lupus La protein homolc K.DNTLLILFK#_E                      | 16.96  | 8.95   | 1.90  | 0.53 |
| P32067_LA_MOUSE     | Ssb   | Lupus La protein homolc K.DNTLLILFK#EDYFAK#_K               | 10.29  | 4.86   | 2.12  | 0.47 |
| P32067_LA_MOUSE     | Ssb   | Lupus La protein homolc K.FVEIPGQK#_Y                       | 151.99 | 101.86 | 1.49  | 0.67 |
| P32067_LA_MOUSE     | Ssb   | Lupus La protein homolc K.GNR@PGYAGAPK#_G                   | 21.30  | 13.96  | 1.53  | 0.66 |
| P32067_LA_MOUSE     | Ssb   | Lupus La protein homolc K.GSIFAVDSIQSAK#_K                  | 248.37 | 166.21 | 1.49  | 0.67 |
| P32067_LA_MOUSE     | Ssb   | Lupus La protein homolc K.ITDDQEQSLNK#_W                    | 161.75 | 106.61 | 1.52  | 0.66 |
| P32067_LA_MOUSE     | Ssb   | Lupus La protein homolc K.KHFEIPIGQK#_Y                     | 44.19  | 35.90  | 1.23  | 0.81 |
| P32067_LA_MOUSE     | Ssb   | Lupus La protein homolc K.LDEGVWPLETMIK#_F                  | 38.68  | 28.32  | 1.37  | 0.73 |
| P32067_LA_MOUSE     | Ssb   | Lupus La protein homolc K.LM*EVSADK#_T                      | 27.57  | 17.64  | 1.56  | 0.64 |
| P32067_LA_MOUSE     | Ssb   | Lupus La protein homolc R.LTTDFVNIQVQLSK#_S                 | 131.92 | 88.74  | 1.49  | 0.67 |
| P32067_LA_MOUSE     | Ssb   | Lupus La protein homolc K.MTALAK#_I                         | 40.04  | 24.31  | 1.65  | 0.61 |
| P32067_LA_MOUSE     | Ssb   | Lupus La protein homolc R.NANNGNLLR@_N                      | 38.00  | 19.28  | 1.97  | 0.51 |
| P32067_LA_MOUSE     | Ssb   | Lupus La protein homolc R.SPSR@PLPEVTDYK#NDVK#_N            | 56.58  | 34.26  | 1.65  | 0.61 |
| P32067_LA_MOUSE     | Ssb   | Lupus La protein homolc K.YK#DNTLLILFK#_E                   | 138.52 | 97.12  | 1.43  | 0.70 |
| P32067_LA_MOUSE     | Ssb   | Lupus La protein homolc K.ITDDQEQSLNK#_W                    | 3.00   | 4.10   | 0.73  | 1.37 |
| P32067_LA_MOUSE     | Ssb   | Lupus La protein homolc K.GSIFAVDSIQSAK#_K                  | 6.55   | 6.44   | 1.02  | 0.98 |
| Q8R2K3_Q8R2K3_MOUSE | Ssbp1 | Single-stranded DNA bin R.QATTIADNIIFLSDQTK#_E              | 8.01   | 12.49  | 0.64  | 1.56 |
| Q8R2K3_Q8R2K3_MOUSE | Ssbp1 | Single-stranded DNA bin R.SGDSEVYQK*GDVSQK#_T               | 11.73  | 17.56  | 0.67  | 1.50 |
| Q9CY50_SSR1_MOUSE   | Ssr1  | Translocon-associated pr K.FLVGFTNK#_G                      | 56.25  | 43.53  | 1.29  | 0.77 |
| Q9CY50_SSR1_MOUSE   | Ssr1  | Translocon-associated pr K.GEDFPANNIVK#_F                   | 24.24  | 24.13  | 1.00  | 1.00 |
| Q9CY50_SSR1_MOUSE   | Ssr1  | Translocon-associated pr K.GTEDFIVESLSDASFR#_Y              | 29.57  | 24.47  | 1.21  | 0.83 |
| Q9CY50_SSR1_MOUSE   | Ssr1  | Translocon-associated pr K.GTEDFIVESLSDASFR@_Y              | 17.61  | 9.79   | 1.80  | 0.56 |
| Q9DFCF9_SSR3_MOUSE  | Ssr3  | Translocon-associated pr K.QQSEEDLLQDPSR@_N                 | 27.44  | 24.62  | 1.11  | 0.90 |
| Q62186_SSRD_MOUSE   | Ssr4  | Translocon-associated pr R.NNEDVSIIPPLFTVSDVHR@_G           | 15.39  | 8.34   | 1.84  | 0.54 |
| Q08943_SSRP1_MOUSE  | Ssrp1 | FACT complex subunit SS K.ASSGLYPLER#_G                     | 14.45  | 25.49  | 0.57  | 1.76 |
| Q08943_SSRP1_MOUSE  | Ssrp1 | FACT complex subunit SS R.FDEISFVNAR@_G                     | 13.63  | 19.94  | 0.68  | 1.46 |
| Q08943_SSRP1_MOUSE  | Ssrp1 | FACT complex subunit SS R.FYVPTQEDGDPVEAFAQNLVSK#_A         | 8.87   | 10.72  | 0.83  | 1.21 |
| Q08943_SSRP1_MOUSE  | Ssrp1 | FACT complex subunit SS K.IPYTVLR#_L                        | 12.60  | 12.85  | 0.98  | 1.02 |
| Q08943_SSRP1_MOUSE  | Ssrp1 | FACT complex subunit SS K.VDNIQAGELTEIWR#_R                 | 6.14   | 8.91   | 0.69  | 1.45 |
| P56873_SSA27_MOUSE  | Ssca1 | Sjogren syndrome/scler K.AAQAPPLPAAPNNTDAVASTQTALLQK#_L     | 6.85   | 3.92   | 1.75  | 0.57 |
| P56873_SSA27_MOUSE  | Ssca1 | Sjogren syndrome/scler K.AAQAPPLPAAPNNTDAVASTQTALLQK#_L     | 25.93  | 12.81  | 2.02  | 0.49 |
| Q924W7_STS_MOUSE    | St5   | Suppression of tumorige K.TFLPGAGNEVLELR@_R                 | 12.00  | 5.51   | 2.18  | 0.46 |
| Q8B271_STAC3_MOUSE  | Stac3 | SH3 and cysteine-rich do K.GDEAGGYK#MYTGR@_K                | 59.12  | 2.45   | 24.09 | 0.04 |
| Q9D3E6_STAG1_MOUSE  | Stag1 | Cohesin subunit SA-1 OS: K.DGIEFAFK#_Y                      | 10.33  | 5.40   | 1.92  | 0.52 |
| Q9D3E6_STAG1_MOUSE  | Stag1 | Cohesin subunit SA-1 OS: K.FLTEQM*MER@_R                    | 14.92  | 4.45   | 3.35  | 0.30 |
| Q9D3E6_STAG1_MOUSE  | Stag1 | Cohesin subunit SA-1 OS: R.FNHVSDLLQGEAEADDDIYVNSTLKH#_R@_L | 11.88  | 1.88   | 6.30  | 0.16 |
| Q9D3E6_STAG1_MOUSE  | Stag1 | Cohesin subunit SA-1 OS: K.ITDGSPSKHEDLLVR@_K               | 21.22  | 10.45  | 2.03  | 0.49 |
| Q9D3E6_STAG1_MOUSE  | Stag1 | Cohesin subunit SA-1 OS: R.IVSM*TLDKHEYDVAVEAIR@_L          | 23.69  | 7.89   | 3.00  | 0.33 |
| Q9D3E6_STAG1_MOUSE  | Stag1 | Cohesin subunit SA-1 OS: R.LELLQK#_R                        | 54.62  | 20.87  | 2.62  | 0.38 |
| Q9D3E6_STAG1_MOUSE  | Stag1 | Cohesin subunit SA-1 OS: K.M*YSDALFNDSYLK#_Y                | 11.46  | 3.67   | 3.13  | 0.32 |
| Q9D3E6_STAG1_MOUSE  | Stag1 | Cohesin subunit SA-1 OS: R.NM*QNAEIR@_K                     | 9.75   | 3.49   | 2.80  | 0.36 |
| Q9D3E6_STAG1_MOUSE  | Stag1 | Cohesin subunit SA-1 OS: R.NSLVTGGEDDR@M*SVNSGSSSK#_T       | 10.88  | 3.64   | 2.80  | 0.36 |
| Q9D3E6_STAG1_MOUSE  | Stag1 | Cohesin subunit SA-1 OS: R.SQLIDFVDR@_F                     | 18.19  | 11.26  | 1.68  | 0.60 |
| Q9D3E6_STAG1_MOUSE  | Stag1 | Cohesin subunit SA-1 OS: R.HDPQAEALAK#_R                    | 12.21  | 11.28  | 1.08  | 0.92 |
| Q9D3E6_STAG1_MOUSE  | Stag1 | Cohesin subunit SA-1 OS: R.IVSM*TLDKHEYDVAVEAIR@_L          | 18.13  | 5.41   | 3.35  | 0.30 |
| Q9D3E6_STAG1_MOUSE  | Stag1 | Cohesin subunit SA-1 OS: R.LELLQK#_R                        | 40.50  | 12.63  | 3.21  | 0.31 |
| Q9D3E6_STAG1_MOUSE  | Stag1 | Cohesin subunit SA-1 OS: K.M*YSDALFNDSYLK#_Y                | 10.79  | 3.76   | 2.87  | 0.35 |
| Q9D3E6_STAG1_MOUSE  | Stag1 | Cohesin subunit SA-1 OS: R.SQLIDFVDR@_F                     | 16.78  | 8.18   | 2.05  | 0.49 |
| Q9D3E6_STAG1_MOUSE  | Stag1 | Cohesin subunit SA-1 OS: K.YYNDYGDIIK#_E                    | 14.12  | 4.64   | 3.05  | 0.33 |
| O35638_STAG2_MOUSE  | Stag2 | Cohesin subunit SA-2 OS: R.ERTEKPDFDPAASIM*DESVLGVSM*F#_-   | 4.62   | 1.75   | 2.64  | 0.38 |
| O35638_STAG2_MOUSE  | Stag2 | Cohesin subunit SA-2 OS: R.IVSM*TLDKHEYDVAVQAIK#_L          | 17.21  | 5.10   | 3.38  | 0.30 |
| O35638_STAG2_MOUSE  | Stag2 | Cohesin subunit SA-2 OS: R.LLEDFLOGEEDDDAYQLVSTLKH#_R@_I    | 9.98   | 2.84   | 3.51  | 0.29 |
| O35638_STAG2_MOUSE  | Stag2 | Cohesin subunit SA-2 OS: R.IVSM*TLDKHEYDVAVQAIK#_L          | 21.63  | 6.02   | 3.59  | 0.28 |
| O35638_STAG2_MOUSE  | Stag2 | Cohesin subunit SA-2 OS: R.LLEDFLOGEEDDDAYQLVSTLKH#_R       | 15.84  | 5.67   | 2.79  | 0.36 |
| O35638_STAG2_MOUSE  | Stag2 | Cohesin subunit SA-2 OS: R.R@DPEEDGLM*KK#_R                 | 7.86   | 4.41   | 1.78  | 0.56 |
| O88811_STAM2_MOUSE  | Stam2 | Signal transducing adapt K.SM*HEEGTVPSPAGSQTVAANA#_N        | 5.75   | 5.35   | 1.08  | 0.93 |
| O88811_STAM2_MOUSE  | Stam2 | Signal transducing adapt K.VLEALDLYNK#_L                    | 10.42  | 3.09   | 3.38  | 0.30 |
| Q8C3V4_Q8C3V4_MOUSE | Stat1 | Signal transducer and act K.ELSAVTFPDIR@_N                  | 10.87  | 12.55  | 0.87  | 1.16 |
| Q8C3V4_Q8C3V4_MOUSE | Stat1 | Signal transducer and act K.FTYEPPDIR#_N                    | 11.56  | 7.91   | 1.46  | 0.68 |
| Q8C3V4_Q8C3V4_MOUSE | Stat1 | Signal transducer and act K.M*FLM*LDNK#_R                   | 6.32   | 7.67   | 0.82  | 1.21 |
| Q8C3V4_Q8C3V4_MOUSE | Stat1 | Signal transducer and act K.TELISVSEVHPSR@_L                | 11.76  | 8.85   | 1.33  | 0.75 |
| Q8C3V4_Q8C3V4_MOUSE | Stat1 | Signal transducer and act K.VM*AAENPENPLK#_Y                | 11.48  | 10.38  | 1.11  | 0.90 |
| Q8C3V4_Q8C3V4_MOUSE | Stat1 | Signal transducer and act K.ELSAVTFPDIR#_N                  | 8.52   | 9.69   | 0.88  | 1.14 |
| Q8C3V4_Q8C3V4_MOUSE | Stat1 | Signal transducer and act R.FHLLSLQDDQYSR@_F                | 5.58   | 5.92   | 0.94  | 1.06 |
| Q8C3V4_Q8C3V4_MOUSE | Stat1 | Signal transducer and act K.FLEQVHQLVDDSPM*EIR#_Q           | 7.01   | 10.57  | 0.66  | 1.51 |
| Q8C3V4_Q8C3V4_MOUSE | Stat1 | Signal transducer and act R.FNQAQEQGNQNTVM*LDK#_Q           | 3.18   | 4.47   | 0.71  | 1.40 |
| Q8C3V4_Q8C3V4_MOUSE | Stat1 | Signal transducer and act R.QYLAQWLK#_Q                     | 4.22   | 2.63   | 1.61  | 0.62 |
| Q8C3V4_Q8C3V4_MOUSE | Stat1 | Signal transducer and act K.TLEELQDYDFK#_C                  | 3.08   | 8.61   | 0.36  | 2.79 |
| Q8C3V4_Q8C3V4_MOUSE | Stat1 | Signal transducer and act K.VM*AAENPENPLK#_Y                | 3.44   | 4.04   | 0.85  | 1.17 |
| Q8C3V4_Q8C3V4_MOUSE | Stat1 | Signal transducer and act R.ALLKHQDQPGTFLLR@_F              | 22.79  | 12.49  | 1.82  | 0.55 |
| Q8C3V4_Q8C3V4_MOUSE | Stat1 | Signal transducer and act K.DQQPGTFLLR@_F                   | 17.54  | 40.32  | 0.43  | 2.30 |
| Q8C3V4_Q8C3V4_MOUSE | Stat1 | Signal transducer and act R.EGAIFFTWVVER#_S                 | 22.41  | 13.53  | 1.66  | 0.60 |
| Q8C3V4_Q8C3V4_MOUSE | Stat1 | Signal transducer and act K.ELSAVTFPDIR@_N                  | 52.03  | 33.56  | 1.55  | 0.64 |
| Q8C3V4_Q8C3V4_MOUSE | Stat1 | Signal transducer and act R.FHLLSLQDDQYSR@_F                | 15.65  | 10.58  | 1.48  | 0.68 |
| Q8C3V4_Q8C3V4_MOUSE | Stat1 | Signal transducer and act R.FNQAQEQGNQNTVM*LDK#_Q           | 7.85   | 5.19   | 1.51  | 0.66 |
| Q8C3V4_Q8C3V4_MOUSE | Stat1 | Signal transducer and act K.FTYEPPDIR#_N                    | 13.33  | 19.33  | 1.75  | 0.57 |
| Q8C3V4_Q8C3V4_MOUSE | Stat1 | Signal transducer and act R.GLNADQLSM*LGKE#_L               | 18.07  | 12.42  | 1.45  | 0.69 |
| Q8C3V4_Q8C3V4_MOUSE | Stat1 | Signal transducer and act K.KHLELEQK#_F                     | 26.96  | 14.74  | 1.83  | 0.55 |
| Q8C3V4_Q8C3V4_MOUSE | Stat1 | Signal transducer and act K.LLQVAGPDPGILPWR@_F              | 101.71 | 66.46  | 1.53  | 0.65 |
| Q8C3V4_Q8C3V4_MOUSE | Stat1 | Signal transducer and act K.LQELNLYNK#_V                    | 101.71 | 15.72  | 1.89  | 0.53 |
| Q8C3V4_Q8C3V4_MOUSE | Stat1 | Signal transducer and act K.QDWEHAAYDVSFATIR@_F             | 29.85  | 2.71   | 4.00  | 0.25 |
| Q8C3V4_Q8C3V4_MOUSE | Stat1 | Signal transducer and act K.SDQK#QEQLLLHK#_M                | 13.89  | 7.96   | 1.75  | 0.57 |
| Q8C3V4_Q8C3V4_MOUSE | Stat1 | Signal transducer and act K.TLEELQDYDFK#_C                  | 16.14  | 7.93   | 2.03  | 0.49 |
| Q8C3V4_Q8C3V4_MOUSE | Stat1 | Signal transducer and act K.VM*AAENPENPLK#_Y                | 20.13  | 13.99  | 1.44  | 0.69 |
| Q8C3V4_Q8C3V4_MOUSE | Stat1 | Signal transducer and act K.DQQPGTFLLR@_F                   | 27.61  | 67.00  | 0.41  | 2.43 |







|                       |          |                                                                |        |         |      |      |
|-----------------------|----------|----------------------------------------------------------------|--------|---------|------|------|
| Q8C092_TAF5_MOUSE     | Taf5     | Transcription initiation f R.LLEEAVAGSGAPGELDGAGAEASALLSR@.V   | 21.27  | 4.47    | 4.76 | 0.21 |
| Q8C092_TAF5_MOUSE     | Taf5     | Transcription initiation f R.LLEEAVAGSGAPGELDGAGAEASALLSR@.V   | 9.93   | 1.83    | 5.41 | 0.18 |
| Q91W05_TAF5L_MOUSE    | Taf5l    | TAF5-like RNA polymerase K.LWDLASGLTLFK#.E                     | 8.05   | 3.77    | 2.14 | 0.47 |
| Q91W05_TAF5L_MOUSE    | Taf5l    | TAF5-like RNA polymerase R.SFLTDSDSQVSR@.E                     | 7.52   | 2.22    | 3.39 | 0.29 |
| Q91W05_TAF5L_MOUSE    | Taf5l    | TAF5-like RNA polymerase K.YLASAGEDQR@.L                       | 7.22   | 3.70    | 1.95 | 0.51 |
| Q91W05_TAF5L_MOUSE    | Taf5l    | TAF5-like RNA polymerase R.SFLTDSDSQVSR@.E                     | 6.86   | 2.25    | 3.04 | 0.33 |
| Q91W05_TAF5L_MOUSE    | Taf5l    | TAF5-like RNA polymerase K.YLASAGEDQR@.L                       | 7.18   | 3.95    | 1.82 | 0.55 |
| Q62311_TAF6_MOUSE     | Taf6     | Transcription initiation f R.AQAALQAQQVNR@.T                   | 7.38   | 1.98    | 3.72 | 0.27 |
| Q62311_TAF6_MOUSE     | Taf6     | Transcription initiation f R.SVLDPGLVSNIDR@.I                  | 6.73   | 3.39    | 1.99 | 0.50 |
| Q62311_TAF6_MOUSE     | Taf6     | Transcription initiation f R.AQAALQAQQVNR@.T                   | 8.55   | 2.89    | 2.96 | 0.34 |
| Q62311_TAF6_MOUSE     | Taf6     | Transcription initiation f R.SVLDPGLVSNIDR@.I                  | 9.55   | 2.66    | 3.59 | 0.28 |
| Q8R2K4_TAF6L_MOUSE    | Taf6l    | TAF6-like RNA polymerase R.LFQTAFAPYGPSPASR@.Y                 | 5.32   | 2.69    | 1.98 | 0.51 |
| Q8R2K4_TAF6L_MOUSE    | Taf6l    | TAF6-like RNA polymerase R.LFQTAFAPYGPSPASR@.Y                 | 6.95   | 2.37    | 2.93 | 0.34 |
| Q8R2K4_TAF6L_MOUSE    | Taf6l    | TAF6-like RNA polymerase K.VALQDLQTNK#.I                       | 7.87   | 1.93    | 4.08 | 0.24 |
| Q9R1C0_TAF7_MOUSE     | Taf7     | Transcription initiation f R.EKHEQLSSLQEELSLLEK#.-             | 22.70  | 4.95    | 4.59 | 0.22 |
| Q9R1C0_TAF7_MOUSE     | Taf7     | Transcription initiation f R.FQAVLDELK#.Q                      | 6.35   | 1.22    | 5.19 | 0.19 |
| Q9R1C0_TAF7_MOUSE     | Taf7     | Transcription initiation f R.LLSTDAEAVSTR@.W                   | 28.65  | 8.16    | 3.51 | 0.28 |
| Q9EQH4_TAF8_MOUSE     | Taf8     | Transcription initiation f R.M*VITAPPVYNQVPTPK#.A              | 6.52   | 2.59    | 2.52 | 0.40 |
| Q9EQH4_TAF8_MOUSE     | Taf8     | Transcription initiation f R.TLQVVSLLTEAGFESAIEK#.A            | 16.03  | 4.30    | 3.73 | 0.27 |
| Q8V133_TAF9_MOUSE     | Taf9     | Transcription initiation f R.ADQSFSPPPP@.D                     | 18.29  | 6.88    | 2.66 | 0.38 |
| Q8V133_TAF9_MOUSE     | Taf9     | Transcription initiation f R.ATVDADVR@.L                       | 21.46  | 7.98    | 2.69 | 0.37 |
| Q8V133_TAF9_MOUSE     | Taf9     | Transcription initiation f R.DFLDLAR@.Q                        | 30.76  | 10.57   | 2.91 | 0.34 |
| Q8V133_TAF9_MOUSE     | Taf9     | Transcription initiation f R.FTVQM*PASOSPAVK#.A                | 13.39  | 3.97    | 3.38 | 0.30 |
| Q8V133_TAF9_MOUSE     | Taf9     | Transcription initiation f R.LSVGSVSSR@PSTPTLGTPTPQTM*SVSTK#.V | 9.38   | 4.59    | 2.05 | 0.49 |
| Q8V133_TAF9_MOUSE     | Taf9     | Transcription initiation f R.VINQM*LEFAFR@.Y                   | 7.64   | 2.42    | 3.16 | 0.32 |
| Q8V133_TAF9_MOUSE     | Taf9     | Transcription initiation f R.VINQM*LEFAFR@.Y                   | 11.16  | 2.69    | 4.15 | 0.24 |
| Q8V133_TAF9_MOUSE     | Taf9     | Transcription initiation f R.LSVGSVSSR@PSTPTLGTPTPQTM*SVSTK#.V | 5.57   | 2.54    | 2.19 | 0.46 |
| Q8V133_TAF9_MOUSE     | Taf9     | Transcription initiation f R.VYTTILDQAK#.I                     | 5.68   | 1.27    | 4.46 | 0.22 |
| P70347_TAN_K_MOUSE    | Tank     | TRAF family member-assoc.R.IR@EQEQLSQFQQLNIDR@.L               | 4.95   | 2.21    | 2.24 | 0.45 |
| Q5F2E8_TAOK1_MOUSE    | Taok1    | Serine/threonine-protein K.AGNILLTEPGQVK#.L                    | 9.92   | 1.17    | 8.49 | 0.12 |
| P21958_TAP1_MOUSE     | Tap1     | Antigen peptide transpor.R.K#PLLLILLDATSALDAGNQLR@.V           | 14.15  | 12.36   | 1.14 | 0.87 |
| P21958_TAP1_MOUSE     | Tap1     | Antigen peptide transpor.R.SFANEEGAQK#.F                       | 6.37   | 4.23    | 1.50 | 0.67 |
| P21958_TAP1_MOUSE     | Tap1     | Antigen peptide transpor.K.STQVLAESALM*PTVR.S                  | 3.12   | 2.30    | 1.36 | 0.74 |
| P21958_TAP1_MOUSE     | Tap1     | Antigen peptide transpor.K.GLVEFQDVSFAYNPQPK#.V                | 6.68   | 2.76    | 2.42 | 0.41 |
| P21958_TAP1_MOUSE     | Tap1     | Antigen peptide transpor.R.K#PLLLILLDATSALDAGNQLR@.V           | 17.63  | 13.88   | 1.27 | 0.79 |
| Q9R233_TPSN_MOUSE     | Tapbp    | Tapasin OS=Mus musculus K.ATAASLTIPR@.N                        | 13.28  | 6.53    | 2.03 | 0.49 |
| Q9R233_TPSN_MOUSE     | Tapbp    | Tapasin OS=Mus musculus R.FAYAPSALGESPLDAGPPFGLWR@.R           | 7.04   | 5.91    | 1.19 | 0.84 |
| Q9R233_TPSN_MOUSE     | Tapbp    | Tapasin OS=Mus musculus K.ATAASLTIPR@.N                        | 16.98  | 15.90   | 1.07 | 0.94 |
| Q921F2_TADBP_MOUSE    | Tardbp   | TAR DNA-binding protein R.AFAFVTFADDK#.V                       | 116.33 | 129.67  | 0.90 | 1.11 |
| Q921F2_TADBP_MOUSE    | Tardbp   | TAR DNA-binding protein K.DYFSTFGEVLM*VQVK#.K                  | 54.37  | 56.77   | 0.96 | 1.04 |
| Q921F2_TADBP_MOUSE    | Tardbp   | TAR DNA-binding protein K.DYFSTFGEVLM*VQVK#.K                  | 18.27  | 17.77   | 1.03 | 0.97 |
| Q921F2_TADBP_MOUSE    | Tardbp   | TAR DNA-binding protein K.DYFSTFGEVLM*VQVK#.K                  | 33.69  | 32.66   | 1.03 | 0.97 |
| Q921F2_TADBP_MOUSE    | Tardbp   | TAR DNA-binding protein R.FGNGNPGGFGNQGFGNSR@.G                | 640.20 | 685.92  | 0.93 | 1.07 |
| Q921F2_TADBP_MOUSE    | Tardbp   | TAR DNA-binding protein R.FTEYEQVK#.V                          | 680.07 | 677.17  | 1.00 | 1.00 |
| Q921F2_TADBP_MOUSE    | Tardbp   | TAR DNA-binding protein R.HMIDGR.W                             | 22.51  | 23.91   | 0.94 | 1.06 |
| Q921F2_TADBP_MOUSE    | Tardbp   | TAR DNA-binding protein R.KHM*DETDASSAVK#.V                    | 281.11 | 299.43  | 0.94 | 1.07 |
| Q921F2_TADBP_MOUSE    | Tardbp   | TAR DNA-binding protein R.LVEGILHAPDAGWGNLVVYVNPYK#.D          | 496.52 | 442.26  | 1.12 | 0.89 |
| Q921F2_TADBP_MOUSE    | Tardbp   | TAR DNA-binding protein K.M*DETDASSAVK#.V                      | 56.46  | 55.36   | 1.02 | 0.98 |
| Q921F2_TADBP_MOUSE    | Tardbp   | TAR DNA-binding protein K.MDETDASSAVK#.V                       | 58.14  | 66.86   | 0.87 | 1.15 |
| Q921F2_TADBP_MOUSE    | Tardbp   | TAR DNA-binding protein K.TSDLVGLPWK#.T                        | 998.47 | 1058.62 | 0.94 | 1.06 |
| Q921F2_TADBP_MOUSE    | Tardbp   | TAR DNA-binding protein K.TTEQDLKDYFSTFGEVLM*VQVK#.K           | 227.50 | 219.21  | 1.04 | 0.96 |
| Q921F2_TADBP_MOUSE    | Tardbp   | TAR DNA-binding protein K.TTEQDLKDYFSTFGEVLM*VQVK#.K           | 3.70   | 4.73    | 0.78 | 1.28 |
| Q921F2_TADBP_MOUSE    | Tardbp   | TAR DNA-binding protein K.TTEQDLKDYFSTFGEVLM*VQVK#.K           | 149.16 | 158.60  | 0.94 | 1.06 |
| Q921F2_TADBP_MOUSE    | Tardbp   | TAR DNA-binding protein R.FGNGNPGGFGNQGFGNSR@.G                | 134.40 | 19.60   | 0.68 | 1.46 |
| Q921F2_TADBP_MOUSE    | Tardbp   | TAR DNA-binding protein R.LVEGILHAPDAGWGNLVVYVNPYK#.D          | 1.58   | 3.00    | 0.53 | 1.90 |
| Q921F2_TADBP_MOUSE    | Tardbp   | TAR DNA-binding protein K.TSDLVGLPWK#.T                        | 5.32   | 8.91    | 0.60 | 1.67 |
| Q921F2_TADBP_MOUSE    | Tardbp   | TAR DNA-binding protein R.AFAFVTFADDK#.V                       | 10.32  | 10.42   | 0.99 | 1.01 |
| Q921F2_TADBP_MOUSE    | Tardbp   | TAR DNA-binding protein R.FGNGNPGGFGNQGFGNSR@.G                | 30.62  | 29.35   | 1.04 | 0.96 |
| Q921F2_TADBP_MOUSE    | Tardbp   | TAR DNA-binding protein R.FTEYEQVK#.V                          | 34.34  | 34.59   | 0.99 | 1.01 |
| Q921F2_TADBP_MOUSE    | Tardbp   | TAR DNA-binding protein R.KM*DETDASSAVK#.V                     | 10.12  | 15.54   | 0.65 | 1.54 |
| Q921F2_TADBP_MOUSE    | Tardbp   | TAR DNA-binding protein R.LVEGILHAPDAGWGNLVVYVNPYK#.D          | 32.96  | 35.14   | 0.94 | 1.07 |
| Q921F2_TADBP_MOUSE    | Tardbp   | TAR DNA-binding protein K.QSPDEPLR@.S                          | 22.64  | 34.29   | 0.66 | 1.51 |
| Q921F2_TADBP_MOUSE    | Tardbp   | TAR DNA-binding protein K.TSDLVGLPWK#.T                        | 46.08  | 49.21   | 0.94 | 1.07 |
| Q921F2_TADBP_MOUSE    | Tardbp   | TAR DNA-binding protein K.TTEQDLKDYFSTFGEVLM*VQVK#.K           | 7.63   | 17.13   | 0.45 | 2.24 |
| Q921F2_TADBP_MOUSE    | Tardbp   | TAR DNA-binding protein R.FGNGNPGGFGNQGFGNSR@.G                | 16.25  | 17.14   | 0.95 | 1.05 |
| Q921F2_TADBP_MOUSE    | Tardbp   | TAR DNA-binding protein R.FTEYEQVK#.V                          | 16.99  | 18.59   | 0.91 | 1.09 |
| Q921F2_TADBP_MOUSE    | Tardbp   | TAR DNA-binding protein R.KM*DETDASSAVK#.V                     | 8.30   | 6.91    | 1.20 | 0.83 |
| Q921F2_TADBP_MOUSE    | Tardbp   | TAR DNA-binding protein K.TSDLVGLPWK#.T                        | 29.26  | 28.41   | 1.03 | 0.97 |
| Q60949_TBC1D1_MOUSE   | Tbc1d1   | TBC1 domain family men K.AILQILLR@.M                           | 11.30  | 4.10    | 2.76 | 0.36 |
| Q60949_TBC1D1_MOUSE   | Tbc1d1   | TBC1 domain family men R.GLQDHSASVDLDSSTSLNTSK#.E              | 5.48   | 1.75    | 3.13 | 0.32 |
| Q60949_TBC1D1_MOUSE   | Tbc1d1   | TBC1 domain family men R.SLTESLESLSR@.G                        | 7.63   | 3.26    | 2.34 | 0.43 |
| P58802_TBC1D10A_MOUSE | Tbc1d10a | TBC1 domain family men K.IIM*QEAFVIEIPLVPTER@.Q                | 12.39  | 4.60    | 2.69 | 0.37 |
| Q9CXF4_TBC15_MOUSE    | Tbc1d15  | TBC1 domain family men R.EFSLDLIR@.L                           | 10.82  | 2.01    | 5.38 | 0.19 |
| Q9CXF4_TBC15_MOUSE    | Tbc1d15  | TBC1 domain family men K.INQEEPEFVTR@.I                        | 6.24   | 2.49    | 2.50 | 0.40 |
| Q9CXF4_TBC15_MOUSE    | Tbc1d15  | TBC1 domain family men K.VTNVYFDSLRL@.G                        | 12.14  | 3.79    | 3.20 | 0.31 |
| Q9CXF4_TBC15_MOUSE    | Tbc1d15  | TBC1 domain family men K.VTNVYFDSLRL@.G                        | 11.43  | 4.41    | 2.59 | 0.39 |
| Q8BY6_TBCD4_MOUSE     | Tbc1d4   | TBC1 domain family men K.EILIAWDKK.L                           | 6.18   | 4.61    | 1.34 | 0.75 |
| Q80XQ2_TBCD5_MOUSE    | Tbc1d5   | TBC1 domain family men R.GAFSGQAQPLTLR@.S                      | 7.77   | 2.93    | 2.66 | 0.38 |
| Q80XQ2_TBCD5_MOUSE    | Tbc1d5   | TBC1 domain family men K.TISSPISLPGGR@.E                       | 8.71   | 4.40    | 1.98 | 0.50 |
| Q5SVR0_TBC9B_MOUSE    | Tbc1d9b  | TBC1 domain family men R.VVGALVDDQGFEEILR@.D                   | 6.49   | 2.85    | 2.28 | 0.44 |
| Q5SVR0_TBC9B_MOUSE    | Tbc1d9b  | TBC1 domain family men K.ADSSSVLPSPLSITLTK#.S                  | 5.76   | 2.07    | 2.78 | 0.36 |
| Q5SVR0_TBC9B_MOUSE    | Tbc1d9b  | TBC1 domain family men R.ANPFVILQR@.R                          | 9.27   | 4.12    | 2.25 | 0.44 |
| Q9WUN2_TBK1_MOUSE     | Tbk1     | Serine/threonine-protein R.LSSSQGTIESLQDISSR@.L                | 7.26   | 1.37    | 5.29 | 0.19 |
| Q9WUN2_TBK1_MOUSE     | Tbk1     | Serine/threonine-protein R.FGSLTM*DGGLR@.N                     | 11.42  | 3.81    | 3.00 | 0.33 |
| Q9WUN2_TBK1_MOUSE     | Tbk1     | Serine/threonine-protein R.LSSSQGTIESLQDISSR@.L                | 13.09  | 2.90    | 4.51 | 0.22 |
| Q9WUN2_TBK1_MOUSE     | Tbk1     | Serine/threonine-protein K.VNLEAAELGEISDHTK#.L                 | 18.49  | 4.89    | 3.78 | 0.26 |
| Q9QXE7_TBL1X_MOUSE    | Tbl1x    | F-box-like/WF repeat-co K.HQEPYVSVAFSFDGK#.Y                   | 7.44   | 3.81    | 1.95 | 0.51 |
| Q9QXE7_TBL1X_MOUSE    | Tbl1x    | F-box-like/WF repeat-co K.LAQQQANAAAAAAAAAATSTATTAAAAQQNPPK#.N | 7.05   | 4.87    | 1.45 | 0.69 |
| Q8BHJ5_TBL1R_MOUSE    | Tbl1xr1  | F-box-like/WF repeat-co K.GPFIKAL#.W                           | 26.22  | 13.82   | 1.90 | 0.53 |
| Q8BHJ5_TBL1R_MOUSE    | Tbl1xr1  | F-box-like/WF repeat-co K.LAQQHAIAAAAAAAAAAATNQGSQAK#.N        | 8.75   | 2.34    | 3.74 | 0.27 |
| Q8BHJ5_TBL1R_MOUSE    | Tbl1xr1  | F-box-like/WF repeat-co K.GPFIKAL#.W                           | 14.43  | 2.25    | 6.40 | 0.16 |
| Q8C4I7_TBL3_MOUSE     | Tbl3     | Transducin beta-like prot K.VNILDVAGSALLR@.S                   | 9.42   | 4.64    | 2.03 | 0.49 |
| Q8C4I7_TBL3_MOUSE     | Tbl3     | Transducin beta-like prot K.SSGLHFLTAGDQIGILR@.V               | 10.90  | 5.23    | 2.08 | 0.48 |
| Q8C4I7_TBL3_MOUSE     | Tbl3     | Transducin beta-like prot K.TAASDGGVLLQDQTR@.R                 | 5.05   | 2.36    | 2.14 | 0.47 |
| Q8C4I7_TBL3_MOUSE     | Tbl3     | Transducin beta-like prot R.TVPVFVESVALLPEQPALGVK#.S           | 10.20  | 6.59    | 1.55 | 0.65 |
| Q8C4I7_TBL3_MOUSE     | Tbl3     | Transducin beta-like prot K.VNILDVAGSALLR@.S                   | 16.00  | 7.97    | 2.01 | 0.50 |
| P29037_TBP_MOUSE      | Tbp      | TATA-box-binding protei R.AEIEAFENIYILK#.G                     | 9.57   | 4.72    | 2.03 | 0.49 |
| P29037_TBP_MOUSE      | Tbp      | TATA-box-binding protei R.AEIEAFENIYILK#.G                     | 8.29   | 3.93    | 2.11 | 0.47 |
| O70306_TBX15_MOUSE    | Tbx15    | T-box transcription facto K.TFNFPETVFTVYAYQNQQITR@.L           | 6.86   | 4.59    | 1.50 | 0.67 |
| O70306_TBX15_MOUSE    | Tbx15    | T-box transcription facto K.TFNFPETVFTVYAYQNQQITR@.L           | 13.58  | 6.69    | 2.03 | 0.49 |
| P83940_ELOC_MOUSE     | Tceb1    | Transcription elongation K.AM*LSGPGQFAENETNEVNR@.E             | 14.51  | 4.80    | 3.02 | 0.33 |
| P62869_ELOB_MOUSE     | Tceb2    | Transcription elongation R.ADDTFEALR@.I                        | 44.77  | 16.56   | 2.70 | 0.37 |
| P62869_ELOB_MOUSE     | Tceb2    | Transcription elongation R.IVEGILK#.R                          | 75.01  | 23.38   | 3.21 | 0.31 |

|                     |        |                                                            |        |       |      |       |
|---------------------|--------|------------------------------------------------------------|--------|-------|------|-------|
| P62869_ELOB_MOUSE   | Tceb2  | Transcription elongation K.TTIFDAK#.E                      | 18.52  | 5.48  | 3.38 | 0.30  |
| Q8CGF7_TCRG1_MOUSE  | Tcerg1 | Transcription elongation R.VFFYNPTR@.L                     | 11.42  | 6.90  | 1.65 | 0.60  |
| Q9EP08_TCF20_MOUSE  | Tcf20  | Transcription factor 20 C R.LYGLQEALEAR.E                  | 5.51   | 12.70 | 0.43 | 2.31  |
| Q9EP08_TCF20_MOUSE  | Tcf20  | Transcription factor 20 C R.GNASPGAAHSDSDYSPQDSR@.S        | 13.25  | 4.20  | 3.16 | 0.32  |
| Q9EP08_TCF20_MOUSE  | Tcf20  | Transcription factor 20 C R.LNPSLSQSVLPGLVSM*ETK#.L        | 5.65   | 1.65  | 3.44 | 0.29  |
| Q9EP08_TCF20_MOUSE  | Tcf20  | Transcription factor 20 C R.LYGLQEALEAR@.E                 | 10.12  | 5.44  | 1.86 | 0.54  |
| Q9EP08_TCF20_MOUSE  | Tcf20  | Transcription factor 20 C K.QAVPVEPQEPK#.L                 | 7.17   | 4.50  | 1.59 | 0.63  |
| Q9EP08_TCF20_MOUSE  | Tcf20  | Transcription factor 20 C R.SASANSAEAGGDTVTLDDILSLK#.S     | 3.43   | 2.84  | 1.21 | 0.83  |
| Q9EP08_TCF20_MOUSE  | Tcf20  | Transcription factor 20 C R.SQSGQK#FEEDFEQK#.S             | 13.45  | 5.99  | 2.25 | 0.45  |
| Q9EP08_TCF20_MOUSE  | Tcf20  | Transcription factor 20 C R.NVSGYQYPPSGQEK#.G              | 3.71   | 1.37  | 2.72 | 0.37  |
| Q9JHF5_Q9JHF5_MOUSE | Tcirg1 | A3 subunit of vacuolar- <i>a</i> -R.DLINESVSFAQR@.R        | 8.99   | 2.71  | 3.31 | 0.30  |
| O08784_TCOF_MOUSE   | Tcof1  | Treacle protein OS=Mus r K.VLTELLEQER.L                    | 9.87   | 16.12 | 0.61 | 1.63  |
| P11983_TCPC_MOUSE   | Tcp1   | T-complex protein 1 subunit R.AFHNEAQNPER@.K               | 43.98  | 22.88 | 1.92 | 0.52  |
| P11983_TCPC_MOUSE   | Tcp1   | T-complex protein 1 subunit R.EQLAIAEFAR@.S                | 111.37 | 54.20 | 2.05 | 0.49  |
| P11983_TCPC_MOUSE   | Tcp1   | T-complex protein 1 subunit K.FATEAAILR@.I                 | 64.73  | 32.24 | 2.01 | 0.50  |
| P11983_TCPC_MOUSE   | Tcp1   | T-complex protein 1 subunit K.ILATGANVILTTGGIDDM*YLK#.Y    | 15.34  | 7.19  | 2.13 | 0.47  |
| P11983_TCPC_MOUSE   | Tcp1   | T-complex protein 1 subunit K.LGVQVITDPEKLDQJR.Q           | 66.64  | 39.11 | 1.70 | 0.59  |
| P11983_TCPC_MOUSE   | Tcp1   | T-complex protein 1 subunit K.M*LVDDIGDVTITNDGATILK#.L     | 20.31  | 10.26 | 1.98 | 0.51  |
| P11983_TCPC_MOUSE   | Tcp1   | T-complex protein 1 subunit K.M*LVDDIGDVTITNDGATILK#.L     | 15.35  | 8.04  | 1.91 | 0.52  |
| P11983_TCPC_MOUSE   | Tcp1   | T-complex protein 1 subunit K.NADELVK#.Q                   | 56.13  | 29.83 | 1.88 | 0.53  |
| P11983_TCPC_MOUSE   | Tcp1   | T-complex protein 1 subunit R.SLLVNPNTLAVNAAQDSTDLVAK#.L   | 36.02  | 18.30 | 1.97 | 0.51  |
| P11983_TCPC_MOUSE   | Tcp1   | T-complex protein 1 subunit R.SQNVM*AAASIANIVK#.S          | 35.56  | 18.05 | 1.97 | 0.51  |
| P11983_TCPC_MOUSE   | Tcp1   | T-complex protein 1 subunit K.SSFGPVLGDK#.M                | 60.18  | 29.84 | 2.02 | 0.50  |
| P11983_TCPC_MOUSE   | Tcp1   | T-complex protein 1 subunit R.TSASILR@.G                   | 106.75 | 53.04 | 2.01 | 0.50  |
| P11983_TCPC_MOUSE   | Tcp1   | T-complex protein 1 subunit K.YFVEAGAM*AVR@.R              | 50.60  | 33.11 | 1.53 | 0.65  |
| P11983_TCPC_MOUSE   | Tcp1   | T-complex protein 1 subunit R.YINENLIINTDELGR@.D           | 17.57  | 6.12  | 2.87 | 0.35  |
| P11983_TCPC_MOUSE   | Tcp1   | T-complex protein 1 subunit R.YPVNSVILK#.A                 | 79.31  | 39.60 | 2.00 | 0.50  |
| P11983_TCPC_MOUSE   | Tcp1   | T-complex protein 1 subunit R.AFHNEAQNPER@.K               | 52.70  | 18.16 | 2.90 | 0.34  |
| P11983_TCPC_MOUSE   | Tcp1   | T-complex protein 1 subunit R.EQLAIAEFAR@.S                | 130.98 | 49.05 | 2.67 | 0.37  |
| P11983_TCPC_MOUSE   | Tcp1   | T-complex protein 1 subunit K.FATEAAILR@.I                 | 146.71 | 54.08 | 2.71 | 0.37  |
| P11983_TCPC_MOUSE   | Tcp1   | T-complex protein 1 subunit K.ILATGANVILTTGGIDDM*YLK#.Y    | 44.12  | 23.05 | 1.91 | 0.52  |
| P11983_TCPC_MOUSE   | Tcp1   | T-complex protein 1 subunit K.LGVQVITDPEKLDQJR@.Q          | 108.64 | 49.55 | 2.19 | 0.46  |
| P11983_TCPC_MOUSE   | Tcp1   | T-complex protein 1 subunit K.LLEVEHPAAK#.V                | 133.83 | 69.65 | 1.92 | 0.52  |
| P11983_TCPC_MOUSE   | Tcp1   | T-complex protein 1 subunit K.M*LVDDIGDVTITNDGATILK#.L     | 28.44  | 8.15  | 3.49 | 0.29  |
| P11983_TCPC_MOUSE   | Tcp1   | T-complex protein 1 subunit K.NADELVK#.Q                   | 41.57  | 19.99 | 2.08 | 0.48  |
| P11983_TCPC_MOUSE   | Tcp1   | T-complex protein 1 subunit K.QAGVFPTIVK#.V                | 89.00  | 39.99 | 2.23 | 0.45  |
| P11983_TCPC_MOUSE   | Tcp1   | T-complex protein 1 subunit R.SLLVNPNTLAVNAAQDSTDLVAK#.L   | 147.96 | 52.17 | 2.84 | 0.35  |
| P11983_TCPC_MOUSE   | Tcp1   | T-complex protein 1 subunit R.SQNVM*AAASIANIVK#.S          | 79.81  | 35.47 | 2.25 | 0.44  |
| P11983_TCPC_MOUSE   | Tcp1   | T-complex protein 1 subunit R.SQNVMAAASIANIVK#.S           | 8.42   | 4.55  | 1.85 | 0.54  |
| P11983_TCPC_MOUSE   | Tcp1   | T-complex protein 1 subunit K.SSFGPVLGDK#.M                | 90.77  | 47.37 | 1.92 | 0.52  |
| P11983_TCPC_MOUSE   | Tcp1   | T-complex protein 1 subunit R.TSASILR@.G                   | 97.62  | 41.64 | 2.34 | 0.43  |
| P11983_TCPC_MOUSE   | Tcp1   | T-complex protein 1 subunit K.YFVEAGAM*AVR@.R              | 59.45  | 24.65 | 2.41 | 0.41  |
| P11983_TCPC_MOUSE   | Tcp1   | T-complex protein 1 subunit K.YFVEAGAM*AVR@.R              | 14.24  | 5.40  | 2.64 | 0.38  |
| P11983_TCPC_MOUSE   | Tcp1   | T-complex protein 1 subunit R.YINENLIINTDELGR@.D           | 18.62  | 9.45  | 1.97 | 0.51  |
| P11983_TCPC_MOUSE   | Tcp1   | T-complex protein 1 subunit R.YPVNSVILK#.A                 | 112.98 | 43.85 | 2.58 | 0.39  |
| P11983_TCPC_MOUSE   | Tcp1   | T-complex protein 1 subunit R.EQLAIAEFAR@.S                | 73.19  | 11.17 | 6.55 | 0.15  |
| P11983_TCPC_MOUSE   | Tcp1   | T-complex protein 1 subunit K.FATEAAILR@.I                 | 54.00  | 11.99 | 4.50 | 0.22  |
| P11983_TCPC_MOUSE   | Tcp1   | T-complex protein 1 subunit K.ILATGANVILTTGGIDDM*YLK#.Y    | 29.59  | 11.01 | 2.69 | 0.37  |
| P11983_TCPC_MOUSE   | Tcp1   | T-complex protein 1 subunit K.LGVQVITDPEKLDQJR@.Q          | 38.64  | 8.01  | 4.82 | 0.21  |
| P11983_TCPC_MOUSE   | Tcp1   | T-complex protein 1 subunit K.LLEVEHPAAK#.V                | 13.23  | 2.76  | 4.79 | 0.21  |
| P11983_TCPC_MOUSE   | Tcp1   | T-complex protein 1 subunit K.M*LVDDIGDVTITNDGATILK#.L     | 25.71  | 5.39  | 4.77 | 0.21  |
| P11983_TCPC_MOUSE   | Tcp1   | T-complex protein 1 subunit K.QAGVFPTIVK#.V                | 45.61  | 8.67  | 5.26 | 0.19  |
| P11983_TCPC_MOUSE   | Tcp1   | T-complex protein 1 subunit R.SLLVNPNTLAVNAAQDSTDLVAK#.L   | 82.44  | 14.95 | 5.51 | 0.18  |
| P11983_TCPC_MOUSE   | Tcp1   | T-complex protein 1 subunit R.SQNVM*AAASIANIVK#.S          | 47.52  | 6.44  | 7.38 | 0.14  |
| P11983_TCPC_MOUSE   | Tcp1   | T-complex protein 1 subunit K.SSFGPVLGDK#.M                | 54.56  | 8.69  | 6.28 | 0.16  |
| P11983_TCPC_MOUSE   | Tcp1   | T-complex protein 1 subunit R.TSASILR@.G                   | 59.04  | 10.97 | 5.38 | 0.19  |
| P11983_TCPC_MOUSE   | Tcp1   | T-complex protein 1 subunit K.YFVEAGAM*AVR@.R              | 37.32  | 7.83  | 4.77 | 0.21  |
| P11983_TCPC_MOUSE   | Tcp1   | T-complex protein 1 subunit R.YINENLIINTDELGR@.D           | 21.95  | 3.70  | 5.93 | 0.17  |
| P11983_TCPC_MOUSE   | Tcp1   | T-complex protein 1 subunit R.YPVNSVILK#.A                 | 56.61  | 9.78  | 5.79 | 0.17  |
| Q8K1H1_TDRD7_MOUSE  | Tdrd7  | Tudor domain-containing R.LAGLEVLDNDPDLVK#.A               | 7.40   | 3.60  | 2.05 | 0.49  |
| P30051_TEA1_MOUSE   | Tead1  | Transcriptional enhancer K.GPQNAFLVK.F                     | 6.15   | 16.99 | 0.36 | 2.76  |
| Q3UH45_Q3UH45_MOUSE | Tecpr2 | Protein Tecpr2 OS=Mus r K.GSSVASSVASEQR@.S                 | 3.42   | 3.05  | 1.12 | 0.89  |
| Q9CY27_TOCR_MOUSE   | Tecr   | Very-long-chain enoyl-Cc K.LPVGTTLTYFR@.D                  | 9.57   | 7.07  | 1.35 | 0.74  |
| Q9D7K2_TEN1_MOUSE   | Ten1   | CST complex subunit TEN R.M*EGGAFVVR@.A                    | 11.65  | 3.47  | 3.35 | 0.30  |
| Q8CGB6_TEN1_MOUSE   | Ten1   | Tensin-like C1 domain-cc R.DQAIALLK#.D                     | 15.21  | 4.27  | 3.56 | 0.28  |
| Q8CGB6_TEN1_MOUSE   | Ten1   | Tensin-like C1 domain-cc R.IPSKHDPLEETPEAVPTNM*STAADLLR@.Q | 3.10   | 1.87  | 1.66 | 0.60  |
| Q8CGB6_TEN1_MOUSE   | Ten1   | Tensin-like C1 domain-cc K.VSAQGITLTDNR@.K                 | 38.29  | 10.64 | 3.60 | 0.28  |
| Q8CGB6_TEN1_MOUSE   | Ten1   | Tensin-like C1 domain-cc R.AGSVSPGPPYLPQR@.K               | 5.26   | 2.58  | 2.04 | 0.49  |
| Q8CGB6_TEN1_MOUSE   | Ten1   | Tensin-like C1 domain-cc R.GPLDGPSPYQVQR@.V                | 3.78   | 77.96 | 0.05 | 20.61 |
| Q8CGB6_TEN1_MOUSE   | Ten1   | Tensin-like C1 domain-cc R.SPVPTLPLGR@.H                   | 9.28   | 2.98  | 3.11 | 0.32  |
| Q8CGB6_TEN1_MOUSE   | Ten1   | Tensin-like C1 domain-cc K.VSAQGITLTDNR@.K                 | 20.39  | 4.66  | 4.38 | 0.23  |
| Q8CGB6_TEN1_MOUSE   | Ten1   | Tensin-like C1 domain-cc R.AGSVSPGPPYLPQR@.K               | 8.51   | 2.74  | 3.11 | 0.32  |
| Q8CGB6_TEN1_MOUSE   | Ten1   | Tensin-like C1 domain-cc R.DQAIALLK#.D                     | 9.25   | 6.23  | 1.48 | 0.67  |
| Q8CGB6_TEN1_MOUSE   | Ten1   | Tensin-like C1 domain-cc R.GPLDGPSPYQVQR@.V                | 14.84  | 42.07 | 0.35 | 2.84  |
| Q8CGB6_TEN1_MOUSE   | Ten1   | Tensin-like C1 domain-cc R.IPSKHDPLEETPEAVPTNM*STAADLLR@.Q | 5.79   | 2.25  | 2.58 | 0.39  |
| Q8CGB6_TEN1_MOUSE   | Ten1   | Tensin-like C1 domain-cc K.ISAGADQALATLTM*R@.K             | 7.05   | 3.67  | 1.92 | 0.52  |
| Q8CGB6_TEN1_MOUSE   | Ten1   | Tensin-like C1 domain-cc K.LALPTAALGLR@.L                  | 24.06  | 10.15 | 2.37 | 0.42  |
| Q8CGB6_TEN1_MOUSE   | Ten1   | Tensin-like C1 domain-cc R.NDPSVSVYNTTEPAVR@.W             | 6.52   | 3.38  | 1.93 | 0.52  |
| Q8CGB6_TEN1_MOUSE   | Ten1   | Tensin-like C1 domain-cc R.SPVPTLPLGR@.H                   | 20.54  | 10.91 | 1.88 | 0.53  |
| Q8CGB6_TEN1_MOUSE   | Ten1   | Tensin-like C1 domain-cc K.VSAQGITLTDNR@.K                 | 16.32  | 5.19  | 3.14 | 0.32  |
| Q8CGB6_TEN1_MOUSE   | Ten1   | Tensin-like C1 domain-cc K.YLLFNLSK#.R                     | 7.80   | 3.04  | 2.56 | 0.39  |
| P47226_TES_MOUSE    | Tes    | Testin OS=Mus musculus R.NVM*ILTNPVAAK#.K                  | 20.01  | 14.82 | 1.35 | 0.74  |
| P47226_TES_MOUSE    | Tes    | Testin OS=Mus musculus K.QPVAGSEGAQYR@.K                   | 9.37   | 4.88  | 1.92 | 0.52  |
| Q3URQ0_TEX10_MOUSE  | Tex10  | Testis-expressed sequenc K.FLQALADGSSR@.L                  | 11.00  | 3.57  | 3.08 | 0.32  |
| Q3URQ0_TEX10_MOUSE  | Tex10  | Testis-expressed sequenc K.VLDLLEHYPALITGR@.S              | 8.82   | 5.41  | 1.63 | 0.61  |
| Q3URQ0_TEX10_MOUSE  | Tex10  | Testis-expressed sequenc K.FLQALADGSSR@.L                  | 13.40  | 6.51  | 2.06 | 0.49  |
| Q3URQ0_TEX10_MOUSE  | Tex10  | Testis-expressed sequenc R.IYDPOEGAVVLPAESQQR@.L           | 8.53   | 4.54  | 1.88 | 0.53  |
| Q3URQ0_TEX10_MOUSE  | Tex10  | Testis-expressed sequenc R.LIQM*QPNR@.D                    | 14.73  | 5.15  | 2.86 | 0.35  |
| Q3URQ0_TEX10_MOUSE  | Tex10  | Testis-expressed sequenc K.VLDLLEHYPALITGR@.S              | 16.42  | 6.87  | 2.39 | 0.42  |
| Q3URQ0_TEX10_MOUSE  | Tex10  | Testis-expressed sequenc K.FLQALADGSSR@.L                  | 14.17  | 6.59  | 2.15 | 0.46  |
| Q3URQ0_TEX10_MOUSE  | Tex10  | Testis-expressed sequenc R.IYDPOEGAVVLPAESQQR@.L           | 15.24  | 8.50  | 1.79 | 0.56  |
| Q3URQ0_TEX10_MOUSE  | Tex10  | Testis-expressed sequenc K.LENATATNFK#.T                   | 8.25   | 4.35  | 1.90 | 0.53  |
| Q3URQ0_TEX10_MOUSE  | Tex10  | Testis-expressed sequenc R.SQSDIM*QSAISK#.H                | 5.70   | 2.98  | 1.91 | 0.52  |
| Q3URQ0_TEX10_MOUSE  | Tex10  | Testis-expressed sequenc K.VLDLLEHYPALITGR@.S              | 11.60  | 5.94  | 1.95 | 0.51  |
| Q3URQ0_TEX10_MOUSE  | Tex10  | Testis-expressed sequenc R.WLAGLPLQLSVLGSR@.N              | 11.43  | 5.23  | 2.19 | 0.46  |
| P40630_TFAM_MOUSE   | Tfam   | Transcription factor A, m R.FSTEQPK.F                      | 1.80   | 20.64 | 0.09 | 11.45 |
| P40630_TFAM_MOUSE   | Tfam   | Transcription factor A, m R.SAYNIVSEFQEA.K                 | 1.45   | 6.25  | 0.23 | 4.30  |
| P40630_TFAM_MOUSE   | Tfam   | Transcription factor A, m K.SWEEQAM*AEVGR.S                | 1.98   | 5.43  | 0.37 | 2.74  |
| P40630_TFAM_MOUSE   | Tfam   | Transcription factor A, m K.VYADF.K.A                      | 2.69   | 21.38 | 0.13 | 7.94  |
| Q9ERA0_TFCP2_MOUSE  | Tfcp2  | Alpha-globin transcriptic K.IAQLFSPHQSIIQY#.K              | 9.85   | 4.37  | 2.26 | 0.44  |
| Q9ERA0_TFCP2_MOUSE  | Tfcp2  | Alpha-globin transcriptic R.ILDIDIPM*SVGVIDPR.A            | 10.88  | 5.76  | 1.89 | 0.53  |
| Q9ERA0_TFCP2_MOUSE  | Tfcp2  | Alpha-globin transcriptic R.LFTNFSGADLLK#.L                | 20.91  | 12.03 | 1.74 | 0.58  |
| Q08639_TFDP1_MOUSE  | Tfdp1  | Transcription factor Dp-1 K.QSQLQELILQQAQAFK#.N            | 7.43   | 5.54  | 1.34 | 0.75  |

|                     |          |                                                                 |        |        |      |      |
|---------------------|----------|-----------------------------------------------------------------|--------|--------|------|------|
| Q9ERA6_TFP11_MOUSE  | Tfp11    | Tuftelin-interacting prot. R.ADLAVAIVPLVK#D                     | 19.30  | 7.28   | 2.65 | 0.38 |
| Q9ERA6_TFP11_MOUSE  | Tfp11    | Tuftelin-interacting prot. K.AEEHNIVFM*PVIQK#R                  | 10.61  | 3.69   | 2.87 | 0.35 |
| Q9ERA6_TFP11_MOUSE  | Tfp11    | Tuftelin-interacting prot. R.AVSSNVGAYM*QPGAR@E                 | 9.40   | 5.47   | 1.72 | 0.58 |
| Q9ERA6_TFP11_MOUSE  | Tfp11    | Tuftelin-interacting prot. R.DGEGHLDLDDDDER@ENFEITDWLQNEFNPNR@Q | 3.01   | 2.65   | 1.13 | 0.88 |
| Q9ERA6_TFP11_MOUSE  | Tfp11    | Tuftelin-interacting prot. R.DYSAPNVFISAGLKK#K                  | 10.64  | 6.49   | 1.64 | 0.61 |
| Q9ERA6_TFP11_MOUSE  | Tfp11    | Tuftelin-interacting prot. K.EVLTSGSWEAFM*LR@N                  | 9.36   | 4.99   | 1.88 | 0.53 |
| Q9ERA6_TFP11_MOUSE  | Tfp11    | Tuftelin-interacting prot. R.GVVVQVQGEK#T                       | 20.40  | 5.42   | 3.76 | 0.27 |
| Q9ERA6_TFP11_MOUSE  | Tfp11    | Tuftelin-interacting prot. R.IFETLQDK#YYEYR@L                   | 13.89  | 5.96   | 2.33 | 0.43 |
| Q9ERA6_TFP11_MOUSE  | Tfp11    | Tuftelin-interacting prot. K.LILQPWKK#E                         | 14.33  | 5.34   | 2.68 | 0.37 |
| Q9ERA6_TFP11_MOUSE  | Tfp11    | Tuftelin-interacting prot. R.NVVAQWQPR@N                        | 11.39  | 3.05   | 3.73 | 0.27 |
| Q9ERA6_TFP11_MOUSE  | Tfp11    | Tuftelin-interacting prot. K.SLENDQLLSSHQDSSDAFHR@L             | 6.41   | 3.53   | 1.82 | 0.55 |
| Q9ERA6_TFP11_MOUSE  | Tfp11    | Tuftelin-interacting prot. K.TAEVLAHEER@V                       | 24.03  | 3.54   | 6.79 | 0.15 |
| Q9ERA6_TFP11_MOUSE  | Tfp11    | Tuftelin-interacting prot. R.TEQEIQSDR@Q                        | 19.17  | 7.18   | 2.67 | 0.37 |
| Q9ERA6_TFP11_MOUSE  | Tfp11    | Tuftelin-interacting prot. R.TTOSLQDFPVADSEEEAEFEQK#ELSQWR@K    | 3.63   | 1.79   | 2.03 | 0.49 |
| Q9ERA6_TFP11_MOUSE  | Tfp11    | Tuftelin-interacting prot. R.ADLAVAIVPLVK#D                     | 12.88  | 6.67   | 1.93 | 0.52 |
| Q9ERA6_TFP11_MOUSE  | Tfp11    | Tuftelin-interacting prot. K.AEEHNIVFM*PVIQK#R                  | 19.94  | 6.24   | 3.20 | 0.31 |
| Q9ERA6_TFP11_MOUSE  | Tfp11    | Tuftelin-interacting prot. R.AVSSNVGAYM*QPGAR@E                 | 6.49   | 4.07   | 1.59 | 0.63 |
| Q9ERA6_TFP11_MOUSE  | Tfp11    | Tuftelin-interacting prot. R.DYSAPNVFISAGLKK#K                  | 6.87   | 4.82   | 1.42 | 0.70 |
| Q9ERA6_TFP11_MOUSE  | Tfp11    | Tuftelin-interacting prot. K.SLENDQLLSSHQDSSDAFHR@L             | 6.85   | 3.13   | 2.19 | 0.46 |
| Q9ERA6_TFP11_MOUSE  | Tfp11    | Tuftelin-interacting prot. K.TAEVLAHEER@V                       | 5.69   | 3.99   | 1.43 | 0.70 |
| Q9ERA6_TFP11_MOUSE  | Tfp11    | Tuftelin-interacting prot. R.TEQEIQSDR@Q                        | 16.28  | 7.23   | 2.25 | 0.44 |
| Q9ERA6_TFP11_MOUSE  | Tfp11    | Tuftelin-interacting prot. R.TTOSLQDFPVADSEEEAEFEQK#ELSQWR@K    | 3.40   | 1.66   | 2.04 | 0.49 |
| Q3U1J1_TFP1_MOUSE   | Tfp1     | TCF3 fusion partner hom R.TTATLDTPSPAPGEGPSGR@K                 | 11.68  | 5.73   | 2.04 | 0.49 |
| Q62351_TFR1_MOUSE   | Tfrc     | Transferrin receptor prot R.AGEITFAEKK#V                        | 7.63   | 4.18   | 1.83 | 0.55 |
| Q62351_TFR1_MOUSE   | Tfrc     | Transferrin receptor prot R.DALGAGVAKK#S                        | 10.22  | 4.49   | 3.42 | 0.29 |
| Q62351_TFR1_MOUSE   | Tfrc     | Transferrin receptor prot K.GYEEPR@YVVGAQR@D                    | 8.83   | 5.49   | 1.61 | 0.62 |
| Q62351_TFR1_MOUSE   | Tfrc     | Transferrin receptor prot R.LINIFGVKK#G                         | 20.51  | 5.77   | 3.56 | 0.28 |
| Q62351_TFR1_MOUSE   | Tfrc     | Transferrin receptor prot K.LAADEENADNMM*K#A                    | 11.43  | 4.32   | 2.65 | 0.38 |
| Q62351_TFR1_MOUSE   | Tfrc     | Transferrin receptor prot K.LAETEEDK#SETM*ETEDVTSR@L            | 11.34  | 4.91   | 2.31 | 0.43 |
| Q62351_TFR1_MOUSE   | Tfrc     | Transferrin receptor prot K.LAQFSDM*ISK#D                       | 8.60   | 5.15   | 1.67 | 0.60 |
| Q62351_TFR1_MOUSE   | Tfrc     | Transferrin receptor prot K.LNSIEFADTIK#Q                       | 17.40  | 8.58   | 2.03 | 0.49 |
| Q62351_TFR1_MOUSE   | Tfrc     | Transferrin receptor prot K.LTHDELNLVEM*YNSK#L                  | 3.93   | 2.43   | 1.61 | 0.62 |
| Q62351_TFR1_MOUSE   | Tfrc     | Transferrin receptor prot R.TAAEVAGLIIK#C                       | 12.31  | 3.54   | 3.48 | 0.29 |
| Q62219_TGF1_MOUSE   | Tgfb11   | Transforming growth fac R.DFLQLFAPR@C                           | 11.62  | 6.27   | 1.86 | 0.54 |
| Q8CHW1_THAP1_MOUSE  | Thap1    | THAP domain-containing R.ILOLQEQVEK#L                           | 6.55   | 3.09   | 2.12 | 0.47 |
| Q9JJD0_THA1_MOUSE   | Thap11   | THAP domain-containing R.VPTIFPLR@G                             | 25.34  | 9.97   | 2.54 | 0.39 |
| Q9JJD0_THA1_MOUSE   | Thap11   | THAP domain-containing R.VPTIFPLR@G                             | 33.63  | 8.54   | 3.94 | 0.25 |
| P35441_TSP1_MOUSE   | Thbs1    | Thrombospondin-1 OS=h R.FVGTTPEDILR#N                           | 1.18   | 5.63   | 0.21 | 4.78 |
| Q8R3N6_THOC1_MOUSE  | Thoc1    | THO complex subunit 1 C.K.LIGNEELTR@L                           | 7.91   | 2.55   | 3.10 | 0.32 |
| Q8R3N6_THOC1_MOUSE  | Thoc1    | THO complex subunit 1 C.K.YEEVLAVFK#S                           | 5.81   | 4.61   | 1.26 | 0.79 |
| Q8R3N6_THOC1_MOUSE  | Thoc1    | THO complex subunit 1 C.K.LIGNEELTR@L                           | 8.06   | 5.78   | 1.39 | 0.72 |
| Q8R3N6_THOC1_MOUSE  | Thoc1    | THO complex subunit 1 C.K.SVYQLLENNPPDGER@F                     | 6.05   | 6.44   | 0.94 | 1.06 |
| B1AZ16_THOC2_MOUSE  | Thoc2    | THO complex subunit 2 C.K.LGELLEALK#V                           | 10.95  | 7.05   | 1.55 | 0.64 |
| B1AZ16_THOC2_MOUSE  | Thoc2    | THO complex subunit 2 C.R.LDPETLESLGLIK#Q                       | 17.89  | 8.32   | 2.15 | 0.46 |
| B1AZ16_THOC2_MOUSE  | Thoc2    | THO complex subunit 2 C.K.LGELLEALK#V                           | 27.35  | 11.96  | 2.29 | 0.44 |
| B1AZ16_THOC2_MOUSE  | Thoc2    | THO complex subunit 2 C.K.SFDLILK#E                             | 9.46   | 5.77   | 1.64 | 0.61 |
| B1AZ16_THOC2_MOUSE  | Thoc2    | THO complex subunit 2 C.K.VLNLGQALER@R                          | 19.29  | 7.39   | 2.61 | 0.38 |
| Q8VE80_THOC3_MOUSE  | Thoc3    | THO complex subunit 3 C.R.VYLGMM*QELFR@G                        | 7.56   | 3.30   | 2.29 | 0.44 |
| Q5U4D9_THOC6_MOUSE  | Thoc6    | THO complex subunit 6 F.R.SPEVLSSGGEDGAVR@L                     | 10.69  | 4.82   | 2.22 | 0.45 |
| Q5U4D9_THOC6_MOUSE  | Thoc6    | THO complex subunit 6 F.R.SSTPTVPPIR@A                          | 9.81   | 7.68   | 1.28 | 0.78 |
| Q5U4D9_THOC6_MOUSE  | Thoc6    | THO complex subunit 6 F.R.TSLEVPINALLVLPK#E                     | 24.90  | 9.92   | 2.51 | 0.40 |
| Q569Z6_TR150_MOUSE  | Thrap3   | Thyroid hormone recept R.ASVSDLSPR@E                            | 6.29   | 1.16   | 5.44 | 0.18 |
| Q569Z6_TR150_MOUSE  | Thrap3   | Thyroid hormone recept K.DSR@PSQAAGDNQDQDEAK#EQTFSGGTSQDIK#G    | 13.75  | 9.37   | 1.47 | 0.68 |
| Q569Z6_TR150_MOUSE  | Thrap3   | Thyroid hormone recept K.GSESSK#WPDATTYAGSASR@A                 | 11.26  | 4.03   | 2.79 | 0.36 |
| Q569Z6_TR150_MOUSE  | Thrap3   | Thyroid hormone recept R.M*DSFDEDLAR@PSGLLAQER@K                | 27.34  | 20.99  | 1.30 | 0.77 |
| Q569Z6_TR150_MOUSE  | Thrap3   | Thyroid hormone recept K.SPLQSVVVR@R                            | 30.75  | 15.04  | 2.04 | 0.49 |
| Q569Z6_TR150_MOUSE  | Thrap3   | Thyroid hormone recept K.SPPATGSAYSSQK#EESAASGGAAYSK#R          | 6.01   | 2.18   | 2.76 | 0.36 |
| Q569Z6_TR150_MOUSE  | Thrap3   | Thyroid hormone recept R.SPSLEFAQHIVTVHHVK#E                    | 4.67   | 4.44   | 1.05 | 0.95 |
| Q569Z6_TR150_MOUSE  | Thrap3   | Thyroid hormone recept K.SSFSTR@E                               | 36.49  | 37.97  | 0.96 | 1.04 |
| Q569Z6_TR150_MOUSE  | Thrap3   | Thyroid hormone recept K.KY#DDPVDLRL@L                          | 37.52  | 35.03  | 1.07 | 0.93 |
| Q569Z6_TR150_MOUSE  | Thrap3   | Thyroid hormone recept K.AEEM*DEPFTR@S                          | 30.84  | 13.58  | 2.27 | 0.44 |
| Q569Z6_TR150_MOUSE  | Thrap3   | Thyroid hormone recept K.AEEVPEAEER@E                           | 25.78  | 5.02   | 5.14 | 0.19 |
| Q569Z6_TR150_MOUSE  | Thrap3   | Thyroid hormone recept R.ASVSDLSPR@E                            | 121.22 | 37.25  | 3.25 | 0.31 |
| Q569Z6_TR150_MOUSE  | Thrap3   | Thyroid hormone recept K.DSR@PSQAAGDNQDQDEAK#E                  | 50.32  | 18.07  | 2.78 | 0.36 |
| Q569Z6_TR150_MOUSE  | Thrap3   | Thyroid hormone recept K.DSR@PSQAAGDNQDQDEAK#E                  | 9.72   | 3.96   | 2.45 | 0.41 |
| Q569Z6_TR150_MOUSE  | Thrap3   | Thyroid hormone recept K.DSR@PSQAAGDNQDQDEAK#E                  | 205.12 | 61.50  | 3.34 | 0.30 |
| Q569Z6_TR150_MOUSE  | Thrap3   | Thyroid hormone recept R.EAQVNR@M                               | 50.22  | 91.79  | 2.72 | 0.37 |
| Q569Z6_TR150_MOUSE  | Thrap3   | Thyroid hormone recept K.EESAASGGAAYSK#R                        | 48.26  | 22.75  | 2.12 | 0.47 |
| Q569Z6_TR150_MOUSE  | Thrap3   | Thyroid hormone recept K.EK#GGFSADAVK#M                         | 24.03  | 5.55   | 4.33 | 0.23 |
| Q569Z6_TR150_MOUSE  | Thrap3   | Thyroid hormone recept K.EQTFSGGTSQDIK#G                        | 130.19 | 52.32  | 2.49 | 0.40 |
| Q569Z6_TR150_MOUSE  | Thrap3   | Thyroid hormone recept K.FSGEGEIEDDESSTENR@EEK#D                | 8.86   | 2.31   | 3.83 | 0.26 |
| Q569Z6_TR150_MOUSE  | Thrap3   | Thyroid hormone recept K.GGFSADAVK#M                            | 243.02 | 109.74 | 2.21 | 0.45 |
| Q569Z6_TR150_MOUSE  | Thrap3   | Thyroid hormone recept K.GR@K#EPFDEPK#F                         | 149.79 | 67.95  | 2.20 | 0.45 |
| Q569Z6_TR150_MOUSE  | Thrap3   | Thyroid hormone recept R.K#AEEM*DEPFTR@S                        | 52.45  | 25.51  | 2.06 | 0.49 |
| Q569Z6_TR150_MOUSE  | Thrap3   | Thyroid hormone recept R.K#AEEM*DEPFTR@S                        | 189.07 | 84.55  | 2.24 | 0.45 |
| Q569Z6_TR150_MOUSE  | Thrap3   | Thyroid hormone recept R.K#EPFDEPK#F                            | 16.51  | 17.58  | 0.94 | 1.07 |
| Q569Z6_TR150_MOUSE  | Thrap3   | Thyroid hormone recept R.M*DSFDEDLAR@PSGLLAQER@K                | 223.55 | 81.60  | 2.74 | 0.37 |
| Q569Z6_TR150_MOUSE  | Thrap3   | Thyroid hormone recept R.MDSFDEDLAR@PSGLLAQER@K                 | 40.21  | 18.73  | 2.15 | 0.47 |
| Q569Z6_TR150_MOUSE  | Thrap3   | Thyroid hormone recept K.M*K#SDPFAPK#T                          | 52.51  | 20.84  | 2.52 | 0.40 |
| Q569Z6_TR150_MOUSE  | Thrap3   | Thyroid hormone recept K.SGK#WESLHTGK#E                         | 35.11  | 14.54  | 2.41 | 0.41 |
| Q569Z6_TR150_MOUSE  | Thrap3   | Thyroid hormone recept R.SIFQHIQSAQSQR@S                        | 311.70 | 110.65 | 2.82 | 0.35 |
| Q569Z6_TR150_MOUSE  | Thrap3   | Thyroid hormone recept R.SIFQHIQSAQSQR@S                        | 52.61  | 17.66  | 2.98 | 0.34 |
| Q569Z6_TR150_MOUSE  | Thrap3   | Thyroid hormone recept K.SPLQSVVVR@R                            | 575.68 | 200.42 | 2.87 | 0.35 |
| Q569Z6_TR150_MOUSE  | Thrap3   | Thyroid hormone recept K.SPPATGSAYSSQK#EESAASGGAAYSK#R          | 79.42  | 24.99  | 3.18 | 0.31 |
| Q569Z6_TR150_MOUSE  | Thrap3   | Thyroid hormone recept R.SREEWDPYETPK#S                         | 28.07  | 8.45   | 3.32 | 0.30 |
| Q569Z6_TR150_MOUSE  | Thrap3   | Thyroid hormone recept K.SSFSTR@E                               | 500.27 | 212.22 | 2.36 | 0.42 |
| Q569Z6_TR150_MOUSE  | Thrap3   | Thyroid hormone recept K.TDSEK#PR@G                             | 93.82  | 41.32  | 2.27 | 0.44 |
| F6YSQ2_F6YSQ2_MOUSE | Thrap3   | Thyroid hormone recept K.R@PSGLLAQER@K                          | 8.54   | 12.27  | 0.70 | 1.44 |
| Q569Z6_TR150_MOUSE  | Thrap3   | Thyroid hormone recept R.ASVSDLSPR@E                            | 35.12  | 9.18   | 3.83 | 0.26 |
| Q569Z6_TR150_MOUSE  | Thrap3   | Thyroid hormone recept K.DSR@PSQAAGDNQDQDEAK#E                  | 12.01  | 4.86   | 2.47 | 0.40 |
| Q569Z6_TR150_MOUSE  | Thrap3   | Thyroid hormone recept K.DSR@PSQAAGDNQDQDEAK#E                  | 33.20  | 10.95  | 3.03 | 0.33 |
| Q569Z6_TR150_MOUSE  | Thrap3   | Thyroid hormone recept K.EQTFSGGTSQDIK#G                        | 29.90  | 10.45  | 2.86 | 0.35 |
| Q569Z6_TR150_MOUSE  | Thrap3   | Thyroid hormone recept K.GGFSADAVK#M                            | 54.61  | 16.54  | 3.30 | 0.30 |
| Q569Z6_TR150_MOUSE  | Thrap3   | Thyroid hormone recept K.GSESSK#WPDATTYAGSASR@A                 | 12.67  | 6.86   | 1.85 | 0.54 |
| Q569Z6_TR150_MOUSE  | Thrap3   | Thyroid hormone recept R.K#AEEM*DEPFTR@S                        | 37.89  | 11.80  | 3.21 | 0.31 |
| Q569Z6_TR150_MOUSE  | Thrap3   | Thyroid hormone recept R.M*DSFDEDLAR@PSGLLAQER@K                | 45.23  | 14.10  | 3.21 | 0.31 |
| Q569Z6_TR150_MOUSE  | Thrap3   | Thyroid hormone recept K.SPLQSVVVR@R                            | 97.70  | 35.53  | 2.75 | 0.36 |
| Q569Z6_TR150_MOUSE  | Thrap3   | Thyroid hormone recept K.SPPATGSAYSSQK#EESAASGGAAYSK#R          | 8.90   | 3.88   | 2.29 | 0.44 |
| P70318_TIA1_MOUSE   | Tial1    | Nucleolysin TIA1 OS=Mu: R.FEDVVNQSSPK#N                         | 57.92  | 38.50  | 1.50 | 0.66 |
| P70318_TIA1_MOUSE   | Tial1    | Nucleolysin TIA1 OS=Mu: R.QTFSPFQIM*EIR@V                       | 34.00  | 15.55  | 2.19 | 0.46 |
| P70318_TIA1_MOUSE   | Tial1    | Nucleolysin TIA1 OS=Mu: R.QTFSPFQIM*EIR@V                       | 15.53  | 11.27  | 1.38 | 0.73 |
| P70318_TIA1_MOUSE   | Tial1    | Nucleolysin TIA1 OS=Mu: K.TLVYGNLS#D                            | 48.29  | 24.93  | 1.94 | 0.52 |
| Q9R1X4_TIM_MOUSE    | Timeless | Protein timeless homolo R.AATFR@PGLVSETLSIR@T                   | 7.24   | 4.21   | 1.72 | 0.58 |

|                    |          |                                                                    |        |       |      |      |
|--------------------|----------|--------------------------------------------------------------------|--------|-------|------|------|
| Q9R1X4_TIM_MOUSE   | Timeless | Protein timeless homolo K.LLALGLVSEER@.R                           | 9.16   | 2.74  | 3.35 | 0.30 |
| Q9R1X4_TIM_MOUSE   | Timeless | Protein timeless homolo K.EFNFLVLEK#.R                             | 10.02  | 3.61  | 2.78 | 0.36 |
| Q9R1X4_TIM_MOUSE   | Timeless | Protein timeless homolo K.LLALGLVSEER@.R                           | 17.36  | 6.06  | 2.87 | 0.35 |
| Q9R1X4_TIM_MOUSE   | Timeless | Protein timeless homolo K.QILSTPLPR@.Q                             | 11.12  | 6.19  | 1.80 | 0.56 |
| Q9R1X4_TIM_MOUSE   | Timeless | Protein timeless homolo R.QQLGAAQIQSDLPLILTQHR@.Q                  | 12.60  | 8.52  | 1.48 | 0.68 |
| P62075_TIM13_MOUSE | Timm13   | Mitochondrial import in K.VQIVANAQELLQR.M                          | 5.70   | 4.32  | 1.32 | 0.76 |
| O35857_TIM44_MOUSE | Timm44   | Mitochondrial import in R.IILDINVDLAM*GK#.M                        | 8.12   | 3.30  | 2.46 | 0.41 |
| O35857_TIM44_MOUSE | Timm44   | Mitochondrial import in K.LGELGTGVK#.E                             | 9.91   | 4.24  | 2.34 | 0.43 |
| O35857_TIM44_MOUSE | Timm44   | Mitochondrial import in K.TEM*SEVLTTEL@.V                          | 11.59  | 4.40  | 2.64 | 0.38 |
| Q99JR5_TINAL_MOUSE | Tinagl1  | Tubulointerstitial nephri R.EQNEASPTPR.C                           | 7.69   | 11.33 | 0.68 | 1.47 |
| Q99JR5_TINAL_MOUSE | Tinagl1  | Tubulointerstitial nephri K.ITWGTEELPDGR@.T                        | 15.95  | 22.92 | 0.70 | 1.44 |
| Q99JR5_TINAL_MOUSE | Tinagl1  | Tubulointerstitial nephri R.LDGAWWFLR.L                            | 13.36  | 20.31 | 0.66 | 1.52 |
| Q99JR5_TINAL_MOUSE | Tinagl1  | Tubulointerstitial nephri R.LGTRPSSVVM*NM*NEYITVLGGQEVLPFAFEASEK.W | 2.19   | 1.80  | 1.21 | 0.82 |
| Q9DCD5_TJAP1_MOUSE | Tjap1    | Tight junction-associater R.LEQEESLTDAR@.M                         | 6.17   | 6.47  | 2.81 | 0.36 |
| Q9DCD5_TJAP1_MOUSE | Tjap1    | Tight junction-associater R.SGQEVASPSPPSSSLSGAVVPTSVIAR@.V         | 7.97   | 4.44  | 1.80 | 0.56 |
| Q9DCD5_TJAP1_MOUSE | Tjap1    | Tight junction-associater R.LEQEESLTDAR@.M                         | 14.96  | 3.66  | 4.09 | 0.24 |
| Q9DCD5_TJAP1_MOUSE | Tjap1    | Tight junction-associater K.LLQENEELER@.K                          | 17.23  | 2.33  | 7.39 | 0.14 |
| Q9DCD5_TJAP1_MOUSE | Tjap1    | Tight junction-associater R.LQNSYTSAR@.T                           | 8.83   | 1.40  | 6.29 | 0.16 |
| Q9DCD5_TJAP1_MOUSE | Tjap1    | Tight junction-associater R.QAISLSLVEDGSR@.A                       | 7.88   | 1.96  | 4.02 | 0.25 |
| Q9DCD5_TJAP1_MOUSE | Tjap1    | Tight junction-associater K.TLDWIVLEITNK#.L                        | 6.26   | 2.20  | 2.84 | 0.35 |
| P39447_Z01_MOUSE   | Tjp1     | Tight junction protein ZC K.GGPAEGQLQENDR@.V                       | 17.87  | 10.20 | 1.75 | 0.57 |
| P39447_Z01_MOUSE   | Tjp1     | Tight junction protein ZC R.SVASSQPAK*PK#.A                        | 4.09   | 2.90  | 1.41 | 0.71 |
| P39447_Z01_MOUSE   | Tjp1     | Tight junction protein ZC K.YQM*NNISTM*PK#.A                       | 8.45   | 5.63  | 1.50 | 0.67 |
| P39447_Z01_MOUSE   | Tjp1     | Tight junction protein ZC R.AEQLASVQTLPK#.T                        | 13.98  | 9.84  | 1.42 | 0.70 |
| P39447_Z01_MOUSE   | Tjp1     | Tight junction protein ZC R.DNPHFOSGETSIVISDLK#.G                  | 10.79  | 4.33  | 2.49 | 0.40 |
| P39447_Z01_MOUSE   | Tjp1     | Tight junction protein ZC R.EAGFLR@PVTIFGPIADVAR@.E                | 51.85  | 36.49 | 1.42 | 0.70 |
| P39447_Z01_MOUSE   | Tjp1     | Tight junction protein ZC K.EAIQQQQQLVWVSEGK#.A                    | 6.30   | 2.03  | 3.10 | 0.32 |
| P39447_Z01_MOUSE   | Tjp1     | Tight junction protein ZC K.EGLEEGQILR@.V                          | 10.09  | 12.30 | 1.63 | 0.61 |
| P39447_Z01_MOUSE   | Tjp1     | Tight junction protein ZC K.EISQDLSAAR@.D                          | 14.44  | 6.42  | 2.25 | 0.44 |
| P39447_Z01_MOUSE   | Tjp1     | Tight junction protein ZC R.FEEPAPVSDSR@.T                         | 13.75  | 8.41  | 1.63 | 0.61 |
| P39447_Z01_MOUSE   | Tjp1     | Tight junction protein ZC K.GEEVTLAQK#.K                           | 10.19  | 8.18  | 1.25 | 0.80 |
| P39447_Z01_MOUSE   | Tjp1     | Tight junction protein ZC K.GGPAEGQLQENDR@.V                       | 9.68   | 5.01  | 1.93 | 0.52 |
| P39447_Z01_MOUSE   | Tjp1     | Tight junction protein ZC R.HEEQAPAYEVHNR@.Y                       | 12.79  | 9.65  | 1.33 | 0.75 |
| P39447_Z01_MOUSE   | Tjp1     | Tight junction protein ZC R.IVESDVGDSFYR@.T                        | 22.53  | 11.05 | 2.04 | 0.49 |
| P39447_Z01_MOUSE   | Tjp1     | Tight junction protein ZC R.LAGGNDVGIFVAGVLEDSPAAR#.E              | 7.35   | 3.84  | 1.91 | 0.52 |
| P39447_Z01_MOUSE   | Tjp1     | Tight junction protein ZC K.LGSWLAI@.I                             | 14.96  | 7.08  | 2.11 | 0.47 |
| P39447_Z01_MOUSE   | Tjp1     | Tight junction protein ZC R.VNNVDFTNIR@.E                          | 10.18  | 7.45  | 1.37 | 0.73 |
| P39447_Z01_MOUSE   | Tjp1     | Tight junction protein ZC R.YEVSSYDQFSR@.N                         | 13.99  | 9.84  | 1.42 | 0.70 |
| P39447_Z01_MOUSE   | Tjp1     | Tight junction protein ZC R.AEQLASVQTLPK#.T                        | 86.63  | 36.96 | 2.34 | 0.43 |
| P39447_Z01_MOUSE   | Tjp1     | Tight junction protein ZC K.AVEEVTVK#.N                            | 34.06  | 13.92 | 2.45 | 0.41 |
| P39447_Z01_MOUSE   | Tjp1     | Tight junction protein ZC R.DGNIEQDVLVVK#.I                        | 102.45 | 41.09 | 2.49 | 0.40 |
| P39447_Z01_MOUSE   | Tjp1     | Tight junction protein ZC R.DLEQPSYR@.Y                            | 91.83  | 42.91 | 2.14 | 0.47 |
| P39447_Z01_MOUSE   | Tjp1     | Tight junction protein ZC R.DNPHFOSGETSIVISDLK#.G                  | 105.22 | 37.09 | 2.84 | 0.35 |
| P39447_Z01_MOUSE   | Tjp1     | Tight junction protein ZC R.EAGFLR@PVTIFGPIADVAR@.E                | 273.11 | 99.28 | 2.75 | 0.36 |
| P39447_Z01_MOUSE   | Tjp1     | Tight junction protein ZC R.EAGFLR@PVTIFGPIADVAR@.E                | 10.40  | 4.20  | 2.47 | 0.40 |
| P39447_Z01_MOUSE   | Tjp1     | Tight junction protein ZC K.EAIQQQQQLVWVSEGK#.A                    | 24.99  | 11.16 | 2.24 | 0.45 |
| P39447_Z01_MOUSE   | Tjp1     | Tight junction protein ZC R.EDLSAQPVQTK#.F                         | 38.87  | 23.99 | 1.62 | 0.62 |
| P39447_Z01_MOUSE   | Tjp1     | Tight junction protein ZC R.EDPPQTFYQK#.S                          | 17.00  | 5.00  | 3.40 | 0.29 |
| P39447_Z01_MOUSE   | Tjp1     | Tight junction protein ZC R.EEAVFLDLPK#.G                          | 76.78  | 39.17 | 1.96 | 0.51 |
| P39447_Z01_MOUSE   | Tjp1     | Tight junction protein ZC R.EEPIVQAK#.S                            | 54.09  | 24.90 | 2.17 | 0.46 |
| P39447_Z01_MOUSE   | Tjp1     | Tight junction protein ZC K.EGLEEGQILR@.V                          | 122.53 | 51.30 | 2.39 | 0.42 |
| P39447_Z01_MOUSE   | Tjp1     | Tight junction protein ZC K.EISQDLSAAR@.D                          | 123.35 | 42.80 | 2.88 | 0.35 |
| P39447_Z01_MOUSE   | Tjp1     | Tight junction protein ZC R.FEEPAPVSDSR@.T                         | 75.25  | 35.00 | 2.15 | 0.47 |
| P39447_Z01_MOUSE   | Tjp1     | Tight junction protein ZC K.GEEVTLAQK#.K                           | 52.30  | 19.03 | 2.75 | 0.36 |
| P39447_Z01_MOUSE   | Tjp1     | Tight junction protein ZC K.GGPAEGQLQENDR@.V                       | 70.96  | 24.95 | 2.84 | 0.35 |
| P39447_Z01_MOUSE   | Tjp1     | Tight junction protein ZC K.GK#PETDAVDR@.S                         | 35.24  | 10.44 | 3.38 | 0.30 |
| P39447_Z01_MOUSE   | Tjp1     | Tight junction protein ZC K.INGVTENM*SLTDAR#.T                     | 19.57  | 8.97  | 2.18 | 0.46 |
| P39447_Z01_MOUSE   | Tjp1     | Tight junction protein ZC R.IVESDVGDSFYR@.T                        | 127.37 | 57.94 | 2.20 | 0.45 |
| P39447_Z01_MOUSE   | Tjp1     | Tight junction protein ZC R.KEPYSEEM*MYR.Q                         | 26.91  | 4.66  | 5.77 | 0.17 |
| P39447_Z01_MOUSE   | Tjp1     | Tight junction protein ZC R.K#HGVSLR@.L                            | 69.89  | 22.51 | 3.10 | 0.32 |
| P39447_Z01_MOUSE   | Tjp1     | Tight junction protein ZC R.LAGGNDVGIFVAGVLEDSPAAR#.E              | 174.33 | 85.85 | 2.03 | 0.49 |
| P39447_Z01_MOUSE   | Tjp1     | Tight junction protein ZC K.LGSWLAI@.I                             | 76.59  | 34.87 | 2.20 | 0.46 |
| P39447_Z01_MOUSE   | Tjp1     | Tight junction protein ZC R.LSVLSAPGSEYSM*YSTDSR@.H                | 10.15  | 5.20  | 1.95 | 0.51 |
| P39447_Z01_MOUSE   | Tjp1     | Tight junction protein ZC K.NR@AEQLASVQTLPK#.T                     | 22.62  | 8.69  | 2.60 | 0.38 |
| P39447_Z01_MOUSE   | Tjp1     | Tight junction protein ZC K.QIIDDQKHALLDVTNPAVDR@.L                | 15.46  | 9.28  | 1.68 | 0.59 |
| P39447_Z01_MOUSE   | Tjp1     | Tight junction protein ZC R.SNHYPDEEYER@.K                         | 14.48  | 7.13  | 2.03 | 0.49 |
| P39447_Z01_MOUSE   | Tjp1     | Tight junction protein ZC R.SVASSQPAK*PK#.V                        | 39.36  | 18.46 | 2.13 | 0.47 |
| P39447_Z01_MOUSE   | Tjp1     | Tight junction protein ZC R.SYEQVPPGFTSK#.T                        | 18.19  | 7.70  | 2.36 | 0.42 |
| P39447_Z01_MOUSE   | Tjp1     | Tight junction protein ZC R.THFVEKHEPSYLSFNK#.G                    | 13.25  | 3.86  | 3.44 | 0.29 |
| P39447_Z01_MOUSE   | Tjp1     | Tight junction protein ZC R.VAM*VNGVSM*DNVEHAFVQQLR@.K             | 10.16  | 4.91  | 2.07 | 0.48 |
| P39447_Z01_MOUSE   | Tjp1     | Tight junction protein ZC R.VNNVDFTNIR@.E                          | 78.65  | 31.92 | 2.46 | 0.41 |
| P39447_Z01_MOUSE   | Tjp1     | Tight junction protein ZC R.VVDTLYNK#.L                            | 30.70  | 10.41 | 2.95 | 0.34 |
| P39447_Z01_MOUSE   | Tjp1     | Tight junction protein ZC R.YEQLPR@.T                              | 43.66  | 22.81 | 1.91 | 0.52 |
| P39447_Z01_MOUSE   | Tjp1     | Tight junction protein ZC R.YEVSSYDQFSR@.N                         | 92.84  | 41.40 | 2.24 | 0.45 |
| P39447_Z01_MOUSE   | Tjp1     | Tight junction protein ZC K.YQM*NNISTM*PK#.A                       | 32.35  | 11.97 | 2.70 | 0.37 |
| P39447_Z01_MOUSE   | Tjp1     | Tight junction protein ZC R.YR@PEAQPYSTGPK#.S                      | 13.15  | 6.95  | 1.89 | 0.53 |
| Q920U1_Z02_MOUSE   | Tjp2     | Tight junction protein ZC R.AEQM*ASVQNAQR@.E                       | 36.66  | 16.28 | 2.25 | 0.44 |
| Q920U1_Z02_MOUSE   | Tjp2     | Tight junction protein ZC K.ANEYGLR.L                              | 25.52  | 10.49 | 2.43 | 0.41 |
| Q920U1_Z02_MOUSE   | Tjp2     | Tight junction protein ZC K.DGNLHEGDIIK#.I                         | 107.63 | 39.01 | 2.76 | 0.36 |
| Q920U1_Z02_MOUSE   | Tjp2     | Tight junction protein ZC R.DNPHFENGETSIVISDLVLPGGPDGLLQENDR@.V    | 6.67   | 2.47  | 2.70 | 0.37 |
| Q920U1_Z02_MOUSE   | Tjp2     | Tight junction protein ZC K.DSIQQQQQLVWVSEGK#.M                    | 8.11   | 4.59  | 1.77 | 0.57 |
| Q920U1_Z02_MOUSE   | Tjp2     | Tight junction protein ZC R.EDAVLYLEIPK#.G                         | 39.18  | 19.16 | 2.05 | 0.49 |
| Q920U1_Z02_MOUSE   | Tjp2     | Tight junction protein ZC R.EDAVLYLEIPK#GETVTLAQSR@.A              | 50.85  | 30.28 | 1.68 | 0.60 |
| Q920U1_Z02_MOUSE   | Tjp2     | Tight junction protein ZC R.GDSFFIR@.S                             | 60.87  | 24.59 | 2.48 | 0.40 |
| Q920U1_Z02_MOUSE   | Tjp2     | Tight junction protein ZC K.GETVTLAQSR@.A                          | 26.34  | 10.37 | 2.54 | 0.39 |
| Q920U1_Z02_MOUSE   | Tjp2     | Tight junction protein ZC R.GFEVIEFDGR@.S                          | 37.00  | 18.12 | 2.04 | 0.49 |
| Q920U1_Z02_MOUSE   | Tjp2     | Tight junction protein ZC R.GFIAYSGGR@.D                           | 36.39  | 13.93 | 2.61 | 0.38 |
| Q920U1_Z02_MOUSE   | Tjp2     | Tight junction protein ZC R.GLDQEDYGR@.S                           | 60.64  | 24.17 | 2.51 | 0.40 |
| Q920U1_Z02_MOUSE   | Tjp2     | Tight junction protein ZC R.GLVR@EDAVLYLEIPK#.G                    | 16.04  | 5.87  | 2.73 | 0.37 |
| Q920U1_Z02_MOUSE   | Tjp2     | Tight junction protein ZC R.GLVR@EDAVLYLEIPK#GETVTLAQSR@.A         | 30.27  | 8.57  | 3.53 | 0.28 |
| Q920U1_Z02_MOUSE   | Tjp2     | Tight junction protein ZC K.HPDYAVPIK#.A                           | 27.99  | 13.54 | 2.07 | 0.48 |
| Q920U1_Z02_MOUSE   | Tjp2     | Tight junction protein ZC K.IAAIVK#.R                              | 82.15  | 31.06 | 2.64 | 0.38 |
| Q920U1_Z02_MOUSE   | Tjp2     | Tight junction protein ZC K.INGVTENM*SLTDAR@.K                     | 13.92  | 8.69  | 1.60 | 0.62 |
| Q920U1_Z02_MOUSE   | Tjp2     | Tight junction protein ZC R.K#LFDQANK#.L                           | 29.84  | 13.01 | 2.29 | 0.44 |
| Q920U1_Z02_MOUSE   | Tjp2     | Tight junction protein ZC R.LAGGNDVGIFVAGIQTGQTSAEQLEQEGDQILK#.V   | 37.93  | 11.12 | 3.41 | 0.29 |
| Q920U1_Z02_MOUSE   | Tjp2     | Tight junction protein ZC R.LATELPDLQTAK#.T                        | 142.88 | 50.36 | 2.84 | 0.35 |
| Q920U1_Z02_MOUSE   | Tjp2     | Tight junction protein ZC R.LGSQIFK#.E                             | 116.42 | 43.63 | 2.67 | 0.37 |
| Q920U1_Z02_MOUSE   | Tjp2     | Tight junction protein ZC K.LQLVLR@.D                              | 56.48  | 20.00 | 2.82 | 0.35 |
| Q920U1_Z02_MOUSE   | Tjp2     | Tight junction protein ZC R.M*GATPTPK#.S                           | 62.09  | 28.86 | 2.15 | 0.46 |
| Q920U1_Z02_MOUSE   | Tjp2     | Tight junction protein ZC R.M*QELQEAQAR@.I                         | 69.69  | 23.36 | 2.98 | 0.34 |
| Q920U1_Z02_MOUSE   | Tjp2     | Tight junction protein ZC K.R@GYYSQPSR@.Y                          | 12.78  | 4.38  | 2.92 | 0.34 |
| Q920U1_Z02_MOUSE   | Tjp2     | Tight junction protein ZC K.RPVVLFPIADIAM*ER.L                     | 122.77 | 43.25 | 2.84 | 0.35 |
| Q920U1_Z02_MOUSE   | Tjp2     | Tight junction protein ZC K.R@PVLFGPIADIAMER@.L                    | 37.73  | 14.58 | 2.59 | 0.39 |



|                   |      |                                                                |         |        |      |      |
|-------------------|------|----------------------------------------------------------------|---------|--------|------|------|
| Q920U1_Z02_MOUSE  | Tjp2 | Tight junction protein ZC R.R@QQYSDQDYHSSTEK#.L                | 28.55   | 9.28   | 3.08 | 0.33 |
| Q920U1_Z02_MOUSE  | Tjp2 | Tight junction protein ZC R.SNLPATAGSEIPGGSTK#.G               | 74.11   | 31.33  | 2.37 | 0.42 |
| Q920U1_Z02_MOUSE  | Tjp2 | Tight junction protein ZC R.SONR@EDSFDFYSK#.S                  | 32.56   | 16.21  | 2.01 | 0.50 |
| Q920U1_Z02_MOUSE  | Tjp2 | Tight junction protein ZC K.SR@EDLAAVSVSTK#.F                  | 30.40   | 9.46   | 3.21 | 0.31 |
| Q920U1_Z02_MOUSE  | Tjp2 | Tight junction protein ZC K.STGDITAGVTEASR@.E                  | 33.87   | 11.95  | 2.84 | 0.35 |
| Q920U1_Z02_MOUSE  | Tjp2 | Tight junction protein ZC R.VFLR@PSPDEAIYGPNTK.M               | 104.44  | 42.05  | 2.48 | 0.40 |
| Q920U1_Z02_MOUSE  | Tjp2 | Tight junction protein ZC K.VNTQDFR@.G                         | 89.69   | 29.67  | 3.02 | 0.33 |
| Q920U1_Z02_MOUSE  | Tjp2 | Tight junction protein ZC R.VVDTLYDGK#.L                       | 89.05   | 34.54  | 2.58 | 0.39 |
| Q920U1_Z02_MOUSE  | Tjp2 | Tight junction protein ZC R.YQEEGYPVQPR@.T                     | 55.39   | 26.45  | 2.09 | 0.48 |
| Q920U1_Z02_MOUSE  | Tjp2 | Tight junction protein ZC R.AEQM*ASVQNAQR@.E                   | 14.36   | 4.57   | 3.14 | 0.23 |
| Q920U1_Z02_MOUSE  | Tjp2 | Tight junction protein ZC K.DGNLHEDGIIJK#.I                    | 45.57   | 12.51  | 3.64 | 0.27 |
| Q920U1_Z02_MOUSE  | Tjp2 | Tight junction protein ZC K.DSIQQQNEIAVWVSEK#.M                | 8.08    | 2.02   | 4.01 | 0.25 |
| Q920U1_Z02_MOUSE  | Tjp2 | Tight junction protein ZC R.EDAVYLLEIK#.G                      | 18.31   | 6.36   | 2.88 | 0.35 |
| Q920U1_Z02_MOUSE  | Tjp2 | Tight junction protein ZC K.GETVTLAQRSR@.A                     | 10.83   | 3.34   | 3.24 | 0.31 |
| Q920U1_Z02_MOUSE  | Tjp2 | Tight junction protein ZC R.GFIVAVSGGR@.D                      | 16.37   | 4.88   | 3.35 | 0.30 |
| Q920U1_Z02_MOUSE  | Tjp2 | Tight junction protein ZC R.GLDQEDYGR@.S                       | 25.69   | 10.92  | 2.35 | 0.43 |
| Q920U1_Z02_MOUSE  | Tjp2 | Tight junction protein ZC R.K.FLDQANK#.L                       | 16.85   | 4.26   | 3.96 | 0.25 |
| Q920U1_Z02_MOUSE  | Tjp2 | Tight junction protein ZC R.LAGGNDVGIIVAGIQEGTSAEQLEQGDQILK#.V | 18.28   | 3.44   | 5.31 | 0.19 |
| Q920U1_Z02_MOUSE  | Tjp2 | Tight junction protein ZC R.LATELPDFLQTAK#.T                   | 55.24   | 21.41  | 2.58 | 0.39 |
| Q920U1_Z02_MOUSE  | Tjp2 | Tight junction protein ZC R.LGSGIFK#.E                         | 30.58   | 9.07   | 3.37 | 0.30 |
| Q920U1_Z02_MOUSE  | Tjp2 | Tight junction protein ZC K.LQLVVLV@.D                         | 24.36   | 8.91   | 2.74 | 0.37 |
| Q920U1_Z02_MOUSE  | Tjp2 | Tight junction protein ZC K.R@PVVLFPIADIAM*ER@.L               | 35.29   | 15.70  | 2.25 | 0.44 |
| Q920U1_Z02_MOUSE  | Tjp2 | Tight junction protein ZC R.R@QQYSDQDYHSSTEK#.L                | 8.36    | 1.58   | 5.31 | 0.19 |
| Q920U1_Z02_MOUSE  | Tjp2 | Tight junction protein ZC K.SNLPATAGSEIPGGSTK#.G               | 38.36   | 17.00  | 2.26 | 0.44 |
| Q920U1_Z02_MOUSE  | Tjp2 | Tight junction protein ZC K.STGDITAGVTEASR@.E                  | 16.32   | 6.40   | 2.55 | 0.39 |
| Q920U1_Z02_MOUSE  | Tjp2 | Tight junction protein ZC R.VFLR@PSPDEAIYGPNTK#.M              | 37.88   | 16.86  | 2.25 | 0.44 |
| Q920U1_Z02_MOUSE  | Tjp2 | Tight junction protein ZC R.VVDTLYDGK#.L                       | 60.57   | 28.26  | 2.14 | 0.47 |
| Q920U1_Z02_MOUSE  | Tjp2 | Tight junction protein ZC R.YQEEGYPVQPR@.T                     | 19.34   | 9.14   | 2.12 | 0.47 |
| P26039_TLN1_MOUSE | Tln1 | Talin-1 OS=Mus musculus: K.VLVQNAAGSQEK#.L                     | 3.74    | 3.84   | 0.97 | 1.03 |
| P26039_TLN1_MOUSE | Tln1 | Talin-1 OS=Mus musculus: K.AIAVTVQEM*YTK#.S                    | 5.39    | 2.99   | 1.80 | 0.55 |
| P26039_TLN1_MOUSE | Tln1 | Talin-1 OS=Mus musculus: K.LLGEIAQGNENYAGIAR@.D                | 5.47    | 2.19   | 2.50 | 0.40 |
| P26039_TLN1_MOUSE | Tln1 | Talin-1 OS=Mus musculus: K.TLAEALQLLYTAK#.E                    | 10.04   | 4.07   | 2.47 | 0.40 |
| P26039_TLN1_MOUSE | Tln1 | Talin-1 OS=Mus musculus: K.VGAIPNALDDGQWVSGQLISAAR@.M          | 5.29    | 0.96   | 5.52 | 0.18 |
| P26039_TLN1_MOUSE | Tln1 | Talin-1 OS=Mus musculus: K.VLVQNAAGSQEK#.L                     | 10.47   | 4.74   | 2.21 | 0.45 |
| P26039_TLN1_MOUSE | Tln1 | Talin-1 OS=Mus musculus: K.AAAFFEDQENETVVK#.E                  | 214.73  | 98.15  | 2.19 | 0.46 |
| P26039_TLN1_MOUSE | Tln1 | Talin-1 OS=Mus musculus: R.AAM*EPVIVISA#.T                     | 248.08  | 106.27 | 2.33 | 0.43 |
| P26039_TLN1_MOUSE | Tln1 | Talin-1 OS=Mus musculus: R.AAMEPVIIVISA#.T                     | 18.82   | 11.75  | 1.60 | 0.62 |
| P26039_TLN1_MOUSE | Tln1 | Talin-1 OS=Mus musculus: K.ADAEAGESDLENSR@.K                   | 36.43   | 15.18  | 2.40 | 0.42 |
| P26039_TLN1_MOUSE | Tln1 | Talin-1 OS=Mus musculus: K.ADAEAGESDLENSR@K#.L                 | 28.34   | 10.32  | 2.75 | 0.36 |
| P26039_TLN1_MOUSE | Tln1 | Talin-1 OS=Mus musculus: R.AEASQLGHK#.V                        | 26.15   | 14.59  | 1.79 | 0.56 |
| P26039_TLN1_MOUSE | Tln1 | Talin-1 OS=Mus musculus: K.AGFLDLK#.D                          | 73.06   | 28.98  | 2.52 | 0.40 |
| P26039_TLN1_MOUSE | Tln1 | Talin-1 OS=Mus musculus: K.AGFLDLKDFLPK#.E                     | 166.40  | 67.37  | 2.47 | 0.40 |
| P26039_TLN1_MOUSE | Tln1 | Talin-1 OS=Mus musculus: K.AHATGAGPAGR@.Y                      | 16.02   | 6.76   | 2.37 | 0.42 |
| P26039_TLN1_MOUSE | Tln1 | Talin-1 OS=Mus musculus: K.AIAVTVQEM*YTK#.S                    | 260.13  | 109.81 | 2.37 | 0.42 |
| P26039_TLN1_MOUSE | Tln1 | Talin-1 OS=Mus musculus: K.AIAVTVQEM*YTK#.S                    | 42.32   | 17.25  | 2.45 | 0.41 |
| P26039_TLN1_MOUSE | Tln1 | Talin-1 OS=Mus musculus: R.LAVNPR@.D                           | 188.05  | 72.88  | 2.58 | 0.39 |
| P26039_TLN1_MOUSE | Tln1 | Talin-1 OS=Mus musculus: K.ALDGDFTEENR@.A                      | 100.60  | 37.70  | 2.67 | 0.37 |
| P26039_TLN1_MOUSE | Tln1 | Talin-1 OS=Mus musculus: K.ALDYYM*LR@.N                        | 108.17  | 37.55  | 2.88 | 0.35 |
| P26039_TLN1_MOUSE | Tln1 | Talin-1 OS=Mus musculus: R.ALEATTEHR#.Q                        | 51.71   | 24.62  | 2.10 | 0.48 |
| P26039_TLN1_MOUSE | Tln1 | Talin-1 OS=Mus musculus: K.ALGDILSATK#.A                       | 279.58  | 123.12 | 2.27 | 0.44 |
| P26039_TLN1_MOUSE | Tln1 | Talin-1 OS=Mus musculus: K.ALSTDPASPDLK#.S                     | 211.11  | 115.52 | 1.83 | 0.55 |
| P26039_TLN1_MOUSE | Tln1 | Talin-1 OS=Mus musculus: R.AQVNSLNK#.G                         | 262.34  | 95.37  | 2.75 | 0.36 |
| P26039_TLN1_MOUSE | Tln1 | Talin-1 OS=Mus musculus: K.ASGHPGDPESQQR@.L                    | 11.09   | 6.65   | 1.67 | 0.60 |
| P26039_TLN1_MOUSE | Tln1 | Talin-1 OS=Mus musculus: K.AVAEQPLLVQGR@.G                     | 223.04  | 97.04  | 2.30 | 0.44 |
| P26039_TLN1_MOUSE | Tln1 | Talin-1 OS=Mus musculus: K.AVAAAAAALVVK#.A                     | 164.31  | 84.91  | 1.94 | 0.52 |
| P26039_TLN1_MOUSE | Tln1 | Talin-1 OS=Mus musculus: K.AVEDEATK#.G                         | 48.27   | 20.38  | 2.37 | 0.42 |
| P26039_TLN1_MOUSE | Tln1 | Talin-1 OS=Mus musculus: K.AVTQALNR@.C                         | 225.96  | 91.09  | 2.48 | 0.40 |
| P26039_TLN1_MOUSE | Tln1 | Talin-1 OS=Mus musculus: K.DHFGLEDGEESTM*LEDVSPK#.K            | 23.94   | 12.44  | 1.92 | 0.52 |
| P26039_TLN1_MOUSE | Tln1 | Talin-1 OS=Mus musculus: R.DLDQASLAASVQQLAPR@.E                | 110.30  | 46.06  | 2.39 | 0.42 |
| P26039_TLN1_MOUSE | Tln1 | Talin-1 OS=Mus musculus: R.DLDQASLAASVQQLAPR#.E                | 85.01   | 33.35  | 2.55 | 0.39 |
| P26039_TLN1_MOUSE | Tln1 | Talin-1 OS=Mus musculus: R.DPVQLNLLVQAR@.D                     | 46.40   | 19.36  | 2.40 | 0.42 |
| P26039_TLN1_MOUSE | Tln1 | Talin-1 OS=Mus musculus: K.EADESLNFEQILEAAK#.S                 | 192.68  | 85.96  | 2.24 | 0.45 |
| P26039_TLN1_MOUSE | Tln1 | Talin-1 OS=Mus musculus: R.EGAEATFADHR@.E                      | 22.71   | 12.24  | 1.85 | 0.54 |
| P26039_TLN1_MOUSE | Tln1 | Talin-1 OS=Mus musculus: R.EGISQALHTQM*LTAVQEIHLIPLASAAR@.A    | 139.09  | 54.76  | 2.54 | 0.39 |
| P26039_TLN1_MOUSE | Tln1 | Talin-1 OS=Mus musculus: R.EGISQALHTQM*LTAVQEIHLIPLASAAR@.A    | 206.67  | 9.69   | 2.13 | 0.47 |
| P26039_TLN1_MOUSE | Tln1 | Talin-1 OS=Mus musculus: R.ERIEALAGPPNDFGLFLSDDPK#.K           | 32.40   | 12.46  | 2.60 | 0.38 |
| P26039_TLN1_MOUSE | Tln1 | Talin-1 OS=Mus musculus: K.EVANSTANLVK#.T                      | 284.24  | 120.03 | 2.37 | 0.42 |
| P26039_TLN1_MOUSE | Tln1 | Talin-1 OS=Mus musculus: K.EVIQEWSLTNK#.R                      | 29.10   | 13.83  | 2.10 | 0.48 |
| P26039_TLN1_MOUSE | Tln1 | Talin-1 OS=Mus musculus: K.FFYSDQNVDSR@.D                      | 21.30   | 9.93   | 2.15 | 0.47 |
| P26039_TLN1_MOUSE | Tln1 | Talin-1 OS=Mus musculus: K.FFYSDQNVDSR@DPVQLNLLVQAR@.D         | 28.65   | 8.06   | 3.55 | 0.28 |
| P26039_TLN1_MOUSE | Tln1 | Talin-1 OS=Mus musculus: R.FGQDFSTLEAGVEM*AGQAPSQEDR@.A        | 80.95   | 37.60  | 2.29 | 0.44 |
| P26039_TLN1_MOUSE | Tln1 | Talin-1 OS=Mus musculus: R.FGQDFSTLEAGVEMAGQAPSQEDR@.A         | 45.27   | 15.95  | 2.52 | 0.40 |
| P26039_TLN1_MOUSE | Tln1 | Talin-1 OS=Mus musculus: K.FLPSELREH#.I                        | 29.65   | 10.78  | 2.75 | 0.36 |
| P26039_TLN1_MOUSE | Tln1 | Talin-1 OS=Mus musculus: K.GAAAHDPSEEQQR@.L                    | 77.77   | 36.58  | 2.13 | 0.47 |
| P26039_TLN1_MOUSE | Tln1 | Talin-1 OS=Mus musculus: K.GAAAHDPSEEQQR@.L                    | 14.40   | 8.94   | 1.61 | 0.62 |
| P26039_TLN1_MOUSE | Tln1 | Talin-1 OS=Mus musculus: K.GLAGAVSELLR@.S                      | 1284.18 | 401.46 | 3.20 | 0.31 |
| P26039_TLN1_MOUSE | Tln1 | Talin-1 OS=Mus musculus: R.GTPQDLAR@.A                         | 197.38  | 87.68  | 2.25 | 0.44 |
| P26039_TLN1_MOUSE | Tln1 | Talin-1 OS=Mus musculus: R.IGITNHDEYSLVR@.E                    | 286.64  | 115.27 | 2.49 | 0.40 |
| P26039_TLN1_MOUSE | Tln1 | Talin-1 OS=Mus musculus: R.IGITNHDEYSLVR#.E                    | 16.97   | 10.45  | 1.62 | 0.62 |
| P26039_TLN1_MOUSE | Tln1 | Talin-1 OS=Mus musculus: R.ILAQATSDLVNAIK#.A                   | 384.76  | 179.46 | 2.14 | 0.47 |
| P26039_TLN1_MOUSE | Tln1 | Talin-1 OS=Mus musculus: R.ILAQATSDLVNAIK#ADAEGESDLENSR@.K     | 24.18   | 8.25   | 2.93 | 0.34 |
| P26039_TLN1_MOUSE | Tln1 | Talin-1 OS=Mus musculus: R.ILAQATSDLVNAIK#ADAEGESDLENSR@.K     | 4.12    | 1.29   | 3.20 | 0.31 |
| P26039_TLN1_MOUSE | Tln1 | Talin-1 OS=Mus musculus: R.IPEALAGPPNDFGLFLSDDPK#.K            | 27.20   | 15.88  | 1.71 | 0.58 |
| P26039_TLN1_MOUSE | Tln1 | Talin-1 OS=Mus musculus: R.IPEALAGPPNDFGLFLSDDPK#.K            | 69.80   | 31.41  | 2.22 | 0.45 |
| P26039_TLN1_MOUSE | Tln1 | Talin-1 OS=Mus musculus: K.ISIGNVV#.T                          | 173.44  | 70.90  | 2.45 | 0.41 |
| P26039_TLN1_MOUSE | Tln1 | Talin-1 OS=Mus musculus: K.KHGIWLEAGK#.A                       | 25.90   | 11.59  | 2.24 | 0.45 |
| P26039_TLN1_MOUSE | Tln1 | Talin-1 OS=Mus musculus: K.KHLEQLK#R@.A                        | 28.52   | 15.91  | 1.79 | 0.56 |
| P26039_TLN1_MOUSE | Tln1 | Talin-1 OS=Mus musculus: K.KSTVLQQQYNR#.V                      | 20.53   | 10.26  | 2.00 | 0.50 |
| P26039_TLN1_MOUSE | Tln1 | Talin-1 OS=Mus musculus: K.KHSTVLQQQYNR@.V                     | 94.97   | 41.66  | 2.28 | 0.44 |
| P26039_TLN1_MOUSE | Tln1 | Talin-1 OS=Mus musculus: K.LAQASQSVVITTR@.L                    | 219.04  | 87.21  | 2.51 | 0.40 |
| P26039_TLN1_MOUSE | Tln1 | Talin-1 OS=Mus musculus: R.LASQAKP#AAVAENEEIGAHIK#.H           | 185.46  | 72.02  | 2.58 | 0.39 |
| P26039_TLN1_MOUSE | Tln1 | Talin-1 OS=Mus musculus: R.LASQAKP#AAVAENEEIGAHIK#.H           | 32.86   | 11.06  | 2.97 | 0.34 |
| P26039_TLN1_MOUSE | Tln1 | Talin-1 OS=Mus musculus: K.LGAAALGAEDEPTQVLLINAVK#.D           | 209.96  | 83.75  | 2.51 | 0.40 |
| P26039_TLN1_MOUSE | Tln1 | Talin-1 OS=Mus musculus: K.LHTDDDELNLWDHGR@.T                  | 402.92  | 17.00  | 2.47 | 0.40 |
| P26039_TLN1_MOUSE | Tln1 | Talin-1 OS=Mus musculus: K.K#PLGETM*EK#.C                      | 108.51  | 53.69  | 2.02 | 0.49 |
| P26039_TLN1_MOUSE | Tln1 | Talin-1 OS=Mus musculus: K.LLAALEDEGGNGR@PLLQAAK#.G            | 204.90  | 71.19  | 2.88 | 0.35 |
| P26039_TLN1_MOUSE | Tln1 | Talin-1 OS=Mus musculus: K.LLGEIAQGNENYAGIAR@.D                | 228.17  | 94.88  | 2.40 | 0.42 |
| P26039_TLN1_MOUSE | Tln1 | Talin-1 OS=Mus musculus: R.LLSDSLPSTGTGFEAQR@.L                | 25.00   | 11.18  | 2.24 | 0.45 |
| P26039_TLN1_MOUSE | Tln1 | Talin-1 OS=Mus musculus: R.LNEAAALNQAAATELVQASR@.G             | 227.67  | 83.95  | 2.71 | 0.37 |
| P26039_TLN1_MOUSE | Tln1 | Talin-1 OS=Mus musculus: R.LNEAAALNQAAATELVQASR#.G             | 130.21  | 58.49  | 2.23 | 0.45 |
| P26039_TLN1_MOUSE | Tln1 | Talin-1 OS=Mus musculus: R.MATNAQAQNAIK#.K                     | 19.52   | 7.93   | 2.46 | 0.41 |
| P26039_TLN1_MOUSE | Tln1 | Talin-1 OS=Mus musculus: R.M*ATNAQAQNAIK#.K                    | 135.19  | 50.23  | 2.69 | 0.37 |
| P26039_TLN1_MOUSE | Tln1 | Talin-1 OS=Mus musculus: K.M*VGGIAQIAAQEEM*LR@.K               | 55.94   | 23.90  | 2.34 | 0.43 |

|                     |          |                                                                            |        |        |       |      |
|---------------------|----------|----------------------------------------------------------------------------|--------|--------|-------|------|
| P26039_TLN1_MOUSE   | Tln1     | Talin-1 OS=Mus musculus: K.MVGGIAQIAAQEEM*LR@.K                            | 6.83   | 1.53   | 4.48  | 0.22 |
| P26039_TLN1_MOUSE   | Tln1     | Talin-1 OS=Mus musculus: K.M*VGGIAQIAAQEEMLR@.K                            | 14.28  | 3.82   | 3.74  | 0.27 |
| P26039_TLN1_MOUSE   | Tln1     | Talin-1 OS=Mus musculus: K.NGNLPEFGDAIATASK#.A                             | 38.56  | 14.77  | 2.61  | 0.38 |
| P26039_TLN1_MOUSE   | Tln1     | Talin-1 OS=Mus musculus: K.NLGTALAE LR@.T                                  | 258.98 | 109.42 | 2.37  | 0.42 |
| P26039_TLN1_MOUSE   | Tln1     | Talin-1 OS=Mus musculus: K.QAAASATQITAAQHAASAPK#.A                         | 308.42 | 130.26 | 2.37  | 0.42 |
| P26039_TLN1_MOUSE   | Tln1     | Talin-1 OS=Mus musculus: R.QEDVIATANLSR@.R                                 | 123.68 | 48.45  | 2.55  | 0.39 |
| P26039_TLN1_MOUSE   | Tln1     | Talin-1 OS=Mus musculus: K.R@VAGSVTELIQAAEAM*#K.G                          | 32.28  | 11.00  | 2.93  | 0.34 |
| P26039_TLN1_MOUSE   | Tln1     | Talin-1 OS=Mus musculus: R.SAQPASAEPR.Q                                    | 120.58 | 43.52  | 2.77  | 0.36 |
| P26039_TLN1_MOUSE   | Tln1     | Talin-1 OS=Mus musculus: R.SGASGPNFQVGSMP*PPAQQTSGQM*HR@.G                 | 84.84  | 43.73  | 1.94  | 0.52 |
| P26039_TLN1_MOUSE   | Tln1     | Talin-1 OS=Mus musculus: R.SGASGPNFQVGSMP*PPAQQTSGQMHR@.G                  | 10.70  | 4.39   | 2.44  | 0.41 |
| P26039_TLN1_MOUSE   | Tln1     | Talin-1 OS=Mus musculus: K.SIAAATSALVK#.A                                  | 211.43 | 102.46 | 2.06  | 0.48 |
| P26039_TLN1_MOUSE   | Tln1     | Talin-1 OS=Mus musculus: K.SNTSPPEELGPLANQLTSDYGR@.L                       | 101.67 | 48.80  | 2.08  | 0.48 |
| P26039_TLN1_MOUSE   | Tln1     | Talin-1 OS=Mus musculus: K.SNTSPPEELGPLANQLTSDYGR.L                        | 89.39  | 45.44  | 1.97  | 0.51 |
| P26039_TLN1_MOUSE   | Tln1     | Talin-1 OS=Mus musculus: K.SQLAAAAR@.A                                     | 144.27 | 71.04  | 2.04  | 0.49 |
| P26039_TLN1_MOUSE   | Tln1     | Talin-1 OS=Mus musculus: K.STVLQQQYNR@.V                                   | 43.32  | 17.44  | 2.48  | 0.40 |
| P26039_TLN1_MOUSE   | Tln1     | Talin-1 OS=Mus musculus: K.TIM*VDDSK#.T                                    | 89.60  | 36.49  | 2.46  | 0.41 |
| P26039_TLN1_MOUSE   | Tln1     | Talin-1 OS=Mus musculus: K.TKHEVQEWLSTNIK#.R                               | 134.43 | 13.21  | 10.18 | 0.10 |
| P26039_TLN1_MOUSE   | Tln1     | Talin-1 OS=Mus musculus: K.LTAESALQLYITAK#.E                               | 618.11 | 267.12 | 2.31  | 0.43 |
| P26039_TLN1_MOUSE   | Tln1     | Talin-1 OS=Mus musculus: R.TLR@EQGVVEEHETLLLR@.R                           | 26.67  | 6.01   | 4.44  | 0.23 |
| P26039_TLN1_MOUSE   | Tln1     | Talin-1 OS=Mus musculus: K.TLSHPQQM*ALLDQTK#.T                             | 142.91 | 67.02  | 2.13  | 0.47 |
| P26039_TLN1_MOUSE   | Tln1     | Talin-1 OS=Mus musculus: K.TLSHPQQMALLDQTK#.T                              | 311.13 | 13.29  | 2.34  | 0.43 |
| P26039_TLN1_MOUSE   | Tln1     | Talin-1 OS=Mus musculus: K.TM*LESAGGLIQATAR@.A                             | 109.94 | 97.52  | 1.13  | 0.89 |
| P26039_TLN1_MOUSE   | Tln1     | Talin-1 OS=Mus musculus: K.TM*LESAGGLIQATAR@.A                             | 45.70  | 14.22  | 3.21  | 0.31 |
| P26039_TLN1_MOUSE   | Tln1     | Talin-1 OS=Mus musculus: K.TMLESAGGLIQATAR@.A                              | 28.03  | 12.22  | 2.29  | 0.44 |
| P26039_TLN1_MOUSE   | Tln1     | Talin-1 OS=Mus musculus: K.TSTPEDFIR@.M                                    | 233.76 | 95.94  | 2.44  | 0.41 |
| P26039_TLN1_MOUSE   | Tln1     | Talin-1 OS=Mus musculus: K.TYGVSFVLVK#.E                                   | 149.57 | 48.71  | 3.07  | 0.33 |
| P26039_TLN1_MOUSE   | Tln1     | Talin-1 OS=Mus musculus: R.VAGSVTELIQAAEAM*#K.G                            | 122.54 | 50.34  | 2.43  | 0.41 |
| P26039_TLN1_MOUSE   | Tln1     | Talin-1 OS=Mus musculus: R.VAGSVTELIQAAEAMK#.G                             | 23.43  | 10.81  | 2.17  | 0.46 |
| P26039_TLN1_MOUSE   | Tln1     | Talin-1 OS=Mus musculus: K.VGAIPANALDDGGWSQGLISAAR@.M                      | 226.70 | 98.01  | 2.31  | 0.43 |
| P26039_TLN1_MOUSE   | Tln1     | Talin-1 OS=Mus musculus: K.VGAIPANALDDGGWSQGLISAAR.M                       | 49.83  | 21.63  | 2.30  | 0.43 |
| P26039_TLN1_MOUSE   | Tln1     | Talin-1 OS=Mus musculus: K.VGDDPAAVQLK#.N                                  | 117.12 | 56.55  | 2.07  | 0.48 |
| P26039_TLN1_MOUSE   | Tln1     | Talin-1 OS=Mus musculus: K.VLGEAM*TGISQNAK#.N                              | 174.05 | 68.97  | 2.52  | 0.40 |
| P26039_TLN1_MOUSE   | Tln1     | Talin-1 OS=Mus musculus: K.VLGEAM*TGISQNAK#.N                              | 21.84  | 9.55   | 2.29  | 0.44 |
| P26039_TLN1_MOUSE   | Tln1     | Talin-1 OS=Mus musculus: K.VLVEDTK#.V                                      | 245.56 | 84.80  | 2.90  | 0.35 |
| P26039_TLN1_MOUSE   | Tln1     | Talin-1 OS=Mus musculus: K.VLVQNAAGSQEK#.L                                 | 437.57 | 192.05 | 2.28  | 0.44 |
| P26039_TLN1_MOUSE   | Tln1     | Talin-1 OS=Mus musculus: K.VM*VTNVTSLLK#.T                                 | 62.54  | 62.53  | 2.41  | 0.41 |
| P26039_TLN1_MOUSE   | Tln1     | Talin-1 OS=Mus musculus: K.VMVTNVTSLLK#.T                                  | 66.94  | 22.36  | 2.99  | 0.33 |
| P26039_TLN1_MOUSE   | Tln1     | Talin-1 OS=Mus musculus: K.VSHVLAALQAGNR@.G                                | 158.43 | 62.89  | 2.52  | 0.40 |
| P26039_TLN1_MOUSE   | Tln1     | Talin-1 OS=Mus musculus: K.VSQM*AQYFEPPLTAAVGAASK#.T                       | 210.36 | 93.43  | 2.25  | 0.44 |
| P26039_TLN1_MOUSE   | Tln1     | Talin-1 OS=Mus musculus: K.VSQMAQYFEPPLTAAVGAASK#.T                        | 15.49  | 7.68   | 2.02  | 0.50 |
| P26039_TLN1_MOUSE   | Tln1     | Talin-1 OS=Mus musculus: R.YDQATDITLVTEMIFSSM*GDAGEM*VR@.Q                 | 216.94 | 79.76  | 2.72  | 0.37 |
| P26039_TLN1_MOUSE   | Tln1     | Talin-1 OS=Mus musculus: R.YDQATDITLVTEMIFSSM*GDAGEMVR@.Q                  | 11.75  | 4.51   | 2.61  | 0.38 |
| Q71LX4_TLN2_MOUSE   | Tln2     | Talin-2 OS=Mus musculus: R.DVM*EGSAM*LIQEAK#.Q                             | 4.74   | 1.36   | 3.49  | 0.29 |
| Q71LX4_TLN2_MOUSE   | Tln2     | Talin-2 OS=Mus musculus: R.EQGVDEENETLLLR@.R                               | 5.69   | 3.00   | 1.90  | 0.53 |
| Q71LX4_TLN2_MOUSE   | Tln2     | Talin-2 OS=Mus musculus: K.GAAANPENEDQQR@.L                                | 4.80   | 2.72   | 1.77  | 0.57 |
| Q71LX4_TLN2_MOUSE   | Tln2     | Talin-2 OS=Mus musculus: K.LGAALSLSGNDPQTQVVLINAIK#.D                      | 6.33   | 2.60   | 2.43  | 0.41 |
| Q71LX4_TLN2_MOUSE   | Tln2     | Talin-2 OS=Mus musculus: K.LLAALM*DDVDGSGDLELLR@.A                         | 10.29  | 4.07   | 2.53  | 0.40 |
| Q71LX4_TLN2_MOUSE   | Tln2     | Talin-2 OS=Mus musculus: K.NLATSLEALR@.T                                   | 10.29  | 6.61   | 2.09  | 0.48 |
| Q71LX4_TLN2_MOUSE   | Tln2     | Talin-2 OS=Mus musculus: K.NVAQVAEDVTLQNR@.V                               | 6.54   | 2.02   | 3.25  | 0.31 |
| Q71LX4_TLN2_MOUSE   | Tln2     | Talin-2 OS=Mus musculus: R.VATNAAQNAIK#.K                                  | 8.08   | 1.63   | 4.96  | 0.20 |
| Q71LX4_TLN2_MOUSE   | Tln2     | Talin-2 OS=Mus musculus: R.VLAQATSDLVNIAM*#R@.S                            | 7.87   | 2.57   | 3.06  | 0.33 |
| Q9DBU0_TM9S1_MOUSE  | Tm9sf1   | Transmembrane 9 superfamily protein R.SLSLGEVLDGDR@.R                      | 8.34   | 3.84   | 2.17  | 0.46 |
| Q9ET30_TM9S3_MOUSE  | Tm9sf3   | Transmembrane 9 superfamily protein R.DAFVYAIK#.N                          | 22.99  | 8.79   | 2.62  | 0.38 |
| Q9ET30_TM9S3_MOUSE  | Tm9sf3   | Transmembrane 9 superfamily protein R.SISYHETLGEALQVELEFSLDIIK#.F          | 42.88  | 9.64   | 4.45  | 0.22 |
| Q8BH24_TM9S4_MOUSE  | Tm9sf4   | Transmembrane 9 superfamily protein R.FEVIQSIIR@.L                         | 11.91  | 3.34   | 3.57  | 0.28 |
| Q8BH24_TM9S4_MOUSE  | Tm9sf4   | Transmembrane 9 superfamily protein R.LGFTDVK#.I                           | 13.69  | 4.93   | 2.78  | 0.36 |
| Q9D2C7_B11_MOUSE    | Tmbim6   | Bax inhibitor 1 OS=Mus musculus: K.INFDALK#.F                              | 15.23  | 8.15   | 1.87  | 0.54 |
| Q9D2C7_B11_MOUSE    | Tmbim6   | Bax inhibitor 1 OS=Mus musculus: R.KHNFDAALK#.F                            | 10.92  | 3.94   | 2.77  | 0.36 |
| Q3V009_TMEDI_MOUSE  | Tmed1    | Transmembrane emp24 component family member 1 R.NLQEDNLER@.V               | 12.55  | 5.58   | 2.25  | 0.44 |
| Q3V009_TMEDI_MOUSE  | Tmed1    | Transmembrane emp24 component family member 1 R.SIQM*TLTLR@.A              | 7.71   | 2.62   | 2.94  | 0.34 |
| Q9D1D4_TMEDA_MOUSE  | Tmed10   | Transmembrane emp24 component family member 10 R.DLLVTGAYETDQSGGAGGLR@.T   | 19.07  | 4.93   | 3.87  | 0.26 |
| Q9D1D4_TMEDA_MOUSE  | Tmed10   | Transmembrane emp24 component family member 10 R.DLLVTGAYETDQSGGAGGLR.T    | 13.99  | 3.28   | 4.27  | 0.23 |
| Q9D1D4_TMEDA_MOUSE  | Tmed10   | Transmembrane emp24 component family member 10 R.EEIKDLVTGAYETDQSGGAGGLR.T | 8.49   | 2.38   | 3.57  | 0.28 |
| Q9D1D4_TMEDA_MOUSE  | Tmed10   | Transmembrane emp24 component family member 10 R.IPDQLVLDLDM*#K#.H         | 102.91 | 28.75  | 3.58  | 0.28 |
| Q9D1D4_TMEDA_MOUSE  | Tmed10   | Transmembrane emp24 component family member 10 R.LKPLEVE LR.R              | 319.13 | 98.15  | 3.25  | 0.31 |
| Q9D1D4_TMEDA_MOUSE  | Tmed10   | Transmembrane emp24 component family member 10 R.KNYEELIK#.V               | 63.25  | 19.20  | 3.29  | 0.30 |
| Q9D1D4_TMEDA_MOUSE  | Tmed10   | Transmembrane emp24 component family member 10 R.R@LEDLSESVNDFAYM*#K#.K    | 109.27 | 31.79  | 3.44  | 0.29 |
| Q9D1D4_TMEDA_MOUSE  | Tmed10   | Transmembrane emp24 component family member 10 R.R@LEDLSESVNDFAYM*#K#.K    | 5.32   | 2.50   | 2.13  | 0.47 |
| Q9D1D4_TMEDA_MOUSE  | Tmed10   | Transmembrane emp24 component family member 10 R.RLEDLSESVNDFAYM*#K#.K     | 28.80  | 9.33   | 3.19  | 0.31 |
| Q9R0Q3_TMED2_MOUSE  | Tmed2    | Transmembrane emp24 component family member 2 R.HEQEYM*EVR@.E              | 19.79  | 11.35  | 1.66  | 0.60 |
| Q9R0Q3_TMED2_MOUSE  | Tmed2    | Transmembrane emp24 component family member 2 R.IVM*FTIDIGEAPK#.G          | 63.62  | 21.73  | 2.93  | 0.34 |
| Q9R0Q3_TMED2_MOUSE  | Tmed2    | Transmembrane emp24 component family member 2 R.IVMFTIDIGEAPK#.G           | 17.78  | 8.22   | 2.16  | 0.46 |
| Q8R1V4_TMEDA_MOUSE  | Tmed4    | Transmembrane emp24 component family member 4 R.QLLDQVQEQI#K.E             | 12.56  | 2.74   | 4.58  | 0.22 |
| Q9CXE7_TMED5_MOUSE  | Tmed5    | Transmembrane emp24 component family member 5 R.LEDILESINSIK#.S            | 6.47   | 2.37   | 2.73  | 0.37 |
| D3YZZ5_D3YZZ5_MOUSE | Tmed7    | Protein Tmed7 OS=Mus musculus: K.QYDSTFATSR@.N                             | 14.12  | 2.58   | 5.48  | 0.18 |
| D3YZZ5_D3YZZ5_MOUSE | Tmed7    | Protein Tmed7 OS=Mus musculus: R.TYVDFQVGEDPPLFSPENR@.V                    | 5.82   | 2.25   | 2.59  | 0.39 |
| Q99KF1_TMED9_MOUSE  | Tmed9    | Transmembrane emp24 component family member 9 R.K.FSLFAGGM*LR@.V           | 7.74   | 3.09   | 2.51  | 0.40 |
| Q99KF1_TMED9_MOUSE  | Tmed9    | Transmembrane emp24 component family member 9 R.QLVEQVEQIQ#K.E             | 35.04  | 13.86  | 2.53  | 0.40 |
| Q99KF1_TMED9_MOUSE  | Tmed9    | Transmembrane emp24 component family member 9 R.DKHLSLQLR@.V               | 26.11  | 9.82   | 2.66  | 0.38 |
| Q99KF1_TMED9_MOUSE  | Tmed9    | Transmembrane emp24 component family member 9 R.K.FSLFAGGM*LR@.V           | 25.20  | 9.83   | 2.56  | 0.39 |
| Q99KF1_TMED9_MOUSE  | Tmed9    | Transmembrane emp24 component family member 9 R.FSLFAGGMLR@.V              | 5.07   | 2.79   | 1.82  | 0.55 |
| Q99KF1_TMED9_MOUSE  | Tmed9    | Transmembrane emp24 component family member 9 R.QLVEQVEQIQ#K.E             | 43.70  | 16.13  | 2.71  | 0.37 |
| Q99KF1_TMED9_MOUSE  | Tmed9    | Transmembrane emp24 component family member 9 R.QLVEQVEQIQ#K.E             | 6.15   | 1.69   | 3.63  | 0.28 |
| Q99KF1_TMED9_MOUSE  | Tmed9    | Transmembrane emp24 component family member 9 R.FSLFAGGM*LR@.V             | 11.92  | 4.39   | 2.72  | 0.37 |
| Q99KF1_TMED9_MOUSE  | Tmed9    | Transmembrane emp24 component family member 9 R.LSELQLR@.V                 | 13.51  | 4.42   | 3.06  | 0.33 |
| Q99KF1_TMED9_MOUSE  | Tmed9    | Transmembrane emp24 component family member 9 R.QLVEQVEQIQ#K.E             | 23.62  | 9.23   | 2.56  | 0.39 |
| Q99KF1_TMED9_MOUSE  | Tmed9    | Transmembrane emp24 component family member 9 R.QLVEQVEQIQ#K.E             | 23.16  | 10.87  | 2.13  | 0.47 |
| Q3UBX0_TM109_MOUSE  | Tmem109  | Transmembrane protein K.ETSADILITQIR@.S                                    | 52.40  | 27.24  | 1.92  | 0.52 |
| Q9CQN6_TM14C_MOUSE  | Tmem14c  | Transmembrane protein K.FM*PAGLIAGASLLM*#VAK#.V                            | 8.74   | 3.62   | 2.41  | 0.41 |
| Q9CQN6_TM14C_MOUSE  | Tmem14c  | Transmembrane protein K.FM*PAGLIAGASLLM*#VAK#.V                            | 6.90   | 3.30   | 2.09  | 0.48 |
| P52875_TM165_MOUSE  | Tmem165  | Transmembrane protein K.M*PDEGQEELEEQALK#.K                                | 16.70  | 9.50   | 1.76  | 0.57 |
| P52875_TM165_MOUSE  | Tmem165  | Transmembrane protein R.NOEPPAQQLQPPAAVQLEPAR@.A                           | 21.97  | 11.43  | 1.92  | 0.52 |
| P52875_TM165_MOUSE  | Tmem165  | Transmembrane protein R.SQLTTIVLAAR@.E                                     | 20.26  | 12.18  | 1.66  | 0.60 |
| Q9DCS1_T176A_MOUSE  | Tmem176a | Transmembrane protein R.IPASASTQSGSSR@.V                                   | 2.59   | 2.76   | 0.94  | 1.07 |
| Q91XE8_TM205_MOUSE  | Tmem205  | Transmembrane protein R.GLGTVEPFGNFGDPYR@.Q                                | 3.16   | 1.78   | 1.77  | 0.56 |
| Q9DAM7_TM263_MOUSE  | Tmem263  | Transmembrane protein R.VTGGIFSVTK#.G                                      | 8.76   | 5.61   | 1.56  | 0.64 |
| Q9CR67_TMM33_MOUSE  | Tmem33   | Transmembrane protein R.ALLANALTSALR@.L                                    | 38.05  | 19.25  | 1.98  | 0.51 |
| Q9CR67_TMM33_MOUSE  | Tmem33   | Transmembrane protein K.GSNLPLLR@.S                                        | 17.37  | 8.56   | 2.03  | 0.49 |
| Q9CR67_TMM33_MOUSE  | Tmem33   | Transmembrane protein K.LDTAM*WLSR@.L                                      | 7.30   | 5.76   | 1.27  | 0.79 |
| Q9CR67_TMM33_MOUSE  | Tmem33   | Transmembrane protein K.LSTNQNLK#.F                                        | 17.97  | 11.42  | 1.57  | 0.64 |
| Q9DBS1_TMM43_MOUSE  | Tmem43   | Transmembrane protein R.FFLSAGLIDK#.I                                      | 10.36  | 4.93   | 2.10  | 0.48 |
| Q9DBS1_TMM43_MOUSE  | Tmem43   | Transmembrane protein R.RGDFYFHSNPKYPEVGDVR.V                              | 13.47  | 9.50   | 1.42  | 0.71 |
| Q9DBS1_TMM43_MOUSE  | Tmem43   | Transmembrane protein K.TATSLAEGLSLVSPDSHVSAPENEGR@.L                      | 16.83  | 13.32  | 1.26  | 0.79 |

|                    |          |                          |                                          |        |        |         |      |
|--------------------|----------|--------------------------|------------------------------------------|--------|--------|---------|------|
| Q9DBS1_TMM43_MOUSE | Tmem43   | Transmembrane protein    | K.VTSEPPQGFLEER@.L                       | 18.84  | 14.74  | 1.28    | 0.78 |
| B9EKI3_TMF1_MOUSE  | Tmf1     | TATA element modulator   | R.HEISELQQR@.L                           | 7.47   | 4.91   | 1.52    | 0.66 |
| B9EKI3_TMF1_MOUSE  | Tmf1     | TATA element modulator   | R.LQVDM*DEEEK#.S                         | 5.69   | 2.75   | 2.07    | 0.48 |
| B9EKI3_TMF1_MOUSE  | Tmf1     | TATA element modulator   | R.TVDESENFSAFLSPSDAHTIQ#.S               | 5.82   | 6.12   | 0.95    | 1.05 |
| B9EKI3_TMF1_MOUSE  | Tmf1     | TATA element modulator   | K.IQM**SVESQNTLRL@.Q                     | 4.79   | 2.57   | 1.86    | 0.54 |
| B9EKI3_TMF1_MOUSE  | Tmf1     | TATA element modulator   | R.LQVDM*DEEEK#.S                         | 3.75   | 2.62   | 1.43    | 0.70 |
| B9EKI3_TMF1_MOUSE  | Tmf1     | TATA element modulator   | K.SSLQESSPQGSR@.V                        | 5.04   | 3.04   | 1.66    | 0.60 |
| Q9JH0_TMOD3_MOUSE  | Tmod3    | Tropomodulin-3           | OS=Mu: K.DLGDYK#DLDEDELLGK#.L            | 174.50 | 152.12 | 1.15    | 0.87 |
| Q9JH0_TMOD3_MOUSE  | Tmod3    | Tropomodulin-3           | OS=Mu: K.DLGDYK#DLDEDELLGK#.L            | 15.57  | 29.37  | 0.53    | 1.89 |
| Q9JH0_TMOD3_MOUSE  | Tmod3    | Tropomodulin-3           | OS=Mu: R.DNETLM*ELK#.I                   | 55.12  | 51.51  | 1.07    | 0.93 |
| Q9JH0_TMOD3_MOUSE  | Tmod3    | Tropomodulin-3           | OS=Mu: K.HFSLAATR.S                      | 328.30 | 233.97 | 1.40    | 0.71 |
| Q9JH0_TMOD3_MOUSE  | Tmod3    | Tropomodulin-3           | OS=Mu: K.LSESELK#.Q                      | 144.71 | 102.82 | 1.41    | 0.71 |
| Q9JH0_TMOD3_MOUSE  | Tmod3    | Tropomodulin-3           | OS=Mu: R.LVEVNLNKK#.N                    | 264.89 | 237.23 | 1.12    | 0.90 |
| Q9JH0_TMOD3_MOUSE  | Tmod3    | Tropomodulin-3           | OS=Mu: K.M*LEENTNLK#.F                   | 132.04 | 106.04 | 1.25    | 0.80 |
| Q9JH0_TMOD3_MOUSE  | Tmod3    | Tropomodulin-3           | OS=Mu: K.NNDLVR@.K                       | 173.25 | 126.68 | 1.37    | 0.73 |
| Q9JH0_TMOD3_MOUSE  | Tmod3    | Tropomodulin-3           | OS=Mu: K.QLETVLDLDPENALLPAGFR@.Q         | 63.60  | 52.46  | 1.21    | 0.82 |
| Q9JH0_TMOD3_MOUSE  | Tmod3    | Tropomodulin-3           | OS=Mu: R.QQLGTSVELEM*AK#.M               | 72.30  | 50.89  | 1.42    | 0.70 |
| Q9JH0_TMOD3_MOUSE  | Tmod3    | Tropomodulin-3           | OS=Mu: K.SATGPFDR@.E                     | 121.81 | 88.39  | 1.38    | 0.73 |
| Q9JH0_TMOD3_MOUSE  | Tmod3    | Tropomodulin-3           | OS=Mu: R.SNDPVAVAFADM*LK#.V              | 66.88  | 66.88  | 1.20    | 0.83 |
| Q9JH0_TMOD3_MOUSE  | Tmod3    | Tropomodulin-3           | OS=Mu: R.SNDPVAVAFADM*LK#.V              | 17.26  | 16.20  | 1.07    | 0.94 |
| Q9JH0_TMOD3_MOUSE  | Tmod3    | Tropomodulin-3           | OS=Mu: R.SNDPVAVAFADM.LK.V               | 40.67  | 33.46  | 1.22    | 0.82 |
| Q9JH0_TMOD3_MOUSE  | Tmod3    | Tropomodulin-3           | OS=Mu: K.DLGDYK#DLDEDELLGK#.L            | 163.78 | 130.72 | 1.25    | 0.80 |
| Q9JH0_TMOD3_MOUSE  | Tmod3    | Tropomodulin-3           | OS=Mu: K.DLGDYK#DLDEDELLGK#.L            | 17.07  | 18.21  | 0.94    | 1.07 |
| Q9JH0_TMOD3_MOUSE  | Tmod3    | Tropomodulin-3           | OS=Mu: K.DLGDYK#DLDEDELLGK#.L            | 23.46  | 18.88  | 1.24    | 0.80 |
| Q9JH0_TMOD3_MOUSE  | Tmod3    | Tropomodulin-3           | OS=Mu: K.DR@DDVYPYTGK#.K                 | 14.15  | 8.68   | 1.63    | 0.61 |
| Q9JH0_TMOD3_MOUSE  | Tmod3    | Tropomodulin-3           | OS=Mu: K.LLPVFEPPNPNVVEESLKR@.I          | 7.38   | 6.43   | 1.15    | 0.87 |
| Q9JH0_TMOD3_MOUSE  | Tmod3    | Tropomodulin-3           | OS=Mu: R.LLSYLEK#.Q                      | 122.23 | 85.54  | 1.43    | 0.70 |
| Q9JH0_TMOD3_MOUSE  | Tmod3    | Tropomodulin-3           | OS=Mu: K.LSESELK#.Q                      | 118.45 | 76.00  | 1.56    | 0.64 |
| Q9JH0_TMOD3_MOUSE  | Tmod3    | Tropomodulin-3           | OS=Mu: K.QLETVLDLDPENALLPAGFR@.Q         | 48.71  | 25.87  | 1.88    | 0.53 |
| Q61033_LAP2A_MOUSE | Tmpo     | Lamina-associated polyp  | R.AEEPVSQDSVFSSER@.E                     | 7.03   | 6.69   | 1.05    | 0.95 |
| Q61033_LAP2A_MOUSE | Tmpo     | Lamina-associated polyp  | R.AOPLR@AEEPVSQDSVFSSER@.E               | 18.57  | 16.97  | 1.09    | 0.91 |
| Q61033_LAP2A_MOUSE | Tmpo     | Lamina-associated polyp  | R.LEDKDDLDTVELSNEELLDQLVR.Y              | 23.16  | 12.64  | 1.83    | 0.55 |
| Q61033_LAP2A_MOUSE | Tmpo     | Lamina-associated polyp  | R.LSQSSYQDSSELSPPR@.K                    | 9.04   | 5.72   | 1.58    | 0.63 |
| Q61033_LAP2A_MOUSE | Tmpo     | Lamina-associated polyp  | K.LTVAPFK#.G                             | 14.02  | 9.44   | 1.49    | 0.67 |
| Q61033_LAP2A_MOUSE | Tmpo     | Lamina-associated polyp  | R.LVSAASPSLR.E                           | 47.52  | 22.09  | 2.15    | 0.46 |
| Q61033_LAP2A_MOUSE | Tmpo     | Lamina-associated polyp  | R.SQVISPPLAQAIR@.D                       | 19.16  | 13.48  | 1.42    | 0.70 |
| Q61033_LAP2A_MOUSE | Tmpo     | Lamina-associated polyp  | R.SSTPLTVSSAENR@.Q                       | 11.74  | 8.02   | 1.46    | 0.68 |
| Q61033_LAP2A_MOUSE | Tmpo     | Lamina-associated polyp  | K.SVVSLSLTLGVEVSKPPQHQDKIEAESPFLHESILK.V | 2.76   | 3.71   | 0.74    | 1.34 |
| Q61033_LAP2A_MOUSE | Tmpo     | Lamina-associated polyp  | R.SYEAASALQIAAHTAFVAK#.S                 | 20.83  | 12.06  | 1.73    | 0.58 |
| Q61033_LAP2A_MOUSE | Tmpo     | Lamina-associated polyp  | K.VDDEILGFSEATPR@.A                      | 17.59  | 18.67  | 0.94    | 1.06 |
| Q61033_LAP2A_MOUSE | Tmpo     | Lamina-associated polyp  | K.VDDEILGFSEATPR@.A                      | 18.19  | 13.82  | 1.32    | 0.76 |
| Q61033_LAP2A_MOUSE | Tmpo     | Lamina-associated polyp  | K.VVEEWEQQIDR@.Q                         | 19.07  | 13.14  | 1.45    | 0.69 |
| Q61033_LAP2A_MOUSE | Tmpo     | Lamina-associated polyp  | R.YPVSSIAAR@.I                           | 55.19  | 30.57  | 1.81    | 0.55 |
| Q61029_LAP2B_MOUSE | Tmpo     | Lamina-associated polyp  | K.ASSNESLIVANR@.L                        | 15.19  | 11.38  | 1.33    | 0.75 |
| Q61029_LAP2B_MOUSE | Tmpo     | Lamina-associated polyp  | K.GAAGR@PLELSDFR@.M                      | 24.70  | 20.41  | 1.21    | 0.83 |
| Q61029_LAP2B_MOUSE | Tmpo     | Lamina-associated polyp  | K.HASSLITFEFSQDTR.L                      | 9.88   | 10.00  | 0.99    | 1.01 |
| Q61029_LAP2B_MOUSE | Tmpo     | Lamina-associated polyp  | R.IDGAVISESTPIAETIK#.A                   | 18.78  | 18.16  | 1.03    | 0.97 |
| Q61033_LAP2A_MOUSE | Tmpo     | Lamina-associated polyp  | R.AEEPVSQDSVFSSER@.E                     | 7.48   | 4.61   | 1.62    | 0.62 |
| Q61033_LAP2A_MOUSE | Tmpo     | Lamina-associated polyp  | R.AOPLRAEPPVSQDSVFSSER.E                 | 24.63  | 13.90  | 1.77    | 0.56 |
| Q61033_LAP2A_MOUSE | Tmpo     | Lamina-associated polyp  | R.EVLQESER@.S                            | 21.88  | 10.61  | 2.06    | 0.49 |
| Q61033_LAP2A_MOUSE | Tmpo     | Lamina-associated polyp  | K.GPPDFSSDEER@EPTPVLGSGASVGR@.G          | 8.97   | 9.83   | 0.91    | 1.10 |
| Q61033_LAP2A_MOUSE | Tmpo     | Lamina-associated polyp  | R.LEDKDDLDTVELSNEELLDQLVR@.Y             | 35.23  | 10.39  | 3.39    | 0.30 |
| Q61033_LAP2A_MOUSE | Tmpo     | Lamina-associated polyp  | R.LSQSSYQDSSELSPPR@.K                    | 8.65   | 5.24   | 1.65    | 0.61 |
| Q61033_LAP2A_MOUSE | Tmpo     | Lamina-associated polyp  | R.LVSAASPSLR@.E                          | 46.34  | 21.07  | 2.20    | 0.45 |
| Q61033_LAP2A_MOUSE | Tmpo     | Lamina-associated polyp  | R.SLFIPSESYDR.C                          | 16.39  | 8.31   | 1.97    | 0.51 |
| Q61033_LAP2A_MOUSE | Tmpo     | Lamina-associated polyp  | R.SQVISPPLAQAIR@.D                       | 22.30  | 9.50   | 2.35    | 0.43 |
| Q61033_LAP2A_MOUSE | Tmpo     | Lamina-associated polyp  | R.SSTPLTVSSAENR@.Q                       | 19.03  | 9.57   | 1.99    | 0.50 |
| Q61033_LAP2A_MOUSE | Tmpo     | Lamina-associated polyp  | R.SYEAASALQIAAHTAFVAK#.S                 | 2.98   | 1.63   | 1.83    | 0.55 |
| Q61033_LAP2A_MOUSE | Tmpo     | Lamina-associated polyp  | K.VDDEILGFSEATPR@.A                      | 25.34  | 11.47  | 2.21    | 0.45 |
| Q61033_LAP2A_MOUSE | Tmpo     | Lamina-associated polyp  | K.VVEEWEQQIDR@.Q                         | 32.98  | 15.98  | 2.06    | 0.48 |
| Q61033_LAP2A_MOUSE | Tmpo     | Lamina-associated polyp  | R.YGVNPGVITVTR@.K                        | 28.06  | 14.21  | 1.98    | 0.51 |
| Q61033_LAP2A_MOUSE | Tmpo     | Lamina-associated polyp  | R.YPVSSIAAR@.I                           | 39.11  | 15.91  | 2.46    | 0.41 |
| Q8VBTO_TMX1_MOUSE  | Tmx1     | Thioredoxin-related tran | K.VDVTEQTGLSGR@.F                        | 15.21  | 6.98   | 2.18    | 0.46 |
| Q8VBTO_TMX1_MOUSE  | Tmx1     | Thioredoxin-related tran | K.VDVTEQTGLSGR@.F                        | 5.38   | 1.55   | 3.48    | 0.29 |
| Q8VBTO_TMX1_MOUSE  | Tmx1     | Thioredoxin-related tran | K.VDVTEQTGLSGR@.F                        | 13.15  | 3.33   | 3.95    | 0.25 |
| Q9WU08_TNIP1_MOUSE | Tnip1    | TNFAIP3-interacting prot | K.IFEEDFOR@.E                            | 7.21   | 1.57   | 4.58    | 0.22 |
| P58871_TB182_MOUSE | Tnks1bp1 | 182 kDa tankyrase-1-bin  | K.AGAVDWTQDLGLR@.N                       | 33.90  | 4.71   | 7.20    | 0.14 |
| P58871_TB182_MOUSE | Tnks1bp1 | 182 kDa tankyrase-1-bin  | R.APAIRPGTGLSETADSDTR.L                  | 43.05  | 10.14  | 4.25    | 0.24 |
| P58871_TB182_MOUSE | Tnks1bp1 | 182 kDa tankyrase-1-bin  | R.APLPSSR@PQPDGEASQVEEDGTWSLTGAAR@.Q     | 10.86  | 1.97   | 5.50    | 0.18 |
| P58871_TB182_MOUSE | Tnks1bp1 | 182 kDa tankyrase-1-bin  | R.ASVSTNQDTEENDQELGM*#.K.N               | 7.02   | 3.03   | 2.31    | 0.43 |
| P58871_TB182_MOUSE | Tnks1bp1 | 182 kDa tankyrase-1-bin  | R.ATAQQQDFGK#.S                          | 12.04  | 2.42   | 4.97    | 0.20 |
| P58871_TB182_MOUSE | Tnks1bp1 | 182 kDa tankyrase-1-bin  | R.AVGR@PAQLGAAGLEADAQQWFEFGK#.R          | 7.50   | 2.89   | 2.60    | 0.38 |
| P58871_TB182_MOUSE | Tnks1bp1 | 182 kDa tankyrase-1-bin  | R.AVGR@PAQLGAAGLEADAQQWFEFGK#.R@.E       | 16.92  | 3.85   | 4.39    | 0.23 |
| P58871_TB182_MOUSE | Tnks1bp1 | 182 kDa tankyrase-1-bin  | K.DEGSWQDGSQQEITR@.L                     | 11.93  | 2.78   | 4.30    | 0.23 |
| P58871_TB182_MOUSE | Tnks1bp1 | 182 kDa tankyrase-1-bin  | R.DSLGSFSTR@.D                           | 22.16  | 4.82   | 4.60    | 0.22 |
| P58871_TB182_MOUSE | Tnks1bp1 | 182 kDa tankyrase-1-bin  | R.DVGHLEAGSGLLSPPSPHRSR@.D               | 14.28  | 4.82   | 2.96    | 0.34 |
| P58871_TB182_MOUSE | Tnks1bp1 | 182 kDa tankyrase-1-bin  | R.ELGVGQVDWGDGLGLR@.N                    | 26.77  | 6.42   | 4.17    | 0.24 |
| P58871_TB182_MOUSE | Tnks1bp1 | 182 kDa tankyrase-1-bin  | K.ENYEDQEPLVGHESPLITLAR@.E               | 8.71   | 7.27   | 1.20    | 0.83 |
| P58871_TB182_MOUSE | Tnks1bp1 | 182 kDa tankyrase-1-bin  | R.ESGVGEPDWSGAEAGEFLK#.S                 | 18.89  | 7.09   | 2.66    | 0.38 |
| P58871_TB182_MOUSE | Tnks1bp1 | 182 kDa tankyrase-1-bin  | R.GYSSQDAEEDR@EFEK#.R@.D                 | 15.73  | 4.29   | 3.67    | 0.27 |
| P58871_TB182_MOUSE | Tnks1bp1 | 182 kDa tankyrase-1-bin  | R.HSLGQEVGIGDSEVVPVR@.E                  | 15.63  | 8.48   | 4.20    | 0.24 |
| P58871_TB182_MOUSE | Tnks1bp1 | 182 kDa tankyrase-1-bin  | R.LFDQSTPEPR@.A                          | 21.22  | 4.12   | 5.15    | 0.19 |
| P58871_TB182_MOUSE | Tnks1bp1 | 182 kDa tankyrase-1-bin  | R.LGTGESEPR@.S                           | 9.81   | 1.14   | 8.59    | 0.12 |
| P58871_TB182_MOUSE | Tnks1bp1 | 182 kDa tankyrase-1-bin  | R.M*QAESQSPNVDLEDK#.R@.E                 | 24.45  | 4.19   | 5.83    | 0.17 |
| P58871_TB182_MOUSE | Tnks1bp1 | 182 kDa tankyrase-1-bin  | R.SAEEGEVETSK#.S                         | 14.09  | 3.86   | 3.65    | 0.27 |
| P58871_TB182_MOUSE | Tnks1bp1 | 182 kDa tankyrase-1-bin  | K.SAWFQDYSYSGGSSR@.V                     | 14.34  | 3.58   | 4.00    | 0.25 |
| P58871_TB182_MOUSE | Tnks1bp1 | 182 kDa tankyrase-1-bin  | R.SPALLPTEVGGPPGAPLLQAK#.E               | 4.54   | 5.27   | 0.86    | 1.16 |
| P58871_TB182_MOUSE | Tnks1bp1 | 182 kDa tankyrase-1-bin  | R.SPPSGQSLEEGIM*ASSSK#.G                 | 5.72   | 2.25   | 2.54    | 0.39 |
| P58871_TB182_MOUSE | Tnks1bp1 | 182 kDa tankyrase-1-bin  | R.SPPSGQSLEEGIM*ASSSK#.G                 | 4.58   | 0.00   | #DIV/0! | 0.00 |
| P58871_TB182_MOUSE | Tnks1bp1 | 182 kDa tankyrase-1-bin  | R.SPVGDTGLGK#.R                          | 26.46  | 8.65   | 3.06    | 0.33 |
| P58871_TB182_MOUSE | Tnks1bp1 | 182 kDa tankyrase-1-bin  | K.SSGSEGSPPNWLQAL#.L                     | 11.15  | 2.45   | 4.54    | 0.22 |
| P58871_TB182_MOUSE | Tnks1bp1 | 182 kDa tankyrase-1-bin  | K.SSGSPLGLETEDPLEAR@.E                   | 28.08  | 8.66   | 3.24    | 0.31 |
| P58871_TB182_MOUSE | Tnks1bp1 | 182 kDa tankyrase-1-bin  | R.VGPDLELDPK#.S                          | 30.21  | 7.09   | 4.26    | 0.23 |
| P58871_TB182_MOUSE | Tnks1bp1 | 182 kDa tankyrase-1-bin  | R.VLLEEGLAAGAGQEPQEPSR@.A                | 25.31  | 5.84   | 4.33    | 0.23 |
| P58871_TB182_MOUSE | Tnks1bp1 | 182 kDa tankyrase-1-bin  | K.VNLFPGLSPAK#.A                         | 40.18  | 10.44  | 3.85    | 0.26 |
| P58871_TB182_MOUSE | Tnks1bp1 | 182 kDa tankyrase-1-bin  | R.WLDDLLASPPNPSGSR@.R                    | 9.47   | 3.83   | 2.47    | 0.40 |
| P58871_TB182_MOUSE | Tnks1bp1 | 182 kDa tankyrase-1-bin  | K.AGAVDWTQDLGLR@.N                       | 53.25  | 14.49  | 3.67    | 0.27 |
| P58871_TB182_MOUSE | Tnks1bp1 | 182 kDa tankyrase-1-bin  | R.APAIR@PGTGLSETADSDTR@.L                | 76.47  | 15.56  | 4.91    | 0.20 |
| P58871_TB182_MOUSE | Tnks1bp1 | 182 kDa tankyrase-1-bin  | R.APLPSSR@PQPDGEASQVEEDGTWSLTGAAR@.Q     | 13.40  | 4.30   | 3.12    | 0.32 |
| P58871_TB182_MOUSE | Tnks1bp1 | 182 kDa tankyrase-1-bin  | R.ASVSTNQDTEENDQELGM*#.K.N               | 19.07  | 6.67   | 2.86    | 0.35 |
| P58871_TB182_MOUSE | Tnks1bp1 | 182 kDa tankyrase-1-bin  | R.ATAQQQDFGK#.S                          | 55.71  | 16.09  | 3.46    | 0.29 |
| P58871_TB182_MOUSE | Tnks1bp1 | 182 kDa tankyrase-1-bin  | R.AVGR@PAQLGAAGLEADAQQWFEFGK#.R          | 11.27  | 3.22   | 3.50    | 0.29 |
| P58871_TB182_MOUSE | Tnks1bp1 | 182 kDa tankyrase-1-bin  | R.DASLQDWEFGK#.R                         | 9.44   | 3.56   | 2.65    | 0.38 |



|                    |          |                                                                   |        |        |       |      |
|--------------------|----------|-------------------------------------------------------------------|--------|--------|-------|------|
| Q64511_TOP2B_MOUSE | Top2b    | DNA topoisomerase 2-be K.EWLVMG*LGAESTK#.L                        | 6.16   | 2.43   | 2.54  | 0.39 |
| Q64511_TOP2B_MOUSE | Top2b    | DNA topoisomerase 2-be K.FDSNEEDTASVFAPFGLK#.Q                    | 2.23   | 1.55   | 1.44  | 0.70 |
| Q64511_TOP2B_MOUSE | Top2b    | DNA topoisomerase 2-be K.HGFLFEETIPVK#.A                          | 23.97  | 18.14  | 1.32  | 0.76 |
| Q64511_TOP2B_MOUSE | Top2b    | DNA topoisomerase 2-be R.HVDVVDQDVVSK#.L                          | 10.75  | 6.16   | 1.75  | 0.57 |
| Q64511_TOP2B_MOUSE | Top2b    | DNA topoisomerase 2-be K.KTFSFDQSDVDIIFPSDFTSEPPALPR.T            | 10.68  | 4.25   | 2.51  | 0.40 |
| Q64511_TOP2B_MOUSE | Top2b    | DNA topoisomerase 2-be K.LAQEAAGLHK#.V                            | 12.66  | 5.17   | 2.45  | 0.41 |
| Q64511_TOP2B_MOUSE | Top2b    | DNA topoisomerase 2-be R.LHGLPEQFLYGTATK#.H                       | 17.47  | 27.60  | 0.63  | 1.58 |
| Q64511_TOP2B_MOUSE | Top2b    | DNA topoisomerase 2-be R.LHFPADVDDNLLK#.F                         | 88.10  | 55.82  | 1.58  | 0.63 |
| Q64511_TOP2B_MOUSE | Top2b    | DNA topoisomerase 2-be K.LQLEETM*PSPYGR@.R                        | 7.90   | 3.05   | 2.59  | 0.39 |
| Q64511_TOP2B_MOUSE | Top2b    | DNA topoisomerase 2-be R.NTVEITLPRV@.T                            | 26.49  | 18.45  | 1.44  | 0.70 |
| Q64511_TOP2B_MOUSE | Top2b    | DNA topoisomerase 2-be K.SLAVSGLVGWR@.D                           | 39.01  | 22.46  | 1.74  | 0.58 |
| Q64511_TOP2B_MOUSE | Top2b    | DNA topoisomerase 2-be K.SQDFGNLFSFSPYQK#.S                       | 12.42  | 5.68   | 2.19  | 0.46 |
| Q64511_TOP2B_MOUSE | Top2b    | DNA topoisomerase 2-be K.SSLAGSDGALTVWNNATK#.K                    | 5.81   | 3.27   | 1.78  | 0.56 |
| Q64511_TOP2B_MOUSE | Top2b    | DNA topoisomerase 2-be R.YAGPEDDAITLAFSK#.K                       | 17.53  | 12.67  | 1.38  | 0.72 |
| Q64511_TOP2B_MOUSE | Top2b    | DNA topoisomerase 2-be R.YIFTM*LSSLAR.L                           | 11.99  | 6.77   | 1.77  | 0.56 |
| Q64511_TOP2B_MOUSE | Top2b    | DNA topoisomerase 2-be K.YTFDFSEEDDDAAADDSNDLEELK#VK#.A           | 4.71   | 2.40   | 1.96  | 0.51 |
| Q62QF0_TOPB1_MOUSE | Topbp1   | DNA topoisomerase 2-bii R.FNQLNEVDVTHVIGDYDDVDR@.Q                | 16.70  | 3.63   | 4.59  | 0.22 |
| Q62QF0_TOPB1_MOUSE | Topbp1   | DNA topoisomerase 2-bii K.GYLPEEYHTNYQPAGIAVSDQPGNQATVLDK#.S      | 3.35   | 1.63   | 2.05  | 0.49 |
| Q62QF0_TOPB1_MOUSE | Topbp1   | DNA topoisomerase 2-bii K.LFK#PFDVTDALAALETNPAASQK#.R             | 10.09  | 4.74   | 2.13  | 0.47 |
| Q62QF0_TOPB1_MOUSE | Topbp1   | DNA topoisomerase 2-bii R.NDQEPFLVK#.F                            | 11.66  | 3.09   | 3.77  | 0.27 |
| Q62QF0_TOPB1_MOUSE | Topbp1   | DNA topoisomerase 2-bii R.DLNVSVTHLAGEVGSK#.K                     | 12.13  | 3.03   | 4.00  | 0.25 |
| Q62QF0_TOPB1_MOUSE | Topbp1   | DNA topoisomerase 2-bii R.NDQEPFLVK#.F                            | 12.20  | 5.81   | 2.10  | 0.48 |
| Q9ER81_FG15_MOUSE  | Tor1aip2 | Torsin-1A-interacting prc R.VAGFNALQLLSR@.T                       | 8.95   | 5.98   | 1.50  | 0.67 |
| Q9ER38_TOR3A_MOUSE | Tor3a    | Torsin-3A OS-Mus muscu R.DAFLGODLPTYEETLDEIAK#.M                  | 4.75   | 2.40   | 1.98  | 0.51 |
| Q8BU11_TOX4_MOUSE  | Tox4     | TOX high mobility group K.DPNPEKHPVSAVALFR@.D                     | 20.60  | 4.03   | 5.11  | 0.20 |
| Q8BU11_TOX4_MOUSE  | Tox4     | TOX high mobility group R.DVFLAWASR@.N                            | 23.62  | 7.79   | 3.03  | 0.33 |
| Q8BU11_TOX4_MOUSE  | Tox4     | TOX high mobility group R.GLQVGGTSTATIQSPQQAQIVTR@.S              | 30.30  | 9.68   | 3.13  | 0.32 |
| Q8BU11_TOX4_MOUSE  | Tox4     | TOX high mobility group K.GQNPATFGEVSK#.I                         | 50.45  | 14.21  | 3.55  | 0.28 |
| Q8BU11_TOX4_MOUSE  | Tox4     | TOX high mobility group R.INLQQQPPPLQSK#.I                        | 23.64  | 7.61   | 3.11  | 0.32 |
| Q8BU11_TOX4_MOUSE  | Tox4     | TOX high mobility group K.IVASM*PDLGEEQK#.Q                       | 15.11  | 5.38   | 2.81  | 0.36 |
| Q8BU11_TOX4_MOUSE  | Tox4     | TOX high mobility group K.IVASMWDSLGEQK#.Q                        | 9.65   | 3.17   | 3.04  | 0.33 |
| Q8BU11_TOX4_MOUSE  | Tox4     | TOX high mobility group K.GQNPATFGEVSK#.I                         | 8.63   | 3.28   | 2.63  | 0.38 |
| Q8BU11_TOX4_MOUSE  | Tox4     | TOX high mobility group R.INLQQQPPPLQSK#.I                        | 9.28   | 1.55   | 6.00  | 0.17 |
| P02340_P53_MOUSE   | Tp53     | Cellular tumor antigen p R.DSFVEVR@.V                             | 155.90 | 85.04  | 1.83  | 0.55 |
| P02340_P53_MOUSE   | Tp53     | Cellular tumor antigen p R.ELNEALELK#.D                           | 108.91 | 58.84  | 1.85  | 0.54 |
| P02340_P53_MOUSE   | Tp53     | Cellular tumor antigen p R.ELNEALELK#DAHATEESGDSR@.A              | 66.97  | 36.47  | 1.84  | 0.54 |
| P02340_P53_MOUSE   | Tp53     | Cellular tumor antigen p R.HSVVVPYEPPEAGSEYTHYK#.Y                | 40.70  | 24.54  | 1.66  | 0.60 |
| P02340_P53_MOUSE   | Tp53     | Cellular tumor antigen p K.K#K#PLDGEYFLK#.I                       | 156.40 | 78.81  | 1.98  | 0.50 |
| P02340_P53_MOUSE   | Tp53     | Cellular tumor antigen p K.KPLDGEYFLK#.I                          | 105.74 | 61.88  | 1.71  | 0.59 |
| P02340_P53_MOUSE   | Tp53     | Cellular tumor antigen p R.R@PILTIITLDESSGNLLGR@.D                | 348.90 | 154.35 | 2.26  | 0.44 |
| P02340_P53_MOUSE   | Tp53     | Cellular tumor antigen p R.R@TEENFR@.K                            | 46.48  | 21.97  | 2.12  | 0.47 |
| P02340_P53_MOUSE   | Tp53     | Cellular tumor antigen p K.SQHM*TEVVR@.R                          | 20.15  | 14.27  | 1.41  | 0.71 |
| P02340_P53_MOUSE   | Tp53     | Cellular tumor antigen p R.TEENFR@.K                              | 52.38  | 27.20  | 1.93  | 0.52 |
| P02340_P53_MOUSE   | Tp53     | Cellular tumor antigen p K.TYQNGYFHLGFLQSGTAK#.S                  | 5.30   | 3.52   | 1.50  | 0.67 |
| P02340_P53_MOUSE   | Tp53     | Cellular tumor antigen p R.VEGNLYPELEDR@.Q                        | 210.77 | 114.89 | 1.83  | 0.55 |
| P02340_P53_MOUSE   | Tp53     | Cellular tumor antigen p R.VSGAPAAQDPVTETPGVPAPATPWPLSSVFPVSPQK.T | 35.78  | 20.09  | 1.78  | 0.56 |
| P02340_P53_MOUSE   | Tp53     | Cellular tumor antigen p R.DSFVEVR@.V                             | 135.82 | 56.32  | 2.41  | 0.41 |
| P02340_P53_MOUSE   | Tp53     | Cellular tumor antigen p R.ELNEALELK#.D                           | 167.10 | 70.51  | 2.37  | 0.42 |
| P02340_P53_MOUSE   | Tp53     | Cellular tumor antigen p R.ELNEALELK#DAHATEESGDSR@.A              | 47.18  | 22.77  | 2.07  | 0.48 |
| P02340_P53_MOUSE   | Tp53     | Cellular tumor antigen p R.HSVVVPYEPPEAGSEYTHYK#.Y                | 42.45  | 27.47  | 1.91  | 0.52 |
| P02340_P53_MOUSE   | Tp53     | Cellular tumor antigen p K.KKPLDGEYFLK#.I                         | 229.39 | 99.66  | 2.30  | 0.43 |
| P02340_P53_MOUSE   | Tp53     | Cellular tumor antigen p K.K#K#PLDGEYFLK#.I                       | 121.63 | 58.86  | 2.07  | 0.48 |
| P02340_P53_MOUSE   | Tp53     | Cellular tumor antigen p R.RPILTIITLDESSGNLLGR.D                  | 536.36 | 212.80 | 2.52  | 0.40 |
| P02340_P53_MOUSE   | Tp53     | Cellular tumor antigen p R.R@TEENFR@.K                            | 67.37  | 29.64  | 2.27  | 0.44 |
| P02340_P53_MOUSE   | Tp53     | Cellular tumor antigen p K.SQHM*TEVVR@.R                          | 24.25  | 9.60   | 2.53  | 0.40 |
| P02340_P53_MOUSE   | Tp53     | Cellular tumor antigen p K.TYQNGYFHLGFLQSGTAK#.S                  | 3.51   | 1.92   | 1.83  | 0.55 |
| P02340_P53_MOUSE   | Tp53     | Cellular tumor antigen p R.VEGNLYPELEDR@.Q                        | 317.11 | 129.36 | 2.45  | 0.41 |
| P02340_P53_MOUSE   | Tp53     | Cellular tumor antigen p R.VSGAPAAQDPVTETPGVPAPATPWPLSSVFPVSPQK#T | 35.88  | 22.16  | 1.62  | 0.62 |
| P02340_P53_MOUSE   | Tp53     | Cellular tumor antigen p K.DAHATEESGDSR@.A                        | 3.09   | 2.54   | 1.22  | 0.82 |
| P02340_P53_MOUSE   | Tp53     | Cellular tumor antigen p R.DSFVEVR@.V                             | 374.50 | 155.32 | 2.41  | 0.41 |
| P02340_P53_MOUSE   | Tp53     | Cellular tumor antigen p R.ELNEALELK#.D                           | 306.07 | 138.82 | 2.20  | 0.45 |
| P02340_P53_MOUSE   | Tp53     | Cellular tumor antigen p R.ELNEALELK#DAHATEESGDSR@.A              | 73.53  | 28.37  | 2.59  | 0.39 |
| P02340_P53_MOUSE   | Tp53     | Cellular tumor antigen p R.FEMFR.E                                | 25.33  | 12.07  | 2.10  | 0.48 |
| P02340_P53_MOUSE   | Tp53     | Cellular tumor antigen p R.HSVVVPYEPPEAGSEYTHYK#.Y                | 108.00 | 47.48  | 2.27  | 0.44 |
| P02340_P53_MOUSE   | Tp53     | Cellular tumor antigen p K.K#K#PLDGEYFLK#.I                       | 317.41 | 146.26 | 2.17  | 0.46 |
| P02340_P53_MOUSE   | Tp53     | Cellular tumor antigen p K.KPLDGEYFLK#.I                          | 210.30 | 97.01  | 2.17  | 0.46 |
| P02340_P53_MOUSE   | Tp53     | Cellular tumor antigen p R.R@PILTIITLDESSGNLLGR@.D                | 710.36 | 296.28 | 2.40  | 0.42 |
| P02340_P53_MOUSE   | Tp53     | Cellular tumor antigen p R.R@PILTIITLDESSGNLLGR@.D                | 24.59  | 8.90   | 2.76  | 0.36 |
| P02340_P53_MOUSE   | Tp53     | Cellular tumor antigen p R.R@TEENFR@.K                            | 120.46 | 53.35  | 2.26  | 0.44 |
| P02340_P53_MOUSE   | Tp53     | Cellular tumor antigen p K.SQHM*TEVVR@.R                          | 48.55  | 21.26  | 2.28  | 0.44 |
| P02340_P53_MOUSE   | Tp53     | Cellular tumor antigen p R.TEENFR.K                               | 147.68 | 58.80  | 2.51  | 0.40 |
| P02340_P53_MOUSE   | Tp53     | Cellular tumor antigen p R.VEGNLYPELEDR@.Q                        | 561.87 | 241.48 | 2.33  | 0.43 |
| P02340_P53_MOUSE   | Tp53     | Cellular tumor antigen p R.VSGAPAAQDPVTETPGVPAPATPWPLSSVFPVSPQK#T | 60.97  | 28.59  | 2.13  | 0.47 |
| P70399_TP53B_MOUSE | Tp53bp1  | Tumor suppressor p53-bi K.ASGTAAADPFPSSR@.G                       | 12.63  | 2.93   | 4.30  | 0.23 |
| P70399_TP53B_MOUSE | Tp53bp1  | Tumor suppressor p53-bi R.LR@EQYGLGYPYAVTPLTK#.A                  | 7.47   | 3.31   | 2.26  | 0.44 |
| P70399_TP53B_MOUSE | Tp53bp1  | Tumor suppressor p53-bi R.M*AVLSLEQGNR@.L                         | 9.03   | 50.46  | 0.18  | 5.59 |
| P70399_TP53B_MOUSE | Tp53bp1  | Tumor suppressor p53-bi R.VITDYYVDGTEVER@.K                       | 12.07  | 4.00   | 3.01  | 0.33 |
| P70399_TP53B_MOUSE | Tp53bp1  | Tumor suppressor p53-bi K.AADISLNDLVEGK#.R                        | 27.73  | 6.89   | 4.02  | 0.25 |
| P70399_TP53B_MOUSE | Tp53bp1  | Tumor suppressor p53-bi R.ANLHFPSAQEEDK#HER@PDVTPK#.L             | 24.87  | 5.05   | 4.93  | 0.20 |
| P70399_TP53B_MOUSE | Tp53bp1  | Tumor suppressor p53-bi K.ASDPVESSHGLTSGISQVIER@.L                | 10.52  | 1.91   | 5.51  | 0.18 |
| P70399_TP53B_MOUSE | Tp53bp1  | Tumor suppressor p53-bi K.ASGTEAADPFPSSR@.G                       | 39.97  | 9.29   | 4.30  | 0.23 |
| P70399_TP53B_MOUSE | Tp53bp1  | Tumor suppressor p53-bi R.ASQEPFPAEDVM*ETDLEGLAANQDRPSK#.M        | 15.24  | 4.97   | 3.07  | 0.33 |
| P70399_TP53B_MOUSE | Tp53bp1  | Tumor suppressor p53-bi R.DEPVR@PDQEQTPQVQEK#.E                   | 48.61  | 8.20   | 5.93  | 0.17 |
| P70399_TP53B_MOUSE | Tp53bp1  | Tumor suppressor p53-bi K.EAQSEAPSPADR@.A                         | 12.80  | 3.91   | 3.27  | 0.31 |
| P70399_TP53B_MOUSE | Tp53bp1  | Tumor suppressor p53-bi R.ELLEEGPQVPSSEVSTQEDLFDQSSK#.T           | 4.79   | 1.92   | 2.50  | 0.40 |
| P70399_TP53B_MOUSE | Tp53bp1  | Tumor suppressor p53-bi R.ENFPQNLK#.V                             | 25.88  | 3.66   | 7.08  | 0.14 |
| P70399_TP53B_MOUSE | Tp53bp1  | Tumor suppressor p53-bi R.EQYGLGYPYAVTPLTK#.A                     | 8.22   | 2.73   | 3.01  | 0.33 |
| P70399_TP53B_MOUSE | Tp53bp1  | Tumor suppressor p53-bi K.ESGELYYSIEK#.E                          | 37.06  | 7.66   | 4.84  | 0.21 |
| P70399_TP53B_MOUSE | Tp53bp1  | Tumor suppressor p53-bi K.ESPVTDAEVAADK#.Q                        | 5.68   | 2.33   | 2.44  | 0.41 |
| P70399_TP53B_MOUSE | Tp53bp1  | Tumor suppressor p53-bi R.ETVVSGLPQVEDISPSM*SPDDK#.S              | 6.48   | 1.76   | 3.67  | 0.27 |
| P70399_TP53B_MOUSE | Tp53bp1  | Tumor suppressor p53-bi R.ETVVSGLPQVEDISPSM*SPDDK#HSFTR@.I        | 9.69   | 1.91   | 5.07  | 0.20 |
| P70399_TP53B_MOUSE | Tp53bp1  | Tumor suppressor p53-bi K.GIHWHAEQNLPLVR@.S                       | 23.26  | 6.03   | 3.86  | 0.26 |
| P70399_TP53B_MOUSE | Tp53bp1  | Tumor suppressor p53-bi R.ILDWQPR@.E                              | 17.12  | 5.17   | 3.31  | 0.30 |
| P70399_TP53B_MOUSE | Tp53bp1  | Tumor suppressor p53-bi R.K#LPTSEER@.S                            | 10.22  | 2.99   | 3.42  | 0.29 |
| P70399_TP53B_MOUSE | Tp53bp1  | Tumor suppressor p53-bi K.LLDGPTSGSSEEEFLEIPFNK#.Q                | 14.67  | 4.38   | 3.35  | 0.30 |
| P70399_TP53B_MOUSE | Tp53bp1  | Tumor suppressor p53-bi K.LM*LTSEYSSQSSK#.M                       | 11.39  | 2.63   | 4.33  | 0.23 |
| P70399_TP53B_MOUSE | Tp53bp1  | Tumor suppressor p53-bi R.LR@EQYGLGYPYAVTPLTK#.A                  | 27.81  | 7.66   | 3.63  | 0.28 |
| P70399_TP53B_MOUSE | Tp53bp1  | Tumor suppressor p53-bi R.M*AVLSLEQGNR@.L                         | 23.01  | 5.68   | 4.05  | 0.25 |
| P70399_TP53B_MOUSE | Tp53bp1  | Tumor suppressor p53-bi K.QDATVQTER@.G                            | 16.38  | 1.54   | 10.66 | 0.09 |
| P70399_TP53B_MOUSE | Tp53bp1  | Tumor suppressor p53-bi R.QSEQV#K#PVG#PVM*DDAAEPSASPVQQR@.A       | 9.20   | 2.96   | 3.10  | 0.32 |
| P70399_TP53B_MOUSE | Tp53bp1  | Tumor suppressor p53-bi R.SEALSVLDQEAM*DTK#.E                     | 11.87  | 2.20   | 5.39  | 0.19 |
| P70399_TP53B_MOUSE | Tp53bp1  | Tumor suppressor p53-bi R.SEDR@PSPQV#VAAVETK#.E                   | 5.61   | 2.88   | 1.94  | 0.51 |
| P70399_TP53B_MOUSE | Tp53bp1  | Tumor suppressor p53-bi R.SNISPVP#T#AASSSTPTR@.K                  | 14.51  | 2.30   | 6.30  | 0.16 |

|                     |          |                                                          |        |        |      |      |
|---------------------|----------|----------------------------------------------------------|--------|--------|------|------|
| P70399_TP53B_MOUSE  | Tp53bp1  | Tumor suppressor p53-b1 R.TEEDR@ENTQIDDTPLSPVSNK#.L      | 9.75   | 1.89   | 5.15 | 0.19 |
| P70399_TP53B_MOUSE  | Tp53bp1  | Tumor suppressor p53-b1 R.VITDYYYYDGTVEER@.K             | 47.25  | 10.10  | 4.68 | 0.21 |
| Q62393_TP052_MOUSE  | Tpd52    | Tumor protein D52 OS=A R.ELTKVEEIQTSQVLA.AK.E            | 11.23  | 8.33   | 1.35 | 0.74 |
| Q9CY22_TP054_MOUSE  | Tpd52I2  | Tumor protein D54 OS=A R.GVLSDFM*TDVPDPGVVHR@.T          | 15.62  | 5.20   | 3.00 | 0.33 |
| Q9CY22_TP054_MOUSE  | Tpd52I2  | Tumor protein D54 OS=A R.TP.VVEGLETEGEEELR@AELAK#.V      | 13.60  | 6.24   | 2.18 | 0.46 |
| Q9CY22_TP054_MOUSE  | Tpd52I2  | Tumor protein D54 OS=A R.TSAAALSTM*GSAISR@.K             | 35.16  | 11.66  | 3.02 | 0.33 |
| Q9CY22_TP054_MOUSE  | Tpd52I2  | Tumor protein D54 OS=A R.TSAAALSTM*GSAISR@.K             | 4.00   | 4.30   | 0.93 | 1.08 |
| P17751_TPI5_MOUSE   | Tpi1     | Triosephosphate isomere: K.VVLAYPEVVAIGTGK#.T            | 13.33  | 20.61  | 0.65 | 1.55 |
| P58771_TPM1_MOUSE   | Tpm1     | Tropomyosin alpha-1 ch: R.AEFAER@.S                      | 133.17 | 74.57  | 1.79 | 0.56 |
| P58771_TPM1_MOUSE   | Tpm1     | Tropomyosin alpha-1 ch: K.ATDAEADVASLNR@.R               | 49.31  | 27.00  | 1.83 | 0.55 |
| P58771_TPM1_MOUSE   | Tpm1     | Tropomyosin alpha-1 ch: K.GTEDELKYSALKDAQEK.L            | 14.60  | 11.53  | 1.27 | 0.79 |
| P58771_TPM1_MOUSE   | Tpm1     | Tropomyosin alpha-1 ch: K.HIAEDADR@.K                    | 44.68  | 21.87  | 2.04 | 0.49 |
| P58771_TPM1_MOUSE   | Tpm1     | Tropomyosin alpha-1 ch: R.IQLVEEELDR@.A                  | 239.48 | 144.88 | 1.65 | 0.60 |
| P58771_TPM1_MOUSE   | Tpm1     | Tropomyosin alpha-1 ch: K.KATDAEADVASLNR.R               | 28.42  | 20.22  | 1.41 | 0.71 |
| P58771_TPM1_MOUSE   | Tpm1     | Tropomyosin alpha-1 ch: R.KLVIIESDLER.A                  | 70.14  | 25.76  | 2.72 | 0.37 |
| P58771_TPM1_MOUSE   | Tpm1     | Tropomyosin alpha-1 ch: R.K.KLVIIESDLER@AEER@.A          | 136.99 | 81.92  | 1.67 | 0.60 |
| P58771_TPM1_MOUSE   | Tpm1     | Tropomyosin alpha-1 ch: R.K.YEEVAR@.K                    | 94.61  | 67.60  | 1.40 | 0.71 |
| P58771_TPM1_MOUSE   | Tpm1     | Tropomyosin alpha-1 ch: R.LATALQK#.L                     | 337.54 | 240.23 | 1.41 | 0.71 |
| P58771_TPM1_MOUSE   | Tpm1     | Tropomyosin alpha-1 ch: K.LEEAEKHADESER@.G               | 133.26 | 91.27  | 1.46 | 0.68 |
| P58771_TPM1_MOUSE   | Tpm1     | Tropomyosin alpha-1 ch: K.LVIIIESDLER@.A                 | 83.88  | 48.51  | 1.73 | 0.58 |
| P58771_TPM1_MOUSE   | Tpm1     | Tropomyosin alpha-1 ch: R.R@IQLVEEELDR@.A                | 25.59  | 16.21  | 1.58 | 0.63 |
| P58771_TPM1_MOUSE   | Tpm1     | Tropomyosin alpha-1 ch: R.RIQLVEEELDR@.L                 | 114.23 | 59.27  | 1.93 | 0.52 |
| P58771_TPM1_MOUSE   | Tpm1     | Tropomyosin alpha-1 ch: K.SIDDELELYAQK#.L                | 16.11  | 6.89   | 2.34 | 0.43 |
| P58771_TPM1_MOUSE   | Tpm1     | Tropomyosin alpha-1 ch: R.SK#QLEDELVSQK#.K               | 82.78  | 38.91  | 2.13 | 0.47 |
| P58771_TPM1_MOUSE   | Tpm1     | Tropomyosin alpha-1 ch: R.SK#QLEDELVSQK#.K#.L            | 17.65  | 9.08   | 1.94 | 0.51 |
| P58771_TPM1_MOUSE   | Tpm1     | Tropomyosin alpha-1 ch: K.SLEAQAEK#.Y                    | 50.76  | 29.86  | 1.70 | 0.59 |
| P58771_TPM1_MOUSE   | Tpm1     | Tropomyosin alpha-1 ch: K.YSQ#EDK#YEEIK#.V               | 226.85 | 124.78 | 1.82 | 0.55 |
| G5E8R1_G5E8R1_MOUSE | Tpm1     | Tropomyosin 1, alpha, is K.EENLSM*HQM*LDQTLLENM*.-       | 4.42   | 4.42   | 1.00 | 1.00 |
| G5E8R1_G5E8R1_MOUSE | Tpm1     | Tropomyosin 1, alpha, is R.ETAADVASLNR@.R                | 58.71  | 43.24  | 1.36 | 0.74 |
| G5E8R1_G5E8R1_MOUSE | Tpm1     | Tropomyosin 1, alpha, is K.SIDDELEK#.L                   | 203.66 | 132.84 | 1.53 | 0.65 |
| G5E8R1_G5E8R1_MOUSE | Tpm1     | Tropomyosin 1, alpha, is R.SLQEQADAAEER@.A               | 171.43 | 107.91 | 1.59 | 0.63 |
| E9Q450_E9Q450_MOUSE | Tpm1     | Tropomyosin alpha-1 ch: R.AELSEGQVR@.Q                   | 56.61  | 44.68  | 1.27 | 0.79 |
| P58771_TPM1_MOUSE   | Tpm1     | Tropomyosin alpha-1 ch: R.IQLVEEELDR@.A                  | 17.27  | 13.82  | 1.25 | 0.80 |
| P58771_TPM1_MOUSE   | Tpm1     | Tropomyosin alpha-1 ch: R.LATALQK#.L                     | 34.52  | 15.68  | 2.20 | 0.45 |
| A2AIM4_A2AIM4_MOUSE | Tpm2     | Tropomyosin beta chain R.K#LVILEGELER@.S                 | 24.92  | 15.04  | 1.66 | 0.60 |
| A2AIM4_A2AIM4_MOUSE | Tpm2     | Tropomyosin beta chain K.QLVEEQALQK#.K                   | 13.16  | 9.97   | 1.32 | 0.76 |
| A2AIM4_A2AIM4_MOUSE | Tpm2     | Tropomyosin beta chain K.SLIASEEYTK#.E                   | 3.93   | 5.22   | 0.75 | 1.33 |
| E9Q7Q3_E9Q7Q3_MOUSE | Tpm3     | Tropomyosin alpha-3 ch: R.AREQAEEVASLNR.R                | 31.82  | 16.21  | 1.96 | 0.51 |
| E9Q7Q3_E9Q7Q3_MOUSE | Tpm3     | Tropomyosin alpha-3 ch: R.AREQAEEVASLNR.L                | 45.49  | 16.96  | 2.68 | 0.37 |
| E9Q7Q3_E9Q7Q3_MOUSE | Tpm3     | Tropomyosin alpha-3 ch: K.TIDDELELYAQK#.L                | 6.13   | 3.03   | 2.02 | 0.49 |
| D3Z2H9_D3Z2H9_MOUSE | Tpm3-rs7 | Uncharacterized protein R.AELAESR@.K                     | 44.94  | 29.30  | 1.53 | 0.65 |
| D3Z2H9_D3Z2H9_MOUSE | Tpm3-rs7 | Uncharacterized protein R.ALKDEEK#ELQELQK.E              | 39.43  | 29.55  | 1.33 | 0.75 |
| D3Z2H9_D3Z2H9_MOUSE | Tpm3-rs7 | Uncharacterized protein R.ALK#DEEK#MELQELQK#.E           | 18.87  | 13.47  | 1.40 | 0.71 |
| D3Z2H9_D3Z2H9_MOUSE | Tpm3-rs7 | Uncharacterized protein K.IQVLQEQADDAEER@.A              | 89.39  | 70.87  | 1.26 | 0.79 |
| D3Z2H9_D3Z2H9_MOUSE | Tpm3-rs7 | Uncharacterized protein K.IQVLQEQADDAEER@AER@.L          | 35.14  | 19.09  | 1.84 | 0.54 |
| D3Z2H9_D3Z2H9_MOUSE | Tpm3-rs7 | Uncharacterized protein R.K#IQLVQEQADDAEER@.A            | 136.87 | 98.34  | 1.39 | 0.72 |
| D3Z2H9_D3Z2H9_MOUSE | Tpm3-rs7 | Uncharacterized protein R.K#IQLVQEQADDAEER@AER@.L        | 35.88  | 22.90  | 1.57 | 0.64 |
| D3Z2H9_D3Z2H9_MOUSE | Tpm3-rs7 | Uncharacterized protein R.K#LVILEGELER@.T                | 125.60 | 96.30  | 1.30 | 0.77 |
| D3Z2H9_D3Z2H9_MOUSE | Tpm3-rs7 | Uncharacterized protein R.K#LVILEGELER@TEER@.A           | 59.06  | 28.80  | 2.05 | 0.49 |
| D3Z2H9_D3Z2H9_MOUSE | Tpm3-rs7 | Uncharacterized protein K.LVIIIESDLER@.T                 | 58.02  | 36.16  | 1.60 | 0.62 |
| D3Z2H9_D3Z2H9_MOUSE | Tpm3-rs7 | Uncharacterized protein R.M*LDQTLLENM*.-                 | 108.91 | 108.91 | 1.00 | 1.00 |
| D3Z2H9_D3Z2H9_MOUSE | Tpm3-rs7 | Uncharacterized protein R.MLDQTLLENM*.-                  | 9.15   | 9.15   | 1.00 | 1.00 |
| D3Z2H9_D3Z2H9_MOUSE | Tpm3-rs7 | Uncharacterized protein R.MLDQTLLENM*.-                  | 6.69   | 6.69   | 1.00 | 1.00 |
| D3Z2H9_D3Z2H9_MOUSE | Tpm3-rs7 | Uncharacterized protein K.TIDDELEK#.K                    | 30.87  | 28.43  | 1.09 | 0.92 |
| Q6IRU2_TPM4_MOUSE   | Tpm4     | Tropomyosin alpha-4 ch: K.AEGDAAALNR@.R                  | 11.46  | 10.40  | 1.10 | 0.91 |
| Q6IRU2_TPM4_MOUSE   | Tpm4     | Tropomyosin alpha-4 ch: K.HITDEADR@.K                    | 12.19  | 10.03  | 1.22 | 0.82 |
| Q6IRU2_TPM4_MOUSE   | Tpm4     | Tropomyosin alpha-4 ch: K.HITDEADR@K#YEEVAR@.K           | 27.62  | 22.20  | 1.24 | 0.80 |
| Q6IRU2_TPM4_MOUSE   | Tpm4     | Tropomyosin alpha-4 ch: K.IQALQEQADDAEER@.A              | 26.07  | 13.94  | 1.87 | 0.53 |
| Q6IRU2_TPM4_MOUSE   | Tpm4     | Tropomyosin alpha-4 ch: K.IQALQEQADDAEER@AQGLQR@.E       | 23.74  | 16.66  | 1.43 | 0.70 |
| Q6IRU2_TPM4_MOUSE   | Tpm4     | Tropomyosin alpha-4 ch: R.IQLVEEELDR@.A                  | 24.10  | 19.47  | 1.24 | 0.81 |
| Q6IRU2_TPM4_MOUSE   | Tpm4     | Tropomyosin alpha-4 ch: R.K#IQLVQEQADDAEER@.A            | 28.46  | 18.96  | 1.50 | 0.67 |
| Q6IRU2_TPM4_MOUSE   | Tpm4     | Tropomyosin alpha-4 ch: R.KIQLVQEQADDAEER@AQGLQR.E       | 10.73  | 5.65   | 1.90 | 0.53 |
| Q6IRU2_TPM4_MOUSE   | Tpm4     | Tropomyosin alpha-4 ch: R.K#LVILEGELER@.A                | 18.97  | 13.87  | 1.37 | 0.73 |
| Q6IRU2_TPM4_MOUSE   | Tpm4     | Tropomyosin alpha-4 ch: R.K#LVILEGELER@.A                | 21.21  | 21.96  | 0.97 | 1.04 |
| Q6IRU2_TPM4_MOUSE   | Tpm4     | Tropomyosin alpha-4 ch: K.LVIIIESDLER@.L                 | 16.39  | 11.76  | 1.39 | 0.72 |
| Q6IRU2_TPM4_MOUSE   | Tpm4     | Tropomyosin alpha-4 ch: K.TIDDELEK#.L                    | 49.37  | 39.48  | 1.25 | 0.80 |
| Q6IRU2_TPM4_MOUSE   | Tpm4     | Tropomyosin alpha-4 ch: K.YSEK#EDK#YEEIK#.L              | 5.01   | 4.41   | 1.14 | 0.88 |
| Q6IRU2_TPM4_MOUSE   | Tpm4     | Tropomyosin alpha-4 ch: K.YSEK#EDK#YEEIK#.L              | 61.54  | 46.58  | 1.32 | 0.76 |
| F6ZDS4_TPR_MOUSE    | Tpr      | Nucleoprotein TPR OS=N R.ELQEQADDAEER@.E                 | 6.14   | 11.95  | 0.51 | 1.95 |
| F6ZDS4_TPR_MOUSE    | Tpr      | Nucleoprotein TPR OS=N R.K#LELDILPLQEQANALSEK#.S         | 7.64   | 2.47   | 3.10 | 0.32 |
| F6ZDS4_TPR_MOUSE    | Tpr      | Nucleoprotein TPR OS=N R.ASTALSNEQQAER@.R                | 65.17  | 21.91  | 2.97 | 0.34 |
| F6ZDS4_TPR_MOUSE    | Tpr      | Nucleoprotein TPR OS=N R.K.DAVQAPLNVLSNEEGK#.S           | 18.70  | 7.61   | 2.46 | 0.41 |
| F6ZDS4_TPR_MOUSE    | Tpr      | Nucleoprotein TPR OS=N R.EITSLQER.N                      | 36.75  | 12.76  | 2.88 | 0.35 |
| F6ZDS4_TPR_MOUSE    | Tpr      | Nucleoprotein TPR OS=N R.ELQEQADDAEER@.E                 | 41.24  | 11.48  | 3.59 | 0.28 |
| F6ZDS4_TPR_MOUSE    | Tpr      | Nucleoprotein TPR OS=N R.FEVAQVESLR@.Y                   | 50.32  | 15.69  | 3.21 | 0.31 |
| F6ZDS4_TPR_MOUSE    | Tpr      | Nucleoprotein TPR OS=N R.FHNELNAHIK#.L                   | 17.12  | 6.39   | 2.68 | 0.37 |
| F6ZDS4_TPR_MOUSE    | Tpr      | Nucleoprotein TPR OS=N R.K.FK#VESEQYFIEIK#.R             | 13.52  | 6.65   | 2.03 | 0.49 |
| F6ZDS4_TPR_MOUSE    | Tpr      | Nucleoprotein TPR OS=N R.K.FK#VESEQYFIEIK#.R@.L          | 7.16   | 4.93   | 1.45 | 0.69 |
| F6ZDS4_TPR_MOUSE    | Tpr      | Nucleoprotein TPR OS=N R.GIASTDPPTANIK#TPVSTPSK#.V       | 20.92  | 9.74   | 2.15 | 0.47 |
| F6ZDS4_TPR_MOUSE    | Tpr      | Nucleoprotein TPR OS=N R.GN#VIR@DEEVASDISSEVISQHLVSYR@.N | 16.94  | 4.66   | 3.64 | 0.28 |
| F6ZDS4_TPR_MOUSE    | Tpr      | Nucleoprotein TPR OS=N R.K.HVEDLLTK#.L                   | 25.13  | 9.78   | 2.57 | 0.39 |
| F6ZDS4_TPR_MOUSE    | Tpr      | Nucleoprotein TPR OS=N R.K.IAELQK#.L                     | 14.33  | 11.75  | 1.22 | 0.82 |
| F6ZDS4_TPR_MOUSE    | Tpr      | Nucleoprotein TPR OS=N R.K#LELDILPLQEQANALSEK#.S         | 97.48  | 36.23  | 2.69 | 0.37 |
| F6ZDS4_TPR_MOUSE    | Tpr      | Nucleoprotein TPR OS=N R.K#LENEVEQR@.H                   | 26.96  | 14.27  | 1.89 | 0.53 |
| F6ZDS4_TPR_MOUSE    | Tpr      | Nucleoprotein TPR OS=N R.LAVAEVR@.A                      | 70.94  | 15.27  | 4.64 | 0.22 |
| F6ZDS4_TPR_MOUSE    | Tpr      | Nucleoprotein TPR OS=N R.LENSLAELQLR@.E                  | 54.16  | 17.39  | 3.12 | 0.32 |
| F6ZDS4_TPR_MOUSE    | Tpr      | Nucleoprotein TPR OS=N R.LEQNLQEQ*QAK#.V                 | 13.31  | 4.91   | 2.71 | 0.37 |
| F6ZDS4_TPR_MOUSE    | Tpr      | Nucleoprotein TPR OS=N R.LLHDQIEK#.L                     | 21.82  | 4.59   | 4.75 | 0.21 |
| F6ZDS4_TPR_MOUSE    | Tpr      | Nucleoprotein TPR OS=N R.LQEQVTDLR@.S                    | 65.07  | 19.34  | 3.36 | 0.30 |
| F6ZDS4_TPR_MOUSE    | Tpr      | Nucleoprotein TPR OS=N R.K.LQNEQLEK#.L                   | 19.03  | 6.72   | 2.83 | 0.35 |
| F6ZDS4_TPR_MOUSE    | Tpr      | Nucleoprotein TPR OS=N R.LSQEVEVETDVK#.R                 | 5.59   | 1.49   | 3.76 | 0.27 |
| F6ZDS4_TPR_MOUSE    | Tpr      | Nucleoprotein TPR OS=N R.K.LTELVAVETDQLLLEK#.Q           | 16.62  | 6.74   | 2.40 | 0.42 |
| F6ZDS4_TPR_MOUSE    | Tpr      | Nucleoprotein TPR OS=N R.NIEELQQNQNR@.L                  | 34.94  | 8.85   | 3.95 | 0.25 |
| F6ZDS4_TPR_MOUSE    | Tpr      | Nucleoprotein TPR OS=N R.NLGIQSQFTR@.A                   | 38.60  | 14.46  | 2.67 | 0.37 |
| F6ZDS4_TPR_MOUSE    | Tpr      | Nucleoprotein TPR OS=N R.NQQLINQK#.D                     | 10.37  | 6.12   | 1.70 | 0.59 |
| F6ZDS4_TPR_MOUSE    | Tpr      | Nucleoprotein TPR OS=N R.NQQLINQK#HDPDTEEYR@K#.L         | 10.38  | 3.33   | 3.12 | 0.32 |
| F6ZDS4_TPR_MOUSE    | Tpr      | Nucleoprotein TPR OS=N R.QEQINTM*TDQLR@.G                | 13.62  | 3.97   | 3.43 | 0.29 |
| F6ZDS4_TPR_MOUSE    | Tpr      | Nucleoprotein TPR OS=N R.QHLNNM*EAQLASQSTQR@.T           | 7.55   | 4.27   | 1.77 | 0.57 |
| F6ZDS4_TPR_MOUSE    | Tpr      | Nucleoprotein TPR OS=N R.K.R@SSTQVSTPAPPEVIDSTEALIAK#.A  | 8.77   | 5.23   | 1.68 | 0.60 |
| F6ZDS4_TPR_MOUSE    | Tpr      | Nucleoprotein TPR OS=N R.SLEGQVNLQK#.T                   | 38.75  | 12.59  | 3.08 | 0.32 |
| F6ZDS4_TPR_MOUSE    | Tpr      | Nucleoprotein TPR OS=N R.SLQEQVQLQESLSR.L                | 23.31  | 6.95   | 3.36 | 0.30 |
| F6ZDS4_TPR_MOUSE    | Tpr      | Nucleoprotein TPR OS=N R.SNASLTNNQLIQSLR@.E              | 11.56  | 5.09   | 2.27 | 0.44 |
| F6ZDS4_TPR_MOUSE    | Tpr      | Nucleoprotein TPR OS=N R.SQEQLEILR@.F                    | 44.68  | 13.25  | 3.37 | 0.30 |

|                     |         |                                                                     |        |        |       |      |
|---------------------|---------|---------------------------------------------------------------------|--------|--------|-------|------|
| F6ZD54_TPR_MOUSE    | Tpr     | Nucleoprotein TPR OS=N.K.TDELLALGR@.E                               | 30.65  | 14.10  | 2.17  | 0.46 |
| F6ZD54_TPR_MOUSE    | Tpr     | Nucleoprotein TPR OS=N.K.TETM*NVVM*ETNK#.M                          | 19.16  | 6.91   | 2.77  | 0.36 |
| F6ZD54_TPR_MOUSE    | Tpr     | Nucleoprotein TPR OS=N.K.TLSTVQNEQALQR@.A                           | 39.87  | 11.35  | 3.51  | 0.28 |
| F6ZD54_TPR_MOUSE    | Tpr     | Nucleoprotein TPR OS=N.R.VLX#DEVSX#.S                               | 23.17  | 7.26   | 3.19  | 0.31 |
| F6ZD54_TPR_MOUSE    | Tpr     | Nucleoprotein TPR OS=N.R.VLLM*ELEEAR@.G                             | 29.78  | 11.40  | 2.61  | 0.38 |
| F6ZD54_TPR_MOUSE    | Tpr     | Nucleoprotein TPR OS=N.R.VLLMELEEAR@.G                              | 9.74   | 3.67   | 2.65  | 0.38 |
| Q6PFR5_TRA2A_MOUSE  | Tra2a   | Transformer-2 protein hc R.ANGM*ELDGR@.R                            | 36.26  | 21.45  | 1.69  | 0.59 |
| Q6PFR5_TRA2A_MOUSE  | Tra2a   | Transformer-2 protein hc R.GFAPVFYFER@.I                            | 229.51 | 122.46 | 1.87  | 0.53 |
| Q6PFR5_TRA2A_MOUSE  | Tra2a   | Transformer-2 protein hc R.GYDRYEDYDVR.R                            | 250.30 | 137.54 | 1.82  | 0.55 |
| Q6PFR5_TRA2A_MOUSE  | Tra2a   | Transformer-2 protein hc R.GYDR@YEDYDVR@.R                          | 40.26  | 16.44  | 2.45  | 0.41 |
| Q6PFR5_TRA2A_MOUSE  | Tra2a   | Transformer-2 protein hc R.IDDSKAM*ER.A                             | 31.30  | 25.45  | 1.23  | 0.81 |
| Q6PFR5_TRA2A_MOUSE  | Tra2a   | Transformer-2 protein hc R.IR@VDYSITK#.R                            | 119.24 | 73.51  | 1.62  | 0.62 |
| Q6PFR5_TRA2A_MOUSE  | Tra2a   | Transformer-2 protein hc R.IR@VDYSITK#@.A                           | 26.37  | 13.10  | 2.01  | 0.50 |
| Q6PFR5_TRA2A_MOUSE  | Tra2a   | Transformer-2 protein hc R.YEDYDVR@.R                               | 45.02  | 31.42  | 1.43  | 0.70 |
| Q6PFR5_TRA2A_MOUSE  | Tra2a   | Transformer-2 protein hc R.YGPLSGVNVVVDQR.T                         | 338.87 | 183.53 | 1.85  | 0.54 |
| Q6PFR5_TRA2A_MOUSE  | Tra2a   | Transformer-2 protein hc R.GFAPVFYFER.I                             | 12.18  | 10.66  | 1.14  | 0.88 |
| Q6PFR5_TRA2A_MOUSE  | Tra2a   | Transformer-2 protein hc R.IDDSK#EAM*ER@.A                          | 3.72   | 8.49   | 0.44  | 2.28 |
| Q6PFR5_TRA2A_MOUSE  | Tra2a   | Transformer-2 protein hc R.IRVDYSITK.R                              | 11.27  | 11.25  | 1.00  | 1.00 |
| Q6PFR5_TRA2A_MOUSE  | Tra2a   | Transformer-2 protein hc R.YGPLSGVNVVVDQR@.T                        | 14.13  | 10.33  | 1.37  | 0.73 |
| Q6PFR5_TRA2A_MOUSE  | Tra2a   | Transformer-2 protein hc R.YGPLSGVNVVVDQR.T                         | 7.21   | 4.80   | 1.50  | 0.67 |
| P62996_TRA2B_MOUSE  | Tra2b   | Transformer-2 protein hc R.DLR@EVFSX#.Y                             | 69.57  | 36.41  | 1.91  | 0.52 |
| P62996_TRA2B_MOUSE  | Tra2b   | Transformer-2 protein hc R.GFAPVFYFENDDAK#.E                        | 656.38 | 336.96 | 1.95  | 0.51 |
| P62996_TRA2B_MOUSE  | Tra2b   | Transformer-2 protein hc R.GFAPVFYFENDDAKHEAK#.E                    | 19.82  | 10.97  | 1.81  | 0.55 |
| P62996_TRA2B_MOUSE  | Tra2b   | Transformer-2 protein hc R.GYDR@VDYSR@.S                            | 160.64 | 77.12  | 2.08  | 0.48 |
| P62996_TRA2B_MOUSE  | Tra2b   | Transformer-2 protein hc R.IR@VDFSIK#.R                             | 56.40  | 29.69  | 1.90  | 0.53 |
| P62996_TRA2B_MOUSE  | Tra2b   | Transformer-2 protein hc R.VDFSIK#.R                                | 294.03 | 179.19 | 1.64  | 0.61 |
| P62996_TRA2B_MOUSE  | Tra2b   | Transformer-2 protein hc K.YGPIADVSIYDQQSR@.R                       | 524.99 | 293.70 | 1.79  | 0.56 |
| P62996_TRA2B_MOUSE  | Tra2b   | Transformer-2 protein hc K.YGPIADVSIYDQQSR@.R                       | 102.52 | 59.21  | 1.73  | 0.58 |
| P62996_TRA2B_MOUSE  | Tra2b   | Transformer-2 protein hc R.GFAPVFYFENDDAK.E                         | 13.90  | 11.72  | 1.19  | 0.84 |
| P62996_TRA2B_MOUSE  | Tra2b   | Transformer-2 protein hc R.IR@VDFSIK#.R                             | 11.63  | 11.78  | 0.99  | 1.01 |
| P62996_TRA2B_MOUSE  | Tra2b   | Transformer-2 protein hc R.VDFSIK#.R                                | 13.36  | 7.48   | 1.79  | 0.56 |
| P62996_TRA2B_MOUSE  | Tra2b   | Transformer-2 protein hc K.YGPIADVSIYDQQSR@.R                       | 22.21  | 16.85  | 1.32  | 0.76 |
| Q9CQN1_TRAP1_MOUSE  | Trap1   | Heat shock protein 75 kD K.AFLEALQNAQTSK#.I                         | 16.91  | 6.87   | 2.46  | 0.41 |
| Q9CQN1_TRAP1_MOUSE  | Trap1   | Heat shock protein 75 kD R.AQLLQPTLEINPR@.H                         | 13.20  | 4.85   | 2.72  | 0.37 |
| Q9CQN1_TRAP1_MOUSE  | Trap1   | Heat shock protein 75 kD R.ELISNASDALEK#.L                          | 15.49  | 21.55  | 0.72  | 1.39 |
| Q9CQN1_TRAP1_MOUSE  | Trap1   | Heat shock protein 75 kD R.YESSALPAGQLTSLPDYASR@.M                  | 9.12   | 3.83   | 2.38  | 0.42 |
| Q9CQN1_TRAP1_MOUSE  | Trap1   | Heat shock protein 75 kD K.AFLEALQNAQTSK#.I                         | 13.69  | 7.85   | 1.74  | 0.57 |
| Q9CQN1_TRAP1_MOUSE  | Trap1   | Heat shock protein 75 kD R.AQLLQPTLEINPR@.H                         | 9.58   | 2.08   | 4.60  | 0.22 |
| Q9CQN1_TRAP1_MOUSE  | Trap1   | Heat shock protein 75 kD R.YESSALPAGQLTSLPDYASR@.M                  | 4.65   | 1.79   | 2.60  | 0.39 |
| Q9CQP2_TPPC2_MOUSE  | Trappc2 | Trafficking protein partic K.FAM*NPYEPNPSP@.S                       | 2.90   | 2.27   | 1.28  | 0.78 |
| O55013_TPPC3_MOUSE  | Trappc3 | Trafficking protein partic K.FVQDTLKHGDGVTEIR@.M                    | 7.23   | 3.62   | 2.00  | 0.50 |
| Q9ES56_TPPC4_MOUSE  | Trappc4 | Trafficking protein partic K.AGGLIYQDYSYSPR@.A                      | 5.40   | 1.80   | 3.01  | 0.33 |
| Q9CQA1_TPPC5_MOUSE  | Trappc5 | Trafficking protein partic K.VLGLFALKV#.G                           | 5.19   | 4.32   | 1.20  | 0.83 |
| Q91XB0_TREX1_MOUSE  | Trex1   | Three-prime repair exon R.QRFDDNLAILLR.A                            | 3.81   | 5.63   | 2.68  | 1.48 |
| E9Q987_E9Q987_MOUSE | Trim12c | Protein Trim12c OS=Mus K.EQLQVVLQR@.L                               | 18.36  | 8.83   | 2.08  | 0.48 |
| E9Q987_E9Q987_MOUSE | Trim12c | Protein Trim12c OS=Mus K.FR@APDLQGM*LVQLQVEAQR@.Y                   | 8.25   | 4.58   | 1.80  | 0.55 |
| E9Q987_E9Q987_MOUSE | Trim12c | Protein Trim12c OS=Mus K.LAESENHAQOSK#.L                            | 6.38   | 2.80   | 2.28  | 0.44 |
| E9Q987_E9Q987_MOUSE | Trim12c | Protein Trim12c OS=Mus R.LK#EFP#PPEEQK#.V                           | 27.87  | 20.42  | 1.36  | 0.73 |
| E9Q987_E9Q987_MOUSE | Trim12c | Protein Trim12c OS=Mus K.TALIEEVAQEYKQLQVVLQR.L                     | 59.38  | 35.33  | 1.68  | 0.59 |
| E9Q987_E9Q987_MOUSE | Trim12c | Protein Trim12c OS=Mus R.TYWENQIQK#.D                               | 21.48  | 13.00  | 1.65  | 0.61 |
| E9Q987_E9Q987_MOUSE | Trim12c | Protein Trim12c OS=Mus R.YEDLQAR@.N                                 | 55.35  | 22.23  | 2.49  | 0.40 |
| E9Q987_E9Q987_MOUSE | Trim12c | Protein Trim12c OS=Mus K.TALIEEVAQEYK#.E                            | 19.45  | 5.33   | 3.65  | 0.27 |
| E9Q987_E9Q987_MOUSE | Trim12c | Protein Trim12c OS=Mus K.TALIEEVAQEYK#.E                            | 6.77   | 3.33   | 2.03  | 0.49 |
| E9Q987_E9Q987_MOUSE | Trim12c | Protein Trim12c OS=Mus R.YEDLQAR@.N                                 | 14.33  | 6.23   | 2.30  | 0.43 |
| Q3U7K7_Q3U7K7_MOUSE | Trim21  | E3 ubiquitin-protein liga R.DHTR@VPIEEAAK#.V                        | 60.16  | 43.74  | 1.38  | 0.73 |
| Q3U7K7_Q3U7K7_MOUSE | Trim21  | E3 ubiquitin-protein liga K.EAELAEKH#NQLQELISELER@.R                | 24.67  | 17.96  | 1.37  | 0.73 |
| Q3U7K7_Q3U7K7_MOUSE | Trim21  | E3 ubiquitin-protein liga R.FSNYPM*VLGAQR@.F                        | 43.58  | 38.76  | 1.12  | 0.89 |
| Q3U7K7_Q3U7K7_MOUSE | Trim21  | E3 ubiquitin-protein liga R.FSNYPM*VLGAQR@.F                        | 20.06  | 17.65  | 1.14  | 0.88 |
| Q3U7K7_Q3U7K7_MOUSE | Trim21  | E3 ubiquitin-protein liga R.GSELLEK#.Q                              | 163.32 | 134.84 | 1.21  | 0.83 |
| Q3U7K7_Q3U7K7_MOUSE | Trim21  | E3 ubiquitin-protein liga R.HIANM*VENLK#.Q                          | 75.25  | 67.77  | 1.11  | 0.90 |
| Q3U7K7_Q3U7K7_MOUSE | Trim21  | E3 ubiquitin-protein liga R.HIANM*VENLK#.Q                          | 12.85  | 11.18  | 1.15  | 0.87 |
| Q3U7K7_Q3U7K7_MOUSE | Trim21  | E3 ubiquitin-protein liga R.IHAFAALQNSLAEQEQR@.Q                    | 70.27  | 65.06  | 1.23  | 0.81 |
| Q3U7K7_Q3U7K7_MOUSE | Trim21  | E3 ubiquitin-protein liga K.IHVALEK#.H                              | 84.94  | 49.47  | 1.51  | 0.66 |
| Q3U7K7_Q3U7K7_MOUSE | Trim21  | E3 ubiquitin-protein liga R.IRGSLELLEQVR.I                          | 52.48  | 36.73  | 1.43  | 0.70 |
| Q3U7K7_Q3U7K7_MOUSE | Trim21  | E3 ubiquitin-protein liga K.M*EM*DLTM*QR.T                          | 46.51  | 39.62  | 1.17  | 0.85 |
| Q3U7K7_Q3U7K7_MOUSE | Trim21  | E3 ubiquitin-protein liga K.MEM*DLTM*QR.T                           | 8.66   | 5.69   | 1.52  | 0.66 |
| Q3U7K7_Q3U7K7_MOUSE | Trim21  | E3 ubiquitin-protein liga R.M*GDTHQVSDNEER.F                        | 11.47  | 8.07   | 1.42  | 0.70 |
| Q3U7K7_Q3U7K7_MOUSE | Trim21  | E3 ubiquitin-protein liga K.M*YWEVDVTQK#.E                          | 46.23  | 41.85  | 1.10  | 0.91 |
| Q3U7K7_Q3U7K7_MOUSE | Trim21  | E3 ubiquitin-protein liga K.MYWEVDVTQK#.E                           | 8.89   | 7.76   | 1.15  | 0.87 |
| Q3U7K7_Q3U7K7_MOUSE | Trim21  | E3 ubiquitin-protein liga K.NQALQELISELER@.R                        | 220.48 | 187.57 | 1.18  | 0.85 |
| Q3U7K7_Q3U7K7_MOUSE | Trim21  | E3 ubiquitin-protein liga R.NTANSANLISK#.D                          | 86.04  | 54.13  | 1.59  | 0.63 |
| Q3U7K7_Q3U7K7_MOUSE | Trim21  | E3 ubiquitin-protein liga R.VPIEEAAK#.V                             | 95.87  | 101.21 | 0.95  | 1.06 |
| Q61510_TRI25_MOUSE  | Trim25  | E3 ubiquitin/SG15 ligas K.FDTIYQLVX#.K                              | 6.38   | 3.71   | 1.72  | 0.58 |
| Q61510_TRI25_MOUSE  | Trim25  | E3 ubiquitin/SG15 ligas K.IDLDHDLIM*GIYQGAADLK#.S                   | 11.01  | 5.30   | 2.08  | 0.48 |
| Q61510_TRI25_MOUSE  | Trim25  | E3 ubiquitin/SG15 ligas K.IDLDHDLIM*GIYQGAADLK#.SELK#.H             | 4.98   | 1.62   | 3.07  | 0.33 |
| Q61510_TRI25_MOUSE  | Trim25  | E3 ubiquitin/SG15 ligas K.ASAAQPDVGVKX#.A                           | 2.67   | 23.91  | 0.95  | 1.05 |
| Q61510_TRI25_MOUSE  | Trim25  | E3 ubiquitin/SG15 ligas K.FDTIYQLVX#.K                              | 12.77  | 4.88   | 2.61  | 0.38 |
| Q61510_TRI25_MOUSE  | Trim25  | E3 ubiquitin/SG15 ligas K.IDLDHDLIM*GIYQGAADLK#.S                   | 13.80  | 4.58   | 3.01  | 0.33 |
| Q61510_TRI25_MOUSE  | Trim25  | E3 ubiquitin/SG15 ligas K.SR@TELEYFVK#.L                            | 18.67  | 6.32   | 2.95  | 0.34 |
| Q61510_TRI25_MOUSE  | Trim25  | E3 ubiquitin/SG15 ligas K.VLENFLTK#.S                               | 21.69  | 7.98   | 2.72  | 0.37 |
| Q61510_TRI25_MOUSE  | Trim25  | E3 ubiquitin/SG15 ligas K.ASAAQPDVGVKX#.A                           | 8.35   | 4.28   | 1.95  | 0.51 |
| Q62318_TIF1B_MOUSE  | Trim28  | Transcription intermedia K.DIVENYFM*.R.D                            | 25.23  | 20.76  | 1.22  | 0.82 |
| Q62318_TIF1B_MOUSE  | Trim28  | Transcription intermedia R.FASWALESDNNTALLSK.K                      | 16.62  | 11.48  | 1.45  | 0.69 |
| Q62318_TIF1B_MOUSE  | Trim28  | Transcription intermedia K.IVAER@PGNSTGPGPM*APPR@.A                 | 29.61  | 13.35  | 2.22  | 0.45 |
| Q62318_TIF1B_MOUSE  | Trim28  | Transcription intermedia K.KHLYFQLHR@.A                             | 10.65  | 8.97   | 1.19  | 0.84 |
| Q62318_TIF1B_MOUSE  | Trim28  | Transcription intermedia R.LDLTSDSQPPVFK#.V                         | 46.65  | 36.23  | 1.29  | 0.78 |
| Q62318_TIF1B_MOUSE  | Trim28  | Transcription intermedia K.LSPPYSSPQEFQADVGR@.M                     | 29.47  | 12.66  | 2.33  | 0.43 |
| Q62318_TIF1B_MOUSE  | Trim28  | Transcription intermedia K.M*ALQIM*KH.E                             | 20.50  | 17.77  | 1.15  | 0.87 |
| Q62318_TIF1B_MOUSE  | Trim28  | Transcription intermedia R.M*NDAFGDTK#.F                            | 11.20  | 5.36   | 2.09  | 0.48 |
| Q62318_TIF1B_MOUSE  | Trim28  | Transcription intermedia K.QGSGSSQPM*EVQEGYGFSGDDPYSSAEPHVSGM*KR#.R | 8.04   | 3.00   | 2.68  | 0.37 |
| Q62318_TIF1B_MOUSE  | Trim28  | Transcription intermedia K.QGSGSSQPM*EVQEGYGFSGDDPYSSAEPHVSGM*KR#.R | 6.27   | 4.89   | 1.28  | 0.78 |
| Q62318_TIF1B_MOUSE  | Trim28  | Transcription intermedia R.SGEGESGLLR@.K                            | 53.25  | 27.51  | 1.94  | 0.52 |
| Q62318_TIF1B_MOUSE  | Trim28  | Transcription intermedia K.VFPGSTEDYNIIVIER.G                       | 6.54   | 4.04   | 1.62  | 0.62 |
| Q62318_TIF1B_MOUSE  | Trim28  | Transcription intermedia R.VLVNDAQK#.V                              | 74.44  | 65.91  | 1.13  | 0.89 |
| Q62318_TIF1B_MOUSE  | Trim28  | Transcription intermedia K.LSPPYSSPQEFQADVGR@.M                     | 4.29   | 4.71   | 0.91  | 1.10 |
| Q62318_TIF1B_MOUSE  | Trim28  | Transcription intermedia K.LTEDKADVOSIGLQR.F                        | 937.35 | 9.81   | 95.53 | 0.01 |
| Q62318_TIF1B_MOUSE  | Trim28  | Transcription intermedia R.M*NDAFGDTK#.F                            | 4.01   | 3.42   | 1.17  | 0.85 |
| Q62318_TIF1B_MOUSE  | Trim28  | Transcription intermedia K.ADVOSIGLQR@.F                            | 65.27  | 47.45  | 1.38  | 0.73 |
| Q62318_TIF1B_MOUSE  | Trim28  | Transcription intermedia K.DHQYQFLEDAVR@.N                          | 15.16  | 9.18   | 1.65  | 0.61 |
| Q62318_TIF1B_MOUSE  | Trim28  | Transcription intermedia K.DIVENYFM*.R.D                            | 105.46 | 70.35  | 1.50  | 0.67 |
| Q62318_TIF1B_MOUSE  | Trim28  | Transcription intermedia K.DIVENYFMR.D                              | 24.74  | 14.87  | 1.66  | 0.60 |
| Q62318_TIF1B_MOUSE  | Trim28  | Transcription intermedia R.FASWALESDNNTALLSK.K                      | 86.13  | 46.57  | 1.85  | 0.54 |
| Q62318_TIF1B_MOUSE  | Trim28  | Transcription intermedia K.FSAVLVPPPLNLSAGLSSQELSGPGDGP.-           | 106.07 | 106.07 | 1.00  | 1.00 |

|                     |         |                                                                         |        |        |      |       |
|---------------------|---------|-------------------------------------------------------------------------|--------|--------|------|-------|
| Q62318_TIF1B_MOUSE  | Trim28  | Transcription intermedia: R.GAAAAAAGQAGTVPPGAPGAPPLPGM*AIVK.E           | 4.66   | 2.24   | 2.08 | 0.48  |
| Q62318_TIF1B_MOUSE  | Trim28  | Transcription intermedia: K.IVAERPNTSTGPGPM*APPR.A                      | 143.93 | 114.81 | 1.25 | 0.80  |
| Q62318_TIF1B_MOUSE  | Trim28  | Transcription intermedia: K.IVAERPNTSTGPGPM*APPR@.A                     | 28.18  | 26.76  | 1.05 | 0.95  |
| Q62318_TIF1B_MOUSE  | Trim28  | Transcription intermedia: K.KHLIVFLQHR@.A                               | 39.17  | 31.08  | 1.26 | 0.79  |
| Q62318_TIF1B_MOUSE  | Trim28  | Transcription intermedia: R.KHLIVFLQHR.R                                | 114.25 | 83.81  | 1.36 | 0.73  |
| Q62318_TIF1B_MOUSE  | Trim28  | Transcription intermedia: R.LDLDLTSQSPVFK#.V                            | 277.63 | 191.43 | 1.45 | 0.69  |
| Q62318_TIF1B_MOUSE  | Trim28  | Transcription intermedia: K.LSPPYSPQEFQADVGR@.M                         | 93.23  | 67.23  | 1.39 | 0.72  |
| Q62318_TIF1B_MOUSE  | Trim28  | Transcription intermedia: K.LTEDK#ADVQSIGLQR@.F                         | 16.02  | 10.09  | 1.59 | 0.63  |
| Q62318_TIF1B_MOUSE  | Trim28  | Transcription intermedia: K.LTEDKADVQSIGLQR.F                           | 234.28 | 142.27 | 1.65 | 0.61  |
| Q62318_TIF1B_MOUSE  | Trim28  | Transcription intermedia: K.M*ALIQM*#K.E                                | 99.92  | 63.22  | 1.58 | 0.63  |
| Q62318_TIF1B_MOUSE  | Trim28  | Transcription intermedia: K.MAILQIM*#K.E                                | 23.58  | 18.15  | 1.30 | 0.77  |
| Q62318_TIF1B_MOUSE  | Trim28  | Transcription intermedia: K.MAILQIMK#.E                                 | 18.38  | 11.11  | 1.65 | 0.60  |
| Q62318_TIF1B_MOUSE  | Trim28  | Transcription intermedia: R.MNDAFDGTK#.F                                | 11.04  | 8.92   | 1.24 | 0.81  |
| Q62318_TIF1B_MOUSE  | Trim28  | Transcription intermedia: R.M*NDAFDGTK#.F                               | 77.94  | 47.97  | 1.62 | 0.62  |
| Q62318_TIF1B_MOUSE  | Trim28  | Transcription intermedia: K.QSGSSSQPM*EVQEGYGFSGDDPYSSAEPHVSQPM*#K.R    | 6.87   | 3.38   | 2.03 | 0.49  |
| Q62318_TIF1B_MOUSE  | Trim28  | Transcription intermedia: K.QSGSSSQPM*EVQEGYGFSGDDPYSSAEPHVSQMK#.R      | 4.91   | 3.25   | 1.51 | 0.66  |
| Q62318_TIF1B_MOUSE  | Trim28  | Transcription intermedia: K.QSGSSSQPM*EVQEGYGFSGDDPYSSAEPHVSQPM*#K.R@.S | 4.36   | 4.11   | 1.06 | 0.94  |
| Q62318_TIF1B_MOUSE  | Trim28  | Transcription intermedia: R.SGEGEVSGLLR@.K                              | 337.81 | 202.40 | 1.67 | 0.60  |
| Q62318_TIF1B_MOUSE  | Trim28  | Transcription intermedia: K.VFPGSTEDYNLIVIER.G                          | 84.75  | 55.10  | 1.54 | 0.65  |
| Q62318_TIF1B_MOUSE  | Trim28  | Transcription intermedia: K.VFPGSTEDYNLIVIER@.G                         | 28.60  | 18.96  | 1.51 | 0.66  |
| Q62318_TIF1B_MOUSE  | Trim28  | Transcription intermedia: R.VLVNDAQK#.V                                 | 204.71 | 140.55 | 1.46 | 0.69  |
| Q62318_TIF1B_MOUSE  | Trim28  | Transcription intermedia: K.VTEGQQR@.L                                  | 17.29  | 11.36  | 1.52 | 0.66  |
| Q62318_TIF1B_MOUSE  | Trim28  | Transcription intermedia: K.DHQYQLEDAVR@.N                              | 24.46  | 8.82   | 2.77 | 0.36  |
| Q62318_TIF1B_MOUSE  | Trim28  | Transcription intermedia: K.DIVENYFM*#R@.D                              | 50.74  | 18.53  | 2.74 | 0.37  |
| Q62318_TIF1B_MOUSE  | Trim28  | Transcription intermedia: K.EEDGSLSDGADSTGVVAK#.L                       | 10.15  | 6.35   | 1.58 | 0.63  |
| Q62318_TIF1B_MOUSE  | Trim28  | Transcription intermedia: R.FASWALESNDNTALLSK#.K                        | 42.15  | 16.95  | 2.49 | 0.40  |
| Q62318_TIF1B_MOUSE  | Trim28  | Transcription intermedia: K.FQWDLNAWTK#.S                               | 20.22  | 7.83   | 2.58 | 0.39  |
| Q62318_TIF1B_MOUSE  | Trim28  | Transcription intermedia: K.IVAERPNTSTGPGPM*APPR@.A                     | 39.70  | 26.86  | 1.48 | 0.68  |
| Q62318_TIF1B_MOUSE  | Trim28  | Transcription intermedia: R.KHLIVFLQHR@.A                               | 37.57  | 15.84  | 2.37 | 0.42  |
| Q62318_TIF1B_MOUSE  | Trim28  | Transcription intermedia: R.LDLDLTSQSPVFK#.V                            | 100.59 | 37.32  | 2.70 | 0.37  |
| Q62318_TIF1B_MOUSE  | Trim28  | Transcription intermedia: K.LSPPYSPQEFQADVGR@.M                         | 47.09  | 18.22  | 2.58 | 0.39  |
| Q62318_TIF1B_MOUSE  | Trim28  | Transcription intermedia: K.LTEDK#ADVQSIGLQR@.F                         | 92.90  | 30.72  | 3.02 | 0.33  |
| Q62318_TIF1B_MOUSE  | Trim28  | Transcription intermedia: K.M*ALIQM*#K.E                                | 46.57  | 15.25  | 3.05 | 0.33  |
| Q62318_TIF1B_MOUSE  | Trim28  | Transcription intermedia: R.SGEGEVSGLLR.K                               | 90.63  | 29.74  | 3.05 | 0.33  |
| Q62318_TIF1B_MOUSE  | Trim28  | Transcription intermedia: K.VFPGSTEDYNLIVIER.G                          | 31.80  | 14.38  | 2.21 | 0.45  |
| Q62318_TIF1B_MOUSE  | Trim28  | Transcription intermedia: R.VLVNDAQK#.V                                 | 110.82 | 46.98  | 2.36 | 0.42  |
| Q9R1R2_TRIM3_MOUSE  | Trim3   | Tripartite motif-containing: K.GEFTNLQGVSAASSGR@.I                      | 7.68   | 3.00   | 2.56 | 0.39  |
| Q9R1R2_TRIM3_MOUSE  | Trim3   | Tripartite motif-containing: R.LGSAPEVLVLR@.K                           | 24.18  | 7.90   | 3.06 | 0.33  |
| Q9R1R2_TRIM3_MOUSE  | Trim3   | Tripartite motif-containing: R.QALVGPASLTVTK#.D                         | 8.08   | 4.80   | 1.68 | 0.59  |
| Q9R1R2_TRIM3_MOUSE  | Trim3   | Tripartite motif-containing: R.SVLNLGALLTSATAHETVATGEGLR@.Q             | 15.72  | 5.92   | 2.65 | 0.38  |
| Q9R1R2_TRIM3_MOUSE  | Trim3   | Tripartite motif-containing: K.VLQQLDTRLR@.Q                            | 21.37  | 7.50   | 2.85 | 0.35  |
| P15533_TR30A_MOUSE  | Trim30a | Tripartite motif-containing: K.LEESENLEQVTLVLR@.D                       | 5.96   | 6.39   | 0.93 | 1.07  |
| Q8CH72_TR32_MOUSE   | Trim32  | E3 ubiquitin-protein ligase: R.ELTLDQVLLK#.V                            | 11.69  | 4.38   | 2.67 | 0.37  |
| Q8CH72_TR32_MOUSE   | Trim32  | E3 ubiquitin-protein ligase: R.ITSLTQLDNLTVLK#.I                        | 9.35   | 3.72   | 2.51 | 0.40  |
| Q9PP7_TR33_MOUSE    | Trim33  | E3 ubiquitin-protein ligase: K.LLQQQNDITGLSR@.Q                         | 6.04   | 2.92   | 2.07 | 0.48  |
| Q9PP7_TR33_MOUSE    | Trim33  | E3 ubiquitin-protein ligase: K.LLQQQNDITGLSR@.Q                         | 20.21  | 8.60   | 2.35 | 0.43  |
| Q9PP7_TR33_MOUSE    | Trim33  | E3 ubiquitin-protein ligase: K.VAIFTLINENK#K#.G                         | 5.22   | 1.89   | 2.77 | 0.36  |
| Q9PP7_TR33_MOUSE    | Trim33  | E3 ubiquitin-protein ligase: K.LLQQQNDITGLSR@.Q                         | 12.24  | 3.19   | 3.83 | 0.26  |
| Q9PP7_TR33_MOUSE    | Trim34a | Tripartite motif-containing: R.FSLENLQANK#.H                            | 6.20   | 3.45   | 1.80 | 0.56  |
| Q8C006_TR35_MOUSE   | Trim35  | Tripartite motif-containing: K.QLAEQALALR@.E                            | 8.45   | 2.07   | 4.08 | 0.25  |
| Q8OV1_TRIS6_MOUSE   | Trim56  | E3 ubiquitin-protein ligase: R.EQAASVGTQVEEAER@.J                       | 10.68  | 3.75   | 2.85 | 0.35  |
| Q8OV1_TRIS6_MOUSE   | Trim56  | E3 ubiquitin-protein ligase: R.K#PGLLELLAGVDSNLVELEATR@.V               | 8.42   | 3.44   | 2.45 | 0.41  |
| Q8OV1_TRIS6_MOUSE   | Trim56  | E3 ubiquitin-protein ligase: R.VVDLVGR@.A                               | 8.93   | 4.54   | 1.97 | 0.51  |
| Q8OV1_TRIS6_MOUSE   | Trim56  | E3 ubiquitin-protein ligase: R.ALVEAAEATR@.E                            | 39.04  | 15.82  | 2.47 | 0.41  |
| Q8OV1_TRIS6_MOUSE   | Trim56  | E3 ubiquitin-protein ligase: K.EGK#DQNPQEDDGVFIER@.G                    | 17.99  | 7.35   | 2.45 | 0.41  |
| Q8OV1_TRIS6_MOUSE   | Trim56  | E3 ubiquitin-protein ligase: R.EIYVPVPAEYVAAFK#.T                       | 16.49  | 7.59   | 2.17 | 0.46  |
| Q8OV1_TRIS6_MOUSE   | Trim56  | E3 ubiquitin-protein ligase: R.EQAASVGTQVEEAER@.J                       | 13.63  | 7.74   | 1.76 | 0.57  |
| Q8OV1_TRIS6_MOUSE   | Trim56  | E3 ubiquitin-protein ligase: R.K#PGLLELLAGVDSNLVELEATR@.V               | 17.97  | 7.24   | 2.48 | 0.40  |
| Q8OV1_TRIS6_MOUSE   | Trim56  | E3 ubiquitin-protein ligase: R.SR@K#PGLLELLAGVDSNLVELEATR@.V            | 5.82   | 5.85   | 0.99 | 1.01  |
| Q8OV1_TRIS6_MOUSE   | Trim56  | E3 ubiquitin-protein ligase: R.VAEK#EALLLR@.E                           | 17.05  | 5.86   | 2.91 | 0.34  |
| Q8OV1_TRIS6_MOUSE   | Trim56  | E3 ubiquitin-protein ligase: R.VVDLVGR@.A                               | 25.59  | 9.75   | 2.62 | 0.38  |
| Q8OV1_TRIS6_MOUSE   | Trim56  | E3 ubiquitin-protein ligase: K.VVLDPK#.G                                | 18.37  | 6.06   | 3.03 | 0.33  |
| QOKL02_TRIO_MOUSE   | Trio    | Triple functional domain: K.DNFDAFYSEVAELGR@.G                          | 3.67   | 1.83   | 2.01 | 0.50  |
| QOKL02_TRIO_MOUSE   | Trio    | Triple functional domain: K.LQR@PLTPGSSDSLTSANYSK#.A                    | 2.95   | 4.79   | 0.62 | 1.62  |
| QOKL02_TRIO_MOUSE   | Trio    | Triple functional domain: K.NILNELQR@.E                                 | 13.66  | 6.38   | 2.14 | 0.47  |
| QOKL02_TRIO_MOUSE   | Trio    | Triple functional domain: R.VQDILLEFLHEK#.Q                             | 12.36  | 4.55   | 2.71 | 0.37  |
| E9Q512_E9Q512_MOUSE | Trip11  | Protein Trip11 OS=Mus n: R.LDEANAALDSASR@.L                             | 5.89   | 3.43   | 1.72 | 0.58  |
| E9Q512_E9Q512_MOUSE | Trip11  | Protein Trip11 OS=Mus n: R.SELTQSQGSSR@.N                               | 3.34   | 1.44   | 2.31 | 0.43  |
| E9Q512_E9Q512_MOUSE | Trip11  | Protein Trip11 OS=Mus n: R.VSAFHEDDM*DFGDVSSQQEINR@.L                   | 7.47   | 1.94   | 3.85 | 0.26  |
| E9Q512_E9Q512_MOUSE | Trip11  | Protein Trip11 OS=Mus n: K.AGELNLLNNAVK#.R                              | 23.30  | 12.51  | 1.86 | 0.54  |
| E9Q512_E9Q512_MOUSE | Trip11  | Protein Trip11 OS=Mus n: K.DLEIQALHAR@.I                                | 25.23  | 708.09 | 0.04 | 28.07 |
| E9Q512_E9Q512_MOUSE | Trip11  | Protein Trip11 OS=Mus n: R.IELENLQDGGSGVTVDHSHK#.V                      | 16.32  | 4.09   | 3.99 | 0.25  |
| E9Q512_E9Q512_MOUSE | Trip11  | Protein Trip11 OS=Mus n: R.LILILEM*DISK#.L                              | 20.36  | 6.90   | 2.95 | 0.34  |
| E9Q512_E9Q512_MOUSE | Trip11  | Protein Trip11 OS=Mus n: R.LDEANAALDSASR@.L                             | 23.84  | 8.00   | 2.98 | 0.34  |
| E9Q512_E9Q512_MOUSE | Trip11  | Protein Trip11 OS=Mus n: R.LFLEK#DEEKHNLQK#.T                           | 17.95  | 8.44   | 2.13 | 0.47  |
| E9Q512_E9Q512_MOUSE | Trip11  | Protein Trip11 OS=Mus n: R.LIQLNQEKHDFEALK#K#.S                         | 23.61  | 5.45   | 4.33 | 0.23  |
| E9Q512_E9Q512_MOUSE | Trip11  | Protein Trip11 OS=Mus n: R.LK#LESEAQSSALR@.Q                            | 9.62   | 3.02   | 3.18 | 0.31  |
| E9Q512_E9Q512_MOUSE | Trip11  | Protein Trip11 OS=Mus n: R.LQQALDAENEIM*#R@.L                           | 14.45  | 5.19   | 2.78 | 0.36  |
| E9Q512_E9Q512_MOUSE | Trip11  | Protein Trip11 OS=Mus n: K.LQVDYTGILQSYEQNETK#.L                        | 11.29  | 5.00   | 2.26 | 0.44  |
| E9Q512_E9Q512_MOUSE | Trip11  | Protein Trip11 OS=Mus n: R.LSDSVAASVESEV@.K                             | 13.68  | 4.68   | 2.93 | 0.34  |
| E9Q512_E9Q512_MOUSE | Trip11  | Protein Trip11 OS=Mus n: K.LTHSEQLSLDLQTLK#.Q                           | 19.95  | 11.96  | 1.67 | 0.60  |
| E9Q512_E9Q512_MOUSE | Trip11  | Protein Trip11 OS=Mus n: R.NVK#HDDLK#.E                                 | 8.02   | 4.74   | 1.69 | 0.59  |
| E9Q512_E9Q512_MOUSE | Trip11  | Protein Trip11 OS=Mus n: R.QDSQNTENSDFQETK#.V                           | 5.62   | 2.69   | 2.09 | 0.48  |
| E9Q512_E9Q512_MOUSE | Trip11  | Protein Trip11 OS=Mus n: K.QM*ETSLQNEVQR@.L                             | 5.31   | 1.98   | 2.69 | 0.37  |
| E9Q512_E9Q512_MOUSE | Trip11  | Protein Trip11 OS=Mus n: R.SELTQSQGSSR@.N                               | 17.69  | 6.70   | 2.64 | 0.38  |
| E9Q512_E9Q512_MOUSE | Trip11  | Protein Trip11 OS=Mus n: K.SLLSQEK#EELQSLSK#.L                          | 15.16  | 7.88   | 1.92 | 0.52  |
| E9Q512_E9Q512_MOUSE | Trip11  | Protein Trip11 OS=Mus n: R.SLNDQISLAEDNOK#.L                            | 15.24  | 6.88   | 2.22 | 0.45  |
| E9Q512_E9Q512_MOUSE | Trip11  | Protein Trip11 OS=Mus n: R.TENEELLEAVEV@.N                              | 12.28  | 5.34   | 2.30 | 0.44  |
| E9Q512_E9Q512_MOUSE | Trip11  | Protein Trip11 OS=Mus n: R.VSAFHEDDM*DFGDVSSQQEINR@.L                   | 22.13  | 7.37   | 3.00 | 0.33  |
| G5E870_TRIPC_MOUSE  | Trip12  | E3 ubiquitin-protein ligase: K.IDPLALVQAEY.R                            | 7.34   | 8.14   | 0.90 | 1.11  |
| G5E870_TRIPC_MOUSE  | Trip12  | E3 ubiquitin-protein ligase: R.IIEAAHQVGEDEISLTLGR@.V                   | 6.56   | 4.81   | 1.36 | 0.73  |
| G5E870_TRIPC_MOUSE  | Trip12  | E3 ubiquitin-protein ligase: K.LPDIYSVYFR@.R                            | 6.82   | 4.45   | 1.53 | 0.65  |
| G5E870_TRIPC_MOUSE  | Trip12  | E3 ubiquitin-protein ligase: R.LVDNFQHEENLQQVASK#.D                     | 9.12   | 8.37   | 1.09 | 0.92  |
| G5E870_TRIPC_MOUSE  | Trip12  | E3 ubiquitin-protein ligase: R.SSAVVDVAIPVLEK#.L                        | 11.71  | 6.43   | 1.82 | 0.55  |
| G5E870_TRIPC_MOUSE  | Trip12  | E3 ubiquitin-protein ligase: R.HLDQEQLK#.S                              | 8.45   | 5.20   | 1.62 | 0.62  |
| G5E870_TRIPC_MOUSE  | Trip12  | E3 ubiquitin-protein ligase: K.IDPLALVQAEY@.Y                           | 45.57  | 18.74  | 2.43 | 0.41  |
| G5E870_TRIPC_MOUSE  | Trip12  | E3 ubiquitin-protein ligase: R.IIEAAHQVGEDEISLTLGR@.V                   | 19.36  | 48.64  | 0.40 | 2.51  |
| G5E870_TRIPC_MOUSE  | Trip12  | E3 ubiquitin-protein ligase: R.LLDTNPEINQSDSQDSR@.V                     | 5.29   | 3.65   | 1.45 | 0.69  |
| G5E870_TRIPC_MOUSE  | Trip12  | E3 ubiquitin-protein ligase: K.LPDIYSVYFR@.R                            | 10.93  | 5.95   | 1.84 | 0.54  |
| G5E870_TRIPC_MOUSE  | Trip12  | E3 ubiquitin-protein ligase: K.LPDYSSIDIM*#R@.D                         | 9.59   | 3.74   | 2.56 | 0.39  |
| G5E870_TRIPC_MOUSE  | Trip12  | E3 ubiquitin-protein ligase: R.LSAQNSNNIEPAR@.T                         | 8.66   | 3.09   | 2.80 | 0.36  |
| G5E870_TRIPC_MOUSE  | Trip12  | E3 ubiquitin-protein ligase: R.LVDLPLGPFYK#.W                           | 23.56  | 13.65  | 1.73 | 0.58  |
| G5E870_TRIPC_MOUSE  | Trip12  | E3 ubiquitin-protein ligase: R.LVDNFQHEENLQQVASK#.D                     | 18.46  | 8.64   | 2.14 | 0.47  |



|                     |        |                           |                                     |         |        |      |      |
|---------------------|--------|---------------------------|-------------------------------------|---------|--------|------|------|
| G5E870_TRIPC_MOUSE  | Trip12 | E3 ubiquitin-protein liga | R.QETSLTSHDLFDIDPVVAR@.S            | 13.17   | 8.51   | 1.55 | 0.65 |
| G5E870_TRIPC_MOUSE  | Trip12 | E3 ubiquitin-protein liga | R.SSAVVDVAIPVLEK#.L                 | 16.90   | 6.82   | 2.48 | 0.40 |
| G5E870_TRIPC_MOUSE  | Trip12 | E3 ubiquitin-protein liga | K.TLFGVLYVEYSSAGPAVR@.H             | 14.31   | 6.70   | 2.14 | 0.47 |
| Q3UA06_PCH2_MOUSE   | Trip13 | Pachytene checkpoint pr   | K.LSLLSEISR@.K                      | 12.52   | 9.36   | 1.34 | 0.75 |
| Q3UA06_PCH2_MOUSE   | Trip13 | Pachytene checkpoint pr   | R.NVQSVSIVDTLQK#.A                  | 8.03    | 4.95   | 1.62 | 0.62 |
| Q9QXN3_TRIP4_MOUSE  | Trip4  | Activating signal cointeg | K.TPLDLAK#.A                        | 48.02   | 6.51   | 7.37 | 0.14 |
| Q921Y4_TRIP6_MOUSE  | Trp6   | Thyroid receptor-interac  | R.GIHR@PGSLDAEIDSLTSM*LADLDGGR@.S   | 24.34   | 11.97  | 2.03 | 0.49 |
| A2RSY6_TRM1L_MOUSE  | Trmt1l | TRMT1-like protein OS=N   | R.NLIGVSVSTDISLQK#.A                | 6.10    | 2.06   | 2.96 | 0.34 |
| A2RSY6_TRM1L_MOUSE  | Trmt1l | TRMT1-like protein OS=N   | K.TTDDTTIDYSAQK#.R                  | 6.30    | 4.35   | 1.45 | 0.69 |
| A2RSY6_TRM1L_MOUSE  | Trmt1l | TRMT1-like protein OS=N   | K.VTINDLNENSVTLIQK#.N               | 5.34    | 2.48   | 2.15 | 0.46 |
| A2RSY6_TRM1L_MOUSE  | Trmt1l | TRMT1-like protein OS=N   | K.DGNM*VEENPYR@.Q                   | 3.84    | 1.48   | 2.60 | 0.39 |
| A2RSY6_TRM1L_MOUSE  | Trmt1l | TRMT1-like protein OS=N   | R.NLIGVSVSTDISLQK#.A                | 10.14   | 3.43   | 2.96 | 0.34 |
| A2RSY6_TRM1L_MOUSE  | Trmt1l | TRMT1-like protein OS=N   | K.TTDDTTIDYSAQK#.R                  | 5.21    | 2.04   | 2.55 | 0.39 |
| A2RSY6_TRM1L_MOUSE  | Trmt1l | TRMT1-like protein OS=N   | K.VTINDLNENSVTLIQK#.N               | 6.05    | 2.24   | 2.71 | 0.37 |
| A2RSY6_TRM1L_MOUSE  | Trmt1l | TRMT1-like protein OS=N   | K.VVVDSEKHEEGDALEDGDTGLDIQVTR@.M    | 7.12    | 2.11   | 3.37 | 0.30 |
| Q8BNV1_TRM2A_MOUSE  | Trmt2a | tRNA (uracil-5)-methyltr  | K.AFQFIR@.S                         | 11.23   | 4.22   | 2.66 | 0.38 |
| Q925H1_TRP51_MOUSE  | Trps1  | Zinc finger transcription | R.LNPEALQAQLNK#.Q                   | 13.34   | 11.22  | 1.19 | 0.84 |
| Q925H1_TRP51_MOUSE  | Trps1  | Zinc finger transcription | K.SASLTQQYPASGESK#.T                | 6.90    | 8.84   | 0.78 | 1.28 |
| Q925H1_TRP51_MOUSE  | Trps1  | Zinc finger transcription | K.VYSLNPD5K#.M                      | 8.31    | 7.69   | 1.08 | 0.93 |
| Q925H1_TRP51_MOUSE  | Trps1  | Zinc finger transcription | R.LNPEALQAQLNK#.Q                   | 6.43    | 3.55   | 1.81 | 0.55 |
| E9PWT1_E9PWT1_MOUSE | Trrap  | Transformation/transcrip  | R.FLTFLQDEYQVFOLEK#PAQQLR@.K        | 2.97    | 2.08   | 1.43 | 0.70 |
| Q9EP53_TSC1_MOUSE   | Tsc1   | Hamartin OS=Mus muscu     | R.VLELEILDYGR@.L                    | 7.34    | 1.46   | 5.02 | 0.20 |
| Q9EP53_TSC1_MOUSE   | Tsc1   | Hamartin OS=Mus muscu     | R.VLELESLLAK#.K                     | 13.28   | 3.58   | 3.71 | 0.27 |
| Q9EP53_TSC1_MOUSE   | Tsc1   | Hamartin OS=Mus muscu     | R.VLELESLLAK#.K                     | 6.53    | 3.89   | 1.68 | 0.60 |
| Q61187_TS101_MOUSE  | Tsg101 | Tumor susceptibility gen  | R.ASLIASVSK#.L                      | 18.05   | 6.96   | 2.59 | 0.39 |
| Q61187_TS101_MOUSE  | Tsg101 | Tumor susceptibility gen  | R.DGTISEDTIR@.A                     | 49.26   | 17.67  | 2.79 | 0.36 |
| Q61187_TS101_MOUSE  | Tsg101 | Tumor susceptibility gen  | K.DLK#PVLDSYVFNDDSSR@.E             | 32.33   | 9.09   | 3.56 | 0.28 |
| Q61187_TS101_MOUSE  | Tsg101 | Tumor susceptibility gen  | R.ELVNLGTIPVVR@.Y                   | 46.70   | 17.72  | 2.64 | 0.38 |
| Q61187_TS101_MOUSE  | Tsg101 | Tumor susceptibility gen  | R.GVIDLDVFLK#.H                     | 28.20   | 10.32  | 2.73 | 0.37 |
| Q61187_TS101_MOUSE  | Tsg101 | Tumor susceptibility gen  | R.LDQEVAEVDK#NIELLK#.K              | 18.18   | 25.15  | 2.86 | 0.35 |
| Q61187_TS101_MOUSE  | Tsg101 | Tumor susceptibility gen  | R.QTVNVIAM*YK#.D                    | 7.59    | 2.76   | 2.76 | 0.36 |
| Q88JU2_TSN9_MOUSE   | Tspan9 | Tetraspanin-9 OS=Mus m    | K.ELGLLYNTENNVLK#.N                 | 2.29    | 2.29   | 3.59 | 0.28 |
| Q8K0G5_TSSC1_MOUSE  | Tssc1  | Protein TSSC1 OS=Mus m    | R.ALTPQATDIAIR@.F                   | 16.55   | 4.91   | 3.37 | 0.30 |
| Q8K0G5_TSSC1_MOUSE  | Tssc1  | Protein TSSC1 OS=Mus m    | K.NVLLHQAGEIWHIASPADK#.G            | 6.98    | 1.69   | 4.13 | 0.24 |
| Q9IHE7_TSSC4_MOUSE  | Tssc4  | Protein TSSC4 OS=Mus m    | K.YSLEDVSEASEQNR@.D                 | 6.42    | 3.93   | 1.63 | 0.61 |
| Q91Z38_TTC1_MOUSE   | Ttc1   | Tetratricopeptide repeat  | K.ASSDSSSELDIEYLILEK#.N             | 4.78    | 2.16   | 2.21 | 0.45 |
| Q80XJ3_TTC28_MOUSE  | Ttc28  | Tetratricopeptide repeat  | R.ELLTAAADLLDLR@.L                  | 4.18    | 1.40   | 2.98 | 0.34 |
| Q88196_TTC3_MOUSE   | Ttc3   | E3 ubiquitin-protein liga | R.LNSFLGDAIGPFPTTR@.Y               | 5.81    | 2.30   | 2.53 | 0.40 |
| Q9D6K7_TTC33_MOUSE  | Ttc33  | Tetratricopeptide repeat  | R.AQLGLGVEIVLAIR@.S                 | 17.36   | 6.16   | 2.82 | 0.35 |
| Q9D6K7_TTC33_MOUSE  | Ttc33  | Tetratricopeptide repeat  | R.SQQLK#DEGAQLAENKHR@.Y             | 10.07   | 2.11   | 4.78 | 0.21 |
| F8VPKO_F8VPKO_MOUSE | Ttc37  | Protein Ttc37 OS=Mus m    | K.ALLYTAVWVQGLAM*GS35               | 7.35    | 1.98   | 3.72 | 0.27 |
| F8VPKO_F8VPKO_MOUSE | Ttc37  | Protein Ttc37 OS=Mus m    | K.ASELNPSTSYVFK#.V                  | 12.70   | 1.86   | 6.81 | 0.15 |
| F8VPKO_F8VPKO_MOUSE | Ttc37  | Protein Ttc37 OS=Mus m    | K.VAIAIQLGR@.Y                      | 16.26   | 3.55   | 4.58 | 0.22 |
| F8VPKO_F8VPKO_MOUSE | Ttc37  | Protein Ttc37 OS=Mus m    | K.VALVDFLDGK#.A                     | 24.37   | 8.48   | 2.87 | 0.35 |
| F8VPKO_F8VPKO_MOUSE | Ttc37  | Protein Ttc37 OS=Mus m    | K.WFSQVPTGLDITGK#.T                 | 8.91    | 1.33   | 6.69 | 0.15 |
| Q5NC05_TTF2_MOUSE   | Ttf2   | Transcription terminatio  | K.KHDVVIHR.F                        | 2.81    | 9.13   | 0.31 | 3.25 |
| Q5NC05_TTF2_MOUSE   | Ttf2   | Transcription terminatio  | K.KHDVVIHR.F                        | 19.08   | 18.67  | 1.02 | 0.98 |
| Q5NC05_TTF2_MOUSE   | Ttf2   | Transcription terminatio  | K.VSSLLAELEAIQK#.G                  | 14.67   | 2.54   | 5.77 | 0.17 |
| P38585_TTL_MOUSE    | Ttl    | Tubulin-tyrosine ligase   | K.EDGEGNVWIAK#.S                    | 6.82    | 2.69   | 1.54 | 0.39 |
| P68369_TBA1A_MOUSE  | Tuba1a | Tubulin alpha-1A chain C  | R.AFVHWVYVGGEM*EEGEFSEAR@.E         | 224.08  | 154.11 | 1.45 | 0.69 |
| P68369_TBA1A_MOUSE  | Tuba1a | Tubulin alpha-1A chain C  | R.AFVHWVYVGGEM*EEGEFSEAR.E          | 5.15    | 3.44   | 1.50 | 0.67 |
| P68369_TBA1A_MOUSE  | Tuba1a | Tubulin alpha-1A chain C  | R.AFVHWVYVGGEM*EEGEFSEAR@.E         | 35.99   | 23.84  | 1.51 | 0.66 |
| P68369_TBA1A_MOUSE  | Tuba1a | Tubulin alpha-1A chain C  | R.AFVHWVYVGGEM*EEGEFSEAREDM*AALEK.D | 22.68   | 17.85  | 1.27 | 0.79 |
| P68369_TBA1A_MOUSE  | Tuba1a | Tubulin alpha-1A chain C  | R.AFVFDLEPTVIDEVR@.T                | 1105.07 | 817.24 | 1.35 | 0.74 |
| P68369_TBA1A_MOUSE  | Tuba1a | Tubulin alpha-1A chain C  | R.DVNAIAITK#.T                      | 1284.48 | 830.55 | 1.55 | 0.65 |
| P68369_TBA1A_MOUSE  | Tuba1a | Tubulin alpha-1A chain C  | R.DYEEVGVDSVEGEEGEEY.-              | 36.53   | 36.53  | 1.00 | 1.00 |
| P68369_TBA1A_MOUSE  | Tuba1a | Tubulin alpha-1A chain C  | R.EDAANNYAR@.G                      | 106.25  | 80.64  | 1.32 | 0.76 |
| P68369_TBA1A_MOUSE  | Tuba1a | Tubulin alpha-1A chain C  | R.EDMAALEK#.D                       | 27.67   | 21.59  | 1.28 | 0.78 |
| P68369_TBA1A_MOUSE  | Tuba1a | Tubulin alpha-1A chain C  | R.EDM*AALEK#DYEEVGVDSVEGEEGEEY.-    | 70.07   | 38.66  | 1.81 | 0.55 |
| P68369_TBA1A_MOUSE  | Tuba1a | Tubulin alpha-1A chain C  | R.EIIDLVDR@.J                       | 640.94  | 497.44 | 1.29 | 0.78 |
| P68369_TBA1A_MOUSE  | Tuba1a | Tubulin alpha-1A chain C  | R.FDGALNVDLTFEQTNLVPYPR@.I          | 333.98  | 229.81 | 1.45 | 0.69 |
| P68369_TBA1A_MOUSE  | Tuba1a | Tubulin alpha-1A chain C  | R.FDGALNVDLTFEQTNLVPYPR.J           | 106.77  | 82.20  | 1.30 | 0.77 |
| P68369_TBA1A_MOUSE  | Tuba1a | Tubulin alpha-1A chain C  | R.FDLM*YAK#.R                       | 260.15  | 194.30 | 1.34 | 0.75 |
| P68369_TBA1A_MOUSE  | Tuba1a | Tubulin alpha-1A chain C  | R.FDLMYAK#.R                        | 34.50   | 28.46  | 1.21 | 0.82 |
| P68369_TBA1A_MOUSE  | Tuba1a | Tubulin alpha-1A chain C  | R.IHFLATYAPVISAQK#.A                | 621.21  | 522.97 | 1.19 | 0.84 |
| P68369_TBA1A_MOUSE  | Tuba1a | Tubulin alpha-1A chain C  | R.LDHK#FDLM*YAK#.R                  | 237.59  | 126.30 | 1.88 | 0.53 |
| P68369_TBA1A_MOUSE  | Tuba1a | Tubulin alpha-1A chain C  | R.LDHK#FDLMYAK#.R                   | 39.16   | 45.00  | 0.87 | 1.15 |
| P68369_TBA1A_MOUSE  | Tuba1a | Tubulin alpha-1A chain C  | R.LIGQVSSITASLR@.F                  | 134.21  | 106.50 | 1.26 | 0.79 |
| P68369_TBA1A_MOUSE  | Tuba1a | Tubulin alpha-1A chain C  | R.LSVDYGR#.K                        | 428.57  | 381.00 | 1.12 | 0.89 |
| P68369_TBA1A_MOUSE  | Tuba1a | Tubulin alpha-1A chain C  | R.LSVDYGR#.K.S                      | 256.98  | 203.67 | 1.26 | 0.79 |
| P68369_TBA1A_MOUSE  | Tuba1a | Tubulin alpha-1A chain C  | R.NLDIRPTYNLNR.L                    | 1119.34 | 814.79 | 1.37 | 0.73 |
| P68369_TBA1A_MOUSE  | Tuba1a | Tubulin alpha-1A chain C  | R.QLHFPEQLTGR#.E                    | 72.95   | 55.05  | 1.33 | 0.75 |
| P68369_TBA1A_MOUSE  | Tuba1a | Tubulin alpha-1A chain C  | R.K@AFVHWVYVGGEM*EEGEFSEAR@.E       | 22.40   | 16.35  | 1.37 | 0.73 |
| P68369_TBA1A_MOUSE  | Tuba1a | Tubulin alpha-1A chain C  | R.RAFVHWVYVGGEM*EEGEFSEAR.E         | 8.08    | 5.06   | 1.60 | 0.63 |
| P68369_TBA1A_MOUSE  | Tuba1a | Tubulin alpha-1A chain C  | R.R@NLDIR@PTYNLNR@.L                | 56.95   | 38.53  | 1.48 | 0.68 |
| P68369_TBA1A_MOUSE  | Tuba1a | Tubulin alpha-1A chain C  | R.TIGGGDSFNFTFSETGAGK#.H            | 71.70   | 42.91  | 1.67 | 0.60 |
| P68369_TBA1A_MOUSE  | Tuba1a | Tubulin alpha-1A chain C  | R.VGINQPPTVPGDGLAK.V                | 533.66  | 447.74 | 1.19 | 0.84 |
| P68369_TBA1A_MOUSE  | Tuba1a | Tubulin alpha-1A chain C  | R.AFVHWVYVGGEM*EEGEFSEAR@.E         | 58.95   | 26.30  | 2.24 | 0.45 |
| P68369_TBA1A_MOUSE  | Tuba1a | Tubulin alpha-1A chain C  | R.AFVFDLEPTVIDEVR@.T                | 297.62  | 188.98 | 1.57 | 0.63 |
| P68369_TBA1A_MOUSE  | Tuba1a | Tubulin alpha-1A chain C  | R.DVNAIAITK#.T                      | 68.77   | 27.25  | 2.52 | 0.40 |
| P68369_TBA1A_MOUSE  | Tuba1a | Tubulin alpha-1A chain C  | R.EDAANNYAR@.G                      | 6.68    | 3.82   | 1.75 | 0.57 |
| P68369_TBA1A_MOUSE  | Tuba1a | Tubulin alpha-1A chain C  | R.EDM*AALEK#DYEEVGVDSVEGEEGEEY.-    | 7.62    | 1.73   | 4.41 | 0.23 |
| P68369_TBA1A_MOUSE  | Tuba1a | Tubulin alpha-1A chain C  | R.EIIDLVDR@.J                       | 158.72  | 51.50  | 3.08 | 0.32 |
| P68369_TBA1A_MOUSE  | Tuba1a | Tubulin alpha-1A chain C  | R.GHYTIQK#EIIDLVDR@.J               | 3.37    | 1.75   | 1.93 | 0.52 |
| P68369_TBA1A_MOUSE  | Tuba1a | Tubulin alpha-1A chain C  | R.IHFLATYAPVISAQK#.A                | 30.13   | 14.47  | 2.08 | 0.48 |
| P68369_TBA1A_MOUSE  | Tuba1a | Tubulin alpha-1A chain C  | R.TIGGGDSFNFTFSETGAGK#.H            | 47.82   | 29.89  | 1.60 | 0.63 |
| P68369_TBA1A_MOUSE  | Tuba1a | Tubulin alpha-1A chain C  | R.VGINQPPTVPGDGLAK.V                | 175.09  | 94.47  | 1.85 | 0.54 |
| P68369_TBA1A_MOUSE  | Tuba1a | Tubulin alpha-1A chain C  | R.AFVHWVYVGGEM*EEGEFSEAR@.E         | 116.01  | 45.19  | 2.57 | 0.39 |
| P68369_TBA1A_MOUSE  | Tuba1a | Tubulin alpha-1A chain C  | R.AFVHWVYVGGEM*EEGEFSEAR@.E         | 18.06   | 9.55   | 1.89 | 0.53 |
| P68369_TBA1A_MOUSE  | Tuba1a | Tubulin alpha-1A chain C  | R.AFVFDLEPTVIDEVR@.T                | 654.45  | 263.71 | 2.48 | 0.40 |
| P68369_TBA1A_MOUSE  | Tuba1a | Tubulin alpha-1A chain C  | R.DVNAIAITK#.T                      | 549.07  | 248.83 | 2.21 | 0.45 |
| P68369_TBA1A_MOUSE  | Tuba1a | Tubulin alpha-1A chain C  | R.DYEEVGVDSVEGEEGEEY.-              | 9.97    | 9.97   | 1.00 | 1.00 |
| P68369_TBA1A_MOUSE  | Tuba1a | Tubulin alpha-1A chain C  | R.EDAANNYAR@.G                      | 49.71   | 19.21  | 2.59 | 0.39 |
| P68369_TBA1A_MOUSE  | Tuba1a | Tubulin alpha-1A chain C  | R.EDM*AALEK#DYEEVGVDSVEGEEGEEY.-    | 22.07   | 8.93   | 2.47 | 0.40 |
| P68369_TBA1A_MOUSE  | Tuba1a | Tubulin alpha-1A chain C  | R.EIIDLVDR@.J                       | 628.57  | 215.36 | 2.92 | 0.34 |
| P68369_TBA1A_MOUSE  | Tuba1a | Tubulin alpha-1A chain C  | R.FDGALNVDLTFEQTNLVPYPR@.I          | 158.72  | 60.29  | 2.62 | 0.38 |
| P68369_TBA1A_MOUSE  | Tuba1a | Tubulin alpha-1A chain C  | R.FDGALNVDLTFEQTNLVPYPR.J           | 58.76   | 25.74  | 2.28 | 0.44 |
| P68369_TBA1A_MOUSE  | Tuba1a | Tubulin alpha-1A chain C  | R.FDLM*YAK#.R                       | 99.80   | 40.47  | 2.47 | 0.41 |
| P68369_TBA1A_MOUSE  | Tuba1a | Tubulin alpha-1A chain C  | R.IHFLATYAPVISAQK#.A                | 332.62  | 134.56 | 2.47 | 0.40 |
| P68369_TBA1A_MOUSE  | Tuba1a | Tubulin alpha-1A chain C  | R.LIGQVSSITASLR@.F                  | 41.24   | 21.05  | 1.96 | 0.51 |
| P68369_TBA1A_MOUSE  | Tuba1a | Tubulin alpha-1A chain C  | R.LSVDYGR#.K                        | 167.77  | 62.19  | 2.70 | 0.37 |
| P68369_TBA1A_MOUSE  | Tuba1a | Tubulin alpha-1A chain C  | R.LSVDYGR#.K.S                      | 136.11  | 45.73  | 2.98 | 0.34 |
| P68369_TBA1A_MOUSE  | Tuba1a | Tubulin alpha-1A chain C  | R.TIGGGDSFNFTFSETGAGK#.H            | 410.01  | 148.39 | 2.76 | 0.36 |

|                    |        |                                                           |         |        |      |      |
|--------------------|--------|-----------------------------------------------------------|---------|--------|------|------|
| P68369_TBA1A_MOUSE | Tuba1a | Tubulin alpha-1A chain C.K.VGINYQPPTVPPGGDLAK#V           | 316.06  | 136.35 | 2.32 | 0.43 |
| P68369_TBA1A_MOUSE | Tuba1a | Tubulin alpha-1A chain C.R.AVFWVWVGGEM#EEGEFSEAR@.E       | 181.47  | 61.56  | 2.95 | 0.34 |
| P68369_TBA1A_MOUSE | Tuba1a | Tubulin alpha-1A chain C.R.AVFWVWVGGEM#EEGEFSEAR@.E       | 14.90   | 3.38   | 4.41 | 0.23 |
| P68369_TBA1A_MOUSE | Tuba1a | Tubulin alpha-1A chain C.R.AVFDLPEPTVIDEVR@.T             | 1675.17 | 493.23 | 3.40 | 0.29 |
| P68369_TBA1A_MOUSE | Tuba1a | Tubulin alpha-1A chain C.K.DVNAIAAIK#T                    | 910.42  | 294.91 | 3.09 | 0.32 |
| P68369_TBA1A_MOUSE | Tuba1a | Tubulin alpha-1A chain C.K.EDAANNYAR@.G                   | 112.46  | 30.56  | 3.68 | 0.27 |
| P68369_TBA1A_MOUSE | Tuba1a | Tubulin alpha-1A chain C.R.EDM#AALEK#DYEVEGVDSVEGEEGEEY.- | 43.56   | 14.18  | 3.07 | 0.33 |
| P68369_TBA1A_MOUSE | Tuba1a | Tubulin alpha-1A chain C.K.EIIDLVDR@.I                    | 1284.18 | 401.46 | 3.20 | 0.31 |
| P68369_TBA1A_MOUSE | Tuba1a | Tubulin alpha-1A chain C.R.FDGALNVDLTFEQTNLVPYPR.I        | 91.75   | 28.30  | 3.24 | 0.31 |
| P68369_TBA1A_MOUSE | Tuba1a | Tubulin alpha-1A chain C.K.FDLM#YAK#R                     | 148.42  | 47.62  | 3.12 | 0.32 |
| P68369_TBA1A_MOUSE | Tuba1a | Tubulin alpha-1A chain C.R.GHYTIGK#E                      | 220.45  | 64.31  | 3.43 | 0.29 |
| P68369_TBA1A_MOUSE | Tuba1a | Tubulin alpha-1A chain C.R.IHFPLATYAPVISAEEK#A            | 682.14  | 228.42 | 2.99 | 0.33 |
| P68369_TBA1A_MOUSE | Tuba1a | Tubulin alpha-1A chain C.R.LIGQVSSITASLR@.F               | 60.50   | 17.26  | 3.50 | 0.29 |
| P68369_TBA1A_MOUSE | Tuba1a | Tubulin alpha-1A chain C.R.LIGQVSSITASLR@.F               | 102.27  | 30.57  | 3.35 | 0.30 |
| P68369_TBA1A_MOUSE | Tuba1a | Tubulin alpha-1A chain C.R.LSVDYGK#K                      | 483.39  | 153.70 | 3.15 | 0.32 |
| P68369_TBA1A_MOUSE | Tuba1a | Tubulin alpha-1A chain C.R.LSVDYGK#K#S                    | 227.61  | 66.85  | 3.40 | 0.29 |
| P68369_TBA1A_MOUSE | Tuba1a | Tubulin alpha-1A chain C.R.NLDIER@PTYTLNLR@.L             | 64.34   | 20.31  | 3.17 | 0.32 |
| P68369_TBA1A_MOUSE | Tuba1a | Tubulin alpha-1A chain C.R.QLFHPQLITGK#EDAANNYAR@.G       | 78.22   | 24.65  | 3.17 | 0.32 |
| P68369_TBA1A_MOUSE | Tuba1a | Tubulin alpha-1A chain C.R.QLFHPQLITGK#EDAANNYAR.G        | 311.90  | 85.42  | 3.65 | 0.27 |
| P68369_TBA1A_MOUSE | Tuba1a | Tubulin alpha-1A chain C.R.R@NLDIER@PTYTLNLR@.L           | 30.81   | 12.24  | 2.52 | 0.40 |
| P68369_TBA1A_MOUSE | Tuba1a | Tubulin alpha-1A chain C.K.TIGGGDSDPTFFSETGAGK#H          | 707.64  | 209.87 | 3.37 | 0.30 |
| P68369_TBA1A_MOUSE | Tuba1a | Tubulin alpha-1A chain C.K.VGINYQPPTVPPGGDLAK#V           | 744.85  | 236.92 | 3.14 | 0.32 |
| P68373_TBA1C_MOUSE | Tuba1c | Tubulin alpha-1C chain C.K.DYEVEGVDSVEGDEGEY.-            | 5.79    | 5.79   | 1.00 | 1.00 |
| P68373_TBA1C_MOUSE | Tuba1c | Tubulin alpha-1C chain C.R.EDM#AALEK#DYEVEGVDSVEGDEGEY.-  | 9.38    | 4.60   | 2.04 | 0.49 |
| P68373_TBA1C_MOUSE | Tuba1c | Tubulin alpha-1C chain C.R.LISQVSSITASLR@.F               | 182.43  | 123.22 | 1.48 | 0.68 |
| P68373_TBA1C_MOUSE | Tuba1c | Tubulin alpha-1C chain C.R.LISQVSSITASLR@.F               | 99.20   | 35.52  | 2.79 | 0.36 |
| P68373_TBA1C_MOUSE | Tuba1c | Tubulin alpha-1C chain C.K.DYEVEGVDSVEGDEGEY.-            | 4.35    | 4.35   | 1.00 | 1.00 |
| P68373_TBA1C_MOUSE | Tuba1c | Tubulin alpha-1C chain C.R.LISQVSSITASLR@.F               | 244.31  | 71.98  | 3.39 | 0.29 |
| P68368_TBA4A_MOUSE | Tuba4a | Tubulin alpha-4A chain C.R.AVFDLPEPTVIDEIR@.N             | 15.63   | 15.53  | 1.01 | 0.99 |
| P68368_TBA4A_MOUSE | Tuba4a | Tubulin alpha-4A chain C.K.DVNAIAAIK#T                    | 16.47   | 17.15  | 0.96 | 1.04 |
| P68368_TBA4A_MOUSE | Tuba4a | Tubulin alpha-4A chain C.K.EIIDVLDLR@.J                   | 13.69   | 16.05  | 0.85 | 1.17 |
| P68368_TBA4A_MOUSE | Tuba4a | Tubulin alpha-4A chain C.R.AVFDLPEPTVIDEIR@.N             | 12.95   | 2.93   | 4.43 | 2.23 |
| Q3UX10_TBA3_MOUSE  | Tuba3  | Tubulin alpha chain-like R.SFGGGTSGSGLTSLM#ER@.L          | 7.23    | 2.11   | 3.42 | 0.29 |
| Q7TM9_TBB2A_MOUSE  | Tubb2a | Tubulin beta-2A chain O.R.AILVDLEPGTM#DSVR@.S             | 896.77  | 645.56 | 1.39 | 0.72 |
| Q7TM9_TBB2A_MOUSE  | Tubb2a | Tubulin beta-2A chain O.R.AILVDLEPGTM#DSVR@.S             | 98.85   | 70.37  | 1.40 | 0.71 |
| Q7TM9_TBB2A_MOUSE  | Tubb2a | Tubulin beta-2A chain O.R.ALTVPTELQQM#FDSK#N              | 61.42   | 55.32  | 1.11 | 0.90 |
| Q7TM9_TBB2A_MOUSE  | Tubb2a | Tubulin beta-2A chain O.R.ALTVPTELQQM#FDSK.N              | 15.12   | 15.74  | 0.96 | 1.04 |
| Q7TM9_TBB2A_MOUSE  | Tubb2a | Tubulin beta-2A chain O.K.EVDEQM#LNVQNK#N                 | 337.40  | 255.88 | 1.32 | 0.76 |
| Q7TM9_TBB2A_MOUSE  | Tubb2a | Tubulin beta-2A chain O.K.EVDEQM#LNVQNK#N                 | 78.88   | 56.73  | 1.39 | 0.72 |
| Q7TM9_TBB2A_MOUSE  | Tubb2a | Tubulin beta-2A chain O.R.FPGQLNADLR.L                    | 180.97  | 131.80 | 1.37 | 0.73 |
| Q7TM9_TBB2A_MOUSE  | Tubb2a | Tubulin beta-2A chain O.R.FPGQLNADLR.L                    | 14.97   | 9.52   | 1.57 | 0.64 |
| Q7TM9_TBB2A_MOUSE  | Tubb2a | Tubulin beta-2A chain O.R.FPGQLNADLR@K#L                  | 111.37  | 94.52  | 1.18 | 0.85 |
| Q7TM9_TBB2A_MOUSE  | Tubb2a | Tubulin beta-2A chain O.K.GHYTEGAEVDSVLDVVR@.K            | 884.04  | 630.50 | 1.40 | 0.71 |
| Q7TM9_TBB2A_MOUSE  | Tubb2a | Tubulin beta-2A chain O.K.GHYTEGAEVDSVLDVVR.K             | 52.10   | 36.18  | 1.44 | 0.69 |
| Q7TM9_TBB2A_MOUSE  | Tubb2a | Tubulin beta-2A chain O.K.GHYTEGAEVDSVLDVVR@K#E           | 235.51  | 151.69 | 1.55 | 0.64 |
| Q7TM9_TBB2A_MOUSE  | Tubb2a | Tubulin beta-2A chain O.R.IM#NTFSVM#PSPK#V                | 73.01   | 55.44  | 1.32 | 0.76 |
| Q7TM9_TBB2A_MOUSE  | Tubb2a | Tubulin beta-2A chain O.R.IM#NTFSVM#PSPK#V                | 9.10    | 12.24  | 0.74 | 1.35 |
| Q7TM9_TBB2A_MOUSE  | Tubb2a | Tubulin beta-2A chain O.R.IM#NTFSVM#PSPK.V                | 5.71    | 6.77   | 0.84 | 1.18 |
| Q7TM9_TBB2A_MOUSE  | Tubb2a | Tubulin beta-2A chain O.R.IM#NTFSVM#PSPK.V                | 6.00    | 7.40   | 0.81 | 1.23 |
| Q7TM9_TBB2A_MOUSE  | Tubb2a | Tubulin beta-2A chain O.R.INVYNAAGNK#Y                    | 53.30   | 46.01  | 1.16 | 0.86 |
| Q7TM9_TBB2A_MOUSE  | Tubb2a | Tubulin beta-2A chain O.R.ISEQFTAM#FR@.R                  | 908.22  | 664.76 | 1.37 | 0.73 |
| Q7TM9_TBB2A_MOUSE  | Tubb2a | Tubulin beta-2A chain O.R.ISEQFTAM#FR@.R                  | 80.96   | 45.50  | 1.78 | 0.56 |
| Q7TM9_TBB2A_MOUSE  | Tubb2a | Tubulin beta-2A chain O.K.LAVNM#VPFPR@.L                  | 275.51  | 212.28 | 1.30 | 0.77 |
| Q7TM9_TBB2A_MOUSE  | Tubb2a | Tubulin beta-2A chain O.K.LAVNM#VPFPR.L                   | 153.41  | 105.68 | 1.45 | 0.69 |
| Q7TM9_TBB2A_MOUSE  | Tubb2a | Tubulin beta-2A chain O.R.LHFFM#PGFAPLTSR@.G              | 332.44  | 261.86 | 1.27 | 0.79 |
| Q7TM9_TBB2A_MOUSE  | Tubb2a | Tubulin beta-2A chain O.R.LHFFM#PGFAPLTSR.G               | 40.57   | 30.64  | 1.32 | 0.76 |
| Q7TM9_TBB2A_MOUSE  | Tubb2a | Tubulin beta-2A chain O.R.LHFFM#PGFAPLTSR@.G              | 100.00  | 72.11  | 1.39 | 0.72 |
| Q7TM9_TBB2A_MOUSE  | Tubb2a | Tubulin beta-2A chain O.K.M#SATFINGSTAIQELFK#R@.I         | 14.91   | 6.22   | 2.40 | 0.42 |
| Q7TM9_TBB2A_MOUSE  | Tubb2a | Tubulin beta-2A chain O.R.M#SM#KEVDEQM#LNVQNK.N           | 153.04  | 126.69 | 1.21 | 0.83 |
| Q7TM9_TBB2A_MOUSE  | Tubb2a | Tubulin beta-2A chain O.R.M#SM#KEVDEQM#LNVQNK.N           | 33.51   | 21.25  | 1.58 | 0.63 |
| Q7TM9_TBB2A_MOUSE  | Tubb2a | Tubulin beta-2A chain O.K.NSSYFVWIPNNVK#T                 | 454.95  | 296.43 | 1.53 | 0.65 |
| Q7TM9_TBB2A_MOUSE  | Tubb2a | Tubulin beta-2A chain O.K.R@ISEQFTAM#FR@.R                | 224.41  | 15.59  | 1.44 | 0.70 |
| Q7TM9_TBB2A_MOUSE  | Tubb2a | Tubulin beta-2A chain O.R.SGPFQIFR@PDNFVFGQSGAGNNWAK#G    | 23.85   | 170.57 | 1.38 | 0.73 |
| Q7TM9_TBB2A_MOUSE  | Tubb2a | Tubulin beta-2A chain O.R.YLTVAAIFR@.G                    | 71.51   | 71.64  | 1.00 | 1.00 |
| Q7TM9_TBB2A_MOUSE  | Tubb2a | Tubulin beta-2A chain O.R.AILVDLEPGTM#DSVR@.S             | 468.18  | 192.11 | 2.44 | 0.41 |
| Q7TM9_TBB2A_MOUSE  | Tubb2a | Tubulin beta-2A chain O.R.AILVDLEPGTM#DSVR@.S             | 35.83   | 14.88  | 2.41 | 0.42 |
| Q7TM9_TBB2A_MOUSE  | Tubb2a | Tubulin beta-2A chain O.K.EVDEQM#LNVQNK#N                 | 18.77   | 8.08   | 2.32 | 0.43 |
| Q7TM9_TBB2A_MOUSE  | Tubb2a | Tubulin beta-2A chain O.K.FWEVISDEHGIDPTGSYHGSDQLQER@.I   | 8.01    | 4.94   | 1.62 | 0.62 |
| Q7TM9_TBB2A_MOUSE  | Tubb2a | Tubulin beta-2A chain O.K.GHYTEGAEVDSVLDVVR@.K            | 272.98  | 97.56  | 2.80 | 0.36 |
| Q7TM9_TBB2A_MOUSE  | Tubb2a | Tubulin beta-2A chain O.K.GHYTEGAEVDSVLDVVR.K             | 27.87   | 9.43   | 2.95 | 0.34 |
| Q7TM9_TBB2A_MOUSE  | Tubb2a | Tubulin beta-2A chain O.K.GHYTEGAEVDSVLDVVR@K#E           | 382.63  | 98.75  | 3.87 | 0.26 |
| Q7TM9_TBB2A_MOUSE  | Tubb2a | Tubulin beta-2A chain O.R.INVYNAAGNK#Y                    | 22.44   | 11.22  | 2.00 | 0.50 |
| Q7TM9_TBB2A_MOUSE  | Tubb2a | Tubulin beta-2A chain O.K.IR@EYPR@.I                      | 7.21    | 7.43   | 0.97 | 1.03 |
| Q7TM9_TBB2A_MOUSE  | Tubb2a | Tubulin beta-2A chain O.R.ISEQFTAM#FR@.R                  | 90.86   | 40.38  | 2.25 | 0.44 |
| Q7TM9_TBB2A_MOUSE  | Tubb2a | Tubulin beta-2A chain O.K.LAVNM#VPFPR@.L                  | 30.82   | 12.33  | 2.50 | 0.40 |
| Q7TM9_TBB2A_MOUSE  | Tubb2a | Tubulin beta-2A chain O.R.LHFFM#PGFAPLTSR@.G              | 18.28   | 7.04   | 2.60 | 0.38 |
| Q7TM9_TBB2A_MOUSE  | Tubb2a | Tubulin beta-2A chain O.K.NSSYFVWIPNNVK#T                 | 65.77   | 31.00  | 2.12 | 0.47 |
| Q7TM9_TBB2A_MOUSE  | Tubb2a | Tubulin beta-2A chain O.R.SGPFQIFR@PDNFVFGQSGAGNNWAK.G    | 85.70   | 30.85  | 2.78 | 0.36 |
| Q7TM9_TBB2A_MOUSE  | Tubb2a | Tubulin beta-2A chain O.R.YLTVAAIFR@.G                    | 12.55   | 7.24   | 1.73 | 0.58 |
| Q7TM9_TBB2A_MOUSE  | Tubb2a | Tubulin beta-2A chain O.R.AILVDLEPGTM#DSVR.S              | 547.30  | 294.72 | 1.86 | 0.54 |
| Q7TM9_TBB2A_MOUSE  | Tubb2a | Tubulin beta-2A chain O.R.AILVDLEPGTM#DSVR@.S             | 48.86   | 25.96  | 1.88 | 0.53 |
| Q7TM9_TBB2A_MOUSE  | Tubb2a | Tubulin beta-2A chain O.R.ALTVPTELQQM#FDSK#N              | 28.99   | 16.89  | 1.72 | 0.58 |
| Q7TM9_TBB2A_MOUSE  | Tubb2a | Tubulin beta-2A chain O.K.EVDEQM#LNVQNK#N                 | 147.73  | 78.57  | 1.88 | 0.53 |
| Q7TM9_TBB2A_MOUSE  | Tubb2a | Tubulin beta-2A chain O.K.EVDEQM#LNVQNK#N                 | 32.54   | 15.71  | 2.07 | 0.48 |
| Q7TM9_TBB2A_MOUSE  | Tubb2a | Tubulin beta-2A chain O.R.FPGQLNADLR@.K                   | 93.16   | 49.17  | 1.89 | 0.53 |
| Q7TM9_TBB2A_MOUSE  | Tubb2a | Tubulin beta-2A chain O.K.FWEVISDEHGIDPTGSYHGSDQLQER@.I   | 5.94    | 3.60   | 1.65 | 0.61 |
| Q7TM9_TBB2A_MOUSE  | Tubb2a | Tubulin beta-2A chain O.K.GHYTEGAEVDSVLDVVR@.K            | 582.55  | 269.68 | 2.16 | 0.46 |
| Q7TM9_TBB2A_MOUSE  | Tubb2a | Tubulin beta-2A chain O.K.GHYTEGAEVDSVLDVVR@K#E           | 130.25  | 55.61  | 2.34 | 0.43 |
| Q7TM9_TBB2A_MOUSE  | Tubb2a | Tubulin beta-2A chain O.R.IM#NTFSVM#PSPK#V                | 77.96   | 16.41  | 4.75 | 0.21 |
| Q7TM9_TBB2A_MOUSE  | Tubb2a | Tubulin beta-2A chain O.R.INVYNAAGNK#Y                    | 38.18   | 18.96  | 2.01 | 0.50 |
| Q7TM9_TBB2A_MOUSE  | Tubb2a | Tubulin beta-2A chain O.R.ISEQFTAM#FR@.R                  | 428.86  | 202.48 | 2.12 | 0.47 |
| Q7TM9_TBB2A_MOUSE  | Tubb2a | Tubulin beta-2A chain O.R.ISEQFTAM#FR@.R                  | 46.45   | 21.86  | 2.12 | 0.47 |
| Q7TM9_TBB2A_MOUSE  | Tubb2a | Tubulin beta-2A chain O.R.KLAVNM#VPFPR.L                  | 38.42   | 29.52  | 1.30 | 0.77 |
| Q7TM9_TBB2A_MOUSE  | Tubb2a | Tubulin beta-2A chain O.K.LAVNM#VPFPR.L                   | 260.66  | 129.53 | 2.01 | 0.50 |
| Q7TM9_TBB2A_MOUSE  | Tubb2a | Tubulin beta-2A chain O.K.LAVNM#VPFPR@.L                  | 66.75   | 33.86  | 1.97 | 0.51 |
| Q7TM9_TBB2A_MOUSE  | Tubb2a | Tubulin beta-2A chain O.R.LHFFM#PGFAPLTSR@.G              | 329.11  | 149.62 | 2.20 | 0.45 |
| Q7TM9_TBB2A_MOUSE  | Tubb2a | Tubulin beta-2A chain O.R.LHFFM#PGFAPLTSR.G               | 30.31   | 17.69  | 1.71 | 0.58 |
| Q7TM9_TBB2A_MOUSE  | Tubb2a | Tubulin beta-2A chain O.R.LHFFM#PGFAPLTSR@.G              | 78.42   | 33.22  | 2.36 | 0.42 |
| Q7TM9_TBB2A_MOUSE  | Tubb2a | Tubulin beta-2A chain O.K.M#SATFINGSTAIQELFK#R@.I         | 12.65   | 4.80   | 2.64 | 0.38 |
| Q7TM9_TBB2A_MOUSE  | Tubb2a | Tubulin beta-2A chain O.R.M#SM#KEVDEQM#LNVQNK.N           | 88.28   | 38.68  | 2.28 | 0.44 |
| Q7TM9_TBB2A_MOUSE  | Tubb2a | Tubulin beta-2A chain O.K.NSSYFVWIPNNVK#T                 | 296.49  | 141.62 | 2.09 | 0.48 |
| Q7TM9_TBB2A_MOUSE  | Tubb2a | Tubulin beta-2A chain O.R.SGPFQIFR@PDNFVFGQSGAGNNWAK#G    | 153.96  | 71.92  | 2.14 | 0.47 |
| Q7TM9_TBB2A_MOUSE  | Tubb2a | Tubulin beta-2A chain O.R.YLTVAAIFR@.G                    | 55.41   | 33.54  | 1.65 | 0.61 |

|                    |        |                                                             |        |        |      |      |
|--------------------|--------|-------------------------------------------------------------|--------|--------|------|------|
| Q7TMM9_TB82A_MOUSE | Tubb2a | Tubulin beta-2A chain OS: R.AILVDLEPGTM*DSVR@.S             | 999.46 | 372.58 | 2.68 | 0.37 |
| Q7TMM9_TB82A_MOUSE | Tubb2a | Tubulin beta-2A chain OS: R.AILVDLEPGTMDSVR@.S              | 77.03  | 29.46  | 2.62 | 0.38 |
| Q7TMM9_TB82A_MOUSE | Tubb2a | Tubulin beta-2A chain OS: R.ALTVPPELQDM*FDSK#.N             | 54.22  | 23.08  | 2.34 | 0.43 |
| Q7TMM9_TB82A_MOUSE | Tubb2a | Tubulin beta-2A chain OS: K.EVDEQML*LNQNK#.N                | 327.46 | 108.37 | 3.02 | 0.33 |
| Q7TMM9_TB82A_MOUSE | Tubb2a | Tubulin beta-2A chain OS: K.EVDEQML*LNQNK#.N                | 44.92  | 18.72  | 2.40 | 0.42 |
| Q7TMM9_TB82A_MOUSE | Tubb2a | Tubulin beta-2A chain OS: R.FPGQLNADLR@.K                   | 139.92 | 68.96  | 2.03 | 0.49 |
| Q7TMM9_TB82A_MOUSE | Tubb2a | Tubulin beta-2A chain OS: R.FPGQLNADLR@.K#.L                | 110.15 | 36.24  | 3.04 | 0.33 |
| Q7TMM9_TB82A_MOUSE | Tubb2a | Tubulin beta-2A chain OS: K.FWEVISDEHGIDPDTGTYHGDSDLQLDR@.I | 100.52 | 40.30  | 2.49 | 0.40 |
| Q7TMM9_TB82A_MOUSE | Tubb2a | Tubulin beta-2A chain OS: K.GHYTEGAEVLDSVLDVVR@.K           | 949.30 | 317.62 | 2.99 | 0.33 |
| Q7TMM9_TB82A_MOUSE | Tubb2a | Tubulin beta-2A chain OS: K.GHYTEGAEVLDSVLDVVR@.K           | 44.32  | 12.43  | 3.56 | 0.28 |
| Q7TMM9_TB82A_MOUSE | Tubb2a | Tubulin beta-2A chain OS: K.GHYTEGAEVLDSVLDVVR@.K#.E        | 286.11 | 79.56  | 3.60 | 0.28 |
| Q7TMM9_TB82A_MOUSE | Tubb2a | Tubulin beta-2A chain OS: R.IM*NTFSVM*PSPK#.V               | 45.83  | 19.67  | 2.33 | 0.43 |
| Q7TMM9_TB82A_MOUSE | Tubb2a | Tubulin beta-2A chain OS: R.IM*NTFSVM*PSPK#.V               | 6.20   | 2.53   | 2.45 | 0.41 |
| Q7TMM9_TB82A_MOUSE | Tubb2a | Tubulin beta-2A chain OS: R.INVYNEATGK#.Y                   | 36.18  | 18.26  | 1.98 | 0.50 |
| Q7TMM9_TB82A_MOUSE | Tubb2a | Tubulin beta-2A chain OS: R.ISEQFTAM*FR@.R                  | 731.55 | 220.28 | 3.32 | 0.30 |
| Q7TMM9_TB82A_MOUSE | Tubb2a | Tubulin beta-2A chain OS: R.ISEQFTAM*FR@.R                  | 31.10  | 8.43   | 3.69 | 0.27 |
| Q7TMM9_TB82A_MOUSE | Tubb2a | Tubulin beta-2A chain OS: K.LAVNM*VPPFR@.L                  | 293.20 | 103.96 | 2.82 | 0.35 |
| Q7TMM9_TB82A_MOUSE | Tubb2a | Tubulin beta-2A chain OS: K.LAVNM*VPPFR@.L                  | 136.14 | 47.01  | 2.90 | 0.35 |
| Q7TMM9_TB82A_MOUSE | Tubb2a | Tubulin beta-2A chain OS: R.LHFFM*PGFAPLTSR@.G              | 408.10 | 150.43 | 2.71 | 0.37 |
| Q7TMM9_TB82A_MOUSE | Tubb2a | Tubulin beta-2A chain OS: R.LHFFM*PGFAPLTSR@.G              | 29.14  | 13.84  | 2.11 | 0.47 |
| Q7TMM9_TB82A_MOUSE | Tubb2a | Tubulin beta-2A chain OS: R.LHFFM*PGFAPLTSR@.G              | 79.06  | 26.31  | 3.01 | 0.33 |
| Q7TMM9_TB82A_MOUSE | Tubb2a | Tubulin beta-2A chain OS: K.M*STFIGNSTAIQELFK#.R            | 183.02 | 64.61  | 2.83 | 0.35 |
| Q7TMM9_TB82A_MOUSE | Tubb2a | Tubulin beta-2A chain OS: K.M*STFIGNSTAIQELFK#.R            | 42.41  | 11.25  | 3.77 | 0.27 |
| Q7TMM9_TB82A_MOUSE | Tubb2a | Tubulin beta-2A chain OS: K.MSATFIGNSTAIQELFK#.R            | 16.36  | 3.05   | 5.37 | 0.19 |
| Q7TMM9_TB82A_MOUSE | Tubb2a | Tubulin beta-2A chain OS: R.M*SM*KEVDEQML*LNQNK#.N          | 146.21 | 49.69  | 3.24 | 0.31 |
| Q7TMM9_TB82A_MOUSE | Tubb2a | Tubulin beta-2A chain OS: K.NSSYFVEWIPNNVK#.T               | 403.69 | 131.29 | 3.07 | 0.33 |
| Q7TMM9_TB82A_MOUSE | Tubb2a | Tubulin beta-2A chain OS: K.R@ISEQFTAM*FR@.R                | 39.20  | 9.56   | 4.10 | 0.24 |
| Q7TMM9_TB82A_MOUSE | Tubb2a | Tubulin beta-2A chain OS: R.SGPFQGLFR@PDNFVFGQSGAGNNWAK#.G  | 217.05 | 59.68  | 3.64 | 0.27 |
| Q7TMM9_TB82A_MOUSE | Tubb2a | Tubulin beta-2A chain OS: R.YLTVAAVFR@.G                    | 88.80  | 37.65  | 2.36 | 0.42 |
| Q9CWF2_TB82B_MOUSE | Tubb2b | Tubulin beta-2B chain OS: R.INVYNEATGK#.Y                   | 25.47  | 15.25  | 1.67 | 0.60 |
| Q9CWF2_TB82B_MOUSE | Tubb2b | Tubulin beta-2B chain OS: R.INVYNEATGK#.Y                   | 33.53  | 20.85  | 1.61 | 0.62 |
| Q9CWF2_TB82B_MOUSE | Tubb2b | Tubulin beta-2B chain OS: R.INVYNEATGK#.Y                   | 51.65  | 25.44  | 2.03 | 0.49 |
| Q9ERD7_TB83_MOUSE  | Tubb3  | Tubulin beta-3 chain OS: R.ALTVPPELQDM*FDAK#.N              | 71.49  | 43.77  | 1.63 | 0.61 |
| Q9ERD7_TB83_MOUSE  | Tubb3  | Tubulin beta-3 chain OS: R.ALTVPPELQDM*FDAK#.N              | 21.91  | 18.23  | 1.20 | 0.83 |
| Q9ERD7_TB83_MOUSE  | Tubb3  | Tubulin beta-3 chain OS: K.FWEVISDEHGIDPDTGTYHGDSDLQLDR@.I  | 2.59   | 5.17   | 0.50 | 2.00 |
| Q9ERD7_TB83_MOUSE  | Tubb3  | Tubulin beta-3 chain OS: R.IM*NTFSVM*PSPK#.V                | 503.83 | 366.95 | 1.37 | 0.73 |
| Q9ERD7_TB83_MOUSE  | Tubb3  | Tubulin beta-3 chain OS: R.IM*NTFSVM*PSPK#.V                | 117.29 | 80.64  | 1.45 | 0.69 |
| Q9ERD7_TB83_MOUSE  | Tubb3  | Tubulin beta-3 chain OS: R.LHFFM*PGFAPLTSR@.G               | 39.03  | 39.60  | 0.99 | 1.01 |
| Q9ERD7_TB83_MOUSE  | Tubb3  | Tubulin beta-3 chain OS: R.LHFFM*PGFAPLTSR@.G               | 13.46  | 9.36   | 1.44 | 0.70 |
| Q9ERD7_TB83_MOUSE  | Tubb3  | Tubulin beta-3 chain OS: K.M*STFIGNSTAIQELFK#.R             | 16.73  | 12.60  | 1.33 | 0.75 |
| Q9ERD7_TB83_MOUSE  | Tubb3  | Tubulin beta-3 chain OS: R.YLTVATVFR@.G                     | 50.62  | 44.81  | 1.13 | 0.89 |
| Q9ERD7_TB83_MOUSE  | Tubb3  | Tubulin beta-3 chain OS: R.ALTVPPELQDM*FDAK#.N              | 4.67   | 3.13   | 1.49 | 0.67 |
| Q9ERD7_TB83_MOUSE  | Tubb3  | Tubulin beta-3 chain OS: R.IM*NTFSVM*PSPK#.V                | 27.59  | 14.00  | 1.97 | 0.51 |
| Q9ERD7_TB83_MOUSE  | Tubb3  | Tubulin beta-3 chain OS: R.ALTVPPELQDM*FDAK#.N              | 43.86  | 16.46  | 2.66 | 0.38 |
| Q9ERD7_TB83_MOUSE  | Tubb3  | Tubulin beta-3 chain OS: R.ALTVPPELQDM*FDAK#.N              | 15.37  | 6.01   | 2.56 | 0.39 |
| Q9ERD7_TB83_MOUSE  | Tubb3  | Tubulin beta-3 chain OS: R.IM*NTFSVM*PSPK#.V                | 263.01 | 137.47 | 1.91 | 0.52 |
| Q9ERD7_TB83_MOUSE  | Tubb3  | Tubulin beta-3 chain OS: R.IM*NTFSVM*PSPK#.V                | 52.16  | 24.05  | 2.17 | 0.46 |
| Q9ERD7_TB83_MOUSE  | Tubb3  | Tubulin beta-3 chain OS: R.LHFFM*PGFAPLTSR@.G               | 15.36  | 8.26   | 1.86 | 0.54 |
| Q9ERD7_TB83_MOUSE  | Tubb3  | Tubulin beta-3 chain OS: K.M*STFIGNSTAIQELFK#.R             | 9.01   | 4.00   | 2.25 | 0.44 |
| Q9ERD7_TB83_MOUSE  | Tubb3  | Tubulin beta-3 chain OS: R.YLTVATVFR@.G                     | 16.74  | 8.78   | 1.91 | 0.52 |
| Q9ERD7_TB83_MOUSE  | Tubb3  | Tubulin beta-3 chain OS: R.ALTVPPELQDM*FDAK#.N              | 80.10  | 21.46  | 3.73 | 0.27 |
| Q9ERD7_TB83_MOUSE  | Tubb3  | Tubulin beta-3 chain OS: R.ALTVPPELQDM*FDAK#.N              | 23.68  | 8.84   | 2.68 | 0.37 |
| Q9ERD7_TB83_MOUSE  | Tubb3  | Tubulin beta-3 chain OS: R.IM*NTFSVM*PSPK#.V                | 434.31 | 152.15 | 2.85 | 0.35 |
| Q9ERD7_TB83_MOUSE  | Tubb3  | Tubulin beta-3 chain OS: R.IM*NTFSVM*PSPK#.V                | 76.00  | 30.31  | 2.51 | 0.40 |
| Q9ERD7_TB83_MOUSE  | Tubb3  | Tubulin beta-3 chain OS: R.LHFFM*PGFAPLTSR@.G               | 27.74  | 9.85   | 2.82 | 0.36 |
| Q9ERD7_TB83_MOUSE  | Tubb3  | Tubulin beta-3 chain OS: K.M*STFIGNSTAIQELFK#.R             | 22.88  | 6.59   | 3.47 | 0.29 |
| Q9ERD7_TB83_MOUSE  | Tubb3  | Tubulin beta-3 chain OS: R.YLTVATVFR@.G                     | 32.28  | 12.61  | 2.56 | 0.39 |
| P68372_TB84B_MOUSE | Tubb4b | Tubulin beta-4B chain OS: R.AVLVDLEPGTM*DSVR@.S             | 103.01 | 54.54  | 1.89 | 0.53 |
| P68372_TB84B_MOUSE | Tubb4b | Tubulin beta-4B chain OS: R.INVYNEATGK#.Y                   | 248.14 | 121.65 | 2.04 | 0.49 |
| P68372_TB84B_MOUSE | Tubb4b | Tubulin beta-4B chain OS: R.YLTVAAVFR@.G                    | 392.93 | 249.80 | 1.57 | 0.64 |
| P68372_TB84B_MOUSE | Tubb4b | Tubulin beta-4B chain OS: R.AVLVDLEPGTM*DSVR@.S             | 154.86 | 43.97  | 3.52 | 0.28 |
| P68372_TB84B_MOUSE | Tubb4b | Tubulin beta-4B chain OS: R.YLTVAAVFR@.G                    | 55.51  | 28.75  | 1.93 | 0.52 |
| P68372_TB84B_MOUSE | Tubb4b | Tubulin beta-4B chain OS: R.AVLVDLEPGTM*DSVR@.S             | 115.64 | 39.02  | 2.96 | 0.34 |
| P68372_TB84B_MOUSE | Tubb4b | Tubulin beta-4B chain OS: R.INVYNEATGK#.Y                   | 93.67  | 32.29  | 2.90 | 0.34 |
| P68372_TB84B_MOUSE | Tubb4b | Tubulin beta-4B chain OS: R.YLTVAAVFR@.G                    | 306.73 | 133.66 | 2.29 | 0.44 |
| P68372_TB84B_MOUSE | Tubb4b | Tubulin beta-4B chain OS: R.AVLVDLEPGTM*DSVR@.S             | 212.80 | 52.95  | 4.02 | 0.25 |
| P68372_TB84B_MOUSE | Tubb4b | Tubulin beta-4B chain OS: R.INVYNEATGK#.Y                   | 201.85 | 43.50  | 4.64 | 0.22 |
| P68372_TB84B_MOUSE | Tubb4b | Tubulin beta-4B chain OS: R.YLTVAAVFR@.G                    | 430.26 | 114.12 | 3.77 | 0.27 |
| P99024_TB85_MOUSE  | Tubb5  | Tubulin beta-5 chain OS: R.ALTVPPELQDM*FDAK#.N              | 485.25 | 374.73 | 1.29 | 0.77 |
| P99024_TB85_MOUSE  | Tubb5  | Tubulin beta-5 chain OS: K.FWEVISDEHGIDPDTGTYHGDSDLQLDR@.I  | 46.11  | 33.52  | 1.38 | 0.73 |
| P99024_TB85_MOUSE  | Tubb5  | Tubulin beta-5 chain OS: R.ISVYNEATGK#.Y                    | 268.11 | 489.06 | 1.39 | 0.72 |
| P99024_TB85_MOUSE  | Tubb5  | Tubulin beta-5 chain OS: K.M*AVTFIGNSTAIQELFK#.R            | 647.41 | 161.32 | 1.53 | 0.65 |
| P99024_TB85_MOUSE  | Tubb5  | Tubulin beta-5 chain OS: K.MAVTFIGNSTAIQELFK#.R             | 60.20  | 45.69  | 1.32 | 0.76 |
| P99024_TB85_MOUSE  | Tubb5  | Tubulin beta-5 chain OS: K.M*AVTFIGNSTAIQELFK#.R            | 59.33  | 35.20  | 1.69 | 0.59 |
| P99024_TB85_MOUSE  | Tubb5  | Tubulin beta-5 chain OS: R.ALTVPPELQDM*FDAK#.N              | 46.98  | 18.02  | 2.61 | 0.38 |
| P99024_TB85_MOUSE  | Tubb5  | Tubulin beta-5 chain OS: K.FWEVISDEHGIDPDTGTYHGDSDLQLDR@.I  | 123.75 | 7.61   | 1.62 | 0.62 |
| P99024_TB85_MOUSE  | Tubb5  | Tubulin beta-5 chain OS: R.ISVYNEATGK#.Y                    | 370.02 | 121.92 | 3.04 | 0.33 |
| P99024_TB85_MOUSE  | Tubb5  | Tubulin beta-5 chain OS: K.M*AVTFIGNSTAIQELFK#.R            | 41.02  | 14.17  | 2.89 | 0.35 |
| P99024_TB85_MOUSE  | Tubb5  | Tubulin beta-5 chain OS: R.ALTVPPELQDM*FDAK#.N              | 371.41 | 193.48 | 1.92 | 0.52 |
| P99024_TB85_MOUSE  | Tubb5  | Tubulin beta-5 chain OS: K.FWEVISDEHGIDPDTGTYHGDSDLQLDR@.I  | 31.91  | 20.18  | 1.58 | 0.63 |
| P99024_TB85_MOUSE  | Tubb5  | Tubulin beta-5 chain OS: R.ISVYNEATGK#.Y                    | 279.08 | 152.45 | 1.83 | 0.53 |
| P99024_TB85_MOUSE  | Tubb5  | Tubulin beta-5 chain OS: K.M*AVTFIGNSTAIQELFK#.R            | 173.49 | 83.34  | 2.08 | 0.48 |
| P99024_TB85_MOUSE  | Tubb5  | Tubulin beta-5 chain OS: K.MAVTFIGNSTAIQELFK#.R             | 19.30  | 7.69   | 2.51 | 0.40 |
| P99024_TB85_MOUSE  | Tubb5  | Tubulin beta-5 chain OS: R.ALTVPPELQDM*FDAK#.N              | 161.21 | 56.05  | 2.88 | 0.35 |
| P99024_TB85_MOUSE  | Tubb5  | Tubulin beta-5 chain OS: R.ALTVPPELQDM*FDAK#.N              | 167.11 | 161.03 | 2.71 | 0.37 |
| P99024_TB85_MOUSE  | Tubb5  | Tubulin beta-5 chain OS: R.ISVYNEATGK#.Y                    | 550.34 | 189.18 | 2.91 | 0.34 |
| P99024_TB85_MOUSE  | Tubb5  | Tubulin beta-5 chain OS: K.M*AVTFIGNSTAIQELFK#.R            | 229.41 | 75.04  | 3.06 | 0.33 |
| P99024_TB85_MOUSE  | Tubb5  | Tubulin beta-5 chain OS: K.MAVTFIGNSTAIQELFK#.R             | 65.09  | 21.19  | 3.07 | 0.33 |
| Q922F4_TB86_MOUSE  | Tubb6  | Tubulin beta-6 chain OS: R.AALVDLEPGTM*DSVR@.S              | 56.22  | 42.59  | 1.32 | 0.76 |
| Q922F4_TB86_MOUSE  | Tubb6  | Tubulin beta-6 chain OS: K.EVDEQML*LNQNK#.N                 | 9.75   | 7.66   | 1.27 | 0.79 |
| Q922F4_TB86_MOUSE  | Tubb6  | Tubulin beta-6 chain OS: K.FWEVISDEHGIDQAGGYVGDSDLQLDR@.I   | 28.86  | 19.29  | 1.50 | 0.67 |
| Q922F4_TB86_MOUSE  | Tubb6  | Tubulin beta-6 chain OS: R.GPM*SM*KEVDEQML*LNQNK#.N         | 10.88  | 11.30  | 0.96 | 1.04 |
| Q922F4_TB86_MOUSE  | Tubb6  | Tubulin beta-6 chain OS: R.ISEQFSAM*FR@.R                   | 35.88  | 29.59  | 1.21 | 0.82 |
| Q922F4_TB86_MOUSE  | Tubb6  | Tubulin beta-6 chain OS: R.ISVYNESSK#.K                     | 46.68  | 31.35  | 1.49 | 0.67 |
| Q922F4_TB86_MOUSE  | Tubb6  | Tubulin beta-6 chain OS: K.LTTPYDGLNLHLSATMSGVTTSLR@.F      | 9.58   | 6.26   | 1.53 | 0.65 |
| Q922F4_TB86_MOUSE  | Tubb6  | Tubulin beta-6 chain OS: R.SGPFQGLFR@PDNFHFGQTGAGNNWAK#.G   | 17.36  | 19.27  | 0.90 | 1.11 |
| Q922F4_TB86_MOUSE  | Tubb6  | Tubulin beta-6 chain OS: R.AALVDLEPGTM*DSVR@.S              | 31.62  | 14.47  | 2.19 | 0.46 |
| Q922F4_TB86_MOUSE  | Tubb6  | Tubulin beta-6 chain OS: K.FWEVISDEHGIDQAGGYVGDSDLQLDR@.I   | 4.69   | 2.48   | 1.89 | 0.53 |
| Q922F4_TB86_MOUSE  | Tubb6  | Tubulin beta-6 chain OS: R.ISVYNESSK#.K                     | 17.07  | 6.60   | 2.59 | 0.39 |
| Q922F4_TB86_MOUSE  | Tubb6  | Tubulin beta-6 chain OS: R.AALVDLEPGTM*DSVR@.S              | 22.03  | 10.73  | 2.05 | 0.49 |
| Q922F4_TB86_MOUSE  | Tubb6  | Tubulin beta-6 chain OS: K.EVDEQML*LNQNK#.N                 | 5.19   | 6.40   | 0.81 | 1.23 |
| Q922F4_TB86_MOUSE  | Tubb6  | Tubulin beta-6 chain OS: K.FWEVISDEHGIDQAGGYVGDSDLQLDR@.I   | 13.00  | 6.74   | 1.93 | 0.52 |
| Q922F4_TB86_MOUSE  | Tubb6  | Tubulin beta-6 chain OS: R.ISEQFSAM*FR@.R                   | 16.52  | 6.08   | 2.72 | 0.37 |

|                    |         |                                                                       |        |        |      |      |
|--------------------|---------|-----------------------------------------------------------------------|--------|--------|------|------|
| Q922F4_TB86_MOUSE  | Tubb6   | Tubulin beta-6 chain OS= R.SGPPFQLFRPNDFIFGQTGAGNNWAK.G               | 5.59   | 4.99   | 1.12 | 0.89 |
| Q922F4_TB86_MOUSE  | Tubb6   | Tubulin beta-6 chain OS= R.AALVDELEPTG*DSVR@.S                        | 44.36  | 14.49  | 3.06 | 0.33 |
| Q922F4_TB86_MOUSE  | Tubb6   | Tubulin beta-6 chain OS= K.EVDEQM*LAIQNK#.N                           | 15.06  | 4.18   | 3.60 | 0.28 |
| Q922F4_TB86_MOUSE  | Tubb6   | Tubulin beta-6 chain OS= K.FWEVSDHEGIDQAGGYVGSALQLER@.I               | 20.79  | 5.95   | 3.50 | 0.29 |
| Q922F4_TB86_MOUSE  | Tubb6   | Tubulin beta-6 chain OS= R.ISEQFSAM*FR@.R                             | 26.45  | 5.72   | 4.63 | 0.22 |
| Q922F4_TB86_MOUSE  | Tubb6   | Tubulin beta-6 chain OS= R.ISVYNESSSK#.K                              | 20.32  | 7.86   | 2.58 | 0.39 |
| Q922F4_TB86_MOUSE  | Tubb6   | Tubulin beta-6 chain OS= K.LTTPYGLDNLHLSVATM*SGVTSLR@.F               | 9.36   | 3.69   | 2.54 | 0.39 |
| Q922F4_TB86_MOUSE  | Tubb6   | Tubulin beta-6 chain OS= R.SGPPFQLFRPNDFIFGQTGAGNNWAK.G               | 6.55   | 4.53   | 1.45 | 0.69 |
| P83887_TB81_MOUSE  | Tubg1   | Tubulin gamma-1 chain ( R.AVLLEPR@.V                                  | 29.19  | 27.52  | 1.06 | 0.94 |
| P83887_TB81_MOUSE  | Tubg1   | Tubulin gamma-1 chain ( K.KLVQYTSVFPNQDEM*SDVVQPYNSLLTLK.R            | 6.53   | 4.59   | 1.42 | 0.70 |
| P83887_TB81_MOUSE  | Tubg1   | Tubulin gamma-1 chain ( K.LYNPENILYSEHGGAGNNWASGFSQGEK#.I             | 9.62   | 3.59   | 2.68 | 0.37 |
| P83887_TB81_MOUSE  | Tubg1   | Tubulin gamma-1 chain ( R.VIHLSILNVSXK#.L                             | 22.72  | 15.91  | 1.43 | 0.70 |
| P83887_TB81_MOUSE  | Tubg1   | Tubulin gamma-1 chain ( R.AVLLEPR@.V                                  | 21.00  | 3.99   | 5.26 | 0.19 |
| P83887_TB81_MOUSE  | Tubg1   | Tubulin gamma-1 chain ( K.IHEDIFDIIR@.E                               | 6.02   | 2.98   | 2.02 | 0.50 |
| P83887_TB81_MOUSE  | Tubg1   | Tubulin gamma-1 chain ( R.LHFLM*GTYPPLTDOQSVASVR@.K                   | 36.97  | 6.09   | 6.07 | 0.16 |
| Q921G8_GCP2_MOUSE  | Tubgcp2 | Gamma-tubulin complex K.AASAP*FELEK#.W                                | 9.10   | 3.64   | 2.50 | 0.40 |
| Q921G8_GCP2_MOUSE  | Tubgcp2 | Gamma-tubulin complex R.IHHDVNLLESLLR@.I                              | 13.57  | 1.87   | 7.27 | 0.14 |
| Q921G8_GCP2_MOUSE  | Tubgcp2 | Gamma-tubulin complex R.LPVAASVTVTR@.F                                | 16.94  | 2.71   | 6.25 | 0.16 |
| Q921G8_GCP2_MOUSE  | Tubgcp2 | Gamma-tubulin complex R.NLDPVLVLLSK#.L                                | 13.96  | 4.68   | 2.98 | 0.34 |
| Q921G8_GCP2_MOUSE  | Tubgcp2 | Gamma-tubulin complex K.VLLEFLM*EEK#.E                                | 14.42  | 5.20   | 2.77 | 0.36 |
| Q921G8_GCP2_MOUSE  | Tubgcp2 | Gamma-tubulin complex R.YTVLPQIQPSFLQK#.V                             | 11.96  | 4.69   | 2.55 | 0.39 |
| Q921G8_GCP2_MOUSE  | Tubgcp2 | Gamma-tubulin complex R.LPVAASVTVTR@.F                                | 13.26  | 4.51   | 2.94 | 0.34 |
| Q921G8_GCP2_MOUSE  | Tubgcp2 | Gamma-tubulin complex R.LTLDQGSVQGPPTTER@.I                           | 13.03  | 3.83   | 3.41 | 0.29 |
| Q921G8_GCP2_MOUSE  | Tubgcp2 | Gamma-tubulin complex R.NLDPVLVLLSK#.L                                | 21.24  | 7.48   | 2.84 | 0.35 |
| Q921G8_GCP2_MOUSE  | Tubgcp2 | Gamma-tubulin complex K.VLLEFLM*EEK#.E                                | 17.93  | 3.68   | 4.87 | 0.21 |
| Q921G8_GCP2_MOUSE  | Tubgcp2 | Gamma-tubulin complex R.YTVLPQIQPSFLQK#.V                             | 13.52  | 4.87   | 2.77 | 0.36 |
| P58854_GCP3_MOUSE  | Tubgcp3 | Gamma-tubulin complex R.DILYVFGIDGK#.N                                | 8.12   | 2.43   | 3.34 | 0.30 |
| P58854_GCP3_MOUSE  | Tubgcp3 | Gamma-tubulin complex R.DILYVFGIDGK#.N                                | 15.57  | 4.89   | 3.19 | 0.31 |
| P58854_GCP3_MOUSE  | Tubgcp3 | Gamma-tubulin complex R.YLLGQGFIR@.H                                  | 9.07   | 4.98   | 1.82 | 0.55 |
| Q8BFR5_EFTU_MOUSE  | Tufm    | Elongation factor Tu, mit K.ADAVQDSEM*VELVEIR@.E                      | 4.28   | 1.90   | 2.26 | 0.44 |
| Q8BFR5_EFTU_MOUSE  | Tufm    | Elongation factor Tu, mit K.ADAVQDSEM*VELVEIR@.E                      | 4.75   | 1.91   | 2.49 | 0.40 |
| Q8BFR5_EFTU_MOUSE  | Tufm    | Elongation factor Tu, mit R.AEAGDNLGALVR@.G                           | 72.27  | 42.60  | 1.70 | 0.59 |
| Q8BFR5_EFTU_MOUSE  | Tufm    | Elongation factor Tu, mit R.EHLLAK#.Q                                 | 22.64  | 7.05   | 3.21 | 0.31 |
| Q8BFR5_EFTU_MOUSE  | Tufm    | Elongation factor Tu, mit K.ELAM*PGEDLK#.L                            | 34.74  | 13.68  | 2.54 | 0.39 |
| Q8BFR5_EFTU_MOUSE  | Tufm    | Elongation factor Tu, mit R.ELLTEFGYK#.G                              | 4.81   | 3.93   | 1.22 | 0.82 |
| Q8BFR5_EFTU_MOUSE  | Tufm    | Elongation factor Tu, mit R.GTVVTGLER@.G                              | 78.06  | 34.12  | 2.29 | 0.44 |
| Q8BFR5_EFTU_MOUSE  | Tufm    | Elongation factor Tu, mit K.K#YEEDINAPEER@.A                          | 9.11   | 4.23   | 2.15 | 0.46 |
| Q8BFR5_EFTU_MOUSE  | Tufm    | Elongation factor Tu, mit K.LLDAVDYTPVPTR.D                           | 68.48  | 23.79  | 2.88 | 0.35 |
| Q8BFR5_EFTU_MOUSE  | Tufm    | Elongation factor Tu, mit K.VEAQVILSK#.E                              | 12.12  | 3.45   | 3.51 | 0.28 |
| Q8BFR5_EFTU_MOUSE  | Tufm    | Elongation factor Tu, mit K.YEEDINAPEER@.A                            | 32.16  | 14.90  | 2.16 | 0.46 |
| Q91YR1_TW1_MOUSE   | Twf1    | Twinfilin-1 OS=Mus musc K.INEVQDTSVSDVTK#.H                           | 5.84   | 2.53   | 2.31 | 0.43 |
| Q78WZ7_RPA43_MOUSE | Twistnb | DNA-directed RNA polym R.EQLDAELLR@.Y                                 | 8.60   | 7.55   | 1.14 | 0.88 |
| Q78WZ7_RPA43_MOUSE | Twistnb | DNA-directed RNA polym R.HQEDQPIFOASDSSYQSDHNNK#.K                    | 2.74   | 2.91   | 0.94 | 1.06 |
| Q6PAM1_TXLNA_MOUSE | Txlna   | Alpha-taxilin OS=Mus mu R.VQJLTAGITDIGSER@.R                          | 4.17   | 3.10   | 1.34 | 0.74 |
| P10639_THIO_MOUSE  | Txn     | Thioredoxin OS=Mus mu: K.EAFQALAAAGDK#.L                              | 14.03  | 16.60  | 0.85 | 1.18 |
| Q9CQ00_TXD12_MOUSE | Txndc12 | Thioredoxin domain-con R.DEDFSPDGGYIP.R                               | 4.77   | 6.36   | 0.75 | 1.33 |
| Q9CQ00_TXD12_MOUSE | Txndc12 | Thioredoxin domain-con K.YFVSAEQVQGM*#K.E                             | 3.08   | 3.87   | 0.80 | 1.26 |
| Q91W90_TXND5_MOUSE | Txndc5  | Thioredoxin domain-con R.GYPTLLFR.G                                   | 14.16  | 18.64  | 0.76 | 1.32 |
| Q91W90_TXND5_MOUSE | Txndc5  | Thioredoxin domain-con R.GYPTLLFR@.D                                  | 10.63  | 14.70  | 0.72 | 1.38 |
| Q91W90_TXND5_MOUSE | Txndc5  | Thioredoxin domain-con K.SFEDTIAGITFVK.F                              | 17.63  | 18.62  | 0.95 | 1.06 |
| Q9CQ79_TXND9_MOUSE | Txndc9  | Thioredoxin domain-con K.VIPTALLR@.D                                  | 18.53  | 13.11  | 1.41 | 0.71 |
| Q9D883_U2AF1_MOUSE | U2af1   | Splicing factor U2AF 35 k R.AVIDLNRR@.W                               | 563.68 | 290.13 | 1.94 | 0.51 |
| Q9D883_U2AF1_MOUSE | U2af1   | Splicing factor U2AF 35 k R.NPQNSSQADGLR@.C                           | 196.72 | 124.01 | 1.59 | 0.63 |
| Q9D883_U2AF1_MOUSE | U2af1   | Splicing factor U2AF 35 k R.WFNGQPIHAELSPVDFR@.E                      | 90.52  | 56.34  | 1.61 | 0.62 |
| Q9D883_U2AF1_MOUSE | U2af1   | Splicing factor U2AF 35 k R.AVIDLNRR@.W                               | 168.07 | 73.80  | 2.28 | 0.44 |
| Q9D883_U2AF1_MOUSE | U2af1   | Splicing factor U2AF 35 k R.NPQNSSQADGLR@.C                           | 15.59  | 10.19  | 1.53 | 0.65 |
| Q9D883_U2AF1_MOUSE | U2af1   | Splicing factor U2AF 35 k R.WFNGQPIHAELSPVDFR@.E                      | 28.32  | 14.18  | 2.00 | 0.50 |
| Q9D883_U2AF1_MOUSE | U2af1   | Splicing factor U2AF 35 k R.NPQNSSQADGLR@.C                           | 10.92  | 6.32   | 1.73 | 0.58 |
| Q9D883_U2AF1_MOUSE | U2af1   | Splicing factor U2AF 35 k R.WFNGQPIHAELSPVDFR@.E                      | 8.86   | 6.51   | 1.36 | 0.73 |
| Q9D883_U2AF1_MOUSE | U2af1   | Splicing factor U2AF 35 k R.AVIDLNRR@.W                               | 19.88  | 6.72   | 2.96 | 0.34 |
| Q9D883_U2AF1_MOUSE | U2af1   | Splicing factor U2AF 35 k R.NPQNSSQADGLR@.C                           | 13.62  | 5.95   | 2.29 | 0.44 |
| P26369_U2AF2_MOUSE | U2af2   | Splicing factor U2AF 65 k R.AM*QAAGQIPATALLPTM*TPDGLAVTPTPVVGSQMTR@.Q | 8.08   | 2.37   | 3.41 | 0.29 |
| P26369_U2AF2_MOUSE | U2af2   | Splicing factor U2AF 65 k R.ELLTDFGLK#.A                              | 46.39  | 16.27  | 1.27 | 0.79 |
| P26369_U2AF2_MOUSE | U2af2   | Splicing factor U2AF 65 k R.LFIFGLPNVLLNDDQVK#.E                      | 55.72  | 44.93  | 1.24 | 0.81 |
| P26369_U2AF2_MOUSE | U2af2   | Splicing factor U2AF 65 k R.LGLGLTQAPGNVPLAVQINQDK#.N                 | 6.91   | 5.86   | 1.18 | 0.85 |
| P26369_U2AF2_MOUSE | U2af2   | Splicing factor U2AF 65 k R.NFAFLFR@.S                                | 48.01  | 29.36  | 1.64 | 0.61 |
| P26369_U2AF2_MOUSE | U2af2   | Splicing factor U2AF 65 k R.RLYVGNIPFGITEAM*M*DFNAQM*R.L              | 5.69   | 3.83   | 1.49 | 0.67 |
| P26369_U2AF2_MOUSE | U2af2   | Splicing factor U2AF 65 k R.R@PHDYQLPGM*SENPVYVGVVSTVWVPSAHK#.L       | 24.78  | 19.10  | 1.30 | 0.77 |
| P26369_U2AF2_MOUSE | U2af2   | Splicing factor U2AF 65 k R.SVDETTQAM*AFDGIHQGQSLK#.I                 | 70.58  | 33.75  | 2.09 | 0.48 |
| P26369_U2AF2_MOUSE | U2af2   | Splicing factor U2AF 65 k R.SVDETTQAM*AFDGIHQGQSLK#.I                 | 12.57  | 6.11   | 2.06 | 0.49 |
| P26369_U2AF2_MOUSE | U2af2   | Splicing factor U2AF 65 k R.SVDETTQAM*AFDGIHQGQSLK#.I                 | 32.30  | 17.32  | 1.87 | 0.54 |
| P26369_U2AF2_MOUSE | U2af2   | Splicing factor U2AF 65 k R.SVDETTQAM*AFDGIHQGQSLK#.I                 | 8.20   | 4.05   | 2.02 | 0.49 |
| P26369_U2AF2_MOUSE | U2af2   | Splicing factor U2AF 65 k R.ELLTDFGLK#.A                              | 43.19  | 30.24  | 1.43 | 0.70 |
| P26369_U2AF2_MOUSE | U2af2   | Splicing factor U2AF 65 k R.LGLGLTQAPGNVPLAVQINQDK#.N                 | 6.62   | 3.22   | 2.06 | 0.49 |
| P26369_U2AF2_MOUSE | U2af2   | Splicing factor U2AF 65 k R.LGLGLTQAPGNVPLAVQINQDK#.N                 | 18.20  | 16.97  | 1.66 | 0.60 |
| P26369_U2AF2_MOUSE | U2af2   | Splicing factor U2AF 65 k R.LGLGLTQAPGNVPLAVQINQDKNFALFR.S            | 25.79  | 7.61   | 2.07 | 0.47 |
| P26369_U2AF2_MOUSE | U2af2   | Splicing factor U2AF 65 k R.NFAFLFR@.S                                | 42.87  | 23.06  | 1.86 | 0.54 |
| P26369_U2AF2_MOUSE | U2af2   | Splicing factor U2AF 65 k R.RLYVGNIPFGITEAM*M*DFNAQM*R.L              | 4.73   | 4.35   | 1.09 | 0.92 |
| P26369_U2AF2_MOUSE | U2af2   | Splicing factor U2AF 65 k R.SVDETTQAM*AFDGIHQGQSLK#.I                 | 44.26  | 22.01  | 2.01 | 0.50 |
| P26369_U2AF2_MOUSE | U2af2   | Splicing factor U2AF 65 k R.SVDETTQAM*AFDGIHQGQSLK#.I                 | 15.09  | 6.34   | 2.38 | 0.42 |
| Q6NV83_SR140_MOUSE | U2surp  | U2 snRNP-associated SUF K.AAAEYEEFLAAFEQSDGNK#.V                      | 55.76  | 11.66  | 4.78 | 0.21 |
| Q6NV83_SR140_MOUSE | U2surp  | U2 snRNP-associated SUF R.AWEDWAIYEPFLIK#.L                           | 35.56  | 11.98  | 2.97 | 0.34 |
| Q6NV83_SR140_MOUSE | U2surp  | U2 snRNP-associated SUF R.DK#HEILR@.G                                 | 141.40 | 248.83 | 0.57 | 1.76 |
| Q6NV83_SR140_MOUSE | U2surp  | U2 snRNP-associated SUF K.EDEK#AAAEYEEFLAAFEQSDGNK#.V                 | 10.05  | 2.18   | 4.62 | 0.22 |
| Q6NV83_SR140_MOUSE | U2surp  | U2 snRNP-associated SUF R.EGPM*FEAM*IM*NR.E                           | 16.14  | 6.69   | 2.41 | 0.41 |
| Q6NV83_SR140_MOUSE | U2surp  | U2 snRNP-associated SUF K.FODELESGK#.R                                | 63.26  | 22.79  | 2.78 | 0.36 |
| Q6NV83_SR140_MOUSE | U2surp  | U2 snRNP-associated SUF R.GGVVNAAK#DEHETDEK#R@.G                      | 27.60  | 8.55   | 3.23 | 0.31 |
| Q6NV83_SR140_MOUSE | U2surp  | U2 snRNP-associated SUF K.K#PQSFQEQVEHYR@.D                           | 60.43  | 19.80  | 3.05 | 0.33 |
| Q6NV83_SR140_MOUSE | U2surp  | U2 snRNP-associated SUF K.#SNLELFK#EELK#.Q                            | 51.35  | 12.86  | 3.99 | 0.25 |
| Q6NV83_SR140_MOUSE | U2surp  | U2 snRNP-associated SUF R.LK#NPNAPM*LPPK#.N                           | 41.69  | 23.98  | 1.74 | 0.58 |
| Q6NV83_SR140_MOUSE | U2surp  | U2 snRNP-associated SUF R.LYLVSDVLYNSSAK#.V                           | 121.48 | 39.72  | 3.06 | 0.33 |
| Q6NV83_SR140_MOUSE | U2surp  | U2 snRNP-associated SUF R.LYLVSDVLYNSSAK#.V                           | 11.74  | 3.66   | 3.21 | 0.31 |
| Q6NV83_SR140_MOUSE | U2surp  | U2 snRNP-associated SUF K.LYSILQDQSPTR#.W                             | 121.18 | 35.29  | 3.43 | 0.29 |
| Q6NV83_SR140_MOUSE | U2surp  | U2 snRNP-associated SUF R.M*IEFVVR@.E                                 | 36.68  | 9.27   | 3.96 | 0.25 |
| Q6NV83_SR140_MOUSE | U2surp  | U2 snRNP-associated SUF R.MIEFVVR@.E                                  | 46.23  | 12.57  | 3.68 | 0.27 |
| Q6NV83_SR140_MOUSE | U2surp  | U2 snRNP-associated SUF R.LLALLIHR@.M                                 | 151.36 | 52.22  | 2.90 | 0.34 |
| Q6NV83_SR140_MOUSE | U2surp  | U2 snRNP-associated SUF K.SLDDDLQDVPVLDATEDSK#.K                      | 26.69  | 8.17   | 3.27 | 0.31 |
| Q6NV83_SR140_MOUSE | U2surp  | U2 snRNP-associated SUF K.SLDDDLQDVPVLDATEDSK#.K#.N                   | 37.13  | 11.49  | 3.23 | 0.31 |
| Q6NV83_SR140_MOUSE | U2surp  | U2 snRNP-associated SUF K.SNLELFK#EELK#.Q                             | 47.63  | 14.84  | 3.21 | 0.31 |
| Q6NV83_SR140_MOUSE | U2surp  | U2 snRNP-associated SUF R.SSDVHSSGSDAHM*DASGSDSDM*PSR@.T              | 43.91  | 8.29   | 5.30 | 0.19 |
| Q6NV83_SR140_MOUSE | U2surp  | U2 snRNP-associated SUF K.VANASYR@.K                                  | 86.72  | 21.70  | 4.00 | 0.25 |
| Q6NV83_SR140_MOUSE | U2surp  | U2 snRNP-associated SUF K.VAPSKWEAVDESEEAQAVTSK.W                     | 56.27  | 14.21  | 3.96 | 0.25 |
| Q6NV83_SR140_MOUSE | U2surp  | U2 snRNP-associated SUF K.AAAEYEEFLAAFEQSDGNK#.V                      | 26.52  | 8.15   | 3.26 | 0.31 |

|                    |         |                                                                     |        |         |      |      |
|--------------------|---------|---------------------------------------------------------------------|--------|---------|------|------|
| Q6NV83_SR140_MOUSE | U2surp  | U2 snRNP-associated SUF R.AWEDWAIYEPFLIK#.L                         | 20.91  | 7.48    | 2.79 | 0.36 |
| Q6NV83_SR140_MOUSE | U2surp  | U2 snRNP-associated SUF R.DK#LEELR@.G                               | 53.48  | 294.91  | 0.18 | 5.51 |
| Q6NV83_SR140_MOUSE | U2surp  | U2 snRNP-associated SUF R.EINPNM*FR@.F                              | 27.53  | 8.60    | 3.20 | 0.31 |
| Q6NV83_SR140_MOUSE | U2surp  | U2 snRNP-associated SUF K.FODELESGK#.R                              | 40.81  | 12.40   | 3.29 | 0.30 |
| Q6NV83_SR140_MOUSE | U2surp  | U2 snRNP-associated SUF K.K#P#G#SQ#Q#VEHYR@.D                       | 15.30  | 5.13    | 2.98 | 0.34 |
| Q6NV83_SR140_MOUSE | U2surp  | U2 snRNP-associated SUF R.LK#INPNAPM*LPPPK#.N                       | 21.45  | 7.11    | 3.01 | 0.33 |
| Q6NV83_SR140_MOUSE | U2surp  | U2 snRNP-associated SUF R.LYLVSDVLYNSSAK#.V                         | 69.57  | 21.05   | 3.30 | 0.30 |
| Q6NV83_SR140_MOUSE | U2surp  | U2 snRNP-associated SUF K.LYSILQGDSPPTK#.W                          | 50.18  | 15.28   | 3.28 | 0.30 |
| Q6NV83_SR140_MOUSE | U2surp  | U2 snRNP-associated SUF R.M*IEFVVR@.E                               | 17.40  | 5.72    | 3.04 | 0.33 |
| Q6NV83_SR140_MOUSE | U2surp  | U2 snRNP-associated SUF R.MIEFVVR@.E                                | 14.55  | 6.40    | 2.27 | 0.44 |
| Q6NV83_SR140_MOUSE | U2surp  | U2 snRNP-associated SUF R.NLLALHR@.M                                | 57.09  | 15.49   | 3.69 | 0.27 |
| Q6NV83_SR140_MOUSE | U2surp  | U2 snRNP-associated SUF K.SLDDDLQDVGPLDATEDSK#.K                    | 10.60  | 4.36    | 2.43 | 0.41 |
| Q6NV83_SR140_MOUSE | U2surp  | U2 snRNP-associated SUF K.SLDDDLQDVGPLDATEDSK#.K#.N                 | 13.89  | 5.26    | 2.64 | 0.38 |
| Q6NV83_SR140_MOUSE | U2surp  | U2 snRNP-associated SUF K.SNLELFK#.E                                | 10.50  | 2.15    | 4.88 | 0.20 |
| Q6NV83_SR140_MOUSE | U2surp  | U2 snRNP-associated SUF K.SNLELFK#HEL#.Q                            | 45.01  | 16.19   | 2.78 | 0.36 |
| Q6NV83_SR140_MOUSE | U2surp  | U2 snRNP-associated SUF R.TIQGHLOQSEFNK#.Q                          | 16.95  | 6.08    | 2.79 | 0.36 |
| Q6NV83_SR140_MOUSE | U2surp  | U2 snRNP-associated SUF K.VANASYR@.K                                | 23.05  | 7.74    | 2.98 | 0.34 |
| Q6NV83_SR140_MOUSE | U2surp  | U2 snRNP-associated SUF K.WEAVDESELEAQAVTTSK#.W                     | 5.70   | 3.00    | 1.90 | 0.53 |
| Q8CGB3_UACA_MOUSE  | Uaca    | Uveal autoantigen with c R.NLENVQNM*K#.A                            | 8.08   | 6.46    | 1.25 | 0.80 |
| Q02053_UBA1_MOUSE  | Uba1    | Ubiquitin-like modifier-a R.IYDDDFQNLQDGVANALNDIDAR@.M              | 8.49   | 4.54    | 1.87 | 0.53 |
| Q02053_UBA1_MOUSE  | Uba1    | Ubiquitin-like modifier-a R.LAGTQPLEVLEAVQR@.S                      | 12.61  | 5.24    | 2.40 | 0.42 |
| Q02053_UBA1_MOUSE  | Uba1    | Ubiquitin-like modifier-a K.SLPASLVPEPDM*VTFKA#.Y                   | 7.98   | 4.04    | 1.97 | 0.51 |
| Q02053_UBA1_MOUSE  | Uba1    | Ubiquitin-like modifier-a R.YDGGVAVFGSDFOEK#.L                      | 5.24   | 4.39    | 1.19 | 0.84 |
| Q02053_UBA1_MOUSE  | Uba1    | Ubiquitin-like modifier-a R.LAGTQPLEVLEAVQR@.S                      | 11.05  | 5.14    | 2.15 | 0.47 |
| Q02053_UBA1_MOUSE  | Uba1    | Ubiquitin-like modifier-a R.LDQPM*TEIVSR@.V                         | 7.10   | 3.04    | 2.34 | 0.43 |
| Q9Z1F9_SAE2_MOUSE  | Uba2    | SUMO-activating enzyme K.VTVLTDQK#.I                                | 8.70   | 4.27    | 2.04 | 0.49 |
| P62984_RL40_MOUSE  | Uba52   | Ubiquitin-60S ribosomal K.EGIPPDQQR.L                               | 51.43  | 9.97    | 5.16 | 0.19 |
| P62984_RL40_MOUSE  | Uba52   | Ubiquitin-60S ribosomal -.M*QIFVK#.T                                | 61.71  | 135.42  | 0.46 | 2.19 |
| P62984_RL40_MOUSE  | Uba52   | Ubiquitin-60S ribosomal -.MQIFVK#.T                                 | 75.73  | 185.33  | 0.41 | 2.45 |
| P62984_RL40_MOUSE  | Uba52   | Ubiquitin-60S ribosomal K.TITLEVEPSTIENVK#.A                        | 173.41 | 350.77  | 0.49 | 2.02 |
| P62984_RL40_MOUSE  | Uba52   | Ubiquitin-60S ribosomal R.TLSDYNIQK#.E                              | 145.17 | 343.18  | 0.42 | 2.36 |
| P62984_RL40_MOUSE  | Uba52   | Ubiquitin-60S ribosomal K.AKIQDKEGIPPDQQR.L                         | 3.23   | 17.81   | 0.18 | 5.51 |
| P62984_RL40_MOUSE  | Uba52   | Ubiquitin-60S ribosomal K.EGIPPDQQR.L                               | 25.26  | 158.56  | 0.16 | 6.28 |
| P62984_RL40_MOUSE  | Uba52   | Ubiquitin-60S ribosomal K.ESTLHLVLR.L                               | 94.26  | 561.49  | 0.17 | 5.96 |
| P62984_RL40_MOUSE  | Uba52   | Ubiquitin-60S ribosomal K.IQDKEGIPPDQQR@.L                          | 11.83  | 71.58   | 0.17 | 6.05 |
| P62984_RL40_MOUSE  | Uba52   | Ubiquitin-60S ribosomal K.IQDKEGIPPDQQR.L                           | 62.65  | 459.29  | 0.14 | 7.33 |
| P62984_RL40_MOUSE  | Uba52   | Ubiquitin-60S ribosomal -.M*QIFVK#.T                                | 209.83 | 1110.21 | 0.19 | 5.29 |
| P62984_RL40_MOUSE  | Uba52   | Ubiquitin-60S ribosomal -.MQIFVK#.T                                 | 107.23 | 580.20  | 0.18 | 5.41 |
| P62984_RL40_MOUSE  | Uba52   | Ubiquitin-60S ribosomal -.MQIFVKTLTGKITLEVEPSTIENVK#.A              | 2.02   | 11.28   | 0.18 | 5.58 |
| P62984_RL40_MOUSE  | Uba52   | Ubiquitin-60S ribosomal K.QLEDGR.T                                  | 27.68  | 151.45  | 0.18 | 5.47 |
| P62984_RL40_MOUSE  | Uba52   | Ubiquitin-60S ribosomal K.TITLEVEPSTIENVK#.A                        | 473.75 | 2187.43 | 0.22 | 4.62 |
| P62984_RL40_MOUSE  | Uba52   | Ubiquitin-60S ribosomal K.TITLEVEPSTIENVK#.A.I                      | 13.38  | 79.69   | 0.17 | 5.96 |
| P62984_RL40_MOUSE  | Uba52   | Ubiquitin-60S ribosomal R.TLSDYNIQK#.E                              | 270.57 | 1809.98 | 0.15 | 6.69 |
| P62984_RL40_MOUSE  | Uba52   | Ubiquitin-60S ribosomal K.TLTGKITLEVEPSTIENVK#.A                    | 1.60   | 12.81   | 0.13 | 8.00 |
| P62984_RL40_MOUSE  | Uba52   | Ubiquitin-60S ribosomal -.M*QIFVK#.T                                | 93.13  | 45.89   | 2.03 | 0.49 |
| P62984_RL40_MOUSE  | Uba52   | Ubiquitin-60S ribosomal -.MQIFVK#.T                                 | 40.95  | 22.15   | 1.85 | 0.54 |
| P62984_RL40_MOUSE  | Uba52   | Ubiquitin-60S ribosomal K.TITLEVEPSTIENVK#.A                        | 198.67 | 96.48   | 2.06 | 0.49 |
| P62984_RL40_MOUSE  | Uba52   | Ubiquitin-60S ribosomal R.TLSDYNIQK#.E                              | 101.58 | 53.48   | 1.90 | 0.53 |
| P62984_RL40_MOUSE  | Uba52   | Ubiquitin-60S ribosomal K.ESTLHLVLR.L                               | 54.35  | 22.97   | 2.37 | 0.42 |
| P62984_RL40_MOUSE  | Uba52   | Ubiquitin-60S ribosomal -.M*QIFVK#.T                                | 94.98  | 59.49   | 1.60 | 0.63 |
| P62984_RL40_MOUSE  | Uba52   | Ubiquitin-60S ribosomal -.MQIFVK#.T                                 | 37.87  | 11.70   | 3.24 | 0.31 |
| P62984_RL40_MOUSE  | Uba52   | Ubiquitin-60S ribosomal K.TITLEVEPSTIENVK#.A                        | 250.05 | 120.59  | 2.07 | 0.48 |
| P62984_RL40_MOUSE  | Uba52   | Ubiquitin-60S ribosomal R.TLSDYNIQK#.E                              | 122.73 | 44.79   | 2.74 | 0.36 |
| Q91VX2_UBAP2_MOUSE | Uba2    | Ubiquitin-associated pro R.ATALVYTK#.A                              | 18.76  | 9.38    | 2.00 | 0.50 |
| Q91VX2_UBAP2_MOUSE | Uba2    | Ubiquitin-associated pro R.DGNLANNPYSQDVTK#.F                       | 26.53  | 13.02   | 2.04 | 0.49 |
| Q91VX2_UBAP2_MOUSE | Uba2    | Ubiquitin-associated pro K.GVSVSSGTGLPDM*TGVSYNK#.T                 | 9.31   | 5.42    | 1.72 | 0.58 |
| Q91VX2_UBAP2_MOUSE | Uba2    | Ubiquitin-associated pro R.LPM*DYGIFFAAPTALASR.D                    | 22.81  | 8.95    | 2.55 | 0.39 |
| Q91VX2_UBAP2_MOUSE | Uba2    | Ubiquitin-associated pro K.NSVSEWTTEDWEDLSETK#.V                    | 3.75   | 1.95    | 1.93 | 0.52 |
| Q91VX2_UBAP2_MOUSE | Uba2    | Ubiquitin-associated pro K.QVQATEAQM*#R@.L                          | 8.22   | 4.02    | 2.04 | 0.49 |
| Q91VX2_UBAP2_MOUSE | Uba2    | Ubiquitin-associated pro K.SQASHP#TYSQAPYWTN.-                      | 3.67   | 6.15    | 0.60 | 1.68 |
| Q91VX2_UBAP2_MOUSE | Uba2    | Ubiquitin-associated pro K.SQPEPVSLSQSR@.Q                          | 22.79  | 14.13   | 1.61 | 0.62 |
| Q80X50_UBP2L_MOUSE | Uba2    | Ubiquitin-associated pro R.DGSLASNPYSGLTK#.F                        | 22.27  | 17.43   | 1.28 | 0.78 |
| Q80X50_UBP2L_MOUSE | Uba2    | Ubiquitin-associated pro R.FPLDYSPFPPTPLTGR.D                       | 13.91  | 8.54    | 1.63 | 0.61 |
| Q80X50_UBP2L_MOUSE | Uba2    | Ubiquitin-associated pro K.GFGDVGEAK#.G                             | 39.96  | 9.52    | 4.20 | 0.24 |
| Q80X50_UBP2L_MOUSE | Uba2    | Ubiquitin-associated pro K.GGTTGVSQLEQFK#.T                         | 37.72  | 14.87   | 2.54 | 0.39 |
| Q80X50_UBP2L_MOUSE | Uba2    | Ubiquitin-associated pro R.IDLAVLLGK#.T                             | 82.52  | 27.93   | 2.95 | 0.34 |
| Q80X50_UBP2L_MOUSE | Uba2    | Ubiquitin-associated pro K.IFTASNVSSVPLPAENVTTAGQR@.I               | 39.24  | 12.71   | 3.09 | 0.32 |
| Q80X50_UBP2L_MOUSE | Uba2    | Ubiquitin-associated pro R.LDFIVGEGSNYPR@.K                         | 35.08  | 12.17   | 2.88 | 0.35 |
| Q80X50_UBP2L_MOUSE | Uba2    | Ubiquitin-associated pro R.TATEWGTEDWNEDLSETK#.I                    | 11.43  | 3.83    | 2.99 | 0.33 |
| Q80X50_UBP2L_MOUSE | Uba2    | Ubiquitin-associated pro K.TPSSM*ENDSNLDPQAPSLAQPLVFSNSK#.Q         | 11.11  | 3.40    | 3.27 | 0.31 |
| Q80X50_UBP2L_MOUSE | Uba2    | Ubiquitin-associated pro R.DGSLASNPYSGLTK#.F                        | 3.26   | 4.50    | 0.72 | 1.38 |
| Q80X50_UBP2L_MOUSE | Uba2    | Ubiquitin-associated pro K.GGTTGVSQLEQFK#.T                         | 4.79   | 2.94    | 1.63 | 0.61 |
| Q80X50_UBP2L_MOUSE | Uba2    | Ubiquitin-associated pro R.IDLAVLLGK#.T                             | 11.29  | 4.92    | 2.29 | 0.44 |
| Q80X50_UBP2L_MOUSE | Uba2    | Ubiquitin-associated pro K.IFTASNVSSVPLPAENVTTAGQR@.I               | 8.54   | 3.08    | 2.78 | 0.36 |
| Q80X50_UBP2L_MOUSE | Uba2    | Ubiquitin-associated pro R.AINVLLEGNPDTHSWEVWGK#.K                  | 13.48  | 3.20    | 4.22 | 0.24 |
| Q80X50_UBP2L_MOUSE | Uba2    | Ubiquitin-associated pro R.DGSLASNPYSGLTK#.F                        | 106.37 | 36.34   | 2.93 | 0.34 |
| Q80X50_UBP2L_MOUSE | Uba2    | Ubiquitin-associated pro R.FPLDYSPFPPTPLTGR@.D                      | 40.47  | 15.18   | 2.67 | 0.38 |
| Q80X50_UBP2L_MOUSE | Uba2    | Ubiquitin-associated pro K.GFGDVGEAK#.G                             | 105.80 | 36.25   | 2.92 | 0.34 |
| Q80X50_UBP2L_MOUSE | Uba2    | Ubiquitin-associated pro K.GGTTGVSQLEQFK#.T                         | 151.02 | 45.93   | 3.29 | 0.30 |
| Q80X50_UBP2L_MOUSE | Uba2    | Ubiquitin-associated pro R.IDLAVLLGK#.T                             | 215.02 | 59.50   | 3.61 | 0.28 |
| Q80X50_UBP2L_MOUSE | Uba2    | Ubiquitin-associated pro K.IFTASNVSSVPLPAENVTTAGQR@.I               | 88.01  | 28.41   | 3.10 | 0.32 |
| Q80X50_UBP2L_MOUSE | Uba2    | Ubiquitin-associated pro R.LAQMSDHNDDFEEK#.V                        | 18.12  | 3.66    | 4.95 | 0.20 |
| Q80X50_UBP2L_MOUSE | Uba2    | Ubiquitin-associated pro R.LDFIVGEGSNYPR@.K                         | 91.92  | 26.30   | 3.50 | 0.29 |
| Q80X50_UBP2L_MOUSE | Uba2    | Ubiquitin-associated pro K.QR@PQATEQIR@.L                           | 101.53 | 14.45   | 7.02 | 0.14 |
| Q80X50_UBP2L_MOUSE | Uba2    | Ubiquitin-associated pro K.QR@PQATEQIR@.L                           | 30.52  | 5.60    | 5.45 | 0.18 |
| Q80X50_UBP2L_MOUSE | Uba2    | Ubiquitin-associated pro R.R@YPSISSSQK#.D                           | 59.31  | 15.26   | 3.89 | 0.26 |
| Q80X50_UBP2L_MOUSE | Uba2    | Ubiquitin-associated pro K.TAQALQAQHSQSGSTTSSWDM*GSTTQSPSLVQYDLK#.S | 25.27  | 6.19    | 4.08 | 0.25 |
| Q80X50_UBP2L_MOUSE | Uba2    | Ubiquitin-associated pro R.TATEWGTEDWNEDLSETK#.I                    | 24.88  | 8.73    | 2.85 | 0.35 |
| Q80X50_UBP2L_MOUSE | Uba2    | Ubiquitin-associated pro K.TPSSM*ENDSNLDPQAPSLAQPLVFSNSK#.Q         | 25.09  | 9.88    | 2.54 | 0.39 |
| Q80X50_UBP2L_MOUSE | Uba2    | Ubiquitin-associated pro K.TPSSM*ENDSNLDPQAPSLAQPLVFSNSK#.Q         | 6.58   | 1.91    | 3.45 | 0.29 |
| Q80X50_UBP2L_MOUSE | Uba2    | Ubiquitin-associated pro K.TQOSFEK#.Q                               | 13.91  | 6.25    | 2.23 | 0.45 |
| Q80X50_UBP2L_MOUSE | Uba2    | Ubiquitin-associated pro R.DGSLASNPYSGLTK#.F                        | 22.97  | 6.87    | 3.34 | 0.30 |
| Q80X50_UBP2L_MOUSE | Uba2    | Ubiquitin-associated pro R.FPLDYSPFPPTPLTGR@.D                      | 7.57   | 2.76    | 2.75 | 0.36 |
| Q80X50_UBP2L_MOUSE | Uba2    | Ubiquitin-associated pro K.GGTTGVSQLEQFK#.T                         | 30.87  | 8.53    | 3.62 | 0.28 |
| Q80X50_UBP2L_MOUSE | Uba2    | Ubiquitin-associated pro R.IDLAVLLGK#.T                             | 57.32  | 16.01   | 3.58 | 0.28 |
| Q80X50_UBP2L_MOUSE | Uba2    | Ubiquitin-associated pro K.IFTASNVSSVPLPAENVTTAGQR@.I               | 33.22  | 7.48    | 4.44 | 0.23 |
| Q80X50_UBP2L_MOUSE | Uba2    | Ubiquitin-associated pro R.STSAPQM*SPGSSNDQSSPQAPQK#.L              | 7.28   | 2.71    | 2.68 | 0.37 |
| Q80X50_UBP2L_MOUSE | Uba2    | Ubiquitin-associated pro R.TATEWGTEDWNEDLSETK#.I                    | 6.80   | 1.92    | 3.55 | 0.28 |
| Q80X50_UBP2L_MOUSE | Uba2    | Ubiquitin-associated pro K.TPSSM*ENDSNLDPQAPSLAQPLVFSNSK#.Q         | 6.71   | 2.06    | 3.25 | 0.31 |
| Q6ZWY6_U2D2B_MOUSE | Ube2d2b | Ubiquitin-conjugating er R.SQWSPALTSK#.V                            | 14.41  | 7.51    | 1.92 | 0.52 |
| P60605_UB2G2_MOUSE | Ube2g2  | Ubiquitin-conjugating er K.ILLSVSM*LAEPNDESGANVDASK#.M              | 6.65   | 4.96    | 1.34 | 0.75 |
| P62257_UBE2H_MOUSE | Ube2h   | Ubiquitin-conjugating er K.HEVTLGLGNEFVK#.F                         | 37.11  | 18.09   | 2.05 | 0.49 |
| P62257_UBE2H_MOUSE | Ube2h   | Ubiquitin-conjugating er R.VDPLDKH#PFK#.S                           | 24.61  | 11.54   | 2.13 | 0.47 |



|                     |          |                                                                |        |        |      |      |
|---------------------|----------|----------------------------------------------------------------|--------|--------|------|------|
| Q6P5E4_UGGG1_MOUSE  | Uggt1    | UDP-glucose:glycoprotei R.IVPEWQDYDQEK#.Q                      | 109.06 | 72.56  | 1.50 | 0.67 |
| Q6P5E4_UGGG1_MOUSE  | Uggt1    | UDP-glucose:glycoprotei R.IYSHDQTDSPDANDVWVILNFK#.S            | 99.96  | 65.41  | 1.53 | 0.65 |
| Q6P5E4_UGGG1_MOUSE  | Uggt1    | UDP-glucose:glycoprotei K.KHADM*ANEDLLSDGTNENESGFWDSEFK#.W     | 25.65  | 14.14  | 1.81 | 0.55 |
| Q6P5E4_UGGG1_MOUSE  | Uggt1    | UDP-glucose:glycoprotei K.K#YFNQVLEQYK#.W                      | 29.30  | 20.40  | 1.44 | 0.70 |
| Q6P5E4_UGGG1_MOUSE  | Uggt1    | UDP-glucose:glycoprotei K.K#YFVVEVNSILGIDSAYDQNR@.K            | 15.28  | 11.87  | 1.29 | 0.78 |
| Q6P5E4_UGGG1_MOUSE  | Uggt1    | UDP-glucose:glycoprotei K.K#YFVVEVNSILGIDSAYDQNR@K#.E          | 13.55  | 12.57  | 1.08 | 0.93 |
| Q6P5E4_UGGG1_MOUSE  | Uggt1    | UDP-glucose:glycoprotei R.LGIEGLSLHNLK#.L                      | 243.06 | 168.73 | 1.44 | 0.69 |
| Q6P5E4_UGGG1_MOUSE  | Uggt1    | UDP-glucose:glycoprotei K.LNIQPSFTDYAVDIR@.S                   | 180.19 | 125.54 | 1.44 | 0.70 |
| Q6P5E4_UGGG1_MOUSE  | Uggt1    | UDP-glucose:glycoprotei K.LR@ELYPALEGLQK#.E                    | 56.26  | 45.68  | 1.23 | 0.81 |
| Q6P5E4_UGGG1_MOUSE  | Uggt1    | UDP-glucose:glycoprotei K.LSDM*PLK#.S                          | 57.82  | 41.48  | 1.39 | 0.72 |
| Q6P5E4_UGGG1_MOUSE  | Uggt1    | UDP-glucose:glycoprotei K.M*AKEETAALAAAGVDIAEFSVGGM*DVSFLK#.E  | 33.83  | 20.18  | 1.68 | 0.60 |
| Q6P5E4_UGGG1_MOUSE  | Uggt1    | UDP-glucose:glycoprotei K.NVLSPTFK#.E                          | 90.06  | 59.54  | 1.51 | 0.66 |
| Q6P5E4_UGGG1_MOUSE  | Uggt1    | UDP-glucose:glycoprotei K.QDKHDDIINFVSAVSHLYER@.F              | 23.56  | 21.73  | 1.08 | 0.92 |
| Q6P5E4_UGGG1_MOUSE  | Uggt1    | UDP-glucose:glycoprotei R.QLLYDAIK#.H                          | 91.42  | 65.25  | 1.40 | 0.71 |
| Q6P5E4_UGGG1_MOUSE  | Uggt1    | UDP-glucose:glycoprotei K.QLQTLFQEK#.E                         | 45.37  | 29.49  | 1.54 | 0.65 |
| Q6P5E4_UGGG1_MOUSE  | Uggt1    | UDP-glucose:glycoprotei K.SGYWASHLAGR#.K                       | 12.34  | 7.82   | 1.58 | 0.63 |
| Q6P5E4_UGGG1_MOUSE  | Uggt1    | UDP-glucose:glycoprotei R.SPAISWVNNLEVDNR@.Y                   | 68.30  | 41.78  | 1.52 | 0.66 |
| Q6P5E4_UGGG1_MOUSE  | Uggt1    | UDP-glucose:glycoprotei K.TAAIANSM*NYLTK#.K                    | 68.30  | 43.54  | 1.57 | 0.64 |
| Q6P5E4_UGGG1_MOUSE  | Uggt1    | UDP-glucose:glycoprotei K.TAVSAQR@.A                           | 189.90 | 111.32 | 1.71 | 0.59 |
| Q6P5E4_UGGG1_MOUSE  | Uggt1    | UDP-glucose:glycoprotei R.TGETVK#HVHVSVLEK#.K                  | 82.86  | 69.23  | 1.20 | 0.84 |
| Q6P5E4_UGGG1_MOUSE  | Uggt1    | UDP-glucose:glycoprotei K.VDALLSAQPK#.G                        | 74.07  | 62.21  | 1.19 | 0.84 |
| Q6P5E4_UGGG1_MOUSE  | Uggt1    | UDP-glucose:glycoprotei R.VEEDVASDLMV*#.V                      | 61.23  | 42.54  | 1.44 | 0.69 |
| Q6P5E4_UGGG1_MOUSE  | Uggt1    | UDP-glucose:glycoprotei K.VEHVSVLEK#.K                         | 67.90  | 45.78  | 1.48 | 0.67 |
| Q6P5E4_UGGG1_MOUSE  | Uggt1    | UDP-glucose:glycoprotei K.VVQLQDLSFQTAR@.J                     | 68.32  | 49.88  | 1.37 | 0.73 |
| Q6P5E4_UGGG1_MOUSE  | Uggt1    | UDP-glucose:glycoprotei K.YNFQYELVQYK#.W                       | 31.37  | 18.06  | 1.74 | 0.58 |
| Q6P5E4_UGGG1_MOUSE  | Uggt1    | UDP-glucose:glycoprotei K.YPYVVEVNSILGIDSAYDQNR@K#.E           | 10.29  | 6.32   | 1.63 | 0.61 |
| Q6P5E4_UGGG1_MOUSE  | Uggt1    | UDP-glucose:glycoprotei R.YVLEPEISFTADSSFAK#.G                 | 97.06  | 62.44  | 1.55 | 0.64 |
| E9Q4X2_E9Q4X2_MOUSE | Uggt2    | Protein Uggt2 OS=Mus m R.IVPEWVYDTEIR@.T                       | 7.28   | 2.33   | 3.12 | 0.32 |
| E9Q4X2_E9Q4X2_MOUSE | Uggt2    | Protein Uggt2 OS=Mus m K.SEDIYEITHEGAEPTNVGNVIVLNTFK#.S        | 4.96   | 1.71   | 2.90 | 0.34 |
| Q8VDF2_UHRF1_MOUSE  | Uhrf1    | E3 ubiquitin-protein liga K.SGLFVWR@.Y                         | 13.95  | 13.17  | 1.06 | 0.94 |
| Q8VDF2_UHRF1_MOUSE  | Uhrf1    | E3 ubiquitin-protein liga R.TDSEVQVQAGEK.L                     | 3.94   | 6.44   | 0.61 | 1.63 |
| Q8VDF2_UHRF1_MOUSE  | Uhrf1    | E3 ubiquitin-protein liga R.LNDTIQLVR@.Q                       | 18.93  | 14.49  | 1.31 | 0.77 |
| Q8VDF2_UHRF1_MOUSE  | Uhrf1    | E3 ubiquitin-protein liga R.QSLALPLSTR#.E                      | 18.50  | 14.17  | 1.31 | 0.77 |
| Q8VDF2_UHRF1_MOUSE  | Uhrf1    | E3 ubiquitin-protein liga R.R@PLIAPSQPMPALR@.N                 | 13.05  | 8.60   | 1.52 | 0.66 |
| Q8VDF2_UHRF1_MOUSE  | Uhrf1    | E3 ubiquitin-protein liga R.TDSEVQVQAGEK.L                     | 33.88  | 22.65  | 1.50 | 0.67 |
| B2KF50_B2KF50_MOUSE | Uhrf1bp1 | Protein Uhrf1bp1 OS=Ml K.SLSGSTEPPAAAVR@.E                     | 4.50   | 1.13   | 3.98 | 0.25 |
| B2KF50_B2KF50_MOUSE | Uhrf1bp1 | Protein Uhrf1bp1 OS=Ml K.SDASSDQAVSPEK#.V                      | 2.31   | 1.62   | 1.42 | 0.70 |
| Q7TM13_UHRF2_MOUSE  | Uhrf2    | E3 ubiquitin-protein liga K.ASDSDVAEAFQLTPQQQR@.L              | 3.05   | 2.02   | 1.51 | 0.66 |
| Q7TM13_UHRF2_MOUSE  | Uhrf2    | E3 ubiquitin-protein liga R.GFWYDAEITLTK#.Q                    | 6.52   | 4.48   | 1.45 | 0.69 |
| Q7TM13_UHRF2_MOUSE  | Uhrf2    | E3 ubiquitin-protein liga R.IGAPSADQTLTNM*NR@.A                | 5.29   | 1.93   | 2.74 | 0.37 |
| Q5U509_UIMC1_MOUSE  | Uimc1    | BRCA1-A complex subun K.LLLEPEOTTSR@.G                         | 12.62  | 9.04   | 1.77 | 0.56 |
| P13439_UMPS_MOUSE   | Umps     | Uridine 5'-monophosph K.FGSFLV#.S                              | 12.64  | 4.47   | 2.83 | 0.35 |
| P13439_UMPS_MOUSE   | Umps     | Uridine 5'-monophosph R.LLSQVADILFQTK#.N                       | 9.64   | 4.30   | 2.24 | 0.45 |
| P13439_UMPS_MOUSE   | Umps     | Uridine 5'-monophosph K.SGLSSPYDILR@.G                         | 12.52  | 6.91   | 1.81 | 0.55 |
| P13439_UMPS_MOUSE   | Umps     | Uridine 5'-monophosph R.LLSQVADILFQTK#.N                       | 12.64  | 1.96   | 6.45 | 0.15 |
| Q9EPU0_RENT1_MOUSE  | Upf1     | Regulator of nonsense tri K.AGAK#DOIGITPYEQQR@.S               | 85.27  | 33.13  | 2.57 | 0.39 |
| Q9EPU0_RENT1_MOUSE  | Upf1     | Regulator of nonsense tri K.AGLSQSLFER@.L                      | 100.38 | 40.43  | 2.48 | 0.40 |
| Q9EPU0_RENT1_MOUSE  | Upf1     | Regulator of nonsense tri K.ALVEGLNLR@.E                       | 105.57 | 52.51  | 2.01 | 0.50 |
| Q9EPU0_RENT1_MOUSE  | Upf1     | Regulator of nonsense tri R.ANEHQIGFLNDRP@.R                   | 62.81  | 25.38  | 2.47 | 0.40 |
| Q9EPU0_RENT1_MOUSE  | Upf1     | Regulator of nonsense tri K.DETGELSADEK#R@.Y                   | 10.32  | 3.16   | 3.26 | 0.31 |
| Q9EPU0_RENT1_MOUSE  | Upf1     | Regulator of nonsense tri K.DINWDSQWQPIQDR@.C                  | 9.71   | 3.71   | 2.61 | 0.38 |
| Q9EPU0_RENT1_MOUSE  | Upf1     | Regulator of nonsense tri R.EAIIPGSYDR@.S                      | 149.57 | 57.72  | 2.59 | 0.39 |
| Q9EPU0_RENT1_MOUSE  | Upf1     | Regulator of nonsense tri K.ESQTDNITVR@.W                      | 24.24  | 11.38  | 2.13 | 0.47 |
| Q9EPU0_RENT1_MOUSE  | Upf1     | Regulator of nonsense tri R.FM*TTAM*YDAR@.E                    | 40.94  | 13.79  | 2.97 | 0.34 |
| Q9EPU0_RENT1_MOUSE  | Upf1     | Regulator of nonsense tri R.IAFFLPK#.T                         | 128.77 | 63.65  | 2.02 | 0.49 |
| Q9EPU0_RENT1_MOUSE  | Upf1     | Regulator of nonsense tri K.IPSEQELR@.A                        | 75.22  | 36.75  | 2.05 | 0.49 |
| Q9EPU0_RENT1_MOUSE  | Upf1     | Regulator of nonsense tri K.KGFDFQWQPDKPM*FFVYVQGEIASSGTYLNR.T | 3.38   | 2.77   | 1.22 | 0.82 |
| Q9EPU0_RENT1_MOUSE  | Upf1     | Regulator of nonsense tri R.K#LVNTVNPGR@.F                     | 30.23  | 15.35  | 1.97 | 0.51 |
| Q9EPU0_RENT1_MOUSE  | Upf1     | Regulator of nonsense tri K.LK#ESQTDNITVR@.W                   | 52.62  | 21.34  | 2.47 | 0.41 |
| Q9EPU0_RENT1_MOUSE  | Upf1     | Regulator of nonsense tri K.LLGEVDEVVVK#.C                     | 88.31  | 32.63  | 2.71 | 0.37 |
| Q9EPU0_RENT1_MOUSE  | Upf1     | Regulator of nonsense tri R.LNVALTR@.A                         | 57.52  | 31.13  | 1.85 | 0.54 |
| Q9EPU0_RENT1_MOUSE  | Upf1     | Regulator of nonsense tri K.LYQVEIASVDAFQGR.E                  | 40.73  | 16.15  | 2.52 | 0.40 |
| Q9EPU0_RENT1_MOUSE  | Upf1     | Regulator of nonsense tri K.LYQVEIASVDAFQGR@.E                 | 19.77  | 10.09  | 1.96 | 0.51 |
| Q9EPU0_RENT1_MOUSE  | Upf1     | Regulator of nonsense tri R.NM*DSM*PELQK#.L                    | 64.91  | 29.69  | 2.19 | 0.46 |
| Q9EPU0_RENT1_MOUSE  | Upf1     | Regulator of nonsense tri R.NVFLGFIPAK#.A                      | 95.27  | 42.69  | 2.23 | 0.45 |
| Q9EPU0_RENT1_MOUSE  | Upf1     | Regulator of nonsense tri R.QITAQINKLEELW#.E                   | 25.24  | 11.95  | 2.11 | 0.47 |
| Q9EPU0_RENT1_MOUSE  | Upf1     | Regulator of nonsense tri K.R@FTAQGLPDLNHSQVYAVK#.T            | 15.58  | 5.66   | 2.75 | 0.36 |
| Q9EPU0_RENT1_MOUSE  | Upf1     | Regulator of nonsense tri K.SQIDVALSQDSTYQGER@.A               | 19.57  | 9.53   | 2.05 | 0.49 |
| Q9EPU0_RENT1_MOUSE  | Upf1     | Regulator of nonsense tri K.TSQLAEINFEDEEDTYTK#.D              | 9.76   | 3.48   | 2.80 | 0.36 |
| Q9EPU0_RENT1_MOUSE  | Upf1     | Regulator of nonsense tri K.TVLQR@PLSLIQGGPPTGK#.T             | 76.06  | 37.18  | 2.05 | 0.49 |
| Q9EPU0_RENT1_MOUSE  | Upf1     | Regulator of nonsense tri K.TVTSATVYHAR@.Q                     | 11.63  | 5.67   | 2.05 | 0.49 |
| Q9EPU0_RENT1_MOUSE  | Upf1     | Regulator of nonsense tri K.VPDNVDGDEIAELR@.S                  | 45.09  | 18.84  | 2.39 | 0.42 |
| Q9EPU0_RENT1_MOUSE  | Upf1     | Regulator of nonsense tri R.YEDAYQNIQFGLPVK#.L                 | 29.95  | 14.85  | 2.02 | 0.50 |
| Q9EPU0_RENT1_MOUSE  | Upf1     | Regulator of nonsense tri R.YGVIVGNPK#.A                       | 76.32  | 40.65  | 1.88 | 0.53 |
| Q9EPU0_RENT1_MOUSE  | Upf1     | Regulator of nonsense tri K.AGLSQSLFER@.L                      | 28.08  | 11.34  | 2.48 | 0.40 |
| Q9EPU0_RENT1_MOUSE  | Upf1     | Regulator of nonsense tri K.ALVEGLNLR@.E                       | 27.64  | 12.76  | 2.17 | 0.46 |
| Q9EPU0_RENT1_MOUSE  | Upf1     | Regulator of nonsense tri R.EAIIPGSYDR@.S                      | 215.30 | 61.42  | 3.51 | 0.29 |
| Q9EPU0_RENT1_MOUSE  | Upf1     | Regulator of nonsense tri R.FM*TTAM*YDAR@.E                    | 8.90   | 3.57   | 2.49 | 0.40 |
| Q9EPU0_RENT1_MOUSE  | Upf1     | Regulator of nonsense tri R.IAFFLPK#.T                         | 44.30  | 17.90  | 2.47 | 0.40 |
| Q9EPU0_RENT1_MOUSE  | Upf1     | Regulator of nonsense tri K.IPSEQELR@.A                        | 23.40  | 8.27   | 2.83 | 0.35 |
| Q9EPU0_RENT1_MOUSE  | Upf1     | Regulator of nonsense tri R.K#LVNTVNPGR@.F                     | 7.43   | 4.00   | 1.85 | 0.54 |
| Q9EPU0_RENT1_MOUSE  | Upf1     | Regulator of nonsense tri K.LLGEVDEVVVK#.C                     | 18.81  | 8.35   | 2.25 | 0.44 |
| Q9EPU0_RENT1_MOUSE  | Upf1     | Regulator of nonsense tri R.LNVALTR@.A                         | 26.06  | 8.10   | 3.22 | 0.31 |
| Q9EPU0_RENT1_MOUSE  | Upf1     | Regulator of nonsense tri R.LNVALTR@.A                         | 18.15  | 7.47   | 2.43 | 0.41 |
| Q9EPU0_RENT1_MOUSE  | Upf1     | Regulator of nonsense tri K.LYQVEIASVDAFQGR@.E                 | 9.89   | 5.25   | 1.88 | 0.53 |
| Q9EPU0_RENT1_MOUSE  | Upf1     | Regulator of nonsense tri R.NM*DSM*PELQK#.L                    | 13.44  | 6.89   | 1.95 | 0.51 |
| Q9EPU0_RENT1_MOUSE  | Upf1     | Regulator of nonsense tri R.NVFLGFIPAK#.A                      | 33.90  | 12.30  | 2.76 | 0.36 |
| Q9EPU0_RENT1_MOUSE  | Upf1     | Regulator of nonsense tri K.R@FTAQGLPDLNHSQVYAVK#.T            | 8.26   | 2.78   | 2.97 | 0.34 |
| Q9EPU0_RENT1_MOUSE  | Upf1     | Regulator of nonsense tri K.SQIDVALSQDSTYQGER@.A               | 6.20   | 2.53   | 2.46 | 0.41 |
| Q9EPU0_RENT1_MOUSE  | Upf1     | Regulator of nonsense tri K.TVLQR@PLSLIQGGPPTGK#.T             | 25.43  | 11.15  | 2.28 | 0.44 |
| Q9EPU0_RENT1_MOUSE  | Upf1     | Regulator of nonsense tri K.VPDNVDGDEIAELR@.S                  | 73.04  | 8.42   | 8.68 | 0.12 |
| A2AT37_A2AT37_MOUSE | Upf2     | Protein Upf2 OS=Mus mu K.AFPVAILFK#.D                          | 16.47  | 5.98   | 2.76 | 0.36 |
| A2AT37_A2AT37_MOUSE | Upf2     | Protein Upf2 OS=Mus mu R.ALFVPR@.Q                             | 13.99  | 4.44   | 3.15 | 0.32 |
| A2AT37_A2AT37_MOUSE | Upf2     | Protein Upf2 OS=Mus mu K.YIAEAVASIVAK#.L                       | 9.95   | 1.40   | 7.10 | 0.14 |
| Q3ULJ3_Q3ULJ3_MOUSE | Upf3a    | MCG3697, isoform CRA_ R.TTPAQETAGER@.L                         | 5.80   | 16.69  | 0.35 | 2.88 |
| Q3ULL6_Q3ULL6_MOUSE | Upf3b    | Protein Upf3b OS=Mus m R.LTPLLFLK#.N                           | 16.35  | 8.83   | 1.85 | 0.54 |
| Q3ULL6_Q3ULL6_MOUSE | Upf3b    | Protein Upf3b OS=Mus m K.FLESYATDNEK#.M                        | 6.37   | 3.01   | 2.11 | 0.47 |
| Q3ULL6_Q3ULL6_MOUSE | Upf3b    | Protein Upf3b OS=Mus m K.NQEDILFR@.D                           | 13.70  | 4.88   | 2.81 | 0.36 |
| Q9CQY6_UQC2_MOUSE   | Uqcrc2   | Ubiquinol-cytochrome-c K.LILSTDTEEFQEM*#.NK.S                  | 7.14   | 3.63   | 1.97 | 0.51 |
| Q9DB77_QCR2_MOUSE   | Uqcrc2   | Cytochrome-b-c1 compl K.AVAQGNLSADVQAAK#.N                     | 12.64  | 10.15  | 1.24 | 0.80 |
| Q9DB77_QCR2_MOUSE   | Uqcrc2   | Cytochrome-b-c1 compl K.SM*AAASGNLGHPTFLDEL.                   | 6.20   | 6.20   | 1.00 | 1.00 |
| Q571H0_NP1P_MOUSE   | Urb1     | Nucleolar pre-ribosomal R.EVTLLALPALHAHLTQQGTQSLGK#.E          | 5.53   | 3.49   | 1.58 | 0.63 |
| Q61069_USF1_MOUSE   | Usf1     | Upstream stimulatory fa R.LESEQLDQLQDNDVLR.Q                   | 2.08   | 3.25   | 0.64 | 1.56 |





|                     |       |                                                           |        |       |      |      |
|---------------------|-------|-----------------------------------------------------------|--------|-------|------|------|
| E9Q6R7_E9Q6R7_MOUSE | Utrn  | Protein Utrn OS=Mus mu R.IDAFQLPQEAQK#.I                  | 17.97  | 8.80  | 2.04 | 0.49 |
| E9Q6R7_E9Q6R7_MOUSE | Utrn  | Protein Utrn OS=Mus mu R.IIADLEEQR@.N                     | 25.27  | 8.17  | 3.09 | 0.32 |
| E9Q6R7_E9Q6R7_MOUSE | Utrn  | Protein Utrn OS=Mus mu K.IQLQEDINAYFK#.Q                  | 8.23   | 2.22  | 3.71 | 0.27 |
| E9Q6R7_E9Q6R7_MOUSE | Utrn  | Protein Utrn OS=Mus mu R.KHTIPVSSGITSALPADLVENK#.I        | 6.99   | 2.07  | 3.38 | 0.30 |
| E9Q6R7_E9Q6R7_MOUSE | Utrn  | Protein Utrn OS=Mus mu R.LEDSSNQVQAVAK#.L                 | 35.35  | 11.65 | 3.03 | 0.33 |
| E9Q6R7_E9Q6R7_MOUSE | Utrn  | Protein Utrn OS=Mus mu R.LK#GESQQLVGYK#.R                 | 33.98  | 8.02  | 4.24 | 0.24 |
| E9Q6R7_E9Q6R7_MOUSE | Utrn  | Protein Utrn OS=Mus mu R.LLASLEELIK#.W                    | 38.73  | 16.69 | 2.32 | 0.43 |
| E9Q6R7_E9Q6R7_MOUSE | Utrn  | Protein Utrn OS=Mus mu K.LLDDLEGLTGTSLPK#.E               | 38.30  | 30.08 | 2.77 | 0.36 |
| E9Q6R7_E9Q6R7_MOUSE | Utrn  | Protein Utrn OS=Mus mu K.LLDPEDVAVHLPDKK#.S               | 25.70  | 9.08  | 2.83 | 0.35 |
| E9Q6R7_E9Q6R7_MOUSE | Utrn  | Protein Utrn OS=Mus mu K.LLLEESGDDTR@.N                   | 13.74  | 5.77  | 2.38 | 0.42 |
| E9Q6R7_E9Q6R7_MOUSE | Utrn  | Protein Utrn OS=Mus mu K.LLQVSDDDR@.L                     | 21.17  | 9.17  | 2.31 | 0.43 |
| E9Q6R7_E9Q6R7_MOUSE | Utrn  | Protein Utrn OS=Mus mu R.LLSELDASLQVENVR@.E               | 27.62  | 10.06 | 2.75 | 0.36 |
| E9Q6R7_E9Q6R7_MOUSE | Utrn  | Protein Utrn OS=Mus mu R.LR@DFEADSEVIK#.W                 | 24.04  | 6.88  | 3.50 | 0.29 |
| E9Q6R7_E9Q6R7_MOUSE | Utrn  | Protein Utrn OS=Mus mu R.LR@PSEAFSLK#.E                   | 22.00  | 14.55 | 1.51 | 0.66 |
| E9Q6R7_E9Q6R7_MOUSE | Utrn  | Protein Utrn OS=Mus mu R.LVDYQSQLEK#.F                    | 38.07  | 13.21 | 2.88 | 0.35 |
| E9Q6R7_E9Q6R7_MOUSE | Utrn  | Protein Utrn OS=Mus mu K.MESLPLGDDLPQLK#.L                | 3.48   | 1.62  | 2.15 | 0.47 |
| E9Q6R7_E9Q6R7_MOUSE | Utrn  | Protein Utrn OS=Mus mu R.NVEETLEYK#.T                     | 11.37  | 3.94  | 2.88 | 0.35 |
| E9Q6R7_E9Q6R7_MOUSE | Utrn  | Protein Utrn OS=Mus mu R.QLGEVAAGGSIENPSVR@.S             | 10.60  | 7.94  | 1.34 | 0.75 |
| E9Q6R7_E9Q6R7_MOUSE | Utrn  | Protein Utrn OS=Mus mu K.QLQQLSSWLALTEER@.I               | 8.02   | 3.05  | 2.63 | 0.38 |
| E9Q6R7_E9Q6R7_MOUSE | Utrn  | Protein Utrn OS=Mus mu R.QQM*LDIQAEIADHNDIF#.S            | 5.93   | 6.13  | 0.97 | 1.03 |
| E9Q6R7_E9Q6R7_MOUSE | Utrn  | Protein Utrn OS=Mus mu R.QTLDLQSEIADHNDIF#.S              | 27.39  | 10.58 | 2.59 | 0.39 |
| E9Q6R7_E9Q6R7_MOUSE | Utrn  | Protein Utrn OS=Mus mu K.SLQNDLEAEQVK#.V                  | 24.26  | 10.56 | 2.30 | 0.44 |
| E9Q6R7_E9Q6R7_MOUSE | Utrn  | Protein Utrn OS=Mus mu K.SM*DEQLTSLK#.V                   | 25.26  | 10.47 | 2.41 | 0.41 |
| E9Q6R7_E9Q6R7_MOUSE | Utrn  | Protein Utrn OS=Mus mu R.STEALPER@AEAVHEALESLESLR@.H      | 22.17  | 7.15  | 3.52 | 0.28 |
| E9Q6R7_E9Q6R7_MOUSE | Utrn  | Protein Utrn OS=Mus mu K.STSEGVIGDLDTEISWAK#.S            | 25.82  | 8.24  | 2.77 | 0.36 |
| E9Q6R7_E9Q6R7_MOUSE | Utrn  | Protein Utrn OS=Mus mu K.TIPVSSGITSALPADLVENK#.I          | 28.54  | 9.39  | 3.04 | 0.33 |
| E9Q6R7_E9Q6R7_MOUSE | Utrn  | Protein Utrn OS=Mus mu K.TLAFR@EIIAPINLK#.V               | 20.64  | 9.00  | 2.29 | 0.44 |
| E9Q6R7_E9Q6R7_MOUSE | Utrn  | Protein Utrn OS=Mus mu K.TM*NDLSSQLSPDLHPSLK#.M           | 23.99  | 8.31  | 2.89 | 0.35 |
| E9Q6R7_E9Q6R7_MOUSE | Utrn  | Protein Utrn OS=Mus mu R.VFLADQPIEAPPEPR.R                | 25.88  | 11.75 | 2.20 | 0.45 |
| E9Q6R7_E9Q6R7_MOUSE | Utrn  | Protein Utrn OS=Mus mu K.VLYNDLGAQVTEGK#.Q                | 28.10  | 9.80  | 2.87 | 0.35 |
| E9Q6R7_E9Q6R7_MOUSE | Utrn  | Protein Utrn OS=Mus mu K.WLQAEATTANVLADASQR@.E            | 9.19   | 3.71  | 2.48 | 0.40 |
| E9Q6R7_E9Q6R7_MOUSE | Utrn  | Protein Utrn OS=Mus mu R.WSTLVAEVLQPR@.L                  | 9.93   | 4.22  | 2.35 | 0.43 |
| E9Q6R7_E9Q6R7_MOUSE | Utrn  | Protein Utrn OS=Mus mu K.YGDLARPDDGQNEFSDIIK.S            | 24.19  | 10.50 | 2.30 | 0.43 |
| Q91XL3_UXS1_MOUSE   | Uxs1  | UDP-glucuronic acid dec R.VVSNFILQALQGEPLTVYSGSQTR@.A     | 3.07   | 4.29  | 0.72 | 1.40 |
| Q9W1T20_LXT_MOUSE   | Uxt   | Protein UXT OS=Mus mu R.YETIFSDVLRQ@.D                    | 10.76  | 3.75  | 2.87 | 0.35 |
| Q80WQ2_VAC14_MOUSE  | Vac14 | Protein VAC14 homolog K.LVTPEDDEPDEPK#.S                  | 8.35   | 3.97  | 2.10 | 0.48 |
| Q80WQ2_VAC14_MOUSE  | Vac14 | Protein VAC14 homolog R.GAVLPHFNVLFDGLSK#.L               | 7.92   | 4.64  | 1.71 | 0.59 |
| Q80WQ2_VAC14_MOUSE  | Vac14 | Protein VAC14 homolog K.LAADPDPNKK#.S                     | 54.43  | 16.02 | 3.40 | 0.29 |
| P63044_VAMP2_MOUSE  | Vamp2 | Vesicle-associated memb R.ADALQAGASQFETSAAK#.L            | 29.78  | 15.80 | 1.88 | 0.53 |
| P63044_VAMP2_MOUSE  | Vamp2 | Vesicle-associated memb R.LQQTQAVQDEVVDM*R@.V             | 11.99  | 4.01  | 2.99 | 0.33 |
| P63044_VAMP2_MOUSE  | Vamp2 | Vesicle-associated memb K.LSELDLDR@.A                     | 28.41  | 19.10 | 1.50 | 0.67 |
| P63044_VAMP2_MOUSE  | Vamp2 | Vesicle-associated memb K.LSELDLDR@ADALQAGASQFETSAAK#.L   | 78.48  | 32.74 | 2.40 | 0.42 |
| P63024_VAMP3_MOUSE  | Vamp3 | Vesicle-associated memb R.LQQTQAVQDEVVDM*R@.V             | 25.48  | 15.36 | 1.66 | 0.60 |
| P63024_VAMP3_MOUSE  | Vamp3 | Vesicle-associated memb R.R@LQQTQAVQDEVVDM*R@.V           | 15.32  | 6.86  | 2.23 | 0.45 |
| O70480_VAMP4_MOUSE  | Vamp4 | Vesicle-associated memb K.HVQNVQDEVVDM*QENITK#.V          | 2.67   | 1.67  | 1.60 | 0.63 |
| O70480_VAMP4_MOUSE  | Vamp4 | Vesicle-associated memb K.SESLSDNATASFNR.S                | 4.36   | 2.61  | 1.67 | 0.60 |
| P70280_VAMP7_MOUSE  | Vamp7 | Vesicle-associated memb R.AFSFLNEVK#.K                    | 20.59  | 8.79  | 2.34 | 0.43 |
| P70280_VAMP7_MOUSE  | Vamp7 | Vesicle-associated memb R.LELLIDKRTENLVDSSVTFK#.T         | 19.03  | 7.74  | 2.46 | 0.41 |
| O70404_VAMP8_MOUSE  | Vamp8 | Vesicle-associated memb K.NIM*QNVNVER@.I                  | 49.35  | 17.05 | 2.89 | 0.35 |
| O70404_VAMP8_MOUSE  | Vamp8 | Vesicle-associated memb R.NK#TEDELEATSEHF#.T              | 34.89  | 14.11 | 2.47 | 0.40 |
| O70404_VAMP8_MOUSE  | Vamp8 | Vesicle-associated memb R.NLQSEVEGK#.N                    | 45.70  | 15.22 | 3.00 | 0.33 |
| Q9WV55_VAPA_MOUSE   | Vapa  | Vesicle-associated memb K.GPFTDVTNLIK#.L                  | 22.35  | 13.49 | 1.66 | 0.60 |
| Q9WV55_VAPA_MOUSE   | Vapa  | Vesicle-associated memb K.HEQLVLDPSPDLK#.F                | 21.23  | 13.60 | 1.56 | 0.64 |
| Q9Z1Q9_SYVC_MOUSE   | Vars  | Valine-tRNA ligase OS=M R.EAFLEEVK#.W                     | 9.79   | 4.31  | 2.27 | 0.44 |
| Q9Z1Q9_SYVC_MOUSE   | Vars  | Valine-tRNA ligase OS=M R.GPGQDPAALGALGK#.A               | 17.17  | 9.69  | 1.77 | 0.56 |
| Q9Z1Q9_SYVC_MOUSE   | Vars  | Valine-tRNA ligase OS=M R.SLPIVDFDVFDM*EFGTGAVK#.I        | 5.57   | 3.24  | 1.72 | 0.58 |
| Q9Z1Q9_SYVC_MOUSE   | Vars  | Valine-tRNA ligase OS=M R.SLPIVDFDVFDM*EFGTGAVK#.I        | 11.28  | 4.93  | 2.29 | 0.44 |
| Q9Z1Q9_SYVC_MOUSE   | Vars  | Valine-tRNA ligase OS=M K.VPLEVQEADEAK#.L                 | 16.20  | 6.99  | 2.32 | 0.43 |
| Q9Z1Q9_SYVC_MOUSE   | Vars  | Valine-tRNA ligase OS=M K.VPLEVQEADEAK#LQQTEALR@.K        | 11.80  | 5.15  | 2.29 | 0.44 |
| Q8C1W1_VASH1_MOUSE  | Vash1 | Vasohibin-1 OS=Mus mu: R.FPISFK#.T                        | 17.70  | 3.46  | 5.11 | 0.20 |
| Q62465_VAT1_MOUSE   | Vat1  | Synaptic vesicle membra K.GVDIVM*DPLGGSDTAK#.G            | 9.21   | 5.12  | 1.80 | 0.56 |
| Q62465_VAT1_MOUSE   | Vat1  | Synaptic vesicle membra R.TVENVTVFGTASAK#.H               | 7.68   | 3.14  | 2.45 | 0.41 |
| Q62465_VAT1_MOUSE   | Vat1  | Synaptic vesicle membra K.VLLVPGPEK#E.T                   | 6.17   | 4.23  | 1.46 | 0.69 |
| Q62465_VAT1_MOUSE   | Vat1  | Synaptic vesicle membra K.VVTVGM*ANLLTGPK#.R              | 10.67  | 3.38  | 3.16 | 0.32 |
| Q62465_VAT1_MOUSE   | Vat1  | Synaptic vesicle membra K.GVDIVM*DPLGGSDTAK#.G            | 4.36   | 2.84  | 1.54 | 0.65 |
| Q62465_VAT1_MOUSE   | Vat1  | Synaptic vesicle membra K.GVDIVM*DPLGGSDTAK#.G            | 7.25   | 3.02  | 2.40 | 0.42 |
| P29533_VCAM1_MOUSE  | Vcam1 | Vascular cell adhesion pr K.ILETFPIETDGTG#.S              | 15.13  | 3.69  | 4.10 | 0.24 |
| P29533_VCAM1_MOUSE  | Vcam1 | Vascular cell adhesion pr K.SLEVTFTPIEDIGK#.A             | 9.38   | 4.17  | 2.25 | 0.44 |
| P29533_VCAM1_MOUSE  | Vcam1 | Vascular cell adhesion pr K.SVDGSYTR@.Q                   | 5.43   | 2.16  | 2.52 | 0.40 |
| P29533_VCAM1_MOUSE  | Vcam1 | Vascular cell adhesion pr R.TQVEVYSPFDPVVIK#.M            | 5.17   | 2.40  | 2.15 | 0.46 |
| P29533_VCAM1_MOUSE  | Vcam1 | Vascular cell adhesion pr K.ILETFPIETDGTG#.S              | 8.96   | 5.02  | 1.78 | 0.56 |
| Q64727_VINC_MOUSE   | Vcl   | Vinculin OS=Mus muscul R.AANFENHSGR@.L                    | 6.11   | 3.38  | 1.81 | 0.55 |
| Q64727_VINC_MOUSE   | Vcl   | Vinculin OS=Mus muscul K.AGEVINQPM*MM*AAAR.Q              | 31.22  | 10.91 | 2.86 | 0.35 |
| Q64727_VINC_MOUSE   | Vcl   | Vinculin OS=Mus muscul R.ALASIDSX#.L                      | 64.05  | 23.91 | 2.66 | 0.37 |
| Q64727_VINC_MOUSE   | Vcl   | Vinculin OS=Mus muscul R.ALASQLQDSLK#.D                   | 111.94 | 40.70 | 2.75 | 0.36 |
| Q64727_VINC_MOUSE   | Vcl   | Vinculin OS=Mus muscul K.AQVQSGLDVLTAK#.V                 | 85.39  | 37.31 | 2.29 | 0.44 |
| Q64727_VINC_MOUSE   | Vcl   | Vinculin OS=Mus muscul K.AVAGNISDPGLQK#.S                 | 88.36  | 33.95 | 2.60 | 0.38 |
| Q64727_VINC_MOUSE   | Vcl   | Vinculin OS=Mus muscul R.DPNASPGDAGEQAIR@.Q               | 14.12  | 7.33  | 1.93 | 0.52 |
| Q64727_VINC_MOUSE   | Vcl   | Vinculin OS=Mus muscul R.DYLDGSR@.G                       | 45.07  | 18.05 | 2.50 | 0.40 |
| Q64727_VINC_MOUSE   | Vcl   | Vinculin OS=Mus muscul R.EAFQPQEPDPPPPDLEQLR@.L           | 6.86   | 6.28  | 1.09 | 0.92 |
| Q64727_VINC_MOUSE   | Vcl   | Vinculin OS=Mus muscul K.ELLPVLISAM*#K.I                  | 84.38  | 42.53 | 1.98 | 0.50 |
| Q64727_VINC_MOUSE   | Vcl   | Vinculin OS=Mus muscul R.ELTPQVISAAR@.I                   | 42.64  | 18.38 | 2.32 | 0.43 |
| Q64727_VINC_MOUSE   | Vcl   | Vinculin OS=Mus muscul R.GILSGTSDLLLTDFEAEVR@.K           | 37.39  | 12.74 | 2.94 | 0.34 |
| Q64727_VINC_MOUSE   | Vcl   | Vinculin OS=Mus muscul R.GILSGTSDLLLTDFEAEVRK.I           | 50.36  | 18.17 | 2.77 | 0.36 |
| Q64727_VINC_MOUSE   | Vcl   | Vinculin OS=Mus muscul K.GNDIIAAK#.R                      | 52.56  | 21.30 | 2.47 | 0.41 |
| Q64727_VINC_MOUSE   | Vcl   | Vinculin OS=Mus muscul R.GQGASPVAM*QK#.A                  | 40.26  | 9.54  | 4.22 | 0.24 |
| Q64727_VINC_MOUSE   | Vcl   | Vinculin OS=Mus muscul R.GVGQAIR@.G                       | 70.10  | 28.45 | 2.46 | 0.41 |
| Q64727_VINC_MOUSE   | Vcl   | Vinculin OS=Mus muscul K.GWLRDPNASPGDAGEQAIR.Q            | 60.30  | 26.53 | 2.27 | 0.44 |
| Q64727_VINC_MOUSE   | Vcl   | Vinculin OS=Mus muscul R.IPTISTQLK#.I                     | 68.08  | 34.25 | 1.99 | 0.50 |
| Q64727_VINC_MOUSE   | Vcl   | Vinculin OS=Mus muscul K.KHIDAAGNQLWDLPNGPEGEQIR@.G       | 13.79  | 5.92  | 2.33 | 0.43 |
| Q64727_VINC_MOUSE   | Vcl   | Vinculin OS=Mus muscul K.LLAVAATAPPDAPNR@EEVFDER@.A       | 85.37  | 31.63 | 2.70 | 0.37 |
| Q64727_VINC_MOUSE   | Vcl   | Vinculin OS=Mus muscul K.LVQAQAM*LGSDPYVVPAR.D            | 16.25  | 7.50  | 2.17 | 0.46 |
| Q64727_VINC_MOUSE   | Vcl   | Vinculin OS=Mus muscul K.M*LGQM*TDQVADLR@.A               | 31.69  | 11.89 | 2.66 | 0.38 |
| Q64727_VINC_MOUSE   | Vcl   | Vinculin OS=Mus muscul K.M*SAEINER@.V                     | 31.46  | 17.98 | 1.75 | 0.57 |
| Q64727_VINC_MOUSE   | Vcl   | Vinculin OS=Mus muscul K.M*TGVLVDEAIDTK#.S                | 18.90  | 10.79 | 1.75 | 0.57 |
| Q64727_VINC_MOUSE   | Vcl   | Vinculin OS=Mus muscul K.NQIGEEALK#.N                     | 65.93  | 36.46 | 1.81 | 0.55 |
| Q64727_VINC_MOUSE   | Vcl   | Vinculin OS=Mus muscul K.NQWIDNVEK#.M                     | 37.24  | 12.82 | 2.91 | 0.34 |
| Q64727_VINC_MOUSE   | Vcl   | Vinculin OS=Mus muscul K.QVATALQNLQTK#.T                  | 56.38  | 22.36 | 2.52 | 0.40 |
| Q64727_VINC_MOUSE   | Vcl   | Vinculin OS=Mus muscul K.SFLDSGYR@.I                      | 42.35  | 15.40 | 2.75 | 0.36 |
| Q64727_VINC_MOUSE   | Vcl   | Vinculin OS=Mus muscul R.SLGEIAALTSK#.L                   | 49.84  | 19.29 | 2.58 | 0.39 |
| Q64727_VINC_MOUSE   | Vcl   | Vinculin OS=Mus muscul K.STVEGIAQSVK#.T                   | 48.86  | 24.54 | 1.99 | 0.50 |
| Q64727_VINC_MOUSE   | Vcl   | Vinculin OS=Mus muscul R.TNISDEESEQATEM*LVHNAQNLN*QSVK#.E | 13.66  | 5.27  | 2.59 | 0.39 |
| Q64727_VINC_MOUSE   | Vcl   | Vinculin OS=Mus muscul R.TNISDEESEQATEM*LVHNAQNLN*QSVK#.E | 5.51   | 2.94  | 1.87 | 0.53 |

|                    |        |                                                           |        |        |      |      |
|--------------------|--------|-----------------------------------------------------------|--------|--------|------|------|
| Q64727_VINC_MOUSE  | Vcl    | Vinculin OS=Mus muscul R.TNISDEESEATEMLVHNAQNLMSQV#E      | 4.29   | 1.86   | 2.30 | 0.43 |
| Q64727_VINC_MOUSE  | Vcl    | Vinculin OS=Mus muscul K.VAM*ANIQPOM*LVAGATSIAR@.R        | 18.41  | 6.81   | 2.70 | 0.37 |
| Q64727_VINC_MOUSE  | Vcl    | Vinculin OS=Mus muscul K.VAMANIQPOM*LVAGATSIAR@.R         | 8.53   | 3.61   | 2.36 | 0.42 |
| Q64727_VINC_MOUSE  | Vcl    | Vinculin OS=Mus muscul R.VLQLTSDWEDAWASK#D                | 29.47  | 11.68  | 2.52 | 0.40 |
| Q64727_VINC_MOUSE  | Vcl    | Vinculin OS=Mus muscul R.VM*LVNSM*NTVK#E                  | 24.45  | 12.78  | 1.91 | 0.52 |
| Q64727_VINC_MOUSE  | Vcl    | Vinculin OS=Mus muscul R.WIDNPTVDDR@.G                    | 46.80  | 21.61  | 2.17 | 0.46 |
| Q64727_VINC_MOUSE  | Vcl    | Vinculin OS=Mus muscul K.AQQVSGGLDVLTA#K.V                | 25.69  | 7.80   | 3.29 | 0.30 |
| Q64727_VINC_MOUSE  | Vcl    | Vinculin OS=Mus muscul K.AVAGNISDPGLQK#S                  | 12.09  | 6.41   | 1.89 | 0.53 |
| Q64727_VINC_MOUSE  | Vcl    | Vinculin OS=Mus muscul K.ELLPLVLSAM*#K.I                  | 19.89  | 8.84   | 2.25 | 0.44 |
| Q64727_VINC_MOUSE  | Vcl    | Vinculin OS=Mus muscul R.GILSGTSDLLLFDFEAEVR@.K           | 6.08   | 30.38  | 0.20 | 5.00 |
| Q64727_VINC_MOUSE  | Vcl    | Vinculin OS=Mus muscul K.QVATALQNLQTK#T                   | 10.34  | 4.37   | 2.37 | 0.42 |
| Q64727_VINC_MOUSE  | Vcl    | Vinculin OS=Mus muscul K.STVEGQASVK#T                     | 11.94  | 4.83   | 2.47 | 0.40 |
| Q01853_TERA_MOUSE  | Vcp    | Transitional endoplasmic R.AVANETGAFFFLINGPEIM*SK.L       | 13.52  | 10.78  | 1.25 | 0.80 |
| Q01853_TERA_MOUSE  | Vcp    | Transitional endoplasmic R.AVANETGAFFFLINGPEIM*SK#L       | 7.17   | 8.30   | 0.86 | 1.16 |
| Q01853_TERA_MOUSE  | Vcp    | Transitional endoplasmic K.DVDLEFLAK#M                    | 29.81  | 24.08  | 1.24 | 0.81 |
| Q01853_TERA_MOUSE  | Vcp    | Transitional endoplasmic R.ELQELVQI*PVEHPDK#F             | 19.14  | 14.85  | 1.29 | 0.78 |
| Q01853_TERA_MOUSE  | Vcp    | Transitional endoplasmic K.EM*VELPLR@.H                   | 12.41  | 13.61  | 0.91 | 1.10 |
| Q01853_TERA_MOUSE  | Vcp    | Transitional endoplasmic R.EVDIGIPDAGTR.L                 | 35.98  | 22.21  | 1.62 | 0.62 |
| Q01853_TERA_MOUSE  | Vcp    | Transitional endoplasmic R.GGNIGDGGGAADR.V                | 9.99   | 10.47  | 0.95 | 1.05 |
| Q01853_TERA_MOUSE  | Vcp    | Transitional endoplasmic R.IVSQLTLTM*DGDK#Q               | 12.98  | 14.46  | 1.35 | 0.74 |
| Q01853_TERA_MOUSE  | Vcp    | Transitional endoplasmic R.IVSQLTLMLDGLK#Q                | 12.96  | 8.08   | 1.60 | 0.62 |
| Q01853_TERA_MOUSE  | Vcp    | Transitional endoplasmic R.K.WGDFILVLR@.G                 | 40.30  | 35.33  | 1.14 | 0.88 |
| Q01853_TERA_MOUSE  | Vcp    | Transitional endoplasmic R.LAGESENLR@.K                   | 35.96  | 21.99  | 1.64 | 0.61 |
| Q01853_TERA_MOUSE  | Vcp    | Transitional endoplasmic R.LDQLIYPLPDEK#S                 | 46.55  | 37.89  | 1.23 | 0.81 |
| Q01853_TERA_MOUSE  | Vcp    | Transitional endoplasmic R.LIVDEAINEDNSVLSQPK#M           | 27.88  | 21.93  | 1.27 | 0.79 |
| Q01853_TERA_MOUSE  | Vcp    | Transitional endoplasmic K.M*DELQLFR@.G                   | 18.82  | 15.86  | 1.19 | 0.84 |
| Q01853_TERA_MOUSE  | Vcp    | Transitional endoplasmic R.WALSQSNPSALR@.E                | 19.34  | 17.47  | 1.11 | 0.90 |
| Q01853_TERA_MOUSE  | Vcp    | Transitional endoplasmic R.LAGESENLR.K                    | 4.23   | 5.03   | 0.84 | 1.19 |
| Q8CDG3_VCI1_MOUSE  | Vcpip1 | Deubiquitinating protein R.SSDGYSATFLPGLIAEK#.C           | 5.13   | 2.94   | 1.74 | 0.57 |
| Q8CDG3_VCI1_MOUSE  | Vcpip1 | Deubiquitinating protein R.TGVIVGQPEVTAANK#.K             | 5.52   | 3.13   | 1.77 | 0.57 |
| Q8CDG3_VCI1_MOUSE  | Vcpip1 | Deubiquitinating protein R.VGDVQGOELSQLPTK#.I             | 10.35  | 5.43   | 1.91 | 0.52 |
| Q8CDG3_VCI1_MOUSE  | Vcpip1 | Deubiquitinating protein R.DGSPSAPATPTK#.A                | 6.49   | 2.51   | 2.58 | 0.39 |
| Q8CDG3_VCI1_MOUSE  | Vcpip1 | Deubiquitinating protein R.SSDGYSATFLPGLIAEK#.C           | 7.64   | 3.40   | 2.25 | 0.45 |
| Q8CDG3_VCI1_MOUSE  | Vcpip1 | Deubiquitinating protein R.VGDVQGOELSQLPTK#.I             | 8.65   | 3.63   | 2.38 | 0.42 |
| Q60932_VDAC1_MOUSE | Vdac1  | Voltage-dependent anion K.GYVGLIK#.L                      | 67.30  | 19.68  | 3.42 | 0.29 |
| Q60932_VDAC1_MOUSE | Vdac1  | Voltage-dependent anion K.LGLGLEFQA-                      | 15.58  | 15.58  | 1.00 | 1.00 |
| Q60932_VDAC1_MOUSE | Vdac1  | Voltage-dependent anion K.SENGLETTSSGSANTETTK#.V          | 12.61  | 2.66   | 4.74 | 0.21 |
| Q60932_VDAC1_MOUSE | Vdac1  | Voltage-dependent anion K.TDEFQLHNMVNDTEFGGSYIYK#.V       | 40.60  | 8.90   | 4.56 | 0.22 |
| Q60932_VDAC1_MOUSE | Vdac1  | Voltage-dependent anion K.TKSENGLETTSSGSANTETTK.V         | 38.02  | 8.07   | 4.71 | 0.21 |
| Q60932_VDAC1_MOUSE | Vdac1  | Voltage-dependent anion K.VNNSLILGLYQTLTK#PGK#.L          | 61.14  | 16.11  | 3.80 | 0.26 |
| Q60932_VDAC1_MOUSE | Vdac1  | Voltage-dependent anion R.VTQGSNFAVGYK#.T                 | 146.35 | 32.74  | 4.47 | 0.22 |
| Q60932_VDAC1_MOUSE | Vdac1  | Voltage-dependent anion K.WNTDNTLGTETVEDQLAR@.G           | 21.21  | 6.84   | 3.10 | 0.32 |
| Q60932_VDAC1_MOUSE | Vdac1  | Voltage-dependent anion R.WTEYGLTFTEK#.W                  | 67.94  | 19.39  | 3.50 | 0.29 |
| Q60930_VDAC2_MOUSE | Vdac2  | Voltage-dependent anion K.GFGVGLVK#.L                     | 41.50  | 13.92  | 2.98 | 0.34 |
| Q60930_VDAC2_MOUSE | Vdac2  | Voltage-dependent anion K.LTFDITFSPNTGK#.K                | 24.96  | 9.45   | 2.64 | 0.38 |
| Q60930_VDAC2_MOUSE | Vdac2  | Voltage-dependent anion K.LTSLALVDGK#.S                   | 55.48  | 16.10  | 3.45 | 0.29 |
| Q60930_VDAC2_MOUSE | Vdac2  | Voltage-dependent anion R.SNFAVGYR@.T                     | 49.43  | 13.21  | 3.74 | 0.27 |
| Q60930_VDAC2_MOUSE | Vdac2  | Voltage-dependent anion K.VNNSLILGLYQTLRPGVK#.L           | 58.04  | 10.49  | 5.53 | 0.18 |
| Q60930_VDAC2_MOUSE | Vdac2  | Voltage-dependent anion K.YQLDPTASISAK#.V                 | 65.72  | 21.54  | 3.05 | 0.33 |
| Q60931_VDAC3_MOUSE | Vdac3  | Voltage-dependent anion R.IETSINLAWTAGSNTR@.F             | 3.43   | 4.04   | 0.85 | 1.18 |
| Q60931_VDAC3_MOUSE | Vdac3  | Voltage-dependent anion K.LSQNFALGYK#.A                   | 36.07  | 12.18  | 2.96 | 0.34 |
| Q60931_VDAC3_MOUSE | Vdac3  | Voltage-dependent anion K.LTLDTIFVPNTGK#.K                | 16.31  | 8.91   | 1.83 | 0.55 |
| Q60931_VDAC3_MOUSE | Vdac3  | Voltage-dependent anion K.LTLDTIFVPNTGK#.S                | 34.29  | 10.77  | 3.18 | 0.31 |
| Q60931_VDAC3_MOUSE | Vdac3  | Voltage-dependent anion K.VNNSLILGLYQTLR@PGVK#.L          | 21.61  | 5.72   | 3.78 | 0.26 |
| Q60931_VDAC3_MOUSE | Vdac3  | Voltage-dependent anion K.WNTDNTLGTESISWENK#.L            | 12.77  | 2.91   | 4.39 | 0.23 |
| Q60931_VDAC3_MOUSE | Vdac3  | Voltage-dependent anion K.LTLDTIFVPNTGK#.K                | 8.97   | 3.97   | 2.26 | 0.44 |
| Q60931_VDAC3_MOUSE | Vdac3  | Voltage-dependent anion K.VNNSLILGLYQTLR@PGVK#.L          | 8.60   | 2.40   | 3.58 | 0.28 |
| Q5SX4_Q5SX4_MOUSE  | Vezf1  | Protein Vezf1 OS=Mus mi R.LWEEAVK#.A                      | 17.65  | 8.42   | 2.09 | 0.48 |
| Q91YD6_VILL_MOUSE  | Vill   | Villin-like protein OS=Mu R.SLATPIFVVK#.Q                 | 10.39  | 3.17   | 3.28 | 0.30 |
| P20152_VIME_MOUSE  | Vim    | Vimentin OS=Mus muscu R.DNLAEADIM*#R@.L                   | 22.30  | 21.94  | 1.02 | 0.98 |
| P20152_VIME_MOUSE  | Vim    | Vimentin OS=Mus muscu R.EEAESTLQSF#R@.Q                   | 85.87  | 80.95  | 1.06 | 0.94 |
| P20152_VIME_MOUSE  | Vim    | Vimentin OS=Mus muscu R.EKLQEEM*LRQEAESTLQSF#R@.Q         | 6.74   | 6.34   | 1.06 | 0.94 |
| P20152_VIME_MOUSE  | Vim    | Vimentin OS=Mus muscu R.EM*EENFALEAANYQDTIGR@.L           | 6.74   | 33.08  | 0.88 | 1.13 |
| P20152_VIME_MOUSE  | Vim    | Vimentin OS=Mus muscu R.EMEEENFALEAANYQDTIGR.L            | 6.25   | 5.43   | 1.15 | 0.87 |
| P20152_VIME_MOUSE  | Vim    | Vimentin OS=Mus muscu R.EMEEENFALEAANYQDTIGR@.L           | 11.81  | 11.38  | 1.04 | 0.96 |
| P20152_VIME_MOUSE  | Vim    | Vimentin OS=Mus muscu R.ETNLESLPLVDTHSK#.R                | 5.25   | 7.70   | 0.68 | 1.47 |
| P20152_VIME_MOUSE  | Vim    | Vimentin OS=Mus muscu R.EYQDLLNVK#.M                      | 96.21  | 95.36  | 1.01 | 0.99 |
| P20152_VIME_MOUSE  | Vim    | Vimentin OS=Mus muscu K.FADLSEAA#R@.N                     | 156.74 | 176.68 | 0.89 | 1.13 |
| P20152_VIME_MOUSE  | Vim    | Vimentin OS=Mus muscu R.FANYIDK#.V                        | 123.49 | 144.03 | 0.86 | 1.17 |
| P20152_VIME_MOUSE  | Vim    | Vimentin OS=Mus muscu K.ILLAELQK#.G                       | 204.85 | 214.29 | 0.96 | 1.05 |
| P20152_VIME_MOUSE  | Vim    | Vimentin OS=Mus muscu R.ISLPLPTFSSLNLR@.E                 | 166.95 | 226.19 | 0.74 | 1.35 |
| P20152_VIME_MOUSE  | Vim    | Vimentin OS=Mus muscu R.K#VESLQEI#IAFK#.L                 | 61.66  | 66.58  | 0.93 | 1.08 |
| P20152_VIME_MOUSE  | Vim    | Vimentin OS=Mus muscu R.K#VESLQEI#IAFK#.L                 | 111.45 | 111.53 | 1.00 | 1.00 |
| P20152_VIME_MOUSE  | Vim    | Vimentin OS=Mus muscu R.LGDIYEEEM*#R.E                    | 45.15  | 49.70  | 0.91 | 1.10 |
| P20152_VIME_MOUSE  | Vim    | Vimentin OS=Mus muscu R.LGDIYEEEMR@.E                     | 22.36  | 26.49  | 0.84 | 1.18 |
| P20152_VIME_MOUSE  | Vim    | Vimentin OS=Mus muscu K.LHDEEIQELQAOIQEQHVQI#DVLTAALR@.D  | 4.84   | 3.48   | 1.39 | 0.72 |
| P20152_VIME_MOUSE  | Vim    | Vimentin OS=Mus muscu K.LHDEEIQELQAOIQEQHVQI#DVLTAALR.D   | 2.98   | 5.39   | 0.55 | 1.81 |
| P20152_VIME_MOUSE  | Vim    | Vimentin OS=Mus muscu R.LLQDSVDFSLADINTEFK#.N             | 102.75 | 85.22  | 1.21 | 0.83 |
| P20152_VIME_MOUSE  | Vim    | Vimentin OS=Mus muscu R.LLQDSVDFSLADINTEFK.N              | 56.92  | 58.10  | 0.98 | 1.02 |
| P20152_VIME_MOUSE  | Vim    | Vimentin OS=Mus muscu K.LQEEM*LRQ.E                       | 35.84  | 41.64  | 0.86 | 1.16 |
| P20152_VIME_MOUSE  | Vim    | Vimentin OS=Mus muscu K.LQEEM*LRQ@EEAESTLQSF#R@.Q         | 26.11  | 26.80  | 0.97 | 1.03 |
| P20152_VIME_MOUSE  | Vim    | Vimentin OS=Mus muscu K.LQEEMLRQEAESTLQSF#R@.Q            | 9.35   | 7.89   | 1.18 | 0.84 |
| P20152_VIME_MOUSE  | Vim    | Vimentin OS=Mus muscu K.M*ALDIEIATYR.K                    | 31.94  | 30.62  | 1.04 | 0.96 |
| P20152_VIME_MOUSE  | Vim    | Vimentin OS=Mus muscu K.NLQEAEEVYK#.S                     | 54.73  | 62.66  | 0.87 | 1.14 |
| P20152_VIME_MOUSE  | Vim    | Vimentin OS=Mus muscu R.QDVONASLAR@.L                     | 138.36 | 153.64 | 0.90 | 1.11 |
| P20152_VIME_MOUSE  | Vim    | Vimentin OS=Mus muscu R.QM*REM*EENFALEAANYQDTIGR.L        | 18.80  | 11.90  | 1.58 | 0.63 |
| P20152_VIME_MOUSE  | Vim    | Vimentin OS=Mus muscu R.QQYESVAANK#.N                     | 63.73  | 76.42  | 0.83 | 1.20 |
| P20152_VIME_MOUSE  | Vim    | Vimentin OS=Mus muscu R.RQVDQLTNDK.A                      | 12.17  | 13.98  | 0.87 | 1.15 |
| P20152_VIME_MOUSE  | Vim    | Vimentin OS=Mus muscu R.SLYSSPGGAYVTR.S                   | 140.21 | 169.29 | 0.83 | 1.21 |
| P20152_VIME_MOUSE  | Vim    | Vimentin OS=Mus muscu R.SYVITSTR.T                        | 112.84 | 142.96 | 0.79 | 1.27 |
| P20152_VIME_MOUSE  | Vim    | Vimentin OS=Mus muscu R.TNEKVELQELNDR.F                   | 157.83 | 152.77 | 1.03 | 0.97 |
| P20152_VIME_MOUSE  | Vim    | Vimentin OS=Mus muscu K.VELQELNDR@.F                      | 32.63  | 30.75  | 1.06 | 0.94 |
| P20152_VIME_MOUSE  | Vim    | Vimentin OS=Mus muscu R.VEVER@DNLAEDIMR@.L                | 40.15  | 29.72  | 1.35 | 0.74 |
| P20152_VIME_MOUSE  | Vim    | Vimentin OS=Mus muscu R.SLYSSPGGAYVTR.S                   | 5.84   | 2.56   | 2.28 | 0.44 |
| P20152_VIME_MOUSE  | Vim    | Vimentin OS=Mus muscu R.DNLAEADIM*#R@.L                   | 4.96   | 6.44   | 0.77 | 1.30 |
| P20152_VIME_MOUSE  | Vim    | Vimentin OS=Mus muscu R.EEAESTLQSF#R@.Q                   | 22.15  | 27.94  | 0.79 | 1.26 |
| P20152_VIME_MOUSE  | Vim    | Vimentin OS=Mus muscu R.EM*EENFALEAANYQDTIGR.L            | 8.91   | 7.36   | 1.21 | 0.83 |
| P20152_VIME_MOUSE  | Vim    | Vimentin OS=Mus muscu R.EYQDLLNVK#.M                      | 40.29  | 43.24  | 0.93 | 1.07 |
| P20152_VIME_MOUSE  | Vim    | Vimentin OS=Mus muscu K.FADLSEAA#R@.N                     | 79.10  | 91.01  | 0.87 | 1.15 |
| P20152_VIME_MOUSE  | Vim    | Vimentin OS=Mus muscu K.ILLAELQK#.G                       | 47.52  | 60.64  | 0.78 | 1.28 |
| P20152_VIME_MOUSE  | Vim    | Vimentin OS=Mus muscu R.ISLPLPTFSSLNLR@.E                 | 61.58  | 89.17  | 0.69 | 1.45 |
| P20152_VIME_MOUSE  | Vim    | Vimentin OS=Mus muscu K.K#HDEEIQELQAOIQEQHVQI#DVLTAALR@.D | 2.77   | 4.00   | 0.69 | 1.44 |
| P20152_VIME_MOUSE  | Vim    | Vimentin OS=Mus muscu K.K#HDEEIQELQAOIQEQHVQI#DVLTAALR.D  | 7.02   | 12.75  | 0.55 | 1.82 |

|                     |          |                                                               |       |        |      |       |
|---------------------|----------|---------------------------------------------------------------|-------|--------|------|-------|
| P20152_VIME_MOUSE   | Vim      | Vimentin OS=Mus muscu R.KVESLQEEIAFLK.K                       | 49.14 | 47.98  | 1.02 | 0.98  |
| P20152_VIME_MOUSE   | Vim      | Vimentin OS=Mus muscu R.KVESLQEEIAFLK.L                       | 32.83 | 32.69  | 1.00 | 1.00  |
| P20152_VIME_MOUSE   | Vim      | Vimentin OS=Mus muscu R.LGDLYEEM*R.E                          | 13.50 | 13.99  | 0.96 | 1.04  |
| P20152_VIME_MOUSE   | Vim      | Vimentin OS=Mus muscu R.LGDLYEEMR.E                           | 7.99  | 11.37  | 0.70 | 1.42  |
| P20152_VIME_MOUSE   | Vim      | Vimentin OS=Mus muscu K.LHDEIEIQEQIQEQHVQDQVQDVKPDLTAALR.D    | 8.16  | 9.35   | 0.87 | 1.15  |
| P20152_VIME_MOUSE   | Vim      | Vimentin OS=Mus muscu R.LLQSDVDFSLADAINTEFK.N                 | 16.30 | 19.42  | 0.84 | 1.19  |
| P20152_VIME_MOUSE   | Vim      | Vimentin OS=Mus muscu K.LQEEEM*LQR@EEAESTLQSF@.Q              | 6.53  | 9.22   | 0.71 | 1.41  |
| P20152_VIME_MOUSE   | Vim      | Vimentin OS=Mus muscu K.M*ALDEIATYR@.K                        | 12.72 | 16.86  | 0.75 | 1.33  |
| P20152_VIME_MOUSE   | Vim      | Vimentin OS=Mus muscu K.NLQEEAEVYK#.S                         | 23.28 | 30.17  | 0.77 | 1.30  |
| P20152_VIME_MOUSE   | Vim      | Vimentin OS=Mus muscu R.QDVONASLAR@.L                         | 47.66 | 52.22  | 0.91 | 1.10  |
| P20152_VIME_MOUSE   | Vim      | Vimentin OS=Mus muscu R.QQYEVAAK.N                            | 26.35 | 38.81  | 0.68 | 1.47  |
| P20152_VIME_MOUSE   | Vim      | Vimentin OS=Mus muscu R.SLYSSPGGAYVTR.S                       | 48.86 | 62.02  | 0.79 | 1.27  |
| P20152_VIME_MOUSE   | Vim      | Vimentin OS=Mus muscu R.TNEKVELQELNDR.F                       | 36.71 | 52.97  | 0.69 | 1.44  |
| P20152_VIME_MOUSE   | Vim      | Vimentin OS=Mus muscu R.VEVERDNLAEDIM*R.L                     | 24.55 | 31.03  | 0.79 | 1.26  |
| P20152_VIME_MOUSE   | Vim      | Vimentin OS=Mus muscu K.FADLSEANR.N                           | 8.28  | 9.31   | 0.89 | 1.12  |
| P20152_VIME_MOUSE   | Vim      | Vimentin OS=Mus muscu K.ILLALEQLK.G                           | 7.96  | 10.99  | 0.72 | 1.38  |
| P20152_VIME_MOUSE   | Vim      | Vimentin OS=Mus muscu R.LLQSDVDFSLADAINTEFK.N                 | 3.90  | 5.72   | 0.68 | 1.47  |
| Q6TEK5_VKORL_MOUSE  | Vkorc111 | Vitamin K epoxide reduc R.GFGLLSGIFGK#.D                      | 18.36 | 8.30   | 2.21 | 0.45  |
| Q6TEK5_VKORL_MOUSE  | Vkorc111 | Vitamin K epoxide reduc R.LVLYNEAWK#.R                        | 5.93  | 4.54   | 1.31 | 0.76  |
| Q78T54_VMA21_MOUSE  | Vma21    | Vacuolar ATPase assembl K.AALNALOPPEFR@.N                     | 5.25  | 5.77   | 0.91 | 1.10  |
| Q91W86_VPS11_MOUSE  | Vps11    | Vacuolar protein sorting K.AFLEHM*SEVQDPSQGGIYDTLLELR@.L      | 2.74  | 11.55  | 0.24 | 4.22  |
| Q91W86_VPS11_MOUSE  | Vps11    | Vacuolar protein sorting K.AFLEHM*SEVQDPSQGGIYDTLLELR@.L      | 4.80  | 141.93 | 0.03 | 29.56 |
| B1ART1_B1ART1_MOUSE | Vps13d   | Protein Vps13d OS=Mus L.ALQITDFCQR@KSEK#.S                    | 5.14  | 2.46   | 2.09 | 0.48  |
| Q920Q4_VPS16_MOUSE  | Vps16    | Vacuolar protein sorting K.HQELDTLKHDLVYNQDNDHQLGSEFHIR@.A    | 7.73  | 1.60   | 4.84 | 0.21  |
| Q920Q4_VPS16_MOUSE  | Vps16    | Vacuolar protein sorting K.LAALADLIEDWEELEK#.F                | 15.17 | 5.27   | 2.88 | 0.35  |
| Q920Q4_VPS16_MOUSE  | Vps16    | Vacuolar protein sorting K.LGDTGPGVSYDJAAR.A                  | 17.04 | 5.69   | 2.99 | 0.33  |
| Q920Q4_VPS16_MOUSE  | Vps16    | Vacuolar protein sorting R.R@LM*VVGNAPEISQFVLEDESYLPELDGVR@.I | 3.49  | 2.77   | 1.26 | 0.80  |
| Q920Q4_VPS16_MOUSE  | Vps16    | Vacuolar protein sorting R.STHEFLHREPVAESEIFK#.I              | 10.19 | 2.32   | 4.39 | 0.23  |
| Q920Q4_VPS16_MOUSE  | Vps16    | Vacuolar protein sorting R.VAALQTAAADAFYK#.A                  | 15.54 | 3.26   | 4.77 | 0.21  |
| Q920Q4_VPS16_MOUSE  | Vps16    | Vacuolar protein sorting K.LAALADLIEDWEELEK#.F                | 23.65 | 10.36  | 2.28 | 0.44  |
| Q920Q4_VPS16_MOUSE  | Vps16    | Vacuolar protein sorting K.LGDTGPGVSYDJAAR@.A                 | 9.01  | 4.41   | 2.04 | 0.49  |
| Q920Q4_VPS16_MOUSE  | Vps16    | Vacuolar protein sorting R.VAALQTAAADAFYK#.A                  | 7.90  | 3.17   | 2.49 | 0.40  |
| Q8R307_VPS18_MOUSE  | Vps18    | Vacuolar protein sorting R.EM*EATASQAQR@.I                    | 3.96  | 1.38   | 2.86 | 0.35  |
| Q9C800_VPS25_MOUSE  | Vps25    | Vacuolar protein-sorting R.KHLPVESQIVLLELR@.K                 | 8.72  | 3.29   | 2.65 | 0.38  |
| P40336_VP26A_MOUSE  | Vps26a   | Vacuolar protein sorting K.EITGPGSTTETETIAK#.Y                | 28.16 | 15.89  | 1.77 | 0.56  |
| P40336_VP26A_MOUSE  | Vps26a   | Vacuolar protein sorting K.ELALPGLTQSR@.S                     | 43.85 | 26.55  | 1.65 | 0.61  |
| P40336_VP26A_MOUSE  | Vps26a   | Vacuolar protein sorting K.EYDLIVHQLATYDPPVNSIK#.M            | 17.30 | 4.65   | 3.72 | 0.27  |
| P40336_VP26A_MOUSE  | Vps26a   | Vacuolar protein sorting R.FESPOSQASAEQPEM#.-                 | 20.50 | 20.50  | 1.00 | 1.00  |
| P40336_VP26A_MOUSE  | Vps26a   | Vacuolar protein sorting K.HYLFYDGEVSGVK#.V                   | 7.04  | 2.97   | 2.37 | 0.42  |
| P40336_VP26A_MOUSE  | Vps26a   | Vacuolar protein sorting K.IQHMM*ELQLIK#.K                    | 11.59 | 5.83   | 1.99 | 0.50  |
| P40336_VP26A_MOUSE  | Vps26a   | Vacuolar protein sorting K.IYFLVLR@.I                         | 23.76 | 9.90   | 2.40 | 0.42  |
| P40336_VP26A_MOUSE  | Vps26a   | Vacuolar protein sorting R.FLAGDYPTPTM*R@.D                   | 39.21 | 17.39  | 2.25 | 0.44  |
| P40336_VP26A_MOUSE  | Vps26a   | Vacuolar protein sorting K.QQEILVLR@.K                        | 14.68 | 6.98   | 2.10 | 0.48  |
| P40336_VP26A_MOUSE  | Vps26a   | Vacuolar protein sorting R.SYDFEFM*QVEKPYESYGANVR.L           | 10.39 | 4.31   | 2.41 | 0.41  |
| P40336_VP26A_MOUSE  | Vps26a   | Vacuolar protein sorting K.YEIM*DGAPVK#GESIPR@.L              | 15.23 | 8.89   | 1.71 | 0.58  |
| Q8C0E2_VP26B_MOUSE  | Vps26b   | Vacuolar protein sorting R.LFAGYELTPTM*R@.D                   | 10.95 | 4.86   | 2.25 | 0.44  |
| Q8C0E2_VP26B_MOUSE  | Vps26b   | Vacuolar protein sorting K.YFLFYDGETVSGK#.V                   | 13.26 | 7.51   | 1.77 | 0.57  |
| Q9D1C8_VPS28_MOUSE  | Vps28    | Vacuolar protein sorting R.AM*DEIQDRLR.E                      | 49.43 | 20.33  | 2.43 | 0.41  |
| Q9D1C8_VPS28_MOUSE  | Vps28    | Vacuolar protein sorting R.QM*LFDESAYNAFNR@.F                 | 16.68 | 8.53   | 1.95 | 0.51  |
| Q9D1C8_VPS28_MOUSE  | Vps28    | Vacuolar protein sorting K.YDNM*AEFAVVK#.T                    | 23.47 | 8.69   | 2.70 | 0.37  |
| Q9D2N9_VP33A_MOUSE  | Vps33a   | Vacuolar protein sorting R.FLSQLEDGGTEVIATTK#.L               | 6.65  | 1.83   | 3.64 | 0.27  |
| Q9D2N9_VP33A_MOUSE  | Vps33a   | Vacuolar protein sorting R.VNMLNVR@.E                         | 7.37  | 3.06   | 2.41 | 0.42  |
| Q9EQH3_VPS35_MOUSE  | Vps35    | Vacuolar protein sorting R.ILVGTLNVR@.L                       | 25.34 | 11.02  | 2.30 | 0.43  |
| Q9EQH3_VPS35_MOUSE  | Vps35    | Vacuolar protein sorting K.IPVDTYNNILTVLK#.L                  | 22.26 | 7.97   | 2.79 | 0.36  |
| Q9EQH3_VPS35_MOUSE  | Vps35    | Vacuolar protein sorting K.IR@EDLNLSESETEQNK#.H               | 10.56 | 4.98   | 2.12 | 0.47  |
| Q9EQH3_VPS35_MOUSE  | Vps35    | Vacuolar protein sorting K.LFDIFSQVATVQSR@.Q                  | 12.82 | 8.10   | 1.52 | 0.66  |
| Q9EQH3_VPS35_MOUSE  | Vps35    | Vacuolar protein sorting R.LSQLEGVNVER@.Y                     | 16.18 | 9.93   | 1.63 | 0.61  |
| Q9EQH3_VPS35_MOUSE  | Vps35    | Vacuolar protein sorting K.NIIIALDIR@.L                       | 13.74 | 7.22   | 1.90 | 0.53  |
| Q9EQH3_VPS35_MOUSE  | Vps35    | Vacuolar protein sorting K.VLETTVEFNK#.L                      | 8.76  | 6.06   | 1.45 | 0.69  |
| Q9EQH3_VPS35_MOUSE  | Vps35    | Vacuolar protein sorting R.ESPESEGVYEGIL.L-                   | 10.07 | 10.07  | 1.00 | 1.00  |
| Q9EQH3_VPS35_MOUSE  | Vps35    | Vacuolar protein sorting R.ILVGTLNVR.L                        | 19.01 | 10.16  | 2.86 | 0.35  |
| Q9EQH3_VPS35_MOUSE  | Vps35    | Vacuolar protein sorting K.IPVDTYNNILTVLK#.L                  | 22.97 | 10.08  | 2.28 | 0.44  |
| Q9EQH3_VPS35_MOUSE  | Vps35    | Vacuolar protein sorting K.IR@EDLNLSESETEQNK#.H               | 10.56 | 6.25   | 1.69 | 0.59  |
| Q9EQH3_VPS35_MOUSE  | Vps35    | Vacuolar protein sorting K.LFDIFSQVATVQSR@.Q                  | 18.24 | 7.26   | 2.51 | 0.40  |
| Q9EQH3_VPS35_MOUSE  | Vps35    | Vacuolar protein sorting K.LNLEHIASTSAVSK#.E                  | 14.74 | 6.67   | 2.21 | 0.45  |
| Q9EQH3_VPS35_MOUSE  | Vps35    | Vacuolar protein sorting R.LSQLEGVNVER@.Y                     | 20.97 | 7.58   | 2.77 | 0.36  |
| Q9EQH3_VPS35_MOUSE  | Vps35    | Vacuolar protein sorting K.NIIIALDIR@.L                       | 14.62 | 9.98   | 1.46 | 0.68  |
| Q9EQH3_VPS35_MOUSE  | Vps35    | Vacuolar protein sorting R.SDDPDQQLYLNTAR@.K                  | 10.97 | 6.72   | 1.63 | 0.61  |
| Q8CHS8_VP37A_MOUSE  | Vps37a   | Vacuolar protein sorting K.SASSAASAPAGLTSLQZQK#.Q             | 4.30  | 1.80   | 2.39 | 0.42  |
| Q8R0J7_VP37B_MOUSE  | Vps37b   | Vacuolar protein sorting K.FLDGELPLDPSFIDYQSK#.R              | 4.44  | 3.71   | 1.20 | 0.84  |
| Q8R0J7_VP37B_MOUSE  | Vps37b   | Vacuolar protein sorting R.GM*EAAQVQLNK#.E                    | 7.11  | 5.18   | 1.37 | 0.73  |
| Q8R5L3_VPS39_MOUSE  | Vps39    | Vam6/Vps39-like protein K.IFTDELPELVSPR@.D                    | 6.91  | 3.78   | 1.83 | 0.55  |
| Q5KU39_VPS41_MOUSE  | Vps41    | Vacuolar protein sorting K.AISPYLPR@.G                        | 11.48 | 3.01   | 3.81 | 0.26  |
| Q5KU39_VPS41_MOUSE  | Vps41    | Vacuolar protein sorting K.ILVADLSLLK#.K                      | 9.63  | 3.16   | 3.05 | 0.33  |
| Q5KU39_VPS41_MOUSE  | Vps41    | Vacuolar protein sorting R.NFVEETVYLLSR@.M                    | 14.01 | 4.39   | 3.19 | 0.31  |
| P97390_VPS45_MOUSE  | Vps45    | Vacuolar protein sorting K.AFVENYQFK#.K                       | 9.88  | 4.12   | 2.40 | 0.42  |
| P97390_VPS45_MOUSE  | Vps45    | Vacuolar protein sorting R.LKHENLYPLGPTLR@.D                  | 10.89 | 4.19   | 2.60 | 0.38  |
| P97390_VPS45_MOUSE  | Vps45    | Vacuolar protein sorting K.SFLEEVLASGLHRS@.S                  | 13.41 | 4.46   | 3.01 | 0.33  |
| Q8VEJ9_VPS4A_MOUSE  | Vps4a    | Vacuolar protein sorting K.GILLFGPPGTGK#.T                    | 14.19 | 9.75   | 1.46 | 0.69  |
| Q8VEJ9_VPS4A_MOUSE  | Vps4a    | Vacuolar protein sorting R.IYIPLPEEAR@.A                      | 12.89 | 5.27   | 2.45 | 0.41  |
| P46467_VPS4B_MOUSE  | Vps4b    | Vacuolar protein sorting R.LHLGTSNLSLEADFQELGR@.K             | 18.11 | 13.87  | 1.31 | 0.77  |
| Q3UVL4_VPS51_MOUSE  | Vps51    | Vacuolar protein sorting K.GGATPALLLLLSR@.L                   | 9.08  | 2.75   | 3.30 | 0.30  |
| Q3UVL4_VPS51_MOUSE  | Vps51    | Vacuolar protein sorting R.GR@LEELSSLEALGSPAPDVLFTDR@.G       | 3.43  | 3.39   | 1.01 | 0.99  |
| Q3UVL4_VPS51_MOUSE  | Vps51    | Vacuolar protein sorting R.LAQEQGSDNLSLVR@.A                  | 8.62  | 2.07   | 4.17 | 0.24  |
| Q3UVL4_VPS51_MOUSE  | Vps51    | Vacuolar protein sorting R.IDVFSYVFNK#.V                      | 12.70 | 1.91   | 6.67 | 0.15  |
| Q3UVL4_VPS51_MOUSE  | Vps51    | Vacuolar protein sorting K.LAAFAQELGGR@.Y                     | 11.48 | 5.74   | 2.00 | 0.50  |
| Q3UVL4_VPS51_MOUSE  | Vps51    | Vacuolar protein sorting R.LAQEQGSDNLSLVR@.A                  | 9.85  | 3.34   | 2.95 | 0.34  |
| Q3UVL4_VPS51_MOUSE  | Vps51    | Vacuolar protein sorting R.LR@APGALLAAGLSSESATEIVER@.V        | 9.84  | 2.80   | 3.51 | 0.28  |
| Q8C754_VPS52_MOUSE  | Vps52    | Vacuolar protein sorting R.AADDSK#EVESFQQLLNAR@.T             | 8.29  | 1.01   | 8.20 | 0.12  |
| Q8C754_VPS52_MOUSE  | Vps52    | Vacuolar protein sorting K.QVELELQEQK#.S                      | 7.27  | 3.05   | 2.38 | 0.42  |
| Q8C754_VPS52_MOUSE  | Vps52    | Vacuolar protein sorting R.VLSQPQLR@.A                        | 7.15  | 3.33   | 2.14 | 0.47  |
| Q8C754_VPS52_MOUSE  | Vps52    | Vacuolar protein sorting R.TLQEQSGAM*NIR@.L                   | 8.70  | 5.53   | 1.57 | 0.64  |
| Q8CCB4_VPS53_MOUSE  | Vps53    | Vacuolar protein sorting K.LLLLFAIR@.T                        | 10.27 | 3.65   | 2.82 | 0.36  |
| Q8CCB4_VPS53_MOUSE  | Vps53    | Vacuolar protein sorting K.TSSSSGGLTSSLLK#.E                  | 8.23  | 4.84   | 1.70 | 0.59  |
| Q8CCB4_VPS53_MOUSE  | Vps53    | Vacuolar protein sorting K.AAQTELQQLADFEEAFPSQGT#.R           | 20.98 | 5.48   | 3.83 | 0.26  |
| Q8CCB4_VPS53_MOUSE  | Vps53    | Vacuolar protein sorting K.M*VLLDLSIGSQVVR@.K                 | 7.63  | 1.87   | 4.08 | 0.25  |
| Q8CCB4_VPS53_MOUSE  | Vps53    | Vacuolar protein sorting K.TSSSSGGLTSSLLK#.E                  | 14.85 | 3.95   | 3.76 | 0.27  |
| Q8CCB4_VPS53_MOUSE  | Vps53    | Vacuolar protein sorting R.TTNFEGFLAK#.R                      | 12.74 | 1.96   | 6.51 | 0.15  |
| Q62481_VPS72_MOUSE  | Vps72    | Vacuolar protein sorting K.ITELNLR@.S                         | 86.89 | 35.99  | 2.41 | 0.41  |
| Q62481_VPS72_MOUSE  | Vps72    | Vacuolar protein sorting R.SLEYER@.L                          | 28.12 | 10.71  | 2.63 | 0.38  |
| Q62481_VPS72_MOUSE  | Vps72    | Vacuolar protein sorting K.YITAHGLPPTASALGPPPPPELPGSGPRA      | 8.26  | 3.98   | 2.07 | 0.48  |
| O89116_VTI1A_MOUSE  | Vti1a    | Vesicle transport throug R.IAYSEVR@NELLGDAGNSSENQR@.A         | 7.09  | 3.02   | 2.35 | 0.43  |
| Q8R3P6_VWA9_MOUSE   | Wwa9     | von Willebrand factor A.K.EGDEVGAGITDDNEDENSANQIAGK#.I        | 13.26 | 3.55   | 3.74 | 0.27  |

|                     |       |                                                             |        |        |      |      |
|---------------------|-------|-------------------------------------------------------------|--------|--------|------|------|
| Q8R3P6_VWA9_MOUSE   | Wwa9  | von Willebrand factor A1 K.LIDLAYTPFHVLK#.C                 | 42.40  | 11.79  | 3.60 | 0.28 |
| Q8R3P6_VWA9_MOUSE   | Wwa9  | von Willebrand factor A1 R.SESNR@FPLPFPSPK#.L               | 22.01  | 11.54  | 1.91 | 0.52 |
| Q8R3P6_VWA9_MOUSE   | Wwa9  | von Willebrand factor A1 R.HLVLPALNK#.E                     | 15.31  | 6.08   | 2.52 | 0.40 |
| Q8R3P6_VWA9_MOUSE   | Wwa9  | von Willebrand factor A1 K.LIDLAYTPFHVLK#.C                 | 22.48  | 6.94   | 3.24 | 0.31 |
| Q65240_WAPL_MOUSE   | Wapal | Wings apart-like protein R.ASLDLM*IR@.L                     | 9.53   | 4.50   | 2.12 | 0.47 |
| Q65240_WAPL_MOUSE   | Wapal | Wings apart-like protein R.LLELEQDASSAK#.L                  | 17.36  | 6.84   | 2.54 | 0.39 |
| Q65240_WAPL_MOUSE   | Wapal | Wings apart-like protein R.SM*DEFTASTPADLGEAGR@.L           | 9.90   | 3.01   | 3.29 | 0.30 |
| Q65240_WAPL_MOUSE   | Wapal | Wings apart-like protein R.ASLDLM*IR@.L                     | 12.86  | 4.69   | 2.74 | 0.36 |
| Q65240_WAPL_MOUSE   | Wapal | Wings apart-like protein R.EYLPEDGFSIM*TEM*LK#.K            | 5.19   | 1.97   | 2.64 | 0.38 |
| Q65240_WAPL_MOUSE   | Wapal | Wings apart-like protein K.GSSYSESEAAQLEEVTSVEFANSK#.C      | 5.52   | 3.41   | 1.62 | 0.62 |
| Q65240_WAPL_MOUSE   | Wapal | Wings apart-like protein R.LLELEQDASSAK#.L                  | 26.52  | 7.93   | 3.35 | 0.30 |
| Q65240_WAPL_MOUSE   | Wapal | Wings apart-like protein K.SGEWQTSGEIUVSTEK#.T              | 3.01   | 1.47   | 2.04 | 0.49 |
| Q65240_WAPL_MOUSE   | Wapal | Wings apart-like protein R.SM*DEFTASTPADLGEAGR@.L           | 11.83  | 3.47   | 3.41 | 0.29 |
| Q65240_WAPL_MOUSE   | Wapal | Wings apart-like protein K.TVITPTQPYQEVITALK#.C             | 28.01  | 7.91   | 3.54 | 0.28 |
| Q65240_WAPL_MOUSE   | Wapal | Wings apart-like protein R.VLESVTVHPNENQSYLIAYK#.D          | 19.36  | 6.80   | 2.85 | 0.35 |
| Q8VDD8_WASH1_MOUSE  | Wash1 | WAS protein family hom R.ATLLSIR@.Q                         | 22.97  | 6.57   | 3.50 | 0.29 |
| Q8VDD8_WASH1_MOUSE  | Wash1 | WAS protein family hom R.ATSQGGDLM*SDLFNK#.L                | 6.28   | 2.87   | 2.19 | 0.46 |
| Q8VDD8_WASH1_MOUSE  | Wash1 | WAS protein family hom K.GPSTGSEGGGAFSR@.M                  | 7.21   | 3.67   | 1.96 | 0.51 |
| Q8VDD8_WASH1_MOUSE  | Wash1 | WAS protein family hom K.THTM*LTGEEK#FDAPLSISK#.R           | 6.87   | 2.45   | 2.80 | 0.36 |
| Q8VDD8_WASH1_MOUSE  | Wash1 | WAS protein family hom K.YPAHELQEGYISFTGALDGLQR@.R          | 18.20  | 6.67   | 2.73 | 0.37 |
| Q8VDD8_WASH1_MOUSE  | Wash1 | WAS protein family hom K.VYFLDPLGAVATK#.C                   | 21.72  | 9.22   | 2.36 | 0.42 |
| Q923D5_WBP11_MOUSE  | Wbp11 | WW domain-binding prc K.ADDASATIEK.K                        | 6.29   | 7.37   | 0.85 | 1.17 |
| Q61048_WBP4_MOUSE   | Wbp4  | WW domain-binding prc K.TVSSLGVAAGVAVPFK#.K                 | 6.16   | 3.72   | 1.65 | 0.60 |
| P59328_WDHD1_MOUSE  | Wdhd1 | WD repeat and HMG-box R.LFTIGGVQK#.E                        | 11.14  | 4.56   | 2.44 | 0.41 |
| P59328_WDHD1_MOUSE  | Wdhd1 | WD repeat and HMG-box K.SGAVFSSSQGVVWPFK#.V                 | 4.29   | 3.32   | 1.29 | 0.77 |
| P59328_WDHD1_MOUSE  | Wdhd1 | WD repeat and HMG-box R.VEK#DYNLDFDGGDTSAGDFLNDNAVEIPFSK#.G | 4.13   | 2.50   | 1.65 | 0.61 |
| P59328_WDHD1_MOUSE  | Wdhd1 | WD repeat and HMG-box K.VVDVM*DNSQQQTFR@.G                  | 7.31   | 2.06   | 3.56 | 0.28 |
| Q8K1X1_WDR11_MOUSE  | Wdr11 | WD repeat-containing pr R.AELSQNSAR@.E                      | 21.46  | 7.75   | 2.77 | 0.36 |
| Q8K1X1_WDR11_MOUSE  | Wdr11 | WD repeat-containing pr R.DLLLAHPNPPYVNLVWADTGTK#.L         | 5.32   | 2.03   | 2.62 | 0.38 |
| Q8K1X1_WDR11_MOUSE  | Wdr11 | WD repeat-containing pr R.DLLELGSTKHEELTES.-                | 17.15  | 8.80   | 1.95 | 0.51 |
| Q8K1X1_WDR11_MOUSE  | Wdr11 | WD repeat-containing pr K.K.LLLDPDFSLQR@.C                  | 3.05   | 3.01   | 1.01 | 0.99 |
| Q8K1X1_WDR11_MOUSE  | Wdr11 | WD repeat-containing pr K.LIAM*YNDGAEVWDTK#.E               | 6.78   | 2.86   | 2.37 | 0.42 |
| Q8K1X1_WDR11_MOUSE  | Wdr11 | WD repeat-containing pr K.LLLDPDFSLQR@.C                    | 45.01  | 13.35  | 3.37 | 0.30 |
| Q8K1X1_WDR11_MOUSE  | Wdr11 | WD repeat-containing pr K.LPDLSDNNM*IGQSAIAGEEHPK#.G        | 11.03  | 6.43   | 1.72 | 0.58 |
| Q8K1X1_WDR11_MOUSE  | Wdr11 | WD repeat-containing pr R.NELQLVLPDTPGR@.S                  | 25.73  | 11.21  | 2.30 | 0.44 |
| Q8K1X1_WDR11_MOUSE  | Wdr11 | WD repeat-containing pr K.QYLAUVFK#.D                       | 15.43  | 5.16   | 2.99 | 0.33 |
| Q8K1X1_WDR11_MOUSE  | Wdr11 | WD repeat-containing pr R.TLTGALNAHNK#.A                    | 5.89   | 2.39   | 2.46 | 0.41 |
| Q8K1X1_WDR11_MOUSE  | Wdr11 | WD repeat-containing pr R.YLQTYGWNRR@.A                     | 9.02   | 2.84   | 3.17 | 0.32 |
| Q8K1X1_WDR11_MOUSE  | Wdr11 | WD repeat-containing pr R.AELSQNSAR@.E                      | 14.43  | 4.85   | 2.97 | 0.34 |
| Q8K1X1_WDR11_MOUSE  | Wdr11 | WD repeat-containing pr R.DLLELGSTKHEELTES.-                | 11.54  | 5.15   | 2.24 | 0.45 |
| Q8K1X1_WDR11_MOUSE  | Wdr11 | WD repeat-containing pr K.LIAM*YNDGAEVWDTK#.E               | 6.08   | 2.06   | 2.95 | 0.34 |
| Q8K1X1_WDR11_MOUSE  | Wdr11 | WD repeat-containing pr K.LLLDPDFSLQR@.C                    | 30.94  | 15.65  | 1.98 | 0.51 |
| Q8K1X1_WDR11_MOUSE  | Wdr11 | WD repeat-containing pr K.LPDLSDNNM*IGQSAIAGEEHPK#.G        | 10.06  | 3.70   | 2.72 | 0.37 |
| Q8K1X1_WDR11_MOUSE  | Wdr11 | WD repeat-containing pr R.NELQLVLPDTPGR@.S                  | 19.14  | 13.65  | 1.40 | 0.71 |
| Q8K1X1_WDR11_MOUSE  | Wdr11 | WD repeat-containing pr R.YSLDISHIDYVENEIK#.T               | 7.97   | 3.71   | 2.15 | 0.47 |
| Q9JJA4_WDR12_MOUSE  | Wdr12 | Ribosome biogenesis pro K.HM*ELNISESEVELEYEK#.Y             | 6.43   | 2.57   | 2.50 | 0.40 |
| Q9JJA4_WDR12_MOUSE  | Wdr12 | Ribosome biogenesis pro K.LYSYSPTSHVGA.-                    | 9.42   | 19.02  | 1.00 | 1.00 |
| Q9JJA4_WDR12_MOUSE  | Wdr12 | Ribosome biogenesis pro K.WSPHTEQLISGSLDNIVK#.L             | 19.06  | 3.53   | 2.68 | 0.37 |
| Q4VBE8_WDR18_MOUSE  | Wdr18 | WD repeat-containing pr R.DLDFSTR@.I                        | 42.19  | 16.42  | 2.57 | 0.39 |
| Q4VBE8_WDR18_MOUSE  | Wdr18 | WD repeat-containing pr K.NM*LGSQM*LPAR@.V                  | 21.12  | 38.50  | 0.55 | 1.82 |
| Q4VBE8_WDR18_MOUSE  | Wdr18 | WD repeat-containing pr R.VATASLDQTVK#.L                    | 102.27 | 39.16  | 2.61 | 0.38 |
| Q4VBE8_WDR18_MOUSE  | Wdr18 | WD repeat-containing pr R.VFDLEDEVR.S                       | 107.88 | 34.55  | 3.12 | 0.32 |
| Q4VBE8_WDR18_MOUSE  | Wdr18 | WD repeat-containing pr K.HLLGAEHGEAQQGGLR@.L               | 12.82  | 4.04   | 3.18 | 0.31 |
| Q4VBE8_WDR18_MOUSE  | Wdr18 | WD repeat-containing pr R.LEQLQALVLSYLEK#.N                 | 8.16   | 3.45   | 2.36 | 0.42 |
| Q4VBE8_WDR18_MOUSE  | Wdr18 | WD repeat-containing pr R.VATASLDQTVK#.L                    | 23.37  | 10.14  | 2.30 | 0.43 |
| Q4VBE8_WDR18_MOUSE  | Wdr18 | WD repeat-containing pr R.VFDLEDEVR.S                       | 32.76  | 21.07  | 1.55 | 0.64 |
| Q4VBE8_WDR18_MOUSE  | Wdr18 | WD repeat-containing pr R.GLALLNGEYLLAAQGGK#.N              | 5.98   | 2.40   | 2.49 | 0.40 |
| Q4VBE8_WDR18_MOUSE  | Wdr18 | WD repeat-containing pr R.VATASLDQTVK#.L                    | 15.94  | 6.28   | 2.54 | 0.39 |
| Q4VBE8_WDR18_MOUSE  | Wdr18 | WD repeat-containing pr R.VFDLEDEVR.S                       | 18.56  | 16.03  | 1.16 | 0.86 |
| Q8C6G8_WDR26_MOUSE  | Wdr26 | WD repeat-containing pr R.LALLNVATQGVHLDLQDR@.V             | 5.31   | 4.19   | 1.27 | 0.79 |
| Q8C6G8_WDR26_MOUSE  | Wdr26 | WD repeat-containing pr K.YLELEDGKHLVLEALQVLR@.C            | 8.40   | 4.87   | 1.34 | 0.75 |
| Q8C6G8_WDR26_MOUSE  | Wdr26 | WD repeat-containing pr R.GYNFEDLDR@.N                      | 8.40   | 3.53   | 2.38 | 0.42 |
| Q8C6G8_WDR26_MOUSE  | Wdr26 | WD repeat-containing pr R.LALLNVATQGVHLDLQDR@.V             | 19.31  | 9.84   | 1.96 | 0.51 |
| Q8C6G8_WDR26_MOUSE  | Wdr26 | WD repeat-containing pr K.YLELEDGKHLVLEALQVLR@.C            | 9.87   | 4.46   | 2.21 | 0.45 |
| Q8K4P0_WDR33_MOUSE  | Wdr33 | pre-mRNA 3' end process R.EASFSPDNDK#.F                     | 16.56  | 7.15   | 2.32 | 0.43 |
| Q8K4P0_WDR33_MOUSE  | Wdr33 | pre-mRNA 3' end process R.NLKHEELQVFR@.G                    | 37.33  | 10.63  | 3.51 | 0.28 |
| Q8K4P0_WDR33_MOUSE  | Wdr33 | pre-mRNA 3' end process K.R@PDFAQQAAM*QQLTFDGGK#.R          | 13.83  | 3.51   | 3.94 | 0.25 |
| Q8K4P0_WDR33_MOUSE  | Wdr33 | pre-mRNA 3' end process R.EASFSPDNDK#.F                     | 16.49  | 3.26   | 5.06 | 0.20 |
| Q8K4P0_WDR33_MOUSE  | Wdr33 | pre-mRNA 3' end process R.GM*QGPSPR@.E                      | 10.02  | 9.58   | 1.05 | 0.96 |
| Q8K4P0_WDR33_MOUSE  | Wdr33 | pre-mRNA 3' end process R.GR@DNFPGPDDGPEEGFDASDEAAR@.G      | 6.23   | 1.45   | 4.29 | 0.23 |
| Q8K4P0_WDR33_MOUSE  | Wdr33 | pre-mRNA 3' end process K.R@PDFAQQAAM*QQLTFDGGK#.R          | 7.27   | 1.26   | 5.76 | 0.17 |
| Q3TAQ9_Q3TAQ9_MOUSE | Wdr36 | Protein Wdr36 OS=Mus r.FAVPEPSPDQSK#.V                      | 5.43   | 6.53   | 0.83 | 1.20 |
| Q3TAQ9_Q3TAQ9_MOUSE | Wdr36 | Protein Wdr36 OS=Mus r.LPPTITQFAEAAER.Q                     | 17.94  | 7.99   | 2.25 | 0.45 |
| Q3TAQ9_Q3TAQ9_MOUSE | Wdr36 | Protein Wdr36 OS=Mus r.R.NLSPDDGGSEVVM*R@.S                 | 6.27   | 3.49   | 1.80 | 0.56 |
| Q3TAQ9_Q3TAQ9_MOUSE | Wdr36 | Protein Wdr36 OS=Mus r.TLPSEPALLELVK#.L                     | 12.57  | 6.72   | 1.87 | 0.53 |
| Q8CBE3_WDR37_MOUSE  | Wdr37 | WD repeat-containing pr R.LAGEGQADGAEISK#.G                 | 8.17   | 3.89   | 2.10 | 0.48 |
| Q8CBE3_WDR37_MOUSE  | Wdr37 | WD repeat-containing pr R.STLLELFGQIER@.E                   | 12.08  | 5.75   | 2.10 | 0.48 |
| Q8CBE3_WDR37_MOUSE  | Wdr37 | WD repeat-containing pr R.STLLELFGQIER@.E                   | 8.64   | 3.06   | 2.83 | 0.35 |
| Q8CBE3_WDR37_MOUSE  | Wdr37 | WD repeat-containing pr R.LAGEGQADGAEISK#.G                 | 10.60  | 4.08   | 2.60 | 0.38 |
| Q6ZQL4_WDR43_MOUSE  | Wdr43 | WD repeat-containing pr K.LGSTEATEER@.L                     | 9.04   | 8.00   | 1.13 | 0.88 |
| Q6ZQL4_WDR43_MOUSE  | Wdr43 | WD repeat-containing pr R.FTTIR@PNESQPSDGTGLYFLSGAVHDR@.L   | 3.09   | 1.44   | 2.14 | 0.47 |
| Q6ZQL4_WDR43_MOUSE  | Wdr43 | WD repeat-containing pr K.LGSTEATEER@.L                     | 20.03  | 10.71  | 1.87 | 0.53 |
| Q6ZQL4_WDR43_MOUSE  | Wdr43 | WD repeat-containing pr K.LILLVTQVASEK#.S                   | 10.56  | 5.92   | 1.78 | 0.56 |
| Q6ZQL4_WDR43_MOUSE  | Wdr43 | WD repeat-containing pr R.LLNWVQVR@.S                       | 13.46  | 6.66   | 2.02 | 0.49 |
| Q91VM3_WIP14_MOUSE  | Wdr45 | WD repeat domain phosj R.IYVYFPDPSR@.K                      | 12.86  | 6.64   | 1.94 | 0.52 |
| P61965_WDR5_MOUSE   | Wdr5  | WD repeat-containing pr K.FSPNGEWLASSADK#.L                 | 8.55   | 3.27   | 2.61 | 0.38 |
| P61965_WDR5_MOUSE   | Wdr5  | WD repeat-containing pr K.FTLAIGHTK#.A                      | 5.40   | 116.56 | 0.30 | 3.38 |
| P61965_WDR5_MOUSE   | Wdr5  | WD repeat-containing pr K.IWGAIDGK#FEK#.T                   | 40.27  | 14.99  | 2.69 | 0.37 |
| P61965_WDR5_MOUSE   | Wdr5  | WD repeat-containing pr K.LGISDVAVSSDNLVLSASDDK#.T          | 7.17   | 2.96   | 2.42 | 0.41 |
| P61965_WDR5_MOUSE   | Wdr5  | WD repeat-containing pr K.LGISDVAVSSDNLVLSASDDK#TLK#.I      | 12.69  | 3.26   | 3.89 | 0.26 |
| P61965_WDR5_MOUSE   | Wdr5  | WD repeat-containing pr K.TLIDDNDNPPVSVFK#.F                | 23.45  | 11.23  | 2.09 | 0.48 |
| P61965_WDR5_MOUSE   | Wdr5  | WD repeat-containing pr K.WIVSGEDNLVYVWNLQTK#.E             | 15.05  | 5.89   | 2.55 | 0.39 |
| P61965_WDR5_MOUSE   | Wdr5  | WD repeat-containing pr K.WIVSGEDNLVYVWNLQTK#.E             | 10.34  | 4.01   | 2.58 | 0.39 |
| P61965_WDR5_MOUSE   | Wdr5  | WD repeat-containing pr K.YILAATDNTLK#.L                    | 141.49 | 19.14  | 7.39 | 0.14 |
| Q99ME2_WDR6_MOUSE   | Wdr6  | WD repeat-containing pr R.GYPGLGVSSLSFK#.S                  | 7.18   | 3.89   | 1.85 | 0.54 |
| Q99ME2_WDR6_MOUSE   | Wdr6  | WD repeat-containing pr R.VLAVTDVGSVLYDLEVK#.S              | 3.21   | 1.32   | 2.43 | 0.41 |
| Q99ME2_WDR6_MOUSE   | Wdr6  | WD repeat-containing pr R.VLAVTDVGSVLYDLEVK#.S              | 7.05   | 2.11   | 3.34 | 0.30 |
| Q9ERF3_WDR61_MOUSE  | Wdr61 | WD repeat-containing pr K.ENIETVVTGSLDLDLTK#.V              | 29.38  | 8.27   | 3.55 | 0.28 |
| Q9ERF3_WDR61_MOUSE  | Wdr61 | WD repeat-containing pr K.SIDAGPVDWATLAFSPDSCYLATGTHM*GK#.V | 12.11  | 3.42   | 3.54 | 0.28 |
| Q9ERF3_WDR61_MOUSE  | Wdr61 | WD repeat-containing pr R.SLTFSPDQLLVASDDGVIK#.I            | 12.43  | 4.21   | 2.95 | 0.34 |
| Q9ERF3_WDR61_MOUSE  | Wdr61 | WD repeat-containing pr R.SLTFSPDQLLVASDDGVIK#.I            | 12.45  | 5.40   | 2.30 | 0.43 |
| Q3U821_Q3U821_MOUSE | Wdr75 | Protein Wdr75 OS=Mus r.R.NLDASAVIQGLVK#.D                   | 8.23   | 4.35   | 1.89 | 0.53 |
| A6PWY4_WDR76_MOUSE  | Wdr76 | WD repeat-containing pr K.SIASAVYSPVTGNR.V                  | 5.44   | 6.91   | 0.79 | 1.27 |

|                     |        |                                                        |       |       |      |      |
|---------------------|--------|--------------------------------------------------------|-------|-------|------|------|
| A6PWY4_WDR76_MOUSE  | Wdr76  | WD repeat-containing pr R.VFDSSSISSLPLLR@.H            | 4.03  | 20.89 | 0.19 | 5.19 |
| Q99J09_MEP50_MOUSE  | Wdr77  | Methylosome protein 50 R.IILLWDR@.C                    | 10.02 | 11.85 | 0.85 | 1.18 |
| Q99J09_MEP50_MOUSE  | Wdr77  | Methylosome protein 50 K.IWDLAQQVSLNSYR@.A             | 7.11  | 4.68  | 1.52 | 0.66 |
| Q99J09_MEP50_MOUSE  | Wdr77  | Methylosome protein 50 R.SDGSLLLVSSLSGR@.C             | 17.51 | 17.94 | 0.98 | 1.02 |
| Q5ND34_WDR81_MOUSE  | Wdr81  | WD repeat-containing pr R.DR@PGTGEDDLQATEALDSLSLPGK#.A | 6.03  | 3.16  | 1.91 | 0.52 |
| Q5ND34_WDR81_MOUSE  | Wdr81  | WD repeat-containing pr R.LAGSPALAPPEPLIPR@.L          | 10.38 | 3.34  | 3.11 | 0.32 |
| Q8BFQ4_WDR82_MOUSE  | Wdr82  | WD repeat-containing pr K.IHVWNGESGK#.V                | 24.26 | 9.58  | 2.53 | 0.39 |
| Q8BFQ4_WDR82_MOUSE  | Wdr82  | WD repeat-containing pr K.LILISTNGSFIR@.L              | 21.87 | 7.04  | 3.10 | 0.32 |
| Q8BFQ4_WDR82_MOUSE  | Wdr82  | WD repeat-containing pr K.R@VVALSM*SPVDDTFISGLDK#.T    | 6.83  | 7.15  | 0.96 | 1.05 |
| Q8BFQ4_WDR82_MOUSE  | Wdr82  | WD repeat-containing pr R.VVALSM*SPVDDTFISGLDK#.T      | 40.20 | 12.70 | 3.17 | 0.32 |
| Q8BFQ4_WDR82_MOUSE  | Wdr82  | WD repeat-containing pr R.VVALSM*SPVDDTFISGLDK#.T      | 9.87  | 4.21  | 2.34 | 0.43 |
| Q8BFQ4_WDR82_MOUSE  | Wdr82  | WD repeat-containing pr K.YGVDLIR@.Y                   | 50.58 | 20.47 | 2.47 | 0.40 |
| Q8BFQ4_WDR82_MOUSE  | Wdr82  | WD repeat-containing pr R.YTHAANTVYSSNK#.I             | 16.63 | 9.47  | 1.76 | 0.57 |
| Q8BFQ4_WDR82_MOUSE  | Wdr82  | WD repeat-containing pr K.VAVLDGK#.H                   | 21.47 | 8.76  | 2.45 | 0.41 |
| Q8BFQ4_WDR82_MOUSE  | Wdr82  | WD repeat-containing pr R.VVALSM*SPVDDTFISGLDK#.T      | 4.95  | 2.32  | 2.13 | 0.47 |
| Q8BFQ4_WDR82_MOUSE  | Wdr82  | WD repeat-containing pr R.VVALSM*SPVDDTFISGLDK#.T      | 7.42  | 1.95  | 3.81 | 0.26 |
| Q8BFQ4_WDR82_MOUSE  | Wdr82  | WD repeat-containing pr K.YGVDLIR@.Y                   | 9.09  | 1.86  | 4.89 | 0.20 |
| Q77MQ7_WDR91_MOUSE  | Wdr91  | WD repeat-containing pr K.IVDLQQLM*QVYDLAALR@.D        | 5.65  | 4.19  | 1.35 | 0.74 |
| Q8BVE8_NSD2_MOUSE   | Whsc1  | Histone-lysine N-methyl R.ASATASSALGFNK#.S             | 24.76 | 13.28 | 1.86 | 0.54 |
| Q8BVE8_NSD2_MOUSE   | Whsc1  | Histone-lysine N-methyl K.NALQEAER@.F                  | 20.09 | 11.06 | 1.82 | 0.55 |
| Q8BVE8_NSD2_MOUSE   | Whsc1  | Histone-lysine N-methyl K.R@ADDPAEDVVEDAPR@.K          | 12.81 | 5.98  | 2.14 | 0.47 |
| Q8BVE8_NSD2_MOUSE   | Whsc1  | Histone-lysine N-methyl R.SIK#DLSLEQLVEALVSK#.I        | 11.90 | 5.09  | 2.34 | 0.43 |
| Q8BVE8_NSD2_MOUSE   | Whsc1  | Histone-lysine N-methyl K.SLVAFEGEEQFEK#.L             | 7.39  | 2.93  | 2.52 | 0.40 |
| Q8BVE8_NSD2_MOUSE   | Whsc1  | Histone-lysine N-methyl K.NALQEAER@.F                  | 16.18 | 4.15  | 3.90 | 0.26 |
| Q8BVE8_NSD2_MOUSE   | Whsc1  | Histone-lysine N-methyl K.SLVAFEGEEQFEK#.L             | 5.76  | 1.00  | 5.73 | 0.17 |
| Q8BVE8_NSD2_MOUSE   | Whsc1  | Histone-lysine N-methyl K.VQIYADISEIPK.C               | 8.50  | 11.19 | 0.76 | 1.32 |
| Q6P2L6_NSD3_MOUSE   | Whsc11 | Histone-lysine N-methyl R.SEK#PAGSASSPEATSGSAGPVEK#.K  | 4.62  | 6.16  | 0.75 | 1.33 |
| Q6P2L6_NSD3_MOUSE   | Whsc11 | Histone-lysine N-methyl R.VEQYTFYIDK#HQPPEASSQAK#.K    | 3.47  | 4.54  | 0.76 | 1.31 |
| Q6P2L6_NSD3_MOUSE   | Whsc11 | Histone-lysine N-methyl K.EAIPVQPLISSVPTTSTGK#.F       | 8.27  | 4.25  | 1.95 | 0.51 |
| Q6P2L6_NSD3_MOUSE   | Whsc11 | Histone-lysine N-methyl K.IEQVFALQATGDGK#.F            | 6.58  | 2.96  | 2.22 | 0.45 |
| Q6P2L6_NSD3_MOUSE   | Whsc11 | Histone-lysine N-methyl R.SEK#PAGSASSPEATSGSAGPVEK#.K  | 8.18  | 4.02  | 2.03 | 0.49 |
| Q6P2L6_NSD3_MOUSE   | Whsc11 | Histone-lysine N-methyl R.VEQYTFYIDK#HQPPEASSQAK#.K    | 9.26  | 4.27  | 2.17 | 0.46 |
| Q6P2L6_NSD3_MOUSE   | Whsc11 | Histone-lysine N-methyl K.VQVQVALDSEIPR@.C             | 5.66  | 4.11  | 1.38 | 0.73 |
| F6ZBR8_F6ZBR8_MOUSE | Wiz    | Protein Wiz (Fragment) C.R.SAGGEPGLEAGR@.A             | 18.04 | 8.50  | 2.12 | 0.47 |
| F6ZBR8_F6ZBR8_MOUSE | Wiz    | Protein Wiz (Fragment) C.K.VLSTGGPSSLEAR@.S            | 12.54 | 3.86  | 3.25 | 0.31 |
| F6ZBR8_F6ZBR8_MOUSE | Wiz    | Protein Wiz (Fragment) C.AADSGER@PLATSPPGTVK#.S        | 15.70 | 9.49  | 2.65 | 0.38 |
| F6ZBR8_F6ZBR8_MOUSE | Wiz    | Protein Wiz (Fragment) C.R.EDM*APLNLSAR@.A             | 15.15 | 5.11  | 3.07 | 0.33 |
| F6ZBR8_F6ZBR8_MOUSE | Wiz    | Protein Wiz (Fragment) C.R.ELSLSPITGSKPSAASLVGPVATK.R  | 26.69 | 40.06 | 0.67 | 1.50 |
| F6ZBR8_F6ZBR8_MOUSE | Wiz    | Protein Wiz (Fragment) C.K.GLDPADAPLGLTPLSTK#.K        | 27.83 | 13.26 | 2.10 | 0.48 |
| F6ZBR8_F6ZBR8_MOUSE | Wiz    | Protein Wiz (Fragment) C.R.SAGGEPGLEAGR@.A             | 25.00 | 10.72 | 2.33 | 0.43 |
| F6ZBR8_F6ZBR8_MOUSE | Wiz    | Protein Wiz (Fragment) C.K.SLPSVSTGLEQVASKR@.L         | 11.80 | 4.62  | 2.55 | 0.39 |
| F6ZBR8_F6ZBR8_MOUSE | Wiz    | Protein Wiz (Fragment) C.R.SP5DLHSLPDK#.K              | 58.40 | 21.52 | 2.71 | 0.37 |
| F6ZBR8_F6ZBR8_MOUSE | Wiz    | Protein Wiz (Fragment) C.K.TYIQTLPFK#.A                | 28.12 | 11.95 | 2.35 | 0.43 |
| F6ZBR8_F6ZBR8_MOUSE | Wiz    | Protein Wiz (Fragment) C.K.VLSTGGPSSLEAR@.S            | 43.26 | 21.29 | 2.03 | 0.49 |
| F6ZBR8_F6ZBR8_MOUSE | Wiz    | Protein Wiz (Fragment) C.R.HLGVSDPDAK#.G               | 7.40  | 5.45  | 1.36 | 0.74 |
| F6ZBR8_F6ZBR8_MOUSE | Wiz    | Protein Wiz (Fragment) C.R.SAGGEPGLEAGR@.A             | 6.59  | 17.92 | 0.37 | 2.72 |
| P83741_WNK1_MOUSE   | Wnk1   | Serine/threonine-protein K.LGATVADSGVGR@.T             | 10.95 | 2.54  | 4.31 | 0.23 |
| P83741_WNK1_MOUSE   | Wnk1   | Serine/threonine-protein R.SQQDDIELETK#.R              | 7.35  | 2.29  | 3.21 | 0.31 |
| O70283_WNT2B_MOUSE  | Wnt2b  | Protein Wnt-2b OS=Mus R.TGDYLR@R@.R                    | 62.81 | 18.81 | 3.34 | 0.30 |
| Q91XU0_WRP1_MOUSE   | Wrnip1 | ATPase WRNIP1 OS=Mus K.AVDTLAVLSDGDAR@.T               | 10.40 | 22.16 | 0.47 | 2.13 |
| Q91XU0_WRP1_MOUSE   | Wrnip1 | ATPase WRNIP1 OS=Mus R.AVGQETLLR@.S                    | 19.68 | 6.25  | 3.15 | 0.32 |
| Q91XU0_WRP1_MOUSE   | Wrnip1 | ATPase WRNIP1 OS=Mus R.M*LEGGEDPLVYAR.R                | 9.15  | 7.28  | 1.26 | 0.79 |
| Q91XU0_WRP1_MOUSE   | Wrnip1 | ATPase WRNIP1 OS=Mus R.VLITENDVK#.E                    | 18.36 | 6.80  | 2.70 | 0.37 |
| Q91XU0_WRP1_MOUSE   | Wrnip1 | ATPase WRNIP1 OS=Mus K.AVDTLAVLSDGDAR@.T               | 12.89 | 21.23 | 0.61 | 1.65 |
| Q91XU0_WRP1_MOUSE   | Wrnip1 | ATPase WRNIP1 OS=Mus R.ESYDAPPVPSGAR@.L                | 5.36  | 1.91  | 2.80 | 0.36 |
| Q91XU0_WRP1_MOUSE   | Wrnip1 | ATPase WRNIP1 OS=Mus R.M*LEGGEDPLVYAR@.R               | 10.77 | 7.77  | 1.39 | 0.72 |
| Q91XU0_WRP1_MOUSE   | Wrnip1 | ATPase WRNIP1 OS=Mus K.SIEVYSAYNNVK#.A                 | 9.84  | 4.08  | 2.42 | 0.41 |
| Q91XU0_WRP1_MOUSE   | Wrnip1 | ATPase WRNIP1 OS=Mus R.VLITENDVK#.E                    | 18.81 | 4.71  | 4.00 | 0.25 |
| Q9ER69_FL2D_MOUSE   | Wtap   | Pre-mRNA-splicing reguli R.M*LIQENQELGR@.Q             | 14.64 | 7.22  | 2.03 | 0.49 |
| Q9ER69_FL2D_MOUSE   | Wtap   | Pre-mRNA-splicing reguli R.QQLAQYQQQSQASAPSTR@.T       | 9.04  | 2.34  | 3.86 | 0.26 |
| Q9ER69_FL2D_MOUSE   | Wtap   | Pre-mRNA-splicing reguli R.QQLAQYQQQSQASAPSTR@.T       | 29.23 | 12.57 | 2.32 | 0.43 |
| Q9ER69_FL2D_MOUSE   | Wtap   | Pre-mRNA-splicing reguli R.QYEAVALQELGK#.Y             | 7.13  | 3.17  | 2.25 | 0.44 |
| Q9ER69_FL2D_MOUSE   | Wtap   | Pre-mRNA-splicing reguli R.STM*VDPAINLFFLK#.M          | 11.72 | 11.72 | 1.91 | 0.52 |
| Q9ER69_FL2D_MOUSE   | Wtap   | Pre-mRNA-splicing reguli R.TTSEVPDQAEVSK#.D            | 21.38 | 7.99  | 2.68 | 0.37 |
| Q9DCD2_SYF1_MOUSE   | Xab2   | Pre-mRNA-splicing factor R.EEEDVDLELR@.L               | 5.48  | 3.74  | 1.47 | 0.68 |
| Q9DCD2_SYF1_MOUSE   | Xab2   | Pre-mRNA-splicing factor R.EIINTYTEAVQTVDPFK#.A        | 11.40 | 6.61  | 1.73 | 0.58 |
| Q9DCD2_SYF1_MOUSE   | Xab2   | Pre-mRNA-splicing factor R.HENYDEALK#.L                | 14.35 | 8.77  | 1.64 | 0.61 |
| Q9DCD2_SYF1_MOUSE   | Xab2   | Pre-mRNA-splicing factor R.LATVVDNER@.F                | 17.37 | 11.83 | 1.47 | 0.68 |
| Q9DCD2_SYF1_MOUSE   | Xab2   | Pre-mRNA-splicing factor K.LSPESAIEYELK#.S             | 11.56 | 7.92  | 1.46 | 0.68 |
| Q9DCD2_SYF1_MOUSE   | Xab2   | Pre-mRNA-splicing factor K.M*ETASELGR@EEDDDVDLELR@.L   | 9.96  | 5.12  | 1.95 | 0.51 |
| Q9DCD2_SYF1_MOUSE   | Xab2   | Pre-mRNA-splicing factor R.SER@PDLFEEDLPYEEIIM*R@.N    | 12.48 | 4.66  | 2.68 | 0.37 |
| Q9DCD2_SYF1_MOUSE   | Xab2   | Pre-mRNA-splicing factor R.SHPLPETAVR@.G               | 19.94 | 44.45 | 0.45 | 2.23 |
| Q9DCD2_SYF1_MOUSE   | Xab2   | Pre-mRNA-splicing factor R.AEYVGSSEPVQNR@.V            | 5.29  | 3.52  | 1.50 | 0.67 |
| Q9DCD2_SYF1_MOUSE   | Xab2   | Pre-mRNA-splicing factor R.AVEPAQQYDM*FINYK#.R         | 9.47  | 4.13  | 1.45 | 0.69 |
| Q9DCD2_SYF1_MOUSE   | Xab2   | Pre-mRNA-splicing factor R.DFTQVFDVQAQFEESM*IAAK#.M    | 8.70  | 3.60  | 2.42 | 0.41 |
| Q9DCD2_SYF1_MOUSE   | Xab2   | Pre-mRNA-splicing factor R.EEEDVDLELR@.L               | 5.76  | 4.30  | 1.34 | 0.75 |
| Q9DCD2_SYF1_MOUSE   | Xab2   | Pre-mRNA-splicing factor R.EIINTYTEAVQTVDPFK#.A        | 16.17 | 8.42  | 1.92 | 0.52 |
| Q9DCD2_SYF1_MOUSE   | Xab2   | Pre-mRNA-splicing factor R.HENYDEALK#.L                | 22.42 | 8.90  | 2.52 | 0.40 |
| Q9DCD2_SYF1_MOUSE   | Xab2   | Pre-mRNA-splicing factor R.LATVVDNER@.F                | 28.88 | 14.22 | 2.03 | 0.49 |
| Q9DCD2_SYF1_MOUSE   | Xab2   | Pre-mRNA-splicing factor R.LEQQSVPAAVFGLSK#.D          | 4.04  | 3.51  | 1.15 | 0.87 |
| Q9DCD2_SYF1_MOUSE   | Xab2   | Pre-mRNA-splicing factor K.LSPESAIEYELK#.S             | 31.64 | 9.80  | 3.23 | 0.31 |
| Q9DCD2_SYF1_MOUSE   | Xab2   | Pre-mRNA-splicing factor R.SER@PDLFEEDLPYEEIIM*R@.N    | 30.31 | 14.59 | 2.08 | 0.48 |
| Q9DCD2_SYF1_MOUSE   | Xab2   | Pre-mRNA-splicing factor K.SSDR@LDEAAQR@.L             | 8.81  | 2.78  | 3.17 | 0.32 |
| Q6P5F9_XP01_MOUSE   | Xpo1   | Exportin-1 OS=Mus musc K.YYGLQIENVIK#.T                | 7.71  | 2.29  | 3.36 | 0.30 |
| Q6P5F9_XP01_MOUSE   | Xpo1   | Exportin-1 OS=Mus musc K.AVGHPFVQLGR@.I                | 12.87 | 9.69  | 1.33 | 0.75 |
| Q6P5F9_XP01_MOUSE   | Xpo1   | Exportin-1 OS=Mus musc K.EFAGEDTDLFLER@.E              | 8.89  | 5.20  | 1.71 | 0.59 |
| Q6P5F9_XP01_MOUSE   | Xpo1   | Exportin-1 OS=Mus musc K.LLSEVDFSSGQITQVK#.A           | 8.00  | 3.94  | 2.03 | 0.49 |
| Q6P5F9_XP01_MOUSE   | Xpo1   | Exportin-1 OS=Mus musc R.M*AK#PEVLVVDQGEVVR@.E         | 12.30 | 6.08  | 2.02 | 0.49 |
| Q6P5F9_XP01_MOUSE   | Xpo1   | Exportin-1 OS=Mus musc R.VDITLEFSQNN*NTK#.Y            | 7.89  | 4.78  | 1.65 | 0.61 |
| Q6P5F9_XP01_MOUSE   | Xpo1   | Exportin-1 OS=Mus musc K.YYGLQIENVIK#.T                | 17.14 | 8.80  | 2.17 | 0.46 |
| Q6P5F9_XP01_MOUSE   | Xpo1   | Exportin-1 OS=Mus musc K.AIIASNNM*YIVGQYPR@.F          | 10.42 | 3.05  | 3.42 | 0.29 |
| Q6P5F9_XP01_MOUSE   | Xpo1   | Exportin-1 OS=Mus musc K.AVGHPFVQLGR@.I                | 40.89 | 14.64 | 2.79 | 0.36 |
| Q6P5F9_XP01_MOUSE   | Xpo1   | Exportin-1 OS=Mus musc K.DTDSINLYK#.N                  | 10.77 | 3.93  | 2.74 | 0.36 |
| Q6P5F9_XP01_MOUSE   | Xpo1   | Exportin-1 OS=Mus musc K.EFAGEDTDLFLER@.E              | 10.53 | 10.93 | 1.88 | 0.53 |
| Q6P5F9_XP01_MOUSE   | Xpo1   | Exportin-1 OS=Mus musc R.EPEVLSTM*AIIVNK#.K            | 8.25  | 4.82  | 1.71 | 0.58 |
| Q6P5F9_XP01_MOUSE   | Xpo1   | Exportin-1 OS=Mus musc R.ETLVLTLDYDVEIIM*TK#.K         | 8.28  | 6.36  | 3.50 | 0.29 |
| Q6P5F9_XP01_MOUSE   | Xpo1   | Exportin-1 OS=Mus musc K.FLNVPM*FR@.N                  | 8.98  | 4.51  | 1.99 | 0.50 |
| Q6P5F9_XP01_MOUSE   | Xpo1   | Exportin-1 OS=Mus musc K.LISGVHVSRS@.S                 | 27.42 | 7.96  | 3.45 | 0.29 |
| Q6P5F9_XP01_MOUSE   | Xpo1   | Exportin-1 OS=Mus musc K.LLSEVDFSSGQITQVK#.A           | 52.41 | 21.71 | 2.41 | 0.41 |
| Q6P5F9_XP01_MOUSE   | Xpo1   | Exportin-1 OS=Mus musc R.M*AK#PEVLVVDQGEVVR@.E         | 34.15 | 12.65 | 2.70 | 0.37 |
| Q6P5F9_XP01_MOUSE   | Xpo1   | Exportin-1 OS=Mus musc R.M*AEVLTTHLK#.E                | 15.55 | 6.80  | 2.29 | 0.44 |
| Q6P5F9_XP01_MOUSE   | Xpo1   | Exportin-1 OS=Mus musc R.QLLDFSQK#.L                   | 13.22 | 8.54  | 1.55 | 0.65 |
| Q6P5F9_XP01_MOUSE   | Xpo1   | Exportin-1 OS=Mus musc K.QM*PLNTNIR@.L                 | 9.15  | 7.03  | 1.30 | 0.77 |

|                     |        |                                                                     |        |        |      |      |
|---------------------|--------|---------------------------------------------------------------------|--------|--------|------|------|
| Q6P5F9_XPO1_MOUSE   | Xpo1   | Exportin-1 OS=Mus musc K.YM*LLPNQVWDSIIQATK#.N                      | 7.70   | 2.15   | 2.65 | 0.38 |
| Q6P5F9_XPO1_MOUSE   | Xpo1   | Exportin-1 OS=Mus musc K.YVWGLIK#.T                                 | 17.15  | 7.70   | 2.23 | 0.45 |
| Q6P5F9_XPO1_MOUSE   | Xpo1   | Exportin-1 OS=Mus musc K.YYGLQIENVIK#.T                             | 47.26  | 19.52  | 2.42 | 0.41 |
| Q924C1_XPO5_MOUSE   | Xpo5   | Exportin-5 OS=Mus musc K.AVTVM**M*DPSSQTR@.Y                        | 5.68   | 2.83   | 2.01 | 0.50 |
| Q924C1_XPO5_MOUSE   | Xpo5   | Exportin-5 OS=Mus musc R.LLDNLLALVR@.T                              | 9.03   | 3.16   | 2.86 | 0.35 |
| Q9EPK7_XPO7_MOUSE   | Xpo7   | Exportin-7 OS=Mus musc R.TNNPLPLEQR@.I                              | 12.36  | 5.96   | 2.07 | 0.48 |
| Q60596_XRCC1_MOUSE  | Xrcc1  | DNA repair protein XRCC R.TPAAAPASTPAQR@.A                          | 8.71   | 8.13   | 1.07 | 0.93 |
| P27641_XRCC5_MOUSE  | Xrcc5  | X-ray repair cross-compl R.AFR@EEAIQFSEQR@.F                        | 13.78  | 7.02   | 1.96 | 0.51 |
| P27641_XRCC5_MOUSE  | Xrcc5  | X-ray repair cross-compl R.FNSFLEALR@.E                             | 19.39  | 10.65  | 1.82 | 0.55 |
| P27641_XRCC5_MOUSE  | Xrcc5  | X-ray repair cross-compl R.HLM*LPDFDLLEDIGNK#.I                     | 19.39  | 17.82  | 1.20 | 0.83 |
| P27641_XRCC5_MOUSE  | Xrcc5  | X-ray repair cross-compl R.SNPQGVAFVPIK#.D                          | 5.71   | 5.57   | 1.03 | 0.97 |
| P27641_XRCC5_MOUSE  | Xrcc5  | X-ray repair cross-compl K.TLFLTEVIK#.K                             | 52.71  | 25.47  | 1.28 | 0.78 |
| P27641_XRCC5_MOUSE  | Xrcc5  | X-ray repair cross-compl K.VGVSVPNVFNR@.F                           | 29.87  | 11.79  | 2.53 | 0.39 |
| P27641_XRCC5_MOUSE  | Xrcc5  | X-ray repair cross-compl R.HLM*LPDFDLLEDIGNK#.I                     | 5.20   | 4.88   | 1.06 | 0.94 |
| P27641_XRCC5_MOUSE  | Xrcc5  | X-ray repair cross-compl K.TLFLTEVIK#.K                             | 15.05  | 6.69   | 2.25 | 0.44 |
| P23475_XRCC6_MOUSE  | Xrcc6  | X-ray repair cross-compl R.DSLFLVDASR@.A                            | 16.75  | 12.21  | 1.37 | 0.73 |
| P23475_XRCC6_MOUSE  | Xrcc6  | X-ray repair cross-compl K.IISSDR@DLLAVVYFVTEK#.D                   | 25.73  | 20.68  | 1.24 | 0.80 |
| P23475_XRCC6_MOUSE  | Xrcc6  | X-ray repair cross-compl K.K#PGGFDVSVFVR@.D                         | 17.11  | 8.84   | 1.94 | 0.52 |
| P23475_XRCC6_MOUSE  | Xrcc6  | X-ray repair cross-compl K.VELSEELK#.A                              | 20.88  | 14.60  | 1.43 | 0.70 |
| P23475_XRCC6_MOUSE  | Xrcc6  | X-ray repair cross-compl R.VLELDQFK#.G                              | 18.09  | 9.49   | 1.91 | 0.52 |
| P23475_XRCC6_MOUSE  | Xrcc6  | X-ray repair cross-compl K.VTANQEQIDK#.M                            | 13.78  | 9.33   | 1.48 | 0.68 |
| P97789_XRN1_MOUSE   | Xrn1   | 5'-3' exoribonuclease 1 O R.APELFSYIAK#.N                           | 18.83  | 2.58   | 7.31 | 0.14 |
| P97789_XRN1_MOUSE   | Xrn1   | 5'-3' exoribonuclease 1 O K.FYIEPPGTQK#.V                           | 13.42  | 3.67   | 3.66 | 0.27 |
| P97789_XRN1_MOUSE   | Xrn1   | 5'-3' exoribonuclease 1 O K.QLPLFVQITVK#.D                          | 8.40   | 1.96   | 4.29 | 0.23 |
| Q9DBR1_XRN2_MOUSE   | Xrn2   | 5'-3' exoribonuclease 2 O R.DLTONAVSINK#DQFAEDYVFK#.A               | 9.01   | 1.51   | 5.96 | 0.17 |
| Q9DBR1_XRN2_MOUSE   | Xrn2   | 5'-3' exoribonuclease 2 O R.ELTM*ASLPPFFDVER@.S                     | 8.03   | 4.32   | 1.86 | 0.54 |
| Q9DBR1_XRN2_MOUSE   | Xrn2   | 5'-3' exoribonuclease 2 O R.NSLGGDLVFGK#.L                          | 17.21  | 4.14   | 4.16 | 0.24 |
| Q9DBR1_XRN2_MOUSE   | Xrn2   | 5'-3' exoribonuclease 2 O K.YAWQGVALLPVDER@.R                       | 17.00  | 4.51   | 2.59 | 0.39 |
| P46938_YAP1_MOUSE   | Yap1   | Transcriptional coactivator R.DESTDGLSM**SSVSPR.T                   | 3.73   | 2.96   | 1.26 | 0.79 |
| P62960_YBOX1_MOUSE  | Ybx1   | Nuclease-sensitive eleme K.AADPNSXSAPEAQGGAE.-                      | 147.92 | 147.92 | 1.00 | 1.00 |
| P62960_YBOX1_MOUSE  | Ybx1   | Nuclease-sensitive eleme R.EDGNNEEDK#ENQGDDETQGGQPPQR@.R            | 156.53 | 130.85 | 1.20 | 0.84 |
| P62960_YBOX1_MOUSE  | Ybx1   | Nuclease-sensitive eleme R.EDGNNEEDK#ENQGDDETQGGQPPQR.Y             | 178.23 | 178.23 | 1.53 | 0.65 |
| P62960_YBOX1_MOUSE  | Ybx1   | Nuclease-sensitive eleme R.EDGNNEEDK#ENQGDDETQGGQPPQR@R@.Y          | 41.26  | 25.07  | 1.65 | 0.61 |
| P62960_YBOX1_MOUSE  | Ybx1   | Nuclease-sensitive eleme K.EDVVFHQITAIK.#                           | 19.42  | 16.47  | 1.18 | 0.85 |
| P62960_YBOX1_MOUSE  | Ybx1   | Nuclease-sensitive eleme K.GAEANVTGPGGVPVQGSK#.Y                    | 308.07 | 332.25 | 0.93 | 1.08 |
| P62960_YBOX1_MOUSE  | Ybx1   | Nuclease-sensitive eleme R.NDTKEDVVFHQITAIK.#                       | 221.22 | 191.34 | 1.16 | 0.86 |
| P62960_YBOX1_MOUSE  | Ybx1   | Nuclease-sensitive eleme R.NDTK#EDVVFHQITAIK#.#.N                   | 192.58 | 161.32 | 1.19 | 0.84 |
| P62960_YBOX1_MOUSE  | Ybx1   | Nuclease-sensitive eleme K.NEGSESAPEGQAQR.#                         | 15.68  | 13.87  | 1.13 | 0.88 |
| P62960_YBOX1_MOUSE  | Ybx1   | Nuclease-sensitive eleme R.NYQNYQVSESGEK.#                          | 11.23  | 9.56   | 1.18 | 0.85 |
| P62960_YBOX1_MOUSE  | Ybx1   | Nuclease-sensitive eleme R.RPQYNSP#VQGEVM*EGADNQGAGEQGRVPR.#        | 361.87 | 286.44 | 1.26 | 0.79 |
| P62960_YBOX1_MOUSE  | Ybx1   | Nuclease-sensitive eleme R.R@PQYNSP#VQGEVM#EGADNQGAGEQGR@PVR@.#     | 57.34  | 57.96  | 0.99 | 1.01 |
| P62960_YBOX1_MOUSE  | Ybx1   | Nuclease-sensitive eleme R.SVGDGETVFEDVVEGEK#.G                     | 314.52 | 348.45 | 0.90 | 1.11 |
| P62960_YBOX1_MOUSE  | Ybx1   | Nuclease-sensitive eleme R.SVGDGETVFEDVVEGEK#GAEANVTGPGGVPVQGSK#.Y  | 47.11  | 46.25  | 1.02 | 0.98 |
| P62960_YBOX1_MOUSE  | Ybx1   | Nuclease-sensitive eleme K.GAEANVTGPGGVPVQGSK.#                     | 7.54   | 14.18  | 0.53 | 1.88 |
| P62960_YBOX1_MOUSE  | Ybx1   | Nuclease-sensitive eleme R.SVGDGETVFEDVVEGEK.#                      | 5.25   | 12.88  | 0.41 | 2.45 |
| P62960_YBOX1_MOUSE  | Ybx1   | Nuclease-sensitive eleme R.SVGDGETVFEDVVEGEK#.G                     | 10.53  | 5.40   | 1.95 | 0.51 |
| Q9JK83_YBOX3_MOUSE  | Ybx3   | Y-box-binding protein 3 ( K.AGEAPTENPAPATEQSSAE.-                   | 15.97  | 15.97  | 1.00 | 1.00 |
| Q9JK83_YBOX3_MOUSE  | Ybx3   | Y-box-binding protein 3 ( K.GAEANVTGPGGVPVVEGSR.#                   | 63.19  | 90.12  | 0.70 | 1.43 |
| Q9JK83_YBOX3_MOUSE  | Ybx3   | Y-box-binding protein 3 ( R.NYAGEEEEESGSGEPFAADGQFSGAR.#            | 4.11   | 3.13   | 1.31 | 0.76 |
| Q9JK83_YBOX3_MOUSE  | Ybx3   | Y-box-binding protein 3 ( R.SVGDGETVFEDVVEGEK#GAEANVTGPGGVPVVEGSR.Y | 4.54   | 6.51   | 0.70 | 1.44 |
| Q3TUF7_YETS2_MOUSE  | Yeats2 | YEATS domain-containing R.ATEQLVSDILR@.#                            | 7.64   | 5.43   | 1.41 | 0.71 |
| Q3TUF7_YETS2_MOUSE  | Yeats2 | YEATS domain-containing R.VDHLTIQQLLTAUVK#.K                        | 10.73  | 5.02   | 2.14 | 0.47 |
| Q3TUF7_YETS2_MOUSE  | Yeats2 | YEATS domain-containing K.ATEQLVSDILR@.#                            | 9.47   | 1.37   | 6.92 | 0.14 |
| Q3TUF7_YETS2_MOUSE  | Yeats2 | YEATS domain-containing R.FYLPPTPGSGFVQDITQK#.I                     | 3.53   | 1.82   | 1.94 | 0.52 |
| Q3TUF7_YETS2_MOUSE  | Yeats2 | YEATS domain-containing K.IGITLQPVALHR@.#                           | 11.17  | 5.42   | 2.06 | 0.48 |
| Q3TUF7_YETS2_MOUSE  | Yeats2 | YEATS domain-containing K.IVSGSPISPTSPSPVLR@.#                      | 13.41  | 4.95   | 2.71 | 0.37 |
| Q3TUF7_YETS2_MOUSE  | Yeats2 | YEATS domain-containing K.LLLIPQGAIR@.#                             | 49.46  | 9.40   | 5.26 | 0.19 |
| Q3TUF7_YETS2_MOUSE  | Yeats2 | YEATS domain-containing K.LPVASQASQGTGSPVPIK#.I                     | 7.11   | 2.96   | 2.40 | 0.42 |
| Q3TUF7_YETS2_MOUSE  | Yeats2 | YEATS domain-containing R.NADLTGETSR@.#                             | 17.64  | 4.33   | 4.08 | 0.25 |
| Q3TUF7_YETS2_MOUSE  | Yeats2 | YEATS domain-containing K.NK#HEHVIDDQR@.#                           | 14.19  | 14.30  | 0.99 | 1.01 |
| Q3TUF7_YETS2_MOUSE  | Yeats2 | YEATS domain-containing K.QVISAGETGQSPK#.I                          | 16.33  | 3.90   | 3.75 | 0.27 |
| Q3TUF7_YETS2_MOUSE  | Yeats2 | YEATS domain-containing K.TTLTQATAGQASLLK.#                         | 9.04   | 1.86   | 4.86 | 0.21 |
| Q3TUF7_YETS2_MOUSE  | Yeats2 | YEATS domain-containing R.TYGTQLTGLAETVVDVLEHR@.#                   | 8.00   | 3.33   | 2.58 | 0.39 |
| Q3TUF7_YETS2_MOUSE  | Yeats2 | YEATS domain-containing K.VDHLTIQQLLTAUVK#.K                        | 14.35  | 5.25   | 2.73 | 0.37 |
| Q3TUF7_YETS2_MOUSE  | Yeats2 | YEATS domain-containing K.AIVSGGGGTIVAQPVQITLTK#.T                  | 11.73  | 1.73   | 5.04 | 0.20 |
| Q3TUF7_YETS2_MOUSE  | Yeats2 | YEATS domain-containing K.IGITLQPVALHR@.#                           | 11.49  | 2.11   | 5.44 | 0.18 |
| Q3TUF7_YETS2_MOUSE  | Yeats2 | YEATS domain-containing K.LLLIPQGAIR@.#                             | 20.50  | 6.19   | 3.31 | 0.30 |
| Q3TUF7_YETS2_MOUSE  | Yeats2 | YEATS domain-containing K.LPTTVLPIVSNQAAPSSAPVAIAK#.V               | 14.72  | 4.36   | 3.37 | 0.30 |
| Q3TUF7_YETS2_MOUSE  | Yeats2 | YEATS domain-containing K.LPVASQASQGTGSPVPIK#.I                     | 5.35   | 1.53   | 3.48 | 0.29 |
| Q3TUF7_YETS2_MOUSE  | Yeats2 | YEATS domain-containing K.VDHLTIQQLLTAUVK#.K                        | 16.37  | 2.53   | 6.46 | 0.15 |
| Q9CR11_YETS4_MOUSE  | Yeats4 | YEATS domain-containing K.GVTIVK#PIVYGVAR@.#                        | 10.41  | 9.78   | 1.06 | 0.94 |
| Q9CR11_YETS4_MOUSE  | Yeats4 | YEATS domain-containing K.HETFEALEVKK#.T                            | 6.35   | 3.10   | 2.05 | 0.49 |
| Q9CR11_YETS4_MOUSE  | Yeats4 | YEATS domain-containing R.K#HEEDDQTK#DI.-                           | 9.18   | 9.47   | 0.97 | 1.03 |
| Q9CR11_YETS4_MOUSE  | Yeats4 | YEATS domain-containing R.K#HEEDDQTK#DI.-                           | 5.76   | 4.60   | 1.25 | 0.80 |
| Q9CR11_YETS4_MOUSE  | Yeats4 | YEATS domain-containing K.TSFEALKK.#                                | 7.66   | 4.77   | 1.61 | 0.62 |
| Q91XB7_YIF1A_MOUSE  | Yif1a  | Protein YIF1A OS=Mus m R.TAASGPDMSM*GGPAPR@.#                       | 9.47   | 4.46   | 2.13 | 0.47 |
| Q91XB7_YIF1A_MOUSE  | Yif1a  | Protein YIF1A OS=Mus m K.YFFAVDTAVYAK#.K                            | 15.72  | 7.06   | 2.23 | 0.45 |
| Q9CX30_YIF1B_MOUSE  | Yif1b  | Protein YIF1B OS=Mus m K.ILAAQAAEGVPVR@.#                           | 52.51  | 23.76  | 2.21 | 0.45 |
| Q9CX30_YIF1B_MOUSE  | Yif1b  | Protein YIF1B OS=Mus m K.YFFAVDTAVYAK#.K                            | 7.03   | 9.35   | 0.75 | 1.33 |
| Q9CX30_YIF1B_MOUSE  | Yif1b  | Protein YIF1B OS=Mus m K.ILAAQAAEGVPVR@.#                           | 3.03   | 10.64  | 0.29 | 3.51 |
| Q8C407_YIPF4_MOUSE  | Yipf4  | Protein YIPF4 OS=Mus m K.LNLGVSGDFIK#.E                             | 42.66  | 12.52  | 3.41 | 0.29 |
| Q9CQW1_YKT6_MOUSE   | Ykt6   | Synaptobrevin homolog K.AAYDVSSFFQR@.#                              | 13.92  | 3.77   | 3.69 | 0.27 |
| Q9CQW1_YKT6_MOUSE   | Ykt6   | Synaptobrevin homolog R.SDSLAVVIADSEVPSR@.#                         | 16.52  | 6.12   | 2.70 | 0.37 |
| Q9CQW1_YKT6_MOUSE   | Ykt6   | Synaptobrevin homolog R.SSVQELM**TFTSLIVER@.#                       | 3.67   | 2.75   | 1.34 | 0.75 |
| D3YWX2_D3YWX2_MOUSE | Ylpm1  | YLP motif-containing prc R.ITLR@PDIPLPER@.#                         | 19.84  | 8.08   | 2.46 | 0.41 |
| D3YWX2_D3YWX2_MOUSE | Ylpm1  | YLP motif-containing prc K.TAIQOEPLSGAK#.N                          | 48.08  | 16.55  | 2.91 | 0.34 |
| D3YWX2_D3YWX2_MOUSE | Ylpm1  | YLP motif-containing prc K.VFSSEQLGESSALSQSIHAAK#.D                 | 20.01  | 8.84   | 2.26 | 0.44 |
| D3YWX2_D3YWX2_MOUSE | Ylpm1  | YLP motif-containing prc R.VGFOYQIGIM*QR@.#                         | 16.39  | 6.73   | 2.44 | 0.41 |
| D3YWX2_D3YWX2_MOUSE | Ylpm1  | YLP motif-containing prc K.VNSFQTKV.#                               | 21.62  | 10.68  | 2.02 | 0.49 |
| D3YWX2_D3YWX2_MOUSE | Ylpm1  | YLP motif-containing prc K.AAQSNLSDSQEQPTK#.S                       | 18.27  | 5.56   | 3.29 | 0.30 |
| D3YWX2_D3YWX2_MOUSE | Ylpm1  | YLP motif-containing prc K.ATQTYLQEK#.V                             | 28.17  | 13.17  | 2.14 | 0.47 |
| D3YWX2_D3YWX2_MOUSE | Ylpm1  | YLP motif-containing prc R.DK#HEVEFGGAPR@.#                         | 44.08  | 8.19   | 5.38 | 0.19 |
| D3YWX2_D3YWX2_MOUSE | Ylpm1  | YLP motif-containing prc R.DYQDITLDSYSR@.#                          | 7.55   | 3.44   | 2.20 | 0.46 |
| D3YWX2_D3YWX2_MOUSE | Ylpm1  | YLP motif-containing prc R.GHEEFPVDR@.#                             | 10.36  | 1.68   | 6.15 | 0.16 |
| D3YWX2_D3YWX2_MOUSE | Ylpm1  | YLP motif-containing prc R.GPASQYITPNTLSLSPR@.#                     | 10.77  | 2.48   | 4.34 | 0.23 |
| D3YWX2_D3YWX2_MOUSE | Ylpm1  | YLP motif-containing prc R.HFDQFVSAKA#.T                            | 15.13  | 3.81   | 3.97 | 0.25 |
| D3YWX2_D3YWX2_MOUSE | Ylpm1  | YLP motif-containing prc R.ITLR@PDIPLPER@.#                         | 39.79  | 11.89  | 3.35 | 0.30 |
| D3YWX2_D3YWX2_MOUSE | Ylpm1  | YLP motif-containing prc K.HDAEESEELGYIPK#.S                        | 20.32  | 3.58   | 5.67 | 0.18 |
| D3YWX2_D3YWX2_MOUSE | Ylpm1  | YLP motif-containing prc R.M*EDYLPQDDYETR@.#                        | 16.47  | 2.85   | 5.78 | 0.17 |
| D3YWX2_D3YWX2_MOUSE | Ylpm1  | YLP motif-containing prc K.SGGLADPPK#.G                             | 19.19  | 5.29   | 3.63 | 0.28 |
| D3YWX2_D3YWX2_MOUSE | Ylpm1  | YLP motif-containing prc K.SGGLADPPK#GSLFEGPR@.#                    | 11.82  | 3.69   | 3.20 | 0.31 |
| D3YWX2_D3YWX2_MOUSE | Ylpm1  | YLP motif-containing prc K.SQAELPSGNK#PELADTSNNQK#.N                | 35.56  | 9.70   | 3.67 | 0.27 |
| D3YWX2_D3YWX2_MOUSE | Ylpm1  | YLP motif-containing prc K.TAIQOEPLSGAK#.N                          | 49.70  | 14.76  | 3.37 | 0.30 |

|                     |         |                                                           |        |        |      |       |
|---------------------|---------|-----------------------------------------------------------|--------|--------|------|-------|
| D3YWX2_D3YWX2_MOUSE | Ylpm1   | YLP motif-containing prc K.VEQPYGER@.I                    | 19.72  | 5.10   | 3.87 | 0.26  |
| D3YWX2_D3YWX2_MOUSE | Ylpm1   | YLP motif-containing prc K.VFSSEQGLGESSALSQSIIAAK#.D      | 55.09  | 10.18  | 5.41 | 0.18  |
| D3YWX2_D3YWX2_MOUSE | Ylpm1   | YLP motif-containing prc R.VLSDLDVFAIEYK#.E               | 4.05   | 2.82   | 1.44 | 0.70  |
| D3YWX2_D3YWX2_MOUSE | Ylpm1   | YLP motif-containing prc K.VNSFQTK#.S                     | 30.04  | 9.44   | 3.18 | 0.31  |
| P62700_YPEL5_MOUSE  | Ypel5   | Protein yippee-like 5 OS= K.VVNLQVSEVQDR@.V               | 15.89  | 7.90   | 2.01 | 0.50  |
| E9Q5K9_YTDC1_MOUSE  | Ythdc1  | YTH domain-containing f R.DQKHEEGNDYDTR@.S                | 1.82   | 1.39   | 1.31 | 0.76  |
| E9Q5K9_YTDC1_MOUSE  | Ythdc1  | YTH domain-containing f R.GISPIVDFR@.S                    | 31.26  | 11.02  | 2.84 | 0.35  |
| E9Q5K9_YTDC1_MOUSE  | Ythdc1  | YTH domain-containing f K.HKLNLAFR@.S                     | 21.67  | 8.83   | 2.46 | 0.41  |
| E9Q5K9_YTDC1_MOUSE  | Ythdc1  | YTH domain-containing f K.M*LGQVFK#.I                     | 37.47  | 13.41  | 2.79 | 0.36  |
| E9Q5K9_YTDC1_MOUSE  | Ythdc1  | YTH domain-containing f R.SEASDSGESVSFTDGSVR@.S           | 31.27  | 4.08   | 5.22 | 0.19  |
| E9Q5K9_YTDC1_MOUSE  | Ythdc1  | YTH domain-containing f R.SGSSASESAGSEK#.K                | 8.42   | 3.29   | 2.56 | 0.39  |
| E9Q5K9_YTDC1_MOUSE  | Ythdc1  | YTH domain-containing f R.VDDFLR@.R                       | 21.32  | 8.72   | 2.44 | 0.41  |
| E9Q5K9_YTDC1_MOUSE  | Ythdc1  | YTH domain-containing f K.YVLQDAR@.F                      | 49.86  | 27.65  | 1.80 | 0.55  |
| E9Q5K9_YTDC1_MOUSE  | Ythdc1  | YTH domain-containing f R.GISPIVDFR@.S                    | 11.59  | 4.87   | 2.38 | 0.42  |
| E9Q5K9_YTDC1_MOUSE  | Ythdc1  | YTH domain-containing f R.SEASDSGESVSFTDGSVR@.S           | 6.61   | 3.85   | 1.72 | 0.58  |
| P59326_YTHD1_MOUSE  | Ythd1   | YTH domain-containing f K.APGM*NSLEQGM*VGLK.I             | 4.81   | 6.46   | 0.74 | 1.34  |
| P59326_YTHD1_MOUSE  | Ythd1   | YTH domain-containing f K.APGM*NSLEQGM*VGLK#.I            | 4.07   | 2.01   | 2.02 | 0.49  |
| P59326_YTHD1_MOUSE  | Ythd1   | YTH domain-containing f R.DTQVEPLEK#.A                    | 66.78  | 39.02  | 1.71 | 0.58  |
| P59326_YTHD1_MOUSE  | Ythd1   | YTH domain-containing f K.HTTSFDDFPHYEK#.R                | 26.09  | 12.83  | 2.03 | 0.49  |
| Q91Y7_YTHD2_MOUSE   | Ythd2   | YTH domain-containing f K.LGSTEVSAPK.V                    | 17.31  | 22.44  | 0.77 | 1.30  |
| Q8BYK6_YTHD3_MOUSE  | Ythd3   | YTH domain-containing f R.AITDQGAGFGNDLTSK#.V             | 21.87  | 23.22  | 0.94 | 1.06  |
| Q8BYK6_YTHD3_MOUSE  | Ythd3   | YTH domain-containing f K.IGGDLTAAVT.T                    | 21.08  | 36.66  | 0.57 | 1.74  |
| Q8BYK6_YTHD3_MOUSE  | Ythd3   | YTH domain-containing f K.VPGISSIEQGM*TLGK#.I             | 16.05  | 21.61  | 0.74 | 1.35  |
| Q8BYK6_YTHD3_MOUSE  | Ythd3   | YTH domain-containing f R.AITDQGAGFGNDLTSK.V              | 12.38  | 16.90  | 0.73 | 1.37  |
| Q8BYK6_YTHD3_MOUSE  | Ythd3   | YTH domain-containing f K.IGGDLTAAVT.T                    | 6.71   | 10.71  | 0.63 | 1.60  |
| Q8BYK6_YTHD3_MOUSE  | Ythd3   | YTH domain-containing f K.VPGISSIEQGM*TLGK.I              | 6.62   | 8.55   | 0.77 | 1.29  |
| Q8BYK6_YTHD3_MOUSE  | Ythd3   | YTH domain-containing f K.AINNYNPK#.D                     | 12.85  | 10.74  | 1.20 | 0.84  |
| Q8BYK6_YTHD3_MOUSE  | Ythd3   | YTH domain-containing f R.AITDQGAGFGNDLTSK#.V             | 30.92  | 17.24  | 1.79 | 0.56  |
| Q8BYK6_YTHD3_MOUSE  | Ythd3   | YTH domain-containing f K.GNVGIGGSAPPPPIK#.H              | 14.60  | 10.49  | 1.39 | 0.72  |
| Q8BYK6_YTHD3_MOUSE  | Ythd3   | YTH domain-containing f K.HTTSFDDFAHYEK#.R                | 24.94  | 9.02   | 2.77 | 0.36  |
| Q8BYK6_YTHD3_MOUSE  | Ythd3   | YTH domain-containing f K.VPGISSIEQGM*TLGK#.I             | 20.76  | 16.43  | 1.26 | 0.79  |
| Q9CQV8_14338_MOUSE  | Ywhab   | 14-3-3 protein beta/alpha K.AVTEGHELSNEER@.N              | 14.35  | 6.35   | 2.26 | 0.44  |
| Q9CQV8_14338_MOUSE  | Ywhab   | 14-3-3 protein beta/alpha K.DSTLIM*QLLR@.D                | 117.95 | 57.89  | 2.04 | 0.49  |
| Q9CQV8_14338_MOUSE  | Ywhab   | 14-3-3 protein beta/alpha K.DSTLIM*QLLR@.D                | 59.48  | 21.53  | 2.76 | 0.36  |
| Q9CQV8_14338_MOUSE  | Ywhab   | 14-3-3 protein beta/alpha K.EM*OPTHPIR@.L                 | 16.31  | 8.42   | 1.94 | 0.52  |
| Q9CQV8_14338_MOUSE  | Ywhab   | 14-3-3 protein beta/alpha K.KEM*OPTHPIR@.L                | 29.57  | 14.06  | 2.10 | 0.48  |
| Q9CQV8_14338_MOUSE  | Ywhab   | 14-3-3 protein beta/alpha K.LAEQAEER@.Y                   | 172.84 | 84.16  | 2.05 | 0.49  |
| Q9CQV8_14338_MOUSE  | Ywhab   | 14-3-3 protein beta/alpha R.NLLSVAYK#.N                   | 261.64 | 109.05 | 2.40 | 0.42  |
| Q9CQV8_14338_MOUSE  | Ywhab   | 14-3-3 protein beta/alpha K.QTTVNSQQAQYQAEFISK#.K         | 4.73   | 1.85   | 2.56 | 0.39  |
| Q9CQV8_14338_MOUSE  | Ywhab   | 14-3-3 protein beta/alpha K.TAFDEIAEALDNLSEYSK#.D         | 9.52   | 5.48   | 1.74 | 0.58  |
| Q9CQV8_14338_MOUSE  | Ywhab   | 14-3-3 protein beta/alpha K.TAFDEIAEALDNLSEYSK#.D         | 4.80   | 2.17   | 2.21 | 0.45  |
| Q9CQV8_14338_MOUSE  | Ywhab   | 14-3-3 protein beta/alpha R.YDDM*AAAM*K#.A                | 39.52  | 16.78  | 2.36 | 0.42  |
| Q9CQV8_14338_MOUSE  | Ywhab   | 14-3-3 protein beta/alpha K.YLILNATQAESK#.V               | 9.99   | 3.89   | 2.57 | 0.39  |
| Q9CQV8_14338_MOUSE  | Ywhab   | 14-3-3 protein beta/alpha R.YLSEVASGENK#.Q                | 42.88  | 18.29  | 2.34 | 0.43  |
| Q9CQV8_14338_MOUSE  | Ywhab   | 14-3-3 protein beta/alpha K.DSTLIM*QLLR@.D                | 18.48  | 8.44   | 2.19 | 0.46  |
| Q9CQV8_14338_MOUSE  | Ywhab   | 14-3-3 protein beta/alpha R.NLLSVAYK#.N                   | 114.23 | 51.15  | 2.23 | 0.45  |
| Q9CQV8_14338_MOUSE  | Ywhab   | 14-3-3 protein beta/alpha R.YLSEVASGENK#.Q                | 8.49   | 13.06  | 0.65 | 1.54  |
| Q9CQV8_14338_MOUSE  | Ywhab   | 14-3-3 protein beta/alpha K.LAEQAEER@.Y                   | 14.21  | 7.64   | 1.86 | 0.54  |
| Q9CQV8_14338_MOUSE  | Ywhab   | 14-3-3 protein beta/alpha R.NLLSVAYK#.N                   | 25.16  | 11.41  | 2.20 | 0.45  |
| P62259_1433E_MOUSE  | Ywhae   | 14-3-3 protein epsilon O. K.AASDIAM*TELPPTHPIR@.L         | 34.56  | 17.74  | 1.95 | 0.51  |
| P62259_1433E_MOUSE  | Ywhae   | 14-3-3 protein epsilon O. K.AASDIAM*TELPPTHPIR@.L         | 10.12  | 451.93 | 0.02 | 44.66 |
| P62259_1433E_MOUSE  | Ywhae   | 14-3-3 protein epsilon O. K.EAAENALVLYEK#.T               | 216.87 | 88.83  | 2.44 | 0.41  |
| P62259_1433E_MOUSE  | Ywhae   | 14-3-3 protein epsilon O. K.EALQDVEDENQ.-                 | 33.84  | 33.84  | 1.00 | 1.00  |
| P62259_1433E_MOUSE  | Ywhae   | 14-3-3 protein epsilon O. K.HLIAPAATGESK#.V               | 37.87  | 19.39  | 1.95 | 0.51  |
| P62259_1433E_MOUSE  | Ywhae   | 14-3-3 protein epsilon O. R.IISSIEQK#.E                   | 127.93 | 45.43  | 2.82 | 0.36  |
| P62259_1433E_MOUSE  | Ywhae   | 14-3-3 protein epsilon O. R.IISSIEQK#EENK#.G              | 7.51   | 3.50   | 2.14 | 0.47  |
| P62259_1433E_MOUSE  | Ywhae   | 14-3-3 protein epsilon O. R.QM*VETELK#.L                  | 33.37  | 18.41  | 1.81 | 0.55  |
| P62259_1433E_MOUSE  | Ywhae   | 14-3-3 protein epsilon O. K.VAGM*DVELTVEER@.N             | 123.13 | 40.30  | 3.06 | 0.33  |
| P62259_1433E_MOUSE  | Ywhae   | 14-3-3 protein epsilon O. K.VAGMDVLTVEER@.N               | 8.16   | 3.53   | 2.31 | 0.43  |
| P62259_1433E_MOUSE  | Ywhae   | 14-3-3 protein epsilon O. K.VAGM*DVELTVEER.N              | 2.97   | 5.85   | 0.51 | 1.97  |
| P61982_1433G_MOUSE  | Ywhag   | 14-3-3 protein gamma O. R.ATVSESEK#.A                     | 45.69  | 19.75  | 2.31 | 0.43  |
| P61982_1433G_MOUSE  | Ywhag   | 14-3-3 protein gamma O. R.DNLLTWTSDDQDDGGEGGN.-           | 11.79  | 11.79  | 1.00 | 1.00  |
| P61982_1433G_MOUSE  | Ywhag   | 14-3-3 protein gamma O. K.NVTELNEPLSNEER@.N               | 159.17 | 69.61  | 2.29 | 0.44  |
| P61982_1433G_MOUSE  | Ywhag   | 14-3-3 protein gamma O. K.R@ATVSESEK#.A                   | 14.64  | 4.84   | 3.02 | 0.33  |
| P61982_1433G_MOUSE  | Ywhag   | 14-3-3 protein gamma O. K.TAFDEIAEALDNLSEYSK#.D           | 27.82  | 14.59  | 1.91 | 0.52  |
| P61982_1433G_MOUSE  | Ywhag   | 14-3-3 protein gamma O. R.YLAEVATGEK#.R                   | 99.96  | 33.14  | 3.02 | 0.33  |
| P61982_1433G_MOUSE  | Ywhag   | 14-3-3 protein gamma O. R.YLAEVATGEK#R@.A                 | 28.77  | 9.96   | 2.89 | 0.35  |
| P61982_1433G_MOUSE  | Ywhag   | 14-3-3 protein gamma O. K.NVTELNEPLSNEER@.N               | 8.97   | 6.21   | 1.45 | 0.69  |
| P61982_1433G_MOUSE  | Ywhag   | 14-3-3 protein gamma O. R.YLAEVATGEK#.R                   | 18.21  | 4.94   | 3.69 | 0.27  |
| P61982_1433G_MOUSE  | Ywhag   | 14-3-3 protein gamma O. K.NVTELNEPLSNEER@.N               | 7.73   | 3.25   | 2.38 | 0.42  |
| P68510_1433F_MOUSE  | Ywhah   | 14-3-3 protein eta OS=M. K.M*KHGYYR@.Y                    | 18.56  | 8.74   | 2.12 | 0.47  |
| P68510_1433F_MOUSE  | Ywhah   | 14-3-3 protein eta OS=M. K.NSVVEASEAAYK#.E                | 41.41  | 32.07  | 1.29 | 0.77  |
| P68510_1433F_MOUSE  | Ywhah   | 14-3-3 protein eta OS=M. K.AVTELNEPLSNEER@.N              | 21.24  | 9.98   | 2.13 | 0.47  |
| P68510_1433F_MOUSE  | Ywhah   | 14-3-3 protein eta OS=M. K.AVTELNEPLSNEER@NLLSVAYK#.N     | 14.07  | 9.53   | 1.48 | 0.68  |
| P68510_1433F_MOUSE  | Ywhah   | 14-3-3 protein eta OS=M. K.NSVVEASEAAYK#.E                | 13.03  | 8.52   | 1.53 | 0.65  |
| P68254_1433T_MOUSE  | Ywhaq   | 14-3-3 protein theta OS= K.AVTEGQAEALSNEER@.N             | 37.82  | 19.82  | 1.91 | 0.52  |
| P68254_1433T_MOUSE  | Ywhaq   | 14-3-3 protein theta OS= K.AVTEGQAEALSNEER@.N             | 16.05  | 14.95  | 1.07 | 0.93  |
| P68254_1433T_MOUSE  | Ywhaq   | 14-3-3 protein theta OS= K.AVTEGQAEALSNEER@.N             | 6.80   | 3.04   | 2.24 | 0.45  |
| P68254_1433T_MOUSE  | Ywhaq   | 14-3-3 protein theta OS= K.AVTEGQAEALSNEER@.N             | 9.59   | 3.78   | 2.54 | 0.39  |
| P63101_1433Z_MOUSE  | Ywhaz   | 14-3-3 protein zeta/delta R.DNLLTWTSDDQDDEAEAGEGGEN.-     | 3.90   | 3.90   | 1.00 | 1.00  |
| P63101_1433Z_MOUSE  | Ywhaz   | 14-3-3 protein zeta/delta K.FLIPNASQPESK#.V               | 136.38 | 57.29  | 2.38 | 0.42  |
| P63101_1433Z_MOUSE  | Ywhaz   | 14-3-3 protein zeta/delta K.GIVDOSQQAQYQAEFISK#.K         | 100.41 | 42.66  | 2.35 | 0.42  |
| P63101_1433Z_MOUSE  | Ywhaz   | 14-3-3 protein zeta/delta K.SVTEGQAEALSNEER@.N            | 254.42 | 93.73  | 2.71 | 0.37  |
| P63101_1433Z_MOUSE  | Ywhaz   | 14-3-3 protein zeta/delta K.TAFDEIAEALDNLSEYSK#.D         | 66.76  | 29.33  | 2.34 | 0.43  |
| P63101_1433Z_MOUSE  | Ywhaz   | 14-3-3 protein zeta/delta R.VVSSIEQK#.T                   | 186.55 | 68.35  | 2.44 | 0.41  |
| P63101_1433Z_MOUSE  | Ywhaz   | 14-3-3 protein zeta/delta R.YLAEVAAGDDK#K#.G              | 242.12 | 82.38  | 2.94 | 0.34  |
| P63101_1433Z_MOUSE  | Ywhaz   | 14-3-3 protein zeta/delta K.FLIPNASQPESK#.V               | 32.72  | 19.30  | 1.70 | 0.59  |
| P63101_1433Z_MOUSE  | Ywhaz   | 14-3-3 protein zeta/delta K.GIVDOSQQAQYQAEFISK#.K         | 9.12   | 3.86   | 2.37 | 0.42  |
| P63101_1433Z_MOUSE  | Ywhaz   | 14-3-3 protein zeta/delta K.SVTEGQAEALSNEER.N             | 41.80  | 54.62  | 0.77 | 1.31  |
| P63101_1433Z_MOUSE  | Ywhaz   | 14-3-3 protein zeta/delta R.VVSSIEQK#.T                   | 52.63  | 47.29  | 1.11 | 0.90  |
| P63101_1433Z_MOUSE  | Ywhaz   | 14-3-3 protein zeta/delta K.GIVDOSQQAQYQAEFISK#.K         | 9.08   | 5.15   | 1.76 | 0.57  |
| P63101_1433Z_MOUSE  | Ywhaz   | 14-3-3 protein zeta/delta K.SVTEGQAEALSNEER.N             | 15.15  | 10.33  | 1.47 | 0.68  |
| P63101_1433Z_MOUSE  | Ywhaz   | 14-3-3 protein zeta/delta R.VVSSIEQK#.T                   | 13.48  | 10.12  | 1.33 | 0.75  |
| P63101_1433Z_MOUSE  | Ywhaz   | 14-3-3 protein zeta/delta K.SVTEGQAEALSNEER@.N            | 13.22  | 6.44   | 2.05 | 0.49  |
| Q00899_TYI1_MOUSE   | Yy1     | Transcriptional repressor K.SYLGGAAGAGGGGADPGNK#.K        | 9.53   | 2.63   | 3.62 | 0.28  |
| Q00899_TYI1_MOUSE   | Yy1     | Transcriptional repressor K.DIDHETVVEQIENGSPDYSEYM*TGK#.K | 3.63   | 1.94   | 1.87 | 0.53  |
| Q00899_TYI1_MOUSE   | Yy1     | Transcriptional repressor R.FSLDFNLR@.T                   | 19.15  | 9.69   | 1.98 | 0.51  |
| Q8K0L9_ZBT20_MOUSE  | Zbtb20  | Zinc finger and BTB domain K.LLLGYSDEIPIPSVSVSQVK#.L      | 7.43   | 3.93   | 1.89 | 0.53  |
| G3X9A3_G3X9A3_MOUSE | Zbtb21  | Protein Zbtb21 OS=Mus1 R.VTVGGDAAAAAATAAATR@.D            | 4.91   | 10.76  | 0.46 | 2.19  |
| Q8BN78_KAISO_MOUSE  | Zbtb33  | Transcriptional regulator K.FIAELVPLSQVK#.S               | 10.10  | 3.22   | 3.13 | 0.32  |
| Q6NZF1_ZC11A_MOUSE  | Zc3h11a | Zinc finger CCCH domain K.QGEGSSGVSVLQQPQNPPEK#ENVR@.T    | 2.74   | 2.91   | 0.94 | 1.06  |
| Q6NZF1_ZC11A_MOUSE  | Zc3h11a | Zinc finger CCCH domain K.TLEILLER@.A                     | 7.57   | 6.24   | 1.21 | 0.83  |
| Q6NZF1_ZC11A_MOUSE  | Zc3h11a | Zinc finger CCCH domain K.AEPEGADDSPSGTK#.S               | 2.66   | 1.31   | 2.04 | 0.49  |

|                     |         |                                                                |         |       |        |      |
|---------------------|---------|----------------------------------------------------------------|---------|-------|--------|------|
| Q6NZF1_ZC11A_MOUSE  | Zc3h11a | Zinc finger CCCH domain K.DSSVLSQAQAEPLPEGSGPSSSQATK#PR@.R     | 7.70    | 2.01  | 2.84   | 0.35 |
| Q6NZF1_ZC11A_MOUSE  | Zc3h11a | Zinc finger CCCH domain K.GEVETSIGDLSLVK#.C                    | 18.34   | 6.33  | 2.90   | 0.35 |
| Q6NZF1_ZC11A_MOUSE  | Zc3h11a | Zinc finger CCCH domain K.KHVEPSTINDIK#.A                      | 7.98    | 2.18  | 3.66   | 0.27 |
| Q6NZF1_ZC11A_MOUSE  | Zc3h11a | Zinc finger CCCH domain K.KHVEPSTINDIK#AK#.K                   | 27.21   | 18.01 | 1.51   | 0.66 |
| Q6NZF1_ZC11A_MOUSE  | Zc3h11a | Zinc finger CCCH domain K.LK#HAEPGADDSFSGTK#.S                 | 31.13   | 11.58 | 2.69   | 0.37 |
| Q6NZF1_ZC11A_MOUSE  | Zc3h11a | Zinc finger CCCH domain K.LSVQNSPPQLR.S                        | 52.35   | 20.07 | 2.61   | 0.38 |
| Q6NZF1_ZC11A_MOUSE  | Zc3h11a | Zinc finger CCCH domain K.M#EANETSDETSIDPTK#.L                 | 14.74   | 5.86  | 2.51   | 0.40 |
| Q6NZF1_ZC11A_MOUSE  | Zc3h11a | Zinc finger CCCH domain K.QGEGSSGVSSVLQQPQNPNGPEK#ENVR@.T      | 13.65   | 5.48  | 2.49   | 0.40 |
| Q6NZF1_ZC11A_MOUSE  | Zc3h11a | Zinc finger CCCH domain K.TFSEVLAEK#.K                         | 21.94   | 8.26  | 2.66   | 0.38 |
| Q6NZF1_ZC11A_MOUSE  | Zc3h11a | Zinc finger CCCH domain K.TLEEILLER@.A                         | 63.93   | 28.45 | 2.25   | 0.45 |
| Q6NZF1_ZC11A_MOUSE  | Zc3h11a | Zinc finger CCCH domain K.TSQLTVQSK#.L                         | 19.83   | 10.32 | 1.92   | 0.52 |
| Q6NZF1_ZC11A_MOUSE  | Zc3h11a | Zinc finger CCCH domain K.TVLPVTPSEQEEVK#.T                    | 17.87   | 10.30 | 1.74   | 0.58 |
| Q6NZF1_ZC11A_MOUSE  | Zc3h11a | Zinc finger CCCH domain R.VAGK#PVLTVASVGR@.H                   | 52.26   | 16.55 | 3.16   | 0.32 |
| Q6NZF1_ZC11A_MOUSE  | Zc3h11a | Zinc finger CCCH domain R.YVDVGLFPPSK#.T                       | 15.62   | 8.75  | 1.79   | 0.56 |
| Q6NZF1_ZC11A_MOUSE  | Zc3h11a | Zinc finger CCCH domain K.LSVQNSPPQLR@.S                       | 5.92    | 2.31  | 2.56   | 0.39 |
| Q6NZF1_ZC11A_MOUSE  | Zc3h11a | Zinc finger CCCH domain K.TLEEILLER@.A                         | 10.10   | 4.70  | 2.15   | 0.46 |
| Q6NZF1_ZC11A_MOUSE  | Zc3h11a | Zinc finger CCCH domain K.TSQLTVQSK#.L                         | 3.86    | 6.68  | 0.58   | 1.73 |
| Q6NZF1_ZC11A_MOUSE  | Zc3h11a | Zinc finger CCCH domain K.TVLPVTPSEQEEVK#.T                    | 4.44    | 5.00  | 0.89   | 1.12 |
| E9Q784_E9Q784_MOUSE | Zc3h13  | Protein Zc3h13 OS=Mus : K.DADSLFHEELGALNM#AALLR@.K             | 14.81   | 2.81  | 5.28   | 2.19 |
| E9Q784_E9Q784_MOUSE | Zc3h13  | Protein Zc3h13 OS=Mus : K.FTPGAVLLR@.V                         | 15.48   | 4.20  | 3.69   | 0.27 |
| Q8BJ05_ZC3HE_MOUSE  | Zc3h14  | Zinc finger CCCH domain K.AISEAQESVTK#.T                       | 31.42   | 13.59 | 2.31   | 0.43 |
| Q8BJ05_ZC3HE_MOUSE  | Zc3h14  | Zinc finger CCCH domain R.FSHDGEEEEEEDYGR@.I                   | 17.51   | 7.30  | 2.40   | 0.42 |
| Q8BJ05_ZC3HE_MOUSE  | Zc3h14  | Zinc finger CCCH domain K.LSEIIVVTPNQDSGM*#.K.T                | 8.70    | 2.61  | 3.33   | 0.30 |
| Q8BJ05_ZC3HE_MOUSE  | Zc3h14  | Zinc finger CCCH domain K.M#SIEDENFR@.K                        | 6.94    | 2.08  | 3.34   | 0.30 |
| Q8BJ05_ZC3HE_MOUSE  | Zc3h14  | Zinc finger CCCH domain K.QLDVQSSQVSEAGR@.L                    | 13.21   | 3.51  | 3.76   | 0.27 |
| Q8BJ05_ZC3HE_MOUSE  | Zc3h14  | Zinc finger CCCH domain K.AISEAQESVTK#.T                       | 88.07   | 33.82 | 2.60   | 0.38 |
| Q8BJ05_ZC3HE_MOUSE  | Zc3h14  | Zinc finger CCCH domain R.FSHDGEEEEEEDYGR@.I                   | 24.44   | 9.00  | 2.71   | 0.37 |
| Q8BJ05_ZC3HE_MOUSE  | Zc3h14  | Zinc finger CCCH domain R.GLLHPQQLHLLSR@.Q                     | 25.36   | 7.50  | 3.38   | 0.30 |
| Q8BJ05_ZC3HE_MOUSE  | Zc3h14  | Zinc finger CCCH domain R.HSYVDGASTR@.L                        | 20.73   | 2.73  | 3.92   | 0.25 |
| Q8BJ05_ZC3HE_MOUSE  | Zc3h14  | Zinc finger CCCH domain K.LSEIIVVTPNQDSGM*#.K.T                | 10.71   | 7.48  | 2.77   | 0.36 |
| Q8BJ05_ZC3HE_MOUSE  | Zc3h14  | Zinc finger CCCH domain K.M#SIEDENFR@.K                        | 12.01   | 3.12  | 3.85   | 0.26 |
| Q8BJ05_ZC3HE_MOUSE  | Zc3h14  | Zinc finger CCCH domain K.QLDVQSSQVSEAGR@.L                    | 26.77   | 9.60  | 2.79   | 0.36 |
| Q8BJ05_ZC3HE_MOUSE  | Zc3h14  | Zinc finger CCCH domain R.SVTTEPSLX#.K                         | 39.88   | 20.66 | 1.93   | 0.52 |
| Q8BJ05_ZC3HE_MOUSE  | Zc3h14  | Zinc finger CCCH domain R.SQOELIAEM#VQSQNR@.A                  | 13.68   | 5.09  | 2.69   | 0.37 |
| Q8BJ05_ZC3HE_MOUSE  | Zc3h14  | Zinc finger CCCH domain K.TTNSAVPQK#.Q                         | 28.15   | 15.75 | 1.79   | 0.56 |
| Q8BJ05_ZC3HE_MOUSE  | Zc3h14  | Zinc finger CCCH domain R.VLSGHLM#QTR@.D                       | 5.80    | 3.24  | 1.79   | 0.56 |
| Q8BJ05_ZC3HE_MOUSE  | Zc3h14  | Zinc finger CCCH domain K.AISEAQESVTK#.T                       | 7.89    | 3.12  | 2.53   | 0.40 |
| Q3TIV5_ZC3HF_MOUSE  | Zc3h15  | Zinc finger CCCH domain R.DVEETGITVASVER@.F                    | 18.14   | 9.05  | 2.00   | 0.50 |
| Q3TIV5_ZC3HF_MOUSE  | Zc3h15  | Zinc finger CCCH domain K.ELQELNELFKPVVAAQK#.I                 | 10.54   | 6.77  | 1.56   | 0.64 |
| Q3TIV5_ZC3HF_MOUSE  | Zc3h15  | Zinc finger CCCH domain R.EVFEFR@PELVNDDEEADTR@.Y              | 14.55   | 5.33  | 2.73   | 0.37 |
| Q3TIV5_ZC3HF_MOUSE  | Zc3h15  | Zinc finger CCCH domain R.DVEETGITVASVER@.F                    | 22.05   | 9.76  | 2.26   | 0.44 |
| Q3TIV5_ZC3HF_MOUSE  | Zc3h15  | Zinc finger CCCH domain K.ELQELNELFKPVVAAQK#.I                 | 20.94   | 12.45 | 2.00   | 0.50 |
| Q3TIV5_ZC3HF_MOUSE  | Zc3h15  | Zinc finger CCCH domain R.EVFEFR@PELVNDDEEADTR@.Y              | 24.43   | 8.95  | 2.28   | 0.44 |
| Q3TIV5_ZC3HF_MOUSE  | Zc3h15  | Zinc finger CCCH domain K.ITLESFLAWK#.K                        | 9.51    | 5.75  | 1.65   | 0.61 |
| Q3TIV5_ZC3HF_MOUSE  | Zc3h15  | Zinc finger CCCH domain R.SALGNPVTX#.I                         | 16.10   | 9.03  | 1.78   | 0.56 |
| Q0P678_ZCH18_MOUSE  | Zc3h18  | Zinc finger CCCH domain K.AGAEKEEGHGGAPGEEGK#PDVQSVGEQPEEAK#.E | 25.92   | 8.79  | 2.95   | 0.34 |
| Q0P678_ZCH18_MOUSE  | Zc3h18  | Zinc finger CCCH domain R.ASDLEENENATR@.V                      | 105.43  | 23.28 | 4.53   | 0.22 |
| Q0P678_ZCH18_MOUSE  | Zc3h18  | Zinc finger CCCH domain K.ASQQAAPQAVPQPQGGSFVAHK#.E            | 126.84  | 57.66 | 2.20   | 0.45 |
| Q0P678_ZCH18_MOUSE  | Zc3h18  | Zinc finger CCCH domain K.AVEDAIAR@.K                          | 104.34  | 23.81 | 4.38   | 0.23 |
| Q0P678_ZCH18_MOUSE  | Zc3h18  | Zinc finger CCCH domain R.DPSAQPK#.S                           | 30.02   | 17.45 | 1.72   | 0.58 |
| Q0P678_ZCH18_MOUSE  | Zc3h18  | Zinc finger CCCH domain R.DTTLEPYADPYDYEIER@.F                 | 57.12   | 25.26 | 2.26   | 0.44 |
| Q0P678_ZCH18_MOUSE  | Zc3h18  | Zinc finger CCCH domain R.ELDEHELDYEEVPEEPAPAAQEEAEK#.A        | 17.99   | 6.90  | 2.61   | 0.38 |
| Q0P678_ZCH18_MOUSE  | Zc3h18  | Zinc finger CCCH domain R.ESGSEQDLGAGGER@.A                    | 62.33   | 12.14 | 5.13   | 0.19 |
| Q0P678_ZCH18_MOUSE  | Zc3h18  | Zinc finger CCCH domain K.ESTSVGPQVK#.R                        | 89.14   | 46.26 | 1.93   | 0.52 |
| Q0P678_ZCH18_MOUSE  | Zc3h18  | Zinc finger CCCH domain R.GGQYENFR@.V                          | 1628.45 | 14.02 | 116.19 | 0.01 |
| Q0P678_ZCH18_MOUSE  | Zc3h18  | Zinc finger CCCH domain K.GNYSLITX#.A                          | 59.39   | 27.45 | 2.16   | 0.46 |
| Q0P678_ZCH18_MOUSE  | Zc3h18  | Zinc finger CCCH domain K.KPAPPAPPQATK.T                       | 30.30   | 15.58 | 1.95   | 0.51 |
| Q0P678_ZCH18_MOUSE  | Zc3h18  | Zinc finger CCCH domain K.LGVSVSPR@.A                          | 27.30   | 15.62 | 1.75   | 0.57 |
| Q0P678_ZCH18_MOUSE  | Zc3h18  | Zinc finger CCCH domain R.TKGEAPPVPGK#.A                       | 34.63   | 18.95 | 1.83   | 0.55 |
| Q0P678_ZCH18_MOUSE  | Zc3h18  | Zinc finger CCCH domain R.TLSGSGSGSSYSSGSSR@.S                 | 10.91   | 2.62  | 4.17   | 0.24 |
| Q0P678_ZCH18_MOUSE  | Zc3h18  | Zinc finger CCCH domain R.VQSQEETR@SDEEDR@ASEPK#.S             | 24.35   | 6.44  | 3.78   | 0.26 |
| Q0P678_ZCH18_MOUSE  | Zc3h18  | Zinc finger CCCH domain R.VQYTEAPYHNYR@.E                      | 110.88  | 48.89 | 2.27   | 0.44 |
| Q0P678_ZCH18_MOUSE  | Zc3h18  | Zinc finger CCCH domain R.VQYTEAPYHNYR@.E                      | 18.98   | 7.99  | 2.38   | 0.42 |
| Q0P678_ZCH18_MOUSE  | Zc3h18  | Zinc finger CCCH domain K.AGAEKEEGHGGAPGEEGK#PDVQSVGEQPEEAK#.E | 30.88   | 12.39 | 2.49   | 0.40 |
| Q0P678_ZCH18_MOUSE  | Zc3h18  | Zinc finger CCCH domain K.APAAPADR@.K                          | 71.41   | 19.48 | 3.66   | 0.27 |
| Q0P678_ZCH18_MOUSE  | Zc3h18  | Zinc finger CCCH domain R.ASDLEENENATR@.V                      | 55.25   | 12.95 | 4.27   | 0.23 |
| Q0P678_ZCH18_MOUSE  | Zc3h18  | Zinc finger CCCH domain K.ASQQAAPQAVPQPQGGSFVAHK#.E            | 70.26   | 31.86 | 2.21   | 0.45 |
| Q0P678_ZCH18_MOUSE  | Zc3h18  | Zinc finger CCCH domain K.AVEDAIAR@.K                          | 62.29   | 21.45 | 2.90   | 0.34 |
| Q0P678_ZCH18_MOUSE  | Zc3h18  | Zinc finger CCCH domain R.DTTLEPYADPYDYEIER@.F                 | 32.43   | 12.21 | 2.66   | 0.38 |
| Q0P678_ZCH18_MOUSE  | Zc3h18  | Zinc finger CCCH domain R.ELDEHELDYEEVPEEPAPAAQEEAEK#.A        | 23.94   | 9.46  | 2.53   | 0.39 |
| Q0P678_ZCH18_MOUSE  | Zc3h18  | Zinc finger CCCH domain K.ESTSVGPQVK#.R                        | 86.00   | 28.54 | 3.01   | 0.33 |
| Q0P678_ZCH18_MOUSE  | Zc3h18  | Zinc finger CCCH domain R.GGQYENFR@.V                          | 52.05   | 21.06 | 2.47   | 0.40 |
| Q0P678_ZCH18_MOUSE  | Zc3h18  | Zinc finger CCCH domain K.GNYSLITX#.A                          | 19.36   | 12.24 | 1.58   | 0.63 |
| Q0P678_ZCH18_MOUSE  | Zc3h18  | Zinc finger CCCH domain K.KPAPPAPPQATK#.T                      | 18.40   | 10.76 | 1.71   | 0.59 |
| Q0P678_ZCH18_MOUSE  | Zc3h18  | Zinc finger CCCH domain R.TKHGEPAPPVPGK#.A                     | 17.68   | 7.81  | 2.26   | 0.44 |
| Q0P678_ZCH18_MOUSE  | Zc3h18  | Zinc finger CCCH domain R.TLSGSGSGSSYSSGSSR@.S                 | 6.55    | 1.52  | 4.36   | 0.23 |
| E9Q8K8_E9Q8K8_MOUSE | Zc3h4   | Zinc finger CCCH domain R.GR@EDGELEELEDGAEVQDPPGGQER@.S        | 7.46    | 4.04  | 1.85   | 0.54 |
| E9Q8K8_E9Q8K8_MOUSE | Zc3h4   | Zinc finger CCCH domain R.HAETSGGSGPDSGSDPR@.L                 | 17.06   | 6.71  | 2.54   | 0.39 |
| E9Q8K8_E9Q8K8_MOUSE | Zc3h4   | Zinc finger CCCH domain K.IPSLFEIVVR@PTGQLAEK#.L               | 16.48   | 10.73 | 1.54   | 0.65 |
| E9Q8K8_E9Q8K8_MOUSE | Zc3h4   | Zinc finger CCCH domain K.TAEPASDTAQPK#.G                      | 9.41    | 3.13  | 3.01   | 0.33 |
| E9Q8K8_E9Q8K8_MOUSE | Zc3h4   | Zinc finger CCCH domain R.VLAAGGLGQSSSGQSSVLSGISLYDPR@.T       | 9.88    | 4.59  | 2.15   | 0.46 |
| E9Q8K8_E9Q8K8_MOUSE | Zc3h4   | Zinc finger CCCH domain K.AEGLHSSPAGPSSSK#.G                   | 94.66   | 30.73 | 3.08   | 0.32 |
| E9Q8K8_E9Q8K8_MOUSE | Zc3h4   | Zinc finger CCCH domain R.GR@EDGELEELEDGAEVQDPPGGQER@.S        | 11.94   | 3.84  | 3.11   | 0.32 |
| E9Q8K8_E9Q8K8_MOUSE | Zc3h4   | Zinc finger CCCH domain R.HAETSGGSGPDSGSDPR@.L                 | 52.65   | 17.52 | 3.00   | 0.33 |
| E9Q8K8_E9Q8K8_MOUSE | Zc3h4   | Zinc finger CCCH domain R.KHSALEQPTGK#.A                       | 7.26    | 2.34  | 3.10   | 0.32 |
| E9Q8K8_E9Q8K8_MOUSE | Zc3h4   | Zinc finger CCCH domain R.LQK#PADPVAASR@.A                     | 67.81   | 15.71 | 4.32   | 0.23 |
| E9Q8K8_E9Q8K8_MOUSE | Zc3h4   | Zinc finger CCCH domain K.QDVPPVPAALOSLPALDPR@.L               | 7.28    | 3.18  | 2.29   | 0.44 |
| E9Q8K8_E9Q8K8_MOUSE | Zc3h4   | Zinc finger CCCH domain R.QQTSSR@PQASVGEPSGLGDRP@.L            | 33.38   | 7.96  | 4.19   | 0.24 |
| E9Q8K8_E9Q8K8_MOUSE | Zc3h4   | Zinc finger CCCH domain R.QRPGSTDPSTSGSLPDELLSR.I              | 37.65   | 7.02  | 5.37   | 0.19 |
| E9Q8K8_E9Q8K8_MOUSE | Zc3h4   | Zinc finger CCCH domain K.TAEPASDTAQPK#.G                      | 45.66   | 14.61 | 3.12   | 0.32 |
| E9Q8K8_E9Q8K8_MOUSE | Zc3h4   | Zinc finger CCCH domain K.TGTGSPFAGNSPAR@.E                    | 10.11   | 2.72  | 3.72   | 0.27 |
| E9Q8K8_E9Q8K8_MOUSE | Zc3h4   | Zinc finger CCCH domain R.VLAAGGLGQSSSGQSSVLSGISLYDPR@.T       | 12.12   | 1.91  | 3.66   | 0.27 |
| D6RI42_D6RI42_MOUSE | Zc3h7a  | Protein Zc3h7a OS=Mus : K.SEEIILPTIEIK#.L                      | 6.24    | 2.34  | 2.67   | 0.37 |
| F8VPP8_F8VPP8_MOUSE | Zc3h7b  | Protein Zc3h7b OS=Mus : R.DLLFDPLGQVK#.R                       | 21.26   | 8.93  | 2.38   | 0.42 |
| F8VPP8_F8VPP8_MOUSE | Zc3h7b  | Protein Zc3h7b OS=Mus : R.DLLFDPLGQVK#.R                       | 29.67   | 6.88  | 4.31   | 0.23 |
| F8VPP8_F8VPP8_MOUSE | Zc3h7b  | Protein Zc3h7b OS=Mus : K.GLQFIQSTPLK#QEEYAFLLK#.L             | 29.67   | 5.07  | 3.34   | 0.30 |
| F8VPP8_F8VPP8_MOUSE | Zc3h7b  | Protein Zc3h7b OS=Mus : R.LGALDSFGAR@.G                        | 25.23   | 4.87  | 5.18   | 0.19 |
| F8VPP8_F8VPP8_MOUSE | Zc3h7b  | Protein Zc3h7b OS=Mus : K.LVQNLFAGENDLFR@.E                    | 19.88   | 4.75  | 4.19   | 0.24 |
| F8VPP8_F8VPP8_MOUSE | Zc3h7b  | Protein Zc3h7b OS=Mus : K.VFTSDSASGWAYR@.F                     | 8.61    | 2.20  | 3.91   | 0.26 |
| Q3UPF5_ZCCHV_MOUSE  | Zc3hav1 | Zinc finger CCCH-type an' R.ASQFLEDGDPDGLFPR@.N                | 22.40   | 13.46 | 1.66   | 0.60 |
| Q3UPF5_ZCCHV_MOUSE  | Zc3hav1 | Zinc finger CCCH-type an' R.FVLLETDAQITR@.S                    | 27.62   | 13.70 | 2.02   | 0.50 |
| Q3UPF5_ZCCHV_MOUSE  | Zc3hav1 | Zinc finger CCCH-type an' R.TSAAGFLVAQQR@.N                    | 26.55   | 23.48 | 1.13   | 0.88 |
| Q3UPF5_ZCCHV_MOUSE  | Zc3hav1 | Zinc finger CCCH-type an' K.YSHVDLSEQNFQVLK#.N                 | 36.42   | 16.61 | 2.19   | 0.46 |







|                    |      |                            |                                             |       |         |      |         |
|--------------------|------|----------------------------|---------------------------------------------|-------|---------|------|---------|
| Q6KAQ7_ZZZ3_MOUSE  | Zzz3 | ZZ-type zinc finger-conta  | R.SQAVQDLESLGK#.H                           | 25.49 | 6.84    | 3.72 | 0.27    |
| Q6KAQ7_ZZZ3_MOUSE  | Zzz3 | ZZ-type zinc finger-conta  | R.TPNLYYSR@.K                               | 14.47 | 4.40    | 3.29 | 0.30    |
| Q6KAQ7_ZZZ3_MOUSE  | Zzz3 | ZZ-type zinc finger-conta  | R.VVQLPEIM*WDOYTNLSLGNFER@.E                | 4.10  | 3.88    | 1.06 | 0.95    |
| Q8BZR9_CQ085_MOUSE |      | Uncharacterized protein    | R.ASGAEEDSSELQR.A                           | 5.51  | 3.22    | 1.71 | 0.58    |
| Q9CQE8_CN166_MOUSE |      | UPF0568 protein C14orf     | K.AGVNM*ALANLQIQR@.H                        | 30.65 | 13.81   | 2.22 | 0.45    |
| Q9CQE8_CN166_MOUSE |      | UPF0568 protein C14orf     | R.HDDVLM*LM#.A                              | 28.18 | 19.02   | 1.48 | 0.67    |
| Q9CQE8_CN166_MOUSE |      | UPF0568 protein C14orf     | K.HILGFDTGDAVLNEAAQLR@.L                    | 76.59 | 28.37   | 2.70 | 0.37    |
| Q9CQE8_CN166_MOUSE |      | UPF0568 protein C14orf     | K.INEAIVAVQAIADPK#.T                        | 23.95 | 11.97   | 2.00 | 0.50    |
| Q9CQE8_CN166_MOUSE |      | UPF0568 protein C14orf     | R.LEYGDNAEK#.Y                              | 28.62 | 15.08   | 1.90 | 0.53    |
| Q9CQE8_CN166_MOUSE |      | UPF0568 protein C14orf     | K.NAEPLINDVNNPDFK#.A                        | 41.19 | 18.08   | 2.28 | 0.44    |
| Q9CQE8_CN166_MOUSE |      | UPF0568 protein C14orf     | R.NFIVWLEDQK#.I                             | 33.82 | 9.59    | 3.53 | 0.28    |
| IGKC_MOUSE         |      | Ig kappa chain C region    | O.K.DSTYSMSSTLTLTK.D                        | 2.97  | 19.71   | 0.15 | 6.64    |
| IGKC_MOUSE         |      | Ig kappa chain C region    | O.R.QNGVLNSWTDQDSK.D                        | 3.84  | 45.40   | 0.08 | 11.83   |
| IGKC_MOUSE         |      | Ig kappa chain C region    | O.K.WKIDGSR.Q                               | 2.61  | 77.65   | 0.03 | 29.79   |
| Q9CXL3_CG050_MOUSE |      | Uncharacterized protein    | R.EAGIAATQTAK#.V                            | 41.44 | 33.88   | 1.22 | 0.82    |
| Q9CXL3_CG050_MOUSE |      | Uncharacterized protein    | R.TSEAGPDKETASTLVQEAPELSPEER.R              | 22.41 | 18.16   | 1.23 | 0.81    |
| Q9CXL3_CG050_MOUSE |      | Uncharacterized protein    | K.VQTLPAK#PSAATLALLEYLQGWAK#.Q              | 25.37 | 19.71   | 1.29 | 0.78    |
| KV2A7_MOUSE        |      | Ig kappa chain V-II region | R.FSGSGSDFTLTK.I                            | 4.40  | 1673.63 | 0.00 | 379.95  |
| KV2A7_MOUSE        |      | Ig kappa chain V-II region | R.FSGVPDR.F                                 | 1.31  | 3700.41 | 0.00 | 2815.42 |
| Q8VDP2_CX056_MOUSE |      | UPF0428 protein Cxorf5     | K.FSSVTVTIDEEEEIEAR@.E                      | 5.57  | 3.96    | 1.41 | 0.71    |
| Q8VDP2_CX056_MOUSE |      | UPF0428 protein Cxorf5     | R.LQELAELEAK#.K                             | 13.84 | 7.19    | 1.92 | 0.52    |
| Q8VDP2_CX056_MOUSE |      | UPF0428 protein Cxorf5     | K.NAPVTFIVDGAVVK#.F                         | 24.32 | 16.98   | 1.43 | 0.70    |
| Q05AH6_CK084_MOUSE |      | Uncharacterized protein    | R.GLR@PLELPTVPIEQGNK#.K                     | 10.93 | 3.39    | 3.23 | 0.31    |
| Q8BGA7_CG026_MOUSE |      | Uncharacterized protein    | R.LGLLFDHMM*VPLVEINR@.L                     | 11.76 | 2.65    | 4.43 | 0.23    |
| Q9CY10_NJMU_MOUSE  |      | Protein Njmu-R1 OS=Mu      | R.SGGINAETPSGDDFSLVDNLNLPSEVEPELR@.S        | 3.81  | 2.13    | 1.79 | 0.56    |
| Q9CY10_NJMU_MOUSE  |      | Protein Njmu-R1 OS=Mu      | R.SVVAVLEEFMR@.E                            | 6.55  | 2.17    | 3.01 | 0.33    |
| Q80X32_CE024_MOUSE |      | UPF0461 protein C5orf2     | R.AADQFDLYSSQGNK.Y                          | 0.00  | 3.75    | 0.00 | #DIV/0! |
| Q80X32_CE024_MOUSE |      | UPF0461 protein C5orf2     | R.NIEIKDELK.K                               | 2.36  | 8.33    | 0.28 | 3.53    |
| Q9D937_CK098_MOUSE |      | Uncharacterized protein    | K.AAM*VEAPSK#.S                             | 17.41 | 4.21    | 4.14 | 0.24    |
| Q9D937_CK098_MOUSE |      | Uncharacterized protein    | K.APQDQVAM*EDLEDK#.S-                       | 16.40 | 4.61    | 3.56 | 0.28    |
| Q9D937_CK098_MOUSE |      | Uncharacterized protein    | K.IK#APQDQVAM*EDLEDK#.S-                    | 15.76 | 5.02    | 3.14 | 0.32    |
| Q9D937_CK098_MOUSE |      | Uncharacterized protein    | R.QVGAVIDEGLTTK#.H                          | 56.02 | 13.57   | 4.13 | 0.24    |
| Q9CQE8_CN166_MOUSE |      | UPF0568 protein C14orf     | K.AGVNM*ALANLQIQR.H                         | 47.13 | 19.56   | 2.41 | 0.41    |
| Q9CQE8_CN166_MOUSE |      | UPF0568 protein C14orf     | K.AGVNM*ALANLQIQR@.H                        | 12.89 | 3.77    | 3.42 | 0.29    |
| Q9CQE8_CN166_MOUSE |      | UPF0568 protein C14orf     | R.EGLPVALEK#.H                              | 82.48 | 38.27   | 2.16 | 0.46    |
| Q9CQE8_CN166_MOUSE |      | UPF0568 protein C14orf     | R.HDDVLM*LM#.A                              | 12.52 | 11.96   | 1.05 | 0.96    |
| Q9CQE8_CN166_MOUSE |      | UPF0568 protein C14orf     | K.HILGFDTGDAVLNEAAQLR@.L                    | 88.99 | 36.07   | 2.47 | 0.41    |
| Q9CQE8_CN166_MOUSE |      | UPF0568 protein C14orf     | K.INEAIVAVQAIADPK#.T                        | 38.24 | 23.87   | 1.60 | 0.62    |
| Q9CQE8_CN166_MOUSE |      | UPF0568 protein C14orf     | R.LEYGDNAEK#.Y                              | 30.73 | 15.83   | 1.94 | 0.52    |
| Q9CQE8_CN166_MOUSE |      | UPF0568 protein C14orf     | R.LLHIEELR@.E                               | 12.99 | 9.91    | 1.31 | 0.76    |
| Q9CQE8_CN166_MOUSE |      | UPF0568 protein C14orf     | K.NAEPLINDVNNPDFK#.A                        | 47.59 | 19.78   | 2.41 | 0.42    |
| Q9CQE8_CN166_MOUSE |      | UPF0568 protein C14orf     | R.NFIVWLEDQK#.I                             | 64.27 | 25.10   | 2.56 | 0.39    |
| IGKC_MOUSE         |      | Ig kappa chain C region    | O.R.QNGVLNSWTDQDSK.D                        | 1.84  | 73.32   | 0.03 | 39.85   |
| Q9CXL3_CG050_MOUSE |      | Uncharacterized protein    | R.EAGIAATQTAK#.V                            | 19.47 | 12.19   | 1.60 | 0.63    |
| Q9CXL3_CG050_MOUSE |      | Uncharacterized protein    | K.LEAEPEEDSGSGPK#.V                         | 20.83 | 14.67   | 1.42 | 0.70    |
| Q9CXL3_CG050_MOUSE |      | Uncharacterized protein    | R.LR@EAGIAATQTAK#.V                         | 3.18  | 2.08    | 1.53 | 0.65    |
| Q9CXL3_CG050_MOUSE |      | Uncharacterized protein    | R.TSEAGPDKETASTLVQEAPELSPEER@.R             | 12.67 | 10.53   | 1.20 | 0.83    |
| Q9CXL3_CG050_MOUSE |      | Uncharacterized protein    | K.VQTLPAK#PSAATLALLEYLQGWAK#.Q              | 9.92  | 11.68   | 0.85 | 1.18    |
| Q8VDP2_CX056_MOUSE |      | UPF0428 protein Cxorf5     | K.NAPVTFIVDGAVVK#.F                         | 4.86  | 2.91    | 1.67 | 0.60    |
| P10404_ENV1_MOUSE  |      | MLV-related proviral Env   | R.GLDLFLK#.E                                | 27.28 | 6.41    | 4.26 | 0.23    |
| P10404_ENV1_MOUSE  |      | MLV-related proviral Env   | R.ISVVQALVTTQYHQLK#.S                       | 11.41 | 4.11    | 2.78 | 0.36    |
| P10404_ENV1_MOUSE  |      | MLV-related proviral Env   | R.R@GLDLFLK#.E                              | 7.87  | 3.70    | 2.13 | 0.47    |
| P10404_ENV1_MOUSE  |      | MLV-related proviral Env   | R.SLTSSEVLQNR@.R                            | 12.88 | 3.44    | 3.74 | 0.27    |
| Q3TYS2_CQ062_MOUSE |      | Uncharacterized protein    | R.R@SDVEIAK#.L                              | 31.16 | 13.72   | 2.27 | 0.44    |
| Q8BZR9_CQ085_MOUSE |      | Uncharacterized protein    | R.ADISSTSNK#.N                              | 25.97 | 5.10    | 5.10 | 0.20    |
| Q8BZR9_CQ085_MOUSE |      | Uncharacterized protein    | K.AEAPAGPALGLSPSEVESGLER@.G                 | 10.92 | 5.51    | 1.98 | 0.50    |
| Q8BZR9_CQ085_MOUSE |      | Uncharacterized protein    | R.AEVNLAQR@.N                               | 25.04 | 5.74    | 4.36 | 0.23    |
| Q8BZR9_CQ085_MOUSE |      | Uncharacterized protein    | K.AGSFITGIDVTSK#.E                          | 35.98 | 8.91    | 4.04 | 0.25    |
| Q8BZR9_CQ085_MOUSE |      | Uncharacterized protein    | R.ALINM*SSLPAQDK#.M                         | 24.66 | 7.53    | 3.28 | 0.31    |
| Q8BZR9_CQ085_MOUSE |      | Uncharacterized protein    | R.ASGAEEDSSELQR@.A                          | 24.73 | 8.67    | 2.85 | 0.35    |
| Q8BZR9_CQ085_MOUSE |      | Uncharacterized protein    | K.M*TM*YADVEVLSK#.S                         | 16.59 | 4.61    | 3.60 | 0.28    |
| Q9CQE8_CN166_MOUSE |      | UPF0568 protein C14orf     | K.HILGFDTGDAVLNEAAQLR@.L                    | 7.92  | 3.34    | 2.37 | 0.42    |
| Q6PIU9_YJ005_MOUSE |      | Uncharacterized protein    | R.ASDDLGEPDVATAPFR@.S                       | 12.53 | 3.44    | 3.64 | 0.27    |
| Q6PIU9_YJ005_MOUSE |      | Uncharacterized protein    | K.GSVAPQDM*DEVDVFSR@.A                      | 9.85  | 3.06    | 3.21 | 0.31    |
| Q6PIU9_YJ005_MOUSE |      | Uncharacterized protein    | R.SSLVPADDVDFSK#.A                          | 13.11 | 3.31    | 3.96 | 0.25    |
| IGKC_MOUSE         |      | Ig kappa chain C region    | O.R.QNGVLNSWTDQDSK.D                        | 1.97  | 25.06   | 0.08 | 12.69   |
| Q8BGA7_CG026_MOUSE |      | Uncharacterized protein    | R.LADELNPLNASQEIELALDR@.L                   | 7.05  | 3.90    | 1.81 | 0.55    |
| Q8BGA7_CG026_MOUSE |      | Uncharacterized protein    | R.LGLLFDHMM*VPLVEINR@.L                     | 9.61  | 2.62    | 3.67 | 0.27    |
| Q8BGA7_CG026_MOUSE |      | Uncharacterized protein    | R.QIFSSLFSPQGNK#.A                          | 12.41 | 3.78    | 3.28 | 0.30    |
| SJGST_Schistosoma  |      | japonicum (Blood fluke)    | R.AEISM*LEGAVLDIR.Y                         | 2.54  | 4.50    | 0.56 | 1.77    |
| SJGST_Schistosoma  |      | japonicum (Blood fluke)    | R.LLLEYLEEK.Y                               | 3.63  | 17.16   | 0.21 | 4.73    |
| Q6PIU9_YJ005_MOUSE |      | Uncharacterized protein    | R.AIYTPAQAPYPM*TFAPQAGLPSHSVQVADHFDGNSPR@.G | 5.73  | 6.67    | 0.86 | 1.16    |
| Q6PIU9_YJ005_MOUSE |      | Uncharacterized protein    | R.ASDDLGEPDVATAPFR@.S                       | 12.48 | 3.69    | 3.39 | 0.30    |
| Q6PIU9_YJ005_MOUSE |      | Uncharacterized protein    | R.SSLVPADDVDFSK#.A                          | 18.31 | 5.30    | 3.46 | 0.29    |
| Q6PIU9_YJ005_MOUSE |      | Uncharacterized protein    | K.TQNTLASDSLAR@.E                           | 13.53 | 1.69    | 7.99 | 0.13    |
| IGKC_MOUSE         |      | Ig kappa chain C region    | O.K.DSTYSMSSTLTLTK.D                        | 6.80  | 131.93  | 0.05 | 19.41   |
| IGKC_MOUSE         |      | Ig kappa chain C region    | O.K.DSTYSMSSTLTLTK.D                        | 1.14  | 13.45   | 0.08 | 11.79   |
| KV2A7_MOUSE        |      | Ig kappa chain V-II region | R.FSGSGSDFTLTK.I                            | 4.29  | 802.43  | 0.01 | 187.17  |
| Q8BGA7_CG026_MOUSE |      | Uncharacterized protein    | R.LADELNPLNASQEIELALDR@.L                   | 12.19 | 4.24    | 2.87 | 0.35    |
| Q8BGA7_CG026_MOUSE |      | Uncharacterized protein    | R.LGLLFDHMM*VPLVEINR@.L                     | 9.85  | 3.19    | 3.09 | 0.32    |
| Q8BGA7_CG026_MOUSE |      | Uncharacterized protein    | R.QIFSSLFSPQGNK#.A                          | 16.84 | 4.29    | 3.92 | 0.26    |
| P84750_KVM5_MOUSE  |      | Ig kappa chain V region    | N.R.YSGVPDR.F                               | 1.39  | 30.64   | 0.05 | 22.12   |
