# Supplementary material
Source: PubMed Central journal article supplement (PMC11345869)
Supplement: NIHMS2014975-supplement-Supplementary_Table_3.pdf [file NIHMS2014975-supplement-Supplementary_Table_3.pdf]

Supplementary Table 3. Full list of proteins identified by mass spectrometry from SILAC experiment of wild type 3xMBT pulldown from WT (light) MEFs as compared to MLL1 KO (heavy) MEFs

| Protein Id         | Gene Symb     | Descriptor | Number of | 1.1     |         | Corrected_max_s | Median    | Corrected Median | Corrected | 1.2            |                | Sum       | Corrected | Corrected |                |
|--------------------|---------------|------------|-----------|---------|---------|-----------------|-----------|------------------|-----------|----------------|----------------|-----------|-----------|-----------|----------------|
|                    |               |            |           | 45331.0 | 41553.3 |                 |           |                  |           | max_sn_heavy_s | max_sn_light_s |           |           |           | max_sn_heavy_s |
|                    |               |            | edian     | edian   | n_light | Ratio_H_L       | Ratio_H_L | Ratio_H_L        | Ratio_H_L | um             | um             | light_sum | Ratio_H_L | Sum       |                |
| Q64487_PtPtpd      | Receptor ty   |            | 1         | 113.1   | 2.1     | 2.3             | 54.2      | 49.68            | 0.02      | 113.1          | 2.1            | 2.5       | 54.2      | 44.53     | 0.02           |
| Q9ER72_SV Cars     | Cysteine-tf   |            | 21        | 38.9    | 2.7     | 2.9             | 14.5      | 13.32            | 0.08      | 902.8          | 113.3          | 137.9     | 8.0       | 6.55      | 0.15           |
| Q9DC23_D Dnajc10   | Dnaj homo     |            | 1         | 118.2   | 9.6     | 10.4            | 12.4      | 11.33            | 0.09      | 118.2          | 9.6            | 11.6      | 12.4      | 10.15     | 0.10           |
| P24547_IN Impdh2   | Inosine-5'-r  |            | 1         | 31.5    | 2.9     | 3.1             | 11.0      | 10.10            | 0.10      | 31.5           | 2.9            | 3.5       | 11.0      | 9.05      | 0.11           |
| P54775_Pf Psmc4    | 26S proteas   |            | 11        | 65.3    | 6.2     | 6.8             | 10.6      | 9.68             | 0.10      | 1034.0         | 194.5          | 236.7     | 5.3       | 4.37      | 0.23           |
| P34022_R_Ranbp1    | Ran-specifc   |            | 1         | 14.7    | 1.4     | 1.5             | 10.5      | 9.58             | 0.10      | 14.7           | 1.4            | 1.7       | 10.5      | 8.59      | 0.12           |
| Q99N15_Q Hsd17b10  | 17beta-hyd    |            | 3         | 27.5    | 2.9     | 3.1             | 9.1       | 8.77             | 0.11      | 88.1           | 11.7           | 14.3      | 7.5       | 6.16      | 0.16           |
| Q63844_M Mapk3     | Mitogen-ac    |            | 1         | 10.5    | 1.2     | 1.3             | 9.6       | 8.31             | 0.12      | 10.5           | 1.2            | 1.4       | 9.1       | 7.45      | 0.13           |
| Q8B271_ST Stac3    | SH3 and cy:   |            | 1         | 48.5    | 5.5     | 6.0             | 8.7       | 8.02             | 0.12      | 48.5           | 5.5            | 6.7       | 8.7       | 7.19      | 0.14           |
| Q8CAY6_Th Acat2    | Acetyl-CoA    |            | 2         | 20.2    | 2.3     | 2.6             | 8.6       | 7.92             | 0.13      | 40.4           | 4.7            | 5.7       | 8.6       | 7.09      | 0.14           |
| Q7TQK4_EI Exosc3   | Exosome cc    |            | 1         | 10.4    | 1.2     | 1.3             | 8.4       | 7.74             | 0.13      | 10.4           | 1.2            | 1.5       | 8.4       | 6.94      | 0.14           |
| O35098_D Dpys14    | Dihydropyr    |            | 3         | 70.7    | 8.4     | 9.2             | 8.4       | 7.67             | 0.13      | 70.7           | 8.4            | 10.3      | 8.4       | 6.88      | 0.15           |
| Q8CR78_XF Xpot     | Exportin-T1   |            | 3         | 12.0    | 1.5     | 1.6             | 8.2       | 7.56             | 0.13      | 40.4           | 5.5            | 6.7       | 7.3       | 6.02      | 0.17           |
| Q8B1Y1_PS Psm5     | 26S proteas   |            | 5         | 18.2    | 2.3     | 2.5             | 8.1       | 7.39             | 0.14      | 93.8           | 14.1           | 17.1      | 6.7       | 5.47      | 0.18           |
| Q71LX4_TL Tln2     | Talin-2 OS-   |            | 1         | 10.6    | 1.4     | 1.5             | 7.7       | 7.06             | 0.14      | 10.6           | 1.4            | 1.7       | 7.7       | 6.33      | 0.16           |
| Q9D0R2_S Tars      | Threonine-    |            | 24        | 27.3    | 3.7     | 4.0             | 7.5       | 6.86             | 0.15      | 873.8          | 122.7          | 149.4     | 7.1       | 5.85      | 0.17           |
| O8553_D Dpys2      | Dihydropyr    |            | 18        | 36.5    | 4.9     | 5.3             | 7.5       | 6.85             | 0.15      | 751.4          | 90.1           | 109.6     | 8.3       | 6.86      | 0.15           |
| Q8D1R2_KI Ktl12    | Protein Ktl   |            | 1         | 8.1     | 1.1     | 1.2             | 7.5       | 6.85             | 0.15      | 8.1            | 1.1            | 1.3       | 7.5       | 6.14      | 0.16           |
| Q8E0F0_RA Rab31p   | Rab-3A-int    |            | 1         | 9.0     | 1.2     | 1.3             | 7.5       | 6.84             | 0.15      | 9.0            | 1.2            | 1.5       | 7.5       | 6.13      | 0.16           |
| P97371_P5 Psm1     | Proteasom     |            | 11        | 81.9    | 11.0    | 12.0            | 7.5       | 6.84             | 0.15      | 928.6          | 149.7          | 182.2     | 6.2       | 5.10      | 0.20           |
| O70251_Ef Eef1b    | Elongation    |            | 6         | 28.2    | 3.8     | 4.2             | 7.4       | 6.77             | 0.15      | 330.4          | 88.2           | 107.4     | 3.7       | 3.08      | 0.32           |
| Q922W5_F Pycr1     | Pyrroline-5   |            | 1         | 92.0    | 13.0    | 14.1            | 7.1       | 6.50             | 0.15      | 92.0           | 13.0           | 15.8      | 7.1       | 5.83      | 0.17           |
| A2A821_OS Osbp19   | Oxyterol-b    |            | 1         | 8.4     | 1.2     | 1.3             | 7.0       | 6.40             | 0.16      | 8.4            | 1.2            | 1.5       | 7.0       | 5.73      | 0.17           |
| Q3UMR0_A Ankr227   | Ankyrin rep   |            | 1         | 9.1     | 1.3     | 1.4             | 6.9       | 6.32             | 0.16      | 9.1            | 1.3            | 1.6       | 6.9       | 5.67      | 0.18           |
| O88342_W Wdr1      | WD repeat     |            | 28        | 63.1    | 9.2     | 10.0            | 6.9       | 6.29             | 0.16      | 1646.8         | 284.0          | 345.7     | 5.8       | 4.76      | 0.21           |
| Q80526_QI Nxf7     | Nuclear RN    |            | 1         | 33.3    | 5.1     | 5.6             | 6.5       | 5.97             | 0.17      | 33.3           | 5.1            | 6.2       | 6.5       | 5.35      | 0.19           |
| Q9CZD3_S3 Gars     | Glycine-tR    |            | 8         | 29.1    | 4.5     | 4.9             | 6.5       | 5.94             | 0.17      | 228.4          | 43.0           | 52.4      | 5.3       | 4.36      | 0.23           |
| Q8R459_IL I1f10    | Interleukin   |            | 1         | 11.5    | 1.8     | 1.9             | 6.4       | 5.90             | 0.17      | 11.5           | 1.8            | 2.2       | 6.4       | 5.29      | 0.19           |
| Q61035_S3 Hars     | Histidine-t   |            | 1         | 9.2     | 1.4     | 1.6             | 6.4       | 5.84             | 0.17      | 9.2            | 1.4            | 1.8       | 6.4       | 5.23      | 0.19           |
| Q5H21_M Mtus1      | Microtubul    |            | 2         | 19.0    | 3.1     | 3.4             | 6.1       | 5.62             | 0.18      | 38.1           | 6.2            | 7.6       | 6.1       | 5.04      | 0.20           |
| B2RY04_D4 Dock5    | Dedicator c   |            | 2         | 25.0    | 4.1     | 4.5             | 6.1       | 5.58             | 0.18      | 50.0           | 8.2            | 10.0      | 6.1       | 5.00      | 0.20           |
| P10126_EF Eef1a1   | Elongation    |            | 69        | 212.3   | 35.0    | 38.2            | 6.1       | 5.56             | 0.18      | 27286.9        | 5732.8         | 6977.8    | 4.8       | 3.91      | 0.26           |
| Q3UQN2_F Fcho2     | F-BAR dom:    |            | 1         | 11.1    | 1.8     | 2.0             | 6.1       | 5.55             | 0.18      | 11.1           | 1.8            | 2.2       | 6.1       | 4.97      | 0.20           |
| Q91V64_JS Isoct1   | Isochorism    |            | 1         | 13.9    | 2.3     | 2.5             | 6.0       | 5.52             | 0.18      | 13.9           | 2.3            | 2.8       | 6.0       | 4.95      | 0.20           |
| Q9CZ44_N Nsf1c     | NSFL1 cofa    |            | 4         | 20.8    | 3.5     | 3.8             | 5.9       | 5.39             | 0.19      | 77.6           | 16.9           | 20.6      | 4.6       | 3.76      | 0.27           |
| P30416_FK Fkbp4    | Peptidyl-pr   |            | 3         | 20.2    | 3.4     | 3.8             | 5.9       | 5.37             | 0.19      | 60.9           | 21.8           | 26.5      | 2.8       | 2.30      | 0.44           |
| A6PW60_A Gm15698   | Protein Gm    |            | 1         | 28.7    | 4.9     | 5.4             | 5.9       | 5.37             | 0.19      | 28.7           | 4.9            | 6.0       | 5.9       | 4.81      | 0.21           |
| P97807_FL Fh       | Fumarate h    |            | 5         | 15.7    | 2.7     | 2.9             | 5.9       | 5.34             | 0.19      | 110.9          | 15.0           | 18.3      | 7.4       | 6.06      | 0.17           |
| Q8BGR9_U Ubicp1    | Ubiquitin-l   |            | 3         | 20.3    | 3.5     | 3.9             | 5.7       | 5.27             | 0.19      | 44.4           | 10.2           | 12.4      | 4.4       | 3.58      | 0.28           |
| A2AAV5_SP SH3pxd2b | SH3 and PX    |            | 1         | 24.7    | 4.3     | 4.7             | 5.7       | 5.26             | 0.19      | 24.7           | 4.3            | 5.2       | 5.7       | 4.71      | 0.21           |
| P09671_SC Sod2     | Superoxide    |            | 1         | 7.5     | 1.3     | 1.4             | 5.7       | 5.23             | 0.19      | 7.5            | 1.3            | 1.6       | 5.7       | 4.69      | 0.21           |
| Q91215_UC Ugp2     | UTP-glucos    |            | 3         | 33.6    | 6.0     | 6.5             | 5.6       | 5.17             | 0.19      | 78.2           | 15.9           | 19.3      | 4.9       | 4.04      | 0.25           |
| Q9CWF8_R Rnaseh2a  | Ribonuclea    |            | 3         | 18.9    | 3.4     | 3.7             | 5.6       | 5.10             | 0.20      | 58.7           | 11.8           | 14.3      | 5.0       | 4.10      | 0.24           |
| Q61183_P Papola    | Poly(A) pol   |            | 1         | 18.4    | 3.3     | 3.6             | 5.6       | 5.09             | 0.20      | 18.4           | 3.3            | 4.0       | 5.6       | 4.56      | 0.22           |
| Q991F8_PS Psp1     | PC4 and SFI   |            | 1         | 5.7     | 1.0     | 1.1             | 5.4       | 4.97             | 0.20      | 5.7            | 1.0            | 1.3       | 5.4       | 4.45      | 0.22           |
| Q9Z218_SU Suclg2   | Succinyl-Cc   |            | 3         | 7.6     | 1.4     | 1.5             | 5.4       | 4.96             | 0.20      | 23.7           | 5.3            | 6.5       | 4.4       | 3.65      | 0.27           |
| Q9ES00_UT Ube4b    | Ubiquitin c   |            | 2         | 21.1    | 4.0     | 4.3             | 5.3       | 4.89             | 0.20      | 42.2           | 7.9            | 9.6       | 5.3       | 4.38      | 0.23           |
| Q9DAR7_D Dcps      | m7GpppX c     |            | 3         | 25.3    | 4.7     | 5.2             | 5.3       | 4.89             | 0.20      | 66.5           | 20.0           | 24.4      | 3.3       | 2.73      | 0.37           |
| P63005_LI Pfah1b1  | Platelet-act  |            | 19        | 42.9    | 8.1     | 8.8             | 5.3       | 4.87             | 0.21      | 782.3          | 185.7          | 226.0     | 4.2       | 3.46      | 0.29           |
| Q9CX11_U Utp23     | rRNA-proce    |            | 1         | 7.2     | 1.4     | 1.5             | 5.3       | 4.86             | 0.21      | 7.2            | 1.4            | 1.7       | 5.3       | 4.35      | 0.23           |
| P27612_P1 Plaa     | Phospholip    |            | 5         | 14.5    | 2.8     | 3.0             | 5.2       | 4.79             | 0.21      | 78.4           | 14.9           | 18.1      | 5.3       | 4.32      | 0.23           |
| Q9WUL7_A Ar13      | ADP-ribosy    |            | 1         | 19.6    | 3.8     | 4.1             | 5.2       | 4.78             | 0.21      | 19.6           | 3.8            | 4.6       | 5.2       | 4.28      | 0.23           |
| P06745_GI Gpi      | Glucose-6-f   |            | 10        | 16.0    | 3.1     | 3.4             | 5.2       | 4.76             | 0.21      | 189.7          | 33.1           | 40.3      | 5.7       | 4.71      | 0.21           |
| Q9WU04_C Coroin-1C | Coroin-1C     |            | 3         | 9.1     | 1.8     | 1.9             | 5.2       | 4.74             | 0.21      | 25.5           | 6.9            | 8.4       | 3.7       | 3.04      | 0.33           |
| Q91Y58_KC Camk1    | Calcium/ca    |            | 1         | 9.5     | 1.9     | 2.0             | 5.1       | 4.70             | 0.21      | 9.5            | 1.9            | 2.3       | 5.1       | 4.21      | 0.24           |
| E9PYG6_E9 Rasa1    | Protein Ras   |            | 1         | 6.8     | 1.3     | 1.5             | 5.1       | 4.69             | 0.21      | 6.8            | 1.3            | 1.6       | 5.1       | 4.21      | 0.24           |
| Q8BV13_C3 Cops5b   | COP9 signa    |            | 3         | 16.8    | 3.3     | 3.6             | 5.1       | 4.67             | 0.21      | 896.2          | 785.9          | 956.6     | 1.1       | 0.94      | 1.07           |
| Q6P1B1_XI Xpnpep1  | Xaa-Pro am    |            | 3         | 14.9    | 2.9     | 3.2             | 5.1       | 4.65             | 0.21      | 40.5           | 10.4           | 12.6      | 3.9       | 3.21      | 0.31           |
| P28660_NI Nckap1   | Nck-associa   |            | 7         | 22.6    | 4.5     | 4.9             | 5.0       | 4.60             | 0.22      | 159.3          | 37.8           | 46.0      | 4.2       | 3.46      | 0.29           |
| Q60967_P Papss1    | Bifunction:   |            | 1         | 12.2    | 2.4     | 2.7             | 5.0       | 4.56             | 0.22      | 12.2           | 2.4            | 3.0       | 5.0       | 4.09      | 0.24           |
| Q8CI95_OS Osbp111  | Oxyterol-b    |            | 9         | 26.4    | 5.3     | 5.8             | 5.0       | 4.56             | 0.22      | 240.2          | 69.8           | 84.9      | 3.4       | 2.83      | 0.35           |
| Q9EPK7_XF Xpo7     | Exportin-7    |            | 7         | 25.3    | 5.1     | 5.6             | 4.9       | 4.51             | 0.22      | 174.3          | 44.2           | 53.8      | 3.9       | 3.24      | 0.31           |
| Q8R010_AI Alimp2   | Aminoacyl-    |            | 7         | 36.2    | 7.4     | 8.0             | 4.9       | 4.51             | 0.22      | 237.3          | 82.6           | 100.6     | 2.9       | 2.36      | 0.42           |
| Q8BMP6_G Acbd3     | Golgi resid   |            | 1         | 9.4     | 1.9     | 2.1             | 4.9       | 4.48             | 0.22      | 9.4            | 1.9            | 2.3       | 4.9       | 4.02      | 0.25           |
| Q99L47_F1 St13     | Hsc70-inte    |            | 2         | 24.3    | 5.0     | 5.4             | 4.9       | 4.48             | 0.22      | 48.5           | 9.9            | 12.1      | 4.9       | 4.02      | 0.25           |
| Q6PB66_LF Lrpprc   | Leucine-ric   |            | 5         | 14.0    | 2.9     | 3.1             | 4.9       | 4.48             | 0.22      | 69.0           | 14.2           | 17.3      | 4.9       | 3.99      | 0.25           |
| Q78PY7_SH Snd1     | Staphyloco    |            | 13        | 17.5    | 3.6     | 3.9             | 4.9       | 4.47             | 0.22      | 240.1          | 90.4           | 110.0     | 2.7       | 2.18      | 0.46           |
| Q80UG5_SI 9-Sep    | Septin-9 OS   |            | 14        | 53.2    | 10.9    | 11.9            | 4.9       | 4.46             | 0.22      | 697.3          | 154.4          | 188.0     | 4.5       | 3.71      | 0.27           |
| Q8CG76_AI Akr7a2   | Aflatoxin B:  |            | 1         | 26.0    | 5.4     | 5.9             | 4.8       | 4.43             | 0.23      | 26.0           | 5.4            | 6.6       | 4.8       | 3.97      | 0.25           |
| Q8BML9_Q Cars      | Glutaminyl    |            | 13        | 20.7    | 4.3     | 4.7             | 4.8       | 4.41             | 0.23      | 316.1          | 92.7           | 112.8     | 3.4       | 2.80      | 0.36           |
| Q99J09_M Wdr77     | Methylsor     |            | 1         | 19.9    | 4.1     | 4.5             | 4.8       | 4.39             | 0.23      | 19.9           | 4.1            | 5.0       | 4.8       | 3.94      | 0.25           |
| Q9D8N0_EI Eef1g    | Elongation    |            | 13        | 43.8    | 9.1     | 10.0            | 4.8       | 4.39             | 0.23      | 700.4          | 139.3          | 169.5     | 5.0       | 4.13      | 0.24           |
| Q9JMD0_Z2 Znf207   | BUB3-inter    |            | 1         | 22.4    | 4.8     | 5.2             | 4.7       | 4.30             | 0.23      | 22.4           | 4.8            | 5.8       | 4.7       | 3.85      | 0.26           |
| Q64737_PL Gart     | Trifunction   |            | 8         | 25.6    | 5.5     | 6.0             | 4.7       | 4.29             | 0.23      | 193.8          | 49.6           | 60.4      | 3.9       | 3.21      | 0.31           |
| Q8K2L8_TP Trappc12 | Trafficking j |            | 1         | 16.3    | 3.5     | 3.8             | 4.7       | 4.28             | 0.23      | 16.3           | 3.5            | 4.2       | 4.7       | 3.84      | 0.26           |
| Q62189_S3 Snrpa    | U1 small nL   |            | 3         | 43.5    | 9.3     | 10.2            | 4.7       | 4.28             | 0.23      | 130.4          | 34.1           | 41.5      | 3.8       | 3.14      | 0.32           |
| Q99MD9_N Nasp      | Nuclear aut   |            | 2         | 23.2    | 5.0     | 5.4             | 4.7       | 4.28             | 0.23      | 46.3           | 9.9            | 12.1      | 4.7       | 3.83      | 0.26           |
| P53395_OD Dbt      | Lipoamide     |            | 1         | 15.0    | 3.2     | 3.5             | 4.7       | 4.26             | 0.23      | 15.0           | 3.2            | 3.9       | 4.7       | 3.82      | 0.26           |
| P23506_PI Pcm1     | Protein-L:is  |            | 1         | 27.8    | 6.0     | 6.5             | 4.6       | 4.24             | 0.24      | 27.8           | 6.0            | 7.3       | 4.6       | 3.80      | 0.26           |
| P61202_C3 Cops2    | COP9 signa    |            | 18        | 20.5    | 4.4     | 4.8             | 4.6       | 4.23             | 0.24      | 463.6          | 143.3          | 174.5     | 3.2       | 2.66      | 0.38           |
| Q3TIR3_RIC Ric8a   | Synergbyn     |            | 1         | 14.6    | 3.2     | 3.5             | 4.6       | 4.23             | 0.24      | 14.6           | 3.2            | 3.9       | 4.6       | 3.79      | 0.26           |
| Q4KWH5_F P1ch1     | 1-phosphat    |            | 1         | 43.1    | 9.4     | 10.2            | 4.6       | 4.22             | 0.24      | 43.1           | 9.4            | 11.4      | 4.6       | 3.78      | 0.26           |
| Q9ES46_PA Parvb    | Beta-parvin   |            | 1         | 13.5    | 2.9     | 3.2             | 4.6       | 4.21             | 0.24      | 13.5           | 2.9            | 3.6       | 4.6       | 3.77      | 0.27           |
| P46471_Pf Psmc2    | 26S proteas   |            |           |         |         |                 |           |                  |           |                |                |           |           |           |                |

|                    |              |    |       |      |      |     |      |      |         |        |        |     |      |      |
|--------------------|--------------|----|-------|------|------|-----|------|------|---------|--------|--------|-----|------|------|
| Q8C1A5_T1 Thop1    | Thimet olig  | 4  | 11.0  | 2.5  | 2.8  | 4.3 | 3.95 | 0.25 | 45.7    | 11.4   | 13.9   | 4.0 | 3.30 | 0.30 |
| Q8VDM4_F Psm2d     | 26S proteas  | 28 | 45.0  | 10.5 | 11.5 | 4.3 | 3.93 | 0.25 | 1777.7  | 435.3  | 529.8  | 4.1 | 3.36 | 0.30 |
| Q8QZZ7_TF Tprkb    | EKC/KEOPS    | 3  | 21.0  | 4.9  | 5.3  | 4.3 | 3.92 | 0.25 | 51.3    | 12.7   | 15.5   | 4.0 | 3.31 | 0.30 |
| Q3UJK4_G1 Gtppbp2  | GTP-bindin   | 1  | 12.9  | 3.0  | 3.3  | 4.3 | 3.92 | 0.26 | 12.9    | 3.0    | 3.7    | 4.3 | 3.51 | 0.28 |
| Q91YR1_TV Twf1     | Twinfilin-1  | 1  | 24.5  | 5.8  | 6.3  | 4.3 | 3.90 | 0.26 | 24.5    | 5.8    | 7.0    | 4.3 | 3.49 | 0.29 |
| Q9R112_S1 Sqrdl    | Sulfidequiu  | 1  | 6.9   | 1.6  | 1.8  | 4.2 | 3.88 | 0.26 | 6.9     | 1.6    | 2.0    | 4.2 | 3.48 | 0.29 |
| Q61151_Z1 Ppp2r5e  | Serine/thre  | 1  | 8.4   | 2.0  | 2.2  | 4.2 | 3.88 | 0.26 | 8.4     | 2.0    | 2.4    | 4.2 | 3.47 | 0.29 |
| Q8BIW6_E1 Eif2a    | Eukaryotic   | 24 | 24.6  | 5.8  | 6.3  | 4.2 | 3.87 | 0.26 | 777.4   | 191.9  | 233.5  | 4.1 | 3.33 | 0.30 |
| Q3TKS7_P5 Psm1     | 26S proteas  | 30 | 30.3  | 7.2  | 7.8  | 4.2 | 3.87 | 0.26 | 1363.2  | 303.6  | 369.5  | 4.5 | 3.69 | 0.27 |
| P09602_H1 Hmgm2    | Non-histon   | 1  | 10.6  | 2.5  | 2.8  | 4.2 | 3.85 | 0.26 | 10.6    | 2.5    | 3.1    | 4.2 | 3.45 | 0.29 |
| Q60864_S1 Stip1    | Stress-indu  | 6  | 16.5  | 3.9  | 4.3  | 4.2 | 3.83 | 0.26 | 128.1   | 27.3   | 33.3   | 4.7 | 3.85 | 0.26 |
| P40124_C1 Cap1     | Adenylly cy  | 7  | 36.0  | 8.6  | 9.4  | 4.2 | 3.83 | 0.26 | 237.0   | 86.5   | 105.3  | 2.7 | 2.25 | 0.44 |
| P47809_M Map2k4    | Dual specif  | 3  | 13.0  | 3.1  | 3.4  | 4.2 | 3.83 | 0.26 | 42.4    | 9.8    | 11.9   | 4.3 | 3.56 | 0.28 |
| P57759_ER Erp29    | Endoplasm    | 1  | 8.1   | 2.0  | 2.1  | 4.2 | 3.82 | 0.26 | 8.1     | 2.0    | 2.4    | 4.2 | 3.42 | 0.29 |
| Q69237_S1 Samd91   | Sterile alph | 18 | 35.3  | 8.5  | 9.3  | 4.2 | 3.81 | 0.26 | 698.1   | 198.7  | 241.8  | 3.5 | 2.89 | 0.35 |
| Q99J83_AT Atg5     | Autophagy    | 1  | 14.7  | 3.6  | 3.9  | 4.1 | 3.80 | 0.26 | 14.7    | 3.6    | 4.3    | 4.1 | 3.40 | 0.29 |
| P24527_LK Lta4h    | Leukotrieni  | 6  | 8.8   | 2.1  | 2.3  | 4.1 | 3.79 | 0.26 | 61.6    | 14.4   | 17.6   | 4.3 | 3.51 | 0.28 |
| Q92119_EX Exosc4   | Exosome cc   | 1  | 5.4   | 1.3  | 1.4  | 4.1 | 3.77 | 0.27 | 5.4     | 1.3    | 1.6    | 4.1 | 3.38 | 0.30 |
| Q9D8W5_F Psm12     | 26S proteas  | 27 | 25.8  | 6.3  | 6.8  | 4.1 | 3.77 | 0.27 | 1066.1  | 305.4  | 371.7  | 3.5 | 2.87 | 0.35 |
| Q9CQC6_B1 Bzw1     | Basic leucir | 4  | 24.2  | 5.9  | 6.4  | 4.1 | 3.77 | 0.27 | 97.0    | 23.5   | 28.6   | 4.1 | 3.39 | 0.29 |
| P62192_PF Psmc1    | 26S proteas  | 22 | 28.2  | 6.9  | 7.5  | 4.1 | 3.75 | 0.27 | 1293.3  | 287.0  | 349.3  | 4.3 | 3.55 | 0.28 |
| Q99J77_Q5 Nans     | N-acetylnu   | 2  | 10.6  | 2.6  | 2.8  | 4.1 | 3.75 | 0.27 | 21.3    | 5.2    | 6.3    | 4.1 | 3.36 | 0.30 |
| Q6NXL1_Q1 Sec2d4   | Protein Sec  | 7  | 38.4  | 9.4  | 10.3 | 4.1 | 3.74 | 0.27 | 212.5   | 67.2   | 81.7   | 3.2 | 2.60 | 0.38 |
| Q8V175_IP1 Ipo4    | Importin-4   | 4  | 30.0  | 7.4  | 8.0  | 4.1 | 3.74 | 0.27 | 114.4   | 29.1   | 35.4   | 3.9 | 3.24 | 0.31 |
| Q61081_C1 Cdc37    | Hsp90 co-c   | 5  | 22.3  | 5.5  | 6.0  | 4.1 | 3.73 | 0.27 | 125.7   | 32.1   | 39.1   | 3.9 | 3.21 | 0.31 |
| Q9R1K9_C1 Cetn2    | Centrin-2 C  | 3  | 18.4  | 4.6  | 5.0  | 4.0 | 3.71 | 0.27 | 49.2    | 23.7   | 28.8   | 2.1 | 1.71 | 0.59 |
| Q8CD10_M Micu2     | Calcium up   | 1  | 5.9   | 1.5  | 1.6  | 4.0 | 3.70 | 0.27 | 5.9     | 1.5    | 1.8    | 4.0 | 3.32 | 0.30 |
| Q01730_R1 Rsu1     | Ras suppl    | 5  | 24.3  | 6.1  | 6.6  | 4.0 | 3.66 | 0.27 | 98.0    | 26.3   | 32.0   | 3.7 | 3.06 | 0.33 |
| P17427_AF Ap2a2    | AP-2 compl   | 12 | 21.3  | 5.3  | 5.8  | 4.0 | 3.66 | 0.27 | 297.6   | 88.0   | 107.1  | 3.4 | 2.78 | 0.36 |
| G5E858_G5 Mpp7     | MAGUK p51    | 3  | 9.3   | 2.3  | 2.6  | 4.0 | 3.65 | 0.27 | 29.9    | 7.3    | 8.9    | 4.1 | 3.36 | 0.30 |
| Q99J14_P5 Psm6     | 26S proteas  | 8  | 20.2  | 5.1  | 5.5  | 4.0 | 3.65 | 0.27 | 179.8   | 48.7   | 59.2   | 3.7 | 3.04 | 0.33 |
| Q61171_P1 Prdx2    | Peroxirodo   | 3  | 28.5  | 7.2  | 7.8  | 4.0 | 3.64 | 0.27 | 66.9    | 17.7   | 21.5   | 3.8 | 3.11 | 0.32 |
| Q62465_V1 Vat1     | Synaptic ve  | 28 | 40.2  | 10.2 | 11.1 | 3.9 | 3.61 | 0.28 | 1434.3  | 346.6  | 421.9  | 4.1 | 3.40 | 0.29 |
| Q9Z1F9_SA Uba2     | SUMO-activ   | 3  | 25.0  | 6.4  | 7.0  | 3.9 | 3.57 | 0.28 | 83.4    | 25.5   | 31.0   | 3.3 | 2.69 | 0.37 |
| P47915_R1 Rpl29    | 60S ribosor  | 8  | 167.7 | 43.1 | 47.0 | 3.9 | 3.57 | 0.28 | 3275.7  | 993.8  | 1209.6 | 3.3 | 2.71 | 0.37 |
| Q9DBL1_A1 Acadsh   | Short/bran   | 1  | 6.1   | 1.6  | 1.7  | 3.9 | 3.56 | 0.28 | 6.1     | 1.6    | 1.9    | 3.9 | 3.19 | 0.31 |
| Q6ZQ66_V1 Ppip5k2  | Inositol he  | 1  | 6.8   | 1.8  | 1.9  | 3.9 | 3.56 | 0.28 | 6.8     | 1.8    | 2.1    | 3.9 | 3.19 | 0.31 |
| Q2NL51_G1 Gsk3a    | Glycogen s   | 1  | 15.7  | 4.1  | 4.4  | 3.9 | 3.54 | 0.28 | 15.7    | 4.1    | 5.0    | 3.9 | 3.17 | 0.32 |
| Q9D172_E1 D10jhu81 | ES1 protein  | 2  | 14.2  | 3.7  | 4.0  | 3.9 | 3.54 | 0.28 | 28.5    | 7.4    | 9.0    | 3.9 | 3.17 | 0.32 |
| P45591_C1 Cf2      | Cofilin-2 O  | 3  | 10.7  | 2.8  | 3.0  | 3.8 | 3.53 | 0.28 | 31.2    | 7.9    | 9.6    | 4.0 | 3.26 | 0.31 |
| P97372_P5 Psm2     | Proteasom    | 17 | 34.5  | 9.0  | 9.8  | 3.8 | 3.50 | 0.29 | 794.5   | 174.3  | 212.2  | 4.6 | 3.75 | 0.27 |
| P05132_L1 Prkaca   | cAMP-depe    | 3  | 25.4  | 6.7  | 7.3  | 3.8 | 3.48 | 0.29 | 76.3    | 20.7   | 25.2   | 3.7 | 3.03 | 0.33 |
| Q5SU09_C1 Ctc1     | CST comple   | 2  | 17.2  | 4.5  | 5.0  | 3.8 | 3.48 | 0.29 | 34.5    | 9.1    | 11.1   | 3.8 | 3.12 | 0.32 |
| Q99LD4_C1 Gps1     | COP9 signa   | 8  | 36.7  | 9.7  | 10.6 | 3.8 | 3.47 | 0.29 | 319.7   | 79.3   | 96.5   | 4.0 | 3.31 | 0.30 |
| Q9WUP7_L1 Uchl5    | Ubiquitin c  | 9  | 17.0  | 4.5  | 4.9  | 3.8 | 3.46 | 0.29 | 186.2   | 53.1   | 64.6   | 3.5 | 2.88 | 0.35 |
| Q9QXL2_K1 Kif21a   | Kinesin-like | 1  | 5.9   | 1.6  | 1.7  | 3.8 | 3.46 | 0.29 | 5.9     | 1.6    | 1.9    | 3.8 | 3.10 | 0.32 |
| Q99J45_NF Nrbp1    | Nuclear rec  | 1  | 21.2  | 5.6  | 6.1  | 3.8 | 3.44 | 0.29 | 21.2    | 5.6    | 6.9    | 3.8 | 3.09 | 0.32 |
| P31750_A1 Akt1     | RAC-alpha    | 2  | 13.7  | 3.6  | 4.0  | 3.8 | 3.44 | 0.29 | 27.3    | 7.3    | 8.9    | 3.8 | 3.09 | 0.32 |
| Q9JMA1_U1 Usp14    | Ubiquitin c  | 9  | 11.5  | 3.1  | 3.3  | 3.8 | 3.44 | 0.29 | 91.4    | 26.1   | 32.0   | 2.0 | 1.63 | 0.61 |
| Q05920_P1 Pc       | Pyruvate ca  | 2  | 11.8  | 3.1  | 3.4  | 3.7 | 3.43 | 0.29 | 23.5    | 6.3    | 7.7    | 3.7 | 3.07 | 0.33 |
| Q99LP6_G1 Grpel1   | GrpE protei  | 2  | 9.6   | 2.6  | 2.8  | 3.7 | 3.42 | 0.29 | 19.2    | 5.2    | 6.3    | 3.7 | 3.07 | 0.33 |
| Q9CQK7_R1 Rwd1     | RWD doma     | 3  | 66.4  | 17.8 | 19.4 | 3.7 | 3.41 | 0.29 | 215.6   | 59.6   | 72.6   | 3.6 | 2.97 | 0.34 |
| Q782A7_N1 Nup114   | Nucleosom    | 3  | 13.1  | 3.5  | 3.8  | 3.7 | 3.41 | 0.29 | 36.0    | 10.8   | 13.2   | 3.3 | 2.73 | 0.37 |
| Q99JY9_AR Actr3    | Actin-relat  | 5  | 17.1  | 4.6  | 5.0  | 3.7 | 3.40 | 0.29 | 91.5    | 31.7   | 38.6   | 2.9 | 2.37 | 0.42 |
| A2AF47_D1 Dock11   | Dedicator c  | 6  | 27.0  | 7.3  | 8.0  | 3.7 | 3.39 | 0.29 | 160.3   | 45.9   | 55.8   | 3.5 | 2.87 | 0.35 |
| Q9D906_A1 Atg7     | Ubiquitin-l  | 5  | 9.7   | 2.6  | 2.8  | 3.7 | 3.39 | 0.29 | 48.1    | 18.0   | 21.9   | 2.7 | 2.20 | 0.45 |
| Q8V193_O1 Oas3     | 2'-5'-oligo  | 11 | 27.1  | 7.3  | 8.0  | 3.7 | 3.39 | 0.29 | 426.2   | 115.3  | 140.3  | 3.7 | 3.04 | 0.33 |
| P50431_G1 Shmt1    | Serine hydr  | 5  | 21.7  | 5.9  | 6.4  | 3.7 | 3.39 | 0.29 | 212.8   | 52.0   | 63.3   | 4.1 | 3.36 | 0.30 |
| O54781_S1 Srpk2    | SRSF protei  | 3  | 31.4  | 8.5  | 9.3  | 3.7 | 3.39 | 0.29 | 79.6    | 24.3   | 29.5   | 3.3 | 2.70 | 0.37 |
| Q8BY87_U1 Usp47    | Ubiquitin c  | 2  | 16.3  | 4.4  | 4.8  | 3.7 | 3.39 | 0.29 | 32.7    | 8.8    | 10.8   | 3.7 | 3.04 | 0.33 |
| Q9WUM5_S1 Suclg1   | Succinyl-Cc  | 2  | 22.9  | 6.2  | 6.8  | 3.7 | 3.39 | 0.29 | 45.9    | 12.4   | 15.1   | 3.7 | 3.04 | 0.33 |
| Q99MN1_S1 Kars     | Lysine-tRN   | 20 | 28.0  | 7.6  | 8.3  | 3.7 | 3.38 | 0.30 | 555.3   | 198.9  | 242.1  | 2.8 | 2.29 | 0.44 |
| Q61699_H1 Hsp1h    | Heat shock   | 3  | 15.2  | 4.1  | 4.5  | 3.7 | 3.38 | 0.30 | 57.3    | 12.3   | 15.0   | 4.6 | 3.82 | 0.26 |
| A2CG63_A1 Arid4b   | AT-rich inte | 1  | 9.2   | 2.5  | 2.7  | 3.7 | 3.36 | 0.30 | 9.2     | 2.5    | 3.1    | 3.7 | 3.01 | 0.33 |
| Q8COL8_C1 Cog5     | Conserved    | 1  | 6.4   | 1.8  | 1.9  | 3.6 | 3.34 | 0.30 | 6.4     | 1.8    | 2.1    | 3.6 | 3.00 | 0.33 |
| O88271_C1 Cfdp1    | Craniofacia  | 1  | 18.4  | 5.1  | 5.5  | 3.6 | 3.33 | 0.30 | 18.4    | 5.1    | 6.2    | 3.6 | 2.98 | 0.34 |
| P14685_P5 Psm2d    | 26S proteas  | 25 | 40.8  | 11.3 | 12.3 | 3.6 | 3.31 | 0.30 | 1200.4  | 334.9  | 407.7  | 3.6 | 2.94 | 0.34 |
| P40142_TK Tkt      | Transketola  | 62 | 52.3  | 14.5 | 15.9 | 3.6 | 3.30 | 0.30 | 4352.2  | 1044.0 | 1270.7 | 4.2 | 3.43 | 0.29 |
| Q9EPL8_IP1 Ipo7    | Importin-7   | 6  | 16.4  | 4.6  | 5.0  | 3.6 | 3.30 | 0.30 | 127.8   | 36.9   | 44.9   | 3.5 | 2.85 | 0.35 |
| Q64514_TF Tpp2     | Tripeptidyl  | 12 | 15.5  | 4.3  | 4.7  | 3.6 | 3.30 | 0.30 | 314.0   | 60.1   | 73.1   | 5.2 | 4.00 | 0.23 |
| P07901_H1 Hsp90aa1 | Heat shock   | 85 | 94.0  | 26.2 | 28.5 | 3.6 | 3.29 | 0.30 | 18117.1 | 4830.8 | 5879.9 | 3.8 | 3.08 | 0.32 |
| Q9ES74_NF Nek7     | Serine/thre  | 1  | 9.9   | 2.8  | 3.0  | 3.6 | 3.27 | 0.31 | 9.9     | 2.8    | 3.4    | 3.6 | 2.93 | 0.34 |
| Q9CQY6_U1 Uqc22    | Ubiquitin-l  | 1  | 8.3   | 2.3  | 2.6  | 3.6 | 3.27 | 0.31 | 8.3     | 2.3    | 2.9    | 3.6 | 2.93 | 0.34 |
| P15092_J1 Ifi204   | Interferon-  | 9  | 18.2  | 5.1  | 5.6  | 3.6 | 3.27 | 0.31 | 162.5   | 51.3   | 62.5   | 3.2 | 2.60 | 0.38 |
| Q8BU30_S1 Iars     | Isoleucine-  | 32 | 33.4  | 9.4  | 10.2 | 3.6 | 3.27 | 0.31 | 1190.5  | 433.6  | 527.8  | 2.7 | 2.26 | 0.44 |
| Q8BMF4_O1 Dlat     | Dihydrolipi  | 9  | 18.4  | 5.2  | 5.6  | 3.6 | 3.26 | 0.31 | 215.3   | 45.7   | 55.6   | 4.7 | 3.87 | 0.26 |
| O88685_P1 Psmc3    | 26S proteas  | 27 | 28.6  | 8.1  | 8.8  | 3.5 | 3.25 | 0.31 | 1379.4  | 296.2  | 360.5  | 4.7 | 3.83 | 0.26 |
| O08539_B1 Bin1     | Myc box-de   | 8  | 14.7  | 4.1  | 4.5  | 3.5 | 3.25 | 0.31 | 190.8   | 60.0   | 73.1   | 3.2 | 2.61 | 0.38 |
| P63038_C1 Hsp1d    | 60 kDa heat  | 27 | 30.9  | 8.7  | 9.5  | 3.5 | 3.25 | 0.31 | 1321.3  | 355.0  | 432.1  | 3.7 | 3.06 | 0.33 |
| Q64362_A1 Aktip    | AKT-interac  | 1  | 5.9   | 1.7  | 1.8  | 3.5 | 3.23 | 0.31 | 5.9     | 1.7    | 2.0    | 3.5 | 2.90 | 0.35 |
| Q91V88_B1 Brk1     | Protein BRI  | 1  | 22.6  | 6.4  | 7.0  | 3.5 | 3.22 | 0.31 | 22.6    | 6.4    | 7.8    | 3.5 | 2.88 | 0.35 |
| Q9CYG7_IC Tomm34   | Mitochond    | 2  | 12.2  | 3.5  | 3.8  | 3.5 | 3.20 | 0.31 | 24.4    | 7.0    | 8.5    | 3.5 | 2.87 | 0.35 |
| P80317_IC Cct6a    | T-complex    | 34 | 60.0  | 17.2 | 18.8 | 3.5 | 3.20 | 0.31 | 5005.6  | 1771.8 | 2156.6 | 2.8 | 2.32 | 0.43 |
| Q8QZT1_T1 Acat1    | Acetyl-CoA   | 2  | 11.0  | 3.1  | 3.4  | 3.5 | 3.19 | 0.31 | 21.9    | 6.3    | 7.7    | 3.5 | 2.86 | 0.35 |
| G3X9F7_G1 Ddx60    | MCG11385     | 8  | 15.6  | 4.5  | 4.9  | 3.5 | 3.19 | 0.31 | 117.5   | 34.4   | 41.9   | 3.4 | 2.81 | 0.36 |
| Q9D2R8_R1 Mrps33   | 28S ribosor  | 1  | 17.2  | 5.0  | 5.5  | 3.5 | 3.18 | 0.31 | 17.2    | 5.0    | 6.0    | 3.5 | 2.85 | 0.35 |
| Q8C128_T1 Trmt10a  | tRNA meth    | 2  | 17.4  | 5.0  | 5.4  | 3.5 | 3.16 | 0.32 | 34.8    | 10.1   | 12.3   | 3.5 | 2.83 | 0.35 |
| Q8BUR4_D1 Dock1    | Dedicator c  | 4  | 20.9  | 6.1  | 6.6  | 3.4 | 3.16 | 0.32 | 81.3    | 24.9   | 30.3   | 3.3 | 2.68 | 0.37 |
| Q8CCP0_N1 Nemf     | Nuclear exp  | 1  | 9.2   | 2.7  |      |     |      |      |         |        |        |     |      |      |

|                    |               |    |       |      |      |     |      |      |         |        |        |     |      |      |
|--------------------|---------------|----|-------|------|------|-----|------|------|---------|--------|--------|-----|------|------|
| Q8R5H1_U Usp15     | Ubiquitin c   | 1  | 11.9  | 3.6  | 3.9  | 3.3 | 3.04 | 0.33 | 11.9    | 3.6    | 4.4    | 3.3 | 2.72 | 0.37 |
| Q8C8R3_At Ank2     | Ankyrin-2 C   | 6  | 13.0  | 3.9  | 4.3  | 3.3 | 3.04 | 0.33 | 82.2    | 30.5   | 37.1   | 2.7 | 2.21 | 0.45 |
| P50518_Vr Atp6v1e1 | V-type prot   | 4  | 24.7  | 7.5  | 8.2  | 3.3 | 3.03 | 0.33 | 96.5    | 36.9   | 44.9   | 2.6 | 2.15 | 0.47 |
| Q80X13_IF4 Eif4g3  | Eukaryotic    | 6  | 17.9  | 5.4  | 5.9  | 3.3 | 3.03 | 0.33 | 138.8   | 41.7   | 50.8   | 3.3 | 2.73 | 0.37 |
| Q9D1R9_Rl Rpl34    | 60S ribosom   | 9  | 25.4  | 7.7  | 8.4  | 3.3 | 3.02 | 0.33 | 2272.3  | 766.5  | 933.0  | 3.0 | 2.44 | 0.41 |
| Q9CZ30_Ol Ola1     | Obg-like AT   | 3  | 8.9   | 2.7  | 2.9  | 3.3 | 3.02 | 0.33 | 37.8    | 8.3    | 10.1   | 4.6 | 3.74 | 0.27 |
| Q9JLQ0_CT Cd2ap    | CD2-associ    | 3  | 17.8  | 5.4  | 5.9  | 3.3 | 3.01 | 0.33 | 60.2    | 16.5   | 20.0   | 3.7 | 3.01 | 0.33 |
| Q9JHQ5_Li Lzf11    | Leucine zip   | 1  | 21.7  | 6.6  | 7.2  | 3.3 | 3.01 | 0.33 | 21.7    | 6.6    | 8.0    | 3.3 | 2.70 | 0.37 |
| Q9Z2X2_Pi Psmd10   | 26S proteas   | 3  | 9.7   | 3.0  | 3.2  | 3.3 | 3.01 | 0.33 | 25.7    | 9.6    | 11.7   | 2.7 | 2.20 | 0.45 |
| Q9WV68_P Pascin2   | Protein kin   | 17 | 46.4  | 14.2 | 15.5 | 3.3 | 2.99 | 0.33 | 1104.0  | 351.8  | 428.2  | 3.1 | 2.58 | 0.39 |
| Q99LX0_Pi Park7    | Protein deg   | 1  | 15.6  | 4.8  | 5.2  | 3.2 | 2.98 | 0.34 | 15.6    | 4.8    | 5.8    | 3.2 | 2.67 | 0.37 |
| Q60597_Ol Ogdh     | 2-oxoglutar   | 3  | 6.4   | 2.0  | 2.2  | 3.2 | 2.98 | 0.34 | 27.2    | 6.5    | 8.0    | 4.2 | 3.42 | 0.29 |
| Q9D051_O Pdhb      | Pyruvate de   | 6  | 21.9  | 6.7  | 7.4  | 3.2 | 2.98 | 0.34 | 164.5   | 42.7   | 52.0   | 3.9 | 3.17 | 0.32 |
| G3XA21_G Mroh1     | MCG13444      | 1  | 13.1  | 4.0  | 4.4  | 3.2 | 2.97 | 0.34 | 13.1    | 4.0    | 4.9    | 3.2 | 2.66 | 0.38 |
| Q8R1F6_Hi Hid1     | Protein HIC   | 6  | 14.7  | 4.5  | 4.9  | 3.2 | 2.96 | 0.34 | 88.0    | 28.9   | 35.2   | 3.0 | 2.50 | 0.40 |
| Q68FE6_FA Fam65a   | Protein FAM   | 1  | 10.3  | 3.2  | 3.5  | 3.2 | 2.96 | 0.34 | 10.3    | 3.2    | 3.9    | 3.2 | 2.66 | 0.38 |
| P14869_Rl Rplp0    | 60S acidic r  | 44 | 156.8 | 48.8 | 53.2 | 3.2 | 2.95 | 0.34 | 10025.1 | 3306.9 | 4025.1 | 3.0 | 2.49 | 0.40 |
| Q9D7X3_D Dusp3     | Dual specif   | 1  | 44.5  | 13.9 | 15.1 | 3.2 | 2.95 | 0.34 | 44.5    | 13.9   | 16.9   | 3.2 | 2.64 | 0.38 |
| Q9Z2Q2_Rl Riok1    | Serine/thre   | 1  | 25.1  | 7.8  | 8.5  | 3.2 | 2.94 | 0.34 | 25.1    | 7.8    | 9.5    | 3.2 | 2.64 | 0.38 |
| Q9CWX9_P Atic      | Bifunction    | 11 | 23.9  | 7.5  | 8.1  | 3.2 | 2.94 | 0.34 | 388.1   | 86.5   | 105.3  | 4.5 | 3.69 | 0.27 |
| Q8C194_PV Pygb     | Glycogen p    | 11 | 15.4  | 4.8  | 5.3  | 3.2 | 2.93 | 0.34 | 256.1   | 84.2   | 102.5  | 3.0 | 2.50 | 0.40 |
| Q6P2K6_Pv Smek1    | Serine/thre   | 8  | 14.1  | 4.4  | 4.8  | 3.2 | 2.93 | 0.34 | 114.4   | 75.5   | 91.9   | 1.5 | 1.24 | 0.80 |
| Q02053_Ul Uba1     | Ubiquitin-l   | 22 | 19.8  | 6.2  | 6.8  | 3.2 | 2.92 | 0.34 | 560.8   | 179.1  | 218.0  | 3.1 | 2.57 | 0.39 |
| Q8CD92_T Ttc27     | Tetratricop   | 3  | 16.5  | 5.2  | 5.7  | 3.2 | 2.91 | 0.34 | 39.2    | 13.3   | 16.2   | 2.9 | 2.42 | 0.41 |
| Q62384_ZF Zpr1     | Zinc finger j | 1  | 12.2  | 3.9  | 4.2  | 3.2 | 2.91 | 0.34 | 12.2    | 3.9    | 4.7    | 3.2 | 2.61 | 0.38 |
| O08529_Cj Capn2    | Calpain-2 c   | 11 | 15.1  | 4.8  | 5.2  | 3.2 | 2.91 | 0.34 | 171.6   | 55.5   | 67.6   | 3.1 | 2.54 | 0.39 |
| G3X972_G Sec24c    | Protein Sec   | 8  | 19.0  | 6.0  | 6.6  | 3.2 | 2.90 | 0.34 | 193.3   | 67.6   | 82.3   | 2.9 | 2.35 | 0.43 |
| Q9JHR7_ID Ide      | Insulin-deg   | 5  | 8.7   | 2.8  | 3.0  | 3.2 | 2.90 | 0.35 | 47.3    | 15.5   | 18.9   | 3.1 | 2.51 | 0.40 |
| Q9CR00_Pi Psmd9    | 26S proteas   | 1  | 25.5  | 8.1  | 8.8  | 3.2 | 2.89 | 0.35 | 25.5    | 8.1    | 9.8    | 3.2 | 2.59 | 0.39 |
| Q35685_Nl Nudc     | Nuclear mij   | 10 | 14.8  | 4.7  | 5.1  | 3.2 | 2.89 | 0.35 | 214.2   | 61.0   | 74.2   | 3.5 | 2.89 | 0.35 |
| Q9DCL9_Pi Paics    | Multi functi  | 15 | 24.3  | 7.7  | 8.4  | 3.2 | 2.89 | 0.35 | 331.6   | 118.4  | 144.1  | 2.8 | 2.30 | 0.43 |
| Q8BGAS_Ki Krr1     | KRR1 small    | 1  | 14.7  | 4.7  | 5.1  | 3.2 | 2.89 | 0.35 | 14.7    | 4.7    | 5.7    | 3.2 | 2.59 | 0.39 |
| Q9QXG4_A Accs2     | Acetyl-coer   | 4  | 8.5   | 2.7  | 2.9  | 3.2 | 2.89 | 0.35 | 31.6    | 11.9   | 14.5   | 2.6 | 2.18 | 0.46 |
| Q8BTY8_SC Scfd2    | Sec1 family   | 1  | 11.1  | 3.5  | 3.8  | 3.1 | 2.89 | 0.35 | 11.1    | 3.5    | 4.3    | 3.1 | 2.59 | 0.39 |
| Q8VHN8_Sl Nudt16l1 | Protein syn   | 1  | 24.3  | 7.7  | 8.4  | 3.1 | 2.88 | 0.35 | 24.3    | 7.7    | 9.4    | 3.1 | 2.58 | 0.39 |
| Q9CX56_Pi Psmd8    | 26S proteas   | 5  | 27.0  | 8.6  | 9.4  | 3.1 | 2.88 | 0.35 | 257.0   | 63.7   | 77.6   | 4.0 | 3.31 | 0.30 |
| Q69Z57_Hf Hbs1     | HBS1-like p   | 3  | 11.3  | 3.6  | 3.9  | 3.1 | 2.87 | 0.35 | 33.2    | 11.0   | 13.4   | 3.0 | 2.47 | 0.40 |
| P34152_Fa Ptk2     | Focal adhes   | 4  | 14.5  | 4.6  | 5.1  | 3.1 | 2.87 | 0.35 | 54.1    | 18.2   | 22.1   | 3.0 | 2.44 | 0.41 |
| Q9DOK2_Sj Oxtt1    | Succinyl-Cc   | 3  | 10.4  | 3.3  | 3.6  | 3.1 | 2.86 | 0.35 | 34.3    | 11.5   | 13.9   | 3.0 | 2.46 | 0.41 |
| Q91240_Qj Gbp7     | Gbp6 prote    | 9  | 10.9  | 3.5  | 3.8  | 3.1 | 2.86 | 0.35 | 117.2   | 31.8   | 38.7   | 3.7 | 3.03 | 0.33 |
| Q8BRN9_C Cc2d1b    | Coiled-coil   | 3  | 10.4  | 3.3  | 3.6  | 3.1 | 2.86 | 0.35 | 30.4    | 21.0   | 25.6   | 1.4 | 1.19 | 0.84 |
| B2RXC1_TF Trappc11 | Trafficking j | 3  | 15.9  | 5.1  | 5.6  | 3.1 | 2.86 | 0.35 | 40.8    | 14.3   | 17.4   | 2.9 | 2.35 | 0.43 |
| Q9Z2B2_Sj Dars     | Aspartate-t   | 28 | 38.8  | 12.5 | 13.6 | 3.1 | 2.85 | 0.35 | 1388.6  | 411.6  | 501.0  | 3.4 | 2.77 | 0.36 |
| O08528_Hi Hk2      | Hexokinase    | 3  | 12.8  | 4.1  | 4.5  | 3.1 | 2.85 | 0.35 | 38.2    | 12.1   | 14.7   | 3.2 | 2.59 | 0.39 |
| Q3UZ39_Lf Lrrfp1   | Leucine-ric   | 5  | 11.8  | 3.8  | 4.1  | 3.1 | 2.85 | 0.35 | 58.4    | 33.8   | 41.1   | 1.7 | 1.42 | 0.70 |
| Q3TC1_F1 Fam175b   | BRISC comp    | 2  | 9.8   | 3.2  | 3.4  | 3.1 | 2.84 | 0.35 | 19.6    | 6.3    | 7.7    | 3.1 | 2.55 | 0.39 |
| Q9EQK5_M Mvp       | Major vault   | 10 | 16.4  | 5.3  | 5.8  | 3.1 | 2.84 | 0.35 | 154.6   | 68.2   | 83.1   | 2.3 | 1.86 | 0.54 |
| Q8BYC6_TA Taok3    | Serine/thre   | 1  | 13.7  | 4.4  | 4.8  | 3.1 | 2.84 | 0.35 | 13.7    | 4.4    | 5.4    | 3.1 | 2.54 | 0.39 |
| Q6PAR5_G Gapv1     | GTPase-acti   | 7  | 11.7  | 3.8  | 4.1  | 3.1 | 2.83 | 0.35 | 97.0    | 38.1   | 46.4   | 2.5 | 2.09 | 0.48 |
| Q9ERF3_W Wdr61     | WD repeat-    | 7  | 25.7  | 8.3  | 9.1  | 3.1 | 2.83 | 0.35 | 196.6   | 65.2   | 79.4   | 3.0 | 2.48 | 0.40 |
| P97461_Rf Rps5     | 40S ribosom   | 9  | 16.9  | 5.5  | 6.0  | 3.1 | 2.82 | 0.35 | 450.1   | 264.4  | 321.8  | 1.7 | 1.40 | 0.71 |
| Q9D071_M Mms19     | MMS19 nu      | 4  | 25.6  | 8.3  | 9.1  | 3.1 | 2.82 | 0.35 | 107.7   | 35.7   | 43.5   | 3.0 | 2.48 | 0.40 |
| Q9D1H7_G Get4      | Golgi to ER   | 4  | 12.9  | 4.2  | 4.6  | 3.1 | 2.81 | 0.36 | 66.2    | 17.7   | 21.6   | 3.7 | 3.07 | 0.33 |
| Q91XU3_Pi Pip4k2c  | Phosphatid    | 1  | 37.3  | 12.2 | 13.3 | 3.1 | 2.81 | 0.36 | 37.3    | 12.2   | 14.8   | 3.1 | 2.52 | 0.40 |
| Q9R1P0_Pi Psm4     | Proteasom     | 2  | 16.3  | 5.3  | 5.8  | 3.1 | 2.80 | 0.36 | 32.7    | 10.7   | 13.0   | 3.1 | 2.51 | 0.40 |
| Q91VA7_Ol Idh3b    | Isocitrate d  | 4  | 26.4  | 8.6  | 9.4  | 3.1 | 2.80 | 0.36 | 96.9    | 30.9   | 37.6   | 3.1 | 2.58 | 0.39 |
| A2AWP8_A Arhgef10l | Rho guanine   | 1  | 9.7   | 3.2  | 3.5  | 3.0 | 2.79 | 0.36 | 9.7     | 3.2    | 3.9    | 3.0 | 2.50 | 0.40 |
| Q99K70_Rl Rrac     | Ras-related   | 6  | 16.5  | 5.4  | 5.9  | 3.0 | 2.79 | 0.36 | 91.0    | 38.1   | 46.3   | 2.4 | 1.96 | 0.51 |
| Q6P8X1_Sf Snx6     | Sorting nex   | 7  | 50.8  | 16.7 | 18.3 | 3.0 | 2.78 | 0.36 | 287.0   | 90.4   | 110.0  | 3.2 | 2.61 | 0.38 |
| Q922H4_G Gmppa     | Mannose-1     | 1  | 4.0   | 1.3  | 1.4  | 3.0 | 2.78 | 0.36 | 4.0     | 1.3    | 1.6    | 3.0 | 2.49 | 0.40 |
| P70349_HI Hint1    | Histidine tr  | 1  | 258.1 | 85.2 | 93.0 | 3.0 | 2.78 | 0.36 | 258.1   | 85.2   | 103.7  | 3.0 | 2.49 | 0.40 |
| O35350_Cj Capn1    | Calpain-1 c   | 11 | 22.4  | 7.4  | 8.1  | 3.0 | 2.77 | 0.36 | 264.5   | 82.6   | 100.5  | 3.2 | 2.63 | 0.38 |
| Q9DSV5_Cj Cul5     | Cullin-5 OS   | 11 | 14.3  | 4.7  | 5.2  | 3.0 | 2.77 | 0.36 | 176.9   | 64.9   | 79.0   | 2.7 | 2.24 | 0.45 |
| Q77NP2_Zj Ppp2r1b  | Serine/thre   | 2  | 17.1  | 5.7  | 6.2  | 3.0 | 2.77 | 0.36 | 34.2    | 11.3   | 13.8   | 3.0 | 2.48 | 0.40 |
| Q3THK7_Gl Gmps     | GMP synth     | 8  | 13.5  | 4.5  | 4.9  | 3.0 | 2.77 | 0.36 | 107.2   | 70.5   | 85.8   | 1.5 | 1.25 | 0.80 |
| Q9D0I9_SV Rars     | Arginine-tf   | 16 | 26.5  | 8.8  | 9.6  | 3.0 | 2.76 | 0.36 | 552.8   | 129.6  | 157.7  | 4.3 | 3.50 | 0.29 |
| Q9CQJ7_Rl Ssrp2b   | U2 small nu   | 3  | 62.0  | 20.6 | 22.5 | 3.0 | 2.76 | 0.36 | 169.6   | 57.7   | 70.2   | 2.9 | 2.42 | 0.41 |
| P50516_Vr Atp6v1a  | V-type prot   | 12 | 16.8  | 5.6  | 6.1  | 3.0 | 2.75 | 0.36 | 356.4   | 80.9   | 98.5   | 4.4 | 3.62 | 0.28 |
| Q80X85_Rl Mrps7    | 28S ribosom   | 1  | 8.1   | 2.7  | 2.9  | 3.0 | 2.75 | 0.36 | 8.1     | 2.7    | 3.3    | 3.0 | 2.47 | 0.41 |
| Q9Z1D1_El Eif3g    | Eukaryotic    | 13 | 23.1  | 7.7  | 8.4  | 3.0 | 2.75 | 0.36 | 543.1   | 334.7  | 407.4  | 1.6 | 1.33 | 0.75 |
| Q6P5H2_N Nes       | Nestin OS-f   | 4  | 16.9  | 5.6  | 6.1  | 3.0 | 2.75 | 0.36 | 75.2    | 45.0   | 54.7   | 1.7 | 1.37 | 0.73 |
| Q8BP67_Rl Rpl24    | 60S ribosom   | 12 | 31.0  | 10.4 | 11.3 | 3.0 | 2.74 | 0.36 | 2600.0  | 1102.6 | 1342.1 | 2.4 | 1.94 | 0.52 |
| P33175_Ki Kif5a    | Kinesin hea   | 9  | 21.4  | 7.2  | 7.8  | 3.0 | 2.74 | 0.36 | 364.3   | 100.8  | 122.7  | 3.6 | 2.97 | 0.34 |
| P58252_EF Eef2     | Elongation    | 62 | 56.7  | 19.0 | 20.7 | 3.0 | 2.74 | 0.36 | 5497.0  | 2177.2 | 2650.0 | 2.5 | 2.07 | 0.48 |
| P42208_SE 2-Sep    | Septin-2 OS   | 7  | 46.9  | 15.7 | 17.1 | 3.0 | 2.74 | 0.37 | 306.7   | 97.7   | 118.9  | 3.1 | 2.58 | 0.39 |
| F6ZAW1_Fj Cald1    | Protein Cal   | 1  | 9.7   | 3.3  | 3.6  | 3.0 | 2.74 | 0.37 | 9.7     | 3.3    | 4.0    | 3.0 | 2.45 | 0.41 |
| Q61166_M Mapre1    | Microtubul    | 6  | 32.8  | 11.0 | 12.0 | 3.0 | 2.73 | 0.37 | 242.7   | 98.9   | 120.4  | 2.5 | 2.02 | 0.50 |
| Q9Z2H5_Ef Epb411l  | Band 4.1-Hil  | 1  | 7.9   | 2.6  | 2.9  | 3.0 | 2.72 | 0.37 | 7.9     | 2.6    | 3.2    | 3.0 | 2.44 | 0.41 |
| Q9WVJ2_P Psm13     | 26S proteas   | 24 | 21.5  | 7.2  | 7.9  | 3.0 | 2.72 | 0.37 | 909.8   | 218.2  | 265.5  | 4.2 | 3.43 | 0.29 |
| Q6PER3_M Mapre3    | Microtubul    | 3  | 32.6  | 11.0 | 12.0 | 3.0 | 2.72 | 0.37 | 73.0    | 24.9   | 30.3   | 2.9 | 2.41 | 0.42 |
| Q9CR29_Cj Ccdc43   | Coiled-coil   | 2  | 15.5  | 5.2  | 5.7  | 3.0 | 2.72 | 0.37 | 31.0    | 10.4   | 12.7   | 3.0 | 2.44 | 0.41 |
| P16254_SF Srp14    | Signal recoj  | 2  | 31.8  | 10.7 | 11.7 | 3.0 | 2.72 | 0.37 | 63.5    | 21.4   | 26.1   | 3.0 | 2.43 | 0.41 |
| P61759_Pf Vpb1     | Prefoldin s   | 7  | 16.2  | 5.5  | 6.0  | 3.0 | 2.71 | 0.37 | 107.0   | 46.6   | 56.7   | 2.3 | 1.89 | 0.53 |
| Q05D44_Jf Eif5b    | Eukaryotic    | 12 | 21.9  | 7.4  | 8.1  | 3.0 | 2.71 | 0.37 | 284.8   | 119.7  | 145.7  | 2.4 | 1.96 | 0.51 |
| P51174_Af Acadl    | Long-chain    | 1  | 9.7   | 3.3  | 3.6  | 3.0 | 2.71 | 0.37 | 9.7     | 3.3    | 4.0    | 3.0 | 2.43 | 0.41 |
| Q9CQM9_G Glr3      | Glutaredox    | 6  | 27.2  | 9.2  | 10.1 | 2.9 | 2.70 | 0.37 | 154.4   | 61.7   | 75.2   | 2.5 | 2.05 | 0.49 |
| Q9CWX8_S Snx2      | Sorting nex   | 7  | 17.4  | 5.9  | 6.5  | 2.9 | 2.69 | 0.37 | 136.2   | 61.0   | 74.2   | 2.2 | 1.84 | 0.54 |
| Q9Z0N2_Jf Eif2s3y  | Eukaryotic    | 1  | 16.0  | 5.5  | 6.0  | 2.9 | 2.68 | 0.37 | 16.0    | 5.5    | 6.7    | 2.9 | 2.40 | 0.42 |
| Q9WVA3_B Bub3      | Mitotic che   |    |       |      |      |     |      |      |         |        |        |     |      |      |

|                      |               |     |       |       |       |     |      |      |         |        |        |     |      |      |
|----------------------|---------------|-----|-------|-------|-------|-----|------|------|---------|--------|--------|-----|------|------|
| Q99LCS_ET Etfa       | Electron tra  | 1   | 5.6   | 2.0   | 2.2   | 2.8 | 2.55 | 0.39 | 5.6     | 2.0    | 2.5    | 2.8 | 2.28 | 0.44 |
| Q9WV86_K Katna1      | Katanin p6l   | 1   | 9.7   | 3.5   | 3.8   | 2.8 | 2.54 | 0.39 | 9.7     | 3.5    | 4.2    | 2.8 | 2.28 | 0.44 |
| P12849_K Prkar1b     | cAMP-depe     | 1   | 5.0   | 1.8   | 2.0   | 2.8 | 2.53 | 0.39 | 5.0     | 1.8    | 2.2    | 2.8 | 2.27 | 0.44 |
| G5E8T3_G5 Srp19      | Signal recoj  | 6   | 7.0   | 2.5   | 2.8   | 2.8 | 2.53 | 0.40 | 138.9   | 54.1   | 65.9   | 2.6 | 2.11 | 0.47 |
| Q8BV66_IF Ifi44      | Interferon-i  | 7   | 18.2  | 6.6   | 7.2   | 2.8 | 2.53 | 0.40 | 170.6   | 73.9   | 89.9   | 2.3 | 1.90 | 0.53 |
| P35283_R4 Rab12      | Ras-related   | 1   | 14.1  | 5.1   | 5.6   | 2.8 | 2.52 | 0.40 | 14.1    | 5.1    | 6.3    | 2.8 | 2.26 | 0.44 |
| E9Q070_ES Gm8730     | Uncharacte    | 4   | 154.2 | 56.2  | 61.3  | 2.7 | 2.52 | 0.40 | 655.7   | 295.3  | 359.4  | 2.2 | 1.82 | 0.55 |
| Q9Z2U0_P1 Psm7       | Proteasom     | 6   | 14.6  | 5.3   | 5.8   | 2.7 | 2.52 | 0.40 | 102.8   | 38.7   | 47.2   | 2.7 | 2.18 | 0.46 |
| Q91V12_B1 Acot7      | Cytosolic ac  | 4   | 19.2  | 7.0   | 7.6   | 2.7 | 2.51 | 0.40 | 87.5    | 28.1   | 34.2   | 3.1 | 2.56 | 0.39 |
| Q8BP48_DI Dpdc       | Protein DPl   | 2   | 20.6  | 7.5   | 8.2   | 2.7 | 2.51 | 0.40 | 41.2    | 15.0   | 18.3   | 2.7 | 2.25 | 0.44 |
| Q8BIU0_SC Sgta       | Small gluta   | 5   | 24.3  | 8.9   | 9.7   | 2.7 | 2.51 | 0.40 | 222.3   | 41.8   | 50.8   | 5.3 | 4.37 | 0.23 |
| P63323_R5 Rps12      | 40S ribosor   | 4   | 84.4  | 30.8  | 33.6  | 2.7 | 2.51 | 0.40 | 613.1   | 219.4  | 267.0  | 2.8 | 2.30 | 0.44 |
| P62862_R5 Fau        | 40S ribosor   | 1   | 429.3 | 157.0 | 171.2 | 2.7 | 2.51 | 0.40 | 429.3   | 157.0  | 191.1  | 2.7 | 2.25 | 0.45 |
| O08759_UI Ube3a      | Ubiquitin-f   | 3   | 13.6  | 5.0   | 5.5   | 2.7 | 2.50 | 0.40 | 36.4    | 13.2   | 16.0   | 2.8 | 2.28 | 0.44 |
| P10922_H1 Histone H1 | Histone H1    | 11  | 67.0  | 24.6  | 26.8  | 2.7 | 2.50 | 0.40 | 4475.7  | 2288.7 | 2785.7 | 2.0 | 1.61 | 0.62 |
| O54916_R1 Repl1      | RalBP1-ass    | 1   | 7.5   | 2.8   | 3.0   | 2.7 | 2.49 | 0.40 | 7.5     | 2.8    | 3.4    | 2.7 | 2.24 | 0.45 |
| F8VQC1_F8 Srp72      | Signal recoj  | 31  | 30.5  | 11.2  | 12.2  | 2.7 | 2.49 | 0.40 | 1125.0  | 489.5  | 595.8  | 2.3 | 1.89 | 0.53 |
| A2AWA9_R Rabgap1     | Rab GTPase    | 16  | 11.8  | 4.3   | 4.7   | 2.7 | 2.49 | 0.40 | 261.1   | 81.3   | 98.9   | 3.2 | 2.64 | 0.38 |
| Q921L5_C1 Cog2       | Conserved r   | 1   | 11.1  | 4.1   | 4.5   | 2.7 | 2.49 | 0.40 | 11.1    | 4.1    | 5.0    | 2.7 | 2.23 | 0.45 |
| P80313_TC Cct7       | T-complex j   | 52  | 47.3  | 17.4  | 19.0  | 2.7 | 2.48 | 0.40 | 4879.1  | 1700.9 | 2070.3 | 2.9 | 2.36 | 0.42 |
| P17426_Af Ap2a1      | AP-2 compl    | 18  | 23.6  | 8.7   | 9.5   | 2.7 | 2.48 | 0.40 | 475.8   | 191.8  | 233.4  | 2.5 | 2.04 | 0.49 |
| P48962_AC Sic25a4    | ADP/ATP tr    | 3   | 28.0  | 10.4  | 11.3  | 2.7 | 2.48 | 0.40 | 70.4    | 27.6   | 33.6   | 2.5 | 2.09 | 0.48 |
| Q9Z104_HI Hmg20b     | SWI/SNF-re    | 1   | 4.6   | 1.7   | 1.8   | 2.7 | 2.47 | 0.40 | 4.6     | 1.7    | 2.1    | 2.7 | 2.22 | 0.45 |
| Q9D0J4_Af Arl2       | ADP-ribosy    | 4   | 20.0  | 7.4   | 8.1   | 2.7 | 2.47 | 0.40 | 75.2    | 29.7   | 36.2   | 2.5 | 2.08 | 0.48 |
| P49117_NI Nr2c2      | Nuclear rec   | 1   | 6.3   | 2.3   | 2.5   | 2.7 | 2.46 | 0.41 | 6.3     | 2.3    | 2.8    | 2.7 | 2.21 | 0.45 |
| Q9Z1Q9_S1 Vars       | Valine-tRn    | 25  | 36.8  | 13.7  | 15.0  | 2.7 | 2.46 | 0.41 | 1478.4  | 372.8  | 453.8  | 4.0 | 3.26 | 0.31 |
| P18653_A1 Rps6ka1    | Ribosomal     | 7   | 22.7  | 8.5   | 9.2   | 2.7 | 2.46 | 0.41 | 199.5   | 90.1   | 109.6  | 2.2 | 1.82 | 0.55 |
| Q9D898_AI Arpc5l     | Actin-relate  | 3   | 48.8  | 18.2  | 19.9  | 2.7 | 2.46 | 0.41 | 121.4   | 90.3   | 109.9  | 1.3 | 1.10 | 0.91 |
| Q9DBB4_N1 Naa161     | N-alpha-acc   | 7   | 14.5  | 5.4   | 5.9   | 2.7 | 2.45 | 0.41 | 169.1   | 56.8   | 69.2   | 3.0 | 2.44 | 0.41 |
| Q8BY4_TT Ttc39b      | Tetratricop   | 2   | 9.5   | 3.6   | 3.9   | 2.7 | 2.45 | 0.41 | 19.1    | 7.1    | 8.7    | 2.7 | 2.20 | 0.46 |
| Q9QXB9_D Drg2        | Developme     | 9   | 31.9  | 11.9  | 13.0  | 2.7 | 2.45 | 0.41 | 325.1   | 126.9  | 154.4  | 2.6 | 2.11 | 0.47 |
| Q9JHS4_CL Clpx       | ATP-depenc    | 3   | 7.5   | 2.8   | 3.1   | 2.7 | 2.45 | 0.41 | 22.9    | 8.0    | 9.7    | 2.9 | 2.36 | 0.42 |
| Q9DBL7_C1 Coasy      | Bifunction:   | 2   | 20.9  | 7.8   | 8.5   | 2.7 | 2.44 | 0.41 | 41.7    | 15.7   | 19.1   | 2.7 | 2.19 | 0.46 |
| Q9CZ78_R4 Rab3b      | Ras-related   | 1   | 6.6   | 2.5   | 2.7   | 2.7 | 2.44 | 0.41 | 6.6     | 2.5    | 3.0    | 2.7 | 2.19 | 0.46 |
| Q921J2_RH Rheb       | GTP-bindin    | 3   | 92.1  | 34.6  | 37.8  | 2.7 | 2.44 | 0.41 | 254.0   | 91.2   | 111.0  | 2.8 | 2.29 | 0.44 |
| Q9Z2V5_HI Hdac6      | Histone dex   | 2   | 31.1  | 11.7  | 12.8  | 2.7 | 2.44 | 0.41 | 62.2    | 23.4   | 28.5   | 2.7 | 2.18 | 0.46 |
| Q8CHC4_S1 Synj1      | Synaptojin    | 3   | 7.0   | 2.6   | 2.9   | 2.7 | 2.44 | 0.41 | 21.3    | 8.2    | 9.9    | 2.6 | 2.14 | 0.47 |
| P31324_K1 Prkar2b    | cAMP-depe     | 3   | 15.2  | 5.7   | 6.2   | 2.7 | 2.44 | 0.41 | 46.1    | 18.6   | 22.6   | 2.5 | 2.04 | 0.49 |
| Q6NZR5_Q1 Skiv2l     | Protein Ski   | 11  | 15.6  | 5.9   | 6.4   | 2.7 | 2.43 | 0.41 | 178.0   | 75.4   | 91.8   | 2.4 | 1.94 | 0.52 |
| P68181_K1 Prkacb     | cAMP-depe     | 3   | 10.4  | 3.9   | 4.3   | 2.6 | 2.43 | 0.41 | 41.9    | 15.0   | 18.3   | 2.8 | 2.30 | 0.44 |
| Q61191_HI Hcfc1      | Host cell fai | 18  | 21.8  | 8.3   | 9.0   | 2.6 | 2.42 | 0.41 | 488.1   | 301.8  | 367.3  | 1.6 | 1.33 | 0.75 |
| Q9Z2E1_M1 Mbd2       | Methyl-CpC    | 2   | 18.5  | 7.0   | 7.6   | 2.6 | 2.42 | 0.41 | 37.0    | 14.0   | 17.1   | 2.6 | 2.17 | 0.46 |
| Q921Q7_R1 Rin1       | Ras and Raf   | 1   | 9.9   | 3.8   | 4.1   | 2.6 | 2.41 | 0.41 | 9.9     | 3.8    | 4.6    | 2.6 | 2.16 | 0.46 |
| Q68FL6_SY Mars       | Methionine    | 21  | 18.4  | 7.0   | 7.7   | 2.6 | 2.41 | 0.42 | 612.2   | 185.9  | 226.3  | 3.3 | 2.71 | 0.37 |
| Q3V1H1_C1 Ckap2      | Cytoskelet    | 5   | 14.3  | 5.5   | 6.0   | 2.6 | 2.40 | 0.42 | 66.1    | 31.1   | 37.8   | 2.1 | 1.75 | 0.57 |
| Q6PD15_EC Ecm29      | Proteasom     | 18  | 19.9  | 7.6   | 8.3   | 2.6 | 2.39 | 0.42 | 355.6   | 137.5  | 167.4  | 2.6 | 2.12 | 0.47 |
| Q61753_SF Phgdh      | D-3-phosph    | 24  | 66.4  | 25.4  | 27.8  | 2.6 | 2.39 | 0.42 | 2712.9  | 1310.3 | 1594.9 | 2.1 | 1.70 | 0.59 |
| P70268_P1 Pkn1       | Serine/thre   | 2   | 8.8   | 3.4   | 3.7   | 2.6 | 2.39 | 0.42 | 17.6    | 6.7    | 8.2    | 2.6 | 2.14 | 0.47 |
| P83741_W Wnk1        | Serine/thre   | 2   | 20.1  | 7.7   | 8.4   | 2.6 | 2.39 | 0.42 | 40.2    | 15.4   | 18.8   | 2.6 | 2.14 | 0.47 |
| Q8KQ05_R1 Arhgap18   | Rho GTPase    | 1   | 9.9   | 3.8   | 4.1   | 2.6 | 2.39 | 0.42 | 9.9     | 3.8    | 4.6    | 2.6 | 2.14 | 0.47 |
| Q8VCC1_P1 Hpgd       | 15-hydroxy    | 1   | 27.7  | 10.7  | 11.6  | 2.6 | 2.38 | 0.42 | 27.7    | 10.7   | 13.0   | 2.6 | 2.13 | 0.47 |
| Q9QY24_Z1 Zbp1       | Z-DNA-bind    | 1   | 22.9  | 8.1   | 8.8   | 2.6 | 2.38 | 0.42 | 20.9    | 8.1    | 9.8    | 2.6 | 2.13 | 0.47 |
| P27641_Xf Xrcc5      | X-ray repair  | 10  | 20.2  | 8.6   | 9.3   | 2.6 | 2.38 | 0.42 | 256.4   | 110.3  | 134.3  | 2.3 | 1.91 | 0.52 |
| P54103_D1 Dnajc2     | Dnaj homo     | 2   | 11.4  | 4.4   | 4.8   | 2.6 | 2.38 | 0.42 | 22.7    | 8.8    | 10.7   | 2.6 | 2.13 | 0.47 |
| Q9WTP7_K Ak3         | GTP-AMP p     | 1   | 5.8   | 2.2   | 2.4   | 2.6 | 2.37 | 0.42 | 5.8     | 2.2    | 2.7    | 2.6 | 2.13 | 0.47 |
| P63158_HI Hmgbl      | High mobil    | 1   | 4.6   | 1.8   | 2.0   | 2.6 | 2.37 | 0.42 | 4.6     | 1.8    | 2.2    | 2.6 | 2.13 | 0.47 |
| P28867_Kf Prkcd      | Protein kin   | 5   | 11.3  | 4.4   | 4.8   | 2.6 | 2.37 | 0.42 | 60.7    | 28.1   | 34.2   | 2.2 | 1.78 | 0.56 |
| Q61024_A1 Asns       | Asparagine    | 49  | 37.2  | 14.4  | 15.7  | 2.6 | 2.37 | 0.42 | 2779.9  | 847.3  | 1031.3 | 3.3 | 2.70 | 0.37 |
| Q9DB05_S1 Napa       | Alpha-solut   | 10  | 14.0  | 5.4   | 5.9   | 2.6 | 2.36 | 0.42 | 221.7   | 70.2   | 85.5   | 3.2 | 2.59 | 0.39 |
| S4R2A9_S4 Sec31a     | Protein tra   | 1   | 8.6   | 3.4   | 3.7   | 2.6 | 2.36 | 0.42 | 8.6     | 3.4    | 4.1    | 2.6 | 2.12 | 0.47 |
| Q9CZ7_N1 Shmt2       | Protein Shr   | 19  | 36.4  | 14.1  | 15.4  | 2.6 | 2.36 | 0.42 | 822.5   | 454.3  | 552.9  | 1.8 | 1.49 | 0.67 |
| E9PWG2_E Trappc8     | Protein Tra   | 1   | 5.1   | 2.0   | 2.2   | 2.6 | 2.36 | 0.42 | 5.1     | 2.0    | 2.4    | 2.6 | 2.11 | 0.47 |
| Q8R4E9_C1 Cdt1       | DNA replica   | 3   | 12.0  | 4.7   | 5.1   | 2.6 | 2.35 | 0.43 | 29.4    | 13.4   | 16.3   | 2.2 | 1.80 | 0.55 |
| O08599_S1 Stxbp1     | Syntaxin-bi   | 11  | 13.1  | 5.1   | 5.6   | 2.6 | 2.34 | 0.43 | 230.4   | 276.4  | 336.4  | 0.8 | 0.68 | 1.46 |
| B2RUR8_O1 Otud7b     | OTU domai     | 7   | 12.3  | 4.8   | 5.3   | 2.5 | 2.33 | 0.43 | 103.0   | 37.3   | 45.3   | 2.8 | 2.27 | 0.44 |
| Q80T06_Q1 Eef1d      | Elongation    | 16  | 27.5  | 10.8  | 11.8  | 2.5 | 2.32 | 0.43 | 1407.9  | 432.5  | 526.4  | 3.3 | 2.67 | 0.37 |
| Q91W90_T1 Txdnc5     | Thioredoxin   | 6   | 35.5  | 14.0  | 15.3  | 2.5 | 2.32 | 0.43 | 242.6   | 109.6  | 133.4  | 2.2 | 1.82 | 0.55 |
| Q3UA06_P1 Trip13     | Pachytene     | 7   | 10.6  | 4.2   | 4.6   | 2.5 | 2.32 | 0.43 | 79.2    | 29.0   | 35.3   | 2.7 | 2.24 | 0.45 |
| O88879_A1 Apaf1      | Apoptotic c   | 1   | 13.2  | 5.2   | 5.7   | 2.5 | 2.32 | 0.43 | 13.2    | 5.2    | 6.3    | 2.5 | 2.08 | 0.48 |
| Q9WU28_H1 Pfdn5      | Prefoldin s   | 7   | 17.7  | 7.0   | 7.6   | 2.5 | 2.32 | 0.43 | 176.5   | 63.2   | 76.9   | 2.8 | 2.30 | 0.44 |
| Q9JKF1_IQ Iqgap1     | Ras GTPase    | 141 | 43.3  | 17.1  | 18.7  | 2.5 | 2.32 | 0.43 | 10390.1 | 3711.8 | 4517.9 | 2.8 | 2.30 | 0.43 |
| Q3TPX4_EX Exoc5      | Exocyst cor   | 2   | 14.1  | 5.6   | 6.1   | 2.5 | 2.31 | 0.43 | 28.2    | 11.2   | 13.6   | 2.5 | 2.07 | 0.48 |
| Q9ERH4_N1 Nusap1     | Nucleolar a   | 1   | 6.5   | 2.6   | 2.8   | 2.5 | 2.31 | 0.43 | 6.5     | 2.6    | 3.1    | 2.5 | 2.07 | 0.48 |
| Q8BI72_CA Cdkn2aip   | CDKN2A-in     | 25  | 19.9  | 7.9   | 8.6   | 2.5 | 2.31 | 0.43 | 594.7   | 311.0  | 378.5  | 1.9 | 1.57 | 0.64 |
| P63101_L1 Ywhaz      | 14-3-3 prot   | 28  | 35.8  | 14.2  | 15.5  | 2.5 | 2.31 | 0.43 | 2545.8  | 900.8  | 1096.5 | 2.8 | 2.32 | 0.43 |
| Q6ZWY3_R Rps27l      | 40S ribosor   | 9   | 26.8  | 10.7  | 11.7  | 2.5 | 2.30 | 0.43 | 633.1   | 266.1  | 323.9  | 2.4 | 1.95 | 0.51 |
| P62849_R5 Rps24      | 40S ribosor   | 7   | 69.0  | 27.5  | 30.0  | 2.5 | 2.30 | 0.43 | 859.2   | 352.4  | 428.9  | 2.4 | 2.00 | 0.50 |
| Q6NSO7_L1 Ltv1       | Protein LTV   | 6   | 16.7  | 6.7   | 7.3   | 2.5 | 2.30 | 0.43 | 103.1   | 42.6   | 51.9   | 2.4 | 1.99 | 0.50 |
| Q91250_Q1 Fen1       | Flap endon    | 11  | 48.2  | 19.2  | 21.0  | 2.5 | 2.30 | 0.44 | 676.8   | 244.7  | 297.9  | 2.8 | 2.27 | 0.44 |
| Q6P069_SC Sri        | Sorcin OS-f   | 1   | 19.5  | 7.8   | 8.5   | 2.5 | 2.30 | 0.44 | 19.5    | 7.8    | 9.5    | 2.5 | 2.06 | 0.49 |
| Q6PHQ8_N1 Naa35      | N-alpha-acc   | 1   | 16.5  | 6.6   | 7.2   | 2.5 | 2.29 | 0.44 | 16.5    | 6.6    | 8.0    | 2.5 | 2.05 | 0.49 |
| O70305_A1 Atxn2      | Ataxin-2 OS   | 8   | 16.8  | 6.7   | 7.3   | 2.5 | 2.29 | 0.44 | 115.7   | 54.4   | 66.2   | 2.1 | 1.75 | 0.57 |
| P26516_P1 Psmf7      | 26S protea    | 6   | 37.7  | 15.1  | 16.5  | 2.5 | 2.29 | 0.44 | 327.0   | 105.7  | 128.7  | 3.1 | 2.54 | 0.39 |
| Q6A099_Q1 Gbfl       | MKIAA024f     | 15  | 13.9  | 5.6   | 6.1   | 2.5 | 2.28 | 0.44 | 286.4   | 124.7  | 151.8  | 2.3 | 1.89 | 0.53 |
| P62331_A1 Arf6       | ADP-ribosy    | 14  | 15.3  | 6.2   | 6.7   | 2.5 | 2.27 | 0.44 | 542.0   | 273.9  | 333.3  | 2.0 | 1.63 | 0.62 |
| Q99JY0_EC Hadhb      | Trifunction   | 3   | 19.2  | 7.8   | 8.5   | 2.5 | 2.27 | 0.44 | 63.9    | 31.4   | 38.2   | 2.0 | 1.67 | 0.60 |
| Q9EQUS_S1 Set        | Protein SET   | 1   | 5.1   | 2.0   | 2.2   | 2.5 | 2.26 | 0.44 | 5.1     | 2.0    | 2.5    | 2.5 | 2.03 | 0.49 |
| Q9DAT7_M1 MrGBP      | MRG/MORF      | 1   | 6.9   | 2.8   | 3.0   | 2.5 | 2.26 | 0.44 | 6.9     | 2.8    | 3.4    | 2.5 | 2.03 | 0.49 |
| P35235_P1            |               |     |       |       |       |     |      |      |         |        |        |     |      |      |

|                    |               |    |       |      |      |     |      |      |         |        |        |     |      |      |
|--------------------|---------------|----|-------|------|------|-----|------|------|---------|--------|--------|-----|------|------|
| Q6PAV2_HI Herc4    | Probable E    | 3  | 29.8  | 12.4 | 13.5 | 2.4 | 2.20 | 0.45 | 74.6    | 53.5   | 65.2   | 1.4 | 1.15 | 0.87 |
| Q9JJK2_LA Lancel2  | LaN-like pr   | 1  | 21.0  | 8.7  | 9.5  | 2.4 | 2.20 | 0.45 | 21.0    | 8.7    | 10.6   | 2.4 | 1.97 | 0.51 |
| P22682_Ct Cbl      | E3 ubiquitin  | 1  | 18.5  | 7.7  | 8.4  | 2.4 | 2.20 | 0.45 | 18.5    | 7.7    | 9.4    | 2.4 | 1.97 | 0.51 |
| P51881_AL Slic25a5 | ADP/ATP tr    | 2  | 19.4  | 8.1  | 8.8  | 2.4 | 2.20 | 0.46 | 38.7    | 16.1   | 19.7   | 2.4 | 1.97 | 0.51 |
| O88874_Ci Ccnk     | Cyclin-K OS   | 3  | 16.3  | 6.8  | 7.4  | 2.4 | 2.20 | 0.46 | 43.5    | 20.9   | 25.4   | 2.1 | 1.71 | 0.58 |
| Q8BG40_K Katnb1    | Katanin p8l   | 1  | 9.5   | 4.0  | 4.3  | 2.4 | 2.19 | 0.46 | 9.5     | 4.0    | 4.8    | 2.4 | 1.96 | 0.51 |
| Q9EPC1_P Parva     | Alpha-parvi   | 9  | 52.1  | 21.8 | 23.8 | 2.4 | 2.19 | 0.46 | 395.6   | 209.7  | 255.2  | 1.9 | 1.55 | 0.65 |
| Q99PG2_O Ogrf      | Opioid grov   | 1  | 14.5  | 6.1  | 6.6  | 2.4 | 2.18 | 0.46 | 14.5    | 6.1    | 7.4    | 2.4 | 1.96 | 0.51 |
| P14576_SF Srp54    | Signal recoj  | 33 | 17.2  | 7.2  | 7.9  | 2.4 | 2.18 | 0.46 | 933.3   | 365.5  | 444.8  | 2.6 | 2.10 | 0.48 |
| Q6P1F6_Z Ppp2r2a   | Serine/thre   | 8  | 11.8  | 5.0  | 5.4  | 2.4 | 2.17 | 0.46 | 149.1   | 385.1  | 468.8  | 0.4 | 0.32 | 3.14 |
| Q8R050_Ef Gsp1     | Eukaryotic    | 15 | 23.5  | 9.9  | 10.8 | 2.4 | 2.17 | 0.46 | 535.6   | 194.7  | 237.0  | 2.8 | 2.26 | 0.44 |
| P46664_PL Adss     | Adenylosuc    | 2  | 5.6   | 2.4  | 2.6  | 2.4 | 2.17 | 0.46 | 11.2    | 4.7    | 5.7    | 2.4 | 1.94 | 0.51 |
| P31938_M Map2k1    | Dual specif   | 9  | 33.7  | 14.3 | 15.6 | 2.4 | 2.17 | 0.46 | 342.3   | 145.5  | 177.1  | 2.4 | 1.93 | 0.52 |
| Q8BH04_P Pck2      | Phosphoen     | 15 | 12.3  | 5.2  | 5.7  | 2.4 | 2.16 | 0.46 | 240.7   | 88.7   | 108.0  | 2.7 | 2.23 | 0.45 |
| P12970_Rl Rpl7a    | 60S ribosor   | 32 | 64.8  | 27.5 | 30.0 | 2.4 | 2.16 | 0.46 | 5052.1  | 2499.5 | 3042.3 | 2.0 | 1.66 | 0.60 |
| Q9D753_E Exosc8    | Exosome cc    | 1  | 11.4  | 4.9  | 5.3  | 2.4 | 2.16 | 0.46 | 11.4    | 4.9    | 5.9    | 2.4 | 1.93 | 0.52 |
| P61222_Af Abce1    | ATP-bindin    | 8  | 9.9   | 4.2  | 4.6  | 2.3 | 2.15 | 0.46 | 93.4    | 39.8   | 48.4   | 2.3 | 1.93 | 0.52 |
| P11983_TC Tcp1     | T-complex j   | 59 | 54.8  | 23.3 | 25.4 | 2.3 | 2.15 | 0.46 | 5349.1  | 2265.2 | 2757.1 | 2.4 | 1.94 | 0.52 |
| P62911_Rl Rpl32    | 60S ribosor   | 12 | 54.2  | 23.1 | 25.2 | 2.3 | 2.15 | 0.47 | 1069.1  | 415.5  | 505.7  | 2.6 | 2.11 | 0.47 |
| P38647_Gl Hspa9    | Stress-70 pi  | 13 | 14.5  | 6.2  | 6.7  | 2.3 | 2.15 | 0.47 | 254.2   | 96.9   | 118.0  | 2.6 | 2.15 | 0.46 |
| P80314_TC Cct2     | T-complex j   | 63 | 48.3  | 20.7 | 22.5 | 2.3 | 2.15 | 0.47 | 7311.1  | 2712.8 | 3301.9 | 2.7 | 2.21 | 0.45 |
| Q9CR55_CP087_MOUS  | UPF0547 p     | 1  | 5.5   | 2.4  | 2.6  | 2.3 | 2.14 | 0.47 | 5.5     | 2.4    | 2.9    | 2.3 | 1.92 | 0.52 |
| Q9D0R8_L Lsm12     | Protein LSM   | 2  | 57.9  | 24.7 | 27.0 | 2.3 | 2.14 | 0.47 | 115.8   | 49.5   | 60.2   | 2.3 | 1.92 | 0.52 |
| Q9Z2Y8_PR Prosc    | Proline syn   | 1  | 9.3   | 4.0  | 4.4  | 2.3 | 2.14 | 0.47 | 9.3     | 4.0    | 4.9    | 2.3 | 1.92 | 0.52 |
| Q9CYX7_Rf Rrp15    | RRP15-like    | 1  | 24.5  | 10.5 | 11.4 | 2.3 | 2.14 | 0.47 | 24.5    | 10.5   | 12.8   | 2.3 | 1.92 | 0.52 |
| I7HJ54_I7H Zfp683  | Protein Zfp   | 1  | 6.4   | 2.8  | 3.0  | 2.3 | 2.13 | 0.47 | 6.4     | 2.8    | 3.4    | 2.3 | 1.91 | 0.52 |
| O55236_M Rngtt     | mRNA-cap      | 2  | 13.3  | 5.7  | 6.2  | 2.3 | 2.13 | 0.47 | 26.6    | 11.4   | 13.9   | 2.3 | 1.91 | 0.52 |
| Q9CR57_Rl Rpl14    | 60S ribosor   | 10 | 104.4 | 45.0 | 49.1 | 2.3 | 2.13 | 0.47 | 3711.1  | 1424.5 | 1733.9 | 2.6 | 2.14 | 0.47 |
| G3X8Y3_Gi Naa15    | N-alpha-acc   | 24 | 26.3  | 11.4 | 12.4 | 2.3 | 2.12 | 0.47 | 908.3   | 323.2  | 393.3  | 2.8 | 2.31 | 0.43 |
| Q8R1Q8_D Dync1l1   | Cytoplasm     | 28 | 17.1  | 7.4  | 8.1  | 2.3 | 2.12 | 0.47 | 970.7   | 520.4  | 633.4  | 1.9 | 1.53 | 0.65 |
| Q9WV95_F Phlda3    | Pleckstrin f  | 1  | 45.4  | 19.7 | 21.5 | 2.3 | 2.12 | 0.47 | 45.4    | 19.7   | 24.0   | 2.3 | 1.90 | 0.53 |
| O08915_AI Aip      | AH recepto    | 2  | 30.4  | 13.2 | 14.4 | 2.3 | 2.11 | 0.47 | 60.7    | 26.3   | 32.1   | 2.3 | 1.89 | 0.53 |
| Q3V3R1_C: Mthfd1   | Monofunct     | 13 | 15.7  | 6.8  | 7.4  | 2.3 | 2.11 | 0.47 | 226.4   | 102.3  | 124.5  | 2.2 | 1.82 | 0.55 |
| Q9Z1O5_Ci Clic1    | Chloridin     | 3  | 5.3   | 2.3  | 2.5  | 2.3 | 2.11 | 0.47 | 14.6    | 6.8    | 8.3    | 2.1 | 1.76 | 0.57 |
| D3Z453_PT Pthrd1   | Putative pe   | 3  | 21.8  | 9.5  | 10.3 | 2.3 | 2.11 | 0.47 | 61.5    | 27.4   | 33.3   | 2.2 | 1.85 | 0.54 |
| Q6P5G6_U Ubxn7     | UBX domai     | 4  | 12.5  | 5.4  | 5.9  | 2.3 | 2.10 | 0.48 | 50.5    | 22.4   | 27.2   | 2.3 | 1.85 | 0.54 |
| Q9WV80_S Srx1      | Sorting nex   | 26 | 18.5  | 8.1  | 8.8  | 2.3 | 2.10 | 0.48 | 672.4   | 288.3  | 350.9  | 2.3 | 1.92 | 0.52 |
| Q9EQP2_Ef Ehd4     | EH domain     | 28 | 18.8  | 8.2  | 9.0  | 2.3 | 2.10 | 0.48 | 716.5   | 292.2  | 355.7  | 2.5 | 2.01 | 0.50 |
| O89090_SF Sp1      | Transcripti   | 1  | 21.4  | 9.4  | 10.2 | 2.3 | 2.10 | 0.48 | 21.4    | 9.4    | 11.4   | 2.3 | 1.88 | 0.53 |
| D3Z7P3_Gl Gls      | Glutaminas    | 2  | 19.6  | 8.6  | 9.3  | 2.3 | 2.10 | 0.48 | 39.2    | 17.1   | 20.8   | 2.3 | 1.88 | 0.53 |
| D3Y2P9_CC Ccdc6    | Coiled-coil   | 3  | 7.5   | 3.3  | 3.6  | 2.3 | 2.10 | 0.48 | 22.2    | 8.8    | 10.7   | 2.5 | 2.07 | 0.48 |
| Q7T750_M Cdc42bpb  | Serine/thre   | 8  | 21.4  | 9.4  | 10.2 | 2.3 | 2.09 | 0.48 | 1035.6  | 180.1  | 219.2  | 5.8 | 4.72 | 0.21 |
| Q61820_RV Rasl2-9  | GTP-bindin    | 5  | 13.2  | 5.8  | 6.3  | 2.3 | 2.09 | 0.48 | 169.0   | 220.0  | 267.8  | 0.8 | 0.63 | 1.58 |
| P80316_TC Cct5     | T-complex j   | 43 | 49.8  | 21.9 | 23.9 | 2.3 | 2.09 | 0.48 | 4394.0  | 1670.4 | 2033.1 | 2.6 | 2.16 | 0.46 |
| Q8BZ4_XF Srek1     | Splicing reg  | 1  | 8.4   | 3.7  | 4.0  | 2.3 | 2.08 | 0.48 | 8.4     | 3.7    | 4.5    | 2.3 | 1.86 | 0.54 |
| Q8K2F0_BF Brd3     | Bromodom      | 2  | 49.4  | 21.8 | 23.8 | 2.3 | 2.08 | 0.48 | 98.8    | 43.6   | 53.0   | 2.3 | 1.86 | 0.54 |
| P60670_NF Nploc4   | Nuclear prc   | 7  | 13.4  | 5.9  | 6.5  | 2.3 | 2.08 | 0.48 | 136.9   | 51.3   | 62.5   | 2.7 | 2.19 | 0.46 |
| Q9CZ15_P: Gins1    | DNA replica   | 1  | 3.2   | 1.4  | 1.5  | 2.3 | 2.08 | 0.48 | 3.2     | 1.4    | 1.7    | 2.3 | 1.86 | 0.54 |
| P17182_EH Eno1     | Alpha-enol    | 1  | 5.3   | 2.3  | 2.5  | 2.3 | 2.08 | 0.48 | 5.3     | 2.3    | 2.8    | 2.3 | 1.86 | 0.54 |
| Q8VDP4_C Ccar2     | Cell cycle e  | 6  | 19.6  | 8.7  | 9.5  | 2.3 | 2.08 | 0.48 | 146.3   | 63.4   | 77.1   | 2.3 | 1.90 | 0.53 |
| P08249_M Mdh2      | Malate deh    | 1  | 9.7   | 4.3  | 4.7  | 2.3 | 2.08 | 0.48 | 9.7     | 4.3    | 5.2    | 2.3 | 1.86 | 0.54 |
| Q8R017_VF Vps37b   | Vacuolar pr   | 3  | 9.6   | 4.3  | 4.6  | 2.3 | 2.07 | 0.48 | 36.1    | 19.8   | 24.1   | 1.8 | 1.50 | 0.67 |
| Q5RL79_K1 Krtcap2  | Keratinocyt   | 1  | 3.9   | 1.7  | 1.9  | 2.3 | 2.07 | 0.48 | 3.9     | 1.7    | 2.1    | 2.3 | 1.85 | 0.54 |
| Q8CIG8_AH Prmt5    | Protein arg   | 6  | 18.6  | 8.3  | 9.0  | 2.3 | 2.07 | 0.48 | 110.3   | 46.9   | 57.1   | 2.4 | 1.93 | 0.52 |
| Q91W36_L Usp3      | Ubiquitin c   | 1  | 7.5   | 3.3  | 3.6  | 2.2 | 2.05 | 0.49 | 7.5     | 3.3    | 4.1    | 2.2 | 1.84 | 0.54 |
| P47738_AL Aldh2    | Aldehyde d    | 1  | 6.1   | 2.7  | 3.0  | 2.2 | 2.05 | 0.49 | 6.1     | 2.7    | 3.3    | 2.2 | 1.84 | 0.54 |
| Q8BRT1_CL Clasp2   | CLIP-associ   | 8  | 17.9  | 8.0  | 8.7  | 2.2 | 2.05 | 0.49 | 168.4   | 90.0   | 109.6  | 1.9 | 1.54 | 0.65 |
| P99029_Pf Prdx5    | Peroxiored    | 4  | 13.2  | 5.9  | 6.4  | 2.2 | 2.05 | 0.49 | 56.8    | 21.5   | 26.2   | 2.6 | 2.17 | 0.46 |
| Q8BG94_C Commd7    | COMM dom      | 5  | 21.8  | 9.7  | 10.6 | 2.2 | 2.05 | 0.49 | 94.5    | 68.6   | 83.5   | 1.4 | 1.13 | 0.88 |
| O88746_TC Tom1     | Target of M   | 1  | 11.2  | 5.0  | 5.5  | 2.2 | 2.05 | 0.49 | 11.2    | 5.0    | 6.1    | 2.2 | 1.83 | 0.54 |
| O88844_ID Idh1     | Isocitrate d  | 3  | 11.4  | 5.1  | 5.6  | 2.2 | 2.05 | 0.49 | 38.9    | 19.6   | 23.8   | 2.0 | 1.63 | 0.61 |
| Q8BG15_C Ctdspl2   | CTD small p   | 1  | 18.3  | 8.2  | 8.9  | 2.2 | 2.05 | 0.49 | 18.3    | 8.2    | 10.0   | 2.2 | 1.83 | 0.55 |
| Q9D9V3_Ef Ehdhc1   | Ethylmalon    | 1  | 13.0  | 5.8  | 6.3  | 2.2 | 2.04 | 0.49 | 13.0    | 5.8    | 7.1    | 2.2 | 1.83 | 0.55 |
| Q9JKK6_NL Nudt5    | ADP-sugar j   | 1  | 12.4  | 5.6  | 6.1  | 2.2 | 2.04 | 0.49 | 12.4    | 5.6    | 6.8    | 2.2 | 1.83 | 0.55 |
| P97770_TR Thumpd3  | THUMP dor     | 1  | 8.4   | 3.8  | 4.1  | 2.2 | 2.04 | 0.49 | 8.4     | 3.8    | 4.6    | 2.2 | 1.83 | 0.55 |
| Q9CQ4_G Gemin2     | Gem-associ    | 1  | 9.7   | 4.4  | 4.8  | 2.2 | 2.03 | 0.49 | 9.7     | 4.4    | 5.3    | 2.2 | 1.82 | 0.55 |
| Q8VD65_Pi Pik3r4   | Phosphoin     | 2  | 20.7  | 9.4  | 10.2 | 2.2 | 2.03 | 0.49 | 41.5    | 18.7   | 22.8   | 2.2 | 1.82 | 0.55 |
| P62717_Rl Rpl18a   | 60S ribosor   | 19 | 47.4  | 21.4 | 23.1 | 2.2 | 2.03 | 0.49 | 1583.4  | 778.9  | 948.0  | 2.0 | 1.67 | 0.60 |
| Q3USH5_SF Sfwap    | Splicing fac  | 2  | 4.3   | 2.0  | 2.1  | 2.2 | 2.02 | 0.49 | 8.7     | 3.9    | 4.8    | 2.2 | 1.81 | 0.55 |
| Q8R1J3_ZC Zcch9    | Zinc finger i | 1  | 7.3   | 3.3  | 3.6  | 2.2 | 2.02 | 0.49 | 7.3     | 3.3    | 4.0    | 2.2 | 1.81 | 0.55 |
| Q61576_FF Fkbp10   | Peptidyl-pr   | 3  | 20.5  | 9.3  | 10.1 | 2.2 | 2.02 | 0.49 | 68.8    | 36.2   | 44.0   | 1.9 | 1.56 | 0.64 |
| E9Q3G8_Ef Nup153   | Protein Nup   | 5  | 12.2  | 5.5  | 6.0  | 2.2 | 2.02 | 0.50 | 52.9    | 39.9   | 48.6   | 1.3 | 1.09 | 0.92 |
| Q9DBG3_A Ap2b1     | AP-2 compl    | 13 | 18.8  | 8.6  | 9.3  | 2.2 | 2.02 | 0.50 | 381.3   | 140.1  | 170.6  | 2.7 | 2.24 | 0.45 |
| P27659_Rl Rpl3     | 60S ribosor   | 49 | 53.6  | 24.4 | 26.6 | 2.2 | 2.02 | 0.50 | 5123.8  | 2074.7 | 2525.3 | 2.5 | 2.03 | 0.49 |
| P08113_EH Hsp90b1  | Endoplasm     | 76 | 57.3  | 28.4 | 28.4 | 2.2 | 2.01 | 0.50 | 10356.8 | 3943.0 | 4799.3 | 2.6 | 2.16 | 0.46 |
| P37913_DL Lig1     | DNA ligase:   | 17 | 15.3  | 7.0  | 7.6  | 2.2 | 2.01 | 0.50 | 351.9   | 135.3  | 164.7  | 2.6 | 2.14 | 0.47 |
| Q9D1G5_L Lrrc57    | Leucine-ric   | 5  | 15.3  | 7.0  | 7.6  | 2.2 | 2.01 | 0.50 | 100.0   | 41.7   | 50.7   | 2.4 | 1.97 | 0.51 |
| P18155_M Mthfd2    | Bifunction:   | 1  | 14.5  | 6.6  | 7.2  | 2.2 | 2.01 | 0.50 | 14.5    | 6.6    | 8.0    | 2.2 | 1.80 | 0.56 |
| Q9JL45_JF Eif25    | Eukaryotic:   | 19 | 24.4  | 11.2 | 12.2 | 2.2 | 2.01 | 0.50 | 1036.8  | 503.6  | 612.9  | 2.1 | 1.69 | 0.59 |
| Q8C2E7_ST Kiaa0196 | WASH com      | 4  | 15.4  | 7.1  | 7.7  | 2.2 | 2.00 | 0.50 | 62.9    | 33.5   | 40.8   | 1.9 | 1.54 | 0.65 |
| Q8C142_AL Ldirap1  | Low densit    | 3  | 7.5   | 3.4  | 3.8  | 2.2 | 2.00 | 0.50 | 23.5    | 9.4    | 11.5   | 2.5 | 2.05 | 0.49 |
| Q9Z160_C Cog1      | Conserved     | 1  | 16.7  | 7.7  | 8.4  | 2.2 | 2.00 | 0.50 | 16.7    | 7.7    | 9.3    | 2.2 | 1.79 | 0.56 |
| P70670_NV Naca     | Nascent po    | 7  | 25.3  | 11.6 | 12.6 | 2.2 | 2.00 | 0.50 | 279.3   | 118.3  | 144.0  | 2.4 | 1.94 | 0.52 |
| Q9QYR6_M Map1a     | Microtubul    | 9  | 15.6  | 7.2  | 7.8  | 2.2 | 2.00 | 0.50 | 238.3   | 98.2   | 119.5  | 2.4 | 1.99 | 0.50 |
| P12367_TL Prkar2a  | cAMP-depe     | 1  | 9.7   | 4.4  | 4.8  | 2.2 | 2.00 | 0.50 | 9.7     | 4.4    | 5.4    | 2.2 | 1.79 | 0.56 |
| Q91WJ8_FF Fubp1    | Far upstrea   | 4  | 23.6  | 10.8 | 11.8 | 2.2 | 2.00 | 0.50 | 126.3   | 72.1   | 87.8   | 1.8 | 1.44 | 0.69 |
| O35226_P: Psm4     | 26S protea    | 9  | 28.7  | 13.2 | 14.4 | 2.2 | 1.99 | 0.50 | 334.3   | 111.7  | 136.0  | 3.0 | 2.46 | 0.41 |
| Q8CFE4_SC Scyl2    | SCY1-like pi  | 5  | 17.0  | 7.8  | 8.5  | 2.2 | 1.99 | 0.50 | 84.6    | 52.9   | 64.4   | 1.6 | 1.31 | 0.76 |
| P62257_UL Ube2h    | Ubiquitin-c   | 5  | 23    |      |      |     |      |      |         |        |        |     |      |      |



|                     |              |    |       |       |       |     |      |      |         |        |        |     |      |      |
|---------------------|--------------|----|-------|-------|-------|-----|------|------|---------|--------|--------|-----|------|------|
| O70591_PI Pfdn2     | Prefoldin su | 2  | 21.6  | 10.2  | 11.1  | 2.1 | 1.95 | 0.51 | 43.2    | 20.3   | 24.7   | 2.1 | 1.75 | 0.57 |
| P47713_P_Pla2g4a    | Cytosolic p  | 1  | 6.3   | 3.0   | 3.2   | 2.1 | 1.95 | 0.51 | 6.3     | 3.0    | 3.6    | 2.1 | 1.75 | 0.57 |
| O9ESN9_IJ_Mpk8ip3   | C-Jun-amin   | 3  | 9.0   | 4.2   | 4.6   | 2.1 | 1.95 | 0.51 | 27.2    | 12.4   | 15.1   | 2.2 | 1.80 | 0.56 |
| O9JM76_AI_Arpc3     | Actin-relat  | 4  | 26.4  | 12.4  | 13.6  | 2.1 | 1.95 | 0.51 | 138.2   | 55.9   | 68.1   | 2.5 | 2.03 | 0.49 |
| Q8C1D8_IW_lws1      | Protein IW'  | 1  | 9.0   | 4.3   | 4.7   | 2.1 | 1.94 | 0.52 | 9.0     | 4.3    | 5.2    | 2.1 | 1.74 | 0.57 |
| P08032_SF_Spta1     | Spectrin alp | 3  | 17.6  | 8.3   | 9.1   | 2.1 | 1.94 | 0.52 | 64.5    | 27.1   | 32.9   | 2.4 | 1.96 | 0.51 |
| Q6NZL1_QI_Dhx37     | DEAH (Asp-4  | 2  | 18.1  | 8.5   | 9.3   | 2.1 | 1.94 | 0.52 | 36.1    | 17.1   | 20.8   | 2.1 | 1.74 | 0.58 |
| Q3TLH4_Pf_Prrc2c    | Protein PRF  | 8  | 10.9  | 5.2   | 5.6   | 2.1 | 1.94 | 0.52 | 101.5   | 67.2   | 81.8   | 1.5 | 1.24 | 0.81 |
| O922A0_Pf_Pdpk1     | 3-phosphoi   | 2  | 12.1  | 5.7   | 6.2   | 2.1 | 1.94 | 0.52 | 24.2    | 11.4   | 13.9   | 2.1 | 1.73 | 0.58 |
| P35585_AF_Ap1m1     | AP-1 compl   | 7  | 12.6  | 6.0   | 6.5   | 2.1 | 1.93 | 0.52 | 94.1    | 40.6   | 49.4   | 2.3 | 1.90 | 0.53 |
| Q61768_KI_Kif5b     | Kinesin-1 h  | 17 | 28.3  | 13.4  | 14.7  | 2.1 | 1.93 | 0.52 | 638.5   | 253.7  | 308.8  | 2.5 | 2.07 | 0.48 |
| O9CWZ7_S_Napg       | Gamma-sol    | 1  | 7.3   | 3.5   | 3.8   | 2.1 | 1.93 | 0.52 | 7.3     | 3.5    | 4.2    | 2.1 | 1.73 | 0.58 |
| P10107_AF_Anxa1     | Annexin A1   | 25 | 41.7  | 19.8  | 21.6  | 2.1 | 1.93 | 0.52 | 2030.5  | 620.5  | 755.2  | 3.3 | 2.69 | 0.37 |
| P62748_Hf_Hpcal1    | Hippocalcin  | 2  | 13.2  | 6.3   | 6.9   | 2.1 | 1.93 | 0.52 | 26.5    | 12.6   | 15.3   | 2.1 | 1.73 | 0.58 |
| O9ROX4_AC_Acot9     | Acyl-coenz   | 3  | 7.0   | 3.3   | 3.6   | 2.1 | 1.93 | 0.52 | 23.8    | 11.5   | 14.0   | 2.1 | 1.70 | 0.59 |
| O922R5_P_Smek2      | Serine/thre  | 2  | 9.5   | 4.5   | 4.9   | 2.1 | 1.92 | 0.52 | 18.9    | 9.0    | 11.0   | 2.1 | 1.72 | 0.58 |
| Q80TR0_QI_Nfat5     | MKIAA082'    | 1  | 6.5   | 3.1   | 3.4   | 2.1 | 1.92 | 0.52 | 6.5     | 3.1    | 3.8    | 2.1 | 1.72 | 0.58 |
| Q6ZQ38_C_Cand1      | Cullin-assoc | 20 | 22.5  | 10.8  | 11.7  | 2.1 | 1.92 | 0.52 | 650.3   | 227.1  | 276.4  | 2.9 | 2.35 | 0.43 |
| Q55516_UTI_Utp18    | U3 small nu  | 1  | 3.9   | 1.9   | 2.0   | 2.1 | 1.92 | 0.52 | 3.9     | 1.9    | 2.3    | 2.1 | 1.72 | 0.58 |
| Q3TDD9_PI_Ppp1r21   | Protein phc  | 1  | 6.0   | 2.8   | 3.1   | 2.1 | 1.92 | 0.52 | 6.0     | 2.8    | 3.5    | 2.1 | 1.72 | 0.58 |
| Q3ULL6_QC_Upf3b     | Protein Upl  | 3  | 11.1  | 5.3   | 5.8   | 2.1 | 1.92 | 0.52 | 31.3    | 17.8   | 21.7   | 1.8 | 1.45 | 0.69 |
| P43275_H:Hist1h1a   | Histone H1   | 18 | 78.2  | 37.4  | 40.8  | 2.1 | 1.92 | 0.52 | 8543.8  | 4281.3 | 5211.1 | 2.0 | 1.64 | 0.61 |
| A3KGB4_TE_Tbc1d8b   | TBC1 doma    | 2  | 8.7   | 4.2   | 4.6   | 2.1 | 1.91 | 0.52 | 17.4    | 8.4    | 10.2   | 2.1 | 1.71 | 0.58 |
| Q6NZNO_RI_Rbm26     | RNA-bindin   | 6  | 12.7  | 6.1   | 6.7   | 2.1 | 1.91 | 0.52 | 89.1    | 55.4   | 67.4   | 1.6 | 1.32 | 0.76 |
| O9CKV9_DI_Dcun1d5   | DCN1-like f  | 2  | 13.8  | 6.6   | 7.2   | 2.1 | 1.91 | 0.52 | 27.5    | 13.2   | 16.1   | 2.1 | 1.71 | 0.58 |
| O88879_FF_Fbln1     | Fibulin-1 O  | 1  | 41.8  | 20.1  | 21.9  | 2.1 | 1.91 | 0.52 | 41.8    | 20.1   | 24.5   | 2.1 | 1.71 | 0.59 |
| A2A6Q5_CI_Cdc27     | Cell divisio | 2  | 4.8   | 2.3   | 2.5   | 2.1 | 1.91 | 0.52 | 9.6     | 4.6    | 5.6    | 2.1 | 1.71 | 0.59 |
| P11499_H: Hsp90ab1  | Heat shock   | 62 | 79.5  | 38.2  | 41.7  | 2.1 | 1.91 | 0.52 | 11168.9 | 4691.8 | 5710.7 | 2.4 | 1.96 | 0.51 |
| O9WUA2_S_Farsb      | Phenylalan   | 32 | 48.8  | 23.5  | 25.6  | 2.1 | 1.91 | 0.52 | 1528.4  | 776.3  | 944.9  | 2.0 | 1.62 | 0.62 |
| P70336_RC_Rock2     | Rho-assoc    | 2  | 5.2   | 2.5   | 2.7   | 2.1 | 1.90 | 0.53 | 10.4    | 5.0    | 6.1    | 2.1 | 1.70 | 0.59 |
| O88545_C_Cops6      | COP9 signa   | 8  | 21.7  | 10.5  | 11.4  | 2.1 | 1.90 | 0.53 | 255.8   | 92.6   | 112.7  | 2.8 | 2.27 | 0.44 |
| O922D4_PI_Ppp6r3    | Serine/thre  | 1  | 6.5   | 3.1   | 3.4   | 2.1 | 1.90 | 0.53 | 6.5     | 3.1    | 3.8    | 2.1 | 1.70 | 0.59 |
| P62702_RI_Rps4x     | 40S ribosor  | 47 | 62.3  | 30.1  | 32.9  | 2.1 | 1.90 | 0.53 | 4592.0  | 2678.6 | 3260.4 | 1.7 | 1.41 | 0.71 |
| Q63918_SI_Sdpr      | Serum depr   | 12 | 46.1  | 22.4  | 24.4  | 2.1 | 1.89 | 0.53 | 470.5   | 290.2  | 353.2  | 1.6 | 1.33 | 0.75 |
| Q8C033_AI_Arghetf10 | Rho guanin   | 2  | 7.4   | 3.6   | 3.9   | 2.1 | 1.89 | 0.53 | 14.7    | 7.1    | 8.7    | 2.1 | 1.69 | 0.59 |
| P59997_KI_Kdm2a     | Lysine-spec  | 2  | 13.2  | 7.4   | 8.0   | 2.1 | 1.89 | 0.53 | 30.3    | 14.7   | 17.9   | 2.1 | 1.69 | 0.59 |
| P51410_RI_Rpl9      | 60S ribosor  | 19 | 35.0  | 16.0  | 17.5  | 2.1 | 1.89 | 0.53 | 2180.9  | 903.7  | 1100.0 | 2.4 | 1.98 | 0.50 |
| Q8R57_FF_Ih1        | Interferon-1 | 21 | 15.2  | 7.4   | 8.1   | 2.1 | 1.88 | 0.53 | 494.6   | 218.4  | 265.8  | 2.3 | 1.86 | 0.54 |
| Q61595_KI_Ktn1      | Kinectin OS  | 1  | 12.0  | 5.8   | 6.4   | 2.1 | 1.88 | 0.53 | 12.0    | 5.8    | 7.1    | 2.1 | 1.69 | 0.59 |
| O991P6_HC_Homer3    | Homer prot   | 1  | 7.5   | 3.7   | 4.0   | 2.1 | 1.88 | 0.53 | 7.5     | 3.7    | 4.5    | 2.1 | 1.69 | 0.59 |
| P42932_TC_Cct8      | T-complex    | 75 | 48.2  | 23.5  | 25.6  | 2.1 | 1.88 | 0.53 | 5936.6  | 2575.6 | 3134.9 | 2.3 | 1.89 | 0.53 |
| Q8K012_FF_Fnbp1l    | Formin-bin   | 3  | 22.3  | 10.9  | 11.9  | 2.1 | 1.88 | 0.53 | 66.8    | 38.4   | 46.7   | 1.7 | 1.43 | 0.70 |
| P49615_CI_Cdk5      | Cyclin-depr  | 4  | 14.4  | 7.0   | 7.7   | 2.1 | 1.88 | 0.53 | 50.6    | 26.2   | 31.9   | 1.9 | 1.59 | 0.63 |
| O91VL8_TE_Terf2ip   | Telomeric r  | 2  | 8.8   | 4.3   | 4.7   | 2.0 | 1.88 | 0.53 | 17.6    | 8.6    | 10.5   | 2.0 | 1.68 | 0.59 |
| P07742_RI_Rrm1      | Ribonuclec   | 10 | 21.3  | 10.4  | 11.4  | 2.0 | 1.88 | 0.53 | 154.9   | 125.0  | 152.1  | 1.2 | 1.02 | 0.98 |
| O9WVF7_C_Pole       | DNA polym    | 2  | 14.9  | 7.3   | 8.0   | 2.0 | 1.88 | 0.53 | 29.9    | 14.6   | 17.8   | 2.0 | 1.68 | 0.59 |
| O9JIF0_ANI_Prm1     | Protein arg  | 27 | 42.7  | 20.9  | 22.7  | 2.0 | 1.88 | 0.53 | 1692.4  | 604.9  | 736.3  | 2.8 | 2.30 | 0.44 |
| P35979_RI_Rpl12     | 60S ribosor  | 11 | 113.8 | 55.6  | 60.7  | 2.0 | 1.87 | 0.53 | 3961.2  | 2036.3 | 2478.5 | 1.9 | 1.60 | 0.63 |
| O9D1J3_SA_Sarnp     | SAP domai    | 1  | 6.9   | 3.4   | 3.7   | 2.0 | 1.87 | 0.53 | 6.9     | 3.4    | 4.1    | 2.0 | 1.68 | 0.60 |
| O9QYH8_SF_Spast     | Spastin OS-  | 1  | 10.7  | 5.2   | 5.7   | 2.0 | 1.87 | 0.53 | 10.7    | 5.2    | 6.4    | 2.0 | 1.68 | 0.60 |
| O35551_RV_Rabep1    | Rab GTPase   | 1  | 8.8   | 4.3   | 4.7   | 2.0 | 1.87 | 0.54 | 8.8     | 4.3    | 5.3    | 2.0 | 1.68 | 0.60 |
| P62274_RI_Rps29     | 40S ribosor  | 1  | 588.4 | 289.1 | 315.3 | 2.0 | 1.87 | 0.54 | 588.4   | 289.1  | 351.8  | 2.0 | 1.67 | 0.60 |
| Q8C863_IT_Ihch      | E3 ubiquiti  | 2  | 13.8  | 6.8   | 7.4   | 2.0 | 1.87 | 0.54 | 27.6    | 13.5   | 16.5   | 2.0 | 1.67 | 0.60 |
| A2AQ19_RI_Rtfl      | RNA polym    | 7  | 9.8   | 4.8   | 5.3   | 2.0 | 1.87 | 0.54 | 150.5   | 56.1   | 68.3   | 2.7 | 2.20 | 0.45 |
| O9R0Y5_KI_Ak1       | Adenylate k  | 1  | 16.4  | 8.0   | 8.8   | 2.0 | 1.87 | 0.54 | 16.4    | 8.0    | 9.8    | 2.0 | 1.67 | 0.60 |
| Q6ZQK0_CI_Ncapd3    | Condensin-   | 4  | 15.4  | 7.6   | 8.3   | 2.0 | 1.86 | 0.54 | 55.1    | 32.8   | 39.9   | 1.7 | 1.38 | 0.72 |
| Q811D0_D_Dlg1       | Diskslarge l | 4  | 11.6  | 5.7   | 6.2   | 2.0 | 1.86 | 0.54 | 45.2    | 22.6   | 27.5   | 2.0 | 1.65 | 0.61 |
| Q8K009_AI_Aldh1l2   | Mitochond    | 6  | 9.1   | 4.5   | 4.9   | 2.0 | 1.86 | 0.54 | 58.1    | 26.2   | 31.9   | 2.2 | 1.82 | 0.55 |
| B1AY13_UF_Usp24     | Ubiquitin c  | 9  | 12.2  | 6.0   | 6.5   | 2.0 | 1.86 | 0.54 | 126.9   | 48.1   | 58.6   | 2.6 | 2.17 | 0.46 |
| P62259_1_4_Ywhae    | 14-3-3 prot  | 25 | 22.2  | 11.0  | 11.9  | 2.0 | 1.86 | 0.54 | 2062.8  | 624.3  | 759.9  | 3.3 | 2.71 | 0.37 |
| Q8VBV3_EI_Exosc2    | Exosome cc   | 1  | 12.4  | 6.1   | 6.7   | 2.0 | 1.85 | 0.54 | 12.4    | 6.1    | 7.5    | 2.0 | 1.66 | 0.60 |
| Q3UWL8_K_Pfdn4      | Protein Pfd  | 2  | 15.0  | 7.4   | 8.1   | 2.0 | 1.85 | 0.54 | 30.1    | 14.9   | 18.1   | 2.0 | 1.66 | 0.60 |
| Q8R3N6_TI_Thoc1     | THO compl    | 9  | 10.4  | 5.1   | 5.6   | 2.0 | 1.85 | 0.54 | 98.4    | 60.4   | 73.5   | 1.6 | 1.34 | 0.75 |
| Q8BFY9_TN_Tnp01     | Transportir  | 9  | 14.0  | 6.9   | 7.6   | 2.0 | 1.85 | 0.54 | 160.7   | 74.5   | 90.7   | 2.2 | 1.77 | 0.56 |
| P61290_P_Spme3      | Proteasom    | 3  | 12.0  | 5.9   | 6.5   | 2.0 | 1.85 | 0.54 | 50.6    | 23.3   | 28.4   | 2.2 | 1.78 | 0.56 |
| P41241_C_Csk        | Tyrosine-pr  | 2  | 10.2  | 5.0   | 5.5   | 2.0 | 1.85 | 0.54 | 20.3    | 10.1   | 12.2   | 2.0 | 1.66 | 0.60 |
| O08808_DI_Diaph1    | Protein dia  | 4  | 12.3  | 6.1   | 6.7   | 2.0 | 1.85 | 0.54 | 49.0    | 22.2   | 27.1   | 2.2 | 1.81 | 0.55 |
| P28658_AI_Atxn10    | Ataxin-10 C  | 18 | 23.5  | 11.7  | 12.7  | 2.0 | 1.85 | 0.54 | 484.1   | 233.0  | 283.7  | 2.1 | 1.71 | 0.59 |
| Q8C1B7_SF_11-Sep    | Septin-11 C  | 7  | 15.1  | 7.5   | 8.2   | 2.0 | 1.85 | 0.54 | 145.5   | 61.7   | 75.1   | 2.4 | 1.94 | 0.52 |
| O9CQ55_RI_Riok2     | Serine/thre  | 4  | 14.7  | 7.3   | 8.0   | 2.0 | 1.85 | 0.54 | 51.7    | 29.0   | 35.3   | 1.8 | 1.46 | 0.68 |
| O9CXK6_IU_Ilf2      | Interleukin  | 36 | 41.4  | 20.5  | 22.4  | 2.0 | 1.85 | 0.54 | 1901.5  | 1125.7 | 1370.2 | 1.7 | 1.39 | 0.72 |
| Q8C4B4_U_Unc119b    | Protein unc  | 1  | 9.1   | 4.5   | 4.9   | 2.0 | 1.85 | 0.54 | 9.1     | 4.5    | 5.5    | 2.0 | 1.66 | 0.60 |
| O991C8_EI_Elf2b1    | Translation  | 15 | 13.9  | 6.9   | 7.5   | 2.0 | 1.85 | 0.54 | 288.6   | 117.3  | 142.8  | 2.5 | 2.02 | 0.49 |
| O9JLN9_M_Mtor       | Serine/thre  | 1  | 9.8   | 4.9   | 5.3   | 2.0 | 1.84 | 0.54 | 9.8     | 4.9    | 5.9    | 2.0 | 1.65 | 0.60 |
| O991X3_GC_Gorasp2   | Golgi reas   | 2  | 15.0  | 7.5   | 8.2   | 2.0 | 1.84 | 0.54 | 30.1    | 15.0   | 18.2   | 2.0 | 1.65 | 0.61 |
| P33611_DI_Pola2     | DNA polym    | 6  | 12.0  | 6.0   | 6.5   | 2.0 | 1.84 | 0.54 | 115.3   | 387.8  | 472.0  | 0.3 | 0.24 | 4.10 |
| Q8C143_M_Myl6b      | Myosin ligh  | 5  | 49.2  | 24.5  | 26.7  | 2.0 | 1.84 | 0.54 | 2282.7  | 1424.4 | 1733.7 | 1.6 | 1.32 | 0.76 |
| O88448_KI_Klc2      | Kinesin ligh | 6  | 29.3  | 14.6  | 15.9  | 2.0 | 1.84 | 0.54 | 171.4   | 83.0   | 101.0  | 2.1 | 1.70 | 0.59 |
| O9D1C9_RI_Rrp7a     | Ribosomal    | 3  | 16.7  | 8.3   | 9.1   | 2.0 | 1.83 | 0.55 | 58.5    | 55.2   | 67.1   | 1.1 | 0.87 | 1.15 |
| P68510_1_4_Ywhah    | 14-3-3 prot  | 13 | 14.2  | 7.1   | 7.7   | 2.0 | 1.83 | 0.55 | 462.3   | 178.0  | 216.6  | 2.6 | 2.13 | 0.47 |
| O9CXK8_NI_Nip7      | 60S ribosor  | 4  | 15.4  | 7.7   | 8.4   | 2.0 | 1.83 | 0.55 | 67.7    | 44.7   | 54.4   | 1.5 | 1.25 | 0.80 |
| A2AS56_T11_Ttn      | Titin OS-M   | 1  | 34.0  | 17.0  | 18.6  | 2.0 | 1.83 | 0.55 | 34.0    | 17.0   | 20.7   | 2.0 | 1.64 | 0.61 |
| Q8BG24_CI_Cdc23     | Cell divisio | 5  | 11.9  | 6.0   | 6.5   | 2.0 | 1.83 | 0.55 | 59.1    | 25.3   | 30.8   | 2.3 | 1.92 | 0.52 |
| O9EPQ8_TC_Tcft0     | Transcripti  | 2  | 12.6  | 6.3   | 6.9   | 2.0 | 1.83 | 0.55 | 25.2    | 12.6   | 15.4   | 2.0 | 1.64 | 0.61 |
| Q6P1G0_H_Heatr6     | HEAT repea   | 4  | 11.1  | 5.6   | 6.1   | 2.0 | 1.83 | 0.55 | 39.5    | 25.1   | 30.6   | 1.6 | 1.29 | 0.77 |
| Q61249_IJ_lgpb1     | Immunoglc    | 4  | 12.1  | 6.1   | 6.6   | 2.0 | 1.83 | 0.55 | 42.5    | 24.7   | 30.1   | 1.7 | 1.41 | 0.71 |
| Q8BY02_NI_Nkrf      | NF-kappa-B   | 1  | 51.5  | 25.9  | 28.2  | 2.0 | 1.82 | 0.55 | 51.5    | 25.9   | 31.5   | 2.0 | 1.64 | 0.61 |
| O91WK2_EI_Eif3h     | Eukaryotic   | 23 | 28.2  | 14.2  | 15.5  | 2.0 | 1.82 | 0.55 | 1254.2  | 600.8  | 731.3  | 2.1 | 1.72 |      |

|                     |              |    |      |      |      |     |      |      |         |        |        |     |      |      |
|---------------------|--------------|----|------|------|------|-----|------|------|---------|--------|--------|-----|------|------|
| Q9JKC8_AF Ap3m1     | AP-3 compl   | 8  | 18.9 | 9.6  | 10.5 | 2.0 | 1.79 | 0.56 | 176.7   | 118.4  | 144.2  | 1.5 | 1.23 | 0.82 |
| Q8CGC4_L4 Lsm14b    | Protein L5A  | 1  | 19.7 | 10.1 | 11.0 | 2.0 | 1.79 | 0.56 | 19.7    | 10.1   | 12.3   | 2.0 | 1.61 | 0.62 |
| P53026_RL Rpl10a    | 60S ribosom  | 23 | 71.8 | 36.8 | 40.1 | 2.0 | 1.79 | 0.56 | 4118.7  | 1829.8 | 2227.2 | 2.3 | 1.85 | 0.54 |
| Q8K2F8_L5 Lsm14a    | Protein L5A  | 1  | 2.9  | 1.5  | 1.6  | 2.0 | 1.79 | 0.56 | 2.9     | 1.5    | 1.8    | 2.0 | 1.61 | 0.62 |
| Q62448_IF EIf4g2    | Eukaryotic   | 27 | 20.3 | 10.4 | 11.3 | 2.0 | 1.79 | 0.56 | 554.8   | 275.9  | 335.8  | 2.0 | 1.65 | 0.61 |
| Q8COD4_RI Arhgap12  | Rho GTPase   | 1  | 7.8  | 4.0  | 4.3  | 2.0 | 1.79 | 0.56 | 7.8     | 4.0    | 4.8    | 2.0 | 1.60 | 0.62 |
| Q9QXE7_TI Tbl1x     | F-box-like/h | 3  | 13.8 | 7.1  | 7.7  | 1.9 | 1.79 | 0.56 | 39.9    | 22.6   | 27.5   | 1.8 | 1.45 | 0.69 |
| Q9R1P4_P1 Psm1      | Proteasom    | 1  | 13.0 | 6.7  | 7.3  | 1.9 | 1.78 | 0.56 | 13.0    | 6.7    | 8.2    | 1.9 | 1.59 | 0.63 |
| P14873_M Map1b      | Microtubul   | 47 | 18.2 | 9.4  | 10.3 | 1.9 | 1.77 | 0.56 | 1302.0  | 590.5  | 718.7  | 2.2 | 1.81 | 0.55 |
| Q6P2B1_T1 Tnp03     | Transportir  | 3  | 18.4 | 9.5  | 10.4 | 1.9 | 1.77 | 0.57 | 50.2    | 26.6   | 32.4   | 1.9 | 1.55 | 0.65 |
| Q6ZQ58_L4 Larp1     | La-related f | 19 | 16.3 | 8.4  | 9.2  | 1.9 | 1.77 | 0.57 | 382.2   | 242.1  | 294.7  | 1.6 | 1.30 | 0.77 |
| P62843_R5 Rps15     | 40S ribosom  | 5  | 18.4 | 9.5  | 10.4 | 1.9 | 1.77 | 0.57 | 154.1   | 79.1   | 96.3   | 1.9 | 1.60 | 0.63 |
| P84099_RL Rpl19     | 60S ribosom  | 17 | 37.6 | 19.5 | 21.3 | 1.9 | 1.76 | 0.57 | 1197.0  | 939.3  | 1143.2 | 1.3 | 1.05 | 0.96 |
| Q8CD76_Q Klc1       | Kinesin ligh | 10 | 13.5 | 7.0  | 7.7  | 1.9 | 1.76 | 0.57 | 190.4   | 111.8  | 136.1  | 1.7 | 1.40 | 0.71 |
| P35123_UI Usp4      | Ubiquitin c  | 6  | 12.7 | 6.6  | 7.2  | 1.9 | 1.76 | 0.57 | 74.8    | 41.8   | 50.8   | 1.8 | 1.47 | 0.68 |
| O09130_NI Nfatc2ip  | NFATC2-int   | 3  | 8.2  | 4.3  | 4.6  | 1.9 | 1.76 | 0.57 | 25.2    | 12.5   | 15.2   | 2.0 | 1.65 | 0.60 |
| Q64337_SQ Sqtst1    | Sequestoso   | 3  | 20.2 | 10.5 | 11.4 | 1.9 | 1.76 | 0.57 | 60.6    | 29.7   | 36.2   | 2.0 | 1.68 | 0.60 |
| Q9WTO5_A Akap12     | A-kinase an  | 15 | 11.5 | 6.0  | 6.5  | 1.9 | 1.76 | 0.57 | 193.4   | 116.1  | 141.3  | 1.7 | 1.37 | 0.73 |
| Q9D8U8_S1 Srx5      | Sorting nex  | 10 | 17.8 | 9.3  | 10.1 | 1.9 | 1.76 | 0.57 | 221.9   | 121.9  | 148.4  | 1.8 | 1.50 | 0.67 |
| Q6ZWU9_F Rps27      | 40S ribosom  | 2  | 28.7 | 15.0 | 16.3 | 1.9 | 1.75 | 0.57 | 57.3    | 30.0   | 36.5   | 1.9 | 1.57 | 0.64 |
| P62852_R5 Rps25     | 40S ribosom  | 9  | 82.0 | 42.9 | 46.8 | 1.9 | 1.75 | 0.57 | 1783.4  | 1456.9 | 1773.3 | 1.2 | 1.01 | 0.99 |
| Q3UJD6_UI Usp19     | Ubiquitin c  | 1  | 9.2  | 4.8  | 5.2  | 1.9 | 1.75 | 0.57 | 9.2     | 4.8    | 5.8    | 1.9 | 1.57 | 0.64 |
| Q3UKV0_Q EIf2b3     | Protein EIf2 | 11 | 14.2 | 7.5  | 8.2  | 1.9 | 1.75 | 0.57 | 203.8   | 151.9  | 184.9  | 1.3 | 1.10 | 0.91 |
| Q9CPX6_A1 Atg3      | Ubiquitin-l  | 1  | 6.7  | 3.5  | 3.9  | 1.9 | 1.75 | 0.57 | 6.7     | 3.5    | 4.3    | 1.9 | 1.56 | 0.64 |
| F7A187_F7 Psm4      | 26S proteas  | 2  | 10.5 | 5.5  | 6.0  | 1.9 | 1.74 | 0.57 | 21.0    | 11.0   | 13.4   | 1.9 | 1.56 | 0.64 |
| A2AN08_UI Ubr4      | E3 ubiquiti  | 13 | 10.9 | 5.7  | 6.2  | 1.9 | 1.74 | 0.57 | 196.6   | 201.3  | 245.0  | 1.0 | 0.80 | 1.25 |
| P15864_H1 Hist1h1c  | Histone H1   | 20 | 84.7 | 44.6 | 48.6 | 1.9 | 1.74 | 0.57 | 10508.3 | 5441.4 | 6623.1 | 1.9 | 1.59 | 0.63 |
| Q99L84_Q1 Capg      | Capping pri  | 10 | 33.1 | 17.4 | 19.0 | 1.9 | 1.74 | 0.57 | 471.1   | 211.7  | 257.7  | 2.2 | 1.83 | 0.55 |
| Q9WJT8_FJ Fam50b    | Protein FAH  | 1  | 31.1 | 16.4 | 17.9 | 1.9 | 1.74 | 0.58 | 31.1    | 16.4   | 20.0   | 1.9 | 1.56 | 0.64 |
| Q5SWD9_T Tsr1       | Pre-rRNA-p   | 3  | 12.9 | 6.8  | 7.4  | 1.9 | 1.74 | 0.58 | 36.3    | 19.6   | 23.9   | 1.9 | 1.52 | 0.66 |
| Q3UIX4_Q1 Srsf11    | Protein Srsf | 10 | 25.6 | 13.5 | 14.7 | 1.9 | 1.74 | 0.58 | 314.9   | 154.6  | 188.1  | 2.0 | 1.67 | 0.60 |
| B1AZI6_TH Thoc2     | THO compl    | 13 | 19.7 | 10.4 | 11.4 | 1.9 | 1.73 | 0.58 | 375.6   | 173.3  | 210.9  | 2.2 | 1.78 | 0.56 |
| B2RXC6_B1 Polr3a    | Polymerase   | 1  | 12.0 | 6.4  | 6.9  | 1.9 | 1.73 | 0.58 | 12.0    | 6.4    | 7.7    | 1.9 | 1.55 | 0.64 |
| P61961_UI Ufm1      | Ubiquitin-f  | 1  | 15.2 | 8.1  | 8.8  | 1.9 | 1.73 | 0.58 | 15.2    | 8.1    | 9.8    | 1.9 | 1.55 | 0.64 |
| Q61189_Q1 Clns1a    | Methylsoro   | 2  | 11.7 | 6.2  | 6.8  | 1.9 | 1.73 | 0.58 | 23.4    | 12.4   | 15.1   | 1.9 | 1.55 | 0.65 |
| Q8C954_CC Ccdc186   | Coiled-coil  | 2  | 7.9  | 4.2  | 4.6  | 1.9 | 1.73 | 0.58 | 15.9    | 8.4    | 10.2   | 1.9 | 1.55 | 0.65 |
| Q6ZQH8_N Nup188     | Nucleopor    | 1  | 5.6  | 3.0  | 3.2  | 1.9 | 1.73 | 0.58 | 5.6     | 3.0    | 3.6    | 1.9 | 1.55 | 0.65 |
| Q8K1R7_N1 Nek9      | Serine/thre  | 3  | 12.9 | 6.8  | 7.5  | 1.9 | 1.72 | 0.58 | 30.9    | 19.2   | 23.4   | 1.6 | 1.32 | 0.76 |
| Q9QZQ1_AI Mllt4     | Afadin 05-f  | 12 | 17.9 | 9.5  | 10.4 | 1.9 | 1.72 | 0.58 | 206.1   | 137.7  | 167.6  | 1.5 | 1.23 | 0.81 |
| Q9D8E6_RL Rpl4      | 60S ribosom  | 34 | 71.3 | 38.0 | 41.4 | 1.9 | 1.72 | 0.58 | 5443.8  | 2048.4 | 2493.2 | 2.7 | 2.18 | 0.46 |
| Q8BS22_AF Ap3s2     | AP-3 compl   | 1  | 8.5  | 4.5  | 5.0  | 1.9 | 1.72 | 0.58 | 8.5     | 4.5    | 5.5    | 1.9 | 1.54 | 0.65 |
| Q9JHU4_D Dync1h1    | Cytoplasm    | 47 | 18.7 | 10.0 | 10.9 | 1.9 | 1.72 | 0.58 | 1092.5  | 529.2  | 644.1  | 2.1 | 1.70 | 0.59 |
| Q6URW6_J Myh14      | Myosin-14    | 5  | 34.1 | 18.2 | 19.9 | 1.9 | 1.72 | 0.58 | 1840.5  | 900.1  | 1095.5 | 2.0 | 1.68 | 0.60 |
| A2ABV5_M Med14      | Mediator o   | 3  | 11.8 | 6.3  | 6.8  | 1.9 | 1.72 | 0.58 | 34.4    | 27.7   | 33.7   | 1.2 | 1.02 | 0.98 |
| Q80ZM5_Q H1xf       | H1 histone   | 5  | 49.6 | 26.5 | 28.9 | 1.9 | 1.72 | 0.58 | 537.8   | 326.6  | 397.6  | 1.6 | 1.35 | 0.74 |
| Q9ZOP5_TV Twf2      | Twinfilin-2  | 1  | 5.5  | 2.9  | 3.2  | 1.9 | 1.72 | 0.58 | 5.5     | 2.9    | 3.6    | 1.9 | 1.54 | 0.65 |
| Q5F2E8_TA Taok1     | Serine/thre  | 3  | 22.1 | 11.8 | 12.9 | 1.9 | 1.71 | 0.58 | 77.0    | 38.8   | 47.3   | 2.0 | 1.63 | 0.61 |
| Q5XF20_CR021_MOUSE  | UPF0711 p    | 1  | 11.1 | 6.0  | 6.5  | 1.9 | 1.71 | 0.58 | 11.1    | 6.0    | 7.2    | 1.9 | 1.53 | 0.65 |
| Q8OU72_S1 Scrib     | Protein scri | 2  | 5.7  | 3.1  | 3.4  | 1.9 | 1.71 | 0.59 | 11.5    | 6.1    | 7.5    | 1.9 | 1.53 | 0.65 |
| E9Q4K7_ES Kif13b    | Kinesin-like | 12 | 9.7  | 5.2  | 5.7  | 1.9 | 1.71 | 0.59 | 165.7   | 78.5   | 95.5   | 2.1 | 1.73 | 0.58 |
| Q9JIH2_NU Nup50     | Nuclear por  | 8  | 15.3 | 8.2  | 9.0  | 1.9 | 1.71 | 0.59 | 173.6   | 79.9   | 97.2   | 2.2 | 1.79 | 0.56 |
| Q9D832_D Dnajb4     | Dnaj homo    | 3  | 9.0  | 4.8  | 5.3  | 1.9 | 1.70 | 0.59 | 33.1    | 42.0   | 51.1   | 0.8 | 0.65 | 1.55 |
| P12382_P1 Pfkf      | ATP-depend   | 12 | 18.6 | 10.0 | 10.9 | 1.9 | 1.70 | 0.59 | 362.6   | 130.4  | 158.7  | 2.8 | 2.28 | 0.44 |
| A2AIM4_A1 Tpm2      | Tropomyos    | 6  | 11.5 | 6.2  | 6.7  | 1.9 | 1.70 | 0.59 | 96.8    | 78.1   | 95.0   | 1.2 | 1.02 | 0.98 |
| Q8K368_F1 Fanci     | Fanconi an   | 1  | 8.7  | 4.7  | 5.1  | 1.9 | 1.70 | 0.59 | 8.7     | 4.7    | 5.7    | 1.9 | 1.52 | 0.66 |
| Q8COD5_E1 Eftud1    | Elongation   | 2  | 34.7 | 18.7 | 20.4 | 1.9 | 1.70 | 0.59 | 69.4    | 37.4   | 45.6   | 1.9 | 1.52 | 0.66 |
| Q8R1X6_S1 Spg20     | Spartin OS-  | 2  | 10.8 | 5.8  | 6.4  | 1.9 | 1.70 | 0.59 | 21.7    | 11.7   | 14.2   | 1.9 | 1.52 | 0.66 |
| Q9JJ28_FL Flii      | Protein flig | 30 | 15.6 | 8.4  | 9.2  | 1.9 | 1.70 | 0.59 | 645.6   | 380.1  | 462.6  | 1.7 | 1.40 | 0.72 |
| Q6PDLO_D Dync1li2   | Cytoplasm    | 6  | 11.8 | 6.4  | 7.0  | 1.8 | 1.70 | 0.59 | 82.2    | 55.0   | 67.0   | 1.5 | 1.23 | 0.81 |
| Q61194_P1 Pik3c2a   | Phosphatid   | 3  | 11.5 | 6.2  | 6.8  | 1.8 | 1.69 | 0.59 | 47.3    | 14.8   | 18.1   | 3.2 | 2.62 | 0.38 |
| Q8K1H1_T1 Tdrd7     | Tudor dom    | 9  | 11.5 | 6.2  | 6.8  | 1.8 | 1.69 | 0.59 | 103.9   | 57.9   | 70.4   | 1.8 | 1.47 | 0.68 |
| Q8CFD4_S1 Srx8      | Sorting nex  | 1  | 13.8 | 7.5  | 8.2  | 1.8 | 1.68 | 0.59 | 13.8    | 7.5    | 9.1    | 1.8 | 1.51 | 0.66 |
| E9Q585_ES Slic4a1ap | Protein Slic | 1  | 5.3  | 2.9  | 3.2  | 1.8 | 1.68 | 0.59 | 5.3     | 2.9    | 3.5    | 1.8 | 1.51 | 0.66 |
| P48722_H1 Hsp41     | Heat shock   | 1  | 3.6  | 1.9  | 2.1  | 1.8 | 1.68 | 0.60 | 3.6     | 1.9    | 2.4    | 1.8 | 1.50 | 0.66 |
| Q9CSU0_R1 Rprd1b    | Regulation   | 6  | 35.1 | 19.2 | 20.9 | 1.8 | 1.68 | 0.60 | 229.2   | 111.8  | 136.0  | 2.1 | 1.68 | 0.59 |
| P97447_FF Fhl1      | Four and a l | 2  | 20.6 | 11.3 | 12.3 | 1.8 | 1.68 | 0.60 | 41.2    | 22.5   | 27.4   | 1.8 | 1.50 | 0.67 |
| Q9ESK5_D1 Dkc1      | H/ACA ribo   | 10 | 8.4  | 4.6  | 5.0  | 1.8 | 1.67 | 0.60 | 87.1    | 51.2   | 62.4   | 1.7 | 1.40 | 0.72 |
| Q9R1T2_S1 Sae1      | SUMO-activ   | 8  | 9.5  | 5.2  | 5.7  | 1.8 | 1.67 | 0.60 | 82.1    | 41.1   | 50.0   | 2.0 | 1.64 | 0.61 |
| Q8CGC6_R1 Rbm28     | RNA-bindin   | 14 | 27.9 | 15.3 | 16.7 | 1.8 | 1.67 | 0.60 | 410.0   | 220.8  | 268.7  | 1.9 | 1.53 | 0.66 |
| P13439_UI Umps      | Uridine 5'-r | 5  | 17.2 | 9.4  | 10.3 | 1.8 | 1.67 | 0.60 | 77.9    | 48.0   | 58.5   | 1.6 | 1.33 | 0.75 |
| Q8VDS4_R1 Rprd1a    | Regulation   | 7  | 33.3 | 18.3 | 20.0 | 1.8 | 1.67 | 0.60 | 263.2   | 126.8  | 154.4  | 2.1 | 1.70 | 0.59 |
| Q8JZX4_SP Rbm17     | Splicing fac | 10 | 21.9 | 12.1 | 13.2 | 1.8 | 1.66 | 0.60 | 320.6   | 227.7  | 277.1  | 1.4 | 1.16 | 0.86 |
| P27546_M Map4       | Microtubul   | 69 | 32.3 | 17.8 | 19.4 | 1.8 | 1.66 | 0.60 | 2942.7  | 1779.3 | 2165.7 | 1.7 | 1.36 | 0.74 |
| E9Q166_ES Atad2b    | Protein Ata  | 1  | 4.5  | 2.5  | 2.7  | 1.8 | 1.66 | 0.60 | 4.5     | 2.5    | 3.0    | 1.8 | 1.49 | 0.67 |
| P97393_R1 Arhgap5   | Rho GTPase   | 2  | 12.5 | 6.9  | 7.5  | 1.8 | 1.66 | 0.60 | 24.9    | 13.7   | 16.7   | 1.8 | 1.49 | 0.67 |
| P68372_TE Tubb4b    | Tubulin bet  | 5  | 94.0 | 51.8 | 56.6 | 1.8 | 1.66 | 0.60 | 477.1   | 275.2  | 335.0  | 1.7 | 1.42 | 0.70 |
| Q91YM2_R1 Arhgap35  | Rho GTPase   | 4  | 6.6  | 3.6  | 4.0  | 1.8 | 1.66 | 0.60 | 27.7    | 14.8   | 18.0   | 1.9 | 1.54 | 0.65 |
| Q3UH28_Q Zmynd8     | Protein Zm   | 2  | 83.9 | 46.4 | 50.6 | 1.8 | 1.66 | 0.60 | 167.7   | 92.8   | 112.9  | 1.8 | 1.48 | 0.67 |
| Q9WTK2_C Cdy1       | Chromodod    | 1  | 10.6 | 5.9  | 6.4  | 1.8 | 1.66 | 0.60 | 10.6    | 5.9    | 7.2    | 1.8 | 1.48 | 0.67 |
| Q8OX98_Q1 Dhx38     | DEAH (Asp-   | 10 | 18.5 | 10.2 | 11.2 | 1.8 | 1.65 | 0.60 | 161.8   | 104.6  | 127.3  | 1.5 | 1.27 | 0.79 |
| Q9D0D4_D Dimt1      | Probable di  | 4  | 18.8 | 10.4 | 11.4 | 1.8 | 1.65 | 0.60 | 60.8    | 47.4   | 57.7   | 1.3 | 1.05 | 0.95 |
| Q9DAW9_C Cnn3       | Calponin-3   | 24 | 22.4 | 12.4 | 13.6 | 1.8 | 1.65 | 0.60 | 789.0   | 451.2  | 549.1  | 1.7 | 1.44 | 0.70 |
| P14206_R5 Rpsa      | 40S ribosom  | 16 | 34.3 | 19.0 | 20.8 | 1.8 | 1.65 | 0.61 | 946.5   | 815.5  | 992.6  | 1.2 | 0.95 | 1.05 |
| P61089_UI Ube2n     | Ubiquitin-c  | 5  | 87.8 | 48.8 | 53.3 | 1.8 | 1.65 | 0.61 | 429.2   | 300.4  | 365.6  | 1.4 | 1.17 | 0.85 |
| Q8CCN5_B1 Bcas3     | Breast carc  | 1  | 10.8 | 6.0  | 6.5  | 1.8 | 1.65 | 0.61 | 10.8    | 6.0    | 7.3    | 1.8 | 1.48 | 0.68 |
| Q9CX86_R1 Hnrnpa0   | Heterogene   | 10 | 31.4 | 17.5 | 19.1 | 1.8 | 1.65 | 0.61 | 679.9   | 545.8  | 664.3  | 1.2 | 1.02 | 0.98 |
| Q9CQ19_M My19       | Myosin regi  | 19 | 43.3 | 24.1 | 26.3 | 1.8 | 1.64 | 0.61 | 2202.8  | 2543.7 | 3096.0 | 0.9 | 0.71 | 1.41 |
| Q9DAW6_F Prpf4      | U4/U6 sma    | 12 | 31.4 | 17.5 | 19.1 |     |      |      |         |        |        |     |      |      |

|                    |               |    |       |       |       |     |      |      |         |        |        |     |      |      |
|--------------------|---------------|----|-------|-------|-------|-----|------|------|---------|--------|--------|-----|------|------|
| P41105_Rl Rpl28    | 60S ribosor   | 13 | 89.0  | 50.8  | 55.4  | 1.8 | 1.61 | 0.62 | 3369.6  | 1085.0 | 1320.6 | 3.1 | 2.55 | 0.39 |
| P19426_Nl Nelfe    | Negative el   | 4  | 12.8  | 7.3   | 8.0   | 1.8 | 1.60 | 0.62 | 52.5    | 30.7   | 37.3   | 1.7 | 1.41 | 0.71 |
| O35492_Cl Clk3     | Dual specif   | 1  | 9.3   | 5.3   | 5.8   | 1.8 | 1.60 | 0.62 | 9.3     | 5.3    | 6.5    | 1.8 | 1.44 | 0.70 |
| P59325_IF Eif5     | Eukaryotic    | 5  | 20.6  | 11.8  | 12.8  | 1.7 | 1.60 | 0.62 | 153.3   | 51.6   | 62.8   | 3.0 | 2.44 | 0.41 |
| Q923D5_W Wbp11     | WW domain     | 1  | 29.0  | 16.6  | 18.1  | 1.7 | 1.60 | 0.62 | 29.0    | 16.6   | 20.2   | 1.7 | 1.44 | 0.70 |
| P84084_Af Arf5     | ADP-ribosy    | 2  | 43.8  | 25.1  | 27.4  | 1.7 | 1.60 | 0.63 | 87.7    | 50.3   | 61.2   | 1.7 | 1.43 | 0.70 |
| P33215_Nl Nedd1    | Protein NEI   | 1  | 20.7  | 11.9  | 12.9  | 1.7 | 1.60 | 0.63 | 20.7    | 11.9   | 14.4   | 1.7 | 1.43 | 0.70 |
| Q8K3W0_E Bre       | BRCA1-A cc    | 3  | 17.9  | 10.3  | 11.2  | 1.7 | 1.60 | 0.63 | 57.4    | 26.9   | 32.8   | 2.1 | 1.75 | 0.57 |
| E9PZM4_Cl Chd2     | Chromodol     | 1  | 7.3   | 4.2   | 4.6   | 1.7 | 1.60 | 0.63 | 7.3     | 4.2    | 5.1    | 1.7 | 1.43 | 0.70 |
| Q8CG48_Sl Smc2     | Structural r  | 57 | 31.8  | 18.2  | 19.9  | 1.7 | 1.60 | 0.63 | 2101.0  | 1264.1 | 1538.6 | 1.7 | 1.37 | 0.73 |
| Q61655_Dl Ddx19a   | ATP-depenc    | 26 | 24.9  | 14.3  | 15.6  | 1.7 | 1.60 | 0.63 | 874.6   | 491.2  | 597.9  | 1.8 | 1.46 | 0.68 |
| Q6P3Y5_Z2 Znf280c  | Zinc finger j | 1  | 4.5   | 2.6   | 2.8   | 1.7 | 1.59 | 0.63 | 4.5     | 2.6    | 3.2    | 1.7 | 1.43 | 0.70 |
| Q8R349_Cl Cdc16    | Cell divisio  | 2  | 22.2  | 12.8  | 13.9  | 1.7 | 1.59 | 0.63 | 44.4    | 25.6   | 31.1   | 1.7 | 1.43 | 0.70 |
| P14148_Rl Rpl7     | 60S ribosor   | 39 | 46.7  | 26.9  | 29.4  | 1.7 | 1.59 | 0.63 | 3737.2  | 2004.0 | 2439.2 | 1.9 | 1.53 | 0.65 |
| Q9D1G1_R Rab1b     | Ras-related   | 4  | 9.7   | 5.6   | 6.1   | 1.7 | 1.59 | 0.63 | 48.0    | 34.7   | 42.2   | 1.4 | 1.14 | 0.88 |
| Q9DCH4_Ul Eif3f    | Eukaryotic    | 19 | 31.7  | 18.3  | 19.9  | 1.7 | 1.59 | 0.63 | 778.3   | 444.1  | 540.6  | 1.8 | 1.44 | 0.69 |
| E9PYL2_E9l Prr12   | Protein Prr   | 3  | 15.0  | 8.7   | 9.4   | 1.7 | 1.59 | 0.63 | 36.7    | 24.0   | 29.2   | 1.5 | 1.25 | 0.80 |
| P10852_4f Slc3a2   | 4F2 cell-sur  | 9  | 17.7  | 10.2  | 11.1  | 1.7 | 1.58 | 0.63 | 176.4   | 124.8  | 151.9  | 1.4 | 1.16 | 0.86 |
| G5E8V9_G9 Arfp1    | MCG18094      | 11 | 21.6  | 12.5  | 13.7  | 1.7 | 1.58 | 0.63 | 282.5   | 159.8  | 194.6  | 1.8 | 1.45 | 0.69 |
| E9Q7C4_E9 Prr14l   | Protein Prr   | 1  | 23.8  | 13.8  | 15.0  | 1.7 | 1.58 | 0.63 | 23.8    | 13.8   | 16.8   | 1.7 | 1.42 | 0.71 |
| P48025_K5 Syk      | Tyrosine-pr   | 1  | 4.0   | 2.3   | 2.5   | 1.7 | 1.58 | 0.63 | 4.0     | 2.3    | 2.8    | 1.7 | 1.42 | 0.71 |
| P35288_Rl Rab23    | Ras-related   | 1  | 5.5   | 3.2   | 3.5   | 1.7 | 1.58 | 0.63 | 5.5     | 3.2    | 3.9    | 1.7 | 1.42 | 0.71 |
| Q3UF54_Gl Gpatch11 | G patch doi   | 1  | 12.7  | 7.4   | 8.0   | 1.7 | 1.58 | 0.63 | 12.7    | 7.4    | 9.0    | 1.7 | 1.41 | 0.71 |
| P61957_SL Sumo2    | Small ubiqi   | 3  | 52.5  | 30.5  | 33.3  | 1.7 | 1.58 | 0.63 | 148.2   | 91.8   | 111.7  | 1.6 | 1.33 | 0.75 |
| P97820_M Map4k4    | Mitogen-ac    | 1  | 8.1   | 4.7   | 5.1   | 1.7 | 1.57 | 0.64 | 8.1     | 4.7    | 5.7    | 1.7 | 1.41 | 0.71 |
| Q9CKL3_CG050_MOUS  | Uncharacte    | 5  | 111.8 | 65.2  | 71.1  | 1.7 | 1.57 | 0.64 | 487.5   | 230.0  | 279.9  | 2.1 | 1.74 | 0.57 |
| Q3UM29_C Cog7      | Conserved r   | 1  | 11.8  | 6.9   | 7.5   | 1.7 | 1.57 | 0.64 | 11.8    | 6.9    | 8.4    | 1.7 | 1.41 | 0.71 |
| P62334_Pf Psmc6    | 26S proteas   | 13 | 25.3  | 14.7  | 16.1  | 1.7 | 1.57 | 0.64 | 877.5   | 260.0  | 316.4  | 3.4 | 2.77 | 0.36 |
| Q8K205_Q Pop1      | Blood vesse   | 1  | 7.2   | 4.2   | 4.6   | 1.7 | 1.57 | 0.64 | 7.2     | 4.2    | 5.1    | 1.7 | 1.41 | 0.71 |
| Q99MP8_B Brap      | BRCA1-asso    | 3  | 6.3   | 3.7   | 4.0   | 1.7 | 1.57 | 0.64 | 18.9    | 14.5   | 17.7   | 1.3 | 1.07 | 0.93 |
| Q6PHO9_Q Pabpc4    | MCG5546,      | 7  | 56.1  | 32.8  | 35.8  | 1.7 | 1.57 | 0.64 | 328.9   | 208.1  | 253.3  | 1.6 | 1.30 | 0.77 |
| Q61210_Al Arhgef1  | Rho guanin    | 11 | 14.2  | 8.3   | 9.1   | 1.7 | 1.57 | 0.64 | 146.7   | 103.0  | 125.4  | 1.4 | 1.17 | 0.85 |
| P98083_SF Shc1     | SHC-transf    | 5  | 10.2  | 6.0   | 6.5   | 1.7 | 1.57 | 0.64 | 109.7   | 38.5   | 46.8   | 2.9 | 2.34 | 0.43 |
| Q62376_Rl Snrnp70  | U1 small nu   | 5  | 33.3  | 19.5  | 21.2  | 1.7 | 1.57 | 0.64 | 178.6   | 138.2  | 168.3  | 1.3 | 1.06 | 0.94 |
| Q8K2X3_S1 Obfc1    | CST comple    | 3  | 4.3   | 2.5   | 2.7   | 1.7 | 1.57 | 0.64 | 19.5    | 8.9    | 10.9   | 2.2 | 1.79 | 0.56 |
| Q8VCR7_Al Abhd14b  | Alpha/beta    | 1  | 3.2   | 1.9   | 2.1   | 1.7 | 1.57 | 0.64 | 3.2     | 1.9    | 2.3    | 1.7 | 1.40 | 0.71 |
| Q8BKX1_B Bapap2    | Brain-speci   | 5  | 18.7  | 11.0  | 12.0  | 1.7 | 1.57 | 0.64 | 77.9    | 45.7   | 55.6   | 1.7 | 1.40 | 0.71 |
| Q6PE54_DI Dhx40    | Probable A'   | 1  | 8.3   | 4.9   | 5.3   | 1.7 | 1.56 | 0.64 | 8.3     | 4.9    | 5.9    | 1.7 | 1.40 | 0.72 |
| Q76MZ3_Z Ppp2r1a   | Serine/thre   | 36 | 27.0  | 15.9  | 17.3  | 1.7 | 1.56 | 0.64 | 2021.8  | 772.5  | 940.2  | 2.6 | 2.15 | 0.47 |
| Q7TPD0_JN Ints3    | Integrator c  | 11 | 17.4  | 10.2  | 11.2  | 1.7 | 1.56 | 0.64 | 205.2   | 125.5  | 152.8  | 1.6 | 1.34 | 0.74 |
| Q9CQV8_1_Ywhab     | 14-3-3 prot   | 28 | 29.0  | 17.1  | 18.7  | 1.7 | 1.55 | 0.64 | 2628.5  | 1028.3 | 1251.6 | 2.6 | 2.10 | 0.48 |
| Q571G4_L Lin5a     | Protein lin-  | 2  | 8.8   | 5.2   | 5.7   | 1.7 | 1.55 | 0.64 | 17.7    | 10.4   | 12.7   | 1.7 | 1.39 | 0.72 |
| Q8K4M5_C Commd1    | COMM dom      | 2  | 17.2  | 10.1  | 11.1  | 1.7 | 1.55 | 0.64 | 34.3    | 20.3   | 24.7   | 1.7 | 1.39 | 0.72 |
| P62281_Rs Rps11    | 40S ribosor   | 10 | 204.1 | 120.6 | 131.6 | 1.7 | 1.55 | 0.64 | 3058.5  | 1665.1 | 2026.7 | 1.8 | 1.51 | 0.66 |
| P28656_Nl Nap111   | Nucleosom     | 7  | 18.5  | 11.0  | 12.0  | 1.7 | 1.55 | 0.65 | 289.8   | 82.5   | 100.5  | 3.5 | 2.88 | 0.35 |
| Q9JIB4_TF2 Gtf2h2  | General tra   | 1  | 10.1  | 6.0   | 6.5   | 1.7 | 1.55 | 0.65 | 10.1    | 6.0    | 7.3    | 1.7 | 1.39 | 0.72 |
| O35984_PI Pbx2     | Pre-B-cell l  | 1  | 7.0   | 4.2   | 4.6   | 1.7 | 1.55 | 0.65 | 7.0     | 4.2    | 5.1    | 1.7 | 1.39 | 0.72 |
| Q8VEK3_HI Hhrnpu   | Heterogene    | 54 | 38.2  | 22.6  | 24.7  | 1.7 | 1.55 | 0.65 | 5444.3  | 2751.1 | 3348.6 | 2.0 | 1.63 | 0.62 |
| Q9CPR8_M Ndn12     | Melanoma-     | 2  | 21.2  | 12.5  | 13.7  | 1.7 | 1.55 | 0.65 | 42.4    | 25.1   | 30.5   | 1.7 | 1.39 | 0.72 |
| P60605_Ul Ube2g2   | Ubiquitin-c   | 1  | 13.0  | 7.7   | 8.4   | 1.7 | 1.55 | 0.65 | 13.0    | 7.7    | 9.3    | 1.7 | 1.39 | 0.72 |
| P60229_El Eif3e    | Eukaryotic    | 40 | 28.4  | 16.8  | 18.4  | 1.7 | 1.55 | 0.65 | 1554.9  | 804.9  | 979.8  | 1.9 | 1.59 | 0.63 |
| Q9CPT5_N Nop16     | Nucleolar p   | 3  | 6.8   | 4.1   | 4.4   | 1.7 | 1.54 | 0.65 | 39.6    | 23.1   | 28.1   | 1.7 | 1.41 | 0.71 |
| O88544_Cl Cops4    | COP9 signa    | 14 | 25.2  | 14.9  | 16.3  | 1.7 | 1.54 | 0.65 | 610.0   | 232.4  | 282.9  | 2.6 | 2.16 | 0.46 |
| Q9DD0M5_C Dnll12   | Dynein ligh   | 3  | 20.7  | 12.3  | 13.4  | 1.7 | 1.54 | 0.65 | 69.3    | 49.7   | 60.5   | 1.4 | 1.14 | 0.87 |
| Q99ME2_W Wdr6      | WD repeat-    | 5  | 10.8  | 6.4   | 7.0   | 1.7 | 1.54 | 0.65 | 60.2    | 38.0   | 46.2   | 1.6 | 1.30 | 0.77 |
| Q80509_Ef Eps8     | Epidermal j   | 5  | 15.0  | 8.9   | 9.7   | 1.7 | 1.54 | 0.65 | 60.8    | 48.8   | 59.4   | 1.2 | 1.02 | 0.98 |
| Q9CQU3_R Rer1      | Protein REF   | 2  | 15.7  | 9.4   | 10.2  | 1.7 | 1.54 | 0.65 | 31.5    | 18.8   | 22.9   | 1.7 | 1.38 | 0.73 |
| Q91W68_C Gne       | Bifunction:   | 1  | 8.8   | 5.3   | 5.8   | 1.7 | 1.54 | 0.65 | 8.8     | 5.3    | 6.4    | 1.7 | 1.38 | 0.73 |
| P84091_Af Ap2m1    | AP-2 compl    | 9  | 16.5  | 9.9   | 10.7  | 1.7 | 1.54 | 0.65 | 362.5   | 168.7  | 205.3  | 2.1 | 1.77 | 0.57 |
| Q99LGO_Ul Usp16    | Ubiquitin c   | 1  | 9.5   | 5.7   | 6.2   | 1.7 | 1.54 | 0.65 | 9.5     | 5.7    | 6.9    | 1.7 | 1.38 | 0.73 |
| P04627_Af Araf     | Serine/thre   | 1  | 14.5  | 8.7   | 9.5   | 1.7 | 1.53 | 0.65 | 14.5    | 8.7    | 10.6   | 1.7 | 1.37 | 0.73 |
| P69566_Rl Ranbp9   | Ran-bindin    | 3  | 17.5  | 10.5  | 11.4  | 1.7 | 1.53 | 0.65 | 40.2    | 31.7   | 38.6   | 1.3 | 1.04 | 0.96 |
| P51660_DI Dhd17b4  | Peroxisom:    | 2  | 64.2  | 38.6  | 42.1  | 1.7 | 1.53 | 0.66 | 128.5   | 77.2   | 93.9   | 1.7 | 1.37 | 0.73 |
| Q99ME9_N Gtbbp4    | Nucleolar C   | 5  | 14.7  | 8.8   | 9.6   | 1.7 | 1.53 | 0.66 | 86.8    | 42.5   | 51.7   | 2.0 | 1.68 | 0.60 |
| Q5SYD0_M Myo1d     | Unconvent     | 3  | 10.8  | 6.5   | 7.1   | 1.7 | 1.53 | 0.66 | 27.3    | 17.7   | 21.5   | 1.5 | 1.27 | 0.79 |
| Q61474_M Msi1      | RNA-bindin    | 3  | 7.2   | 4.4   | 4.7   | 1.7 | 1.52 | 0.66 | 24.5    | 15.2   | 18.5   | 1.6 | 1.32 | 0.76 |
| Q8R570_SF Snap47   | Synaptosor    | 1  | 5.8   | 3.5   | 3.8   | 1.7 | 1.52 | 0.66 | 5.8     | 3.5    | 4.3    | 1.7 | 1.37 | 0.73 |
| Q5XJES_Ll Leo1     | RNA polym     | 3  | 26.6  | 16.0  | 17.5  | 1.7 | 1.52 | 0.66 | 79.4    | 50.9   | 62.0   | 1.6 | 1.28 | 0.78 |
| P54729_Nl Nub1     | NEDD8 ulti    | 8  | 9.5   | 5.8   | 6.3   | 1.7 | 1.52 | 0.66 | 182.1   | 65.1   | 79.3   | 2.8 | 2.30 | 0.44 |
| Q9DCA5_Bl Brix1    | Ribosome t    | 3  | 12.5  | 7.5   | 8.2   | 1.7 | 1.52 | 0.66 | 60.1    | 28.6   | 34.8   | 2.1 | 1.73 | 0.58 |
| Q8BMB3_Jl Eif4e2   | Eukaryotic    | 2  | 9.0   | 5.4   | 5.9   | 1.7 | 1.52 | 0.66 | 17.9    | 10.8   | 13.2   | 1.7 | 1.36 | 0.74 |
| Q9EQQ3_M Myc3p     | C-Myc-bind    | 5  | 59.2  | 35.8  | 39.0  | 1.7 | 1.52 | 0.66 | 214.2   | 153.0  | 186.2  | 1.4 | 1.15 | 0.87 |
| P46735_M Myo1b     | Unconvent     | 6  | 15.8  | 9.5   | 10.4  | 1.7 | 1.52 | 0.66 | 110.6   | 67.6   | 82.3   | 1.6 | 1.34 | 0.74 |
| P70677_Cl Casp3    | Caspase-3 C   | 1  | 9.7   | 5.8   | 6.4   | 1.7 | 1.52 | 0.66 | 9.7     | 5.8    | 7.1    | 1.7 | 1.36 | 0.74 |
| Q9D7Z3_Nl Nol7     | Nucleolar p   | 2  | 5.7   | 3.5   | 3.8   | 1.7 | 1.52 | 0.66 | 11.4    | 6.9    | 8.4    | 1.7 | 1.36 | 0.74 |
| Q9WVK4_E Ehd1      | EH domain-    | 32 | 12.8  | 7.7   | 8.4   | 1.7 | 1.52 | 0.66 | 576.8   | 395.3  | 481.1  | 1.5 | 1.20 | 0.83 |
| Q8COE2_VF Vps26b   | Vacuolar pr   | 7  | 14.3  | 8.7   | 9.5   | 1.7 | 1.51 | 0.66 | 107.2   | 96.4   | 117.3  | 1.1 | 0.91 | 1.09 |
| P56546_Cl Ctpb2    | C-terminal-   | 3  | 39.4  | 23.8  | 26.0  | 1.7 | 1.51 | 0.66 | 95.3    | 67.2   | 81.8   | 1.4 | 1.17 | 0.86 |
| Q8C7V8_Cl Ccd134   | Coiled-coil   | 4  | 7.2   | 4.4   | 4.8   | 1.6 | 1.51 | 0.66 | 39.1    | 22.1   | 27.0   | 1.8 | 1.45 | 0.69 |
| Q922L6_Nl Nelfcd   | Negative-ely  | 8  | 15.4  | 9.3   | 10.2  | 1.6 | 1.51 | 0.66 | 151.9   | 238.8  | 290.7  | 0.6 | 0.52 | 1.91 |
| Q91WCO_S Setd3     | Histone-ely   | 2  | 6.8   | 4.1   | 4.5   | 1.6 | 1.51 | 0.66 | 13.6    | 8.2    | 10.0   | 1.6 | 1.35 | 0.74 |
| Q9CQ22_Ll Lamtor1  | Regulator c   | 1  | 12.9  | 7.8   | 8.6   | 1.6 | 1.51 | 0.66 | 12.9    | 7.8    | 9.5    | 1.6 | 1.35 | 0.74 |
| Q8C9B9_DI Dido1    | Death-indu    | 3  | 3.9   | 2.4   | 2.6   | 1.6 | 1.51 | 0.66 | 12.0    | 12.6   | 15.3   | 1.0 | 0.78 | 1.28 |
| Q9CPY6_Gl Gid4     | Glucose-inc   | 1  | 10.9  | 6.6   | 7.2   | 1.6 | 1.51 | 0.66 | 10.9    | 6.6    | 8.1    | 1.6 | 1.35 | 0.74 |
| Q8BR65_SF Suds3    | Sin3 histon   | 1  | 6.0   | 3.7   | 4.0   | 1.6 | 1.51 | 0.66 | 6.0     | 3.7    | 4.5    | 1.6 | 1.35 | 0.74 |
| Q35638_S1 Stag2    | Cohesin sul   | 3  | 19.4  | 11.8  | 12.9  | 1.6 | 1.51 | 0.66 | 53.3    | 31.4   | 38.2   | 1.7 | 1.39 | 0.72 |
| Q8B7M8_Fl Flna     | Filamin-A/C   | 85 | 101.9 | 62.1  | 67.7  | 1.6 | 1.51 | 0.66 | 15025.6 | 5893.0 | 7172.7 | 2.5 | 2.09 | 0.48 |
| E9QQ10_Ef Akap9    | A-kinase an   | 1  | 6.3   | 3.8   | 4.2   | 1.6 | 1.50 | 0.66 | 6.3     | 3.8    | 4.7    | 1.6 | 1.35 | 0.74 |
| Q                  |               |    |       |       |       |     |      |      |         |        |        |     |      |      |



|           |            |               |    |       |      |      |     |      |      |        |        |        |     |      |      |
|-----------|------------|---------------|----|-------|------|------|-----|------|------|--------|--------|--------|-----|------|------|
| Q9CQU5_Z2 | Zwint      | ZW10 inter    | 1  | 8.0   | 5.0  | 5.5  | 1.6 | 1.46 | 0.68 | 8.0    | 5.0    | 6.1    | 1.6 | 1.31 | 0.76 |
| Q61048_W  | Wbp4       | WW domai      | 3  | 12.3  | 7.7  | 8.4  | 1.6 | 1.46 | 0.68 | 34.5   | 27.2   | 33.1   | 1.3 | 1.04 | 0.96 |
| A2AR02_Pf | Pf Pig     | Peptidyl-pr   | 2  | 15.1  | 9.5  | 10.3 | 1.6 | 1.46 | 0.68 | 30.2   | 18.9   | 23.0   | 1.6 | 1.31 | 0.76 |
| Q8CIB5_Ff | FermT2     | Fermitin fai  | 34 | 20.5  | 12.9 | 14.0 | 1.6 | 1.46 | 0.69 | 1056.2 | 532.4  | 648.1  | 2.0 | 1.63 | 0.61 |
| G3UUV2_G  | Sf3a2      | Splicing fac  | 9  | 17.4  | 10.9 | 11.9 | 1.6 | 1.46 | 0.69 | 183.9  | 126.6  | 154.0  | 1.5 | 1.19 | 0.84 |
| Q3T122_Q3 | Aamp       | Angio-assoc   | 1  | 3.5   | 2.2  | 2.4  | 1.6 | 1.46 | 0.69 | 3.5    | 2.2    | 2.7    | 1.6 | 1.31 | 0.77 |
| P29037_TE | Tbp        | TATA-box-b    | 3  | 13.5  | 8.5  | 9.3  | 1.6 | 1.45 | 0.69 | 37.1   | 27.6   | 33.6   | 1.3 | 1.10 | 0.91 |
| Q80Y56_AF | Afap1      | Actin filam   | 1  | 9.7   | 6.1  | 6.7  | 1.6 | 1.45 | 0.69 | 9.7    | 6.1    | 7.5    | 1.6 | 1.30 | 0.77 |
| Q8VEE1_LA | Lmcid1     | LIM and cys   | 1  | 6.8   | 4.3  | 4.7  | 1.6 | 1.45 | 0.69 | 6.8    | 4.3    | 5.2    | 1.6 | 1.30 | 0.77 |
| Q91W59_F  | Rbms1      | RNA-bindin    | 2  | 41.0  | 25.9 | 28.3 | 1.6 | 1.45 | 0.69 | 82.1   | 51.8   | 63.1   | 1.6 | 1.30 | 0.77 |
| Q8BG07_S  | Aars       | Alanine-tR    | 29 | 13.7  | 8.7  | 9.5  | 1.6 | 1.45 | 0.69 | 734.5  | 305.3  | 371.6  | 2.4 | 1.98 | 0.51 |
| P49586_PC | Pcyl1a     | Choline-ph    | 3  | 29.6  | 18.7 | 20.4 | 1.6 | 1.45 | 0.69 | 76.2   | 53.4   | 65.0   | 1.4 | 1.17 | 0.85 |
| Q9D937_CK | 098_MOU    | Uncharacte    | 4  | 15.0  | 9.5  | 10.4 | 1.6 | 1.45 | 0.69 | 107.6  | 53.0   | 64.5   | 2.0 | 1.67 | 0.60 |
| O35326_Sf | SrSf5      | Serine/argi   | 5  | 92.0  | 58.4 | 63.7 | 1.6 | 1.45 | 0.69 | 309.7  | 220.9  | 268.9  | 1.4 | 1.15 | 0.87 |
| O35623_Bf | Bet1       | BET1 homo     | 1  | 5.3   | 3.4  | 3.7  | 1.6 | 1.44 | 0.69 | 5.3    | 3.4    | 4.1    | 1.6 | 1.29 | 0.77 |
| Q9EQC8_Q  | Prcc       | Papillary re  | 2  | 8.8   | 5.6  | 6.1  | 1.6 | 1.44 | 0.69 | 17.6   | 11.2   | 13.6   | 1.6 | 1.29 | 0.77 |
| Q91V41_Rv | Rab14      | Ras-related   | 5  | 26.4  | 16.8 | 18.3 | 1.6 | 1.44 | 0.69 | 128.9  | 101.9  | 124.1  | 1.3 | 1.04 | 0.96 |
| Q99K8_Vf  | Vwa5a      | von Willebr   | 4  | 15.6  | 9.9  | 10.8 | 1.6 | 1.44 | 0.69 | 67.8   | 33.1   | 40.2   | 2.1 | 1.69 | 0.59 |
| Q99124_QS | Sar1a      | GTP-bindin    | 5  | 27.1  | 17.2 | 18.8 | 1.6 | 1.44 | 0.69 | 170.6  | 151.9  | 184.9  | 1.1 | 0.92 | 1.08 |
| Q8K124_Pf | Plekho2    | Pleckstrin f  | 1  | 10.3  | 6.6  | 7.2  | 1.6 | 1.44 | 0.70 | 10.3   | 6.6    | 8.0    | 1.6 | 1.29 | 0.78 |
| Q91YU8_Sf | Ppan       | Suppressor    | 3  | 9.9   | 6.3  | 6.9  | 1.6 | 1.44 | 0.70 | 30.3   | 19.2   | 23.4   | 1.6 | 1.29 | 0.77 |
| Q3V485_Cf | CommD6     | COMM don      | 2  | 18.7  | 11.9 | 13.0 | 1.6 | 1.44 | 0.70 | 37.3   | 23.8   | 29.0   | 1.6 | 1.29 | 0.78 |
| Q6A028_Sf | Swap70     | Switch-assc   | 9  | 9.9   | 6.3  | 6.9  | 1.6 | 1.43 | 0.70 | 102.2  | 96.2   | 117.1  | 1.1 | 0.87 | 1.15 |
| Q9WV70_N  | Noc2l      | Nucleolar c   | 1  | 19.0  | 12.2 | 13.3 | 1.6 | 1.43 | 0.70 | 19.0   | 12.2   | 14.8   | 1.6 | 1.28 | 0.78 |
| Q9D0P8_Jf | Ift27      | Intraflagell  | 2  | 14.4  | 9.2  | 10.1 | 1.6 | 1.43 | 0.70 | 28.8   | 18.4   | 22.4   | 1.6 | 1.28 | 0.78 |
| Q8C3P7_M  | Mettl3     | N6-adenosi    | 3  | 10.8  | 6.9  | 7.5  | 1.6 | 1.43 | 0.70 | 32.7   | 25.9   | 31.5   | 1.3 | 1.04 | 0.96 |
| Q3U1T3_Bf | Bms1l      | Breast canc   | 1  | 18.2  | 11.7 | 12.7 | 1.6 | 1.43 | 0.70 | 18.2   | 11.7   | 14.2   | 1.6 | 1.28 | 0.78 |
| O55057_Pf | Pde6d      | Retinal rod   | 1  | 6.5   | 4.2  | 4.5  | 1.6 | 1.43 | 0.70 | 6.5    | 4.2    | 5.1    | 1.6 | 1.28 | 0.78 |
| Q8BMA6_S  | Srp68      | Signal recoj  | 19 | 12.2  | 7.8  | 8.5  | 1.6 | 1.43 | 0.70 | 265.1  | 174.1  | 211.9  | 1.5 | 1.25 | 0.80 |
| Q8C052_M  | Map1s      | Microtubul    | 2  | 12.1  | 7.8  | 8.5  | 1.6 | 1.43 | 0.70 | 24.3   | 15.5   | 18.9   | 1.6 | 1.28 | 0.78 |
| Q9CY22_TP | Tpd52l2    | Tumor prot    | 4  | 25.5  | 16.3 | 17.8 | 1.6 | 1.43 | 0.70 | 118.2  | 59.3   | 72.2   | 2.0 | 1.64 | 0.61 |
| Q6ZQK5_Af | Acap2      | Arf-GAP wit   | 4  | 8.9   | 5.7  | 6.2  | 1.6 | 1.43 | 0.70 | 37.0   | 55.4   | 67.4   | 0.7 | 0.55 | 1.82 |
| Q8K1M6_C  | Dnm1l      | Dynamin-1     | 39 | 15.9  | 10.2 | 11.1 | 1.6 | 1.43 | 0.70 | 762.2  | 504.7  | 614.2  | 1.5 | 1.24 | 0.81 |
| Q6P542_Af | Abcf1      | ATP-bindin    | 29 | 15.8  | 10.2 | 11.1 | 1.6 | 1.43 | 0.70 | 871.8  | 435.0  | 529.5  | 2.0 | 1.65 | 0.61 |
| Q8R2Y8_Pf | P1rth2     | Peptidyl-tR   | 1  | 15.5  | 10.0 | 10.9 | 1.6 | 1.42 | 0.70 | 15.5   | 10.0   | 12.2   | 1.6 | 1.28 | 0.78 |
| P09103_Pf | P4hb       | Protein dis   | 21 | 55.8  | 35.9 | 39.2 | 1.6 | 1.42 | 0.70 | 1158.3 | 695.5  | 846.5  | 1.7 | 1.37 | 0.73 |
| Q8K2T1_Nf | Nmral1     | NmrA-like f   | 1  | 10.9  | 7.0  | 7.7  | 1.6 | 1.42 | 0.70 | 10.9   | 7.0    | 8.6    | 1.6 | 1.28 | 0.78 |
| Q9DB96_N  | Ngdnd      | Neuroguidi    | 1  | 8.3   | 5.4  | 5.9  | 1.6 | 1.42 | 0.70 | 8.3    | 5.4    | 6.5    | 1.6 | 1.27 | 0.78 |
| P16045_LE | Lgals1     | Galectin-1    | 5  | 5.2   | 3.4  | 3.7  | 1.6 | 1.42 | 0.70 | 48.1   | 42.2   | 51.4   | 1.1 | 0.94 | 1.07 |
| Q9D662_Sf | Sec23b     | Protein tra   | 12 | 12.8  | 8.3  | 9.0  | 1.5 | 1.42 | 0.70 | 175.8  | 137.6  | 167.5  | 1.3 | 1.05 | 0.95 |
| Q8BWW9_P  | Pkn2       | Serine/thre   | 3  | 6.5   | 4.2  | 4.6  | 1.5 | 1.42 | 0.71 | 22.1   | 12.3   | 15.0   | 1.8 | 1.47 | 0.68 |
| Q8K194_Sf | Snrnp27    | U4/U6.U5 s    | 1  | 5.9   | 3.8  | 4.1  | 1.5 | 1.42 | 0.71 | 5.9    | 3.8    | 4.6    | 1.5 | 1.27 | 0.79 |
| Q9JHH9_Cf | Cop22      | Coatomer s    | 1  | 43.0  | 27.9 | 30.4 | 1.5 | 1.42 | 0.71 | 43.0   | 27.9   | 33.9   | 1.5 | 1.27 | 0.79 |
| P59708_Sf | Sf3b6      | Splicing fac  | 5  | 122.4 | 79.3 | 86.5 | 1.5 | 1.41 | 0.71 | 458.5  | 306.7  | 373.3  | 1.5 | 1.23 | 0.81 |
| Q9Z110_Pf | Alhd18a1   | Delta-1-pyr   | 10 | 10.5  | 6.8  | 7.4  | 1.5 | 1.41 | 0.71 | 132.3  | 119.7  | 145.6  | 1.1 | 0.91 | 1.10 |
| A2A4P0_Df | Dhx8       | ATP-depenc    | 8  | 13.9  | 9.1  | 9.9  | 1.5 | 1.41 | 0.71 | 108.3  | 76.6   | 93.2   | 1.4 | 1.16 | 0.86 |
| Q8CB77_Nf | Tceb3      | Transcripti   | 2  | 14.3  | 9.3  | 10.2 | 1.5 | 1.41 | 0.71 | 28.7   | 18.6   | 22.7   | 1.5 | 1.26 | 0.79 |
| F7CVJ5_Ff | Ahnak2     | Protein Ahr   | 1  | 32.1  | 20.9 | 22.9 | 1.5 | 1.41 | 0.71 | 32.1   | 20.9   | 25.5   | 1.5 | 1.26 | 0.79 |
| G3X8R0_Gf | Reep5      | Receptor ac   | 1  | 14.0  | 9.1  | 10.0 | 1.5 | 1.41 | 0.71 | 14.0   | 9.1    | 11.1   | 1.5 | 1.26 | 0.79 |
| Q8CH58_Vf | Vps37a     | Vacuolar pr   | 1  | 5.3   | 3.5  | 3.8  | 1.5 | 1.40 | 0.71 | 5.3    | 3.5    | 4.2    | 1.5 | 1.26 | 0.79 |
| Q8V194_Qf | Oasl1      | 2'-5'-oligo   | 19 | 15.8  | 10.3 | 11.2 | 1.5 | 1.40 | 0.71 | 351.9  | 229.0  | 278.7  | 1.5 | 1.26 | 0.79 |
| Q5PRF0_Hf | Heatrs5a   | HEAT repea    | 4  | 8.0   | 5.2  | 5.7  | 1.5 | 1.40 | 0.71 | 31.8   | 30.5   | 37.1   | 1.0 | 0.86 | 1.17 |
| Q8CSL7_Rf | Rbm34      | RNA-bindin    | 3  | 16.0  | 10.5 | 11.4 | 1.5 | 1.40 | 0.71 | 51.2   | 37.8   | 46.0   | 1.4 | 1.11 | 0.90 |
| Q3TIX9_Sf | Usp39      | U4/U6.U5 t    | 9  | 8.8   | 5.8  | 6.3  | 1.5 | 1.40 | 0.71 | 106.6  | 54.9   | 66.8   | 1.9 | 1.60 | 0.63 |
| Q8VDP2_Cf | XO56       | MOU:UPF0428 p | 1  | 13.2  | 8.7  | 9.5  | 1.5 | 1.40 | 0.71 | 13.2   | 8.7    | 10.6   | 1.5 | 1.25 | 0.80 |
| Q99LB2_Df | Dhrs4      | Dehydroge     | 3  | 8.9   | 5.8  | 6.3  | 1.5 | 1.40 | 0.71 | 25.9   | 16.6   | 20.2   | 1.6 | 1.28 | 0.78 |
| P54276_Mf | Msh6       | DNA mism      | 22 | 16.6  | 10.9 | 11.9 | 1.5 | 1.40 | 0.72 | 636.1  | 326.3  | 397.2  | 1.9 | 1.60 | 0.62 |
| P43247_Mf | Msh2       | DNA mism      | 43 | 17.4  | 11.4 | 12.4 | 1.5 | 1.40 | 0.72 | 1057.4 | 608.6  | 740.7  | 1.7 | 1.43 | 0.70 |
| O35841_Af | Apoptosi s | Apoptosis i   | 25 | 18.9  | 12.4 | 13.6 | 1.5 | 1.40 | 0.72 | 606.1  | 382.2  | 465.2  | 1.6 | 1.30 | 0.77 |
| Q80YV3_Tf | Trrap      | Transforma    | 1  | 6.5   | 4.2  | 4.6  | 1.5 | 1.39 | 0.72 | 6.5    | 4.2    | 5.2    | 1.5 | 1.25 | 0.80 |
| Q3U1G5_Jf | Isg20l2    | Interferon-   | 2  | 17.1  | 11.2 | 12.2 | 1.5 | 1.39 | 0.72 | 34.1   | 22.5   | 27.3   | 1.5 | 1.25 | 0.80 |
| P47963_Rf | Rpl13      | 60S riboso    | 25 | 86.9  | 57.2 | 62.4 | 1.5 | 1.39 | 0.72 | 2371.0 | 2100.8 | 2557.1 | 1.1 | 0.93 | 1.08 |
| P30412_Pf | Ppic       | Peptidyl-pr   | 1  | 3.0   | 2.0  | 2.2  | 1.5 | 1.39 | 0.72 | 3.0    | 2.0    | 2.4    | 1.5 | 1.25 | 0.80 |
| P20108_Pf | Prdx3      | Thioredoxi    | 3  | 12.2  | 8.1  | 8.8  | 1.5 | 1.39 | 0.72 | 37.5   | 20.7   | 25.2   | 1.8 | 1.49 | 0.67 |
| Q6P5B0_Rf | Rrp12      | RRP12-like    | 5  | 9.5   | 6.3  | 6.8  | 1.5 | 1.39 | 0.72 | 53.1   | 38.0   | 46.2   | 1.4 | 1.15 | 0.87 |
| Q8C4Y3_Nf | Nelfb      | Negative eli  | 11 | 17.4  | 11.5 | 12.5 | 1.5 | 1.39 | 0.72 | 250.5  | 133.1  | 162.0  | 1.9 | 1.55 | 0.65 |
| Q8CDG3_Vf | Vcpip1     | Deubiquiti    | 5  | 9.0   | 6.0  | 6.5  | 1.5 | 1.39 | 0.72 | 48.4   | 27.0   | 32.9   | 1.8 | 1.47 | 0.68 |
| P70290_Ef | Mpp1       | 5S kDa eryt   | 3  | 15.9  | 10.5 | 11.5 | 1.5 | 1.39 | 0.72 | 65.3   | 33.3   | 40.5   | 2.0 | 1.61 | 0.62 |
| Q3THG9_Af | Aarsd1     | Alanyl-tRNU   | 1  | 6.9   | 4.6  | 5.0  | 1.5 | 1.39 | 0.72 | 6.9    | 4.6    | 5.6    | 1.5 | 1.24 | 0.81 |
| P61982_14 | Ywhag      | 14-3-3 prot   | 13 | 33.9  | 22.5 | 24.5 | 1.5 | 1.38 | 0.72 | 736.5  | 393.8  | 479.4  | 1.9 | 1.54 | 0.65 |
| Q91WM3_Jf | Rrp9       | U3 small nu   | 3  | 7.9   | 5.2  | 5.7  | 1.5 | 1.38 | 0.72 | 25.5   | 17.7   | 21.5   | 1.4 | 1.19 | 0.84 |
| Q9ERA6_Tf | Tfp11      | Tuftelin-int  | 11 | 13.3  | 8.8  | 9.6  | 1.5 | 1.38 | 0.72 | 141.3  | 104.4  | 127.1  | 1.4 | 1.11 | 0.90 |
| Q3TCH7_Cf | Cul4a      | Cullin-4A O   | 11 | 16.4  | 10.9 | 11.9 | 1.5 | 1.38 | 0.72 | 175.2  | 111.5  | 135.8  | 1.6 | 1.29 | 0.78 |
| Q99JW4_Uf | Lims1      | LIM and ser   | 3  | 64.6  | 42.8 | 46.7 | 1.5 | 1.38 | 0.72 | 210.6  | 126.0  | 153.4  | 1.7 | 1.37 | 0.73 |
| P67871_Uf | Cskn2b     | Casein kina   | 4  | 46.4  | 30.8 | 33.6 | 1.5 | 1.38 | 0.72 | 183.1  | 119.8  | 145.8  | 1.5 | 1.26 | 0.80 |
| P59048_Pf | Pdrg1      | p53 and GH    | 1  | 13.5  | 8.9  | 9.7  | 1.5 | 1.38 | 0.72 | 13.5   | 8.9    | 10.9   | 1.5 | 1.24 | 0.81 |
| Q9JM13_Rf | Rabgef1    | Rab5 GDP/i    | 2  | 7.5   | 5.0  | 5.4  | 1.5 | 1.38 | 0.72 | 14.9   | 9.9    | 12.1   | 1.5 | 1.24 | 0.81 |
| Q9DBZ5_Ef | Eif3k      | Eukaryotic-   | 9  | 30.3  | 20.1 | 22.0 | 1.5 | 1.38 | 0.72 | 371.1  | 300.1  | 365.3  | 1.2 | 1.02 | 0.98 |
| Q8R4X3_Rf | Rbm12      | RNA-bindin    | 4  | 12.1  | 8.1  | 8.8  | 1.5 | 1.38 | 0.73 | 74.2   | 28.4   | 34.5   | 2.6 | 2.15 | 0.47 |
| Q9R078_Af | Prkab1     | 5'-AMP-acti   | 3  | 17.1  | 11.3 | 12.4 | 1.5 | 1.38 | 0.73 | 48.4   | 31.8   | 38.6   | 1.5 | 1.25 | 0.80 |
| Q8VEH3_Af | Ar18a      | ADP-ribosy    | 2  | 9.8   | 6.5  | 7.1  | 1.5 | 1.38 | 0.73 | 19.6   | 13.0   | 15.9   | 1.5 | 1.24 | 0.81 |
| Q9D554_Sf | Sf3a3      | Splicing fac  | 13 | 12.8  | 8.5  | 9.3  | 1.5 | 1.38 | 0.73 | 576.4  | 234.2  | 285.1  | 2.5 | 2.02 | 0.49 |
| Q64339_Jf | Isg15      | Ubiquitin-l   | 22 | 50.6  | 33.7 | 36.7 | 1.5 | 1.38 | 0.73 | 2138.2 | 1592.5 | 1938.3 | 1.3 | 1.10 | 0.91 |
| Q62193_Rf | Rpa2       | Replication   | 7  | 6.5   | 4.3  | 4.7  | 1.5 | 1.38 | 0.73 | 166.8  | 107.5  | 130.8  | 1.6 | 1.28 | 0.78 |
| Q5SWU9_Af | Acaca      | Acetyl-CoA    | 36 | 17.8  | 11.9 | 13.0 | 1.5 | 1.38 | 0.73 | 713.4  | 543.2  | 661.1  | 1.3 |      |      |

|                    |               |    |       |      |       |     |      |      |        |        |        |     |      |      |
|--------------------|---------------|----|-------|------|-------|-----|------|------|--------|--------|--------|-----|------|------|
| Q6ZMY6_U Ube2d2b   | Ubiquitin-c   | 1  | 27.0  | 18.4 | 20.0  | 1.5 | 1.35 | 0.74 | 27.0   | 18.4   | 22.3   | 1.5 | 1.21 | 0.83 |
| Q91V89_Q Ppp2r5d   | Protein Ppp   | 17 | 17.1  | 11.6 | 12.7  | 1.5 | 1.35 | 0.74 | 339.1  | 279.3  | 339.9  | 1.2 | 1.00 | 1.00 |
| Q5NC05_T Tf2       | Transcriptin  | 2  | 9.3   | 6.3  | 6.9   | 1.5 | 1.35 | 0.74 | 18.5   | 12.6   | 15.4   | 1.5 | 1.21 | 0.83 |
| Q8VC08_Q Cald1     | Caldesmon     | 24 | 20.4  | 13.9 | 15.2  | 1.5 | 1.34 | 0.74 | 740.4  | 457.1  | 556.4  | 1.6 | 1.33 | 0.75 |
| P14211_C_Calr      | Calreticulin  | 3  | 6.5   | 4.4  | 4.8   | 1.5 | 1.34 | 0.75 | 19.2   | 12.0   | 14.6   | 1.6 | 1.31 | 0.76 |
| Q692A1_C1 Cdk13    | Cyclin-dexp   | 3  | 11.3  | 7.7  | 8.4   | 1.5 | 1.34 | 0.75 | 42.7   | 22.1   | 26.9   | 1.9 | 1.59 | 0.63 |
| Q8CFE3_R Rcor1     | REST corep1   | 7  | 25.3  | 17.3 | 18.9  | 1.5 | 1.34 | 0.75 | 128.6  | 112.6  | 137.1  | 1.1 | 0.94 | 1.07 |
| Q3TA09_Q Wdr36     | Protein Wd    | 2  | 9.6   | 6.6  | 7.2   | 1.5 | 1.34 | 0.75 | 19.2   | 13.2   | 16.0   | 1.5 | 1.20 | 0.84 |
| Q9QZL0_R1 Ripk3    | Receptor-ir   | 1  | 19.0  | 13.0 | 14.2  | 1.5 | 1.34 | 0.75 | 19.0   | 13.0   | 15.8   | 1.5 | 1.20 | 0.84 |
| Q9CXW4_F Rpl11     | 60S ribosor   | 14 | 44.1  | 30.3 | 33.0  | 1.5 | 1.34 | 0.75 | 5074.9 | 2043.6 | 2487.4 | 2.5 | 2.04 | 0.49 |
| Q8CDJ8_ST Ston1    | Stonin-1 Oc   | 1  | 15.1  | 10.4 | 11.3  | 1.5 | 1.34 | 0.75 | 15.1   | 10.4   | 12.6   | 1.5 | 1.20 | 0.84 |
| O54950_AV Prkag1   | 5'-AMP-acti   | 10 | 26.4  | 18.1 | 19.8  | 1.5 | 1.33 | 0.75 | 279.9  | 189.5  | 230.7  | 1.5 | 1.21 | 0.82 |
| Q9JKY0_RC Rqc1     | Cell differer | 9  | 20.7  | 14.3 | 15.6  | 1.5 | 1.33 | 0.75 | 253.6  | 154.5  | 188.1  | 1.6 | 1.35 | 0.74 |
| P35831_P1 Ptpn12   | Tyrosine-pr   | 1  | 4.9   | 3.4  | 3.7   | 1.5 | 1.33 | 0.75 | 4.9    | 3.4    | 4.1    | 1.5 | 1.20 | 0.84 |
| Q9CWF2_T Tubb2b    | Tubulin bet   | 4  | 72.8  | 50.1 | 54.7  | 1.5 | 1.33 | 0.75 | 317.5  | 232.1  | 282.6  | 1.4 | 1.12 | 0.89 |
| Q6ZWN5_R Rps9      | 40S ribosor   | 36 | 36.6  | 25.3 | 27.6  | 1.5 | 1.33 | 0.75 | 3951.4 | 2791.1 | 3397.3 | 1.4 | 1.16 | 0.86 |
| E9Q634_M Myo1e     | Unconvent     | 7  | 13.1  | 9.0  | 9.9   | 1.4 | 1.33 | 0.75 | 109.8  | 69.9   | 85.1   | 1.6 | 1.29 | 0.77 |
| P47962_R1 Rpl5     | 60S ribosor   | 24 | 26.4  | 18.2 | 19.9  | 1.4 | 1.33 | 0.75 | 1876.8 | 739.9  | 900.6  | 2.5 | 2.08 | 0.48 |
| E9Q450_ES Tpm1     | Tropomyos     | 5  | 44.8  | 31.0 | 33.8  | 1.4 | 1.32 | 0.75 | 219.5  | 171.6  | 208.8  | 1.3 | 1.05 | 0.95 |
| Q91WB4_F Plekhf2   | Pleckstrin f  | 1  | 5.3   | 3.6  | 4.0   | 1.4 | 1.32 | 0.76 | 5.3    | 3.6    | 4.4    | 1.4 | 1.18 | 0.84 |
| Q99LH8_HG Hgs      | Hepatocyte    | 5  | 15.1  | 10.5 | 11.5  | 1.4 | 1.32 | 0.76 | 61.9   | 53.0   | 64.6   | 1.2 | 0.96 | 1.04 |
| P56959_FL Fus      | RNA-bindin    | 6  | 16.8  | 11.7 | 12.7  | 1.4 | 1.32 | 0.76 | 198.1  | 87.7   | 106.7  | 2.3 | 1.86 | 0.54 |
| Q5SRX1_TH Tom1l2   | TOM1-like f   | 2  | 7.1   | 4.9  | 5.4   | 1.4 | 1.32 | 0.76 | 14.2   | 9.9    | 12.0   | 1.4 | 1.18 | 0.85 |
| Q922D8_C Mthfd1    | C-1-tetrahy   | 44 | 30.8  | 21.4 | 23.3  | 1.4 | 1.32 | 0.76 | 2050.6 | 1189.7 | 1448.0 | 1.7 | 1.42 | 0.71 |
| Q8VDG3_P Parr      | Poly(A)-spe   | 2  | 5.5   | 3.8  | 4.2   | 1.4 | 1.32 | 0.76 | 11.0   | 7.7    | 9.3    | 1.4 | 1.18 | 0.85 |
| P14131_R1 Rps16    | 40S ribosor   | 17 | 71.6  | 49.8 | 54.3  | 1.4 | 1.32 | 0.76 | 2604.3 | 1882.5 | 2291.3 | 1.4 | 1.14 | 0.88 |
| P97315_CS Crsp1    | Cysteine an   | 5  | 29.0  | 20.2 | 22.1  | 1.4 | 1.31 | 0.76 | 628.3  | 608.8  | 741.0  | 1.0 | 0.85 | 1.18 |
| Q9DBS9_O Osbp13    | Oxysterol-b   | 3  | 12.8  | 8.9  | 9.7   | 1.4 | 1.31 | 0.76 | 95.7   | 41.9   | 51.0   | 2.3 | 1.88 | 0.53 |
| P39054_D Dnm2      | Dynamin-2     | 40 | 18.5  | 13.0 | 14.1  | 1.4 | 1.31 | 0.76 | 1298.7 | 706.3  | 859.7  | 1.8 | 1.51 | 0.66 |
| P00375_D Dhfr      | Dihydrofolo:  | 1  | 12.6  | 8.8  | 9.6   | 1.4 | 1.31 | 0.76 | 12.6   | 8.8    | 10.7   | 1.4 | 1.17 | 0.85 |
| Q62418_D Dbnl      | Drebrin-like  | 4  | 6.7   | 4.7  | 5.1   | 1.4 | 1.31 | 0.76 | 40.4   | 19.9   | 24.3   | 2.0 | 1.66 | 0.60 |
| Q9ROQ3_TI Tmed2    | Transmemt     | 2  | 14.4  | 10.1 | 11.0  | 1.4 | 1.31 | 0.76 | 28.8   | 20.2   | 24.6   | 1.4 | 1.17 | 0.85 |
| O55201_U1 Supt5h   | Transcripti   | 17 | 16.6  | 11.7 | 12.7  | 1.4 | 1.31 | 0.77 | 409.4  | 206.9  | 251.8  | 2.0 | 1.63 | 0.62 |
| Q8BVL3_SH Snx17    | Sorting nex   | 1  | 7.5   | 5.3  | 5.8   | 1.4 | 1.31 | 0.77 | 7.5    | 5.3    | 6.4    | 1.4 | 1.17 | 0.85 |
| B2RX14_TL Zcch11   | Terminal ur   | 2  | 17.6  | 12.3 | 13.4  | 1.4 | 1.31 | 0.77 | 35.1   | 24.7   | 30.0   | 1.4 | 1.17 | 0.85 |
| O88665_B1 Brd7     | Bromodom      | 3  | 11.5  | 8.1  | 8.8   | 1.4 | 1.30 | 0.77 | 31.4   | 31.1   | 37.8   | 1.0 | 0.83 | 1.21 |
| Q61771_K1 Kif3b    | Kinesin-like  | 3  | 8.3   | 5.8  | 6.3   | 1.4 | 1.30 | 0.77 | 29.3   | 18.4   | 22.4   | 1.6 | 1.31 | 0.76 |
| Q9CXE7_TH Tmed5    | Transmemt     | 1  | 9.6   | 6.8  | 7.4   | 1.4 | 1.30 | 0.77 | 9.6    | 6.8    | 8.3    | 1.4 | 1.17 | 0.86 |
| Q99MR6_S Srrt      | Serrate RNf   | 27 | 26.1  | 18.4 | 20.1  | 1.4 | 1.30 | 0.77 | 1451.3 | 743.0  | 904.4  | 2.0 | 1.60 | 0.62 |
| Q8BP22_FF Fam92a1  | Protein FAF   | 1  | 5.2   | 3.7  | 4.0   | 1.4 | 1.30 | 0.77 | 5.2    | 3.7    | 4.4    | 1.4 | 1.16 | 0.86 |
| Q61635_Q Ifi47     | GTP-bindin    | 3  | 8.4   | 6.0  | 6.5   | 1.4 | 1.30 | 0.77 | 25.8   | 16.0   | 19.5   | 1.6 | 1.32 | 0.75 |
| Q8CHP6_PI Phc3     | Polyhomec     | 1  | 12.8  | 9.1  | 9.9   | 1.4 | 1.30 | 0.77 | 12.8   | 9.1    | 11.1   | 1.4 | 1.16 | 0.86 |
| P14824_A1 Anxa6    | Annexin A6    | 9  | 5.7   | 4.1  | 4.4   | 1.4 | 1.29 | 0.77 | 60.8   | 52.2   | 63.5   | 1.2 | 0.96 | 1.05 |
| P99024_TE Tubb5    | Tubulin bet   | 21 | 129.9 | 92.2 | 100.6 | 1.4 | 1.29 | 0.77 | 4512.3 | 2936.1 | 3573.8 | 1.5 | 1.26 | 0.79 |
| Q3UKR0_Q Daxx      | Death dom     | 2  | 10.8  | 7.7  | 8.4   | 1.4 | 1.29 | 0.77 | 21.7   | 15.4   | 18.7   | 1.4 | 1.16 | 0.86 |
| P81269_A1 Atf1     | Cyclic AMP    | 1  | 6.6   | 4.7  | 5.1   | 1.4 | 1.29 | 0.77 | 6.6    | 4.7    | 5.7    | 1.4 | 1.16 | 0.86 |
| Q6AD06_PI Pds5a    | Sister chror  | 21 | 13.3  | 9.4  | 10.3  | 1.4 | 1.29 | 0.77 | 479.3  | 387.6  | 471.8  | 1.2 | 1.02 | 0.98 |
| Q6PGC1_D Dhx29     | ATP-depenc    | 14 | 8.9   | 6.3  | 6.9   | 1.4 | 1.29 | 0.78 | 172.8  | 110.9  | 134.9  | 1.6 | 1.28 | 0.78 |
| Q62018_C1 Ctr9     | RNA polym     | 3  | 14.1  | 10.0 | 11.0  | 1.4 | 1.29 | 0.78 | 45.2   | 26.9   | 32.7   | 1.7 | 1.38 | 0.72 |
| Q03265_A1 Atp5a1   | ATP syntha:   | 19 | 21.3  | 15.1 | 16.5  | 1.4 | 1.29 | 0.78 | 760.1  | 277.9  | 338.3  | 2.7 | 2.25 | 0.45 |
| Q6PGF5_Q Bms1      | BMS1 homu     | 4  | 10.3  | 7.3  | 8.0   | 1.4 | 1.29 | 0.78 | 48.8   | 30.8   | 37.5   | 1.6 | 1.30 | 0.77 |
| O88532_Zf Zfr      | Zinc finger I | 13 | 23.0  | 16.4 | 17.9  | 1.4 | 1.29 | 0.78 | 286.1  | 208.0  | 253.2  | 1.4 | 1.13 | 0.89 |
| Q61735_C1 Cd47     | Leukocyte s   | 3  | 10.9  | 7.7  | 8.5   | 1.4 | 1.29 | 0.78 | 31.3   | 22.1   | 26.9   | 1.4 | 1.16 | 0.86 |
| Q60715_P4 P4ha1    | Prolyl 4-hy   | 19 | 19.1  | 13.7 | 14.9  | 1.4 | 1.28 | 0.78 | 560.7  | 467.2  | 568.7  | 1.2 | 0.99 | 1.01 |
| Q9Z0U1_Z1 Tjp2     | Tight juncti  | 12 | 21.1  | 15.1 | 16.4  | 1.4 | 1.28 | 0.78 | 207.9  | 163.6  | 199.1  | 1.3 | 1.04 | 0.96 |
| Q8BG50_M Mak16     | Protein MA    | 1  | 13.6  | 9.8  | 10.6  | 1.4 | 1.28 | 0.78 | 13.6   | 9.8    | 11.9   | 1.4 | 1.15 | 0.87 |
| Q6IRU2_TP Tpm4     | Tropomyos     | 18 | 17.3  | 12.4 | 13.6  | 1.4 | 1.28 | 0.78 | 525.5  | 271.0  | 329.9  | 1.9 | 1.59 | 0.63 |
| Q8KOVA_C1 Cnot3    | CCR4-NOT1     | 2  | 7.5   | 5.4  | 5.8   | 1.4 | 1.28 | 0.78 | 14.9   | 10.7   | 13.1   | 1.4 | 1.14 | 0.87 |
| P16460_A1 Ass1     | Argininosus   | 3  | 7.8   | 5.7  | 6.2   | 1.4 | 1.27 | 0.79 | 55.5   | 21.7   | 26.4   | 2.6 | 2.10 | 0.48 |
| P52431_D1 Pold1    | DNA polym     | 6  | 8.3   | 6.0  | 6.5   | 1.4 | 1.27 | 0.79 | 54.0   | 42.1   | 51.3   | 1.3 | 1.05 | 0.95 |
| Q9EQ28_D1 Pold3    | DNA polym     | 2  | 7.3   | 5.3  | 5.8   | 1.4 | 1.27 | 0.79 | 14.6   | 10.6   | 12.9   | 1.4 | 1.13 | 0.88 |
| O08784_TC Tcof1    | Treacle pro   | 3  | 5.4   | 3.9  | 4.3   | 1.4 | 1.27 | 0.79 | 17.0   | 25.0   | 30.5   | 0.7 | 0.56 | 1.80 |
| Q9JJT9_PH Phax     | Phosphoryl    | 1  | 18.1  | 13.1 | 14.3  | 1.4 | 1.26 | 0.79 | 18.1   | 13.1   | 15.9   | 1.4 | 1.13 | 0.88 |
| O54774_A1 Ap3d1    | AP-3 compl    | 19 | 17.7  | 12.8 | 14.0  | 1.4 | 1.26 | 0.79 | 436.9  | 410.3  | 499.4  | 1.1 | 0.87 | 1.14 |
| P28063_P1 Psmb8    | Proteasom     | 1  | 4.2   | 3.1  | 3.3   | 1.4 | 1.26 | 0.79 | 4.2    | 3.1    | 3.7    | 1.4 | 1.13 | 0.88 |
| A2R576_TR Trmt11   | TRMT1-like    | 7  | 10.3  | 7.5  | 8.1   | 1.4 | 1.26 | 0.79 | 69.0   | 45.4   | 55.3   | 1.5 | 1.25 | 0.80 |
| Q8JZ09_E1l Eif3b   | Eukaryotic:   | 37 | 28.6  | 20.8 | 22.7  | 1.4 | 1.26 | 0.79 | 1300.9 | 1144.9 | 1393.6 | 1.1 | 0.93 | 1.07 |
| Q9Z1T1_AF Ap3b1    | AP-3 compl    | 30 | 15.7  | 11.4 | 12.4  | 1.4 | 1.26 | 0.79 | 666.9  | 577.4  | 702.8  | 1.2 | 0.95 | 1.05 |
| Q5EG47_AV Prkaa1   | 5'-AMP-acti   | 9  | 13.3  | 9.7  | 10.6  | 1.4 | 1.26 | 0.79 | 134.3  | 109.1  | 132.8  | 1.2 | 1.01 | 0.99 |
| Q8BVF2_PI Pdc13    | Phosducin:    | 2  | 12.1  | 8.8  | 9.6   | 1.4 | 1.26 | 0.79 | 24.1   | 17.6   | 21.4   | 1.4 | 1.13 | 0.89 |
| Q9Z1CS_B1 Bicd2    | Protein bic   | 2  | 20.9  | 15.3 | 16.6  | 1.4 | 1.26 | 0.79 | 41.9   | 30.5   | 37.1   | 1.4 | 1.13 | 0.89 |
| P09405_N1 Ncl      | Nucleolin C   | 26 | 25.6  | 18.6 | 20.3  | 1.4 | 1.26 | 0.79 | 1510.0 | 847.3  | 1031.4 | 1.8 | 1.46 | 0.68 |
| P84096_R1 Rhog     | Rho-relatec   | 2  | 8.9   | 6.5  | 7.1   | 1.4 | 1.26 | 0.79 | 17.8   | 12.9   | 15.8   | 1.4 | 1.13 | 0.89 |
| Q9CYC5_D1 Dsn1     | Kinetochor    | 1  | 9.8   | 7.2  | 7.8   | 1.4 | 1.26 | 0.80 | 9.8    | 7.2    | 8.7    | 1.4 | 1.13 | 0.89 |
| F8WHY8_F1 Mta1     | Metastasis-   | 8  | 17.1  | 12.4 | 13.6  | 1.4 | 1.26 | 0.80 | 168.2  | 107.5  | 130.9  | 1.6 | 1.29 | 0.78 |
| Q8QZY1_E1l Eif3l   | Eukaryotic:   | 44 | 32.2  | 23.5 | 25.6  | 1.4 | 1.25 | 0.80 | 1914.1 | 1196.4 | 1456.2 | 1.6 | 1.31 | 0.76 |
| Q9R1X4_T1 Timeless | Protein tim   | 6  | 15.8  | 11.6 | 12.6  | 1.4 | 1.25 | 0.80 | 94.8   | 65.0   | 79.1   | 1.5 | 1.20 | 0.83 |
| F7DBB3_F7 Ahnak2   | Protein Ahr   | 4  | 7.0   | 5.1  | 5.6   | 1.4 | 1.25 | 0.80 | 31.1   | 23.4   | 28.5   | 1.3 | 1.09 | 0.92 |
| A2ASQ1_A1 Agrn     | Agrin OS-M    | 1  | 2.4   | 1.7  | 1.9   | 1.4 | 1.25 | 0.80 | 2.4    | 1.7    | 2.1    | 1.4 | 1.12 | 0.89 |
| Q9WUK4_F Rfc2      | Replicatio    | 9  | 13.9  | 10.2 | 11.1  | 1.4 | 1.25 | 0.80 | 148.9  | 202.0  | 245.9  | 0.7 | 0.61 | 1.65 |
| E9PWG6_E Ncapg     | Protein Nc:   | 29 | 14.8  | 10.8 | 11.8  | 1.4 | 1.25 | 0.80 | 452.5  | 423.5  | 515.4  | 1.1 | 0.88 | 1.14 |
| Q8VBV7_C1 Cops8    | COP9 signa    | 4  | 22.5  | 16.5 | 18.0  | 1.4 | 1.25 | 0.80 | 100.2  | 86.6   | 105.4  | 1.2 | 0.95 | 1.05 |
| Q9D854_O1 Rexo2    | Oligoribon    | 1  | 10.0  | 7.4  | 8.0   | 1.4 | 1.25 | 0.80 | 10.0   | 7.4    | 8.9    | 1.4 | 1.12 | 0.89 |
| Q9QXJ2_Q1 Stat2    | Signal trans  | 16 | 13.3  | 9.8  | 10.7  | 1.4 | 1.25 | 0.80 | 234.7  | 208.9  | 254.2  | 1.1 | 0.92 | 1.08 |
| Q3TMP1_Q Gtf3c3    | General tra   | 5  | 9.2   | 6.7  | 7.4   | 1.4 | 1.24 | 0.80 | 45.2   | 33.8   | 41.1   | 1.3 | 1.10 | 0.91 |
| Q9D0I8_M1 Mrto4    | mRNA turn     | 14 | 11.4  | 8.4  | 9.2   | 1.4 | 1.24 | 0.80 | 199.4  | 138.8  | 168.9  | 1.4 | 1.18 | 0.85 |
| Q8BHL5_E1l Elmo2   | Engulfment    | 4  | 6.2   | 4.6  | 5.0   | 1.4 | 1.24 | 0.80 | 26.8   | 22.1   | 27.0   | 1.2 | 0.99 | 1.01 |
| Q8CH25_S1 Sltm     | SAFB-like tr  | 4  | 11.6  | 8.6  | 9.4   | 1.4 | 1.24 | 0.81 | 58.2   | 43.6   |        |     |      |      |

|                     |               |     |       |      |      |     |      |      |         |         |         |     |      |      |
|---------------------|---------------|-----|-------|------|------|-----|------|------|---------|---------|---------|-----|------|------|
| Q9WU08_Tnjp1        | TNFAIP3-in    | 2   | 2.9   | 2.2  | 2.4  | 1.3 | 1.21 | 0.82 | 5.9     | 4.4     | 5.4     | 1.3 | 1.09 | 0.92 |
| Q8CI53_CliTrip10    | Cdc42-inte    | 4   | 18.3  | 13.8 | 15.1 | 1.3 | 1.21 | 0.82 | 77.2    | 47.5    | 57.8    | 1.6 | 1.33 | 0.75 |
| Q62470_ITItga3      | Integrin alp  | 1   | 12.0  | 9.0  | 9.8  | 1.3 | 1.21 | 0.82 | 12.0    | 9.0     | 11.0    | 1.3 | 1.09 | 0.92 |
| Q35609_ScScamp3     | Secretory c   | 3   | 6.0   | 4.6  | 5.0  | 1.3 | 1.21 | 0.82 | 14.4    | 23.8    | 29.0    | 0.6 | 5.00 | 2.01 |
| Q6NVF9_CiCpsf6      | Cleavage an   | 6   | 31.5  | 23.8 | 25.9 | 1.3 | 1.21 | 0.82 | 241.0   | 139.6   | 169.9   | 1.7 | 1.42 | 0.71 |
| Q70404_VVamp8       | Vesicle-assc  | 1   | 8.6   | 6.5  | 7.1  | 1.3 | 1.21 | 0.82 | 8.6     | 6.5     | 7.9     | 1.3 | 1.09 | 0.92 |
| P62320_SH_Snrp3     | Small nucl    | 5   | 107.9 | 81.6 | 89.0 | 1.3 | 1.21 | 0.82 | 604.1   | 621.8   | 756.8   | 1.0 | 8.00 | 1.25 |
| Q8BHA0_INo80c       | INO80 com     | 4   | 5.7   | 4.3  | 4.7  | 1.3 | 1.21 | 0.82 | 24.2    | 18.3    | 22.3    | 1.3 | 1.09 | 0.92 |
| Q6P5F9_XfXpo1       | Exportin-1    | 23  | 18.8  | 14.2 | 15.5 | 1.3 | 1.21 | 0.83 | 739.7   | 392.5   | 477.8   | 1.9 | 1.55 | 0.65 |
| Q9WV60_CGsk3b       | Glycogen s    | 2   | 19.3  | 14.6 | 15.9 | 1.3 | 1.21 | 0.83 | 38.7    | 29.2    | 35.6    | 1.3 | 1.09 | 0.92 |
| Q8OUZ2_STSad1       | Protein SDI   | 1   | 11.4  | 8.7  | 9.5  | 1.3 | 1.21 | 0.83 | 11.4    | 8.7     | 10.5    | 1.3 | 1.09 | 0.92 |
| Q9D1K2_VAtp6v1f     | V-type prot   | 2   | 15.4  | 11.6 | 12.7 | 1.3 | 1.21 | 0.83 | 30.7    | 23.3    | 28.3    | 1.3 | 1.08 | 0.92 |
| Q9ESE1_LR_Lrba      | Lipopolysac   | 2   | 5.6   | 4.2  | 4.6  | 1.3 | 1.21 | 0.83 | 11.2    | 8.5     | 10.3    | 1.3 | 1.08 | 0.92 |
| Q35280_CiChek1      | Serine/thre   | 1   | 1.8   | 1.3  | 1.5  | 1.3 | 1.21 | 0.83 | 1.8     | 1.3     | 1.6     | 1.3 | 1.08 | 0.92 |
| Q60960_IN_Kpna1     | Importin su   | 5   | 6.0   | 4.6  | 5.0  | 1.3 | 1.21 | 0.83 | 41.9    | 29.2    | 35.6    | 1.4 | 1.18 | 0.85 |
| Q61234_STsnta1      | Alpha-1-syr   | 2   | 4.9   | 3.7  | 4.1  | 1.3 | 1.21 | 0.83 | 9.9     | 7.5     | 9.1     | 1.3 | 1.08 | 0.92 |
| Q9QWT9_KKifc1       | Kinesin-like  | 9   | 8.6   | 6.5  | 7.1  | 1.3 | 1.21 | 0.83 | 142.7   | 69.7    | 84.9    | 2.0 | 1.68 | 0.59 |
| Q8BK59_KcKiaa0020   | Pumilio do    | 1   | 10.4  | 7.9  | 8.6  | 1.3 | 1.21 | 0.83 | 10.4    | 7.9     | 9.6     | 1.3 | 1.08 | 0.92 |
| Q9QYB5_AtAdd3       | Gamma-adi     | 4   | 9.1   | 6.9  | 7.5  | 1.3 | 1.21 | 0.83 | 39.0    | 26.8    | 32.7    | 1.5 | 1.19 | 0.84 |
| Q9QUJ7_AcAcl4       | Long-chain    | 1   | 6.5   | 5.0  | 5.4  | 1.3 | 1.20 | 0.83 | 6.5     | 5.0     | 6.1     | 1.3 | 1.08 | 0.93 |
| Q9QXN3_TI_Trip4     | Activating    | 3   | 9.3   | 7.1  | 7.7  | 1.3 | 1.20 | 0.83 | 25.8    | 26.6    | 32.3    | 1.0 | 0.80 | 1.25 |
| P97823_LV_Lypl1     | Acyl-protei   | 1   | 10.4  | 7.9  | 8.7  | 1.3 | 1.20 | 0.83 | 10.4    | 7.9     | 9.7     | 1.3 | 1.08 | 0.93 |
| Q8K224_N_Nat10      | N-acetyltra   | 6   | 10.1  | 7.7  | 8.4  | 1.3 | 1.20 | 0.83 | 82.1    | 50.9    | 61.9    | 1.6 | 1.33 | 0.75 |
| Q9WU0_FPhf2         | Lysine-spec   | 6   | 9.8   | 7.5  | 8.2  | 1.3 | 1.20 | 0.83 | 299.7   | 41.5    | 50.5    | 7.2 | 5.93 | 0.17 |
| Q61187_TSTsg101     | Tumor susc    | 5   | 28.1  | 21.5 | 23.5 | 1.3 | 1.20 | 0.83 | 120.7   | 109.3   | 133.1   | 1.1 | 0.91 | 1.10 |
| Q6PB44_P1Ptpn23     | Tyrosine-pr   | 20  | 13.8  | 10.6 | 11.5 | 1.3 | 1.20 | 0.83 | 341.6   | 273.9   | 333.3   | 1.2 | 1.02 | 0.98 |
| Q9WU7_M_Myo1c       | Unconvent     | 33  | 28.1  | 21.5 | 23.4 | 1.3 | 1.20 | 0.83 | 1827.2  | 893.9   | 1088.0  | 2.0 | 1.68 | 0.60 |
| Q8OUJ7_RfRab3gap1   | Rab3 GTPas    | 4   | 9.1   | 7.0  | 7.6  | 1.3 | 1.20 | 0.83 | 36.7    | 30.5    | 37.1    | 1.2 | 0.99 | 1.01 |
| Q80YV2_NiZc3hc1     | Nuclear-int   | 4   | 8.8   | 6.7  | 7.3  | 1.3 | 1.20 | 0.84 | 34.9    | 26.8    | 32.6    | 1.3 | 1.07 | 0.93 |
| Q99LI7_CS_Cstf3     | Cleavage sti  | 14  | 13.0  | 9.9  | 10.8 | 1.3 | 1.20 | 0.84 | 228.9   | 177.3   | 215.8   | 1.3 | 1.06 | 0.94 |
| Q9DC16_El_Ergic1    | Endoplasm     | 2   | 7.4   | 5.7  | 6.2  | 1.3 | 1.19 | 0.84 | 14.8    | 11.4    | 13.9    | 1.3 | 1.07 | 0.93 |
| Q6PII4_NFI_Nfrkb    | Nuclear fac   | 2   | 9.8   | 7.5  | 8.2  | 1.3 | 1.19 | 0.84 | 19.5    | 15.0    | 18.3    | 1.3 | 1.07 | 0.94 |
| Q91YW3_C_Dnajc3     | Dnal homo     | 1   | 9.0   | 6.9  | 7.5  | 1.3 | 1.19 | 0.84 | 9.0     | 6.9     | 8.4     | 1.3 | 1.07 | 0.94 |
| Q8VDW0_LDdx39a      | ATP-depend    | 30  | 51.2  | 39.4 | 43.0 | 1.3 | 1.19 | 0.84 | 2118.9  | 2047.0  | 2491.5  | 1.0 | 0.85 | 1.18 |
| Q9CQW9_LI_lftm3     | Interferon-i  | 1   | 12.9  | 10.0 | 10.9 | 1.3 | 1.19 | 0.84 | 12.9    | 10.0    | 12.1    | 1.3 | 1.07 | 0.94 |
| Q99LE6_AE_Abcf2     | ATP-bindin    | 19  | 15.5  | 11.9 | 13.0 | 1.3 | 1.19 | 0.84 | 415.5   | 315.3   | 383.8   | 1.3 | 1.08 | 0.92 |
| Q8BQ30_P_Ppp1r18    | Phostensin    | 2   | 16.0  | 12.4 | 13.5 | 1.3 | 1.19 | 0.84 | 32.0    | 24.7    | 30.1    | 1.3 | 1.06 | 0.94 |
| Q8K094_Q_Pvr        | Nectin-2 Of   | 1   | 7.1   | 5.5  | 6.0  | 1.3 | 1.19 | 0.84 | 7.1     | 5.5     | 6.7     | 1.3 | 1.06 | 0.94 |
| P58501_P_Paxbp1     | PAX3-and f    | 3   | 14.6  | 11.3 | 12.3 | 1.3 | 1.19 | 0.84 | 38.8    | 28.7    | 35.0    | 1.4 | 1.11 | 0.90 |
| Q8CD94_L_Lin52      | Protein lin-  | 1   | 4.1   | 3.2  | 3.5  | 1.3 | 1.19 | 0.84 | 4.1     | 3.2     | 3.9     | 1.3 | 1.06 | 0.94 |
| Q55SL4_AB_Abr       | Active brea   | 3   | 11.1  | 8.6  | 9.4  | 1.3 | 1.19 | 0.84 | 30.0    | 22.5    | 27.3    | 1.3 | 1.10 | 0.91 |
| Q8K301_D_Ddx52      | Probable A'   | 7   | 13.0  | 10.1 | 11.0 | 1.3 | 1.18 | 0.84 | 93.6    | 80.3    | 97.7    | 1.2 | 0.96 | 1.04 |
| P62908_Rf_Rps3      | 40S ribosom   | 40  | 36.2  | 28.1 | 30.6 | 1.3 | 1.18 | 0.85 | 4418.0  | 2657.2  | 3234.2  | 1.7 | 1.37 | 0.73 |
| Q99LB0_T_Dnttt1p1   | Deoxynucl     | 1   | 5.8   | 4.5  | 4.9  | 1.3 | 1.18 | 0.85 | 5.8     | 4.5     | 5.5     | 1.3 | 1.06 | 0.94 |
| Q99M31_H_Hspa14     | Heat shock    | 8   | 12.2  | 9.5  | 10.4 | 1.3 | 1.18 | 0.85 | 141.9   | 266.7   | 324.6   | 0.5 | 0.44 | 2.29 |
| Q64701_RI_Rbl1      | Retinoblast   | 2   | 12.6  | 9.8  | 10.7 | 1.3 | 1.18 | 0.85 | 25.1    | 19.5    | 23.8    | 1.3 | 1.06 | 0.95 |
| Q8BH43_W_Wasf2      | Wiskott-Alc   | 3   | 10.1  | 7.8  | 8.5  | 1.3 | 1.18 | 0.85 | 25.9    | 21.7    | 26.4    | 1.2 | 0.98 | 1.02 |
| Q63932_M_Map2k2     | Dual specif   | 2   | 11.6  | 9.1  | 9.9  | 1.3 | 1.18 | 0.85 | 23.3    | 18.1    | 22.1    | 1.3 | 1.05 | 0.95 |
| Q9JKP7_D_Pole3      | DNA polym     | 2   | 22.5  | 17.5 | 19.1 | 1.3 | 1.18 | 0.85 | 44.9    | 35.0    | 42.6    | 1.3 | 1.05 | 0.95 |
| Q61584_F_Fxr1       | Fragile X m   | 26  | 19.9  | 15.6 | 17.0 | 1.3 | 1.17 | 0.85 | 789.2   | 817.3   | 994.7   | 1.0 | 0.79 | 1.26 |
| Q3TLI0_TP_Trappc10  | Trafficking j | 1   | 4.4   | 3.4  | 3.7  | 1.3 | 1.17 | 0.85 | 4.4     | 3.4     | 4.2     | 1.3 | 1.05 | 0.95 |
| Q8VDJ3_VI_Hdlbp     | Vigilin OSF   | 76  | 25.5  | 20.0 | 21.8 | 1.3 | 1.17 | 0.85 | 3360.3  | 2270.9  | 2764.0  | 1.5 | 1.22 | 0.82 |
| Q54962_B_Banf1      | Barrier-to-e  | 3   | 88.1  | 68.9 | 75.2 | 1.3 | 1.17 | 0.85 | 229.4   | 186.5   | 227.0   | 1.2 | 1.01 | 0.99 |
| P70388_R_Rad50      | DNA repair    | 15  | 22.9  | 18.0 | 19.6 | 1.3 | 1.17 | 0.85 | 366.0   | 239.8   | 291.8   | 1.5 | 1.25 | 0.80 |
| Q91VR5_D_Ddx1       | ATP-depend    | 46  | 18.5  | 14.5 | 15.8 | 1.3 | 1.17 | 0.85 | 1848.1  | 1480.5  | 1802.0  | 1.2 | 1.03 | 0.98 |
| P97479_M_Myo7a      | Unconvent     | 1   | 4.7   | 3.7  | 4.0  | 1.3 | 1.17 | 0.86 | 4.7     | 3.7     | 4.5     | 1.3 | 1.05 | 0.95 |
| Q88952_LI_Lin7c     | Protein lin-  | 1   | 12.0  | 9.4  | 10.3 | 1.3 | 1.17 | 0.86 | 12.0    | 9.4     | 11.5    | 1.3 | 1.05 | 0.95 |
| P61255_RI_Rpl26     | 60S ribosom   | 14  | 93.5  | 73.3 | 80.0 | 1.3 | 1.17 | 0.86 | 2991.4  | 2003.7  | 2438.8  | 1.5 | 1.23 | 0.82 |
| Q8C3R1_BI_Brat1     | BRCA1-asso    | 1   | 9.0   | 7.0  | 7.7  | 1.3 | 1.17 | 0.86 | 9.0     | 7.0     | 8.6     | 1.3 | 1.05 | 0.96 |
| Q9WVA4_T_Tagln2     | Transgelin-   | 5   | 13.4  | 10.5 | 11.5 | 1.3 | 1.17 | 0.86 | 90.8    | 49.1    | 59.7    | 1.9 | 1.52 | 0.66 |
| Q9CWN7_C_Cnot11     | CCR4-NOT1     | 2   | 9.8   | 7.7  | 8.4  | 1.3 | 1.17 | 0.86 | 19.5    | 15.3    | 18.6    | 1.3 | 1.05 | 0.96 |
| Q8BWy9_C_Kiaa1524   | Protein CIP   | 2   | 9.8   | 7.7  | 8.4  | 1.3 | 1.17 | 0.86 | 19.7    | 15.5    | 18.8    | 1.3 | 1.04 | 0.96 |
| P24788_C_Cdk11b     | Cyclin-depr   | 10  | 20.1  | 15.8 | 17.2 | 1.3 | 1.16 | 0.86 | 272.0   | 201.7   | 245.5   | 1.3 | 1.11 | 0.90 |
| Q9EP71_RI_Rai14     | Ankycorbin    | 4   | 8.9   | 7.0  | 7.6  | 1.3 | 1.16 | 0.86 | 41.2    | 30.4    | 36.9    | 1.4 | 1.11 | 0.90 |
| Q8C570_RV_Rae1      | mRNA expc     | 3   | 16.2  | 12.8 | 14.0 | 1.3 | 1.16 | 0.86 | 36.4    | 39.5    | 48.1    | 0.9 | 0.76 | 1.32 |
| Q6NZI6_IF_Eif4g1    | Eukaryotic-   | 66  | 19.9  | 15.7 | 17.2 | 1.3 | 1.16 | 0.86 | 2182.5  | 1816.4  | 2210.9  | 1.2 | 0.99 | 1.01 |
| P26039_TL_Tln1      | Talin-1 OSF   | 153 | 54.4  | 43.0 | 46.9 | 1.3 | 1.16 | 0.86 | 21578.9 | 11748.9 | 14300.4 | 1.8 | 1.51 | 0.66 |
| Q9DA08_S_Ccdc101    | SAGA-asso     | 1   | 11.0  | 8.7  | 9.5  | 1.3 | 1.16 | 0.86 | 11.0    | 8.7     | 10.6    | 1.3 | 1.04 | 0.96 |
| Q99J88_SN_Smarcd2   | SWI/SNF-re    | 3   | 16.6  | 13.1 | 14.3 | 1.3 | 1.16 | 0.86 | 66.0    | 46.5    | 56.6    | 1.4 | 1.17 | 0.86 |
| Q9D0T2_D_Dusp12     | Dual specif   | 1   | 3.3   | 2.6  | 2.8  | 1.3 | 1.16 | 0.86 | 3.3     | 2.6     | 3.1     | 1.3 | 1.04 | 0.96 |
| P10404_ENV1_MOUSESE | MLV-relate    | 3   | 14.1  | 11.2 | 12.2 | 1.3 | 1.16 | 0.86 | 31.9    | 35.9    | 43.7    | 0.9 | 0.73 | 1.37 |
| Q8BFR5_EF_Tufm      | Elongation    | 7   | 17.8  | 14.1 | 15.4 | 1.3 | 1.16 | 0.86 | 112.7   | 114.3   | 139.1   | 1.0 | 0.81 | 1.23 |
| Q9ERU9_RI_Ranbp2    | E3 SUMO-p     | 1   | 4.6   | 3.6  | 4.0  | 1.3 | 1.15 | 0.87 | 4.6     | 3.6     | 4.4     | 1.3 | 1.03 | 0.97 |
| Q8BTU1_Ci_Cfap20    | Cilia-and fl  | 1   | 11.3  | 9.0  | 9.8  | 1.3 | 1.15 | 0.87 | 11.3    | 9.0     | 10.9    | 1.3 | 1.03 | 0.97 |
| D323H2_D_Ino80e     | Coiled-coil   | 1   | 5.8   | 4.6  | 5.0  | 1.3 | 1.15 | 0.87 | 5.8     | 4.6     | 5.6     | 1.3 | 1.03 | 0.97 |
| Q9QYCO_AAdd1        | Alpha-addu    | 6   | 8.5   | 6.8  | 7.4  | 1.3 | 1.15 | 0.87 | 52.0    | 39.4    | 47.9    | 1.3 | 1.08 | 0.92 |
| P61211_Af_Arl1      | ADP-ribosy    | 2   | 9.6   | 7.7  | 8.4  | 1.3 | 1.15 | 0.87 | 19.2    | 15.3    | 18.7    | 1.3 | 1.03 | 0.97 |
| Q6ADA2_L_Larp4b     | La-related f  | 3   | 16.8  | 13.4 | 14.6 | 1.3 | 1.15 | 0.87 | 49.3    | 42.8    | 52.0    | 1.2 | 0.95 | 1.06 |
| Q9CXF4_TB_Tbc1d15   | TBC1 doma     | 2   | 13.3  | 10.6 | 11.5 | 1.3 | 1.15 | 0.87 | 26.5    | 21.2    | 25.8    | 1.3 | 1.03 | 0.97 |
| Q8BVE8_NWhsc1       | Histone-lys   | 6   | 12.9  | 10.3 | 11.3 | 1.3 | 1.15 | 0.87 | 74.2    | 68.0    | 82.7    | 1.1 | 0.90 | 1.12 |
| P23116_EI_Eif3a     | Eukaryotic-   | 60  | 28.6  | 22.8 | 24.9 | 1.3 | 1.15 | 0.87 | 2737.4  | 1767.0  | 2150.7  | 1.5 | 1.27 | 0.79 |
| Q3UK78_P_Pcgf5      | Polycomb f    | 1   | 3.7   | 2.9  | 3.2  | 1.3 | 1.15 | 0.87 | 3.7     | 2.9     | 3.6     | 1.3 | 1.03 | 0.97 |
| Q9CYA6_ZC_Zcchc8    | Zinc finger   | 10  | 13.1  | 10.4 | 11.4 | 1.3 | 1.15 | 0.87 | 184.0   | 141.2   | 171.9   | 1.3 | 1.07 | 0.93 |
| Q9QYI0_Df_Dnaja2    | Dnal homo     | 12  | 30.7  | 24.6 | 26.8 | 1.2 | 1.15 | 0.87 | 559.2   | 460.0   | 560.0   | 1.2 | 1.00 | 1.00 |
| P63168_Df_Dynl1     | Dynein ligh   | 4   | 27.7  | 22.2 | 24.2 | 1.2 | 1.14 | 0.88 | 161.6   | 166.1   | 202.2   | 1.0 | 0.80 | 1.25 |
| Q8R060_Z_Zwilch     | Protein zwi   | 3   | 7.9   | 6.4  | 6.9  | 1.2 | 1.14 | 0.88 | 22.7    | 19.4    | 23.6    | 1.2 | 0.96 | 1.04 |
| Q5PSV9_M_Mdc1       | Mediator o    | 2   | 7.1   | 5.7  | 6.2  | 1.2 | 1.14 | 0.88 | 14.2    | 11.4    | 13.9    | 1.2 | 1.02 | 0.98 |
| Q3UMG5_V_Lrch2      | Leucine-ric   | 2   | 11.0  | 8.9  | 9.7  | 1.2 | 1.14 | 0.88 | 22.1    | 17.7    | 21.6    | 1.2 | 1.02 | 0.98 |

|                            |                     |     |       |       |       |     |      |      |        |        |        |     |      |      |
|----------------------------|---------------------|-----|-------|-------|-------|-----|------|------|--------|--------|--------|-----|------|------|
| P13020_GlGsn               | Gelsolin OS         | 23  | 55.8  | 45.5  | 49.6  | 1.2 | 1.12 | 0.89 | 1736.9 | 1176.8 | 1432.4 | 1.5 | 1.21 | 0.82 |
| O9ERD7_TI Tubb3            | Tubulin bet         | 24  | 24.9  | 20.3  | 22.2  | 1.2 | 1.12 | 0.89 | 1814.1 | 1327.4 | 1615.6 | 1.4 | 1.12 | 0.89 |
| O922P9_GlGlyr1             | Putative ox         | 9   | 15.9  | 13.0  | 14.2  | 1.2 | 1.12 | 0.89 | 182.6  | 209.1  | 254.5  | 0.9 | 0.72 | 1.39 |
| P62869_EL Tceb2            | Transcripti         | 7   | 37.7  | 30.9  | 33.7  | 1.2 | 1.12 | 0.89 | 279.4  | 201.3  | 245.0  | 1.4 | 1.14 | 0.88 |
| O99NF3_CI Cep41            | Centrosom           | 1   | 4.1   | 3.4   | 3.7   | 1.2 | 1.12 | 0.89 | 4.1    | 3.4    | 4.1    | 1.2 | 1.00 | 1.00 |
| Q3TYA6_MI Mphosph8         | M-phase ph          | 1   | 6.6   | 5.4   | 5.9   | 1.2 | 1.12 | 0.89 | 6.6    | 5.4    | 6.6    | 1.2 | 1.00 | 1.00 |
| P62317_SH Snpd2            | Small nucle         | 17  | 25.3  | 20.7  | 22.6  | 1.2 | 1.12 | 0.90 | 968.8  | 849.0  | 1033.3 | 1.1 | 0.94 | 1.07 |
| O91267_SF Srgap2           | SLIT-ROBO1          | 2   | 9.9   | 8.2   | 8.9   | 1.2 | 1.11 | 0.90 | 19.8   | 16.3   | 19.9   | 1.2 | 1.00 | 1.00 |
| Q6P4T2_UI Snpnp200         | US small nu         | 51  | 36.4  | 30.0  | 32.7  | 1.2 | 1.11 | 0.90 | 2824.5 | 2030.2 | 2471.1 | 1.4 | 1.14 | 0.87 |
| O9WXT5_S Skp1              | S-phase kin         | 7   | 23.3  | 19.2  | 20.9  | 1.2 | 1.11 | 0.90 | 185.1  | 223.9  | 272.5  | 0.8 | 0.68 | 1.47 |
| Q8BK12_TN Trnc6b           | Trinucleoti         | 1   | 4.9   | 4.0   | 4.4   | 1.2 | 1.11 | 0.90 | 4.9    | 4.0    | 4.9    | 1.2 | 1.00 | 1.00 |
| Q8VH51_RI Rbm39            | RNA-bindin          | 34  | 19.3  | 15.9  | 17.4  | 1.2 | 1.11 | 0.90 | 1221.1 | 1272.3 | 1548.6 | 1.0 | 0.79 | 1.27 |
| Q1HF20_NI Nsun2            | tRNA (cytos         | 19  | 22.4  | 18.4  | 20.1  | 1.2 | 1.11 | 0.90 | 483.5  | 448.7  | 546.1  | 1.1 | 0.89 | 1.13 |
| Q8K2K6_AI Aegf1            | Arf-GAP doi         | 10  | 8.2   | 6.8   | 7.4   | 1.2 | 1.11 | 0.90 | 93.5   | 98.0   | 119.3  | 1.0 | 0.78 | 1.28 |
| Q8CI33_CI Cwf191           | CWF19-like          | 3   | 12.7  | 10.5  | 11.5  | 1.2 | 1.11 | 0.90 | 42.4   | 31.3   | 38.1   | 1.4 | 1.11 | 0.90 |
| P23249_M Mov10             | Putative he         | 31  | 18.4  | 15.2  | 16.6  | 1.2 | 1.11 | 0.90 | 662.6  | 508.4  | 618.9  | 1.3 | 1.07 | 0.93 |
| Q8OZ11_RA Rap2a            | Ras-related         | 1   | 24.0  | 19.8  | 21.6  | 1.2 | 1.11 | 0.90 | 24.0   | 19.8   | 24.1   | 1.2 | 0.99 | 1.01 |
| P70318_TI Tial1            | Nucleolysir         | 4   | 22.7  | 18.8  | 20.5  | 1.2 | 1.11 | 0.90 | 159.5  | 94.4   | 114.9  | 1.7 | 1.39 | 0.72 |
| Q8V136_PA Pxn              | Paxillin OS-        | 4   | 17.5  | 14.5  | 15.8  | 1.2 | 1.11 | 0.90 | 80.2   | 52.0   | 63.3   | 1.5 | 1.27 | 0.79 |
| Q8BMO2_T Gtf3c4            | General tra         | 5   | 8.8   | 7.3   | 7.9   | 1.2 | 1.11 | 0.90 | 50.1   | 35.7   | 43.4   | 1.4 | 1.16 | 0.87 |
| P43406_IT Itgav            | Integrin alp        | 1   | 8.3   | 6.9   | 7.5   | 1.2 | 1.11 | 0.90 | 8.3    | 6.9    | 8.4    | 1.2 | 0.99 | 1.01 |
| O9D708_Q_S100a16           | Protein S1C         | 1   | 12.4  | 10.3  | 11.2  | 1.2 | 1.10 | 0.91 | 12.4   | 10.3   | 12.5   | 1.2 | 0.99 | 1.01 |
| F8W130_F8 Snx7             | Sorting nex         | 7   | 17.5  | 14.5  | 15.8  | 1.2 | 1.10 | 0.91 | 135.8  | 101.1  | 123.1  | 1.3 | 1.10 | 0.91 |
| P59017_BI Bcl2l13          | Bcl-2-like p        | 1   | 4.4   | 3.6   | 4.0   | 1.2 | 1.10 | 0.91 | 4.4    | 3.6    | 4.4    | 1.2 | 0.99 | 1.01 |
| O88487_DI Dync1i2          | Cytoplasmic         | 8   | 21.7  | 18.0  | 19.7  | 1.2 | 1.10 | 0.91 | 278.1  | 190.8  | 232.3  | 1.5 | 1.20 | 0.84 |
| Q8O5Y5_PR Prpf38b          | Pre-mRNA-           | 6   | 14.2  | 11.8  | 12.9  | 1.2 | 1.10 | 0.91 | 91.2   | 70.3   | 85.6   | 1.3 | 1.06 | 0.94 |
| O912U6_DI Dst              | Dystonin O          | 8   | 9.2   | 7.7   | 8.4   | 1.2 | 1.10 | 0.91 | 71.2   | 54.2   | 66.0   | 1.3 | 1.08 | 0.93 |
| P28740_KI Kif2a            | Kinesin-like        | 7   | 9.6   | 8.0   | 8.8   | 1.2 | 1.10 | 0.91 | 111.5  | 80.0   | 97.3   | 1.4 | 1.15 | 0.87 |
| Q8BL66_EE Eea1             | Early endos         | 47  | 15.2  | 12.7  | 13.8  | 1.2 | 1.10 | 0.91 | 851.7  | 626.4  | 762.4  | 1.4 | 1.12 | 0.90 |
| E9Q616_ES Ahnak            | Protein Ahr         | 163 | 22.1  | 18.5  | 20.2  | 1.2 | 1.09 | 0.91 | 6414.9 | 4720.7 | 5745.8 | 1.4 | 1.12 | 0.90 |
| Q8BIH1_ZC Zc2hc1a          | Zinc finger 1       | 1   | 29.3  | 24.6  | 26.8  | 1.2 | 1.09 | 0.91 | 29.3   | 24.6   | 29.9   | 1.2 | 0.98 | 1.02 |
| P63330_PF Ppp2ca           | Serine/thre         | 4   | 9.3   | 7.8   | 8.5   | 1.2 | 1.09 | 0.92 | 52.6   | 35.1   | 42.8   | 1.5 | 1.23 | 0.81 |
| Q6P6L6_QI Gemin4           | Gem (Nucle          | 2   | 9.1   | 7.7   | 8.4   | 1.2 | 1.09 | 0.92 | 18.2   | 15.3   | 18.6   | 1.2 | 0.98 | 1.02 |
| Q8CI11_GI Gnl3             | Guanine nu          | 11  | 10.2  | 8.6   | 9.3   | 1.2 | 1.09 | 0.92 | 112.9  | 103.7  | 126.2  | 1.1 | 0.89 | 1.12 |
| Q7TPV4_MI Mybbp1a          | Myb-bindir          | 71  | 28.8  | 24.3  | 26.5  | 1.2 | 1.09 | 0.92 | 3888.0 | 3053.8 | 3716.9 | 1.3 | 1.05 | 0.96 |
| F8VPK0_F8 Ttc37            | Protein Ttc         | 10  | 11.1  | 9.4   | 10.2  | 1.2 | 1.09 | 0.92 | 169.5  | 96.4   | 117.3  | 1.8 | 1.44 | 0.69 |
| O921E6_EE Eed              | Polycomb 1          | 10  | 12.7  | 10.7  | 11.7  | 1.2 | 1.08 | 0.92 | 117.1  | 115.8  | 141.0  | 1.0 | 0.83 | 1.20 |
| O91YK2_RF Rrp1b            | Ribosomal           | 2   | 5.4   | 4.6   | 5.0   | 1.2 | 1.08 | 0.92 | 10.8   | 9.1    | 11.1   | 1.2 | 0.97 | 1.03 |
| P40336_VF Vps26a           | Vacuolar pr         | 20  | 23.5  | 19.9  | 21.7  | 1.2 | 1.08 | 0.92 | 706.2  | 656.5  | 799.1  | 1.1 | 0.88 | 1.13 |
| Q2EMV9_P Parp14            | Poly (ADP- <i>r</i> | 23  | 20.3  | 17.2  | 18.8  | 1.2 | 1.08 | 0.92 | 527.1  | 440.8  | 536.5  | 1.2 | 0.98 | 1.02 |
| Q01405_SC Sec23a           | Protein trai        | 12  | 12.0  | 10.2  | 11.1  | 1.2 | 1.08 | 0.92 | 223.6  | 126.1  | 153.5  | 1.8 | 1.46 | 0.69 |
| Q61136_P1 Prpf4b           | Serine/thre         | 8   | 9.9   | 8.4   | 9.2   | 1.2 | 1.08 | 0.92 | 76.2   | 62.7   | 76.3   | 1.2 | 1.00 | 1.00 |
| Q60716_P4 P4ha2            | Prolyl 4-hy         | 2   | 11.6  | 9.9   | 10.8  | 1.2 | 1.08 | 0.93 | 23.3   | 19.8   | 24.1   | 1.2 | 0.97 | 1.03 |
| Q8R088_GI Golph3l          | Golgi phosf         | 1   | 8.0   | 6.8   | 7.5   | 1.2 | 1.08 | 0.93 | 8.0    | 6.8    | 8.3    | 1.2 | 0.97 | 1.03 |
| E0CX20_E0 Bud31            | Protein BUI         | 5   | 25.6  | 21.8  | 23.8  | 1.2 | 1.08 | 0.93 | 133.8  | 160.9  | 195.8  | 0.8 | 0.68 | 1.46 |
| Q3V0C5_UI Usp48            | Ubiquitin c         | 6   | 9.1   | 7.7   | 8.4   | 1.2 | 1.08 | 0.93 | 56.8   | 45.1   | 54.9   | 1.3 | 1.03 | 0.97 |
| Q8K1N4_SI Spats2           | Spermatogi          | 4   | 15.6  | 13.3  | 14.5  | 1.2 | 1.08 | 0.93 | 66.0   | 46.9   | 57.1   | 1.4 | 1.16 | 0.86 |
| P60762_M Morf4l1           | Mortality fa        | 1   | 2.4   | 2.1   | 2.3   | 1.2 | 1.08 | 0.93 | 2.4    | 2.1    | 2.5    | 1.2 | 0.96 | 1.04 |
| P48193_41 Epb41            | Protein 4.1         | 4   | 10.5  | 8.9   | 9.7   | 1.2 | 1.08 | 0.93 | 44.7   | 31.8   | 38.7   | 1.4 | 1.16 | 0.87 |
| Q8BK64_AI Ahsa1            | Activator o         | 3   | 11.8  | 10.1  | 11.0  | 1.2 | 1.07 | 0.93 | 46.3   | 36.1   | 44.0   | 1.3 | 1.05 | 0.95 |
| O9DOA3_AI Arpin            | Arpin OS-M          | 3   | 7.9   | 6.8   | 7.4   | 1.2 | 1.07 | 0.93 | 25.2   | 39.7   | 48.3   | 0.6 | 0.52 | 1.92 |
| O9CQ39_M Med21             | Mediator o          | 1   | 9.6   | 8.2   | 8.9   | 1.2 | 1.07 | 0.93 | 9.6    | 8.2    | 9.9    | 1.2 | 0.96 | 1.04 |
| Q8BWQ6_CP062_MOU UPF0505 p |                     | 2   | 19.4  | 16.6  | 18.1  | 1.2 | 1.07 | 0.93 | 38.8   | 33.2   | 40.4   | 1.2 | 0.96 | 1.04 |
| Q6DFW4_I Nop58             | Nucleolar p         | 19  | 8.5   | 7.2   | 7.9   | 1.2 | 1.07 | 0.93 | 189.8  | 180.3  | 219.5  | 1.1 | 0.86 | 1.16 |
| P26231_CI Cttna1           | Catenin alp         | 8   | 11.5  | 9.8   | 10.7  | 1.2 | 1.07 | 0.93 | 98.3   | 100.5  | 122.4  | 1.0 | 0.80 | 1.24 |
| P97855_GI G3bp1            | Ras GTPase-         | 18  | 18.3  | 15.6  | 17.1  | 1.2 | 1.07 | 0.93 | 570.8  | 441.0  | 536.7  | 1.3 | 1.06 | 0.94 |
| P56873_SS Sscca1           | Sjoegren sy         | 1   | 35.9  | 30.8  | 33.6  | 1.2 | 1.07 | 0.93 | 35.9   | 30.8   | 37.4   | 1.2 | 0.96 | 1.04 |
| P62900_RL Rpl31            | 60S riboso          | 7   | 238.5 | 204.2 | 222.8 | 1.2 | 1.07 | 0.93 | 2469.5 | 2459.2 | 2993.2 | 1.0 | 0.83 | 1.21 |
| O55022_P Pgrmc1            | Membrane            | 3   | 3.4   | 2.9   | 3.2   | 1.2 | 1.07 | 0.93 | 10.4   | 26.6   | 32.4   | 0.4 | 0.32 | 3.10 |
| O5X1Y5_CC Arcn1            | Coatomer s          | 40  | 17.1  | 14.6  | 16.0  | 1.2 | 1.07 | 0.94 | 1082.9 | 947.4  | 1153.1 | 1.1 | 0.94 | 1.06 |
| Q8R5C5_AI Actr1b           | Beta-centra         | 12  | 18.8  | 16.2  | 17.6  | 1.2 | 1.07 | 0.94 | 526.9  | 477.0  | 580.5  | 1.1 | 0.91 | 1.10 |
| P42567_EF Eps15            | Epidermal j         | 6   | 7.2   | 6.2   | 6.7   | 1.2 | 1.07 | 0.94 | 39.4   | 35.1   | 42.7   | 1.1 | 0.92 | 1.09 |
| G3X8X0_GI Dhx16            | DEAH (Asp           | 1   | 6.7   | 5.8   | 6.3   | 1.2 | 1.06 | 0.94 | 6.7    | 5.8    | 7.0    | 1.2 | 0.95 | 1.05 |
| P25976_UI Ubtf             | Nucleolar t         | 2   | 8.0   | 6.9   | 7.6   | 1.2 | 1.06 | 0.94 | 16.1   | 13.8   | 16.9   | 1.2 | 0.95 | 1.05 |
| O9Z0R4_IT Itsn1            | Intersectin         | 6   | 5.6   | 4.9   | 5.3   | 1.2 | 1.06 | 0.94 | 50.5   | 27.1   | 33.0   | 1.9 | 1.53 | 0.65 |
| F6ZDS4_TP Tpr              | Nucleoprot          | 22  | 15.5  | 13.4  | 14.6  | 1.2 | 1.06 | 0.94 | 465.3  | 319.2  | 388.5  | 1.5 | 1.20 | 0.83 |
| Q61029_L4 Tmpo             | Lamina-ass          | 1   | 10.1  | 8.7   | 9.5   | 1.2 | 1.06 | 0.94 | 10.1   | 8.7    | 10.6   | 1.2 | 0.95 | 1.05 |
| P84078_AF Arf1             | ADP-ribosy          | 21  | 18.7  | 16.1  | 17.6  | 1.2 | 1.06 | 0.94 | 2357.2 | 1319.5 | 1606.0 | 1.8 | 1.47 | 0.68 |
| E9QAE3_E9 Btaf1            | Protein Bta         | 3   | 11.5  | 10.0  | 10.9  | 1.2 | 1.06 | 0.94 | 27.0   | 30.6   | 37.2   | 0.9 | 0.72 | 1.38 |
| P48036_AF Anxa5            | Annexin A5          | 5   | 13.8  | 11.9  | 13.0  | 1.2 | 1.06 | 0.95 | 100.1  | 59.4   | 72.3   | 1.7 | 1.38 | 0.72 |
| Q6P9R2_OI Oxsr1            | Serine/thre         | 8   | 13.1  | 11.4  | 12.4  | 1.2 | 1.06 | 0.95 | 195.5  | 95.3   | 115.9  | 2.1 | 1.69 | 0.59 |
| Q8K114_NI Ints9            | Integrator c        | 5   | 8.4   | 7.3   | 8.0   | 1.2 | 1.06 | 0.95 | 54.6   | 42.5   | 51.7   | 1.3 | 1.06 | 0.95 |
| A2BGI8_A2 Ppih             | Peptidyl-pr         | 9   | 21.5  | 18.7  | 20.4  | 1.2 | 1.06 | 0.95 | 349.5  | 267.5  | 325.5  | 1.3 | 1.07 | 0.93 |
| P97377_CI Cdk2             | Cyclin-dexp         | 10  | 11.3  | 9.8   | 10.7  | 1.2 | 1.05 | 0.95 | 123.1  | 107.9  | 131.4  | 1.1 | 0.94 | 1.07 |
| O9CQH7_B Btf3l4            | Transcripti         | 4   | 11.7  | 10.2  | 11.1  | 1.2 | 1.05 | 0.95 | 59.9   | 62.1   | 75.6   | 1.0 | 0.79 | 1.26 |
| B2RQC6_P1 Cad              | CAD protei          | 25  | 18.8  | 16.4  | 17.9  | 1.1 | 1.05 | 0.95 | 594.2  | 536.4  | 652.8  | 1.1 | 0.91 | 1.10 |
| O9QY13_DI Dnajb1           | Dnal homo           | 1   | 14.3  | 12.4  | 13.6  | 1.1 | 1.05 | 0.95 | 14.3   | 12.4   | 15.1   | 1.1 | 0.94 | 1.06 |
| Q6NS45_CI Ccdc66           | Coiled-coil         | 1   | 4.8   | 4.2   | 4.5   | 1.1 | 1.05 | 0.95 | 4.8    | 4.2    | 5.1    | 1.1 | 0.94 | 1.06 |
| Q8CHW4_EI Eif2b5           | Translation         | 7   | 10.9  | 9.5   | 10.4  | 1.1 | 1.05 | 0.95 | 68.5   | 77.9   | 94.9   | 0.9 | 0.72 | 1.38 |
| O9WXT2_P Prkra             | Interferon-1        | 2   | 11.7  | 10.2  | 11.1  | 1.1 | 1.05 | 0.95 | 23.4   | 20.4   | 24.9   | 1.1 | 0.94 | 1.06 |
| O99PU8_D Dhx30             | Putative AT         | 8   | 12.5  | 10.9  | 11.9  | 1.1 | 1.05 | 0.95 | 100.3  | 88.2   | 107.3  | 1.1 | 0.93 | 1.07 |
| E9PYB0_E9 Ahnak2           | Protein Ahr         | 15  | 19.3  | 16.9  | 18.4  | 1.1 | 1.05 | 0.95 | 1102.9 | 655.1  | 797.4  | 1.7 | 1.38 | 0.72 |
| Q8R1U1_OI Cog4             | Conserved r         | 1   | 8.5   | 7.4   | 8.1   | 1.1 | 1.05 | 0.95 | 8.5    | 7.4    | 9.0    | 1.1 | 0.94 | 1.06 |
| Q8CG46_SI Smc5             | Structural r        | 5   | 11.2  | 9.8   | 10.7  | 1.1 | 1.05 | 0.95 | 46.0   | 54.4   | 66.2   | 0.8 | 0.69 | 1.44 |
| Q8CGY8_OI Ogt              | UDP-N-acet          | 14  | 10.0  | 8.8   | 9.6   | 1.1 | 1.05 | 0.95 | 180.0  | 178.1  | 216.7  | 1.0 | 0.83 | 1.20 |
| Q64727_VI Vcl              | Vinculin OS         | 40  | 22.2  | 19.4  | 21.2  | 1.1 | 1.05 | 0.95 | 1952.8 | 986.2  | 1200.4 | 2.0 | 1.63 | 0.61 |
| P35700_PF Prdx1            | Peroxi-red          | 9   | 22.6  | 19.8  | 21.6  | 1.1 | 1.05 | 0.96 | 384.8  | 171.2  | 208.4  | 2.2 | 1.85 | 0.54 |
| Q04692_SF Smarcd1          | SWI/SNF-re          | 2   | 5.9   | 5.2   | 5     |     |      |      |        |        |        |     |      |      |

|                    |              |    |       |       |       |     |      |      |        |        |        |     |      |      |
|--------------------|--------------|----|-------|-------|-------|-----|------|------|--------|--------|--------|-----|------|------|
| Q9WVG6_C_Carm1     | Histone-arg  | 3  | 15.7  | 14.1  | 15.4  | 1.1 | 1.02 | 0.98 | 52.4   | 40.1   | 48.8   | 1.3 | 1.07 | 0.93 |
| Q9D853_AtArfgap3   | ADP-ribosy   | 6  | 9.9   | 8.9   | 9.7   | 1.1 | 1.02 | 0.98 | 74.2   | 53.1   | 64.7   | 1.4 | 1.15 | 0.87 |
| Q80U93_N_Nup214    | Nuclear poi  | 3  | 9.7   | 8.7   | 9.5   | 1.1 | 1.02 | 0.98 | 23.6   | 26.0   | 31.6   | 0.9 | 0.75 | 1.34 |
| Q80X82_S_Sympk     | Sympleklin   | 15 | 10.2  | 9.2   | 10.0  | 1.1 | 1.02 | 0.98 | 208.0  | 153.1  | 186.4  | 1.4 | 1.12 | 0.90 |
| Q9CXU1_M_Med31     | Mediator o   | 1  | 10.5  | 9.5   | 10.3  | 1.1 | 1.02 | 0.98 | 10.5   | 9.5    | 11.5   | 1.1 | 0.91 | 1.10 |
| Q6ZVW7_R_Rpl35     | 60S ribosor  | 5  | 36.1  | 32.5  | 35.5  | 1.1 | 1.02 | 0.98 | 1643.7 | 450.7  | 548.6  | 3.6 | 3.00 | 0.33 |
| Q09XV5_C1_Chd8     | Chromodoi    | 3  | 10.2  | 9.2   | 10.0  | 1.1 | 1.02 | 0.98 | 31.8   | 28.3   | 34.4   | 1.1 | 0.92 | 1.08 |
| Q9CY58_P_Serbp1    | Plasminoge   | 4  | 16.1  | 14.6  | 15.9  | 1.1 | 1.02 | 0.98 | 71.7   | 58.2   | 70.9   | 1.2 | 1.01 | 0.99 |
| O35134_RI_Polr1a   | DNA-direct   | 2  | 3.7   | 3.3   | 3.6   | 1.1 | 1.01 | 0.99 | 7.3    | 6.6    | 8.1    | 1.1 | 0.91 | 1.10 |
| Q9Z0H3_S_Smarcb1   | SWI/SNF-re   | 9  | 18.1  | 16.4  | 17.9  | 1.1 | 1.01 | 0.99 | 154.5  | 179.4  | 218.3  | 0.9 | 0.71 | 1.41 |
| Q9D541_C_Cdc47     | Coiled-coil  | 1  | 1.2   | 1.1   | 1.2   | 1.1 | 1.01 | 0.99 | 1.2    | 1.1    | 1.3    | 1.1 | 0.91 | 1.10 |
| Q9Z122_ST_Strap    | Serine-thre  | 10 | 14.3  | 12.9  | 14.1  | 1.1 | 1.01 | 0.99 | 163.5  | 126.5  | 154.0  | 1.3 | 1.06 | 0.94 |
| Q99LF4_RT_Rtcb     | tRNA-splici  | 22 | 39.4  | 35.7  | 39.0  | 1.1 | 1.01 | 0.99 | 1079.0 | 825.2  | 1004.4 | 1.3 | 1.07 | 0.93 |
| Q8KOL9_ZB_Zbtb20   | Zinc finger  | 2  | 7.9   | 7.2   | 7.8   | 1.1 | 1.01 | 0.99 | 15.8   | 14.4   | 17.5   | 1.1 | 0.91 | 1.10 |
| P62270_R5_Rps18    | 40S ribosor  | 13 | 200.7 | 182.3 | 198.9 | 1.1 | 1.01 | 0.99 | 3605.9 | 3428.4 | 4172.9 | 1.1 | 0.86 | 1.16 |
| Q9Z1M8_R_Ik        | Protein Rec  | 15 | 15.7  | 14.2  | 15.5  | 1.1 | 1.01 | 0.99 | 346.4  | 268.4  | 326.7  | 1.3 | 1.06 | 0.94 |
| Q9Z1K5_Af_Arh1     | E3 ubiquiti  | 3  | 15.1  | 13.8  | 15.0  | 1.1 | 1.01 | 0.99 | 37.0   | 46.2   | 56.2   | 0.8 | 0.66 | 1.52 |
| Q3UMY5_E_Eml4      | Echinoderm   | 1  | 3.3   | 3.0   | 3.3   | 1.1 | 1.01 | 0.99 | 3.3    | 3.0    | 3.7    | 1.1 | 0.90 | 1.11 |
| P47226_TE_Tes      | Testin OS-h  | 4  | 11.3  | 10.3  | 11.3  | 1.1 | 1.01 | 0.99 | 46.9   | 46.5   | 56.6   | 1.0 | 0.83 | 1.21 |
| Q9Z2H9_ZI_Znf330   | Zinc finger  | 2  | 17.3  | 15.8  | 17.2  | 1.1 | 1.00 | 1.00 | 34.6   | 31.6   | 38.5   | 1.1 | 0.90 | 1.11 |
| Q9D1C8_V_Vps28     | Vacuolar pr  | 5  | 17.1  | 15.6  | 17.1  | 1.1 | 1.00 | 1.00 | 115.0  | 66.2   | 80.6   | 1.7 | 1.43 | 0.70 |
| Q9Z0G0_GI_Gipc1    | PDZ domain   | 2  | 9.5   | 8.7   | 9.5   | 1.1 | 1.00 | 1.00 | 19.0   | 17.4   | 21.1   | 1.1 | 0.90 | 1.11 |
| Q9JJ50_SCI_Scub2   | Signal pept  | 1  | 16.4  | 15.0  | 16.4  | 1.1 | 1.00 | 1.00 | 16.4   | 15.0   | 18.3   | 1.1 | 0.90 | 1.11 |
| Q9CU65_ZI_Zmym2    | Zinc finger  | 2  | 7.6   | 6.9   | 7.5   | 1.1 | 1.00 | 1.00 | 15.1   | 13.8   | 16.8   | 1.1 | 0.90 | 1.11 |
| Q6PGF3_M_Med16     | Mediator o   | 1  | 14.7  | 13.5  | 14.7  | 1.1 | 1.00 | 1.00 | 14.7   | 13.5   | 16.4   | 1.1 | 0.90 | 1.12 |
| P97822_At_Anp32e   | Acidic leuci | 2  | 12.9  | 11.8  | 12.9  | 1.1 | 1.00 | 1.00 | 25.8   | 23.6   | 28.7   | 1.1 | 0.90 | 1.12 |
| Q3TEA8_HF_Hp1bp3   | Heterochro   | 20 | 32.1  | 29.5  | 32.1  | 1.1 | 1.00 | 1.00 | 985.9  | 793.1  | 965.3  | 1.2 | 1.02 | 0.98 |
| A2APB8_TF_Tpx2     | Targeting p  | 2  | 9.0   | 8.3   | 9.0   | 1.1 | 1.00 | 1.00 | 18.0   | 16.5   | 20.1   | 1.1 | 0.89 | 1.12 |
| Q60949_TI_Tbc1d1   | TBC1 doma    | 9  | 9.0   | 8.2   | 9.0   | 1.1 | 1.00 | 1.00 | 108.1  | 174.0  | 211.8  | 0.6 | 0.51 | 1.96 |
| Q35144_TI_Terf2    | Telomeric r  | 5  | 7.3   | 6.7   | 7.3   | 1.1 | 1.00 | 1.00 | 46.6   | 32.0   | 38.9   | 1.5 | 1.20 | 0.84 |
| Q692R2_HI_Hectd1   | E3 ubiquiti  | 2  | 4.3   | 4.0   | 4.4   | 1.1 | 1.00 | 1.00 | 8.7    | 8.0    | 9.7    | 1.1 | 0.89 | 1.12 |
| Q6PGB6_N_Naa50     | N-alpha-acc  | 1  | 5.0   | 4.6   | 5.0   | 1.1 | 1.00 | 1.00 | 5.0    | 4.6    | 5.6    | 1.1 | 0.89 | 1.12 |
| Q9DB55_KI_Klc4     | Kinesin ligh | 1  | 3.7   | 3.4   | 3.7   | 1.1 | 1.00 | 1.00 | 3.7    | 3.4    | 4.1    | 1.1 | 0.89 | 1.12 |
| Q640M1_L_Utp14a    | U3 small nu  | 2  | 11.8  | 10.9  | 11.9  | 1.1 | 1.00 | 1.00 | 23.7   | 21.8   | 26.5   | 1.1 | 0.89 | 1.12 |
| Q8BGD9_IF_Eif4b    | Eukaryotic   | 2  | 8.9   | 8.2   | 8.9   | 1.1 | 1.01 | 0.99 | 17.7   | 16.3   | 19.9   | 1.1 | 0.89 | 1.12 |
| Q8K212_P_Pacsl1    | Phosphofu    | 2  | 7.5   | 6.9   | 7.5   | 1.1 | 1.01 | 0.99 | 15.0   | 13.8   | 16.8   | 1.1 | 0.89 | 1.12 |
| O54833_C_CskN2a2   | Casein kina  | 7  | 11.5  | 10.6  | 11.6  | 1.1 | 1.01 | 0.99 | 85.1   | 75.6   | 92.0   | 1.1 | 0.93 | 1.08 |
| Q7TQHO_A_Atnx2l    | Ataxin-2-lik | 10 | 11.2  | 10.4  | 11.3  | 1.1 | 1.01 | 0.99 | 153.8  | 114.9  | 139.9  | 1.3 | 1.10 | 0.91 |
| Q9CQ92_FI_Fl1      | Mitochond    | 2  | 15.4  | 14.2  | 15.5  | 1.1 | 1.01 | 0.99 | 30.7   | 28.4   | 34.6   | 1.1 | 0.89 | 1.13 |
| Q80893_C1_Cnn2     | Calponin-2   | 14 | 42.5  | 39.3  | 42.9  | 1.1 | 1.01 | 0.99 | 1027.1 | 782.4  | 952.3  | 1.3 | 1.08 | 0.93 |
| Q8VHM5_C_Hnrnp     | Heterogene   | 9  | 12.1  | 11.2  | 12.2  | 1.1 | 1.01 | 0.99 | 157.1  | 118.6  | 144.4  | 1.3 | 1.09 | 0.92 |
| O9106_HI_Hdac1     | Histone dex  | 25 | 18.7  | 17.3  | 18.9  | 1.1 | 1.01 | 0.99 | 488.2  | 602.0  | 732.7  | 0.8 | 0.67 | 1.50 |
| Q8CBW3_A_Abl1      | Abl interact | 5  | 6.3   | 5.9   | 6.4   | 1.1 | 1.01 | 0.99 | 77.2   | 34.4   | 41.9   | 2.2 | 1.84 | 0.54 |
| Q8K2A7_I_Nts10     | Integrator   | 5  | 13.3  | 12.3  | 13.5  | 1.1 | 1.01 | 0.99 | 57.9   | 66.3   | 80.7   | 0.9 | 0.72 | 1.39 |
| Q6ZQL4_W_Wdr43     | WD repeat    | 3  | 7.1   | 6.6   | 7.2   | 1.1 | 1.01 | 0.99 | 19.2   | 29.2   | 35.6   | 0.7 | 0.54 | 1.85 |
| Q9JIW9_R_RalB      | Ras-related  | 2  | 8.9   | 8.2   | 9.0   | 1.1 | 1.01 | 0.99 | 17.7   | 16.4   | 20.0   | 1.1 | 0.89 | 1.13 |
| P70210_TE_Tead3    | Transcripti  | 1  | 4.2   | 3.9   | 4.2   | 1.1 | 1.01 | 0.99 | 4.2    | 3.9    | 4.7    | 1.1 | 0.89 | 1.13 |
| Q8BZ9_CQ085_MOUS   | Uncharacte   | 8  | 18.0  | 16.7  | 18.2  | 1.1 | 1.01 | 0.99 | 169.8  | 119.3  | 145.2  | 1.4 | 1.17 | 0.86 |
| Q4VA53_PI_Pds5b    | Sister chror | 35 | 20.0  | 18.6  | 20.3  | 1.1 | 1.01 | 0.99 | 1179.7 | 959.6  | 1168.0 | 1.2 | 1.01 | 0.99 |
| Q80WC7_A_Agfg2     | Arf-GAP doi  | 2  | 9.6   | 9.0   | 9.8   | 1.1 | 1.01 | 0.99 | 19.3   | 17.9   | 21.8   | 1.1 | 0.88 | 1.13 |
| Q8CG47_S_Smc4      | Structural   | 66 | 20.0  | 18.6  | 20.3  | 1.1 | 1.01 | 0.99 | 2188.3 | 1630.4 | 1984.5 | 1.3 | 1.10 | 0.91 |
| Q9JHS9_CV_Cwc15    | Spliceosom   | 1  | 4.7   | 4.4   | 4.8   | 1.1 | 1.02 | 1.00 | 4.7    | 4.4    | 5.3    | 1.1 | 0.88 | 1.13 |
| Q9CXUO_N_Med10     | Mediator o   | 4  | 9.6   | 9.0   | 9.8   | 1.1 | 1.02 | 0.98 | 48.9   | 41.5   | 50.6   | 1.2 | 0.97 | 1.03 |
| Q2VPO9_E_Meaf6     | Chromatin    | 4  | 17.2  | 16.0  | 17.5  | 1.1 | 1.02 | 0.98 | 73.3   | 78.1   | 95.1   | 0.9 | 0.77 | 1.30 |
| Q9WTK6_C_Cul1      | Cullin-1 OS  | 45 | 12.3  | 11.5  | 12.6  | 1.1 | 1.02 | 0.98 | 763.1  | 584.4  | 711.3  | 1.3 | 1.07 | 0.93 |
| Q6DID3_SC_Scaf8    | Protein SCF  | 3  | 7.5   | 7.0   | 7.7   | 1.1 | 1.02 | 0.98 | 20.9   | 30.7   | 37.3   | 0.7 | 0.56 | 1.79 |
| P20444_KF_PrfkA    | Protein kin  | 2  | 15.7  | 14.7  | 16.1  | 1.1 | 1.02 | 0.98 | 31.5   | 29.4   | 35.8   | 1.1 | 0.88 | 1.14 |
| Q99LE1_RL_Rilp12   | RILP-like pr | 1  | 8.9   | 8.3   | 9.0   | 1.1 | 1.02 | 0.98 | 8.9    | 8.3    | 10.1   | 1.1 | 0.88 | 1.14 |
| Q9D7W5_W_Med8      | Mediator o   | 1  | 6.1   | 5.7   | 6.2   | 1.1 | 1.02 | 0.98 | 6.1    | 5.7    | 6.9    | 1.1 | 0.88 | 1.14 |
| P24369_Pf_Ppib     | Peptidyl-pr  | 2  | 13.7  | 12.8  | 14.0  | 1.1 | 1.02 | 0.98 | 27.4   | 25.7   | 31.2   | 1.1 | 0.88 | 1.14 |
| Q9EPJ9_AR_Arfgap1  | ADP-ribosy   | 1  | 4.1   | 3.8   | 4.2   | 1.1 | 1.02 | 0.98 | 4.1    | 3.8    | 4.7    | 1.1 | 0.88 | 1.14 |
| E9Q555_RI_Rnf213   | E3 ubiquiti  | 20 | 13.8  | 12.9  | 14.1  | 1.1 | 1.02 | 0.98 | 286.6  | 301.8  | 367.3  | 0.9 | 0.78 | 1.28 |
| Q921N6_D_Ddx27     | Probable A   | 5  | 7.2   | 6.8   | 7.4   | 1.1 | 1.02 | 0.98 | 35.6   | 34.2   | 41.6   | 1.0 | 0.86 | 1.17 |
| Q9CXG3_PI_Ppil4    | Peptidyl-pr  | 3  | 7.6   | 7.1   | 7.8   | 1.1 | 1.03 | 0.97 | 19.3   | 22.3   | 27.2   | 0.9 | 0.71 | 1.41 |
| Q6PEB6_P_Mob4      | MOB-like pi  | 2  | 29.6  | 27.8  | 30.4  | 1.1 | 1.03 | 0.97 | 59.1   | 55.6   | 67.7   | 1.1 | 0.87 | 1.15 |
| Q3UIA2_RH_Arfgap17 | Rho GTPase   | 9  | 5.5   | 5.2   | 5.6   | 1.1 | 1.03 | 0.97 | 83.2   | 65.4   | 79.6   | 1.3 | 1.04 | 0.96 |
| Q65Z40_W_Wapal     | Wings apar   | 7  | 10.8  | 10.2  | 11.1  | 1.1 | 1.03 | 0.97 | 80.4   | 78.1   | 95.0   | 1.0 | 0.85 | 1.18 |
| A2A1T4_PN_Pnir     | Arginine/se  | 1  | 22.7  | 21.4  | 23.4  | 1.1 | 1.03 | 0.97 | 22.7   | 21.4   | 26.1   | 1.1 | 0.87 | 1.15 |
| Q5SUF2_LC_Luc7l3   | Luc7-like pi | 12 | 21.4  | 20.2  | 22.0  | 1.1 | 1.03 | 0.97 | 480.7  | 440.2  | 535.8  | 1.1 | 0.90 | 1.11 |
| Q6Z008_C1_Cnot1    | CCR4-NOT1    | 31 | 15.0  | 14.2  | 15.5  | 1.1 | 1.03 | 0.97 | 695.9  | 523.7  | 637.4  | 1.3 | 1.09 | 0.92 |
| Q9CQU1_N_Mfap1     | Microfibril  | 3  | 8.0   | 7.6   | 8.2   | 1.1 | 1.03 | 0.97 | 21.0   | 23.5   | 28.6   | 0.9 | 0.73 | 1.37 |
| Q9R1P1_P_Psmb3     | Proteasom    | 2  | 4.3   | 4.1   | 4.4   | 1.1 | 1.03 | 0.97 | 8.6    | 8.1    | 9.9    | 1.1 | 0.87 | 1.15 |
| Q9JIF7_CO_Cop1     | Coatomer s   | 41 | 18.3  | 17.4  | 19.0  | 1.1 | 1.03 | 0.97 | 1266.2 | 1068.1 | 1300.0 | 1.2 | 0.97 | 1.03 |
| Q9JHS3_LT_Lamtor2  | Regulator c  | 2  | 7.8   | 7.4   | 8.1   | 1.1 | 1.03 | 0.97 | 15.6   | 14.8   | 18.0   | 1.1 | 0.87 | 1.15 |
| Q8R356_EX_Exoc1    | Exocyst cor  | 3  | 10.4  | 9.9   | 10.8  | 1.1 | 1.04 | 0.97 | 32.9   | 25.6   | 31.1   | 1.3 | 1.06 | 0.95 |
| Q8JZM7_C1_Cdc73    | Parafibrom   | 11 | 25.1  | 23.8  | 26.0  | 1.1 | 1.04 | 0.96 | 251.7  | 277.2  | 337.4  | 0.9 | 0.75 | 1.34 |
| Q61335_BV_Bcap31   | B-cell recep | 1  | 13.7  | 13.1  | 14.3  | 1.1 | 1.04 | 0.96 | 13.7   | 13.1   | 15.9   | 1.1 | 0.86 | 1.16 |
| P62918_RL_Rpl8     | 60S ribosor  | 10 | 116.0 | 110.4 | 120.4 | 1.1 | 1.04 | 0.96 | 1370.7 | 1392.1 | 1694.5 | 1.0 | 0.81 | 1.24 |
| Q9Z1N5_D_Ddx39b    | Spliceosom   | 32 | 15.0  | 14.3  | 15.6  | 1.1 | 1.04 | 0.96 | 1949.2 | 1106.0 | 1346.2 | 1.8 | 1.45 | 0.69 |
| Q7TMI3_UH_Uhrf2    | E3 ubiquiti  | 2  | 6.5   | 6.2   | 6.8   | 1.0 | 1.04 | 0.96 | 13.0   | 12.4   | 15.1   | 1.0 | 0.86 | 1.16 |
| O54790_N_Mafg      | Transcripti  | 2  | 16.7  | 15.9  | 17.3  | 1.0 | 1.04 | 0.96 | 33.3   | 31.8   | 38.7   | 1.0 | 0.86 | 1.16 |
| Q9ES28_AR_Argef7   | Rho guanin   | 8  | 10.0  | 9.5   | 10.4  | 1.0 | 1.04 | 0.96 | 91.5   | 106.1  | 129.2  | 0.9 | 0.71 | 1.41 |
| P35279_R_Rab6a     | Ras-related  | 6  | 14.0  | 13.4  | 14.6  | 1.0 | 1.04 | 0.96 | 122.2  | 86.8   | 105.6  | 1.4 | 1.16 | 0.86 |
| P62627_DI_Dynlrb1  | Dynein ligh  | 3  | 15.9  | 15.2  | 16.6  | 1.0 | 1.04 | 0.96 | 58.5   | 50.4   | 61.3   | 1.2 | 0.95 | 1.05 |
| Q64324_S1_Stxbp2   | Syntaxin-bi  | 2  | 8.2   | 7.8   | 8.5   | 1.0 | 1.04 | 0.96 | 16.4   | 15.7   | 19.0   | 1.0 | 0.86 | 1.16 |
| Q9CR20_IR_Ier3ip1  | Immediate    | 1  | 2.9   | 2.8   | 3.0   | 1.0 | 1.04 | 0.96 | 2.9    | 2.8    | 3.4    | 1.0 | 0.86 | 1.16 |
| Q6ADA9_F1_FAM120A  | Constitutiv  | 18 | 16.6  | 15.8  | 17.3  | 1.0 | 1.04 | 0.96 | 475.3  | 325.4  | 396.1  | 1.5 | 1.20 | 0.83 |
| P07607_TV_Tyms     | Thymidylat   | 1  | 2.2   | 2.1   | 2.3   | 1.0 | 1.05 | 1.05 | 2.2    | 2.1    |        |     |      |      |



|                   |               |    |       |       |       |     |      |      |        |        |        |     |      |      |
|-------------------|---------------|----|-------|-------|-------|-----|------|------|--------|--------|--------|-----|------|------|
| Q91V12_SN Srx4    | Sorting nex   | 12 | 10.6  | 10.3  | 11.3  | 1.0 | 0.94 | 1.07 | 187.7  | 165.3  | 201.2  | 1.1 | 0.93 | 1.07 |
| O35343_IN Kpn4a   | Importin su   | 9  | 20.3  | 19.8  | 21.6  | 1.0 | 0.94 | 1.07 | 162.2  | 218.0  | 265.4  | 0.7 | 0.61 | 1.64 |
| Q99K01_P1 Pdxk1   | Pyridoxal-d   | 7  | 7.0   | 6.8   | 7.5   | 1.0 | 0.94 | 1.07 | 54.9   | 49.1   | 59.8   | 1.1 | 0.92 | 1.09 |
| Q60575_K1 Kif1b   | Kinesin-like  | 1  | 2.5   | 2.4   | 2.7   | 1.0 | 0.93 | 1.07 | 2.5    | 2.4    | 3.0    | 1.0 | 0.84 | 1.19 |
| Q9D1Q1_M Mphosph6 | M-phase ph    | 3  | 15.8  | 15.6  | 17.0  | 1.0 | 0.93 | 1.07 | 50.4   | 46.9   | 57.1   | 1.1 | 0.88 | 1.13 |
| O70194_E1 Eif3d   | Eukaryotic    | 28 | 17.4  | 17.1  | 18.7  | 1.0 | 0.93 | 1.07 | 731.1  | 541.7  | 659.4  | 1.3 | 1.11 | 0.90 |
| B2RRE7_OT Otud4   | OTU domai     | 2  | 15.0  | 14.8  | 16.1  | 1.0 | 0.93 | 1.07 | 30.0   | 29.5   | 36.0   | 1.0 | 0.84 | 1.20 |
| Q9D2R0_A Aacs     | Acetoacety    | 34 | 24.4  | 23.9  | 26.1  | 1.0 | 0.93 | 1.07 | 978.8  | 806.6  | 981.8  | 1.2 | 1.00 | 1.00 |
| P70335_RK Rck1    | Rho-associ    | 4  | 7.6   | 7.4   | 8.1   | 1.0 | 0.93 | 1.07 | 33.0   | 29.5   | 35.9   | 1.1 | 0.92 | 1.09 |
| Q9QWY8_A Asap1    | Arf-GAP wit   | 5  | 9.9   | 9.7   | 10.6  | 1.0 | 0.93 | 1.07 | 61.6   | 44.1   | 53.7   | 1.4 | 1.15 | 0.87 |
| Q8R422_CI Cd109   | CD109 anti    | 2  | 9.2   | 9.0   | 9.9   | 1.0 | 0.93 | 1.07 | 18.4   | 18.1   | 22.0   | 1.0 | 0.83 | 1.20 |
| P62754_RS Rps6    | 40S ribosor   | 10 | 27.0  | 26.6  | 29.0  | 1.0 | 0.93 | 1.07 | 680.2  | 381.6  | 464.5  | 1.8 | 1.46 | 0.68 |
| Q4FK66_PF Prpf38a | Pre-mRNA-     | 6  | 13.7  | 13.5  | 14.7  | 1.0 | 0.93 | 1.08 | 76.0   | 82.7   | 100.6  | 0.9 | 0.76 | 1.32 |
| Q6Y7W8_P Gigyf2   | PERQamin      | 5  | 4.2   | 4.2   | 4.5   | 1.0 | 0.93 | 1.08 | 32.6   | 32.9   | 40.1   | 1.0 | 0.81 | 1.23 |
| Q9DBE7_Q Stau1    | Double-str    | 8  | 13.9  | 13.7  | 14.9  | 1.0 | 0.93 | 1.08 | 124.5  | 148.1  | 180.2  | 0.8 | 0.69 | 1.45 |
| Q5SVQ0_K Kat7     | Histone ace   | 9  | 15.1  | 14.9  | 16.3  | 1.0 | 0.93 | 1.08 | 105.3  | 123.2  | 150.0  | 0.9 | 0.70 | 1.42 |
| Q6P9Q4_FI Fhod1   | FH1/FH2 dc    | 3  | 6.2   | 6.2   | 6.7   | 1.0 | 0.92 | 1.08 | 33.9   | 16.1   | 19.6   | 2.1 | 1.73 | 0.58 |
| Q3UMB9_U Kiaa1033 | WASH com      | 6  | 7.0   | 7.0   | 7.6   | 1.0 | 0.92 | 1.08 | 52.7   | 41.6   | 50.6   | 1.3 | 1.04 | 0.96 |
| Q9ES28_GT Gtf21   | General tra   | 35 | 13.4  | 13.3  | 14.5  | 1.0 | 0.92 | 1.08 | 728.5  | 774.8  | 943.1  | 0.9 | 0.77 | 1.29 |
| Q9EQH3_V Vps35    | Vacuolar pr   | 50 | 26.9  | 26.8  | 29.2  | 1.0 | 0.92 | 1.08 | 2209.2 | 1846.9 | 2247.9 | 1.2 | 0.98 | 1.02 |
| Q9CQ9_M Med30     | Mediator o    | 1  | 22.0  | 21.9  | 23.9  | 1.0 | 0.92 | 1.08 | 22.0   | 21.9   | 26.6   | 1.0 | 0.83 | 1.21 |
| Q9R1C7_P1 Prpf40a | Pre-mRNA-i    | 34 | 20.5  | 20.4  | 22.3  | 1.0 | 0.92 | 1.08 | 1142.3 | 988.0  | 1202.5 | 1.2 | 0.95 | 1.05 |
| Q6A065_CI Cep170  | Centrosom     | 5  | 12.1  | 12.0  | 13.1  | 1.0 | 0.92 | 1.08 | 61.1   | 59.6   | 72.5   | 1.0 | 0.84 | 1.19 |
| Q91V14_ST Stk38   | Serine/thre   | 3  | 8.4   | 8.4   | 9.1   | 1.0 | 0.92 | 1.09 | 26.9   | 29.8   | 36.3   | 0.9 | 0.74 | 1.35 |
| Q8BX17_GI Gemin5  | Gem-associ    | 5  | 11.0  | 11.0  | 12.0  | 1.0 | 0.92 | 1.09 | 57.1   | 54.0   | 65.7   | 1.1 | 0.87 | 1.15 |
| O35382_EJ Exoc4   | Exocyst cor   | 4  | 9.1   | 9.0   | 9.9   | 1.0 | 0.92 | 1.09 | 39.4   | 36.6   | 44.5   | 1.1 | 0.88 | 1.13 |
| Q60749_KI Khdrb1  | KH domain     | 16 | 49.8  | 49.6  | 54.1  | 1.0 | 0.92 | 1.09 | 1522.3 | 1371.2 | 1669.0 | 1.1 | 0.91 | 1.10 |
| Q921E2_RI Rab31   | Ras-related   | 1  | 6.6   | 6.6   | 7.2   | 1.0 | 0.92 | 1.09 | 6.6    | 6.6    | 8.1    | 1.0 | 0.83 | 1.21 |
| Q3UOV1_FI Khsp1   | Far upstrea   | 14 | 12.3  | 12.2  | 13.3  | 1.0 | 0.92 | 1.09 | 229.6  | 257.5  | 313.4  | 0.9 | 0.73 | 1.36 |
| Q9QZB7_AI Actr10  | Actin-relat   | 4  | 6.7   | 6.7   | 7.3   | 1.0 | 0.92 | 1.09 | 36.9   | 40.7   | 49.5   | 0.9 | 0.75 | 1.34 |
| Q9QZ88_VI Vps29   | Vacuolar pr   | 6  | 15.8  | 15.7  | 17.1  | 1.0 | 0.92 | 1.09 | 294.8  | 168.6  | 205.2  | 1.7 | 1.44 | 0.70 |
| P48377_RF Rfx1    | MHC class I   | 3  | 11.3  | 11.3  | 12.3  | 1.0 | 0.92 | 1.09 | 30.4   | 28.2   | 34.3   | 1.1 | 0.88 | 1.13 |
| Q9QZQ8_H H2afy    | Core histon   | 30 | 29.6  | 29.5  | 32.2  | 1.0 | 0.92 | 1.09 | 1224.6 | 1476.9 | 1797.6 | 0.8 | 0.68 | 1.47 |
| Q8C079_S1 Strip1  | Striatin-int  | 6  | 12.4  | 12.3  | 13.5  | 1.0 | 0.92 | 1.09 | 70.4   | 90.9   | 110.7  | 0.8 | 0.64 | 1.57 |
| Q6P216_NI Whsc11  | Histone-lys   | 6  | 8.5   | 8.5   | 9.3   | 1.0 | 0.92 | 1.09 | 50.0   | 54.8   | 66.7   | 0.9 | 0.75 | 1.33 |
| Q9QYB1_CI Clic4   | Chloride in   | 3  | 2.3   | 2.3   | 2.5   | 1.0 | 0.92 | 1.09 | 8.7    | 8.1    | 9.9    | 1.1 | 0.88 | 1.14 |
| Q91YR7_P1 Prpf6   | Pre-mRNA-i    | 23 | 15.1  | 15.1  | 16.5  | 1.0 | 0.92 | 1.09 | 429.2  | 365.3  | 444.6  | 1.2 | 0.97 | 1.04 |
| Q99PV0_P1 Prpf8   | Pre-mRNA-i    | 76 | 25.1  | 25.1  | 27.4  | 1.0 | 0.92 | 1.09 | 2497.7 | 2244.3 | 2731.7 | 1.1 | 0.91 | 1.09 |
| Q3U898_M Myeov2   | Myeloma-o     | 1  | 22.4  | 22.4  | 24.4  | 1.0 | 0.92 | 1.09 | 22.4   | 22.4   | 27.2   | 1.0 | 0.82 | 1.22 |
| Q3UA37_Q Qrich1   | Glutamine-    | 3  | 5.9   | 5.9   | 6.4   | 1.0 | 0.92 | 1.09 | 19.1   | 17.4   | 21.2   | 1.1 | 0.90 | 1.11 |
| Q8CEJ2_Q8 Uxt     | MCG11770      | 3  | 11.0  | 11.0  | 12.0  | 1.0 | 0.92 | 1.09 | 36.4   | 34.6   | 42.1   | 1.1 | 0.86 | 1.16 |
| P61087_UI Ube2k   | Ubiquitin-c   | 3  | 30.6  | 30.6  | 33.4  | 1.0 | 0.92 | 1.09 | 98.5   | 75.0   | 91.3   | 1.3 | 1.08 | 0.93 |
| Q8CBU0_U1 Ppfbp1  | Liprin-beta   | 3  | 10.6  | 10.6  | 11.5  | 1.0 | 0.92 | 1.09 | 29.2   | 30.6   | 37.3   | 1.0 | 0.78 | 1.27 |
| Q9JJA4_U1 Wdr12   | Ribosome-t    | 1  | 18.7  | 18.7  | 20.4  | 1.0 | 0.92 | 1.09 | 18.7   | 18.7   | 22.8   | 1.0 | 0.82 | 1.22 |
| Q9WVC3_C Cav2     | Caveolin-2    | 1  | 6.0   | 6.0   | 6.5   | 1.0 | 0.92 | 1.09 | 6.0    | 6.0    | 7.3    | 1.0 | 0.82 | 1.22 |
| Q8C050_KI Rps6ka5 | Ribosomal     | 1  | 4.5   | 4.5   | 4.9   | 1.0 | 0.92 | 1.09 | 4.5    | 4.5    | 5.5    | 1.0 | 0.82 | 1.22 |
| P68373_TE Tubal1c | Tubulin alp   | 7  | 15.7  | 15.7  | 17.1  | 1.0 | 0.92 | 1.09 | 176.1  | 417.1  | 507.7  | 0.4 | 0.35 | 2.88 |
| Q9CWJ3_KI Katnbl1 | KATNB1-like   | 1  | 12.6  | 12.6  | 13.7  | 1.0 | 0.92 | 1.09 | 12.6   | 12.6   | 15.3   | 1.0 | 0.82 | 1.22 |
| Q8R040_RI Rpp21   | Ribonuclea    | 1  | 8.4   | 8.4   | 9.2   | 1.0 | 0.92 | 1.09 | 8.4    | 8.4    | 10.2   | 1.0 | 0.82 | 1.22 |
| Q9R1Q7_P1 Pip2    | Protoleipi    | 1  | 183.1 | 183.1 | 199.7 | 1.0 | 0.92 | 1.09 | 183.1  | 183.1  | 222.8  | 1.0 | 0.82 | 1.22 |
| Q92148_ER Ehm2    | Histone-lys   | 3  | 14.1  | 14.1  | 15.4  | 1.0 | 0.92 | 1.09 | 42.5   | 47.4   | 57.7   | 0.9 | 0.74 | 1.36 |
| Q9R0P5_D1 Dstn    | Destrin OS-   | 1  | 17.5  | 17.5  | 19.1  | 1.0 | 0.92 | 1.09 | 17.5   | 17.5   | 21.3   | 1.0 | 0.82 | 1.22 |
| D3YWS8_D Leng8    | Leukocyter    | 2  | 10.5  | 10.5  | 11.5  | 1.0 | 0.92 | 1.09 | 21.1   | 21.1   | 25.6   | 1.0 | 0.82 | 1.22 |
| Q9CQN3_T1 Tomm6   | Mitochond     | 1  | 5.7   | 5.7   | 6.2   | 1.0 | 0.92 | 1.09 | 5.7    | 5.7    | 6.9    | 1.0 | 0.82 | 1.22 |
| P62743_AF Aps2s1  | AP-2 compl    | 3  | 12.1  | 12.1  | 13.2  | 1.0 | 0.92 | 1.09 | 47.5   | 48.0   | 58.5   | 1.0 | 0.81 | 1.23 |
| Q91W89_A Man2c1   | Alpha-man     | 1  | 9.0   | 9.0   | 9.8   | 1.0 | 0.92 | 1.09 | 9.0    | 9.0    | 10.9   | 1.0 | 0.82 | 1.22 |
| Q9D116_RH Mrpl14  | 39S ribosor   | 1  | 8.2   | 8.2   | 9.0   | 1.0 | 0.92 | 1.09 | 8.2    | 8.2    | 10.0   | 1.0 | 0.82 | 1.22 |
| Q9D757_RI Rpl221  | 60S ribosor   | 1  | 12.6  | 12.6  | 13.8  | 1.0 | 0.92 | 1.09 | 12.6   | 12.6   | 15.4   | 1.0 | 0.82 | 1.22 |
| Q9CR41_H HYPK     | Huntingtin    | 2  | 30.3  | 30.3  | 33.1  | 1.0 | 0.92 | 1.09 | 60.7   | 60.7   | 73.8   | 1.0 | 0.82 | 1.22 |
| Q99L28_RL Rsl24d1 | Probable ri   | 3  | 8.8   | 8.8   | 9.6   | 1.0 | 0.92 | 1.09 | 36.9   | 30.9   | 37.6   | 1.2 | 0.98 | 1.02 |
| Q63810_C_Ppp3r1   | Calcineurin   | 3  | 9.0   | 9.0   | 9.8   | 1.0 | 0.92 | 1.09 | 24.5   | 94.2   | 114.7  | 0.3 | 0.21 | 4.68 |
| P62242_RS Rps8    | 40S ribosor   | 16 | 42.9  | 43.0  | 46.9  | 1.0 | 0.92 | 1.09 | 2711.5 | 1146.1 | 1395.0 | 2.4 | 1.94 | 0.51 |
| Q9CWS4_IJ Cpsf3l  | Integrator c  | 4  | 11.0  | 11.0  | 12.0  | 1.0 | 0.91 | 1.09 | 38.4   | 60.0   | 73.0   | 0.6 | 0.53 | 1.90 |
| E9Q214_E9 Elmsan1 | Protein Elr   | 2  | 7.3   | 7.3   | 8.0   | 1.0 | 0.91 | 1.09 | 14.6   | 14.6   | 17.8   | 1.0 | 0.82 | 1.22 |
| Q8BGW1_F Fto      | Alpha-keto    | 1  | 2.4   | 2.4   | 2.6   | 1.0 | 0.91 | 1.09 | 2.4    | 2.4    | 2.9    | 1.0 | 0.82 | 1.22 |
| Q9ER80_R1 Rtp4    | Receptor-tr   | 1  | 14.1  | 14.1  | 15.4  | 1.0 | 0.91 | 1.10 | 14.1   | 14.1   | 17.2   | 1.0 | 0.82 | 1.22 |
| Q6ZPY7_KC Kdm3b   | Lysine-spec   | 7  | 7.4   | 7.5   | 8.1   | 1.0 | 0.91 | 1.10 | 44.1   | 53.9   | 65.6   | 0.8 | 0.67 | 1.49 |
| P46061_RV Rangap1 | Ran GTPase    | 26 | 19.7  | 19.8  | 21.6  | 1.0 | 0.91 | 1.10 | 732.9  | 624.0  | 759.6  | 1.2 | 0.96 | 1.04 |
| P53986_M Slc16a1  | Monocarbo     | 2  | 15.9  | 16.0  | 17.4  | 1.0 | 0.91 | 1.10 | 31.8   | 31.9   | 38.9   | 1.0 | 0.82 | 1.22 |
| P53995_AF Anapc1  | Anapase-p     | 5  | 11.2  | 11.3  | 12.3  | 1.0 | 0.91 | 1.10 | 59.9   | 53.3   | 64.9   | 1.1 | 0.92 | 1.08 |
| Q99J87_D1 Dhx58   | Probable A'   | 25 | 9.7   | 9.8   | 10.7  | 1.0 | 0.91 | 1.10 | 381.9  | 330.8  | 402.7  | 1.2 | 0.95 | 1.05 |
| Q4QY64_A Atad5    | ATPase fam    | 1  | 10.4  | 10.5  | 11.4  | 1.0 | 0.91 | 1.10 | 10.4   | 10.5   | 12.8   | 1.0 | 0.81 | 1.23 |
| Q8CSQ4_G Grsf1    | G-rich sequ   | 1  | 7.1   | 7.1   | 7.8   | 1.0 | 0.91 | 1.10 | 7.1    | 7.1    | 8.7    | 1.0 | 0.81 | 1.23 |
| P53569_CI Cebp3   | CCAAT/enh     | 5  | 7.9   | 7.9   | 8.7   | 1.0 | 0.91 | 1.10 | 46.1   | 45.0   | 54.8   | 1.0 | 0.84 | 1.19 |
| Q9CZ88_RS Rps19   | 40S ribosor   | 10 | 78.6  | 79.3  | 86.5  | 1.0 | 0.91 | 1.10 | 2529.7 | 1648.1 | 2006.0 | 1.5 | 1.26 | 0.79 |
| Q8BZ21_KI Kat6a   | Histone ace   | 1  | 6.2   | 6.3   | 6.8   | 1.0 | 0.91 | 1.10 | 6.2    | 6.3    | 7.6    | 1.0 | 0.81 | 1.23 |
| Q62261_SF Sptbn1  | Spectrin be   | 81 | 21.9  | 22.2  | 24.2  | 1.0 | 0.91 | 1.10 | 3119.2 | 2204.4 | 2683.1 | 1.4 | 1.16 | 0.86 |
| Q6A068_CI Cdc5l   | Cell division | 32 | 11.8  | 12.0  | 13.1  | 1.0 | 0.90 | 1.11 | 528.0  | 499.4  | 607.9  | 1.1 | 0.87 | 1.15 |
| Q8BL74_TF Gtf3c2  | General tra   | 2  | 8.0   | 8.2   | 8.9   | 1.0 | 0.90 | 1.11 | 16.1   | 16.3   | 19.9   | 1.0 | 0.81 | 1.23 |
| Q6KCD5_N Nipbl    | Nipped-B-li   | 8  | 13.6  | 13.8  | 15.0  | 1.0 | 0.90 | 1.11 | 102.9  | 100.0  | 121.8  | 1.0 | 0.85 | 1.18 |
| O55143_A1 Atp2a2  | Sarcoplasm    | 1  | 7.0   | 7.2   | 7.8   | 1.0 | 0.90 | 1.11 | 7.0    | 7.2    | 8.7    | 1.0 | 0.81 | 1.24 |
| P25206_M Mcm3     | DNA replica   | 80 | 21.5  | 21.9  | 23.8  | 1.0 | 0.90 | 1.11 | 2769.7 | 3473.7 | 4228.1 | 0.8 | 0.66 | 1.53 |
| Q3U2P1_S1 Sec24a  | Protein tra   | 4  | 7.4   | 7.6   | 8.3   | 1.0 | 0.90 | 1.11 | 36.9   | 37.2   | 45.2   | 1.0 | 0.81 | 1.23 |
| Q8VD12_Z1 Znfx85a | Zinc finger j | 3  | 14.2  | 14.5  | 15.8  | 1.0 | 0.90 | 1.11 | 46.0   | 48.4   | 58.9   | 1.0 | 0.78 | 1.28 |
| Q9DCN2_N Cyp5r3   | NADH-cyto     | 3  | 11.8  | 12.0  | 13.1  | 1.0 | 0.90 | 1.11 | 37.2   | 44.2   | 53.8   | 0.8 | 0.69 | 1.45 |
| Q9D8C4_IJ Ifi35   | Interferon-i  | 1  | 13.8  | 14.1  | 15.4  | 1.0 | 0.90 | 1.11 | 13.8   | 14.1   | 17.2   | 1.0 | 0.80 | 1.24 |
| Q8K284_TF Gtf3c1  | General tra   | 2  | 12.8  | 13.1  | 14.3  | 1.0 | 0.90 | 1.11 | 25.6   | 26.1   | 31.8   | 1.0 | 0.80 | 1.24 |
| P68369_TE Tubal1a | Tubulin alp   | 77 | 80.3  | 82.1  | 89.6  | 1.0 | 0.90 | 1    |        |        |        |     |      |      |

|                    |               |    |       |       |       |     |      |      |         |         |         |     |      |      |
|--------------------|---------------|----|-------|-------|-------|-----|------|------|---------|---------|---------|-----|------|------|
| Q6PCM2_II Ints6    | Integrator c  | 3  | 8.0   | 8.4   | 9.2   | 0.9 | 0.87 | 1.15 | 22.0    | 22.4    | 27.2    | 1.0 | 0.81 | 1.24 |
| P42128_FC Foxk1    | Forkhead b    | 2  | 9.0   | 9.5   | 10.4  | 0.9 | 0.87 | 1.15 | 18.0    | 19.0    | 23.1    | 0.9 | 0.78 | 1.28 |
| P62874_Gl Gbn1     | Guanine nu    | 7  | 29.8  | 31.5  | 34.4  | 0.9 | 0.87 | 1.15 | 294.0   | 305.6   | 305.6   | 1.2 | 0.96 | 1.04 |
| Q8BHG9_C Cggbp1    | CGG triplet   | 1  | 30.5  | 32.3  | 35.2  | 0.9 | 0.87 | 1.15 | 30.5    | 32.3    | 39.3    | 0.9 | 0.78 | 1.29 |
| O08810_U_Eftud2    | 116 kDa U5    | 47 | 32.9  | 34.9  | 38.0  | 0.9 | 0.87 | 1.16 | 2110.6  | 1955.8  | 2380.6  | 1.1 | 0.89 | 1.13 |
| Q6A009_L Ltn1      | E3 ubiquiti   | 2  | 9.3   | 9.9   | 10.8  | 0.9 | 0.87 | 1.16 | 18.7    | 19.8    | 24.1    | 0.9 | 0.78 | 1.29 |
| Q00422_G_Gabpa     | GA-binding    | 4  | 27.1  | 28.7  | 31.3  | 0.9 | 0.87 | 1.16 | 106.1   | 274.6   | 334.2   | 0.4 | 0.32 | 3.15 |
| P35550_FE Fbl      | rRNA 2'-O-n   | 18 | 24.7  | 26.2  | 28.5  | 0.9 | 0.87 | 1.16 | 1067.5  | 1078.4  | 1312.6  | 1.0 | 0.81 | 1.23 |
| Q8CCK0_H_H2afy2    | Core histon   | 15 | 24.1  | 25.5  | 27.8  | 0.9 | 0.86 | 1.16 | 478.2   | 750.4   | 913.4   | 0.6 | 0.52 | 1.91 |
| Q9D6N5_N Drap1     | Dr1-associa   | 5  | 11.3  | 12.1  | 13.2  | 0.9 | 0.86 | 1.16 | 69.9    | 54.5    | 66.3    | 1.3 | 1.05 | 0.95 |
| Q9CQF3_CI Nudt21   | Cleavage an   | 11 | 15.1  | 16.0  | 17.5  | 0.9 | 0.86 | 1.16 | 614.2   | 461.4   | 561.6   | 1.3 | 1.09 | 0.91 |
| Q7M6Y3_P Picalm    | Phosphatid    | 22 | 15.0  | 15.9  | 17.4  | 0.9 | 0.86 | 1.16 | 540.9   | 422.8   | 514.6   | 1.3 | 1.05 | 0.95 |
| E9Q2H1_E5 Ubr5     | E3 ubiquiti   | 9  | 7.5   | 7.9   | 8.7   | 0.9 | 0.86 | 1.16 | 82.6    | 78.5    | 95.5    | 1.1 | 0.87 | 1.16 |
| O09172_G_Gclm      | Glutamate-    | 1  | 3.0   | 3.2   | 3.5   | 0.9 | 0.86 | 1.16 | 3.0     | 3.2     | 3.9     | 0.9 | 0.77 | 1.30 |
| P54823_DI Ddx6     | Probable A    | 21 | 25.7  | 27.5  | 29.9  | 0.9 | 0.86 | 1.16 | 929.9   | 1074.7  | 1308.1  | 0.9 | 0.71 | 1.41 |
| Q52K18_SR Srrm1    | Serine/argi   | 14 | 25.1  | 26.9  | 29.3  | 0.9 | 0.86 | 1.17 | 536.8   | 425.5   | 517.8   | 1.3 | 1.04 | 0.96 |
| Q9QZD9_EI Eif3i    | Eukaryotic    | 12 | 36.7  | 39.3  | 42.9  | 0.9 | 0.86 | 1.17 | 834.7   | 468.3   | 570.0   | 1.8 | 1.46 | 0.68 |
| Q3UMCO_S Spata5    | Spermatog     | 6  | 8.6   | 9.2   | 10.0  | 0.9 | 0.86 | 1.17 | 48.3    | 55.9    | 68.0    | 0.9 | 0.71 | 1.41 |
| E9PZJ8_AS Ascc3    | Activating    | 12 | 9.7   | 10.4  | 11.3  | 0.9 | 0.85 | 1.17 | 116.4   | 135.8   | 165.2   | 0.9 | 0.70 | 1.42 |
| P10639_TH Txn      | Thioredoxin   | 2  | 10.6  | 11.4  | 12.4  | 0.9 | 0.85 | 1.17 | 21.2    | 22.8    | 27.7    | 0.9 | 0.77 | 1.31 |
| Q80X73_PI Pelo     | Protein pel   | 2  | 13.7  | 14.7  | 16.0  | 0.9 | 0.85 | 1.17 | 27.3    | 29.3    | 35.7    | 0.9 | 0.77 | 1.31 |
| Q99PG4_R Rgs18     | Regulator c   | 1  | 13.5  | 14.5  | 15.8  | 0.9 | 0.85 | 1.17 | 13.5    | 14.5    | 17.6    | 0.9 | 0.76 | 1.31 |
| Q921H8_TI Acaa1a   | 3-ketoacyl-   | 1  | 3.8   | 4.0   | 4.4   | 0.9 | 0.85 | 1.17 | 3.8     | 4.0     | 4.9     | 0.9 | 0.76 | 1.31 |
| Q8COCT_S Farsa     | Phenylalan    | 18 | 17.2  | 18.5  | 20.2  | 0.9 | 0.85 | 1.17 | 333.2   | 420.1   | 511.3   | 0.8 | 0.65 | 1.53 |
| Q8CIE4_Q8 Parp10   | Plec1 prote   | 1  | 1.7   | 1.9   | 2.0   | 0.9 | 0.85 | 1.17 | 1.7     | 1.9     | 2.3     | 0.9 | 0.76 | 1.31 |
| A0A0A0MC Swi5      | DNA repair    | 2  | 12.8  | 13.8  | 15.1  | 0.9 | 0.85 | 1.17 | 25.7    | 27.7    | 33.7    | 0.9 | 0.76 | 1.31 |
| Q8K224_CI Ncapd2   | Condensin-    | 34 | 15.1  | 16.2  | 17.7  | 0.9 | 0.85 | 1.18 | 813.8   | 700.1   | 852.2   | 1.2 | 0.96 | 1.05 |
| Q9Z207_DI Diaph3   | Protein dia   | 1  | 6.3   | 6.8   | 7.5   | 0.9 | 0.85 | 1.18 | 6.3     | 6.8     | 8.3     | 0.9 | 0.76 | 1.31 |
| Q6NV83_SI U2surp   | U2 snRNP-a    | 27 | 19.3  | 20.8  | 22.7  | 0.9 | 0.85 | 1.18 | 722.4   | 713.0   | 867.8   | 1.0 | 0.83 | 1.20 |
| Q8VHX6_FI Flnc     | Filamin-C C   | 68 | 41.6  | 45.0  | 49.1  | 0.9 | 0.85 | 1.18 | 5531.0  | 3818.5  | 4647.7  | 1.4 | 1.19 | 0.84 |
| Q8C3V4_Q Stat1     | Signal trans  | 70 | 22.2  | 24.0  | 26.2  | 0.9 | 0.85 | 1.18 | 3593.8  | 2426.5  | 2953.4  | 1.5 | 1.22 | 0.82 |
| Q9D6L8_PI Ppil3    | Peptidyl-pr   | 4  | 17.4  | 18.8  | 20.5  | 0.9 | 0.85 | 1.18 | 68.7    | 70.5    | 85.8    | 1.0 | 0.80 | 1.25 |
| Q810B6_AI Ankyf1   | Rabankyrin    | 7  | 9.1   | 9.8   | 10.7  | 0.9 | 0.85 | 1.18 | 73.1    | 74.5    | 90.7    | 1.0 | 0.81 | 1.24 |
| Q8R326_PI Pspc1    | Paraspeckl    | 6  | 17.0  | 18.4  | 20.0  | 0.9 | 0.85 | 1.18 | 152.6   | 103.3   | 125.7   | 1.5 | 1.21 | 0.82 |
| Q5DW34_E Ehm1      | Histone-lys   | 5  | 9.8   | 10.6  | 11.6  | 0.9 | 0.85 | 1.18 | 42.7    | 55.7    | 67.8    | 0.8 | 0.63 | 1.59 |
| Q8VDD9_P Phip      | PH-interact   | 6  | 12.2  | 13.2  | 14.4  | 0.9 | 0.85 | 1.18 | 62.7    | 79.7    | 97.0    | 0.8 | 0.65 | 1.55 |
| Q80VD1_F Farn98b   | Protein FAN   | 7  | 24.3  | 26.3  | 28.7  | 0.9 | 0.84 | 1.18 | 314.9   | 221.7   | 269.8   | 1.4 | 1.17 | 0.86 |
| Q70551_SF Srpk1    | SRSF protei   | 4  | 8.3   | 9.0   | 9.9   | 0.9 | 0.84 | 1.18 | 35.5    | 38.7    | 47.1    | 0.9 | 0.75 | 1.33 |
| Q9Z1R2_B Bag6      | Large proli   | 16 | 6.9   | 7.5   | 8.2   | 0.9 | 0.84 | 1.19 | 122.1   | 165.6   | 201.6   | 0.7 | 0.61 | 1.65 |
| Q8CF89_TA Tab1     | TGF-beta-ak   | 1  | 7.1   | 7.7   | 8.4   | 0.9 | 0.84 | 1.19 | 7.1     | 7.7     | 9.4     | 0.9 | 0.75 | 1.33 |
| Q60973_RI Rbbp7    | Histone-bir   | 4  | 7.6   | 8.3   | 9.0   | 0.9 | 0.84 | 1.19 | 40.0    | 49.3    | 60.0    | 0.8 | 0.67 | 1.50 |
| O55131_SI 7-Sep    | Septin-7 OS   | 4  | 9.2   | 10.0  | 10.9  | 0.9 | 0.84 | 1.19 | 37.1    | 38.8    | 47.2    | 1.0 | 0.79 | 1.27 |
| Q91YD3_DI Dcp1a    | mRNA-deca     | 1  | 3.5   | 3.8   | 4.1   | 0.9 | 0.84 | 1.19 | 3.5     | 3.8     | 4.6     | 0.9 | 0.75 | 1.33 |
| E9Q614_E9 Chd3     | Protein Chc   | 3  | 6.0   | 6.5   | 7.1   | 0.9 | 0.84 | 1.19 | 19.0    | 21.0    | 25.6    | 0.9 | 0.74 | 1.35 |
| P60843_IF Eif4a1   | Eukaryotic    | 97 | 42.6  | 46.6  | 50.8  | 0.9 | 0.84 | 1.19 | 9775.5  | 7762.8  | 9448.6  | 1.3 | 1.03 | 0.97 |
| P63276_RI Rps17    | 40S riboso    | 11 | 20.1  | 22.0  | 24.0  | 0.9 | 0.84 | 1.19 | 1544.7  | 662.4   | 806.3   | 2.3 | 1.92 | 0.52 |
| Q924K8_M Mta3      | Metastasin    | 7  | 6.5   | 7.1   | 7.7   | 0.9 | 0.84 | 1.19 | 41.3    | 57.9    | 70.5    | 0.7 | 0.59 | 1.71 |
| Q924C1_XI Xpo5     | Exportin-5    | 8  | 11.4  | 12.4  | 13.6  | 0.9 | 0.84 | 1.20 | 135.6   | 102.8   | 125.1   | 1.3 | 1.08 | 0.92 |
| Q80XR8_QI Git2     | ARF GTPase    | 2  | 6.6   | 7.3   | 7.9   | 0.9 | 0.83 | 1.20 | 13.2    | 14.6    | 17.7    | 0.9 | 0.75 | 1.34 |
| P46467_VF Vps4b    | Vacuolar pr   | 4  | 10.9  | 12.0  | 13.1  | 0.9 | 0.83 | 1.20 | 80.7    | 55.3    | 67.3    | 1.5 | 1.20 | 0.83 |
| Q3UI43_BA Babam1   | BRIS and E    | 2  | 15.1  | 16.6  | 18.1  | 0.9 | 0.83 | 1.20 | 30.2    | 33.2    | 40.4    | 0.9 | 0.75 | 1.34 |
| Q5EE38_AC Acd      | Adrenocort    | 2  | 3.9   | 4.3   | 4.6   | 0.9 | 0.83 | 1.20 | 7.7     | 8.5     | 10.4    | 0.9 | 0.75 | 1.34 |
| Q62419_SI Sh3g1    | Endophilin    | 14 | 34.2  | 37.7  | 41.1  | 0.9 | 0.83 | 1.20 | 690.1   | 1268.1  | 1543.5  | 0.5 | 0.45 | 2.24 |
| F8VPJ2_FU Farp1    | FERM, Rho     | 8  | 10.9  | 12.0  | 13.1  | 0.9 | 0.83 | 1.20 | 104.9   | 125.7   | 153.0   | 0.8 | 0.69 | 1.46 |
| P62737_AC Acta2    | Actin, aorti  | 63 | 217.2 | 239.5 | 261.3 | 0.9 | 0.83 | 1.20 | 20178.3 | 23874.6 | 29059.4 | 0.8 | 0.69 | 1.44 |
| Q9QXTO_CI Cnpy2    | Protein can   | 3  | 11.3  | 12.5  | 13.7  | 0.9 | 0.83 | 1.20 | 30.7    | 32.3    | 39.3    | 0.9 | 0.78 | 1.28 |
| P62984_RI Uba52    | Ubiquitin-ε   | 21 | 119.9 | 132.3 | 144.4 | 0.9 | 0.83 | 1.20 | 5207.1  | 7601.7  | 9252.6  | 0.7 | 0.56 | 1.78 |
| Q9CR60_GI Golt1b   | Vesicle tran  | 1  | 4.8   | 5.3   | 5.8   | 0.9 | 0.83 | 1.21 | 4.8     | 5.3     | 6.5     | 0.9 | 0.74 | 1.34 |
| Q92089_SF Sufpt16h | FACT comp     | 21 | 15.5  | 17.2  | 18.7  | 0.9 | 0.83 | 1.21 | 346.0   | 396.5   | 482.6   | 0.9 | 0.72 | 1.39 |
| Q8R0L9_TA Tada3    | Transcripti   | 2  | 8.0   | 8.9   | 9.7   | 0.9 | 0.83 | 1.21 | 16.1    | 17.8    | 21.6    | 0.9 | 0.74 | 1.35 |
| Q6NXI6_RP Rprd2    | Regulation    | 8  | 10.6  | 11.7  | 12.7  | 0.9 | 0.83 | 1.21 | 83.0    | 88.4    | 107.5   | 0.9 | 0.77 | 1.30 |
| Q70378_EF Emc8     | ER membra     | 3  | 6.2   | 6.9   | 7.5   | 0.9 | 0.83 | 1.21 | 17.3    | 18.5    | 22.5    | 0.9 | 0.77 | 1.31 |
| P27773_PC Pdia3    | Protein disi  | 12 | 12.5  | 13.9  | 15.2  | 0.9 | 0.83 | 1.21 | 184.5   | 250.2   | 304.5   | 0.7 | 0.61 | 1.65 |
| Q9CQ49_N Ncbp2     | Nuclear cap   | 4  | 20.4  | 22.6  | 24.7  | 0.9 | 0.83 | 1.21 | 72.1    | 107.0   | 130.2   | 0.7 | 0.55 | 1.81 |
| Q9CY57_CI Chtop    | Chromatin     | 6  | 4.7   | 5.3   | 5.7   | 0.9 | 0.83 | 1.21 | 32.6    | 42.2    | 51.4    | 0.8 | 0.63 | 1.58 |
| O55106_S1 Strn     | Striatin OS-  | 3  | 5.6   | 6.2   | 6.8   | 0.9 | 0.83 | 1.21 | 17.9    | 23.0    | 28.0    | 0.8 | 0.64 | 1.56 |
| O88845_AI Akap10   | A-kinase an   | 2  | 7.0   | 7.8   | 8.5   | 0.9 | 0.82 | 1.21 | 14.0    | 15.5    | 18.9    | 0.9 | 0.74 | 1.35 |
| Q91Y7T_YT Ythdf2   | YTH domain    | 3  | 26.1  | 29.0  | 31.6  | 0.9 | 0.82 | 1.21 | 62.1    | 69.9    | 85.1    | 0.9 | 0.73 | 1.37 |
| Q3UPL0_SK Sec3a1   | Protein tra   | 45 | 17.6  | 19.6  | 21.4  | 0.9 | 0.82 | 1.21 | 1171.6  | 878.5   | 1069.3  | 1.3 | 1.10 | 0.91 |
| O55029_CI Copb2    | Coatomer s    | 36 | 24.1  | 26.8  | 29.3  | 0.9 | 0.82 | 1.22 | 1221.5  | 1313.4  | 1598.6  | 0.9 | 0.76 | 1.31 |
| E9QKH0_E5 Clasp1   | CLIP-associ   | 14 | 7.8   | 8.7   | 9.5   | 0.9 | 0.82 | 1.22 | 167.3   | 128.0   | 155.8   | 1.3 | 1.07 | 0.93 |
| Q9D1D4_TI Tmed10   | Transmeml     | 6  | 11.2  | 12.5  | 13.7  | 0.9 | 0.82 | 1.22 | 82.6    | 106.3   | 129.4   | 0.8 | 0.64 | 1.57 |
| O88520_SI Shoc2    | Leucine-ric   | 5  | 5.7   | 6.3   | 6.9   | 0.9 | 0.82 | 1.22 | 37.6    | 34.8    | 42.3    | 1.1 | 0.89 | 1.12 |
| Q9D4J7_PI Phf6     | PHD finger    | 2  | 20.5  | 23.0  | 25.0  | 0.9 | 0.82 | 1.22 | 41.1    | 45.9    | 55.9    | 0.9 | 0.73 | 1.36 |
| O55128_SF Sap18    | Histone dex   | 12 | 27.8  | 31.1  | 33.9  | 0.9 | 0.82 | 1.22 | 382.7   | 568.1   | 691.5   | 0.7 | 0.55 | 1.81 |
| Q91W40_KI Klc3     | Kinesin ligh  | 8  | 7.4   | 8.4   | 9.1   | 0.9 | 0.82 | 1.23 | 79.1    | 80.8    | 98.3    | 1.0 | 0.80 | 1.24 |
| Q9JM93_AI Arl6ip4  | ADP-ribosy    | 2  | 6.5   | 7.4   | 8.0   | 0.9 | 0.81 | 1.23 | 13.1    | 14.7    | 17.9    | 0.9 | 0.73 | 1.37 |
| Q99K18_DC Dctn2    | Dynactin s    | 20 | 16.4  | 18.5  | 20.2  | 0.9 | 0.81 | 1.23 | 425.1   | 556.0   | 676.8   | 0.8 | 0.63 | 1.59 |
| Q03963_EI Eif2ak2  | Interferon-i  | 32 | 23.3  | 26.3  | 28.7  | 0.9 | 0.81 | 1.23 | 1169.9  | 1060.4  | 1290.7  | 1.1 | 0.91 | 1.10 |
| P16858_GI Gaphd    | Glyceralde    | 17 | 12.3  | 13.9  | 15.2  | 0.9 | 0.81 | 1.23 | 499.6   | 656.3   | 798.8   | 0.8 | 0.63 | 1.60 |
| Q99K66_PI Prpf19   | Pre-mRNA-q    | 15 | 35.3  | 39.9  | 43.6  | 0.9 | 0.81 | 1.23 | 912.4   | 796.7   | 969.8   | 1.1 | 0.94 | 1.06 |
| P70698_PI Ctp1     | CTP syntha    | 28 | 18.6  | 21.0  | 22.9  | 0.9 | 0.81 | 1.23 | 1256.4  | 814.9   | 991.9   | 1.5 | 1.27 | 0.79 |
| G3X959_GI Pph1n1   | Periphilin 1  | 2  | 18.2  | 20.6  | 22.4  | 0.9 | 0.81 | 1.23 | 36.4    | 41.2    | 50.1    | 0.9 | 0.73 | 1.38 |
| Q8BMG7_F Rab3gap2  | Rab3 GTPas    | 4  | 7.3   | 8.3   | 9.0   | 0.9 | 0.81 | 1.24 | 30.7    | 36.4    | 44.3    | 0.8 | 0.69 | 1.44 |
| Q9QY06_M Myo9b     | Unconvent     | 4  | 7.7   | 8.7   | 9.5   | 0.9 | 0.81 | 1.24 | 31.7    | 36.1    | 43.9    | 0.9 | 0.72 | 1.38 |
| Q8BI05_ZC Zc3h14   | Zinc finger I | 7  | 15.8  | 17.9  | 19.5  | 0.9 | 0.81 | 1.24 | 126.8   | 158.3   | 192.7   | 0.8 | 0.66 | 1.52 |
| P49817_CJ Cav1     | Caveolin-1    | 1  | 20.3  | 23.0  | 25.1  | 0.9 | 0.81 | 1.24 | 20.3    | 23.0    | 28.0    | 0.9 | 0.72 | 1.38 |
| Q50116_DF Ddx17    | Probable A</  |    |       |       |       |     |      |      |         |         |         |     |      |      |

|                    |               |    |      |      |      |     |      |      |        |        |        |     |      |      |
|--------------------|---------------|----|------|------|------|-----|------|------|--------|--------|--------|-----|------|------|
| Q9CQER_CN166_MOU5  | UPF0568 p     | 14 | 54.7 | 63.7 | 69.5 | 0.9 | 0.79 | 1.27 | 937.2  | 980.8  | 1193.8 | 1.0 | 0.79 | 1.27 |
| Q61624_Zf Zn148    | Zinc finger j | 7  | 10.0 | 11.7 | 12.7 | 0.9 | 0.79 | 1.27 | 73.0   | 102.2  | 124.4  | 0.7 | 0.59 | 1.70 |
| P46460_Nf Nsf      | Vesicle-fuser | 14 | 13.7 | 16.0 | 17.4 | 0.9 | 0.79 | 1.27 | 293.2  | 322.3  | 392.3  | 0.9 | 0.75 | 1.34 |
| Q9DCT6_Bv Bap18    | Chromatin     | 4  | 14.7 | 17.2 | 18.8 | 0.9 | 0.78 | 1.28 | 71.2   | 71.3   | 86.8   | 1.0 | 0.82 | 1.22 |
| P40240_CI Cd9      | CD9 antigen   | 1  | 6.2  | 7.3  | 8.0  | 0.9 | 0.78 | 1.28 | 6.2    | 7.3    | 8.9    | 0.9 | 0.70 | 1.42 |
| Q8BIH0_SP Sap130   | Histone dex   | 2  | 8.9  | 10.4 | 11.4 | 0.9 | 0.78 | 1.28 | 17.8   | 20.9   | 25.4   | 0.9 | 0.70 | 1.42 |
| Q8CI71_CC Ccdc132  | Coiled-coil   | 2  | 6.2  | 7.3  | 7.9  | 0.9 | 0.78 | 1.28 | 12.4   | 14.5   | 17.7   | 0.9 | 0.70 | 1.43 |
| P97868_RF Rbbp6    | E3 ubiquitin  | 4  | 9.7  | 11.4 | 12.4 | 0.9 | 0.78 | 1.28 | 40.0   | 43.8   | 53.3   | 0.9 | 0.75 | 1.33 |
| Q8BMK4_C Ckap4     | Cytoskeletc   | 1  | 11.8 | 13.9 | 15.1 | 0.9 | 0.78 | 1.28 | 11.8   | 13.9   | 16.9   | 0.9 | 0.70 | 1.43 |
| P61965_W Wdr5      | WD repeat-    | 5  | 8.2  | 9.6  | 10.5 | 0.9 | 0.78 | 1.28 | 168.5  | 106.3  | 129.3  | 1.6 | 1.30 | 0.77 |
| Q7TT37_EL Ikbkap   | Elongator c   | 23 | 12.4 | 14.6 | 16.0 | 0.9 | 0.78 | 1.28 | 438.9  | 371.3  | 451.9  | 1.2 | 0.97 | 1.03 |
| Q99LI5_ZN Zn2f81   | Zinc finger j | 2  | 6.0  | 7.0  | 7.7  | 0.9 | 0.78 | 1.28 | 11.9   | 14.0   | 17.1   | 0.9 | 0.70 | 1.43 |
| Q9J157_GT Gtf2ird1 | General tra   | 2  | 4.0  | 4.7  | 5.1  | 0.8 | 0.78 | 1.28 | 7.9    | 9.3    | 11.4   | 0.8 | 0.70 | 1.43 |
| D3YW48_D Capns1    | Calpain sm-   | 9  | 7.5  | 8.9  | 9.7  | 0.8 | 0.78 | 1.29 | 158.3  | 137.1  | 166.9  | 1.2 | 0.95 | 1.05 |
| A6H5X4_PI Phf11    | PHD finger    | 6  | 61.3 | 72.3 | 78.9 | 0.8 | 0.78 | 1.29 | 447.0  | 481.1  | 585.6  | 0.9 | 0.76 | 1.31 |
| E9Q6R7_ES Utrn     | Protein Utr   | 14 | 8.3  | 9.8  | 10.7 | 0.8 | 0.78 | 1.29 | 125.2  | 164.5  | 200.2  | 0.8 | 0.63 | 1.60 |
| Q9QXK7_CI Cpsf3    | Cleavage an   | 11 | 15.0 | 17.7 | 19.3 | 0.8 | 0.78 | 1.29 | 255.9  | 286.1  | 348.3  | 0.9 | 0.73 | 1.36 |
| Q923D4_SI Sfb35    | Splicing fac  | 3  | 22.3 | 26.3 | 28.7 | 0.8 | 0.78 | 1.29 | 63.9   | 85.1   | 103.6  | 0.8 | 0.62 | 1.62 |
| Q80X32_CE024_MOU5  | UPF0461 p     | 3  | 11.3 | 13.3 | 14.5 | 0.8 | 0.77 | 1.29 | 59.1   | 100.9  | 122.8  | 0.6 | 0.48 | 2.08 |
| Q61510_TF Trim25   | E3 ubiquitin  | 2  | 11.0 | 13.1 | 14.3 | 0.8 | 0.77 | 1.29 | 22.1   | 26.2   | 31.8   | 0.8 | 0.69 | 1.44 |
| Q8VDG6_N Mlk4      | Mitogen-ac    | 1  | 3.4  | 4.0  | 4.4  | 0.8 | 0.77 | 1.29 | 3.4    | 4.0    | 4.9    | 0.8 | 0.69 | 1.44 |
| Q8BMB0_E Emsy      | Protein EM    | 3  | 5.3  | 6.3  | 6.9  | 0.8 | 0.77 | 1.29 | 17.4   | 20.5   | 25.0   | 0.8 | 0.70 | 1.44 |
| Q3UA16_SI Spc25    | Kinetochor    | 2  | 9.1  | 10.7 | 11.7 | 0.8 | 0.77 | 1.29 | 18.1   | 21.5   | 26.2   | 0.8 | 0.69 | 1.44 |
| Q8BX09_NI Rbbp5    | Retinoblast   | 7  | 11.8 | 14.0 | 15.2 | 0.8 | 0.77 | 1.29 | 91.4   | 99.0   | 120.5  | 0.9 | 0.76 | 1.32 |
| Q9CQT3_M Mri1      | Methylthio    | 2  | 10.0 | 11.8 | 12.9 | 0.8 | 0.77 | 1.30 | 20.0   | 23.7   | 28.8   | 0.8 | 0.69 | 1.45 |
| Q80X50_UI Ubap21   | Ubiquitin-a   | 31 | 14.4 | 17.1 | 18.6 | 0.8 | 0.77 | 1.30 | 658.2  | 661.8  | 805.5  | 1.0 | 0.82 | 1.22 |
| O54941_SI Smarce1  | SWI/SNF-re    | 9  | 9.4  | 11.2 | 12.2 | 0.8 | 0.77 | 1.30 | 115.1  | 113.8  | 138.5  | 1.0 | 0.83 | 1.20 |
| P62821_RI Rab1A    | Ras-related   | 8  | 12.4 | 14.7 | 16.0 | 0.8 | 0.77 | 1.30 | 176.1  | 146.6  | 178.4  | 1.2 | 0.99 | 1.01 |
| Q9CW03_S Smc3      | Structural r  | 76 | 18.2 | 21.7 | 23.7 | 0.8 | 0.77 | 1.30 | 1966.1 | 1990.0 | 2422.1 | 1.0 | 0.81 | 1.23 |
| Q61550_RI Rad21    | Double-str    | 17 | 7.7  | 9.1  | 9.9  | 0.8 | 0.77 | 1.30 | 214.8  | 313.9  | 382.0  | 0.7 | 0.56 | 1.78 |
| O09044_SI Snap23   | Synaptosor    | 2  | 6.3  | 7.5  | 8.1  | 0.8 | 0.77 | 1.30 | 12.5   | 14.9   | 18.1   | 0.8 | 0.69 | 1.45 |
| Q2KN98_C Specc1    | Cytospin-A    | 1  | 4.3  | 5.2  | 5.6  | 0.8 | 0.77 | 1.30 | 4.3    | 5.2    | 6.3    | 0.8 | 0.69 | 1.45 |
| P23949_TI Zfp3612  | Zinc finger j | 1  | 5.6  | 6.7  | 7.3  | 0.8 | 0.77 | 1.30 | 5.6    | 6.7    | 8.2    | 0.8 | 0.69 | 1.45 |
| Q80W00_F Ppp1710   | Serine/thre   | 9  | 20.5 | 24.5 | 26.7 | 0.8 | 0.77 | 1.30 | 182.6  | 194.8  | 237.1  | 0.9 | 0.77 | 1.30 |
| Q8C7V3_UI Utp15    | U3 small nu   | 1  | 12.6 | 15.0 | 16.4 | 0.8 | 0.77 | 1.30 | 12.6   | 15.0   | 18.3   | 0.8 | 0.69 | 1.45 |
| P36916_GI Gnl1     | Guanine nu    | 13 | 9.9  | 11.9 | 12.9 | 0.8 | 0.77 | 1.30 | 184.7  | 134.1  | 163.3  | 1.4 | 1.13 | 0.88 |
| F8VQ29_F8 Iqgap3   | Protein lag   | 1  | 6.2  | 7.4  | 8.0  | 0.8 | 0.77 | 1.30 | 6.2    | 7.4    | 9.0    | 0.8 | 0.69 | 1.45 |
| Q9JIG7_CC Ccdc22   | Coiled-coil   | 6  | 6.6  | 7.9  | 8.6  | 0.8 | 0.77 | 1.30 | 38.0   | 53.7   | 65.3   | 0.7 | 0.58 | 1.72 |
| Q9CZG9_PI Pdz11    | PDZ domai     | 2  | 5.1  | 6.1  | 6.6  | 0.8 | 0.77 | 1.30 | 10.1   | 12.1   | 14.8   | 0.8 | 0.69 | 1.46 |
| P33174_KI Kif4     | Chromosor     | 13 | 8.5  | 10.2 | 11.2 | 0.8 | 0.77 | 1.31 | 130.7  | 170.6  | 207.7  | 0.8 | 0.63 | 1.59 |
| Q8BHD7_P Ptpb3     | Polypyrimi    | 11 | 16.0 | 19.1 | 20.9 | 0.8 | 0.76 | 1.31 | 1781.0 | 911.3  | 1109.3 | 2.0 | 1.61 | 0.62 |
| Q8K363_DI Ddx18    | ATP-depend    | 4  | 16.6 | 19.9 | 21.7 | 0.8 | 0.76 | 1.31 | 75.1   | 78.4   | 95.4   | 1.0 | 0.79 | 1.27 |
| Q921F2_TA Tardbp   | TAR DNA-bi    | 29 | 29.2 | 35.1 | 38.3 | 0.8 | 0.76 | 1.31 | 2538.4 | 4336.0 | 5277.6 | 0.6 | 0.48 | 2.08 |
| Q9ER62_S1 Strn3    | Striatin-3 C  | 3  | 8.8  | 10.6 | 11.5 | 0.8 | 0.76 | 1.31 | 41.1   | 28.7   | 34.9   | 1.4 | 1.18 | 0.85 |
| Q0P678_ZC Zc3h18   | Zinc finger i | 18 | 16.0 | 19.2 | 20.9 | 0.8 | 0.76 | 1.31 | 1162.5 | 478.5  | 582.4  | 2.4 | 2.00 | 0.50 |
| Q9JHC9_EL Eif2     | ETS-related   | 2  | 7.8  | 9.4  | 10.2 | 0.8 | 0.76 | 1.31 | 15.6   | 18.7   | 22.8   | 0.8 | 0.68 | 1.46 |
| Q9Z2Q2_OI Knop1    | Lysine-rich   | 2  | 7.3  | 8.8  | 9.6  | 0.8 | 0.76 | 1.31 | 14.6   | 17.6   | 21.4   | 0.8 | 0.68 | 1.46 |
| Q9Z2F2_OI Oasl2    | 2'-5'-oligo   | 16 | 13.4 | 16.1 | 17.6 | 0.8 | 0.76 | 1.31 | 278.3  | 268.4  | 326.7  | 1.0 | 0.85 | 1.17 |
| P70333_HI Hnrnpb2  | Heterogene    | 4  | 20.2 | 24.3 | 26.6 | 0.8 | 0.76 | 1.32 | 83.0   | 101.8  | 124.0  | 0.8 | 0.67 | 1.49 |
| P61963_DI Dcaf7    | DDb1-and-     | 2  | 9.9  | 11.9 | 13.0 | 0.8 | 0.76 | 1.32 | 19.7   | 23.8   | 29.0   | 0.8 | 0.68 | 1.47 |
| Q68925_SE Sbn01    | Protein str   | 8  | 8.1  | 9.7  | 10.6 | 0.8 | 0.76 | 1.32 | 75.8   | 87.1   | 106.0  | 0.9 | 0.72 | 1.40 |
| Q64282_IF Ifit1    | Interferon-i  | 51 | 28.0 | 33.8 | 36.9 | 0.8 | 0.76 | 1.32 | 2229.7 | 2135.9 | 2599.7 | 1.0 | 0.86 | 1.17 |
| Q6ZW24_Q Rpl36     | 60S ribosor   | 8  | 49.1 | 59.4 | 64.8 | 0.8 | 0.76 | 1.32 | 794.5  | 607.4  | 739.3  | 1.3 | 1.07 | 0.93 |
| Q924W5_S Smc6      | Structural r  | 9  | 7.7  | 9.3  | 10.2 | 0.8 | 0.76 | 1.32 | 60.4   | 81.6   | 99.3   | 0.7 | 0.61 | 1.65 |
| Q810A7_DI Ddx42    | ATP-depend    | 22 | 12.4 | 15.0 | 16.3 | 0.8 | 0.76 | 1.32 | 408.6  | 475.7  | 579.0  | 0.9 | 0.71 | 1.42 |
| P62855_S1 Rps26    | 40S ribosor   | 5  | 41.3 | 50.1 | 54.7 | 0.8 | 0.76 | 1.32 | 1491.0 | 918.4  | 1117.9 | 1.6 | 1.33 | 0.75 |
| Q9QZH3_PI Ppie     | Peptidyl-pr   | 5  | 11.0 | 13.4 | 14.6 | 0.8 | 0.76 | 1.32 | 63.3   | 77.0   | 93.7   | 0.8 | 0.68 | 1.48 |
| P35293_RI Rab18    | Ras-related   | 5  | 8.5  | 10.3 | 11.2 | 0.8 | 0.76 | 1.32 | 115.8  | 73.6   | 89.6   | 1.6 | 1.29 | 0.77 |
| Q9JLM8_DI Dcl1     | Serine/thre   | 3  | 10.0 | 12.2 | 13.3 | 0.8 | 0.75 | 1.32 | 25.3   | 33.9   | 41.2   | 0.7 | 0.61 | 1.63 |
| Q9D7M8_F Polr2d    | DNA-direct    | 4  | 22.1 | 26.9 | 29.3 | 0.8 | 0.75 | 1.33 | 142.0  | 145.2  | 176.8  | 1.0 | 0.80 | 1.25 |
| Q9Z2B9_K5 Rps6ka4  | Ribosomal     | 1  | 6.2  | 7.6  | 8.3  | 0.8 | 0.75 | 1.33 | 6.2    | 7.6    | 9.2    | 0.8 | 0.68 | 1.48 |
| Q99L53_SE PspH     | Phosphoser    | 1  | 11.4 | 13.9 | 15.1 | 0.8 | 0.75 | 1.33 | 11.4   | 13.9   | 16.9   | 0.8 | 0.68 | 1.48 |
| O35345_JN Kpn6     | Importin su   | 3  | 4.6  | 5.6  | 6.2  | 0.8 | 0.75 | 1.33 | 13.0   | 20.4   | 24.8   | 0.6 | 0.52 | 1.91 |
| P40630_TF Tfam     | Transcripti   | 1  | 4.5  | 5.5  | 6.0  | 0.8 | 0.75 | 1.33 | 4.5    | 5.5    | 6.6    | 0.8 | 0.67 | 1.48 |
| Q9QWF0_C Chaf1a    | Chromatin     | 3  | 9.2  | 11.3 | 12.3 | 0.8 | 0.75 | 1.33 | 25.2   | 35.9   | 43.8   | 0.7 | 0.58 | 1.74 |
| Q8C5D8_PI Pias2    | E3 SUMO-p     | 1  | 3.5  | 4.3  | 4.7  | 0.8 | 0.75 | 1.33 | 3.5    | 4.3    | 5.2    | 0.8 | 0.67 | 1.48 |
| Q9CWX3_C Cd2bp2    | CD2 antigen   | 3  | 7.1  | 8.6  | 9.4  | 0.8 | 0.75 | 1.33 | 24.8   | 25.2   | 30.6   | 1.0 | 0.81 | 1.23 |
| Q91W92_B Cdc42ep1  | Cdc42 effec   | 3  | 4.1  | 5.0  | 5.5  | 0.8 | 0.75 | 1.33 | 13.1   | 14.4   | 17.5   | 0.9 | 0.75 | 1.34 |
| Q6DFV1_CI Cnapp2   | Condensin-    | 8  | 11.4 | 13.9 | 15.2 | 0.8 | 0.75 | 1.33 | 98.9   | 110.5  | 134.6  | 0.9 | 0.73 | 1.36 |
| Q9CU62_S1 Smc1a    | Structural r  | 79 | 21.3 | 26.1 | 28.4 | 0.8 | 0.75 | 1.34 | 2537.1 | 2645.2 | 3219.6 | 1.0 | 0.79 | 1.27 |
| Q91VX2_UI Ubap2    | Ubiquitin-a   | 16 | 9.7  | 11.9 | 12.9 | 0.8 | 0.75 | 1.34 | 197.1  | 322.1  | 392.1  | 0.6 | 0.50 | 1.99 |
| P70353_NI Nfyc     | Nuclear tra   | 2  | 7.5  | 9.2  | 10.0 | 0.8 | 0.75 | 1.34 | 14.9   | 18.3   | 22.3   | 0.8 | 0.67 | 1.49 |
| Q9QUR7_P Pin1      | Peptidyl-pr   | 5  | 18.8 | 23.0 | 25.1 | 0.8 | 0.75 | 1.34 | 171.6  | 197.3  | 240.1  | 0.9 | 0.71 | 1.40 |
| P52479_UI Usp10    | Ubiquitin c   | 14 | 10.1 | 12.4 | 13.5 | 0.8 | 0.75 | 1.34 | 197.8  | 179.5  | 218.5  | 1.1 | 0.91 | 1.10 |
| Q76KJ5_RP Cd3eap   | DNA-direct    | 2  | 4.2  | 5.2  | 5.7  | 0.8 | 0.75 | 1.34 | 8.4    | 10.4   | 12.6   | 0.8 | 0.67 | 1.50 |
| Q9R190_M Mta2      | Metastasis-   | 17 | 13.8 | 17.0 | 18.5 | 0.8 | 0.75 | 1.34 | 274.0  | 345.5  | 420.6  | 0.8 | 0.65 | 1.54 |
| Q9D1M0_S Sec13     | Protein SEC   | 4  | 11.8 | 14.5 | 15.8 | 0.8 | 0.74 | 1.34 | 92.3   | 97.8   | 119.0  | 0.9 | 0.78 | 1.29 |
| A2A654_Ai Bptf     | Protein Bpt   | 10 | 7.8  | 9.6  | 10.5 | 0.8 | 0.74 | 1.35 | 77.7   | 130.4  | 158.7  | 0.6 | 0.49 | 2.04 |
| Q61466_SF Smarcd1  | SWI/SNF-re    | 2  | 11.2 | 13.8 | 15.1 | 0.8 | 0.74 | 1.35 | 22.4   | 27.6   | 33.6   | 0.8 | 0.67 | 1.50 |
| Q92127_LA Slc7a5   | Large neutr   | 1  | 4.1  | 5.1  | 5.6  | 0.8 | 0.74 | 1.35 | 4.1    | 5.1    | 6.2    | 0.8 | 0.67 | 1.50 |
| E9Q1A5_ES Zfp384   | Protein Zfp   | 1  | 10.5 | 13.0 | 14.2 | 0.8 | 0.74 | 1.35 | 10.5   | 13.0   | 15.8   | 0.8 | 0.67 | 1.50 |
| Q8CHG7_R Rapgef2   | Rap guanin    | 2  | 11.6 | 14.3 | 15.6 | 0.8 | 0.74 | 1.35 | 23.2   | 28.7   | 34.9   | 0.8 | 0.67 | 1.50 |
| Q6ZQ03_FI Fnbp4    | Formin-bin    | 3  | 7.4  | 9.2  | 10.0 | 0.8 | 0.74 | 1.35 | 34.8   | 22.5   | 27.4   | 1.5 | 1.27 | 0.79 |
| Q8QZV7_AI Asun     | Protein asu   | 2  | 9.4  | 11.6 | 12.6 | 0.8 | 0.74 | 1.35 | 18.7   | 23.2   | 28.2   | 0.8 | 0.66 | 1.51 |
| P49312_RI Hnrnpa1  | Heterogene    | 11 | 14.9 | 18.4 | 20.1 | 0.8 | 0.74 | 1.35 | 206.1  | 248.5  | 302.4  | 0.8 | 0.68 | 1.47 |
| Q6ZQ88_KI Kdm1a    | Lysine-spec   | 14 | 11.5 | 14.2 | 15.5 | 0.8 | 0.74 | 1.35 | 181.4  | 199.4  | 242.7  | 0.9 | 0.75 | 1.34 |
| P30415_NI Nktr     | NK-tumorr     | 2  | 7.0  | 8.7  | 9.5  | 0.8 | 0.74 | 1.35 | 14.0   | 17.4   | 21.2   | 0.8 | 0.66 | 1.51 |
| P27661_HI H2afx    | Histone H2    | 4  | 64.8 | 80.7 | 88.1 | 0.8 |      |      |        |        |        |     |      |      |

|                    |               |     |       |       |       |     |      |      |         |         |         |     |      |      |
|--------------------|---------------|-----|-------|-------|-------|-----|------|------|---------|---------|---------|-----|------|------|
| Q04750_TKTop1      | DNA topois    | 14  | 13.1  | 16.8  | 18.3  | 0.8 | 0.71 | 1.40 | 229.4   | 306.2   | 372.7   | 0.7 | 0.62 | 1.63 |
| Q9QXV1_C1 Cbx8     | Chromobo:     | 4   | 6.3   | 8.0   | 8.8   | 0.8 | 0.71 | 1.40 | 25.6    | 59.6    | 72.6    | 0.4 | 0.35 | 2.84 |
| Q60737_C1 Csnk2a1  | Casein kina   | 10  | 16.6  | 21.3  | 23.2  | 0.8 | 0.71 | 1.40 | 240.8   | 290.7   | 353.8   | 0.8 | 0.68 | 1.47 |
| P83940_EL Tceb1    | Transcripti   | 3   | 14.4  | 18.5  | 20.2  | 0.8 | 0.71 | 1.40 | 65.3    | 61.7    | 75.1    | 1.1 | 0.87 | 1.15 |
| A2A791_Zh Zmym4    | Zinc finger I | 2   | 5.4   | 7.0   | 7.6   | 0.8 | 0.71 | 1.41 | 10.8    | 14.0    | 17.0    | 0.8 | 0.64 | 1.57 |
| Q92258_K1 Kif2c    | Kinesin-like  | 1   | 6.8   | 8.7   | 9.5   | 0.8 | 0.71 | 1.41 | 6.8     | 8.7     | 10.6    | 0.8 | 0.64 | 1.57 |
| P11928_Ov Oas1a    | 2'-5'-oligoa  | 1   | 7.5   | 9.6   | 10.5  | 0.8 | 0.71 | 1.41 | 7.5     | 9.6     | 11.7    | 0.8 | 0.64 | 1.57 |
| Q6NZF1_ZC Zc3h11a  | Zinc finger I | 14  | 11.2  | 14.4  | 15.7  | 0.8 | 0.71 | 1.41 | 216.9   | 246.5   | 300.0   | 0.9 | 0.72 | 1.38 |
| Q505F5_LF Lrrc4    | Leucine-ric   | 16  | 13.1  | 17.0  | 18.6  | 0.8 | 0.71 | 1.41 | 285.3   | 323.2   | 393.3   | 0.9 | 0.73 | 1.38 |
| Q9DBR7_M Ppp1r12a  | Protein phc   | 8   | 11.5  | 14.8  | 16.2  | 0.8 | 0.71 | 1.41 | 143.7   | 127.6   | 155.3   | 1.1 | 0.93 | 1.08 |
| A0A0A6VW Mbn1      | Muscleblin    | 2   | 8.1   | 10.5  | 11.4  | 0.8 | 0.71 | 1.41 | 16.2    | 21.0    | 25.5    | 0.8 | 0.63 | 1.58 |
| Q805U7_G' Gvin1    | Interferon-i  | 29  | 12.7  | 16.4  | 17.9  | 0.8 | 0.71 | 1.41 | 399.4   | 506.1   | 615.9   | 0.8 | 0.65 | 1.54 |
| Q9CRC8_LF Lrrc40   | Leucine-ric   | 11  | 8.1   | 10.5  | 11.4  | 0.8 | 0.71 | 1.41 | 107.3   | 128.5   | 156.4   | 0.8 | 0.69 | 1.46 |
| O35075_D' Dscr3    | Down synd     | 5   | 7.8   | 10.1  | 11.0  | 0.8 | 0.71 | 1.42 | 38.3    | 42.3    | 51.5    | 0.9 | 0.74 | 1.35 |
| P61358_RL Rpl27    | 60S ribosor   | 4   | 278.2 | 361.1 | 393.9 | 0.8 | 0.71 | 1.42 | 2291.5  | 1545.4  | 1880.9  | 1.5 | 1.22 | 0.82 |
| Q9R1R2_TF Trim3    | Tripartite n  | 2   | 6.5   | 8.5   | 9.2   | 0.8 | 0.71 | 1.42 | 13.0    | 16.9    | 20.6    | 0.8 | 0.63 | 1.58 |
| P63321_R' Rala     | Ras-related   | 4   | 4.6   | 5.9   | 6.5   | 0.8 | 0.70 | 1.42 | 41.6    | 40.1    | 48.8    | 1.0 | 0.85 | 1.17 |
| Q8VE10_N' Naa40    | N-alpha-acc   | 5   | 3.6   | 4.7   | 5.2   | 0.8 | 0.70 | 1.42 | 28.5    | 45.1    | 54.9    | 0.6 | 0.52 | 1.93 |
| Q8VE70_P' Pdc10    | Programme     | 4   | 4.6   | 6.0   | 6.5   | 0.8 | 0.70 | 1.42 | 38.5    | 25.6    | 31.2    | 1.5 | 1.24 | 0.81 |
| Q8K1N2_P' Phldb2   | Pleckstrin f  | 9   | 6.5   | 8.5   | 9.3   | 0.8 | 0.70 | 1.43 | 67.9    | 83.5    | 101.7   | 0.8 | 0.67 | 1.50 |
| P60766_CT Cdc42    | Cell divisio  | 3   | 16.4  | 21.4  | 23.3  | 0.8 | 0.70 | 1.43 | 50.8    | 67.7    | 82.4    | 0.8 | 0.62 | 1.62 |
| Q5DTM8_B Rnf20     | E3 ubiquiti   | 9   | 12.1  | 15.8  | 17.3  | 0.8 | 0.70 | 1.43 | 109.2   | 144.3   | 175.7   | 0.8 | 0.62 | 1.61 |
| G3X922_G' Dnajc13  | MCG11560      | 10  | 7.1   | 9.3   | 10.1  | 0.8 | 0.70 | 1.43 | 75.7    | 106.5   | 129.7   | 0.7 | 0.58 | 1.71 |
| Q9QWH1_I' Phc2     | Polyhomee     | 4   | 13.8  | 18.1  | 19.8  | 0.8 | 0.70 | 1.43 | 59.0    | 67.1    | 81.7    | 0.9 | 0.72 | 1.38 |
| Q61188_E' Ezh2     | Histone-lys   | 3   | 8.7   | 11.5  | 12.5  | 0.8 | 0.70 | 1.43 | 40.9    | 37.3    | 45.4    | 1.1 | 0.90 | 1.11 |
| Q5RKN9_Q' Capz1    | Capping pri   | 7   | 12.7  | 16.7  | 18.2  | 0.8 | 0.70 | 1.43 | 137.6   | 199.5   | 242.8   | 0.7 | 0.57 | 1.76 |
| Q920Q6_M' Msl1     | RNA-bindin    | 3   | 7.8   | 10.2  | 11.2  | 0.8 | 0.70 | 1.44 | 46.3    | 42.0    | 51.1    | 1.1 | 0.91 | 1.10 |
| P56480_AT Atp5b    | ATP synthas   | 6   | 8.4   | 11.1  | 12.1  | 0.8 | 0.70 | 1.44 | 71.2    | 62.4    | 76.0    | 1.1 | 0.94 | 1.07 |
| Q9Z266_SH Snapin   | SNARE-asso    | 4   | 10.8  | 14.3  | 15.5  | 0.8 | 0.70 | 1.44 | 54.7    | 57.6    | 70.1    | 0.9 | 0.78 | 1.28 |
| Q6AA18_U' Usp7     | Ubiquitin c   | 7   | 7.2   | 9.6   | 10.4  | 0.8 | 0.69 | 1.44 | 80.2    | 54.8    | 66.7    | 1.5 | 1.20 | 0.83 |
| Q8VEE4_RF Rpa1     | Replicatio    | 27  | 9.0   | 11.9  | 12.9  | 0.8 | 0.69 | 1.44 | 476.0   | 352.9   | 429.5   | 1.3 | 1.11 | 0.90 |
| P27048_R' Snrpb    | Small nucle   | 11  | 21.0  | 27.7  | 30.3  | 0.8 | 0.69 | 1.44 | 725.5   | 681.4   | 829.4   | 1.1 | 0.87 | 1.14 |
| O54956_D' Pole2    | DNA polym     | 1   | 7.8   | 10.3  | 11.2  | 0.8 | 0.69 | 1.45 | 7.8     | 10.3    | 12.5    | 0.8 | 0.62 | 1.61 |
| Q61216_M' Mre11a   | Double-str    | 10  | 9.8   | 13.0  | 14.2  | 0.8 | 0.69 | 1.45 | 146.3   | 143.4   | 174.6   | 1.0 | 0.84 | 1.19 |
| Q62074_K1 Prkci    | Protein kin   | 7   | 9.2   | 12.3  | 13.4  | 0.8 | 0.69 | 1.45 | 90.5    | 91.3    | 111.1   | 1.0 | 0.82 | 1.23 |
| Q9D967_V' Mdp1     | Magnesium     | 2   | 11.3  | 15.0  | 16.4  | 0.8 | 0.69 | 1.45 | 22.6    | 30.1    | 36.6    | 0.8 | 0.62 | 1.62 |
| P57780_A' Actn4    | Alpha-actin   | 12  | 9.7   | 13.0  | 14.1  | 0.7 | 0.69 | 1.46 | 176.0   | 198.4   | 241.5   | 0.9 | 0.73 | 1.37 |
| D3Z0M9_D' Ddx23    | MCG18410      | 27  | 15.8  | 21.1  | 23.0  | 0.7 | 0.69 | 1.46 | 773.8   | 665.8   | 810.4   | 1.2 | 0.95 | 1.05 |
| Q9QXK2_R' Rad18    | E3 ubiquiti   | 1   | 3.6   | 4.8   | 5.2   | 0.7 | 0.69 | 1.46 | 3.6     | 4.8     | 5.8     | 0.7 | 0.61 | 1.63 |
| O35730_RI Ring1    | E3 ubiquiti   | 3   | 5.7   | 7.6   | 8.3   | 0.7 | 0.69 | 1.46 | 21.8    | 44.8    | 54.6    | 0.5 | 0.40 | 2.51 |
| Q8VDD5_N' Myh9     | Myosin-9 O    | 155 | 66.3  | 88.7  | 96.8  | 0.7 | 0.68 | 1.46 | 22450.4 | 18425.4 | 22426.8 | 1.2 | 1.00 | 1.00 |
| Q8BHJ5_TE Tbl1x1r1 | F-box-like/A  | 3   | 26.9  | 36.1  | 39.4  | 0.7 | 0.68 | 1.46 | 85.7    | 89.5    | 108.9   | 1.0 | 0.79 | 1.27 |
| Q9DBR0_A' Akap8    | A-kinase an   | 5   | 15.9  | 21.3  | 23.2  | 0.7 | 0.68 | 1.46 | 102.5   | 166.0   | 202.0   | 0.6 | 0.51 | 1.97 |
| Q8VD75_V' Hip1     | Huntingtin    | 2   | 5.9   | 7.9   | 8.6   | 0.7 | 0.68 | 1.47 | 11.7    | 15.7    | 19.1    | 0.7 | 0.61 | 1.64 |
| P68040_GI Gnb211   | Guanine nu    | 50  | 36.2  | 48.6  | 53.0  | 0.7 | 0.68 | 1.47 | 5110.5  | 3829.4  | 4661.1  | 1.3 | 1.10 | 0.91 |
| Q8R151_Z' Znfx1    | NFX1-type:    | 3   | 8.7   | 11.7  | 12.7  | 0.7 | 0.68 | 1.47 | 26.3    | 31.6    | 38.5    | 0.8 | 0.68 | 1.46 |
| P99027_RL Rplp2    | 60S acidic    | 15  | 29.3  | 39.5  | 43.1  | 0.7 | 0.68 | 1.47 | 2585.8  | 2630.5  | 3201.8  | 1.0 | 0.81 | 1.24 |
| Q9Z1B5_M' Mad211   | Mitotic spii  | 1   | 8.1   | 10.9  | 11.9  | 0.7 | 0.68 | 1.47 | 8.1     | 10.9    | 13.3    | 0.7 | 0.61 | 1.64 |
| Q6NS46_RI Pdc11    | Protein RRF   | 22  | 12.6  | 17.0  | 18.5  | 0.7 | 0.68 | 1.47 | 336.7   | 394.9   | 480.6   | 0.9 | 0.70 | 1.43 |
| P07356_A' Anxa2    | Annexin A2    | 32  | 17.7  | 24.0  | 26.2  | 0.7 | 0.68 | 1.47 | 896.2   | 1199.0  | 1459.4  | 0.7 | 0.61 | 1.63 |
| O35691_P' Pnn      | Pinin OS-M    | 28  | 14.0  | 19.0  | 20.7  | 0.7 | 0.68 | 1.48 | 555.4   | 938.0   | 1141.7  | 0.6 | 0.49 | 2.06 |
| Q99KY4_G' Gak      | Cyclin-G-as   | 4   | 3.9   | 5.3   | 5.8   | 0.7 | 0.68 | 1.48 | 21.9    | 23.2    | 28.3    | 0.9 | 0.77 | 1.29 |
| P83870_P' Phf5a    | PHD finger-   | 2   | 52.3  | 71.0  | 77.4  | 0.7 | 0.68 | 1.48 | 104.6   | 141.9   | 172.8   | 0.7 | 0.61 | 1.65 |
| Q77QI3_OT Otub1    | Ubiquitin t   | 3   | 5.7   | 7.8   | 8.5   | 0.7 | 0.68 | 1.48 | 23.6    | 23.6    | 28.7    | 1.0 | 0.82 | 1.21 |
| Q81157_U' Ubp1     | Upstream-t    | 1   | 14.1  | 19.2  | 20.9  | 0.7 | 0.67 | 1.48 | 14.1    | 19.2    | 23.3    | 0.7 | 0.60 | 1.65 |
| Q8VC70_RI Rbms2    | RNA-bindin    | 4   | 21.2  | 28.8  | 31.5  | 0.7 | 0.67 | 1.48 | 95.4    | 120.6   | 146.8   | 0.8 | 0.65 | 1.54 |
| Q80U70_S' Suz12    | Polycomb j    | 8   | 12.3  | 16.8  | 18.3  | 0.7 | 0.67 | 1.49 | 165.7   | 118.0   | 143.6   | 1.4 | 1.15 | 0.87 |
| Q6ZVW3_R Rpl10     | 60S ribosor   | 15  | 35.4  | 48.3  | 52.7  | 0.7 | 0.67 | 1.49 | 963.9   | 1034.7  | 1259.4  | 0.9 | 0.77 | 1.31 |
| P43276_H' Hist1h1b | Histone H1    | 16  | 45.8  | 62.5  | 68.2  | 0.7 | 0.67 | 1.49 | 5859.4  | 3276.2  | 3987.6  | 1.8 | 1.47 | 0.68 |
| Q3U1J4_D' Ddb1     | DNA damag     | 23  | 11.4  | 15.6  | 17.0  | 0.7 | 0.67 | 1.49 | 432.1   | 345.2   | 420.2   | 1.3 | 1.03 | 0.97 |
| O08788_D' Dctn1    | Dynactin su   | 43  | 14.0  | 19.2  | 21.0  | 0.7 | 0.67 | 1.49 | 953.8   | 873.3   | 1062.9  | 1.1 | 0.90 | 1.11 |
| Q9CYR0_S5 Ssbp1    | Single-strar  | 1   | 8.3   | 11.4  | 12.4  | 0.7 | 0.67 | 1.49 | 8.3     | 11.4    | 13.9    | 0.7 | 0.60 | 1.67 |
| A2AGH6_N' Med12    | Mediator o    | 3   | 8.6   | 11.8  | 12.8  | 0.7 | 0.67 | 1.49 | 24.2    | 32.2    | 39.2    | 0.7 | 0.62 | 1.62 |
| Q6PDD0_P' Phldb1   | Pleckstrin f  | 1   | 4.3   | 5.8   | 6.4   | 0.7 | 0.67 | 1.50 | 4.3     | 5.8     | 7.1     | 0.7 | 0.60 | 1.67 |
| Q9QYS9_Q' Qki      | Protein qu:   | 5   | 9.6   | 13.2  | 14.4  | 0.7 | 0.67 | 1.50 | 61.0    | 76.3    | 92.9    | 0.8 | 0.66 | 1.52 |
| Q3TIV5_ZC Zc3h15   | Zinc finger I | 8   | 12.9  | 17.7  | 19.3  | 0.7 | 0.67 | 1.50 | 180.4   | 181.2   | 220.6   | 1.0 | 0.82 | 1.22 |
| E9QAP7_ES Taf4a    | Protein Taf   | 3   | 8.6   | 11.9  | 12.9  | 0.7 | 0.67 | 1.50 | 29.1    | 44.7    | 54.5    | 0.7 | 0.54 | 1.87 |
| Q924C6_L' LoxL4    | Lysyl oxid:   | 3   | 11.4  | 15.7  | 17.2  | 0.7 | 0.66 | 1.51 | 41.8    | 48.2    | 58.7    | 0.9 | 0.71 | 1.40 |
| Q80X14_P' Pip4k2b  | Phosphatid    | 1   | 2.8   | 3.8   | 4.2   | 0.7 | 0.66 | 1.51 | 2.8     | 3.8     | 4.7     | 0.7 | 0.59 | 1.68 |
| Q80YQ2_M' Med23    | Mediator o    | 6   | 10.0  | 13.9  | 15.1  | 0.7 | 0.66 | 1.51 | 57.4    | 78.1    | 95.0    | 0.7 | 0.60 | 1.66 |
| Q9WV92_E' Epb4113  | Band 4.1-HI   | 5   | 6.5   | 9.1   | 9.9   | 0.7 | 0.66 | 1.51 | 52.2    | 38.4    | 46.7    | 1.4 | 1.12 | 0.90 |
| P14602_H' Hspb1    | Heat shock    | 11  | 16.2  | 22.6  | 24.6  | 0.7 | 0.66 | 1.52 | 352.5   | 482.0   | 586.6   | 0.7 | 0.60 | 1.66 |
| O09000_N' Ncoas3   | Nuclear rec   | 1   | 2.2   | 3.0   | 3.3   | 0.7 | 0.66 | 1.52 | 2.2     | 3.0     | 3.7     | 0.7 | 0.59 | 1.69 |
| A2RTL5_RS Rsrc2    | Arginine/se   | 7   | 13.9  | 19.4  | 21.2  | 0.7 | 0.66 | 1.52 | 211.0   | 182.3   | 221.8   | 1.2 | 0.95 | 1.05 |
| Q8K327_C1 Champ1   | Chromosor     | 12  | 6.7   | 9.3   | 10.1  | 0.7 | 0.66 | 1.52 | 109.7   | 128.4   | 156.3   | 0.9 | 0.70 | 1.42 |
| O56925_D' Ddx46    | Probable A'   | 33  | 19.1  | 26.6  | 29.1  | 0.7 | 0.66 | 1.52 | 1104.9  | 1138.0  | 1385.1  | 1.0 | 0.80 | 1.25 |
| Q8C156_C' Ncapd    | Condensin     | 12  | 23.8  | 33.3  | 36.3  | 0.7 | 0.66 | 1.52 | 423.2   | 365.6   | 445.0   | 1.2 | 0.95 | 1.05 |
| Q9Z2W0_C' Dnpep    | Aspartyl arr  | 16  | 13.7  | 19.2  | 20.9  | 0.7 | 0.66 | 1.52 | 350.5   | 353.0   | 429.7   | 1.0 | 0.82 | 1.23 |
| Q99NB9_S' Sfb3b1   | Splicing fac  | 58  | 13.9  | 19.4  | 21.2  | 0.7 | 0.66 | 1.52 | 1952.0  | 1636.7  | 1992.1  | 1.2 | 0.98 | 1.02 |
| Q9CSH3_RI Dis3     | Exosome cc    | 31  | 10.8  | 15.2  | 16.5  | 0.7 | 0.65 | 1.53 | 378.8   | 560.3   | 682.0   | 0.7 | 0.56 | 1.80 |
| Q62167_D' Ddx3x    | ATP-depenc    | 57  | 31.7  | 44.4  | 48.5  | 0.7 | 0.65 | 1.53 | 4873.9  | 4248.9  | 5171.6  | 1.1 | 0.94 | 1.06 |
| Q8BFQ4_U' Wdr82    | WD repeat-    | 4   | 10.9  | 15.2  | 16.6  | 0.7 | 0.65 | 1.53 | 192.5   | 88.4    | 107.6   | 2.2 | 1.79 | 0.56 |
| Q99K48_N' Nono     | Non-POU d     | 17  | 22.1  | 31.1  | 33.9  | 0.7 | 0.65 | 1.53 | 560.1   | 733.5   | 892.8   | 0.8 | 0.63 | 1.59 |
| Q91XUO_U' Wrnrip1  | ATPase WRI    | 5   | 12.6  | 17.7  | 19.4  | 0.7 | 0.65 | 1.54 | 69.0    | 72.1    | 87.7    | 1.0 | 0.79 | 1.27 |
| Q9ER69_FL Wtap     | Pre-mRNA-     | 4   | 7.5   | 10.6  | 11.6  | 0.7 | 0.65 | 1.54 | 31.1    | 43.9    | 53.4    | 0.7 | 0.58 | 1.72 |
| Q8BIA4_FB Fbxw8    | F-box/WD r    | 1   | 4.5   | 6.4   | 6.9   | 0.7 | 0.65 | 1.54 | 4.5     | 6.4     | 7.7     | 0.7 | 0.58 | 1.72 |
| Q9D8Y0_EF Ehd2     | EF-hand do    | 3   | 4.2   | 5.9   | 6.4   | 0.7 | 0.65 | 1.54 | 19.0    | 20.5    |         |     |      |      |

|                    |               |    |      |      |      |     |      |      |        |        |        |     |      |      |
|--------------------|---------------|----|------|------|------|-----|------|------|--------|--------|--------|-----|------|------|
| Q9ETS4_PA Pallid   | Palladin OS   | 6  | 6.9  | 10.0 | 10.9 | 0.7 | 0.63 | 1.59 | 54.4   | 60.2   | 73.3   | 0.9 | 0.74 | 1.35 |
| O54724_P1 Ptf      | Polymerase    | 17 | 35.6 | 51.8 | 56.5 | 0.7 | 0.63 | 1.59 | 739.4  | 1034.2 | 1258.8 | 0.7 | 0.59 | 1.70 |
| Q8VEM8_N_Slc25a3   | Phosphate     | 2  | 8.0  | 11.6 | 12.7 | 0.7 | 0.63 | 1.59 | 16.0   | 23.2   | 28.3   | 0.7 | 0.56 | 1.77 |
| E9QNF5_E5 Fmr1     | Fragile X m   | 10 | 7.9  | 11.4 | 12.5 | 0.7 | 0.63 | 1.59 | 88.0   | 138.6  | 168.7  | 0.6 | 0.52 | 1.92 |
| Q9J118_LRI Lrp1b   | Low-densit    | 1  | 9.7  | 14.2 | 15.4 | 0.7 | 0.63 | 1.59 | 9.7    | 14.2   | 17.2   | 0.7 | 0.56 | 1.77 |
| Q8BUH8_S1 Senp7    | Sentrin-spe   | 1  | 5.0  | 7.3  | 8.0  | 0.7 | 0.63 | 1.59 | 5.0    | 7.3    | 8.9    | 0.7 | 0.56 | 1.77 |
| Q9JIK5_DD Ddx21    | Nucleolar R   | 51 | 29.1 | 42.4 | 46.3 | 0.7 | 0.63 | 1.59 | 2823.6 | 3401.5 | 4140.2 | 0.8 | 0.68 | 1.47 |
| Q9DC48_P1 Cdc40    | Pre-mRNA-i    | 8  | 9.5  | 13.9 | 15.2 | 0.7 | 0.63 | 1.59 | 73.1   | 107.1  | 130.4  | 0.7 | 0.56 | 1.78 |
| Q61656_DI Ddx5     | Probable A'   | 47 | 36.1 | 52.7 | 57.5 | 0.7 | 0.63 | 1.59 | 2612.8 | 3866.9 | 4706.6 | 0.7 | 0.56 | 1.80 |
| Q60605_M Myf6      | Myosin ligh   | 14 | 57.1 | 83.6 | 91.2 | 0.7 | 0.63 | 1.60 | 3899.3 | 3654.6 | 4448.2 | 1.1 | 0.88 | 1.14 |
| Q6PFA2_Q1 Clta     | Clathrin lig  | 3  | 12.4 | 18.2 | 19.9 | 0.7 | 0.63 | 1.60 | 37.1   | 46.8   | 57.0   | 0.8 | 0.65 | 1.54 |
| Q8BZ4_P1 Pogz      | Pogo transp   | 15 | 12.4 | 18.1 | 19.8 | 0.7 | 0.62 | 1.60 | 173.6  | 276.8  | 336.9  | 0.6 | 0.52 | 1.94 |
| O88569_R Hrnnpa2b1 | Heterogene    | 26 | 31.2 | 45.8 | 50.0 | 0.7 | 0.62 | 1.60 | 1658.9 | 1762.8 | 2145.7 | 0.9 | 0.77 | 1.29 |
| Q6PHZ2_K1 Camk2d   | Calcium/ca    | 21 | 15.5 | 22.8 | 24.8 | 0.7 | 0.62 | 1.60 | 384.1  | 487.8  | 593.7  | 0.8 | 0.65 | 1.55 |
| O35286_DI Dhx15    | Putative pr   | 34 | 15.8 | 23.3 | 25.4 | 0.7 | 0.62 | 1.61 | 1313.1 | 1100.8 | 1339.8 | 1.2 | 0.98 | 1.02 |
| Q9D6F9_T1 Tubb4a   | Tubulin bet   | 10 | 38.1 | 56.4 | 61.5 | 0.7 | 0.62 | 1.61 | 432.4  | 886.9  | 1079.5 | 0.5 | 0.40 | 2.50 |
| S4R1W5_S Rbm6      | Protein Rbr   | 4  | 7.0  | 10.4 | 11.3 | 0.7 | 0.62 | 1.62 | 27.4   | 42.6   | 51.9   | 0.6 | 0.53 | 1.89 |
| Q9Z130_HI Hrnnpdl  | Heterogene    | 9  | 8.5  | 12.6 | 13.8 | 0.7 | 0.62 | 1.62 | 324.0  | 500.4  | 609.1  | 0.6 | 0.53 | 1.88 |
| P24668_M M6pr      | Cation-dep    | 1  | 2.9  | 4.3  | 4.7  | 0.7 | 0.62 | 1.62 | 2.9    | 4.3    | 5.2    | 0.7 | 0.55 | 1.80 |
| Q91VC3_IF Eif4a3   | Eukaryotic    | 31 | 29.0 | 43.1 | 47.1 | 0.7 | 0.62 | 1.62 | 1252.2 | 1997.9 | 2431.8 | 0.6 | 0.51 | 1.94 |
| P97434_M Mprp      | Myosin phc    | 4  | 5.3  | 7.8  | 8.6  | 0.7 | 0.61 | 1.63 | 20.3   | 34.4   | 41.8   | 0.6 | 0.49 | 2.06 |
| P46638_RF Rab11b   | Ras-related   | 10 | 19.7 | 29.7 | 32.9 | 0.7 | 0.61 | 1.64 | 347.3  | 476.2  | 579.6  | 0.7 | 0.60 | 1.67 |
| Q8R278_TF Gtf3c5   | General tra   | 2  | 6.6  | 10.0 | 10.3 | 0.7 | 0.61 | 1.64 | 13.3   | 20.0   | 24.3   | 0.7 | 0.55 | 1.83 |
| P33609_DI Pola1    | DNA polym     | 16 | 13.2 | 19.8 | 21.6 | 0.7 | 0.61 | 1.64 | 290.0  | 274.5  | 334.1  | 1.1 | 0.87 | 1.15 |
| Q9D787_P1 Ppil2    | Peptidyl-pr   | 7  | 6.8  | 10.2 | 11.2 | 0.7 | 0.61 | 1.64 | 55.9   | 87.4   | 106.4  | 0.6 | 0.53 | 1.90 |
| Q60848_HI Hells    | Lymphocyt     | 10 | 13.9 | 21.0 | 22.9 | 0.7 | 0.61 | 1.65 | 160.0  | 215.9  | 262.8  | 0.7 | 0.61 | 1.64 |
| Q8CB54_M Myef2     | Myelin expr   | 33 | 14.4 | 21.7 | 23.6 | 0.7 | 0.61 | 1.65 | 859.9  | 1293.7 | 1574.7 | 0.7 | 0.55 | 1.83 |
| Q9CQP2_T1 Trappc2  | Trafficking j | 1  | 2.4  | 3.6  | 3.9  | 0.7 | 0.61 | 1.65 | 2.4    | 3.6    | 4.3    | 0.7 | 0.54 | 1.84 |
| P17742_P1 Ppia     | Peptidyl-pr   | 1  | 7.4  | 11.3 | 12.3 | 0.7 | 0.61 | 1.65 | 7.4    | 11.3   | 13.7   | 0.7 | 0.54 | 1.84 |
| A2AMM0_J Murc      | Muscle-rela   | 5  | 7.8  | 11.9 | 12.9 | 0.7 | 0.61 | 1.65 | 44.2   | 72.2   | 87.9   | 0.6 | 0.50 | 1.99 |
| Q8R2U4_N Ntm1      | N-terminal    | 3  | 6.2  | 9.4  | 10.3 | 0.7 | 0.60 | 1.65 | 34.5   | 36.2   | 44.1   | 1.0 | 0.78 | 1.28 |
| P47930_FC Fosl2    | Fos-related   | 2  | 9.7  | 14.7 | 16.0 | 0.7 | 0.60 | 1.66 | 19.3   | 29.4   | 35.8   | 0.7 | 0.54 | 1.85 |
| P63017_H1 Hspa8    | Heat shock    | 56 | 25.8 | 39.3 | 42.9 | 0.7 | 0.60 | 1.66 | 2679.4 | 3094.9 | 3767.0 | 0.9 | 0.71 | 1.41 |
| P37889_EF Fbln2    | Fibulin-2 O   | 12 | 18.7 | 28.5 | 31.1 | 0.7 | 0.60 | 1.67 | 335.6  | 404.3  | 492.2  | 0.8 | 0.68 | 1.47 |
| P62204_C1 Calm1    | Calmodulir    | 9  | 8.6  | 13.1 | 14.3 | 0.7 | 0.60 | 1.67 | 213.1  | 272.5  | 331.7  | 0.8 | 0.64 | 1.56 |
| Q8R015_B1 Bloct15  | Biogenesis i  | 3  | 5.2  | 7.9  | 8.6  | 0.7 | 0.60 | 1.67 | 25.6   | 30.8   | 37.4   | 0.8 | 0.68 | 1.46 |
| Q9Z2N8_A1 Actl6a   | Actin-like e  | 7  | 22.9 | 35.1 | 38.3 | 0.7 | 0.60 | 1.67 | 177.7  | 380.3  | 462.9  | 0.5 | 0.38 | 2.61 |
| Q8R1A4_D1 Dock7    | Dedicator c   | 15 | 12.1 | 18.6 | 20.3 | 0.7 | 0.60 | 1.68 | 261.7  | 277.2  | 337.3  | 0.9 | 0.78 | 1.29 |
| Q91W50_C1 Csd1     | Cold shock    | 5  | 10.3 | 15.9 | 17.4 | 0.6 | 0.60 | 1.68 | 70.1   | 68.0   | 82.8   | 1.0 | 0.85 | 1.18 |
| P97465_D1 Dok1     | Docking pri   | 2  | 4.5  | 6.9  | 7.5  | 0.6 | 0.59 | 1.69 | 8.9    | 13.8   | 16.8   | 0.6 | 0.53 | 1.88 |
| Q9D8X5_C1 Cnot8    | CCR4-NOT1     | 1  | 5.7  | 8.8  | 9.6  | 0.6 | 0.59 | 1.69 | 5.7    | 8.8    | 10.7   | 0.6 | 0.53 | 1.88 |
| O89079_C1 Cope     | Coatome r     | 6  | 10.9 | 16.8 | 18.3 | 0.6 | 0.59 | 1.69 | 55.6   | 112.6  | 137.0  | 0.5 | 0.41 | 2.46 |
| Q00417_T1 Tcf7     | Transcripti   | 1  | 1.4  | 2.2  | 2.4  | 0.6 | 0.59 | 1.69 | 1.4    | 2.2    | 2.7    | 0.6 | 0.53 | 1.89 |
| Q99195_C1 Cdk9     | Cyclin-depr   | 6  | 5.8  | 9.0  | 9.9  | 0.6 | 0.59 | 1.69 | 49.8   | 50.6   | 61.6   | 1.0 | 0.81 | 1.24 |
| P42669_P1 Pura     | Transcripti   | 13 | 13.4 | 20.7 | 22.6 | 0.6 | 0.59 | 1.69 | 272.7  | 528.0  | 642.7  | 0.5 | 0.42 | 2.36 |
| Q3UR00_T1 Tex10    | Testis-expr   | 7  | 6.5  | 10.1 | 11.0 | 0.6 | 0.59 | 1.69 | 50.1   | 73.2   | 89.1   | 0.7 | 0.56 | 1.78 |
| P29391_FF Ftfl     | Ferritin lig  | 1  | 2.2  | 3.4  | 3.7  | 0.6 | 0.59 | 1.70 | 2.2    | 3.4    | 4.2    | 0.6 | 0.53 | 1.89 |
| Q6ZW09_C1 Myl12a   | MCG5400 (     | 12 | 34.9 | 54.3 | 59.3 | 0.6 | 0.59 | 1.70 | 1158.1 | 2475.9 | 3013.5 | 0.5 | 0.38 | 2.60 |
| Q9WTK5_N Nfkb2     | Nuclear fac   | 6  | 6.4  | 10.0 | 10.9 | 0.6 | 0.59 | 1.70 | 36.0   | 65.1   | 79.3   | 0.6 | 0.45 | 2.20 |
| Q6PDD2_C1 Chd4     | Chromodoi     | 82 | 14.0 | 21.8 | 23.8 | 0.6 | 0.59 | 1.70 | 2175.2 | 2699.5 | 3285.8 | 0.8 | 0.66 | 1.51 |
| Q5FWK3_R Arhgap1   | Rho GTPase    | 6  | 7.6  | 11.8 | 12.8 | 0.6 | 0.59 | 1.70 | 68.7   | 87.0   | 105.9  | 0.8 | 0.65 | 1.54 |
| Q8BH78_C1 Rtna     | RTN4 OS-M     | 7  | 11.9 | 18.6 | 20.3 | 0.6 | 0.59 | 1.70 | 177.1  | 195.2  | 237.6  | 0.9 | 0.75 | 1.34 |
| Q9ESV0_D1 Ddx24    | ATP-depenc    | 2  | 5.5  | 8.6  | 9.4  | 0.6 | 0.59 | 1.70 | 11.0   | 17.3   | 21.0   | 0.6 | 0.53 | 1.90 |
| Q9DB42_Z1 Znf593   | Zinc finger j | 1  | 7.2  | 11.2 | 12.2 | 0.6 | 0.59 | 1.70 | 7.2    | 11.2   | 13.6   | 0.6 | 0.53 | 1.90 |
| P58468_F2 Fam207a  | Protein FAM   | 2  | 6.6  | 10.4 | 11.3 | 0.6 | 0.59 | 1.71 | 13.2   | 20.7   | 25.2   | 0.6 | 0.53 | 1.90 |
| Q6P458_IN Ints1    | Integrator c  | 4  | 7.5  | 11.7 | 12.8 | 0.6 | 0.59 | 1.71 | 30.2   | 46.2   | 56.2   | 0.7 | 0.54 | 1.86 |
| B2M1R6_B Hrnnpk    | Heterogene    | 57 | 33.9 | 53.1 | 57.9 | 0.6 | 0.59 | 1.71 | 8267.2 | 7792.8 | 9485.2 | 1.1 | 0.87 | 1.15 |
| Q9JKP8_C1 Chrac1   | Chromatin     | 2  | 15.4 | 24.2 | 26.4 | 0.6 | 0.58 | 1.71 | 30.8   | 48.4   | 58.9   | 0.6 | 0.52 | 1.91 |
| G5E8R1_G1 Tpm1     | Tropomyos     | 15 | 27.3 | 42.8 | 46.7 | 0.6 | 0.58 | 1.71 | 1041.3 | 767.9  | 934.7  | 1.4 | 1.11 | 0.90 |
| P61164_A1 Actr1a   | Alpha-centi   | 4  | 8.9  | 14.1 | 15.3 | 0.6 | 0.58 | 1.71 | 48.1   | 70.3   | 85.6   | 0.7 | 0.56 | 1.78 |
| Q8K019_B1 Bclaf1   | Bcl-2-assoc   | 22 | 12.0 | 18.8 | 20.5 | 0.6 | 0.58 | 1.72 | 462.5  | 740.4  | 901.2  | 0.6 | 0.51 | 1.95 |
| Q8VE97_SF Srsf4    | Serine/argi   | 9  | 24.3 | 38.3 | 41.8 | 0.6 | 0.58 | 1.72 | 281.6  | 655.8  | 798.3  | 0.4 | 0.35 | 2.84 |
| P52480_KF Pkm      | Pyruvate ki   | 5  | 9.0  | 14.2 | 15.5 | 0.6 | 0.58 | 1.72 | 57.6   | 55.1   | 67.0   | 1.0 | 0.86 | 1.16 |
| Q00PI9_HH Hrnnpul2 | Heterogene    | 28 | 17.8 | 28.0 | 30.5 | 0.6 | 0.58 | 1.72 | 834.5  | 1140.9 | 1388.7 | 0.7 | 0.60 | 1.66 |
| Q8R081_HI Hrnnp1   | Heterogene    | 27 | 15.3 | 24.2 | 26.5 | 0.6 | 0.58 | 1.72 | 754.8  | 797.2  | 970.3  | 0.9 | 0.78 | 1.29 |
| Q9EQM6_C Dgcr8     | Microproci    | 1  | 10.2 | 16.0 | 17.5 | 0.6 | 0.58 | 1.72 | 10.2   | 16.0   | 19.5   | 0.6 | 0.52 | 1.92 |
| P30051_TE Tead1    | Transcripti   | 1  | 12.7 | 20.0 | 21.9 | 0.6 | 0.58 | 1.73 | 12.7   | 20.0   | 24.4   | 0.6 | 0.52 | 1.93 |
| Q62318_T1 Trim28   | Transcripti   | 68 | 21.5 | 34.1 | 37.2 | 0.6 | 0.58 | 1.73 | 3454.4 | 4822.3 | 5869.5 | 0.7 | 0.59 | 1.70 |
| Q8CH18_O1 Ccar1    | Cell division | 11 | 9.0  | 14.2 | 15.5 | 0.6 | 0.58 | 1.73 | 169.3  | 200.8  | 244.4  | 0.8 | 0.69 | 1.44 |
| Q9JLB0_M1 Mpp6     | MAGUK p5'     | 7  | 5.7  | 9.0  | 9.8  | 0.6 | 0.58 | 1.73 | 74.6   | 60.9   | 74.1   | 1.2 | 1.01 | 0.99 |
| Q8K298_A1 Anln     | Actin-bindi   | 13 | 7.7  | 12.3 | 13.4 | 0.6 | 0.58 | 1.73 | 106.8  | 161.8  | 196.9  | 0.7 | 0.54 | 1.84 |
| Q9ERGO_L1 Lima1    | LIM domai     | 10 | 9.6  | 15.3 | 16.7 | 0.6 | 0.58 | 1.74 | 115.3  | 168.9  | 205.6  | 0.7 | 0.56 | 1.78 |
| Q9Z2D6_M1 Mecp2    | Methyl-CpC    | 9  | 9.3  | 14.8 | 16.1 | 0.6 | 0.58 | 1.74 | 102.8  | 148.2  | 180.4  | 0.7 | 0.57 | 1.75 |
| Q8C714_Q8 Apo19b   | Protein Apr   | 4  | 15.1 | 24.0 | 26.2 | 0.6 | 0.58 | 1.74 | 65.0   | 121.3  | 147.6  | 0.5 | 0.44 | 2.27 |
| Q810D6_G1 Grwd1    | Glutamate-    | 6  | 6.9  | 11.0 | 12.0 | 0.6 | 0.58 | 1.74 | 74.4   | 72.2   | 87.8   | 1.0 | 0.85 | 1.18 |
| P56399_U1 Usp5     | Ubiquitin c   | 7  | 8.2  | 13.1 | 14.3 | 0.6 | 0.58 | 1.74 | 65.2   | 86.0   | 104.6  | 0.8 | 0.62 | 1.60 |
| Q9Z277_T1 Baz1b    | Tyrosine-pr   | 63 | 12.9 | 20.7 | 22.5 | 0.6 | 0.57 | 1.74 | 1113.1 | 1479.8 | 1801.2 | 0.8 | 0.62 | 1.62 |
| O08582_G1 Gtbbp1   | GTP-bindin    | 7  | 9.0  | 14.4 | 15.7 | 0.6 | 0.57 | 1.74 | 149.5  | 87.5   | 106.5  | 0.7 | 1.40 | 0.71 |
| B2RY56_RB Rbm25    | RNA-bindin    | 15 | 11.8 | 18.8 | 20.5 | 0.6 | 0.57 | 1.74 | 298.6  | 485.4  | 590.8  | 0.6 | 0.51 | 1.98 |
| B1ARD6_B1 Sifn9    | Protein Sifn  | 7  | 9.5  | 15.2 | 16.6 | 0.6 | 0.57 | 1.74 | 458.5  | 118.2  | 143.8  | 3.9 | 3.19 | 0.31 |
| P15066_JL Jund     | Transcripti   | 2  | 6.3  | 10.1 | 11.1 | 0.6 | 0.57 | 1.75 | 12.7   | 20.3   | 24.7   | 0.6 | 0.51 | 1.95 |
| Q9QXS1_P1 Plect    | Plectin OS-   | 14 | 4.9  | 7.8  | 8.5  | 0.6 | 0.57 | 1.75 | 100.1  | 157.4  | 191.6  | 0.6 | 0.52 | 1.91 |
| Q3UM18_L1 Lsg1     | Large substr  | 2  | 6.6  | 10.6 | 11.6 | 0.6 | 0.57 | 1.75 | 13.3   | 21.3   | 25.9   | 0.6 | 0.51 | 1.95 |
| Q9D670_N1 Nosip    | Nitric oxid   | 2  | 10.4 | 16.7 | 18.3 | 0.6 | 0.57 | 1.75 | 20.9   | 33.5   | 40.8   | 0.6 | 0.51 | 1.95 |
| Q5U4D9_T1 Thoc6    | THO compl     | 5  | 9.3  | 15.0 | 16.4 | 0.6 | 0.57 | 1.75 | 87.5   | 62.7   | 76.3   | 1.4 | 1.15 | 0.87 |
| Q64127_T1 Trim24   | Transcripti   | 2  | 5.0  | 8.0  | 8.7  | 0.6 | 0.57 | 1.75 | 10.0   | 16.0   | 19.5   | 0.6 | 0.51 | 1.96 |
| E9QNN1_E1 Dhx9     | ATP-depenc    | 88 | 35.7 | 57.4 | 62.6 | 0.6 | 0.57 | 1.75 | 4877.1 | 7894.6 | 9609.0 | 0.6 | 0.51 | 1.97 |



|                      |               |     |      |      |      |     |      |      |        |         |         |     |      |      |
|----------------------|---------------|-----|------|------|------|-----|------|------|--------|---------|---------|-----|------|------|
| Q8VIJ6_SFF5fpq       | Splicing fac  | 11  | 25.6 | 42.5 | 46.4 | 0.6 | 0.55 | 1.81 | 429.5  | 461.5   | 561.7   | 0.9 | 0.76 | 1.31 |
| Q05C8L_LA Larp7      | La-related f  | 11  | 10.8 | 17.9 | 19.6 | 0.6 | 0.55 | 1.82 | 227.3  | 206.3   | 251.1   | 1.1 | 0.91 | 1.10 |
| Q9CQZ1_H Hsbp1       | Heat shock    | 1   | 2.6  | 4.3  | 4.7  | 0.6 | 0.55 | 1.82 | 2.6    | 4.3     | 5.2     | 0.6 | 0.49 | 2.03 |
| Q8BWT3_E Exosc6      | Exosome cc    | 3   | 4.6  | 7.7  | 8.4  | 0.6 | 0.55 | 1.82 | 21.6   | 22.1    | 27.0    | 1.0 | 0.80 | 1.25 |
| Q60953_P1 Pml        | Protein PM    | 10  | 7.5  | 12.5 | 13.6 | 0.6 | 0.55 | 1.82 | 79.5   | 136.5   | 166.1   | 0.6 | 0.48 | 2.09 |
| Q99PL6_UI Ubxn6      | UBX domai     | 3   | 7.5  | 12.5 | 13.7 | 0.6 | 0.55 | 1.83 | 36.2   | 27.8    | 33.8    | 1.3 | 1.07 | 0.93 |
| E9PYH6_E9 Setd1a     | Protein Set   | 7   | 6.5  | 11.0 | 12.0 | 0.6 | 0.55 | 1.83 | 66.1   | 94.4    | 114.9   | 0.7 | 0.58 | 1.74 |
| Q60596_X1 Xrcc1      | DNA repair    | 5   | 12.5 | 21.0 | 22.9 | 0.6 | 0.55 | 1.83 | 77.4   | 105.2   | 128.0   | 0.7 | 0.60 | 1.65 |
| Q9DCD2_S Xab2        | Pre-mRNA-     | 14  | 7.9  | 13.2 | 14.4 | 0.6 | 0.55 | 1.83 | 126.1  | 174.2   | 212.1   | 0.7 | 0.59 | 1.68 |
| Q92114_UI Ube2s      | Ubiquitin-c   | 3   | 4.4  | 7.4  | 8.1  | 0.6 | 0.55 | 1.83 | 16.6   | 31.9    | 38.8    | 0.5 | 0.43 | 2.33 |
| Q8BG81_P1 Poldip3    | Polymerase    | 8   | 9.8  | 16.5 | 18.0 | 0.6 | 0.54 | 1.84 | 123.0  | 133.8   | 162.8   | 0.9 | 0.76 | 1.32 |
| Q9CQD1_R Rab5a       | Ras-related   | 3   | 15.7 | 26.5 | 28.9 | 0.6 | 0.54 | 1.84 | 77.7   | 86.4    | 105.2   | 0.9 | 0.74 | 1.35 |
| Q9CZH3_P1 Psmg3      | Proteasom     | 1   | 1.7  | 2.9  | 3.2  | 0.6 | 0.54 | 1.84 | 1.7    | 2.9     | 3.5     | 0.6 | 0.49 | 2.05 |
| Q7TQK1_IN Ints7      | Integrator c  | 3   | 5.7  | 9.6  | 10.5 | 0.6 | 0.54 | 1.84 | 23.6   | 25.4    | 30.9    | 0.9 | 0.76 | 1.31 |
| Q62093_SF Srsf2      | Serine/argi   | 4   | 22.5 | 38.1 | 41.6 | 0.6 | 0.54 | 1.84 | 94.7   | 187.9   | 228.7   | 0.5 | 0.41 | 2.42 |
| P60335_PC Pcbp1      | Poly(rC)-bir  | 28  | 19.8 | 33.8 | 36.9 | 0.6 | 0.54 | 1.86 | 1880.5 | 1973.7  | 2402.3  | 1.0 | 0.78 | 1.28 |
| Q8BP48_M Metap1      | Methionine    | 2   | 7.0  | 11.9 | 13.0 | 0.6 | 0.54 | 1.86 | 14.0   | 23.8    | 29.0    | 0.6 | 0.48 | 2.07 |
| Q3U319_B1 Rnf40      | E3 ubiquiti   | 4   | 6.4  | 11.0 | 12.0 | 0.6 | 0.53 | 1.87 | 26.5   | 43.7    | 53.3    | 0.6 | 0.50 | 2.01 |
| P26369_U; U2af2      | Splicing fac  | 8   | 13.6 | 23.4 | 25.5 | 0.6 | 0.53 | 1.88 | 244.6  | 221.2   | 269.2   | 1.1 | 0.91 | 1.10 |
| Q99L20_Q; Gstt3      | Glutathion    | 1   | 2.1  | 3.6  | 3.9  | 0.6 | 0.53 | 1.88 | 2.1    | 3.6     | 4.4     | 0.6 | 0.48 | 2.09 |
| A6H8H2_D Dendnd4c    | DENN dom-     | 2   | 12.5 | 21.6 | 23.5 | 0.6 | 0.53 | 1.88 | 25.1   | 43.2    | 52.5    | 0.6 | 0.48 | 2.09 |
| P62915_TF Gtf2b      | Transcripti   | 9   | 5.4  | 9.4  | 10.2 | 0.6 | 0.53 | 1.88 | 82.5   | 82.3    | 100.1   | 1.0 | 0.82 | 1.21 |
| Q8BNY6_N Ncs1        | Neuronal ci   | 1   | 6.2  | 10.8 | 11.7 | 0.6 | 0.53 | 1.88 | 6.2    | 10.8    | 13.1    | 0.6 | 0.48 | 2.10 |
| Q8BMC4_N Nop9        | Nucleolar p   | 4   | 6.1  | 10.6 | 11.6 | 0.6 | 0.53 | 1.89 | 36.7   | 52.1    | 63.4    | 0.7 | 0.58 | 1.73 |
| Q8BP92_R Rcn2        | Reticulocal   | 4   | 4.5  | 7.8  | 8.5  | 0.6 | 0.53 | 1.89 | 38.7   | 40.1    | 48.7    | 1.0 | 0.79 | 1.26 |
| Q61164_C; Ctcf       | Transcripti   | 4   | 15.2 | 26.3 | 28.7 | 0.6 | 0.53 | 1.89 | 75.9   | 97.7    | 118.9   | 0.8 | 0.64 | 1.57 |
| Q6ZQ73_C; Cand2      | Cullin-ass    | 2   | 7.1  | 12.3 | 13.4 | 0.6 | 0.53 | 1.89 | 14.1   | 24.5    | 29.9    | 0.6 | 0.47 | 2.11 |
| Q8R3B7_B1 Brcd       | Bromodom      | 2   | 5.0  | 8.7  | 9.5  | 0.6 | 0.53 | 1.90 | 10.0   | 17.5    | 21.3    | 0.6 | 0.47 | 2.12 |
| P97311_M Mcm6        | DNA replica   | 62  | 21.3 | 37.1 | 40.5 | 0.6 | 0.53 | 1.90 | 2424.2 | 3195.0  | 3888.9  | 0.8 | 0.62 | 1.60 |
| Q9D621_N Nop56       | Nucleolar p   | 23  | 9.2  | 16.2 | 17.7 | 0.6 | 0.52 | 1.91 | 355.9  | 414.4   | 504.4   | 0.9 | 0.71 | 1.42 |
| Q9CQJ4_R1 Rnf2       | E3 ubiquiti   | 3   | 10.5 | 18.3 | 20.0 | 0.6 | 0.52 | 1.91 | 42.5   | 47.1    | 57.3    | 0.9 | 0.74 | 1.35 |
| P61967_A; Ap1s1      | AP-1 compl    | 2   | 7.7  | 13.5 | 14.7 | 0.6 | 0.52 | 1.92 | 15.3   | 27.0    | 32.8    | 0.6 | 0.47 | 2.14 |
| P11440_C; Cdk1       | Cyclin-depr   | 28  | 12.6 | 22.2 | 24.2 | 0.6 | 0.52 | 1.92 | 563.0  | 979.5   | 1192.3  | 0.6 | 0.47 | 2.12 |
| Q99JRS_T11 Tinagl1   | Tubulointe    | 1   | 5.4  | 9.5  | 10.3 | 0.6 | 0.52 | 1.92 | 5.4    | 9.5     | 11.5    | 0.6 | 0.47 | 2.14 |
| P49718_M Mcm5        | DNA replica   | 73  | 15.6 | 27.5 | 30.0 | 0.6 | 0.52 | 1.93 | 3145.7 | 3600.2  | 4382.0  | 0.9 | 0.72 | 1.39 |
| Q8VD24_Z; Zcchc18    | Zinc finger 1 | 1   | 22.1 | 39.1 | 42.7 | 0.6 | 0.52 | 1.93 | 22.1   | 39.1    | 47.6    | 0.6 | 0.46 | 2.15 |
| P63001_R; Rac1       | Ras-related   | 1   | 8.3  | 14.6 | 16.0 | 0.6 | 0.52 | 1.93 | 8.3    | 14.6    | 17.8    | 0.6 | 0.46 | 2.16 |
| Q2YDW2_H Msto1       | Protein mis   | 6   | 6.0  | 10.6 | 11.5 | 0.6 | 0.52 | 1.94 | 38.0   | 64.0    | 77.9    | 0.6 | 0.49 | 2.05 |
| Q61879_M Mth10       | Myosin-10     | 125 | 34.2 | 60.6 | 66.1 | 0.6 | 0.52 | 1.94 | 9296.0 | 10573.1 | 12869.2 | 0.9 | 0.72 | 1.38 |
| Q69299_Zh Sma3c5     | Zinc finger j | 8   | 5.5  | 9.9  | 10.8 | 0.6 | 0.52 | 1.94 | 80.9   | 130.5   | 158.8   | 0.6 | 0.51 | 1.96 |
| Q912W3_S Smarca5     | SWI/SNF-re    | 72  | 23.9 | 42.5 | 46.3 | 0.6 | 0.52 | 1.94 | 2650.1 | 3556.7  | 4329.0  | 0.7 | 0.61 | 1.63 |
| G5E870_TR Trip12     | E3 ubiquiti   | 19  | 8.5  | 15.1 | 16.5 | 0.6 | 0.51 | 1.94 | 314.4  | 349.3   | 425.2   | 0.9 | 0.74 | 1.35 |
| P49717_M Mcm4        | DNA replica   | 48  | 14.8 | 26.4 | 28.8 | 0.6 | 0.51 | 1.95 | 1616.3 | 2271.3  | 2764.5  | 0.7 | 0.58 | 1.71 |
| Q9CY14_LU Luc7l      | Putative RH   | 4   | 16.9 | 30.2 | 33.0 | 0.6 | 0.51 | 1.95 | 147.9  | 210.9   | 256.6   | 0.7 | 0.58 | 1.74 |
| Q3TID7_PC Pdlim7     | PDZ and LH    | 13  | 7.4  | 13.3 | 14.5 | 0.6 | 0.51 | 1.95 | 148.5  | 216.4   | 263.4   | 0.7 | 0.56 | 1.77 |
| P83887_T; Tubg1      | Tubulin gar   | 9   | 4.8  | 8.7  | 9.5  | 0.6 | 0.51 | 1.96 | 54.7   | 74.9    | 91.1    | 0.7 | 0.60 | 1.67 |
| Q9Z0Y1_D; Dctn3      | Dynactin su   | 7   | 24.1 | 43.4 | 47.3 | 0.6 | 0.51 | 1.96 | 399.3  | 314.1   | 382.3   | 1.3 | 1.04 | 0.96 |
| Q8CIM8_IN Ints4      | Integrator c  | 6   | 4.2  | 7.6  | 8.3  | 0.6 | 0.51 | 1.96 | 43.5   | 40.5    | 49.3    | 1.1 | 0.88 | 1.13 |
| D3Z420_D; Tada2b     | MCG49644      | 1   | 2.9  | 5.2  | 5.7  | 0.6 | 0.51 | 1.96 | 2.9    | 5.2     | 6.4     | 0.6 | 0.46 | 2.19 |
| Q80WQ2_V Vac14       | Protein VAF   | 5   | 16.8 | 30.2 | 33.0 | 0.6 | 0.51 | 1.96 | 256.8  | 142.6   | 173.6   | 1.8 | 1.48 | 0.68 |
| O70306_T; Tbx15      | T-box trans   | 1   | 3.5  | 6.2  | 6.8  | 0.6 | 0.51 | 1.97 | 3.5    | 6.2     | 7.6     | 0.6 | 0.46 | 2.19 |
| E9PWW9_I Rsf1        | Protein Rsf   | 12  | 10.3 | 18.6 | 20.3 | 0.6 | 0.51 | 1.97 | 162.6  | 247.0   | 300.7   | 0.7 | 0.54 | 1.85 |
| Q9CQB2_F; Fam195a    | Protein FAM   | 1   | 3.4  | 6.1  | 6.7  | 0.6 | 0.51 | 1.97 | 3.4    | 6.1     | 7.5     | 0.6 | 0.46 | 2.20 |
| Q35218_C; Cpsf2      | Cleavage an   | 11  | 6.3  | 11.4 | 12.5 | 0.6 | 0.51 | 1.97 | 93.3   | 122.7   | 149.3   | 0.8 | 0.62 | 1.60 |
| Q7TPM1_P; Prrc2b     | Protein PRF   | 1   | 5.3  | 9.6  | 10.4 | 0.6 | 0.51 | 1.98 | 5.3    | 9.6     | 11.6    | 0.6 | 0.45 | 2.21 |
| Q6PGL7_F; Fam21      | WASH com      | 11  | 5.6  | 10.2 | 11.2 | 0.5 | 0.50 | 1.98 | 96.6   | 100.2   | 121.9   | 1.0 | 0.79 | 1.26 |
| Q9CWG9_E; Bloct1s2   | Biogenesis i  | 1   | 6.1  | 11.0 | 12.0 | 0.5 | 0.50 | 1.98 | 6.1    | 11.0    | 13.4    | 0.5 | 0.45 | 2.21 |
| Q61749_E; Eif2b4     | Translation   | 11  | 5.7  | 10.5 | 11.4 | 0.5 | 0.50 | 1.99 | 72.3   | 132.6   | 161.4   | 0.5 | 0.45 | 2.23 |
| P46935_N; Nedd4      | E3 ubiquiti   | 17  | 7.0  | 12.7 | 13.9 | 0.5 | 0.50 | 2.00 | 184.2  | 219.3   | 266.9   | 0.8 | 0.69 | 1.45 |
| Q8K278_P; Paf1       | RNA polym     | 5   | 11.3 | 20.7 | 22.6 | 0.5 | 0.50 | 2.00 | 88.0   | 100.5   | 122.3   | 0.9 | 0.72 | 1.39 |
| Q02248_C; Ctnnb1     | Catenin bet   | 2   | 5.1  | 9.4  | 10.2 | 0.5 | 0.50 | 2.01 | 10.2   | 18.8    | 22.9    | 0.5 | 0.45 | 2.24 |
| A2A6A1_G; Gpatch8    | G patch doi   | 3   | 9.7  | 17.9 | 19.5 | 0.5 | 0.50 | 2.01 | 29.6   | 56.9    | 69.3    | 0.5 | 0.43 | 2.34 |
| P70255_N; Nfic       | Nuclear fac   | 4   | 3.1  | 5.7  | 6.2  | 0.5 | 0.50 | 2.01 | 16.9   | 20.1    | 24.5    | 0.8 | 0.69 | 1.45 |
| Q9D0D5_T; Gtf2e1     | General tra   | 3   | 4.7  | 8.6  | 9.4  | 0.5 | 0.50 | 2.01 | 13.6   | 31.6    | 38.5    | 0.4 | 0.35 | 2.82 |
| Q61286_H; Tcf12      | Transcripti   | 2   | 4.3  | 7.9  | 8.6  | 0.5 | 0.50 | 2.01 | 8.5    | 15.8    | 19.2    | 0.5 | 0.44 | 2.25 |
| A2BDX0_A; Adnp       | Activity-dej  | 21  | 7.9  | 14.6 | 16.0 | 0.5 | 0.50 | 2.02 | 208.0  | 390.1   | 474.9   | 0.5 | 0.44 | 2.28 |
| Q60865_C; Caprin1    | Caprin-1 O    | 23  | 20.1 | 37.4 | 40.8 | 0.5 | 0.49 | 2.03 | 1077.8 | 1297.9  | 1579.7  | 0.8 | 0.68 | 1.47 |
| Q9D0B6_P; Pbdcd1     | Protein PBF   | 5   | 10.1 | 18.8 | 20.5 | 0.5 | 0.49 | 2.03 | 105.8  | 80.5    | 98.0    | 1.3 | 1.08 | 0.93 |
| Q99J62_R; Rf4        | Replication   | 16  | 14.7 | 27.4 | 29.9 | 0.5 | 0.49 | 2.03 | 438.4  | 521.1   | 634.3   | 0.8 | 0.69 | 1.45 |
| Q9CQ66_A; Asf1a      | Histone chi   | 2   | 3.2  | 6.0  | 6.5  | 0.5 | 0.49 | 2.03 | 6.4    | 12.0    | 14.6    | 0.5 | 0.44 | 2.26 |
| Q99K30_E; Eps8l2     | E3 ubiquiti   | 6   | 5.1  | 9.6  | 10.4 | 0.5 | 0.49 | 2.03 | 46.4   | 47.4    | 57.7    | 1.0 | 0.80 | 1.24 |
| P70372_EL Elavl1     | ELAV-like pr  | 17  | 30.8 | 57.3 | 62.6 | 0.5 | 0.49 | 2.03 | 1507.8 | 1529.6  | 1861.7  | 1.0 | 0.81 | 1.23 |
| Q9VWM1_I; Racgap1    | Rac GTPase    | 2   | 4.1  | 7.7  | 8.4  | 0.5 | 0.49 | 2.03 | 8.2    | 15.4    | 18.7    | 0.5 | 0.44 | 2.27 |
| Q6PE01_S; Ssrnp40    | U5 small nu   | 10  | 13.9 | 25.9 | 28.2 | 0.5 | 0.49 | 2.03 | 213.7  | 288.1   | 350.7   | 0.7 | 0.61 | 1.64 |
| Q9CY10_N; NIMU_MOUSE | Protein Njn   | 1   | 1.8  | 3.3  | 3.6  | 0.5 | 0.49 | 2.04 | 1.8    | 3.3     | 4.1     | 0.5 | 0.44 | 2.27 |
| Q64213_SF Sfc1       | Splicing fac  | 8   | 5.7  | 10.8 | 11.7 | 0.5 | 0.49 | 2.05 | 52.2   | 95.4    | 116.1   | 0.5 | 0.45 | 2.22 |
| Q61881_M Mcm7        | DNA replica   | 78  | 27.7 | 52.0 | 56.7 | 0.5 | 0.49 | 2.05 | 3280.5 | 5027.9  | 6119.7  | 0.7 | 0.54 | 1.87 |
| Q07813_B; Bax        | Apoptosis r   | 4   | 9.5  | 17.8 | 19.4 | 0.5 | 0.49 | 2.05 | 38.6   | 76.0    | 92.5    | 0.5 | 0.42 | 2.40 |
| Q69Z89_F2 Fam208a    | Protein FAM   | 3   | 7.1  | 13.4 | 14.6 | 0.5 | 0.49 | 2.06 | 27.0   | 40.6    | 49.4    | 0.7 | 0.55 | 1.83 |
| P13864_D; Dnmt1      | DNA (cytosi   | 52  | 21.4 | 40.4 | 44.1 | 0.5 | 0.49 | 2.06 | 1661.3 | 3104.7  | 3778.9  | 0.5 | 0.44 | 2.27 |
| Q9CY97_S; Ssu72      | RNA polym     | 2   | 3.5  | 6.5  | 7.1  | 0.5 | 0.49 | 2.06 | 6.9    | 13.1    | 15.9    | 0.5 | 0.44 | 2.30 |
| Q8CF17_R; Polr2b     | DNA-direct    | 29  | 11.7 | 22.1 | 24.1 | 0.5 | 0.49 | 2.06 | 448.3  | 679.5   | 827.0   | 0.7 | 0.54 | 1.84 |
| Q8BFQ8_P; Pddc1      | Parkinson c   | 3   | 8.5  | 16.0 | 17.5 | 0.5 | 0.49 | 2.06 | 50.8   | 42.5    | 51.8    | 1.2 | 0.98 | 1.02 |
| Q8VDN2_A; Atp1a1     | Sodium/po     | 9   | 7.2  | 13.6 | 14.8 | 0.5 | 0.48 | 2.06 | 101.8  | 137.4   | 167.3   | 0.7 | 0.61 | 1.64 |
| Q9CQJ2_P; Pih1d1     | PIH1 doma     | 3   | 10.3 | 19.6 | 21.4 | 0.5 | 0.48 | 2.06 | 47.2   | 65.1    | 79.2    | 0.7 | 0.60 | 1.68 |
| P47757_C; Capz2      | F-actin-cap   | 11  | 9.6  | 18.2 | 19.8 | 0.5 | 0.48 | 2.07 | 343.9  | 272.2   | 331.4   | 1.3 | 1.04 | 0.96 |
| D3Z5T8_D; 493040711  | Protein 49:   | 1   | 13.1 | 24.8 | 27.0 | 0.5 | 0.48 | 2.07 | 13.1   | 24.8    | 30.2    | 0.5 | 0.43 | 2.31 |
| Q70318_E; Epb41l2    | Band 4.1-HI   | 18  | 8.   |      |      |     |      |      |        |         |         |     |      |      |

|                    |              |     |      |       |       |     |      |      |         |         |         |     |      |      |
|--------------------|--------------|-----|------|-------|-------|-----|------|------|---------|---------|---------|-----|------|------|
| Q922F4_TE Tubb6    | Tubulin bet  | 21  | 10.3 | 20.0  | 21.8  | 0.5 | 0.47 | 2.12 | 326.2   | 411.4   | 500.7   | 0.8 | 0.65 | 1.54 |
| O88322_NiNid2      | Nidogen-2 I  | 1   | 2.1  | 4.1   | 4.5   | 0.5 | 0.47 | 2.13 | 2.1     | 4.1     | 5.0     | 0.5 | 0.42 | 2.37 |
| Q99M28_R Rnps1     | RNA-bindin   | 12  | 14.1 | 27.5  | 30.0  | 0.5 | 0.47 | 2.13 | 283.7   | 430.5   | 524.0   | 0.7 | 0.54 | 1.85 |
| E9Q070_G0 Num1     | Protein Nur  | 128 | 14.2 | 27.8  | 30.4  | 0.5 | 0.47 | 2.14 | 3329.9  | 5545.7  | 6750.0  | 0.6 | 0.49 | 2.03 |
| E9Q1P8_I2 Irf2bp2  | Interferon r | 3   | 9.6  | 18.8  | 20.5  | 0.5 | 0.47 | 2.14 | 25.2    | 50.0    | 60.8    | 0.5 | 0.41 | 2.41 |
| Q64475_H_Hist1h2bb | Histone H2   | 50  | 65.1 | 128.0 | 139.7 | 0.5 | 0.47 | 2.15 | 25628.9 | 46575.2 | 56689.8 | 0.6 | 0.45 | 2.21 |
| Q0VBL3_Qk Rbm15    | Protein Rbr  | 8   | 5.5  | 10.9  | 11.9  | 0.5 | 0.47 | 2.15 | 53.3    | 97.0    | 118.1   | 0.5 | 0.45 | 2.22 |
| Q8C150_M Med19     | Mediator o   | 2   | 7.0  | 13.7  | 15.0  | 0.5 | 0.47 | 2.15 | 14.0    | 27.5    | 33.5    | 0.5 | 0.42 | 2.40 |
| Q9CQ80_V Vps25     | Vacuolar pr  | 1   | 1.7  | 3.3   | 3.7   | 0.5 | 0.46 | 2.16 | 1.7     | 3.3     | 4.1     | 0.5 | 0.42 | 2.41 |
| Q91WG4_E E1p2      | Elongator c  | 2   | 4.2  | 8.4   | 9.1   | 0.5 | 0.46 | 2.16 | 8.5     | 16.7    | 20.4    | 0.5 | 0.42 | 2.41 |
| P83917_Cf Cbx1     | Chromobio:   | 18  | 29.9 | 59.2  | 64.6  | 0.5 | 0.46 | 2.16 | 897.7   | 1966.4  | 2393.4  | 0.5 | 0.38 | 2.67 |
| O54784_D DapK3     | Death-assoc  | 1   | 4.9  | 9.7   | 10.5  | 0.5 | 0.46 | 2.16 | 4.9     | 9.7     | 11.8    | 0.5 | 0.41 | 2.41 |
| P58871_TE Tnks1bp1 | 182 kDa tar  | 33  | 7.1  | 14.1  | 15.4  | 0.5 | 0.46 | 2.16 | 505.2   | 583.3   | 710.0   | 0.9 | 0.71 | 1.41 |
| Q7TMY4_Tl Thoc7    | THO compl    | 4   | 6.3  | 12.5  | 13.6  | 0.5 | 0.46 | 2.17 | 54.1    | 43.1    | 52.5    | 1.3 | 1.03 | 0.97 |
| AOA087WCrcap       | Protein Src  | 4   | 7.4  | 14.9  | 16.2  | 0.5 | 0.46 | 2.18 | 36.1    | 66.3    | 80.7    | 0.5 | 0.45 | 2.24 |
| Q9CQL1_M Magohb    | Protein ma   | 5   | 13.7 | 27.3  | 29.8  | 0.5 | 0.46 | 2.18 | 119.5   | 203.5   | 247.7   | 0.6 | 0.48 | 2.07 |
| Q9D0R4_D Ddx56     | Probable A'  | 4   | 4.1  | 8.1   | 8.9   | 0.5 | 0.46 | 2.18 | 17.6    | 42.3    | 51.4    | 0.4 | 0.34 | 2.93 |
| Q3TKT4_SA Smarca4  | Transcripti  | 28  | 10.6 | 21.1  | 23.1  | 0.5 | 0.46 | 2.18 | 525.0   | 722.4   | 879.3   | 0.7 | 0.60 | 1.67 |
| P60867_R Rps20     | 40S ribosom  | 4   | 87.4 | 177.2 | 193.3 | 0.5 | 0.45 | 2.21 | 614.1   | 581.5   | 707.8   | 1.1 | 0.87 | 1.15 |
| P49722_P5 Psm2     | Proteasom    | 5   | 3.3  | 6.7   | 7.3   | 0.5 | 0.45 | 2.22 | 41.2    | 38.2    | 46.6    | 1.1 | 0.88 | 1.13 |
| P61028_R Rab8b     | Ras-related  | 1   | 4.1  | 8.3   | 9.0   | 0.5 | 0.45 | 2.22 | 4.1     | 8.3     | 10.1    | 0.5 | 0.40 | 2.47 |
| Q8BTV2_Cf Cpsf7    | Cleavage an  | 4   | 11.3 | 22.9  | 25.0  | 0.5 | 0.45 | 2.22 | 62.4    | 83.8    | 102.1   | 0.7 | 0.61 | 1.64 |
| P62309_RL Snrpg    | Small nucle  | 4   | 9.1  | 18.5  | 20.2  | 0.5 | 0.45 | 2.22 | 33.1    | 74.9    | 91.1    | 0.4 | 0.36 | 2.75 |
| P63154_Cf Crnk1    | Crooked ne   | 13  | 7.8  | 16.0  | 17.4  | 0.5 | 0.45 | 2.22 | 121.3   | 265.9   | 323.6   | 0.5 | 0.37 | 2.67 |
| Q9CQR2_R Rps21     | 40S ribosom  | 4   | 19.0 | 38.7  | 42.2  | 0.5 | 0.45 | 2.22 | 87.0    | 161.3   | 196.3   | 0.5 | 0.44 | 2.26 |
| P68368_RL Tuba4a   | Tubulin alp  | 4   | 8.1  | 16.5  | 18.0  | 0.5 | 0.45 | 2.22 | 49.4    | 67.4    | 82.0    | 0.7 | 0.60 | 1.66 |
| P97429_Af Anxa4    | Annexin A4   | 3   | 2.5  | 5.2   | 5.7   | 0.5 | 0.45 | 2.24 | 17.3    | 16.4    | 20.0    | 1.1 | 0.86 | 1.16 |
| Q80UW8_F Polr2e    | DNA-direct   | 4   | 24.3 | 50.2  | 54.7  | 0.5 | 0.44 | 2.25 | 109.2   | 216.6   | 263.7   | 0.5 | 0.41 | 2.41 |
| E9QN31_Ef Nop2     | Probable 2i  | 12  | 10.0 | 20.6  | 22.4  | 0.5 | 0.44 | 2.25 | 176.4   | 289.0   | 351.7   | 0.6 | 0.50 | 1.99 |
| Q6RT24_Cf Cenpe    | Centromeri   | 1   | 2.9  | 6.0   | 6.5   | 0.5 | 0.44 | 2.25 | 2.9     | 6.0     | 7.3     | 0.5 | 0.40 | 2.51 |
| Q08943_Sf Ssrp1    | FACT comp    | 15  | 12.8 | 26.5  | 28.9  | 0.5 | 0.44 | 2.25 | 311.3   | 447.3   | 544.5   | 0.7 | 0.57 | 1.75 |
| P62305_RL Snrpe    | Small nucle  | 12  | 9.2  | 19.1  | 20.9  | 0.5 | 0.44 | 2.26 | 320.6   | 589.2   | 717.2   | 0.5 | 0.45 | 2.24 |
| F6ZBR8_F6 Wiz      | Protein Wi:  | 12  | 11.3 | 23.3  | 25.5  | 0.5 | 0.44 | 2.26 | 154.7   | 269.5   | 328.0   | 0.6 | 0.47 | 2.12 |
| Q61686_Cf Cbx5     | Chromobio:   | 9   | 13.2 | 27.4  | 29.9  | 0.5 | 0.44 | 2.27 | 339.3   | 652.8   | 794.6   | 0.5 | 0.43 | 2.34 |
| Q9D187_V Fam96b    | Mitotic spin | 2   | 6.5  | 13.6  | 14.8  | 0.5 | 0.44 | 2.27 | 13.1    | 27.2    | 33.1    | 0.5 | 0.39 | 2.53 |
| Q8VE88_F1 Fam114a2 | Protein FAF  | 1   | 2.3  | 4.7   | 5.1   | 0.5 | 0.44 | 2.27 | 2.3     | 4.7     | 5.7     | 0.5 | 0.39 | 2.54 |
| O70400_P1 Pdlim1   | PDZ and LIM  | 7   | 11.1 | 23.1  | 25.2  | 0.5 | 0.44 | 2.28 | 116.6   | 162.1   | 197.3   | 0.7 | 0.59 | 1.69 |
| Q9QX56_D Dbn1      | Drebrin OS-  | 12  | 13.4 | 28.0  | 30.6  | 0.5 | 0.44 | 2.28 | 351.1   | 372.0   | 452.8   | 0.9 | 0.78 | 1.29 |
| Q8BH64_El Ehd2     | EH domain-   | 15  | 8.8  | 18.5  | 20.1  | 0.5 | 0.44 | 2.28 | 170.2   | 271.9   | 330.9   | 0.6 | 0.51 | 1.94 |
| Q99K43_P1 Prc1     | Protein reg  | 1   | 4.0  | 8.4   | 9.1   | 0.5 | 0.44 | 2.28 | 4.0     | 8.4     | 10.2    | 0.5 | 0.39 | 2.54 |
| O35130_NI Emg1     | Ribosomal    | 3   | 5.6  | 11.8  | 12.9  | 0.5 | 0.44 | 2.28 | 16.8    | 30.1    | 36.6    | 0.6 | 0.46 | 2.17 |
| Q99KV1_D Dnajb11   | Dnaj homo    | 3   | 6.1  | 12.7  | 13.9  | 0.5 | 0.44 | 2.28 | 29.3    | 32.2    | 39.2    | 0.9 | 0.75 | 1.34 |
| Q99MJ9_D Ddx50     | ATP-depenc   | 7   | 14.7 | 30.9  | 33.7  | 0.5 | 0.44 | 2.28 | 109.9   | 210.8   | 256.6   | 0.5 | 0.43 | 2.33 |
| Q5SVR0_TE Tbc1d9b  | TBC1 doma    | 1   | 5.4  | 11.3  | 12.4  | 0.5 | 0.44 | 2.28 | 5.4     | 11.3    | 13.8    | 0.5 | 0.39 | 2.55 |
| P97863_NI Nfib     | Nuclear fac  | 2   | 5.2  | 10.8  | 11.8  | 0.5 | 0.44 | 2.28 | 10.3    | 21.7    | 26.4    | 0.5 | 0.39 | 2.55 |
| Q9D6K8_Fl Fundc2   | FUN14 dom    | 1   | 3.0  | 6.3   | 6.9   | 0.5 | 0.44 | 2.29 | 3.0     | 6.3     | 7.7     | 0.5 | 0.39 | 2.56 |
| Q62481_VI Vps72    | Vacuolar pr  | 3   | 4.9  | 10.3  | 11.3  | 0.5 | 0.44 | 2.29 | 15.6    | 30.1    | 36.6    | 0.5 | 0.43 | 2.35 |
| P02340_P5 Tps3     | Cellular tur | 30  | 21.8 | 45.9  | 50.0  | 0.5 | 0.44 | 2.29 | 756.4   | 1929.2  | 2348.2  | 0.4 | 0.32 | 3.10 |
| D3YWX2_C Ylpm1     | YLP motif-c  | 18  | 5.9  | 12.5  | 13.7  | 0.5 | 0.43 | 2.30 | 201.9   | 258.5   | 314.7   | 0.8 | 0.64 | 1.56 |
| Q8CFQ3_Af Agr      | Intron-binc  | 12  | 7.5  | 15.9  | 17.4  | 0.5 | 0.43 | 2.31 | 148.7   | 246.8   | 300.4   | 0.6 | 0.49 | 2.02 |
| Q9D168_IH Ints12   | Integrator c | 5   | 5.0  | 10.7  | 11.7  | 0.5 | 0.43 | 2.31 | 45.3    | 49.5    | 60.2    | 0.9 | 0.75 | 1.33 |
| Q9D0F1_N Ndc80     | Kinetochor   | 2   | 6.0  | 12.7  | 13.9  | 0.5 | 0.43 | 2.31 | 12.0    | 25.4    | 31.0    | 0.5 | 0.39 | 2.58 |
| Q9DB40_N Med27     | Mediator o   | 1   | 1.7  | 3.5   | 3.9   | 0.5 | 0.43 | 2.31 | 1.7     | 3.5     | 4.3     | 0.5 | 0.39 | 2.58 |
| O54931_Af Akap2    | A-kinase an  | 3   | 4.3  | 9.1   | 9.9   | 0.5 | 0.43 | 2.32 | 19.6    | 39.5    | 48.1    | 0.5 | 0.41 | 2.46 |
| Q9CQ25_N Mzt2      | Mitotic-spi  | 1   | 2.0  | 4.3   | 4.7   | 0.5 | 0.43 | 2.32 | 2.0     | 4.3     | 5.2     | 0.5 | 0.39 | 2.59 |
| O88712_Cf Ctbp1    | C-terminal-  | 13  | 13.3 | 28.5  | 31.0  | 0.5 | 0.43 | 2.33 | 438.9   | 379.7   | 462.1   | 1.2 | 0.95 | 1.05 |
| Q9QZ85_IK Ilgp1    | Interferon-i | 1   | 2.8  | 6.0   | 6.5   | 0.5 | 0.43 | 2.33 | 2.8     | 6.0     | 7.3     | 0.5 | 0.38 | 2.60 |
| Q62422_O Ostf1     | Osteoclast-  | 1   | 10.6 | 22.7  | 24.7  | 0.5 | 0.43 | 2.34 | 10.6    | 22.7    | 27.6    | 0.5 | 0.38 | 2.61 |
| Q9JKB3_YB Ybx3     | Y-box-bindi  | 4   | 12.4 | 26.6  | 29.0  | 0.5 | 0.43 | 2.34 | 58.9    | 164.8   | 200.6   | 0.4 | 0.29 | 3.41 |
| O35887_Cf Calu     | Calumenin    | 11  | 15.1 | 32.6  | 35.5  | 0.5 | 0.43 | 2.35 | 278.7   | 543.8   | 661.9   | 0.5 | 0.42 | 2.38 |
| P63328_Pf Ppp3cca  | Serine/thre  | 1   | 5.0  | 10.7  | 11.7  | 0.5 | 0.43 | 2.35 | 5.0     | 10.7    | 13.0    | 0.5 | 0.38 | 2.62 |
| Q6PIU9_YI005_MOUSE | Uncharacte   | 6   | 7.0  | 15.2  | 16.6  | 0.5 | 0.43 | 2.35 | 58.9    | 85.3    | 103.9   | 0.7 | 0.57 | 1.76 |
| Q6P9R4_Af Arhgef18 | Rho guanin   | 2   | 8.3  | 17.9  | 19.6  | 0.5 | 0.42 | 2.35 | 16.6    | 35.9    | 43.7    | 0.5 | 0.38 | 2.63 |
| P62960_YE Ybx1     | Nuclease-se  | 17  | 34.1 | 73.6  | 80.3  | 0.5 | 0.42 | 2.35 | 2341.3  | 1816.2  | 2210.7  | 1.3 | 1.06 | 0.94 |
| Q62101_Kf Prkd1    | Serine/thre  | 1   | 4.1  | 8.9   | 9.7   | 0.5 | 0.42 | 2.36 | 4.1     | 8.9     | 10.8    | 0.5 | 0.38 | 2.64 |
| O70126_Af Aurkb    | Aurora kina  | 2   | 4.0  | 8.7   | 9.5   | 0.5 | 0.42 | 2.36 | 8.0     | 17.4    | 21.1    | 0.5 | 0.38 | 2.64 |
| Q8RSK4_N Nolo6     | Nucleolar p  | 4   | 4.7  | 10.2  | 11.2  | 0.5 | 0.42 | 2.37 | 30.2    | 41.2    | 50.1    | 0.7 | 0.60 | 1.66 |
| P19157_Gf Gstp1    | Glutathion   | 2   | 2.8  | 6.1   | 6.6   | 0.5 | 0.42 | 2.37 | 5.6     | 12.1    | 14.7    | 0.5 | 0.38 | 2.64 |
| Q9CYD3_Cf Crtap    | Cartilage-as | 2   | 5.9  | 12.8  | 13.9  | 0.5 | 0.42 | 2.37 | 11.7    | 25.5    | 31.1    | 0.5 | 0.38 | 2.64 |
| Q8CI08_SL Slain2   | SLAIN moti   | 2   | 8.5  | 18.4  | 20.1  | 0.5 | 0.42 | 2.37 | 16.9    | 36.8    | 44.8    | 0.5 | 0.38 | 2.65 |
| Q61823_P1 Pdc4     | Programmi    | 2   | 8.9  | 19.3  | 21.1  | 0.5 | 0.42 | 2.37 | 17.8    | 38.7    | 47.1    | 0.5 | 0.38 | 2.65 |
| P35278_RL Rab5c    | Ras-related  | 6   | 6.4  | 13.9  | 15.2  | 0.5 | 0.42 | 2.38 | 48.3    | 95.5    | 116.2   | 0.5 | 0.42 | 2.41 |
| Q8VDM6_F Hnrrp1    | Heterogene   | 5   | 8.9  | 19.5  | 21.3  | 0.5 | 0.42 | 2.38 | 62.5    | 125.0   | 152.2   | 0.5 | 0.41 | 2.44 |
| P62488_RL Polr2g   | DNA-direct   | 6   | 8.3  | 18.3  | 19.9  | 0.5 | 0.42 | 2.39 | 141.9   | 169.8   | 206.6   | 0.8 | 0.69 | 1.46 |
| Q9WTM5_IJ Ruvb1    | RuvB-like 2  | 26  | 16.7 | 36.7  | 40.0  | 0.5 | 0.42 | 2.39 | 1076.7  | 1178.0  | 1433.8  | 0.9 | 0.75 | 1.33 |
| Q6PAM1_T Txlna     | Alpha-taxil  | 1   | 2.7  | 5.8   | 6.4   | 0.5 | 0.42 | 2.40 | 2.7     | 5.8     | 7.1     | 0.5 | 0.37 | 2.67 |
| Q3UX10_Tl Tubal3   | Tubulin alp  | 2   | 4.0  | 8.2   | 8.9   | 0.5 | 0.42 | 2.40 | 7.4     | 16.4    | 20.0    | 0.5 | 0.37 | 2.68 |
| Q9DBY8_N Nvl       | Nuclear val  | 9   | 9.8  | 21.7  | 23.6  | 0.5 | 0.42 | 2.41 | 78.8    | 191.4   | 232.9   | 0.4 | 0.34 | 2.96 |
| Q9CYL5_Gf Glipr2   | Golgi-assoc  | 6   | 16.1 | 35.5  | 38.8  | 0.5 | 0.42 | 2.41 | 114.7   | 238.6   | 290.4   | 0.5 | 0.39 | 2.53 |
| P51150_RL Rab7a    | Ras-related  | 11  | 9.6  | 21.3  | 23.2  | 0.5 | 0.42 | 2.41 | 223.2   | 291.1   | 354.4   | 0.8 | 0.63 | 1.59 |
| Q9JK48_SH Sh3glb1  | Endophilin   | 3   | 8.2  | 18.1  | 19.8  | 0.5 | 0.41 | 2.42 | 40.0    | 52.4    | 63.7    | 0.8 | 0.63 | 1.59 |
| Q8K310_M Matr3     | Matrin-3 O:  | 40  | 14.6 | 32.4  | 35.3  | 0.5 | 0.41 | 2.42 | 1308.2  | 2440.9  | 2970.9  | 0.5 | 0.44 | 2.27 |
| Q8C788_Qj Snx18    | Sorting nex  | 5   | 8.6  | 19.2  | 21.0  | 0.4 | 0.41 | 2.43 | 48.8    | 95.5    | 116.2   | 0.5 | 0.42 | 2.38 |
| P54731_Fa Faf1     | FAS-associa  | 6   | 12.1 | 27.1  | 29.6  | 0.4 | 0.41 | 2.43 | 116.0   | 151.7   | 184.7   | 0.8 | 0.63 | 1.59 |
| Q9D920_L: Loh12cr1 | Loss of hete | 1   | 2.3  | 5.2   | 5.7   | 0.4 | 0.41 | 2.43 | 2.3     | 5.2     | 6.4     | 0.4 | 0.37 | 2.72 |
| O89112_Lf Lancf1   | LanC-likep1  | 1   | 4.1  | 9.1   | 10.0  | 0.4 | 0.41 | 2.44 | 4.1     | 9.1     | 11.1    | 0.4 | 0.37 | 2.72 |
| Q62523_Zf Zyx      | Zyxin OS-M   | 7   | 19.5 | 43.7  | 47.6  | 0.4 | 0.41 | 2.44 | 212.3   | 240.0   | 292.1   | 0.9 | 0.73 | 1.38 |
| Q8R0S1_Af Atf7     | Cyclic AMP   | 1   | 2.5  | 5.5   | 6.0   | 0.4 | 0.41 | 2.44 | 2.5     | 5.5     |         |     |      |      |

|                    |               |    |      |       |       |     |      |      |        |        |        |     |      |      |
|--------------------|---------------|----|------|-------|-------|-----|------|------|--------|--------|--------|-----|------|------|
| Q99NHO_A Ankrd17   | Ankyrin rep   | 11 | 6.7  | 15.9  | 17.3  | 0.4 | 0.39 | 2.56 | 125.0  | 162.6  | 197.9  | 0.8 | 0.63 | 1.58 |
| Q8VDF2_Ui Uhrf1    | E3 ubiquitin  | 21 | 7.5  | 17.8  | 19.4  | 0.4 | 0.39 | 2.57 | 210.9  | 643.7  | 783.5  | 0.3 | 0.27 | 3.72 |
| P97386_Dl Lig3     | DNA ligase I  | 9  | 5.4  | 12.8  | 14.0  | 0.4 | 0.39 | 2.60 | 76.9   | 125.0  | 152.2  | 0.6 | 0.51 | 1.98 |
| Q9DCR2_Ai Ap3s1    | AP-3 compl    | 7  | 4.9  | 11.7  | 12.7  | 0.4 | 0.39 | 2.60 | 90.0   | 94.3   | 114.8  | 1.0 | 0.78 | 1.28 |
| Q99LX5_M Mmtag2    | Multiple m    | 1  | 3.1  | 7.4   | 8.0   | 0.4 | 0.38 | 2.61 | 3.1    | 7.4    | 9.0    | 0.4 | 0.34 | 2.91 |
| P47811_M Mapk14    | Mitogen-ac    | 1  | 1.7  | 4.1   | 4.5   | 0.4 | 0.38 | 2.61 | 1.7    | 4.1    | 5.0    | 0.4 | 0.34 | 2.91 |
| G3XA30_G Nsmc4a    | MCG1618,      | 3  | 5.3  | 12.7  | 13.8  | 0.4 | 0.38 | 2.61 | 23.3   | 43.0   | 52.4   | 0.5 | 0.44 | 2.25 |
| Q61687_Ai Atrx     | Transcripti   | 13 | 5.1  | 12.2  | 13.4  | 0.4 | 0.38 | 2.62 | 94.4   | 171.0  | 208.1  | 0.6 | 0.45 | 2.21 |
| Q8BWW4_Larp4       | La-related f  | 11 | 8.9  | 21.4  | 23.3  | 0.4 | 0.38 | 2.62 | 145.0  | 232.7  | 283.3  | 0.6 | 0.51 | 1.95 |
| Q8BFW7_L Lpp       | Lipoma-pre    | 4  | 4.0  | 9.6   | 10.5  | 0.4 | 0.38 | 2.63 | 19.7   | 41.9   | 51.0   | 0.5 | 0.39 | 2.59 |
| P62835_R4 Rap1a    | Ras-related   | 6  | 8.8  | 21.2  | 23.1  | 0.4 | 0.38 | 2.64 | 120.3  | 194.5  | 236.7  | 0.6 | 0.51 | 1.97 |
| Q921M3_S Sf3b3     | Splicing fac  | 39 | 10.8 | 26.2  | 28.6  | 0.4 | 0.38 | 2.65 | 564.6  | 1322.2 | 1609.3 | 0.4 | 0.35 | 2.85 |
| P48678_LH Lnna     | Prelamin-A    | 30 | 7.0  | 17.1  | 18.6  | 0.4 | 0.38 | 2.65 | 463.1  | 651.3  | 792.8  | 0.7 | 0.58 | 1.71 |
| Q9D3D9_A Atp5d     | ATP synthas   | 1  | 2.6  | 6.2   | 6.8   | 0.4 | 0.38 | 2.65 | 2.6    | 6.2    | 7.6    | 0.4 | 0.34 | 2.96 |
| B2RVL6_ZC Zcchc24  | Zinc finger r | 1  | 5.3  | 12.8  | 14.0  | 0.4 | 0.38 | 2.65 | 5.3    | 12.8   | 15.6   | 0.4 | 0.34 | 2.96 |
| E9Q5F9_SE Setd2    | Histone-lys   | 6  | 4.9  | 12.1  | 13.1  | 0.4 | 0.38 | 2.66 | 28.2   | 70.1   | 85.3   | 0.4 | 0.33 | 3.02 |
| Q8C6B9_Ai Rps19bp1 | Active regu   | 3  | 13.5 | 32.9  | 35.8  | 0.4 | 0.38 | 2.66 | 40.0   | 82.7   | 100.6  | 0.5 | 0.40 | 2.51 |
| Q9DCG9_Tl Trmt112  | Multifuncti   | 3  | 29.8 | 72.9  | 79.5  | 0.4 | 0.38 | 2.67 | 1113.6 | 6062.4 | 7378.9 | 0.2 | 0.15 | 6.63 |
| Q7TNC4_LC Luc712   | Putative RH   | 19 | 24.1 | 59.0  | 64.4  | 0.4 | 0.37 | 2.67 | 1335.7 | 1585.6 | 1930.0 | 0.8 | 0.69 | 1.44 |
| Q9WU62_U Incenp    | Inner centr   | 4  | 4.2  | 10.2  | 11.1  | 0.4 | 0.37 | 2.67 | 16.2   | 47.7   | 58.1   | 0.3 | 0.28 | 3.58 |
| Q8R080_G Gtse1     | G2 and S pF   | 2  | 12.2 | 29.9  | 32.6  | 0.4 | 0.37 | 2.67 | 24.4   | 59.7   | 72.7   | 0.4 | 0.34 | 2.98 |
| E9Q6H8_Ef Plekha5  | Protein Ple   | 1  | 5.4  | 13.2  | 14.4  | 0.4 | 0.37 | 2.68 | 5.4    | 13.2   | 16.1   | 0.4 | 0.33 | 2.99 |
| Q6PAL7_Ai Ahdcd1   | AT-hook DH    | 3  | 3.4  | 8.4   | 9.1   | 0.4 | 0.37 | 2.68 | 13.7   | 21.9   | 26.6   | 0.6 | 0.51 | 1.95 |
| Q8VHZ7_IN Imp4     | U3 small nu   | 1  | 1.7  | 4.2   | 4.6   | 0.4 | 0.37 | 2.68 | 1.7    | 4.2    | 5.1    | 0.4 | 0.33 | 2.99 |
| P25799_NI Nfkb1    | Nuclear fac   | 8  | 4.4  | 10.8  | 11.8  | 0.4 | 0.37 | 2.69 | 34.5   | 82.6   | 100.5  | 0.4 | 0.34 | 2.91 |
| Q922V4_PL Plrg1    | Pleiotropic   | 4  | 6.6  | 16.3  | 17.8  | 0.4 | 0.37 | 2.69 | 45.8   | 68.5   | 83.4   | 0.7 | 0.55 | 1.82 |
| Q9Z199_SF Supt4h1b | Transcripti   | 1  | 16.4 | 40.6  | 44.2  | 0.4 | 0.37 | 2.70 | 16.4   | 40.6   | 49.4   | 0.4 | 0.33 | 3.01 |
| Q8K2Q0_Ci CommD9   | COMM don      | 2  | 3.2  | 8.0   | 8.7   | 0.4 | 0.37 | 2.70 | 6.5    | 16.0   | 19.4   | 0.4 | 0.33 | 3.01 |
| P62700_YF Ypel5    | Protein yip   | 3  | 6.4  | 15.8  | 17.2  | 0.4 | 0.37 | 2.70 | 54.2   | 70.2   | 85.5   | 0.8 | 0.63 | 1.58 |
| P63037_Dl Dnaj1    | Dnal homo     | 12 | 7.5  | 18.7  | 20.4  | 0.4 | 0.37 | 2.71 | 323.5  | 327.8  | 399.0  | 1.0 | 0.81 | 1.23 |
| Q9J144_DN Dmap1    | DNA methy     | 7  | 7.0  | 17.4  | 19.0  | 0.4 | 0.37 | 2.72 | 84.5   | 117.9  | 143.5  | 0.7 | 0.59 | 1.70 |
| P52293_NI Kpna2    | Importin su   | 18 | 6.8  | 17.1  | 18.6  | 0.4 | 0.37 | 2.73 | 192.0  | 362.0  | 440.7  | 0.5 | 0.44 | 2.29 |
| P61216_TA Taf13    | Transcripti   | 1  | 5.3  | 13.2  | 14.4  | 0.4 | 0.37 | 2.73 | 5.3    | 13.2   | 16.1   | 0.4 | 0.33 | 3.05 |
| Q3UIB9_EC Edc4     | Enhancer o    | 25 | 5.8  | 14.4  | 15.6  | 0.4 | 0.37 | 2.73 | 235.8  | 377.3  | 459.3  | 0.6 | 0.51 | 1.95 |
| Q9WVR4_F Fxr2      | Fragile X m   | 3  | 7.9  | 19.8  | 21.8  | 0.4 | 0.37 | 2.73 | 19.2   | 48.0   | 58.5   | 0.4 | 0.33 | 3.05 |
| Q9R059_Ff Fhl3     | Four and a l  | 6  | 8.5  | 21.2  | 23.2  | 0.4 | 0.37 | 2.73 | 59.5   | 161.3  | 196.3  | 0.4 | 0.30 | 3.30 |
| Q9D1C1_U Ube2c     | Ubiquitin-c   | 3  | 5.2  | 13.2  | 14.4  | 0.4 | 0.36 | 2.75 | 14.0   | 32.4   | 39.5   | 0.4 | 0.35 | 2.82 |
| Q70433_Ff Fhl2     | Four and a l  | 1  | 2.0  | 5.0   | 5.4   | 0.4 | 0.36 | 2.76 | 2.0    | 5.0    | 6.0    | 0.4 | 0.33 | 3.08 |
| A2BH40_Ai Arid1a   | AT-rich inte  | 8  | 4.1  | 10.3  | 11.3  | 0.4 | 0.36 | 2.77 | 53.4   | 81.9   | 99.7   | 0.7 | 0.54 | 1.87 |
| Q8C2Q3_RI Rbm14    | RNA-bindin    | 14 | 21.7 | 55.2  | 60.2  | 0.4 | 0.36 | 2.77 | 315.0  | 638.9  | 777.6  | 0.5 | 0.41 | 2.47 |
| Q9JKX4_Ai Aatf     | Protein AAT   | 4  | 4.1  | 10.5  | 11.4  | 0.4 | 0.36 | 2.78 | 18.6   | 42.3   | 51.5   | 0.4 | 0.36 | 2.77 |
| Q8OV86_IN Ints8    | Integrator c  | 1  | 2.4  | 6.2   | 6.8   | 0.4 | 0.36 | 2.78 | 2.4    | 6.2    | 7.6    | 0.4 | 0.32 | 3.11 |
| Q9JMH9_N Myo18a    | Unconvent     | 14 | 5.8  | 14.8  | 16.2  | 0.4 | 0.36 | 2.79 | 107.9  | 222.8  | 271.2  | 0.5 | 0.40 | 2.51 |
| Q3UQA7_Si Selh     | Selenoprot    | 3  | 10.0 | 25.6  | 27.9  | 0.4 | 0.36 | 2.80 | 34.4   | 81.0   | 98.5   | 0.4 | 0.35 | 2.87 |
| Q68FF6_Gi Glt1     | ARF GTPase    | 1  | 3.6  | 9.2   | 10.1  | 0.4 | 0.36 | 2.80 | 3.6    | 9.2    | 11.3   | 0.4 | 0.32 | 3.12 |
| Q6XLQ8_Q Calu      | Calumenin     | 3  | 7.1  | 18.3  | 20.0  | 0.4 | 0.36 | 2.80 | 28.6   | 45.5   | 55.4   | 0.6 | 0.52 | 1.94 |
| Q9DCT8_CI Crip2    | Cysteine-ric  | 1  | 4.3  | 11.0  | 12.0  | 0.4 | 0.36 | 2.81 | 4.3    | 11.0   | 13.4   | 0.4 | 0.32 | 3.13 |
| Q8R0K4_Ci Ccdc137  | Coiled-coil   | 1  | 4.2  | 10.9  | 11.9  | 0.4 | 0.36 | 2.81 | 4.2    | 10.9   | 13.3   | 0.4 | 0.32 | 3.14 |
| Q8K4L0_DI Ddx54    | ATP-depenc    | 1  | 3.5  | 9.0   | 9.8   | 0.4 | 0.36 | 2.81 | 3.5    | 9.0    | 10.9   | 0.4 | 0.32 | 3.14 |
| Q921Y2_IN Imp3     | U3 small nu   | 4  | 1.9  | 4.9   | 5.3   | 0.4 | 0.35 | 2.82 | 7.5    | 20.6   | 25.1   | 0.4 | 0.30 | 3.34 |
| P23198_CI Cbx3     | Chromobob:    | 11 | 50.9 | 131.7 | 143.7 | 0.4 | 0.35 | 2.82 | 708.7  | 1730.4 | 2106.2 | 0.4 | 0.34 | 2.97 |
| Q9CQ52_NI Nop10    | H/ACA ribo    | 2  | 2.8  | 7.2   | 7.9   | 0.4 | 0.35 | 2.83 | 5.6    | 14.4   | 17.5   | 0.4 | 0.32 | 3.15 |
| Q8BSP2_CI NcapH2   | Condensin-    | 4  | 6.1  | 15.9  | 17.3  | 0.4 | 0.35 | 2.83 | 21.9   | 58.7   | 71.4   | 0.4 | 0.31 | 3.26 |
| P52927_HI Hmgaa2   | High mobil    | 1  | 6.9  | 17.8  | 19.5  | 0.4 | 0.35 | 2.83 | 6.9    | 17.8   | 21.7   | 0.4 | 0.32 | 3.16 |
| Q8R3W5_S Tsen15    | tRNA-splici   | 1  | 2.1  | 5.5   | 6.0   | 0.4 | 0.35 | 2.84 | 2.1    | 5.5    | 6.7    | 0.4 | 0.32 | 3.16 |
| Q9Z315_Sk Sart1    | U4/U6.U5 t    | 22 | 8.5  | 22.2  | 24.3  | 0.4 | 0.35 | 2.84 | 337.6  | 551.2  | 670.9  | 0.6 | 0.50 | 1.99 |
| Q8BFZ3_AC Actb2    | Beta-actin-I  | 12 | 74.6 | 194.1 | 211.7 | 0.4 | 0.35 | 2.84 | 2890.7 | 3746.8 | 4560.5 | 0.8 | 0.63 | 1.58 |
| Q8K3X4_I2 Irf2bp1  | Interferon r  | 6  | 4.5  | 11.8  | 12.9  | 0.4 | 0.35 | 2.84 | 35.3   | 122.5  | 149.1  | 0.3 | 0.24 | 4.23 |
| Q00899_Ty Yy1      | Transcripti   | 3  | 5.0  | 13.2  | 14.4  | 0.4 | 0.35 | 2.86 | 28.4   | 33.6   | 40.9   | 0.8 | 0.69 | 1.44 |
| P26040_EZ Ezr      | Ezrin OS-M    | 3  | 5.6  | 14.7  | 16.1  | 0.4 | 0.35 | 2.87 | 23.8   | 40.9   | 49.8   | 0.6 | 0.48 | 2.09 |
| E9Q5G3_KI Kif23    | Kinesin-like  | 3  | 2.2  | 5.7   | 6.2   | 0.4 | 0.35 | 2.88 | 6.8    | 17.7   | 21.6   | 0.4 | 0.31 | 3.19 |
| Q9CQEO_RI Rnf138   | E3 ubiquitin  | 2  | 10.6 | 28.1  | 30.7  | 0.4 | 0.35 | 2.90 | 21.2   | 56.3   | 68.5   | 0.4 | 0.31 | 3.23 |
| Q9DBD5_P Pelp1     | Proline, gli  | 8  | 9.4  | 24.9  | 27.1  | 0.4 | 0.35 | 2.90 | 107.9  | 192.4  | 234.2  | 0.6 | 0.46 | 2.17 |
| Q6P9Q6_FI Fkbp15   | FK506-binc    | 3  | 2.6  | 6.8   | 7.4   | 0.4 | 0.34 | 2.91 | 15.7   | 21.5   | 26.1   | 0.7 | 0.60 | 1.67 |
| Q9DAM7_T Tmem263   | Transmemt     | 3  | 6.3  | 16.8  | 18.4  | 0.4 | 0.34 | 2.91 | 16.9   | 51.9   | 63.2   | 0.3 | 0.27 | 3.73 |
| Q9EPU4_CI Cpsf1    | Cleavage an   | 17 | 6.1  | 16.4  | 17.9  | 0.4 | 0.34 | 2.91 | 113.0  | 259.7  | 316.1  | 0.4 | 0.36 | 2.80 |
| Q62186_Ss Ssr4     | Translocon    | 1  | 1.6  | 4.3   | 4.7   | 0.4 | 0.34 | 2.91 | 1.6    | 4.3    | 5.3    | 0.4 | 0.31 | 3.25 |
| Q54734_O' Ddost    | Dolichyl-di   | 1  | 2.3  | 6.2   | 6.7   | 0.4 | 0.34 | 2.92 | 2.3    | 6.2    | 7.5    | 0.4 | 0.31 | 3.26 |
| Q61103_RI Dpf2     | Zinc finger j | 6  | 6.6  | 17.6  | 19.2  | 0.4 | 0.34 | 2.93 | 69.9   | 109.5  | 133.3  | 0.6 | 0.52 | 1.91 |
| Q9CPR1_RI Rwd4     | RWD doma      | 3  | 10.2 | 27.4  | 29.9  | 0.4 | 0.34 | 2.93 | 77.4   | 60.1   | 73.2   | 1.3 | 1.06 | 0.95 |
| Q9WTM3_Si Sema6c   | Semaphori     | 1  | 2.7  | 7.2   | 7.8   | 0.4 | 0.34 | 2.95 | 2.7    | 7.2    | 8.8    | 0.4 | 0.30 | 3.30 |
| P62858_RS Rps28    | 40S ribosom   | 4  | 31.4 | 85.0  | 92.7  | 0.4 | 0.34 | 2.96 | 216.8  | 491.7  | 598.5  | 0.4 | 0.36 | 2.76 |
| P70271_PI Pdlim4   | PDZ and LIM   | 7  | 6.5  | 17.8  | 19.4  | 0.4 | 0.34 | 2.97 | 48.8   | 183.5  | 223.4  | 0.3 | 0.22 | 4.57 |
| Q9CWW7_Ccxc1       | CXCC-type:    | 3  | 3.1  | 8.4   | 9.1   | 0.4 | 0.33 | 2.99 | 10.2   | 21.2   | 25.8   | 0.5 | 0.40 | 2.52 |
| Q62276_M Med22     | Mediator o    | 3  | 2.7  | 7.3   | 7.9   | 0.4 | 0.33 | 2.99 | 29.0   | 29.2   | 35.5   | 1.0 | 0.82 | 1.22 |
| Q3UG54_F: Fam195b  | Protein FAM   | 1  | 3.5  | 9.7   | 10.6  | 0.4 | 0.33 | 2.99 | 3.5    | 9.7    | 11.8   | 0.4 | 0.30 | 3.34 |
| Q62219_TK Tgfb11   | Transformin   | 1  | 2.7  | 7.6   | 8.2   | 0.4 | 0.33 | 3.02 | 2.7    | 7.6    | 9.2    | 0.4 | 0.30 | 3.37 |
| F8VQL9_F8 Ncor2    | Nuclear rec   | 20 | 5.6  | 15.4  | 16.8  | 0.4 | 0.33 | 3.02 | 204.7  | 398.5  | 485.0  | 0.5 | 0.42 | 2.37 |
| Q99M46_C Polr2c    | DNA-direct    | 6  | 9.5  | 26.3  | 28.7  | 0.4 | 0.33 | 3.03 | 135.0  | 191.6  | 233.2  | 0.7 | 0.58 | 1.73 |
| Q3U7R1_Ei Eyt1     | Extended sJ   | 4  | 5.6  | 15.5  | 16.9  | 0.4 | 0.33 | 3.03 | 26.7   | 60.5   | 73.7   | 0.4 | 0.36 | 2.76 |
| Q99104_M Myo5a     | Unconvent     | 3  | 2.6  | 7.3   | 7.9   | 0.4 | 0.33 | 3.03 | 7.1    | 23.3   | 28.3   | 0.3 | 0.25 | 3.96 |
| Q3UPH7_A Arhgef40  | Rho guanin    | 5  | 4.5  | 12.4  | 13.5  | 0.4 | 0.33 | 3.04 | 22.2   | 60.1   | 73.2   | 0.4 | 0.30 | 3.30 |
| Q8BH97_R Rcn3      | Reticulocol   | 3  | 2.6  | 7.2   | 7.9   | 0.4 | 0.33 | 3.04 | 7.4    | 22.0   | 26.7   | 0.3 | 0.28 | 3.61 |
| Q6ZP23_ZC Zc3h4    | Zinc finger r | 9  | 4.1  | 11.4  | 12.4  | 0.4 | 0.33 | 3.04 | 47.9   | 106.1  | 129.1  | 0.5 | 0.37 | 2.70 |
| Q9JL16_ISK Isg20   | Interferon-   | 3  | 7.3  | 20.4  | 22.2  | 0.4 | 0.33 | 3.04 | 43.4   | 62.2   | 75.8   | 0.7 | 0.57 | 1.74 |
| Q78Y26_SC Scoc     | Short coile   | 1  | 8.0  | 22.3  | 24.3  | 0.4 | 0.33 | 3.04 | 8.0    | 22.3   | 27.1   | 0.4 | 0.29 | 3.39 |
| Q9ES56_TP Trappc4  | Trafficking j | 2  | 2.5  | 6.8   | 7.5   | 0.4 | 0.33 | 3.05 | 4.9    | 13.7   | 16.7   | 0.4 | 0.29 | 3.40 |
| Q9CQAS_N Med4      | Mediator o    | 1  | 4.6  | 12.7  | 13.9  | 0.4 | 0.33 | 3.05 | 4.6    | 12.7   | 15.5   | 0.4 | 0.29 | 3.40 |
| P58462_FC Foxp1    | Forkhead      |    |      |       |       |     |      |      |        |        |        |     |      |      |

|                      |               |     |       |       |       |     |      |      |         |         |         |     |      |      |
|----------------------|---------------|-----|-------|-------|-------|-----|------|------|---------|---------|---------|-----|------|------|
| Q9D720_N Nsmc1       | Non-structi   | 2   | 4.0   | 11.8  | 12.9  | 0.3 | 0.31 | 3.24 | 8.0     | 23.6    | 28.8    | 0.3 | 0.28 | 3.61 |
| Q8BV71_Hu Hat1       | Histone ace   | 5   | 4.5   | 13.5  | 14.8  | 0.3 | 0.31 | 3.24 | 39.9    | 66.2    | 80.5    | 0.6 | 0.49 | 2.02 |
| P27600_Gl Guan12     | Guanine nu    | 1   | 101.0 | 300.9 | 328.3 | 0.3 | 0.31 | 3.25 | 101.0   | 300.9   | 366.3   | 0.3 | 0.28 | 3.63 |
| Q4FZF3_DF Ddx49      | Probable A    | 1   | 2.9   | 8.7   | 9.4   | 0.3 | 0.31 | 3.25 | 2.9     | 8.7     | 10.5    | 0.3 | 0.28 | 3.63 |
| P62996_TR Tra2b      | Transforme    | 6   | 36.8  | 110.0 | 120.0 | 0.3 | 0.31 | 3.26 | 655.5   | 788.1   | 959.2   | 0.8 | 0.68 | 1.46 |
| P45481_Cf Crebbp     | CREB-bindi    | 5   | 5.0   | 15.0  | 16.3  | 0.3 | 0.31 | 3.26 | 21.3    | 60.3    | 73.4    | 0.4 | 0.29 | 3.45 |
| Q8R2Q8_B Bst2        | Bone marrc    | 9   | 9.2   | 27.5  | 30.0  | 0.3 | 0.31 | 3.26 | 132.0   | 282.5   | 343.8   | 0.5 | 0.38 | 2.60 |
| P62315_SH Snrpd1     | Small nucle   | 9   | 9.9   | 29.7  | 32.4  | 0.3 | 0.31 | 3.26 | 275.1   | 386.4   | 470.3   | 0.7 | 0.58 | 1.71 |
| P40338_VH Vhl        | Von Hippel    | 1   | 2.3   | 7.0   | 7.6   | 0.3 | 0.31 | 3.27 | 2.3     | 7.0     | 8.5     | 0.3 | 0.27 | 3.64 |
| Q8BT18_SR Srrm2      | Serine/argi   | 37  | 7.2   | 21.6  | 23.6  | 0.3 | 0.31 | 3.27 | 520.2   | 1029.3  | 1252.8  | 0.5 | 0.42 | 2.41 |
| Q60668_HI Hnrnpd     | Heterogene    | 13  | 9.7   | 29.3  | 31.9  | 0.3 | 0.30 | 3.29 | 286.5   | 630.8   | 767.8   | 0.5 | 0.37 | 2.68 |
| Q9JJI8_RL3 Rpl38     | 60S ribosor   | 3   | 15.6  | 47.1  | 51.3  | 0.3 | 0.30 | 3.30 | 104.8   | 288.6   | 351.3   | 0.4 | 0.30 | 3.35 |
| Q99KG3_RI Rbm10      | RNA-bindin    | 10  | 6.6   | 19.9  | 21.7  | 0.3 | 0.30 | 3.30 | 97.5    | 287.6   | 287.6   | 0.4 | 0.34 | 2.95 |
| OS5013_TF Trappc3    | Trafficking j | 3   | 8.1   | 24.5  | 26.7  | 0.3 | 0.30 | 3.31 | 23.5    | 70.5    | 85.8    | 0.3 | 0.27 | 3.65 |
| Q8CBY8_DI Dctn4      | Dynactin su   | 8   | 6.3   | 19.2  | 20.9  | 0.3 | 0.30 | 3.33 | 188.7   | 204.9   | 249.4   | 0.9 | 0.76 | 1.32 |
| Q8BI26_SN Snip1      | Smad nucle    | 2   | 4.5   | 13.8  | 15.0  | 0.3 | 0.30 | 3.33 | 9.0     | 27.5    | 33.5    | 0.3 | 0.27 | 3.71 |
| P28033_CI Cebp       | CCAAT/enh     | 1   | 2.6   | 7.9   | 8.6   | 0.3 | 0.30 | 3.34 | 2.6     | 7.9     | 9.6     | 0.3 | 0.27 | 3.73 |
| E9PX91_E9 Pisd       | Phosphatid    | 1   | 1.6   | 5.1   | 5.5   | 0.3 | 0.30 | 3.34 | 1.6     | 5.1     | 6.1     | 0.3 | 0.27 | 3.73 |
| P53994_R4 Rab2a      | Ras-related   | 6   | 6.5   | 20.1  | 22.0  | 0.3 | 0.30 | 3.35 | 79.6    | 120.6   | 146.8   | 0.7 | 0.54 | 1.84 |
| P28574_M Max         | Protein ma    | 2   | 4.3   | 13.4  | 14.6  | 0.3 | 0.30 | 3.36 | 8.7     | 26.8    | 32.6    | 0.3 | 0.27 | 3.75 |
| Q9CQT2_RI Rbm7       | RNA-bindin    | 6   | 8.7   | 26.7  | 29.1  | 0.3 | 0.30 | 3.36 | 124.5   | 136.0   | 165.5   | 0.9 | 0.75 | 1.33 |
| Q6PGF7_E Ecoc8       | Exocyst cor   | 2   | 2.2   | 6.9   | 7.5   | 0.3 | 0.30 | 3.38 | 4.4     | 13.8    | 16.8    | 0.3 | 0.27 | 3.77 |
| O08573_LF Lgals9     | Galectin-9    | 1   | 3.0   | 9.2   | 10.1  | 0.3 | 0.29 | 3.39 | 3.0     | 9.2     | 11.2    | 0.3 | 0.26 | 3.79 |
| P68433_HI Hist1h3a   | Histone H3    | 21  | 77.8  | 242.6 | 264.6 | 0.3 | 0.29 | 3.40 | 11776.4 | 20792.3 | 25307.7 | 0.6 | 0.47 | 2.15 |
| P54116_ST Stom       | Erythrocyt    | 1   | 2.7   | 8.4   | 9.2   | 0.3 | 0.29 | 3.41 | 2.7     | 8.4     | 10.3    | 0.3 | 0.26 | 3.81 |
| P62307_RI Snrpf      | Small nucle   | 3   | 5.0   | 15.8  | 17.2  | 0.3 | 0.29 | 3.43 | 23.7    | 60.7    | 73.9    | 0.4 | 0.32 | 3.12 |
| P61027_R4 Rab10      | Ras-related   | 5   | 4.7   | 15.0  | 16.4  | 0.3 | 0.29 | 3.45 | 45.4    | 70.1    | 85.4    | 0.6 | 0.53 | 1.88 |
| A2AJI0_MA Map7d1     | MAP7 dom      | 1   | 4.6   | 14.5  | 15.8  | 0.3 | 0.29 | 3.46 | 4.6     | 14.5    | 17.7    | 0.3 | 0.26 | 3.86 |
| Q99020_RI Hnrnpab    | Heterogene    | 8   | 17.8  | 56.7  | 61.8  | 0.3 | 0.29 | 3.47 | 275.3   | 647.2   | 787.7   | 0.4 | 0.35 | 2.86 |
| Q6PF09_NI Nup98      | Nuclear poi   | 2   | 3.2   | 10.3  | 11.2  | 0.3 | 0.29 | 3.47 | 6.5     | 20.6    | 25.0    | 0.3 | 0.26 | 3.88 |
| Q3V1T4_YI Lepre1     | Prolyl 3-hy   | 3   | 4.9   | 15.6  | 17.1  | 0.3 | 0.29 | 3.48 | 33.9    | 54.1    | 65.9    | 0.6 | 0.52 | 1.94 |
| Q62383_SU Suptf6h    | Transcripti   | 32  | 5.8   | 18.5  | 20.2  | 0.3 | 0.29 | 3.50 | 374.9   | 711.3   | 865.8   | 0.5 | 0.43 | 2.31 |
| Q8BIW9_C Chtf18      | Chromosor     | 2   | 2.5   | 8.0   | 8.7   | 0.3 | 0.28 | 3.52 | 5.0     | 16.0    | 19.5    | 0.3 | 0.25 | 3.92 |
| Q02566_M Myh6        | Myosin-6 O    | 1   | 5.5   | 17.7  | 19.3  | 0.3 | 0.28 | 3.52 | 5.5     | 17.7    | 21.5    | 0.3 | 0.25 | 3.93 |
| Q99JH1_RI Rpp25l     | Ribonuclea    | 1   | 6.4   | 20.6  | 22.5  | 0.3 | 0.28 | 3.52 | 6.4     | 20.6    | 25.1    | 0.3 | 0.25 | 3.93 |
| P47754_CI Capza2     | F-actin-cap   | 6   | 10.4  | 33.7  | 36.7  | 0.3 | 0.28 | 3.53 | 96.5    | 199.8   | 243.2   | 0.5 | 0.40 | 2.52 |
| Q9D8C6_M Med11       | Mediator o    | 1   | 4.4   | 14.2  | 15.4  | 0.3 | 0.28 | 3.53 | 4.4     | 14.2    | 17.2    | 0.3 | 0.25 | 3.94 |
| Q8BG05_RI Hnrnpa3    | Heterogene    | 5   | 7.2   | 23.3  | 25.4  | 0.3 | 0.28 | 3.54 | 44.6    | 156.6   | 190.6   | 0.3 | 0.23 | 4.27 |
| Q8BHS3_RI Rbm22      | Pre-mRNA-     | 7   | 7.1   | 23.2  | 25.4  | 0.3 | 0.28 | 3.55 | 97.7    | 235.1   | 286.2   | 0.4 | 0.34 | 2.93 |
| Q8VHN7_G Gpr98       | G-protein c   | 1   | 8.9   | 29.3  | 31.9  | 0.3 | 0.28 | 3.57 | 8.9     | 29.3    | 35.6    | 0.3 | 0.25 | 3.98 |
| Q9R061_NI Nubp2      | Cytosolic F   | 1   | 2.6   | 8.5   | 9.2   | 0.3 | 0.28 | 3.58 | 2.6     | 8.5     | 10.3    | 0.3 | 0.25 | 3.99 |
| O08547_SC Sec22b     | Vesicle-traf  | 2   | 1.9   | 6.2   | 6.8   | 0.3 | 0.28 | 3.59 | 3.8     | 12.4    | 15.1    | 0.3 | 0.25 | 4.01 |
| P11276_FI Fln        | Fibronectir   | 57  | 14.7  | 48.5  | 52.9  | 0.3 | 0.28 | 3.60 | 2307.0  | 3718.4  | 4525.9  | 0.6 | 0.51 | 1.96 |
| Q9CSN1_SF Snw1       | SNW doma      | 19  | 6.8   | 22.6  | 24.7  | 0.3 | 0.28 | 3.60 | 253.0   | 658.0   | 800.9   | 0.4 | 0.32 | 3.17 |
| Q9R1P3_P1 Psmb2      | Proteasom     | 1   | 2.8   | 9.2   | 10.0  | 0.3 | 0.27 | 3.64 | 2.8     | 9.2     | 11.2    | 0.3 | 0.25 | 4.06 |
| Q9WU00_I Nrf1        | Nuclear res   | 3   | 3.8   | 12.7  | 13.9  | 0.3 | 0.27 | 3.65 | 11.3    | 36.8    | 44.8    | 0.3 | 0.25 | 3.95 |
| P60710_AC Actb       | Actin, cyto   | 32  | 61.0  | 204.9 | 223.5 | 0.3 | 0.27 | 3.66 | 6346.8  | 11871.9 | 14450.1 | 0.5 | 0.44 | 2.28 |
| Q9D4H9_P Phf14       | PHD finger    | 6   | 3.5   | 11.7  | 12.8  | 0.3 | 0.27 | 3.68 | 27.1    | 73.1    | 89.0    | 0.4 | 0.30 | 3.28 |
| OS5135_JF Eif6       | Eukaryotic    | 2   | 5.5   | 18.4  | 20.1  | 0.3 | 0.27 | 3.68 | 10.9    | 36.8    | 44.8    | 0.3 | 0.24 | 4.11 |
| Q921W4_C Cryz1       | Quinone ox    | 1   | 1.9   | 6.3   | 6.9   | 0.3 | 0.27 | 3.69 | 1.9     | 6.3     | 7.7     | 0.3 | 0.24 | 4.12 |
| Q8R0F5_RI Rbm2c      | RNA-bindin    | 1   | 8.2   | 27.7  | 30.2  | 0.3 | 0.27 | 3.70 | 8.2     | 27.7    | 33.7    | 0.3 | 0.24 | 4.13 |
| Q61696_HI Hspa1a     | Heat shock    | 5   | 16.9  | 57.5  | 62.8  | 0.3 | 0.27 | 3.72 | 112.6   | 369.9   | 450.2   | 0.3 | 0.25 | 4.00 |
| Q8BGFO_Q AW551984    | Protein AW    | 1   | 1.4   | 4.6   | 5.1   | 0.3 | 0.27 | 3.72 | 1.4     | 4.6     | 5.6     | 0.3 | 0.24 | 4.15 |
| P17809_GI Sic2a1     | Solute carri  | 1   | 4.1   | 14.1  | 15.3  | 0.3 | 0.27 | 3.77 | 4.1     | 14.1    | 17.1    | 0.3 | 0.24 | 4.20 |
| OS4864_SL Suv39h1    | Histone-lys   | 1   | 5.5   | 19.1  | 20.8  | 0.3 | 0.27 | 3.77 | 5.5     | 19.1    | 23.2    | 0.3 | 0.24 | 4.21 |
| Q8C417_TB Tbl3       | Transducin    | 3   | 3.0   | 10.3  | 11.2  | 0.3 | 0.26 | 3.78 | 25.2    | 32.3    | 39.3    | 0.8 | 0.64 | 1.56 |
| O70157_TC Top3a      | DNA topois    | 1   | 2.3   | 7.9   | 8.6   | 0.3 | 0.26 | 3.78 | 2.3     | 7.9     | 9.6     | 0.3 | 0.24 | 4.22 |
| Q6GSS7_HI Hist2h2aa1 | Histone H2    | 8   | 22.9  | 79.9  | 87.2  | 0.3 | 0.26 | 3.80 | 1306.0  | 1846.1  | 2247.0  | 0.7 | 0.58 | 1.72 |
| Q9CQ79_T Txdn9       | Thioredoxin   | 2   | 4.7   | 16.4  | 17.9  | 0.3 | 0.26 | 3.82 | 9.4     | 32.8    | 39.9    | 0.3 | 0.23 | 4.26 |
| Q8CH18_EP Ep400      | E1A-bindin    | 5   | 3.2   | 11.1  | 12.1  | 0.3 | 0.26 | 3.82 | 21.9    | 51.1    | 62.2    | 0.4 | 0.35 | 2.84 |
| P30999_CT Ctnnd1     | Catenin del   | 5   | 4.2   | 14.8  | 16.1  | 0.3 | 0.26 | 3.83 | 86.0    | 60.2    | 73.3    | 1.4 | 1.17 | 0.85 |
| Q9CY50_SS Ssr1       | Translocon    | 1   | 3.2   | 11.4  | 12.4  | 0.3 | 0.26 | 3.84 | 3.2     | 11.4    | 13.8    | 0.3 | 0.23 | 4.29 |
| Q9DCF9_SS Ssr3       | Translocon    | 1   | 2.4   | 8.4   | 9.1   | 0.3 | 0.26 | 3.84 | 2.4     | 8.4     | 10.2    | 0.3 | 0.23 | 4.29 |
| Q9JJG0_TA Tacc2      | Transformin   | 1   | 1.7   | 6.2   | 6.7   | 0.3 | 0.26 | 3.86 | 1.7     | 6.2     | 7.5     | 0.3 | 0.23 | 4.31 |
| Q8OTM9_N Nisch       | Nischarin C   | 3   | 4.1   | 14.7  | 16.0  | 0.3 | 0.26 | 3.87 | 10.6    | 41.3    | 50.3    | 0.3 | 0.21 | 4.75 |
| Q8R323_RI Rfc3       | Replication   | 8   | 4.8   | 16.9  | 18.5  | 0.3 | 0.26 | 3.89 | 45.4    | 144.1   | 175.4   | 0.3 | 0.26 | 3.87 |
| Q920Q4_VI Vps16      | Vacuolar pr   | 3   | 2.0   | 7.3   | 7.9   | 0.3 | 0.26 | 3.92 | 12.1    | 27.4    | 33.4    | 0.4 | 0.36 | 2.76 |
| Q8C6G8_W Wdr26       | WD repeat-    | 3   | 2.5   | 9.0   | 9.8   | 0.3 | 0.26 | 3.92 | 9.7     | 28.4    | 34.5    | 0.3 | 0.28 | 3.55 |
| Q8BZ20_P1 Parp12     | Poly[ADP-r    | 1   | 4.0   | 14.4  | 15.8  | 0.3 | 0.25 | 3.94 | 4.0     | 14.4    | 17.6    | 0.3 | 0.23 | 4.40 |
| P62806_HV Hist1h4a   | Histone H4    | 29  | 26.6  | 96.4  | 105.1 | 0.3 | 0.25 | 3.95 | 13669.1 | 25951.4 | 31587.2 | 0.5 | 0.43 | 2.31 |
| Q99LTO_DF Dpy30      | Protein dpy   | 1   | 7.4   | 26.9  | 29.4  | 0.3 | 0.25 | 3.95 | 7.4     | 26.9    | 32.8    | 0.3 | 0.23 | 4.40 |
| P70257_NI Nfix       | Nuclear fac   | 11  | 3.3   | 12.3  | 13.4  | 0.3 | 0.25 | 4.00 | 81.8    | 138.7   | 168.9   | 0.6 | 0.48 | 2.06 |
| A2BE28_LA Las1l      | Ribosomal     | 4   | 4.3   | 15.8  | 17.2  | 0.3 | 0.25 | 4.02 | 27.8    | 63.1    | 76.8    | 0.4 | 0.36 | 2.76 |
| Q925I9_M Med1        | Mediator o    | 1   | 2.9   | 10.7  | 11.7  | 0.3 | 0.25 | 4.02 | 2.9     | 10.7    | 13.1    | 0.3 | 0.22 | 4.48 |
| Q3UPF5_ZC3hav1       | Zinc finger   | 7   | 2.9   | 10.5  | 11.5  | 0.3 | 0.25 | 4.02 | 26.1    | 65.6    | 79.8    | 0.4 | 0.33 | 3.05 |
| Q63871_RI Polr2k     | DNA-direct    | 1   | 12.3  | 45.5  | 49.6  | 0.3 | 0.25 | 4.03 | 12.3    | 45.5    | 55.3    | 0.3 | 0.22 | 4.49 |
| Q80YR9_RI Rbm12b1    | RNA-bindin    | 1   | 2.4   | 8.7   | 9.5   | 0.3 | 0.25 | 4.03 | 2.4     | 8.7     | 10.6    | 0.3 | 0.22 | 4.50 |
| Q99K28_AI Arfgap2    | ADP-ribosy    | 8   | 4.4   | 16.2  | 17.7  | 0.3 | 0.25 | 4.04 | 43.7    | 132.3   | 161.0   | 0.3 | 0.27 | 3.68 |
| Q9D0W5_F Pp1l        | Peptidyl-pr   | 2   | 5.0   | 18.5  | 20.1  | 0.3 | 0.25 | 4.04 | 10.0    | 36.9    | 44.9    | 0.3 | 0.22 | 4.51 |
| Q3TH56_M Mat2a       | S-adenosylr   | 2   | 1.7   | 6.4   | 7.0   | 0.3 | 0.25 | 4.05 | 3.5     | 12.8    | 15.6    | 0.3 | 0.22 | 4.51 |
| Q8BU11_TX Tox4       | TOX high m    | 5   | 4.2   | 15.6  | 17.0  | 0.3 | 0.25 | 4.06 | 58.7    | 102.1   | 124.3   | 0.6 | 0.47 | 2.12 |
| Q64310_SL Surf4      | Surfeit locu  | 1   | 9.5   | 35.6  | 38.9  | 0.3 | 0.25 | 4.07 | 9.5     | 35.6    | 43.4    | 0.3 | 0.22 | 4.54 |
| A6PWY4_W Wdr76       | WD repeat-    | 7   | 2.3   | 8.4   | 9.2   | 0.3 | 0.24 | 4.08 | 18.7    | 62.4    | 75.9    | 0.3 | 0.25 | 4.06 |
| Q8BL97_SF Srsf7      | Serine/argi   | 5   | 15.4  | 58.0  | 63.2  | 0.3 | 0.24 | 4.11 | 263.7   | 357.8   | 435.5   | 0.7 | 0.61 | 1.65 |
| Q9D0E1_HI Hnrnpm     | Heterogene    | 139 | 13.0  | 49.1  | 53.6  | 0.3 | 0.24 | 4.13 | 5701.0  | 13172.3 | 16032.9 | 0.4 | 0.36 | 2.81 |
| Q9ER81_JF Tor1aip2   | Torsin-1A-i   | 1   | 5.5   | 21.0  | 22.9  | 0.3 | 0.24 | 4.13 | 5.5     | 21.0    | 25.5    | 0.3 | 0.22 | 4.61 |
| Q60974_N Ncor1       | Nuclear rec   | 3   | 2.9   | 11.1  | 12.1  | 0.3 | 0.24 | 4.14 | 16.2    | 33.2    | 40.5    | 0.5 | 0.40 | 2.50 |
| Q922D8_M Mbd3        | Methyl-CpC    | 8   | 4.6   | 17.3  | 18.9  | 0.3 | 0.24 | 4.14 | 43.5    | 157.1   | 191.2   | 0.3 | 0.23 | 4.39 |
| P61022_CI            |               |     |       |       |       |     |      |      |         |         |         |     |      |      |

|                     |               |    |       |       |        |     |      |       |        |        |        |     |      |       |
|---------------------|---------------|----|-------|-------|--------|-----|------|-------|--------|--------|--------|-----|------|-------|
| Q9R233_Tf Tapbp     | Tapasin OS-   | 1  | 3.2   | 13.2  | 14.3   | 0.2 | 0.22 | 4.52  | 3.2    | 13.2   | 16.0   | 0.2 | 0.20 | 5.05  |
| Q9DAS9_Gl Gng12     | Guanine nu    | 1  | 8.2   | 34.6  | 37.7   | 0.2 | 0.22 | 4.61  | 8.2    | 34.6   | 42.1   | 0.2 | 0.19 | 5.14  |
| Q9CQ65_M Mtap       | S-methyl-5'   | 1  | 1.8   | 7.5   | 8.1    | 0.2 | 0.22 | 4.61  | 1.8    | 7.5    | 9.1    | 0.2 | 0.19 | 5.14  |
| Q9L48_NI Nmd3       | 60S ribosor   | 2  | 2.7   | 11.3  | 12.3   | 0.2 | 0.22 | 4.62  | 5.3    | 22.6   | 27.5   | 0.2 | 0.19 | 5.15  |
| Q9D2D7_ZI Zn687     | Zinc finger J | 4  | 4.7   | 19.9  | 21.7   | 0.2 | 0.22 | 4.65  | 28.7   | 74.5   | 90.6   | 0.4 | 0.32 | 3.15  |
| P63044_V Vamp2      | Vesicle-assc  | 1  | 10.2  | 43.7  | 47.7   | 0.2 | 0.21 | 4.66  | 10.2   | 43.7   | 53.2   | 0.2 | 0.19 | 5.20  |
| Q8BP71_RI Rbfox2    | RNA bindin    | 6  | 6.9   | 29.5  | 32.2   | 0.2 | 0.21 | 4.68  | 39.3   | 199.8  | 243.2  | 0.2 | 0.16 | 6.18  |
| Q923D1_Q Zfp61      | Protein Zfp   | 1  | 3.7   | 16.0  | 17.4   | 0.2 | 0.21 | 4.71  | 3.7    | 16.0   | 19.4   | 0.2 | 0.19 | 5.25  |
| Q912X7_LF Lrp1      | Prolow-der    | 1  | 1.6   | 7.0   | 7.6    | 0.2 | 0.21 | 4.72  | 1.6    | 7.0    | 8.5    | 0.2 | 0.19 | 5.26  |
| Q8BMZ5_Sl Tsen34    | tRNA-splici   | 1  | 2.1   | 9.1   | 9.9    | 0.2 | 0.21 | 4.74  | 2.1    | 9.1    | 11.1   | 0.2 | 0.19 | 5.28  |
| P14404_Ev Mecom     | MDS1 and f    | 4  | 3.3   | 14.3  | 15.6   | 0.2 | 0.21 | 4.74  | 27.6   | 59.6   | 72.5   | 0.5 | 0.38 | 2.63  |
| Q8BPM2_N Map4k5     | Mitogen-ac    | 2  | 9.0   | 39.1  | 42.6   | 0.2 | 0.21 | 4.75  | 18.0   | 78.1   | 95.1   | 0.2 | 0.19 | 5.30  |
| D3YWT1_D Hnrrnph3   | MCG11326      | 5  | 4.9   | 21.6  | 23.6   | 0.2 | 0.21 | 4.79  | 81.8   | 126.0  | 153.4  | 0.6 | 0.53 | 1.88  |
| O88522_NI Ikbkg     | NF-kappa-B    | 1  | 2.1   | 9.2   | 10.0   | 0.2 | 0.21 | 4.79  | 2.1    | 9.2    | 11.2   | 0.2 | 0.19 | 5.35  |
| Q61329_Zf Zfhx3     | Zinc finger I | 1  | 2.0   | 8.9   | 9.8    | 0.2 | 0.21 | 4.80  | 2.0    | 8.9    | 10.9   | 0.2 | 0.19 | 5.35  |
| E9Q7N9_Ef Dnah11    | Protein Dna   | 2  | 14.9  | 65.4  | 71.4   | 0.2 | 0.21 | 4.80  | 29.7   | 130.9  | 159.3  | 0.2 | 0.19 | 5.36  |
| Q9D2L9_FJ Fam111a   | Protein FAF   | 1  | 3.3   | 14.5  | 15.9   | 0.2 | 0.21 | 4.81  | 3.3    | 14.5   | 17.7   | 0.2 | 0.19 | 5.37  |
| Q8R149_BI Bud13     | BUD13 hon     | 3  | 4.4   | 19.4  | 21.1   | 0.2 | 0.21 | 4.82  | 15.5   | 54.4   | 66.2   | 0.3 | 0.23 | 4.26  |
| Q91YE5_BA Baz2a     | Bromodom      | 2  | 2.1   | 9.3   | 10.2   | 0.2 | 0.21 | 4.82  | 4.2    | 18.6   | 22.7   | 0.2 | 0.19 | 5.38  |
| P01899_HI H2-D1     | H-2 class I h | 23 | 4.8   | 21.3  | 23.3   | 0.2 | 0.21 | 4.85  | 219.1  | 497.2  | 605.1  | 0.4 | 0.36 | 2.76  |
| P84089_ER Erh       | Enhancer o    | 2  | 17.2  | 76.4  | 83.3   | 0.2 | 0.21 | 4.86  | 34.3   | 152.8  | 186.0  | 0.2 | 0.18 | 5.42  |
| Q8VDP6_CI Cdipt     | CDP-diaclyl   | 1  | 1.4   | 6.2   | 6.8    | 0.2 | 0.20 | 4.89  | 1.4    | 6.2    | 7.6    | 0.2 | 0.18 | 5.46  |
| P28653_PC Bgn       | Biglycan OS   | 1  | 2.7   | 12.0  | 13.0   | 0.2 | 0.20 | 4.90  | 2.7    | 12.0   | 14.5   | 0.2 | 0.18 | 5.46  |
| Q9CZK5_PI Pinx1     | PIN2/TERF1    | 1  | 2.4   | 10.7  | 11.7   | 0.2 | 0.20 | 4.92  | 2.4    | 10.7   | 13.0   | 0.2 | 0.18 | 5.49  |
| Q6DIDS_M Mum1       | PWWP don      | 1  | 2.1   | 9.4   | 10.3   | 0.2 | 0.20 | 4.95  | 2.1    | 9.4    | 11.5   | 0.2 | 0.18 | 5.52  |
| Q8K280_SC Leprel4   | Synaptoner    | 1  | 1.5   | 7.0   | 7.6    | 0.2 | 0.20 | 4.97  | 1.5    | 7.0    | 8.5    | 0.2 | 0.18 | 5.55  |
| G5E8P1_GI Brd1      | MCG7283 (     | 4  | 4.9   | 22.6  | 24.6   | 0.2 | 0.20 | 4.99  | 35.5   | 112.2  | 136.5  | 0.3 | 0.26 | 3.84  |
| Q923G2_RI Polr2h    | DNA-direct    | 5  | 6.1   | 27.8  | 30.4   | 0.2 | 0.20 | 4.99  | 34.7   | 156.6  | 190.6  | 0.2 | 0.18 | 5.49  |
| E9Q4F8_E9 Ankrd11   | Protein Anl   | 1  | 1.9   | 8.7   | 9.5    | 0.2 | 0.20 | 5.01  | 1.9    | 8.7    | 10.6   | 0.2 | 0.18 | 5.59  |
| Q9D883_U U2af1      | Splicing fac  | 5  | 11.7  | 54.4  | 59.4   | 0.2 | 0.20 | 5.07  | 118.3  | 485.7  | 591.2  | 0.2 | 0.20 | 5.00  |
| Q9D083_SI Spc24     | Kinetochor    | 2  | 1.8   | 8.3   | 9.0    | 0.2 | 0.20 | 5.10  | 3.5    | 16.5   | 20.1   | 0.2 | 0.18 | 5.69  |
| P01887_BI B2m       | Beta-2-mici   | 2  | 12.9  | 60.4  | 65.9   | 0.2 | 0.20 | 5.12  | 25.7   | 120.8  | 147.0  | 0.2 | 0.17 | 5.72  |
| P20152_VI Vim       | Vimentin O    | 7  | 4.8   | 22.7  | 24.8   | 0.2 | 0.19 | 5.16  | 53.3   | 154.1  | 187.5  | 0.3 | 0.28 | 3.52  |
| P05627_JL Jun       | Transcripti   | 1  | 1.8   | 8.7   | 9.5    | 0.2 | 0.19 | 5.17  | 1.8    | 8.7    | 10.6   | 0.2 | 0.17 | 5.76  |
| F6ZQA3_F6 Numa1     | Protein Nuu   | 2  | 6.5   | 30.6  | 33.4   | 0.2 | 0.19 | 5.17  | 12.9   | 61.2   | 74.5   | 0.2 | 0.17 | 5.77  |
| Q80XP8_FJ Fam76b    | Protein FAF   | 3  | 3.9   | 18.6  | 20.3   | 0.2 | 0.19 | 5.19  | 25.9   | 45.9   | 55.8   | 0.6 | 0.46 | 2.15  |
| Q80YR5_SA Safb2     | Scaffold att  | 5  | 3.5   | 16.4  | 17.9   | 0.2 | 0.19 | 5.19  | 19.2   | 79.9   | 97.2   | 0.2 | 0.20 | 5.07  |
| Q9PP77_TF Trim33    | E3 ubiquiti   | 2  | 3.1   | 14.8  | 16.1   | 0.2 | 0.19 | 5.19  | 6.2    | 29.5   | 35.9   | 0.2 | 0.17 | 5.79  |
| Q64522_HI Hist2h2ab | Histone H2    | 3  | 32.1  | 153.4 | 167.4  | 0.2 | 0.19 | 5.22  | 481.0  | 727.5  | 885.5  | 0.7 | 0.54 | 1.84  |
| Q61602_GI Gli3      | Transcripti   | 1  | 1.4   | 6.8   | 7.5    | 0.2 | 0.19 | 5.30  | 1.4    | 6.8    | 8.3    | 0.2 | 0.17 | 5.92  |
| Q78ZM0_QI Srx3      | Sorting nex   | 7  | 11.6  | 56.7  | 61.9   | 0.2 | 0.19 | 5.34  | 169.2  | 335.0  | 407.7  | 0.5 | 0.42 | 2.41  |
| Q8C7Q4_RI Rbm4      | RNA-bindin    | 4  | 2.5   | 12.1  | 13.2   | 0.2 | 0.19 | 5.35  | 23.7   | 49.9   | 60.8   | 0.5 | 0.39 | 2.56  |
| Q91YH5_ATI At13     | Atlastin-3 C  | 2  | 2.4   | 12.0  | 13.1   | 0.2 | 0.19 | 5.37  | 4.9    | 24.0   | 29.2   | 0.2 | 0.17 | 5.99  |
| P97314_C1 Csrp2     | Cysteine an   | 7  | 12.3  | 60.6  | 66.1   | 0.2 | 0.19 | 5.37  | 580.3  | 858.0  | 1044.4 | 0.7 | 0.56 | 1.80  |
| Q61792_LI Lasp1     | LIM and SH    | 9  | 8.6   | 43.0  | 46.9   | 0.2 | 0.18 | 5.43  | 197.1  | 317.8  | 386.9  | 0.6 | 0.51 | 1.96  |
| P97376_FR Frg1      | Protein FRC   | 1  | 1.8   | 8.8   | 9.6    | 0.2 | 0.18 | 5.51  | 1.8    | 8.8    | 10.8   | 0.2 | 0.16 | 6.14  |
| Q91V81_RI Rbm42     | RNA-bindin    | 4  | 2.9   | 14.6  | 15.9   | 0.2 | 0.18 | 5.57  | 25.2   | 52.9   | 64.4   | 0.5 | 0.39 | 2.56  |
| Q6PFQ7_RV Rsa4      | Ras GTPase    | 1  | 1.5   | 8.0   | 8.7    | 0.2 | 0.18 | 5.66  | 1.5    | 8.0    | 9.7    | 0.2 | 0.16 | 6.32  |
| O35216_CI Cenpa     | Histone H3    | 1  | 2.2   | 11.7  | 12.8   | 0.2 | 0.18 | 5.68  | 2.2    | 11.7   | 14.2   | 0.2 | 0.16 | 6.33  |
| J3QNWO_JI Dnm11     | DNA (cytosi   | 2  | 3.6   | 19.0  | 20.8   | 0.2 | 0.18 | 5.71  | 7.3    | 38.1   | 46.3   | 0.2 | 0.16 | 6.37  |
| P51480_CI Cdkn2a    | Cyclin-depr   | 1  | 2.9   | 15.3  | 16.7   | 0.2 | 0.17 | 5.74  | 2.9    | 15.3   | 18.6   | 0.2 | 0.16 | 6.41  |
| Q6ZWY9_HI Hist1h2bc | Histone H2    | 1  | 179.0 | 944.5 | 1030.3 | 0.2 | 0.17 | 5.76  | 179.0  | 944.5  | 1149.6 | 0.2 | 0.16 | 6.42  |
| Q5SU73_CI Coil      | Coilin OS=A   | 1  | 2.6   | 13.8  | 15.1   | 0.2 | 0.17 | 5.76  | 2.6    | 13.8   | 16.8   | 0.2 | 0.16 | 6.43  |
| Q9CQL7_M Mrflap1    | MORF4 fam     | 2  | 3.7   | 19.4  | 21.2   | 0.2 | 0.17 | 5.79  | 7.3    | 38.8   | 47.3   | 0.2 | 0.15 | 6.46  |
| P15379_CI Cd44      | CD44 antig    | 1  | 6.4   | 33.7  | 36.8   | 0.2 | 0.17 | 5.79  | 6.4    | 33.7   | 41.1   | 0.2 | 0.15 | 6.46  |
| Q8K1E0_ST Stx5      | Syntaxin-5    | 1  | 0.9   | 4.8   | 5.3    | 0.2 | 0.17 | 5.84  | 0.9    | 4.8    | 5.9    | 0.2 | 0.15 | 6.51  |
| Q9QYH6_M Maged1     | Melanoma-     | 1  | 2.2   | 11.9  | 12.9   | 0.2 | 0.17 | 5.87  | 2.2    | 11.9   | 14.4   | 0.2 | 0.15 | 6.55  |
| POCOA3_CI Chmp6     | Charged mu    | 1  | 1.8   | 10.0  | 10.9   | 0.2 | 0.17 | 5.94  | 1.8    | 10.0   | 12.2   | 0.2 | 0.15 | 6.63  |
| Q00288_PJ Pax8      | Paired box    | 2  | 2.8   | 15.3  | 16.6   | 0.2 | 0.17 | 5.99  | 5.6    | 30.5   | 37.1   | 0.2 | 0.15 | 6.68  |
| Q9JIY2_HAI Cbl1     | E3 ubiquiti   | 1  | 2.3   | 13.0  | 14.2   | 0.2 | 0.16 | 6.08  | 2.3    | 13.0   | 15.9   | 0.2 | 0.15 | 6.79  |
| P60898_RF Polr2i    | DNA-direct    | 2  | 7.6   | 43.8  | 47.8   | 0.2 | 0.16 | 6.25  | 15.3   | 87.6   | 106.6  | 0.2 | 0.14 | 6.97  |
| Q9JHJ0_TV Tmod3     | Tropomod      | 19 | 7.6   | 43.9  | 47.9   | 0.2 | 0.16 | 6.31  | 439.9  | 1439.2 | 1751.8 | 0.3 | 0.25 | 3.98  |
| Q148V8_FJ Fam83h    | Protein FAF   | 1  | 1.2   | 6.7   | 7.3    | 0.2 | 0.16 | 6.33  | 1.2    | 6.7    | 8.1    | 0.2 | 0.14 | 7.07  |
| Q922G2_FJ Fam76a    | Protein FAF   | 1  | 2.3   | 13.6  | 14.8   | 0.2 | 0.16 | 6.35  | 2.3    | 13.6   | 16.5   | 0.2 | 0.14 | 7.08  |
| Q3THW5_FJ H2afv     | Histone H2    | 3  | 86.6  | 505.5 | 551.4  | 0.2 | 0.16 | 6.36  | 1203.0 | 2191.6 | 2667.5 | 0.5 | 0.45 | 2.22  |
| Q8R344_CI Ccdc12    | Coiled-coil   | 2  | 4.2   | 24.6  | 26.9   | 0.2 | 0.16 | 6.42  | 8.4    | 49.3   | 60.0   | 0.2 | 0.14 | 7.17  |
| Q9D0B0_SI Srsf9     | Serine/argi   | 13 | 4.8   | 28.6  | 31.2   | 0.2 | 0.15 | 6.50  | 209.9  | 685.9  | 834.9  | 0.3 | 0.25 | 3.98  |
| G3X9B1_GI Heatr1    | HEAT repea    | 1  | 2.1   | 13.0  | 14.2   | 0.2 | 0.15 | 6.68  | 2.1    | 13.0   | 15.8   | 0.2 | 0.13 | 7.45  |
| Q8BVG8_N Nat14      | N-acetyltra   | 1  | 1.8   | 10.9  | 11.8   | 0.2 | 0.15 | 6.70  | 1.8    | 10.9   | 13.2   | 0.2 | 0.13 | 7.47  |
| Q9WTX8_N Mad11      | Mitotic spii  | 5  | 2.9   | 18.0  | 19.7   | 0.2 | 0.15 | 6.73  | 18.8   | 82.0   | 99.8   | 0.2 | 0.19 | 5.32  |
| Q91VT1_NI Nsmce2    | E3 SUMO-p     | 1  | 2.3   | 14.8  | 16.1   | 0.2 | 0.14 | 7.00  | 2.3    | 14.8   | 18.0   | 0.2 | 0.13 | 7.81  |
| A2A9Z5_A2 Gm53      | Protein Gm    | 1  | 1.7   | 11.3  | 12.4   | 0.2 | 0.14 | 7.21  | 1.7    | 11.3   | 13.8   | 0.2 | 0.12 | 8.04  |
| Q9ROUO_SI Srsf10    | Serine/argi   | 8  | 13.1  | 86.6  | 94.5   | 0.2 | 0.14 | 7.22  | 108.4  | 659.8  | 803.1  | 0.2 | 0.13 | 7.41  |
| P07214_SF Sparc     | SPARC OS=f    | 1  | 3.0   | 20.0  | 21.8   | 0.2 | 0.14 | 7.23  | 3.0    | 20.0   | 24.4   | 0.2 | 0.12 | 8.06  |
| P62892_RI Rpl39     | 60S ribosor   | 1  | 2.8   | 18.9  | 20.6   | 0.1 | 0.14 | 7.31  | 2.8    | 18.9   | 23.0   | 0.1 | 0.12 | 8.15  |
| Q9EP97_SF Semp3     | Sentrin-spe   | 1  | 1.9   | 13.0  | 14.2   | 0.1 | 0.13 | 7.43  | 1.9    | 13.0   | 15.8   | 0.1 | 0.12 | 8.29  |
| Q91W39_HI Ncoa5     | Nuclear rec   | 3  | 3.0   | 20.5  | 22.4   | 0.1 | 0.13 | 7.56  | 10.0   | 57.3   | 69.7   | 0.2 | 0.14 | 6.94  |
| Q921M4_G Golga2     | Golgin subf   | 1  | 1.3   | 9.3   | 10.1   | 0.1 | 0.13 | 7.67  | 1.3    | 9.3    | 11.3   | 0.1 | 0.12 | 8.56  |
| E9PW14_E9F Mroh8    | Protein Mri   | 1  | 1.8   | 12.9  | 14.1   | 0.1 | 0.13 | 7.71  | 1.8    | 12.9   | 15.8   | 0.1 | 0.12 | 8.60  |
| Q9CPW7_Z Zmat2      | Zinc finger I | 1  | 1.9   | 13.4  | 14.7   | 0.1 | 0.13 | 7.72  | 1.9    | 13.4   | 16.4   | 0.1 | 0.12 | 8.61  |
| Q810F8_TB Tbx10     | T-box trans   | 1  | 2.4   | 17.5  | 19.1   | 0.1 | 0.13 | 7.81  | 2.4    | 17.5   | 21.3   | 0.1 | 0.11 | 8.72  |
| Q6PND3_N Mylk       | Myosin ligh   | 1  | 4.2   | 30.7  | 33.5   | 0.1 | 0.13 | 7.97  | 4.2    | 30.7   | 37.4   | 0.1 | 0.11 | 8.89  |
| P62071_Rf Rras2     | Ras-related   | 3  | 1.4   | 10.7  | 11.6   | 0.1 | 0.12 | 8.08  | 39.7   | 31.4   | 38.3   | 1.3 | 1.04 | 0.96  |
| Q5D7T3_F2 Fam208b   | Protein FAF   | 1  | 2.0   | 16.0  | 17.5   | 0.1 | 0.12 | 8.59  | 2.0    | 16.0   | 19.5   | 0.1 | 0.10 | 9.59  |
| Q9JJD0_TH Thap11    | THAP doma     | 1  | 1.4   | 10.9  | 11.9   | 0.1 | 0.12 | 8.69  | 1.4    | 10.9   | 13.3   | 0.1 | 0.10 | 9.69  |
| P17918_PC Pcn       | Proliferatin  | 9  | 3.4   | 28.3  | 30.9   | 0.1 | 0.11 | 9.12  | 73.9   | 251.6  | 306.2  | 0.3 | 0.24 | 4.14  |
| AAOAG6WV Ighg1      | Ig gamma-1    | 1  | 24.2  | 227.1 | 247.8  | 0.1 | 0.10 | 10.26 | 24.2   | 227.1  | 276.5  | 0.1 | 0.09 | 11.44 |
| Q6PFR5_TR Tra2a     | Transforme    | 5  | 2.5   | 26.8  | 29.3   | 0.1 | 0.09 | 11.62 | 50.3   | 256.7  | 312.4  | 0.2 | 0.16 | 6.21  |
| P09450_JL Iunb      | Transcripti   | 1  | 1.4   | 15.8  | 17.3   |     |      |       |        |        |        |     |      |       |
