# Supplementary material
Source: PubMed Central journal article supplement (PMC11345869)
Supplement: NIHMS2014975-supplement-Supplementary_Table_4.pdf [file NIHMS2014975-supplement-Supplementary_Table_4.pdf]

Supplementary Table 4. Full list of peptides identified by mass spectrometry from SILAC experiment of wild type 3xMBT pulldown from WT (light) MEFs as compared to MLL1 KO (heavy) MEFs

| ProteinId           | GeneSymb    | Descriptor            | PeptideSequence                       | max_sn_heavy | max_sn_light | Ratio_H_L | Ratio_L_H |
|---------------------|-------------|-----------------------|---------------------------------------|--------------|--------------|-----------|-----------|
| D3Z5T8_D1493040711  | Protein 495 | K.NQENFR@DGNDAADIQK.Q |                                       | 13.09        | 24.79        | 0.53      | 1.89      |
| H3BL88_HI:99300211C | Protein 99  | K.LALLSRHLR.E         |                                       | 1.37         | 28.92        | 0.05      | 21.13     |
| Q9D2R0_A            | Aacs        | Acetoacety            | K.GIADVPEWFR.G                        | 6.73         | 7.32         | 0.92      | 1.09      |
| Q9D2R0_A            | Aacs        | Acetoacety            | R.IGITILGTGAK#.W                      | 16.41        | 6.06         | 2.71      | 0.37      |
| Q9D2R0_A            | Aacs        | Acetoacety            | R.VLFLK#.M                            | 20.03        | 7.32         | 2.74      | 0.37      |
| Q9D2R0_A            | Aacs        | Acetoacety            | K.WLSVLEEK#.D                         | 12.58        | 7.75         | 1.62      | 0.62      |
| Q9D2R0_A            | Aacs        | Acetoacety            | K.AQSYEYVVR.C                         | 42.18        | 24.60        | 1.71      | 0.58      |
| Q9D2R0_A            | Aacs        | Acetoacety            | R.DIPELQDF.-                          | 31.11        | 31.11        | 1.00      | 1.00      |
| Q9D2R0_A            | Aacs        | Acetoacety            | K.DMK#PVETHLHLTLHLTLSTGSPK#.A         | 9.81         | 5.89         | 1.66      | 0.60      |
| Q9D2R0_A            | Aacs        | Acetoacety            | R.FSQIQPK#.L                          | 71.95        | 34.35        | 2.09      | 0.48      |
| Q9D2R0_A            | Aacs        | Acetoacety            | R.GAFSNPETLDLYR.D                     | 14.40        | 27.18        | 0.53      | 1.89      |
| Q9D2R0_A            | Aacs        | Acetoacety            | K.GIADVPEWFR.G                        | 16.31        | 30.68        | 0.53      | 1.88      |
| Q9D2R0_A            | Aacs        | Acetoacety            | R.IGITILGTGAK#.W                      | 30.68        | 20.00        | 1.53      | 0.65      |
| Q9D2R0_A            | Aacs        | Acetoacety            | K.KHVEAVK#.Q                          | 43.81        | 23.29        | 1.88      | 0.53      |
| Q9D2R0_A            | Aacs        | Acetoacety            | R.LNYAENLLR.H                         | 13.64        | 24.88        | 0.55      | 1.82      |
| Q9D2R0_A            | Aacs        | Acetoacety            | R.M*YDEVVDTSK#.G                      | 24.34        | 11.20        | 2.17      | 0.46      |
| Q9D2R0_A            | Aacs        | Acetoacety            | R.NLGM*AVEAWDEEGK#.A                  | 6.43         | 3.97         | 1.62      | 0.62      |
| Q9D2R0_A            | Aacs        | Acetoacety            | R.VALYVAR.E                           | 12.22        | 31.99        | 0.38      | 2.62      |
| Q9D2R0_A            | Aacs        | Acetoacety            | K.VTFEELR.Q                           | 17.32        | 31.29        | 0.55      | 1.81      |
| Q9D2R0_A            | Aacs        | Acetoacety            | R.VLFLK#.M                            | 45.56        | 21.01        | 2.17      | 0.46      |
| Q9D2R0_A            | Aacs        | Acetoacety            | K.AQSYEYVVR.C                         | 14.47        | 32.31        | 0.45      | 2.23      |
| Q9D2R0_A            | Aacs        | Acetoacety            | R.DIPELQDF.-                          | 40.76        | 40.76        | 1.00      | 1.00      |
| Q9D2R0_A            | Aacs        | Acetoacety            | R.FSQIQPK#.L                          | 80.53        | 37.04        | 2.17      | 0.46      |
| Q9D2R0_A            | Aacs        | Acetoacety            | R.GAFSNPETLDLYR.D                     | 29.11        | 33.43        | 0.87      | 1.15      |
| Q9D2R0_A            | Aacs        | Acetoacety            | K.GIADVPEWFR.G                        | 15.02        | 30.97        | 0.48      | 2.06      |
| Q9D2R0_A            | Aacs        | Acetoacety            | R.IGITILGTGAK#.W                      | 56.99        | 22.66        | 2.51      | 0.40      |
| Q9D2R0_A            | Aacs        | Acetoacety            | K.KHVEAVK#.Q                          | 54.73        | 17.52        | 3.12      | 0.32      |
| Q9D2R0_A            | Aacs        | Acetoacety            | R.LNYAENLLR.H                         | 17.54        | 43.35        | 0.40      | 2.47      |
| Q9D2R0_A            | Aacs        | Acetoacety            | K.M*ASGHTFQPLVK#.R                    | 34.77        | 12.92        | 2.69      | 0.37      |
| Q9D2R0_A            | Aacs        | Acetoacety            | R.M*YDEVVDTSK#.G                      | 32.37        | 12.95        | 2.50      | 0.40      |
| Q9D2R0_A            | Aacs        | Acetoacety            | R.NLGM*AVEAWDEEGK#.A                  | 10.81        | 4.98         | 2.17      | 0.46      |
| Q9D2R0_A            | Aacs        | Acetoacety            | R.SDGLTNPNGVRF.                       | 5.81         | 12.19        | 0.48      | 2.10      |
| Q9D2R0_A            | Aacs        | Acetoacety            | R.VALYVAR.E                           | 24.36        | 49.26        | 0.49      | 2.02      |
| Q9D2R0_A            | Aacs        | Acetoacety            | R.VLFLK#.M                            | 57.59        | 28.69        | 2.01      | 0.50      |
| Q9D2R0_A            | Aacs        | Acetoacety            | R.VLIPYVLR.E                          | 38.76        | 64.61        | 0.60      | 1.67      |
| Q9D2R0_A            | Aacs        | Acetoacety            | K.WLSVLEEK#.D                         | 29.60        | 13.11        | 2.26      | 0.44      |
| Q3UHJ0_A            | Aak1        | AP2-associ            | K.AQATPSQPLQSSQPK#.Q                  | 32.06        | 20.89        | 1.53      | 0.65      |
| Q3UHJ0_A            | Aak1        | AP2-associ            | R.ATVQPLQAAQPSNPQGLLPSVSQPK#.A        | 14.88        | 10.26        | 1.45      | 0.69      |
| Q3UHJ0_A            | Aak1        | AP2-associ            | K.FQNPQAEVGNVADEIKHK#.Y               | 29.65        | 22.05        | 1.34      | 0.74      |
| Q3UHJ0_A            | Aak1        | AP2-associ            | R.I LSDVTHSAVFGVPAASK#.S              | 26.47        | 16.58        | 1.60      | 0.63      |
| Q3UHJ0_A            | Aak1        | AP2-associ            | R.LTDPIPTTTSIAPR.Q                    | 4.81         | 14.17        | 0.34      | 2.95      |
| Q3UHJ0_A            | Aak1        | AP2-associ            | K.STQLLQAAAEEASLNK#.S                 | 13.69        | 9.22         | 1.49      | 0.67      |
| Q3UHJ0_A            | Aak1        | AP2-associ            | K.VQTPPTTQGGK#.V                      | 11.07        | 6.16         | 1.80      | 0.56      |
| Q3UHJ0_A            | Aak1        | AP2-associ            | R.APEM*VNLVYSGK#.I                    | 17.60        | 8.99         | 1.96      | 0.51      |
| Q3UHJ0_A            | Aak1        | AP2-associ            | R.APEM*VNLVYSGK#.I                    | 7.31         | 4.38         | 1.67      | 0.60      |
| Q3UHJ0_A            | Aak1        | AP2-associ            | K.AQATPSQPLQSSQPK#.Q                  | 34.98        | 26.04        | 1.34      | 0.74      |
| Q3UHJ0_A            | Aak1        | AP2-associ            | R.ATVQPLQAAQPSNPQGLLPSVSQPK#.A        | 20.59        | 12.87        | 1.60      | 0.63      |
| Q3UHJ0_A            | Aak1        | AP2-associ            | R.I LSDVTHSAVFGVPAASK#.S              | 25.08        | 14.06        | 1.78      | 0.56      |
| Q3UHJ0_A            | Aak1        | AP2-associ            | R.LTDPIPTTTSIAPR.Q                    | 6.12         | 20.28        | 0.30      | 3.31      |
| Q3UHJ0_A            | Aak1        | AP2-associ            | K.QPQAPPTPQPTATQGLPTQAQATPQHQQHLLK#.Q | 11.21        | 5.50         | 2.04      | 0.49      |
| Q3UHJ0_A            | Aak1        | AP2-associ            | K.STQLLQAAAEEASLNK#.S                 | 16.21        | 7.33         | 2.21      | 0.45      |
| Q3UHJ0_A            | Aak1        | AP2-associ            | K.TAVVPPQSQAPATAPQAAAAEPEGQIQAPVR.Q   | 1.76         | 4.22         | 0.42      | 2.40      |
| Q3T122_Q3           | Aamp        | Angio-assoc           | R.APVLLAGTADGNTWMMWV.V                | 3.51         | 2.21         | 1.59      | 0.63      |
| Q8BGQ7_S            | Aars        | Alanine-tr            | K.ALNEALK#.L                          | 78.40        | 20.24        | 3.87      | 0.26      |
| Q8BGQ7_S            | Aars        | Alanine-tr            | K.ASEWVQVQVSGLM*DGK#.G                | 14.81        | 4.92         | 3.01      | 0.33      |
| Q8BGQ7_S            | Aars        | Alanine-tr            | K.ASEWVQVQVSGLMDGK#.G                 | 15.64        | 4.28         | 3.66      | 0.27      |
| Q8BGQ7_S            | Aars        | Alanine-tr            | R.AVFDETPDPVVR.V                      | 10.00        | 22.53        | 0.44      | 2.25      |
| Q8BGQ7_S            | Aars        | Alanine-tr            | K.DIINEEVEQFLK#.T                     | 13.72        | 11.19        | 1.23      | 0.82      |
| Q8BGQ7_S            | Aars        | Alanine-tr            | R.EIADLGEALATAVIPQWQK#.D              | 30.70        | 15.92        | 1.93      | 0.52      |
| Q8BGQ7_S            | Aars        | Alanine-tr            | R.ESDGVL#PLPK#.K                      | 18.66        | 8.84         | 2.11      | 0.47      |
| Q8BGQ7_S            | Aars        | Alanine-tr            | K.GAM*STQIK#.K                        | 6.07         | 4.84         | 1.25      | 0.80      |
| Q8BGQ7_S            | Aars        | Alanine-tr            | R.GGVVLIHGTIYGNLK#.V                  | 41.63        | 14.21        | 2.93      | 0.34      |
| Q8BGQ7_S            | Aars        | Alanine-tr            | K.GLEATDSDPK#.Y                       | 50.17        | 15.48        | 3.24      | 0.31      |
| Q8BGQ7_S            | Aars        | Alanine-tr            | R.IVAVTGAEAK#.A                       | 100.94       | 32.50        | 3.11      | 0.32      |
| Q8BGQ7_S            | Aars        | Alanine-tr            | K.K#DPEMVK#DIINEEVEQFLK#.T            | 10.21        | 5.69         | 1.79      | 0.56      |
| Q8BGQ7_S            | Aars        | Alanine-tr            | R.LFIDEP.R                            | 12.57        | 20.26        | 0.62      | 1.61      |
| Q8BGQ7_S            | Aars        | Alanine-tr            | R.LVSVLQNK#.M                         | 64.38        | 16.17        | 3.98      | 0.25      |
| Q8BGQ7_S            | Aars        | Alanine-tr            | K.M*SNYVTDLFM*PYFAIQK#.G              | 4.76         | 1.58         | 3.01      | 0.33      |
| Q8BGQ7_S            | Aars        | Alanine-tr            | R.NSSHAGAFVITVEEAIK#.G                | 39.43        | 13.31        | 2.96      | 0.34      |
| Q8BGQ7_S            | Aars        | Alanine-tr            | R.NSSHAGAFVITVEEAIK#.G                | 6.21         | 2.81         | 2.21      | 0.45      |
| Q8BGQ7_S            | Aars        | Alanine-tr            | K.QLIDSNPNQPLVILEM*ESGASAK#.A         | 8.01         | 3.43         | 2.33      | 0.43      |
| Q8BGQ7_S            | Aars        | Alanine-tr            | K.QLIDSNPNQPLVILEM*ESGASAK#.A         | 12.62        | 4.03         | 3.13      | 0.32      |
| Q8BGQ7_S            | Aars        | Alanine-tr            | R.SVLGEADQK#.G                        | 48.28        | 17.05        | 2.83      | 0.35      |
| Q8BGQ7_S            | Aars        | Alanine-tr            | K.THSPQTSAM*LFTVDNEAGK#.I             | 17.78        | 3.62         | 4.92      | 0.20      |
| Q8BGQ7_S            | Aars        | Alanine-tr            | K.VGAEDADGIDM*AYR.V                   | 8.15         | 9.72         | 0.84      | 1.19      |
| Q8BGQ7_S            | Aars        | Alanine-tr            | K.VGAEDADGIDMAYR.V                    | 4.01         | 7.76         | 0.52      | 1.93      |
| Q8BGQ7_S            | Aars        | Alanine-tr            | K.ALNEALK#.L                          | 39.50        | 7.95         | 4.97      | 0.20      |
| Q8BGQ7_S            | Aars        | Alanine-tr            | K.ASEWVQVQVSGLM*DGK#.G                | 7.82         | 2.95         | 2.65      | 0.38      |
| Q8BGQ7_S            | Aars        | Alanine-tr            | R.GGVVLIHGTIYGNLK#.V                  | 13.29        | 6.44         | 2.07      | 0.48      |
| Q8BGQ7_S            | Aars        | Alanine-tr            | R.LVSVLQNK#.M                         | 44.33        | 14.43        | 3.07      | 0.33      |
| Q8BGQ7_S            | Aars        | Alanine-tr            | K.M*ALLELTQEFIPVER.L                  | 4.16         | 8.67         | 0.48      | 2.08      |
| Q8BGQ7_S            | Aars        | Alanine-tr            | K.QLIDSNPNQPLVILEM*ESGASAK#.A         | 8.30         | 4.50         | 1.85      | 0.54      |
| Q3THG9_A            | Aarsd1      | Alanyl-tRN            | R.SVIELDPSVTAEQVAIEQVSNQK#.I          | 6.90         | 4.57         | 1.51      | 0.66      |
| Q9JKX4_AA           | Aatf        | Protein AAt           | K.ALLTTNQLPQDPVFPFK#.D                | 8.32         | 9.28         | 0.90      | 1.11      |
| Q9JKX4_AA           | Aatf        | Protein AAt           | R.DLDEIFDDDDPHYQLLR.E                 | 5.51         | 11.71        | 0.47      | 2.12      |
| Q9JKX4_AA           | Aatf        | Protein AAt           | R.SVLDLQELLFQYDTR.H                   | 2.06         | 9.20         | 0.22      | 4.47      |
| Q9JKX4_AA           | Aatf        | Protein AAt           | R.VLKGPEPPEPVAETLPGEPELPGQANAHLR.D    | 2.72         | 12.11        | 0.22      | 4.45      |
| P61222_AE           | Abce1       | ATP-bindin            | K.AIK#PQVVDQPK#.A                     | 23.16        | 8.31         | 2.79      | 0.36      |
| P61222_AE           | Abce1       | ATP-bindin            | R.EGINFLDGYVTENLR.F                   | 3.20         | 3.38         | 0.94      | 1.06      |
| P61222_AE           | Abce1       | ATP-bindin            | R.GSELQNYTFK#.I                       | 16.43        | 6.05         | 2.71      | 0.37      |
| P61222_AE           | Abce1       | ATP-bindin            | K.ADFM*FDEPSSYLDVK#.Q                 | 5.67         | 1.94         | 2.92      | 0.34      |
| P61222_AE           | Abce1       | ATP-bindin            | R.VIVFDGVPK#.N                        | 10.73        | 3.35         | 3.21      | 0.31      |
| P61222_AE           | Abce1       | ATP-bindin            | K.ADFM*FDEPSSYLDVK#.Q                 | 9.00         | 5.03         | 1.79      | 0.56      |
| P61222_AE           | Abce1       | ATP-bindin            | K.AIK#PQVVDQPK#.A                     | 20.52        | 9.55         | 2.15      | 0.47      |
| P61222_AE           | Abce1       | ATP-bindin            | K.VAETANEEVK#.M                       | 4.67         | 2.16         | 2.16      | 0.46      |
| Q6P542_Af           | Abcf1       | ATP-bindin            | K.AANAENDPSVQAEVSSR.Q                 | 13.54        | 16.40        | 0.83      | 1.21      |
| Q6P542_Af           | Abcf1       | ATP-bindin            | K.ANDPYANLSK#.K                       | 51.13        | 16.37        | 3.12      | 0.32      |
| Q6P542_Af           | Abcf1       | ATP-bindin            | R.ATGAAAAEAK#.A                       | 18.38        | 12.94        | 1.42      | 0.70      |
| Q6P542_Af           | Abcf1       | ATP-bindin            | R.GNYM*TFK#.K                         | 21.63        | 7.22         | 2.99      | 0.33      |
| Q6P542_Af           | Abcf1       | ATP-bindin            | R.GNYM*TFK#.K                         | 21.06        | 5.90         | 3.57      | 0.28      |

|                   |                                          |        |       |      |      |
|-------------------|------------------------------------------|--------|-------|------|------|
| Q6P542_Ai Abcf1   | ATP-bindin, K.IGFFNQYAEQLHM*EETPTEYLQR.S | 23.77  | 27.05 | 0.88 | 1.14 |
| Q6P542_Ai Abcf1   | ATP-bindin, K.IGFFNQYAEQLHMEETPTEYLQR.S  | 11.84  | 9.87  | 1.20 | 0.83 |
| Q6P542_Ai Abcf1   | ATP-bindin, R.LQGQLEQGGDDTAAEK#.L        | 17.53  | 7.72  | 2.27 | 0.44 |
| Q6P542_Ai Abcf1   | ATP-bindin, R.LQGQLEQGGDDTAAEK#LEK#.V    | 186.76 | 50.04 | 3.73 | 0.27 |
| Q6P542_Ai Abcf1   | ATP-bindin, K.NLDFGIDM*DSR.I             | 6.78   | 8.17  | 0.83 | 1.20 |
| Q6P542_Ai Abcf1   | ATP-bindin, K.NQDEESQEPPELLK#.R          | 24.13  | 10.40 | 2.32 | 0.43 |
| Q6P542_Ai Abcf1   | ATP-bindin, K.LQSVPASDEEDEVPAPIR.G       | 1.74   | 5.03  | 0.35 | 2.89 |
| Q6P542_Ai Abcf1   | ATP-bindin, K.QQPPPEWIGDGEETSPADK#.V     | 8.99   | 3.88  | 2.32 | 0.43 |
| Q6P542_Ai Abcf1   | ATP-bindin, R.LQGQLEQGGDDTAAEKLEK.V      | 15.82  | 24.14 | 0.66 | 1.53 |
| Q6P542_Ai Abcf1   | ATP-bindin, R.SFNLPYQDAR.K               | 28.55  | 52.48 | 0.54 | 1.84 |
| Q6P542_Ai Abcf1   | ATP-bindin, K.STLLLLTGK#.L               | 145.89 | 40.74 | 3.58 | 0.28 |
| Q6P542_Ai Abcf1   | ATP-bindin, K.TFEEELAVEDK#.Q             | 23.55  | 10.15 | 2.32 | 0.43 |
| Q6P542_Ai Abcf1   | ATP-bindin, K.TFEEELAVEDK#QAGEEEK#LQK#.E | 7.64   | 2.32  | 3.30 | 0.30 |
| Q6P542_Ai Abcf1   | ATP-bindin, K.AANAAENDFSVQAQEVSSR.Q      | 7.01   | 7.61  | 0.92 | 1.09 |
| Q6P542_Ai Abcf1   | ATP-bindin, K.ANDPYANLSK#.K              | 22.60  | 8.38  | 2.70 | 0.37 |
| Q6P542_Ai Abcf1   | ATP-bindin, K.AVAEPPGLR.S                | 14.67  | 20.02 | 0.73 | 1.36 |
| Q6P542_Ai Abcf1   | ATP-bindin, K.IGFFNQYAEQLHM*EETPTEYLQR.S | 8.01   | 14.62 | 0.55 | 1.82 |
| Q6P542_Ai Abcf1   | ATP-bindin, R.LQGQLEQGGDDTAAEK#.L        | 11.03  | 5.37  | 2.05 | 0.49 |
| Q6P542_Ai Abcf1   | ATP-bindin, R.LQGQLEQGGDDTAAEK#LEK#.V    | 62.93  | 19.12 | 3.29 | 0.30 |
| Q6P542_Ai Abcf1   | ATP-bindin, K.NQDEESQEPPELLK#.R          | 13.76  | 6.12  | 2.25 | 0.44 |
| Q6P542_Ai Abcf1   | ATP-bindin, R.LQGQLEQGGDDTAAEKLEK.V      | 6.44   | 10.25 | 0.63 | 1.59 |
| Q6P542_Ai Abcf1   | ATP-bindin, K.SKPPAAADSEGESEEDTAK#.E     | 7.09   | 4.04  | 1.75 | 0.57 |
| Q6P542_Ai Abcf1   | ATP-bindin, K.STLLLLTGK#.L               | 75.12  | 21.73 | 3.46 | 0.29 |
| Q6P542_Ai Abcf1   | ATP-bindin, K.TFEEELAVEDK#.Q             | 14.40  | 6.90  | 2.09 | 0.48 |
| Q99LE6_AB Abcf2   | ATP-bindin, R.ETTGDGEVLLTK#.E            | 10.92  | 6.36  | 1.72 | 0.58 |
| Q99LE6_AB Abcf2   | ATP-bindin, K.YYTGNYDQYVK#.T             | 15.48  | 10.62 | 1.46 | 0.69 |
| Q99LE6_AB Abcf2   | ATP-bindin, R.FHWEQDQJAHM*#K#.N          | 19.60  | 13.80 | 1.42 | 0.70 |
| Q99LE6_AB Abcf2   | ATP-bindin, R.FHWEQDQJAHM*#K#.N          | 19.14  | 11.95 | 1.60 | 0.62 |
| Q99LE6_AB Abcf2   | ATP-bindin, K.IPPPVM*VQNVSK#.Y           | 11.88  | 7.89  | 1.51 | 0.66 |
| Q99LE6_AB Abcf2   | ATP-bindin, K.IPPPVM*VQNVSK#.Y           | 33.48  | 21.15 | 1.58 | 0.63 |
| Q99LE6_AB Abcf2   | ATP-bindin, K.LLTGELLPTDGM*IR.K          | 6.74   | 23.96 | 0.28 | 3.56 |
| Q99LE6_AB Abcf2   | ATP-bindin, K.LLTGELLPTDGM*IR.K          | 7.81   | 22.50 | 0.35 | 2.88 |
| Q99LE6_AB Abcf2   | ATP-bindin, K.LVDEEPLTK#.R               | 71.04  | 48.52 | 1.46 | 0.68 |
| Q99LE6_AB Abcf2   | ATP-bindin, K.SMLLSAIGK#.R               | 27.18  | 15.31 | 1.78 | 0.56 |
| Q99LE6_AB Abcf2   | ATP-bindin, R.VALVGPNGAGK#.S             | 10.19  | 6.65  | 1.53 | 0.65 |
| Q99LE6_AB Abcf2   | ATP-bindin, K.WPGDILAYK#.E               | 34.97  | 22.69 | 1.54 | 0.65 |
| Q99LE6_AB Abcf2   | ATP-bindin, R.YHQHLQEQDLDLSPLEYM*#K#.C   | 6.19   | 1.85  | 3.34 | 0.30 |
| Q99LE6_AB Abcf2   | ATP-bindin, K.YYTGNYDQYVK#.T             | 74.40  | 56.81 | 1.31 | 0.76 |
| Q99LE6_AB Abcf2   | ATP-bindin, K.IPPPVM*VQNVSK#.Y           | 7.46   | 5.20  | 1.43 | 0.70 |
| Q99LE6_AB Abcf2   | ATP-bindin, K.IPPPVM*VQNVSK#.Y           | 8.66   | 8.53  | 1.02 | 0.98 |
| Q99LE6_AB Abcf2   | ATP-bindin, K.LLTGELLPTDGM*IR.K          | 5.04   | 8.97  | 0.56 | 1.78 |
| Q99LE6_AB Abcf2   | ATP-bindin, K.SM*LLSAIGK#.R              | 16.88  | 5.41  | 3.12 | 0.32 |
| Q99LE6_AB Abcf2   | ATP-bindin, K.YYTGNYDQYVK#.T             | 28.41  | 17.17 | 1.65 | 0.60 |
| Q8K268_Ai Abcf3   | ATP-bindin, R.EYEAQQYR.Q                 | 2.52   | 9.96  | 0.25 | 3.95 |
| Q8K268_Ai Abcf3   | ATP-bindin, K.FSPPLQLQDEVDFYDPK.H        | 5.37   | 7.32  | 0.73 | 1.36 |
| Q8K268_Ai Abcf3   | ATP-bindin, K.TSNPLVLEASASQAGSR.K        | 1.19   | 4.13  | 0.29 | 3.46 |
| Q8VCR7_Ai Abhd14b | Alpha/beta K.TPALIVYQDQDPM*GSSSFQHLK#.Q  | 3.22   | 1.89  | 1.71 | 0.59 |
| Q8CBW3_A Abi1     | Abi interact R.ALIESYQLTR.V              | 6.34   | 7.64  | 0.83 | 1.21 |
| Q8CBW3_A Abi1     | Abi interact R.K#PIDYTVLDDVGHGVK#.W      | 50.68  | 11.58 | 4.37 | 0.23 |
| Q8CBW3_A Abi1     | Abi interact R.VTGLFPGNYVESIM*HYTD.-     | 5.23   | 5.23  | 1.00 | 1.00 |
| Q8CBW3_A Abi1     | Abi interact R.VTGLFPGNYVESIM*HYTD.-     | 4.10   | 4.10  | 1.00 | 1.00 |
| Q8CBW3_A Abi1     | Abi interact R.K#PIDYTVLDDVGHGVK#.W      | 10.83  | 5.87  | 1.84 | 0.54 |
| Q5SSL4_AB Abr     | Active brea K.GIQIQDQPQTVESK#.N          | 7.23   | 4.52  | 1.60 | 0.63 |
| Q5SSL4_AB Abr     | Active brea R.ISGVATDIAQK#.A             | 11.11  | 9.35  | 1.19 | 0.84 |
| Q5SSL4_AB Abr     | Active brea R.STLVHLHLLK#.H              | 11.63  | 8.59  | 1.35 | 0.74 |
| Q921H8_Ti Acaa1a  | 3-ketoacyl-R.LKPEQLDISVGNVLEPGAGAVMAR.I  | 3.76   | 4.04  | 0.93 | 1.07 |
| Q5SWU9_A Acaca    | Acetyl-CoA K.ANAEYK#.M                   | 17.74  | 10.36 | 1.71 | 0.58 |
| Q5SWU9_A Acaca    | Acetyl-CoA K.AYVWNNK#DLVLEWK#.Q          | 18.16  | 5.88  | 3.09 | 0.32 |
| Q5SWU9_A Acaca    | Acetyl-CoA R.DFTVASPAEFVTR.F             | 11.07  | 19.66 | 0.56 | 1.78 |
| Q5SWU9_A Acaca    | Acetyl-CoA K.EASFEVQNEGER.L              | 7.63   | 16.09 | 0.47 | 2.11 |
| Q5SWU9_A Acaca    | Acetyl-CoA K.FGAYVDFGLR.E                | 3.94   | 8.45  | 0.47 | 2.14 |
| Q5SWU9_A Acaca    | Acetyl-CoA R.FHIGSVSEDSSEDEISNLVK#.L     | 22.04  | 8.16  | 2.70 | 0.37 |
| Q5SWU9_A Acaca    | Acetyl-CoA R.FHIGSVSEDSSEDEISNLVK#.L     | 17.90  | 5.96  | 3.01 | 0.33 |
| Q5SWU9_A Acaca    | Acetyl-CoA R.FVVM*VTPEDLK#.A             | 29.26  | 14.42 | 2.03 | 0.49 |
| Q5SWU9_A Acaca    | Acetyl-CoA R.FVVM*VTPEDLK#.A             | 19.68  | 6.37  | 3.09 | 0.32 |
| Q5SWU9_A Acaca    | Acetyl-CoA R.GQVLPHTLNTVDVLEIYEGIK#.Y    | 9.80   | 11.63 | 0.84 | 1.19 |
| Q5SWU9_A Acaca    | Acetyl-CoA R.GSVLEPEGTVEIK#.F            | 46.15  | 23.42 | 1.97 | 0.51 |
| Q5SWU9_A Acaca    | Acetyl-CoA K.GVINDILDWK#.T               | 31.93  | 12.13 | 2.63 | 0.38 |
| Q5SWU9_A Acaca    | Acetyl-CoA R.IGFSFQEDLLFLR.A             | 18.03  | 34.48 | 0.52 | 1.91 |
| Q5SWU9_A Acaca    | Acetyl-CoA R.IIEFVPTK#.A                 | 45.29  | 20.59 | 2.20 | 0.45 |
| Q5SWU9_A Acaca    | Acetyl-CoA K.IIQAGQVWFPDSAFK#.T          | 15.42  | 9.58  | 1.61 | 0.62 |
| Q5SWU9_A Acaca    | Acetyl-CoA R.IILNVPQDLYEK#.G             | 32.56  | 14.57 | 2.24 | 0.45 |
| Q5SWU9_A Acaca    | Acetyl-CoA R.IPVQAVWAGWGHASENPK#.L       | 8.33   | 4.83  | 1.73 | 0.58 |
| Q5SWU9_A Acaca    | Acetyl-CoA K.ITDIIGKEGLGAENLR.G          | 13.13  | 22.66 | 0.58 | 1.73 |
| Q5SWU9_A Acaca    | Acetyl-CoA R.ITSENPDGEFVPSGTVQELNFR.S    | 12.62  | 22.94 | 0.55 | 1.82 |
| Q5SWU9_A Acaca    | Acetyl-CoA R.LGGIPVGVAVETR.T             | 26.09  | 43.27 | 0.60 | 1.66 |
| Q5SWU9_A Acaca    | Acetyl-CoA K.LLETESFQLNR.I               | 11.94  | 24.29 | 0.49 | 2.03 |
| Q5SWU9_A Acaca    | Acetyl-CoA R.LLLEDLVK#.K                 | 44.50  | 18.65 | 2.39 | 0.42 |
| Q5SWU9_A Acaca    | Acetyl-CoA K.LPELLK#.N                   | 39.71  | 17.13 | 2.32 | 0.43 |
| Q5SWU9_A Acaca    | Acetyl-CoA R.LPGGNEIGM*VAWK#.M           | 19.28  | 10.96 | 1.76 | 0.57 |
| Q5SWU9_A Acaca    | Acetyl-CoA R.LPGGNEIGM*VAWK#.M           | 12.68  | 5.90  | 2.15 | 0.47 |
| Q5SWU9_A Acaca    | Acetyl-CoA R.M*AALEVVR.R                 | 4.92   | 7.98  | 0.62 | 1.62 |
| Q5SWU9_A Acaca    | Acetyl-CoA K.SDM*NTLVNIFYSHAQVTK#.K      | 19.82  | 9.04  | 2.19 | 0.46 |
| Q5SWU9_A Acaca    | Acetyl-CoA K.SPEYDGRDIIIVGNDITYR.I       | 3.76   | 4.87  | 0.77 | 1.29 |
| Q5SWU9_A Acaca    | Acetyl-CoA K.TLRDPSLPLLELDQIM*TSVSGR.I   | 2.25   | 10.67 | 0.21 | 4.74 |
| Q5SWU9_A Acaca    | Acetyl-CoA R.TVELSIPADPANLSEAK#.I        | 37.94  | 17.01 | 2.23 | 0.45 |
| Q5SWU9_A Acaca    | Acetyl-CoA R.VDWQENDFSK#.R               | 14.39  | 7.80  | 1.84 | 0.54 |
| Q5SWU9_A Acaca    | Acetyl-CoA K.VEVTEVTDYR.F                | 15.54  | 28.05 | 0.55 | 1.81 |
| Q5SWU9_A Acaca    | Acetyl-CoA K.VLIANNIAAVK#.C              | 18.15  | 8.84  | 2.05 | 0.49 |
| Q5SWU9_A Acaca    | Acetyl-CoA R.VLQAEK#.I                   | 43.06  | 18.57 | 2.32 | 0.43 |
| Q5SWU9_A Acaca    | Acetyl-CoA K.VNNADFPNFR.Q                | 2.83   | 7.02  | 0.40 | 2.48 |
| Q5SWU9_A Acaca    | Acetyl-CoA K.VQQAELHTGSLPQIOSTALR.G      | 15.86  | 30.98 | 0.51 | 1.95 |
| P51174_Ai Acad    | Long-chain R.VQPIYGGTNEIMK#.E            | 9.68   | 3.27  | 2.96 | 0.34 |
| Q9DBL1_Ai Acadsb  | Short/bran K.YYAVEGLTTSK#.C              | 6.12   | 1.57  | 3.89 | 0.26 |
| P50544_Ai Acadvl  | Very long-c K.VPSENLEGEVGDGFK#.V         | 4.77   | 1.98  | 2.41 | 0.41 |
| Q6ZQK5_Ai Acap2   | Arf-GAP wit R.DLAQYSSNDAAVETSITK#.F      | 4.19   | 2.19  | 1.91 | 0.52 |
| Q6ZQK5_Ai Acap2   | Arf-GAP wit R.SLTLDTWPELLK#.L            | 11.67  | 41.77 | 0.28 | 3.58 |
| Q6ZQK5_Ai Acap2   | Arf-GAP wit R.DLAQYSSNDAAVETSITK#.F      | 6.15   | 4.10  | 1.50 | 0.67 |
| Q6ZQK5_Ai Acap2   | Arf-GAP wit R.SLTLDTWPELLK#.L            | 15.02  | 7.32  | 2.05 | 0.49 |
| Q8QZT1_Ti Acat1   | Acetyl-CoA K.FASEITPITISVK#.G            | 16.40  | 3.79  | 4.33 | 0.23 |
| Q8QZT1_Ti Acat1   | Acetyl-CoA R.TPIGSLGLASQPATK#.L          | 5.51   | 2.50  | 2.21 | 0.45 |
| Q8CAY6_Ti Acat2   | Acetyl-CoA R.HGSNLEAMGK#.L               | 26.95  | 3.06  | 8.80 | 0.11 |
| Q8CAY6_Ti Acat2   | Acetyl-CoA R.TAIGSFNGALSTVPVHEMGTTVIK#.E | 13.47  | 1.62  | 8.33 | 0.12 |

|                  |                                            |         |         |      |       |
|------------------|--------------------------------------------|---------|---------|------|-------|
| Q8BMP6_G_Acub3   | Golgi reside K.VLEPEAAEEALENGPK#D          | 9.37    | 1.92    | 4.89 | 0.20  |
| Q5EE38_AC_Acd    | Adrenocort K.AVFTVSGSLHHPGEEQJLSTGSSQK#A   | 6.08    | 3.33    | 1.83 | 0.55  |
| Q5EE38_AC_Acd    | Adrenocort R.ELJLGSSETLSSPR.T              | 1.66    | 5.19    | 0.32 | 3.13  |
| Q9JIX8_ACI_Acin1 | Apoptotic c K.LLDDLFR.K                    | 8.28    | 19.47   | 0.43 | 2.35  |
| Q9JIX8_ACI_Acin1 | Apoptotic c K.SGVSTIDDPVR.T                | 3.54    | 14.21   | 0.25 | 4.02  |
| Q9JIX8_ACI_Acin1 | Apoptotic c R.TGTLVEEAFWIDK#I              | 28.46   | 19.10   | 1.49 | 0.67  |
| Q9JIX8_ACI_Acin1 | Apoptotic c K.AEEQGAPRPLHPPPPPPVQPPPPHPR.A | 2.11    | 14.20   | 0.15 | 6.71  |
| Q9JIX8_ACI_Acin1 | Apoptotic c R.LLGLVDRPSETK.A               | 10.21   | 38.27   | 0.27 | 3.75  |
| Q9JIX8_ACI_Acin1 | Apoptotic c K.GVQAGNSDTGGGQPGR.K           | 10.91   | 56.25   | 0.19 | 5.15  |
| Q9JIX8_ACI_Acin1 | Apoptotic c K.ISVVSATK#.G                  | 27.47   | 35.71   | 0.77 | 1.30  |
| Q9JIX8_ACI_Acin1 | Apoptotic c R.K#SVVSATK#.G                 | 41.13   | 33.30   | 1.24 | 0.81  |
| Q9JIX8_ACI_Acin1 | Apoptotic c K.K#PSISITTESLK#.S             | 42.44   | 45.69   | 0.93 | 1.08  |
| Q9JIX8_ACI_Acin1 | Apoptotic c K.LLDDLFR.K                    | 23.29   | 91.90   | 0.25 | 3.95  |
| Q9JIX8_ACI_Acin1 | Apoptotic c R.RWGASTAATQK.K                | 3.92    | 13.99   | 0.28 | 3.56  |
| Q9JIX8_ACI_Acin1 | Apoptotic c K.SAPLPLTVEEFAPAK#.G           | 17.58   | 9.99    | 1.76 | 0.57  |
| Q9JIX8_ACI_Acin1 | Apoptotic c K.SGVSTIDDPVR.T                | 10.43   | 61.92   | 0.17 | 5.94  |
| Q9JIX8_ACI_Acin1 | Apoptotic c R.TGTLVEEAFWIDK#I              | 82.31   | 69.10   | 1.19 | 0.84  |
| Q9JIX8_ACI_Acin1 | Apoptotic c R.TGTLVEEAFWIDK#HK#.S          | 41.96   | 38.42   | 1.09 | 0.92  |
| Q9JIX8_ACI_Acin1 | Apoptotic c K.VTLGDLTLR.R                  | 21.68   | 88.17   | 0.25 | 4.07  |
| Q9JIX8_ACI_Acin1 | Apoptotic c R.WGASTAATQK.K                 | 76.24   | 84.40   | 0.90 | 1.11  |
| Q9JIX8_ACI_Acin1 | Apoptotic c K.APVVLQPEQIVSEETPPPLLT.K.E    | 19.68   | 27.85   | 0.71 | 1.42  |
| Q9JIX8_ACI_Acin1 | Apoptotic c K.ETQVSLPQEEENEK.S             | 18.42   | 26.81   | 0.69 | 1.46  |
| Q9JIX8_ACI_Acin1 | Apoptotic c K.GVQAGNSDTGGGQPGR.K           | 6.45    | 27.72   | 0.23 | 4.30  |
| Q9JIX8_ACI_Acin1 | Apoptotic c K.KPSISITTESLK.S               | 11.24   | 19.55   | 0.57 | 1.74  |
| Q9JIX8_ACI_Acin1 | Apoptotic c K.LLDDLFR.K                    | 34.20   | 36.90   | 0.93 | 1.08  |
| Q9JIX8_ACI_Acin1 | Apoptotic c K.QFDEEGER.T                   | 1.46    | 9.01    | 0.16 | 6.15  |
| Q9JIX8_ACI_Acin1 | Apoptotic c K.SAPLPLTVEEFAPAK.G            | 44.21   | 66.28   | 0.67 | 1.50  |
| Q9JIX8_ACI_Acin1 | Apoptotic c K.SGVSTIDDPVR.T                | 4.48    | 24.20   | 0.19 | 5.40  |
| Q9JIX8_ACI_Acin1 | Apoptotic c K.SKLPVSOQTAEEDDQETPSR.N       | 5.43    | 29.43   | 0.18 | 5.42  |
| Q9JIX8_ACI_Acin1 | Apoptotic c R.VSDESVLPLAQK.S               | 32.14   | 42.51   | 0.76 | 1.32  |
| Q9JIX8_ACI_Acin1 | Apoptotic c K.VTLGDLTLR.R                  | 4.68    | 36.54   | 0.13 | 7.81  |
| Q91V92_A_Acly    | ATP-citrate R.EAYPEEYIADLDAK#.S            | 7.59    | 1.63    | 4.65 | 0.22  |
| Q91V92_A_Acly    | ATP-citrate K.AFDSGIIPM*EFVNK#.M           | 17.71   | 2.30    | 7.68 | 0.13  |
| Q91V92_A_Acly    | ATP-citrate K.DGVYILDAAK#.V                | 19.76   | 2.96    | 6.68 | 0.15  |
| Q91V92_A_Acly    | ATP-citrate R.FGGALDAAK#.M                 | 29.07   | 4.99    | 5.83 | 0.17  |
| Q91V92_A_Acly    | ATP-citrate K.IGNTGGM*LDNILASK#.L          | 12.38   | 2.34    | 5.28 | 0.19  |
| Q91V92_A_Acly    | ATP-citrate K.LGLVGVNLSLDGVK#.S            | 21.16   | 5.13    | 4.12 | 0.24  |
| Q91V92_A_Acly    | ATP-citrate K.LLGLVGVDEK#.L                | 18.44   | 5.13    | 3.60 | 0.28  |
| Q91V92_A_Acly    | ATP-citrate K.LTLNPK#.G                    | 23.80   | 3.74    | 6.36 | 0.16  |
| Q91V92_A_Acly    | ATP-citrate R.TIIAIEGPIEALTR.K             | 7.05    | 6.39    | 1.10 | 0.91  |
| Q91V92_A_Acly    | ATP-citrate K.AFDSGIIPM*EFVNK#.M           | 31.21   | 4.23    | 7.38 | 0.14  |
| Q91V92_A_Acly    | ATP-citrate K.AFDSGIIPMEFVNK#.M            | 13.85   | 2.86    | 4.84 | 0.21  |
| Q91V92_A_Acly    | ATP-citrate K.DGVYILDAAK#.V                | 35.67   | 5.67    | 6.29 | 0.16  |
| Q91V92_A_Acly    | ATP-citrate R.EAYPEEYIADLDAK#.S            | 16.68   | 4.58    | 3.64 | 0.27  |
| Q91V92_A_Acly    | ATP-citrate R.EGDYVLFHHEGGVDVGDVDAK#.A     | 15.08   | 4.45    | 3.38 | 0.30  |
| Q91V92_A_Acly    | ATP-citrate R.FGGALDAAK#.M                 | 60.30   | 9.04    | 6.67 | 0.15  |
| Q91V92_A_Acly    | ATP-citrate K.IGNTGGM*LDNILASK#.L          | 22.09   | 4.54    | 4.87 | 0.21  |
| Q91V92_A_Acly    | ATP-citrate K.LGLVGVNLSLDGVK#.S            | 25.90   | 5.51    | 4.70 | 0.21  |
| Q91V92_A_Acly    | ATP-citrate K.LLGLVGVDEK#.L                | 12.80   | 2.87    | 4.46 | 0.22  |
| Q9CQR4_A_Acot13  | Acyl-coenz K.VTLFASVDLTKN#.T               | 17.15   | 3.82    | 4.49 | 0.22  |
| Q9CQR4_A_Acot13  | Acyl-coenz K.VTLFASVAAPEK#.L               | 40.07   | 8.44    | 4.75 | 0.21  |
| Q91V12_B_Acot7   | Cytosolic ai K.TNIVWYVDAINFHDK#.I          | 23.70   | 3.99    | 5.95 | 0.17  |
| Q91V12_B_Acot7   | Cytosolic ai K.ATLWYVPLSLK#.N              | 9.07    | 10.09   | 0.90 | 1.11  |
| Q91V12_B_Acot7   | Cytosolic ai K.ATLWYVPLSLK#.N              | 14.70   | 5.57    | 2.64 | 0.38  |
| Q9R0X4_A_Acot9   | Acyl-coenz R.DSENK#GPAFVNPLIPENK#EEEEFK#.Q | 4.01    | 1.71    | 2.35 | 0.43  |
| Q9R0X4_A_Acot9   | Acyl-coenz K.GPAFVNPLIPENK#EEEEFK#.Q       | 6.97    | 6.49    | 1.07 | 0.93  |
| Q9R0X4_A_Acot9   | Acyl-coenz R.IAFSTSSLLK#.V                 | 12.82   | 3.32    | 3.87 | 0.26  |
| Q8VCW8_A_Acsf2   | Acyl-CoA sy R.GGENYPAELEDFFLK#.H           | 11.69   | 4.26    | 2.74 | 0.36  |
| Q8VCW8_A_Acsf2   | Acyl-CoA sy K.TQYVYDLK#.Q                  | 10.98   | 9.90    | 1.11 | 0.90  |
| Q9QUJ7_A_Acsl4   | Long-chain R.IJGSSPLTLDQSSQK#.I            | 6.54    | 4.98    | 1.31 | 0.76  |
| Q9QXG4_A_Acss2   | Acetyl-coer K.IGPIATPDYIQNAPGLPK#.T        | 9.04    | 2.50    | 3.62 | 0.28  |
| Q9QXG4_A_Acss2   | Acetyl-coer K.VAFYWEGNEPETTK#.I            | 9.09    | 2.05    | 4.42 | 0.23  |
| Q9QXG4_A_Acss2   | Acetyl-coer K.IGPIATPDYIQNAPGLPK#.T        | 7.97    | 4.49    | 1.77 | 0.56  |
| Q9QXG4_A_Acss2   | Acetyl-coer K.VAFYWEGNEPETTK#.I            | 5.54    | 2.90    | 1.91 | 0.52  |
| P62737_A_Acta2   | Actin, aorti K.AGFAGDDAPR.A                | 465.69  | 1972.12 | 0.24 | 4.23  |
| P62737_A_Acta2   | Actin, aorti R.AVFPISVGRPR.H               | 19.53   | 242.77  | 0.08 | 12.43 |
| P62737_A_Acta2   | Actin, aorti R.DLTDYLM*#K.I                | 685.85  | 663.77  | 1.03 | 0.97  |
| P62737_A_Acta2   | Actin, aorti R.DLTDYLMK#.I                 | 728.73  | 645.05  | 1.13 | 0.89  |
| P62737_A_Acta2   | Actin, aorti K.DSYVGEAQSK#.R               | 2514.21 | 2361.46 | 1.06 | 0.94  |
| P62737_A_Acta2   | Actin, aorti K.DSYVGEAQSKR.G               | 148.38  | 501.38  | 0.30 | 3.38  |
| P62737_A_Acta2   | Actin, aorti K.EITALPSTM*#K.I              | 1324.63 | 1383.62 | 0.96 | 1.04  |
| P62737_A_Acta2   | Actin, aorti K.EITALPSTMK#.I               | 1208.98 | 950.03  | 1.27 | 0.79  |
| P62737_A_Acta2   | Actin, aorti R.GYSFVTAER.E                 | 9.49    | 34.54   | 0.27 | 3.64  |
| P62737_A_Acta2   | Actin, aorti R.HQGVMMVGMGQK#.D             | 265.50  | 226.64  | 1.17 | 0.85  |
| P62737_A_Acta2   | Actin, aorti R.HQGVMMVGMGQK.D              | 230.12  | 194.80  | 1.18 | 0.85  |
| P62737_A_Acta2   | Actin, aorti R.HQGVMMVGM*GQK.D             | 471.90  | 449.53  | 1.05 | 0.95  |
| P62737_A_Acta2   | Actin, aorti R.HQGVMMVGM*GQK.D             | 728.88  | 680.00  | 1.07 | 0.93  |
| P62737_A_Acta2   | Actin, aorti R.HQGVMMVGM*GQK#.D            | 355.71  | 339.52  | 1.05 | 0.95  |
| P62737_A_Acta2   | Actin, aorti R.HQGVMMVGMGQK#.D             | 221.10  | 248.71  | 0.89 | 1.12  |
| P62737_A_Acta2   | Actin, aorti K.IIAPPERR.K                  | 56.08   | 257.62  | 0.22 | 4.59  |
| P62737_A_Acta2   | Actin, aorti K.SYELPDGQVITIGNER.F          | 239.31  | 1047.86 | 0.23 | 4.38  |
| P62737_A_Acta2   | Actin, aorti K.YPIEHGIITNWDDM*EK.I         | 645.32  | 570.36  | 1.13 | 0.88  |
| P62737_A_Acta2   | Actin, aorti K.YPIEHGIITNWDDM*EK#.I        | 123.99  | 119.82  | 1.03 | 0.97  |
| P62737_A_Acta2   | Actin, aorti K.YPIEHGIITNWDDMEK#.I         | 537.36  | 455.56  | 1.18 | 0.85  |
| P62737_A_Acta2   | Actin, aorti K.YPIEHGIITNWDDMEK.I          | 115.20  | 85.11   | 1.35 | 0.74  |
| P62737_A_Acta2   | Actin, aorti K.AGFAGDDAPR.A                | 35.72   | 41.74   | 0.86 | 1.17  |
| P62737_A_Acta2   | Actin, aorti R.DLTDYLM*#K.I                | 107.30  | 17.60   | 6.10 | 0.16  |
| P62737_A_Acta2   | Actin, aorti R.DLTDYLMK#.I                 | 14.75   | 3.42    | 4.32 | 0.23  |
| P62737_A_Acta2   | Actin, aorti K.DSYVGEAQSK#.R               | 40.57   | 11.44   | 3.55 | 0.28  |
| P62737_A_Acta2   | Actin, aorti K.DSYVGEAQSKR.G               | 5.92    | 7.86    | 0.75 | 1.33  |
| P62737_A_Acta2   | Actin, aorti K.EITALPSTM*#K.I              | 134.05  | 25.28   | 5.30 | 0.19  |
| P62737_A_Acta2   | Actin, aorti K.EITALPSTMK#.I               | 68.58   | 10.23   | 6.70 | 0.15  |
| P62737_A_Acta2   | Actin, aorti K.SYELPDGQVITIGNER.F          | 69.11   | 56.48   | 1.22 | 0.82  |
| P62737_A_Acta2   | Actin, aorti K.AGFAGDDAPR.A                | 206.36  | 753.82  | 0.27 | 3.65  |
| P62737_A_Acta2   | Actin, aorti R.DLTDYLM*#K.I                | 355.93  | 280.76  | 1.27 | 0.79  |
| P62737_A_Acta2   | Actin, aorti R.DLTDYLMK#.I                 | 160.25  | 127.77  | 1.25 | 0.80  |
| P62737_A_Acta2   | Actin, aorti K.DSYVGEAQSK#.R               | 534.55  | 452.09  | 1.18 | 0.85  |
| P62737_A_Acta2   | Actin, aorti K.DSYVGEAQSKR.G               | 54.13   | 186.25  | 0.29 | 3.44  |
| P62737_A_Acta2   | Actin, aorti K.EITALPSTM*#K.I              | 487.59  | 445.37  | 1.09 | 0.91  |
| P62737_A_Acta2   | Actin, aorti K.EITALPSTMK#.I               | 254.03  | 206.55  | 1.23 | 0.81  |
| P62737_A_Acta2   | Actin, aorti R.HQGVMMVGMGQK#.D             | 78.73   | 70.43   | 1.12 | 0.89  |
| P62737_A_Acta2   | Actin, aorti R.HQGVMMVGMGQK#.D             | 65.86   | 60.00   | 1.10 | 0.91  |
| P62737_A_Acta2   | Actin, aorti R.HQGVMMVGM*GQK#.D            | 217.16  | 163.86  | 1.33 | 0.75  |

|                  |                                                  |         |         |      |      |
|------------------|--------------------------------------------------|---------|---------|------|------|
| P62737_AC Acta2  | Actin, aorti R.HQGVMMGM*GQK#.D                   | 89.85   | 68.67   | 1.31 | 0.76 |
| P62737_AC Acta2  | Actin, aorti K.IIAPPER.K                         | 34.91   | 126.21  | 0.28 | 3.61 |
| P62737_AC Acta2  | Actin, aorti K.SYELPDGQVITIGNER.F                | 108.49  | 420.28  | 0.26 | 3.87 |
| P62737_AC Acta2  | Actin, aorti R.VAPEEHPTLLEAPLNPK#.A              | 15.43   | 17.76   | 0.87 | 1.15 |
| P62737_AC Acta2  | Actin, aorti K.YPIEHGIITNWDDM*EK#.I              | 242.22  | 187.94  | 1.29 | 0.78 |
| P62737_AC Acta2  | Actin, aorti K.YPIEHGIITNWDDM*EK.I               | 36.85   | 27.77   | 1.33 | 0.75 |
| P62737_AC Acta2  | Actin, aorti K.YPIEHGIITNWDDMEK#.I               | 31.87   | 25.95   | 1.23 | 0.81 |
| P62737_AC Acta2  | Actin, aorti K.AGFAGDDAPR.A                      | 326.40  | 1072.08 | 0.30 | 3.28 |
| P62737_AC Acta2  | Actin, aorti R.DLTDYLM*#.I                       | 589.11  | 449.09  | 1.31 | 0.76 |
| P62737_AC Acta2  | Actin, aorti R.DLTDYLMK#.I                       | 219.34  | 150.15  | 1.46 | 0.68 |
| P62737_AC Acta2  | Actin, aorti K.DSVVGEAQS#.R                      | 875.32  | 631.27  | 1.39 | 0.72 |
| P62737_AC Acta2  | Actin, aorti K.DSVVGEAQS#.G                      | 69.44   | 239.49  | 0.29 | 3.45 |
| P62737_AC Acta2  | Actin, aorti K.EITALPSTM*#.I                     | 1082.81 | 775.91  | 1.40 | 0.72 |
| P62737_AC Acta2  | Actin, aorti K.EITALPSTMK#.I                     | 408.13  | 298.98  | 1.37 | 0.73 |
| P62737_AC Acta2  | Actin, aorti R.HQGVMMGMGQK#.D                    | 41.79   | 56.79   | 0.74 | 1.36 |
| P62737_AC Acta2  | Actin, aorti R.HQGVMM*VGM*GQK#.D                 | 437.61  | 317.43  | 1.38 | 0.73 |
| P62737_AC Acta2  | Actin, aorti R.HQGVMMGM*GQK#.D                   | 67.57   | 49.36   | 1.37 | 0.73 |
| P62737_AC Acta2  | Actin, aorti K.IIAPPER.K                         | 237.90  | 980.78  | 0.24 | 4.12 |
| P62737_AC Acta2  | Actin, aorti K.IIAPPER.K                         | 55.48   | 148.85  | 0.37 | 2.68 |
| P62737_AC Acta2  | Actin, aorti K.SYELPDGQVITIGNER.F                | 263.37  | 804.62  | 0.33 | 3.06 |
| P62737_AC Acta2  | Actin, aorti R.VAPEEHPTLLEAPLNPK#.A              | 35.96   | 28.90   | 1.24 | 0.80 |
| P62737_AC Acta2  | Actin, aorti K.YPIEHGIITNWDDM*EK#.I              | 521.08  | 369.36  | 1.41 | 0.71 |
| P62737_AC Acta2  | Actin, aorti K.YPIEHGIITNWDDM*EK.I               | 47.03   | 35.50   | 1.33 | 0.75 |
| P62737_AC Acta2  | Actin, aorti K.YPIEHGIITNWDDMEK#.I               | 353.87  | 240.18  | 1.47 | 0.68 |
| P60710_AC Actb   | Actin, cyto K.DLYANTVLSGGTTM*YPIADR.M            | 89.09   | 361.00  | 0.25 | 4.05 |
| P60710_AC Actb   | Actin, cyto K.DLYANTVLSGGTTM*YPIADR.M            | 83.38   | 262.42  | 0.32 | 3.15 |
| P60710_AC Actb   | Actin, cyto K.DLYANTVLSGGTTM*YPIADR.M            | 53.99   | 223.01  | 0.24 | 4.13 |
| P60710_AC Actb   | Actin, cyto K.DLYANTVLSGGTTM*YPIADR.M            | 60.64   | 238.95  | 0.25 | 3.94 |
| P60710_AC Actb   | Actin, cyto R.GYSFTTAER.E                        | 419.40  | 1833.79 | 0.23 | 4.37 |
| P60710_AC Actb   | Actin, cyto K.IWHHTFYNELR.V                      | 236.49  | 949.26  | 0.25 | 4.01 |
| P60710_AC Actb   | Actin, cyto K.KDLYANTVLSGGTTM*YPIADR.M           | 61.45   | 256.55  | 0.24 | 4.18 |
| P60710_AC Actb   | Actin, cyto R.KDLYANTVLSGGTTM*YPIADR.M           | 31.31   | 134.88  | 0.23 | 4.31 |
| P60710_AC Actb   | Actin, cyto K.QEYDESPSIVHR.K                     | 179.59  | 852.20  | 0.21 | 4.75 |
| P60710_AC Actb   | Actin, cyto R.VAPEEHPVLLTEAPLNPK#.A              | 1328.94 | 1233.79 | 1.08 | 0.93 |
| P60710_AC Actb   | Actin, cyto R.VAPEEHPVLLTEAPLNPK#.A              | 195.40  | 149.01  | 1.31 | 0.76 |
| P60710_AC Actb   | Actin, cyto K.YPIEHGIITNWDDM*EK#.I               | 4.31    | 6.98    | 0.62 | 1.62 |
| P60710_AC Actb   | Actin, cyto K.YPIEHGIITNWDDMEK#.I                | 19.22   | 23.70   | 0.81 | 1.23 |
| P60710_AC Actb   | Actin, cyto K.DLYANTVLSGGTTM*YPIADR.M            | 10.17   | 6.64    | 1.53 | 0.65 |
| P60710_AC Actb   | Actin, cyto R.GYSFTTAER.E                        | 38.61   | 28.19   | 1.37 | 0.73 |
| P60710_AC Actb   | Actin, cyto R.KDLYANTVLSGGTTM*YPIADR.M           | 6.61    | 3.06    | 2.16 | 0.46 |
| P60710_AC Actb   | Actin, cyto K.DLYANTVLSGGTTM*YPIADR.M            | 50.05   | 186.81  | 0.27 | 3.73 |
| P60710_AC Actb   | Actin, cyto K.DLYANTVLSGGTTM*YPIADR.M            | 18.12   | 61.41   | 0.30 | 3.39 |
| P60710_AC Actb   | Actin, cyto R.GYSFTTAER.E                        | 189.03  | 668.20  | 0.28 | 3.53 |
| P60710_AC Actb   | Actin, cyto K.IWHHTFYNELR.V                      | 84.89   | 298.19  | 0.28 | 3.51 |
| P60710_AC Actb   | Actin, cyto R.KDLYANTVLSGGTTM*YPIADR.M           | 18.24   | 60.49   | 0.30 | 3.32 |
| P60710_AC Actb   | Actin, cyto R.KDLYANTVLSGGTTM*YPIADR.M           | 3.22    | 29.31   | 0.11 | 9.10 |
| P60710_AC Actb   | Actin, cyto R.VAPEEHPVLLTEAPLNPK#.A              | 920.65  | 840.34  | 1.10 | 0.91 |
| P60710_AC Actb   | Actin, cyto K.DLYANTVLSGGTTM*YPIADR.M            | 97.31   | 308.34  | 0.32 | 3.17 |
| P60710_AC Actb   | Actin, cyto K.DLYANTVLSGGTTM*YPIADR.M            | 25.45   | 82.28   | 0.31 | 3.23 |
| P60710_AC Actb   | Actin, cyto K.DLYANTVLSGGTTM*YPIADR.M            | 17.25   | 57.25   | 0.30 | 3.32 |
| P60710_AC Actb   | Actin, cyto R.GYSFTTAER.E                        | 278.39  | 875.55  | 0.32 | 3.15 |
| P60710_AC Actb   | Actin, cyto R.KDLYANTVLSGGTTM*YPIADR.M           | 29.29   | 89.33   | 0.33 | 3.05 |
| P60710_AC Actb   | Actin, cyto R.KDLYANTVLSGGTTM*YPIADR.M           | 5.02    | 19.68   | 0.26 | 3.92 |
| P60710_AC Actb   | Actin, cyto K.QEYDESPSIVHR.K                     | 135.48  | 514.70  | 0.26 | 3.80 |
| P60710_AC Actb   | Actin, cyto R.VAPEEHPVLLTEAPLNPK#.A              | 1574.14 | 1164.56 | 1.35 | 0.74 |
| P60710_AC Actb   | Actin, cyto R.VAPEEHPVLLTEAPLNPK#.A              | 81.69   | 52.05   | 1.57 | 0.64 |
| Q8BF23_AC Actb12 | Beta-actin-I.R.TTGIVM*DSGDGVTHTVPIYEGYALPHAILR.L | 138.13  | 357.95  | 0.39 | 2.59 |
| Q8BF23_AC Actb12 | Beta-actin-I.R.TTGIVM*DSGDGVTHTVPIYEGYALPHAILR.L | 2.11    | 4.25    | 0.50 | 2.02 |
| Q8BF23_AC Actb12 | Beta-actin-I.R.TTGIVMDSGDGVTHTVPIYEGYALPHAILR.L  | 157.72  | 423.77  | 0.37 | 2.69 |
| Q8BF23_AC Actb12 | Beta-actin-I.R.TTGIVMDSGDGVTHTVPIYEGYALPHAILR.L  | 2.61    | 5.24    | 0.50 | 2.01 |
| Q8BF23_AC Actb12 | Beta-actin-I.R.VAPDEHPILLTEAPLNPK#.I             | 1328.94 | 1233.79 | 1.08 | 0.93 |
| Q8BF23_AC Actb12 | Beta-actin-I.R.TTGIVM*DSGDGVTHTVPIYEGYALPHAILR.L | 3.81    | 2.78    | 1.37 | 0.73 |
| Q8BF23_AC Actb12 | Beta-actin-I.R.TTGIVM*DSGDGVTHTVPIYEGYALPHAILR.L | 78.16   | 220.49  | 0.35 | 2.82 |
| Q8BF23_AC Actb12 | Beta-actin-I.R.TTGIVMDSGDGVTHTVPIYEGYALPHAILR.L  | 71.01   | 167.71  | 0.42 | 2.36 |
| Q8BF23_AC Actb12 | Beta-actin-I.R.TTGIVMDSGDGVTHTVPIYEGYALPHAILR.L  | 19.26   | 49.43   | 0.39 | 2.57 |
| Q8BF23_AC Actb12 | Beta-actin-I.R.VAPDEHPILLTEAPLNPK#.I             | 920.65  | 840.34  | 1.10 | 0.91 |
| Q8BF23_AC Actb12 | Beta-actin-I.R.TTGIVM*DSGDGVTHTVPIYEGYALPHAILR.L | 143.52  | 373.91  | 0.38 | 2.61 |
| Q8BF23_AC Actb12 | Beta-actin-I.R.TTGIVM*DSGDGVTHTVPIYEGYALPHAILR.L | 24.79   | 67.12   | 0.37 | 2.71 |
| Q922N8_AI Act16a | Actin-I-like p R.ENM*EASPLK#.N                   | 60.53   | 53.02   | 1.14 | 0.88 |
| Q922N8_AI Act16a | Actin-I-like p K.LIANNTVER.R                     | 44.42   | 153.75  | 0.29 | 3.46 |
| Q922N8_AI Act16a | Actin-I-like p K.QGGPTYIDTALR.V                  | 9.96    | 35.07   | 0.28 | 3.52 |
| Q922N8_AI Act16a | Actin-I-like p K.SEASLHPVLM*SEAPWNTR.A           | 8.69    | 28.88   | 0.30 | 3.32 |
| Q922N8_AI Act16a | Actin-I-like p K.SEASLHPVLM*SEAPWNTR.A           | 6.23    | 20.17   | 0.31 | 3.24 |
| Q922N8_AI Act16a | Actin-I-like p R.STGLILDSGATHTAIPVHDGVLQQGIVK#.S | 25.00   | 12.62   | 1.98 | 0.51 |
| Q922N8_AI Act16a | Actin-I-like p K.VDFPTAIGVLER.D                  | 22.85   | 76.79   | 0.30 | 3.36 |
| P57780_AC Actn4  | Alpha-actin K.ALDFIASK#.G                        | 27.60   | 18.83   | 1.47 | 0.68 |
| P57780_AC Actn4  | Alpha-actin R.ETTDTDADQVIAFK#.V                  | 8.67    | 5.21    | 1.66 | 0.60 |
| P57780_AC Actn4  | Alpha-actin R.FAIQDISVEETSAK#.E                  | 33.71   | 24.03   | 1.40 | 0.71 |
| P57780_AC Actn4  | Alpha-actin K.GYEELLNEIR.R                       | 15.21   | 8.28    | 1.84 | 0.54 |
| P57780_AC Actn4  | Alpha-actin K.LASDLLEWR.R                        | 13.12   | 24.48   | 0.54 | 1.87 |
| P57780_AC Actn4  | Alpha-actin K.LSGSNPYTTVTPQINSK#.W               | 9.57    | 6.09    | 1.57 | 0.64 |
| P57780_AC Actn4  | Alpha-actin K.LVSIAGEEIVDGNK#.M                  | 28.86   | 16.63   | 1.74 | 0.58 |
| P57780_AC Actn4  | Alpha-actin R.M*APYQGPDAAPGALDYK.S               | 6.50    | 7.42    | 0.88 | 1.14 |
| P57780_AC Actn4  | Alpha-actin R.TINEVENQLTR.D                      | 4.50    | 18.85   | 0.24 | 4.19 |
| P57780_AC Actn4  | Alpha-actin R.VGWQLLTIAR.T                       | 8.97    | 51.76   | 0.17 | 5.77 |
| P57780_AC Actn4  | Alpha-actin K.ALDFIASK#.G                        | 9.47    | 7.49    | 1.26 | 0.79 |
| P57780_AC Actn4  | Alpha-actin R.FAIQDISVEETSAK#.E                  | 9.85    | 9.30    | 1.06 | 0.94 |
| Q9QZB7_AI Actr10 | Actin-relate K.TAVVILGFAFTK#.C                   | 8.08    | 8.02    | 1.01 | 0.99 |
| Q9QZB7_AI Actr10 | Actin-relate R.DSVVEILFEQDNEEK#.S                | 5.34    | 5.35    | 1.00 | 1.00 |
| Q9QZB7_AI Actr10 | Actin-relate K.FNIDGNNEPPTPPNVDPYLDGKE.I         | 2.97    | 4.95    | 0.60 | 1.66 |
| Q9QZB7_AI Actr10 | Actin-relate K.TAVVILGFAFTK#.C                   | 20.49   | 22.34   | 0.92 | 1.09 |
| P61164_AI Actr1a | Alpha-centri K.AQYVLDGSTEIGPSR.F                 | 12.25   | 35.74   | 0.34 | 2.92 |
| P61164_AI Actr1a | Alpha-centri R.YPM*EHGIVK#.D                     | 28.28   | 20.69   | 1.37 | 0.73 |
| P61164_AI Actr1a | Alpha-centri K.AQYVLDGSTEIGPSR.F                 | 1.96    | 6.50    | 0.30 | 3.32 |
| P61164_AI Actr1a | Alpha-centri K.AQYVLDGSTEIGPSR.F                 | 5.64    | 7.41    | 0.76 | 1.31 |
| Q8R5C5_AI Actr1b | Beta-centra K.AGFAGDQIPK#.Y                      | 121.47  | 84.58   | 1.44 | 0.70 |
| Q8R5C5_AI Actr1b | Beta-centra K.DQLQTFSEHPVLLTEAPLNPK#.N           | 63.24   | 40.31   | 1.57 | 0.64 |
| Q8R5C5_AI Actr1b | Beta-centra K.EGAFHSTAEFVVR.T                    | 3.07    | 10.89   | 0.28 | 3.54 |
| Q8R5C5_AI Actr1b | Beta-centra K.ISAPQER.L                          | 47.42   | 147.14  | 0.32 | 3.10 |
| Q8R5C5_AI Actr1b | Beta-centra R.IWQYVYSK#.D                        | 100.11  | 61.94   | 1.62 | 0.62 |
| Q8R5C5_AI Actr1b | Beta-centra R.TLFSNIVLSGGTLFK#.G                 | 122.64  | 71.97   | 1.70 | 0.59 |
| Q8R5C5_AI Actr1b | Beta-centra K.VQYVLDGSTEIGPSR.F                  | 6.56    | 21.46   | 0.31 | 3.27 |
| Q8R5C5_AI Actr1b | Beta-centra K.DQLQTFSEHPVLLTEAPLNPK#.N           | 5.55    | 3.63    | 1.53 | 0.65 |

|                   |                                                        |       |       |      |       |
|-------------------|--------------------------------------------------------|-------|-------|------|-------|
| Q8R5C5_A1 Actr1b  | Beta-centra R.TLFSNVLSGGSTLTK#.G                       | 11.11 | 9.21  | 1.21 | 0.83  |
| Q8R5C5_A1 Actr1b  | Beta-centra R.IWQYVYSK#.D                              | 13.09 | 8.78  | 1.49 | 0.67  |
| Q8R5C5_A1 Actr1b  | Beta-centra R.TLFSNVLSGGSTLTK#.G                       | 24.55 | 9.07  | 2.71 | 0.37  |
| Q8R5C5_A1 Actr1b  | Beta-centra R.VM*AGALEGDLFIQPK#.A                      | 8.12  | 7.98  | 1.02 | 0.98  |
| P61161_AF Actr2   | Actin-relate K.HLWDTYFGPEK#.L                          | 21.94 | 6.13  | 3.58 | 0.28  |
| P61161_AF Actr2   | Actin-relate K.IILLTEPPM*NPTK#.N                       | 24.82 | 7.63  | 3.25 | 0.31  |
| P61161_AF Actr2   | Actin-relate R.KLWGDVVEK#.L                            | 16.63 | 5.58  | 2.98 | 0.34  |
| P61161_AF Actr2   | Actin-relate K.HLWDTYFGPEK#.L                          | 10.93 | 3.23  | 3.38 | 0.30  |
| P61161_AF Actr2   | Actin-relate K.IILLTEPPM*NPTK#.N                       | 15.34 | 4.99  | 3.07 | 0.33  |
| P61161_AF Actr2   | Actin-relate K.IILLTEPPM*NPTK#.N                       | 24.31 | 5.74  | 4.24 | 0.24  |
| P61161_AF Actr2   | Actin-relate K.IILLTEPPM*NPTK#.N                       | 10.51 | 2.26  | 4.65 | 0.22  |
| P61161_AF Actr2   | Actin-relate K.VGNIEIK#.D                              | 38.23 | 7.25  | 5.27 | 0.19  |
| Q99JY9_AR Actr3   | Actin-relate K.EFNK#YDTDGSK#.W                         | 9.74  | 1.43  | 6.81 | 0.15  |
| Q99JY9_AR Actr3   | Actin-relate R.FMEQVIFK#.Y                             | 20.87 | 5.04  | 4.14 | 0.24  |
| Q99JY9_AR Actr3   | Actin-relate K.GVDDLDFFIGDEAIEK#PTYATK#.W              | 31.76 | 16.87 | 1.88 | 0.53  |
| Q99JY9_AR Actr3   | Actin-relate K.GVDDLDFFIGDEAIEK#PTYATK#.W              | 12.01 | 3.74  | 3.22 | 0.31  |
| Q99JY9_AR Actr3   | Actin-relate K.GVDDLDFFIGDEAIEK#PTYATK#.W              | 17.12 | 4.61  | 3.71 | 0.27  |
| Q99MU3_C Adar     | Double-strc R.AIM*EM*PSFYSPTLPR.C                      | 2.31  | 5.60  | 0.41 | 2.42  |
| Q99MU3_C Adar     | Double-strc K.ALQEEAASSADDQSGGANTDSLDESMA*APNK#.I      | 9.23  | 7.60  | 1.21 | 0.82  |
| Q99MU3_C Adar     | Double-strc R.DVTSVLDLDER.C                            | 24.69 | 10.15 | 2.43 | 0.41  |
| Q99MU3_C Adar     | Double-strc R.SFQLQIQEFLK#.G                           | 11.87 | 10.67 | 1.11 | 0.90  |
| Q99MU3_C Adar     | Double-strc R.STHSAPAPPTAVPEATR.S                      | 5.78  | 25.06 | 0.23 | 4.34  |
| Q99MU3_C Adar     | Double-strc R.YLNTNPVGLLEVAR.S                         | 13.49 | 5.94  | 2.27 | 0.44  |
| Q99MU3_C Adar     | Double-strc K.ALQEEAASSADDQSGGANTDSLDESMA*APNK#.I      | 13.15 | 9.78  | 1.34 | 0.74  |
| Q99MU3_C Adar     | Double-strc K.ALQEEAASSADDQSGGANTDSLDESMA*APNK#.I      | 4.81  | 2.31  | 2.08 | 0.48  |
| Q99MU3_C Adar     | Double-strc R.DLLQLSYGEAK#.K                           | 32.69 | 51.08 | 0.64 | 1.56  |
| Q99MU3_C Adar     | Double-strc K.LIDQSGPPHEPK#.F                          | 14.32 | 9.45  | 1.52 | 0.66  |
| Q99MU3_C Adar     | Double-strc K.NSIFELAR.G                               | 7.67  | 24.90 | 0.31 | 3.25  |
| Q99MU3_C Adar     | Double-strc R.QGATPPIWYLTDK.K                          | 16.50 | 14.95 | 1.10 | 0.91  |
| Q99MU3_C Adar     | Double-strc R.STHSAPAPPTAVPEATR.S                      | 13.74 | 52.91 | 0.26 | 3.85  |
| Q99MU3_C Adar     | Double-strc R.VLNTNPVGLLEVAR.S                         | 2.86  | 11.04 | 0.26 | 3.86  |
| Q99MU3_C Adar     | Double-strc R.YLNTNPVGLLEVAR.S                         | 14.00 | 35.31 | 0.40 | 2.52  |
| Q9QYCO_AI Add1    | Alpha-addu R.GSDSIAYDK#GK#.L                           | 4.31  | 3.87  | 1.11 | 0.90  |
| Q9QYCO_AI Add1    | Alpha-addu R.SPGTPAGEGSGSPPK#.W                        | 12.71 | 9.06  | 1.40 | 0.71  |
| Q9QYCO_AI Add1    | Alpha-addu R.TLASAGGPNLVLDPGK#.Y                       | 10.05 | 7.57  | 1.33 | 0.75  |
| Q9QYCO_AI Add1    | Alpha-addu R.TSASVAVNLFVPLNTNPK#.E                     | 9.21  | 6.93  | 1.33 | 0.75  |
| Q9QYCO_AI Add1    | Alpha-addu R.TLASAGGPNLVLDPGK#.Y                       | 7.79  | 6.69  | 1.16 | 0.86  |
| Q9QYCO_AI Add1    | Alpha-addu R.TSASVAVNLFVPLNTNPK#.E                     | 7.88  | 5.23  | 1.51 | 0.66  |
| Q9QYB5_AI Add3    | Gamma-adi R.GLSFSEATSLVK#.V                            | 12.51 | 9.22  | 1.36 | 0.74  |
| Q9QYB5_AI Add3    | Gamma-adi R.VNIIEVVDQSGSTDLK#.I                        | 8.65  | 4.84  | 1.79 | 0.56  |
| Q9QYB5_AI Add3    | Gamma-adi R.GLSFSEATSLVK#.V                            | 8.34  | 8.93  | 0.93 | 1.07  |
| Q9QYB5_AI Add3    | Gamma-adi R.VNIIEVVDQSGSTDLK#.I                        | 9.47  | 3.85  | 2.46 | 0.41  |
| A2BDX0_A; Adnp    | Activity-dej K.NTTWEDVGLWDPSTLK.N                      | 4.74  | 5.68  | 0.83 | 1.20  |
| A2BDX0_A; Adnp    | Activity-dej K.SVGSYGVGQSVR.L                          | 3.09  | 11.31 | 0.27 | 3.66  |
| A2BDX0_A; Adnp    | Activity-dej K.SYEALVHVIEDHER.I                        | 3.11  | 15.23 | 0.20 | 4.90  |
| A2BDX0_A; Adnp    | Activity-dej K.NTTWEDVGLWDPSTLK.N                      | 4.04  | 4.81  | 0.84 | 1.19  |
| A2BDX0_A; Adnp    | Activity-dej K.ATVQDDTEQLK#.W                          | 24.43 | 31.20 | 0.78 | 1.28  |
| A2BDX0_A; Adnp    | Activity-dej K.DQSQWENASENER.L                         | 2.96  | 13.57 | 0.22 | 4.58  |
| A2BDX0_A; Adnp    | Activity-dej R.HQVIQTVHPVEK.K                          | 36.20 | 59.21 | 0.61 | 1.64  |
| A2BDX0_A; Adnp    | Activity-dej K.IPSDNLEEPVK.V                           | 21.94 | 34.52 | 0.64 | 1.57  |
| A2BDX0_A; Adnp    | Activity-dej R.LGLGGNAPVSIQSQSOSVK.Q                   | 13.92 | 14.63 | 0.95 | 1.05  |
| A2BDX0_A; Adnp    | Activity-dej R.LNGSQPLAPVK.R                           | 5.41  | 10.64 | 0.51 | 1.97  |
| A2BDX0_A; Adnp    | Activity-dej K.NTTWEDVGLWDPSTLK.N                      | 7.92  | 7.59  | 1.04 | 0.96  |
| A2BDX0_A; Adnp    | Activity-dej K.SPSVSOSQASR.V                           | 3.13  | 23.85 | 0.13 | 7.61  |
| A2BDX0_A; Adnp    | Activity-dej K.SVGSYGVGQSVR.L                          | 9.36  | 34.95 | 0.27 | 3.73  |
| A2BDX0_A; Adnp    | Activity-dej R.TYEQM*EFPLK.K                           | 10.07 | 14.17 | 0.71 | 1.41  |
| A2BDX0_A; Adnp    | Activity-dej R.TYEQMEFPLK.K                            | 9.19  | 10.91 | 0.84 | 1.19  |
| A2BDX0_A; Adnp    | Activity-dej K.VPAVANYM*#K.I                           | 10.05 | 12.47 | 0.81 | 1.24  |
| A2BDX0_A; Adnp    | Activity-dej K.ATVQDDTEQLK.W                           | 13.94 | 20.73 | 0.67 | 1.49  |
| A2BDX0_A; Adnp    | Activity-dej K.IPSDNLEEPVK.V                           | 12.40 | 19.16 | 0.65 | 1.55  |
| A2BDX0_A; Adnp    | Activity-dej K.NTTWEDVGLWDPSTLK.N                      | 4.91  | 7.10  | 0.69 | 1.45  |
| A2BDX0_A; Adnp    | Activity-dej K.SPSVSOSQASR.V                           | 4.18  | 15.60 | 0.27 | 3.73  |
| A2BDX0_A; Adnp    | Activity-dej K.SVGSYGVGQSVR.L                          | 3.02  | 22.80 | 0.13 | 7.54  |
| Q9JKV1_AC Adrm1   | Proteasom: R.LFFWM*QEPK#.T                             | 16.85 | 3.26  | 5.16 | 0.19  |
| Q9JKV1_AC Adrm1   | Proteasom: R.SQSAAVTPSSSTSSAR.A                        | 26.03 | 25.34 | 1.03 | 0.97  |
| P46664_PL Adss    | Adenylosuc K.SIYPTLEIDIEGELQQLK#.G                     | 7.00  | 3.12  | 2.24 | 0.45  |
| P46664_PL Adss    | Adenylosuc R.VTVLGAQWGDGEGK#.G                         | 4.16  | 1.60  | 2.60 | 0.38  |
| Q80Y56_AF Afap1   | Actin filam: K.ITQQGTDPLVLAQSK#.E                      | 9.74  | 6.14  | 1.59 | 0.63  |
| Q8K2K6_A Agfg1    | Arf-GAP doi K.AGLQTADK#YAALANLDNIFASAGQGGDQSGFGTTGK#.A | 10.35 | 3.29  | 3.14 | 0.32  |
| Q8K2K6_A Agfg1    | Arf-GAP doi K.GTPSQSPVVR.S                             | 20.01 | 42.21 | 0.47 | 2.11  |
| Q8K2K6_A Agfg1    | Arf-GAP doi K.QIWLGLFDDR.S                             | 1.65  | 10.05 | 0.16 | 6.08  |
| Q8K2K6_A Agfg1    | Arf-GAP doi K.SISM*TTFTTQIEEFLQK#.H                    | 7.16  | 4.80  | 1.49 | 0.67  |
| Q8K2K6_A Agfg1    | Arf-GAP doi K.SISM*TTFTTQIEEFLQK#.H                    | 5.97  | 5.45  | 1.09 | 0.91  |
| Q8K2K6_A Agfg1    | Arf-GAP doi K.SISM*TTFTTQIEEFLQK#.H                    | 14.95 | 9.66  | 1.55 | 0.65  |
| Q8K2K6_A Agfg1    | Arf-GAP doi K.SISM*TTFTTQIEEFLQK#.H                    | 9.31  | 8.14  | 1.14 | 0.87  |
| Q8K2K6_A Agfg1    | Arf-GAP doi K.VVASVHASISGSSASSTSTPEVK#PLK#.S           | 3.92  | 3.97  | 0.99 | 1.01  |
| Q8K2K6_A Agfg1    | Arf-GAP doi K.YAALANLDNIFASAGQGGDQSGFGTTGK#.A          | 17.35 | 8.79  | 1.97 | 0.51  |
| Q8K2K6_A Agfg1    | Arf-GAP doi K.SISM*TTFTTQIEEFLQK#.H                    | 2.78  | 1.67  | 1.66 | 0.60  |
| Q80WC7_A Agfg2    | Arf-GAP doi K.SISM*TTFTTEPEVLFQSR.G                    | 3.61  | 5.90  | 0.61 | 1.63  |
| Q80WC7_A Agfg2    | Arf-GAP doi K.VKEFLQEK.Y                               | 15.66 | 12.02 | 1.30 | 0.77  |
| A2ASQ1_AC Agrn    | Agrin OS=M R.EGSLQVNEAPVTGSSPLGATQLDLDGALWGLGQK#.L     | 2.36  | 1.73  | 1.36 | 0.73  |
| Q8CJF7_EL' Ahctf1 | Protein ELY K.EVSANTVADVSSGTSK.C                       | 3.26  | 13.51 | 0.24 | 4.14  |
| Q6PAL7_A' Ahdc1   | AT-hook DN R.AFASTGLESGASGR.G                          | 2.65  | 10.10 | 0.26 | 3.81  |
| Q6PAL7_A' Ahdc1   | AT-hook DN K.SGFLGPM*AEHPHEDFTVTSL.-                   | 3.41  | 3.41  | 1.00 | 1.00  |
| Q6PAL7_A' Ahdc1   | AT-hook DN K.VSSLSLSEVSGK#.E                           | 7.61  | 8.38  | 0.91 | 1.10  |
| E9Q616_E9 Ahnak   | Protein Ahr R.AGASISAGPELEGAGHSK#.F                    | 7.36  | 5.49  | 1.34 | 0.75  |
| E9Q616_E9 Ahnak   | Protein Ahr R.HEVTEISNTDVTQPGK#.T                      | 24.57 | 14.94 | 1.64 | 0.61  |
| E9Q616_E9 Ahnak   | Protein Ahr K.IEGSITGVSVEITPDDVHGLGK#.L                | 6.71  | 3.42  | 1.96 | 0.51  |
| E9Q616_E9 Ahnak   | Protein Ahr K.LK#GPGQITGSPLEGLDGLK#.G                  | 9.76  | 6.19  | 1.58 | 0.63  |
| E9Q616_E9 Ahnak   | Protein Ahr R.LPSGSGPASPTTGSADVIR.A                    | 4.34  | 12.30 | 0.35 | 2.83  |
| E9Q616_E9 Ahnak   | Protein Ahr R.SSEVLSGDDDEDYQR.I                        | 3.17  | 9.79  | 0.32 | 3.09  |
| E9Q616_E9 Ahnak   | Protein Ahr K.VGSLDNNVK#.A                             | 37.16 | 18.67 | 1.99 | 0.50  |
| E9Q616_E9 Ahnak   | Protein Ahr R.LRSEDGVEGLDGETQSR.T                      | 1.28  | 13.50 | 0.09 | 10.57 |
| E9Q616_E9 Ahnak   | Protein Ahr R.SEDGVEGLDGETQSR.T                        | 3.39  | 11.33 | 0.30 | 3.34  |
| E9Q616_E9 Ahnak   | Protein Ahr K.ADLISGTK#.V                              | 8.82  | 5.35  | 1.65 | 0.61  |
| E9Q616_E9 Ahnak   | Protein Ahr K.EGDQIVGATYFDNLQSGVEQLLNTM*GHHTVGLK#.L    | 14.68 | 5.42  | 2.71 | 0.37  |
| E9Q616_E9 Ahnak   | Protein Ahr R.EGVKHDIDISPEFMK#.I                       | 12.97 | 5.31  | 2.45 | 0.41  |
| E9Q616_E9 Ahnak   | Protein Ahr K.FGVSAGLDGQIPEVGLSVSAPESVGHK#.G           | 9.90  | 5.58  | 1.77 | 0.56  |
| E9Q616_E9 Ahnak   | Protein Ahr K.FVSPGVK#.G                               | 11.92 | 10.44 | 1.14 | 0.88  |
| E9Q616_E9 Ahnak   | Protein Ahr K.GGVVILPNEVGK#.A                          | 13.08 | 6.45  | 2.03 | 0.49  |
| E9Q616_E9 Ahnak   | Protein Ahr K.GPQVSSLLNLDTSK#.L                        | 6.94  | 4.13  | 1.68 | 0.59  |
| E9Q616_E9 Ahnak   | Protein Ahr R.HEVTEISNTDVTQPGK#.T                      | 67.86 | 43.60 | 1.56 | 0.64  |
| E9Q616_E9 Ahnak   | Protein Ahr K.IEGSITGVSVEITPDDVHGLGK#.L                | 20.08 | 9.06  | 2.21 | 0.45  |

|                 |                                               |        |        |      |      |
|-----------------|-----------------------------------------------|--------|--------|------|------|
| E9Q616_E9_Ahnak | Protein Ahr R.ISM*ADVLDLNVAAAPK#.G            | 14.38  | 13.33  | 1.08 | 0.93 |
| E9Q616_E9_Ahnak | Protein Ahr K.LDISAPDLNLEPEGLK.L              | 9.19   | 8.30   | 1.11 | 0.90 |
| E9Q616_E9_Ahnak | Protein Ahr K.LKGPDLNLEPEVSK.T                | 23.16  | 13.60  | 1.70 | 0.59 |
| E9Q616_E9_Ahnak | Protein Ahr K.LK#GPGQTGSPLEGLDGLK#.G          | 33.94  | 24.45  | 1.39 | 0.72 |
| E9Q616_E9_Ahnak | Protein Ahr R.LRSESGPASPPTGSAVDIR.A           | 5.76   | 11.85  | 0.49 | 2.06 |
| E9Q616_E9_Ahnak | Protein Ahr R.LRSESGVEGLGETQSR.T              | 4.11   | 22.92  | 0.18 | 5.58 |
| E9Q616_E9_Ahnak | Protein Ahr K.M*DISAPDVEHVGPEWLNK#.M          | 14.17  | 7.39   | 1.92 | 0.52 |
| E9Q616_E9_Ahnak | Protein Ahr R.SSEVGLSGLDGETQSR.T              | 3.21   | 6.98   | 0.46 | 2.18 |
| E9Q616_E9_Ahnak | Protein Ahr R.SSEVGLSGLDDEDYQJR.I             | 10.09  | 25.31  | 0.40 | 2.51 |
| E9Q616_E9_Ahnak | Protein Ahr K.VDIDVPDVIENIEGPDAK#.L           | 6.23   | 7.62   | 0.82 | 1.22 |
| E9Q616_E9_Ahnak | Protein Ahr R.VDIETPNLEGLTGP.K.I              | 30.42  | 17.14  | 1.77 | 0.56 |
| E9Q616_E9_Ahnak | Protein Ahr K.VESAPDVSIEGSEGG#.L              | 13.24  | 6.92   | 1.91 | 0.52 |
| E9Q616_E9_Ahnak | Protein Ahr K.VGSLDVLNVK#.A                   | 55.17  | 32.67  | 1.69 | 0.59 |
| E9Q616_E9_Ahnak | Protein Ahr K.VNVEAPNVNM*EGLGGK#.L            | 11.12  | 6.27   | 1.77 | 0.56 |
| E9Q616_E9_Ahnak | Protein Ahr K.VNVEAPNVNMEGLGGK#.L             | 13.10  | 9.94   | 1.32 | 0.76 |
| E9Q616_E9_Ahnak | Protein Ahr K.VQANLDTDPDINIEGPEAK#.I          | 4.92   | 3.09   | 1.59 | 0.63 |
| E9Q616_E9_Ahnak | Protein Ahr R.VTAYVDVTR.E                     | 8.32   | 22.85  | 0.36 | 2.75 |
| E9Q616_E9_Ahnak | Protein Ahr K.ADIDVSGPK#VDIDVPDVIENIEGPEGG#.L | 8.56   | 5.65   | 1.51 | 0.66 |
| E9Q616_E9_Ahnak | Protein Ahr K.ADLDISGTR#.V                    | 35.78  | 24.74  | 1.45 | 0.69 |
| E9Q616_E9_Ahnak | Protein Ahr K.ADLDVSPPK#.V                    | 203.66 | 131.96 | 1.54 | 0.65 |
| E9Q616_E9_Ahnak | Protein Ahr K.ADVASLPEVEGGVKK#.V              | 21.37  | 12.72  | 1.68 | 0.60 |
| E9Q616_E9_Ahnak | Protein Ahr K.ADVDISVPPK#.L                   | 74.72  | 40.31  | 1.85 | 0.54 |
| E9Q616_E9_Ahnak | Protein Ahr R.AEGEIK#PDVELK#.S                | 61.37  | 50.74  | 1.21 | 0.83 |
| E9Q616_E9_Ahnak | Protein Ahr K.AEGPDVAVDLPPK#.G                | 16.80  | 10.81  | 1.55 | 0.64 |
| E9Q616_E9_Ahnak | Protein Ahr K.AEGPEVDVNLPPK#.A                | 300.04 | 218.34 | 1.37 | 0.73 |
| E9Q616_E9_Ahnak | Protein Ahr K.AEGPEVSLPK#.A                   | 62.68  | 45.32  | 1.38 | 0.72 |
| E9Q616_E9_Ahnak | Protein Ahr K.AESPEM*EVNLPK#.S                | 25.57  | 15.03  | 1.70 | 0.59 |
| E9Q616_E9_Ahnak | Protein Ahr R.AGASISASGPELEGAGHSK#.F          | 143.50 | 97.42  | 1.47 | 0.68 |
| E9Q616_E9_Ahnak | Protein Ahr K.ANIDVSGPK#.V                    | 149.62 | 94.12  | 1.59 | 0.63 |
| E9Q616_E9_Ahnak | Protein Ahr K.APDVQLNAPDVDVHGPWLNK#.M         | 17.13  | 16.48  | 1.04 | 0.96 |
| E9Q616_E9_Ahnak | Protein Ahr K.APEVDVQGPWLSLK#.M               | 27.83  | 23.60  | 1.18 | 0.85 |
| E9Q616_E9_Ahnak | Protein Ahr K.ASLGSEGEAEASSPK#.G              | 8.86   | 8.37   | 1.06 | 0.95 |
| E9Q616_E9_Ahnak | Protein Ahr K.ATIDVSGPK#.L                    | 58.00  | 39.94  | 1.45 | 0.69 |
| E9Q616_E9_Ahnak | Protein Ahr R.DDGVFQVQVM*QNSPAAR.T            | 25.57  | 9.51   | 2.69 | 0.37 |
| E9Q616_E9_Ahnak | Protein Ahr R.DDGVFQVQVMQNSPAAR.T             | 2.33   | 5.68   | 0.41 | 2.43 |
| E9Q616_E9_Ahnak | Protein Ahr K.DIDITSPEFMK#.I                  | 10.70  | 6.81   | 1.57 | 0.64 |
| E9Q616_E9_Ahnak | Protein Ahr R.EGVK#DIDITSPEFM*IK#.I           | 51.52  | 29.01  | 1.78 | 0.56 |
| E9Q616_E9_Ahnak | Protein Ahr K.FGM*PGFK#.A                     | 37.60  | 23.29  | 1.61 | 0.62 |
| E9Q616_E9_Ahnak | Protein Ahr K.FGMPGFK#.A                      | 16.27  | 10.32  | 1.58 | 0.63 |
| E9Q616_E9_Ahnak | Protein Ahr K.FGVSAGLDGQ#PEVGLSVSAPESVGHK#.G  | 15.61  | 12.19  | 1.28 | 0.78 |
| E9Q616_E9_Ahnak | Protein Ahr K.FK#MPEMNK#.A                    | 21.92  | 11.14  | 1.97 | 0.51 |
| E9Q616_E9_Ahnak | Protein Ahr K.FK#VPDQFK#.T                    | 17.80  | 16.27  | 1.09 | 0.91 |
| E9Q616_E9_Ahnak | Protein Ahr K.FQVTPGAK#.V                     | 73.55  | 45.79  | 1.61 | 0.62 |
| E9Q616_E9_Ahnak | Protein Ahr K.FSM*PGFK#.A                     | 198.58 | 136.81 | 1.45 | 0.69 |
| E9Q616_E9_Ahnak | Protein Ahr K.FSMPGFK#.A                      | 113.44 | 69.56  | 1.63 | 0.61 |
| E9Q616_E9_Ahnak | Protein Ahr K.FSM*PGFK#GEGAEVDVNLQK#.A        | 10.87  | 6.72   | 1.62 | 0.62 |
| E9Q616_E9_Ahnak | Protein Ahr K.FSM*PGFK#GEGPEVDVNLQK#.A        | 29.40  | 21.23  | 1.39 | 0.72 |
| E9Q616_E9_Ahnak | Protein Ahr K.FSM*PGFK#GEGPEVDVSLPK#.A        | 23.42  | 13.46  | 1.74 | 0.57 |
| E9Q616_E9_Ahnak | Protein Ahr K.FSMPGFK#GEGPEVDVSLPK#.A         | 17.77  | 19.46  | 0.91 | 1.10 |
| E9Q616_E9_Ahnak | Protein Ahr K.FSMPGLK#GEGPDVDVSLPK#.A         | 20.55  | 17.14  | 1.20 | 0.83 |
| E9Q616_E9_Ahnak | Protein Ahr K.FSVPGFK#.A                      | 73.96  | 45.43  | 1.63 | 0.61 |
| E9Q616_E9_Ahnak | Protein Ahr K.FSVPGVK#.G                      | 54.44  | 38.03  | 1.43 | 0.70 |
| E9Q616_E9_Ahnak | Protein Ahr K.GDVLVSLPK#.V                    | 25.15  | 19.15  | 1.31 | 0.76 |
| E9Q616_E9_Ahnak | Protein Ahr K.GEGAEVDVNLQK#.A                 | 43.45  | 24.47  | 1.78 | 0.56 |
| E9Q616_E9_Ahnak | Protein Ahr K.GEGPDVDSLQK#.A                  | 41.36  | 34.65  | 1.19 | 0.84 |
| E9Q616_E9_Ahnak | Protein Ahr K.GEGPELDVNLMPK#.A                | 13.63  | 6.46   | 2.11 | 0.47 |
| E9Q616_E9_Ahnak | Protein Ahr K.GEGPEVDVNLQK#.A                 | 52.80  | 43.22  | 1.22 | 0.82 |
| E9Q616_E9_Ahnak | Protein Ahr K.GEGPEVDVSLPK#.A                 | 161.57 | 24.12  | 6.70 | 0.15 |
| E9Q616_E9_Ahnak | Protein Ahr K.GEYDVTVR.A                      | 7.72   | 36.41  | 0.21 | 4.71 |
| E9Q616_E9_Ahnak | Protein Ahr K.GGQTGLQGPLSVQPGHLESESG#.V       | 11.17  | 11.87  | 0.94 | 1.06 |
| E9Q616_E9_Ahnak | Protein Ahr K.GK#GGVDVILPNVEGK#.A             | 34.70  | 26.96  | 1.29 | 0.78 |
| E9Q616_E9_Ahnak | Protein Ahr K.GKGGVDVILPNVEGK.A               | 9.63   | 7.18   | 1.34 | 0.75 |
| E9Q616_E9_Ahnak | Protein Ahr K.GLEVVK#.G                       | 41.24  | 24.53  | 1.68 | 0.59 |
| E9Q616_E9_Ahnak | Protein Ahr R.GPDVHLK#.M                      | 17.09  | 12.75  | 1.34 | 0.75 |
| E9Q616_E9_Ahnak | Protein Ahr K.GPGLDFEGPDAK#.L                 | 13.17  | 9.82   | 1.34 | 0.75 |
| E9Q616_E9_Ahnak | Protein Ahr K.GPNVDM*SRPDIEIEGPEGK.L          | 2.01   | 4.91   | 0.41 | 2.44 |
| E9Q616_E9_Ahnak | Protein Ahr K.GPQVSSLLNLDTSK#.L               | 13.60  | 11.43  | 1.19 | 0.84 |
| E9Q616_E9_Ahnak | Protein Ahr K.GPSFNVASPEDFGVSLK#.G            | 8.08   | 8.96   | 0.90 | 1.11 |
| E9Q616_E9_Ahnak | Protein Ahr K.GPSLQGLDVLAVGDIK#.C             | 18.11  | 6.23   | 2.91 | 0.34 |
| E9Q616_E9_Ahnak | Protein Ahr K.GSK#VDITPQVDVHGPDLK#.I          | 16.69  | 10.27  | 1.63 | 0.62 |
| E9Q616_E9_Ahnak | Protein Ahr R.HEVTEISNTDVTETQPK#.T            | 146.89 | 94.66  | 1.55 | 0.64 |
| E9Q616_E9_Ahnak | Protein Ahr R.HEVTEISNTDVTETQPK.T             | 24.83  | 17.72  | 1.40 | 0.71 |
| E9Q616_E9_Ahnak | Protein Ahr K.IEGEM*K#VPDVIK#.G               | 37.33  | 25.67  | 1.45 | 0.69 |
| E9Q616_E9_Ahnak | Protein Ahr K.IEGSITGSVEIETPDVDVHGLGGK#.L     | 45.99  | 35.57  | 1.29 | 0.77 |
| E9Q616_E9_Ahnak | Protein Ahr K.IKAPFSVSAPQVSPDVLNVK#.G         | 3.82   | 5.65   | 0.68 | 1.48 |
| E9Q616_E9_Ahnak | Protein Ahr K.IK#GDIQVSPK#.I                  | 31.70  | 21.19  | 1.50 | 0.67 |
| E9Q616_E9_Ahnak | Protein Ahr K.IK#GDIQVSPGLEGNIDLQPEGK#.I      | 14.73  | 13.86  | 1.06 | 0.94 |
| E9Q616_E9_Ahnak | Protein Ahr R.ISM*ADVLDLNVAAAPK#.G            | 53.02  | 34.43  | 1.54 | 0.65 |
| E9Q616_E9_Ahnak | Protein Ahr R.ISMADVDLNVAAAPK#.G              | 22.13  | 29.99  | 0.74 | 1.36 |
| E9Q616_E9_Ahnak | Protein Ahr K.ISM*PDFDLHLK#.G                 | 15.91  | 14.32  | 1.11 | 0.90 |
| E9Q616_E9_Ahnak | Protein Ahr K.ISM*PDIDLHLK#.S                 | 11.36  | 8.25   | 1.38 | 0.73 |
| E9Q616_E9_Ahnak | Protein Ahr K.ISM*PDIDLHLK#.G                 | 27.09  | 20.07  | 1.35 | 0.74 |
| E9Q616_E9_Ahnak | Protein Ahr K.ISM*PDIDLNLKGP.K.V              | 52.75  | 46.80  | 1.13 | 0.89 |
| E9Q616_E9_Ahnak | Protein Ahr K.ISM*PDVDFNLK#.G                 | 21.04  | 12.74  | 1.65 | 0.61 |
| E9Q616_E9_Ahnak | Protein Ahr K.ISM*PDVDFNLK.G                  | 11.50  | 8.65   | 1.33 | 0.75 |
| E9Q616_E9_Ahnak | Protein Ahr K.ISM*PDVDLHIK#.G                 | 90.28  | 62.28  | 1.45 | 0.69 |
| E9Q616_E9_Ahnak | Protein Ahr K.ISM*PDVDLHIK#.G                 | 87.78  | 54.57  | 1.61 | 0.62 |
| E9Q616_E9_Ahnak | Protein Ahr K.ISM*PDVDLHIKGP.K.V              | 21.22  | 15.99  | 1.33 | 0.75 |
| E9Q616_E9_Ahnak | Protein Ahr K.ISM*PDVDLHIK#GPK#.V             | 30.15  | 17.20  | 1.75 | 0.57 |
| E9Q616_E9_Ahnak | Protein Ahr K.ISM*PDVDLNLK#.G                 | 16.79  | 8.67   | 1.94 | 0.52 |
| E9Q616_E9_Ahnak | Protein Ahr K.ISM*PDVGLNLK#.G                 | 17.71  | 10.85  | 1.63 | 0.61 |
| E9Q616_E9_Ahnak | Protein Ahr K.ISM*PDVSLNLK#.G                 | 20.63  | 15.44  | 1.34 | 0.75 |
| E9Q616_E9_Ahnak | Protein Ahr K.ISM*PDVSLNLK#.G                 | 22.02  | 21.17  | 1.04 | 0.96 |
| E9Q616_E9_Ahnak | Protein Ahr K.LDANIPVAVEGPEGK#.W              | 37.92  | 27.28  | 1.39 | 0.72 |
| E9Q616_E9_Ahnak | Protein Ahr K.LDIDVNVQVQPELHM*K#.M            | 23.42  | 15.67  | 1.49 | 0.67 |
| E9Q616_E9_Ahnak | Protein Ahr K.LDIETSDVSLGPEGK#.L              | 74.55  | 51.31  | 1.45 | 0.69 |
| E9Q616_E9_Ahnak | Protein Ahr K.LDISAPDLNLEPEGK#.L              | 82.84  | 59.68  | 1.39 | 0.72 |
| E9Q616_E9_Ahnak | Protein Ahr K.LDYNAPDIDVHGPPEGK#.L            | 31.90  | 27.49  | 1.16 | 0.86 |
| E9Q616_E9_Ahnak | Protein Ahr K.LKGPDLNLEPEVSK.T                | 85.04  | 60.12  | 1.41 | 0.71 |
| E9Q616_E9_Ahnak | Protein Ahr K.LK#GPGQTGSPLEGLDGLK#.G          | 68.71  | 52.38  | 1.31 | 0.76 |
| E9Q616_E9_Ahnak | Protein Ahr K.LK#GPDVITAPK#.V                 | 36.36  | 20.57  | 1.77 | 0.57 |
| E9Q616_E9_Ahnak | Protein Ahr R.LPSGSGPASPPTGSAVDIR.A           | 10.04  | 30.51  | 0.33 | 3.04 |
| E9Q616_E9_Ahnak | Protein Ahr R.LRSESGVEGLGETQSR.T              | 6.95   | 32.90  | 0.21 | 4.74 |

|                  |                                                               |        |        |      |      |
|------------------|---------------------------------------------------------------|--------|--------|------|------|
| E9Q616_E9 Ahnak  | Protein Ahr K.M*DINAPDM*DVQGPDWHLK#.M                         | 28.51  | 23.08  | 1.24 | 0.81 |
| E9Q616_E9 Ahnak  | Protein Ahr K.MDINAPDM*DVQGPDWHLK#.M                          | 14.49  | 11.04  | 1.31 | 0.76 |
| E9Q616_E9 Ahnak  | Protein Ahr K.M*DINAPDM*DVQGPDWHLK#.M                         | 15.75  | 9.86   | 1.60 | 0.63 |
| E9Q616_E9 Ahnak  | Protein Ahr K.M*DISAPDVEHVGPEWNLK#.M                          | 36.20  | 26.97  | 1.34 | 0.75 |
| E9Q616_E9 Ahnak  | Protein Ahr K.MPEMNIK#.A                                      | 15.55  | 12.80  | 1.22 | 0.82 |
| E9Q616_E9 Ahnak  | Protein Ahr K.MPSLEVSVPK#.I                                   | 7.62   | 5.54   | 1.37 | 0.73 |
| E9Q616_E9 Ahnak  | Protein Ahr K.SDIDVSGPNVDVK#.V                                | 60.49  | 34.99  | 1.73 | 0.58 |
| E9Q616_E9 Ahnak  | Protein Ahr K.SDIDVSGPNVDVK#VPDVIENIEGPEGK#.L                 | 8.65   | 8.19   | 1.06 | 0.95 |
| E9Q616_E9 Ahnak  | Protein Ahr R.SEDGVEGLDGETQSR.T                               | 7.22   | 19.50  | 0.37 | 2.70 |
| E9Q616_E9 Ahnak  | Protein Ahr K.TPTVDVTVPEALNVDSPENIGGK#.S                      | 5.46   | 4.20   | 1.30 | 0.77 |
| E9Q616_E9 Ahnak  | Protein Ahr K.VDIDVDPDLIEGPEGK#.L                             | 61.38  | 36.74  | 1.67 | 0.60 |
| E9Q616_E9 Ahnak  | Protein Ahr K.VDIDVDPDVHVGPDWHLK#.M                           | 83.94  | 79.61  | 1.05 | 0.95 |
| E9Q616_E9 Ahnak  | Protein Ahr K.VDIDVDPVNIIEGPDAK#.L                            | 164.70 | 127.81 | 1.29 | 0.78 |
| E9Q616_E9 Ahnak  | Protein Ahr K.VDIDVDPVNIIEGPDTK#.L                            | 33.47  | 25.75  | 1.30 | 0.77 |
| E9Q616_E9 Ahnak  | Protein Ahr K.VDIDVDPVNIIEGPEGK#.L                            | 164.70 | 127.81 | 1.29 | 0.78 |
| E9Q616_E9 Ahnak  | Protein Ahr K.VDIDVDPVNIIEGPDVPM*#.V                          | 6.52   | 4.39   | 1.48 | 0.67 |
| E9Q616_E9 Ahnak  | Protein Ahr K.VDIEAPDVSIIEGPEGK#.L                            | 53.43  | 45.44  | 1.18 | 0.85 |
| E9Q616_E9 Ahnak  | Protein Ahr R.VDIEPNLEGLTGPVK#.I                              | 76.94  | 55.18  | 1.39 | 0.72 |
| E9Q616_E9 Ahnak  | Protein Ahr K.VDINAPDVDPVHHLK#.M                              | 29.89  | 22.83  | 1.31 | 0.76 |
| E9Q616_E9 Ahnak  | Protein Ahr K.VDINAPDVDPV.R                                   | 25.63  | 81.01  | 0.32 | 3.16 |
| E9Q616_E9 Ahnak  | Protein Ahr K.VDINAPEVEVQK#.V                                 | 38.85  | 33.24  | 1.17 | 0.86 |
| E9Q616_E9 Ahnak  | Protein Ahr R.VDLK#GPEVDISAPK#.V                              | 20.89  | 17.42  | 1.20 | 0.83 |
| E9Q616_E9 Ahnak  | Protein Ahr K.VEANVQAGAGEGK#VEESEVK#.L                        | 17.23  | 10.90  | 1.58 | 0.63 |
| E9Q616_E9 Ahnak  | Protein Ahr K.VEAPDVEHVGPDWHLK#.M                             | 77.08  | 48.68  | 1.58 | 0.63 |
| E9Q616_E9 Ahnak  | Protein Ahr K.VEGDIK#GPEVDIK#GPK#.V                           | 13.51  | 10.15  | 1.33 | 0.75 |
| E9Q616_E9 Ahnak  | Protein Ahr K.VEGDLK#GPDIDIK#.G                               | 48.70  | 30.30  | 1.61 | 0.62 |
| E9Q616_E9 Ahnak  | Protein Ahr K.VEGEIK#GPEVDIK#.G                               | 115.33 | 89.01  | 1.30 | 0.77 |
| E9Q616_E9 Ahnak  | Protein Ahr K.VESAPDVSIIEGSEGK#.L                             | 40.82  | 29.63  | 1.38 | 0.73 |
| E9Q616_E9 Ahnak  | Protein Ahr K.VGIDVDPVHVGPDWHLK#.M                            | 78.95  | 47.76  | 1.65 | 0.60 |
| E9Q616_E9 Ahnak  | Protein Ahr K.VGSLDNNVK#.A                                    | 115.94 | 63.22  | 1.83 | 0.55 |
| E9Q616_E9 Ahnak  | Protein Ahr K.VKHGDLAAGPNLEGDFK#GPK#.V                        | 8.19   | 5.66   | 1.45 | 0.69 |
| E9Q616_E9 Ahnak  | Protein Ahr K.VKHGDM*DVTVPK#.I                                | 33.88  | 22.92  | 1.48 | 0.68 |
| E9Q616_E9 Ahnak  | Protein Ahr K.VKHGDM*VTPK#.I                                  | 52.87  | 34.61  | 1.53 | 0.65 |
| E9Q616_E9 Ahnak  | Protein Ahr K.VKHGDM*SLPK#.V                                  | 8.53   | 7.94   | 1.07 | 0.93 |
| E9Q616_E9 Ahnak  | Protein Ahr K.VKHGDM*VSLPK#.V                                 | 85.03  | 60.35  | 1.41 | 0.71 |
| E9Q616_E9 Ahnak  | Protein Ahr K.VKHGDM*VTPK#.L                                  | 216.37 | 143.95 | 1.50 | 0.67 |
| E9Q616_E9 Ahnak  | Protein Ahr K.VKHGEYDVTMPK#.L                                 | 16.36  | 7.33   | 2.23 | 0.45 |
| E9Q616_E9 Ahnak  | Protein Ahr K.VNVEAPVNNM*EGLGGK#.L                            | 28.76  | 18.55  | 1.55 | 0.64 |
| E9Q616_E9 Ahnak  | Protein Ahr K.VPDVDIK#.G                                      | 54.14  | 32.05  | 1.69 | 0.59 |
| E9Q616_E9 Ahnak  | Protein Ahr K.VPDVNIIEGPEGK#.L                                | 32.70  | 109.04 | 0.30 | 3.33 |
| E9Q616_E9 Ahnak  | Protein Ahr K.VQANLTDPTDINIEGPEAK#.I                          | 9.51   | 12.58  | 0.76 | 1.32 |
| E9Q616_E9 Ahnak  | Protein Ahr K.VQTPVEDVK#.L                                    | 29.78  | 20.63  | 1.44 | 0.69 |
| E9PYB0_E9 Ahnak2 | Protein Ahr R.FGM*TSQSPDTSQK#.G                               | 3.29   | 1.51   | 2.18 | 0.46 |
| E9PYB0_E9 Ahnak2 | Protein Ahr K.VEADVAPQVQGLDK#.T                               | 12.70  | 2.95   | 4.30 | 0.23 |
| F7DBB3_F7 Ahnak2 | Protein Ahr R.FSFPAPSEADVFFPV.R                               | 2.75   | 8.28   | 0.33 | 3.02 |
| F7DBB3_F7 Ahnak2 | Protein Ahr K.SQTQVVISIPLAEK#.A                               | 7.12   | 4.89   | 1.46 | 0.69 |
| E9PYB0_E9 Ahnak2 | Protein Ahr K.FKM*PSFGVSPAGKPSLEASLEVGAPK.V                   | 10.93  | 6.31   | 1.73 | 0.58 |
| E9PYB0_E9 Ahnak2 | Protein Ahr K.GEVSAPDLEVLPGVEVDIQAPGAK#.L                     | 38.37  | 20.35  | 1.89 | 0.53 |
| E9PYB0_E9 Ahnak2 | Protein Ahr K.LEGELALADKVAAK.D                                | 272.68 | 112.28 | 2.43 | 0.41 |
| E9PYB0_E9 Ahnak2 | Protein Ahr K.LPEGLPEALPAAK#.A                                | 12.32  | 6.25   | 1.97 | 0.51 |
| E9PYB0_E9 Ahnak2 | Protein Ahr K.LPEGLPEALPAQAAAAAGLK#.G                         | 328.97 | 172.31 | 1.91 | 0.52 |
| E9PYB0_E9 Ahnak2 | Protein Ahr K.LPEGLPEALPAQAAAAAGLK#.G                         | 14.94  | 11.82  | 1.26 | 0.79 |
| E9PYB0_E9 Ahnak2 | Protein Ahr K.M*PSFGVSPAGKPSLEASLEVGAPK#.V                    | 13.63  | 10.49  | 1.30 | 0.77 |
| E9PYB0_E9 Ahnak2 | Protein Ahr K.MPSFGVSPAGKPSLEASLEVGAPK#.V                     | 19.32  | 11.75  | 1.64 | 0.61 |
| E9PYB0_E9 Ahnak2 | Protein Ahr K.TPDLVQLPSADLELK#.A                              | 48.46  | 25.82  | 1.88 | 0.53 |
| E9PYB0_E9 Ahnak2 | Protein Ahr K.TPDLVQLR.S                                      | 6.27   | 16.88  | 0.37 | 2.69 |
| E9PYB0_E9 Ahnak2 | Protein Ahr K.VDLK#GPHVDLK#.G                                 | 63.09  | 33.18  | 1.90 | 0.53 |
| E9PYB0_E9 Ahnak2 | Protein Ahr K.VEADVAPQVQGLDK#.T                               | 188.12 | 106.63 | 1.76 | 0.57 |
| E9PYB0_E9 Ahnak2 | Protein Ahr K.VQM*PSLK#.M                                     | 69.79  | 116.62 | 0.60 | 1.67 |
| F7DBB3_F7 Ahnak2 | Protein Ahr R.LGEQEQTK#.S                                     | 6.94   | 5.05   | 1.37 | 0.73 |
| F7DBB3_F7 Ahnak2 | Protein Ahr K.SQTQVVISIPLAEK#.A                               | 14.25  | 5.22   | 2.73 | 0.37 |
| F7CJ5_F7 Ahnak2  | Protein Ahr K.LPEGLPEALPAQAAAAAGLK#.G                         | 32.13  | 20.95  | 1.53 | 0.65 |
| Q8BK64_Ai Ahsa1  | Activator o R.EAVGIVSTL#.T                                    | 27.85  | 10.07  | 2.77 | 0.36 |
| Q8BK64_Ai Ahsa1  | Activator o R.ETFLTSPPELYR.V                                  | 6.61   | 9.18   | 0.72 | 1.39 |
| Q8BK64_Ai Ahsa1  | Activator o R.VFTTQELVQAFTHAPAALADR.G                         | 11.80  | 16.88  | 0.70 | 1.43 |
| P31230_Ai Aimp1  | Aminoacyl K.GAEADQIIEYLK#.Q                                   | 117.17 | 24.89  | 4.71 | 0.21 |
| P31230_Ai Aimp1  | Aminoacyl K.GAEADQIIEYLK#.Q                                   | 12.85  | 13.52  | 0.95 | 1.05 |
| Q8R010_Ai Aimp2  | Aminoacyl R.FLFLFGQK#.H                                       | 36.22  | 13.60  | 2.66 | 0.38 |
| Q8R010_Ai Aimp2  | Aminoacyl R.VLSTVHTSSVK#.N                                    | 18.38  | 4.55   | 4.04 | 0.25 |
| Q8R010_Ai Aimp2  | Aminoacyl R.FLFLFGQK#.H                                       | 38.50  | 7.36   | 5.23 | 0.19 |
| Q8R010_Ai Aimp2  | Aminoacyl K.AAVDGLSK#.M                                       | 60.34  | 34.09  | 1.77 | 0.56 |
| Q8R010_Ai Aimp2  | Aminoacyl K.M*HTPDADLDVNTLQADEPTLATNTLDLNSVLGK#.D             | 33.06  | 7.36   | 4.49 | 0.22 |
| Q8R010_Ai Aimp2  | Aminoacyl K.NVPELVK#.C                                        | 36.82  | 4.60   | 8.00 | 0.12 |
| Q8R010_Ai Aimp2  | Aminoacyl K.TTSPATDAGHVQETSEPSLQAESR.Q                        | 13.97  | 11.06  | 1.26 | 0.79 |
| O08915_Ai Aip    | AH recepto K.AHAAVWNAQEAQADFAK#.V                             | 26.62  | 10.96  | 2.43 | 0.41 |
| O08915_Ai Aip    | AH recepto R.GELPFDQGT#.A                                     | 34.08  | 15.37  | 2.22 | 0.45 |
| Q9R0Y5_Kf Ak1    | Adenylate k K.IIFVVGPGSGK#.G                                  | 16.35  | 8.04   | 2.03 | 0.49 |
| Q9WTP6_K Ak2     | Adenylate k K.LVSDM*VVELIEK#.N                                | 13.22  | 6.66   | 1.99 | 0.50 |
| Q9WTP7_K Ak3     | GTP:AMP p R.VYNIENPPK#.T                                      | 5.76   | 2.23   | 2.59 | 0.39 |
| O88845_Ai Akap10 | A-kinase an K.SIEQDANVTFTK#.Y                                 | 7.29   | 10.40  | 0.70 | 1.43 |
| O88845_Ai Akap10 | A-kinase an K.SIEQDANVTFTK#.Y                                 | 6.67   | 5.12   | 1.30 | 0.77 |
| Q9WTQ5_A Akap12  | A-kinase an K.AEVQGEAGQDFGK#.V                                | 20.13  | 8.40   | 2.40 | 0.42 |
| Q9WTQ5_A Akap12  | A-kinase an K.ALEK#VEEVEEDSEVLATEK#.E                         | 11.14  | 5.11   | 2.18 | 0.46 |
| Q9WTQ5_A Akap12  | A-kinase an R.AQENVELPQLK#.G                                  | 24.43  | 24.60  | 0.99 | 1.01 |
| Q9WTQ5_A Akap12  | A-kinase an K.DITAEATPALAQLTPGGK#.D                           | 8.43   | 4.01   | 2.10 | 0.48 |
| Q9WTQ5_A Akap12  | A-kinase an R.DVLEPTQALAAAGVPIAK#.A                           | 21.34  | 8.64   | 2.47 | 0.40 |
| Q9WTQ5_A Akap12  | A-kinase an K.GAVVYSELSK#.T                                   | 32.66  | 15.60  | 2.09 | 0.48 |
| Q9WTQ5_A Akap12  | A-kinase an K.GPSEAPQEAEEGATSDGK#.K                           | 12.97  | 5.54   | 2.34 | 0.43 |
| Q9WTQ5_A Akap12  | A-kinase an K.IVQSVIQTAVDQFAR.T                               | 2.62   | 4.64   | 0.56 | 1.77 |
| Q9WTQ5_A Akap12  | A-kinase an K.IVQSVIQTAVDQFAR.T                               | 3.80   | 6.27   | 0.61 | 1.65 |
| Q9WTQ5_A Akap12  | A-kinase an K.K#EGEGAEASVAGDHOEPGVETVGESASK#.E                | 11.66  | 5.45   | 2.14 | 0.47 |
| Q9WTQ5_A Akap12  | A-kinase an R.LSADYEK#VELPLEDQVGDLEALSEK#.C                   | 11.48  | 2.82   | 4.07 | 0.25 |
| Q9WTQ5_A Akap12  | A-kinase an K.LSETGGYGLQHGEDVTPQGPESQAESIPIIIVTAPESILHSDLQR.E | 4.61   | 4.36   | 1.06 | 0.95 |
| Q9WTQ5_A Akap12  | A-kinase an R.QTQVLAQVADK#.V                                  | 12.63  | 6.22   | 2.03 | 0.49 |
| Q9WTQ5_A Akap12  | A-kinase an K.VELPLEDQVGDLEALSEK#.C                           | 5.45   | 5.97   | 0.91 | 1.10 |
| Q9WTQ5_A Akap12  | A-kinase an K.VELPLEDQVGDLEALSEK#.C                           | 10.04  | 8.42   | 1.19 | 0.84 |
| O54931_Ai Akap2  | A-kinase an R.DGEFTLTLK#K#.E                                  | 11.24  | 9.07   | 1.24 | 0.81 |
| O54931_Ai Akap2  | A-kinase an R.STASLLATQESDVMVGPFFK.L                          | 4.26   | 3.97   | 1.07 | 0.93 |
| O54931_Ai Akap2  | A-kinase an K.YSEAAELR.S                                      | 4.07   | 26.50  | 0.15 | 6.51 |
| Q9DBR0_Ai Akap8  | A-kinase an R.GISSGEGGVQDR.D                                  | 15.87  | 59.41  | 0.27 | 3.74 |
| Q9DBR0_Ai Akap8  | A-kinase an K.LPDKTVEFLOEYIINR.N                              | 8.60   | 21.29  | 0.40 | 2.48 |
| Q9DBR0_Ai Akap8  | A-kinase an K.QFPLYEEDPAK#.H                                  | 16.96  | 14.58  | 1.16 | 0.86 |
| Q9DBR0_Ai Akap8  | A-kinase an R.SFEDEIQK#.L                                     | 56.68  | 59.27  | 0.96 | 1.05 |

|                    |                                                    |        |       |      |      |
|--------------------|----------------------------------------------------|--------|-------|------|------|
| Q9DBRO_AI Akap8    | A-kinase an K.TVEFLQEIYINR.N                       | 4.36   | 11.41 | 0.38 | 2.62 |
| Q9ROL7_AI Akap8l   | A-kinase an K.GALTAQDESSQAK#.R                     | 28.60  | 16.01 | 1.79 | 0.56 |
| E9QQ10_E5 Akap9    | A-kinase an R.LEAVSEAPVQPSLSIDSVVFK#.G             | 6.30   | 3.84  | 1.64 | 0.61 |
| Q8CG76_AI Ak7a2    | Aflatoxin B: R.FYANPLAGGLTGK#.Y                    | 26.05  | 5.39  | 4.83 | 0.21 |
| P31750_AI Akt1     | RAC-alpha s R.EEWATAIQVADGLK#.R                    | 6.09   | 3.06  | 1.99 | 0.50 |
| P31750_AI Akt1     | RAC-alpha s R.HPFLTALK#.Y                          | 21.22  | 4.21  | 5.04 | 0.20 |
| Q64362_AI Aktip    | AKT-interac K.IDTTPSLNPEAAVLVEK#.D                 | 5.89   | 1.67  | 3.52 | 0.28 |
| Q57119_AI Aldh16a1 | Aldehyde d R.LLWLTLESLVTGR.G                       | 20.18  | 9.13  | 2.21 | 0.45 |
| Q57119_AI Aldh16a1 | Aldehyde d R.VDQDQGLTQVTLGR.G                      | 3.96   | 7.94  | 0.50 | 2.01 |
| Q57119_AI Aldh16a1 | Aldehyde d R.VDQDQGLTQVTLGR.G                      | 2.94   | 9.58  | 0.31 | 3.26 |
| Q9Z110_P5 Aldh18a1 | Delta-1-pyr R.GPVQGLEGLTTK#.W                      | 8.24   | 6.09  | 1.35 | 0.74 |
| Q9Z110_P5 Aldh18a1 | Delta-1-pyr K.FASYLTFSPSEVK#.S                     | 23.72  | 10.96 | 2.16 | 0.46 |
| Q9Z110_P5 Aldh18a1 | Delta-1-pyr R.GPVQGLEGLTTK#.W                      | 30.47  | 18.25 | 1.67 | 0.60 |
| Q9Z110_P5 Aldh18a1 | Delta-1-pyr R.LLHLLTQEALSIGHGVK#.E                 | 5.84   | 5.28  | 1.11 | 0.90 |
| Q9Z110_P5 Aldh18a1 | Delta-1-pyr R.LASIVEQVSVLQVQGR.E                   | 3.20   | 6.79  | 0.47 | 2.12 |
| Q9Z110_P5 Aldh18a1 | Delta-1-pyr R.LASPLLK#.R                           | 18.48  | 49.52 | 0.37 | 2.68 |
| Q9Z110_P5 Aldh18a1 | Delta-1-pyr K.LIDIFYPQQSVTFGTK#.S                  | 14.33  | 6.88  | 2.08 | 0.48 |
| Q9Z110_P5 Aldh18a1 | Delta-1-pyr K.VSGHVITDIVEGK#.K                     | 11.37  | 6.83  | 1.67 | 0.60 |
| Q9Z110_P5 Aldh18a1 | Delta-1-pyr K.FASYLTFSPSEVK#.S                     | 9.64   | 5.08  | 1.90 | 0.53 |
| Q9Z110_P5 Aldh18a1 | Delta-1-pyr K.LIDIFYPQQSVTFGTK#.S                  | 7.02   | 4.00  | 1.76 | 0.57 |
| Q8K009_AI Aldh112  | Mitochond K.DLGEALNEVLK#.I                         | 12.62  | 3.67  | 3.44 | 0.29 |
| Q8K009_AI Aldh112  | Mitochond R.ILSNTPVIEDSTDFK#.S                     | 18.87  | 5.14  | 3.67 | 0.27 |
| Q8K009_AI Aldh112  | Mitochond K.M*IPASQYFSAGETSVELTAEELK#.V            | 4.07   | 4.68  | 0.87 | 1.15 |
| Q8K009_AI Aldh112  | Mitochond R.TPOPEEGATYEGIK#.K                      | 11.10  | 4.27  | 2.60 | 0.38 |
| Q8K009_AI Aldh112  | Mitochond R.ILSNTPVIEDSTDFK#.S                     | 7.04   | 3.20  | 2.20 | 0.45 |
| Q8K009_AI Aldh112  | Mitochond K.M*IPASQYFSAGETSVELTAEELK#.V            | 4.35   | 5.24  | 0.83 | 1.20 |
| P47738_AI Aldh2    | Aldehyde d R.TEQGQVDETQFK#.K                       | 6.08   | 2.71  | 2.24 | 0.45 |
| Q9DBT5_AI Ampd2    | AMP deami R.HLEEVHVEQGR.E                          | 9.93   | 15.88 | 0.63 | 1.60 |
| Q9DBT5_AI Ampd2    | AMP deami R.LQVLSK#.F                              | 25.73  | 13.98 | 1.84 | 0.54 |
| Q9DBT5_AI Ampd2    | AMP deami R.SAPYFEEPSIEQLEER.R                     | 3.97   | 7.40  | 0.54 | 1.86 |
| Q9DBT5_AI Ampd2    | AMP deami K.TDSDSDLQVYK#.E                         | 23.12  | 5.96  | 3.88 | 0.26 |
| Q9DBT5_AI Ampd2    | AMP deami K.YFAHIK#.E                              | 14.87  | 4.94  | 3.01 | 0.33 |
| Q9DBT5_AI Ampd2    | AMP deami R.YLQQLAEKPLETR.T                        | 3.10   | 2.96  | 1.05 | 0.95 |
| Q9DBT5_AI Ampd2    | AMP deami R.LQVLSK#.F                              | 36.09  | 10.40 | 3.47 | 0.29 |
| Q9DBT5_AI Ampd2    | AMP deami R.SAPYFEEPSIEQLEER.R                     | 4.11   | 6.15  | 0.67 | 1.49 |
| Q9DBT5_AI Ampd2    | AMP deami K.TDSDSDLQVYK#.E                         | 21.60  | 5.88  | 3.67 | 0.27 |
| P53995_AF Anapc1   | Anaphase-p R.GM*FTLFSYHPVTEPLPVPK.L                | 8.28   | 8.96  | 0.92 | 1.08 |
| P53995_AF Anapc1   | Anaphase-p R.LAPVLLGNPQPM*VM*.-                    | 13.89  | 13.89 | 1.00 | 1.00 |
| P53995_AF Anapc1   | Anaphase-p R.NVESHLNKH#.S                          | 11.23  | 11.30 | 0.99 | 1.01 |
| P53995_AF Anapc1   | Anaphase-p R.LQVASELWSSDGAAGLVGSLQEVTHHEK#.Q       | 5.02   | 5.38  | 0.93 | 1.07 |
| P53995_AF Anapc1   | Anaphase-p R.SDFEGSLVPIAPK#.K                      | 21.48  | 13.77 | 1.56 | 0.64 |
| Q91W96_A Anapc4    | Anaphase-p R.DLIALANTTGEVLLHR.L                    | 4.50   | 9.16  | 0.49 | 2.03 |
| Q91W96_A Anapc4    | Anaphase-p R.LDEQGSIIPTTR.T                        | 3.68   | 8.37  | 0.44 | 2.27 |
| Q91W96_A Anapc4    | Anaphase-p K.LGQSISSYSIQK#.L                       | 11.99  | 6.01  | 2.00 | 0.50 |
| Q91W96_A Anapc4    | Anaphase-p K.LLAFALADTK#.K                         | 10.65  | 8.98  | 1.19 | 0.84 |
| Q9WVM3_A Anapc7    | Anaphase-p K.AIQLSNSVQALLK#.G                      | 8.58   | 4.03  | 2.13 | 0.47 |
| Q8C8R3_AI Ank2     | Ankyrin-2 C.R.DSAM*IDDTVVPSHQVSAK#.E               | 12.42  | 3.15  | 3.94 | 0.25 |
| Q8C8R3_AI Ank2     | Ankyrin-2 C.K.FVFAK#.S                             | 18.54  | 10.13 | 1.83 | 0.55 |
| Q8C8R3_AI Ank2     | Ankyrin-2 C.R.IK#QDSNLGPEGGVLSSTVVSQVAVFPEGALTK#.R | 7.98   | 2.47  | 3.23 | 0.31 |
| Q8C8R3_AI Ank2     | Ankyrin-2 C.R.LGYSVVDTLK#.V                        | 17.28  | 8.60  | 2.01 | 0.50 |
| Q8C8R3_AI Ank2     | Ankyrin-2 C.K.SGLTSLHLAAQEDK#NVNVDILTK#.H          | 12.31  | 1.45  | 8.49 | 0.12 |
| Q8C8R3_AI Ank2     | Ankyrin-2 C.K.VVTEEVTTTTTITEK#.H                   | 13.63  | 4.71  | 2.89 | 0.35 |
| G5E8K5_AI Ank3     | Ankyrin-3 C.R.YLVQDGAQVEAK.A                       | 6.95   | 7.98  | 0.87 | 1.15 |
| Q810B6_AI Ankfy1   | Rabankyrin R.GDLFASTFLIK#.N                        | 12.06  | 9.88  | 1.22 | 0.82 |
| Q810B6_AI Ankfy1   | Rabankyrin R.AAGAGNEAAALFLATSGAHANHR.N             | 1.75   | 9.84  | 0.18 | 5.62 |
| Q810B6_AI Ankfy1   | Rabankyrin K.ANALHATNNLQIIPDFSLK#.D                | 13.83  | 17.60 | 0.79 | 1.27 |
| Q810B6_AI Ankfy1   | Rabankyrin R.ESGAAEQVNDK.G                         | 3.57   | 4.05  | 0.88 | 1.13 |
| Q810B6_AI Ankfy1   | Rabankyrin R.GDLFASTFLIK#.N                        | 28.73  | 23.00 | 1.25 | 0.80 |
| Q810B6_AI Ankfy1   | Rabankyrin R.LGVNQQGVNIFNYQVATK#.Q                 | 4.07   | 3.98  | 1.02 | 0.98 |
| Q810B6_AI Ankfy1   | Rabankyrin K.NGALVNAATAGAQETPLHLVALYSPK.K          | 9.10   | 6.19  | 1.47 | 0.68 |
| E9Q4F8_E9 Ankrd11  | Protein Ank K.VFSSIISEDFSER.K                      | 1.90   | 8.71  | 0.22 | 4.59 |
| Q99NH0_A Ankrd17   | Ankyrin rep R.LEALLEAAGIGK#.L                      | 10.84  | 6.51  | 1.67 | 0.60 |
| Q99NH0_A Ankrd17   | Ankyrin rep K.NASILLEELDLEK.L                      | 6.18   | 6.92  | 0.89 | 1.12 |
| Q99NH0_A Ankrd17   | Ankyrin rep K.GADVNAPPVPSR.D                       | 5.43   | 24.69 | 0.22 | 4.55 |
| Q99NH0_A Ankrd17   | Ankyrin rep R.GASLEEVNDEGYLPM*EAAR.E               | 2.51   | 6.01  | 0.42 | 2.39 |
| Q99NH0_A Ankrd17   | Ankyrin rep R.LEALLEAAGIGK#.L                      | 34.35  | 25.23 | 1.36 | 0.73 |
| Q99NH0_A Ankrd17   | Ankyrin rep K.LLLSGTADGADLR.T                      | 6.75   | 24.01 | 0.28 | 3.56 |
| Q99NH0_A Ankrd17   | Ankyrin rep K.NASILLEELDLEK#.L                     | 22.04  | 15.86 | 1.39 | 0.72 |
| Q99NH0_A Ankrd17   | Ankyrin rep R.NVSDYTPLSLAASGGVYNIK#.I              | 18.76  | 15.91 | 1.18 | 0.85 |
| Q99NH0_A Ankrd17   | Ankyrin rep R.TEVVLLDR.K                           | 4.63   | 22.24 | 0.21 | 4.81 |
| Q99NH0_A Ankrd17   | Ankyrin rep K.TGLTPLM*EAASGGYAEVGR.V               | 2.55   | 8.95  | 0.28 | 3.51 |
| Q99NH0_A Ankrd17   | Ankyrin rep K.TPAPVQSSASVNLVNHK#.R                 | 11.01  | 6.25  | 1.76 | 0.57 |
| Q3UMR0_A Ankrd27   | Ankyrin rep R.LLSQDDQD#DAM*QK#.M                   | 9.12   | 1.32  | 6.90 | 0.15 |
| Q8K298_AI Anln     | Actin-bindin R.AESADLSGEDRDLLSIDAYR.S              | 1.88   | 11.50 | 0.16 | 6.11 |
| Q8K298_AI Anln     | Actin-bindin R.ALLIDELNK#.L                        | 14.29  | 17.28 | 0.83 | 1.21 |
| Q8K298_AI Anln     | Actin-bindin K.ASSPVTAATFITENR.E                   | 2.88   | 9.90  | 0.29 | 3.43 |
| Q8K298_AI Anln     | Actin-bindin R.DSNLSAASPCKG.F                      | 8.52   | 8.06  | 1.06 | 0.95 |
| Q8K298_AI Anln     | Actin-bindin R.GLNSGSEASATSVVK#.T                  | 17.59  | 9.49  | 1.85 | 0.54 |
| Q8K298_AI Anln     | Actin-bindin K.ITLFLLEEK.S                         | 11.06  | 12.95 | 0.85 | 1.17 |
| Q8K298_AI Anln     | Actin-bindin R.LLLIATEK#.R                         | 16.37  | 17.95 | 0.91 | 1.10 |
| Q8K298_AI Anln     | Actin-bindin K.LLNQVIVDIR.L                        | 3.68   | 14.51 | 0.25 | 3.94 |
| Q8K298_AI Anln     | Actin-bindin K.LSSTEPAGSTESEM*TK#.S                | 7.74   | 4.94  | 1.57 | 0.64 |
| Q8K298_AI Anln     | Actin-bindin R.NTELTIVRQR.E                        | 1.60   | 4.54  | 0.35 | 2.83 |
| Q8K298_AI Anln     | Actin-bindin K.RLLTSITSK.S                         | 2.35   | 12.29 | 0.19 | 5.22 |
| Q8K298_AI Anln     | Actin-bindin K.TSVISQSEFAPS#.G                     | 14.94  | 21.31 | 0.70 | 1.43 |
| Q8K298_AI Anln     | Actin-bindin K.VASDLEVEQNTAVER.E                   | 3.91   | 17.07 | 0.23 | 4.37 |
| P97822_AI Anp32e   | Acidic leuci K.IK#DLSTVEALQNLK#.N                  | 16.91  | 4.23  | 3.99 | 0.25 |
| P97822_AI Anp32e   | Acidic leuci K.DLSTVEALQNLK#.N                     | 8.85   | 19.37 | 0.46 | 2.19 |
| P10107_AI Anxa1    | Annexin A1 K.ALLALAK#.G                            | 140.59 | 26.52 | 5.30 | 0.19 |
| P10107_AI Anxa1    | Annexin A1 K.ALTHGHEEVVLM*LK#.T                    | 47.54  | 8.32  | 5.71 | 0.18 |
| P10107_AI Anxa1    | Annexin A1 K.ALTHGHEEVVLM*LK#.T                    | 154.34 | 29.67 | 5.20 | 0.19 |
| P10107_AI Anxa1    | Annexin A1 K.DITSDTSQDFRK.A                        | 25.88  | 22.43 | 1.15 | 0.87 |
| P10107_AI Anxa1    | Annexin A1 R.FLENEQEQYQAVK#.S                      | 274.68 | 38.98 | 7.05 | 0.14 |
| P10107_AI Anxa1    | Annexin A1 K.GGPGSAVSPYPSFNVSDDVAALHK#.A           | 349.74 | 53.84 | 6.50 | 0.15 |
| P10107_AI Anxa1    | Annexin A1 K.GLGTEDTLIELLTR.S                      | 68.50  | 57.07 | 1.20 | 0.83 |
| P10107_AI Anxa1    | Annexin A1 K.GTDVNVFTLITR.S                        | 42.44  | 41.95 | 1.01 | 0.99 |
| P10107_AI Anxa1    | Annexin A1 K.GVDEATIIDLTK#.R                       | 234.15 | 41.92 | 5.59 | 0.18 |
| P10107_AI Anxa1    | Annexin A1 R.K#ALLALAK#.G                          | 15.38  | 3.32  | 4.63 | 0.22 |
| P10107_AI Anxa1    | Annexin A1 R.K#ALTHGHEEVVLM*LK#.T                  | 10.66  | 25.46 | 0.42 | 2.39 |
| P10107_AI Anxa1    | Annexin A1 R.K#ALTHGHEEVVLM*LK#.T                  | 32.52  | 4.31  | 7.54 | 0.13 |
| P10107_AI Anxa1    | Annexin A1 R.SEIDM*NEIK#.V                         | 124.34 | 21.11 | 5.89 | 0.17 |
| P10107_AI Anxa1    | Annexin A1 R.SEIDMNEIK#.V                          | 86.95  | 15.34 | 5.67 | 0.18 |
| P10107_AI Anxa1    | Annexin A1 K.TPAQFADDEL.R                          | 84.83  | 88.40 | 0.96 | 1.04 |



|                  |                                            |        |        |      |      |
|------------------|--------------------------------------------|--------|--------|------|------|
| P10107_A0 Anxa1  | Annexin A1 R.VFQNYGK#.Y                    | 121.03 | 19.81  | 6.11 | 0.16 |
| P10107_A0 Anxa1  | Annexin A1 R.FLENEQEYVQAVK#.S              | 5.36   | 1.50   | 3.58 | 0.28 |
| P10107_A0 Anxa1  | Annexin A1 K.ALLALAK#.G                    | 31.29  | 8.53   | 3.67 | 0.27 |
| P10107_A0 Anxa1  | Annexin A1 K.ALTHGLEEVVLAAMK#.T            | 14.90  | 2.72   | 5.48 | 0.18 |
| P10107_A0 Anxa1  | Annexin A1 R.FLENEQEYVQAVK#.S              | 18.63  | 12.35  | 1.51 | 0.66 |
| P10107_A0 Anxa1  | Annexin A1 K.GGPGSAVSPYPFVSSDVAALHK#.A     | 23.97  | 10.56  | 2.27 | 0.44 |
| P10107_A0 Anxa1  | Annexin A1 K.TPAQFDADLER.G                 | 14.39  | 9.30   | 1.55 | 0.65 |
| P10107_A0 Anxa1  | Annexin A1 K.ALLALAK#.G                    | 28.68  | 16.91  | 1.70 | 0.59 |
| P10107_A0 Anxa1  | Annexin A1 R.FLENEQEYVQAVK#.S              | 41.68  | 46.11  | 0.90 | 1.11 |
| P10107_A0 Anxa1  | Annexin A1 K.GGPGSAVSPYPFVSSDVAALHK#.A     | 38.05  | 14.05  | 2.71 | 0.37 |
| P97384_A0 Anxa11 | Annexin A1 K.TPVLFDVYK#.E                  | 8.38   | 6.23   | 1.34 | 0.74 |
| P07356_A0 Anxa2  | Annexin A2 R.AEDGSDVYELIDQDAR.E            | 4.52   | 18.75  | 0.24 | 4.15 |
| P07356_A0 Anxa2  | Annexin A2 R.DALNIETAVK.T                  | 80.09  | 52.39  | 1.53 | 0.65 |
| P07356_A0 Anxa2  | Annexin A2 K.GVDEVTVNLTNR.S                | 4.55   | 16.97  | 0.27 | 3.73 |
| P07356_A0 Anxa2  | Annexin A2 K.LMVALAK#.G                    | 17.66  | 10.97  | 1.61 | 0.62 |
| P07356_A0 Anxa2  | Annexin A2 K.LMVALAK#.G                    | 36.36  | 30.30  | 1.20 | 0.83 |
| P07356_A0 Anxa2  | Annexin A2 R.QDIAFAYQR.R                   | 26.28  | 103.37 | 0.25 | 3.93 |
| P07356_A0 Anxa2  | Annexin A2 R.RAEDGSDVYELIDQDAR.E           | 4.73   | 43.67  | 0.11 | 9.23 |
| P07356_A0 Anxa2  | Annexin A2 K.SALSGHLETVLGLLK#.T            | 177.60 | 136.63 | 1.30 | 0.77 |
| P07356_A0 Anxa2  | Annexin A2 K.SALSGHLETVLGLLK#.T            | 17.83  | 8.32   | 2.14 | 0.47 |
| P07356_A0 Anxa2  | Annexin A2 R.SEVDMLK#.I                    | 18.37  | 9.60   | 1.91 | 0.52 |
| P07356_A0 Anxa2  | Annexin A2 K.SLYYYIQDQTK#.G                | 62.11  | 46.65  | 1.33 | 0.75 |
| P07356_A0 Anxa2  | Annexin A2 K.SYSPYDMLESIK.K                | 6.72   | 7.10   | 0.95 | 1.06 |
| P07356_A0 Anxa2  | Annexin A2 K.SYSPYDMLESIK#.E               | 11.83  | 7.20   | 1.64 | 0.61 |
| P07356_A0 Anxa2  | Annexin A2 K.TDLEKDIISDTSDFRKL.L           | 24.53  | 77.65  | 0.32 | 3.17 |
| P07356_A0 Anxa2  | Annexin A2 K.TKGVDEVTVNLTNR.S              | 9.16   | 33.98  | 0.27 | 3.71 |
| P07356_A0 Anxa2  | Annexin A2 R.TNQLQEINR.V                   | 38.41  | 129.39 | 0.30 | 3.37 |
| P07356_A0 Anxa2  | Annexin A2 K.TPAQYDASELK#.A                | 103.50 | 95.69  | 1.08 | 0.92 |
| P07356_A0 Anxa2  | Annexin A2 K.WISIMTER.S                    | 2.94   | 7.86   | 0.37 | 2.68 |
| P07356_A0 Anxa2  | Annexin A2 R.AEDGSDVYELIDQDAR.E            | 2.40   | 4.23   | 0.57 | 1.77 |
| P07356_A0 Anxa2  | Annexin A2 K.GVDEVTVNLTNR.S                | 5.15   | 20.39  | 0.25 | 3.96 |
| P07356_A0 Anxa2  | Annexin A2 R.RAEDGSDVYELIDQDAR.E           | 2.25   | 13.34  | 0.17 | 5.94 |
| P07356_A0 Anxa2  | Annexin A2 K.SALSGHLETVLGLLK#.T            | 49.36  | 43.48  | 1.14 | 0.88 |
| P07356_A0 Anxa2  | Annexin A2 K.SLYYYIQDQTK#.G                | 19.02  | 11.98  | 1.59 | 0.63 |
| P07356_A0 Anxa2  | Annexin A2 K.TKGVDEVTVNLTNR.S              | 4.86   | 19.76  | 0.25 | 4.06 |
| P07356_A0 Anxa2  | Annexin A2 R.TNQLQEINR.V                   | 8.07   | 32.75  | 0.25 | 4.06 |
| P07356_A0 Anxa2  | Annexin A2 K.TPAQYDASELK#.A                | 37.70  | 39.66  | 0.95 | 1.05 |
| P07356_A0 Anxa2  | Annexin A2 R.AEDGSDVYELIDQDAR.E            | 3.47   | 9.06   | 0.38 | 2.61 |
| P07356_A0 Anxa2  | Annexin A2 R.DALNIETAVK#.T                 | 25.79  | 27.57  | 0.94 | 1.07 |
| P07356_A0 Anxa2  | Annexin A2 K.SLYYYIQDQTK#.G                | 18.31  | 15.55  | 1.18 | 0.85 |
| P07356_A0 Anxa2  | Annexin A2 K.TKGVDEVTVNLTNR.S              | 4.18   | 17.40  | 0.24 | 4.17 |
| P07356_A0 Anxa2  | Annexin A2 R.TNQLQEINR.V                   | 15.08  | 57.43  | 0.26 | 3.81 |
| P07356_A0 Anxa2  | Annexin A2 K.TPAQYDASELK#.A                | 53.36  | 49.96  | 1.07 | 0.94 |
| P97429_A0 Anxa4  | Annexin A4 K.GLGTDEDAIIGLAYR.N             | 2.52   | 5.19   | 0.48 | 2.06 |
| P97429_A0 Anxa4  | Annexin A4 R.INQTYQQYGR.S                  | 2.53   | 4.80   | 0.53 | 1.89 |
| P97429_A0 Anxa4  | Annexin A4 K.SETSGSFEDALIAVK#.C            | 12.26  | 6.45   | 1.90 | 0.53 |
| P48036_A0 Anxa5  | Annexin A5 K.GLGTDESILNLTNR.S              | 11.46  | 14.67  | 0.78 | 1.28 |
| P48036_A0 Anxa5  | Annexin A5 R.GTVDTPPGFDR.GR.A              | 8.73   | 10.05  | 0.87 | 1.15 |
| P48036_A0 Anxa5  | Annexin A5 R.LYDAYELK#.H                   | 37.97  | 11.92  | 3.18 | 0.31 |
| P48036_A0 Anxa5  | Annexin A5 R.TPEELSAIK#.Q                  | 28.16  | 6.08   | 4.63 | 0.22 |
| P48036_A0 Anxa5  | Annexin A5 K.LTEIASR.T                     | 13.75  | 16.65  | 0.83 | 1.21 |
| P14824_A0 Anxa6  | Annexin A6 R.ENDDVVSEDLVQQDQVQDLYEAGELK#.W | 12.32  | 3.25   | 3.79 | 0.26 |
| P14824_A0 Anxa6  | Annexin A6 K.GFGSDKESILNLTNR.S             | 5.06   | 8.47   | 0.60 | 1.67 |
| P14824_A0 Anxa6  | Annexin A6 R.GSVHDFPEFDANQDAEALYAMK#.G     | 5.72   | 2.82   | 2.03 | 0.49 |
| P14824_A0 Anxa6  | Annexin A6 R.SEIDLINR.R                    | 3.73   | 9.52   | 0.39 | 2.55 |
| P14824_A0 Anxa6  | Annexin A6 K.TLIEILATR.T                   | 3.08   | 11.79  | 0.26 | 3.84 |
| P14824_A0 Anxa6  | Annexin A6 K.DAFVAIQSVK#.N                 | 8.86   | 6.80   | 1.30 | 0.77 |
| P14824_A0 Anxa6  | Annexin A6 R.ENDDVVSEDLVQQDQVQDLYEAGELK#.W | 9.16   | 4.05   | 2.26 | 0.44 |
| P14824_A0 Anxa6  | Annexin A6 R.GSVHDFPEFDANQDAEALYAMK#.G     | 7.74   | 3.72   | 2.08 | 0.48 |
| P14824_A0 Anxa6  | Annexin A6 R.GSVHDFPEFDANQDAEALYAMK#.G     | 5.10   | 1.77   | 2.89 | 0.35 |
| O35643_A0 Ap1b1  | AP-1 compl R.AAMIWIVGEAER.J                | 3.07   | 6.73   | 0.46 | 2.20 |
| O35643_A0 Ap1b1  | AP-1 compl K.EYATEVDVDFVR.K                | 5.81   | 8.37   | 0.69 | 1.44 |
| O35643_A0 Ap1b1  | AP-1 compl R.IQPGNPSFTLSLK#.C              | 11.77  | 6.74   | 1.75 | 0.57 |
| O35643_A0 Ap1b1  | AP-1 compl K.KGEIFELK.A                    | 77.18  | 18.42  | 4.19 | 0.24 |
| O35643_A0 Ap1b1  | AP-1 compl R.LASQANIAQVLAELK#.E            | 50.35  | 14.72  | 3.42 | 0.29 |
| O35643_A0 Ap1b1  | AP-1 compl K.LHDIINAQLVEDQGLDTLK#.D        | 6.78   | 2.29   | 2.96 | 0.34 |
| O35643_A0 Ap1b1  | AP-1 compl R.LSHANSVAVLSAVK#.V             | 92.44  | 24.05  | 3.84 | 0.26 |
| O35643_A0 Ap1b1  | AP-1 compl K.LVYLILM*NYAK#.S               | 12.36  | 3.43   | 3.61 | 0.28 |
| O35643_A0 Ap1b1  | AP-1 compl K.M*EPLNQLQVAVK#.N              | 13.21  | 6.27   | 2.11 | 0.47 |
| O35643_A0 Ap1b1  | AP-1 compl R.NINLIVQK#.R                   | 84.00  | 24.60  | 3.42 | 0.29 |
| O35643_A0 Ap1b1  | AP-1 compl R.NVEGQDM*LYQSLK#.L             | 13.62  | 9.65   | 1.41 | 0.71 |
| O35643_A0 Ap1b1  | AP-1 compl K.VNYVQEAIVVVK#.D               | 18.25  | 4.00   | 4.57 | 0.22 |
| O35643_A0 Ap1b1  | AP-1 compl K.VNDPIYVK#.L                   | 72.75  | 21.21  | 3.43 | 0.29 |
| O35643_A0 Ap1b1  | AP-1 compl K.DLDYYATLLK#.K                 | 18.09  | 4.86   | 3.73 | 0.27 |
| O35643_A0 Ap1b1  | AP-1 compl K.FM*EM*LSK#.D                  | 16.14  | 5.99   | 2.69 | 0.37 |
| O35643_A0 Ap1b1  | AP-1 compl R.IQPGNPSFTLSLK#.C              | 14.27  | 5.11   | 2.80 | 0.36 |
| O35643_A0 Ap1b1  | AP-1 compl K.KGEIFELK#.A                   | 84.59  | 21.54  | 3.93 | 0.25 |
| O35643_A0 Ap1b1  | AP-1 compl R.LASQANIAQVLAELK#.E            | 64.39  | 16.75  | 3.84 | 0.26 |
| O35643_A0 Ap1b1  | AP-1 compl K.LHDIINAQLVEDQGLDTLK#.D        | 5.90   | 2.45   | 2.41 | 0.42 |
| O35643_A0 Ap1b1  | AP-1 compl R.LLSTDPVAAK#.E                 | 48.78  | 11.81  | 4.13 | 0.24 |
| O35643_A0 Ap1b1  | AP-1 compl R.LSHANSVAVLSAVK#.V             | 66.63  | 20.98  | 3.18 | 0.31 |
| O35643_A0 Ap1b1  | AP-1 compl K.M*EPLNQLQVAVK#.N              | 20.45  | 9.17   | 2.23 | 0.45 |
| O35643_A0 Ap1b1  | AP-1 compl R.NINLIVQK#.R                   | 67.98  | 19.32  | 3.52 | 0.28 |
| O35643_A0 Ap1b1  | AP-1 compl R.NVEGQDM*LYQSLK#.L             | 13.71  | 3.93   | 3.48 | 0.29 |
| O35643_A0 Ap1b1  | AP-1 compl K.VNYVQEAIVVVK#.D               | 12.34  | 4.05   | 3.05 | 0.33 |
| P22892_A0 Ap1g1  | AP-1 compl R.DLAGEVEK#.L                   | 12.57  | 6.40   | 1.96 | 0.51 |
| P22892_A0 Ap1g1  | AP-1 compl R.VLAINILGR.F                   | 5.25   | 12.90  | 0.41 | 2.46 |
| P22892_A0 Ap1g1  | AP-1 compl R.YVALTSLK#.K                   | 33.43  | 12.23  | 2.73 | 0.37 |
| P22892_A0 Ap1g1  | AP-1 compl R.AVEYNALFK#.T                  | 21.88  | 7.81   | 2.80 | 0.36 |
| P22892_A0 Ap1g1  | AP-1 compl R.GYALTAIM*K#.L                 | 11.06  | 4.26   | 2.59 | 0.39 |
| P22892_A0 Ap1g1  | AP-1 compl R.VLAINILGR.F                   | 8.86   | 14.34  | 0.62 | 1.62 |
| P22892_A0 Ap1g1  | AP-1 compl R.YVALTSLK#.T                   | 48.65  | 14.35  | 3.39 | 0.30 |
| P35585_A0 Ap1m1  | AP-1 compl K.IIQEYITQEGH#.L                | 7.68   | 3.16   | 2.43 | 0.41 |
| P35585_A0 Ap1m1  | AP-1 compl K.VVQVFSEYFK#.E                 | 24.20  | 7.92   | 3.06 | 0.33 |
| P35585_A0 Ap1m1  | AP-1 compl R.STANNVEIHIPVNDADSPK#.F        | 9.07   | 4.52   | 2.01 | 0.50 |
| P35585_A0 Ap1m1  | AP-1 compl K.VVQVFSEYFK#.E                 | 12.30  | 5.98   | 2.06 | 0.49 |
| P35585_A0 Ap1m1  | AP-1 compl R.AHFGPVSVAEDKHEGK#PPIVSK#.F    | 12.61  | 5.10   | 2.47 | 0.40 |
| P35585_A0 Ap1m1  | AP-1 compl R.STANNVEIHIPVNDADSPK#.F        | 13.80  | 6.00   | 2.30 | 0.43 |
| P35585_A0 Ap1m1  | AP-1 compl K.VVQVFSEYFK#.E                 | 14.41  | 7.92   | 1.82 | 0.55 |
| P61967_A0 Ap1s1  | AP-1 compl K.AIEQADLLQEEDESPR.S            | 8.08   | 16.85  | 0.48 | 2.08 |
| P61967_A0 Ap1s1  | AP-1 compl R.FM*LLFSR.Q                    | 7.25   | 10.11  | 0.72 | 1.40 |
| P17426_A0 Ap2a1  | AP-2 compl R.ALLLSTYK#.F                   | 56.63  | 16.45  | 3.44 | 0.29 |
| P17426_A0 Ap2a1  | AP-2 compl R.DFLTPTPLSVR.F                 | 4.05   | 8.37   | 0.48 | 2.07 |

|                 |                                                 |        |        |      |       |
|-----------------|-------------------------------------------------|--------|--------|------|-------|
| P17426_AF Ap2a1 | AP-2 compl K.FINLFPETK#.A                       | 20.77  | 6.49   | 3.20 | 0.31  |
| P17426_AF Ap2a1 | AP-2 compl R.GLAVFISDIR.N                       | 19.19  | 15.02  | 1.28 | 0.78  |
| P17426_AF Ap2a1 | AP-2 compl R.IAGDYVSEEVWYR.V                    | 12.59  | 12.03  | 1.05 | 0.96  |
| P17426_AF Ap2a1 | AP-2 compl R.ILVAGDSM*DSVK#.Q                   | 26.65  | 8.56   | 3.11 | 0.32  |
| P17426_AF Ap2a1 | AP-2 compl R.ILVAGDSMDSVK#.Q                    | 26.04  | 2.70   | 9.63 | 0.10  |
| P17426_AF Ap2a1 | AP-2 compl K.LPVTINK#.F                         | 33.14  | 12.96  | 2.56 | 0.39  |
| P17426_AF Ap2a1 | AP-2 compl R.NADVELQQR.A                        | 22.21  | 28.16  | 0.79 | 1.27  |
| P17426_AF Ap2a1 | AP-2 compl K.NSGVLFENQLLQIGVK#.S                | 24.91  | 6.21   | 4.01 | 0.25  |
| P17426_AF Ap2a1 | AP-2 compl K.QLSLPLQEAQK#.I                     | 16.43  | 8.47   | 1.94 | 0.52  |
| P17426_AF Ap2a1 | AP-2 compl K.THIDTVINALK#.T                     | 12.92  | 5.41   | 2.39 | 0.42  |
| P17426_AF Ap2a1 | AP-2 compl K.VAILAEK#.Y                         | 53.80  | 16.56  | 3.25 | 0.31  |
| P17426_AF Ap2a1 | AP-2 compl R.YGGTAQSLTLK#.L                     | 32.81  | 13.97  | 2.35 | 0.43  |
| P17426_AF Ap2a1 | AP-2 compl R.ALLSTYK#.F                         | 30.32  | 8.86   | 3.42 | 0.29  |
| P17426_AF Ap2a1 | AP-2 compl R.ILVAGDSM*DSVK#.Q                   | 16.73  | 5.97   | 2.80 | 0.36  |
| P17426_AF Ap2a1 | AP-2 compl K.NSGVLFENQLLQIGVK#.S                | 9.38   | 4.03   | 2.32 | 0.43  |
| P17426_AF Ap2a1 | AP-2 compl K.VAILAEK#.Y                         | 57.28  | 11.53  | 4.97 | 0.20  |
| P17427_AF Ap2a2 | AP-2 compl R.EM*AEAFAGEIPK#.I                   | 18.78  | 3.83   | 4.91 | 0.20  |
| P17427_AF Ap2a2 | AP-2 compl K.ILVAGDTM*DSVK#.Q                   | 44.28  | 15.83  | 2.80 | 0.36  |
| P17427_AF Ap2a2 | AP-2 compl K.LPITLTK#.F                         | 39.11  | 9.69   | 4.03 | 0.25  |
| P17427_AF Ap2a2 | AP-2 compl R.MFIFYGNK#.T                        | 7.87   | 2.96   | 2.66 | 0.38  |
| P17427_AF Ap2a2 | AP-2 compl K.NNGVLFENQLLQIGLK#.S                | 10.20  | 4.19   | 2.43 | 0.41  |
| P17427_AF Ap2a2 | AP-2 compl K.QLSNPQEQVQIFK#.A                   | 13.34  | 4.47   | 2.98 | 0.34  |
| P17427_AF Ap2a2 | AP-2 compl K.THIVETVINALK#.T                    | 29.38  | 8.45   | 3.48 | 0.29  |
| P17427_AF Ap2a2 | AP-2 compl R.YGGTQVNSVK#.L                      | 56.42  | 19.31  | 2.92 | 0.34  |
| P17427_AF Ap2a2 | AP-2 compl R.EM*AEAFAGEIPK#.I                   | 15.86  | 4.86   | 3.26 | 0.31  |
| P17427_AF Ap2a2 | AP-2 compl K.ILVAGDTM*DSVK#.Q                   | 27.79  | 6.45   | 4.31 | 0.23  |
| P17427_AF Ap2a2 | AP-2 compl K.LPITLTK#.F                         | 23.78  | 5.80   | 4.10 | 0.24  |
| P17427_AF Ap2a2 | AP-2 compl K.QLSNPQEQVQIFK#.A                   | 10.86  | 2.14   | 5.08 | 0.20  |
| Q9DBG3_A Ap2b1  | AP-2 compl K.ALQHM*TDFAIQFNK#.N                 | 14.77  | 4.73   | 3.13 | 0.32  |
| Q9DBG3_A Ap2b1  | AP-2 compl K.DSDYNN*LLK#.K                      | 20.81  | 5.65   | 3.69 | 0.27  |
| Q9DBG3_A Ap2b1  | AP-2 compl K.FLELLPK#.D                         | 40.03  | 13.05  | 3.07 | 0.33  |
| Q9DBG3_A Ap2b1  | AP-2 compl K.LHDIINAQM*VEDQGFDSL.R              | 3.82   | 5.05   | 0.76 | 1.32  |
| Q9DBG3_A Ap2b1  | AP-2 compl R.LLSTDPVTK#.E                       | 83.01  | 29.18  | 2.84 | 0.35  |
| Q9DBG3_A Ap2b1  | AP-2 compl K.LQNNNVYTIK#.R                      | 24.71  | 8.56   | 2.89 | 0.35  |
| Q9DBG3_A Ap2b1  | AP-2 compl K.VNYVQEAIVVIR.D                     | 4.87   | 10.97  | 0.44 | 2.25  |
| Q9DBG3_A Ap2b1  | AP-2 compl K.ALQHM*TDFAIQFNK#.N                 | 14.51  | 4.58   | 3.17 | 0.32  |
| Q9DBG3_A Ap2b1  | AP-2 compl K.AVVLPVAK#.A                        | 18.84  | 8.44   | 2.23 | 0.45  |
| Q9DBG3_A Ap2b1  | AP-2 compl K.DSDYNN*LLK#.K                      | 13.73  | 5.51   | 2.49 | 0.40  |
| Q9DBG3_A Ap2b1  | AP-2 compl K.KPSETQELVQQLSLATQSDNPD.LR.D        | 8.19   | 10.83  | 0.76 | 1.32  |
| Q9DBG3_A Ap2b1  | AP-2 compl R.LLSTDPVTK#.E                       | 83.52  | 22.39  | 3.73 | 0.27  |
| Q9DBG3_A Ap2b1  | AP-2 compl K.VIAAM*TVGK#.D                      | 50.49  | 11.22  | 4.50 | 0.22  |
| P84091_AF Ap2m1 | AP-2 compl K.ASENAVVK#.I                        | 94.59  | 32.45  | 2.91 | 0.34  |
| P84091_AF Ap2m1 | AP-2 compl K.ESQSAEIELPTNDK#.K                  | 16.50  | 6.11   | 2.70 | 0.37  |
| P84091_AF Ap2m1 | AP-2 compl K.LNYSDDHVK#.W                       | 108.37 | 36.30  | 2.99 | 0.33  |
| P84091_AF Ap2m1 | AP-2 compl K.QNVNAAMVFEFLYK#.M                  | 8.08   | 2.82   | 2.86 | 0.35  |
| P84091_AF Ap2m1 | AP-2 compl K.SNFK#PSLLAQK#.I                    | 14.55  | 7.17   | 2.03 | 0.49  |
| P84091_AF Ap2m1 | AP-2 compl R.SNIWLAAVTK#.Q                      | 65.12  | 20.49  | 3.18 | 0.31  |
| P84091_AF Ap2m1 | AP-2 compl R.SPVTNIAR.T                         | 40.28  | 48.87  | 0.82 | 1.21  |
| P84091_AF Ap2m1 | AP-2 compl K.WARPPISMNEFVPFAPSGLK.V             | 6.20   | 9.85   | 0.63 | 1.59  |
| P84091_AF Ap2m1 | AP-2 compl R.SNIWLAAVTK#.Q                      | 8.83   | 4.63   | 1.91 | 0.52  |
| P62743_AF Ap2s1 | AP-2 compl K.QLLM*LSQLE.-                       | 28.74  | 28.74  | 1.00 | 1.00  |
| P62743_AF Ap2s1 | AP-2 compl K.QLMLQSL.-                          | 12.12  | 12.12  | 1.00 | 1.00  |
| P62743_AF Ap2s1 | AP-2 compl K.YTVVDEM*FLAGEIR.E                  | 6.67   | 7.17   | 0.93 | 1.07  |
| Q921T1_AP Ap3b1 | AP-3 compl K.LLTQYILNLGK#.Y                     | 17.50  | 4.36   | 4.01 | 0.25  |
| Q921T1_AP Ap3b1 | AP-3 compl K.VNVNANLGAVPSSQDNVHR.F              | 4.65   | 10.05  | 0.46 | 2.16  |
| Q921T1_AP Ap3b1 | AP-3 compl K.EGSTAQLINTEK#.T                    | 13.07  | 2.84   | 4.61 | 0.22  |
| Q921T1_AP Ap3b1 | AP-3 compl K.EASADLSPYVR.K                      | 7.82   | 21.66  | 0.36 | 2.77  |
| Q921T1_AP Ap3b1 | AP-3 compl K.EGSTAQLINTEK#.T                    | 20.51  | 7.13   | 2.88 | 0.35  |
| Q921T1_AP Ap3b1 | AP-3 compl R.ELK#PVLQSG.-                       | 13.73  | 8.12   | 1.69 | 0.59  |
| Q921T1_AP Ap3b1 | AP-3 compl K.EMLIEVIEK#.L                       | 15.47  | 5.74   | 2.70 | 0.37  |
| Q921T1_AP Ap3b1 | AP-3 compl K.LEILNLANEANISTLLR.E                | 3.90   | 12.70  | 0.31 | 3.26  |
| Q921T1_AP Ap3b1 | AP-3 compl K.LLSDITVPVAR.A                      | 15.86  | 67.89  | 0.23 | 4.28  |
| Q921T1_AP Ap3b1 | AP-3 compl K.LLTQYILNLGK#.Y                     | 86.29  | 35.24  | 2.45 | 0.41  |
| Q921T1_AP Ap3b1 | AP-3 compl K.LQLLNAK#.L                         | 61.12  | 21.65  | 2.82 | 0.35  |
| Q921T1_AP Ap3b1 | AP-3 compl K.LYLTNSK#.Q                         | 25.73  | 13.98  | 1.84 | 0.54  |
| Q921T1_AP Ap3b1 | AP-3 compl K.LYSLDPEQK#.E                       | 22.38  | 8.35   | 2.68 | 0.37  |
| Q921T1_AP Ap3b1 | AP-3 compl K.NASELFPVAVK#.N                     | 25.95  | 14.34  | 1.81 | 0.55  |
| Q921T1_AP Ap3b1 | AP-3 compl R.NVEVIESAK#.E                       | 21.35  | 5.63   | 3.79 | 0.26  |
| Q921T1_AP Ap3b1 | AP-3 compl K.QFAAATIQTIGR.C                     | 4.65   | 10.11  | 0.46 | 2.17  |
| Q921T1_AP Ap3b1 | AP-3 compl K.SFTSEDDLVK#.L                      | 51.13  | 25.97  | 1.97 | 0.51  |
| Q921T1_AP Ap3b1 | AP-3 compl R.VPIVPM*LAIK#.E                     | 11.25  | 4.30   | 2.62 | 0.38  |
| Q921T1_AP Ap3b1 | AP-3 compl K.VNVNANLGAVPSSQDNVHR.F              | 9.48   | 14.75  | 0.64 | 1.56  |
| Q921T1_AP Ap3b1 | AP-3 compl R.YAEQQDALLSISTFOR.A                 | 4.71   | 15.03  | 0.31 | 3.19  |
| Q921T1_AP Ap3b1 | AP-3 compl K.EASADLSPYVR.K                      | 16.71  | 17.89  | 0.93 | 1.07  |
| Q921T1_AP Ap3b1 | AP-3 compl K.EQGTLTGM*NETSATJAAPQNFTPSM*ILQK#.V | 7.02   | 3.65   | 1.92 | 0.52  |
| Q921T1_AP Ap3b1 | AP-3 compl K.LLSDITVPVAR.A                      | 11.96  | 157.38 | 0.08 | 13.16 |
| Q921T1_AP Ap3b1 | AP-3 compl K.LLTQYILNLGK#.Y                     | 75.57  | 29.37  | 2.57 | 0.39  |
| Q921T1_AP Ap3b1 | AP-3 compl K.LQLLNAK#.L                         | 38.02  | 20.51  | 1.85 | 0.54  |
| Q921T1_AP Ap3b1 | AP-3 compl K.LYSLDPEQK#.E                       | 18.19  | 6.66   | 2.73 | 0.37  |
| Q921T1_AP Ap3b1 | AP-3 compl K.LYSLDPEQKHEM*LIEVIEK#.L            | 13.31  | 6.22   | 2.14 | 0.47  |
| Q921T1_AP Ap3b1 | AP-3 compl K.NASELFPVAVK#.N                     | 34.56  | 13.18  | 2.62 | 0.38  |
| Q921T1_AP Ap3b1 | AP-3 compl K.QFAAATIQTIGR.C                     | 3.83   | 7.90   | 0.49 | 2.06  |
| Q921T1_AP Ap3b1 | AP-3 compl R.VPIVPM*LAIK#.E                     | 11.24  | 4.82   | 2.33 | 0.43  |
| Q921T1_AP Ap3b1 | AP-3 compl R.ALDLLYGMVSK#.K                     | 9.85   | 3.09   | 3.19 | 0.31  |
| Q921T1_AP Ap3b1 | AP-3 compl R.LIEDSDONLK#.Y                      | 18.34  | 13.00  | 1.41 | 0.71  |
| Q921T1_AP Ap3b1 | AP-3 compl K.LFGALTPLEPR.L                      | 3.15   | 7.87   | 0.40 | 2.50  |
| Q921T1_AP Ap3b1 | AP-3 compl R.LPQVQSQADLEVQER.A                  | 1.86   | 2.71   | 0.68 | 1.46  |
| Q921T1_AP Ap3b1 | AP-3 compl K.LYASILQK#.E                        | 14.19  | 75.12  | 0.19 | 5.29  |
| Q921T1_AP Ap3b1 | AP-3 compl K.NYLSLAPLFFK#.L                     | 20.02  | 7.73   | 2.59 | 0.39  |
| Q921T1_AP Ap3b1 | AP-3 compl R.ALDIDLK#PLADSEK#LPVQK#.H           | 17.68  | 6.37   | 2.78 | 0.36  |
| Q921T1_AP Ap3b1 | AP-3 compl R.ALDLLYGMVSK#.K                     | 21.02  | 12.83  | 1.64 | 0.61  |
| Q921T1_AP Ap3b1 | AP-3 compl K.EQAADTEAAQEVTLQLLVER.L             | 14.55  | 31.88  | 0.46 | 2.19  |
| Q921T1_AP Ap3b1 | AP-3 compl R.LIEDSDONLK#.Y                      | 80.81  | 43.94  | 1.84 | 0.54  |
| Q921T1_AP Ap3b1 | AP-3 compl K.LFGALTPLEPR.L                      | 10.59  | 25.98  | 0.41 | 2.45  |
| Q921T1_AP Ap3b1 | AP-3 compl K.LLESGLDSM*NSIK#.V                  | 21.97  | 36.29  | 0.61 | 1.65  |
| Q921T1_AP Ap3b1 | AP-3 compl R.LPQVQSQADLEVQER.A                  | 3.52   | 8.79   | 0.40 | 2.49  |
| Q921T1_AP Ap3b1 | AP-3 compl K.LYASILQK#.E                        | 54.22  | 55.90  | 0.97 | 1.03  |
| Q921T1_AP Ap3b1 | AP-3 compl K.NM*ELNVLDLNTK#.M                   | 13.20  | 7.31   | 1.81 | 0.55  |
| Q921T1_AP Ap3b1 | AP-3 compl K.NYLSLAPLFFK#.L                     | 77.60  | 33.83  | 2.29 | 0.44  |
| Q921T1_AP Ap3b1 | AP-3 compl R.RRQPEEDELAR.R                      | 2.43   | 14.47  | 0.17 | 5.96  |
| Q921T1_AP Ap3b1 | AP-3 compl K.VTYDIQASLQK#.D                     | 30.49  | 12.48  | 2.44 | 0.41  |
| Q921T1_AP Ap3b1 | AP-3 compl K.YLGLLAM*SK#.I                      | 21.42  | 10.70  | 2.00 | 0.50  |
| Q91KC8_AP Ap3m1 | AP-3 compl K.GLVNLSQSGAPK#PEENPNLNIOFK#.I       | 20.64  | 20.24  | 1.02 | 0.98  |

|                  |                                              |        |        |      |       |
|------------------|----------------------------------------------|--------|--------|------|-------|
| Q9JKC8_AP Ap3m1  | AP-3 compl K.IQQLAISGLK#.V                   | 52.35  | 42.03  | 1.25 | 0.80  |
| Q9JKC8_AP Ap3m1  | AP-3 compl R.SVVNSITGSSNVGDTLPTGQLSNIPWR.R   | 3.75   | 7.00   | 0.54 | 1.87  |
| Q9JKC8_AP Ap3m1  | AP-3 compl R.VSSQNLVAIPVYVK#.H               | 28.67  | 19.33  | 1.48 | 0.67  |
| Q9JKC8_AP Ap3m1  | AP-3 compl K.GLVNLSQSGAPKPEENPNLNIQFK.I      | 10.84  | 4.89   | 2.21 | 0.45  |
| Q9JKC8_AP Ap3m1  | AP-3 compl K.GLVNLSQSGAPKPEENPNLNIQFK#.I     | 13.64  | 5.65   | 2.41 | 0.41  |
| Q9JKC8_AP Ap3m1  | AP-3 compl K.IQQLAISGLK#.V                   | 29.67  | 10.68  | 2.78 | 0.36  |
| Q9JKC8_AP Ap3m1  | AP-3 compl K.VLAWDVGK#.I                     | 17.10  | 8.62   | 1.98 | 0.50  |
| Q9DCR2_AI Ap3s1  | AP-3 compl K.FYQPYSEDTOQQIIR.E               | 3.48   | 3.94   | 0.88 | 1.13  |
| Q9DCR2_AI Ap3s1  | AP-3 compl K.FYQPYSEDTOQQIIR.E               | 4.89   | 7.78   | 0.63 | 1.59  |
| Q9DCR2_AI Ap3s1  | AP-3 compl R.NINIGDISIK#.V                   | 51.69  | 30.22  | 1.71 | 0.58  |
| Q9DCR2_AI Ap3s1  | AP-3 compl R.NINIGDISIK#VPNLP5FK#.-          | 17.53  | 11.65  | 1.50 | 0.66  |
| Q9DCR2_AI Ap3s1  | AP-3 compl K.NM*NLPEIPR.N                    | 3.69   | 11.95  | 0.31 | 3.24  |
| Q9DCR2_AI Ap3s1  | AP-3 compl K.SEAGLAGAPAR.A                   | 6.54   | 21.22  | 0.31 | 3.25  |
| Q9DCR2_AI Ap3s1  | AP-3 compl K.FYQPYSEDTOQQIIR.E               | 2.22   | 7.56   | 0.29 | 3.41  |
| Q8BSZ2_AI Ap3s2  | AP-3 compl R.NINIGDLNIK#.V                   | 8.52   | 4.54   | 1.88 | 0.53  |
| O88879_AI Apaf1  | Apoptotic f R.GLQLIAGK#.T                    | 13.18  | 5.21   | 2.53 | 0.40  |
| O35841_AI Ap15   | Apoptosis i K.ELPQFATGENLPR.V                | 12.25  | 32.61  | 0.38 | 2.66  |
| O35841_AI Ap15   | Apoptosis i K.EVEELILTESK#.K                 | 51.36  | 23.04  | 2.23 | 0.45  |
| O35841_AI Ap15   | Apoptosis i K.ITNNINVLIK#.D                  | 69.11  | 25.70  | 2.69 | 0.37  |
| O35841_AI Ap15   | Apoptosis i R.LAAQFIPK#.F                    | 68.86  | 36.32  | 1.90 | 0.53  |
| O35841_AI Ap15   | Apoptosis i R.QAVPLFSK#.N                    | 31.56  | 16.55  | 1.91 | 0.52  |
| O35841_AI Ap15   | Apoptosis i K.SLQTVSGR.Q                     | 15.69  | 27.92  | 0.56 | 1.78  |
| O35841_AI Ap15   | Apoptosis i K.STVTL5WK#PVQK#.V               | 10.79  | 24.82  | 0.43 | 2.30  |
| O35841_AI Ap15   | Apoptosis i K.TGEALK#TEENK#.I                | 15.55  | 10.06  | 1.55 | 0.65  |
| O35841_AI Ap15   | Apoptosis i K.VLEDVTGEEFVLFMK#.I             | 20.41  | 12.82  | 1.59 | 0.63  |
| O35841_AI Ap15   | Apoptosis i K.ITNNINVLIK#.D                  | 17.19  | 11.53  | 1.49 | 0.67  |
| O35841_AI Ap15   | Apoptosis i K.YSSNLSNFYNER.S                 | 24.11  | 6.09   | 3.96 | 0.25  |
| O35841_AI Ap15   | Apoptosis i K.DAYQVILDGVK#.G                 | 21.52  | 6.34   | 3.39 | 0.29  |
| O35841_AI Ap15   | Apoptosis i K.ELPQFATGENLPR.V                | 4.90   | 12.43  | 0.39 | 2.53  |
| O35841_AI Ap15   | Apoptosis i K.ITNNINVLIK#.D                  | 16.39  | 8.65   | 1.90 | 0.53  |
| O35841_AI Ap15   | Apoptosis i R.KH#PLFLTK#.L                   | 16.94  | 12.42  | 1.36 | 0.73  |
| O35841_AI Ap15   | Apoptosis i R.LAAQFIPK#.F                    | 21.91  | 12.19  | 1.80 | 0.56  |
| O35841_AI Ap15   | Apoptosis i K.VLEDVTGEEFVLFMK#.I             | 8.59   | 4.30   | 2.00 | 0.50  |
| O35841_AI Ap15   | Apoptosis i K.DAYQVILDGVK#.G                 | 45.74  | 19.10  | 2.39 | 0.42  |
| O35841_AI Ap15   | Apoptosis i K.ELPQFATGENLPR.V                | 7.80   | 16.80  | 0.46 | 2.15  |
| O35841_AI Ap15   | Apoptosis i K.EVEELILTESK#.K                 | 18.94  | 12.27  | 1.54 | 0.65  |
| O35841_AI Ap15   | Apoptosis i K.ITNNINVLIK#.D                  | 26.59  | 13.77  | 1.93 | 0.52  |
| O35841_AI Ap15   | Apoptosis i R.LAAQFIPK#.F                    | 32.59  | 16.16  | 2.02 | 0.50  |
| O35841_AI Ap15   | Apoptosis i K.TGEALK#TEENK#.I                | 33.37  | 8.73   | 3.82 | 0.26  |
| O35841_AI Ap15   | Apoptosis i K.VLEDVTGEEFVLFM*#K#.I           | 6.14   | 7.68   | 0.80 | 1.25  |
| O35841_AI Ap15   | Apoptosis i K.VLEDVTGEEFVLFMK#.I             | 7.81   | 3.92   | 1.99 | 0.50  |
| Q8C714_Q8 Apol9b | Protein Apr K.ELLTALLAIADR.G                 | 17.23  | 23.48  | 0.73 | 1.36  |
| Q8C714_Q8 Apol9b | Protein Apr K.HLYEGSASEAEALR.L               | 12.87  | 24.47  | 0.53 | 1.90  |
| Q8C714_Q8 Apol9b | Protein Apr R.LATTGSISAQR.A                  | 32.95  | 67.72  | 0.49 | 2.05  |
| Q8C714_Q8 Apol9b | Protein Apr R.LATTGSISAQR.A                  | 1.97   | 5.61   | 0.35 | 2.85  |
| Q8CFQ3_AI Aqr    | Intron-binc R.AAFHFPELYDALSNAEVDAR.D         | 4.34   | 14.91  | 0.29 | 3.43  |
| Q8CFQ3_AI Aqr    | Intron-binc R.AGM*QPGLTM*VVGPPGTGK#.T        | 8.33   | 14.55  | 0.57 | 1.75  |
| Q8CFQ3_AI Aqr    | Intron-binc K.DADGEDDTEEA#.T                 | 2.50   | 2.49   | 1.01 | 0.99  |
| Q8CFQ3_AI Aqr    | Intron-binc K.FISVLK#.S                      | 19.08  | 12.99  | 1.47 | 0.68  |
| Q8CFQ3_AI Aqr    | Intron-binc K.M*PNQIATLDFNDTFLSIEHLK#.A      | 35.77  | 23.37  | 1.53 | 0.65  |
| Q8CFQ3_AI Aqr    | Intron-binc R.NFNFLR.L                       | 4.01   | 15.42  | 0.26 | 3.84  |
| Q8CFQ3_AI Aqr    | Intron-binc R.RIELLEEVK.R                    | 2.97   | 40.41  | 0.07 | 13.61 |
| Q8CFQ3_AI Aqr    | Intron-binc K.TDVAVQIISNIYHNPPEQR.T          | 9.29   | 33.34  | 0.28 | 3.59  |
| Q8CFQ3_AI Aqr    | Intron-binc R.TLIVTHSNQALNQLFEK#.I           | 29.81  | 28.32  | 1.05 | 0.95  |
| Q8CFQ3_AI Aqr    | Intron-binc K.VIEIEYK#EIVK#.S                | 22.82  | 16.02  | 1.42 | 0.70  |
| Q8CFQ3_AI Aqr    | Intron-binc R.VNYVLAR.R                      | 6.72   | 29.19  | 0.23 | 4.34  |
| Q8CFQ3_AI Aqr    | Intron-binc K.YSNM*EQSLFTR.F                 | 3.02   | 15.80  | 0.19 | 5.24  |
| P04627_AF Araf   | Serine/thre K.IGDGFLATVK#.T                  | 14.52  | 8.68   | 1.67 | 0.60  |
| Q5XJY5_CC Arcn1  | Coatome r R.ENVNLAQIR.T                      | 17.77  | 57.40  | 0.31 | 3.23  |
| Q5XJY5_CC Arcn1  | Coatome r R.FSTETTLFVDK#YEIL.-               | 46.12  | 23.85  | 1.93 | 0.52  |
| Q5XJY5_CC Arcn1  | Coatome r K.GK#HEVDNFVDK#.L                  | 34.19  | 14.18  | 2.41 | 0.41  |
| Q5XJY5_CC Arcn1  | Coatome r K.GK#HEVDNFVDK#LK#.S               | 15.55  | 12.57  | 1.24 | 0.81  |
| Q5XJY5_CC Arcn1  | Coatome r R.IEGLLAAFP#.L                     | 36.00  | 25.71  | 1.40 | 0.71  |
| Q5XJY5_CC Arcn1  | Coatome r R.ISDDKFGJR.I                      | 7.08   | 15.12  | 0.47 | 2.14  |
| Q5XJY5_CC Arcn1  | Coatome r K.KAPFGGGSSAVSGGTAAM*ITETIETDKPK.V | 2.88   | 2.73   | 1.05 | 0.95  |
| Q5XJY5_CC Arcn1  | Coatome r K.KAPFGGGSSAVSGGTAAM*ITETIETDKPK.V | 6.96   | 4.50   | 1.55 | 0.65  |
| Q5XJY5_CC Arcn1  | Coatome r K.LFTAESLIGLK#.N                   | 166.64 | 83.47  | 2.00 | 0.50  |
| Q5XJY5_CC Arcn1  | Coatome r R.LHVENEDK#K#.G                    | 11.75  | 6.67   | 1.76 | 0.57  |
| Q5XJY5_CC Arcn1  | Coatome r K.LYM*VLITTK#.N                    | 15.79  | 10.03  | 1.57 | 0.64  |
| Q5XJY5_CC Arcn1  | Coatome r K.NSNILEDLETLR.L                   | 34.01  | 96.33  | 0.35 | 2.83  |
| Q5XJY5_CC Arcn1  | Coatome r K.SEGETIMSSNM*GK#.R                | 13.91  | 9.24   | 1.51 | 0.66  |
| Q5XJY5_CC Arcn1  | Coatome r K.SEGETIMSSNM*GK#.R                | 8.41   | 4.78   | 1.76 | 0.57  |
| Q5XJY5_CC Arcn1  | Coatome r K.SEGETIM*SSNM*GK#.R               | 17.93  | 10.83  | 1.65 | 0.60  |
| Q5XJY5_CC Arcn1  | Coatome r K.SEGETIM*SSNM*GK#.R               | 10.74  | 4.83   | 2.22 | 0.45  |
| Q5XJY5_CC Arcn1  | Coatome r K.SFPVNSDVGVLK#.W                  | 65.96  | 38.01  | 1.74 | 0.58  |
| Q5XJY5_CC Arcn1  | Coatome r R.TFTEM*DSHEEK#.V                  | 15.96  | 12.78  | 1.25 | 0.80  |
| Q5XJY5_CC Arcn1  | Coatome r R.TFTEMDSHEEK#.V                   | 17.11  | 16.27  | 1.05 | 0.95  |
| Q5XJY5_CC Arcn1  | Coatome r R.TRIEGLLAAFP#.L                   | 7.55   | 24.18  | 0.31 | 3.20  |
| Q5XJY5_CC Arcn1  | Coatome r K.VHAPPINMESVHM*#K#.I              | 8.21   | 5.27   | 1.56 | 0.64  |
| Q5XJY5_CC Arcn1  | Coatome r K.VHAPPINMESVHM*#K#.I              | 11.41  | 4.44   | 2.57 | 0.39  |
| Q5XJY5_CC Arcn1  | Coatome r K.VTQVDGNSPVR.F                    | 42.81  | 102.85 | 0.42 | 2.40  |
| Q5XJY5_CC Arcn1  | Coatome r R.YYQPM*EK#.L                      | 37.16  | 30.44  | 1.22 | 0.82  |
| Q5XJY5_CC Arcn1  | Coatome r R.IEGLLAAFP#.L                     | 108.32 | 39.55  | 2.74 | 0.37  |
| Q5XJY5_CC Arcn1  | Coatome r K.LYM*VLITTK#.N                    | 21.37  | 12.61  | 1.69 | 0.59  |
| Q5XJY5_CC Arcn1  | Coatome r K.LYMVLITTK#.N                     | 58.60  | 17.80  | 3.29 | 0.30  |
| Q5XJY5_CC Arcn1  | Coatome r K.NSNILEDLETLR.L                   | 51.79  | 85.42  | 0.61 | 1.65  |
| Q5XJY5_CC Arcn1  | Coatome r R.TRIEGLLAAFP#.L                   | 24.06  | 37.78  | 0.64 | 1.57  |
| Q5XJY5_CC Arcn1  | Coatome r R.YYQPM*EK#.L                      | 38.27  | 16.06  | 2.38 | 0.42  |
| Q5XJY5_CC Arcn1  | Coatome r R.IEGLLAAFP#.L                     | 12.38  | 10.76  | 1.15 | 0.87  |
| Q5XJY5_CC Arcn1  | Coatome r K.LFTAESLIGLK#.N                   | 18.53  | 9.74   | 1.90 | 0.53  |
| Q5XJY5_CC Arcn1  | Coatome r K.NSNILEDLETLR.L                   | 9.66   | 27.82  | 0.35 | 2.88  |
| Q5XJY5_CC Arcn1  | Coatome r K.SFPVNSDVGVLK#.W                  | 17.01  | 19.50  | 0.87 | 1.15  |
| Q5XJY5_CC Arcn1  | Coatome r K.VTQVDGNSPVR.F                    | 4.45   | 17.33  | 0.26 | 3.89  |
| Q5XJY5_CC Arcn1  | Coatome r R.FSTETTLFVDK#YEIL.-               | 11.77  | 5.45   | 2.16 | 0.46  |
| Q5XJY5_CC Arcn1  | Coatome r K.LFTAESLIGLK#.N                   | 19.33  | 9.34   | 2.07 | 0.48  |
| Q5XJY5_CC Arcn1  | Coatome r K.SEGETIM*SSNM*GK#.R               | 4.97   | 2.64   | 1.89 | 0.53  |
| Q5XJY5_CC Arcn1  | Coatome r R.TFTEM*DSHEEK#.V                  | 4.94   | 3.18   | 1.55 | 0.64  |
| Q5XJY5_CC Arcn1  | Coatome r K.VTQVDGNSPVR.F                    | 25.53  | 15.96  | 1.60 | 0.63  |
| P84078_AF Arf1   | ADP-ribosy R.ILMVGLDAAGK#.T                  | 16.71  | 8.48   | 1.97 | 0.51  |
| P84078_AF Arf1   | ADP-ribosy K.LGEIVTTPITGPNVETVEYK#.N         | 7.56   | 2.30   | 3.29 | 0.30  |
| P84078_AF Arf1   | ADP-ribosy K.NISFTVVDVGGQDK#.I               | 9.51   | 5.18   | 1.84 | 0.54  |
| P84078_AF Arf1   | ADP-ribosy R.DAVLLVFANK#.Q                   | 763.58 | 326.98 | 2.34 | 0.43  |
| P84078_AF Arf1   | ADP-ribosy R.HYFQNTQGLFVVD5NDR.E             | 7.72   | 18.95  | 0.41 | 2.46  |

|                    |                                                   |        |        |      |      |
|--------------------|---------------------------------------------------|--------|--------|------|------|
| P84078_Af Arf1     | ADP-ribosy R.HYFQNTQGLIFVWDSNDRER.V               | 4.23   | 35.01  | 0.12 | 8.28 |
| P84078_Af Arf1     | ADP-ribosy R.LLM*VGLDAAGK#.T                      | 851.94 | 541.27 | 1.57 | 0.64 |
| P84078_Af Arf1     | ADP-ribosy K.LGEIVTTIPTIGFNVETVEYK#.N             | 167.18 | 72.27  | 2.31 | 0.43 |
| P84078_Af Arf1     | ADP-ribosy K.LK#LGEIVTTIPTIGFNVETVEYK#.N          | 49.03  | 27.99  | 1.75 | 0.57 |
| P84078_Af Arf1     | ADP-ribosy R.M*LAEDEL.R.D                         | 28.93  | 67.91  | 0.43 | 2.35 |
| P84078_Af Arf1     | ADP-ribosy K.NISFTVWVDVGGQDK#.I                   | 247.42 | 93.84  | 2.64 | 0.38 |
| P84078_Af Arf1     | ADP-ribosy K.QDLPNAM*NAAEITDK#.L                  | 28.37  | 11.64  | 2.44 | 0.41 |
| P84078_Af Arf1     | ADP-ribosy K.QDLPNAM*NAAEITDK#.L                  | 18.67  | 8.52   | 2.19 | 0.46 |
| P84078_Af Arf1     | ADP-ribosy K.QDLPNAM*NAAEITDKLGLHSLR.H            | 4.17   | 11.50  | 0.36 | 2.76 |
| P84078_Af Arf1     | ADP-ribosy K.QDLPNAM*NAAEITDKLGLHSLR.H            | 5.25   | 17.00  | 0.31 | 3.24 |
| P84078_Af Arf1     | ADP-ribosy R.I.LMVGDLAAGK#.T                      | 17.74  | 11.15  | 1.59 | 0.63 |
| P84078_Af Arf1     | ADP-ribosy K.LGEIVTTIPTIGFNVETVEYK#.N             | 44.85  | 19.95  | 2.25 | 0.44 |
| P84078_Af Arf1     | ADP-ribosy K.NISFTVWVDVGGQDK#.I                   | 11.95  | 6.99   | 1.71 | 0.59 |
| P84078_Af Arf1     | ADP-ribosy R.I.LMVGDLAAGK#.T                      | 21.42  | 8.37   | 2.56 | 0.39 |
| P84078_Af Arf1     | ADP-ribosy K.LGEIVTTIPTIGFNVETVEYK#.N             | 39.84  | 16.13  | 2.47 | 0.40 |
| P84078_Af Arf1     | ADP-ribosy K.NISFTVWVDVGGQDK#.I                   | 11.15  | 8.09   | 1.38 | 0.73 |
| P61750_Af Arf4     | ADP-ribosy R.I.QEAAVLQK#.M                        | 22.16  | 11.92  | 1.86 | 0.54 |
| P61750_Af Arf4     | ADP-ribosy R.I.QEAAVLQK#.M                        | 220.05 | 143.40 | 1.53 | 0.65 |
| P61750_Af Arf4     | ADP-ribosy K.L.LGQSLR.N                           | 9.16   | 40.88  | 0.22 | 4.46 |
| P61750_Af Arf4     | ADP-ribosy K.QDLPNAM*AISEM*TDK#.L                 | 6.07   | 5.38   | 1.13 | 0.89 |
| P61750_Af Arf4     | ADP-ribosy R.I.QEAAVLQK#.M                        | 31.74  | 17.92  | 1.77 | 0.56 |
| P84084_Af Arf5     | ADP-ribosy K.QDM*PNAM*PVSELTDK#.L                 | 2.37   | 2.01   | 1.18 | 0.85 |
| P84084_Af Arf5     | ADP-ribosy R.VQESADELQK#.M                        | 85.33  | 48.28  | 1.77 | 0.57 |
| P62331_Af Arf6     | ADP-ribosy K.FNVWVDVGGQDK#.I                      | 9.94   | 4.20   | 2.37 | 0.42 |
| P62331_Af Arf6     | ADP-ribosy K.L.GQSVTTIPTVGFNVETVYK#.N             | 8.96   | 2.67   | 3.36 | 0.30 |
| P62331_Af Arf6     | ADP-ribosy K.L.GQSVTTIPTVGFNVETVYK#.N             | 3.56   | 2.35   | 1.51 | 0.66 |
| P62331_Af Arf6     | ADP-ribosy R.DAIIIFANK#.Q                         | 120.98 | 53.36  | 2.27 | 0.44 |
| P62331_Af Arf6     | ADP-ribosy K.FNVWVDVGGQDK#.I                      | 85.82  | 42.08  | 2.04 | 0.49 |
| P62331_Af Arf6     | ADP-ribosy R.I.LM*VGLDAAGK#.T                     | 68.15  | 70.34  | 0.97 | 1.03 |
| P62331_Af Arf6     | ADP-ribosy R.I.LMGLDAAGK#.T                       | 57.17  | 22.42  | 2.55 | 0.39 |
| P62331_Af Arf6     | ADP-ribosy K.L.GQSVTTIPTVGFNVETVYK#.N             | 110.21 | 43.50  | 2.53 | 0.39 |
| P62331_Af Arf6     | ADP-ribosy K.LK#L.GQSVTTIPTVGFNVETVYK#.N          | 12.16  | 6.39   | 1.90 | 0.53 |
| P62331_Af Arf6     | ADP-ribosy R.DAIIIFANK#.Q                         | 14.11  | 5.92   | 2.39 | 0.42 |
| P62331_Af Arf6     | ADP-ribosy K.L.GQSVTTIPTVGFNVETVYK#.N             | 3.43   | 2.16   | 1.59 | 0.63 |
| P62331_Af Arf6     | ADP-ribosy K.L.GQSVTTIPTVGFNVETVYK#.N             | 10.08  | 4.12   | 2.45 | 0.41 |
| P62331_Af Arf6     | ADP-ribosy R.DAIIIFANK#.Q                         | 20.88  | 5.96   | 3.50 | 0.29 |
| P62331_Af Arf6     | ADP-ribosy K.L.GQSVTTIPTVGFNVETVYK#.N             | 16.50  | 8.41   | 1.96 | 0.51 |
| Q9EP19_Ar Arfgap1  | ADP-ribosy R.I.FDVSSSVGSQASK#.V                   | 4.10   | 3.85   | 1.07 | 0.94 |
| Q99K28_Af Arfgap2  | ADP-ribosy R.EVDSEYAR.S                           | 2.87   | 17.63  | 0.16 | 6.15 |
| Q99K28_Af Arfgap2  | ADP-ribosy R.LGM*GLVRS.S                          | 4.92   | 21.58  | 0.23 | 4.39 |
| Q99K28_Af Arfgap2  | ADP-ribosy R.SQDLDFDVGTFASGPPK.Y                  | 14.21  | 17.21  | 0.83 | 1.21 |
| Q99K28_Af Arfgap2  | ADP-ribosy R.SSISHVLSVM*QM*IEQETPLSAK#.S          | 4.19   | 4.59   | 0.91 | 1.10 |
| Q99K28_Af Arfgap2  | ADP-ribosy R.STELSDNWSWQLR.C                      | 2.61   | 13.00  | 0.20 | 4.98 |
| Q99K28_Af Arfgap2  | ADP-ribosy K.VNSQFTEIER.Q                         | 7.29   | 37.44  | 0.19 | 5.13 |
| Q99K28_Af Arfgap2  | ADP-ribosy K.YKDNFSLGETFGSR.W                     | 3.03   | 15.24  | 0.20 | 5.02 |
| Q99K28_Af Arfgap2  | ADP-ribosy R.SQDLDFDVGTFASGPPK.Y                  | 4.58   | 5.57   | 0.82 | 1.22 |
| Q9D853_Af Arfgap3  | ADP-ribosy R.LSTSSISSADLFDEQR.K                   | 3.07   | 10.45  | 0.29 | 3.41 |
| Q9D853_Af Arfgap3  | ADP-ribosy K.LTNTSFTEIEK#.Q                       | 31.92  | 17.75  | 1.80 | 0.56 |
| Q9D853_Af Arfgap3  | ADP-ribosy R.SSSFSWDDGADSYWKK#.K                  | 6.48   | 3.72   | 1.74 | 0.57 |
| Q9D853_Af Arfgap3  | ADP-ribosy K.YQEDPEDSYSSSSK#.W                    | 13.30  | 8.23   | 1.61 | 0.62 |
| Q9D853_Af Arfgap3  | ADP-ribosy R.LSTSSISSADLFDEQR.K                   | 1.80   | 3.47   | 0.52 | 1.93 |
| Q9D853_Af Arfgap3  | ADP-ribosy K.LTNTSFTEIEK#.Q                       | 17.67  | 9.51   | 1.86 | 0.54 |
| A2RSX9_A2 Arfp1    | Arfp1 prot.K.EGVTEAGAPQGGQR.T                     | 16.88  | 30.78  | 0.55 | 1.82 |
| G5E8V9_G1 Arfp1    | MCG18094.K.GGPVILADEIK#.N                         | 23.05  | 10.85  | 2.12 | 0.47 |
| G5E8V9_G1 Arfp1    | MCG18094.K.K#ENILK#.L                             | 68.98  | 22.73  | 3.04 | 0.33 |
| G5E8V9_G1 Arfp1    | MCG18094.R.LK#TPGVDAPSWLEEQ.-                     | 21.63  | 8.47   | 2.55 | 0.39 |
| G5E8V9_G1 Arfp1    | MCG18094.K.LTQQAGDLTPVAGGQR.T                     | 7.85   | 20.30  | 0.39 | 2.59 |
| G5E8V9_G1 Arfp1    | MCG18094.R.NQLVLFHSAVAAYFAGNQK#.Q                 | 16.14  | 9.88   | 1.63 | 0.61 |
| G5E8V9_G1 Arfp1    | MCG18094.K.QLGDFAFADSLK#.S                        | 30.56  | 12.54  | 2.44 | 0.41 |
| G5E8V9_G1 Arfp1    | MCG18094.K.SLELHEEFYGNADTQK#.L                    | 8.98   | 3.53   | 2.54 | 0.39 |
| G5E8V9_G1 Arfp1    | MCG18094.R.TDLEELNLGPR.D                          | 20.05  | 34.78  | 0.58 | 1.73 |
| G5E8V9_G1 Arfp1    | MCG18094.K.TIEDTLM*TVK#.Q                         | 47.11  | 13.59  | 3.47 | 0.29 |
| G5E8V9_G1 Arfp1    | MCG18094.K.TPGVDAPSWLEEQ.-                        | 13.33  | 13.33  | 1.00 | 1.00 |
| G5E8V9_G1 Arfp1    | MCG18094.K.WSLNTYK#.C                             | 24.85  | 9.86   | 2.52 | 0.40 |
| A2RSX9_A2 Arfp1    | Arfp1 prot.K.EGVTEAGAPQGGQR.T                     | 1.51   | 4.55   | 0.33 | 3.00 |
| Q8K221_Af Arfp2    | Arfaptin-2 (K.QLEQLTQQFNK#.L                      | 6.31   | 12.07  | 0.52 | 1.91 |
| Q5FWK3_R Arhgap1   | Rho GTPase K.FLLDHQGLFSPSTDAQGV.-                 | 32.83  | 32.83  | 1.00 | 1.00 |
| Q5FWK3_R Arhgap1   | Rho GTPase K.LEQLGIPR.Q                           | 5.93   | 15.98  | 0.37 | 2.69 |
| Q5FWK3_R Arhgap1   | Rho GTPase K.SPGQDPIPIVLR.E                       | 4.09   | 12.74  | 0.32 | 3.11 |
| Q5FWK3_R Arhgap1   | Rho GTPase K.WDDPYDIAR.H                          | 5.93   | 5.54   | 1.07 | 0.93 |
| Q5FWK3_R Arhgap1   | Rho GTPase K.FLLDHQGLFSPSTDAQGV.-                 | 10.79  | 10.79  | 1.00 | 1.00 |
| Q5FWK3_R Arhgap1   | Rho GTPase K.FLLDHQGLFSPSTDAQGV.-                 | 9.17   | 9.17   | 1.00 | 1.00 |
| Q8C0D4_Rl Arhgap12 | Rho GTPase R.LFGHFPPPEFLDIEK#.T                   | 7.75   | 3.97   | 1.95 | 0.51 |
| Q3UIA2_Rl Arhgap17 | Rho GTPase R.ADSSSGGPPVFSSTGILEQGLSPGDSSPPK#PK#.D | 7.45   | 2.16   | 3.44 | 0.29 |
| Q3UIA2_Rl Arhgap17 | Rho GTPase K.EIM*DPLYIAEVEIPNIQK#.Q               | 4.91   | 3.79   | 1.30 | 0.77 |
| Q3UIA2_Rl Arhgap17 | Rho GTPase K.LAQTSDVKN#.M                         | 15.17  | 7.53   | 2.02 | 0.50 |
| Q3UIA2_Rl Arhgap17 | Rho GTPase K.LPLTALAQNMQEASQALESLLGK#.M           | 5.48   | 3.68   | 1.49 | 0.67 |
| Q3UIA2_Rl Arhgap17 | Rho GTPase K.SSGTNFQGLPSK#.I                      | 21.46  | 22.09  | 0.97 | 1.03 |
| Q3UIA2_Rl Arhgap17 | Rho GTPase K.TEVLSLEDLQIER.R                      | 4.15   | 11.46  | 0.36 | 2.76 |
| Q3UIA2_Rl Arhgap17 | Rho GTPase R.ADSSSGGPPVFSSTGILEQGLSPGDSSPPK#PK#.D | 3.85   | 2.00   | 1.92 | 0.52 |
| Q3UIA2_Rl Arhgap17 | Rho GTPase K.EVPGHILLIDINDTESTAL.-                | 5.16   | 5.16   | 1.00 | 1.00 |
| Q3UIA2_Rl Arhgap17 | Rho GTPase K.SSGTNFQGLPSK#.I                      | 15.56  | 7.55   | 2.06 | 0.49 |
| Q8K0Q5_Rl Arhgap18 | Rho GTPase R.FLSQESVGAQLTK#.K                     | 9.86   | 3.79   | 2.60 | 0.38 |
| Q91YM2_R Arhgap35  | Rho GTPase K.ESLSYVVEK#.S                         | 7.69   | 3.22   | 2.39 | 0.42 |
| Q91YM2_R Arhgap35  | Rho GTPase K.FVSNLYNLAK#.T                        | 9.55   | 4.68   | 2.04 | 0.49 |
| Q91YM2_R Arhgap35  | Rho GTPase R.GDTSGETLHSLIQGQOQASK#.L              | 5.48   | 4.07   | 1.35 | 0.74 |
| Q91YM2_R Arhgap35  | Rho GTPase R.IPTYNISVVLGSGTEK#.E                  | 4.99   | 2.79   | 1.79 | 0.56 |
| P97393_Rl Arhgap5  | Rho GTPase R.I.PFDLLSTLEAK#.V                     | 9.09   | 5.19   | 1.75 | 0.57 |
| P97393_Rl Arhgap5  | Rho GTPase R.TQSTDDEYALDGK#.I                     | 15.84  | 8.54   | 1.85 | 0.54 |
| Q61210_Af Arhgef1  | Rho guanin R.APGPVHTQIEENLLSLEVAIR.Q              | 3.01   | 5.97   | 0.50 | 1.98 |
| Q61210_Af Arhgef1  | Rho guanin R.FDGAEGSWFQK#.I                       | 14.24  | 7.94   | 1.79 | 0.56 |
| Q61210_Af Arhgef1  | Rho guanin K.K#AFDFHVSFLEK#.T                     | 11.48  | 5.81   | 1.98 | 0.51 |
| Q61210_Af Arhgef1  | Rho guanin R.LLSHLEETQHTISTDEEK#.S                | 16.37  | 6.59   | 2.49 | 0.40 |
| Q61210_Af Arhgef1  | Rho guanin R.LRPLLSQGLTSPNLAAPER.S                | 2.23   | 11.70  | 0.19 | 5.25 |
| Q61210_Af Arhgef1  | Rho guanin R.OSFALEQLK#.A                         | 17.11  | 8.87   | 1.93 | 0.52 |
| Q61210_Af Arhgef1  | Rho guanin R.ELVPPDITLSPK#.S                      | 33.05  | 23.94  | 1.38 | 0.72 |
| Q61210_Af Arhgef1  | Rho guanin R.LLSHLEETQHTISTDEEK#.S                | 22.95  | 9.16   | 2.51 | 0.40 |
| Q61210_Af Arhgef1  | Rho guanin R.LRPLLSQGLTSPNLAAPER.S                | 3.15   | 8.55   | 0.37 | 2.71 |
| Q61210_Af Arhgef1  | Rho guanin R.OSFALEQLK#.A                         | 19.51  | 6.18   | 3.16 | 0.32 |
| Q61210_Af Arhgef1  | Rho guanin R.VPVPVSAFELDR.T                       | 3.61   | 8.32   | 0.43 | 2.30 |
| Q8C033_Af Arhgef10 | Rho guanin K.APDGSSWNSEPQQVIK#.L                  | 5.84   | 3.23   | 1.81 | 0.55 |
| Q8C033_Af Arhgef10 | Rho guanin R.YLGSIVSEK#.N                         | 8.86   | 3.91   | 2.27 | 0.44 |
| A2AWP8_A Arhgef101 | Rho guanin R.LADQVAEQQLTK#.S                      | 9.70   | 3.19   | 3.04 | 0.33 |

|                    |                                             |        |       |      |       |
|--------------------|---------------------------------------------|--------|-------|------|-------|
| Q6P9R4_Ai Arhgef18 | Rho guanin K.IGDVLVQQFSGTGER.M              | 3.39   | 6.41  | 0.53 | 1.89  |
| Q6P9R4_Ai Arhgef18 | Rho guanin R.LSLK#DLIAQSLLEK#.Q             | 13.23  | 29.46 | 0.45 | 2.23  |
| Q60875_Ai Arhgef2  | Rho guanin R.FLNQLER.R                      | 5.30   | 18.65 | 0.28 | 3.52  |
| Q60875_Ai Arhgef2  | Rho guanin K.YIFTSLDKPSVSLQNLIVR.D          | 4.66   | 21.77 | 0.21 | 4.67  |
| Q60875_Ai Arhgef2  | Rho guanin R.AAVASVTPKE#.Q                  | 46.46  | 40.40 | 1.15 | 0.87  |
| Q60875_Ai Arhgef2  | Rho guanin K.AGFVGM*PPPALPR.G               | 12.18  | 26.19 | 0.46 | 2.15  |
| Q60875_Ai Arhgef2  | Rho guanin R.EAQLGSPEDR.L                   | 3.04   | 10.72 | 0.28 | 3.53  |
| Q60875_Ai Arhgef2  | Rho guanin R.FLNQLER.R                      | 15.68  | 54.76 | 0.29 | 3.49  |
| Q60875_Ai Arhgef2  | Rho guanin R.IQLNSHGVEEYQDLASALGLVK#.E      | 77.37  | 47.63 | 1.62 | 0.62  |
| Q60875_Ai Arhgef2  | Rho guanin R.LGDLLISQFSGSNAEQMR.K           | 2.80   | 9.33  | 0.30 | 3.33  |
| Q60875_Ai Arhgef2  | Rho guanin R.LM*EALFPEGPER.W                | 7.19   | 19.65 | 0.37 | 2.73  |
| Q60875_Ai Arhgef2  | Rho guanin R.M*QDIPETESR.D                  | 5.09   | 16.89 | 0.30 | 3.32  |
| Q60875_Ai Arhgef2  | Rho guanin R.NNTALQSVLR.S                   | 7.10   | 35.88 | 0.20 | 5.06  |
| Q60875_Ai Arhgef2  | Rho guanin K.QATELALLQR.Q                   | 4.98   | 30.58 | 0.16 | 6.14  |
| Q60875_Ai Arhgef2  | Rho guanin K.YIFTSLDKPSVSLQNLIVR.D          | 18.56  | 55.63 | 0.33 | 3.00  |
| Q60875_Ai Arhgef2  | Rho guanin K.YPVLINR.I                      | 5.00   | 17.35 | 0.29 | 3.47  |
| Q3UPH7_A Arhgef40  | Rho guanin R.AAVQLLQEQEAR.G                 | 4.86   | 12.98 | 0.37 | 2.67  |
| Q3UPH7_A Arhgef40  | Rho guanin R.EALALDLSGPAALR.E               | 2.75   | 12.42 | 0.22 | 4.52  |
| Q3UPH7_A Arhgef40  | Rho guanin R.EALAEEDLTSQK#.V                | 7.55   | 10.81 | 0.70 | 1.43  |
| Q3UPH7_A Arhgef40  | Rho guanin R.EALLAALALR.R                   | 4.46   | 15.84 | 0.28 | 3.55  |
| Q3UPH7_A Arhgef40  | Rho guanin R.GSPVDAEASGLSR.T                | 2.56   | 8.07  | 0.32 | 3.15  |
| Q9ES28_AR Arhgef7  | Rho guanin K.ELELQILTEPIR.S                 | 3.47   | 16.50 | 0.21 | 4.76  |
| Q9ES28_AR Arhgef7  | Rho guanin K.FNFQJTNDELESFK#.G              | 11.33  | 6.20  | 1.83 | 0.55  |
| Q9ES28_AR Arhgef7  | Rho guanin R.K#STAALDEAQILK#.V              | 5.14   | 3.29  | 1.56 | 0.64  |
| Q9ES28_AR Arhgef7  | Rho guanin R.LDK#HYPITLK#.E                 | 20.68  | 9.43  | 2.19 | 0.46  |
| Q9ES28_AR Arhgef7  | Rho guanin K.LPTTGM*TIK#.L                  | 22.61  | 20.91 | 1.08 | 0.92  |
| Q9ES28_AR Arhgef7  | Rho guanin K.NM*NDPAWDETNL.-                | 5.44   | 5.44  | 1.00 | 1.00  |
| Q9ES28_AR Arhgef7  | Rho guanin K.SLVDTVYALKDEVQELR.Q            | 8.59   | 34.75 | 0.25 | 4.05  |
| Q9ES28_AR Arhgef7  | Rho guanin K.STAALEDAQILK#.V                | 14.27  | 9.58  | 1.49 | 0.67  |
| A2BH40_Ai Arid1a   | AT-rich inte R.EEAGGEEAAAAER.G              | 2.30   | 10.23 | 0.22 | 4.45  |
| A2BH40_Ai Arid1a   | AT-rich inte K.EIGGLTVQNK#.N                | 25.03  | 11.19 | 2.24 | 0.45  |
| A2BH40_Ai Arid1a   | AT-rich inte R.ELATNLNVGSSAASLK#.K          | 6.86   | 3.09  | 2.22 | 0.45  |
| A2BH40_Ai Arid1a   | AT-rich inte R.EM*AVVLANLAQGDLSAAR.A        | 4.39   | 9.69  | 0.45 | 2.21  |
| A2BH40_Ai Arid1a   | AT-rich inte R.ITATM*DDM*LSLR.S             | 3.74   | 8.45  | 0.44 | 2.26  |
| A2BH40_Ai Arid1a   | AT-rich inte K.LSIQDNNVDLILATPPFSR.L        | 3.16   | 10.41 | 0.30 | 3.29  |
| A2BH40_Ai Arid1a   | AT-rich inte R.RPAGGPQNFQPFQGR.D            | 3.13   | 12.54 | 0.25 | 4.00  |
| A2BH40_Ai Arid1a   | AT-rich inte K.VDENHSEFTLYESR.L             | 4.75   | 16.33 | 0.29 | 3.44  |
| E9Q6R4_E9 Arid1b   | Protein Arir R.GSPVSLPAVQK#.K               | 7.99   | 7.09  | 1.13 | 0.89  |
| E9Q6R4_E9 Arid1b   | Protein Arir R.HM*DM*YGPYPAK#.R             | 2.92   | 3.18  | 0.92 | 1.09  |
| E9Q6R4_E9 Arid1b   | Protein Arir K.SSPALAAPDASVDPK.E            | 8.17   | 8.85  | 0.92 | 1.08  |
| A2CG63_Ai Arid4b   | AT-rich inte R.SANIDFQM*ALPEK#.V            | 9.22   | 2.52  | 3.66 | 0.27  |
| Q9Z1K5_Af Arih1    | E3 ubiquiti R.DISQSDQDIK#.Q                 | 15.15  | 3.39  | 4.47 | 0.22  |
| Q9Z1K5_Af Arih1    | E3 ubiquiti K.YR@YCESR.R                    | 2.22   | 28.99 | 0.08 | 13.09 |
| Q9Z1K5_Af Arih1    | E3 ubiquiti R.DISQSDQDIK#.Q                 | 19.60  | 13.78 | 1.42 | 0.70  |
| P61211_Af Ar11     | ADP-ribosy K.AILVVFANK.Q                    | 10.67  | 8.52  | 1.25 | 0.80  |
| P61211_Af Ar11     | ADP-ribosy K.GTGLDDEAM*EWLVETLK#.S          | 8.58   | 6.82  | 1.26 | 0.80  |
| Q9D0J4_Af Ar12     | ADP-ribosy K.K#FNGEDVDTISPTLGFNIK#.T        | 4.15   | 4.23  | 0.98 | 1.02  |
| Q9D0J4_Af Ar12     | ADP-ribosy R.LAGATLLIFANK#.Q                | 31.06  | 9.14  | 3.40 | 0.29  |
| Q9D0J4_Af Ar12     | ADP-ribosy R.LLM*GLDNAGK#.T                 | 23.08  | 10.64 | 2.17 | 0.46  |
| Q9D0J4_Af Ar12     | ADP-ribosy K.LNIWVDDGQK#.S                  | 16.92  | 5.69  | 2.97 | 0.34  |
| Q9WUL7_A Ar13      | ADP-ribosy R.IILLGLDNAGK#.T                 | 19.64  | 3.77  | 5.21 | 0.19  |
| Q9JM93_Ai Ar16ip4  | ADP-ribosy R.LIK#GDGEVLEEIVTK#.E            | 8.62   | 8.79  | 0.98 | 1.02  |
| Q9JM93_Ai Ar16ip4  | ADP-ribosy R.SAGEDNDGPVLTDEQK#.S            | 4.45   | 5.93  | 0.75 | 1.33  |
| Q8R5J9_PR Ar16ip5  | PRA1 familj R.AWDDFFPQSDR.F                 | 9.63   | 47.17 | 0.20 | 4.90  |
| Q8R5J9_PR Ar16ip5  | PRA1 familj K.K#TPM*GIILDALEQQEDNINK#.F     | 2.79   | 2.43  | 1.15 | 0.87  |
| Q8R5J9_PR Ar16ip5  | PRA1 familj K.K#TPMGIILDALEQQEDNINK#.F      | 7.23   | 9.05  | 0.80 | 1.25  |
| Q8R5J9_PR Ar16ip5  | PRA1 familj K.TPM*GIILDALEQQEDNINK#.F       | 26.71  | 27.27 | 0.98 | 1.02  |
| Q8R5J9_PR Ar16ip5  | PRA1 familj K.TPMGIILDALEQQEDNINK#.F        | 7.94   | 7.85  | 1.01 | 0.99  |
| Q8VEH3_Af Ar18a    | ADP-ribosy R.DLAGALDEK#ELIEK#.M             | 7.50   | 3.26  | 2.30 | 0.43  |
| Q8VEH3_Af Ar18a    | ADP-ribosy K.LVWDIGGQPR.F                   | 12.11  | 9.78  | 1.24 | 0.81  |
| G3X920_G: Armc8    | Armadillo r.R.IVTGLSESSVK#.V                | 14.58  | 4.28  | 3.41 | 0.29  |
| P53762_Af Arnt     | Aryl hydroc R.FPEIYPSITADQSK.G              | 4.07   | 5.22  | 0.78 | 1.28  |
| Q9CVB6_Af Arpc2    | Actin-relate R.DDETM*YVESK#.K               | 10.81  | 2.28  | 4.73 | 0.21  |
| Q9CVB6_Af Arpc2    | Actin-relate K.DSIVQAGM*LK#.R               | 8.97   | 2.07  | 4.33 | 0.23  |
| Q9CVB6_Af Arpc2    | Actin-relate K.ELQAHGADLELLK#.R             | 5.54   | 5.89  | 0.94 | 1.06  |
| Q9CVB6_Af Arpc2    | Actin-relate R.IIETLALK#.F                  | 41.47  | 14.21 | 2.92 | 0.34  |
| Q9JM76_Ai Arpc3    | Actin-relate K.ANVFFK#.N                    | 26.08  | 7.00  | 3.73 | 0.27  |
| Q9JM76_Ai Arpc3    | Actin-relate R.ETK#DTDIVDEAIYFK#.A          | 72.86  | 17.86 | 4.08 | 0.25  |
| Q9JM76_Ai Arpc3    | Actin-relate K.LIGNM*ALLPLR.S               | 26.71  | 27.36 | 0.98 | 1.02  |
| Q9JM76_Ai Arpc3    | Actin-relate K.ANVFFK#.N                    | 12.59  | 3.71  | 3.40 | 0.29  |
| P59999_Af Arpc4    | Actin-relate R.AENFFILR.R                   | 45.24  | 47.38 | 0.95 | 1.05  |
| P59999_Af Arpc4    | Actin-relate R.IVAEEFLK#.N                  | 240.59 | 64.01 | 3.76 | 0.27  |
| P59999_Af Arpc4    | Actin-relate K.VLIEGSINSR.V                 | 33.92  | 42.92 | 0.79 | 1.27  |
| Q9D898_Ai Arpc5l   | Actin-relate K.ALAVGGLGSIIIR.V              | 59.04  | 61.96 | 0.95 | 1.05  |
| Q9D898_Ai Arpc5l   | Actin-relate R.AQGVVLK#.V                   | 48.85  | 10.12 | 4.83 | 0.21  |
| Q9D898_Ai Arpc5l   | Actin-relate K.SSEIEQAVQSLDR.N              | 13.52  | 18.20 | 0.74 | 1.35  |
| Q9D0A3_Ai Arpin    | Arpin OS=lv R.GDGFIDSLAK#.L                 | 10.07  | 6.76  | 1.49 | 0.67  |
| Q9D0A3_Ai Arpin    | Arpin OS=lv R.LPGTWDPATHQGGNGILLEGELVDVSR.H | 7.92   | 27.72 | 0.29 | 3.50  |
| Q9D0A3_Ai Arpin    | Arpin OS=lv K.TGASWTDNIM*AQK#.S             | 7.18   | 5.21  | 1.38 | 0.73  |
| Q9QWY8_A Asap1     | Arf-GAP wit K.AIYNSGQDQVQNEENYAQVLDK#.F     | 9.87   | 4.91  | 2.01 | 0.50  |
| Q9QWY8_A Asap1     | Arf-GAP wit R.GEOSTGENSLEDLTK#.A            | 13.39  | 9.71  | 1.38 | 0.73  |
| Q9QWY8_A Asap1     | Arf-GAP wit K.GVDLLQNLK#.Y                  | 9.54   | 10.76 | 0.89 | 1.13  |
| Q9QWY8_A Asap1     | Arf-GAP wit R.IQSLLEDK#LGTSELLAK#.N         | 25.95  | 12.64 | 2.05 | 0.49  |
| Q9QWY8_A Asap1     | Arf-GAP wit R.NVTLLLEALDQDR.T               | 2.81   | 6.11  | 0.46 | 2.17  |
| E9PZJ8_AS Asc3     | Activating s K.AGEDGEVSGEVLVFPDPK.E         | 8.46   | 6.06  | 1.40 | 0.72  |
| E9PZJ8_AS Asc3     | Activating s K.ALAAEM*TNYSK#.R              | 11.74  | 8.55  | 1.37 | 0.73  |
| E9PZJ8_AS Asc3     | Activating s R.DLADWLNK#.Q                  | 15.07  | 11.84 | 1.27 | 0.79  |
| E9PZJ8_AS Asc3     | Activating s K.ELTGDGM*QLSK#.S              | 13.89  | 12.51 | 1.11 | 0.90  |
| E9PZJ8_AS Asc3     | Activating s K.FLNEQFQEPYTELKPVKE.T         | 19.32  | 21.72 | 0.89 | 1.12  |
| E9PZJ8_AS Asc3     | Activating s R.FRPVPLGQTFGLK.S              | 2.04   | 9.23  | 0.22 | 4.52  |
| E9PZJ8_AS Asc3     | Activating s R.GEM*DSFSLSDSAYVAQNAAR.I      | 3.49   | 8.94  | 0.39 | 2.56  |
| E9PZJ8_AS Asc3     | Activating s K.QDNVNEEVADLK#.L              | 10.86  | 8.55  | 1.27 | 0.79  |
| E9PZJ8_AS Asc3     | Activating s K.REPLGIVVK#.E                 | 4.41   | 18.79 | 0.23 | 4.26  |
| E9PZJ8_AS Asc3     | Activating s K.TEGDFAIVSK#.A                | 16.91  | 11.48 | 1.47 | 0.68  |
| E9PZJ8_AS Asc3     | Activating s K.TVAELAIFR.V                  | 5.54   | 12.77 | 0.43 | 2.31  |
| E9PZJ8_AS Asc3     | Activating s R.YVDFPITDVLQM*M*GR.A          | 4.71   | 5.31  | 0.89 | 1.13  |
| Q9CQE6_AS Asf1a    | Histone chr R.ENPVPK#PDFSK#.L               | 3.68   | 3.34  | 1.10 | 0.91  |
| Q9CQE6_AS Asf1a    | Histone chr R.VGYVYNNYETELR.E               | 2.75   | 8.62  | 0.32 | 3.14  |
| Q91X20_A Ash2l     | Set1/Ash2 l K.FGLLDQDLSNIGPAYDNQK#.Q        | 8.11   | 4.60  | 1.76 | 0.57  |
| O54984_A Asna1     | ATPase Asn: R.ESVLIIDTPAHNISDAFDDQK#.F      | 18.89  | 15.56 | 1.21 | 0.82  |
| O54984_A Asna1     | ATPase Asn: R.LLNFPTIVER.G                  | 25.59  | 22.28 | 1.15 | 0.87  |
| O54984_A Asna1     | ATPase Asn: K.YLDQM*EDLYEDFHIVK#.L          | 18.85  | 12.03 | 1.57 | 0.64  |
| O54984_A Asna1     | ATPase Asn: K.YLDQMEDLYEDFHIVK#.L           | 20.01  | 13.52 | 1.48 | 0.68  |

|                 |                                               |        |       |      |       |
|-----------------|-----------------------------------------------|--------|-------|------|-------|
| Q61024_A_Sns    | Asparagine R.ASVGM*YLISK#Y                    | 43.23  | 8.98  | 4.82 | 0.21  |
| Q61024_A_Sns    | Asparagine R.ASVGMYLISK#Y                     | 50.59  | 14.10 | 3.59 | 0.28  |
| Q61024_A_Sns    | Asparagine K.EAFSDGTSVK#N                     | 169.24 | 38.05 | 4.45 | 0.22  |
| Q61024_A_Sns    | Asparagine K.ELYLFDVLR.A                      | 37.20  | 32.48 | 1.15 | 0.87  |
| Q61024_A_Sns    | Asparagine K.FPNTPK#T                         | 50.74  | 15.31 | 3.31 | 0.30  |
| Q61024_A_Sns    | Asparagine K.HSTTPFLK#V                       | 151.78 | 35.54 | 4.27 | 0.23  |
| Q61024_A_Sns    | Asparagine K.IIQDYVEHQVDDMM*MSAASQK#F         | 46.91  | 9.35  | 5.02 | 0.20  |
| Q61024_A_Sns    | Asparagine K.IIQDYVEHQVDDMM*MSAASQK#F         | 15.40  | 2.65  | 5.81 | 0.17  |
| Q61024_A_Sns    | Asparagine K.IIQDYVEHQVDDMM*MSAASQK#F         | 28.91  | 7.12  | 4.06 | 0.25  |
| Q61024_A_Sns    | Asparagine R.K#NTDSVVFSGEGSDELTOGYIYFHK#A     | 48.75  | 12.76 | 3.82 | 0.26  |
| Q61024_A_Sns    | Asparagine R.K#NTDSVVFSGEGSDELTOGYIYFHK#A     | 17.85  | 3.89  | 4.59 | 0.22  |
| Q61024_A_Sns    | Asparagine R.LAVVDPLFGM*QPIR.V                | 16.21  | 16.85 | 0.96 | 1.04  |
| Q61024_A_Sns    | Asparagine R.LAVVDPLFGM*QPIR.V                | 18.85  | 21.14 | 0.89 | 1.12  |
| Q61024_A_Sns    | Asparagine R.LAVVDPLFGM*QPIR.V                | 40.46  | 10.61 | 3.81 | 0.26  |
| Q61024_A_Sns    | Asparagine R.LAVVDPLFGM*QPIR.V                | 10.04  | 12.67 | 0.79 | 1.26  |
| Q61024_A_Sns    | Asparagine R.TTAAHGLELR.V                     | 79.69  | 15.74 | 5.06 | 0.20  |
| Q61024_A_Sns    | Asparagine K.VASVEM*VK#Y                      | 50.67  | 15.10 | 3.36 | 0.30  |
| Q61024_A_Sns    | Asparagine K.VASVEM*VK#Y                      | 19.25  | 24.76 | 0.78 | 1.29  |
| Q61024_A_Sns    | Asparagine K.WINATDPSAR.T                     | 20.66  | 5.04  | 4.10 | 0.24  |
| Q61024_A_Sns    | Asparagine R.ASVGM*YLISK#Y                    | 30.53  | 6.94  | 4.40 | 0.23  |
| Q61024_A_Sns    | Asparagine K.EAFSDGTSVK#N                     | 125.21 | 21.62 | 5.79 | 0.17  |
| Q61024_A_Sns    | Asparagine K.ELYLFDVLR.A                      | 33.95  | 27.74 | 1.22 | 0.82  |
| Q61024_A_Sns    | Asparagine K.HSTTPFLK#V                       | 105.03 | 19.91 | 5.27 | 0.19  |
| Q61024_A_Sns    | Asparagine R.I.LFDNAIK#K                      | 84.75  | 20.30 | 4.17 | 0.24  |
| Q61024_A_Sns    | Asparagine K.IIQDYVEHQVDDMM*MSAASQK#F         | 51.85  | 8.54  | 6.07 | 0.16  |
| Q61024_A_Sns    | Asparagine K.IIQDYVEHQVDDMM*MSAASQK#F         | 6.46   | 1.66  | 3.89 | 0.26  |
| Q61024_A_Sns    | Asparagine K.IIQDYVEHQVDDMM*MSAASQK#F         | 7.53   | 1.03  | 7.32 | 0.14  |
| Q61024_A_Sns    | Asparagine R.LAVVDPLFGM*QPIR.V                | 12.58  | 11.73 | 1.07 | 0.93  |
| Q61024_A_Sns    | Asparagine R.LAVVDPLFGM*QPIR.V                | 28.57  | 5.63  | 5.08 | 0.20  |
| Q61024_A_Sns    | Asparagine K.VASVEM*VK#Y                      | 40.93  | 11.81 | 3.47 | 0.29  |
| Q61024_A_Sns    | Asparagine K.WINATDPSAR.T                     | 12.36  | 14.42 | 0.86 | 1.17  |
| Q61024_A_Sns    | Asparagine R.ASVGM*YLISK#Y                    | 62.45  | 17.55 | 3.56 | 0.28  |
| Q61024_A_Sns    | Asparagine R.ASVGMYLISK#Y                     | 45.96  | 8.95  | 5.13 | 0.19  |
| Q61024_A_Sns    | Asparagine R.DTYGVRPLFK.A                     | 26.11  | 21.35 | 1.22 | 0.82  |
| Q61024_A_Sns    | Asparagine K.EAFSDGTSVK#N                     | 209.95 | 38.70 | 5.42 | 0.18  |
| Q61024_A_Sns    | Asparagine K.EAQQYPLQTFAGM*EDSPDLLAAR.K       | 16.18  | 16.63 | 0.97 | 1.03  |
| Q61024_A_Sns    | Asparagine K.ELYLFDVLR.A                      | 82.60  | 68.95 | 1.20 | 0.83  |
| Q61024_A_Sns    | Asparagine K.FPNTPK#T                         | 60.32  | 13.47 | 4.48 | 0.22  |
| Q61024_A_Sns    | Asparagine K.HSTTPFLK#V                       | 310.92 | 49.23 | 6.32 | 0.16  |
| Q61024_A_Sns    | Asparagine R.I.LFDNAIK#K                      | 164.28 | 29.88 | 5.50 | 0.18  |
| Q61024_A_Sns    | Asparagine K.IIQDYVEHQVDDMM*MSAASQK#F         | 104.03 | 21.56 | 4.82 | 0.21  |
| Q61024_A_Sns    | Asparagine K.IIQDYVEHQVDDMM*MSAASQK#F         | 12.02  | 4.14  | 2.90 | 0.34  |
| Q61024_A_Sns    | Asparagine K.IIQDYVEHQVDDMM*MSAASQK#F         | 16.85  | 5.49  | 3.07 | 0.33  |
| Q61024_A_Sns    | Asparagine K.IIQDYVEHQVDDMM*MSAASQK#F         | 19.36  | 3.49  | 5.55 | 0.18  |
| Q61024_A_Sns    | Asparagine R.LAVVDPLFGM*QPIR.V                | 28.55  | 33.38 | 0.86 | 1.17  |
| Q61024_A_Sns    | Asparagine R.LAVVDPLFGM*QPIR.V                | 17.02  | 13.42 | 1.27 | 0.79  |
| Q61024_A_Sns    | Asparagine R.LAVVDPLFGM*QPIR.V                | 35.65  | 7.51  | 4.75 | 0.21  |
| Q61024_A_Sns    | Asparagine K.VASVEM*VK#Y                      | 81.46  | 15.07 | 5.41 | 0.18  |
| Q61024_A_Sns    | Asparagine K.WINATDPSAR.T                     | 30.04  | 25.01 | 1.20 | 0.83  |
| P16460_A_Sns1   | Argininosu K.APNSDVLEIEFK#K                   | 7.85   | 4.35  | 1.80 | 0.55  |
| P16460_A_Sns1   | Argininosu K.SPWSM*DENLM*HISYEAGILENPK#N      | 2.89   | 5.66  | 0.51 | 1.96  |
| P16460_A_Sns1   | Argininosu K.VQSVFK#G                         | 44.73  | 11.67 | 3.83 | 0.26  |
| Q8QZV7_A_Sun    | Protein asu R.IM*WNELETLVR.A                  | 2.39   | 10.20 | 0.23 | 4.27  |
| Q8QZV7_A_Sun    | Protein asu R.TQGIPLAPISK#S                   | 16.35  | 12.98 | 1.26 | 0.79  |
| G3X963_G_Atd2   | ATPase fam R.EFLFSLPDK#N                      | 15.21  | 13.47 | 1.13 | 0.89  |
| G3X963_G_Atd2   | ATPase fam K.LITNTAEAVLQK#M                   | 33.37  | 25.97 | 1.28 | 0.78  |
| G3X963_G_Atd2   | ATPase fam R.NQAQTSSESSFDK#N                  | 4.64   | 3.91  | 1.19 | 0.84  |
| G3X963_G_Atd2   | ATPase fam R.STTSSATSLDLSSEFLSQDSSGGR.R       | 2.46   | 5.37  | 0.46 | 2.18  |
| G3X963_G_Atd2   | ATPase fam R.VFTK#PVDPEVDPYVTVIK.Q            | 14.18  | 12.62 | 1.12 | 0.89  |
| G3X963_G_Atd2   | ATPase fam R.EFLFSLPDK#N                      | 28.62  | 27.89 | 1.03 | 0.97  |
| G3X963_G_Atd2   | ATPase fam R.GSQVEQELISM*EQALAILSQPTSLVDHKK#Q | 8.19   | 3.55  | 2.31 | 0.43  |
| G3X963_G_Atd2   | ATPase fam K.I.GASLADVDP*QLDTSVR.F            | 2.47   | 6.81  | 0.36 | 2.75  |
| G3X963_G_Atd2   | ATPase fam K.KLEDLGVFNETEENLTM*YTR.G          | 1.65   | 5.37  | 0.31 | 3.26  |
| G3X963_G_Atd2   | ATPase fam R.LDSIDPALR.R                      | 7.49   | 27.51 | 0.27 | 3.67  |
| G3X963_G_Atd2   | ATPase fam R.LEEQEEDTFR.E                     | 4.33   | 17.35 | 0.25 | 4.01  |
| G3X963_G_Atd2   | ATPase fam R.LESNDLKH#N                       | 27.30  | 22.25 | 1.23 | 0.82  |
| G3X963_G_Atd2   | ATPase fam K.LITNTAEAVLQK#M                   | 60.49  | 52.73 | 1.15 | 0.87  |
| G3X963_G_Atd2   | ATPase fam R.LLIVGEPGFQSSHLAPAVIHAEK#F        | 31.95  | 26.12 | 1.22 | 0.82  |
| G3X963_G_Atd2   | ATPase fam R.STTSSATSLDLSSEFLSQDSSGGR.R       | 2.88   | 12.51 | 0.23 | 4.35  |
| G3X963_G_Atd2   | ATPase fam R.VFTK#PVDPEVDPYVTVIK.Q            | 41.23  | 34.61 | 1.19 | 0.84  |
| G3X963_G_Atd2   | ATPase fam R.YSTM*NQSLFDFK#L                  | 12.88  | 12.06 | 1.07 | 0.94  |
| E9Q166_E9_Atd2b | Protein Ata R.ARN#R#CLPMPFR.A                 | 4.53   | 2.50  | 1.82 | 0.55  |
| Q4QY64_A1_Atd5  | ATPase fam K.NIASPQDLSLLK#H                   | 10.40  | 10.49 | 0.99 | 1.01  |
| P81269_AT1f1    | Cyclic AMP R.TTPSATSLPQTVMTSPVTLASQITK#T      | 6.63   | 4.70  | 1.41 | 0.71  |
| Q8ROS1_AT1f7    | Cyclic AMP K.KAEELTSQNIQLSNEVTLR.N            | 2.46   | 5.50  | 0.45 | 2.24  |
| Q9CPX6_A1_Atd3  | Ubiquitin-I K.ALEVAEYLPVTK#E                  | 6.74   | 3.54  | 1.90 | 0.53  |
| Q9J83_AT_Atd5   | Autophagy R.VSULTLTDK#V                       | 14.72  | 3.55  | 4.14 | 0.24  |
| Q9D906_A_Atd7   | Ubiquitin-I R.AEGVTALPYFLFK#Y                 | 12.81  | 7.32  | 1.75 | 0.57  |
| Q9D906_A_Atd7   | Ubiquitin-I R.FDNVLPVSLAFDK#C                 | 11.08  | 4.75  | 2.33 | 0.43  |
| Q9D906_A_Atd7   | Ubiquitin-I K.LLLEQSANIEWEAIK#S               | 9.67   | 2.61  | 3.70 | 0.27  |
| Q9D906_A_Atd7   | Ubiquitin-I K.LLLEQSANIEWEAIK#S               | 7.52   | 1.64  | 4.58 | 0.22  |
| Q9D906_A_Atd7   | Ubiquitin-I K.YDDTLVLSLLK#H                   | 7.07   | 1.67  | 4.24 | 0.24  |
| Q9CWJ9_P_Atic   | Bifunction: R.DLIVATVAVK#Y                    | 48.81  | 7.46  | 6.54 | 0.15  |
| Q9CWJ9_P_Atic   | Bifunction: R.EVSDGIVAPGYEEALK#I              | 66.26  | 14.74 | 4.49 | 0.22  |
| Q9CWJ9_P_Atic   | Bifunction: R.GAVDIPAAAFK#H                   | 55.29  | 9.45  | 5.85 | 0.17  |
| Q9CWJ9_P_Atic   | Bifunction: R.LDFNLVR.V                       | 15.15  | 13.58 | 1.12 | 0.90  |
| Q9CWJ9_P_Atic   | Bifunction: R.SGVAVIVAPSGSTADK#V              | 20.84  | 3.88  | 5.37 | 0.19  |
| Q9CWJ9_P_Atic   | Bifunction: R.SLASLGLSLVASGGTAK#A             | 23.94  | 3.50  | 6.83 | 0.15  |
| Q9CWJ9_P_Atic   | Bifunction: K.SLFSNIVTK#N                     | 76.00  | 14.59 | 5.21 | 0.19  |
| Q9CWJ9_P_Atic   | Bifunction: R.YGM*NPHQTPAQLYTLK#PK#L          | 47.40  | 8.52  | 5.57 | 0.18  |
| Q9CWJ9_P_Atic   | Bifunction: R.DLIVATVAVK#Y                    | 12.60  | 5.02  | 2.51 | 0.40  |
| Q9CWJ9_P_Atic   | Bifunction: R.EVSDGIVAPGYEEALK#I              | 15.50  | 3.30  | 4.69 | 0.21  |
| Q9CWJ9_P_Atic   | Bifunction: R.EVSDGIVAPGYEEALK#I              | 6.32   | 2.43  | 2.60 | 0.38  |
| Q91YH5_A1_Atd3  | Atlastin-3 R.ELGGADISGAAYLEQASSHIGNSTQAAVR.D  | 3.60   | 6.32  | 0.57 | 1.75  |
| Q91YH5_A1_Atd3  | Atlastin-3 K.KIKKM*GGK.D                      | 1.28   | 17.68 | 0.07 | 13.86 |
| Q8VDN2_A_Atp1a1 | Sodium/po K.GVGISEGNETVEDIAR.L                | 1.85   | 4.83  | 0.38 | 2.61  |
| Q8VDN2_A_Atp1a1 | Sodium/po R.AVAGDASESALLK#C                   | 14.30  | 15.45 | 0.93 | 1.08  |
| Q8VDN2_A_Atp1a1 | Sodium/po R.AVFOANQENLPLK#R                   | 21.76  | 22.19 | 0.98 | 1.02  |
| Q8VDN2_A_Atp1a1 | Sodium/po K.GVGISEGNETVEDIAR.L                | 6.24   | 12.82 | 0.49 | 2.05  |
| Q8VDN2_A_Atp1a1 | Sodium/po K.IVEIPFNSTNK.Y                     | 29.95  | 31.91 | 0.94 | 1.07  |
| Q8VDN2_A_Atp1a1 | Sodium/po K.M*SIINAEDVVVGDLEVEVK#G            | 7.18   | 8.55  | 0.84 | 1.19  |
| Q8VDN2_A_Atp1a1 | Sodium/po R.SPDPFTNENPLETR.N                  | 4.24   | 16.32 | 0.26 | 3.85  |
| Q8VDN2_A_Atp1a1 | Sodium/po K.TSATWFALSRL.I                     | 9.56   | 11.76 | 0.81 | 1.23  |

|                   |                                                |        |       |      |      |
|-------------------|------------------------------------------------|--------|-------|------|------|
| Q8VDN2_A Atp1a1   | Sodium/po K.VDNSSLTGESEPQTR.S                  | 6.70   | 13.58 | 0.49 | 2.03 |
| O55143_A1 Atp2a2  | Sarcoplasm.R.IGIFGQEDVTSK.A                    | 7.04   | 7.16  | 0.98 | 1.02 |
| Q03265_A1 Atp5a1  | ATP synthase.K.AVDSLVPIGR.K                    | 24.97  | 23.78 | 1.05 | 0.95 |
| Q03265_A1 Atp5a1  | ATP synthase.K.EIVTNFLAGFEP.-                  | 25.31  | 25.31 | 1.00 | 1.00 |
| Q03265_A1 Atp5a1  | ATP synthase.R.FNDGTDEK#.K                     | 6.92   | 5.67  | 1.22 | 0.82 |
| Q03265_A1 Atp5a1  | ATP synthase.K.GMSLNLEPDNVGVVWFVGNDK#.L        | 12.77  | 5.94  | 2.15 | 0.47 |
| Q03265_A1 Atp5a1  | ATP synthase.R.GYLDK#LEPSK#.I                  | 31.15  | 44.54 | 0.70 | 1.43 |
| Q03265_A1 Atp5a1  | ATP synthase.K.HALIYDDLSK#.Q                   | 95.39  | 16.17 | 5.90 | 0.17 |
| Q03265_A1 Atp5a1  | ATP synthase.R.LGADTSVDLEETGR.V                | 15.52  | 17.50 | 0.89 | 1.13 |
| Q03265_A1 Atp5a1  | ATP synthase.K.LKHEIVTNFLAGFEP.-               | 74.18  | 16.40 | 4.52 | 0.22 |
| Q03265_A1 Atp5a1  | ATP synthase.R.NVQAEEM**VEFSSGLK#.G            | 19.46  | 4.45  | 4.37 | 0.23 |
| Q03265_A1 Atp5a1  | ATP synthase.R.NVQAEEM**VEFSSGLK#.G            | 24.08  | 9.28  | 2.59 | 0.39 |
| Q03265_A1 Atp5a1  | ATP synthase.R.STVAQLVK#.R                     | 92.43  | 15.13 | 6.11 | 0.16 |
| Q03265_A1 Atp5a1  | ATP synthase.K.TGTAEM**SSILEER.I               | 19.16  | 18.55 | 1.03 | 0.97 |
| Q03265_A1 Atp5a1  | ATP synthase.K.TGTAEM**SSILEER.I               | 6.09   | 5.02  | 1.21 | 0.82 |
| Q03265_A1 Atp5a1  | ATP synthase.K.TSIAIDTIINQK#.R                 | 102.98 | 21.12 | 4.88 | 0.21 |
| Q03265_A1 Atp5a1  | ATP synthase.R.VVDALGNADGK#.G                  | 162.35 | 31.83 | 5.10 | 0.20 |
| Q03265_A1 Atp5a1  | ATP synthase.K.EIVTNFLAGFEP.-                  | 4.69   | 4.69  | 1.00 | 1.00 |
| Q03265_A1 Atp5a1  | ATP synthase.K.LKHEIVTNFLAGFEP.-               | 21.27  | 5.72  | 3.72 | 0.27 |
| Q03265_A1 Atp5a1  | ATP synthase.R.LTELLK#.Q                       | 11.08  | 3.82  | 2.90 | 0.34 |
| Q03265_A1 Atp5a1  | ATP synthase.R.VVDALGNADGK#.G                  | 10.32  | 2.99  | 3.45 | 0.29 |
| P56480_A1 Atp5b   | ATP synthase.R.AIAELGIPAVDPLDSTRS.I            | 2.42   | 4.26  | 0.57 | 1.76 |
| P56480_A1 Atp5b   | ATP synthase.R.FTQAGEVSALLGR.I                 | 16.87  | 11.35 | 1.49 | 0.67 |
| P56480_A1 Atp5b   | ATP synthase.K.IGLFGAGVGK#.T                   | 31.05  | 22.22 | 1.40 | 0.72 |
| P56480_A1 Atp5b   | ATP synthase.K.QFAPHAEAPEFIEM**SVEQEILVTGIK#.V | 4.05   | 1.21  | 3.34 | 0.30 |
| P56480_A1 Atp5b   | ATP synthase.R.VALTGLTVAEYFR.D                 | 7.74   | 12.58 | 0.62 | 1.62 |
| P56480_A1 Atp5b   | ATP synthase.K.VLDGAPIKIPVGPETLGR.I            | 9.07   | 10.83 | 0.84 | 1.19 |
| Q91VR2_A1 Atp5c1  | ATP synthase.K.ELIEISGAAALD.-                  | 11.86  | 11.86 | 1.00 | 1.00 |
| Q91VR2_A1 Atp5c1  | ATP synthase.R.VYGTGSLALYK#.A                  | 15.95  | 5.50  | 2.90 | 0.34 |
| Q9D3D9_A Atp5d    | ATP synthase.K.AQSELSGAADAAR.A                 | 2.57   | 6.24  | 0.41 | 2.43 |
| P50516_V Atp6v1a  | V-type prot K.AKHEILOEEDLAEIVLQVGK#.A          | 17.02  | 2.60  | 6.55 | 0.15 |
| P50516_V Atp6v1a  | V-type prot K.FK#DHPV#DGEAK#.I                 | 4.04   | 1.39  | 2.90 | 0.34 |
| P50516_V Atp6v1a  | V-type prot R.VGSHITGGDIYGVNENSLIK#.H          | 20.89  | 3.78  | 5.53 | 0.18 |
| P50516_V Atp6v1a  | V-type prot K.AKHEILOEEDLAEIVLQVGK#.A          | 73.32  | 9.46  | 7.75 | 0.13 |
| P50516_V Atp6v1a  | V-type prot R.AVETTAQSDNK#.I                   | 5.94   | 1.30  | 4.56 | 0.22 |
| P50516_V Atp6v1a  | V-type prot R.DIK#WEIFPSK#.N                   | 13.77  | 5.10  | 2.70 | 0.37 |
| P50516_V Atp6v1a  | V-type prot R.LAEM**PADSGYPAYLGAR.L            | 6.26   | 5.51  | 1.14 | 0.88 |
| P50516_V Atp6v1a  | V-type prot R.TALVATNSNM**PVAAR.E              | 14.90  | 12.48 | 1.19 | 0.84 |
| P50516_V Atp6v1a  | V-type prot K.TVISQSLK#.Y                      | 94.29  | 16.74 | 5.63 | 0.18 |
| P50516_V Atp6v1a  | V-type prot R.VGSHITGGDIYGVNENSLIK#.H          | 65.57  | 9.96  | 6.59 | 0.15 |
| P50516_V Atp6v1a  | V-type prot K.AKHEILOEEDLAEIVLQVGK#.A          | 16.52  | 5.65  | 2.92 | 0.34 |
| P50516_V Atp6v1a  | V-type prot K.TVISQSLK#.Y                      | 23.92  | 6.96  | 3.44 | 0.29 |
| P62814_V Atp6v1b2 | V-type prot K.AVVGEEALTSDDLYLEFLQK#.F          | 22.84  | 2.77  | 8.25 | 0.12 |
| P62814_V Atp6v1b2 | V-type prot K.AVVQFEGTSGIDAK#.K                | 110.19 | 21.44 | 5.14 | 0.19 |
| P62814_V Atp6v1b2 | V-type prot K.NFITQGPYENR.T                    | 18.64  | 23.05 | 0.81 | 1.24 |
| P62814_V Atp6v1b2 | V-type prot R.SGQVLVSGSK#.A                    | 72.06  | 14.43 | 4.99 | 0.20 |
| P62814_V Atp6v1b2 | V-type prot R.TPVSEDM**LGR.V                   | 14.43  | 14.65 | 0.99 | 1.02 |
| P62814_V Atp6v1b2 | V-type prot K.AVVGEEALTSDDLYLEFLQK#.F          | 10.26  | 4.30  | 2.38 | 0.42 |
| P62814_V Atp6v1b2 | V-type prot K.AVVQFEGTSGIDAK#.K                | 19.11  | 4.43  | 4.31 | 0.23 |
| P62814_V Atp6v1b2 | V-type prot K.AVVQFEGTSGIDAK#.K                | 31.43  | 5.11  | 6.15 | 0.16 |
| P57746_V Atp6v1d  | V-type prot R.AAGEVM**EPANLLAEK#.D             | 29.29  | 6.35  | 4.61 | 0.22 |
| P57746_V Atp6v1d  | V-type prot R.AAGEVM**EPANLLAEK#.D             | 11.70  | 5.22  | 2.24 | 0.45 |
| P57746_V Atp6v1d  | V-type prot R.EAASFLEAK#.F                     | 17.70  | 5.03  | 3.52 | 0.28 |
| P57746_V Atp6v1d  | V-type prot K.FTAGDFSTVIQNVNK#.A               | 33.02  | 10.54 | 3.13 | 0.32 |
| P57746_V Atp6v1d  | V-type prot R.AAGEVM**EPANLLAEK#.D             | 3.93   | 2.66  | 1.48 | 0.68 |
| P50518_V Atp6v1e1 | V-type prot K.AEEFNIEK#.G                      | 35.90  | 9.28  | 3.87 | 0.26 |
| P50518_V Atp6v1e1 | V-type prot R.ARDDLITLLNEAK.Q                  | 20.61  | 16.51 | 1.25 | 0.80 |
| P50518_V Atp6v1e1 | V-type prot R.K#QDDPLVK#.A                     | 28.87  | 5.41  | 5.34 | 0.19 |
| P50518_V Atp6v1e1 | V-type prot R.LDLIAQQM**PEVR.G                 | 11.14  | 5.69  | 1.96 | 0.51 |
| Q9D1K2_V Atp6v1f  | V-type prot K.DTTINEIEDTFR.Q                   | 6.66   | 13.70 | 0.49 | 2.05 |
| Q9D1K2_V Atp6v1f  | V-type prot R.SIPAVLEIPSK#.E                   | 24.04  | 9.56  | 2.51 | 0.40 |
| Q8BVE3_V Atp6v1h  | V-type prot K.ELMEGSDLYNYFNWIK#.T              | 7.52   | 1.58  | 4.74 | 0.21 |
| Q8BVE3_V Atp6v1h  | V-type prot R.GAVDAAVPTNIIAAK#.A               | 32.12  | 10.71 | 3.00 | 0.33 |
| Q8BVE3_V Atp6v1h  | V-type prot K.LGESVQDLSFDEYSSELK#.S            | 19.36  | 7.56  | 2.56 | 0.39 |
| Q8BVE3_V Atp6v1h  | V-type prot K.QLENLEQQ#YDDEDISEDIK#.F          | 7.62   | 3.42  | 2.23 | 0.45 |
| Q8BVE3_V Atp6v1h  | V-type prot R.VSIFDYAK#.R                      | 20.99  | 9.57  | 2.19 | 0.46 |
| Q8BVE3_V Atp6v1h  | V-type prot R.GAVDAAVPTNIIAAK#.A               | 22.91  | 6.74  | 3.40 | 0.29 |
| Q8BVE3_V Atp6v1h  | V-type prot K.LGESVQDLSFDEYSSELK#.S            | 13.49  | 5.11  | 2.64 | 0.38 |
| Q8BVE3_V Atp6v1h  | V-type prot R.VSIFDYAK#.R                      | 15.24  | 4.97  | 3.07 | 0.33 |
| Q8BVE3_V Atp6v1h  | V-type prot R.GAVDAAVPTNIIAAK#.A               | 53.15  | 14.86 | 3.58 | 0.28 |
| Q8BVE3_V Atp6v1h  | V-type prot K.LGESVQDLSFDEYSSELK#.S            | 32.37  | 11.72 | 2.76 | 0.36 |
| Q8BVE3_V Atp6v1h  | V-type prot K.QLENLEQQ#YDDEDISEDIK#.F          | 9.88   | 4.34  | 2.28 | 0.44 |
| Q8BVE3_V Atp6v1h  | V-type prot R.VSIFDYAK#.R                      | 29.58  | 8.37  | 3.53 | 0.28 |
| Q61687_A1 Atrx    | Transcriptin K.LIETTNSM**NSSYIK#.F             | 17.75  | 12.78 | 1.39 | 0.72 |
| Q61687_A1 Atrx    | Transcriptin K.LIETTNSM**NSSYIK#.F             | 10.83  | 8.20  | 1.32 | 0.76 |
| Q61687_A1 Atrx    | Transcriptin R.VVDQQQVER.H                     | 1.79   | 8.76  | 0.20 | 4.89 |
| Q61687_A1 Atrx    | Transcriptin K.AGSLGINLVAANR.V                 | 1.86   | 9.61  | 0.19 | 5.16 |
| Q61687_A1 Atrx    | Transcriptin R.EAIYNDVLTQ.Q                    | 13.85  | 17.30 | 0.80 | 1.25 |
| Q61687_A1 Atrx    | Transcriptin R.LFHISTK#.A                      | 13.77  | 12.40 | 1.11 | 0.90 |
| Q61687_A1 Atrx    | Transcriptin K.LFQDFQM**LSR.I                  | 3.46   | 13.40 | 0.26 | 3.87 |
| Q61687_A1 Atrx    | Transcriptin K.LIETTNSM**NSSYIK#.F             | 9.36   | 10.94 | 0.85 | 1.17 |
| Q61687_A1 Atrx    | Transcriptin K.LYQYLDHLTGVGNSTEGGR.G           | 3.35   | 9.95  | 0.34 | 2.97 |
| Q61687_A1 Atrx    | Transcriptin R.SRGGDGNVDDTGNNSVSLK.L           | 5.10   | 10.45 | 0.49 | 2.05 |
| Q61687_A1 Atrx    | Transcriptin K.SVPATVDDDDNDPENR.I              | 6.63   | 13.22 | 0.27 | 3.64 |
| Q61687_A1 Atrx    | Transcriptin R.VVDQQQVER.H                     | 3.17   | 31.76 | 0.19 | 5.14 |
| Q61687_A1 Atrx    | Transcriptin K.LIETTNSM**TAVR.J                | 3.45   | 12.24 | 0.28 | 3.55 |
| P28658_AT Atrn10  | Ataxin-10 C.K.AEGDIEHM**TEGFK#.S               | 7.88   | 7.67  | 1.03 | 0.97 |
| P28658_AT Atrn10  | Ataxin-10 C.R.ALTALEFK#.E                      | 40.16  | 15.16 | 2.65 | 0.38 |
| P28658_AT Atrn10  | Ataxin-10 C.K.ESTNIFSPDSLSK#.A                 | 36.88  | 20.52 | 1.80 | 0.56 |
| P28658_AT Atrn10  | Ataxin-10 C.K.HPASEWPFLLISDHFLK#.S             | 21.03  | 9.68  | 2.17 | 0.46 |
| P28658_AT Atrn10  | Ataxin-10 C.R.ITLLDVIK#.L                      | 50.28  | 26.35 | 1.91 | 0.52 |
| P28658_AT Atrn10  | Ataxin-10 C.R.LSGIM**VPAPIQDLEALR.A            | 3.41   | 7.34  | 0.46 | 2.15 |
| P28658_AT Atrn10  | Ataxin-10 C.K.LVGEELQTKDISIFVR.H               | 6.19   | 12.72 | 0.49 | 2.06 |
| P28658_AT Atrn10  | Ataxin-10 C.R.NLTEDNSQDQVIAK#.M                | 49.35  | 28.74 | 1.72 | 0.58 |
| P28658_AT Atrn10  | Ataxin-10 C.K.SPVELVAM**YGK#.L                 | 20.86  | 6.19  | 3.37 | 0.30 |
| P28658_AT Atrn10  | Ataxin-10 C.K.HPASEWPFLLISDHFLK#.S             | 13.30  | 5.22  | 2.55 | 0.39 |
| P28658_AT Atrn10  | Ataxin-10 C.R.ITLLDVIK#.L                      | 30.43  | 13.66 | 2.23 | 0.45 |
| P28658_AT Atrn10  | Ataxin-10 C.R.NLTEDNSQDQVIAK#.M                | 21.18  | 10.61 | 2.00 | 0.50 |
| P28658_AT Atrn10  | Ataxin-10 C.R.ALTALEFK#.E                      | 31.85  | 14.52 | 2.19 | 0.46 |
| P28658_AT Atrn10  | Ataxin-10 C.K.ESTNIFSPDSLSK#.A                 | 20.80  | 8.70  | 2.39 | 0.42 |
| P28658_AT Atrn10  | Ataxin-10 C.R.ITLLDVIK#.L                      | 25.90  | 4.76  | 5.45 | 0.18 |
| P28658_AT Atrn10  | Ataxin-10 C.K.LVGEELQTK#.D                     | 20.21  | 7.73  | 2.61 | 0.38 |
| P28658_AT Atrn10  | Ataxin-10 C.R.NLTEDNSQDQVIAK#.M                | 50.38  | 19.15 | 2.63 | 0.38 |

|                   |                                                    |        |        |      |       |
|-------------------|----------------------------------------------------|--------|--------|------|-------|
| P28658_A1 Atxn10  | Ataxin-10 C.K.SPELVEAM*YGGK.L                      | 34.00  | 14.32  | 2.37 | 0.42  |
| O70305_A1 Atxn2   | Ataxin-2 OS R.ANQLAEIESSAQYK#.A                    | 15.07  | 6.86   | 2.20 | 0.46  |
| O70305_A1 Atxn2   | Ataxin-2 OS R.DAFTDSALSAK#.V                       | 22.22  | 7.28   | 3.05 | 0.33  |
| O70305_A1 Atxn2   | Ataxin-2 OS K.GLPQPTISFDGIYANVR.M                  | 2.54   | 6.03   | 0.42 | 2.37  |
| O70305_A1 Atxn2   | Ataxin-2 OS R.ANQLAEIESSAQYK#.A                    | 20.70  | 4.99   | 4.15 | 0.24  |
| O70305_A1 Atxn2   | Ataxin-2 OS K.ASETSPSFSK#.A                        | 18.48  | 6.41   | 2.88 | 0.35  |
| O70305_A1 Atxn2   | Ataxin-2 OS R.DAFTDSALSAK#.V                       | 30.85  | 8.15   | 3.78 | 0.26  |
| O70305_A1 Atxn2   | Ataxin-2 OS K.GLPQPTISFDGIYANVR.M                  | 3.44   | 8.09   | 0.42 | 2.35  |
| O70305_A1 Atxn2   | Ataxin-2 OS R.TSPAGGTWSSVSGVPR.L                   | 2.40   | 6.56   | 0.37 | 2.74  |
| Q77QH0_A Atxn21   | Ataxin-2-lik K.TTYDSSLSSYTVPLEK#.D                 | 3.42   | 2.08   | 1.64 | 0.61  |
| Q77QH0_A Atxn21   | Ataxin-2-lik K.DK#FTDSAIAM*NSK#.V                  | 11.78  | 7.12   | 1.66 | 0.60  |
| Q77QH0_A Atxn21   | Ataxin-2-lik R.EIEESPQYR.L                         | 6.46   | 14.88  | 0.43 | 2.30  |
| Q77QH0_A Atxn21   | Ataxin-2-lik K.FNEENYGVK#.T                        | 51.91  | 24.46  | 2.12 | 0.47  |
| Q77QH0_A Atxn21   | Ataxin-2-lik K.GDEKEEPVTEQVKK.S                    | 18.90  | 14.37  | 1.31 | 0.76  |
| Q77QH0_A Atxn21   | Ataxin-2-lik K.LQPSSPETGLDPFPSR.I                  | 3.36   | 12.08  | 0.28 | 3.60  |
| Q77QH0_A Atxn21   | Ataxin-2-lik R.NVDVFNATK#.D                        | 30.22  | 17.45  | 1.73 | 0.58  |
| Q77QH0_A Atxn21   | Ataxin-2-lik R.REDIVDMVMFKPSDVLVHFR.N              | 2.88   | 7.55   | 0.38 | 2.62  |
| Q77QH0_A Atxn21   | Ataxin-2-lik K.STLNPNAK#.E                         | 14.20  | 8.65   | 1.64 | 0.61  |
| Q77QH0_A Atxn21   | Ataxin-2-lik K.TTYDSSLSSYTVPLEK#.D                 | 10.64  | 6.28   | 1.69 | 0.59  |
| O70126_AI Aurkb   | Aurora kinase R.DIKPENLLGLQGLK.L                   | 4.22   | 11.21  | 0.38 | 2.66  |
| O70126_AI Aurkb   | Aurora kinase R.FPSSVPSGAQDLISK.L                  | 3.79   | 1.66   | 0.62 | 1.62  |
| Q8BGF0_Q:AW551984 | Protein AW K.ELKDEWELLER.K                         | 1.36   | 4.64   | 0.29 | 3.41  |
| P01887_B2 B2m     | Beta-2-microglobulin K.TPQIQVYSR.H                 | 14.66  | 100.42 | 0.15 | 6.85  |
| P01887_B2 B2m     | Beta-2-microglobulin K.VEM*SDM*SFSK.D              | 11.06  | 20.38  | 0.54 | 1.84  |
| Q3UI43_BA Babam1  | BRISCA and ER.ALGAQASVGRS.S                        | 12.04  | 25.96  | 0.46 | 2.16  |
| Q3UI43_BA Babam1  | BRISCA and ER.TNALNVSQK#.M                         | 18.13  | 7.27   | 2.49 | 0.40  |
| Q91YN9_B/ Bag2    | BAG family K.FLDDLGNNAK#.S                         | 22.28  | 13.95  | 1.60 | 0.63  |
| Q91YN9_B/ Bag2    | BAG family R.IIDEVSK#.F                            | 42.36  | 38.77  | 1.09 | 0.92  |
| Q91YN9_B/ Bag2    | BAG family R.LLESLDLQELR.V                         | 13.46  | 50.94  | 0.26 | 3.78  |
| Q91YN9_B/ Bag2    | BAG family K.SLQNTDK#FN.-                          | 14.80  | 10.93  | 1.35 | 0.74  |
| Q921R2_B/ Bag6    | Large prolin R.DLEAPEVQESYR.Q                      | 4.28   | 7.55   | 0.57 | 1.77  |
| Q921R2_B/ Bag6    | Large prolin R.EFSVLVQVQGVDIR.T                    | 3.67   | 6.72   | 0.55 | 1.83  |
| Q921R2_B/ Bag6    | Large prolin R.LQVLEHMPVGPDAILR.Y                  | 7.77   | 5.67   | 1.37 | 0.73  |
| Q921R2_B/ Bag6    | Large prolin K.VK#PQPPLSDAIVLGM*PAK#.R             | 4.58   | 1.92   | 2.39 | 0.42  |
| Q921R2_B/ Bag6    | Large prolin R.AGSSSEIAAFIQR.L                     | 5.97   | 10.07  | 0.59 | 1.69  |
| Q921R2_B/ Bag6    | Large prolin R.APPQTQLPSGASSGTGSASATHGGAPLPGTR.G   | 9.92   | 19.57  | 0.51 | 1.97  |
| Q921R2_B/ Bag6    | Large prolin R.DIQTLRSR.M                          | 8.41   | 19.02  | 0.44 | 2.26  |
| Q921R2_B/ Bag6    | Large prolin K.EHIAASVSPSEK#.Q                     | 9.45   | 2.71   | 3.48 | 0.29  |
| Q921R2_B/ Bag6    | Large prolin R.LINLVGSLR.L                         | 13.20  | 23.10  | 0.57 | 1.75  |
| Q921R2_B/ Bag6    | Large prolin R.LLGNFTVALSDLR.C                     | 15.26  | 25.29  | 0.60 | 1.66  |
| Q921R2_B/ Bag6    | Large prolin R.LQEDPNVSPQR.F                       | 3.24   | 12.44  | 0.26 | 3.84  |
| Q921R2_B/ Bag6    | Large prolin R.LQVLEHMPVGPDAILR.Y                  | 3.35   | 7.39   | 0.45 | 2.20  |
| Q921R2_B/ Bag6    | Large prolin R.TFIVGAQM*NVK#.E                     | 16.36  | 4.84   | 3.38 | 0.30  |
| Q921R2_B/ Bag6    | Large prolin R.TFIVGAQMNVK#.E                      | 12.59  | 3.81   | 3.31 | 0.30  |
| Q921R2_B/ Bag6    | Large prolin R.APPQTQLPSGASSGTGSASATHGGAPLPGTR.G   | 2.16   | 5.72   | 0.38 | 2.65  |
| Q921R2_B/ Bag6    | Large prolin R.LQEDPNVSPQR.F                       | 1.92   | 9.76   | 0.20 | 5.08  |
| Q8BKX1_B/ Baiap2  | Brain-specific K.AIFSHAAGDNSTLLSFK#.E              | 21.69  | 11.62  | 1.87 | 0.54  |
| Q8BKX1_B/ Baiap2  | Brain-specific K.M*GELASESQSK#.E                   | 8.08   | 6.16   | 1.31 | 0.76  |
| Q8BKX1_B/ Baiap2  | Brain-specific K.QGELNEVYDSYGYK#.T                 | 8.96   | 5.42   | 1.65 | 0.61  |
| Q8BKX1_B/ Baiap2  | Brain-specific K.SFNELLTQLEQK#.V                   | 18.70  | 10.95  | 1.71 | 0.59  |
| Q8BKX1_B/ Baiap2  | Brain-specific K.YSDK#ELQYDAISNK#.Q                | 20.46  | 11.50  | 1.78 | 0.56  |
| O54962_B/ Banf1   | Barrier-to-iron K.AYVVLGDFLVLK#.K                  | 88.06  | 68.93  | 1.28 | 0.78  |
| O54962_B/ Banf1   | Barrier-to-iron R.DFVAEPM*GEM#PVGSLAGIGDVLK#.R     | 105.33 | 82.61  | 1.28 | 0.78  |
| O54962_B/ Banf1   | Barrier-to-iron R.DFVAEPM*GEM#PVGSLAGIGDVLK#.R     | 36.00  | 34.97  | 1.03 | 0.97  |
| Q9DCT6_B/ Bap18   | Chromatin K.LGELTM*QLHPVSDSSPAGAK#.W               | 21.90  | 19.18  | 1.14 | 0.88  |
| Q9DCT6_B/ Bap18   | Chromatin K.VGEIISAAGAAFTK#.L                      | 36.69  | 29.49  | 1.24 | 0.80  |
| Q9DCT6_B/ Bap18   | Chromatin K.VYEDSGIPLPAESPCK#.K                    | 7.58   | 7.37   | 1.03 | 0.97  |
| Q9DCT6_B/ Bap18   | Chromatin K.WTETIEMLR.A                            | 5.06   | 15.29  | 0.33 | 3.02  |
| Q07813_B/ Bax     | Apoptosis R.R.IGDELDSNM*ELQR.M                     | 9.33   | 35.01  | 0.27 | 3.75  |
| Q07813_B/ Bax     | Apoptosis R.M*AGETPELTLEQPPQDASTK#.K               | 9.64   | 12.49  | 0.77 | 1.30  |
| Q07813_B/ Bax     | Apoptosis R.M*ADVDTDSR.E                           | 8.34   | 23.16  | 0.36 | 2.78  |
| Q07813_B/ Bax     | Apoptosis R.R.VVALFYFASK#.L                        | 11.29  | 5.31   | 2.13 | 0.47  |
| O88379_B/ Baz1a   | Bromodomain R.IFSGQEDSIASK.Q                       | 6.39   | 7.23   | 0.88 | 1.13  |
| O88379_B/ Baz1a   | Bromodomain K.DLTEALDEADPTK.S                      | 7.31   | 8.38   | 0.87 | 1.15  |
| O88379_B/ Baz1a   | Bromodomain R.IFSGQEDSIASK.Q                       | 14.71  | 11.52  | 1.28 | 0.78  |
| O88379_B/ Baz1a   | Bromodomain K.LGLHVSPSTVQVSTPLAAK#.K               | 12.13  | 17.50  | 0.69 | 1.44  |
| O88379_B/ Baz1a   | Bromodomain R.LSNPSLVK#.K                          | 15.62  | 13.21  | 1.18 | 0.85  |
| O88379_B/ Baz1a   | Bromodomain K.LSSTSYVDLTPGEK#.M                    | 5.75   | 5.90   | 0.97 | 1.03  |
| Q92277_B/ Baz1b   | Tyrosine-phosphatase R.AGTGENAPWVVEDELVK.K         | 9.78   | 10.81  | 0.90 | 1.11  |
| Q92277_B/ Baz1b   | Tyrosine-phosphatase R.EAWEEQVEALLKEEFPNWKYK.L     | 6.97   | 8.13   | 0.86 | 1.17  |
| Q92277_B/ Baz1b   | Tyrosine-phosphatase K.FLQGFMP*APK.Q               | 13.59  | 19.43  | 0.70 | 1.43  |
| Q92277_B/ Baz1b   | Tyrosine-phosphatase K.GGLGYM*EGTSEFEAR.V          | 2.60   | 14.08  | 0.18 | 5.43  |
| Q92277_B/ Baz1b   | Tyrosine-phosphatase K.GGLGYM*EGTSEFEAR.V          | 1.16   | 5.82   | 0.20 | 5.01  |
| Q92277_B/ Baz1b   | Tyrosine-phosphatase K.IISNVPADSLIR.T              | 11.70  | 41.13  | 0.28 | 3.51  |
| Q92277_B/ Baz1b   | Tyrosine-phosphatase R.KPFPVLPKLPGEPELFTIPTQEAFR.T | 6.31   | 20.99  | 0.30 | 3.33  |
| Q92277_B/ Baz1b   | Tyrosine-phosphatase R.LADDEGSDSESVGQSR.G          | 5.30   | 16.53  | 0.32 | 3.12  |
| Q92277_B/ Baz1b   | Tyrosine-phosphatase K.LVDSAWLEIMTK#.Y             | 14.58  | 9.53   | 1.53 | 0.65  |
| Q92277_B/ Baz1b   | Tyrosine-phosphatase R.SDLIEVATR.L                 | 6.48   | 31.00  | 0.21 | 4.79  |
| Q92277_B/ Baz1b   | Tyrosine-phosphatase R.SRPKDDPEVDDLVLQTK.R         | 1.93   | 23.64  | 0.08 | 12.27 |
| Q92277_B/ Baz1b   | Tyrosine-phosphatase K.FSDFLDPYK.Y                 | 3.85   | 5.70   | 0.68 | 1.48  |
| Q92277_B/ Baz1b   | Tyrosine-phosphatase R.SDLIEVATR.L                 | 5.71   | 16.64  | 0.34 | 2.91  |
| Q92277_B/ Baz1b   | Tyrosine-phosphatase K.AFOEGIAK#.A                 | 79.55  | 69.06  | 1.15 | 0.87  |
| Q92277_B/ Baz1b   | Tyrosine-phosphatase R.AGTGENAPWVVEDELVK.K         | 14.16  | 11.34  | 1.25 | 0.80  |
| Q92277_B/ Baz1b   | Tyrosine-phosphatase R.DEAEDYDVIEHPM*DFQTIQNK#.C   | 4.47   | 4.28   | 1.04 | 0.96  |
| Q92277_B/ Baz1b   | Tyrosine-phosphatase R.FEQELGGR.N                  | 15.94  | 82.21  | 0.19 | 5.16  |
| Q92277_B/ Baz1b   | Tyrosine-phosphatase K.FLQGFMP*APK#.Q              | 22.76  | 28.61  | 0.80 | 1.26  |
| Q92277_B/ Baz1b   | Tyrosine-phosphatase K.FSDFLDPYK#.Y                | 38.53  | 36.67  | 1.05 | 0.95  |
| Q92277_B/ Baz1b   | Tyrosine-phosphatase K.FSDFLDPYK*YM*TLNPSTK#.R     | 5.61   | 5.66   | 0.99 | 1.01  |
| Q92277_B/ Baz1b   | Tyrosine-phosphatase K.GGFLYLN.R.V                 | 7.18   | 27.51  | 0.26 | 3.83  |
| Q92277_B/ Baz1b   | Tyrosine-phosphatase K.GGLGYM*EGTSEFEAR.V          | 7.17   | 31.16  | 0.23 | 4.35  |
| Q92277_B/ Baz1b   | Tyrosine-phosphatase K.GGLGYM*EGTSEFEAR.V          | 1.83   | 11.57  | 0.16 | 6.34  |
| Q92277_B/ Baz1b   | Tyrosine-phosphatase K.IEQQVEEADDM*ISAVK#.S        | 9.73   | 10.82  | 0.90 | 1.11  |
| Q92277_B/ Baz1b   | Tyrosine-phosphatase K.IEQQVEEADDM*ISAVK#.S        | 11.38  | 12.87  | 0.88 | 1.13  |
| Q92277_B/ Baz1b   | Tyrosine-phosphatase K.IEQQVEEADDM*ISAVK#.S        | 4.01   | 5.51   | 0.73 | 1.38  |
| Q92277_B/ Baz1b   | Tyrosine-phosphatase K.IISNVPADSLIR.T              | 9.33   | 37.85  | 0.25 | 4.06  |
| Q92277_B/ Baz1b   | Tyrosine-phosphatase R.KPFPVLPKLPGEPELFTIPTQEAFR.T | 7.51   | 27.15  | 0.28 | 3.61  |
| Q92277_B/ Baz1b   | Tyrosine-phosphatase K.LETSEFFELTSEEK#.L           | 20.59  | 21.31  | 0.97 | 1.04  |
| Q92277_B/ Baz1b   | Tyrosine-phosphatase K.LVDSAWLEIMTK#.Y             | 19.05  | 23.38  | 0.82 | 1.23  |
| Q92277_B/ Baz1b   | Tyrosine-phosphatase K.NASVNAHGGALAEVETVVKP.Q      | 24.33  | 26.58  | 0.92 | 1.09  |
| Q92277_B/ Baz1b   | Tyrosine-phosphatase R.SDLIEVATR.L                 | 13.24  | 66.71  | 0.20 | 5.04  |
| Q92277_B/ Baz1b   | Tyrosine-phosphatase R.SRPKDDPEVDDLVLQTK.R         | 4.16   | 19.32  | 0.22 | 4.64  |
| Q92277_B/ Baz1b   | Tyrosine-phosphatase R.SVQEFELTDM*HK#.Q            | 18.76  | 27.42  | 0.68 | 1.46  |
| Q92277_B/ Baz1b   | Tyrosine-phosphatase K.WDM*SAENAR.C                | 1.50   | 7.67   | 0.20 | 5.12  |



|                   |                                           |        |        |      |       |
|-------------------|-------------------------------------------|--------|--------|------|-------|
| Q9Z277_Bf Baz1b   | Tyrosine-pr K.AFQEGIAK#.A                 | 88.12  | 55.77  | 1.58 | 0.63  |
| Q9Z277_Bf Baz1b   | Tyrosine-pr R.AGTGENAPWVVEDELVK#.K        | 29.40  | 18.42  | 1.60 | 0.63  |
| Q9Z277_Bf Baz1b   | Tyrosine-pr K.DDPEVDLVLQTK#.R             | 17.27  | 10.70  | 1.61 | 0.62  |
| Q9Z277_Bf Baz1b   | Tyrosine-pr R.DEAEDYDVIEHPM*DFQTIQNK#.C   | 13.60  | 5.99   | 2.27 | 0.44  |
| Q9Z277_Bf Baz1b   | Tyrosine-pr R.DEAEDYDVIEHPMDFQTIQNK#.C    | 7.67   | 4.90   | 1.57 | 0.64  |
| Q9Z277_Bf Baz1b   | Tyrosine-pr R.DSSSLSPLNPK#.L              | 50.28  | 25.29  | 1.99 | 0.50  |
| Q9Z277_Bf Baz1b   | Tyrosine-pr R.FEDQELGGR.N                 | 16.87  | 68.12  | 0.25 | 4.04  |
| Q9Z277_Bf Baz1b   | Tyrosine-pr K.FLQGFMM*APK#.Q              | 48.02  | 32.74  | 1.47 | 0.68  |
| Q9Z277_Bf Baz1b   | Tyrosine-pr K.FSDFLLDPK#.Y                | 52.38  | 33.70  | 1.55 | 0.64  |
| Q9Z277_Bf Baz1b   | Tyrosine-pr K.GGFLYLN.R.V                 | 10.07  | 25.29  | 0.40 | 2.51  |
| Q9Z277_Bf Baz1b   | Tyrosine-pr K.GGLGYM*EGTSEFEAR.V          | 12.28  | 31.43  | 0.39 | 2.56  |
| Q9Z277_Bf Baz1b   | Tyrosine-pr K.GGLGYMEGTSEFEAR.V           | 2.10   | 9.27   | 0.23 | 4.41  |
| Q9Z277_Bf Baz1b   | Tyrosine-pr K.IEQQVEEADDM*ISAVK#.S        | 12.96  | 11.37  | 1.14 | 0.88  |
| Q9Z277_Bf Baz1b   | Tyrosine-pr K.IEQQVEEADDMISAVK.S          | 15.03  | 11.55  | 1.30 | 0.77  |
| Q9Z277_Bf Baz1b   | Tyrosine-pr K.IEQQVEEADDMISAVK#.S         | 5.67   | 4.17   | 1.36 | 0.73  |
| Q9Z277_Bf Baz1b   | Tyrosine-pr R.LADDEGDSSESVEGQSR.G         | 5.27   | 25.58  | 0.21 | 4.85  |
| Q9Z277_Bf Baz1b   | Tyrosine-pr K.LETSEFFELTSEEK#.L           | 31.81  | 23.28  | 1.37 | 0.73  |
| Q9Z277_Bf Baz1b   | Tyrosine-pr K.LQNEDEKISNVPADSLIR.T        | 11.32  | 34.50  | 0.33 | 3.05  |
| Q9Z277_Bf Baz1b   | Tyrosine-pr K.LVDSAWLEIMTK#.Y             | 12.95  | 10.47  | 1.24 | 0.81  |
| Q9Z277_Bf Baz1b   | Tyrosine-pr K.NASVNAHGHGPALEAVETVPPK#.Q   | 56.08  | 28.89  | 1.94 | 0.52  |
| Q9Z277_Bf Baz1b   | Tyrosine-pr K.QM*TLMDM*AK#.G              | 14.76  | 11.91  | 1.24 | 0.81  |
| Q9Z277_Bf Baz1b   | Tyrosine-pr R.SDLIEVATR.L                 | 25.05  | 61.09  | 0.41 | 2.44  |
| Q9Z277_Bf Baz1b   | Tyrosine-pr K.SLNGPLK#.V                  | 19.99  | 13.01  | 1.54 | 0.65  |
| Q9Z277_Bf Baz1b   | Tyrosine-pr K.SPEEHLEGM*#.I               | 39.21  | 29.37  | 1.34 | 0.75  |
| Q9Z277_Bf Baz1b   | Tyrosine-pr R.SRPKDDPEVDLVLQTK.R          | 9.26   | 24.67  | 0.38 | 2.66  |
| Q9Z277_Bf Baz1b   | Tyrosine-pr R.SVQEFITDM*#.K.Q             | 34.18  | 20.65  | 1.66 | 0.60  |
| Q9Z277_Bf Baz1b   | Tyrosine-pr K.VDEEAVEK.K                  | 17.80  | 10.61  | 1.68 | 0.60  |
| Q9Z277_Bf Baz1b   | Tyrosine-pr K.YM*TLNPSTK#.R               | 23.01  | 18.97  | 1.21 | 0.82  |
| Q91Y55_BA Baz2a   | Bromodom R.ELTGSNASTSPAR.S                | 1.97   | 9.17   | 0.21 | 4.66  |
| Q91Y55_BA Baz2a   | Bromodom R.GESQTPVQGOAR.N                 | 2.25   | 9.48   | 0.24 | 4.22  |
| Q61335_Bf Bcap31  | B-cell recep K.AENEALAM*QK#.Q             | 13.74  | 13.07  | 1.05 | 0.95  |
| Q9D287_Sf Bcas2   | Pre-mRNA-R.TIVQLENEYQIK#.Q                | 16.72  | 9.20   | 1.82 | 0.55  |
| Q9D287_Sf Bcas2   | Pre-mRNA-R.EM*ESNVVSLVSK#.N               | 25.86  | 14.16  | 1.83 | 0.55  |
| Q9D287_Sf Bcas2   | Pre-mRNA-K.LREM*ESNVVSLVSK.N              | 7.88   | 20.55  | 0.38 | 2.61  |
| Q9D287_Sf Bcas2   | Pre-mRNA-K.NMQLTAGSK#.L                   | 13.63  | 7.46   | 1.83 | 0.55  |
| Q9D287_Sf Bcas2   | Pre-mRNA-K.NYLSYLTAPDYSAFETDIM*R.N        | 2.26   | 5.00   | 0.45 | 2.21  |
| Q9D287_Sf Bcas2   | Pre-mRNA-K.NYLSYLTAPDYSAFETDIMR.N         | 2.25   | 5.00   | 0.45 | 2.23  |
| Q9D287_Sf Bcas2   | Pre-mRNA-K.NYLSYLTAPDYSAFETDIM*RNEFERL    | 1.78   | 11.99  | 0.15 | 6.74  |
| Q9D287_Sf Bcas2   | Pre-mRNA-R.TIVQLENEYQIK#.Q                | 170.26 | 105.80 | 1.61 | 0.62  |
| Q9D287_Sf Bcas2   | Pre-mRNA-R.VLPPAPSSGQK#.N                 | 42.47  | 25.93  | 1.64 | 0.61  |
| Q8CCN5_Bf Bcas3   | Breast carci K.SAGLEIEIQELTSK#.Q          | 10.75  | 5.99   | 1.80 | 0.56  |
| P59017_B2 Bcl2l13 | Bcl-2-like p K.QQGFPPVQQLDVAPQSLNPEVLK#.L | 4.36   | 3.62   | 1.20 | 0.83  |
| Q8K019_Bf Bclaf1  | Bcl-2-assoc R.SSFYEGDQETAK.T              | 19.09  | 19.22  | 0.99 | 1.01  |
| Q8K019_Bf Bclaf1  | Bcl-2-assoc K.DRLLASTLHVSVK.K             | 4.08   | 15.37  | 0.27 | 3.77  |
| Q8K019_Bf Bclaf1  | Bcl-2-assoc K.DYSGFAGVSRPR.G              | 2.84   | 9.83   | 0.29 | 3.46  |
| Q8K019_Bf Bclaf1  | Bcl-2-assoc K.EEWDPEYTPK#.S               | 11.66  | 9.65   | 1.21 | 0.83  |
| Q8K019_Bf Bclaf1  | Bcl-2-assoc R.ESDGFREEK.N                 | 5.66   | 14.30  | 0.40 | 2.53  |
| Q8K019_Bf Bclaf1  | Bcl-2-assoc K.EVQSPQVVK#.S                | 20.01  | 18.40  | 1.09 | 0.92  |
| Q8K019_Bf Bclaf1  | Bcl-2-assoc K.EYHPK#HDDSK#.H              | 8.37   | 4.18   | 2.00 | 0.50  |
| Q8K019_Bf Bclaf1  | Bcl-2-assoc K.FHDSGDDTEETEDYR.Q           | 5.93   | 15.24  | 0.39 | 2.57  |
| Q8K019_Bf Bclaf1  | Bcl-2-assoc R.GFKEEIQK.G                  | 38.60  | 38.81  | 0.99 | 1.01  |
| Q8K019_Bf Bclaf1  | Bcl-2-assoc R.GFKEEIQKGD.K                | 32.19  | 26.19  | 1.23 | 0.81  |
| Q8K019_Bf Bclaf1  | Bcl-2-assoc K.KAEGEPQEEISPLK.S            | 10.31  | 9.36   | 1.10 | 0.91  |
| Q8K019_Bf Bclaf1  | Bcl-2-assoc K.RPKEEEDPEYTPK#.S            | 5.11   | 27.09  | 0.19 | 5.30  |
| Q8K019_Bf Bclaf1  | Bcl-2-assoc K.SFATSSH.R.N                 | 5.02   | 15.18  | 0.33 | 3.03  |
| Q8K019_Bf Bclaf1  | Bcl-2-assoc K.SPAVTLNER.F                 | 24.39  | 138.90 | 0.18 | 5.69  |
| Q8K019_Bf Bclaf1  | Bcl-2-assoc K.SQEEPKDTFEHDPSESIDEFNK.S    | 25.58  | 20.19  | 1.27 | 0.79  |
| Q8K019_Bf Bclaf1  | Bcl-2-assoc R.SSFYEGDQETAK#.T             | 142.93 | 132.00 | 1.08 | 0.92  |
| Q8K019_Bf Bclaf1  | Bcl-2-assoc K.STSEFIQHIVSLVHVHK#.E        | 12.27  | 10.70  | 1.15 | 0.87  |
| Q8K019_Bf Bclaf1  | Bcl-2-assoc R.VFLDLR.G                    | 33.92  | 110.57 | 0.31 | 3.26  |
| Q8K019_Bf Bclaf1  | Bcl-2-assoc K.SPAVTLNER.F                 | 6.41   | 30.65  | 0.21 | 4.78  |
| Q8K019_Bf Bclaf1  | Bcl-2-assoc K.SQEEPKDTFEHDPSESIDEFNK.S    | 13.24  | 12.03  | 1.10 | 0.91  |
| Q8K019_Bf Bclaf1  | Bcl-2-assoc R.SSFYEGDQETAK#.T             | 27.74  | 29.83  | 0.93 | 1.08  |
| Q8K019_Bf Bclaf1  | Bcl-2-assoc R.VFLDLR.G                    | 7.18   | 32.74  | 0.22 | 4.56  |
| Q35623_Bf Bet1    | BET1 homo K.LLAEM*DSQFDDSTTGFLGK.T        | 5.31   | 3.38   | 1.57 | 0.64  |
| P28653_Pc Bgn     | Biglycan OS.K.IQAILEDLLR.Y                | 2.66   | 11.95  | 0.22 | 4.49  |
| Q921C5_Bf Bicd2   | Protein bic K.IISLLEK#.A                  | 38.42  | 27.75  | 1.38 | 0.72  |
| Q921C5_Bf Bicd2   | Protein bic R.LLDYSELEENISLQK.Q           | 3.45   | 2.76   | 1.25 | 0.80  |
| O08539_Bf Bin1    | Myc box-de K.ESDWNQH#ELEK#.C              | 2.97   | 1.25   | 2.37 | 0.42  |
| O08539_Bf Bin1    | Myc box-de R.HHYSLQTAQ#.K                 | 16.54  | 2.79   | 5.92 | 0.17  |
| O08539_Bf Bin1    | Myc box-de R.LDPPGFMMF#.V                 | 12.64  | 4.37   | 2.89 | 0.35  |
| O08539_Bf Bin1    | Myc box-de K.LNQNLNDVLSLEK#.Q             | 12.82  | 3.91   | 3.27 | 0.31  |
| O08539_Bf Bin1    | Myc box-de K.SPSPDPGSPAATPEIR.V           | 3.13   | 2.91   | 1.07 | 0.93  |
| O08539_Bf Bin1    | Myc box-de R.VGFVNTFSIAGLEENFH#.E         | 43.01  | 11.29  | 3.81 | 0.26  |
| O08539_Bf Bin1    | Myc box-de R.VNHEPEASGASPGATPK#.S         | 61.81  | 22.98  | 2.69 | 0.37  |
| O08539_Bf Bin1    | Myc box-de K.VQAQHDYATDTELQK#.A           | 37.86  | 10.50  | 3.61 | 0.28  |
| O88738_Bf Birc6   | Baculoviral K.HFYLK#.R                    | 18.82  | 5.13   | 3.67 | 0.27  |
| O88738_Bf Birc6   | Baculoviral R.LLDYVATVEDEAAA#.K           | 10.96  | 5.40   | 2.03 | 0.49  |
| O55102_Bf Bloc1s1 | Biogenesis R.TIATALEYVK#.G                | 34.14  | 24.39  | 1.40 | 0.71  |
| O55102_Bf Bloc1s1 | Biogenesis K.TLQVQAAQFAK#.Q               | 30.79  | 19.69  | 1.56 | 0.64  |
| Q9CWC9_Ef Bloc1s2 | Biogenesis K.M*ATYLTGELTATSSEDYK#.L       | 6.05   | 11.01  | 0.55 | 1.82  |
| Q8R015_Bf Bloc1s5 | Biogenesis R.DSLGTPGAHLIHK#.D             | 5.16   | 3.50   | 1.48 | 0.68  |
| Q8R015_Bf Bloc1s5 | Biogenesis R.LVQWEEFVSGQPQR.R             | 1.50   | 7.91   | 0.19 | 5.28  |
| Q8R015_Bf Bloc1s5 | Biogenesis K.VINDYLTAASEK#.R              | 18.89  | 19.34  | 0.98 | 1.02  |
| Q6PGF5_Qf Bms1    | BMS1 homi R.IAATGVVLDLDK#.S               | 8.98   | 7.44   | 1.21 | 0.83  |
| Q6PGF5_Qf Bms1    | BMS1 homi K.IIAEEELYGDFELETGDVHK#.G       | 9.46   | 5.13   | 1.84 | 0.54  |
| Q6PGF5_Qf Bms1    | BMS1 homi R.IAATGVVLDLDK#.S               | 19.18  | 10.94  | 1.75 | 0.57  |
| Q6PGF5_Qf Bms1    | BMS1 homi K.IIAEEELYGDFELETGDVHK#.G       | 11.19  | 7.26   | 1.54 | 0.65  |
| E9Q6J5_E9f Bod1l  | Protein Boc K.AAETEAQEGVTR@.Q             | 7.78   | 4.28   | 1.82 | 0.55  |
| E9Q6J5_E9f Bod1l  | Protein Boc K.ETVEDTITSTGLK#.G            | 14.71  | 5.62   | 2.62 | 0.38  |
| E9Q6J5_E9f Bod1l  | Protein Boc K.GVVTEGFAESELLTSSK#.E        | 7.55   | 1.60   | 4.70 | 0.21  |
| E9Q6J5_E9f Bod1l  | Protein Boc K.TGDATTTTSVEGEK#.G           | 17.41  | 6.20   | 2.81 | 0.36  |
| E9Q6J5_E9f Bod1l  | Protein Boc K.VSQADESN#EIANLEEK#.S        | 12.12  | 4.92   | 2.46 | 0.41  |
| A2A654_A2f Bptf   | Protein Bpt K.DENVNGESQRK.T               | 2.40   | 47.58  | 0.05 | 19.82 |
| A2A654_A2f Bptf   | Protein Bpt K.ESASTQVTPR.A                | 4.54   | 13.52  | 0.34 | 2.98  |
| A2A654_A2f Bptf   | Protein Bpt R.FIAPEQGESVESTK.C            | 7.95   | 8.79   | 0.90 | 1.11  |
| A2A654_A2f Bptf   | Protein Bpt R.K.#HLSQDDSTVVSSEK#.S        | 10.43  | 10.47  | 1.00 | 1.00  |
| A2A654_A2f Bptf   | Protein Bpt R.LIIEEDTDNENEK.K             | 7.67   | 7.08   | 1.08 | 0.92  |
| A2A654_A2f Bptf   | Protein Bpt K.LSTPSPDTGVDITISVK#.E        | 11.84  | 11.08  | 1.07 | 0.94  |
| A2A654_A2f Bptf   | Protein Bpt K.QGQNSNGM*VQVQK#.V           | 2.84   | 2.40   | 1.18 | 0.84  |
| A2A654_A2f Bptf   | Protein Bpt R.TETSETITTEIK#.R             | 8.90   | 4.91   | 1.81 | 0.55  |
| A2A654_A2f Bptf   | Protein Bpt K.VGSPATVTFQNK#.N             | 14.91  | 16.68  | 0.89 | 1.12  |
| A2A654_A2f Bptf   | Protein Bpt R.WAAQAQVAPK.T                | 6.24   | 7.88   | 0.79 | 1.26  |

|                  |                                                   |       |       |       |       |
|------------------|---------------------------------------------------|-------|-------|-------|-------|
| Q99MP8_B Brap    | BRCA1-asso K.FVAPFNDVIEQMK#.I                     | 6.40  | 3.33  | 1.92  | 0.52  |
| Q99MP8_B Brap    | BRCA1-asso K.LSTELQEEQELNK#.C                     | 6.29  | 7.51  | 0.84  | 1.19  |
| Q99MP8_B Brap    | BRCA1-asso K.LSTELQEEQELNK#.C                     | 6.24  | 3.67  | 1.70  | 0.59  |
| Q8C3R1_Bf Btd1   | BRCA1-asso R.LSPIQAGPLALGTLK#.L                   | 8.97  | 7.04  | 1.27  | 0.78  |
| G5E8P1_Gf Btd1   | MCG7283 (K.IFAQPVSLK#.E                           | 23.30 | 16.81 | 1.39  | 0.72  |
| G5E8P1_Gf Btd1   | MCG7283 (R.IVEYSPPSAPR.R                          | 2.34  | 55.94 | 0.04  | 23.88 |
| G5E8P1_Gf Btd1   | MCG7283 (R.LLIELLR.K                              | 3.59  | 11.11 | 0.32  | 3.09  |
| G5E8P1_Gf Btd1   | MCG7283 (R.LTPLVLLR.S                             | 6.27  | 28.30 | 0.22  | 4.51  |
| Q7J113_BR Btd2   | Bromodom K.AGGGGSNATLHSPGFGTSGSSNK#.L             | 12.16 | 7.75  | 1.57  | 0.64  |
| Q7J113_BR Btd2   | Bromodom R.AVHEQLAALSQGPISK#PK#.R                 | 28.06 | 14.13 | 1.99  | 0.50  |
| Q7J113_BR Btd2   | Bromodom R.LAELQELR.A                             | 11.18 | 24.34 | 0.46  | 2.18  |
| Q7J113_BR Btd2   | Bromodom K.SLHSAQPLLAWSAAPPQPLAK#.K               | 36.39 | 24.39 | 1.49  | 0.67  |
| Q7J113_BR Btd2   | Bromodom K.VASM*PQEEQLVVTIPK#.N                   | 12.19 | 9.69  | 1.26  | 0.80  |
| Q7J113_BR Btd2   | Bromodom K.VASMPQEEQLVVTIPK#.N                    | 9.27  | 11.01 | 0.84  | 1.19  |
| Q8K2FO_Bf Btd3   | Bromodom R.LAELQELK#.A                            | 84.13 | 37.55 | 2.24  | 0.45  |
| Q8K2FO_Bf Btd3   | Bromodom R.LQDVSGQLNSK#.K                         | 14.69 | 6.01  | 2.44  | 0.41  |
| Q9ESU6_Bf Btd4   | Bromodom K.AVHEQLAALSQPPQNK#PK#.K                 | 14.90 | 5.94  | 2.51  | 0.40  |
| Q9ESU6_Bf Btd4   | Bromodom R.DAQEGADVR.L                            | 8.41  | 12.54 | 0.67  | 1.49  |
| Q9ESU6_Bf Btd4   | Bromodom K.HQFAWPFQPPVDAVK#.L                     | 14.53 | 6.67  | 2.18  | 0.46  |
| Q9ESU6_Bf Btd4   | Bromodom K.INELPTEETEM*IVQAK#.G                   | 9.91  | 5.45  | 1.82  | 0.55  |
| Q9ESU6_Bf Btd4   | Bromodom K.INELPTEETEMIVQAK#.G                    | 10.48 | 6.04  | 1.74  | 0.58  |
| Q9ESU6_Bf Btd4   | Bromodom K.LNLPDYK#.J                             | 41.81 | 18.27 | 2.29  | 0.44  |
| Q9ESU6_Bf Btd4   | Bromodom K.AVHEQLAALSQPPQNK#PK#.K                 | 13.13 | 4.97  | 2.64  | 0.38  |
| Q9ESU6_Bf Btd4   | Bromodom R.DAQEGADVR.L                            | 4.23  | 11.30 | 0.37  | 2.67  |
| Q9ESU6_Bf Btd4   | Bromodom K.DVPDSQQHPGPEK#.S                       | 9.56  | 6.68  | 1.43  | 0.70  |
| Q9ESU6_Bf Btd4   | Bromodom K.INELPTEETEM*IVQAK#.G                   | 5.06  | 3.84  | 1.32  | 0.76  |
| Q9ESU6_Bf Btd4   | Bromodom K.INELPTEETEMIVQAK#.G                    | 5.80  | 3.70  | 1.57  | 0.64  |
| Q9ESU6_Bf Btd4   | Bromodom K.LNLPDYK#.J                             | 28.67 | 24.44 | 1.17  | 0.85  |
| O88665_Bf Btd7   | Bromodom K.EAEITQIEPTGR.L                         | 16.74 | 8.08  | 2.07  | 0.48  |
| O88665_Bf Btd7   | Bromodom R.LQSGVNTLQGF.K                          | 11.48 | 15.53 | 0.74  | 1.35  |
| O88665_Bf Btd7   | Bromodom K.VGGSEVELTSSGSDSSLFEDR.S                | 3.15  | 7.46  | 0.42  | 2.37  |
| Q8R3B7_Bf Btd8   | Bromodom R.LLEAGPTQFTPLPSFTVASEPPVK.L             | 8.50  | 11.34 | 0.75  | 1.34  |
| Q8R3B7_Bf Btd8   | Bromodom K.LLSTGPTPEWSIR.E                        | 1.54  | 6.14  | 0.25  | 3.99  |
| Q8K3W0_B Bre     | BRCA1-A co K.LPVDFSNIPTYLLK#.D                    | 24.88 | 10.68 | 2.33  | 0.43  |
| Q8K3W0_B Bre     | BRCA1-A co K.LPVDFSNIPTYLLK#.D                    | 14.67 | 6.02  | 2.44  | 0.41  |
| Q8K3W0_B Bre     | BRCA1-A co K.LPVDFSNIPTYLLK#.D                    | 17.86 | 10.25 | 1.74  | 0.57  |
| Q9DCA5_Bf Brix1  | Ribosome t K.EFLIQIFSTPR.Y                        | 3.05  | 7.55  | 0.40  | 2.48  |
| Q9DCA5_Bf Brix1  | Ribosome t R.FVLNLK#.I                            | 44.55 | 17.20 | 2.59  | 0.39  |
| Q9DCA5_Bf Brix1  | Ribosome t R.FVLNLK#.I                            | 12.50 | 3.87  | 3.23  | 0.31  |
| Q91VR8_Bf Brk1   | Protein BRI R.EYIEITSSIK#.K                       | 22.55 | 6.43  | 3.51  | 0.29  |
| Q3U1T3_Bf Brms11 | Breast canc K.LLLYDVTQSELEEK#.I                   | 18.25 | 11.68 | 1.56  | 0.64  |
| Q8R2Q8_Bf Bst2   | Bone marrc R.K.ELENEVTK#.L                        | 31.55 | 27.52 | 1.15  | 0.87  |
| Q8R2Q8_Bf Bst2   | Bone marrc R.K.ELENEVTK.L                         | 45.40 | 34.40 | 1.32  | 0.76  |
| Q8R2Q8_Bf Bst2   | Bone marrc K.KVSOALEQQAR.I                        | 9.21  | 29.44 | 0.31  | 3.20  |
| Q8R2Q8_Bf Bst2   | Bone marrc K.KVSOALEQQAR.I                        | 6.84  | 26.51 | 0.26  | 3.88  |
| Q8R2Q8_Bf Bst2   | Bone marrc K.LNQLENL.R.I                          | 18.98 | 65.34 | 0.29  | 3.44  |
| Q8R2Q8_Bf Bst2   | Bone marrc K.VSOALEQQAR.I                         | 10.51 | 49.04 | 0.21  | 4.67  |
| Q8R2Q8_Bf Bst2   | Bone marrc K.KVSOALEQQAR.I                        | 2.78  | 12.79 | 0.22  | 4.60  |
| Q8R2Q8_Bf Bst2   | Bone marrc K.LNQLENL.R.I                          | 4.97  | 23.08 | 0.22  | 4.64  |
| Q8R2Q8_Bf Bst2   | Bone marrc K.VSOALEQQAR.I                         | 1.81  | 14.36 | 0.13  | 7.93  |
| E9QAE3_E9 Btaf1  | Protein Bta K.AAAQGLGEVVK.L                       | 11.53 | 9.88  | 1.17  | 0.86  |
| E9QAE3_E9 Btaf1  | Protein Bta K.IPVPIAELR.K                         | 2.68  | 9.96  | 0.27  | 3.72  |
| E9QAE3_E9 Btaf1  | Protein Bta K.VANVINQATSDSK#.V                    | 12.77 | 10.74 | 1.19  | 0.84  |
| Q64152_Bf Btf3   | Transcripti K.APLATGEDDDVDPDLVENFDEASK#.N         | 19.00 | 9.96  | 1.91  | 0.52  |
| Q64152_Bf Btf3   | Transcripti K.K.#LGNVNSIGIEEVNM*FTNQGTVIHFNNPK#.V | 13.54 | 4.02  | 3.37  | 0.30  |
| Q64152_Bf Btf3   | Transcripti K.K.#LGNVNSIGIEEVNMFTNQGTVIHFNNPK#.V  | 12.57 | 3.53  | 3.56  | 0.28  |
| Q64152_Bf Btf3   | Transcripti K.LGVNNSIGIEEVNM*FTNQGTVIHFNNPK#.V    | 29.31 | 14.85 | 1.97  | 0.51  |
| Q64152_Bf Btf3   | Transcripti K.LGVNNSIGIEEVNMFTNQGTVIHFNNPK#.V     | 36.03 | 14.57 | 2.47  | 0.40  |
| Q64152_Bf Btf3   | Transcripti R.LLAEALPK.Q                          | 7.39  | 10.01 | 0.74  | 1.35  |
| Q64152_Bf Btf3   | Transcripti K.VQASLAANTTITGHAETK#.Q               | 48.47 | 21.94 | 2.21  | 0.45  |
| Q64152_Bf Btf3   | Transcripti K.VQASLAANTTITGHAETK.Q                | 7.29  | 5.19  | 1.40  | 0.71  |
| Q9CQH7_Bf Btf314 | Transcripti K.APK#PEDIEEDDDVDPDLVENFDEASK#.N      | 7.46  | 4.62  | 1.62  | 0.62  |
| Q9CQH7_Bf Btf314 | Transcripti K.APK#PEDIEEDDDVDPDLVENFDEASK#NEAN.-  | 29.07 | 14.93 | 1.95  | 0.51  |
| Q9CQH7_Bf Btf314 | Transcripti K.LAVNIAIGIEEVNM*IK#DDGTVIHFNNPK#.V   | 11.86 | 5.40  | 2.19  | 0.46  |
| Q9CQH7_Bf Btf314 | Transcripti K.LQAQVR.I                            | 11.52 | 37.14 | 0.31  | 3.22  |
| Q9WVA3_Bf Bub3   | Mitotic che R.QVTAETK#PK#.S                       | 5.24  | 1.83  | 2.87  | 0.35  |
| Q9WVA3_Bf Bub3   | Mitotic che R.VAVEYLDPSPEVQK#.K                   | 13.48 | 4.59  | 2.93  | 0.34  |
| Q8R149_Bf Bud13  | BUD13 hon K.TGLVTDVQR.E                           | 4.38  | 22.06 | 0.20  | 5.03  |
| Q8R149_Bf Bud13  | BUD13 hon R.YDDEDLDR.M                            | 2.96  | 19.37 | 0.15  | 6.54  |
| Q8R149_Bf Bud13  | BUD13 hon R.YLSGTDAGLEGPEAGR.K                    | 8.19  | 12.94 | 0.63  | 1.58  |
| E0CX20_E0 Bud31  | Protein BUI K.APPDGGWELIEPTLDELQDK.M              | 25.63 | 21.80 | 1.18  | 0.85  |
| E0CX20_E0 Bud31  | Protein BUI K.APPDGGWELIEPTLDELQDK.M              | 3.45  | 6.06  | 0.57  | 1.76  |
| E0CX20_E0 Bud31  | Protein BUI R.KAPDGGWELIEPTLDELQDK.M              | 58.08 | 74.76 | 0.78  | 1.29  |
| E0CX20_E0 Bud31  | Protein BUI R.KVSLWPIFR.I                         | 5.90  | 15.89 | 0.37  | 2.69  |
| E0CX20_E0 Bud31  | Protein BUI R.YIFDLFYK.R                          | 40.72 | 42.35 | 0.96  | 1.04  |
| O54825_Bf Bysl   | Bystin OS=h K.EALLELR.L                           | 5.85  | 7.41  | 0.79  | 1.27  |
| O54825_Bf Bysl   | Bystin OS=h R.FYNLVLLPR.V                         | 5.80  | 10.53 | 0.55  | 1.82  |
| O54825_Bf Bysl   | Bystin OS=h K.IAEM*EYSGANSIFLR.L                  | 2.46  | 3.62  | 0.68  | 1.47  |
| O9CQC6_Bf Bzw1   | Basic leucir K.AEVLSEEPILK#.W                     | 24.57 | 9.32  | 2.64  | 0.38  |
| O9CQC6_Bf Bzw1   | Basic leucir K.EGVSAFAVK#.L                       | 23.79 | 3.48  | 6.83  | 0.15  |
| O9CQC6_Bf Bzw1   | Basic leucir R.GDPFK#HILYVK#.E                    | 8.74  | 2.42  | 3.61  | 0.28  |
| O9CQC6_Bf Bzw1   | Basic leucir K.IVVLFYK#.A                         | 39.95 | 8.28  | 4.83  | 0.21  |
| B2RQC6_P1 Cad    | CAD protei R.AAFALGGLGSGFASTK#.E                  | 32.56 | 16.88 | 1.93  | 0.52  |
| B2RQC6_P1 Cad    | CAD protei K.AIVHAGQELQVTFPFLQLIAK#.D             | 16.48 | 9.28  | 1.78  | 0.56  |
| B2RQC6_P1 Cad    | CAD protei K.ALK#EENIQTLLINNIATVQTSQGLADK#.V      | 9.04  | 3.79  | 2.39  | 0.42  |
| B2RQC6_P1 Cad    | CAD protei R.ASDPGLAEEP#.E                        | 47.63 | 3.33  | 14.29 | 0.07  |
| B2RQC6_P1 Cad    | CAD protei K.ATGYPLAVAAK#.L                       | 47.81 | 24.49 | 1.95  | 0.51  |
| B2RQC6_P1 Cad    | CAD protei R.EAAGNIGGQTVR.E                       | 29.72 | 50.29 | 0.59  | 1.69  |
| B2RQC6_P1 Cad    | CAD protei K.EELSALVAPAFHTSQVLIDK#.S              | 38.32 | 21.02 | 1.82  | 0.55  |
| B2RQC6_P1 Cad    | CAD protei R.ELSDLESAR.Q                          | 15.90 | 22.17 | 0.72  | 1.39  |
| B2RQC6_P1 Cad    | CAD protei R.EQGSLLGK#.L                          | 22.06 | 11.61 | 1.90  | 0.53  |
| B2RQC6_P1 Cad    | CAD protei R.FLSSAAAVSK#.E                        | 64.34 | 26.18 | 2.46  | 0.41  |
| B2RQC6_P1 Cad    | CAD protei R.IVTHAQLLEQHR.G                       | 7.87  | 16.03 | 0.49  | 2.04  |
| B2RQC6_P1 Cad    | CAD protei K.LALGIPLELR.N                         | 40.66 | 94.05 | 0.43  | 2.31  |
| B2RQC6_P1 Cad    | CAD protei K.LFVEALQIGQPAPPLK#.V                  | 23.26 | 11.68 | 1.99  | 0.50  |
| B2RQC6_P1 Cad    | CAD protei R.LGGAVLSFSEATSSVQK#.G                 | 42.91 | 16.38 | 2.62  | 0.38  |
| B2RQC6_P1 Cad    | CAD protei R.LGYPVLR.A                            | 9.47  | 14.19 | 0.67  | 1.50  |
| B2RQC6_P1 Cad    | CAD protei R.LLDTIGISQPQWR.E                      | 12.37 | 26.62 | 0.46  | 2.15  |
| B2RQC6_P1 Cad    | CAD protei R.LSLDILLOR.L                          | 15.98 | 21.90 | 0.73  | 1.37  |
| B2RQC6_P1 Cad    | CAD protei R.M*AEIGHVAPSEANSLEQAQAAAER.L          | 12.51 | 23.65 | 0.53  | 1.89  |
| B2RQC6_P1 Cad    | CAD protei R.MAEIGHVAPSEANSLEQAQAAAER.L           | 4.15  | 6.06  | 0.68  | 1.46  |
| B2RQC6_P1 Cad    | CAD protei R.M*ALLATVLR.F                         | 10.03 | 12.29 | 0.82  | 1.23  |
| B2RQC6_P1 Cad    | CAD protei K.NILLTIGSYK#.N                        | 27.49 | 14.11 | 1.95  | 0.51  |

|                  |                                                                   |        |        |      |      |
|------------------|-------------------------------------------------------------------|--------|--------|------|------|
| B2RQC6_P1 Cad    | CAD protei K.TLGVLDLVALTR.I                                       | 17.33  | 36.82  | 0.47 | 2.12 |
| B2RQC6_P1 Cad    | CAD protei K.VEPVGLM*TGSGVGVGK#.V                                 | 19.94  | 8.68   | 2.30 | 0.44 |
| B2RQC6_P1 Cad    | CAD protei R.VLGTSPAIDSAENR.F                                     | 18.80  | 31.01  | 0.61 | 1.65 |
| B2RQC6_P1 Cad    | CAD protei R.VNEISVEVSDP.R.A                                      | 7.53   | 13.85  | 0.54 | 1.84 |
| Q8VCQ8_Q Cald1   | Caldesmon R.AEFLNK#.S                                             | 30.38  | 12.95  | 2.35 | 0.43 |
| Q8VCQ8_Q Cald1   | Caldesmon R.ASGDK#EAEGAPQVEAGK#.R                                 | 20.43  | 9.25   | 2.21 | 0.45 |
| Q8VCQ8_Q Cald1   | Caldesmon R.ASGDK#EAEGAPQVEAGK.R                                  | 7.50   | 4.06   | 1.85 | 0.54 |
| Q8VCQ8_Q Cald1   | Caldesmon K.GSVFSAPSASGTPNK#.E                                    | 15.72  | 8.99   | 1.75 | 0.57 |
| Q8VCQ8_Q Cald1   | Caldesmon K.GSVFSAPSASGTPNK#HETAGLK#.V                            | 23.08  | 14.92  | 1.55 | 0.65 |
| Q8VCQ8_Q Cald1   | Caldesmon R.LEQYTNIAEGTK#.A                                       | 31.50  | 11.59  | 2.72 | 0.37 |
| Q8VCQ8_Q Cald1   | Caldesmon R.SGRYEVEETEVVIK.S                                      | 8.43   | 8.34   | 1.01 | 0.99 |
| Q8VCQ8_Q Cald1   | Caldesmon K.VLEEEER.R                                             | 7.61   | 22.51  | 0.34 | 2.96 |
| Q8VCQ8_Q Cald1   | Caldesmon R.YEVEETEVVIK#.S                                        | 28.91  | 9.72   | 2.97 | 0.34 |
| Q8VCQ8_Q Cald1   | Caldesmon R.AEFLNK#.S                                             | 82.58  | 38.17  | 2.16 | 0.46 |
| Q8VCQ8_Q Cald1   | Caldesmon R.ASGDK#EAEGAPQVEAGK#.R                                 | 79.21  | 39.90  | 1.99 | 0.50 |
| Q8VCQ8_Q Cald1   | Caldesmon K.ASKPM*KPAASDLPVPAEAGVR.N                              | 5.97   | 15.83  | 0.38 | 2.65 |
| Q8VCQ8_Q Cald1   | Caldesmon K.DKREP#EEVK#.S                                         | 4.74   | 3.58   | 1.33 | 0.75 |
| Q8VCQ8_Q Cald1   | Caldesmon K.GSVFSAPSASGTPNK#.E                                    | 42.79  | 18.81  | 2.27 | 0.44 |
| Q8VCQ8_Q Cald1   | Caldesmon R.I.NEWLTK#.S                                           | 77.83  | 32.46  | 2.40 | 0.42 |
| Q8VCQ8_Q Cald1   | Caldesmon R.LEQYTNIAEGTK#.A                                       | 149.62 | 68.53  | 2.18 | 0.46 |
| Q8VCQ8_Q Cald1   | Caldesmon K.LKQTNIAFSP.R.S                                        | 4.75   | 17.34  | 0.27 | 3.65 |
| Q8VCQ8_Q Cald1   | Caldesmon R.QKQEESLQVTDQEAHVQNSVPDEESKPASSNTQVGEDEEAALLER.L       | 4.40   | 3.44   | 1.28 | 0.78 |
| Q8VCQ8_Q Cald1   | Caldesmon K.QSVDK#VTSPTK#.-                                       | 7.47   | 5.61   | 1.33 | 0.75 |
| Q8VCQ8_Q Cald1   | Caldesmon R.RGETENEEFEK.L                                         | 5.27   | 11.33  | 0.47 | 2.15 |
| Q8VCQ8_Q Cald1   | Caldesmon R.SGRYEVEETEVVIK.S                                      | 20.43  | 36.60  | 0.56 | 1.79 |
| Q8VCQ8_Q Cald1   | Caldesmon R.STHQAAVVS.K.I                                         | 13.81  | 9.48   | 1.46 | 0.69 |
| Q8VCQ8_Q Cald1   | Caldesmon K.VLEEEER.R                                             | 21.35  | 35.74  | 0.60 | 1.67 |
| Q8VCQ8_Q Cald1   | Caldesmon R.YEVEETEVVIK#.S                                        | 46.66  | 18.00  | 2.59 | 0.39 |
| F6ZAW1_F1 Cald1  | Protein Cal K.GGSLGENQVEK#.M                                      | 9.71   | 3.25   | 2.98 | 0.34 |
| P62204_C1 Calm1  | Calmodulin K.DTSEEEIR.E                                           | 11.20  | 19.78  | 0.57 | 1.77 |
| P62204_C1 Calm1  | Calmodulin R.EADIDGGQVNYEEFVQM*MTAK#.-                            | 71.38  | 30.52  | 2.34 | 0.43 |
| P62204_C1 Calm1  | Calmodulin R.EADIDGGQVNYEEFVQM*MTAK#.-                            | 12.82  | 4.99   | 2.57 | 0.39 |
| P62204_C1 Calm1  | Calmodulin R.EADIDGGQVNYEEFVQM*MTAK#.-                            | 7.09   | 4.81   | 1.47 | 0.68 |
| P62204_C1 Calm1  | Calmodulin R.EADIDGGQVNYEEFVQM*MTAK#.-                            | 5.53   | 1.93   | 2.86 | 0.35 |
| P62204_C1 Calm1  | Calmodulin R.EADIDGGQVNYEEFVQM*MTAK#.-                            | 7.04   | 3.96   | 1.78 | 0.56 |
| P62204_C1 Calm1  | Calmodulin K.ELGTVM*.R.S                                          | 85.78  | 179.06 | 0.48 | 2.09 |
| P62204_C1 Calm1  | Calmodulin K.M*KDTSSEEEIR.E                                       | 3.66   | 14.36  | 0.25 | 3.93 |
| P62204_C1 Calm1  | Calmodulin R.VFDKNGVYSAAELR.H                                     | 8.57   | 13.11  | 0.65 | 1.53 |
| P14211_C1 Calr   | Calreticulin K.IDNSQVEESLQVTDQEAHVQNSVPDEESKPASSNTQVGEDEEAALLER.L | 6.50   | 4.44   | 1.46 | 0.68 |
| P14211_C1 Calr   | Calreticulin K.K#PEDWDEEM*DGWEPVPPVQNPYK#.G                       | 8.94   | 4.67   | 1.92 | 0.52 |
| P14211_C1 Calr   | Calreticulin K.K#PEDWDEEMDGWEPVPPVQNPYK#.G                        | 3.73   | 2.92   | 1.28 | 0.78 |
| Q35887_C1 Calu   | Calumenin R.EQFVEFR.D                                             | 19.62  | 114.64 | 0.17 | 5.84 |
| Q35887_C1 Calu   | Calumenin K.GHDLNEDGLVSWEEYK#.N                                   | 8.95   | 12.26  | 0.73 | 1.37 |
| Q35887_C1 Calu   | Calumenin K.GHDLNEDGLVSWEEYK.N                                    | 3.42   | 5.56   | 0.61 | 1.63 |
| Q35887_C1 Calu   | Calumenin R.HLVYEDSQNKDGK.L                                       | 84.48  | 97.50  | 0.87 | 1.15 |
| Q35887_C1 Calu   | Calumenin K.IDDDK#DGFVTVDELK#.G                                   | 66.57  | 105.47 | 0.63 | 1.58 |
| Q35887_C1 Calu   | Calumenin K.IDDDK#DGFVTVDELK.G                                    | 15.14  | 24.13  | 0.63 | 1.59 |
| Q35887_C1 Calu   | Calumenin K.LTKEEIVDKYDLFVGSQATDFGEALVR.H                         | 10.76  | 60.15  | 0.18 | 5.59 |
| Q35887_C1 Calu   | Calumenin K.MDKETKDWLPSDYDHAEEAR.H                                | 2.00   | 6.30   | 0.32 | 3.14 |
| Q35887_C1 Calu   | Calumenin K.SFDQLTPEESK#.E                                        | 39.85  | 67.99  | 0.59 | 1.71 |
| Q35887_C1 Calu   | Calumenin R.VHHEPQLSK.V                                           | 15.53  | 32.56  | 0.48 | 2.10 |
| Q35887_C1 Calu   | Calumenin K.VHNDANFDYDHDFAFLGAEAK#.S                              | 12.33  | 17.28  | 0.71 | 1.40 |
| Q6XLQ8_Q1 Calu   | Calumenin K.IDADK#DGFVTEGELK.S                                    | 3.42   | 6.80   | 0.50 | 1.99 |
| Q6XLQ8_Q1 Calu   | Calumenin R.LGM#IVDKIDADK#DGFVTEGELK.S                            | 18.01  | 20.35  | 0.88 | 1.13 |
| Q6XLQ8_Q1 Calu   | Calumenin R.LGM#IVDKIDADK#DGFVTEGELK.S                            | 7.14   | 18.35  | 0.39 | 2.57 |
| Q91YS8_KC Camk1  | Calcium/ca R.LIFQVLDVAVK#.Y                                       | 9.49   | 1.85   | 5.13 | 0.20 |
| Q6PHZ2_K1 Camk2d | Calcium/ca R.DLK#PENLLASK#.S                                      | 13.61  | 23.17  | 0.59 | 1.70 |
| Q6PHZ2_K1 Camk2d | Calcium/ca R.DLK#PENLLASK.S                                       | 15.48  | 33.36  | 0.46 | 2.15 |
| Q6PHZ2_K1 Camk2d | Calcium/ca K.ESTESNTTIEDEDVK#.A                                   | 13.88  | 22.78  | 0.61 | 1.64 |
| Q6PHZ2_K1 Camk2d | Calcium/ca K.IPTGQEYAAK.I                                         | 34.39  | 54.17  | 0.63 | 1.58 |
| Q6PHZ2_K1 Camk2d | Calcium/ca K.VTEQLEAINNGDFEAYTK.I                                 | 5.82   | 9.83   | 0.59 | 1.69 |
| Q6PHZ2_K1 Camk2d | Calcium/ca R.FYFENALSK.S                                          | 13.29  | 22.43  | 0.59 | 1.69 |
| Q6PHZ2_K1 Camk2d | Calcium/ca R.LTQYM*DGSGM*PK.T                                     | 5.18   | 6.93   | 0.75 | 1.34 |
| Q6PHZ2_K1 Camk2d | Calcium/ca K.VTEQLEAINNGDFEAYTK.I                                 | 6.28   | 8.13   | 0.77 | 1.29 |
| Q6PHZ2_K1 Camk2d | Calcium/ca R.DLK#PENLLASK#.S                                      | 16.53  | 24.06  | 0.69 | 1.46 |
| Q6PHZ2_K1 Camk2d | Calcium/ca K.ESTESNTTIEDEDVK.A                                    | 9.56   | 13.91  | 0.69 | 1.45 |
| Q6PHZ2_K1 Camk2d | Calcium/ca R.FTDEYQLFEELG.G                                       | 16.53  | 19.68  | 0.84 | 1.19 |
| Q6PHZ2_K1 Camk2d | Calcium/ca R.LTQYM*DGSGM*PK.T                                     | 6.20   | 9.32   | 0.67 | 1.50 |
| Q6PHZ2_K1 Camk2d | Calcium/ca K.VTEQLEAINNGDFEAYTK.I                                 | 5.85   | 7.66   | 0.76 | 1.31 |
| Q6PHZ2_K1 Camk2d | Calcium/ca K.AGAYDFPSPEDVTVPEAK.D                                 | 21.96  | 25.06  | 0.88 | 1.14 |
| Q6PHZ2_K1 Camk2d | Calcium/ca R.DLK#PENLLASK#.S                                      | 38.74  | 43.31  | 0.89 | 1.12 |
| Q6PHZ2_K1 Camk2d | Calcium/ca K.ESTESNTTIEDEDVK.A                                    | 18.91  | 28.84  | 0.66 | 1.53 |
| Q6PHZ2_K1 Camk2d | Calcium/ca R.FTDEYQLFEELG.G                                       | 32.57  | 34.86  | 0.93 | 1.07 |
| Q6PHZ2_K1 Camk2d | Calcium/ca R.FYFENALSK#.S                                         | 20.01  | 24.86  | 0.80 | 1.24 |
| Q6PHZ2_K1 Camk2d | Calcium/ca K.IPTGQEYAAK.I                                         | 33.80  | 38.27  | 0.88 | 1.13 |
| Q6PHZ2_K1 Camk2d | Calcium/ca R.LTQYM*DGSGM*PK.T                                     | 14.33  | 17.47  | 0.82 | 1.22 |
| Q6PHZ2_K1 Camk2d | Calcium/ca K.VTEQLEAINNGDFEAYTK.I                                 | 41.16  | 19.70  | 2.09 | 0.48 |
| Q6ZQ38_C1 Cand1  | Cullin-asso K.ALTLIAGSPLK#.I                                      | 22.35  | 7.44   | 3.00 | 0.33 |
| Q6ZQ38_C1 Cand1  | Cullin-asso R.AVAALLTIPEAK#.S                                     | 10.22  | 4.03   | 2.54 | 0.39 |
| Q6ZQ38_C1 Cand1  | Cullin-asso R.EGPAVGVQFIQDVVK#.N                                  | 21.46  | 6.60   | 3.25 | 0.31 |
| Q6ZQ38_C1 Cand1  | Cullin-asso R.HEM*LPFYK#.T                                        | 12.15  | 3.66   | 3.32 | 0.30 |
| Q6ZQ38_C1 Cand1  | Cullin-asso K.ITSEALLVQQLVK#.V                                    | 16.23  | 6.28   | 2.59 | 0.39 |
| Q6ZQ38_C1 Cand1  | Cullin-asso K.LGTLGALDILK#.N                                      | 44.53  | 14.81  | 3.01 | 0.33 |
| Q6ZQ38_C1 Cand1  | Cullin-asso K.ALTLIAGSPLK#.I                                      | 51.42  | 13.89  | 3.70 | 0.27 |
| Q6ZQ38_C1 Cand1  | Cullin-asso R.AVAALLTIPEAK#.S                                     | 22.71  | 8.14   | 2.79 | 0.36 |
| Q6ZQ38_C1 Cand1  | Cullin-asso R.DISSIGLK#.T                                         | 31.00  | 4.82   | 6.43 | 0.16 |
| Q6ZQ38_C1 Cand1  | Cullin-asso R.DLLDSVLPPLHLYNETK#.V                                | 31.76  | 13.46  | 2.36 | 0.42 |
| Q6ZQ38_C1 Cand1  | Cullin-asso K.DSSSTNLES#DTS.-                                     | 8.92   | 8.92   | 1.00 | 1.00 |
| Q6ZQ38_C1 Cand1  | Cullin-asso K.EGPAVGVQFIQDVVK#.N                                  | 69.09  | 19.60  | 3.52 | 0.28 |
| Q6ZQ38_C1 Cand1  | Cullin-asso R.EVEM*GPFK#.H                                        | 19.00  | 6.16   | 3.08 | 0.32 |
| Q6ZQ38_C1 Cand1  | Cullin-asso R.FM*ATNDLM*TELQK#.D                                  | 7.41   | 3.20   | 2.31 | 0.43 |
| Q6ZQ38_C1 Cand1  | Cullin-asso K.ITSEALLVQQLVK#.V                                    | 44.42  | 13.98  | 3.18 | 0.31 |
| Q6ZQ38_C1 Cand1  | Cullin-asso K.LGTLGALDILK#.N                                      | 97.79  | 22.00  | 4.45 | 0.22 |
| Q6ZQ38_C1 Cand1  | Cullin-asso K.LTLIDPETLLPR.L                                      | 15.99  | 21.21  | 0.75 | 1.33 |
| Q6ZQ38_C1 Cand1  | Cullin-asso R.SSVVAVK#.F                                          | 58.41  | 12.60  | 4.64 | 0.22 |
| Q6ZQ38_C1 Cand1  | Cullin-asso K.SVLEAFSSPSEEVK#.S                                   | 52.57  | 20.42  | 2.57 | 0.39 |
| Q6ZQ38_C1 Cand1  | Cullin-asso K.VIRPLDQPSFADTPYK.D                                  | 12.83  | 15.85  | 0.81 | 1.24 |
| Q6ZQ73_C1 Cand2  | Cullin-asso R.AVAALLTNPEVR.K                                      | 4.01   | 12.30  | 0.33 | 3.07 |
| Q6ZQ73_C1 Cand2  | Cullin-asso R.SNPETLTFESIQK#.D                                    | 10.13  | 12.24  | 0.83 | 1.21 |
| P35564_C1 Canx   | Calnexin O: K.APVPTGEVYFADSFDR.G                                  | 7.18   | 28.13  | 0.26 | 3.92 |
| P35564_C1 Canx   | Calnexin O: R.GSLSGWILSK#.A                                       | 29.66  | 21.02  | 1.41 | 0.71 |
| P35564_C1 Canx   | Calnexin O: R.K#PNPFFFELEPFK#.M                                   | 23.12  | 17.65  | 1.31 | 0.76 |
| P35564_C1 Canx   | Calnexin O: K.APVPTGEVYFADSFDR.G                                  | 2.17   | 10.15  | 0.21 | 4.67 |

|                   |                                                                         |        |        |       |         |
|-------------------|-------------------------------------------------------------------------|--------|--------|-------|---------|
| P35564_C/ Canx    | Calnexin O<K.SDASTPPSPK#.V                                              | 10.78  | 7.32   | 1.47  | 0.68    |
| P40124_C/ Cap1    | Adenylyl cy K.EM*NDAAAM*FYTNR.V                                         | 7.32   | 8.62   | 0.85  | 1.18    |
| P40124_C/ Cap1    | Adenylyl cy K.EPALLEEGK#.K                                              | 23.79  | 4.40   | 5.41  | 0.18    |
| P40124_C/ Cap1    | Adenylyl cy K.#EPALLEEGK#.K                                             | 38.57  | 7.90   | 4.88  | 0.20    |
| P40124_C/ Cap1    | Adenylyl cy K.LVTTVTEIAG.-                                              | 35.97  | 35.97  | 1.00  | 1.00    |
| P40124_C/ Cap1    | Adenylyl cy R.VENQENVSNLVIDDTELK#.Q                                     | 51.48  | 10.48  | 4.91  | 0.20    |
| P40124_C/ Cap1    | Adenylyl cy K.VPTISINK#.T                                               | 72.93  | 17.15  | 4.25  | 0.24    |
| P40124_C/ Cap1    | Adenylyl cy R.VENQENVSNLVIDDTELK#.Q                                     | 6.97   | 1.98   | 3.52  | 0.28    |
| Q99LB4_Q/ Capg    | Capping pri K.AQVEITDGEPEAM*QVLGPK#PALK#.E                              | 19.30  | 7.03   | 2.74  | 0.36    |
| Q99LB4_Q/ Capg    | Capping pri K.AQVEITDGEPEAM*QVLGPK#PALK#.E                              | 54.38  | 20.27  | 2.68  | 0.37    |
| Q99LB4_Q/ Capg    | Capping pri R.EGGVESAFHK#.T                                             | 51.76  | 14.52  | 3.56  | 0.28    |
| Q99LB4_Q/ Capg    | Capping pri K.EGNPEEDITADQTNAAQAAALYK#.V                                | 38.05  | 10.04  | 3.79  | 0.26    |
| Q99LB4_Q/ Capg    | Capping pri R.EVQGNESDLFM*SYFPR.G                                       | 8.02   | 7.99   | 1.00  | 1.00    |
| Q99LB4_Q/ Capg    | Capping pri R.EVQGNESDLFM*SYFPR.G                                       | 6.31   | 7.84   | 0.80  | 1.24    |
| Q99LB4_Q/ Capg    | Capping pri R.QAALQVADGFSR.M                                            | 28.06  | 39.82  | 0.70  | 1.42    |
| Q99LB4_Q/ Capg    | Capping pri K.VSDATGQMNLTk#.V                                           | 101.53 | 29.75  | 3.41  | 0.29    |
| Q99LB4_Q/ Capg    | Capping pri K.VSDATGQMN*NLTK#.V                                         | 144.36 | 45.71  | 3.16  | 0.32    |
| Q99LB4_Q/ Capg    | Capping pri R.YSPNTQVEILPQGR.E                                          | 19.37  | 28.74  | 0.67  | 1.48    |
| O35350_C/ Capn1   | Calpain-1 c K.APSDLYQILK#.A                                             | 28.13  | 7.39   | 3.80  | 0.26    |
| O35350_C/ Capn1   | Calpain-1 c K.#AQVQELDDQIQANLPDEK#.V                                    | 8.46   | 2.61   | 3.24  | 0.31    |
| O35350_C/ Capn1   | Calpain-1 c K.LVVFVHSAQGNFWSALLEK#.A                                    | 17.64  | 5.92   | 2.98  | 0.34    |
| O35350_C/ Capn1   | Calpain-1 c R.NYPATFVWNPQFK#.I                                          | 15.70  | 7.02   | 2.23  | 0.45    |
| O35350_C/ Capn1   | Calpain-1 c K.VLSEEDIDNFK#.T                                            | 25.68  | 7.72   | 3.33  | 0.30    |
| O35350_C/ Capn1   | Calpain-1 c K.APSDLYQILK#.A                                             | 47.07  | 10.42  | 4.52  | 0.22    |
| O35350_C/ Capn1   | Calpain-1 c R.GHAYSVTGAK#.Q                                             | 16.89  | 10.78  | 1.57  | 0.64    |
| O35350_C/ Capn1   | Calpain-1 c K.LVVFVHSAQGNFWSALLEK#.A                                    | 25.57  | 4.36   | 5.86  | 0.17    |
| O35350_C/ Capn1   | Calpain-1 c R.M*AEAAAGFK#.L                                             | 22.37  | 11.24  | 1.99  | 0.50    |
| O35350_C/ Capn1   | Calpain-1 c R.NYPATFVWNPQFK#.I                                          | 15.11  | 6.28   | 2.41  | 0.42    |
| O35350_C/ Capn1   | Calpain-1 c K.VLSEEDIDNFK#.T                                            | 41.93  | 8.85   | 4.74  | 0.21    |
| O08529_C/ Capn2   | Calpain-2 c K.DGELLFVHSAEGSEFWSALLEK#.A                                 | 22.26  | 4.78   | 4.66  | 0.21    |
| O08529_C/ Capn2   | Calpain-2 c K.GHAYSVTGAEEVSSGSLQK#.L                                    | 28.46  | 7.44   | 3.83  | 0.26    |
| O08529_C/ Capn2   | Calpain-2 c R.LETLFK#.I                                                 | 15.14  | 6.40   | 2.37  | 0.42    |
| O08529_C/ Capn2   | Calpain-2 c R.NPWQVQVEWTGK#.W                                           | 18.92  | 5.89   | 3.21  | 0.31    |
| O08529_C/ Capn2   | Calpain-2 c R.NYPNTFWM*NPQYLIK#.L                                       | 6.89   | 2.85   | 2.42  | 0.41    |
| O08529_C/ Capn2   | Calpain-2 c R.NYPNTFWM*NPQYLIK#.L                                       | 6.44   | 2.40   | 2.68  | 0.37    |
| O08529_C/ Capn2   | Calpain-2 c K.GHAYSVTGAEEVSSGSLQK#.L                                    | 37.82  | 8.32   | 4.55  | 0.22    |
| O08529_C/ Capn2   | Calpain-2 c K.LLEEDDEEDGER.G                                            | 1.77   | 3.97   | 0.44  | 2.25    |
| O08529_C/ Capn2   | Calpain-2 c K.M*GEMD*HTIGFQIYEVPEELTQQTNIHLGK#.N                        | 8.62   | 2.50   | 3.45  | 0.29    |
| O08529_C/ Capn2   | Calpain-2 c R.NPWQVQVEWTGK#.W                                           | 17.29  | 8.14   | 2.12  | 0.47    |
| O08529_C/ Capn2   | Calpain-2 c R.NYPNTFWM*NPQYLIK#.L                                       | 8.02   | 2.84   | 2.82  | 0.35    |
| D3YW48_D/ Capns1  | Calpain sm: R.I.LGGVISAISAAQYNPEPPPR.S                                  | 2.56   | 6.46   | 0.40  | 2.52    |
| D3YW48_D/ Capns1  | Calpain sm: K.GGGGGGGGGGLGGGLGNVLGGLSGAAGGGGGGGGG*GLGGGGGGGGTAM*.R.I    | 7.00   | 8.87   | 0.79  | 1.27    |
| D3YW48_D/ Capns1  | Calpain sm: R.I.LGGVISAISAAQYNPEPPPR.S                                  | 8.25   | 20.09  | 0.41  | 2.44    |
| D3YW48_D/ Capns1  | Calpain sm: K.LFVQLAGDDM*EVSATELM*NLINK#.V                              | 7.53   | 4.21   | 1.79  | 0.56    |
| D3YW48_D/ Capns1  | Calpain sm: K.LFVQLAGDDM*EVSATELM*NLINK#.V                              | 5.09   | 2.82   | 1.81  | 0.55    |
| D3YW48_D/ Capns1  | Calpain sm: K.LGFEEFK#.Y                                                | 74.05  | 36.89  | 2.01  | 0.50    |
| D3YW48_D/ Capns1  | Calpain sm: R.SHYSNIEANESEVR.Q                                          | 18.38  | 41.22  | 0.45  | 2.24    |
| D3YW48_D/ Capns1  | Calpain sm: R.SM*VAVMDSDTGK#.L                                          | 7.19   | 2.03   | 3.54  | 0.28    |
| D3YW48_D/ Capns1  | Calpain sm: R.SM*VAVM*DSDTGK#.L                                         | 28.25  | 14.55  | 1.94  | 0.51    |
| Q60865_C/ Caprin1 | Caprin-1 O<R.LNEQYEHASHIHLWDLLEGK#.E                                    | 13.00  | 3.39   | 3.84  | 0.26    |
| Q60865_C/ Caprin1 | Caprin-1 O<R.LNQDQLDAVSK#.Y                                             | 48.32  | 38.92  | 1.24  | 0.81    |
| Q60865_C/ Caprin1 | Caprin-1 O<K.SSGPPPSGSGSEAAAGAAPASQHPATGTGAVQTEAM*#.K.Q                 | 4.29   | 3.25   | 1.32  | 0.76    |
| Q60865_C/ Caprin1 | Caprin-1 O<K.TVLELQVLDK#.L                                              | 10.33  | 10.50  | 0.98  | 1.02    |
| Q60865_C/ Caprin1 | Caprin-1 O<K.YQEVNINLEFAK#.E                                            | 20.12  | 17.33  | 1.16  | 0.86    |
| Q60865_C/ Caprin1 | Caprin-1 O<R.GGVGYRPSFNTSPNSGYSQSFAPR.D                                 | 1.49   | 8.08   | 0.18  | 5.42    |
| Q60865_C/ Caprin1 | Caprin-1 O<K.GKLLDDYQER.M                                               | 14.49  | 64.64  | 0.22  | 4.46    |
| Q60865_C/ Caprin1 | Caprin-1 O<K.LDDYQER.M                                                  | 10.28  | 41.87  | 0.25  | 4.07    |
| Q60865_C/ Caprin1 | Caprin-1 O<R.LNEQYEHASHIHLWDLLEGK#.E                                    | 54.91  | 48.44  | 1.13  | 0.88    |
| Q60865_C/ Caprin1 | Caprin-1 O<R.LNQDQLDAVSK#.Y                                             | 337.22 | 396.45 | 0.85  | 1.18    |
| Q60865_C/ Caprin1 | Caprin-1 O<R.QFM*AEQFSGSEKEQVDEWTVETVENSLLQQPQAASPSVPEPHSLTPVAQSDPLVR.R | 1.71   | 2.54   | 0.67  | 1.49    |
| Q60865_C/ Caprin1 | Caprin-1 O<K.QILGVIDK*#.L                                               | 38.72  | 37.36  | 1.04  | 0.96    |
| Q60865_C/ Caprin1 | Caprin-1 O<R.SFM*ALSQDIQK#.T                                            | 67.46  | 81.49  | 0.83  | 1.21    |
| Q60865_C/ Caprin1 | Caprin-1 O<R.SFM*ALSQDIQK#.T                                            | 62.00  | 65.08  | 0.95  | 1.05    |
| Q60865_C/ Caprin1 | Caprin-1 O<K.SSGPPPSGSGSEAAAGAAPASQHPATGTGAVQTEAM.K.Q                   | 29.97  | 27.49  | 1.09  | 0.92    |
| Q60865_C/ Caprin1 | Caprin-1 O<K.TVLELQVLDK#.L                                              | 67.46  | 69.72  | 0.97  | 1.03    |
| Q60865_C/ Caprin1 | Caprin-1 O<K.TVLELQVLDK#LGGDDVDR.T                                      | 13.22  | 79.21  | 0.17  | 5.99    |
| Q60865_C/ Caprin1 | Caprin-1 O<K.YQEVNINLEFAK#.E                                            | 184.95 | 202.13 | 0.91  | 1.09    |
| Q60865_C/ Caprin1 | Caprin-1 O<K.LDDYQER.M                                                  | 1.47   | 7.32   | 0.20  | 4.98    |
| Q60865_C/ Caprin1 | Caprin-1 O<R.LNQDQLDAVSK#.Y                                             | 51.96  | 42.16  | 1.23  | 0.81    |
| Q60865_C/ Caprin1 | Caprin-1 O<R.SFM*ALSQDIQK#.T                                            | 12.92  | 18.64  | 0.69  | 1.44    |
| Q60865_C/ Caprin1 | Caprin-1 O<K.TVLELQVLDK#.L                                              | 7.46   | 6.56   | 1.14  | 0.88    |
| Q60865_C/ Caprin1 | Caprin-1 O<K.YQEVNINLEFAK#.E                                            | 24.09  | 25.29  | 0.95  | 1.05    |
| Q5RKN9_Q/ Capza1  | Capping pri K.DVQDSVTVSNEIQTTK#.E                                       | 15.61  | 16.67  | 0.94  | 1.07    |
| Q5RKN9_Q/ Capza1  | Capping pri K.EASDPQEDVGGK#.S                                           | 27.76  | 45.19  | 0.61  | 1.63    |
| Q5RKN9_Q/ Capza1  | Capping pri K.FITHAPPGEFNEVFNDVR.L                                      | 8.89   | 44.96  | 0.20  | 5.06    |
| Q5RKN9_Q/ Capza1  | Capping pri K.FITTPSAQVGVK#.I                                           | 52.29  | 61.49  | 0.85  | 1.18    |
| Q5RKN9_Q/ Capza1  | Capping pri K.IEGYDQVLTIEHGDLGNSR.F                                     | 11.36  | 14.54  | 0.78  | 1.28    |
| Q5RKN9_Q/ Capza1  | Capping pri K.IIESAENEYQTAISENYQTM*SDTTFK.A                             | 12.67  | 11.04  | 1.15  | 0.87    |
| Q5RKN9_Q/ Capza1  | Capping pri K.IIESAENEYQTAISENYQTM*SDTTFK.A                             | 9.07   | 5.64   | 1.61  | 0.62    |
| P47754_C/ Capza2  | F-actin-cap K.EATDPRPYEAENIAEWSR.T                                      | 2.20   | 25.51  | 0.09  | 11.60   |
| P47754_C/ Capza2  | F-actin-cap R.EGAAHAFAYNLDOQFVVK#.I                                     | 15.38  | 13.32  | 1.15  | 0.87    |
| P47754_C/ Capza2  | F-actin-cap K.FIHAPPGEFNEVFNDVR.L                                       | 8.06   | 41.85  | 0.19  | 5.19    |
| P47754_C/ Capza2  | F-actin-cap K.FITVPTSTQVVGILK.I                                         | 50.42  | 64.41  | 0.78  | 1.28    |
| P47754_C/ Capza2  | F-actin-cap K.IVEAENEYQTAISENYQTM*SDTTFK.A                              | 12.79  | 6.96   | 1.84  | 0.54    |
| P47754_C/ Capza2  | F-actin-cap R.TSVETALR.A                                                | 7.66   | 47.74  | 0.16  | 6.24    |
| P47757_C/ Capzb   | F-actin-cap R.KLEVEANAFDQYR.D                                           | 6.52   | 41.10  | 0.16  | 6.30    |
| P47757_C/ Capzb   | F-actin-cap R.LVEDM*ENK.I                                               | 9.60   | 18.18  | 0.53  | 1.89    |
| P47757_C/ Capzb   | F-actin-cap R.LVEDM*ENK.I                                               | 22.63  | 30.18  | 0.75  | 1.33    |
| P47757_C/ Capzb   | F-actin-cap R.RLPPQKQK.N                                                | 3.50   | 11.70  | 0.30  | 3.35    |
| P47757_C/ Capzb   | F-actin-cap K.SGSGTM*NLGSSLR.Q                                          | 216.25 | 38.14  | 5.67  | 0.18    |
| P47757_C/ Capzb   | F-actin-cap R.SPWSNKYDPPLEDGAM*PSAR.L                                   | 2.74   | 15.87  | 0.17  | 5.79    |
| P47757_C/ Capzb   | F-actin-cap R.KLEVEANAFDQYR.D                                           | 2.40   | 12.60  | 0.19  | 5.25    |
| P47757_C/ Capzb   | F-actin-cap K.LEVEANAFDQYR.D                                            | 0.00   | 3.78   | 0.00  | #DIV/0! |
| P47757_C/ Capzb   | F-actin-cap K.SGSGTM*NLGSSLR.Q                                          | 14.81  | 33.87  | 0.44  | 2.29    |
| P47757_C/ Capzb   | F-actin-cap R.STLNEIFGK.T                                               | 42.55  | 58.83  | 0.72  | 1.38    |
| P47757_C/ Capzb   | F-actin-cap K.SGSGTM*NLGSSLR.Q                                          | 22.88  | 7.99   | 2.86  | 0.35    |
| Q9WVG6_C/ Carm1   | Histone-arg R.GAAVDEYFR.Q                                               | 5.76   | 14.10  | 0.41  | 2.45    |
| Q9WVG6_C/ Carm1   | Histone-arg K.SSNLLDLK#.N                                               | 15.72  | 6.79   | 2.31  | 0.43    |
| Q9WVG6_C/ Carm1   | Histone-arg K.YTVNFLEAK#.E                                              | 30.87  | 19.20  | 1.61  | 0.62    |
| Q9ER72_SY/ Cars   | Cysteine-tf R.APVDITGQFEK#.W                                            | 33.24  | 2.52   | 13.19 | 0.08    |
| Q9ER72_SY/ Cars   | Cysteine-tf R.FEDHEGLPTVVK#.L                                           | 39.06  | 2.23   | 17.55 | 0.06    |
| Q9ER72_SY/ Cars   | Cysteine-tf K.FM*NEFFLNK#.D                                             | 15.32  | 1.36   | 11.27 | 0.09    |
| Q9ER72_SY/ Cars   | Cysteine-tf K.FMNEFFLNK#.D                                              | 18.63  | 9.60   | 1.94  | 0.52    |

|                   |                                                |        |        |       |      |
|-------------------|------------------------------------------------|--------|--------|-------|------|
| Q9ER72_SY Cars    | Cysteine-tf R.NK#DVFIPQDGK#K#.V                | 40.25  | 2.47   | 16.31 | 0.06 |
| Q9ER72_SY Cars    | Cysteine-tf R.SPNDFAW#K.A                      | 29.93  | 1.57   | 19.08 | 0.05 |
| Q9ER72_SY Cars    | Cysteine-tf R.SSLSGEEVDSK#.V                   | 50.66  | 1.42   | 35.68 | 0.03 |
| Q9ER72_SY Cars    | Cysteine-tf K.WEAEELVK#.N                      | 10.72  | 6.56   | 1.64  | 0.61 |
| Q9ER72_SY Cars    | Cysteine-tf R.APVDITGQFEK#.W                   | 48.20  | 2.69   | 17.91 | 0.06 |
| Q9ER72_SY Cars    | Cysteine-tf R.APVDITGQFEK#WEAEELVK#.N          | 47.95  | 2.35   | 20.43 | 0.05 |
| Q9ER72_SY Cars    | Cysteine-tf K.DLLSDWLDSTGGSEVTDNSIFSK#.L       | 19.08  | 1.32   | 14.45 | 0.07 |
| Q9ER72_SY Cars    | Cysteine-tf K.DTLDYSSNTM*ESALQYK#.F            | 13.88  | 2.02   | 6.88  | 0.15 |
| Q9ER72_SY Cars    | Cysteine-tf R.FEDHGLPTVVK#.L                   | 62.16  | 3.38   | 18.41 | 0.05 |
| Q9ER72_SY Cars    | Cysteine-tf K.FM*NEFFLVK#.D                    | 24.50  | 2.08   | 11.75 | 0.09 |
| Q9ER72_SY Cars    | Cysteine-tf K.FMNEFFLVK#.D                     | 14.96  | 20.83  | 0.72  | 1.39 |
| Q9ER72_SY Cars    | Cysteine-tf K.LFEAQEK#.L                       | 38.86  | 9.59   | 4.05  | 0.25 |
| Q9ER72_SY Cars    | Cysteine-tf K.LVPEAVGQK#.A                     | 108.06 | 6.27   | 17.22 | 0.06 |
| Q9ER72_SY Cars    | Cysteine-tf R.SPNDFAW#K.A                      | 35.96  | 3.24   | 11.10 | 0.09 |
| Q9ER72_SY Cars    | Cysteine-tf R.SSLSGEEVDSK#.V                   | 104.66 | 26.04  | 4.02  | 0.25 |
| Q9ER72_SY Cars    | Cysteine-tf K.VQVLEEA#K.D                      | 97.66  | 3.10   | 31.49 | 0.03 |
| Q9ER72_SY Cars    | Cysteine-tf R.VSEYVPEIVNFVQK#.I                | 49.03  | 2.68   | 18.33 | 0.05 |
| P70677_C_Casp3    | Caspase-3 C K.SLSDGIVLDSYK#.M                  | 9.66   | 5.84   | 1.65  | 0.60 |
| P49817_C_Cav1     | Caveolin-1 K.HLND DVVK#.I                      | 20.29  | 23.02  | 0.88  | 1.13 |
| Q9WVC3_C_Cav2     | Caveolin-2 R.SFSSVSMQLSHD.-                    | 5.96   | 5.96   | 1.00  | 1.00 |
| Q8024_P1 Cbfb     | Core-bindir R.AQQEDALQAQAFEEAR.R               | 5.00   | 31.60  | 0.16  | 6.32 |
| Q8024_P1 Cbfb     | Core-bindir R.SKFEFFER.K                       | 47.72  | 10.83  | 4.41  | 0.23 |
| P22682_CE Cbl     | E3 ubiquiti R.APVPASTSVLGTASK#.A               | 18.46  | 7.70   | 2.40  | 0.42 |
| Q9I1Y2_HAI Cbl1   | E3 ubiquiti R.ASLNVPHPPIAPPPTDIPDR.F           | 2.34   | 13.03  | 0.18  | 5.58 |
| P08074_CE Cbr2    | Carbonyl re R.SASTSGGGILVDAGYLAS.-             | 46.29  | 46.29  | 1.00  | 1.00 |
| P08074_CE Cbr2    | Carbonyl re R.SVFQVQSM*VAR.D                   | 28.59  | 14.99  | 1.91  | 0.52 |
| P08074_CE Cbr2    | Carbonyl re R.VNSVNPTVLTDM*GK#.K               | 41.77  | 5.91   | 7.06  | 0.14 |
| P08074_CE Cbr2    | Carbonyl re R.VNSVNPTVLTDMGK#.K                | 15.09  | 3.14   | 4.81  | 0.21 |
| P83917_CE Cbx1    | Chromobo: R.IIGATDSSGEL*FLM*K.W                | 4.63   | 8.11   | 0.57  | 1.75 |
| P83917_CE Cbx1    | Chromobo: R.IIGATDSSGELMFLM.K.W                | 4.87   | 9.86   | 0.49  | 2.02 |
| P83917_CE Cbx1    | Chromobo: K.KVEEVELEEEEEVEEK.V                 | 4.09   | 11.19  | 0.37  | 2.73 |
| P83917_CE Cbx1    | Chromobo: K.NSDEADLVPAK.E                      | 17.19  | 27.08  | 0.63  | 1.57 |
| P83917_CE Cbx1    | Chromobo: K.GK#VEYLLK#.W                       | 115.87 | 287.93 | 0.40  | 2.48 |
| P83917_CE Cbx1    | Chromobo: R.IIGATDSSGELM*FLM*K.W               | 122.84 | 267.87 | 0.46  | 2.18 |
| P83917_CE Cbx1    | Chromobo: R.IIGATDSSGEL*FLM*K#.W               | 46.91  | 113.80 | 0.41  | 2.43 |
| P83917_CE Cbx1    | Chromobo: R.IIGATDSSGELMFLM*K.W                | 26.98  | 58.28  | 0.46  | 2.16 |
| P83917_CE Cbx1    | Chromobo: R.IIGATDSSGELM*FLM.K.W               | 99.84  | 212.63 | 0.47  | 2.13 |
| P83917_CE Cbx1    | Chromobo: R.IIGATDSSGELMFLM.K.W                | 52.94  | 118.04 | 0.45  | 2.23 |
| P83917_CE Cbx1    | Chromobo: R.IIGATDSSGELMFLM.K.W                | 3.70   | 9.95   | 0.37  | 2.69 |
| P83917_CE Cbx1    | Chromobo: K.K#KVEEVELEEEEEVEEK#.V              | 41.36  | 116.19 | 0.36  | 2.81 |
| P83917_CE Cbx1    | Chromobo: K.KKVEEVELEEEEEVEEK.V                | 11.43  | 25.91  | 0.44  | 2.27 |
| P83917_CE Cbx1    | Chromobo: K.KVEEVELEEEEEVEEK#.V                | 130.80 | 261.27 | 0.50  | 2.00 |
| P83917_CE Cbx1    | Chromobo: K.NSDEADLVPAK.E                      | 133.36 | 281.61 | 0.47  | 2.11 |
| P83917_CE Cbx1    | Chromobo: K.VEEVELEEEEEVEEK.V                  | 21.13  | 50.56  | 0.42  | 2.39 |
| P83917_CE Cbx1    | Chromobo: K.VEYLLK#.W                          | 30.48  | 46.04  | 0.66  | 1.51 |
| P83917_CE Cbx1    | Chromobo: K.WKNSDEADLVPAK.E                    | 29.28  | 60.11  | 0.49  | 2.05 |
| P23198_CE Cbx3    | Chromobo: K.KVEEAEPEEFVVEK.V                   | 7.69   | 28.78  | 0.27  | 3.74 |
| P23198_CE Cbx3    | Chromobo: K.VEEAEPEEFVVEK.V                    | 4.06   | 8.09   | 0.50  | 1.99 |
| P23198_CE Cbx3    | Chromobo: K.DSDEADLVAK.E                       | 50.89  | 131.71 | 0.39  | 2.59 |
| P23198_CE Cbx3    | Chromobo: K.KVEEAEPEEFVVEK.V                   | 73.26  | 162.80 | 0.45  | 2.22 |
| P23198_CE Cbx3    | Chromobo: K.KVEEAEPEEFVVEK.V                   | 187.68 | 411.60 | 0.46  | 2.19 |
| P23198_CE Cbx3    | Chromobo: K.SKKVEEAEPEEFVVEK.V                 | 23.58  | 63.35  | 0.37  | 2.69 |
| P23198_CE Cbx3    | Chromobo: K.SLSDSESDSK.S                       | 5.93   | 17.52  | 0.34  | 2.95 |
| P23198_CE Cbx3    | Chromobo: K.VEEAEPEEFVVEK.V                    | 124.76 | 287.42 | 0.43  | 2.30 |
| P23198_CE Cbx3    | Chromobo: K.VEYFLK#.W                          | 110.96 | 248.06 | 0.45  | 2.24 |
| P23198_CE Cbx3    | Chromobo: R.VVNGKVEYFLK.W                      | 1.39   | 10.61  | 0.13  | 7.63 |
| P23198_CE Cbx3    | Chromobo: K.WK#DSDEADLVAK#.E                   | 118.52 | 360.50 | 0.33  | 3.04 |
| Q61686_C1 Cbx5    | Chromobo: K.SSFSNSADDIK.S                      | 7.02   | 15.37  | 0.46  | 2.19 |
| Q61686_C1 Cbx5    | Chromobo: K.GFSEHNTWPEK.N                      | 3.39   | 9.54   | 0.36  | 2.82 |
| Q61686_C1 Cbx5    | Chromobo: K.GQVEYLLK#.W                        | 68.48  | 129.59 | 0.53  | 1.89 |
| Q61686_C1 Cbx5    | Chromobo: R.KSFSNSADDIK.S                      | 11.10  | 24.18  | 0.46  | 2.18 |
| Q61686_C1 Cbx5    | Chromobo: R.LTWHAYPEDAENKEK.E                  | 1.96   | 5.49   | 0.36  | 2.80 |
| Q61686_C1 Cbx5    | Chromobo: R.LTWHAYPEDAENK#EK#.E                | 20.53  | 57.37  | 0.36  | 2.79 |
| Q61686_C1 Cbx5    | Chromobo: K.SSFSNSADDIK.S                      | 133.82 | 216.13 | 0.62  | 1.62 |
| Q61686_C1 Cbx5    | Chromobo: R.TADSSSEDEEEVEEK.V                  | 13.18  | 27.43  | 0.48  | 2.08 |
| Q61686_C1 Cbx5    | Chromobo: K.WK#DTEADLVAK#.E                    | 79.85  | 167.74 | 0.48  | 2.10 |
| Q9QXV1_C1 Cbx8    | Chromobo: R.I.LGDPEESWSPSLTNLEK.V              | 8.95   | 5.75   | 1.56  | 0.64 |
| Q9QXV1_C1 Cbx8    | Chromobo: R.RQDSLVQYGVTPSSAEASK.L              | 3.56   | 8.50   | 0.42  | 2.39 |
| Q9QXV1_C1 Cbx8    | Chromobo: R.SPQDLASTR.A                        | 11.23  | 37.77  | 0.30  | 3.36 |
| Q9QXV1_C1 Cbx8    | Chromobo: K.YSTWPEEENILDAR.L                   | 1.82   | 7.60   | 0.24  | 4.17 |
| Q8BRN9_C.Cc2d1b   | Coiled-coil R.K#GSEQDVAATLATAQK#.L             | 12.97  | 15.37  | 0.84  | 1.18 |
| Q8BRN9_C.Cc2d1b   | Coiled-coil K.LASEDAALVDDDESDTPAQAPLAK#.K      | 7.08   | 2.36   | 3.00  | 0.33 |
| Q8BRN9_C.Cc2d1b   | Coiled-coil K.NTNSPEFEQVFK#.L                  | 10.35  | 3.32   | 3.12  | 0.32 |
| Q8CH18_C1 Ccar1   | Cell division K.AGLLQPPVR.I                    | 4.10   | 14.19  | 0.29  | 3.46 |
| Q8CH18_C1 Ccar1   | Cell division R.IQTLPNQNSQTOPLK#.T             | 8.86   | 6.30   | 1.41  | 0.71 |
| Q8CH18_C1 Ccar1   | Cell division R.IVSQPQPAR.R                    | 13.42  | 44.05  | 0.30  | 3.28 |
| Q8CH18_C1 Ccar1   | Cell division R.LLLPTPTIK#.Q                   | 40.20  | 36.91  | 1.09  | 0.92 |
| Q8CH18_C1 Ccar1   | Cell division R.VLVEATYNPNM*PFK#.W             | 9.40   | 7.47   | 1.26  | 0.79 |
| Q8CH18_C1 Ccar1   | Cell division K.AGLLQPPVR.I                    | 5.12   | 14.65  | 0.35  | 2.86 |
| Q8CH18_C1 Ccar1   | Cell division R.IVSQPQPAR.R                    | 20.15  | 34.38  | 0.59  | 1.71 |
| Q8CH18_C1 Ccar1   | Cell division R.LLLPTPTIK#.Q                   | 46.15  | 27.46  | 1.68  | 0.60 |
| Q8CH18_C1 Ccar1   | Cell division K.LQLEEK#TDEGK#TILNLENSK#.S      | 5.80   | 3.79   | 1.53  | 0.65 |
| Q8CH18_C1 Ccar1   | Cell division R.VLVEATYNPNM*PFK#.W             | 8.96   | 7.04   | 1.27  | 0.79 |
| Q8CH18_C1 Ccar1   | Cell division R.VLVEATYNPNM*PFK#.W             | 7.14   | 4.54   | 1.57  | 0.64 |
| Q8VDP4_C1 Ccar2   | Cell cycle ai K.ADSWVEK#EPTPSN.-               | 11.26  | 10.17  | 1.11  | 0.90 |
| Q8VDP4_C1 Ccar2   | Cell cycle ai R.KEEAVLVGGEVPSLDGLDPQADPQVLVR.T | 1.67   | 3.78   | 0.44  | 2.27 |
| Q8VDP4_C1 Ccar2   | Cell cycle ai K.VQTLNQPLK#.S                   | 33.32  | 9.13   | 3.65  | 0.27 |
| Q8VDP4_C1 Ccar2   | Cell cycle ai R.FSATEVTK#.T                    | 14.40  | 1.44   | 9.99  | 0.10 |
| Q8VDP4_C1 Ccar2   | Cell cycle ai R.LPQLGEK#.V                     | 60.81  | 30.63  | 1.99  | 0.50 |
| Q8VDP4_C1 Ccar2   | Cell cycle ai K.VQTLNQPLK#.S                   | 24.88  | 8.21   | 3.03  | 0.33 |
| Q9DA08_S1 Ccdc101 | SAGA-assoc R.AIELLTELHQLIK#.Q                  | 11.00  | 8.70   | 1.26  | 0.79 |
| Q8R344_C1 Ccdc12  | Coiled-coil R.AIAELIR.E                        | 4.78   | 23.40  | 0.20  | 4.90 |
| Q8R344_C1 Ccdc12  | Coiled-coil K.EQLAAKPEPVEEVDLANLAPR.K          | 3.59   | 25.87  | 0.14  | 7.21 |
| Q8C171_CC Ccdc132 | Coiled-coil R.DYVDEQTDGVPVK#.S                 | 10.66  | 8.81   | 1.21  | 0.83 |
| Q8C171_CC Ccdc132 | Coiled-coil K.SPPELNDLGFASLR.V                 | 1.76   | 5.73   | 0.31  | 3.26 |
| Q8C7V8_C1 Ccdc134 | Coiled-coil K.LKDAFASHVENTAFFGDVLVR.F          | 2.64   | 3.41   | 0.77  | 1.29 |
| Q8C7V8_C1 Ccdc134 | Coiled-coil K.TDQTEFIPSTDPFQK#.A               | 22.06  | 11.01  | 2.00  | 0.50 |
| Q8C7V8_C1 Ccdc134 | Coiled-coil R.TVLIADVLDPGVPQDEK#.L             | 9.50   | 5.33   | 1.78  | 0.56 |
| Q8C7V8_C1 Ccdc134 | Coiled-coil R.TVLIADVLDPGVPQDEK#.L             | 4.93   | 2.39   | 2.06  | 0.49 |
| Q8R0K4_C1 Ccdc137 | Coiled-coil K.NQDEQEPFR.L                      | 4.24   | 10.92  | 0.39  | 2.58 |
| Q8C9S4_CC Ccdc186 | Coiled-coil R.EESGTLSEASDFNK#.V                | 5.49   | 3.90   | 1.41  | 0.71 |
| Q8C9S4_CC Ccdc186 | Coiled-coil R.ESELLFTEK#.L                     | 10.38  | 4.52   | 2.30  | 0.44 |
| Q9I1G7_CC Ccdc22  | Coiled-coil K.FTFHLEPQVQAQVADVPATSQR.L         | 1.62   | 10.82  | 0.15  | 6.67 |

|                   |                                               |        |        |       |      |
|-------------------|-----------------------------------------------|--------|--------|-------|------|
| Q9JIG7_CC Ccdc22  | Coiled-coil R.ILEIVGNIR.K                     | 6.75   | 15.82  | 0.43  | 2.34 |
| Q9JIG7_CC Ccdc22  | Coiled-coil R.LIHLASQWEK#.H                   | 6.44   | 4.69   | 1.37  | 0.73 |
| Q9JIG7_CC Ccdc22  | Coiled-coil K.QLVSELETLPK#.D                  | 10.53  | 6.57   | 1.60  | 0.62 |
| Q9JIG7_CC Ccdc22  | Coiled-coil R.QSELSVAEQEALR.L                 | 3.03   | 8.14   | 0.37  | 2.69 |
| Q9JIG7_CC Ccdc22  | Coiled-coil R.TVELLPDGAANLAK#.L               | 9.62   | 7.63   | 1.26  | 0.79 |
| Q9CR29_C1 Ccdc43  | Coiled-coil K.VK#K#EDEVQAIATLIEK#.Q           | 16.83  | 4.07   | 4.13  | 0.24 |
| Q9CR29_C1 Ccdc43  | Coiled-coil K.VK#K#EDEVQAIATLIEK#.Q           | 14.16  | 6.38   | 2.22  | 0.45 |
| Q9CR27_C1 Ccdc53  | WASH com R.IQQJETTLLNLDK#.L                   | 14.57  | 11.06  | 1.32  | 0.76 |
| Q9CR27_C1 Ccdc53  | WASH com R.IQQJETTLLNLDK#.L                   | 6.21   | 3.01   | 2.06  | 0.49 |
| D3YZP9_CC Ccdc6   | Coiled-coil R.AEQEEFISNTLFFK#.K               | 8.54   | 3.27   | 2.61  | 0.38 |
| D3YZP9_CC Ccdc6   | Coiled-coil R.AEQEEFISNTLFFK#.K               | 7.48   | 2.07   | 3.62  | 0.28 |
| D3YZP9_CC Ccdc6   | Coiled-coil K.K#LENDTISK#.Q                   | 6.16   | 3.47   | 1.78  | 0.56 |
| Q6NS45_C1 Ccdc66  | Coiled-coil K.VSVK#MGNK#.F                    | 4.77   | 4.16   | 1.15  | 0.87 |
| Q9D541_C1 Ccdc7   | Coiled-coil R.K#FEDFK.S                       | 1.20   | 1.09   | 1.10  | 0.91 |
| Q5SNZ0_GF Ccdc88a | Girdin OS=R.TSELAEPQK#.S                      | 14.01  | 12.29  | 1.14  | 0.88 |
| Q7TQK5_C1 Ccdc93  | Coiled-coil R.ALVAM*NESLK#.S                  | 9.99   | 5.73   | 1.75  | 0.57 |
| Q7TQK5_C1 Ccdc93  | Coiled-coil R.DQLNDQYLELLEK#.Q                | 13.58  | 7.76   | 1.75  | 0.57 |
| Q7TQK5_C1 Ccdc93  | Coiled-coil K.QSELSAESEPK#.L                  | 10.26  | 5.17   | 1.98  | 0.50 |
| O88874_C1 Ccnk    | Cyclin-K OS R.K#PPLAPALGAEATGPVTSDDLPK#.V     | 17.26  | 8.29   | 2.08  | 0.48 |
| O88874_C1 Ccnk    | Cyclin-K OS R.K#PPLAPALGAEATGPVTSDDLPK#.V     | 9.96   | 5.82   | 1.71  | 0.58 |
| O88874_C1 Ccnk    | Cyclin-K OS R.K#PPLAPALGAEATGPVTSDDLPK#.V     | 16.29  | 6.79   | 2.40  | 0.42 |
| Q9QWV9_C Ccnt1    | Cyclin-T1 O K.TYLSLSTSSSSSTR.K                | 1.95   | 5.88   | 0.33  | 3.01 |
| Q9QWV9_C Ccnt1    | Cyclin-T1 O K.TYLSLSTSSSSSTR.K                | 15.56  | 9.94   | 1.57  | 0.64 |
| Q9QWV9_C Ccnt1    | Cyclin-T1 O K.TYLSLSTSSSSSTR.K                | 5.04   | 7.50   | 0.67  | 1.49 |
| Q9QWV9_C Ccnt1    | Cyclin-T1 O K.TYLSLSTSSSSSTR.K                | 5.68   | 5.80   | 0.98  | 1.02 |
| P80314_TC Cct2    | T-complex   R.AAHSEGHITAGLDMK#.E              | 171.23 | 48.53  | 3.53  | 0.28 |
| P80314_TC Cct2    | T-complex   R.AAHSEGHITAGLDMK#.E              | 220.88 | 61.55  | 3.59  | 0.28 |
| P80314_TC Cct2    | T-complex   R.DAALM*VTNDGATLK#.N              | 161.46 | 50.88  | 3.17  | 0.32 |
| P80314_TC Cct2    | T-complex   R.DAALM*VTNDGATLK#.N              | 210.11 | 60.63  | 3.47  | 0.29 |
| P80314_TC Cct2    | T-complex   R.EAESLIAK#.K                     | 335.37 | 89.47  | 3.75  | 0.27 |
| P80314_TC Cct2    | T-complex   R.EALLSVAVDHGSDEAR.F              | 27.18  | 44.35  | 0.61  | 1.63 |
| P80314_TC Cct2    | T-complex   K.EAVAM*ESFAK#.A                  | 348.55 | 94.53  | 3.69  | 0.27 |
| P80314_TC Cct2    | T-complex   K.EAVAM*ESFAK#.A                  | 211.16 | 65.51  | 3.22  | 0.31 |
| P80314_TC Cct2    | T-complex   K.EGTIGDM*AVLGITSFQVK#.R          | 45.82  | 13.74  | 3.33  | 0.30 |
| P80314_TC Cct2    | T-complex   K.EGTIGDM*AVLGITSFQVK#.R          | 4.34   | 1.91   | 2.28  | 0.44 |
| P80314_TC Cct2    | T-complex   K.EGTIGDM*AVLGITSFQVK#.R          | 87.18  | 17.86  | 4.88  | 0.20 |
| P80314_TC Cct2    | T-complex   R.FWQDLM*NIAGTTLSSK#.L            | 67.83  | 16.97  | 4.00  | 0.25 |
| P80314_TC Cct2    | T-complex   R.FWQDLM*NIAGTTLSSK#.L            | 86.96  | 26.10  | 3.33  | 0.30 |
| P80314_TC Cct2    | T-complex   R.GATQJLDEAER.S                   | 140.11 | 179.35 | 0.78  | 1.28 |
| P80314_TC Cct2    | T-complex   K.GSGLEAIHVIK#.H.L                | 6.18   | 1.77   | 3.49  | 0.29 |
| P80314_TC Cct2    | T-complex   K.LLIANTGM*DTDK#.I                | 122.69 | 40.91  | 3.00  | 0.33 |
| P80314_TC Cct2    | T-complex   K.LLIANTGM*DTDK#.I                | 63.20  | 17.32  | 3.65  | 0.27 |
| P80314_TC Cct2    | T-complex   K.LLIANTGM*DTDK#.I                | 73.72  | 18.85  | 3.91  | 0.26 |
| P80314_TC Cct2    | T-complex   K.LLSSGR.D                        | 145.74 | 175.45 | 0.83  | 1.20 |
| P80314_TC Cct2    | T-complex   K.KIHPQTIISGWR.E                  | 35.52  | 49.99  | 0.71  | 1.41 |
| P80314_TC Cct2    | T-complex   K.K#LGGSLADSYLDEGFLLDK#.K         | 42.08  | 11.23  | 3.75  | 0.27 |
| P80314_TC Cct2    | T-complex   K.K#LGGSLADSYLDEGFLLDK#.K         | 77.92  | 20.92  | 3.72  | 0.27 |
| P80314_TC Cct2    | T-complex   R.LALVTGGEIASTFDHPELVK#.L         | 762.01 | 211.59 | 3.60  | 0.28 |
| P80314_TC Cct2    | T-complex   R.LAVEAVL.R                       | 78.54  | 108.12 | 0.73  | 1.38 |
| P80314_TC Cct2    | T-complex   K.LGGSLADSYLDEGFLLDK#.K           | 47.97  | 15.68  | 3.06  | 0.33 |
| P80314_TC Cct2    | T-complex   K.LGGSLADSYLDEGFLLDK#.K           | 327.38 | 83.69  | 3.91  | 0.26 |
| P80314_TC Cct2    | T-complex   K.LIEEVM*IGEDK#.L                 | 81.22  | 27.48  | 2.96  | 0.34 |
| P80314_TC Cct2    | T-complex   K.LIEEVM*IGEDK#.L                 | 70.40  | 39.34  | 1.79  | 0.56 |
| P80314_TC Cct2    | T-complex   R.LK#GSGNLEAIHVIK#.K              | 248.11 | 52.78  | 4.70  | 0.21 |
| P80314_TC Cct2    | T-complex   R.LK#GSGNLEAIHVIK#.K              | 10.13  | 3.91   | 2.59  | 0.39 |
| P80314_TC Cct2    | T-complex   K.LLTHHKDHFTK.L                   | 13.63  | 3.34   | 4.08  | 0.24 |
| P80314_TC Cct2    | T-complex   R.LSSFIGAIAGDLVK#.S               | 678.02 | 177.98 | 3.81  | 0.26 |
| P80314_TC Cct2    | T-complex   R.M*LPTIADNAGYDSADLVAQLR.A        | 40.97  | 45.19  | 0.91  | 1.10 |
| P80314_TC Cct2    | T-complex   R.M*LPTIADNAGYDSADLVAQLR.A        | 7.56   | 10.06  | 0.75  | 1.33 |
| P80314_TC Cct2    | T-complex   R.MLPTIADNAGYDSADLVAQLR.A         | 42.62  | 57.17  | 0.75  | 1.34 |
| P80314_TC Cct2    | T-complex   K.NIGVDNPAK#.V                    | 391.80 | 119.48 | 3.28  | 0.30 |
| P80314_TC Cct2    | T-complex   R.QLIYNPEQLFGAAGVM*AIEHADFAGVER.L | 17.37  | 16.84  | 1.03  | 0.97 |
| P80314_TC Cct2    | T-complex   R.QVLSAAEAIVLR.V                  | 56.90  | 57.55  | 0.99  | 1.01 |
| P80314_TC Cct2    | T-complex   R.QVLSAAEAIVLR.V                  | 5.47   | 16.77  | 0.33  | 3.07 |
| P80314_TC Cct2    | T-complex   K.VAEIEHAEKEK#.M                  | 384.64 | 128.75 | 2.99  | 0.33 |
| P80314_TC Cct2    | T-complex   K.VAEIEHAEKEK#.M                  | 160.07 | 51.00  | 3.14  | 0.32 |
| P80314_TC Cct2    | T-complex   K.VLVDMS*SR.V                     | 44.46  | 72.98  | 0.61  | 1.64 |
| P80314_TC Cct2    | T-complex   R.VQDDEVGDGTSVTVLAELLR.E          | 64.20  | 88.12  | 0.73  | 1.37 |
| P80314_TC Cct2    | T-complex   R.DAALM*VTNDGATLK#.N              | 8.54   | 2.51   | 3.40  | 0.29 |
| P80314_TC Cct2    | T-complex   R.GATQJLDEAER.S                   | 637.12 | 8.18   | 77.88 | 0.01 |
| P80314_TC Cct2    | T-complex   R.LALVTGGEIASTFDHPELVK#.L         | 24.64  | 6.69   | 3.68  | 0.27 |
| P80314_TC Cct2    | T-complex   K.LGGSLADSYLDEGFLLDK#.K           | 6.99   | 2.66   | 2.62  | 0.38 |
| P80314_TC Cct2    | T-complex   R.DAALM*VTNDGATLK#.N              | 11.55  | 5.37   | 2.15  | 0.47 |
| P80314_TC Cct2    | T-complex   R.EAESLIAK#.K                     | 30.21  | 29.18  | 1.04  | 0.97 |
| P80314_TC Cct2    | T-complex   K.EAVAM*ESFAK#.A                  | 27.80  | 7.29   | 3.81  | 0.26 |
| P80314_TC Cct2    | T-complex   K.EGTIGDM*AVLGITSFQVK#.R          | 8.02   | 1.67   | 4.80  | 0.21 |
| P80314_TC Cct2    | T-complex   R.FWQDLM*NIAGTTLSSK#.L            | 4.88   | 2.64   | 1.85  | 0.54 |
| P80314_TC Cct2    | T-complex   R.FWQDLM*NIAGTTLSSK#.L            | 6.78   | 4.67   | 1.44  | 0.70 |
| P80314_TC Cct2    | T-complex   R.GATQJLDEAER.S                   | 17.05  | 20.66  | 0.83  | 1.21 |
| P80314_TC Cct2    | T-complex   R.LALVTGGEIASTFDHPELVK#.L         | 81.64  | 28.52  | 2.86  | 0.35 |
| P80314_TC Cct2    | T-complex   K.LGGSLADSYLDEGFLLDK#.K           | 29.75  | 8.75   | 3.40  | 0.29 |
| P80314_TC Cct2    | T-complex   R.LSSFIGAIAGDLVK#.S               | 56.49  | 18.57  | 3.04  | 0.33 |
| P80314_TC Cct2    | T-complex   R.M*LPTIADNAGYDSADLVAQLR.A        | 8.16   | 11.28  | 0.72  | 1.38 |
| P80314_TC Cct2    | T-complex   K.NIGVDNPAK#.V                    | 32.26  | 10.48  | 3.08  | 0.32 |
| P80314_TC Cct2    | T-complex   R.VDNIK#.A                        | 48.34  | 18.90  | 2.56  | 0.39 |
| P80314_TC Cct2    | T-complex   R.VQDDEVGDGTSVTVLAELLR.E          | 14.70  | 14.86  | 0.99  | 1.01 |
| P80314_TC Cct2    | T-complex   K.EAVAM*ESFAK#.A                  | 11.66  | 4.95   | 2.36  | 0.42 |
| P80314_TC Cct2    | T-complex   R.LSSFIGAIAGDLVK#.S               | 25.83  | 9.33   | 2.77  | 0.36 |
| P80318_TC Cct3    | T-complex   K.AM*FTGEQWVYR.A                  | 45.96  | 61.69  | 0.74  | 1.34 |
| P80318_TC Cct3    | T-complex   R.ANVTAIR.R                       | 93.39  | 115.10 | 0.81  | 1.23 |
| P80318_TC Cct3    | T-complex   R.AVAQAEVLR.P.T                   | 101.04 | 133.91 | 0.75  | 1.33 |
| P80318_TC Cct3    | T-complex   R.EDDVTGAGLLEIK#.K                | 35.18  | 11.48  | 3.07  | 0.33 |
| P80318_TC Cct3    | T-complex   K.EILSEVER.N                      | 91.05  | 111.99 | 0.81  | 1.23 |
| P80318_TC Cct3    | T-complex   R.EIQVQHPAAK#.S                   | 177.99 | 52.60  | 3.38  | 0.30 |
| P80318_TC Cct3    | T-complex   K.ELGIWEPLAVK#.L                  | 376.77 | 102.62 | 3.67  | 0.27 |
| P80318_TC Cct3    | T-complex   R.EM*MLSIINSITTK#.V               | 85.76  | 26.60  | 3.22  | 0.31 |
| P80318_TC Cct3    | T-complex   R.EM*MLSIINSITTK#.V               | 32.49  | 11.58  | 2.81  | 0.36 |
| P80318_TC Cct3    | T-complex   R.EMMLSIINSITTK#.V                | 79.01  | 21.49  | 3.68  | 0.27 |
| P80318_TC Cct3    | T-complex   K.GESQTDIEITR.E                   | 3.38   | 9.39   | 0.36  | 2.78 |
| P80318_TC Cct3    | T-complex   K.GISDLAQHYLMR*.R.A               | 20.29  | 22.29  | 0.91  | 1.10 |
| P80318_TC Cct3    | T-complex   K.GISDLAQHYLMR*.R.A               | 12.70  | 15.74  | 0.81  | 1.24 |
| P80318_TC Cct3    | T-complex   R.IDDIVSGHKK.K                    | 38.58  | 13.00  | 2.97  | 0.34 |
| P80318_TC Cct3    | T-complex   R.IVLLDSLEYK#.K                   | 680.64 | 186.91 | 3.64  | 0.27 |

|                |                                                     |        |        |      |      |
|----------------|-----------------------------------------------------|--------|--------|------|------|
| P80318_TC Cct3 | T-complex   R.IVSRPEELREDDVGTGAGLLEIK.K             | 25.25  | 60.19  | 0.42 | 2.38 |
| P80318_TC Cct3 | T-complex   R.IVSRPEELREDDVGTGAGLLEIK.K             | 7.53   | 17.80  | 0.42 | 2.36 |
| P80318_TC Cct3 | T-complex   K.KGESQTDIEITR.E                        | 36.13  | 48.32  | 0.75 | 1.34 |
| P80318_TC Cct3 | T-complex   K.KISTPVDVNNR.E                         | 12.62  | 14.38  | 0.88 | 1.14 |
| P80318_TC Cct3 | T-complex   R.K#VQSGNINA#K.T                        | 127.79 | 34.88  | 3.66 | 0.27 |
| P80318_TC Cct3 | T-complex   R.M*ALDDM*ISTLK#.K                      | 51.54  | 15.79  | 3.26 | 0.31 |
| P80318_TC Cct3 | T-complex   R.MALDDM*ISTLK#.K                       | 18.43  | 8.75   | 2.11 | 0.47 |
| P80318_TC Cct3 | T-complex   R.M*ALDDMISTLK#.K                       | 42.04  | 25.50  | 1.65 | 0.61 |
| P80318_TC Cct3 | T-complex   R.M*ALDDMISTLK#.I                       | 65.66  | 15.13  | 4.34 | 0.23 |
| P80318_TC Cct3 | T-complex   R.MALDDMISTLK#K#.I                      | 33.99  | 15.51  | 2.19 | 0.46 |
| P80318_TC Cct3 | T-complex   K.M*LLDPM*GGIVM*INDGNAILR.E             | 3.05   | 5.30   | 0.58 | 1.74 |
| P80318_TC Cct3 | T-complex   K.M*LLDPM*GGIVM*INDGNAILR.E             | 3.37   | 2.27   | 1.48 | 0.67 |
| P80318_TC Cct3 | T-complex   R.NVLLDPQLVPGGASEM*AVAHALTEK#.S         | 197.73 | 58.86  | 3.36 | 0.30 |
| P80318_TC Cct3 | T-complex   R.NVLLDPQLVPGGASEM*AVAHALTEK#.S         | 184.72 | 46.93  | 3.94 | 0.25 |
| P80318_TC Cct3 | T-complex   K.SM*EISR.T                             | 44.17  | 61.82  | 0.71 | 1.40 |
| P80318_TC Cct3 | T-complex   K.TAVETAVLLLR.I                         | 143.21 | 186.79 | 0.77 | 1.30 |
| P80318_TC Cct3 | T-complex   K.VQSGNINA#K.T                          | 110.95 | 35.38  | 3.14 | 0.32 |
| P80318_TC Cct3 | T-complex   K.AM*TGVEQWVPR.A                        | 7.56   | 9.97   | 0.76 | 1.32 |
| P80318_TC Cct3 | T-complex   R.AVAQALEVPR.T                          | 28.01  | 33.74  | 0.83 | 1.20 |
| P80318_TC Cct3 | T-complex   K.ELGIWEPLAVK#.L                        | 88.75  | 48.78  | 1.82 | 0.55 |
| P80318_TC Cct3 | T-complex   R.EM*M*SIINSSITTK#.V                    | 14.47  | 3.20   | 4.53 | 0.22 |
| P80318_TC Cct3 | T-complex   R.EMMSSIINSSITTK#.V                     | 28.39  | 7.89   | 3.60 | 0.28 |
| P80318_TC Cct3 | T-complex   R.IDDIVSGHK#.K                          | 30.16  | 73.12  | 0.41 | 2.42 |
| P80318_TC Cct3 | T-complex   R.IVLLDSLEYK#.K                         | 153.44 | 44.40  | 3.46 | 0.29 |
| P80318_TC Cct3 | T-complex   R.IVSRPEELREDDVGTGAGLLEIK.K             | 2.88   | 8.49   | 0.34 | 2.95 |
| P80318_TC Cct3 | T-complex   R.K#VQSGNINA#K.T                        | 16.93  | 4.12   | 4.11 | 0.24 |
| P80318_TC Cct3 | T-complex   K.TAVETAVLLLR.I                         | 46.02  | 67.65  | 0.68 | 1.47 |
| P80318_TC Cct3 | T-complex   K.VQSGNINA#K.T                          | 30.98  | 14.24  | 2.18 | 0.46 |
| P80318_TC Cct3 | T-complex   K.ELGIWEPLAVK#.L                        | 81.77  | 35.05  | 2.33 | 0.43 |
| P80318_TC Cct3 | T-complex   R.EM*M*SIINSSITTK#.V                    | 16.88  | 5.58   | 3.02 | 0.33 |
| P80318_TC Cct3 | T-complex   K.ISTPVDVNNR.E                          | 23.75  | 25.22  | 0.94 | 1.06 |
| P80318_TC Cct3 | T-complex   R.IVLLDSLEYK#.K                         | 170.91 | 21.93  | 7.79 | 0.13 |
| P80318_TC Cct3 | T-complex   R.K#VQSGNINA#K.T                        | 20.79  | 7.18   | 2.90 | 0.35 |
| P80318_TC Cct3 | T-complex   R.M*ALDDM*ISTLK#.K                      | 15.67  | 6.81   | 2.30 | 0.43 |
| P80318_TC Cct3 | T-complex   K.TAVETAVLLLR.I                         | 34.85  | 39.19  | 0.89 | 1.12 |
| P80318_TC Cct3 | T-complex   K.VQSGNINA#K.T                          | 35.97  | 8.74   | 4.12 | 0.24 |
| P80315_TC Cct4 | T-complex   R.AFADAM*EVIPSTLAENAGLNPISTVTELR.N      | 26.02  | 28.26  | 0.92 | 1.09 |
| P80315_TC Cct4 | T-complex   R.ALIAGGAPAEIELALR.L                    | 67.33  | 73.91  | 0.91 | 1.10 |
| P80315_TC Cct4 | T-complex   R.AYLLNLVK#.Q                           | 294.70 | 62.23  | 4.74 | 0.21 |
| P80315_TC Cct4 | T-complex   R.ETLLNSATLSNSK#.V                      | 180.15 | 43.10  | 4.18 | 0.24 |
| P80315_TC Cct4 | T-complex   R.FSNISA#K.A                            | 273.23 | 74.63  | 3.66 | 0.27 |
| P80315_TC Cct4 | T-complex   K.GDVTITNDGATILK#.Q                     | 112.89 | 28.62  | 3.94 | 0.25 |
| P80315_TC Cct4 | T-complex   K.GIHPTIISFQK#.A                        | 257.63 | 86.56  | 2.98 | 0.34 |
| P80315_TC Cct4 | T-complex   K.GIHPTIISFQK#.A                        | 115.37 | 36.24  | 3.18 | 0.31 |
| P80315_TC Cct4 | T-complex   K.GLEITDM*SRPVQLSDRETLNSATLSNSK.V       | 4.99   | 8.26   | 0.60 | 1.65 |
| P80315_TC Cct4 | T-complex   K.IDDVVNTR.-                            | 103.80 | 127.38 | 0.81 | 1.23 |
| P80315_TC Cct4 | T-complex   K.LVIEEAER.S                            | 96.22  | 115.89 | 0.83 | 1.20 |
| P80315_TC Cct4 | T-complex   K.M*IQDGK#GDVTITNDGATILK#.Q             | 19.99  | 7.79   | 2.57 | 0.39 |
| P80315_TC Cct4 | T-complex   K.M*IQDGK#GDVTITNDGATILK#.Q             | 188.29 | 44.23  | 4.26 | 0.23 |
| P80315_TC Cct4 | T-complex   K.MIQDGK#GDVTITNDGATILK#.Q              | 94.16  | 20.30  | 4.64 | 0.22 |
| P80315_TC Cct4 | T-complex   R.M*LVLSK#.A                            | 190.75 | 33.50  | 5.69 | 0.18 |
| P80315_TC Cct4 | T-complex   R.MLVLSK#.A                             | 197.31 | 55.91  | 3.53 | 0.28 |
| P80315_TC Cct4 | T-complex   K.TDM*DNQIVVSDYAQM*DR.V                 | 8.85   | 12.76  | 0.69 | 1.44 |
| P80315_TC Cct4 | T-complex   K.TDMDNQIVVSDYAQM*DR.V                  | 5.32   | 5.70   | 0.93 | 1.07 |
| P80315_TC Cct4 | T-complex   K.TDMDNQIVVSDYAQMDR.V                   | 4.70   | 6.92   | 0.68 | 1.47 |
| P80315_TC Cct4 | T-complex   K.TIGTK#PVAHIDQFTADMLGSAELAEVSLNGSGK#.L | 2.44   | 1.77   | 1.38 | 0.73 |
| P80315_TC Cct4 | T-complex   K.VIDPATATVDLR.D                        | 112.13 | 144.45 | 0.78 | 1.29 |
| P80315_TC Cct4 | T-complex   K.VVQYSSLLSPM*SVNAV#K#.V                | 15.84  | 5.60   | 2.83 | 0.35 |
| P80315_TC Cct4 | T-complex   K.VVQYSSLLSPM*SVNAV#K#.V                | 40.53  | 10.93  | 3.71 | 0.27 |
| P80315_TC Cct4 | T-complex   K.VVQYSSLLSPMSVNAV#K#.V                 | 25.77  | 7.11   | 3.62 | 0.28 |
| P80315_TC Cct4 | T-complex   K.VVQYSSLLSPM*SVNAV#K#.V                | 10.84  | 2.28   | 4.75 | 0.21 |
| P80315_TC Cct4 | T-complex   K.VVQYSSLLSPM*SVNAV#K#.V                | 15.12  | 3.43   | 4.41 | 0.23 |
| P80315_TC Cct4 | T-complex   K.VVQYSSLLSPMSVNAV#K#.V                 | 26.17  | 6.93   | 3.78 | 0.26 |
| P80315_TC Cct4 | T-complex   K.VVQYSSLLSPMSVNAV#K#.V                 | 22.10  | 6.14   | 3.60 | 0.28 |
| P80315_TC Cct4 | T-complex   R.ETLLNSATLSNSK#.V                      | 4.53   | 2.43   | 1.86 | 0.54 |
| P80315_TC Cct4 | T-complex   R.ALIAGGAPAEIELALR.L                    | 20.54  | 26.15  | 0.79 | 1.27 |
| P80315_TC Cct4 | T-complex   R.AYLLNLVK#.Q                           | 60.22  | 16.84  | 3.58 | 0.28 |
| P80315_TC Cct4 | T-complex   R.ETLLNSATLSNSK#.V                      | 26.32  | 7.02   | 3.75 | 0.27 |
| P80315_TC Cct4 | T-complex   R.FSNISA#K.A                            | 67.55  | 24.10  | 2.80 | 0.36 |
| P80315_TC Cct4 | T-complex   K.GDVTITNDGATILK#.Q                     | 15.16  | 4.23   | 3.58 | 0.28 |
| P80315_TC Cct4 | T-complex   K.GIHPTIISFQK#.A                        | 50.60  | 25.06  | 2.02 | 0.50 |
| P80315_TC Cct4 | T-complex   K.IDDVVNTR.-                            | 18.06  | 18.73  | 0.96 | 1.04 |
| P80315_TC Cct4 | T-complex   K.LVIEEAER.S                            | 24.35  | 23.76  | 1.02 | 0.98 |
| P80315_TC Cct4 | T-complex   K.M*IQDGK#GDVTITNDGATILK#.Q             | 33.21  | 8.72   | 3.81 | 0.26 |
| P80315_TC Cct4 | T-complex   K.MIQDGK#GDVTITNDGATILK#.Q              | 20.44  | 3.36   | 6.08 | 0.16 |
| P80315_TC Cct4 | T-complex   K.VVQYSSLLSPM*SVNAV#K#.V                | 7.69   | 1.86   | 4.13 | 0.24 |
| P80315_TC Cct4 | T-complex   R.ALIAGGAPAEIELALR.L                    | 25.25  | 32.36  | 0.78 | 1.28 |
| P80315_TC Cct4 | T-complex   R.AYLLNLVK#.Q                           | 111.80 | 25.48  | 4.39 | 0.23 |
| P80315_TC Cct4 | T-complex   R.ETLLNSATLSNSK#.V                      | 48.64  | 11.08  | 4.39 | 0.23 |
| P80315_TC Cct4 | T-complex   R.FSNISA#K.A                            | 73.24  | 29.24  | 2.50 | 0.40 |
| P80315_TC Cct4 | T-complex   K.GDVTITNDGATILK#.Q                     | 34.27  | 7.32   | 4.68 | 0.21 |
| P80315_TC Cct4 | T-complex   K.GIHPTIISFQK#.A                        | 103.07 | 25.43  | 4.05 | 0.25 |
| P80315_TC Cct4 | T-complex   K.IDDVVNTR.-                            | 33.03  | 29.71  | 1.11 | 0.90 |
| P80315_TC Cct4 | T-complex   K.LVIEEAER.S                            | 31.07  | 33.02  | 0.94 | 1.06 |
| P80315_TC Cct4 | T-complex   K.M*IQDGK#GDVTITNDGATILK#.Q             | 61.11  | 10.80  | 5.66 | 0.18 |
| P80315_TC Cct4 | T-complex   K.MIQDGK#GDVTITNDGATILK#.Q              | 21.27  | 4.24   | 5.01 | 0.20 |
| P80315_TC Cct4 | T-complex   R.M*LVLSK#.A                            | 67.36  | 16.06  | 4.19 | 0.24 |
| P80315_TC Cct4 | T-complex   R.MLVLSK#.A                             | 21.10  | 9.00   | 2.35 | 0.43 |
| P80315_TC Cct4 | T-complex   R.SGAPTAGPSR.G                          | 15.59  | 15.16  | 1.03 | 0.97 |
| P80315_TC Cct4 | T-complex   K.VIDPATATVDLR.D                        | 40.10  | 33.56  | 1.20 | 0.84 |
| P80315_TC Cct4 | T-complex   K.VVQYSSLLSPM*SVNAV#K#.V                | 16.42  | 3.77   | 4.36 | 0.23 |
| P80316_TC Cct5 | T-complex   R.AFADALEVPMALSENSGM*NPIQTM*TEVR.A      | 7.50   | 8.06   | 0.93 | 1.07 |
| P80316_TC Cct5 | T-complex   R.AFADALEVPM*ALSENSGM*NPIQTM*TEVR.A     | 8.62   | 6.87   | 1.26 | 0.80 |
| P80316_TC Cct5 | T-complex   R.AVTIFIR.G                             | 47.07  | 67.25  | 0.70 | 1.43 |
| P80316_TC Cct5 | T-complex   K.DGDVTITNDGATILSMMDDVHDJQAK#.L         | 13.84  | 4.07   | 3.40 | 0.29 |
| P80316_TC Cct5 | T-complex   R.DVDVELIK#.V                           | 171.75 | 65.09  | 2.64 | 0.38 |
| P80316_TC Cct5 | T-complex   R.DVDVELIKVEGK.V                        | 74.08  | 21.65  | 3.42 | 0.29 |
| P80316_TC Cct5 | T-complex   R.FSELTSEK#.L                           | 619.77 | 154.35 | 4.02 | 0.25 |
| P80316_TC Cct5 | T-complex   K.GSNDM*YQYHVIETLIGK#.K                 | 125.26 | 38.12  | 3.29 | 0.30 |
| P80316_TC Cct5 | T-complex   K.GSNDMQYHVIETLIGK#.K                   | 110.57 | 35.49  | 3.12 | 0.32 |
| P80316_TC Cct5 | T-complex   K.GSNDMQYHVIETLIGK#K#.Q                 | 21.64  | 7.47   | 2.90 | 0.35 |
| P80316_TC Cct5 | T-complex   K.GVIVDK#DFSHQPM*PK#.K                  | 143.34 | 39.56  | 3.62 | 0.28 |
| P80316_TC Cct5 | T-complex   K.GVIVDK#DFSHQPM*PK#.K                  | 131.98 | 44.85  | 2.94 | 0.34 |

|                 |                                                     |        |        |      |      |
|-----------------|-----------------------------------------------------|--------|--------|------|------|
| P80316_TC Cct5  | T-complex   K.HK#LDVM*SVEDYK#.A                     | 35.29  | 8.69   | 4.06 | 0.25 |
| P80316_TC Cct5  | T-complex   K.HK#LDVMSVEDYK#.A                      | 111.49 | 25.75  | 4.33 | 0.23 |
| P80316_TC Cct5  | T-complex   R.IADGYEQAAR.I                          | 140.74 | 195.05 | 0.72 | 1.39 |
| P80316_TC Cct5  | T-complex   R.IAIQHLDK#.I                           | 227.56 | 83.53  | 2.72 | 0.37 |
| P80316_TC Cct5  | T-complex   K.IDDIRKPGSEEE.-                        | 19.55  | 21.90  | 0.89 | 1.12 |
| P80316_TC Cct5  | T-complex   K.ISDK#VLVDINNPELIQTAK#.T               | 21.53  | 4.11   | 5.23 | 0.19 |
| P80316_TC Cct5  | T-complex   K.KQISLATQM*VR.M                        | 9.27   | 12.99  | 0.71 | 1.40 |
| P80316_TC Cct5  | T-complex   K.LDVM*SVEDYK#.A                        | 49.43  | 15.76  | 3.14 | 0.32 |
| P80316_TC Cct5  | T-complex   K.LDVM*SVEDYK#.A                        | 43.04  | 9.74   | 4.42 | 0.23 |
| P80316_TC Cct5  | T-complex   K.LGFAGVQEISFGTTK#.D                    | 535.47 | 138.13 | 3.88 | 0.26 |
| P80316_TC Cct5  | T-complex   R.LM*GLEALK#.S                          | 176.12 | 47.49  | 3.71 | 0.27 |
| P80316_TC Cct5  | T-complex   R.LMGLEALK#.S                           | 159.90 | 43.55  | 3.67 | 0.27 |
| P80316_TC Cct5  | T-complex   K.LM*VLSK#.S                            | 112.02 | 33.28  | 3.37 | 0.30 |
| P80316_TC Cct5  | T-complex   K.MIIEAK#.R                             | 46.92  | 10.91  | 4.30 | 0.23 |
| P80316_TC Cct5  | T-complex   K.M*IEAK#.R                             | 49.81  | 15.87  | 3.14 | 0.32 |
| P80316_TC Cct5  | T-complex   K.M*LVIEK#.C                            | 85.96  | 25.58  | 3.36 | 0.30 |
| P80316_TC Cct5  | T-complex   K.MLVIEK#.C                             | 168.99 | 48.35  | 3.50 | 0.29 |
| P80316_TC Cct5  | T-complex   K.QQISLATQM*VR.M                        | 27.10  | 29.75  | 0.91 | 1.10 |
| P80316_TC Cct5  | T-complex   K.QQISLATQM*VR.M                        | 17.13  | 21.33  | 0.80 | 1.24 |
| P80316_TC Cct5  | T-complex   R.TSLGNPLDK#.M                          | 94.43  | 55.49  | 1.70 | 0.59 |
| P80316_TC Cct5  | T-complex   K.VLVDINNPELIQTAK#.T                    | 437.23 | 135.16 | 3.24 | 0.31 |
| P80316_TC Cct5  | T-complex   R.VVWGPEELIAIATGGR.I                    | 65.54  | 77.61  | 0.84 | 1.18 |
| P80316_TC Cct5  | T-complex   R.DVDFLK#.V                             | 16.97  | 6.81   | 2.49 | 0.40 |
| P80316_TC Cct5  | T-complex   R.IADGYEQAAR.I                          | 17.11  | 24.29  | 0.70 | 1.42 |
| P80316_TC Cct5  | T-complex   K.LGFAGVQEISFGTTK#.D                    | 67.86  | 18.50  | 3.67 | 0.27 |
| P80316_TC Cct5  | T-complex   K.MLVIEK#.C                             | 14.55  | 1.55   | 9.41 | 0.11 |
| P80316_TC Cct5  | T-complex   R.TSLGNPLDK#.M                          | 12.62  | 6.54   | 1.93 | 0.52 |
| P80316_TC Cct5  | T-complex   K.VLVDINNPELIQTAK#.T                    | 50.39  | 16.81  | 3.00 | 0.33 |
| P80316_TC Cct5  | T-complex   K.LGFAGVQEISFGTTK#.D                    | 37.11  | 15.87  | 2.34 | 0.43 |
| P80316_TC Cct5  | T-complex   K.M*LVIEK#.C                            | 35.03  | 19.21  | 1.82 | 0.55 |
| P80316_TC Cct5  | T-complex   K.VLVDINNPELIQTAK#.T                    | 32.41  | 7.95   | 4.08 | 0.25 |
| P80317_TC Cct6a | T-complex   R.AGM*SSLK#G.-                          | 118.69 | 16.18  | 7.33 | 0.14 |
| P80317_TC Cct6a | T-complex   K.ALQFLEQVK#.V                          | 563.28 | 161.67 | 3.48 | 0.29 |
| P80317_TC Cct6a | T-complex   R.AQAALAVNISAAAR.G                      | 26.68  | 36.47  | 0.73 | 1.37 |
| P80317_TC Cct6a | T-complex   R.AQLGVQAFADALIIPK#.V                   | 60.33  | 16.04  | 3.76 | 0.27 |
| P80317_TC Cct6a | T-complex   K.GIDPFLDALAK#.E                        | 842.85 | 237.26 | 3.55 | 0.28 |
| P80317_TC Cct6a | T-complex   R.GLDVLR.T                              | 63.19  | 86.77  | 0.73 | 1.37 |
| P80317_TC Cct6a | T-complex   K.GPNK#HTLTQIK#.D                       | 25.73  | 10.06  | 2.56 | 0.39 |
| P80317_TC Cct6a | T-complex   K.HTLTQIK#.D                            | 413.25 | 135.31 | 3.05 | 0.33 |
| P80317_TC Cct6a | T-complex   R.IITEGFEAAK#.E                         | 627.15 | 192.63 | 3.26 | 0.31 |
| P80317_TC Cct6a | T-complex   R.KKDEPIDLFM*VEIM*EM*.K.H               | 45.81  | 13.11  | 3.49 | 0.29 |
| P80317_TC Cct6a | T-complex   R.KKDEPIDLFMVEIM*EM*.K.H                | 23.06  | 6.79   | 3.40 | 0.29 |
| P80317_TC Cct6a | T-complex   R.KK#DEPIDLFMVEIMEMK#.H                 | 13.13  | 3.85   | 3.41 | 0.29 |
| P80317_TC Cct6a | T-complex   K.M*LVSGAGDIK#.L                        | 318.38 | 93.55  | 3.40 | 0.29 |
| P80317_TC Cct6a | T-complex   K.MLVSGAGDIK#.L                         | 165.66 | 61.01  | 2.72 | 0.37 |
| P80317_TC Cct6a | T-complex   K.QADYISEGLHPR.I                        | 59.16  | 85.11  | 0.70 | 1.44 |
| P80317_TC Cct6a | T-complex   K.SETDTSILR.G                           | 82.87  | 127.06 | 0.65 | 1.53 |
| P80317_TC Cct6a | T-complex   K.TEVNSGFFYK#.S                         | 180.24 | 48.09  | 3.75 | 0.27 |
| P80317_TC Cct6a | T-complex   K.VATAQDDITGDGTTSNVLIIGELLK#.Q          | 315.65 | 90.19  | 3.50 | 0.29 |
| P80317_TC Cct6a | T-complex   K.VLAQNSGFDLQETLVK#.V                   | 401.45 | 117.46 | 3.42 | 0.29 |
| P80317_TC Cct6a | T-complex   K.ALQFLEQVK#.V                          | 59.65  | 48.38  | 1.23 | 0.81 |
| P80317_TC Cct6a | T-complex   K.DGNVLLHEM*QIQHTASIAK#.V               | 10.18  | 4.16   | 2.45 | 0.41 |
| P80317_TC Cct6a | T-complex   K.DGNVLLHEM*QIQHTASIAK#.V               | 15.86  | 5.18   | 3.06 | 0.33 |
| P80317_TC Cct6a | T-complex   K.GIDPFLDALAK#.E                        | 107.26 | 29.82  | 3.60 | 0.28 |
| P80317_TC Cct6a | T-complex   R.IITEGFEAAK#.E                         | 78.30  | 31.65  | 2.47 | 0.40 |
| P80317_TC Cct6a | T-complex   K.M*LVSGAGDIK#.L                        | 69.74  | 16.82  | 4.15 | 0.24 |
| P80317_TC Cct6a | T-complex   R.SVTLVK#.G                             | 57.25  | 13.58  | 4.22 | 0.24 |
| P80317_TC Cct6a | T-complex   K.TEVNSGFFYK#.S                         | 18.53  | 6.90   | 2.69 | 0.37 |
| P80317_TC Cct6a | T-complex   K.VATAQDDITGDGTTSNVLIIGELLK#.Q          | 63.72  | 15.73  | 4.05 | 0.25 |
| P80317_TC Cct6a | T-complex   K.VLAQNSGFDLQETLVK#.V                   | 50.98  | 17.55  | 2.90 | 0.34 |
| P80317_TC Cct6a | T-complex   K.DGNVLLHEM*QIQHTASIAK#.V               | 9.41   | 1.81   | 5.21 | 0.19 |
| P80317_TC Cct6a | T-complex   K.GIDPFLDALAK#.E                        | 47.76  | 16.58  | 2.88 | 0.35 |
| P80317_TC Cct6a | T-complex   K.M*LVSGAGDIK#.L                        | 31.72  | 12.28  | 2.58 | 0.39 |
| P80317_TC Cct6a | T-complex   K.TEVNSGFFYK#.S                         | 10.88  | 4.67   | 2.33 | 0.43 |
| P80317_TC Cct6a | T-complex   K.VLAQNSGFDLQETLVK#.V                   | 27.80  | 8.11   | 3.43 | 0.29 |
| P80313_TC Cct7  | T-complex   R.AIK#NDSVWAGGAIEM*ELSK#.Y              | 43.75  | 11.14  | 3.93 | 0.25 |
| P80313_TC Cct7  | T-complex   R.AIK#NDSVWAGGAIEMELSK#.Y               | 28.59  | 10.00  | 2.86 | 0.35 |
| P80313_TC Cct7  | T-complex   K.ALEIIPR.Q                             | 50.76  | 59.29  | 0.86 | 1.17 |
| P80313_TC Cct7  | T-complex   K.ATISNDGATLK#.L                        | 635.23 | 187.43 | 3.39 | 0.30 |
| P80313_TC Cct7  | T-complex   R.GGAEQFM*EETER.S                       | 53.50  | 78.02  | 0.69 | 1.46 |
| P80313_TC Cct7  | T-complex   R.GGAEQFMEETER.S                        | 36.03  | 46.59  | 0.77 | 1.29 |
| P80313_TC Cct7  | T-complex   R.HAQGGM*WYGVDDINNENIADNFQAFVWEPAM*VR.I | 3.75   | 5.96   | 0.63 | 1.59 |
| P80313_TC Cct7  | T-complex   K.IALLNVELK#.A                          | 94.31  | 21.36  | 4.42 | 0.23 |
| P80313_TC Cct7  | T-complex   K.IK#EIAVTVK#.K                         | 119.23 | 35.81  | 3.33 | 0.30 |
| P80313_TC Cct7  | T-complex   K.K#FYSYAGFEM*QPK#.K                    | 15.85  | 6.28   | 2.52 | 0.40 |
| P80313_TC Cct7  | T-complex   K.K#FYSYAGFEMQPK#.K                     | 20.06  | 7.54   | 2.66 | 0.38 |
| P80313_TC Cct7  | T-complex   K.K#FYSYAGFEMQPK#.K                     | 78.75  | 23.99  | 3.28 | 0.30 |
| P80313_TC Cct7  | T-complex   K.LISQK#.V                              | 133.41 | 35.89  | 3.72 | 0.27 |
| P80313_TC Cct7  | T-complex   K.LLDVVHPAAK#.T                         | 508.35 | 162.02 | 3.14 | 0.32 |
| P80313_TC Cct7  | T-complex   K.LPIGDVATQYFADR.D                      | 58.32  | 80.14  | 0.73 | 1.37 |
| P80313_TC Cct7  | T-complex   K.NDSVWAGGAIEM*ELSK#.Y                  | 78.55  | 39.36  | 2.00 | 0.50 |
| P80313_TC Cct7  | T-complex   K.NDSVWAGGAIEMELSK#.Y                   | 57.84  | 16.92  | 3.42 | 0.29 |
| P80313_TC Cct7  | T-complex   K.QQLIGAYAK#.A                          | 240.44 | 61.06  | 3.94 | 0.25 |
| P80313_TC Cct7  | T-complex   K.SQDAEVDGDTSVTLAAEFLK#.Q               | 208.71 | 55.88  | 3.73 | 0.27 |
| P80313_TC Cct7  | T-complex   R.TATQLAVNK#.I                          | 489.36 | 147.16 | 3.33 | 0.30 |
| P80313_TC Cct7  | T-complex   K.TFSYAGFEM*QPK#.K                      | 164.96 | 44.65  | 3.69 | 0.27 |
| P80313_TC Cct7  | T-complex   K.TFSYAGFEMQPK#.K                       | 111.96 | 35.91  | 3.12 | 0.32 |
| P80313_TC Cct7  | T-complex   K.TLVDJAK#.S                            | 446.84 | 142.55 | 3.13 | 0.32 |
| P80313_TC Cct7  | T-complex   R.VHTVEDYQAIQVDAEWNIYDK#.L              | 29.34  | 6.66   | 4.41 | 0.23 |
| P80313_TC Cct7  | T-complex   R.VHTVEDYQAIQVDAEWNIYDK#LEK#.I          | 202.40 | 52.49  | 3.86 | 0.26 |
| P80313_TC Cct7  | T-complex   R.VPEEDLK#.R                            | 91.00  | 30.32  | 3.00 | 0.33 |
| P80313_TC Cct7  | T-complex   K.VQGALEESQLVAGVAFK#.K                  | 122.38 | 35.09  | 3.49 | 0.29 |
| P80313_TC Cct7  | T-complex   R.AIK#NDSVWAGGAIEMELSK#.Y               | 8.02   | 4.30   | 1.87 | 0.54 |
| P80313_TC Cct7  | T-complex   K.ALEIIPR.Q                             | 13.10  | 23.19  | 0.57 | 1.77 |
| P80313_TC Cct7  | T-complex   K.ATISNDGATLK#.L                        | 83.20  | 19.02  | 4.37 | 0.23 |
| P80313_TC Cct7  | T-complex   R.GGAEQFM*EETER.S                       | 8.13   | 14.03  | 0.58 | 1.72 |
| P80313_TC Cct7  | T-complex   K.IALLNVELK#.A                          | 10.26  | 4.25   | 2.41 | 0.41 |
| P80313_TC Cct7  | T-complex   K.LPIGDVATQYFADR.D                      | 6.72   | 6.72   | 1.00 | 1.00 |
| P80313_TC Cct7  | T-complex   K.NDSVWAGGAIEM*ELSK#.Y                  | 5.48   | 2.51   | 2.18 | 0.46 |
| P80313_TC Cct7  | T-complex   K.NDSVWAGGAIEMELSK#.Y                   | 6.28   | 4.39   | 1.43 | 0.70 |
| P80313_TC Cct7  | T-complex   K.SQDAEVDGDTSVTLAAEFLK#.Q               | 36.87  | 7.83   | 4.71 | 0.21 |
| P80313_TC Cct7  | T-complex   R.TATQLAVNK#.I                          | 74.63  | 24.92  | 2.99 | 0.33 |
| P80313_TC Cct7  | T-complex   K.TFSYAGFEM*QPK#.K                      | 26.55  | 9.06   | 2.93 | 0.34 |



|                  |                                           |        |        |      |      |
|------------------|-------------------------------------------|--------|--------|------|------|
| P80313_TC Cct7   | T-complex   K.TLVDIAK#.S                  | 71.50  | 16.35  | 4.37 | 0.23 |
| P80313_TC Cct7   | T-complex   R.VHTVEDYQAIVDAEWNLVDK#LEK#.I | 29.32  | 8.43   | 3.48 | 0.29 |
| P80313_TC Cct7   | T-complex   K.VQGGALEESQVAVGAFK#.K        | 12.46  | 5.12   | 2.43 | 0.41 |
| P80313_TC Cct7   | T-complex   R.AIK#NDSVAVGGGAIEM*ELSK#.Y   | 14.90  | 3.12   | 4.78 | 0.21 |
| P80313_TC Cct7   | T-complex   R.AIK#NDSVAVGGGAIEMELSK#.Y    | 9.31   | 1.96   | 4.74 | 0.21 |
| P80313_TC Cct7   | T-complex   K.ATISNDGATILK#.L             | 79.57  | 23.24  | 3.42 | 0.29 |
| P80313_TC Cct7   | T-complex   R.GGAEQFM*EETER.S             | 11.44  | 10.33  | 1.11 | 0.90 |
| P80313_TC Cct7   | T-complex   K.LPIGDVATQYFADR.D            | 13.99  | 6.64   | 2.11 | 0.47 |
| P80313_TC Cct7   | T-complex   K.NDSVAVGGGAIEM*ELSK#.Y       | 9.92   | 2.88   | 3.45 | 0.29 |
| P80313_TC Cct7   | T-complex   K.NDSVAVGGGAIEMELSK#.Y        | 6.77   | 4.30   | 1.58 | 0.63 |
| P80313_TC Cct7   | T-complex   K.SQDAEVDGDTSTVLAEEFLK#.Q     | 71.01  | 17.96  | 3.95 | 0.25 |
| P80313_TC Cct7   | T-complex   R.TATQLAVNK#.I                | 85.62  | 25.41  | 3.37 | 0.30 |
| P80313_TC Cct7   | T-complex   K.TFSYAGFEM*QPK#.K            | 33.03  | 7.93   | 4.16 | 0.24 |
| P80313_TC Cct7   | T-complex   K.VQGGALEESQVAVGAFK#.K        | 27.34  | 7.54   | 3.63 | 0.28 |
| P42932_TC Cct8   | T-complex   K.AIAGTGANVIVTGK#.V           | 450.92 | 132.70 | 3.40 | 0.29 |
| P42932_TC Cct8   | T-complex   R.ALAENSGVK#.A                | 252.54 | 117.80 | 2.14 | 0.47 |
| P42932_TC Cct8   | T-complex   K.APGFAQM*LK#.D               | 204.02 | 70.56  | 2.89 | 0.35 |
| P42932_TC Cct8   | T-complex   K.APGFAQMLK#.D                | 85.88  | 25.75  | 3.33 | 0.30 |
| P42932_TC Cct8   | T-complex   R.AVDDGVNFK#.V                | 224.43 | 56.80  | 3.95 | 0.25 |
| P42932_TC Cct8   | T-complex   K.DM*LEASILDYLGK#.Y           | 36.71  | 41.33  | 0.89 | 1.13 |
| P42932_TC Cct8   | T-complex   K.DMLEASILDYLGK#.Y            | 64.55  | 19.49  | 3.31 | 0.30 |
| P42932_TC Cct8   | T-complex   R.DVDEVSLLR.T                 | 56.51  | 67.46  | 0.84 | 1.19 |
| P42932_TC Cct8   | T-complex   K.ETEGDVTSVK#.D               | 237.13 | 70.56  | 3.36 | 0.30 |
| P42932_TC Cct8   | T-complex   K.ETEGDVTSVKDAK.I             | 8.29   | 2.50   | 3.32 | 0.30 |
| P42932_TC Cct8   | T-complex   K.FAEAFEIPR.A                 | 51.57  | 84.20  | 0.61 | 1.63 |
| P42932_TC Cct8   | T-complex   K.GEENLM*DAQVK#.A             | 94.68  | 23.46  | 4.04 | 0.25 |
| P42932_TC Cct8   | T-complex   K.GEENLMDAQVK#.A              | 24.80  | 6.95   | 3.57 | 0.28 |
| P42932_TC Cct8   | T-complex   R.GSTDNLM*DDIER.A             | 13.56  | 23.46  | 0.58 | 1.73 |
| P42932_TC Cct8   | T-complex   R.GSTDNLMDDIER.A              | 11.51  | 20.20  | 0.57 | 1.75 |
| P42932_TC Cct8   | T-complex   K.HFSGLEEAAYR.N               | 30.67  | 43.87  | 0.70 | 1.43 |
| P42932_TC Cct8   | T-complex   K.LGSGYSSVLM*VFK#.K           | 10.92  | 2.83   | 3.86 | 0.26 |
| P42932_TC Cct8   | T-complex   K.K#ETEGDVTSVK#.D             | 24.97  | 6.41   | 3.90 | 0.26 |
| P42932_TC Cct8   | T-complex   K.LATNAAVTLR.V                | 98.22  | 119.08 | 0.82 | 1.21 |
| P42932_TC Cct8   | T-complex   K.LFVTNDAATILR.E              | 120.41 | 158.76 | 0.76 | 1.32 |
| P42932_TC Cct8   | T-complex   K.NVGLDIEAEPVAVK#.D           | 116.83 | 36.52  | 3.20 | 0.31 |
| P42932_TC Cct8   | T-complex   K.QYGETFLAK#.L                | 161.58 | 47.51  | 3.40 | 0.29 |
| P42932_TC Cct8   | T-complex   K.TAEELM*NFVK#.G              | 54.79  | 15.76  | 3.48 | 0.29 |
| P42932_TC Cct8   | T-complex   K.TAEELMNFVK#.G               | 61.29  | 14.77  | 4.15 | 0.24 |
| P42932_TC Cct8   | T-complex   K.TAEELM*NFSGEENLM*DAQVK#.A   | 36.63  | 5.32   | 6.88 | 0.15 |
| P42932_TC Cct8   | T-complex   K.TAEELMNFSGEENLM*DAQVK#.A    | 17.20  | 4.75   | 3.62 | 0.28 |
| P42932_TC Cct8   | T-complex   K.TAEELMNFSGEENLMDAQVK#.A     | 13.15  | 4.59   | 2.87 | 0.35 |
| P42932_TC Cct8   | T-complex   R.TAYGPNMKNK#.M               | 9.17   | 2.80   | 3.28 | 0.31 |
| P42932_TC Cct8   | T-complex   K.TVAGTALPK#.L                | 250.83 | 69.90  | 3.59 | 0.28 |
| P42932_TC Cct8   | T-complex   K.YNIM*LVR.L                  | 115.83 | 35.69  | 3.25 | 0.31 |
| P42932_TC Cct8   | T-complex   K.AIAGTGANVIVTGK#.V           | 177.53 | 47.22  | 3.76 | 0.27 |
| P42932_TC Cct8   | T-complex   K.ANEVSK#.L                   | 59.81  | 42.37  | 1.41 | 0.71 |
| P42932_TC Cct8   | T-complex   K.APGFAQM*LK#.D               | 115.51 | 41.40  | 2.79 | 0.36 |
| P42932_TC Cct8   | T-complex   K.APGFAQMLK#.D                | 80.41  | 9.83   | 8.18 | 0.12 |
| P42932_TC Cct8   | T-complex   R.AVDDGVNFK#.V                | 184.41 | 39.33  | 4.69 | 0.21 |
| P42932_TC Cct8   | T-complex   K.DM*LEASILDYLGK#.Y           | 13.67  | 5.54   | 2.47 | 0.40 |
| P42932_TC Cct8   | T-complex   K.DMLEASILDYLGK#.Y            | 25.74  | 7.20   | 3.58 | 0.28 |
| P42932_TC Cct8   | T-complex   R.DVDEVSLLR.T                 | 27.54  | 33.86  | 0.81 | 1.23 |
| P42932_TC Cct8   | T-complex   K.ETEGDVTSVK#.D               | 73.70  | 20.02  | 3.68 | 0.27 |
| P42932_TC Cct8   | T-complex   K.FAEAFEIPR.A                 | 34.32  | 42.23  | 0.81 | 1.23 |
| P42932_TC Cct8   | T-complex   K.GEENLM*DAQVK#.A             | 41.46  | 10.68  | 3.88 | 0.26 |
| P42932_TC Cct8   | T-complex   R.GSTDNLM*DDIER.A             | 15.23  | 18.32  | 0.83 | 1.20 |
| P42932_TC Cct8   | T-complex   K.HFSGLEEAAYR.N               | 14.73  | 27.33  | 0.54 | 1.86 |
| P42932_TC Cct8   | T-complex   K.K#WDDDDQND.-                | 6.28   | 2.33   | 2.69 | 0.37 |
| P42932_TC Cct8   | T-complex   K.LATNAAVTLR.V                | 37.98  | 40.30  | 0.94 | 1.06 |
| P42932_TC Cct8   | T-complex   K.LFVTNDAATILR.E              | 52.46  | 64.11  | 0.82 | 1.22 |
| P42932_TC Cct8   | T-complex   K.NVGLDIEAEPVAVK#.D           | 32.57  | 10.33  | 3.15 | 0.32 |
| P42932_TC Cct8   | T-complex   K.QYGETFLAK#.L                | 84.66  | 39.10  | 2.17 | 0.46 |
| P42932_TC Cct8   | T-complex   K.TAEELM*NFVK#.G              | 24.94  | 7.36   | 3.39 | 0.29 |
| P42932_TC Cct8   | T-complex   K.TAEELMNFSGEENLM*DAQVK#.A    | 12.38  | 3.39   | 3.65 | 0.27 |
| P42932_TC Cct8   | T-complex   K.TAEELMNFSGEENLMDAQVK#.A     | 6.44   | 4.02   | 1.60 | 0.62 |
| P42932_TC Cct8   | T-complex   K.AIAGTGANVIVTGK#.V           | 279.72 | 59.37  | 4.71 | 0.21 |
| P42932_TC Cct8   | T-complex   K.ANEVSK#.L                   | 96.69  | 26.21  | 3.69 | 0.27 |
| P42932_TC Cct8   | T-complex   K.APGFAQM*LK#.D               | 188.72 | 48.73  | 3.87 | 0.26 |
| P42932_TC Cct8   | T-complex   K.APGFAQMLK#.D                | 37.09  | 12.59  | 2.95 | 0.34 |
| P42932_TC Cct8   | T-complex   R.AVDDGVNFK#.V                | 271.87 | 62.35  | 4.36 | 0.23 |
| P42932_TC Cct8   | T-complex   K.DM*LEASILDYLGK#.Y           | 29.32  | 8.01   | 3.66 | 0.27 |
| P42932_TC Cct8   | T-complex   K.DMLEASILDYLGK#.Y            | 32.84  | 7.51   | 4.37 | 0.23 |
| P42932_TC Cct8   | T-complex   R.DVDEVSLLR.T                 | 48.20  | 54.83  | 0.88 | 1.14 |
| P42932_TC Cct8   | T-complex   K.EDGASTIVLR.G                | 10.86  | 15.78  | 0.69 | 1.45 |
| P42932_TC Cct8   | T-complex   K.ETEGDVTSVK#.D               | 204.95 | 44.23  | 4.63 | 0.22 |
| P42932_TC Cct8   | T-complex   K.FAEAFEIPR.A                 | 47.56  | 48.02  | 0.99 | 1.01 |
| P42932_TC Cct8   | T-complex   R.GSTDNLM*DDIER.A             | 26.73  | 21.80  | 1.23 | 0.82 |
| P42932_TC Cct8   | T-complex   R.GSTDNLMDDIER.A              | 9.02   | 6.66   | 1.35 | 0.74 |
| P42932_TC Cct8   | T-complex   K.HFSGLEEAAYR.N               | 19.41  | 19.49  | 1.00 | 1.00 |
| P42932_TC Cct8   | T-complex   K.K#WDDDDQND.-                | 9.90   | 3.49   | 2.84 | 0.35 |
| P42932_TC Cct8   | T-complex   K.LATNAAVTLR.V                | 57.50  | 53.04  | 1.08 | 0.92 |
| P42932_TC Cct8   | T-complex   K.LFVTNDAATILR.E              | 63.45  | 69.62  | 0.91 | 1.10 |
| P42932_TC Cct8   | T-complex   K.NVGLDIEAEPVAVK#.D           | 66.58  | 20.14  | 3.31 | 0.30 |
| P42932_TC Cct8   | T-complex   K.QYGETFLAK#.L                | 108.39 | 78.21  | 1.39 | 0.72 |
| P42932_TC Cct8   | T-complex   K.TAEELM*NFVK#.G              | 53.63  | 10.28  | 5.22 | 0.19 |
| P42932_TC Cct8   | T-complex   K.TAEELM*NFSGEENLM*DAQVK#.A   | 26.64  | 4.89   | 5.44 | 0.18 |
| P42932_TC Cct8   | T-complex   K.TAEELMNFSGEENLM*DAQVK#.A    | 20.88  | 4.62   | 4.52 | 0.22 |
| P42932_TC Cct8   | T-complex   K.VADIALHYANK#.Y              | 148.76 | 26.29  | 5.66 | 0.18 |
| P42932_TC Cct8   | T-complex   K.YNIM*LVR.L                  | 16.56  | 21.34  | 0.78 | 1.29 |
| Q8R422_CI Cd109  | CD109 anti R.FAEENANLVD FEDASSVNNVHR.V    | 1.95   | 9.72   | 0.20 | 4.98 |
| Q8R422_CI Cd109  | CD109 anti K.IPVQLVFENK#.V                | 16.43  | 8.38   | 1.96 | 0.51 |
| Q9JLQ0_CI Cd2ap  | CD2-associi: K.LGLFSPNFVK#.E              | 24.74  | 7.49   | 3.30 | 0.30 |
| Q9JLQ0_CI Cd2ap  | CD2-associi: K.SSLSTPSSASK#.V             | 17.71  | 3.56   | 4.98 | 0.20 |
| Q9JLQ0_CI Cd2ap  | CD2-associi: K.VNTAFLTPLK#.A              | 17.76  | 5.41   | 3.29 | 0.30 |
| Q9CWK3_C Cd2bp2  | CD2 antigen: R.DSWLDNIDVVR.I              | 7.08   | 8.63   | 0.82 | 1.22 |
| Q9CWK3_C Cd2bp2  | CD2 antigen: R.GNLGVQETR.E                | 2.35   | 9.56   | 0.25 | 4.06 |
| Q9CWK3_C Cd2bp2  | CD2 antigen: K.VTFQGVGDEDGEDEISVPK#.K     | 15.41  | 6.96   | 2.21 | 0.45 |
| Q76KJ5_RP Cd3eap | DNA-direct: R.FSAFGSPVPTGPGSASALR.S       | 2.95   | 8.05   | 0.37 | 2.72 |
| Q76KJ5_RP Cd3eap | DNA-direct: R.YFM*QEEM*EAK#.T             | 5.49   | 2.33   | 2.35 | 0.42 |
| P15379_CI Cd44   | CD44 anti: R.YFIEGNNVPR.I                 | 6.35   | 33.73  | 0.19 | 5.31 |
| Q61735_CI Cd47   | Leukocyte: K.ISVSDLINGIASLK#.M            | 12.44  | 7.75   | 1.60 | 0.62 |
| Q61735_CI Cd47   | Leukocyte: R.NVEAQSTEEM*FVK#.W            | 10.87  | 8.43   | 1.29 | 0.78 |
| Q61735_CI Cd47   | Leukocyte: R.NVEAQSTEEMFVK#.W             | 7.98   | 5.96   | 1.34 | 0.75 |

|                    |                                                  |        |        |       |       |
|--------------------|--------------------------------------------------|--------|--------|-------|-------|
| P40240_CI Cdc9     | CD9 antigen K.ELQEFYKDYQK.L                      | 6.25   | 7.30   | 0.86  | 1.17  |
| Q8R349_CI Cdc16    | Cell division K.ANELFYLSHK#.L                    | 22.20  | 13.96  | 1.59  | 0.63  |
| Q8R349_CI Cdc16    | Cell division R.TLATYSYK#.E                      | 22.20  | 11.61  | 1.91  | 0.52  |
| Q8BG24_CI Cdc23    | Cell division R.AWYGLGQTYEILK#.M                 | 5.39   | 2.86   | 1.89  | 0.53  |
| Q8BG24_CI Cdc23    | Cell division R.AYAVDVEK#.K                      | 13.33  | 5.97   | 2.23  | 0.45  |
| Q8BG24_CI Cdc23    | Cell division K.K#K#DDETVDSLGPLEK#.G             | 9.49   | 6.23   | 1.52  | 0.66  |
| Q8BG24_CI Cdc23    | Cell division R.AWYGLGQTYEILK#.M                 | 11.93  | 3.87   | 3.08  | 0.32  |
| Q8BG24_CI Cdc23    | Cell division R.AYAVDVEK#.K                      | 19.00  | 6.36   | 2.99  | 0.33  |
| A2A6Q5_CI Cdc27    | Cell division K.LAEGEQLSGGVFNK#.Q                | 3.45   | 1.91   | 1.80  | 0.55  |
| A2A6Q5_CI Cdc27    | Cell division K.ITTVTPQQAFLNQLK#.A               | 6.11   | 2.68   | 2.28  | 0.44  |
| Q61081_CI Cdc37    | Hsp90 co-c K.DVQMLQDAISK#.M                      | 41.73  | 9.81   | 4.25  | 0.24  |
| Q61081_CI Cdc37    | Hsp90 co-c K.DVQMLQDAISK#.M                      | 30.88  | 5.48   | 5.63  | 0.18  |
| Q61081_CI Cdc37    | Hsp90 co-c K.NM*PWNVDLTSK#.D                     | 21.26  | 9.45   | 2.25  | 0.44  |
| Q61081_CI Cdc37    | Hsp90 co-c K.TADHQM*EGFK#.Y                      | 9.52   | 2.80   | 3.40  | 0.29  |
| Q61081_CI Cdc37    | Hsp90 co-c K.TADHQM*EGFK#.Y                      | 22.29  | 4.61   | 4.84  | 0.21  |
| Q9DC48_PI Cdc40    | Pre-mRNA-1 K.FKENDASNDGFLGPWAK.Y                 | 8.67   | 8.57   | 1.01  | 0.99  |
| Q9DC48_PI Cdc40    | Pre-mRNA-1 R.SGEIVQEYDR.H                        | 3.61   | 15.10  | 0.24  | 4.18  |
| Q9DC48_PI Cdc40    | Pre-mRNA-1 K.YIGSVEAEKNGQLTVFETGQK.K             | 12.28  | 8.39   | 1.46  | 0.68  |
| Q9DC48_PI Cdc40    | Pre-mRNA-1 K.FKENDASNDGFLGPWAK.Y                 | 9.16   | 14.75  | 0.62  | 1.61  |
| Q9DC48_PI Cdc40    | Pre-mRNA-1 R.SYLHHPQDQVGNLR.S                    | 2.87   | 13.11  | 0.22  | 4.56  |
| Q9DC48_PI Cdc40    | Pre-mRNA-1 R.TFATYGYALDPSLDNHQVSAK.Y             | 9.92   | 13.04  | 0.76  | 1.31  |
| Q9DC48_PI Cdc40    | Pre-mRNA-1 R.VWEVDIPVDFK#.Y                      | 16.45  | 16.30  | 1.01  | 0.99  |
| Q9DC48_PI Cdc40    | Pre-mRNA-1 K.YVDKDVAKPSEEEQKELDEITAK.R           | 10.18  | 17.85  | 0.57  | 1.75  |
| P60766_CI Cdc42    | Cell division K.NVDFEAILAALPEPEPK#.K             | 31.34  | 32.23  | 0.97  | 1.03  |
| P60766_CI Cdc42    | Cell division K.TPFLVGTQIDLRDPSSTIEK.L           | 3.10   | 21.40  | 0.15  | 6.89  |
| P60766_CI Cdc42    | Cell division K.NVDFEAILAALPEPEPK#.K             | 16.37  | 14.09  | 1.16  | 0.86  |
| Q7TT50_MI Cdc42bpb | Serine/thre R.GAFGEVAVVK#.L                      | 408.79 | 61.40  | 6.66  | 0.15  |
| Q7TT50_MI Cdc42bpb | Serine/thre R.GYLQALASK#.M                       | 7.55   | 5.10   | 1.48  | 0.68  |
| Q7TT50_MI Cdc42bpb | Serine/thre K.EVHDESHQLALQK#.E                   | 113.19 | 7.79   | 14.53 | 0.07  |
| Q7TT50_MI Cdc42bpb | Serine/thre K.FSGTILNVPDTSNDSK#.K                | 9.32   | 3.93   | 2.37  | 0.42  |
| Q7TT50_MI Cdc42bpb | Serine/thre R.GAFGEVAVVK#.L                      | 439.97 | 70.51  | 6.24  | 0.16  |
| Q7TT50_MI Cdc42bpb | Serine/thre R.GYLQALASK#.M                       | 14.01  | 11.00  | 1.27  | 0.79  |
| Q7TT50_MI Cdc42bpb | Serine/thre K.SQVHVAEQYDSSSLPIK#.A               | 27.51  | 12.57  | 2.19  | 0.46  |
| Q7TT50_MI Cdc42bpb | Serine/thre K.VYQIEAPK#.E                        | 15.23  | 7.78   | 1.96  | 0.51  |
| Q91W92_B Cdc42ep1  | Cdc42 effec R.M*ASPAAPSPAPPISPIIK#.N             | 5.94   | 5.46   | 1.09  | 0.92  |
| Q91W92_B Cdc42ep1  | Cdc42 effec R.MASPAAPSPAPPISPIIK#.N              | 4.12   | 3.89   | 1.06  | 0.94  |
| Q91W92_B Cdc42ep1  | Cdc42 effec R.M*ASPAAPSPAPPISPIIK#.N             | 3.02   | 5.04   | 0.60  | 1.67  |
| Q6A068_CI Cdc51    | Cell division K.AQDALVQEM*EVVK#.Q                | 12.30  | 17.59  | 0.70  | 1.43  |
| Q6A068_CI Cdc51    | Cell division R.DKHLNINPEDGM*ADYSDPSVVK#.Q       | 3.58   | 1.56   | 2.30  | 0.44  |
| Q6A068_CI Cdc51    | Cell division R.EIDDTYEDIAADVADAR.K              | 2.43   | 4.92   | 0.49  | 2.02  |
| Q6A068_CI Cdc51    | Cell division K.ESDLSALQTSQVSEFTK#.K             | 5.89   | 4.20   | 1.40  | 0.71  |
| Q6A068_CI Cdc51    | Cell division R.GVDYNAEIPFEK#.K                  | 21.08  | 10.03  | 2.10  | 0.48  |
| Q6A068_CI Cdc51    | Cell division R.LGLLGLPAPK#.N                    | 40.25  | 12.05  | 3.34  | 0.30  |
| Q6A068_CI Cdc51    | Cell division K.LININPEDGM*ADYSDPSVVK#.Q         | 6.13   | 2.04   | 3.00  | 0.33  |
| Q6A068_CI Cdc51    | Cell division K.LVLPAPQSDAELQEVVK#.V             | 13.50  | 9.30   | 1.45  | 0.69  |
| Q6A068_CI Cdc51    | Cell division K.AQDALVQEM*EVVK#.Q                | 6.29   | 7.67   | 0.82  | 1.22  |
| Q6A068_CI Cdc51    | Cell division K.ILLGGYQSR.A                      | 3.21   | 7.06   | 0.45  | 2.20  |
| Q6A068_CI Cdc51    | Cell division R.AAGIEIQK#.K                      | 43.01  | 25.62  | 1.68  | 0.60  |
| Q6A068_CI Cdc51    | Cell division K.AQDALVQEM*EVVK#.Q                | 16.55  | 35.19  | 0.47  | 2.13  |
| Q6A068_CI Cdc51    | Cell division R.DKHLNINPEDGM*ADYSDPSVVK#.Q       | 6.85   | 6.80   | 1.01  | 0.99  |
| Q6A068_CI Cdc51    | Cell division R.EIDDTYEDIAADVADAR.K              | 4.48   | 14.52  | 0.31  | 3.24  |
| Q6A068_CI Cdc51    | Cell division K.ESDLSALQTSQVSEFTK#.K             | 14.67  | 12.19  | 1.20  | 0.83  |
| Q6A068_CI Cdc51    | Cell division R.GVDYNAEIPFEK#.K                  | 28.51  | 25.36  | 1.12  | 0.89  |
| Q6A068_CI Cdc51    | Cell division K.HEDSAIPR.R                       | 4.79   | 11.89  | 0.40  | 2.48  |
| Q6A068_CI Cdc51    | Cell division K.ILLGGYQSR.A                      | 11.32  | 41.31  | 0.27  | 3.65  |
| Q6A068_CI Cdc51    | Cell division R.ILQEAQNLM*ALTNVDPLK#.G           | 3.68   | 3.27   | 1.13  | 0.89  |
| Q6A068_CI Cdc51    | Cell division R.ILQEAQNLM*ALTNVDPLK#.G           | 24.01  | 19.89  | 1.21  | 0.83  |
| Q6A068_CI Cdc51    | Cell division R.K#K#ESDLSALQTSQVSEFTK#.K         | 11.31  | 6.60   | 1.72  | 0.58  |
| Q6A068_CI Cdc51    | Cell division R.LGLLGLPAPK#.N                    | 70.62  | 52.39  | 1.35  | 0.74  |
| Q6A068_CI Cdc51    | Cell division K.LININPEDGM*ADYSDPSVVK#.Q         | 9.61   | 6.52   | 1.47  | 0.68  |
| Q6A068_CI Cdc51    | Cell division K.LVLPAPQSDAELQEVVK#.V             | 47.77  | 36.22  | 1.32  | 0.76  |
| Q6A068_CI Cdc51    | Cell division K.NDFEVLPEAEK#.E                   | 17.66  | 15.12  | 1.17  | 0.86  |
| Q6A068_CI Cdc51    | Cell division R.NTEDELK#.A                       | 30.43  | 22.19  | 1.37  | 0.73  |
| Q6A068_CI Cdc51    | Cell division K.NVGAFNINSEHITLHSPYK#.F           | 19.32  | 11.35  | 1.70  | 0.59  |
| Q6A068_CI Cdc51    | Cell division R.QTAEESGINTSASITLLSEYVNTNNSIALR.T | 2.51   | 9.19   | 0.27  | 3.66  |
| Q6A068_CI Cdc51    | Cell division R.SGTTPKPVNTATPGR.T                | 4.70   | 17.20  | 0.27  | 3.66  |
| Q6A068_CI Cdc51    | Cell division R.SKHLVLPAPQSDAELQEVVK#.V          | 15.34  | 10.10  | 1.52  | 0.66  |
| Q6A068_CI Cdc51    | Cell division K.VGQASEVAR.Q                      | 10.11  | 26.96  | 0.38  | 2.67  |
| Q6A068_CI Cdc51    | Cell division R.WYEWLPSIK#.K                     | 16.07  | 13.17  | 1.22  | 0.82  |
| Q8JZM7_CI Cdc73    | Parafibrom R.AADEVLAEK#.K                        | 40.59  | 34.30  | 1.18  | 0.84  |
| Q8JZM7_CI Cdc73    | Parafibrom K.EGIVQTEQIR.S                        | 11.99  | 42.56  | 0.28  | 3.55  |
| Q8JZM7_CI Cdc73    | Parafibrom R.FWETLDR.Y                           | 2.95   | 15.54  | 0.19  | 5.27  |
| Q8JZM7_CI Cdc73    | Parafibrom K.GDEVIFGFSWPK#.N                     | 25.07  | 23.81  | 1.05  | 0.95  |
| Q8JZM7_CI Cdc73    | Parafibrom K.NIFALQSVK#.A                        | 39.90  | 20.29  | 1.97  | 0.51  |
| Q8JZM7_CI Cdc73    | Parafibrom R.SAPLEIGLQR.S                        | 5.98   | 22.16  | 0.27  | 3.70  |
| Q8JZM7_CI Cdc73    | Parafibrom R.SFVDAEVDVTR.D                       | 12.78  | 30.06  | 0.43  | 2.35  |
| Q8JZM7_CI Cdc73    | Parafibrom R.SLSEAM*SVK#.I                       | 24.19  | 18.20  | 1.33  | 0.75  |
| Q8JZM7_CI Cdc73    | Parafibrom K.TDLDDITALK#.Q                       | 35.58  | 24.29  | 1.46  | 0.68  |
| Q8JZM7_CI Cdc73    | Parafibrom K.TNYVVWGTGK#.E                       | 25.44  | 20.06  | 1.27  | 0.79  |
| Q8JZM7_CI Cdc73    | Parafibrom R.TTLQSTGK#.N                         | 27.26  | 25.94  | 1.05  | 0.95  |
| Q8BHX3_Bi Cdc48    | Borealin OS K.EVENLYNIELR.L                      | 1.58   | 11.43  | 0.14  | 7.23  |
| Q8BHX3_Bi Cdc48    | Borealin OS K.IDIAQNLPEALGNIR.K                  | 1.78   | 33.44  | 0.05  | 18.82 |
| Q8VDP6_CI Cdipt    | CDP-diacyl K.SVISVHLITAA.N                       | 1.39   | 6.22   | 0.22  | 4.48  |
| P11440_CI Cdk1     | Cyclin-depe R.ALGTPNNEVWPEVESLQDYK.N             | 12.63  | 13.08  | 0.97  | 1.04  |
| P11440_CI Cdk1     | Cyclin-depe R.ALGTPNNEVWPEVESLQDYK.N             | 18.10  | 24.08  | 0.75  | 1.33  |
| P11440_CI Cdk1     | Cyclin-depe R.DLK#QNLLIDDK#.G                    | 27.15  | 32.43  | 0.84  | 1.19  |
| P11440_CI Cdk1     | Cyclin-depe R.DLK#QNLLIDDK#GTIK#.L               | 25.97  | 29.64  | 0.88  | 1.14  |
| P11440_CI Cdk1     | Cyclin-depe R.HPNIVSLQDVLMOQDSR.L                | 6.02   | 20.35  | 0.30  | 3.38  |
| P11440_CI Cdk1     | Cyclin-depe K.HPYFDDLNDQK#.K                     | 33.55  | 32.40  | 1.04  | 0.97  |
| P11440_CI Cdk1     | Cyclin-depe K.IGEGTYGVVYK#.G                     | 115.76 | 122.07 | 0.95  | 1.05  |
| P11440_CI Cdk1     | Cyclin-depe K.KPLFHGDESIDQLFR.I                  | 10.95  | 57.45  | 0.19  | 5.25  |
| P11440_CI Cdk1     | Cyclin-depe R.LESEEGVPSTAIR.E                    | 12.75  | 68.38  | 0.19  | 5.36  |
| P11440_CI Cdk1     | Cyclin-depe K.M*LVYDPAK.R                        | 12.60  | 12.35  | 1.02  | 0.98  |
| P11440_CI Cdk1     | Cyclin-depe K.M*LVYDPAK.R                        | 3.14   | 12.16  | 0.26  | 3.88  |
| P11440_CI Cdk1     | Cyclin-depe K.NLDENGLDLSK#.M                     | 52.48  | 43.72  | 1.20  | 0.83  |
| P11440_CI Cdk1     | Cyclin-depe R.SPEVLLGSAR.Y                       | 33.97  | 192.70 | 0.18  | 5.67  |
| P11440_CI Cdk1     | Cyclin-depe R.VTGQIVAM*KK#.K                     | 22.82  | 28.37  | 0.80  | 1.24  |
| P11440_CI Cdk1     | Cyclin-depe R.VTGQIVAM*KK#.K                     | 38.22  | 41.40  | 0.92  | 1.08  |
| P11440_CI Cdk1     | Cyclin-depe R.VTGQIVAM*KK#.I                     | 11.94  | 13.63  | 0.88  | 1.14  |
| P11440_CI Cdk1     | Cyclin-depe R.VYHVVTLWYR.S                       | 13.34  | 58.09  | 0.23  | 4.35  |
| P11440_CI Cdk1     | Cyclin-depe K.YLDSIPPGQFM*DSSLVK#.S              | 10.54  | 9.66   | 1.09  | 0.92  |
| P11440_CI Cdk1     | Cyclin-depe K.YLDSIPPGQFM*DSSLVK#.S              | 5.38   | 5.13   | 1.05  | 0.95  |
| P11440_CI Cdk1     | Cyclin-depe K.IGEGTYGVVYK#.G                     | 5.02   | 6.54   | 0.77  | 1.30  |

|                    |                                              |        |       |      |      |
|--------------------|----------------------------------------------|--------|-------|------|------|
| P11440_CI Cdk1     | Cyclin-depr R.DLK#QNLLIDDK#GTIK#.L           | 14.28  | 10.64 | 1.34 | 0.75 |
| P11440_CI Cdk1     | Cyclin-depr K.KPLFHGDSSEIDQLFR.I             | 2.57   | 14.54 | 0.18 | 5.65 |
| P11440_CI Cdk1     | Cyclin-depr R.VYTHEVTVLWYR.S                 | 2.69   | 10.96 | 0.25 | 4.07 |
| P11440_CI Cdk1     | Cyclin-depr K.HPYFDLNDQIK#.K                 | 5.42   | 6.58  | 0.82 | 1.21 |
| P11440_CI Cdk1     | Cyclin-depr K.IGEGTYGVVYK#.G                 | 49.94  | 42.23 | 1.18 | 0.85 |
| P11440_CI Cdk1     | Cyclin-depr K.KPLFHGDSSEIDQLFR.I             | 2.64   | 13.55 | 0.20 | 5.13 |
| P11440_CI Cdk1     | Cyclin-depr R.LEESEEVPSTAIR.E                | 6.50   | 17.21 | 0.38 | 2.65 |
| P11440_CI Cdk1     | Cyclin-depr R.SPEVLLGSAR.Y                   | 6.66   | 40.18 | 0.17 | 6.03 |
| P24788_CI Cdk11b   | Cyclin-depr R.APELLLGAK#.E                   | 67.19  | 39.35 | 1.71 | 0.59 |
| P24788_CI Cdk11b   | Cyclin-depr R.EIVVGSNM*DK#.I                 | 28.50  | 15.63 | 1.82 | 0.55 |
| P24788_CI Cdk11b   | Cyclin-depr R.ETPLPIDPSM*FPTWPAK.S           | 8.56   | 5.57  | 1.54 | 0.65 |
| P24788_CI Cdk11b   | Cyclin-depr R.IEEGTYGVVYR.A                  | 10.87  | 39.02 | 0.28 | 3.59 |
| P24788_CI Cdk11b   | Cyclin-depr K.IYIVMNYVEHDLK#.S               | 20.64  | 15.99 | 1.29 | 0.77 |
| P24788_CI Cdk11b   | Cyclin-depr K.M*TFSEYPYNNLR.K                | 2.73   | 8.97  | 0.30 | 3.28 |
| P24788_CI Cdk11b   | Cyclin-depr K.SDIDQNK#.I                     | 44.45  | 23.73 | 1.87 | 0.53 |
| P24788_CI Cdk11b   | Cyclin-depr K.SLM*ETM*KQFPLPGEVK.T           | 16.60  | 11.18 | 1.48 | 0.67 |
| P24788_CI Cdk11b   | Cyclin-depr K.TLMIQLLSGVK#.H                 | 19.48  | 11.46 | 1.70 | 0.59 |
| P24788_CI Cdk11b   | Cyclin-depr K.TLNSLLSHAGILK#.V               | 53.00  | 30.79 | 1.72 | 0.58 |
| Q692A1_CI Cdk13    | Cyclin-depr K.EVK#H#L#K#.T                   | 22.39  | 4.64  | 4.82 | 0.21 |
| Q692A1_CI Cdk13    | Cyclin-depr K.SLGGVQPSQTIQPK#.V              | 9.00   | 7.70  | 1.17 | 0.86 |
| Q692A1_CI Cdk13    | Cyclin-depr K.SLGGVQPSQTIQPK#.V              | 11.26  | 9.74  | 1.16 | 0.86 |
| P97377_CI Cdk2     | Cyclin-depr R.ALFPDSEIDQLFR.I                | 8.01   | 20.23 | 0.40 | 2.53 |
| P97377_CI Cdk2     | Cyclin-depr R.DLK#QNLLINAECSIK#.L            | 29.47  | 13.33 | 2.21 | 0.45 |
| P97377_CI Cdk2     | Cyclin-depr K.FM*DASALTGPLPLIK#.S            | 13.48  | 7.88  | 1.71 | 0.58 |
| P97377_CI Cdk2     | Cyclin-depr R.TLGTDPDEVVWPGVTSMPDYK#PSFPK#.W | 4.24   | 3.33  | 1.27 | 0.79 |
| P97377_CI Cdk2     | Cyclin-depr R.ALFPDSEIDQLFR.I                | 5.14   | 10.71 | 0.48 | 2.08 |
| P97377_CI Cdk2     | Cyclin-depr R.DLK#QNLLINAECSIK#.L            | 11.17  | 8.95  | 1.25 | 0.80 |
| P97377_CI Cdk2     | Cyclin-depr R.ALFPDSEIDQLFR.I                | 6.66   | 17.69 | 0.38 | 2.66 |
| P97377_CI Cdk2     | Cyclin-depr R.DLK#QNLLINAECSIK#.L            | 21.23  | 14.75 | 1.44 | 0.70 |
| P97377_CI Cdk2     | Cyclin-depr K.FM*DASALTGPLPLIK#.S            | 11.46  | 6.41  | 1.79 | 0.56 |
| P97377_CI Cdk2     | Cyclin-depr R.TLGTDPDEVVWPGVTSMPDYK#PSFPK#.W | 12.24  | 4.65  | 2.63 | 0.38 |
| P49615_CI Cdk5     | Cyclin-depr K.IGEGTYGVVYK#.A                 | 17.16  | 8.55  | 2.01 | 0.50 |
| P49615_CI Cdk5     | Cyclin-depr R.DLLQNLK#.C                     | 12.99  | 5.50  | 2.36 | 0.42 |
| P49615_CI Cdk5     | Cyclin-depr K.IGEGTYGVVYK#.A                 | 15.81  | 9.61  | 1.65 | 0.61 |
| P49615_CI Cdk5     | Cyclin-depr R.LLGTPTEEQWPAW*TK#.L            | 4.65   | 2.52  | 1.85 | 0.54 |
| Q03147_CI Cdk7     | Cyclin-depr R.APELLFGAR.M                    | 1.54   | 9.97  | 0.15 | 6.49 |
| Q03147_CI Cdk7     | Cyclin-depr R.DLKPNLLLDENGVLK.L              | 7.01   | 6.56  | 1.07 | 0.94 |
| Q03147_CI Cdk7     | Cyclin-depr R.VPFLPGDSDLDQLTR.I              | 7.21   | 16.38 | 0.44 | 2.27 |
| Q99J95_CI Cdk9     | Cyclin-depr K.GSQITQOSTNQR.N                 | 1.36   | 3.84  | 0.36 | 2.82 |
| Q99J95_CI Cdk9     | Cyclin-depr K.IGQGTGFEVFK#.A                 | 19.09  | 10.02 | 1.90 | 0.53 |
| Q99J95_CI Cdk9     | Cyclin-depr K.LLVLDPAQR.I                    | 4.20   | 8.05  | 0.52 | 1.92 |
| Q99J95_CI Cdk9     | Cyclin-depr R.NPATTNQTETER.V                 | 4.10   | 13.07 | 0.31 | 3.19 |
| Q99J95_CI Cdk9     | Cyclin-depr K.LLQLLK#.H                      | 13.61  | 4.78  | 2.85 | 0.35 |
| Q99J95_CI Cdk9     | Cyclin-depr R.NPATTNQTETER.V                 | 7.46   | 10.85 | 0.69 | 1.45 |
| P51480_CI Cdkn2a   | Cyclin-depr R.ALLEAGVSPNAPNSFGR.T            | 2.90   | 15.27 | 0.19 | 5.26 |
| Q8BI72_CA Cdkn2aip | CDKN2A-in K.ATLDVFFVPLK#.E                   | 14.11  | 5.19  | 2.72 | 0.37 |
| Q8BI72_CA Cdkn2aip | CDKN2A-in K.ELADLPQNK#.S                     | 19.87  | 82.87 | 0.24 | 4.17 |
| Q8BI72_CA Cdkn2aip | CDKN2A-in R.GISSNEGVEEPSK#.K                 | 19.82  | 19.08 | 1.04 | 0.96 |
| Q8BI72_CA Cdkn2aip | CDKN2A-in R.GASVFSLLK#.S                     | 23.54  | 9.18  | 2.56 | 0.39 |
| Q8BI72_CA Cdkn2aip | CDKN2A-in K.NSSSSGSSLLTPOSSSTNPSLLTSK#.S     | 9.62   | 3.93  | 2.45 | 0.41 |
| Q8BI72_CA Cdkn2aip | CDKN2A-in K.SGASLGSVSQLAAK#.S                | 28.02  | 14.64 | 1.91 | 0.52 |
| Q8BI72_CA Cdkn2aip | CDKN2A-in K.SGSSQSTSLPSK#.S                  | 64.38  | 34.12 | 1.89 | 0.53 |
| Q8BI72_CA Cdkn2aip | CDKN2A-in K.SSSEANISSVSK#.N                  | 45.48  | 12.26 | 3.71 | 0.27 |
| Q8BI72_CA Cdkn2aip | CDKN2A-in K.SSSEANISSVSK#.S                  | 33.48  | 12.13 | 2.76 | 0.36 |
| Q8BI72_CA Cdkn2aip | CDKN2A-in K.STAQVAASLLATK#.S                 | 40.74  | 15.05 | 2.71 | 0.37 |
| Q8BI72_CA Cdkn2aip | CDKN2A-in R.GISSNEGVEEPSK#.K                 | 15.58  | 9.44  | 1.65 | 0.61 |
| Q8BI72_CA Cdkn2aip | CDKN2A-in R.GASVFSVLLK#.S                    | 14.38  | 6.29  | 2.28 | 0.44 |
| Q8BI72_CA Cdkn2aip | CDKN2A-in K.LVAVGFSPTVNHGELLNAAEALK#.A       | 8.03   | 2.93  | 2.74 | 0.36 |
| Q8BI72_CA Cdkn2aip | CDKN2A-in K.SGASLGSVSQLAAK#.S                | 23.74  | 6.25  | 3.80 | 0.26 |
| Q8BI72_CA Cdkn2aip | CDKN2A-in K.SGSSQSTSLPSK#.S                  | 40.52  | 12.17 | 3.33 | 0.30 |
| Q8BI72_CA Cdkn2aip | CDKN2A-in K.SSSEANISSVSK#.N                  | 21.43  | 6.53  | 3.28 | 0.30 |
| Q8BI72_CA Cdkn2aip | CDKN2A-in K.SSSETASSLTSK#.S                  | 18.96  | 7.55  | 2.51 | 0.40 |
| Q8BI72_CA Cdkn2aip | CDKN2A-in R.GISSNEGVEEPSK#.K                 | 18.21  | 4.61  | 3.95 | 0.25 |
| Q8BI72_CA Cdkn2aip | CDKN2A-in R.GASVFSVLLK#.S                    | 18.84  | 5.95  | 3.17 | 0.32 |
| Q8BI72_CA Cdkn2aip | CDKN2A-in R.GSEIEDLVLLDEEARPNVLPALK.H        | 1.59   | 3.77  | 0.42 | 2.38 |
| Q8BI72_CA Cdkn2aip | CDKN2A-in K.SGASLGSVSQLAAK#.S                | 17.72  | 7.48  | 2.37 | 0.42 |
| Q8BI72_CA Cdkn2aip | CDKN2A-in K.SGSSQSTSLPSK#.S                  | 24.68  | 7.88  | 3.13 | 0.32 |
| Q8BI72_CA Cdkn2aip | CDKN2A-in K.SSSEANISSVSK#.N                  | 29.20  | 8.15  | 3.58 | 0.28 |
| Q8BI72_CA Cdkn2aip | CDKN2A-in K.SSSETASSLTSK#.S                  | 15.52  | 10.60 | 1.46 | 0.68 |
| Q8BI72_CA Cdkn2aip | CDKN2A-in K.STAQVAASLLATK#.S                 | 27.27  | 2.95  | 9.25 | 0.11 |
| Q8R4E9_CI Cdt1     | DNA replica: R.VQENAVPESTPAK#.V              | 12.25  | 4.69  | 2.61 | 0.38 |
| Q8R4E9_CI Cdt1     | DNA replica: R.FNVDEVPDIEPAELPPQVTEK#.L      | 5.08   | 2.71  | 1.88 | 0.53 |
| Q8R4E9_CI Cdt1     | DNA replica: R.VQENAVPESTPAK#.V              | 12.02  | 5.98  | 2.01 | 0.50 |
| Q9WTK2_C Cdy1      | Chromodori: K.EVQSALSTAADD5K#.L              | 10.62  | 5.88  | 1.81 | 0.55 |
| P28033_CE Cebp     | CCAAT/enh K.VLELTAENER.L                     | 2.57   | 7.87  | 0.33 | 3.06 |
| P53569_CE Cebpz    | CCAAT/enh K.AIVSSGTLADR.M                    | 14.86  | 9.80  | 1.52 | 0.66 |
| P53569_CE Cebpz    | CCAAT/enh K.ELLIIDLPLPSR.K                   | 1.98   | 7.71  | 0.26 | 3.89 |
| P53569_CE Cebpz    | CCAAT/enh K.K#GTIDDLQGELESFIQNLNLA#.Y        | 6.74   | 5.17  | 1.30 | 0.77 |
| P53569_CE Cebpz    | CCAAT/enh K.AIVSSGTLADR.M                    | 7.86   | 14.38 | 0.55 | 1.83 |
| P53569_CE Cebpz    | CCAAT/enh K.EESQIPDVEFFYR.Y                  | 14.62  | 7.94  | 1.84 | 0.54 |
| P28659_CE Celf1    | CUGBP Elav: K.#ALEAQNALHNM*#K#.V             | 3.43   | 2.37  | 1.45 | 0.69 |
| P28659_CE Celf1    | CUGBP Elav: K.MFVGQVPR.T                     | 4.66   | 16.11 | 0.29 | 3.46 |
| Q35216_CI Cenpa    | Histone H3: K.STDLFR.K                       | 2.25   | 11.71 | 0.19 | 5.20 |
| Q6RT24_CE Cenpe    | Centromeri: R.GSISENAQAGSTQDTAK.S            | 2.89   | 5.96  | 0.48 | 2.06 |
| Q9CPQ5_CI Cenpq    | Centromeri: K.IQLTSEVEEEQEVK#.Q              | 5.63   | 5.00  | 1.13 | 0.89 |
| Q9CPQ5_CI Cenpq    | Centromeri: K.VLALPESQK#.S                   | 10.24  | 5.69  | 1.80 | 0.56 |
| Q6A065_CI Cep170   | Centrosom: R.FNPDGEEEDVTVHE.-                | 12.08  | 12.08 | 1.00 | 1.00 |
| Q6A065_CI Cep170   | Centrosom: R.FNPDGEEEDVTVHE.-                | 18.12  | 18.12 | 1.00 | 1.00 |
| Q6A065_CI Cep170   | Centrosom: R.IDLLAQPR.R                      | 2.88   | 12.01 | 0.24 | 4.17 |
| Q6A065_CI Cep170   | Centrosom: R.M*QSTGSAM*PASSFK#.H             | 9.92   | 7.47  | 1.33 | 0.75 |
| Q6A065_CI Cep170   | Centrosom: R.TLPQLPNEEK#.L                   | 18.08  | 9.92  | 1.82 | 0.55 |
| Q99NF3_CI Cep41    | Centrosom: R.LEDNDSATSEADAIEIAAK#.T          | 4.14   | 3.38  | 1.22 | 0.82 |
| Q9R1K9_CI Cetn2    | Centrin-2: C.R.EAFDLFDADGTGTDIK#.E           | 26.42  | 16.02 | 1.65 | 0.61 |
| Q9R1K9_CI Cetn2    | Centrin-2: C.K.M*ISEIDKGTGK.M                | 18.45  | 4.56  | 4.04 | 0.25 |
| Q9R1K9_CI Cetn2    | Centrin-2: C.K.M*NFSDFTVM*#TQK#.M            | 4.38   | 3.11  | 1.41 | 0.71 |
| Q35648_CI Cetn3    | Centrin-3: C.R.ALGFVVK#.K                    | 16.68  | 8.16  | 2.04 | 0.49 |
| Q35648_CI Cetn3    | Centrin-3: C.K.DAFELFDTKDQDAIDYHELK.V        | 5.65   | 5.69  | 0.99 | 1.01 |
| Q35648_CI Cetn3    | Centrin-3: C.R.ELGENM*#SDEELR.A              | 2.35   | 8.21  | 0.29 | 3.50 |
| Q8BTU1_CI Cfpap20  | Cilia- and fl: R.LYSEDELPAEFK#.L             | 11.30  | 8.99  | 1.26 | 0.80 |
| O88271_CI Cfdp1    | Craniofacia: R.EK#QALVTSPTATPLPAGSGIK#.R     | 18.38  | 5.06  | 3.63 | 0.28 |
| P18760_CC Cfl1     | Cofilin-1: O: K.EILVGDVGTVDPPYTFVK#.M        | 12.90  | 5.31  | 2.43 | 0.41 |
| P18760_CC Cfl1     | Cofilin-1: O: K.#EDLVFVWAPENAPLK#.S          | 24.75  | 9.45  | 2.62 | 0.38 |
| P18760_CC Cfl1     | Cofilin-1: O: K.LGGSAVISLEGG#PL.-            | 108.60 | 42.38 | 2.56 | 0.39 |

|                  |                                                             |        |        |      |      |
|------------------|-------------------------------------------------------------|--------|--------|------|------|
| P18760_CC Cfl1   | Cofilin-1 O5.K.NILLEEG#EILVGDVGQTVDDPYTFVK#.M               | 47.58  | 13.88  | 3.43 | 0.29 |
| P18760_CC Cfl1   | Cofilin-1 O5.R.YALYDATTYK#.E                                | 69.05  | 21.56  | 3.20 | 0.31 |
| P45591_CC Cfl2   | Cofilin-2 O5.K.ESK#H#EDLVFVWAPESAPLK#.S                     | 5.04   | 1.43   | 3.53 | 0.28 |
| P45591_CC Cfl2   | Cofilin-2 O5.K.LGGSSVVSLEGG#.L-                             | 15.47  | 3.65   | 4.23 | 0.24 |
| P45591_CC Cfl2   | Cofilin-2 O5.K.QLVGDIGDVTDEPYTFVK#.L                        | 10.71  | 2.78   | 3.85 | 0.26 |
| Q8BH99_C Cggbp1  | CGG triplet K.ASVIQDFVK#.M                                  | 30.54  | 32.30  | 0.95 | 1.06 |
| Q9QWFO_C Chaf1a  | Chromatin K.AK#EWDLELAK#.G                                  | 9.24   | 10.05  | 0.92 | 1.09 |
| Q9QWFO_C Chaf1a  | Chromatin K.AK#EWDLELAK#.G                                  | 13.94  | 14.64  | 0.95 | 1.05 |
| Q9QWFO_C Chaf1a  | Chromatin K.VP#V#LEDILATKPSIASLPM*#M#SLDR.S                 | 1.98   | 11.25  | 0.18 | 5.67 |
| Q9D0N7_C Chaf1b  | Chromatin K.AIVEFLSNLAR.H                                   | 1.24   | 11.07  | 0.11 | 8.95 |
| Q9D0N7_C Chaf1b  | Chromatin K.ASESP#LNV#PYR.M                                 | 1.93   | 7.54   | 0.26 | 3.91 |
| Q9D0N7_C Chaf1b  | Chromatin R.FSPTGEILASGGDDAVILLWK#.M                        | 6.40   | 3.20   | 2.00 | 0.50 |
| Q8K327_C1 Champ1 | Chromosor K.APELSEIQLEAVDNAK#.C                             | 4.19   | 11.04  | 0.38 | 2.64 |
| Q8K327_C1 Champ1 | Chromosor K.DSQ#NSDAELSSSEYR.A                              | 5.79   | 2.79   | 2.07 | 0.48 |
| Q8K327_C1 Champ1 | Chromosor K.NVLQ#FTEK#.E                                    | 16.95  | 8.31   | 2.04 | 0.49 |
| Q8K327_C1 Champ1 | Chromosor K.VASDIWKP#VLSIDAEP.R.K                           | 7.07   | 10.24  | 0.69 | 1.45 |
| Q8K327_C1 Champ1 | Chromosor K.AFL#ESLLK#.N                                    | 19.49  | 22.95  | 0.85 | 1.18 |
| Q8K327_C1 Champ1 | Chromosor K.APELSEIQLEAVDNAK#.C                             | 4.64   | 4.73   | 0.98 | 1.02 |
| Q8K327_C1 Champ1 | Chromosor K.AVL#PASPEPR.K                                   | 4.72   | 24.99  | 0.19 | 5.30 |
| Q8K327_C1 Champ1 | Chromosor K.LL#DEALSPSSK.K                                  | 6.27   | 6.94   | 0.90 | 1.11 |
| Q8K327_C1 Champ1 | Chromosor K.LM*#EAL#ESPLEEQQL.-                             | 11.24  | 11.24  | 1.00 | 1.00 |
| Q8K327_C1 Champ1 | Chromosor K.LMEAL#ESPLEEQQL.-                               | 5.39   | 5.39   | 1.00 | 1.00 |
| Q8K327_C1 Champ1 | Chromosor K.NVLQ#FTEKEAFISEEIIA#.Y                          | 13.42  | 12.27  | 1.09 | 0.91 |
| Q8K327_C1 Champ1 | Chromosor K.TSPASLD#FPEPQK#.S                               | 10.57  | 7.49   | 1.41 | 0.71 |
| P40201_C1 Chd1   | Chromodoi R.LLITG#TPLQNSLK#.E                               | 11.96  | 4.33   | 2.76 | 0.36 |
| P40201_C1 Chd1   | Chromodoi K.SV#SDAP#VHITASGEPVPIA#E#EELDQK.T                | 4.14   | 3.30   | 1.25 | 0.80 |
| P40201_C1 Chd1   | Chromodoi K.ELE#FLLR.R                                      | 4.90   | 13.72  | 0.36 | 2.80 |
| P40201_C1 Chd1   | Chromodoi K.FGAEL#KEPEGE#EQEPQEM*#DIDEILK.R                 | 4.23   | 4.86   | 0.87 | 1.15 |
| P40201_C1 Chd1   | Chromodoi K.LILLDK#.L                                       | 26.03  | 17.57  | 1.48 | 0.67 |
| P40201_C1 Chd1   | Chromodoi R.LK#N#D#SLLYK#.T                                 | 21.71  | 11.18  | 1.94 | 0.52 |
| P40201_C1 Chd1   | Chromodoi K.LVIA#EDEL#PLH#K#.S                              | 12.28  | 9.41   | 1.31 | 0.77 |
| P40201_C1 Chd1   | Chromodoi K.SV#SDAP#VHITASGEPVPIA#E#EELDQK.T                | 14.43  | 8.69   | 1.66 | 0.60 |
| E9PZM4_C1 Chd2   | Chromodoi R.ENE#VST#AT#D#LLSQF#K#.V                         | 7.30   | 4.19   | 1.74 | 0.57 |
| E9Q614_E9 Chd3   | Protein Chr K.ELQGD#GPP#SSPT#NDPTVK#.Y                      | 5.95   | 5.91   | 1.01 | 0.99 |
| E9Q614_E9 Chd3   | Protein Chr R.ENE#SFEDNAI#K#.G                              | 11.56  | 8.60   | 1.34 | 0.74 |
| E9Q614_E9 Chd3   | Protein Chr K.SES#G#SEYGT#G#PGR.K                           | 1.50   | 6.51   | 0.23 | 4.33 |
| Q6PDQ2_C Chd4    | Chromodoi R.APE#PP#Q#V#AQQQ.-                               | 19.55  | 19.55  | 1.00 | 1.00 |
| Q6PDQ2_C Chd4    | Chromodoi K.GT#TEVEK#VEEK#.S                                | 15.55  | 10.16  | 1.53 | 0.65 |
| Q6PDQ2_C Chd4    | Chromodoi K.IE#ENSLK#E#E#TEGEK#EVK#.S                       | 8.84   | 6.78   | 1.30 | 0.77 |
| Q6PDQ2_C Chd4    | Chromodoi R.WQD#IQ#NDR.Y                                    | 7.93   | 9.42   | 0.84 | 1.19 |
| Q6PDQ2_C Chd4    | Chromodoi K.AFL#NAIM*#R.Y                                   | 2.61   | 11.43  | 0.23 | 4.38 |
| Q6PDQ2_C Chd4    | Chromodoi R.APE#PP#Q#V#AQQQ.-                               | 40.11  | 40.11  | 1.00 | 1.00 |
| Q6PDQ2_C Chd4    | Chromodoi K.AY#SLFM*#R.H                                    | 3.44   | 11.64  | 0.30 | 3.38 |
| Q6PDQ2_C Chd4    | Chromodoi R.ENE#SFEDNAI.R.G                                 | 4.45   | 22.85  | 0.19 | 5.13 |
| Q6PDQ2_C Chd4    | Chromodoi K.FG#TEEL#K#D#EATD#GG#D#N#K#E#G#D#S#V#H#YD#D#K#.A | 9.11   | 6.78   | 1.34 | 0.74 |
| Q6PDQ2_C Chd4    | Chromodoi R.FM*#F#NIAD#G#G#FTEL#H#L#W#Q#E#R.A               | 3.51   | 17.94  | 0.20 | 5.11 |
| Q6PDQ2_C Chd4    | Chromodoi R.FS#W#AQ#D#T#L#A#D#E#M*#G#L#G#K#.T               | 5.41   | 5.94   | 0.91 | 1.10 |
| Q6PDQ2_C Chd4    | Chromodoi R.GN#FLEI#K.N                                     | 22.29  | 24.71  | 0.90 | 1.11 |
| Q6PDQ2_C Chd4    | Chromodoi K.GT#TEVEK#VEEK#.S                                | 34.68  | 42.68  | 0.81 | 1.23 |
| Q6PDQ2_C Chd4    | Chromodoi R.HH#YEQ#Q#D#L#R.N                                | 4.25   | 36.47  | 0.12 | 8.58 |
| Q6PDQ2_C Chd4    | Chromodoi K.IE#ENSLK#E#E#TEGEK#EVK#.S                       | 13.37  | 11.63  | 1.15 | 0.87 |
| Q6PDQ2_C Chd4    | Chromodoi R.I#G#V#M#L#R.K                                   | 5.57   | 25.64  | 0.22 | 4.61 |
| Q6PDQ2_C Chd4    | Chromodoi R.ND#K#P#L#L#R.V                                  | 4.27   | 28.42  | 0.15 | 6.65 |
| Q6PDQ2_C Chd4    | Chromodoi R.NF#EAL#N#R.G                                    | 3.25   | 16.96  | 0.19 | 5.21 |
| Q6PDQ2_C Chd4    | Chromodoi R.TE#EPM*#E#E#K#.G                                | 11.02  | 6.59   | 1.67 | 0.60 |
| Q6PDQ2_C Chd4    | Chromodoi K.TV#Q#T#AV#L#S#L#Y#K#.E                          | 13.34  | 12.39  | 1.08 | 0.93 |
| Q6PDQ2_C Chd4    | Chromodoi R.VG#N#I#E#L#F#N#R.Q                              | 9.75   | 39.44  | 0.25 | 4.05 |
| Q6PDQ2_C Chd4    | Chromodoi R.VL#I#F#S#Q#M*#T.K.M                             | 15.06  | 18.82  | 0.80 | 1.25 |
| Q6PDQ2_C Chd4    | Chromodoi R.YA#L#N#E#P#K.G                                  | 7.59   | 8.70   | 0.87 | 1.15 |
| Q6PDQ2_C Chd4    | Chromodoi R.YG#M*#P#Q#D#A#F#T#Q#W#L#V#R.D                   | 2.95   | 8.58   | 0.34 | 2.91 |
| Q6PDQ2_C Chd4    | Chromodoi R.AI#R#E#N#E#F#D#N#A#I.R.G                        | 3.67   | 17.83  | 0.21 | 4.86 |
| Q6PDQ2_C Chd4    | Chromodoi R.APE#PP#Q#V#AQQQ.-                               | 112.33 | 112.33 | 1.00 | 1.00 |
| Q6PDQ2_C Chd4    | Chromodoi K.AY#SLFM*#R.H                                    | 13.10  | 32.53  | 0.40 | 2.48 |
| Q6PDQ2_C Chd4    | Chromodoi R.EE#E#M*#E#E#E#E#V#E.E                           | 4.17   | 11.07  | 0.38 | 2.66 |
| Q6PDQ2_C Chd4    | Chromodoi K.EG#I#Q#W#E#A#K#.E                               | 32.50  | 19.85  | 1.64 | 0.61 |
| Q6PDQ2_C Chd4    | Chromodoi R.EI#K#Q#E#S#V#D#P#D#Y#E#K#.L                     | 26.74  | 22.27  | 1.20 | 0.83 |
| Q6PDQ2_C Chd4    | Chromodoi R.ENE#SFEDNAI.R.G                                 | 28.44  | 112.45 | 0.25 | 3.95 |
| Q6PDQ2_C Chd4    | Chromodoi K.ES#M*#A#G#N#K#P#A#N#A#V#L#H#K#.V                | 72.96  | 71.43  | 1.02 | 0.98 |
| Q6PDQ2_C Chd4    | Chromodoi K.ES#M*#A#G#N#K#P#A#N#A#V#L#H#K#.V                | 8.49   | 8.14   | 1.04 | 0.96 |
| Q6PDQ2_C Chd4    | Chromodoi K.FA#E#M*#E#E#R.F                                 | 12.65  | 43.09  | 0.29 | 3.41 |
| Q6PDQ2_C Chd4    | Chromodoi K.FG#TEEL#K#.D                                    | 12.39  | 12.54  | 0.99 | 1.01 |
| Q6PDQ2_C Chd4    | Chromodoi K.FG#TEEL#K#D#EATD#GG#D#N#K#E#G#D#S#V#H#YD#D#K#.A | 56.33  | 39.80  | 1.42 | 0.71 |
| Q6PDQ2_C Chd4    | Chromodoi R.FM*#F#NIAD#G#G#FTEL#H#L#W#Q#E#R.A               | 6.64   | 13.58  | 0.49 | 2.05 |
| Q6PDQ2_C Chd4    | Chromodoi R.FS#W#AQ#D#T#L#A#D#E#M*#G#L#G#K#.T               | 50.77  | 32.73  | 1.55 | 0.64 |
| Q6PDQ2_C Chd4    | Chromodoi R.GG#N#Q#S#L#L#N#V#M*#D#L#K#.K                    | 35.81  | 30.52  | 1.17 | 0.85 |
| Q6PDQ2_C Chd4    | Chromodoi R.GG#N#Q#S#L#L#N#V#M#D#L#K#K#.C                   | 23.53  | 18.41  | 1.28 | 0.78 |
| Q6PDQ2_C Chd4    | Chromodoi R.GN#FLEI#K#.N                                    | 66.79  | 47.94  | 1.39 | 0.72 |
| Q6PDQ2_C Chd4    | Chromodoi K.GT#TEVEK#VEEK.S                                 | 95.03  | 67.16  | 1.42 | 0.71 |
| Q6PDQ2_C Chd4    | Chromodoi R.HH#YEQ#Q#D#L#R.N                                | 24.51  | 74.87  | 0.33 | 3.05 |
| Q6PDQ2_C Chd4    | Chromodoi R.ID#G#G#I#T#N#M*#R.Q                             | 32.11  | 122.35 | 0.26 | 3.81 |
| Q6PDQ2_C Chd4    | Chromodoi R.ID#G#G#I#T#N#M*#R.Q                             | 16.29  | 25.85  | 0.63 | 1.59 |
| Q6PDQ2_C Chd4    | Chromodoi K.IE#ENSLK#E#E#TEGEK#EVK#.S                       | 29.13  | 21.43  | 1.36 | 0.74 |
| Q6PDQ2_C Chd4    | Chromodoi K.IE#ENSLK#E#E#TEGEK#EVK#.S                       | 68.92  | 41.10  | 1.68 | 0.60 |
| Q6PDQ2_C Chd4    | Chromodoi R.I#G#V#M#L#R.K                                   | 8.64   | 42.36  | 0.20 | 4.90 |
| Q6PDQ2_C Chd4    | Chromodoi R.I#G#V#M#L#R.K                                   | 14.38  | 36.50  | 0.39 | 2.54 |
| Q6PDQ2_C Chd4    | Chromodoi R.I#L#N#H#S#V#D#K#K#.G                            | 27.42  | 19.66  | 1.39 | 0.72 |
| Q6PDQ2_C Chd4    | Chromodoi R.K#E#E#E#E#D#D#D#K#E#P#K#.S                      | 23.09  | 19.65  | 1.17 | 0.85 |
| Q6PDQ2_C Chd4    | Chromodoi R.KL#E#R#P#P#T#V#D#P#T#V#K.Y                      | 19.41  | 78.86  | 0.25 | 4.06 |
| Q6PDQ2_C Chd4    | Chromodoi R.K#N#D#M*#D#E#P#S#G#D#F#G#D#E#E#K#.S             | 43.04  | 33.70  | 1.28 | 0.78 |
| Q6PDQ2_C Chd4    | Chromodoi R.K#N#D#M#D#E#P#S#G#D#F#G#D#E#E#K#.S              | 14.27  | 12.88  | 1.11 | 0.90 |
| Q6PDQ2_C Chd4    | Chromodoi K.L#E#R#P#P#T#V#D#P#T#V#K.Y                       | 9.31   | 43.30  | 0.21 | 4.65 |
| Q6PDQ2_C Chd4    | Chromodoi R.LL#D#R#N#Q#D#E#T#E#L#Q#G#M*#N#E#L#S#S#F#K.V     | 3.50   | 10.88  | 0.32 | 3.11 |
| Q6PDQ2_C Chd4    | Chromodoi R.LL#D#R#N#Q#D#E#T#E#L#Q#G#M#N#E#L#S#S#F#K.V      | 3.37   | 11.08  | 0.30 | 3.29 |
| Q6PDQ2_C Chd4    | Chromodoi K.LL#E#Q#L#V#E#E#Q#L#R.R                          | 13.20  | 33.08  | 0.40 | 2.51 |
| Q6PDQ2_C Chd4    | Chromodoi K.LL#L#L#Q#K#.M                                   | 194.28 | 134.84 | 1.44 | 0.69 |
| Q6PDQ2_C Chd4    | Chromodoi K.M*#L#D#L#L#E#F#L#E#H#E#G#Y#K#.Y                 | 39.67  | 25.28  | 1.57 | 0.64 |
| Q6PDQ2_C Chd4    | Chromodoi K.M*#M*#L#H#L#V#R#P#L#G#S#K.T                     | 2.17   | 16.04  | 0.14 | 7.38 |
| Q6PDQ2_C Chd4    | Chromodoi K.M*#S#Q#P#S#P#S#P#T                              | 12.54  | 8.30   | 1.51 | 0.66 |
| Q6PDQ2_C Chd4    | Chromodoi R.NF#EAL#N#R.G                                    | 28.05  | 78.93  | 0.36 | 2.81 |
| Q6PDQ2_C Chd4    | Chromodoi R.NQ#D#E#T#E#L#Q#G#M*#N#E#L#S#S#F#K.V             | 14.41  | 10.91  | 1.32 | 0.76 |
| Q6PDQ2_C Chd4    | Chromodoi R.NQ#D#E#T#E#L#Q#G#M#N#E#L#S#S#F#K.V              | 13.78  | 8.79   | 1.57 | 0.64 |
| Q6PDQ2_C Chd4    | Chromodoi K.QE#S#V#D#P#D#Y#E#K#.L                           | 8.53   | 8.34   | 1.02 | 0.98 |
| Q6PDQ2_C Chd4    | Chromodoi K.QE#L#D#I#L#K#.F                                 | 65.03  | 44.69  | 1.46 | 0.69 |

|                  |                                            |        |        |      |      |
|------------------|--------------------------------------------|--------|--------|------|------|
| Q6PDQ2_C Chd4    | Chromodoi K.QVNYNDGSQEDR.D                 | 2.15   | 5.54   | 0.39 | 2.58 |
| Q6PDQ2_C Chd4    | Chromodoi K.SAVDLTPVVDK#.E                 | 22.48  | 15.42  | 1.46 | 0.69 |
| Q6PDQ2_C Chd4    | Chromodoi K.SSAQLLEDWGM*EDIDHVFSEEDYR.T    | 11.43  | 42.37  | 0.27 | 3.71 |
| Q6PDQ2_C Chd4    | Chromodoi K.SSAQLLEDWGMEDIHVFSEEDYR.T      | 4.56   | 12.20  | 0.37 | 2.67 |
| Q6PDQ2_C Chd4    | Chromodoi K.TPTPSTPGDTQNTNPAVPPAEDGIK.I    | 13.53  | 12.84  | 1.05 | 0.95 |
| Q6PDQ2_C Chd4    | Chromodoi K.TVQTAVFLYSLYK#.E               | 79.19  | 54.76  | 1.45 | 0.69 |
| Q6PDQ2_C Chd4    | Chromodoi K.TVQTAVFLYSLYK#.E               | 9.47   | 9.71   | 0.98 | 1.03 |
| Q6PDQ2_C Chd4    | Chromodoi K.VAQYVVEEEM*GEEEVER.E           | 2.65   | 10.84  | 0.24 | 4.08 |
| Q6PDQ2_C Chd4    | Chromodoi R.VELSPM*QK#.K                   | 71.95  | 53.70  | 1.34 | 0.75 |
| Q6PDQ2_C Chd4    | Chromodoi R.VGGNIEVLGFNAR.Q                | 32.44  | 101.83 | 0.32 | 3.14 |
| Q6PDQ2_C Chd4    | Chromodoi R.VLIFSQM*TK#.M                  | 157.87 | 125.70 | 1.26 | 0.80 |
| Q6PDQ2_C Chd4    | Chromodoi R.VLIFSQM*TK#.M                  | 58.26  | 46.15  | 1.26 | 0.79 |
| Q6PDQ2_C Chd4    | Chromodoi R.WQDQNDP.R.Y                    | 16.68  | 46.23  | 0.36 | 2.77 |
| Q6PDQ2_C Chd4    | Chromodoi R.YAILNEPFK#.G                   | 25.63  | 22.49  | 1.14 | 0.88 |
| Q6PDQ2_C Chd4    | Chromodoi R.YGM*PPQDAFTTQWLVR.D            | 10.61  | 18.77  | 0.41 | 2.47 |
| Q09XV5_Ci Chd8   | Chromodoi R.DGNITGIQFQSK#.K                | 7.20   | 9.20   | 1.11 | 0.90 |
| Q09XV5_Ci Chd8   | Chromodoi R.LPPAAGDEPPDNLFIPIEITER.A       | 18.89  | 12.23  | 1.54 | 0.65 |
| Q09XV5_Ci Chd8   | Chromodoi R.M*NYM*QNHQAGASASLSR.C          | 2.69   | 6.82   | 0.39 | 2.54 |
| O35280_Ci Chk1   | Serine/thre R.ATSGGM*SESSGFSK#.H           | 1.76   | 1.34   | 1.32 | 0.76 |
| Q8CGZ0_Ci Cherp  | Calcium ho K.ARDEFSTFGTR.K                 | 5.03   | 9.56   | 0.53 | 1.90 |
| Q8CGZ0_Ci Cherp  | Calcium ho R.DEFSTFGTR.K                   | 8.38   | 25.73  | 0.33 | 3.07 |
| Q8CGZ0_Ci Cherp  | Calcium ho R.ELLAALQK#.V                   | 78.75  | 59.87  | 1.32 | 0.76 |
| Q8CGZ0_Ci Cherp  | Calcium ho R.LLQLWEK#.N                    | 90.57  | 56.04  | 1.62 | 0.62 |
| Q8CGZ0_Ci Cherp  | Calcium ho K.M*GWSGSGGLGAK#.E              | 32.61  | 36.58  | 0.89 | 1.12 |
| Q8CGZ0_Ci Cherp  | Calcium ho K.MGWSGSGGLGAK#.E               | 17.99  | 12.01  | 1.50 | 0.67 |
| Q8CGZ0_Ci Cherp  | Calcium ho R.NGPEFEK#.M                    | 23.61  | 19.07  | 1.24 | 0.81 |
| Q8CGZ0_Ci Cherp  | Calcium ho R.NSEGWEQNGLYEFFR.A             | 5.11   | 13.85  | 0.37 | 2.71 |
| Q8CGZ0_Ci Cherp  | Calcium ho R.QEQVTTAVAHAVEQOM*QK#.L        | 27.17  | 21.00  | 1.29 | 0.77 |
| Q8CGZ0_Ci Cherp  | Calcium ho R.ELLAALQK#.V                   | 31.48  | 20.24  | 1.56 | 0.64 |
| Q8CGZ0_Ci Cherp  | Calcium ho K.GHQMLVKMGWSGSGGLGAK#.E        | 3.64   | 23.83  | 0.15 | 6.55 |
| Q9CQ10_Ci Chmp3  | Charged mi.R.LLFEITAGALGK#.A               | 11.68  | 5.47   | 2.13 | 0.47 |
| Q9D8B3_Ci Chmp4b | Charged mi.R.EALENANTTEVLK#.N              | 21.08  | 10.93  | 1.93 | 0.52 |
| Q9D8B3_Ci Chmp4b | Charged mi.K.K#EQELTAAK#.K                 | 25.46  | 10.92  | 2.33 | 0.43 |
| Q9D759_Ci Chmp5  | Charged mi.K.NK#DGLVDFEGLPQIPAS.-          | 16.18  | 6.69   | 2.42 | 0.41 |
| P0COA3_Ci Chmp6  | Charged mi.R.LDETOEAVERQ.R.Q               | 1.84   | 10.02  | 0.18 | 5.45 |
| P61022_Ci Chp1   | Calcineurin R.ASTLLRDELEEKI.K.E            | 2.29   | 16.68  | 0.14 | 7.27 |
| P61022_Ci Chp1   | Calcineurin R.IINAFSEGEDQVNF.R.G           | 2.50   | 9.53   | 0.26 | 3.81 |
| P61022_Ci Chp1   | Calcineurin R.IPELAINPLGDR.I               | 4.03   | 15.27  | 0.26 | 3.79 |
| P61022_Ci Chp1   | Calcineurin R.TIQEADQDGSASIFTEVK#.V        | 5.65   | 6.10   | 0.93 | 1.08 |
| Q9JKP8_Ci Chrac1 | Chromatin R.LVLSPLSR.I                     | 10.43  | 38.65  | 0.27 | 3.70 |
| Q9JKP8_Ci Chrac1 | Chromatin K.SSEPVSSINQEALVLTAK#.A          | 20.40  | 9.71   | 2.10 | 0.48 |
| Q8BIW9_Ci Chtf18 | Chromosor K.VVQGLFDNFR.L                   | 1.58   | 6.57   | 0.24 | 4.15 |
| Q8BIW9_Ci Chtf18 | Chromosor K.VVQGLFDNFR.L                   | 3.39   | 9.46   | 0.36 | 2.79 |
| Q9CY57_Ci Chtop  | Chromatin R.ASMQQQQALASAR.N                | 3.57   | 18.91  | 0.19 | 5.29 |
| Q9CY57_Ci Chtop  | Chromatin K.EQLDNQLDAYMSK#.T               | 8.23   | 5.58   | 1.48 | 0.68 |
| Q9CY57_Ci Chtop  | Chromatin K.GHLDALDAYM*AQDTPETND.-         | 3.95   | 3.95   | 1.00 | 1.00 |
| Q9CY57_Ci Chtop  | Chromatin K.EQLDNQLDAYM*SK#.T              | 8.49   | 6.04   | 1.41 | 0.71 |
| Q9CY57_Ci Chtop  | Chromatin K.EQLDNQLDAYMSK#.T               | 5.54   | 4.95   | 1.12 | 0.89 |
| Q9CY57_Ci Chtop  | Chromatin K.GHLDALDAYM*AQDTPETND.-         | 2.82   | 2.82   | 1.00 | 1.00 |
| Q99KN2_Ci Cia01  | Probable c1 K.HVVVHPQSQELLASASVDDTVK#.L    | 7.04   | 2.87   | 2.45 | 0.41 |
| Q3V1H1_Ci Ckap2  | Cytoskeletc R.IEPIITSPINIISYK#.A           | 10.70  | 5.44   | 1.97 | 0.51 |
| Q3V1H1_Ci Ckap2  | Cytoskeletc K.AQSEPANTVSVK#.A              | 18.29  | 10.68  | 1.71 | 0.58 |
| Q3V1H1_Ci Ckap2  | Cytoskeletc R.HIIDLITK#.S                  | 15.88  | 5.47   | 2.90 | 0.34 |
| Q3V1H1_Ci Ckap2  | Cytoskeletc R.IEPIITSPINIISYK#.A           | 14.35  | 5.84   | 2.46 | 0.41 |
| Q3V1H1_Ci Ckap2  | Cytoskeletc R.IEPIITSPINIISYK#.A           | 6.84   | 3.65   | 1.87 | 0.53 |
| Q8BMK4_C Ckap4   | Cytoskeletc K.IETNENNLAK#.G                | 11.79  | 13.86  | 0.85 | 1.17 |
| A2AGT5_Ck Ckap5  | Cytoskeletc R.IEDLEEQQVIR.S                | 1.82   | 8.91   | 0.20 | 4.89 |
| A2AGT5_Ck Ckap5  | Cytoskeletc K.FIQPNIGELPTALK#.G            | 7.50   | 3.94   | 1.90 | 0.53 |
| A2AGT5_Ck Ckap5  | Cytoskeletc K.LDDIFEPVLIPEPK#.I            | 5.98   | 5.93   | 1.01 | 0.99 |
| A2AGT5_Ck Ckap5  | Cytoskeletc K.AFISNVK#.T                   | 57.16  | 25.65  | 2.23 | 0.45 |
| A2AGT5_Ck Ckap5  | Cytoskeletc K.AK#VNDFLAEIFK#K#.I           | 14.49  | 9.92   | 1.46 | 0.69 |
| A2AGT5_Ck Ckap5  | Cytoskeletc R.DAAFEALGTALK#.V              | 82.00  | 44.89  | 1.83 | 0.55 |
| A2AGT5_Ck Ckap5  | Cytoskeletc K.DTNVM*LVLAALK#.C             | 9.87   | 5.67   | 1.74 | 0.57 |
| A2AGT5_Ck Ckap5  | Cytoskeletc K.DTNVM*LVLAALK#.C             | 7.62   | 4.18   | 1.82 | 0.55 |
| A2AGT5_Ck Ckap5  | Cytoskeletc K.EALEAVEVLK#.N                | 36.28  | 14.00  | 2.59 | 0.39 |
| A2AGT5_Ck Ckap5  | Cytoskeletc K.EGLDEVAGIINEAK#.F            | 51.87  | 22.46  | 2.31 | 0.43 |
| A2AGT5_Ck Ckap5  | Cytoskeletc K.ELEEEVVK#.L                  | 17.41  | 7.02   | 2.48 | 0.40 |
| A2AGT5_Ck Ckap5  | Cytoskeletc K.ETNFQVM*QM*Q#.L              | 21.73  | 10.29  | 2.11 | 0.47 |
| A2AGT5_Ck Ckap5  | Cytoskeletc K.FGQVAGHVPTILEK#.F            | 51.41  | 26.81  | 1.92 | 0.52 |
| A2AGT5_Ck Ckap5  | Cytoskeletc K.FIQPNIGELPTALK#.G            | 70.73  | 40.16  | 1.76 | 0.57 |
| A2AGT5_Ck Ckap5  | Cytoskeletc K.FVTDNSAVVQLK#.G              | 35.05  | 17.81  | 1.97 | 0.51 |
| A2AGT5_Ck Ckap5  | Cytoskeletc K.GLEAALVYVENAHVAGK#.T         | 50.00  | 24.28  | 2.06 | 0.49 |
| A2AGT5_Ck Ckap5  | Cytoskeletc K.HINDSAPEVR.D                 | 10.59  | 30.18  | 0.35 | 2.85 |
| A2AGT5_Ck Ckap5  | Cytoskeletc K.HSTSATDEGEDGEEPEGGNDVDDLPR.I | 3.54   | 8.40   | 0.42 | 2.37 |
| A2AGT5_Ck Ckap5  | Cytoskeletc K.HTLQININSVQLK#.E             | 18.44  | 8.93   | 2.07 | 0.48 |
| A2AGT5_Ck Ckap5  | Cytoskeletc R.IEDLEEQQVIR.S                | 10.33  | 27.96  | 0.37 | 2.71 |
| A2AGT5_Ck Ckap5  | Cytoskeletc K.LDDIFEPVLIPEPK#.I            | 70.49  | 40.64  | 1.73 | 0.58 |
| A2AGT5_Ck Ckap5  | Cytoskeletc K.LEAGDYADLVK#.A               | 62.37  | 28.63  | 2.18 | 0.46 |
| A2AGT5_Ck Ckap5  | Cytoskeletc K.LFAIEIYR.W                   | 3.43   | 11.25  | 0.31 | 3.28 |
| A2AGT5_Ck Ckap5  | Cytoskeletc R.LLPDTINSINLDR.I              | 13.90  | 32.82  | 0.42 | 2.36 |
| A2AGT5_Ck Ckap5  | Cytoskeletc R.LSGYEALK#.I                  | 50.01  | 22.55  | 2.22 | 0.45 |
| A2AGT5_Ck Ckap5  | Cytoskeletc R.M*IFEDEK*PALLSQIDAEFQK.M     | 19.11  | 61.77  | 0.31 | 3.23 |
| A2AGT5_Ck Ckap5  | Cytoskeletc R.MIFEDEK*PALLSQIDAEFQK.M      | 7.28   | 6.23   | 1.17 | 0.86 |
| A2AGT5_Ck Ckap5  | Cytoskeletc K.M*QGQSPAPTR.G                | 12.36  | 34.06  | 0.36 | 2.76 |
| A2AGT5_Ck Ckap5  | Cytoskeletc K.MQGQSPAPTR.G                 | 3.80   | 12.06  | 0.31 | 3.18 |
| A2AGT5_Ck Ckap5  | Cytoskeletc K.NLGIPVITVLGDSK#.N            | 109.39 | 45.37  | 2.41 | 0.41 |
| A2AGT5_Ck Ckap5  | Cytoskeletc K.NQSETLNLWLSNAIK#.E           | 21.72  | 9.38   | 2.32 | 0.43 |
| A2AGT5_Ck Ckap5  | Cytoskeletc K.NSSQFFQSYVER.G               | 7.26   | 24.21  | 0.30 | 3.33 |
| A2AGT5_Ck Ckap5  | Cytoskeletc R.QELLGWLAEK#.L                | 16.42  | 8.21   | 2.00 | 0.50 |
| A2AGT5_Ck Ckap5  | Cytoskeletc R.SQQLAEK#.L                   | 18.51  | 11.37  | 1.63 | 0.61 |
| A2AGT5_Ck Ckap5  | Cytoskeletc K.SVNPFLADVVK#.L               | 18.30  | 9.31   | 1.96 | 0.51 |
| A2AGT5_Ck Ckap5  | Cytoskeletc K.TALAAATNPAVR.T               | 17.85  | 42.70  | 0.42 | 2.39 |
| A2AGT5_Ck Ckap5  | Cytoskeletc R.TQININSANM*LR.K              | 8.36   | 20.22  | 0.41 | 2.42 |
| A2AGT5_Ck Ckap5  | Cytoskeletc K.TQIPAPVEDSVSTIEAK#PDLK#K#.A  | 37.16  | 29.14  | 1.28 | 0.78 |
| A2AGT5_Ck Ckap5  | Cytoskeletc K.TSAQVLDGLVDK#.I              | 34.04  | 13.78  | 2.47 | 0.40 |
| A2AGT5_Ck Ckap5  | Cytoskeletc K.TSAQVLDGLVDK#HGDVK#.C        | 44.95  | 22.42  | 2.01 | 0.50 |
| A2AGT5_Ck Ckap5  | Cytoskeletc K.TTGEVSVGVSK#.V               | 76.33  | 34.19  | 2.23 | 0.45 |
| A2AGT5_Ck Ckap5  | Cytoskeletc K.VNDFLAEIFK#.K                | 16.77  | 10.54  | 1.59 | 0.63 |
| A2AGT5_Ck Ckap5  | Cytoskeletc K.VNDFLAEIFK#K#.I              | 32.76  | 15.91  | 2.06 | 0.49 |
| A2AGT5_Ck Ckap5  | Cytoskeletc K.YSDTDIEPLK#.N                | 37.42  | 21.12  | 1.77 | 0.56 |
| E9QKH0_E5 Clasp1 | CLIP-associi R.AQTNTNSSSSDVSTHS.-          | 3.29   | 3.29   | 1.00 | 1.00 |
| E9QKH0_E5 Clasp1 | CLIP-associi R.FIVDQQTQPNLK#.V             | 8.72   | 6.78   | 1.29 | 0.78 |
| E9QKH0_E5 Clasp1 | CLIP-associi R.FIVDQQTQPNLK#.V             | 19.75  | 14.36  | 1.38 | 0.73 |



|                 |                                                              |        |        |       |      |
|-----------------|--------------------------------------------------------------|--------|--------|-------|------|
| Q68FD5_C1Cltc   | Clathrin he R.LAELEEFINGPNNNAHQVQVGR.C                       | 20.85  | 23.41  | 0.89  | 1.12 |
| Q68FD5_C1Cltc   | Clathrin he R.LASTLVHLGEVQAADGAR.K                           | 68.15  | 76.34  | 0.89  | 1.12 |
| Q68FD5_C1Cltc   | Clathrin he R.LEKHELIEFR.R                                   | 18.01  | 14.18  | 1.27  | 0.79 |
| Q68FD5_C1Cltc   | Clathrin he K.LLVNNSVNFGR.L                                  | 43.54  | 59.25  | 0.73  | 1.36 |
| Q68FD5_C1Cltc   | Clathrin he R.NLQNLILLTAIK#.A                                | 319.40 | 95.42  | 3.35  | 0.30 |
| Q68FD5_C1Cltc   | Clathrin he K.NNRPSEGLQTR.L                                  | 10.40  | 44.88  | 0.23  | 4.32 |
| Q68FD5_C1Cltc   | Clathrin he R.RPISADSAIM*NPASK.V                             | 7.80   | 10.29  | 0.76  | 1.32 |
| Q68FD5_C1Cltc   | Clathrin he R.RPLIDQVQVLTSETQDPEEVSVTVK.A                    | 7.77   | 12.96  | 0.60  | 1.67 |
| Q68FD5_C1Cltc   | Clathrin he K.SVNESLNLFITEEDYQALR.T                          | 38.72  | 43.10  | 0.90  | 1.11 |
| Q68FD5_C1Cltc   | Clathrin he K.TLQJFNIEM*K#.S                                 | 92.60  | 24.92  | 3.72  | 0.27 |
| Q68FD5_C1Cltc   | Clathrin he K.TLQJFNIEM*K#.S                                 | 51.05  | 13.83  | 3.69  | 0.27 |
| Q68FD5_C1Cltc   | Clathrin he R.TSIDAYDNFDNISLAQR.L                            | 34.32  | 39.40  | 0.87  | 1.15 |
| Q68FD5_C1Cltc   | Clathrin he K.VANVELYK#.A                                    | 204.03 | 53.34  | 3.83  | 0.26 |
| Q68FD5_C1Cltc   | Clathrin he R.VVGAM*QLYSVDR.K                                | 8.83   | 12.61  | 0.70  | 1.43 |
| Q68FD5_C1Cltc   | Clathrin he R.VVGAMQLYSVDR.K                                 | 9.57   | 14.88  | 0.64  | 1.56 |
| Q68FD5_C1Cltc   | Clathrin he K.WISLNTLVTDNAVYHWSM*EGESQPVK#.M                 | 12.40  | 2.61   | 4.75  | 0.21 |
| Q68FD5_C1Cltc   | Clathrin he K.YEIVVQK#.V                                     | 72.57  | 24.02  | 3.02  | 0.33 |
| Q9DBC3_C1Cmtr1  | Cap-speciffr R.NTESDVLNVPLM*VIK#.G                           | 7.14   | 2.88   | 2.48  | 0.40 |
| Q9DBC3_C1Cmtr1  | Cap-speciffr R.EYLFVNIK#.L                                   | 13.61  | 3.36   | 4.05  | 0.25 |
| Q9D1A2_C1Cndp2  | Cytosolic n R.EGGSIPVTLTQFQATGK#.N                           | 16.07  | 5.31   | 3.03  | 0.33 |
| Q9D1A2_C1Cndp2  | Cytosolic n R.LNWIEGT#.M                                     | 18.35  | 6.94   | 2.64  | 0.38 |
| Q9D1A2_C1Cndp2  | Cytosolic n K.NVM*LLPVGADDGAHSQNEK#.L                        | 5.99   | 1.90   | 3.15  | 0.32 |
| Q9D1A2_C1Cndp2  | Cytosolic n K.QK#LPGDSEIPLPILLGK#.L                          | 14.72  | 3.83   | 3.85  | 0.26 |
| Q08093_C1Cnn2   | Calponin-2 K.GLOSGVDIGVK#.Y                                  | 120.20 | 102.40 | 1.17  | 0.85 |
| Q08093_C1Cnn2   | Calponin-2 K.GPSYGLSAEVK#.N                                  | 398.83 | 242.36 | 1.65  | 0.61 |
| Q08093_C1Cnn2   | Calponin-2 R.NFDDATM*K#.A                                    | 62.02  | 51.98  | 1.19  | 0.84 |
| Q08093_C1Cnn2   | Calponin-2 R.SM*QNWHLQENLSNFIK#.A                            | 67.78  | 42.97  | 1.58  | 0.63 |
| Q08093_C1Cnn2   | Calponin-2 R.SMQNWHQENLSNFIK#.A                              | 37.52  | 29.03  | 1.29  | 0.77 |
| Q08093_C1Cnn2   | Calponin-2 R.SMQNWHQENLSNFIK#.A                              | 6.02   | 3.42   | 1.76  | 0.57 |
| Q08093_C1Cnn2   | Calponin-2 R.SWIEGLTGLSIGDPFQK#.G                            | 121.35 | 96.38  | 1.26  | 0.79 |
| Q08093_C1Cnn2   | Calponin-2 R.SWIEGLTGLSIGDPFQK#.G                            | 13.87  | 13.48  | 1.03  | 0.97 |
| Q08093_C1Cnn2   | Calponin-2 K.YDPQKAEELR.S                                    | 6.31   | 28.65  | 0.22  | 4.54 |
| Q08093_C1Cnn2   | Calponin-2 K.GLOSGVDIGVK#.Y                                  | 36.25  | 35.62  | 1.02  | 0.98 |
| Q08093_C1Cnn2   | Calponin-2 R.SM*QNWHLQENLSNFIK#.A                            | 47.40  | 47.87  | 0.99  | 1.01 |
| Q08093_C1Cnn2   | Calponin-2 R.SWIEGLTGLSIGDPFQK#.G                            | 70.58  | 63.02  | 1.12  | 0.89 |
| Q08093_C1Cnn2   | Calponin-2 K.GPSYGLSAEVK#.N                                  | 20.19  | 12.10  | 1.67  | 0.60 |
| Q08093_C1Cnn2   | Calponin-2 K.GPSYGLSAEVK#.N                                  | 18.79  | 13.14  | 1.43  | 0.70 |
| Q9DAW9_C1Cnn3   | Calponin-3 K.AGQSVIGLQM*GTNK#.C                              | 110.81 | 48.51  | 2.28  | 0.44 |
| Q9DAW9_C1Cnn3   | Calponin-3 K.AGQSVIGLQMGTNK#.C                               | 56.76  | 28.01  | 2.03  | 0.49 |
| Q9DAW9_C1Cnn3   | Calponin-3 R.EYQYDQDQIGY.-                                   | 47.14  | 47.14  | 1.00  | 1.00 |
| Q9DAW9_C1Cnn3   | Calponin-3 K.GASQAGM*LAPGTR.R                                | 32.28  | 64.67  | 0.50  | 2.00 |
| Q9DAW9_C1Cnn3   | Calponin-3 K.GHHTIDIGK#.Y                                    | 73.96  | 27.64  | 2.68  | 0.37 |
| Q9DAW9_C1Cnn3   | Calponin-3 K.GM*SVYGLGR.Q                                    | 23.91  | 37.05  | 0.65  | 1.55 |
| Q9DAW9_C1Cnn3   | Calponin-3 K.GMSVYGLGR.Q                                     | 11.98  | 13.09  | 0.92  | 1.09 |
| Q9DAW9_C1Cnn3   | Calponin-3 K.K#VNESSLNWPQLENIGNFIK#.A                        | 29.23  | 12.33  | 2.37  | 0.42 |
| Q9DAW9_C1Cnn3   | Calponin-3 K.LTLQPVNDSTLSLQM*GTNK#.V                         | 22.77  | 9.55   | 2.38  | 0.42 |
| Q9DAW9_C1Cnn3   | Calponin-3 K.LTLQPVNDSTLSLQMGTNK#.V                          | 22.08  | 8.42   | 2.62  | 0.38 |
| Q9DAW9_C1Cnn3   | Calponin-3 K.M*QTDK#PFDQTTISLQM*GTNK.G                       | 35.85  | 16.47  | 2.18  | 0.46 |
| Q9DAW9_C1Cnn3   | Calponin-3 K.MQTDK#PFDQTTISLQM*GTNK#.G                       | 13.66  | 6.82   | 2.00  | 0.50 |
| Q9DAW9_C1Cnn3   | Calponin-3 K.M*QTDK#PFDQTTISLQMGTNK#.G                       | 21.52  | 10.28  | 2.09  | 0.48 |
| Q9DAW9_C1Cnn3   | Calponin-3 K.MQTDK#PFDQTTISLQMGTNK#.G                        | 11.80  | 5.97   | 1.98  | 0.51 |
| Q9DAW9_C1Cnn3   | Calponin-3 K.VNESSLNWPQLENIGNFIK#.A                          | 52.73  | 21.60  | 2.44  | 0.41 |
| Q9DAW9_C1Cnn3   | Calponin-3 K.YDQQAEDLR.N                                     | 11.13  | 31.08  | 0.36  | 2.79 |
| Q9DAW9_C1Cnn3   | Calponin-3 K.AGQSVIGLQM*GTNK#.C                              | 26.39  | 10.20  | 2.59  | 0.39 |
| Q9DAW9_C1Cnn3   | Calponin-3 K.AGQSVIGLQMGTNK#.C                               | 122.52 | 4.66   | 26.31 | 0.04 |
| Q9DAW9_C1Cnn3   | Calponin-3 K.GASQAGM*LAPGTR.R                                | 7.50   | 13.59  | 0.55  | 1.81 |
| Q9DAW9_C1Cnn3   | Calponin-3 K.K#VNESSLNWPQLENIGNFIK#.A                        | 8.73   | 4.64   | 1.88  | 0.53 |
| Q9DAW9_C1Cnn3   | Calponin-3 K.M*QTDK#PFDQTTISLQM*GTNK.G                       | 12.19  | 7.75   | 1.57  | 0.64 |
| Q9DAW9_C1Cnn3   | Calponin-3 K.VNESSLNWPQLENIGNFIK#.A                          | 10.33  | 5.37   | 1.93  | 0.52 |
| Q9DAW9_C1Cnn3   | Calponin-3 K.VNESSLNWPQLENIGNFIK#.A                          | 21.46  | 12.53  | 1.71  | 0.58 |
| Q9DAW9_C1Cnn3   | Calponin-3 K.YDQQAEDLR.N                                     | 2.23   | 3.80   | 0.59  | 1.70 |
| Q6ZQ08_C1Cnot1  | CCR4-NOT t K.AVEGLDLDATSGADALLLR.Y                           | 7.17   | 15.52  | 0.46  | 2.17 |
| Q6ZQ08_C1Cnot1  | CCR4-NOT t R.DAIALGLLQK#.A                                   | 65.79  | 43.35  | 1.52  | 0.66 |
| Q6ZQ08_C1Cnot1  | CCR4-NOT t K.DVPPSINTNIDTLVATDQTER.I                         | 9.83   | 14.18  | 0.69  | 1.44 |
| Q6ZQ08_C1Cnot1  | CCR4-NOT t K.EIDDEANSYFOR.J                                  | 10.35  | 20.36  | 0.51  | 1.97 |
| Q6ZQ08_C1Cnot1  | CCR4-NOT t R.EPLLM*SISTNLK#.N                                | 8.16   | 2.72   | 3.00  | 0.33 |
| Q6ZQ08_C1Cnot1  | CCR4-NOT t K.GAFVGVGQEQIDAFK#.T                              | 30.97  | 13.03  | 2.38  | 0.42 |
| Q6ZQ08_C1Cnot1  | CCR4-NOT t K.GQQLLYVVPFAK#.V                                 | 40.80  | 21.93  | 1.86  | 0.54 |
| Q6ZQ08_C1Cnot1  | CCR4-NOT t K.HSGEATNTVTK#.I                                  | 5.60   | 2.55   | 2.20  | 0.46 |
| Q6ZQ08_C1Cnot1  | CCR4-NOT t K.IAFIFNLSQSNM*TKQ#.V                             | 9.14   | 5.54   | 1.65  | 0.61 |
| Q6ZQ08_C1Cnot1  | CCR4-NOT t K.IAFIFNLSQSNMTQK#.V                              | 4.85   | 2.75   | 1.76  | 0.57 |
| Q6ZQ08_C1Cnot1  | CCR4-NOT t R.IILTNFTGVM*PPQFK#.K                             | 21.55  | 13.22  | 1.63  | 0.61 |
| Q6ZQ08_C1Cnot1  | CCR4-NOT t K.IINLLK#.V                                       | 40.65  | 16.91  | 2.40  | 0.42 |
| Q6ZQ08_C1Cnot1  | CCR4-NOT t R.LAEVGYEQVK#.Q                                   | 71.15  | 34.50  | 2.06  | 0.48 |
| Q6ZQ08_C1Cnot1  | CCR4-NOT t K.LGTSGLNQPTFQSK#.M                               | 15.65  | 8.48   | 1.84  | 0.54 |
| Q6ZQ08_C1Cnot1  | CCR4-NOT t R.LIALLVK#.H                                      | 21.16  | 8.99   | 2.35  | 0.42 |
| Q6ZQ08_C1Cnot1  | CCR4-NOT t R.LPDPFPNLK#.V                                    | 28.61  | 14.48  | 1.98  | 0.51 |
| Q6ZQ08_C1Cnot1  | CCR4-NOT t K.M*QGSITTPGSIALQAQAQVPAK#.A                      | 32.66  | 18.78  | 1.74  | 0.57 |
| Q6ZQ08_C1Cnot1  | CCR4-NOT t K.MQGSITTPGSIALQAQAQVPAK#.A                       | 9.98   | 5.68   | 1.76  | 0.57 |
| Q6ZQ08_C1Cnot1  | CCR4-NOT t K.M*VLNETYR.N                                     | 10.18  | 19.30  | 0.53  | 1.90 |
| Q6ZQ08_C1Cnot1  | CCR4-NOT t K.M*YFYGIALDR.F                                   | 16.06  | 8.31   | 1.93  | 0.52 |
| Q6ZQ08_C1Cnot1  | CCR4-NOT t K.NLDEQLSAPK#.K                                   | 41.50  | 25.31  | 1.64  | 0.61 |
| Q6ZQ08_C1Cnot1  | CCR4-NOT t R.NLILSAFPR.N                                     | 12.30  | 31.41  | 0.39  | 2.55 |
| Q6ZQ08_C1Cnot1  | CCR4-NOT t R.NVPGFLPTNDLSQPTGFLAQP*M#.Q                      | 43.94  | 30.57  | 1.44  | 0.70 |
| Q6ZQ08_C1Cnot1  | CCR4-NOT t K.QAWATDVAQIDYK#.C                                | 5.87   | 3.05   | 1.93  | 0.52 |
| Q6ZQ08_C1Cnot1  | CCR4-NOT t K.SLDLIESLR.L                                     | 13.23  | 39.89  | 0.33  | 3.01 |
| Q6ZQ08_C1Cnot1  | CCR4-NOT t K.SLK#APHLFAQLSK#.V                               | 11.41  | 7.55   | 1.51  | 0.66 |
| Q6ZQ08_C1Cnot1  | CCR4-NOT t K.SLLLEYVK#.G                                     | 16.11  | 10.18  | 1.58  | 0.63 |
| Q6ZQ08_C1Cnot1  | CCR4-NOT t R.SNYEAM*IDR.A                                    | 6.11   | 12.27  | 0.50  | 2.01 |
| Q6ZQ08_C1Cnot1  | CCR4-NOT t R.SPVTFSLDLR.S                                    | 15.02  | 38.00  | 0.40  | 2.53 |
| Q6ZQ08_C1Cnot1  | CCR4-NOT t K.VLLTSDK#.A                                      | 65.63  | 23.76  | 2.76  | 0.36 |
| Q6ZQ08_C1Cnot1  | CCR4-NOT t K.YNVEAVELLIR.N                                   | 4.53   | 11.16  | 0.41  | 2.46 |
| Q6ZQ08_C1Cnot1  | CCR4-NOT t K.IILNTAVAEFFK.N                                  | 7.25   | 9.51   | 0.76  | 1.31 |
| Q8BH15_C1Cnot10 | CCR4-NOT t K.IILNTAVAEFFK#.N                                 | 27.45  | 18.76  | 1.46  | 0.68 |
| Q8BH15_C1Cnot10 | CCR4-NOT t K.SVM*NTAGNSAPSLFLK#.S                            | 4.78   | 2.84   | 1.68  | 0.59 |
| Q8BH15_C1Cnot10 | CCR4-NOT t K.AESAAALIEAAK#.S                                 | 20.02  | 10.76  | 1.86  | 0.54 |
| Q8BH15_C1Cnot10 | CCR4-NOT t K.IILNTAVAEFFK#.N                                 | 34.54  | 18.52  | 1.86  | 0.54 |
| Q8BH15_C1Cnot10 | CCR4-NOT t R.ISDAITHLNPEVTDVSLGISSNEQDQSDK#GENEAM*ESSGK#.R   | 3.20   | 2.39   | 1.34  | 0.75 |
| Q9CWN7_C1Cnot11 | CCR4-NOT t R.GGQEPDRPPLSGFLPITPPEK.F                         | 2.75   | 6.94   | 0.40  | 2.52 |
| Q9CWN7_C1Cnot11 | CCR4-NOT t K.LTDTGETPSET#.I                                  | 16.75  | 8.37   | 2.00  | 0.50 |
| Q8C5L3_C1Cnot2  | CCR4-NOT t R.AAETDPGM*VHLALGSDLTLGLNLNSPENLYPK#.F            | 8.53   | 5.45   | 1.56  | 0.64 |
| Q8C5L3_C1Cnot2  | CCR4-NOT t R.APVYGM*VTKPANEQSDFSIHNEFDPALPGSSYKDPSTSSNDSDK.S | 6.12   | 4.63   | 1.32  | 0.76 |
| Q8C5L3_C1Cnot2  | CCR4-NOT t R.EGSGNPTPLINPLAGR.A                              | 7.55   | 22.63  | 0.33  | 3.00 |

|                    |                                                          |        |        |      |      |
|--------------------|----------------------------------------------------------|--------|--------|------|------|
| Q8C5L3_C1 Cnot2    | CCR4-NOT1 R.GM*SNPTQLNR.S                                | 3.48   | 15.49  | 0.22 | 4.45 |
| Q8C5L3_C1 Cnot2    | CCR4-NOT1 R.TNSM*SSGLGSPNR.S                             | 2.69   | 9.63   | 0.28 | 3.58 |
| Q8C5L3_C1 Cnot2    | CCR4-NOT1 R.EGSGNPTPLINPLAGR.A                           | 4.08   | 7.02   | 0.58 | 1.72 |
| Q8K0V4_C1 Cnot3    | CCR4-NOT1 K.AAGTLNGPQFSTTPEIK#.A                         | 4.19   | 3.28   | 1.28 | 0.78 |
| Q8K0V4_C1 Cnot3    | CCR4-NOT1 K.TWVASNEIK#.D                                 | 10.73  | 7.44   | 1.44 | 0.69 |
| Q60809_C1 Cnot7    | CCR4-NOT1 R.LFFPVYDVVK#.Y                                | 18.59  | 10.29  | 1.81 | 0.55 |
| Q60809_C1 Cnot7    | CCR4-NOT1 R.LFFPVYDVVK#.Y                                | 14.78  | 10.38  | 1.42 | 0.70 |
| Q60809_C1 Cnot7    | CCR4-NOT1 R.LFFPVYDVVK#.Y                                | 31.68  | 17.55  | 1.81 | 0.55 |
| Q9D8X5_C1 Cnot8    | CCR4-NOT1 R.LYGLGTGVAQK.Q                                | 5.66   | 8.76   | 0.65 | 1.55 |
| Q9QXT0_C1 Cnpy2    | Protein can R.ALVDELEWEIAR.V                             | 15.74  | 15.76  | 1.00 | 1.00 |
| Q9QXT0_C1 Cnpy2    | Protein can R.INPDGSSQSVVEVPYAR.S                        | 11.34  | 12.52  | 0.91 | 1.10 |
| Q9QXT0_C1 Cnpy2    | Protein can R.NGESSELDLQIR.I                             | 3.58   | 4.00   | 0.89 | 1.12 |
| P12960_C1 Cntr1    | Contactin-1 K.TDPIIEGNMESAK#.A                           | 9.66   | 3.93   | 2.46 | 0.41 |
| Q9DBL7_C1 Coasy    | Bifunction: R.LLTLNIQTK#.S                               | 22.09  | 8.54   | 2.59 | 0.39 |
| Q9DBL7_C1 Coasy    | Bifunction: K.LLTDIVWPVIAK#.L                            | 19.63  | 7.13   | 2.75 | 0.36 |
| Q9Z160_CC Cog1     | Conserved i K.VK#LDDLALYLPSSDTPLLK#.D                    | 16.72  | 7.66   | 2.18 | 0.46 |
| Q9Z1L5_CC Cog2     | Conserved i R.LQEGLPDLLETVK#.Q                           | 11.10  | 4.09   | 2.71 | 0.37 |
| Q8R1U1_C1 Cog4     | Conserved i R.LFQSGIGEGEAQAK#.F                          | 8.50   | 7.43   | 1.14 | 0.87 |
| Q8COL8_CC Cog5     | Conserved i R.LLEQGVETQNPQTQVGTALQVFNHGLTK#.E            | 6.42   | 1.76   | 3.65 | 0.27 |
| Q3UM29_C1 Cog7     | Conserved i K.VVELVDVAVYGPYKHPFLK#.Y                     | 11.78  | 6.87   | 1.71 | 0.58 |
| Q5SU73_C1 Coil     | Coilin OS=R.VTDLISLIR.Q                                  | 2.62   | 13.84  | 0.19 | 5.28 |
| Q8K297_G1 Colgalt1 | Procollagen R.AFSVEPLLIYPTHYDGDVYSDTETSVMNNEQVK#.T       | 5.86   | 2.03   | 2.88 | 0.35 |
| Q8K297_G1 Colgalt1 | Procollagen R.EGLDWDLVYVGR.K                             | 10.90  | 6.54   | 1.67 | 0.60 |
| Q8K297_G1 Colgalt1 | Procollagen R.FEIFFK#.R                                  | 22.51  | 7.11   | 3.17 | 0.32 |
| Q8K297_G1 Colgalt1 | Procollagen R.NAAPALPATLGALEQLR.H                        | 11.66  | 10.97  | 1.06 | 0.94 |
| Q8K297_G1 Colgalt1 | Procollagen R.TPAYIPIR.K                                 | 8.74   | 13.63  | 0.64 | 1.56 |
| Q8K297_G1 Colgalt1 | Procollagen R.WSPESLQAPR.V                               | 6.59   | 7.49   | 0.88 | 1.14 |
| Q8K4M5_C1 Commd1   | COMM don K.K#QGGITSEQAIVISK#.F                           | 4.23   | 3.74   | 1.13 | 0.88 |
| Q8K4M5_C1 Commd1   | COMM don K.SIASADM*DFNQLFAFLTAQTK#.K                     | 30.11  | 16.55  | 1.82 | 0.55 |
| Q8JZY2_CO Commd10  | COMM don K.AVPLNIAIDTGR.F                                | 7.21   | 18.72  | 0.39 | 2.59 |
| Q8JZY2_CO Commd10  | COMM don K.DK#AEAFASAWSAM*GQETVEK#.F                     | 10.58  | 7.46   | 1.42 | 0.70 |
| Q8JZY2_CO Commd10  | COMM don K.DK#AEAFASAWSAMGQETVEK#.F                      | 2.62   | 1.72   | 1.52 | 0.66 |
| Q8JZY2_CO Commd10  | COMM don K.LQSPAVLQLGVSK#.E                              | 21.27  | 12.90  | 1.65 | 0.61 |
| Q8BXC6_C1 Commd2   | COMM don R.IAVEFLR.R                                     | 8.09   | 21.38  | 0.38 | 2.64 |
| Q8BXC6_C1 Commd2   | COMM don K.LNVSDDTIQHVEGLTYLLETSK#.L                     | 14.86  | 13.77  | 1.08 | 0.93 |
| Q8BXC6_C1 Commd2   | COMM don R.TILNELAPR.L                                   | 18.50  | 38.51  | 0.48 | 2.08 |
| Q63829_C1 Commd3   | COMM don R.AAFQSLLDAR.A                                  | 8.60   | 22.60  | 0.38 | 2.63 |
| Q63829_C1 Commd3   | COMM don K.NSLTELGSIGR.S                                 | 14.01  | 29.40  | 0.48 | 2.10 |
| Q8R395_C1 Commd5   | COMM don R.SLQPSVLMQLK.L                                 | 11.62  | 9.95   | 1.17 | 0.86 |
| Q8R395_C1 Commd5   | COMM don R.VDVAISQAQR.S                                  | 2.04   | 5.87   | 0.35 | 2.88 |
| Q8R395_C1 Commd5   | COMM don R.VSFLGSPSAEVTAVAQLLK#.D                        | 8.49   | 7.60   | 1.12 | 0.90 |
| Q3V4B5_C1 Commd6   | COMM don K.SEVTGQLDFQWVK#.L                              | 22.43  | 14.57  | 1.54 | 0.65 |
| Q3V4B5_C1 Commd6   | COMM don K.SIEM*TIQFQFYK#.Q                              | 14.92  | 9.28   | 1.61 | 0.62 |
| Q8BG94_C1 Commd7   | COMM don R.FGVTSGSSELEK.V                                | 12.44  | 7.42   | 1.68 | 0.60 |
| Q8BG94_C1 Commd7   | COMM don R.FLAQLSEFATSNQISLGPLK#.S                       | 3.12   | 1.97   | 1.59 | 0.63 |
| Q8BG94_C1 Commd7   | COMM don R.FLAQLSEFATSNQISLGPLK#.S                       | 21.78  | 9.74   | 2.24 | 0.45 |
| Q8BG94_C1 Commd7   | COMM don R.TDLQTLGLSEEK#.A                               | 35.40  | 22.11  | 1.60 | 0.62 |
| Q8BG94_C1 Commd7   | COMM don K.VGSIFLQK#.L                                   | 21.76  | 27.36  | 0.80 | 1.26 |
| Q8K2Q0_C1 Commd9   | COMM don R.AEAQANQLSPR.L                                 | 2.96   | 9.08   | 0.33 | 3.06 |
| Q8K2Q0_C1 Commd9   | COMM don K.ETLDTM*LDGLGR.I                               | 3.49   | 6.88   | 0.51 | 1.97 |
| Q8CIE6_CO Copa     | Coatome r S.R.ASNLENSTYDLYTIPK#.D                        | 13.98  | 12.99  | 1.08 | 0.93 |
| Q8CIE6_CO Copa     | Coatome r S.R.DADSIPLFDVQQR.K                            | 23.75  | 19.57  | 1.21 | 0.82 |
| Q8CIE6_CO Copa     | Coatome r S.K.DADSQNPDAPQK.R                             | 8.35   | 5.31   | 1.57 | 0.64 |
| Q8CIE6_CO Copa     | Coatome r S.R.GITGVDFGTTDAVVK#.H                         | 30.98  | 22.94  | 1.35 | 0.74 |
| Q8CIE6_CO Copa     | Coatome r S.R.GVNWAAFHPTMPLVSGADDR.Q                     | 2.27   | 6.72   | 0.34 | 2.96 |
| Q8CIE6_CO Copa     | Coatome r S.R.LLELGPKEVAOQTR.K                           | 7.47   | 28.88  | 0.26 | 3.87 |
| Q8CIE6_CO Copa     | Coatome r S.R.LLHDQVGVIGFQPYK#.Q                         | 23.45  | 14.18  | 1.65 | 0.60 |
| Q8CIE6_CO Copa     | Coatome r S.K.LVGSQSIAYLQK#.K                            | 35.34  | 22.66  | 1.56 | 0.64 |
| Q8CIE6_CO Copa     | Coatome r S.K.NLSPGAVESDVR.G                             | 7.66   | 27.87  | 0.27 | 3.64 |
| Q8CIE6_CO Copa     | Coatome r S.K.QLFLQTYAR.G                                | 7.38   | 12.00  | 0.62 | 1.63 |
| Q8CIE6_CO Copa     | Coatome r S.K.SLAYLSAATHGLDEEAESLK#ETFDPEK#ETIPDIPNAK#.L | 5.88   | 4.04   | 1.46 | 0.69 |
| Q8CIE6_CO Copa     | Coatome r S.R.SSGLTAVVVAR.N                              | 4.95   | 15.85  | 0.31 | 3.20 |
| Q8CIE6_CO Copa     | Coatome r S.R.TALNLFK#.L                                 | 24.02  | 16.72  | 1.44 | 0.70 |
| Q8CIE6_CO Copa     | Coatome r S.R.VLTIPTFEK#.F                               | 37.25  | 27.84  | 1.34 | 0.75 |
| Q8CIE6_CO Copa     | Coatome r S.R.ASNLENSTYDLYTIPK#.D                        | 78.05  | 45.10  | 1.73 | 0.58 |
| Q8CIE6_CO Copa     | Coatome r S.R.DADSIPLFDVQQR.R                            | 104.29 | 55.63  | 1.87 | 0.53 |
| Q8CIE6_CO Copa     | Coatome r S.K.DADSQNPDAPQK#.R                            | 31.07  | 25.37  | 1.22 | 0.82 |
| Q8CIE6_CO Copa     | Coatome r S.K.DVAVM*QLR.S                                | 10.11  | 42.91  | 0.24 | 4.25 |
| Q8CIE6_CO Copa     | Coatome r S.K.ETIPDIPNAK#.L                              | 17.00  | 10.62  | 1.60 | 0.62 |
| Q8CIE6_CO Copa     | Coatome r S.R.FAVLDR.N                                   | 26.03  | 66.27  | 0.39 | 2.55 |
| Q8CIE6_CO Copa     | Coatome r S.K.GFFEGSIASK#.G                              | 100.14 | 57.14  | 1.75 | 0.57 |
| Q8CIE6_CO Copa     | Coatome r S.R.GITGVDFGTTDAVVK#.H                         | 186.16 | 112.26 | 1.66 | 0.60 |
| Q8CIE6_CO Copa     | Coatome r S.K.GLSFHPK#.R                                 | 56.22  | 22.78  | 2.47 | 0.41 |
| Q8CIE6_CO Copa     | Coatome r S.R.LLELGPKEVAOQTR.K                           | 35.69  | 93.91  | 0.38 | 2.63 |
| Q8CIE6_CO Copa     | Coatome r S.R.LLHDQVGVIGFQPYK#.Q                         | 124.82 | 82.02  | 1.52 | 0.66 |
| Q8CIE6_CO Copa     | Coatome r S.K.LVGSQSIAYLQK#.K                            | 203.56 | 120.34 | 1.69 | 0.59 |
| Q8CIE6_CO Copa     | Coatome r S.K.NLKHNEITK#.K                               | 65.83  | 25.01  | 2.63 | 0.38 |
| Q8CIE6_CO Copa     | Coatome r S.K.NLSPGAVESDVR.G                             | 27.51  | 82.77  | 0.33 | 3.01 |
| Q8CIE6_CO Copa     | Coatome r S.R.QLDFNSSK#.D                                | 45.77  | 35.22  | 1.30 | 0.77 |
| Q8CIE6_CO Copa     | Coatome r S.K.QLFLQTYAR.G                                | 17.17  | 39.95  | 0.43 | 2.33 |
| Q8CIE6_CO Copa     | Coatome r S.K.QQPLFVSGDDYK#.I                            | 41.21  | 24.71  | 1.67 | 0.60 |
| Q8CIE6_CO Copa     | Coatome r S.K.QQPLFVSGDDYK#.IK#.V                        | 26.87  | 12.74  | 2.11 | 0.47 |
| Q8CIE6_CO Copa     | Coatome r S.R.LLELGPKEVAOQTR.K                           | 3.71   | 32.27  | 0.11 | 8.71 |
| Q8CIE6_CO Copa     | Coatome r S.K.SGAWDESQVYFTTSHIK#.Y                       | 59.80  | 36.01  | 1.66 | 0.60 |
| Q8CIE6_CO Copa     | Coatome r S.K.SLAYLSAATHGLDEEAESLK#ETFDPEK#ETIPDIPNAK.L  | 40.57  | 28.59  | 1.42 | 0.70 |
| Q8CIE6_CO Copa     | Coatome r S.R.SSGLTAVVVAR.N                              | 23.65  | 55.51  | 0.43 | 2.35 |
| Q8CIE6_CO Copa     | Coatome r S.R.TALNLFK#.L                                 | 123.93 | 74.50  | 1.66 | 0.60 |
| Q8CIE6_CO Copa     | Coatome r S.R.TGVQTR.R                                   | 18.12  | 70.15  | 0.26 | 3.87 |
| Q8CIE6_CO Copa     | Coatome r S.R.TLDPYVTR.V                                 | 53.52  | 145.83 | 0.37 | 2.72 |
| Q8CIE6_CO Copa     | Coatome r S.R.VLTIPTFEK#.F                               | 222.57 | 139.38 | 1.60 | 0.63 |
| Q8CIE6_CO Copa     | Coatome r S.R.VTVTEIGKDVIGLR.I                           | 46.48  | 127.52 | 0.36 | 2.74 |
| Q8CIE6_CO Copa     | Coatome r S.R.VWDISGLR.K                                 | 17.91  | 48.17  | 0.37 | 2.69 |
| Q8CIE6_CO Copa     | Coatome r S.R.VVNWQSR.T                                  | 9.06   | 24.25  | 0.37 | 2.68 |
| Q9J1F7_COI Copb1   | Coatome r S.K.EAGELK#PEEITVGPVQK#.L                      | 24.79  | 12.36  | 2.01 | 0.50 |
| Q9J1F7_COI Copb1   | Coatome r S.K.LVEK#PSPLTLAPHDFANIK.A                     | 8.87   | 5.61   | 1.58 | 0.63 |
| Q9J1F7_COI Copb1   | Coatome r S.R.NFEHLIPDAPLHDFLNEK#.D                      | 7.83   | 2.29   | 3.42 | 0.29 |
| Q9J1F7_COI Copb1   | Coatome r S.R.NVEELVIVLK#.K                              | 9.64   | 4.28   | 2.25 | 0.44 |
| Q9J1F7_COI Copb1   | Coatome r S.K.YEAGTLVLTSSAPTAIK#.A                       | 16.65  | 6.50   | 2.56 | 0.39 |
| Q9J1F7_COI Copb1   | Coatome r S.K.LVEK#PSPLTLAPHDFANIK#.A                    | 18.34  | 14.46  | 1.27 | 0.79 |
| Q9J1F7_COI Copb1   | Coatome r S.R.QM*WAEFVENK#.V                             | 5.25   | 3.90   | 1.35 | 0.74 |
| Q9J1F7_COI Copb1   | Coatome r S.K.EAGELK#PEEITVGPVQK#.L                      | 86.62  | 47.63  | 1.82 | 0.55 |
| Q9J1F7_COI Copb1   | Coatome r S.K.LIVLDR.L                                   | 14.19  | 26.87  | 0.53 | 1.89 |
| Q9J1F7_COI Copb1   | Coatome r S.K.LVEK#PSPLTLAPHDFANIK#.A                    | 23.68  | 15.96  | 1.48 | 0.67 |



|                  |                                          |        |        |      |      |
|------------------|------------------------------------------|--------|--------|------|------|
| Q9J1F7_COI Copb1 | Coatomer s R.NFEHLIPDAPELIHDFLNEK#.D     | 56.99  | 44.89  | 1.27 | 0.79 |
| Q9J1F7_COI Copb1 | Coatomer s R.NVEELVIVL#.K                | 23.04  | 15.43  | 1.49 | 0.67 |
| Q9J1F7_COI Copb1 | Coatomer s R.NVTVQDDPISFQM*QLTAK#.N      | 7.82   | 4.01   | 1.95 | 0.51 |
| Q9J1F7_COI Copb1 | Coatomer s R.NVTVQDDPISFQM*QLTAK#.N      | 11.09  | 8.19   | 1.35 | 0.74 |
| Q9J1F7_COI Copb1 | Coatomer s R.QSLQVM*LSAK#.L              | 36.21  | 22.36  | 1.62 | 0.62 |
| Q9J1F7_COI Copb1 | Coatomer s R.VLQDLVM*DIRL.V              | 11.31  | 21.74  | 0.52 | 1.92 |
| Q9J1F7_COI Copb1 | Coatomer s R.VLQDLVMDILR.V               | 14.69  | 22.84  | 0.64 | 1.55 |
| Q9J1F7_COI Copb1 | Coatomer s R.VLSTPDLEVR.K                | 22.73  | 44.85  | 0.51 | 1.97 |
| Q9J1F7_COI Copb1 | Coatomer s K.YEAAAGTLVTLSSAPTAIK#.A      | 42.61  | 24.27  | 1.76 | 0.57 |
| Q9J1F7_COI Copb1 | Coatomer s R.YVALVQEK#.K                 | 54.90  | 28.31  | 1.94 | 0.52 |
| Q9J1F7_COI Copb1 | Coatomer s K.EAELEPLM*PAIR.A             | 3.91   | 11.01  | 0.36 | 2.82 |
| Q9J1F7_COI Copb1 | Coatomer s K.EAGELK#PEEITVGPVQK#.L       | 177.79 | 107.66 | 1.65 | 0.61 |
| Q9J1F7_COI Copb1 | Coatomer s K.EDIQVM*TEVR.R               | 3.88   | 9.61   | 0.40 | 2.48 |
| Q9J1F7_COI Copb1 | Coatomer s K.KPITDDVDVDR.I               | 7.03   | 16.15  | 0.44 | 2.30 |
| Q9J1F7_COI Copb1 | Coatomer s K.LEEKH#LSQK#.K               | 16.86  | 9.34   | 1.81 | 0.55 |
| Q9J1F7_COI Copb1 | Coatomer s K.LIVLDR.L                    | 23.80  | 52.65  | 0.45 | 2.21 |
| Q9J1F7_COI Copb1 | Coatomer s K.LKEAELEPLM*PAIR.A           | 5.55   | 28.55  | 0.19 | 5.14 |
| Q9J1F7_COI Copb1 | Coatomer s K.LVEK#PSPLTLAPHDFANIK#.A     | 89.88  | 56.74  | 1.58 | 0.63 |
| Q9J1F7_COI Copb1 | Coatomer s K.LVEK#PSPLTLAPHDFANIK#.A     | 31.84  | 18.47  | 1.72 | 0.58 |
| Q9J1F7_COI Copb1 | Coatomer s K.MLEVFHAIK#.S                | 18.15  | 12.85  | 1.41 | 0.71 |
| Q9J1F7_COI Copb1 | Coatomer s R.NVEELVIVL#.K                | 21.63  | 13.54  | 1.60 | 0.63 |
| Q9J1F7_COI Copb1 | Coatomer s R.NVTVQDDPISFQM*QLTAK#.N      | 12.96  | 9.14   | 1.42 | 0.70 |
| Q9J1F7_COI Copb1 | Coatomer s R.NVTVQDDPISFQM*QLTAK#.N      | 14.08  | 10.79  | 1.30 | 0.77 |
| Q9J1F7_COI Copb1 | Coatomer s R.QSLQVM*LSAK#.L              | 56.71  | 29.62  | 1.91 | 0.52 |
| Q9J1F7_COI Copb1 | Coatomer s R.SLGEIPVISEIK#.K             | 30.15  | 17.38  | 1.74 | 0.58 |
| Q9J1F7_COI Copb1 | Coatomer s K.VASTENIIFGNIVYVSGAASDR.N    | 4.14   | 11.03  | 0.38 | 2.67 |
| Q9J1F7_COI Copb1 | Coatomer s R.VLQDLVM*DIRL.V              | 18.55  | 47.71  | 0.39 | 2.57 |
| Q9J1F7_COI Copb1 | Coatomer s R.VLQDLVMDILR.V               | 12.48  | 27.06  | 0.46 | 2.17 |
| Q9J1F7_COI Copb1 | Coatomer s R.VLSTPDLEVR.K                | 43.88  | 94.71  | 0.46 | 2.16 |
| Q9J1F7_COI Copb1 | Coatomer s K.YEAAAGTLVTLSSAPTAIK#.A      | 81.08  | 47.51  | 1.71 | 0.59 |
| Q9J1F7_COI Copb1 | Coatomer s R.YVALVQEK#.K                 | 94.64  | 59.81  | 1.58 | 0.63 |
| O55029_CI Copb2  | Coatomer s K.AAESLADPTEYENLFPGLK#.E      | 10.54  | 8.49   | 1.24 | 0.81 |
| O55029_CI Copb2  | Coatomer s K.AAESLADPTEYENLFPGLK#.E      | 45.70  | 31.52  | 1.45 | 0.69 |
| O55029_CI Copb2  | Coatomer s K.DNNQFASASLDR.T              | 13.92  | 37.09  | 0.38 | 2.66 |
| O55029_CI Copb2  | Coatomer s K.EAFVVEEVVK#.E               | 37.69  | 26.67  | 1.41 | 0.71 |
| O55029_CI Copb2  | Coatomer s R.FELALQELK#.I                | 13.39  | 8.19   | 1.63 | 0.61 |
| O55029_CI Copb2  | Coatomer s R.GSMNVALGYDEGSIIVK#.L        | 52.59  | 39.36  | 1.34 | 0.75 |
| O55029_CI Copb2  | Coatomer s K.HSEVQOANLK#.A               | 83.18  | 52.01  | 1.60 | 0.63 |
| O55029_CI Copb2  | Coatomer s K.IAYQLAVEAESEK#.W            | 17.66  | 10.87  | 1.62 | 0.62 |
| O55029_CI Copb2  | Coatomer s K.IWDYQNK#.T                  | 25.25  | 14.80  | 1.71 | 0.59 |
| O55029_CI Copb2  | Coatomer s R.LPEAAFLAR.T                 | 16.64  | 48.38  | 0.34 | 2.91 |
| O55029_CI Copb2  | Coatomer s K.NNVAFMSYFLOGK#.L            | 11.26  | 8.60   | 1.31 | 0.76 |
| O55029_CI Copb2  | Coatomer s K.QLAELAIK#.C                 | 30.92  | 16.27  | 1.90 | 0.53 |
| O55029_CI Copb2  | Coatomer s K.SFGSAQEFWAHDSSEYAIR.E       | 9.43   | 32.09  | 0.29 | 3.40 |
| O55029_CI Copb2  | Coatomer s K.SFKPFDGAEISYGGFLGVR.S       | 10.90  | 27.02  | 0.40 | 2.48 |
| O55029_CI Copb2  | Coatomer s R.TMYLLGYIPK#.D               | 21.15  | 13.75  | 1.54 | 0.65 |
| O55029_CI Copb2  | Coatomer s R.TYLPQVSR.V                  | 12.21  | 46.49  | 0.26 | 3.81 |
| O55029_CI Copb2  | Coatomer s R.VFNNTLER.V                  | 22.89  | 59.50  | 0.38 | 2.60 |
| O55029_CI Copb2  | Coatomer s K.AM*GDTEIKDGER.L             | 1.40   | 11.94  | 0.12 | 8.55 |
| O55029_CI Copb2  | Coatomer s K.DNNQFASASLDR.T              | 28.89  | 73.02  | 0.40 | 2.53 |
| O55029_CI Copb2  | Coatomer s K.EAFVVEEVVK#.E               | 75.20  | 49.88  | 1.51 | 0.66 |
| O55029_CI Copb2  | Coatomer s R.GSMNVALGYDEGSIIVK#.L        | 97.81  | 92.34  | 1.06 | 0.94 |
| O55029_CI Copb2  | Coatomer s K.HSEVQOANLK#.A               | 202.73 | 141.96 | 1.43 | 0.70 |
| O55029_CI Copb2  | Coatomer s K.IAYQLAVEAESEK#.W            | 40.17  | 22.97  | 1.75 | 0.57 |
| O55029_CI Copb2  | Coatomer s K.IWDYQNK#.T                  | 60.85  | 38.45  | 1.58 | 0.63 |
| O55029_CI Copb2  | Coatomer s R.KNWWVTGADD*QJR.V            | 7.71   | 19.67  | 0.39 | 2.55 |
| O55029_CI Copb2  | Coatomer s R.LESTLNYGM*ER.V              | 19.32  | 52.48  | 0.37 | 2.72 |
| O55029_CI Copb2  | Coatomer s R.LESTLNYGM*ER.V              | 5.39   | 13.85  | 0.39 | 2.57 |
| O55029_CI Copb2  | Coatomer s R.LPEAAFLAR.T                 | 36.63  | 81.79  | 0.45 | 2.23 |
| O55029_CI Copb2  | Coatomer s K.NNVAFMSYFLOGK#.L            | 10.75  | 7.79   | 1.38 | 0.72 |
| O55029_CI Copb2  | Coatomer s K.NNVAFMSYFLOGK#.L            | 14.17  | 9.72   | 1.46 | 0.69 |
| O55029_CI Copb2  | Coatomer s K.QLAELAIK#.C                 | 49.52  | 30.49  | 1.62 | 0.62 |
| O55029_CI Copb2  | Coatomer s R.SVNLGAFYDWENTELIR.R         | 3.08   | 10.72  | 0.29 | 3.48 |
| O55029_CI Copb2  | Coatomer s R.TM*YLLGYIPK#.D              | 30.35  | 21.37  | 1.42 | 0.70 |
| O55029_CI Copb2  | Coatomer s R.TMYLLGYIPK#.D               | 34.05  | 24.07  | 1.41 | 0.71 |
| O55029_CI Copb2  | Coatomer s R.VAHLEK#.Q                   | 30.61  | 23.26  | 1.32 | 0.76 |
| O55029_CI Copb2  | Coatomer s R.VFNNTLER.V                  | 37.59  | 106.53 | 0.35 | 2.83 |
| O89079_CI Cope   | Coatomer s R.DSIVLELDR.E                 | 6.76   | 18.64  | 0.36 | 2.76 |
| O89079_CI Cope   | Coatomer s R.KYGVWDEIKPSAPPELQAVR.M      | 11.26  | 35.03  | 0.32 | 3.11 |
| O89079_CI Cope   | Coatomer s K.LQEAAYIQELADK#.C            | 13.27  | 14.97  | 0.89 | 1.13 |
| O89079_CI Cope   | Coatomer s K.LQEAAYIQELADK#.C            | 12.36  | 6.52   | 1.90 | 0.53 |
| O89079_CI Cope   | Coatomer s R.M*FAEYLAENQR.D              | 10.45  | 31.46  | 0.33 | 3.01 |
| O89079_CI Cope   | Coatomer s K.YGVWDEIKPSAPPELQAVR.M       | 1.51   | 5.96   | 0.25 | 3.95 |
| Q9QZES_CC Copg1  | Coatomer s K.ALQOYTLPESEK#PFDLK#.S       | 21.85  | 15.30  | 1.43 | 0.70 |
| Q9QZES_CC Copg1  | Coatomer s R.SIATLAIITLLK.T              | 16.57  | 16.98  | 0.98 | 1.02 |
| Q9QZES_CC Copg1  | Coatomer s K.SSPEPVALTESEYVIR.C          | 2.57   | 7.96   | 0.32 | 3.10 |
| Q9QZES_CC Copg1  | Coatomer s K.TLEEAVGNIVK#.F              | 21.35  | 15.65  | 1.36 | 0.73 |
| Q9QZES_CC Copg1  | Coatomer s K.ALQOYTLPESEK#PFDLK#.S       | 55.50  | 37.86  | 1.47 | 0.68 |
| Q9QZES_CC Copg1  | Coatomer s R.ATFYNVLEQK#.Q               | 35.76  | 21.97  | 1.63 | 0.61 |
| Q9QZES_CC Copg1  | Coatomer s R.IHLHLGQEGPK#.T              | 49.48  | 30.94  | 1.60 | 0.63 |
| Q9QZES_CC Copg1  | Coatomer s K.ILYLQNGEHLGTTATEAFFAM*TK#.L | 16.56  | 10.21  | 1.62 | 0.62 |
| Q9QZES_CC Copg1  | Coatomer s K.ILYLQNGEHLGTTATEAFFAM*TK#.L | 10.58  | 4.49   | 2.36 | 0.42 |
| Q9QZES_CC Copg1  | Coatomer s K.ILYLQNGEHLGTTATEAFFAM*TK#.L | 18.42  | 14.45  | 1.27 | 0.78 |
| Q9QZES_CC Copg1  | Coatomer s K.KHEESGGSNPLQHLEK#.S         | 10.61  | 7.22   | 1.47 | 0.68 |
| Q9QZES_CC Copg1  | Coatomer s R.LLLLDVTM*QVTAR.S            | 6.64   | 9.66   | 0.69 | 1.46 |
| Q9QZES_CC Copg1  | Coatomer s K.NHTLLLAGVFR.G               | 6.24   | 20.99  | 0.30 | 3.37 |
| Q9QZES_CC Copg1  | Coatomer s K.SAVLQEAR.V                  | 12.99  | 30.39  | 0.43 | 2.34 |
| Q9QZES_CC Copg1  | Coatomer s R.SIATLAIITLLK#.T             | 208.41 | 136.60 | 1.53 | 0.66 |
| Q9QZES_CC Copg1  | Coatomer s K.SSPEPVALTESEYVIR.C          | 7.72   | 18.88  | 0.41 | 2.45 |
| Q9QZES_CC Copg1  | Coatomer s K.TLEEAVGNIVK#.F              | 76.78  | 39.90  | 1.92 | 0.52 |
| Q9QZES_CC Copg1  | Coatomer s R.VFNETPINR.K                 | 12.07  | 41.47  | 0.29 | 3.44 |
| Q9QZES_CC Copg1  | Coatomer s R.AGAVSALAK.F                 | 112.96 | 70.00  | 1.61 | 0.62 |
| Q9QZES_CC Copg1  | Coatomer s K.ALQOYTLPESEK#PFDLK#.S       | 100.89 | 65.61  | 1.54 | 0.65 |
| Q9QZES_CC Copg1  | Coatomer s R.ATFYNVLEQK#.Q               | 72.26  | 46.52  | 1.55 | 0.64 |
| Q9QZES_CC Copg1  | Coatomer s K.FGAQNEEM*LP SILVLLKR.C      | 2.46   | 4.07   | 0.60 | 1.65 |
| Q9QZES_CC Copg1  | Coatomer s R.IHLHLGQEGPK#.T              | 87.05  | 49.98  | 1.74 | 0.57 |
| Q9QZES_CC Copg1  | Coatomer s K.KDEESGGSNPLQHLEK#.S         | 24.79  | 17.02  | 1.46 | 0.69 |
| Q9QZES_CC Copg1  | Coatomer s K.LFOSNDPTLR.R                | 84.70  | 34.52  | 2.45 | 0.41 |
| Q9QZES_CC Copg1  | Coatomer s R.LLLLDVTM*QVTAR.S            | 5.72   | 21.45  | 0.27 | 3.75 |
| Q9QZES_CC Copg1  | Coatomer s K.NHTLLLAGVFR.G               | 6.23   | 17.42  | 0.36 | 2.80 |
| Q9QZES_CC Copg1  | Coatomer s K.SAVLQEAR.V                  | 21.51  | 62.75  | 0.34 | 2.92 |
| Q9QZES_CC Copg1  | Coatomer s R.SIATLAIITLLK#.T             | 187.28 | 128.78 | 1.45 | 0.69 |
| Q9QZES_CC Copg1  | Coatomer s K.SSPEPVALTESEYVIR.C          | 9.17   | 25.78  | 0.36 | 2.81 |

|                  |                                                            |        |        |       |      |
|------------------|------------------------------------------------------------|--------|--------|-------|------|
| Q9QZE5_CC Cogg1  | Coatomer s K.TLEEAVGNIVK#.F                                | 101.48 | 61.28  | 1.66  | 0.60 |
| Q9QZE5_CC Cogg1  | Coatomer s R.VNETPINPR.K                                   | 16.54  | 64.49  | 0.26  | 3.90 |
| Q9QZE5_CC Cogg1  | Coatomer s K.VPSVSSALVSSLLHLK#.C                           | 35.24  | 17.01  | 2.07  | 0.48 |
| Q9QXK3_CI Cogg2  | Coatomer s K.SSEPVQLTEAETEFVVR.C                           | 1.36   | 6.49   | 0.21  | 4.77 |
| Q9QXK3_CI Cogg2  | Coatomer s K.EM*ATISEDVIVTSSLTG#.D                         | 12.04  | 5.50   | 2.19  | 0.46 |
| Q9QXK3_CI Cogg2  | Coatomer s R.FINETPINPR.R                                  | 4.45   | 12.42  | 0.36  | 2.79 |
| Q9QXK3_CI Cogg2  | Coatomer s K.SIPLAM*APVFEQK.S                              | 14.12  | 13.06  | 1.08  | 0.92 |
| Q9QXK3_CI Cogg2  | Coatomer s K.SSEPVQLTEAETEFVVR.C                           | 1.97   | 8.49   | 0.23  | 4.31 |
| P61202_CS Cops2  | COP9 signa K.AALSSFQK#.V                                   | 53.76  | 13.02  | 4.13  | 0.24 |
| P61202_CS Cops2  | COP9 signa K.AHTDFFEAFK#.N                                 | 34.18  | 6.51   | 5.25  | 0.19 |
| P61202_CS Cops2  | COP9 signa K.GTQLLEIYALIQM*YTAQK#.N                        | 7.56   | 1.86   | 4.06  | 0.25 |
| P61202_CS Cops2  | COP9 signa R.IDQVNQLLELDHQK#.R                             | 7.86   | 1.96   | 4.01  | 0.25 |
| P61202_CS Cops2  | COP9 signa R.IHIPFSK#.E                                    | 14.62  | 17.70  | 0.83  | 1.21 |
| P61202_CS Cops2  | COP9 signa K.SINSILDYISTSK#.Q                              | 49.51  | 9.77   | 5.07  | 0.20 |
| P61202_CS Cops2  | COP9 signa K.WTNQLNSLNQAVVSK#.L                            | 20.24  | 3.48   | 5.82  | 0.17 |
| P61202_CS Cops2  | COP9 signa K.YLVLANM*LM*K#.S                               | 9.97   | 2.76   | 3.61  | 0.28 |
| P61202_CS Cops2  | COP9 signa K.YLVLANMLMK#.S                                 | 10.12  | 3.49   | 2.90  | 0.34 |
| P61202_CS Cops2  | COP9 signa R.YTALDK#WNTNQLNSLNQAVVSK#.L                    | 24.21  | 2.98   | 8.13  | 0.12 |
| P61202_CS Cops2  | COP9 signa K.AALSSFQK#.V                                   | 20.67  | 5.38   | 3.84  | 0.26 |
| P61202_CS Cops2  | COP9 signa R.YTALDK#WNTNQLNSLNQAVVSK#.L                    | 13.14  | 3.36   | 3.91  | 0.26 |
| P61202_CS Cops2  | COP9 signa K.AALSSFQK#.V                                   | 48.09  | 10.46  | 4.60  | 0.22 |
| P61202_CS Cops2  | COP9 signa K.GTQLLEIYALIQM*YTAQK#.N                        | 5.89   | 1.94   | 3.04  | 0.33 |
| P61202_CS Cops2  | COP9 signa K.SGINPFDSQEAQ#PK#NDPEILAMTNLVSAYQNNDI TEFEK#.I | 5.11   | 1.99   | 2.56  | 0.39 |
| P61202_CS Cops2  | COP9 signa K.SINSILDYISTSK#.Q                              | 46.81  | 10.53  | 4.44  | 0.23 |
| P61202_CS Cops2  | COP9 signa R.TQVLK#.L                                      | 61.19  | 38.21  | 1.60  | 0.62 |
| P61202_CS Cops2  | COP9 signa R.YTALDK#WNTNQLNSLNQAVVSK#.L                    | 30.68  | 7.95   | 3.86  | 0.26 |
| O88543_CS Cops3  | COP9 signa K.AM*DEQITVNPQFVQK#.S                           | 26.95  | 7.62   | 3.54  | 0.28 |
| O88543_CS Cops3  | COP9 signa K.AMDQEITVNPQFVQK#.S                            | 17.59  | 2.70   | 6.51  | 0.15 |
| O88543_CS Cops3  | COP9 signa R.FIKPLSNAYHELAQYVSTNNPSELN.R                   | 5.16   | 3.54   | 1.46  | 0.69 |
| O88543_CS Cops3  | COP9 signa K.SM*GSQEDDSGNK#PSSYS.-                         | 13.69  | 3.51   | 3.90  | 0.26 |
| O88543_CS Cops3  | COP9 signa K.SMGSQEDDSGNK#PSSYS.-                          | 13.24  | 3.12   | 4.24  | 0.24 |
| O88543_CS Cops3  | COP9 signa R.VQLSGPQEAQK#.Y                                | 100.57 | 20.73  | 4.85  | 0.21 |
| O88543_CS Cops3  | COP9 signa K.YTSQJVR.F                                     | 11.41  | 9.03   | 1.26  | 0.79 |
| O88543_CS Cops3  | COP9 signa R.VQLSGPQEAQK#.Y                                | 42.83  | 8.49   | 5.04  | 0.20 |
| O88543_CS Cops3  | COP9 signa K.AM*DEQITVNPQFVQK#.S                           | 12.17  | 2.21   | 5.51  | 0.18 |
| O88543_CS Cops3  | COP9 signa R.VQLSGPQEAQK#.Y                                | 41.64  | 8.92   | 4.67  | 0.21 |
| O88544_CS Cops4  | COP9 signa K.AIQLSGTEQLEALK#.A                             | 127.18 | 26.43  | 4.81  | 0.21 |
| O88544_CS Cops4  | COP9 signa R.ASLNQUESTNEQLQIHYK#.V                         | 12.23  | 2.50   | 4.90  | 0.20 |
| O88544_CS Cops4  | COP9 signa K.ATTADGSSILDR.A                                | 28.11  | 27.81  | 1.01  | 0.99 |
| O88544_CS Cops4  | COP9 signa R.AVIEHLLNSASK#.L                               | 82.43  | 15.41  | 5.35  | 0.19 |
| O88544_CS Cops4  | COP9 signa K.IASQM*ITEGR.M                                 | 22.25  | 24.85  | 0.90  | 1.12 |
| O88544_CS Cops4  | COP9 signa K.ISQTAPEWTAQAM*EAQM*AQ.-                       | 14.48  | 14.48  | 1.00  | 1.00 |
| O88544_CS Cops4  | COP9 signa K.ISQTAPEWTAQAMEAQM*AQ.-                        | 3.28   | 3.28   | 1.00  | 1.00 |
| O88544_CS Cops4  | COP9 signa K.ISQTAPEWTAQAMEAQMAQ.-                         | 4.23   | 4.23   | 1.00  | 1.00 |
| O88544_CS Cops4  | COP9 signa R.LYLEDDEPQAEAVINR.A                            | 12.03  | 11.81  | 1.02  | 0.98 |
| O88544_CS Cops4  | COP9 signa R.NAAQVLVGIPLGTGQK#.Q                           | 107.36 | 25.71  | 4.18  | 0.24 |
| O88544_CS Cops4  | COP9 signa R.QDLAQLM*NSSGSHK#.D                            | 4.95   | 1.77   | 2.80  | 0.36 |
| O88544_CS Cops4  | COP9 signa K.QYVVDYK#.L                                    | 43.15  | 10.21  | 4.23  | 0.24 |
| O88544_CS Cops4  | COP9 signa R.VIFEEQVASIR.Q                                 | 50.23  | 42.55  | 1.18  | 0.85 |
| O88544_CS Cops4  | COP9 signa R.YNELSVK#.T                                    | 98.09  | 21.36  | 4.59  | 0.22 |
| O35864_CS Cops5  | COP9 signa K.GYK#PDEGPSEYQTIPLNK#.I                        | 42.05  | 11.53  | 3.65  | 0.27 |
| O35864_CS Cops5  | COP9 signa K.ISALALLK#.M                                   | 74.56  | 14.93  | 4.99  | 0.20 |
| O35864_CS Cops5  | COP9 signa K.LEQSEALGR.G                                   | 15.62  | 14.80  | 1.06  | 0.95 |
| O35864_CS Cops5  | COP9 signa K.LFNQINVA.-                                    | 28.49  | 28.49  | 1.00  | 1.00 |
| O35864_CS Cops5  | COP9 signa K.LLELLWNK#.Y                                   | 38.70  | 7.17   | 5.40  | 0.19 |
| O35864_CS Cops5  | COP9 signa K.QQQLAALAK#PWTK#.D                             | 44.07  | 4.82   | 9.13  | 0.11 |
| O35864_CS Cops5  | COP9 signa K.QYALEVSYFK#.S                                 | 24.05  | 3.73   | 6.45  | 0.16 |
| O35864_CS Cops5  | COP9 signa R.SGGNLEVM*GLM*LGK#.V                           | 14.86  | 10.25  | 1.45  | 0.69 |
| O35864_CS Cops5  | COP9 signa R.SGGNLEVMGLMLGK#.V                             | 16.01  | 4.07   | 3.93  | 0.25 |
| O35864_CS Cops5  | COP9 signa R.VNAQAAAYEYMAAYENAK#.Q                         | 3.59   | 1.86   | 1.93  | 0.52 |
| O35864_CS Cops5  | COP9 signa R.VNAQAAAYEYMAAYENAK#.Q                         | 10.18  | 1.91   | 5.32  | 0.19 |
| O35864_CS Cops5  | COP9 signa K.ISALALLK#.M                                   | 17.23  | 1.61   | 10.72 | 0.09 |
| O35864_CS Cops5  | COP9 signa K.QYALEVSYFK#.S                                 | 7.77   | 2.73   | 2.85  | 0.35 |
| O35864_CS Cops5  | COP9 signa K.GYK#PDEGPSEYQTIPLNK#.I                        | 24.66  | 2.86   | 8.62  | 0.12 |
| O35864_CS Cops5  | COP9 signa K.ISALALLK#.M                                   | 17.50  | 2.63   | 6.66  | 0.15 |
| O35864_CS Cops5  | COP9 signa R.VNAQAAAYEYMAAYENAK#.Q                         | 8.74   | 1.19   | 7.36  | 0.14 |
| O88545_CS Cops6  | COP9 signa K.ASEAGEVPFNHEILR.E                             | 18.02  | 22.73  | 0.79  | 1.26 |
| O88545_CS Cops6  | COP9 signa K.ELEFLGWYTTGGPPDPSDIHVHK#.Q                    | 17.33  | 9.33   | 1.86  | 0.54 |
| O88545_CS Cops6  | COP9 signa K.FNVLVDR.Q                                     | 25.49  | 15.03  | 1.70  | 0.59 |
| O88545_CS Cops6  | COP9 signa K.IIIDK#EYTYK#.E                                | 21.18  | 3.16   | 6.70  | 0.15 |
| O88545_CS Cops6  | COP9 signa K.LILEVYK#.A                                    | 108.43 | 21.71  | 5.00  | 0.20 |
| O88545_CS Cops6  | COP9 signa R.M*TAGGSGENSTVAEHLIAQSAIK#.M                   | 22.32  | 2.77   | 8.05  | 0.12 |
| O88545_CS Cops6  | COP9 signa R.MTAGGSGENSTVAEHLIAQSAIK#.M                    | 33.18  | 6.23   | 5.33  | 0.19 |
| O88545_CS Cops6  | COP9 signa R.SQEGRPQMVGALIGK.Q                             | 9.84   | 11.66  | 0.84  | 1.18 |
| Q9CZ04_CS Cops7a | COP9 signa R.ELAESDFASTFR.L                                | 16.77  | 14.48  | 1.16  | 0.86 |
| Q9CZ04_CS Cops7a | COP9 signa R.HLSVTLAAK#.V                                  | 60.43  | 13.61  | 4.44  | 0.23 |
| Q9CZ04_CS Cops7a | COP9 signa R.LEVDYSIGR.D                                   | 12.04  | 15.52  | 0.78  | 1.29 |
| Q9CZ04_CS Cops7a | COP9 signa K.VTGQNEQFLLLAK#.S                              | 57.21  | 12.11  | 4.72  | 0.21 |
| Q9CZ04_CS Cops7a | COP9 signa K.VTGQNEQFLLLAK#.S                              | 8.31   | 1.52   | 5.45  | 0.18 |
| Q8BV13_CS Cops7b | COP9 signa K.ESLPELSVAQQNK#.L                              | 16.80  | 3.30   | 5.10  | 0.20 |
| Q8BV13_CS Cops7b | COP9 signa K.ESLPELSVAQQNK#.L                              | 10.51  | 2.71   | 3.88  | 0.26 |
| Q8BV13_CS Cops7b | COP9 signa K.K#DINNIVK#.T                                  | 868.88 | 779.94 | 1.11  | 0.90 |
| Q8VBV7_CS Cops8  | COP9 signa R.FIPLSEAPVPPIPNEQQLAR.L                        | 12.38  | 11.53  | 1.07  | 0.93 |
| Q8VBV7_CS Cops8  | COP9 signa K.GVLQEWQADSTTR.M                               | 45.21  | 44.42  | 1.02  | 0.98 |
| Q8VBV7_CS Cops8  | COP9 signa R.KPASGLDVSLSNR.F                               | 32.55  | 21.46  | 1.52  | 0.66 |
| Q8VBV7_CS Cops8  | COP9 signa K.SANSELGGIWSVGQR.I                             | 10.09  | 9.17   | 1.10  | 0.91 |
| P61924_CI Cops1  | Coatomer s R.GEDVPLTEQTVSQVLSAQK#.E                        | 44.04  | 42.23  | 1.04  | 0.96 |
| P61924_CI Cops21 | Coatomer s R.TDSEIALLLEGLTVVYK#.S                          | 34.82  | 32.79  | 1.06  | 0.94 |
| P61924_CI Cops21 | Coatomer s R.VALRGEDVPLTEQTVSQVLSAQK.E                     | 49.00  | 199.29 | 0.25  | 4.07 |
| P61924_CI Cops21 | Coatomer s K.YYDDTYPVSK#.E                                 | 152.14 | 111.86 | 1.36  | 0.74 |
| Q9JHH9_CI Cops2  | Coatomer s K.YYDDTYPVSK#.E                                 | 43.04  | 27.87  | 1.54  | 0.65 |
| Q9WUM4_Coro1c    | Coronin-1C.R.#SDLFQDDLYPDATGPEAALEAEWFEQK#.N               | 3.21   | 1.69   | 1.90  | 0.53 |
| Q9WUM4_Coro1c    | Coronin-1C.K.NADPILISLK#.H                                 | 9.06   | 1.75   | 5.17  | 0.19 |
| Q9WUM4_Coro1c    | Coronin-1C.K.NADPILISLK#.H                                 | 13.25  | 3.45   | 3.84  | 0.26 |
| Q9EPU4_CI Cpsf1  | Cleavage an K.AESTEQEAPK#.A                                | 6.57   | 31.42  | 0.21  | 4.78 |
| Q9EPU4_CI Cpsf1  | Cleavage an K.IGTTDILLDDLETR.V                             | 2.76   | 6.63   | 0.42  | 2.40 |
| Q9EPU4_CI Cpsf1  | Cleavage an R.ISVLPAYLSYDAPVPRV.R                          | 1.69   | 6.66   | 0.25  | 3.93 |
| Q9EPU4_CI Cpsf1  | Cleavage an K.NFLAADVM*K#.S                                | 8.30   | 8.37   | 0.99  | 1.01 |
| Q9EPU4_CI Cpsf1  | Cleavage an R.SSFLPSYIIDV.R.A                              | 3.53   | 14.36  | 0.25  | 4.07 |
| Q9EPU4_CI Cpsf1  | Cleavage an R.VLDSSFGQPTTQGEVR.K                           | 6.64   | 8.89   | 0.41  | 2.44 |
| Q9EPU4_CI Cpsf1  | Cleavage an R.YIVQVSPGLGR.L                                | 3.15   | 20.59  | 0.30  | 3.35 |
| Q9EPU4_CI Cpsf1  | Cleavage an K.AAASVLTSM*VTM*EPGYLFLGSR.L                   | 2.80   | 6.28   | 0.45  | 2.24 |
| Q9EPU4_CI Cpsf1  | Cleavage an R.DALLSFK#.D                                   | 14.41  | 10.06  | 1.43  | 0.70 |

|                  |                                                   |         |         |      |      |
|------------------|---------------------------------------------------|---------|---------|------|------|
| Q9EPU4_C1 Cpsf1  | Cleavage an K.EVLLVALGSR.Q                        | 8.13    | 16.42   | 0.49 | 2.02 |
| Q9EPU4_C1 Cpsf1  | Cleavage an K.IGTTPDIILDLELTD.R.V                 | 8.33    | 18.96   | 0.44 | 2.28 |
| Q9EPU4_C1 Cpsf1  | Cleavage an R.K#EEETPK#AESTEQEPSAPK#.A            | 5.59    | 5.46    | 1.02 | 0.98 |
| Q9EPU4_C1 Cpsf1  | Cleavage an R.NVLGDGELLNR.Y                       | 6.10    | 18.99   | 0.32 | 3.11 |
| Q9EPU4_C1 Cpsf1  | Cleavage an R.SSFLPSYIIDVR.A                      | 9.87    | 23.97   | 0.41 | 2.43 |
| Q9EPU4_C1 Cpsf1  | Cleavage an K.TLSLHYFEEPELR.D                     | 9.66    | 17.01   | 0.57 | 1.76 |
| Q9EPU4_C1 Cpsf1  | Cleavage an R.VLWSSFGQPTTQGEVR.K                  | 5.63    | 23.09   | 0.24 | 4.10 |
| Q9EPU4_C1 Cpsf1  | Cleavage an R.YIVQVSPGLGR.L                       | 9.88    | 22.51   | 0.44 | 2.28 |
| 035218_C1 Cpsf2  | Cleavage an K.FSQIVNLK#.G                         | 24.63   | 17.39   | 1.42 | 0.71 |
| 035218_C1 Cpsf2  | Cleavage an R.GDGNVLIADVTAGR.V                    | 3.99    | 15.41   | 0.26 | 3.86 |
| 035218_C1 Cpsf2  | Cleavage an K.HVHQIDAVLLSHPDPLHLGALPFAVGK#.L      | 8.33    | 3.78    | 2.20 | 0.45 |
| 035218_C1 Cpsf2  | Cleavage an K.HVHQIDAVLLSHPDPLHLGALPFAVGK#.L      | 6.80    | 7.26    | 0.94 | 1.07 |
| 035218_C1 Cpsf2  | Cleavage an R.IRDLLYEQYAI.V                       | 3.96    | 17.07   | 0.23 | 4.31 |
| 035218_C1 Cpsf2  | Cleavage an K.NSIIITYR.T                          | 2.63    | 10.67   | 0.25 | 4.06 |
| 035218_C1 Cpsf2  | Cleavage an K.VTEIELR.K                           | 6.07    | 19.46   | 0.31 | 3.21 |
| 035218_C1 Cpsf2  | Cleavage an R.FLIDNPTEK#.V                        | 18.57   | 12.87   | 1.44 | 0.69 |
| 035218_C1 Cpsf2  | Cleavage an R.GDGNVLIADVTAGR.V                    | 6.32    | 11.44   | 0.55 | 1.81 |
| 035218_C1 Cpsf2  | Cleavage an R.IK#WDEYGEIK#PEDFLVPELQATEEEK#.S     | 9.37    | 5.21    | 1.80 | 0.56 |
| 035218_C1 Cpsf2  | Cleavage an R.IK#WDEYGEIK#PEDFLVPELQATEEEK#.S     | 2.60    | 2.14    | 1.22 | 0.82 |
| 09QXK7_C1 Cpsf3  | Cleavage an R.GLIPVFALGR.A                        | 10.43   | 33.46   | 0.31 | 3.21 |
| 09QXK7_C1 Cpsf3  | Cleavage an K.HIM#SEPEEITM#SGQK#.L                | 17.85   | 13.30   | 1.34 | 0.75 |
| 09QXK7_C1 Cpsf3  | Cleavage an R.K#QININNFVFK#.H                     | 15.02   | 11.51   | 1.30 | 0.77 |
| 09QXK7_C1 Cpsf3  | Cleavage an K.LTGDVEELIQEK#PALK#.V                | 64.67   | 38.04   | 1.70 | 0.59 |
| 09QXK7_C1 Cpsf3  | Cleavage an R.LYEALTPVH.-                         | 77.17   | 77.17   | 1.00 | 1.00 |
| 09QXK7_C1 Cpsf3  | Cleavage an K.M#SVDVYFSAHDTYQQTSEFIR.A            | 1.73    | 2.25    | 0.77 | 1.30 |
| 09QXK7_C1 Cpsf3  | Cleavage an R.NTEAVTLNFR.G                        | 10.99   | 31.78   | 0.35 | 2.89 |
| 09QXK7_C1 Cpsf3  | Cleavage an K.TANINLETR.A                         | 13.52   | 42.53   | 0.32 | 3.15 |
| 09QXK7_C1 Cpsf3  | Cleavage an K.VSNISADDMLYTETDLEESMDK#ETINFHEVK#.E | 4.50    | 2.20    | 2.04 | 0.49 |
| 09QXK7_C1 Cpsf3  | Cleavage an R.WLLSDYVK#.V                         | 22.32   | 16.17   | 1.38 | 0.72 |
| 09QXK7_C1 Cpsf3  | Cleavage an R.LYEALTPVH.-                         | 17.73   | 17.73   | 1.00 | 1.00 |
| 09CWS4_I1 Cpsf31 | Integrator c K.GLIPVFALGR.A                       | 3.59    | 13.25   | 0.27 | 3.69 |
| 09CWS4_I1 Cpsf31 | Integrator c K.GIMQLQVGAEPESVLLVHGEAK#.K          | 9.70    | 4.81    | 2.02 | 0.50 |
| 09CWS4_I1 Cpsf31 | Integrator c K.GLIPVFALGR.A                       | 12.88   | 33.16   | 0.39 | 2.57 |
| 09CWS4_I1 Cpsf31 | Integrator c K.VPIYFSTGLTEK#.A                    | 12.26   | 8.78    | 1.40 | 0.72 |
| Q8BQZ5_C1 Cpsf4  | Cleavage an R.FELPM#GTTEQPPLPQQTQPTK.R            | 3.22    | 4.45    | 0.72 | 1.38 |
| Q8BQZ5_C1 Cpsf4  | Cleavage an K.GHLAFLSGQ.-                         | 16.07   | 16.07   | 1.00 | 1.00 |
| Q8BQZ5_C1 Cpsf4  | Cleavage an R.FELPMGTTEQPPLPQQTQPTK.R             | 6.18    | 5.34    | 1.16 | 0.86 |
| Q8BQZ5_C1 Cpsf4  | Cleavage an K.GHLAFLSGQ.-                         | 33.88   | 33.88   | 1.00 | 1.00 |
| Q6NVF9_C1 Cpsf6  | Cleavage an K.GAANVVVYTYGK#.R                     | 29.60   | 11.95   | 2.48 | 0.40 |
| Q6NVF9_C1 Cpsf6  | Cleavage an K.GFALVGVGSEASSK#.K                   | 33.34   | 8.30    | 4.02 | 0.25 |
| Q6NVF9_C1 Cpsf6  | Cleavage an R.AISSAISR.A                          | 25.49   | 37.99   | 0.67 | 1.49 |
| Q6NVF9_C1 Cpsf6  | Cleavage an K.GAANVVVYTYGK#.R                     | 76.17   | 33.78   | 2.25 | 0.44 |
| Q6NVF9_C1 Cpsf6  | Cleavage an K.GFALVGVGSEASSK#.K                   | 66.34   | 30.78   | 2.16 | 0.46 |
| Q6NVF9_C1 Cpsf6  | Cleavage an R.TPLSEAEFEEIMNR.N                    | 10.02   | 16.76   | 0.60 | 1.67 |
| Q8BTV2_CF Cpsf7  | Cleavage an K.GYAEVVVAESENSVHK#.L                 | 32.69   | 10.78   | 3.03 | 0.33 |
| Q8BTV2_CF Cpsf7  | Cleavage an R.QNLSQFEAQAR.K                       | 7.16    | 25.27   | 0.28 | 3.53 |
| Q8BTV2_CF Cpsf7  | Cleavage an R.SYSGVAGSSSR.K                       | 11.55   | 27.26   | 0.42 | 2.36 |
| Q8BTV2_CF Cpsf7  | Cleavage an K.TPAILTYSGLR.S                       | 10.97   | 20.54   | 0.53 | 1.87 |
| P45481_C1 Crebbp | CREB-binding D.DAFLLTAR.D                         | 5.01    | 22.12   | 0.23 | 4.42 |
| P45481_C1 Crebbp | CREB-binding R.KKEESTAASETPEGSQDGSK.N             | 2.02    | 3.06    | 0.66 | 1.51 |
| P45481_C1 Crebbp | CREB-binding R.SALSSELLVDDTGDITLTK#.F             | 5.23    | 2.83    | 1.84 | 0.54 |
| P45481_C1 Crebbp | CREB-binding K.TEVQTDAAEPETESKGEPR.S              | 6.24    | 14.96   | 0.42 | 2.40 |
| P45481_C1 Crebbp | CREB-binding K.VEAKEEENSNDTASQTSQPQR.K            | 2.77    | 17.37   | 0.16 | 6.28 |
| Q9DCT8_C1 Crip2  | Cysteine-ric K.GVNIAGAGSYIEKQTEAPQVGTGIEVPVVR.T   | 4.26    | 10.97   | 0.39 | 2.57 |
| P63154_C1 Crnk1  | Crooked ne R.AIELAISQPR.L                         | 7.85    | 24.84   | 0.32 | 3.17 |
| P63154_C1 Crnk1  | Crooked ne R.ALDVDYR.N                            | 4.83    | 24.32   | 0.20 | 5.04 |
| P63154_C1 Crnk1  | Crooked ne K.ANPHNYDAWFYLR.L                      | 2.94    | 9.68    | 0.30 | 3.30 |
| P63154_C1 Crnk1  | Crooked ne R.EAAEQDQDK#DIDEESSFF.-                | 11.89   | 15.61   | 0.76 | 1.31 |
| P63154_C1 Crnk1  | Crooked ne K.FAELETILGDIR.A                       | 4.49    | 15.97   | 0.28 | 3.56 |
| P63154_C1 Crnk1  | Crooked ne R.GIEDIIVSK#.R                         | 23.22   | 21.65   | 1.07 | 0.93 |
| P63154_C1 Crnk1  | Crooked ne K.ITDEEELNDYK#.L                       | 9.11    | 9.09    | 1.00 | 1.00 |
| P63154_C1 Crnk1  | Crooked ne R.LM#LLESWR.S                          | 13.26   | 15.82   | 0.84 | 1.19 |
| P63154_C1 Crnk1  | Crooked ne R.LVESDAEADTVR.E                       | 6.37    | 31.32   | 0.20 | 4.92 |
| P63154_C1 Crnk1  | Crooked ne K.NKAPAEQJTAEOQLLR.E                   | 3.83    | 13.60   | 0.28 | 3.55 |
| P63154_C1 Crnk1  | Crooked ne R.VNOFVYK#.Y                           | 10.81   | 9.32    | 1.16 | 0.86 |
| P63154_C1 Crnk1  | Crooked ne R.AIELAISQPR.L                         | 17.11   | 49.33   | 0.35 | 2.88 |
| P63154_C1 Crnk1  | Crooked ne R.LVESDAEADTVR.E                       | 5.59    | 25.32   | 0.22 | 4.53 |
| Q9CYD3_C1 Crtap  | Cartilage-as R.SVLADFQQR.E                        | 5.91    | 14.25   | 0.41 | 2.41 |
| Q9CYD3_C1 Crtap  | Cartilage-as K.SYESLFSV.R                         | 5.84    | 11.26   | 0.52 | 1.93 |
| P23927_C1 Cryab  | Alpha-cryst R.IPADVDPLTITSSSLSDGVLTVNGPR.K        | 8.33    | 13.63   | 0.61 | 1.64 |
| Q921W4_C1 Cryz1  | Quinone ox K.LSAGVFRPLDDEPIPLYEAK.V               | 1.87    | 6.32    | 0.30 | 3.39 |
| Q91W50_C Csd1    | Cold shock K.AHSVNGITEANPTIYSGK.V                 | 10.34   | 7.94    | 1.30 | 0.77 |
| Q91W50_C Csd1    | Cold shock R.ANIEVLNNTFQFTNEAR.E                  | 2.37    | 9.04    | 0.26 | 3.82 |
| Q91W50_C Csd1    | Cold shock R.GPDSNM#GFGAER.K                      | 6.33    | 15.92   | 0.40 | 2.52 |
| Q91W50_C Csd1    | Cold shock R.IK#VDFVPIK#.E                        | 30.74   | 17.95   | 1.71 | 0.58 |
| Q91W50_C Csd1    | Cold shock R.LLGYVATLK#.D                         | 20.28   | 17.16   | 1.18 | 0.85 |
| Q9ERK4_XF Cse1   | Exportin-2 K.ANIVHLM#LSSPEIQK#.Q                  | 4.43    | 2.16    | 2.05 | 0.49 |
| Q9ERK4_XF Cse1   | Exportin-2 K.IIIEIQK.V                            | 5666.33 | 7896.29 | 0.72 | 1.39 |
| Q9ERK4_XF Cse1   | Exportin-2 K.ANIVHLM#LSSPEIQK#.Q                  | 14.88   | 5.38    | 2.77 | 0.36 |
| Q9ERK4_XF Cse1   | Exportin-2 K.ANIVHLM#LSSPEIQK#.Q                  | 15.85   | 7.77    | 2.04 | 0.49 |
| Q9ERK4_XF Cse1   | Exportin-2 K.FFEGPVTGIFSGYVNSM#LQEYAK#.N          | 11.85   | 2.99    | 3.97 | 0.25 |
| Q9ERK4_XF Cse1   | Exportin-2 R.GSSTIATAADK#IPGLLVFQK#.L             | 35.98   | 16.00   | 2.25 | 0.44 |
| Q9ERK4_XF Cse1   | Exportin-2 K.HKHDAIYLVTSLASK#.A                   | 40.62   | 8.62    | 4.71 | 0.21 |
| Q9ERK4_XF Cse1   | Exportin-2 K.LLQTDDEEAGLLELLK#.S                  | 24.21   | 6.12    | 3.96 | 0.25 |
| Q9ERK4_XF Cse1   | Exportin-2 K.SNELWTEIK#.L                         | 15.66   | 4.78    | 3.27 | 0.31 |
| Q9ERK4_XF Cse1   | Exportin-2 K.SNNVNEFPVK#.A                        | 38.41   | 12.85   | 2.99 | 0.33 |
| Q9ERK4_XF Cse1   | Exportin-2 K.YGALALQEIFDGIQPK#.M                  | 16.93   | 5.69    | 2.98 | 0.34 |
| Q9ERK4_XF Cse1   | Exportin-2 R.AADEEAFEDNSEYIR.R                    | 4.25    | 8.84    | 0.48 | 2.08 |
| Q9ERK4_XF Cse1   | Exportin-2 K.ALTLPGSSENEYIM#K#.A                  | 32.10   | 11.00   | 2.92 | 0.34 |
| Q9ERK4_XF Cse1   | Exportin-2 K.ANIVHLM#LSSPEIQK#.Q                  | 29.63   | 11.70   | 2.53 | 0.40 |
| Q9ERK4_XF Cse1   | Exportin-2 K.ANIVHLM#LSSPEIQK#.Q                  | 25.10   | 6.97    | 3.60 | 0.28 |
| Q9ERK4_XF Cse1   | Exportin-2 R.DLEGSDIDTR.R                         | 16.94   | 22.41   | 0.76 | 1.32 |
| Q9ERK4_XF Cse1   | Exportin-2 K.EHDPVGQM#VNNPK#.I                    | 53.88   | 18.22   | 2.96 | 0.34 |
| Q9ERK4_XF Cse1   | Exportin-2 K.FFEGPVTGIFSGYVNSM#LQEYAK#.N          | 24.82   | 4.67    | 5.31 | 0.19 |
| Q9ERK4_XF Cse1   | Exportin-2 R.GSSTIATAADK#IPGLLVFQK#.L             | 79.82   | 27.96   | 2.85 | 0.35 |
| Q9ERK4_XF Cse1   | Exportin-2 K.IPGLLVFQK#.L                         | 12.70   | 6.94    | 1.83 | 0.55 |
| Q9ERK4_XF Cse1   | Exportin-2 R.LLOAFLER.G                           | 10.67   | 16.00   | 0.67 | 1.50 |
| Q9ERK4_XF Cse1   | Exportin-2 K.LLQTDDEEAGLLELLK#.S                  | 77.80   | 30.48   | 2.55 | 0.39 |
| Q9ERK4_XF Cse1   | Exportin-2 K.SNNVNEFPVK#.A                        | 54.97   | 15.49   | 3.55 | 0.28 |
| Q9ERK4_XF Cse1   | Exportin-2 R.TGNIPALVR.L                          | 11.37   | 18.75   | 0.61 | 1.65 |
| Q9ERK4_XF Cse1   | Exportin-2 K.TLDDPAIR.R                           | 14.09   | 17.54   | 0.80 | 1.25 |
| Q9ERK4_XF Cse1   | Exportin-2 K.YGALALQEIFDGIQPK#.M                  | 29.46   | 12.37   | 2.38 | 0.42 |
| P41241_CS Csk    | Tyrosine-pr R.HSNLVLQELGIVVEEK#.G                 | 17.17   | 3.41    | 5.04 | 0.20 |

|                   |                                                                    |        |        |      |       |
|-------------------|--------------------------------------------------------------------|--------|--------|------|-------|
| P41241_CS Csk     | Tyrosine-pr R.LLYPPETGLFLVR.E                                      | 3.14   | 6.65   | 0.47 | 2.12  |
| Q60737_CS Csnk2a1 | Casein kina R.EWVDYSHVVEWGNQDDYQLVR.K                              | 3.74   | 7.54   | 0.50 | 2.02  |
| Q60737_CS Csnk2a1 | Casein kina R.FNDILGR.H                                            | 12.67  | 41.52  | 0.31 | 3.28  |
| Q60737_CS Csnk2a1 | Casein kina R.GGPNITLADIVK#.D                                      | 29.12  | 20.85  | 1.40 | 0.72  |
| Q60737_CS Csnk2a1 | Casein kina R.GK#PYSEVFEAINITNNEK#.V                               | 25.73  | 14.38  | 1.79 | 0.56  |
| Q60737_CS Csnk2a1 | Casein kina R.LIDWGLAEFYPHPGQEQYVNR.V                              | 19.08  | 61.70  | 0.31 | 3.23  |
| Q60737_CS Csnk2a1 | Casein kina K.QLYQLTDYDIR.F                                        | 3.43   | 17.08  | 0.20 | 4.98  |
| Q60737_CS Csnk2a1 | Casein kina R.TPALVFEHVNTDFK#.Q                                    | 98.92  | 58.06  | 1.70 | 0.59  |
| Q60737_CS Csnk2a1 | Casein kina K.VLGTEDLDYVDKYNIELDPR.F                               | 11.57  | 41.23  | 0.28 | 3.56  |
| Q60737_CS Csnk2a1 | Casein kina K.YSEVFEAINITNNEK#.V                                   | 22.47  | 21.74  | 1.03 | 0.97  |
| Q60737_CS Csnk2a1 | Casein kina K.YSEVFEAINITNNEK#.V                                   | 14.02  | 6.60   | 2.13 | 0.47  |
| O54833_CS Csnk2a2 | Casein kina R.HLVSPALDLDK#.L                                       | 13.03  | 7.11   | 1.83 | 0.55  |
| O54833_CS Csnk2a2 | Casein kina R.HLVSPALDLDK#.L                                       | 8.92   | 10.60  | 0.84 | 1.19  |
| O54833_CS Csnk2a2 | Casein kina K.LIDTVKDPVSK.T                                        | 7.64   | 7.53   | 1.01 | 0.99  |
| O54833_CS Csnk2a2 | Casein kina R.LIDWGLAEFYPHPAQEQYVNR.V                              | 6.40   | 15.23  | 0.42 | 2.38  |
| O54833_CS Csnk2a2 | Casein kina K.TPALVFEYINNTDFK#.Q                                   | 16.20  | 12.74  | 1.27 | 0.79  |
| O54833_CS Csnk2a2 | Casein kina K.TPALVFEYINNTDFK#.Q                                   | 11.48  | 4.89   | 2.35 | 0.43  |
| O54833_CS Csnk2a2 | Casein kina K.VLGTEDLDYGLK.K                                       | 21.47  | 17.45  | 1.23 | 0.81  |
| P67871_CS Csnk2b  | Casein kina R.GIAQM*LEK#.Y                                         | 76.95  | 48.06  | 1.60 | 0.62  |
| P67871_CS Csnk2b  | Casein kina R.GIAQM*LEK#.Y                                         | 36.15  | 26.30  | 1.37 | 0.73  |
| P67871_CS Csnk2b  | Casein kina K.IHPM*AYQLQLQAASNFK#.S                                | 56.66  | 35.31  | 1.60 | 0.62  |
| P67871_CS Csnk2b  | Casein kina K.IHPMAYQLQLQAASNFK#.S                                 | 13.38  | 10.09  | 1.33 | 0.75  |
| P97315_CS Csrp1   | Cysteine an K.GFGFGQGAGALVHSE.-                                    | 460.27 | 460.27 | 1.00 | 1.00  |
| P97315_CS Csrp1   | Cysteine an K.GLESTLADK#.D                                         | 20.54  | 20.24  | 1.01 | 0.99  |
| P97315_CS Csrp1   | Cysteine an K.GYGYGQGAGTLDK#.G                                     | 28.98  | 19.65  | 1.48 | 0.68  |
| P97315_CS Csrp1   | Cysteine an K.GYGYGQGAGTLDK#GESLGIK#.H                             | 115.47 | 101.37 | 1.14 | 0.88  |
| P97315_CS Csrp1   | Cysteine an K.GYGYGQGAGTLDK#GESLGIK#EHPGHRPTTNPASK.F               | 3.05   | 7.27   | 0.42 | 2.38  |
| P97314_CS Csrp2   | Cysteine an K.GFGYGGAGALVHAQ.-                                     | 10.91  | 10.91  | 1.00 | 1.00  |
| P97314_CS Csrp2   | Cysteine an K.GFGYGGAGALVHAQ.-                                     | 369.02 | 369.02 | 1.00 | 1.00  |
| P97314_CS Csrp2   | Cysteine an K.GYGYGQGAGTLDK#.D                                     | 23.73  | 144.76 | 0.16 | 6.10  |
| P97314_CS Csrp2   | Cysteine an K.GYGYGQGAGTLDK#.D                                     | 4.22   | 47.92  | 0.09 | 11.34 |
| P97314_CS Csrp2   | Cysteine an R.LGKIPESQPHRPTTNPASK.F                                | 5.11   | 60.57  | 0.08 | 11.86 |
| P97314_CS Csrp2   | Cysteine an K.SLESTLTK#.E                                          | 155.02 | 212.54 | 0.73 | 1.37  |
| P97314_CS Csrp2   | Cysteine an K.GFGYGGAGALVHAQ.-                                     | 12.31  | 12.31  | 1.00 | 1.00  |
| Q99LC2_CS Cstf1   | Cleavage sti R.DGQLIATGSADASIK#.I                                  | 21.21  | 8.53   | 2.49 | 0.40  |
| Q99LC2_CS Cstf1   | Cleavage sti K.LGM*ENDDTAVQYAGR.S                                  | 4.79   | 11.04  | 0.43 | 2.31  |
| Q99LC2_CS Cstf1   | Cleavage sti K.LGMENDDTAVQYAGR.S                                   | 3.66   | 6.81   | 0.54 | 1.86  |
| Q99LC2_CS Cstf1   | Cleavage sti K.YQEAEMLR.S                                          | 5.12   | 7.80   | 0.66 | 1.52  |
| Q99L17_CS Cstf3   | Cleavage sti R.DYNK#YEEGINIHAK#.K                                  | 28.69  | 10.58  | 2.71 | 0.37  |
| Q99L17_CS Cstf3   | Cleavage sti K.GVEAVSYAENQR.I                                      | 10.69  | 18.94  | 0.56 | 1.77  |
| Q99L17_CS Cstf3   | Cleavage sti R.HLAPPGLHPVPGVFPVPPAAVLM*#.L                         | 3.94   | 3.19   | 1.23 | 0.81  |
| Q99L17_CS Cstf3   | Cleavage sti R.HLAPPGLHPVPGVFPVPPAAVLM*#.L                         | 5.63   | 2.04   | 2.76 | 0.36  |
| Q99L17_CS Cstf3   | Cleavage sti K.IFELGLK#.K                                          | 21.08  | 9.29   | 2.27 | 0.44  |
| Q99L17_CS Cstf3   | Cleavage sti K.KLEENPYDLDAWSILIR.E                                 | 11.91  | 27.97  | 0.43 | 2.35  |
| Q99L17_CS Cstf3   | Cleavage sti K.LFSDAANIYER.A                                       | 9.41   | 20.44  | 0.46 | 2.17  |
| Q99L17_CS Cstf3   | Cleavage sti R.LLAIEDIDPTLVYQYM*#.F                                | 13.76  | 5.96   | 2.31 | 0.43  |
| Q99L17_CS Cstf3   | Cleavage sti R.LVAQFPSSGR.F                                        | 12.58  | 29.90  | 0.42 | 2.38  |
| Q99L17_CS Cstf3   | Cleavage sti K.M*AAQYDFALDK#.I                                     | 24.11  | 7.38   | 3.27 | 0.31  |
| Q99L17_CS Cstf3   | Cleavage sti K.SGEIWAR.F                                           | 11.42  | 13.01  | 0.88 | 1.14  |
| Q99L17_CS Cstf3   | Cleavage sti R.TEDQTLTK#.R                                         | 44.66  | 18.52  | 2.41 | 0.41  |
| Q99L17_CS Cstf3   | Cleavage sti R.TEDQTLTK#.R                                         | 13.35  | 4.39   | 3.04 | 0.33  |
| Q99L17_CS Cstf3   | Cleavage sti R.TEDQTLTK#.R                                         | 17.65  | 5.65   | 3.12 | 0.32  |
| O88712_CI Ctbp1   | C-terminal- K.ALAQALK#.E                                           | 83.54  | 42.54  | 1.96 | 0.51  |
| O88712_CI Ctbp1   | C-terminal- R.GAALDVHESEPFSSQGLK#.D                                | 67.53  | 43.29  | 1.56 | 0.64  |
| O88712_CI Ctbp1   | C-terminal- R.GETLGIIGLR.V                                         | 5.06   | 13.94  | 0.36 | 2.76  |
| O88712_CI Ctbp1   | C-terminal- R.GGLVDEK#.A                                           | 107.95 | 57.61  | 1.87 | 0.53  |
| O88712_CI Ctbp1   | C-terminal- R.IGSGFDNIDIK#.S                                       | 79.76  | 45.54  | 1.75 | 0.57  |
| O88712_CI Ctbp1   | C-terminal- R.IRGETLGIIGLR.V                                       | 5.23   | 49.09  | 0.11 | 9.38  |
| O88712_CI Ctbp1   | C-terminal- R.QGAFVNTAR.G                                          | 13.82  | 28.45  | 0.49 | 2.06  |
| O88712_CI Ctbp1   | C-terminal- R.VGQAVLR.A                                            | 23.43  | 52.62  | 0.45 | 2.25  |
| O88712_CI Ctbp1   | C-terminal- K.VLNEAVGALMYHTTLTR.E                                  | 10.69  | 19.11  | 0.56 | 1.79  |
| O88712_CI Ctbp1   | C-terminal- R.GAALDVHESEPFSSQGLK#.D                                | 7.79   | 7.25   | 1.07 | 0.93  |
| O88712_CI Ctbp1   | C-terminal- R.IGSGFDNIDIK#.S                                       | 11.91  | 5.57   | 2.14 | 0.47  |
| O88712_CI Ctbp1   | C-terminal- R.GAALDVHESEPFSSQGLK#.D                                | 8.87   | 7.07   | 1.25 | 0.80  |
| O88712_CI Ctbp1   | C-terminal- R.IGSGFDNIDIK#.S                                       | 13.34  | 7.62   | 1.75 | 0.57  |
| P56546_CI Ctbp2   | C-terminal- R.GAALDVHESEPFSSQGLK#.D                                | 39.35  | 23.82  | 1.65 | 0.61  |
| P56546_CI Ctbp2   | C-terminal- R.IGSGYDNVDIK#.A                                       | 51.00  | 33.61  | 1.52 | 0.66  |
| P56546_CI Ctbp2   | C-terminal- R.NTWLYQALR.E                                          | 4.96   | 9.76   | 0.51 | 1.97  |
| Q5SU09_C Ctc1     | CST comple R.VALQFTGLGGQTESASK#.T                                  | 7.40   | 2.43   | 3.04 | 0.33  |
| Q5SU09_C Ctc1     | CST comple R.VALQFTGLGGQTESASK#.T                                  | 27.06  | 6.65   | 4.07 | 0.25  |
| Q61164_CI Ctf     | Transcripti R.TVLLLR.N                                             | 5.16   | 35.11  | 0.15 | 6.80  |
| Q61164_CI Ctf     | Transcripti R.YALIQHQK#.S                                          | 40.37  | 39.67  | 1.02 | 0.98  |
| Q61164_CI Ctf     | Transcripti R.YTEEGKDVDVSVYDFEQQEGLLSEVNAEK.V                      | 8.61   | 5.40   | 1.59 | 0.63  |
| Q61164_CI Ctf     | Transcripti R.YTEEGKDVDVSVYDFEQQEGLLSEVNAEK#.V                     | 21.74  | 17.48  | 1.24 | 0.80  |
| Q88G15_C Ctdspl2  | CTD small p.K.LLNILDPK#.K                                          | 18.29  | 8.20   | 2.23 | 0.45  |
| P26231_CI Cttna1  | Catenin alp K.IAEQVASFQEEK#.S                                      | 28.91  | 24.61  | 1.17 | 0.85  |
| P26231_CI Cttna1  | Catenin alp R.LLILADMDVYK#.L                                       | 11.83  | 7.75   | 1.53 | 0.65  |
| P26231_CI Cttna1  | Catenin alp R.NAGNEQDLGIQYK.A                                      | 18.67  | 18.03  | 1.03 | 0.97  |
| P26231_CI Cttna1  | Catenin alp K.NLM*NAVVTQVK.A                                       | 6.39   | 6.97   | 0.92 | 1.09  |
| P26231_CI Cttna1  | Catenin alp K.NLMNAVVTQVK#.A                                       | 12.58  | 9.32   | 1.35 | 0.74  |
| P26231_CI Cttna1  | Catenin alp K.QIIVDPLSFSEER.F                                      | 3.67   | 10.31  | 0.36 | 2.81  |
| P26231_CI Cttna1  | Catenin alp R.TSVQTEDDLQIAGQASAR.A                                 | 5.16   | 15.30  | 0.34 | 2.97  |
| P26231_CI Cttna1  | Catenin alp R.VIHVVTSEM*DNYPGVYTEK#.V                              | 11.13  | 8.25   | 1.35 | 0.74  |
| Q02248_CI Cttnb1  | Catenin bet K.HAVNLIYNQDDAELATR.A                                  | 4.97   | 6.67   | 0.75 | 1.34  |
| Q02248_CI Cttnb1  | Catenin bet K.LLNDEQDQVVK.A                                        | 5.25   | 12.11  | 0.43 | 2.31  |
| P30999_CI Cttnnd1 | Catenin del R.FVGDADLER.Q                                          | 68.37  | 16.83  | 4.06 | 0.25  |
| P30999_CI Cttnnd1 | Catenin del R.GYELLFQPEVVR.I                                       | 4.20   | 19.22  | 0.22 | 4.58  |
| P30999_CI Cttnnd1 | Catenin del K.LNGPQDHNHLLYSTIPR@M*QEPGQVETYTEEDPEGAMSVSVETDDGTR@.R | 1.76   | 2.80   | 0.63 | 1.59  |
| P30999_CI Cttnnd1 | Catenin del R.QDVYGPQPQVR.V                                        | 9.68   | 14.75  | 0.66 | 1.52  |
| P30999_CI Cttnnd1 | Catenin del R.TVQVPM*GPDGLPVDASAVSNYIQLGR.D                        | 1.98   | 6.62   | 0.30 | 3.34  |
| P70698_Py Ctps1   | CTP syntha: R.FEVNPLVK#.K                                          | 17.76  | 9.07   | 1.96 | 0.51  |
| P70698_Py Ctps1   | CTP syntha: K.FSDSYASVIK#.A                                        | 104.19 | 59.06  | 1.76 | 0.57  |
| P70698_Py Ctps1   | CTP syntha: K.IQAIWAR.K                                            | 16.45  | 54.04  | 0.30 | 3.29  |
| P70698_Py Ctps1   | CTP syntha: K.IYQVINK#.E                                           | 160.54 | 68.74  | 2.34 | 0.43  |
| P70698_Py Ctps1   | CTP syntha: R.KLYGDTDYLEER.H                                       | 6.23   | 18.19  | 0.34 | 2.92  |
| P70698_Py Ctps1   | CTP syntha: K.LYGDTDYLEER.H                                        | 11.25  | 20.93  | 0.54 | 1.86  |
| P70698_Py Ctps1   | CTP syntha: R.NVLGWQDANSTEFDPK#.T                                  | 31.51  | 17.35  | 1.82 | 0.55  |
| P70698_Py Ctps1   | CTP syntha: K.TVQVPHITDAIQEWMVR.Q                                  | 6.56   | 17.41  | 0.38 | 2.66  |
| P70698_Py Ctps1   | CTP syntha: K.YIDSTDLPESTLQEEPVR.Y                                 | 7.72   | 18.06  | 0.43 | 2.34  |
| P70698_Py Ctps1   | CTP syntha: K.GIASSVGTLLK.S                                        | 10.05  | 16.87  | 0.60 | 1.68  |
| P70698_Py Ctps1   | CTP syntha: R.FEVNPLVK#.K                                          | 16.44  | 4.92   | 3.34 | 0.30  |
| P70698_Py Ctps1   | CTP syntha: R.FEVNPLVK#.C                                          | 32.62  | 9.37   | 3.48 | 0.29  |
| P70698_Py Ctps1   | CTP syntha: K.FSDSYASVIK#.A                                        | 162.28 | 69.95  | 2.32 | 0.43  |

|                     |                                                     |        |        |      |      |
|---------------------|-----------------------------------------------------|--------|--------|------|------|
| P70698_P1 Ctps1     | CTP syntha: K.FVGQDVEGER.M                          | 32.80  | 50.84  | 0.65 | 1.55 |
| P70698_P1 Ctps1     | CTP syntha: K.GIAVSSGTLK#.S                         | 135.43 | 50.81  | 2.67 | 0.38 |
| P70698_P1 Ctps1     | CTP syntha: K.IQAIWAR.K                             | 29.27  | 47.49  | 0.62 | 1.62 |
| P70698_P1 Ctps1     | CTP syntha: K.IYQVINK#.E                            | 174.07 | 72.38  | 2.40 | 0.42 |
| P70698_P1 Ctps1     | CTP syntha: R.LTK#DNNLTTGK#.I                       | 4.36   | 1.33   | 3.27 | 0.31 |
| P70698_P1 Ctps1     | CTP syntha: K.LYGDTDYLEER.H                         | 15.65  | 22.78  | 0.69 | 1.46 |
| P70698_P1 Ctps1     | CTP syntha: R.NVLGWQDANSTEFDPK#.T                   | 55.06  | 20.44  | 2.69 | 0.37 |
| P70698_P1 Ctps1     | CTP syntha: K.TVQVPHITDAIQEWMVR.Q                   | 10.91  | 22.48  | 0.49 | 2.06 |
| P70698_P1 Ctps1     | CTP syntha: K.YIDSTLEPSTLQEEPVR.Y                   | 13.78  | 24.94  | 0.55 | 1.81 |
| P70698_P1 Ctps1     | CTP syntha: K.FSDSYAVIK#.A                          | 65.14  | 21.08  | 3.09 | 0.32 |
| P70698_P1 Ctps1     | CTP syntha: K.FVGQDVEGER.M                          | 19.39  | 32.80  | 0.59 | 1.69 |
| P70698_P1 Ctps1     | CTP syntha: K.IYQVINK#.E                            | 77.76  | 26.68  | 2.91 | 0.34 |
| P70698_P1 Ctps1     | CTP syntha: K.LYGDTDYLEER.H                         | 5.55   | 11.68  | 0.48 | 2.10 |
| P70698_P1 Ctps1     | CTP syntha: R.NVLGWQDANSTEFDPK#.T                   | 27.76  | 13.14  | 2.11 | 0.47 |
| P70698_P1 Ctps1     | CTP syntha: K.YIDSTLEPSTLQEEPVR.Y                   | 5.83   | 12.10  | 0.48 | 2.07 |
| P70303_P1 Ctps2     | CTP syntha: K.ALEHSALAINHK#.L                       | 113.50 | 57.43  | 1.98 | 0.51 |
| P70303_P1 Ctps2     | CTP syntha: R.VPLLEEQGVVK#.Y                        | 29.85  | 9.76   | 3.06 | 0.33 |
| P70303_P1 Ctps2     | CTP syntha: K.YILVTGGVIGSGK#.G                      | 36.43  | 16.08  | 2.27 | 0.44 |
| P70303_P1 Ctps2     | CTP syntha: K.ALEHSALAINHK#.L                       | 138.40 | 54.11  | 2.56 | 0.39 |
| P70303_P1 Ctps2     | CTP syntha: K.GIAVSSGTLK#.S                         | 20.04  | 4.73   | 4.24 | 0.24 |
| P70303_P1 Ctps2     | CTP syntha: R.VPLLEEQGVVK#.Y                        | 29.16  | 8.28   | 3.52 | 0.28 |
| P70303_P1 Ctps2     | CTP syntha: K.YILVTGGVIGSGK#.G                      | 63.98  | 26.63  | 2.40 | 0.42 |
| P70303_P1 Ctps2     | CTP syntha: K.ALEHSALAINHK#.L                       | 75.37  | 37.08  | 2.03 | 0.49 |
| P70303_P1 Ctps2     | CTP syntha: K.DNNITTKG#.I                           | 8.52   | 8.67   | 0.98 | 1.02 |
| P70303_P1 Ctps2     | CTP syntha: K.GIAVSSGTLK#.S                         | 31.39  | 8.66   | 3.63 | 0.28 |
| P70303_P1 Ctps2     | CTP syntha: K.LNLMYIDSIDLEPVT#.A                    | 10.23  | 3.56   | 2.87 | 0.35 |
| P70303_P1 Ctps2     | CTP syntha: K.TVQVPHITDAIQEWMVQAK#.V                | 5.49   | 2.99   | 1.83 | 0.55 |
| P70303_P1 Ctps2     | CTP syntha: R.VPLLEEQGVVK#.Y                        | 50.01  | 15.35  | 3.26 | 0.31 |
| P70303_P1 Ctps2     | CTP syntha: K.YILVTGGVIGSGK#.G                      | 26.54  | 8.48   | 3.13 | 0.32 |
| Q62018_C1 Ctr9      | RNA polym R.LATSVLKHDEK#.S                          | 14.12  | 10.04  | 1.41 | 0.71 |
| Q62018_C1 Ctr9      | RNA polym K.DLITQATLTYMADK#.I                       | 6.97   | 2.34   | 2.98 | 0.34 |
| Q62018_C1 Ctr9      | RNA polym R.LATSVLKHDEK#.S                          | 24.10  | 14.48  | 1.66 | 0.60 |
| Q60598_SF Ctt9      | Src substral K.ASAGHAVSIQDDGGADDWETDPDFVNDVSEK#.E   | 6.87   | 2.34   | 2.94 | 0.34 |
| Q60598_SF Ctt9      | Src substral K.NASTFEEVQVPSAYQK#.T                  | 7.53   | 2.39   | 3.15 | 0.32 |
| Q60598_SF Ctt9      | Src substral R.ANFENLAK#.E                          | 170.08 | 76.18  | 2.23 | 0.45 |
| Q60598_SF Ctt9      | Src substral K.ASAGHAVSIQDDGGADDWETDPDFVNDVSEK#.E   | 32.69  | 13.37  | 2.44 | 0.41 |
| Q60598_SF Ctt9      | Src substral K.ASAGHAVSIQDDGGADDWETDPDFVNDVSEKEQR.W | 9.85   | 14.74  | 0.67 | 1.50 |
| Q60598_SF Ctt9      | Src substral K.ASAGHAVSIQDDGGADDWETDPDFVNDVSEKEQR.W | 2.76   | 2.57   | 1.07 | 0.93 |
| Q60598_SF Ctt9      | Src substral K.EK#ELETPK#.A                         | 33.09  | 15.43  | 2.14 | 0.47 |
| Q60598_SF Ctt9      | Src substral R.ENVFQEHLK#.E                         | 19.59  | 11.00  | 1.78 | 0.56 |
| Q60598_SF Ctt9      | Src substral K.FGVQMDR.V                            | 10.21  | 18.43  | 0.55 | 1.80 |
| Q60598_SF Ctt9      | Src substral K.FGVQDR.Q                             | 33.18  | 61.86  | 0.54 | 1.86 |
| Q60598_SF Ctt9      | Src substral K.HESQDYAK#.G                          | 13.22  | 4.00   | 3.31 | 0.30 |
| Q60598_SF Ctt9      | Src substral K.LQLHESQK#.D                          | 47.14  | 21.18  | 2.23 | 0.45 |
| Q60598_SF Ctt9      | Src substral K.LRENVFQEHQTLK.E                      | 33.57  | 55.96  | 0.60 | 1.67 |
| Q60598_SF Ctt9      | Src substral R.M*DK#NASTFEEVQVPSAYQK#.T             | 32.38  | 14.67  | 2.21 | 0.45 |
| Q60598_SF Ctt9      | Src substral R.MDK#NASTFEEVQVPSAYQK#.T              | 24.84  | 11.19  | 2.22 | 0.45 |
| Q60598_SF Ctt9      | Src substral K.NASTFEEVQVPSAYQK#.T                  | 66.20  | 26.81  | 2.47 | 0.41 |
| Q60598_SF Ctt9      | Src substral R.QDSSAVGFQYK#.E                       | 74.50  | 39.45  | 1.89 | 0.53 |
| Q60598_SF Ctt9      | Src substral K.SAVGFQYQK#.T                         | 238.59 | 91.28  | 2.61 | 0.38 |
| Q60598_SF Ctt9      | Src substral K.SAVGFQYQK#.T                         | 285.30 | 105.90 | 2.69 | 0.37 |
| Q60598_SF Ctt9      | Src substral R.SAVGHEYOQK#.L                        | 34.67  | 14.72  | 2.35 | 0.42 |
| Q60598_SF Ctt9      | Src substral R.VDQSAVGFQYQK#.T                      | 248.79 | 120.42 | 2.07 | 0.48 |
| Q60598_SF Ctt9      | Src substral K.YGIDK#DK#VDK#.S                      | 226.48 | 121.03 | 1.87 | 0.53 |
| Q60598_SF Ctt9      | Src substral R.YGLFPANVELR.Q                        | 29.00  | 75.04  | 0.39 | 2.59 |
| Q60598_SF Ctt9      | Src substral R.YGLFPANVELR.Q                        | 15.94  | 28.79  | 0.55 | 1.81 |
| Q60598_SF Ctt9      | Src substral K.SAVGFQYQK#.T                         | 11.84  | 4.97   | 2.38 | 0.42 |
| Q99LJ0_CT Ctt9bp2nl | CTTNBP2 N R.ELTSDSSTENGGPPR.E                       | 3.57   | 8.06   | 0.44 | 2.26 |
| Q99LJ0_CT Ctt9bp2nl | CTTNBP2 N R.GLQTEAQVEK#.Q                           | 16.20  | 6.77   | 2.39 | 0.42 |
| Q99LJ0_CT Ctt9bp2nl | CTTNBP2 N K.LTDTGLPGPTAAYSYAK#.A                    | 10.70  | 8.40   | 1.27 | 0.78 |
| Q9WXT6_C Cui1       | Cullin-1 OS R.AGIQVYTR.Q                            | 10.71  | 31.68  | 0.34 | 2.96 |
| Q9WXT6_C Cui1       | Cullin-1 OS K.ESFESQFLADTER.F                       | 10.86  | 17.60  | 0.62 | 1.62 |
| Q9WXT6_C Cui1       | Cullin-1 OS R.ESTEFQONPVTEYM*#K.K                   | 5.70   | 3.14   | 1.81 | 0.55 |
| Q9WXT6_C Cui1       | Cullin-1 OS R.ESTEFQONPVTEYMK#.K                    | 7.48   | 3.98   | 1.88 | 0.53 |
| Q9WXT6_C Cui1       | Cullin-1 OS R.FINNAVTK#.M                           | 56.46  | 35.01  | 1.61 | 0.62 |
| Q9WXT6_C Cui1       | Cullin-1 OS R.FTFAYSR.H                             | 5.75   | 16.64  | 0.35 | 2.89 |
| Q9WXT6_C Cui1       | Cullin-1 OS K.FYQWEDYR.F                            | 6.00   | 15.47  | 0.39 | 2.58 |
| Q9WXT6_C Cui1       | Cullin-1 OS K.GQTPGGAQFVGLLELYK#.R                  | 11.90  | 7.33   | 1.62 | 0.62 |
| Q9WXT6_C Cui1       | Cullin-1 OS K.HLEIFHFQNLDDAKNEDLGR.M                | 5.53   | 16.87  | 0.33 | 3.05 |
| Q9WXT6_C Cui1       | Cullin-1 OS K.HQQLLGEVLTQLSSR.F                     | 8.18   | 15.98  | 0.51 | 1.95 |
| Q9WXT6_C Cui1       | Cullin-1 OS R.IQDGLGELK#.L                          | 15.91  | 5.70   | 2.79 | 0.36 |
| Q9WXT6_C Cui1       | Cullin-1 OS K.KGQTPGGAQFVGLLELYK#.R                 | 18.79  | 11.51  | 1.63 | 0.61 |
| Q9WXT6_C Cui1       | Cullin-1 OS R.LISGVVQSYVELGLNEDDAFAK#.G             | 6.65   | 1.94   | 3.43 | 0.29 |
| Q9WXT6_C Cui1       | Cullin-1 OS R.LISGVVQSYVELGLNEDDAFAK#.G             | 1.94   | 2.74   | 0.71 | 1.41 |
| Q9WXT6_C Cui1       | Cullin-1 OS K.LLQAAIVR.I                            | 5.81   | 15.13  | 0.38 | 2.61 |
| Q9WXT6_C Cui1       | Cullin-1 OS K.LLVEDEANVDEVELK#PDTLIK#.L             | 43.71  | 18.60  | 2.35 | 0.43 |
| Q9WXT6_C Cui1       | Cullin-1 OS K.LTWLYQSK#.G                           | 15.95  | 5.35   | 2.98 | 0.34 |
| Q9WXT6_C Cui1       | Cullin-1 OS R.LVHQNSASDDAEASMSK#.L                  | 15.42  | 11.29  | 1.37 | 0.73 |
| Q9WXT6_C Cui1       | Cullin-1 OS K.M*DILAQVLQILLK#.S                     | 60.94  | 33.31  | 1.83 | 0.55 |
| Q9WXT6_C Cui1       | Cullin-1 OS R.M*FQDIGVSK#.D                         | 18.47  | 9.69   | 1.91 | 0.52 |
| Q9WXT6_C Cui1       | Cullin-1 OS R.MFQDIGVSK#.D                          | 13.32  | 7.68   | 1.73 | 0.58 |
| Q9WXT6_C Cui1       | Cullin-1 OS K.NPEEALEDTLNQVM*VVF#.Y                 | 8.53   | 4.42   | 1.93 | 0.52 |
| Q9WXT6_C Cui1       | Cullin-1 OS K.NYLTNLLK#.D                           | 14.09  | 5.23   | 2.69 | 0.37 |
| Q9WXT6_C Cui1       | Cullin-1 OS K.NYLTNLLKGDGLM*DESVLK.F                | 8.38   | 5.35   | 1.57 | 0.64 |
| Q9WXT6_C Cui1       | Cullin-1 OS K.SSK#NPEEALEDTLNQVMVVF#.Y              | 12.33  | 8.81   | 1.40 | 0.71 |
| Q9WXT6_C Cui1       | Cullin-1 OS R.VDGEK#DYSYLA.-                        | 23.05  | 13.52  | 1.70 | 0.59 |
| Q9WXT6_C Cui1       | Cullin-1 OS K.YIEDK#DVFQK#.F                        | 19.80  | 10.60  | 1.87 | 0.54 |
| Q9WXT6_C Cui1       | Cullin-1 OS K.YNALVMSAFNNDAGFVAALDK#.A              | 6.14   | 5.20   | 1.18 | 0.85 |
| Q9WXT6_C Cui1       | Cullin-1 OS R.AGIQVYTR.Q                            | 13.57  | 34.23  | 0.40 | 2.52 |
| Q9WXT6_C Cui1       | Cullin-1 OS K.ESFESQFLADTER.F                       | 5.29   | 12.71  | 0.42 | 2.40 |
| Q9WXT6_C Cui1       | Cullin-1 OS R.ESTEFQONPVTEYM*#K.K                   | 4.79   | 2.55   | 1.88 | 0.53 |
| Q9WXT6_C Cui1       | Cullin-1 OS R.ESTEFQONPVTEYMK#.K                    | 5.70   | 2.11   | 2.70 | 0.37 |
| Q9WXT6_C Cui1       | Cullin-1 OS R.FINNAVTK#.M                           | 67.94  | 35.35  | 1.92 | 0.52 |
| Q9WXT6_C Cui1       | Cullin-1 OS R.FTFAYSR.H                             | 6.78   | 12.73  | 0.53 | 1.88 |
| Q9WXT6_C Cui1       | Cullin-1 OS K.GPTLVYK#.E                            | 29.14  | 14.67  | 1.99 | 0.50 |
| Q9WXT6_C Cui1       | Cullin-1 OS K.GQTPGGAQFVGLLELYK#.R                  | 12.51  | 10.38  | 1.21 | 0.83 |
| Q9WXT6_C Cui1       | Cullin-1 OS K.HQQLLGEVLTQLSSR.F                     | 8.79   | 12.27  | 0.72 | 1.40 |
| Q9WXT6_C Cui1       | Cullin-1 OS R.LISGVVQSYVELGLNEDDAFAK#.G             | 13.72  | 9.52   | 1.44 | 0.69 |
| Q9WXT6_C Cui1       | Cullin-1 OS K.LLVEDEANVDEVELK#PDTLIK#.L             | 41.19  | 21.27  | 1.94 | 0.52 |
| Q9WXT6_C Cui1       | Cullin-1 OS R.LVHQNSASDDAEASMSK#.L                  | 42.41  | 25.46  | 1.67 | 0.60 |
| Q9WXT6_C Cui1       | Cullin-1 OS R.LVHQNSASDDAEASMSK#.L                  | 14.81  | 6.37   | 2.33 | 0.43 |
| Q9WXT6_C Cui1       | Cullin-1 OS R.M*FQDIGVSK#.D                         | 16.86  | 11.72  | 1.44 | 0.69 |
| Q9WXT6_C Cui1       | Cullin-1 OS K.NYLTNLLKGDGLM*DESVLK#.F               | 10.17  | 6.78   | 1.50 | 0.67 |

|                                                                  |                                              |       |       |      |      |
|------------------------------------------------------------------|----------------------------------------------|-------|-------|------|------|
| Q9WTK6_C_Cu11                                                    | Cullin-1 OS K.QIGLDQJWDDL.R.A                | 7.02  | 12.86 | 0.55 | 1.83 |
| Q9WTK6_C_Cu11                                                    | Cullin-1 OS R.VDGEK#DTSYLA-                  | 24.67 | 13.62 | 1.81 | 0.55 |
| Q9D4H8_C_Cu12                                                    | Cullin-2 OS K.GM*TENEVEDK#LTSFITVFK#.Y       | 19.92 | 13.22 | 1.51 | 0.66 |
| Q9D4H8_C_Cu12                                                    | Cullin-2 OS R.YLNTQYIK#.K                    | 16.09 | 5.98  | 2.69 | 0.37 |
| Q9D4H8_C_Cu12                                                    | Cullin-2 OS K.DTPQEQLEQTR.S                  | 8.82  | 17.15 | 0.51 | 1.95 |
| Q9D4H8_C_Cu12                                                    | Cullin-2 OS K.GM*TENEVEDK#LTSFITVFK#.Y       | 28.59 | 9.37  | 3.05 | 0.33 |
| Q9D4H8_C_Cu12                                                    | Cullin-2 OS K.GMTENEVEDK#LTSFITVFK#.Y        | 8.48  | 5.30  | 1.60 | 0.62 |
| Q9D4H8_C_Cu12                                                    | Cullin-2 OS R.YLNTQYIK#.K                    | 14.25 | 5.27  | 2.70 | 0.37 |
| Q9JLV5_CU_Cu13                                                   | Cullin-3 OS K.ALVEEGEGKNPVDYIQGLLDL.K.S      | 69.76 | 33.29 | 2.10 | 0.48 |
| Q9JLV5_CU_Cu13                                                   | Cullin-3 OS R.DM*SISNTTM*DEFR.Q              | 3.83  | 9.71  | 0.39 | 2.53 |
| Q9JLV5_CU_Cu13                                                   | Cullin-3 OS K.EDGESEVGGAAQVTSNTR.K           | 4.79  | 14.78 | 0.32 | 3.08 |
| Q9JLV5_CU_Cu13                                                   | Cullin-3 OS R.EVTEHLINK#.V                   | 30.38 | 12.34 | 2.46 | 0.41 |
| Q9JLV5_CU_Cu13                                                   | Cullin-3 OS K.FLAENSASVYIK#.K                | 33.48 | 12.43 | 2.69 | 0.37 |
| Q9JLV5_CU_Cu13                                                   | Cullin-3 OS K.GLTEQEVETILD.K#.A              | 61.94 | 35.13 | 1.76 | 0.57 |
| Q9JLV5_CU_Cu13                                                   | Cullin-3 OS R.NHEEIER.V                      | 8.73  | 21.23 | 0.41 | 2.43 |
| Q9JLV5_CU_Cu13                                                   | Cullin-3 OS K.MQHNVLVAEVTLQK#.A              | 13.42 | 5.42  | 2.47 | 0.40 |
| Q9JLV5_CU_Cu13                                                   | Cullin-3 OS K.NAIQEIQR.K                     | 9.20  | 38.47 | 0.24 | 4.18 |
| Q9JLV5_CU_Cu13                                                   | Cullin-3 OS K.NNSGLSFEELYR.N                 | 5.31  | 11.96 | 0.44 | 2.25 |
| Q9JLV5_CU_Cu13                                                   | Cullin-3 OS K.SKHEIESGHIFTVNDQFTSK#.L        | 24.20 | 10.09 | 2.40 | 0.42 |
| Q9JLV5_CU_Cu13                                                   | Cullin-3 OS R.SPEVLSFIDDK#L#.K               | 10.07 | 7.14  | 1.41 | 0.71 |
| Q9JLV5_CU_Cu13                                                   | Cullin-3 OS K.STEPIV#.V                      | 37.61 | 12.95 | 2.90 | 0.34 |
| Q9JLV5_CU_Cu13                                                   | Cullin-3 OS K.SVSDSEK#NM*ISK#.L              | 13.09 | 3.48  | 3.76 | 0.27 |
| Q9JLV5_CU_Cu13                                                   | Cullin-3 OS R.VLTGYWPTQSATPK#.C              | 35.34 | 14.55 | 2.43 | 0.41 |
| Q9JLV5_CU_Cu13                                                   | Cullin-3 OS K.YVNSIWL.LK#.N                  | 56.84 | 26.97 | 2.11 | 0.47 |
| Q9JLV5_CU_Cu13                                                   | Cullin-3 OS K.ALVEEGEGKNPVDYIQGLLDL.K#.S     | 32.55 | 10.95 | 2.97 | 0.34 |
| Q9JLV5_CU_Cu13                                                   | Cullin-3 OS R.EVTEHLINK#.V                   | 14.89 | 5.38  | 2.77 | 0.36 |
| Q9JLV5_CU_Cu13                                                   | Cullin-3 OS K.GLTEQEVETILD.K#.A              | 16.76 | 8.72  | 1.92 | 0.52 |
| Q9JLV5_CU_Cu13                                                   | Cullin-3 OS K.SVSDSEK#NM*ISK#.L              | 3.43  | 1.29  | 2.65 | 0.38 |
| Q9JLV5_CU_Cu13                                                   | Cullin-3 OS R.VLTGYWPTQSATPK#.C              | 9.48  | 4.17  | 2.27 | 0.44 |
| Q9JLV5_CU_Cu13                                                   | Cullin-3 OS K.YVNSIWL.LK#.N                  | 12.88 | 3.93  | 3.27 | 0.31 |
| Q3TCH7_C1_Cu14a                                                  | Cullin-4A OS K.DVFEAFYK#.K                   | 26.30 | 11.55 | 2.28 | 0.44 |
| Q3TCH7_C1_Cu14a                                                  | Cullin-4A OS K.DVFEAFYK#.#.D                 | 13.70 | 6.89  | 1.99 | 0.50 |
| Q3TCH7_C1_Cu14a                                                  | Cullin-4A OS R.EDSLDVLFLK#.K                 | 21.64 | 9.27  | 2.33 | 0.43 |
| Q3TCH7_C1_Cu14a                                                  | Cullin-4A OS K.ETVEEQVSTTER.V                | 6.75  | 11.80 | 0.57 | 1.75 |
| Q3TCH7_C1_Cu14a                                                  | Cullin-4A OS R.LPDNYQD.TWR.K                 | 4.04  | 6.86  | 0.59 | 1.70 |
| Q3TCH7_C1_Cu14a                                                  | Cullin-4A OS R.SIFLDR.T                      | 8.60  | 19.26 | 0.45 | 2.24 |
| Q3TCH7_C1_Cu14a                                                  | Cullin-4A OS K.TLGHNLVSELYNQLK#.F            | 20.80 | 5.56  | 3.74 | 0.27 |
| Q3TCH7_C1_Cu14a                                                  | Cullin-4A OS K.DVFEAFYK#.K                   | 16.42 | 5.99  | 2.74 | 0.36 |
| Q3TCH7_C1_Cu14a                                                  | Cullin-4A OS R.EDSLDVLFLK#.K                 | 20.27 | 11.62 | 1.74 | 0.57 |
| Q3TCH7_C1_Cu14a                                                  | Cullin-4A OS K.ETVEEQVSTTER.V                | 6.54  | 11.85 | 0.55 | 1.81 |
| Q3TCH7_C1_Cu14a                                                  | Cullin-4A OS K.QLLGEHLTAILQK#.G              | 30.12 | 10.89 | 2.77 | 0.36 |
| A2A432_C1_Cu14b                                                  | Cullin-4B OS K.AFGSTVINPEK#D.K#.T            | 6.67  | 2.99  | 2.23 | 0.45 |
| A2A432_C1_Cu14b                                                  | Cullin-4B OS R.AGNK#EATDEELEK#.M             | 7.42  | 4.98  | 1.49 | 0.67 |
| A2A432_C1_Cu14b                                                  | Cullin-4B OS R.DK#ENPNQYNYIA.-               | 27.64 | 15.44 | 1.79 | 0.56 |
| A2A432_C1_Cu14b                                                  | Cullin-4B OS K.EAFETFIN.K#.R                 | 15.13 | 10.10 | 1.50 | 0.67 |
| A2A432_C1_Cu14b                                                  | Cullin-4B OS K.ETVEEQVSTTER.V                | 16.47 | 42.55 | 0.39 | 2.58 |
| A2A432_C1_Cu14b                                                  | Cullin-4B OS K.LPENYD.TE.WQK#.L              | 29.87 | 13.27 | 2.25 | 0.44 |
| A2A432_C1_Cu14b                                                  | Cullin-4B OS K.LQEIFK#.T                     | 29.87 | 14.97 | 2.00 | 0.50 |
| A2A432_C1_Cu14b                                                  | Cullin-4B OS R.LYAAEQK#.L                    | 26.18 | 90.79 | 0.29 | 3.47 |
| A2A432_C1_Cu14b                                                  | Cullin-4B OS R.SATDGNSTTPPTS.AK#.K           | 14.55 | 8.08  | 1.80 | 0.56 |
| A2A432_C1_Cu14b                                                  | Cullin-4B OS K.TIDGILL.LLIER.E               | 7.86  | 18.77 | 0.42 | 2.39 |
| A2A432_C1_Cu14b                                                  | Cullin-4B OS K.TLSHNLVSEVYNQLK#.F            | 40.73 | 32.73 | 1.24 | 0.80 |
| A2A432_C1_Cu14b                                                  | Cullin-4B OS R.AHISDQK#.V                    | 14.77 | 4.80  | 3.08 | 0.33 |
| A2A432_C1_Cu14b                                                  | Cullin-4B OS K.ETVEEQVSTTER.V                | 14.17 | 32.52 | 0.44 | 2.30 |
| A2A432_C1_Cu14b                                                  | Cullin-4B OS K.LK#EAVEAIQNSTSIK#.Y           | 14.69 | 6.94  | 2.12 | 0.47 |
| A2A432_C1_Cu14b                                                  | Cullin-4B OS K.LPENYD.TE.WQK#.L              | 21.38 | 11.83 | 1.81 | 0.55 |
| A2A432_C1_Cu14b                                                  | Cullin-4B OS K.M*AESSSSSSSPTAATSQQQQQQQLK#.T | 8.94  | 5.97  | 1.50 | 0.67 |
| A2A432_C1_Cu14b                                                  | Cullin-4B OS R.SATDGNSTTPPTS.AK#.K           | 18.49 | 7.98  | 2.32 | 0.43 |
| A2A432_C1_Cu14b                                                  | Cullin-4B OS K.SLIAVEK#.Q                    | 36.86 | 13.82 | 2.67 | 0.37 |
| A2A432_C1_Cu14b                                                  | Cullin-4B OS K.TLSHNLVSEVYNQLK#.F            | 21.00 | 32.06 | 0.65 | 1.53 |
| Q9D5V5_C1_Cu15                                                   | Cullin-5 OS K.DFTEGLTFSVNDQFSLIK#.N          | 13.33 | 3.91  | 3.41 | 0.29 |
| Q9D5V5_C1_Cu15                                                   | Cullin-5 OS K.IHQALK#EDILEFIK#.Q             | 19.36 | 7.30  | 2.65 | 0.38 |
| Q9D5V5_C1_Cu15                                                   | Cullin-5 OS K.ISNAQLQTEVLEIK#.N              | 14.93 | 4.74  | 3.15 | 0.32 |
| Q9D5V5_C1_Cu15                                                   | Cullin-5 OS R.K#L#M*LDWTWNSIFSNIK#.N         | 6.10  | 3.29  | 1.85 | 0.54 |
| Q9D5V5_C1_Cu15                                                   | Cullin-5 OS K.K#L#TSEEIEAK#.L                | 10.25 | 10.43 | 0.98 | 1.02 |
| Q9D5V5_C1_Cu15                                                   | Cullin-5 OS K.LALP.ADSVNIK#.I                | 39.96 | 10.71 | 3.73 | 0.27 |
| Q9D5V5_C1_Cu15                                                   | Cullin-5 OS R.QVLLYDPQVNSPK#.D               | 11.57 | 3.05  | 3.79 | 0.26 |
| Q9D5V5_C1_Cu15                                                   | Cullin-5 OS R.TLWLVAFPK#.L                   | 18.42 | 5.87  | 3.14 | 0.32 |
| Q9D5V5_C1_Cu15                                                   | Cullin-5 OS K.DFTEGLTFSVNDQFSLIK#.N          | 14.34 | 4.11  | 3.49 | 0.29 |
| Q9D5V5_C1_Cu15                                                   | Cullin-5 OS R.TLWLVAFPK#.L                   | 14.52 | 7.17  | 2.03 | 0.49 |
| Q9D5V5_C1_Cu15                                                   | Cullin-5 OS R.TQEAIQM*K#.M                   | 14.08 | 4.30  | 3.27 | 0.31 |
| P53564_C1_Cux1                                                   | Homeobox R.ASETGSDEAIK#.S                    | 11.76 | 9.71  | 1.21 | 0.83 |
| P53564_C1_Cux1                                                   | Homeobox R.EMEAQAALDPALKPAPLSQPDLTILTPK.H    | 4.36  | 2.23  | 1.95 | 0.51 |
| P53564_C1_Cux1                                                   | Homeobox R.LIDVDPV.PALDVGQQLK.V              | 9.97  | 9.60  | 1.04 | 0.96 |
| P53564_C1_Cux1                                                   | Homeobox K.SQAETIALEK#.E                     | 16.17 | 9.17  | 1.76 | 0.57 |
| P53564_C1_Cux1                                                   | Homeobox K.SQGLLVAEAAAPADREEAOTPAEK.A        | 3.90  | 12.24 | 0.32 | 3.14 |
| P53564_C1_Cux1                                                   | Homeobox R.SSALPSTAPANAPAR.R                 | 4.42  | 12.82 | 0.34 | 2.90 |
| P53564_C1_Cux1                                                   | Homeobox K.TPAAPETSTAALPSAPALK#.#.E          | 10.07 | 9.73  | 1.03 | 0.97 |
| Q9JH59_CV_Cwc15                                                  | Spliceosom R.MENISGNPL.LNL.TG.PSQOANFK.V     | 4.69  | 4.37  | 1.07 | 0.93 |
| Q8C5N3_C_Cwc22                                                   | Pre-mRNA- R.GINAI.FER.L                      | 6.07  | 12.32 | 0.49 | 2.03 |
| Q8C5N3_C_Cwc22                                                   | Pre-mRNA- R.LKDETLQPFEGLLPR.D                | 9.09  | 33.07 | 0.28 | 3.64 |
| Q8C5N3_C_Cwc22                                                   | Pre-mRNA- R.M*EFAEQTK#.E                     | 13.68 | 5.99  | 2.28 | 0.44 |
| Q8C5N3_C_Cwc22                                                   | Pre-mRNA- R.M*MQEQITDK#.S                    | 17.34 | 11.11 | 1.56 | 0.64 |
| Q8C5N3_C_Cwc22                                                   | Pre-mRNA- R.TGGAYIPPAK#.L                    | 9.72  | 7.87  | 1.24 | 0.81 |
| Q8C133_C1_Cwf1911                                                | CWF19-like K.DFEPFD.TLDD.-                   | 10.51 | 10.51 | 1.00 | 1.00 |
| Q8C133_C1_Cwf1911                                                | CWF19-like R.FIALANVGNPEK#.K                 | 19.14 | 11.78 | 1.62 | 0.62 |
| Q8C133_C1_Cwf1911                                                | CWF19-like K.GVDILLTSPWPVK#.Y                | 12.72 | 9.03  | 1.41 | 0.71 |
| Q9CWW7_C_Cxc1                                                    | CXXC-type: R.IYEILPQR.I                      | 5.67  | 9.27  | 0.61 | 1.63 |
| Q9CWW7_C_Cxc1                                                    | CXXC-type: K.LDELFEQER.N                     | 3.05  | 8.37  | 0.36 | 2.74 |
| Q9CWW7_C_Cxc1                                                    | CXXC-type: R.RPPPTQQOQQOQK.L                 | 1.52  | 3.54  | 0.43 | 2.33 |
| Q9DCN2_N_Cyb5r3                                                  | NADH-cyto K.I.GD.TIEFR.G                     | 9.01  | 25.98 | 0.35 | 2.88 |
| Q9DCN2_N_Cyb5r3                                                  | NADH-cyto K.M*SQVLENM*#.#.I                  | 11.76 | 6.19  | 1.90 | 0.53 |
| Q9DCN2_N_Cyb5r3                                                  | NADH-cyto R.STPAITLENPDIK#.Y                 | 16.38 | 12.00 | 1.37 | 0.73 |
| Q7TMB8_C_Cyfp1                                                   | Cytoplasmic K.FQLNDEIITLDK#.Y                | 9.72  | 2.28  | 4.27 | 0.23 |
| Q7TMB8_C_Cyfp1                                                   | Cytoplasmic K.TVEVLEPEVTK#.L                 | 11.03 | 5.51  | 2.00 | 0.50 |
| Q7TMB8_C_Cyfp1                                                   | Cytoplasmic K.FQLNDEIITLDK#.Y                | 27.81 | 4.88  | 5.70 | 0.18 |
| Q7TMB8_C_Cyfp1                                                   | Cytoplasmic K.LADQIFAYYK#.V                  | 28.22 | 6.27  | 4.50 | 0.22 |
| Q7TMB8_C_Cyfp1                                                   | Cytoplasmic R.LGTPOQIAIAR.E                  | 18.29 | 16.33 | 1.12 | 0.89 |
| Q7TMB8_C_Cyfp1                                                   | Cytoplasmic K.NVIQSVLQAIR.K                  | 12.36 | 12.11 | 1.02 | 0.98 |
| Q7TMB8_C_Cyfp1                                                   | Cytoplasmic K.SLLQGTILQVVK#.T                | 36.34 | 5.34  | 6.80 | 0.15 |
| Q7TMB8_C_Cyfp1                                                   | Cytoplasmic R.SSLEGP.TILDIEK#.F              | 53.12 | 18.34 | 2.90 | 0.35 |
| Q7TMB8_C_Cyfp1                                                   | Cytoplasmic K.TVEVLEPEVTK#.L                 | 44.22 | 12.68 | 3.49 | 0.29 |
| Q9D172_E: D10Jhu81e ES1 protein K.GVEVTVGHEQEEGGK#WPYAGTAEAIK#.A |                                              | 4.12  | 1.31  | 3.14 | 0.32 |

|                                                              |        |       |      |       |
|--------------------------------------------------------------|--------|-------|------|-------|
| Q9D172_E5 D10Jhu81e E51 protein K.ITSLAQLNANHDAIFPGGFGAAK#.N | 24.35  | 6.06  | 4.02 | 0.25  |
| Q9ER88_RT Dap3                                               | 1.82   | 22.37 | 0.08 | 12.27 |
| O54784_D DapK3                                               | 4.88   | 9.67  | 0.50 | 1.98  |
| Q922B2_SY Dars                                               | 79.20  | 23.11 | 3.43 | 0.29  |
| Q922B2_SY Dars                                               | 30.59  | 5.71  | 5.36 | 0.19  |
| Q922B2_SY Dars                                               | 7.13   | 1.86  | 3.82 | 0.26  |
| Q922B2_SY Dars                                               | 105.69 | 27.02 | 3.91 | 0.26  |
| Q922B2_SY Dars                                               | 24.25  | 21.05 | 1.15 | 0.87  |
| Q922B2_SY Dars                                               | 118.81 | 32.86 | 3.62 | 0.28  |
| Q922B2_SY Dars                                               | 75.19  | 22.32 | 3.37 | 0.30  |
| Q922B2_SY Dars                                               | 61.43  | 16.41 | 3.74 | 0.27  |
| Q922B2_SY Dars                                               | 32.25  | 8.41  | 3.83 | 0.26  |
| Q922B2_SY Dars                                               | 18.08  | 15.29 | 1.18 | 0.85  |
| Q922B2_SY Dars                                               | 36.54  | 12.79 | 2.86 | 0.35  |
| Q922B2_SY Dars                                               | 36.35  | 11.25 | 3.23 | 0.31  |
| Q922B2_SY Dars                                               | 40.71  | 15.70 | 2.59 | 0.39  |
| Q922B2_SY Dars                                               | 13.31  | 3.02  | 4.42 | 0.23  |
| Q922B2_SY Dars                                               | 36.84  | 9.62  | 3.83 | 0.26  |
| Q922B2_SY Dars                                               | 49.07  | 11.59 | 4.23 | 0.24  |
| Q922B2_SY Dars                                               | 12.35  | 3.45  | 3.58 | 0.28  |
| Q922B2_SY Dars                                               | 15.85  | 6.28  | 2.53 | 0.40  |
| Q922B2_SY Dars                                               | 105.12 | 29.40 | 3.58 | 0.28  |
| Q922B2_SY Dars                                               | 41.27  | 9.60  | 4.30 | 0.23  |
| Q922B2_SY Dars                                               | 66.55  | 13.83 | 4.81 | 0.21  |
| Q922B2_SY Dars                                               | 81.28  | 25.93 | 3.13 | 0.32  |
| Q922B2_SY Dars                                               | 120.85 | 29.39 | 4.11 | 0.24  |
| Q922B2_SY Dars                                               | 52.51  | 14.39 | 3.65 | 0.27  |
| Q922B2_SY Dars                                               | 36.77  | 9.95  | 3.70 | 0.27  |
| Q922B2_SY Dars                                               | 43.83  | 12.14 | 3.61 | 0.28  |
| Q922B2_SY Dars                                               | 28.05  | 10.93 | 2.57 | 0.39  |
| Q922B2_SY Dars                                               | 18.71  | 8.30  | 2.25 | 0.44  |
| Q3UKR0_Q Daxx                                                | 2.40   | 5.00  | 0.48 | 2.08  |
| Q3UKR0_Q Daxx                                                | 19.26  | 10.38 | 1.86 | 0.54  |
| Q9QX56_DI Dbn1                                               | 56.95  | 23.14 | 2.46 | 0.41  |
| Q9QX56_DI Dbn1                                               | 45.57  | 31.10 | 1.47 | 0.68  |
| Q9QX56_DI Dbn1                                               | 16.00  | 9.08  | 1.76 | 0.57  |
| Q9QX56_DI Dbn1                                               | 2.09   | 27.76 | 0.08 | 13.31 |
| Q9QX56_DI Dbn1                                               | 129.92 | 70.62 | 1.84 | 0.54  |
| Q9QX56_DI Dbn1                                               | 26.48  | 48.18 | 0.55 | 1.82  |
| Q9QX56_DI Dbn1                                               | 8.26   | 27.33 | 0.30 | 3.31  |
| Q9QX56_DI Dbn1                                               | 33.40  | 18.57 | 1.80 | 0.56  |
| Q9QX56_DI Dbn1                                               | 4.22   | 39.02 | 0.11 | 9.25  |
| Q9QX56_DI Dbn1                                               | 10.78  | 37.40 | 0.29 | 3.47  |
| Q9QX56_DI Dbn1                                               | 6.63   | 11.51 | 0.58 | 1.73  |
| Q9QX56_DI Dbn1                                               | 10.84  | 28.29 | 0.38 | 2.61  |
| Q62418_DI Dbn1                                               | 20.62  | 3.09  | 6.68 | 0.15  |
| Q62418_DI Dbn1                                               | 6.68   | 2.12  | 3.16 | 0.32  |
| Q62418_DI Dbn1                                               | 6.34   | 8.44  | 0.75 | 1.33  |
| Q62418_DI Dbn1                                               | 6.74   | 6.31  | 1.07 | 0.94  |
| P53395_OI Dbt                                                | 15.01  | 3.23  | 4.65 | 0.21  |
| P61963_DI Dcaf7                                              | 2.85   | 9.87  | 0.29 | 3.46  |
| P61963_DI Dcaf7                                              | 16.87  | 13.93 | 1.21 | 0.83  |
| Q9JLM8_DI Dcl1                                               | 12.46  | 12.18 | 1.02 | 0.98  |
| Q9JLM8_DI Dcl1                                               | 2.77   | 13.66 | 0.20 | 4.94  |
| Q9JLM8_DI Dcl1                                               | 10.03  | 8.01  | 1.25 | 0.80  |
| Q91YD3_DI Dcp1a                                              | 3.48   | 3.80  | 0.91 | 1.09  |
| Q9DAR7_D Dcps                                                | 25.28  | 4.55  | 5.56 | 0.18  |
| Q9DAR7_D Dcps                                                | 26.20  | 10.75 | 2.44 | 0.41  |
| Q9DAR7_D Dcps                                                | 15.00  | 4.74  | 3.17 | 0.32  |
| O08788_DI Dctn1                                              | 7.36   | 19.21 | 0.38 | 2.61  |
| O08788_DI Dctn1                                              | 44.92  | 26.29 | 1.71 | 0.59  |
| O08788_DI Dctn1                                              | 10.35  | 6.68  | 1.55 | 0.65  |
| O08788_DI Dctn1                                              | 6.91   | 20.67 | 0.33 | 2.99  |
| O08788_DI Dctn1                                              | 10.03  | 5.39  | 1.86 | 0.54  |
| O08788_DI Dctn1                                              | 7.13   | 3.58  | 2.00 | 0.50  |
| O08788_DI Dctn1                                              | 21.22  | 46.20 | 0.46 | 2.18  |
| O08788_DI Dctn1                                              | 5.41   | 16.81 | 0.32 | 3.11  |
| O08788_DI Dctn1                                              | 33.65  | 23.16 | 1.45 | 0.69  |
| O08788_DI Dctn1                                              | 11.76  | 25.33 | 0.46 | 2.15  |
| O08788_DI Dctn1                                              | 54.33  | 36.74 | 1.48 | 0.68  |
| O08788_DI Dctn1                                              | 5.92   | 13.30 | 0.44 | 2.25  |
| O08788_DI Dctn1                                              | 14.42  | 12.89 | 1.12 | 0.89  |
| O08788_DI Dctn1                                              | 3.85   | 11.80 | 0.33 | 3.06  |
| O08788_DI Dctn1                                              | 12.71  | 6.93  | 1.83 | 0.55  |
| O08788_DI Dctn1                                              | 33.39  | 21.13 | 1.58 | 0.63  |
| O08788_DI Dctn1                                              | 19.84  | 12.85 | 1.54 | 0.65  |
| O08788_DI Dctn1                                              | 82.00  | 36.91 | 2.22 | 0.45  |
| O08788_DI Dctn1                                              | 7.36   | 5.92  | 1.24 | 0.80  |
| O08788_DI Dctn1                                              | 29.64  | 17.71 | 1.67 | 0.60  |
| O08788_DI Dctn1                                              | 64.40  | 34.89 | 1.85 | 0.54  |
| O08788_DI Dctn1                                              | 14.22  | 11.64 | 1.22 | 0.82  |
| O08788_DI Dctn1                                              | 9.27   | 22.40 | 0.41 | 2.42  |
| O08788_DI Dctn1                                              | 14.04  | 10.41 | 1.35 | 0.74  |
| O08788_DI Dctn1                                              | 5.37   | 10.58 | 0.51 | 1.97  |
| O08788_DI Dctn1                                              | 18.51  | 54.16 | 0.34 | 2.93  |
| O08788_DI Dctn1                                              | 8.16   | 22.21 | 0.37 | 2.72  |
| O08788_DI Dctn1                                              | 51.16  | 32.26 | 1.59 | 0.63  |
| O08788_DI Dctn1                                              | 10.77  | 38.07 | 0.28 | 3.53  |
| O08788_DI Dctn1                                              | 36.27  | 23.08 | 1.57 | 0.64  |
| O08788_DI Dctn1                                              | 14.47  | 34.96 | 0.41 | 2.42  |
| O08788_DI Dctn1                                              | 11.91  | 20.56 | 0.58 | 1.73  |
| O08788_DI Dctn1                                              | 4.83   | 13.31 | 0.36 | 2.76  |
| O08788_DI Dctn1                                              | 84.11  | 18.53 | 4.54 | 0.22  |
| O08788_DI Dctn1                                              | 15.75  | 11.03 | 1.43 | 0.70  |
| O08788_DI Dctn1                                              | 4.49   | 14.52 | 0.31 | 3.23  |
| O08788_DI Dctn1                                              | 33.28  | 29.05 | 1.15 | 0.87  |
| O08788_DI Dctn1                                              | 23.88  | 13.99 | 1.71 | 0.59  |
| O08788_DI Dctn1                                              | 10.80  | 38.51 | 0.28 | 3.57  |
| O08788_DI Dctn1                                              | 45.03  | 21.53 | 2.09 | 0.48  |
| O08788_DI Dctn1                                              | 11.52  | 6.14  | 1.88 | 0.53  |
| O08788_DI Dctn1                                              | 35.23  | 20.36 | 1.73 | 0.58  |
| O08788_DI Dctn1                                              | 4.16   | 1.61  | 2.59 | 0.39  |
| Q99KJ8_DC Dctn2                                              | 31.74  | 24.42 | 1.30 | 0.77  |

|                  |                                                  |        |        |      |      |
|------------------|--------------------------------------------------|--------|--------|------|------|
| Q99KJ8_DC Dctn2  | Dynactin su. K.DNTALLTQVQTTM.R                   | 7.08   | 18.26  | 0.39 | 2.58 |
| Q99KJ8_DC Dctn2  | Dynactin su. R.ENLATVEGNFASIDAR.M                | 14.93  | 53.18  | 0.28 | 3.56 |
| Q99KJ8_DC Dctn2  | Dynactin su. K.LLGPDAAINLADPDGALAK#.R            | 29.09  | 14.63  | 1.99 | 0.50 |
| Q99KJ8_DC Dctn2  | Dynactin su. R.LLHEVQELTEVEK#.I                  | 23.10  | 16.62  | 1.39 | 0.72 |
| Q99KJ8_DC Dctn2  | Dynactin su. R.LLLQLEATK#.S                      | 76.79  | 45.73  | 1.68 | 0.60 |
| Q99KJ8_DC Dctn2  | Dynactin su. R.LQSVLGG#.V                        | 74.32  | 52.43  | 1.42 | 0.71 |
| Q99KJ8_DC Dctn2  | Dynactin su. R.LTELEATVR. C                      | 16.39  | 53.47  | 0.31 | 3.26 |
| Q99KJ8_DC Dctn2  | Dynactin su. K.QQLVASHLEK#.L                     | 35.89  | 28.99  | 1.24 | 0.81 |
| Q99KJ8_DC Dctn2  | Dynactin su. K.RLLLEQLEATK. S                    | 3.95   | 12.09  | 0.33 | 3.06 |
| Q99KJ8_DC Dctn2  | Dynactin su. R.TGYESGDYEM*LGEGLGVK#.E            | 18.05  | 10.15  | 1.78 | 0.56 |
| Q99KJ8_DC Dctn2  | Dynactin su. R.TGYESGDYEM*LGEGLGVK#.E            | 17.03  | 13.01  | 1.31 | 0.76 |
| Q99KJ8_DC Dctn2  | Dynactin su. K.VSALDLAVLDQVEAR.L                 | 19.05  | 61.66  | 0.31 | 3.24 |
| Q99KJ8_DC Dctn2  | Dynactin su. R.WSPVASTLPVLQVR.L                  | 16.43  | 52.23  | 0.31 | 3.18 |
| Q99KJ8_DC Dctn2  | Dynactin su. K.YADLPGIAR.N                       | 16.16  | 54.13  | 0.30 | 3.35 |
| Q99KJ8_DC Dctn2  | Dynactin su. K.DNTALLTQVQTTM*.R.E                | 3.32   | 6.22   | 0.53 | 1.87 |
| Q99KJ8_DC Dctn2  | Dynactin su. K.DNTALLTQVQTTM*RENLATVEGNFASIDAR.M | 1.60   | 1.58   | 1.01 | 0.99 |
| Q99KJ8_DC Dctn2  | Dynactin su. R.LTELEATVR. C                      | 5.44   | 13.23  | 0.41 | 2.43 |
| Q99KJ8_DC Dctn2  | Dynactin su. K.VSALDLAVLDQVEAR.L                 | 10.44  | 18.76  | 0.56 | 1.80 |
| Q99KJ8_DC Dctn2  | Dynactin su. R.WSPVASTLPVLQVR.L                  | 4.29   | 5.23   | 0.82 | 1.22 |
| Q920Y1_DC Dctn3  | Dynactin su. K.ALLEGYK#.T                        | 92.50  | 81.36  | 1.14 | 0.88 |
| Q920Y1_DC Dctn3  | Dynactin su. K.IEDLIK#.Y                         | 24.14  | 12.27  | 1.97 | 0.51 |
| Q920Y1_DC Dctn3  | Dynactin su. R.K.#ADGLVK#.V                      | 11.97  | 10.63  | 1.13 | 0.89 |
| Q920Y1_DC Dctn3  | Dynactin su. K.TTM*L LSK#.Q                      | 100.51 | 15.80  | 6.36 | 0.16 |
| Q920Y1_DC Dctn3  | Dynactin su. K.VQVALGNIASK#.R                    | 133.53 | 69.46  | 1.92 | 0.52 |
| Q920Y1_DC Dctn3  | Dynactin su. R.WVYGPGRTR.G                       | 14.81  | 43.36  | 0.34 | 2.93 |
| Q920Y1_DC Dctn3  | Dynactin su. K.YLDPYIDR.I                        | 21.79  | 81.20  | 0.27 | 3.73 |
| Q8CBY8_DC Dctn4  | Dynactin su. R.AGASITLGLSLR.E                    | 4.83   | 21.01  | 0.23 | 4.35 |
| Q8CBY8_DC Dctn4  | Dynactin su. R.ATSISTQLPDPDAK#.T                 | 38.70  | 28.19  | 1.37 | 0.73 |
| Q8CBY8_DC Dctn4  | Dynactin su. K.IEPAQVAEVEPELPEYTRPVNLTETVTLQQR.L | 2.03   | 6.09   | 0.33 | 3.00 |
| Q8CBY8_DC Dctn4  | Dynactin su. K.IQLVAVNVIPEVR.I                   | 6.40   | 17.33  | 0.37 | 2.71 |
| Q8CBY8_DC Dctn4  | Dynactin su. K.LIEVYQQAQK#.E                     | 40.85  | 32.51  | 1.26 | 0.80 |
| Q8CBY8_DC Dctn4  | Dynactin su. R.LLQPLDQVPSASQVPR.H                | 87.90  | 93.45  | 0.94 | 1.06 |
| Q8CBY8_DC Dctn4  | Dynactin su. K.IQLVAVNVIPEVR.I                   | 1.84   | 3.73   | 0.49 | 2.02 |
| Q8CBY8_DC Dctn4  | Dynactin su. K.LIEVYQQAQK#.E                     | 6.17   | 2.57   | 2.40 | 0.42 |
| Q9CXV9_D Dcun1d5 | DCN1-like f R.K#APGVAVAEADAGLK#.#.C              | 9.66   | 5.69   | 1.70 | 0.59 |
| Q9CXV9_D Dcun1d5 | DCN1-like f R.SQLNDISSFK#.N                      | 17.88  | 7.54   | 2.37 | 0.42 |
| Q9D9Z5_DI Ddb1   | DET1- and f R.EYPSEQIVTEK#.T                     | 12.06  | 6.15   | 1.96 | 0.51 |
| Q3U1J4_DI Ddb1   | DNA damag K.DLLFILTAQ#.Y                         | 19.85  | 10.91  | 1.82 | 0.55 |
| Q3U1J4_DI Ddb1   | DNA damag K.GESK#DLLFILTAQ#.Y                    | 13.16  | 3.68   | 3.57 | 0.28 |
| Q3U1J4_DI Ddb1   | DNA damag R.IEVQDSSGGTTALRPSASTQALSSVSSSK.L      | 10.23  | 24.03  | 0.43 | 2.35 |
| Q3U1J4_DI Ddb1   | DNA damag R.IVVQYSQDGK#.L                        | 59.18  | 20.76  | 2.85 | 0.35 |
| Q3U1J4_DI Ddb1   | DNA damag R.LGDSQLVK#.L                          | 50.78  | 26.95  | 1.88 | 0.53 |
| Q3U1J4_DI Ddb1   | DNA damag K.LGK#DPNTYFIVGTAM*VYPEEAEPK#.Q        | 8.28   | 6.47   | 1.28 | 0.78 |
| Q3U1J4_DI Ddb1   | DNA damag K.LGK#DPNTYFIVGTAM*VYPEEAEPK#.Q        | 7.61   | 6.33   | 1.20 | 0.83 |
| Q3U1J4_DI Ddb1   | DNA damag K.LLASINSTRV.L                         | 11.40  | 24.74  | 0.46 | 2.17 |
| Q3U1J4_DI Ddb1   | DNA damag K.LPSFELHK#.E                          | 28.02  | 19.18  | 1.46 | 0.68 |
| Q3U1J4_DI Ddb1   | DNA damag K.LVFSNVNLK#.E                         | 38.76  | 24.52  | 1.58 | 0.63 |
| Q3U1J4_DI Ddb1   | DNA damag R.LYEVTEK#.E                           | 23.73  | 16.58  | 1.43 | 0.70 |
| Q3U1J4_DI Ddb1   | DNA damag R.SVLLLAKYPM#EGNFEEIAR.D               | 4.70   | 15.58  | 0.30 | 3.32 |
| Q3U1J4_DI Ddb1   | DNA damag R.SVLLLAKYPM#EGNFEEIAR.D               | 3.10   | 10.57  | 0.29 | 3.41 |
| Q3U1J4_DI Ddb1   | DNA damag K.TYEVSLR.E                            | 11.22  | 22.65  | 0.50 | 2.02 |
| Q3U1J4_DI Ddb1   | DNA damag K.VTLGTQPTVLR.T                        | 10.13  | 24.04  | 0.42 | 2.37 |
| Q3U1J4_DI Ddb1   | DNA damag K.VLAIAPPIHK#.Q                        | 20.17  | 16.21  | 1.24 | 0.80 |
| Q3U1J4_DI Ddb1   | DNA damag R.IEVQDSSGGTTALRPSASTQALSSVSSSK.L      | 3.01   | 9.00   | 0.33 | 2.99 |
| Q3U1J4_DI Ddb1   | DNA damag R.IVVQYSQDGK#.L                        | 38.04  | 12.93  | 2.94 | 0.34 |
| Q3U1J4_DI Ddb1   | DNA damag R.LGDSQLVK#.L                          | 21.42  | 15.60  | 1.37 | 0.73 |
| Q3U1J4_DI Ddb1   | DNA damag K.LGK#DPNTYFIVGTAM*VYPEEAEPK#.Q        | 4.93   | 4.91   | 1.00 | 1.00 |
| Q3U1J4_DI Ddb1   | DNA damag K.LLASINSTRV.L                         | 9.17   | 13.81  | 0.66 | 1.51 |
| Q3U1J4_DI Ddb1   | DNA damag K.LVFSNVNLK#.E                         | 24.28  | 8.57   | 2.83 | 0.35 |
| Q3U1J4_DI Ddb1   | DNA damag K.VLAIAPPIHK#.Q                        | 10.90  | 7.19   | 1.52 | 0.66 |
| A2ADY9_DI Ddi2   | Protein DD R.LFSADPFDELAQAK#.I                   | 7.20   | 3.65   | 1.97 | 0.51 |
| O54734_O Ddost   | Dolichyl-di. R.LVLLDNLNVR.D                      | 2.30   | 6.17   | 0.37 | 2.68 |
| Q91VR5_DI Ddx1   | ATP-depend K.APDNIVK#.S                          | 31.29  | 20.92  | 1.50 | 0.67 |
| Q91VR5_DI Ddx1   | ATP-depend K.DGFVALSK#.A                         | 19.03  | 7.46   | 2.55 | 0.39 |
| Q91VR5_DI Ddx1   | ATP-depend R.ELAEQTLNNVK#.Q                      | 40.92  | 21.41  | 1.91 | 0.52 |
| Q91VR5_DI Ddx1   | ATP-depend R.ELLIIGGVAAR.D                       | 5.40   | 7.69   | 0.70 | 1.42 |
| Q91VR5_DI Ddx1   | ATP-depend K.GHVDVLAPTQVQELAALEK#.E              | 2.14   | 2.96   | 0.72 | 1.39 |
| Q91VR5_DI Ddx1   | ATP-depend K.GHVDVLAPTQVQELAALEK#.E              | 21.52  | 15.98  | 1.35 | 0.74 |
| Q91VR5_DI Ddx1   | ATP-depend R.GIDIHGVPYINVTLPDEK#.Q               | 16.10  | 8.55   | 1.88 | 0.53 |
| Q91VR5_DI Ddx1   | ATP-depend R.LDDLSTGK#.L                         | 18.64  | 9.54   | 1.95 | 0.51 |
| Q91VR5_DI Ddx1   | ATP-depend K.TGASVNLK#.W                         | 10.72  | 9.15   | 1.17 | 0.85 |
| Q91VR5_DI Ddx1   | ATP-depend R.VGWSTM*QASLDLGTDK#.F                | 7.84   | 1.81   | 4.33 | 0.23 |
| Q91VR5_DI Ddx1   | ATP-depend K.GHVDVLAPTQVQELAALEK#.E              | 12.32  | 12.95  | 0.95 | 1.05 |
| Q91VR5_DI Ddx1   | ATP-depend R.GIDIHGVPYINVTLPDEK#.Q               | 7.60   | 2.99   | 2.54 | 0.39 |
| Q91VR5_DI Ddx1   | ATP-depend K.ALIVPSR.E                           | 32.63  | 79.69  | 0.41 | 2.44 |
| Q91VR5_DI Ddx1   | ATP-depend K.ALIVPSR.E                           | 17.89  | 37.05  | 0.48 | 2.07 |
| Q91VR5_DI Ddx1   | ATP-depend K.APDNIVK#.S                          | 185.56 | 111.14 | 1.67 | 0.60 |
| Q91VR5_DI Ddx1   | ATP-depend K.DGFVALSK#.A                         | 83.93  | 45.94  | 1.83 | 0.55 |
| Q91VR5_DI Ddx1   | ATP-depend K.DGLAFEPHAK#.N                       | 91.84  | 72.02  | 1.28 | 0.78 |
| Q91VR5_DI Ddx1   | ATP-depend K.DNTRPGANSPEM*WSEAIK.I               | 7.04   | 26.71  | 0.26 | 3.79 |
| Q91VR5_DI Ddx1   | ATP-depend K.DNTRPGANSPEM*WSEAIK.I               | 6.60   | 17.25  | 0.38 | 2.61 |
| Q91VR5_DI Ddx1   | ATP-depend R.DQLSVLDNGVDIVGTPGR.L                | 4.03   | 10.93  | 0.37 | 2.71 |
| Q91VR5_DI Ddx1   | ATP-depend R.DQLSVLDNGVDIVGTPGR.L                | 3.97   | 10.86  | 0.37 | 2.74 |
| Q91VR5_DI Ddx1   | ATP-depend R.DQLSVLDNGVDIVGTPGR.L                | 7.22   | 17.95  | 0.40 | 2.48 |
| Q91VR5_DI Ddx1   | ATP-depend K.EAQTSLHLGYPNQFLR.T                  | 43.65  | 97.59  | 0.45 | 2.24 |
| Q91VR5_DI Ddx1   | ATP-depend K.EAQTSLHLGYPNQFLR.T                  | 3.16   | 7.57   | 0.42 | 2.39 |
| Q91VR5_DI Ddx1   | ATP-depend R.ELAEQTLNNVK#.Q                      | 240.87 | 119.04 | 2.02 | 0.49 |
| Q91VR5_DI Ddx1   | ATP-depend R.ELLIIGGVAAR. D                      | 33.25  | 72.61  | 0.46 | 2.18 |
| Q91VR5_DI Ddx1   | ATP-depend K.FNFGEEFK#FPPK#.D                    | 18.29  | 10.50  | 1.74 | 0.57 |
| Q91VR5_DI Ddx1   | ATP-depend K.GHVDVLAPTQVQELAALEK#.E              | 193.03 | 110.99 | 1.74 | 0.57 |
| Q91VR5_DI Ddx1   | ATP-depend R.GIDIHGVPYINVTLPDEK#.Q               | 138.89 | 75.25  | 1.85 | 0.54 |
| Q91VR5_DI Ddx1   | ATP-depend K.K.#IDNPK#.L                         | 13.91  | 9.29   | 1.50 | 0.67 |
| Q91VR5_DI Ddx1   | ATP-depend R.LDDLSTGK#.L                         | 128.21 | 60.74  | 2.11 | 0.47 |
| Q91VR5_DI Ddx1   | ATP-depend K.LNLSQVR.F                           | 41.80  | 112.74 | 0.37 | 2.70 |
| Q91VR5_DI Ddx1   | ATP-depend K.SQHTGNAQVSQTK#.F                    | 5.91   | 4.57   | 1.29 | 0.77 |
| Q91VR5_DI Ddx1   | ATP-depend K.TGASVNLK#.W                         | 98.36  | 66.79  | 1.47 | 0.68 |
| Q91VR5_DI Ddx1   | ATP-depend R.VGWSTM*QASLDLGTDK#.F                | 25.32  | 13.08  | 1.94 | 0.52 |
| Q91VR5_DI Ddx1   | ATP-depend R.VGWSTM*QASLDLGTDK#.F                | 12.86  | 6.08   | 2.12 | 0.47 |
| Q91VR5_DI Ddx1   | ATP-depend R.VGWSTM*QASLDLGTDK#.F                | 21.27  | 8.82   | 2.41 | 0.41 |
| Q91VR5_DI Ddx1   | ATP-depend K.VPVEFDGK#.V                         | 70.74  | 47.88  | 1.48 | 0.68 |
| Q91VR5_DI Ddx1   | ATP-depend K.WQMNYPDR. G                         | 5.10   | 14.25  | 0.36 | 2.80 |
| Q91VR5_DI Ddx1   | ATP-depend K.ALIVPSR.E                           | 2.46   | 8.26   | 0.30 | 3.36 |
| Q91VR5_DI Ddx1   | ATP-depend K.DGFVALSK#.A                         | 18.35  | 8.59   | 2.14 | 0.47 |



|                  |                                       |        |        |      |      |
|------------------|---------------------------------------|--------|--------|------|------|
| Q91VR5_DI Ddx1   | ATP-depenc R.ELAEQTLNNVK#.Q           | 20.76  | 16.06  | 1.29 | 0.77 |
| Q91VR5_DI Ddx1   | ATP-depenc K.GHVDLAPVQLEAALEK#.E      | 34.48  | 20.19  | 1.71 | 0.59 |
| Q91VR5_DI Ddx1   | ATP-depenc R.LDDLSTGK#.L              | 25.65  | 13.04  | 1.97 | 0.51 |
| Q91VR5_DI Ddx1   | ATP-depenc K.LNLQVSR.F                | 6.31   | 14.73  | 0.43 | 2.34 |
| Q91VR5_DI Ddx1   | ATP-depenc K.VPVEFDGK#.V              | 11.22  | 10.86  | 1.03 | 0.97 |
| Q501J6_DI Ddx17  | Probable A K.APILIATDVASR.G           | 201.44 | 863.34 | 0.23 | 4.29 |
| Q501J6_DI Ddx17  | Probable A R.DM*VGIAGTQSGK#.T         | 66.86  | 34.79  | 1.92 | 0.52 |
| Q501J6_DI Ddx17  | Probable A R.DWVLFNEFR.S              | 9.69   | 20.85  | 0.46 | 2.15 |
| Q501J6_DI Ddx17  | Probable A R.ELAQVQVADDYVGK.C         | 60.64  | 34.54  | 1.76 | 0.57 |
| Q501J6_DI Ddx17  | Probable A K.FVINYDYPNSSESDYVHR.I     | 2.27   | 4.61   | 0.49 | 2.03 |
| Q501J6_DI Ddx17  | Probable A R.GLDVEDVK#.F              | 372.72 | 330.95 | 1.13 | 0.89 |
| Q501J6_DI Ddx17  | Probable A K.GTAYFFFTPGNLK#.Q         | 84.76  | 43.85  | 1.93 | 0.52 |
| Q501J6_DI Ddx17  | Probable A K.LIQLM*EEIM*AEK#.E        | 8.87   | 2.94   | 3.02 | 0.33 |
| Q501J6_DI Ddx17  | Probable A R.M*LDM*GFEPQIR.K          | 30.75  | 146.03 | 0.21 | 4.75 |
| Q501J6_DI Ddx17  | Probable A R.MLDM*GFEPQIR.K           | 17.48  | 57.82  | 0.30 | 3.31 |
| Q501J6_DI Ddx17  | Probable A R.M*LDMGFEPQIR.K           | 13.52  | 45.41  | 0.30 | 3.36 |
| Q501J6_DI Ddx17  | Probable A R.MLDMGFEPQIR.K            | 12.67  | 53.07  | 0.24 | 4.19 |
| Q501J6_DI Ddx17  | Probable A R.QLAEDFLR.D               | 8.54   | 18.32  | 0.47 | 2.15 |
| Q501J6_DI Ddx17  | Probable A R.QTLM*WSATWPK#.E          | 86.04  | 71.19  | 1.21 | 0.83 |
| Q501J6_DI Ddx17  | Probable A R.QTLMWSATWPK#.E           | 62.56  | 94.70  | 0.66 | 1.51 |
| Q501J6_DI Ddx17  | Probable A R.SSQSSQSQSGIGR.S          | 12.00  | 30.10  | 0.40 | 2.51 |
| Q501J6_DI Ddx17  | Probable A K.VLEEANQAINPK#.L          | 120.89 | 70.41  | 1.72 | 0.58 |
| Q501J6_DI Ddx17  | Probable A K.WDLSLSEPK#.F             | 30.42  | 16.23  | 1.87 | 0.53 |
| Q501J6_DI Ddx17  | Probable A K.APILIATDVASR.G           | 1.15   | 6.81   | 0.17 | 5.93 |
| Q501J6_DI Ddx17  | Probable A R.SSQSSQSQSGIGR.S          | 13.60  | 6.58   | 2.07 | 0.48 |
| Q501J6_DI Ddx17  | Probable A K.APILIATDVASR.G           | 138.30 | 364.73 | 0.38 | 2.64 |
| Q501J6_DI Ddx17  | Probable A R.DM*VGIAGTQSGK#.T         | 153.46 | 66.25  | 2.32 | 0.43 |
| Q501J6_DI Ddx17  | Probable A R.DMVGIAQTGSGK#.T          | 66.94  | 32.59  | 2.05 | 0.49 |
| Q501J6_DI Ddx17  | Probable A R.DWVLFNEFR.S              | 18.17  | 33.83  | 0.54 | 1.86 |
| Q501J6_DI Ddx17  | Probable A R.ELAQVQVADDYVGK#.C        | 185.46 | 79.19  | 2.34 | 0.43 |
| Q501J6_DI Ddx17  | Probable A R.GLDVEDVK#.F              | 329.58 | 202.68 | 1.63 | 0.61 |
| Q501J6_DI Ddx17  | Probable A K.GTAYFFFTPGNLK#.Q         | 209.11 | 94.28  | 2.22 | 0.45 |
| Q501J6_DI Ddx17  | Probable A K.KKWDLSEPK#.F             | 42.85  | 17.94  | 2.39 | 0.42 |
| Q501J6_DI Ddx17  | Probable A K.K#WDLSEPK#.F             | 23.09  | 13.68  | 1.69 | 0.59 |
| Q501J6_DI Ddx17  | Probable A R.LIDFLESGK#.T             | 221.17 | 79.52  | 2.78 | 0.36 |
| Q501J6_DI Ddx17  | Probable A K.LIQLM*EEIM*AEK#.E        | 13.75  | 5.52   | 2.49 | 0.40 |
| Q501J6_DI Ddx17  | Probable A K.LIQLMEEIMAEK#.E          | 18.26  | 6.34   | 2.88 | 0.35 |
| Q501J6_DI Ddx17  | Probable A R.M*LDM*GFEPQIR.K          | 30.96  | 92.24  | 0.34 | 2.98 |
| Q501J6_DI Ddx17  | Probable A R.MLDM*GFEPQIR.K           | 13.46  | 30.80  | 0.44 | 2.29 |
| Q501J6_DI Ddx17  | Probable A R.MLDMGFEPQIR.K            | 8.50   | 23.43  | 0.36 | 2.76 |
| Q501J6_DI Ddx17  | Probable A R.QLAEDFLR.D               | 21.88  | 49.26  | 0.44 | 2.25 |
| Q501J6_DI Ddx17  | Probable A R.QTLM*WSATWPK#.E          | 62.88  | 35.00  | 1.80 | 0.56 |
| Q501J6_DI Ddx17  | Probable A R.QTLMWSATWPK#.E           | 42.40  | 31.12  | 1.36 | 0.73 |
| Q501J6_DI Ddx17  | Probable A R.SSQSSQSQSGIGR.S          | 55.04  | 128.09 | 0.43 | 2.33 |
| Q501J6_DI Ddx17  | Probable A K.VLEEANQAINPK#.L          | 302.83 | 129.58 | 2.34 | 0.43 |
| Q501J6_DI Ddx17  | Probable A K.WDLSLSEPK#.F             | 50.42  | 26.81  | 1.88 | 0.53 |
| Q501J6_DI Ddx17  | Probable A K.APILIATDVASR.G           | 17.15  | 70.44  | 0.24 | 4.11 |
| Q501J6_DI Ddx17  | Probable A R.ELAQVQVADDYVGK#.C        | 11.05  | 10.11  | 1.09 | 0.91 |
| Q501J6_DI Ddx17  | Probable A K.GTAYFFFTPGNLK#.Q         | 15.65  | 4.88   | 3.21 | 0.31 |
| Q501J6_DI Ddx17  | Probable A R.M*LDM*GFEPQIR.K          | 5.00   | 10.49  | 0.48 | 2.10 |
| Q501J6_DI Ddx17  | Probable A R.SSQSSQSQSGIGR.S          | 4.33   | 9.38   | 0.46 | 2.17 |
| Q501J6_DI Ddx17  | Probable A K.VLEEANQAINPK#.L          | 19.19  | 9.24   | 2.08 | 0.48 |
| Q8K363_DI Ddx18  | ATP-depenc K.VPLNQDFSWSK#.V           | 17.82  | 19.81  | 0.90 | 1.11 |
| Q8K363_DI Ddx18  | ATP-depenc K.VSDIQSLEK#.L             | 30.02  | 28.73  | 1.04 | 0.96 |
| Q8K363_DI Ddx18  | ATP-depenc K.VPLNQDFSWSK#.V           | 11.87  | 9.86   | 1.20 | 0.83 |
| Q8K363_DI Ddx18  | ATP-depenc K.VSDIQSLEK#.L             | 15.37  | 20.01  | 0.77 | 1.30 |
| Q61655_DI Ddx19a | ATP-depenc R.AAQSLLNK#.L              | 91.37  | 43.33  | 2.11 | 0.47 |
| Q61655_DI Ddx19a | ATP-depenc R.DPSSPLYSK#.S             | 112.84 | 41.13  | 2.74 | 0.36 |
| Q61655_DI Ddx19a | ATP-depenc R.EEETLDTIK#.Q             | 72.75  | 36.57  | 1.99 | 0.50 |
| Q61655_DI Ddx19a | ATP-depenc K.EGHQVALLSGEM*MM*VEQR.A   | 9.78   | 11.69  | 0.84 | 1.20 |
| Q61655_DI Ddx19a | ATP-depenc R.GLAVNIMVDSK#.H           | 30.91  | 14.56  | 2.12 | 0.47 |
| Q61655_DI Ddx19a | ATP-depenc R.IQEHFNK#.K               | 55.83  | 15.55  | 3.59 | 0.28 |
| Q61655_DI Ddx19a | ATP-depenc R.KHFWLAAELSK#.E           | 18.71  | 5.59   | 3.34 | 0.30 |
| Q61655_DI Ddx19a | ATP-depenc R.LDITDLEIEK#.I            | 113.16 | 48.32  | 2.34 | 0.43 |
| Q61655_DI Ddx19a | ATP-depenc R.SNLVDNTNQVEVLQR.D        | 24.73  | 46.01  | 0.54 | 1.86 |
| Q61655_DI Ddx19a | ATP-depenc K.TAAFWLAM*.L.S.V          | 6.91   | 18.78  | 0.37 | 2.72 |
| Q61655_DI Ddx19a | ATP-depenc K.TASWLAELSK#.E            | 76.58  | 28.32  | 2.70 | 0.37 |
| Q61655_DI Ddx19a | ATP-depenc K.TSTTAEK#TEEEK#.E         | 4.84   | 2.38   | 2.03 | 0.49 |
| Q61655_DI Ddx19a | ATP-depenc K.VFVLEADVM*IATQGHQDQSIR.I | 10.31  | 11.36  | 0.91 | 1.10 |
| Q61655_DI Ddx19a | ATP-depenc K.VFVLEADVM*IATQGHQDQSIR.I | 9.92   | 16.31  | 0.61 | 1.64 |
| Q61655_DI Ddx19a | ATP-depenc R.AAQSLLNK#.L              | 25.45  | 7.26   | 3.51 | 0.29 |
| Q61655_DI Ddx19a | ATP-depenc R.DPSSPLYSK#.S             | 30.13  | 14.76  | 2.04 | 0.49 |
| Q61655_DI Ddx19a | ATP-depenc R.SNLVDNTNQVEVLQR.D        | 6.98   | 10.51  | 0.66 | 1.51 |
| Q61655_DI Ddx19a | ATP-depenc K.TSTTAEK#TEEEKEDR.A       | 3.70   | 12.80  | 0.29 | 3.46 |
| Q61655_DI Ddx19a | ATP-depenc R.AAQSLLNK#.L              | 34.47  | 12.81  | 2.69 | 0.37 |
| Q61655_DI Ddx19a | ATP-depenc R.DPSSPLYSK#.S             | 35.94  | 14.03  | 2.56 | 0.39 |
| Q61655_DI Ddx19a | ATP-depenc K.EGHQVALLSGEM*MM*VEQR.A   | 8.71   | 11.56  | 0.75 | 1.33 |
| Q61655_DI Ddx19a | ATP-depenc K.HSM*NLNR.I               | 9.98   | 18.77  | 0.53 | 1.88 |
| Q61655_DI Ddx19a | ATP-depenc R.LDITDLEIEK#.I            | 41.36  | 17.75  | 2.33 | 0.43 |
| Q61655_DI Ddx19a | ATP-depenc R.SNLVDNTNQVEVLQR.D        | 6.29   | 12.48  | 0.50 | 1.98 |
| Q61655_DI Ddx19a | ATP-depenc K.TASWLAELSK#.E            | 25.03  | 5.57   | 4.50 | 0.22 |
| Q61655_DI Ddx19a | ATP-depenc K.TSTTAEK#TEEEKEDR.A       | 7.89   | 12.98  | 0.61 | 1.65 |
| Q91IK5_DD Ddx21  | Nucleolar R.R.GVNFLEPIQAK.T           | 9.15   | 12.55  | 0.73 | 1.37 |
| Q91IK5_DD Ddx21  | Nucleolar R.R.GVPSATEIHK#.A           | 15.06  | 11.67  | 1.29 | 0.77 |
| Q91IK5_DD Ddx21  | Nucleolar R.R.TEAVTEIQEK.W            | 16.12  | 17.41  | 0.93 | 1.08 |
| Q91IK5_DD Ddx21  | Nucleolar R.R.AAVIGDVR.V              | 81.28  | 187.11 | 0.43 | 2.30 |
| Q91IK5_DD Ddx21  | Nucleolar R.R.APQVLVAPTR.E            | 27.17  | 126.93 | 0.21 | 4.67 |
| Q91IK5_DD Ddx21  | Nucleolar R.K.DFSITKHK#.L             | 47.65  | 44.32  | 1.08 | 0.93 |
| Q91IK5_DD Ddx21  | Nucleolar R.K.EGAFSNFPISEETVK#.L      | 139.94 | 115.29 | 1.21 | 0.82 |
| Q91IK5_DD Ddx21  | Nucleolar R.R.ELANQVSK#.D             | 209.26 | 125.42 | 1.67 | 0.60 |
| Q91IK5_DD Ddx21  | Nucleolar R.K.EQLGESIDAK#.V           | 49.15  | 45.17  | 1.09 | 0.92 |
| Q91IK5_DD Ddx21  | Nucleolar R.K.EQLGESIDAK#.V           | 38.85  | 36.54  | 1.06 | 0.94 |
| Q91IK5_DD Ddx21  | Nucleolar R.K.GAVEALAAALHISGATSDQR.S  | 52.95  | 229.15 | 1.23 | 4.33 |
| Q91IK5_DD Ddx21  | Nucleolar R.K.GM*VFLK#.G              | 43.15  | 35.18  | 1.23 | 0.82 |
| Q91IK5_DD Ddx21  | Nucleolar R.R.GVNFLEPIQAK.T           | 329.30 | 296.41 | 1.11 | 0.90 |
| Q91IK5_DD Ddx21  | Nucleolar R.R.GVPSATEIHK#.A           | 166.17 | 158.27 | 1.05 | 0.95 |
| Q91IK5_DD Ddx21  | Nucleolar R.K.KGPSEDDVPPK.S           | 42.07  | 49.28  | 0.85 | 1.17 |
| Q91IK5_DD Ddx21  | Nucleolar R.K.K#QEEEPQDQTASTSK#.T     | 22.82  | 24.85  | 0.92 | 1.09 |
| Q91IK5_DD Ddx21  | Nucleolar R.K.LGSDGAEESMETLPPKPKSEK.K | 45.42  | 59.86  | 0.76 | 1.32 |
| Q91IK5_DD Ddx21  | Nucleolar R.K.LGSDGAEESMETLPPKPKSEK.K | 29.11  | 34.02  | 0.86 | 1.17 |
| Q91IK5_DD Ddx21  | Nucleolar R.R.LLDSVPPPTAISHFK#.Q      | 60.64  | 58.60  | 1.03 | 0.97 |
| Q91IK5_DD Ddx21  | Nucleolar R.K.LQGGLQER.K              | 26.62  | 120.69 | 0.22 | 4.53 |
| Q91IK5_DD Ddx21  | Nucleolar R.R.NGNFGLVATNVAAR.G        | 4.47   | 18.01  | 0.25 | 4.03 |

|                 |                                                |        |        |      |      |
|-----------------|------------------------------------------------|--------|--------|------|------|
| Q9JIK5_DD Ddx21 | Nucleolar R.R.RWQLTVATEQPELEGGPPDGYR.G         | 1.14   | 8.96   | 0.13 | 7.85 |
| Q9JIK5_DD Ddx21 | Nucleolar R.R.SGIDLVGTPGR.I                    | 30.13  | 143.06 | 0.21 | 4.75 |
| Q9JIK5_DD Ddx21 | Nucleolar R.K.SK#TEEATEGM#EAVSSK#.A            | 25.83  | 21.32  | 1.21 | 0.83 |
| Q9JIK5_DD Ddx21 | Nucleolar R.K.SK#TEEATEGM#EAVSSK#.A            | 61.49  | 45.10  | 1.36 | 0.73 |
| Q9JIK5_DD Ddx21 | Nucleolar R.K.SK#TEEATEGM#EAVSSK#.A            | 103.68 | 93.54  | 1.11 | 0.90 |
| Q9JIK5_DD Ddx21 | Nucleolar R.K.SK#TEEATEGM#EAVSSK#.A            | 38.46  | 45.08  | 0.85 | 1.17 |
| Q9JIK5_DD Ddx21 | Nucleolar R.R.SLINSQAGVFTM#L.R.C               | 4.39   | 24.65  | 0.18 | 5.61 |
| Q9JIK5_DD Ddx21 | Nucleolar R.R.SLINSQAGVFTM#L.R.C               | 8.08   | 37.90  | 0.21 | 4.69 |
| Q9JIK5_DD Ddx21 | Nucleolar R.K.SNSSDAPGESSSETEKI#PVEQK.E        | 64.27  | 70.68  | 0.91 | 1.10 |
| Q9JIK5_DD Ddx21 | Nucleolar R.K.STYEQVDLIGK#.K                   | 52.40  | 39.21  | 1.34 | 0.75 |
| Q9JIK5_DD Ddx21 | Nucleolar R.R.TEAVTEIQEK#.W                    | 245.91 | 214.43 | 1.15 | 0.87 |
| Q9JIK5_DD Ddx21 | Nucleolar R.K.TEEATEGM#EAVSSK#.A               | 11.27  | 7.16   | 1.57 | 0.64 |
| Q9JIK5_DD Ddx21 | Nucleolar R.K.TEEATEGM#EAVSSK#.A               | 26.10  | 23.46  | 1.11 | 0.90 |
| Q9JIK5_DD Ddx21 | Nucleolar R.K.TFHHVYSGK.D                      | 21.10  | 23.34  | 0.90 | 1.11 |
| Q9JIK5_DD Ddx21 | Nucleolar R.K.TFSFALPIEK.L                     | 284.53 | 293.54 | 0.97 | 1.03 |
| Q9JIK5_DD Ddx21 | Nucleolar R.R.WQLTVATEQPELEGGPPDGYR.G          | 5.38   | 27.73  | 0.19 | 5.15 |
| Q9JIK5_DD Ddx21 | Nucleolar R.R.AAVIGDIVR.V                      | 15.47  | 46.99  | 0.33 | 3.04 |
| Q9JIK5_DD Ddx21 | Nucleolar R.R.APQVLVLAPTR.E                    | 6.33   | 36.54  | 0.17 | 5.77 |
| Q9JIK5_DD Ddx21 | Nucleolar R.K.ELKQESLIDAK.V                    | 9.27   | 9.29   | 1.00 | 1.00 |
| Q9JIK5_DD Ddx21 | Nucleolar R.K.EQLGESLIDAK#.V                   | 14.57  | 14.54  | 1.00 | 1.00 |
| Q9JIK5_DD Ddx21 | Nucleolar R.K.GAVEALAAALHISGATSVDQR.S          | 9.82   | 55.54  | 0.18 | 5.65 |
| Q9JIK5_DD Ddx21 | Nucleolar R.R.GVNFPIQAK#.T                     | 73.35  | 70.96  | 1.03 | 0.97 |
| Q9JIK5_DD Ddx21 | Nucleolar R.K.KOEEEPDQTASTK.T                  | 4.86   | 3.72   | 1.30 | 0.77 |
| Q9JIK5_DD Ddx21 | Nucleolar R.R.SGIDLVGTPGR.I                    | 15.15  | 43.81  | 0.35 | 2.89 |
| Q9JIK5_DD Ddx21 | Nucleolar R.K.SK#TEEATEGM#EAVSSK#.A            | 12.21  | 9.09   | 1.34 | 0.74 |
| Q9JIK5_DD Ddx21 | Nucleolar R.K.SK#TEEATEGM#EAVSSK#.A            | 46.74  | 38.89  | 1.20 | 0.83 |
| Q9JIK5_DD Ddx21 | Nucleolar R.K.STYEQVDLIGK#.K                   | 17.12  | 7.88   | 2.17 | 0.46 |
| Q9JIK5_DD Ddx21 | Nucleolar R.R.TEAVTEIQEK#.W                    | 54.74  | 42.40  | 1.29 | 0.77 |
| Q9JIK5_DD Ddx21 | Nucleolar R.K.TEEATEGM#EAVSSK#.A               | 10.45  | 7.75   | 1.35 | 0.74 |
| Q9JIK5_DD Ddx21 | Nucleolar R.K.TFSFALPIEK.L                     | 93.00  | 88.24  | 1.05 | 0.95 |
| D3Z0M9_D Ddx23  | MCG18410.R.DIIIGAVTSGSK#.T                     | 91.03  | 51.20  | 1.78 | 0.56 |
| D3Z0M9_D Ddx23  | MCG18410.K.DILVATDVAGR.G                       | 23.18  | 48.81  | 0.47 | 2.11 |
| D3Z0M9_D Ddx23  | MCG18410.K.EDSAVFYELK#.Q                       | 56.46  | 27.50  | 2.05 | 0.49 |
| D3Z0M9_D Ddx23  | MCG18410.R.ELAQEIEETIK#.F                      | 71.36  | 40.74  | 1.75 | 0.57 |
| D3Z0M9_D Ddx23  | MCG18410.R.FYGDLM#EK#.R                        | 34.11  | 19.68  | 1.73 | 0.58 |
| D3Z0M9_D Ddx23  | MCG18410.R.GFIAGDLK#.Q                         | 56.36  | 26.22  | 2.15 | 0.47 |
| D3Z0M9_D Ddx23  | MCG18410.R.GIDIQVSM#VVNYDM#AK#.N               | 4.39   | 2.38   | 1.84 | 0.54 |
| D3Z0M9_D Ddx23  | MCG18410.R.GIDIQVSM#VVNYDMAK#.N                | 6.70   | 3.55   | 1.89 | 0.53 |
| D3Z0M9_D Ddx23  | MCG18410.R.HQVQLLGR.G                          | 15.80  | 51.79  | 0.31 | 3.28 |
| D3Z0M9_D Ddx23  | MCG18410.K.IDRIEESDQGPYAILAPTR.E               | 4.00   | 21.11  | 0.19 | 5.28 |
| D3Z0M9_D Ddx23  | MCG18410.R.IEESDQGPYAILAPTR.E                  | 3.78   | 11.27  | 0.34 | 2.98 |
| D3Z0M9_D Ddx23  | MCG18410.R.I.FREDSYITTK.G                      | 8.22   | 30.41  | 0.27 | 3.70 |
| D3Z0M9_D Ddx23  | MCG18410.K.IQPLLELLAK#.K                       | 146.17 | 76.85  | 1.90 | 0.53 |
| D3Z0M9_D Ddx23  | MCG18410.R.LIDVLENR.Y                          | 19.66  | 43.12  | 0.46 | 2.19 |
| D3Z0M9_D Ddx23  | MCG18410.R.M#IDM#GFEPDVQK#.I                   | 12.00  | 7.31   | 1.64 | 0.61 |
| D3Z0M9_D Ddx23  | MCG18410.R.MIDM#GFEPDVQK#.I                    | 10.41  | 3.24   | 3.22 | 0.31 |
| D3Z0M9_D Ddx23  | MCG18410.R.QAIPGLQNR.D                         | 15.62  | 34.77  | 0.45 | 2.23 |
| D3Z0M9_D Ddx23  | MCG18410.R.QTVM#FATM#PPAVER.L                  | 2.47   | 6.28   | 0.39 | 2.54 |
| D3Z0M9_D Ddx23  | MCG18410.R.RPAVYIGSAGKPHER.V                   | 4.00   | 23.52  | 0.17 | 5.88 |
| D3Z0M9_D Ddx23  | MCG18410.K.SGVAVITLTK#.E                       | 54.42  | 25.71  | 2.12 | 0.47 |
| D3Z0M9_D Ddx23  | MCG18410.R.TLEEKQEER.L                         | 11.55  | 20.30  | 0.57 | 1.76 |
| D3Z0M9_D Ddx23  | MCG18410.R.TVAVIGISR.E                         | 12.49  | 31.03  | 0.40 | 2.48 |
| D3Z0M9_D Ddx23  | MCG18410.K.VFLMSESEK#.R                        | 20.69  | 9.06   | 2.28 | 0.44 |
| D3Z0M9_D Ddx23  | MCG18410.K.DILVATDVAGR.G                       | 30.98  | 14.50  | 2.14 | 0.47 |
| D3Z0M9_D Ddx23  | MCG18410.K.EDSAVFYELK#.Q                       | 18.33  | 9.22   | 1.99 | 0.50 |
| D3Z0M9_D Ddx23  | MCG18410.K.IQPLLELLAK#.K                       | 36.82  | 19.70  | 1.87 | 0.54 |
| D3Z0M9_D Ddx23  | MCG18410.R.TLEEKQEER.L                         | 2.83   | 6.56   | 0.43 | 2.32 |
| Q9ESV0_D Ddx24  | ATP-depenc R.NEGVTETLTK.I                      | 6.76   | 9.73   | 0.69 | 1.44 |
| Q9ESV0_D Ddx24  | ATP-depenc K.TLQKDEDIPFPVQSK.Y                 | 4.28   | 7.53   | 0.57 | 1.76 |
| Q921N6_D Ddx27  | Probable A'R.AM#PEDEPTGPAK#.K                  | 7.63   | 5.46   | 1.40 | 0.72 |
| Q921N6_D Ddx27  | Probable A'R.GLDIEGK#.T                        | 11.54  | 6.77   | 1.70 | 0.59 |
| Q921N6_D Ddx27  | Probable A'R.IFVNSNTDVPFLR.Q                   | 4.89   | 9.24   | 0.53 | 1.89 |
| Q921N6_D Ddx27  | Probable A'K.TAAFPALVLER.L                     | 4.33   | 10.85  | 0.40 | 2.51 |
| Q921N6_D Ddx27  | Probable A'K.TVNFIMPNTVK#.H                    | 7.21   | 1.86   | 3.87 | 0.26 |
| Q8VDW0_I Ddx39a | ATP-depenc R.DFLKPELLR.A                       | 54.17  | 86.41  | 0.63 | 1.60 |
| Q8VDW0_I Ddx39a | ATP-depenc R.DVQEIFR.L                         | 82.04  | 158.79 | 0.52 | 1.94 |
| Q8VDW0_I Ddx39a | ATP-depenc R.FEVNVAELPEEIDISTYEQSR.-           | 6.70   | 12.98  | 0.52 | 1.94 |
| Q8VDW0_I Ddx39a | ATP-depenc K.FM#QDPM#EVFVDDETK#.L              | 7.00   | 3.71   | 1.89 | 0.53 |
| Q8VDW0_I Ddx39a | ATP-depenc K.GLAVTFVSDENDAK#.I                 | 151.70 | 56.87  | 2.67 | 0.37 |
| Q8VDW0_I Ddx39a | ATP-depenc K.I.LNDVQDR.F                       | 51.24  | 97.02  | 0.53 | 1.89 |
| Q8VDW0_I Ddx39a | ATP-depenc K.I.LNDVQDRFEVNVVAELPEEIDISTYEQSR.- | 1.36   | 8.01   | 1.17 | 5.89 |
| Q8VDW0_I Ddx39a | ATP-depenc R.I.LVATNLFGR.G                     | 137.58 | 289.10 | 0.48 | 2.10 |
| Q8VDW0_I Ddx39a | ATP-depenc K.LTLHGLQQYVVK#.L                   | 359.97 | 162.61 | 2.21 | 0.45 |
| Q8VDW0_I Ddx39a | ATP-depenc R.RDVQEIFR.L                        | 7.19   | 27.47  | 0.26 | 3.82 |
| Q8VDW0_I Ddx39a | ATP-depenc R.RILVATNLFGR.G                     | 2.11   | 13.44  | 0.16 | 6.38 |
| Q8VDW0_I Ddx39a | ATP-depenc R.VNIVFNIDM#PESDSTYLHR.V            | 8.54   | 17.56  | 0.49 | 2.06 |
| Q8VDW0_I Ddx39a | ATP-depenc K.VSFFGGLSIK#.K                     | 115.83 | 57.12  | 2.03 | 0.49 |
| Q8VDW0_I Ddx39a | ATP-depenc R.I.LVATNLFGR.G                     | 13.29  | 36.32  | 0.37 | 2.73 |
| Q8VDW0_I Ddx39a | ATP-depenc R.DVQEIFR.L                         | 50.86  | 99.04  | 0.51 | 1.95 |
| Q8VDW0_I Ddx39a | ATP-depenc K.GLAVTFVSDENDAK#.I                 | 78.42  | 33.03  | 2.37 | 0.42 |
| Q8VDW0_I Ddx39a | ATP-depenc K.GSVVSIHSSGFR.D                    | 19.97  | 33.96  | 0.59 | 1.70 |
| Q8VDW0_I Ddx39a | ATP-depenc K.I.LNDVQDR.F                       | 10.75  | 27.85  | 0.39 | 2.59 |
| Q8VDW0_I Ddx39a | ATP-depenc R.I.LVATNLFGR.G                     | 83.54  | 153.11 | 0.55 | 1.83 |
| Q8VDW0_I Ddx39a | ATP-depenc K.LTLHGLQQYVVK#.L                   | 162.09 | 61.49  | 2.64 | 0.38 |
| Q8VDW0_I Ddx39a | ATP-depenc R.VNIVFNIDM#PESDSTYLHR.V            | 11.55  | 11.33  | 1.02 | 0.98 |
| Q8VDW0_I Ddx39a | ATP-depenc K.VSFFGGLSIK#.K                     | 60.28  | 25.99  | 2.32 | 0.43 |
| Q8VDW0_I Ddx39a | ATP-depenc R.DVQEIFR.L                         | 51.23  | 115.66 | 0.44 | 2.26 |
| Q8VDW0_I Ddx39a | ATP-depenc K.FM#QDPM#EVFVDDETK#.L              | 8.49   | 4.67   | 1.82 | 0.55 |
| Q8VDW0_I Ddx39a | ATP-depenc K.GLAVTFVSDENDAK#.I                 | 148.40 | 60.75  | 2.44 | 0.41 |
| Q8VDW0_I Ddx39a | ATP-depenc K.I.LNDVQDR.F                       | 16.03  | 33.37  | 0.48 | 2.08 |
| Q8VDW0_I Ddx39a | ATP-depenc R.I.LVATNLFGR.G                     | 111.88 | 209.96 | 0.53 | 1.88 |
| Q8VDW0_I Ddx39a | ATP-depenc K.LTLHGLQQYVVK#.L                   | 187.07 | 87.36  | 2.14 | 0.47 |
| Q8VDW0_I Ddx39a | ATP-depenc R.VNIVFNIDM#PESDSTYLHR.V            | 13.73  | 19.48  | 0.70 | 1.42 |
| Q8VDW0_I Ddx39a | ATP-depenc K.VSFFGGLSIK#.K                     | 105.86 | 42.49  | 2.49 | 0.40 |
| Q9Z1N5_D Ddx39b | Spliceosom R.FEVNSELPEEIDISSYIEQTR.-           | 14.94  | 26.81  | 0.56 | 1.79 |
| Q9Z1N5_D Ddx39b | Spliceosom K.FM#QDPM#EIFVDDETK#.L              | 18.04  | 11.60  | 1.55 | 0.64 |
| Q9Z1N5_D Ddx39b | Spliceosom K.FMQDPM#EIFVDDETK#.L               | 5.98   | 4.07   | 1.47 | 0.68 |
| Q9Z1N5_D Ddx39b | Spliceosom K.FM#QDPM#EIFVDDETK#.L              | 8.14   | 3.60   | 2.26 | 0.44 |
| Q9Z1N5_D Ddx39b | Spliceosom K.FMQDPM#EIFVDDETK#.L               | 13.73  | 6.92   | 1.99 | 0.50 |
| Q9Z1N5_D Ddx39b | Spliceosom K.FM#QDPM#EIFVDDETK#.L              | 12.93  | 3.92   | 3.30 | 0.30 |
| Q9Z1N5_D Ddx39b | Spliceosom K.FMQDPM#EIFVDDETK#.L               | 10.42  | 7.43   | 1.40 | 0.71 |
| Q9Z1N5_D Ddx39b | Spliceosom K.GLAITFVSDENDAK#.I                 | 346.88 | 158.74 | 2.19 | 0.46 |
| Q9Z1N5_D Ddx39b | Spliceosom R.K.FM#QDPM#EIFVDDETK#.L            | 12.77  | 7.64   | 1.67 | 0.60 |

|                 |                                      |        |        |      |       |
|-----------------|--------------------------------------|--------|--------|------|-------|
| Q9Z1N5_D:Ddx39b | Spliceosom K.QVM*MFATLSK#.E          | 66.86  | 35.19  | 1.90 | 0.53  |
| Q9Z1N5_D:Ddx39b | Spliceosom K.QVM*MFATLSK#.E          | 24.78  | 13.58  | 1.83 | 0.55  |
| Q9Z1N5_D:Ddx39b | Spliceosom K.QVM*MFATLSK#.E          | 25.70  | 14.96  | 1.72 | 0.58  |
| Q9Z1N5_D:Ddx39b | Spliceosom K.VAVFFGLSIK#.K           | 286.55 | 135.34 | 2.12 | 0.47  |
| Q9Z1N5_D:Ddx39b | Spliceosom R.VNIAFNVDMPEDSDTYLHR.V   | 40.03  | 75.84  | 0.53 | 1.89  |
| Q9Z1N5_D:Ddx39b | Spliceosom R.VNIAFNVDMPEDSDTYLHR.V   | 24.55  | 48.20  | 0.51 | 1.96  |
| Q9Z1N5_D:Ddx39b | Spliceosom K.GLAITVSDENDAK.I         | 3.76   | 4.19   | 0.90 | 1.11  |
| Q9Z1N5_D:Ddx39b | Spliceosom R.FEVNISELPDEIDISSIEQTR.- | 6.90   | 10.94  | 0.63 | 1.59  |
| Q9Z1N5_D:Ddx39b | Spliceosom K.FM*QDPM*EIFVDETEK#.L    | 7.59   | 4.70   | 1.61 | 0.62  |
| Q9Z1N5_D:Ddx39b | Spliceosom K.FM*QDPM*EIFVDETEK#.L    | 7.44   | 2.14   | 3.47 | 0.29  |
| Q9Z1N5_D:Ddx39b | Spliceosom K.GLAITVSDENDAK#.I        | 170.88 | 72.16  | 2.37 | 0.42  |
| Q9Z1N5_D:Ddx39b | Spliceosom K.QVM*MFATLSK#.E          | 6.76   | 3.25   | 2.08 | 0.48  |
| Q9Z1N5_D:Ddx39b | Spliceosom K.VAVFFGLSIK#.K           | 176.13 | 79.92  | 2.20 | 0.45  |
| Q9Z1N5_D:Ddx39b | Spliceosom R.VNIAFNVDMPEDSDTYLHR.V   | 11.24  | 17.06  | 0.66 | 1.52  |
| Q9Z1N5_D:Ddx39b | Spliceosom K.FM*QDPM*EIFVDETEK#.L    | 12.49  | 7.32   | 1.70 | 0.59  |
| Q9Z1N5_D:Ddx39b | Spliceosom K.FM*QDPM*EIFVDETEK#.L    | 4.46   | 3.65   | 1.22 | 0.82  |
| Q9Z1N5_D:Ddx39b | Spliceosom K.GLAITVSDENDAK#.I        | 281.00 | 128.90 | 2.18 | 0.46  |
| Q9Z1N5_D:Ddx39b | Spliceosom K.QVM*MFATLSK#.E          | 56.13  | 22.57  | 2.49 | 0.40  |
| Q9Z1N5_D:Ddx39b | Spliceosom K.QVM*MFATLSK#.E          | 15.01  | 11.39  | 1.32 | 0.76  |
| Q9Z1N5_D:Ddx39b | Spliceosom K.VAVFFGLSIK#.K           | 165.44 | 74.37  | 2.22 | 0.45  |
| Q9Z1N5_D:Ddx39b | Spliceosom R.VNIAFNVDMPEDSDTYLHR.V   | 24.99  | 50.34  | 0.50 | 2.01  |
| Q9Z1N5_D:Ddx39b | Spliceosom R.VNIAFNVDMPEDSDTYLHR.V   | 9.42   | 19.55  | 0.48 | 2.07  |
| Q9Z1N5_D:Ddx39b | Spliceosom K.YM*PNVK#.V              | 77.26  | 39.68  | 1.95 | 0.51  |
| Q62167_D:Ddx3x  | ATP-depenc K.DLLDLEVEAK#.Q           | 145.29 | 97.78  | 1.49 | 0.67  |
| Q62167_D:Ddx3x  | ATP-depenc R.DREALHQFR.S             | 6.37   | 82.77  | 0.08 | 13.00 |
| Q62167_D:Ddx3x  | ATP-depenc K.DSLTLVFVETK#.K          | 51.22  | 35.44  | 1.45 | 0.69  |
| Q62167_D:Ddx3x  | ATP-depenc K.EIQM*LAR.D              | 8.77   | 31.39  | 0.28 | 3.58  |
| Q62167_D:Ddx3x  | ATP-depenc R.ELAVQIYEER.K            | 58.31  | 124.29 | 0.47 | 2.13  |
| Q62167_D:Ddx3x  | ATP-depenc R.GLDSINVK#.H             | 71.29  | 62.86  | 1.13 | 0.88  |
| Q62167_D:Ddx3x  | ATP-depenc K.HAIPIK#.E               | 74.20  | 65.16  | 1.14 | 0.88  |
| Q62167_D:Ddx3x  | ATP-depenc R.HTM*MFATFPK#.E          | 13.62  | 12.87  | 1.06 | 0.95  |
| Q62167_D:Ddx3x  | ATP-depenc K.HVINFLDPSDIEEYVHR.I     | 24.24  | 62.13  | 0.39 | 2.56  |
| Q62167_D:Ddx3x  | ATP-depenc R.IVEQDTM*PPK#.G          | 5.40   | 63.91  | 0.08 | 11.84 |
| Q62167_D:Ddx3x  | ATP-depenc R.IVEQDTM*PPK#.G          | 43.06  | 31.85  | 1.35 | 0.74  |
| Q62167_D:Ddx3x  | ATP-depenc R.LEQELFSGGNTGINFEX#.Y    | 29.73  | 17.82  | 1.67 | 0.60  |
| Q62167_D:Ddx3x  | ATP-depenc R.QSSGASSSFSSSR.A         | 4.04   | 10.57  | 0.38 | 2.61  |
| Q62167_D:Ddx3x  | ATP-depenc K.QYPISLVLAPTR.E          | 8.60   | 30.71  | 0.28 | 3.57  |
| Q62167_D:Ddx3x  | ATP-depenc R.SFLDLLLNATGK#.D         | 275.39 | 177.29 | 1.55 | 0.64  |
| Q62167_D:Ddx3x  | ATP-depenc K.SPILVATAVAAR.G          | 31.72  | 109.47 | 0.29 | 3.45  |
| Q62167_D:Ddx3x  | ATP-depenc K.SSFFGDR.G               | 6.53   | 25.03  | 0.26 | 3.83  |
| Q62167_D:Ddx3x  | ATP-depenc R.VGNLGLATSFNNER.N        | 17.54  | 46.22  | 0.38 | 2.63  |
| Q62167_D:Ddx3x  | ATP-depenc R.VGTSSENTQK#.V           | 231.88 | 171.56 | 1.35 | 0.74  |
| Q62167_D:Ddx3x  | ATP-depenc K.DLLDLEVEAK#.Q           | 609.24 | 348.90 | 1.75 | 0.57  |
| Q62167_D:Ddx3x  | ATP-depenc K.DSLTLVFVETK#.K          | 142.89 | 83.37  | 1.71 | 0.58  |
| Q62167_D:Ddx3x  | ATP-depenc K.DSLTLVFVETK#.K          | 17.16  | 7.63   | 2.25 | 0.44  |
| Q62167_D:Ddx3x  | ATP-depenc R.ELAVQIYEER.K            | 42.15  | 117.34 | 0.36 | 2.78  |
| Q62167_D:Ddx3x  | ATP-depenc R.FSGGFGAR.D              | 46.66  | 124.91 | 0.37 | 2.68  |
| Q62167_D:Ddx3x  | ATP-depenc R.GDYDGIIGR.G             | 10.87  | 29.99  | 0.36 | 2.76  |
| Q62167_D:Ddx3x  | ATP-depenc R.GLDSINVK#.H             | 227.15 | 109.54 | 2.07 | 0.48  |
| Q62167_D:Ddx3x  | ATP-depenc K.HAIPIK#.E               | 272.30 | 166.19 | 1.64 | 0.61  |
| Q62167_D:Ddx3x  | ATP-depenc R.HTM*MFATFPK#.E          | 56.66  | 44.05  | 1.29 | 0.78  |
| Q62167_D:Ddx3x  | ATP-depenc R.HTM*MFATFPK#.E          | 28.70  | 17.21  | 1.67 | 0.60  |
| Q62167_D:Ddx3x  | ATP-depenc R.HTM*MFATFPK#.E          | 28.70  | 17.21  | 1.67 | 0.60  |
| Q62167_D:Ddx3x  | ATP-depenc R.HTM*MFATFPK#.E          | 19.75  | 11.18  | 1.77 | 0.57  |
| Q62167_D:Ddx3x  | ATP-depenc K.HVINFLDPSDIEEYVHR.I     | 43.32  | 117.59 | 0.37 | 2.71  |
| Q62167_D:Ddx3x  | ATP-depenc R.IVEQDTM*PPK#.G          | 128.16 | 68.72  | 1.86 | 0.54  |
| Q62167_D:Ddx3x  | ATP-depenc R.LEQELFSGGNTGINFEX#.Y    | 113.22 | 48.01  | 2.36 | 0.42  |
| Q62167_D:Ddx3x  | ATP-depenc K.QEVPISLWENMAFEHYYK#.G   | 28.20  | 10.36  | 2.72 | 0.37  |
| Q62167_D:Ddx3x  | ATP-depenc R.QSSGASSSFSSSR.A         | 13.27  | 35.02  | 0.38 | 2.64  |
| Q62167_D:Ddx3x  | ATP-depenc K.QYPISLVLAPTR.E          | 37.08  | 107.03 | 0.35 | 2.89  |
| Q62167_D:Ddx3x  | ATP-depenc R.SFLDLLLNATGK#.D         | 679.95 | 332.01 | 2.05 | 0.49  |
| Q62167_D:Ddx3x  | ATP-depenc K.SPILVATAVAAR.G          | 78.76  | 208.05 | 0.38 | 2.64  |
| Q62167_D:Ddx3x  | ATP-depenc K.TAFLPLLSQIYADPGALR@.A   | 32.59  | 22.21  | 1.47 | 0.68  |
| Q62167_D:Ddx3x  | ATP-depenc R.VGNLGLATSFNNER.N        | 68.67  | 188.92 | 0.36 | 2.75  |
| Q62167_D:Ddx3x  | ATP-depenc R.VGTSSENTQK#.V           | 548.39 | 289.82 | 1.89 | 0.53  |
| Q62167_D:Ddx3x  | ATP-depenc K.YLVLEADRM               | 29.39  | 100.58 | 0.29 | 3.42  |
| Q62167_D:Ddx3x  | ATP-depenc K.YLVLEADRM*LDM*GFEPQJR.R | 3.52   | 22.10  | 0.16 | 6.28  |
| Q62167_D:Ddx3x  | ATP-depenc K.DKDAYSSFGSR.S           | 5.59   | 8.72   | 0.64 | 1.56  |
| Q62167_D:Ddx3x  | ATP-depenc K.DLLDLEVEAK#.Q           | 44.26  | 31.50  | 1.40 | 0.71  |
| Q62167_D:Ddx3x  | ATP-depenc K.DSLTLVFVETK#.K          | 23.77  | 12.13  | 1.96 | 0.51  |
| Q62167_D:Ddx3x  | ATP-depenc R.FSGGFGAR.D              | 4.99   | 22.46  | 0.22 | 4.50  |
| Q62167_D:Ddx3x  | ATP-depenc K.HAIPIK#.E               | 67.62  | 39.09  | 1.73 | 0.58  |
| Q62167_D:Ddx3x  | ATP-depenc R.IVEQDTM*PPK#.G          | 26.23  | 11.95  | 2.19 | 0.46  |
| Q62167_D:Ddx3x  | ATP-depenc R.LEQELFSGGNTGINFEX#.Y    | 13.45  | 8.63   | 1.56 | 0.64  |
| Q62167_D:Ddx3x  | ATP-depenc R.QSSGASSSFSSSR.A         | 4.50   | 11.33  | 0.40 | 2.52  |
| Q62167_D:Ddx3x  | ATP-depenc K.QYPISLVLAPTR.E          | 16.86  | 18.94  | 0.89 | 1.12  |
| Q62167_D:Ddx3x  | ATP-depenc R.SFLDLLLNATGK#.D         | 128.12 | 62.43  | 2.05 | 0.49  |
| Q62167_D:Ddx3x  | ATP-depenc K.SPILVATAVAAR.G          | 15.36  | 44.43  | 0.35 | 2.89  |
| Q62167_D:Ddx3x  | ATP-depenc R.VGNLGLATSFNNER.N        | 17.90  | 42.49  | 0.42 | 2.37  |
| Q62167_D:Ddx3x  | ATP-depenc R.VGTSSENTQK#.V           | 91.36  | 47.72  | 1.91 | 0.52  |
| Q91VN6_D:Ddx41  | Probable A' K.DYLAHSSM*DF.-          | 6.35   | 6.35   | 1.00 | 1.00  |
| Q91VN6_D:Ddx41  | Probable A' K.LLQEDSSPLL.R           | 3.31   | 7.48   | 0.44 | 2.26  |
| Q91VN6_D:Ddx41  | Probable A' K.TPPPVLIAEK#.K          | 10.45  | 13.90  | 0.75 | 1.33  |
| Q91VN6_D:Ddx41  | Probable A' K.DVLVATDVASK#.G         | 11.08  | 12.58  | 0.88 | 1.13  |
| Q91VN6_D:Ddx41  | Probable A' K.DYLAHSSM*DF.-          | 8.40   | 8.40   | 1.00 | 1.00  |
| Q91VN6_D:Ddx41  | Probable A' K.GILHPDPIQIQIIPILSGR.D  | 2.02   | 8.80   | 0.23 | 4.37  |
| Q91VN6_D:Ddx41  | Probable A' K.K#ADVDIAIHEYLLK#.G     | 23.60  | 13.61  | 1.73 | 0.58  |
| Q91VN6_D:Ddx41  | Probable A' R.LLQEDSSPLL.R           | 3.04   | 18.18  | 0.17 | 5.99  |
| Q91VN6_D:Ddx41  | Probable A' K.SALVKPVITINVR.A        | 2.93   | 14.11  | 0.21 | 4.82  |
| Q91VN6_D:Ddx41  | Probable A' R.SGNTGIATFINK.A         | 10.13  | 17.98  | 0.56 | 1.77  |
| Q91VN6_D:Ddx41  | Probable A' K.TPPPVLIAEK#.K          | 28.08  | 25.29  | 1.11 | 0.90  |
| Q810A7_D:Ddx42  | ATP-depenc K.AAFQSQYK#.S             | 40.67  | 24.83  | 1.64 | 0.61  |
| Q810A7_D:Ddx42  | ATP-depenc K.DIPVLVATDVAAR.G         | 20.08  | 72.07  | 0.28 | 3.59  |
| Q810A7_D:Ddx42  | ATP-depenc R.DM*IGIAK#.T             | 46.96  | 25.94  | 1.81 | 0.55  |
| Q810A7_D:Ddx42  | ATP-depenc K.DSNFAGDLVR.N            | 11.51  | 34.73  | 0.33 | 3.02  |
| Q810A7_D:Ddx42  | ATP-depenc K.ELLDLAM*QNAWFR.K        | 4.50   | 9.84   | 0.46 | 2.19  |
| Q810A7_D:Ddx42  | ATP-depenc K.ELLDLAMQNAWFR.K         | 4.68   | 9.25   | 0.51 | 1.98  |
| Q810A7_D:Ddx42  | ATP-depenc R.FGFGGFAISAGK#.K         | 38.85  | 18.23  | 2.13 | 0.47  |
| Q810A7_D:Ddx42  | ATP-depenc K.GIRDDIEEDDQEAIFR.Y      | 2.93   | 8.84   | 0.33 | 3.01  |
| Q810A7_D:Ddx42  | ATP-depenc R.GLDSINVK#.T             | 43.52  | 35.68  | 1.22 | 0.82  |
| Q810A7_D:Ddx42  | ATP-depenc K.GVAYLTPK#.D             | 50.45  | 31.71  | 1.59 | 0.63  |
| Q810A7_D:Ddx42  | ATP-depenc K.K#ANAEELASNLK#.Q        | 12.64  | 8.68   | 1.46 | 0.69  |
| Q810A7_D:Ddx42  | ATP-depenc K.LPQSQSHAFGAASSSGFGK#.S  | 12.07  | 6.19   | 1.95 | 0.51  |

|                 |                                                      |        |        |      |       |
|-----------------|------------------------------------------------------|--------|--------|------|-------|
| Q810A7_DI Ddx42 | ATP-depend K.NFYNEHEEITNLTQQIDLR.H                   | 12.86  | 37.42  | 0.34 | 2.91  |
| Q810A7_DI Ddx42 | ATP-depend K.NLPGFNNSGNISSAPVTYPSGAQVNNNTASGNNSR.E   | 1.57   | 1.75   | 0.90 | 1.12  |
| Q810A7_DI Ddx42 | ATP-depend R.NLEGANQHVSK#.E                          | 27.13  | 15.91  | 1.70 | 0.59  |
| Q810A7_DI Ddx42 | ATP-depend R.QTLFSATFR.K                             | 6.29   | 17.82  | 0.35 | 2.83  |
| Q810A7_DI Ddx42 | ATP-depend R.SVAVYGGSSM*WEQAK#.A                     | 16.55  | 10.60  | 1.56 | 0.64  |
| Q810A7_DI Ddx42 | ATP-depend K.TVINYDVAR.D                             | 31.46  | 61.21  | 0.51 | 1.95  |
| Q810A7_DI Ddx42 | ATP-depend K.WNNWLR.R                                | 5.54   | 14.03  | 0.39 | 2.53  |
| Q810A7_DI Ddx42 | ATP-depend K.DIPVLVATDVAAR.G                         | 4.54   | 11.30  | 0.40 | 2.49  |
| Q810A7_DI Ddx42 | ATP-depend K.GVAYLLTPK#.D                            | 10.10  | 8.87   | 1.14 | 0.88  |
| Q810A7_DI Ddx42 | ATP-depend K.NFYNEHEEITNLTQQIDLR.H                   | 3.71   | 10.77  | 0.34 | 2.90  |
| Q569Z5_DI Ddx46 | Probable A'.K.ELSGTAVPPDLEK#.L                       | 19.35  | 17.44  | 1.11 | 0.90  |
| Q569Z5_DI Ddx46 | Probable A'.R.DLIGIAK#.T                             | 64.66  | 31.67  | 2.04 | 0.49  |
| Q569Z5_DI Ddx46 | Probable A'.R.ELALQITK#.E                            | 86.30  | 67.93  | 1.27 | 0.79  |
| Q569Z5_DI Ddx46 | Probable A'.K.FDETEQALANER.K                         | 10.75  | 29.55  | 0.36 | 2.75  |
| Q569Z5_DI Ddx46 | Probable A'.R.GGTILAPTVSAK#.T                        | 96.82  | 54.23  | 1.79 | 0.56  |
| Q569Z5_DI Ddx46 | Probable A'.K.GYAYFITEDQAR.Y                         | 19.14  | 48.21  | 0.40 | 2.52  |
| Q569Z5_DI Ddx46 | Probable A'.R.ILSKPIEVQVGR.S                         | 17.49  | 49.90  | 0.35 | 2.85  |
| Q569Z5_DI Ddx46 | Probable A'.R.K#VLAIESANELAVQK#.A                    | 19.26  | 13.51  | 1.43 | 0.70  |
| Q569Z5_DI Ddx46 | Probable A'.R.KLLEPVHDGK.I                           | 10.75  | 8.26   | 1.30 | 0.77  |
| Q569Z5_DI Ddx46 | Probable A'.R.LEM*EGITVK#.G                          | 43.45  | 33.20  | 1.31 | 0.76  |
| Q569Z5_DI Ddx46 | Probable A'.R.LEMEGITVK#.G                           | 12.84  | 194.55 | 0.07 | 15.16 |
| Q569Z5_DI Ddx46 | Probable A'.K.LLVATVAAR.G                            | 27.58  | 69.65  | 0.40 | 2.53  |
| Q569Z5_DI Ddx46 | Probable A'.R.LQNSYQPTNK.G                           | 94.69  | 57.45  | 1.65 | 0.61  |
| Q569Z5_DI Ddx46 | Probable A'.R.M*DM*LAANSGR.V                         | 8.46   | 16.05  | 0.53 | 1.90  |
| Q569Z5_DI Ddx46 | Probable A'.K.MSQEEVNVFR.L                           | 5.46   | 16.28  | 0.34 | 2.98  |
| Q569Z5_DI Ddx46 | Probable A'.K.NFYVEVPELAK#.M                         | 102.58 | 54.08  | 1.90 | 0.53  |
| Q569Z5_DI Ddx46 | Probable A'.K.NLGIESQVDVM*QQATNAILR.G                | 8.92   | 9.35   | 0.95 | 1.05  |
| Q569Z5_DI Ddx46 | Probable A'.K.NLGIESQVDVM*QQATNAILR.G                | 10.18  | 19.51  | 0.52 | 1.92  |
| Q569Z5_DI Ddx46 | Probable A'.R.SLEEGEGPIAVIMTPTR.E                    | 7.64   | 15.87  | 0.48 | 2.08  |
| Q569Z5_DI Ddx46 | Probable A'.K.TIAFLAEK#.I                            | 93.54  | 51.42  | 1.82 | 0.55  |
| Q569Z5_DI Ddx46 | Probable A'.K.TIAFLPM*FR.H                           | 11.85  | 33.00  | 0.36 | 2.78  |
| Q569Z5_DI Ddx46 | Probable A'.R.VKHDM*AAPGTSSVPAPTAGNAEK#.L            | 45.65  | 30.35  | 1.50 | 0.66  |
| Q569Z5_DI Ddx46 | Probable A'.R.VKHDM*AAPGTSSVPAPTAGNAEK#.L            | 21.46  | 8.85   | 2.42 | 0.41  |
| Q569Z5_DI Ddx46 | Probable A'.R.VTVVLDADR.M                            | 9.88   | 26.64  | 0.37 | 2.69  |
| Q569Z5_DI Ddx46 | Probable A'.K.VTVVTTK#.K                             | 88.74  | 44.62  | 1.99 | 0.50  |
| Q569Z5_DI Ddx46 | Probable A'.R.YAGDIKH.A                              | 85.42  | 48.95  | 1.74 | 0.57  |
| Q569Z5_DI Ddx46 | Probable A'.R.YEELEINDFPQAR.W                        | 4.39   | 7.77   | 0.57 | 1.77  |
| Q569Z5_DI Ddx46 | Probable A'.R.GGTILAPTVSAK#.T                        | 34.96  | 23.35  | 1.50 | 0.67  |
| Q569Z5_DI Ddx46 | Probable A'.K.LLVATVAAR.G                            | 8.31   | 16.17  | 0.51 | 1.95  |
| Q569Z5_DI Ddx46 | Probable A'.R.M*DM*LAANSGR.V                         | 2.73   | 7.48   | 0.36 | 2.74  |
| Q569Z5_DI Ddx46 | Probable A'.K.NFYVEVPELAK#.M                         | 22.51  | 13.14  | 1.71 | 0.58  |
| Q569Z5_DI Ddx46 | Probable A'.R.SLEEGEGPIAVIMTPTR.E                    | 4.54   | 4.93   | 0.92 | 1.09  |
| Q569Z5_DI Ddx46 | Probable A'.K.TIAFLPM*FR.H                           | 4.55   | 14.58  | 0.31 | 3.20  |
| Q9CWX9_I Ddx47  | Probable A'.R.DIIGLAETGSGK#.T                        | 27.55  | 16.72  | 1.65 | 0.61  |
| Q9CWX9_I Ddx47  | Probable A'.R.LLNMDFETEVDK#.I                        | 5.92   | 4.76   | 1.24 | 0.80  |
| Q9CWX9_I Ddx47  | Probable A'.R.LFALVLTPTRE                            | 5.53   | 20.66  | 0.27 | 3.73  |
| Q4FZF3_DC Ddx49 | Probable A'.R.SRPQEAQAEAQD.-                         | 2.91   | 8.66   | 0.34 | 2.98  |
| Q61656_DI Ddx5  | Probable A'.R.DGWPAM*GIHGDK#.S                       | 41.48  | 38.63  | 1.07 | 0.93  |
| Q61656_DI Ddx5  | Probable A'.R.DWLVNEFK#.H                            | 218.27 | 197.60 | 1.10 | 0.91  |
| Q61656_DI Ddx5  | Probable A'.R.EANQAINPK#.L                           | 192.71 | 202.46 | 0.95 | 1.05  |
| Q61656_DI Ddx5  | Probable A'.K.FGNPGEK.L                              | 100.34 | 100.72 | 1.00 | 1.00  |
| Q61656_DI Ddx5  | Probable A'.K.FVINYDYPNSESSEDIYHR.I                  | 76.50  | 373.13 | 0.21 | 4.88  |
| Q61656_DI Ddx5  | Probable A'.R.GYSNLLK.R                              | 89.21  | 79.09  | 1.13 | 0.89  |
| Q61656_DI Ddx5  | Probable A'.K.K#K#WNLDELPK#.F                        | 5.67   | 4.59   | 1.24 | 0.81  |
| Q61656_DI Ddx5  | Probable A'.K.K#WNLDELPK#.F                          | 12.37  | 9.52   | 1.30 | 0.77  |
| Q61656_DI Ddx5  | Probable A'.K.LLQVLEDR.G                             | 101.37 | 398.07 | 0.25 | 3.93  |
| Q61656_DI Ddx5  | Probable A'.R.LMEEIM*SEK#.E                          | 45.00  | 45.60  | 0.99 | 1.01  |
| Q61656_DI Ddx5  | Probable A'.R.LM*EIMSEK.E                            | 36.09  | 36.34  | 0.99 | 1.01  |
| Q61656_DI Ddx5  | Probable A'.R.LMEEIMSEK#.E                           | 59.28  | 61.69  | 0.96 | 1.04  |
| Q61656_DI Ddx5  | Probable A'.R.LM*EIM*SEK#.E                          | 86.78  | 80.47  | 1.08 | 0.93  |
| Q61656_DI Ddx5  | Probable A'.K.NFYQEHPLDAR.R                          | 18.62  | 77.26  | 0.24 | 4.15  |
| Q61656_DI Ddx5  | Probable A'.R.QLAEDFLK#.D                            | 48.70  | 50.83  | 0.96 | 1.04  |
| Q61656_DI Ddx5  | Probable A'.R.QNFTEPTAIQAQGWVPVVALSGLDM*VGVAQTGSGK.T | 51.53  | 37.39  | 1.38 | 0.73  |
| Q61656_DI Ddx5  | Probable A'.K.QVSDLSVLR.E                            | 46.28  | 214.28 | 0.22 | 4.63  |
| Q61656_DI Ddx5  | Probable A'.R.RTAQEVDTYR.R                           | 4.19   | 52.74  | 0.08 | 12.58 |
| Q61656_DI Ddx5  | Probable A'.R.RTYLVLDEADR.M                          | 1.13   | 14.20  | 0.08 | 12.55 |
| Q61656_DI Ddx5  | Probable A'.R.TAQEVDTYR.R                            | 27.33  | 143.35 | 0.19 | 5.25  |
| Q61656_DI Ddx5  | Probable A'.K.TGTAYFFTPNNIK#.Q                       | 230.91 | 214.69 | 1.08 | 0.93  |
| Q61656_DI Ddx5  | Probable A'.R.TIVFVETK#.R                            | 267.68 | 231.91 | 1.15 | 0.87  |
| Q61656_DI Ddx5  | Probable A'.R.TTYLVLDEADR.M                          | 55.68  | 226.71 | 0.25 | 4.07  |
| Q61656_DI Ddx5  | Probable A'.R.TTYLVLDEADR.M*LDM*GFEPQJR.K            | 32.61  | 3.71   | 8.80 | 0.11  |
| Q61656_DI Ddx5  | Probable A'.R.TTYLVLDEADR.M*LDM*GFEPQJR.K            | 2.86   | 6.80   | 0.42 | 2.38  |
| Q61656_DI Ddx5  | Probable A'.K.WNLDELPK#.F                            | 151.78 | 165.02 | 0.92 | 1.09  |
| Q61656_DI Ddx5  | Probable A'.K.WNLDELPK#FEK#.N                        | 39.80  | 36.66  | 1.09 | 0.92  |
| Q61656_DI Ddx5  | Probable A'.R.DWLVNEFK#.H                            | 61.38  | 55.15  | 1.11 | 0.90  |
| Q61656_DI Ddx5  | Probable A'.R.EANQAINPK.L                            | 54.27  | 56.67  | 0.96 | 1.04  |
| Q61656_DI Ddx5  | Probable A'.K.FGNPGEK#.L                             | 31.73  | 31.85  | 1.00 | 1.00  |
| Q61656_DI Ddx5  | Probable A'.R.GYSNLLK#.R                             | 56.54  | 55.34  | 1.02 | 0.98  |
| Q61656_DI Ddx5  | Probable A'.K.LLQVLEDR.G                             | 32.89  | 132.76 | 0.25 | 4.04  |
| Q61656_DI Ddx5  | Probable A'.R.LM*EIM*SEK.E                           | 17.40  | 14.68  | 1.19 | 0.84  |
| Q61656_DI Ddx5  | Probable A'.R.QNFTEPTAIQAQGWVPVVALSGLDM*VGVAQTGSGK.T | 14.87  | 11.31  | 1.32 | 0.76  |
| Q61656_DI Ddx5  | Probable A'.R.QNFTEPTAIQAQGWVPVVALSGLDM*VGVAQTGSGK.T | 3.98   | 2.24   | 1.77 | 0.56  |
| Q61656_DI Ddx5  | Probable A'.K.QVSDLSVLR.E                            | 18.49  | 87.80  | 0.21 | 4.75  |
| Q61656_DI Ddx5  | Probable A'.K.SQQRDWWLVNEFK.H                        | 6.08   | 11.64  | 0.52 | 1.91  |
| Q61656_DI Ddx5  | Probable A'.K.TGTAYFFTPNNIK#.Q                       | 64.42  | 62.09  | 1.04 | 0.96  |
| Q61656_DI Ddx5  | Probable A'.K.TIVFVETK#.R                            | 79.30  | 72.07  | 1.10 | 0.91  |
| Q61656_DI Ddx5  | Probable A'.R.TTYLVLDEADR.M                          | 14.26  | 54.34  | 0.26 | 3.81  |
| Q61656_DI Ddx5  | Probable A'.R.TTYLVLDEADR.M*LDM*GFEPQJR.K            | 17.85  | 17.06  | 1.05 | 0.96  |
| Q61656_DI Ddx5  | Probable A'.K.WNLDELPK#.F                            | 30.04  | 26.90  | 1.12 | 0.90  |
| Q61656_DI Ddx5  | Probable A'.K.WNLDELPK#FEK#.N                        | 26.06  | 20.89  | 1.25 | 0.80  |
| Q61656_DI Ddx5  | Probable A'.R.DWLVNEFK#.H                            | 14.20  | 13.39  | 1.06 | 0.94  |
| Q61656_DI Ddx5  | Probable A'.R.EANQAINPK.L                            | 4.41   | 16.24  | 0.27 | 3.68  |
| Q61656_DI Ddx5  | Probable A'.R.QNFTEPTAIQAQGWVPVVALSGLDM*VGVAQTGSGK.T | 5.73   | 5.07   | 1.13 | 0.89  |
| Q61656_DI Ddx5  | Probable A'.K.TGTAYFFTPNNIK#.Q                       | 14.68  | 15.91  | 0.92 | 1.08  |
| Q99MI9_D Ddx50  | ATP-depend K.EGAFNSFSISETIK#.L                       | 23.32  | 18.82  | 1.24 | 0.81  |
| Q99MI9_D Ddx50  | ATP-depend R.ELANQVAK#.D                             | 16.33  | 14.16  | 1.15 | 0.87  |
| Q99MI9_D Ddx50  | ATP-depend K.GAVDALAAALAHISGASSFEPR.S                | 14.74  | 55.97  | 0.26 | 3.80  |
| Q99MI9_D Ddx50  | ATP-depend R.GVTYLFPIQVK#.T                          | 27.33  | 30.85  | 0.89 | 1.13  |
| Q99MI9_D Ddx50  | ATP-depend R.LQAETHSDWILSVPK#.L                      | 10.58  | 9.53   | 1.11 | 0.90  |
| Q99MI9_D Ddx50  | ATP-depend K.TFSFAPLIER.L                            | 8.71   | 38.21  | 0.23 | 4.39  |
| Q99MI9_D Ddx50  | ATP-depend K.VLVATNVAAR.G                            | 8.93   | 43.30  | 0.21 | 4.85  |
| Q8K301_DI Ddx52 | Probable A'.K.IHVQGTDLDPDIATFQQLDQEQYK#.I            | 9.29   | 7.54   | 1.23 | 0.81  |
| Q8K301_DI Ddx52 | Probable A'.R.NSAVETVEQLLFGVSETGK#.L                 | 13.01  | 10.07  | 1.29 | 0.77  |

|                  |                                            |        |        |      |       |
|------------------|--------------------------------------------|--------|--------|------|-------|
| Q8K301_DI Ddx52  | Probable A' R.ELLASAPTSGK#.T               | 19.13  | 16.14  | 1.19 | 0.84  |
| Q8K301_DI Ddx52  | Probable A' K.LLVQVDTLPDIATFQQLDQEQYK#.I   | 13.67  | 12.12  | 1.13 | 0.89  |
| Q8K301_DI Ddx52  | Probable A' R.NSAVETVEQELLFVGSGETGK#.L     | 23.49  | 21.37  | 1.10 | 0.91  |
| Q8K301_DI Ddx52  | Probable A' R.NSAVETVEQELLFVGSGETGK#.L     | 8.56   | 7.93   | 1.08 | 0.93  |
| Q8K301_DI Ddx52  | Probable A' R.NSAVETVEQELLFVGSGETGK#.L     | 6.46   | 5.11   | 1.26 | 0.79  |
| Q8K4L0_DI Ddx54  | ATP-depent R.QEGPADPAPQR.E                 | 3.48   | 8.98   | 0.39 | 2.58  |
| Q9D0R4_D Ddx56   | Probable A' K.ALLFVNTER.L                  | 3.26   | 11.32  | 0.29 | 3.47  |
| Q9D0R4_D Ddx56   | Probable A' R.LLQAVTDLGSWRPTLQEK.A         | 2.89   | 4.97   | 0.58 | 1.72  |
| Q9D0R4_D Ddx56   | Probable A' R.VANVSAEDSASQR.A              | 4.89   | 22.80  | 0.21 | 4.67  |
| Q9D0R4_D Ddx56   | Probable A' R.VLSHLQNTLK#.L                | 6.53   | 3.17   | 2.06 | 0.49  |
| Q6Q899_D Ddx58   | Probable A' K.FSELWIVDK#.G                 | 9.24   | 6.12   | 1.51 | 0.66  |
| Q6Q899_D Ddx58   | Probable A' K.VLQLALEK#.D                  | 14.40  | 6.65   | 2.17 | 0.46  |
| Q6Q899_D Ddx58   | Probable A' R.ALVDALK#K#.W                 | 36.34  | 7.54   | 4.82 | 0.21  |
| Q6Q899_D Ddx58   | Probable A' R.DLYLVLQEEYHLK#PETK#.T        | 32.78  | 7.41   | 4.42 | 0.23  |
| Q6Q899_D Ddx58   | Probable A' R.DPLPQVGLTASVGVGDAK#.T        | 22.63  | 4.82   | 4.70 | 0.21  |
| Q6Q899_D Ddx58   | Probable A' R.DSQHK#PQPVPDK#ENK#.K         | 4.03   | 1.30   | 3.09 | 0.32  |
| Q6Q899_D Ddx58   | Probable A' R.DSQHK#PQPVPDK#ENK#.K         | 25.91  | 9.14   | 2.84 | 0.35  |
| Q6Q899_D Ddx58   | Probable A' K.DVSEELGK#.L                  | 38.85  | 15.07  | 2.58 | 0.39  |
| Q6Q899_D Ddx58   | Probable A' K.FSELWIVDK#.G                 | 62.58  | 16.04  | 3.90 | 0.26  |
| Q6Q899_D Ddx58   | Probable A' K.IESFVWEDIVSGVQNR.H           | 21.43  | 21.00  | 1.02 | 0.98  |
| Q6Q899_D Ddx58   | Probable A' R.IQFDPAEM*SV.-                | 12.62  | 12.62  | 1.00 | 1.00  |
| Q6Q899_D Ddx58   | Probable A' K.IYDNFK#.K                    | 39.77  | 10.86  | 3.66 | 0.27  |
| Q6Q899_D Ddx58   | Probable A' R.K#YNDALIISED AQM*TDALNLYK#.A | 10.61  | 3.53   | 3.00 | 0.33  |
| Q6Q899_D Ddx58   | Probable A' R.K#YNDALIISED AQM*TDALNLYK#.A | 14.41  | 4.71   | 3.06 | 0.33  |
| Q6Q899_D Ddx58   | Probable A' R.LQTDWEM*K#.F                 | 19.61  | 5.55   | 3.53 | 0.28  |
| Q6Q899_D Ddx58   | Probable A' R.NYQLELALPAK#.K               | 35.92  | 11.31  | 3.18 | 0.31  |
| Q6Q899_D Ddx58   | Probable A' R.RFEELLELEK.V                 | 15.16  | 20.08  | 0.75 | 1.32  |
| Q6Q899_D Ddx58   | Probable A' K.TFEIPVIK#.I                  | 43.85  | 13.95  | 3.14 | 0.32  |
| Q6Q899_D Ddx58   | Probable A' K.VLQLALEK#.D                  | 41.28  | 13.12  | 3.15 | 0.32  |
| Q6Q899_D Ddx58   | Probable A' R.VVETSHYTLGDFAFK#.E           | 63.69  | 19.78  | 3.22 | 0.31  |
| Q6Q899_D Ddx58   | Probable A' K.VVFFANQIPVYQATVFSR.Y         | 12.58  | 16.72  | 0.75 | 1.33  |
| Q6Q899_D Ddx58   | Probable A' K.WIENPALSFLKPGILTGR.G         | 16.27  | 23.54  | 0.69 | 1.45  |
| Q6Q899_D Ddx58   | Probable A' K.YEQWIVGVHK#.A                | 34.65  | 10.84  | 3.20 | 0.31  |
| Q6Q899_D Ddx58   | Probable A' R.ALVDALK#K#.W                 | 41.65  | 7.79   | 5.35 | 0.19  |
| Q6Q899_D Ddx58   | Probable A' R.ATGMTLPAQK#.C                | 34.77  | 35.21  | 0.99 | 1.01  |
| Q6Q899_D Ddx58   | Probable A' R.ATGM*TLPAQK#.C               | 80.78  | 18.47  | 4.37 | 0.23  |
| Q6Q899_D Ddx58   | Probable A' R.DLYLVLQEEYHLK#PETK#.T        | 10.14  | 3.94   | 2.58 | 0.39  |
| Q6Q899_D Ddx58   | Probable A' R.DPLPQVGLTASVGVGDAK#.T        | 28.50  | 7.29   | 3.91 | 0.26  |
| Q6Q899_D Ddx58   | Probable A' K.DVSEELGK#.L                  | 66.83  | 17.02  | 3.93 | 0.25  |
| Q6Q899_D Ddx58   | Probable A' K.FSELWIVDK#.G                 | 84.66  | 22.47  | 3.77 | 0.27  |
| Q6Q899_D Ddx58   | Probable A' K.IESFVWEDIVSGVQNR.H           | 35.02  | 49.52  | 0.71 | 1.41  |
| Q6Q899_D Ddx58   | Probable A' K.IIM*NESILR.L                 | 16.75  | 22.22  | 0.75 | 1.33  |
| Q6Q899_D Ddx58   | Probable A' R.IQFDPAEM*SV.-                | 24.40  | 24.40  | 1.00 | 1.00  |
| Q6Q899_D Ddx58   | Probable A' R.K#YNDALIISED AQM*TDALNLYK#.A | 19.08  | 4.82   | 3.96 | 0.25  |
| Q6Q899_D Ddx58   | Probable A' R.K#YNDALIISED AQM*TDALNLYK#.A | 9.15   | 4.16   | 2.20 | 0.46  |
| Q6Q899_D Ddx58   | Probable A' K.LFOJQNR.E                    | 16.28  | 27.61  | 0.59 | 1.70  |
| Q6Q899_D Ddx58   | Probable A' R.LQTDWEM*K#.F                 | 32.85  | 8.00   | 4.10 | 0.24  |
| Q6Q899_D Ddx58   | Probable A' R.NYQLELALPAK#.K               | 64.82  | 16.84  | 3.85 | 0.26  |
| Q6Q899_D Ddx58   | Probable A' R.RFEELLELEK.V                 | 16.11  | 24.06  | 0.67 | 1.49  |
| Q6Q899_D Ddx58   | Probable A' R.SDK#ENWPK#.V                 | 18.31  | 7.05   | 2.60 | 0.39  |
| Q6Q899_D Ddx58   | Probable A' K.TFEIPVIK#.I                  | 82.34  | 27.16  | 3.03 | 0.33  |
| Q6Q899_D Ddx58   | Probable A' K.TILFVK#.T                    | 61.66  | 18.52  | 3.33 | 0.30  |
| Q6Q899_D Ddx58   | Probable A' K.VLQLALEK#.D                  | 79.90  | 21.94  | 3.64 | 0.27  |
| Q6Q899_D Ddx58   | Probable A' R.VVETSHYTLGDFAFK#.E           | 125.73 | 33.63  | 3.74 | 0.27  |
| Q6Q899_D Ddx58   | Probable A' K.VVFFANQIPVYQATVFSR.Y         | 122.74 | 88.74  | 1.38 | 0.72  |
| Q6Q899_D Ddx58   | Probable A' K.WIENPALSFLKPGILTGR.G         | 39.22  | 38.27  | 1.03 | 0.98  |
| Q6Q899_D Ddx58   | Probable A' K.YEQWIVGVHK#.A                | 40.79  | 12.82  | 3.18 | 0.31  |
| Q6Q899_D Ddx58   | Probable A' R.YK#TFEIPVIK#.I               | 16.52  | 4.25   | 3.89 | 0.26  |
| P54823_DI Ddx6   | Probable A' K.DNIQAM*VIVPTR.E              | 124.48 | 29.29  | 4.25 | 0.24  |
| P54823_DI Ddx6   | Probable A' K.FM#NMSHLQK#P#YEINLMEELTLK#.G | 6.62   | 3.45   | 1.92 | 0.52  |
| P54823_DI Ddx6   | Probable A' K.FMNSHLQK#P#YEINLMEELTLK#.G   | 19.36  | 10.29  | 1.88 | 0.53  |
| P54823_DI Ddx6   | Probable A' K.GVTQYAYVTR.Q                 | 33.23  | 80.22  | 0.41 | 2.41  |
| P54823_DI Ddx6   | Probable A' K.LAETYLHR.I                   | 12.83  | 248.36 | 0.05 | 19.36 |
| P54823_DI Ddx6   | Probable A' R.LDDTVHVIATPGR.I              | 36.41  | 100.37 | 0.36 | 2.76  |
| P54823_DI Ddx6   | Probable A' K.SGAYLIPLLER.L                | 57.25  | 134.73 | 0.42 | 2.35  |
| P54823_DI Ddx6   | Probable A' K.SIEEQLGTEIPIPSNIDK.S         | 198.73 | 106.34 | 1.87 | 0.54  |
| P54823_DI Ddx6   | Probable A' K.SLYVAEYHSEPAEDEK#P.-         | 160.92 | 83.49  | 1.93 | 0.52  |
| P54823_DI Ddx6   | Probable A' K.VMATTGGTNR.D                 | 13.08  | 18.72  | 0.70 | 1.43  |
| P54823_DI Ddx6   | Probable A' K.VM*ATTGGTNR.D                | 16.81  | 35.56  | 0.47 | 2.12  |
| P54823_DI Ddx6   | Probable A' R.QLLYSATFPLSVQK#.F            | 25.71  | 13.14  | 1.96 | 0.51  |
| P54823_DI Ddx6   | Probable A' K.SGAYLIPLLER.L                | 10.71  | 28.68  | 0.37 | 2.68  |
| P54823_DI Ddx6   | Probable A' K.SIEEQLGTEIPIPSNIDK.S         | 44.79  | 27.21  | 1.65 | 0.61  |
| P54823_DI Ddx6   | Probable A' K.SLYVAEYHSEPAEDEK#P.-         | 50.95  | 27.45  | 1.86 | 0.54  |
| P54823_DI Ddx6   | Probable A' K.SLYVAEYHSEPAEDEK#P.-         | 11.03  | 3.53   | 3.12 | 0.32  |
| P54823_DI Ddx6   | Probable A' K.DNIQAM*VIVPTR.E              | 5.37   | 10.87  | 0.49 | 2.02  |
| P54823_DI Ddx6   | Probable A' K.GVTQYAYVTR.Q                 | 7.09   | 21.59  | 0.33 | 3.05  |
| P54823_DI Ddx6   | Probable A' R.QLLYSATFPLSVQK#.F            | 33.21  | 13.92  | 2.39 | 0.42  |
| P54823_DI Ddx6   | Probable A' K.SGAYLIPLLER.L                | 21.24  | 50.86  | 0.42 | 2.39  |
| P54823_DI Ddx6   | Probable A' K.SIEEQLGTEIPIPSNIDK#.S        | 40.06  | 26.64  | 1.50 | 0.66  |
| G3X9F7_G: Ddx60  | MCG11385 R.FITANWIQDLK#.T                  | 6.64   | 2.03   | 3.28 | 0.31  |
| G3X9F7_G: Ddx60  | MCG11385 R.K#NVDSGM*#K#.K                  | 2.90   | 1.51   | 1.91 | 0.52  |
| G3X9F7_G: Ddx60  | MCG11385 K.DFNLIK#.S                       | 19.27  | 4.51   | 4.28 | 0.23  |
| G3X9F7_G: Ddx60  | MCG11385 K.DLPFLM*SDDPITVSLVK#.H           | 25.52  | 8.33   | 3.06 | 0.33  |
| G3X9F7_G: Ddx60  | MCG11385 K.ESDEGVVYVAPTK#.A                | 14.37  | 4.48   | 3.21 | 0.31  |
| G3X9F7_G: Ddx60  | MCG11385 R.FITANWIQDLK#.T                  | 22.77  | 6.02   | 3.78 | 0.26  |
| G3X9F7_G: Ddx60  | MCG11385 R.K#PLNAYALDFYK#.H                | 9.15   | 2.85   | 3.21 | 0.31  |
| G3X9F7_G: Ddx60  | MCG11385 K.SLIQLEK#.Y                      | 16.90  | 4.67   | 3.62 | 0.28  |
| A6H8H2_D Dennd4c | DENN dom: K.APITDIAVHK#.S                  | 13.67  | 38.87  | 0.35 | 2.84  |
| A6H8H2_D Dennd4c | DENN dom: K.QLTLQGLLTLVEK#.R               | 11.41  | 4.30   | 2.66 | 0.38  |
| P31001_Df Des    | Desmin OS- R.TNEKVELQELNDR.F               | 8.72   | 15.21  | 0.57 | 1.74  |
| P31001_Df Des    | Desmin OS- K.VSLDTQAANK.N                  | 1.96   | 143.79 | 0.01 | 73.21 |
| Q9EQM6_D Dgcr8   | Microproce R.ATLELIPDFVK.Q                 | 10.15  | 16.05  | 0.63 | 1.58  |
| P00375_D Dhfr    | Dihydrofoli: K.LLPEYVGLVSEVQEK#.G          | 12.61  | 8.82   | 1.43 | 0.70  |
| Q99LB2_Df Dhfr4  | Dehydrogei R.FSSVLWEEK#.A                  | 8.87   | 3.97   | 2.24 | 0.45  |
| Q99LB2_Df Dhfr4  | Dehydrogei R.GGGSVIVGVSAGFTR.F             | 4.11   | 6.82   | 0.60 | 1.66  |
| Q99LB2_Df Dhfr4  | Dehydrogei K.TALLGLTK#.N                   | 12.88  | 5.82   | 2.22 | 0.45  |
| Q35286_DI Dhx15  | Putative pr R.TLATDILM*GVLK#.E             | 9.13   | 3.81   | 2.40 | 0.42  |
| Q35286_DI Dhx15  | Putative pr R.ASTNAMLISAGLPLK#.A           | 8.49   | 4.19   | 2.03 | 0.49  |
| Q35286_DI Dhx15  | Putative pr R.EAM*NDPLLER.Y                | 8.70   | 27.24  | 0.32 | 3.13  |
| Q35286_DI Dhx15  | Putative pr R.EVDLGPVEVDIK#.I              | 76.04  | 40.32  | 1.89 | 0.53  |
| Q35286_DI Dhx15  | Putative pr R.FAHIDGDLHLNINVYHAFK#.Q       | 33.95  | 24.56  | 1.38 | 0.72  |
| Q35286_DI Dhx15  | Putative pr R.FTDILVR.H                    | 12.96  | 40.84  | 0.32 | 3.15  |
| Q35286_DI Dhx15  | Putative pr R.HQSFVLVGETSGSK#.T            | 39.18  | 25.54  | 1.53 | 0.65  |

|                 |                                       |        |        |      |       |
|-----------------|---------------------------------------|--------|--------|------|-------|
| O35286_D1Dhx15  | Putative pr R.HRLDLGEDYPSGK.K         | 13.12  | 33.47  | 0.39 | 2.55  |
| O35286_D1Dhx15  | Putative pr R.IFEPPPPK#.K             | 48.37  | 34.18  | 1.42 | 0.71  |
| O35286_D1Dhx15  | Putative pr R.IRVESLLVTAISK.A         | 5.68   | 15.44  | 0.37 | 2.72  |
| O35286_D1Dhx15  | Putative pr R.LQLPVWEYK#.D            | 35.17  | 20.56  | 1.71 | 0.58  |
| O35286_D1Dhx15  | Putative pr R.SNLGSSVVLQK#.K          | 67.35  | 43.27  | 1.56 | 0.64  |
| O35286_D1Dhx15  | Putative pr K.TEM*QDNITYPEILR.S       | 3.77   | 14.26  | 0.26 | 3.78  |
| O35286_D1Dhx15  | Putative pr R.TGHYLVTK#.D             | 28.77  | 17.08  | 1.68 | 0.59  |
| O35286_D1Dhx15  | Putative pr R.TLATDILM*GVLK#.E        | 186.51 | 117.80 | 1.58 | 0.63  |
| O35286_D1Dhx15  | Putative pr R.TLATDILM*GVLK#.E        | 65.88  | 33.23  | 1.98 | 0.50  |
| O35286_D1Dhx15  | Putative pr K.VIVM*SATLDAGK#.F        | 15.73  | 8.76   | 1.80 | 0.56  |
| O35286_D1Dhx15  | Putative pr K.YM*TDGM*LLR.E           | 7.14   | 12.83  | 0.56 | 1.80  |
| O35286_D1Dhx15  | Putative pr R.ASTNAM*LSAGLPPK#.A      | 13.17  | 5.30   | 2.48 | 0.40  |
| O35286_D1Dhx15  | Putative pr R.DYYINIR.K               | 12.39  | 22.42  | 0.55 | 1.81  |
| O35286_D1Dhx15  | Putative pr R.EAM*NDPLLR.Y            | 15.56  | 20.99  | 0.74 | 1.35  |
| O35286_D1Dhx15  | Putative pr R.EVDLGPVEGDIK#.I         | 65.20  | 24.10  | 2.71 | 0.37  |
| O35286_D1Dhx15  | Putative pr R.FTDILVR.H               | 14.80  | 24.85  | 0.60 | 1.68  |
| O35286_D1Dhx15  | Putative pr R.HQSFVLVGETSGK#.T        | 22.32  | 14.08  | 1.58 | 0.63  |
| O35286_D1Dhx15  | Putative pr R.HRLDLGEDYPSGK.K         | 9.58   | 20.51  | 0.47 | 2.14  |
| O35286_D1Dhx15  | Putative pr R.IFEPPPPK#.K             | 42.70  | 18.68  | 2.29 | 0.44  |
| O35286_D1Dhx15  | Putative pr R.LQLPVWEYK#.D            | 36.51  | 19.18  | 1.90 | 0.53  |
| O35286_D1Dhx15  | Putative pr R.SNLGSSVVLQK#.K          | 59.83  | 29.57  | 2.02 | 0.49  |
| O35286_D1Dhx15  | Putative pr R.TLATDILM*GVLK#.E        | 234.39 | 99.91  | 2.35 | 0.43  |
| O35286_D1Dhx15  | Putative pr R.TLATDILM*GVLK#.E        | 63.73  | 30.79  | 2.07 | 0.48  |
| O35286_D1Dhx15  | Putative pr R.VESLLVTAISK#.A          | 15.89  | 6.17   | 2.58 | 0.39  |
| O35286_D1Dhx15  | Putative pr K.VIVM*SATLDAGK#.F        | 15.63  | 8.53   | 1.83 | 0.55  |
| O35286_D1Dhx15  | Putative pr K.VIVMSATLDAGK#.F         | 11.72  | 202.77 | 0.06 | 17.30 |
| O35286_D1Dhx15  | Putative pr R.YGVILDEAHER.T           | 13.78  | 35.51  | 0.39 | 2.58  |
| G3X8X0_G_Dhx16  | DEAH (Asp->R.TSLGNVLLK#.S             | 6.72   | 5.78   | 1.16 | 0.86  |
| Q6PGC1_D_Dhx29  | ATP-depenc K.IYFSNANDSGGSANLKD#.S     | 4.20   | 2.27   | 1.85 | 0.54  |
| Q6PGC1_D_Dhx29  | ATP-depenc R.DLQTYGWLLYQEK#.H         | 5.48   | 2.54   | 2.15 | 0.46  |
| Q6PGC1_D_Dhx29  | ATP-depenc R.LQEDGLADVSHVIVDEVHER.S   | 7.83   | 8.05   | 0.97 | 1.03  |
| Q6PGC1_D_Dhx29  | ATP-depenc R.SVQSDFLLVILK#.E          | 12.49  | 5.48   | 2.28 | 0.44  |
| Q6PGC1_D_Dhx29  | ATP-depenc K.YQEYIPVQSGAPELNPFYQK#.Y  | 5.60   | 3.49   | 1.61 | 0.62  |
| Q6PGC1_D_Dhx29  | ATP-depenc K.AAGFSSPSWEGR.K           | 4.69   | 7.78   | 0.60 | 1.66  |
| Q6PGC1_D_Dhx29  | ATP-depenc R.DLQTYGWLLYQEK#.V         | 10.88  | 4.02   | 2.71 | 0.37  |
| Q6PGC1_D_Dhx29  | ATP-depenc K.GPQLTSFQDIALK#.A         | 9.80   | 5.22   | 1.88 | 0.53  |
| Q6PGC1_D_Dhx29  | ATP-depenc K.IILQITELIK#.T            | 13.49  | 7.20   | 1.87 | 0.53  |
| Q6PGC1_D_Dhx29  | ATP-depenc K.IYFSNANDSGGSANLKD#.S     | 8.05   | 5.10   | 1.58 | 0.63  |
| Q6PGC1_D_Dhx29  | ATP-depenc R.K#GPQTLFQDIALK#.A        | 20.03  | 11.26  | 1.78 | 0.56  |
| Q6PGC1_D_Dhx29  | ATP-depenc R.SAEAGAVGAQSK#.K          | 18.80  | 11.46  | 1.64 | 0.61  |
| Q6PGC1_D_Dhx29  | ATP-depenc K.SPFITPIGR.K              | 6.59   | 20.06  | 0.33 | 3.05  |
| Q6PGC1_D_Dhx29  | ATP-depenc R.VVVVAGETSGGK#.S          | 44.87  | 16.95  | 2.65 | 0.38  |
| Q99PU8_D_Dhx30  | Putative AT R.IPQLLLR.Y               | 4.39   | 11.77  | 0.37 | 2.68  |
| Q99PU8_D_Dhx30  | Putative AT R.LQSDDILPLGK#.D          | 9.08   | 10.49  | 0.87 | 1.16  |
| Q99PU8_D_Dhx30  | Putative AT R.TPLENLVLQAK#.I          | 14.33  | 10.21  | 1.40 | 0.71  |
| Q99PU8_D_Dhx30  | Putative AT K.VIQATSSSTAK#.N          | 11.61  | 6.97   | 1.67 | 0.60  |
| Q99PU8_D_Dhx30  | Putative AT R.ENYLEENLLYAPSLR.F       | 2.91   | 6.35   | 0.46 | 2.18  |
| Q99PU8_D_Dhx30  | Putative AT R.LQSDDILPLGK#.D          | 13.39  | 16.33  | 0.82 | 1.22  |
| Q99PU8_D_Dhx30  | Putative AT R.TPLENLVLQAK#.I          | 28.28  | 11.32  | 2.50 | 0.40  |
| Q99PU8_D_Dhx30  | Putative AT K.VIQATSSSTAK#.N          | 16.32  | 14.71  | 1.11 | 0.90  |
| Q8VHK9_D_Dhx36  | ATP-depenc R.ASLDDYQLPEILR.T          | 4.93   | 17.50  | 0.28 | 3.55  |
| Q8VHK9_D_Dhx36  | ATP-depenc K.DPKANINSNEK.I            | 6.74   | 33.18  | 0.20 | 4.93  |
| Q8VHK9_D_Dhx36  | ATP-depenc K.ELDSLQEK#.I              | 15.17  | 15.60  | 0.97 | 1.03  |
| Q8VHK9_D_Dhx36  | ATP-depenc R.SDHLTVVNAFEGWEEAK#.R     | 6.71   | 3.55   | 1.89 | 0.53  |
| Q8VHK9_D_Dhx36  | ATP-depenc K.TTQVTFQDLNVIYR.G         | 3.64   | 14.92  | 0.24 | 4.10  |
| Q8VHK9_D_Dhx36  | ATP-depenc R.SDHLTVVNAFEGWEEAK#.R     | 8.33   | 4.54   | 1.84 | 0.54  |
| Q6NZL1_Qd_Dhx37 | DEAH (Asp->K.ELPEFVYQEVETTK#.M        | 11.33  | 5.16   | 2.20 | 0.46  |
| Q6NZL1_Qd_Dhx37 | DEAH (Asp->K.TPLDDPVFHPSSVLFK#.E      | 24.80  | 11.93  | 2.08 | 0.48  |
| Q80X98_Qd_Dhx38 | DEAH (Asp->K.LIVTSATM*DAEK#.F         | 22.49  | 8.96   | 2.51 | 0.40  |
| Q80X98_Qd_Dhx38 | DEAH (Asp->R.SLNTDVLFLGK#.E           | 3.34   | 20.54  | 0.16 | 6.16  |
| Q80X98_Qd_Dhx38 | DEAH (Asp->R.TNLANVLLK#.S             | 20.21  | 11.61  | 1.74 | 0.57  |
| Q80X98_Qd_Dhx38 | DEAH (Asp->K.TPQEDYVEAAVK#.Q          | 19.90  | 11.61  | 1.71 | 0.58  |
| Q80X98_Qd_Dhx38 | DEAH (Asp->R.LEVDEFEEDNAAK#.V         | 9.84   | 5.13   | 1.92 | 0.52  |
| Q80X98_Qd_Dhx38 | DEAH (Asp->K.LIVTSATM*DAEK#.F         | 19.43  | 10.65  | 1.82 | 0.55  |
| Q80X98_Qd_Dhx38 | DEAH (Asp->R.LM*VEFPLDPAK#.M          | 16.02  | 9.84   | 1.63 | 0.61  |
| Q80X98_Qd_Dhx38 | DEAH (Asp->R.LM*VEFPLDPAK#.M          | 8.61   | 3.66   | 2.35 | 0.42  |
| Q80X98_Qd_Dhx38 | DEAH (Asp->R.TNLANVLLK#.S             | 24.44  | 12.80  | 1.91 | 0.52  |
| Q80X98_Qd_Dhx38 | DEAH (Asp->K.TPQEDYVEAAVK#.Q          | 17.56  | 9.78   | 1.80 | 0.56  |
| Q6PE54_D1Dhx40  | Probable A R.LGLDLEVVPIISK#.S         | 8.28   | 4.87   | 1.70 | 0.59  |
| Q99J87_Df_Dhx58 | Probable A K.IGSILLETPR.G             | 2.97   | 6.81   | 0.44 | 2.29  |
| Q99J87_Df_Dhx58 | Probable A K.NIIIVLPTGAGK#.T          | 17.31  | 11.62  | 1.49 | 0.67  |
| Q99J87_Df_Dhx58 | Probable A R.ELTNEALEVLM*EK#.A        | 20.69  | 12.43  | 1.66 | 0.60  |
| Q99J87_Df_Dhx58 | Probable A K.NIIIVLPTGAGK#.T          | 9.70   | 4.51   | 2.15 | 0.47  |
| Q99J87_Df_Dhx58 | Probable A K.AEPLQVLGLTASPGTGATK#.L   | 5.77   | 2.91   | 1.98 | 0.50  |
| Q99J87_Df_Dhx58 | Probable A R.AGQSYFSLATEGSR.E         | 8.41   | 12.62  | 0.67 | 1.50  |
| Q99J87_Df_Dhx58 | Probable A K.DQCEVQEFR.D              | 6.31   | 16.82  | 0.38 | 2.67  |
| Q99J87_Df_Dhx58 | Probable A K.DTYNTILSR.Y              | 5.46   | 8.11   | 0.67 | 1.49  |
| Q99J87_Df_Dhx58 | Probable A R.ELTNEALEVLM*EK#.A        | 19.12  | 9.78   | 1.96 | 0.51  |
| Q99J87_Df_Dhx58 | Probable A K.IGSILLETPR.G             | 12.99  | 27.02  | 0.48 | 2.08  |
| Q99J87_Df_Dhx58 | Probable A K.NIIIVLPTGAGK#.T          | 46.78  | 20.63  | 2.27 | 0.44  |
| Q99J87_Df_Dhx58 | Probable A R.QTASSLLWL.R.Q            | 2.25   | 8.97   | 0.25 | 3.99  |
| Q99J87_Df_Dhx58 | Probable A K.VVVLN.R.V                | 9.29   | 17.92  | 0.52 | 1.93  |
| Q99J87_Df_Dhx58 | Probable A R.YGLLTNEISM*VQAR.G        | 18.20  | 47.42  | 0.38 | 2.61  |
| Q99J87_Df_Dhx58 | Probable A K.AEPLQVLGLTASPGTGATK#.L   | 7.29   | 4.59   | 1.59 | 0.63  |
| Q99J87_Df_Dhx58 | Probable A R.AESVLLK#.L               | 23.05  | 7.57   | 3.04 | 0.33  |
| Q99J87_Df_Dhx58 | Probable A R.AGQSYFSLATEGSR.E         | 4.96   | 9.76   | 0.51 | 1.97  |
| Q99J87_Df_Dhx58 | Probable A R.AQDPFGDLK#.K             | 19.80  | 12.06  | 1.64 | 0.61  |
| Q99J87_Df_Dhx58 | Probable A K.DQCEVQEFR.D              | 5.62   | 12.81  | 0.44 | 2.28  |
| Q99J87_Df_Dhx58 | Probable A K.DTYNTILSR.Y              | 7.80   | 9.53   | 0.82 | 1.22  |
| Q99J87_Df_Dhx58 | Probable A R.ELTNEALEVLM*EK#.A        | 15.24  | 7.35   | 2.07 | 0.48  |
| Q99J87_Df_Dhx58 | Probable A R.ELTNEALEVLM*EK#.A        | 16.18  | 5.66   | 2.86 | 0.35  |
| Q99J87_Df_Dhx58 | Probable A K.IGSILLETPR.G             | 9.43   | 22.60  | 0.42 | 2.40  |
| Q99J87_Df_Dhx58 | Probable A K.K#AEPLQVLGLTASPGTGATK#.L | 22.80  | 7.82   | 2.92 | 0.34  |
| Q99J87_Df_Dhx58 | Probable A K.NIIIVLPTGAGK#.T          | 64.53  | 23.49  | 2.75 | 0.36  |
| A2A4P0_D1Dhx8   | ATP-depenc K.FSQYFYEAFITPIGR.T        | 4.41   | 3.75   | 1.17 | 0.85  |
| A2A4P0_D1Dhx8   | ATP-depenc K.LIVTSATLDAVK#.F          | 19.41  | 10.76  | 1.80 | 0.55  |
| A2A4P0_D1Dhx8   | ATP-depenc K.TGIDQLVVTPISQQAQ#.Q      | 6.56   | 6.37   | 1.03 | 0.97  |
| A2A4P0_D1Dhx8   | ATP-depenc R.TNLASTVLSLK#.A           | 21.92  | 12.67  | 1.73 | 0.58  |
| A2A4P0_D1Dhx8   | ATP-depenc R.VANVADVWSK#.G            | 10.16  | 7.66   | 1.33 | 0.75  |
| A2A4P0_D1Dhx8   | ATP-depenc K.LIVTSATLDAVK#.F          | 17.43  | 10.45  | 1.67 | 0.60  |
| A2A4P0_D1Dhx8   | ATP-depenc K.TGIDQLVVTPISQQAQ#.Q      | 10.44  | 4.92   | 2.12 | 0.47  |
| A2A4P0_D1Dhx8   | ATP-depenc R.TNLASTVLSLK#.A           | 17.98  | 20.00  | 0.90 | 1.11  |
| E9QNN1_Ef_Dhx9  | ATP-depenc R.DFVNYLVR.I               | 4.48   | 9.79   | 0.46 | 2.19  |

|                  |                                                  |        |        |      |       |
|------------------|--------------------------------------------------|--------|--------|------|-------|
| E9QNN1_E5 Dhx9   | ATP-depenc R.GANLK#DYYSRK.E                      | 2.72   | 3.88   | 0.70 | 1.42  |
| E9QNN1_E5 Dhx9   | ATP-depenc R.AAM*EALVVEVSK#.Q                    | 67.82  | 60.40  | 1.12 | 0.89  |
| E9QNN1_E5 Dhx9   | ATP-depenc R.AAMEALVVEVSK#.Q                     | 78.27  | 77.98  | 1.00 | 1.00  |
| E9QNN1_E5 Dhx9   | ATP-depenc K.AEAENSGVSSGYPGPTWDR.G               | 5.77   | 25.45  | 0.23 | 4.41  |
| E9QNN1_E5 Dhx9   | ATP-depenc R.DVVLAYPEVR.I                        | 38.62  | 163.30 | 0.24 | 4.23  |
| E9QNN1_E5 Dhx9   | ATP-depenc K.EGERVEPYK.V                         | 1.85   | 7.52   | 0.25 | 4.06  |
| E9QNN1_E5 Dhx9   | ATP-depenc R.ELDALDANDELTPLGR.I                  | 41.19  | 174.26 | 0.24 | 4.23  |
| E9QNN1_E5 Dhx9   | ATP-depenc R.ELLPVK#K#.F                         | 21.63  | 19.68  | 1.10 | 0.91  |
| E9QNN1_E5 Dhx9   | ATP-depenc K.FEAELIAISSNSVVIIR.G                 | 2.68   | 12.36  | 0.22 | 4.61  |
| E9QNN1_E5 Dhx9   | ATP-depenc R.FSDHVALLSVFGQAWDDAR.M               | 44.91  | 157.31 | 0.29 | 3.50  |
| E9QNN1_E5 Dhx9   | ATP-depenc R.GISHIVDEIHER.D                      | 78.51  | 288.11 | 0.27 | 3.67  |
| E9QNN1_E5 Dhx9   | ATP-depenc K.LLTTGR.N                            | 24.15  | 103.09 | 0.23 | 4.27  |
| E9QNN1_E5 Dhx9   | ATP-depenc R.ISAVAVAER.V                         | 36.36  | 131.69 | 0.28 | 3.62  |
| E9QNN1_E5 Dhx9   | ATP-depenc R.K#EEQEVQATLESEEVDLNAGLHGNWTLNNAK#.A | 12.73  | 8.18   | 1.56 | 0.64  |
| E9QNN1_E5 Dhx9   | ATP-depenc K.KFEAEILIAISSNSVVIIR.G               | 7.70   | 31.27  | 0.25 | 4.06  |
| E9QNN1_E5 Dhx9   | ATP-depenc R.KLEAGIR.G                           | 34.01  | 162.96 | 0.21 | 4.79  |
| E9QNN1_E5 Dhx9   | ATP-depenc R.KM*TPAYEIR.A                        | 4.79   | 28.13  | 0.17 | 5.87  |
| E9QNN1_E5 Dhx9   | ATP-depenc R.KMTPAYEIR.A                         | 2.35   | 10.05  | 0.23 | 4.28  |
| E9QNN1_E5 Dhx9   | ATP-depenc R.KVFDPPVDPGVTK.V                     | 48.76  | 49.40  | 0.99 | 1.01  |
| E9QNN1_E5 Dhx9   | ATP-depenc K.KVQSDGQVFIIDDWIR.L                  | 17.34  | 64.88  | 0.27 | 3.74  |
| E9QNN1_E5 Dhx9   | ATP-depenc K.LFTAHHNM*TNATVWASK#.T               | 79.52  | 56.92  | 1.40 | 0.72  |
| E9QNN1_E5 Dhx9   | ATP-depenc K.LFTAHHNM*TNATVWASK#.T               | 9.36   | 4.82   | 1.94 | 0.52  |
| E9QNN1_E5 Dhx9   | ATP-depenc K.LFTAHHNM*TNATVWASK#.T               | 34.80  | 27.79  | 1.25 | 0.80  |
| E9QNN1_E5 Dhx9   | ATP-depenc R.LGGIGQFLAK#.A                       | 189.86 | 174.85 | 1.09 | 0.92  |
| E9QNN1_E5 Dhx9   | ATP-depenc R.LNMMATLR.M                          | 7.42   | 45.33  | 0.16 | 6.11  |
| E9QNN1_E5 Dhx9   | ATP-depenc R.LNQYFQK#.E                          | 173.16 | 148.91 | 1.16 | 0.86  |
| E9QNN1_E5 Dhx9   | ATP-depenc K.LPIEPR.F                            | 57.07  | 222.77 | 0.26 | 3.90  |
| E9QNN1_E5 Dhx9   | ATP-depenc K.LLSM*SQLNEK.E                       | 44.61  | 39.08  | 1.14 | 0.88  |
| E9QNN1_E5 Dhx9   | ATP-depenc K.LLSMSQLNEK#.E                       | 17.74  | 16.31  | 1.09 | 0.92  |
| E9QNN1_E5 Dhx9   | ATP-depenc R.MSGEAEIR.F                          | 7.24   | 31.13  | 0.23 | 4.30  |
| E9QNN1_E5 Dhx9   | ATP-depenc R.M*SGEAEIR.F                         | 42.39  | 124.49 | 0.34 | 2.94  |
| E9QNN1_E5 Dhx9   | ATP-depenc K.MTPAYEIR.A                          | 6.79   | 29.15  | 0.23 | 4.30  |
| E9QNN1_E5 Dhx9   | ATP-depenc K.NELTYQM*EQDHNLSQVLQER.E             | 18.92  | 63.72  | 0.30 | 3.37  |
| E9QNN1_E5 Dhx9   | ATP-depenc K.NELTYQM*EQDHNLSQVLQER.E             | 6.86   | 25.79  | 0.27 | 3.76  |
| E9QNN1_E5 Dhx9   | ATP-depenc R.QJSRPSAAGINLM*IGSVR.Y               | 11.25  | 28.27  | 0.40 | 2.51  |
| E9QNN1_E5 Dhx9   | ATP-depenc R.QLYHLGVIEAYSLTK#.K                  | 120.90 | 108.05 | 1.12 | 0.89  |
| E9QNN1_E5 Dhx9   | ATP-depenc K.RLNMMATLR.M                         | 10.19  | 12.58  | 0.81 | 1.23  |
| E9QNN1_E5 Dhx9   | ATP-depenc R.SFIAEM*TIYIK.Q                      | 26.21  | 27.99  | 0.94 | 1.07  |
| E9QNN1_E5 Dhx9   | ATP-depenc R.TPLHEIALSIK#.L                      | 55.58  | 47.84  | 1.16 | 0.86  |
| E9QNN1_E5 Dhx9   | ATP-depenc K.TTQVPQYLLDDFIQNDR.A                 | 41.27  | 126.73 | 0.33 | 3.07  |
| E9QNN1_E5 Dhx9   | ATP-depenc K.TTQVPQYLLDDFIQNDR.A                 | 27.55  | 71.51  | 0.39 | 2.60  |
| E9QNN1_E5 Dhx9   | ATP-depenc K.VFDPPVDPGVTK#.V                     | 143.03 | 133.10 | 1.07 | 0.93  |
| E9QNN1_E5 Dhx9   | ATP-depenc K.VQSDGQVFIIDDWIR.L                   | 13.78  | 54.57  | 0.25 | 3.96  |
| E9QNN1_E5 Dhx9   | ATP-depenc R.YGDGPRPK.M                          | 13.98  | 29.09  | 0.48 | 2.08  |
| E9QNN1_E5 Dhx9   | ATP-depenc K.YPSPFFVFGK#.I                       | 154.15 | 143.80 | 1.07 | 0.93  |
| E9QNN1_E5 Dhx9   | ATP-depenc K.YTQVDPDHN.R.S                       | 9.35   | 56.18  | 0.17 | 6.01  |
| E9QNN1_E5 Dhx9   | ATP-depenc R.AAM*EALVVEVSK#.Q                    | 73.66  | 57.91  | 1.27 | 0.79  |
| E9QNN1_E5 Dhx9   | ATP-depenc R.AAMEALVVEVSK#.Q                     | 110.58 | 82.58  | 1.34 | 0.75  |
| E9QNN1_E5 Dhx9   | ATP-depenc K.AEAENSGVSSGYPGPTWDR.G               | 10.24  | 39.77  | 0.26 | 3.88  |
| E9QNN1_E5 Dhx9   | ATP-depenc R.DFVNLVR.I                           | 57.61  | 199.39 | 0.29 | 3.46  |
| E9QNN1_E5 Dhx9   | ATP-depenc R.DVVLAYPEVR.I                        | 62.63  | 218.16 | 0.29 | 3.48  |
| E9QNN1_E5 Dhx9   | ATP-depenc R.ELDALDANDELTPLGR.I                  | 70.20  | 244.28 | 0.29 | 3.48  |
| E9QNN1_E5 Dhx9   | ATP-depenc R.FSDHVALLSVFGQAWDDAR.M               | 18.01  | 52.59  | 0.34 | 2.92  |
| E9QNN1_E5 Dhx9   | ATP-depenc R.GANLKDYYSR.K                        | 10.35  | 32.14  | 0.32 | 3.11  |
| E9QNN1_E5 Dhx9   | ATP-depenc R.GISHIVDEIHER.D                      | 96.08  | 314.43 | 0.31 | 3.27  |
| E9QNN1_E5 Dhx9   | ATP-depenc K.HLENNSHFGSHR.Y                      | 10.82  | 44.56  | 0.24 | 4.12  |
| E9QNN1_E5 Dhx9   | ATP-depenc R.ISAVAVAER.V                         | 49.26  | 200.15 | 0.25 | 4.06  |
| E9QNN1_E5 Dhx9   | ATP-depenc R.K#EEQEVQATLESEEVDLNAGLHGNWTLNNAK#.A | 40.60  | 33.68  | 1.21 | 0.83  |
| E9QNN1_E5 Dhx9   | ATP-depenc R.KEEQEVQATLESEEVDLNAGLHGNWTLNNAK#.A  | 11.48  | 8.66   | 1.33 | 0.75  |
| E9QNN1_E5 Dhx9   | ATP-depenc K.KFEAEILIAISSNSVVIIR.G               | 4.14   | 8.49   | 0.49 | 2.05  |
| E9QNN1_E5 Dhx9   | ATP-depenc R.KLEAGIR.G                           | 41.73  | 152.42 | 0.27 | 3.65  |
| E9QNN1_E5 Dhx9   | ATP-depenc R.K#VFDPPVDPGVTK#.V                   | 60.85  | 54.16  | 1.12 | 0.89  |
| E9QNN1_E5 Dhx9   | ATP-depenc K.LFTAHHNM*TNATVWASK#.T               | 138.74 | 85.01  | 1.63 | 0.61  |
| E9QNN1_E5 Dhx9   | ATP-depenc K.LFTAHHNM*TNATVWASK#.T               | 36.14  | 27.99  | 1.29 | 0.77  |
| E9QNN1_E5 Dhx9   | ATP-depenc R.LGGIGQFLAK#.A                       | 342.81 | 267.03 | 1.28 | 0.78  |
| E9QNN1_E5 Dhx9   | ATP-depenc R.LNM*ATLR.M                          | 26.47  | 79.84  | 0.33 | 3.02  |
| E9QNN1_E5 Dhx9   | ATP-depenc R.LNQYFQK#.E                          | 306.96 | 226.52 | 1.36 | 0.74  |
| E9QNN1_E5 Dhx9   | ATP-depenc K.LPIEPR.F                            | 91.97  | 344.43 | 0.27 | 3.74  |
| E9QNN1_E5 Dhx9   | ATP-depenc K.LLSMSQLNEK#.E                       | 22.16  | 19.06  | 1.16 | 0.86  |
| E9QNN1_E5 Dhx9   | ATP-depenc K.LLSM*SQLNEK#.E                      | 103.06 | 69.82  | 1.48 | 0.68  |
| E9QNN1_E5 Dhx9   | ATP-depenc R.M*SGEAEIR.F                         | 42.83  | 135.10 | 0.32 | 3.15  |
| E9QNN1_E5 Dhx9   | ATP-depenc K.NELTYQM*EQDHNLSQVLQER.E             | 40.19  | 118.93 | 0.34 | 2.96  |
| E9QNN1_E5 Dhx9   | ATP-depenc K.NELTYQM*EQDHNLSQVLQER.E             | 42.08  | 35.17  | 1.20 | 0.84  |
| E9QNN1_E5 Dhx9   | ATP-depenc R.QJSRPSAAGINLM*IGSVR.Y               | 11.08  | 32.82  | 0.34 | 2.96  |
| E9QNN1_E5 Dhx9   | ATP-depenc R.QLYHLGVIEAYSLTK#.K                  | 186.63 | 123.31 | 1.51 | 0.66  |
| E9QNN1_E5 Dhx9   | ATP-depenc R.RISAVAVAER.V                        | 9.73   | 160.83 | 0.06 | 16.52 |
| E9QNN1_E5 Dhx9   | ATP-depenc R.SFIAEM*TIYIK#.Q                     | 52.12  | 42.37  | 1.23 | 0.81  |
| E9QNN1_E5 Dhx9   | ATP-depenc R.TPLHEIALSIK#.L                      | 155.84 | 133.24 | 1.17 | 0.85  |
| E9QNN1_E5 Dhx9   | ATP-depenc K.TTQVPQYLLDDFIQNDR.A                 | 60.85  | 191.92 | 0.32 | 3.15  |
| E9QNN1_E5 Dhx9   | ATP-depenc R.VEGFNAYAGM*GNSTNK#.K                | 35.26  | 29.16  | 1.21 | 0.83  |
| E9QNN1_E5 Dhx9   | ATP-depenc R.VEGFNAYAGM*GNSTNK#.K                | 8.72   | 5.76   | 1.52 | 0.66  |
| E9QNN1_E5 Dhx9   | ATP-depenc R.VEGFNAYAGM*GNSTNK#.D                | 19.70  | 12.58  | 1.57 | 0.64  |
| E9QNN1_E5 Dhx9   | ATP-depenc K.VFDPPVDPGVTK#.V                     | 248.89 | 224.84 | 1.11 | 0.90  |
| E9QNN1_E5 Dhx9   | ATP-depenc K.VQSDGQVFIIDDWIR.L                   | 19.33  | 72.57  | 0.27 | 3.75  |
| E9QNN1_E5 Dhx9   | ATP-depenc K.YPSPFFVFGK#.I                       | 219.58 | 176.97 | 1.24 | 0.81  |
| E9QNN1_E5 Dhx9   | ATP-depenc R.YQILPLHSQIPR.E                      | 6.72   | 24.48  | 0.27 | 3.64  |
| E9QNN1_E5 Dhx9   | ATP-depenc K.YTQVDPDHN.R.S                       | 21.35  | 70.93  | 0.30 | 3.32  |
| O08808_DI Diaph1 | Protein dia R.ELGDYFVDFPK#.K                     | 7.60   | 2.33   | 3.26 | 0.31  |
| O08808_DI Diaph1 | Protein dia R.LNALFK#.L                          | 13.97  | 5.01   | 2.79 | 0.36  |
| O08808_DI Diaph1 | Protein dia R.NM*FLQAVK#.E                       | 10.71  | 7.68   | 1.39 | 0.72  |
| O08808_DI Diaph1 | Protein dia R.SPDELATGDDGGK#.H                   | 16.74  | 7.21   | 2.32 | 0.43  |
| Q9Z207_DI Diaph3 | Protein dia K.INELQAELOAFK#.S                    | 6.34   | 6.85   | 0.93 | 1.08  |
| Q8C9B9_DI Dido1  | Death-indu R.LQOELETSVYPK#.V                     | 3.95   | 2.40   | 1.65 | 0.61  |
| Q8C9B9_DI Dido1  | Death-indu K.AKHGEDTM*SAAPLLDPIVQQFGQFSK#.D      | 5.19   | 1.79   | 2.90 | 0.34  |
| Q8C9B9_DI Dido1  | Death-indu R.LGVPSPAPSQNSQIR.Q                   | 2.88   | 8.40   | 0.34 | 2.92  |
| Q9D0D4_D Dimt1   | Probable di K.AALRPTDVVLEVPPTGNGM*TVK.L          | 2.84   | 6.17   | 0.46 | 2.17  |
| Q9D0D4_D Dimt1   | Probable di R.LLHGFGNAEIGHFS.-                   | 20.41  | 20.41  | 1.00 | 1.00  |
| Q9D0D4_D Dimt1   | Probable di K.LQLVGLDVLK#.S                      | 19.96  | 7.64   | 2.61 | 0.38  |
| Q9D0D4_D Dimt1   | Probable di K.SSAVQQLLEK#.N                      | 17.62  | 13.18  | 1.34 | 0.75  |
| Q9CSH3_Rf Dis3   | Exosome cc R.AESPPFYLNTLLR.I                     | 5.15   | 13.00  | 0.40 | 2.53  |
| Q9CSH3_Rf Dis3   | Exosome cc K.ASLTYAEAQM*.I                       | 6.70   | 16.75  | 0.40 | 2.50  |
| Q9CSH3_Rf Dis3   | Exosome cc R.AVHEDIVAVELLP.R.S                   | 7.64   | 21.83  | 0.35 | 2.86  |
| Q9CSH3_Rf Dis3   | Exosome cc R.IDSAAM*NDITTSR.L.G                  | 4.97   | 13.45  | 0.37 | 2.71  |

|                  |                                                |        |        |       |      |
|------------------|------------------------------------------------|--------|--------|-------|------|
| Q9CSH3_Rf Dis3   | Exosome cc R.IEGTVFHVFDK#.V                    | 11.75  | 8.23   | 1.43  | 0.70 |
| Q9CSH3_Rf Dis3   | Exosome cc R.IIIVADGWPR.N                      | 6.11   | 21.29  | 0.29  | 3.48 |
| Q9CSH3_Rf Dis3   | Exosome cc R.LAYDDEIPSLR.I                     | 10.39  | 19.17  | 0.54  | 1.84 |
| Q9CSH3_Rf Dis3   | Exosome cc R.LAYLSDDEM*NEIESGK#.I              | 11.81  | 9.38   | 1.26  | 0.79 |
| Q9CSH3_Rf Dis3   | Exosome cc K.NAIVVLIPK#.Y                      | 21.91  | 12.25  | 1.79  | 0.56 |
| Q9CSH3_Rf Dis3   | Exosome cc R.NVIVLQTVM*QEVN.N                  | 1.61   | 7.30   | 0.22  | 4.54 |
| Q9CSH3_Rf Dis3   | Exosome cc R.NVIVLQTVMQEVN.N                   | 4.36   | 10.63  | 0.41  | 2.44 |
| Q9CSH3_Rf Dis3   | Exosome cc K.SLTANPELIDR.L                     | 12.10  | 26.48  | 0.46  | 2.19 |
| Q9CSH3_Rf Dis3   | Exosome cc K.YLGEVTFVFEK#.D                    | 9.30   | 8.44   | 1.10  | 0.91 |
| Q9CSH3_Rf Dis3   | Exosome cc R.AESDPFYLNTLLR.I                   | 10.86  | 21.52  | 0.50  | 1.98 |
| Q9CSH3_Rf Dis3   | Exosome cc K.ASLTYAEAQM*R.I                    | 8.13   | 22.57  | 0.36  | 2.78 |
| Q9CSH3_Rf Dis3   | Exosome cc R.AVHEDIVAVELLPR.S                  | 6.77   | 21.80  | 0.31  | 3.22 |
| Q9CSH3_Rf Dis3   | Exosome cc R.FHM*DSETHDPIDLQTK#.E              | 22.75  | 14.71  | 1.55  | 0.65 |
| Q9CSH3_Rf Dis3   | Exosome cc K.GALLTSSPEIR.F                     | 19.72  | 31.02  | 0.64  | 1.57 |
| Q9CSH3_Rf Dis3   | Exosome cc R.HLFTPADK#.R                       | 23.17  | 73.46  | 0.32  | 3.17 |
| Q9CSH3_Rf Dis3   | Exosome cc R.IDSAAM*NDITTSR.G                  | 11.41  | 25.58  | 0.45  | 2.24 |
| Q9CSH3_Rf Dis3   | Exosome cc R.IDSAAMNDITTSR.G                   | 2.89   | 8.26   | 0.35  | 2.86 |
| Q9CSH3_Rf Dis3   | Exosome cc R.IEGTVFHVFDK#.V                    | 26.61  | 16.06  | 1.66  | 0.60 |
| Q9CSH3_Rf Dis3   | Exosome cc R.K.IH#PAPPSPNYDILVK#.A             | 19.50  | 15.17  | 1.29  | 0.78 |
| Q9CSH3_Rf Dis3   | Exosome cc R.LAYLSDDEM*NEIESGK#.I              | 18.65  | 9.84   | 1.90  | 0.53 |
| Q9CSH3_Rf Dis3   | Exosome cc R.LAYLSDDEMNEIESGK#.I               | 10.83  | 8.66   | 1.25  | 0.80 |
| Q9CSH3_Rf Dis3   | Exosome cc R.M*PWSITEEDM*K.N                   | 4.67   | 5.95   | 0.78  | 1.27 |
| Q9CSH3_Rf Dis3   | Exosome cc K.NAIVVLIPK#.Y                      | 34.90  | 21.86  | 1.60  | 0.63 |
| Q9CSH3_Rf Dis3   | Exosome cc R.NVIVLQTVM*QEVN.N                  | 4.60   | 8.91   | 0.52  | 1.94 |
| Q9CSH3_Rf Dis3   | Exosome cc K.SGSVLQGTFR.A                      | 10.63  | 29.92  | 0.36  | 2.81 |
| Q9CSH3_Rf Dis3   | Exosome cc K.SLTANPELIDR.L                     | 12.96  | 28.28  | 0.46  | 2.18 |
| Q9CSH3_Rf Dis3   | Exosome cc K.YLGEVTFVFEK#.D                    | 15.96  | 8.55   | 1.87  | 0.54 |
| Q9ESX5_Dk Dkc1   | H/ACA ribo R.ALETLTGALFQRPPPIAAVK.R            | 5.31   | 9.79   | 0.54  | 1.84 |
| Q9ESX5_Dk Dkc1   | H/ACA ribo R.K.#LQEDDVAEIQHAEFLIK#PESK#.V      | 8.65   | 4.48   | 1.93  | 0.52 |
| Q9ESX5_Dk Dkc1   | H/ACA ribo K.NTLVTEAVQAPQLAAEAVNVIK#.R         | 15.26  | 9.10   | 1.68  | 0.60 |
| Q9ESX5_Dk Dkc1   | H/ACA ribo K.TLVESGETGDGNDTTK#.K               | 4.78   | 2.33   | 2.05  | 0.49 |
| Q9ESX5_Dk Dkc1   | H/ACA ribo K.VAQLDTSQWPLLLK#.N                 | 7.74   | 4.84   | 1.60  | 0.62 |
| Q9ESX5_Dk Dkc1   | H/ACA ribo K.NTLVTEAVQAPQLAAEAVNVIK#.R         | 11.99  | 2.82   | 4.25  | 0.24 |
| Q9ESX5_Dk Dkc1   | H/ACA ribo K.VAQLDTSQWPLLLK#.N                 | 8.09   | 2.26   | 3.58  | 0.28 |
| Q9ESX5_Dk Dkc1   | H/ACA ribo R.ALETLTGALFQRPPPIAAVK.R            | 5.77   | 6.47   | 0.89  | 1.12 |
| Q9ESX5_Dk Dkc1   | H/ACA ribo K.NTLVTEAVQAPQLAAEAVNVIK#.R         | 9.10   | 4.61   | 1.97  | 0.51 |
| Q9ESX5_Dk Dkc1   | H/ACA ribo K.VAQLDTSQWPLLLK#.N                 | 10.40  | 4.55   | 2.29  | 0.44 |
| Q8BMF4_O Dlat    | Dihydrolipi K.DIDSPVSK#.A                      | 16.68  | 5.76   | 2.90  | 0.35 |
| Q8BMF4_O Dlat    | Dihydrolipi K.GIDLTQVK#.G                      | 39.88  | 3.75   | 10.63 | 0.09 |
| Q8BMF4_O Dlat    | Dihydrolipi K.GLETIASD VVSLASK#.A              | 46.21  | 5.17   | 8.94  | 0.11 |
| Q8BMF4_O Dlat    | Dihydrolipi K.ISVNDFIK#.A                      | 25.18  | 6.03   | 4.18  | 0.24 |
| Q8BMF4_O Dlat    | Dihydrolipi K.LQPHEGQGTFTISNLGMFGIK#.N         | 6.99   | 2.92   | 2.39  | 0.42 |
| Q8BMF4_O Dlat    | Dihydrolipi R.VFVPLAK#.K                       | 33.46  | 7.38   | 4.53  | 0.22 |
| Q8BMF4_O Dlat    | Dihydrolipi K.YLEK#PITMLL.-                    | 10.60  | 4.19   | 2.53  | 0.39 |
| Q8BMF4_O Dlat    | Dihydrolipi K.GLETIASD VVSLASK#.A              | 18.38  | 6.36   | 2.89  | 0.35 |
| Q8BMF4_O Dlat    | Dihydrolipi K.ISVNDFIK#.A                      | 17.96  | 4.13   | 4.35  | 0.23 |
| Q811D0_D Dlg1    | Disks large I R.AASHEQAAALK#.N                 | 13.00  | 6.84   | 1.90  | 0.53 |
| Q811D0_D Dlg1    | Disks large I K.GLGFSIAGVGNQHPGDNSIYVTK#.I     | 11.66  | 4.78   | 2.44  | 0.41 |
| Q811D0_D Dlg1    | Disks large I R.GNSLGFSGIAGGTDNPHGDDSSIFITK#.I | 11.61  | 6.68   | 1.74  | 0.57 |
| Q811D0_D Dlg1    | Disks large I K.LEQEFTHEFTAIQVQDLEDIYVQVK#.Q   | 8.91   | 4.26   | 2.09  | 0.48 |
| Q9J144_Div Dmap1 | DNA methy K.DAPPLSPD TGGQVYR.T                 | 3.98   | 19.84  | 0.20  | 4.99 |
| Q9J144_Div Dmap1 | DNA methy R.DILELGGPEGDAASGTISK#.K             | 22.19  | 17.40  | 1.27  | 0.78 |
| Q9J144_Div Dmap1 | DNA methy R.EVVALYSDK.D                        | 8.56   | 8.46   | 1.01  | 0.99 |
| Q9J144_Div Dmap1 | DNA methy K.LITAADTAEQR.R                      | 6.98   | 25.62  | 0.27  | 3.67 |
| Q9J144_Div Dmap1 | DNA methy R.SDLVLLYELK#.Q                      | 37.32  | 27.50  | 1.36  | 0.74 |
| Q9J144_Div Dmap1 | DNA methy R.TPEQVAEEYLLQELR.K                  | 3.18   | 9.62   | 0.33  | 3.03 |
| Q9J144_Div Dmap1 | DNA methy R.TPEQVAEEYLLQELR.K                  | 2.29   | 9.44   | 0.24  | 4.13 |
| E9Q7N9_E5 Dnah11 | Protein Dn: K.KIAAMVR.H                        | 28.13  | 124.66 | 0.23  | 4.43 |
| E9Q7N9_E5 Dnah11 | Protein Dn: R.LSPSEQEEDDEEAAAARRVQR.F          | 1.62   | 6.23   | 0.26  | 3.85 |
| P63037_DI Dnaj1  | Dnal homo K.EGAGGGGFGSPM*DI FDM*FFGGGGR.M      | 1.95   | 8.53   | 0.23  | 4.38 |
| P63037_DI Dnaj1  | Dnal homo K.EVEETDEM*QVVELVDFDPNQER.R          | 6.77   | 22.99  | 0.29  | 3.39 |
| P63037_DI Dnaj1  | Dnal homo K.EVEETDEM*QVVELVDFDPNQER.R          | 3.08   | 10.70  | 0.29  | 3.48 |
| P63037_DI Dnaj1  | Dnal homo K.ILEVHIDK#.G                        | 43.60  | 23.32  | 1.87  | 0.53 |
| P63037_DI Dnaj1  | Dnal homo K.ITFHGEGDQEPGLEPGDIIIVLDQK#.D       | 97.42  | 67.79  | 1.44  | 0.70 |
| P63037_DI Dnaj1  | Dnal homo R.KEVEETDEM*QVVELVDFDPNQER.R         | 1.59   | 9.48   | 0.17  | 5.95 |
| P63037_DI Dnaj1  | Dnal homo K.NVVHQLSVTLEDLYNGATR.K              | 8.31   | 40.08  | 0.21  | 4.83 |
| P63037_DI Dnaj1  | Dnal homo K.QISQAYEVLADSK#.K                   | 87.87  | 70.05  | 1.25  | 0.80 |
| P63037_DI Dnaj1  | Dnal homo R.TIVITSHPGQVK.H                     | 48.87  | 49.88  | 0.98  | 1.02 |
| P63037_DI Dnaj1  | Dnal homo K.VNFPENFLSPDK.L                     | 14.10  | 14.42  | 0.98  | 1.02 |
| P63037_DI Dnaj1  | Dnal homo K.QISQAYEVLADSK#.K                   | 3.47   | 3.43   | 1.01  | 0.99 |
| P63037_DI Dnaj1  | Dnal homo K.ITFHGEGDQEPGLEPGDIIIVLDQK#.D       | 6.50   | 7.10   | 0.92  | 1.09 |
| Q9QV10_Df Dnaj2  | Dnal homo R.DGNLHMITYK#.I                      | 18.15  | 14.23  | 1.28  | 0.78 |
| Q9QV10_Df Dnaj2  | Dnal homo R.DGNLHMITYK#.I                      | 33.55  | 19.09  | 1.76  | 0.57 |
| Q9QV10_Df Dnaj2  | Dnal homo R.EGSGGGGGM*DDIFSHIFGGGLFGFM*GNQSR.S | 7.58   | 16.75  | 0.45  | 2.21 |
| Q9QV10_Df Dnaj2  | Dnal homo K.EISFAYEVLNPEK#.R                   | 15.52  | 10.32  | 1.50  | 0.66 |
| Q9QV10_Df Dnaj2  | Dnal homo K.FDVQFPENNWINPK#.L                  | 21.48  | 10.69  | 2.01  | 0.50 |
| Q9QV10_Df Dnaj2  | Dnal homo K.GDLVIK#.F                          | 118.62 | 72.27  | 1.64  | 0.61 |
| Q9QV10_Df Dnaj2  | Dnal homo R.GEGM*PQYR.N                        | 8.21   | 20.96  | 0.39  | 2.55 |
| Q9QV10_Df Dnaj2  | Dnal homo K.ILEVHVDK#.G                        | 43.50  | 28.23  | 1.54  | 0.65 |
| Q9QV10_Df Dnaj2  | Dnal homo R.ITFTGEADQAPGVEPGDIIIVLQK#.E        | 166.92 | 100.16 | 1.67  | 0.60 |
| Q9QV10_Df Dnaj2  | Dnal homo K.LYDILGPPGASENELK#.A                | 33.95  | 31.10  | 1.09  | 0.92 |
| Q9QV10_Df Dnaj2  | Dnal homo K.VSLEDLYNGK#.T                      | 63.80  | 38.45  | 1.66  | 0.60 |
| Q9QV10_Df Dnaj2  | Dnal homo R.YGEOGLR.E                          | 27.90  | 97.79  | 0.29  | 3.51 |
| Q9QV13_Df Dnajb1 | Dnal homo K.EGDQTSNNIPADIVFLK#.D               | 14.27  | 12.44  | 1.15  | 0.87 |
| Q99KV1_D Dnajb11 | Dnal homo K.FQDLGAAEYVLSSEK#.R                 | 17.26  | 12.72  | 1.36  | 0.74 |
| Q99KV1_D Dnajb11 | Dnal homo K.GSLITFDVDFPK#EQLTEAK#.E            | 6.08   | 4.52   | 1.34  | 0.74 |
| Q99KV1_D Dnajb11 | Dnal homo R.TLEVEIEPVR.D                       | 6.00   | 15.00  | 0.40  | 2.50 |
| Q9D832_D Dnajb4  | Dnal homo R.DGNSIYVTAQ#.I                      | 9.00   | 4.85   | 1.86  | 0.54 |
| Q9D832_D Dnajb4  | Dnal homo R.EGDETPNSIPADIVFVVK#.D              | 16.73  | 34.64  | 0.48  | 2.07 |
| Q9D832_D Dnajb4  | Dnal homo R.EIYDFGEEGLK#.G                     | 7.36   | 2.52   | 2.91  | 0.34 |
| O54946_DI Dnajb6 | Dnal homo R.GQPTPALAPGAPAPVR.V                 | 1.95   | 4.72   | 0.41  | 2.42 |
| O54946_DI Dnajb6 | Dnal homo R.VEVEEDGQLK#.S                      | 33.05  | 29.85  | 1.11  | 0.90 |
| O54946_DI Dnajb6 | Dnal homo K.QVAEAYEVLSDAK.K                    | 7.41   | 8.43   | 0.88  | 1.14 |
| Q9DC23_D Dnajc10 | Dnal homo K.SSVLFLNSLDAK#.E                    | 118.24 | 9.57   | 12.36 | 0.08 |
| G3X922_G Dnajc13 | MCG11560 K.AGFLATQLPK#.F                       | 10.19  | 12.79  | 0.80  | 1.25 |
| G3X922_G Dnajc13 | MCG11560 K.GQGTENLTKR.K                        | 2.36   | 9.19   | 0.26  | 3.90 |
| G3X922_G Dnajc13 | MCG11560 K.IVDGDPENILILK#.T                    | 18.86  | 20.82  | 0.91  | 1.10 |
| G3X922_G Dnajc13 | MCG11560 K.KPVVLEVPGGFDQNPVTNR.V               | 2.41   | 16.21  | 0.15  | 6.73 |
| G3X922_G Dnajc13 | MCG11560 R.LGGYSEDOATPENPTVR.K                 | 1.62   | 6.22   | 0.26  | 3.85 |
| G3X922_G Dnajc13 | MCG11560 K.LLEGGVLENLSPAATK#.A                 | 7.04   | 9.40   | 0.75  | 1.33 |
| G3X922_G Dnajc13 | MCG11560 K.NEETNQEVANS LAK.L                   | 8.57   | 8.24   | 1.04  | 0.96 |
| G3X922_G Dnajc13 | MCG11560 R.SNLIWNFK#.T                         | 13.89  | 6.18   | 2.25  | 0.45 |
| G3X922_G Dnajc13 | MCG11560 R.TELLTEALR.F                         | 3.60   | 13.92  | 0.26  | 3.87 |



|                  |                                              |        |        |      |       |
|------------------|----------------------------------------------|--------|--------|------|-------|
| G3X922_G_Dnajc13 | MCG11560.K.YSTDESITSLAEFVVQK#.I              | 7.16   | 3.56   | 2.01 | 0.50  |
| P54103_D_Dnajc2  | Dnal homo R.AFN5VDPDFDN5VPSK#.S              | 10.61  | 1.85   | 5.75 | 0.17  |
| P54103_D_Dnajc2  | Dnal homo K.NWSEDDLQLLK#.A                   | 12.10  | 6.92   | 1.75 | 0.57  |
| Q91YW3_D_Dnajc3  | Dnal homo R.SQALDAFDGADYTAATFLDK#.I          | 8.95   | 6.88   | 1.30 | 0.77  |
| Q91WN1_I_Dnajc9  | Dnal homo K.AVDEQGTVEDESAGLNQDRDWDAYWR.L     | 3.63   | 18.44  | 0.20 | 5.08  |
| Q91WN1_I_Dnajc9  | Dnal homo K.EIPAFSAFVK#.E                    | 66.47  | 54.35  | 1.22 | 0.82  |
| Q91WN1_I_Dnajc9  | Dnal homo K.GSEELNDIK#.Q                     | 44.26  | 48.95  | 0.90 | 1.11  |
| Q91WN1_I_Dnajc9  | Dnal homo K.I.SLEIQAFEK#.T                   | 54.47  | 61.97  | 0.88 | 1.14  |
| Q91WN1_I_Dnajc9  | Dnal homo K.K.#SLEIQAFEK#.T                  | 11.83  | 10.76  | 1.10 | 0.91  |
| Q91WN1_I_Dnajc9  | Dnal homo K.TYK#GSEELNDIK#.Q                 | 10.60  | 9.87   | 1.07 | 0.93  |
| Q91WN1_I_Dnajc9  | Dnal homo R.VYAVLSRDEKQ#.A                   | 33.63  | 18.76  | 1.79 | 0.56  |
| P39053_D_Dnm1    | Dynammin-1 R.GYGVVNR.S                       | 16.65  | 32.82  | 0.51 | 1.97  |
| P39053_D_Dnm1    | Dynammin-1 R.LQDAFSAIGQNADLDPQJAVVGGQSAGK#.S | 12.05  | 2.87   | 4.20 | 0.24  |
| P39053_D_Dnm1    | Dynammin-1 R.TGLFTPDMAFETIVK#.K              | 7.58   | 5.53   | 1.37 | 0.73  |
| P39053_D_Dnm1    | Dynammin-1 R.VYSPHVLNLTLDLPGM*TK#.V          | 13.89  | 5.32   | 2.61 | 0.38  |
| P39053_D_Dnm1    | Dynammin-1 K.ALLQM*VQGFVDFEK#.R              | 15.85  | 5.47   | 2.90 | 0.34  |
| P39053_D_Dnm1    | Dynammin-1 K.ALLQM*VQGFVDFEK#.R              | 14.55  | 5.12   | 2.84 | 0.35  |
| P39053_D_Dnm1    | Dynammin-1 R.EISYAK#.N                       | 92.27  | 164.92 | 0.56 | 1.79  |
| P39053_D_Dnm1    | Dynammin-1 R.FPFELVK#.M                      | 137.86 | 54.34  | 2.54 | 0.39  |
| P39053_D_Dnm1    | Dynammin-1 K.GISPVPINLR.V                    | 29.48  | 51.60  | 0.57 | 1.75  |
| P39053_D_Dnm1    | Dynammin-1 R.GYGVVNR.S                       | 30.20  | 48.02  | 0.63 | 1.59  |
| P39053_D_Dnm1    | Dynammin-1 R.IEGSGDQIDTYELSGGAR.I            | 5.40   | 7.84   | 0.69 | 1.45  |
| P39053_D_Dnm1    | Dynammin-1 K.LDLM*DEGTDAR.D                  | 10.98  | 17.99  | 0.61 | 1.64  |
| P39053_D_Dnm1    | Dynammin-1 R.LQDAFSAIGQNADLDPQJAVVGGQSAGK#.S | 53.10  | 16.62  | 3.20 | 0.31  |
| P39053_D_Dnm1    | Dynammin-1 K.LQSQLLSIEK#.E                   | 45.41  | 15.07  | 3.01 | 0.33  |
| P39053_D_Dnm1    | Dynammin-1 R.M*GTPYLQK#.V                    | 21.09  | 8.22   | 2.57 | 0.39  |
| P39053_D_Dnm1    | Dynammin-1 R.NLVD5YM*AVNKK#.T                | 16.09  | 7.87   | 2.04 | 0.49  |
| P39053_D_Dnm1    | Dynammin-1 K.RIEGSGDQIDTYELSGGAR.I           | 6.28   | 14.63  | 0.43 | 2.33  |
| P39053_D_Dnm1    | Dynammin-1 K.SSVLENFVGR.D                    | 29.04  | 47.13  | 0.62 | 1.62  |
| P39053_D_Dnm1    | Dynammin-1 R.TGLFTPDM*AFETIVK#.K             | 29.07  | 10.01  | 2.90 | 0.34  |
| P39053_D_Dnm1    | Dynammin-1 R.TGLFTPDMAFETIVK#.K              | 17.81  | 7.05   | 2.53 | 0.40  |
| P39053_D_Dnm1    | Dynammin-1 K.VPVGDPQPDIEFQIR.D               | 6.98   | 14.83  | 0.47 | 2.12  |
| P39053_D_Dnm1    | Dynammin-1 R.VYSPHVLNLTLDLPGM*TK#.V          | 46.19  | 17.01  | 2.72 | 0.37  |
| P39053_D_Dnm1    | Dynammin-1 K.YM*LSVDNLK#.L                   | 21.53  | 7.32   | 2.94 | 0.34  |
| P39053_D_Dnm1    | Dynammin-1 R.FPFELVK#.M                      | 48.92  | 19.21  | 2.55 | 0.39  |
| P39053_D_Dnm1    | Dynammin-1 R.LQDAFSAIGQNADLDPQJAVVGGQSAGK#.S | 11.07  | 11.84  | 0.94 | 1.07  |
| P39053_D_Dnm1    | Dynammin-1 R.TGLFTPDM*AFETIVK#.K             | 9.30   | 4.04   | 2.30 | 0.43  |
| P39053_D_Dnm1    | Dynammin-1 K.VPVGDPQPDIEFQIR.D               | 2.65   | 7.92   | 0.34 | 2.98  |
| P39053_D_Dnm1    | Dynammin-1 R.VYSPHVLNLTLDLPGM*TK#.V          | 9.94   | 6.34   | 1.57 | 0.64  |
| Q8K1M6_D_Dnm1    | Dynammin-1 R.FISNPNSILAVTAANTDM*ATSEALK#.I   | 5.13   | 3.87   | 1.32 | 0.75  |
| Q8K1M6_D_Dnm1    | Dynammin-1 R.TLAVITK#.L                      | 17.54  | 11.76  | 1.49 | 0.67  |
| Q8K1M6_D_Dnm1    | Dynammin-1 K.VFSPNVNLTLDLPGM*TK#.V           | 7.49   | 5.64   | 1.33 | 0.75  |
| Q8K1M6_D_Dnm1    | Dynammin-1 K.VFSPNVNLTLDLPGM*TK#.V           | 5.47   | 4.95   | 1.11 | 0.90  |
| Q8K1M6_D_Dnm1    | Dynammin-1 K.ALQASQJAEIR.E                   | 12.27  | 38.48  | 0.32 | 3.14  |
| Q8K1M6_D_Dnm1    | Dynammin-1 K.DTLQSELVGLYK#.S                 | 18.40  | 10.20  | 1.80 | 0.55  |
| Q8K1M6_D_Dnm1    | Dynammin-1 K.ALQASQJAEIR.E                   | 13.19  | 23.61  | 0.56 | 1.79  |
| Q8K1M6_D_Dnm1    | Dynammin-1 K.DTLQSELVGLYK#.S                 | 14.05  | 3.20   | 4.39 | 0.23  |
| Q8K1M6_D_Dnm1    | Dynammin-1 R.FISNPNSILAVTAANTDM*ATSEALK#.I   | 32.52  | 12.83  | 2.54 | 0.39  |
| Q8K1M6_D_Dnm1    | Dynammin-1 R.FISNPNSILAVTAANTDM*ATSEALK#.I   | 24.43  | 9.71   | 2.52 | 0.40  |
| Q8K1M6_D_Dnm1    | Dynammin-1 K.GHAVNLLDVPVVAR.K                | 15.53  | 27.10  | 0.57 | 1.75  |
| Q8K1M6_D_Dnm1    | Dynammin-1 R.K#NIQDSVPK#.A                   | 12.22  | 7.55   | 1.62 | 0.62  |
| Q8K1M6_D_Dnm1    | Dynammin-1 K.LGILGVVNR.S                     | 15.90  | 30.20  | 0.53 | 1.90  |
| Q8K1M6_D_Dnm1    | Dynammin-1 R.LLM*HHR.D                       | 1.65   | 12.21  | 0.14 | 7.38  |
| Q8K1M6_D_Dnm1    | Dynammin-1 R.LPVTNEM*VHNLVAIELAYINTK#.H      | 5.32   | 3.42   | 1.55 | 0.64  |
| Q8K1M6_D_Dnm1    | Dynammin-1 K.NIQDSVPK#.A                     | 31.03  | 20.97  | 1.48 | 0.68  |
| Q8K1M6_D_Dnm1    | Dynammin-1 R.RPLILQLVHVSPEDK.R               | 10.65  | 15.84  | 0.67 | 1.49  |
| Q8K1M6_D_Dnm1    | Dynammin-1 R.RPLILQLVHVSPEDK.R               | 1.85   | 19.08  | 0.10 | 10.34 |
| Q8K1M6_D_Dnm1    | Dynammin-1 K.SATLQLITK#.F                    | 25.28  | 9.50   | 2.66 | 0.38  |
| Q8K1M6_D_Dnm1    | Dynammin-1 R.SQLDINNK#.S                     | 22.15  | 9.30   | 2.38 | 0.42  |
| Q8K1M6_D_Dnm1    | Dynammin-1 K.SSVLESVGR.D                     | 11.82  | 25.22  | 0.47 | 2.13  |
| Q8K1M6_D_Dnm1    | Dynammin-1 R.TLAVITK#.L                      | 51.44  | 19.76  | 2.60 | 0.38  |
| Q8K1M6_D_Dnm1    | Dynammin-1 K.TSK#AEELAEK#.S                  | 17.65  | 4.91   | 3.60 | 0.28  |
| Q8K1M6_D_Dnm1    | Dynammin-1 K.VFSPNVNLTLDLPGM*TK#.V           | 30.47  | 11.95  | 2.55 | 0.39  |
| Q8K1M6_D_Dnm1    | Dynammin-1 K.VFSPNVNLTLDLPGM*TK#.V           | 28.19  | 7.04   | 4.00 | 0.25  |
| Q8K1M6_D_Dnm1    | Dynammin-1 K.VPVGDPQK#.D                     | 61.58  | 25.29  | 2.44 | 0.41  |
| Q8K1M6_D_Dnm1    | Dynammin-1 K.AEELAEK#.S                      | 23.27  | 9.72   | 2.39 | 0.42  |
| Q8K1M6_D_Dnm1    | Dynammin-1 K.ALQASQJAEIR.E                   | 11.35  | 14.32  | 0.79 | 1.26  |
| Q8K1M6_D_Dnm1    | Dynammin-1 K.DTLQSELVGLYK#.S                 | 25.35  | 10.06  | 2.52 | 0.40  |
| Q8K1M6_D_Dnm1    | Dynammin-1 R.FISNPNSILAVTAANTDM*ATSEALK#.I   | 31.35  | 9.61   | 3.26 | 0.31  |
| Q8K1M6_D_Dnm1    | Dynammin-1 R.FISNPNSILAVTAANTDM*ATSEALK#.I   | 10.18  | 3.91   | 2.60 | 0.38  |
| Q8K1M6_D_Dnm1    | Dynammin-1 R.I.NVLAQQSLLSYGEPVDDK#.S         | 8.40   | 2.65   | 3.17 | 0.32  |
| Q8K1M6_D_Dnm1    | Dynammin-1 R.RPLILQLVHVSPEDK.R               | 8.86   | 12.40  | 0.72 | 1.40  |
| Q8K1M6_D_Dnm1    | Dynammin-1 K.SATLQLITK#.F                    | 17.54  | 7.63   | 2.30 | 0.44  |
| Q8K1M6_D_Dnm1    | Dynammin-1 R.TLAVITK#.L                      | 36.71  | 17.27  | 2.13 | 0.47  |
| Q8K1M6_D_Dnm1    | Dynammin-1 K.TSK#AEELAEK#.S                  | 13.50  | 5.76   | 2.35 | 0.43  |
| Q8K1M6_D_Dnm1    | Dynammin-1 K.VFSPNVNLTLDLPGM*TK#.V           | 27.31  | 10.51  | 2.60 | 0.38  |
| Q8K1M6_D_Dnm1    | Dynammin-1 K.VFSPNVNLTLDLPGM*TK#.V           | 10.29  | 4.18   | 2.46 | 0.41  |
| Q8K1M6_D_Dnm1    | Dynammin-1 K.VPVGDPQK#.D                     | 44.88  | 23.04  | 1.95 | 0.51  |
| P39054_D_Dnm2    | Dynammin-2 R.AGVYPEKDAQENEDGAQENTFSMDPQLER.Q | 3.04   | 9.55   | 0.32 | 3.14  |
| P39054_D_Dnm2    | Dynammin-2 R.AGVYPEKDAQENEDGAQENTFSMDPQLER.Q | 4.12   | 3.28   | 1.26 | 0.80  |
| P39054_D_Dnm2    | Dynammin-2 K.ALLQM*VQGFVDFEK#.R              | 7.58   | 6.12   | 1.24 | 0.81  |
| P39054_D_Dnm2    | Dynammin-2 K.ALLQM*VQGFVDFEK#.R              | 52.67  | 6.74   | 7.82 | 0.13  |
| P39054_D_Dnm2    | Dynammin-2 R.ESSLILAVTPANM*DLANSALK#.L       | 8.33   | 5.13   | 1.62 | 0.62  |
| P39054_D_Dnm2    | Dynammin-2 K.EVDPQGLR.T                      | 16.86  | 32.54  | 0.52 | 1.93  |
| P39054_D_Dnm2    | Dynammin-2 R.GM*EELIPLVKN#.L                 | 52.45  | 26.61  | 1.97 | 0.51  |
| P39054_D_Dnm2    | Dynammin-2 R.GMEELIPLVKN#.L                  | 23.85  | 7.27   | 3.28 | 0.30  |
| P39054_D_Dnm2    | Dynammin-2 R.GWLTINNISLM*Kh.G                | 9.20   | 5.11   | 1.80 | 0.56  |
| P39054_D_Dnm2    | Dynammin-2 R.IEGSGDQVDTLELGGAR.I             | 6.71   | 10.81  | 0.62 | 1.61  |
| P39054_D_Dnm2    | Dynammin-2 R.IVTTYR.E                        | 22.31  | 23.41  | 0.95 | 1.05  |
| P39054_D_Dnm2    | Dynammin-2 R.NLVD5YVAIIN#.S                  | 71.97  | 35.91  | 2.00 | 0.50  |
| P39054_D_Dnm2    | Dynammin-2 K.RIEGSGDQVDTLELGGAR.I            | 2.45   | 17.00  | 0.14 | 6.95  |
| P39054_D_Dnm2    | Dynammin-2 R.SK#LQSQLLSLEK#.E                | 18.27  | 7.42   | 2.46 | 0.41  |
| P39054_D_Dnm2    | Dynammin-2 R.TGLFTPDLAFAIVK#.K               | 86.02  | 39.59  | 2.17 | 0.46  |
| P39054_D_Dnm2    | Dynammin-2 K.VPVGDPQPDIEYQIK#.D              | 67.61  | 33.84  | 2.00 | 0.50  |
| P39054_D_Dnm2    | Dynammin-2 R.VYSPHVLNLTLDLPGITK#.V           | 118.62 | 50.06  | 2.37 | 0.42  |
| P39054_D_Dnm2    | Dynammin-2 K.VPVGDPQPDIEYQIK#.D              | 2.45   | 1.42   | 1.72 | 0.58  |
| P39054_D_Dnm2    | Dynammin-2 K.ALLQM*VQGFVDFEK#.R              | 9.45   | 3.76   | 2.51 | 0.40  |
| P39054_D_Dnm2    | Dynammin-2 K.ALLQM*VQGFVDFEK#.R              | 15.21  | 4.12   | 3.69 | 0.27  |
| P39054_D_Dnm2    | Dynammin-2 K.DMILQFISR.E                     | 7.09   | 13.62  | 0.52 | 1.92  |
| P39054_D_Dnm2    | Dynammin-2 R.ESSLILAVTPANM*DLANSALK#.L       | 17.75  | 8.51   | 2.08 | 0.48  |
| P39054_D_Dnm2    | Dynammin-2 K.FTDFEVRQEIAETDR.V               | 2.49   | 12.37  | 0.20 | 4.96  |
| P39054_D_Dnm2    | Dynammin-2 R.GM*EELIPLVKN#.L                 | 54.41  | 21.45  | 2.54 | 0.39  |
| P39054_D_Dnm2    | Dynammin-2 R.GMEELIPLVKN#.L                  | 23.54  | 8.46   | 2.78 | 0.36  |

|                  |                                         |        |        |       |       |
|------------------|-----------------------------------------|--------|--------|-------|-------|
| P39054_D1 Dnm2   | Dynamin-2 R.IEGSGDQVDTLELSGGAR.I        | 6.66   | 13.60  | 0.49  | 2.04  |
| P39054_D1 Dnm2   | Dynamin-2 R.IVTTYR.E                    | 24.85  | 41.50  | 0.60  | 1.67  |
| P39054_D1 Dnm2   | Dynamin-2 R.NLVDSYVAIINK#.S             | 90.48  | 33.56  | 2.70  | 0.37  |
| P39054_D1 Dnm2   | Dynamin-2 R.RIEGSGDQVDTLELSGGAR.I       | 2.47   | 20.24  | 0.12  | 8.21  |
| P39054_D1 Dnm2   | Dynamin-2 R.SKHLQSQLLSLEK#.E            | 14.62  | 6.03   | 2.42  | 0.41  |
| P39054_D1 Dnm2   | Dynamin-2 R.SKHLQSQLLSLEK#EVEEYK#.N     | 6.14   | 5.28   | 1.16  | 0.86  |
| P39054_D1 Dnm2   | Dynamin-2 R.TGLFTPDLAFAEIVK#.K          | 78.12  | 34.34  | 2.28  | 0.44  |
| P39054_D1 Dnm2   | Dynamin-2 K.VPVGDPDPIEYQIK#.D           | 59.89  | 27.80  | 2.15  | 0.46  |
| P39054_D1 Dnm2   | Dynamin-2 R.VYSPHVLNLTLDLPGITK#.V       | 147.83 | 59.92  | 2.47  | 0.41  |
| P39054_D1 Dnm2   | Dynamin-2 K.YMLPLDNLK#.I                | 19.18  | 6.79   | 2.83  | 0.35  |
| P39054_D1 Dnm2   | Dynamin-2 R.IEGSGDQVDTLELSGGAR.I        | 3.07   | 8.23   | 0.37  | 2.68  |
| P39054_D1 Dnm2   | Dynamin-2 R.NLVDSYVAIINK#.S             | 36.73  | 16.51  | 2.22  | 0.45  |
| P39054_D1 Dnm2   | Dynamin-2 R.TGLFTPDLAFAEIVK#.K          | 27.40  | 13.54  | 2.02  | 0.49  |
| P39054_D1 Dnm2   | Dynamin-2 K.VPVGDPDPIEYQIK#.D           | 18.81  | 8.61   | 2.19  | 0.46  |
| P39054_D1 Dnm2   | Dynamin-2 R.VYSPHVLNLTLDLPGITK#.V       | 57.98  | 16.24  | 3.57  | 0.28  |
| P13864_D1 Dnm1   | DNA (cytosi R.FFGNILDR.H                | 4.01   | 12.67  | 0.32  | 3.16  |
| P13864_D1 Dnm1   | DNA (cytosi R.FFLENVR.N                 | 2.64   | 11.11  | 0.24  | 4.21  |
| P13864_D1 Dnm1   | DNA (cytosi R.FTEDSLR.H                 | 3.89   | 13.87  | 0.28  | 3.57  |
| P13864_D1 Dnm1   | DNA (cytosi K.GSNLDAPEPYR.I             | 5.24   | 9.66   | 0.54  | 1.84  |
| P13864_D1 Dnm1   | DNA (cytosi K.NLGPINQWVLSGFDGGEK.V      | 12.62  | 10.74  | 1.17  | 0.85  |
| P13864_D1 Dnm1   | DNA (cytosi K.VLEQIEVDGR.V              | 4.24   | 23.74  | 0.18  | 5.60  |
| P13864_D1 Dnm1   | DNA (cytosi K.AIGLEIK#.L                | 35.37  | 41.32  | 0.86  | 1.17  |
| P13864_D1 Dnm1   | DNA (cytosi K.AIHDEPNM*EGGINGK#.N       | 34.80  | 34.89  | 1.00  | 1.00  |
| P13864_D1 Dnm1   | DNA (cytosi R.AILAAAPGEK#.L             | 74.54  | 86.03  | 0.87  | 1.15  |
| P13864_D1 Dnm1   | DNA (cytosi R.AILAAAPGEKLPFPEPLHVFAPR.A | 3.95   | 40.65  | 0.10  | 10.29 |
| P13864_D1 Dnm1   | DNA (cytosi R.ALIHLAAGVSLGQR.R          | 17.50  | 92.17  | 0.19  | 5.27  |
| P13864_D1 Dnm1   | DNA (cytosi R.DLPNIQVR.L                | 15.07  | 92.83  | 0.16  | 6.16  |
| P13864_D1 Dnm1   | DNA (cytosi K.DM**SPLVAAR.M             | 116.54 | 41.28  | 2.82  | 0.35  |
| P13864_D1 Dnm1   | DNA (cytosi K.EADDEEADDVSEM*PSPK#.K     | 17.38  | 14.24  | 1.22  | 0.82  |
| P13864_D1 Dnm1   | DNA (cytosi K.EAEPEQVAPETPEDR.D         | 3.66   | 18.96  | 0.19  | 5.19  |
| P13864_D1 Dnm1   | DNA (cytosi R.EARPEHLDEDEGKK.D          | 2.74   | 9.05   | 0.30  | 3.31  |
| P13864_D1 Dnm1   | DNA (cytosi K.EESEGNESAESAER.D          | 6.17   | 31.41  | 0.20  | 5.09  |
| P13864_D1 Dnm1   | DNA (cytosi R.FESPPK#.T                 | 69.67  | 90.37  | 0.77  | 1.30  |
| P13864_D1 Dnm1   | DNA (cytosi R.FFGNILDR.H                | 22.76  | 100.00 | 0.23  | 4.39  |
| P13864_D1 Dnm1   | DNA (cytosi R.FFLENVR.N                 | 18.09  | 100.46 | 0.18  | 5.55  |
| P13864_D1 Dnm1   | DNA (cytosi R.FTEDSLR.H                 | 26.45  | 109.41 | 0.24  | 4.14  |
| P13864_D1 Dnm1   | DNA (cytosi K.FVSNITR.L                 | 18.15  | 95.73  | 0.19  | 5.27  |
| P13864_D1 Dnm1   | DNA (cytosi R.FYFLEANSK#.T              | 70.34  | 61.14  | 1.15  | 0.87  |
| P13864_D1 Dnm1   | DNA (cytosi K.GK#HQVSEPK#EPEAAIK#.L     | 30.99  | 30.75  | 1.01  | 0.99  |
| P13864_D1 Dnm1   | DNA (cytosi K.GK#VNEADIK#.L             | 26.08  | 25.36  | 1.03  | 0.97  |
| P13864_D1 Dnm1   | DNA (cytosi K.GSNLDAPEPYR.I             | 20.12  | 132.08 | 0.15  | 6.56  |
| P13864_D1 Dnm1   | DNA (cytosi R.HAQVSEVQVSEYDEAK.D        | 12.05  | 13.09  | 0.92  | 1.09  |
| P13864_D1 Dnm1   | DNA (cytosi K.HQVSEPK#EPEAAIK#.L        | 98.40  | 95.85  | 1.03  | 0.97  |
| P13864_D1 Dnm1   | DNA (cytosi K.IVVEFLQNPDAVDELINK#.I     | 9.10   | 10.92  | 0.83  | 1.20  |
| P13864_D1 Dnm1   | DNA (cytosi K.KDPVNETLPEHYR.K           | 12.84  | 67.62  | 0.19  | 5.27  |
| P13864_D1 Dnm1   | DNA (cytosi R.LEWDGFFSTVTNPEPM*GK#.Q    | 31.19  | 30.79  | 1.01  | 0.99  |
| P13864_D1 Dnm1   | DNA (cytosi R.LEWDGFFSTVTNPEPM*GK.Q     | 24.17  | 27.24  | 0.89  | 1.13  |
| P13864_D1 Dnm1   | DNA (cytosi R.LEWDGFFSTVTNPEPMGK#.Q     | 10.70  | 7.38   | 1.45  | 0.69  |
| P13864_D1 Dnm1   | DNA (cytosi R.LGDGVIHAK#.L              | 51.22  | 43.40  | 1.18  | 0.85  |
| P13864_D1 Dnm1   | DNA (cytosi R.LGDSVLYLPEAFFNK.V         | 85.33  | 86.25  | 0.99  | 1.01  |
| P13864_D1 Dnm1   | DNA (cytosi K.LHK#EELSEEGYLAKE#.V       | 75.90  | 96.81  | 0.78  | 1.28  |
| P13864_D1 Dnm1   | DNA (cytosi K.LNLLHEFLQTEIK#.S          | 39.21  | 40.20  | 0.98  | 1.03  |
| P13864_D1 Dnm1   | DNA (cytosi K.LNLLHEFLQTEIK.S           | 9.56   | 10.10  | 0.95  | 1.06  |
| P13864_D1 Dnm1   | DNA (cytosi K.LPLFPEPLHVFAPR.A          | 54.06  | 257.30 | 0.21  | 4.76  |
| P13864_D1 Dnm1   | DNA (cytosi K.LVM*AGEVNTSLGQR.L         | 10.40  | 61.80  | 0.17  | 5.94  |
| P13864_D1 Dnm1   | DNA (cytosi K.LVMAGEVNTSLGQR.L          | 4.43   | 29.39  | 0.15  | 6.64  |
| P13864_D1 Dnm1   | DNA (cytosi K.NLGPINQWVLSGFDGGEK#.V     | 73.75  | 80.86  | 0.91  | 1.10  |
| P13864_D1 Dnm1   | DNA (cytosi R.QVGNVPPPPLAK.A            | 32.89  | 37.63  | 0.87  | 1.14  |
| P13864_D1 Dnm1   | DNA (cytosi K.SDSDTLSEVSPSSVATR.R       | 4.81   | 23.43  | 0.21  | 4.87  |
| P13864_D1 Dnm1   | DNA (cytosi R.SKSDSDTLSEVSPSSVATR.R     | 7.80   | 36.90  | 0.21  | 4.73  |
| P13864_D1 Dnm1   | DNA (cytosi R.SQGFPSVSR.F               | 7.54   | 56.42  | 0.13  | 7.48  |
| P13864_D1 Dnm1   | DNA (cytosi K.VLEQIEVDGR.V              | 35.54  | 204.08 | 0.17  | 5.74  |
| P13864_D1 Dnm1   | DNA (cytosi K.VNEADIK#.L                | 39.57  | 38.33  | 1.03  | 0.97  |
| P13864_D1 Dnm1   | DNA (cytosi R.VPALASAGSLPDHVR.R         | 26.09  | 146.67 | 0.18  | 5.62  |
| P13864_D1 Dnm1   | DNA (cytosi R.VTALWEDK.N                | 31.51  | 29.58  | 1.07  | 0.94  |
| P13864_D1 Dnm1   | DNA (cytosi R.VVDTESGAAAVEK#.L          | 97.16  | 114.96 | 0.85  | 1.18  |
| P13864_D1 Dnm1   | DNA (cytosi K.YQQHPEDAVIDEQM*LTSEK#.L   | 113.03 | 127.77 | 0.88  | 1.13  |
| J3QNWO_J1 Dnm1   | DNA (cytosi K.SDSDTLSEVSPSSVATR.R       | 3.69   | 18.37  | 0.20  | 4.98  |
| J3QNWO_J1 Dnm1   | DNA (cytosi R.SKSDSDTLSEVSPSSVATR.R     | 3.58   | 19.68  | 0.18  | 5.50  |
| Q922W0_D Dnpep   | Aspartyl arr K.EAIQATAR.E               | 15.39  | 28.01  | 0.55  | 1.82  |
| Q922W0_D Dnpep   | Aspartyl arr R.ELK#ETEGWDIVPENK#.Y      | 38.84  | 20.19  | 1.92  | 0.52  |
| Q922W0_D Dnpep   | Aspartyl arr R.ELK#ETEGWDIVPENK.Y       | 13.11  | 6.26   | 2.09  | 0.48  |
| Q922W0_D Dnpep   | Aspartyl arr R.EVAGQGVPLQDLM*VR.N       | 5.51   | 10.74  | 0.51  | 1.95  |
| Q922W0_D Dnpep   | Aspartyl arr R.EVAGQGVPLQDLM*VR.N       | 4.83   | 11.13  | 0.43  | 2.30  |
| Q922W0_D Dnpep   | Aspartyl arr K.GFFELFVPSVR.N            | 22.36  | 45.61  | 0.49  | 2.04  |
| Q922W0_D Dnpep   | Aspartyl arr K.GTPEPGPLGATDER.H         | 16.20  | 39.05  | 0.41  | 2.41  |
| Q922W0_D Dnpep   | Aspartyl arr R.LTAFEAIK#.S              | 107.92 | 45.69  | 2.36  | 0.42  |
| Q922W0_D Dnpep   | Aspartyl arr R.YASNAVSESM*IR.E          | 14.37  | 23.30  | 0.62  | 1.62  |
| Q922W0_D Dnpep   | Aspartyl arr K.GFFELFVPSVR.N            | 5.79   | 11.18  | 0.52  | 1.93  |
| Q922W0_D Dnpep   | Aspartyl arr R.LTAFEAIK#.S              | 9.86   | 4.19   | 2.35  | 0.43  |
| Q922W0_D Dnpep   | Aspartyl arr K.GFFELFVPSVR.N            | 7.59   | 10.07  | 0.75  | 1.33  |
| Q922W0_D Dnpep   | Aspartyl arr K.GTPEPGPLGATDER.H         | 8.22   | 13.22  | 0.62  | 1.61  |
| Q922W0_D Dnpep   | Aspartyl arr K.GFFELFVPSVR.N            | 10.20  | 18.19  | 0.56  | 1.78  |
| Q922W0_D Dnpep   | Aspartyl arr R.LLQAGFR.E                | 22.53  | 45.18  | 0.50  | 2.01  |
| Q922W0_D Dnpep   | Aspartyl arr R.LTAFEAIK#.S              | 47.79  | 20.99  | 2.28  | 0.44  |
| Q9180_D Dntip1   | Deoxynucle R.AVLQPSINEIQGVFNK#.Y        | 5.84   | 4.53   | 1.29  | 0.78  |
| Q8BUR4_D Dock1   | Dedicator c K.IFALFAVK#.L               | 23.49  | 6.07   | 3.87  | 0.26  |
| Q8BUR4_D Dock1   | Dedicator c R.LTQNVLDLGLLK#.W           | 32.61  | 10.97  | 2.97  | 0.34  |
| Q8BUR4_D Dock1   | Dedicator c R.SFQM*FENEITK#.L           | 6.87   | 1.81   | 3.81  | 0.26  |
| Q8BUR4_D Dock1   | Dedicator c K.SVIYQVK#.Q                | 18.37  | 6.08   | 3.02  | 0.33  |
| A2AF47_DC Dock11 | Dedicator c K.IIQNTDLSLVQEK#.K          | 22.59  | 6.19   | 3.65  | 0.27  |
| A2AF47_DC Dock11 | Dedicator c K.K#QDVTETPVGFVAVVPLLK#.D   | 32.70  | 11.05  | 2.96  | 0.34  |
| A2AF47_DC Dock11 | Dedicator c K.LIPIYK#.R                 | 37.83  | 11.04  | 3.43  | 0.29  |
| A2AF47_DC Dock11 | Dedicator c K.LSINEDILK#.L              | 31.39  | 5.00   | 6.28  | 0.16  |
| A2AF47_DC Dock11 | Dedicator c R.YEIVSEIK#.L               | 20.92  | 8.39   | 2.49  | 0.40  |
| A2AF47_DC Dock11 | Dedicator c R.YTAVSIVK#.N               | 14.89  | 4.18   | 3.56  | 0.28  |
| B2RY04_DC Dock5  | Dedicator c R.AINQFAEVLTK#.S            | 11.54  | 4.67   | 2.47  | 0.40  |
| B2RY04_DC Dock5  | Dedicator c K.VDFYEGLSLLK#.K            | 38.45  | 3.54   | 10.88 | 0.09  |
| Q8R1A4_D Dock7   | Dedicator c R.DLVEFPDDIEVVSYP.R         | 2.07   | 3.93   | 0.53  | 1.90  |
| Q8R1A4_D Dock7   | Dedicator c R.DVYVNTTYR.N               | 8.71   | 22.83  | 0.38  | 2.62  |
| Q8R1A4_D Dock7   | Dedicator c K.ELFALHPSDDEEPIER.L        | 4.64   | 12.61  | 0.37  | 2.72  |
| Q8R1A4_D Dock7   | Dedicator c K.ESILGGVLK#.V              | 22.38  | 13.72  | 1.63  | 0.61  |
| Q8R1A4_D Dock7   | Dedicator c R.FGDLDEQEFVYK#EPAITK#.L    | 51.71  | 36.46  | 1.42  | 0.71  |

|                  |                                                 |        |       |       |      |
|------------------|-------------------------------------------------|--------|-------|-------|------|
| Q8R1A4_Di Dock7  | Dedicator c R.FGEDVLEVIKDSNPVDK.C               | 22.01  | 10.16 | 2.17  | 0.46 |
| Q8R1A4_Di Dock7  | Dedicator c R.GFVSLIK#.S                        | 15.09  | 9.75  | 1.55  | 0.65 |
| Q8R1A4_Di Dock7  | Dedicator c K.GYQTSPLDL.R                       | 7.03   | 18.62 | 0.38  | 2.65 |
| Q8R1A4_Di Dock7  | Dedicator c R.LEGFYGER.F                        | 5.52   | 22.82 | 0.24  | 4.13 |
| Q8R1A4_Di Dock7  | Dedicator c K.LGTGFNPNTLDK#.Q                   | 36.63  | 24.86 | 1.47  | 0.68 |
| Q8R1A4_Di Dock7  | Dedicator c R.NLIIYYPQSLNFANR.Q                 | 7.79   | 20.88 | 0.37  | 2.68 |
| Q8R1A4_Di Dock7  | Dedicator c K.QISGQYSGPSQLLK#.N                 | 12.12  | 8.58  | 1.41  | 0.71 |
| Q8R1A4_Di Dock7  | Dedicator c K.SLIGDPQK#.E                       | 20.48  | 13.63 | 1.50  | 0.67 |
| Q8R1A4_Di Dock7  | Dedicator c R.SP5GSAFGSQENLR.W                  | 7.90   | 32.08 | 0.25  | 4.06 |
| Q8R1A4_Di Dock7  | Dedicator c R.YSDPQIK#.A                        | 37.63  | 26.21 | 1.44  | 0.70 |
| P97465_Di Dok1   | Docking pri R.GLYDLPOEPR.D                      | 2.81   | 8.96  | 0.31  | 3.19 |
| P97465_Di Dok1   | Docking pri R.IPPGSPQDSVYSDPLGSTPAGAGEGVHSH#.K  | 6.14   | 4.88  | 1.26  | 0.79 |
| Q8BPA8_Di Dpdc   | Protein DPK.K.DVY5SVAQK#.E                      | 30.38  | 12.52 | 2.43  | 0.41 |
| Q8BPA8_Di Dpdc   | Protein DPK.K.NALGALGQWQLEVGEPVPSGAGSLGSELIK#.E | 10.79  | 2.50  | 4.32  | 0.23 |
| Q61103_Rf Dpf2   | Zinc finger j K.EGLISQDSSLEALLR.T               | 11.95  | 37.95 | 0.31  | 3.18 |
| Q61103_Rf Dpf2   | Zinc finger j R.GPGLASGQLYSYPAR.R               | 5.11   | 16.26 | 0.31  | 3.18 |
| Q61103_Rf Dpf2   | Zinc finger j R.IIEPDDFLDDDEDEEEDTPK#.R         | 8.01   | 6.51  | 1.23  | 0.81 |
| Q61103_Rf Dpf2   | Zinc finger j R.IIEPDDFLDDDEDEEEDTPK#.R         | 2.46   | 5.83  | 0.42  | 2.37 |
| Q61103_Rf Dpf2   | Zinc finger j K.LLGEQYK#.D                      | 37.49  | 24.00 | 1.56  | 0.64 |
| Q61103_Rf Dpf2   | Zinc finger j R.VDDSDLEFFPVSNSR.A               | 4.90   | 18.95 | 0.26  | 3.87 |
| Q99LT0_DF Dpys30 | Protein dpy.K.VDLQSLPTR.A                       | 7.45   | 26.94 | 0.28  | 3.62 |
| O08553_Di Dpys2  | Dihydropyr K.DHGVNSFLVYM*AFK#.D                 | 18.45  | 2.52  | 7.31  | 0.14 |
| O08553_Di Dpys2  | Dihydropyr R.GSPLVVISQK#.I                      | 155.90 | 11.97 | 13.02 | 0.08 |
| O08553_Di Dpys2  | Dihydropyr R.IVNDQSFYADIM*EDGLIK#.Q             | 66.29  | 5.07  | 13.07 | 0.08 |
| O08553_Di Dpys2  | Dihydropyr K.IVNDQSFYADIM*EDGLIK#.Q             | 12.49  | 2.20  | 5.69  | 0.18 |
| O08553_Di Dpys2  | Dihydropyr K.M*DENQFVAVTSTNAAK#.I               | 74.29  | 10.44 | 7.11  | 0.14 |
| O08553_Di Dpys2  | Dihydropyr K.MDENQFVAVTSTNAAK#.I                | 36.96  | 5.50  | 6.72  | 0.15 |
| O08553_Di Dpys2  | Dihydropyr R.MSVIWDK#.A                         | 40.18  | 5.41  | 7.43  | 0.13 |
| O08553_Di Dpys2  | Dihydropyr K.QGENLIVPGGK#.T                     | 90.56  | 7.14  | 12.68 | 0.08 |
| O08553_Di Dpys2  | Dihydropyr R.IVNDQSFYADIM*EDGLIK#.Q             | 15.11  | 4.41  | 3.42  | 0.29 |
| O08553_Di Dpys2  | Dihydropyr K.M*DENQFVAVTSTNAAK#.I               | 13.00  | 2.65  | 4.90  | 0.20 |
| O08553_Di Dpys2  | Dihydropyr R.GSPLVVISQK#.I                      | 53.24  | 5.40  | 9.87  | 0.10 |
| O08553_Di Dpys2  | Dihydropyr R.IVNDQSFYADIM*EDGLIK#.Q             | 39.02  | 4.63  | 8.42  | 0.12 |
| O08553_Di Dpys2  | Dihydropyr K.IVNDQSFYADIM*EDGLIK#.Q             | 10.94  | 2.39  | 4.59  | 0.22 |
| O08553_Di Dpys2  | Dihydropyr K.IVNDQSFYADIM*EDGLIK#.Q             | 9.82   | 1.94  | 5.06  | 0.20 |
| O08553_Di Dpys2  | Dihydropyr K.M*DENQFVAVTSTNAAK#.I               | 36.12  | 6.74  | 5.36  | 0.19 |
| O08553_Di Dpys2  | Dihydropyr K.MDENQFVAVTSTNAAK#.I                | 19.54  | 4.77  | 4.10  | 0.24 |
| O08553_Di Dpys2  | Dihydropyr R.MSVIWDK#.A                         | 21.37  | 5.00  | 4.27  | 0.23 |
| O08553_Di Dpys2  | Dihydropyr K.QGENLIVPGGK#.T                     | 38.20  | 1.88  | 20.33 | 0.05 |
| E9PW8_Ef Dpys3   | Dihydropyr K.EVLQNLPGK#.D                       | 33.16  | 4.48  | 7.40  | 0.14 |
| E9PW8_Ef Dpys3   | Dihydropyr K.GM*TTVDFFQGTK#.A                   | 16.14  | 6.72  | 2.40  | 0.42 |
| E9PW8_Ef Dpys3   | Dihydropyr K.GM*TTVDFFQGTK#.A                   | 11.35  | 6.61  | 1.72  | 0.58 |
| E9PW8_Ef Dpys3   | Dihydropyr R.GM*YDGPVFDLTTTPK#.G                | 15.38  | 4.99  | 3.08  | 0.32 |
| E9PW8_Ef Dpys3   | Dihydropyr R.GMYDGPVFDLTTTPK#.G                 | 6.27   | 2.60  | 2.41  | 0.42 |
| E9PW8_Ef Dpys3   | Dihydropyr R.IAVGSDSLVWDPDALK#.I                | 22.53  | 8.32  | 2.71  | 0.37 |
| E9PW8_Ef Dpys3   | Dihydropyr K.IFNLYPR.K                          | 8.48   | 14.17 | 0.60  | 1.67 |
| E9PW8_Ef Dpys3   | Dihydropyr K.QEVQSLK#.E                         | 27.70  | 8.60  | 3.22  | 0.31 |
| E9PW8_Ef Dpys3   | Dihydropyr K.QGDNLIVPGGK#.T                     | 17.44  | 8.91  | 1.96  | 0.51 |
| E9PW8_Ef Dpys3   | Dihydropyr K.SAADLISQAR.K                       | 13.60  | 15.15 | 0.90  | 1.11 |
| E9PW8_Ef Dpys3   | Dihydropyr R.GMYDGPVFDLTTTPK#.G                 | 4.08   | 3.76  | 1.08  | 0.92 |
| E9PW8_Ef Dpys3   | Dihydropyr R.IAVGSDSLVWDPDALK#.I                | 9.14   | 1.94  | 4.70  | 0.21 |
| E9PW8_Ef Dpys3   | Dihydropyr K.GM*TTVDFFQGTK#.A                   | 24.01  | 8.77  | 2.74  | 0.37 |
| E9PW8_Ef Dpys3   | Dihydropyr R.GM*YDGPVFDLTTTPK#.G                | 22.46  | 9.30  | 2.42  | 0.41 |
| E9PW8_Ef Dpys3   | Dihydropyr R.GMYDGPVFDLTTTPK#.G                 | 9.90   | 2.79  | 3.55  | 0.28 |
| E9PW8_Ef Dpys3   | Dihydropyr K.GNVFGEPTASLIGDGHYVSK#.N            | 18.86  | 9.18  | 2.05  | 0.49 |
| E9PW8_Ef Dpys3   | Dihydropyr R.IAVGSDSLVWDPDALK#.I                | 35.26  | 12.17 | 2.90  | 0.35 |
| E9PW8_Ef Dpys3   | Dihydropyr K.IFNLYPR.K                          | 37.62  | 16.26 | 2.31  | 0.43 |
| E9PW8_Ef Dpys3   | Dihydropyr K.QGDNLIVPGGK#.T                     | 23.12  | 9.46  | 2.44  | 0.41 |
| E9PW8_Ef Dpys3   | Dihydropyr K.SAADLISQAR.K                       | 17.23  | 27.47 | 0.63  | 1.59 |
| E9PW8_Ef Dpys3   | Dihydropyr R.GM*YDGPVFDLTTTPK#.G                | 3.36   | 8.15  | 0.41  | 2.43 |
| E9PW8_Ef Dpys3   | Dihydropyr R.IAVGSDSLVWDPDALK#.I                | 5.07   | 3.41  | 1.49  | 0.67 |
| O35098_Di Dpys4  | Dihydropyr K.M*DENQFVAVTSTNAAK#.I               | 70.68  | 8.44  | 8.37  | 0.12 |
| Q91WV0_H Dr1     | Protein Dr1 R.LENLGPEEELLR.Q                    | 36.69  | 82.25 | 0.45  | 2.24 |
| Q9D6N5_N Drap1   | Dr1-associ K.I.M*QTDEEIGK#.V                    | 28.79  | 12.07 | 2.39  | 0.42 |
| Q9D6N5_N Drap1   | Dr1-associ K.K.#M*QTDEEIGK#.V                   | 7.13   | 2.49  | 2.87  | 0.35 |
| Q9D6N5_N Drap1   | Dr1-associ K.VAAAVPVIIR.A                       | 16.41  | 21.21 | 0.77  | 1.29 |
| Q9D6N5_N Drap1   | Dr1-associ K.I.M*QTDEEIGK#.V                    | 11.34  | 3.35  | 3.38  | 0.30 |
| Q9D6N5_N Drap1   | Dr1-associ K.VAAAVPVIIR.A                       | 6.20   | 15.36 | 0.40  | 2.48 |
| P32233_Df Drg1   | Developme K.GGGGGGPGEGFDVAK#.T                  | 43.30  | 33.37 | 1.30  | 0.77 |
| P32233_Df Drg1   | Developme K.GQLPDYTPVVLVPSR.T                   | 3.84   | 20.26 | 0.19  | 5.27 |
| P32233_Df Drg1   | Developme K.IAEIEAEM*AR.T                       | 6.24   | 15.44 | 0.40  | 2.48 |
| P32233_Df Drg1   | Developme R.IGFVGFPSVGK#.S                      | 58.57  | 48.04 | 1.22  | 0.82 |
| P32233_Df Drg1   | Developme R.SDATADDLIDVVEGNR.V                  | 8.39   | 13.35 | 0.63  | 1.59 |
| P32233_Df Drg1   | Developme K.VGK#HTLEDEEDVIQVK#.K                | 8.50   | 6.16  | 1.38  | 0.72 |
| P32233_Df Drg1   | Developme R.WNFDDLLEK#.I                        | 12.41  | 9.64  | 1.29  | 0.78 |
| P32233_Df Drg1   | Developme K.GGGGGGPGEGFDVAK#.T                  | 27.38  | 17.97 | 1.52  | 0.66 |
| P32233_Df Drg1   | Developme K.IDQISIEELDIYK#.V                    | 8.32   | 3.26  | 2.55  | 0.39 |
| P32233_Df Drg1   | Developme R.IGFVGFPSVGK#.S                      | 36.84  | 23.85 | 1.55  | 0.65 |
| P32233_Df Drg1   | Developme K.IIENELEFGIR.L                       | 3.12   | 15.97 | 0.20  | 5.11 |
| P32233_Df Drg1   | Developme K.IQLLDLPGIIEGAK#.D                   | 47.66  | 26.80 | 1.78  | 0.56 |
| P32233_Df Drg1   | Developme K.GGGGGGPGEGFDVAK#.T                  | 37.97  | 19.03 | 2.00  | 0.50 |
| P32233_Df Drg1   | Developme R.IGFVGFPSVGK#.S                      | 52.93  | 33.42 | 1.58  | 0.63 |
| P32233_Df Drg1   | Developme R.SDATADDLIDVVEGNR.V                  | 18.69  | 8.83  | 2.12  | 0.47 |
| Q9QX89_D Drg2    | Developme K.IDQISM*EEVDL.R                      | 6.95   | 11.94 | 0.58  | 1.72 |
| Q9QX89_D Drg2    | Developme R.VALIGFSPVGK#.S                      | 40.57  | 16.44 | 2.47  | 0.41 |
| Q9QX89_D Drg2    | Developme R.VGLTHTM*EHEDVIQVK#.K                | 11.67  | 3.67  | 3.18  | 0.31 |
| Q9QX89_D Drg2    | Developme K.YALVWGTSTK#.Y                       | 29.72  | 11.13 | 2.67  | 0.37 |
| Q9QX89_D Drg2    | Developme R.VALIGFSPVGK#.S                      | 45.77  | 12.55 | 3.65  | 0.27 |
| Q9QX89_D Drg2    | Developme R.AQLLEPSK#.S                         | 40.26  | 11.53 | 3.49  | 0.29 |
| Q9QX89_D Drg2    | Developme K.GEGFVVM*#K#.S                       | 28.36  | 10.26 | 2.76  | 0.36 |
| Q9QX89_D Drg2    | Developme R.VALIGFSPVGK#.S                      | 89.98  | 24.03 | 3.74  | 0.27 |
| Q9QX89_D Drg2    | Developme K.YALVWGTSTK#.Y                       | 31.86  | 25.31 | 1.26  | 0.79 |
| O35075_Df Dscr3  | Down synd K.LTPSPVDFITPETLQNVK.E                | 3.12   | 3.37  | 0.93  | 1.08 |
| O35075_Df Dscr3  | Down synd K.TEVPFEPFLVK#.G                      | 7.78   | 10.54 | 0.74  | 1.35 |
| O35075_Df Dscr3  | Down synd K.LTPSPVDFITPETLQNVK.E                | 2.74   | 2.35  | 1.17  | 0.86 |
| O35075_Df Dscr3  | Down synd K.TEVPFEPFLVK#.G                      | 9.25   | 10.09 | 0.92  | 1.09 |
| O35075_Df Dscr3  | Down synd K.TEVPFEPFLVK#.G                      | 15.36  | 15.95 | 0.96  | 1.04 |
| Q9CYC5_Df Dsn1   | Kinetochor K.AADFSLEASVAEK#.E                   | 9.83   | 7.17  | 1.37  | 0.73 |
| Q91ZU6_Df Dst    | Dystonin O K.ALQGGQSSQAVAEK#.L                  | 12.36  | 7.92  | 1.56  | 0.64 |
| Q91ZU6_Df Dst    | Dystonin O R.DLEGIGKSLKHYR.D                    | 1.76   | 4.55  | 0.39  | 2.58 |
| Q91ZU6_Df Dst    | Dystonin O K.LANSEPIGTQAPK#.L                   | 10.82  | 8.28  | 1.31  | 0.77 |
| Q91ZU6_Df Dst    | Dystonin O R.LAQDLVVEAADSK#.G                   | 11.89  | 9.68  | 1.23  | 0.81 |
| Q91ZU6_Df Dst    | Dystonin O R.LEQDQTSALQVQK#.A                   | 7.53   | 7.40  | 1.02  | 0.98 |

|                   |                                              |        |       |       |      |
|-------------------|----------------------------------------------|--------|-------|-------|------|
| Q91ZU6_D' Dst     | Dystonin O K.LGAGEEDEVNGNLLLETD AEGHSEATK#.G | 5.05   | 2.16  | 2.33  | 0.43 |
| Q91ZU6_D' Dst     | Dystonin O R.LLEDPEVDVSSPDEK#.S              | 7.15   | 4.28  | 1.67  | 0.60 |
| Q91ZU6_D' Dst     | Dystonin O R.VGGGW*ALDEFLVK#.N               | 14.62  | 9.91  | 1.48  | 0.68 |
| Q9R0P5_Di Dstn    | Destrin OS- K.LGGSLIVAFEGSPV.-               | 17.48  | 17.48 | 1.00  | 1.00 |
| Q3UIR3_D1 Dtx3I   | E3 ubiquiti K.LLEPELLQEISEIEQK#.F            | 9.85   | 5.10  | 1.93  | 0.52 |
| Q3UIR3_D1 Dtx3I   | E3 ubiquiti K.FGGPANFGYPPDYLRK.V             | 8.39   | 29.95 | 0.28  | 3.57 |
| Q3UIR3_D1 Dtx3I   | E3 ubiquiti K.GNQPETM*SYSTQK.G               | 15.30  | 8.93  | 1.71  | 0.58 |
| Q3UIR3_D1 Dtx3I   | E3 ubiquiti K.IHHFLSEQLER.E                  | 16.52  | 30.31 | 0.55  | 1.83 |
| Q3UIR3_D1 Dtx3I   | E3 ubiquiti K.IASGYTTGIEVDSTR.F              | 11.04  | 36.67 | 0.30  | 3.32 |
| Q3UIR3_D1 Dtx3I   | E3 ubiquiti K.LLEPELLQEISEIEQK#.F            | 34.79  | 27.16 | 1.28  | 0.78 |
| Q3UIR3_D1 Dtx3I   | E3 ubiquiti R.M*GLAPSSGKE#.L                 | 17.92  | 16.18 | 1.11  | 0.90 |
| Q3UIR3_D1 Dtx3I   | E3 ubiquiti K.SEHEM*LVHNK#PVITVLETTK#.K      | 8.80   | 7.41  | 1.19  | 0.84 |
| Q3UIR3_D1 Dtx3I   | E3 ubiquiti R.TEVLSLK#.G                     | 44.09  | 31.42 | 1.40  | 0.71 |
| Q3UIR3_D1 Dtx3I   | E3 ubiquiti R.TLTLGSPADISAATEK#.V            | 40.17  | 30.62 | 1.31  | 0.76 |
| Q3UIR3_D1 Dtx3I   | E3 ubiquiti K.VSQGLLRPVK.I                   | 4.84   | 14.41 | 0.34  | 2.97 |
| Q3UIR3_D1 Dtx3I   | E3 ubiquiti K.LLEPELLQEISEIEQK#.F            | 18.37  | 17.91 | 1.03  | 0.97 |
| Q9D0T2_Di Dusp12  | Dual specifi K.LYEAM*GYEVDTSAFYK#.Q          | 3.25   | 2.58  | 1.26  | 0.79 |
| Q9D7X3_D Dusp3    | Dual specifi R.VYVGNASVADITLQK#.L            | 44.53  | 13.85 | 3.21  | 0.31 |
| Q8VCG1_Q Dut      | Deoxyuridi R.AAGYDLFSAYDYTISPM*EK#.A         | 8.45   | 3.10  | 2.72  | 0.37 |
| Q8VCG1_Q Dut      | Deoxyuridi R.GNVGVVLFPGK#.E                  | 41.31  | 8.37  | 4.93  | 0.20 |
| Q9JHU4_D' Dync1h1 | Cytoplasm K.VTDFGDKVEDPTFLNQLQSGVNR.W        | 2.64   | 3.35  | 0.79  | 1.27 |
| Q9JHU4_D' Dync1h1 | Cytoplasm R.K#LVPILLEDGGDAPAAEALEEK#.S       | 25.04  | 14.61 | 1.71  | 0.58 |
| Q9JHU4_D' Dync1h1 | Cytoplasm R.K#LVPILLEDGGDAPAAEALEEK#.S       | 9.18   | 5.41  | 1.70  | 0.59 |
| Q9JHU4_D' Dync1h1 | Cytoplasm K.VAEVLFDAADANAIEEVLAYENVK#.E      | 7.10   | 3.03  | 2.34  | 0.43 |
| Q9JHU4_D' Dync1h1 | Cytoplasm K.VTDFGDKVEDPTFLNQLQSGVNR.W        | 2.87   | 4.27  | 0.67  | 1.49 |
| Q9JHU4_D' Dync1h1 | Cytoplasm K.ADLAAVEAK#.V                     | 58.00  | 39.94 | 1.45  | 0.69 |
| Q9JHU4_D' Dync1h1 | Cytoplasm K.ANEVEQM*IR.D                     | 6.97   | 10.92 | 0.64  | 1.57 |
| Q9JHU4_D' Dync1h1 | Cytoplasm K.AVDDLNLHSYSLPIWVWVK#.L           | 32.09  | 16.74 | 1.92  | 0.52 |
| Q9JHU4_D' Dync1h1 | Cytoplasm R.DLPPVSGSIWAK#.Q                  | 18.41  | 7.53  | 2.44  | 0.41 |
| Q9JHU4_D' Dync1h1 | Cytoplasm K.EDLDK#VEPAVIEAQNVAK#.S           | 24.62  | 10.23 | 2.41  | 0.42 |
| Q9JHU4_D' Dync1h1 | Cytoplasm K.EFGPVVIDYGGK#.V                  | 34.44  | 8.10  | 4.25  | 0.24 |
| Q9JHU4_D' Dync1h1 | Cytoplasm K.EIVLSAGSSTPK#.I                  | 17.05  | 4.90  | 3.48  | 0.29 |
| Q9JHU4_D' Dync1h1 | Cytoplasm R.ESEVLLDLILK#.H                   | 16.52  | 5.04  | 3.28  | 0.31 |
| Q9JHU4_D' Dync1h1 | Cytoplasm R.EWVNTYELDLVNYQNK#.C              | 9.76   | 2.80  | 3.48  | 0.29 |
| Q9JHU4_D' Dync1h1 | Cytoplasm R.EYQTLQIR.V                       | 9.02   | 17.25 | 0.52  | 1.91 |
| Q9JHU4_D' Dync1h1 | Cytoplasm R.FGNPLLVQDYESYDPLNPLVLR.E         | 8.66   | 15.81 | 0.55  | 1.83 |
| Q9JHU4_D' Dync1h1 | Cytoplasm K.FNYGFEYLVQDK#.L                  | 24.31  | 12.23 | 1.99  | 0.50 |
| Q9JHU4_D' Dync1h1 | Cytoplasm R.FQSISTEFLALM*KK.K                | 13.56  | 3.28  | 4.14  | 0.24 |
| Q9JHU4_D' Dync1h1 | Cytoplasm R.FQSISTEFLALMK#.K                 | 13.99  | 5.12  | 2.74  | 0.37 |
| Q9JHU4_D' Dync1h1 | Cytoplasm R.IFVFEPPGPK#.A                    | 47.60  | 19.57 | 2.43  | 0.41 |
| Q9JHU4_D' Dync1h1 | Cytoplasm R.ILDDDTITLLENK#.R                 | 13.68  | 4.33  | 3.16  | 0.32 |
| Q9JHU4_D' Dync1h1 | Cytoplasm K.INEWLTLVEK#.E                    | 29.15  | 8.06  | 3.61  | 0.28 |
| Q9JHU4_D' Dync1h1 | Cytoplasm K.IQGLTVEQAEAVR.L                  | 9.82   | 12.20 | 0.80  | 1.24 |
| Q9JHU4_D' Dync1h1 | Cytoplasm R.K#LVPILLEDGGDAPAAEALEEK#.S       | 32.38  | 10.22 | 3.17  | 0.32 |
| Q9JHU4_D' Dync1h1 | Cytoplasm R.LADLLGK#.I                       | 24.24  | 8.69  | 2.79  | 0.36 |
| Q9JHU4_D' Dync1h1 | Cytoplasm R.LAETVFNQEK#.V                    | 23.63  | 7.10  | 3.33  | 0.30 |
| Q9JHU4_D' Dync1h1 | Cytoplasm R.LGGSPFGPAGTGK#.T                 | 54.77  | 18.55 | 2.95  | 0.34 |
| Q9JHU4_D' Dync1h1 | Cytoplasm K.LK#VNFLEPITLSK#.E                | 18.71  | 6.56  | 2.85  | 0.35 |
| Q9JHU4_D' Dync1h1 | Cytoplasm K.LINTQEIFDDWAR.K                  | 5.56   | 8.60  | 0.65  | 1.55 |
| Q9JHU4_D' Dync1h1 | Cytoplasm K.QLQNIQAASGGAK#.E                 | 28.22  | 9.98  | 2.83  | 0.35 |
| Q9JHU4_D' Dync1h1 | Cytoplasm R.QNLDDLNLQK#.N                    | 14.59  | 10.64 | 1.37  | 0.73 |
| Q9JHU4_D' Dync1h1 | Cytoplasm K.SLLQALNEVK#.G                    | 53.83  | 21.91 | 2.46  | 0.41 |
| Q9JHU4_D' Dync1h1 | Cytoplasm K.SVLVSAGNVK#.R                    | 27.80  | 13.79 | 2.02  | 0.50 |
| Q9JHU4_D' Dync1h1 | Cytoplasm R.TAEVLANK#.I                      | 21.81  | 6.46  | 3.38  | 0.30 |
| Q9JHU4_D' Dync1h1 | Cytoplasm K.TKPVGNLRPEEALQALTYEGK.F          | 9.96   | 11.28 | 0.88  | 1.13 |
| Q9JHU4_D' Dync1h1 | Cytoplasm R.TLINELVK#.G                      | 44.29  | 13.99 | 3.17  | 0.32 |
| Q9JHU4_D' Dync1h1 | Cytoplasm K.TLM*AQSIYGR.V                    | 3.83   | 8.45  | 0.45  | 2.21 |
| Q9JHU4_D' Dync1h1 | Cytoplasm R.TPNGVVLAPVQLGK#.W                | 7.37   | 3.31  | 2.22  | 0.45 |
| Q9JHU4_D' Dync1h1 | Cytoplasm R.TDILLTDWEK#.T                    | 24.24  | 8.57  | 2.83  | 0.35 |
| Q9JHU4_D' Dync1h1 | Cytoplasm K.VAEVLFDAADANAIEEVLAYENVK#.E      | 30.04  | 9.48  | 3.17  | 0.32 |
| Q9JHU4_D' Dync1h1 | Cytoplasm R.VLLTTQGVDM*ISK#.M                | 36.00  | 10.60 | 3.40  | 0.29 |
| Q9JHU4_D' Dync1h1 | Cytoplasm K.VLQLYQITQNHGLM*MM*VGPSSGSK#.S    | 11.03  | 2.95  | 3.74  | 0.27 |
| Q9JHU4_D' Dync1h1 | Cytoplasm R.VLRPQVTAQAQQOGEAPEPQDM*K.V       | 8.59   | 15.33 | 0.56  | 1.79 |
| Q9JHU4_D' Dync1h1 | Cytoplasm K.VNLFPEITLSK#.E                   | 70.96  | 22.47 | 3.16  | 0.32 |
| Q9JHU4_D' Dync1h1 | Cytoplasm R.VPLAIVNK#.A                      | 47.80  | 20.10 | 2.38  | 0.42 |
| Q9JHU4_D' Dync1h1 | Cytoplasm R.VQVALEELQDLK#.G                  | 52.25  | 33.83 | 1.54  | 0.65 |
| Q9JHU4_D' Dync1h1 | Cytoplasm K.VTDFGDKVEDPTFLNQLQSGVNR.W        | 6.18   | 11.59 | 0.53  | 1.87 |
| O88487_Di Dync1I2 | Cytoplasm R.DLEDK#EGEIQAGAK#.L               | 7.81   | 51.25 | 0.15  | 6.56 |
| O88487_Di Dync1I2 | Cytoplasm R.ADAEEAATR.I                      | 8.52   | 11.30 | 0.75  | 1.33 |
| O88487_Di Dync1I2 | Cytoplasm R.ALSEQINIFFDYSGR.D                | 5.91   | 15.93 | 0.37  | 2.69 |
| O88487_Di Dync1I2 | Cytoplasm R.DLEDK#EGEIQAGAK#.L               | 119.86 | 39.00 | 3.07  | 0.33 |
| O88487_Di Dync1I2 | Cytoplasm K.EAAVSVQEESDLEK#.K                | 65.04  | 20.13 | 3.23  | 0.31 |
| O88487_Di Dync1I2 | Cytoplasm K.ETQTPVTAQPK#.E                   | 27.59  | 10.39 | 2.66  | 0.38 |
| O88487_Di Dync1I2 | Cytoplasm K.SVSTPSEAGSQSDGAVGSR.R            | 22.57  | 38.96 | 0.58  | 1.73 |
| O88487_Di Dync1I2 | Cytoplasm K.EAAVSVQEESDLEK#.K                | 20.79  | 3.86  | 5.38  | 0.19 |
| Q8R1Q8_D Dync1I1  | Cytoplasm K.DAVFIPAGWVNDK#.I                 | 16.98  | 6.84  | 2.48  | 0.40 |
| Q8R1Q8_D Dync1I1  | Cytoplasm R.DFQEVPEGFDPASPQR.R               | 4.17   | 6.02  | 0.69  | 1.44 |
| Q8R1Q8_D Dync1I1  | Cytoplasm R.DTLVMLVVDM*SK#PWTALDSLQK#.W      | 6.57   | 4.95  | 1.33  | 0.75 |
| Q8R1Q8_D Dync1I1  | Cytoplasm K.EIM*AEDDQVFLM*KR.L               | 15.05  | 6.85  | 2.20  | 0.46 |
| Q8R1Q8_D Dync1I1  | Cytoplasm K.EIM*AEDDQVFLM*KR.L               | 11.70  | 5.71  | 2.05  | 0.49 |
| Q8R1Q8_D Dync1I1  | Cytoplasm K.EIM*AEDDQVFLM*KR.L               | 13.09  | 6.60  | 1.98  | 0.50 |
| Q8R1Q8_D Dync1I1  | Cytoplasm K.FSLDALSLR.D                      | 22.58  | 40.46 | 0.56  | 1.79 |
| Q8R1Q8_D Dync1I1  | Cytoplasm K.IGILHENFQTLK#.V                  | 208.42 | 65.51 | 3.18  | 0.31 |
| Q8R1Q8_D Dync1I1  | Cytoplasm K.IPAVVVEK#.D                      | 60.59  | 29.74 | 2.04  | 0.49 |
| Q8R1Q8_D Dync1I1  | Cytoplasm R.IQGEIEYK#.G                      | 48.50  | 8.32  | 5.83  | 0.17 |
| Q8R1Q8_D Dync1I1  | Cytoplasm R.K#ASVSPPTPTSPTEGEAS.-            | 57.16  | 23.85 | 2.40  | 0.42 |
| Q8R1Q8_D Dync1I1  | Cytoplasm K.K#GTGSPGGVGGSPGGGAAGASPLPPSAK#.K | 6.32   | 4.22  | 1.50  | 0.67 |
| Q8R1Q8_D Dync1I1  | Cytoplasm K.LQSLAK#.Q                        | 88.99  | 33.90 | 2.62  | 0.38 |
| Q8R1Q8_D Dync1I1  | Cytoplasm K.LYGFYK#.I                        | 73.49  | 28.38 | 2.59  | 0.39 |
| Q8R1Q8_D Dync1I1  | Cytoplasm K.NVLLGEGDAGK#.T                   | 80.21  | 31.28 | 2.56  | 0.39 |
| Q8R1Q8_D Dync1I1  | Cytoplasm R.RIQGIEYK#.G                      | 12.67  | 28.43 | 0.45  | 2.24 |
| Q8R1Q8_D Dync1I1  | Cytoplasm R.SVSSNVASVPIPAGSK#.K              | 60.42  | 84.08 | 0.72  | 1.39 |
| Q8R1Q8_D Dync1I1  | Cytoplasm K.TGSPGGVGGSPGGGAAGASPLPPSAK#.K    | 7.67   | 2.78  | 2.76  | 0.36 |
| Q8R1Q8_D Dync1I1  | Cytoplasm K.VEFNEDIITKPPVR.K                 | 24.67  | 44.47 | 0.55  | 1.80 |
| Q8R1Q8_D Dync1I1  | Cytoplasm K.IPAVVVEK#.D                      | 12.88  | 6.99  | 1.84  | 0.54 |
| Q8R1Q8_D Dync1I1  | Cytoplasm R.K#ASVSPPTPTSPTEGEAS.-            | 16.08  | 4.70  | 3.42  | 0.29 |
| Q8R1Q8_D Dync1I1  | Cytoplasm K.LQSLAK#.Q                        | 20.57  | 7.36  | 2.79  | 0.36 |
| Q8R1Q8_D Dync1I1  | Cytoplasm K.LYGFYK#.I                        | 17.27  | 7.47  | 2.31  | 0.43 |
| Q8R1Q8_D Dync1I1  | Cytoplasm K.NVLLGEGDAGK#.T                   | 19.06  | 9.75  | 1.95  | 0.51 |
| Q8R1Q8_D Dync1I1  | Cytoplasm R.SVSSNVASVPIPAGSK#.K              | 15.09  | 7.90  | 1.91  | 0.52 |
| Q8R1Q8_D Dync1I1  | Cytoplasm R.K#ASVSPPTPTSPTEGEAS.-            | 14.24  | 5.84  | 2.44  | 0.41 |
| Q8R1Q8_D Dync1I1  | Cytoplasm K.NVLLGEGDAGK#.T                   | 24.61  | 2.08  | 11.84 | 0.08 |
| Q8R1Q8_D Dync1I1  | Cytoplasm R.SVSSNVASVPIPAGSK#.K              | 11.62  | 5.94  | 1.96  | 0.51 |

|                    |                                                                          |        |        |      |      |
|--------------------|--------------------------------------------------------------------------|--------|--------|------|------|
| Q6PDL0_D1 Dync11i2 | Cytoplasmic K.FAVSAESLR.E                                                | 12.89  | 20.87  | 0.62 | 1.62 |
| Q6PDL0_D1 Dync11i2 | Cytoplasmic R.K#PDSM*VTNSSTENEA-                                         | 8.79   | 1.73   | 5.07 | 0.20 |
| Q6PDL0_D1 Dync11i2 | Cytoplasmic R.K#PDSMVTNSSTENEA-                                          | 10.20  | 4.48   | 2.28 | 0.44 |
| Q6PDL0_D1 Dync11i2 | Cytoplasmic K.K#TSPGSPGAGVQSTAK#.K                                       | 13.34  | 7.40   | 1.80 | 0.55 |
| Q6PDL0_D1 Dync11i2 | Cytoplasmic K.TYGFHFTIPALVWEK#.D                                         | 26.18  | 15.14  | 1.73 | 0.58 |
| Q6PDL0_D1 Dync11i2 | Cytoplasmic K.NILVFGEDGSGK#.T                                            | 10.77  | 5.40   | 2.00 | 0.50 |
| P63168_D1 Dync11i1 | Dynein light K.DIAAHK#.K                                                 | 100.48 | 117.32 | 0.86 | 1.17 |
| P63168_D1 Dync11i1 | Dynein light K.DIAAHK#.E                                                 | 5.77   | 4.33   | 1.33 | 0.75 |
| P63168_D1 Dync11i1 | Dynein light K.YNIEK#DIAAHK#.K                                           | 42.35  | 35.32  | 1.20 | 0.83 |
| P63168_D1 Dync11i1 | Dynein light K.YNIEK#DIAAHK#.E                                           | 13.01  | 9.11   | 1.43 | 0.70 |
| Q9D0M5_D1 Dync11i2 | Dynein light K.YNIEK#DIAAHK#.K                                           | 37.09  | 29.13  | 1.27 | 0.79 |
| Q9D0M5_D1 Dync11i2 | Dynein light K.YNIEK#DIAAHK#.E                                           | 11.50  | 8.33   | 1.38 | 0.72 |
| Q9D0M5_D1 Dync11i2 | Dynein light K.YNIEK#DIAAHK#.K                                           | 20.67  | 12.29  | 1.68 | 0.59 |
| P62627_D1 Dync11i1 | Dynein light R.EIDPQNDLFLR.I                                             | 15.89  | 30.69  | 0.52 | 1.93 |
| P62627_D1 Dync11i1 | Dynein light K.GVQSDIVNTEGPIK#.S                                         | 35.47  | 15.18  | 2.34 | 0.43 |
| P62627_D1 Dync11i1 | Dynein light K.STM*DNPTTQYANLM*HNFILK#.A                                 | 7.16   | 4.53   | 1.58 | 0.63 |
| Q61214_D1 Dyrk1a   | Dual specific K.HINEVYAK#.K                                              | 15.35  | 13.48  | 1.14 | 0.88 |
| Q9D903_E1 Ebna1bp2 | Probable rF K.ESYDDVSSFR.A                                               | 11.28  | 23.70  | 0.48 | 2.10 |
| Q9D903_E1 Ebna1bp2 | Probable rF R.GLLK#PGLNVLEK#PK#.K                                        | 19.67  | 13.07  | 1.51 | 0.66 |
| Q9D903_E1 Ebna1bp2 | Probable rF K.#K#AVNDVSLK#.Q                                             | 11.26  | 6.24   | 1.81 | 0.55 |
| Q9D903_E1 Ebna1bp2 | Probable rF K.K#VQTEVLQK#.R                                              | 20.81  | 13.75  | 1.51 | 0.66 |
| Q9D903_E1 Ebna1bp2 | Probable rF R.LDVTGLGPVEVSETQPTPNQDQK#.K                                 | 15.36  | 10.94  | 1.40 | 0.71 |
| Q9D903_E1 Ebna1bp2 | Probable rF R.LDVTGLGPVEVSETQPTPNQDQK#.G                                 | 4.44   | 4.50   | 0.99 | 1.01 |
| Q9D903_E1 Ebna1bp2 | Probable rF K.RPTDYFAEM*AK.S                                             | 3.99   | 8.47   | 0.47 | 2.12 |
| Q9D9V3_E1 Echdc1   | Ethylmalon R.VIELENWTEGK#.G                                              | 12.95  | 5.81   | 2.23 | 0.45 |
| Q6PD15_EC Ecm29    | Proteasome R.FQEFSDIVPLIK#.K                                             | 6.49   | 3.97   | 1.64 | 0.61 |
| Q6PD15_EC Ecm29    | Proteasome R.ALMS*SSSQATASSSNK#.S                                        | 14.92  | 4.16   | 3.59 | 0.28 |
| Q6PD15_EC Ecm29    | Proteasome R.ALSINTLVK#.I                                                | 34.80  | 9.26   | 3.76 | 0.27 |
| Q6PD15_EC Ecm29    | Proteasome K.AQGA#IAM*ASISK#.Q                                           | 22.02  | 8.29   | 2.66 | 0.38 |
| Q6PD15_EC Ecm29    | Proteasome K.EILQDLIK#.N                                                 | 11.69  | 6.91   | 1.69 | 0.59 |
| Q6PD15_EC Ecm29    | Proteasome K.EIQS#FVLSSENDELSDQVASK#.G                                   | 38.65  | 11.80  | 3.28 | 0.31 |
| Q6PD15_EC Ecm29    | Proteasome R.FQEFSDIVPLIK#.K                                             | 31.72  | 10.17  | 3.12 | 0.32 |
| Q6PD15_EC Ecm29    | Proteasome R.HSVATAADLEL#.S                                              | 12.41  | 4.68   | 2.65 | 0.38 |
| Q6PD15_EC Ecm29    | Proteasome K.LLQGLM*DSVEAK#.Q                                            | 23.73  | 8.31   | 2.85 | 0.35 |
| Q6PD15_EC Ecm29    | Proteasome K.LLQGLMDSVEAK#.Q                                             | 9.89   | 4.34   | 2.28 | 0.44 |
| Q6PD15_EC Ecm29    | Proteasome K.LLSM*AYS#AVGK#.L                                            | 21.16  | 11.67  | 1.81 | 0.55 |
| Q6PD15_EC Ecm29    | Proteasome R.NGPLPIPSESGGFTK#.L                                          | 18.65  | 7.44   | 2.50 | 0.40 |
| Q6PD15_EC Ecm29    | Proteasome R.QAAETFPANI#QVYDGLFGTNTNSK#.L                                | 9.64   | 4.22   | 2.28 | 0.44 |
| Q6PD15_EC Ecm29    | Proteasome K.QSLIDWNNP#AIIN#.M                                           | 16.28  | 5.95   | 2.74 | 0.37 |
| Q6PD15_EC Ecm29    | Proteasome K.TPDGQGLSTY#.E                                               | 24.09  | 9.88   | 2.44 | 0.41 |
| Q6PD15_EC Ecm29    | Proteasome R.VKH#EVSGETTV#VQGGGLGK#.T                                    | 24.07  | 5.44   | 4.42 | 0.23 |
| Q6PD15_EC Ecm29    | Proteasome K.VYLDIPLK#.T                                                 | 27.85  | 7.79   | 3.57 | 0.28 |
| Q6PD15_EC Ecm29    | Proteasome R.YQFDPNLGR.Q                                                 | 7.51   | 13.21  | 0.57 | 1.76 |
| Q8K2D3_E1 Edc3     | Enhancer o K.AAVFEEDTYER.R                                               | 2.33   | 7.81   | 0.30 | 3.35 |
| Q8K2D3_E1 Edc3     | Enhancer o K.K#P#ASSSAPQSPK#.R                                           | 6.78   | 9.95   | 0.68 | 1.47 |
| Q8K2D3_E1 Edc3     | Enhancer o K.M*LESITNELSLFSK.T                                           | 7.70   | 6.47   | 1.19 | 0.84 |
| Q3UJ89_EC Edc4     | Enhancer o R.EAFQSVLPAFEK.S                                              | 4.65   | 5.96   | 0.78 | 1.28 |
| Q3UJ89_EC Edc4     | Enhancer o R.ELAE#LWH#QELLQR.L                                           | 1.58   | 5.52   | 0.29 | 3.49 |
| Q3UJ89_EC Edc4     | Enhancer o R.SLEPVAGQLSNSVATK#.L                                         | 4.60   | 4.79   | 0.96 | 1.04 |
| Q3UJ89_EC Edc4     | Enhancer o R.AAADTLQGP#QAAYR.E                                           | 1.68   | 4.94   | 0.34 | 2.94 |
| Q3UJ89_EC Edc4     | Enhancer o R.EAFQSVLPAFEK.S                                              | 16.40  | 24.22  | 0.68 | 1.48 |
| Q3UJ89_EC Edc4     | Enhancer o R.ELAE#LWH#QELLQR.L                                           | 2.23   | 14.44  | 0.15 | 6.47 |
| Q3UJ89_EC Edc4     | Enhancer o R.GGQLEQLTQQLSQALSSAVAGR.L                                    | 5.77   | 28.27  | 0.20 | 4.90 |
| Q3UJ89_EC Edc4     | Enhancer o R.GLVSTLQSAEQMAATVSSVYR.A                                     | 2.99   | 17.59  | 0.17 | 5.88 |
| Q3UJ89_EC Edc4     | Enhancer o K.GPQVST#AASL#L#DQ#VE#LPL#QASPSR.T                            | 1.95   | 7.79   | 0.25 | 4.00 |
| Q3UJ89_EC Edc4     | Enhancer o K.L#FQFLQADPHNSL#K.A                                          | 9.13   | 15.54  | 0.59 | 1.70 |
| Q3UJ89_EC Edc4     | Enhancer o R.LTEHQVAEPEDWPALW#QQQR.E                                     | 1.90   | 9.48   | 0.20 | 5.00 |
| Q3UJ89_EC Edc4     | Enhancer o R.SLEPVAGQLSNSVATK#.L                                         | 18.41  | 19.28  | 0.95 | 1.05 |
| Q3UJ89_EC Edc4     | Enhancer o R.SLPLG#LPGPADK.L                                             | 24.33  | 36.13  | 0.67 | 1.49 |
| Q3UJ89_EC Edc4     | Enhancer o R.AAADTLQGP#QAAYR.E                                           | 2.48   | 6.07   | 0.41 | 2.45 |
| Q3UJ89_EC Edc4     | Enhancer o K.ALQDVQIR.F                                                  | 5.17   | 21.04  | 0.25 | 4.07 |
| Q3UJ89_EC Edc4     | Enhancer o R.DSQDTS#AEQSDH#DEVASLASASGGFGSK#.I                           | 11.28  | 7.27   | 1.55 | 0.64 |
| Q3UJ89_EC Edc4     | Enhancer o R.ELAE#LWH#QELLQR.L                                           | 2.73   | 10.33  | 0.26 | 3.78 |
| Q3UJ89_EC Edc4     | Enhancer o K.EVEIVASSDSSISSK.A                                           | 6.41   | 9.52   | 0.67 | 1.49 |
| Q3UJ89_EC Edc4     | Enhancer o R.GGQLEQLTQQLSQALSSAVAGR.L                                    | 7.02   | 21.21  | 0.33 | 3.02 |
| Q3UJ89_EC Edc4     | Enhancer o R.GLVSTLQSAEQMAATVSSVYR.A                                     | 3.47   | 20.71  | 0.17 | 5.97 |
| Q3UJ89_EC Edc4     | Enhancer o R.HTEVLP#EEN#SLGTESSHGAGALESAAGVLIK#.L                        | 27.38  | 14.44  | 1.90 | 0.53 |
| Q3UJ89_EC Edc4     | Enhancer o K.L#FQFLQADPHNSL#K.A                                          | 18.95  | 19.90  | 0.95 | 1.05 |
| Q3UJ89_EC Edc4     | Enhancer o K.QG#FV#K.G                                                   | 12.37  | 8.34   | 1.48 | 0.67 |
| Q3UJ89_EC Edc4     | Enhancer o R.SLEPVAGQLSNSVATK#.L                                         | 15.42  | 17.32  | 0.89 | 1.12 |
| Q3UJ89_EC Edc4     | Enhancer o R.SLPLG#LPGPADK.L                                             | 27.55  | 27.22  | 1.01 | 0.99 |
| Q8BL66_EE Eea1     | Early endosome K.AAQLATEADIK#.S                                          | 28.86  | 18.52  | 1.56 | 0.64 |
| Q8BL66_EE Eea1     | Early endosome K.AAVLLEK#.A                                              | 22.26  | 12.78  | 1.74 | 0.57 |
| Q8BL66_EE Eea1     | Early endosome R.ADLQNHLD#TAQH#ALQDK#.Q                                  | 21.66  | 15.35  | 1.41 | 0.71 |
| Q8BL66_EE Eea1     | Early endosome R.ADLQNHLD#TAQH#ALQDK#H#Q#QELNK#.V                        | 10.92  | 7.44   | 1.47 | 0.68 |
| Q8BL66_EE Eea1     | Early endosome K.DALLAELSTTK#.E                                          | 25.79  | 10.84  | 2.38 | 0.42 |
| Q8BL66_EE Eea1     | Early endosome R.DLDCQQLQAR.L                                            | 2.93   | 14.25  | 0.21 | 4.87 |
| Q8BL66_EE Eea1     | Early endosome R.ENQSLQK#.H                                              | 18.79  | 15.08  | 1.25 | 0.80 |
| Q8BL66_EE Eea1     | Early endosome K.EQALQSLQQQR.Q                                           | 5.75   | 12.79  | 0.45 | 2.22 |
| Q8BL66_EE Eea1     | Early endosome K.GPQEVAVY#QEIQK#.L                                       | 6.40   | 6.14   | 1.04 | 0.96 |
| Q8BL66_EE Eea1     | Early endosome K.HYQAVHDAGNDS#GHG#EAGLALTR.D                             | 2.47   | 12.48  | 0.20 | 5.05 |
| Q8BL66_EE Eea1     | Early endosome K.IELN#VSG#EVSQAQNTL#K#.Q                                 | 12.72  | 8.69   | 1.46 | 0.68 |
| Q8BL66_EE Eea1     | Early endosome K.IQAGEGETAVLN#QLQEK#.N                                   | 15.15  | 10.86  | 1.40 | 0.72 |
| Q8BL66_EE Eea1     | Early endosome K.IQNL#EALLQK#.G                                          | 30.37  | 17.48  | 1.74 | 0.58 |
| Q8BL66_EE Eea1     | Early endosome K.K#E#EEN#V#L#H#Q#E#F#K#.L                                | 25.42  | 17.53  | 1.45 | 0.69 |
| Q8BL66_EE Eea1     | Early endosome K.K#E#L#E#A#L#E#V#K#.A                                    | 22.34  | 12.81  | 1.74 | 0.57 |
| Q8BL66_EE Eea1     | Early endosome K.L#Q#Q#S#S#A#Q#E#L#A#E#K#.G                              | 36.55  | 21.18  | 1.73 | 0.58 |
| Q8BL66_EE Eea1     | Early endosome K.L#L#A#Q#E#L#I#S#N#.N                                    | 7.70   | 16.67  | 0.46 | 2.16 |
| Q8BL66_EE Eea1     | Early endosome K.L#T#M#*#Q#V#T#L#N#E#L#G#T#V#K#.K                        | 7.06   | 4.03   | 1.75 | 0.57 |
| Q8BL66_EE Eea1     | Early endosome K.L#T#M#*#Q#V#T#L#N#E#L#G#T#V#K#.K                        | 5.41   | 4.10   | 1.32 | 0.76 |
| Q8BL66_EE Eea1     | Early endosome R.MQAAVTE#L#TAVK#.A                                       | 14.90  | 8.21   | 1.81 | 0.55 |
| Q8BL66_EE Eea1     | Early endosome K.NH#L#Q#Q#L#T#Q#L#T#E#K#.L                               | 8.52   | 3.75   | 2.27 | 0.44 |
| Q8BL66_EE Eea1     | Early endosome K.QH#Q#E#Q#Q#L#Q#S#A#T#A#K#.L                             | 16.17  | 10.22  | 1.58 | 0.63 |
| Q8BL66_EE Eea1     | Early endosome K.SD#G#L#V#T#S#S#A#E#L#Q#A#L#E#Q#L#E#A#Q#T#E#N#F#N#I#K#.Q | 19.78  | 9.10   | 2.17 | 0.46 |
| Q8BL66_EE Eea1     | Early endosome K.S#H#Q#H#Q#E#Q#Q#L#Q#S#A#T#A#K#.L                        | 18.62  | 9.18   | 2.03 | 0.49 |
| Q8BL66_EE Eea1     | Early endosome K.VED#L#E#G#H#K#.K                                        | 13.91  | 3.03   | 4.59 | 0.22 |
| Q8BL66_EE Eea1     | Early endosome R.VL#S#L#E#T#S#E#L#S#Q#L#N#E#S#K#.E                       | 14.64  | 9.32   | 1.57 | 0.64 |
| Q8BL66_EE Eea1     | Early endosome K.VS#V#Q#L#D#L#T#A#K#.F                                   | 40.03  | 20.11  | 1.99 | 0.50 |
| Q8BL66_EE Eea1     | Early endosome K.V#H#L#T#E#D#L#N#K#.Q                                    | 13.34  | 5.76   | 2.32 | 0.43 |
| Q8BL66_EE Eea1     | Early endosome K.Y#Q#G#L#Q#Q#E#A#K#.S                                    | 27.15  | 15.91  | 1.71 | 0.59 |
| Q8BL66_EE Eea1     | Early endosome K.AAVLLEK#.A                                              | 104.38 | 56.32  | 1.85 | 0.54 |
| Q8BL66_EE Eea1     | Early endosome R.ADLQNHLD#TAQH#ALQDK#.Q                                  | 23.59  | 10.65  | 2.21 | 0.45 |
| Q8BL66_EE Eea1     | Early endosome K.EQALQSLQQQR.Q                                           | 5.87   | 16.37  | 0.36 | 2.79 |

|                  |                                                    |         |        |      |      |
|------------------|----------------------------------------------------|---------|--------|------|------|
| Q8BL66_EE Eea1   | Early endos K.EQQVADLQLK.L                         | 9.26    | 25.60  | 0.36 | 2.76 |
| Q8BL66_EE Eea1   | Early endos K.IQAGEGETAVLNQLQEK#.N                 | 15.16   | 9.96   | 1.52 | 0.66 |
| Q8BL66_EE Eea1   | Early endos K.IQNLEALLQK#.G                        | 27.53   | 19.52  | 1.41 | 0.71 |
| Q8BL66_EE Eea1   | Early endos K.K#EENNVVL#H0EFEK#.L                  | 20.11   | 12.66  | 1.59 | 0.63 |
| Q8BL66_EE Eea1   | Early endos K.LQQQSSQAAQELAAEK#.G                  | 23.14   | 16.14  | 1.43 | 0.70 |
| Q8BL66_EE Eea1   | Early endos K.LSALQSNYEK#.C                        | 15.56   | 16.50  | 0.94 | 1.06 |
| Q8BL66_EE Eea1   | Early endos R.LTASESSLQR.A                         | 10.00   | 25.92  | 0.39 | 2.59 |
| Q8BL66_EE Eea1   | Early endos K.LTLAQEDLISNR.N                       | 7.85    | 15.12  | 0.52 | 1.93 |
| Q8BL66_EE Eea1   | Early endos K.LTM*QVTLNENLGTVK#.K                  | 4.27    | 3.37   | 1.27 | 0.79 |
| Q8BL66_EE Eea1   | Early endos R.M*QAAVTLTAVK#.A                      | 13.14   | 17.85  | 0.74 | 1.36 |
| Q8BL66_EE Eea1   | Early endos K.QTTVLDLKH.T                          | 12.20   | 9.40   | 1.30 | 0.77 |
| Q8BL66_EE Eea1   | Early endos K.SK#HQHQEQALQQAATAK#.L                | 20.19   | 12.78  | 1.58 | 0.63 |
| Q8BL66_EE Eea1   | Early endos R.VLSLETSVSESSLQNESK#.E                | 7.73    | 3.33   | 2.32 | 0.43 |
| Q8BL66_EE Eea1   | Early endos R.VLSLETSVSESSLQNESK#.E                | 17.48   | 12.68  | 1.38 | 0.73 |
| Q8BL66_EE Eea1   | Early endos K.VSQLDLQIK#.A                         | 18.60   | 8.61   | 2.16 | 0.46 |
| Q921E6_EE Eed    | Polycomb † R.DPNLLLSVSK#.D                         | 17.08   | 16.27  | 1.05 | 0.95 |
| Q921E6_EE Eed    | Polycomb † K.EGDPLVFATVGSNR.V                      | 3.99    | 13.99  | 0.29 | 3.50 |
| Q921E6_EE Eed    | Polycomb † R.EVSTAPAGTDM*PAAK#.K                   | 6.74    | 5.11   | 1.32 | 0.76 |
| Q921E6_EE Eed    | Polycomb † R.EVSTAPAGTDM*PAAK#.K                   | 11.64   | 8.62   | 1.35 | 0.74 |
| Q921E6_EE Eed    | Polycomb † R.FSM*DFWQK#.M                          | 9.34    | 7.57   | 1.23 | 0.81 |
| Q921E6_EE Eed    | Polycomb † K.HVYGHGNAINELK#.F                      | 17.86   | 15.33  | 1.16 | 0.86 |
| Q921E6_EE Eed    | Polycomb † R.WLGDLLSK#.S                           | 17.15   | 21.38  | 0.80 | 1.25 |
| Q921E6_EE Eed    | Polycomb † R.DPNLLLSVSK#.D                         | 15.59   | 12.16  | 1.28 | 0.78 |
| Q921E6_EE Eed    | Polycomb † K.EGDPLVFATVGSNR.V                      | 4.01    | 9.22   | 0.44 | 2.30 |
| Q921E6_EE Eed    | Polycomb † R.WLGDLLSK#.S                           | 13.67   | 6.20   | 2.20 | 0.45 |
| P10126_EF Eef1a1 | Elongation R.EHALLAYTLGVK#.Q                       | 645.48  | 98.92  | 6.52 | 0.15 |
| P10126_EF Eef1a1 | Elongation R.EHALLAYTLGVK#.Q                       | 557.20  | 75.83  | 7.35 | 0.14 |
| P10126_EF Eef1a1 | Elongation K.EVSTYIK#.K                            | 1582.02 | 260.33 | 6.08 | 0.16 |
| P10126_EF Eef1a1 | Elongation K.EVSTYIK#.K                            | 300.53  | 56.94  | 5.28 | 0.19 |
| P10126_EF Eef1a1 | Elongation K.FEKEAEM*GK.G                          | 34.38   | 7.46   | 4.61 | 0.22 |
| P10126_EF Eef1a1 | Elongation K.IGGIGTVPVGR.V                         | 705.24  | 545.67 | 1.29 | 0.77 |
| P10126_EF Eef1a1 | Elongation K.IGYNPDTVAFVPIGWNGDNM*LEPSANM*PWFK#.G  | 114.72  | 14.65  | 7.83 | 0.13 |
| P10126_EF Eef1a1 | Elongation K.KIGYNPDTVAFVPIGWNGDNM*LEPSANM*PWFK#.G | 36.28   | 7.81   | 4.65 | 0.22 |
| P10126_EF Eef1a1 | Elongation K.K#LEDGPK#.F                           | 650.24  | 136.37 | 4.77 | 0.21 |
| P10126_EF Eef1a1 | Elongation R.LPLQDVYK#.I                           | 2780.82 | 406.41 | 6.84 | 0.15 |
| P10126_EF Eef1a1 | Elongation K.M*DSTPEPPYSQK#.R                      | 1029.11 | 198.02 | 5.20 | 0.19 |
| P10126_EF Eef1a1 | Elongation K.MDSTPEPPYSQK#.R                       | 1192.89 | 230.58 | 5.17 | 0.19 |
| P10126_EF Eef1a1 | Elongation K.QLVGVNK#.M                            | 1730.31 | 315.22 | 5.49 | 0.18 |
| P10126_EF Eef1a1 | Elongation K.QLVGVNK#M*DSTPEPPYSQK#.R              | 140.88  | 18.81  | 7.49 | 0.13 |
| P10126_EF Eef1a1 | Elongation K.STTTGHLIYK#.C                         | 1705.69 | 328.24 | 5.20 | 0.19 |
| P10126_EF Eef1a1 | Elongation K.THINIVIGHVDSGK#.S                     | 460.17  | 75.78  | 6.07 | 0.16 |
| P10126_EF Eef1a1 | Elongation R.TIEK#FEK#.E                           | 1263.58 | 182.83 | 6.91 | 0.14 |
| P10126_EF Eef1a1 | Elongation R.VETGVLK#PGM*VVFAPVNVVTEVK#.S          | 1002.91 | 161.75 | 6.20 | 0.16 |
| P10126_EF Eef1a1 | Elongation R.VETGVLK#PGM*VVFAPVNVVTEVK#.S          | 55.29   | 9.06   | 6.10 | 0.16 |
| P10126_EF Eef1a1 | Elongation R.VETGVLK#PGMVVVFAPVNVVTEVK#.S          | 1252.22 | 207.35 | 6.04 | 0.17 |
| P10126_EF Eef1a1 | Elongation R.VETGVLK#PGMVVVFAPVNVVTEVK#.S          | 78.06   | 11.15  | 7.00 | 0.14 |
| P10126_EF Eef1a1 | Elongation R.YEIVK#EVSTYIK#.K                      | 62.16   | 7.65   | 8.13 | 0.12 |
| P10126_EF Eef1a1 | Elongation K.YVYVTHDAPGHR.D                        | 138.98  | 111.59 | 1.25 | 0.80 |
| P10126_EF Eef1a1 | Elongation K.YVYVTHDAPGHR.D                        | 371.04  | 288.85 | 1.28 | 0.78 |
| P10126_EF Eef1a1 | Elongation R.EHALLAYTLGVK#.Q                       | 51.18   | 10.96  | 4.67 | 0.21 |
| P10126_EF Eef1a1 | Elongation K.IGGIGTVPVGR.V                         | 19.56   | 16.19  | 1.21 | 0.83 |
| P10126_EF Eef1a1 | Elongation R.LPLQDVYK#.I                           | 83.70   | 22.80  | 3.67 | 0.27 |
| P10126_EF Eef1a1 | Elongation K.M*DSTPEPPYSQK#.R                      | 39.22   | 9.94   | 3.95 | 0.25 |
| P10126_EF Eef1a1 | Elongation K.QLVGVNK#.M                            | 53.93   | 12.03  | 4.48 | 0.22 |
| P10126_EF Eef1a1 | Elongation R.QTVAVGVIK#.A                          | 64.84   | 16.78  | 3.86 | 0.26 |
| P10126_EF Eef1a1 | Elongation K.STTTGHLIYK#.C                         | 106.34  | 19.84  | 5.36 | 0.19 |
| P10126_EF Eef1a1 | Elongation K.THINIVIGHVDSGK#.S                     | 58.84   | 14.83  | 3.97 | 0.25 |
| P10126_EF Eef1a1 | Elongation R.TIEK#FEK#.E                           | 43.78   | 8.70   | 5.03 | 0.20 |
| P10126_EF Eef1a1 | Elongation R.VETGVLK#PGM*VVFAPVNVVTEVK#.S          | 26.57   | 5.16   | 5.15 | 0.19 |
| P10126_EF Eef1a1 | Elongation R.VETGVLK#PGMVVVFAPVNVVTEVK#.S          | 82.43   | 12.23  | 6.74 | 0.15 |
| P10126_EF Eef1a1 | Elongation R.YEIVK#.E                              | 47.25   | 5.61   | 8.42 | 0.12 |
| P10126_EF Eef1a1 | Elongation R.EHALLAYTLGVK#.Q                       | 218.42  | 29.07  | 7.51 | 0.13 |
| P10126_EF Eef1a1 | Elongation K.EVSTYIK#.K                            | 89.88   | 22.84  | 3.93 | 0.25 |
| P10126_EF Eef1a1 | Elongation K.IGGIGTVPVGR.V                         | 250.97  | 192.83 | 1.30 | 0.77 |
| P10126_EF Eef1a1 | Elongation K.K#LEDGPK#.F                           | 94.62   | 34.45  | 2.75 | 0.36 |
| P10126_EF Eef1a1 | Elongation R.LPLQDVYK#.I                           | 710.82  | 108.16 | 6.57 | 0.15 |
| P10126_EF Eef1a1 | Elongation K.MDSTPEPPYSQK#.R                       | 104.68  | 18.37  | 5.70 | 0.18 |
| P10126_EF Eef1a1 | Elongation K.M*DSTPEPPYSQK#.R                      | 219.21  | 38.18  | 5.74 | 0.17 |
| P10126_EF Eef1a1 | Elongation K.QLVGVNK#.M                            | 431.97  | 80.59  | 5.36 | 0.19 |
| P10126_EF Eef1a1 | Elongation K.QLVGVNK#M*DSTPEPPYSQK#.R              | 58.20   | 8.56   | 6.80 | 0.15 |
| P10126_EF Eef1a1 | Elongation K.STTTGHLIYK#.C                         | 504.10  | 94.49  | 5.33 | 0.19 |
| P10126_EF Eef1a1 | Elongation K.THINIVIGHVDSGK#.S                     | 197.01  | 34.97  | 5.63 | 0.18 |
| P10126_EF Eef1a1 | Elongation R.TIEK#FEK#.E                           | 214.71  | 32.94  | 6.52 | 0.15 |
| P10126_EF Eef1a1 | Elongation R.VETGVLK#PGM*VVFAPVNVVTEVK#.S          | 300.58  | 46.44  | 6.47 | 0.15 |
| P10126_EF Eef1a1 | Elongation R.VETGVLK#PGMVVVFAPVNVVTEVK#.S          | 373.99  | 52.29  | 7.15 | 0.14 |
| P10126_EF Eef1a1 | Elongation R.YEIVK#.E                              | 423.18  | 68.62  | 6.17 | 0.16 |
| P10126_EF Eef1a1 | Elongation R.YEIVK#EVSTYIK#.K                      | 6.61    | 0.95   | 6.98 | 0.14 |
| P10126_EF Eef1a1 | Elongation R.EHALLAYTLGVK#.Q                       | 237.45  | 36.31  | 6.54 | 0.15 |
| P10126_EF Eef1a1 | Elongation K.EVSTYIK#.K                            | 113.42  | 24.68  | 4.60 | 0.22 |
| P10126_EF Eef1a1 | Elongation K.IGGIGTVPVGR.V                         | 326.04  | 241.50 | 1.35 | 0.74 |
| P10126_EF Eef1a1 | Elongation K.K#LEDGPK#.F                           | 119.00  | 24.36  | 4.88 | 0.20 |
| P10126_EF Eef1a1 | Elongation R.LPLQDVYK#.I                           | 763.68  | 121.58 | 6.28 | 0.16 |
| P10126_EF Eef1a1 | Elongation K.MDSTPEPPYSQK#.R                       | 99.96   | 16.17  | 6.18 | 0.16 |
| P10126_EF Eef1a1 | Elongation K.M*DSTPEPPYSQK#.R                      | 212.27  | 37.62  | 5.64 | 0.18 |
| P10126_EF Eef1a1 | Elongation K.QLVGVNK#.M                            | 513.23  | 80.31  | 6.39 | 0.16 |
| P10126_EF Eef1a1 | Elongation K.QLVGVNK#M*DSTPEPPYSQK#.R              | 65.10   | 13.12  | 4.96 | 0.20 |
| P10126_EF Eef1a1 | Elongation K.STTTGHLIYK#.C                         | 463.87  | 91.56  | 5.07 | 0.20 |
| P10126_EF Eef1a1 | Elongation K.THINIVIGHVDSGK#.S                     | 96.56   | 22.44  | 4.30 | 0.23 |
| P10126_EF Eef1a1 | Elongation R.TIEK#FEK#.E                           | 211.21  | 25.80  | 8.19 | 0.12 |
| P10126_EF Eef1a1 | Elongation R.VETGVLK#PGM*VVFAPVNVVTEVK#.S          | 342.95  | 53.75  | 6.38 | 0.16 |
| P10126_EF Eef1a1 | Elongation R.VETGVLK#PGMVVVFAPVNVVTEVK#.S          | 447.93  | 62.03  | 7.22 | 0.14 |
| P10126_EF Eef1a1 | Elongation R.YEIVK#.E                              | 454.00  | 80.95  | 5.61 | 0.18 |
| P10126_EF Eef1a1 | Elongation R.YEIVK#EVSTYIK#.K                      | 28.57   | 4.58   | 6.24 | 0.16 |
| P10126_EF Eef1a1 | Elongation K.YVYVTHDAPGHR.D                        | 24.83   | 19.99  | 1.24 | 0.80 |
| O70251_EF Eef1b  | Elongation R.SIQADGLVWSSK#.L                       | 105.71  | 55.00  | 1.92 | 0.52 |
| O70251_EF Eef1b  | Elongation K.SSILLDVK#PWDEDTM*TK#.L                | 6.17    | 1.70   | 3.62 | 0.28 |
| O70251_EF Eef1b  | Elongation K.TPAGLQVLDNYLADK#.S                    | 158.35  | 20.88  | 7.58 | 0.13 |
| O70251_EF Eef1b  | Elongation K.YGPSSVEDTTGSSGADAK#.D                 | 33.29   | 4.22   | 7.90 | 0.13 |
| O70251_EF Eef1b  | Elongation K.TPAGLQVLDNYLADK#.S                    | 23.18   | 3.43   | 6.77 | 0.15 |
| O70251_EF Eef1b  | Elongation K.YGPSSVEDTTGSSGADAK#.D                 | 3.72    | 2.98   | 1.25 | 0.80 |
| Q80T06_Q8 Eef1d  | Elongation K.AKH#PTLVAK#.S                         | 39.68   | 11.86  | 3.35 | 0.30 |
| Q80T06_Q8 Eef1d  | Elongation R.ATAPQTHVSPM*#R.Q                      | 20.74   | 15.65  | 1.33 | 0.75 |
| Q80T06_Q8 Eef1d  | Elongation K.FEEHVQSDIAAFNK#.-                     | 27.28   | 8.11   | 3.37 | 0.30 |

|                  |                                             |        |        |       |      |
|------------------|---------------------------------------------|--------|--------|-------|------|
| Q80T06_Q_Eef1d   | Elongation R.FYEQM*NGPVTSGSR.Q              | 27.74  | 23.70  | 1.17  | 0.85 |
| Q80T06_Q_Eef1d   | Elongation R.FYEQMNGPVTSGSR.Q               | 13.32  | 11.67  | 1.14  | 0.88 |
| Q80T06_Q_Eef1d   | Elongation K.GATPAEDDEDKIDLFGSDEEEEDKEAAR.L | 4.62   | 5.49   | 0.84  | 1.19 |
| Q80T06_Q_Eef1d   | Elongation R.GVVQDLQQAISK#.L                | 454.09 | 92.54  | 4.91  | 0.20 |
| Q80T06_Q_Eef1d   | Elongation R.ITSLEVENQNLR.G                 | 133.39 | 121.82 | 1.10  | 0.91 |
| Q80T06_Q_Eef1d   | Elongation K.IWFDK#K#.Y                     | 60.80  | 10.03  | 6.06  | 0.16 |
| Q80T06_Q_Eef1d   | Elongation K.K#PVLVAK#.S                    | 235.26 | 46.29  | 5.08  | 0.20 |
| Q80T06_Q_Eef1d   | Elongation R.SIQLDGLVWGASK#.L               | 301.65 | 56.32  | 5.36  | 0.19 |
| Q80T06_Q_Eef1d   | Elongation K.SLAGSSGPGASSGPGGDHSELIVR.I     | 10.49  | 7.44   | 1.41  | 0.71 |
| Q80T06_Q_Eef1d   | Elongation R.GVVQDLQQAISK#.L                | 53.84  | 8.71   | 6.18  | 0.16 |
| Q80T06_Q_Eef1d   | Elongation R.ITSLEVENQNLR.G                 | 6.57   | 7.77   | 0.85  | 1.18 |
| Q80T06_Q_Eef1d   | Elongation R.SIQLDGLVWGASK#.L               | 10.15  | 1.71   | 5.95  | 0.17 |
| Q80T06_Q_Eef1d   | Elongation R.GVVQDLQQAISK#.L                | 8.28   | 3.41   | 2.43  | 0.41 |
| Q9D1M4_N_Eef1e1  | Eukaryotic K.DLNSVLEDK#.V                   | 28.24  | 5.39   | 5.24  | 0.19 |
| Q9D1M4_N_Eef1e1  | Eukaryotic R.FIVDLTVQEK#.E                  | 40.73  | 20.58  | 1.98  | 0.51 |
| Q9D1M4_N_Eef1e1  | Eukaryotic R.QHLSIVFIK#.N                   | 26.46  | 6.43   | 4.12  | 0.24 |
| Q9D1M4_N_Eef1e1  | Eukaryotic K.SLGLK#P#GNK#.Y                 | 14.15  | 6.16   | 2.30  | 0.44 |
| Q9D8N0_El_Eef1g  | Elongation K.AK#DPPFAHLPK#.S                | 137.73 | 12.26  | 11.23 | 0.09 |
| Q9D8N0_El_Eef1g  | Elongation K.ALI#AAQYSGAQVR.V               | 56.55  | 29.53  | 1.92  | 0.52 |
| Q9D8N0_El_Eef1g  | Elongation R.IJLGLLDLTK#.T                  | 129.11 | 12.88  | 10.02 | 0.10 |
| Q9D8N0_El_Eef1g  | Elongation K.K#FAESQPK#.K                   | 41.03  | 8.18   | 5.01  | 0.20 |
| Q9D8N0_El_Eef1g  | Elongation R.KLDPGSEETQTLVR.E               | 17.13  | 14.34  | 1.19  | 0.84 |
| Q9D8N0_El_Eef1g  | Elongation K.LDPGSEETQTLVR.E                | 12.21  | 12.15  | 1.01  | 0.99 |
| Q9D8N0_El_Eef1g  | Elongation K.MAQFDAK#.K                     | 43.76  | 4.35   | 10.06 | 0.10 |
| Q9D8N0_El_Eef1g  | Elongation K.M*AQFDAK#.K                    | 57.95  | 9.13   | 6.35  | 0.16 |
| Q9D8N0_El_Eef1g  | Elongation K.STPVLDEFK#.R                   | 22.28  | 4.01   | 5.55  | 0.18 |
| Q9D8N0_El_Eef1g  | Elongation K.AK#DPPFAHLPK#.S                | 66.33  | 13.97  | 4.75  | 0.21 |
| Q9D8N0_El_Eef1g  | Elongation K.FAESQPK#.K                     | 20.28  | 6.81   | 2.98  | 0.34 |
| Q9D8N0_El_Eef1g  | Elongation R.IJLGLLDLTK#.T                  | 67.76  | 8.24   | 8.23  | 0.12 |
| Q9D8N0_El_Eef1g  | Elongation K.M*AQFDAK#.K                    | 28.25  | 3.42   | 8.27  | 0.12 |
| P58252_EF_Eef2   | Elongation K.AYLPVNESFGFTADLR.S             | 13.99  | 8.17   | 1.71  | 0.58 |
| P58252_EF_Eef2   | Elongation R.GHVFEESQVAGTPMFVVK#.A          | 23.15  | 3.65   | 6.35  | 0.16 |
| P58252_EF_Eef2   | Elongation K.GVQYLNEIK#DSVAVAGFQWATK#.E     | 35.86  | 4.09   | 8.76  | 0.11 |
| P58252_EF_Eef2   | Elongation R.VFSGVVSTGLK#.V                 | 53.60  | 7.52   | 7.13  | 0.14 |
| P58252_EF_Eef2   | Elongation K.YEWDVAEAR.K                    | 18.90  | 12.62  | 1.50  | 0.67 |
| P58252_EF_Eef2   | Elongation K.AGI#ASAR.A                     | 94.47  | 96.72  | 0.98  | 1.02 |
| P58252_EF_Eef2   | Elongation R.ALLELQLEPEELYQTFQR.I           | 107.98 | 98.55  | 1.10  | 0.91 |
| P58252_EF_Eef2   | Elongation K.ARPPDGLAEDIDKGEVSAR.Q          | 9.00   | 23.68  | 0.38  | 2.63 |
| P58252_EF_Eef2   | Elongation K.AYLPVNESFGFTADLR.S             | 59.91  | 58.31  | 1.03  | 0.97 |
| P58252_EF_Eef2   | Elongation K.DSVVAGFQWATK#.E                | 37.78  | 8.67   | 4.36  | 0.23 |
| P58252_EF_Eef2   | Elongation K.EGIPALDNFLDK#L.-               | 232.60 | 52.31  | 4.45  | 0.22 |
| P58252_EF_Eef2   | Elongation K.FSVSPVVR.V                     | 108.35 | 105.49 | 1.03  | 0.97 |
| P58252_EF_Eef2   | Elongation K.GEGLSAAER.A                    | 121.99 | 114.58 | 1.06  | 0.94 |
| P58252_EF_Eef2   | Elongation R.GGGQIPTAR.R                    | 90.36  | 145.13 | 0.62  | 1.61 |
| P58252_EF_Eef2   | Elongation R.GHVFEESQVAGTPMFVVK#.A          | 113.13 | 23.59  | 4.80  | 0.21 |
| P58252_EF_Eef2   | Elongation R.GHVFEESQVAGTPMFVVK#.A          | 64.59  | 10.79  | 5.99  | 0.17 |
| P58252_EF_Eef2   | Elongation K.GLK#EGIPALDNFLDK#L.-           | 68.20  | 22.61  | 3.02  | 0.33 |
| P58252_EF_Eef2   | Elongation K.GPLMM*YISK#.M                  | 38.88  | 8.71   | 4.46  | 0.22 |
| P58252_EF_Eef2   | Elongation K.GPLM*MYISK#.M                  | 32.68  | 8.62   | 3.79  | 0.26 |
| P58252_EF_Eef2   | Elongation K.GPLMMYISK#.M                   | 58.01  | 18.02  | 3.22  | 0.31 |
| P58252_EF_Eef2   | Elongation K.GVQYLNEIK#DSVAVAGFQWATK#.E     | 236.72 | 39.64  | 5.97  | 0.17 |
| P58252_EF_Eef2   | Elongation R.IK#PVLMMNK#.M                  | 62.84  | 12.35  | 5.09  | 0.20 |
| P58252_EF_Eef2   | Elongation R.IK#PVLMMNK#.M                  | 49.08  | 10.41  | 4.72  | 0.21 |
| P58252_EF_Eef2   | Elongation R.IM*GPNYTPGK#.K                 | 109.37 | 26.35  | 4.15  | 0.24 |
| P58252_EF_Eef2   | Elongation R.IMGPNYTPGK#.K                  | 54.74  | 16.70  | 3.28  | 0.31 |
| P58252_EF_Eef2   | Elongation R.IM*GPNYTPGK#K#.E               | 29.92  | 9.15   | 3.27  | 0.31 |
| P58252_EF_Eef2   | Elongation R.IMGPNYTPGK#K#.E                | 8.90   | 3.64   | 2.45  | 0.41 |
| P58252_EF_Eef2   | Elongation K.KEDLYKPIQR.T                   | 31.95  | 31.20  | 1.02  | 0.98 |
| P58252_EF_Eef2   | Elongation K.K#VEDMMK#.K                    | 25.23  | 6.01   | 4.20  | 0.24 |
| P58252_EF_Eef2   | Elongation K.NPADLPK#.L                     | 295.28 | 81.08  | 3.64  | 0.27 |
| P58252_EF_Eef2   | Elongation K.QFAEM*YVAK#.F                  | 128.33 | 26.33  | 4.87  | 0.21 |
| P58252_EF_Eef2   | Elongation K.QFAEM*YVAK#.F                  | 79.23  | 17.13  | 4.62  | 0.22 |
| P58252_EF_Eef2   | Elongation K.VFDAIM*NFR.K                   | 35.91  | 30.73  | 1.17  | 0.86 |
| P58252_EF_Eef2   | Elongation R.VFSGVVSTGLK#.V                 | 652.50 | 135.91 | 4.80  | 0.21 |
| P58252_EF_Eef2   | Elongation K.YEWDVAEAR.K                    | 40.79  | 46.84  | 0.87  | 1.15 |
| P58252_EF_Eef2   | Elongation R.YFDPANGK#.F                    | 74.01  | 15.99  | 4.63  | 0.22 |
| P58252_EF_Eef2   | Elongation R.YLAEKYEWDVAEAR.K               | 6.62   | 4.93   | 1.34  | 0.74 |
| P58252_EF_Eef2   | Elongation K.AGI#ASAR.A                     | 97.92  | 95.19  | 1.03  | 0.97 |
| P58252_EF_Eef2   | Elongation R.ALLELQLEPEELYQTFQR.I           | 11.34  | 9.96   | 1.14  | 0.88 |
| P58252_EF_Eef2   | Elongation K.ARPPDGLAEDIDKGEVSAR.Q          | 5.96   | 16.95  | 0.35  | 2.84 |
| P58252_EF_Eef2   | Elongation K.AYLPVNESFGFTADLR.S             | 44.09  | 43.91  | 1.00  | 1.00 |
| P58252_EF_Eef2   | Elongation K.EGIPALDNFLDK#.L                | 19.29  | 7.15   | 2.70  | 0.37 |
| P58252_EF_Eef2   | Elongation K.FSVSPVVR.V                     | 77.53  | 63.95  | 1.21  | 0.82 |
| P58252_EF_Eef2   | Elongation K.GEGLSAAER.A                    | 103.55 | 74.65  | 1.39  | 0.72 |
| P58252_EF_Eef2   | Elongation R.GGGQIPTAR.R                    | 69.70  | 79.98  | 0.87  | 1.15 |
| P58252_EF_Eef2   | Elongation R.GHVFEESQVAGTPMFVVK#.A          | 135.11 | 26.29  | 5.14  | 0.19 |
| P58252_EF_Eef2   | Elongation R.GHVFEESQVAGTPMFVVK#.A          | 46.65  | 9.52   | 4.90  | 0.20 |
| P58252_EF_Eef2   | Elongation K.GLK#EGIPALDNFLDK#L.-           | 51.26  | 8.21   | 6.24  | 0.16 |
| P58252_EF_Eef2   | Elongation K.GPLM*YISK#.M                   | 52.43  | 14.46  | 3.63  | 0.28 |
| P58252_EF_Eef2   | Elongation K.GPLM*MYISK#.M                  | 16.44  | 4.16   | 3.95  | 0.25 |
| P58252_EF_Eef2   | Elongation K.GVQYLNEIK#.D                   | 55.49  | 6.95   | 7.98  | 0.13 |
| P58252_EF_Eef2   | Elongation K.GVQYLNEIK#DSVAVAGFQWATK#.E     | 116.30 | 19.93  | 5.84  | 0.17 |
| P58252_EF_Eef2   | Elongation R.IK#PVLMMNK#.M                  | 15.00  | 2.75   | 5.46  | 0.18 |
| P58252_EF_Eef2   | Elongation R.IM*GPNYTPGK#.K                 | 122.28 | 22.17  | 5.52  | 0.18 |
| P58252_EF_Eef2   | Elongation R.IMGPNYTPGK#.K                  | 41.25  | 8.30   | 4.97  | 0.20 |
| P58252_EF_Eef2   | Elongation K.NPADLPK#.L                     | 322.30 | 86.07  | 3.74  | 0.27 |
| P58252_EF_Eef2   | Elongation K.QFAEM*YVAK#.F                  | 81.55  | 15.97  | 5.11  | 0.20 |
| P58252_EF_Eef2   | Elongation K.SDPVVSIR.E                     | 73.46  | 64.69  | 1.14  | 0.88 |
| P58252_EF_Eef2   | Elongation K.VFDAIM*NFR.K                   | 22.28  | 20.48  | 1.09  | 0.92 |
| P58252_EF_Eef2   | Elongation R.VFSGVVSTGLK#.V                 | 521.86 | 92.44  | 5.65  | 0.18 |
| P58252_EF_Eef2   | Elongation K.YEWDVAEAR.K                    | 26.46  | 25.38  | 1.04  | 0.96 |
| P58252_EF_Eef2   | Elongation R.YFDPANGK#.F                    | 62.63  | 11.46  | 5.47  | 0.18 |
| Q9D8Y0_EF_Efh2   | EF-hand do R.DGFIEM*ELK#.L                  | 11.00  | 10.08  | 1.09  | 0.92 |
| Q9D8Y0_EF_Efh2   | EF-hand do K.SM*IQEVEDDFDSK.L               | 3.85   | 5.89   | 0.65  | 1.53 |
| Q9D8Y0_EF_Efh2   | EF-hand do K.SMIQEVEDDFDSK.L                | 4.17   | 4.49   | 0.93  | 1.08 |
| Q8COD5_El_Eftud1 | Elongation K.IVTSGLK#.I                     | 43.34  | 19.87  | 2.18  | 0.46 |
| Q8COD5_El_Eftud1 | Elongation R.LIVELK#.F                      | 26.03  | 17.57  | 1.48  | 0.67 |
| O08810_Ul_Eftud2 | 116 kDa U5 K.AFI#PAIDSFQFETDLR.T            | 29.39  | 72.81  | 0.40  | 2.48 |
| O08810_Ul_Eftud2 | 116 kDa U5 K.DSIVQSFQWGRTR.E                | 17.03  | 44.73  | 0.38  | 2.63 |
| O08810_Ul_Eftud2 | 116 kDa U5 K.FFDDPM*LELAK#.Q                | 32.94  | 29.62  | 1.11  | 0.90 |
| O08810_Ul_Eftud2 | 116 kDa U5 K.FFDDPM*LELAK#.Q                | 27.51  | 19.06  | 1.44  | 0.69 |
| O08810_Ul_Eftud2 | 116 kDa U5 K.FNTTSVIK#.I                    | 98.23  | 59.75  | 1.64  | 0.61 |
| O08810_Ul_Eftud2 | 116 kDa U5 K.GLAEDIENEVQJTWNR.K             | 26.45  | 89.64  | 0.30  | 3.39 |

|                 |                                                  |        |        |      |      |
|-----------------|--------------------------------------------------|--------|--------|------|------|
| O08810_U:Eftud2 | 116 kDa U5 K.GLSEDEVSIK#.F                       | 127.01 | 70.06  | 1.81 | 0.55 |
| O08810_U:Eftud2 | 116 kDa U5 K.IAVEPVNPELPK#.M                     | 145.24 | 123.41 | 1.18 | 0.85 |
| O08810_U:Eftud2 | 116 kDa U5 K.ILAQVVGVDVDSLPR.T                   | 19.27  | 57.44  | 0.34 | 2.98 |
| O08810_U:Eftud2 | 116 kDa U5 K.IADAVVAQEP.LHR.G                    | 42.59  | 98.81  | 0.43 | 2.32 |
| O08810_U:Eftud2 | 116 kDa U5 R.ISDGVVLFIDAAEGVM*LNTER.L            | 4.77   | 14.66  | 0.33 | 3.07 |
| O08810_U:Eftud2 | 116 kDa U5 K.ITM*IAEPLEK#.G                      | 68.59  | 44.83  | 1.53 | 0.65 |
| O08810_U:Eftud2 | 116 kDa U5 K.ITMIAEPLEK#.G                       | 45.37  | 30.30  | 1.50 | 0.67 |
| O08810_U:Eftud2 | 116 kDa U5 K.IYADTFGDINYQEFAK#.R                 | 80.24  | 51.57  | 1.56 | 0.64 |
| O08810_U:Eftud2 | 116 kDa U5 K.#GLSEDEVSIK#.F                      | 22.49  | 16.37  | 1.37 | 0.73 |
| O08810_U:Eftud2 | 116 kDa U5 K.LGEFFQTK#.Y                         | 109.95 | 73.67  | 1.49 | 0.67 |
| O08810_U:Eftud2 | 116 kDa U5 R.LILELK#.L                           | 73.43  | 38.85  | 1.89 | 0.53 |
| O08810_U:Eftud2 | 116 kDa U5 K.LPPTDAYK#.L                         | 51.88  | 36.72  | 1.41 | 0.71 |
| O08810_U:Eftud2 | 116 kDa U5 R.LWGDYFNPK#.T                        | 43.57  | 29.43  | 1.48 | 0.68 |
| O08810_U:Eftud2 | 116 kDa U5 R.LWISVAR.Y                           | 16.57  | 43.46  | 0.38 | 2.62 |
| O08810_U:Eftud2 | 116 kDa U5 K.M*YSEIDIK#.V                        | 33.03  | 21.88  | 1.51 | 0.66 |
| O08810_U:Eftud2 | 116 kDa U5 K.RLWGDYFNPK.T                        | 6.35   | 10.67  | 0.60 | 1.68 |
| O08810_U:Eftud2 | 116 kDa U5 K.STPVTVVLPDTK#.G                     | 113.88 | 84.33  | 1.35 | 0.74 |
| O08810_U:Eftud2 | 116 kDa U5 K.SYLFNIM*DTPGHVNFSDEVTAGL.R.I        | 18.84  | 36.12  | 0.52 | 1.92 |
| O08810_U:Eftud2 | 116 kDa U5 K.TATITEPR.G                          | 23.72  | 82.07  | 0.29 | 3.46 |
| O08810_U:Eftud2 | 116 kDa U5 R.VPAGNWWLIEGVDPQIVK#.T               | 60.63  | 41.17  | 1.47 | 0.68 |
| O08810_U:Eftud2 | 116 kDa U5 R.VPAGNWWLIEGVDPQIVK.T                | 76.74  | 45.48  | 1.69 | 0.59 |
| O08810_U:Eftud2 | 116 kDa U5 K.YDWVLLAAR.S                         | 21.35  | 64.46  | 0.33 | 3.02 |
| O08810_U:Eftud2 | 116 kDa U5 K.YPTAEVYGPVEVITVQEEETQPLTEPIIKPVK#.T | 24.68  | 20.27  | 1.22 | 0.82 |
| O08810_U:Eftud2 | 116 kDa U5 K.AFIAPDSFGFDTL.R.T                   | 16.28  | 34.62  | 0.47 | 2.13 |
| O08810_U:Eftud2 | 116 kDa U5 K.DSIVGQFQWGR.E                       | 9.56   | 21.64  | 0.44 | 2.26 |
| O08810_U:Eftud2 | 116 kDa U5 K.FFDDPM*LLELAK#.Q                    | 35.49  | 18.26  | 1.94 | 0.51 |
| O08810_U:Eftud2 | 116 kDa U5 K.FNTTSVVK#.I                         | 51.75  | 28.50  | 1.82 | 0.55 |
| O08810_U:Eftud2 | 116 kDa U5 K.GLSEDEVSIK#.F                       | 65.27  | 33.97  | 1.92 | 0.52 |
| O08810_U:Eftud2 | 116 kDa U5 K.IAVEPVNPELPK#.M                     | 93.02  | 61.30  | 1.52 | 0.66 |
| O08810_U:Eftud2 | 116 kDa U5 K.IADAVVAQEP.LHR.G                    | 25.84  | 47.86  | 0.54 | 1.85 |
| O08810_U:Eftud2 | 116 kDa U5 K.ITM*IAEPLEK#.G                      | 32.72  | 21.48  | 1.52 | 0.66 |
| O08810_U:Eftud2 | 116 kDa U5 K.ITMIAEPLEK#.G                       | 18.98  | 12.00  | 1.58 | 0.63 |
| O08810_U:Eftud2 | 116 kDa U5 K.IYADTFGDINYQEFAK#.R                 | 49.94  | 26.63  | 1.88 | 0.53 |
| O08810_U:Eftud2 | 116 kDa U5 K.LGEFFQTK#.Y                         | 54.71  | 34.87  | 1.57 | 0.64 |
| O08810_U:Eftud2 | 116 kDa U5 R.LILELK#.L                           | 31.72  | 20.17  | 1.57 | 0.64 |
| O08810_U:Eftud2 | 116 kDa U5 K.M*YSEIDIK#.V                        | 15.03  | 10.70  | 1.40 | 0.71 |
| O08810_U:Eftud2 | 116 kDa U5 K.STPVTVVLPDTK#.G                     | 73.37  | 47.22  | 1.55 | 0.64 |
| O08810_U:Eftud2 | 116 kDa U5 K.SYLFNIM*DTPGHVNFSDEVTAGL.R.I        | 10.16  | 23.24  | 0.44 | 2.29 |
| O08810_U:Eftud2 | 116 kDa U5 R.VPAGNWWLIEGVDPQIVK#.T               | 38.99  | 21.84  | 1.78 | 0.56 |
| O08810_U:Eftud2 | 116 kDa U5 K.YDWVLLAAR.S                         | 11.99  | 30.51  | 0.39 | 2.55 |
| O08810_U:Eftud2 | 116 kDa U5 K.YPTAEVYGPVEVITVQEEETQPLTEPIIKPVK#.T | 14.04  | 9.37   | 1.50 | 0.67 |
| P08046_EG:Egr1  | Early growt.R.TQPSLTPSLTK.A                      | 4.55   | 5.72   | 0.80 | 1.26 |
| Q9WVK4_E:Ehd1   | EH domain-K.ADQIETQQLM*.V                        | 13.10  | 25.03  | 0.52 | 1.91 |
| Q9WVK4_E:Ehd1   | EH domain-K.ADQIETQQLM*.V                        | 11.29  | 10.26  | 1.10 | 0.91 |
| Q9WVK4_E:Ehd1   | EH domain-K.DK#PTYDEIYTLSPVNGK#.I                | 9.41   | 5.83   | 1.61 | 0.62 |
| Q9WVK4_E:Ehd1   | EH domain-R.EHQJSSGDFPSLR.K                      | 14.07  | 32.81  | 0.43 | 2.33 |
| Q9WVK4_E:Ehd1   | EH domain-K.ELVNNLGEIYQK#.I                      | 78.42  | 33.46  | 2.34 | 0.43 |
| Q9WVK4_E:Ehd1   | EH domain-R.FHEFHSPALADFDNK#PM*VLLGQYSTGK#.T     | 12.05  | 4.48   | 2.69 | 0.37 |
| Q9WVK4_E:Ehd1   | EH domain-K.GGAFDGTM*NGPFGHGYGEGAGEGIDDEVWVGK#.D | 11.86  | 4.93   | 2.41 | 0.42 |
| Q9WVK4_E:Ehd1   | EH domain-K.GGAFDGTM*NGPFGHGYGEGAGEGIDDEVWVGK#.D | 6.45   | 2.47   | 2.61 | 0.38 |
| Q9WVK4_E:Ehd1   | EH domain-R.IGPEPTDSFIAM*HGPTGEGVPGNALVWVDP.R    | 3.98   | 5.72   | 0.70 | 1.44 |
| Q9WVK4_E:Ehd1   | EH domain-R.IILLFDAHK#LIDISDEFSEVIK#.A           | 10.05  | 4.96   | 2.03 | 0.49 |
| Q9WVK4_E:Ehd1   | EH domain-K.IIINTPEVVR.V                         | 29.76  | 61.00  | 0.49 | 2.05 |
| Q9WVK4_E:Ehd1   | EH domain-R.K#LNDLIK#.R                          | 49.14  | 22.68  | 2.17 | 0.46 |
| Q9WVK4_E:Ehd1   | EH domain-R.K#M*QELLQTQDFSK#.F                   | 13.60  | 5.91   | 2.30 | 0.43 |
| Q9WVK4_E:Ehd1   | EH domain-R.K#MQELLQTQDFSK#.F                    | 12.47  | 2.29   | 5.44 | 0.18 |
| Q9WVK4_E:Ehd1   | EH domain-K.LDISDEFSEVIK#.A                      | 51.80  | 25.14  | 2.06 | 0.49 |
| Q9WVK4_E:Ehd1   | EH domain-K.LFEAEQDLFK#.D                        | 28.48  | 15.75  | 1.81 | 0.55 |
| Q9WVK4_E:Ehd1   | EH domain-K.LFEAEQDLFKDIQSLPR.N                  | 3.81   | 10.87  | 0.35 | 2.85 |
| Q9WVK4_E:Ehd1   | EH domain-K.LLDTVDDM*LANDIAR.L                   | 5.97   | 9.00   | 0.66 | 1.51 |
| Q9WVK4_E:Ehd1   | EH domain-K.LLDTVDDMLANDIAR.L                    | 3.77   | 7.58   | 0.50 | 2.01 |
| Q9WVK4_E:Ehd1   | EH domain-K.M*QELLQTQDFSK#.F                     | 14.43  | 7.58   | 1.90 | 0.53 |
| Q9WVK4_E:Ehd1   | EH domain-R.QEESLM*PSQAVK#.G                     | 20.66  | 8.47   | 2.44 | 0.41 |
| Q9WVK4_E:Ehd1   | EH domain-R.QEESLM*PSQAVK#.G                     | 22.70  | 12.28  | 1.85 | 0.54 |
| Q9WVK4_E:Ehd1   | EH domain-K.SK#LNTVLGK#.I                        | 49.40  | 20.83  | 2.37 | 0.42 |
| Q9WVK4_E:Ehd1   | EH domain-R.VYALMWSLGGK#.I                       | 23.03  | 13.84  | 1.66 | 0.60 |
| Q9WVK4_E:Ehd1   | EH domain-K.ELVNNLGEIYQK#.I                      | 18.49  | 10.15  | 1.82 | 0.55 |
| Q9WVK4_E:Ehd1   | EH domain-K.GGAFDGTM*NGPFGHGYGEGAGEGIDDEVWVGK#.D | 3.58   | 2.73   | 1.31 | 0.76 |
| Q9WVK4_E:Ehd1   | EH domain-R.IGPEPTDSFIAM*HGPTGEGVPGNALVWVDP.R    | 1.64   | 3.03   | 0.54 | 1.85 |
| Q9WVK4_E:Ehd1   | EH domain-R.K#LNDLIK#.R                          | 23.04  | 7.47   | 3.08 | 0.32 |
| Q9WVK4_E:Ehd1   | EH domain-K.LFEAEQDLFKDIQSLPR.N                  | 3.66   | 7.89   | 0.46 | 2.15 |
| Q9WVK4_E:Ehd1   | EH domain-R.VYALMWSLGGK#.I                       | 7.20   | 2.57   | 2.80 | 0.36 |
| Q9WVK4_E:Ehd1   | EH domain-K.ELVNNLGEIYQK#.I                      | 16.44  | 6.48   | 2.54 | 0.39 |
| Q9WVK4_E:Ehd1   | EH domain-K.GGAFDGTM*NGPFGHGYGEGAGEGIDDEVWVGK#.D | 3.06   | 1.77   | 1.73 | 0.58 |
| Q8BH64_E:Ehd2   | EH domain-R.FGFSHSPALADFDGK#PM*VLVAGQYSTGK#.T    | 8.84   | 3.99   | 2.21 | 0.45 |
| Q8BH64_E:Ehd2   | EH domain-R.GYDFPAVL.R                           | 6.98   | 23.30  | 0.30 | 3.34 |
| Q8BH64_E:Ehd2   | EH domain-R.LFELEEQDLFR.D                        | 7.18   | 24.51  | 0.29 | 3.41 |
| Q8BH64_E:Ehd2   | EH domain-K.LLEALDDM*LAQDIK#.L                   | 7.21   | 7.68   | 0.94 | 1.07 |
| Q8BH64_E:Ehd2   | EH domain-K.LPVIFAK#.I                           | 19.06  | 19.30  | 0.99 | 1.01 |
| Q8BH64_E:Ehd2   | EH domain-K.SK#YDEIFYNLAPADGK#.L                 | 11.58  | 10.37  | 1.12 | 0.90 |
| Q8BH64_E:Ehd2   | EH domain-K.TSFIQLEQEVPGSR.V                     | 14.26  | 26.49  | 0.54 | 1.86 |
| Q8BH64_E:Ehd2   | EH domain-R.VHAYISLTK#.K                         | 27.59  | 12.55  | 2.20 | 0.45 |
| Q8BH64_E:Ehd2   | EH domain-K.VVGTPEVLR.V                          | 12.32  | 32.99  | 0.37 | 2.68 |
| Q8BH64_E:Ehd2   | EH domain-R.GYDFPAVL.R                           | 5.86   | 11.60  | 0.51 | 1.98 |
| Q8BH64_E:Ehd2   | EH domain-R.LFELEEQDLFR.D                        | 7.44   | 29.70  | 0.25 | 3.99 |
| Q8BH64_E:Ehd2   | EH domain-K.LPVIFAK#.I                           | 15.34  | 13.49  | 1.14 | 0.88 |
| Q8BH64_E:Ehd2   | EH domain-K.TSFIQLEQEVPGSR.V                     | 14.11  | 18.47  | 0.76 | 1.31 |
| Q8BH64_E:Ehd2   | EH domain-R.LFELEEQDLFR.D                        | 4.24   | 17.51  | 0.24 | 4.13 |
| Q8BH64_E:Ehd2   | EH domain-K.TSFIQLEQEVPGSR.V                     | 8.15   | 19.92  | 0.41 | 2.44 |
| Q9EQP2_E:Ehd4   | EH domain-K.ADQVDTQQLM*.V                        | 9.47   | 15.57  | 0.61 | 1.64 |
| Q9EQP2_E:Ehd4   | EH domain-K.AM*QEQLNYDFTK#.F                     | 48.35  | 15.63  | 3.09 | 0.32 |
| Q9EQP2_E:Ehd4   | EH domain-K.AMQEQLNYDFTK#.F                      | 23.13  | 6.34   | 3.65 | 0.27 |
| Q9EQP2_E:Ehd4   | EH domain-R.DIQSLPQK#.A                          | 67.32  | 16.80  | 4.01 | 0.25 |
| Q9EQP2_E:Ehd4   | EH domain-K.DK#PVYDELFTLSPINGK#.I                | 7.87   | 3.80   | 2.07 | 0.48 |
| Q9EQP2_E:Ehd4   | EH domain-R.EYQJAGDFPEVK#.A                      | 58.36  | 23.58  | 2.48 | 0.40 |
| Q9EQP2_E:Ehd4   | EH domain-R.FGNAFLNR.F                           | 12.85  | 17.14  | 0.75 | 1.33 |
| Q9EQP2_E:Ehd4   | EH domain-R.IILLFDAHK#LIDISDEFSEAIK#.A           | 21.30  | 4.41   | 4.84 | 0.21 |
| Q9EQP2_E:Ehd4   | EH domain-K.LDISDEFSEAIK#.A                      | 36.86  | 11.91  | 3.10 | 0.32 |
| Q9EQP2_E:Ehd4   | EH domain-R.LFEAEQDLFR.D                         | 16.97  | 21.19  | 0.80 | 1.25 |
| Q9EQP2_E:Ehd4   | EH domain-K.LIEADNM*LTNK#.I                      | 35.98  | 12.16  | 2.96 | 0.34 |
| Q9EQP2_E:Ehd4   | EH domain-K.SIHSDSPGILSGEK#.Q                    | 77.32  | 29.35  | 2.63 | 0.38 |
| Q9EQP2_E:Ehd4   | EH domain-K.AM*QEQLNYDFTK#.F                     | 22.10  | 7.08   | 3.12 | 0.32 |
| Q9EQP2_E:Ehd4   | EH domain-K.AMQEQLNYDFTK#.F                      | 9.37   | 2.51   | 3.73 | 0.27 |



|                   |                                                  |        |        |      |       |
|-------------------|--------------------------------------------------|--------|--------|------|-------|
| Q9EQP2_Ef Ehd4    | EH domain-R.DIQSLPQK#.A                          | 38.52  | 8.19   | 4.70 | 0.21  |
| Q9EQP2_Ef Ehd4    | EH domain-R.EYQISAGDFPEVK#.A                     | 35.98  | 10.56  | 3.41 | 0.29  |
| Q9EQP2_Ef Ehd4    | EH domain-R.FHEFHSPALEDADFENK#PMP*ILLVGOYSTGK#.T | 4.33   | 2.56   | 1.70 | 0.59  |
| Q9EQP2_Ef Ehd4    | EH domain-R.IGEPTTDSFIAMV*YGETESTPGNALVDPK#.K    | 5.92   | 2.40   | 2.46 | 0.41  |
| Q9EQP2_Ef Ehd4    | EH domain-K.LDISDEFSEAIK#.A                      | 16.09  | 6.11   | 2.63 | 0.38  |
| Q9EQP2_Ef Ehd4    | EH domain-R.LFEAEAQDLFR.D                        | 8.13   | 10.78  | 0.75 | 1.33  |
| Q9EQP2_Ef Ehd4    | EH domain-K.LIEAVDNM*LTNK#.I                     | 18.66  | 5.11   | 3.65 | 0.27  |
| Q9EQP2_Ef Ehd4    | EH domain-K.AM*QEQLNVDYFTK#.F                    | 18.91  | 5.75   | 3.29 | 0.30  |
| Q9EQP2_Ef Ehd4    | EH domain-K.EGADEEEVVAK#.D                       | 18.25  | 5.66   | 3.22 | 0.31  |
| Q9EQP2_Ef Ehd4    | EH domain-R.EYQISAGDFPEVK#.A                     | 25.79  | 8.25   | 3.13 | 0.32  |
| Q9EQP2_Ef Ehd4    | EH domain-R.LFEAEAQDLFR.D                        | 5.53   | 9.67   | 0.57 | 1.75  |
| Q9EQP2_Ef Ehd4    | EH domain-K.LIEAVDNM*LTNK#.I                     | 18.72  | 4.78   | 3.92 | 0.26  |
| Q9EQP2_Ef Ehd4    | EH domain-R.SGGM*DAVQJVTGGLR.S                   | 4.48   | 8.01   | 0.56 | 1.79  |
| Q9EQP2_Ef Ehd4    | EH domain-K.SISIDSPGILSGEK#.Q                    | 49.95  | 16.95  | 2.95 | 0.34  |
| Q5DW34_E Ehm1     | Histone-lys R.ADTTSTVTLAPGQEK#.S                 | 11.54  | 12.56  | 0.92 | 1.09  |
| Q5DW34_E Ehm1     | Histone-lys R.ADTTSTVTLAPGQEK#.S                 | 3.03   | 13.81  | 0.22 | 4.56  |
| Q5DW34_E Ehm1     | Histone-lys R.DSAPDKPVAVEK#.T                    | 9.78   | 10.61  | 0.92 | 1.08  |
| Q5DW34_E Ehm1     | Histone-lys R.LIQAGEQLGFDYGER.F                  | 6.91   | 9.94   | 0.70 | 1.44  |
| Q5DW34_E Ehm1     | Histone-lys R.ADTTSTVTLAPGQEK#.S                 | 11.43  | 8.82   | 1.30 | 0.77  |
| Q9Z148_E Ehm2     | Histone-lys R.LDHPPELLDLSSLPPIN.-                | 27.22  | 27.22  | 1.00 | 1.00  |
| Q9Z148_E Ehm2     | Histone-lys R.TGEEELGFDYGRDFWDIK.S               | 1.21   | 6.12   | 0.20 | 5.07  |
| Q9Z148_E Ehm2     | Histone-lys R.LDHPPELLDLSSLPPIN.-                | 14.09  | 14.09  | 1.00 | 1.00  |
| Q9CXU9_Ef Ehf1b   | Eukaryotic: K.TLTTVQGIADDYDK#.K                  | 48.82  | 16.89  | 2.89 | 0.35  |
| Q9CXU9_Ef Ehf1b   | Eukaryotic: K.TLTTVQGIADDYDK#K#.L                | 6.36   | 2.46   | 2.59 | 0.39  |
| Q8BJW6_Ef Ehf2a   | Eukaryotic: K.AIEQLK#EQAAAGK#.Q                  | 27.41  | 5.71   | 4.80 | 0.21  |
| Q8BJW6_Ef Ehf2a   | Eukaryotic: K.DGTAGTPNLQLYDM*#.T                 | 16.23  | 4.51   | 3.60 | 0.28  |
| Q8BJW6_Ef Ehf2a   | Eukaryotic: K.DGTAGTPNLQLYDMK#.T                 | 15.85  | 3.41   | 4.64 | 0.22  |
| Q8BJW6_Ef Ehf2a   | Eukaryotic: K.GLLHFSDFLQK#.A                     | 45.95  | 10.26  | 4.48 | 0.22  |
| Q8BJW6_Ef Ehf2a   | Eukaryotic: R.GQMEVWVVK#.N                       | 25.30  | 4.04   | 6.26 | 0.16  |
| Q8BJW6_Ef Ehf2a   | Eukaryotic: K.IWHYTGSLHKK#.Y                     | 31.29  | 7.38   | 4.24 | 0.24  |
| Q8BJW6_Ef Ehf2a   | Eukaryotic: R.LYQYPNFAGPQAALANK#.S               | 26.54  | 6.00   | 4.43 | 0.23  |
| Q8BJW6_Ef Ehf2a   | Eukaryotic: R.NTVTQASGDPVDDK#K#.I                | 19.16  | 5.93   | 3.23 | 0.31  |
| Q8BJW6_Ef Ehf2a   | Eukaryotic: R.NTVTQASGDPVDDK#K#.I                | 77.10  | 19.69  | 3.92 | 0.26  |
| Q8BJW6_Ef Ehf2a   | Eukaryotic: R.NVNNEVHFFENNNTIANK#.L              | 39.02  | 11.32  | 3.45 | 0.29  |
| Q8BJW6_Ef Ehf2a   | Eukaryotic: R.SDAAPTVPVQSAAPR.N                  | 36.58  | 25.43  | 1.44 | 0.70  |
| Q8BJW6_Ef Ehf2a   | Eukaryotic: K.VAVYYPGSK#.G                       | 50.22  | 11.07  | 4.54 | 0.22  |
| Q8BJW6_Ef Ehf2a   | Eukaryotic: K.VNDFNLSPGTQPYK#.V                  | 38.51  | 7.34   | 5.25 | 0.19  |
| Q8BJW6_Ef Ehf2a   | Eukaryotic: K.VNIINVANK#.G                       | 121.46 | 23.62  | 5.14 | 0.19  |
| Q8BJW6_Ef Ehf2a   | Eukaryotic: K.YQAVSEVPSEEPK#.V                   | 67.81  | 12.08  | 5.61 | 0.18  |
| Q8BJW6_Ef Ehf2a   | Eukaryotic: R.LYQYPNFAGPQAALANK#.S               | 7.89   | 3.08   | 2.57 | 0.39  |
| Q8BJW6_Ef Ehf2a   | Eukaryotic: K.VNDFNLSPGTQPYK#.V                  | 10.31  | 3.24   | 3.18 | 0.31  |
| Q8BJW6_Ef Ehf2a   | Eukaryotic: K.VNIINVANK#.G                       | 17.33  | 3.08   | 5.62 | 0.18  |
| Q8BJW6_Ef Ehf2a   | Eukaryotic: K.YQAVSEVPSEEPK#.V                   | 21.27  | 6.05   | 3.51 | 0.28  |
| Q8BJW6_Ef Ehf2a   | Eukaryotic: R.LYQYPNFAGPQAALANK#.S               | 6.87   | 2.72   | 2.53 | 0.40  |
| Q8BJW6_Ef Ehf2a   | Eukaryotic: R.NVNNEVHFFENNNTIANK#.L              | 14.03  | 2.20   | 6.38 | 0.16  |
| Q8BJW6_Ef Ehf2a   | Eukaryotic: K.VAVYYPGSK#.G                       | 23.87  | 4.55   | 5.24 | 0.19  |
| Q8BJW6_Ef Ehf2a   | Eukaryotic: K.VNIINVANK#.G                       | 15.05  | 4.07   | 3.69 | 0.27  |
| Q8BJW6_Ef Ehf2a   | Eukaryotic: K.YQAVSEVPSEEPK#.V                   | 22.35  | 5.08   | 4.40 | 0.23  |
| Q03963_E2 Ehf2ak2 | Interferon-i R.DLPGNIFLVDER.H                    | 10.90  | 34.24  | 0.32 | 3.14  |
| Q03963_E2 Ehf2ak2 | Interferon-i K.DRPETSEILK.T                      | 26.79  | 128.82 | 0.21 | 4.81  |
| Q03963_E2 Ehf2ak2 | Interferon-i R.FTFQVLIDEK#.E                     | 26.02  | 14.90  | 1.75 | 0.57  |
| Q03963_E2 Ehf2ak2 | Interferon-i R.FTFQVLIDEK#E#PEAK#.G              | 39.98  | 25.25  | 1.58 | 0.63  |
| Q03963_E2 Ehf2ak2 | Interferon-i K.GDFSNIDFNK#.E                     | 27.24  | 18.89  | 1.44 | 0.69  |
| Q03963_E2 Ehf2ak2 | Interferon-i K.GDFSNIDFNK#E#K#.S                 | 20.89  | 14.17  | 1.47 | 0.68  |
| Q03963_E2 Ehf2ak2 | Interferon-i K.GDFGLATALENDGK#.S                 | 183.03 | 120.56 | 1.52 | 0.66  |
| Q03963_E2 Ehf2ak2 | Interferon-i K.IGQTM*YGTGSGVTK#.Q                | 126.61 | 72.43  | 1.75 | 0.57  |
| Q03963_E2 Ehf2ak2 | Interferon-i K.IGQTM*YGTGSGVTK#.Q                | 79.32  | 48.38  | 1.64 | 0.61  |
| Q03963_E2 Ehf2ak2 | Interferon-i R.KGDFSNIDFNK#.E                    | 70.25  | 38.43  | 1.83 | 0.55  |
| Q03963_E2 Ehf2ak2 | Interferon-i K.LAVDILDNENK#.V                    | 15.20  | 8.39   | 1.81 | 0.55  |
| Q03963_E2 Ehf2ak2 | Interferon-i R.FTFQVLIDEK#PEAK#.G                | 5.72   | 11.04  | 0.52 | 1.93  |
| Q03963_E2 Ehf2ak2 | Interferon-i R.TGTLQYM*SPEQLFLK#.H               | 28.27  | 39.07  | 0.72 | 1.38  |
| Q03963_E2 Ehf2ak2 | Interferon-i R.TGTLQYMSPEQLFLK#.H                | 51.12  | 33.63  | 1.52 | 0.66  |
| Q03963_E2 Ehf2ak2 | Interferon-i K.IGDFGLATALENDGK#.S                | 16.10  | 8.54   | 1.89 | 0.53  |
| Q03963_E2 Ehf2ak2 | Interferon-i R.DLPGNIFLVDER.H                    | 20.30  | 42.87  | 0.47 | 2.11  |
| Q03963_E2 Ehf2ak2 | Interferon-i K.DRPETSEILK.T                      | 15.55  | 52.62  | 0.30 | 3.38  |
| Q03963_E2 Ehf2ak2 | Interferon-i R.FTFQVLIDEK#E#PEAK#.G              | 28.21  | 18.93  | 1.49 | 0.67  |
| Q03963_E2 Ehf2ak2 | Interferon-i K.IGDFGLATALENDGK#.S                | 68.26  | 40.14  | 1.70 | 0.59  |
| Q03963_E2 Ehf2ak2 | Interferon-i K.IGQTM*YGTGSGVTK#.Q                | 34.65  | 20.53  | 1.69 | 0.59  |
| Q03963_E2 Ehf2ak2 | Interferon-i K.IGQTM*YGTGSGVTK#.Q                | 20.27  | 13.75  | 1.47 | 0.68  |
| Q03963_E2 Ehf2ak2 | Interferon-i R.KGDFSNIDFNK#E#K#.S                | 16.71  | 12.55  | 1.33 | 0.75  |
| Q03963_E2 Ehf2ak2 | Interferon-i R.TGTLQYM*SPEQLFLK#.H               | 14.47  | 9.85   | 1.47 | 0.68  |
| Q03963_E2 Ehf2ak2 | Interferon-i R.DLPGNIFLVDER.H                    | 15.87  | 38.34  | 0.41 | 2.42  |
| Q03963_E2 Ehf2ak2 | Interferon-i K.DRPETSEILK.T                      | 4.37   | 44.21  | 0.10 | 10.12 |
| Q03963_E2 Ehf2ak2 | Interferon-i K.GDFSNIDFNK#.E                     | 13.67  | 5.75   | 2.38 | 0.42  |
| Q03963_E2 Ehf2ak2 | Interferon-i K.IGDFGLATALENDGK#.S                | 89.05  | 44.88  | 1.98 | 0.50  |
| Q03963_E2 Ehf2ak2 | Interferon-i K.IGQTM*YGTGSGVTK#.Q                | 41.32  | 21.96  | 1.88 | 0.53  |
| Q03963_E2 Ehf2ak2 | Interferon-i K.LAVDILDNENK#.V                    | 8.51   | 5.34   | 1.60 | 0.63  |
| Q03963_E2 Ehf2ak2 | Interferon-i R.TGTLQYM*SPEQLFLK#.H               | 25.77  | 27.44  | 0.94 | 1.06  |
| Q03963_E2 Ehf2ak2 | Interferon-i R.TGTLQYMSPEQLFLK#.H                | 12.10  | 10.25  | 1.18 | 0.85  |
| Q03963_E2 Ehf2ak2 | Interferon-i K.VSPDDVQR.N                        | 13.39  | 34.25  | 0.39 | 2.56  |
| Q9QZ05_E2 Ehf2ak4 | Eukaryotic: R.DASDNLAVQTLK#.G                    | 8.73   | 5.26   | 1.66 | 0.60  |
| Q9QZ05_E2 Ehf2ak4 | Eukaryotic: R.DLK#PVIINFLDSDHVK#.I               | 10.87  | 4.83   | 2.25 | 0.44  |
| Q9QZ05_E2 Ehf2ak4 | Eukaryotic: R.LEITSLNQDYASK#.R                   | 9.24   | 22.62  | 0.41 | 2.45  |
| Q99LC8_E1 Ehf2b1  | Translation K.ADLVIVGAEGVVENGGIINK#.I            | 8.80   | 3.72   | 2.36 | 0.42  |
| Q99LC8_E1 Ehf2b1  | Translation R.ANLTYAIK#.T                        | 25.51  | 12.35  | 2.07 | 0.48  |
| Q99LC8_E1 Ehf2b1  | Translation R.FISLTSLEYSYK#.C                    | 27.50  | 10.71  | 2.57 | 0.39  |
| Q99LC8_E1 Ehf2b1  | Translation R.FSVVITESQPDLSGK#.K                 | 9.14   | 5.10   | 1.79 | 0.56  |
| Q99LC8_E1 Ehf2b1  | Translation R.FSVVITESQPDLSGK#K#.M               | 4.30   | 3.77   | 1.14 | 0.88  |
| Q99LC8_E1 Ehf2b1  | Translation R.VLEEVAACK#.K                       | 76.51  | 19.76  | 3.87 | 0.26  |
| Q99LC8_E1 Ehf2b1  | Translation R.FISLTSLEYSYK#.C                    | 6.62   | 4.80   | 1.38 | 0.73  |
| Q99LC8_E1 Ehf2b1  | Translation K.ADLVIVGAEGVVENGGIINK#.I            | 4.36   | 1.86   | 2.35 | 0.43  |
| Q99LC8_E1 Ehf2b1  | Translation R.ANLTYAIK#.T                        | 16.29  | 4.84   | 3.37 | 0.30  |
| Q99LC8_E1 Ehf2b1  | Translation K.AQNK#PFYVAESFK#.F                  | 13.17  | 6.19   | 2.13 | 0.47  |
| Q99LC8_E1 Ehf2b1  | Translation R.FISLTSLEYSYK#.C                    | 13.17  | 8.26   | 1.59 | 0.63  |
| Q99LC8_E1 Ehf2b1  | Translation K.ADLVIVGAEGVVENGGIINK#.I            | 13.86  | 6.89   | 2.01 | 0.50  |
| Q99LC8_E1 Ehf2b1  | Translation R.ANLTYAIK#.T                        | 21.46  | 8.59   | 2.50 | 0.40  |
| Q99LC8_E1 Ehf2b1  | Translation K.AQNK#PFYVAESFK#.F                  | 21.20  | 9.36   | 2.27 | 0.44  |
| Q99LC8_E1 Ehf2b1  | Translation R.FISLTSLEYSYK#.C                    | 26.66  | 11.10  | 2.40 | 0.42  |
| Q99LD9_E1 Ehf2b2  | Translation K.FVAPPEVLPFTEGDILEK#.V              | 27.71  | 19.58  | 1.42 | 0.71  |
| Q99LD9_E1 Ehf2b2  | Translation R.M*TAAPQSETVGNM*VR.R                | 3.93   | 10.40  | 0.38 | 2.64  |
| Q99LD9_E1 Ehf2b2  | Translation R.TVEAFK#.E                          | 26.84  | 21.64  | 1.24 | 0.81  |
| Q99LD9_E1 Ehf2b2  | Translation K.FVAPPEVLPFTEGDILEK#.V              | 8.32   | 4.90   | 1.70 | 0.59  |
| Q99LD9_E1 Ehf2b2  | Translation K.FVAPPEVLPFTEGDILEK#.V              | 13.96  | 8.94   | 1.56 | 0.64  |

|                   |                                            |        |        |      |      |
|-------------------|--------------------------------------------|--------|--------|------|------|
| Q3UKV0_Q_Eif2b3   | Protein Eif2 R.DFIGVDSTGK#.R               | 10.56  | 6.19   | 1.71 | 0.59 |
| Q3UKV0_Q_Eif2b3   | Protein Eif2 R.KHGQESIEPVPQK#.G            | 27.37  | 9.51   | 2.88 | 0.35 |
| Q3UKV0_Q_Eif2b3   | Protein Eif2 K.SLDIYSFIK#.K                | 46.58  | 36.09  | 1.29 | 0.77 |
| Q3UKV0_Q_Eif2b3   | Protein Eif2 R.VGFEEVIVTTK#.D              | 29.09  | 10.37  | 2.80 | 0.36 |
| Q3UKV0_Q_Eif2b3   | Protein Eif2 K.HLIGADSLGPDQTQGEK#.S        | 7.43   | 2.74   | 2.71 | 0.37 |
| Q3UKV0_Q_Eif2b3   | Protein Eif2 K.SLDIYSFIK#.K                | 14.24  | 7.74   | 1.84 | 0.54 |
| Q3UKV0_Q_Eif2b3   | Protein Eif2 R.VGFEEVIVTTK#.D              | 8.91   | 4.20   | 2.12 | 0.47 |
| Q3UKV0_Q_Eif2b3   | Protein Eif2 R.AYDASLAM*LM*R@.K            | 18.49  | 60.44  | 0.31 | 3.27 |
| Q3UKV0_Q_Eif2b3   | Protein Eif2 K.QGESIEPVPQK#.G              | 10.38  | 4.97   | 2.09 | 0.48 |
| Q3UKV0_Q_Eif2b3   | Protein Eif2 R.KHGQESIEPVPQK#.G            | 9.00   | 2.21   | 4.07 | 0.25 |
| Q3UKV0_Q_Eif2b3   | Protein Eif2 K.SLDIYSFIK#.K                | 21.78  | 7.48   | 2.91 | 0.34 |
| Q61749_EI_Eif2b4  | Translation R.ELPGPGSQLGGTAGEK#.L          | 11.61  | 9.49   | 1.22 | 0.82 |
| Q61749_EI_Eif2b4  | Translation K.GADQIEIGSAVSAQR.Q            | 11.69  | 5.02   | 2.33 | 0.43 |
| Q61749_EI_Eif2b4  | Translation K.IVLAQAISR.F                  | 8.36   | 26.91  | 0.31 | 3.22 |
| Q61749_EI_Eif2b4  | Translation R.LGLQYSOGLISGSNAR.C           | 3.76   | 8.52   | 0.44 | 2.26 |
| Q61749_EI_Eif2b4  | Translation R.VGTAQLALVAR.A                | 7.01   | 24.01  | 0.29 | 3.42 |
| Q61749_EI_Eif2b4  | Translation K.GADQIEIGSAVSAQR.Q            | 8.33   | 2.45   | 3.40 | 0.29 |
| Q61749_EI_Eif2b4  | Translation K.IVLAQAISR.F                  | 3.07   | 11.05  | 0.28 | 3.60 |
| Q61749_EI_Eif2b4  | Translation R.VGTAQLALVAR.A                | 4.61   | 10.47  | 0.44 | 2.27 |
| Q61749_EI_Eif2b4  | Translation K.GADQIEIGSAVSAQR.Q            | 3.22   | 8.71   | 0.37 | 2.71 |
| Q61749_EI_Eif2b4  | Translation K.IVLAQAISR.F                  | 5.74   | 14.59  | 0.39 | 2.54 |
| Q61749_EI_Eif2b4  | Translation R.VGTAQLALVAR.A                | 4.88   | 11.39  | 0.43 | 2.34 |
| Q8CHW4_E_Eif2b5   | Translation R.DTTDEGOQLR.K                 | 4.96   | 12.71  | 0.39 | 2.56 |
| Q8CHW4_E_Eif2b5   | Translation R.FIQWLR.E                     | 4.95   | 9.55   | 0.52 | 1.93 |
| Q8CHW4_E_Eif2b5   | Translation K.GYNPAEVGLEGGYLWK#.A          | 13.34  | 6.20   | 2.15 | 0.46 |
| Q8CHW4_E_Eif2b5   | Translation K.HAYNISLK#.E                  | 14.05  | 7.65   | 1.84 | 0.54 |
| Q8CHW4_E_Eif2b5   | Translation K.LK#GYNPAEVGLEGGYLWK#.A       | 12.11  | 6.19   | 1.96 | 0.51 |
| Q8CHW4_E_Eif2b5   | Translation R.VFQNEVLGTLQR.G               | 10.95  | 20.57  | 0.53 | 1.88 |
| Q8CHW4_E_Eif2b5   | Translation R.VFQNEVLGTLQR.G               | 8.16   | 15.06  | 0.54 | 1.84 |
| Q6ZWX6_JF_Eif2s1  | Eukaryotic: R.ENAEVDGDDDAEEM#A             | 34.70  | 13.48  | 2.57 | 0.39 |
| Q6ZWX6_JF_Eif2s1  | Eukaryotic: R.ENAEVDGDDDAEEM*EAK#.A        | 81.42  | 27.77  | 2.93 | 0.34 |
| Q6ZWX6_JF_Eif2s1  | Eukaryotic: R.GVFNVQM*EPK#.V               | 64.04  | 26.52  | 2.41 | 0.41 |
| Q6ZWX6_JF_Eif2s1  | Eukaryotic: R.GVFNVQMEPK#.V                | 31.77  | 11.76  | 2.70 | 0.37 |
| Q6ZWX6_JF_Eif2s1  | Eukaryotic: K.GYDLSK#.R                    | 39.20  | 14.67  | 2.67 | 0.37 |
| Q6ZWX6_JF_Eif2s1  | Eukaryotic: K.HAVSDPSILDLDLNEDE.R          | 12.71  | 19.42  | 0.65 | 1.53 |
| Q6ZWX6_JF_Eif2s1  | Eukaryotic: R.HVAEVLTYKDEQLSFLOR.T         | 10.17  | 17.09  | 0.60 | 1.68 |
| Q6ZWX6_JF_Eif2s1  | Eukaryotic: R.HVAEVLTYKDEQLSFLOR.T         | 10.00  | 17.46  | 0.57 | 1.75 |
| Q6ZWX6_JF_Eif2s1  | Eukaryotic: K.INLIAPPR.Y                   | 22.38  | 51.91  | 0.43 | 2.32 |
| Q6ZWX6_JF_Eif2s1  | Eukaryotic: R.LERENAEVDGDDDAEEM*EAK.A      | 6.53   | 12.16  | 0.54 | 1.86 |
| Q6ZWX6_JF_Eif2s1  | Eukaryotic: K.RPGYGYADF.AK.H               | 12.07  | 20.06  | 0.60 | 1.66 |
| Q6ZWX6_JF_Eif2s1  | Eukaryotic: R.TAWVFDDK#YK#.R               | 19.09  | 4.33   | 4.41 | 0.23 |
| Q6ZWX6_JF_Eif2s1  | Eukaryotic: R.TEGLSVLNQAM*AVIK#.E          | 58.99  | 25.34  | 2.33 | 0.43 |
| Q6ZWX6_JF_Eif2s1  | Eukaryotic: R.TEGLSVLNQAMAVIK#.E           | 72.68  | 26.48  | 2.74 | 0.36 |
| Q6ZWX6_JF_Eif2s1  | Eukaryotic: K.VVTDTEDELAR.Q                | 71.79  | 137.07 | 0.52 | 1.91 |
| Q6ZWX6_JF_Eif2s1  | Eukaryotic: R.YVMITTLER.T                  | 19.88  | 28.01  | 0.71 | 1.41 |
| Q6ZWX6_JF_Eif2s1  | Eukaryotic: R.TEGLSVLNQAMAVIK#.E           | 7.72   | 3.07   | 2.52 | 0.40 |
| Q6ZWX6_JF_Eif2s1  | Eukaryotic: R.ENAEVDGDDDAEEM*EAK#.A        | 5.32   | 1.52   | 3.50 | 0.29 |
| Q6ZWX6_JF_Eif2s1  | Eukaryotic: R.TEGLSVLNQAM*AVIK#.E          | 12.50  | 2.69   | 4.64 | 0.22 |
| Q6ZWX6_JF_Eif2s1  | Eukaryotic: R.TEGLSVLNQAMAVIK#.E           | 15.79  | 4.43   | 3.56 | 0.28 |
| Q6ZWX6_JF_Eif2s1  | Eukaryotic: K.VVTDTEDELAR.Q                | 16.04  | 12.88  | 1.25 | 0.80 |
| Q99L45_JF_Eif2s2  | Eukaryotic: R.DYTYEELNLR.V                 | 32.37  | 55.42  | 0.58 | 1.71 |
| Q99L45_JF_Eif2s2  | Eukaryotic: R.EK#NPDV*VAGEK#.R             | 17.18  | 9.23   | 1.86 | 0.54 |
| Q99L45_JF_Eif2s2  | Eukaryotic: R.EK#NPDV*VAGEK#.R             | 21.87  | 11.17  | 1.96 | 0.51 |
| Q99L45_JF_Eif2s2  | Eukaryotic: K.FPEEIELEK#.D                 | 88.80  | 38.88  | 2.28 | 0.44 |
| Q99L45_JF_Eif2s2  | Eukaryotic: K.IESDAQEPAEPEDLDIM*LGNK#.K    | 25.42  | 10.38  | 2.45 | 0.41 |
| Q99L45_JF_Eif2s2  | Eukaryotic: K.IESDAQEPAEPEDLDIM*LGNK#.K    | 15.47  | 7.47   | 2.07 | 0.48 |
| Q99L45_JF_Eif2s2  | Eukaryotic: K.IESDAQEPAEPEDLDIM*LGNK#.K    | 6.81   | 2.29   | 2.97 | 0.34 |
| Q99L45_JF_Eif2s2  | Eukaryotic: K.IFDIDEAEEAIK#.D              | 31.51  | 15.62  | 2.02 | 0.50 |
| Q99L45_JF_Eif2s2  | Eukaryotic: K.IFDIDEAEEAIK#DVK#.I          | 164.93 | 64.71  | 2.55 | 0.39 |
| Q99L45_JF_Eif2s2  | Eukaryotic: K.K#FDIDEAEEAIK#.D             | 12.34  | 4.33   | 2.85 | 0.35 |
| Q99L45_JF_Eif2s2  | Eukaryotic: K.KIFDIDEAEEAIK#DVK.I          | 107.33 | 47.29  | 2.27 | 0.44 |
| Q99L45_JF_Eif2s2  | Eukaryotic: R.K#K#DASDLDLDFNFFNQK#.K       | 31.97  | 11.99  | 2.67 | 0.38 |
| Q99L45_JF_Eif2s2  | Eukaryotic: K.K#K#PFMLDEEGDAQTEETQPSK#.E   | 2.24   | 1.51   | 1.48 | 0.67 |
| Q99L45_JF_Eif2s2  | Eukaryotic: R.SPDLTKQ#.D                   | 175.37 | 72.48  | 2.42 | 0.41 |
| Q99L45_JF_Eif2s2  | Eukaryotic: K.TGFQAVTGK#.R                 | 250.27 | 84.84  | 2.95 | 0.34 |
| Q99L45_JF_Eif2s2  | Eukaryotic: R.VFNIM*R.E                    | 24.39  | 50.02  | 0.49 | 2.05 |
| Q99L45_JF_Eif2s2  | Eukaryotic: R.DYTYEELNLR.V                 | 3.12   | 5.71   | 0.55 | 1.83 |
| Q99L45_JF_Eif2s2  | Eukaryotic: K.TGFQAVTGK#.R                 | 17.62  | 7.49   | 2.35 | 0.43 |
| Q99L45_JF_Eif2s2  | Eukaryotic: K.DASDLDLDFNFFNQK#.K           | 7.82   | 2.72   | 2.87 | 0.35 |
| Q920N1_JF_Eif2s3x | Eukaryotic: K.GGAVGGSILK#.G                | 19.06  | 7.60   | 2.51 | 0.40 |
| Q920N1_JF_Eif2s3x | Eukaryotic: R.GVTIK#PTVDDD.-               | 45.96  | 29.08  | 1.58 | 0.63 |
| Q920N1_JF_Eif2s3x | Eukaryotic: K.HILILQNK#.I                  | 135.38 | 43.47  | 3.11 | 0.32 |
| Q920N1_JF_Eif2s3x | Eukaryotic: R.QATINIGTIHVAHGK#.S           | 47.14  | 21.98  | 2.15 | 0.47 |
| Q920N1_JF_Eif2s3x | Eukaryotic: R.QDLATLDVTK#.L                | 120.20 | 50.15  | 2.40 | 0.42 |
| Q920N1_JF_Eif2s3x | Eukaryotic: R.RGVTIK#PTVDDD.-              | 7.22   | 17.23  | 0.42 | 2.39 |
| Q920N1_JF_Eif2s3x | Eukaryotic: R.GVTIK#PTVDDD.-               | 31.47  | 9.52   | 3.30 | 0.30 |
| Q920N1_JF_Eif2s3x | Eukaryotic: R.QDLATLDVTK#.L                | 27.03  | 9.97   | 2.71 | 0.37 |
| Q920N1_JF_Eif2s3x | Eukaryotic: R.GVTIK#PTVDDD.-               | 35.12  | 15.19  | 2.31 | 0.43 |
| Q920N1_JF_Eif2s3x | Eukaryotic: K.HILILQNK#.I                  | 55.70  | 15.83  | 3.52 | 0.28 |
| Q920N1_JF_Eif2s3x | Eukaryotic: K.IVSLFAEHNDLQYAAPGGGLIGVTK#.I | 10.40  | 3.26   | 3.19 | 0.31 |
| Q920N1_JF_Eif2s3x | Eukaryotic: R.QDLATLDVTK#.L                | 60.84  | 16.29  | 3.74 | 0.27 |
| Q920N1_JF_Eif2s3x | Eukaryotic: K.VGQIEVVRP#GIVK.D             | 26.59  | 36.73  | 0.72 | 1.38 |
| Q920N2_JF_Eif2s3y | Eukaryotic: R.GVTIK#PTIDDE.-               | 16.02  | 5.49   | 2.92 | 0.34 |
| P23116_EI_Eif3a   | Eukaryotic: K.AFKDIDIEDLELDPDFIM*AK.Q      | 34.17  | 9.87   | 3.46 | 0.29 |
| P23116_EI_Eif3a   | Eukaryotic: K.AFKDIDIEDLELDPDFIMAK.Q       | 24.71  | 8.65   | 2.86 | 0.35 |
| P23116_EI_Eif3a   | Eukaryotic: R.ANEFLVGVK#.K                 | 50.49  | 15.87  | 3.18 | 0.31 |
| P23116_EI_Eif3a   | Eukaryotic: R.ANEFLVGVK#K#.Q               | 18.55  | 8.62   | 2.15 | 0.46 |
| P23116_EI_Eif3a   | Eukaryotic: K.DIDIEDLELDPDFIMAK#.Q         | 15.24  | 5.34   | 2.85 | 0.35 |
| P23116_EI_Eif3a   | Eukaryotic: K.EGLYQYK#.N                   | 47.83  | 21.90  | 2.18 | 0.46 |
| P23116_EI_Eif3a   | Eukaryotic: R.EQPEPELQYVPPQLQNTLRL.L       | 9.86   | 20.65  | 0.48 | 2.10 |
| P23116_EI_Eif3a   | Eukaryotic: R.FSVLQYVPEVK#.D               | 94.74  | 35.71  | 2.65 | 0.38 |
| P23116_EI_Eif3a   | Eukaryotic: R.IGLINDM*VR.F                 | 18.75  | 19.39  | 0.97 | 1.03 |
| P23116_EI_Eif3a   | Eukaryotic: R.LEEIPLIK#.S                  | 40.54  | 13.41  | 3.02 | 0.33 |
| P23116_EI_Eif3a   | Eukaryotic: R.LESLNIQR.E                   | 19.75  | 33.88  | 0.58 | 1.72 |
| P23116_EI_Eif3a   | Eukaryotic: R.LLDM*DGIVK#.Q                | 54.07  | 22.87  | 2.36 | 0.42 |
| P23116_EI_Eif3a   | Eukaryotic: R.LLDMGDGIVK#.Q                | 26.66  | 9.89   | 2.70 | 0.37 |
| P23116_EI_Eif3a   | Eukaryotic: R.LLLTPVVK#.F                  | 80.37  | 32.55  | 2.47 | 0.41 |
| P23116_EI_Eif3a   | Eukaryotic: R.LVQLDSASMS*ELWQEAFAK#.A      | 35.51  | 12.07  | 2.94 | 0.34 |
| P23116_EI_Eif3a   | Eukaryotic: R.LYHDIQAQAFK#.F               | 39.98  | 18.14  | 2.20 | 0.45 |
| P23116_EI_Eif3a   | Eukaryotic: R.NQLTAM*SSVLAK#.A             | 52.55  | 18.58  | 2.83 | 0.35 |
| P23116_EI_Eif3a   | Eukaryotic: K.QPALDVLVVM*#K.S              | 7.26   | 2.66   | 2.73 | 0.37 |
| P23116_EI_Eif3a   | Eukaryotic: K.RLEEPLIK.S                   | 10.61  | 20.41  | 0.52 | 1.92 |
| P23116_EI_Eif3a   | Eukaryotic: K.SLEDVVR.A                    | 18.09  | 25.65  | 0.71 | 1.42 |

|                |                                               |        |        |       |       |
|----------------|-----------------------------------------------|--------|--------|-------|-------|
| P23116_EI1E13a | Eukaryotic: R.TLSFGSDLNYATR.E                 | 16.32  | 26.69  | 0.61  | 1.64  |
| P23116_EI1E13a | Eukaryotic: R.VKDM*DLWEQQEER.I                | 9.31   | 19.05  | 0.49  | 2.05  |
| P23116_EI1E13a | Eukaryotic: R.VKDMDLWEQQEER.I                 | 4.72   | 8.14   | 0.58  | 1.72  |
| P23116_EI1E13a | Eukaryotic: R.VLLATLSIPIPER.T                 | 20.15  | 42.87  | 0.47  | 2.13  |
| P23116_EI1E13a | Eukaryotic: K.AFK#DIDIEDLELDPDFIM*AK#.Q       | 89.45  | 36.68  | 2.44  | 0.41  |
| P23116_EI1E13a | Eukaryotic: K.AFKDIDIEDLELDPDFIMAK.Q          | 27.16  | 9.44   | 2.88  | 0.35  |
| P23116_EI1E13a | Eukaryotic: R.ANEFLEVGGK.K                    | 117.40 | 37.63  | 3.12  | 0.32  |
| P23116_EI1E13a | Eukaryotic: R.ANEFLEVGGK.Q                    | 26.04  | 9.89   | 2.63  | 0.38  |
| P23116_EI1E13a | Eukaryotic: K.DIDIEDLELDPDFIM*AK#.Q           | 73.11  | 26.12  | 2.80  | 0.36  |
| P23116_EI1E13a | Eukaryotic: K.DIDIEDLELDPDFIMAK.Q             | 22.81  | 12.38  | 1.84  | 0.54  |
| P23116_EI1E13a | Eukaryotic: R.EQPELELQVVPQLQNTLRL.L           | 27.25  | 39.57  | 0.69  | 1.45  |
| P23116_EI1E13a | Eukaryotic: R.ESSLRPDDDRIPR.R                 | 7.31   | 41.91  | 0.17  | 5.73  |
| P23116_EI1E13a | Eukaryotic: K.FLWESYR.Q                       | 4.89   | 10.64  | 0.46  | 2.18  |
| P23116_EI1E13a | Eukaryotic: R.FSVLQYVVEVK#.D                  | 176.33 | 64.87  | 2.72  | 0.37  |
| P23116_EI1E13a | Eukaryotic: R.IGLINDM*VR.F                    | 42.20  | 38.81  | 1.09  | 0.92  |
| P23116_EI1E13a | Eukaryotic: R.IGLINDMVR.F                     | 12.70  | 21.21  | 0.60  | 1.67  |
| P23116_EI1E13a | Eukaryotic: K.IHEPIML#.Y                      | 11.81  | 3.25   | 3.64  | 0.27  |
| P23116_EI1E13a | Eukaryotic: R.ILQEHEQIK#.K                    | 257.89 | 70.65  | 3.65  | 0.27  |
| P23116_EI1E13a | Eukaryotic: R.ITTM*QLER.E                     | 30.02  | 52.88  | 0.57  | 1.76  |
| P23116_EI1E13a | Eukaryotic: R.KGPEADSEWR.R                    | 9.39   | 19.35  | 0.49  | 2.06  |
| P23116_EI1E13a | Eukaryotic: K.K#QPALDVLVDVM*#.S               | 32.85  | 15.69  | 2.09  | 0.48  |
| P23116_EI1E13a | Eukaryotic: R.LATLLGLQAPPTR.I                 | 19.04  | 28.47  | 0.67  | 1.50  |
| P23116_EI1E13a | Eukaryotic: R.LESLNIQR.E                      | 44.40  | 77.36  | 0.57  | 1.74  |
| P23116_EI1E13a | Eukaryotic: R.LLDM*DGIVVEK#.Q                 | 92.41  | 89.68  | 1.03  | 0.97  |
| P23116_EI1E13a | Eukaryotic: R.LLDMDGIVVEK#.Q                  | 48.67  | 16.31  | 2.98  | 0.34  |
| P23116_EI1E13a | Eukaryotic: R.LLLTPVVK#.F                     | 111.75 | 47.13  | 2.37  | 0.42  |
| P23116_EI1E13a | Eukaryotic: R.LVQLDSAISM*ELWQEAFF#.A          | 112.49 | 46.62  | 2.41  | 0.41  |
| P23116_EI1E13a | Eukaryotic: R.LYHDIQAQAFK#.F                  | 76.21  | 29.91  | 2.55  | 0.39  |
| P23116_EI1E13a | Eukaryotic: K.NLTQEEM*QR.M                    | 26.85  | 50.88  | 0.53  | 1.90  |
| P23116_EI1E13a | Eukaryotic: R.NQLTAM*SSVLAK#.A                | 113.04 | 46.06  | 2.45  | 0.41  |
| P23116_EI1E13a | Eukaryotic: R.NQLTAMSSVLAK#.A                 | 66.85  | 25.43  | 2.63  | 0.38  |
| P23116_EI1E13a | Eukaryotic: K.QPALDVLVDVM*#.S                 | 12.23  | 3.74   | 3.27  | 0.31  |
| P23116_EI1E13a | Eukaryotic: R.QSYVEEK.L                       | 28.83  | 10.17  | 2.83  | 0.35  |
| P23116_EI1E13a | Eukaryotic: R.RVPPPALSR.D                     | 1.58   | 17.21  | 0.09  | 10.92 |
| P23116_EI1E13a | Eukaryotic: K.SGNALFHASTLHR.L                 | 19.35  | 29.62  | 0.65  | 1.53  |
| P23116_EI1E13a | Eukaryotic: K.SLEDVVR.A                       | 28.37  | 44.50  | 0.64  | 1.57  |
| P23116_EI1E13a | Eukaryotic: R.TLSFGSDLNYATR.E                 | 39.77  | 66.76  | 0.60  | 1.68  |
| P23116_EI1E13a | Eukaryotic: R.VKDM*DLWEQQEER.I                | 15.96  | 22.78  | 0.70  | 1.43  |
| P23116_EI1E13a | Eukaryotic: R.VLLATLSIPIPER.T                 | 49.92  | 106.64 | 0.47  | 2.14  |
| P23116_EI1E13a | Eukaryotic: K.VSTVFWK#.S                      | 110.83 | 43.92  | 2.52  | 0.40  |
| Q8JZ09_EI1E13b | Eukaryotic: K.AEAVGEQAR.G                     | 10.13  | 20.81  | 0.49  | 2.05  |
| Q8JZ09_EI1E13b | Eukaryotic: R.AKPAQCEETATSPAASPTQSAER.S       | 23.99  | 41.69  | 0.58  | 1.74  |
| Q8JZ09_EI1E13b | Eukaryotic: R.DQYSVIFESGDR.T                  | 9.69   | 14.85  | 0.65  | 1.53  |
| Q8JZ09_EI1E13b | Eukaryotic: K.DRPEADGIDSVIVVDNVPQVGPDRLEK.L   | 2.13   | 12.04  | 0.18  | 5.65  |
| Q8JZ09_EI1E13b | Eukaryotic: R.GHPSAGAEEGSDGSAEAEPR.A          | 41.60  | 99.85  | 0.42  | 2.40  |
| Q8JZ09_EI1E13b | Eukaryotic: R.GIALWGGDK#.F                    | 46.90  | 22.84  | 2.05  | 0.49  |
| Q8JZ09_EI1E13b | Eukaryotic: R.GIALWGGDKFK.Q                   | 58.35  | 25.00  | 2.33  | 0.43  |
| Q8JZ09_EI1E13b | Eukaryotic: K.GTQGVVTNFEIFR.M                 | 67.09  | 129.63 | 0.52  | 1.93  |
| Q8JZ09_EI1E13b | Eukaryotic: K.GTYLATHFQR.G                    | 21.99  | 43.28  | 0.51  | 1.97  |
| Q8JZ09_EI1E13b | Eukaryotic: K.GYFLEYASPAHAVDAVK#.N            | 240.85 | 99.42  | 2.42  | 0.41  |
| Q8JZ09_EI1E13b | Eukaryotic: K.IINDYPEEDGK#.T                  | 38.89  | 20.20  | 1.93  | 0.52  |
| Q8JZ09_EI1E13b | Eukaryotic: K.M*AEQELM*#.K.Q                  | 44.20  | 19.86  | 2.23  | 0.45  |
| Q8JZ09_EI1E13b | Eukaryotic: R.M*TLDTLSIYETPSM*GLLDK#.K        | 3.91   | 2.62   | 1.49  | 0.67  |
| Q8JZ09_EI1E13b | Eukaryotic: R.MTLDTLSIYETPSM*GLLDK#.K         | 3.99   | 2.56   | 1.56  | 0.64  |
| Q8JZ09_EI1E13b | Eukaryotic: R.MTLDTLSIYETPSM*GLLDK#.K#.S      | 49.57  | 18.27  | 2.71  | 0.37  |
| Q8JZ09_EI1E13b | Eukaryotic: R.M*TLDTLSIYETPSMGLLDK#.K#.S      | 21.51  | 9.70   | 2.22  | 0.45  |
| Q8JZ09_EI1E13b | Eukaryotic: R.MTLDTLSIYETPSMGLLDK#.K#.S       | 30.23  | 9.46   | 3.19  | 0.31  |
| Q8JZ09_EI1E13b | Eukaryotic: K.NADGYK#.LQK#.Q                  | 57.22  | 22.71  | 2.52  | 0.40  |
| Q8JZ09_EI1E13b | Eukaryotic: K.QQANTFVSPQGFVVLGLR.LS           | 6.31   | 17.28  | 0.37  | 2.74  |
| Q8JZ09_EI1E13b | Eukaryotic: K.QVPDVVEM*#.E                    | 48.75  | 22.43  | 2.17  | 0.46  |
| Q8JZ09_EI1E13b | Eukaryotic: K.QVPDVVEMK#.E                    | 38.51  | 1.22   | 31.44 | 0.03  |
| Q8JZ09_EI1E13b | Eukaryotic: R.SPSQEPSAPGK#.A                  | 84.17  | 34.91  | 2.41  | 0.41  |
| Q8JZ09_EI1E13b | Eukaryotic: R.SPSQEPSAPGK#A.EAVGEQAR.G        | 22.61  | 49.30  | 0.46  | 2.18  |
| Q8JZ09_EI1E13b | Eukaryotic: R.TSIFWNDVKDPVSEER.A              | 37.91  | 68.59  | 0.55  | 1.81  |
| Q8JZ09_EI1E13b | Eukaryotic: K.VDNAYWLWTFQGR.L                 | 25.34  | 40.18  | 0.63  | 1.59  |
| Q8JZ09_EI1E13b | Eukaryotic: K.VDNAYWLWTFQGR.L                 | 8.20   | 12.14  | 0.68  | 1.48  |
| Q8JZ09_EI1E13b | Eukaryotic: R.VNLFTDFDK#.Y                    | 43.59  | 21.17  | 2.06  | 0.49  |
| Q8JZ09_EI1E13b | Eukaryotic: R.VNLFTDFDK#YMTISDEWDIPEK#QPFK#.D | 33.12  | 8.85   | 3.74  | 0.27  |
| Q8JZ09_EI1E13b | Eukaryotic: R.VTLM*QLPTR.Q                    | 28.63  | 53.76  | 0.53  | 1.88  |
| Q8JZ09_EI1E13b | Eukaryotic: R.WTETYVR.W                       | 49.10  | 90.41  | 0.54  | 1.84  |
| Q8JZ09_EI1E13b | Eukaryotic: R.AKPAQCEETATSPAASPTQSAER.S       | 18.45  | 13.25  | 1.39  | 0.72  |
| Q8JZ09_EI1E13b | Eukaryotic: K.DRPEADGIDSVIVVDNVPQVGPDR.L      | 2.94   | 9.83   | 0.30  | 3.35  |
| Q8JZ09_EI1E13b | Eukaryotic: R.GHPSAGAEEGSDGSAEAEPR.A          | 8.10   | 29.45  | 0.27  | 3.64  |
| Q8JZ09_EI1E13b | Eukaryotic: K.GYFLEYASPAHAVDAVK#.N            | 39.74  | 27.38  | 1.45  | 0.69  |
| Q8JZ09_EI1E13b | Eukaryotic: K.IINDYPEEDGK#.T                  | 9.73   | 5.41   | 1.80  | 0.56  |
| Q8JZ09_EI1E13b | Eukaryotic: R.SPSQEPSAPGK#.A                  | 16.58  | 11.20  | 1.48  | 0.68  |
| Q8JZ09_EI1E13b | Eukaryotic: R.TSIFWNDVKDPVSEER.A              | 6.84   | 13.37  | 0.51  | 1.95  |
| Q8R1B4_EI1E13c | Eukaryotic: R.AKELLGQSLLR.S                   | 14.73  | 27.93  | 0.53  | 1.90  |
| Q8R1B4_EI1E13c | Eukaryotic: K.DAHNALLDIQSSGR.A                | 5.15   | 9.09   | 0.57  | 1.76  |
| Q8R1B4_EI1E13c | Eukaryotic: R.DFESHITNYK#.Q                   | 65.43  | 25.10  | 2.61  | 0.38  |
| Q8R1B4_EI1E13c | Eukaryotic: K.ELLGQGLLR#@.S                   | 12.13  | 19.02  | 0.64  | 1.57  |
| Q8R1B4_EI1E13c | Eukaryotic: R.FEELTNLIR.T                     | 19.24  | 35.25  | 0.55  | 1.83  |
| Q8R1B4_EI1E13c | Eukaryotic: K.GTEITHAVVIK#.K                  | 32.12  | 14.96  | 2.15  | 0.47  |
| Q8R1B4_EI1E13c | Eukaryotic: K.GTEITHAVVIK#.L                  | 47.07  | 16.09  | 2.93  | 0.34  |
| Q8R1B4_EI1E13c | Eukaryotic: K.KLNELQVR.G                      | 6.43   | 9.27   | 0.69  | 1.44  |
| Q8R1B4_EI1E13c | Eukaryotic: K.LGSLVENNER.V                    | 44.31  | 54.48  | 0.81  | 1.23  |
| Q8R1B4_EI1E13c | Eukaryotic: K.LNEILQVR.G                      | 12.99  | 26.24  | 0.50  | 2.02  |
| Q8R1B4_EI1E13c | Eukaryotic: K.SEQDQAEENEGEDSAVLM*ER.L         | 7.71   | 14.90  | 0.52  | 1.93  |
| Q8R1B4_EI1E13c | Eukaryotic: K.SIVDKGVPR.F                     | 9.81   | 15.96  | 0.61  | 1.63  |
| Q8R1B4_EI1E13c | Eukaryotic: R.TEPTAQNLALQLAEK#.L              | 81.36  | 28.72  | 2.83  | 0.35  |
| Q8R1B4_EI1E13c | Eukaryotic: R.AKELLGQGLLR.S                   | 23.22  | 40.35  | 0.58  | 1.74  |
| Q8R1B4_EI1E13c | Eukaryotic: R.DFESHITNYK#.Q                   | 94.16  | 25.49  | 3.69  | 0.27  |
| Q8R1B4_EI1E13c | Eukaryotic: K.ELLGQGLLR.S                     | 18.41  | 28.48  | 0.65  | 1.55  |
| Q8R1B4_EI1E13c | Eukaryotic: R.FEELTNLIR.T                     | 30.52  | 45.70  | 0.67  | 1.50  |
| Q8R1B4_EI1E13c | Eukaryotic: R.FFTGSDSESSLSGEEELVTK#PVSNGYK#.Q | 7.99   | 2.45   | 3.25  | 0.31  |
| Q8R1B4_EI1E13c | Eukaryotic: K.GTEITHAVVIK#.K                  | 63.87  | 25.84  | 2.47  | 0.40  |
| Q8R1B4_EI1E13c | Eukaryotic: R.LHTYK#.F                        | 30.86  | 14.59  | 2.12  | 0.47  |
| Q8R1B4_EI1E13c | Eukaryotic: R.LDEEEDNEGGEWER.V                | 7.04   | 12.30  | 0.57  | 1.75  |
| Q8R1B4_EI1E13c | Eukaryotic: K.M*HINEELM*ASLDQPTQVVM*HR.T      | 7.99   | 2.88   | 2.77  | 0.36  |
| Q8R1B4_EI1E13c | Eukaryotic: K.RLDEEEDNEGGEWER.V               | 4.25   | 32.43  | 0.13  | 7.63  |
| Q8R1B4_EI1E13c | Eukaryotic: K.SEQDQAEENEGEDSAVLM*ER.L         | 7.11   | 16.32  | 0.44  | 2.30  |
| Q8R1B4_EI1E13c | Eukaryotic: K.SIVDKGVPR.F                     | 10.87  | 26.04  | 0.42  | 2.39  |
| Q8R1B4_EI1E13c | Eukaryotic: R.TEPTAQNLALQLAEK#.L              | 123.36 | 47.68  | 2.59  | 0.39  |

|                |                                                 |        |        |      |      |
|----------------|-------------------------------------------------|--------|--------|------|------|
| Q8R1B4_EI_Ef3c | Eukaryotic: K.VWDLFPEADK#.V                     | 15.44  | 6.08   | 2.54 | 0.39 |
| O70194_EI_Ef3d | Eukaryotic: R.DM*PYQPSK#.G                      | 38.96  | 19.35  | 2.01 | 0.50 |
| O70194_EI_Ef3d | Eukaryotic: R.DMPYQPSK#.G                       | 11.35  | 5.57   | 2.04 | 0.49 |
| O70194_EI_Ef3d | Eukaryotic: R.GAVIATELK#.N                      | 94.61  | 52.32  | 1.81 | 0.55 |
| O70194_EI_Ef3d | Eukaryotic: R.IFHVTITDDPVIR.K                   | 3.88   | 10.67  | 0.36 | 2.75 |
| O70194_EI_Ef3d | Eukaryotic: R.NM*VQFNLQTLPK#.S                  | 54.21  | 29.19  | 1.86 | 0.54 |
| O70194_EI_Ef3d | Eukaryotic: R.SDWVWKHEEMDFPQLMK#.M              | 6.23   | 4.13   | 1.51 | 0.66 |
| O70194_EI_Ef3d | Eukaryotic: R.SVYSWDIVVQR.V                     | 25.67  | 36.65  | 0.70 | 1.43 |
| O70194_EI_Ef3d | Eukaryotic: K.TLNEWDSR.H                        | 15.50  | 29.04  | 0.53 | 1.87 |
| O70194_EI_Ef3d | Eukaryotic: K.VADWTGATYQDK#.R                   | 23.04  | 13.61  | 1.69 | 0.59 |
| O70194_EI_Ef3d | Eukaryotic: K.YLILKHPDNK#.Q                     | 31.41  | 11.25  | 2.79 | 0.36 |
| O70194_EI_Ef3d | Eukaryotic: R.YNFPNPNPFVEDDM*DKNEIASVAYR.Y      | 6.52   | 18.34  | 0.36 | 2.81 |
| O70194_EI_Ef3d | Eukaryotic: K.YSSQFGGGSQYAFHEEETSFLQVDTAR.T     | 5.68   | 8.02   | 0.71 | 1.41 |
| O70194_EI_Ef3d | Eukaryotic: R.DNSDFDLLTVSETANEPQDEGNSFNSPR.N    | 6.89   | 11.55  | 0.60 | 1.68 |
| O70194_EI_Ef3d | Eukaryotic: R.GAVIATELK#.N                      | 79.06  | 34.88  | 2.27 | 0.44 |
| O70194_EI_Ef3d | Eukaryotic: R.IFHVTITDDPVIR.K                   | 19.37  | 43.08  | 0.45 | 2.22 |
| O70194_EI_Ef3d | Eukaryotic: R.NM*VQFNLQTLPK#.S                  | 39.98  | 16.23  | 2.46 | 0.41 |
| O70194_EI_Ef3d | Eukaryotic: R.SDWVWKHEEMDFPQLM*K.M              | 19.32  | 7.47   | 2.59 | 0.39 |
| O70194_EI_Ef3d | Eukaryotic: K.TLNEWDSR.H                        | 14.78  | 19.98  | 0.74 | 1.35 |
| O70194_EI_Ef3d | Eukaryotic: K.VADWTGATYQDK#.R                   | 13.57  | 6.20   | 2.19 | 0.46 |
| O70194_EI_Ef3d | Eukaryotic: K.YLILKHPDNK#.Q                     | 20.38  | 10.45  | 1.95 | 0.51 |
| O70194_EI_Ef3d | Eukaryotic: K.YSSQFGGGSQYAFHEEETSFLQVDTAR.T     | 4.23   | 9.30   | 0.46 | 2.20 |
| O70194_EI_Ef3d | Eukaryotic: R.DNSDFDLLTVSETANEPQDEGNSFNSPR.N    | 9.97   | 16.37  | 0.61 | 1.64 |
| O70194_EI_Ef3d | Eukaryotic: R.GAVIATELK#.N                      | 76.52  | 33.19  | 2.31 | 0.43 |
| O70194_EI_Ef3d | Eukaryotic: K.LGDDIDLIVR.C                      | 12.07  | 22.67  | 0.53 | 1.88 |
| O70194_EI_Ef3d | Eukaryotic: R.NM*VQFNLQTLPK#.S                  | 58.06  | 22.30  | 2.60 | 0.38 |
| O70194_EI_Ef3d | Eukaryotic: R.SVYSWDIVVQR.V                     | 12.08  | 17.86  | 0.68 | 1.48 |
| O70194_EI_Ef3d | Eukaryotic: K.TLNEWDSR.H                        | 8.16   | 20.40  | 0.40 | 2.50 |
| O70194_EI_Ef3d | Eukaryotic: K.VADWTGATYQDK#.R                   | 19.59  | 11.63  | 1.68 | 0.59 |
| P60229_EI_Ef3e | Eukaryotic: K.ETIDNNSVSSPQLSQQR.T               | 2.08   | 4.41   | 0.47 | 2.12 |
| P60229_EI_Ef3e | Eukaryotic: K.LASEILM*QNWDAAM*EDLTRL.L          | 2.12   | 3.72   | 0.57 | 1.75 |
| P60229_EI_Ef3e | Eukaryotic: K.LASEILM*QNWDAAMEDLTRL.L           | 4.40   | 6.35   | 0.69 | 1.44 |
| P60229_EI_Ef3e | Eukaryotic: K.LDLSDTNM*VDFAM*DVYK#.N            | 14.86  | 12.11  | 1.23 | 0.81 |
| P60229_EI_Ef3e | Eukaryotic: K.LDLSDTNM*VDFAM*DVYK#.N            | 4.85   | 1.78   | 2.73 | 0.37 |
| P60229_EI_Ef3e | Eukaryotic: K.LDLSDTNM*VDFAM*DVYK#.N            | 21.13  | 5.58   | 3.79 | 0.26 |
| P60229_EI_Ef3e | Eukaryotic: K.LGHVVM*GNNVSPYQVIEK#.T            | 78.34  | 27.70  | 2.83 | 0.35 |
| P60229_EI_Ef3e | Eukaryotic: K.LGHVVM*GNNVSPYQVIEK#.T            | 5.50   | 2.33   | 2.36 | 0.42 |
| P60229_EI_Ef3e | Eukaryotic: K.M*FEDPETTR.Q                      | 12.05  | 16.82  | 0.72 | 1.40 |
| P60229_EI_Ef3e | Eukaryotic: R.M*LFYLDADK#.H                     | 45.32  | 18.35  | 2.47 | 0.40 |
| P60229_EI_Ef3e | Eukaryotic: R.M*LFYLDADK#.H                     | 28.44  | 9.85   | 2.89 | 0.35 |
| P60229_EI_Ef3e | Eukaryotic: R.NALSSLVGK#.L                      | 53.38  | 22.47  | 2.38 | 0.42 |
| P60229_EI_Ef3e | Eukaryotic: K.LQQAETPIVK#.M                     | 125.04 | 55.03  | 2.27 | 0.44 |
| P60229_EI_Ef3e | Eukaryotic: R.SQM*LAM*NIEK#.K                   | 40.68  | 18.22  | 2.23 | 0.45 |
| P60229_EI_Ef3e | Eukaryotic: R.SQM*LAM*NIEK#.K                   | 26.07  | 11.73  | 2.22 | 0.45 |
| P60229_EI_Ef3e | Eukaryotic: R.TTVVAQLK#.Q                       | 87.38  | 28.67  | 3.05 | 0.33 |
| P60229_EI_Ef3e | Eukaryotic: R.VLVPATDR.N                        | 28.31  | 70.54  | 0.40 | 2.49 |
| P60229_EI_Ef3e | Eukaryotic: R.WIVNLIR.N                         | 12.04  | 20.66  | 0.58 | 1.72 |
| P60229_EI_Ef3e | Eukaryotic: R.YLTTAVITNK#.D                     | 122.55 | 49.80  | 2.46 | 0.41 |
| P60229_EI_Ef3e | Eukaryotic: K.LDLSDTNM*VDFAM*DVYK#.N            | 11.77  | 4.39   | 2.68 | 0.37 |
| P60229_EI_Ef3e | Eukaryotic: K.LGHVVM*GNNVSPYQVIEK#.T            | 35.22  | 13.01  | 2.71 | 0.37 |
| P60229_EI_Ef3e | Eukaryotic: K.LGHVVM*GNNVSPYQVIEK#.T            | 17.26  | 6.62   | 2.61 | 0.38 |
| P60229_EI_Ef3e | Eukaryotic: R.LKETIDNNSVSSPQLSQQR.T             | 11.62  | 13.87  | 0.84 | 1.19 |
| P60229_EI_Ef3e | Eukaryotic: R.M*LFYLDADK#.H                     | 23.94  | 11.29  | 2.12 | 0.47 |
| P60229_EI_Ef3e | Eukaryotic: R.NALSSLVGK#.L                      | 37.77  | 16.85  | 2.24 | 0.45 |
| P60229_EI_Ef3e | Eukaryotic: K.LQQAETPIVK#.M                     | 59.59  | 25.62  | 2.33 | 0.43 |
| P60229_EI_Ef3e | Eukaryotic: R.SEAPNWTQDSGFY.-                   | 18.63  | 18.63  | 1.00 | 1.00 |
| P60229_EI_Ef3e | Eukaryotic: R.SQM*LAM*NIEK#.K                   | 28.90  | 13.05  | 2.21 | 0.45 |
| P60229_EI_Ef3e | Eukaryotic: R.TTVVAQLK#.Q                       | 81.66  | 48.75  | 1.68 | 0.60 |
| P60229_EI_Ef3e | Eukaryotic: R.YLTTAVITNK#.D                     | 76.72  | 27.71  | 2.77 | 0.36 |
| P60229_EI_Ef3e | Eukaryotic: K.LGHVVM*GNNVSPYQVIEK#.T            | 64.38  | 21.40  | 3.01 | 0.33 |
| P60229_EI_Ef3e | Eukaryotic: R.LKETIDNNSVSSPQLSQQR.T             | 15.55  | 27.24  | 0.57 | 1.75 |
| P60229_EI_Ef3e | Eukaryotic: K.M*FEDPETTR.Q                      | 10.59  | 13.99  | 0.76 | 1.32 |
| P60229_EI_Ef3e | Eukaryotic: R.M*LFYLDADK#.H                     | 39.94  | 14.12  | 2.83 | 0.35 |
| P60229_EI_Ef3e | Eukaryotic: R.NALSSLVGK#.L                      | 47.42  | 16.66  | 2.85 | 0.35 |
| P60229_EI_Ef3e | Eukaryotic: K.LQQAETPIVK#.M                     | 81.29  | 28.85  | 2.82 | 0.35 |
| P60229_EI_Ef3e | Eukaryotic: R.SEAPNWTQDSGFY.-                   | 21.12  | 21.12  | 1.00 | 1.00 |
| P60229_EI_Ef3e | Eukaryotic: R.SQM*LAM*NIEK#.K                   | 45.78  | 17.85  | 2.57 | 0.39 |
| P60229_EI_Ef3e | Eukaryotic: R.WIVNLIR.N                         | 7.78   | 16.34  | 0.48 | 2.10 |
| P60229_EI_Ef3e | Eukaryotic: R.YLTTAVITNK#.D                     | 103.46 | 41.46  | 2.50 | 0.40 |
| Q9DCH4_EI_Ef3f | Eukaryotic: K.AYVSTLM*GVPGR.T                   | 28.64  | 46.18  | 0.62 | 1.61 |
| Q9DCH4_EI_Ef3f | Eukaryotic: K.AYVSTLM*GVPGR.T                   | 12.04  | 18.28  | 0.66 | 1.52 |
| Q9DCH4_EI_Ef3f | Eukaryotic: R.EAPNPHILTVDTGLQHGR.M              | 1.35   | 2.88   | 0.47 | 2.13 |
| Q9DCH4_EI_Ef3f | Eukaryotic: R.FLM*SLVNQVPK#.I                   | 79.39  | 31.92  | 2.49 | 0.40 |
| Q9DCH4_EI_Ef3f | Eukaryotic: R.IGVDLIM*K#.T                      | 88.20  | 28.36  | 3.11 | 0.32 |
| Q9DCH4_EI_Ef3f | Eukaryotic: R.IGVDLIM*K#.T                      | 63.77  | 18.62  | 3.43 | 0.29 |
| Q9DCH4_EI_Ef3f | Eukaryotic: R.LHPVILASIVDSYER.R                 | 32.82  | 48.35  | 0.68 | 1.47 |
| Q9DCH4_EI_Ef3f | Eukaryotic: K.NMYELHK#.K                        | 40.48  | 13.73  | 2.95 | 0.34 |
| Q9DCH4_EI_Ef3f | Eukaryotic: R.TM*GVM*FTPLTVK#.Y                 | 68.08  | 36.26  | 1.88 | 0.53 |
| Q9DCH4_EI_Ef3f | Eukaryotic: R.TMGVM*FTPLTVK#.Y                  | 32.94  | 11.53  | 2.86 | 0.35 |
| Q9DCH4_EI_Ef3f | Eukaryotic: R.TM*GVM*FTPLTVK#.Y                 | 32.94  | 11.53  | 2.86 | 0.35 |
| Q9DCH4_EI_Ef3f | Eukaryotic: R.TMGVM*FTPLTVK#.Y                  | 27.87  | 7.00   | 3.98 | 0.25 |
| Q9DCH4_EI_Ef3f | Eukaryotic: R.VIGLSDQLQVGGASAR.I                | 31.61  | 52.13  | 0.61 | 1.65 |
| Q9DCH4_EI_Ef3f | Eukaryotic: R.VIGLLGTVDK#.H                     | 125.30 | 48.34  | 2.59 | 0.39 |
| Q9DCH4_EI_Ef3f | Eukaryotic: K.VSADNTVGR.F                       | 28.23  | 37.84  | 0.75 | 1.34 |
| Q9DCH4_EI_Ef3f | Eukaryotic: R.FLM*SLVNQVPK#.I                   | 10.93  | 4.47   | 2.45 | 0.41 |
| Q9DCH4_EI_Ef3f | Eukaryotic: R.FLM*SLVNQVPK#.I                   | 12.42  | 6.15   | 2.02 | 0.50 |
| Q9DCH4_EI_Ef3f | Eukaryotic: R.VIGLLGTVDK#.H                     | 31.65  | 9.57   | 3.31 | 0.30 |
| Q9DCH4_EI_Ef3f | Eukaryotic: R.VIGLLGTVDK#.H                     | 29.67  | 10.98  | 2.70 | 0.37 |
| Q9Z1D1_EI_Ef3g | Eukaryotic: R.AIAGVSGFYDHLILNVEWAK#PSTN.-       | 23.06  | 5.03   | 4.59 | 0.22 |
| Q9Z1D1_EI_Ef3g | Eukaryotic: K.EK#LPEGELEPVQAAQSK#.T             | 115.13 | 47.18  | 2.44 | 0.41 |
| Q9Z1D1_EI_Ef3g | Eukaryotic: K.EK#LPEGELEPVQAAQSK#.T             | 124.48 | 47.93  | 2.60 | 0.39 |
| Q9Z1D1_EI_Ef3g | Eukaryotic: K.EK#LPEGELEPVQAAQSK#.T             | 14.90  | 5.14   | 2.90 | 0.34 |
| Q9Z1D1_EI_Ef3g | Eukaryotic: K.FGNSEFDPGPNVATTTVSDVSM*TFITSK#.E  | 8.86   | 3.82   | 2.32 | 0.43 |
| Q9Z1D1_EI_Ef3g | Eukaryotic: K.FGNSEFDPGPNVATTTVSDVSM*TFITSK#.E  | 18.12  | 7.69   | 2.36 | 0.42 |
| Q9Z1D1_EI_Ef3g | Eukaryotic: K.GIPLTGDTSPEPELLPGDPLPPPK#.E       | 25.66  | 19.21  | 1.34 | 0.75 |
| Q9Z1D1_EI_Ef3g | Eukaryotic: K.GIPLTGDTSPEPELLPGDPLPPPK#.E       | 3.99   | 2.57   | 1.55 | 0.64 |
| Q9Z1D1_EI_Ef3g | Eukaryotic: K.GIPLTGDTSPEPELLPGDPLPPPK#.E       | 5.46   | 4.16   | 1.31 | 0.76 |
| Q9Z1D1_EI_Ef3g | Eukaryotic: K.KFGNSEFDPGPNVATTTVSDVSM*TFITSK#.E | 5.17   | 1.95   | 2.65 | 0.38 |
| Q9Z1D1_EI_Ef3g | Eukaryotic: K.LPEGELEPVQAAQSK#.T                | 74.01  | 37.74  | 1.96 | 0.51 |
| Q9Z1D1_EI_Ef3g | Eukaryotic: K.VTEYK#EEDGK#.F                    | 38.50  | 13.52  | 2.85 | 0.35 |
| Q9Z1D1_EI_Ef3g | Eukaryotic: R.VTNLSEDR.E                        | 85.78  | 138.74 | 0.62 | 1.62 |
| Q91WK2_E_Ef3h  | Eukaryotic: K.ASITFEHM*FEEVPIVK#.N              | 108.19 | 46.30  | 2.34 | 0.43 |
| Q91WK2_E_Ef3h  | Eukaryotic: K.ASITFEHM*FEEVPIVK#.N              | 153.55 | 54.52  | 2.82 | 0.36 |

|                  |                                                     |        |       |      |      |
|------------------|-----------------------------------------------------|--------|-------|------|------|
| Q91WK2_E_EiF3h   | Eukaryotic: K.DFSPALKK#A                            | 28.23  | 10.05 | 2.81 | 0.36 |
| Q91WK2_E_EiF3h   | Eukaryotic: K.ETGSTATSSGAGGAVGK#G                   | 145.74 | 48.71 | 2.99 | 0.33 |
| Q91WK2_E_EiF3h   | Eukaryotic: K.HELLINLSSNHLGK#S                      | 9.36   | 6.91  | 1.35 | 0.74 |
| Q91WK2_E_EiF3h   | Eukaryotic: K.HYQEGQGTVEQVGLLGLVVEDR.L              | 13.76  | 26.24 | 0.52 | 1.91 |
| Q91WK2_E_EiF3h   | Eukaryotic: R.KHEGTSTATSSGAGGAVGK#G                 | 16.53  | 9.74  | 1.70 | 0.59 |
| Q91WK2_E_EiF3h   | Eukaryotic: K.LFM*AOALQEYNN.-                       | 60.17  | 60.17 | 1.00 | 1.00 |
| Q91WK2_E_EiF3h   | Eukaryotic: K.LFMAOALQEYNN.-                        | 80.71  | 80.71 | 1.00 | 1.00 |
| Q91WK2_E_EiF3h   | Eukaryotic: K.NSHLINVLM*WELEK#K                     | 20.49  | 12.16 | 1.68 | 0.59 |
| Q91WK2_E_EiF3h   | Eukaryotic: K.NSHLINVLM*WELEK#K                     | 55.58  | 19.61 | 2.83 | 0.35 |
| Q91WK2_E_EiF3h   | Eukaryotic: K.NSHLINVLM*WELEK#K.S                   | 13.58  | 5.19  | 2.62 | 0.38 |
| Q91WK2_E_EiF3h   | Eukaryotic: K.QVQIDGLVVLK#I                         | 61.21  | 24.44 | 2.50 | 0.40 |
| Q91WK2_E_EiF3h   | Eukaryotic: K.SAVADKHELLSLASSNHLGK.S                | 55.23  | 23.58 | 2.34 | 0.43 |
| Q91WK2_E_EiF3h   | Eukaryotic: K.TAQGSLSLK#A                           | 228.64 | 85.24 | 2.68 | 0.37 |
| Q91WK2_E_EiF3h   | Eukaryotic: R.VDEM*SODI#K.Y                         | 96.10  | 35.95 | 2.67 | 0.37 |
| Q91WK2_E_EiF3h   | Eukaryotic: R.VDEMSQDI#K.Y                          | 34.26  | 14.18 | 2.42 | 0.41 |
| Q91WK2_E_EiF3h   | Eukaryotic: K.ASITFEHMFEEVPIV#N                     | 13.63  | 5.00  | 2.73 | 0.37 |
| Q91WK2_E_EiF3h   | Eukaryotic: K.ETGSTATSSGAGGAVGK#G                   | 14.56  | 5.29  | 2.75 | 0.36 |
| Q91WK2_E_EiF3h   | Eukaryotic: K.LFM*AOALQEYNN.-                       | 6.72   | 6.72  | 1.00 | 1.00 |
| Q91WK2_E_EiF3h   | Eukaryotic: K.ASITFEHMFEEVPIV#N                     | 9.94   | 2.24  | 4.44 | 0.23 |
| Q91WK2_E_EiF3h   | Eukaryotic: K.ETGSTATSSGAGGAVGK#G                   | 21.07  | 10.87 | 1.94 | 0.52 |
| Q91WK2_E_EiF3h   | Eukaryotic: K.LFM*AOALQEYNN.-                       | 6.96   | 6.96  | 1.00 | 1.00 |
| Q9QZD9_Ei_EiF3i  | Eukaryotic: R.DM*TM*FVTASK#D                        | 54.79  | 24.20 | 2.26 | 0.44 |
| Q9QZD9_Ei_EiF3i  | Eukaryotic: R.DM*TM*FVTASK#D                        | 18.71  | 8.91  | 2.10 | 0.48 |
| Q9QZD9_Ei_EiF3i  | Eukaryotic: R.DPQSDSNPEYMK#I                        | 30.32  | 11.70 | 2.59 | 0.39 |
| Q9QZD9_Ei_EiF3i  | Eukaryotic: R.EGDLFTVAK#D                           | 98.89  | 33.41 | 2.96 | 0.34 |
| Q9QZD9_Ei_EiF3i  | Eukaryotic: R.FFHAFEEFGR.V                          | 28.63  | 45.19 | 0.63 | 1.58 |
| Q9QZD9_Ei_EiF3i  | Eukaryotic: K.GHFGPINSVAFHPDGK#S                    | 164.44 | 64.04 | 2.57 | 0.39 |
| Q9QZD9_Ei_EiF3i  | Eukaryotic: R.IHYFDQYFEFEFA.-                       | 19.48  | 19.48 | 1.00 | 1.00 |
| Q9QZD9_Ei_EiF3i  | Eukaryotic: K.LFDSTLLEHQK#T                         | 162.68 | 60.31 | 2.70 | 0.37 |
| Q9QZD9_Ei_EiF3i  | Eukaryotic: R.QINDIQLSR.D                           | 36.53  | 60.55 | 0.60 | 1.66 |
| Q9QZD9_Ei_EiF3i  | Eukaryotic: K.SGEVNVV#K.I                           | 177.69 | 66.59 | 2.67 | 0.37 |
| Q9QZD9_Ei_EiF3i  | Eukaryotic: K.SYSSGGEDGYVR.E                        | 36.96  | 59.97 | 0.62 | 1.62 |
| Q9QZD9_Ei_EiF3i  | Eukaryotic: R.TERPNSAALSPLYDHHVLLGGQEAM*DVTTTSTR.I  | 5.56   | 13.94 | 0.40 | 2.51 |
| Q3UGC7_Ei_EiF3j1 | Eukaryotic: K.ATM*#HDLADYGGYEGYQDYEDFM*.-           | 16.47  | 8.96  | 1.84 | 0.54 |
| Q3UGC7_Ei_EiF3j1 | Eukaryotic: R.DDFTEFGK#L                            | 134.38 | 57.73 | 2.33 | 0.43 |
| Q3UGC7_Ei_EiF3j1 | Eukaryotic: K.DNWDDDDDENKHEAEV#KPEVK#I              | 6.28   | 2.11  | 2.98 | 0.34 |
| Q3UGC7_Ei_EiF3j1 | Eukaryotic: K.ETFGVNNVYIGDAM*NPSSR.D                | 6.15   | 11.03 | 0.56 | 1.79 |
| Q3UGC7_Ei_EiF3j1 | Eukaryotic: K.KHGVVPGGLK#A                          | 52.29  | 24.31 | 2.15 | 0.46 |
| Q3UGC7_Ei_EiF3j1 | Eukaryotic: K.LQEESEDLAK#E                          | 207.55 | 93.73 | 2.21 | 0.45 |
| Q3UGC7_Ei_EiF3j1 | Eukaryotic: K.RLEPEESK.V                            | 17.08  | 37.27 | 0.46 | 2.18 |
| Q3UGC7_Ei_EiF3j1 | Eukaryotic: K.VLTPPEQLADK#L                         | 108.99 | 48.36 | 2.25 | 0.44 |
| Q9DBZ5_Ei_EiF3k  | Eukaryotic: K.ENAYDLEANLAVL#L                       | 30.32  | 9.60  | 3.16 | 0.32 |
| Q9DBZ5_Ei_EiF3k  | Eukaryotic: K.ENAYDLEANLAVL#L                       | 158.58 | 57.24 | 2.77 | 0.36 |
| Q9DBZ5_Ei_EiF3k  | Eukaryotic: K.GIDRYNPENLATER.Y                      | 4.18   | 34.66 | 0.12 | 8.30 |
| Q9DBZ5_Ei_EiF3k  | Eukaryotic: K.IDFDSVSSIM*ASSQ.-                     | 60.65  | 60.65 | 1.00 | 1.00 |
| Q9DBZ5_Ei_EiF3k  | Eukaryotic: K.IDFDSVSSIMASSQ.-                      | 7.54   | 7.54  | 1.00 | 1.00 |
| Q9DBZ5_Ei_EiF3k  | Eukaryotic: R.YNPENLATER.Y                          | 38.50  | 84.32 | 0.46 | 2.19 |
| Q9DBZ5_Ei_EiF3k  | Eukaryotic: K.ENAYDLEANLAVL#L                       | 45.41  | 20.14 | 2.25 | 0.44 |
| Q9DBZ5_Ei_EiF3k  | Eukaryotic: K.IDFDSVSSIM*ASSQ.-                     | 16.68  | 16.68 | 1.00 | 1.00 |
| Q9DBZ5_Ei_EiF3k  | Eukaryotic: K.IDFDSVSSIMASSQ.-                      | 9.27   | 9.27  | 1.00 | 1.00 |
| Q8QZY1_Ei_EiF3l  | Eukaryotic: K.EPFLQQLK#V                            | 32.20  | 17.71 | 1.82 | 0.55 |
| Q8QZY1_Ei_EiF3l  | Eukaryotic: R.IQLLVFK#H                             | 60.25  | 21.53 | 2.80 | 0.36 |
| Q8QZY1_Ei_EiF3l  | Eukaryotic: K.LAGFLDLTQEQR.I                        | 41.82  | 64.59 | 0.65 | 1.54 |
| Q8QZY1_Ei_EiF3l  | Eukaryotic: R.LHSLLDYQAIK#V                         | 84.92  | 25.19 | 3.37 | 0.30 |
| Q8QZY1_Ei_EiF3l  | Eukaryotic: K.LYTTMPVAK#L                           | 36.34  | 24.13 | 1.51 | 0.66 |
| Q8QZY1_Ei_EiF3l  | Eukaryotic: R.QLEVYTSGGDPESVAGEYGR.H                | 6.42   | 13.39 | 0.48 | 2.08 |
| Q8QZY1_Ei_EiF3l  | Eukaryotic: R.QYEQQYQVPEVIK#N                       | 21.25  | 7.65  | 2.78 | 0.36 |
| Q8QZY1_Ei_EiF3l  | Eukaryotic: K.VFSDVQQAQLSTR.S                       | 17.19  | 28.55 | 0.60 | 1.66 |
| Q8QZY1_Ei_EiF3l  | Eukaryotic: K.VLENIENK#S                            | 39.76  | 17.67 | 2.25 | 0.44 |
| Q8QZY1_Ei_EiF3l  | Eukaryotic: K.VSGGPSLEQR.F                          | 38.80  | 62.69 | 0.62 | 1.62 |
| Q8QZY1_Ei_EiF3l  | Eukaryotic: R.VSSDVIDQK#V                           | 143.11 | 53.24 | 2.69 | 0.37 |
| Q8QZY1_Ei_EiF3l  | Eukaryotic: K.VYEQDIYENSWTK#L                       | 73.27  | 26.39 | 2.78 | 0.36 |
| Q8QZY1_Ei_EiF3l  | Eukaryotic: K.VYELQASR.V                            | 22.23  | 43.60 | 0.51 | 1.96 |
| Q8QZY1_Ei_EiF3l  | Eukaryotic: R.YGDFRIR.Q                             | 10.83  | 14.81 | 0.73 | 1.37 |
| Q8QZY1_Ei_EiF3l  | Eukaryotic: K.EPFLQQLK#V                            | 16.94  | 6.43  | 2.63 | 0.38 |
| Q8QZY1_Ei_EiF3l  | Eukaryotic: R.IQLLVFK#H                             | 74.98  | 30.81 | 2.43 | 0.41 |
| Q8QZY1_Ei_EiF3l  | Eukaryotic: K.LAGFLDLTQEQR.I                        | 31.47  | 61.70 | 0.51 | 1.96 |
| Q8QZY1_Ei_EiF3l  | Eukaryotic: R.LHSLLDYQAIK#V                         | 48.72  | 17.46 | 2.79 | 0.36 |
| Q8QZY1_Ei_EiF3l  | Eukaryotic: K.NLVWTSGISALDGEFOSAEVDFYDK#DM*IHADTK#V | 1.95   | 1.67  | 1.16 | 0.86 |
| Q8QZY1_Ei_EiF3l  | Eukaryotic: R.QLEVYTSGGDPESVAGEYGR.H                | 5.43   | 7.40  | 0.73 | 1.36 |
| Q8QZY1_Ei_EiF3l  | Eukaryotic: R.QYEQQYQVPEVIK#N                       | 15.43  | 6.14  | 2.51 | 0.40 |
| Q8QZY1_Ei_EiF3l  | Eukaryotic: K.TVSDLIDQK#V                           | 77.63  | 28.98 | 2.68 | 0.37 |
| Q8QZY1_Ei_EiF3l  | Eukaryotic: K.VFSDVQQAQLSTR.S                       | 10.36  | 14.22 | 0.73 | 1.37 |
| Q8QZY1_Ei_EiF3l  | Eukaryotic: K.VLENIENK#K                            | 17.38  | 6.53  | 2.66 | 0.38 |
| Q8QZY1_Ei_EiF3l  | Eukaryotic: K.VSGGPSLEQR.F                          | 25.67  | 45.10 | 0.57 | 1.76 |
| Q8QZY1_Ei_EiF3l  | Eukaryotic: R.VSSDVIDQK#V                           | 118.54 | 37.11 | 3.19 | 0.31 |
| Q8QZY1_Ei_EiF3l  | Eukaryotic: K.VYEQDIYENSWTK#L                       | 47.26  | 18.98 | 2.49 | 0.40 |
| Q8QZY1_Ei_EiF3l  | Eukaryotic: K.VYELQASR.V                            | 38.47  | 33.77 | 1.14 | 0.88 |
| Q8QZY1_Ei_EiF3l  | Eukaryotic: R.YGDFRIR.Q                             | 8.11   | 16.49 | 0.49 | 2.03 |
| Q8QZY1_Ei_EiF3l  | Eukaryotic: K.EPFLQQLK#V                            | 22.87  | 11.83 | 1.93 | 0.52 |
| Q8QZY1_Ei_EiF3l  | Eukaryotic: R.IQLLVFK#H                             | 115.77 | 43.71 | 2.65 | 0.38 |
| Q8QZY1_Ei_EiF3l  | Eukaryotic: K.LAGFLDLTQEQR.I                        | 30.32  | 51.55 | 0.59 | 1.70 |
| Q8QZY1_Ei_EiF3l  | Eukaryotic: R.LHSLLDYQAIK#V                         | 78.00  | 23.51 | 3.32 | 0.30 |
| Q8QZY1_Ei_EiF3l  | Eukaryotic: K.LYTTMPVAK#L                           | 17.46  | 11.05 | 1.58 | 0.63 |
| Q8QZY1_Ei_EiF3l  | Eukaryotic: R.QLEVYTSGGDPESVAGEYGR.H                | 8.53   | 9.49  | 0.90 | 1.11 |
| Q8QZY1_Ei_EiF3l  | Eukaryotic: R.QYEQQYQVPEVIK#N                       | 21.56  | 8.61  | 2.50 | 0.40 |
| Q8QZY1_Ei_EiF3l  | Eukaryotic: K.TVSDLIDQK#V                           | 123.23 | 38.75 | 3.18 | 0.31 |
| Q8QZY1_Ei_EiF3l  | Eukaryotic: K.VFSDVQQAQLSTR.S                       | 16.18  | 27.02 | 0.60 | 1.67 |
| Q8QZY1_Ei_EiF3l  | Eukaryotic: K.VLENIENK#K                            | 32.13  | 10.13 | 3.17 | 0.32 |
| Q8QZY1_Ei_EiF3l  | Eukaryotic: K.VSGGPSLEQR.F                          | 35.91  | 65.92 | 0.54 | 1.84 |
| Q8QZY1_Ei_EiF3l  | Eukaryotic: R.VSSDVIDQK#V                           | 138.45 | 60.23 | 2.30 | 0.44 |
| Q8QZY1_Ei_EiF3l  | Eukaryotic: K.VYEQDIYENSWTK#L                       | 61.49  | 23.49 | 2.62 | 0.38 |
| Q8QZY1_Ei_EiF3l  | Eukaryotic: K.VYELQASR.V                            | 34.93  | 35.50 | 0.98 | 1.02 |
| Q8QZY1_Ei_EiF3l  | Eukaryotic: R.YGDFRIR.Q                             | 10.60  | 21.68 | 0.49 | 2.05 |
| Q9JX4_EiF3m      | Eukaryotic: R.AL#DPNAPFLDHLTLK#PVK#F                | 122.79 | 55.78 | 2.20 | 0.45 |
| Q9JX4_EiF3m      | Eukaryotic: K.DFIDSLGLHEQNM*AK#M                    | 24.35  | 8.06  | 3.02 | 0.33 |
| Q9JX4_EiF3m      | Eukaryotic: K.FYONNKDFIDSLGLHEQNM*AK#M              | 16.41  | 5.57  | 2.94 | 0.34 |
| Q9JX4_EiF3m      | Eukaryotic: K.FYONNKDFIDSLGLHEQNM*AK#M              | 22.68  | 7.77  | 2.92 | 0.34 |
| Q9JX4_EiF3m      | Eukaryotic: R.LLTFM*GM*AVENK#E                      | 49.75  | 21.14 | 2.35 | 0.42 |
| Q9JX4_EiF3m      | Eukaryotic: R.LLTFM*GM*AVENK#E                      | 30.10  | 64.93 | 0.46 | 2.16 |
| Q9JX4_EiF3m      | Eukaryotic: R.LLTFM*GM*AVENK#E                      | 28.77  | 13.79 | 2.09 | 0.48 |
| Q9JX4_EiF3m      | Eukaryotic: K.QWQQLYTLNAW#K.Q                       | 41.07  | 17.52 | 2.34 | 0.43 |
| Q9JX4_EiF3m      | Eukaryotic: K.VM*VELLGSYTEDNASQAR.V                 | 2.93   | 7.24  | 0.41 | 2.47 |

|                  |                                          |         |        |      |      |
|------------------|------------------------------------------|---------|--------|------|------|
| Q99JX4_EIF EIF3m | Eukaryotic: K.WISDWK#.L                  | 53.13   | 18.00  | 2.95 | 0.34 |
| Q99JX4_EIF EIF3m | Eukaryotic: R.ALK#DPNAPLFDHLLTLKPKV#.F   | 40.90   | 10.07  | 4.06 | 0.25 |
| Q99JX4_EIF EIF3m | Eukaryotic: K.FYQNNKHFIDSLGLLHEQNM*AK#.M | 5.25    | 2.01   | 2.61 | 0.38 |
| Q99JX4_EIF EIF3m | Eukaryotic: R.LLTFM*GM*AVENK#.E          | 10.65   | 3.71   | 2.87 | 0.35 |
| Q99JX4_EIF EIF3m | Eukaryotic: R.LLTFM*GMAVENK#.E           | 14.81   | 51.08  | 0.29 | 3.45 |
| Q99JX4_EIF EIF3m | Eukaryotic: R.LLTFMGM*AVENK#.E           | 14.81   | 51.08  | 0.29 | 3.45 |
| Q99JX4_EIF EIF3m | Eukaryotic: K.QQVQQLYDYLNAWK#.Q          | 10.58   | 4.21   | 2.51 | 0.40 |
| Q99JX4_EIF EIF3m | Eukaryotic: R.ALK#DPNAPLFDHLLTLKPKV#.F   | 52.19   | 18.38  | 2.84 | 0.35 |
| Q99JX4_EIF EIF3m | Eukaryotic: R.LLTFM*GM*AVENK#.E          | 47.03   | 18.54  | 2.54 | 0.39 |
| Q99JX4_EIF EIF3m | Eukaryotic: R.LQLLSNLFHGMK#.N            | 13.01   | 4.41   | 2.95 | 0.34 |
| Q99JX4_EIF EIF3m | Eukaryotic: K.QQVQQLYDYLNAWK#.Q          | 12.00   | 4.06   | 2.95 | 0.34 |
| P60843_IF EIF4a1 | Eukaryotic: K.ATQALVLAPTR.E              | 106.75  | 228.78 | 0.47 | 2.14 |
| P60843_IF EIF4a1 | Eukaryotic: R.DFTVSAM*HGDMD*QDK#.E       | 7.59    | 3.26   | 2.33 | 0.43 |
| P60843_IF EIF4a1 | Eukaryotic: R.DFTVSAM*HGDMDQK#.E         | 30.39   | 15.92  | 1.91 | 0.52 |
| P60843_IF EIF4a1 | Eukaryotic: R.DFTVSAMHGDMD*QDK#.E        | 45.98   | 18.43  | 2.50 | 0.40 |
| P60843_IF EIF4a1 | Eukaryotic: K.DQIYDIFQK#.L               | 148.64  | 58.20  | 2.55 | 0.39 |
| P60843_IF EIF4a1 | Eukaryotic: K.EELTLEGIR.Q                | 44.29   | 79.58  | 0.56 | 1.80 |
| P60843_IF EIF4a1 | Eukaryotic: R.ELAQIQK#.V                 | 1325.90 | 603.68 | 2.20 | 0.46 |
| P60843_IF EIF4a1 | Eukaryotic: R.ENVIHR.I                   | 39.20   | 73.42  | 0.53 | 1.87 |
| P60843_IF EIF4a1 | Eukaryotic: R.GFK#DQIYDIFQK#.L           | 306.63  | 110.02 | 2.79 | 0.36 |
| P60843_IF EIF4a1 | Eukaryotic: R.GFKDQIYDIFQK#.L            | 438.28  | 157.70 | 2.78 | 0.36 |
| P60843_IF EIF4a1 | Eukaryotic: R.GIDVQVSLVINYDLPTR.E        | 32.16   | 60.45  | 0.53 | 1.88 |
| P60843_IF EIF4a1 | Eukaryotic: R.GIDVQVSLVINYDLPTR.E        | 37.70   | 74.32  | 0.51 | 1.97 |
| P60843_IF EIF4a1 | Eukaryotic: R.GIYAGFEKPSAIQQR.A          | 182.49  | 389.12 | 0.47 | 2.13 |
| P60843_IF EIF4a1 | Eukaryotic: K.GYDVIQAQCSGTGK#.T          | 649.79  | 232.04 | 2.80 | 0.36 |
| P60843_IF EIF4a1 | Eukaryotic: K.KEELTLEGIR.Q               | 71.55   | 152.40 | 0.47 | 2.13 |
| P60843_IF EIF4a1 | Eukaryotic: R.KGVAINM*VTEEDKR.T          | 182.51  | 334.67 | 0.55 | 1.83 |
| P60843_IF EIF4a1 | Eukaryotic: R.K#VDWLTEK#.M               | 521.68  | 229.83 | 2.27 | 0.44 |
| P60843_IF EIF4a1 | Eukaryotic: K.LNSNTQVLLSATM*PSDVLVTK#.K  | 98.03   | 39.02  | 2.51 | 0.40 |
| P60843_IF EIF4a1 | Eukaryotic: K.LNSNTQVLLSATM*PSDVLVTK#.K  | 35.71   | 13.80  | 2.59 | 0.39 |
| P60843_IF EIF4a1 | Eukaryotic: K.LNSNTQVLLSATM*PSDVLVTK#.K  | 43.37   | 16.81  | 2.58 | 0.39 |
| P60843_IF EIF4a1 | Eukaryotic: K.LNSNTQVLLSATM*PSDVLVTK#.K  | 155.76  | 54.61  | 2.85 | 0.35 |
| P60843_IF EIF4a1 | Eukaryotic: K.LNSNTQVLLSATM*PSDVLVTK#.K  | 138.61  | 50.58  | 2.74 | 0.36 |
| P60843_IF EIF4a1 | Eukaryotic: K.LNSNTQVLLSATM*PSDVLVTK#.K  | 4.69    | 2.80   | 1.68 | 0.60 |
| P60843_IF EIF4a1 | Eukaryotic: K.LNSNTQVLLSATM*PSDVLVTK#.K  | 203.14  | 86.44  | 2.35 | 0.43 |
| P60843_IF EIF4a1 | Eukaryotic: K.LNSNTQVLLSATM*PSDVLVTK#.K  | 8.05    | 3.04   | 2.65 | 0.38 |
| P60843_IF EIF4a1 | Eukaryotic: K.LQVM*EAPHIIVGTPGR.V        | 117.11  | 267.74 | 0.44 | 2.29 |
| P60843_IF EIF4a1 | Eukaryotic: K.LQMEAPHIIVGTPGR.V          | 82.40   | 145.62 | 0.57 | 1.77 |
| P60843_IF EIF4a1 | Eukaryotic: K.M*FVLDEADEM*LSR.G          | 84.95   | 160.28 | 0.53 | 1.89 |
| P60843_IF EIF4a1 | Eukaryotic: K.MFVLDEADEM*LSR.G           | 30.20   | 55.11  | 0.55 | 1.82 |
| P60843_IF EIF4a1 | Eukaryotic: K.M*FVLDEADEMLSR.G           | 42.89   | 78.19  | 0.55 | 1.82 |
| P60843_IF EIF4a1 | Eukaryotic: K.MFVLDEADEMLSR.G            | 47.38   | 93.51  | 0.51 | 1.97 |
| P60843_IF EIF4a1 | Eukaryotic: R.QFINVER.E                  | 123.61  | 206.49 | 0.60 | 1.67 |
| P60843_IF EIF4a1 | Eukaryotic: R.RKVDWLTEK.M                | 72.77   | 46.61  | 1.56 | 0.64 |
| P60843_IF EIF4a1 | Eukaryotic: K.VDWLTEK#.M                 | 165.19  | 69.13  | 2.39 | 0.42 |
| P60843_IF EIF4a1 | Eukaryotic: R.VFDM*LN.R                  | 55.15   | 90.56  | 0.61 | 1.64 |
| P60843_IF EIF4a1 | Eukaryotic: R.VFDM*LN.R                  | 48.52   | 108.79 | 0.45 | 2.24 |
| P60843_IF EIF4a1 | Eukaryotic: R.VLITD*LLAR.G               | 257.45  | 486.69 | 0.53 | 1.89 |
| P60843_IF EIF4a1 | Eukaryotic: K.ATQALVLAPTR.E              | 5.67    | 17.12  | 0.33 | 3.02 |
| P60843_IF EIF4a1 | Eukaryotic: R.ELAQIQK#.V                 | 22.34   | 23.01  | 0.97 | 1.03 |
| P60843_IF EIF4a1 | Eukaryotic: R.GFK#DQIYDIFQK#.L           | 11.64   | 5.31   | 2.19 | 0.46 |
| P60843_IF EIF4a1 | Eukaryotic: R.GIYAGFEKPSAIQQR.A          | 7.49    | 31.90  | 0.23 | 4.26 |
| P60843_IF EIF4a1 | Eukaryotic: K.GYDVIQAQCSGTGK#.T          | 11.86   | 7.39   | 1.60 | 0.62 |
| P60843_IF EIF4a1 | Eukaryotic: R.VLITD*LLAR.G               | 15.50   | 41.24  | 0.38 | 2.66 |
| P60843_IF EIF4a1 | Eukaryotic: K.ATQALVLAPTR.E              | 48.74   | 74.07  | 0.66 | 1.52 |
| P60843_IF EIF4a1 | Eukaryotic: K.DQIYDIFQK#.L               | 22.14   | 8.52   | 2.60 | 0.38 |
| P60843_IF EIF4a1 | Eukaryotic: K.KEELTLEGIR.Q               | 16.94   | 19.67  | 0.86 | 1.16 |
| P60843_IF EIF4a1 | Eukaryotic: R.ELAQIQK#.V                 | 282.70  | 117.33 | 2.41 | 0.42 |
| P60843_IF EIF4a1 | Eukaryotic: R.ENVIHR.I                   | 15.68   | 21.46  | 0.73 | 1.37 |
| P60843_IF EIF4a1 | Eukaryotic: R.GFK#DQIYDIFQK#.L           | 135.66  | 51.21  | 2.65 | 0.38 |
| P60843_IF EIF4a1 | Eukaryotic: R.GIDVQVSLVINYDLPTR.E        | 11.11   | 20.30  | 0.55 | 1.83 |
| P60843_IF EIF4a1 | Eukaryotic: R.GIYAGFEKPSAIQQR.A          | 58.76   | 80.61  | 0.73 | 1.37 |
| P60843_IF EIF4a1 | Eukaryotic: K.GYDVIQAQCSGTGK#.T          | 267.55  | 92.93  | 2.88 | 0.35 |
| P60843_IF EIF4a1 | Eukaryotic: K.KEELTLEGIR.Q               | 21.03   | 30.04  | 0.70 | 1.43 |
| P60843_IF EIF4a1 | Eukaryotic: R.KGVAINM*VTEEDKR.T          | 23.86   | 41.51  | 0.57 | 1.74 |
| P60843_IF EIF4a1 | Eukaryotic: R.KGVAINM*VTEEDKR.T          | 17.91   | 40.53  | 0.44 | 2.26 |
| P60843_IF EIF4a1 | Eukaryotic: R.K#VDWLTEK#.M               | 131.72  | 62.04  | 2.12 | 0.47 |
| P60843_IF EIF4a1 | Eukaryotic: K.LNSNTQVLLSATM*PSDVLVTK#.K  | 24.87   | 9.92   | 2.51 | 0.40 |
| P60843_IF EIF4a1 | Eukaryotic: K.LNSNTQVLLSATM*PSDVLVTK#.K  | 9.54    | 3.89   | 2.46 | 0.41 |
| P60843_IF EIF4a1 | Eukaryotic: K.LNSNTQVLLSATM*PSDVLVTK#.K  | 34.05   | 11.43  | 2.98 | 0.34 |
| P60843_IF EIF4a1 | Eukaryotic: K.LNSNTQVLLSATM*PSDVLVTK#.K  | 42.60   | 12.13  | 3.51 | 0.28 |
| P60843_IF EIF4a1 | Eukaryotic: K.LQVM*EAPHIIVGTPGR.V        | 26.96   | 61.55  | 0.44 | 2.28 |
| P60843_IF EIF4a1 | Eukaryotic: K.LQVM*EAPHIIVGTPGR.V        | 2.72    | 6.88   | 0.40 | 2.53 |
| P60843_IF EIF4a1 | Eukaryotic: K.M*FVLDEADEM*LSR.G          | 19.57   | 35.82  | 0.55 | 1.83 |
| P60843_IF EIF4a1 | Eukaryotic: K.MFVLDEADEM*LSR.G           | 10.29   | 12.24  | 0.84 | 1.19 |
| P60843_IF EIF4a1 | Eukaryotic: K.M*FVLDEADEMLSR.G           | 11.99   | 23.87  | 0.50 | 1.99 |
| P60843_IF EIF4a1 | Eukaryotic: K.MFVLDEADEMLSR.G            | 9.47    | 13.61  | 0.70 | 1.44 |
| P60843_IF EIF4a1 | Eukaryotic: R.QFINVER.E                  | 15.60   | 23.88  | 0.65 | 1.53 |
| P60843_IF EIF4a1 | Eukaryotic: R.RKVDWLTEK.M                | 24.20   | 42.63  | 0.57 | 1.76 |
| P60843_IF EIF4a1 | Eukaryotic: K.VDWLTEK#.M                 | 29.12   | 16.74  | 1.74 | 0.57 |
| P60843_IF EIF4a1 | Eukaryotic: R.VLITD*LLAR.G               | 91.85   | 152.45 | 0.60 | 1.66 |
| P60843_IF EIF4a1 | Eukaryotic: K.ATQALVLAPTR.E              | 52.97   | 103.37 | 0.51 | 1.95 |
| P60843_IF EIF4a1 | Eukaryotic: K.DQIYDIFQK#.L               | 75.07   | 32.04  | 2.34 | 0.43 |
| P60843_IF EIF4a1 | Eukaryotic: K.EELTLEGIR.Q                | 20.17   | 31.96  | 0.63 | 1.58 |
| P60843_IF EIF4a1 | Eukaryotic: R.ELAQIQK#.V                 | 579.22  | 182.12 | 3.18 | 0.31 |
| P60843_IF EIF4a1 | Eukaryotic: R.ENVIHR.I                   | 14.54   | 32.19  | 0.45 | 2.21 |
| P60843_IF EIF4a1 | Eukaryotic: R.GFK#DQIYDIFQK#.L           | 191.76  | 66.78  | 2.87 | 0.35 |
| P60843_IF EIF4a1 | Eukaryotic: R.GIDVQVSLVINYDLPTR.E        | 10.67   | 19.39  | 0.55 | 1.82 |
| P60843_IF EIF4a1 | Eukaryotic: K.GYDVIQAQCSGTGK#.T          | 423.71  | 159.28 | 2.66 | 0.38 |
| P60843_IF EIF4a1 | Eukaryotic: K.KEELTLEGIR.Q               | 28.46   | 55.75  | 0.51 | 1.96 |
| P60843_IF EIF4a1 | Eukaryotic: R.KGVAINM*VTEEDKR.T          | 43.79   | 90.09  | 0.49 | 2.06 |
| P60843_IF EIF4a1 | Eukaryotic: R.KGVAINM*VTEEDKR.T          | 29.24   | 52.73  | 0.55 | 1.80 |
| P60843_IF EIF4a1 | Eukaryotic: R.K#VDWLTEK#.M               | 175.11  | 77.81  | 2.25 | 0.44 |
| P60843_IF EIF4a1 | Eukaryotic: K.LNSNTQVLLSATM*PSDVLVTK#.K  | 63.80   | 27.70  | 2.30 | 0.43 |
| P60843_IF EIF4a1 | Eukaryotic: K.LNSNTQVLLSATM*PSDVLVTK#.K  | 10.68   | 5.22   | 2.04 | 0.49 |
| P60843_IF EIF4a1 | Eukaryotic: K.LNSNTQVLLSATM*PSDVLVTK#.K  | 68.73   | 23.50  | 2.93 | 0.34 |
| P60843_IF EIF4a1 | Eukaryotic: K.LNSNTQVLLSATM*PSDVLVTK#.K  | 50.89   | 18.48  | 2.75 | 0.36 |
| P60843_IF EIF4a1 | Eukaryotic: K.LNSNTQVLLSATM*PSDVLVTK#.K  | 42.52   | 14.80  | 2.87 | 0.35 |
| P60843_IF EIF4a1 | Eukaryotic: K.LQVM*EAPHIIVGTPGR.V        | 51.27   | 113.18 | 0.45 | 2.21 |
| P60843_IF EIF4a1 | Eukaryotic: K.LQMEAPHIIVGTPGR.V          | 36.19   | 69.03  | 0.52 | 1.91 |
| P60843_IF EIF4a1 | Eukaryotic: K.M*FVLDEADEM*LSR.G          | 35.00   | 56.84  | 0.62 | 1.62 |
| P60843_IF EIF4a1 | Eukaryotic: K.MFVLDEADEM*LSR.G           | 7.59    | 14.22  | 0.53 | 1.87 |
| P60843_IF EIF4a1 | Eukaryotic: K.M*FVLDEADEMLSR.G           | 14.15   | 19.93  | 0.71 | 1.41 |

|                  |            |                                      |        |        |      |       |
|------------------|------------|--------------------------------------|--------|--------|------|-------|
| P60843_IF_EiF4a1 | Eukaryotic | R.QFINVER.E                          | 27.77  | 40.76  | 0.68 | 1.47  |
| P60843_IF_EiF4a1 | Eukaryotic | K.VDWLTEK#.M                         | 60.96  | 25.30  | 2.41 | 0.42  |
| P60843_IF_EiF4a1 | Eukaryotic | R.VFDM*.LNR.R                        | 23.01  | 38.17  | 0.60 | 1.66  |
| P60843_IF_EiF4a1 | Eukaryotic | R.VFDM.LNR.R                         | 7.63   | 14.55  | 0.52 | 1.91  |
| P60843_IF_EiF4a1 | Eukaryotic | R.VLITD.LLAR.G                       | 162.95 | 266.71 | 0.61 | 1.64  |
| P10630_IF_EiF4a2 | Eukaryotic | R.DFTVSALHGDM*#DQK#.E                | 22.85  | 10.29  | 2.22 | 0.45  |
| P10630_IF_EiF4a2 | Eukaryotic | R.DIETFYNTVEEM*PM*#NVADLI.-          | 9.99   | 9.99   | 1.00 | 1.00  |
| P10630_IF_EiF4a2 | Eukaryotic | K.DQIYEIFQK#.L                       | 17.46  | 8.19   | 2.13 | 0.47  |
| P10630_IF_EiF4a2 | Eukaryotic | R.EHGGPEGMDPDGVIENWNEIVDFDDM*NLK#.E  | 14.24  | 3.40   | 4.18 | 0.24  |
| P10630_IF_EiF4a2 | Eukaryotic | R.EHGGPEGM*DPDGVIESNWNEIVDFDDMNLK#.E | 6.27   | 3.87   | 1.62 | 0.62  |
| P10630_IF_EiF4a2 | Eukaryotic | R.GFK#DQIYEIFQK#.L                   | 97.05  | 27.33  | 3.55 | 0.28  |
| P10630_IF_EiF4a2 | Eukaryotic | R.GFKDQIYEIFQK.L                     | 46.12  | 14.64  | 3.15 | 0.32  |
| P10630_IF_EiF4a2 | Eukaryotic | K.#EELTEGK#.Q                        | 98.52  | 31.49  | 3.13 | 0.32  |
| P10630_IF_EiF4a2 | Eukaryotic | K.LNTSIQVLLSATM*PTDVLEVT#.K          | 32.28  | 14.12  | 2.29 | 0.44  |
| P10630_IF_EiF4a2 | Eukaryotic | K.LNTSIQVLLSATM*PTDVLEVT#.K.F        | 9.65   | 3.78   | 2.55 | 0.39  |
| P10630_IF_EiF4a2 | Eukaryotic | K.LQAEAPHIVVGTGR.V                   | 39.77  | 75.89  | 0.52 | 1.91  |
| P10630_IF_EiF4a2 | Eukaryotic | K.LNTSIQVLLSATM*PTDVLEVT#.K          | 10.07  | 2.42   | 4.16 | 0.24  |
| Q91VC3_IF_EiF4a3 | Eukaryotic | R.DELTLEGK.Q                         | 46.44  | 202.41 | 0.23 | 4.36  |
| Q91VC3_IF_EiF4a3 | Eukaryotic | R.DIEQYSTQJDEM*PM*#NVADLI.-          | 43.13  | 43.13  | 1.00 | 1.00  |
| Q91VC3_IF_EiF4a3 | Eukaryotic | R.DVIAQSOSGTGK#.T                    | 76.26  | 62.50  | 1.22 | 0.82  |
| Q91VC3_IF_EiF4a3 | Eukaryotic | R.ELAVQIK#.G                         | 221.26 | 140.34 | 1.58 | 0.63  |
| Q91VC3_IF_EiF4a3 | Eukaryotic | K.EQYVYR.V                           | 35.09  | 106.63 | 0.33 | 3.04  |
| Q91VC3_IF_EiF4a3 | Eukaryotic | R.ETQALILAPTR.E                      | 50.03  | 174.44 | 0.29 | 3.49  |
| Q91VC3_IF_EiF4a3 | Eukaryotic | K.FM*TDPIR.J                         | 27.80  | 100.16 | 0.28 | 3.60  |
| Q91VC3_IF_EiF4a3 | Eukaryotic | R.GFKEQYDYYR.Y                       | 6.27   | 31.30  | 0.20 | 4.99  |
| Q91VC3_IF_EiF4a3 | Eukaryotic | R.GLDVPPQVLIINYDLPNRR.E              | 18.28  | 52.39  | 0.35 | 2.87  |
| Q91VC3_IF_EiF4a3 | Eukaryotic | K.GRDVIAQSOSGTGK.T                   | 24.87  | 70.10  | 0.35 | 2.82  |
| Q91VC3_IF_EiF4a3 | Eukaryotic | K.GVAINFVK#.N                        | 57.04  | 44.09  | 1.29 | 0.77  |
| Q91VC3_IF_EiF4a3 | Eukaryotic | R.K#GVAINFVK#.N                      | 144.08 | 114.56 | 1.26 | 0.80  |
| Q91VC3_IF_EiF4a3 | Eukaryotic | R.KLDYQGVVAGTGR.V                    | 38.16  | 115.29 | 0.33 | 3.02  |
| Q91VC3_IF_EiF4a3 | Eukaryotic | R.LL#EEDM*TK#.V                      | 29.59  | 15.07  | 1.96 | 0.51  |
| Q91VC3_IF_EiF4a3 | Eukaryotic | K.M*LVLDEADEM*LNK#.G                 | 59.08  | 48.61  | 1.22 | 0.82  |
| Q91VC3_IF_EiF4a3 | Eukaryotic | K.MLVLDEADEM*LNK#.G                  | 29.08  | 26.04  | 1.12 | 0.90  |
| Q91VC3_IF_EiF4a3 | Eukaryotic | K.M*LVLDEADEMLNK#.G                  | 28.41  | 24.90  | 1.14 | 0.88  |
| Q91VC3_IF_EiF4a3 | Eukaryotic | K.MLVLDEADEMLNK#.G                   | 45.77  | 33.41  | 1.37 | 0.73  |
| Q91VC3_IF_EiF4a3 | Eukaryotic | K.QFFAVER.E                          | 28.97  | 112.48 | 0.26 | 3.88  |
| Q91VC3_IF_EiF4a3 | Eukaryotic | K.RDELTEGK.Q                         | 52.25  | 171.28 | 0.31 | 3.28  |
| Q91VC3_IF_EiF4a3 | Eukaryotic | K.VEFETSEEDVTPFDTM*GLR.E             | 1.83   | 4.38   | 0.42 | 2.40  |
| Q91VC3_IF_EiF4a3 | Eukaryotic | R.VLISTVWAR.G                        | 59.25  | 176.79 | 0.34 | 2.98  |
| Q91VC3_IF_EiF4a3 | Eukaryotic | R.DIEQYSTQJDEM*PM*#NVADLI.-          | 8.45   | 8.45   | 1.00 | 1.00  |
| Q91VC3_IF_EiF4a3 | Eukaryotic | R.DVIAQSOSGTGK#.T                    | 15.82  | 11.35  | 1.39 | 0.72  |
| Q91VC3_IF_EiF4a3 | Eukaryotic | R.K#GVAINFVK#.N                      | 16.45  | 13.04  | 1.26 | 0.79  |
| Q91VC3_IF_EiF4a3 | Eukaryotic | R.KLDYQGVVAGTGR.V                    | 5.60   | 25.27  | 0.22 | 4.52  |
| Q91VC3_IF_EiF4a3 | Eukaryotic | K.M*LVLDEADEM*LNK#.G                 | 15.65  | 8.26   | 1.90 | 0.53  |
| Q91VC3_IF_EiF4a3 | Eukaryotic | K.M*LVLDEADEMLNK#.G                  | 6.88   | 24.65  | 0.28 | 3.58  |
| Q91VC3_IF_EiF4a3 | Eukaryotic | R.DVIAQSOSGTGK#.T                    | 25.59  | 13.81  | 1.85 | 0.54  |
| Q91VC3_IF_EiF4a3 | Eukaryotic | K.GVAINFVK#.N                        | 14.09  | 9.17   | 1.54 | 0.65  |
| Q91VC3_IF_EiF4a3 | Eukaryotic | K.M*LVLDEADEM*LNK#.G                 | 20.69  | 13.62  | 1.52 | 0.66  |
| Q8BGD9_IF_EiF4b  | Eukaryotic | R.AASIFGGAKPVDTAAR.E                 | 7.56   | 12.54  | 0.60 | 1.66  |
| Q8BGD9_IF_EiF4b  | Eukaryotic | R.SQSSDTEQPSSTSGGK#.V                | 10.18  | 3.81   | 2.67 | 0.37  |
| Q8BMB3_IF_EiF4e2 | Eukaryotic | R.FQEDIISWKN#.T                      | 10.75  | 5.81   | 1.85 | 0.54  |
| Q8BMB3_IF_EiF4e2 | Eukaryotic | K.QIGTFASVEQFWK#.F                   | 7.20   | 5.03   | 1.43 | 0.70  |
| Q6NZ16_IF_EiF4g1 | Eukaryotic | R.EFLAEGDQVGSFVAEK#.K                | 17.33  | 8.57   | 2.02 | 0.49  |
| Q6NZ16_IF_EiF4g1 | Eukaryotic | K.FIGELFK#.L                         | 19.34  | 9.20   | 2.10 | 0.48  |
| Q6NZ16_IF_EiF4g1 | Eukaryotic | R.GLPLVDGGWNTVPISK#.G                | 18.15  | 9.13   | 1.99 | 0.50  |
| Q6NZ16_IF_EiF4g1 | Eukaryotic | K.GVIDLIFEK#.A                       | 19.71  | 6.72   | 2.93 | 0.34  |
| Q6NZ16_IF_EiF4g1 | Eukaryotic | R.M*#DQYFNQM*EK#.I                   | 8.95   | 3.66   | 2.45 | 0.41  |
| Q6NZ16_IF_EiF4g1 | Eukaryotic | K.QVTQLAIDTEER.L                     | 3.54   | 14.34  | 0.25 | 4.05  |
| Q6NZ16_IF_EiF4g1 | Eukaryotic | K.DK#DDDEVFEK#.K                     | 8.54   | 2.43   | 3.52 | 0.28  |
| Q6NZ16_IF_EiF4g1 | Eukaryotic | K.EAVGDLLDAFK#.E                     | 30.99  | 13.58  | 2.28 | 0.44  |
| Q6NZ16_IF_EiF4g1 | Eukaryotic | R.EFLAEGDQVGSFVAEK#.K                | 66.08  | 23.69  | 2.79 | 0.36  |
| Q6NZ16_IF_EiF4g1 | Eukaryotic | K.EM*DEAATAEER.G                     | 1.99   | 4.69   | 0.42 | 2.35  |
| Q6NZ16_IF_EiF4g1 | Eukaryotic | K.FIGELFK#.L                         | 71.18  | 22.77  | 3.13 | 0.32  |
| Q6NZ16_IF_EiF4g1 | Eukaryotic | R.FMLQDVLDR.LQ                       | 56.11  | 15.28  | 3.67 | 0.27  |
| Q6NZ16_IF_EiF4g1 | Eukaryotic | R.GGPPGPPINR.G                       | 8.66   | 19.91  | 0.43 | 2.30  |
| Q6NZ16_IF_EiF4g1 | Eukaryotic | R.GLPLVDGGWNTVPISK#.G                | 61.56  | 19.72  | 3.12 | 0.32  |
| Q6NZ16_IF_EiF4g1 | Eukaryotic | R.GPAGLGRP.R                         | 11.15  | 20.36  | 0.55 | 1.83  |
| Q6NZ16_IF_EiF4g1 | Eukaryotic | K.GVIDLIFEK#.A                       | 59.30  | 21.34  | 2.78 | 0.36  |
| Q6NZ16_IF_EiF4g1 | Eukaryotic | K.IISSVIM*#TEDIK#.L                  | 13.02  | 5.72   | 2.28 | 0.44  |
| Q6NZ16_IF_EiF4g1 | Eukaryotic | R.K#IISSVIM*#TEDIK#.L                | 20.15  | 80.58  | 0.25 | 4.00  |
| Q6NZ16_IF_EiF4g1 | Eukaryotic | R.K#IISSVIM*#TEDIK#.L                | 15.70  | 7.40   | 2.12 | 0.47  |
| Q6NZ16_IF_EiF4g1 | Eukaryotic | K.KVEYLTGEESEAPGQR.T                 | 18.64  | 32.54  | 0.57 | 1.75  |
| Q6NZ16_IF_EiF4g1 | Eukaryotic | R.LGIESTLER.S                        | 22.92  | 107.01 | 0.21 | 4.67  |
| Q6NZ16_IF_EiF4g1 | Eukaryotic | R.LKEELEEAR.D                        | 18.21  | 304.56 | 0.06 | 16.73 |
| Q6NZ16_IF_EiF4g1 | Eukaryotic | R.LK#GVIDLIFEK#.A                    | 20.21  | 6.35   | 3.18 | 0.31  |
| Q6NZ16_IF_EiF4g1 | Eukaryotic | R.LLTTIGK#.D                         | 89.21  | 27.10  | 3.29 | 0.30  |
| Q6NZ16_IF_EiF4g1 | Eukaryotic | R.M*#DQYFNQM*EK#.I                   | 39.86  | 17.34  | 2.30 | 0.43  |
| Q6NZ16_IF_EiF4g1 | Eukaryotic | R.MDQYFNQM*EK#.I                     | 8.94   | 3.50   | 2.55 | 0.39  |
| Q6NZ16_IF_EiF4g1 | Eukaryotic | R.M*#DQYFNQM*EK#.I                   | 11.78  | 4.55   | 2.59 | 0.39  |
| Q6NZ16_IF_EiF4g1 | Eukaryotic | R.MDQYFNQM*EK#.I                     | 9.30   | 4.34   | 2.14 | 0.47  |
| Q6NZ16_IF_EiF4g1 | Eukaryotic | K.QVTQLAIDTEER.L                     | 15.97  | 30.25  | 0.53 | 1.89  |
| Q6NZ16_IF_EiF4g1 | Eukaryotic | K.SDQWK#PLNLEEK#.K                   | 28.13  | 20.40  | 1.38 | 0.73  |
| Q6NZ16_IF_EiF4g1 | Eukaryotic | K.SVTAFFNWLR.E                       | 9.88   | 12.72  | 0.78 | 1.29  |
| Q6NZ16_IF_EiF4g1 | Eukaryotic | R.VDQVVK#.V                          | 38.07  | 13.23  | 2.88 | 0.35  |
| Q6NZ16_IF_EiF4g1 | Eukaryotic | R.VFDWIDANLNEQJASNTLVR.A             | 8.53   | 17.98  | 0.47 | 2.11  |
| Q6NZ16_IF_EiF4g1 | Eukaryotic | R.VFDWIDANLNEQJASNTLVR.A             | 2.77   | 5.00   | 0.55 | 1.81  |
| Q6NZ16_IF_EiF4g1 | Eukaryotic | R.EATLPPVSPK#.A                      | 34.31  | 13.87  | 2.47 | 0.40  |
| Q6NZ16_IF_EiF4g1 | Eukaryotic | K.EAVGDLLDAFK#.E                     | 72.62  | 36.44  | 1.99 | 0.50  |
| Q6NZ16_IF_EiF4g1 | Eukaryotic | K.EFEK#DK#DDDEVFEK#.K                | 35.40  | 11.53  | 3.07 | 0.33  |
| Q6NZ16_IF_EiF4g1 | Eukaryotic | R.EFLAEGDQVGSFVAEK#.K                | 124.40 | 48.35  | 2.57 | 0.39  |
| Q6NZ16_IF_EiF4g1 | Eukaryotic | K.EM*DEAATAEER.G                     | 6.14   | 10.95  | 0.56 | 1.78  |
| Q6NZ16_IF_EiF4g1 | Eukaryotic | K.EMDEAATAEER.G                      | 5.69   | 7.91   | 0.72 | 1.39  |
| Q6NZ16_IF_EiF4g1 | Eukaryotic | K.FIGELFK#.L                         | 126.71 | 51.70  | 2.45 | 0.41  |
| Q6NZ16_IF_EiF4g1 | Eukaryotic | R.FM*#LQDVLDR.LQ                     | 15.07  | 16.21  | 0.93 | 1.08  |
| Q6NZ16_IF_EiF4g1 | Eukaryotic | R.GGPPGPPINR.G                       | 35.55  | 69.87  | 0.51 | 1.97  |
| Q6NZ16_IF_EiF4g1 | Eukaryotic | R.GGPPGPPINR.G                       | 20.94  | 33.40  | 0.63 | 1.59  |
| Q6NZ16_IF_EiF4g1 | Eukaryotic | R.GLPLVDGGWNTVPISK#.G                | 160.94 | 62.48  | 2.58 | 0.39  |
| Q6NZ16_IF_EiF4g1 | Eukaryotic | R.GPAGLGRP.R                         | 32.89  | 47.55  | 0.69 | 1.45  |
| Q6NZ16_IF_EiF4g1 | Eukaryotic | K.GSRPIDTSR.L                        | 3.02   | 14.15  | 0.21 | 4.69  |
| Q6NZ16_IF_EiF4g1 | Eukaryotic | K.GVIDLIFEK#.A                       | 89.48  | 36.21  | 2.47 | 0.40  |
| Q6NZ16_IF_EiF4g1 | Eukaryotic | K.IISSVIM*#TEDIK#.L                  | 38.42  | 18.01  | 2.13 | 0.47  |
| Q6NZ16_IF_EiF4g1 | Eukaryotic | K.ITKPGSIDSNNQLFAPGGGR.L             | 44.19  | 81.64  | 0.54 | 1.85  |
| Q6NZ16_IF_EiF4g1 | Eukaryotic | R.K#IISSVIM*#TEDIK#.L                | 28.73  | 11.81  | 2.43 | 0.41  |

|                    |                                                     |        |        |       |      |
|--------------------|-----------------------------------------------------|--------|--------|-------|------|
| Q6NZ16_IF:Ef4g1    | Eukaryotic: R.KIISVVIM*TEDIK.L                      | 16.69  | 7.25   | 2.30  | 0.43 |
| Q6NZ16_IF:Ef4g1    | Eukaryotic: K.KVEYTLGESEAPGQR.T                     | 30.48  | 58.00  | 0.53  | 1.90 |
| Q6NZ16_IF:Ef4g1    | Eukaryotic: R.LGIESTLER.S                           | 51.14  | 79.06  | 0.65  | 1.55 |
| Q6NZ16_IF:Ef4g1    | Eukaryotic: K.LTPQM*FQQLM*#K#.Q                     | 15.31  | 6.66   | 2.30  | 0.43 |
| Q6NZ16_IF:Ef4g1    | Eukaryotic: K.LTPQM*FQQLM*#K#.Q                     | 14.54  | 6.41   | 2.27  | 0.44 |
| Q6NZ16_IF:Ef4g1    | Eukaryotic: R.M*QYFNQM*EK#.I                        | 73.15  | 27.29  | 2.68  | 0.37 |
| Q6NZ16_IF:Ef4g1    | Eukaryotic: R.MDQYFNQM*EK#.I                        | 12.74  | 3.54   | 3.60  | 0.28 |
| Q6NZ16_IF:Ef4g1    | Eukaryotic: R.M*QYFNQM*EK#.I                        | 13.99  | 5.94   | 2.35  | 0.42 |
| Q6NZ16_IF:Ef4g1    | Eukaryotic: R.MDQYFNQM*EK#.I                        | 18.17  | 3.26   | 5.57  | 0.18 |
| Q6NZ16_IF:Ef4g1    | Eukaryotic: K.SDQWK#PLNLEEK#.K                      | 59.01  | 27.41  | 2.15  | 0.46 |
| Q6NZ16_IF:Ef4g1    | Eukaryotic: K.SVTAFWNLR.E                           | 17.74  | 24.22  | 0.73  | 1.37 |
| Q6NZ16_IF:Ef4g1    | Eukaryotic: K.TIDQJHK#.E                            | 32.47  | 13.41  | 2.42  | 0.41 |
| Q6NZ16_IF:Ef4g1    | Eukaryotic: R.VDVQVLK#.V                            | 71.45  | 22.23  | 3.21  | 0.31 |
| Q6NZ16_IF:Ef4g1    | Eukaryotic: K.VEYTLGESEAPGQR.T                      | 5.01   | 7.89   | 0.64  | 1.57 |
| Q6NZ16_IF:Ef4g1    | Eukaryotic: R.VFDWIDANLNEQQIASNTLVR.A               | 22.29  | 35.85  | 0.62  | 1.61 |
| Q62448_IF:Ef4g2    | Eukaryotic: K.ASSLISLLK#.Q                          | 33.88  | 12.90  | 2.63  | 0.38 |
| Q62448_IF:Ef4g2    | Eukaryotic: K.EDITQEFFPGK#.G                        | 20.27  | 8.93   | 2.27  | 0.44 |
| Q62448_IF:Ef4g2    | Eukaryotic: R.EWLTELQFQSK#.V                        | 19.28  | 8.35   | 2.31  | 0.43 |
| Q62448_IF:Ef4g2    | Eukaryotic: K.HFLPEM*LSK#.V                         | 15.85  | 10.46  | 1.51  | 0.66 |
| Q62448_IF:Ef4g2    | Eukaryotic: R.LAEDAPNFDGPAEAGPQGK#.Q                | 6.78   | 4.38   | 1.55  | 0.65 |
| Q62448_IF:Ef4g2    | Eukaryotic: K.LEVDIPLVK#.S                          | 31.19  | 13.92  | 2.24  | 0.45 |
| Q62448_IF:Ef4g2    | Eukaryotic: K.TAGNSEFLGK#.T                         | 19.70  | 6.24   | 3.16  | 0.32 |
| Q62448_IF:Ef4g2    | Eukaryotic: R.TQTPPLGQTPQLGLK#.T                    | 21.15  | 8.43   | 2.51  | 0.40 |
| Q62448_IF:Ef4g2    | Eukaryotic: K.ASSLISLLK#.Q                          | 30.97  | 11.76  | 2.63  | 0.38 |
| Q62448_IF:Ef4g2    | Eukaryotic: R.EWLTELQFQSK#.V                        | 10.05  | 6.28   | 1.60  | 0.62 |
| Q62448_IF:Ef4g2    | Eukaryotic: R.FLLQDTELVE.R.E                        | 8.44   | 16.92  | 0.50  | 2.00 |
| Q62448_IF:Ef4g2    | Eukaryotic: K.GVILLIVDK#.A                          | 14.19  | 5.21   | 2.72  | 0.37 |
| Q62448_IF:Ef4g2    | Eukaryotic: K.HFLPEM*LSK#.V                         | 27.12  | 11.88  | 2.28  | 0.44 |
| Q62448_IF:Ef4g2    | Eukaryotic: R.LAEDAPNFDGPAEAGPQGK#.Q                | 14.06  | 6.46   | 2.18  | 0.46 |
| Q62448_IF:Ef4g2    | Eukaryotic: K.LDPSPLQTYK#.W                         | 17.44  | 9.72   | 1.79  | 0.56 |
| Q62448_IF:Ef4g2    | Eukaryotic: K.LEVDIPLVK#.S                          | 33.91  | 14.29  | 2.37  | 0.42 |
| Q62448_IF:Ef4g2    | Eukaryotic: K.LTEAVVTYLNNSGNANDAVSGVR.E             | 6.13   | 12.54  | 0.49  | 2.05 |
| Q62448_IF:Ef4g2    | Eukaryotic: K.SQGLSQYLNNSQGLLSLQGLQSK#.D            | 24.15  | 11.68  | 2.07  | 0.48 |
| Q62448_IF:Ef4g2    | Eukaryotic: K.TAGNSEFLGK#.T                         | 37.56  | 10.49  | 3.58  | 0.28 |
| Q62448_IF:Ef4g2    | Eukaryotic: R.TQTPPLGQTPQLGLK#.T                    | 21.57  | 9.25   | 2.33  | 0.43 |
| Q62448_IF:Ef4g2    | Eukaryotic: K.ASSLISLLK#.Q                          | 36.07  | 12.08  | 2.99  | 0.33 |
| Q62448_IF:Ef4g2    | Eukaryotic: K.HFLPEM*LSK#.V                         | 27.75  | 12.45  | 2.23  | 0.45 |
| Q62448_IF:Ef4g2    | Eukaryotic: R.LAEDAPNFDGPAEAGPQGK#.Q                | 13.75  | 8.08   | 1.70  | 0.59 |
| Q62448_IF:Ef4g2    | Eukaryotic: K.LEVDIPLVK#.S                          | 26.58  | 14.61  | 1.82  | 0.55 |
| Q62448_IF:Ef4g2    | Eukaryotic: K.LTEAVVTYLNNSGNANDAVSGVR.E             | 6.57   | 8.24   | 0.80  | 1.25 |
| Q62448_IF:Ef4g2    | Eukaryotic: R.TQTPPLGQTPQLGLK#.T                    | 25.17  | 10.38  | 2.42  | 0.41 |
| Q62448_IF:Ef4g2    | Eukaryotic: K.VIILSDR.S                             | 5.17   | 9.93   | 0.52  | 1.92 |
| Q80X13_IF4:Ef4g3   | Eukaryotic: R.SPAPVQTATTAPK#.S                      | 25.99  | 7.40   | 3.51  | 0.28 |
| Q80X13_IF4:Ef4g3   | Eukaryotic: K.YLDSSTEK#ELQALVALQASIVK#.L            | 15.44  | 6.13   | 2.52  | 0.40 |
| Q80X13_IF4:Ef4g3   | Eukaryotic: K.GVIDLVFEK#.A                          | 14.98  | 4.10   | 3.66  | 0.27 |
| Q80X13_IF4:Ef4g3   | Eukaryotic: R.SPAPVQTATTAPK#.S                      | 53.06  | 17.96  | 2.95  | 0.34 |
| Q80X13_IF4:Ef4g3   | Eukaryotic: R.TPDEVLEAEAEK#AEELAVDSVLEPEQEK#.M      | 8.84   | 4.74   | 1.86  | 0.54 |
| Q80X13_IF4:Ef4g3   | Eukaryotic: R.VDEGGWNTVQAGK#.N                      | 20.45  | 1.37   | 14.96 | 0.07 |
| P59325_IF:Ef5      | Eukaryotic: K.AM*GPLVLTEVLFDEK#.I                   | 20.56  | 4.56   | 4.51  | 0.22 |
| P59325_IF:Ef5      | Eukaryotic: K.GLTSDLLER.T                           | 18.23  | 16.38  | 1.11  | 0.90 |
| P59325_IF:Ef5      | Eukaryotic: K.SDNK#DDIDIDAI.-                       | 23.49  | 11.75  | 2.00  | 0.50 |
| P59325_IF:Ef5      | Eukaryotic: K.TVINNM*VDVAK#.A                       | 14.58  | 6.33   | 2.30  | 0.43 |
| P59325_IF:Ef5      | Eukaryotic: R.VNLFDFVK#.K                           | 76.39  | 12.54  | 6.09  | 0.16 |
| Q05D44_IF:Ef5b     | Eukaryotic: R.HFEATDILVSK#.I                        | 26.72  | 7.10   | 3.77  | 0.27 |
| Q05D44_IF:Ef5b     | Eukaryotic: R.HLQAQGVVPSK#DLSLPK#.K                 | 23.87  | 6.13   | 3.89  | 0.26 |
| Q05D44_IF:Ef5b     | Eukaryotic: R.LKEGDTIIVPGVEGPIVQIR.G                | 14.12  | 13.32  | 1.06  | 0.94 |
| Q05D44_IF:Ef5b     | Eukaryotic: K.NK#SEDSTK#DDTDLGALAAEIEGAGAAK#.E      | 4.99   | 4.17   | 1.20  | 0.84 |
| Q05D44_IF:Ef5b     | Eukaryotic: K.AIQEALAK#.L                           | 51.81  | 14.13  | 3.67  | 0.27 |
| Q05D44_IF:Ef5b     | Eukaryotic: R.GLLPPPMM*#K#.E                        | 11.45  | 3.09   | 3.70  | 0.27 |
| Q05D44_IF:Ef5b     | Eukaryotic: R.HFEATDILVSK#.I                        | 40.12  | 31.67  | 1.27  | 0.79 |
| Q05D44_IF:Ef5b     | Eukaryotic: R.HLQAQGVVPSK#DLSLPK#.D                 | 19.93  | 3.19   | 6.25  | 0.16 |
| Q05D44_IF:Ef5b     | Eukaryotic: R.HLQAQGVVPSK#DLSLPK#.K                 | 34.46  | 9.12   | 3.78  | 0.26 |
| Q05D44_IF:Ef5b     | Eukaryotic: K.K#SPDSVAVTLK#K#.Q                     | 32.89  | 7.71   | 4.27  | 0.23 |
| Q05D44_IF:Ef5b     | Eukaryotic: R.LKEGDTIIVPGVEGPIVQIR.G                | 11.91  | 17.52  | 0.68  | 1.47 |
| Q05D44_IF:Ef5b     | Eukaryotic: K.SEDSTK#DDTDLGALAAEIEGAGAAK#.E         | 12.54  | 2.56   | 4.90  | 0.20 |
| O55135_IF:Ef6      | Eukaryotic: R.HGLLVNNTTQELQHIR.N                    | 2.73   | 10.62  | 0.26  | 3.89 |
| O55135_IF:Ef6      | Eukaryotic: K.TSIEDQDELSSLQVPLVAGTVNVR.G            | 8.17   | 26.16  | 0.31  | 3.20 |
| Q80Y81_RN:Elac2    | Zinc phospl K.DATLLIHEATLEDGLEEEAVEK#.T             | 8.84   | 1.64   | 5.41  | 0.18 |
| Q80Y81_RN:Elac2    | Zinc phospl K.DATLLIHEATLEDGLEEEAVEK#.T             | 9.14   | 2.36   | 3.88  | 0.26 |
| P70372_EL:Elav1    | ELAV-like pi R.AISTLNGLR.L                          | 18.52  | 57.34  | 0.32  | 3.10 |
| P70372_EL:Elav1    | ELAV-like pi R.DANLISGLPR.T                         | 54.41  | 165.03 | 0.33  | 3.03 |
| P70372_EL:Elav1    | ELAV-like pi R.DK#VAGHSLGYFVNVYVAK#.D               | 47.50  | 30.73  | 1.55  | 0.65 |
| P70372_EL:Elav1    | ELAV-like pi R.DVEMD*F#R.F                          | 24.17  | 67.58  | 0.36  | 2.80 |
| P70372_EL:Elav1    | ELAV-like pi R.FAANPNQNK#.N                         | 290.11 | 187.91 | 1.54  | 0.65 |
| P70372_EL:Elav1    | ELAV-like pi R.FGGPVVHQQR.F                         | 8.19   | 13.34  | 0.61  | 1.63 |
| P70372_EL:Elav1    | ELAV-like pi K.I.LQVFSK#.T                          | 234.53 | 109.12 | 2.15  | 0.47 |
| P70372_EL:Elav1    | ELAV-like pi K.NMALLSLQYHSPAR.R                     | 7.95   | 25.92  | 0.31  | 3.26 |
| P70372_EL:Elav1    | ELAV-like pi R.SEAEEATSFNGHK#PGSSSEPTVK#.F          | 26.76  | 18.91  | 1.41  | 0.71 |
| P70372_EL:Elav1    | ELAV-like pi R.SLFSIGEVESAK#.L                      | 411.06 | 212.81 | 1.93  | 0.52 |
| P70372_EL:Elav1    | ELAV-like pi R.TNLVNYLPQNM*#Q#EEL.R.S               | 32.94  | 64.08  | 0.51  | 1.95 |
| P70372_EL:Elav1    | ELAV-like pi R.TNLVNYLPQNM*#Q#EEL.R.S               | 11.03  | 24.53  | 0.45  | 2.22 |
| P70372_EL:Elav1    | ELAV-like pi R.VAGHSLGYFVNVYVAK#.D                  | 146.73 | 88.78  | 1.65  | 0.61 |
| P70372_EL:Elav1    | ELAV-like pi R.VLVDITGLSR.G                         | 152.26 | 429.71 | 0.35  | 2.82 |
| P70372_EL:Elav1    | ELAV-like pi R.DANLISGLPR.T                         | 1.73   | 6.77   | 0.26  | 3.92 |
| P70372_EL:Elav1    | ELAV-like pi K.I.LQVFSK#.T                          | 30.78  | 20.59  | 1.49  | 0.67 |
| P70372_EL:Elav1    | ELAV-like pi R.SLFSIGEVESAK#.L                      | 9.12   | 6.40   | 1.43  | 0.70 |
| Q91HC9_EL:Elf2     | ETS-related R.SPTTAPVSAAPR.T                        | 3.73   | 9.38   | 0.40  | 2.51 |
| Q91HC9_EL:Elf2     | ETS-related R.VLSAELSK#.A                           | 11.84  | 9.36   | 1.27  | 0.79 |
| Q8BHL5_EL:Elmo2    | Engulfment K.EPSSYDFVYHYG.-                         | 9.86   | 9.86   | 1.00  | 1.00 |
| Q8BHL5_EL:Elmo2    | Engulfment R.IAFDAESDPSNVPGSGTEK#.R                 | 4.98   | 3.45   | 1.44  | 0.69 |
| Q8BHL5_EL:Elmo2    | Engulfment K.VAIEVPGANAQLLEIDQK#.R                  | 4.45   | 3.08   | 1.44  | 0.69 |
| Q8BHL5_EL:Elmo2    | Engulfment K.VLHGYDLDNPPQGEVTFESLQEK#.I             | 7.50   | 5.76   | 1.30  | 0.77 |
| E9Q2I4_E9I:Elmsan1 | Protein Elmr R.VPGTEVAQGGAGDEGTGLQEQYPTHEKPSVIVTR.R | 3.31   | 6.65   | 0.50  | 2.01 |
| E9Q2I4_E9I:Elmsan1 | Protein Elmr R.VPGTAAAQAEEDLNK#.L                   | 11.26  | 7.97   | 1.41  | 0.71 |
| Q91WG4_E:Elp2      | Elongator c R.NFVENSFVSR.Q                          | 2.45   | 8.50   | 0.29  | 3.46 |
| Q91WG4_E:Elp2      | Elongator c R.TEDGSPSNELVSGGSDNR.V                  | 6.00   | 8.24   | 0.73  | 1.37 |
| Q9CZX0_EL:Elp3     | Elongator c R.GTGLVELW#.S                           | 10.66  | 9.20   | 1.16  | 0.86 |
| Q9CZX0_EL:Elp3     | Elongator c R.I.LALVPPWTR.V                         | 4.84   | 24.05  | 0.20  | 4.97 |
| Q9CZX0_EL:Elp3     | Elongator c R.LEIGVQSVYEDVAR.D                      | 1.74   | 10.98  | 0.16  | 6.30 |
| O70378_EH:Emc8     | ER membra R.IAEGFGDAALIM*VDNAK#.F                   | 6.23   | 9.66   | 0.65  | 1.55 |
| O70378_EH:Emc8     | ER membra R.IAEGFGDAALIM*VDNAK#.F                   | 4.54   | 1.95   | 2.32  | 0.43 |
| O70378_EH:Emc8     | ER membra R.VKDASPQNQVAEK.V                         | 6.48   | 6.90   | 0.94  | 1.06 |
| O35130_NI:Emg1     | Ribosomal R.FSQEQDQWETTPPK#.K                       | 5.00   | 3.82   | 1.31  | 0.76 |



|                    |                                                     |        |        |      |      |
|--------------------|-----------------------------------------------------|--------|--------|------|------|
| O35130_NI_Emg1     | Ribosomal K.IGTSFVEDISDIR.E                         | 5.65   | 11.81  | 0.48 | 2.09 |
| O35130_NI_Emg1     | Ribosomal K.NLVLEENPQTR.I                           | 6.19   | 14.44  | 0.43 | 2.33 |
| Q3UMY5_E_Eml4      | Echinoderm R.VQOQDEITVLK#.A                         | 3.34   | 3.04   | 1.10 | 0.91 |
| Q8BM80_E_Emsy      | Protein EM K.SLVQPQLQTLQVQK#.T                      | 7.33   | 7.86   | 0.93 | 1.07 |
| Q8BM80_E_Emsy      | Protein EM K.SLVSPGPTQLAQFPK#.Q                     | 4.71   | 6.33   | 0.74 | 1.34 |
| Q8BM80_E_Emsy      | Protein EM R.TLLQHVAGSQATQTQTSVVVK#.S               | 5.35   | 6.34   | 0.84 | 1.19 |
| P17182_EN_Eno1     | Alpha-enoli K.DATNVGDEGGFAPNILENK#.E                | 5.28   | 2.33   | 2.27 | 0.44 |
| B2RW56_EP_Ep300    | Histone ace K.TDGGHEEEQPSATSATQSSPAPGQSK#.K         | 15.22  | 21.65  | 0.70 | 1.42 |
| Q8CHI8_EP_Ep400    | E1A-bindin K.FSAPSLLYGALR.D                         | 2.41   | 10.93  | 0.22 | 4.54 |
| Q8CHI8_EP_Ep400    | E1A-bindin K.IAQLASLAGQPSR.V                        | 2.11   | 12.48  | 0.17 | 5.92 |
| Q8CHI8_EP_Ep400    | E1A-bindin R.VAQPTVTLQFQGNK.F                       | 3.16   | 5.45   | 0.58 | 1.72 |
| Q8CHI8_EP_Ep400    | E1A-bindin K.VAYAAQPAK.T                            | 6.16   | 11.06  | 0.56 | 1.80 |
| Q8CHI8_EP_Ep400    | E1A-bindin R.VPGSSFAAGSLQYK#.S                      | 8.10   | 11.23  | 0.72 | 1.39 |
| P48193_41Epb41     | Protein 4.1 K.TQTVTISDTANAVK#.S                     | 9.42   | 7.93   | 1.19 | 0.84 |
| P48193_41Epb41     | Protein 4.1 K.VVHQETISEE-                           | 11.03  | 11.03  | 1.00 | 1.00 |
| P48193_41Epb41     | Protein 4.1 K.TQTVTISDTANAVK#.S                     | 14.39  | 2.94   | 4.89 | 0.20 |
| P48193_41Epb41     | Protein 4.1 K.VVHQETISEE-                           | 9.89   | 9.89   | 1.00 | 1.00 |
| Q9Z2H5_E_Epb4111   | Band 4.1-III R.VSAADSTQVGGTTPM*VK#.D                | 7.87   | 2.65   | 2.97 | 0.34 |
| O70318_E4_Epb4112  | Band 4.1-III K.AKEVENEQTPVSEPEEKGSQPPVER.Q          | 5.07   | 13.10  | 0.39 | 2.58 |
| O70318_E4_Epb4112  | Band 4.1-III K.DKHEETIQDTQEEKHLEGGAAK#.R            | 30.74  | 15.75  | 1.95 | 0.51 |
| O70318_E4_Epb4112  | Band 4.1-III K.EVPIVQETK#.T                         | 39.46  | 26.60  | 1.48 | 0.67 |
| O70318_E4_Epb4112  | Band 4.1-III R.SLDGAPIGVVDQSPPEGVSPGPGVISYTTIQDGR.R | 23.66  | 16.05  | 1.47 | 0.68 |
| O70318_E4_Epb4112  | Band 4.1-III R.SLDGAPIGVVDQSPPEGVSPGPGVISYTTIQDGR.R | 2.66   | 6.86   | 0.39 | 2.58 |
| O70318_E4_Epb4112  | Band 4.1-III K.AKEVENEQTPVSEPEEKGSQPPVER.Q          | 6.06   | 19.64  | 0.31 | 3.24 |
| O70318_E4_Epb4112  | Band 4.1-III K.DKHEETIQDTQEEKHLEGGAAK#.R            | 5.89   | 3.54   | 1.66 | 0.60 |
| O70318_E4_Epb4112  | Band 4.1-III K.DKHEETIQDTQEEKHLEGGAAK#.R            | 30.08  | 17.07  | 1.76 | 0.57 |
| O70318_E4_Epb4112  | Band 4.1-III K.EVPIVQETK#.T                         | 41.62  | 43.65  | 0.95 | 1.05 |
| O70318_E4_Epb4112  | Band 4.1-III R.GLSPAQADSQFLENK#.R                   | 31.91  | 20.80  | 1.53 | 0.65 |
| O70318_E4_Epb4112  | Band 4.1-III R.HSNLM*LEDLKH#AQEAILK#.H              | 6.21   | 6.92   | 0.90 | 1.11 |
| O70318_E4_Epb4112  | Band 4.1-III R.HSNLMLEDLKH#AQEAILK#.H               | 5.64   | 4.98   | 1.13 | 0.88 |
| O70318_E4_Epb4112  | Band 4.1-III R.VITGDAAALDHDQALAQAIR.E               | 11.24  | 17.50  | 0.64 | 1.56 |
| O70318_E4_Epb4112  | Band 4.1-III R.SLDGAPIGVVDQSPPEGVSPGPGVISYTTIQDGR.R | 4.06   | 8.10   | 0.50 | 1.99 |
| O70318_E4_Epb4112  | Band 4.1-III R.SLDGAPIGVVDQSPPEGVSPGPGVISYTTIQDGR.R | 1.60   | 6.57   | 0.24 | 4.11 |
| O70318_E4_Epb4112  | Band 4.1-III R.SYNLVAK#.D                           | 49.09  | 19.25  | 2.55 | 0.39 |
| O70318_E4_Epb4112  | Band 4.1-III K.TEM*VTISDASOR.T                      | 5.68   | 24.49  | 0.23 | 4.31 |
| O70318_E4_Epb4112  | Band 4.1-III K.VRPALEQFESTIGFK.L                    | 14.60  | 39.91  | 0.37 | 2.73 |
| O9WV92_E_Epb4113   | Band 4.1-III K.DSVSAAEVGTGQYATK#.G                  | 12.55  | 5.58   | 2.25 | 0.44 |
| O9WV92_E_Epb4113   | Band 4.1-III R.GEEVDQSAPEEQATPVSHHEEQASTIR.T        | 3.64   | 9.06   | 0.40 | 2.49 |
| O9WV92_E_Epb4113   | Band 4.1-III R.VESTSVGSIPIGGAK#.L                   | 24.26  | 9.86   | 2.46 | 0.41 |
| O9WV92_E_Epb4113   | Band 4.1-III K.VLQETILVEER.H                        | 5.22   | 10.38  | 0.50 | 1.99 |
| O9WV92_E_Epb4113   | Band 4.1-III K.DSVSAAEVGTGQYATK#.G                  | 6.52   | 3.49   | 1.87 | 0.54 |
| Q03145_EF_Epha2    | Ephrin type K.FADIVSLDK#.L                          | 7.62   | 6.16   | 1.24 | 0.81 |
| Q8VEH5_EF_Epm2aip1 | EPM2A-inte K.DLELFSNPFSPKPEYAPISVR.V                | 2.55   | 7.47   | 0.34 | 2.93 |
| Q8VEH5_EF_Epm2aip1 | EPM2A-inte R.EVLPDHVGLGIDLSPEITR.Q                  | 5.21   | 11.15  | 0.47 | 2.14 |
| Q8VEH5_EF_Epm2aip1 | EPM2A-inte K.DLELFSNPFSPKPEYAPISVR.V                | 4.10   | 20.91  | 0.20 | 5.10 |
| Q8VEH5_EF_Epm2aip1 | EPM2A-inte R.EVLPDHVGLGIDLSPEITR.Q                  | 5.55   | 15.63  | 0.36 | 2.82 |
| Q8CGC7_S1_Eprs     | Bifunctione K.ASK#DQVDSAVQELLQLK#.A                 | 25.76  | 8.30   | 3.10 | 0.32 |
| Q8CGC7_S1_Eprs     | Bifunctione R.DQDVEPGAPSM*GAK#.S                    | 19.75  | 2.86   | 6.90 | 0.15 |
| Q8CGC7_S1_Eprs     | Bifunctione K.DQVDSAVQELLQLK#.A                     | 9.45   | 3.27   | 2.89 | 0.35 |
| Q8CGC7_S1_Eprs     | Bifunctione R.FDDTNPEK#EKHEDFEK#.V                  | 16.43  | 7.40   | 2.22 | 0.45 |
| Q8CGC7_S1_Eprs     | Bifunctione K.FVELPGAEM*GK#.V                       | 28.13  | 8.62   | 3.26 | 0.31 |
| Q8CGC7_S1_Eprs     | Bifunctione K.K#EENLAEWYSQVITK#.S                   | 17.80  | 3.89   | 4.57 | 0.22 |
| Q8CGC7_S1_Eprs     | Bifunctione R.LNLNNTVLSK#.R                         | 42.81  | 13.16  | 3.25 | 0.31 |
| Q8CGC7_S1_Eprs     | Bifunctione K.NPDVGLK#VWVYSPK#.V                    | 23.88  | 6.36   | 3.76 | 0.27 |
| Q8CGC7_S1_Eprs     | Bifunctione K.SQSGSLSSGGAGEGQGPK#.K                 | 43.30  | 9.24   | 4.68 | 0.21 |
| Q8CGC7_S1_Eprs     | Bifunctione K.SSSNTVESTSLYK#.V                      | 32.36  | 70.26  | 0.46 | 2.17 |
| Q8CGC7_S1_Eprs     | Bifunctione K.TGQEK#GNPSAAAQVTVSK#.S                | 51.82  | 7.63   | 6.79 | 0.15 |
| Q8CGC7_S1_Eprs     | Bifunctione R.VYELLAIPIVVR.G                        | 10.27  | 7.64   | 1.34 | 0.74 |
| Q8CGC7_S1_Eprs     | Bifunctione K.APK#HEDIDAIVK#.Q                      | 12.26  | 2.72   | 4.51 | 0.22 |
| Q8CGC7_S1_Eprs     | Bifunctione K.ASK#DQVDSAVQELLQLK#.A                 | 208.07 | 37.46  | 5.55 | 0.18 |
| Q8CGC7_S1_Eprs     | Bifunctione R.ATVAPDK#K#.Q                          | 8.06   | 1.37   | 5.87 | 0.17 |
| Q8CGC7_S1_Eprs     | Bifunctione K.AVYDDTPAEQM*K#.A                      | 99.94  | 17.74  | 5.63 | 0.18 |
| Q8CGC7_S1_Eprs     | Bifunctione R.DNYSPIGWK#.F                          | 57.21  | 17.14  | 3.34 | 0.30 |
| Q8CGC7_S1_Eprs     | Bifunctione R.DQDVEPGAPSMGAK#.S                     | 40.36  | 7.24   | 5.58 | 0.18 |
| Q8CGC7_S1_Eprs     | Bifunctione R.DQDVEPGAPSM*GAK#.S                    | 118.77 | 26.46  | 4.49 | 0.22 |
| Q8CGC7_S1_Eprs     | Bifunctione K.DQVDSAVQELLQLK#.A                     | 92.54  | 16.71  | 5.54 | 0.18 |
| Q8CGC7_S1_Eprs     | Bifunctione K.EDIDAIVK#.Q                           | 45.75  | 7.30   | 6.27 | 0.16 |
| Q8CGC7_S1_Eprs     | Bifunctione K.EVVPVNVLDAAQEM*K#.E                   | 18.66  | 4.15   | 4.50 | 0.22 |
| Q8CGC7_S1_Eprs     | Bifunctione K.FAGDQYTTIEAFISASGR.A                  | 7.45   | 9.67   | 0.77 | 1.30 |
| Q8CGC7_S1_Eprs     | Bifunctione R.FDDTNPEK#.E                           | 20.56  | 4.64   | 4.43 | 0.23 |
| Q8CGC7_S1_Eprs     | Bifunctione R.FDDTNPEK#EKHEDFEK#.V                  | 107.74 | 28.55  | 3.77 | 0.26 |
| Q8CGC7_S1_Eprs     | Bifunctione K.FVELPGAEM*GK#.V                       | 154.10 | 27.62  | 5.58 | 0.18 |
| Q8CGC7_S1_Eprs     | Bifunctione K.ITSLDAK#.L                            | 131.30 | 32.05  | 4.10 | 0.24 |
| Q8CGC7_S1_Eprs     | Bifunctione K.K#EENLAEWYSQVITK#.S                   | 99.41  | 12.33  | 8.06 | 0.12 |
| Q8CGC7_S1_Eprs     | Bifunctione R.LNLNNTVLSK#.R                         | 174.75 | 28.00  | 6.24 | 0.16 |
| Q8CGC7_S1_Eprs     | Bifunctione K.LTIAEK#EAIAK#.L                       | 14.62  | 2.80   | 5.23 | 0.19 |
| Q8CGC7_S1_Eprs     | Bifunctione K.NPDVGLK#VWVYSPK#.V                    | 90.25  | 17.73  | 5.09 | 0.20 |
| Q8CGC7_S1_Eprs     | Bifunctione K.SLTGIEYK#PVSATGAEDK#.D                | 32.58  | 7.52   | 4.33 | 0.23 |
| Q8CGC7_S1_Eprs     | Bifunctione K.SQSGSLSSGGAGEGQGPK#.K                 | 209.33 | 30.94  | 6.77 | 0.15 |
| Q8CGC7_S1_Eprs     | Bifunctione K.SSSNTVESTSLYK#.V                      | 159.88 | 108.69 | 1.47 | 0.68 |
| Q8CGC7_S1_Eprs     | Bifunctione R.SVVNM*EWDK#.I                         | 18.74  | 2.66   | 7.05 | 0.14 |
| Q8CGC7_S1_Eprs     | Bifunctione K.TGK#DYVQPQSPQNSHNSPNSAOPAGAEM*PEAK#.V | 31.02  | 8.21   | 3.78 | 0.26 |
| Q8CGC7_S1_Eprs     | Bifunctione K.TGQEK#GNPSAAAQVTVSK#.S                | 211.89 | 41.60  | 5.09 | 0.20 |
| Q8CGC7_S1_Eprs     | Bifunctione K.THM*VSNLTLEDFQK#.V                    | 41.40  | 11.19  | 3.70 | 0.27 |
| Q8CGC7_S1_Eprs     | Bifunctione K.THM*VSNLTLEDFQK#.V                    | 14.59  | 4.40   | 3.32 | 0.30 |
| Q8CGC7_S1_Eprs     | Bifunctione R.VAVQDQVVR.E                           | 50.94  | 41.98  | 1.21 | 0.82 |
| Q8CGC7_S1_Eprs     | Bifunctione K.VFIEGDAETFESEM*VTFINWGNINIK#.I        | 11.07  | 2.39   | 4.64 | 0.22 |
| Q8CGC7_S1_Eprs     | Bifunctione R.VSETVAFTDVSILR.Y                      | 28.54  | 31.91  | 0.89 | 1.12 |
| Q8CGC7_S1_Eprs     | Bifunctione R.VYELLAIPIVVR.G                        | 49.51  | 47.92  | 1.03 | 0.97 |
| Q8CGC7_S1_Eprs     | Bifunctione R.VYALLK#.K                             | 78.73  | 13.06  | 6.03 | 0.17 |
| P42567_EP_Eps15    | Epidermal e K.AEITSQESQSSYEELLK#.A                  | 5.78   | 3.61   | 1.60 | 0.63 |
| P42567_EP_Eps15    | Epidermal e K.AEITSQESQSSYEELLK#.A                  | 3.28   | 3.57   | 0.92 | 1.09 |
| P42567_EP_Eps15    | Epidermal e R.FHDSPLSLTSPGVAELPWAVK#.S              | 9.04   | 6.85   | 1.32 | 0.76 |
| P42567_EP_Eps15    | Epidermal e K.SGLPDLILGK#.I                         | 9.20   | 7.29   | 1.26 | 0.79 |
| P42567_EP_Eps15    | Epidermal e R.TSEVQDLQDEVQR.E                       | 3.48   | 8.30   | 0.42 | 2.38 |
| P42567_EP_Eps15    | Epidermal e K.YDAIFDLSLSPVDGFLSGDK#.V               | 8.58   | 5.49   | 1.56 | 0.64 |
| Q60902_EF_Eps1511  | Epidermal e K.IWDLADPEGK#.G                         | 9.99   | 6.52   | 1.53 | 0.65 |
| Q60902_EF_Eps1511  | Epidermal e K.NPSLPSKLDPFSSDPFSSSISK.G              | 2.78   | 4.66   | 0.60 | 1.68 |
| Q60902_EF_Eps1511  | Epidermal e K.SGLSDIILGK#.I                         | 16.68  | 10.51  | 1.59 | 0.63 |
| Q60902_EF_Eps1511  | Epidermal e R.SLEQYQVPGVSGTSLPDLATLNEGILLAER.G      | 5.00   | 7.98   | 0.63 | 1.60 |
| Q60902_EF_Eps1511  | Epidermal e K.TQIQSQESDLK#.S                        | 13.47  | 9.64   | 1.40 | 0.72 |
| Q60902_EF_Eps1511  | Epidermal e K.TQIQSQESDLK#QEDLNR.A                  | 6.36   | 16.53  | 0.39 | 2.60 |
| Q60902_EF_Eps1511  | Epidermal e R.VGASEAALFLK#.K                        | 16.27  | 9.59   | 1.70 | 0.59 |

|                  |                                               |       |        |      |      |
|------------------|-----------------------------------------------|-------|--------|------|------|
| Q08509_EF Eps8   | Epidermal ξ K.ANLISEDIESAISDSK#.G             | 20.90 | 8.93   | 2.34 | 0.43 |
| Q08509_EF Eps8   | Epidermal ξ K.DTVDFLNYTATAEER.K               | 2.35  | 6.95   | 0.34 | 2.96 |
| Q08509_EF Eps8   | Epidermal ξ K.HGFNLAK#.L                      | 16.11 | 9.74   | 1.65 | 0.60 |
| Q08509_EF Eps8   | Epidermal ξ K.ISAASASDGVESFDEGSSH.-           | 14.98 | 14.98  | 1.00 | 1.00 |
| Q08509_EF Eps8   | Epidermal ξ R.NASGDGSGVFNILDIR.M.T            | 6.46  | 8.23   | 0.79 | 1.27 |
| Q99K30_ES Eps8I2 | Epidermal ξ R.LLDVSEQEELEFNPLTVQH5QTVLNQLR.Y  | 3.52  | 3.12   | 1.13 | 0.89 |
| Q99K30_ES Eps8I2 | Epidermal ξ R.QEDVGALEQSGQK#.Y                | 5.39  | 3.13   | 1.72 | 0.58 |
| Q99K30_ES Eps8I2 | Epidermal ξ R.SQPVHLPLFESGPDVGR.A             | 4.89  | 9.29   | 0.53 | 1.90 |
| Q99K30_ES Eps8I2 | Epidermal ξ R.SVSPSLSTDAVSFLR.G               | 4.58  | 10.20  | 0.45 | 2.23 |
| Q99K30_ES Eps8I2 | Epidermal ξ R.VGLPLPVFSEPGYR.R                | 5.71  | 11.80  | 0.48 | 2.07 |
| Q99K30_ES Eps8I2 | Epidermal ξ R.VYSQTVQK#.A                     | 22.29 | 9.84   | 2.27 | 0.44 |
| Q99M11_Rf Erc1   | ELKS/Rab6- R.AAILQTEVDALR.L                   | 29.99 | 27.24  | 1.10 | 0.91 |
| Q99M11_Rf Erc1   | ELKS/Rab6- K.LETLNQFSDSK#.Q                   | 20.22 | 11.50  | 1.76 | 0.57 |
| Q99M11_Rf Erc1   | ELKS/Rab6- K.SLQADTTNTOTALTLEALADKER.T        | 6.50  | 10.14  | 0.64 | 1.56 |
| Q8BHK9_Ef Erc6I  | DNA excisic K.ELFTVGDQLK#.S                   | 10.11 | 2.24   | 4.51 | 0.22 |
| Q8BHK9_Ef Erc6I  | DNA excisic R.SPLAELGVLK#.K                   | 9.91  | 6.09   | 1.63 | 0.61 |
| Q9DC16_Ef Ergic1 | Endoplasm R.YDLSPTVK#.Y                       | 6.19  | 5.00   | 1.24 | 0.81 |
| Q9DC16_Ef Ergic1 | Endoplasm R.YSQYTVANK#.E                      | 8.66  | 6.40   | 1.35 | 0.74 |
| P84089_ER Erh    | Enhancer o R.ADTQTYQYPNK.D                    | 14.78 | 24.03  | 0.62 | 1.63 |
| P84089_ER Erh    | Enhancer o K.IYVLLR.R                         | 19.55 | 128.77 | 0.15 | 6.59 |
| P57759_ER Erp29  | Endoplasm K.FDTQPYGK#.Q                       | 8.15  | 1.95   | 4.17 | 0.24 |
| Q3U7R1_Ef Eyt1   | Extended s3 R.ALTLGALTLPLAR.L                 | 6.13  | 21.23  | 0.29 | 3.46 |
| Q3U7R1_Ef Eyt1   | Extended s3 K.LLAETVAVPR.G                    | 2.91  | 12.68  | 0.23 | 4.36 |
| Q3U7R1_Ef Eyt1   | Extended s3 R.ALTLGALTLPLAR.L                 | 5.05  | 18.38  | 0.27 | 3.64 |
| Q3U7R1_Ef Eyt1   | Extended s3 R.LTHGDSPSEAVPLGQVK#.L            | 12.57 | 8.26   | 1.52 | 0.66 |
| Q8BWY3_E Etf1    | Eukaryotic K.FGATLEIVTDK#.S                   | 40.72 | 14.17  | 2.87 | 0.35 |
| Q8BWY3_E Etf1    | Eukaryotic K.FGATLEIVTDK#SQEGSQFVK#.G         | 50.97 | 17.46  | 2.92 | 0.34 |
| Q8BWY3_E Etf1    | Eukaryotic K.FHTEALTALLSDDSK#.F               | 23.34 | 10.48  | 2.23 | 0.45 |
| Q8BWY3_E Etf1    | Eukaryotic K.FHTEALTALLSDDSK#.F               | 8.31  | 3.61   | 2.30 | 0.43 |
| Q8BWY3_E Etf1    | Eukaryotic K.FTVDLPK#.K                       | 74.87 | 26.55  | 2.82 | 0.35 |
| Q8BWY3_E Etf1    | Eukaryotic K.I.LYLTPEQEK#.D                   | 87.51 | 31.74  | 2.76 | 0.36 |
| Q8BWY3_E Etf1    | Eukaryotic R.LSVLGAITSVQQR.L                  | 25.23 | 35.82  | 0.70 | 1.42 |
| Q8BWY3_E Etf1    | Eukaryotic K.SQESQFVK#.G                      | 39.33 | 14.87  | 2.65 | 0.38 |
| Q8BWY3_E Etf1    | Eukaryotic K.TELSQSDM*FDQR.L                  | 8.77  | 12.76  | 0.69 | 1.46 |
| Q8BWY3_E Etf1    | Eukaryotic K.TELSQSDMFDQR.L                   | 5.10  | 9.46   | 0.54 | 1.85 |
| Q8BWY3_E Etf1    | Eukaryotic K.VAETAVQLFISGDK#.V                | 14.30 | 3.21   | 4.46 | 0.22 |
| Q8BWY3_E Etf1    | Eukaryotic K.VNVAGLVLAGSADF#.T                | 29.85 | 11.38  | 2.62 | 0.38 |
| Q8BWY3_E Etf1    | Eukaryotic R.FDEISQDTGK#.Y                    | 18.15 | 5.72   | 3.17 | 0.32 |
| Q99LC5_ET Etf1   | Electron tr K.LNVAPVSDIIEI#.S                 | 5.59  | 2.01   | 2.78 | 0.36 |
| P97360_ET Etf6   | Transcripti K.LALLTK#.E                       | 12.58 | 20.10  | 0.63 | 1.60 |
| P97360_ET Etf6   | Transcripti K.TPDEIM*SGR.T                    | 2.00  | 13.01  | 0.15 | 6.50 |
| Q61545_Ef Ewsr1  | RNA-bindin K.AAWEVFDGK.D                      | 11.21 | 11.77  | 0.95 | 1.05 |
| Q61545_Ef Ewsr1  | RNA-bindin K.GDATVSYEDPPTAK#.A                | 75.37 | 78.84  | 0.96 | 1.05 |
| Q61545_Ef Ewsr1  | RNA-bindin R.GGPGGGGPGPM*GR.M                 | 3.11  | 16.74  | 0.19 | 5.38 |
| Q61545_Ef Ewsr1  | RNA-bindin R.QDHPSM*GVYQESGGFSGPGENR.S        | 10.27 | 43.02  | 0.24 | 4.19 |
| Q61545_Ef Ewsr1  | RNA-bindin R.QDHPSM*GVYQESGGFSGPGENR.S        | 5.97  | 19.64  | 0.30 | 3.29 |
| Q8R356_EX Exoc1  | Exocyst cor K.DAIK#ENPEFDLHFEK#.V             | 14.00 | 11.36  | 1.23 | 0.81 |
| Q8R356_EX Exoc1  | Exocyst cor K.DAIK#ENPEFDLHFEK#.V             | 10.45 | 9.92   | 1.05 | 0.95 |
| Q8R356_EX Exoc1  | Exocyst cor K.LSYEEM*QSVK#.E                  | 8.46  | 4.30   | 1.96 | 0.51 |
| Q9D4H1_Ef Exoc2  | Exocyst cor K.HNFQGIK#.I                      | 12.90 | 16.76  | 0.77 | 1.30 |
| Q9D4H1_Ef Exoc2  | Exocyst cor R.HFTLNIAEHFEK#.H                 | 13.34 | 11.21  | 1.19 | 0.84 |
| Q9D4H1_Ef Exoc2  | Exocyst cor R.ASNATDILFQVGLR.K                | 5.61  | 12.39  | 0.45 | 2.21 |
| Q9D4H1_Ef Exoc2  | Exocyst cor R.LFENYELK#.A                     | 14.32 | 8.68   | 1.65 | 0.61 |
| Q9D4H1_Ef Exoc2  | Exocyst cor R.VVEAVSELSR.L                    | 4.49  | 18.87  | 0.24 | 4.20 |
| Q35382_Ef Exoc4  | Exocyst cor K.ESEVLIGNLGDK#.L                 | 17.77 | 10.47  | 1.70 | 0.59 |
| Q35382_Ef Exoc4  | Exocyst cor R.SGELQGGPDDNLIIEGGTK#.F          | 14.59 | 8.05   | 1.81 | 0.55 |
| Q35382_Ef Exoc4  | Exocyst cor R.SQTGVGDQTTQNTL.R                | 3.48  | 8.87   | 0.39 | 2.55 |
| Q35382_Ef Exoc4  | Exocyst cor R.STTQVADSAVQR.G                  | 3.56  | 9.19   | 0.39 | 2.58 |
| Q3TPX4_EX Exoc5  | Exocyst cor K.LIQSVFEK#.L                     | 21.23 | 7.91   | 2.68 | 0.37 |
| Q3TPX4_EX Exoc5  | Exocyst cor K.QVGDIFSNPEAVLAK#.L              | 6.92  | 3.25   | 2.13 | 0.47 |
| A6H523_EX Exoc6b | Exocyst cor R.TLSNLSQNVK#.R                   | 7.18  | 4.05   | 1.78 | 0.56 |
| A6H523_EX Exoc6b | Exocyst cor R.VNPVATLTLLEK#.M                 | 13.33 | 4.73   | 2.82 | 0.35 |
| A6H523_EX Exoc6b | Exocyst cor K.VVGQFPQDIELEK#.Q                | 5.57  | 5.60   | 0.99 | 1.01 |
| A6H523_EX Exoc6b | Exocyst cor K.VVGQFPQDIELEK#.Q                | 6.78  | 10.41  | 0.65 | 1.54 |
| Q35250_Ef Exoc7  | Exocyst cor K.AVEYQDNPSPDELNK#.V              | 7.86  | 4.11   | 1.91 | 0.52 |
| Q35250_Ef Exoc7  | Exocyst cor K.SELIQLVAVTQK#.T                 | 16.86 | 9.52   | 1.77 | 0.56 |
| Q35250_Ef Exoc7  | Exocyst cor K.VLGNLQLNLSK#.S                  | 11.09 | 6.87   | 1.61 | 0.62 |
| Q6PGF7_Ef Exoc8  | Exocyst cor R.GAVQAGFLPGPAGVPR.E              | 1.97  | 7.03   | 0.28 | 3.58 |
| Q6PGF7_Ef Exoc8  | Exocyst cor R.GAVQAGFLPGPAGVPR.E              | 2.48  | 6.74   | 0.37 | 2.72 |
| P56960_EX Exoc10 | Exosome cc K.FALGSVAVTK#.A                    | 7.65  | 6.61   | 1.16 | 0.86 |
| P56960_EX Exoc10 | Exosome cc K.ASGGLPQFQDEYDFYR.S               | 3.02  | 8.08   | 0.37 | 2.68 |
| P56960_EX Exoc10 | Exosome cc K.FALGSVAVTK#.A                    | 38.79 | 15.40  | 2.52 | 0.40 |
| P56960_EX Exoc10 | Exosome cc K.HQQPVLPAQLQVPK#.T                | 17.20 | 9.61   | 1.79 | 0.56 |
| P56960_EX Exoc10 | Exosome cc R.K#PLPLLSK#.E                     | 17.54 | 8.26   | 2.12 | 0.47 |
| P56960_EX Exoc10 | Exosome cc R.SDMYLNLSLTPAIVK#.V               | 4.41  | 3.26   | 1.35 | 0.74 |
| P56960_EX Exoc10 | Exosome cc K.SKHPSSQFDPNK#.L                  | 4.77  | 2.78   | 1.72 | 0.58 |
| P56960_EX Exoc10 | Exosome cc R.TEDFIVTLELR.S                    | 7.16  | 10.95  | 0.65 | 1.53 |
| P56960_EX Exoc10 | Exosome cc K.VFHGADSDIEWLQK#.D                | 14.22 | 7.60   | 1.87 | 0.53 |
| P56960_EX Exoc10 | Exosome cc R.VGM*LLDEASGVNK#.H                | 7.89  | 5.58   | 1.42 | 0.71 |
| P56960_EX Exoc10 | Exosome cc K.ASGGLPQFQDEYDFYR.S               | 3.47  | 8.68   | 0.40 | 2.50 |
| P56960_EX Exoc10 | Exosome cc K.IDNSNTPFLPK#.I                   | 19.60 | 12.09  | 1.62 | 0.62 |
| P56960_EX Exoc10 | Exosome cc R.K#PLPLLSK#.E                     | 16.47 | 7.10   | 2.32 | 0.43 |
| P56960_EX Exoc10 | Exosome cc R.SDMYLNLSLTPAIVK#.V               | 8.60  | 4.48   | 1.92 | 0.52 |
| P56960_EX Exoc10 | Exosome cc R.VGM*LLDEASGVNK#HQQPVLPAQLQVPK#.T | 7.60  | 3.29   | 2.31 | 0.43 |
| Q8BV3_Ef Exoc2   | Exosome cc K.LGQGVLVQVSPSLVK#.R               | 12.44 | 6.15   | 2.02 | 0.49 |
| Q7TQK4_Ef Exoc3  | Exosome cc R.HKHEPSSGGGGVYVDSQQK#.R           | 10.35 | 1.23   | 8.45 | 0.12 |
| Q92119_EX Exoc4  | Exosome cc R.M*GVFAQADGSVIEQGNTRK#.A          | 5.41  | 1.31   | 4.11 | 0.24 |
| Q9CRA8_Ef Exoc5  | Exosome cc R.ADANLLTDTESSPR.S                 | 2.82  | 8.58   | 0.33 | 3.04 |
| Q9CRA8_Ef Exoc5  | Exosome cc K.IGLPGVAEK#.S                     | 21.80 | 13.32  | 1.64 | 0.61 |
| Q8BTW3_Ef Exoc6  | Exosome cc R.AGLLSQAK#.G                      | 15.72 | 7.67   | 2.05 | 0.49 |
| Q8BTW3_Ef Exoc6  | Exosome cc R.GSGPAGAGGEAPALR.G                | 4.59  | 9.57   | 0.48 | 2.08 |
| Q8BTW3_Ef Exoc6  | Exosome cc R.IRGPESQPQLYAAEDDETPAAR.D         | 1.27  | 4.91   | 0.26 | 3.85 |
| Q9D753_Ef Exoc8  | Exosome cc R.ATTVNGISITADGSAVVK#.L            | 11.45 | 4.87   | 2.35 | 0.43 |
| Q9JH17_EXI Exoc9 | Exosome cc K.VAETELIQK#.A                     | 35.13 | 10.29  | 3.42 | 0.29 |
| Q61188_Ez Ezh2   | Histone-lys R.AIQTEELFDYR.Y                   | 5.49  | 11.48  | 0.48 | 2.09 |
| Q61188_Ez Ezh2   | Histone-lys K.HLLAPSVDVAGVGIKDPVQK.N          | 8.74  | 5.61   | 1.56 | 0.64 |
| Q61188_Ez Ezh2   | Histone-lys R.TETLNOEWK#.Q                    | 26.69 | 20.22  | 1.32 | 0.76 |
| P26040_EZ Ezh    | Ezrin OS=M K.APDFVYAPR.L                      | 4.13  | 14.73  | 0.28 | 3.57 |
| P26040_EZ Ezh    | Ezrin OS=M K.IGFPWSEIR.N                      | 5.60  | 14.94  | 0.37 | 2.67 |
| P26040_EZ Ezh    | Ezrin OS=M K.LFFLQVK.D                        | 14.12 | 11.26  | 1.25 | 0.80 |
| P54731_FA Faf1   | FAS-associa K.LLSTFPR.R                       | 9.80  | 24.83  | 0.39 | 2.53 |
| P54731_FA Faf1   | FAS-associa R.LSLEQALPPEPK#.E                 | 11.37 | 12.38  | 0.92 | 1.09 |
| P54731_FA Faf1   | FAS-associa R.NVVDLTSIPVR.H                   | 12.92 | 32.72  | 0.39 | 2.53 |

|                    |                                                  |        |       |      |      |
|--------------------|--------------------------------------------------|--------|-------|------|------|
| P54731_FA Faf1     | FAS-associa R.RDVTQLDPNK.S                       | 6.05   | 21.08 | 0.29 | 3.49 |
| P54731_FA Faf1     | FAS-associa K.TGDVEDSTVLK#.S                     | 61.91  | 29.35 | 2.11 | 0.47 |
| P54731_FA Faf1     | FAS-associa R.TPSEGFLEFR.R                       | 13.92  | 31.37 | 0.44 | 2.25 |
| Q9D2L9_F1 Fam111a  | Protein FAF R.VVSVTQNSGSENR.N                    | 3.30   | 14.54 | 0.23 | 4.41 |
| Q8VE88_F1 Fam114a2 | Protein FAF K.SILSSLSGEEQLQTR.L                  | 2.26   | 4.72  | 0.48 | 2.08 |
| Q6ADA9_F1 FAM120A  | Constitutiv K.SQGGVQVPIPSQGGK#.L                 | 4.72   | 3.72  | 1.27 | 0.79 |
| Q6ADA9_F1 FAM120A  | Constitutiv R.EAALEAAVLNKHEE.-                   | 14.90  | 10.27 | 1.45 | 0.69 |
| Q6ADA9_F1 FAM120A  | Constitutiv R.LPPEFSLIIK#.E                      | 10.50  | 8.73  | 1.20 | 0.83 |
| Q6ADA9_F1 FAM120A  | Constitutiv K.NLTQNSYSNIPHEGK#.H                 | 25.21  | 12.82 | 1.97 | 0.51 |
| Q6ADA9_F1 FAM120A  | Constitutiv K.SPQTEPVEALAFR.E                    | 6.01   | 14.70 | 0.41 | 2.45 |
| Q6ADA9_F1 FAM120A  | Constitutiv K.SQGAIQGRPPYAASAEVAK.E              | 8.96   | 27.30 | 0.33 | 3.05 |
| Q6ADA9_F1 FAM120A  | Constitutiv K.SQGGVQVPIPSQGGK#.L                 | 18.21  | 16.99 | 1.07 | 0.93 |
| Q6ADA9_F1 FAM120A  | Constitutiv K.VEGSTASSGSQLAEGK#.G                | 32.14  | 17.45 | 1.84 | 0.54 |
| Q6ADA9_F1 FAM120A  | Constitutiv R.EAALEAAVLNKHEE.-                   | 25.73  | 14.45 | 1.78 | 0.56 |
| Q6ADA9_F1 FAM120A  | Constitutiv R.GDPPDQVKHVEGSTASSGSQLAEGK#.G       | 12.11  | 6.30  | 1.92 | 0.52 |
| Q6ADA9_F1 FAM120A  | Constitutiv R.LPPEFSLIIK#.E                      | 25.32  | 13.32 | 1.90 | 0.53 |
| Q6ADA9_F1 FAM120A  | Constitutiv K.LYEPDQLQELK#.I                     | 58.03  | 30.88 | 1.88 | 0.53 |
| Q6ADA9_F1 FAM120A  | Constitutiv K.NLTQNSYSNIPHEGK#.H                 | 80.30  | 31.91 | 2.52 | 0.40 |
| Q6ADA9_F1 FAM120A  | Constitutiv R.QNHPLFPPPPAPFPYASVYPR.H            | 5.96   | 22.41 | 0.27 | 3.76 |
| Q6ADA9_F1 FAM120A  | Constitutiv K.SLTTSQYLM*HEVAK#.Q                 | 9.06   | 4.06  | 2.23 | 0.45 |
| Q6ADA9_F1 FAM120A  | Constitutiv K.SPQTEPVEALAFR.E                    | 10.06  | 19.86 | 0.51 | 1.97 |
| Q6ADA9_F1 FAM120A  | Constitutiv K.SQGGVQVPIPSQGGK#.L                 | 54.12  | 23.29 | 2.32 | 0.43 |
| Q6ADA9_F1 FAM120A  | Constitutiv K.VEGSTASSGSQLAEGK#.G                | 73.91  | 46.99 | 1.57 | 0.64 |
| Q8R1F1_NI Fam129b  | Niban-like f R.AVINSAGYK#.V                      | 42.65  | 12.77 | 3.34 | 0.30 |
| Q8R1F1_NI Fam129b  | Niban-like f K.EVTDN*NLNVINEGGIDK#.L             | 5.74   | 3.80  | 1.51 | 0.66 |
| Q8R1F1_NI Fam129b  | Niban-like f R.FQELIFEDFAR.F                     | 19.56  | 28.61 | 0.68 | 1.46 |
| Q8R1F1_NI Fam129b  | Niban-like f R.FSLVPHNYGLVLYENK#.V               | 61.51  | 16.82 | 3.66 | 0.27 |
| Q8R1F1_NI Fam129b  | Niban-like f R.FYEDQYGVSLFNSM*#.R.H              | 4.47   | 3.64  | 1.23 | 0.81 |
| Q8R1F1_NI Fam129b  | Niban-like f R.HEIEGTGPPQAQLLWR.K                | 8.55   | 14.14 | 0.61 | 1.65 |
| Q8R1F1_NI Fam129b  | Niban-like f K.KYVDSSVR.K                        | 4.07   | 6.40  | 0.64 | 1.57 |
| Q8R1F1_NI Fam129b  | Niban-like f R.QWIQSDAVYR.L                      | 10.34  | 6.20  | 1.67 | 0.60 |
| Q8R1F1_NI Fam129b  | Niban-like f K.VLTSVDQYLELVGNSLPGTTSK#.S         | 52.31  | 26.64 | 1.96 | 0.51 |
| Q8R1F1_NI Fam129b  | Niban-like f R.AVINSAGYK#.V                      | 92.26  | 27.40 | 3.37 | 0.30 |
| Q8R1F1_NI Fam129b  | Niban-like f K.EVTDN*NLNVINEGGIDK#.L             | 10.39  | 4.49  | 2.32 | 0.43 |
| Q8R1F1_NI Fam129b  | Niban-like f K.EVTDN*NLNVINEGGIDK#.L             | 6.74   | 2.20  | 3.07 | 0.33 |
| Q8R1F1_NI Fam129b  | Niban-like f R.FDVSSTVFK#.Q                      | 79.45  | 30.33 | 2.62 | 0.38 |
| Q8R1F1_NI Fam129b  | Niban-like f R.FSLVPHNYGLVLYENK#.V               | 5.64   | 1.98  | 2.86 | 0.35 |
| Q8R1F1_NI Fam129b  | Niban-like f R.FYEDQYGVSLFNSM*#.R.H              | 3.33   | 4.96  | 0.67 | 1.49 |
| Q8R1F1_NI Fam129b  | Niban-like f R.HEIEGTGPPQAQLLWR.K                | 6.16   | 15.05 | 0.41 | 2.44 |
| Q8R1F1_NI Fam129b  | Niban-like f K.LSQYALPHK#.M                      | 79.76  | 31.12 | 2.56 | 0.39 |
| Q8R1F1_NI Fam129b  | Niban-like f R.LVFEQAK#.V                        | 61.54  | 11.62 | 5.29 | 0.19 |
| Q8R1F1_NI Fam129b  | Niban-like f R.QWIQSDAVYR.L                      | 11.51  | 5.32  | 2.16 | 0.46 |
| Q8R1F1_NI Fam129b  | Niban-like f K.SGSTPILK#.C                       | 48.78  | 22.80 | 2.14 | 0.47 |
| Q8R1F1_NI Fam129b  | Niban-like f R.TDM*DIQTSK#.E                     | 56.79  | 12.63 | 4.50 | 0.22 |
| Q8R1F1_NI Fam129b  | Niban-like f K.VEGPAFTDAIR.M                     | 14.52  | 24.78 | 0.59 | 1.71 |
| Q8R1F1_NI Fam129b  | Niban-like f K.VLTSVDQYLELVGNSLPGTTSK#.S         | 80.74  | 22.57 | 3.58 | 0.28 |
| Q3TCJ1_F1 Fam175b  | BRISC com f R.AYQVYNALQEK#.V                     | 8.02   | 1.73  | 4.64 | 0.22 |
| Q3TCJ1_F1 Fam175b  | BRISC com f K.VSSVPNTSQYAK#.V                    | 11.58  | 4.59  | 2.52 | 0.40 |
| Q9CQB2_F: Fam195a  | Protein FAF R.TGTPQQVESR.L                       | 3.40   | 6.13  | 0.55 | 1.80 |
| Q3UGS4_F: Fam195b  | Protein FAF R.FIYEAWQGVFR.D                      | 3.55   | 9.73  | 0.36 | 2.74 |
| P58468_F2 Fam207a  | Protein FAF R.AVEPALPQSPAGGAGAK#.D               | 9.81   | 8.51  | 1.15 | 0.87 |
| P58468_F2 Fam207a  | Protein FAF R.DALPELEAQR.Q                       | 3.44   | 12.21 | 0.28 | 3.55 |
| Q69ZR9_F2 Fam208a  | Protein FAF R.LQAQNIQOR.H                        | 7.09   | 20.28 | 0.35 | 2.86 |
| Q69ZR9_F2 Fam208a  | Protein FAF K.NVSYSAIPTIFSAQEK#.M                | 4.56   | 6.98  | 0.65 | 1.53 |
| Q69ZR9_F2 Fam208a  | Protein FAF R.VSVSSDFSAK.E                       | 15.36  | 13.36 | 1.15 | 0.87 |
| Q5DTT3_F2 Fam208b  | Protein FAF K.TPVSNVQQR.S                        | 2.03   | 16.00 | 0.13 | 7.88 |
| Q6PGL7_FF Fam21    | WASH com K.DLYIDRPLPILGSK.L                      | 4.93   | 17.38 | 0.28 | 3.52 |
| Q6PGL7_FF Fam21    | WASH com K.IPAGAVSVLLGHPDVSSTAPSALK#.E           | 16.97  | 10.24 | 1.66 | 0.60 |
| Q6PGL7_FF Fam21    | WASH com K.QTSSLOQSQEK#.A                        | 5.63   | 3.84  | 1.47 | 0.68 |
| Q6PGL7_FF Fam21    | WASH com R.RTPADDEEDLFPPTLDEDFSPFGSR.G           | 2.41   | 6.64  | 0.36 | 2.75 |
| Q6PGL7_FF Fam21    | WASH com K.SSHLPTAGLFDDDDNDDNDDNFFM*PSSSK#PSK#.T | 1.86   | 2.00  | 0.93 | 1.08 |
| Q6PGL7_FF Fam21    | WASH com R.SVSPSGSGLFGDDEDDLFSK#.T               | 4.86   | 3.78  | 1.29 | 0.78 |
| Q6PGL7_FF Fam21    | WASH com K.STAIIFDDDEGLFK#.E                     | 4.71   | 12.13 | 0.39 | 2.57 |
| Q6PGL7_FF Fam21    | WASH com K.TEPAQDSGLTFFK#.S                      | 8.57   | 11.37 | 0.75 | 1.33 |
| Q6PGL7_FF Fam21    | WASH com K.VPILFSDDEEVEVSPGVKPEDLK.V             | 20.40  | 13.20 | 1.55 | 0.65 |
| Q6PGL7_FF Fam21    | WASH com K.IPAGAVSVLLGHPDVSSTAPSALK#.E           | 9.34   | 7.50  | 1.25 | 0.80 |
| Q6PGL7_FF Fam21    | WASH com K.VPILFSDDEEVEVSPGVKPEDLK.V             | 16.87  | 12.08 | 1.40 | 0.72 |
| Q9D8N2_F: Fam45a   | Protein FAF K.EIGQLIVQSAEDPEKSDSQVIQDIALK.T      | 4.19   | 8.57  | 0.49 | 2.04 |
| Q9D8N2_F: Fam45a   | Protein FAF K.IEAVQEFTR.T                        | 5.33   | 10.95 | 0.49 | 2.05 |
| Q9D8N2_F: Fam45a   | Protein FAF K.VILNVEALK.Q                        | 6.35   | 10.24 | 0.62 | 1.61 |
| Q9D8N2_F: Fam45a   | Protein FAF K.EIGQLIVQSAEDPEKSDSQVIQDIALK#.T     | 4.50   | 3.55  | 1.27 | 0.79 |
| Q9WTJ8_F: Fam50b   | Protein FAF K.FSAHYDAVEALK#.S                    | 31.10  | 16.40 | 1.90 | 0.53 |
| Q68FE6_FA Fam65a   | Protein FAF R.LGLFLDLDK#.Q                       | 10.33  | 3.20  | 3.23 | 0.31 |
| Q922G2_F: Fam76a   | Protein FAF K.ADFQVQESQTR.A                      | 2.34   | 13.59 | 0.17 | 5.82 |
| Q80XP8_FF Fam76b   | Protein FAF K.ADFQVQESNLR.T                      | 3.91   | 18.60 | 0.21 | 4.75 |
| Q80XP8_FF Fam76b   | Protein FAF K.SLGSSSHNSSSSLTEK#.D                | 2.43   | 3.08  | 0.79 | 1.27 |
| Q80XP8_FF Fam76b   | Protein FAF K.SSAIQNETPK.K                       | 19.58  | 24.18 | 0.81 | 1.24 |
| Q148V8_FF Fam83h   | Protein FAF K.EQTVSETLPGSGEAVR.S                 | 1.15   | 6.69  | 0.17 | 5.81 |
| Q3UVG3_F: Fam91a1  | Protein FAF R.SPSSLLIASLHL.-                     | 12.54  | 12.54 | 1.00 | 1.00 |
| Q3UVG3_F: Fam91a1  | Protein FAF K.IIDSGPQLSGSLDYNVHSLYLNK#.G         | 23.41  | 12.83 | 1.82 | 0.55 |
| Q3UVG3_F: Fam91a1  | Protein FAF K.KHGPQVINLQLHSSWK#.N                | 12.90  | 5.69  | 2.27 | 0.44 |
| Q3UVG3_F: Fam91a1  | Protein FAF K.LSDESLSFLIELEK#.V                  | 23.42  | 9.37  | 2.50 | 0.40 |
| Q3UVG3_F: Fam91a1  | Protein FAF K.LYIYHVTGQGPPLLSK#.G                | 12.47  | 7.84  | 1.59 | 0.63 |
| Q3UVG3_F: Fam91a1  | Protein FAF R.SPSSLLIASLHL.-                     | 48.84  | 48.84 | 1.00 | 1.00 |
| Q3UVG3_F: Fam91a1  | Protein FAF R.VQGDYFETLLYK#.I                    | 27.06  | 11.08 | 2.44 | 0.41 |
| Q3UVG3_F: Fam91a1  | Protein FAF K.LSDESLSFLIELEK#.V                  | 21.34  | 10.85 | 1.97 | 0.51 |
| Q3UVG3_F: Fam91a1  | Protein FAF K.LYIYHVTGQGPPLLSK#.G                | 18.47  | 7.68  | 2.41 | 0.42 |
| Q8BP22_F5 Fam92a1  | Protein FAF R.HLEETIDNFEK#.Q                     | 5.17   | 3.65  | 1.41 | 0.71 |
| Q9D187_V: Fam96b   | Mitotic spii R.EIFDLIR.S                         | 10.74  | 18.65 | 0.58 | 1.74 |
| Q9D187_V: Fam96b   | Mitotic spii R.SINDPEHPLTLEELNVVEQVR.I           | 2.33   | 8.57  | 0.27 | 3.68 |
| Q3TJ26_FA: Fam98a  | Protein FAF K.AQEGGSEVFEQELK#.G                  | 31.07  | 18.87 | 1.65 | 0.61 |
| Q3TJ26_FA: Fam98a  | Protein FAF R.GGRNIEPPPPPEM*PPWQK.R              | 5.26   | 15.82 | 0.33 | 3.01 |
| Q3TJ26_FA: Fam98a  | Protein FAF K.HQGGWTDGSGSGGGYQDQAYR.D            | 2.30   | 11.51 | 0.20 | 5.00 |
| Q3TJ26_FA: Fam98a  | Protein FAF K.IEAINQAIANEVYR.R                   | 15.69  | 33.52 | 0.47 | 2.14 |
| Q3TJ26_FA: Fam98a  | Protein FAF K.KHQAQEGGSEVFEQELK#.G               | 7.64   | 6.95  | 1.10 | 0.91 |
| Q3TJ26_FA: Fam98a  | Protein FAF K.KHMGPAHWEK#.I                      | 19.83  | 14.55 | 1.36 | 0.73 |
| Q3TJ26_FA: Fam98a  | Protein FAF R.LDVTQSFQVSDR.A                     | 8.66   | 15.39 | 0.56 | 1.78 |
| Q3TJ26_FA: Fam98a  | Protein FAF K.RLDVTQSFQVSDR.A                    | 4.18   | 32.61 | 0.13 | 7.80 |
| Q80VD1_F: Fam98b   | Protein FAF R.DDLEFQLEISGFLK#.E                  | 24.29  | 14.50 | 1.67 | 0.60 |
| Q80VD1_F: Fam98b   | Protein FAF R.GPELQVETSMT*EGDVLDTLEALGYK#.G      | 11.98  | 5.17  | 2.32 | 0.43 |
| Q80VD1_F: Fam98b   | Protein FAF K.GPLLEEALSK#.A                      | 138.11 | 74.81 | 1.85 | 0.54 |
| Q80VD1_F: Fam98b   | Protein FAF -M*RGPELQVETSMT*EGDVLDTLEALGYK.G     | 2.77   | 7.61  | 0.36 | 2.74 |
| Q80VD1_F: Fam98b   | Protein FAF K.SDTSIDIPLLSQVESK#.V                | 59.84  | 38.82 | 1.54 | 0.65 |

|                  |                                               |        |        |      |      |
|------------------|-----------------------------------------------|--------|--------|------|------|
| Q80VD1_F1 Fam98b | Protein FAM K.TVTLAHLAAR.E                    | 8.70   | 26.35  | 0.33 | 3.03 |
| Q80VD1_F1 Fam98b | Protein FAM K.VDLSSEAEK.L                     | 69.26  | 54.39  | 1.27 | 0.79 |
| Q8K368_FF Fanci  | Fanconi ani K.LGANILLETFK.I                   | 8.72   | 4.70   | 1.85 | 0.54 |
| F8VPU2_FA Farp1  | FERM, Rho t.R.LGAPENSGISTLER.G                | 3.24   | 7.39   | 0.44 | 2.28 |
| F8VPU2_FA Farp1  | FERM, Rho t.R.LGAPENSGISTLER.G                | 5.29   | 12.38  | 0.43 | 2.34 |
| F8VPU2_FA Farp1  | FERM, Rho t.R.SLVSQPTAPNSEVPK#.Q              | 11.23  | 11.62  | 0.97 | 1.03 |
| F8VPU2_FA Farp1  | FERM, Rho t.R.AALAEITEMVAQLHGTM*TIK#.M        | 9.46   | 6.54   | 1.45 | 0.69 |
| F8VPU2_FA Farp1  | FERM, Rho t.R.HSEALEALETSIK#.G                | 15.95  | 8.81   | 1.81 | 0.55 |
| F8VPU2_FA Farp1  | FERM, Rho t.R.LGAPENSGISTLER.G                | 10.55  | 34.37  | 0.31 | 3.26 |
| F8VPU2_FA Farp1  | FERM, Rho t.R.SLVSQPTAPNSEVPK#.Q              | 35.47  | 24.84  | 1.43 | 0.70 |
| F8VPU2_FA Farp1  | FERM, Rho t.R.YLFALQVK#.Q                     | 13.70  | 19.74  | 0.69 | 1.44 |
| Q8COC7_S1 Farsa  | Phenylalan R.DRPFKPYNFSAR.G                   | 6.50   | 40.42  | 0.16 | 6.22 |
| Q8COC7_S1 Farsa  | Phenylalan R.K#LLTEVILK#.T                    | 52.80  | 27.98  | 1.89 | 0.53 |
| Q8COC7_S1 Farsa  | Phenylalan R.LDIEPR.S                         | 11.71  | 33.22  | 0.35 | 2.84 |
| Q8COC7_S1 Farsa  | Phenylalan R.LEVADGGDLSAELATQLGVEHQAVVGAVK#.S | 4.39   | 2.98   | 1.47 | 0.68 |
| Q8COC7_S1 Farsa  | Phenylalan K.LGITQLR.F                        | 28.76  | 61.15  | 0.47 | 2.13 |
| Q8COC7_S1 Farsa  | Phenylalan K.LLLEVLK#.T                       | 41.57  | 25.55  | 1.63 | 0.61 |
| Q8COC7_S1 Farsa  | Phenylalan K.QEALSPEM*ISSGSWR.D               | 2.66   | 7.05   | 0.38 | 2.65 |
| Q8COC7_S1 Farsa  | Phenylalan R.LEVADGGDLSAELATQLGVEHQAVVGAVK#.S | 16.80  | 30.23  | 0.56 | 1.80 |
| Q8COC7_S1 Farsa  | Phenylalan K.SLQALGEVIAELR.S                  | 20.23  | 51.53  | 0.39 | 2.55 |
| Q8COC7_S1 Farsa  | Phenylalan R.THSGQGYSGQYK#.Y                  | 17.59  | 6.26   | 2.81 | 0.36 |
| Q8COC7_S1 Farsa  | Phenylalan K.TWVSK#.G                         | 48.25  | 27.90  | 1.73 | 0.58 |
| Q8COC7_S1 Farsa  | Phenylalan R.VVDSIEDEVQK#.R                   | 18.26  | 11.42  | 1.60 | 0.63 |
| Q8COC7_S1 Farsa  | Phenylalan K.YGINNIR.E                        | 17.98  | 60.62  | 0.30 | 3.37 |
| Q8COC7_S1 Farsa  | Phenylalan R.ALYQLAQK#.K                      | 8.03   | 5.25   | 1.53 | 0.65 |
| Q8COC7_S1 Farsa  | Phenylalan K.LLLEVLK#.T                       | 22.23  | 7.65   | 2.91 | 0.34 |
| Q8COC7_S1 Farsa  | Phenylalan K.SLQALGEVIAELR.S                  | 5.19   | 9.24   | 0.56 | 1.78 |
| Q8COC7_S1 Farsa  | Phenylalan R.VVDSIEDEVQK#.R                   | 6.89   | 3.37   | 2.04 | 0.49 |
| Q8COC7_S1 Farsa  | Phenylalan K.SLQALGEVIAELR.S                  | 3.36   | 8.27   | 0.41 | 2.46 |
| Q9WUA2_S Farsb   | Phenylalan R.ADLINK#.V                        | 28.17  | 13.92  | 2.02 | 0.49 |
| Q9WUA2_S Farsb   | Phenylalan R.ALVAIGTHDLDTLSPGPFYTA#K.R        | 67.39  | 24.30  | 2.77 | 0.36 |
| Q9WUA2_S Farsb   | Phenylalan K.AQGASDVVLYK#.I                   | 101.48 | 39.64  | 2.56 | 0.39 |
| Q9WUA2_S Farsb   | Phenylalan K.AVHISNPK#.T                      | 18.60  | 10.70  | 1.74 | 0.58 |
| Q9WUA2_S Farsb   | Phenylalan R.DLLFOALGR.T                      | 13.11  | 31.91  | 0.41 | 2.43 |
| Q9WUA2_S Farsb   | Phenylalan K.DRYDSFIEQLEK.L                   | 4.87   | 6.87   | 0.71 | 1.41 |
| Q9WUA2_S Farsb   | Phenylalan K.IDVPANR.Y                        | 13.60  | 29.33  | 0.46 | 2.16 |
| Q9WUA2_S Farsb   | Phenylalan K.LFEISDVVVK#.D                    | 97.30  | 45.79  | 2.13 | 0.47 |
| Q9WUA2_S Farsb   | Phenylalan K.LGLDISATK#.A                     | 27.69  | 13.35  | 2.07 | 0.48 |
| Q9WUA2_S Farsb   | Phenylalan K.LGVLHPDVTIK#.F                   | 115.22 | 45.63  | 2.53 | 0.40 |
| Q9WUA2_S Farsb   | Phenylalan K.LVITEETA#K.V                     | 87.83  | 39.25  | 2.24 | 0.45 |
| Q9WUA2_S Farsb   | Phenylalan K.TAEFQVAR.T                       | 18.67  | 34.37  | 0.54 | 1.84 |
| Q9WUA2_S Farsb   | Phenylalan K.TPGFEIHLGDDR.I                   | 22.83  | 34.79  | 0.66 | 1.52 |
| Q9WUA2_S Farsb   | Phenylalan R.TTLLPGLLK#.T                     | 82.78  | 38.50  | 2.15 | 0.47 |
| Q9WUA2_S Farsb   | Phenylalan K.TYTIANQFPLNK#.L                  | 57.54  | 27.58  | 2.09 | 0.48 |
| Q9WUA2_S Farsb   | Phenylalan R.ALVAIGTHDLDTLSPGPFYTA#K.R        | 50.78  | 15.31  | 3.32 | 0.30 |
| Q9WUA2_S Farsb   | Phenylalan K.AQGASDVVLYK#.I                   | 75.36  | 24.85  | 3.03 | 0.33 |
| Q9WUA2_S Farsb   | Phenylalan K.ASAGSAFFPGR.C                    | 12.85  | 15.98  | 0.80 | 1.24 |
| Q9WUA2_S Farsb   | Phenylalan R.DLLFOALGR.T                      | 12.77  | 22.02  | 0.58 | 1.72 |
| Q9WUA2_S Farsb   | Phenylalan K.LFEISDVVVK#.D                    | 70.85  | 28.05  | 2.53 | 0.40 |
| Q9WUA2_S Farsb   | Phenylalan K.LVITEETA#K.V                     | 80.14  | 29.20  | 2.74 | 0.36 |
| Q9WUA2_S Farsb   | Phenylalan R.TTLLPGLLK#.T                     | 52.93  | 17.94  | 2.95 | 0.34 |
| Q9WUA2_S Farsb   | Phenylalan K.TYTIANQFPLNK#.L                  | 33.07  | 12.70  | 2.60 | 0.38 |
| Q9WUA2_S Farsb   | Phenylalan R.ALVAIGTHDLDTLSPGPFYTA#K.R        | 66.92  | 18.37  | 3.64 | 0.27 |
| Q9WUA2_S Farsb   | Phenylalan K.ASAGSAFFPGR.C                    | 13.93  | 14.93  | 0.93 | 1.07 |
| Q9WUA2_S Farsb   | Phenylalan R.DLLFOALGR.T                      | 13.79  | 22.75  | 0.61 | 1.65 |
| Q9WUA2_S Farsb   | Phenylalan K.LFEISDVVVK#.D                    | 67.50  | 26.39  | 2.56 | 0.39 |
| Q9WUA2_S Farsb   | Phenylalan K.LGLDISATK#.A                     | 20.33  | 7.33   | 2.77 | 0.36 |
| Q9WUA2_S Farsb   | Phenylalan K.LVITEETA#K.V                     | 76.21  | 23.55  | 3.24 | 0.31 |
| Q9WUA2_S Farsb   | Phenylalan K.TPGFEIHLGDDR.I                   | 12.01  | 21.36  | 0.56 | 1.78 |
| Q9WUA2_S Farsb   | Phenylalan R.TTLLPGLLK#.T                     | 65.17  | 23.37  | 2.79 | 0.36 |
| Q9WUA2_S Farsb   | Phenylalan K.TYTIANQFPLNK#.L                  | 46.74  | 16.34  | 2.86 | 0.35 |
| P19096_FA Fasn   | Fatty acid s R.VAASVDLITK#.S                  | 18.39  | 4.58   | 4.01 | 0.25 |
| P19096_FA Fasn   | Fatty acid s K.VLEALLPLK#.S                   | 16.63  | 7.13   | 2.33 | 0.43 |
| P19096_FA Fasn   | Fatty acid s R.AADQYK#PK#.A                   | 10.88  | 3.03   | 3.58 | 0.28 |
| P19096_FA Fasn   | Fatty acid s K.AGLVLPK#.R                     | 160.64 | 62.01  | 2.59 | 0.39 |
| P19096_FA Fasn   | Fatty acid s R.AIPQEK#PILFVSDTFSFQVWVSLK#.S   | 144.31 | 67.70  | 2.13 | 0.47 |
| P19096_FA Fasn   | Fatty acid s R.ALIAEATK#.L                    | 183.73 | 67.73  | 2.71 | 0.37 |
| P19096_FA Fasn   | Fatty acid s K.AQVEDAFR.Y                     | 29.02  | 57.47  | 0.51 | 1.98 |
| P19096_FA Fasn   | Fatty acid s R.DAM*LENQTPLEFQDVK#PK#.Y        | 80.01  | 30.33  | 2.64 | 0.38 |
| P19096_FA Fasn   | Fatty acid s R.DGAWGAFR.H                     | 21.51  | 33.27  | 0.65 | 1.55 |
| P19096_FA Fasn   | Fatty acid s R.DGVGK#PLK#.C                   | 98.71  | 38.32  | 2.58 | 0.39 |
| P19096_FA Fasn   | Fatty acid s R.DHK#DNLFFLTNLGK#.V             | 112.25 | 31.30  | 3.59 | 0.28 |
| P19096_FA Fasn   | Fatty acid s R.DIM*LATG#.L                    | 58.57  | 19.32  | 3.03 | 0.33 |
| P19096_FA Fasn   | Fatty acid s K.DNLEFFLTNLGK#.V                | 74.38  | 23.73  | 3.13 | 0.32 |
| P19096_FA Fasn   | Fatty acid s R.EAVLAAYWR.G                    | 16.43  | 34.14  | 0.48 | 2.08 |
| P19096_FA Fasn   | Fatty acid s R.EHDLVLP#R.E                    | 5.09   | 9.66   | 0.53 | 1.90 |
| P19096_FA Fasn   | Fatty acid s K.FDASFFGVHPK#.Q                 | 221.27 | 78.55  | 2.82 | 0.36 |
| P19096_FA Fasn   | Fatty acid s K.FDLSNNHPLGM*AIFLK#.N           | 75.65  | 29.79  | 2.54 | 0.39 |
| P19096_FA Fasn   | Fatty acid s K.FDLSNNHPLGM#AIFLK#.N           | 24.84  | 9.43   | 2.64 | 0.38 |
| P19096_FA Fasn   | Fatty acid s R.FLEIGK#.F                      | 83.74  | 31.60  | 2.65 | 0.38 |
| P19096_FA Fasn   | Fatty acid s R.GNAGQTNYGANSTM*ER.I            | 10.90  | 13.48  | 0.81 | 1.24 |
| P19096_FA Fasn   | Fatty acid s R.GNAGQTNYGANSTM*ER.I            | 4.93   | 5.71   | 0.86 | 1.16 |
| P19096_FA Fasn   | Fatty acid s R.GTNTGWWVGVSGSEALS.R.D          | 5.65   | 10.71  | 0.53 | 1.89 |
| P19096_FA Fasn   | Fatty acid s K.GVDLVLNSLAEEK#.L               | 267.99 | 79.20  | 3.38 | 0.30 |
| P19096_FA Fasn   | Fatty acid s R.GYTLGVEGR.V                    | 44.52  | 60.02  | 0.74 | 1.35 |
| P19096_FA Fasn   | Fatty acid s K.HDLVMNVYR.D                    | 9.28   | 15.99  | 0.58 | 1.72 |
| P19096_FA Fasn   | Fatty acid s R.HFQLEQDK#PK#.E                 | 144.66 | 83.03  | 1.74 | 0.57 |
| P19096_FA Fasn   | Fatty acid s R.IPALLNTQPMQLQLEYATDR.H         | 8.26   | 10.74  | 0.77 | 1.30 |
| P19096_FA Fasn   | Fatty acid s R.IPALLNTQPMQLQLEYATDRHQPALK.D   | 6.58   | 10.48  | 0.63 | 1.59 |
| P19096_FA Fasn   | Fatty acid s K.LDPPGSELQQLK#.H                | 231.45 | 77.72  | 2.98 | 0.34 |
| P19096_FA Fasn   | Fatty acid s K.LGPPGVGNLAM*VLR.D              | 94.10  | 130.38 | 0.72 | 1.39 |
| P19096_FA Fasn   | Fatty acid s R.LKEDTQVADVITSR.C               | 20.67  | 32.17  | 0.64 | 1.56 |
| P19096_FA Fasn   | Fatty acid s R.LLEASHAFVSDGNTLIVSGK#.V        | 121.95 | 42.13  | 2.89 | 0.35 |
| P19096_FA Fasn   | Fatty acid s K.LSPDAIPGK#.W                   | 161.47 | 59.31  | 2.72 | 0.37 |
| P19096_FA Fasn   | Fatty acid s R.LTQGEVYK#.E                    | 236.74 | 83.83  | 2.82 | 0.35 |
| P19096_FA Fasn   | Fatty acid s R.QGIQVLVSTSNVSSLEGAR.A          | 7.52   | 6.99   | 1.08 | 0.93 |
| P19096_FA Fasn   | Fatty acid s R.QHSQDLAFVSM*LNIDIAATPTAAMPFR.G | 6.48   | 5.30   | 1.22 | 0.82 |
| P19096_FA Fasn   | Fatty acid s R.QQEQLVPTLEK#.F                 | 40.17  | 12.77  | 3.14 | 0.32 |
| P19096_FA Fasn   | Fatty acid s K.QVQPEGPYR.I                    | 33.66  | 52.38  | 0.64 | 1.56 |
| P19096_FA Fasn   | Fatty acid s R.RVYATILNAGTNDGSK.E             | 14.20  | 17.94  | 0.79 | 1.26 |
| P19096_FA Fasn   | Fatty acid s R.SDEAVK#PLGVK#.V                | 228.54 | 85.08  | 2.69 | 0.37 |
| P19096_FA Fasn   | Fatty acid s R.SDEAVKPLGVK#.V                 | 90.22  | 33.97  | 2.66 | 0.38 |
| P19096_FA Fasn   | Fatty acid s R.SEAUVAVLTK#.K                  | 141.76 | 47.23  | 3.00 | 0.33 |

|                  |                                                                 |        |        |      |       |
|------------------|-----------------------------------------------------------------|--------|--------|------|-------|
| P19096_FA Fasn   | Fatty acid s R.SLGLSLEETPVFVNFVSHQATILPK#.T                     | 253.84 | 83.33  | 3.05 | 0.33  |
| P19096_FA Fasn   | Fatty acid s R.SLGLSLEETPVFVNFVSHQATILPK#.T                     | 9.03   | 6.48   | 1.39 | 0.72  |
| P19096_FA Fasn   | Fatty acid s K.SNM*GHPEPASGLAALTK#.V                            | 154.48 | 53.03  | 2.91 | 0.34  |
| P19096_FA Fasn   | Fatty acid s K.SNM*GHPEPASGLAALTK#.V                            | 17.92  | 6.57   | 2.73 | 0.37  |
| P19096_FA Fasn   | Fatty acid s K.SNM*GHPEPASGLAALTK#.V                            | 51.91  | 18.86  | 2.75 | 0.36  |
| P19096_FA Fasn   | Fatty acid s K.SYIITGGLGGFGLLELAR.W                             | 20.47  | 27.23  | 0.75 | 1.33  |
| P19096_FA Fasn   | Fatty acid s K.TDSATDITPAK#.S                                   | 83.09  | 27.82  | 2.99 | 0.33  |
| P19096_FA Fasn   | Fatty acid s R.TGGLAFHSYFM*EGIAPTLLQALK#K#.V                    | 7.98   | 4.01   | 1.99 | 0.50  |
| P19096_FA Fasn   | Fatty acid s K.TGTVALEVR.L                                      | 46.58  | 72.14  | 0.65 | 1.55  |
| P19096_FA Fasn   | Fatty acid s R.TLEAVQDLEQGR.Q                                   | 32.81  | 110.23 | 0.30 | 3.36  |
| P19096_FA Fasn   | Fatty acid s R.VAASVDLITK#.S                                    | 175.03 | 56.08  | 3.12 | 0.32  |
| P19096_FA Fasn   | Fatty acid s K.VAEVLAGEHLYSR.I                                  | 63.10  | 86.39  | 0.73 | 1.37  |
| P19096_FA Fasn   | Fatty acid s R.VFTTVGSAEK#.R                                    | 147.39 | 50.09  | 2.94 | 0.34  |
| P19096_FA Fasn   | Fatty acid s K.VGDPQELNGITR.S                                   | 26.21  | 39.17  | 0.67 | 1.49  |
| P19096_FA Fasn   | Fatty acid s K.VHLGTINVPNALFPVVEFPAPR.G                         | 72.32  | 127.91 | 0.57 | 1.77  |
| P19096_FA Fasn   | Fatty acid s K.VLEALLPK#.S                                      | 238.04 | 76.65  | 3.11 | 0.32  |
| P19096_FA Fasn   | Fatty acid s K.VLVQVREEPEAVLPGAQPTLSAISAK.T                     | 5.26   | 8.31   | 0.63 | 1.58  |
| P19096_FA Fasn   | Fatty acid s R.VQEVQVSTNKH.R                                    | 359.57 | 96.56  | 3.72 | 0.27  |
| P19096_FA Fasn   | Fatty acid s K.VSDLLSTDER.T                                     | 45.54  | 52.91  | 0.86 | 1.16  |
| P19096_FA Fasn   | Fatty acid s R.YATILNAGNTDGSK#.E                                | 48.99  | 16.91  | 2.90 | 0.35  |
| P19096_FA Fasn   | Fatty acid s R.WLSTSIPEAQWQSSLAR.T                              | 11.80  | 18.88  | 0.62 | 1.60  |
| P62862_RS Fau    | 40S ribosor R.FVNVVPTFGK#.K                                     | 429.29 | 156.97 | 2.73 | 0.37  |
| P35550_FB Fbl    | rRNA 2'-O-n.R.DHAVVGVYRPPK.S                                    | 47.05  | 134.63 | 0.35 | 2.86  |
| P35550_FB Fbl    | rRNA 2'-O-n.R.GK#HADLVTK#.N                                     | 340.68 | 240.63 | 1.42 | 0.71  |
| P35550_FB Fbl    | rRNA 2'-O-n.K.LAAAILGGVDQIHIK#PGA#K.V                           | 181.27 | 108.27 | 1.67 | 0.60  |
| P35550_FB Fbl    | rRNA 2'-O-n.R.M*LIAM*VDVIFADVAQPDQTR.I                          | 5.50   | 9.43   | 0.58 | 1.71  |
| P35550_FB Fbl    | rRNA 2'-O-n.K.M*QENM*KPQEQLTLEPYER.D                            | 24.01  | 68.70  | 0.35 | 2.86  |
| P35550_FB Fbl    | rRNA 2'-O-n.K.M*QENM*KPQEQLTLEPYER.D                            | 8.78   | 19.64  | 0.45 | 2.24  |
| P35550_FB Fbl    | rRNA 2'-O-n.K.M*QENM*KPQEQLTLEPYER.D                            | 3.94   | 11.89  | 0.33 | 3.02  |
| P35550_FB Fbl    | rRNA 2'-O-n.R.NGGHFVISIK#.A                                     | 25.40  | 13.28  | 1.91 | 0.52  |
| P35550_FB Fbl    | rRNA 2'-O-n.K.NLVPGEVYGEK#.R                                    | 262.33 | 186.14 | 1.41 | 0.71  |
| P35550_FB Fbl    | rRNA 2'-O-n.K.RVSISEGDKIEYR.A                                   | 10.17  | 97.47  | 0.10 | 9.58  |
| P35550_FB Fbl    | rRNA 2'-O-n.K.VLYLGAASGTTVSHVSDIVGPDGLVYAVEFSHR.S               | 31.52  | 60.84  | 0.52 | 1.93  |
| P35550_FB Fbl    | rRNA 2'-O-n.K.VLYLGAASGTTVSHVSDIVGPDGLVYAVEFSHR.S               | 4.17   | 8.27   | 0.50 | 1.98  |
| P35550_FB Fbl    | rRNA 2'-O-n.R.DLNLAK#.K                                         | 35.67  | 30.38  | 1.17 | 0.85  |
| P35550_FB Fbl    | rRNA 2'-O-n.R.GKEDALVTK.N                                       | 33.33  | 26.20  | 1.27 | 0.79  |
| P35550_FB Fbl    | rRNA 2'-O-n.K.LAAAILGGVDQIHIKPGA#K.V                            | 15.16  | 12.64  | 1.20 | 0.83  |
| P35550_FB Fbl    | rRNA 2'-O-n.R.M*LIAM*VDVIFADVAQPDQTR.I                          | 4.50   | 6.00   | 0.75 | 1.33  |
| P35550_FB Fbl    | rRNA 2'-O-n.K.M*QENM*KPQEQLTLEPYER.D                            | 6.42   | 26.13  | 0.25 | 4.07  |
| P35550_FB Fbl    | rRNA 2'-O-n.R.GKEDALVTK.N                                       | 27.58  | 17.85  | 1.54 | 0.65  |
| Q08879_FE Fbln1  | Fibulin-1 O.R.DSFDIKR.Y                                         | 41.80  | 20.09  | 2.08 | 0.48  |
| P37889_FB Fbln2  | Fibulin-2 O.R.GPAPAFAGDTSITITK#.G                               | 18.44  | 9.27   | 1.99 | 0.50  |
| P37889_FB Fbln2  | Fibulin-2 O.R.QGSVTTFLAK#.M                                     | 18.89  | 8.78   | 2.15 | 0.46  |
| P37889_FB Fbln2  | Fibulin-2 O.R.FRAEEDIDPNSVHSVPR.G                               | 1.60   | 17.47  | 0.09 | 10.93 |
| P37889_FB Fbln2  | Fibulin-2 O.R.GPAPAFAGDTSITITK#.G                               | 51.76  | 30.52  | 1.70 | 0.59  |
| P37889_FB Fbln2  | Fibulin-2 O.R.GPAPAFAGDTSITITK#.G                               | 6.72   | 5.90   | 1.14 | 0.88  |
| P37889_FB Fbln2  | Fibulin-2 O.R.DFALDVEV#K#.L                                     | 23.00  | 13.34  | 1.72 | 0.58  |
| P37889_FB Fbln2  | Fibulin-2 O.R.FRAEEDIDPNSVHSVPR.G                               | 3.03   | 35.94  | 0.08 | 11.84 |
| P37889_FB Fbln2  | Fibulin-2 O.K.GNEEGYVTR.R                                       | 28.33  | 78.36  | 0.36 | 2.77  |
| P37889_FB Fbln2  | Fibulin-2 O.R.GPAPAFAGDTSITITK#.G                               | 139.09 | 81.76  | 1.70 | 0.59  |
| P37889_FB Fbln2  | Fibulin-2 O.K.M*YIFFTTAP.-                                      | 26.48  | 26.48  | 1.00 | 1.00  |
| P37889_FB Fbln2  | Fibulin-2 O.R.RPPEEAAPR.R                                       | 3.44   | 47.36  | 0.07 | 13.76 |
| P37889_FB Fbln2  | Fibulin-2 O.R.SVM*QEGAAPLR.S                                    | 14.79  | 49.16  | 0.30 | 3.32  |
| Q8C786_F Fbx12   | F-box and I-M*HITQLNR.E                                         | 9.80   | 15.80  | 0.62 | 1.61  |
| Q8BIA_FB Fbxw8   | F-box/WDR.DLNLDDVDFDVR.L                                        | 4.50   | 6.36   | 0.71 | 1.41  |
| Q3UQN2_F Fcho2   | F-BAR dom: K.TKHEEVAGTLEAVQAIQNITQALQK#.S                       | 11.13  | 1.84   | 6.05 | 0.17  |
| Q91250_Qf Fen1   | Flap endon K.EAQQLFLEPEVLDPESELK#.W                             | 43.16  | 10.50  | 4.11 | 0.24  |
| Q91250_Qf Fen1   | Flap endon K.EAQQLFLEPEVLDPESELK#.W                             | 98.53  | 23.46  | 4.20 | 0.24  |
| Q91250_Qf Fen1   | Flap endon R.HLTASEAK#.K                                        | 48.25  | 11.07  | 4.36 | 0.23  |
| Q91250_Qf Fen1   | Flap endon R.LDDFFK#.V                                          | 132.03 | 29.52  | 4.47 | 0.22  |
| Q91250_Qf Fen1   | Flap endon K.LIADVSAIR.E                                        | 61.34  | 69.38  | 0.88 | 1.13  |
| Q91250_Qf Fen1   | Flap endon K.LQQAQEGM*EEVEK#.F                                  | 77.03  | 19.25  | 4.00 | 0.25  |
| Q91250_Qf Fen1   | Flap endon K.SIEIVR.R                                           | 27.65  | 32.11  | 0.86 | 1.16  |
| Q91250_Qf Fen1   | Flap endon K.WSEPNEELVK#.F                                      | 156.57 | 38.39  | 4.08 | 0.25  |
| Q91250_Qf Fen1   | Flap endon K.EAQQLFLEPEVLDPESELK#.W                             | 5.71   | 2.91   | 1.96 | 0.51  |
| Q91250_Qf Fen1   | Flap endon K.WSEPNEELVK#.F                                      | 8.72   | 3.00   | 2.90 | 0.34  |
| Q91250_Qf Fen1   | Flap endon K.EAQQLFLEPEVLDPESELK#.W                             | 17.81  | 5.12   | 3.48 | 0.29  |
| Q8CIB5_FE Fermt2 | Fermitin fai R.INQLYEQA#.W                                      | 15.19  | 4.93   | 3.08 | 0.32  |
| Q8CIB5_FE Fermt2 | Fermitin fai R.AK#DQNESLDEEM*FYK#.L                             | 25.72  | 10.25  | 2.51 | 0.40  |
| Q8CIB5_FE Fermt2 | Fermitin fai R.FIQAWQSLPEFGITHFIAR.F                            | 7.68   | 21.06  | 0.36 | 2.74  |
| Q8CIB5_FE Fermt2 | Fermitin fai K.GK#HTM*ADSSYNLEVOQNLSFLK#.M                      | 11.78  | 4.98   | 2.37 | 0.42  |
| Q8CIB5_FE Fermt2 | Fermitin fai R.HPEELSLK#.K                                      | 87.45  | 34.43  | 2.54 | 0.39  |
| Q8CIB5_FE Fermt2 | Fermitin fai R.ILEAHQNAQVM*SLIEAK#.M                            | 72.71  | 24.75  | 2.94 | 0.34  |
| Q8CIB5_FE Fermt2 | Fermitin fai R.ILEAHQNAQVM*SLIEAK#.M                            | 36.73  | 13.92  | 2.64 | 0.38  |
| Q8CIB5_FE Fermt2 | Fermitin fai R.INQLYEQA#.W                                      | 121.76 | 43.76  | 2.78 | 0.36  |
| Q8CIB5_FE Fermt2 | Fermitin fai K.K#LDDQSEDEALELEGLPIM*PGSGSIYSSPGLYSK#.T          | 9.20   | 4.17   | 2.21 | 0.45  |
| Q8CIB5_FE Fermt2 | Fermitin fai K.K#LDDQSEDEALELEGLPIM*PGSGSIYSSPGLYSK#.T          | 4.79   | 2.57   | 1.87 | 0.54  |
| Q8CIB5_FE Fermt2 | Fermitin fai R.LQLPNM#.Y                                        | 19.49  | 16.58  | 1.18 | 0.85  |
| Q8CIB5_FE Fermt2 | Fermitin fai K.LS#M*TSENHLNNSDK#E#VEVDAALSDLEITEGGK#.T          | 33.83  | 8.54   | 3.96 | 0.25  |
| Q8CIB5_FE Fermt2 | Fermitin fai R.M*DASTGDAIK#.T                                   | 35.53  | 18.89  | 1.88 | 0.53  |
| Q8CIB5_FE Fermt2 | Fermitin fai K.M*FK#PQALLDK#.A                                  | 10.22  | 5.46   | 1.87 | 0.53  |
| Q8CIB5_FE Fermt2 | Fermitin fai R.SLM*EQDKVENEALLLR.F                              | 14.60  | 25.29  | 0.58 | 1.73  |
| Q8CIB5_FE Fermt2 | Fermitin fai R.SLMEQDKVENEALLLR.F                               | 7.86   | 10.17  | 0.77 | 1.29  |
| Q8CIB5_FE Fermt2 | Fermitin fai K.TM*TPDYADHGSPLSTSAWFGDSALSEGNPGLVSAQVTSPEILAK#.M | 23.77  | 4.27   | 5.56 | 0.18  |
| Q8CIB5_FE Fermt2 | Fermitin fai K.TNQGWLDDSSR.S                                    | 12.88  | 22.04  | 0.58 | 1.71  |
| Q8CIB5_FE Fermt2 | Fermitin fai K.YYFFDLNPK#.Y                                     | 71.66  | 26.74  | 2.68 | 0.37  |
| Q8CIB5_FE Fermt2 | Fermitin fai R.AK#DQNESLDEEM*FYK#.L                             | 21.47  | 7.36   | 2.92 | 0.34  |
| Q8CIB5_FE Fermt2 | Fermitin fai R.FIQAWQSLPEFGITHFIAR.F                            | 8.49   | 19.57  | 0.43 | 2.31  |
| Q8CIB5_FE Fermt2 | Fermitin fai R.HPEELSLK#.K                                      | 55.44  | 27.78  | 2.00 | 0.50  |
| Q8CIB5_FE Fermt2 | Fermitin fai R.ILEAHQNAQVM*SLIEAK#.M                            | 57.89  | 24.49  | 2.36 | 0.42  |
| Q8CIB5_FE Fermt2 | Fermitin fai R.ILEAHQNAQVM*SLIEAK#.M                            | 35.99  | 11.79  | 3.05 | 0.33  |
| Q8CIB5_FE Fermt2 | Fermitin fai R.INQLYEQA#.W                                      | 86.65  | 44.71  | 1.94 | 0.52  |
| Q8CIB5_FE Fermt2 | Fermitin fai K.K#LDDQSEDEALELEGLPIM*PGSGSIYSSPGLYSK#.T          | 8.84   | 5.23   | 1.69 | 0.59  |
| Q8CIB5_FE Fermt2 | Fermitin fai K.LDDQSEDEALELEGLPIM*PGSGSIYSSPGLYSK#.T            | 7.35   | 4.28   | 1.72 | 0.58  |
| Q8CIB5_FE Fermt2 | Fermitin fai K.LDDQSEDEALELEGLPIM*PGSGSIYSSPGLYSK#.T            | 3.54   | 3.90   | 0.91 | 1.10  |
| Q8CIB5_FE Fermt2 | Fermitin fai K.LLIPVAEGM*NEIWR.C                                | 8.60   | 14.10  | 0.61 | 1.64  |
| Q8CIB5_FE Fermt2 | Fermitin fai R.LQLPNM*#K#.Y                                     | 29.47  | 22.47  | 1.31 | 0.76  |
| Q8CIB5_FE Fermt2 | Fermitin fai R.MDASTGDAIK#.T                                    | 13.76  | 8.73   | 1.58 | 0.63  |
| Q8CIB5_FE Fermt2 | Fermitin fai R.M*DASTGDAIK#.T                                   | 25.29  | 11.83  | 2.14 | 0.47  |
| Q8CIB5_FE Fermt2 | Fermitin fai R.VTGEVHIGVMLK#.L                                  | 7.42   | 1.10   | 6.76 | 0.15  |
| Q8CIB5_FE Fermt2 | Fermitin fai K.YYFFDLNPK#.Y                                     | 63.11  | 22.33  | 2.83 | 0.35  |
| Q6TYBS_FE Fez2   | Fasciculat K.SGPPSVEDLQILTK#.I                                  | 10.16  | 7.65   | 1.33 | 0.75  |
| Q69ZL1_FG Fgd6   | FWVE, RhoG K.SLSAVDADR.C                                        | 13.19  | 12.80  | 1.03 | 0.97  |

|                  |                                                   |        |        |       |       |
|------------------|---------------------------------------------------|--------|--------|-------|-------|
| P97807_FL Fh     | Fumarate h K.LM*NESLM*LVLTALNHPIGYDK#A            | 8.59   | 2.13   | 4.03  | 0.25  |
| P97807_FL Fh     | Fumarate h K.LM*NESLM*LVLTALNHPIGYDK#A            | 8.76   | 1.94   | 4.52  | 0.22  |
| P97807_FL Fh     | Fumarate h R.M*PIPIVQAFGLK#R                      | 29.15  | 2.70   | 10.80 | 0.09  |
| P97807_FL Fh     | Fumarate h R.SGLGELIPENEPSSIM*PGK#V               | 15.73  | 2.97   | 5.30  | 0.19  |
| P97807_FL Fh     | Fumarate h K.VLLPGLQK#L                           | 48.66  | 5.30   | 9.18  | 0.11  |
| P97447_FF Fh1    | Four and a l K.AIVAGDQNVYK#G                      | 22.05  | 13.04  | 1.69  | 0.59  |
| P97447_FF Fh1    | Four and a l K.AIVAGDQNVYK#G                      | 19.18  | 9.49   | 2.02  | 0.49  |
| O70433_FF Fh12   | Four and a l K.KPITGGVYTR.E                       | 1.96   | 4.96   | 0.40  | 2.53  |
| Q9R059_FF Fh13   | Four and a l K.RPITGGSGGEGAGLGGGK.Y               | 3.47   | 11.47  | 0.30  | 3.30  |
| Q9R059_FF Fh13   | Four and a l K.TLTQGGVYTR.D                       | 17.61  | 50.26  | 0.35  | 2.85  |
| Q9R059_FF Fh13   | Four and a l K.TPLAGQFTSR.D                       | 11.86  | 39.12  | 0.30  | 3.30  |
| Q9R059_FF Fh13   | Four and a l K.RPITGGSGGEGAGLGGGK.Y               | 3.72   | 20.65  | 0.18  | 5.56  |
| Q9R059_FF Fh13   | Four and a l K.TLTQGGVYTR.D                       | 5.09   | 17.97  | 0.28  | 3.53  |
| Q9R059_FF Fh13   | Four and a l K.TPLAGQFTSR.D                       | 17.77  | 21.83  | 0.81  | 1.23  |
| Q6P9Q4_FF Fh0d1  | FH1/FH2 dc R.AETLAGATVDDTDGSSGTR.E                | 6.23   | 7.83   | 0.80  | 1.26  |
| Q6P9Q4_FF Fh0d1  | FH1/FH2 dc R.EIAEPLFDLKK.V                        | 23.14  | 6.17   | 3.75  | 0.27  |
| Q6P9Q4_FF Fh0d1  | FH1/FH2 dc R.FSGVAGEAPNLSVPVAVGSGPGQGDNDNHASM*K#S | 4.54   | 2.11   | 2.15  | 0.47  |
| Q6P6L0_Fl Fip11  | Filamin A-ir K.LQSTTSQLQAEQNK.V                   | 8.52   | 7.55   | 1.13  | 0.89  |
| Q9D824_Fl Fip11  | Pre-mRNA : K.AEFTSPPSLFK#T                        | 15.89  | 19.28  | 0.82  | 1.21  |
| Q9D824_Fl Fip11  | Pre-mRNA : R.AFPYGNVAFPHLTSAPSWSLVDTTK.Q          | 11.52  | 8.95   | 1.29  | 0.78  |
| Q9D824_Fl Fip11  | Pre-mRNA : R.ANENSIQVLSDR.S                       | 3.58   | 14.10  | 0.25  | 3.94  |
| Q9D824_Fl Fip11  | Pre-mRNA : R.KPGADLSDFYFNFGNEDTWK.A               | 6.65   | 6.23   | 1.07  | 0.94  |
| Q9D824_Fl Fip11  | Pre-mRNA : R.M*GLEVIPVSTTTNK#I                    | 4.38   | 5.64   | 0.78  | 1.29  |
| Q9D824_Fl Fip11  | Pre-mRNA : R.RLPGAIDVIGQITISR.V                   | 1.26   | 21.20  | 0.06  | 16.82 |
| Q9D824_Fl Fip11  | Pre-mRNA : K.TGAPQYSGVTAPVNLNK#A                  | 4.32   | 5.79   | 0.75  | 1.34  |
| Q9D824_Fl Fip11  | Pre-mRNA : K.AEFTSPPSLFK.T                        | 60.22  | 74.96  | 0.80  | 1.24  |
| Q9D824_Fl Fip11  | Pre-mRNA : R.ANENSIQVLSDR.S                       | 14.26  | 55.77  | 0.26  | 3.91  |
| Q9D824_Fl Fip11  | Pre-mRNA : K.DLDENEVEPEREENASANPPSGIEEAAENGVAQK.V | 1.68   | 6.60   | 0.25  | 3.94  |
| Q9D824_Fl Fip11  | Pre-mRNA : R.K#GADLSDFYFNFGNEDTWK#A               | 31.88  | 29.49  | 1.08  | 0.93  |
| Q9D824_Fl Fip11  | Pre-mRNA : R.KPGADLSDFYFNFGNEDTWK.A               | 4.89   | 3.41   | 1.43  | 0.70  |
| Q9D824_Fl Fip11  | Pre-mRNA : R.LPGAIDVIGQITISR.V                    | 8.43   | 13.07  | 0.64  | 1.55  |
| Q9D824_Fl Fip11  | Pre-mRNA : R.M*GLEVIPVSTTTNK.I                    | 21.02  | 23.24  | 0.90  | 1.11  |
| Q9D824_Fl Fip11  | Pre-mRNA : R.MGLEVIPVSTTTNK#I                     | 24.63  | 18.40  | 1.34  | 0.75  |
| Q9D824_Fl Fip11  | Pre-mRNA : R.RLPGAIDVIGQITISR.V                   | 3.13   | 57.93  | 0.05  | 18.49 |
| Q9D824_Fl Fip11  | Pre-mRNA : K.TGAPQYSGVTAPVNLNK#A                  | 39.03  | 36.26  | 1.08  | 0.93  |
| Q9D824_Fl Fip11  | Pre-mRNA : R.TGNSEKAAALPSTK.A                     | 14.59  | 11.10  | 1.31  | 0.76  |
| Q9CQ92_Fl Fip1   | Mitochond K.FQSEQAAGSVSK#S                        | 8.61   | 5.72   | 1.51  | 0.66  |
| Q9CQ92_Fl Fip1   | Mitochond R.GLLQTEPNQNAK.E                        | 22.13  | 22.72  | 0.97  | 1.03  |
| Q61576_Fk Fkbp10 | Peptidyl-pr R.GGTYDYIGSGWLIK#G                    | 9.07   | 4.92   | 1.84  | 0.54  |
| Q61576_Fk Fkbp10 | Peptidyl-pr K.IIIPFLYAGEK#G                       | 39.25  | 21.98  | 1.79  | 0.56  |
| Q61576_Fk Fkbp10 | Peptidyl-pr R.LFSSHDEYAPQEITLGANK#V               | 20.47  | 9.29   | 2.20  | 0.45  |
| Q6P9Q6_FF Fkbp15 | FK506-binc R.ETLDELASAAAGTSLR.H                   | 2.55   | 5.90   | 0.43  | 2.31  |
| Q6P9Q6_FF Fkbp15 | FK506-binc R.NNSLQTATENTQAR.I                     | 1.47   | 8.77   | 0.17  | 5.98  |
| Q6P9Q6_FF Fkbp15 | FK506-binc R.YVEQSNLM*MEK#R                       | 11.63  | 6.81   | 1.71  | 0.59  |
| P30416_Fk Fkbp4  | Peptidyl-pr K.ALELDSNNEK#G                        | 16.01  | 1.83   | 8.76  | 0.11  |
| P30416_Fk Fkbp4  | Peptidyl-pr K.QALLQYK#K                           | 20.21  | 16.51  | 1.22  | 0.82  |
| P30416_Fk Fkbp4  | Peptidyl-pr K.VLQLYPSNK#A                         | 24.64  | 3.45   | 7.14  | 0.14  |
| Q92247_FF Fkbp9  | Peptidyl-pr R.YHYVGTFLDGQK#F                      | 7.69   | 8.81   | 0.87  | 1.15  |
| Q9J128_Fl Flii   | Protein flig K.ADLTALFLPR.Q                       | 14.57  | 28.64  | 0.51  | 1.97  |
| Q9J128_Fl Flii   | Protein flig R.ASDPDEAK#LAEDILNTM*FDASYK#Q        | 10.90  | 6.31   | 1.73  | 0.58  |
| Q9J128_Fl Flii   | Protein flig R.EGEEAAAEAEK#Q                      | 8.46   | 4.14   | 2.04  | 0.49  |
| Q9J128_Fl Flii   | Protein flig R.GAQTLSNTTK#A                       | 48.63  | 19.54  | 2.49  | 0.40  |
| Q9J128_Fl Flii   | Protein flig R.GVDLSGNDFK#G                       | 31.87  | 15.24  | 2.09  | 0.48  |
| Q9J128_Fl Flii   | Protein flig K.GYFVTEK#C                          | 32.77  | 13.97  | 2.34  | 0.43  |
| Q9J128_Fl Flii   | Protein flig K.LDFDGLPSGIGK#L                     | 10.91  | 6.06   | 1.80  | 0.56  |
| Q9J128_Fl Flii   | Protein flig R.LLQSLDTR.C                         | 8.97   | 16.14  | 0.56  | 1.80  |
| Q9J128_Fl Flii   | Protein flig K.LYLSNKH#LDFDGLPSGIGK#L             | 23.42  | 12.89  | 1.82  | 0.55  |
| Q9J128_Fl Flii   | Protein flig R.NAEAVLQGGLSGK#V                    | 55.07  | 18.91  | 2.91  | 0.34  |
| Q9J128_Fl Flii   | Protein flig R.TAEWYNIQDLSQNL.R.L                 | 13.00  | 7.42   | 1.75  | 0.57  |
| Q9J128_Fl Flii   | Protein flig K.VPFESEDNQGIYAWVGR.A                | 2.65   | 4.43   | 0.60  | 1.67  |
| Q9J128_Fl Flii   | Protein flig K.VTQGLQPLTYQIR.T                    | 3.58   | 7.73   | 0.46  | 2.16  |
| Q9J128_Fl Flii   | Protein flig K.ADLTALFLPR.Q                       | 18.27  | 42.36  | 0.43  | 2.32  |
| Q9J128_Fl Flii   | Protein flig R.ASDPDEAK#LAEDILNTM*FDASYK#Q        | 9.11   | 4.26   | 2.14  | 0.47  |
| Q9J128_Fl Flii   | Protein flig R.EGEEAAAEAEK#Q                      | 19.44  | 7.81   | 2.49  | 0.40  |
| Q9J128_Fl Flii   | Protein flig R.GAQTLSNTTK#A                       | 70.72  | 24.72  | 2.86  | 0.35  |
| Q9J128_Fl Flii   | Protein flig K.GGYFVTEK#A                         | 17.95  | 6.06   | 2.96  | 0.34  |
| Q9J128_Fl Flii   | Protein flig R.GVDLSGNDFK#G                       | 43.98  | 21.23  | 2.07  | 0.48  |
| Q9J128_Fl Flii   | Protein flig K.K#FESLFPK#L                        | 16.87  | 10.69  | 1.58  | 0.63  |
| Q9J128_Fl Flii   | Protein flig K.LAEDILNTM*FDASYK#Q                 | 7.00   | 2.48   | 2.82  | 0.35  |
| Q9J128_Fl Flii   | Protein flig R.LAGASPATVAAAAGSGSK#D               | 14.20  | 2.75   | 5.17  | 0.19  |
| Q9J128_Fl Flii   | Protein flig K.LDFDGLPSGIGK#L                     | 16.64  | 7.08   | 2.35  | 0.43  |
| Q9J128_Fl Flii   | Protein flig R.LLQSLDTR.C                         | 11.46  | 19.08  | 0.60  | 1.66  |
| Q9J128_Fl Flii   | Protein flig K.LYLSNKH#LDFDGLPSGIGK#L             | 28.95  | 23.45  | 1.23  | 0.81  |
| Q9J128_Fl Flii   | Protein flig R.NAEAVLQGGLSGK#V                    | 59.19  | 25.17  | 2.35  | 0.43  |
| Q9J128_Fl Flii   | Protein flig K.NSGVPDDIFK#L                       | 10.10  | 3.75   | 2.69  | 0.37  |
| Q9J128_Fl Flii   | Protein flig K.QVINEGEEPENFFWVGIGAQK#PYDDAEYM*K#H | 4.81   | 2.01   | 2.40  | 0.42  |
| Q9J128_Fl Flii   | Protein flig K.VGLGLGYLELQINQY#L                  | 27.11  | 9.04   | 3.00  | 0.33  |
| Q9J128_Fl Flii   | Protein flig K.VPFESEDNQGIYAWVGR.A                | 4.98   | 6.74   | 0.74  | 1.36  |
| Q8BTM8_Fl Flna   | Filamin-A C.R.LTVSSLQESGLK#V                      | 8.80   | 1.01   | 8.72  | 0.11  |
| Q8BTM8_Fl Flna   | Filamin-A C.R.LTVSVYLLK#D                         | 12.47  | 3.43   | 3.64  | 0.27  |
| Q8BTM8_Fl Flna   | Filamin-A C.K.VATVPQHATSGPGPADVSK#V               | 39.18  | 12.82  | 3.06  | 0.33  |
| Q8BTM8_Fl Flna   | Filamin-A C.R.AEFTVETR.S                          | 39.28  | 46.54  | 0.84  | 1.18  |
| Q8BTM8_Fl Flna   | Filamin-A C.K.AEISFEDR.K                          | 19.94  | 24.93  | 0.80  | 1.25  |
| Q8BTM8_Fl Flna   | Filamin-A C.R.AEVGVPPEFGIWR.E                     | 78.99  | 95.84  | 0.82  | 1.21  |
| Q8BTM8_Fl Flna   | Filamin-A C.K.AFGPGLQGGNAGSPAR.F                  | 95.69  | 139.21 | 0.69  | 1.45  |
| Q8BTM8_Fl Flna   | Filamin-A C.K.AGNMNM*LLVGVHGR.T                   | 34.38  | 48.01  | 0.72  | 1.40  |
| Q8BTM8_Fl Flna   | Filamin-A C.K.AGVAPLQV#V                          | 390.35 | 119.31 | 3.27  | 0.31  |
| Q8BTM8_Fl Flna   | Filamin-A C.R.ALTTQGGPHVK#A                       | 228.71 | 58.39  | 3.92  | 0.26  |
| Q8BTM8_Fl Flna   | Filamin-A C.R.ANLPQSFQVDTSK#A                     | 406.56 | 119.72 | 3.40  | 0.29  |
| Q8BTM8_Fl Flna   | Filamin-A C.K.ASGPGLNTTGVPSLPEVFTDAK#D            | 241.35 | 69.28  | 3.48  | 0.29  |
| Q8BTM8_Fl Flna   | Filamin-A C.R.AWGPGLGGIVGK#S                      | 422.55 | 131.26 | 3.22  | 0.31  |
| Q8BTM8_Fl Flna   | Filamin-A C.R.AYGPPIPTGNM*VK#K                    | 180.97 | 50.20  | 3.60  | 0.28  |
| Q8BTM8_Fl Flna   | Filamin-A C.R.AYGPPIPTGNM*VK#K                    | 110.88 | 36.01  | 3.08  | 0.32  |
| Q8BTM8_Fl Flna   | Filamin-A C.K.DAGEGGLSLAIEGPK#A                   | 226.18 | 71.94  | 3.14  | 0.32  |
| Q8BTM8_Fl Flna   | Filamin-A C.K.DAGEGGLAVQTDPEGK#PK#K               | 238.10 | 77.52  | 3.07  | 0.33  |
| Q8BTM8_Fl Flna   | Filamin-A C.R.DAGYGLGLSIEGPK#V                    | 27.57  | 11.68  | 2.36  | 0.42  |
| Q8BTM8_Fl Flna   | Filamin-A C.K.DKGEVTLVVK.W                        | 289.14 | 97.15  | 2.98  | 0.34  |
| Q8BTM8_Fl Flna   | Filamin-A C.K.DLAEDAPWK#K#I                       | 41.70  | 15.52  | 2.69  | 0.37  |
| Q8BTM8_Fl Flna   | Filamin-A C.R.DVDIHDHNTYTK#Y                      | 417.33 | 113.57 | 3.67  | 0.27  |
| Q8BTM8_Fl Flna   | Filamin-A C.R.EAGAGGLAIAVEGPK#A                   | 302.52 | 91.07  | 3.32  | 0.30  |
| Q8BTM8_Fl Flna   | Filamin-A C.R.EATTEFSVDAR.A                       | 105.68 | 145.95 | 0.72  | 1.38  |
| Q8BTM8_Fl Flna   | Filamin-A C.R.EEGPEVEVTVYDGVVPGSPFLEAVPTK#PSK#V   | 88.70  | 28.13  | 3.15  | 0.32  |
| Q8BTM8_Fl Flna   | Filamin-A C.R.EGSYSISVYEEVEPR.S                   | 50.47  | 60.20  | 0.84  | 1.19  |

|               |                                                                   |         |        |      |      |
|---------------|-------------------------------------------------------------------|---------|--------|------|------|
| Q8BTM8_FlFlna | Filamin-A C R. ENGIYLDIVK#.F                                      | 69.96   | 26.96  | 2.59 | 0.39 |
| Q8BTM8_FlFlna | Filamin-A C K. FADQHVPSPFSVK#.V                                   | 92.36   | 32.79  | 2.82 | 0.36 |
| Q8BTM8_FlFlna | Filamin-A C R. FGGHEVHPNSPQVTLALAGDQPTVQTPLR.S                    | 41.46   | 55.34  | 0.75 | 1.33 |
| Q8BTM8_FlFlna | Filamin-A C K. FNEEHIPDPFPVVPVSPSGDAR.R                           | 91.20   | 126.36 | 0.72 | 1.39 |
| Q8BTM8_FlFlna | Filamin-A C K. GAGSGELK#.V                                        | 16.16   | 5.60   | 2.89 | 0.35 |
| Q8BTM8_FlFlna | Filamin-A C R. GAGTGGGLLAVEGPEAK#.M                               | 384.48  | 109.24 | 3.52 | 0.28 |
| Q8BTM8_FlFlna | Filamin-A C K. GEITGEVR.M                                         | 27.07   | 63.47  | 0.43 | 2.34 |
| Q8BTM8_FlFlna | Filamin-A C K. GKRLDVQFSLAK#.G                                    | 182.57  | 42.88  | 4.26 | 0.23 |
| Q8BTM8_FlFlna | Filamin-A C K. GLPEVVDVNDADGTQTVNVVPSR.E                          | 68.83   | 89.48  | 0.77 | 1.30 |
| Q8BTM8_FlFlna | Filamin-A C K. GQHVPQSPFQFTVGLGEGGAHK#.V                          | 243.78  | 101.37 | 2.40 | 0.42 |
| Q8BTM8_FlFlna | Filamin-A C K. GTVEPQLEAR.G                                       | 90.66   | 132.03 | 0.69 | 1.46 |
| Q8BTM8_FlFlna | Filamin-A C K. HTAM*VSWGVSIPNSPFR.V                               | 18.04   | 19.07  | 0.95 | 1.06 |
| Q8BTM8_FlFlna | Filamin-A C R. IANLQTDLSDGLR.L                                    | 79.02   | 100.77 | 0.78 | 1.28 |
| Q8BTM8_FlFlna | Filamin-A C K. IPEISIQDM*TAQVTSPSGK#.T                            | 16.14   | 5.56   | 2.90 | 0.34 |
| Q8BTM8_FlFlna | Filamin-A C K. IPEISIQDM*TAQVTSPSGK#.T                            | 21.10   | 10.59  | 1.99 | 0.50 |
| Q8BTM8_FlFlna | Filamin-A C K. IPEISIQDM*TAQVTSPSGK#.T                            | 20.19   | 8.74   | 2.31 | 0.43 |
| Q8BTM8_FlFlna | Filamin-A C K. IQQNTFR.W                                          | 134.98  | 207.62 | 0.65 | 1.54 |
| Q8BTM8_FlFlna | Filamin-A C K. KGEITGEVR.M                                        | 45.56   | 57.06  | 0.80 | 1.25 |
| Q8BTM8_FlFlna | Filamin-A C K. LDVQFSLAK#.G                                       | 125.24  | 33.85  | 3.70 | 0.27 |
| Q8BTM8_FlFlna | Filamin-A C R. LIALLEVLQSK#.K                                     | 474.20  | 172.47 | 2.75 | 0.36 |
| Q8BTM8_FlFlna | Filamin-A C R. LLLGWIQNK#.L                                       | 287.90  | 117.91 | 2.44 | 0.41 |
| Q8BTM8_FlFlna | Filamin-A C K. LPQLPITNFR.D                                       | 95.50   | 143.84 | 0.66 | 1.51 |
| Q8BTM8_FlFlna | Filamin-A C R. LTVSSLQESGLK#.V                                    | 272.81  | 62.09  | 4.39 | 0.23 |
| Q8BTM8_FlFlna | Filamin-A C K. LVSIDSK#.A                                         | 696.56  | 209.45 | 3.33 | 0.30 |
| Q8BTM8_FlFlna | Filamin-A C R. LVSNSHLETSSVFDLSLTK#.V                             | 225.84  | 62.24  | 3.63 | 0.28 |
| Q8BTM8_FlFlna | Filamin-A C R. LYSVSYLLK#.D                                       | 282.90  | 72.95  | 3.88 | 0.26 |
| Q8BTM8_FlFlna | Filamin-A C R. NDNDFTFVK#.Y                                       | 164.51  | 50.60  | 3.25 | 0.31 |
| Q8BTM8_FlFlna | Filamin-A C R. NGHVGISFVPK#.E                                     | 83.99   | 27.51  | 3.05 | 0.33 |
| Q8BTM8_FlFlna | Filamin-A C K. NGQVASSPIPVISQSEIGDASR.V                           | 4.71    | 6.30   | 0.75 | 1.34 |
| Q8BTM8_FlFlna | Filamin-A C R. QM*QLENVSALEFLDR.E                                 | 4.88    | 8.84   | 0.55 | 1.81 |
| Q8BTM8_FlFlna | Filamin-A C R. R.LTVSSLQESGLK.V                                   | 10.04   | 8.87   | 1.13 | 0.88 |
| Q8BTM8_FlFlna | Filamin-A C K. SADPVVEAIGDDVGLGFSVEGSPQAK#.I                      | 225.43  | 80.17  | 2.81 | 0.36 |
| Q8BTM8_FlFlna | Filamin-A C R. SAGQGEVLYVEDPAGHQEEAK#.V                           | 269.38  | 76.88  | 3.50 | 0.29 |
| Q8BTM8_FlFlna | Filamin-A C R. SPFEVK#.V                                          | 337.75  | 85.13  | 3.97 | 0.25 |
| Q8BTM8_FlFlna | Filamin-A C K. SPFEVVDK#.S                                        | 256.61  | 80.01  | 3.21 | 0.31 |
| Q8BTM8_FlFlna | Filamin-A C K. SPFEVVDK#SQGDASK#.V                                | 83.11   | 25.38  | 3.27 | 0.31 |
| Q8BTM8_FlFlna | Filamin-A C K. SPFSVGVSPSLDLSK#.I                                 | 522.51  | 148.35 | 3.52 | 0.28 |
| Q8BTM8_FlFlna | Filamin-A C R. TFSVWVYVETGTHK#.V                                  | 265.91  | 71.00  | 3.75 | 0.27 |
| Q8BTM8_FlFlna | Filamin-A C K. TGVAVNK#PAEFTVDAK#.H                               | 617.42  | 157.51 | 3.92 | 0.26 |
| Q8BTM8_FlFlna | Filamin-A C K. VAQPSITDNK#.D                                      | 214.02  | 56.61  | 3.78 | 0.26 |
| Q8BTM8_FlFlna | Filamin-A C K. VATVPQHATSGPGPADVSK#.V                             | 1147.53 | 330.10 | 3.48 | 0.29 |
| Q8BTM8_FlFlna | Filamin-A C K. VDVGQDQEFVTK#.S                                    | 124.03  | 35.63  | 3.48 | 0.29 |
| Q8BTM8_FlFlna | Filamin-A C K. VEPGLGADNSVFR.F                                    | 50.94   | 68.58  | 0.74 | 1.35 |
| Q8BTM8_FlFlna | Filamin-A C R. VEGPHGGDPLVSYAGLEGVGTGSPAEIFVNTSNAGAGALSVTIDGPK#.V | 19.77   | 3.77   | 5.25 | 0.19 |
| Q8BTM8_FlFlna | Filamin-A C R. VHGGIQQSSTNPNK.F                                   | 357.30  | 113.14 | 3.16 | 0.32 |
| Q8BTM8_FlFlna | Filamin-A C K. VKAEGPGLNR.T                                       | 27.30   | 37.19  | 0.73 | 1.36 |
| Q8BTM8_FlFlna | Filamin-A C R. VK#METADFK#.V                                      | 99.82   | 26.53  | 3.76 | 0.27 |
| Q8BTM8_FlFlna | Filamin-A C R. VK#VEPSHDASK#.V                                    | 42.97   | 14.49  | 2.96 | 0.34 |
| Q8BTM8_FlFlna | Filamin-A C K. VNPQASFAVSLNGAK#.G                                 | 65.26   | 18.91  | 3.45 | 0.29 |
| Q8BTM8_FlFlna | Filamin-A C R. VNVGAGSHPNK#.V                                     | 229.18  | 76.73  | 2.99 | 0.33 |
| Q8BTM8_FlFlna | Filamin-A C R. VSGQLHEGHTFEPAEIHDTR.D                             | 6.92    | 7.88   | 0.88 | 1.14 |
| Q8BTM8_FlFlna | Filamin-A C K. VTAQGLEPESGNIANK#.T                                | 386.65  | 106.40 | 3.63 | 0.28 |
| Q8BTM8_FlFlna | Filamin-A C K. VTLVLAGQHIK#.S                                     | 253.05  | 83.97  | 3.01 | 0.33 |
| Q8BTM8_FlFlna | Filamin-A C R. VTYTPM*APGYSLSIK#.Y                                | 101.94  | 31.78  | 3.21 | 0.31 |
| Q8BTM8_FlFlna | Filamin-A C R. VTYTPM*APGYSLSIK#.Y                                | 42.51   | 11.87  | 3.58 | 0.28 |
| Q8BTM8_FlFlna | Filamin-A C R. VTYTPM*APGYSLSIK#.Y                                | 107.87  | 28.49  | 3.79 | 0.26 |
| Q8BTM8_FlFlna | Filamin-A C K. VYGPGVAK#.T                                        | 372.48  | 116.38 | 3.20 | 0.31 |
| Q8BTM8_FlFlna | Filamin-A C K. YGGDEIPFSPYR.V                                     | 52.50   | 69.80  | 0.75 | 1.33 |
| Q8BTM8_FlFlna | Filamin-A C K. YGGQPVFPNPSK#.L                                    | 266.77  | 80.85  | 3.30 | 0.30 |
| Q8BTM8_FlFlna | Filamin-A C K. YNDQHIPPSPFTAR.V                                   | 8.53    | 8.91   | 0.96 | 1.04 |
| Q80X90_FLFlnb | Filamin-B C K. IGNLQTDLSDGLR.L                                    | 2.12    | 4.92   | 0.43 | 2.32 |
| Q80X90_FLFlnb | Filamin-B C K. AAGSGELGTVK#.G                                     | 58.88   | 62.93  | 0.94 | 1.07 |
| Q80X90_FLFlnb | Filamin-B C K. ADIEM*PFDPK#.V                                     | 13.35   | 7.34   | 1.82 | 0.55 |
| Q80X90_FLFlnb | Filamin-B C K. ADIEM*PFDPK#.V                                     | 10.18   | 4.91   | 2.07 | 0.48 |
| Q80X90_FLFlnb | Filamin-B C K. AEVSIQNNK#.D                                       | 24.00   | 11.57  | 2.07 | 0.48 |
| Q80X90_FLFlnb | Filamin-B C K. AGLAPLEVR.V                                        | 8.61    | 23.03  | 0.37 | 2.67 |
| Q80X90_FLFlnb | Filamin-B C K. APLNVQFSSPLPGEAVK#.D                               | 24.49   | 16.18  | 1.51 | 0.66 |
| Q80X90_FLFlnb | Filamin-B C K. APLNVQFSSPLPGEAVK#DLI0NDNYDSHTVK#.Y                | 9.94    | 5.40   | 1.84 | 0.54 |
| Q80X90_FLFlnb | Filamin-B C R. ATVDNDKDTGAVTYPDK.T                                | 13.83   | 5.16   | 2.68 | 0.37 |
| Q80X90_FLFlnb | Filamin-B C R. DAGYGGILAVEGPK#.V                                  | 17.12   | 10.91  | 1.57 | 0.64 |
| Q80X90_FLFlnb | Filamin-B C K. DNADGTQVYPTFEK#.G                                  | 14.44   | 6.91   | 2.09 | 0.48 |
| Q80X90_FLFlnb | Filamin-B C R. EAGAGGLSIAVEGPK#.A                                 | 201.26  | 91.63  | 2.20 | 0.46 |
| Q80X90_FLFlnb | Filamin-B C K. FADEHVPSPFTVK#.I                                   | 57.64   | 36.67  | 1.57 | 0.64 |
| Q80X90_FLFlnb | Filamin-B C K. FNDEHVPSPYLVPIAPSDAR.C                             | 8.10    | 20.87  | 0.39 | 2.58 |
| Q80X90_FLFlnb | Filamin-B C R. GAGIGLGTIVGEPSEK#.I                                | 42.12   | 24.05  | 1.75 | 0.57 |
| Q80X90_FLFlnb | Filamin-B C R. GEAGIPAEFSIWTR.E                                   | 10.25   | 27.08  | 0.38 | 2.64 |
| Q80X90_FLFlnb | Filamin-B C K. GFLDGVVSFEYPTPGK#.Y                                | 19.68   | 9.60   | 2.05 | 0.49 |
| Q80X90_FLFlnb | Filamin-B C R. GSHIPESPLQFYVNPNSGVSAYGPGLVGVANK.T                 | 6.20    | 2.46   | 2.53 | 0.40 |
| Q80X90_FLFlnb | Filamin-B C K. ILAQDGEGQPIDIQM*#K.S                               | 9.19    | 4.72   | 1.95 | 0.51 |
| Q80X90_FLFlnb | Filamin-B C K. ILAQDGEGQPIDIQM*#S                                 | 7.17    | 5.37   | 1.33 | 0.75 |
| Q80X90_FLFlnb | Filamin-B C K. IPEINSSDM*SAHVTPSGHVTEAIEVPM*GK#.N                 | 7.05    | 6.21   | 1.14 | 0.88 |
| Q80X90_FLFlnb | Filamin-B C K. IPEINSSDM*SAHVTPSGHVTEAIEVPM*GK#.N                 | 21.61   | 18.90  | 1.14 | 0.87 |
| Q80X90_FLFlnb | Filamin-B C R. KHGEITGTVM*PSGK#.K                                 | 21.56   | 12.53  | 1.72 | 0.58 |
| Q80X90_FLFlnb | Filamin-B C K. LENVSALEFLDHESIK#.L                                | 28.95   | 23.09  | 1.25 | 0.80 |
| Q80X90_FLFlnb | Filamin-B C K. LENVSALEFLDHESIK#.L                                | 6.61    | 4.62   | 1.43 | 0.70 |
| Q80X90_FLFlnb | Filamin-B C R. LPNNHIGIFRIPR.E                                    | 5.76    | 12.59  | 0.46 | 2.19 |
| Q80X90_FLFlnb | Filamin-B C R. LVSPGSANETSILVESVTR.S                              | 11.29   | 26.39  | 0.43 | 2.34 |
| Q80X90_FLFlnb | Filamin-B C K. QQVNYTVYVVK#.E                                     | 29.39   | 19.03  | 1.54 | 0.65 |
| Q80X90_FLFlnb | Filamin-B C R. SADPVVESIGSEVGTGFAIEGSPQAK#.I                      | 36.31   | 20.15  | 1.80 | 0.56 |
| Q80X90_FLFlnb | Filamin-B C K. SPFEVNVDK#.A                                       | 36.97   | 21.65  | 1.71 | 0.59 |
| Q80X90_FLFlnb | Filamin-B C K. SPFEVQVPEAGM*QK#.V                                 | 19.82   | 10.50  | 1.89 | 0.53 |
| Q80X90_FLFlnb | Filamin-B C K. SPFEVQVPEAGM*QK#.V                                 | 9.94    | 13.51  | 0.74 | 1.36 |
| Q80X90_FLFlnb | Filamin-B C K. SPFTVGAAPLDLSK#.I                                  | 67.71   | 41.84  | 1.62 | 0.62 |
| Q80X90_FLFlnb | Filamin-B C K. TGEVGVFVDAK#.T                                     | 63.57   | 25.98  | 2.45 | 0.41 |
| Q80X90_FLFlnb | Filamin-B C K. TVSYEVLK#.V                                        | 31.18   | 16.72  | 1.87 | 0.54 |
| Q80X90_FLFlnb | Filamin-B C R. VEVGK#DQEFADITNAGAGGQK#.L                          | 8.91    | 11.83  | 0.75 | 1.33 |
| Q80X90_FLFlnb | Filamin-B C K. VFGPVER.S                                          | 12.16   | 22.69  | 0.54 | 1.87 |
| Q80X90_FLFlnb | Filamin-B C R. VHAQPGGLK#.E                                       | 28.39   | 12.40  | 2.29 | 0.44 |
| Q80X90_FLFlnb | Filamin-B C K. VLFASQEIAPSPFR.V                                   | 12.58   | 46.10  | 0.27 | 3.66 |
| Q80X90_FLFlnb | Filamin-B C R. VLSDEEDVDI0HNANDTFTVK#.Y                           | 31.75   | 18.60  | 1.71 | 0.59 |
| Q80X90_FLFlnb | Filamin-B C R. VNIQGSHPK#.V                                       | 12.59   | 6.55   | 1.92 | 0.52 |
| Q80X90_FLFlnb | Filamin-B C K. VNPQASFAIR.L                                       | 10.85   | 22.76  | 0.48 | 2.10 |
| Q80X90_FLFlnb | Filamin-B C K. VSFAGDAIPK#.S                                      | 54.52   | 33.02  | 1.65 | 0.61 |

|                |                                                       |        |        |      |       |
|----------------|-------------------------------------------------------|--------|--------|------|-------|
| Q80X90_FL.Flnb | Filamin-B C.K.VSYFPTVPGVIVSTK#.F                      | 57.14  | 32.52  | 1.76 | 0.57  |
| Q80X90_FL.Flnb | Filamin-B C.K.VSYFPTVPGVIVSTK#.F                      | 11.98  | 6.03   | 1.99 | 0.50  |
| Q80X90_FL.Flnb | Filamin-B C.K.VTASGPGLSAYGPVSLPVEFAIDAR.D             | 14.54  | 46.11  | 0.32 | 3.17  |
| Q80X90_FL.Flnb | Filamin-B C.K.YGQGLSEGR.T                             | 16.58  | 35.00  | 0.47 | 2.11  |
| Q80X90_FL.Flnb | Filamin-B C.K.YADEEIPR.S                              | 12.36  | 24.36  | 0.51 | 1.97  |
| Q80X90_FL.Flnb | Filamin-B C.K.YGGELVPHFPWVVK#.V                       | 36.63  | 20.93  | 1.75 | 0.57  |
| Q80X90_FL.Flnb | Filamin-B C.R.YM*IGVITYGGDNIPSPYR.I                   | 2.11   | 6.37   | 0.33 | 3.02  |
| Q80X90_FL.Flnb | Filamin-B C.K.YTPQQGNM*QVLVTYGGDPIPK#.S               | 7.40   | 5.47   | 1.35 | 0.74  |
| Q8VHX6_FL.Flnc | Filamin-C C.K.AEIAFEDR.K                              | 15.07  | 24.68  | 0.61 | 1.64  |
| Q8VHX6_FL.Flnc | Filamin-C C.R.AFGPGLEGGLVNK#.A                        | 330.46 | 144.29 | 2.29 | 0.44  |
| Q8VHX6_FL.Flnc | Filamin-C C.R.AGGTGLER.G                              | 28.92  | 59.47  | 0.49 | 2.06  |
| Q8VHX6_FL.Flnc | Filamin-C C.R.APLQVAVLPGTGAEPVEVR.D                   | 17.36  | 36.00  | 0.48 | 2.07  |
| Q8VHX6_FL.Flnc | Filamin-C C.R.APLQVAVLPGTGAEPVEVR.D                   | 23.47  | 48.68  | 0.48 | 2.07  |
| Q8VHX6_FL.Flnc | Filamin-C C.R.ASGGGLNAGSIPASLPVEFTIDAR.D              | 24.44  | 37.47  | 0.65 | 1.53  |
| Q8VHX6_FL.Flnc | Filamin-C C.K.ATIOPVDFPSK#.V                          | 134.78 | 67.20  | 2.01 | 0.50  |
| Q8VHX6_FL.Flnc | Filamin-C C.R.AWGPGLTGGQVVK#.S                        | 122.22 | 50.26  | 2.43 | 0.41  |
| Q8VHX6_FL.Flnc | Filamin-C C.K.DAGEGGLSLAVEGSPK#.A                     | 125.79 | 65.70  | 1.91 | 0.52  |
| Q8VHX6_FL.Flnc | Filamin-C C.R.DTVEVALEDK#.G                           | 17.84  | 8.56   | 2.08 | 0.48  |
| Q8VHX6_FL.Flnc | Filamin-C C.R.DTVEVALEDKGDNTFR.C                      | 6.53   | 9.03   | 0.72 | 1.38  |
| Q8VHX6_FL.Flnc | Filamin-C C.R.EAGAGGLSIAVEGSPKAEIAFEDR.K              | 3.50   | 7.41   | 0.47 | 2.12  |
| Q8VHX6_FL.Flnc | Filamin-C C.K.EKMGDYILIVK#.W                          | 111.36 | 48.58  | 2.29 | 0.44  |
| Q8VHX6_FL.Flnc | Filamin-C C.K.EGHEVVSVR.K                             | 21.45  | 57.52  | 0.37 | 2.68  |
| Q8VHX6_FL.Flnc | Filamin-C C.R.EVRVEESTQVGGDPPAVFGDFLGR.E              | 4.50   | 5.42   | 0.83 | 1.21  |
| Q8VHX6_FL.Flnc | Filamin-C C.R.EVTEFTVDAR.S                            | 8.80   | 20.49  | 0.43 | 2.33  |
| Q8VHX6_FL.Flnc | Filamin-C C.R.FDDKHIPGSPFATA.I                        | 89.65  | 41.26  | 2.17 | 0.46  |
| Q8VHX6_FL.Flnc | Filamin-C C.K.FNDEHIPDPPFVVPVSLSDDDR.R                | 60.24  | 126.58 | 0.48 | 2.10  |
| Q8VHX6_FL.Flnc | Filamin-C C.R.GAGGQQGLDVR.M                           | 75.53  | 173.08 | 0.44 | 2.29  |
| Q8VHX6_FL.Flnc | Filamin-C C.R.GAGTGGGLLAEIGPSEAK#.M                   | 226.44 | 97.40  | 2.32 | 0.43  |
| Q8VHX6_FL.Flnc | Filamin-C C.R.GASYSIPK#.F                             | 163.82 | 83.76  | 1.96 | 0.51  |
| Q8VHX6_FL.Flnc | Filamin-C C.K.GDYILIVK#.W                             | 30.28  | 12.10  | 2.50 | 0.40  |
| Q8VHX6_FL.Flnc | Filamin-C C.K.GLGLVTPAPFSIDTK#.G                      | 292.91 | 139.90 | 2.09 | 0.48  |
| Q8VHX6_FL.Flnc | Filamin-C C.K.GLHQM*GIK#.Y                            | 31.73  | 15.14  | 2.10 | 0.48  |
| Q8VHX6_FL.Flnc | Filamin-C C.K.GLSEGTQVAFIVDTR.N                       | 22.75  | 51.43  | 0.44 | 2.26  |
| Q8VHX6_FL.Flnc | Filamin-C C.R.GPGLPEVGNVANKPTFYDIAGAGTGDVAVVIVDPQGR.R | 2.70   | 4.48   | 0.60 | 1.66  |
| Q8VHX6_FL.Flnc | Filamin-C C.R.GPGLSQAFVQK#.N                          | 282.50 | 121.69 | 2.32 | 0.43  |
| Q8VHX6_FL.Flnc | Filamin-C C.R.GVAGVPAEFSIWR.E                         | 54.54  | 128.15 | 0.43 | 2.35  |
| Q8VHX6_FL.Flnc | Filamin-C C.R.HIGISFTPK#.E                            | 234.56 | 104.73 | 2.24 | 0.45  |
| Q8VHX6_FL.Flnc | Filamin-C C.R.HVSAYGGLSHGM*VVK#PATFTIVTK#.D           | 60.69  | 28.46  | 2.13 | 0.47  |
| Q8VHX6_FL.Flnc | Filamin-C C.R.HVSAYGGLSHGMVVK#PATFTIVTK#.D            | 43.29  | 21.71  | 1.99 | 0.50  |
| Q8VHX6_FL.Flnc | Filamin-C C.K.HVTNSPFK#.I                             | 325.85 | 137.41 | 2.37 | 0.42  |
| Q8VHX6_FL.Flnc | Filamin-C C.K.ILVGSEIGDASK#.V                         | 171.60 | 75.85  | 2.26 | 0.44  |
| Q8VHX6_FL.Flnc | Filamin-C C.K.IPGNWFQMSQAQR.L                         | 5.40   | 18.62  | 0.29 | 3.45  |
| Q8VHX6_FL.Flnc | Filamin-C C.R.IQGEETVITVDK#.A                         | 29.02  | 14.75  | 1.97 | 0.51  |
| Q8VHX6_FL.Flnc | Filamin-C C.K.ITEGDLQSLTASIR.A                        | 45.63  | 90.52  | 0.50 | 1.98  |
| Q8VHX6_FL.Flnc | Filamin-C C.K.LDVHFAAGAK#.G                           | 25.17  | 10.65  | 2.36 | 0.42  |
| Q8VHX6_FL.Flnc | Filamin-C C.K.LEPGGGAEAQAVR.Y                         | 193.53 | 117.90 | 1.64 | 0.61  |
| Q8VHX6_FL.Flnc | Filamin-C C.R.LGSGFSITR.Q                             | 49.53  | 123.50 | 0.40 | 2.49  |
| Q8VHX6_FL.Flnc | Filamin-C C.R.LSGGHSLSHETSTVLVETVTK#.S                | 149.67 | 57.69  | 2.59 | 0.39  |
| Q8VHX6_FL.Flnc | Filamin-C C.R.LTVTSLQETGLK#.V                         | 208.76 | 85.90  | 2.43 | 0.41  |
| Q8VHX6_FL.Flnc | Filamin-C C.R.NAGYGGGLLSIEGSPK#.V                     | 39.41  | 16.42  | 2.40 | 0.42  |
| Q8VHX6_FL.Flnc | Filamin-C C.R.QQEGEASSQDMTAAQVTSPSGK#.T               | 25.10  | 11.81  | 2.13 | 0.47  |
| Q8VHX6_FL.Flnc | Filamin-C C.R.QQEGEASSQDMTAAQVTSPSGK#.T               | 40.70  | 17.68  | 2.30 | 0.43  |
| Q8VHX6_FL.Flnc | Filamin-C C.R.RDTEVALEDKGDNTFR.C                      | 2.63   | 24.31  | 0.11 | 9.23  |
| Q8VHX6_FL.Flnc | Filamin-C C.R.SPFVEQVSPGAQK#.V                        | 69.18  | 35.48  | 1.95 | 0.51  |
| Q8VHX6_FL.Flnc | Filamin-C C.K.SPFVNVAPPDLDSK#.V                       | 289.42 | 150.81 | 1.92 | 0.52  |
| Q8VHX6_FL.Flnc | Filamin-C C.K.TARPNITDKDGTITR.Y                       | 4.66   | 50.08  | 0.09 | 10.74 |
| Q8VHX6_FL.Flnc | Filamin-C C.K.TEAAEIVEGSEDSYSVR.F                     | 45.12  | 113.19 | 0.40 | 2.51  |
| Q8VHX6_FL.Flnc | Filamin-C C.R.TGVEVGPVTHFTVTK.G                       | 103.56 | 36.49  | 2.84 | 0.35  |
| Q8VHX6_FL.Flnc | Filamin-C C.R.TSQLNVGTSTDSLK#.I                       | 158.28 | 62.68  | 2.53 | 0.40  |
| Q8VHX6_FL.Flnc | Filamin-C C.R.TYAVSVYPK#.V                            | 27.05  | 15.63  | 1.73 | 0.58  |
| Q8VHX6_FL.Flnc | Filamin-C C.K.VAVGQEQAFVSNTR.G                        | 74.54  | 145.05 | 0.51 | 1.95  |
| Q8VHX6_FL.Flnc | Filamin-C C.K.VDITYDGHVPVPGSPFAVEGLPPDPSPK#.V         | 17.93  | 7.75   | 2.31 | 0.43  |
| Q8VHX6_FL.Flnc | Filamin-C C.R.VHVQPAVDTSIGIK#.V                       | 42.54  | 21.95  | 1.94 | 0.52  |
| Q8VHX6_FL.Flnc | Filamin-C C.R.VKHEVADF#.V                             | 33.19  | 14.36  | 2.31 | 0.43  |
| Q8VHX6_FL.Flnc | Filamin-C C.K.VKHVGQLNSK#.V                           | 51.33  | 14.93  | 3.44 | 0.29  |
| Q8VHX6_FL.Flnc | Filamin-C C.K.VNQPASVAFQNLGAR.G                       | 8.41   | 16.21  | 0.52 | 1.93  |
| Q8VHX6_FL.Flnc | Filamin-C C.K.VPQLPITNFR.D                            | 56.79  | 118.01 | 0.48 | 2.08  |
| Q8VHX6_FL.Flnc | Filamin-C C.K.VSGPVEPHVGLR.E                          | 18.93  | 41.35  | 0.46 | 2.18  |
| Q8VHX6_FL.Flnc | Filamin-C C.R.VNVTYTVK#.E                             | 286.67 | 99.90  | 2.87 | 0.35  |
| Q8VHX6_FL.Flnc | Filamin-C C.K.WGDESVPVSPFK#.V                         | 127.54 | 52.89  | 2.41 | 0.41  |
| Q8VHX6_FL.Flnc | Filamin-C C.K.YADQEVPR.S                              | 27.96  | 64.02  | 0.44 | 2.29  |
| Q8VHX6_FL.Flnc | Filamin-C C.K.YDGNHPIGSPVQVVDAINS.R                   | 25.64  | 53.49  | 0.48 | 2.09  |
| Q8VHX6_FL.Flnc | Filamin-C C.K.YGGDEIIPSPFR.I                          | 13.02  | 31.27  | 0.42 | 2.40  |
| Q8VHX6_FL.Flnc | Filamin-C C.K.YGGHPPIK#.F                             | 37.34  | 15.20  | 2.46 | 0.41  |
| Q8VHX6_FL.Flnc | Filamin-C C.K.YTAVQQNM*AVTVTYGGDVPVK#.S               | 17.15  | 6.34   | 2.70 | 0.37  |
| Q8VHX6_FL.Flnc | Filamin-C C.K.YTAVQQNM*AVTVTYGGDVPVK#.S               | 14.65  | 7.76   | 1.89 | 0.53  |
| E9QNF5_E9.Fmr1 | Fragile X mi K.DINESDEVEYSR.A                         | 1.84   | 7.20   | 0.26 | 3.91  |
| E9QNF5_E9.Fmr1 | Fragile X mi K.DSIANATVLLDYHLNLYLK#.E                 | 11.57  | 14.17  | 0.82 | 1.22  |
| E9QNF5_E9.Fmr1 | Fragile X mi R.SFLEFAEDVIQVPR.N                       | 4.20   | 11.98  | 0.35 | 2.85  |
| E9QNF5_E9.Fmr1 | Fragile X mi R.TADGSLQASSEGRS.L                       | 1.72   | 5.40   | 0.32 | 3.14  |
| E9QNF5_E9.Fmr1 | Fragile X mi K.DINESDEVEYSR.A                         | 6.25   | 21.31  | 0.29 | 3.41  |
| E9QNF5_E9.Fmr1 | Fragile X mi K.ENTHFSQPNSTK.V                         | 22.50  | 16.29  | 1.38 | 0.72  |
| E9QNF5_E9.Fmr1 | Fragile X mi R.GM*VPFVFGTK#.D                         | 16.09  | 10.91  | 1.47 | 0.68  |
| E9QNF5_E9.Fmr1 | Fragile X mi R.GMVPFVFGTK#.D                          | 11.05  | 9.26   | 1.19 | 0.84  |
| E9QNF5_E9.Fmr1 | Fragile X mi K.GYTDGQGM*GR.G                          | 3.26   | 7.49   | 0.44 | 2.29  |
| E9QNF5_E9.Fmr1 | Fragile X mi R.SFLEFAEDVIQVPR.N                       | 9.47   | 34.54  | 0.27 | 3.65  |
| P11276_FII.Fn1 | Fibronectin R.APITGVIIH.H                             | 8.28   | 32.32  | 0.26 | 3.90  |
| P11276_FII.Fn1 | Fibronectin R.ATGVFTLQPLR.S                           | 4.23   | 17.12  | 0.25 | 4.05  |
| P11276_FII.Fn1 | Fibronectin R.GLAFTDVEDVDSIK#.I                       | 13.53  | 12.24  | 1.11 | 0.90  |
| P11276_FII.Fn1 | Fibronectin R.GVTYIIVEALQNR.R                         | 3.74   | 15.53  | 0.24 | 4.16  |
| P11276_FII.Fn1 | Fibronectin R.NLQPGSEYTVLVAVK#.G                      | 13.86  | 10.05  | 1.38 | 0.72  |
| P11276_FII.Fn1 | Fibronectin R.NTFAEITGLSPGVTLF.V                      | 18.25  | 20.14  | 0.91 | 1.10  |
| P11276_FII.Fn1 | Fibronectin R.SDNVPPPTDLOFVELDVK.V                    | 5.02   | 6.35   | 0.79 | 1.27  |
| P11276_FII.Fn1 | Fibronectin R.TGLDSPGTGFDSSDITANSFTVHWVAPR.A          | 3.56   | 11.57  | 0.31 | 3.25  |
| P11276_FII.Fn1 | Fibronectin R.VTLPSPPTNLHLEANPDTGLVTSWER.S            | 1.94   | 6.49   | 0.30 | 3.34  |
| P11276_FII.Fn1 | Fibronectin R.YIVNVQISEEGK.Q                          | 14.03  | 10.88  | 1.29 | 0.78  |
| P11276_FII.Fn1 | Fibronectin R.APITGVIIH.H                             | 60.06  | 265.91 | 0.23 | 4.43  |
| P11276_FII.Fn1 | Fibronectin R.ATGVFTLQPLR.S                           | 47.27  | 187.57 | 0.25 | 3.97  |
| P11276_FII.Fn1 | Fibronectin R.EESPLIGQATVSDIPR.D                      | 5.13   | 18.96  | 0.27 | 3.70  |
| P11276_FII.Fn1 | Fibronectin R.EINLSPDSSVIVSGLM*VATK#.Y                | 11.28  | 7.42   | 1.52 | 0.66  |
| P11276_FII.Fn1 | Fibronectin R.ESNPLTAQQT#.L                           | 122.48 | 119.36 | 1.03 | 0.97  |
| P11276_FII.Fn1 | Fibronectin R.EVTSDSGIVSGLTPGVEYTIQVLR.D              | 7.58   | 22.08  | 0.34 | 2.91  |
| P11276_FII.Fn1 | Fibronectin R.FLITTPNSLLVSWQAPR.A                     | 15.09  | 66.83  | 0.23 | 4.43  |



|                  |                                                        |        |        |      |      |
|------------------|--------------------------------------------------------|--------|--------|------|------|
| P11276_FII Fn1   | Fibronectin R.FSQVTPSTFAQWIAPSVLQTVGR.V                | 23.22  | 65.34  | 0.36 | 2.81 |
| P11276_FII Fn1   | Fibronectin R.FTNIGPDMT*RV                             | 37.01  | 104.85 | 0.35 | 2.83 |
| P11276_FII Fn1   | Fibronectin R.GLAFTDQVDSIK#I                           | 210.65 | 179.18 | 1.18 | 0.85 |
| P11276_FII Fn1   | Fibronectin R.GVTYNIIVIALQNR.R                         | 21.45  | 69.07  | 0.31 | 3.22 |
| P11276_FII Fn1   | Fibronectin R.HALQASASAGSGSFTDVR.T                     | 16.19  | 107.42 | 0.15 | 6.63 |
| P11276_FII Fn1   | Fibronectin R.IAWESPQGGVSR.Y                           | 27.20  | 124.72 | 0.22 | 4.59 |
| P11276_FII Fn1   | Fibronectin R.IGDTWSK#K                                | 106.74 | 93.13  | 1.15 | 0.87 |
| P11276_FII Fn1   | Fibronectin R.ITGYIHK#Y                                | 118.64 | 112.85 | 1.05 | 0.95 |
| P11276_FII Fn1   | Fibronectin R.IYTGTEGGNSPQVEFTVPGSK#S                  | 46.55  | 45.17  | 1.03 | 0.97 |
| P11276_FII Fn1   | Fibronectin R.K#K#TDELPLQLVTLPHNLHGPEILDVPSTVQK#T      | 12.75  | 19.93  | 0.64 | 1.56 |
| P11276_FII Fn1   | Fibronectin R.KTDELPLQLVTLPHNLHGPEILDVPSTVQK.T         | 13.56  | 14.92  | 0.91 | 1.10 |
| P11276_FII Fn1   | Fibronectin R.LRPRPYLPNVDEEVQIGHVPR.G                  | 12.54  | 30.22  | 0.41 | 2.41 |
| P11276_FII Fn1   | Fibronectin R.NLQPGSEYTVLVAVK#G                        | 121.06 | 90.84  | 1.33 | 0.75 |
| P11276_FII Fn1   | Fibronectin R.NTFAEITGLSPGVTLFK#V                      | 264.60 | 216.87 | 1.22 | 0.82 |
| P11276_FII Fn1   | Fibronectin R.QSLILSTSQTAPDAPPDPTVQVDDTSIVVR.W         | 5.89   | 19.29  | 0.31 | 3.27 |
| P11276_FII Fn1   | Fibronectin R.SDNVPPPTDLQFVELTDVK#V                    | 97.78  | 85.28  | 1.15 | 0.87 |
| P11276_FII Fn1   | Fibronectin R.SDNVPPPTDLQFVELTDVK#V                    | 64.34  | 60.79  | 1.06 | 0.94 |
| P11276_FII Fn1   | Fibronectin R.SIPPYNTVEVTITVITWTPAPR.I                 | 4.80   | 9.37   | 0.51 | 1.95 |
| P11276_FII Fn1   | Fibronectin R.SSPVIIDASTAIDAPSNLR.F                    | 24.38  | 114.79 | 0.21 | 4.71 |
| P11276_FII Fn1   | Fibronectin R.SSTATINNIKPGADYITLVAVGR.G                | 8.38   | 35.85  | 0.23 | 4.28 |
| P11276_FII Fn1   | Fibronectin R.SYITGLQPGDYIK#I                          | 175.70 | 149.78 | 1.17 | 0.85 |
| P11276_FII Fn1   | Fibronectin R.TASPDQTEM*TEGLQPTVEYVSVYAQR.N            | 12.05  | 59.63  | 0.20 | 4.95 |
| P11276_FII Fn1   | Fibronectin R.TASPDQTEM*TEGLQPTVEYVSVYAQR.N            | 12.06  | 35.41  | 0.34 | 2.94 |
| P11276_FII Fn1   | Fibronectin R.TEIDKPSQM*QVTDVQDINSVR.W                 | 17.20  | 65.30  | 0.26 | 3.80 |
| P11276_FII Fn1   | Fibronectin R.TEIDKPSQM*QVTDVQDINSVR.W                 | 14.38  | 63.97  | 0.22 | 4.45 |
| P11276_FII Fn1   | Fibronectin R.TGLDSPGTGFDSSDITANSFTVHVWVAPR.A          | 34.46  | 116.81 | 0.30 | 3.39 |
| P11276_FII Fn1   | Fibronectin R.TKTEITIGFQVDAIPANGQTPVQR.S               | 9.23   | 36.36  | 0.25 | 3.94 |
| P11276_FII Fn1   | Fibronectin R.TPFITNPGVDYENGLQPGTTHQQPSVGGQM*IFEEHGR.F | 4.04   | 6.09   | 0.66 | 1.51 |
| P11276_FII Fn1   | Fibronectin R.TVLTVWTPPR.A                             | 14.69  | 63.28  | 0.23 | 4.31 |
| P11276_FII Fn1   | Fibronectin R.VEYELSEEGDEPQLDLPSTATSNIPDLLPGR.K        | 5.61   | 20.09  | 0.28 | 3.58 |
| P11276_FII Fn1   | Fibronectin R.VEYELSEEGDEPQLDLPSTATSNIPDLLPGR.KY       | 4.40   | 19.11  | 0.23 | 4.34 |
| P11276_FII Fn1   | Fibronectin R.VFAVHQGR.E                               | 82.63  | 41.72  | 1.98 | 0.50 |
| P11276_FII Fn1   | Fibronectin R.VGDTYERPK.D                              | 12.07  | 48.48  | 0.25 | 4.02 |
| P11276_FII Fn1   | Fibronectin R.VTIM*WTPPDSVSGYR.V                       | 5.85   | 27.79  | 0.21 | 4.75 |
| P11276_FII Fn1   | Fibronectin R.VTIM*WTPPDSVSGYR.V                       | 5.43   | 18.60  | 0.29 | 3.42 |
| P11276_FII Fn1   | Fibronectin R.VTYSSPEDGIR.E                            | 37.17  | 142.66 | 0.26 | 3.84 |
| P11276_FII Fn1   | Fibronectin R.VVTPSPPTNLHLEANPDTGVLTVSWER.S            | 14.73  | 48.90  | 0.30 | 3.32 |
| P11276_FII Fn1   | Fibronectin R.VLPTSPVTGYR.V                            | 31.79  | 119.69 | 0.27 | 3.77 |
| P11276_FII Fn1   | Fibronectin R.YEVSVALK#D                               | 97.58  | 97.78  | 1.00 | 1.00 |
| P11276_FII Fn1   | Fibronectin R.YIVNVQJSEEGK#Q                           | 122.84 | 106.26 | 1.16 | 0.87 |
| Q8K012_FF Fnbp11 | Formin-bin R.IEIEQNYAK#Q                               | 28.62  | 17.55  | 1.63 | 0.61 |
| Q8K012_FF Fnbp11 | Formin-bin R.K#WPIISK#C                                | 15.91  | 10.87  | 1.46 | 0.68 |
| Q8K012_FF Fnbp11 | Formin-bin R.TISDGTISAQK#Q                             | 22.31  | 9.97   | 2.24 | 0.45 |
| Q6ZQ03_FF Fnbp4  | Formin-bin K.FEFLGINR.Q                                | 4.25   | 9.81   | 0.43 | 2.31 |
| Q6ZQ03_FF Fnbp4  | Formin-bin K.FQIGELANTLSK#F                            | 23.13  | 9.18   | 2.52 | 0.40 |
| Q6ZQ03_FF Fnbp4  | Formin-bin K.VEEEQDK#FQIGELANTLSK#F                    | 7.43   | 3.51   | 2.11 | 0.47 |
| P47930_FC Fosl2  | Fos-related R.TGSAVGPVVVK.Q                            | 11.29  | 17.77  | 0.64 | 1.57 |
| P47930_FC Fosl2  | Fos-related K.LQAEETEEEEK#S                            | 8.01   | 11.62  | 0.69 | 1.45 |
| P42128_FC Fcpx1  | Forkhead b R.FQVNTSDQLAAEFAAK#A                        | 11.25  | 5.98   | 1.88 | 0.53 |
| P42128_FC Fcpx1  | Forkhead b R.TPFGPLSSR.S                               | 6.79   | 13.02  | 0.52 | 1.92 |
| P58462_FC Fcpx1  | Forkhead b K.AAPQLNLVSSVTLK.S                          | 6.70   | 13.29  | 0.50 | 1.99 |
| P58462_FC Fcpx1  | Forkhead b K.NAEVRPPFTYASLR.Q                          | 2.27   | 19.15  | 0.12 | 8.44 |
| P58462_FC Fcpx1  | Forkhead b R.SDYKYNVPISSADIAQNFQYK.N                   | 3.66   | 7.37   | 0.50 | 2.01 |
| P58462_FC Fcpx1  | Forkhead b K.AAPQLNLVSSVTLK.S                          | 11.95  | 22.34  | 0.54 | 1.87 |
| P58462_FC Fcpx1  | Forkhead b K.NAEVRPPFTYASLR.Q                          | 11.22  | 20.09  | 0.56 | 1.79 |
| P58462_FC Fcpx1  | Forkhead b R.SDYKYNVPISSADIAQNFQYK.N                   | 4.89   | 8.09   | 0.61 | 1.65 |
| P97376_FR Frg1   | Protein FRK K.YLGINSDGLVGR.S                           | 1.75   | 8.84   | 0.20 | 5.05 |
| P29391_FR Frl1   | Ferritin ligR R.QNYSVEEAAVNR.L                         | 2.20   | 3.43   | 0.64 | 1.56 |
| Q8BGW1_F Fto     | Alpha-ketol K.DDEFYQWQLK#Y                             | 2.41   | 2.42   | 1.00 | 1.00 |
| Q91WJ8_FI Fubp1  | Far upstrea K.AWEYYK#K                                 | 27.22  | 12.90  | 2.11 | 0.47 |
| Q91WJ8_FI Fubp1  | Far upstrea K.IGGDAGTSLNSNDYGYGGQK#R                   | 14.74  | 4.67   | 3.15 | 0.32 |
| Q91WJ8_FI Fubp1  | Far upstrea R.LLDQVEK#G                                | 20.01  | 8.78   | 2.28 | 0.44 |
| Q91WJ8_FI Fubp1  | Far upstrea K.TGLIIGK#G                                | 64.38  | 45.75  | 1.41 | 0.71 |
| A2A172_A2 Fubp3  | MCG13045 R.EILGGLVTR.G                                 | 16.39  | 49.45  | 0.33 | 3.02 |
| A2A172_A2 Fubp3  | MCG13045 R.GAPQOMEVAR.H                                | 6.65   | 27.21  | 0.24 | 4.09 |
| A2A172_A2 Fubp3  | MCG13045 K.IDSIPLNINSTPLVDPSVYGVYQK#R                  | 49.98  | 28.41  | 1.76 | 0.57 |
| A2A172_A2 Fubp3  | MCG13045 R.IINELLTAQER.E                               | 13.78  | 34.60  | 0.40 | 2.51 |
| A2A172_A2 Fubp3  | MCG13045 R.IQFKPDDGISPER.A                             | 16.22  | 62.24  | 0.26 | 3.84 |
| A2A172_A2 Fubp3  | MCG13045 K.M*VGFIGR.G                                  | 4.78   | 16.09  | 0.30 | 3.37 |
| A2A172_A2 Fubp3  | MCG13045 K.MVGFIIIR.G                                  | 4.51   | 10.45  | 0.43 | 2.32 |
| A2A172_A2 Fubp3  | MCG13045 K.M*VM*IQDGPLPTGADKPLR.I                      | 4.63   | 9.56   | 0.48 | 2.06 |
| A2A172_A2 Fubp3  | MCG13045 R.NGPFHNDM*DGNSTIQELLIPASK#V                  | 13.37  | 8.06   | 1.66 | 0.60 |
| A2A172_A2 Fubp3  | MCG13045 R.NGPFHNDM*DGNSTIQELLIPASK#V                  | 8.46   | 6.36   | 1.33 | 0.75 |
| A2A172_A2 Fubp3  | MCG13045 R.NPPNPTDPLNR.I                               | 7.08   | 21.48  | 0.33 | 3.03 |
| A2A172_A2 Fubp3  | MCG13045 R.QQAAYQTLGQAQHSQEQ..                         | 15.04  | 15.04  | 1.00 | 1.00 |
| A2A172_A2 Fubp3  | MCG13045 R.SDWSVGTGQGEITVTPADK#C                       | 23.80  | 8.87   | 2.68 | 0.37 |
| A2A172_A2 Fubp3  | MCG13045 K.VGGASLGAFAFGQSPSPQPAAPHQNTFFPR.G            | 1.53   | 3.77   | 0.41 | 2.46 |
| Q9D6K8_FI Fundc2 | FUN14 don R.K#LFGQSGPSAEK#Y                            | 3.02   | 6.35   | 0.48 | 2.10 |
| P56959_FL Fus    | RNA-bindin K.AAIDWFDGK#E                               | 93.26  | 26.79  | 3.48 | 0.29 |
| P56959_FL Fus    | RNA-bindin K.AAIDWFDGK#E                               | 18.45  | 14.83  | 1.24 | 0.80 |
| P56959_FL Fus    | RNA-bindin R.HDSEQDNDNNTFVQGLGENVTIESVADYFK#Q          | 8.73   | 5.95   | 1.47 | 0.68 |
| P56959_FL Fus    | RNA-bindin K.AAIDWFDGK#E                               | 15.19  | 8.53   | 1.78 | 0.56 |
| P56959_FL Fus    | RNA-bindin K.GEATVSFDDPPSAK#A                          | 55.28  | 28.71  | 1.93 | 0.52 |
| P56959_FL Fus    | RNA-bindin R.HDSEQDNDNNTFVQGLGENVTIESVADYFK#Q          | 7.24   | 2.87   | 2.52 | 0.40 |
| Q61584_F Fxr1    | Fragile X mi R.EDGM*VPFVFGTK#E                         | 20.96  | 13.97  | 1.50 | 0.67 |
| Q61584_F Fxr1    | Fragile X mi R.FYHPETTLQML*ILSASEATVK#R                | 9.81   | 7.78   | 1.26 | 0.79 |
| Q61584_F Fxr1    | Fragile X mi R.FYHPETTLQML*ILSASEATVK#R                | 8.66   | 7.70   | 1.12 | 0.89 |
| Q61584_F Fxr1    | Fragile X mi R.IYGESAEV#K                              | 15.77  | 10.75  | 1.47 | 0.68 |
| Q61584_F Fxr1    | Fragile X mi R.IYGESAEV#K#A                            | 21.68  | 9.79   | 2.21 | 0.45 |
| Q61584_F Fxr1    | Fragile X mi R.KVPGVTAILEDDETGTFR.I                    | 4.71   | 36.57  | 0.13 | 7.76 |
| Q61584_F Fxr1    | Fragile X mi R.LQJDEQLR.Q                              | 18.90  | 57.69  | 0.33 | 3.05 |
| Q61584_F Fxr1    | Fragile X mi K.VIQEIVDK#S                              | 58.62  | 32.22  | 1.82 | 0.55 |
| Q61584_F Fxr1    | Fragile X mi K.AINGPTSASGEIPK#L                        | 5.75   | 4.58   | 1.26 | 0.80 |
| Q61584_F Fxr1    | Fragile X mi K.DVHEDSLTVFVFNWQPER.Q                    | 5.71   | 13.31  | 0.43 | 2.33 |
| Q61584_F Fxr1    | Fragile X mi R.EDGM*VPFVFGTK#E                         | 32.16  | 21.15  | 1.52 | 0.66 |
| Q61584_F Fxr1    | Fragile X mi R.EDGM*VPFVFGTK#E                         | 27.98  | 17.17  | 1.63 | 0.61 |
| Q61584_F Fxr1    | Fragile X mi K.EMAKDVEEHGPSEK.A                        | 25.47  | 11.86  | 2.15 | 0.47 |
| Q61584_F Fxr1    | Fragile X mi K.ESIGNVQLVLEHYHIAVK#E                    | 43.66  | 23.39  | 1.87 | 0.54 |
| Q61584_F Fxr1    | Fragile X mi K.GYATDESTVSSVQGR.S                       | 5.84   | 17.54  | 0.33 | 3.01 |
| Q61584_F Fxr1    | Fragile X mi R.IFYHPETTLQML*ILSASEATVK#R               | 21.40  | 11.24  | 1.90 | 0.53 |
| Q61584_F Fxr1    | Fragile X mi R.IFYHPETTLQML*ILSASEATVK#R               | 36.11  | 20.39  | 1.77 | 0.56 |
| Q61584_F Fxr1    | Fragile X mi R.IYGESAEV#K                              | 66.12  | 28.34  | 2.33 | 0.43 |
| Q61584_F Fxr1    | Fragile X mi R.KVPGVTAILEDDETGTFR.I                    | 22.62  | 69.92  | 0.32 | 3.09 |

|                   |                                                         |        |        |       |       |
|-------------------|---------------------------------------------------------|--------|--------|-------|-------|
| Q61584_Fx Fxr1    | Fragile X mi R.LIQDEQLR.Q                               | 63.00  | 189.92 | 0.33  | 3.01  |
| Q61584_Fx Fxr1    | Fragile X mi R.LRPVNQNK.T                               | 4.38   | 11.04  | 0.40  | 2.52  |
| Q61584_Fx Fxr1    | Fragile X mi K.SSISVLDKDPDSNPYLLDNTESDQTADTASESHHSTNR.R | 2.46   | 4.81   | 0.51  | 1.96  |
| Q61584_Fx Fxr1    | Fragile X mi K.TLK#HEDSTQEAALVNGVS.-                    | 3.68   | 3.42   | 1.08  | 0.93  |
| Q61584_Fx Fxr1    | Fragile X mi K.VIQEIVDK#.S                              | 248.47 | 149.03 | 1.67  | 0.60  |
| Q61584_Fx Fxr1    | Fragile X mi R.VRIEGDNENKLP.R.E                         | 1.27   | 37.46  | 0.03  | 29.43 |
| Q61584_Fx Fxr1    | Fragile X mi R.EDGM*VPFVFGTK#.E                         | 13.95  | 6.20   | 2.25  | 0.44  |
| Q9WVVR4_F Fxr2    | Fragile X mi R.SYLEFSEDSVQVPR.D                         | 2.22   | 4.98   | 0.45  | 2.25  |
| Q9WVVR4_F Fxr2    | Fragile X mi R.EDLM*GLAIGHGANIQQAR.K                    | 7.90   | 23.27  | 0.34  | 2.95  |
| Q9WVVR4_F Fxr2    | Fragile X mi R.SYLEFSEDSVQVPR.D                         | 9.05   | 19.78  | 0.46  | 2.19  |
| Q91249_UI Fytd1   | UAP56-inte K.GVPLQFDINSVKG#.Q                           | 23.82  | 26.67  | 0.89  | 1.12  |
| Q91249_UI Fytd1   | UAP56-inte R.LVGATATPPPPPK#.A                           | 16.26  | 22.29  | 0.73  | 1.37  |
| Q91249_UI Fytd1   | UAP56-inte K.VQTQLNTEQLDDVVAK.R                         | 4.70   | 7.86   | 0.60  | 1.67  |
| Q91249_UI Fytd1   | UAP56-inte R.LVGATATPPPPPK#.A                           | 1.96   | 3.49   | 0.56  | 1.78  |
| P97855_G: G3bp1   | Ras GTPase- K.DFFQNFVNVVLR.LI                           | 6.29   | 15.22  | 0.41  | 2.42  |
| P97855_G: G3bp1   | Ras GTPase- R.EAGEPGDVEPR.R                             | 18.22  | 38.28  | 0.48  | 2.10  |
| P97855_G: G3bp1   | Ras GTPase- R.FM*QTFVLAPEGSVANK#.F                      | 27.10  | 14.67  | 1.85  | 0.54  |
| P97855_G: G3bp1   | Ras GTPase- R.FMQTFVLAPEGSVANK#.F                       | 20.89  | 9.60   | 2.18  | 0.46  |
| P97855_G: G3bp1   | Ras GTPase- R.HPDHSHQLFIGNLPHVDK#HSELK#.D               | 8.97   | 7.51   | 1.20  | 0.84  |
| P97855_G: G3bp1   | Ras GTPase- K.STSPAPADVAPAQEDLR.T                       | 4.99   | 11.42  | 0.44  | 2.29  |
| P97855_G: G3bp1   | Ras GTPase- R.FM*QTFVLAPEGSVANK#.F                      | 9.29   | 4.49   | 2.07  | 0.48  |
| P97855_G: G3bp1   | Ras GTPase- R.FMQTFVLAPEGSVANK#.F                       | 13.72  | 5.50   | 2.49  | 0.40  |
| P97855_G: G3bp1   | Ras GTPase- R.QYTTLNQAPDM*LHR.F                         | 13.22  | 28.77  | 0.46  | 2.18  |
| P97855_G: G3bp1   | Ras GTPase- R.EAGEPGDVEPR.R                             | 37.46  | 93.86  | 0.40  | 2.51  |
| P97855_G: G3bp1   | Ras GTPase- R.FM*QTFVLAPEGSVANK#.F                      | 31.50  | 16.05  | 1.96  | 0.51  |
| P97855_G: G3bp1   | Ras GTPase- R.FMQTFVLAPEGSVANK#.F                       | 42.14  | 17.84  | 2.36  | 0.42  |
| P97855_G: G3bp1   | Ras GTPase- R.HPDHSHQLFIGNLPHVDK#HSELK#.D               | 18.34  | 7.40   | 2.48  | 0.40  |
| P97855_G: G3bp1   | Ras GTPase- R.LNVEEK#.K                                 | 142.30 | 65.18  | 2.18  | 0.46  |
| P97855_G: G3bp1   | Ras GTPase- K.LPNFGFVVDDESPVQK#.V                       | 60.16  | 35.04  | 1.72  | 0.58  |
| P97855_G: G3bp1   | Ras GTPase- K.NSSVHAGGLDSNGK#PADAVYQK#.E                | 17.24  | 6.01   | 2.87  | 0.35  |
| P97855_G: G3bp1   | Ras GTPase- K.STSPAPADVAPAQEDLR.T                       | 6.68   | 19.92  | 0.34  | 2.98  |
| P97855_G: G3bp1   | Ras GTPase- R.TFSWASVTSK#.N                             | 92.32  | 44.20  | 2.09  | 0.48  |
| P97379_G: G3bp2   | Ras GTPase- K.FM*QTFVLAPEGSVANK#.F                      | 17.15  | 7.42   | 2.31  | 0.43  |
| P97379_G: G3bp2   | Ras GTPase- K.FMQTFVLAPEGSVANK#.F                       | 13.52  | 5.53   | 2.44  | 0.41  |
| P97379_G: G3bp2   | Ras GTPase- K.HLEEEK#.S                                 | 53.38  | 22.63  | 2.36  | 0.42  |
| P97379_G: G3bp2   | Ras GTPase- K.TEELK#QVEEK.H                             | 19.28  | 8.88   | 2.17  | 0.46  |
| P97379_G: G3bp2   | Ras GTPase- R.VDAK#PEVQSQPPR.V                          | 23.03  | 47.51  | 0.48  | 2.06  |
| P97379_G: G3bp2   | Ras GTPase- K.APEYLHR.F                                 | 8.24   | 11.26  | 0.73  | 1.37  |
| P97379_G: G3bp2   | Ras GTPase- K.FM*QTFVLAPEGSVANK#.F                      | 20.05  | 9.44   | 2.12  | 0.47  |
| P97379_G: G3bp2   | Ras GTPase- K.FMQTFVLAPEGSVANK#.F                       | 7.26   | 4.80   | 1.51  | 0.66  |
| P97379_G: G3bp2   | Ras GTPase- R.NSSVHAGGLDSNGK#PQEAUVQNDIHHK#.V           | 17.19  | 6.01   | 2.86  | 0.35  |
| P97379_G: G3bp2   | Ras GTPase- K.AFSWASVTSK#.N                             | 27.96  | 13.13  | 2.13  | 0.47  |
| P97379_G: G3bp2   | Ras GTPase- K.FM*QTFVLAPEGSVANK#.F                      | 20.57  | 11.65  | 1.77  | 0.57  |
| P97379_G: G3bp2   | Ras GTPase- K.FMQTFVLAPEGSVANK#.F                       | 13.71  | 8.53   | 1.61  | 0.62  |
| P97379_G: G3bp2   | Ras GTPase- K.HLEEEK#.S                                 | 77.76  | 38.61  | 2.01  | 0.50  |
| P97379_G: G3bp2   | Ras GTPase- K.LPNFGFVVDDESPVQK#.I                       | 11.76  | 23.39  | 0.50  | 1.99  |
| P97379_G: G3bp2   | Ras GTPase- K.TEELK#QVEEK#.H                            | 13.76  | 5.79   | 2.38  | 0.42  |
| P97379_G: G3bp2   | Ras GTPase- R.VDAK#PEVQSQPPR.V                          | 35.65  | 63.47  | 0.56  | 1.78  |
| Q00422_G: Gabpa   | GA-binding K.HITTSIDTSEQVTR.W                           | 5.14   | 24.75  | 0.21  | 4.81  |
| Q00422_G: Gabpa   | GA-binding K.LNILEVKK#.T                                | 46.76  | 32.61  | 1.43  | 0.70  |
| Q00422_G: Gabpa   | GA-binding K.LNQPELVAQK#.W                              | 36.73  | 208.28 | 0.18  | 5.67  |
| Q00422_G: Gabpa   | GA-binding R.MQLHGIAPVTAVALAATSLQADK#E.L-               | 17.43  | 8.91   | 1.96  | 0.51  |
| P81069_G: Gabpb2  | GA-binding K.ATSAHLEEMEGNSLSDSTQVQVGGQR.V               | 1.51   | 2.45   | 0.62  | 1.62  |
| P81069_G: Gabpb2  | GA-binding R.TTEPHTNVSITETS.-                           | 25.79  | 25.79  | 1.00  | 1.00  |
| Q99KY4_G: Gak     | Cyclin-G-as R.DQSDFGVQTVELGEL.R.L                       | 1.68   | 6.40   | 0.26  | 3.81  |
| Q99KY4_G: Gak     | Cyclin-G-as K.VSENFEDLTPNQGFSK#.S                       | 3.70   | 3.34   | 1.11  | 0.90  |
| Q99KY4_G: Gak     | Cyclin-G-as K.VQSVANYAK#.G                              | 12.35  | 9.29   | 1.33  | 0.75  |
| Q99KY4_G: Gak     | Cyclin-G-as K.VSENFEDLTPNQGFSK#.S                       | 4.13   | 4.20   | 0.98  | 1.02  |
| Q8BH3_G: Ganab    | Neutral alp R.DDNVELTVAEGPYK#.I                         | 3.24   | 4.64   | 0.70  | 1.43  |
| P16858_G: Gapdh   | Glyceralde R.GAAQNIIIPASTGAAK#.A                        | 168.09 | 245.81 | 0.68  | 1.46  |
| P16858_G: Gapdh   | Glyceralde R.LISWYDNEYGYSNR.V                           | 19.53  | 104.08 | 0.19  | 5.33  |
| P16858_G: Gapdh   | Glyceralde R.LVINGKPIITFQER.D                           | 3.67   | 29.51  | 0.12  | 8.05  |
| P16858_G: Gapdh   | Glyceralde K.VIHDNFGIVEGLM*TTVHAITATQK#.T               | 42.86  | 39.63  | 1.08  | 0.92  |
| P16858_G: Gapdh   | Glyceralde K.VIHDNFGIVEGLM*TTVHAITATQK.T                | 15.69  | 13.93  | 1.13  | 0.89  |
| P16858_G: Gapdh   | Glyceralde K.VIHDNFGIVEGLM*TTVHAITATQK.T                | 63.91  | 63.57  | 1.01  | 0.99  |
| P16858_G: Gapdh   | Glyceralde R.VVDLM*AYM*ASK.E                            | 77.94  | 11.92  | 6.54  | 0.15  |
| P16858_G: Gapdh   | Glyceralde R.VVDLM*AYM*ASK#E.-                          | 22.98  | 31.23  | 0.74  | 1.36  |
| P16858_G: Gapdh   | Glyceralde R.VVDLMAYMASKE.-                             | 10.58  | 13.88  | 0.76  | 1.31  |
| P16858_G: Gapdh   | Glyceralde K.WGEAGAEYVVESTGVFTTM*EK#.A                  | 10.09  | 10.09  | 1.00  | 1.00  |
| P16858_G: Gapdh   | Glyceralde K.WGEAGAEYVVESTGVFTTM*EK.A                   | 18.56  | 26.39  | 0.70  | 1.42  |
| P16858_G: Gapdh   | Glyceralde R.GAAQNIIIPASTGAAK#.A                        | 12.32  | 21.62  | 0.57  | 1.75  |
| P16858_G: Gapdh   | Glyceralde R.LISWYDNEYGYSNR.V                           | 1.93   | 10.38  | 0.19  | 5.39  |
| P16858_G: Gapdh   | Glyceralde R.VVDLM*AYM*ASK.E                            | 9.10   | 10.56  | 0.86  | 1.16  |
| P16858_G: Gapdh   | Glyceralde K.WGEAGAEYVVESTGVFTTM*EK.A                   | 8.05   | 7.10   | 1.13  | 0.88  |
| P16858_G: Gapdh   | Glyceralde K.WGEAGAEYVVESTGVFTTM*EK.A                   | 3.75   | 3.73   | 1.00  | 1.00  |
| P16858_G: Gapdh   | Glyceralde R.GAAQNIIIPASTGAAK#.A                        | 10.56  | 12.84  | 0.82  | 1.22  |
| Q6PAR5_G: Gapvd1  | GTPase-acti R.LLEDTOFVDGYK#.Q                           | 12.67  | 2.95   | 4.30  | 0.23  |
| Q6PAR5_G: Gapvd1  | GTPase-acti R.M*ALDNLNLANLPQAK#PGK#.S                   | 9.44   | 3.59   | 2.63  | 0.38  |
| Q6PAR5_G: Gapvd1  | GTPase-acti R.LIASSLVAGEK#.L                            | 30.29  | 8.35   | 3.63  | 0.28  |
| Q6PAR5_G: Gapvd1  | GTPase-acti R.LPNFGSHVLTAAEM*EAFK#.Q                    | 10.54  | 3.80   | 2.78  | 0.36  |
| Q6PAR5_G: Gapvd1  | GTPase-acti R.LPNFGSHVLTAAEM*EAFK#.Q                    | 11.73  | 2.21   | 5.32  | 0.19  |
| Q6PAR5_G: Gapvd1  | GTPase-acti R.VQEM*VDSNEAK#.L                           | 8.67   | 4.39   | 1.98  | 0.51  |
| Q6PAR5_G: Gapvd1  | GTPase-acti K.VQIAEAINLQDK#.S                           | 13.65  | 12.86  | 1.06  | 0.94  |
| Q9CY66_G: Gar1    | H/ACAribo K.VDEIFGQLR.D                                 | 4.48   | 8.61   | 0.52  | 1.92  |
| Q9CZD3_Sy Gars    | Glycine-tr K.FADFM*VK#.D                                | 15.44  | 4.25   | 3.63  | 0.28  |
| Q9CZD3_Sy Gars    | Glycine-tr K.GEFTIETEGK#.T                              | 16.48  | 3.59   | 4.60  | 0.22  |
| Q9CZD3_Sy Gars    | Glycine-tr R.LYLYTK#.V                                  | 24.08  | 2.32   | 10.39 | 0.10  |
| Q9CZD3_Sy Gars    | Glycine-tr R.LLEFNQK#.L                                 | 32.29  | 4.73   | 6.82  | 0.15  |
| Q9CZD3_Sy Gars    | Glycine-tr R.TFFSFPVAVPFK#.C                            | 46.56  | 8.94   | 5.21  | 0.19  |
| Q9CZD3_Sy Gars    | Glycine-tr K.TVNVVQFEPNK#.G                             | 25.96  | 9.75   | 2.66  | 0.38  |
| Q9CZD3_Sy Gars    | Glycine-tr R.YPLFEGQETGK#.E                             | 34.08  | 5.66   | 6.02  | 0.17  |
| Q9CZD3_Sy Gars    | Glycine-tr R.TFFSFPVAVPFK#.C                            | 33.50  | 3.79   | 8.83  | 0.11  |
| Q64737_Pi Gart    | Trifunction K.AAGFK#DPLASGTDGVTGK#.L                    | 29.13  | 4.86   | 6.00  | 0.17  |
| Q64737_Pi Gart    | Trifunction R.AVDGM*QEQGAPYTGILYAGIMLTK#.D              | 5.46   | 2.27   | 2.40  | 0.42  |
| Q64737_Pi Gart    | Trifunction R.AVQEM*QEK#.S                              | 26.02  | 5.37   | 4.84  | 0.21  |
| Q64737_Pi Gart    | Trifunction K.DSGVDIAAGNM*LVK#.K                        | 27.06  | 5.55   | 4.88  | 0.21  |
| Q64737_Pi Gart    | Trifunction K.GVEITGFPEAQLGLQVHAGTALK#.D                | 42.10  | 10.86  | 3.88  | 0.26  |
| Q64737_Pi Gart    | Trifunction K.K#OPLAK#.A                                | 14.93  | 10.49  | 1.42  | 0.70  |
| Q64737_Pi Gart    | Trifunction K.M*LNHPSLLPSFK#.G                          | 25.15  | 5.89   | 4.27  | 0.23  |
| Q64737_Pi Gart    | Trifunction K.SSSHIVLVSNK#.A                            | 23.94  | 4.33   | 5.52  | 0.18  |
| P11862_G: Gas2    | Growth arr R.VGGGWETVAGYLLK#.H                          | 5.53   | 6.40   | 0.86  | 1.16  |
| Q8CHY6_Pf Gatad2a | Transcripti K.ALQEQEQEM*EQR.L                           | 3.76   | 10.20  | 0.37  | 2.71  |
| Q8CHY6_Pf Gatad2a | Transcripti K.ALQEQEQEM*EQR.L                           | 5.08   | 19.83  | 0.26  | 3.90  |

|                   |                                             |        |        |       |       |
|-------------------|---------------------------------------------|--------|--------|-------|-------|
| Q8CHY6_Pf Gatad2a | Transcriptin R.ISATAAAVLSR.E                | 38.74  | 42.42  | 0.91  | 1.10  |
| Q8CHY6_Pf Gatad2a | Transcriptin R.LLQQGVGTASIK#.A              | 44.55  | 36.08  | 1.23  | 0.81  |
| Q8CHY6_Pf Gatad2a | Transcriptin K.LQNAASATALVSR.T              | 5.39   | 24.27  | 0.22  | 4.50  |
| Q8CHY6_Pf Gatad2a | Transcriptin K.TPLSTGGTLAFVSPSLAVHK#.T      | 23.73  | 16.33  | 1.45  | 0.69  |
| Q8CHY6_Pf Gatad2a | Transcriptin R.IIQQLIR.V                    | 2.78   | 15.83  | 0.18  | 5.70  |
| Q8CHY6_Pf Gatad2a | Transcriptin R.IPGSIHPPPLVR.G               | 3.42   | 13.61  | 0.25  | 3.98  |
| Q8CHY6_Pf Gatad2a | Transcriptin R.ISATAAAVLSR.E                | 5.05   | 14.77  | 0.34  | 2.93  |
| Q8CHY6_Pf Gatad2a | Transcriptin K.LQNAASATALVSR.T              | 4.66   | 21.57  | 0.22  | 4.63  |
| Q8CHY6_Pf Gatad2a | Transcriptin K.TPLSTGGTLAFVSPSLAVHK#.T      | 15.56  | 19.84  | 0.78  | 1.28  |
| Q8VHR5_Pi Gatad2b | Transcriptin K.ALQQEQEIEQR.L                | 11.99  | 53.99  | 0.22  | 4.50  |
| Q8VHR5_Pi Gatad2b | Transcriptin K.DLANLEVPHELPTK#.Q            | 4.38   | 4.05   | 1.08  | 0.92  |
| Q8VHR5_Pi Gatad2b | Transcriptin R.LLQQQAALSPPTAPAVSSVK.Q       | 12.89  | 12.31  | 1.05  | 0.95  |
| Q8VHR5_Pi Gatad2b | Transcriptin R.QAPQPQSLQR.Q                 | 5.73   | 34.56  | 0.17  | 6.04  |
| Q8VHR5_Pi Gatad2b | Transcriptin K.TPVVQNAASIVQSPAHVGGQQLSK.L   | 19.93  | 20.90  | 0.95  | 1.05  |
| Q8VHR5_Pi Gatad2b | Transcriptin R.VIAPNPAQLQQR.G               | 16.90  | 28.97  | 0.58  | 1.71  |
| Q8VHR5_Pi Gatad2b | Transcriptin R.VSSPLPSPSAM*SDAANSQAAK.L     | 7.24   | 7.87   | 0.92  | 1.09  |
| Q8VHR5_Pi Gatad2b | Transcriptin K.ALQQEQEIEQR.L                | 4.44   | 20.02  | 0.22  | 4.51  |
| Q8VHR5_Pi Gatad2b | Transcriptin R.LLQQQAALSPPTAPAVSSVK.Q       | 7.01   | 7.03   | 1.00  | 1.00  |
| Q8VHR5_Pi Gatad2b | Transcriptin K.ALQQEQEIEQR.L                | 11.84  | 25.50  | 0.46  | 2.15  |
| Q8VHR5_Pi Gatad2b | Transcriptin R.QAPQPQSLQR.Q                 | 4.21   | 17.54  | 0.24  | 4.17  |
| Q8VHR5_Pi Gatad2b | Transcriptin R.VIAPNPAQLQQR.G               | 6.37   | 21.25  | 0.30  | 3.33  |
| Q6A099_Qi Gbf1    | MKIAA024f K.FLQLESLQELMK#.A                 | 9.31   | 4.70   | 1.98  | 0.50  |
| Q6A099_Qi Gbf1    | MKIAA024f R.ADAPDAGAQSDSELPSPHYQNDVSLD.R.G  | 2.90   | 6.84   | 0.42  | 2.36  |
| Q6A099_Qi Gbf1    | MKIAA024f R.ALLVHDLQK#.L                    | 18.68  | 7.33   | 2.55  | 0.39  |
| Q6A099_Qi Gbf1    | MKIAA024f R.APSSSSPSPM*ASSPSK#.L            | 9.23   | 4.99   | 1.85  | 0.54  |
| Q6A099_Qi Gbf1    | MKIAA024f R.APSSSSPSPM*ASSPSK#.L            | 26.83  | 14.00  | 1.92  | 0.52  |
| Q6A099_Qi Gbf1    | MKIAA024f R.DLEEAGDSGADK.K.F                | 8.83   | 3.46   | 2.55  | 0.39  |
| Q6A099_Qi Gbf1    | MKIAA024f R.EITTEPSSSEM*GASDQLDPQEGAHVEK#.A | 18.60  | 8.76   | 2.12  | 0.47  |
| Q6A099_Qi Gbf1    | MKIAA024f K.FLQLESLQELMK#.A                 | 13.92  | 4.58   | 3.04  | 0.33  |
| Q6A099_Qi Gbf1    | MKIAA024f K.FLQLESLQELMK#.A                 | 15.83  | 5.59   | 2.83  | 0.35  |
| Q6A099_Qi Gbf1    | MKIAA024f K.FTALSESIEIENLSPVSGSNPK#.A       | 9.64   | 3.92   | 2.46  | 0.41  |
| Q6A099_Qi Gbf1    | MKIAA024f R.FVGTDPASDEVLM*#K#.I             | 13.31  | 5.05   | 2.64  | 0.38  |
| Q6A099_Qi Gbf1    | MKIAA024f K.LMEIITVENPK#.M                  | 9.64   | 2.10   | 4.59  | 0.22  |
| Q6A099_Qi Gbf1    | MKIAA024f K.SLEETIQK#.A                     | 43.10  | 17.63  | 2.44  | 0.41  |
| Q6A099_Qi Gbf1    | MKIAA024f K.FLPLPFTK#.L                     | 37.27  | 19.84  | 1.88  | 0.53  |
| Q6A099_Qi Gbf1    | MKIAA024f K.VLNLTLNQQEK#.K                  | 49.29  | 15.94  | 3.09  | 0.32  |
| Q91240_Qi Gbp7    | Gbp6 prote K.ANHVLSQFSLQSIEDSIM*QSDK#.A     | 6.60   | 2.82   | 2.34  | 0.43  |
| Q91240_Qi Gbp7    | Gbp6 prote R.DFVLELK#.L                     | 15.26  | 4.39   | 3.48  | 0.29  |
| Q91240_Qi Gbp7    | Gbp6 prote K.DKHELLVHEEM*PEDQLDHSFQVQSK#.E  | 5.38   | 2.60   | 2.07  | 0.48  |
| Q91240_Qi Gbp7    | Gbp6 prote K.FTLVLLTEGLGDVEK#.G             | 10.85  | 3.47   | 3.12  | 0.32  |
| Q91240_Qi Gbp7    | Gbp6 prote K.FTLVLLTEGLGDVEK#GDPK#.N        | 10.79  | 4.41   | 2.45  | 0.41  |
| Q91240_Qi Gbp7    | Gbp6 prote R.VITADEYENALK#.L                | 25.59  | 2.43   | 10.55 | 0.09  |
| Q91240_Qi Gbp7    | Gbp6 prote R.DFVLELK#.L                     | 10.49  | 3.44   | 3.05  | 0.33  |
| Q91240_Qi Gbp7    | Gbp6 prote K.FTLVLLTEGLGDVEK#.G             | 12.21  | 3.62   | 3.38  | 0.30  |
| Q91240_Qi Gbp7    | Gbp6 prote R.VITADEYENALK#.L                | 20.01  | 4.63   | 4.32  | 0.23  |
| Q8BK73_Gi Gcfc2   | GC-rich seq R.VAFEQFASENEVS#.N              | 8.50   | 3.24   | 2.62  | 0.38  |
| Q8BK73_Gi Gcfc2   | GC-rich seq K.SIEDDIFIPLYPK#.S              | 7.95   | 5.49   | 1.45  | 0.69  |
| Q8BK73_Gi Gcfc2   | GC-rich seq R.VAFEQFASENEVS#.N              | 7.73   | 2.36   | 3.28  | 0.31  |
| O09172_Gi Gclm    | Glutamate- K.LFVIGSSNSSTR.S                 | 2.99   | 3.19   | 0.94  | 1.07  |
| E9PVA8_E9 Gcn11   | Protein Gcr K.LSVADAQAEAK#.L                | 11.97  | 8.07   | 1.48  | 0.67  |
| E9PVA8_E9 Gcn11   | Protein Gcr K.SNSPR@LMDEAVLALR.L            | 1.80   | 135.57 | 0.01  | 75.18 |
| E9PVA8_E9 Gcn11   | Protein Gcr K.AASQGTQVPTVEGVAAALLLSK#.L     | 53.31  | 33.94  | 1.57  | 0.64  |
| E9PVA8_E9 Gcn11   | Protein Gcr R.ALQAAIQQLAEQAPEATAK#.N        | 30.96  | 16.11  | 1.92  | 0.52  |
| E9PVA8_E9 Gcn11   | Protein Gcr R.AYSDQAIVNLK#.M                | 53.82  | 20.33  | 2.65  | 0.38  |
| E9PVA8_E9 Gcn11   | Protein Gcr K.DAPNDASVDVAVR.Q               | 4.17   | 9.93   | 0.42  | 2.38  |
| E9PVA8_E9 Gcn11   | Protein Gcr R.DAVLFFESLVPVPTAR.K            | 11.99  | 27.26  | 0.44  | 2.27  |
| E9PVA8_E9 Gcn11   | Protein Gcr K.DLAPLYSVTPGLK#.A              | 30.34  | 18.95  | 1.60  | 0.62  |
| E9PVA8_E9 Gcn11   | Protein Gcr K.DLILPTIQK#.S                  | 16.44  | 10.47  | 1.57  | 0.64  |
| E9PVA8_E9 Gcn11   | Protein Gcr R.EEFSIM*QTPAGELFDK#.S          | 7.55   | 5.91   | 1.28  | 0.78  |
| E9PVA8_E9 Gcn11   | Protein Gcr K.FVHFIDAPSLALIM*PIVQR.A        | 13.76  | 19.11  | 0.72  | 1.39  |
| E9PVA8_E9 Gcn11   | Protein Gcr K.GAAYGLAGLVK#.G                | 27.23  | 16.63  | 1.64  | 0.61  |
| E9PVA8_E9 Gcn11   | Protein Gcr R.GEELLOSLK#.I                  | 13.87  | 7.72   | 1.80  | 0.56  |
| E9PVA8_E9 Gcn11   | Protein Gcr K.GIK#EEVQLTSK#.Q               | 14.64  | 8.53   | 1.72  | 0.58  |
| E9PVA8_E9 Gcn11   | Protein Gcr K.GLGLISLK#.Q                   | 38.74  | 10.90  | 3.55  | 0.28  |
| E9PVA8_E9 Gcn11   | Protein Gcr R.IIIEDLEATR.S                  | 16.85  | 35.08  | 0.48  | 2.08  |
| E9PVA8_E9 Gcn11   | Protein Gcr K.K#DLNGLQALAEELHK#.E           | 42.37  | 18.80  | 2.25  | 0.44  |
| E9PVA8_E9 Gcn11   | Protein Gcr K.LANGLLDELK#.T                 | 19.77  | 8.89   | 2.22  | 0.45  |
| E9PVA8_E9 Gcn11   | Protein Gcr K.LSGFWQLVVEK#.R                | 17.30  | 15.12  | 1.14  | 0.87  |
| E9PVA8_E9 Gcn11   | Protein Gcr K.LSVADAQAEAK#.L                | 76.36  | 42.79  | 1.78  | 0.56  |
| E9PVA8_E9 Gcn11   | Protein Gcr K.LTEVLTDVSHVK#.V               | 56.12  | 25.54  | 2.20  | 0.46  |
| E9PVA8_E9 Gcn11   | Protein Gcr K.LTIIAQK#.M                    | 36.47  | 20.11  | 1.81  | 0.55  |
| E9PVA8_E9 Gcn11   | Protein Gcr R.LTSDALRPSVWSITGLPIR.I         | 2.72   | 30.86  | 0.09  | 11.33 |
| E9PVA8_E9 Gcn11   | Protein Gcr K.LYRPPVLDALGR.V                | 1.82   | 15.88  | 0.11  | 8.74  |
| E9PVA8_E9 Gcn11   | Protein Gcr K.M*TTETAASEDNFGTAQSNK#.A       | 14.35  | 7.04   | 2.04  | 0.49  |
| E9PVA8_E9 Gcn11   | Protein Gcr K.QLDDEEVSEFALDGLK#.Q           | 31.94  | 4.18   | 7.64  | 0.13  |
| E9PVA8_E9 Gcn11   | Protein Gcr R.SDTQLVVR.Q                    | 8.02   | 22.89  | 0.35  | 2.86  |
| E9PVA8_E9 Gcn11   | Protein Gcr R.SGAAQGLAEVM*AGLGVEK#.L        | 6.71   | 5.99   | 1.12  | 0.89  |
| E9PVA8_E9 Gcn11   | Protein Gcr R.SGAAQGLAEVM*AGLGVEK#.L        | 12.00  | 7.15   | 1.68  | 0.60  |
| E9PVA8_E9 Gcn11   | Protein Gcr R.VDENGPELLPR.V                 | 3.35   | 9.63   | 0.35  | 2.88  |
| E9PVA8_E9 Gcn11   | Protein Gcr K.VGIALK#PFLPQLQTTFTK#.A        | 13.56  | 6.54   | 2.07  | 0.48  |
| E9PVA8_E9 Gcn11   | Protein Gcr R.VGK#GEPDAAPLSAPAFSLVFPM*#L#.M | 41.70  | 16.82  | 2.48  | 0.40  |
| E9PVA8_E9 Gcn11   | Protein Gcr R.VISESPDQWEAR.C                | 4.45   | 10.30  | 0.43  | 2.32  |
| E9PVA8_E9 Gcn11   | Protein Gcr R.VLFLSSVAGDALTR.H              | 9.70   | 14.47  | 0.67  | 1.49  |
| E9PVA8_E9 Gcn11   | Protein Gcr K.VLPLEALVTDAGEVTEM*GK#.T       | 125.02 | 57.50  | 2.17  | 0.46  |
| E9PVA8_E9 Gcn11   | Protein Gcr R.VVLPYLVPK#.L                  | 60.06  | 35.55  | 1.69  | 0.59  |
| Q9CQ04_Gi Gemin2  | Gem-associ K.SQQLDSNVAM*PK#.S               | 9.69   | 4.37   | 2.22  | 0.45  |
| Q6P6L6_Qi Gemin4  | Gem (Nucl) K.SNPSSVSLQK#.V                  | 14.52  | 5.11   | 2.84  | 0.35  |
| Q6P6L6_Qi Gemin4  | Gem (Nucl) K.VLQSPVSPSDTDR.W                | 3.69   | 10.20  | 0.36  | 2.77  |
| Q8BX17_Gi Gemin5  | Gem-associ R.GPSSYHQWATGSEGLVQR.V           | 2.44   | 7.20   | 0.34  | 2.95  |
| Q8BX17_Gi Gemin5  | Gem-associ K.LIAETPITK#.G                   | 18.59  | 18.39  | 1.01  | 0.99  |
| Q8BX17_Gi Gemin5  | Gem-associ K.VLALNGEDSIEIFQVPNLR.L          | 11.02  | 10.96  | 1.00  | 1.00  |
| Q8BX17_Gi Gemin5  | Gem-associ R.VWNTLSIK#.N                    | 8.32   | 5.62   | 1.48  | 0.68  |
| Q8BX17_Gi Gemin5  | Gem-associ K.VYEAELK#.S                     | 16.71  | 11.82  | 1.41  | 0.71  |
| Q9D1H7_Gi Get4    | Golgi to ER K.AEVDVADELLENLAK#.V            | 35.57  | 7.91   | 4.50  | 0.22  |
| Q9D1H7_Gi Get4    | Golgi to ER R.IGLQFFGVPPK#.Q                | 11.43  | 4.45   | 2.57  | 0.39  |
| Q9D1H7_Gi Get4    | Golgi to ER K.AEVDVADELLENLAK#.V            | 4.80   | 1.42   | 3.37  | 0.30  |
| Q9D1H7_Gi Get4    | Golgi to ER K.AEVDVADELLENLAK#.V            | 14.37  | 3.96   | 3.63  | 0.28  |
| P47856_Gi Gfpt1   | Glutamine- K.EIFEQPESVNTM*#R.G              | 1.92   | 6.10   | 0.31  | 3.19  |
| P47856_Gi Gfpt1   | Glutamine- K.EVLSM*#DEIQK#.L                | 6.87   | 6.07   | 1.13  | 0.88  |
| P47856_Gi Gfpt1   | Glutamine- R.GALTVGINTVGVSSISR.E            | 2.08   | 9.16   | 0.23  | 4.41  |
| P47856_Gi Gfpt1   | Glutamine- K.GYDFESETDTEIAK#.L              | 11.54  | 8.48   | 1.36  | 0.74  |
| P47856_Gi Gfpt1   | Glutamine- R.VIQLEGAFFALVFK#.S              | 12.75  | 28.60  | 0.45  | 2.24  |
| P47856_Gi Gfpt1   | Glutamine- R.AVQTLQMLQQIM*#K#.G             | 4.19   | 3.61   | 1.16  | 0.86  |

|                  |                                                        |        |        |      |       |
|------------------|--------------------------------------------------------|--------|--------|------|-------|
| P47856_Gf Gfpt1  | Glutamine-K.EIFEQPEVVNTM*R.G                           | 6.43   | 18.18  | 0.35 | 2.83  |
| P47856_Gf Gfpt1  | Glutamine-R.EILETIK#.G                                 | 46.84  | 27.40  | 1.71 | 0.58  |
| P47856_Gf Gfpt1  | Glutamine-K.EVLSM*DDEIQK#.L                            | 39.55  | 23.43  | 1.69 | 0.59  |
| P47856_Gf Gfpt1  | Glutamine-R.GALTVGINTVSSISR.E                          | 9.34   | 19.99  | 0.47 | 2.14  |
| P47856_Gf Gfpt1  | Glutamine-K.GNFSSFM*QK#.E                              | 21.97  | 10.97  | 2.00 | 0.50  |
| P47856_Gf Gfpt1  | Glutamine-R.GSPLLIGVR.S                                | 8.07   | 20.04  | 0.40 | 2.48  |
| P47856_Gf Gfpt1  | Glutamine-K.GYDFESETDTETIAK#.L                         | 51.15  | 29.92  | 1.71 | 0.58  |
| P47856_Gf Gfpt1  | Glutamine-K.LSTDHPIPLYR.T                              | 8.95   | 35.99  | 0.25 | 4.02  |
| P47856_Gf Gfpt1  | Glutamine-R.VIFLEDVVAAVVDGR.L                          | 14.54  | 36.75  | 0.40 | 2.53  |
| P47856_Gf Gfpt1  | Glutamine-R.VIQQLEGAFALVFK#.S                          | 41.68  | 26.89  | 1.55 | 0.65  |
| P47856_Gf Gfpt1  | Glutamine-R.VNFDDYTVNLGGLK.D                           | 8.16   | 6.56   | 1.24 | 0.80  |
| P47856_Gf Gfpt1  | Glutamine-K.EIFEQPEVVNTM*R.G                           | 8.96   | 25.12  | 0.36 | 2.80  |
| P47856_Gf Gfpt1  | Glutamine-K.EIFEQPEVVNTMR.G                            | 2.17   | 6.97   | 0.31 | 3.22  |
| P47856_Gf Gfpt1  | Glutamine-R.EILETIK#.G                                 | 31.23  | 18.47  | 1.69 | 0.59  |
| P47856_Gf Gfpt1  | Glutamine-K.EIM*LGLK#.R                                | 18.15  | 11.78  | 1.54 | 0.65  |
| P47856_Gf Gfpt1  | Glutamine-K.EVLSM*DDEIQK#.L                            | 32.85  | 18.78  | 1.75 | 0.57  |
| P47856_Gf Gfpt1  | Glutamine-R.GALTVGINTVSSISR.E                          | 4.06   | 13.15  | 0.31 | 3.24  |
| P47856_Gf Gfpt1  | Glutamine-K.GNFSSFM*QK#.E                              | 16.85  | 13.08  | 1.29 | 0.78  |
| P47856_Gf Gfpt1  | Glutamine-R.GSPLLIGVR.S                                | 8.24   | 18.78  | 0.44 | 2.28  |
| P47856_Gf Gfpt1  | Glutamine-K.GYDFESETDTETIAK#.L                         | 42.55  | 26.42  | 1.61 | 0.62  |
| P47856_Gf Gfpt1  | Glutamine-K.HGPLALVDK#.L                               | 29.98  | 17.37  | 1.73 | 0.58  |
| P47856_Gf Gfpt1  | Glutamine-K.LSTDHPIPLYR.T                              | 9.59   | 22.55  | 0.43 | 2.35  |
| P47856_Gf Gfpt1  | Glutamine-R.VIFLEDVVAAVVDGR.L                          | 3.91   | 15.77  | 0.25 | 4.04  |
| Q9CPY6_Gi Gid4   | Glucose-inc K.FLAFYQAK#.S                              | 10.90  | 6.62   | 1.65 | 0.61  |
| Q9D7M1_C Gid8    | Glucose-inc R.LIMNYLVTEGFK#.E                          | 18.04  | 10.62  | 1.70 | 0.59  |
| Q9D7M1_C Gid8    | Glucose-inc K.LLLWAQNELDQK#.K                          | 11.29  | 6.42   | 1.76 | 0.57  |
| Q9D7M1_C Gid8    | Glucose-inc R.LIM*NYLVTEGFK#.E                         | 8.08   | 3.75   | 2.16 | 0.46  |
| Q6Y7W8_P Gigyf2  | PERQ amini R.ALSSGGISITSPPLPK#.Y                       | 4.22   | 4.16   | 1.01 | 0.99  |
| Q6Y7W8_P Gigyf2  | PERQ amini K.ALQQQQQQQQK#.L                            | 3.24   | 1.65   | 1.97 | 0.51  |
| Q6Y7W8_P Gigyf2  | PERQ amini R.ALSSGGISITSPPLPK#.Y                       | 6.11   | 4.13   | 1.48 | 0.68  |
| Q6Y7W8_P Gigyf2  | PERQ amini R.M*SDQNIIPVTR.S                            | 15.31  | 8.35   | 1.83 | 0.54  |
| Q6Y7W8_P Gigyf2  | PERQ amini R.VPFSPPAPPHPHM*GELDQER.L                   | 3.76   | 14.62  | 0.26 | 3.89  |
| Q9CZ15_P5 Gins1  | DNA replic K.ALVEQNSQSDVNEAK#.S                        | 3.19   | 1.41   | 2.27 | 0.44  |
| Q9Z0G0_Gi Gipc1  | PDZ domai R.GPATVEDLPSAFEK#.A                          | 12.43  | 4.87   | 2.55 | 0.39  |
| Q9Z0G0_Gi Gipc1  | PDZ domai R.NPDELAELDER.L                              | 6.56   | 12.50  | 0.53 | 1.90  |
| Q68FF6_Gi Git1   | ARF GTPase K.SLSSPTDNLSELSAR.S                         | 3.60   | 9.25   | 0.39 | 2.57  |
| Q80XR8_Qi Git2   | ARF GTPase R.ADSSLDELSELA#.A                           | 9.05   | 7.61   | 1.19 | 0.84  |
| Q80XR8_Qi Git2   | ARF GTPase R.LIEIQVTDLR.L                              | 4.19   | 6.94   | 0.60 | 1.66  |
| Q9JMB0_G Gkap1   | G kinase-an K.EQQQSEANELR.N                            | 2.52   | 4.96   | 0.51 | 1.97  |
| Q9JMB0_G Gkap1   | G kinase-an K.EQQQSEANELR.N                            | 1.67   | 142.08 | 0.01 | 85.17 |
| Q61602_Gi Gil3   | Transcripti K.ISEEPSTSSDER.A                           | 1.41   | 6.84   | 0.21 | 4.86  |
| Q9CYL5_Gf Glipr2 | Golgi-assoc K.ASASDSSVVAR.Y                            | 15.27  | 75.12  | 0.20 | 4.92  |
| Q9CYL5_Gf Glipr2 | Golgi-assoc R.EAQYSEALASTR.I                           | 16.91  | 76.81  | 0.22 | 4.54  |
| Q9CYL5_Gf Glipr2 | Golgi-assoc K.QFNNEVLK#.A                              | 25.68  | 25.21  | 1.02 | 0.98  |
| Q9CYL5_Gf Glipr2 | Golgi-assoc K.SYFQPGFTSGTGHTAMVWK.N                    | 12.51  | 9.17   | 1.36 | 0.73  |
| Q9CYL5_Gf Glipr2 | Golgi-assoc R.YFPAGNINQGFEEVPPPK.K.                    | 5.49   | 6.40   | 0.86 | 1.17  |
| Q9CYL5_Gf Glipr2 | Golgi-assoc R.YFPAGNINQGFEEVPPPK.K.-                   | 38.82  | 45.86  | 0.85 | 1.18  |
| Q9CQM9_C GlrX3   | Glutaredox R.GDLVGLDVK#.E                              | 51.50  | 17.09  | 3.01 | 0.33  |
| Q9CQM9_C GlrX3   | Glutaredox K.HNIQFSFDIFSDEEV.R.Q                       | 7.77   | 8.92   | 0.87 | 1.15  |
| Q9CQM9_C GlrX3   | Glutaredox K.LEEAVPEVSEK#.Y                            | 35.32  | 9.70   | 3.64 | 0.27  |
| Q9CQM9_C GlrX3   | Glutaredox K.LEEAVPEVSEK#YEISVPTFLFFK#.N               | 23.08  | 8.73   | 2.65 | 0.38  |
| Q9CQM9_C GlrX3   | Glutaredox K.TFSNWPTYQYVR.G                            | 5.42   | 9.54   | 0.57 | 1.76  |
| Q9CQM9_C GlrX3   | Glutaredox K.YEISSVPTFLFFK#.N                          | 31.34  | 7.76   | 4.04 | 0.25  |
| D3Z7P3_Gi Gls    | Glutamins K.DSPGETDAFGNSEGK#.E                         | 12.47  | 4.71   | 2.65 | 0.38  |
| D3Z7P3_Gi Gls    | Glutamins K.VADYIPQLAK#.F                              | 26.71  | 12.42  | 2.15 | 0.47  |
| Q922P9_Gi Glyr1  | Putative ox K.ALDQSDNDM*SAVYR.A                        | 14.12  | 36.01  | 0.39 | 2.55  |
| Q922P9_Gi Glyr1  | Putative ox K.ALDQSDNDMSAVYR.A                         | 5.80   | 12.99  | 0.45 | 2.24  |
| Q922P9_Gi Glyr1  | Putative ox R.FLEAPVSGNQLSDMGLVILAAGDR.G               | 2.95   | 9.53   | 0.31 | 3.23  |
| Q922P9_Gi Glyr1  | Putative ox R.FQQAQVDAVEFLR.R                          | 10.09  | 28.55  | 0.35 | 2.83  |
| Q922P9_Gi Glyr1  | Putative ox R.LAIALGDVNHPTPM*AAAAANEVYK#.R             | 17.55  | 10.77  | 1.63 | 0.61  |
| Q922P9_Gi Glyr1  | Putative ox R.LAIALGDVNHPTPM*AAAAANEVYK#.R             | 20.11  | 10.52  | 1.91 | 0.52  |
| Q922P9_Gi Glyr1  | Putative ox R.LGDVLWVGK#.L                             | 30.46  | 17.10  | 1.78 | 0.56  |
| Q922P9_Gi Glyr1  | Putative ox K.TSFFLGEVGNAAK#.M                         | 65.64  | 78.45  | 0.84 | 1.20  |
| Q922P9_Gi Glyr1  | Putative ox K.TSFFLGEVGNAAK#.M                         | 15.91  | 5.18   | 3.07 | 0.33  |
| A6PWEO_A Gm15698 | Protein Gm - MDVFLMIR@YK#.K                            | 28.74  | 4.91   | 5.85 | 0.17  |
| A2A9Z5_A2 Gm53   | Protein Gm R.QTSPSFSFHAR.D                             | 1.72   | 11.34  | 0.15 | 6.61  |
| E9Q070_E9 Gm8730 | Uncharacte R.VLALSVEYTFPLAEK#.V                        | 294.61 | 164.55 | 1.79 | 0.56  |
| E9Q070_E9 Gm8730 | Uncharacte R.VLALSVEYTFPLAEK#.V                        | 224.00 | 82.92  | 2.70 | 0.37  |
| E9Q070_E9 Gm8730 | Uncharacte R.VLALSVEYTFPLAEK#.V                        | 84.32  | 29.38  | 2.87 | 0.35  |
| E9Q070_E9 Gm8730 | Uncharacte R.VLALSVEYTFPLAEK#.V                        | 52.73  | 18.41  | 2.87 | 0.35  |
| Q922H4_G Gmppa   | Mannose-1 K.AVLIGLQPK#.G                               | 3.99   | 1.32   | 3.03 | 0.33  |
| Q3THK7_Gi Gmps   | GMP synthi R.GLQHEEIVLLTHGSDVK#VADGFK#.V               | 16.07  | 5.59   | 2.88 | 0.35  |
| Q3THK7_Gi Gmps   | GMP synthi K.IANEVIGEM*SLKPEEVFLAQGLTRPDLIESASLVASGK.A | 5.40   | 2.69   | 2.01 | 0.50  |
| Q3THK7_Gi Gmps   | GMP synthi R.IM*YDLTSK#PPGTTEWE.-                      | 8.01   | 2.66   | 3.01 | 0.33  |
| Q3THK7_Gi Gmps   | GMP synthi K.IVADFSASVK#.K                             | 28.79  | 7.73   | 3.72 | 0.27  |
| Q3THK7_Gi Gmps   | GMP synthi K.LM*QITSLHSLAFLLPIK#.T                     | 12.21  | 3.41   | 3.58 | 0.28  |
| Q3THK7_Gi Gmps   | GMP synthi R.SGNIVAGIANESK#K#.L                        | 4.99   | 1.39   | 3.59 | 0.28  |
| Q3THK7_Gi Gmps   | GMP synthi K.TLNM*TTSPEEK#.R                           | 14.79  | 5.53   | 2.67 | 0.37  |
| Q3THK7_Gi Gmps   | GMP synthi R.VVYIFGPPVK#.E                             | 16.94  | 41.48  | 0.41 | 2.45  |
| P27600_Gi Gna12  | Guanine nu R.DIDALLARER@R@.A                           | 101.01 | 300.91 | 0.34 | 2.98  |
| P08752_Gi Gna12  | Guanine nu R.IAQSDYIPTQQDVL.R.T                        | 1.91   | 10.50  | 0.18 | 5.50  |
| P08752_Gi Gna12  | Guanine nu R.IAQSDYIPTQQDVL.R.T                        | 2.42   | 11.71  | 0.21 | 4.84  |
| P08752_Gi Gna12  | Guanine nu K.TTIVETHFTFK.D                             | 4.05   | 12.24  | 0.33 | 3.02  |
| P08752_Gi Gna12  | Guanine nu R.AVVSNTIQSIAIVK#.A                         | 7.37   | 7.26   | 1.02 | 0.98  |
| P08752_Gi Gna12  | Guanine nu R.EYQLNDSAAAYLNDLER.I                       | 1.58   | 5.40   | 0.29 | 3.43  |
| P08752_Gi Gna12  | Guanine nu R.IAQSDYIPTQQDVL.R.T                        | 4.18   | 27.99  | 0.15 | 6.69  |
| P08752_Gi Gna12  | Guanine nu K.YDEAASYIOSK.F                             | 9.19   | 12.49  | 0.74 | 1.36  |
| Q9DC5_1_G Gna13  | Guanine nu R.ISQNTYIPTQQDVL.R.T                        | 2.42   | 9.85   | 0.25 | 4.06  |
| P62874_Gi Gnb1   | Guanine nu K.IYAM*HWGTDSR.L                            | 1.52   | 5.96   | 0.25 | 3.93  |
| P62874_Gi Gnb1   | Guanine nu K.LIIWDSYTTNK.V                             | 71.59  | 47.58  | 1.50 | 0.66  |
| P62874_Gi Gnb1   | Guanine nu R.LLIVSASQDGK#.L                            | 98.19  | 75.86  | 1.29 | 0.77  |
| P62874_Gi Gnb1   | Guanine nu K.LIIWDSYTTNK#.V                            | 17.08  | 16.59  | 1.03 | 0.97  |
| P62874_Gi Gnb1   | Guanine nu R.AGVLAGHDNR.V                              | 3.45   | 8.95   | 0.38 | 2.60  |
| P62874_Gi Gnb1   | Guanine nu K.LIIWDSYTTNK#.V                            | 29.81  | 31.51  | 0.95 | 1.06  |
| P62874_Gi Gnb1   | Guanine nu R.LLIVSASQDGK#.L                            | 72.42  | 64.67  | 1.12 | 0.89  |
| P68040_Gi Gnb211 | Guanine nu R.DETNYGIPQR.A                              | 213.76 | 469.00 | 0.46 | 2.19  |
| P68040_Gi Gnb211 | Guanine nu K.DGQAM*LWDLNEGK#.H                         | 163.08 | 69.29  | 2.35 | 0.42  |
| P68040_Gi Gnb211 | Guanine nu K.DGQAMLWDLNEGK#.H                          | 136.86 | 63.03  | 2.17 | 0.46  |
| P68040_Gi Gnb211 | Guanine nu R.DK#TIIM*WK#.L                             | 85.20  | 42.04  | 2.03 | 0.49  |
| P68040_Gi Gnb211 | Guanine nu R.DK#TIIM*WK#.L                             | 190.73 | 66.65  | 2.86 | 0.35  |
| P68040_Gi Gnb211 | Guanine nu K.DVLSVAFSSDNR.Q                            | 121.42 | 235.23 | 0.52 | 1.94  |
| P68040_Gi Gnb211 | Guanine nu K.GHNGWVYQJATTPQFPDM*ILSASR.D               | 10.26  | 15.14  | 0.68 | 1.48  |
| P68040_Gi Gnb211 | Guanine nu K.GHNGWVYQJATTPQFPDM*ILSASR.D               | 7.82   | 14.53  | 0.54 | 1.86  |

|                    |                                          |        |        |       |       |
|--------------------|------------------------------------------|--------|--------|-------|-------|
| P68040_Gf Gnb211   | Guanine nu K.IIIVDELK#.Q                 | 230.16 | 97.27  | 2.37  | 0.42  |
| P68040_Gf Gnb211   | Guanine nu K.IIIVDELK#QEVISTSSK#.A       | 802.07 | 336.22 | 2.39  | 0.42  |
| P68040_Gf Gnb211   | Guanine nu K.IIIVDELK#QEVISTSSK#.A       | 4.54   | 3.10   | 1.47  | 0.68  |
| P68040_Gf Gnb211   | Guanine nu K.IIIVDELK#.I                 | 553.28 | 232.03 | 2.38  | 0.42  |
| P68040_Gf Gnb211   | Guanine nu K.LTRDETNYGIPQR.A             | 14.45  | 115.62 | 0.12  | 8.00  |
| P68040_Gf Gnb211   | Guanine nu R.LWDLTTGTTTR.R               | 149.15 | 298.68 | 0.50  | 2.00  |
| P68040_Gf Gnb211   | Guanine nu K.QEVISTSSK#.A                | 136.32 | 31.26  | 4.36  | 0.23  |
| P68040_Gf Gnb211   | Guanine nu K.TIIMWK#.L                   | 56.49  | 26.32  | 2.15  | 0.47  |
| P68040_Gf Gnb211   | Guanine nu R.VWQVTIGTR.-                 | 106.62 | 192.04 | 0.56  | 1.80  |
| P68040_Gf Gnb211   | Guanine nu R.DETNYGIPQR.A                | 24.51  | 51.33  | 0.48  | 2.09  |
| P68040_Gf Gnb211   | Guanine nu K.DGQAM*LWDLNEGK#.H           | 23.60  | 12.37  | 1.91  | 0.52  |
| P68040_Gf Gnb211   | Guanine nu K.DGQAMLWDLNEGK#.H            | 11.50  | 5.09   | 2.26  | 0.44  |
| P68040_Gf Gnb211   | Guanine nu R.DK#TIIMWK#.L                | 23.15  | 10.22  | 2.27  | 0.44  |
| P68040_Gf Gnb211   | Guanine nu K.DVLSVAFSSDNR.Q              | 51.08  | 104.06 | 0.49  | 2.04  |
| P68040_Gf Gnb211   | Guanine nu K.IIIVDELK#QEVISTSSK#.A       | 298.26 | 120.17 | 2.48  | 0.40  |
| P68040_Gf Gnb211   | Guanine nu K.IIIVDELK#.I                 | 98.02  | 42.96  | 2.28  | 0.44  |
| P68040_Gf Gnb211   | Guanine nu R.LWDLTTGTTTR.R               | 23.54  | 45.19  | 0.52  | 1.92  |
| P68040_Gf Gnb211   | Guanine nu R.VWQVTIGTR.-                 | 15.70  | 28.29  | 0.55  | 1.80  |
| P68040_Gf Gnb211   | Guanine nu R.DETNYGIPQR.A                | 29.37  | 56.05  | 0.52  | 1.91  |
| P68040_Gf Gnb211   | Guanine nu K.DGQAM*LWDLNEGK#.H           | 21.88  | 8.85   | 2.47  | 0.40  |
| P68040_Gf Gnb211   | Guanine nu K.DGQAMLWDLNEGK#.H            | 16.97  | 8.21   | 2.07  | 0.48  |
| P68040_Gf Gnb211   | Guanine nu R.DK#TIIMWK#.L                | 23.71  | 7.17   | 3.31  | 0.30  |
| P68040_Gf Gnb211   | Guanine nu R.DK#TIIMWK#.L                | 36.43  | 15.15  | 2.40  | 0.42  |
| P68040_Gf Gnb211   | Guanine nu K.DVLSVAFSSDNR.Q              | 33.89  | 55.87  | 0.61  | 1.65  |
| P68040_Gf Gnb211   | Guanine nu K.IIIVDELK#QEVISTSSK#.A       | 280.87 | 102.79 | 2.73  | 0.37  |
| P68040_Gf Gnb211   | Guanine nu K.IIIVDELK#.I                 | 123.86 | 45.89  | 2.70  | 0.37  |
| P68040_Gf Gnb211   | Guanine nu K.LTRDETNYGIPQR.A             | 2.12   | 25.30  | 0.08  | 11.91 |
| P68040_Gf Gnb211   | Guanine nu R.LWDLTTGTTTR.R               | 35.90  | 60.62  | 0.59  | 1.69  |
| P68040_Gf Gnb211   | Guanine nu R.VWQVTIGTR.-                 | 57.39  | 56.70  | 1.01  | 0.99  |
| P68040_Gf Gnb211   | Guanine nu R.DETNYGIPQR.A                | 50.73  | 99.74  | 0.51  | 1.97  |
| P68040_Gf Gnb211   | Guanine nu K.DGQAM*LWDLNEGK#.H           | 52.37  | 21.50  | 2.44  | 0.41  |
| P68040_Gf Gnb211   | Guanine nu K.DGQAMLWDLNEGK#.H            | 26.22  | 10.15  | 2.58  | 0.39  |
| P68040_Gf Gnb211   | Guanine nu R.DK#TIIMWK#.L                | 32.03  | 12.18  | 2.63  | 0.38  |
| P68040_Gf Gnb211   | Guanine nu R.DK#TIIMWK#.L                | 24.29  | 14.21  | 1.71  | 0.58  |
| P68040_Gf Gnb211   | Guanine nu K.GHNGWVQJATTPQFPDM*LSASR.D   | 5.79   | 8.94   | 0.65  | 1.54  |
| P68040_Gf Gnb211   | Guanine nu K.GHNGWVQJATTPQFPDM*LSASR.D   | 5.22   | 9.06   | 0.58  | 1.73  |
| P68040_Gf Gnb211   | Guanine nu K.IIIVDELK#QEVISTSSK#.A       | 379.68 | 171.54 | 2.21  | 0.45  |
| P68040_Gf Gnb211   | Guanine nu K.IIIVDELK#.I                 | 207.92 | 79.48  | 2.62  | 0.38  |
| P68040_Gf Gnb211   | Guanine nu K.LTRDETNYGIPQR.A             | 4.67   | 59.23  | 0.08  | 12.68 |
| P68040_Gf Gnb211   | Guanine nu R.LWDLTTGTTTR.R               | 60.82  | 110.44 | 0.55  | 1.82  |
| P68040_Gf Gnb211   | Guanine nu K.TIIMWK#.L                   | 15.65  | 7.51   | 2.08  | 0.48  |
| P68040_Gf Gnb211   | Guanine nu R.VWQVTIGTR.-                 | 31.11  | 55.76  | 0.56  | 1.79  |
| Q91WG8_C Gne       | Bifunction: R.TLVLFPNIDAGSK#.E           | 8.85   | 5.28   | 1.68  | 0.60  |
| Q9DAS9_G Gng12     | Guanine nu K.TASTNSIAQAR.R               | 8.20   | 34.60  | 0.24  | 4.22  |
| P36916_Gf Gnl1     | Guanine nu R.ACEAITVGK#.V                | 32.62  | 11.87  | 2.75  | 0.36  |
| P36916_Gf Gnl1     | Guanine nu R.EQVLPVSAEVLDIR.E            | 7.61   | 12.42  | 0.61  | 1.63  |
| P36916_Gf Gnl1     | Guanine nu R.EVYQPGSVLDFPR.R             | 10.66  | 12.00  | 0.89  | 1.13  |
| P36916_Gf Gnl1     | Guanine nu R.LNQGPSQGLGPR.G              | 4.87   | 13.53  | 0.36  | 2.78  |
| P36916_Gf Gnl1     | Guanine nu R.SFQYELGK#.I                 | 29.71  | 15.90  | 1.87  | 0.54  |
| P36916_Gf Gnl1     | Guanine nu R.TPOEPGGVLK#.K               | 13.14  | 6.47   | 2.03  | 0.49  |
| P36916_Gf Gnl1     | Guanine nu K.VDLSWR.E                    | 6.90   | 12.66  | 0.55  | 1.83  |
| P36916_Gf Gnl1     | Guanine nu R.YFQYFLTPSVK#.L              | 21.69  | 9.43   | 2.30  | 0.43  |
| P36916_Gf Gnl1     | Guanine nu R.EQVLPVSAEVLDIR.E            | 9.27   | 4.87   | 1.90  | 0.52  |
| P36916_Gf Gnl1     | Guanine nu R.EVYQPGSVLDFPR.R             | 6.24   | 8.01   | 0.78  | 1.28  |
| P36916_Gf Gnl1     | Guanine nu R.GTWESHETAELVLSOGR.V         | 9.61   | 10.94  | 0.88  | 1.14  |
| P36916_Gf Gnl1     | Guanine nu R.TPOEPGGVLK#.K.N             | 9.95   | 3.00   | 3.31  | 0.30  |
| P36916_Gf Gnl1     | Guanine nu R.YFQYFLTPSVK#.L              | 22.42  | 13.04  | 1.72  | 0.58  |
| Q8C111_Gh Gnl3     | Guanine nu R.ASQEETDYFTTDYI.-            | 8.55   | 8.55   | 1.00  | 1.00  |
| Q8C111_Gh Gnl3     | Guanine nu K.DIQVGIFFPNVKG#.S            | 14.82  | 7.82   | 1.89  | 0.53  |
| Q8C111_Gh Gnl3     | Guanine nu K.ENLENLWLNK#.E               | 10.60  | 8.24   | 1.29  | 0.78  |
| Q8C111_Gh Gnl3     | Guanine nu R.K#DPGVPNSAPFK#.E            | 5.21   | 4.74   | 1.10  | 0.91  |
| Q8C111_Gh Gnl3     | Guanine nu K.LILVLNK#.S                  | 10.16  | 5.50   | 1.85  | 0.54  |
| Q8C111_Gh Gnl3     | Guanine nu R.NAEISDVAPVEETR.E            | 5.60   | 11.59  | 0.48  | 2.07  |
| Q8C111_Gh Gnl3     | Guanine nu R.SPASIEELRLEASALSQADNEQVLK.Y | 4.31   | 10.05  | 0.43  | 2.33  |
| Q8C111_Gh Gnl3     | Guanine nu K.DIQVGIFFPNVKG#.S            | 10.75  | 8.19   | 1.31  | 0.76  |
| Q8C111_Gh Gnl3     | Guanine nu K.ELPTVVK#.A                  | 17.47  | 11.43  | 1.53  | 0.65  |
| Q8C111_Gh Gnl3     | Guanine nu K.GGSPNVESAAS#.L              | 22.62  | 18.53  | 1.22  | 0.82  |
| Q8C111_Gh Gnl3     | Guanine nu R.NAEISDVAPVEETR.E            | 2.81   | 9.06   | 0.31  | 3.23  |
| Q921M4_G Golga2    | Golgin subf K.SQEAQGLQEQR.D              | 1.32   | 9.27   | 0.14  | 7.03  |
| P55937_Gf Golga3   | Golgin subf K.ELEGTQTLQTIK#.S            | 14.18  | 5.74   | 2.47  | 0.40  |
| P55937_Gf Golga3   | Golgin subf R.LGSDLSAQK#.E               | 18.21  | 7.38   | 2.47  | 0.41  |
| P55937_Gf Golga3   | Golgin subf K.QDLSSEVDTLK#.Q             | 8.18   | 5.76   | 1.42  | 0.70  |
| P55937_Gf Golga3   | Golgin subf K.QLTSTQEQALQAK#.Q           | 12.39  | 3.86   | 3.21  | 0.31  |
| P55937_Gf Golga3   | Golgin subf R.ALEVQLNVGOSK#.I            | 7.17   | 4.65   | 1.54  | 0.65  |
| P55937_Gf Golga3   | Golgin subf K.QDLSSEVDTLK#.Q             | 9.27   | 36.75  | 0.25  | 3.96  |
| P55937_Gf Golga3   | Golgin subf K.TLLQNNQK#.L                | 10.90  | 4.99   | 2.18  | 0.46  |
| P55937_Gf Golga3   | Golgin subf K.VLELEDELQESR.G             | 3.86   | 7.12   | 0.54  | 1.85  |
| Q8R088_Gi Golph3l  | Golgi phos; K.SDSPTGDVLLDELTK#.H         | 8.04   | 6.84   | 1.18  | 0.85  |
| Q9CR60_Gi Golt1b   | Vesicle tran R.SFVDK#VGESNNM#.V          | 4.80   | 5.31   | 0.91  | 1.10  |
| Q99JX3_Gc Gorasp2  | Golgi reasse K.ADASSLTVDVTSPASK#.V       | 17.06  | 7.37   | 2.31  | 0.43  |
| Q99JX3_Gc Gorasp2  | Golgi reasse K.ISLPGQM*GTPTPLK#.D        | 13.01  | 7.58   | 1.72  | 0.58  |
| Q3UFS4_Gf Gpatch11 | G patch doi K.SGDGIVEPIPLNVK#.T          | 12.69  | 7.37   | 1.72  | 0.58  |
| Q3TFK5_Gf Gpatch4  | G patch doi K.ALGSQPLTSEPSQK.K           | 8.81   | 10.16  | 0.87  | 1.15  |
| Q3TFK5_Gf Gpatch4  | G patch doi K.TAASLVDSGK#.D              | 14.96  | 9.06   | 1.65  | 0.61  |
| A2A6A1_Gf Gpatch8  | G patch doi K.DISQATPATK.A               | 9.73   | 17.88  | 0.54  | 1.84  |
| A2A6A1_Gf Gpatch8  | G patch doi K.GAGLPSQNSNTGTGR.G          | 2.85   | 15.57  | 0.18  | 5.46  |
| A2A6A1_Gf Gpatch8  | G patch doi R.TVSEASELQK.E               | 17.05  | 23.45  | 0.73  | 1.38  |
| P51655_Gf Gpc4     | Glypican-4 R.LEGPFNIESVM*DPIDVK.I        | 7.35   | 9.98   | 0.74  | 1.36  |
| P51655_Gf Gpc4     | Glypican-4 R.LEGPFNIESVM*DPIDVK.I        | 4.95   | 5.06   | 0.98  | 1.02  |
| P51655_Gf Gpc4     | Glypican-4 R.TFAQGLAVAR.D                | 4.34   | 21.29  | 0.20  | 4.91  |
| P51655_Gf Gpc4     | Glypican-4 R.LEGPFNIESVM*DPIDVK.I        | 4.49   | 5.54   | 0.81  | 1.24  |
| P06745_Gf Gpi      | Glucose-6-f K.EVMQMLVELAK#.S             | 14.06  | 1.67   | 8.42  | 1.12  |
| P06745_Gf Gpi      | Glucose-6-f K.IILLANFLAQTEALM*K#.G       | 38.54  | 3.61   | 10.68 | 0.09  |
| P06745_Gf Gpi      | Glucose-6-f R.SNTPK#VDGK#.D              | 14.97  | 5.57   | 2.69  | 0.37  |
| P06745_Gf Gpi      | Glucose-6-f K.TFTTQETITNAETAK#.E         | 14.93  | 2.87   | 5.20  | 0.19  |
| P06745_Gf Gpi      | Glucose-6-f K.TLASLSPETSLFIASK#.T        | 30.30  | 4.32   | 7.01  | 0.14  |
| P06745_Gf Gpi      | Glucose-6-f K.IILLANFLAQTEALM*K#.G       | 16.17  | 3.30   | 4.91  | 0.20  |
| P06745_Gf Gpi      | Glucose-6-f K.TLASLSPETSLFIASK#.T        | 17.08  | 2.55   | 6.70  | 0.15  |
| P06745_Gf Gpi      | Glucose-6-f R.VWVFNIDGTHIAK#.T           | 15.84  | 2.70   | 5.87  | 0.17  |
| P06745_Gf Gpi      | Glucose-6-f K.IILLANFLAQTEALM*K#.G       | 10.03  | 2.48   | 4.05  | 0.25  |
| P06745_Gf Gpi      | Glucose-6-f K.TLASLSPETSLFIASK#.T        | 17.79  | 4.01   | 4.44  | 0.23  |
| Q8VHN7_G Gpr98     | G-protein c R.RSGGHFGR.L                 | 8.95   | 29.27  | 0.31  | 3.27  |
| Q99LD4_Cs Gps1     | COP9 signa K.AESTPEIAEQR.G               | 14.33  | 11.08  | 1.29  | 0.77  |

|                   |                                                     |        |        |      |      |
|-------------------|-----------------------------------------------------|--------|--------|------|------|
| Q99LD4_C3 Gps1    | COP9 signa R.DSQTQAILTK#.L                          | 41.27  | 8.25   | 5.00 | 0.20 |
| Q99LD4_C3 Gps1    | COP9 signa R.DSQTQAILTK#.L                          | 32.13  | 5.70   | 5.64 | 0.18 |
| Q99LD4_C3 Gps1    | COP9 signa R.ALIQYFSPYVSADM*HK#.M                   | 60.97  | 6.40   | 9.52 | 0.11 |
| Q99LD4_C3 Gps1    | COP9 signa R.DSQTQAILTK#.L                          | 70.13  | 10.84  | 6.47 | 0.15 |
| Q99LD4_C3 Gps1    | COP9 signa R.EGSGQGLTPANSQSR.M                      | 11.80  | 15.40  | 0.77 | 1.31 |
| Q99LD4_C3 Gps1    | COP9 signa K.LFLELEPQVR.D                           | 26.24  | 13.02  | 2.01 | 0.50 |
| Q99LD4_C3 Gps1    | COP9 signa R.NVSSSSFK#.L                            | 62.81  | 8.58   | 7.32 | 0.14 |
| P11352_Gf Gpx1    | Glutathion R.DYEM*NDLQK#.R                          | 7.66   | 2.48   | 3.09 | 0.32 |
| P11352_Gf Gpx1    | Glutathion K.FLVGPDGVPVR.R                          | 2.31   | 5.78   | 0.40 | 2.50 |
| P11352_Gf Gpx1    | Glutathion R.NALPTSDPTALM*TPDK#.Y                   | 8.60   | 4.24   | 2.03 | 0.49 |
| P11352_Gf Gpx1    | Glutathion R.NDIAWNFEK#.F                           | 9.25   | 2.52   | 3.68 | 0.27 |
| P11352_Gf Gpx1    | Glutathion R.TIDIEPIETLSQOSGNS.-                    | 9.35   | 9.35   | 1.00 | 1.00 |
| P11352_Gf Gpx1    | Glutathion K.YVRPGGFEFNPFTLFEK.C                    | 6.84   | 7.61   | 0.90 | 1.11 |
| Q35127_C: Grc10   | Protein C1(K.M)*LQFVLVATQIQVEVIK#.A                 | 2.55   | 2.94   | 0.87 | 1.15 |
| Q99LP6_Gf Grpel1  | GrpE protei K.DLLEVADILEK#.A                        | 13.07  | 3.66   | 3.57 | 0.28 |
| Q99LP6_Gf Grpel1  | GrpE protei K.SLYEGLVMTEVQJQK#.V                    | 6.16   | 1.49   | 4.13 | 0.24 |
| Q8CSQ4_G Grsf1    | G-rich sequ K.LGDVEDDYYLIR.A                        | 7.06   | 7.12   | 0.99 | 1.01 |
| Q810D6_G Grwd1    | Glutamate- R.DPESGETETDPGLAALPQQLFVHQGETDLK#.E      | 4.55   | 1.75   | 2.60 | 0.38 |
| Q810D6_G Grwd1    | Glutamate- R.EPFLSSGGDGALK#.V                       | 9.25   | 7.91   | 1.17 | 0.86 |
| Q810D6_G Grwd1    | Glutamate- R.LLQVDDPQALAIFLRDEQAR.I                 | 3.71   | 13.53  | 0.27 | 3.65 |
| Q810D6_G Grwd1    | Glutamate- R.REPFLSSGGDDGALK.V                      | 1.82   | 8.47   | 0.21 | 4.67 |
| Q810D6_G Grwd1    | Glutamate- K.SGSPVATFK#.Q                           | 31.89  | 17.24  | 1.85 | 0.54 |
| Q810D6_G Grwd1    | Glutamate- R.VSWLGEPEVAGVWSEK#.G                    | 23.19  | 23.26  | 1.00 | 1.00 |
| Q2NL51_G: Gsk3a   | Glycogen s3 R.DIK#QNLVDPDTAVLK#.L                   | 15.73  | 4.07   | 3.86 | 0.26 |
| Q9WV60_C Gsk3b    | Glycogen s3 R.DIK#QNLVDPDTAVLK#.L                   | 29.44  | 11.23  | 2.62 | 0.38 |
| Q9WV60_C Gsk3b    | Glycogen s3 K.VTTVATPGQGPDRPQEVSYDTK.V              | 9.22   | 18.01  | 0.51 | 1.95 |
| P13020_Gf Gsn     | Gelsolin OS K.SGALNSNDAFVLK#.T                      | 5.99   | 3.69   | 1.63 | 0.62 |
| P13020_Gf Gsn     | Gelsolin OS K.AGKEPGLQWR.V                          | 33.85  | 71.76  | 0.47 | 2.12 |
| P13020_Gf Gsn     | Gelsolin OS R.AQHVSEEGEPEAM*LQVLGPK#PALPEGTEDTAK#.E | 3.60   | 6.08   | 0.59 | 1.69 |
| P13020_Gf Gsn     | Gelsolin OS R.AVEVMPK#.S                            | 59.24  | 29.88  | 1.98 | 0.50 |
| P13020_Gf Gsn     | Gelsolin OS R.DGGQTAPASIR.L                         | 55.76  | 126.70 | 0.44 | 2.27 |
| P13020_Gf Gsn     | Gelsolin OS K.DSQEEEK#TEALTSAK#.R                   | 245.68 | 127.55 | 1.93 | 0.52 |
| P13020_Gf Gsn     | Gelsolin OS R.EVQGESFSTSGYFK#.S                     | 117.65 | 59.14  | 1.99 | 0.50 |
| P13020_Gf Gsn     | Gelsolin OS K.GGVASGFK#.H                           | 76.38  | 37.21  | 2.05 | 0.49 |
| P13020_Gf Gsn     | Gelsolin OS K.HVVPNEVVQR.L                          | 32.59  | 70.53  | 0.46 | 2.16 |
| P13020_Gf Gsn     | Gelsolin OS R.IEGSNKVPVDPATYQFYGGDSYIILYNYR.H       | 10.07  | 14.03  | 0.72 | 1.39 |
| P13020_Gf Gsn     | Gelsolin OS K.K#GGVASGFK#.H                         | 83.85  | 38.81  | 2.16 | 0.46 |
| P13020_Gf Gsn     | Gelsolin OS K.NWRDPDQDQDGLYLSSHIANVER.V             | 12.11  | 43.25  | 0.28 | 3.57 |
| P13020_Gf Gsn     | Gelsolin OS R.QTQVSVLPEGETPLFK#.Q                   | 107.08 | 47.40  | 2.26 | 0.44 |
| P13020_Gf Gsn     | Gelsolin OS R.RTPITVVR.Q                            | 8.54   | 45.47  | 0.19 | 5.32 |
| P13020_Gf Gsn     | Gelsolin OS K.SGALNSNDAFVLK#.T                      | 178.22 | 77.67  | 2.29 | 0.44 |
| P13020_Gf Gsn     | Gelsolin OS R.SQHVVQEESEPDAFWEALGGK#.T              | 138.12 | 61.49  | 2.25 | 0.45 |
| P13020_Gf Gsn     | Gelsolin OS K.TASDFISK#.M                           | 233.36 | 102.66 | 2.27 | 0.44 |
| P13020_Gf Gsn     | Gelsolin OS K.TGAQELK#.V                            | 184.04 | 94.02  | 1.96 | 0.51 |
| P13020_Gf Gsn     | Gelsolin OS K.TPSAAYLVVVGAGASEAEK#.T                | 92.80  | 46.38  | 2.00 | 0.50 |
| P13020_Gf Gsn     | Gelsolin OS R.VPFDALHTLSTAMAAHQHM*DDDGTTGQK#.Q      | 14.44  | 3.41   | 4.24 | 0.24 |
| P13020_Gf Gsn     | Gelsolin OS K.VPVDPATYQFYGGDSYIILYNYR.H             | 13.60  | 18.06  | 0.75 | 1.33 |
| P13020_Gf Gsn     | Gelsolin OS K.VSNGAGSMSVSLVADENPFAQGALR.S           | 4.03   | 7.41   | 0.54 | 1.84 |
| P13020_Gf Gsn     | Gelsolin OS R.YIETDPANR.D                           | 25.93  | 44.23  | 0.59 | 1.71 |
| Q8R050_EF Gsp1    | Eukaryotic R.AYFETEK#.K                             | 15.92  | 13.10  | 1.21 | 0.82 |
| Q8R050_EF Gsp1    | Eukaryotic K.GQQLVMM*P#PNK#.H                       | 35.74  | 6.36   | 5.62 | 0.18 |
| Q8R050_EF Gsp1    | Eukaryotic K.GQQLVMM*P#PNK#.H                       | 15.42  | 3.35   | 4.61 | 0.22 |
| Q8R050_EF Gsp1    | Eukaryotic K.GQQLVMM*P#PNK#.H                       | 9.57   | 2.29   | 4.18 | 0.24 |
| Q8R050_EF Gsp1    | Eukaryotic K.HFTILDAPGHK#.S                         | 55.72  | 9.91   | 5.62 | 0.18 |
| Q8R050_EF Gsp1    | Eukaryotic K.HLIVLINK#.M                            | 91.64  | 14.93  | 6.14 | 0.16 |
| Q8R050_EF Gsp1    | Eukaryotic K.K#EHVNVVFIHVVDAGK#.S                   | 11.15  | 1.66   | 6.70 | 0.15 |
| Q8R050_EF Gsp1    | Eukaryotic R.K#GEFETGEK#.G                          | 75.38  | 18.63  | 4.05 | 0.25 |
| Q8R050_EF Gsp1    | Eukaryotic K.SAVAPPAGPK#.K                          | 98.84  | 23.95  | 4.13 | 0.24 |
| Q8R050_EF Gsp1    | Eukaryotic K.SFVPMN*IGGASQADLAVLVISAR.K             | 9.65   | 10.17  | 0.95 | 1.05 |
| Q8R050_EF Gsp1    | Eukaryotic K.DM*GTVLGGK#.L                          | 14.16  | 1.61   | 8.79 | 0.11 |
| Q8R050_EF Gsp1    | Eukaryotic K.HFTILDAPGHK#.S                         | 16.91  | 69.31  | 0.24 | 4.10 |
| Q8R050_EF Gsp1    | Eukaryotic K.HLIVLINK#.M                            | 23.49  | 3.24   | 7.26 | 0.14 |
| Q8R050_EF Gsp1    | Eukaryotic K.HNVEVLGILSDDVETDSVAPENLK#.I            | 27.91  | 5.24   | 5.33 | 0.19 |
| Q8R050_EF Gsp1    | Eukaryotic K.SAVAPPAGPK#.K                          | 34.11  | 10.93  | 3.12 | 0.32 |
| P19157_G5 Gstp1   | Glutathion K.ALPGHLK#PFETLLSQNQGGK#.A               | 3.23   | 3.38   | 0.95 | 1.05 |
| P19157_G5 Gstp1   | Glutathion K.FEDGDLTYQSNAILR.H                      | 2.35   | 8.72   | 0.27 | 3.72 |
| Q99L20_Qf Gst13   | Glutathion K.GQQYTSFAQVPLR.K                        | 2.10   | 3.61   | 0.58 | 1.72 |
| P62915_TF Gtf2b   | Transcripti R.APDLFPPDFK.F                          | 24.54  | 14.87  | 1.65 | 0.61 |
| P62915_TF Gtf2b   | Transcripti R.APDLFPPDFK#FDTVPDK#LPLQL.-            | 7.60   | 4.77   | 1.59 | 0.63 |
| P62915_TF Gtf2b   | Transcripti K.EIGDIAGVADVTR.Q                       | 3.55   | 11.00  | 0.32 | 3.10 |
| P62915_TF Gtf2b   | Transcripti K.FDTPVDK#LPLQL.-                       | 20.68  | 17.07  | 1.21 | 0.83 |
| P62915_TF Gtf2b   | Transcripti R.KAVELDLVPR.GS                         | 2.57   | 11.72  | 0.22 | 4.56 |
| P62915_TF Gtf2b   | Transcripti R.SPISVAAAAYM*ASQASAEK#.R               | 4.58   | 2.42   | 1.89 | 0.53 |
| P62915_TF Gtf2b   | Transcripti R.SPISVAAAAYMASQASAEK#.R                | 9.99   | 5.09   | 1.96 | 0.51 |
| P62915_TF Gtf2b   | Transcripti R.VGDSQNLPSDGLSTMIGK.G                  | 5.44   | 5.96   | 0.91 | 1.10 |
| P62915_TF Gtf2b   | Transcripti R.VIDVSEWR.T                            | 3.59   | 9.37   | 0.38 | 2.61 |
| Q9D0D5_T: Gtf2e1  | General tra R.AGPDDNEEV#M#.A                        | 2.54   | 8.60   | 0.30 | 3.39 |
| Q9D0D5_T: Gtf2e1  | General tra R.ESTVQGAYSSEEM*#K#.E                   | 4.66   | 2.28   | 2.04 | 0.49 |
| Q9D0D5_T: Gtf2e1  | General tra R.FNEQEPYALLR.E                         | 6.44   | 20.72  | 0.31 | 3.22 |
| Q9D902_T: Gtf2e2  | General tra R.GLGGILLEIEGLPNSQK#.A                  | 15.42  | 20.45  | 0.75 | 1.33 |
| Q9D902_T: Gtf2e2  | General tra R.GLGGILLEIEGLPNSQK#.A                  | 12.98  | 3.00   | 4.32 | 0.23 |
| Q9D902_T: Gtf2e2  | General tra K.QWLM*TEALVNNPK#.I                     | 5.11   | 5.91   | 0.87 | 1.16 |
| Q9D902_T: Gtf2e2  | General tra R.SVTVDSM*DEEK#.I                       | 6.93   | 4.21   | 1.65 | 0.61 |
| Q9J1B4_TF2 Gtf2h2 | General tra K.ATIEDILFK#.A                          | 10.13  | 6.00   | 1.69 | 0.59 |
| Q9ES28_GT Gtf2i   | General tra K.AGISFIK#.R                            | 13.42  | 13.04  | 1.03 | 0.97 |
| Q9ES28_GT Gtf2i   | General tra R.DQSAVVVQGLPEGVAFK#.H                  | 17.90  | 10.04  | 1.78 | 0.56 |
| Q9ES28_GT Gtf2i   | General tra K.FEAHPNDLYEGLPENIPFR.S                 | 4.55   | 7.26   | 0.63 | 1.60 |
| Q9ES28_GT Gtf2i   | General tra K.HPEHYDLATLK#.W                        | 12.02  | 46.87  | 0.26 | 3.90 |
| Q9ES28_GT Gtf2i   | General tra K.RPELLTHSTTEVTQPR.T                    | 1.28   | 6.36   | 0.20 | 4.99 |
| Q9ES28_GT Gtf2i   | General tra K.STVVPVPEYK#.M                         | 27.31  | 16.66  | 1.64 | 0.61 |
| Q9ES28_GT Gtf2i   | General tra K.AGISFIK#.R                            | 47.39  | 17.13  | 2.77 | 0.36 |
| Q9ES28_GT Gtf2i   | General tra K.APSYLEISSM*#R                         | 9.54   | 12.34  | 0.77 | 1.29 |
| Q9ES28_GT Gtf2i   | General tra K.DFQKHDFVK#.Y                          | 9.54   | 6.12   | 1.56 | 0.64 |
| Q9ES28_GT Gtf2i   | General tra R.DQSAVVVQGLPEGVAFK#.H                  | 46.29  | 23.19  | 2.00 | 0.50 |
| Q9ES28_GT Gtf2i   | General tra R.EFSEFVAVNAK#.I                        | 17.77  | 7.45   | 2.39 | 0.42 |
| Q9ES28_GT Gtf2i   | General tra R.EQVNDLFSR.K                           | 11.77  | 23.02  | 0.51 | 1.96 |
| Q9ES28_GT Gtf2i   | General tra K.FAQALGLTEAVK#.V                       | 116.72 | 51.26  | 2.28 | 0.44 |
| Q9ES28_GT Gtf2i   | General tra K.FEAHPNDLYEGLPENIPFR.S                 | 17.99  | 47.88  | 0.38 | 2.66 |
| Q9ES28_GT Gtf2i   | General tra R.IILDSAEFIK#.F                         | 63.09  | 31.98  | 1.97 | 0.51 |
| Q9ES28_GT Gtf2i   | General tra R.K#GEAIGM*GFPVK#.V                     | 11.11  | 5.48   | 2.03 | 0.49 |
| Q9ES28_GT Gtf2i   | General tra K.K#EM*FETAIK#.E                        | 16.21  | 63.94  | 0.25 | 3.94 |
| Q9ES28_GT Gtf2i   | General tra R.K#QVEIEFNK#.F                         | 19.07  | 7.45   | 2.56 | 0.39 |
| Q9ES28_GT Gtf2i   | General tra R.LK#STEP PPPVPEPANAGK#.R               | 8.66   | 7.51   | 1.15 | 0.87 |

|                    |                                               |         |         |      |       |
|--------------------|-----------------------------------------------|---------|---------|------|-------|
| Q9ES28_GT Gtf2i    | General tra R.M*SVDAVEIETR.K                  | 2.91    | 7.24    | 0.40 | 2.49  |
| Q9ES28_GT Gtf2i    | General tra K.REPELLTHSTTEVTPQR.T             | 6.38    | 47.92   | 0.13 | 7.51  |
| Q9ES28_GT Gtf2i    | General tra R.RPSTYGIPIR.L                    | 3.30    | 26.46   | 0.12 | 8.01  |
| Q9ES28_GT Gtf2i    | General tra R.SPSPWYGIPIR.L                   | 11.47   | 27.62   | 0.42 | 2.41  |
| Q9ES28_GT Gtf2i    | General tra R.SPTWFGIPIR.L                    | 17.37   | 37.28   | 0.47 | 2.15  |
| Q9ES28_GT Gtf2i    | General tra K.STEPPPPPPVPEPANAGK#.R           | 7.38    | 5.29    | 1.39 | 0.72  |
| Q9ES28_GT Gtf2i    | General tra K.STVVPVPEK#.M                    | 76.14   | 37.06   | 2.05 | 0.49  |
| Q9ES28_GT Gtf2i    | General tra R.TNTPVKEDWNV.R.I                 | 4.87    | 13.34   | 0.37 | 2.74  |
| Q9ES28_GT Gtf2i    | General tra R.LAAEAER.S                       | 22.85   | 49.97   | 0.46 | 2.19  |
| Q9ES28_GT Gtf2i    | General tra K.VPEIEVTEGPNNSPQTSAVR.T          | 3.84    | 10.39   | 0.37 | 2.70  |
| Q9ES28_GT Gtf2i    | General tra K.AGISFIKH.R                      | 13.42   | 7.45    | 1.80 | 0.55  |
| Q9ES28_GT Gtf2i    | General tra R.DQSAVVQGLPEGVAFK#.H             | 16.87   | 12.98   | 1.30 | 0.77  |
| Q9ES28_GT Gtf2i    | General tra K.FAALGSTEAK#.A                   | 30.73   | 12.79   | 2.40 | 0.42  |
| Q9ES28_GT Gtf2i    | General tra K.FAALGLTEAVK#.V                  | 33.22   | 46.52   | 0.71 | 1.40  |
| Q9ES28_GT Gtf2i    | General tra K.REPELLTHSTTEVTPQR.T             | 1.36    | 15.98   | 0.08 | 11.77 |
| Q9ES28_GT Gtf2i    | General tra R.SPTWFGIPIR.L                    | 4.75    | 11.57   | 0.41 | 2.43  |
| Q9J157_GT.Gtf2ird1 | General tra R.LLREPLLAVALQGLPEGLAFR.R         | 4.30    | 4.92    | 0.87 | 1.14  |
| Q9J157_GT.Gtf2ird1 | General tra R.LLREPLLAVALQGLPEGLAFR.R         | 3.63    | 4.41    | 0.82 | 1.21  |
| Q8K284_TF Gtf3c1   | General tra R.ALATHPGISFYEEPR.E               | 4.77    | 10.59   | 0.45 | 2.22  |
| Q8K284_TF Gtf3c1   | General tra R.LIESLFTIQ#.M                    | 20.81   | 15.53   | 1.34 | 0.75  |
| Q8BL74_TF Gtf3c2   | General tra R.KPPSTPLVPLLDQSNLSTPM*PK.K       | 7.37    | 7.94    | 0.93 | 1.08  |
| Q8BL74_TF Gtf3c2   | General tra R.LQQQLSSEM*SK#.V                 | 8.71    | 8.38    | 1.04 | 0.96  |
| Q3TMP1_Q Gtf3c3    | General tra R.DK#SDNNNEQETSNDYAK#.A           | 6.03    | 4.25    | 1.42 | 0.71  |
| Q3TMP1_Q Gtf3c3    | General tra K.ETLEEGSTEENK#.A                 | 8.66    | 6.95    | 1.25 | 0.80  |
| Q3TMP1_Q Gtf3c3    | General tra R.LAEM*SLQDNK#.Q                  | 11.69   | 5.94    | 1.97 | 0.51  |
| Q3TMP1_Q Gtf3c3    | General tra R.STLLFSQGK#.M                    | 9.16    | 6.75    | 1.36 | 0.74  |
| Q3TMP1_Q Gtf3c3    | General tra R.SYVEANDSASANIIEAFK#.H           | 9.66    | 9.93    | 0.97 | 1.03  |
| Q8BMQ2_T Gtf3c4    | General tra K.LQYAVSGLPELWSHEDHR.V            | 3.78    | 7.82    | 0.48 | 2.07  |
| Q8BMQ2_T Gtf3c4    | General tra K.NYQVQVTLK#.T                    | 16.07   | 7.28    | 2.21 | 0.45  |
| Q8BMQ2_T Gtf3c4    | General tra K.SKEGDTEETPEDSLTAGGDTGGREPVEEK.L | 8.79    | 10.17   | 0.86 | 1.16  |
| Q8BMQ2_T Gtf3c4    | General tra K.M*SGLVGSAGFQPK#.I               | 7.29    | 3.95    | 1.85 | 0.54  |
| Q8BMQ2_T Gtf3c4    | General tra K.NYQVQVTLK#.T                    | 14.21   | 6.43    | 2.21 | 0.45  |
| Q8R2T8_TF Gtf3c5   | General tra R.EGYHNPTISGENLIGLSR.A            | 3.70    | 10.47   | 0.35 | 2.83  |
| Q8R2T8_TF Gtf3c5   | General tra R.STYNSLPITVK#.K                  | 9.58    | 9.49    | 1.01 | 0.99  |
| O08582_G Gtppb1    | GTP-bindin K.LVLVSTPEQYDSSLR.Q                | 7.46    | 15.13   | 0.49 | 2.03  |
| O08582_G Gtppb1    | GTP-bindin R.VAVVGNVDAGK#.S                   | 61.57   | 19.40   | 3.17 | 0.32  |
| O08582_G Gtppb1    | GTP-bindin R.VGDNDFLEVR.V                     | 6.55    | 11.65   | 0.56 | 1.78  |
| O08582_G Gtppb1    | GTP-bindin K.LVLVSTPEQYDSSLR.Q                | 9.00    | 14.37   | 0.63 | 1.60  |
| O08582_G Gtppb1    | GTP-bindin R.TSYREEPEAFQDDTYSVPGVGTVSGTTLR.G  | 1.95    | 2.95    | 0.66 | 1.51  |
| O08582_G Gtppb1    | GTP-bindin R.VAVVGNVDAGK#.S                   | 39.38   | 15.29   | 2.58 | 0.39  |
| O08582_G Gtppb1    | GTP-bindin K.VITFDLAGHEK#.Y                   | 23.57   | 8.74    | 2.70 | 0.37  |
| Q3UJK4_G1 Gtppb2   | GTP-bindin R.VAVLGNVDSGK#.S                   | 12.88   | 3.01    | 4.27 | 0.23  |
| Q99ME9_N Gtppb4    | Nucleolar C.R.ADVVDQPYAFTK#.S                 | 10.27   | 4.86    | 2.11 | 0.47  |
| Q99ME9_N Gtppb4    | Nucleolar C.R.IAELSEEDQK#.I                   | 11.85   | 10.80   | 1.10 | 0.91  |
| Q99ME9_N Gtppb4    | Nucleolar C.K.LALGQINIAK#.N                   | 14.71   | 8.03    | 1.83 | 0.55  |
| Q99ME9_N Gtppb4    | Nucleolar C.R.IAELSEEDQK#.I                   | 23.45   | 8.84    | 2.65 | 0.38  |
| Q99ME9_N Gtppb4    | Nucleolar C.K.LALGQINIAK#.N                   | 26.50   | 9.93    | 2.67 | 0.37  |
| Q8R080_G Gtse1     | G2 and S pr R.LDPDTEPQLNK#.T                  | 7.73    | 7.51    | 1.03 | 0.97  |
| Q8R080_G Gtse1     | G2 and S pr K.TEAVSTTTNPFK#.V                 | 16.63   | 52.20   | 0.32 | 3.14  |
| Q80SU7_G Gvin1     | Interferon-i R.AQAFVLTALR.T                   | 3.38    | 20.36   | 0.17 | 6.02  |
| Q80SU7_G Gvin1     | Interferon-i R.ELGFHIEDQR.D                   | 2.99    | 8.19    | 0.37 | 2.73  |
| Q80SU7_G Gvin1     | Interferon-i K.ELPFYFLQK#.L                   | 15.22   | 16.94   | 0.90 | 1.11  |
| Q80SU7_G Gvin1     | Interferon-i R.EVGVYEALETSRSSR.D              | 4.04    | 12.79   | 0.32 | 3.17  |
| Q80SU7_G Gvin1     | Interferon-i K.FTETLNIWIK#.Q                  | 23.33   | 18.97   | 1.23 | 0.81  |
| Q80SU7_G Gvin1     | Interferon-i K.GK#HSEELHEK#.F                 | 27.60   | 31.37   | 0.88 | 1.14  |
| Q80SU7_G Gvin1     | Interferon-i K.HIDEIVPDIEK#.I                 | 9.90    | 10.80   | 0.92 | 1.09  |
| Q80SU7_G Gvin1     | Interferon-i K.ILTLTSNLLEPLSR.K               | 6.76    | 32.66   | 0.21 | 4.83  |
| Q80SU7_G Gvin1     | Interferon-i R.LGLDNIYYPK#.I                  | 19.43   | 20.99   | 0.93 | 1.08  |
| Q80SU7_G Gvin1     | Interferon-i K.LLDFMQTSLQK#.R                 | 14.38   | 6.76    | 2.13 | 0.47  |
| Q80SU7_G Gvin1     | Interferon-i K.LLDFSQPNVAELQETPR.E            | 2.59    | 10.14   | 0.26 | 3.91  |
| Q80SU7_G Gvin1     | Interferon-i R.LLIEGDYK#.A                    | 37.62   | 34.29   | 1.10 | 0.91  |
| Q80SU7_G Gvin1     | Interferon-i K.LLM*LDYGR.H                    | 4.11    | 10.39   | 0.40 | 2.53  |
| Q80SU7_G Gvin1     | Interferon-i K.LQEDLGVSAQALQYLDNRDLQK.L       | 4.06    | 11.91   | 0.34 | 2.93  |
| Q80SU7_G Gvin1     | Interferon-i K.NEAPETVEAER.T                  | 5.14    | 22.49   | 0.23 | 4.37  |
| Q80SU7_G Gvin1     | Interferon-i R.NEILTAQESR.G                   | 10.15   | 30.00   | 0.34 | 2.96  |
| Q80SU7_G Gvin1     | Interferon-i K.NSQEILDNQK#.S                  | 29.34   | 19.28   | 1.52 | 0.66  |
| Q80SU7_G Gvin1     | Interferon-i R.NTQEVIAM*SK#.L                 | 20.68   | 16.26   | 1.27 | 0.79  |
| Q80SU7_G Gvin1     | Interferon-i R.QAGQALQALK#.A                  | 27.03   | 16.39   | 1.65 | 0.61  |
| Q80SU7_G Gvin1     | Interferon-i R.SEK#ELPFYFLQK#.L               | 12.65   | 12.99   | 0.97 | 1.03  |
| Q80SU7_G Gvin1     | Interferon-i R.SNLEENYK.K.F                   | 4.32    | 3.41    | 1.27 | 0.79  |
| Q80SU7_G Gvin1     | Interferon-i K.SQIM*NSLLSK#.R                 | 15.48   | 10.80   | 1.43 | 0.70  |
| Q80SU7_G Gvin1     | Interferon-i K.TANDP#VNYLER.K                 | 8.04    | 22.63   | 0.36 | 2.82  |
| Q80SU7_G Gvin1     | Interferon-i R.TATYEVTTALSSFLK#.Y             | 27.55   | 27.04   | 1.02 | 0.98  |
| Q80SU7_G Gvin1     | Interferon-i K.TTNIQLK#.F                     | 18.36   | 20.30   | 0.90 | 1.11  |
| Q80SU7_G Gvin1     | Interferon-i R.TTVEIDISTEEK.R                 | 7.78    | 9.91    | 0.78 | 1.27  |
| Q80SU7_G Gvin1     | Interferon-i K.VTNFPEAHSIIQW#INQSEYGEQVK#.I   | 17.74   | 9.70    | 1.83 | 0.55  |
| Q80SU7_G Gvin1     | Interferon-i R.WASGGLALQGIYK#.T               | 12.71   | 15.95   | 0.80 | 1.25  |
| Q80SU7_G Gvin1     | Interferon-i R.YSINVQELR.N                    | 7.05    | 22.36   | 0.32 | 3.17  |
| P10922_H: H1f0     | Histone H1 K.GVGASGSFR.L                      | 324.62  | 607.02  | 0.53 | 1.87  |
| P10922_H: H1f0     | Histone H1 K.RLVTTGVLK.Q                      | 104.57  | 175.61  | 0.60 | 1.68  |
| P10922_H: H1f0     | Histone H1 K.VGENADSQIK#.L                    | 2838.48 | 1067.11 | 2.66 | 0.38  |
| P10922_H: H1f0     | Histone H1 K.YSDM*IVAAIQAEK#.N                | 390.72  | 130.97  | 2.98 | 0.34  |
| P10922_H: H1f0     | Histone H1 K.YSDM*IVAAIQAEK#.N                | 29.76   | 11.97   | 2.49 | 0.40  |
| P10922_H: H1f0     | Histone H1 K.YSDM*IVAAIQAEK#.N                | 567.71  | 207.26  | 2.74 | 0.37  |
| P10922_H: H1f0     | Histone H1 K.VGENADSQIK#.L                    | 40.82   | 22.39   | 1.82 | 0.55  |
| P10922_H: H1f0     | Histone H1 K.YSDM*IVAAIQAEK#.N                | 32.27   | 13.50   | 2.39 | 0.42  |
| P10922_H: H1f0     | Histone H1 K.YSDM*IVAAIQAEK#.N                | 66.99   | 24.61   | 2.72 | 0.37  |
| P10922_H: H1f0     | Histone H1 K.VGENADSQIK#.L                    | 60.95   | 24.37   | 2.50 | 0.40  |
| P10922_H: H1f0     | Histone H1 K.YSDM*IVAAIQAEK#.N                | 18.81   | 3.85    | 4.89 | 0.20  |
| Q80ZM5_Q H1fx      | H1 histone K.AGGSAAPTQPK#.R                   | 15.62   | 7.05    | 2.22 | 0.45  |
| Q80ZM5_Q H1fx      | H1 histone R.ALQNDLTLQVK#.G                   | 54.51   | 26.50   | 2.06 | 0.49  |
| Q80ZM5_Q H1fx      | H1 histone K.AGGSAAPTQPK#.R                   | 49.60   | 25.57   | 1.94 | 0.52  |
| Q80ZM5_Q H1fx      | H1 histone R.ALQNDLTLQVK#.G                   | 372.53  | 179.55  | 2.07 | 0.48  |
| Q80ZM5_Q H1fx      | H1 histone K.YSQLVETIR.K                      | 45.52   | 87.98   | 0.52 | 1.93  |
| Q3THW5_H H2afv     | Histone H2. R.GDEELDSLIIK.A                   | 32.81   | 45.33   | 0.72 | 1.38  |
| Q3THW5_H H2afv     | Histone H2. R.GDEELDSLIIK.A                   | 1083.58 | 1640.77 | 0.66 | 1.51  |
| Q3THW5_H H2afv     | Histone H2. R.HLQLAIRGDEELDSLIIK.A            | 86.63   | 505.46  | 0.17 | 5.83  |
| P27661_H: H2afx    | Histone H2. K.ASQASQEQ.-                      | 52.50   | 52.50   | 1.00 | 1.00  |
| P27661_H: H2afx    | Histone H2. K.K#ASQASQEQ.-                    | 13.46   | 13.30   | 1.01 | 0.99  |
| P27661_H: H2afx    | Histone H2. K.KSSATVGP.K.A                    | 77.15   | 108.93  | 0.71 | 1.41  |
| P27661_H: H2afx    | Histone H2. K.KSSATVGP.K.A                    | 111.22  | 165.64  | 0.67 | 1.49  |
| Q9QZ08_H H2afy     | Core histon K.AASADSTTEGTPDGTFLVSTK#.S        | 78.46   | 70.95   | 1.11 | 0.90  |
| Q9QZ08_H H2afy     | Core histon K.AISSYFVSTM*SSSIK#.T             | 39.58   | 40.19   | 0.98 | 1.02  |

|                 |                                                 |        |        |      |       |
|-----------------|-------------------------------------------------|--------|--------|------|-------|
| Q9QZ08_H H2afy  | Core histon K.AISSYFVSTMSSSIK#.T                | 26.90  | 26.42  | 1.02 | 0.98  |
| Q9QZ08_H H2afy  | Core histon K.DDLGNTEK.K                        | 11.46  | 13.81  | 0.83 | 1.20  |
| Q9QZ08_H H2afy  | Core histon K.EFVEAVLELR.K                      | 28.82  | 98.57  | 0.29 | 3.42  |
| Q9QZ08_H H2afy  | Core histon K.GKLEAITPPPAK.K                    | 36.79  | 44.97  | 0.82 | 1.22  |
| Q9QZ08_H H2afy  | Core histon K.GKLEAITPPPAK.K                    | 58.69  | 73.95  | 0.79 | 1.26  |
| Q9QZ08_H H2afy  | Core histon K.GVTIASGGVLPNIHPELLAK#.K           | 195.43 | 171.89 | 1.14 | 0.88  |
| Q9QZ08_H H2afy  | Core histon K.LEAITPPPAK#.K                     | 12.15  | 14.89  | 0.82 | 1.23  |
| Q9QZ08_H H2afy  | Core histon K.NGPLVAGAAISAGHGLPAK#.F            | 86.79  | 86.71  | 1.00 | 1.00  |
| Q9QZ08_H H2afy  | Core histon K.QTAAQLLK#.A                       | 137.96 | 137.66 | 1.00 | 1.00  |
| Q9QZ08_H H2afy  | Core histon K.SIAFPSIGSGR.N                     | 44.11  | 177.93 | 0.25 | 4.03  |
| Q9QZ08_H H2afy  | Core histon K.AISSYFVSTMSSSIK#.T                | 4.15   | 2.13   | 1.95 | 0.51  |
| Q9QZ08_H H2afy  | Core histon K.GVTIASGGVLPNIHPELLAK#.K           | 54.69  | 23.07  | 2.37 | 0.42  |
| Q9QZ08_H H2afy  | Core histon K.AASADSTTEGTPDGFVLSTK#.S           | 17.79  | 18.56  | 0.96 | 1.04  |
| Q9QZ08_H H2afy  | Core histon K.AASADSTTEGTPDGFVLSTK.S            | 10.46  | 14.38  | 0.73 | 1.37  |
| Q9QZ08_H H2afy  | Core histon K.AISSYFVSTMSSSIK#.T                | 9.94   | 10.80  | 0.92 | 1.09  |
| Q9QZ08_H H2afy  | Core histon K.AISSYFVSTMSSSIK#.T                | 5.54   | 5.76   | 0.96 | 1.04  |
| Q9QZ08_H H2afy  | Core histon K.EFVEAVLELR.K                      | 6.71   | 23.58  | 0.28 | 3.52  |
| Q9QZ08_H H2afy  | Core histon K.GVTIASGGVLPNIHPELLAK#.K           | 52.51  | 61.16  | 0.86 | 1.16  |
| Q9QZ08_H H2afy  | Core histon R.I.GVGAPVYM*AAVLEYLTAELIELAGNAAR.D | 10.80  | 22.25  | 0.49 | 2.06  |
| Q9QZ08_H H2afy  | Core histon K.QTAAQLLK#.A                       | 26.72  | 25.96  | 1.03 | 0.97  |
| Q9QZ08_H H2afy  | Core histon K.SIAFPSIGSGR.N                     | 8.48   | 31.25  | 0.27 | 3.69  |
| Q9QZ08_H H2afy  | Core histon K.SLFLGQK#.L                        | 31.16  | 27.84  | 1.12 | 0.89  |
| Q9QZ08_H H2afy  | Core histon K.AASADSTTEGTPDGFVLSTK#.S           | 18.37  | 24.23  | 0.76 | 1.32  |
| Q9QZ08_H H2afy  | Core histon K.AISSYFVSTMSSSIK#.T                | 30.47  | 16.89  | 1.80 | 0.55  |
| Q9QZ08_H H2afy  | Core histon K.GVTIASGGVLPNIHPELLAK#.K           | 91.49  | 83.35  | 1.10 | 0.91  |
| Q9QZ08_H H2afy  | Core histon K.QTAAQLLK#.A                       | 34.82  | 42.16  | 0.83 | 1.21  |
| Q9QZ08_H H2afy  | Core histon K.SIAFPSIGSGR.N                     | 12.03  | 46.34  | 0.26 | 3.85  |
| Q9QZ08_H H2afy  | Core histon K.SLFLGQK#.L                        | 41.35  | 39.26  | 1.05 | 0.95  |
| Q8CCK0_H H2afy2 | Core histon R.AGVIFPVGR.L                       | 62.19  | 278.16 | 0.22 | 4.47  |
| Q8CCK0_H H2afy2 | Core histon K.AISAFDSSSSSLK#.N                  | 28.37  | 25.52  | 1.11 | 0.90  |
| Q8CCK0_H H2afy2 | Core histon K.DSDKHEGTSNSTSEDPGPDGFTLSSK#.S     | 25.57  | 20.32  | 1.26 | 0.79  |
| Q8CCK0_H H2afy2 | Core histon K.EGTSNSTSEDPGPDGFTLSSK.S           | 4.16   | 4.07   | 1.02 | 0.98  |
| Q8CCK0_H H2afy2 | Core histon K.GVTIASGGVLPNIHPELLAK#.K           | 14.69  | 52.22  | 0.28 | 3.55  |
| Q8CCK0_H H2afy2 | Core histon R.HILLAVANDEELNQLLK#.G              | 129.70 | 110.40 | 1.17 | 0.85  |
| Q8CCK0_H H2afy2 | Core histon R.HILLAVANDEELNQLLK.G               | 32.58  | 26.21  | 1.24 | 0.80  |
| Q8CCK0_H H2afy2 | Core histon R.KSQGPLVAAEAASQSSGLAAK.F           | 11.93  | 13.22  | 0.90 | 1.11  |
| Q8CCK0_H H2afy2 | Core histon K.QTAAQVTLK.A                       | 64.77  | 77.62  | 0.83 | 1.20  |
| Q8CCK0_H H2afy2 | Core histon K.SQGPLVEAAEAASQSSGLAAK.F           | 19.63  | 22.02  | 0.89 | 1.12  |
| Q8CCK0_H H2afy2 | Core histon K.SVAFPPFSGR.N                      | 3.07   | 12.05  | 0.26 | 3.92  |
| Q8CCK0_H H2afy2 | Core histon R.VEGIVHPTTAEIDLK#.EIEGK#.A         | 33.74  | 27.03  | 1.25 | 0.80  |
| Q8CCK0_H H2afy2 | Core histon R.HILLAVANDEELNQLLK.G               | 13.49  | 8.19   | 1.65 | 0.61  |
| Q8CCK0_H H2afy2 | Core histon R.AGVIFPVGR.L                       | 10.22  | 50.57  | 0.20 | 4.95  |
| Q8CCK0_H H2afy2 | Core histon R.HILLAVANDEELNQLLK.G               | 24.05  | 22.87  | 1.05 | 0.95  |
| P01899_H/H2-D1  | H-2 class I h R.APWWM*EQEGPEYWER.E              | 1.94   | 6.01   | 0.32 | 3.09  |
| P01899_H/H2-D1  | H-2 class I h R.APWWM*EQEGPEYWER.E              | 12.09  | 8.28   | 1.46 | 0.69  |
| P01899_H/H2-D1  | H-2 class I h R.DYIALNEDLK#.T                   | 20.32  | 27.77  | 0.73 | 1.37  |
| P01899_H/H2-D1  | H-2 class I h R.FDSDAENPR.Y                     | 6.90   | 47.28  | 0.15 | 6.85  |
| P01899_H/H2-D1  | H-2 class I h K.GGOYALAPGSOSSEM*SLR.D           | 1.93   | 10.02  | 0.19 | 5.18  |
| P01899_H/H2-D1  | H-2 class I h K.TWTAADM*AAQITR.R                | 2.71   | 13.00  | 0.21 | 4.80  |
| P01899_H/H2-D1  | H-2 class I h K.TWTAADM*AAQITR.R                | 2.83   | 17.02  | 0.17 | 6.01  |
| P01899_H/H2-D1  | H-2 class I h K.WASVVPLGK#.E                    | 45.17  | 46.81  | 0.96 | 1.04  |
| P01899_H/H2-D1  | H-2 class I h R.YISVGVVGNK.E                    | 15.09  | 29.71  | 0.51 | 1.97  |
| P01899_H/H2-D1  | H-2 class I h R.DYIALNEDLK.T                    | 6.83   | 10.59  | 0.64 | 1.55  |
| P01899_H/H2-D1  | H-2 class I h R.DYIALNEDLK.T                    | 10.71  | 21.33  | 0.50 | 1.99  |
| P01899_H/H2-D1  | H-2 class I h R.FDSDAENPR.Y                     | 5.89   | 35.67  | 0.17 | 6.05  |
| P01899_H/H2-D1  | H-2 class I h K.GGOYALAPGSOSSEM*SLR.D           | 1.41   | 7.52   | 0.19 | 5.33  |
| P01899_H/H2-D1  | H-2 class I h K.TWTAADM*AAQITR.R                | 4.45   | 7.73   | 0.58 | 1.74  |
| P01899_H/H2-D1  | H-2 class I h K.TWTAADM*AAQITR.R                | 2.25   | 9.39   | 0.24 | 4.17  |
| P01899_H/H2-D1  | H-2 class I h K.WASVVPLGK#.E                    | 25.77  | 26.24  | 0.98 | 1.02  |
| P01899_H/H2-D1  | H-2 class I h R.YFETAVSRPGLLEPR.Y               | 3.04   | 37.47  | 0.08 | 12.31 |
| P01899_H/H2-D1  | H-2 class I h R.APWWM*EQEGPEYWER.E              | 1.74   | 4.24   | 0.41 | 2.44  |
| P01899_H/H2-D1  | H-2 class I h R.DYIALNEDLK.T                    | 17.47  | 25.98  | 0.67 | 1.49  |
| P01899_H/H2-D1  | H-2 class I h R.FDSDAENPR.Y                     | 4.80   | 25.61  | 0.19 | 5.34  |
| P01899_H/H2-D1  | H-2 class I h K.GGOYALAPGSOSSEM*SLR.D           | 2.14   | 12.53  | 0.17 | 5.87  |
| P01899_H/H2-D1  | H-2 class I h K.WASVVPLGK#.E                    | 19.42  | 29.71  | 0.65 | 1.53  |
| P01899_H/H2-D1  | H-2 class I h R.YFETAVSRPGLLEPR.Y               | 4.20   | 37.24  | 0.11 | 8.87  |
| Q8BMS1_Ei Hadha | Trifunction K.AGLEQSDGAGVLAESQK#.F              | 32.70  | 7.73   | 4.23 | 0.24  |
| Q8BMS1_Ei Hadha | Trifunction R.DSIFSNLIGLDYK#.G                  | 41.31  | 11.07  | 3.73 | 0.27  |
| Q8BMS1_Ei Hadha | Trifunction K.FGELALTK#.E                       | 39.38  | 10.70  | 3.68 | 0.27  |
| Q8BMS1_Ei Hadha | Trifunction R.FGGGSVELLK#.Q                     | 49.40  | 9.86   | 5.01 | 0.20  |
| Q8BMS1_Ei Hadha | Trifunction R.FVDLYGAQK#.V                      | 50.89  | 10.85  | 4.69 | 0.21  |
| Q8BMS1_Ei Hadha | Trifunction K.GFYIQECSK#.N                      | 33.31  | 6.05   | 5.50 | 0.18  |
| Q8BMS1_Ei Hadha | Trifunction R.LPAKPEVSSDEDVQYR.V                | 20.30  | 17.43  | 1.16 | 0.86  |
| Q8BMS1_Ei Hadha | Trifunction K.M*QLLEIITDK#.T                    | 13.09  | 6.62   | 1.98 | 0.51  |
| Q8BMS1_Ei Hadha | Trifunction K.MQLLEIITDK#.T                     | 21.45  | 3.89   | 5.51 | 0.18  |
| Q99JY0_EC Hadhb | Trifunction K.DQLLLGPTYATPK#.V                  | 19.22  | 4.61   | 4.17 | 0.24  |
| Q99JY0_EC Hadhb | Trifunction R.EAALGAGFSDK#.T                    | 28.88  | 7.77   | 3.72 | 0.27  |
| Q99JY0_EC Hadhb | Trifunction R.IPFLLSGTSYK#.D                    | 15.75  | 19.01  | 0.83 | 1.21  |
| Q61035_S4 Hars  | Histidine-t R.IGDYVQQHGGVSLVEQLLQDPK#.L         | 9.21   | 1.45   | 6.37 | 0.16  |
| Q8BY71_H/Hat1   | Histone ace R.LLVTDMM*SDAEQYR.S                 | 5.72   | 16.21  | 0.35 | 2.83  |
| Q8BY71_H/Hat1   | Histone ace R.TFFPEYTHQLFGDDETAFGYK#.G          | 24.55  | 13.25  | 1.85 | 0.54  |
| Q8BY71_H/Hat1   | Histone ace R.YYISFPTVLDTAEDPSR.S               | 2.14   | 14.56  | 0.15 | 6.79  |
| Q8BY71_H/Hat1   | Histone ace R.LLVTDMM*SDAEQYR.S                 | 4.55   | 13.53  | 0.34 | 2.97  |
| Q8BY71_H/Hat1   | Histone ace R.YYISFPTVLDTAEDPSR.S               | 2.89   | 8.62   | 0.34 | 2.98  |
| Q9CQ59_H_Haus2  | HAUS augm R.LQQISDQIAEIQNNLELELLK.L             | 7.52   | 10.30  | 0.73 | 1.37  |
| Q9CQ59_H_Haus2  | HAUS augm R.LQQISDQIAEIQNNLELELLK#.L            | 6.20   | 4.70   | 1.32 | 0.76  |
| Q9CQ59_H_Haus2  | HAUS augm K.M*DLVKNTEELAEENILK.W                | 10.62  | 14.07  | 0.75 | 1.33  |
| Q9CQ59_H_Haus2  | HAUS augm K.MDLVKNTEELAEENILK.W                 | 3.78   | 7.18   | 0.53 | 1.90  |
| Q9D786_H_Haus5  | HAUS augm K.LVPTSEAVAPQSQELLR.C                 | 1.72   | 5.47   | 0.31 | 3.19  |
| Q9D786_H_Haus5  | HAUS augm R.VLLGPLLPYHVK.G                      | 11.97  | 14.34  | 0.84 | 1.20  |
| Q99L00_H/Haus8  | HAUS augm R.LVVSQVVELSSQASK#.E                  | 18.46  | 18.93  | 0.98 | 1.03  |
| Q69Z57_HE Hbs1l | HBS1-i like p R.ILVFNIEVPITK#.G                 | 13.59  | 5.02   | 2.71 | 0.37  |
| Q69Z57_HE Hbs1l | HBS1-i like p R.SQSDLTWYK#.G                    | 8.27   | 3.61   | 2.30 | 0.44  |
| Q69Z57_HE Hbs1l | HBS1-i like p R.YGGSTVAAGVTEIK#.E-              | 11.29  | 2.40   | 4.71 | 0.21  |
| Q61191_HI Hcfc1 | Host cell fai R.GPSEISAFK#.T                    | 13.34  | 5.95   | 2.24 | 0.45  |
| Q61191_HI Hcfc1 | Host cell fai K.KHQEQLQPATYK#.F                 | 10.51  | 2.54   | 4.14 | 0.24  |
| Q61191_HI Hcfc1 | Host cell fai R.ANTNSLEVSWGAVATADSVLLQLQK#.Y    | 27.71  | 6.96   | 3.98 | 0.25  |
| Q61191_HI Hcfc1 | Host cell fai K.ENQWFDVGVIK#.G                  | 27.66  | 17.50  | 1.58 | 0.63  |
| Q61191_HI Hcfc1 | Host cell fai R.ESHTAVVTEK#.D                   | 12.37  | 5.23   | 2.36 | 0.42  |
| Q61191_HI Hcfc1 | Host cell fai R.GPSEISAFK#.T                    | 25.71  | 8.99   | 2.86 | 0.35  |
| Q61191_HI Hcfc1 | Host cell fai K.GPLPAGTILK#.L                   | 29.31  | 20.50  | 1.43 | 0.70  |
| Q61191_HI Hcfc1 | Host cell fai K.IATGQGQGVTVQVVK#.G              | 75.23  | 27.52  | 2.73 | 0.37  |
| Q61191_HI Hcfc1 | Host cell fai K.IITAVPK#.I                      | 56.10  | 111.58 | 0.50 | 1.99  |



|                   |                                                                        |        |        |       |      |
|-------------------|------------------------------------------------------------------------|--------|--------|-------|------|
| Q61191_H1 Hcfc1   | Host cell fai K.KHQELQPGTAYK#.F                                        | 14.87  | 7.62   | 1.95  | 0.51 |
| Q61191_H1 Hcfc1   | Host cell fai R.LLVFGGM*VEYK#.Y                                        | 9.35   | 6.05   | 1.55  | 0.65 |
| Q61191_H1 Hcfc1   | Host cell fai R.LLVFGGM*VEYK#.Y                                        | 12.87  | 4.99   | 2.58  | 0.39 |
| Q61191_H1 Hcfc1   | Host cell fai K.M*YVFGG*VPLVM*DDVK#.V                                  | 8.42   | 6.07   | 1.39  | 0.72 |
| Q61191_H1 Hcfc1   | Host cell fai R.SLHSATTIGNK#.M                                         | 15.73  | 5.84   | 2.69  | 0.37 |
| Q61191_H1 Hcfc1   | Host cell fai K.SPISVPGG*ALISNLGK#.V                                   | 67.19  | 20.65  | 3.25  | 0.31 |
| Q61191_H1 Hcfc1   | Host cell fai K.GPLPAGTLK#.L                                           | 19.00  | 8.90   | 2.13  | 0.47 |
| Q61191_H1 Hcfc1   | Host cell fai K.IATGQGQVTVLQV#.G                                       | 38.11  | 20.78  | 1.83  | 0.55 |
| Q61191_H1 Hcfc1   | Host cell fai K.SPISVPGG*ALISNLGK#.V                                   | 24.65  | 14.10  | 1.75  | 0.57 |
| O09106_H1 Hdac1   | Histone dex K.LHISPSNM*TNQNTNEYLEK#.I                                  | 6.55   | 3.92   | 1.67  | 0.60 |
| O09106_H1 Hdac1   | Histone dex K.SFNLP*LM*LG*GGYTIR.N                                     | 3.49   | 4.23   | 0.82  | 1.21 |
| O09106_H1 Hdac1   | Histone dex R.SIRPDNM*SEYSK.Q                                          | 3.35   | 9.21   | 0.36  | 2.75 |
| O09106_H1 Hdac1   | Histone dex R.SIRPDNM*SEYSK.Q                                          | 10.02  | 27.17  | 0.37  | 2.71 |
| O09106_H1 Hdac1   | Histone dex K.YGEYFPGTGLR.D                                            | 22.16  | 73.86  | 0.30  | 3.33 |
| O09106_H1 Hdac1   | Histone dex K.YHSDDYK#.F                                               | 26.77  | 13.64  | 1.96  | 0.51 |
| O09106_H1 Hdac1   | Histone dex R.LFENLR.M                                                 | 30.86  | 72.28  | 0.43  | 2.34 |
| O09106_H1 Hdac1   | Histone dex K.LHISPSNM*TNQNTNEYLEK#.I                                  | 53.68  | 4.30   | 12.49 | 0.08 |
| O09106_H1 Hdac1   | Histone dex K.LHISPSNM*TNQNTNEYLEK#.I                                  | 19.42  | 12.78  | 1.52  | 0.66 |
| O09106_H1 Hdac1   | Histone dex K.SFNLP*LM*LG*GGYTIR.N                                     | 2.83   | 6.51   | 0.43  | 2.30 |
| O09106_H1 Hdac1   | Histone dex R.SIRPDNM*SEYSK.Q                                          | 2.00   | 6.93   | 0.29  | 3.46 |
| O09106_H1 Hdac1   | Histone dex R.SIRPDNM*SEYSK.Q                                          | 4.79   | 13.47  | 0.36  | 2.81 |
| O09106_H1 Hdac1   | Histone dex R.SIRPDNM*SEYSK.Q                                          | 20.35  | 48.32  | 0.42  | 2.37 |
| O09106_H1 Hdac1   | Histone dex K.YGEYFPGTGLR.D                                            | 18.70  | 52.34  | 0.36  | 2.80 |
| O09106_H1 Hdac1   | Histone dex K.YHSDDYK#.F                                               | 26.44  | 17.33  | 1.53  | 0.66 |
| O09106_H1 Hdac1   | Histone dex K.YYAVNYPLR.D                                              | 5.10   | 14.60  | 0.35  | 2.86 |
| O09106_H1 Hdac1   | Histone dex R.DGIDDES*YAFK#*PVM*SK#.V                                  | 27.72  | 13.34  | 2.08  | 0.48 |
| O09106_H1 Hdac1   | Histone dex K.LHISPSNM*TNQNTNEYLEK#.I                                  | 69.27  | 33.50  | 2.07  | 0.48 |
| O09106_H1 Hdac1   | Histone dex K.LHISPSNM*TNQNTNEYLEK#.I                                  | 35.53  | 19.71  | 1.80  | 0.55 |
| O09106_H1 Hdac1   | Histone dex R.M*THNLLNLYGLR.K                                          | 6.89   | 18.45  | 0.37  | 2.68 |
| O09106_H1 Hdac1   | Histone dex K.SFNLP*LM*LG*GGYTIR.N                                     | 4.65   | 7.68   | 0.61  | 1.65 |
| O09106_H1 Hdac1   | Histone dex R.SIRPDNM*SEYSK.Q                                          | 6.86   | 27.73  | 0.25  | 4.04 |
| O09106_H1 Hdac1   | Histone dex K.YGEYFPGTGLR.D                                            | 30.55  | 62.94  | 0.49  | 2.06 |
| O09106_H1 Hdac1   | Histone dex K.YHSDDYK#.F                                               | 41.83  | 19.99  | 2.09  | 0.48 |
| O09106_H1 Hdac1   | Histone dex K.YYAVNYPLR.D                                              | 8.40   | 17.73  | 0.47  | 2.11 |
| P70288_H1 Hdac2   | Histone dex K.LHISPSNM*TNQNTPEYM*EK#.I                                 | 6.55   | 5.34   | 1.23  | 0.81 |
| Q922V5_H1 Hdac6   | Histone dex K.AVLAQGOSSEQA*AK#.G                                       | 28.60  | 9.71   | 2.95  | 0.34 |
| Q922V5_H1 Hdac6   | Histone dex K.AVLAQGOSSEQA*AK#.G                                       | 33.65  | 13.71  | 2.45  | 0.41 |
| Q3UMU9_H1 Hdgrfp2 | Hepatoma- R.ADNELEE*PGEQAPR.E                                          | 5.28   | 14.09  | 0.37  | 2.67 |
| Q3UMU9_H1 Hdgrfp2 | Hepatoma- R.ELAEDEP*STR.S                                              | 3.66   | 10.38  | 0.35  | 2.84 |
| Q3UMU9_H1 Hdgrfp2 | Hepatoma- R.IDDIADGAVK*PPN*YPIFFGT*HETALGPK.D                          | 2.92   | 7.17   | 0.41  | 2.45 |
| Q8VDJ3_VI Hdlbp   | Vigilin OS=R.IEEDPQGVQQA*AK#.R                                         | 10.90  | 8.63   | 1.26  | 0.79 |
| Q8VDJ3_VI Hdlbp   | Vigilin OS=R.LEHEVNI*QF*DK*DDGN*Q*QD*ITITG*EK#.N                       | 7.97   | 2.52   | 3.16  | 0.32 |
| Q8VDJ3_VI Hdlbp   | Vigilin OS=K.LGQALTEVYAK#.A                                            | 11.19  | 5.79   | 1.93  | 0.52 |
| Q8VDJ3_VI Hdlbp   | Vigilin OS=R.LQTOQASAT*PIPK#.E                                         | 12.41  | 9.65   | 1.29  | 0.78 |
| Q8VDJ3_VI Hdlbp   | Vigilin OS=K.LSVTVDPK#.Y                                               | 14.48  | 5.18   | 2.80  | 0.36 |
| Q8VDJ3_VI Hdlbp   | Vigilin OS=R.K.AHF*PIAG*PYNR.L                                         | 27.67  | 48.70  | 0.57  | 1.76 |
| Q8VDJ3_VI Hdlbp   | Vigilin OS=R.K.ANSFTVSS*VSP*SWLHR.F                                    | 14.95  | 31.05  | 0.48  | 2.08 |
| Q8VDJ3_VI Hdlbp   | Vigilin OS=K.APDM*SSSE*E*P*SGAQVAPK#.T                                 | 12.11  | 8.20   | 1.48  | 0.68 |
| Q8VDJ3_VI Hdlbp   | Vigilin OS=K.APDM*SSSE*E*P*SGAQVAPK#.T                                 | 6.21   | 4.10   | 1.51  | 0.66 |
| Q8VDJ3_VI Hdlbp   | Vigilin OS=K.ARHE*V*LLISA*EQDKR.A                                      | 3.45   | 23.59  | 0.15  | 6.84 |
| Q8VDJ3_VI Hdlbp   | Vigilin OS=R.K.ASVIT*Q*F*V*PLEER.K                                     | 59.80  | 125.82 | 0.48  | 2.10 |
| Q8VDJ3_VI Hdlbp   | Vigilin OS=R.DAP*W*TS*NS*EK#.A                                         | 25.85  | 17.34  | 1.49  | 0.67 |
| Q8VDJ3_VI Hdlbp   | Vigilin OS=R.DAP*W*TS*NS*EK*APDM*SSSE*E*P*SGAQVAPK#.T                  | 13.64  | 8.26   | 1.65  | 0.61 |
| Q8VDJ3_VI Hdlbp   | Vigilin OS=R.DAP*W*TS*NS*EK*APDM*SSSE*E*P*SGAQVAPK#.T                  | 5.41   | 3.93   | 1.38  | 0.73 |
| Q8VDJ3_VI Hdlbp   | Vigilin OS=R.DK*HF*E*V*IN*F*DP*QA*AK#.S                                | 93.70  | 50.37  | 1.86  | 0.54 |
| Q8VDJ3_VI Hdlbp   | Vigilin OS=K.DLANIA*E*V*SI*PAK#.L                                      | 91.66  | 42.91  | 2.14  | 0.47 |
| Q8VDJ3_VI Hdlbp   | Vigilin OS=R.K.DM*NQ*F*GE*Q*AK#.I                                      | 169.47 | 8.01   | 21.15 | 0.05 |
| Q8VDJ3_VI Hdlbp   | Vigilin OS=R.K.DQ*GL*SI*V*SGK#.L                                       | 81.34  | 38.54  | 2.11  | 0.47 |
| Q8VDJ3_VI Hdlbp   | Vigilin OS=R.EIA*E*Y*G*V*M*V*SF*P*.S                                   | 11.48  | 23.82  | 0.48  | 2.07 |
| Q8VDJ3_VI Hdlbp   | Vigilin OS=R.EIA*E*Y*G*V*M*V*SF*P*.S                                   | 5.21   | 15.96  | 0.33  | 3.06 |
| Q8VDJ3_VI Hdlbp   | Vigilin OS=R.E*LL*E*LA*SR.M                                            | 22.12  | 48.77  | 0.45  | 2.20 |
| Q8VDJ3_VI Hdlbp   | Vigilin OS=K.E*LA*EQ*EDR.A                                             | 6.14   | 11.74  | 0.52  | 1.91 |
| Q8VDJ3_VI Hdlbp   | Vigilin OS=R.G*EP*EK*LG*Q*AL*TEVYAK#.A                                 | 15.43  | 8.27   | 1.86  | 0.54 |
| Q8VDJ3_VI Hdlbp   | Vigilin OS=K.G*NS*L*Q*E*ILR.T                                          | 35.36  | 77.79  | 0.45  | 2.20 |
| Q8VDJ3_VI Hdlbp   | Vigilin OS=R.HE*V*LLISA*EQDKR.A                                        | 10.29  | 34.42  | 0.30  | 3.35 |
| Q8VDJ3_VI Hdlbp   | Vigilin OS=K.I*DL*PA*EN*SI*ET*ITGK#.R                                  | 81.80  | 38.11  | 2.15  | 0.47 |
| Q8VDJ3_VI Hdlbp   | Vigilin OS=R.IE*ED*P*Q*GV*QQA*AK#.R                                    | 296.17 | 127.65 | 2.32  | 0.43 |
| Q8VDJ3_VI Hdlbp   | Vigilin OS=R.I*IF*PA*ED*K*Q*DL*IT*ITG*EK*DAVR.E                        | 3.38   | 12.45  | 0.27  | 3.69 |
| Q8VDJ3_VI Hdlbp   | Vigilin OS=R.I*LSI*QK#.D                                               | 129.36 | 49.64  | 2.61  | 0.38 |
| Q8VDJ3_VI Hdlbp   | Vigilin OS=K.I*TT*Q*MPK#.V                                             | 45.73  | 22.68  | 2.02  | 0.50 |
| Q8VDJ3_VI Hdlbp   | Vigilin OS=R.K*#*M*DEFK#.V                                             | 30.88  | 14.54  | 2.12  | 0.47 |
| Q8VDJ3_VI Hdlbp   | Vigilin OS=K.LG*Q*AL*TEVYAK#.A                                         | 208.96 | 96.33  | 2.17  | 0.46 |
| Q8VDJ3_VI Hdlbp   | Vigilin OS=K.L*H*NS*L*IG*TK#.G                                         | 74.32  | 45.98  | 1.62  | 0.62 |
| Q8VDJ3_VI Hdlbp   | Vigilin OS=K.L*Q*DL*ELK#.T                                             | 127.27 | 60.17  | 2.11  | 0.47 |
| Q8VDJ3_VI Hdlbp   | Vigilin OS=R.L*Q*TO*Q*AS*AT*PIPK#.E                                    | 216.70 | 112.88 | 1.92  | 0.52 |
| Q8VDJ3_VI Hdlbp   | Vigilin OS=K.L*SV*TV*DPK#.Y                                            | 91.03  | 41.40  | 2.20  | 0.45 |
| Q8VDJ3_VI Hdlbp   | Vigilin OS=R.L*V*GEI*M*Q*ET*GTR.I                                      | 25.24  | 48.18  | 0.52  | 1.91 |
| Q8VDJ3_VI Hdlbp   | Vigilin OS=R.L*V*GEI*M*Q*ET*GTR.I                                      | 21.11  | 41.94  | 0.50  | 1.99 |
| Q8VDJ3_VI Hdlbp   | Vigilin OS=R.M*DY*E*V*E*IN*DHK#.F                                      | 39.36  | 19.23  | 2.05  | 0.49 |
| Q8VDJ3_VI Hdlbp   | Vigilin OS=R.M*DY*E*V*E*IN*DHK#.F                                      | 22.19  | 12.12  | 1.83  | 0.55 |
| Q8VDJ3_VI Hdlbp   | Vigilin OS=K.M*M*DEF*E*V*NI*H*V*PA*EL*Q*SD*TI*GL*AN*LR.A               | 3.92   | 7.61   | 0.52  | 1.94 |
| Q8VDJ3_VI Hdlbp   | Vigilin OS=K.M*VADL*V*NS*YS*IS*V*PI*FK#.Q                              | 46.52  | 24.65  | 1.89  | 0.53 |
| Q8VDJ3_VI Hdlbp   | Vigilin OS=K.M*VADL*V*NS*YS*IS*V*PI*FK#.Q                              | 28.54  | 12.72  | 2.24  | 0.45 |
| Q8VDJ3_VI Hdlbp   | Vigilin OS=K.S*DI*V*QLR.G                                              | 29.66  | 64.49  | 0.46  | 2.17 |
| Q8VDJ3_VI Hdlbp   | Vigilin OS=R.S*GL*V*P*Q*QK#.V                                          | 175.12 | 86.60  | 2.02  | 0.49 |
| Q8VDJ3_VI Hdlbp   | Vigilin OS=R.S*GT*Q*SD*K*V*TLK.G                                       | 60.40  | 24.68  | 2.45  | 0.41 |
| Q8VDJ3_VI Hdlbp   | Vigilin OS=R.T*E*IV*F*G*EK#.E                                          | 27.72  | 20.20  | 1.37  | 0.73 |
| Q8VDJ3_VI Hdlbp   | Vigilin OS=R.T*E*IV*F*G*EK*Q*LA*Q*AVAR.I                               | 32.26  | 61.25  | 0.53  | 1.90 |
| Q8VDJ3_VI Hdlbp   | Vigilin OS=R.T*GA*H*LE*LS*AK#.D                                        | 67.78  | 35.69  | 1.90  | 0.53 |
| Q8VDJ3_VI Hdlbp   | Vigilin OS=R.T*G*V*SV*E*IP*DS*IS*E*TV*LR.G                             | 4.00   | 12.25  | 0.33  | 3.06 |
| Q8VDJ3_VI Hdlbp   | Vigilin OS=R.T*TK*DL*IE*QR.F                                           | 15.17  | 27.74  | 0.55  | 1.83 |
| Q8VDJ3_VI Hdlbp   | Vigilin OS=K.T*TTI*AVE*V*K#.K                                          | 78.61  | 44.40  | 1.77  | 0.56 |
| Q8VDJ3_VI Hdlbp   | Vigilin OS=K.T*TTI*AVE*V*K*#*.S                                        | 32.70  | 14.46  | 2.26  | 0.44 |
| Q8VDJ3_VI Hdlbp   | Vigilin OS=K.VATL*N*SE*E*ND*P*TYK#.D                                   | 51.54  | 23.13  | 2.23  | 0.45 |
| Q8VDJ3_VI Hdlbp   | Vigilin OS=K.VATL*N*SE*E*ND*P*TYK*#D*AF*P*PL*EK#.A                     | 8.61   | 8.60   | 1.00  | 1.00 |
| Q8VDJ3_VI Hdlbp   | Vigilin OS=K.VH*IE*F*TE*G*ED*K*#T*LE*G*P*TE*DV*V*AE*Q*E*IG*E*GM*V*K#.D | 13.12  | 5.03   | 2.61  | 0.38 |
| Q8VDJ3_VI Hdlbp   | Vigilin OS=R.VK*EL*Q*AE*Q*EDR.A                                        | 11.57  | 29.91  | 0.39  | 2.59 |
| Q8VDJ3_VI Hdlbp   | Vigilin OS=R.VK*EL*Q*AE*Q*EDR.A                                        | 26.16  | 74.87  | 0.35  | 2.86 |
| Q8VDJ3_VI Hdlbp   | Vigilin OS=R.DAP*W*TS*NS*EK*APDM*SSSE*E*P*SGAQVAPK#.T                  | 5.31   | 2.59   | 2.05  | 0.49 |
| Q8VDJ3_VI Hdlbp   | Vigilin OS=R.DK*HF*E*V*IN*F*DP*QA*AK#.S                                | 40.23  | 18.24  | 2.21  | 0.45 |
| Q8VDJ3_VI Hdlbp   | Vigilin OS=R.EIA*E*Y*G*V*M*V*SF*P*.S                                   | 6.53   | 7.96   | 0.82  | 1.22 |
| Q8VDJ3_VI Hdlbp   | Vigilin OS=K.I*DL*PA*EN*SI*ET*ITGK#.R                                  | 27.25  | 13.95  | 1.95  | 0.51 |
| Q8VDJ3_VI Hdlbp   | Vigilin OS=R.IE*ED*P*Q*GV*QQA*AK#.R                                    | 90.96  | 55.36  | 1.64  | 0.61 |

|                   |                                           |         |         |      |       |
|-------------------|-------------------------------------------|---------|---------|------|-------|
| Q8VDJ3_VI Hdlbp   | Vigilin OS=K.IVGELEQM*VSEVDPLDRH.V        | 7.36    | 14.24   | 0.52 | 1.93  |
| Q8VDJ3_VI Hdlbp   | Vigilin OS=K.LGQALTEVYAK#.A               | 57.90   | 25.56   | 2.27 | 0.44  |
| Q8VDJ3_VI Hdlbp   | Vigilin OS=K.LQDLK#.T                     | 26.39   | 10.89   | 2.42 | 0.41  |
| Q8VDJ3_VI Hdlbp   | Vigilin OS=R.L.QTQASATVP1PK#.E            | 41.89   | 19.87   | 2.11 | 0.47  |
| Q8VDJ3_VI Hdlbp   | Vigilin OS=K.LSVTVDPK#.Y                  | 23.05   | 11.77   | 1.96 | 0.51  |
| Q8VDJ3_VI Hdlbp   | Vigilin OS=R.LVGEIM*QETGTR.I              | 7.78    | 14.14   | 0.55 | 1.82  |
| Q8VDJ3_VI Hdlbp   | Vigilin OS=R.LVGEIMQETGTR.I               | 3.36    | 10.80   | 0.31 | 3.22  |
| Q8VDJ3_VI Hdlbp   | Vigilin OS=K.M*VADLVENSYSIVPIFK#.Q        | 18.10   | 10.69   | 1.69 | 0.59  |
| Q8VDJ3_VI Hdlbp   | Vigilin OS=K.M*VADLVENSYSIVPIFK#.Q        | 14.53   | 6.73    | 2.16 | 0.46  |
| Q8VDJ3_VI Hdlbp   | Vigilin OS=R.SGLVPQJK#.V                  | 14.52   | 20.10   | 2.27 | 0.44  |
| Q8VDJ3_VI Hdlbp   | Vigilin OS=R.TEIVTQKEQLQAQAVAR.I          | 11.61   | 25.34   | 0.46 | 2.18  |
| Q8VDJ3_VI Hdlbp   | Vigilin OS=R.TGAHLELSLAK#.D               | 18.97   | 8.06    | 2.35 | 0.43  |
| Q8VDJ3_VI Hdlbp   | Vigilin OS=K.VATLNSEEDPPPTYK#.D           | 18.20   | 9.60    | 1.90 | 0.53  |
| G3X9B1_G_Heatr1   | HEAT repea R.EAEDQAINR.Q                  | 2.13    | 13.02   | 0.16 | 6.12  |
| Q8BQM4_F_Heatr3   | HEAT repea R.FIAYQTEVK#.R                 | 12.04   | 3.84    | 3.13 | 0.32  |
| Q8BQM4_F_Heatr3   | HEAT repea R.LIGPLLLDSSLAVR.E             | 6.50    | 9.66    | 0.67 | 1.49  |
| Q8BQM4_F_Heatr3   | HEAT repea R.DDGTLLDLK#.T                 | 20.14   | 7.56    | 2.66 | 0.38  |
| Q8BQM4_F_Heatr3   | HEAT repea R.LIGPLLLDSSLAVR.E             | 13.69   | 15.59   | 0.88 | 1.14  |
| Q5PRFO_H1_Heatr5a | HEAT repea K.DVEGDSVPK#PLP PALSVISSASK#.L | 6.55    | 4.00    | 1.64 | 0.61  |
| Q5PRFO_H1_Heatr5a | HEAT repea R.I.GSQDLDGIELLNLVLR.V         | 10.61   | 16.35   | 0.65 | 1.54  |
| Q5PRFO_H1_Heatr5a | HEAT repea R.LLANGFTDVTVNILK#.A           | 5.23    | 3.72    | 1.41 | 0.71  |
| Q5PRFO_H1_Heatr5a | HEAT repea R.SAEVVDGASEK#ETLPEFGGEGK#.D   | 9.39    | 6.41    | 1.46 | 0.68  |
| Q8C547_H_Heatr5b  | HEAT repea K.AVEAVNDTSSENK#.S             | 8.42    | 3.94    | 2.14 | 0.47  |
| Q6P1G0_H_Heatr6   | HEAT repea R.EQASLPFASSSWK#.R             | 12.04   | 5.14    | 2.34 | 0.43  |
| Q6P1G0_H_Heatr6   | HEAT repea K.LLEELGAGLIQQYK#PSNIAPEQR.V   | 1.59    | 5.80    | 0.27 | 3.65  |
| Q6P1G0_H_Heatr6   | HEAT repea R.LTQTEHLGALLAVLK#.K           | 10.13   | 5.31    | 1.91 | 0.52  |
| Q6P1G0_H_Heatr6   | HEAT repea R.SYLQFLK#.S                   | 15.72   | 8.86    | 1.77 | 0.56  |
| Q69ZR2_H1_Hectd1  | E3 ubiquiti R.LPHLYDTPGSTYNLQILTR.R       | 2.20    | 4.42    | 0.50 | 2.01  |
| Q69ZR2_H1_Hectd1  | E3 ubiquiti R.STGTPGSAADSK#.L             | 6.49    | 3.57    | 1.82 | 0.55  |
| Q6NVF4_HI_Helb    | DNA helica: R.TESQLIVDNATR.I              | 3.80    | 7.02    | 0.54 | 1.85  |
| Q6NVF4_HI_Helb    | DNA helica: R.THTFGQSEENTVVVVGK#.A        | 18.93   | 6.79    | 2.79 | 0.36  |
| Q6NVF4_HI_Helb    | DNA helica: R.VSIPEYTK#.E                 | 33.25   | 5.28    | 6.29 | 0.16  |
| Q60848_HI_Hells   | Lymphocyt K.LISQIQPEVNR.E                 | 5.00    | 24.00   | 0.21 | 4.80  |
| Q60848_HI_Hells   | Lymphocyt R.LVTANTIDQK#.I                 | 34.14   | 35.58   | 0.96 | 1.04  |
| Q60848_HI_Hells   | Lymphocyt R.TVVEGNIPIESEVNLK#.L           | 16.67   | 14.18   | 1.18 | 0.85  |
| Q60848_HI_Hells   | Lymphocyt K.IDEELVTNSGK.F                 | 16.44   | 17.99   | 0.91 | 1.09  |
| Q60848_HI_Hells   | Lymphocyt R.IGQTKPVVYR.L                  | 6.83    | 32.38   | 0.21 | 4.74  |
| Q60848_HI_Hells   | Lymphocyt K.LISQIQPEVNR.E                 | 8.58    | 35.37   | 0.24 | 4.12  |
| Q60848_HI_Hells   | Lymphocyt K.M*EQQLLEEQK#.K                | 11.40   | 9.87    | 1.16 | 0.87  |
| Q60848_HI_Hells   | Lymphocyt K.NFLDAK#.E                     | 38.72   | 12.65   | 3.06 | 0.33  |
| Q60848_HI_Hells   | Lymphocyt R.TVVEGNIPIESEVNLK#.L           | 20.62   | 25.18   | 0.82 | 1.22  |
| Q60848_HI_Hells   | Lymphocyt K.VISDELELLDR.S                 | 1.61    | 8.74    | 0.18 | 5.43  |
| Q6PAV2_HI_Herc4   | Probable E:K.LIQADHNEGFSLI.-              | 12.40   | 12.40   | 1.00 | 1.00  |
| Q6PAV2_HI_Herc4   | Probable E:K.LIQADHNEGFSLI.-              | 29.77   | 29.77   | 1.00 | 1.00  |
| Q6PAV2_HI_Herc4   | Probable E:K.LIQDPHQSQQAASLEK#.N          | 32.47   | 11.37   | 2.86 | 0.35  |
| F2Z461_HE_Herc6   | E3 ISG15-p K.AISQIQVQYATEQVITNIK#.V       | 9.00    | 3.23    | 2.79 | 0.36  |
| F2Z461_HE_Herc6   | E3 ISG15-p K.M*SSPPYLK#.V                 | 9.74    | 5.63    | 1.73 | 0.58  |
| F2Z461_HE_Herc6   | E3 ISG15-p R.NSEGQLGLGK#.N                | 14.08   | 87.43   | 0.16 | 6.21  |
| F2Z461_HE_Herc6   | E3 ISG15-p R.SGQLALSGNK#.V                | 16.21   | 6.39    | 2.54 | 0.39  |
| Q99L18_HG_Hgs     | Hepatocyte K.KQEYELVQR.Q                  | 1.26    | 7.32    | 0.17 | 5.82  |
| Q99L18_HG_Hgs     | Hepatocyte R.RLYEGLQDK.L                  | 15.14   | 10.51   | 1.44 | 0.69  |
| Q99L18_HG_Hgs     | Hepatocyte K.VEGHVFPEFK#.E                | 22.01   | 16.06   | 1.37 | 0.73  |
| Q99L18_HG_Hgs     | Hepatocyte K.VNDK#NPHVALYALEVMVVK#.N      | 6.97    | 6.87    | 1.01 | 0.99  |
| Q99L18_HG_Hgs     | Hepatocyte K.VVQDTYQJM*#.V                | 16.47   | 12.28   | 1.34 | 0.75  |
| Q8R1F6_HI_Hid1    | Protein HIC R.LLQVLPVQVEK#.I              | 12.98   | 4.62    | 2.81 | 0.36  |
| Q8R1F6_HI_Hid1    | Protein HIC R.LLSNPLLQTVLPNSTK#.K         | 12.16   | 3.99    | 3.05 | 0.33  |
| Q8R1F6_HI_Hid1    | Protein HIC R.LLQVLPVQVEK#.I              | 16.56   | 5.50    | 3.01 | 0.33  |
| Q8R1F6_HI_Hid1    | Protein HIC R.LLSNPLLQTVLPNSTK#.K         | 16.35   | 4.45    | 3.67 | 0.27  |
| Q8R1F6_HI_Hid1    | Protein HIC R.NVDPPIWYDVTDK#.L            | 9.43    | 1.86    | 5.07 | 0.20  |
| Q8R1F6_HI_Hid1    | Protein HIC K.TSLVATPQIDK#LTK#.S          | 20.55   | 8.51    | 2.42 | 0.41  |
| P70349_HI_Hint1   | Histidine tr K.AQVAQPGDGTIFGK#.I          | 258.07  | 85.23   | 3.03 | 0.33  |
| Q8VD75_H_Hip1     | Huntingtin R.EIAASTAQLVAASK.V             | 7.97    | 8.40    | 0.95 | 1.05  |
| Q8VD75_H_Hip1     | Huntingtin R.LIQPQLPENPPNFLR.A            | 3.74    | 7.32    | 0.51 | 1.96  |
| P43275_H_Hist1h1a | Histone H1 K.ERSGVLAALK.K                 | 5.17    | 10.58   | 0.49 | 2.04  |
| P43275_H_Hist1h1a | Histone H1 K.GTGAAGSF.K                   | 335.14  | 288.41  | 1.16 | 0.86  |
| P43275_H_Hist1h1a | Histone H1 K.GTQVTK#.G                    | 3124.39 | 1647.19 | 1.90 | 0.53  |
| P43275_H_Hist1h1a | Histone H1 R.K#K#PAGPSVSELIVQAVSSSK#.E    | 308.59  | 265.19  | 1.16 | 0.86  |
| P43275_H_Hist1h1a | Histone H1 R.K#K#PAGPSVSELIVQAVSSSK#.E    | 275.12  | 186.05  | 1.48 | 0.68  |
| P43275_H_Hist1h1a | Histone H1 K.K#PAGPSVSELIVQAVSSSK#.E      | 25.72   | 29.85   | 0.86 | 1.16  |
| P43275_H_Hist1h1a | Histone H1 K.K#SALAAAGYDVEK#.N            | 32.25   | 36.58   | 0.88 | 1.13  |
| P43275_H_Hist1h1a | Histone H1 R.SGVSLAALK#.K                 | 1702.49 | 680.48  | 2.50 | 0.40  |
| P43275_H_Hist1h1a | Histone H1 R.SGVSLAALK#.K                 | 2220.24 | 798.94  | 2.78 | 0.36  |
| P43275_H_Hist1h1a | Histone H1 K.SLAAAGYDVEK#.N               | 191.83  | 185.02  | 1.04 | 0.96  |
| P43275_H_Hist1h1a | Histone H1 K.SLAAAGYDVEKNNSR.I            | 3.53    | 8.43    | 0.42 | 2.39  |
| P43275_H_Hist1h1a | Histone H1 R.K#PAGPSVSELIVQAVSSSK#.E      | 7.36    | 4.50    | 1.64 | 0.61  |
| P43275_H_Hist1h1a | Histone H1 R.SGVSLAALK#.K                 | 71.11   | 17.05   | 4.17 | 0.24  |
| P43275_H_Hist1h1a | Histone H1 R.SGVSLAALK#.K                 | 27.27   | 18.88   | 1.44 | 0.69  |
| P43275_H_Hist1h1a | Histone H1 R.SGVSLAALK#.K                 | 29.18   | 16.33   | 1.79 | 0.56  |
| P43275_H_Hist1h1a | Histone H1 R.K#K#PAGPSVSELIVQAVSSSK#.E    | 5.14    | 7.17    | 0.72 | 1.39  |
| P43275_H_Hist1h1a | Histone H1 R.SGVSLAALK#.K                 | 85.24   | 38.24   | 2.23 | 0.45  |
| P43275_H_Hist1h1a | Histone H1 R.SGVSLAALK#.K                 | 94.00   | 42.45   | 2.21 | 0.45  |
| P43276_H_Hist1h1b | Histone H1 K.A#K#PAAAGVK#.K               | 8.59    | 4.86    | 1.77 | 0.57  |
| P43276_H_Hist1h1b | Histone H1 K.ALAAGYDVEK#.N                | 1947.36 | 993.68  | 1.96 | 0.51  |
| P43276_H_Hist1h1b | Histone H1 K.ATGPPVSELITK#.A              | 1458.74 | 804.15  | 1.81 | 0.55  |
| P43276_H_Hist1h1b | Histone H1 K.ERGGVSLPALK.K                | 12.47   | 33.94   | 0.37 | 2.72  |
| P43276_H_Hist1h1b | Histone H1 R.GGVSLPALK#.K                 | 719.85  | 345.54  | 2.08 | 0.48  |
| P43276_H_Hist1h1b | Histone H1 R.GGVSLPALK#.K                 | 274.08  | 122.26  | 2.24 | 0.45  |
| P43276_H_Hist1h1b | Histone H1 K.#ALAAGYDVEK#.N               | 152.59  | 91.02   | 1.68 | 0.60  |
| P43276_H_Hist1h1b | Histone H1 R.#ATGPPVSELITK#.A             | 400.81  | 201.54  | 1.99 | 0.50  |
| P43276_H_Hist1h1b | Histone H1 R.#ATGPPVSELITK#.A             | 689.79  | 334.70  | 2.06 | 0.49  |
| P43276_H_Hist1h1b | Histone H1 K.#PAGATPK#.K                  | 47.66   | 29.38   | 1.62 | 0.62  |
| P43276_H_Hist1h1b | Histone H1 K.ATGPPVSELITK#.A              | 32.08   | 12.78   | 2.51 | 0.40  |
| P43276_H_Hist1h1b | Histone H1 R.#ATGPPVSELITK#.A             | 14.91   | 241.65  | 0.06 | 16.20 |
| P43276_H_Hist1h1b | Histone H1 K.ATGPPVSELITK#.A              | 11.87   | 7.16    | 1.66 | 0.60  |
| P43276_H_Hist1h1b | Histone H1 K.ATGPPVSELITK#.A              | 43.92   | 26.16   | 1.68 | 0.60  |
| P43276_H_Hist1h1b | Histone H1 R.GGVSLPALK#.K                 | 13.64   | 7.07    | 1.93 | 0.52  |
| P43276_H_Hist1h1b | Histone H1 R.#ATGPPVSELITK#.A             | 31.09   | 20.24   | 1.54 | 0.65  |
| P15864_H_Hist1h1c | Histone H1 K.A#K#PAAAVTK#.K               | 28.28   | 19.83   | 1.43 | 0.70  |
| P15864_H_Hist1h1c | Histone H1 K.ALAAGYDVEK#.N                | 3028.28 | 1306.70 | 2.32 | 0.43  |
| P15864_H_Hist1h1c | Histone H1 K.ASGPPVSELITK#.A              | 1983.02 | 1080.22 | 1.84 | 0.54  |
| P15864_H_Hist1h1c | Histone H1 K.GTGAAGYDVEK#.L               | 1560.15 | 806.20  | 1.94 | 0.52  |
| P15864_H_Hist1h1c | Histone H1 K.#ALAAGYDVEK#.N               | 573.71  | 195.41  | 2.94 | 0.34  |
| P15864_H_Hist1h1c | Histone H1 K.KALAAAGYDVEKNNSR.I           | 19.77   | 37.09   | 0.53 | 1.88  |

|                    |                                               |         |         |      |       |
|--------------------|-----------------------------------------------|---------|---------|------|-------|
| P15864_H:Hist1h1c  | Histone H1 R.K#ASGPPVSELITK#.A                | 1048.07 | 693.51  | 1.51 | 0.66  |
| P15864_H:Hist1h1c  | Histone H1 R.KASGPPVSELITK.A                  | 631.18  | 378.07  | 1.67 | 0.60  |
| P15864_H:Hist1h1c  | Histone H1 K.KATGAATPK.K                      | 324.64  | 176.91  | 1.84 | 0.54  |
| P15864_H:Hist1h1c  | Histone H1 K.K#H#AAAATVK#.K                   | 711.68  | 423.96  | 1.68 | 0.60  |
| P15864_H:Hist1h1c  | Histone H1 K.K#H#AAAATVK#.V                   | 17.41   | 10.74   | 1.62 | 0.62  |
| P15864_H:Hist1h1c  | Histone H1 K.ASGPPVSELITK#.A                  | 78.06   | 25.92   | 3.01 | 0.33  |
| P15864_H:Hist1h1c  | Histone H1 R.K#ASGPPVSELITK#.A                | 7.92    | 4.73    | 1.67 | 0.60  |
| P15864_H:Hist1h1c  | Histone H1 K.KATGAATPK.K                      | 7.99    | 6.00    | 1.33 | 0.75  |
| P15864_H:Hist1h1c  | Histone H1 K.ALAAGYDVEK#.N                    | 64.32   | 31.67   | 2.03 | 0.49  |
| P15864_H:Hist1h1c  | Histone H1 K.ALAAGYDVEK#.N                    | 237.19  | 140.40  | 1.69 | 0.59  |
| P15864_H:Hist1h1c  | Histone H1 K.ASGPPVSELITK#.A                  | 91.42   | 52.10   | 1.75 | 0.57  |
| P15864_H:Hist1h1c  | Histone H1 K.GTAGSGFK#.L                      | 61.80   | 31.10   | 1.99 | 0.50  |
| P15864_H:Hist1h1c  | Histone H1 K.#ALAAAGYDVEK#.N                  | 12.00   | 9.58    | 1.25 | 0.80  |
| P15864_H:Hist1h1c  | Histone H1 R.K#ASGPPVSELITK#.A                | 21.41   | 11.25   | 1.90 | 0.53  |
| P43274_H:Hist1h1e  | Histone H1 K.AASGEAK#PK#.A                    | 50.99   | 28.90   | 1.76 | 0.57  |
| P43274_H:Hist1h1e  | Histone H1 K.#AAGTATAK#.K                     | 98.37   | 50.28   | 1.96 | 0.51  |
| P43274_H:Hist1h1e  | Histone H1 K.#AASGEAK#PK#.A                   | 12.98   | 6.76    | 1.92 | 0.52  |
| P43274_H:Hist1h1e  | Histone H1 K.#H#AAAAGAK#.K                    | 224.11  | 147.24  | 1.52 | 0.66  |
| P43274_H:Hist1h1e  | Histone H1 R.K#TSGPPVSELITK#.A                | 468.41  | 253.20  | 1.85 | 0.54  |
| P43274_H:Hist1h1e  | Histone H1 K.SLVSK#GTLVQTK#.G                 | 11.52   | 10.37   | 1.11 | 0.90  |
| P43274_H:Hist1h1e  | Histone H1 K.TSGPPVSELITK#.A                  | 2783.51 | 1329.30 | 2.09 | 0.48  |
| P43274_H:Hist1h1e  | Histone H1 K.TSGPPVSELITK#.A                  | 43.28   | 7.70    | 5.62 | 0.18  |
| P43274_H:Hist1h1e  | Histone H1 K.TSGPPVSELITK#.A                  | 28.56   | 16.75   | 1.71 | 0.59  |
| P43274_H:Hist1h1e  | Histone H1 R.K#TSGPPVSELITK#.A                | 26.62   | 12.71   | 2.09 | 0.48  |
| P43274_H:Hist1h1e  | Histone H1 K.TSGPPVSELITK#.A                  | 169.90  | 96.97   | 1.75 | 0.57  |
| Q8CGP6_H:Hist1h2ah | Histone H2 R.AGLQFPVGR.V                      | 143.92  | 815.90  | 0.18 | 5.67  |
| Q8CGP6_H:Hist1h2ah | Histone H2 R.HLQLAIR.N                        | 214.11  | 723.72  | 0.30 | 3.38  |
| Q8CGP6_H:Hist1h2ah | Histone H2 R.NDEELNK.L                        | 42.15   | 60.69   | 0.69 | 1.44  |
| Q8CGP6_H:Hist1h2ah | Histone H2 R.NDEELNKLLGR.V                    | 7.20    | 35.57   | 0.20 | 4.94  |
| Q8CGP6_H:Hist1h2ah | Histone H2 R.VTIAQGGVLPNIQAVLLPK.K            | 253.14  | 356.15  | 0.71 | 1.41  |
| Q8CGP6_H:Hist1h2ah | Histone H2 R.VTIAQGGVLPNIQAVLLPK#.K           | 254.30  | 357.11  | 0.71 | 1.40  |
| Q8CGP6_H:Hist1h2ah | Histone H2 R.AGLQFPVGR.V                      | 1219.82 | 7020.59 | 0.17 | 5.76  |
| Q8CGP6_H:Hist1h2ah | Histone H2 R.HLQLAIR.N                        | 1279.35 | 7615.01 | 0.17 | 5.95  |
| Q8CGP6_H:Hist1h2ah | Histone H2 R.HLQLAIRNDEELNK.L                 | 255.48  | 1329.51 | 0.19 | 5.20  |
| Q8CGP6_H:Hist1h2ah | Histone H2 R.HLQLAIRNDEELNK.L                 | 1.22    | 4.94    | 0.25 | 4.06  |
| Q8CGP6_H:Hist1h2ah | Histone H2 R.HLQLAIRNDEELNKLLGR.V             | 35.10   | 681.79  | 0.05 | 19.43 |
| Q8CGP6_H:Hist1h2ah | Histone H2 R.KGNYSER.V                        | 35.35   | 203.22  | 0.17 | 5.75  |
| Q8CGP6_H:Hist1h2ah | Histone H2 K.#TESHHK#.A                       | 108.93  | 22.07   | 4.94 | 0.20  |
| Q8CGP6_H:Hist1h2ah | Histone H2 R.NDEELNK#.L                       | 700.76  | 989.96  | 0.71 | 1.41  |
| Q8CGP6_H:Hist1h2ah | Histone H2 R.NDEELNKLLGR.V                    | 405.04  | 2191.28 | 0.18 | 5.41  |
| Q8CGP6_H:Hist1h2ah | Histone H2 R.NDEELNKLLGR.V                    | 245.65  | 1395.32 | 0.18 | 5.68  |
| Q8CGP6_H:Hist1h2ah | Histone H2 R.VTIAQGGVLPNIQAVLLPK.K            | 2817.40 | 3162.40 | 0.89 | 1.12  |
| Q8CGP6_H:Hist1h2ah | Histone H2 R.VTIAQGGVLPNIQAVLLPK.K            | 1834.67 | 2429.63 | 0.76 | 1.32  |
| Q8CGP6_H:Hist1h2ah | Histone H2 R.VTIAQGGVLPNIQAVLLPK.T            | 253.87  | 367.17  | 0.69 | 1.45  |
| Q8CGP6_H:Hist1h2ah | Histone H2 R.VTIAQGGVLPNIQAVLLPK#.K#TESHHK#.A | 18.38   | 20.80   | 0.88 | 1.13  |
| Q8CGP6_H:Hist1h2ah | Histone H2 R.AGLQFPVGR.V                      | 29.02   | 165.14  | 0.18 | 5.69  |
| Q8CGP6_H:Hist1h2ah | Histone H2 R.HLQLAIR.N                        | 5.95    | 141.11  | 0.04 | 23.70 |
| Q8CGP6_H:Hist1h2ah | Histone H2 R.VTIAQGGVLPNIQAVLLPK.K            | 65.61   | 82.28   | 0.80 | 1.25  |
| Q8CGP6_H:Hist1h2ah | Histone H2 R.AGLQFPVGR.V                      | 41.94   | 193.17  | 0.22 | 4.61  |
| Q8CGP6_H:Hist1h2ah | Histone H2 R.HLQLAIR.N                        | 18.63   | 57.51   | 0.32 | 3.09  |
| Q8CGP6_H:Hist1h2ah | Histone H2 R.VTIAQGGVLPNIQAVLLPK.K            | 77.33   | 98.01   | 0.79 | 1.27  |
| Q64475_H:Hist1h2bb | Histone H2 K.AM#GIM#NSFVNDIFER.I              | 26.73   | 104.34  | 0.26 | 3.90  |
| Q64475_H:Hist1h2bb | Histone H2 K.AM#GIM#NSFVNDIFER.I              | 5.54    | 9.94    | 0.56 | 1.79  |
| Q64475_H:Hist1h2bb | Histone H2 K.AM#GIM#NSFVNDIFER.I              | 8.08    | 25.08   | 0.32 | 3.10  |
| Q64475_H:Hist1h2bb | Histone H2 K.AM#GIM#NSFVNDIFER.I              | 10.92   | 47.32   | 0.23 | 4.33  |
| Q64475_H:Hist1h2bb | Histone H2 K.AM#GIM#NSFVNDIFER.I              | 18.51   | 104.18  | 0.18 | 5.63  |
| Q64475_H:Hist1h2bb | Histone H2 R.EIQTAVR.L                        | 64.47   | 389.08  | 0.17 | 6.03  |
| Q64475_H:Hist1h2bb | Histone H2 K.ESYSVYVK#.V                      | 132.29  | 128.72  | 1.03 | 0.97  |
| Q64475_H:Hist1h2bb | Histone H2 R.KESYSVYVK#.V                     | 119.43  | 142.94  | 0.84 | 1.20  |
| Q64475_H:Hist1h2bb | Histone H2 R.LLLPGLAK.H                       | 490.46  | 566.93  | 0.87 | 1.16  |
| Q64475_H:Hist1h2bb | Histone H2 K.QVHPDTGISSK#.A                   | 172.45  | 203.28  | 0.85 | 1.18  |
| Q64475_H:Hist1h2bb | Histone H2 K.AM#GIM#NSFVNDIFER.I              | 860.89  | 4194.39 | 0.21 | 4.87  |
| Q64475_H:Hist1h2bb | Histone H2 K.AM#GIM#NSFVNDIFER.I              | 3.20    | 12.02   | 0.27 | 3.76  |
| Q64475_H:Hist1h2bb | Histone H2 K.AM#GIM#NSFVNDIFER.I              | 475.85  | 2425.26 | 0.20 | 5.10  |
| Q64475_H:Hist1h2bb | Histone H2 K.AM#GIM#NSFVNDIFER.I              | 475.85  | 2425.26 | 0.20 | 5.10  |
| Q64475_H:Hist1h2bb | Histone H2 K.AM#GIM#NSFVNDIFER.I              | 3.64    | 10.33   | 0.35 | 2.84  |
| Q64475_H:Hist1h2bb | Histone H2 K.AM#GIM#NSFVNDIFER.I              | 399.99  | 2032.42 | 0.20 | 5.08  |
| Q64475_H:Hist1h2bb | Histone H2 K.AM#GIM#NSFVNDIFER.I#ASEASR.L     | 1.84    | 7.23    | 0.25 | 3.92  |
| Q64475_H:Hist1h2bb | Histone H2 K.AVTKYTSSK.-                      | 20.73   | 27.69   | 0.75 | 1.34  |
| Q64475_H:Hist1h2bb | Histone H2 R.EIQTAVR.L                        | 1058.82 | 5964.56 | 0.18 | 5.63  |
| Q64475_H:Hist1h2bb | Histone H2 K.ESYSVYVK#.V                      | 4834.22 | 4722.61 | 1.02 | 0.98  |
| Q64475_H:Hist1h2bb | Histone H2 K.HAVSEGT#.A                       | 1533.92 | 1970.29 | 0.78 | 1.28  |
| Q64475_H:Hist1h2bb | Histone H2 K.HAVSEGT#AVTK#.Y                  | 26.90   | 29.66   | 0.91 | 1.10  |
| Q64475_H:Hist1h2bb | Histone H2 R.IASEASR.L                        | 212.00  | 1140.15 | 0.19 | 5.38  |
| Q64475_H:Hist1h2bb | Histone H2 R.#ESYSVYVK#.V                     | 2717.77 | 2326.87 | 1.17 | 0.86  |
| Q64475_H:Hist1h2bb | Histone H2 R.K#ESYSVYVK#VLK#.Q                | 99.18   | 108.92  | 0.91 | 1.10  |
| Q64475_H:Hist1h2bb | Histone H2 R.LAHYNK#.R                        | 105.04  | 192.05  | 0.55 | 1.83  |
| Q64475_H:Hist1h2bb | Histone H2 R.LAHYNK#.S                        | 65.63   | 321.79  | 0.20 | 4.90  |
| Q64475_H:Hist1h2bb | Histone H2 R.LLLPGLAK#.H                      | 5666.33 | 7896.29 | 0.72 | 1.39  |
| Q64475_H:Hist1h2bb | Histone H2 K.QVHPDTGISSK.A                    | 2195.14 | 2774.25 | 0.79 | 1.26  |
| Q64475_H:Hist1h2bb | Histone H2 K.QVHPDTGISSK.A                    | 2136.25 | 2966.46 | 0.72 | 1.39  |
| Q64475_H:Hist1h2bb | Histone H2 K.QVHPDTGISSKAM#GIM#NSFVNDIFER.I   | 24.98   | 127.97  | 0.20 | 5.12  |
| Q64475_H:Hist1h2bb | Histone H2 K.QVHPDTGISSKAM#GIM#NSFVNDIFER.I   | 6.45    | 30.79   | 0.21 | 4.77  |
| Q64475_H:Hist1h2bb | Histone H2 K.QVHPDTGISSKAM#GIM#NSFVNDIFER.I   | 5.54    | 33.48   | 0.17 | 6.04  |
| Q64475_H:Hist1h2bb | Histone H2 R.SRKEYSVYVK#.V                    | 135.73  | 779.15  | 0.17 | 5.74  |
| Q64475_H:Hist1h2bb | Histone H2 R.SRKEYSVYVK#.V                    | 14.27   | 61.40   | 0.23 | 4.30  |
| Q64475_H:Hist1h2bb | Histone H2 K.VLK#QVHPDTGISSK#.A               | 450.03  | 630.55  | 0.71 | 1.40  |
| Q64475_H:Hist1h2bb | Histone H2 K.AM#GIM#NSFVNDIFER.I              | 11.46   | 36.80   | 0.31 | 3.21  |
| Q64475_H:Hist1h2bb | Histone H2 K.AM#GIM#NSFVNDIFER.I              | 3.26    | 12.05   | 0.27 | 3.70  |
| Q64475_H:Hist1h2bb | Histone H2 K.AM#GIM#NSFVNDIFER.I              | 7.69    | 24.06   | 0.32 | 3.13  |
| Q64475_H:Hist1h2bb | Histone H2 K.ESYSVYVK#.V                      | 74.03   | 82.04   | 0.90 | 1.11  |
| Q64475_H:Hist1h2bb | Histone H2 R.#ESYSVYVK#.V                     | 24.07   | 30.22   | 0.80 | 1.26  |
| Q64475_H:Hist1h2bb | Histone H2 K.AM#GIM#NSFVNDIFER.I              | 25.07   | 128.08  | 0.20 | 5.11  |
| Q64475_H:Hist1h2bb | Histone H2 K.AM#GIM#NSFVNDIFER.I              | 5.66    | 13.09   | 0.43 | 2.31  |
| Q64475_H:Hist1h2bb | Histone H2 K.AM#GIM#NSFVNDIFER.I              | 11.63   | 27.52   | 0.42 | 2.37  |
| Q64475_H:Hist1h2bb | Histone H2 K.AM#GIM#NSFVNDIFER.I              | 5.95    | 21.74   | 0.27 | 3.65  |
| Q64475_H:Hist1h2bb | Histone H2 R.EIQTAVR.L                        | 68.94   | 349.48  | 0.20 | 5.07  |
| Q64475_H:Hist1h2bb | Histone H2 K.ESYSVYVK#.V                      | 239.22  | 230.40  | 1.04 | 0.96  |
| Q64475_H:Hist1h2bb | Histone H2 K.HAVSEGT#.A                       | 19.49   | 20.00   | 0.97 | 1.03  |
| Q64475_H:Hist1h2bb | Histone H2 R.#ESYSVYVK#.V                     | 49.74   | 65.06   | 0.76 | 1.31  |
| Q64475_H:Hist1h2bb | Histone H2 R.LLLPGLAK.H                       | 503.56  | 600.99  | 0.84 | 1.19  |
| Q6ZWY9_H:Hist1h2bc | Histone H2 R.IASEASR.L                        | 178.98  | 944.48  | 0.19 | 5.28  |
| P68433_H:Hist1h3a  | Histone H3 R.EAQDFK#.T                        | 779.90  | 621.86  | 1.25 | 0.80  |

|                      |                                              |         |         |      |       |
|----------------------|----------------------------------------------|---------|---------|------|-------|
| P68433_H: Hist1h3a   | Histone H3 K.STELLIR.K                       | 136.55  | 557.08  | 0.25 | 4.08  |
| P68433_H: Hist1h3a   | Histone H3 R.EIAQDFK.T                       | 4889.38 | 3621.73 | 1.35 | 0.74  |
| P68433_H: Hist1h3a   | Histone H3 R.EIAQDFKTLR.F                    | 260.14  | 877.64  | 0.30 | 3.37  |
| P68433_H: Hist1h3a   | Histone H3 R.KLPFOR.L                        | 604.27  | 2455.45 | 0.25 | 4.06  |
| P68433_H: Hist1h3a   | Histone H3 R.KSAPATGGVK.K                    | 25.50   | 96.87   | 0.26 | 3.80  |
| P68433_H: Hist1h3a   | Histone H3 K.RVTIM*PK.D                      | 455.89  | 2156.75 | 0.21 | 4.73  |
| P68433_H: Hist1h3a   | Histone H3 K.RVTIMPKDIQLAR.R                 | 1.48    | 40.24   | 0.04 | 27.27 |
| P68433_H: Hist1h3a   | Histone H3 R.RYQKSTELLIR.K                   | 4.97    | 65.60   | 0.08 | 13.20 |
| P68433_H: Hist1h3a   | Histone H3 K.STELLIR.K                       | 1079.97 | 4120.69 | 0.26 | 3.82  |
| P68433_H: Hist1h3a   | Histone H3 K.STELLIRK.L                      | 45.93   | 128.15  | 0.36 | 2.79  |
| P68433_H: Hist1h3a   | Histone H3 R.VTIM*PK#D                       | 2931.70 | 2682.01 | 1.09 | 0.91  |
| P68433_H: Hist1h3a   | Histone H3 R.VTIM*PKDIQLAR.R                 | 33.10   | 106.55  | 0.31 | 3.22  |
| P68433_H: Hist1h3a   | Histone H3 R.VTIMPKDIQLAR.R                  | 8.37    | 34.14   | 0.25 | 4.08  |
| P68433_H: Hist1h3a   | Histone H3 R.YQKSTELLIR.K                    | 26.08   | 106.05  | 0.25 | 4.07  |
| P68433_H: Hist1h3a   | Histone H3 R.YRPGTVALR.E                     | 134.89  | 2113.48 | 0.06 | 15.67 |
| P68433_H: Hist1h3a   | Histone H3 R.KLPFOR.L                        | 28.13   | 124.66  | 0.23 | 4.43  |
| P68433_H: Hist1h3a   | Histone H3 K.STELLIR.K                       | 77.83   | 296.65  | 0.26 | 3.81  |
| P68433_H: Hist1h3a   | Histone H3 R.EIAQDFK.T                       | 191.84  | 164.49  | 1.17 | 0.86  |
| P68433_H: Hist1h3a   | Histone H3 K.STELLIR.K                       | 48.74   | 242.57  | 0.20 | 4.98  |
| P68433_H: Hist1h3a   | Histone H3 R.YRPGTVALR.E                     | 11.77   | 179.64  | 0.07 | 15.27 |
| P62806_H: Hist1h4a   | Histone H4 R.DAVTYTEHAK#R                    | 59.98   | 50.46   | 1.19 | 0.84  |
| P62806_H: Hist1h4a   | Histone H4 R.DNIQGITPAIR.R                   | 6.37    | 27.70   | 0.23 | 4.35  |
| P62806_H: Hist1h4a   | Histone H4 R.ISGLIYEETR.G                    | 24.07   | 95.75   | 0.25 | 3.98  |
| P62806_H: Hist1h4a   | Histone H4 K.TVTAMDVVYALK#R                  | 19.17   | 17.07   | 1.12 | 0.89  |
| P62806_H: Hist1h4a   | Histone H4 K.VFLENVIR.D                      | 26.64   | 96.36   | 0.28 | 3.62  |
| P62806_H: Hist1h4a   | Histone H4 R.DAVTYTEHAK#R                    | 1463.20 | 1371.58 | 1.07 | 0.94  |
| P62806_H: Hist1h4a   | Histone H4 R.DAVTYTEHAK.K                    | 15.83   | 46.42   | 0.34 | 2.93  |
| P62806_H: Hist1h4a   | Histone H4 R.DNIQGITPAIR.R                   | 815.21  | 3423.04 | 0.24 | 4.20  |
| P62806_H: Hist1h4a   | Histone H4 R.DNIQGITPAIR.R                   | 743.99  | 2930.26 | 0.25 | 3.94  |
| P62806_H: Hist1h4a   | Histone H4 R.GVLKFLENVIR.D                   | 9.13    | 46.35   | 0.20 | 5.08  |
| P62806_H: Hist1h4a   | Histone H4 R.ISGLIYEETR.G                    | 1169.25 | 4650.72 | 0.25 | 3.98  |
| P62806_H: Hist1h4a   | Histone H4 R.K#VTAM*DVVYALK#R                | 392.96  | 310.68  | 1.26 | 0.79  |
| P62806_H: Hist1h4a   | Histone H4 R.K#VTAM*DVVYALK.R                | 352.48  | 284.94  | 1.24 | 0.81  |
| P62806_H: Hist1h4a   | Histone H4 R.K#VTAMDVVYALK#R                 | 397.64  | 401.65  | 0.99 | 1.01  |
| P62806_H: Hist1h4a   | Histone H4 R.K#VTAMDVVYALK.R                 | 115.47  | 105.83  | 1.09 | 0.92  |
| P62806_H: Hist1h4a   | Histone H4 R.K#VTAM*DVVYALK.R                | 393.21  | 1212.55 | 0.32 | 3.08  |
| P62806_H: Hist1h4a   | Histone H4 R.K#VTAMDVVYALK.R                 | 158.51  | 474.90  | 0.33 | 3.00  |
| P62806_H: Hist1h4a   | Histone H4 R.ISGLIYEETR.G                    | 19.73   | 286.54  | 0.07 | 14.52 |
| P62806_H: Hist1h4a   | Histone H4 K.RKVTAM*DVVYALK.R                | 3.46    | 11.81   | 0.29 | 3.42  |
| P62806_H: Hist1h4a   | Histone H4 K.TVTAM*DVVYALK#R                 | 4112.10 | 3220.85 | 1.28 | 0.78  |
| P62806_H: Hist1h4a   | Histone H4 K.TVTAMDVVYALK#R                  | 2011.82 | 1840.20 | 1.09 | 0.91  |
| P62806_H: Hist1h4a   | Histone H4 K.VFLENVIR.D                      | 1272.41 | 4870.59 | 0.26 | 3.83  |
| P62806_H: Hist1h4a   | Histone H4 R.DAVTYTEHAK#R                    | 23.63   | 19.54   | 1.21 | 0.83  |
| P62806_H: Hist1h4a   | Histone H4 R.DNIQGITPAIR.R                   | 2.47    | 15.75   | 0.16 | 6.38  |
| P62806_H: Hist1h4a   | Histone H4 K.VFLENVIR.D                      | 5.36    | 23.28   | 0.23 | 4.34  |
| P62806_H: Hist1h4a   | Histone H4 R.DAVTYTEHAK#R                    | 25.70   | 24.89   | 1.03 | 0.97  |
| P62806_H: Hist1h4a   | Histone H4 R.ISGLIYEETR.G                    | 13.60   | 39.96   | 0.34 | 2.94  |
| P62806_H: Hist1h4a   | Histone H4 K.TVTAMDVVYALK#R                  | 7.19    | 5.87    | 1.22 | 0.82  |
| P62806_H: Hist1h4a   | Histone H4 K.VFLENVIR.D                      | 8.56    | 45.80   | 0.19 | 5.35  |
| Q6GSS7_H: Hist2h2aa1 | Histone H2 R.NDEENKLLGK.V                    | 15.31   | 13.15   | 1.16 | 0.86  |
| Q6GSS7_H: Hist2h2aa1 | Histone H2 R.VGAGAPVYM*AAVLEVTAEILELAGNAAR.D | 26.17   | 77.15   | 0.34 | 2.95  |
| Q6GSS7_H: Hist2h2aa1 | Histone H2 R.HLQLAIRNDEENKLLGK.V             | 14.84   | 82.65   | 0.18 | 5.57  |
| Q6GSS7_H: Hist2h2aa1 | Histone H2 R.KGNYAER.V                       | 19.68   | 102.12  | 0.19 | 5.19  |
| Q6GSS7_H: Hist2h2aa1 | Histone H2 K.LLKGVTIAQGGVLPNIQAVLLPK.K       | 8.47    | 13.50   | 0.63 | 1.59  |
| Q6GSS7_H: Hist2h2aa1 | Histone H2 R.NDEENKLLGK.V                    | 1085.87 | 1167.54 | 0.93 | 1.08  |
| Q6GSS7_H: Hist2h2aa1 | Histone H2 R.NDEENKLLGKVTIAQGGVLPNIQAVLLPK.K | 42.35   | 42.61   | 0.99 | 1.01  |
| Q6GSS7_H: Hist2h2aa1 | Histone H2 R.VGAGAPVYM*AAVLEVTAEILELAGNAAR.D | 93.32   | 347.39  | 0.27 | 3.72  |
| Q64522_H: Hist2h2ab  | Histone H2 R.HLQLAVR.N                       | 32.06   | 153.42  | 0.21 | 4.79  |
| Q64522_H: Hist2h2ab  | Histone H2 K.LLGGVTAQGGVLPNIQAVLLPK.T        | 29.86   | 35.88   | 0.83 | 1.20  |
| Q64522_H: Hist2h2ab  | Histone H2 R.NDEENKLLGKVTIAQGGVLPNIQAVLLPK.K | 419.04  | 538.17  | 0.78 | 1.28  |
| O08528_H: Hk2        | Hexokinase K.GLGTHTPTAAVK#M                  | 13.05   | 3.15    | 4.15 | 0.24  |
| O08528_H: Hk2        | Hexokinase K.LSPELTTGSFETK#D                 | 12.83   | 4.83    | 2.66 | 0.38  |
| O08528_H: Hk2        | Hexokinase K.VTVGDGDTLYK#L                   | 12.27   | 4.13    | 2.97 | 0.34  |
| Q9Z104_H: Hmg20b     | SWI/SNF-re K.EDSSGLM*NTLLNGHK#G              | 4.57    | 1.69    | 2.70 | 0.37  |
| P52927_H: Hmga2      | High mobil R.GEGAGQPSTSAQQPAAVPQK.R          | 6.88    | 17.84   | 0.39 | 2.59  |
| P63158_H: Hmgb1      | High mobil K.LGEM*WNNTAADK#QPVEK#K           | 4.62    | 1.79    | 2.59 | 0.39  |
| Q8JZK9_H: Hmgs1      | Hydroxyme K.VTODATPGSALDK#I                  | 8.03    | 4.97    | 1.62 | 0.62  |
| P09602_H: Hmgn2      | Non-histon K.AEGDAK#GDK#T                    | 10.64   | 2.54    | 4.20 | 0.24  |
| Q9CX86_R: Hnrnpa0    | Heterogene K.AEIIADK#Q                       | 196.55  | 127.35  | 1.54 | 0.65  |
| Q9CX86_R: Hnrnpa0    | Heterogene K.GDVAEGDLIEHFSQFAVEK#A           | 246.92  | 137.07  | 1.80 | 0.56  |
| Q9CX86_R: Hnrnpa0    | Heterogene R.GFGFVYFQSHDAADK.A               | 22.38   | 14.66   | 1.53 | 0.66  |
| Q9CX86_R: Hnrnpa0    | Heterogene K.LFIGGLNVQTSSEGLR.G              | 60.33   | 179.10  | 0.34 | 2.97  |
| Q9CX86_R: Hnrnpa0    | Heterogene K.RGFGFVYFQSHDAADK.A              | 3.04    | 7.67    | 0.40 | 2.52  |
| Q9CX86_R: Hnrnpa0    | Heterogene K.AEIIADK#Q                       | 16.56   | 6.13    | 2.70 | 0.37  |
| Q9CX86_R: Hnrnpa0    | Heterogene K.GDVAEGDLIEHFSQFAVEK#A           | 83.11   | 37.87   | 2.19 | 0.46  |
| Q9CX86_R: Hnrnpa0    | Heterogene K.LFIGGLNVQTSSEGLR.G              | 8.68    | 20.32   | 0.43 | 2.34  |
| Q9CX86_R: Hnrnpa0    | Heterogene K.LFVGGK#G                        | 40.43   | 14.10   | 2.87 | 0.35  |
| Q9CX86_R: Hnrnpa0    | Heterogene K.LFVGGK#GVAEGDLIEHFSQFAVEK#A     | 1.93    | 1.53    | 1.26 | 0.79  |
| P49312_RC: Hnrnpa1   | Heterogene R.GFAFVTFDDHSDVK#HVIQK#Y          | 55.17   | 18.44   | 2.99 | 0.33  |
| P49312_RC: Hnrnpa1   | Heterogene R.GFGFVYATVEEVDAAAM*NARPHK.V      | 14.89   | 21.20   | 0.70 | 1.42  |
| P49312_RC: Hnrnpa1   | Heterogene K.IEVEIM*TRD.R                    | 27.01   | 41.07   | 0.66 | 1.52  |
| P49312_RC: Hnrnpa1   | Heterogene R.KLFIGGLSFETTESL.R               | 4.07    | 7.25    | 0.56 | 1.78  |
| P49312_RC: Hnrnpa1   | Heterogene K.LFIGGLSFETTESL.R                | 37.88   | 54.39   | 0.70 | 1.44  |
| P49312_RC: Hnrnpa1   | Heterogene R.NQGGYGGSSSSSYGSR.R              | 21.76   | 32.98   | 0.66 | 1.52  |
| P49312_RC: Hnrnpa1   | Heterogene K.RGFAVTFDDHSDVK.I                | 3.56    | 8.47    | 0.42 | 2.38  |
| P49312_RC: Hnrnpa1   | Heterogene K.SESPKEQLR.K                     | 15.99   | 34.43   | 0.46 | 2.15  |
| P49312_RC: Hnrnpa1   | Heterogene R.SSGPYGGGGYFAKPR.N               | 7.41    | 15.45   | 0.48 | 2.09  |
| P49312_RC: Hnrnpa1   | Heterogene R.GFAVTFDDHSDVKIYQK.Y             | 14.12   | 6.29    | 2.25 | 0.45  |
| P49312_RC: Hnrnpa1   | Heterogene K.IEVEIMTRD.R                     | 4.24    | 8.49    | 0.50 | 2.00  |
| O88569_R: Hnrnpa2b1  | Heterogene R.DYFEEYK#I                       | 106.48  | 46.81   | 2.27 | 0.44  |
| O88569_R: Hnrnpa2b1  | Heterogene R.DYFEEYKIDTIEITDR.Q              | 36.59   | 58.30   | 0.63 | 1.59  |
| O88569_R: Hnrnpa2b1  | Heterogene R.EESGK#GAHVTVK#K                 | 138.99  | 53.67   | 2.59 | 0.39  |
| O88569_R: Hnrnpa2b1  | Heterogene R.GFGFVTFDDHSDVK#I                | 85.21   | 35.04   | 2.43 | 0.41  |
| O88569_R: Hnrnpa2b1  | Heterogene R.GFGFVTFDDHSDVK#HVIQK#Y          | 141.82  | 48.28   | 2.94 | 0.34  |
| O88569_R: Hnrnpa2b1  | Heterogene R.GFGFVTFSSM*AEVDAAM*AARPHSIDGR.V | 1.88    | 4.27    | 0.44 | 2.27  |
| O88569_R: Hnrnpa2b1  | Heterogene R.GGGGNFPGPGSNFR.G                | 137.26  | 293.02  | 0.47 | 2.13  |
| O88569_R: Hnrnpa2b1  | Heterogene R.GNGFGDSR.G                      | 109.40  | 202.61  | 0.54 | 1.85  |
| O88569_R: Hnrnpa2b1  | Heterogene R.GGSDYGGSGR.G                    | 5.12    | 9.88    | 0.52 | 1.93  |
| O88569_R: Hnrnpa2b1  | Heterogene K.IDTIEITDR.Q                     | 132.73  | 210.75  | 0.63 | 1.59  |
| O88569_R: Hnrnpa2b1  | Heterogene R.KLFIGGLSFETTESL.R               | 31.83   | 62.62   | 0.51 | 1.97  |
| O88569_R: Hnrnpa2b1  | Heterogene K.LFIGGLSFETTESL.R                | 128.18  | 218.35  | 0.59 | 1.70  |
| O88569_R: Hnrnpa2b1  | Heterogene R.NM*GGPYGGGNYGPGGSGGGYGGR.S      | 30.52   | 51.92   | 0.59 | 1.70  |
| O88569_R: Hnrnpa2b1  | Heterogene R.NMGPGYGGNYGPGGSGGGYGGR.S        | 7.95    | 12.10   | 0.66 | 1.52  |

|                     |                                                     |         |        |      |       |
|---------------------|-----------------------------------------------------|---------|--------|------|-------|
| O88569_RI Hnrnpa2b1 | Heterogene R.NYEQWGK#.L                             | 352.99  | 115.32 | 3.06 | 0.33  |
| O88569_RI Hnrnpa2b1 | Heterogene R.QEM*QEVQSSR.S                          | 21.87   | 44.86  | 0.49 | 2.05  |
| O88569_RI Hnrnpa2b1 | Heterogene R.QEMQEVQSSR.S                           | 70.91   | 96.50  | 0.73 | 1.36  |
| O88569_RI Hnrnpa2b1 | Heterogene R.RGFVFTFDDHDPVVK.I                      | 8.06    | 14.34  | 0.56 | 1.78  |
| O88569_RI Hnrnpa2b1 | Heterogene K.SGNFGGSR.N                             | 14.47   | 29.60  | 0.49 | 2.04  |
| O88569_RI Hnrnpa2b1 | Heterogene K.TLETVPLER.K                            | 29.15   | 75.66  | 0.39 | 2.60  |
| O88569_RI Hnrnpa2b1 | Heterogene R.GFGVFTFDDHDPVVK#IVLQK#.Y               | 40.08   | 13.51  | 2.97 | 0.34  |
| O88569_RI Hnrnpa2b1 | Heterogene R.GFGVFTFSSM*AEVDAAM*AAARPHSIDGR.V       | 1.93    | 4.65   | 0.41 | 2.41  |
| O88569_RI Hnrnpa2b1 | Heterogene R.GGNGFNGPFGSNGFR.G                      | 6.14    | 17.01  | 0.36 | 2.77  |
| O88569_RI Hnrnpa2b1 | Heterogene R.GGNGFNGDSR.G                           | 7.18    | 18.12  | 0.40 | 2.53  |
| O88569_RI Hnrnpa2b1 | Heterogene R.KLFIGGLSFETTESLR.N                     | 2.13    | 5.65   | 0.38 | 2.66  |
| O88569_RI Hnrnpa2b1 | Heterogene K.LFIGGLSFETTESLR.N                      | 10.04   | 19.98  | 0.50 | 1.99  |
| Q8BG05_RI Hnrnpa3   | Heterogene R.GFAVFTFDDHDTVOK#.I                     | 7.17    | 8.91   | 0.81 | 1.24  |
| Q8BG05_RI Hnrnpa3   | Heterogene K.IETIEVM*EDR.Q                          | 8.21    | 37.42  | 0.22 | 4.56  |
| Q8BG05_RI Hnrnpa3   | Heterogene K.IETIEVMEDR.Q                           | 6.54    | 20.62  | 0.32 | 3.15  |
| Q8BG05_RI Hnrnpa3   | Heterogene K.IFVGGIKEDTEYNLR.D                      | 16.69   | 66.41  | 0.25 | 3.98  |
| Q8BG05_RI Hnrnpa3   | Heterogene R.SSGSPYGGYGGGGSGYGSR.R                  | 6.01    | 23.27  | 0.26 | 3.87  |
| Q99020_RI Hnrnpab   | Heterogene R.EYFGFGEIEAELPIDPK.L                    | 21.92   | 45.30  | 0.48 | 2.07  |
| Q99020_RI Hnrnpab   | Heterogene R.GFGFLFK.D                              | 59.35   | 163.29 | 0.36 | 2.75  |
| Q99020_RI Hnrnpab   | Heterogene R.GFVITFK.E                              | 6.85    | 19.57  | 0.35 | 2.86  |
| Q99020_RI Hnrnpab   | Heterogene R.GFVITFK#EEDPVK#K#.V                    | 26.83   | 78.36  | 0.34 | 2.92  |
| Q99020_RI Hnrnpab   | Heterogene K.IFVGGLNPEATEEK.I                       | 140.51  | 254.16 | 0.55 | 1.81  |
| Q99020_RI Hnrnpab   | Heterogene K.IREYFGFGEIEAELPIDPK.L                  | 1.35    | 68.03  | 0.02 | 50.28 |
| Q99020_RI Hnrnpab   | Heterogene K.M*FVGGLSWDTSK#.D                       | 4.77    | 9.18   | 0.52 | 1.93  |
| Q99020_RI Hnrnpab   | Heterogene K.IFVGGLNPEATEEK.I                       | 13.72   | 9.26   | 1.48 | 0.68  |
| Q9Z204_HI Hnrnpc    | Heterogene R.AAVAGEDGR.M                            | 36.02   | 136.52 | 0.26 | 3.79  |
| Q9Z204_HI Hnrnpc    | Heterogene K.GDDLQAIK#.E                            | 32.02   | 25.84  | 1.24 | 0.81  |
| Q9Z204_HI Hnrnpc    | Heterogene K.GFAFVQYVNER.N                          | 175.43  | 669.36 | 0.26 | 3.82  |
| Q9Z204_HI Hnrnpc    | Heterogene K.K#SDVEAIFSK#.Y                         | 514.41  | 455.28 | 1.13 | 0.89  |
| Q9Z204_HI Hnrnpc    | Heterogene K.LK#GGDLQAIK#.K                         | 150.65  | 176.62 | 0.85 | 1.17  |
| Q9Z204_HI Hnrnpc    | Heterogene K.LK#GGDLQAIK#.E                         | 1080.84 | 867.34 | 1.25 | 0.80  |
| Q9Z204_HI Hnrnpc    | Heterogene K.M*ESEAGADDSAEEDLDDDDNEDRGDDQLEK.L      | 2.30    | 4.57   | 0.50 | 1.99  |
| Q9Z204_HI Hnrnpc    | Heterogene R.M*AGQVLDINLAEPK#.V                     | 338.29  | 284.17 | 1.19 | 0.84  |
| Q9Z204_HI Hnrnpc    | Heterogene R.M*AGQVLDINLAEPK#.V                     | 98.13   | 82.82  | 1.18 | 0.84  |
| Q9Z204_HI Hnrnpc    | Heterogene R.MIAGQVLDINLAEPK#.V                     | 317.83  | 238.76 | 1.33 | 0.75  |
| Q9Z204_HI Hnrnpc    | Heterogene R.MIAGQVLDINLAEPK#.V                     | 143.73  | 137.90 | 1.04 | 0.96  |
| Q9Z204_HI Hnrnpc    | Heterogene R.MYSYPAR.V                              | 33.08   | 151.08 | 0.22 | 4.57  |
| Q9Z204_HI Hnrnpc    | Heterogene R.M*YSYPAR.V                             | 44.96   | 168.77 | 0.27 | 3.75  |
| Q9Z204_HI Hnrnpc    | Heterogene K.NEKSEEEQSSASVK.K                       | 124.23  | 109.71 | 1.13 | 0.88  |
| Q9Z204_HI Hnrnpc    | Heterogene K.NEKSEEEQSSASVK#.K                      | 142.50  | 127.22 | 1.12 | 0.89  |
| Q9Z204_HI Hnrnpc    | Heterogene K.QADLSFSSPVMK#.N                        | 129.05  | 113.86 | 1.13 | 0.88  |
| Q9Z204_HI Hnrnpc    | Heterogene K.QADLSFSSPVMK#.N                        | 129.18  | 103.31 | 1.25 | 0.80  |
| Q9Z204_HI Hnrnpc    | Heterogene K.QK#VDSLLESLEK#.I                       | 102.19  | 84.08  | 1.22 | 0.82  |
| Q9Z204_HI Hnrnpc    | Heterogene K.QK#VDSLLESLEK#.E                       | 20.71   | 17.21  | 1.20 | 0.83  |
| Q9Z204_HI Hnrnpc    | Heterogene R.SAAEM*YGSVPEHPSPPLSSSFDLDYDFQR.D       | 21.33   | 44.62  | 0.48 | 2.09  |
| Q9Z204_HI Hnrnpc    | Heterogene R.SAAEM*YGSVPEHPSPPLSSSFDLDYDFQR.D       | 12.64   | 28.55  | 0.44 | 2.26  |
| Q9Z204_HI Hnrnpc    | Heterogene K.SDVEAIFSK#.Y                           | 349.62  | 267.64 | 1.31 | 0.77  |
| Q9Z204_HI Hnrnpc    | Heterogene K.SEEEQSSASVK#.K                         | 153.88  | 137.16 | 1.12 | 0.89  |
| Q9Z204_HI Hnrnpc    | Heterogene K.VDSLLESLEK#.I                          | 146.26  | 132.91 | 1.10 | 0.91  |
| Q9Z204_HI Hnrnpc    | Heterogene R.VFIGNLNTLVVK#.K                        | 935.48  | 777.98 | 1.20 | 0.83  |
| Q9Z204_HI Hnrnpc    | Heterogene R.VFIGNLNTLVVK#.K                        | 12.40   | 10.19  | 1.22 | 0.82  |
| Q9Z204_HI Hnrnpc    | Heterogene K.GFAFVQYVNER.N                          | 12.71   | 20.57  | 0.62 | 1.62  |
| Q9Z204_HI Hnrnpc    | Heterogene K.LK#GGDLQAIK#.E                         | 84.82   | 96.13  | 0.88 | 1.13  |
| Q9Z204_HI Hnrnpc    | Heterogene R.M*AGQVLDINLAEPK#.V                     | 25.44   | 30.74  | 0.83 | 1.21  |
| Q9Z204_HI Hnrnpc    | Heterogene K.QADLSFSSPVMK#.N                        | 9.27    | 11.33  | 0.82 | 1.22  |
| Q9Z204_HI Hnrnpc    | Heterogene K.QADLSFSSPVMK#.N                        | 10.57   | 10.04  | 1.05 | 0.95  |
| Q9Z204_HI Hnrnpc    | Heterogene K.QK#VDSLLESLEK#.I                       | 18.62   | 22.52  | 0.83 | 1.21  |
| Q9Z204_HI Hnrnpc    | Heterogene K.VDSLLESLEK#.I                          | 9.11    | 9.68   | 0.94 | 1.06  |
| Q9Z204_HI Hnrnpc    | Heterogene R.VFIGNLNTLVVK#.K                        | 10.15   | 10.39  | 0.98 | 1.02  |
| Q9Z204_HI Hnrnpc    | Heterogene K.GFAFVQYVNER.N                          | 4.76    | 22.13  | 0.22 | 4.65  |
| Q9Z204_HI Hnrnpc    | Heterogene R.M*AGQVLDINLAEPK#.V                     | 11.38   | 10.75  | 1.06 | 0.95  |
| Q9Z204_HI Hnrnpc    | Heterogene K.NEKSEEEQSSASVK.K                       | 2.45    | 3.24   | 0.76 | 1.32  |
| Q9Z204_HI Hnrnpc    | Heterogene K.QK#VDSLLESLEK#.I                       | 7.25    | 5.47   | 1.33 | 0.75  |
| Q9Z204_HI Hnrnpc    | Heterogene K.SEEEQSSASVK#.K                         | 2.84    | 2.70   | 1.05 | 0.95  |
| Q9Z204_HI Hnrnpc    | Heterogene R.VFIGNLNTLVVK#.K                        | 41.95   | 38.21  | 1.10 | 0.91  |
| Q9Z204_HI Hnrnpc    | Heterogene R.VFIGNLNTLVVK#.K                        | 12.39   | 10.27  | 1.21 | 0.83  |
| Q60668_HI Hnrnpd    | Heterogene K.DLKDYFSK.F                             | 38.77   | 74.43  | 0.52 | 1.92  |
| Q60668_HI Hnrnpd    | Heterogene K.ESESVDKVMDQK.E                         | 9.67    | 17.95  | 0.54 | 1.86  |
| Q60668_HI Hnrnpd    | Heterogene K.ESESVDKVM*DQK.E                        | 20.40   | 49.32  | 0.41 | 2.42  |
| Q60668_HI Hnrnpd    | Heterogene R.EYFGFGEVESIELPM*DNK.T                  | 24.87   | 29.10  | 0.85 | 1.17  |
| Q60668_HI Hnrnpd    | Heterogene R.EYFGFGEVESIELPM*DNK.T                  | 14.46   | 29.27  | 0.49 | 2.02  |
| Q60668_HI Hnrnpd    | Heterogene K.IDASKNEDEGHNSSPR.H                     | 2.57    | 39.96  | 0.06 | 15.55 |
| Q60668_HI Hnrnpd    | Heterogene K.IFVGGLSWDTPEEK.I                       | 120.39  | 236.35 | 0.51 | 1.96  |
| Q60668_HI Hnrnpd    | Heterogene K.IREYFGFGEVESIELPM*DNK.T                | 3.30    | 30.16  | 0.11 | 9.13  |
| Q60668_HI Hnrnpd    | Heterogene K.IREYFGFGEVESIELPM*DNK.T                | 4.19    | 29.01  | 0.14 | 6.92  |
| Q60668_HI Hnrnpd    | Heterogene K.KYHNVGLSK.C                            | 21.23   | 41.11  | 0.52 | 1.94  |
| Q60668_HI Hnrnpd    | Heterogene K.M*FIGGLSWDTTK.K                        | 7.74    | 19.99  | 0.39 | 2.58  |
| Q60668_HI Hnrnpd    | Heterogene K.MFIGGLSWDTTK.K                         | 9.70    | 18.27  | 0.53 | 1.88  |
| G3X9W0_C Hnrnpd     | Heterogene K.IDASKNEDEGK.M                          | 8.44    | 16.03  | 0.53 | 1.90  |
| Q60668_HI Hnrnpd    | Heterogene K.IFVGGLSWDTPEEK.I                       | 9.17    | 15.85  | 0.58 | 1.73  |
| Q9Z130_HI Hnrnpdl   | Heterogene K.DAASVDK#VLELK#.E                       | 8.53    | 8.06   | 1.06 | 0.94  |
| Q9Z130_HI Hnrnpdl   | Heterogene K.DLTEYLSR.F                             | 16.80   | 76.42  | 0.22 | 4.55  |
| Q9Z130_HI Hnrnpdl   | Heterogene R.EYFGFGEIENIELPM*DTK.T                  | 4.41    | 6.30   | 0.70 | 1.43  |
| Q9Z130_HI Hnrnpdl   | Heterogene R.GFGVFLFK#.D                            | 239.40  | 334.03 | 0.72 | 1.40  |
| Q9Z130_HI Hnrnpdl   | Heterogene K.MFIGGLSWDTSK.K                         | 7.30    | 10.49  | 0.70 | 1.44  |
| Q9Z130_HI Hnrnpdl   | Heterogene K.MFIGGLSWDTSK#K#.D                      | 7.73    | 10.12  | 0.76 | 1.31  |
| Q9Z130_HI Hnrnpdl   | Heterogene K.VFVGGLSWDTSEQIK#.E                     | 20.97   | 23.92  | 0.88 | 1.14  |
| Q9Z130_HI Hnrnpdl   | Heterogene K.VFVGGLSWDTSEQIK#EYFGFGEIENIELPM*DTK#.T | 11.18   | 12.65  | 0.88 | 1.13  |
| Q9Z130_HI Hnrnpdl   | Heterogene R.GFGVFLFK.D                             | 7.68    | 18.45  | 0.42 | 2.40  |
| Q9Z2X1_HI Hnrnpf    | Heterogene K.HSGPNSADSANDGFVR.L                     | 67.73   | 289.80 | 0.23 | 4.28  |
| Q9Z2X1_HI Hnrnpf    | Heterogene K.ITGEAFVQFASQELAEK#.A                   | 222.49  | 170.43 | 1.31 | 0.77  |
| Q9Z2X1_HI Hnrnpf    | Heterogene K.ITGEAFVQFASQELAEK.A                    | 520.71  | 457.84 | 1.14 | 0.88  |
| Q9Z2X1_HI Hnrnpf    | Heterogene R.QSGEAFVELEDDVK#.L                      | 115.84  | 107.64 | 1.08 | 0.93  |
| Q9Z2X1_HI Hnrnpf    | Heterogene R.QSGEAFVELEDDVK#.L                      | 13.70   | 10.01  | 1.37 | 0.73  |
| Q9Z2X1_HI Hnrnpf    | Heterogene R.RYVIGLQ.K                              | 40.56   | 169.89 | 0.24 | 4.19  |
| Q9Z2X1_HI Hnrnpf    | Heterogene R.SGAVSAGYGGYEGSLSDGYFTTDLFGR.D          | 19.99   | 60.75  | 0.33 | 3.04  |
| Q9Z2X1_HI Hnrnpf    | Heterogene R.SYSDPPLK#.F                            | 303.86  | 284.61 | 1.07 | 0.94  |
| Q9Z2X1_HI Hnrnpf    | Heterogene R.TEM*DWVLK#.H                           | 169.02  | 133.21 | 1.27 | 0.79  |
| Q9Z2X1_HI Hnrnpf    | Heterogene R.TEMDWVLK#.H                            | 164.46  | 117.01 | 1.41 | 0.71  |
| Q9Z2X1_HI Hnrnpf    | Heterogene R.VTGEADVEFATHEEVAAM*SK#.D               | 93.38   | 78.00  | 1.20 | 0.84  |
| Q9Z2X1_HI Hnrnpf    | Heterogene R.VTGEADVEFATHEEVAAM*SK#.D               | 10.50   | 9.25   | 1.14 | 0.88  |
| Q9Z2X1_HI Hnrnpf    | Heterogene R.VTGEADVEFATHEEVAAMSK.D                 | 7.68    | 6.40   | 1.20 | 0.83  |
| Q9Z2X1_HI Hnrnpf    | Heterogene R.VTGEADVEFATHEEVAAMSK#.D                | 74.19   | 60.51  | 1.23 | 0.82  |

|                  |                                         |         |        |      |       |
|------------------|-----------------------------------------|---------|--------|------|-------|
| Q9Z2X1_HI Hnrnpf | Heterogene R.YIEVFK#.S                  | 686.28  | 541.71 | 1.27 | 0.79  |
| Q9Z2X1_HI Hnrnpf | Heterogene K.HSGPNSADSDANDGFVR.L        | 3.55    | 9.80   | 0.36 | 2.76  |
| Q9Z2X1_HI Hnrnpf | Heterogene K.ITGEAFVQFASQELAEK#.A       | 48.02   | 36.99  | 1.30 | 0.77  |
| Q9Z2X1_HI Hnrnpf | Heterogene R.OSGEAFVLESEDDVK#.L         | 12.62   | 10.30  | 1.23 | 0.82  |
| Q9Z2X1_HI Hnrnpf | Heterogene K.ITGEAFVQFASQELAEK#.A       | 23.22   | 13.58  | 1.71 | 0.58  |
| Q9Z2X1_HI Hnrnpf | Heterogene K.ITGEAFVQFASQELAEK.A        | 16.55   | 13.33  | 1.24 | 0.81  |
| Q9Z2X1_HI Hnrnpf | Heterogene R.OSGEAFVLESEDDVK#.L         | 8.50    | 6.05   | 1.41 | 0.71  |
| O35737_HI Hnrnp1 | Heterogene R.ATENDIYNFFSPLNPNR.V        | 56.65   | 224.49 | 0.25 | 3.96  |
| O35737_HI Hnrnp1 | Heterogene R.EGRPSGEAFVESEDEVK.L        | 39.67   | 164.06 | 0.24 | 4.14  |
| O35737_HI Hnrnp1 | Heterogene K.HTGPNSPDTANDGFVR.L         | 97.71   | 383.47 | 0.25 | 3.92  |
| O35737_HI Hnrnp1 | Heterogene K.IQNGAQGR.F                 | 33.28   | 54.78  | 0.61 | 1.65  |
| O35737_HI Hnrnp1 | Heterogene K.SNNVEM*DWVLK#.H            | 51.97   | 41.57  | 1.25 | 0.80  |
| O35737_HI Hnrnp1 | Heterogene K.SNNVEMDWVLK#.H             | 63.36   | 59.53  | 1.06 | 0.94  |
| O35737_HI Hnrnp1 | Heterogene R.STGEAFVQFASQELAEK#.A       | 415.28  | 322.26 | 1.29 | 0.78  |
| O35737_HI Hnrnp1 | Heterogene R.VHIEIGPDGR.V               | 64.16   | 328.14 | 0.20 | 5.11  |
| O35737_HI Hnrnp1 | Heterogene R.VTGEADVEFATHEDAVAAM*SK#.D  | 82.18   | 63.25  | 1.30 | 0.77  |
| O35737_HI Hnrnp1 | Heterogene R.VTGEADVEFATHEDAVAAM*SK#.D  | 7.22    | 6.27   | 1.15 | 0.87  |
| O35737_HI Hnrnp1 | Heterogene R.YVELFLNSITAGASGGAYEHR.Y    | 14.37   | 55.70  | 0.26 | 3.87  |
| O35737_HI Hnrnp1 | Heterogene R.ATENDIYNFFSPLNPNR.V        | 6.65    | 16.03  | 0.42 | 2.41  |
| O35737_HI Hnrnp1 | Heterogene R.STGEAFVQFASQELAEK#.A       | 5.95    | 4.53   | 1.31 | 0.76  |
| O35737_HI Hnrnp1 | Heterogene R.VTGEADVEFATHEDAVAAM*SK#.D  | 6.89    | 4.30   | 1.60 | 0.62  |
| O35737_HI Hnrnp1 | Heterogene R.ATENDIYNFFSPLNPNR.V        | 11.25   | 39.03  | 0.29 | 3.47  |
| O35737_HI Hnrnp1 | Heterogene K.HTGPNSPDTANDGFVR.L         | 2.31    | 7.71   | 0.30 | 3.34  |
| O35737_HI Hnrnp1 | Heterogene R.STGEAFVQFASQELAEK#.A       | 23.88   | 18.11  | 1.32 | 0.76  |
| O35737_HI Hnrnp1 | Heterogene R.VHIEIGPDGR.V               | 9.92    | 23.92  | 0.41 | 2.41  |
| O35737_HI Hnrnp1 | Heterogene R.ATENDIYNFFSPLNPNR.V        | 6.30    | 24.28  | 0.26 | 3.86  |
| O35737_HI Hnrnp1 | Heterogene R.STGEAFVQFASQELAEK#.A       | 31.73   | 12.05  | 2.63 | 0.38  |
| P70333_HI Hnrnp2 | Heterogene R.ATENDIYNFFSPLNPNR*.V       | 6.41    | 23.49  | 0.27 | 3.66  |
| P70333_HI Hnrnp2 | Heterogene R.ATENDIYNFFSPLNPNR*.V       | 6.08    | 23.09  | 0.26 | 3.80  |
| P70333_HI Hnrnp2 | Heterogene K.SNSVEM*DWVLK#.H            | 36.54   | 30.05  | 1.22 | 0.82  |
| P70333_HI Hnrnp2 | Heterogene R.VTGEADVEFATHEDAVAAMAK#.D   | 33.96   | 25.20  | 1.35 | 0.74  |
| D3YWT1_D Hnrnp3  | MCG11326 R.ATENDIANFFSPLNPNR.V          | 4.19    | 21.65  | 0.19 | 5.17  |
| D3YWT1_D Hnrnp3  | MCG11326 R.DGM*DNQGGYGVSGR.M            | 4.93    | 19.65  | 0.25 | 3.99  |
| D3YWT1_D Hnrnp3  | MCG11326 K.EIAENALGK#.H                 | 25.94   | 26.19  | 0.99 | 1.01  |
| D3YWT1_D Hnrnp3  | MCG11326 R.STGEAFVQFASK#.E              | 43.20   | 46.17  | 0.94 | 1.07  |
| D3YWT1_D Hnrnp3  | MCG11326 R.VHIDGADGR.A                  | 3.53    | 12.35  | 0.29 | 3.50  |
| B2M1R6_B Hnrnpk  | Heterogene R.AQPYDPNFYEDYDYGFTM*MFDDR.R | 11.97   | 17.09  | 0.70 | 1.43  |
| B2M1R6_B Hnrnpk  | Heterogene K.DLAGSIIK#.G                | 1098.19 | 559.23 | 1.96 | 0.51  |
| B2M1R6_B Hnrnpk  | Heterogene R.DYDDMSPR.R                 | 21.93   | 57.10  | 0.38 | 2.60  |
| B2M1R6_B Hnrnpk  | Heterogene R.DYDDM*SPR.R                | 33.87   | 90.67  | 0.37 | 2.68  |
| B2M1R6_B Hnrnpk  | Heterogene R.ENTQTTIK#.L                | 265.10  | 157.89 | 1.68 | 0.60  |
| B2M1R6_B Hnrnpk  | Heterogene R.GGDLM*AYDR.R               | 106.33  | 316.51 | 0.34 | 2.98  |
| B2M1R6_B Hnrnpk  | Heterogene R.GGDLMAYDR.R                | 12.74   | 37.67  | 0.34 | 2.96  |
| B2M1R6_B Hnrnpk  | Heterogene R.GSYGDLGGPIITQVTPK#.D       | 576.17  | 295.98 | 1.95 | 0.51  |
| B2M1R6_B Hnrnpk  | Heterogene R.HESGASIK#.I                | 113.97  | 74.48  | 1.53 | 0.65  |
| B2M1R6_B Hnrnpk  | Heterogene R.HESGASIKIDEPLEGSEDR.I      | 27.37   | 71.42  | 0.38 | 2.61  |
| B2M1R6_B Hnrnpk  | Heterogene K.IDEPLGSEDR.I               | 257.93  | 711.83 | 0.36 | 2.76  |
| B2M1R6_B Hnrnpk  | Heterogene K.IDEPLGSEDR.I               | 3.11    | 10.36  | 0.30 | 3.34  |
| B2M1R6_B Hnrnpk  | Heterogene K.IIDLISESPIK#.G             | 1118.63 | 675.40 | 1.66 | 0.60  |
| B2M1R6_B Hnrnpk  | Heterogene K.IIPTLEEYHYK#.G             | 16.82   | 8.56   | 1.96 | 0.51  |
| B2M1R6_B Hnrnpk  | Heterogene R.IITITGTQDQIQNAQYLLQNSVK#.Q | 1199.69 | 597.67 | 2.01 | 0.50  |
| B2M1R6_B Hnrnpk  | Heterogene R.IITITGTQDQIQNAQYLLQNSVK#.Q | 80.53   | 41.17  | 1.96 | 0.51  |
| B2M1R6_B Hnrnpk  | Heterogene K.K#IIPTEEYHYK#.G            | 8.13    | 4.20   | 1.94 | 0.52  |
| B2M1R6_B Hnrnpk  | Heterogene R.LLIHQSLAGGIIIGVK#.G        | 485.34  | 264.90 | 1.83 | 0.55  |
| B2M1R6_B Hnrnpk  | Heterogene K.NAGAVIGK#.G                | 687.64  | 272.88 | 2.52 | 0.40  |
| B2M1R6_B Hnrnpk  | Heterogene R.NLPLPPPPPR.G               | 78.30   | 270.05 | 0.29 | 3.45  |
| B2M1R6_B Hnrnpk  | Heterogene R.NTDEM*VELR.I               | 97.05   | 258.94 | 0.37 | 2.67  |
| B2M1R6_B Hnrnpk  | Heterogene R.NTDEMVELR.I                | 68.65   | 175.75 | 0.39 | 2.56  |
| B2M1R6_B Hnrnpk  | Heterogene R.RDYDDM*SPR.R               | 2.41    | 8.36   | 0.29 | 3.46  |
| B2M1R6_B Hnrnpk  | Heterogene K.RPAEDMEEEQAFK.R            | 5.00    | 21.02  | 0.24 | 4.20  |
| B2M1R6_B Hnrnpk  | Heterogene K.RPAEDM*EEEQAFK.R           | 14.97   | 50.84  | 0.29 | 3.40  |
| B2M1R6_B Hnrnpk  | Heterogene K.RPAEDMEEEQAFK.R.S          | 19.48   | 269.16 | 0.07 | 13.82 |
| B2M1R6_B Hnrnpk  | Heterogene K.RPAEDM*EEEQAFK.R.S         | 30.70   | 429.42 | 0.07 | 13.99 |
| B2M1R6_B Hnrnpk  | Heterogene R.SRNTDEM*VELR.I             | 4.15    | 51.40  | 0.08 | 12.38 |
| B2M1R6_B Hnrnpk  | Heterogene R.TDYNASVSPDSSGPER.I         | 127.96  | 383.95 | 0.33 | 3.00  |
| B2M1R6_B Hnrnpk  | Heterogene R.GSYGDLGGPIITQVTPK#.D       | 38.99   | 20.60  | 1.89 | 0.53  |
| B2M1R6_B Hnrnpk  | Heterogene R.IITITGTQDQIQNAQYLLQNSVK#.Q | 72.72   | 40.32  | 1.80 | 0.55  |
| B2M1R6_B Hnrnpk  | Heterogene R.LLIHQSLAGGIIIGVK#.G        | 20.96   | 9.28   | 2.26 | 0.44  |
| B2M1R6_B Hnrnpk  | Heterogene R.NTDEM*VELR.I               | 2.94    | 8.57   | 0.34 | 2.92  |
| B2M1R6_B Hnrnpk  | Heterogene R.TDYNASVSPDSSGPER.I         | 14.11   | 33.34  | 0.42 | 2.36  |
| B2M1R6_B Hnrnpk  | Heterogene K.DLAGSIIK#.G                | 166.83  | 113.49 | 1.47 | 0.68  |
| B2M1R6_B Hnrnpk  | Heterogene R.ENTQTTIK#.L                | 32.76   | 20.80  | 1.58 | 0.63  |
| B2M1R6_B Hnrnpk  | Heterogene R.GGDLM*AYDR.R               | 14.06   | 40.68  | 0.35 | 2.89  |
| B2M1R6_B Hnrnpk  | Heterogene R.GSYGDLGGPIITQVTPK#.D       | 129.33  | 70.27  | 1.84 | 0.54  |
| B2M1R6_B Hnrnpk  | Heterogene R.GSYGDLGGPIITQVTPK#.D       | 40.92   | 26.42  | 1.55 | 0.65  |
| B2M1R6_B Hnrnpk  | Heterogene R.HESGASIKIDEPLEGSEDR.I      | 9.61    | 28.72  | 0.33 | 2.99  |
| B2M1R6_B Hnrnpk  | Heterogene K.IDEPLGSEDR.I               | 33.43   | 109.46 | 0.31 | 3.27  |
| B2M1R6_B Hnrnpk  | Heterogene K.IIDLISESPIK#.G             | 218.02  | 134.42 | 1.62 | 0.62  |
| B2M1R6_B Hnrnpk  | Heterogene R.IITITGTQDQIQNAQYLLQNSVK#.Q | 373.69  | 188.20 | 1.99 | 0.50  |
| B2M1R6_B Hnrnpk  | Heterogene R.IITITGTQDQIQNAQYLLQNSVK#.Q | 17.26   | 10.29  | 1.68 | 0.60  |
| B2M1R6_B Hnrnpk  | Heterogene R.LLIHQSLAGGIIIGVK#.G        | 171.19  | 103.94 | 1.65 | 0.61  |
| B2M1R6_B Hnrnpk  | Heterogene R.NLPLPPPPPR.G               | 11.82   | 49.72  | 0.24 | 4.21  |
| B2M1R6_B Hnrnpk  | Heterogene R.NTDEM*VELR.I               | 21.37   | 49.52  | 0.43 | 2.32  |
| B2M1R6_B Hnrnpk  | Heterogene R.NTDEMVELR.I                | 11.72   | 30.96  | 0.38 | 2.64  |
| B2M1R6_B Hnrnpk  | Heterogene K.RPAEDM*EEEQAFK.R           | 2.73    | 59.60  | 0.05 | 21.85 |
| B2M1R6_B Hnrnpk  | Heterogene K.RPAEDMEEEQAFK.R.S          | 4.56    | 69.31  | 0.07 | 15.18 |
| B2M1R6_B Hnrnpk  | Heterogene R.TDYNASVSPDSSGPER.I         | 54.52   | 162.41 | 0.34 | 2.98  |
| B2M1R6_B Hnrnpk  | Heterogene K.DLAGSIIK#.G                | 63.20   | 53.05  | 1.19 | 0.84  |
| B2M1R6_B Hnrnpk  | Heterogene R.GSYGDLGGPIITQVTPK#.D       | 39.64   | 34.09  | 1.16 | 0.86  |
| B2M1R6_B Hnrnpk  | Heterogene K.IDEPLGSEDR.I               | 9.29    | 38.26  | 0.24 | 4.12  |
| B2M1R6_B Hnrnpk  | Heterogene K.IIDLISESPIK#.G             | 64.71   | 36.64  | 1.77 | 0.57  |
| B2M1R6_B Hnrnpk  | Heterogene R.LLIHQSLAGGIIIGVK#.G        | 39.23   | 23.59  | 1.66 | 0.60  |
| B2M1R6_B Hnrnpk  | Heterogene R.TDYNASVSPDSSGPER.I         | 13.39   | 42.96  | 0.31 | 3.21  |
| Q8R081_HI Hnrnp1 | Heterogene R.AITHLNNFM*FGQK#.M          | 10.67   | 6.26   | 1.70 | 0.59  |
| Q8R081_HI Hnrnp1 | Heterogene R.AITHLNNFM*FGQK#.M          | 42.16   | 27.57  | 1.53 | 0.65  |
| Q8R081_HI Hnrnp1 | Heterogene K.IEYAKPTR.L                 | 25.39   | 82.96  | 0.31 | 3.27  |
| Q8R081_HI Hnrnp1 | Heterogene K.ISRPPVGGDSR.S              | 3.55    | 48.01  | 0.07 | 13.53 |
| Q8R081_HI Hnrnp1 | Heterogene R.MGPPVGGHR.R                | 11.68   | 6.78   | 1.72 | 0.58  |
| Q8R081_HI Hnrnp1 | Heterogene K.NDQDTWDYTNPLSGQGGPSNPNKR.Q | 15.34   | 62.76  | 0.24 | 4.09  |
| Q8R081_HI Hnrnp1 | Heterogene K.NGVQAMVEFDSVQSAQR.A        | 2.22    | 5.36   | 0.41 | 2.41  |
| Q8R081_HI Hnrnp1 | Heterogene K.NPNGPYPYTLK#.L             | 78.06   | 48.36  | 1.61 | 0.62  |
| Q8R081_HI Hnrnp1 | Heterogene K.SDALETGLFNHYQMK#.N         | 16.68   | 9.35   | 1.78 | 0.56  |
| Q8R081_HI Hnrnp1 | Heterogene K.SDALETGLFNHYQMK#.N         | 73.50   | 48.59  | 1.51 | 0.66  |

|                  |                                                           |        |        |      |       |
|------------------|-----------------------------------------------------------|--------|--------|------|-------|
| Q8R081_HI Hnrnpl | Heterogene K.SKPGAAM*VEM*ADGYAVDR.A                       | 18.25  | 58.41  | 0.31 | 3.20  |
| Q8R081_HI Hnrnpl | Heterogene K.SKPGAAM*VEMADGYAVDR.A                        | 5.84   | 20.25  | 0.29 | 3.47  |
| Q8R081_HI Hnrnpl | Heterogene K.SKPGAAMVEM*ADGYAVDR.A                        | 13.67  | 33.68  | 0.41 | 2.46  |
| Q8R081_HI Hnrnpl | Heterogene R.SSSGLLEWDSK#.S                               | 126.97 | 87.02  | 1.46 | 0.69  |
| Q8R081_HI Hnrnpl | Heterogene K.TPASPVVHIR.G                                 | 15.55  | 61.43  | 0.25 | 3.95  |
| Q8R081_HI Hnrnpl | Heterogene R.YGPQYGHPPPPPPDYGHADSPVLM*VYGLDQSK#.M         | 23.66  | 11.45  | 2.07 | 0.48  |
| Q8R081_HI Hnrnpl | Heterogene R.AITHLNNFM*FGQK#.M                            | 131.19 | 24.25  | 5.41 | 0.18  |
| Q8R081_HI Hnrnpl | Heterogene R.AITHLNNFMFGQK#.M                             | 24.60  | 13.66  | 1.80 | 0.56  |
| Q8R081_HI Hnrnpl | Heterogene K.IEYAKPTR.L                                   | 11.67  | 29.15  | 0.40 | 2.50  |
| Q8R081_HI Hnrnpl | Heterogene K.ISRPGDSDSR.S                                 | 1.37   | 18.84  | 0.07 | 13.74 |
| Q8R081_HI Hnrnpl | Heterogene R.LKTENAGDQHGSGGGGGAAGGGGGENYDDPHKTPASPVVHIR.G | 5.80   | 7.93   | 0.73 | 1.37  |
| Q8R081_HI Hnrnpl | Heterogene K.NDQDWDYTNPNLSGGQDPSGNPKR.Q                   | 10.22  | 24.71  | 0.41 | 2.42  |
| Q8R081_HI Hnrnpl | Heterogene K.NPNGPYPYTK#.L                                | 32.09  | 20.07  | 1.60 | 0.63  |
| Q8R081_HI Hnrnpl | Heterogene K.SDALETLGLNHQYMK#.N                           | 7.02   | 2.43   | 2.89 | 0.35  |
| Q8R081_HI Hnrnpl | Heterogene K.SKPGAAM*VEM*ADGYAVDR.A                       | 10.97  | 26.03  | 0.42 | 2.37  |
| Q8R081_HI Hnrnpl | Heterogene R.YGPQYGHPPPPPPDYGHADSPVLM*VYGLDQSK#.M         | 12.07  | 2.52   | 4.80 | 0.21  |
| Q8R081_HI Hnrnpl | Heterogene R.YGPQYGHPPPPPPDYGHADSPVLMVYGLDQSK#.M          | 24.60  | 9.39   | 2.62 | 0.38  |
| Q921F4_HI Hnrnpl | Heterogene R.HDYGSHGHLPLPLPSR.Y                           | 8.91   | 28.26  | 0.32 | 3.17  |
| Q921F4_HI Hnrnpl | Heterogene R.ITRPGNTDDPSGKNK.V                            | 7.22   | 8.18   | 0.88 | 1.13  |
| Q921F4_HI Hnrnpl | Heterogene R.QALVEFENIDSAK#.E                             | 11.93  | 7.02   | 1.70 | 0.59  |
| Q921F4_HI Hnrnpl | Heterogene K.TDAVEALTALNHQYR.V                            | 7.72   | 16.13  | 0.48 | 2.09  |
| Q921F4_HI Hnrnpl | Heterogene K.TLSGLELWV#.C                                 | 21.79  | 11.18  | 1.95 | 0.51  |
| Q921F4_HI Hnrnpl | Heterogene R.HDYGSHGHLPLPLPSR.Y                           | 22.94  | 37.20  | 0.62 | 1.62  |
| Q921F4_HI Hnrnpl | Heterogene R.ITRPGNTDDPSGKNK.V                            | 22.18  | 35.45  | 0.63 | 1.60  |
| Q921F4_HI Hnrnpl | Heterogene R.LKTEEGEIVSAESEN.R.Q                          | 18.31  | 30.14  | 0.61 | 1.65  |
| Q921F4_HI Hnrnpl | Heterogene R.QALVEFENIDSAK#.E                             | 22.81  | 8.81   | 2.59 | 0.39  |
| Q921F4_HI Hnrnpl | Heterogene K.QHSVPSQFLEDDGTSYK#.D                         | 20.33  | 8.43   | 2.41 | 0.41  |
| Q921F4_HI Hnrnpl | Heterogene R.SMPLTEGGSHHK#.V                              | 16.65  | 4.60   | 3.62 | 0.28  |
| Q921F4_HI Hnrnpl | Heterogene K.TDAVEALTALNHQYR.V                            | 18.44  | 34.33  | 0.54 | 1.86  |
| Q921F4_HI Hnrnpl | Heterogene K.TIPGTALVEM*GDEYAVR.A                         | 11.61  | 17.51  | 0.66 | 1.51  |
| Q921F4_HI Hnrnpl | Heterogene K.TIPGTALVEMGDEYAVR.A                          | 8.53   | 17.25  | 0.49 | 2.02  |
| Q921F4_HI Hnrnpl | Heterogene K.TLSGLELWV#.C                                 | 86.45  | 31.04  | 2.79 | 0.36  |
| Q921F4_HI Hnrnpl | Heterogene K.YK#VFDK#.A                                   | 24.48  | 13.32  | 1.84 | 0.54  |
| Q921F4_HI Hnrnpl | Heterogene K.TIPGTALVEM*GDEYAVR.A                         | 1.77   | 3.66   | 0.48 | 2.07  |
| Q9D0E1_HI Hnrnpl | Heterogene K.AAEVLNK#.H                                   | 181.60 | 178.84 | 1.02 | 0.98  |
| Q9D0E1_HI Hnrnpl | Heterogene R.ADILEDK#DGK#.S                               | 77.32  | 95.90  | 0.81 | 1.24  |
| Q9D0E1_HI Hnrnpl | Heterogene R.AFITNIPFDVK#.W                               | 169.83 | 187.58 | 0.91 | 1.10  |
| Q9D0E1_HI Hnrnpl | Heterogene K.EKVGEVTVYVLLM*DAEGK.S                        | 10.01  | 15.96  | 0.63 | 1.60  |
| Q9D0E1_HI Hnrnpl | Heterogene K.EKVGEVTVYVLLM#DAEGK.S                        | 12.97  | 13.13  | 0.99 | 1.01  |
| Q9D0E1_HI Hnrnpl | Heterogene K.EVFSM*AGVVVR.A                               | 3.34   | 18.17  | 0.18 | 5.43  |
| Q9D0E1_HI Hnrnpl | Heterogene R.FEPYSNPTK.R                                  | 36.36  | 53.70  | 0.68 | 1.48  |
| Q9D0E1_HI Hnrnpl | Heterogene K.FESPEVAER.A                                  | 40.02  | 129.86 | 0.31 | 3.24  |
| Q9D0E1_HI Hnrnpl | Heterogene K.GDFFPERPQQLPHLGGIGM*GLPGGQPIDANHLSK.G        | 5.99   | 22.64  | 0.26 | 3.78  |
| Q9D0E1_HI Hnrnpl | Heterogene K.GDFFPERPQQLPHLGGIGMGLPGGQPIDANHLSK.G         | 1.74   | 6.89   | 0.25 | 3.95  |
| Q9D0E1_HI Hnrnpl | Heterogene R.GGNRFEPYSNPTK.R                              | 1.67   | 52.69  | 0.03 | 31.63 |
| Q9D0E1_HI Hnrnpl | Heterogene K.GIGM*GNLGPAGM*GM*EGIGFGINK.I                 | 17.45  | 16.35  | 1.07 | 0.94  |
| Q9D0E1_HI Hnrnpl | Heterogene K.GIGM*GNLGPAGMGM*EGIGFGINK.I                  | 8.73   | 9.22   | 0.95 | 1.06  |
| Q9D0E1_HI Hnrnpl | Heterogene K.GIGM*GNLGPAGM*GM*EGIGFGINK.I                 | 12.26  | 10.70  | 1.15 | 0.87  |
| Q9D0E1_HI Hnrnpl | Heterogene K.GIGM*GNLGPAGMGM*EGIGFGINK.I                  | 4.20   | 5.59   | 0.75 | 1.33  |
| Q9D0E1_HI Hnrnpl | Heterogene R.GNFGSFGAGGAGGAPGVAR.K                        | 20.18  | 85.85  | 0.24 | 4.25  |
| Q9D0E1_HI Hnrnpl | Heterogene K.I.GGM*EGPFGGM*ENM*GR.F                       | 5.34   | 28.32  | 0.19 | 5.30  |
| Q9D0E1_HI Hnrnpl | Heterogene K.I.GGM*EGPFGGM*ENMGR.F                        | 2.59   | 6.01   | 0.43 | 2.32  |
| Q9D0E1_HI Hnrnpl | Heterogene K.I.GGM*EGPFGGM*ENM*GR.F                       | 2.08   | 10.40  | 0.20 | 5.01  |
| Q9D0E1_HI Hnrnpl | Heterogene R.INELSNALK.R                                  | 181.12 | 206.32 | 0.88 | 1.14  |
| Q9D0E1_HI Hnrnpl | Heterogene R.ISGAGM*ER.M                                  | 5.29   | 16.45  | 0.32 | 3.11  |
| Q9D0E1_HI Hnrnpl | Heterogene R.ISGAGMER.M                                   | 11.51  | 62.66  | 0.18 | 5.44  |
| Q9D0E1_HI Hnrnpl | Heterogene R.LGSTVFVANLDYK#.V                             | 127.79 | 127.85 | 1.00 | 1.00  |
| Q9D0E1_HI Hnrnpl | Heterogene K.LKEVFSM*AGVVVR.A                             | 11.66  | 39.28  | 0.30 | 3.37  |
| Q9D0E1_HI Hnrnpl | Heterogene K.LKEVFSMAGVVVR.A                              | 3.34   | 15.86  | 0.21 | 4.74  |
| Q9D0E1_HI Hnrnpl | Heterogene R.M*AAPDR.V                                    | 14.83  | 109.09 | 0.14 | 7.35  |
| Q9D0E1_HI Hnrnpl | Heterogene R.MATGLER.M                                    | 11.10  | 45.82  | 0.24 | 4.13  |
| Q9D0E1_HI Hnrnpl | Heterogene R.MGAGLGHGM*DR.V                               | 3.15   | 12.02  | 0.26 | 3.82  |
| Q9D0E1_HI Hnrnpl | Heterogene R.M*GAGM*GFGLER.M                              | 26.83  | 131.16 | 0.20 | 4.89  |
| Q9D0E1_HI Hnrnpl | Heterogene R.MGAGMFGGLER.M                                | 3.80   | 21.44  | 0.18 | 5.65  |
| Q9D0E1_HI Hnrnpl | Heterogene R.M*GANNLER.M                                  | 6.49   | 29.43  | 0.22 | 4.53  |
| Q9D0E1_HI Hnrnpl | Heterogene R.M*GANSLER.M                                  | 9.94   | 58.77  | 0.17 | 5.91  |
| Q9D0E1_HI Hnrnpl | Heterogene R.MGANSLER.M                                   | 8.72   | 53.27  | 0.16 | 6.11  |
| Q9D0E1_HI Hnrnpl | Heterogene R.MGLAM*GGAGGASFDR.A                           | 3.37   | 27.25  | 0.12 | 8.08  |
| Q9D0E1_HI Hnrnpl | Heterogene R.M*GLAMGGAGGASFDR.A                           | 2.86   | 14.87  | 0.19 | 5.20  |
| Q9D0E1_HI Hnrnpl | Heterogene R.MGLAMGGAGGASFDR.A                            | 3.14   | 11.30  | 0.28 | 3.60  |
| Q9D0E1_HI Hnrnpl | Heterogene R.MGLVM*DR.M                                   | 6.36   | 24.07  | 0.26 | 3.79  |
| Q9D0E1_HI Hnrnpl | Heterogene R.MGPAIER.M                                    | 23.88  | 146.98 | 0.16 | 6.16  |
| Q9D0E1_HI Hnrnpl | Heterogene R.M*GPAIER.M                                   | 23.76  | 121.01 | 0.20 | 5.09  |
| Q9D0E1_HI Hnrnpl | Heterogene R.M*GPAM*GPALGAGIER.M                          | 29.81  | 165.60 | 0.18 | 5.56  |
| Q9D0E1_HI Hnrnpl | Heterogene R.M*GPAMGPALGAGIER.M                           | 2.24   | 25.34  | 0.09 | 11.32 |
| Q9D0E1_HI Hnrnpl | Heterogene R.MPGIDR.I                                     | 10.74  | 74.03  | 0.15 | 6.89  |
| Q9D0E1_HI Hnrnpl | Heterogene R.M*GPIDR.I                                    | 60.45  | 79.15  | 0.76 | 1.31  |
| Q9D0E1_HI Hnrnpl | Heterogene R.M*GPLGLDHM*ASSIER.M                          | 3.82   | 14.56  | 0.26 | 3.81  |
| Q9D0E1_HI Hnrnpl | Heterogene R.M*VPTGM*GASLER.M                             | 11.69  | 56.79  | 0.21 | 4.86  |
| Q9D0E1_HI Hnrnpl | Heterogene R.MVPTGMGASLER.M                               | 4.61   | 18.70  | 0.25 | 4.06  |
| Q9D0E1_HI Hnrnpl | Heterogene R.NLPFDFTWK.M                                  | 105.02 | 122.05 | 0.86 | 1.16  |
| Q9D0E1_HI Hnrnpl | Heterogene K.QGQGGAGGVPGIER.M                             | 25.72  | 125.74 | 0.20 | 4.89  |
| Q9D0E1_HI Hnrnpl | Heterogene K.VGEVTVYVLLM*DAEGK.S                          | 23.26  | 19.42  | 1.20 | 0.84  |
| Q9D0E1_HI Hnrnpl | Heterogene K.VGEVTVYVLLM#DAEGK#.S                         | 14.25  | 15.40  | 0.93 | 1.08  |
| Q9D0E1_HI Hnrnpl | Heterogene R.VGQTIER.M                                    | 16.59  | 92.51  | 0.18 | 5.58  |
| Q9D0E1_HI Hnrnpl | Heterogene R.VGSEIER.M                                    | 23.79  | 133.77 | 0.18 | 5.62  |
| Q9D0E1_HI Hnrnpl | Heterogene K.VKEDDGEHAR.R                                 | 1.65   | 3.78   | 0.44 | 2.29  |
| Q9D0E1_HI Hnrnpl | Heterogene K.AAEVLNK#.H                                   | 188.80 | 197.79 | 0.95 | 1.05  |
| Q9D0E1_HI Hnrnpl | Heterogene R.ADILEDKDGK.S                                 | 183.93 | 205.67 | 0.89 | 1.12  |
| Q9D0E1_HI Hnrnpl | Heterogene R.AFITNIPFDVK#.W                               | 546.68 | 556.68 | 0.98 | 1.02  |
| Q9D0E1_HI Hnrnpl | Heterogene K.EK#VGEVTVYVLLM*DAEGK#.S                      | 33.76  | 34.62  | 0.98 | 1.03  |
| Q9D0E1_HI Hnrnpl | Heterogene K.EKVGEVTVYVLLM#DAEGK.S                        | 60.47  | 58.24  | 1.04 | 0.96  |
| Q9D0E1_HI Hnrnpl | Heterogene K.EVFSM*AGVVVR.A                               | 7.95   | 31.35  | 0.25 | 3.94  |
| Q9D0E1_HI Hnrnpl | Heterogene K.FESPEVAER.A                                  | 71.27  | 369.05 | 0.19 | 5.18  |
| Q9D0E1_HI Hnrnpl | Heterogene R.FGSGMNMGR.I                                  | 11.22  | 40.17  | 0.28 | 3.58  |
| Q9D0E1_HI Hnrnpl | Heterogene R.FGSGM*NM*GR.I                                | 16.19  | 61.94  | 0.26 | 3.83  |
| Q9D0E1_HI Hnrnpl | Heterogene K.GDFFPERPQQLPHLGGIGM*GLPGGQPIDANHLSK.G        | 4.35   | 20.54  | 0.21 | 4.72  |
| Q9D0E1_HI Hnrnpl | Heterogene K.GDFFPERPQQLPHLGGIGMGLPGGQPIDANHLSK.G         | 3.05   | 10.43  | 0.29 | 3.42  |
| Q9D0E1_HI Hnrnpl | Heterogene K.GEERTQNEK.R                                  | 1.47   | 9.81   | 0.15 | 6.65  |
| Q9D0E1_HI Hnrnpl | Heterogene R.GGNRFEPYSNPTK.R                              | 11.83  | 64.77  | 0.18 | 5.48  |
| Q9D0E1_HI Hnrnpl | Heterogene K.GIGM*GNLGPAGM*GM*EGIGFGINK.I                 | 121.48 | 113.08 | 1.07 | 0.93  |
| Q9D0E1_HI Hnrnpl | Heterogene K.GIGM*GNLGPAGMGM*EGIGFGINK#.I                 | 22.16  | 20.18  | 1.10 | 0.91  |
| Q9D0E1_HI Hnrnpl | Heterogene K.GIGMGNLGPAGM*GM*EGIGFGINK#.I                 | 27.47  | 28.20  | 0.97 | 1.03  |

|                   |                                              |        |        |      |      |
|-------------------|----------------------------------------------|--------|--------|------|------|
| Q9D0E1_HI Hnrrnmp | Heterogene K.GIGMGNLGPAGM*GM*EGIGFGINK.I     | 12.28  | 11.47  | 1.07 | 0.93 |
| Q9D0E1_HI Hnrrnmp | Heterogene K.GIGM*GNLGPAGM*GMEGIGFGINK.I     | 11.83  | 10.27  | 1.15 | 0.87 |
| Q9D0E1_HI Hnrrnmp | Heterogene K.GIGMGNLGPAGM*GM*EGIGFGINK.I     | 5.38   | 7.47   | 0.72 | 1.39 |
| Q9D0E1_HI Hnrrnmp | Heterogene K.GIGMGNLGPAGM*GMEGIGFGINK.I      | 16.81  | 18.59  | 0.90 | 1.11 |
| Q9D0E1_HI Hnrrnmp | Heterogene K.GIGMGNLGPAGM*GMEGIGFGINK.I      | 8.34   | 9.06   | 0.92 | 1.09 |
| Q9D0E1_HI Hnrrnmp | Heterogene K.GIGM*GNLGPAGM*GMEGIGFGINK.I     | 16.81  | 18.59  | 0.90 | 1.11 |
| Q9D0E1_HI Hnrrnmp | Heterogene K.GIGMGNLGPAGM*GMEGIGFGINK.I      | 12.40  | 13.75  | 0.90 | 1.11 |
| Q9D0E1_HI Hnrrnmp | Heterogene K.GIGMGNLGPAGM*GMEGIGFGINK.I      | 7.01   | 6.90   | 1.02 | 0.99 |
| Q9D0E1_HI Hnrrnmp | Heterogene R.GNFGSFGAGSFGAGGHPGVAR.K         | 76.04  | 357.60 | 0.21 | 4.70 |
| Q9D0E1_HI Hnrrnmp | Heterogene K.HLSLGRPLK.V                     | 13.15  | 76.69  | 0.17 | 5.83 |
| Q9D0E1_HI Hnrrnmp | Heterogene K.I.GGM*EGPFGGGM*ENM*GR.F         | 20.82  | 106.11 | 0.20 | 5.10 |
| Q9D0E1_HI Hnrrnmp | Heterogene K.I.GGM*EGPFGGGM*ENMGR.F          | 3.42   | 16.40  | 0.21 | 4.79 |
| Q9D0E1_HI Hnrrnmp | Heterogene K.I.GGM*EGPFGGGMENM*GR.F          | 2.98   | 14.60  | 0.20 | 4.89 |
| Q9D0E1_HI Hnrrnmp | Heterogene K.I.GGM*EGPFGGGM*ENM*GR.F         | 5.61   | 26.72  | 0.21 | 4.76 |
| Q9D0E1_HI Hnrrnmp | Heterogene K.I.GGM*EGPFGGGM*ENMGR.F          | 2.03   | 7.66   | 0.26 | 3.78 |
| Q9D0E1_HI Hnrrnmp | Heterogene K.I.GGM*EGPFGGGMENMGR.F           | 2.25   | 7.66   | 0.29 | 3.40 |
| Q9D0E1_HI Hnrrnmp | Heterogene K.I.GGM*EGPFGGGMENM*GR.F          | 1.44   | 6.28   | 0.23 | 4.35 |
| Q9D0E1_HI Hnrrnmp | Heterogene R.I.GSGVER.M                      | 33.48  | 178.88 | 0.19 | 5.34 |
| Q9D0E1_HI Hnrrnmp | Heterogene R.INELSNALK#.R                    | 478.56 | 454.81 | 1.05 | 0.95 |
| Q9D0E1_HI Hnrrnmp | Heterogene R.I.SGAGM*ER.M                    | 11.62  | 49.09  | 0.24 | 4.23 |
| Q9D0E1_HI Hnrrnmp | Heterogene K.K#AAEVLNK#.H                    | 27.85  | 34.75  | 0.80 | 1.25 |
| Q9D0E1_HI Hnrrnmp | Heterogene R.L.GSTVFANLDYK#.V                | 366.22 | 359.80 | 1.02 | 0.98 |
| Q9D0E1_HI Hnrrnmp | Heterogene K.LKEVFSM*AGVVR.A                 | 23.15  | 96.85  | 0.24 | 4.18 |
| Q9D0E1_HI Hnrrnmp | Heterogene K.LKEVFSMAGVVR.A                  | 11.33  | 62.43  | 0.18 | 5.51 |
| Q9D0E1_HI Hnrrnmp | Heterogene R.M*AAPDR.V                       | 60.34  | 323.55 | 0.19 | 5.36 |
| Q9D0E1_HI Hnrrnmp | Heterogene R.M*ATGLER.M                      | 28.87  | 131.97 | 0.22 | 4.57 |
| Q9D0E1_HI Hnrrnmp | Heterogene R.MGAGLGHGMDR.V                   | 2.35   | 17.16  | 0.14 | 7.29 |
| Q9D0E1_HI Hnrrnmp | Heterogene R.M*GAGLGHGM*DR.V                 | 10.41  | 39.38  | 0.26 | 3.78 |
| Q9D0E1_HI Hnrrnmp | Heterogene R.MGAGLGHGM*DR.V                  | 2.77   | 20.26  | 0.14 | 7.32 |
| Q9D0E1_HI Hnrrnmp | Heterogene R.M*GAGM*GFLER.M                  | 40.92  | 199.82 | 0.20 | 4.88 |
| Q9D0E1_HI Hnrrnmp | Heterogene R.MGAGM*GFLER.M                   | 15.82  | 70.03  | 0.23 | 4.43 |
| Q9D0E1_HI Hnrrnmp | Heterogene R.M*GAGMGFLER.M                   | 7.84   | 38.04  | 0.21 | 4.85 |
| Q9D0E1_HI Hnrrnmp | Heterogene R.MGAGMGFLER.M                    | 6.57   | 38.26  | 0.17 | 5.82 |
| Q9D0E1_HI Hnrrnmp | Heterogene R.MGANNLER.M                      | 28.73  | 113.64 | 0.25 | 3.96 |
| Q9D0E1_HI Hnrrnmp | Heterogene R.M*GANNLER.M                     | 14.86  | 72.93  | 0.20 | 4.91 |
| Q9D0E1_HI Hnrrnmp | Heterogene R.MGANSLER.M                      | 45.66  | 199.30 | 0.23 | 4.37 |
| Q9D0E1_HI Hnrrnmp | Heterogene R.M*GANSLER.M                     | 49.25  | 214.49 | 0.23 | 4.35 |
| Q9D0E1_HI Hnrrnmp | Heterogene R.M*GLAM*GGAGGASFDR.A             | 53.32  | 227.34 | 0.23 | 4.26 |
| Q9D0E1_HI Hnrrnmp | Heterogene R.MGLAM*GGAGGASFDR.A              | 20.68  | 81.40  | 0.25 | 3.94 |
| Q9D0E1_HI Hnrrnmp | Heterogene R.M*GLAMGGAGGASFDR.A              | 6.78   | 28.24  | 0.24 | 4.16 |
| Q9D0E1_HI Hnrrnmp | Heterogene R.MGLAMGGAGGASFDR.A               | 6.06   | 29.12  | 0.21 | 4.81 |
| Q9D0E1_HI Hnrrnmp | Heterogene R.MGLSM*DR.M                      | 6.06   | 27.97  | 0.22 | 4.61 |
| Q9D0E1_HI Hnrrnmp | Heterogene R.MGLSMR.M                        | 6.40   | 34.06  | 0.19 | 5.32 |
| Q9D0E1_HI Hnrrnmp | Heterogene R.M*GLSM*DR.M                     | 11.30  | 42.62  | 0.27 | 3.77 |
| Q9D0E1_HI Hnrrnmp | Heterogene R.M*GLVM*DR.M                     | 16.27  | 98.36  | 0.17 | 6.05 |
| Q9D0E1_HI Hnrrnmp | Heterogene R.MGLVM*DR.M                      | 12.86  | 58.47  | 0.22 | 4.55 |
| Q9D0E1_HI Hnrrnmp | Heterogene R.MGLVMR.M                        | 7.40   | 37.14  | 0.20 | 5.02 |
| Q9D0E1_HI Hnrrnmp | Heterogene R.MGPALER.M                       | 45.73  | 257.46 | 0.18 | 5.63 |
| Q9D0E1_HI Hnrrnmp | Heterogene R.M*GPALER.M                      | 60.93  | 273.32 | 0.22 | 4.49 |
| Q9D0E1_HI Hnrrnmp | Heterogene R.M*GPAM*GPALGAGIER.M             | 75.41  | 371.86 | 0.20 | 4.93 |
| Q9D0E1_HI Hnrrnmp | Heterogene R.MGPAM*GPALGAGIER.M              | 14.91  | 64.10  | 0.23 | 4.30 |
| Q9D0E1_HI Hnrrnmp | Heterogene R.M*GPAMGPALGAGIER.M              | 11.11  | 58.87  | 0.19 | 5.30 |
| Q9D0E1_HI Hnrrnmp | Heterogene R.MGPAMGPALGAGIER.M               | 9.76   | 48.00  | 0.20 | 4.92 |
| Q9D0E1_HI Hnrrnmp | Heterogene R.MGPIDR.I                        | 24.18  | 114.51 | 0.21 | 4.74 |
| Q9D0E1_HI Hnrrnmp | Heterogene R.M*GPIDR.I                       | 72.85  | 300.67 | 0.24 | 4.13 |
| Q9D0E1_HI Hnrrnmp | Heterogene R.M*GPLGLDHM*ASSIER.M             | 53.72  | 259.81 | 0.21 | 4.84 |
| Q9D0E1_HI Hnrrnmp | Heterogene R.M*GPVM*DR.M                     | 12.07  | 57.34  | 0.21 | 4.75 |
| Q9D0E1_HI Hnrrnmp | Heterogene R.M*GSSIER.M                      | 10.65  | 48.69  | 0.22 | 4.57 |
| Q9D0E1_HI Hnrrnmp | Heterogene R.MGSSIER.M                       | 15.30  | 82.20  | 0.19 | 5.37 |
| Q9D0E1_HI Hnrrnmp | Heterogene R.M*VPTGM*GASLER.M                | 43.71  | 189.40 | 0.23 | 4.33 |
| Q9D0E1_HI Hnrrnmp | Heterogene R.M*VPTGMGASLER.M                 | 9.27   | 42.81  | 0.22 | 4.62 |
| Q9D0E1_HI Hnrrnmp | Heterogene R.NLPDFFTWK#.M                    | 405.66 | 441.06 | 0.92 | 1.09 |
| Q9D0E1_HI Hnrrnmp | Heterogene K.QGGGAGGAGSVPGER.M               | 104.25 | 501.61 | 0.21 | 4.81 |
| Q9D0E1_HI Hnrrnmp | Heterogene K.VGEVTVYVLLM*DAEGK#.S            | 74.81  | 70.10  | 1.07 | 0.94 |
| Q9D0E1_HI Hnrrnmp | Heterogene K.VGEVTVYVLLM*DAEGK.S             | 25.00  | 27.56  | 0.91 | 1.10 |
| Q9D0E1_HI Hnrrnmp | Heterogene K.VGEVTVYVLLMDAEGK#.S             | 70.80  | 63.91  | 1.11 | 0.90 |
| Q9D0E1_HI Hnrrnmp | Heterogene R.VGQTER.M                        | 70.43  | 342.94 | 0.21 | 4.87 |
| Q9D0E1_HI Hnrrnmp | Heterogene R.VGSEIER.M                       | 84.62  | 430.46 | 0.20 | 5.09 |
| Q9D0E1_HI Hnrrnmp | Heterogene K.VKEDPDGEHAR.R                   | 2.43   | 8.88   | 0.27 | 3.66 |
| Q9D0E1_HI Hnrrnmp | Heterogene K.WQSLKDLVK.E                     | 22.71  | 28.73  | 0.79 | 1.26 |
| Q8VHM5_C Hnrrnpr  | Heterogene R.LM*MDPLSQGNR.G                  | 2.84   | 7.48   | 0.38 | 2.63 |
| Q8VHM5_C Hnrrnpr  | Heterogene R.NLATTVEILEK#.S                  | 24.28  | 17.18  | 1.41 | 0.71 |
| Q8VHM5_C Hnrrnpr  | Heterogene K.VQESTK#GPDEAK#.I                | 4.07   | 2.45   | 1.66 | 0.60 |
| Q8VHM5_C Hnrrnpr  | Heterogene R.DLYEDELVPFEK#.A                 | 24.11  | 17.65  | 1.37 | 0.73 |
| Q8VHM5_C Hnrrnpr  | Heterogene R.K#YGGPPPSVYSGVQPGIGTEVFGK#.I    | 12.06  | 6.78   | 1.78 | 0.56 |
| Q8VHM5_C Hnrrnpr  | Heterogene R.LM*MDPLSQGNR.G                  | 4.15   | 11.56  | 0.36 | 2.79 |
| Q8VHM5_C Hnrrnpr  | Heterogene R.NLATTVEILEK#.S                  | 57.49  | 40.29  | 1.43 | 0.70 |
| Q8VHM5_C Hnrrnpr  | Heterogene K.TLIEAGLPQK#.V                   | 22.45  | 11.16  | 2.01 | 0.50 |
| Q8VHM5_C Hnrrnpr  | Heterogene K.VQESTK#GPDEAK#.I                | 5.69   | 4.08   | 1.39 | 0.72 |
| Q8VEK3_HI Hnrrnpu | Heterogene R.GYFEIENK#.Y                     | 16.53  | 5.42   | 3.05 | 0.33 |
| Q8VEK3_HI Hnrrnpu | Heterogene K.LLEQYK#EESK#.K                  | 26.36  | 12.68  | 2.08 | 0.48 |
| Q8VEK3_HI Hnrrnpu | Heterogene K.MM*VAGFK#.K                     | 17.39  | 6.43   | 2.70 | 0.37 |
| Q8VEK3_HI Hnrrnpu | Heterogene K.NGQDLGAFK#.I                    | 56.52  | 13.07  | 4.32 | 0.23 |
| Q8VEK3_HI Hnrrnpu | Heterogene K.YNILGTNTIM*DK#.M                | 68.03  | 21.07  | 3.23 | 0.31 |
| Q8VEK3_HI Hnrrnpu | Heterogene K.YNILGTNTIMDK#.M                 | 32.83  | 11.86  | 2.77 | 0.36 |
| Q8VEK3_HI Hnrrnpu | Heterogene K.DLPEHAVLK#.M                    | 50.06  | 21.80  | 2.30 | 0.44 |
| Q8VEK3_HI Hnrrnpu | Heterogene R.NFILDTNVSAAAQR.R                | 5.34   | 10.46  | 0.51 | 1.96 |
| Q8VEK3_HI Hnrrnpu | Heterogene K.DIDIEVR.I                       | 102.57 | 143.47 | 0.71 | 1.40 |
| Q8VEK3_HI Hnrrnpu | Heterogene K.DLPEHAVLK#.M                    | 786.16 | 179.12 | 4.39 | 0.23 |
| Q8VEK3_HI Hnrrnpu | Heterogene R.DRLSASSLTM*ESFAFLWAGGR.A        | 8.59   | 36.58  | 0.23 | 4.26 |
| Q8VEK3_HI Hnrrnpu | Heterogene K.FIEAAR.K                        | 196.40 | 257.62 | 0.76 | 1.31 |
| Q8VEK3_HI Hnrrnpu | Heterogene R.GYFEIENK#.Y                     | 268.63 | 77.72  | 3.46 | 0.29 |
| Q8VEK3_HI Hnrrnpu | Heterogene K.HAAENPGK#.Y                     | 19.95  | 8.98   | 2.22 | 0.45 |
| Q8VEK3_HI Hnrrnpu | Heterogene K.HAAENPGK#YNYLGTNTIM*DK#.M       | 40.68  | 12.11  | 3.36 | 0.30 |
| Q8VEK3_HI Hnrrnpu | Heterogene K.HAAENPGK#YNYLGTNTIMDK#.M        | 28.92  | 7.58   | 3.81 | 0.26 |
| Q8VEK3_HI Hnrrnpu | Heterogene R.I.GWSLTTSGM*LLGEEFYSYGLK#.G     | 4.43   | 3.15   | 1.41 | 0.71 |
| Q8VEK3_HI Hnrrnpu | Heterogene R.I.GWSLTTSGM*LLGEEFYSYGLK#.G     | 23.06  | 8.36   | 2.76 | 0.36 |
| Q8VEK3_HI Hnrrnpu | Heterogene R.I.GWSLTTSGM*LLGEEFYSYGLK#.G     | 13.99  | 2.86   | 4.90 | 0.20 |
| Q8VEK3_HI Hnrrnpu | Heterogene K.LK#VSELK#EELK#.K                | 73.35  | 13.56  | 5.41 | 0.18 |
| Q8VEK3_HI Hnrrnpu | Heterogene K.LLEQYK#EESK#.K                  | 154.35 | 60.26  | 2.56 | 0.39 |
| Q8VEK3_HI Hnrrnpu | Heterogene K.LLEQYK#EESK#.A                  | 209.84 | 58.50  | 3.59 | 0.28 |
| Q8VEK3_HI Hnrrnpu | Heterogene K.LNTLLQR.A                       | 179.20 | 263.38 | 0.68 | 1.47 |
| Q8VEK3_HI Hnrrnpu | Heterogene R.LQAALDNEAGRPAM*EPNGSLDGGDAAGR.S | 9.77   | 25.96  | 0.38 | 2.66 |



|                    |                                                 |        |        |      |       |
|--------------------|-------------------------------------------------|--------|--------|------|-------|
| Q8VEK3_HI Hnrnpu   | Heterogene R.LQAALDNEAGGRPAMEPGNSLDLGGDAAGR.S   | 6.73   | 18.58  | 0.36 | 2.76  |
| Q8VEK3_HI Hnrnpu   | Heterogene R.LSASLTM*ESFAFLWAGGR.A              | 39.59  | 54.14  | 0.73 | 1.37  |
| Q8VEK3_HI Hnrnpu   | Heterogene K.M*M*VAGFK#.K                       | 173.25 | 56.26  | 3.08 | 0.32  |
| Q8VEK3_HI Hnrnpu   | Heterogene K.MM*VAGFK#.K                        | 62.67  | 26.20  | 2.39 | 0.42  |
| Q8VEK3_HI Hnrnpu   | Heterogene K.MM*VAGFK#.K                        | 84.97  | 26.84  | 3.17 | 0.32  |
| Q8VEK3_HI Hnrnpu   | Heterogene K.M*M*VAGFK#.K                       | 30.20  | 8.17   | 3.70 | 0.27  |
| Q8VEK3_HI Hnrnpu   | Heterogene K.MM*VAGFK#.K                        | 39.54  | 22.41  | 1.76 | 0.57  |
| Q8VEK3_HI Hnrnpu   | Heterogene R.NFILDQTNVSAQAQR.R                  | 145.95 | 204.28 | 0.71 | 1.40  |
| Q8VEK3_HI Hnrnpu   | Heterogene K.NGQDLGVAFK#.I                      | 444.84 | 127.39 | 3.49 | 0.29  |
| Q8VEK3_HI Hnrnpu   | Heterogene R.QGQQQAGDGK#.T                      | 5.78   | 2.36   | 2.45 | 0.41  |
| Q8VEK3_HI Hnrnpu   | Heterogene R.QGQQQAGDGK#TEQK#.G                 | 11.95  | 4.72   | 2.53 | 0.40  |
| Q8VEK3_HI Hnrnpu   | Heterogene K.RNFILDQTNVSAQAQR.R                 | 3.56   | 22.97  | 0.16 | 6.45  |
| Q8VEK3_HI Hnrnpu   | Heterogene K.SSGPSTLFAVTAPPGAR.Q                | 131.95 | 210.46 | 0.63 | 1.59  |
| Q8VEK3_HI Hnrnpu   | Heterogene K.VSELK#EELK#.K                      | 206.08 | 74.10  | 2.78 | 0.36  |
| Q8VEK3_HI Hnrnpu   | Heterogene K.VSELK#EELK#.K                      | 495.38 | 120.91 | 4.10 | 0.24  |
| Q8VEK3_HI Hnrnpu   | Heterogene K.VTEKIPVR.H                         | 19.53  | 34.00  | 0.57 | 1.74  |
| Q8VEK3_HI Hnrnpu   | Heterogene K.YNILGNTNTIM*DK#.M                  | 485.53 | 143.91 | 3.37 | 0.30  |
| Q8VEK3_HI Hnrnpu   | Heterogene K.YNILGNTNTIMDK#.M                   | 249.24 | 79.28  | 3.14 | 0.32  |
| Q8VEK3_HI Hnrnpu   | Heterogene K.DIDIHEVR.I                         | 29.40  | 37.65  | 0.78 | 1.28  |
| Q8VEK3_HI Hnrnpu   | Heterogene R.GYFEIENK#.Y                        | 47.25  | 14.28  | 3.31 | 0.30  |
| Q8VEK3_HI Hnrnpu   | Heterogene K.HAAENPGK#YNYLGTNTIM*DK#.M          | 7.44   | 2.16   | 3.44 | 0.29  |
| Q8VEK3_HI Hnrnpu   | Heterogene R.LQAALDNEAGGRPAM*EPNGNSLDLGGDAAGR.S | 1.91   | 5.38   | 0.35 | 2.82  |
| Q8VEK3_HI Hnrnpu   | Heterogene R.LQAALDNEAGGRPAMEPGNSLDLGGDAAGR.S   | 1.69   | 2.83   | 0.60 | 1.67  |
| Q8VEK3_HI Hnrnpu   | Heterogene K.M*M*VAGFK#.K                       | 34.06  | 9.06   | 3.76 | 0.27  |
| Q8VEK3_HI Hnrnpu   | Heterogene R.NFILDQTNVSAQAQR.R                  | 36.93  | 51.03  | 0.72 | 1.38  |
| Q8VEK3_HI Hnrnpu   | Heterogene K.NGQDLGVAFK#.I                      | 75.14  | 22.88  | 3.28 | 0.30  |
| Q8VEK3_HI Hnrnpu   | Heterogene K.SSGPSTLFAVTAPPGAR.Q                | 28.51  | 56.84  | 0.50 | 1.99  |
| Q8VEK3_HI Hnrnpu   | Heterogene K.VSELK#EELK#.K                      | 27.13  | 8.95   | 3.03 | 0.33  |
| Q8VEK3_HI Hnrnpu   | Heterogene K.YNILGNTNTIM*DK#.M                  | 91.02  | 29.87  | 3.05 | 0.33  |
| Q8VEK3_HI Hnrnpu   | Heterogene K.YNILGNTNTIMDK#.M                   | 34.12  | 11.24  | 3.04 | 0.33  |
| Q8VDM6_I Hnrnpul1  | Heterogene K.HLPSTEPDHHVVR.I                    | 14.29  | 52.09  | 0.27 | 3.65  |
| Q8VDM6_I Hnrnpul1  | Heterogene K.QEAPPSPFLPEASQLK#.T                | 6.06   | 3.51   | 1.73 | 0.58  |
| Q8VDM6_I Hnrnpul1  | Heterogene R.DEEEK#DVPDHAVLEMK#.A               | 8.92   | 41.78  | 0.21 | 4.68  |
| Q8VDM6_I Hnrnpul1  | Heterogene K.TEM*QEAPPSPFLPEASQLK.T             | 8.31   | 8.17   | 1.02 | 0.98  |
| Q8VDM6_I Hnrnpul1  | Heterogene K.YNILGNTNIM*DK#.M                   | 24.89  | 19.48  | 1.28 | 0.78  |
| Q00P19_HH Hnrnpul2 | Heterogene K.ANFSLPEK#.C                        | 62.18  | 44.88  | 1.39 | 0.72  |
| Q00P19_HH Hnrnpul2 | Heterogene K.AVEEQGDQDQSEK#.S                   | 13.17  | 8.42   | 1.56 | 0.64  |
| Q00P19_HH Hnrnpul2 | Heterogene R.AYEEFR.E                           | 24.34  | 51.58  | 0.47 | 2.12  |
| Q00P19_HH Hnrnpul2 | Heterogene K.DRYGGQPLFSEK.F                     | 4.92   | 14.28  | 0.34 | 2.90  |
| Q00P19_HH Hnrnpul2 | Heterogene K.EVEGDVPESSIMLEMK#.A                | 7.74   | 6.41   | 1.21 | 0.83  |
| Q00P19_HH Hnrnpul2 | Heterogene K.FPTLWSGAR.S                        | 36.09  | 99.43  | 0.36 | 2.75  |
| Q00P19_HH Hnrnpul2 | Heterogene K.GLEPEMDPK#.S                       | 17.26  | 10.80  | 1.60 | 0.63  |
| Q00P19_HH Hnrnpul2 | Heterogene R.K#LLLFK#.T                         | 33.90  | 21.70  | 1.56 | 0.64  |
| Q00P19_HH Hnrnpul2 | Heterogene R.KVVVVVNPNEEDWKR.R                  | 25.90  | 76.79  | 0.34 | 2.96  |
| Q00P19_HH Hnrnpul2 | Heterogene R.LKVTLSR.S                          | 11.74  | 27.84  | 0.42 | 2.37  |
| Q00P19_HH Hnrnpul2 | Heterogene K.LVQJASR.S                          | 82.76  | 213.08 | 0.39 | 2.57  |
| Q00P19_HH Hnrnpul2 | Heterogene K.NGEDLGVAFR.I                       | 17.85  | 64.76  | 0.28 | 3.63  |
| Q00P19_HH Hnrnpul2 | Heterogene R.NYGYGYQR.-                         | 37.48  | 74.53  | 0.50 | 1.99  |
| Q00P19_HH Hnrnpul2 | Heterogene R.RYNYLGAETVLTQM*.M                  | 1.35   | 16.71  | 0.08 | 12.35 |
| Q00P19_HH Hnrnpul2 | Heterogene R.SGDDETPGSEAPGDK#.A                 | 33.61  | 28.14  | 1.19 | 0.84  |
| Q00P19_HH Hnrnpul2 | Heterogene R.SGDDETPGSEAPGDKAVEEQGDQDQSEK.S     | 76.50  | 53.29  | 1.44 | 0.70  |
| Q00P19_HH Hnrnpul2 | Heterogene K.TQWALK#.Y                          | 144.51 | 61.37  | 2.35 | 0.42  |
| Q00P19_HH Hnrnpul2 | Heterogene K.VTQNLPM*#.E                        | 36.37  | 28.27  | 1.29 | 0.78  |
| Q00P19_HH Hnrnpul2 | Heterogene K.VVVVVVNPNEEDWKR.R                  | 15.87  | 9.01   | 1.76 | 0.57  |
| Q00P19_HH Hnrnpul2 | Heterogene R.YGQPLFSEK#.F                       | 80.41  | 66.84  | 1.20 | 0.83  |
| Q00P19_HH Hnrnpul2 | Heterogene R.YNVLGAETVLTQM*.M                   | 18.20  | 47.42  | 0.38 | 2.61  |
| Q00P19_HH Hnrnpul2 | Heterogene R.YNVLGAETVLTQMR.M                   | 17.66  | 39.91  | 0.44 | 2.26  |
| Q00P19_HH Hnrnpul2 | Heterogene R.YRDYR.Q                            | 2.15   | 19.82  | 0.11 | 9.21  |
| Q00P19_HH Hnrnpul2 | Heterogene K.AVEEQGDQDQSEK#.S                   | 3.42   | 1.58   | 2.17 | 0.46  |
| Q00P19_HH Hnrnpul2 | Heterogene K.FPTLWSGAR.S                        | 7.18   | 17.83  | 0.40 | 2.48  |
| Q00P19_HH Hnrnpul2 | Heterogene R.KVVVVVNPNEEDWKR.R                  | 2.99   | 11.72  | 0.25 | 3.92  |
| Q00P19_HH Hnrnpul2 | Heterogene R.SGDDETPGSEAPGDK.A                  | 12.85  | 9.31   | 1.38 | 0.72  |
| Q00P19_HH Hnrnpul2 | Heterogene R.YNVLGAETVLTQM*.M                   | 6.12   | 15.19  | 0.40 | 2.48  |
| Q99JP6_HC Homer3   | Homer prot R.ANTVYGLGFASEQLQTOFAEK#.F           | 7.54   | 3.67   | 2.05 | 0.49  |
| Q8BUK6_H Hook3     | Protein Hoi R.HLQLQTLQLEQETFR.L                 | 3.65   | 10.03  | 0.36 | 2.75  |
| Q8BUK6_H Hook3     | Protein Hoi R.IEELQEALR.K                       | 8.07   | 21.55  | 0.37 | 2.67  |
| Q8BUK6_H Hook3     | Protein Hoi R.LASTSGSQSFLAR.Q                   | 7.97   | 19.02  | 0.42 | 2.39  |
| Q8BUK6_H Hook3     | Protein Hoi R.LLEVQSQVEELQK#.S                  | 30.73  | 14.03  | 2.19 | 0.46  |
| Q8BUK6_H Hook3     | Protein Hoi R.LNGEDSDNEKIALQSLDDANLR.K          | 3.68   | 6.73   | 0.55 | 1.83  |
| Q8BUK6_H Hook3     | Protein Hoi R.LNGQSDIEDPNSPAGR.R                | 6.15   | 14.79  | 0.42 | 2.40  |
| Q8BUK6_H Hook3     | Protein Hoi R.QNGQAAPQIALK#.N                   | 16.86  | 8.85   | 1.90 | 0.53  |
| Q8BUK6_H Hook3     | Protein Hoi R.QQNDELTLADEAQSLLKIDEIVLR.H        | 4.51   | 8.96   | 0.50 | 1.99  |
| Q8BUK6_H Hook3     | Protein Hoi R.TTEELNEALSARK.E                   | 13.89  | 6.84   | 2.03 | 0.49  |
| Q3TEA8_HF Hp1bp3   | Heterochro K.GASGSFVVQK#.S                      | 29.24  | 15.08  | 1.94 | 0.52  |
| Q3TEA8_HF Hp1bp3   | Heterochro R.GLEQITGK#.G                        | 53.35  | 30.21  | 1.77 | 0.57  |
| Q3TEA8_HF Hp1bp3   | Heterochro R.K#VVSQYYPK#.L                      | 16.89  | 9.74   | 1.73 | 0.58  |
| Q3TEA8_HF Hp1bp3   | Heterochro K.LEDVLPLAFTR.L                      | 11.46  | 28.70  | 0.40 | 2.50  |
| Q3TEA8_HF Hp1bp3   | Heterochro K.GASGSFVVQK#.S                      | 129.49 | 55.62  | 2.33 | 0.43  |
| Q3TEA8_HF Hp1bp3   | Heterochro K.GK#GASGSFVVQK#.S                   | 57.72  | 27.03  | 2.14 | 0.47  |
| Q3TEA8_HF Hp1bp3   | Heterochro R.GLEQITGK#.G                        | 199.00 | 94.29  | 2.11 | 0.47  |
| Q3TEA8_HF Hp1bp3   | Heterochro K.KGSALDPEPQVK.L                     | 16.33  | 9.55   | 1.71 | 0.59  |
| Q3TEA8_HF Hp1bp3   | Heterochro R.K#VVSQYYPK#.L                      | 63.54  | 33.78  | 1.88 | 0.53  |
| Q3TEA8_HF Hp1bp3   | Heterochro K.LEDVLPLAFTR.L                      | 61.43  | 139.19 | 0.44 | 2.27  |
| Q3TEA8_HF Hp1bp3   | Heterochro K.M*DAILTEAIK#.A                     | 80.61  | 47.73  | 1.69 | 0.59  |
| Q3TEA8_HF Hp1bp3   | Heterochro K.MDAILTEAIK#.A                      | 68.85  | 32.06  | 2.15 | 0.47  |
| Q3TEA8_HF Hp1bp3   | Heterochro K.NGWLEQISGK#.G                      | 25.37  | 14.73  | 1.72 | 0.58  |
| Q3TEA8_HF Hp1bp3   | Heterochro K.SGEKPLLGSSLM*EYAILSIAIAM*NEPK.T    | 17.97  | 9.40   | 1.91 | 0.52  |
| Q3TEA8_HF Hp1bp3   | Heterochro K.TGASVAIR.K                         | 35.03  | 80.49  | 0.44 | 2.30  |
| Q3TEA8_HF Hp1bp3   | Heterochro K.TIPAWATLSASQLAR.A                  | 19.76  | 47.76  | 0.41 | 2.42  |
| Q3TEA8_HF Hp1bp3   | Heterochro K.YPSLGLER.R                         | 24.12  | 61.66  | 0.39 | 2.56  |
| Q3TEA8_HF Hp1bp3   | Heterochro K.YVLENHPGANSNYQMHLK#.K              | 18.99  | 18.72  | 1.01 | 0.99  |
| Q3TEA8_HF Hp1bp3   | Heterochro K.YVVSQYYPK#.L                       | 52.65  | 25.48  | 2.07 | 0.48  |
| Q3TEA8_HF Hp1bp3   | Heterochro K.LEDVLPLAFTR.L                      | 4.15   | 11.88  | 0.35 | 2.87  |
| P62748_HF Hpcal1   | Hippocalci K.IYANFFPYGDASK#.F                   | 11.97  | 5.38   | 2.23 | 0.45  |
| P62748_HF Hpcal1   | Hippocalci K.LSLEEFK#.G                         | 14.50  | 7.21   | 2.01 | 0.50  |
| Q8VCC1_P1 Hpgd     | 15-hydroxy K.EENMGQYIEYK#.D                     | 27.69  | 10.68  | 2.59 | 0.39  |
| Q9CQZ1_H1 Hsbp1    | Heat shock K.NIADLM*TOAGVEELDPEEN#IPTAQK#.S     | 2.58   | 4.31   | 0.60 | 1.67  |
| Q99N15_Q Hsd17b10  | 17beta-hyd K.GLVAVVTGGASGLGLATAK#.R             | 15.95  | 1.96   | 8.13 | 0.12  |
| Q99N15_Q Hsd17b10  | 17beta-hyd R.GVIINTASVAAFEGQVGAAYSASK#.G        | 27.54  | 2.88   | 9.57 | 0.10  |
| Q99N15_Q Hsd17b10  | 17beta-hyd R.LVGGQATAVLDDVDPSEGEAQAK#.K         | 44.61  | 6.90   | 6.46 | 0.15  |
| P51660_DI Hsd17b4  | Peroxisom K.AVANYSVEAGEK#.L                     | 112.52 | 71.94  | 1.56 | 0.64  |
| P51660_DI Hsd17b4  | Peroxisom R.GALVIVNDLGGDFK#.G                   | 15.98  | 5.22   | 3.06 | 0.33  |
| P07901_H1 Hsp90aa1 | Heat shock K.ADLINLGTIAK#.S                     | 156.22 | 27.07  | 5.77 | 0.17  |

|                   |            |                                        |         |        |        |      |
|-------------------|------------|----------------------------------------|---------|--------|--------|------|
| P07901_H#Hsp90aa1 | Heat shock | K.EDQTEYLEER.R                         | 15.59   | 13.19  | 1.18   | 0.85 |
| P07901_H#Hsp90aa1 | Heat shock | K.EK#YIDQEELNK#.T                      | 8.85    | 1.28   | 6.90   | 0.14 |
| P07901_H#Hsp90aa1 | Heat shock | K.HIFYFITGETK#.D                       | 30.68   | 5.66   | 5.42   | 0.18 |
| P07901_H#Hsp90aa1 | Heat shock | K.HLEINPDHSIETLR.@.Q                   | 57.72   | 7.40   | 7.80   | 0.13 |
| P07901_H#Hsp90aa1 | Heat shock | K.HNDDEQYAWESSAGGSFTVR.T               | 5.25    | 5.37   | 0.98   | 1.02 |
| P07901_H#Hsp90aa1 | Heat shock | K.HSQFIGYPITLFEVEK#.E                  | 7.59    | 2.30   | 3.30   | 0.30 |
| P07901_H#Hsp90aa1 | Heat shock | R.NPDDITNEEYGEFYK#.S                   | 25.85   | 4.04   | 6.40   | 0.16 |
| P07901_H#Hsp90aa1 | Heat shock | R.YESLTDPSK#.L                         | 26.22   | 7.42   | 3.53   | 0.28 |
| P07901_H#Hsp90aa1 | Heat shock | K.YIDQEELNK#.T                         | 253.05  | 63.56  | 3.98   | 0.25 |
| P07901_H#Hsp90aa1 | Heat shock | K.ADLINNLGTIAK#.S                      | 93.75   | 27.48  | 3.41   | 0.29 |
| P07901_H#Hsp90aa1 | Heat shock | R.ELISNSDLDK#.I                        | 5.43    | 1.93   | 2.81   | 0.36 |
| P07901_H#Hsp90aa1 | Heat shock | R.GVVDSEDLPLNISR.E                     | 1.58    | 3.78   | 0.42   | 2.39 |
| P07901_H#Hsp90aa1 | Heat shock | R.TLTIVDGTIGM*TK#.A                    | 48.36   | 15.45  | 3.13   | 0.32 |
| P07901_H#Hsp90aa1 | Heat shock | R.TLTIVDGTIGMTK#.A                     | 9.30    | 3.63   | 2.56   | 0.39 |
| P07901_H#Hsp90aa1 | Heat shock | R.YESLTDPSK#.L                         | 19.99   | 6.95   | 2.88   | 0.35 |
| P07901_H#Hsp90aa1 | Heat shock | K.ADLINNLGTIAK#.S                      | 1834.53 | 342.28 | 5.36   | 0.19 |
| P07901_H#Hsp90aa1 | Heat shock | K.AEADK#NDK#.S                         | 6.85    | 1.27   | 5.38   | 0.19 |
| P07901_H#Hsp90aa1 | Heat shock | K.AFM*EALQAGADISM*IGQFVGVPYSAYLVAEK#.V | 2.59    | 1.60   | 1.62   | 0.62 |
| P07901_H#Hsp90aa1 | Heat shock | R.ALLFVPR.R                            | 132.27  | 78.58  | 1.68   | 0.59 |
| P07901_H#Hsp90aa1 | Heat shock | R.APFDLFENR.K                          | 31.23   | 17.10  | 1.83   | 0.55 |
| P07901_H#Hsp90aa1 | Heat shock | R.DNSTMGYM*AAK#.K                      | 42.50   | 6.19   | 6.87   | 0.15 |
| P07901_H#Hsp90aa1 | Heat shock | R.DNSTMGYMAAK#.K                       | 34.46   | 5.26   | 6.55   | 0.15 |
| P07901_H#Hsp90aa1 | Heat shock | R.DNSTM*GYM*AAK#.K                     | 85.85   | 14.90  | 5.76   | 0.17 |
| P07901_H#Hsp90aa1 | Heat shock | K.DQVANSFAVER.L                        | 193.42  | 122.69 | 1.58   | 0.63 |
| P07901_H#Hsp90aa1 | Heat shock | K.EDQTEYLEER.R                         | 189.51  | 160.96 | 1.18   | 0.85 |
| P07901_H#Hsp90aa1 | Heat shock | K.EGLEPEDEEEK#.K                       | 133.57  | 28.01  | 4.77   | 0.21 |
| P07901_H#Hsp90aa1 | Heat shock | K.EK#YIDQEELNK#.T                      | 104.50  | 27.80  | 3.76   | 0.27 |
| P07901_H#Hsp90aa1 | Heat shock | R.ELISNSDLDK#.I                        | 360.02  | 61.09  | 5.89   | 0.17 |
| P07901_H#Hsp90aa1 | Heat shock | R.EM*LQOSK#.I                          | 146.35  | 27.03  | 5.42   | 0.18 |
| P07901_H#Hsp90aa1 | Heat shock | R.EMLQOSK#.I                           | 220.19  | 50.59  | 4.35   | 0.23 |
| P07901_H#Hsp90aa1 | Heat shock | K.FYEQFSK#.N                           | 540.69  | 66.94  | 8.08   | 0.12 |
| P07901_H#Hsp90aa1 | Heat shock | R.GVVDSEDLPLNISR.E                     | 272.52  | 254.96 | 1.07   | 0.94 |
| P07901_H#Hsp90aa1 | Heat shock | K.HFSVEGLEFR.A                         | 76.30   | 69.08  | 1.10   | 0.91 |
| P07901_H#Hsp90aa1 | Heat shock | K.HIFYFITGETK#.D                       | 642.04  | 80.73  | 7.95   | 0.13 |
| P07901_H#Hsp90aa1 | Heat shock | K.HLEINPDHSIETLR.@.Q                   | 21.87   | 18.51  | 1.18   | 0.85 |
| P07901_H#Hsp90aa1 | Heat shock | K.HNDDEQYAWESSAGGSFTVR.T               | 25.03   | 24.99  | 1.00   | 1.00 |
| P07901_H#Hsp90aa1 | Heat shock | K.HNDDEQYAWESSAGGSFTVR.T               | 127.11  | 104.66 | 1.21   | 0.82 |
| P07901_H#Hsp90aa1 | Heat shock | K.HSQFIGYPITLFEVEK#.E                  | 326.85  | 47.39  | 6.90   | 0.14 |
| P07901_H#Hsp90aa1 | Heat shock | K.HSQFIGYPITLFEVEKER.D                 | 23.79   | 12.66  | 1.88   | 0.53 |
| P07901_H#Hsp90aa1 | Heat shock | K.I#K#DILEK#.K                         | 57.40   | 7.07   | 8.12   | 0.12 |
| P07901_H#Hsp90aa1 | Heat shock | K.IRYESLTDPSKLDGK.E                    | 26.27   | 25.97  | 1.01   | 0.99 |
| P07901_H#Hsp90aa1 | Heat shock | K.KHLEINPDHSIETLR.Q                    | 37.79   | 20.17  | 1.87   | 0.53 |
| P07901_H#Hsp90aa1 | Heat shock | K.K#H#SQFIGYPITLFEVEK#.E               | 51.72   | 5.70   | 9.08   | 0.11 |
| P07901_H#Hsp90aa1 | Heat shock | K.LDSGK#HELHINLPSK#.Q                  | 20.74   | 1.66   | 12.50  | 0.08 |
| P07901_H#Hsp90aa1 | Heat shock | K.LIGIHESQNR.K                         | 66.99   | 44.29  | 1.51   | 0.66 |
| P07901_H#Hsp90aa1 | Heat shock | K.LSELLR.@.Y                           | 284.23  | 258.62 | 1.10   | 0.91 |
| P07901_H#Hsp90aa1 | Heat shock | R.NPDDITNEEYGEFYK#.S                   | 490.08  | 65.10  | 7.53   | 0.13 |
| P07901_H#Hsp90aa1 | Heat shock | R.TDTGPEM*GR.G                         | 12.74   | 7.50   | 1.70   | 0.59 |
| P07901_H#Hsp90aa1 | Heat shock | R.TLTIVDGTIGM*TK#.A                    | 769.96  | 179.43 | 4.29   | 0.23 |
| P07901_H#Hsp90aa1 | Heat shock | R.TLTIVDGTIGMTK#.A                     | 508.21  | 114.63 | 4.43   | 0.23 |
| P07901_H#Hsp90aa1 | Heat shock | K.VILHLK#.E                            | 278.48  | 58.52  | 4.76   | 0.21 |
| P07901_H#Hsp90aa1 | Heat shock | K.VILHLKEDQTEYLEER.R                   | 160.46  | 119.65 | 1.34   | 0.75 |
| P07901_H#Hsp90aa1 | Heat shock | R.YESLTDPSK#.L                         | 622.27  | 140.69 | 4.42   | 0.23 |
| P07901_H#Hsp90aa1 | Heat shock | R.YESLTDPSKLDGK.E                      | 236.21  | 49.47  | 4.77   | 0.21 |
| P07901_H#Hsp90aa1 | Heat shock | K.YIDQEELNK#.T                         | 2141.58 | 418.21 | 5.12   | 0.20 |
| P07901_H#Hsp90aa1 | Heat shock | R.YYTSAGDEM*VSLK#.D                    | 101.40  | 14.39  | 7.05   | 0.14 |
| P07901_H#Hsp90aa1 | Heat shock | R.YYTSAGDEM*VSLK#.D                    | 36.89   | 5.37   | 6.87   | 0.15 |
| P07901_H#Hsp90aa1 | Heat shock | K.ADLINNLGTIAK#.S                      | 1131.43 | 216.71 | 5.22   | 0.19 |
| P07901_H#Hsp90aa1 | Heat shock | K.AEADK#NDK#.S                         | 17.11   | 8.78   | 1.95   | 0.51 |
| P07901_H#Hsp90aa1 | Heat shock | R.ALLFVPR.R                            | 53.33   | 29.41  | 1.81   | 0.55 |
| P07901_H#Hsp90aa1 | Heat shock | R.DNSTM*GYM*AAK#.K                     | 70.75   | 8.33   | 8.49   | 0.12 |
| P07901_H#Hsp90aa1 | Heat shock | K.DQVANSFAVER.L                        | 101.24  | 48.46  | 2.09   | 0.48 |
| P07901_H#Hsp90aa1 | Heat shock | K.EDQTEYLEER.R                         | 61.73   | 60.10  | 1.03   | 0.97 |
| P07901_H#Hsp90aa1 | Heat shock | K.EGLEPEDEEEK#.K                       | 135.80  | 30.84  | 4.40   | 0.23 |
| P07901_H#Hsp90aa1 | Heat shock | R.ELISNSDLDK#.I                        | 183.39  | 17.32  | 10.59  | 0.09 |
| P07901_H#Hsp90aa1 | Heat shock | R.EM*LQOSK#.I                          | 84.91   | 14.85  | 5.72   | 0.17 |
| P07901_H#Hsp90aa1 | Heat shock | R.EMLQOSK#.I                           | 27.83   | 10.40  | 2.68   | 0.37 |
| P07901_H#Hsp90aa1 | Heat shock | K.FYEQFSK#.N                           | 203.96  | 23.62  | 8.64   | 0.12 |
| P07901_H#Hsp90aa1 | Heat shock | R.GVVDSEDLPLNISR.E                     | 210.71  | 184.50 | 1.14   | 0.88 |
| P07901_H#Hsp90aa1 | Heat shock | K.HFSVEGLEFR.A                         | 13.63   | 12.62  | 1.08   | 0.93 |
| P07901_H#Hsp90aa1 | Heat shock | K.HIFYFITGETK#.D                       | 294.22  | 29.90  | 9.84   | 0.10 |
| P07901_H#Hsp90aa1 | Heat shock | K.HLEINPDHSIETLR.@.Q                   | 246.99  | 1.19   | 207.48 | 0.00 |
| P07901_H#Hsp90aa1 | Heat shock | K.HNDDEQYAWESSAGGSFTVR.T               | 54.07   | 44.03  | 1.23   | 0.81 |
| P07901_H#Hsp90aa1 | Heat shock | K.HSQFIGYPITLFEVEK#.E                  | 93.98   | 8.90   | 10.56  | 0.09 |
| P07901_H#Hsp90aa1 | Heat shock | K.LSELLR.@.Y                           | 145.27  | 130.61 | 1.11   | 0.90 |
| P07901_H#Hsp90aa1 | Heat shock | R.NPDDITNEEYGEFYK#.S                   | 204.95  | 26.15  | 7.84   | 0.13 |
| P07901_H#Hsp90aa1 | Heat shock | R.TLTIVDGTIGM*TK#.A                    | 520.97  | 122.65 | 4.25   | 0.24 |
| P07901_H#Hsp90aa1 | Heat shock | R.TLTIVDGTIGMTK#.A                     | 200.76  | 40.86  | 4.91   | 0.20 |
| P07901_H#Hsp90aa1 | Heat shock | K.VILHLK#.E                            | 114.86  | 21.96  | 5.23   | 0.19 |
| P07901_H#Hsp90aa1 | Heat shock | K.VILHLKEDQTEYLEER.R                   | 68.96   | 61.62  | 1.12   | 0.89 |
| P07901_H#Hsp90aa1 | Heat shock | R.YESLTDPSK#.L                         | 276.78  | 50.37  | 5.49   | 0.18 |
| P07901_H#Hsp90aa1 | Heat shock | R.YESLTDPSKLDGK.E                      | 95.00   | 17.57  | 5.41   | 0.18 |
| P07901_H#Hsp90aa1 | Heat shock | K.YIDQEELNK#.T                         | 1248.39 | 248.81 | 5.02   | 0.20 |
| P07901_H#Hsp90aa1 | Heat shock | R.YYTSAGDEM*VSLK#.D                    | 13.23   | 2.05   | 6.44   | 0.16 |
| P11499_H#Hsp90ab1 | Heat shock | R.ALLFIPR.R                            | 26.37   | 25.61  | 1.03   | 0.97 |
| P11499_H#Hsp90ab1 | Heat shock | K.EQVANSFAVER.V                        | 37.58   | 35.56  | 1.06   | 0.95 |
| P11499_H#Hsp90ab1 | Heat shock | K.FYAFSK#.N                            | 143.73  | 28.68  | 5.01   | 0.20 |
| P11499_H#Hsp90ab1 | Heat shock | K.HSQFIGYPITLFEVEK#.E                  | 62.61   | 14.49  | 4.32   | 0.23 |
| P11499_H#Hsp90ab1 | Heat shock | K.K#H#SQFIGYPITLFEVEK#.E               | 5.54    | 3.91   | 1.42   | 0.71 |
| P11499_H#Hsp90ab1 | Heat shock | R.NPDDITNEEYGEFYK#.S                   | 92.38   | 22.31  | 4.14   | 0.24 |
| P11499_H#Hsp90ab1 | Heat shock | R.RAPDFLFENR.K                         | 12.06   | 12.10  | 1.00   | 1.00 |
| P11499_H#Hsp90ab1 | Heat shock | K.SIYYITGESK#.E                        | 137.88  | 29.23  | 4.72   | 0.21 |
| P11499_H#Hsp90ab1 | Heat shock | K.SLVSVTK#.E                           | 170.54  | 34.41  | 4.96   | 0.20 |
| P11499_H#Hsp90ab1 | Heat shock | R.YHYSQSGDEM*TSLSYVSR.M                | 10.85   | 13.22  | 0.82   | 1.22 |
| P11499_H#Hsp90ab1 | Heat shock | K.HLEINPDHSIETLR.Q                     | 17.16   | 42.25  | 0.41   | 2.46 |
| P11499_H#Hsp90ab1 | Heat shock | K.LGLGIDEVTAEPSAAVDEIPPLEGDEEDASR.M    | 16.92   | 18.99  | 0.89   | 1.12 |
| P11499_H#Hsp90ab1 | Heat shock | R.ALLFIPR.R                            | 255.81  | 255.79 | 1.00   | 1.00 |
| P11499_H#Hsp90ab1 | Heat shock | R.APFDLFENK#.K                         | 187.54  | 40.90  | 4.58   | 0.22 |
| P11499_H#Hsp90ab1 | Heat shock | R.DNSTMGYM*MAK#.K                      | 45.34   | 9.83   | 4.61   | 0.22 |
| P11499_H#Hsp90ab1 | Heat shock | R.DNSTM*GYM*MAK#.K                     | 48.29   | 11.99  | 4.03   | 0.25 |
| P11499_H#Hsp90ab1 | Heat shock | R.DNSTM*GYM*MAK#.K                     | 92.63   | 20.75  | 4.46   | 0.22 |
| P11499_H#Hsp90ab1 | Heat shock | R.DNSTMGYM*MAK#.K                      | 55.40   | 12.81  | 4.32   | 0.23 |
| P11499_H#Hsp90ab1 | Heat shock | R.DNSTMGYMM*AK#.K                      | 28.10   | 6.62   | 4.24   | 0.24 |

|                    |            |                                         |         |        |      |      |
|--------------------|------------|-----------------------------------------|---------|--------|------|------|
| P11499_Hf Hsp90ab1 | Heat shock | R.DNSTMGYMMAK#.K                        | 38.31   | 8.02   | 4.78 | 0.21 |
| P11499_Hf Hsp90ab1 | Heat shock | K.EQVANSFAVER.V                         | 327.64  | 359.11 | 0.91 | 1.10 |
| P11499_Hf Hsp90ab1 | Heat shock | K.FYEAFSK#.N                            | 1335.26 | 260.72 | 5.12 | 0.20 |
| P11499_Hf Hsp90ab1 | Heat shock | K.HLEINPDHPIVETLR.Q                     | 159.97  | 179.93 | 0.89 | 1.12 |
| P11499_Hf Hsp90ab1 | Heat shock | K.HSQFIGYPITLYLEK#.E                    | 757.78  | 162.95 | 4.65 | 0.22 |
| P11499_Hf Hsp90ab1 | Heat shock | K.HSQFIGYPITLYLEK#.E                    | 182.22  | 42.47  | 4.29 | 0.23 |
| P11499_Hf Hsp90ab1 | Heat shock | K.HSQFIGYPITLYLEKER.E                   | 26.94   | 21.48  | 1.25 | 0.80 |
| P11499_Hf Hsp90ab1 | Heat shock | K.IDIIPNPOER.T                          | 235.76  | 291.47 | 0.81 | 1.24 |
| P11499_Hf Hsp90ab1 | Heat shock | K.IEDVGSDEEDDSGK#.D                     | 39.21   | 9.90   | 3.96 | 0.25 |
| P11499_Hf Hsp90ab1 | Heat shock | K.IEDVGSDEEDDSGK#HDK#.K                 | 10.24   | 1.97   | 5.20 | 0.19 |
| P11499_Hf Hsp90ab1 | Heat shock | K.K#H#YAFSK#.N                          | 51.86   | 14.24  | 3.64 | 0.27 |
| P11499_Hf Hsp90ab1 | Heat shock | K.KHLEINPDHPIVETLR.Q                    | 129.30  | 138.14 | 0.94 | 1.07 |
| P11499_Hf Hsp90ab1 | Heat shock | K.K#H#SQFIGYPITLYLEK#.E                 | 113.42  | 32.51  | 3.49 | 0.29 |
| P11499_Hf Hsp90ab1 | Heat shock | K.K#H#SQFIGYPITLYLEK#.E                 | 36.13   | 7.99   | 4.52 | 0.22 |
| P11499_Hf Hsp90ab1 | Heat shock | K.LGIHEDSTNR.R                          | 134.19  | 130.67 | 1.03 | 0.97 |
| P11499_Hf Hsp90ab1 | Heat shock | K.LGLGIDEDEVTAEPASAAPVDEIPPLEGDEEDASR.M | 23.04   | 28.45  | 0.81 | 1.24 |
| P11499_Hf Hsp90ab1 | Heat shock | K.LM*#HEILDK#.K                         | 66.52   | 17.38  | 3.83 | 0.26 |
| P11499_Hf Hsp90ab1 | Heat shock | R.NPDDITQEYGEFYK#.S                     | 825.88  | 169.64 | 4.87 | 0.21 |
| P11499_Hf Hsp90ab1 | Heat shock | R.RAPFDLFENK.K                          | 113.98  | 120.94 | 0.94 | 1.06 |
| P11499_Hf Hsp90ab1 | Heat shock | R.RAPFDLFENK.K                          | 59.03   | 62.69  | 0.94 | 1.06 |
| P11499_Hf Hsp90ab1 | Heat shock | R.RLSELLR.Y                             | 22.60   | 98.91  | 0.23 | 4.38 |
| P11499_Hf Hsp90ab1 | Heat shock | K.SIYYITGESK#.E                         | 1191.31 | 259.83 | 4.58 | 0.22 |
| P11499_Hf Hsp90ab1 | Heat shock | R.YHTSQSGDEM*#TSLSEVSR.M                | 182.21  | 185.69 | 0.98 | 1.02 |
| P11499_Hf Hsp90ab1 | Heat shock | R.YHTSQSGDEM*#TSLSEVSR.M                | 66.57   | 60.07  | 1.11 | 0.90 |
| P11499_Hf Hsp90ab1 | Heat shock | R.ADHGEPIGR.G                           | 30.34   | 35.30  | 0.86 | 1.16 |
| P11499_Hf Hsp90ab1 | Heat shock | R.ALLFIPR.R                             | 174.00  | 157.38 | 1.11 | 0.90 |
| P11499_Hf Hsp90ab1 | Heat shock | R.APFDFENK#.K                           | 127.92  | 32.10  | 3.99 | 0.25 |
| P11499_Hf Hsp90ab1 | Heat shock | R.DNSTM*GYMM*AK#.K                      | 35.39   | 6.38   | 5.55 | 0.18 |
| P11499_Hf Hsp90ab1 | Heat shock | R.DNSTM*GYMM*AK#.K                      | 8.79    | 2.12   | 4.14 | 0.24 |
| P11499_Hf Hsp90ab1 | Heat shock | K.EQVANSFAVER.V                         | 132.20  | 125.75 | 1.05 | 0.95 |
| P11499_Hf Hsp90ab1 | Heat shock | K.FYEAFSK#.N                            | 561.62  | 120.10 | 4.68 | 0.21 |
| P11499_Hf Hsp90ab1 | Heat shock | K.HLEINPDHPIVETLR.Q                     | 107.59  | 97.93  | 1.10 | 0.91 |
| P11499_Hf Hsp90ab1 | Heat shock | K.HSQFIGYPITLYLEK#.E                    | 241.30  | 53.05  | 4.55 | 0.22 |
| P11499_Hf Hsp90ab1 | Heat shock | K.HSQFIGYPITLYLEK#.E                    | 35.77   | 7.48   | 4.78 | 0.21 |
| P11499_Hf Hsp90ab1 | Heat shock | K.IDIIPNPOER.T                          | 96.12   | 97.96  | 0.98 | 1.02 |
| P11499_Hf Hsp90ab1 | Heat shock | K.IEDVGSDEEDDSGK#.D                     | 54.13   | 13.19  | 4.11 | 0.24 |
| P11499_Hf Hsp90ab1 | Heat shock | K.KHLEINPDHPIVETLR.Q                    | 44.47   | 45.54  | 0.98 | 1.02 |
| P11499_Hf Hsp90ab1 | Heat shock | K.LGIHEDSTNR.R                          | 55.64   | 59.18  | 0.94 | 1.06 |
| P11499_Hf Hsp90ab1 | Heat shock | R.NPDDITQEYGEFYK#.S                     | 411.25  | 92.52  | 4.44 | 0.22 |
| P11499_Hf Hsp90ab1 | Heat shock | R.RAPFDLFENK.K                          | 47.30   | 51.08  | 0.93 | 1.08 |
| P11499_Hf Hsp90ab1 | Heat shock | K.SIYYITGESK#.E                         | 574.95  | 124.37 | 4.62 | 0.22 |
| P11499_Hf Hsp90ab1 | Heat shock | K.SLVSVTK#.E                            | 736.30  | 152.48 | 4.83 | 0.21 |
| P11499_Hf Hsp90ab1 | Heat shock | R.YHTSQSGDEM*#TSLSEVSR.M                | 117.73  | 113.31 | 1.04 | 0.96 |
| P08113_EN Hsp90b1  | Endoplasm  | K.DISTNYYASQK#.K                        | 13.34   | 3.87   | 3.45 | 0.29 |
| P08113_EN Hsp90b1  | Endoplasm  | R.ELISNASDALDK#.I                       | 116.08  | 27.17  | 4.27 | 0.23 |
| P08113_EN Hsp90b1  | Endoplasm  | K.SGTSEFLNK#.M                          | 19.67   | 4.06   | 4.85 | 0.21 |
| P08113_EN Hsp90b1  | Endoplasm  | K.DISTNYYASQK#.K                        | 14.13   | 5.31   | 2.66 | 0.38 |
| P08113_EN Hsp90b1  | Endoplasm  | R.ELISNASDALDK#.I                       | 32.86   | 13.89  | 2.37 | 0.42 |
| P08113_EN Hsp90b1  | Endoplasm  | R.LISLTDENALAGNEELTVK#.I                | 7.00    | 2.37   | 2.96 | 0.34 |
| P08113_EN Hsp90b1  | Endoplasm  | R.TDDEVVQREEEAIQLDGLNASQIR.E            | 2.26    | 8.72   | 0.26 | 3.86 |
| P08113_EN Hsp90b1  | Endoplasm  | K.AK#DK#EK#.A                           | 101.04  | 27.83  | 3.63 | 0.28 |
| P08113_EN Hsp90b1  | Endoplasm  | K.AQAVYQTK#.D                           | 45.80   | 16.29  | 2.81 | 0.36 |
| P08113_EN Hsp90b1  | Endoplasm  | K.DISTNYYASQK#.K                        | 546.75  | 143.47 | 3.81 | 0.26 |
| P08113_EN Hsp90b1  | Endoplasm  | K.EAESPFVER.L                           | 129.18  | 161.66 | 0.80 | 1.25 |
| P08113_EN Hsp90b1  | Endoplasm  | R.EATEK#FEPELLNWM*#K.D                  | 128.93  | 30.64  | 4.21 | 0.24 |
| P08113_EN Hsp90b1  | Endoplasm  | R.EATEK#FEPELLNWM*#K.D                  | 22.33   | 8.90   | 2.51 | 0.40 |
| P08113_EN Hsp90b1  | Endoplasm  | R.EATEK#FEPELLNWM*#K.D                  | 333.35  | 76.94  | 4.33 | 0.23 |
| P08113_EN Hsp90b1  | Endoplasm  | K.EEASDYLELDTIK#.N                      | 177.23  | 43.82  | 4.04 | 0.25 |
| P08113_EN Hsp90b1  | Endoplasm  | R.EEEAIQLDGLNASQIR.E                    | 8.95    | 13.77  | 0.65 | 1.54 |
| P08113_EN Hsp90b1  | Endoplasm  | K.EESDDEAAVEEEEEK#.K                    | 14.93   | 5.43   | 2.75 | 0.36 |
| P08113_EN Hsp90b1  | Endoplasm  | K.EFEPELLNWM*#K.D                       | 32.51   | 7.95   | 4.09 | 0.24 |
| P08113_EN Hsp90b1  | Endoplasm  | K.EFEPELLNWM*#K.D                       | 57.26   | 12.28  | 4.66 | 0.21 |
| P08113_EN Hsp90b1  | Endoplasm  | R.EGSRDDEVVQREEEAIQLDGLNASQIR.E         | 10.47   | 35.07  | 0.30 | 3.35 |
| P08113_EN Hsp90b1  | Endoplasm  | K.EGVK#FDESEK#.T                        | 124.99  | 35.78  | 3.49 | 0.29 |
| P08113_EN Hsp90b1  | Endoplasm  | K.EGVK#FDESEK#.E                        | 61.64   | 17.02  | 3.62 | 0.28 |
| P08113_EN Hsp90b1  | Endoplasm  | R.ELISNASDALDK#.I                       | 1142.27 | 280.81 | 4.07 | 0.25 |
| P08113_EN Hsp90b1  | Endoplasm  | K.ESDDPM*YIHFTAEGEVTFK#.S               | 18.09   | 4.64   | 3.89 | 0.26 |
| P08113_EN Hsp90b1  | Endoplasm  | K.ESDDPM*YIHFTAEGEVTFK#.S               | 21.89   | 7.13   | 3.07 | 0.33 |
| P08113_EN Hsp90b1  | Endoplasm  | K.EVEEYK#.A                             | 310.86  | 86.28  | 3.60 | 0.28 |
| P08113_EN Hsp90b1  | Endoplasm  | K.FAFQAEVNR.M                           | 218.69  | 245.08 | 0.89 | 1.12 |
| P08113_EN Hsp90b1  | Endoplasm  | K.FDESEK#TK#.E                          | 18.72   | 10.56  | 1.77 | 0.56 |
| P08113_EN Hsp90b1  | Endoplasm  | R.FQVNAK#.E                             | 648.50  | 168.81 | 3.84 | 0.26 |
| P08113_EN Hsp90b1  | Endoplasm  | R.FQSSHSTIDTSLDQYVER.M                  | 78.35   | 87.55  | 0.89 | 1.12 |
| P08113_EN Hsp90b1  | Endoplasm  | R.GLFDEYGSK#.K                          | 389.58  | 106.56 | 3.66 | 0.27 |
| P08113_EN Hsp90b1  | Endoplasm  | R.GLFDEYGSK#K#.S                        | 47.14   | 14.23  | 3.31 | 0.30 |
| P08113_EN Hsp90b1  | Endoplasm  | R.GTTITLVK#.E                           | 65.85   | 15.81  | 4.16 | 0.24 |
| P08113_EN Hsp90b1  | Endoplasm  | R.GTTITLVK#EEASDYLELDTIK#.N             | 82.69   | 20.58  | 4.02 | 0.25 |
| P08113_EN Hsp90b1  | Endoplasm  | K.GVVDSDDLPLNVR.E                       | 171.83  | 208.83 | 0.82 | 1.22 |
| P08113_EN Hsp90b1  | Endoplasm  | K.IADEK#YNDTFWK#.E                      | 311.47  | 64.33  | 4.84 | 0.21 |
| P08113_EN Hsp90b1  | Endoplasm  | K.IADEK#YNDTFWK#REFGTNIK#.L             | 14.63   | 3.02   | 4.84 | 0.21 |
| P08113_EN Hsp90b1  | Endoplasm  | K.IYFM*AGSSR.K                          | 67.83   | 72.71  | 0.93 | 1.07 |
| P08113_EN Hsp90b1  | Endoplasm  | K.IYFM*AGSSR.K                          | 57.77   | 59.91  | 0.96 | 1.04 |
| P08113_EN Hsp90b1  | Endoplasm  | R.KEAESPFFVER.L                         | 55.35   | 59.21  | 0.93 | 1.07 |
| P08113_EN Hsp90b1  | Endoplasm  | K.K#ADEK#YNDTFWK#.E                     | 57.25   | 10.85  | 5.28 | 0.19 |
| P08113_EN Hsp90b1  | Endoplasm  | R.K#FLDMIK#.K                           | 35.61   | 10.65  | 3.34 | 0.30 |
| P08113_EN Hsp90b1  | Endoplasm  | R.K#FLDMIK#.K                           | 32.47   | 8.08   | 4.02 | 0.25 |
| P08113_EN Hsp90b1  | Endoplasm  | R.K#YSQFINFIYVWSSK#.T                   | 177.40  | 40.57  | 4.37 | 0.23 |
| P08113_EN Hsp90b1  | Endoplasm  | K.LIINSLYK#.N                           | 820.48  | 198.35 | 4.14 | 0.24 |
| P08113_EN Hsp90b1  | Endoplasm  | R.LISLTDENALAGNEELTVK#.I                | 213.47  | 55.79  | 3.83 | 0.26 |
| P08113_EN Hsp90b1  | Endoplasm  | K.NKEIFLR.E                             | 64.85   | 61.91  | 1.05 | 0.95 |
| P08113_EN Hsp90b1  | Endoplasm  | K.NLLHVTDTGVGM*TR.E                     | 74.45   | 82.46  | 0.90 | 1.11 |
| P08113_EN Hsp90b1  | Endoplasm  | K.NLLHVTDTGVGMTR.E                      | 20.89   | 28.18  | 0.74 | 1.35 |
| P08113_EN Hsp90b1  | Endoplasm  | K.NLLHVTDTGVGMTR.EELVK.N                | 23.72   | 29.23  | 0.81 | 1.23 |
| P08113_EN Hsp90b1  | Endoplasm  | R.RVFITDDFHDMMPK.Y                      | 11.60   | 12.08  | 0.96 | 1.04 |
| P08113_EN Hsp90b1  | Endoplasm  | K.SGTSEFLNK#.M                          | 719.59  | 167.80 | 4.29 | 0.23 |
| P08113_EN Hsp90b1  | Endoplasm  | R.SGYLLPDTK#.A                          | 601.59  | 136.68 | 4.40 | 0.23 |
| P08113_EN Hsp90b1  | Endoplasm  | K.SILFVTSAPR.G                          | 181.46  | 225.58 | 0.80 | 1.24 |
| P08113_EN Hsp90b1  | Endoplasm  | R.TDDEVVQREEEAIQLDGLNASQIR.E            | 23.04   | 65.82  | 0.35 | 2.86 |
| P08113_EN Hsp90b1  | Endoplasm  | K.TETVEEPEEDEAAK#.E                     | 14.31   | 3.82   | 3.74 | 0.27 |
| P08113_EN Hsp90b1  | Endoplasm  | K.TETVEEPEEDEAAK#EEK#.E                 | 181.02  | 51.49  | 3.52 | 0.28 |
| P08113_EN Hsp90b1  | Endoplasm  | K.TETVEEPEEDEAAK#EEK#EESDDEAAVEEEEEK.K  | 18.63   | 6.61   | 2.82 | 0.35 |
| P08113_EN Hsp90b1  | Endoplasm  | K.TFEINPR.H                             | 108.56  | 121.32 | 0.89 | 1.12 |
| P08113_EN Hsp90b1  | Endoplasm  | K.TLDMIK#.K                             | 34.50   | 13.31  | 2.59 | 0.39 |

|                   |                                            |        |        |      |       |
|-------------------|--------------------------------------------|--------|--------|------|-------|
| P08113_EH Hsp90b1 | Endoplasm K.TLDM*IK#K.I                    | 44.43  | 7.26   | 6.12 | 0.16  |
| P08113_EH Hsp90b1 | Endoplasm R.VFITDFHDM*PK#.Y                | 6.64   | 3.50   | 1.90 | 0.53  |
| P08113_EH Hsp90b1 | Endoplasm K.YNDTFWK#.E                     | 194.03 | 54.33  | 3.57 | 0.28  |
| P08113_EH Hsp90b1 | Endoplasm K.DISTNYASQK#.K                  | 65.31  | 19.55  | 3.34 | 0.30  |
| P08113_EH Hsp90b1 | Endoplasm K.EEASDYLEDTK#.N                 | 16.36  | 3.96   | 4.13 | 0.24  |
| P08113_EH Hsp90b1 | Endoplasm K.EFGTNIK#.L                     | 50.61  | 9.96   | 5.08 | 0.20  |
| P08113_EH Hsp90b1 | Endoplasm R.ELISNASDALDK#.I                | 468.25 | 115.25 | 4.06 | 0.25  |
| P08113_EH Hsp90b1 | Endoplasm K.EVEDEYK#.A                     | 28.19  | 10.20  | 2.76 | 0.36  |
| P08113_EH Hsp90b1 | Endoplasm K.FAQAEVNR.M                     | 24.30  | 26.85  | 0.91 | 1.10  |
| P08113_EH Hsp90b1 | Endoplasm K.GVVDSDDLPLNVR.E                | 24.20  | 33.55  | 0.72 | 1.39  |
| P08113_EH Hsp90b1 | Endoplasm K.LIINSLYK#.N                    | 89.28  | 25.27  | 3.53 | 0.28  |
| P08113_EH Hsp90b1 | Endoplasm R.LIISLTDENALAGNEELTVK#.I        | 19.62  | 7.53   | 2.61 | 0.38  |
| P08113_EH Hsp90b1 | Endoplasm K.SGTSEFLNK#.M                   | 75.70  | 19.35  | 3.91 | 0.26  |
| P08113_EH Hsp90b1 | Endoplasm R.SGVLPLDTK#.A                   | 70.59  | 20.51  | 3.44 | 0.29  |
| P08113_EH Hsp90b1 | Endoplasm K.SILFVPTSAPR.G                  | 31.24  | 34.56  | 0.90 | 1.11  |
| P08113_EH Hsp90b1 | Endoplasm K.YSQFINFPIYVWSSK#.T             | 10.92  | 2.52   | 4.34 | 0.23  |
| Q99M31_H Hspa14   | Heat shock R.ADVVANDAGDR.V                 | 13.48  | 19.38  | 0.70 | 1.44  |
| Q99M31_H Hspa14   | Heat shock R.DILAVLTMK#.R                  | 11.00  | 1.32   | 8.30 | 0.12  |
| Q99M31_H Hspa14   | Heat shock K.FAQVQLDLKDK#.E                | 47.80  | 14.87  | 3.21 | 0.31  |
| Q99M31_H Hspa14   | Heat shock R.FTVLFPSTPLPAR.R               | 4.03   | 6.57   | 0.61 | 1.63  |
| Q99M31_H Hspa14   | Heat shock R.HVSTTVK#.V                    | 26.03  | 202.57 | 0.13 | 7.78  |
| Q99M31_H Hspa14   | Heat shock R.VLNTSNDIGGAHFTDTLAQYLASEFQR.L | 6.81   | 2.97   | 2.29 | 0.44  |
| Q99M31_H Hspa14   | Heat shock R.VTPAIVASER.E                  | 9.63   | 12.07  | 0.80 | 1.25  |
| Q99M31_H Hspa14   | Heat shock R.YEIDGEEK#.L                   | 23.12  | 6.95   | 3.33 | 0.30  |
| Q61696_H Hspa1a   | Heat shock K.NQVALNPQTVFADK#.R             | 5.66   | 3.52   | 1.61 | 0.62  |
| Q61696_H Hspa1a   | Heat shock R.TTPSYVAFTDTER.L               | 21.43  | 84.34  | 0.25 | 3.93  |
| Q61696_H Hspa1a   | Heat shock K.QTQITTYSDNQPGLVQVYEGER.A      | 16.88  | 57.55  | 0.29 | 3.41  |
| Q61696_H Hspa1a   | Heat shock R.TTPSYVAFTDTER.L               | 58.04  | 205.53 | 0.28 | 3.54  |
| Q61696_H Hspa1a   | Heat shock R.TTPSYVAFTDTER.L               | 10.59  | 18.95  | 0.56 | 1.79  |
| P48722_H Hspa4I   | Heat shock R.IGNFTIQNVFQSDGSSK#.V          | 3.55   | 1.94   | 1.83 | 0.55  |
| P20029_G Hspa5    | 78 kDa gluc R.IINEPTAAAIYGLDK#.R           | 25.60  | 23.88  | 1.07 | 0.93  |
| P20029_G Hspa5    | 78 kDa gluc R.VEIANDQGNR.J                 | 24.99  | 96.80  | 0.26 | 3.87  |
| P20029_G Hspa5    | 78 kDa gluc R.AKFEELNM*DLFR.S              | 21.23  | 15.17  | 1.40 | 0.71  |
| P20029_G Hspa5    | 78 kDa gluc K.DAGTIAGLNM*RI                | 9.47   | 40.99  | 0.23 | 4.33  |
| P20029_G Hspa5    | 78 kDa gluc K.DAGTIAGLNMVR.I               | 6.02   | 25.44  | 0.24 | 4.22  |
| P20029_G Hspa5    | 78 kDa gluc K.DNHLLGTFDLTGPPAPR.G          | 4.69   | 26.15  | 0.18 | 5.58  |
| P20029_G Hspa5    | 78 kDa gluc K.ELEEIVQPIISK.L               | 27.85  | 26.76  | 1.04 | 0.96  |
| P20029_G Hspa5    | 78 kDa gluc R.IEIESFFEGEDFSETLTRA.A        | 8.21   | 39.97  | 0.21 | 4.87  |
| P20029_G Hspa5    | 78 kDa gluc K.IEWLESHQDADIEDFK#.A          | 26.13  | 34.73  | 0.75 | 1.33  |
| P20029_G Hspa5    | 78 kDa gluc K.IEWLESHQDADIEDFK#AK#.K       | 20.42  | 25.10  | 0.81 | 1.23  |
| P20029_G Hspa5    | 78 kDa gluc R.IINEPTAAAIYGLDK#.R           | 65.08  | 53.60  | 1.21 | 0.82  |
| P20029_G Hspa5    | 78 kDa gluc K.IITINDQNR.L                  | 15.78  | 82.44  | 0.19 | 5.22  |
| P20029_G Hspa5    | 78 kDa gluc R.ITPSYVAFTPEGER.L             | 11.06  | 79.32  | 0.14 | 7.17  |
| P20029_G Hspa5    | 78 kDa gluc K.K#K#ELEEIVQPIISK#.L          | 52.99  | 69.14  | 0.77 | 1.30  |
| P20029_G Hspa5    | 78 kDa gluc K.KSDIDEIVLGGSTR.I             | 3.60   | 25.99  | 0.14 | 7.21  |
| P20029_G Hspa5    | 78 kDa gluc R.LTPEEIER.M                   | 14.40  | 67.42  | 0.21 | 4.68  |
| P20029_G Hspa5    | 78 kDa gluc K.LYGGSGPPPTGEEDTSEK#DEL.-     | 15.93  | 19.65  | 0.81 | 1.23  |
| P20029_G Hspa5    | 78 kDa gluc R.NELSYVSLK#.N                 | 87.81  | 53.84  | 1.63 | 0.61  |
| P20029_G Hspa5    | 78 kDa gluc K.NQLTSNPENTVFDK#.R            | 57.91  | 74.41  | 0.78 | 1.28  |
| P20029_G Hspa5    | 78 kDa gluc R.NTVVPTK#.S                   | 23.45  | 27.68  | 0.85 | 1.18  |
| P20029_G Hspa5    | 78 kDa gluc K.SQJFSTASDNQPTVTIK#.V         | 40.76  | 43.42  | 0.94 | 1.07  |
| P20029_G Hspa5    | 78 kDa gluc K.TFAPEISAM*VLT.K.M            | 13.49  | 13.94  | 0.97 | 1.03  |
| P20029_G Hspa5    | 78 kDa gluc K.TFAPEISAMVLT.K.M             | 31.86  | 40.98  | 0.78 | 1.29  |
| P20029_G Hspa5    | 78 kDa gluc K.TKHPYIQVDIGGGQTK#.T          | 40.12  | 49.12  | 0.82 | 1.22  |
| P20029_G Hspa5    | 78 kDa gluc R.TWNPVQQDIK#.F                | 44.04  | 59.08  | 0.75 | 1.34  |
| P20029_G Hspa5    | 78 kDa gluc R.VEIANDQGNR.J                 | 99.86  | 382.45 | 0.26 | 3.83  |
| P20029_G Hspa5    | 78 kDa gluc K.VTHAVTVPAYFNDAQR.Q           | 12.10  | 55.20  | 0.22 | 4.56  |
| P20029_G Hspa5    | 78 kDa gluc K.VYEGERPLT.D                  | 6.53   | 27.79  | 0.24 | 4.25  |
| P20029_G Hspa5    | 78 kDa gluc K.NQLTSNPENTVFDK#.R            | 6.49   | 7.65   | 0.85 | 1.18  |
| P20029_G Hspa5    | 78 kDa gluc K.SQJFSTASDNQPTVTIK#.V         | 5.13   | 4.08   | 1.26 | 0.80  |
| P63017_H Hspa8    | Heat shock R.ARFEELNADLFR.G                | 3.26   | 39.66  | 0.08 | 12.15 |
| P63017_H Hspa8    | Heat shock K.DAGTIAGLNLVR.I                | 21.22  | 83.75  | 0.25 | 3.95  |
| P63017_H Hspa8    | Heat shock R.FDDAVVQSDM*K.H                | 13.01  | 10.24  | 1.27 | 0.79  |
| P63017_H Hspa8    | Heat shock R.IINEPTAAAIYGLDK#.K#.G         | 108.52 | 92.40  | 1.17 | 0.85  |
| P63017_H Hspa8    | Heat shock K.LDKSQJHDIIVLGGSTR.I           | 1.99   | 9.63   | 0.21 | 4.84  |
| P63017_H Hspa8    | Heat shock K.LLQDFGNGK#.E                  | 26.34  | 20.12  | 1.31 | 0.76  |
| P63017_H Hspa8    | Heat shock K.M*K#EIAEAYLGK#.T              | 7.12   | 4.68   | 1.52 | 0.66  |
| P63017_H Hspa8    | Heat shock K.MK#EIAEAYLGK#.T               | 9.90   | 8.15   | 1.21 | 0.82  |
| P63017_H Hspa8    | Heat shock R.M*VNHFAEFK#.R                 | 24.71  | 19.57  | 1.26 | 0.79  |
| P63017_H Hspa8    | Heat shock K.NQTAEK#EEFEHQK#.E             | 21.89  | 13.68  | 1.60 | 0.62  |
| P63017_H Hspa8    | Heat shock K.NQVAM*NPNTVFDK#.R             | 63.54  | 60.22  | 1.06 | 0.95  |
| P63017_H Hspa8    | Heat shock K.NQVAMNPNTVFDK#.R              | 22.51  | 21.89  | 1.03 | 0.97  |
| P63017_H Hspa8    | Heat shock K.NLSYAFNMK#.A                  | 35.22  | 27.45  | 1.28 | 0.78  |
| P63017_H Hspa8    | Heat shock R.RFDDAVVQSDM*K.H               | 5.17   | 15.88  | 0.33 | 3.07  |
| P63017_H Hspa8    | Heat shock K.SFYPEVSSM*VLT.K#.M            | 18.27  | 7.89   | 2.31 | 0.43  |
| P63017_H Hspa8    | Heat shock K.SFYPEVSSM*VLT.K#.M            | 27.12  | 27.52  | 0.99 | 1.01  |
| P63017_H Hspa8    | Heat shock K.SINPDEAVYGAOVAAILSGDK#.S      | 6.25   | 3.68   | 1.70 | 0.59  |
| P63017_H Hspa8    | Heat shock K.SQJHDIIVLGGSTR.I              | 4.05   | 17.53  | 0.23 | 4.32  |
| P63017_H Hspa8    | Heat shock K.STAGDTHLGGEDFNR.M             | 27.40  | 116.47 | 0.24 | 4.25  |
| P63017_H Hspa8    | Heat shock K.TVNAVTVPAYFNDSQR.Q            | 6.41   | 17.67  | 0.36 | 2.76  |
| P63017_H Hspa8    | Heat shock K.VQVEYK#.G                     | 38.07  | 40.95  | 0.93 | 1.08  |
| P63017_H Hspa8    | Heat shock R.ARFEELNADLFR.G                | 12.30  | 148.06 | 0.08 | 12.04 |
| P63017_H Hspa8    | Heat shock K.DAGTIAGLNLVR.I                | 81.30  | 258.31 | 0.31 | 3.18  |
| P63017_H Hspa8    | Heat shock K.DNNLLGK#.F                    | 65.54  | 56.83  | 1.15 | 0.87  |
| P63017_H Hspa8    | Heat shock K.EIAEAYLGK#.T                  | 60.25  | 48.19  | 1.25 | 0.80  |
| P63017_H Hspa8    | Heat shock R.FDDAVVQSDM*K.H                | 39.50  | 24.04  | 1.64 | 0.61  |
| P63017_H Hspa8    | Heat shock R.FEELNADLFR.G                  | 19.07  | 65.35  | 0.29 | 3.43  |
| P63017_H Hspa8    | Heat shock K.FELTGPAPR.G                   | 2.00   | 11.41  | 0.18 | 5.71  |
| P63017_H Hspa8    | Heat shock R.GTLDPVEK#.A                   | 221.87 | 206.81 | 1.07 | 0.93  |
| P63017_H Hspa8    | Heat shock K.HWPFMVVNDAGRPK.V              | 11.39  | 35.34  | 0.32 | 3.10  |
| P63017_H Hspa8    | Heat shock K.LDKSQJHDIIVLGGSTR.I           | 13.02  | 40.62  | 0.32 | 3.12  |
| P63017_H Hspa8    | Heat shock K.LLQDFGNGK#.E                  | 101.10 | 67.91  | 1.49 | 0.67  |
| P63017_H Hspa8    | Heat shock R.LSKEDIER.M                    | 32.56  | 136.39 | 0.24 | 4.19  |
| P63017_H Hspa8    | Heat shock K.M*K#EIAEAYLGK#.T              | 84.51  | 58.16  | 1.45 | 0.69  |
| P63017_H Hspa8    | Heat shock K.MK#EIAEAYLGK#.T               | 74.36  | 66.90  | 1.11 | 0.90  |
| P63017_H Hspa8    | Heat shock R.M*VNHFAEFK#.R                 | 74.00  | 63.00  | 1.17 | 0.85  |
| P63017_H Hspa8    | Heat shock R.MVNHFAEFK#.R                  | 31.62  | 23.97  | 1.32 | 0.76  |
| P63017_H Hspa8    | Heat shock R.M*VNHFAEFK#.K                 | 2.16   | 15.15  | 0.14 | 7.00  |
| P63017_H Hspa8    | Heat shock K.NQTAEK#EEFEHQK#.E             | 34.29  | 36.06  | 0.95 | 1.05  |
| P63017_H Hspa8    | Heat shock K.NQVAM*NPNTVFDK#.R             | 155.90 | 124.36 | 1.25 | 0.80  |
| P63017_H Hspa8    | Heat shock K.NQVAMNPNTVFDK#.R              | 75.21  | 66.43  | 1.13 | 0.88  |
| P63017_H Hspa8    | Heat shock K.NLSYAFNMK#.A                  | 85.04  | 60.97  | 1.39 | 0.72  |
| P63017_H Hspa8    | Heat shock K.NLSYAFNMK#.A                  | 110.00 | 87.76  | 1.25 | 0.80  |

|                 |                                               |        |        |      |      |
|-----------------|-----------------------------------------------|--------|--------|------|------|
| P63017_H5 Hspa8 | Heat shock R.RFDDAVVQSDM*K.H                  | 11.21  | 42.94  | 0.26 | 3.83 |
| P63017_H5 Hspa8 | Heat shock R.RFDDAVVQSDMK.H                   | 8.48   | 40.20  | 0.21 | 4.74 |
| P63017_H5 Hspa8 | Heat shock K.SFYPEVSSM*VLT#M                  | 53.67  | 38.94  | 1.38 | 0.73 |
| P63017_H5 Hspa8 | Heat shock K.SFYPEVSSM*VLT#M                  | 93.93  | 75.65  | 1.24 | 0.81 |
| P63017_H5 Hspa8 | Heat shock K.SFYPEVSSM*VLT#M                  | 25.21  | 22.21  | 1.14 | 0.88 |
| P63017_H5 Hspa8 | Heat shock K.SINPDEAVYGAAVQAAILSGDK.S         | 41.79  | 28.90  | 1.45 | 0.69 |
| P63017_H5 Hspa8 | Heat shock K.SQIHDLVVGSGSTR.I                 | 35.91  | 109.36 | 0.33 | 3.05 |
| P63017_H5 Hspa8 | Heat shock K.TVTNNAVTVPAYFNDSQR.Q             | 24.65  | 99.63  | 0.25 | 4.04 |
| P63017_H5 Hspa8 | Heat shock K.VQYVEQGETK.S                     | 459.64 | 225.34 | 2.04 | 0.49 |
| P63017_H5 Hspa8 | Heat shock K.DAGTIAGLNLVR.I                   | 9.33   | 26.02  | 0.36 | 2.79 |
| P63017_H5 Hspa8 | Heat shock R.M*VNHFIAEFK.R                    | 5.50   | 3.28   | 1.68 | 0.60 |
| P63017_H5 Hspa8 | Heat shock K.NQVAM*NPTNTVFDK#R                | 24.10  | 15.64  | 1.54 | 0.65 |
| P63017_H5 Hspa8 | Heat shock K.NQVAMNPTNTVFDK#R                 | 6.97   | 5.74   | 1.21 | 0.82 |
| P38647_Gf Hspa9 | Stress-70 pi R.AQFEGIVDLIK#R                  | 25.27  | 6.18   | 4.09 | 0.24 |
| P38647_Gf Hspa9 | Stress-70 pi R.QAASSLQASLK#L                  | 18.09  | 4.44   | 4.08 | 0.25 |
| P38647_Gf Hspa9 | Stress-70 pi R.VINEPTAAALAYGLDK#S             | 4.12   | 1.69   | 2.43 | 0.41 |
| P38647_Gf Hspa9 | Stress-70 pi R.AQFEGIVDLIK#R                  | 47.94  | 14.57  | 3.29 | 0.30 |
| P38647_Gf Hspa9 | Stress-70 pi R.LFEMAYK#K                      | 14.02  | 4.95   | 2.83 | 0.35 |
| P38647_Gf Hspa9 | Stress-70 pi R.NAVITVPAFYFNDSQR.Q             | 4.25   | 6.86   | 0.62 | 1.62 |
| P38647_Gf Hspa9 | Stress-70 pi R.QAASSLQASLK#L                  | 49.95  | 9.96   | 5.02 | 0.20 |
| P38647_Gf Hspa9 | Stress-70 pi R.QAVTNPNNTFYATK#R               | 34.38  | 8.39   | 4.10 | 0.24 |
| P38647_Gf Hspa9 | Stress-70 pi R.SQVFSTAADGQTQVEIK#V            | 10.98  | 2.61   | 4.21 | 0.24 |
| P38647_Gf Hspa9 | Stress-70 pi R.TTPSVAFADGER.L                 | 14.46  | 13.56  | 1.07 | 0.94 |
| P38647_Gf Hspa9 | Stress-70 pi R.VINEPTAAALAYGLDK#S             | 14.79  | 4.44   | 3.33 | 0.30 |
| P38647_Gf Hspa9 | Stress-70 pi R.VQQTVDLIFGR.A                  | 12.45  | 16.38  | 0.76 | 1.32 |
| P38647_Gf Hspa9 | Stress-70 pi R.YDDPEVQK#DTK#N                 | 3.47   | 2.92   | 1.19 | 0.84 |
| P14602_H5 Hspb1 | Heat shock R.AQGGPEAGK#S                      | 16.23  | 13.76  | 1.18 | 0.85 |
| P14602_H5 Hspb1 | Heat shock R.KYTLPPGVDTLVSSLSPEGLTVEAPLPK.A   | 3.29   | 4.07   | 0.81 | 1.24 |
| P14602_H5 Hspb1 | Heat shock R.LFDQAFVPR.L                      | 5.36   | 16.55  | 0.32 | 3.09 |
| P14602_H5 Hspb1 | Heat shock R.VSLDVNHFAPPELTVK#T               | 36.71  | 28.42  | 1.29 | 0.77 |
| P14602_H5 Hspb1 | Heat shock R.AQGGPEAGK#S                      | 12.51  | 10.44  | 1.20 | 0.83 |
| P14602_H5 Hspb1 | Heat shock K.AVTQSAEITPVTFEAR.A               | 25.85  | 98.26  | 0.26 | 3.80 |
| P14602_H5 Hspb1 | Heat shock K.EGVVETGK#H                       | 24.86  | 22.55  | 1.10 | 0.91 |
| P14602_H5 Hspb1 | Heat shock R.K#YTLPPGVDTLVSSLSPEGLTVEAPLPK#A  | 7.57   | 11.82  | 0.64 | 1.56 |
| P14602_H5 Hspb1 | Heat shock R.LFDQAFVPR.L                      | 17.52  | 47.21  | 0.37 | 2.69 |
| P14602_H5 Hspb1 | Heat shock R.QLSSGVSEIR.Q                     | 14.72  | 66.32  | 0.22 | 4.51 |
| P14602_H5 Hspb1 | Heat shock R.VSLDVNHFAPPELTVK#T               | 187.85 | 162.55 | 1.16 | 0.87 |
| P63038_Cf Hspd1 | 60 kDa heat K.DDAM*LLK#G                      | 10.76  | 2.32   | 3.64 | 0.22 |
| P63038_Cf Hspd1 | 60 kDa heat K.DM*AIATGGAVFEGEGLNLEVDQAHDLGK#V | 11.33  | 3.33   | 3.40 | 0.29 |
| P63038_Cf Hspd1 | 60 kDa heat R.GYSPYFNITSK#G                   | 68.90  | 15.44  | 4.46 | 0.22 |
| P63038_Cf Hspd1 | 60 kDa heat K.IGIEIK#R                        | 75.10  | 15.09  | 4.98 | 0.20 |
| P63038_Cf Hspd1 | 60 kDa heat K.ILOSSEVGDAM*LGDFVNM*VEK#G       | 7.98   | 3.02   | 2.65 | 0.38 |
| P63038_Cf Hspd1 | 60 kDa heat K.ILOSSEVGYDAMLGDFVNM*VEK#G       | 7.18   | 6.13   | 1.17 | 0.85 |
| P63038_Cf Hspd1 | 60 kDa heat K.IPAM*TIK#N                      | 64.72  | 14.42  | 4.49 | 0.22 |
| P63038_Cf Hspd1 | 60 kDa heat K.IPAM*TIK#N                      | 51.35  | 9.62   | 5.34 | 0.19 |
| P63038_Cf Hspd1 | 60 kDa heat R.IQEITEQLDITTSYEK#E              | 17.86  | 5.11   | 3.50 | 0.29 |
| P63038_Cf Hspd1 | 60 kDa heat R.IQEITEQLDITTSYEK#EK#L           | 47.12  | 12.14  | 3.88 | 0.26 |
| P63038_Cf Hspd1 | 60 kDa heat R.KPLVIAEDVDGEALSTLVNLR.L         | 14.03  | 12.44  | 1.13 | 0.89 |
| P63038_Cf Hspd1 | 60 kDa heat K.LSDGVAVLK#V                     | 113.63 | 24.63  | 4.61 | 0.22 |
| P63038_Cf Hspd1 | 60 kDa heat K.NAGVEGLIVEK#I                   | 95.96  | 21.03  | 4.56 | 0.22 |
| P63038_Cf Hspd1 | 60 kDa heat K.TLNDELEIEGK#F                   | 25.66  | 8.73   | 2.94 | 0.34 |
| P63038_Cf Hspd1 | 60 kDa heat K.TLNDELEIEGK#F                   | 41.12  | 8.57   | 4.80 | 0.21 |
| P63038_Cf Hspd1 | 60 kDa heat R.TLVQSWGSPK#V                    | 110.53 | 30.05  | 3.68 | 0.27 |
| P63038_Cf Hspd1 | 60 kDa heat K.VGEVITVK#D                      | 73.02  | 14.86  | 4.92 | 0.20 |
| P63038_Cf Hspd1 | 60 kDa heat K.VGGTSDVEVNEK#K                  | 169.81 | 47.64  | 3.56 | 0.28 |
| P63038_Cf Hspd1 | 60 kDa heat K.VGGTSDVEVNEK#K#D                | 30.91  | 5.41   | 5.71 | 0.18 |
| P63038_Cf Hspd1 | 60 kDa heat K.VGGTSDVEVNEK#K#D                | 7.51   | 3.13   | 2.40 | 0.42 |
| P63038_Cf Hspd1 | 60 kDa heat K.VGLQVAVK#A                      | 165.39 | 31.52  | 5.25 | 0.19 |
| P63038_Cf Hspd1 | 60 kDa heat R.VTDALNATR.A                     | 43.89  | 40.40  | 1.09 | 0.92 |
| P63038_Cf Hspd1 | 60 kDa heat R.GYSPYFNITSK#G                   | 9.80   | 3.14   | 3.12 | 0.32 |
| P63038_Cf Hspd1 | 60 kDa heat K.LSDGVAVLK#V                     | 15.86  | 2.93   | 5.41 | 0.18 |
| P63038_Cf Hspd1 | 60 kDa heat K.NAGVEGLIVEK#I                   | 16.30  | 5.20   | 3.13 | 0.32 |
| P63038_Cf Hspd1 | 60 kDa heat K.VGGTSDVEVNEK#K                  | 13.85  | 5.82   | 2.38 | 0.42 |
| P63038_Cf Hspd1 | 60 kDa heat K.VGLQVAVK#A                      | 11.76  | 2.89   | 4.07 | 0.25 |
| Q61699_Hf Hsph1 | Heat shock R.FVVQNVSAQK#D                     | 15.17  | 4.12   | 3.68 | 0.27 |
| Q61699_Hf Hsph1 | Heat shock K.VLGTAFDPLGGK#N                   | 9.24   | 1.96   | 4.72 | 0.21 |
| Q61699_Hf Hsph1 | Heat shock R.FVVQNVSAQK#D                     | 32.93  | 6.27   | 5.25 | 0.19 |
| Q7TM8_H Huwe1   | E3 ubiquitin R.IVNPSSFLGSK#S                  | 24.74  | 28.57  | 0.87 | 1.15 |
| Q7TM8_H Huwe1   | E3 ubiquitin R.LLSLISIALPENK#V                | 22.88  | 5.43   | 4.22 | 0.24 |
| Q7TM8_H Huwe1   | E3 ubiquitin K.QVNVQVVEAADVLK#A               | 7.56   | 2.14   | 3.54 | 0.28 |
| Q7TM8_H Huwe1   | E3 ubiquitin K.TDATTALK#L                     | 12.13  | 10.93  | 1.11 | 0.90 |
| Q9JKR6_Hf Hyou1 | Hypoxia up K.AANSLEAFIFETQDK#L                | 18.53  | 3.87   | 4.79 | 0.21 |
| Q9JKR6_Hf Hyou1 | Hypoxia up R.AEPLNANSAGDQEEK#V                | 22.72  | 3.50   | 6.48 | 0.15 |
| Q9JKR6_Hf Hyou1 | Hypoxia up R.EVQVLLNK#A                       | 30.22  | 4.04   | 7.48 | 0.13 |
| Q9JKR6_Hf Hyou1 | Hypoxia up R.FLGDASAAGM*AIK#N                 | 45.85  | 7.91   | 5.80 | 0.17 |
| Q9JKR6_Hf Hyou1 | Hypoxia up K.K#PPDYESK#G                      | 16.01  | 2.81   | 5.69 | 0.18 |
| Q9JKR6_Hf Hyou1 | Hypoxia up K.LGNITSSFLGGTSSDAK#E              | 12.19  | 2.33   | 5.24 | 0.19 |
| Q9JKR6_Hf Hyou1 | Hypoxia up R.LIPEM*DQVFEVEM*TTLEK#V           | 7.01   | 2.76   | 2.54 | 0.39 |
| Q9JKR6_Hf Hyou1 | Hypoxia up R.LIPEM*DQVFEVEM*TTLEK#V           | 7.53   | 2.14   | 3.51 | 0.28 |
| Q9JKR6_Hf Hyou1 | Hypoxia up K.NINADEAAAM*GAVYQAAALS#A          | 11.52  | 3.27   | 3.52 | 0.28 |
| Q9JKR6_Hf Hyou1 | Hypoxia up K.NINADEAAAM*GAVYQAAALS#A          | 19.52  | 2.89   | 6.75 | 0.15 |
| Q9JKR6_Hf Hyou1 | Hypoxia up R.SLAEDFAEQPIK#D                   | 10.38  | 10.69  | 0.97 | 1.03 |
| Q9JKR6_Hf Hyou1 | Hypoxia up K.TPVTVTLK#E                       | 35.38  | 5.52   | 6.41 | 0.16 |
| Q9JKR6_Hf Hyou1 | Hypoxia up K.TVLSANADHM*AQJGLM*DDVDFK#A       | 9.49   | 2.05   | 4.62 | 0.22 |
| Q9JKR6_Hf Hyou1 | Hypoxia up K.TVLSANADHM*AQJGLM*DDVDFK#A       | 7.31   | 2.67   | 2.74 | 0.36 |
| Q9JKR6_Hf Hyou1 | Hypoxia up K.VAIVK#GVPMEIVLNK#E               | 75.16  | 8.77   | 8.57 | 0.12 |
| Q9JKR6_Hf Hyou1 | Hypoxia up K.VAIVK#GVPMEIVLNK#E               | 37.82  | 6.76   | 5.60 | 0.18 |
| Q9JKR6_Hf Hyou1 | Hypoxia up R.VESVFETLVEDSPEESTLK#L            | 15.23  | 1.97   | 7.73 | 0.13 |
| Q9JKR6_Hf Hyou1 | Hypoxia up K.VLQLINDNTATLSYGVFR.R             | 6.49   | 5.31   | 1.22 | 0.82 |
| Q9JKR6_Hf Hyou1 | Hypoxia up K.VQEVLLK#A                        | 59.79  | 9.49   | 6.30 | 0.16 |
| Q9JKR6_Hf Hyou1 | Hypoxia up R.YFQHLGK#Q                        | 20.66  | 3.29   | 6.29 | 0.16 |
| Q9JKR6_Hf Hyou1 | Hypoxia up K.AANSLEAFIFETQDK#L                | 7.22   | 2.60   | 2.78 | 0.36 |
| Q9JKR6_Hf Hyou1 | Hypoxia up R.AEPLNANSAGDQEEK#V                | 7.99   | 2.19   | 3.64 | 0.27 |
| Q9JKR6_Hf Hyou1 | Hypoxia up R.EVQVLLNK#A                       | 10.37  | 1.46   | 7.10 | 0.14 |
| Q9JKR6_Hf Hyou1 | Hypoxia up R.FLGDASAAGM*AIK#N                 | 11.06  | 3.06   | 3.61 | 0.28 |
| Q9JKR6_Hf Hyou1 | Hypoxia up R.VESVFETLVEDSPEESTLK#L            | 9.25   | 1.79   | 5.18 | 0.19 |
| Q9JKR6_Hf Hyou1 | Hypoxia up K.VQEVLLK#A                        | 17.70  | 3.55   | 4.98 | 0.20 |
| Q9CR41_Hf Hyph  | Huntingtin R.EHM*GNVVEALIALTN.-               | 30.05  | 30.05  | 1.00 | 1.00 |
| Q9CR41_Hf Hyph  | Huntingtin R.EHM*GNVVEALIALTN.-               | 30.61  | 30.61  | 1.00 | 1.00 |
| Q8BU30_S1Iars   | Isoleucine- K.APLK#PPVPTSDNLIQEQTLK#G         | 35.57  | 7.49   | 4.75 | 0.21 |
| Q8BU30_S1Iars   | Isoleucine- K.GDNQLNLVK#L                     | 21.39  | 5.71   | 3.75 | 0.27 |
| Q8BU30_S1Iars   | Isoleucine- K.GSELETTLK#G                     | 28.68  | 5.79   | 4.95 | 0.20 |
| Q8BU30_S1Iars   | Isoleucine- R.LFLNETLQTEIPM*K#T               | 9.25   | 3.61   | 2.57 | 0.39 |

|                   |                                             |        |        |      |      |
|-------------------|---------------------------------------------|--------|--------|------|------|
| Q8BU30_S1ars      | Isoleucine- R.LFLNETQTQTEIDIPMK#.T          | 7.11   | 1.45   | 4.90 | 0.20 |
| Q8BU30_S1ars      | Isoleucine- K.LLIDPASLR.D                   | 14.95  | 16.46  | 0.91 | 1.10 |
| Q8BU30_S1ars      | Isoleucine- K.LSVFHGETEQNQDLSLSGR.T         | 10.59  | 11.31  | 0.94 | 1.07 |
| Q8BU30_S1ars      | Isoleucine- R.M*OSVIELGR.V                  | 5.78   | 9.76   | 0.59 | 1.69 |
| Q8BU30_S1ars      | Isoleucine- K.TVVTSVFGVK#.N                 | 44.81  | 7.02   | 6.39 | 0.16 |
| Q8BU30_S1ars      | Isoleucine- K.YK#PLFDYFIK#.C                | 11.26  | 2.83   | 3.98 | 0.25 |
| Q8BU30_S1ars      | Isoleucine- K.APLK#PPYPTSDNLIQEQTLK#.G      | 117.71 | 22.41  | 5.25 | 0.19 |
| Q8BU30_S1ars      | Isoleucine- R.EFEDAFPADFIAEGIDQTR.G         | 5.18   | 6.19   | 0.84 | 1.20 |
| Q8BU30_S1ars      | Isoleucine- K.EIVVHQDPEALEDIR.S             | 18.80  | 17.03  | 1.10 | 0.91 |
| Q8BU30_S1ars      | Isoleucine- R.FFIQNVFR.L                    | 33.30  | 33.27  | 1.00 | 1.00 |
| Q8BU30_S1ars      | Isoleucine- R.FGNWLK#.E                     | 51.51  | 9.02   | 5.71 | 0.18 |
| Q8BU30_S1ars      | Isoleucine- R.FPGASLK#.G                    | 56.73  | 15.25  | 3.72 | 0.27 |
| Q8BU30_S1ars      | Isoleucine- K.GDNQLNLVK#.L                  | 68.42  | 16.19  | 4.23 | 0.24 |
| Q8BU30_S1ars      | Isoleucine- K.GSELEITLTK#.G                 | 62.06  | 13.61  | 4.56 | 0.22 |
| Q8BU30_S1ars      | Isoleucine- R.LFLNETQTQTEIDIPM*K#.T         | 19.02  | 3.38   | 5.63 | 0.18 |
| Q8BU30_S1ars      | Isoleucine- R.LFLNETQTQTEIDIPM*K#.T         | 37.40  | 6.61   | 5.66 | 0.18 |
| Q8BU30_S1ars      | Isoleucine- R.LFLNETQTQTEIDIPMK#.T          | 14.89  | 3.35   | 4.45 | 0.22 |
| Q8BU30_S1ars      | Isoleucine- K.LLIDPASLR.D                   | 39.01  | 34.26  | 1.14 | 0.88 |
| Q8BU30_S1ars      | Isoleucine- R.LM*APYTPFLTELM*YQNLK#.L       | 5.56   | 4.20   | 1.32 | 0.76 |
| Q8BU30_S1ars      | Isoleucine- R.LM*APYTPFLTELM*YQNLK#.L       | 19.66  | 8.54   | 2.30 | 0.43 |
| Q8BU30_S1ars      | Isoleucine- K.M*GIAEYK#.Q                   | 39.03  | 11.54  | 3.38 | 0.30 |
| Q8BU30_S1ars      | Isoleucine- K.TVVTSVFGVK#.N                 | 114.40 | 22.24  | 5.14 | 0.19 |
| Q8BU30_S1ars      | Isoleucine- K.TVVSVLPPTADG.-                | 67.93  | 67.93  | 1.00 | 1.00 |
| Q8BU30_S1ars      | Isoleucine- K.VTLSTDK#NK#.Y                 | 12.06  | 35.97  | 0.34 | 2.98 |
| Q8BU30_S1ars      | Isoleucine- R.WJDFDNDYK#.T                  | 43.13  | 6.80   | 6.34 | 0.16 |
| Q8BU30_S1ars      | Isoleucine- K.YK#PLFDYFIK#.C                | 33.58  | 4.28   | 7.85 | 0.13 |
| Q8BU30_S1ars      | Isoleucine- R.LLNNVIESHTDFIFATIK#.A         | 87.51  | 10.35  | 8.45 | 0.12 |
| Q8BU30_S1ars      | Isoleucine- R.YSAEWK#.S                     | 54.18  | 9.76   | 5.55 | 0.18 |
| Q9JHR7_ID ide     | Insulin-deg K.AIEDM*TEEAFQK#.H              | 5.93   | 2.77   | 2.14 | 0.47 |
| Q9JHR7_ID ide     | Insulin-deg R.ESLDDLTLVVK#.L                | 10.18  | 4.30   | 2.37 | 0.42 |
| Q9JHR7_ID ide     | Insulin-deg K.NEFIPTNFSLSEK#.D              | 14.34  | 1.76   | 8.17 | 0.12 |
| Q9JHR7_ID ide     | Insulin-deg K.AIEDM*TEEAFQK#.H              | 8.13   | 1.30   | 6.25 | 0.16 |
| Q9JHR7_ID ide     | Insulin-deg K.GWVNTLVGGQK#.E                | 8.75   | 5.38   | 1.62 | 0.62 |
| Q8844_ID idh1     | Isoctrate d R.FKHDFQEIYDK#K#.Y              | 11.44  | 4.64   | 2.46 | 0.41 |
| Q8844_ID idh1     | Isoctrate d R.IIWELIK#.E                    | 10.89  | 9.82   | 1.11 | 0.90 |
| Q8844_ID idh1     | Isoctrate d K.VEITYPK#.D                    | 16.61  | 5.13   | 3.24 | 0.31 |
| Q9D6R2_IC idh3a   | Isoctrate d R.ENTEGEYSIEHVIVDGVVQSIK#.L     | 99.36  | 19.37  | 5.13 | 0.19 |
| Q9D6R2_IC idh3a   | Isoctrate d R.HM*GLFDHAAK#.I                | 29.11  | 12.67  | 2.30 | 0.44 |
| Q9D6R2_IC idh3a   | Isoctrate d R.IAEFAFEYAR.N                  | 26.87  | 28.02  | 0.96 | 1.04 |
| Q9D6R2_IC idh3a   | Isoctrate d R.M*SDGLFLQK#.C                 | 52.81  | 13.33  | 3.96 | 0.25 |
| Q9D6R2_IC idh3a   | Isoctrate d R.MSDGLFLQK#.C                  | 16.84  | 3.93   | 4.28 | 0.23 |
| Q9D6R2_IC idh3a   | Isoctrate d R.NVTAIQPGGK#.W                 | 87.10  | 21.34  | 4.08 | 0.25 |
| Q9D6R2_IC idh3a   | Isoctrate d K.TPIAAGHPMSMNLK#.K             | 20.21  | 16.43  | 1.23 | 0.81 |
| Q9D6R2_IC idh3a   | Isoctrate d K.TPYTDVNIIVTIR.E               | 11.32  | 13.52  | 0.84 | 1.20 |
| Q9D6R2_IC idh3a   | Isoctrate d R.IAEFAFEYAR.N                  | 2.43   | 2.31   | 1.05 | 0.95 |
| Q91VA7_QI idh3b   | Isoctrate d K.AAAVPEFK#.E                   | 28.89  | 10.97  | 2.63 | 0.38 |
| Q91VA7_QI idh3b   | Isoctrate d R.DM*GGYSTTDFIK#.S              | 23.97  | 6.94   | 3.45 | 0.29 |
| Q91VA7_QI idh3b   | Isoctrate d R.DMGYSTTDFIK#.S                | 11.06  | 2.60   | 4.26 | 0.23 |
| Q91VA7_QI idh3b   | Isoctrate d R.K#DLFANVHVVK#.S               | 33.02  | 10.36  | 3.19 | 0.31 |
| Q9CR20_IR Ier3ip1 | Immediate K.NIGWGTQDQGGFGEPIGK.S            | 2.92   | 2.79   | 1.05 | 0.96 |
| P15092_IFI Ifi204 | Interferon- R.SEVTGETSLEK#.N                | 31.16  | 12.26  | 2.54 | 0.39 |
| P15092_IFI Ifi204 | Interferon- R.GTFVSGEVLNKH#.K               | 17.13  | 4.74   | 3.61 | 0.28 |
| P15092_IFI Ifi204 | Interferon- K.NFIHSNYFESK#.G                | 7.39   | 3.61   | 2.05 | 0.49 |
| P15092_IFI Ifi204 | Interferon- R.SEVTGETSLEK#.N                | 22.23  | 5.28   | 4.21 | 0.24 |
| P15092_IFI Ifi204 | Interferon- K.VFDTALK#.S                    | 19.32  | 4.52   | 4.27 | 0.23 |
| P15092_IFI Ifi204 | Interferon- K.VFNINLK#.E                    | 13.96  | 5.80   | 2.41 | 0.42 |
| P15092_IFI Ifi204 | Interferon- K.DGSGSIEVVGSGK#.W              | 18.18  | 6.13   | 2.97 | 0.34 |
| P15092_IFI Ifi204 | Interferon- R.SEVTGETSLEK#.N                | 19.05  | 3.90   | 4.89 | 0.20 |
| P15092_IFI Ifi204 | Interferon- K.VFNINLK#.E                    | 14.03  | 5.10   | 2.75 | 0.36 |
| Q8CGE8_IF Ifi205a | Interferon- K.GILEINTSSVLEAAPK#.Q           | 41.99  | 12.65  | 3.32 | 0.30 |
| Q8CGE8_IF Ifi205a | Interferon- K.NNFITISNYFESK#.G              | 17.58  | 4.94   | 3.56 | 0.28 |
| Q8CGE8_IF Ifi205a | Interferon- K.VFNIDLK#.E                    | 30.55  | 12.65  | 2.42 | 0.41 |
| Q9D8C4_IN Ifi35   | Interferon- R.VSPVYVSGIQK.A                 | 13.84  | 14.13  | 0.98 | 1.02 |
| Q8BV66_IF Ifi44   | Interferon- R.VLLLPVIGAGK#.S                | 46.81  | 22.14  | 2.11 | 0.47 |
| Q8BV66_IF Ifi44   | Interferon- R.VLLLPVIGAGK#.S                | 8.64   | 3.85   | 2.24 | 0.45 |
| Q8BV66_IF Ifi44   | Interferon- R.VLLLPVIGAGK#.S                | 29.27  | 9.18   | 3.19 | 0.31 |
| Q8BV66_IF Ifi44   | Interferon- R.YQFDSMKPITSNIHNYTHDPLKDR@.I   | 2.53   | 3.29   | 0.77 | 1.30 |
| Q8BV66_IF Ifi44   | Interferon- K.EILYTANEFLEDLPLNK#.-          | 7.12   | 3.73   | 1.91 | 0.52 |
| Q8BV66_IF Ifi44   | Interferon- K.TNDFSILLDEK#.A                | 18.20  | 6.61   | 2.75 | 0.36 |
| Q8BV66_IF Ifi44   | Interferon- R.VLLLPVIGAGK#.S                | 58.04  | 25.05  | 2.32 | 0.43 |
| Q61635_QI Ifi47   | GTP-bindin R.FSLNDALLAQK#.I                 | 9.29   | 5.95   | 1.56 | 0.64 |
| Q61635_QI Ifi47   | GTP-bindin R.TQFLNIVDDAK#.H                 | 8.09   | 3.15   | 2.57 | 0.39 |
| Q61635_QI Ifi47   | GTP-bindin K.EFLPQYSALISK#.A                | 8.41   | 6.90   | 1.22 | 0.82 |
| Q8R5F7_IFI Ifi1   | Interferon- K.AHHLIAGHSSEVK#PM*QTEQK#.E     | 14.25  | 5.80   | 2.46 | 0.41 |
| Q8R5F7_IFI Ifi1   | Interferon- K.AHHLIAGHSSEVK#PM*QTEQK#.E     | 5.76   | 1.98   | 2.90 | 0.34 |
| Q8R5F7_IFI Ifi1   | Interferon- R.DSGTM*GSDSDESIVITK#.R         | 15.23  | 6.02   | 2.53 | 0.40 |
| Q8R5F7_IFI Ifi1   | Interferon- R.IIGLSDTQLK#.I                 | 66.04  | 21.99  | 3.00 | 0.33 |
| Q8R5F7_IFI Ifi1   | Interferon- K.ILELQVQSILEK#.K               | 29.62  | 9.38   | 3.16 | 0.32 |
| Q8R5F7_IFI Ifi1   | Interferon- R.ISAAGNSGNESGVR.E              | 16.32  | 23.23  | 0.70 | 1.42 |
| Q8R5F7_IFI Ifi1   | Interferon- K.ISFPEVVK#.S                   | 45.69  | 20.25  | 2.26 | 0.44 |
| Q8R5F7_IFI Ifi1   | Interferon- R.K.#EFNPYLK#.K                 | 14.81  | 6.47   | 2.29 | 0.44 |
| Q8R5F7_IFI Ifi1   | Interferon- K.K#QNK#PAIPLPQLGLTASPGVGAAK#.K | 9.19   | 3.47   | 2.65 | 0.38 |
| Q8R5F7_IFI Ifi1   | Interferon- K.LAENPK#YENEK#.L               | 7.09   | 1.96   | 3.61 | 0.28 |
| Q8R5F7_IFI Ifi1   | Interferon- K.M*YIQVEPVLHILFLSAETK#.E       | 14.46  | 3.82   | 3.79 | 0.26 |
| Q8R5F7_IFI Ifi1   | Interferon- K.QNK#PAIPLPQLGLTASPGVGAAK#.K   | 23.84  | 9.09   | 2.62 | 0.38 |
| Q8R5F7_IFI Ifi1   | Interferon- K.VIVLVNK#.V                    | 70.12  | 26.84  | 2.61 | 0.38 |
| Q8R5F7_IFI Ifi1   | Interferon- R.DSGTM*GSDSDESIVITK#.R         | 12.48  | 3.04   | 4.10 | 0.24 |
| Q8R5F7_IFI Ifi1   | Interferon- K.ILELQVQSILEK#.K               | 23.48  | 7.41   | 3.17 | 0.32 |
| Q8R5F7_IFI Ifi1   | Interferon- R.ISAAGNSGNESGVR.E              | 14.26  | 22.24  | 0.64 | 1.56 |
| Q8R5F7_IFI Ifi1   | Interferon- K.ISFPEVVK#.S                   | 26.76  | 14.47  | 1.85 | 0.54 |
| Q8R5F7_IFI Ifi1   | Interferon- K.LAENPK#YENEK#.L               | 4.42   | 1.82   | 2.42 | 0.41 |
| Q8R5F7_IFI Ifi1   | Interferon- K.QNK#PAIPLPQLGLTASPGVGAAK#.K   | 37.59  | 15.71  | 2.39 | 0.42 |
| Q8R5F7_IFI Ifi1   | Interferon- R.QSTYLSQWIMENAK#.F             | 5.99   | 1.64   | 3.65 | 0.27 |
| Q8R5F7_IFI Ifi1   | Interferon- K.VIVLVNK#.V                    | 37.23  | 11.76  | 3.17 | 0.32 |
| Q64282_IF Ifi1    | Interferon- K.ALKVEPENPEYNTGYAVVAYR.Q       | 20.78  | 65.04  | 0.32 | 3.13 |
| Q64282_IF Ifi1    | Interferon- K.EAEALIQSEQLSK#.R              | 147.72 | 93.04  | 1.59 | 0.63 |
| Q64282_IF Ifi1    | Interferon- K.EFSSPFR.Y                     | 7.66   | 49.64  | 0.15 | 6.48 |
| Q64282_IF Ifi1    | Interferon- K.GQQDEALQSLK#.E                | 145.06 | 107.62 | 1.35 | 0.74 |
| Q64282_IF Ifi1    | Interferon- K.GQQDEALQSLK#EAEALIQSEQLSK#.R  | 12.16  | 6.03   | 2.02 | 0.50 |
| Q64282_IF Ifi1    | Interferon- R.GSLAEAQYLDK#.V                | 41.10  | 27.64  | 1.49 | 0.67 |
| Q64282_IF Ifi1    | Interferon- R.HLKHGQQDEALQSLK#.E            | 27.98  | 14.34  | 1.95 | 0.51 |
| Q64282_IF Ifi1    | Interferon- R.ISEQVQFLDK#.N                 | 150.10 | 96.50  | 1.56 | 0.64 |
| Q64282_IF Ifi1    | Interferon- R.K#LLTALEK#.V                  | 82.48  | 65.54  | 1.26 | 0.79 |

|                   |                                             |        |        |      |      |
|-------------------|---------------------------------------------|--------|--------|------|------|
| Q64282_IF ift1    | Interferon-i K.LLFENNDIPLEVR.I              | 26.78  | 79.66  | 0.34 | 2.97 |
| Q64282_IF ift1    | Interferon-i R.LTGEM*NPAF-                  | 47.04  | 47.04  | 1.00 | 1.00 |
| Q64282_IF ift1    | Interferon-i K.NALFYEEK#.A                  | 159.68 | 89.31  | 1.79 | 0.56 |
| Q64282_IF ift1    | Interferon-i K.NPLGM*HNLAYVR.H              | 4.07   | 9.85   | 0.41 | 2.42 |
| Q64282_IF ift1    | Interferon-i K.NPLGMHNLAYVR.H               | 6.80   | 29.73  | 0.23 | 4.37 |
| Q64282_IF ift1    | Interferon-i R.QDLDNFIISLEPLR.K             | 4.05   | 13.23  | 0.31 | 3.27 |
| Q64282_IF ift1    | Interferon-i R.QDLDNFIISLEPLR.K.A           | 16.85  | 51.92  | 0.32 | 3.08 |
| Q64282_IF ift1    | Interferon-i R.QDNVQELAQQAHEFQETLK#.L       | 10.36  | 5.34   | 1.94 | 0.52 |
| Q64282_IF ift1    | Interferon-i R.RQDNVQELAQQAHEFQETLK.L       | 31.89  | 88.68  | 0.36 | 2.78 |
| Q64282_IF ift1    | Interferon-i K.TLVAHIEQDIHLR.Y              | 1.72   | 6.64   | 0.26 | 3.86 |
| Q64282_IF ift1    | Interferon-i K.VEPENPEYNTGYAVVAYR.Q         | 3.73   | 15.37  | 0.24 | 4.12 |
| Q64282_IF ift1    | Interferon-i K.LLFENNDIPLEVR.I              | 1.60   | 5.54   | 0.29 | 3.47 |
| Q64282_IF ift1    | Interferon-i K.AITLYLK#.G                   | 46.64  | 32.13  | 1.45 | 0.69 |
| Q64282_IF ift1    | Interferon-i K.ALKVEPENPEYNTGYAVVAYR.Q      | 10.80  | 27.24  | 0.40 | 2.52 |
| Q64282_IF ift1    | Interferon-i K.EAEALIQSEQLSK#.R             | 57.84  | 39.69  | 1.46 | 0.69 |
| Q64282_IF ift1    | Interferon-i K.GQQDEALQSLK#.E               | 49.45  | 32.39  | 1.53 | 0.66 |
| Q64282_IF ift1    | Interferon-i K.GQQDEALQSLK#EAEALIQSEQLSK#.R | 7.70   | 2.84   | 2.71 | 0.37 |
| Q64282_IF ift1    | Interferon-i R.HLKHGQQDEALQSLK#.E           | 29.03  | 9.75   | 2.98 | 0.34 |
| Q64282_IF ift1    | Interferon-i R.ISEVQFLDIK#.N                | 48.60  | 33.84  | 1.44 | 0.70 |
| Q64282_IF ift1    | Interferon-i R.K#LLTALEK#.V                 | 42.91  | 25.77  | 1.67 | 0.60 |
| Q64282_IF ift1    | Interferon-i K.LLFENNDIPLEVR.I              | 17.15  | 38.23  | 0.45 | 2.23 |
| Q64282_IF ift1    | Interferon-i K.NALFYEEK#.A                  | 40.65  | 31.41  | 1.29 | 0.77 |
| Q64282_IF ift1    | Interferon-i R.QDLDNFIISLEPLR.K             | 3.38   | 6.74   | 0.50 | 2.00 |
| Q64282_IF ift1    | Interferon-i R.RQDNVQELAQQAHEFQETLK.L       | 17.28  | 39.78  | 0.43 | 2.30 |
| Q64282_IF ift1    | Interferon-i K.VEPENPEYNTGYAVVAYR.Q         | 2.12   | 5.39   | 0.39 | 2.54 |
| Q64282_IF ift1    | Interferon-i K.ALKVEPENPEYNTGYAVVAYR.Q      | 16.77  | 53.90  | 0.31 | 3.21 |
| Q64282_IF ift1    | Interferon-i K.EAEALIQSEQLSK#.R             | 121.61 | 76.62  | 1.59 | 0.63 |
| Q64282_IF ift1    | Interferon-i K.GQQDEALQSLK#.E               | 108.56 | 77.18  | 1.41 | 0.71 |
| Q64282_IF ift1    | Interferon-i K.GQQDEALQSLK#EAEALIQSEQLSK#.R | 22.87  | 17.36  | 1.32 | 0.76 |
| Q64282_IF ift1    | Interferon-i R.HLKHGQQDEALQSLK#.E           | 61.73  | 29.51  | 2.09 | 0.48 |
| Q64282_IF ift1    | Interferon-i R.ISEVQFLDIK#.N                | 133.69 | 90.82  | 1.47 | 0.68 |
| Q64282_IF ift1    | Interferon-i R.K#LLTALEK#.V                 | 66.66  | 48.05  | 1.39 | 0.72 |
| Q64282_IF ift1    | Interferon-i K.LLFENNDIPLEVR.I              | 34.09  | 97.52  | 0.35 | 2.86 |
| Q64282_IF ift1    | Interferon-i R.LNPEDPYLK#.V                 | 115.06 | 70.94  | 1.62 | 0.62 |
| Q64282_IF ift1    | Interferon-i R.LTGEM*NPAF-                  | 47.85  | 47.85  | 1.00 | 1.00 |
| Q64282_IF ift1    | Interferon-i K.NALFYEEK#.A                  | 84.93  | 51.43  | 1.65 | 0.61 |
| Q64282_IF ift1    | Interferon-i K.NPLGMHNLAYVR.H               | 4.34   | 19.41  | 0.22 | 4.48 |
| Q64282_IF ift1    | Interferon-i R.QDLDNFIISLEPLR.K             | 11.55  | 39.36  | 0.29 | 3.41 |
| Q64282_IF ift1    | Interferon-i R.QDNVQELAQQAHEFQETLK#.L       | 34.07  | 13.94  | 2.44 | 0.41 |
| Q64282_IF ift1    | Interferon-i R.RQDNVQELAQQAHEFQETLK.L       | 19.79  | 60.83  | 0.33 | 3.07 |
| Q64282_IF ift1    | Interferon-i K.TLVAHIEQDIHLR.Y              | 17.70  | 30.07  | 0.59 | 1.70 |
| Q64282_IF ift1    | Interferon-i K.VEPENPEYNTGYAVVAYR.Q         | 5.28   | 18.18  | 0.29 | 3.44 |
| Q9CQW9_I iftm3    | Interferon-i K.M*VGDVTGAQAYASTAK#.C         | 12.93  | 9.97   | 1.30 | 0.77 |
| Q9D0P8_IF ift27   | Intraflagelli K.NYTLTPGVDLVKH.T             | 6.83   | 4.80   | 1.42 | 0.70 |
| Q9D0P8_IF ift27   | Intraflagelli R.SQTSGISLPGVLVGTK#.T         | 21.99  | 13.63  | 1.61 | 0.62 |
| Q61249_IgIgbp1    | Immunogl c R.AAQQQEDQEOK#DEESEK#.A          | 9.31   | 6.34   | 1.47 | 0.68 |
| Q61249_IgIgbp1    | Immunogl c R.LPELFETSK#.K                   | 15.35  | 7.51   | 2.04 | 0.49 |
| Q61249_IgIgbp1    | Immunogl c R.WIAVLELESIDQEI#.I              | 14.99  | 5.84   | 2.57 | 0.39 |
| Q61249_IgIgbp1    | Immunogl c R.LLEDVETATEPGRS.T               | 2.86   | 5.03   | 0.57 | 1.76 |
| O88477_IF Igf2bp1 | Insulin-like R.DQTPDENDQVIVK#.I             | 18.88  | 8.85   | 2.13 | 0.47 |
| O88477_IF Igf2bp1 | Insulin-like R.LLVPTQYVGAIGK#.E             | 66.99  | 16.95  | 3.95 | 0.25 |
| O88477_IF Igf2bp1 | Insulin-like K.LYIGNLNSVTPADLEK#.V          | 22.17  | 3.20   | 6.92 | 0.14 |
| O88477_IF Igf2bp1 | Insulin-like R.MVITGPPPEAQFK#.A             | 12.88  | 4.52   | 2.85 | 0.35 |
| O88477_IF Igf2bp1 | Insulin-like K.TADEVPLK#.I                  | 47.24  | 13.93  | 3.39 | 0.29 |
| O88477_IF Igf2bp1 | Insulin-like K.TVNEQLQLTAAEVVPR.D           | 2.59   | 5.83   | 0.44 | 2.25 |
| O88477_IF Igf2bp1 | Insulin-like R.DQTPDENDQVIVK#.I             | 138.79 | 59.78  | 2.32 | 0.43 |
| O88477_IF Igf2bp1 | Insulin-like R.FASASIK#.I                   | 61.33  | 53.21  | 1.15 | 0.87 |
| O88477_IF Igf2bp1 | Insulin-like K.LKHEENFFGPK#.E               | 15.20  | 7.01   | 2.17 | 0.46 |
| O88477_IF Igf2bp1 | Insulin-like K.LKHEENFFGPK.E                | 9.72   | 5.58   | 1.74 | 0.57 |
| O88477_IF Igf2bp1 | Insulin-like R.M*VITGPPPEAQFK#.A            | 20.91  | 8.86   | 2.36 | 0.42 |
| O88477_IF Igf2bp1 | Insulin-like R.MVITGPPPEAQFK#.A             | 9.31   | 6.39   | 1.46 | 0.69 |
| O88477_IF Igf2bp1 | Insulin-like K.TVNEQLQLTAAEVVPR.D           | 14.91  | 28.89  | 0.52 | 1.94 |
| Q5SF07_IF Igf2bp2 | Insulin-like R.DQTPDENEVIVR.I               | 6.58   | 22.27  | 0.30 | 3.38 |
| Q5SF07_IF Igf2bp2 | Insulin-like K.IAPAEQPDVSR.M                | 35.53  | 35.12  | 1.01 | 0.99 |
| Q5SF07_IF Igf2bp2 | Insulin-like K.IM*EVDYSVSK#.K               | 19.65  | 13.90  | 1.41 | 0.71 |
| Q5SF07_IF Igf2bp2 | Insulin-like K.IMEVDYSVSK#.K                | 22.75  | 12.09  | 1.88 | 0.53 |
| Q5SF07_IF Igf2bp2 | Insulin-like K.ITISLQDLSYVPR.T              | 10.45  | 29.60  | 0.35 | 2.83 |
| Q5SF07_IF Igf2bp2 | Insulin-like R.K#PLAGQVLLK#.S               | 26.40  | 12.49  | 2.11 | 0.47 |
| Q5SF07_IF Igf2bp2 | Insulin-like R.KLPLAGQVLLK.S                | 20.81  | 12.45  | 1.67 | 0.60 |
| Q5SF07_IF Igf2bp2 | Insulin-like K.LAEVPLK#.I                   | 48.09  | 25.22  | 1.91 | 0.52 |
| Q5SF07_IF Igf2bp2 | Insulin-like K.LSGHFQEDYSFK#.I              | 30.71  | 14.26  | 2.15 | 0.46 |
| Q5SF07_IF Igf2bp2 | Insulin-like K.LYIGNLNSVTPADLEK#.V          | 11.87  | 41.42  | 0.29 | 3.49 |
| Q5SF07_IF Igf2bp2 | Insulin-like R.MILEIMQK#.E                  | 19.53  | 9.93   | 1.97 | 0.51 |
| Q5SF07_IF Igf2bp2 | Insulin-like R.M*VITGPPPEAQFK#.A            | 6.34   | 5.82   | 1.09 | 0.92 |
| Q5SF07_IF Igf2bp2 | Insulin-like K.SGVAFVDYDQNWAI.R.A           | 7.05   | 16.90  | 0.42 | 2.40 |
| Q5SF07_IF Igf2bp2 | Insulin-like K.TVNEQLQLTAAEVVPR.D           | 1.48   | 5.25   | 0.28 | 3.55 |
| Q5SF07_IF Igf2bp2 | Insulin-like R.DQTPDENEVIVR.I               | 28.90  | 79.74  | 0.36 | 2.76 |
| Q5SF07_IF Igf2bp2 | Insulin-like K.IAPAEQPDVSR.M                | 18.12  | 53.41  | 0.34 | 2.95 |
| Q5SF07_IF Igf2bp2 | Insulin-like R.IIGHFFASQTAQR.K              | 10.23  | 30.10  | 0.34 | 2.94 |
| Q5SF07_IF Igf2bp2 | Insulin-like K.LKHEENFFNPK#.E               | 9.14   | 8.03   | 1.14 | 0.88 |
| Q5SF07_IF Igf2bp2 | Insulin-like K.LKHEENFFNPKKEVK.L            | 18.70  | 10.56  | 1.77 | 0.56 |
| Q5SF07_IF Igf2bp2 | Insulin-like R.M*VITGPPPEAQFK#.A            | 33.34  | 22.52  | 1.48 | 0.68 |
| Q5SF07_IF Igf2bp2 | Insulin-like R.MVITGPPPEAQFK#.A             | 50.52  | 33.39  | 1.51 | 0.66 |
| Q5SF07_IF Igf2bp2 | Insulin-like K.TVNEQLQLTAAEVVPR.D           | 16.74  | 37.57  | 0.45 | 2.24 |
| A0A0A6YV Ighg1    | Ig gamma-1 K.NTQPI*M*DTDGSYFVSK.L           | 24.16  | 227.15 | 0.11 | 9.40 |
| Q9QZ85_IIC Ighp1  | Interferon-i R.TVGVDETSLQR.L                | 2.79   | 5.97   | 0.47 | 2.14 |
| Q9Z1M8_R Iik      | Protein Rec K.GLDFALLQKH.V                  | 24.70  | 11.16  | 2.21 | 0.45 |
| Q9Z1M8_R Iik      | Protein Rec K.KPPEADM*NIFEDIGDYVPTTK.T      | 7.44   | 3.88   | 1.92 | 0.52 |
| Q9Z1M8_R Iik      | Protein Rec R.NELFLPGR.M                    | 4.82   | 17.44  | 0.28 | 3.62 |
| Q9Z1M8_R Iik      | Protein Rec K.AAFQYGIK#.M                   | 37.93  | 26.59  | 1.43 | 0.70 |
| Q9Z1M8_R Iik      | Protein Rec R.AVGPTAEADKSAEK.R              | 15.67  | 14.25  | 1.10 | 0.91 |
| Q9Z1M8_R Iik      | Protein Rec R.DGVNKDYEETELISTTANR.A         | 6.49   | 19.43  | 0.33 | 2.99 |
| Q9Z1M8_R Iik      | Protein Rec R.EYNEDEPAAR.R                  | 9.22   | 26.73  | 0.35 | 2.90 |
| Q9Z1M8_R Iik      | Protein Rec K.FAGSAGVETGSLK#.K              | 61.67  | 12.71  | 4.85 | 0.21 |
| Q9Z1M8_R Iik      | Protein Rec K.GLDFALLQKH.V                  | 61.56  | 39.92  | 1.54 | 0.65 |
| Q9Z1M8_R Iik      | Protein Rec K.K#HEDPENK#IEFK#.T             | 53.30  | 46.74  | 1.14 | 0.88 |
| Q9Z1M8_R Iik      | Protein Rec K.K#PPEADM*NIFEDIGDYVPTTK.T     | 21.35  | 18.46  | 1.16 | 0.86 |
| Q9Z1M8_R Iik      | Protein Rec K.K#PPEADM*NIFEDIGDYVPTTK.T     | 21.52  | 13.70  | 1.57 | 0.64 |
| Q9Z1M8_R Iik      | Protein Rec R.M*AYVVDLDEYADTDIPTTLR.S       | 3.85   | 7.98   | 0.48 | 2.07 |
| Q9Z1M8_R Iik      | Protein Rec R.M*EADGVEVK#.R                 | 11.76  | 6.42   | 1.83 | 0.55 |
| Q9Z1M8_R Iik      | Protein Rec R.WDFDTEEYSEYMNK#.E             | 5.06   | 2.97   | 1.70 | 0.59 |
| Q7TT37_EL Ikbkap  | Elongator c R.AEQGTVLIGSER.G                | 4.64   | 8.08   | 0.57 | 1.74 |
| Q7TT37_EL Ikbkap  | Elongator c K.DFEVIAEQHQDDFEGEK#.F          | 11.69  | 7.18   | 1.63 | 0.61 |

|                 |                                                            |        |        |      |      |
|-----------------|------------------------------------------------------------|--------|--------|------|------|
| Q7T37_EL lkkap  | Elongator c R.EFALQSTSEVPLGALAWK#PSGSLIASTQDK#PNQQDVVFEK#N | 5.15   | 4.67   | 1.10 | 0.91 |
| Q7T37_EL lkkap  | Elongator c R.IVTVVPODTK#L                                 | 20.05  | 16.48  | 1.22 | 0.82 |
| Q7T37_EL lkkap  | Elongator c K.SLAVLADQGVK#Y                                | 14.05  | 11.20  | 1.25 | 0.80 |
| Q7T37_EL lkkap  | Elongator c R.SSGNSANDLANVAVIDGNR.V                        | 2.48   | 7.13   | 0.35 | 2.87 |
| Q7T37_EL lkkap  | Elongator c K.VFLENVETVK#Q                                 | 32.25  | 22.85  | 1.41 | 0.71 |
| Q7T37_EL lkkap  | Elongator c R.AAM*EAINPR.K                                 | 7.02   | 20.76  | 0.34 | 2.96 |
| Q7T37_EL lkkap  | Elongator c R.AEQGTVLIGSER.G                               | 5.18   | 18.51  | 0.28 | 3.57 |
| Q7T37_EL lkkap  | Elongator c R.ALVALQIR.K                                   | 6.56   | 17.70  | 0.37 | 2.70 |
| Q7T37_EL lkkap  | Elongator c K.DFEVIAEEQHDDFGEK#F                           | 28.45  | 14.21  | 2.00 | 0.50 |
| Q7T37_EL lkkap  | Elongator c R.EFALQSTSEVPLGALAWKPSGSLIASTQDKPNQQDVVFEK.N   | 12.45  | 7.70   | 1.62 | 0.62 |
| Q7T37_EL lkkap  | Elongator c R.IVTVVPODTK#L                                 | 54.43  | 37.90  | 1.44 | 0.70 |
| Q7T37_EL lkkap  | Elongator c K.M*LQAALSGSHEASGEILR.K                        | 10.44  | 7.96   | 1.31 | 0.76 |
| Q7T37_EL lkkap  | Elongator c K.NYM*DFLDSETATFIR.H                           | 1.68   | 4.77   | 0.35 | 2.83 |
| Q7T37_EL lkkap  | Elongator c K.SLAVLADQGVK#Y                                | 35.41  | 19.49  | 1.82 | 0.55 |
| Q7T37_EL lkkap  | Elongator c R.SSGNSANDLANVAVIDGNR.V                        | 4.73   | 14.11  | 0.34 | 2.98 |
| Q7T37_EL lkkap  | Elongator c K.SVQVSTHPDGK#K                                | 15.84  | 7.13   | 2.22 | 0.45 |
| Q7T37_EL lkkap  | Elongator c K.TPELEIVLQK#V                                 | 27.84  | 14.64  | 1.90 | 0.53 |
| Q7T37_EL lkkap  | Elongator c R.VIHIEVSK#PSLEAQK#N                           | 44.01  | 25.21  | 1.75 | 0.57 |
| Q7T37_EL lkkap  | Elongator c K.VFLENVETVK#Q                                 | 54.49  | 41.89  | 1.30 | 0.77 |
| Q7T37_EL lkkap  | Elongator c R.VLTVFR.Q                                     | 9.18   | 23.89  | 0.38 | 2.60 |
| Q7T37_EL lkkap  | Elongator c K.VQELQGNLPPDFPESVVEEALK#Y                     | 30.90  | 17.79  | 1.74 | 0.58 |
| O88522_Nl lkkap | NF-kappa-B K.AQVTLGELQESQSR.L                              | 2.09   | 9.17   | 0.23 | 4.39 |
| Q8R459_IL l1f10 | Interleukin R.SKVPILGM*QGGSCCLACVKTR@.E                    | 11.45  | 1.78   | 6.44 | 0.16 |
| Q9CX6_IL l1f2   | Interleukin R.AQDPSEVLTMLTNETGFEISSDATVK#I                 | 17.89  | 8.70   | 2.06 | 0.49 |
| Q9CX6_IL l1f2   | Interleukin R.AQDPSEVLTMLTNETGFEISSDATVK#I                 | 43.89  | 28.98  | 1.51 | 0.66 |
| Q9CX6_IL l1f2   | Interleukin K.GTM*TTGHNADVLLVILK#I                         | 40.46  | 13.54  | 2.99 | 0.33 |
| Q9CX6_IL l1f2   | Interleukin K.GTM*TTGHNADVLLVILK#I                         | 15.16  | 4.77   | 3.18 | 0.31 |
| Q9CX6_IL l1f2   | Interleukin K.GTM*TTGHNADVLLVILK#I                         | 48.11  | 19.60  | 2.45 | 0.41 |
| Q9CX6_IL l1f2   | Interleukin K.I.LITVPPNLR.K                                | 12.90  | 31.74  | 0.41 | 2.46 |
| Q9CX6_IL l1f2   | Interleukin K.I.LPTEAVALGNK#V                              | 68.69  | 35.54  | 1.93 | 0.52 |
| Q9CX6_IL l1f2   | Interleukin K.I.LPTEAVALGNK#V                              | 234.35 | 118.90 | 1.97 | 0.51 |
| Q9CX6_IL l1f2   | Interleukin R.K#LDPELHLDIK#V                               | 140.01 | 54.36  | 2.58 | 0.39 |
| Q9CX6_IL l1f2   | Interleukin R.NQDLAPNSAEQASISLVTK#I                        | 92.33  | 44.22  | 2.09 | 0.48 |
| Q9CX6_IL l1f2   | Interleukin R.QPLALNVAYR.R                                 | 28.87  | 58.56  | 0.49 | 2.03 |
| Q9CX6_IL l1f2   | Interleukin R.VKHPAPDETSFSEALLK#R                          | 133.81 | 72.27  | 1.85 | 0.54 |
| Q9CX6_IL l1f2   | Interleukin K.VLQSAALAIR.H                                 | 54.06  | 120.56 | 0.45 | 2.23 |
| Q9CX6_IL l1f2   | Interleukin R.WFEENASQSTVK#V                               | 98.00  | 39.05  | 2.51 | 0.40 |
| Q9CX6_IL l1f2   | Interleukin K.GTM*TTGHNADVLLVILK#I                         | 18.79  | 8.38   | 2.24 | 0.45 |
| Q9CX6_IL l1f2   | Interleukin K.GTM*TTGHNADVLLVILK#I                         | 17.83  | 6.74   | 2.64 | 0.38 |
| Q9CX6_IL l1f2   | Interleukin K.I.LITVPPNLR.K                                | 6.66   | 11.42  | 0.58 | 1.71 |
| Q9CX6_IL l1f2   | Interleukin K.I.LPTEAVALGNK#V                              | 65.57  | 27.92  | 2.35 | 0.43 |
| Q9CX6_IL l1f2   | Interleukin R.K#LDPELHLDIK#V                               | 35.43  | 20.43  | 1.73 | 0.58 |
| Q9CX6_IL l1f2   | Interleukin R.NQDLAPNSAEQASISLVTK#I                        | 67.61  | 35.21  | 1.92 | 0.52 |
| Q9CX6_IL l1f2   | Interleukin R.QPLALNVAYR.R                                 | 5.03   | 11.89  | 0.42 | 2.36 |
| Q9CX6_IL l1f2   | Interleukin R.VKHPAPDETSFSEALLK#R                          | 42.35  | 18.25  | 2.32 | 0.43 |
| Q9CX6_IL l1f2   | Interleukin R.VKHPAPDETSFSEALLK#R                          | 6.25   | 3.10   | 2.02 | 0.50 |
| Q9CX6_IL l1f2   | Interleukin K.VLQSAALAIR.H                                 | 15.26  | 24.43  | 0.62 | 1.60 |
| Q9CX6_IL l1f2   | Interleukin R.AQDPSEVLTMLTNETGFEISSDATVK#I                 | 24.42  | 8.06   | 3.03 | 0.33 |
| Q9CX6_IL l1f2   | Interleukin K.GTM*TTGHNADVLLVILK#I                         | 43.68  | 11.89  | 3.67 | 0.27 |
| Q9CX6_IL l1f2   | Interleukin K.GTM*TTGHNADVLLVILK#I                         | 11.78  | 9.19   | 1.28 | 0.78 |
| Q9CX6_IL l1f2   | Interleukin K.I.LITVPPNLR.K                                | 9.10   | 16.20  | 0.56 | 1.78 |
| Q9CX6_IL l1f2   | Interleukin K.I.LPTEAVALGNK#V                              | 132.76 | 59.80  | 2.22 | 0.45 |
| Q9CX6_IL l1f2   | Interleukin R.K#LDPELHLDIK#V                               | 59.06  | 20.61  | 2.87 | 0.35 |
| Q9CX6_IL l1f2   | Interleukin R.NQDLAPNSAEQASISLVTK#I                        | 109.41 | 43.51  | 2.51 | 0.40 |
| Q9CX6_IL l1f2   | Interleukin R.NQDLAPNSAEQASISLVTK#I                        | 26.82  | 12.37  | 2.17 | 0.46 |
| Q9CX6_IL l1f2   | Interleukin R.VKHPAPDETSFSEALLK#R                          | 81.07  | 37.99  | 2.13 | 0.47 |
| Q9CX6_IL l1f2   | Interleukin R.VKHPAPDETSFSEALLK#R                          | 12.23  | 18.75  | 0.65 | 1.53 |
| Q9CX6_IL l1f2   | Interleukin K.VLQSAALAIR.H                                 | 29.82  | 48.36  | 0.62 | 1.62 |
| Q9CX6_IL l1f2   | Interleukin R.WFEENASQSTVK#V                               | 52.03  | 20.46  | 2.54 | 0.39 |
| Q9Z1X4_IL l1f3  | Interleukin K.AYALAALAEK#L                                 | 12.88  | 5.36   | 2.40 | 0.42 |
| Q9Z1X4_IL l1f3  | Interleukin K.LFPDTPALAEANK#K                              | 6.71   | 4.18   | 1.60 | 0.62 |
| Q9Z1X4_IL l1f3  | Interleukin K.ADPQAM*NALM*R.L                              | 7.57   | 19.89  | 0.38 | 2.63 |
| Q9Z1X4_IL l1f3  | Interleukin K.AVSDWIDEQEK#G                                | 14.48  | 5.97   | 2.43 | 0.41 |
| Q9Z1X4_IL l1f3  | Interleukin K.AVSDWIDEQEK#G                                | 14.45  | 6.95   | 2.08 | 0.48 |
| Q9Z1X4_IL l1f3  | Interleukin R.EDITQSAQHALR.L                               | 12.74  | 32.52  | 0.39 | 2.55 |
| Q9Z1X4_IL l1f3  | Interleukin K.FNYSVGGGR.S                                  | 9.19   | 23.03  | 0.40 | 2.51 |
| Q9Z1X4_IL l1f3  | Interleukin R.FVMEVVDGQK#F                                 | 88.07  | 42.09  | 2.09 | 0.48 |
| Q9Z1X4_IL l1f3  | Interleukin K.HGK#NPVM*ELNEK#R                             | 34.49  | 14.94  | 2.31 | 0.43 |
| Q9Z1X4_IL l1f3  | Interleukin K.HSSVYPTQEELEAVQNM*VSHTER.A                   | 2.33   | 5.68   | 0.41 | 2.44 |
| Q9Z1X4_IL l1f3  | Interleukin K.HSSVYPTQEELEAVQNM*VSHTER.A                   | 5.38   | 10.20  | 0.53 | 1.90 |
| Q9Z1X4_IL l1f3  | Interleukin R.LAAGQLHKK#V                                  | 98.24  | 39.52  | 2.49 | 0.40 |
| Q9Z1X4_IL l1f3  | Interleukin K.LFPDTPALAEANK#K                              | 55.16  | 34.09  | 1.62 | 0.62 |
| Q9Z1X4_IL l1f3  | Interleukin K.LISQTPVHAPIFTM*SEVVDGNSFEASGPSK#K            | 10.23  | 4.71   | 2.17 | 0.46 |
| Q9Z1X4_IL l1f3  | Interleukin K.LISQTPVHAPIFTM*SEVVDGNSFEASGPSK#K            | 24.59  | 8.11   | 3.03 | 0.33 |
| Q9Z1X4_IL l1f3  | Interleukin K.LISQTPVHAPIFTM*SEVVDGNSFEASGPSK#K            | 36.08  | 18.61  | 1.94 | 0.52 |
| Q9Z1X4_IL l1f3  | Interleukin K.LISQTPVHAPIFTM*SEVVDGNSFEASGPSK#K            | 6.34   | 2.69   | 2.36 | 0.42 |
| Q9Z1X4_IL l1f3  | Interleukin K.NPVM*ELNEK#R                                 | 25.01  | 16.34  | 1.53 | 0.65 |
| Q9Z1X4_IL l1f3  | Interleukin K.NPVMELNEK#R                                  | 45.51  | 20.65  | 2.20 | 0.45 |
| Q9Z1X4_IL l1f3  | Interleukin R.NTEHSM*NYQR.-                                | 2.05   | 7.48   | 0.27 | 3.65 |
| Q9Z1X4_IL l1f3  | Interleukin K.NTEPPLSLTIHLTSPVVR.E                         | 2.72   | 4.06   | 0.67 | 1.50 |
| Q9Z1X4_IL l1f3  | Interleukin R.SSGNSVSGSSSYNTGSHGSGSSSYQK#Q                 | 24.26  | 12.34  | 1.97 | 0.51 |
| Q9Z1X4_IL l1f3  | Interleukin K.VLAGETSLVNDPPDVLDR.Q                         | 15.28  | 35.29  | 0.43 | 2.31 |
| Q9Z1X4_IL l1f3  | Interleukin K.VLGM*DPPLSK#M                                | 109.18 | 58.94  | 1.85 | 0.54 |
| Q9Z1X4_IL l1f3  | Interleukin K.VLGM*DPPLSK#M                                | 55.19  | 26.35  | 2.09 | 0.48 |
| Q9Z1X4_IL l1f3  | Interleukin K.VLQDM*GLPTGAER.D                             | 14.26  | 55.77  | 0.26 | 3.91 |
| Q9Z1X4_IL l1f3  | Interleukin K.VLQDM*GLPTGAER.D                             | 14.78  | 31.83  | 0.46 | 2.15 |
| Q9Z1X4_IL l1f3  | Interleukin R.VPTWGPLR.G                                   | 15.53  | 37.55  | 0.41 | 2.42 |
| Q9Z1X4_IL l1f3  | Interleukin K.AVSDWIDEQEK#G                                | 8.23   | 3.92   | 2.10 | 0.48 |
| Q9Z1X4_IL l1f3  | Interleukin K.AYALAALAEK#L                                 | 59.69  | 24.31  | 2.46 | 0.41 |
| Q9Z1X4_IL l1f3  | Interleukin K.LFPDTPALAEANK#K                              | 39.64  | 19.85  | 2.00 | 0.50 |
| Q9Z1X4_IL l1f3  | Interleukin K.LISQTPVHAPIFTM*SEVVDGNSFEASGPSK#K            | 3.92   | 3.52   | 1.11 | 0.90 |
| Q9Z1X4_IL l1f3  | Interleukin K.LISQTPVHAPIFTM*SEVVDGNSFEASGPSK#K            | 4.10   | 1.82   | 2.25 | 0.44 |
| Q9Z1X4_IL l1f3  | Interleukin K.NPVMELNEK#R                                  | 11.38  | 11.13  | 1.02 | 0.98 |
| Q9Z1X4_IL l1f3  | Interleukin K.VLAGETSLVNDPPDVLDR.Q                         | 6.17   | 11.99  | 0.51 | 1.94 |
| Q9Z1X4_IL l1f3  | Interleukin K.VLGM*DPPLSK#M                                | 49.73  | 19.12  | 2.60 | 0.38 |
| Q9Z1X4_IL l1f3  | Interleukin K.VLQDM*GLPTGAER.D                             | 3.99   | 7.22   | 0.55 | 1.81 |
| Q9Z1X4_IL l1f3  | Interleukin R.VPTWGPLR.G                                   | 5.92   | 12.66  | 0.47 | 2.14 |
| O55222_IL l1k   | Integrin-lin R.EVPFADLSNM*EIGM*K#V                         | 11.33  | 10.00  | 1.13 | 0.88 |
| O55222_IL l1k   | Integrin-lin R.EVPFADLSNM*EIGM*K#V                         | 7.38   | 6.49   | 1.14 | 0.88 |
| O55222_IL l1k   | Integrin-lin R.EVPFADLSNM*EIGM*K#V                         | 4.41   | 4.98   | 0.89 | 1.13 |
| O55222_IL l1k   | Integrin-lin K.FDM*VPILEK#M                                | 23.83  | 23.02  | 1.04 | 0.97 |
| O55222_IL l1k   | Integrin-lin K.FDM*VPILEK#M                                | 27.64  | 29.14  | 0.95 | 1.05 |
| O55222_IL l1k   | Integrin-lin R.GM*AFHLTLELIPR.H                            | 6.79   | 18.93  | 0.36 | 2.79 |



|                  |                                                     |       |       |       |       |
|------------------|-----------------------------------------------------|-------|-------|-------|-------|
| O55222_IL Iik    | Integrin-lin R.GMAFLHLEPLIPR.H                      | 3.69  | 11.10 | 0.33  | 3.01  |
| O55222_IL Iik    | Integrin-lin R.M*YAPAWVAPEALQK#.K                   | 13.33 | 16.11 | 0.83  | 1.21  |
| O55222_IL Iik    | Integrin-lin R.MYAPAWVAPEALQK#.K                    | 11.00 | 8.61  | 1.28  | 0.78  |
| O55222_IL Iik    | Integrin-lin R.SAVVEMLIIM*RG                        | 4.29  | 10.61 | 0.40  | 2.47  |
| O55222_IL Iik    | Integrin-lin R.SVM*IDEDM*TR.A.I                     | 3.98  | 14.32 | 0.28  | 3.60  |
| O55222_IL Iik    | Integrin-lin K.YGEM*PVDK#.A                         | 19.64 | 18.05 | 1.09  | 0.92  |
| O55222_IL Iik    | Integrin-lin K.FDM*IVPILEK#.M                       | 10.69 | 6.71  | 1.59  | 0.63  |
| O55222_IL Iik    | Integrin-lin K.FDMIVPILEK#.M                        | 15.38 | 10.55 | 1.46  | 0.69  |
| O55222_IL Iik    | Integrin-lin K.YGEM*PVDK#.A                         | 6.86  | 6.89  | 1.00  | 1.00  |
| O55222_IL Iik    | Integrin-lin R.EVPFADLSNM*EIGM*#K.V                 | 7.49  | 4.75  | 1.58  | 0.63  |
| O55222_IL Iik    | Integrin-lin K.FDM*IVPILEK#.M                       | 13.16 | 15.97 | 0.82  | 1.21  |
| O55222_IL Iik    | Integrin-lin K.FDMIVPILEK#.M                        | 12.84 | 9.76  | 1.32  | 0.76  |
| Q921Y2_IV Imp3   | U3 small nu.R.HVLEYNEER.D                           | 1.33  | 7.21  | 0.18  | 5.44  |
| Q921Y2_IV Imp3   | U3 small nu.K.LYAM*GLVPT.R.G                        | 1.43  | 5.22  | 0.27  | 3.64  |
| Q921Y2_IV Imp3   | U3 small nu.R.VGPDVWVTDPAFLVTR.S                    | 2.33  | 3.68  | 0.63  | 1.58  |
| Q921Y2_IV Imp3   | U3 small nu.R.VITFANQDDYISFR.H                      | 2.42  | 4.52  | 0.54  | 1.86  |
| Q8VHZ7_IV Imp4   | U3 small nu.R.VITFANQDDYISFR.H                      | 1.70  | 4.18  | 0.41  | 2.46  |
| P24547_IV Impdh2 | Inosine-5'-r K.VAQGVSGAVQDK#.G                      | 31.50 | 2.86  | 11.02 | 0.09  |
| Q9WU62_I Incenp  | Inner centr R.LAEQQLQEEQAK.K                        | 4.11  | 19.88 | 0.21  | 4.84  |
| Q9WU62_I Incenp  | Inner centr R.TSSAVVNSPPLK.A                        | 2.50  | 9.04  | 0.28  | 3.62  |
| Q9WU62_I Incenp  | Inner centr R.LAEQQLQEEQAK.K                        | 5.41  | 11.35 | 0.48  | 2.10  |
| Q9WU62_I Incenp  | Inner centr R.VSIPILLNLIPTTAK.S                     | 4.21  | 7.44  | 0.57  | 1.77  |
| E9QLA5_E9 Inf2   | Inverted foi K.FDVEVLK#.Q                           | 18.81 | 10.67 | 1.76  | 0.57  |
| E9QLA5_E9 Inf2   | Inverted foi R.LQASIEASQELDK#VFDAIEQK#.K            | 33.98 | 16.17 | 2.10  | 0.48  |
| E9QLA5_E9 Inf2   | Inverted foi R.NQEEFVPSDDIK#.A                      | 9.75  | 4.99  | 1.96  | 0.51  |
| E9QLA5_E9 Inf2   | Inverted foi R.TEADSTSEGPEDAQR.G                    | 3.62  | 5.36  | 0.68  | 1.48  |
| E9QLA5_E9 Inf2   | Inverted foi R.VSASIPVEQK#.Q                        | 14.27 | 11.73 | 1.22  | 0.82  |
| E9QLA5_E9 Inf2   | Inverted foi R.AVM*NSQQGIEYLNSQGYVR.Q               | 1.22  | 5.19  | 0.23  | 4.26  |
| E9QLA5_E9 Inf2   | Inverted foi K.IGNFLNYSHTGDADGFK#.I                 | 25.64 | 9.65  | 2.66  | 0.38  |
| E9QLA5_E9 Inf2   | Inverted foi R.LQASIEASQELDK#VFDAIEQK#.K            | 29.77 | 13.20 | 2.25  | 0.44  |
| E9QLA5_E9 Inf2   | Inverted foi R.NQEEFVPSDDIK#.A                      | 9.54  | 5.41  | 1.76  | 0.57  |
| E9QLA5_E9 Inf2   | Inverted foi R.TEADSTSEGPEDAQR.G                    | 3.52  | 7.20  | 0.49  | 2.05  |
| E9QLA5_E9 Inf2   | Inverted foi K.VSASIPVEQK#.Q                        | 24.28 | 32.07 | 0.76  | 1.32  |
| Q9D8Y8_IN Ing5   | Inhibitor of R.RLDADLAR.F                           | 1.42  | 22.10 | 0.06  | 15.51 |
| Q9D8Y8_IN Ing5   | Inhibitor of R.RLDADLAR.F                           | 6.53  | 8.31  | 0.79  | 1.27  |
| Q8BHA0_IN Ino80c | INO80 com K.LSASGAFQVGSIEAM*NESK#.M                 | 3.48  | 3.02  | 1.15  | 0.87  |
| Q8BHA0_IN Ino80c | INO80 com K.MASSELSGVPVEK#.A                        | 4.64  | 2.12  | 2.19  | 0.46  |
| Q8BHA0_IN Ino80c | INO80 com K.M*ASSELSSGVPVEK#.A                      | 9.36  | 7.60  | 1.23  | 0.81  |
| Q8BHA0_IN Ino80c | INO80 com K.YSDISGLLANYTDPOSK#.L                    | 6.76  | 5.59  | 1.21  | 0.83  |
| D3Z3H2_D.Ino80e  | Coiled-coil R.GSGSVAALTPPPK#.M                      | 5.80  | 4.62  | 1.26  | 0.80  |
| Q6P549_SF Inpp1  | Phosphatid R.LLQQSLPQTGELESLVK#.L                   | 12.31 | 6.24  | 1.97  | 0.51  |
| Q6P549_SF Inpp1  | Phosphatid K.SFENDAQSSDNINFLK#.V                    | 5.86  | 3.70  | 1.58  | 0.63  |
| Q6P549_SF Inpp1  | Phosphatid K.TSDQAYEFESINIAVK#.T                    | 7.37  | 1.20  | 6.15  | 0.16  |
| Q6P549_SF Inpp1  | Phosphatid K.LDVTLGDLTK#.I                          | 13.88 | 6.94  | 2.00  | 0.50  |
| Q6P549_SF Inpp1  | Phosphatid K.LGVVFEK#.E                             | 13.72 | 5.04  | 2.72  | 0.37  |
| Q6P549_SF Inpp1  | Phosphatid R.LLDDTLQLSK#.-                          | 23.37 | 8.97  | 2.61  | 0.38  |
| Q6P549_SF Inpp1  | Phosphatid K.SFENDAQSSDNINFLK#.V                    | 7.27  | 9.33  | 0.78  | 1.28  |
| Q6P549_SF Inpp1  | Phosphatid K.TGIANTLGNK#.G                          | 13.61 | 7.65  | 1.78  | 0.56  |
| Q6P549_SF Inpp1  | Phosphatid K.LVLSGLEILSK#.V                         | 9.89  | 4.79  | 2.06  | 0.48  |
| Q6P458_IN Ints1  | Integrator c R.AVEDVELTSLDIDEM*SR.R                 | 1.24  | 10.55 | 0.12  | 8.52  |
| Q6P458_IN Ints1  | Integrator c K.FVFNELSNAR.N                         | 3.12  | 13.38 | 0.23  | 4.28  |
| Q6P458_IN Ints1  | Integrator c R.LQDLLLGPCK#.A                        | 13.97 | 12.90 | 1.08  | 0.92  |
| Q6P458_IN Ints1  | Integrator c K.VLFTQEPETYK#.W                       | 11.85 | 9.37  | 1.27  | 0.79  |
| Q8K2A7_IN Ints10 | Integrator c K.ADLNSIEVLESFK.L                      | 14.20 | 10.25 | 1.39  | 0.72  |
| Q8K2A7_IN Ints10 | Integrator c R.EISITIALR.N                          | 10.05 | 12.33 | 0.82  | 1.23  |
| Q8K2A7_IN Ints10 | Integrator c K.IILLQLTL.-                           | 16.76 | 16.76 | 1.00  | 1.00  |
| Q8K2A7_IN Ints10 | Integrator c K.IILNVVGM*RC                          | 3.56  | 11.18 | 0.32  | 3.14  |
| Q8K2A7_IN Ints10 | Integrator c K.YIEGLETK.S                           | 13.30 | 15.75 | 0.84  | 1.18  |
| Q9D168_IN Ints12 | Integrator c K.ALLDESLAR.G                          | 4.67  | 19.12 | 0.24  | 4.10  |
| Q9D168_IN Ints12 | Integrator c K.ATSESSSTASLK#.G                      | 19.94 | 10.69 | 1.87  | 0.54  |
| Q9D168_IN Ints12 | Integrator c K.IGSGNSTSPVPLKPLPPLTLGK.T             | 11.25 | 11.63 | 0.97  | 1.03  |
| Q9D168_IN Ints12 | Integrator c R.TEVK#PSTVISGNSNNVSSVTSGLTGWAAFAAK#.T | 4.36  | 3.01  | 1.45  | 0.69  |
| Q9D168_IN Ints12 | Integrator c K.TQKPPQKPAPTVVSVPVTKDPLVK.K           | 5.04  | 5.01  | 1.01  | 0.99  |
| Q7TPD0_IN Ints3  | Integrator c K.FSDLFSLAEEYDSST#PPK#.S               | 17.41 | 8.58  | 2.03  | 0.49  |
| Q7TPD0_IN Ints3  | Integrator c K.GKGTVAASAAAGGGGGGAGAGAPGGGR.L        | 23.60 | 18.16 | 1.30  | 0.77  |
| Q7TPD0_IN Ints3  | Integrator c R.IPEFLLWK#.D                          | 14.41 | 6.47  | 2.23  | 0.45  |
| Q7TPD0_IN Ints3  | Integrator c R.TQLVWLVLR.E                          | 3.94  | 10.16 | 0.29  | 2.58  |
| Q7TPD0_IN Ints3  | Integrator c R.DGM*NIIVLNK#.I                       | 13.64 | 7.25  | 1.88  | 0.53  |
| Q7TPD0_IN Ints3  | Integrator c K.FSDLFSLAEEYDSSTKPKP.K.S              | 39.08 | 21.53 | 1.82  | 0.55  |
| Q7TPD0_IN Ints3  | Integrator c K.HDELAEHIK#.A                         | 17.09 | 7.73  | 2.21  | 0.45  |
| Q7TPD0_IN Ints3  | Integrator c K.IQLLML*EK#.Y                         | 22.21 | 11.98 | 1.85  | 0.54  |
| Q7TPD0_IN Ints3  | Integrator c R.IPEFLLWK#.D                          | 11.79 | 11.68 | 1.01  | 0.99  |
| Q7TPD0_IN Ints3  | Integrator c K.QIAGGDVATK#.N                        | 23.91 | 10.25 | 2.33  | 0.43  |
| Q7TPD0_IN Ints3  | Integrator c R.VLHAPLFDNPK#.L                       | 18.17 | 11.74 | 1.55  | 0.65  |
| Q8CIM8_IN Ints4  | Integrator c K.SPWLGESEM*SPQVETSIETIPFSKPKV.V       | 2.54  | 3.13  | 0.81  | 1.23  |
| Q8CIM8_IN Ints4  | Integrator c K.ASATIIEPAGESDNPLR.F                  | 2.64  | 7.94  | 0.33  | 3.01  |
| Q8CIM8_IN Ints4  | Integrator c K.IASLLGLLSK#.T                        | 17.80 | 9.48  | 1.88  | 0.53  |
| Q8CIM8_IN Ints4  | Integrator c K.LLSDDYEQVR.S                         | 4.17  | 10.50 | 0.40  | 2.52  |
| Q8CIM8_IN Ints4  | Integrator c K.SPWLGESEM*SPQVETSIETIPFSK#PVK#.V     | 4.27  | 2.20  | 1.94  | 0.51  |
| Q8CIM8_IN Ints4  | Integrator c K.VVQQQEEIATK.K                        | 12.11 | 7.24  | 1.67  | 0.60  |
| Q6PCM2_IF Ints6  | Integrator c R.ANQINHINSN.-                         | 8.44  | 8.44  | 1.00  | 1.00  |
| Q6PCM2_IF Ints6  | Integrator c K.GQDEQVHVSPIAQM*GNYQEYK#.Q            | 5.50  | 5.16  | 1.07  | 0.94  |
| Q6PCM2_IF Ints6  | Integrator c K.LTTTSGVQDELHPLNSPLP#GSELT.K.E        | 8.01  | 8.76  | 0.91  | 1.09  |
| Q7TQK1_IN Ints7  | Integrator c K.IILNVDFVK#.R                         | 14.78 | 10.43 | 1.42  | 0.71  |
| Q7TQK1_IN Ints7  | Integrator c K.IPIDSM*TNEM*EQR.V                    | 5.68  | 5.38  | 1.06  | 0.95  |
| Q7TQK1_IN Ints7  | Integrator c K.SLEDYPSQQI.R.L                       | 3.10  | 9.59  | 0.32  | 3.10  |
| Q80V86_IN Ints8  | Integrator c K.AIGQTELNASNPEVQLQAAQR.R              | 2.43  | 6.21  | 0.39  | 2.55  |
| Q8K114_IN Ints9  | Integrator c K.VLK#PLLSGSSIPVEQFVQTEK#.H            | 8.45  | 7.33  | 1.15  | 0.87  |
| Q8K114_IN Ints9  | Integrator c R.LLM*EELVNFIER.V                      | 1.07  | 3.82  | 0.28  | 3.57  |
| Q8K114_IN Ints9  | Integrator c R.LNFIQVSK#.L                          | 19.02 | 9.19  | 2.07  | 0.48  |
| Q8K114_IN Ints9  | Integrator c K.VLK#PLLSGSSIPVEQFVQTEK#.H            | 18.85 | 18.45 | 1.02  | 0.98  |
| Q8K114_IN Ints9  | Integrator c K.VSYVSGSLTTHPQPM*DOASLK#.N            | 7.22  | 3.72  | 1.94  | 0.51  |
| Q8VI75_IP Ipo4   | Importin-4 K.SLVLTAQK#.E                            | 26.27 | 6.05  | 4.34  | 0.23  |
| Q8VI75_IP Ipo4   | Importin-4 K.SLVLTAQK#.E                            | 41.30 | 8.69  | 4.75  | 0.21  |
| Q8VI75_IP Ipo4   | Importin-4 K.TEPQVATLTLR.A                          | 13.03 | 10.74 | 1.21  | 0.82  |
| Q8VI75_IP Ipo4   | Importin-4 R.VLM*ASPVGK#.T                          | 33.82 | 3.58  | 9.46  | 0.11  |
| Q8BK5_IP Ipo5    | Importin-5 K.EGFVEYEQVVK#.L                         | 10.56 | 2.68  | 3.94  | 0.25  |
| Q8BK5_IP Ipo5    | Importin-5 K.FVPYDVFMPSLK#.H                        | 8.50  | 2.72  | 3.13  | 0.32  |
| Q8BK5_IP Ipo5    | Importin-5 K.HIVENAVQK#.E                           | 25.41 | 11.47 | 2.21  | 0.45  |
| Q8BK5_IP Ipo5    | Importin-5 K.LQELIQK#.G                             | 13.66 | 2.16  | 6.31  | 0.16  |
| Q8BK5_IP Ipo5    | Importin-5 K.SLLIPYLDNLVK#.H                        | 27.23 | 4.84  | 5.62  | 0.18  |
| Q8BK5_IP Ipo5    | Importin-5 K.SLVEIADTVPK#.Y                         | 21.45 | 7.84  | 2.73  | 0.37  |
| Q8BK5_IP Ipo5    | Importin-5 R.VIQAPEAK#.T                            | 25.05 | 6.99  | 3.59  | 0.28  |

|                  |                                               |        |       |      |      |
|------------------|-----------------------------------------------|--------|-------|------|------|
| Q8BK5_IP Ipo5    | Importin-5 K.VSDILHSIFSSYK#.E                 | 18.19  | 5.02  | 3.62 | 0.28 |
| Q8BK5_IP Ipo5    | Importin-5 K.AIGTEPDSVLEIM*HSFAK#.C           | 32.50  | 8.38  | 3.88 | 0.26 |
| Q8BK5_IP Ipo5    | Importin-5 K.AIGTEPDSVLEIMHSFAK#.C            | 40.65  | 10.09 | 4.03 | 0.25 |
| Q8BK5_IP Ipo5    | Importin-5 K.EFOQQLVPM*GPLM*K#.T              | 19.10  | 3.66  | 5.22 | 0.19 |
| Q8BK5_IP Ipo5    | Importin-5 K.EGFVEYTEQVYK#.L                  | 34.02  | 9.30  | 3.66 | 0.27 |
| Q8BK5_IP Ipo5    | Importin-5 K.FM*QDASDVM*QLLKK#.T              | 10.00  | 4.02  | 2.49 | 0.40 |
| Q8BK5_IP Ipo5    | Importin-5 K.FVPYDLFM*PSLK#.H                 | 28.65  | 9.64  | 2.97 | 0.34 |
| Q8BK5_IP Ipo5    | Importin-5 K.FVPYDLFM*PSLK#.H                 | 19.29  | 5.15  | 3.75 | 0.27 |
| Q8BK5_IP Ipo5    | Importin-5 K.HIVENAVQK#.E                     | 93.67  | 18.49 | 5.06 | 0.20 |
| Q8BK5_IP Ipo5    | Importin-5 R.LLSSAFDEVYPALPSDVQTAIK#.S        | 52.13  | 12.66 | 4.12 | 0.24 |
| Q8BK5_IP Ipo5    | Importin-5 K.LM*VPLLK#.F                      | 24.34  | 6.11  | 3.98 | 0.25 |
| Q8BK5_IP Ipo5    | Importin-5 K.LM*VPLLK#.F                      | 20.84  | 5.47  | 3.81 | 0.26 |
| Q8BK5_IP Ipo5    | Importin-5 K.LQELIQK#.G                       | 58.72  | 10.39 | 5.65 | 0.18 |
| Q8BK5_IP Ipo5    | Importin-5 R.NLIDEQGNQWPEGLK#.F               | 11.38  | 5.18  | 2.20 | 0.46 |
| Q8BK5_IP Ipo5    | Importin-5 R.RQDEYDEQVESLQDEDDNDVWLT.K.V      | 5.64   | 4.70  | 1.20 | 0.83 |
| Q8BK5_IP Ipo5    | Importin-5 K.SLLIPYLDNLVK#.H                  | 103.52 | 21.66 | 4.78 | 0.21 |
| Q8BK5_IP Ipo5    | Importin-5 K.SLVEIADTVPK#.Y                   | 97.81  | 18.82 | 5.20 | 0.19 |
| Q8BK5_IP Ipo5    | Importin-5 R.VIQAPEAK#.T                      | 95.59  | 25.59 | 3.74 | 0.27 |
| Q8BK5_IP Ipo5    | Importin-5 K.VSDILHSIFSSYK#.E                 | 78.32  | 12.40 | 6.32 | 0.16 |
| Q9EPL8_IP Ipo7   | Importin-7 K.AFAVGVQQLLK#.V                   | 43.92  | 7.72  | 5.69 | 0.18 |
| Q9EPL8_IP Ipo7   | Importin-7 R.ETENDLTVIQQ#.M                   | 25.87  | 5.61  | 4.61 | 0.22 |
| Q9EPL8_IP Ipo7   | Importin-7 R.FQLLSDQSDQSVLIQK#.Q              | 11.95  | 3.49  | 3.42 | 0.29 |
| Q9EPL8_IP Ipo7   | Importin-7 K.FSAPVVPSSFNFGPAPGM#.N.           | 15.93  | 15.93 | 1.00 | 1.00 |
| Q9EPL8_IP Ipo7   | Importin-7 R.QAGVIYK#.N                       | 13.34  | 1.71  | 7.81 | 0.13 |
| Q9EPL8_IP Ipo7   | Importin-7 R.SPLVAMQHFPLVK#.D                 | 16.81  | 2.41  | 6.99 | 0.14 |
| Q91YE6_IP Ipo9   | Importin-9 R.HLQEAQTK#.A                      | 6.07   | 4.35  | 1.39 | 0.72 |
| Q91YE6_IP Ipo9   | Importin-9 K.YSNDPVSASLAQDIFK#.E              | 9.34   | 4.30  | 2.17 | 0.46 |
| Q9JKF1_IQ Iqgap1 | Ras GTPase-K.ATFYGEQVYK#.S                    | 15.64  | 7.88  | 1.98 | 0.50 |
| Q9JKF1_IQ Iqgap1 | Ras GTPase-K.GVLLELDLQANQK#.N                 | 12.88  | 8.55  | 1.51 | 0.66 |
| Q9JKF1_IQ Iqgap1 | Ras GTPase-K.LPYDVTPEQALSHHEVK#.T             | 14.23  | 6.65  | 2.14 | 0.47 |
| Q9JKF1_IQ Iqgap1 | Ras GTPase-K.LQQYTSALNSK#.A                   | 28.38  | 12.77 | 2.22 | 0.45 |
| Q9JKF1_IQ Iqgap1 | Ras GTPase-K.LTELGTVDPK#.N                    | 16.35  | 6.13  | 2.67 | 0.37 |
| Q9JKF1_IQ Iqgap1 | Ras GTPase-K.NVIFGPTVEEVDVFEVK#.A             | 18.16  | 9.57  | 1.90 | 0.53 |
| Q9JKF1_IQ Iqgap1 | Ras GTPase-R.ALESGDM*TTWVK#.Q                 | 35.27  | 6.50  | 5.42 | 0.18 |
| Q9JKF1_IQ Iqgap1 | Ras GTPase-K.AQETQDESAVLWLDIEIQQGIWQSNK#.D    | 10.95  | 1.95  | 5.62 | 0.18 |
| Q9JKF1_IQ Iqgap1 | Ras GTPase-K.ATFYGEQVYK#.S                    | 92.74  | 32.14 | 2.89 | 0.35 |
| Q9JKF1_IQ Iqgap1 | Ras GTPase-R.DHINDIHK#.I                      | 120.55 | 38.46 | 3.13 | 0.32 |
| Q9JKF1_IQ Iqgap1 | Ras GTPase-K.DSLHEK#FPDAGEDLKK#.I             | 41.17  | 17.82 | 2.31 | 0.43 |
| Q9JKF1_IQ Iqgap1 | Ras GTPase-R.EEIQSSISGVTAAAYNR.E              | 13.46  | 12.35 | 1.09 | 0.92 |
| Q9JKF1_IQ Iqgap1 | Ras GTPase-R.EEIQSSISGVTAAAYNR.E              | 11.79  | 2.53  | 4.67 | 0.21 |
| Q9JKF1_IQ Iqgap1 | Ras GTPase-R.EKLEAYHFLYLLQTNPTYLAK.L          | 19.66  | 4.27  | 4.61 | 0.22 |
| Q9JKF1_IQ Iqgap1 | Ras GTPase-R.EQLWLANEGLITK#.L                 | 74.18  | 19.01 | 3.90 | 0.26 |
| Q9JKF1_IQ Iqgap1 | Ras GTPase-R.FALGSAINEAVDSGDVGR.T             | 10.82  | 11.08 | 0.98 | 1.02 |
| Q9JKF1_IQ Iqgap1 | Ras GTPase-K.FDVPQDENAEM*DAR.T                | 7.28   | 10.39 | 0.70 | 1.43 |
| Q9JKF1_IQ Iqgap1 | Ras GTPase-K.FLSAIVSSVDK#.I                   | 43.11  | 10.55 | 4.09 | 0.24 |
| Q9JKF1_IQ Iqgap1 | Ras GTPase-K.FM*DSVIFTLNYASNRQ.E              | 3.38   | 8.44  | 0.40 | 2.50 |
| Q9JKF1_IQ Iqgap1 | Ras GTPase-K.FPDAGEDLKK#.I                    | 15.11  | 8.58  | 1.76 | 0.57 |
| Q9JKF1_IQ Iqgap1 | Ras GTPase-K.FVHLLDQSDQDFQEELDLM*K#.M         | 21.42  | 8.19  | 2.61 | 0.38 |
| Q9JKF1_IQ Iqgap1 | Ras GTPase-K.FVHLLDQSDQDFQEELDLM*K#.M         | 12.53  | 6.61  | 1.90 | 0.53 |
| Q9JKF1_IQ Iqgap1 | Ras GTPase-R.GLQTSNSDWMYK#.Q                  | 17.41  | 5.33  | 3.27 | 0.31 |
| Q9JKF1_IQ Iqgap1 | Ras GTPase-K.GVLLELDLQANQK#.N                 | 83.10  | 19.28 | 4.31 | 0.23 |
| Q9JKF1_IQ Iqgap1 | Ras GTPase-R.HTDNVIQWLNAM*DEIGLPK#.I          | 14.26  | 8.12  | 1.76 | 0.57 |
| Q9JKF1_IQ Iqgap1 | Ras GTPase-R.HTDNVIQWLNAM*DEIGLPK#.I          | 26.94  | 7.06  | 4.52 | 0.22 |
| Q9JKF1_IQ Iqgap1 | Ras GTPase-K.IIGNLLYR.Y                       | 31.37  | 41.61 | 0.63 | 1.58 |
| Q9JKF1_IQ Iqgap1 | Ras GTPase-R.LAIGLINEALDEGDAQK#.T             | 74.88  | 15.80 | 4.74 | 0.21 |
| Q9JKF1_IQ Iqgap1 | Ras GTPase-R.LAIGLINEALDEGDAQK#.T             | 196.95 | 56.11 | 3.51 | 0.28 |
| Q9JKF1_IQ Iqgap1 | Ras GTPase-R.K#FVHLLDQSDQDFQEELDLM*K#.M       | 12.44  | 3.90  | 3.19 | 0.31 |
| Q9JKF1_IQ Iqgap1 | Ras GTPase-K.K#LTELGTVDPK#.N                  | 20.29  | 6.67  | 3.04 | 0.33 |
| Q9JKF1_IQ Iqgap1 | Ras GTPase-R.LAAVAANAIAIK#.G                  | 21.28  | 5.13  | 4.14 | 0.24 |
| Q9JKF1_IQ Iqgap1 | Ras GTPase-R.LAYLHSHK#DEVVK#.I                | 106.81 | 21.20 | 5.04 | 0.20 |
| Q9JKF1_IQ Iqgap1 | Ras GTPase-K.LEAVQHFLYLLQTNPTYLAK.L           | 21.27  | 8.16  | 2.61 | 0.38 |
| Q9JKF1_IQ Iqgap1 | Ras GTPase-K.LEGVLAEAQHYQDTLIR.A              | 26.67  | 37.12 | 0.72 | 1.39 |
| Q9JKF1_IQ Iqgap1 | Ras GTPase-R.LFQTALQEEIK#.S                   | 176.83 | 57.86 | 3.06 | 0.33 |
| Q9JKF1_IQ Iqgap1 | Ras GTPase-K.LGLAPQJDLYGK#.V                  | 59.16  | 12.70 | 4.66 | 0.21 |
| Q9JKF1_IQ Iqgap1 | Ras GTPase-K.LGNFFSPK#.V                      | 49.22  | 13.32 | 3.69 | 0.27 |
| Q9JKF1_IQ Iqgap1 | Ras GTPase-K.LIFQM*PQNK#.S                    | 110.32 | 40.24 | 2.74 | 0.36 |
| Q9JKF1_IQ Iqgap1 | Ras GTPase-K.LIFQM*PQNK#.S                    | 31.66  | 12.39 | 2.55 | 0.39 |
| Q9JKF1_IQ Iqgap1 | Ras GTPase-R.LIVDVIR.F                        | 21.84  | 30.96 | 0.71 | 1.42 |
| Q9JKF1_IQ Iqgap1 | Ras GTPase-K.LPYDVTPEQALSHHEVK#.T             | 128.22 | 43.65 | 2.94 | 0.34 |
| Q9JKF1_IQ Iqgap1 | Ras GTPase-K.LQQYTSALNSK#.A                   | 117.77 | 39.18 | 3.01 | 0.33 |
| Q9JKF1_IQ Iqgap1 | Ras GTPase-K.LTELGTVDPK#.N                    | 121.15 | 35.22 | 3.44 | 0.29 |
| Q9JKF1_IQ Iqgap1 | Ras GTPase-K.M*FLGDNHLSIINEYLSQSYQK#.F        | 65.50  | 17.15 | 3.82 | 0.26 |
| Q9JKF1_IQ Iqgap1 | Ras GTPase-K.MFLGDNHLSIINEYLSQSYQK#.F         | 18.44  | 4.89  | 3.77 | 0.27 |
| Q9JKF1_IQ Iqgap1 | Ras GTPase-K.NPNAM*LVNLEGLAPTYQDVLVQAK#.Q     | 9.67   | 4.02  | 2.40 | 0.42 |
| Q9JKF1_IQ Iqgap1 | Ras GTPase-K.NPNAM*LVNLEGLAPTYQDVLVQAK#.Q     | 8.94   | 4.60  | 1.94 | 0.52 |
| Q9JKF1_IQ Iqgap1 | Ras GTPase-K.NVIFGPTVEEVDVFEVK#.A             | 103.12 | 37.93 | 2.72 | 0.37 |
| Q9JKF1_IQ Iqgap1 | Ras GTPase-K.LQSDIQK#.R                       | 45.45  | 13.15 | 3.46 | 0.29 |
| Q9JKF1_IQ Iqgap1 | Ras GTPase-R.QSGQTDPLQKEEVQAGVDAANSAAQQYQR.R  | 3.80   | 4.48  | 0.85 | 1.18 |
| Q9JKF1_IQ Iqgap1 | Ras GTPase-K.SK#VDQIEVTVGNPTVIK#.M            | 80.81  | 20.56 | 3.93 | 0.25 |
| Q9JKF1_IQ Iqgap1 | Ras GTPase-R.SNQQLENDLNLMDIK#.I               | 55.13  | 17.27 | 3.19 | 0.31 |
| Q9JKF1_IQ Iqgap1 | Ras GTPase-R.SNQQLENDLNLMDIK#.I               | 24.99  | 8.72  | 2.87 | 0.35 |
| Q9JKF1_IQ Iqgap1 | Ras GTPase-K.SWVNQM*ESQTGEASK#.L              | 20.25  | 7.56  | 2.68 | 0.37 |
| Q9JKF1_IQ Iqgap1 | Ras GTPase-K.SWVNQM*ESQTGEASK#.L              | 29.15  | 6.79  | 4.29 | 0.23 |
| Q9JKF1_IQ Iqgap1 | Ras GTPase-K.TEVSLLTNK#.F                     | 35.14  | 9.89  | 3.55 | 0.28 |
| Q9JKF1_IQ Iqgap1 | Ras GTPase-K.TLINAEDPPM*VVR.K                 | 3.59   | 6.82  | 0.53 | 1.90 |
| Q9JKF1_IQ Iqgap1 | Ras GTPase-K.TLQALQPAK#.L                     | 69.61  | 15.63 | 4.45 | 0.22 |
| Q9JKF1_IQ Iqgap1 | Ras GTPase-R.VAADTFTALK#.N                    | 47.22  | 12.38 | 3.82 | 0.26 |
| Q9JKF1_IQ Iqgap1 | Ras GTPase-K.VDFTEIINN*K#.I                   | 2.07   | 13.73 | 0.15 | 6.62 |
| Q9JKF1_IQ Iqgap1 | Ras GTPase-K.VDQIEVTVGNPTVIK#.M               | 50.47  | 13.49 | 3.74 | 0.27 |
| Q9JKF1_IQ Iqgap1 | Ras GTPase-K.YGIQM*PAFSK#.I                   | 34.41  | 7.86  | 4.38 | 0.23 |
| Q9JKF1_IQ Iqgap1 | Ras GTPase-K.YGIQM*PAFSK#.I                   | 13.69  | 3.96  | 3.46 | 0.29 |
| Q9JKF1_IQ Iqgap1 | Ras GTPase-R.YM*NPAIVAPDAFDIIDL SAGGQLTTDQR.R | 8.28   | 16.24 | 0.51 | 1.96 |
| Q9JKF1_IQ Iqgap1 | Ras GTPase-R.YQELINDIAK#.D                    | 114.28 | 32.15 | 3.55 | 0.28 |
| Q9JKF1_IQ Iqgap1 | Ras GTPase-R.ALESGDM*TTWVK#.Q                 | 65.26  | 20.33 | 3.21 | 0.31 |
| Q9JKF1_IQ Iqgap1 | Ras GTPase-R.ALESGDM*TTWVK#.Q                 | 29.83  | 9.74  | 3.06 | 0.33 |
| Q9JKF1_IQ Iqgap1 | Ras GTPase-K.ALQSLALGLR.G                     | 56.99  | 46.19 | 1.23 | 0.81 |
| Q9JKF1_IQ Iqgap1 | Ras GTPase-K.ATFYGEQVYK#.S                    | 198.43 | 52.46 | 3.78 | 0.26 |
| Q9JKF1_IQ Iqgap1 | Ras GTPase-R.DHINDIHK#.I                      | 232.15 | 67.99 | 3.41 | 0.29 |
| Q9JKF1_IQ Iqgap1 | Ras GTPase-K.DSLHEK#FPDAGEDLKK#.I             | 72.62  | 23.10 | 3.14 | 0.32 |
| Q9JKF1_IQ Iqgap1 | Ras GTPase-R.DVYEELLQAEIQGNVVK#.V             | 18.79  | 5.61  | 3.35 | 0.30 |
| Q9JKF1_IQ Iqgap1 | Ras GTPase-K.EDNLLSQEK#.K                     | 45.13  | 15.74 | 2.87 | 0.35 |
| Q9JKF1_IQ Iqgap1 | Ras GTPase-R.EEIQSSISGVTAAAYNR.E              | 34.29  | 46.11 | 0.74 | 1.34 |
| Q9JKF1_IQ Iqgap1 | Ras GTPase-K.EEVQAGVDAANSAAQQYQR.R            | 10.18  | 13.44 | 0.76 | 1.32 |

|                  |                                                      |        |        |       |       |
|------------------|------------------------------------------------------|--------|--------|-------|-------|
| Q9JKF1_IQIlgap1  | Ras GTPase-R.EQLWLANEGLITK#.L                        | 213.89 | 56.74  | 3.77  | 0.27  |
| Q9JKF1_IQIlgap1  | Ras GTPase-R.ERDVYELLTQAEIQGNVVK.V                   | 11.07  | 27.68  | 0.40  | 2.50  |
| Q9JKF1_IQIlgap1  | Ras GTPase-R.FALGISAINEAVDSQDVGRT.T                  | 43.33  | 61.28  | 0.71  | 1.41  |
| Q9JKF1_IQIlgap1  | Ras GTPase-K.FDVPGDENAEM*DAR.T                       | 11.24  | 22.79  | 0.49  | 2.03  |
| Q9JKF1_IQIlgap1  | Ras GTPase-K.FLSAIVSVDK#.I                           | 63.28  | 18.02  | 3.51  | 0.28  |
| Q9JKF1_IQIlgap1  | Ras GTPase-K.FPDAGEDELLK#.I                          | 16.57  | 9.12   | 1.82  | 0.55  |
| Q9JKF1_IQIlgap1  | Ras GTPase-K.FVHLLDQSDQDFQEELDM*#K#.M                | 51.20  | 12.49  | 4.10  | 0.24  |
| Q9JKF1_IQIlgap1  | Ras GTPase-K.FVHLLDQSDQDFQEELDMK#.M                  | 30.48  | 7.16   | 4.26  | 0.23  |
| Q9JKF1_IQIlgap1  | Ras GTPase-R.GLQTONSDWYVM*#K#.Q                      | 64.78  | 17.22  | 3.76  | 0.27  |
| Q9JKF1_IQIlgap1  | Ras GTPase-K.GVLEIEDLQANQFK#.N                       | 109.72 | 38.75  | 2.83  | 0.35  |
| Q9JKF1_IQIlgap1  | Ras GTPase-R.HTDNVIQWLNAM*DEIGLPK#.I                 | 54.95  | 24.89  | 2.21  | 0.45  |
| Q9JKF1_IQIlgap1  | Ras GTPase-R.HTDNVIQWLNAMDEIGLPK#.I                  | 53.52  | 17.50  | 3.06  | 0.33  |
| Q9JKF1_IQIlgap1  | Ras GTPase-K.IFYPETDIDYR.K                           | 11.82  | 19.27  | 0.61  | 1.63  |
| Q9JKF1_IQIlgap1  | Ras GTPase-K.IIGNLLYR.Y                              | 44.25  | 63.13  | 0.70  | 1.43  |
| Q9JKF1_IQIlgap1  | Ras GTPase-R.ILAGLINEALDEGDAQ#.T                     | 639.74 | 182.34 | 3.51  | 0.29  |
| Q9JKF1_IQIlgap1  | Ras GTPase-R.ILAGLINEALDEGDAQ#.T                     | 258.00 | 79.24  | 3.26  | 0.31  |
| Q9JKF1_IQIlgap1  | Ras GTPase-K.ITLQDVVSHSK#.K                          | 223.40 | 69.75  | 3.20  | 0.31  |
| Q9JKF1_IQIlgap1  | Ras GTPase-R.KFVHLLDQSDQDFQEELDM*#K#.M               | 23.32  | 27.93  | 0.84  | 1.20  |
| Q9JKF1_IQIlgap1  | Ras GTPase-R.LAAGDNNSK#.W                            | 8.02   | 4.64   | 1.73  | 0.58  |
| Q9JKF1_IQIlgap1  | Ras GTPase-R.LAAVAANAIAQK#.G                         | 66.95  | 23.53  | 2.85  | 0.35  |
| Q9JKF1_IQIlgap1  | Ras GTPase-K.LEAVYHLYLQTNPTYLAK#.L                   | 46.66  | 8.81   | 5.30  | 0.19  |
| Q9JKF1_IQIlgap1  | Ras GTPase-K.LEGVLAEVAQHYQDTLIR.A                    | 100.38 | 129.27 | 0.78  | 1.29  |
| Q9JKF1_IQIlgap1  | Ras GTPase-R.LFOTALQEEIK#.S                          | 350.97 | 98.23  | 3.57  | 0.28  |
| Q9JKF1_IQIlgap1  | Ras GTPase-K.LGLAPQDLYGK#.V                          | 159.73 | 47.49  | 3.36  | 0.30  |
| Q9JKF1_IQIlgap1  | Ras GTPase-K.LGLAPQDLYGK#VDFTEEINNMK#.I              | 11.62  | 2.16   | 5.37  | 0.19  |
| Q9JKF1_IQIlgap1  | Ras GTPase-K.LIGNFFSPK#.V                            | 149.59 | 40.64  | 3.68  | 0.27  |
| Q9JKF1_IQIlgap1  | Ras GTPase-K.LIFQMPQNK#.S                            | 254.83 | 91.88  | 2.77  | 0.36  |
| Q9JKF1_IQIlgap1  | Ras GTPase-K.LIFQMPQNK#.S                            | 62.87  | 19.44  | 3.23  | 0.31  |
| Q9JKF1_IQIlgap1  | Ras GTPase-R.LIIVDIVR.F                              | 50.48  | 62.06  | 0.81  | 1.23  |
| Q9JKF1_IQIlgap1  | Ras GTPase-K.LPYDVTPEQALSHHEEVK#.T                   | 279.76 | 101.88 | 2.75  | 0.36  |
| Q9JKF1_IQIlgap1  | Ras GTPase-K.LQQYTSALNSK#.A                          | 311.64 | 95.38  | 3.27  | 0.31  |
| Q9JKF1_IQIlgap1  | Ras GTPase-R.LTAEEM*DER.R                            | 23.87  | 29.59  | 0.81  | 1.24  |
| Q9JKF1_IQIlgap1  | Ras GTPase-K.LTELGTVDPK#.N                           | 200.08 | 48.58  | 4.12  | 0.24  |
| Q9JKF1_IQIlgap1  | Ras GTPase-K.M*LTGLDHAHLIINEYLSQSYQK#.F              | 95.59  | 21.66  | 4.41  | 0.23  |
| Q9JKF1_IQIlgap1  | Ras GTPase-K.MFLGDNAHLIINEYLSQSYQK#.F                | 13.83  | 3.73   | 3.71  | 0.27  |
| Q9JKF1_IQIlgap1  | Ras GTPase-K.M*LQHAASNK#.M                           | 4.72   | 1.78   | 2.65  | 0.38  |
| Q9JKF1_IQIlgap1  | Ras GTPase-K.M*REEVTLIR.S                            | 5.50   | 24.69  | 0.22  | 4.49  |
| Q9JKF1_IQIlgap1  | Ras GTPase-R.NGVYLAK#.L                              | 394.63 | 14.42  | 27.36 | 0.04  |
| Q9JKF1_IQIlgap1  | Ras GTPase-K.NPNAM*LVNLEELAPTYQDVLVYQAK#.Q           | 22.65  | 7.77   | 2.92  | 0.34  |
| Q9JKF1_IQIlgap1  | Ras GTPase-K.NPNAMLVNLEELAPTYQDVLVYQAK#.Q            | 48.62  | 14.91  | 3.26  | 0.31  |
| Q9JKF1_IQIlgap1  | Ras GTPase-K.NVIFIGPTEEVGDPEVK#.A                    | 243.50 | 70.84  | 3.44  | 0.29  |
| Q9JKF1_IQIlgap1  | Ras GTPase-K.QLQSDLQK#.R                             | 156.03 | 52.44  | 2.98  | 0.34  |
| Q9JKF1_IQIlgap1  | Ras GTPase-R.OSGQTDPLQK#.E                           | 23.74  | 8.37   | 2.84  | 0.35  |
| Q9JKF1_IQIlgap1  | Ras GTPase-R.OSGQTDPLQKEEVQAGVDAANSAQQYQR.R          | 14.96  | 16.22  | 0.92  | 1.08  |
| Q9JKF1_IQIlgap1  | Ras GTPase-K.RLIVDIVR.F                              | 3.12   | 20.32  | 0.15  | 6.51  |
| Q9JKF1_IQIlgap1  | Ras GTPase-K.SK#VDQJQEVGTNPVVIK#.M                   | 168.01 | 46.21  | 3.64  | 0.28  |
| Q9JKF1_IQIlgap1  | Ras GTPase-R.SNQQLENDLNLMDIK#.I                      | 75.17  | 23.49  | 3.20  | 0.31  |
| Q9JKF1_IQIlgap1  | Ras GTPase-R.SNQQLENDLNLMDIK#.I                      | 52.47  | 19.10  | 2.75  | 0.36  |
| Q9JKF1_IQIlgap1  | Ras GTPase-K.SWVNQM*ESQTGEASK#.L                     | 41.44  | 13.39  | 3.09  | 0.32  |
| Q9JKF1_IQIlgap1  | Ras GTPase-K.SWVNQM*ESQTGEASK#.L                     | 33.71  | 10.86  | 3.10  | 0.32  |
| Q9JKF1_IQIlgap1  | Ras GTPase-K.SWVNQM*ESQTGEASK#LPYDVTPEQALSHHEEVK#.T  | 28.36  | 9.33   | 3.04  | 0.33  |
| Q9JKF1_IQIlgap1  | Ras GTPase-K.TEVSLTLNKN#.F                           | 76.92  | 22.76  | 3.38  | 0.30  |
| Q9JKF1_IQIlgap1  | Ras GTPase-K.TEVSLTLNKNFDPGDENAEM*DAR.T              | 9.35   | 13.24  | 0.71  | 1.42  |
| Q9JKF1_IQIlgap1  | Ras GTPase-R.TILLNTK#.R                              | 195.40 | 47.85  | 4.08  | 0.24  |
| Q9JKF1_IQIlgap1  | Ras GTPase-K.TLNAEDPMP*VVVR.K                        | 12.74  | 17.46  | 0.73  | 1.37  |
| Q9JKF1_IQIlgap1  | Ras GTPase-K.TLQALQPAK#.L                            | 212.11 | 70.60  | 3.00  | 0.33  |
| Q9JKF1_IQIlgap1  | Ras GTPase-K.TVLELM*NPEAQLPQVYFPAADLYQK#.E           | 61.64  | 15.53  | 3.97  | 0.25  |
| Q9JKF1_IQIlgap1  | Ras GTPase-R.VAADFTALK#.N                            | 128.61 | 38.62  | 3.33  | 0.30  |
| Q9JKF1_IQIlgap1  | Ras GTPase-R.VAADFTALK#NPNAM*LVNLEELAPTYQDVLVYQAK#.Q | 14.36  | 5.35   | 2.68  | 0.37  |
| Q9JKF1_IQIlgap1  | Ras GTPase-K.VDQJQEVGTNPVVIK#.M                      | 97.92  | 27.43  | 3.57  | 0.28  |
| Q9JKF1_IQIlgap1  | Ras GTPase-K.YGIQMPAFSK#.I                           | 77.77  | 25.52  | 3.05  | 0.33  |
| Q9JKF1_IQIlgap1  | Ras GTPase-K.YGIQMPAFSK#.I                           | 46.69  | 13.01  | 3.59  | 0.28  |
| Q9JKF1_IQIlgap1  | Ras GTPase-R.YLDELK#.L                               | 94.19  | 34.93  | 2.70  | 0.37  |
| Q9JKF1_IQIlgap1  | Ras GTPase-R.YM*NPVAPDAFDIIDL SAGGQLTDDQR.R          | 28.57  | 41.15  | 0.69  | 1.44  |
| Q9JKF1_IQIlgap1  | Ras GTPase-R.YQELINDIAK#.D                           | 189.21 | 48.64  | 3.89  | 0.26  |
| F8VQ29_F8Ilgap3  | Protein Iqg K.FAHLNQSQDFSAESELK.L                    | 6.18   | 7.38   | 0.84  | 1.19  |
| E9Q1P8_I2Irf2bp2 | Interferon r R.AAATLAASVGTPLGQAQPAELGTHK#.R          | 13.13  | 18.82  | 0.70  | 1.43  |
| E9Q1P8_I2Irf2bp2 | Interferon r R.RPASVSSAAAEHEAR.E                     | 2.52   | 23.25  | 0.11  | 9.24  |
| E9Q1P8_I2Irf2bp2 | Interferon r R.SPADLSLSAAGASELSAEGAGK.G              | 9.60   | 7.91   | 1.21  | 0.82  |
| Q8K3X4_I2Irf2bpl | Interferon r R.QQWM*ANQSEALK.L                       | 2.81   | 62.94  | 0.04  | 22.43 |
| Q8K3X4_I2Irf2bpl | Interferon r R.QQWMANQSEALK.L                        | 1.91   | 25.61  | 0.07  | 13.41 |
| Q8K3X4_I2Irf2bpl | Interferon r K.LFIEYPTGSGNVSSASGVAK#.Q               | 7.04   | 2.92   | 2.41  | 0.41  |
| Q8K3X4_I2Irf2bpl | Interferon r R.LLGDLLPEAVR.F                         | 5.14   | 12.03  | 0.43  | 2.34  |
| Q8K3X4_I2Irf2bpl | Interferon r R.NAEALAESLRS.N                         | 14.45  | 7.41   | 1.95  | 0.51  |
| Q8K3X4_I2Irf2bpl | Interferon r R.YGLSAAAAAAAQAQVRS.S                   | 3.94   | 11.62  | 0.34  | 2.95  |
| Q64339_I5Isg15   | Ubiquitin-I R.GHSNIYEVFLTQVDTLTK#.K                  | 81.32  | 43.71  | 1.86  | 0.54  |
| Q64339_I5Isg15   | Ubiquitin-I R.GHSNIYEVFLTQVDTLTK#.K                  | 38.48  | 19.29  | 1.99  | 0.50  |
| Q64339_I5Isg15   | Ubiquitin-I R.GHSNIYEVFLTQVDTLTK#.K                  | 11.75  | 9.08   | 1.29  | 0.77  |
| Q64339_I5Isg15   | Ubiquitin-I K.IGVPAFQQR.L                            | 27.70  | 65.22  | 0.42  | 2.35  |
| Q64339_I5Isg15   | Ubiquitin-I K.M*LGNDFLVSVTNSMTVSELK#.K               | 19.72  | 14.28  | 1.38  | 0.72  |
| Q64339_I5Isg15   | Ubiquitin-I R.GHSNIYEVFLTQVDTLTK#.K                  | 38.57  | 20.14  | 1.92  | 0.52  |
| Q64339_I5Isg15   | Ubiquitin-I K.IGVPAFQQR.L                            | 26.28  | 71.17  | 0.37  | 2.71  |
| Q64339_I5Isg15   | Ubiquitin-I K.M*LGNDFLVSVTNSMTVSELK#.K               | 47.54  | 27.90  | 1.70  | 0.59  |
| Q64339_I5Isg15   | Ubiquitin-I K.M*LGNDFLVSVTNSMTVSELK#.K               | 19.60  | 12.12  | 1.62  | 0.62  |
| Q64339_I5Isg15   | Ubiquitin-I R.GHSNIYEVFLTQVDTLTK#.K                  | 428.08 | 200.45 | 2.14  | 0.47  |
| Q64339_I5Isg15   | Ubiquitin-I R.GHSNIYEVFLTQVDTLTK#.K                  | 143.77 | 70.78  | 2.03  | 0.49  |
| Q64339_I5Isg15   | Ubiquitin-I K.M*LGNDFLVSVTNSMTVSELK#.K               | 106.93 | 42.70  | 2.50  | 0.40  |
| Q64339_I5Isg15   | Ubiquitin-I K.MLGNDFLVSVTNSMTVSELK#.K                | 53.59  | 26.58  | 2.02  | 0.50  |
| Q64339_I5Isg15   | Ubiquitin-I K.M*LGNDFLVSVTNSMTVSELK#.K               | 79.99  | 34.39  | 2.33  | 0.43  |
| Q64339_I5Isg15   | Ubiquitin-I K.MLGNDFLVSVTNSMTVSELK#.K                | 38.75  | 23.05  | 1.68  | 0.59  |
| Q64339_I5Isg15   | Ubiquitin-I R.GHSNIYEVFLTQVDTLTK#.K                  | 460.61 | 187.33 | 2.46  | 0.41  |
| Q64339_I5Isg15   | Ubiquitin-I R.GHSNIYEVFLTQVDTLTK#.K                  | 93.81  | 45.19  | 2.08  | 0.48  |
| Q64339_I5Isg15   | Ubiquitin-I K.IGVPAFQQR.L                            | 133.84 | 532.74 | 0.25  | 3.98  |
| Q64339_I5Isg15   | Ubiquitin-I K.M*LGNDFLVSVTNSMTVSELK#.K               | 15.61  | 9.77   | 1.60  | 0.63  |
| Q64339_I5Isg15   | Ubiquitin-I K.M*LGNDFLVSVTNSMTVSELK#.K               | 200.57 | 100.41 | 2.00  | 0.50  |
| Q64339_I5Isg15   | Ubiquitin-I K.MLGNDFLVSVTNSMTVSELK#.K                | 5.42   | 3.19   | 1.70  | 0.59  |
| Q64339_I5Isg15   | Ubiquitin-I K.M*LGNDFLVSVTNSMTVSELK#.K               | 66.25  | 32.97  | 2.01  | 0.50  |
| Q9JL16_I5CIsig20 | Interferon- R.LEILQLK#.G                             | 34.80  | 24.33  | 1.43  | 0.70  |
| Q9JL16_I5CIsig20 | Interferon- K.YIRPEGETDYR.T                          | 1.34   | 20.38  | 0.07  | 15.22 |
| Q9JL16_I5CIsig20 | Interferon- K.YITDYTSDR.L                            | 7.31   | 17.53  | 0.42  | 2.40  |
| Q3U1G5_I2Isg20I2 | Interferon- K.IDLLGFEQSALPK#.T                       | 24.78  | 13.10  | 1.89  | 0.53  |
| Q3U1G5_I2Isg20I2 | Interferon- K.LVEVEWQHLAQNPPEN.-                     | 9.36   | 9.36   | 1.00  | 1.00  |
| Q9I1V64_I5Isoc1  | Isochirism K.GLGSTVQIEDLTGVK#.L                      | 13.87  | 2.30   | 6.02  | 0.17  |

|                    |                                                    |        |        |      |       |
|--------------------|----------------------------------------------------|--------|--------|------|-------|
| Q69202_IS Isy1     | Pre-mRNA-K.ELGGPDYGG.V                             | 3.17   | 6.99   | 0.45 | 2.21  |
| Q69202_IS Isy1     | Pre-mRNA-K.FIAHVPPVPSQQEIEEALVR.R                  | 5.55   | 24.11  | 0.23 | 4.34  |
| Q69202_IS Isy1     | Pre-mRNA-K.YASETLQAQSEEA.R                         | 10.59  | 6.81   | 1.56 | 0.64  |
| Q8C863_IT Itch     | E3 ubiquitin K.FIDTGFSLPFYK#.R                     | 14.26  | 5.17   | 2.76 | 0.36  |
| Q8C863_IT Itch     | E3 ubiquitin K.FIDTGFSLPFYK#.R                     | 13.31  | 8.38   | 1.59 | 0.63  |
| Q62470_IT Itga3    | Integrin alp K.LGLPGLATFGYSLGK#.M                  | 11.95  | 9.03   | 1.32 | 0.76  |
| P43406_IT Itgav    | Integrin alp K.IYIGDDNPLTLTVK.A                    | 8.32   | 6.90   | 1.21 | 0.83  |
| P09055_IT Itgb1    | Integrin bei R.GEFFNELVGGQR.I                      | 2.98   | 8.32   | 0.36 | 2.79  |
| P09055_IT Itgb1    | Integrin bei R.IFGFSGFVEK#.T                       | 37.95  | 29.48  | 1.29 | 0.78  |
| P09055_IT Itgb1    | Integrin bei K.LRPEDITQIQPQQLLK.L                  | 9.02   | 34.74  | 0.26 | 3.85  |
| P09055_IT Itgb1    | Integrin bei K.LENNIQTIFAVTEEFQPVYK#.E             | 32.93  | 28.40  | 1.16 | 0.86  |
| P09055_IT Itgb1    | Integrin bei K.LENNIQTIFAVTEEFQPVYK#.E             | 7.28   | 6.98   | 1.04 | 0.96  |
| P09055_IT Itgb1    | Integrin bei K.NVSLTDRGEFFNELVGGQR.I               | 1.69   | 20.90  | 0.08 | 12.36 |
| P09055_IT Itgb1    | Integrin bei K.SAVTTVNPVK#.Y                       | 38.59  | 31.02  | 1.24 | 0.80  |
| P09055_IT Itgb1    | Integrin bei K.TVM*PYSTTPAK.L                      | 8.87   | 13.82  | 0.64 | 1.56  |
| P09055_IT Itgb1    | Integrin bei K.WDGTGENPIYK#.S                      | 17.18  | 13.43  | 1.28 | 0.78  |
| P09055_IT Itgb1    | Integrin bei K.LRPEDITQIQPQQLLK.L                  | 1.86   | 11.37  | 0.16 | 6.10  |
| Q9CQ82_CI Itgb3bp  | Centromeri K.NLSIQALEGNR.Q                         | 3.57   | 10.28  | 0.35 | 2.88  |
| Q9Z0R4_IT: Itsn1   | Intersectin-K.GPLTISAQSEVK#.V                      | 18.80  | 6.67   | 2.82 | 0.38  |
| Q9Z0R4_IT: Itsn1   | Intersectin-K.I.PENEVTPAK#PVTDLTSAPAK#.L           | 6.02   | 5.36   | 1.12 | 0.89  |
| Q9Z0R4_IT: Itsn1   | Intersectin-K.LATQAPWSTTEK#.G                      | 12.66  | 4.66   | 2.72 | 0.37  |
| Q9Z0R4_IT: Itsn1   | Intersectin-R.SHDEITIQPDIVM#VDESQTGEPGWLGELK#.G    | 2.87   | 1.50   | 1.92 | 0.52  |
| Q9Z0R4_IT: Itsn1   | Intersectin-R.SHDEITIQPDIVM#VDESQTGEPGWLGELK#.G    | 5.26   | 3.89   | 1.35 | 0.74  |
| Q9Z0R4_IT: Itsn1   | Intersectin-K.TGWFPANYAEKIPENEVTPAK#PVTDLTSAPAK#.L | 4.86   | 5.06   | 0.96 | 1.04  |
| Q8C1D8_IV Iwsl1    | Protein IWI.K.IQLQELPSVSETLK#.H                    | 9.04   | 4.27   | 2.12 | 0.47  |
| P05627_JU Jun      | Transcriptii K.NVTDQEQGFAEGFVR.A                   | 1.85   | 8.74   | 0.21 | 4.74  |
| P09450_JU Junb     | Transcriptii R.GASAFKEEPQTPVEAR.S                  | 1.37   | 15.83  | 0.09 | 11.54 |
| P15066_JU Jund     | Transcriptii K.SQNTLELASTALLR.E                    | 3.07   | 10.20  | 0.30 | 3.33  |
| P15066_JU Jund     | Transcriptii K.VAASEEQEFAEFGVK.A                   | 9.62   | 10.09  | 0.95 | 1.05  |
| Q99MN1_S Kars      | Lysine-tRN K.ETAATTETPESTEASPSV.-                  | 3.84   | 3.84   | 1.00 | 1.00  |
| Q99MN1_S Kars      | Lysine-tRN K.ETAATTETPESTEASPSV.-                  | 23.07  | 23.07  | 1.00 | 1.00  |
| Q99MN1_S Kars      | Lysine-tRN R.FELFVMK#.K                            | 31.49  | 5.13   | 6.14 | 0.16  |
| Q99MN1_S Kars      | Lysine-tRN R.ISM*VEELEK#.A                         | 38.86  | 7.89   | 4.93 | 0.20  |
| Q99MN1_S Kars      | Lysine-tRN R.ISM*VEELEK#.A                         | 31.75  | 4.43   | 7.17 | 0.14  |
| Q99MN1_S Kars      | Lysine-tRN K.ITYHPDQPEGQAYEVDFTPPFR.R              | 11.68  | 11.48  | 1.02 | 0.98  |
| Q99MN1_S Kars      | Lysine-tRN K.K#ETAATTETPESTEASPSV.-                | 12.78  | 2.38   | 5.38 | 0.19  |
| Q99MN1_S Kars      | Lysine-tRN K.LIFYDLR.G                             | 23.88  | 15.56  | 1.53 | 0.65  |
| Q99MN1_S Kars      | Lysine-tRN R.LTM*FLTDSNNIK#.E                      | 20.90  | 9.09   | 2.30 | 0.43  |
| Q99MN1_S Kars      | Lysine-tRN R.NYK#EIEEFVHNNK#.L                     | 34.75  | 7.28   | 4.77 | 0.21  |
| Q99MN1_S Kars      | Lysine-tRN R.QLFEEQAK#.A                           | 37.40  | 20.98  | 1.78 | 0.56  |
| Q99MN1_S Kars      | Lysine-tRN K.QLNQASAPNHTADNGVGAEEETLDPNQYK#.I      | 5.01   | 1.76   | 2.84 | 0.35  |
| Q99MN1_S Kars      | Lysine-tRN R.SQVQQLK#.V                            | 70.28  | 9.93   | 7.08 | 0.14  |
| Q99MN1_S Kars      | Lysine-tRN R.YLDLILNDLNVFR.Q                       | 51.76  | 21.21  | 2.44 | 0.41  |
| Q99MN1_S Kars      | Lysine-tRN K.ETAATTETPESTEASPSV.-                  | 26.08  | 26.08  | 1.00 | 1.00  |
| Q99MN1_S Kars      | Lysine-tRN R.FELFVMK#.K                            | 11.33  | 2.19   | 5.18 | 0.19  |
| Q99MN1_S Kars      | Lysine-tRN R.ISM*VEELEK#.A                         | 41.92  | 5.03   | 8.33 | 0.12  |
| Q99MN1_S Kars      | Lysine-tRN R.LTM*FLTDSNNIK#.E                      | 18.05  | 2.59   | 6.97 | 0.14  |
| Q99MN1_S Kars      | Lysine-tRN R.NYK#EIEEFVHNNK#.L                     | 30.65  | 14.98  | 2.05 | 0.49  |
| Q99MN1_S Kars      | Lysine-tRN R.QLFEEQAK#.A                           | 29.83  | 4.02   | 7.41 | 0.13  |
| Q8B221_K/K Kat6a   | Histone ace R.AFEGLAETGGTLK#.S                     | 6.22   | 6.28   | 0.99 | 1.01  |
| Q5SVQ0_K/K Kat7    | Histone ace R.LQGGITGESSNM*IK#.T                   | 7.79   | 5.12   | 1.52 | 0.66  |
| Q5SVQ0_K/K Kat7    | Histone ace K.VGSPERPLSDGLISYR.S                   | 1.50   | 6.43   | 0.23 | 4.28  |
| Q5SVQ0_K/K Kat7    | Histone ace R.LQGGITGESSNM*IK#.T                   | 20.04  | 16.52  | 1.21 | 0.82  |
| Q5SVQ0_K/K Kat7    | Histone ace R.SQQQPTVTPK.K                         | 15.56  | 17.27  | 0.90 | 1.11  |
| Q5SVQ0_K/K Kat7    | Histone ace K.VGSPERPLSDGLISYR.S                   | 1.50   | 22.22  | 0.07 | 14.84 |
| Q5SVQ0_K/K Kat7    | Histone ace R.YELDTWYHSPYPEYAR.L                   | 1.65   | 8.55   | 0.19 | 5.18  |
| Q5SVQ0_K/K Kat7    | Histone ace R.LQGGITGESSNM*IK#.T                   | 24.64  | 18.70  | 1.32 | 0.76  |
| Q5SVQ0_K/K Kat7    | Histone ace K.M*LDIFSLSK#.V                        | 17.52  | 14.95  | 1.17 | 0.85  |
| Q5SVQ0_K/K Kat7    | Histone ace R.SQQQPTVTPK#.K                        | 15.11  | 13.48  | 1.12 | 0.89  |
| Q9WV86_K Katna1    | Katanin p6i K.TTFFNVSSSTLTSK#.Y                    | 9.67   | 3.49   | 2.77 | 0.36  |
| Q8K0T4_K/K Katnal1 | Katanin p6i K.SIVSTLESFK#.M                        | 12.87  | 5.24   | 2.46 | 0.41  |
| Q8BG40_K Katnb1    | Katanin p8i K.LQEIHAVASNVSSVLGK#.A                 | 9.46   | 3.97   | 2.39 | 0.42  |
| Q9CWJ3_K Katnb1    | KATNB1-lik K.DVDAYLLQLH.-                          | 12.56  | 12.56  | 1.00 | 1.00  |
| Q6ZQ88_KI Kdm1a    | Lysine-spec R.DITAEFLVK#.S                         | 25.71  | 13.94  | 1.84 | 0.54  |
| Q6ZQ88_KI Kdm1a    | Lysine-spec K.GIFGSAVPOPK#.E                       | 24.35  | 17.52  | 1.39 | 0.72  |
| Q6ZQ88_KI Kdm1a    | Lysine-spec R.HGLINFGIYK#.R                        | 15.47  | 10.87  | 1.42 | 0.70  |
| Q6ZQ88_KI Kdm1a    | Lysine-spec K.HWDQDDDFEFTGSHLTVR.N                 | 5.67   | 20.17  | 0.28 | 3.56  |
| Q6ZQ88_KI Kdm1a    | Lysine-spec R.IADQFLGAM*YTLPR.Q                    | 2.20   | 8.89   | 0.25 | 4.04  |
| Q6ZQ88_KI Kdm1a    | Lysine-spec K.IQLTAEATLQLEAP#NSDVLVHR.V            | 2.40   | 6.08   | 0.39 | 2.53  |
| Q6ZQ88_KI Kdm1a    | Lysine-spec R.STSQTFIYK#.C                         | 25.49  | 14.45  | 1.76 | 0.57  |
| Q6ZQ88_KI Kdm1a    | Lysine-spec R.TLQLWLDNPK#.I                        | 16.32  | 22.13  | 0.74 | 1.36  |
| Q6ZQ88_KI Kdm1a    | Lysine-spec K.VLFFIR.N                             | 7.01   | 20.09  | 0.35 | 2.86  |
| Q6ZQ88_KI Kdm1a    | Lysine-spec K.VIIIGSGVSLGAAAR.Q                    | 6.55   | 21.60  | 0.30 | 3.30  |
| Q6ZQ88_KI Kdm1a    | Lysine-spec R.DITAEFLVK#.S                         | 18.99  | 13.98  | 1.36 | 0.74  |
| Q6ZQ88_KI Kdm1a    | Lysine-spec K.EYDELAETQGK#.L                       | 11.89  | 6.56   | 1.81 | 0.55  |
| Q6ZQ88_KI Kdm1a    | Lysine-spec R.HGLINFGIYK#.R                        | 11.05  | 4.95   | 2.23 | 0.45  |
| Q6ZQ88_KI Kdm1a    | Lysine-spec K.VIIIGSGVSLGAAAR.Q                    | 8.34   | 18.19  | 0.46 | 2.18  |
| P59997_KI Kdm2a    | Lysine-spec K.AIVPQALSGIHK#.R                      | 17.86  | 7.11   | 2.51 | 0.40  |
| P59997_KI Kdm2a    | Lysine-spec K.LALTGVPVQVWPVK#.R                    | 12.45  | 7.61   | 1.64 | 0.61  |
| Q6ZPY7_KC Kdm3b    | Lysine-spec K.LGLGSPVPEVYVDR.E                     | 3.76   | 9.19   | 0.41 | 2.44  |
| Q6ZPY7_KC Kdm3b    | Lysine-spec K.TIDEGDADEVTK#.Q                      | 7.41   | 3.32   | 2.23 | 0.45  |
| Q6ZPY7_KC Kdm3b    | Lysine-spec K.LGLGSPVPEVYVDR.E                     | 1.97   | 9.39   | 0.21 | 4.77  |
| Q6ZPY7_KC Kdm3b    | Lysine-spec R.SEEPLK#AEGSASNSNSELK#.A              | 7.54   | 6.66   | 1.13 | 0.88  |
| Q6ZPY7_KC Kdm3b    | Lysine-spec K.LGLGSPVPEVYVDR.E                     | 3.69   | 10.70  | 0.34 | 2.90  |
| Q6ZPY7_KC Kdm3b    | Lysine-spec R.SEEPLK#AEGSASNSNSELK#.A              | 11.99  | 7.20   | 1.67 | 0.60  |
| Q6ZPY7_KC Kdm3b    | Lysine-spec K.TIDEGDADEVTK#.Q                      | 7.78   | 7.45   | 1.04 | 0.96  |
| Q3UX29_KI Kdm5a    | Lysine-spec K.NIPAFLPNVLSK.E                       | 14.30  | 22.00  | 0.65 | 1.54  |
| Q3UX29_KI Kdm5a    | Lysine-spec R.SLEPPVLELSPGAK#.A                    | 6.35   | 10.07  | 0.63 | 1.59  |
| Q3UX29_KI Kdm5a    | Lysine-spec K.VEAIQSGNNYAYLEQLESLSAK#.G            | 6.83   | 11.17  | 0.61 | 1.63  |
| Q60749_KI Khdrbs1  | KH domain R.DKAKEELR.K                             | 2.07   | 8.91   | 0.23 | 4.31  |
| Q60749_KI Khdrbs1  | KH domain K.DSLDPSFTHAMQQLSVEIEK.I                 | 110.89 | 91.56  | 1.21 | 0.83  |
| Q60749_KI Khdrbs1  | KH domain K.FNFVGGK#.I                             | 228.64 | 169.41 | 1.35 | 0.74  |
| Q60749_KI Khdrbs1  | KH domain K.GESK#K#DDEENYLDLFSHK#.N                | 19.60  | 21.77  | 0.90 | 1.11  |
| Q60749_KI Khdrbs1  | KH domain K.ILPGQNTIK#.R                           | 311.71 | 255.38 | 1.22 | 0.82  |
| Q60749_KI Khdrbs1  | KH domain K.K#DDEENYLDLFSHK#.N                     | 292.51 | 271.21 | 1.08 | 0.93  |
| Q60749_KI Khdrbs1  | KH domain K.RLQETGAK.I                             | 5.28   | 17.60  | 0.30 | 3.33  |
| Q60749_KI Khdrbs1  | KH domain K.YLPELM*AEKDSLDPSTHAM*QLLSVEIEK.I       | 6.83   | 5.53   | 1.23 | 0.81  |
| Q60749_KI Khdrbs1  | KH domain K.DSLDPSFTHAMQQLSVEIEK#.I                | 41.22  | 41.46  | 0.99 | 1.01  |
| Q60749_KI Khdrbs1  | KH domain K.FNFVGGK#.I                             | 149.56 | 133.54 | 1.12 | 0.89  |
| Q60749_KI Khdrbs1  | KH domain K.ILPGQNTIK#.R                           | 205.39 | 199.81 | 1.03 | 0.97  |
| Q60749_KI Khdrbs1  | KH domain K.K#DDEENYLDLFSHK#.N                     | 7.75   | 6.93   | 1.12 | 0.89  |
| Q60749_KI Khdrbs1  | KH domain K.RLQETGAK.I                             | 2.31   | 12.10  | 0.19 | 5.25  |
| Q60749_KI Khdrbs1  | KH domain K.FNFVGGK#.I                             | 58.39  | 57.69  | 1.01 | 0.99  |

|                    |                                                    |        |       |       |      |
|--------------------|----------------------------------------------------|--------|-------|-------|------|
| Q60749_KI Khdrbs1  | KH domain K.GESKKDEENYLDLFSHK.N                    | 14.76  | 15.11 | 0.98  | 1.02 |
| Q60749_KI Khdrbs1  | KH domain K.LIGPQGNITK#.R                          | 65.39  | 63.18 | 1.03  | 0.97 |
| Q3U0V1_FI Khshr    | Far upstrea K.AINQQTGFVEISR.Q                      | 4.19   | 7.79  | 0.54  | 1.86 |
| Q3U0V1_FI Khshr    | Far upstrea K.IGQQPQQPGAPPQQDYTK#.A                | 7.02   | 4.48  | 1.57  | 0.64 |
| Q3U0V1_FI Khshr    | Far upstrea K.AINQQTGFVEISR.Q                      | 12.43  | 18.57 | 0.67  | 1.49 |
| Q3U0V1_FI Khshr    | Far upstrea K.DAFADAVQR.A                          | 8.33   | 13.57 | 0.61  | 1.63 |
| Q3U0V1_FI Khshr    | Far upstrea R.GGGPGGGGGGGGASGGPSQPPGGGGGPIRK.D     | 3.93   | 4.85  | 0.81  | 1.23 |
| Q3U0V1_FI Khshr    | Far upstrea R.GSPQQIDHAK#.Q                        | 12.09  | 6.34  | 1.91  | 0.52 |
| Q3U0V1_FI Khshr    | Far upstrea R.HSVGVVIGR.S                          | 26.52  | 44.68 | 0.59  | 1.68 |
| Q3U0V1_FI Khshr    | Far upstrea K.IGGDAATTNNNTDFGFGGQK#.R              | 9.42   | 3.29  | 2.86  | 0.35 |
| Q3U0V1_FI Khshr    | Far upstrea K.IGQQPQQPGAPPQQDYTK#.A                | 23.23  | 10.84 | 2.14  | 0.47 |
| Q3U0V1_FI Khshr    | Far upstrea R.IINDLLQSLR.S                         | 17.22  | 24.67 | 0.70  | 1.43 |
| Q3U0V1_FI Khshr    | Far upstrea R.SVSLTGAPESVQK#.A                     | 68.56  | 30.14 | 2.27  | 0.44 |
| Q3U0V1_FI Khshr    | Far upstrea R.TSMTEERYVPDGMVGLIIGR.G               | 1.65   | 8.21  | 0.20  | 4.98 |
| Q3U0V1_FI Khshr    | Far upstrea R.VGGGIDVVPVR.H                        | 18.49  | 42.44 | 0.44  | 2.29 |
| Q3U0V1_FI Khshr    | Far upstrea K.VQISPDGGLPER.S                       | 16.55  | 37.65 | 0.44  | 2.27 |
| Q8BK59_KC Kiaa0020 | Pumilio do R.DPAHTVPELIELLQK#.G                    | 10.37  | 7.88  | 1.32  | 0.76 |
| Q8C2E7_ST Kiaa0196 | WASH com R.AQVQQLK#.E                              | 20.19  | 8.83  | 2.29  | 0.44 |
| Q8C2E7_ST Kiaa0196 | WASH com R.HLAALDNLNK#.A                           | 10.67  | 5.30  | 2.01  | 0.50 |
| Q8C2E7_ST Kiaa0196 | WASH com K.LASALDPLLR.I                            | 8.14   | 14.54 | 0.56  | 1.79 |
| Q8C2E7_ST Kiaa0196 | WASH com K.TALNNTLDLANVK#.E                        | 23.85  | 4.82  | 4.94  | 0.20 |
| Q3UMB9_V Kiaa1033  | WASH com K.LLPYEQSLLLEIK#.T                        | 10.92  | 3.54  | 3.09  | 0.32 |
| Q3UMB9_V Kiaa1033  | WASH com R.AVFPIYLDVYENAVDAAR.L                    | 5.95   | 10.39 | 0.57  | 1.75 |
| Q3UMB9_V Kiaa1033  | WASH com K.LGAFTDDGFAM*GVAYTLK#.L                  | 8.08   | 2.95  | 2.74  | 0.36 |
| Q3UMB9_V Kiaa1033  | WASH com K.M*LVDFVAFEFR.R                          | 3.94   | 10.48 | 0.38  | 2.66 |
| Q3UMB9_V Kiaa1033  | WASH com K.QQNVQSTSQDEK#.L                         | 3.16   | 2.87  | 1.10  | 0.91 |
| Q3UMB9_V Kiaa1033  | WASH com R.SIFANVEAK#.L                            | 20.64  | 11.39 | 1.81  | 0.55 |
| Q8BWY9_C Kiaa1524  | Protein CIP K.DNAPALNIEDLIEK.L                     | 8.15   | 5.68  | 1.43  | 0.70 |
| Q8BWY9_C Kiaa1524  | Protein CIP R.HLEVVSGQK#.L                         | 11.55  | 9.80  | 1.18  | 0.85 |
| Q6P9P6_KI Kif11    | Kinesin-like R.AIDEHNAEQESFGK.N                    | 6.94   | 6.19  | 1.12  | 0.89 |
| Q6P9P6_KI Kif11    | Kinesin-like K.EEYVSALER.T                         | 17.98  | 10.64 | 1.69  | 0.59 |
| Q6P9P6_KI Kif11    | Kinesin-like K.GLEETVHNK#DEYVQILEK#.G              | 9.72   | 13.07 | 0.74  | 1.34 |
| Q6P9P6_KI Kif11    | Kinesin-like K.LNLVDLAGSENGR.S                     | 2.82   | 20.06 | 0.14  | 7.11 |
| Q6P9P6_KI Kif11    | Kinesin-like K.NLNSLFNNMEELIK#.D                   | 14.93  | 11.43 | 1.31  | 0.77 |
| Q6P9P6_KI Kif11    | Kinesin-like R.SPNEVYWEEDPLAGIPR.T                 | 2.58   | 6.64  | 0.39  | 2.57 |
| Q6P9P6_KI Kif11    | Kinesin-like K.TIVAPSVSLLNINK.Q                    | 13.35  | 25.41 | 0.53  | 1.90 |
| Q6P9P6_KI Kif11    | Kinesin-like K.TQLETTQK#.H                         | 12.51  | 12.54 | 1.00  | 1.00 |
| Q6P9P6_KI Kif11    | Kinesin-like R.TAATLM*NAVSSR.S                     | 1.20   | 8.08  | 0.15  | 6.74 |
| Q6P9P6_KI Kif11    | Kinesin-like R.VITALVER.T                          | 4.46   | 23.36 | 0.19  | 5.24 |
| Q6P9P6_KI Kif11    | Kinesin-like K.GLEETVHNK#DEYVQILEK#.G              | 4.08   | 4.37  | 0.93  | 1.07 |
| Q6P9P6_KI Kif11    | Kinesin-like K.LNLVDLAGSENGR.S                     | 2.20   | 8.55  | 0.26  | 3.88 |
| Q6P9P6_KI Kif11    | Kinesin-like K.TIVAPSVSLLNINK#.Q                   | 10.16  | 39.25 | 0.26  | 3.86 |
| E9Q4K7_E9 Kif13b   | Kinesin-like R.APLSEPAVPTSPFR.I                    | 4.10   | 8.17  | 0.50  | 1.99 |
| E9Q4K7_E9 Kif13b   | Kinesin-like R.DSVLTLWLL#.D                        | 23.31  | 7.73  | 3.01  | 0.33 |
| E9Q4K7_E9 Kif13b   | Kinesin-like R.EHSVLGPYVDGLSK#.L                   | 10.49  | 3.41  | 3.08  | 0.32 |
| E9Q4K7_E9 Kif13b   | Kinesin-like R.GIAPGPPALSPQNNQSPDPLGGVAASYLNPVK#.S | 8.67   | 3.78  | 2.30  | 0.44 |
| E9Q4K7_E9 Kif13b   | Kinesin-like R.IAGGDDPTVSSEK#.E                    | 25.88  | 9.92  | 2.83  | 0.35 |
| E9Q4K7_E9 Kif13b   | Kinesin-like R.KHNPALWDLGIQAK#.T                   | 15.88  | 4.72  | 3.36  | 0.30 |
| E9Q4K7_E9 Kif13b   | Kinesin-like R.M*ANVENPASADSEAYEK#.Y               | 9.00   | 3.10  | 2.90  | 0.34 |
| E9Q4K7_E9 Kif13b   | Kinesin-like R.MAANVENPASADSEAYEK#.Y               | 5.03   | 2.40  | 2.09  | 0.48 |
| E9Q4K7_E9 Kif13b   | Kinesin-like R.QGFAQSLK#.K                         | 11.10  | 3.58  | 3.10  | 0.32 |
| E9Q4K7_E9 Kif13b   | Kinesin-like R.SVLAVENLLTLDR.L                     | 8.94   | 14.41 | 0.62  | 1.61 |
| E9Q4K7_E9 Kif13b   | Kinesin-like R.TVAATNM*NEESSR.S                    | 3.18   | 5.74  | 0.55  | 1.81 |
| E9Q4K7_E9 Kif13b   | Kinesin-like K.VILNPVNTLNSK#.G                     | 37.94  | 11.53 | 3.29  | 0.30 |
| Q60575_KI Kif1b    | Kinesin-like K.KHQDPETNLSTEK#.V                    | 2.48   | 2.43  | 1.02  | 0.98 |
| Q80WE4_K Kif20b    | Kinesin-like R.SQASTVASIANI.K                      | 2.62   | 7.57  | 0.35  | 2.88 |
| Q90XL2_KI Kif21a   | Kinesin-like R.SPYFASAFSPITLSSDK#ETEIIDLAK#.K      | 5.87   | 1.56  | 3.77  | 0.27 |
| E905G3_KI Kif23    | Kinesin-like K.LVQAPLDADGNVLQEK.E                  | 2.15   | 5.47  | 0.39  | 2.54 |
| E905G3_KI Kif23    | Kinesin-like R.NLQEQLESQNK.L                       | 3.32   | 6.58  | 0.50  | 1.98 |
| E905G3_KI Kif23    | Kinesin-like K.LLDINDEETLP.K.L                     | 1.29   | 5.68  | 0.23  | 4.41 |
| P28740_KI Kif2a    | Kinesin-like R.AALQEEQASK#.Q                       | 9.62   | 6.92  | 1.39  | 0.72 |
| P28740_KI Kif2a    | Kinesin-like K.IDILTELR.D                          | 4.35   | 8.04  | 0.54  | 1.85 |
| P28740_KI Kif2a    | Kinesin-like R.AALQEEQASK#.Q                       | 61.95  | 24.75 | 2.50  | 0.40 |
| P28740_KI Kif2a    | Kinesin-like K.DLDVITIPSK#DVMVMHEPK#.Q             | 9.67   | 6.81  | 1.42  | 0.70 |
| P28740_KI Kif2a    | Kinesin-like R.DVFLMLK#.K                          | 9.38   | 2.12  | 4.42  | 0.23 |
| P28740_KI Kif2a    | Kinesin-like K.FSLDLAGNER.G                        | 12.16  | 20.71 | 0.59  | 1.70 |
| P28740_KI Kif2a    | Kinesin-like K.IDILTELR.D                          | 4.33   | 10.60 | 0.41  | 2.45 |
| Q92258_KI Kif2c    | Kinesin-like K.DSLPLQENVTPVK#.Q                    | 6.76   | 8.72  | 0.77  | 1.29 |
| P28741_KI Kif3a    | Kinesin-like R.LLQDLSGGNSK#.T                      | 24.03  | 9.45  | 2.54  | 0.39 |
| P28741_KI Kif3a    | Kinesin-like R.SAK#PETVDSLLQ.-                     | 21.73  | 9.84  | 2.21  | 0.45 |
| P28741_KI Kif3a    | Kinesin-like R.VIVGGVLLAK#.A                       | 19.81  | 10.74 | 1.84  | 0.54 |
| P28741_KI Kif3a    | Kinesin-like R.VSYLVEEVR.D                         | 2.51   | 8.88  | 0.28  | 3.54 |
| Q61771_KI Kif3b    | Kinesin-like K.HLIEFIPLEEK#.N                      | 17.42  | 7.76  | 2.25  | 0.45 |
| Q61771_KI Kif3b    | Kinesin-like R.QELEQTONELTR.E                      | 3.66   | 5.81  | 0.63  | 1.59 |
| Q61771_KI Kif3b    | Kinesin-like K.TFTFDVAVWNAK#.Q                     | 8.26   | 4.82  | 1.71  | 0.58 |
| P33174_KI Kif4     | Chromosor K.GYNATVLAGYGTSGK.T                      | 8.55   | 10.24 | 0.83  | 1.20 |
| P33174_KI Kif4     | Chromosor R.IILTEQANEK.M                           | 23.04  | 33.24 | 0.69  | 1.44 |
| P33174_KI Kif4     | Chromosor K.ILAQDVAQLK#.E                          | 15.63  | 13.59 | 1.15  | 0.87 |
| P33174_KI Kif4     | Chromosor R.K#LAQDVAQLK#.E                         | 7.69   | 8.84  | 0.87  | 1.15 |
| P33174_KI Kif4     | Chromosor K.LTLLQVASK#.Q                           | 16.40  | 18.94 | 0.87  | 1.15 |
| P33174_KI Kif4     | Chromosor K.NK#PIINIDPQAELNHLK#.Q                  | 8.97   | 9.02  | 0.99  | 1.01 |
| P33174_KI Kif4     | Chromosor K.NLESEVLSQR.E                           | 4.41   | 16.10 | 0.27  | 3.65 |
| P33174_KI Kif4     | Chromosor R.TVASTAM*NSQSSR.S                       | 3.68   | 7.97  | 0.46  | 2.17 |
| P33174_KI Kif4     | Chromosor R.VIQLLFK.E                              | 11.02  | 13.87 | 0.79  | 1.26 |
| P33174_KI Kif4     | Chromosor R.WESIATILEAK.C                          | 7.42   | 9.22  | 0.80  | 1.24 |
| P33174_KI Kif4     | Chromosor K.YLVGELVSK#.I                           | 14.77  | 16.85 | 0.88  | 1.14 |
| P33174_KI Kif4     | Chromosor K.ILAQDVAQLK#.E                          | 7.73   | 7.26  | 1.06  | 0.94 |
| P33174_KI Kif4     | Chromosor R.TVASTAM*NSQSSR.S                       | 1.41   | 5.51  | 0.26  | 3.90 |
| P33175_KI Kif5a    | Kinesin hea K.QQMLDQEEVLVSTR@.G                    | 38.43  | 2.37  | 16.19 | 0.06 |
| P33175_KI Kif5a    | Kinesin hea K.ISFLENLQLTK#.V                       | 17.32  | 6.47  | 2.68  | 0.37 |
| P33175_KI Kif5a    | Kinesin hea K.LYLVDLAGESEK#.V                      | 20.46  | 4.31  | 4.75  | 0.21 |
| P33175_KI Kif5a    | Kinesin hea K.TGAEGAVLDEAK#.N                      | 25.45  | 11.07 | 2.30  | 0.44 |
| P33175_KI Kif5a    | Kinesin hea K.EVLQALELAVNYDQK#.S                   | 21.39  | 7.55  | 2.83  | 0.35 |
| P33175_KI Kif5a    | Kinesin hea K.ISFLENLQLTK#.V                       | 109.72 | 29.51 | 3.72  | 0.27 |
| P33175_KI Kif5a    | Kinesin hea K.LYLVDLAGESEK#.V                      | 100.22 | 26.26 | 3.82  | 0.26 |
| P33175_KI Kif5a    | Kinesin hea K.TNLSVHEDK#.N                         | 12.31  | 6.06  | 2.03  | 0.49 |
| P33175_KI Kif5a    | Kinesin hea K.VSYFELYDK#.I                         | 18.94  | 7.15  | 2.65  | 0.38 |
| Q61768_KI Kif5b    | Kinesin-1 h K.LITDLQDQNK#.M                        | 17.27  | 6.74  | 2.56  | 0.39 |
| Q61768_KI Kif5b    | Kinesin-1 h R.AAEM*MASLLK#.D                       | 35.36  | 12.24 | 2.89  | 0.35 |
| Q61768_KI Kif5b    | Kinesin-1 h K.ALESAK#.E                            | 55.80  | 17.73 | 3.15  | 0.32 |
| Q61768_KI Kif5b    | Kinesin-1 h K.ANLEAFTADKDIATSDKPAAVAGM*AGSFTDAER.R | 6.78   | 7.86  | 0.86  | 1.16 |
| Q61768_KI Kif5b    | Kinesin-1 h K.DLAIEGIAGVGNNDVK#.Q                  | 23.07  | 37.94 | 0.61  | 1.64 |
| Q61768_KI Kif5b    | Kinesin-1 h K.DVLEGIYNGTIFAYGQTSQSK#.T             | 7.54   | 2.28  | 3.31  | 0.30 |

|                 |                                             |        |       |      |      |
|-----------------|---------------------------------------------|--------|-------|------|------|
| Q61768_KI Kif5b | Kinesin-1 h K.EVELLDELNQK#.S                | 28.12  | 7.87  | 3.57 | 0.28 |
| Q61768_KI Kif5b | Kinesin-1 h K.LFVQDLATR.V                   | 28.30  | 24.86 | 1.14 | 0.88 |
| Q61768_KI Kif5b | Kinesin-1 h K.LITDLODQNK#.M                 | 94.20  | 38.13 | 2.47 | 0.40 |
| Q61768_KI Kif5b | Kinesin-1 h R.NGETVPIDQFQDK#.E              | 9.14   | 2.23  | 4.09 | 0.24 |
| Q61768_KI Kif5b | Kinesin-1 h R.NGETVPIDQFQDK#.A              | 48.78  | 13.44 | 3.63 | 0.28 |
| Q61768_KI Kif5b | Kinesin-1 h K.QLDDK#DEEINQOSQLVEK#.L        | 54.18  | 13.82 | 3.92 | 0.26 |
| Q61768_KI Kif5b | Kinesin-1 h K.SAEVSDDTGGSAAQK#.Q            | 40.88  | 16.34 | 2.50 | 0.40 |
| Q61768_KI Kif5b | Kinesin-1 h K.SATLASIDAELQK#.L              | 85.52  | 26.15 | 3.27 | 0.31 |
| Q61768_KI Kif5b | Kinesin-1 h R.SHSIFLINVK#.Q                 | 27.06  | 7.22  | 3.75 | 0.27 |
| Q61768_KI Kif5b | Kinesin-1 h K.SLSTEYLQNVQK#.K               | 61.67  | 15.60 | 3.95 | 0.25 |
| Q61768_KI Kif5b | Kinesin-1 h K.TK#EYELLSDELNQK#.S            | 14.80  | 3.24  | 4.57 | 0.22 |
| Q9QWT9_K Kifc1  | Kinesin-like R.ASPGSEELVTNAR.Y              | 3.02   | 6.49  | 0.46 | 2.15 |
| Q9QWT9_K Kifc1  | Kinesin-like K.LTYLLQNSLGGSAK#.M            | 4.84   | 2.07  | 2.34 | 0.43 |
| Q9QWT9_K Kifc1  | Kinesin-like K.LTYLLQNSLGGSAK#.M            | 5.05   | 2.03  | 2.48 | 0.40 |
| Q9QWT9_K Kifc1  | Kinesin-like R.EVQEQATTGTER.N               | 8.55   | 17.48 | 0.49 | 2.04 |
| Q9QWT9_K Kifc1  | Kinesin-like R.GPDQM#EDALEPAK#.K            | 12.62  | 3.45  | 3.65 | 0.27 |
| Q9QWT9_K Kifc1  | Kinesin-like R.LLQELQGER.L                  | 62.22  | 11.85 | 5.25 | 0.19 |
| Q9QWT9_K Kifc1  | Kinesin-like K.LTYLLQNSLGGSAK#.M            | 22.08  | 8.68  | 2.55 | 0.39 |
| Q9QWT9_K Kifc1  | Kinesin-like R.NTLELGLASVR.S                | 7.99   | 12.07 | 0.66 | 1.51 |
| Q9QWT9_K Kifc1  | Kinesin-like K.LTYLLQNSLGGSAK#.M            | 16.32  | 5.62  | 2.90 | 0.34 |
| Q8CD76_Q Klc1   | Kinesin Iigh R.ALGIYQTK#.L                  | 13.83  | 7.14  | 1.94 | 0.52 |
| Q8CD76_Q Klc1   | Kinesin Iigh K.DAANLLNDLALAIR.E             | 3.13   | 6.36  | 0.49 | 2.03 |
| Q8CD76_Q Klc1   | Kinesin Iigh K.DGSAGFGEYGGWYK#.A            | 12.04  | 4.26  | 2.83 | 0.35 |
| Q8CD76_Q Klc1   | Kinesin Iigh R.VAEVLNDPESM#EK#.R            | 26.50  | 14.78 | 1.79 | 0.56 |
| Q8CD76_Q Klc1   | Kinesin Iigh R.VAEVLNDPESMEK#.R             | 13.16  | 5.92  | 2.22 | 0.45 |
| Q8CD76_Q Klc1   | Kinesin Iigh R.ALGIYQTK#.L                  | 22.41  | 11.43 | 1.96 | 0.51 |
| Q8CD76_Q Klc1   | Kinesin Iigh K.DGSAGFGEYGGWYK#.A            | 11.47  | 6.89  | 1.66 | 0.60 |
| Q8CD76_Q Klc1   | Kinesin Iigh K.LTQDEIISK#.T                 | 50.42  | 34.60 | 1.46 | 0.69 |
| Q8CD76_Q Klc1   | Kinesin Iigh R.VAEVLNDPESM#EK#.R            | 26.62  | 14.09 | 1.89 | 0.53 |
| Q8CD76_Q Klc1   | Kinesin Iigh R.VAEVLNDPESMEK#.R             | 10.85  | 6.37  | 1.70 | 0.59 |
| O88448_KI Klc2  | Kinesin Iigh R.DHPVAVALNNAVLAVLYGK#.R       | 20.26  | 12.29 | 1.65 | 0.61 |
| O88448_KI Klc2  | Kinesin Iigh R.LGPDPPNVAK#.T                | 39.84  | 16.94 | 2.35 | 0.43 |
| O88448_KI Klc2  | Kinesin Iigh K.LSQDEIVLGTK#.A               | 10.05  | 3.43  | 2.93 | 0.34 |
| O88448_KI Klc2  | Kinesin Iigh R.DHPVAVALNNAVLAVLYGK#.R       | 38.36  | 20.37 | 1.88 | 0.53 |
| O88448_KI Klc2  | Kinesin Iigh R.LGPDPPNVAK#.T                | 56.89  | 22.38 | 2.54 | 0.39 |
| O88448_KI Klc2  | Kinesin Iigh R.TLHNLVQYASQGR.Y              | 5.97   | 7.58  | 0.79 | 1.27 |
| O91W40_K Klc3   | Kinesin Iigh R.ALSIYALGPPQDPPNVAK#.T        | 10.22  | 6.38  | 1.60 | 0.62 |
| O91W40_K Klc3   | Kinesin Iigh R.ASEEAVALQEEK#.S              | 7.40   | 4.51  | 1.64 | 0.61 |
| O91W40_K Klc3   | Kinesin Iigh R.ASEEAVALQEEKSHLQFLQLR.Q      | 2.68   | 5.70  | 0.47 | 2.13 |
| O91W40_K Klc3   | Kinesin Iigh R.DSLALFPSEEEK#.K              | 7.47   | 6.63  | 1.13 | 0.89 |
| O91W40_K Klc3   | Kinesin Iigh R.EQTLGHPVAVALNNAVLAVLYGK#.R   | 28.19  | 14.44 | 1.95 | 0.51 |
| O91W40_K Klc3   | Kinesin Iigh K.KGPEAAGAAAQQGGYEIPAR.L       | 6.26   | 18.65 | 0.34 | 2.98 |
| O91W40_K Klc3   | Kinesin Iigh R.QVVOGLELAR.A                 | 6.58   | 14.40 | 0.46 | 2.19 |
| O91W40_K Klc3   | Kinesin Iigh K.YQQAELYK#.E                  | 10.28  | 10.08 | 1.02 | 0.98 |
| Q9DB55_KI Klc4  | Kinesin Iigh R.ALAIESQLGPDNPNNVAR.T         | 3.66   | 3.37  | 1.09 | 0.92 |
| Q9Z2Q2_KI Kноп1 | Lysine-rich K.SEALFVPIDSPK#.A               | 7.75   | 8.31  | 0.93 | 1.07 |
| Q9Z2Q2_KI Kноп1 | Lysine-rich K.SEALFVPIDSPK#.A               | 6.88   | 9.30  | 0.74 | 1.35 |
| Q60960_IL Kpna1 | Importin su K.EPNPPIDEVINTPGVVAR.F          | 2.06   | 3.45  | 0.60 | 1.67 |
| Q60960_IL Kpna1 | Importin su K.IVQVALNGLENILR.L              | 2.93   | 8.58  | 0.34 | 2.93 |
| Q60960_IL Kpna1 | Importin su R.LVELLM#HNDYK#.V               | 6.04   | 4.58  | 1.32 | 0.76 |
| Q60960_IL Kpna1 | Importin su K.EAAWAINATSGSAEQK#.Y           | 7.09   | 2.37  | 3.00 | 0.33 |
| Q60960_IL Kpna1 | Importin su R.FVEFLK#.R                     | 23.75  | 10.25 | 2.32 | 0.43 |
| P52293_IL Kpna2 | Importin su R.AIGNVTGTDEQTK.V               | 29.99  | 36.21 | 0.83 | 1.21 |
| P52293_IL Kpna2 | Importin su K.EATWTM#SNITAGR.Q              | 2.25   | 7.50  | 0.30 | 3.34 |
| P52293_IL Kpna2 | Importin su K.GINSNNLESQLOAQAR.K            | 2.13   | 13.26 | 0.16 | 6.22 |
| P52293_IL Kpna2 | Importin su K.LLGATELPIVTPALR.A             | 6.42   | 39.49 | 0.16 | 6.16 |
| P52293_IL Kpna2 | Importin su R.NNQGTVNWSVEDIVK.G             | 11.33  | 15.15 | 0.75 | 1.34 |
| P52293_IL Kpna2 | Importin su R.NVSSFPDDATSPQENR.N            | 5.55   | 9.03  | 0.62 | 1.63 |
| P52293_IL Kpna2 | Importin su K.VIDAGALAVFSPLLTNP.K           | 20.64  | 29.25 | 0.71 | 1.42 |
| P52293_IL Kpna2 | Importin su R.AIGNVTGTDEQTK#.V              | 16.78  | 17.29 | 0.97 | 1.03 |
| P52293_IL Kpna2 | Importin su R.NKNPAPPLDAVEQLPTLVR.L         | 2.71   | 21.16 | 0.13 | 7.82 |
| P52293_IL Kpna2 | Importin su R.NNQGTVNWSVEDIVK.G             | 3.69   | 6.90  | 0.54 | 1.87 |
| P52293_IL Kpna2 | Importin su K.VIDAGALAVFSPLLTNP.K           | 15.41  | 16.85 | 0.91 | 1.09 |
| P52293_IL Kpna2 | Importin su R.AIGNVTGTDEQTK#.V              | 19.47  | 28.90 | 0.67 | 1.48 |
| P52293_IL Kpna2 | Importin su K.EATWTM#SNITAGR.Q              | 2.32   | 7.20  | 0.32 | 3.10 |
| P52293_IL Kpna2 | Importin su K.FVFLGK#.T                     | 13.48  | 9.56  | 1.41 | 0.71 |
| P52293_IL Kpna2 | Importin su K.GINSNNLESQLOAQAR.K            | 1.96   | 7.85  | 0.25 | 4.00 |
| P52293_IL Kpna2 | Importin su K.LLGATELPIVTPALR.A             | 7.24   | 32.93 | 0.22 | 4.54 |
| P52293_IL Kpna2 | Importin su R.NKNPAPPLDAVEQLPTLVR.L         | 4.68   | 33.34 | 0.14 | 7.13 |
| P52293_IL Kpna2 | Importin su K.VIDAGALAVFSPLLTNP.K           | 25.96  | 30.18 | 0.86 | 1.16 |
| O35344_IL Kpna3 | Importin su K.DSQVQVVDLGLK#.N               | 66.05  | 39.68 | 1.66 | 0.60 |
| O35344_IL Kpna3 | Importin su K.IEVLQKHENEDIYK#.L             | 59.41  | 34.20 | 1.74 | 0.58 |
| O35344_IL Kpna3 | Importin su R.NVPQEESLSDVDADF#.A            | 22.95  | 12.37 | 1.85 | 0.54 |
| O35344_IL Kpna3 | Importin su K.SGILPILVK#.C                  | 42.19  | 26.87 | 1.57 | 0.64 |
| O35344_IL Kpna3 | Importin su R.NVPQEESLSDVDADF#.A            | 9.40   | 4.09  | 2.30 | 0.43 |
| O35344_IL Kpna3 | Importin su K.SGILPILVK#.C                  | 27.45  | 13.35 | 2.06 | 0.49 |
| O35344_IL Kpna3 | Importin su R.NVPQEESLSDVDADF#.A            | 10.51  | 7.18  | 1.46 | 0.68 |
| O35344_IL Kpna3 | Importin su K.SGILPILVK#.C                  | 35.13  | 16.01 | 2.19 | 0.46 |
| O35343_IL Kpna4 | Importin su K.EAAWAINLTSIGR.K               | 28.28  | 69.22 | 0.41 | 2.45 |
| O35343_IL Kpna4 | Importin su R.VQNTSLEAIVQNASDNGIQLSAVQAAR.K | 9.56   | 18.60 | 0.51 | 1.95 |
| O35343_IL Kpna4 | Importin su K.EAAWAINLTSIGR.K               | 25.92  | 31.16 | 0.83 | 1.20 |
| O35343_IL Kpna4 | Importin su K.IEVLQKHENEDIYK#.L             | 34.35  | 23.97 | 1.43 | 0.70 |
| O35343_IL Kpna4 | Importin su R.NPPIDDLK#.S                   | 20.32  | 11.42 | 1.78 | 0.56 |
| O35343_IL Kpna4 | Importin su R.VQNTSLEAIVQNASDNGIQLSAVQAAR.K | 6.32   | 8.26  | 0.77 | 1.31 |
| O35343_IL Kpna4 | Importin su K.EAAWAINLTSIGR.K               | 12.19  | 26.22 | 0.46 | 2.15 |
| O35343_IL Kpna4 | Importin su R.NPPIDDLK#.S                   | 20.30  | 19.83 | 1.02 | 0.98 |
| O35343_IL Kpna4 | Importin su R.VQNTSLEAIVQNASDNGIQLSAVQAAR.K | 4.97   | 9.34  | 0.53 | 1.88 |
| O35345_IL Kpna6 | Importin su K.EAAWAINATSGGTPAQIR.Y          | 4.64   | 9.49  | 0.49 | 2.05 |
| O35345_IL Kpna6 | Importin su K.EAAWAINATSGGTPAQIR.Y          | 5.50   | 5.22  | 1.06 | 0.95 |
| O35345_IL Kpna6 | Importin su K.LLSKEPSPIDEVINTPGVVDR.F       | 2.83   | 5.65  | 0.50 | 2.00 |
| P70168_IL Kpnb1 | Importin su R.AAVENLPTFLVLSR.V              | 8.70   | 9.03  | 0.96 | 1.04 |
| P70168_IL Kpnb1 | Importin su K.LAATNALLNSLEFTK#.A            | 46.13  | 16.79 | 2.75 | 0.36 |
| P70168_IL Kpnb1 | Importin su R.SSAYESLMEIVK#.N               | 6.69   | 2.32  | 2.88 | 0.35 |
| P70168_IL Kpnb1 | Importin su R.VAAGLQK#.N                    | 27.71  | 13.26 | 2.09 | 0.48 |
| P70168_IL Kpnb1 | Importin su R.VAALQNLV#.I                   | 27.59  | 10.87 | 2.54 | 0.39 |
| P70168_IL Kpnb1 | Importin su R.VLANPQNSQVAR.V                | 8.87   | 20.00 | 0.44 | 2.25 |
| P70168_IL Kpnb1 | Importin su R.AAVENLPTFLVLSR.V              | 25.22  | 31.33 | 0.81 | 1.24 |
| P70168_IL Kpnb1 | Importin su K.LAATNALLNSLEFTK#.A            | 110.90 | 36.31 | 3.05 | 0.33 |
| P70168_IL Kpnb1 | Importin su R.LQQVLMQ#ESHQSTSDR.I           | 16.20  | 16.93 | 0.96 | 1.05 |
| P70168_IL Kpnb1 | Importin su R.SSAYESLMEIVK#.N               | 27.58  | 6.70  | 4.12 | 0.24 |
| P70168_IL Kpnb1 | Importin su R.SSAYESLMEIVK#.N               | 14.68  | 4.08  | 3.60 | 0.28 |
| P70168_IL Kpnb1 | Importin su R.VAAGLQK#.N                    | 73.06  | 18.90 | 3.87 | 0.26 |
| P70168_IL Kpnb1 | Importin su R.VAALQNLV#.I                   | 54.18  | 20.51 | 2.64 | 0.38 |

|                   |                                               |        |       |      |      |
|-------------------|-----------------------------------------------|--------|-------|------|------|
| P70168_IIV Kpnb1  | Importin su R.VLANPGNSQVAR.V                  | 26.65  | 38.85 | 0.69 | 1.46 |
| Q8BGA5_KI Krr1    | KRR1 small R.LLEESSEFATLFPK#Y                 | 14.70  | 4.66  | 3.15 | 0.32 |
| Q5RL79_K1 Krtcap2 | Keratinocyt K.IJSTLYQATAPVLPK#I               | 3.95   | 1.75  | 2.26 | 0.44 |
| Q9D1R2_K1 Kti12   | Protein KTI R.QDVVLSVNYIK#G                   | 8.06   | 1.08  | 7.47 | 0.13 |
| Q61595_K1 Ktn1    | Kinectin OS R.DAVSNITNQLSEK#Q                 | 11.99  | 5.83  | 2.06 | 0.49 |
| Q61092_L4 Lamc2   | Laminin sul K.SEMREMIELAR@K#E                 | 2.29   | 2.04  | 1.12 | 0.89 |
| P11438_LA Lamp1   | Lysosome-e K.ALQATVGNSSK#C                    | 23.04  | 15.68 | 1.47 | 0.68 |
| Q9CQ22_L1 Lamtor1 | Ragulator c R.TDEQALLSSILAK#T                 | 12.91  | 7.85  | 1.65 | 0.61 |
| Q9JHS3_IT Lamtor2 | Ragulator c R.AQALVQYLEEPTQVAAS.-             | 11.83  | 11.83 | 1.00 | 1.00 |
| Q9JHS3_IT Lamtor2 | Ragulator c R.NGNQAFNEDSLK#F                  | 3.76   | 2.96  | 1.27 | 0.79 |
| O89112_L4 Lanc1   | LanC-like pi K.SLAENYFDSTGR.L                 | 4.09   | 9.12  | 0.45 | 2.23 |
| Q9JJK2_LAI Lanc12 | LanC-like pi K.EVSAIESGK#S                    | 20.95  | 8.73  | 2.40 | 0.42 |
| Q9CPY7_A1 Lap3    | Cytosol am K.DKHDDDLQFQTSAGESFNK#L            | 41.40  | 10.45 | 3.96 | 0.25 |
| Q9CPY7_A1 Lap3    | Cytosol am R.FAEIEK#N                         | 63.21  | 17.22 | 3.67 | 0.27 |
| Q9CPY7_A1 Lap3    | Cytosol am K.GITDFSGGISIK#A                   | 70.23  | 16.02 | 4.38 | 0.23 |
| Q9CPY7_A1 Lap3    | Cytosol am K.LFEASVETGDR.V                    | 16.38  | 17.34 | 0.94 | 1.06 |
| Q9CPY7_A1 Lap3    | Cytosol am K.LHGSGLDEAWEK#G                   | 14.92  | 6.65  | 2.24 | 0.45 |
| Q9CPY7_A1 Lap3    | Cytosol am K.SWIEEQEM*GSFLSVAK#G              | 8.03   | 3.03  | 2.65 | 0.38 |
| Q9CPY7_A1 Lap3    | Cytosol am K.SWIEEQEMGSFLSVAK#G               | 14.17  | 4.16  | 3.40 | 0.29 |
| Q9CPY7_A1 Lap3    | Cytosol am R.TFYGLHQDFPSVWVVLGK#R             | 30.18  | 7.94  | 3.80 | 0.26 |
| Q9CPY7_A1 Lap3    | Cytosol am R.TLIEFLLR.F                       | 15.23  | 13.37 | 1.14 | 0.88 |
| Q9CPY7_A1 Lap3    | Cytosol am K.GITDFSGGISIK#A                   | 16.33  | 3.55  | 4.60 | 0.22 |
| Q6ZQ58_L4 Larp1   | La-related f R.FQQVPTDALANK.L                 | 5.62   | 5.91  | 0.95 | 1.05 |
| Q6ZQ58_L4 Larp1   | La-related f R.DFQETVK#DYEAGQLYGLEK#F         | 10.83  | 4.91  | 2.21 | 0.45 |
| Q6ZQ58_L4 Larp1   | La-related f R.FQQVPTDALANK#L                 | 75.50  | 37.84 | 2.00 | 0.50 |
| Q6ZQ58_L4 Larp1   | La-related f R.FSHPTALPQQLPSQQLM*SK#D         | 40.38  | 24.04 | 1.68 | 0.60 |
| Q6ZQ58_L4 Larp1   | La-related f K.FWAFLK#Y                       | 24.35  | 9.47  | 2.57 | 0.39 |
| Q6ZQ58_L4 Larp1   | La-related f K.GLSASLPDLDESWEIVK#K            | 8.38   | 7.36  | 1.14 | 0.88 |
| Q6ZQ58_L4 Larp1   | La-related f K.IILIVTQTPPM#R                  | 5.37   | 8.44  | 0.64 | 1.57 |
| Q6ZQ58_L4 Larp1   | La-related f R.LDIFK#DFQETVK#DYEAGQLYGLEK#F   | 10.63  | 5.76  | 1.85 | 0.54 |
| Q6ZQ58_L4 Larp1   | La-related f K.LFGAPEPSTIAR.S                 | 18.58  | 35.48 | 0.52 | 1.91 |
| Q6ZQ58_L4 Larp1   | La-related f R.LIGGOSQEMNTLFR.F               | 3.72   | 9.26  | 0.40 | 2.49 |
| Q6ZQ58_L4 Larp1   | La-related f K.LQEVYLGK#F                     | 38.77  | 23.84 | 1.63 | 0.61 |
| Q6ZQ58_L4 Larp1   | La-related f K.NLDIDPK#L                      | 24.21  | 9.95  | 2.43 | 0.41 |
| Q6ZQ58_L4 Larp1   | La-related f K.VDGFDAVNWPTPGEIAHK#S           | 24.37  | 12.75 | 1.91 | 0.52 |
| Q6ZQ58_L4 Larp1   | La-related f K.VINDGLFYEQDLWTEK#F             | 5.47   | 3.32  | 1.65 | 0.61 |
| Q6ZQ58_L4 Larp1   | La-related f K.VINDGLFYEQDLWTEK#FPEYSQIK#Q    | 9.21   | 5.46  | 1.69 | 0.59 |
| Q6ZQ58_L4 Larp1   | La-related f K.VVEMVEEK#V                     | 18.49  | 7.86  | 2.35 | 0.42 |
| Q6ZQ58_L4 Larp1   | La-related f K.VVEM*VEEK#V                    | 34.69  | 18.90 | 1.84 | 0.54 |
| Q6ZQ58_L4 Larp1   | La-related f R.FQQVPTDALANK#L                 | 16.28  | 7.74  | 2.10 | 0.48 |
| Q6ZQ58_L4 Larp1   | La-related f K.VDGFDAVNWPTPGEIAHK#S           | 7.34   | 3.84  | 1.91 | 0.52 |
| Q8BWW4_L4 Larp4   | La-related f K.LTTNTDLILEVLR.S                | 4.87   | 13.31 | 0.37 | 2.73 |
| Q8BWW4_L4 Larp4   | La-related f K.AINTFFAK#N                     | 37.88  | 22.90 | 1.65 | 0.60 |
| Q8BWW4_L4 Larp4   | La-related f R.AVALQEPK.K                     | 11.98  | 23.45 | 0.51 | 1.96 |
| Q8BWW4_L4 Larp4   | La-related f K.DLYLISQM*DSDQFVPIWTVANM*EEIK.L | 5.58   | 7.00  | 0.80 | 1.26 |
| Q8BWW4_L4 Larp4   | La-related f K.DLYLISQM*DSDQFVPIWTVANM*EEIK#L | 8.02   | 7.27  | 1.10 | 0.91 |
| Q8BWW4_L4 Larp4   | La-related f K.FDLLATNFPPPLPGSSSR.V           | 3.80   | 11.29 | 0.34 | 2.97 |
| Q8BWW4_L4 Larp4   | La-related f R.HNPVTYQGEQTYLPK#E              | 31.02  | 31.31 | 0.99 | 1.01 |
| Q8BWW4_L4 Larp4   | La-related f R.HNPVTYQGEQTYLPK.E              | 8.89   | 11.80 | 0.75 | 1.33 |
| Q8BWW4_L4 Larp4   | La-related f K.LTTNTDLILEVLR.S                | 15.49  | 43.74 | 0.35 | 2.82 |
| Q8BWW4_L4 Larp4   | La-related f R.SSSGSEHSTEGSVLGDGGLPSR.S       | 6.00   | 21.38 | 0.28 | 3.56 |
| Q8BWW4_L4 Larp4   | La-related f R.VPDELGLNR.M                    | 11.43  | 39.29 | 0.29 | 3.44 |
| Q6ADA2_L4 Larp4b  | La-related f K.AIAINTFLPK#N                   | 27.78  | 19.92 | 1.39 | 0.72 |
| Q6ADA2_L4 Larp4b  | La-related f R.GPGLLESPIFNFTADR.L             | 4.75   | 13.38 | 0.36 | 2.81 |
| Q6ADA2_L4 Larp4b  | La-related f R.LSLSLIGSSK#E                   | 16.77  | 9.46  | 1.77 | 0.56 |
| Q05CL8_LA Larp7   | La-related f K.GFAVFEFK#E                     | 8.74   | 5.13  | 1.70 | 0.59 |
| Q05CL8_LA Larp7   | La-related f K.VSAQGPQFVTGVIVK#I              | 17.43  | 8.21  | 2.12 | 0.47 |
| Q05CL8_LA Larp7   | La-related f K.DGVGQAASEVSK#E                 | 57.90  | 35.93 | 1.61 | 0.62 |
| Q05CL8_LA Larp7   | La-related f R.DKVEASSLPEAR.A                 | 6.98   | 23.61 | 0.30 | 3.38 |
| Q05CL8_LA Larp7   | La-related f K.GFAVFEFK#E                     | 30.37  | 21.62 | 1.40 | 0.71 |
| Q05CL8_LA Larp7   | La-related f K.HSWNLEVLSDGHEQR.Y              | 6.71   | 15.56 | 0.43 | 2.32 |
| Q05CL8_LA Larp7   | La-related f K.NKPIPSLR.V                     | 3.56   | 12.59 | 0.28 | 3.53 |
| Q05CL8_LA Larp7   | La-related f K.QVDFWFGDANLHK#D                | 10.21  | 6.51  | 1.57 | 0.64 |
| Q05CL8_LA Larp7   | La-related f K.SSSVVELDLEGR.I                 | 10.76  | 17.94 | 0.60 | 1.67 |
| Q05CL8_LA Larp7   | La-related f R.TVYVLEPK#N                     | 31.12  | 24.82 | 1.25 | 0.80 |
| Q05CL8_LA Larp7   | La-related f K.VSAQGPQFVTGVIVK#I              | 43.49  | 34.36 | 1.27 | 0.79 |
| Q8BMJ2_S1 Lars    | Leucine-tR K.DVWDYVFFK#D                      | 55.06  | 8.84  | 6.23 | 0.16 |
| Q8BMJ2_S1 Lars    | Leucine-tR K.FSEAEHWLDYFPLAVQDLK#T            | 37.62  | 9.59  | 3.92 | 0.25 |
| Q8BMJ2_S1 Lars    | Leucine-tR R.GFYDGVN*LVDFGK#G                 | 28.57  | 7.37  | 3.88 | 0.26 |
| Q8BMJ2_S1 Lars    | Leucine-tR K.GTGVVTSVPSDDLAALR.D              | 8.89   | 5.13  | 1.73 | 0.58 |
| Q8BMJ2_S1 Lars    | Leucine-tR L.YTWVWVVK#E                       | 18.49  | 8.67  | 2.13 | 0.47 |
| Q8BMJ2_S1 Lars    | Leucine-tR K.NM*IDAGDALIYM*EPEK#Q             | 8.61   | 3.75  | 2.29 | 0.44 |
| Q8BMJ2_S1 Lars    | Leucine-tR R.QTGEVGPQYTLVK#L                  | 19.89  | 7.09  | 2.80 | 0.36 |
| Q8BMJ2_S1 Lars    | Leucine-tR R.TDIGDTM*VYLVH.-                  | 24.90  | 24.90 | 1.00 | 1.00 |
| Q8BMJ2_S1 Lars    | Leucine-tR R.TDIGDTM*VYLVH.-                  | 22.84  | 22.84 | 1.00 | 1.00 |
| Q8BMJ2_S1 Lars    | Leucine-tR K.TGFFEQAAK#D                      | 59.07  | 8.44  | 7.00 | 0.14 |
| Q8BMJ2_S1 Lars    | Leucine-tR R.VFASEM*NAGIK#T                   | 46.38  | 10.85 | 4.27 | 0.23 |
| Q8BMJ2_S1 Lars    | Leucine-tR R.VFASEM*NAGIK#T                   | 20.52  | 3.86  | 5.31 | 0.19 |
| Q8BMJ2_S1 Lars    | Leucine-tR K.VIASLGLPELK#K                    | 43.77  | 9.36  | 4.67 | 0.21 |
| Q8BMJ2_S1 Lars    | Leucine-tR K.VLEPYPK#L                        | 44.70  | 22.03 | 2.03 | 0.49 |
| Q8BMJ2_S1 Lars    | Leucine-tR R.WQFLTR.E                         | 8.45   | 9.23  | 0.92 | 1.09 |
| Q8BMJ2_S1 Lars    | Leucine-tR R.YTIVSPK#D                        | 35.40  | 7.73  | 4.58 | 0.22 |
| Q8BMJ2_S1 Lars    | Leucine-tR K.DVWDYVFFK#D                      | 69.93  | 13.03 | 5.37 | 0.19 |
| Q8BMJ2_S1 Lars    | Leucine-tR R.FDDPLLGP.R                       | 16.46  | 15.98 | 1.03 | 0.97 |
| Q8BMJ2_S1 Lars    | Leucine-tR K.FSEAEHWLDYFPLAVQDLK#T            | 52.24  | 12.38 | 4.22 | 0.24 |
| Q8BMJ2_S1 Lars    | Leucine-tR R.GFYDGVN*LVDFGK#G                 | 58.44  | 14.11 | 4.14 | 0.24 |
| Q8BMJ2_S1 Lars    | Leucine-tR K.GTGVVTSVPSDDLAALR.D              | 13.62  | 12.57 | 1.08 | 0.92 |
| Q8BMJ2_S1 Lars    | Leucine-tR K.HNGVVPVK#E                       | 32.13  | 4.80  | 6.70 | 0.15 |
| Q8BMJ2_S1 Lars    | Leucine-tR R.LALADAGTVDANFEAM*ADAGILR.L       | 6.79   | 11.45 | 0.59 | 1.69 |
| Q8BMJ2_S1 Lars    | Leucine-tR K.NM*IDAGDALIYM*EPEK#Q             | 11.71  | 2.75  | 4.26 | 0.23 |
| Q8BMJ2_S1 Lars    | Leucine-tR R.NM*SYQGFTK#H                     | 49.15  | 9.77  | 5.03 | 0.20 |
| Q8BMJ2_S1 Lars    | Leucine-tR R.QTGEVGPQYTLVK#L                  | 33.59  | 7.83  | 4.29 | 0.23 |
| Q8BMJ2_S1 Lars    | Leucine-tR R.FITTDVNPYDVFVR.W                 | 16.91  | 15.13 | 1.12 | 0.89 |
| Q8BMJ2_S1 Lars    | Leucine-tR K.SLGLSDDIVK#F                     | 78.68  | 15.65 | 5.03 | 0.20 |
| Q8BMJ2_S1 Lars    | Leucine-tR K.STGNFLTSQAVDK#F                  | 48.80  | 8.89  | 5.49 | 0.18 |
| Q8BMJ2_S1 Lars    | Leucine-tR R.TDIGDTM*VYLVH.-                  | 35.48  | 35.48 | 1.00 | 1.00 |
| Q8BMJ2_S1 Lars    | Leucine-tR R.TDIGDTM*VYLVH.-                  | 25.78  | 25.78 | 1.00 | 1.00 |
| Q8BMJ2_S1 Lars    | Leucine-tR K.TGFFEQAAK#D                      | 115.48 | 15.41 | 7.49 | 0.13 |
| Q8BMJ2_S1 Lars    | Leucine-tR K.VDFLK#EIEK#E                     | 11.86  | 2.81  | 4.22 | 0.24 |
| Q8BMJ2_S1 Lars    | Leucine-tR K.VDFLK#EIEK#EAQK#W                | 18.73  | 6.49  | 2.89 | 0.35 |
| Q8BMJ2_S1 Lars    | Leucine-tR R.VFASEM*NAGIK#T                   | 98.51  | 16.31 | 6.04 | 0.17 |
| Q8BMJ2_S1 Lars    | Leucine-tR K.VIASLGLPELK#K                    | 83.36  | 15.47 | 5.39 | 0.19 |
| Q8BMJ2_S1 Lars    | Leucine-tR K.VLEPYPK#L                        | 97.68  | 20.57 | 4.75 | 0.21 |

|                  |                                                  |        |       |      |       |
|------------------|--------------------------------------------------|--------|-------|------|-------|
| Q8BMJ2_S1Lars    | Leucine-tR K.VVVVLPMLTIK#E                       | 21.52  | 7.98  | 2.70 | 0.37  |
| Q8BMJ2_S1Lars    | Leucine-tR K.VVVVLPMLTIK#E                       | 24.37  | 3.19  | 7.64 | 0.13  |
| Q8BMJ2_S1Lars    | Leucine-tR R.YTIVSPK#D                           | 71.69  | 12.14 | 5.91 | 0.17  |
| A2BE28_LA Las1   | Ribosomal K.LIDAAGTLGTDELRL                      | 3.89   | 12.37 | 0.31 | 3.18  |
| A2BE28_LA Las1   | Ribosomal R.ELLVSYEEQFK#V                        | 15.91  | 13.86 | 1.15 | 0.87  |
| A2BE28_LA Las1   | Ribosomal R.LIGNELPLAVASTADLVR.C                 | 3.32   | 17.65 | 0.19 | 5.31  |
| A2BE28_LA Las1   | Ribosomal K.LIDAAGTLGTDELRL                      | 4.67   | 19.26 | 0.24 | 4.12  |
| Q61792_L1Lasp1   | LIM and SH K.GFSVVADTPELQR.I                     | 18.43  | 73.38 | 0.25 | 3.98  |
| Q61792_L1Lasp1   | LIM and SH K.R.QQSQEQLSQQV.R                     | 10.73  | 48.21 | 0.22 | 4.49  |
| Q61792_L1Lasp1   | LIM and SH R.MGPSGGEGVEPERR.E                    | 2.55   | 8.53  | 0.30 | 3.35  |
| Q61792_L1Lasp1   | LIM and SH K.QQSEQLSQQV.R                        | 8.64   | 47.77 | 0.18 | 5.53  |
| Q61792_L1Lasp1   | LIM and SH K.QSFTM*VADTPENLR.L                   | 3.72   | 11.40 | 0.33 | 3.07  |
| Q61792_L1Lasp1   | LIM and SH K.QSFTM*VADTPENLR.L                   | 3.48   | 12.47 | 0.28 | 3.58  |
| Q61792_L1Lasp1   | LIM and SH K.TQDQISNIK#Y                         | 90.26  | 68.12 | 1.33 | 0.75  |
| Q61792_L1Lasp1   | LIM and SH K.YHEEFK#S                            | 58.01  | 42.96 | 1.35 | 0.74  |
| Q61792_L1Lasp1   | LIM and SH K.GFSVVADTPELQR.I                     | 1.22   | 5.00  | 0.24 | 4.08  |
| Q8C142_A1Ld1rap1 | Low density R.ETLLEGM*VFSLK#Y                    | 7.51   | 2.35  | 3.19 | 0.31  |
| Q8C142_A1Ld1rap1 | Low density K.GEELSAAAVK#R                       | 7.38   | 3.65  | 2.02 | 0.49  |
| Q8C142_A1Ld1rap1 | Low density K.VAQAVTLTVAQAFK#V                   | 8.62   | 3.44  | 2.51 | 0.40  |
| D3YWS8_D Leng8   | Leukocyte r R.LSLAQLPAF.-                        | 7.09   | 7.09  | 1.00 | 1.00  |
| D3YWS8_D Leng8   | Leukocyte r R.LSLAQLPAF.-                        | 13.97  | 13.97 | 1.00 | 1.00  |
| Q5XJES_LE1Leo1   | RNA polym R.IEVEIPK#V                            | 25.28  | 14.29 | 1.77 | 0.57  |
| Q5XJES_LE1Leo1   | RNA polym R.QGTGLQGOAVFK#T                       | 27.58  | 20.62 | 1.34 | 0.75  |
| Q5XJES_LE1Leo1   | RNA polym K.VNTDIGNDLVYFK#L                      | 26.58  | 16.03 | 1.66 | 0.60  |
| Q3V1T4_P1Lepre1  | Prolyl 3-hyR.LTNAATSGDGYR.G                      | 4.19   | 26.95 | 0.16 | 6.43  |
| Q3V1T4_P1Lepre1  | Prolyl 3-hyR.SPYNYLQVAYFK.I                      | 24.85  | 15.65 | 1.59 | 0.63  |
| Q3V1T4_P1Lepre1  | Prolyl 3-hyR.TAIEESQAER.K                        | 4.91   | 11.53 | 0.43 | 2.35  |
| Q8CG70_P1Leprel2 | Prolyl 3-hyR.ALNQYQTLQGEPRDLGPR.E                | 1.29   | 7.46  | 0.17 | 5.80  |
| Q8CG70_P1Leprel2 | Prolyl 3-hyR.FEGLTVLK#A                          | 8.81   | 5.26  | 1.67 | 0.60  |
| Q8K2B0_S1Leprel4 | Synaptoner R.WGLEDDEFQPR.E                       | 1.53   | 6.97  | 0.22 | 4.56  |
| P16045_LE Lgals1 | Galectin-1 (R.LNM*EAINYM*AADGDFK#I               | 10.67  | 14.06 | 0.76 | 1.32  |
| P16045_LE Lgals1 | Galectin-1 (R.LNM*EAINYM*AADGDFK#I               | 1.70   | 2.33  | 0.73 | 1.37  |
| P16045_LE Lgals1 | Galectin-1 (R.LNMEAINYM*AADGDFK#I                | 3.65   | 3.07  | 1.19 | 0.84  |
| P16045_LE Lgals1 | Galectin-1 (K.SFVLNLGK#D                         | 26.80  | 19.34 | 1.39 | 0.72  |
| P16045_LE Lgals1 | Galectin-1 (K.FPNRLNMEAINYM*AADGDFK#I            | 5.24   | 3.38  | 1.55 | 0.64  |
| Q08573_LE Lgals9 | Galectin-9 (R.NTQJNNSWQEER.S                     | 2.97   | 9.23  | 0.32 | 3.11  |
| P37913_D1Lig1    | DNA ligase K.DTEQAEFLEQSVK#D                     | 27.45  | 6.82  | 4.03 | 0.25  |
| P37913_D1Lig1    | DNA ligase R.ENFVETEGEVFTTSLDTK#D                | 8.84   | 1.05  | 8.39 | 0.12  |
| P37913_D1Lig1    | DNA ligase K.GTLDPANYNPSK#N                      | 36.36  | 11.86 | 3.07 | 0.33  |
| P37913_D1Lig1    | DNA ligase R.IDGAVAPDHWLPSIVWEVK#C               | 44.53  | 10.52 | 4.23 | 0.24  |
| P37913_D1Lig1    | DNA ligase R.LGPPQQGLELGVGDGVLLK#A               | 51.76  | 12.73 | 4.07 | 0.25  |
| P37913_D1Lig1    | DNA ligase R.LM*LPPLPTISGVFTK#F                  | 15.30  | 5.12  | 2.99 | 0.33  |
| P37913_D1Lig1    | DNA ligase K.TLDDVDATYIAK#R                      | 25.75  | 16.20 | 1.59 | 0.63  |
| P37913_D1Lig1    | DNA ligase K.TLSSFFTPR.K                         | 12.12  | 12.36 | 0.98 | 1.02  |
| P37913_D1Lig1    | DNA ligase K.VPFLAVAR.T                          | 13.52  | 18.56 | 0.73 | 1.37  |
| P37913_D1Lig1    | DNA ligase R.AQIHVLEGEVVK#I                      | 10.51  | 4.26  | 2.47 | 0.41  |
| P37913_D1Lig1    | DNA ligase K.DTEQAEFLEQSVK#D                     | 11.37  | 2.82  | 4.03 | 0.25  |
| P37913_D1Lig1    | DNA ligase K.EGDQLIVPSEPTK#S                     | 7.92   | 3.88  | 2.04 | 0.49  |
| P37913_D1Lig1    | DNA ligase R.ENFVETEGEVFTTSLDTK#D                | 3.97   | 2.91  | 1.36 | 0.73  |
| P37913_D1Lig1    | DNA ligase K.GTLDPANYNPSK#N                      | 21.16  | 7.90  | 2.68 | 0.37  |
| P37913_D1Lig1    | DNA ligase R.IDGAVAPDHWLPSIVWEVK#C               | 27.27  | 6.98  | 3.91 | 0.26  |
| P37913_D1Lig1    | DNA ligase R.LGPPQQGLELGVGDGVLLK#A               | 24.23  | 7.52  | 3.22 | 0.31  |
| P37913_D1Lig1    | DNA ligase R.LM*LPPLPTISGVFTK#F                  | 9.82   | 3.85  | 2.55 | 0.39  |
| P97386_D1Lig3    | DNA ligase K.AAVWEITGAESR.S                      | 2.50   | 8.94  | 0.28 | 3.57  |
| P97386_D1Lig3    | DNA ligase R.DLEQGDVSETIR.I                      | 5.12   | 22.81 | 0.22 | 4.45  |
| P97386_D1Lig3    | DNA ligase K.GASFITSNPR.K                        | 3.54   | 12.84 | 0.28 | 3.63  |
| P97386_D1Lig3    | DNA ligase K.K#EDLETEGWEELENEK#EQSQHIADLSSK#A    | 8.88   | 6.96  | 1.28 | 0.78  |
| P97386_D1Lig3    | DNA ligase K.LTKEEQQALQDIASR.C                   | 5.40   | 28.50 | 0.19 | 5.28  |
| P97386_D1Lig3    | DNA ligase K.LTTTGQVTSVK#G                       | 18.97  | 13.52 | 1.40 | 0.71  |
| P97386_D1Lig3    | DNA ligase K.TQIHDFLQK#G                         | 12.24  | 8.58  | 1.43 | 0.70  |
| P97386_D1Lig3    | DNA ligase K.VLLDVFVGR.L                         | 5.25   | 13.93 | 0.38 | 2.65  |
| P97386_D1Lig3    | DNA ligase K.LTTTGQVTSVK#G                       | 14.98  | 8.96  | 1.67 | 0.60  |
| Q9ERGO_L1Lima1   | LIM domair K.QSSPASVTNELK#T                      | 7.09   | 7.35  | 0.96 | 1.04  |
| Q9ERGO_L1Lima1   | LIM domair K.SQDVGFWEVEVVR.E                     | 1.49   | 6.69  | 0.22 | 4.49  |
| Q9ERGO_L1Lima1   | LIM domair R.HEAEK#PETSSENTETSJK#I               | 19.21  | 21.09 | 0.91 | 1.10  |
| Q9ERGO_L1Lima1   | LIM domair R.IAWPPPAELGSGSALAEIGK#V              | 13.78  | 13.29 | 1.04 | 0.96  |
| Q9ERGO_L1Lima1   | LIM domair R.IAWPPPAELGSGSALAEIGK#V              | 12.10  | 14.65 | 0.83 | 1.21  |
| Q9ERGO_L1Lima1   | LIM domair R.KGWSESEQSEFGGIATM*ER.K              | 2.92   | 7.19  | 0.41 | 2.46  |
| Q9ERGO_L1Lima1   | LIM domair K.QSSPASVTNELK#T                      | 21.79  | 22.75 | 0.96 | 1.04  |
| Q9ERGO_L1Lima1   | LIM domair K.SDNNEITLRPAQPPNAGESPHSPGVEDIAPIAK.V | 1.23   | 15.89 | 0.08 | 12.87 |
| Q9ERGO_L1Lima1   | LIM domair K.SQDVGFWEVEVVR.E                     | 5.03   | 29.90 | 0.17 | 5.95  |
| Q9ERGO_L1Lima1   | LIM domair R.TSSLPESPSVK#T                       | 30.65  | 30.07 | 1.02 | 0.98  |
| Q99JW4_L1Lims1   | LIM and ser K.FPLELK#K                           | 27.20  | 24.25 | 1.12 | 0.89  |
| Q99JW4_L1Lims1   | LIM and ser K.LSETLGR.K                          | 118.81 | 42.83 | 2.77 | 0.36  |
| Q99JW4_L1Lims1   | LIM and ser R.VIEGDVVSALNK#A                     | 64.57  | 58.93 | 1.10 | 0.91  |
| Q8CD94_L1Lins2   | Protein Iin-K.ELGSLTANLM*EK.V                    | 4.10   | 3.17  | 1.29 | 0.77  |
| Q571G4_L1Lins4   | Protein Iin-R.VLSQSTGTPSK#T                      | 12.18  | 6.93  | 1.76 | 0.57  |
| Q571G4_L1Lins4   | Protein Iin-K.VTAQAQPGDAK#L                      | 5.50   | 3.49  | 1.58 | 0.63  |
| O88952_L1Lin7c   | Protein Iin-K.TEEGLGFNIM*GGK#E                   | 12.02  | 9.43  | 1.27 | 0.78  |
| Q8VEE1_L1Lmcd1   | LIM and cys K.SEALGVEVALPGQGGPLPK#E              | 6.81   | 4.30  | 1.58 | 0.63  |
| P48678_L1Lmna    | Prelamin-A.K.AAYEALGDAR.K                        | 6.20   | 19.36 | 0.32 | 3.12  |
| P48678_L1Lmna    | Prelamin-A.R.AQHEDQVEQYK#K#E                     | 5.91   | 4.24  | 1.39 | 0.72  |
| P48678_L1Lmna    | Prelamin-A.K.EAALSTALSEK#R                       | 23.06  | 27.25 | 0.85 | 1.18  |
| P48678_L1Lmna    | Prelamin-A.R.ITESEVVS.R                          | 9.29   | 32.59 | 0.29 | 3.51  |
| P48678_L1Lmna    | Prelamin-A.K.LEAALGEAK#K                         | 175.37 | 72.48 | 2.42 | 0.41  |
| P48678_L1Lmna    | Prelamin-A.R.LKDLLEALLNSK.E                      | 12.36  | 11.62 | 1.06 | 0.94  |
| P48678_L1Lmna    | Prelamin-A.K.LLEGEER.L                           | 7.23   | 31.87 | 0.23 | 4.41  |
| P48678_L1Lmna    | Prelamin-A.R.LQEKEDLQELNDR.L                     | 1.72   | 5.30  | 0.32 | 3.09  |
| P48678_L1Lmna    | Prelamin-A.R.LQTLKEELDFQK.N                      | 22.84  | 18.64 | 1.23 | 0.82  |
| P48678_L1Lmna    | Prelamin-A.R.M*QQQLDEYQELLDIK#L                  | 6.85   | 6.30  | 1.09 | 0.92  |
| P48678_L1Lmna    | Prelamin-A.R.SLETENAGLR.L                        | 5.11   | 36.08 | 0.14 | 7.06  |
| P48678_L1Lmna    | Prelamin-A.K.SNEDQSM*GNWQJR.R                    | 2.51   | 14.03 | 0.18 | 5.59  |
| P48678_L1Lmna    | Prelamin-A.R.TALINSTEVEVVR*E                     | 2.53   | 9.13  | 0.28 | 3.60  |
| P48678_L1Lmna    | Prelamin-A.R.VAVEEVEEGK.F                        | 14.67  | 17.02 | 0.86 | 1.16  |
| P48678_L1Lmna    | Prelamin-A.K.AGQVVTIIVASGAGATHSPPTDLVWK#A        | 9.63   | 8.48  | 1.14 | 0.88  |
| P48678_L1Lmna    | Prelamin-A.K.EAALSTALSEK#R                       | 18.55  | 17.15 | 1.08 | 0.92  |
| P48678_L1Lmna    | Prelamin-A.R.IDLSAQLSQLQK#Q                      | 13.48  | 11.99 | 1.12 | 0.89  |
| P48678_L1Lmna    | Prelamin-A.R.ITESEVVS.R                          | 11.86  | 46.26 | 0.26 | 3.90  |
| P48678_L1Lmna    | Prelamin-A.R.LADALQELR.A                         | 9.59   | 40.84 | 0.23 | 4.26  |
| P48678_L1Lmna    | Prelamin-A.R.LAVYIDR.V                           | 5.62   | 22.52 | 0.25 | 4.01  |
| P48678_L1Lmna    | Prelamin-A.K.LEAALGEAK#K                         | 46.76  | 42.11 | 1.11 | 0.90  |
| P48678_L1Lmna    | Prelamin-A.R.LK#DLEALLNSK#E                      | 15.18  | 13.26 | 1.15 | 0.87  |
| P48678_L1Lmna    | Prelamin-A.K.LLEGEER.L                           | 6.86   | 28.66 | 0.24 | 4.18  |



|                    |                                                |        |        |       |      |
|--------------------|------------------------------------------------|--------|--------|-------|------|
| P48678_LN_Lmna     | Prelamin-A R.LQEKEDLQELNDR.L                   | 3.74   | 32.83  | 0.11  | 8.79 |
| P48678_LN_Lmna     | Prelamin-A R.M*QQQLDEYQELLDIK.L                | 7.20   | 7.72   | 0.93  | 1.07 |
| P48678_LN_Lmna     | Prelamin-A R.NSNLVGAAHEELQOSR.I                | 3.25   | 8.59   | 0.38  | 2.64 |
| P48678_LN_Lmna     | Prelamin-A R.SLETENAGLR.L                      | 3.11   | 28.28  | 0.11  | 9.08 |
| P48678_LN_Lmna     | Prelamin-A R.SVGGSGGSGFDNLVTR.S                | 4.41   | 16.49  | 0.27  | 3.74 |
| P48678_LN_Lmna     | Prelamin-A R.TALINSTGEEVAM*R.K                 | 3.43   | 10.63  | 0.32  | 3.10 |
| P48678_LN_Lmna     | Prelamin-A R.TLEGLHDLR.G                       | 4.72   | 9.59   | 0.49  | 2.03 |
| Q9D920_L1:Loh12cr1 | Loss of hete R.LNSM*LPEAER.L                   | 2.35   | 5.24   | 0.45  | 2.23 |
| Q8CGK3_L1Lomp1     | Lon protea: R.AFLM*EQDPENDFLVTSIHHLHVPEGATPK#D | 7.51   | 1.51   | 4.97  | 0.20 |
| Q8CGK3_L1Lomp1     | Lon protea: R.AFLMEQDPENDFLVTSIHHLHVPEGATPK#D  | 6.18   | 3.74   | 1.65  | 0.60 |
| Q8CGK3_L1Lomp1     | Lon protea: K.AQLSAAVLTLIK#.Q                  | 16.90  | 10.36  | 1.63  | 0.61 |
| Q8CGK3_L1Lomp1     | Lon protea: R.DIALNPLYR.E                      | 4.62   | 7.30   | 0.63  | 1.58 |
| Q8CGK3_L1Lomp1     | Lon protea: K.ELGLEK#DDK#DAIEEK#.F             | 37.73  | 9.01   | 4.19  | 0.24 |
| Q8CGK3_L1Lomp1     | Lon protea: K.EVEDELGPK#QLEM*VTEAATDTSK#.E     | 12.15  | 10.93  | 1.11  | 0.90 |
| Q8CGK3_L1Lomp1     | Lon protea: K.EVEDELGPK#QLEMVTEAATDTSK#.E      | 9.08   | 2.03   | 4.47  | 0.22 |
| Q8CGK3_L1Lomp1     | Lon protea: R.FSVGGM*TDVAEIK#.G                | 38.75  | 6.64   | 5.83  | 0.17 |
| Q8CGK3_L1Lomp1     | Lon protea: K.HVM*DVDEELSK#.L                  | 20.12  | 5.12   | 3.93  | 0.25 |
| Q8CGK3_L1Lomp1     | Lon protea: K.IVSGEAQVQVTPENLQDFVGKPVFVVER.M   | 11.44  | 6.65   | 1.72  | 0.58 |
| Q8CGK3_L1Lomp1     | Lon protea: R.LAQPYVGVFLK#.R                   | 37.50  | 10.55  | 3.56  | 0.28 |
| Q8CGK3_L1Lomp1     | Lon protea: R.M*EM*INVSQYVAQEK#.L              | 11.91  | 2.98   | 4.00  | 0.25 |
| Q8CGK3_L1Lomp1     | Lon protea: R.M*IVTGHRR.I                      | 3.28   | 30.44  | 0.11  | 9.30 |
| Q8CGK3_L1Lomp1     | Lon protea: R.QLEVEPEGLEPEAEK#.Q               | 10.55  | 5.31   | 1.99  | 0.50 |
| Q8CGK3_L1Lomp1     | Lon protea: K.TENPLVIDEVDK#.I                  | 12.89  | 4.44   | 2.90  | 0.34 |
| Q8CGK3_L1Lomp1     | Lon protea: R.M*IVTGHRR.I                      | 2.76   | 26.86  | 0.10  | 9.74 |
| Q924C6_L1Lox14     | Lysyl oxida: R.EALFQAQLGQGLGPIHSEVR.C          | 8.06   | 15.73  | 0.51  | 1.95 |
| Q924C6_L1Lox14     | Lysyl oxida: R.QLGLGFANFALK#.D                 | 11.36  | 8.14   | 1.40  | 0.72 |
| Q924C6_L1Lox14     | Lysyl oxida: K.YGQEGPWLDNVR.C                  | 22.41  | 24.33  | 0.92  | 1.09 |
| Q8BFW7_L1Lpp       | Lipoma-pre K.EPIM*PAPGOEETVR.I                 | 2.40   | 6.89   | 0.35  | 2.87 |
| Q8BFW7_L1Lpp       | Lipoma-pre K.SAQPSPHYM*AGPSSQYVGPGR.G          | 3.22   | 15.76  | 0.20  | 4.90 |
| Q8BFW7_L1Lpp       | Lipoma-pre R.SEGDTAYGQQVQPNWK#.R               | 9.29   | 9.21   | 1.01  | 0.99 |
| Q8BFW7_L1Lpp       | Lipoma-pre R.YYEPYAAQPSYVGR.S                  | 4.77   | 10.04  | 0.47  | 2.11 |
| Q9ESE1_LR_Lrba     | Lipopolsai K.ASTSTEAPQQR.H                     | 2.70   | 4.29   | 0.63  | 1.58 |
| Q9ESE1_LR_Lrba     | Lipopolsai K.YGPDFFNPGK#.S                     | 8.52   | 4.21   | 2.02  | 0.49 |
| Q3UMG5_L1Lrch2     | Leucine-ric R.NNLHVLDPDELGLPVK#.L              | 8.87   | 9.01   | 0.98  | 1.02 |
| Q3UMG5_L1Lrch2     | Leucine-ric K.YLFDLPLK#.V                      | 13.20  | 8.74   | 1.51  | 0.66 |
| Q91ZX7_LR_Lrp1     | Prolow-der K.AVTDEEPLIFANR.Y                   | 1.62   | 7.00   | 0.23  | 4.32 |
| Q9J118_LR_Lrp1b    | Low-densit R.NSLASVDER.K                       | 9.72   | 14.15  | 0.69  | 1.46 |
| Q6PB66_L1Lrpprc    | Leucine-ric R.LLAELIK#.T                       | 14.03  | 3.20   | 4.38  | 0.23 |
| Q6PB66_L1Lrpprc    | Leucine-ric K.NVQGIIDILK#.I                    | 14.21  | 2.87   | 4.95  | 0.20 |
| Q6PB66_L1Lrpprc    | Leucine-ric K.TSQVTSDDLSTLEK#.L                | 13.18  | 2.39   | 5.51  | 0.18 |
| Q6PB66_L1Lrpprc    | Leucine-ric K.AGYPQVSEILEK#.I                  | 11.54  | 1.91   | 6.05  | 0.17 |
| Q6PB66_L1Lrpprc    | Leucine-ric K.NVQGIIDILK#.I                    | 16.01  | 3.85   | 4.16  | 0.24 |
| Q9CRC8_L1Lrrc40    | Leucine-ric K.ELHLAENQJEK#.L                   | 14.80  | 6.12   | 2.42  | 0.41 |
| Q9CRC8_L1Lrrc40    | Leucine-ric K.GTAAVLYLR.D                      | 5.48   | 12.33  | 0.44  | 2.25 |
| Q9CRC8_L1Lrrc40    | Leucine-ric R.LLPALTVLDIHDNQLTSLPSAIR.E        | 8.09   | 17.07  | 0.47  | 2.11 |
| Q9CRC8_L1Lrrc40    | Leucine-ric K.LQSLSDDLR.L                      | 4.58   | 14.17  | 0.32  | 3.10 |
| Q9CRC8_L1Lrrc40    | Leucine-ric K.QATLIPDDLPDATK#.T                | 14.03  | 8.55   | 1.64  | 0.61 |
| Q9CRC8_L1Lrrc40    | Leucine-ric K.FLALEGNPLR.T                     | 4.57   | 9.93   | 0.46  | 2.17 |
| Q9CRC8_L1Lrrc40    | Leucine-ric K.ILPEEITSLK#.N                    | 23.36  | 10.48  | 2.23  | 0.45 |
| Q9CRC8_L1Lrrc40    | Leucine-ric R.LLPALTVLDIHDNQLTSLPSAIR.E        | 8.24   | 15.39  | 0.54  | 1.87 |
| Q9CRC8_L1Lrrc40    | Leucine-ric K.LQTLNLSFN.R                      | 7.81   | 9.96   | 0.78  | 1.28 |
| Q9CRC8_L1Lrrc40    | Leucine-ric R.NNLSLPEEM*SSLTK#.L               | 5.20   | 18.28  | 0.28  | 3.52 |
| Q9CRC8_L1Lrrc40    | Leucine-ric K.TLTIISINFSK#.N                   | 11.11  | 6.20   | 1.79  | 0.56 |
| Q505F5_LR_Lrrc47   | Leucine-ric R.APGPGLAQGLPQLHSLVLR.R            | 16.85  | 27.36  | 0.62  | 1.62 |
| Q505F5_LR_Lrrc47   | Leucine-ric K.DIMDSLIUR.M                      | 4.55   | 11.99  | 0.38  | 2.64 |
| Q505F5_LR_Lrrc47   | Leucine-ric R.ELLITGPLEER.V                    | 14.73  | 26.06  | 0.57  | 1.77 |
| Q505F5_LR_Lrrc47   | Leucine-ric R.ELSPDIAHLASLK#.T                 | 14.20  | 6.65   | 2.14  | 0.47 |
| Q505F5_LR_Lrrc47   | Leucine-ric R.ESGEVEEVADRSAR.L                 | 22.64  | 35.33  | 0.64  | 1.56 |
| Q505F5_LR_Lrrc47   | Leucine-ric R.FLNSQTK#.L                       | 27.10  | 15.38  | 1.76  | 0.57 |
| Q505F5_LR_Lrrc47   | Leucine-ric R.GPLLYAARPPEDLK.I                 | 12.14  | 25.14  | 0.48  | 2.07 |
| Q505F5_LR_Lrrc47   | Leucine-ric R.LQSLNLTGNR.L                     | 12.23  | 34.08  | 0.36  | 2.79 |
| Q505F5_LR_Lrrc47   | Leucine-ric R.QLQLEAEQR.K                      | 8.28   | 13.67  | 0.61  | 1.65 |
| Q505F5_LR_Lrrc47   | Leucine-ric R.TAATIATHDQAVR.G                  | 14.07  | 26.82  | 0.52  | 1.91 |
| Q505F5_LR_Lrrc47   | Leucine-ric R.VVDLEGLK#.V                      | 78.28  | 31.56  | 2.48  | 0.40 |
| Q505F5_LR_Lrrc47   | Leucine-ric R.APGPGLAQGLPQLHSLVLR.R            | 6.42   | 12.21  | 0.53  | 1.90 |
| Q505F5_LR_Lrrc47   | Leucine-ric R.ELLITGPLEER.V                    | 6.38   | 13.17  | 0.48  | 2.06 |
| Q505F5_LR_Lrrc47   | Leucine-ric R.ESGEVEEVADRSAR.L                 | 7.00   | 12.80  | 0.55  | 1.83 |
| Q505F5_LR_Lrrc47   | Leucine-ric R.NALGPGLSPELGPLPALR.V             | 6.31   | 18.63  | 0.34  | 2.95 |
| Q505F5_LR_Lrrc47   | Leucine-ric R.VDLEGLSK#.V                      | 34.07  | 12.33  | 2.76  | 0.36 |
| Q9D1G5_L1Lrrc57    | Leucine-ric R.ELPSTFGQSLAK#.T                  | 42.56  | 19.07  | 2.23  | 0.45 |
| Q9D1G5_L1Lrrc57    | Leucine-ric R.ELTFPELQK#.L                     | 13.38  | 5.12   | 2.61  | 0.38 |
| Q9D1G5_L1Lrrc57    | Leucine-ric R.SIPDTVGLQAIELNLNQNSQLSVK#.I      | 18.60  | 6.96   | 2.67  | 0.37 |
| Q9D1G5_L1Lrrc57    | Leucine-ric K.TGVFQLK#.D                       | 10.24  | 3.49   | 2.93  | 0.34 |
| Q9D1G5_L1Lrrc57    | Leucine-ric R.TIDLSNNK#DSLPLIIGK#.F            | 15.26  | 7.02   | 2.17  | 0.46 |
| Q3UZ39_L1Lrrfp1    | Leucine-ric K.AM*VSNALQDNEK#.T                 | 11.81  | 3.80   | 3.11  | 0.32 |
| Q3UZ39_L1Lrrfp1    | Leucine-ric K.HAHSILQFQFAEVK#.E                | 12.69  | 7.56   | 1.68  | 0.60 |
| Q3UZ39_L1Lrrfp1    | Leucine-ric K.AM*VSNALQDNEK#.T                 | 8.02   | 1.51   | 5.33  | 0.19 |
| Q3UZ39_L1Lrrfp1    | Leucine-ric R.ELTQEAPEEAVIQPQAGGENTITK#.A      | 9.61   | 2.68   | 3.58  | 0.28 |
| Q3UZ39_L1Lrrfp1    | Leucine-ric K.HAHSILQFQFAEVK#.E                | 16.22  | 18.21  | 0.89  | 1.12 |
| Q8BUI3_LR_LRWd1    | Leucine-ric R.ELDSLNNLLETLPANLGLSHLR.I         | 3.93   | 7.58   | 0.52  | 1.93 |
| Q3UM18_L1Lsg1      | Large subur K.LILTPFER.N                       | 4.25   | 15.03  | 0.28  | 3.54 |
| Q3UM18_L1Lsg1      | Large subur K.NAENQVNNNDYLSVK#.Q               | 9.03   | 6.26   | 1.44  | 0.69 |
| Q9DOR8_L1Lsm12     | Protein LSA R.LQGEVAVFDYQSK#.M                 | 91.08  | 36.61  | 2.49  | 0.40 |
| Q9DOR8_L1Lsm12     | Protein LSA R.TETPPPLASLVNSK#.L                | 24.70  | 12.89  | 1.92  | 0.52 |
| Q8K2F8_L1Lsm14a    | Protein LSA R.YEGILYDITENSTVALAK#.V            | 2.92   | 1.49   | 1.95  | 0.51 |
| Q8CGC4_L1Lsm14b    | Protein LSA K.SFFDNISSELK#.T                   | 19.72  | 10.09  | 1.96  | 0.51 |
| P24527_LK_Lta4h    | Leukotrieni K.GSPMEISPLIALSK#.N                | 8.58   | 2.20   | 3.90  | 0.26 |
| P24527_LK_Lta4h    | Leukotrieni K.GSPM*EISPLIALSK#.N               | 7.57   | 1.33   | 5.70  | 0.18 |
| P24527_LK_Lta4h    | Leukotrieni K.DLSHQNEFLAQVLQK#.A               | 8.94   | 2.35   | 3.81  | 0.26 |
| P24527_LK_Lta4h    | Leukotrieni K.DVDPDVAVSIPYK#.G                 | 5.08   | 2.04   | 2.49  | 0.40 |
| P24527_LK_Lta4h    | Leukotrieni K.GSPM*EISPLIALSK#.N               | 16.75  | 1.17   | 14.30 | 0.07 |
| P24527_LK_Lta4h    | Leukotrieni K.LTYTAEVSVK#.E                    | 14.71  | 5.33   | 2.76  | 0.36 |
| Q6A009_L1Ltn1      | E3 ubiquiti K.LPQSIPEPK#.L                     | 13.95  | 7.86   | 1.78  | 0.56 |
| Q6A009_L1Ltn1      | E3 ubiquiti K.NFLSTVGLSTER.T                   | 4.72   | 11.91  | 0.40  | 2.52 |
| Q6NSQ7_L1Ltv1      | Protein LTV K.LPSSVFASFEEDVGLLNK#.A            | 9.39   | 4.51   | 2.08  | 0.48 |
| Q6NSQ7_L1Ltv1      | Protein LTV R.DPLAADETAPQR@.V                  | 7.71   | 7.37   | 1.05  | 0.95 |
| Q6NSQ7_L1Ltv1      | Protein LTV K.HLFWEEETK#.S                     | 17.03  | 5.98   | 2.85  | 0.35 |
| Q6NSQ7_L1Ltv1      | Protein LTV K.LPSSVFASFEEDVGLLNK#.A            | 27.60  | 10.16  | 2.72  | 0.37 |
| Q6NSQ7_L1Ltv1      | Protein LTV R.LQEVLDNYK#.E                     | 24.87  | 8.84   | 2.81  | 0.36 |
| Q6NSQ7_L1Ltv1      | Protein LTV K.NIEGLK#.-                        | 16.47  | 5.76   | 2.86  | 0.35 |
| Q9CY14_LU_Luc7i    | Putative RN K.AEQLAGENVDDESQK#.I               | 108.89 | 123.90 | 0.88  | 1.14 |
| Q9CY14_LU_Luc7i    | Putative RN R.ALLDQLMGTR.D                     | 5.23   | 28.96  | 0.18  | 5.54 |
| Q9CY14_LU_Luc7i    | Putative RN R.LAETQEISAEVSAK#.A                | 27.33  | 31.47  | 0.87  | 1.15 |

|                  |                                               |        |        |      |       |
|------------------|-----------------------------------------------|--------|--------|------|-------|
| Q9CY14_LU Luc71  | Putative RN K.LHLGFIQIR.E                     | 6.45   | 26.53  | 0.24 | 4.11  |
| Q7TNC4_LC Luc712 | Putative RN R.ADYEJASK#.E                     | 260.53 | 249.35 | 1.04 | 0.96  |
| Q7TNC4_LC Luc712 | Putative RN R.AM*LDQLM*GTSR.D                 | 8.55   | 109.70 | 0.08 | 12.83 |
| Q7TNC4_LC Luc712 | Putative RN R.AMLDQLM*GTSR.D                  | 6.12   | 26.44  | 0.23 | 4.32  |
| Q7TNC4_LC Luc712 | Putative RN R.AM*LDQLM*GTSR.D                 | 7.59   | 29.00  | 0.26 | 3.82  |
| Q7TNC4_LC Luc712 | Putative RN R.AMLDQLM*GTSR.D                  | 2.81   | 11.31  | 0.25 | 4.02  |
| Q7TNC4_LC Luc712 | Putative RN R.EAEVYR.N                        | 36.91  | 145.19 | 0.25 | 3.93  |
| Q7TNC4_LC Luc712 | Putative RN R.FRDQDLASR.D                     | 2.74   | 44.56  | 0.06 | 16.25 |
| Q7TNC4_LC Luc712 | Putative RN R.LADHFGGK#.L                     | 59.82  | 59.00  | 1.01 | 0.99  |
| Q7TNC4_LC Luc712 | Putative RN R.LAETQEEISAEEAAK#.A              | 153.27 | 145.24 | 1.06 | 0.95  |
| Q7TNC4_LC Luc712 | Putative RN K.LHLGFIEIR.E                     | 24.13  | 77.38  | 0.31 | 3.21  |
| Q7TNC4_LC Luc712 | Putative RN R.NSM*PASSFQQK#.L                 | 112.52 | 71.94  | 1.56 | 0.64  |
| Q7TNC4_LC Luc712 | Putative RN R.NSM*PASSFQQK#.L                 | 105.61 | 97.53  | 1.08 | 0.92  |
| Q7TNC4_LC Luc712 | Putative RN K.VEQLGAEGNVEESQK#.V              | 315.03 | 282.93 | 1.11 | 0.90  |
| Q7TNC4_LC Luc712 | Putative RN K.VEQLGAEGNVEESQK#VMDVEK#.A       | 5.74   | 6.85   | 0.84 | 1.19  |
| Q7TNC4_LC Luc712 | Putative RN R.VHELNEEIGK#.L                   | 176.90 | 173.83 | 1.02 | 0.98  |
| Q7TNC4_LC Luc712 | Putative RN K.VMDVEK#.A                       | 46.43  | 39.81  | 1.17 | 0.86  |
| Q7TNC4_LC Luc712 | Putative RN R.AM*LDQLM*GTSR.D                 | 2.13   | 4.74   | 0.45 | 2.22  |
| Q7TNC4_LC Luc712 | Putative RN K.VEQLGAEGNVEESQK#.V              | 4.72   | 3.17   | 1.49 | 0.67  |
| Q7TNC4_LC Luc712 | Putative RN K.VEQLGAEGNVEESQK#.V              | 4.12   | 7.65   | 0.54 | 1.86  |
| Q5SUF2_LC Luc713 | Luc7-like pi R.EKQSEDTPESK.E                  | 2.60   | 3.01   | 0.86 | 1.16  |
| Q5SUF2_LC Luc713 | Luc7-like pi R.LK#ATVEELK#EK#.L               | 25.04  | 20.62  | 1.21 | 0.82  |
| Q5SUF2_LC Luc713 | Luc7-like pi R.LALSONQQSSGAAGPTGK#.N          | 142.53 | 106.13 | 1.34 | 0.74  |
| Q5SUF2_LC Luc713 | Luc7-like pi R.STTSTIESFAAQEK#.Q              | 169.58 | 119.23 | 1.42 | 0.70  |
| Q5SUF2_LC Luc713 | Luc7-like pi R.YLQSLLAEVER.R                  | 23.07  | 59.54  | 0.39 | 2.58  |
| Q5SUF2_LC Luc713 | Luc7-like pi R.LALSONQQSSGAAGPTGK#.N          | 19.15  | 14.61  | 1.31 | 0.76  |
| Q5SUF2_LC Luc713 | Luc7-like pi R.STTSTIESFAAQEK#.Q              | 22.20  | 26.05  | 0.85 | 1.17  |
| Q5SUF2_LC Luc713 | Luc7-like pi R.YLQSLLAEVER.R                  | 6.02   | 24.98  | 0.24 | 4.15  |
| Q5SUF2_LC Luc713 | Luc7-like pi R.STTSTIESFAAQEK#.Q              | 25.17  | 19.71  | 1.28 | 0.78  |
| Q5SUF2_LC Luc713 | Luc7-like pi R.YLQSLLAEVER.R                  | 6.05   | 19.56  | 0.31 | 3.23  |
| Q5SUF2_LC Luc713 | Luc7-like pi R.LALSONQQSSGAAGPTGK#.N          | 18.73  | 13.58  | 1.38 | 0.73  |
| Q5SUF2_LC Luc713 | Luc7-like pi R.STTSTIESFAAQEK#.Q              | 20.57  | 13.16  | 1.56 | 0.64  |
| Q8R4U7_L1 Lutzp1 | Leucine zip K.AIGALSQQK#.A                    | 12.50  | 11.42  | 1.09 | 0.91  |
| Q8R4U7_L1 Lutzp1 | Leucine zip K.GAPKPTGESLKG.G                  | 9.89   | 13.90  | 0.71 | 1.41  |
| Q8R4U7_L1 Lutzp1 | Leucine zip R.EDGISLSSK#.E                    | 25.43  | 21.55  | 1.18 | 0.85  |
| Q8R4U7_L1 Lutzp1 | Leucine zip K.NNDLQDNYLTELNR.N                | 1.92   | 5.11   | 0.37 | 2.67  |
| Q8R4U7_L1 Lutzp1 | Leucine zip R.RLDELEATK.N                     | 4.93   | 10.89  | 0.45 | 2.21  |
| Q8R4U7_L1 Lutzp1 | Leucine zip R.SLASQLEEK#.L                    | 15.08  | 19.91  | 0.76 | 1.32  |
| Q8R4U7_L1 Lutzp1 | Leucine zip K.SLTLFVNER.K                     | 3.69   | 8.33   | 0.44 | 2.26  |
| Q8R4U7_L1 Lutzp1 | Leucine zip R.SQENIQGLFSLPNK#.E               | 7.57   | 6.22   | 1.22 | 0.82  |
| Q08288_LY Lyar   | Cell growth R.ELLQISAFDNVPR.K                 | 17.70  | 25.21  | 0.70 | 1.42  |
| Q08288_LY Lyar   | Cell growth K.FQNMWIK#.N                      | 14.44  | 7.78   | 1.86 | 0.54  |
| Q08288_LY Lyar   | Cell growth R.NGGPGEAAGGQTK#.T                | 10.41  | 6.66   | 1.56 | 0.64  |
| Q08288_LY Lyar   | Cell growth K.NQEAGHEAAGEEAAEASGPPEK#.K       | 51.10  | 34.97  | 1.46 | 0.68  |
| Q08288_LY Lyar   | Cell growth K.NQEAGHEAAGEEAAEASGPPEK#K#.K     | 23.03  | 10.87  | 2.12 | 0.47  |
| Q08288_LY Lyar   | Cell growth K.QQAWIQK#.J                      | 37.58  | 22.32  | 1.68 | 0.59  |
| P97823_LY Lyp1a1 | Acyl-protei K.ALINPANTVFK#.I                  | 10.43  | 7.95   | 1.31 | 0.76  |
| Q3UFF7_LY Lyp1a1 | Lysophosph K.ASVYQDLQQGR.M                    | 2.52   | 4.89   | 0.52 | 1.94  |
| Q9JHQ5_L2 Lzf1   | Leucine zip K.LVPINQGITTELNK#.E               | 21.71  | 6.61   | 3.28 | 0.30  |
| P24668_M M6pr    | Cation-dep K.SFESTVGGQSDTYSYIFR.V             | 2.89   | 4.29   | 0.67 | 1.48  |
| Q9QX20_M Macf1   | Microtubul K.AFLAELEQNSPK#.I                  | 13.72  | 3.30   | 4.15 | 0.24  |
| Q9QX20_M Macf1   | Microtubul K.AGSELESAGDDASSLR.S               | 6.80   | 14.30  | 0.48 | 2.10  |
| Q9QX20_M Macf1   | Microtubul K.AILEQQLVAELTTK#.K                | 6.59   | 2.52   | 2.61 | 0.38  |
| Q9QX20_M Macf1   | Microtubul K.ALNEEIIIRK.K                     | 1.17   | 16.22  | 0.07 | 13.92 |
| Q9QX20_M Macf1   | Microtubul R.DQEPQONIDR.V                     | 5.98   | 16.77  | 0.36 | 2.80  |
| Q9QX20_M Macf1   | Microtubul R.DQIILDQTNQLK#.F                  | 8.97   | 5.43   | 1.65 | 0.61  |
| Q9QX20_M Macf1   | Microtubul R.EAEELAAASGGSPTEQIPQFQQR.Q        | 4.58   | 12.79  | 0.36 | 2.79  |
| Q9QX20_M Macf1   | Microtubul K.ELEAVTSALQETEK#.S                | 6.57   | 3.43   | 1.91 | 0.52  |
| Q9QX20_M Macf1   | Microtubul K.ELNPEEGKM*VEEK.Y                 | 3.95   | 6.74   | 0.59 | 1.71  |
| Q9QX20_M Macf1   | Microtubul K.FLDVLEAEK#.F                     | 38.33  | 27.78  | 1.38 | 0.72  |
| Q9QX20_M Macf1   | Microtubul R.FQQLQEQEK#.E                     | 14.02  | 7.31   | 1.92 | 0.52  |
| Q9QX20_M Macf1   | Microtubul R.IAQEHTQEDLQHLR.S                 | 2.69   | 9.17   | 0.29 | 3.41  |
| Q9QX20_M Macf1   | Microtubul K.LANSEPVGTQAK#.I                  | 29.14  | 20.83  | 1.40 | 0.71  |
| Q9QX20_M Macf1   | Microtubul R.LEQDQTAALQVQK#.A                 | 18.14  | 12.04  | 1.51 | 0.66  |
| Q9QX20_M Macf1   | Microtubul K.LISDTVQGR.V                      | 7.38   | 17.13  | 0.43 | 2.32  |
| Q9QX20_M Macf1   | Microtubul R.LLDAEDVVPSPDEK#.S                | 9.43   | 4.30   | 2.19 | 0.46  |
| Q9QX20_M Macf1   | Microtubul R.LQNVQJALDFLK#.Q                  | 11.14  | 3.63   | 3.07 | 0.33  |
| Q9QX20_M Macf1   | Microtubul R.LSGQSAISTQPEAVK#.Q               | 19.89  | 7.31   | 2.72 | 0.37  |
| Q9QX20_M Macf1   | Microtubul K.LVDSANEQY#.L                     | 31.91  | 16.39  | 1.95 | 0.51  |
| Q9QX20_M Macf1   | Microtubul R.M*ENQLSASKPTGGLPETAR.E           | 6.82   | 20.53  | 0.33 | 3.01  |
| Q9QX20_M Macf1   | Microtubul K.NDVLAHQATVATVKN#.A               | 9.72   | 6.17   | 1.58 | 0.63  |
| Q9QX20_M Macf1   | Microtubul K.QLQEELAEHPVPEK#.L                | 17.01  | 6.17   | 2.76 | 0.36  |
| Q9QX20_M Macf1   | Microtubul R.RGEEILGR.S                       | 1.45   | 22.49  | 0.06 | 15.54 |
| Q9QX20_M Macf1   | Microtubul K.SIDEM*NNAWENLNK#.T               | 9.59   | 2.83   | 3.39 | 0.30  |
| Q9QX20_M Macf1   | Microtubul R.SSQDQAIK#.S                      | 58.88  | 62.93  | 0.94 | 1.07  |
| Q9QX20_M Macf1   | Microtubul K.STQYDILLQDLSEK#.V                | 7.94   | 7.61   | 1.04 | 0.96  |
| Q9QX20_M Macf1   | Microtubul K.TEOSVALLQK#.W                    | 17.74  | 10.07  | 1.76 | 0.57  |
| Q9QX20_M Macf1   | Microtubul R.TSLAGDTSNSSPASTGAK#.A            | 18.65  | 10.57  | 1.76 | 0.57  |
| Q9QX20_M Macf1   | Microtubul R.YADITLTSK#.A                     | 23.90  | 13.89  | 1.72 | 0.58  |
| Q9WXT8_N Mad111  | Mitotic spii R.EQEDSLASAR.E                   | 2.64   | 9.51   | 0.28 | 3.60  |
| Q9WXT8_N Mad111  | Mitotic spii R.GGPIPADLEAASSLPSSK.E           | 7.80   | 13.02  | 0.60 | 1.67  |
| Q9WXT8_N Mad111  | Mitotic spii K.IQELQASQDER.A                  | 1.79   | 19.20  | 0.09 | 10.70 |
| Q9WXT8_N Mad111  | Mitotic spii K.LTLQGDYNSQR.T                  | 3.62   | 18.04  | 0.20 | 4.99  |
| Q9WXT8_N Mad111  | Mitotic spii K.VQQLQDQVQR.Q                   | 2.92   | 22.26  | 0.13 | 7.61  |
| Q9Z1B5_M Mad211  | Mitotic spii K.YGLTLTTTDPelik.Y               | 8.09   | 10.93  | 0.74 | 1.35  |
| Q4VC33_M Maea    | Macrophag K.AVESIQAEDESAK#.L                  | 17.41  | 10.74  | 1.62 | 0.62  |
| Q4VC33_M Maea    | Macrophag R.IQEFIELVR.Q                       | 4.75   | 14.63  | 0.32 | 3.08  |
| O54790_M Mafg    | Transcripti R.GPLAAGLGLVPGK.V                 | 13.18  | 14.52  | 0.91 | 1.10  |
| O54790_M Mafg    | Transcripti K.VAATSVITIK#.S                   | 20.14  | 17.26  | 1.17 | 0.86  |
| Q9QYH6_M Maged1  | Melanoma- R.IPPTFWAR.Y                        | 2.20   | 11.85  | 0.19 | 5.38  |
| Q9CQL1_M Magohb  | Protein ma K.IGSLDINQSK.D                     | 83.72  | 91.85  | 0.91 | 1.10  |
| Q9CQL1_M Magohb  | Protein ma R.IIDSEITKEDDALWPPPPDR.V           | 14.45  | 67.06  | 0.22 | 4.64  |
| Q9CQL1_M Magohb  | Protein ma R.IIDSEITKEDDALWPPPPDR.V           | 2.09   | 5.89   | 0.35 | 2.82  |
| Q9CQL1_M Magohb  | Protein ma R.VFYLVQDLK#.C                     | 13.67  | 11.42  | 1.20 | 0.83  |
| Q9CQL1_M Magohb  | Protein ma R.YANNISNYKNDVM*IR.K               | 5.55   | 27.33  | 0.20 | 4.93  |
| Q8BGS0_M Mak16   | Protein MA K.ALIAAQLDNAIEK#.E                 | 13.61  | 9.75   | 1.40 | 0.72  |
| Q91W89_M Man2c1  | Alpha-mani R.SLLLVQSPNN-                      | 8.96   | 8.96   | 1.00 | 1.00  |
| Q9QYR6_M Map1a   | Microtubul R.AVLDALEGGK#.A                    | 63.85  | 27.07  | 2.36 | 0.42  |
| Q9QYR6_M Map1a   | Microtubul R.AVLDALEGGK#.A                    | 70.83  | 24.36  | 2.91 | 0.34  |
| Q9QYR6_M Map1a   | Microtubul R.EGEGGAGAPDSSSFSSK#.V             | 13.66  | 5.75   | 2.38 | 0.42  |
| Q9QYR6_M Map1a   | Microtubul R.ESTFLDEGPNQEIPTLQHTPR.S          | 3.01   | 9.15   | 0.33 | 3.04  |
| Q9QYR6_M Map1a   | Microtubul R.FPTSTYDLSGPEGPGPFASQASAVPSSSK#.T | 4.06   | 1.57   | 2.60 | 0.39  |
| Q9QYR6_M Map1a   | Microtubul K.GVEQQDGAVPEK#.T                  | 25.58  | 14.93  | 1.71 | 0.58  |

|                 |                                                  |        |       |      |      |
|-----------------|--------------------------------------------------|--------|-------|------|------|
| Q9QYR6_M Map1a  | Microtubul K.SSFLEDK#.S                          | 11.64  | 3.02  | 3.86 | 0.26 |
| Q9QYR6_M Map1a  | Microtubul R.VPSAPGOESPVPDTK#.S                  | 15.61  | 5.20  | 3.00 | 0.33 |
| Q9QYR6_M Map1a  | Microtubul R.VVSNITIEPLTLFHK#.M                  | 30.04  | 7.15  | 4.20 | 0.24 |
| P14873_M Map1b  | Microtubul K.ITSPFESESYSTK#.T                    | 8.19   | 4.06  | 2.02 | 0.50 |
| P14873_M Map1b  | Microtubul R.SSYVVVSGNDPAAEPPSR.A                | 10.65  | 12.97 | 0.82 | 1.22 |
| P14873_M Map1b  | Microtubul R.TPEEGGYSYSEK#.T                     | 12.70  | 6.11  | 2.08 | 0.48 |
| P14873_M Map1b  | Microtubul R.TPEVSGYTYEK#.T                      | 32.03  | 18.16 | 1.76 | 0.57 |
| P14873_M Map1b  | Microtubul R.SSYVVVSGNDPAAEPPSR.A                | 4.79   | 4.38  | 1.09 | 0.92 |
| P14873_M Map1b  | Microtubul K.DLTGQVPTPPVK#.Q                     | 25.24  | 3.63  | 6.95 | 0.14 |
| P14873_M Map1b  | Microtubul R.ESSPLYPGFSDSSTAASAK#.E              | 7.21   | 2.86  | 2.52 | 0.40 |
| P14873_M Map1b  | Microtubul K.EVSSKHEEQSPVK#AEVAEK#.Q             | 7.91   | 1.16  | 6.82 | 0.15 |
| P14873_M Map1b  | Microtubul K.HSPTEDESAAK#AEADVHLK#.E             | 13.73  | 2.76  | 4.97 | 0.20 |
| P14873_M Map1b  | Microtubul K.ITSPFESESYSTK#.T                    | 11.09  | 5.02  | 2.21 | 0.45 |
| P14873_M Map1b  | Microtubul R.SQGSTNSDWM*#K#.N                    | 7.30   | 2.20  | 3.32 | 0.30 |
| P14873_M Map1b  | Microtubul R.TPEEGGYSYSEK#.T                     | 22.02  | 8.21  | 2.68 | 0.37 |
| P14873_M Map1b  | Microtubul R.TPEVSGYTYEK#.T                      | 26.61  | 12.17 | 2.19 | 0.46 |
| P14873_M Map1b  | Microtubul K.TPOASTYSYETSDR.C                    | 2.59   | 6.29  | 0.41 | 2.42 |
| P14873_M Map1b  | Microtubul R.VLFPNGNSTQYINILEGLEK#.L             | 16.36  | 3.91  | 4.18 | 0.24 |
| P14873_M Map1b  | Microtubul R.AIGNELGIR.S                         | 20.86  | 31.21 | 0.67 | 1.50 |
| P14873_M Map1b  | Microtubul R.ASLSPM*DEPVPDSESPVEK#.V             | 6.77   | 2.15  | 3.15 | 0.32 |
| P14873_M Map1b  | Microtubul R.ASLSPMDEPVPDSESPVEK#.V              | 5.93   | 6.38  | 0.93 | 1.08 |
| P14873_M Map1b  | Microtubul K.DIKPQLELIEDEEKKETQPGEAYVIQK.E       | 59.32  | 22.06 | 2.69 | 0.37 |
| P14873_M Map1b  | Microtubul K.DLTGQVPTPPVK#.Q                     | 84.05  | 34.05 | 2.47 | 0.41 |
| P14873_M Map1b  | Microtubul R.DVM*SDETNNEETESPSQEFVNITK#.Y        | 13.77  | 4.88  | 2.82 | 0.35 |
| P14873_M Map1b  | Microtubul R.DVMSDETNNETESPSQEFVNITK#.Y          | 7.05   | 3.55  | 1.99 | 0.50 |
| P14873_M Map1b  | Microtubul R.EEGYEPDK#TEAEDYVM*AVADK#.A          | 5.58   | 2.40  | 2.33 | 0.43 |
| P14873_M Map1b  | Microtubul R.EM*SLYASLASEK#.V                    | 16.20  | 9.40  | 1.72 | 0.58 |
| P14873_M Map1b  | Microtubul K.ESKHEETPEVTK#.T                     | 13.69  | 4.17  | 3.28 | 0.30 |
| P14873_M Map1b  | Microtubul R.ESSPLYPGFSDSSTAASAK#.E              | 20.64  | 9.47  | 2.18 | 0.46 |
| P14873_M Map1b  | Microtubul K.ETQPGEAYVIQK#.E                     | 20.11  | 11.50 | 1.75 | 0.57 |
| P14873_M Map1b  | Microtubul K.EVSSKHEEQSPVK#AEVAEK#.Q             | 15.98  | 5.61  | 2.85 | 0.35 |
| P14873_M Map1b  | Microtubul K.HLDFLK#.Q                           | 26.36  | 7.88  | 3.35 | 0.30 |
| P14873_M Map1b  | Microtubul R.HNLQDFINIK#.L                       | 43.48  | 24.81 | 1.75 | 0.57 |
| P14873_M Map1b  | Microtubul K.HSPTEDESAAK#AEADVHLK#.E             | 112.39 | 38.74 | 2.90 | 0.34 |
| P14873_M Map1b  | Microtubul K.ITSPFESESYSTK#.T                    | 20.86  | 9.29  | 2.25 | 0.45 |
| P14873_M Map1b  | Microtubul R.KHEKHEETPEVTK#.T                    | 31.19  | 10.17 | 3.07 | 0.33 |
| P14873_M Map1b  | Microtubul K.LEM*YVNLNPK#.S                      | 15.80  | 10.63 | 1.49 | 0.67 |
| P14873_M Map1b  | Microtubul K.LKHETQPGEAYVIQK#.E                  | 14.73  | 13.34 | 1.10 | 0.91 |
| P14873_M Map1b  | Microtubul K.M*SISEGLTVSDK#.S                    | 27.07  | 11.70 | 2.31 | 0.43 |
| P14873_M Map1b  | Microtubul K.NLISPLDGLVFLNPNENKLDPEPNIK.M        | 88.02  | 37.85 | 2.33 | 0.43 |
| P14873_M Map1b  | Microtubul R.SPPLLGSESPYEDFLSADSK#.V             | 18.19  | 10.13 | 1.80 | 0.56 |
| P14873_M Map1b  | Microtubul R.SQGSTNSDWM*#K#.N                    | 27.28  | 4.55  | 5.99 | 0.17 |
| P14873_M Map1b  | Microtubul K.STGFPIK#EDFGPEK#.K.T                | 42.37  | 28.35 | 1.49 | 0.67 |
| P14873_M Map1b  | Microtubul R.SVGNITPEVLFQK#.M                    | 97.02  | 31.73 | 3.06 | 0.33 |
| P14873_M Map1b  | Microtubul R.SVNFSLTPNEIK#.V                     | 75.70  | 24.77 | 3.06 | 0.33 |
| P14873_M Map1b  | Microtubul R.THDVGGYTYEK#.T                      | 15.51  | 9.56  | 1.62 | 0.62 |
| P14873_M Map1b  | Microtubul R.TPEEGGYSYSEK#.T                     | 42.28  | 20.13 | 2.10 | 0.48 |
| P14873_M Map1b  | Microtubul R.TPEVSGYTYEK#.T                      | 56.86  | 36.14 | 1.57 | 0.64 |
| P14873_M Map1b  | Microtubul R.VLFPNGNSTQYINILEGLEK#.L             | 44.39  | 15.84 | 2.80 | 0.36 |
| P14873_M Map1b  | Microtubul K.YESSLYQESYK#PAVASFNGLSEGSK#.T       | 4.06   | 4.20  | 0.97 | 1.03 |
| Q8C052_M Map1s  | Microtubul R.AVLDALLAGK#.R                       | 13.34  | 3.85  | 3.47 | 0.29 |
| Q8C052_M Map1s  | Microtubul R.HSATFSSIVK#.G                       | 10.93  | 11.70 | 0.93 | 1.07 |
| P31938_M Map2k1 | Dual specifi R.IPEQLGK#.V                        | 89.50  | 21.76 | 4.11 | 0.24 |
| P31938_M Map2k1 | Dual specifi K.KLELELDEQQR.K                     | 3.75   | 14.17 | 0.26 | 3.78 |
| P31938_M Map2k1 | Dual specifi R.LEAFLTKQ#.Q                       | 37.08  | 12.16 | 3.05 | 0.33 |
| P31938_M Map2k1 | Dual specifi K.LPSGVFSLFQDFVNK#.C                | 50.15  | 18.31 | 2.74 | 0.37 |
| P31938_M Map2k1 | Dual specifi K.VGELK#DDDFEK#.I                   | 33.74  | 14.28 | 2.36 | 0.42 |
| P31938_M Map2k1 | Dual specifi K.VSIAVIK#.G                        | 76.77  | 27.98 | 2.74 | 0.36 |
| P31938_M Map2k1 | Dual specifi R.YPIPPDAK#.E                       | 26.11  | 28.90 | 0.90 | 1.11 |
| P31938_M Map2k1 | Dual specifi K.LPSGVFSLFQDFVNK#.C                | 6.05   | 2.40  | 2.53 | 0.40 |
| P31938_M Map2k1 | Dual specifi K.VSIAVIK#.G                        | 19.17  | 5.54  | 3.46 | 0.29 |
| Q63932_M Map2k2 | Dual specifi K.LPSGVFSSDFQEFVNK#.C               | 7.11   | 1.45  | 4.91 | 0.20 |
| Q63932_M Map2k2 | Dual specifi K.VSIAVLR.G                         | 16.17  | 16.70 | 0.97 | 1.03 |
| P47809_M Map2k4 | Dual specifi K.WNSVFDQLTQVVK#.G                  | 11.29  | 3.11  | 3.63 | 0.28 |
| P47809_M Map2k4 | Dual specifi K.WNSVFDQLTQVVK#.G                  | 12.98  | 2.15  | 6.05 | 0.17 |
| P47809_M Map2k4 | Dual specifi K.YYVSLDQVPEELGK#.I                 | 18.09  | 4.51  | 4.01 | 0.25 |
| P27546_M Map4   | Microtubul K.TEFPLLDGDK#.T                       | 11.49  | 7.66  | 1.50 | 0.67 |
| P27546_M Map4   | Microtubul K.AAEQM*STLPIDAPSPLENLEQK#.E          | 13.23  | 2.48  | 5.34 | 0.19 |
| P27546_M Map4   | Microtubul K.AAEQMSTLPIDAPSPLENLEQK#.E           | 10.79  | 3.66  | 2.95 | 0.34 |
| P27546_M Map4   | Microtubul K.ATSPSTLVSTGSSR.S                    | 9.83   | 12.55 | 0.78 | 1.28 |
| P27546_M Map4   | Microtubul K.DM*SPLESEVTLGK#.D                   | 9.22   | 3.14  | 2.94 | 0.34 |
| P27546_M Map4   | Microtubul K.DMSPLESEVTLGK#.D                    | 10.45  | 2.85  | 3.66 | 0.27 |
| P27546_M Map4   | Microtubul K.DM*SPLESEVTLGK#DVLVLPETK#.V         | 13.71  | 9.32  | 1.47 | 0.68 |
| P27546_M Map4   | Microtubul K.DMSPSAETEAPLAK#.N                   | 18.52  | 5.87  | 3.16 | 0.32 |
| P27546_M Map4   | Microtubul K.DVVLVLPETK#.V                       | 20.15  | 5.36  | 3.76 | 0.27 |
| P27546_M Map4   | Microtubul K.ETAPPTETNLGM*AK#.D                  | 17.11  | 6.10  | 2.81 | 0.36 |
| P27546_M Map4   | Microtubul K.ETAPPTETNLGMAK#.D                   | 9.49   | 55.77 | 0.17 | 5.88 |
| P27546_M Map4   | Microtubul K.ETETLPIK#.M                         | 32.99  | 11.51 | 2.87 | 0.35 |
| P27546_M Map4   | Microtubul K.GM*VSLSEIEEALAK#.N                  | 32.31  | 7.75  | 4.17 | 0.24 |
| P27546_M Map4   | Microtubul K.GMVSLSEIEEALAK#.N                   | 28.60  | 7.62  | 3.75 | 0.27 |
| P27546_M Map4   | Microtubul K.M*DLAPPEDVLLTK#.E                   | 12.59  | 3.20  | 3.93 | 0.25 |
| P27546_M Map4   | Microtubul K.MDLAPPEDVLLTK#.E                    | 37.22  | 11.39 | 3.27 | 0.31 |
| P27546_M Map4   | Microtubul K.NADLHSGTGLVDNSM*APASDLALPLETK#.V    | 10.64  | 4.81  | 2.21 | 0.45 |
| P27546_M Map4   | Microtubul K.NADLHSGTGLVDNSMAPASDLALPLETK#.V     | 17.22  | 6.25  | 2.76 | 0.36 |
| P27546_M Map4   | Microtubul K.TEFPLLDGDK#.T                       | 7.96   | 5.77  | 1.38 | 0.72 |
| P27546_M Map4   | Microtubul K.TQPTSLPK#.Q                         | 42.24  | 8.06  | 5.24 | 0.19 |
| P27546_M Map4   | Microtubul K.VAEFNNVTLSEEVTSVK#.D                | 14.46  | 3.94  | 3.67 | 0.27 |
| P27546_M Map4   | Microtubul K.AAEQM*STLPIDAPSPLENLEQK#.E          | 59.86  | 31.94 | 1.87 | 0.53 |
| P27546_M Map4   | Microtubul K.AAEQMSTLPIDAPSPLENLEQK#.E           | 51.26  | 21.88 | 2.34 | 0.43 |
| P27546_M Map4   | Microtubul K.AAEVESVK#.E                         | 31.10  | 13.54 | 2.30 | 0.44 |
| P27546_M Map4   | Microtubul K.AAGSIAAQK#PAGK#.V                   | 50.69  | 26.41 | 1.92 | 0.52 |
| P27546_M Map4   | Microtubul K.AAVGTGNDITPPNKN#.E                  | 14.04  | 6.13  | 2.29 | 0.44 |
| P27546_M Map4   | Microtubul K.AAVGTGNDITPPNKN#EPPPSPPEK#.K        | 27.12  | 11.16 | 2.43 | 0.41 |
| P27546_M Map4   | Microtubul K.AK#PLATTQPAK#.T                     | 102.70 | 67.03 | 1.53 | 0.65 |
| P27546_M Map4   | Microtubul K.ALETM*AEQTDDVHSPSTDTTGPDPTEAALAK#.D | 31.46  | 12.71 | 2.48 | 0.40 |
| P27546_M Map4   | Microtubul K.ALETMAEQTTDVVHSPSTDTTGPDPTEAALAK#.D | 44.91  | 22.05 | 2.04 | 0.49 |
| P27546_M Map4   | Microtubul K.ATSPSTLVSTGSSR.S                    | 26.50  | 90.36 | 0.29 | 3.41 |
| P27546_M Map4   | Microtubul R.DFMAALEAEPYDDIVGETVEK#.T            | 8.00   | 6.32  | 1.27 | 0.79 |
| P27546_M Map4   | Microtubul K.DM*SPLESEVTLGK#.D                   | 37.66  | 25.52 | 1.48 | 0.68 |
| P27546_M Map4   | Microtubul K.DMSPLESEVTLGK#.D                    | 28.42  | 15.26 | 1.86 | 0.54 |
| P27546_M Map4   | Microtubul K.DM*SPLESEVTLGK#DVLVLPETK#.V         | 55.97  | 36.14 | 1.55 | 0.65 |
| P27546_M Map4   | Microtubul K.DM*SPSAETEAPLAK#.N                  | 42.62  | 25.96 | 1.64 | 0.61 |
| P27546_M Map4   | Microtubul K.DMSPSAETEAPLAK#.N                   | 45.78  | 20.86 | 2.19 | 0.46 |

|                      |                                                      |        |        |      |       |
|----------------------|------------------------------------------------------|--------|--------|------|-------|
| P27546_M Map4        | Microtubul K.DVAPPMP*EEIIVPGNDTTSPPK#.E              | 8.89   | 8.17   | 1.09 | 0.92  |
| P27546_M Map4        | Microtubul K.DVAPPMEIIVPGNDTTSPPK#.E                 | 11.92  | 8.68   | 1.37 | 0.73  |
| P27546_M Map4        | Microtubul R.DVK#K#PITEAK#.V                         | 191.73 | 124.82 | 1.54 | 0.65  |
| P27546_M Map4        | Microtubul K.DVTLPLEAERPLVTDMP*TPSLETET*TLGK.E       | 11.65  | 26.90  | 0.43 | 2.31  |
| P27546_M Map4        | Microtubul K.DVTLPLEAERPLVTDMP*TPSLETET*TLGK.E       | 4.88   | 10.57  | 0.46 | 2.16  |
| P27546_M Map4        | Microtubul K.DVTLPLEAERPLVTDMP*TPSLETET*TLGK.E       | 8.28   | 31.97  | 0.26 | 3.86  |
| P27546_M Map4        | Microtubul K.DVTLPLEAERPLVTDMP*TPSLETET*TLGK.E       | 51.44  | 46.67  | 1.10 | 0.91  |
| P27546_M Map4        | Microtubul K.ETAPPETNLGM*AK#.D                       | 54.97  | 27.83  | 1.98 | 0.51  |
| P27546_M Map4        | Microtubul K.ETAPPETNLGM*AK#.D                       | 34.77  | 17.79  | 1.95 | 0.51  |
| P27546_M Map4        | Microtubul K.ETELAPAK#.G                             | 94.83  | 51.38  | 1.85 | 0.54  |
| P27546_M Map4        | Microtubul K.ETETLPIK#.M                             | 65.42  | 38.32  | 1.71 | 0.59  |
| P27546_M Map4        | Microtubul K.ETETLPIK#M*DLAPPEDVLLTK#.E              | 40.69  | 15.95  | 2.55 | 0.39  |
| P27546_M Map4        | Microtubul K.GM*VLSIEIEALAK#.N                       | 93.47  | 44.30  | 2.11 | 0.47  |
| P27546_M Map4        | Microtubul K.GM*VLSIEIEALAK#.N                       | 87.47  | 39.70  | 2.20 | 0.45  |
| P27546_M Map4        | Microtubul K.HVPGGGNVQJQNK#.K                        | 71.31  | 31.25  | 2.28 | 0.44  |
| P27546_M Map4        | Microtubul K.K#VSYSHIQSK#.C                          | 60.20  | 32.64  | 1.84 | 0.54  |
| P27546_M Map4        | Microtubul R.LATTVSAPDLK#.S                          | 219.47 | 110.93 | 1.98 | 0.51  |
| P27546_M Map4        | Microtubul K.M*DLAPPEDVLLTK#.E                       | 38.17  | 20.39  | 1.87 | 0.53  |
| P27546_M Map4        | Microtubul K.NADLHSGTELIVDSNM*APASDLALPLETK#.V       | 65.51  | 31.83  | 2.06 | 0.49  |
| P27546_M Map4        | Microtubul K.NADLHSGTELIVDSNM*APASDLALPLETK#.V       | 55.12  | 25.66  | 2.15 | 0.47  |
| P27546_M Map4        | Microtubul R.NTTPGAAPPAGM*TSTR.V                     | 22.25  | 49.79  | 0.45 | 2.24  |
| P27546_M Map4        | Microtubul R.NTTPGAAPPAGM*TSTR.V                     | 8.19   | 17.62  | 0.46 | 2.15  |
| P27546_M Map4        | Microtubul R.SK#V#G#STENIK#.H                        | 19.70  | 8.25   | 2.39 | 0.42  |
| P27546_M Map4        | Microtubul R.SPATLPIK#.R                             | 196.42 | 106.01 | 1.85 | 0.54  |
| P27546_M Map4        | Microtubul R.SSGALSVDK#.K                            | 59.98  | 26.75  | 2.24 | 0.45  |
| P27546_M Map4        | Microtubul R.SSGALSVDK#K*PTSTK#SSSAPR.V              | 40.50  | 63.03  | 0.64 | 1.56  |
| P27546_M Map4        | Microtubul K.TEFLLDGDEK.T                            | 38.16  | 37.64  | 1.01 | 0.99  |
| P27546_M Map4        | Microtubul R.TSPSK#SPSAPALK#GPK#.T                   | 113.48 | 41.55  | 2.73 | 0.37  |
| P27546_M Map4        | Microtubul K.VAEFNNVPLSEEEVTSVK#.D                   | 58.02  | 27.12  | 2.14 | 0.47  |
| P27546_M Map4        | Microtubul K.VAEFNNVPLSEEEVTSVKDM*SPSAETAPLAK#.N     | 8.63   | 4.87   | 1.77 | 0.56  |
| P27546_M Map4        | Microtubul K.VAEFNNVPLSEEEVTSVK#DMSPSAETAPLAK#.N     | 8.51   | 5.30   | 1.61 | 0.62  |
| P27546_M Map4        | Microtubul K.VG#STENIK#.H                            | 60.39  | 27.28  | 2.21 | 0.45  |
| P97820_M Map4k4      | Mitogen-ac K.QONVLLTENA#K#.L                         | 8.05   | 4.69   | 1.72 | 0.58  |
| Q8BPM2_n Map4k5      | Mitogen-ac K.SDEVTOEISDETR.V                         | 3.68   | 8.44   | 0.44 | 2.29  |
| Q8BPM2_n Map4k5      | Mitogen-ac R.VGSGTYGDVYK#.A                          | 14.28  | 69.70  | 0.20 | 4.88  |
| A2AJIO_MA Map7d1     | MAP7 dom R.SLQLSAWESSIVDR.L                          | 4.57   | 14.51  | 0.32 | 3.17  |
| P47811_M Mapk14      | Mitogen-ac K.HENVIGLLDVFTPAR.S                       | 1.72   | 4.12   | 0.42 | 2.39  |
| Q63844_M Mapk3       | Mitogen-ac R.GTAGVVPVVP#GEVEVVK#.G                   | 10.46  | 1.15   | 9.07 | 0.11  |
| Q9ESN9_IIIF Mapk8ip3 | C-Jun-amin K.EVGNLLENSQLLETK#.N                      | 9.01   | 2.25   | 4.01 | 0.25  |
| Q9ESN9_IIIF Mapk8ip3 | C-Jun-amin R.VWILTSTLTSK#.V                          | 8.75   | 4.24   | 2.06 | 0.49  |
| Q9ESN9_IIIF Mapk8ip3 | C-Jun-amin K.EVGNLLENSQLLETK#.N                      | 9.45   | 5.94   | 1.59 | 0.63  |
| Q61166_M Mapre1      | Microtubul K.FFDANDYDGG#.E                           | 25.95  | 11.31  | 2.29 | 0.44  |
| Q61166_M Mapre1      | Microtubul K.FQDNFEFVQWFK#.K                         | 39.58  | 10.71  | 3.70 | 0.27  |
| Q61166_M Mapre1      | Microtubul K.K#FQDNFEFVQWFK#.K                       | 18.79  | 9.27   | 2.03 | 0.49  |
| Q61166_M Mapre1      | Microtubul K.ILQAGFK#.R                              | 103.22 | 48.48  | 2.13 | 0.47  |
| Q61166_M Mapre1      | Microtubul R.QGQETAVAPSLVAPALSK#PK#.K                | 53.45  | 17.48  | 3.06 | 0.33  |
| Q61166_M Mapre1      | Microtubul R.QGQETAVAPSLVAPALSK#PK#.K                | 1.71   | 1.67   | 1.02 | 0.98  |
| Q6PER3_M Mapre3      | Microtubul K.LTVDGLEK#.E                             | 32.57  | 10.98  | 2.97 | 0.34  |
| Q6PER3_M Mapre3      | Microtubul R.QGQDVAPP#P#GQIFNK#.S                    | 4.96   | 1.85   | 2.68 | 0.37  |
| Q6PER3_M Mapre3      | Microtubul K.VLQAAFK#.K                              | 35.43  | 12.05  | 2.94 | 0.34  |
| Q68FL6_SY Mars       | Methionine R.GIGVFGDM*AK#.D                          | 12.29  | 5.29   | 2.32 | 0.43  |
| Q68FL6_SY Mars       | Methionine K.GLESPLPK#.L                             | 15.84  | 5.09   | 3.11 | 0.32  |
| Q68FL6_SY Mars       | Methionine K.GSPK#PAAVEAVTAAGSQHQLTDEVTK#.Q          | 18.41  | 5.26   | 3.50 | 0.29  |
| Q68FL6_SY Mars       | Methionine K.GSPK#PAAVEAVTAAGSQHQLTDEVTK#.Q          | 6.80   | 2.12   | 3.20 | 0.31  |
| Q68FL6_SY Mars       | Methionine K.HIIATELYNYEDGK#.F                       | 8.46   | 2.38   | 3.55 | 0.28  |
| Q68FL6_SY Mars       | Methionine R.IGTVSPLFQK#.L                           | 42.16  | 20.76  | 2.03 | 0.49  |
| Q68FL6_SY Mars       | Methionine K.LINAIELK#.K                             | 27.56  | 7.02   | 3.92 | 0.25  |
| Q68FL6_SY Mars       | Methionine K.NPEQVDLYQFM*AK#.D                       | 6.91   | 1.58   | 4.39 | 0.23  |
| Q68FL6_SY Mars       | Methionine R.SSQHFLDLPK#.L                           | 22.23  | 5.33   | 4.17 | 0.24  |
| Q68FL6_SY Mars       | Methionine K.ADK#NQA#VAEAK#.L                        | 64.11  | 11.74  | 5.46 | 0.18  |
| Q68FL6_SY Mars       | Methionine R.GIGVFGDM*AK#.D                          | 43.40  | 10.21  | 4.25 | 0.24  |
| Q68FL6_SY Mars       | Methionine K.GLESPLPK#.L                             | 40.56  | 8.19   | 4.95 | 0.20  |
| Q68FL6_SY Mars       | Methionine K.GSPK#PAAVEAVTAAGSQHQLTDEVTK#.Q          | 8.60   | 4.71   | 1.83 | 0.55  |
| Q68FL6_SY Mars       | Methionine K.HIIATELYNYEDGK#FSK#.S                   | 13.09  | 3.67   | 3.56 | 0.28  |
| Q68FL6_SY Mars       | Methionine R.IGTVSPLFQK#.L                           | 95.95  | 21.54  | 4.45 | 0.22  |
| Q68FL6_SY Mars       | Methionine K.I.TQDIFQR.L                             | 18.45  | 18.48  | 1.00 | 1.00  |
| Q68FL6_SY Mars       | Methionine R.LFVSEGS#PSLVLAAAAA.A                    | 11.42  | 12.93  | 0.88 | 1.13  |
| Q68FL6_SY Mars       | Methionine K.LINAIELK#.K                             | 83.12  | 17.60  | 4.72 | 0.21  |
| Q68FL6_SY Mars       | Methionine K.NPEQVDLYQFM*AK#.D                       | 23.90  | 7.11   | 3.36 | 0.30  |
| Q68FL6_SY Mars       | Methionine K.NPEQVDLYQFM*AK#.D                       | 8.15   | 2.24   | 3.63 | 0.28  |
| Q68FL6_SY Mars       | Methionine R.SSQHFLDLPK#.L                           | 40.80  | 12.68  | 3.22 | 0.31  |
| Q3TH56_M Mat2a       | S-adenosyl R.TQVTVQMQDR.G                            | 2.21   | 7.43   | 0.30 | 3.35  |
| Q3TH56_M Mat2a       | S-adenosyl R.FVIQPGQDAGLGR.K                         | 1.25   | 5.41   | 0.23 | 4.34  |
| Q8K310_M Matr3       | Matrin-3 O:R.DLDELSRYPEDK.I                          | 2.48   | 6.77   | 0.37 | 2.73  |
| Q8K310_M Matr3       | Matrin-3 O:R.GDTDQASNILASFGLSAR.D                    | 3.98   | 18.14  | 0.22 | 4.56  |
| Q8K310_M Matr3       | Matrin-3 O:R.IGPYQPNVPGIDYVIPK.T                     | 3.94   | 4.13   | 0.95 | 1.05  |
| Q8K310_M Matr3       | Matrin-3 O:K.IITPENLQJLLQLK.R                        | 24.25  | 42.18  | 0.57 | 1.74  |
| Q8K310_M Matr3       | Matrin-3 O:K.SFQQSSLR.D                              | 9.31   | 44.91  | 0.21 | 4.82  |
| Q8K310_M Matr3       | Matrin-3 O:R.TEEGTPSYGR.D                            | 8.22   | 32.60  | 0.25 | 3.97  |
| Q8K310_M Matr3       | Matrin-3 O:R.IGPYQPNVPGIDYVIPK.T                     | 33.94  | 31.16  | 1.09 | 0.92  |
| Q8K310_M Matr3       | Matrin-3 O:K.ALWFQGR.C                               | 24.13  | 75.18  | 0.32 | 3.12  |
| Q8K310_M Matr3       | Matrin-3 O:R.DLDELSRYPEDKIPENLQJLLQLK.R              | 19.26  | 109.51 | 0.18 | 5.69  |
| Q8K310_M Matr3       | Matrin-3 O:K.FDSEYER.M                               | 11.81  | 66.91  | 0.18 | 5.66  |
| Q8K310_M Matr3       | Matrin-3 O:R.GDTDQASNILASFGLSAR.D                    | 30.78  | 116.68 | 0.26 | 3.79  |
| Q8K310_M Matr3       | Matrin-3 O:R.GNLDGAGNQLQGR.H                         | 8.29   | 41.51  | 0.20 | 5.01  |
| Q8K310_M Matr3       | Matrin-3 O:R.GPGLQER.S                               | 17.37  | 118.37 | 0.15 | 6.82  |
| Q8K310_M Matr3       | Matrin-3 O:R.IGPYQPNVPGIDYVIPK.T                     | 148.54 | 177.87 | 0.84 | 1.20  |
| Q8K310_M Matr3       | Matrin-3 O:K.IK#NYLLM*#R.M                           | 3.35   | 12.34  | 0.27 | 3.68  |
| Q8K310_M Matr3       | Matrin-3 O:K.I#NEAFIEM*ATTEDAQA#VDDYTTTPALVFGK#PVR.V | 2.70   | 13.07  | 0.21 | 4.84  |
| Q8K310_M Matr3       | Matrin-3 O:K.I#NEAFIEMATTEDAQA#VDDYTTTPALVFGK#PVR.V  | 4.59   | 9.04   | 0.51 | 1.97  |
| Q8K310_M Matr3       | Matrin-3 O:K.IITPENLQJLLQLK#.R                       | 202.80 | 211.38 | 0.96 | 1.04  |
| Q8K310_M Matr3       | Matrin-3 O:K.LAEPYK#.I                               | 250.36 | 228.82 | 1.09 | 0.91  |
| Q8K310_M Matr3       | Matrin-3 O:K.NYLLM#.M                                | 5.46   | 16.91  | 0.32 | 3.10  |
| Q8K310_M Matr3       | Matrin-3 O:R.RRTEEGTPSYGR.D                          | 2.09   | 37.42  | 0.06 | 17.88 |
| Q8K310_M Matr3       | Matrin-3 O:K.SFQQSSLR.D                              | 34.86  | 186.22 | 0.19 | 5.34  |
| Q8K310_M Matr3       | Matrin-3 O:K.SQAFIEM*ETR.E                           | 33.69  | 126.76 | 0.27 | 3.76  |
| Q8K310_M Matr3       | Matrin-3 O:K.SQAFIEM*ETR.E                           | 18.76  | 66.36  | 0.28 | 3.54  |
| Q8K310_M Matr3       | Matrin-3 O:R.SQESGYDR.M                              | 8.64   | 26.59  | 0.32 | 3.08  |
| Q8K310_M Matr3       | Matrin-3 O:K.TDAQ#TESPAEGK#EQEEK#.S                  | 5.92   | 9.16   | 0.65 | 1.55  |
| Q8K310_M Matr3       | Matrin-3 O:R.TEEGTPSYGR.D                            | 35.61  | 141.25 | 0.25 | 3.97  |
| Q8K310_M Matr3       | Matrin-3 O:K.TESPAEGK#EQEEK#.S                       | 18.50  | 24.61  | 0.75 | 1.33  |
| Q8K310_M Matr3       | Matrin-3 O:R.VIHLNPLHSGYSDSAVLK.L                    | 176.27 | 161.91 | 1.09 | 0.92  |
| Q8K310_M Matr3       | Matrin-3 O:R.VHIMDFQR.G                              | 21.39  | 74.97  | 0.29 | 3.51  |

|                |                                                  |        |        |      |       |
|----------------|--------------------------------------------------|--------|--------|------|-------|
| Q8K310_M Matr3 | Matrin-3 O: R.YPEDKIPENLPQILLQLK.R               | 31.70  | 29.34  | 1.08 | 0.93  |
| Q8K310_M Matr3 | Matrin-3 O: R.DLDELSRYPEDKIPENLPQILLQLK.R        | 2.57   | 19.22  | 0.13 | 7.47  |
| Q8K310_M Matr3 | Matrin-3 O: R.GDTDQASNILSAGLSAR.D                | 5.51   | 17.65  | 0.31 | 3.21  |
| Q8K310_M Matr3 | Matrin-3 O: R.FYQYPQNPVPGIDVYIPK.T               | 24.79  | 34.37  | 0.72 | 1.39  |
| Q8K310_M Matr3 | Matrin-3 O: K.ITPENLPQILLQLK.R                   | 29.44  | 32.10  | 0.92 | 1.09  |
| Q8K310_M Matr3 | Matrin-3 O: K.SQAFIEM*ETR.E                      | 3.56   | 15.46  | 0.23 | 4.34  |
| Q8K310_M Matr3 | Matrin-3 O: R.SQESGYDR.M                         | 2.86   | 5.48   | 0.52 | 1.92  |
| Q8K310_M Matr3 | Matrin-3 O: R.TEEGPTLSYGR.D                      | 4.78   | 20.62  | 0.23 | 4.31  |
| Q8K310_M Matr3 | Matrin-3 O: K.TEPAEGKEQEEK.S                     | 2.45   | 1.80   | 1.36 | 0.74  |
| Q8K310_M Matr3 | Matrin-3 O: R.VIHLSNLPHSYGSYDASVAVK#.L           | 29.24  | 32.08  | 0.91 | 1.10  |
| P28574_M Max   | Protein ma R.QNALLEQVQR.A                        | 2.56   | 15.68  | 0.16 | 6.12  |
| P28574_M Max   | Protein ma R.SSAQLQNTYPSDDNSLYTNAK.G             | 6.13   | 11.09  | 0.55 | 1.81  |
| Q922E1_M Mbd2  | Methyl-CpC R.LQGLSASDVTEQIK#.T                   | 29.36  | 12.81  | 2.29 | 0.44  |
| Q922E1_M Mbd2  | Methyl-CpC R.LQGLSASDVTEQIK#.T                   | 7.65   | 1.21   | 6.33 | 0.16  |
| Q922D8_M Mbd3  | Methyl-CpC K.AFM*VTDDDR.K                        | 5.59   | 18.36  | 0.30 | 3.29  |
| Q922D8_M Mbd3  | Methyl-CpC K.AFM*VTDDDR.K                        | 3.19   | 10.66  | 0.30 | 3.34  |
| Q922D8_M Mbd3  | Methyl-CpC K.KLSGLSAFDIAELVR.T                   | 9.03   | 30.66  | 0.29 | 3.40  |
| Q922D8_M Mbd3  | Methyl-CpC R.KQEELVQVQR.K                        | 5.03   | 19.03  | 0.26 | 3.78  |
| Q922D8_M Mbd3  | Methyl-CpC K.LSGLSAFDIAELVR.T                    | 10.04  | 38.85  | 0.26 | 3.87  |
| Q922D8_M Mbd3  | Methyl-CpC R.YLGGSM*DLSTFDFFR.T                  | 4.09   | 16.27  | 0.25 | 3.98  |
| Q922D8_M Mbd3  | Methyl-CpC K.KLSGLSAFDIAELVR.T                   | 2.80   | 15.61  | 0.18 | 5.58  |
| Q922D8_M Mbd3  | Methyl-CpC R.YLGGSM*DLSTFDFFR.T                  | 3.78   | 7.60   | 0.50 | 2.01  |
| A0A0A6YW_Mbn11 | Muscleblin K.AAQYQVNOAAAQAATAAMTQSAVK#.S         | 7.46   | 8.49   | 0.88 | 1.14  |
| A0A0A6YW_Mbn11 | Muscleblin K.RPLEATFDLGIQAVPLPPLK.R              | 8.73   | 12.48  | 0.70 | 1.43  |
| P97310_M Mcm2  | DNA replic: R.ESLVVNYEDLAAR.E                    | 8.52   | 28.41  | 0.30 | 3.34  |
| P97310_M Mcm2  | DNA replic: R.EWTEAGALVLADR.G                    | 4.81   | 10.55  | 0.46 | 2.19  |
| P97310_M Mcm2  | DNA replic: R.FGAQQDTIEPEK#DLM*DK#.A             | 9.34   | 6.59   | 1.42 | 0.71  |
| P97310_M Mcm2  | DNA replic: R.FGAQQDTIEPEK#DLM*DK#.A             | 5.28   | 5.40   | 0.98 | 1.02  |
| P97310_M Mcm2  | DNA replic: R.GLALALFGGEPK#.N                    | 19.01  | 15.91  | 1.19 | 0.84  |
| P97310_M Mcm2  | DNA replic: R.ISHLPVEELR.S                       | 5.28   | 17.30  | 0.31 | 3.27  |
| P97310_M Mcm2  | DNA replic: R.QNIHNLISAFYSDLFK#.F                | 11.77  | 8.26   | 1.42 | 0.70  |
| P97310_M Mcm2  | DNA replic: K.QLVAEQVTYQR.N                      | 6.26   | 17.05  | 0.37 | 2.72  |
| P97310_M Mcm2  | DNA replic: R.TSIHEAM*EQQSISISK#.A               | 12.10  | 9.26   | 1.31 | 0.77  |
| P97310_M Mcm2  | DNA replic: R.VM*MESFIDTQK#.F                    | 9.50   | 5.38   | 1.76 | 0.57  |
| P97310_M Mcm2  | DNA replic: R.VMMESFIDTQK#.F                     | 6.12   | 4.67   | 1.31 | 0.76  |
| P97310_M Mcm2  | DNA replic: R.YDPSLTSENVDLTEPIISR.F              | 1.94   | 7.08   | 0.27 | 3.65  |
| P97310_M Mcm2  | DNA replic: K.ESM*ATGSIPITVR.H                   | 6.94   | 30.27  | 0.23 | 4.36  |
| P97310_M Mcm2  | DNA replic: R.FGAQQDTIEPEK#DLM*DK#.A             | 18.70  | 16.03  | 1.17 | 0.86  |
| P97310_M Mcm2  | DNA replic: R.FGAQQDTIEPEK#DLM*DK#.A             | 5.63   | 8.63   | 0.65 | 1.53  |
| P97310_M Mcm2  | DNA replic: R.KLILQOQF.-                         | 6.88   | 7.67   | 0.90 | 1.12  |
| P97310_M Mcm2  | DNA replic: R.QNIHNLISAFYSDLFK#.F                | 24.61  | 19.59  | 1.26 | 0.80  |
| P97310_M Mcm2  | DNA replic: R.VM*MESFIDTQK#.F                    | 12.99  | 11.19  | 1.16 | 0.86  |
| P97310_M Mcm2  | DNA replic: K.AGIVTSLQAR.C                       | 65.56  | 176.33 | 0.37 | 2.69  |
| P97310_M Mcm2  | DNA replic: R.AIFTTGQGSAGVLTAYVQR.H              | 19.41  | 55.49  | 0.35 | 2.86  |
| P97310_M Mcm2  | DNA replic: R.ATEDGEEDEEM*ESINLEDLK#.G           | 15.74  | 9.41   | 1.67 | 0.60  |
| P97310_M Mcm2  | DNA replic: R.ATEDGEEDEEM*ESINLEDLK#.GHSVR.E     | 17.16  | 50.59  | 0.34 | 2.95  |
| P97310_M Mcm2  | DNA replic: R.DTVPVQDEEM*LAR.F                   | 17.68  | 60.31  | 0.29 | 3.41  |
| P97310_M Mcm2  | DNA replic: R.DTVPVQDEMLAR.F                     | 9.73   | 38.31  | 0.25 | 3.94  |
| P97310_M Mcm2  | DNA replic: R.DYRPIPELDVYEAEGALDDEDVEELTASQR.E   | 8.60   | 44.88  | 0.19 | 5.22  |
| P97310_M Mcm2  | DNA replic: R.DYVM*EDDVNM*AIR.V                  | 13.34  | 30.42  | 0.44 | 2.28  |
| P97310_M Mcm2  | DNA replic: R.DYVM*EDDVNM*AIR.V                  | 4.74   | 11.80  | 0.40 | 2.49  |
| P97310_M Mcm2  | DNA replic: R.DYVMEDDVNM*AIR.V                   | 2.57   | 5.97   | 0.43 | 2.32  |
| P97310_M Mcm2  | DNA replic: R.ESLVVNYEDLAAR.E                    | 48.34  | 147.67 | 0.33 | 3.06  |
| P97310_M Mcm2  | DNA replic: K.ESM*ATGSIPITVR.H                   | 46.29  | 140.23 | 0.33 | 3.03  |
| P97310_M Mcm2  | DNA replic: K.ESMATGSIPITVR.H                    | 14.84  | 33.57  | 0.44 | 2.26  |
| P97310_M Mcm2  | DNA replic: R.EWTEAGALVLADR.G                    | 25.36  | 73.11  | 0.35 | 2.88  |
| P97310_M Mcm2  | DNA replic: R.EWVSM*AGPR.L                       | 18.37  | 50.53  | 0.36 | 2.75  |
| P97310_M Mcm2  | DNA replic: R.EWVSM*AGPR.L                       | 10.82  | 28.26  | 0.38 | 2.61  |
| P97310_M Mcm2  | DNA replic: R.FGAQQDTIEPEK#.D                    | 13.85  | 5.77   | 2.40 | 0.42  |
| P97310_M Mcm2  | DNA replic: R.FGAQQDTIEPEK#DLM*DK#.A             | 121.82 | 66.62  | 1.83 | 0.55  |
| P97310_M Mcm2  | DNA replic: R.FGAQQDTIEPEK#DLM*DK#.A             | 65.95  | 38.11  | 1.73 | 0.58  |
| P97310_M Mcm2  | DNA replic: R.GLALALFGGEPK#.N                    | 303.28 | 169.47 | 1.79 | 0.56  |
| P97310_M Mcm2  | DNA replic: K.IFASIASPIYGHEDIK.R.G               | 24.25  | 59.26  | 0.41 | 2.44  |
| P97310_M Mcm2  | DNA replic: R.IQESPGK#.V                         | 55.29  | 38.46  | 1.44 | 0.70  |
| P97310_M Mcm2  | DNA replic: R.ISDPLTSSPGR.S                      | 22.52  | 32.16  | 0.70 | 1.43  |
| P97310_M Mcm2  | DNA replic: R.ISHLPVEELR.S                       | 43.77  | 104.59 | 0.42 | 2.39  |
| P97310_M Mcm2  | DNA replic: K.K#DEGLTNGGTLEPAM*PNTYGVLEPLQEVK#.K | 7.00   | 7.10   | 0.99 | 1.01  |
| P97310_M Mcm2  | DNA replic: K.K#DEGLTNGGTLEPAM*PNTYGVLEPLQEVK#.K | 4.33   | 4.03   | 1.07 | 0.93  |
| P97310_M Mcm2  | DNA replic: R.K#LILQOQF.-                        | 91.38  | 43.25  | 2.11 | 0.47  |
| P97310_M Mcm2  | DNA replic: K.K#YIYAK#.E                         | 32.76  | 18.71  | 1.75 | 0.57  |
| P97310_M Mcm2  | DNA replic: K.LILQOQF.-                          | 45.24  | 45.24  | 1.00 | 1.00  |
| P97310_M Mcm2  | DNA replic: K.LNQM*DDQK#.V                       | 8.55   | 5.56   | 1.54 | 0.65  |
| P97310_M Mcm2  | DNA replic: R.QNIHNLISAFYSDLFK#.F                | 141.06 | 66.40  | 2.12 | 0.47  |
| P97310_M Mcm2  | DNA replic: K.QLVAEQVTYQR.N                      | 46.76  | 108.27 | 0.43 | 2.32  |
| P97310_M Mcm2  | DNA replic: R.RADALTSSPGR.D                      | 3.60   | 42.03  | 0.09 | 11.67 |
| P97310_M Mcm2  | DNA replic: R.RDNNLLFILK.Q                       | 10.02  | 34.93  | 0.29 | 3.49  |
| P97310_M Mcm2  | DNA replic: R.THYDSHGHNVEK#.E                    | 146.14 | 67.82  | 2.15 | 0.46  |
| P97310_M Mcm2  | DNA replic: R.TSIHEAM*EQQSISISK#.A               | 120.41 | 69.94  | 1.72 | 0.58  |
| P97310_M Mcm2  | DNA replic: R.TSIHEAMEQQSISISK#.A                | 80.29  | 65.06  | 1.23 | 0.81  |
| P97310_M Mcm2  | DNA replic: R.TSIHEAMEQQSISISK#.A                | 17.19  | 14.33  | 1.20 | 0.83  |
| P97310_M Mcm2  | DNA replic: K.VAVGELTDEDVK#.M                    | 313.74 | 210.56 | 1.49 | 0.67  |
| P97310_M Mcm2  | DNA replic: K.VAVGELTDEDVK#M*ITGLSK#.D           | 16.97  | 8.40   | 2.02 | 0.49  |
| P97310_M Mcm2  | DNA replic: K.VAVGELTDEDVK#M*ITGLSK#.D           | 4.13   | 1.63   | 2.54 | 0.39  |
| P97310_M Mcm2  | DNA replic: R.VM*MESFIDTQK#.F                    | 102.18 | 56.45  | 1.81 | 0.55  |
| P97310_M Mcm2  | DNA replic: R.VMM*ESFIDTQK#.F                    | 29.44  | 18.88  | 1.56 | 0.64  |
| P97310_M Mcm2  | DNA replic: R.VM*MESFIDTQK#.F                    | 34.58  | 14.51  | 2.38 | 0.42  |
| P97310_M Mcm2  | DNA replic: R.VMMESFIDTQK#.F                     | 45.56  | 23.65  | 1.93 | 0.52  |
| P97310_M Mcm2  | DNA replic: R.YDPSLTSENVDLTEPIISR.F              | 15.27  | 44.60  | 0.34 | 2.92  |
| P97310_M Mcm2  | DNA replic: K.AGIVTSLQAR.C                       | 27.98  | 79.72  | 0.35 | 2.85  |
| P97310_M Mcm2  | DNA replic: R.AIFTTGQGSAGVLTAYVQR.H              | 5.85   | 20.13  | 0.29 | 3.44  |
| P97310_M Mcm2  | DNA replic: R.ATEDGEEDEEM*ESINLEDLK#.G           | 14.10  | 7.59   | 1.86 | 0.54  |
| P97310_M Mcm2  | DNA replic: R.ATEDGEEDEEM*ESINLEDLK#.GHSVR.E     | 11.07  | 22.46  | 0.49 | 2.03  |
| P97310_M Mcm2  | DNA replic: R.DTVPVQDEEM*LAR.F                   | 6.11   | 21.37  | 0.29 | 3.50  |
| P97310_M Mcm2  | DNA replic: R.DTVPVQDEMLAR.F                     | 5.44   | 9.63   | 0.57 | 1.77  |
| P97310_M Mcm2  | DNA replic: R.DYRPIPELDVYEAEGALDDEDVEELTASQR.E   | 6.11   | 19.05  | 0.32 | 3.11  |
| P97310_M Mcm2  | DNA replic: R.DYVM*EDDVNM*AIR.V                  | 7.61   | 20.19  | 0.38 | 2.65  |
| P97310_M Mcm2  | DNA replic: R.DYVM*EDDVNM*AIR.V                  | 1.46   | 5.54   | 0.26 | 3.79  |
| P97310_M Mcm2  | DNA replic: R.ESLVVNYEDLAAR.E                    | 32.76  | 81.25  | 0.40 | 2.48  |
| P97310_M Mcm2  | DNA replic: K.ESM*ATGSIPITVR.H                   | 24.73  | 57.20  | 0.43 | 2.31  |
| P97310_M Mcm2  | DNA replic: K.ESMATGSIPITVR.H                    | 9.27   | 16.00  | 0.58 | 1.73  |
| P97310_M Mcm2  | DNA replic: R.FGAQQDTIEPEK#.D                    | 11.23  | 6.50   | 1.73 | 0.58  |
| P97310_M Mcm2  | DNA replic: R.FGAQQDTIEPEK#DLM*DK#.A             | 76.84  | 35.88  | 2.14 | 0.47  |
| P97310_M Mcm2  | DNA replic: R.FGAQQDTIEPEK#DLM*DK#.A             | 28.30  | 23.16  | 1.22 | 0.82  |

|               |                                                       |        |        |      |       |
|---------------|-------------------------------------------------------|--------|--------|------|-------|
| P97310_M Mcm2 | DNA replicase: R.GLALALFGGEPK#N                       | 166.65 | 97.10  | 1.72 | 0.58  |
| P97310_M Mcm2 | DNA replicase: K.FASIAPSIYGHEDIKR.G                   | 21.66  | 50.05  | 0.43 | 2.31  |
| P97310_M Mcm2 | DNA replicase: R.ISDPLTSSPR.G                         | 12.68  | 27.60  | 0.46 | 2.18  |
| P97310_M Mcm2 | DNA replicase: R.ISHPLVEELR.S                         | 20.11  | 49.77  | 0.40 | 2.47  |
| P97310_M Mcm2 | DNA replicase: R.K#LILQQF.-                           | 66.40  | 25.71  | 2.58 | 0.39  |
| P97310_M Mcm2 | DNA replicase: K.LILQQF.-                             | 19.93  | 19.93  | 1.00 | 1.00  |
| P97310_M Mcm2 | DNA replicase: R.THVDSHGHNVFK#E                       | 3.91   | 4.47   | 0.87 | 1.14  |
| P97310_M Mcm2 | DNA replicase: R.TSIHEAM*EQQSISISK#A                  | 85.17  | 34.73  | 2.45 | 0.41  |
| P97310_M Mcm2 | DNA replicase: R.TSIHEAMEQQSISISK#A                   | 40.25  | 21.45  | 1.88 | 0.53  |
| P97310_M Mcm2 | DNA replicase: K.VAVGELTDEEDVK#M                      | 189.65 | 119.49 | 1.59 | 0.63  |
| P97310_M Mcm2 | DNA replicase: R.VM*M*ESFIDTQK#.F                     | 62.24  | 32.44  | 1.92 | 0.52  |
| P97310_M Mcm2 | DNA replicase: R.VMMESFIDTQK#.F                       | 14.64  | 9.26   | 1.58 | 0.63  |
| P97310_M Mcm2 | DNA replicase: R.YDPSLTFSEVNDLTEPIHNR.F               | 6.62   | 18.82  | 0.35 | 2.84  |
| P25206_M Mcm3 | DNA replicase: K.DIQPFSADDAIAK#.I                     | 21.61  | 13.39  | 1.61 | 0.62  |
| P25206_M Mcm3 | DNA replicase: R.DYLDLDEEDQGIYQNK#.V                  | 7.35   | 3.56   | 2.07 | 0.48  |
| P25206_M Mcm3 | DNA replicase: R.GDINILLIGDPSVAK#.S                   | 10.92  | 4.43   | 2.47 | 0.41  |
| P25206_M Mcm3 | DNA replicase: K.IIKPRTLQESAAYIAEYSR.L                | 6.55   | 14.55  | 0.45 | 2.22  |
| P25206_M Mcm3 | DNA replicase: R.LIVSVNDR.LR                          | 7.72   | 21.98  | 0.35 | 2.85  |
| P25206_M Mcm3 | DNA replicase: R.LLNNAFEEVAFQR.A                      | 3.59   | 8.61   | 0.42 | 2.40  |
| P25206_M Mcm3 | DNA replicase: R.SVDVILDDDLVDK#.V                     | 9.12   | 2.58   | 3.53 | 0.28  |
| P25206_M Mcm3 | DNA replicase: K.TPM*ENIGLQDSSLR.F                    | 3.88   | 6.79   | 0.57 | 1.75  |
| P25206_M Mcm3 | DNA replicase: R.ALK#DFVASIDATYAK#.Q                  | 202.52 | 115.92 | 1.75 | 0.57  |
| P25206_M Mcm3 | DNA replicase: K.DFVASIDATYAK#.Q                      | 49.90  | 31.64  | 1.58 | 0.63  |
| P25206_M Mcm3 | DNA replicase: R.DYLDLDEEDQGIYQNK#.V                  | 27.62  | 14.61  | 1.89 | 0.53  |
| P25206_M Mcm3 | DNA replicase: R.DYLDLDEEDQGIYQNK.V                   | 16.65  | 10.55  | 1.58 | 0.63  |
| P25206_M Mcm3 | DNA replicase: R.EAQRDYLDLDEEDQGIYQNK.V               | 25.18  | 68.12  | 0.37 | 2.70  |
| P25206_M Mcm3 | DNA replicase: R.LIVSVNDR.LR                          | 106.99 | 331.20 | 0.32 | 3.10  |
| P25206_M Mcm3 | DNA replicase: R.LLNNAFEEVAFQR.A                      | 32.95  | 89.15  | 0.37 | 2.71  |
| P25206_M Mcm3 | DNA replicase: K.QYEEFYGLESGFSK.H                     | 7.26   | 5.53   | 1.31 | 0.76  |
| P25206_M Mcm3 | DNA replicase: K.AALLEVFQEAHEQSVGLMLHTEINSR.N         | 38.15  | 103.82 | 0.37 | 2.72  |
| P25206_M Mcm3 | DNA replicase: R.ALK#DFVASIDATYAK#.Q                  | 105.46 | 51.50  | 2.05 | 0.49  |
| P25206_M Mcm3 | DNA replicase: K.APAGQLPR.S                           | 21.41  | 65.64  | 0.33 | 3.07  |
| P25206_M Mcm3 | DNA replicase: R.APGEQDGDALPLGSSVDILATDDPFTQDDQQDTR.I | 13.78  | 30.21  | 0.46 | 2.19  |
| P25206_M Mcm3 | DNA replicase: K.ASEDESLEDEEKE#SQEDTEQK#.R            | 20.61  | 15.17  | 1.36 | 0.74  |
| P25206_M Mcm3 | DNA replicase: K.DGESYDYPFSEATQM*PQVHTPK#.T           | 47.99  | 37.67  | 1.27 | 0.79  |
| P25206_M Mcm3 | DNA replicase: K.DGESYDYPFSEATQMPQVHTPK#.T            | 29.14  | 17.19  | 1.69 | 0.59  |
| P25206_M Mcm3 | DNA replicase: K.DHQITTIQEM*PEK#.A                    | 12.78  | 8.57   | 1.49 | 0.67  |
| P25206_M Mcm3 | DNA replicase: K.DHQITTIQEMPEK#.A                     | 5.81   | 4.95   | 1.17 | 0.85  |
| P25206_M Mcm3 | DNA replicase: K.DHQITTIQEM*PEKAPAGQLPR.S             | 11.37  | 13.49  | 0.84 | 1.19  |
| P25206_M Mcm3 | DNA replicase: K.DHQITTIQEMPEKAPAGQLPR.S              | 8.82   | 19.25  | 0.46 | 2.18  |
| P25206_M Mcm3 | DNA replicase: K.DIQPFSADDAIAK#.I                     | 254.05 | 153.56 | 1.65 | 0.60  |
| P25206_M Mcm3 | DNA replicase: R.DYLDLDEEDQGIYQNK#.V                  | 40.45  | 16.70  | 2.42 | 0.41  |
| P25206_M Mcm3 | DNA replicase: R.EAQRDYLDLDEEDQGIYQNK.V               | 9.29   | 14.36  | 0.65 | 1.55  |
| P25206_M Mcm3 | DNA replicase: R.FDLIFIM*LDQM*DPEQDREISDHVLR.M        | 2.66   | 11.83  | 0.22 | 4.45  |
| P25206_M Mcm3 | DNA replicase: R.GDINILLIGDPSVAK#.S                   | 213.06 | 122.79 | 1.74 | 0.58  |
| P25206_M Mcm3 | DNA replicase: R.GSSVGLTAAVTTDQETGER.R                | 28.21  | 68.24  | 0.41 | 2.42  |
| P25206_M Mcm3 | DNA replicase: K.HDSLHGTK#.K                          | 21.58  | 13.04  | 1.66 | 0.60  |
| P25206_M Mcm3 | DNA replicase: K.IIKPRTLQESAAYIAEYSR.L                | 71.78  | 193.85 | 0.37 | 2.70  |
| P25206_M Mcm3 | DNA replicase: K.IIKPRTLQESAAYIAEYSR.L                | 4.90   | 9.26   | 0.53 | 1.89  |
| P25206_M Mcm3 | DNA replicase: R.IQVVGTYR.C                           | 74.18  | 186.33 | 0.40 | 2.51  |
| P25206_M Mcm3 | DNA replicase: R.LEAGAM*VLADR.G                       | 8.09   | 25.17  | 0.32 | 3.11  |
| P25206_M Mcm3 | DNA replicase: R.LIVSVNDR.LR                          | 45.84  | 102.54 | 0.45 | 2.24  |
| P25206_M Mcm3 | DNA replicase: R.LLNNAFEEVAFQR.A                      | 31.75  | 70.76  | 0.45 | 2.23  |
| P25206_M Mcm3 | DNA replicase: K.M*VSAAFM*KH.K                        | 44.69  | 24.93  | 1.79 | 0.56  |
| P25206_M Mcm3 | DNA replicase: K.MVSAAFM*KH.K                         | 29.79  | 15.03  | 1.98 | 0.50  |
| P25206_M Mcm3 | DNA replicase: K.M*VSAAFM*KH.K                        | 19.54  | 12.39  | 1.58 | 0.63  |
| P25206_M Mcm3 | DNA replicase: K.QYEEFYGLESGFSK#.H                    | 6.37   | 4.60   | 1.38 | 0.72  |
| P25206_M Mcm3 | DNA replicase: R.LEAGAM*VLADR.G                       | 5.26   | 53.88  | 0.10 | 10.25 |
| P25206_M Mcm3 | DNA replicase: R.LEAGAMVLADR.G                        | 3.88   | 36.88  | 0.11 | 9.49  |
| P25206_M Mcm3 | DNA replicase: R.RYSDDLTFVAFSSVYPTKDEENNPLETEYLSVYK.D | 1.27   | 4.30   | 0.30 | 3.38  |
| P25206_M Mcm3 | DNA replicase: R.SKDVFEQLAR.S                         | 32.76  | 99.75  | 0.33 | 3.04  |
| P25206_M Mcm3 | DNA replicase: R.SQDSMSSDART.T                        | 3.34   | 5.54   | 0.60 | 1.66  |
| P25206_M Mcm3 | DNA replicase: R.SVDVILDDDLVDK#.V                     | 98.58  | 59.39  | 1.66 | 0.60  |
| P25206_M Mcm3 | DNA replicase: R.TAIHEVM*EQGR.V                       | 24.60  | 72.45  | 0.34 | 2.95  |
| P25206_M Mcm3 | DNA replicase: R.TAIHEVM*EQGR.V                       | 22.79  | 69.96  | 0.33 | 3.07  |
| P25206_M Mcm3 | DNA replicase: K.TDSDQEK#TDDSQETQDSQK#.V              | 3.50   | 3.38   | 1.04 | 0.97  |
| P25206_M Mcm3 | DNA replicase: K.TDSDQEK#TDDSQETQDSQKVELSEPR.L        | 26.08  | 55.93  | 0.47 | 2.14  |
| P25206_M Mcm3 | DNA replicase: K.TDSDQETQDSQKVELSEPR.L                | 5.72   | 13.93  | 0.41 | 2.44  |
| P25206_M Mcm3 | DNA replicase: R.TLETILR.L                            | 51.31  | 148.97 | 0.34 | 2.90  |
| P25206_M Mcm3 | DNA replicase: K.TPM*ENIGLQDSSLR.F                    | 20.88  | 55.82  | 0.37 | 2.67  |
| P25206_M Mcm3 | DNA replicase: K.TPMENIGLQDSSLR.F                     | 52.79  | 47.73  | 1.11 | 0.90  |
| P25206_M Mcm3 | DNA replicase: K.VELSEPR.L                            | 16.04  | 43.71  | 0.37 | 2.73  |
| P25206_M Mcm3 | DNA replicase: R.ALK#DFVASIDATYAK#.Q                  | 58.52  | 17.10  | 3.42 | 0.29  |
| P25206_M Mcm3 | DNA replicase: R.APGEQDGDALPLGSSVDILATDDPFTQDDQQDTR.I | 6.94   | 9.62   | 0.72 | 1.39  |
| P25206_M Mcm3 | DNA replicase: K.ASEDESLEDEEKE#.S                     | 12.66  | 4.49   | 2.82 | 0.35  |
| P25206_M Mcm3 | DNA replicase: K.DEENNPLETEYLSVYK#.D                  | 9.26   | 4.21   | 2.20 | 0.45  |
| P25206_M Mcm3 | DNA replicase: K.DIQPFSADDAIAK#.I                     | 116.63 | 54.22  | 2.15 | 0.46  |
| P25206_M Mcm3 | DNA replicase: R.DYLDLDEEDQGIYQNK#.V                  | 24.30  | 8.58   | 2.83 | 0.35  |
| P25206_M Mcm3 | DNA replicase: R.EAQRDYLDLDEEDQGIYQNK.V               | 7.14   | 6.23   | 1.15 | 0.87  |
| P25206_M Mcm3 | DNA replicase: R.ELISDNQYR.L                          | 23.59  | 43.71  | 0.54 | 1.85  |
| P25206_M Mcm3 | DNA replicase: R.GDINILLIGDPSVAK#.S                   | 126.57 | 47.74  | 2.65 | 0.38  |
| P25206_M Mcm3 | DNA replicase: R.GSSVGLTAAVTTDQETGER.R                | 11.59  | 18.15  | 0.64 | 1.57  |
| P25206_M Mcm3 | DNA replicase: K.IIKPRTLQESAAYIAEYSR.L                | 37.54  | 72.56  | 0.52 | 1.93  |
| P25206_M Mcm3 | DNA replicase: R.IQVVGTYR.C                           | 23.37  | 48.68  | 0.48 | 2.08  |
| P25206_M Mcm3 | DNA replicase: R.LIVSVNDR.LR                          | 26.92  | 50.86  | 0.53 | 1.89  |
| P25206_M Mcm3 | DNA replicase: R.LLNNAFEEVAFQR.A                      | 22.69  | 27.06  | 0.84 | 1.19  |
| P25206_M Mcm3 | DNA replicase: K.M*VSAAFM*KH.K                        | 18.47  | 12.91  | 1.43 | 0.70  |
| P25206_M Mcm3 | DNA replicase: R.SKDVFEQLAR.S                         | 13.09  | 27.95  | 0.47 | 2.14  |
| P25206_M Mcm3 | DNA replicase: R.SVDVILDDDLVDK#.V                     | 45.29  | 23.09  | 1.96 | 0.51  |
| P25206_M Mcm3 | DNA replicase: R.TAIHEVM*EQGR.V                       | 11.57  | 21.73  | 0.53 | 1.88  |
| P25206_M Mcm3 | DNA replicase: K.TDSDQEK#TDDSQETQDSQKVELSEPR.L        | 10.63  | 17.98  | 0.59 | 1.69  |
| P25206_M Mcm3 | DNA replicase: K.TPM*ENIGLQDSSLR.F                    | 6.39   | 18.63  | 0.34 | 2.91  |
| P25206_M Mcm3 | DNA replicase: K.TVDLQDAEEAVELQYQVYFK#.V              | 26.39  | 11.19  | 2.36 | 0.42  |
| P49717_M Mcm4 | DNA replicase: R.ALADDDFLVTGK#.T                      | 10.17  | 10.03  | 1.01 | 0.99  |
| P49717_M Mcm4 | DNA replicase: R.LASALAPSIYEHEDIK#.G                  | 9.29   | 5.33   | 1.74 | 0.57  |
| P49717_M Mcm4 | DNA replicase: R.ALADDDFLVTGK#.T                      | 21.41  | 15.50  | 1.38 | 0.72  |
| P49717_M Mcm4 | DNA replicase: R.LSEEAQALIEAYVNM#.R                   | 4.59   | 10.37  | 0.44 | 2.26  |
| P49717_M Mcm4 | DNA replicase: R.TGIVDISILTTGM*SATSR.K                | 7.28   | 27.27  | 0.27 | 3.75  |
| P49717_M Mcm4 | DNA replicase: R.TSVLAAANPIESQWNP#.K                  | 4.32   | 4.86   | 0.89 | 1.13  |
| P49717_M Mcm4 | DNA replicase: R.ALADDDFLVTGK#.T                      | 320.32 | 229.36 | 1.40 | 0.72  |
| P49717_M Mcm4 | DNA replicase: K.DM*FEALR.A                           | 14.48  | 49.88  | 0.29 | 3.44  |
| P49717_M Mcm4 | DNA replicase: K.DMFEALR.A                            | 14.75  | 42.82  | 0.34 | 2.90  |
| P49717_M Mcm4 | DNA replicase: K.DYIAYAHSTIMPR.L                      | 3.68   | 13.99  | 0.26 | 3.80  |

|               |                                                    |        |        |      |       |
|---------------|----------------------------------------------------|--------|--------|------|-------|
| P49717_M Mcm4 | DNA replic: R.FDLIFLM*LDPQDEAYDRR.L                | 3.73   | 19.08  | 0.20 | 5.12  |
| P49717_M Mcm4 | DNA replic: R.FSNKVEADVVEAKR.L                     | 30.51  | 100.39 | 0.30 | 3.29  |
| P49717_M Mcm4 | DNA replic: K.GILLQLFGGTR.K                        | 25.38  | 68.80  | 0.37 | 2.71  |
| P49717_M Mcm4 | DNA replic: K.LGQVLDQSDGAAAEDIVPSEQSLGQK#.L        | 31.33  | 25.59  | 1.22 | 0.82  |
| P49717_M Mcm4 | DNA replic: R.GM*VSAYPR.Q                          | 24.33  | 61.02  | 0.40 | 2.51  |
| P49717_M Mcm4 | DNA replic: R.GQSDTATK#.D                          | 19.03  | 11.84  | 1.61 | 0.62  |
| P49717_M Mcm4 | DNA replic: K.GSSAVGLTAYVMK#.D                     | 8.70   | 5.08   | 1.71 | 0.58  |
| P49717_M Mcm4 | DNA replic: R.KHGLQVLDQSDGAAAEDIVPSEQSLGQK#.L      | 108.81 | 66.67  | 1.63 | 0.61  |
| P49717_M Mcm4 | DNA replic: K.LQESPEDM*PAGQTPHTIVLFAHNDLVDK#.V     | 9.79   | 5.53   | 1.77 | 0.56  |
| P49717_M Mcm4 | DNA replic: R.LSEESQALIEAVNM#.R.K                  | 11.04  | 39.40  | 0.28 | 3.57  |
| P49717_M Mcm4 | DNA replic: R.LSEESQALIEAVNM#.K                    | 8.49   | 21.16  | 0.40 | 2.49  |
| P49717_M Mcm4 | DNA replic: R.NLNPEDIDLITISGM*VIR.T                | 19.04  | 58.08  | 0.33 | 3.05  |
| P49717_M Mcm4 | DNA replic: R.NLNPEDIDLITISGM*VIR.T                | 7.50   | 20.02  | 0.37 | 2.67  |
| P49717_M Mcm4 | DNA replic: K.RLHGLDDEAEQK.L                       | 50.84  | 148.63 | 0.34 | 2.92  |
| P49717_M Mcm4 | DNA replic: K.SQLLQYVNLVPR.G                       | 11.36  | 37.23  | 0.31 | 3.28  |
| P49717_M Mcm4 | DNA replic: R.SVLHEVM*EQQTLSIAK#.A                 | 94.91  | 94.24  | 1.01 | 0.99  |
| P49717_M Mcm4 | DNA replic: R.SVLHEVMEQQTLSIAK#.A                  | 118.94 | 75.12  | 1.58 | 0.63  |
| P49717_M Mcm4 | DNA replic: R.SVLHEVMEQQTLSIAK#.A                  | 32.16  | 19.25  | 1.67 | 0.60  |
| P49717_M Mcm4 | DNA replic: R.TGIVDISILTTGM*SATSR.K                | 16.47  | 43.45  | 0.38 | 2.64  |
| P49717_M Mcm4 | DNA replic: R.TGIVDISILTTGMSATSR.K                 | 4.57   | 12.65  | 0.36 | 2.77  |
| P49717_M Mcm4 | DNA replic: R.TSVLAAANPIESQWNP#.K                  | 141.03 | 99.74  | 1.41 | 0.71  |
| P49717_M Mcm4 | DNA replic: K.TTJENIQPLTLLSR.F                     | 44.19  | 150.50 | 0.29 | 3.41  |
| P49717_M Mcm4 | DNA replic: R.VNVTGIYR.A                           | 54.00  | 197.27 | 0.27 | 3.65  |
| P49717_M Mcm4 | DNA replic: K.YQQLFEDIR.G                          | 34.60  | 116.03 | 0.30 | 3.35  |
| P49717_M Mcm4 | DNA replic: R.ALADDFLVTGK#.T                       | 114.03 | 65.98  | 1.73 | 0.58  |
| P49717_M Mcm4 | DNA replic: K.GILLQLFGGTR.K                        | 3.87   | 21.20  | 0.18 | 5.49  |
| P49717_M Mcm4 | DNA replic: R.KGLQVLDQSDGAAAEDIVPSEQSLGQK.L        | 27.30  | 17.19  | 1.59 | 0.63  |
| P49717_M Mcm4 | DNA replic: K.LQESPEDM*PAGQTPHTIVLFAHNDLVDK#.V     | 17.71  | 14.67  | 1.21 | 0.83  |
| P49717_M Mcm4 | DNA replic: K.LQESPEDMPAGQTPHTIVLFAHNDLVKVPQGD.R.V | 1.86   | 4.95   | 0.38 | 2.65  |
| P49717_M Mcm4 | DNA replic: R.LSEESQALIEAVNM#.R.K                  | 6.93   | 11.90  | 0.58 | 1.72  |
| P49717_M Mcm4 | DNA replic: R.NLNPEDIDLITISGM*VIR.T                | 8.06   | 19.82  | 0.41 | 2.46  |
| P49717_M Mcm4 | DNA replic: K.RLHGLDDEAEQK.L                       | 12.09  | 35.04  | 0.35 | 2.90  |
| P49717_M Mcm4 | DNA replic: R.SVLHEVM*EQQTLSIAK#.A                 | 6.08   | 5.56   | 1.09 | 0.92  |
| P49717_M Mcm4 | DNA replic: R.SVLHEVMEQQTLSIAK#.A                  | 21.24  | 40.27  | 0.53 | 1.90  |
| P49717_M Mcm4 | DNA replic: R.TGIVDISILTTGM*SATSR.K                | 6.29   | 22.61  | 0.28 | 3.59  |
| P49717_M Mcm4 | DNA replic: R.TSVLAAANPIESQWNP#.K                  | 45.55  | 29.94  | 1.52 | 0.66  |
| P49717_M Mcm4 | DNA replic: R.VNVTGIYR.A                           | 14.83  | 57.21  | 0.26 | 3.86  |
| P49717_M Mcm4 | DNA replic: K.YQQLFEDIR.G                          | 9.43   | 18.71  | 0.50 | 1.98  |
| P49718_M Mcm5 | DNA replic: K.IPGIISASAVR.A                        | 4.20   | 27.53  | 0.15 | 6.55  |
| P49718_M Mcm5 | DNA replic: R.LAALPNYIELISK.S                      | 39.53  | 65.91  | 0.60 | 1.67  |
| P49718_M Mcm5 | DNA replic: K.LQPFATEADVEEALR.L                    | 3.43   | 11.10  | 0.31 | 3.23  |
| P49718_M Mcm5 | DNA replic: K.SISPSIFGGM*DM*#K.K                   | 6.30   | 6.13   | 1.03 | 0.97  |
| P49718_M Mcm5 | DNA replic: R.VAIHEAM*EQQTLSIAK#.A                 | 13.33  | 14.45  | 0.92 | 1.08  |
| P49718_M Mcm5 | DNA replic: R.VLGIQVDTDGSGR.S                      | 8.37   | 18.32  | 0.46 | 2.19  |
| P49718_M Mcm5 | DNA replic: R.LFQVSTLDAALSGNLSGVEGFTTQEQDEM*LSR.I  | 3.14   | 10.56  | 0.30 | 3.37  |
| P49718_M Mcm5 | DNA replic: K.LQPFATEADVEEALR.L                    | 10.62  | 49.31  | 0.22 | 4.64  |
| P49718_M Mcm5 | DNA replic: K.M*KLQPFATEADVEEALR.L                 | 1.65   | 11.14  | 0.15 | 6.76  |
| P49718_M Mcm5 | DNA replic: K.AGITTTLSNR.C                         | 29.58  | 105.69 | 0.28 | 3.57  |
| P49718_M Mcm5 | DNA replic: R.FAIGSQVSEHSIVQDFTK#.Q                | 110.98 | 87.12  | 1.27 | 0.79  |
| P49718_M Mcm5 | DNA replic: R.FDMIFIVK#.D                          | 13.22  | 10.40  | 1.27 | 0.79  |
| P49718_M Mcm5 | DNA replic: K.FGLNPSK#.G                           | 81.42  | 67.06  | 1.21 | 0.82  |
| P49718_M Mcm5 | DNA replic: K.GSSAAGLTASVIR.D                      | 45.19  | 47.64  | 0.95 | 1.05  |
| P49718_M Mcm5 | DNA replic: K.HVM*TLHVSALTQTQAVEGEIDLAK#.M         | 7.52   | 4.41   | 1.70 | 0.59  |
| P49718_M Mcm5 | DNA replic: K.HVM*TLHVSALTQTQAVEGEIDLAK#.M         | 11.93  | 6.80   | 1.75 | 0.57  |
| P49718_M Mcm5 | DNA replic: R.IAEALSK#.M                           | 164.98 | 120.76 | 1.37 | 0.73  |
| P49718_M Mcm5 | DNA replic: K.IPGIISASAVR.A                        | 38.25  | 161.34 | 0.24 | 4.22  |
| P49718_M Mcm5 | DNA replic: R.LAALPNYIELISK#.S                     | 297.11 | 234.67 | 1.27 | 0.79  |
| P49718_M Mcm5 | DNA replic: R.LFQVSTLDAALSGNLSGVEGFTTQEQDEM*LSR.I  | 9.49   | 22.07  | 0.43 | 2.32  |
| P49718_M Mcm5 | DNA replic: R.LFQVSTLDAALSGNLSGVEGFTTQEQDEM.LSR.I  | 11.99  | 23.20  | 0.52 | 1.94  |
| P49718_M Mcm5 | DNA replic: K.LQELPDVPHGEMPR.H                     | 12.95  | 54.97  | 0.24 | 4.24  |
| P49718_M Mcm5 | DNA replic: K.LQPFATEADVEEALR.L                    | 25.79  | 93.45  | 0.28 | 3.62  |
| P49718_M Mcm5 | DNA replic: R.LSAEAAEK#.L                          | 85.43  | 69.83  | 1.22 | 0.82  |
| P49718_M Mcm5 | DNA replic: K.QPAEHLQLLEAAK.E                      | 49.02  | 43.54  | 1.13 | 0.89  |
| P49718_M Mcm5 | DNA replic: R.RFAIGSQVSEHSIVQDFTK.Q                | 2.26   | 8.18   | 0.28 | 3.62  |
| P49718_M Mcm5 | DNA replic: R.RGDINLLM*LGDPGTAK.S                  | 12.65  | 47.19  | 0.27 | 3.73  |
| P49718_M Mcm5 | DNA replic: R.RGDINLLM*LGDPGTAK.S                  | 5.54   | 27.52  | 0.20 | 4.97  |
| P49718_M Mcm5 | DNA replic: K.SISPSIFGGM*DM*#K.K                   | 23.87  | 20.04  | 1.19 | 0.84  |
| P49718_M Mcm5 | DNA replic: K.SISPSIFGGM*DM*#K.K                   | 10.28  | 11.18  | 0.92 | 1.09  |
| P49718_M Mcm5 | DNA replic: K.SISPSIFGGM*DM*#K.K                   | 15.40  | 10.72  | 1.44 | 0.70  |
| P49718_M Mcm5 | DNA replic: R.VAIHEAM*EQQTLSIAK#.A                 | 86.25  | 68.05  | 1.27 | 0.79  |
| P49718_M Mcm5 | DNA replic: R.VAIHEAM*EQQTLSIAK#.A                 | 15.23  | 15.38  | 0.99 | 1.01  |
| P49718_M Mcm5 | DNA replic: R.VAIHEAMEQQTLSIAK#.A                  | 39.30  | 32.73  | 1.20 | 0.83  |
| P49718_M Mcm5 | DNA replic: R.VAIHEAMEQQTLSIAK#.A                  | 10.12  | 5.77   | 1.75 | 0.57  |
| P49718_M Mcm5 | DNA replic: R.VLGIQVDTDGSGR.S                      | 24.92  | 85.30  | 0.29 | 3.42  |
| P49718_M Mcm5 | DNA replic: K.VLQML*LR.R                           | 5.57   | 24.44  | 0.23 | 4.39  |
| P49718_M Mcm5 | DNA replic: K.VLQMLR.R                             | 6.65   | 18.93  | 0.35 | 2.85  |
| P49718_M Mcm5 | DNA replic: R.VTIM*GIYSIK#.K                       | 16.48  | 11.38  | 1.45 | 0.69  |
| P49718_M Mcm5 | DNA replic: R.VTIMGIYSIK#.K                        | 43.41  | 27.17  | 1.60 | 0.63  |
| P49718_M Mcm5 | DNA replic: R.WDETKGEDNIDFMPITLSR.F                | 14.65  | 28.65  | 0.51 | 1.96  |
| P49718_M Mcm5 | DNA replic: K.AGITTTLSNR.C                         | 35.55  | 86.09  | 0.41 | 2.42  |
| P49718_M Mcm5 | DNA replic: R.EDDRVAIHEAMEQQTLSIAK.A               | 4.88   | 7.52   | 0.65 | 1.54  |
| P49718_M Mcm5 | DNA replic: K.EVADEVTRPRAGDELLQDQIQVM*#L.K.S       | 4.45   | 14.54  | 0.31 | 3.26  |
| P49718_M Mcm5 | DNA replic: R.FAIGSQVSEHSIVQDFTK.Q                 | 20.24  | 10.00  | 2.02 | 0.49  |
| P49718_M Mcm5 | DNA replic: R.FAIGSQVSEHSIVQDFTK#.Q                | 199.78 | 140.30 | 1.42 | 0.70  |
| P49718_M Mcm5 | DNA replic: K.FGLNPSK#.G                           | 141.90 | 96.83  | 1.47 | 0.68  |
| P49718_M Mcm5 | DNA replic: R.GDINLLM*LGDPGTAK#.S                  | 15.57  | 11.69  | 1.33 | 0.75  |
| P49718_M Mcm5 | DNA replic: K.GSSAAGLTASVIR.D                      | 11.79  | 36.56  | 0.32 | 3.10  |
| P49718_M Mcm5 | DNA replic: K.HVM*TLHVSALTQTQAVEGEIDLAK#.M         | 7.92   | 5.23   | 1.51 | 0.66  |
| P49718_M Mcm5 | DNA replic: R.IAEALSK#.M                           | 177.27 | 110.00 | 1.61 | 0.62  |
| P49718_M Mcm5 | DNA replic: K.IPGIISASAVR.A                        | 31.94  | 111.88 | 0.29 | 3.50  |
| P49718_M Mcm5 | DNA replic: R.LAALPNYIELISK#.S                     | 522.97 | 371.55 | 1.41 | 0.71  |
| P49718_M Mcm5 | DNA replic: R.LFQVSTLDAALSGNLSGVEGFTTQEQDEM*LSR.I  | 15.66  | 39.81  | 0.39 | 2.54  |
| P49718_M Mcm5 | DNA replic: R.LFQVSTLDAALSGNLSGVEGFTTQEQDEM.LSR.I  | 8.30   | 19.82  | 0.42 | 2.39  |
| P49718_M Mcm5 | DNA replic: K.LQELPDVPHGEMPR.H                     | 13.68  | 32.85  | 0.42 | 2.40  |
| P49718_M Mcm5 | DNA replic: K.LQPFATEADVEEALR.L                    | 30.33  | 106.55 | 0.28 | 3.51  |
| P49718_M Mcm5 | DNA replic: R.LSAEAAEK#.L                          | 101.72 | 69.04  | 1.47 | 0.68  |
| P49718_M Mcm5 | DNA replic: K.QPAEHLQLLEAAK.E                      | 47.61  | 39.51  | 1.21 | 0.83  |
| P49718_M Mcm5 | DNA replic: R.RGDINLLM*LGDPGTAK.S                  | 17.45  | 46.85  | 0.37 | 2.68  |
| P49718_M Mcm5 | DNA replic: K.RLPDGLTR.R                           | 4.12   | 52.24  | 0.08 | 12.67 |
| P49718_M Mcm5 | DNA replic: K.SDM*#SHLVK#.I                        | 21.40  | 12.16  | 1.76 | 0.57  |
| P49718_M Mcm5 | DNA replic: R.SFAGSVSPQEEEF.R                      | 4.17   | 17.07  | 0.24 | 4.09  |
| P49718_M Mcm5 | DNA replic: K.SISPSIFGGM*DM*#K.K                   | 33.07  | 30.56  | 1.08 | 0.92  |
| P49718_M Mcm5 | DNA replic: R.VAIHEAM*EQQTLSIAK#.A                 | 117.89 | 70.66  | 1.67 | 0.60  |

|               |                                                      |        |        |      |       |
|---------------|------------------------------------------------------|--------|--------|------|-------|
| P49718_M Mcm5 | DNA replic: R.VAIHEAMEQQTISIAK#.A                    | 26.32  | 17.02  | 1.55 | 0.65  |
| P49718_M Mcm5 | DNA replic: R.VAIHEAMEQQTISIAK#.A                    | 6.80   | 5.14   | 1.32 | 0.76  |
| P49718_M Mcm5 | DNA replic: R.VLGIQVDTGDSGR.S                        | 35.53  | 122.44 | 0.29 | 3.45  |
| P49718_M Mcm5 | DNA replic: K.VLQLM*LR.R                             | 8.81   | 32.44  | 0.27 | 3.68  |
| P49718_M Mcm5 | DNA replic: R.VTIM*GIYSIK#.K                         | 19.04  | 13.55  | 1.41 | 0.71  |
| P49718_M Mcm5 | DNA replic: R.VTIMGIYSIK#.K                          | 26.41  | 15.05  | 1.75 | 0.57  |
| P49718_M Mcm5 | DNA replic: R.WDETKGEDNIDFM*PTILSR.F                 | 8.33   | 25.78  | 0.32 | 3.10  |
| P49718_M Mcm5 | DNA replic: R.WDETKGEDNIDFMPTILSR.F                  | 6.78   | 19.37  | 0.35 | 2.86  |
| P97311_M Mcm6 | DNA replic: K.DFYVAFQDLPTR.H                         | 6.23   | 15.80  | 0.39 | 2.54  |
| P97311_M Mcm6 | DNA replic: K.HVDEFSPR.A                             | 2.52   | 9.40   | 0.27 | 3.72  |
| P97311_M Mcm6 | DNA replic: R.LTHYDVHVLIELTQAGLK#.G                  | 12.61  | 12.94  | 0.97 | 1.03  |
| P97311_M Mcm6 | DNA replic: R.AEAVESAQAGDR.C                         | 15.90  | 40.06  | 0.40 | 2.52  |
| P97311_M Mcm6 | DNA replic: K.ASSAAGLTAAVVR.D                        | 10.22  | 37.33  | 0.27 | 3.65  |
| P97311_M Mcm6 | DNA replic: K.DFYVAFQDLPTR.H                         | 35.98  | 117.02 | 0.31 | 3.25  |
| P97311_M Mcm6 | DNA replic: R.DQVAIHEAM*EQQTISITK#.A                 | 62.34  | 36.93  | 1.69 | 0.59  |
| P97311_M Mcm6 | DNA replic: R.DQVAIHEAM*EQQTISITK#.A                 | 12.84  | 7.31   | 1.76 | 0.57  |
| P97311_M Mcm6 | DNA replic: R.DQVAIHEAMEQQTISITK#.A                  | 52.97  | 31.69  | 1.67 | 0.60  |
| P97311_M Mcm6 | DNA replic: K.DVEQFK#.Y                              | 47.34  | 46.04  | 1.03 | 0.97  |
| P97311_M Mcm6 | DNA replic: K.EIESEIDSEELINK#.K                      | 7.96   | 4.13   | 1.92 | 0.52  |
| P97311_M Mcm6 | DNA replic: K.ELRDEEQTAEISKQM*TVK.E                  | 11.78  | 37.54  | 0.31 | 3.19  |
| P97311_M Mcm6 | DNA replic: K.ELRDEEQTAEISKQM*TVK.E                  | 4.03   | 15.59  | 0.26 | 3.87  |
| P97311_M Mcm6 | DNA replic: R.FLLDTNK#.S                             | 166.25 | 103.96 | 1.60 | 0.63  |
| P97311_M Mcm6 | DNA replic: R.FVDFQK#.V                              | 290.44 | 175.63 | 1.65 | 0.60  |
| P97311_M Mcm6 | DNA replic: R.GVLLM*LFGGVPK#.T                       | 84.16  | 58.25  | 1.44 | 0.69  |
| P97311_M Mcm6 | DNA replic: R.GVLLMLFGGVPK#.T                        | 85.28  | 51.09  | 1.67 | 0.60  |
| P97311_M Mcm6 | DNA replic: K.HVDEFSPR.A                             | 55.60  | 157.77 | 0.35 | 2.84  |
| P97311_M Mcm6 | DNA replic: R.IQEQALPR.G                             | 78.24  | 222.94 | 0.35 | 2.85  |
| P97311_M Mcm6 | DNA replic: R.ISGQVVR.T                              | 37.47  | 100.24 | 0.37 | 2.67  |
| P97311_M Mcm6 | DNA replic: K.ISESEDFIVEQYKR.L                       | 8.34   | 18.78  | 0.44 | 2.25  |
| P97311_M Mcm6 | DNA replic: R.ISNLIHLR.LK                            | 22.83  | 55.68  | 0.41 | 2.44  |
| P97311_M Mcm6 | DNA replic: R.IVDLHSR.J                              | 6.05   | 20.20  | 0.30 | 3.34  |
| P97311_M Mcm6 | DNA replic: R.K#M*EEEEESALK#.R                       | 9.46   | 6.16   | 1.54 | 0.65  |
| P97311_M Mcm6 | DNA replic: R.KM*EEEEESALKR.S                        | 37.36  | 132.55 | 0.28 | 3.55  |
| P97311_M Mcm6 | DNA replic: R.KMEEEEESALKR.S                         | 25.76  | 63.06  | 0.41 | 2.45  |
| P97311_M Mcm6 | DNA replic: R.LTHYDVHVLIELTQAGLK#.G                  | 153.71 | 91.16  | 1.69 | 0.59  |
| P97311_M Mcm6 | DNA replic: K.QNINLSAPIM*SR.F                        | 18.57  | 58.51  | 0.32 | 3.15  |
| P97311_M Mcm6 | DNA replic: K.QNINLSAPIMSR.F                         | 14.96  | 32.19  | 0.46 | 2.15  |
| P97311_M Mcm6 | DNA replic: R.SELVNWYLK#.E                           | 148.82 | 83.78  | 1.78 | 0.56  |
| P97311_M Mcm6 | DNA replic: R.TSILAAANPVSGHYDR.S                     | 8.07   | 26.93  | 0.30 | 3.34  |
| P97311_M Mcm6 | DNA replic: K.TTGETSLR.G                             | 20.24  | 66.37  | 0.30 | 3.28  |
| P97311_M Mcm6 | DNA replic: R.VETPDVNLQEEIQM*ETDEGQGGVNGHADSPAPVNR.F | 2.03   | 2.17   | 0.94 | 1.07  |
| P97311_M Mcm6 | DNA replic: K.VFEM*SQDK#.N                           | 59.50  | 40.52  | 1.47 | 0.68  |
| P97311_M Mcm6 | DNA replic: R.VSGADGYETEGIR.G                        | 62.23  | 177.76 | 0.35 | 2.86  |
| P97311_M Mcm6 | DNA replic: R.VYSLDIR.R                              | 12.68  | 25.56  | 0.50 | 2.02  |
| P97311_M Mcm6 | DNA replic: R.AEAVESAQAGDR.C                         | 7.51   | 22.05  | 0.34 | 2.94  |
| P97311_M Mcm6 | DNA replic: K.ASSAAGLTAAVVR.D                        | 8.70   | 25.84  | 0.34 | 2.97  |
| P97311_M Mcm6 | DNA replic: R.DEEQTAEISK#.N                          | 18.21  | 8.71   | 2.09 | 0.48  |
| P97311_M Mcm6 | DNA replic: K.DFYVAFQDLPTR.H                         | 22.36  | 41.98  | 0.53 | 1.88  |
| P97311_M Mcm6 | DNA replic: R.DQVAIHEAM*EQQTISITK#.A                 | 34.56  | 22.59  | 1.53 | 0.65  |
| P97311_M Mcm6 | DNA replic: R.DQVAIHEAMEQQTISITK#.A                  | 25.35  | 21.74  | 1.17 | 0.86  |
| P97311_M Mcm6 | DNA replic: K.DVEQFK#.Y                              | 32.02  | 38.57  | 0.83 | 1.20  |
| P97311_M Mcm6 | DNA replic: K.EIESEIDSEELINK#.K                      | 9.53   | 5.30   | 1.80 | 0.56  |
| P97311_M Mcm6 | DNA replic: K.EIESEIDSEELINK.T                       | 15.87  | 11.59  | 1.37 | 0.73  |
| P97311_M Mcm6 | DNA replic: K.ELRDEEQTAEISKQM*TVK.E                  | 2.49   | 7.80   | 0.32 | 3.14  |
| P97311_M Mcm6 | DNA replic: R.FLLDTNK#.S                             | 79.08  | 56.90  | 1.39 | 0.72  |
| P97311_M Mcm6 | DNA replic: R.FNGSSEASQETVSKPSLR.L                   | 11.56  | 34.55  | 0.33 | 2.99  |
| P97311_M Mcm6 | DNA replic: R.FVDFQK#.V                              | 142.31 | 97.70  | 1.46 | 0.69  |
| P97311_M Mcm6 | DNA replic: R.GVLLM*LFGGVPK#.T                       | 59.71  | 28.84  | 2.07 | 0.48  |
| P97311_M Mcm6 | DNA replic: R.GVLLMLFGGVPK#.T                        | 30.43  | 21.05  | 1.45 | 0.69  |
| P97311_M Mcm6 | DNA replic: K.HVDEFSPR.A                             | 19.99  | 70.46  | 0.28 | 3.52  |
| P97311_M Mcm6 | DNA replic: R.IQEQALPR.G                             | 40.17  | 114.04 | 0.35 | 2.84  |
| P97311_M Mcm6 | DNA replic: R.ISGQVVR.T                              | 30.05  | 64.01  | 0.47 | 2.13  |
| P97311_M Mcm6 | DNA replic: R.ISNLIHLR.LK                            | 6.83   | 28.30  | 0.24 | 4.14  |
| P97311_M Mcm6 | DNA replic: R.KM*EEEEESALKR.S                        | 19.49  | 70.66  | 0.28 | 3.62  |
| P97311_M Mcm6 | DNA replic: R.KMEEEEESALKR.S                         | 8.57   | 19.53  | 0.44 | 2.28  |
| P97311_M Mcm6 | DNA replic: R.LTHYDVHVLIELTQAGLK#.G                  | 36.92  | 19.38  | 1.91 | 0.52  |
| P97311_M Mcm6 | DNA replic: K.VFEM*SQDK#.N                           | 25.32  | 15.42  | 1.64 | 0.61  |
| P97311_M Mcm6 | DNA replic: R.VSGADGYETEGIR.G                        | 36.48  | 100.51 | 0.36 | 2.76  |
| P97311_M Mcm6 | DNA replic: R.VYSLDIR.R                              | 1.27   | 13.99  | 0.09 | 11.05 |
| P97311_M Mcm6 | DNA replic: K.YLQFAELIRPER.N                         | 8.61   | 50.49  | 0.17 | 5.86  |
| P97311_M Mcm6 | DNA replic: K.AGILLTLNAR.C                           | 4.85   | 13.28  | 0.37 | 2.74  |
| Q61881_M Mcm7 | DNA replic: K.ALLLLLVGGVDQSPQGM*#K.I                 | 11.23  | 8.71   | 1.29 | 0.78  |
| Q61881_M Mcm7 | DNA replic: K.FLQEFYENELGK#.K                        | 8.70   | 5.86   | 1.49 | 0.67  |
| Q61881_M Mcm7 | DNA replic: R.GSSGVLTAAVLR.D                         | 11.24  | 21.19  | 0.53 | 1.88  |
| Q61881_M Mcm7 | DNA replic: R.IAQPDGHDVSTGIFLPLVR.T                  | 3.41   | 22.18  | 0.15 | 6.51  |
| Q61881_M Mcm7 | DNA replic: R.LFGDVOELLPEYK#.E                       | 17.68  | 15.24  | 1.16 | 0.86  |
| Q61881_M Mcm7 | DNA replic: K.QJAEEDFYEK.L                           | 8.26   | 8.61   | 0.96 | 1.04  |
| Q61881_M Mcm7 | DNA replic: K.SDDVSGAGLSSEELK#.Q                     | 13.42  | 12.99  | 1.03 | 0.97  |
| Q61881_M Mcm7 | DNA replic: R.TGFQQM*AQGLLSEYLEAHWIVK#.M             | 8.81   | 7.95   | 1.11 | 0.90  |
| Q61881_M Mcm7 | DNA replic: K.FLQEFYENELGK.K                         | 7.90   | 5.53   | 1.43 | 0.70  |
| Q61881_M Mcm7 | DNA replic: R.LFGDVOELLPEYK.E                        | 11.05  | 9.92   | 1.11 | 0.90  |
| Q61881_M Mcm7 | DNA replic: R.SLEQVQLPAALLSR.F                       | 1.12   | 3.81   | 0.29 | 3.42  |
| Q61881_M Mcm7 | DNA replic: K.AGILLTLNAR.C                           | 52.16  | 190.75 | 0.27 | 3.66  |
| Q61881_M Mcm7 | DNA replic: K.ALLLLLVGGVDQSPQGM*#K.I                 | 157.05 | 113.82 | 1.38 | 0.72  |
| Q61881_M Mcm7 | DNA replic: K.ALLLLLVGGVDQSPQGM*#K.I                 | 39.70  | 33.88  | 1.17 | 0.85  |
| Q61881_M Mcm7 | DNA replic: K.DSLLGK#.G                              | 127.08 | 93.69  | 1.36 | 0.74  |
| Q61881_M Mcm7 | DNA replic: K.EVNVKDLVDYIEHR.L                       | 16.60  | 53.36  | 0.31 | 3.21  |
| Q61881_M Mcm7 | DNA replic: R.FELYFR.G                               | 8.65   | 32.20  | 0.27 | 3.72  |
| Q61881_M Mcm7 | DNA replic: K.FLQEFYENELGK#.K                        | 89.34  | 72.15  | 1.24 | 0.81  |
| Q61881_M Mcm7 | DNA replic: R.GTFPAQFQAALDEYEEINNVQWNTSR.T           | 63.35  | 67.55  | 0.94 | 1.07  |
| Q61881_M Mcm7 | DNA replic: R.GSSGVLTAAVLR.D                         | 43.79  | 141.95 | 0.31 | 3.24  |
| Q61881_M Mcm7 | DNA replic: R.IAQPDGHDVSTGIFLPLVR.T                  | 82.31  | 272.49 | 0.30 | 3.31  |
| Q61881_M Mcm7 | DNA replic: K.IQEHSDQVPVGNIPR.S                      | 45.38  | 159.94 | 0.28 | 3.52  |
| Q61881_M Mcm7 | DNA replic: K.#FLQEFYENELGK#.K                       | 12.00  | 5.13   | 2.34 | 0.43  |
| Q61881_M Mcm7 | DNA replic: R.LAQHITYVHQHSR.Q                        | 18.48  | 58.15  | 0.32 | 3.15  |
| Q61881_M Mcm7 | DNA replic: R.LAQHITYVHQHSR.Q                        | 5.00   | 15.22  | 0.33 | 3.04  |
| Q61881_M Mcm7 | DNA replic: R.LFGDVOELLPEYK#.E                       | 207.92 | 160.01 | 1.30 | 0.77  |
| Q61881_M Mcm7 | DNA replic: R.LSTALAR.L                              | 51.46  | 148.55 | 0.35 | 2.89  |
| Q61881_M Mcm7 | DNA replic: R.LYLQTR.G                               | 42.44  | 146.73 | 0.29 | 3.46  |
| Q61881_M Mcm7 | DNA replic: R.M*VDIVKEKEDVNEAIR.L                    | 29.26  | 100.19 | 0.29 | 3.42  |
| Q61881_M Mcm7 | DNA replic: R.MVDIVKEKEDVNEAIR.L                     | 9.63   | 30.81  | 0.31 | 3.20  |
| Q61881_M Mcm7 | DNA replic: R.MVDIVKEKEDVNEAIR.L                     | 6.51   | 6.72   | 0.97 | 1.03  |
| Q61881_M Mcm7 | DNA replic: R.NPQNQYPSSELM*#R.R                      | 36.36  | 140.35 | 0.26 | 3.86  |



|                 |                                                  |        |        |      |       |
|-----------------|--------------------------------------------------|--------|--------|------|-------|
| Q61881_M Mcm7   | DNA replicase R.NPQNQPSELMR.R                    | 19.76  | 39.07  | 0.51 | 1.98  |
| Q61881_M Mcm7   | DNA replicase K.QIAEEDFYEK#.L                    | 107.91 | 91.04  | 1.19 | 0.84  |
| Q61881_M Mcm7   | DNA replicase R.QPPAQFELDM*#K#.L                 | 30.56  | 22.73  | 1.34 | 0.74  |
| Q61881_M Mcm7   | DNA replicase R.OPTVPESLADYITAAVEM*#R.R          | 9.69   | 27.69  | 0.35 | 2.86  |
| Q61881_M Mcm7   | DNA replicase R.RFELYFR.G                        | 2.88   | 38.86  | 0.07 | 13.48 |
| Q61881_M Mcm7   | DNA replicase K.SDDDVSGAGELSSSEELK#.Q            | 160.71 | 121.26 | 1.33 | 0.75  |
| Q61881_M Mcm7   | DNA replicase K.SDDDVSGAGELSSSEELK#QIAEEDFYEK#.L | 18.02  | 11.69  | 1.54 | 0.65  |
| Q61881_M Mcm7   | DNA replicase R.SITVLEGENR.I                     | 38.95  | 119.56 | 0.33 | 3.07  |
| Q61881_M Mcm7   | DNA replicase R.SLEQNVQLPAALLSR.F                | 28.31  | 98.59  | 0.29 | 3.48  |
| Q61881_M Mcm7   | DNA replicase K.SQLLSVIDR.L                      | 59.11  | 164.17 | 0.36 | 2.78  |
| Q61881_M Mcm7   | DNA replicase R.SVHFSEAEQR.C                     | 41.11  | 183.15 | 0.22 | 4.46  |
| Q61881_M Mcm7   | DNA replicase R.TAIHEVM*EQQTISI#A.A              | 83.45  | 63.83  | 1.31 | 0.76  |
| Q61881_M Mcm7   | DNA replicase R.TAIHEVMEQQTISI#A.A               | 76.81  | 51.62  | 1.49 | 0.67  |
| Q61881_M Mcm7   | DNA replicase R.TGFQQM*AQGLSETYLEAHWIVK#.M       | 133.73 | 72.79  | 1.84 | 0.54  |
| Q61881_M Mcm7   | DNA replicase R.TLLAILR.L                        | 37.77  | 100.58 | 0.38 | 2.66  |
| Q61881_M Mcm7   | DNA replicase R.TQRPADVIFATR.E                   | 5.10   | 97.76  | 0.05 | 19.16 |
| Q61881_M Mcm7   | DNA replicase R.VSEVKPR.M                        | 8.44   | 27.87  | 0.30 | 3.30  |
| Q61881_M Mcm7   | DNA replicase K.AGILLTLNAR.C                     | 29.46  | 81.37  | 0.36 | 2.76  |
| Q61881_M Mcm7   | DNA replicase K.ALLLLLGVGDVQSPQGM*#K#.I          | 60.69  | 38.74  | 1.57 | 0.64  |
| Q61881_M Mcm7   | DNA replicase K.DSLLGEK#.G                       | 62.41  | 40.95  | 1.52 | 0.66  |
| Q61881_M Mcm7   | DNA replicase K.EVWKNVDLVIEHR.L                  | 5.12   | 13.78  | 0.37 | 2.69  |
| Q61881_M Mcm7   | DNA replicase K.FLQFYENELGK#.K                   | 51.47  | 32.70  | 1.57 | 0.64  |
| Q61881_M Mcm7   | DNA replicase R.GFTPAQFQALDYEELNVVQVNTSR.T       | 166.12 | 40.54  | 4.10 | 0.24  |
| Q61881_M Mcm7   | DNA replicase R.GSSVGLTAAVLR.D                   | 29.01  | 75.29  | 0.39 | 2.60  |
| Q61881_M Mcm7   | DNA replicase R.IAQPQGDHVSVTGIFLPLVR.T           | 69.09  | 212.66 | 0.32 | 3.08  |
| Q61881_M Mcm7   | DNA replicase K.IQEHSDQV/PVGNIPR.S               | 30.78  | 106.96 | 0.29 | 3.47  |
| Q61881_M Mcm7   | DNA replicase R.LAQHTYVHQHSR.Q                   | 5.83   | 24.53  | 0.24 | 4.21  |
| Q61881_M Mcm7   | DNA replicase R.LFGDVVQELLPEYK#.E                | 148.34 | 88.79  | 1.67 | 0.60  |
| Q61881_M Mcm7   | DNA replicase R.LYQTR.G                          | 21.91  | 68.67  | 0.32 | 3.13  |
| Q61881_M Mcm7   | DNA replicase R.M*YDIVEKEDVNEAIR.L               | 25.79  | 65.74  | 0.39 | 2.55  |
| Q61881_M Mcm7   | DNA replicase R.NPQNQPSELMR*.R                   | 20.14  | 59.90  | 0.34 | 2.97  |
| Q61881_M Mcm7   | DNA replicase R.NPQNQPSELMR.R                    | 4.23   | 13.47  | 0.31 | 3.18  |
| Q61881_M Mcm7   | DNA replicase K.QIAEEDFYEK#.L                    | 75.14  | 52.39  | 1.43 | 0.70  |
| Q61881_M Mcm7   | DNA replicase R.QPPAQFELDM*#K#.L                 | 15.60  | 14.93  | 1.04 | 0.96  |
| Q61881_M Mcm7   | DNA replicase R.OPTVPESLADYITAAVEM*#R.R          | 9.20   | 23.36  | 0.39 | 2.54  |
| Q61881_M Mcm7   | DNA replicase K.SDDDVSGAGELSSSEELK#.Q            | 102.89 | 62.07  | 1.66 | 0.60  |
| Q61881_M Mcm7   | DNA replicase K.SDDDVSGAGELSSSEELK#QIAEEDFYEK#.L | 12.01  | 8.10   | 1.48 | 0.67  |
| Q61881_M Mcm7   | DNA replicase R.SITVLEGENR.I                     | 23.77  | 66.27  | 0.36 | 2.79  |
| Q61881_M Mcm7   | DNA replicase R.SLEQNVQLPAALLSR.F                | 17.33  | 57.18  | 0.30 | 3.30  |
| Q61881_M Mcm7   | DNA replicase K.SQLLSVIDR.L                      | 27.13  | 81.13  | 0.33 | 2.99  |
| Q61881_M Mcm7   | DNA replicase R.TAIHEVM*EQQTISI#A.A              | 60.73  | 34.72  | 1.75 | 0.57  |
| Q61881_M Mcm7   | DNA replicase R.TAIHEVMEQQTISI#A.A               | 32.61  | 20.49  | 1.59 | 0.63  |
| Q61881_M Mcm7   | DNA replicase R.TGFQQM*AQGLSETYLEAHWIVK#.M       | 36.08  | 22.61  | 1.60 | 0.63  |
| Q61881_M Mcm7   | DNA replicase R.TLLAILR.L                        | 19.32  | 63.23  | 0.31 | 3.27  |
| Q61881_M Mcm7   | DNA replicase R.TQRPADVIFATR.E                   | 3.86   | 46.08  | 0.08 | 11.92 |
| Q8R3CO_M Mcmbp  | Mini-chromon R.FLDYNSDDITK#.A                    | 13.90  | 9.28   | 1.50 | 0.67  |
| Q5PSV9_M Mdc1   | Mediator o K.TPEASVPTPELOQPTSK#.K                | 8.81   | 4.96   | 1.78 | 0.56  |
| Q5PSV9_M Mdc1   | Mediator o R.TPESVSTGPELOPLTSEQVPIEPR.A          | 5.40   | 6.46   | 0.84 | 1.20  |
| P08249_M Mdh2   | Malate dehydrogenase K.VAVLGAAGGQGLSLLK#.N       | 9.66   | 4.27   | 2.26 | 0.44  |
| Q9D967_M Mdp1   | Magnesium R.DGM*SLQTLTQGLTFAK#.A                 | 12.86  | 6.50   | 1.98 | 0.51  |
| Q9D967_M Mdp1   | Magnesium R.LQSLVGVAAASR.T                       | 9.73   | 23.58  | 0.41 | 2.42  |
| Q2VPO9_Ej Meaf6 | Chromatin K.SSVTSAAVSALAGVQDQIEK#.R              | 17.71  | 14.66  | 1.21 | 0.83  |
| Q2VPO9_Ej Meaf6 | Chromatin K.SSVTSAAVSALAGVQDQIEK#.R              | 16.69  | 9.96   | 1.68 | 0.60  |
| Q2VPO9_Ej Meaf6 | Chromatin K.SSVTSAAVSALAGVQDQIEK#.R              | 34.58  | 36.06  | 0.96 | 1.04  |
| Q2VPO9_Ej Meaf6 | Chromatin K.SSVTSAAVSALAGVQDQIEK#.R              | 4.37   | 17.42  | 0.25 | 3.99  |
| P14404_Ev Mecom | MDS1 and R.R.AAAESAIQSIHV.-                      | 19.09  | 19.09  | 1.00 | 1.00  |
| P14404_Ev Mecom | MDS1 and R.APPNTLEPENLLR.K                       | 1.91   | 23.31  | 0.08 | 12.22 |
| P14404_Ev Mecom | MDS1 and R.K.LTDPLEALKEK.Y                       | 2.96   | 9.54   | 0.31 | 3.22  |
| P14404_Ev Mecom | MDS1 and R.K.NHFAAGFFGGISLPGTPAM*DK.T            | 3.62   | 7.65   | 0.47 | 2.11  |
| Q9Z2D6_M Mecp2  | Methyl-CpG K.AAASEGVQVK#.R                       | 26.28  | 29.41  | 0.89 | 1.12  |
| Q9Z2D6_M Mecp2  | Methyl-CpG K.AETSESGSAPVPEASAPK#.Q               | 7.21   | 5.45   | 1.32 | 0.76  |
| Q9Z2D6_M Mecp2  | Methyl-CpG K.EVVK#PLLVSTLGEK#.S                  | 9.27   | 13.34  | 0.69 | 1.44  |
| Q9Z2D6_M Mecp2  | Methyl-CpG K.GEGGATTSACQVMVVK#.R                 | 8.09   | 6.18   | 1.31 | 0.76  |
| Q9Z2D6_M Mecp2  | Methyl-CpG K.R#AEADPQAIK#.K                      | 13.61  | 29.27  | 0.47 | 2.15  |
| Q9Z2D6_M Mecp2  | Methyl-CpG K.SEDQDLOGLR.D                        | 4.02   | 21.83  | 0.18 | 5.43  |
| Q9Z2D6_M Mecp2  | Methyl-CpG K.TQPM*VATTITVAEK#.Y                  | 13.20  | 10.43  | 1.27 | 0.79  |
| Q9Z2D6_M Mecp2  | Methyl-CpG K.TQPMVATTITVAEK#.Y                   | 16.38  | 14.75  | 1.11 | 0.90  |
| Q9Z2D6_M Mecp2  | Methyl-CpG K.VGDTSLDPNDFFTVTR.G                  | 4.78   | 17.57  | 0.27 | 3.68  |
| Q925J9_M Med1   | Mediator o R.VPLINMR*.H                          | 2.91   | 10.73  | 0.27 | 3.68  |
| Q9CXU0_M Med10  | Mediator o K.LNFIVTQDQIDK#.C                     | 7.00   | 8.73   | 0.80 | 1.25  |
| Q9CXU0_M Med10  | Mediator o R.QLGIIVDFQPSQAGLSQK#.L               | 12.19  | 9.25   | 1.32 | 0.76  |
| Q9CXU0_M Med10  | Mediator o R.QLGIIVDFQPSQAGLSQK#.L               | 7.10   | 6.54   | 1.09 | 0.92  |
| Q9CXU0_M Med10  | Mediator o K.SLLIQELSK#.V                        | 22.64  | 17.02  | 1.33 | 0.75  |
| Q9D8C6_M Med11  | Mediator o R.QAAAFTSVQHVAELSAQIR.Y               | 4.38   | 14.16  | 0.31 | 3.23  |
| A2AGH6_M Med12  | Mediator o R.IVDGAVFAVLK.A                       | 8.60   | 11.77  | 0.73 | 1.37  |
| A2AGH6_M Med12  | Mediator o R.SGVWLVPLIAK#.L                      | 14.10  | 16.99  | 0.83 | 1.21  |
| A2AGH6_M Med12  | Mediator o K.TGSPDLHPLIAPSNIPLM*PEGNSAFTQQRV.A   | 1.48   | 3.47   | 0.43 | 2.35  |
| Q5SWW4_M Med13  | Mediator o R.GAGGPAASQSVK.Y                      | 10.29  | 9.47   | 1.09 | 0.92  |
| Q5SWW4_M Med13  | Mediator o K.LDLLSPGSPM*PFK#.E                   | 7.01   | 9.06   | 0.77 | 1.29  |
| Q5SWW4_M Med13  | Mediator o K.NQVLSAIASTEQEPK#.I                  | 7.06   | 4.58   | 1.54 | 0.65  |
| Q5SWW4_M Med13  | Mediator o K.TLTGFGPLAM*ETALK#.S                 | 5.70   | 4.63   | 1.23 | 0.81  |
| A2ABV5_M Med14  | Mediator o R.DGAYSLFDNSK#.L                      | 9.30   | 6.07   | 1.53 | 0.65  |
| A2ABV5_M Med14  | Mediator o R.IIQEQLQINSNEPVGVM*FK#.T             | 11.75  | 6.27   | 1.87 | 0.53  |
| A2ABV5_M Med14  | Mediator o K.LVGEVFPAPGLK.T                      | 13.38  | 15.31  | 0.87 | 1.14  |
| Q6PGF3_M Med16  | Mediator o K.LPISLTNTDLK#.V                      | 14.71  | 13.48  | 1.09 | 0.92  |
| Q8VCD5_M Med17  | Mediator o R.IEDPQIAHWSNINDVYESSVK#.V            | 7.00   | 4.76   | 1.47 | 0.68  |
| Q8VCD5_M Med17  | Mediator o R.LSGPOAFD#NEINSIQSTEGLEK#.I          | 11.41  | 9.01   | 1.27 | 0.79  |
| Q8C1S0_M Med19  | Mediator o R.SLIEKPIILGGSNPITGTM*LSGFR.L         | 3.63   | 15.09  | 0.24 | 4.15  |
| Q8C1S0_M Med19  | Mediator o K.STAGSGPFYLM*.R                      | 10.32  | 12.40  | 0.83 | 1.20  |
| Q9R0X0_M Med20  | Mediator o K.SLQQTVELLTK.K                       | 17.27  | 22.53  | 0.77 | 1.30  |
| Q9R0X0_M Med20  | Mediator o K.VGTVM*GPSAR.G                       | 3.43   | 11.50  | 0.30 | 3.35  |
| Q9CQ39_M Med21  | Mediator o K.IQSALADIAQSKL#.K                    | 9.56   | 8.16   | 1.17 | 0.85  |
| Q62276_M Med22  | Mediator o K.ETLLSYNKR.L                         | 2.28   | 7.27   | 0.31 | 3.19  |
| Q62276_M Med22  | Mediator o K.QFLINDFPVNEAIDQR.N                  | 2.65   | 6.73   | 0.39 | 2.54  |
| Q62276_M Med22  | Mediator o K.SIMDNFTEIK#.T                       | 24.08  | 15.19  | 1.59 | 0.63  |
| Q80YQ2_M Med23  | Mediator o K.DVGNALLNVVLK#.S                     | 14.35  | 14.18  | 1.01 | 0.99  |
| Q80YQ2_M Med23  | Mediator o R.FLELLPVSK.S                         | 14.90  | 15.39  | 0.97 | 1.03  |
| Q80YQ2_M Med23  | Mediator o K.FLELLPVVK#.T                        | 14.98  | 13.53  | 1.11 | 0.90  |
| Q80YQ2_M Med23  | Mediator o R.LITALGSSEVQPFTR.F                   | 2.84   | 13.05  | 0.22 | 4.59  |
| Q80YQ2_M Med23  | Mediator o R.TFADFVLFVSTAGGQQLNK#.C              | 5.63   | 6.10   | 0.92 | 1.08  |
| Q80YQ2_M Med23  | Mediator o K.TVLSAESEELNR.A                      | 4.70   | 15.80  | 0.30 | 3.36  |
| Q99K74_M Med24  | Mediator o K.SLDLAAAATAAGK#.L                    | 9.27   | 4.64   | 2.00 | 0.50  |
| Q99K74_M Med24  | Mediator o K.VVLAITDLSLPLGR.Q                    | 4.27   | 8.94   | 0.48 | 2.10  |

|                  |                                                        |        |        |      |      |
|------------------|--------------------------------------------------------|--------|--------|------|------|
| Q99K74_M Med24   | Mediator o K.LGEILANLNPQLR.S                           | 2.74   | 9.26   | 0.30 | 3.38 |
| Q99K74_M Med24   | Mediator o R.LQEGLEAGTPAPGEK.Q                         | 19.35  | 14.85  | 1.30 | 0.77 |
| Q99K74_M Med24   | Mediator o K.SLDLLAAAAATGK#.L                          | 13.15  | 10.12  | 1.30 | 0.77 |
| Q99K74_M Med24   | Mediator o K.SSENANIQNPGLRL.A                          | 1.85   | 5.71   | 0.32 | 3.09 |
| Q99K74_M Med24   | Mediator o K.VLVAITDLSPLGR.Q                           | 4.78   | 15.10  | 0.32 | 3.16 |
| Q8VCB2_M Med25   | Mediator o R.GLVLPVGGSSSTGSLQTK#.Q                     | 13.41  | 4.56   | 2.94 | 0.34 |
| Q8VCB2_M Med25   | Mediator o R.GLVLPVGGSSSTGSLQTK#.Q                     | 4.60   | 1.87   | 2.47 | 0.41 |
| Q9DB40_M Med27   | Mediator o K.AQPTTLVPPQYVDDVISR.I                      | 1.67   | 3.55   | 0.47 | 2.12 |
| Q920D3_M Med28   | Mediator o R.HWQQVLEDINVQHK.K                          | 3.45   | 4.29   | 0.80 | 1.24 |
| Q920D3_M Med28   | Mediator o K.K#ADM*PQGSALFLEQASANIPAPLK#QT.-           | 7.16   | 2.82   | 2.54 | 0.39 |
| Q9CQI9_M Med30   | Mediator o R.EIVEVKK.L                                 | 22.02  | 21.89  | 1.01 | 0.99 |
| Q9CXU1_M Med31   | Mediator o R.LQQALAEQQNNNTAGK#.-                       | 10.52  | 9.46   | 1.11 | 0.90 |
| Q9CQA5_M Med4    | Mediator o R.LLSALEDELVLSR.E                           | 4.56   | 12.73  | 0.36 | 2.79 |
| Q9D7W5_M Med8    | Mediator o K.QTFNPGDNTALVAVAFAVGK#.G                   | 6.05   | 5.67   | 1.07 | 0.94 |
| Q8BP48_M Metap1  | Methionine R.EVLDAAGM*IK#.A                            | 8.94   | 8.73   | 1.02 | 0.98 |
| Q8BP48_M Metap1  | Methionine K.LLSEDEIGM*KL                              | 5.04   | 15.09  | 0.33 | 2.99 |
| O08663_M Metap2  | Methionine R.M*EEGEVYAIETFGSTGK#.G                     | 4.82   | 2.07   | 2.33 | 0.43 |
| O08663_M Metap2  | Methionine K.YDILLTAVK#.D                              | 17.38  | 8.24   | 2.11 | 0.47 |
| Q8C3P7_M Mett13  | N6-adenosine K.FAAQELIEVK#.R                           | 10.80  | 6.91   | 1.56 | 0.64 |
| Q8C3P7_M Mett13  | N6-adenosine K.GLGEVAGTIAGQK#.R                        | 9.69   | 6.70   | 1.45 | 0.69 |
| Q8C3P7_M Mett13  | N6-adenosine R.VDEIIVVK#.T                             | 12.18  | 12.28  | 0.99 | 1.01 |
| Q9CQU1_M Mfap1   | Microfibril R.DFSAPLTLEDHFNK.T                         | 11.04  | 7.56   | 1.46 | 0.69 |
| Q9CQU1_M Mfap1   | Microfibril K.QPPIQSTAGAVPVR.N                         | 1.93   | 9.81   | 0.20 | 5.09 |
| Q9CQU1_M Mfap1   | Microfibril K.YTHLVDQDTSFSAWGOESAQNTK#.F               | 8.01   | 6.15   | 1.30 | 0.77 |
| P21956_M Mfge8   | Lactadherin R.DFGHIQVASYK#.V                           | 10.96  | 8.47   | 1.29 | 0.77 |
| P21956_M Mfge8   | Lactadherin K.INAWTAQNSAK#.E                           | 18.90  | 9.81   | 1.93 | 0.52 |
| P21956_M Mfge8   | Lactadherin R.K#FEFIQESGGDK#EFLGNLDNNSLK#.V            | 8.43   | 5.37   | 1.57 | 0.64 |
| P21956_M Mfge8   | Lactadherin R.K#FEFIQESGGDK#EFLGNLDNNSLK.V             | 14.30  | 14.09  | 1.01 | 0.99 |
| P21956_M Mfge8   | Lactadherin R.QVTGIITQGAR.D                            | 7.15   | 22.76  | 0.31 | 3.18 |
| P21956_M Mfge8   | Lactadherin K.VFQGNLDNNSHK#K#.N                        | 2.53   | 11.17  | 0.23 | 4.40 |
| P21956_M Mfge8   | Lactadherin K.VNM*FNPTLEAQYK#.L                        | 10.13  | 5.99   | 1.69 | 0.59 |
| P21956_M Mfge8   | Lactadherin K.VNMFNPTLEAQYK.L                          | 8.69   | 8.24   | 1.06 | 0.95 |
| P26187_M Mgmt    | Methylated K.FGETSYQQLAALAGPNK#.A                      | 7.80   | 5.42   | 1.44 | 0.70 |
| P26187_M Mgmt    | Methylated K.YSVLDSPLGK#.M                             | 4.31   | 2.67   | 1.61 | 0.62 |
| Q8VDP3_M Mical1  | Protein-me K.NTSHSSGLVSPQSPGTPSAILFLGK#.L              | 7.77   | 3.38   | 2.30 | 0.44 |
| Q8VDP3_M Mical1  | Protein-me R.NVAQYGLDPATR.Y                            | 7.72   | 9.29   | 0.83 | 1.20 |
| Q8VDP3_M Mical1  | Protein-me R.AKEEEM*K#.R                               | 5.83   | 4.43   | 1.32 | 0.76 |
| Q8VDP3_M Mical1  | Protein-me K.NTSHSSGLVSPQSPGTPSAILFLGK#.L              | 13.96  | 7.92   | 1.76 | 0.57 |
| Q8VDP3_M Mical1  | Protein-me R.QDLETDQLLGG#.A                            | 10.35  | 6.10   | 1.70 | 0.59 |
| Q8VDP3_M Mical1  | Protein-me R.TVEETQVPEISGAR.I                          | 4.10   | 6.46   | 0.63 | 1.58 |
| Q8CD10_M Micu2   | Calcium up K.VATGQELSDNLLDITVFK#.I                     | 5.88   | 1.46   | 4.04 | 0.25 |
| Q3UB25_M Mif4gd  | MIF4G dom R.DGFLPTDLSLAR.L                             | 1.97   | 6.69   | 0.29 | 3.40 |
| Q3UB25_M Mif4gd  | MIF4G dom K.IQSFDAETQQLK#.T                            | 6.29   | 2.72   | 2.31 | 0.43 |
| E9PVX6_E9 Mki67  | Protein Mki R.APGTPAPVQEENDSTAFM*ETPKQK#LDFEAENSSGSK.R | 3.65   | 1.68   | 2.18 | 0.46 |
| E9PVX6_E9 Mki67  | Protein Mki K.MSLESQAEPVK.T                            | 3.56   | 4.47   | 0.80 | 1.26 |
| E9PVX6_E9 Mki67  | Protein Mki K.SPOVTENITNTKPTQSTSGK.K                   | 2.45   | 9.61   | 0.26 | 3.92 |
| E9PVX6_E9 Mki67  | Protein Mki R.AQPLELDGQELFQTPAGANDSVTVEESAK.M          | 5.48   | 4.02   | 1.36 | 0.73 |
| E9PVX6_E9 Mki67  | Protein Mki R.EQVDDQVQDNENAPQR.C                       | 3.05   | 10.72  | 0.28 | 3.52 |
| E9PVX6_E9 Mki67  | Protein Mki K.ETLQTAADGTR.L                            | 2.97   | 17.79  | 0.17 | 5.99 |
| E9PVX6_E9 Mki67  | Protein Mki R.GGM*VPVQTSTETAK.M                        | 5.46   | 14.55  | 0.38 | 2.66 |
| E9PVX6_E9 Mki67  | Protein Mki K.GLSDASPASDGSK#.N                         | 7.48   | 9.41   | 0.80 | 1.26 |
| E9PVX6_E9 Mki67  | Protein Mki R.HSVNLDGEGSAQAVHK.T                       | 23.20  | 36.12  | 0.64 | 1.56 |
| E9PVX6_E9 Mki67  | Protein Mki R.KVDPSDELGLTEM*FK.T                       | 4.01   | 6.80   | 0.59 | 1.70 |
| E9PVX6_E9 Mki67  | Protein Mki R.SGASEANLIVAK.S                           | 18.21  | 29.59  | 0.62 | 1.62 |
| E9PVX6_E9 Mki67  | Protein Mki K.SPOVTENITNTKPTQSTSGK.K                   | 15.90  | 27.87  | 0.57 | 1.75 |
| E9PVX6_E9 Mki67  | Protein Mki K.SSGSTPYTAASSPK.V                         | 15.98  | 30.60  | 0.52 | 1.92 |
| E9PVX6_E9 Mki67  | Protein Mki K.TPVSETEPLK.T                             | 3.81   | 9.66   | 0.39 | 2.54 |
| E9PVX6_E9 Mki67  | Protein Mki K.VDQVQDNENAPQR.C                          | 1.66   | 11.48  | 0.14 | 6.90 |
| E9PVX6_E9 Mki67  | Protein Mki R.YSASPLR.R                                | 27.40  | 20.24  | 1.35 | 0.74 |
| E9PVX6_E9 Mki67  | Protein Mki K.TPVSETEPLK.T                             | 3.37   | 16.91  | 0.20 | 5.02 |
| Q9JK91_M Mlh1    | DNA misme K.HFTEDGNVLQLANLPDLVK#.V                     | 7.32   | 3.71   | 1.97 | 0.51 |
| Q9JK91_M Mlh1    | DNA misme R.SIFGNVSR.E                                 | 2.81   | 25.52  | 0.11 | 9.09 |
| Q8VDG6_M Mlk4    | Mitogen-ac K.SVMCQPSIYALEK#DFLT.-                      | 3.39   | 4.02   | 0.84 | 1.19 |
| Q9QZ01_AI Mlt4   | Afadin OS=R.VSSTATTQDVIELTAEK#.F                       | 4.12   | 33.78  | 0.12 | 8.21 |
| Q9QZ01_AI Mlt4   | Afadin OS=R.ESSEDSFLSAINYNTSSTVHFH#.L                  | 29.09  | 17.83  | 1.63 | 0.61 |
| Q9QZ01_AI Mlt4   | Afadin OS=R.EYTFPASK#.S                                | 20.79  | 7.07   | 2.94 | 0.34 |
| Q9QZ01_AI Mlt4   | Afadin OS=R.KILVFLQK#.R                                | 19.04  | 8.24   | 2.31 | 0.43 |
| Q9QZ01_AI Mlt4   | Afadin OS=R.HKPGAVQETTFELGGDVHSGTALPASR.S              | 8.17   | 10.52  | 0.78 | 1.29 |
| Q9QZ01_AI Mlt4   | Afadin OS=R.IVQATLLTMM*DK#.Y                           | 16.80  | 11.44  | 1.47 | 0.68 |
| Q9QZ01_AI Mlt4   | Afadin OS=R.LDQEQEYR.R                                 | 5.16   | 7.55   | 0.68 | 1.46 |
| Q9QZ01_AI Mlt4   | Afadin OS=R.SM*DAEYTVVDGQR.I                           | 7.09   | 10.74  | 0.66 | 1.51 |
| Q9QZ01_AI Mlt4   | Afadin OS=R.SQDADLPSSGAPENLFTK#.E                      | 4.57   | 4.18   | 1.09 | 0.91 |
| Q9QZ01_AI Mlt4   | Afadin OS=R.TILLSTDTADFAVAESLEK#.Y                     | 29.79  | 4.98   | 5.98 | 0.17 |
| Q9QZ01_AI Mlt4   | Afadin OS=R.TSSVTLLEVAK#.Q                             | 32.46  | 12.84  | 2.53 | 0.40 |
| Q9QZ01_AI Mlt4   | Afadin OS=R.VSSTATTQDVIELTAEK#.F                       | 29.03  | 8.56   | 3.39 | 0.29 |
| Q9D071_M Mms19   | MMS19 nuu R.LPSTVLLPYK#.S                              | 26.64  | 7.10   | 3.75 | 0.27 |
| Q9D071_M Mms19   | MMS19 nuu K.LLQAAGASAR.A                               | 8.96   | 9.57   | 0.94 | 1.07 |
| Q9D071_M Mms19   | MMS19 nuu R.LPSTVLLPYK#.S                              | 47.49  | 14.04  | 3.38 | 0.30 |
| Q9D071_M Mms19   | MMS19 nuu K.VDSELSAK#.L                                | 24.62  | 5.02   | 4.90 | 0.20 |
| Q99LX5_M Mmtag2  | Multiple m R.VSSEGPSTAPTAPR.K                          | 3.09   | 7.37   | 0.42 | 2.39 |
| P51949_M Mnat1   | CDK-activat R.LFIQKEELQALR.K                           | 3.20   | 3.32   | 0.97 | 1.04 |
| Q921Y0_M Mob1a   | MOB kinase R.ELAPLQELIEK#.L                            | 228.85 | 167.63 | 1.37 | 0.73 |
| Q921Y0_M Mob1a   | MOB kinase K.HAEATLGSNLR.Q                             | 11.05  | 31.14  | 0.35 | 2.82 |
| Q921Y0_M Mob1a   | MOB kinase K.HFFVQEFNLIDRR.E                           | 2.03   | 4.50   | 0.45 | 2.22 |
| Q921Y0_M Mob1a   | MOB kinase K.IGVFPFK#.N                                | 128.28 | 99.30  | 1.29 | 0.77 |
| Q921Y0_M Mob1a   | MOB kinase K.K#NIPESHQYELK#.H                          | 5.34   | 2.05   | 2.60 | 0.38 |
| Q921Y0_M Mob1a   | MOB kinase K.NIPEGSHQYELK#.H                           | 10.57  | 5.26   | 2.01 | 0.50 |
| Q921Y0_M Mob1a   | MOB kinase R.YEYHWADGTNIK#.K                           | 42.82  | 28.30  | 1.51 | 0.66 |
| Q921Y0_M Mob1a   | MOB kinase R.ELAPLQELIEK#.L                            | 21.61  | 13.42  | 1.61 | 0.62 |
| Q921Y0_M Mob1a   | MOB kinase K.IGVFPFK#.N                                | 16.63  | 16.11  | 1.03 | 0.97 |
| Q6PEB6_Pf Mob4   | MOB-like pi K.DNLIIVPILIEEVQNSVSGESE.-                 | 49.55  | 49.55  | 1.00 | 1.00 |
| Q6PEB6_Pf Mob4   | MOB-like pi K.ILEPPEQDEGVVW#.Y                         | 9.55   | 6.09   | 1.57 | 0.64 |
| Q69ZX6_M Morc2a  | MORC fami R.TNIVALLQK#.V                               | 23.73  | 13.37  | 1.78 | 0.56 |
| P60762_M Morf411 | Mortality f: R.GNTDNKHEYAVNEVAVGK#.E                   | 2.43   | 2.07   | 1.17 | 0.85 |
| P23249_M Mov10   | Putative he K.AQLETTLK#.S                              | 30.28  | 16.41  | 1.84 | 0.54 |
| P23249_M Mov10   | Putative he R.EGEGGLPLQVEPEWR.N                        | 4.38   | 14.20  | 0.31 | 3.24 |
| P23249_M Mov10   | Putative he R.EGNSPFFNPEEAATVTSVK#.Q                   | 16.30  | 8.73   | 1.87 | 0.54 |
| P23249_M Mov10   | Putative he K.ETGNPGGQLVLGDP.R.Q                       | 7.32   | 12.96  | 0.56 | 1.77 |
| P23249_M Mov10   | Putative he R.FESFLAER.G                               | 29.99  | 15.20  | 1.97 | 0.51 |
| P23249_M Mov10   | Putative he R.GDHLFALLSSETQDDPVYK#.G                   | 27.06  | 16.00  | 1.69 | 0.59 |
| P23249_M Mov10   | Putative he R.GVSLPDSVK#.F                             | 28.60  | 13.65  | 2.09 | 0.48 |
| P23249_M Mov10   | Putative he K.IANLAFVTK#.T                             | 43.43  | 20.69  | 2.10 | 0.48 |
| P23249_M Mov10   | Putative he K.LDLQGGDQLLQGLSK#.L                       | 32.36  | 13.52  | 2.39 | 0.42 |

|                   |                                                |       |       |      |       |
|-------------------|------------------------------------------------|-------|-------|------|-------|
| P23249_M Mov10    | Putative he R.LLAYNSLYK#.K                     | 28.31 | 15.38 | 1.84 | 0.54  |
| P23249_M Mov10    | Putative he R.QLLPTLLQGPSIFTAPK#.E             | 18.38 | 9.01  | 2.04 | 0.49  |
| P23249_M Mov10    | Putative he K.RFNVAVTR.A                       | 3.03  | 15.69 | 0.19 | 5.17  |
| P23249_M Mov10    | Putative he R.SLESNPEQLQAM*K#.H                | 28.52 | 18.91 | 1.51 | 0.66  |
| P23249_M Mov10    | Putative he K.VGSVEEFGQER.S                    | 11.57 | 33.98 | 0.34 | 2.94  |
| P23249_M Mov10    | Putative he R.WEGLPQQGFPIHFGVM*GK#.D           | 11.87 | 4.35  | 2.73 | 0.37  |
| P23249_M Mov10    | Putative he K.AQLTTLK#.S                       | 38.40 | 15.37 | 2.50 | 0.40  |
| P23249_M Mov10    | Putative he R.EGEGGLPLQVEPEWR.N                | 5.63  | 13.56 | 0.42 | 2.41  |
| P23249_M Mov10    | Putative he R.EGNPSFFNPEEAATVTSYK#.Q           | 16.68 | 7.67  | 2.17 | 0.46  |
| P23249_M Mov10    | Putative he K.ETGNPGGLVLADDP.R.Q               | 5.40  | 10.69 | 0.51 | 1.98  |
| P23249_M Mov10    | Putative he R.FESFAER.G                        | 9.72  | 20.27 | 0.48 | 2.09  |
| P23249_M Mov10    | Putative he R.FLAAVAHSPLAAQLKPTTFFK.R          | 9.70  | 3.06  | 3.17 | 0.32  |
| P23249_M Mov10    | Putative he R.FVDGLTFK#.V                      | 15.32 | 9.15  | 1.67 | 0.60  |
| P23249_M Mov10    | Putative he R.GDHLFALLSSETQDDPVYTK#.G          | 26.55 | 10.70 | 2.48 | 0.40  |
| P23249_M Mov10    | Putative he R.GVSLPDSVK#.F                     | 27.79 | 14.31 | 1.94 | 0.52  |
| P23249_M Mov10    | Putative he K.HGVDVEVQGPHEAR.D                 | 17.25 | 26.93 | 0.64 | 1.56  |
| P23249_M Mov10    | Putative he K.IANLAFVTK#.T                     | 53.98 | 23.03 | 2.34 | 0.43  |
| P23249_M Mov10    | Putative he K.LDLQQGDLLQGLSK#.L                | 33.27 | 15.84 | 2.10 | 0.48  |
| P23249_M Mov10    | Putative he R.LLAYNSLYK#.K                     | 38.63 | 59.38 | 0.65 | 1.54  |
| P23249_M Mov10    | Putative he R.SLESNPEQLQAM*K#.H                | 21.60 | 16.49 | 1.31 | 0.76  |
| P23249_M Mov10    | Putative he R.VLITLITASR.L                     | 7.66  | 20.14 | 0.38 | 2.63  |
| P23249_M Mov10    | Putative he R.WADVQLPEK#.R                     | 13.59 | 13.16 | 1.03 | 0.97  |
| Q9D1Q1_V Mphosph6 | M-phase ph R.ANYEEDENGTIK#.A                   | 15.84 | 7.73  | 2.05 | 0.49  |
| Q9D1Q1_V Mphosph6 | M-phase ph K.M*ISDEHWLDELPELK#.E               | 26.60 | 15.57 | 1.71 | 0.59  |
| Q9D1Q1_V Mphosph6 | M-phase ph R.RYETLVGTIGKK.F                    | 7.92  | 23.65 | 0.34 | 2.98  |
| Q3TYA6_M Mphosph8 | M-phase ph K.TAQETVQEGIFEK.H                   | 6.65  | 5.45  | 1.22 | 0.82  |
| P70290_EN Mpp1    | 55 kDa eryt K.FVTGDIIQINK#.D                   | 15.94 | 10.54 | 1.51 | 0.66  |
| P70290_EN Mpp1    | 55 kDa eryt K.IALDIEPQTLK#.T                   | 35.69 | 14.77 | 2.42 | 0.41  |
| P70290_EN Mpp1    | 55 kDa eryt K.IITEPM*GITLK#.L                  | 13.66 | 8.00  | 1.71 | 0.59  |
| Q9JL80_Mf Mpp6    | MAGUK p5:K.EGGSAGLIPSGFLEEK#.R                 | 13.54 | 9.12  | 1.48 | 0.67  |
| Q9JL80_Mf Mpp6    | MAGUK p5:R.FIVLNP.PAR.F                        | 2.97  | 8.08  | 0.37 | 2.72  |
| Q9JL80_Mf Mpp6    | MAGUK p5:K.IDSLLEVVTQGR.T                      | 5.67  | 15.51 | 0.37 | 2.73  |
| Q9JL80_Mf Mpp6    | MAGUK p5:K.LQTAIEK#.L                          | 25.78 | 7.22  | 3.57 | 0.28  |
| Q9JL80_Mf Mpp6    | MAGUK p5:R.VENNDLVIAR.I                        | 4.28  | 9.26  | 0.46 | 2.16  |
| Q9JL80_Mf Mpp6    | MAGUK p5:K.YLEHGEYEGNLVYTK#.I                  | 16.74 | 9.00  | 1.86 | 0.54  |
| Q9JL80_Mf Mpp6    | MAGUK p5:K.YLEHGEYEGNLVYTK#.I                  | 5.64  | 2.66  | 2.12 | 0.47  |
| G5E8S8_G5 Mpp7    | MAGUK p5:K.HLFETDVQNNK#.F                      | 12.72 | 2.99  | 4.25 | 0.24  |
| G5E8S8_G5 Mpp7    | MAGUK p5:R.LIVLVPGVGVGLNELK#.R                 | 9.35  | 2.34  | 3.99 | 0.25  |
| G5E8S8_G5 Mpp7    | MAGUK p5:K.IIINDLTVAFNELK#.T                   | 7.87  | 1.98  | 3.98 | 0.25  |
| P97434_M Mrip     | Myosin phc R.LAEETAATISAIEM*K.N                | 7.67  | 11.91 | 0.64 | 1.55  |
| P97434_M Mrip     | Myosin phc K.SPEGTTVSGYDIM*K.S                 | 4.05  | 6.75  | 0.60 | 1.67  |
| P97434_M Mrip     | Myosin phc K.TFDWAERPIQALQER.A                 | 2.10  | 6.86  | 0.31 | 3.27  |
| P97434_M Mrip     | Myosin phc R.TLLTGDGGGEGSTGLPLTOGK.D           | 6.47  | 8.83  | 0.73 | 1.37  |
| Q61216_M Mre11a   | Double-strc R.FFIEDVLANHPNLPNDPK#.V            | 24.51 | 15.42 | 1.59 | 0.63  |
| Q61216_M Mre11a   | Double-strc R.GMGAEAVQFVDKHEEK#DAIEELVK#.Y     | 10.89 | 7.42  | 1.47 | 0.68  |
| Q61216_M Mre11a   | Double-strc R.GNDTFVTFDEILR.L                  | 5.07  | 23.62 | 0.21 | 4.66  |
| Q61216_M Mre11a   | Double-strc K.IGPIK#NEQQLFVYSPGSSVTSLSPEAVK#.K | 13.50 | 9.88  | 1.37 | 0.73  |
| Q61216_M Mre11a   | Double-strc K.LALYGLGSPIDER.L                  | 7.18  | 15.01 | 0.48 | 2.09  |
| Q61216_M Mre11a   | Double-strc K.NVQLSLLTER.G                     | 8.75  | 18.92 | 0.46 | 2.16  |
| Q61216_M Mre11a   | Double-strc K.TGEEINFGMLITKPASEGATLR.V         | 4.26  | 7.33  | 0.58 | 1.72  |
| Q61216_M Mre11a   | Double-strc K.VDISPLVLLQK#.G                   | 40.85 | 24.11 | 1.69 | 0.59  |
| Q61216_M Mre11a   | Double-strc R.VDYSGGFEPFNLR.F                  | 4.68  | 11.05 | 0.42 | 2.36  |
| Q61216_M Mre11a   | Double-strc R.VEDLVK#.Q                        | 26.62 | 10.65 | 2.50 | 0.40  |
| Q9CQL7_M Mrfap1   | MORF4 fam K.M*AEEM*LVQLVR.R                    | 2.13  | 7.85  | 0.27 | 3.68  |
| Q9CQL7_M Mrfap1   | MORF4 fam K.TQVFAESEALNHLQAGGAEP.R.G           | 5.18  | 30.98 | 0.17 | 5.98  |
| Q9DAT2_M Mrgbp    | MRG/MORF K.VLTANSNPSPPSAK#.R                   | 6.87  | 2.78  | 2.47 | 0.41  |
| Q9CQT1_M Mri1     | Methylthio R.DLGQVAAQEAER.E                    | 5.10  | 17.08 | 0.30 | 3.35  |
| Q9CQT1_M Mri1     | Methylthio K.IGTYQLAIVAK#.H                    | 14.85 | 6.61  | 2.25 | 0.45  |
| G3XA21_G Mroh1    | MCG13444 R.LVSTNLYFVK#.S                       | 13.07 | 4.03  | 3.24 | 0.31  |
| E9PY14_E9F Mroh8  | Protein Mri R.SGKWLQERAGGDAR.D                 | 1.83  | 12.94 | 0.14 | 7.07  |
| Q9N9N6_RI Mrp11   | 39S ribosor K.IAEENGAFAAGTDLVKK.I              | 3.06  | 50.89 | 0.06 | 16.64 |
| Q9D116_M Mrp114   | 39S ribosor K.VLAIAQNFV.-                      | 8.24  | 8.24  | 1.00 | 1.00  |
| Q8VE22_R1 Mrps23  | 28S ribosor K.YTELQNLGETDEEK#LFFVETGK#.A       | 6.45  | 2.66  | 2.43 | 0.41  |
| Q8ZS3_RT Mrps26   | 28S ribosor R.LQLAQEAQVQK#.A                   | 23.92 | 5.45  | 4.39 | 0.23  |
| Q8ZS3_RT Mrps26   | 28S ribosor R.VQTPPADVAEFFVTER.Y               | 3.35  | 4.05  | 0.83 | 1.21  |
| Q9D2R8_R1 Mrps33  | 28S ribosor K.VVSLFSEQLAK#.K                   | 17.19 | 4.95  | 3.47 | 0.29  |
| Q80X85_R1 Mrps7   | 28S ribosor K.AAAATETSSVFADPVISK#.F            | 8.07  | 2.69  | 3.00 | 0.33  |
| Q9D018_Ml Mrto4   | mRNA turn K.ATLTVSLDPPGLK#.Q                   | 19.01 | 9.73  | 1.95 | 0.51  |
| Q9D018_Ml Mrto4   | mRNA turn K.EGDVLTEPQAR.I                      | 4.98  | 11.35 | 0.44 | 2.28  |
| Q9D018_Ml Mrto4   | mRNA turn R.GEVGLFTNR.T                        | 10.09 | 17.19 | 0.59 | 1.70  |
| Q9D018_Ml Mrto4   | mRNA turn K.LFGYEM*AEFK#.V                     | 12.91 | 7.12  | 1.81 | 0.55  |
| Q9D018_Ml Mrto4   | mRNA turn K.LFGYEMAEFK#.V                      | 15.03 | 7.06  | 2.13 | 0.47  |
| Q9D018_Ml Mrto4   | mRNA turn R.SPDSVEYK#DNLHQVSK#.K               | 43.35 | 25.56 | 1.70 | 0.59  |
| Q9D018_Ml Mrto4   | mRNA turn R.TKHEEVNEWFTK#.Y                    | 28.97 | 14.69 | 1.97 | 0.51  |
| Q9D018_Ml Mrto4   | mRNA turn R.TKEEVNEWFTK.Y                      | 21.76 | 10.41 | 2.09 | 0.48  |
| Q9D018_Ml Mrto4   | mRNA turn R.GEVGLFTNR.T                        | 5.79  | 11.47 | 0.50 | 1.98  |
| Q9D018_Ml Mrto4   | mRNA turn K.LFGYEM*AEFK#.V                     | 8.75  | 5.54  | 1.58 | 0.63  |
| Q9D018_Ml Mrto4   | mRNA turn K.LFGYEMAEFK#.V                      | 6.55  | 5.49  | 1.19 | 0.84  |
| Q9D018_Ml Mrto4   | mRNA turn R.TKHEEVNEWFTK#.Y                    | 7.80  | 3.68  | 2.12 | 0.47  |
| Q9D018_Ml Mrto4   | mRNA turn R.TKEEVNEWFTK.Y                      | 12.79 | 5.37  | 2.38 | 0.42  |
| Q9D018_Ml Mrto4   | mRNA turn K.YTEM*DFAR.A                        | 1.61  | 4.13  | 0.39 | 2.56  |
| P43247_M Msh2     | DNA mismæ R.ALNLFGQSVEDTTGSQSLAALLNK#.C        | 48.20 | 21.26 | 2.27 | 0.44  |
| P43247_M Msh2     | DNA mismæ K.ASK#ENEWYLFVK#.A                   | 8.69  | 3.64  | 2.39 | 0.42  |
| P43247_M Msh2     | DNA mismæ K.ASPGNLSQFEDILFGNNDM*SASVGM*GIK#.M  | 14.22 | 3.61  | 3.93 | 0.25  |
| P43247_M Msh2     | DNA mismæ K.ASPGNLSQFEDILFGNNDM*SASVGMGIK#.M   | 14.59 | 7.51  | 1.94 | 0.51  |
| P43247_M Msh2     | DNA mismæ K.DSLIIDLDEL.G                       | 9.25  | 20.68 | 0.45 | 2.23  |
| P43247_M Msh2     | DNA mismæ K.ENEWYLFVK#.A                       | 18.67 | 8.37  | 2.23 | 0.45  |
| P43247_M Msh2     | DNA mismæ K.ETLQLEGAEEAGFVR.F                  | 11.53 | 27.93 | 0.41 | 2.42  |
| P43247_M Msh2     | DNA mismæ K.FTNSLSSLEEYTK#.N                   | 29.69 | 15.94 | 1.86 | 0.54  |
| P43247_M Msh2     | DNA mismæ R.GLGLDPGK#.Q                        | 21.02 | 7.22  | 2.91 | 0.34  |
| P43247_M Msh2     | DNA mismæ K.IILEFLSK#.V                        | 49.38 | 20.80 | 2.37 | 0.42  |
| P43247_M Msh2     | DNA mismæ K.K#GEQJNSAALPEM*ENQVAVSSSAVIK#.F    | 17.64 | 8.17  | 2.16 | 0.46  |
| P43247_M Msh2     | DNA mismæ K.K#GEQJNSAALPEM*ENQVAVSSSAVIK#.F    | 8.26  | 5.03  | 1.64 | 0.61  |
| P43247_M Msh2     | DNA mismæ K.LDSSAQFGYFR.V                      | 7.32  | 11.68 | 0.63 | 1.60  |
| P43247_M Msh2     | DNA mismæ R.LNLVEAFVDSLEL.R.Q                  | 10.55 | 20.70 | 0.51 | 1.96  |
| P43247_M Msh2     | DNA mismæ R.LYQGINQLPSVQALEK#.Y                | 12.15 | 7.22  | 1.68 | 0.59  |
| P43247_M Msh2     | DNA mismæ K.MNFESVVK#.D                        | 16.15 | 5.93  | 2.72 | 0.37  |
| P43247_M Msh2     | DNA mismæ K.NK#GEYEAQDAIVK#.E                  | 30.67 | 10.74 | 2.85 | 0.35  |
| P43247_M Msh2     | DNA mismæ K.NK#GEYEAQDAIVK#.E                  | 16.30 | 8.97  | 1.82 | 0.55  |
| P43247_M Msh2     | DNA mismæ K.QVPTAMSEESIASK#.L                  | 7.57  | 2.87  | 2.64 | 0.38  |
| P43247_M Msh2     | DNA mismæ K.TLQSVVLSK#.M                       | 55.72 | 24.69 | 2.26 | 0.44  |
| P43247_M Msh2     | DNA mismæ R.VGAGDSQLK#.G                       | 49.24 | 49.67 | 0.99 | 1.01  |
| P43247_M Msh2     | DNA mismæ R.ALNLFGQSVEDTTGSQSLAALLNK#.C        | 94.14 | 33.75 | 2.79 | 0.36  |

|                 |                                                        |        |       |      |      |
|-----------------|--------------------------------------------------------|--------|-------|------|------|
| P43247_M Msh2   | DNA mismatch R.ALNLFQGSVEDTTGSQSLAALLNK#.C             | 9.46   | 2.51  | 3.77 | 0.27 |
| P43247_M Msh2   | DNA mismatch K.ASPGNLSQFEDLFGNNDMM*SASVGM*GIK#.M       | 28.84  | 9.54  | 3.02 | 0.33 |
| P43247_M Msh2   | DNA mismatch K.DSLIIIIDELGR.G                          | 14.83  | 29.30 | 0.51 | 1.98 |
| P43247_M Msh2   | DNA mismatch K.ENEWYLFK#.A                             | 17.37  | 10.68 | 1.63 | 0.61 |
| P43247_M Msh2   | DNA mismatch K.FTNSLSLSNEEYTK#.N                       | 34.43  | 13.12 | 2.63 | 0.38 |
| P43247_M Msh2   | DNA mismatch R.GLGLDPGK#.Q                             | 37.43  | 14.94 | 2.50 | 0.40 |
| P43247_M Msh2   | DNA mismatch R.HVGVGYVSTQR.K                           | 10.58  | 23.81 | 0.44 | 2.25 |
| P43247_M Msh2   | DNA mismatch K.IILEFLSK#.V                             | 52.82  | 24.88 | 2.12 | 0.47 |
| P43247_M Msh2   | DNA mismatch K.K#GEGQNSAALPEM*ENQVAVSSLSAVIK#.F        | 22.00  | 11.39 | 1.93 | 0.52 |
| P43247_M Msh2   | DNA mismatch K.K#GEGQNSAALPEMENQVAVSSLSAVIK#.F         | 13.91  | 3.32  | 4.19 | 0.24 |
| P43247_M Msh2   | DNA mismatch K.LDSSAQFGYFR.V                           | 6.82   | 12.49 | 0.55 | 1.83 |
| P43247_M Msh2   | DNA mismatch R.LNLVFAFVESELR.Q                         | 12.23  | 18.36 | 0.67 | 1.50 |
| P43247_M Msh2   | DNA mismatch R.LYQGINQLPSVIQALEK#.Y                    | 33.45  | 14.89 | 2.25 | 0.45 |
| P43247_M Msh2   | DNA mismatch R.LYQGINQLPSVIQALEK#.Y                    | 18.67  | 6.73  | 2.77 | 0.36 |
| P43247_M Msh2   | DNA mismatch K.MNFESVFK#.D                             | 10.42  | 4.07  | 2.56 | 0.39 |
| P43247_M Msh2   | DNA mismatch K.NFSTVDIQK#.N                            | 47.98  | 20.16 | 2.38 | 0.42 |
| P43247_M Msh2   | DNA mismatch K.NK#GEYEAQDAIVK#.E                       | 18.58  | 7.94  | 2.34 | 0.43 |
| P43247_M Msh2   | DNA mismatch K.QVPTAM*SEESISAK#.L                      | 17.21  | 10.10 | 1.70 | 0.59 |
| P43247_M Msh2   | DNA mismatch K.QVPTAM*SEESISAK#.L                      | 5.56   | 2.76  | 2.01 | 0.50 |
| P43247_M Msh2   | DNA mismatch K.TLQSVVLSK#.M                            | 58.75  | 22.33 | 2.63 | 0.38 |
| P43247_M Msh2   | DNA mismatch R.VGAGDSQLK#.G                            | 35.11  | 18.86 | 1.86 | 0.54 |
| P54276_M Msh6   | DNA mismatch R.AIM*YEETYSK#.K                          | 14.26  | 5.56  | 2.56 | 0.39 |
| P54276_M Msh6   | DNA mismatch R.LANLPEEVQK#.G                           | 30.70  | 15.79 | 1.94 | 0.51 |
| P54276_M Msh6   | DNA mismatch R.SAASASSPEAK#.D                          | 13.07  | 5.14  | 2.54 | 0.39 |
| P54276_M Msh6   | DNA mismatch R.TLVAHYPPVQLFEK#.G                       | 14.40  | 5.99  | 2.41 | 0.42 |
| P54276_M Msh6   | DNA mismatch R.VEQTETPEM*M*EAR.C                       | 3.31   | 4.74  | 0.70 | 1.43 |
| P54276_M Msh6   | DNA mismatch K.VGGLLEEVAGGFTSK#.T                      | 16.80  | 8.30  | 2.02 | 0.49 |
| P54276_M Msh6   | DNA mismatch R.AIM*YEETYSK#.K                          | 44.30  | 16.33 | 2.71 | 0.37 |
| P54276_M Msh6   | DNA mismatch R.AIM*YEETYSK#.K                          | 13.27  | 6.17  | 2.15 | 0.46 |
| P54276_M Msh6   | DNA mismatch R.FSDSLVQK#.G                             | 68.58  | 64.24 | 1.07 | 0.94 |
| P54276_M Msh6   | DNA mismatch K.GRFPDLTALQR.W                           | 1.94   | 10.63 | 0.18 | 5.48 |
| P54276_M Msh6   | DNA mismatch R.GTATFDGTALANAVK#.E                      | 56.09  | 18.17 | 3.09 | 0.32 |
| P54276_M Msh6   | DNA mismatch K.GTQTVSLDGPSENYSR.Y                      | 6.41   | 11.01 | 0.58 | 1.72 |
| P54276_M Msh6   | DNA mismatch K.IHNVGSLK#.S                             | 25.60  | 10.72 | 2.39 | 0.42 |
| P54276_M Msh6   | DNA mismatch R.LANLPEEVQK#.G                           | 91.37  | 36.95 | 2.47 | 0.40 |
| P54276_M Msh6   | DNA mismatch R.LDAVEDLM*AVPDK#VTEVDLLK#.K              | 15.27  | 9.08  | 1.68 | 0.59 |
| P54276_M Msh6   | DNA mismatch R.QSTLYSFFPK#.S                           | 16.35  | 11.36 | 1.44 | 0.69 |
| P54276_M Msh6   | DNA mismatch R.SAASASSPEAK#.D                          | 41.70  | 15.01 | 2.78 | 0.36 |
| P54276_M Msh6   | DNA mismatch K.SPALGDTK#.A                             | 11.61  | 6.31  | 1.84 | 0.54 |
| P54276_M Msh6   | DNA mismatch K.SQNFDFLVIFK#.V                          | 21.11  | 11.54 | 1.83 | 0.55 |
| P54276_M Msh6   | DNA mismatch R.TLVAHYPPVQLFEK#.G                       | 40.99  | 17.24 | 2.38 | 0.42 |
| P54276_M Msh6   | DNA mismatch R.VEQTETPEM*M*EAR.C                       | 5.97   | 8.37  | 0.71 | 1.40 |
| P54276_M Msh6   | DNA mismatch K.VGGLLEEVAGGFTSK#.T                      | 83.02  | 27.65 | 3.00 | 0.33 |
| Q61474_M Msi1   | RNA-binding R.GFGVFTFM*DAQVVDK#.V                      | 5.03   | 3.33  | 1.51 | 0.66 |
| Q61474_M Msi1   | RNA-binding R.GFGVFTFM*DAQVVDK#.V                      | 7.24   | 4.35  | 1.66 | 0.60 |
| Q61474_M Msi1   | RNA-binding K.HYFQFGK#.V                               | 12.18  | 7.49  | 1.63 | 0.61 |
| Q920Q6_M Msi2   | RNA-binding K.IFVGGLSANTVVEDVK#.Q                      | 32.29  | 25.77 | 1.25 | 0.80 |
| Q920Q6_M Msi2   | RNA-binding K.VEDAM*LM*FDK#.T                          | 6.24   | 5.99  | 1.04 | 0.96 |
| Q920Q6_M Msi2   | RNA-binding K.VLQDPHHELDK#.T                           | 7.78   | 10.24 | 2.76 | 1.32 |
| Q692F8_M Msi2   | E3 ubiquitin K.K#HEHGSK#.K                             | 9.57   | 3.42  | 2.80 | 0.36 |
| Q2YDW2_M Msto1  | Protein mis K.GAAVQSPVFGALR.S                          | 9.13   | 17.05 | 0.54 | 1.87 |
| Q2YDW2_M Msto1  | Protein mis K.GLAM*DSTPK#.G                            | 6.82   | 5.16  | 1.32 | 0.76 |
| Q2YDW2_M Msto1  | Protein mis R.GVLTVGLLPGYSLGEPQK#.N                    | 8.81   | 8.81  | 1.00 | 1.00 |
| Q2YDW2_M Msto1  | Protein mis K.NPNLQGLLSAEGVR.S                         | 3.86   | 11.88 | 0.32 | 3.08 |
| Q2YDW2_M Msto1  | Protein mis K.TAELLQDEYAGR.G                           | 4.29   | 11.79 | 0.36 | 2.74 |
| Q2YDW2_M Msto1  | Protein mis R.TLGDLAELSR.L                             | 5.10   | 9.36  | 0.55 | 1.83 |
| F8WHY8_Fi Mta1  | Metastasis- R.DISSSLIALADK#.H                          | 9.78   | 5.29  | 1.85 | 0.54 |
| F8WHY8_Fi Mta1  | Metastasis- R.DISSSLIALADK#.H                          | 41.09  | 23.97 | 1.71 | 0.58 |
| F8WHY8_Fi Mta1  | Metastasis- R.EVEEVENPEM*VDLPEK#.L                     | 5.75   | 5.20  | 1.10 | 0.91 |
| F8WHY8_Fi Mta1  | Metastasis- R.LPEASOSPLVQK#.Q                          | 34.04  | 23.60 | 1.44 | 0.69 |
| F8WHY8_Fi Mta1  | Metastasis- K.QVYIPNYNK#NPNPQISASSVK#.A                | 17.18  | 9.77  | 1.76 | 0.57 |
| F8WHY8_Fi Mta1  | Metastasis- K.SSSVLSLTPAK#.S                           | 29.96  | 18.89 | 1.59 | 0.63 |
| F8WHY8_Fi Mta1  | Metastasis- K.YGK#HFDIQDQDFLPWK#.S                     | 16.96  | 15.11 | 1.12 | 0.89 |
| F8WHY8_Fi Mta1  | Metastasis- R.DISSSLIALADK#.H                          | 13.47  | 5.68  | 2.37 | 0.42 |
| Q9R190_M Mta2   | Metastasis- R.DISSSLIALADSNAR.E                        | 5.31   | 12.71 | 0.42 | 2.40 |
| Q9R190_M Mta2   | Metastasis- K.DLVAQAPL#PK#.T                           | 13.82  | 11.00 | 1.26 | 0.80 |
| Q9R190_M Mta2   | Metastasis- R.EFEESKOPGVSEQQR.H                        | 6.00   | 16.99 | 0.35 | 2.83 |
| Q9R190_M Mta2   | Metastasis- K.LNPADAPNPVVFVATK#.D                      | 10.18  | 8.75  | 1.16 | 0.86 |
| Q9R190_M Mta2   | Metastasis- R.LPLATVQK#.D                              | 34.08  | 22.29 | 1.53 | 0.65 |
| Q9R190_M Mta2   | Metastasis- K.TPTQLEGAAR.G                             | 13.44  | 23.31 | 0.58 | 1.73 |
| Q9R190_M Mta2   | Metastasis- R.VGDYVYFENSSNPYLVR.R                      | 3.59   | 11.92 | 0.30 | 3.32 |
| Q9R190_M Mta2   | Metastasis- R.VGDYVYFENSSNPYLVR.R                      | 1.86   | 3.19  | 0.59 | 1.71 |
| Q9R190_M Mta2   | Metastasis- R.DISSSLIALADSNAR.E                        | 8.11   | 19.75 | 0.41 | 2.44 |
| Q9R190_M Mta2   | Metastasis- K.DLVAQAPL#PK#.T                           | 41.52  | 24.53 | 1.69 | 0.59 |
| Q9R190_M Mta2   | Metastasis- R.EFEESKOPGVSEQQR.H                        | 15.40  | 35.36 | 0.44 | 2.30 |
| Q9R190_M Mta2   | Metastasis- R.GLGGIM*VK#.R                             | 27.14  | 13.74 | 1.98 | 0.51 |
| Q9R190_M Mta2   | Metastasis- K.LNPADAPNPVVFVATK#.D                      | 33.60  | 22.10 | 1.52 | 0.66 |
| Q9R190_M Mta2   | Metastasis- R.QK#LNPADAPNPVVFVATK#.D                   | 16.38  | 8.66  | 1.89 | 0.53 |
| Q9R190_M Mta2   | Metastasis- K.TLLADQGEIR.V                             | 14.28  | 33.21 | 0.43 | 2.33 |
| Q9R190_M Mta2   | Metastasis- K.TPTQLEGAAR.G                             | 22.50  | 62.60 | 0.36 | 2.78 |
| Q9R190_M Mta2   | Metastasis- R.VGDYVYFENSSNPYLVR.R                      | 6.75   | 15.43 | 0.44 | 2.29 |
| Q924K8_M Mta3   | Metastasis- R.DISNTLIM*LDK#.H                          | 7.16   | 5.58  | 1.28 | 0.78 |
| Q924K8_M Mta3   | Metastasis- K.QIDQFLVVAR.S                             | 6.48   | 15.81 | 0.41 | 2.44 |
| Q924K8_M Mta3   | Metastasis- R.VGDYVYFENSSNPYLVR.R                      | 2.38   | 7.05  | 0.34 | 2.96 |
| Q924K8_M Mta3   | Metastasis- K.ETEESETPVEADLTEK#.Q                      | 7.68   | 5.00  | 1.54 | 0.65 |
| Q924K8_M Mta3   | Metastasis- R.VGDYVYFENSSNPYLVR.R                      | 3.18   | 9.59  | 0.33 | 3.01 |
| Q924K8_M Mta3   | Metastasis- K.ETEESETPVEADLTEK#.Q                      | 12.45  | 7.81  | 1.59 | 0.63 |
| Q924K8_M Mta3   | Metastasis- R.VGDYVYFENSSNPYLVR.R                      | 1.93   | 7.09  | 0.27 | 3.67 |
| Q9CQ65_M Mtap   | S-methyl-5' K.IGIIGGTGLDDPEILEGR.T                     | 1.77   | 7.46  | 0.24 | 4.22 |
| Q922D8_C Mthfd1 | C-1-tetrahry R.ASOQPSFFQLLYDLK#.L                      | 18.90  | 5.61  | 3.37 | 0.30 |
| Q922D8_C Mthfd1 | C-1-tetrahry K.AYTEEDLDLVEK#.G                         | 9.63   | 3.86  | 2.50 | 0.40 |
| Q922D8_C Mthfd1 | C-1-tetrahry K.TDPTTLTDDIENR.F                         | 3.16   | 6.98  | 0.45 | 2.20 |
| Q922D8_C Mthfd1 | C-1-tetrahry K.AAEI#GIK#.A                             | 101.23 | 45.97 | 2.20 | 0.45 |
| Q922D8_C Mthfd1 | C-1-tetrahry R.ASOQPSFFQLLYDLK#.L                      | 135.57 | 49.72 | 2.73 | 0.37 |
| Q922D8_C Mthfd1 | C-1-tetrahry K.AYTEEDLDLVEK#.G                         | 129.79 | 51.32 | 2.53 | 0.40 |
| Q922D8_C Mthfd1 | C-1-tetrahry K.DAIKPNLM*QTLGTPVVFHAGPFANIAHGNSSIIADR.I | 3.42   | 3.14  | 1.09 | 0.92 |
| Q922D8_C Mthfd1 | C-1-tetrahry K.DVDGLTSVYAGK#.L                         | 12.35  | 5.24  | 2.36 | 0.42 |
| Q922D8_C Mthfd1 | C-1-tetrahry R.EIGLLTEVELYGETK#.A                      | 99.51  | 36.39 | 2.73 | 0.37 |
| Q922D8_C Mthfd1 | C-1-tetrahry K.FSDIQR.R                                | 15.50  | 25.00 | 0.62 | 1.61 |
| Q922D8_C Mthfd1 | C-1-tetrahry R.IFHELTQTDK#.A                           | 128.59 | 58.82 | 2.19 | 0.46 |
| Q922D8_C Mthfd1 | C-1-tetrahry K.ITIGQSPTEK#.G                           | 56.75  | 24.04 | 2.36 | 0.42 |
| Q922D8_C Mthfd1 | C-1-tetrahry R.IYGADIELLPEAQNK#.A                      | 74.29  | 32.09 | 2.31 | 0.43 |
| Q922D8_C Mthfd1 | C-1-tetrahry R.IYGADIELLPEAQNK#AEIYTK#.Q               | 20.63  | 6.47  | 3.19 | 0.31 |

|                  |                                        |        |        |       |      |
|------------------|----------------------------------------|--------|--------|-------|------|
| Q922D8_C_Mthfd1  | C-1-tetrah R.K#TIGQSPTEK#.G            | 70.33  | 27.62  | 2.55  | 0.39 |
| Q922D8_C_Mthfd1  | C-1-tetrah R.K#VGDVAYDEAK#.E           | 37.33  | 15.40  | 2.42  | 0.41 |
| Q922D8_C_Mthfd1  | C-1-tetrah R.LDIDPETIWRQ.V             | 25.98  | 47.27  | 0.55  | 1.82 |
| Q922D8_C_Mthfd1  | C-1-tetrah K.LK#AAEIEGK#.A             | 23.11  | 9.91   | 2.33  | 0.43 |
| Q922D8_C_Mthfd1  | C-1-tetrah K.LVGPGEFVTEAGFGADIGM*EK#.F | 86.40  | 37.85  | 2.28  | 0.44 |
| Q922D8_C_Mthfd1  | C-1-tetrah K.LVGPGEFVTEAGFGADIGMEK#.F  | 20.67  | 8.49   | 2.44  | 0.41 |
| Q922D8_C_Mthfd1  | C-1-tetrah R.M*FGVPVVAVNVFK#.T         | 99.92  | 40.02  | 2.50  | 0.40 |
| Q922D8_C_Mthfd1  | C-1-tetrah K.TDPTLTDDEINR.F            | 37.95  | 62.32  | 0.61  | 1.64 |
| Q922D8_C_Mthfd1  | C-1-tetrah K.TDPTDAELDLVSR.L           | 10.94  | 55.98  | 0.20  | 5.11 |
| Q922D8_C_Mthfd1  | C-1-tetrah K.THLSLSHNPEQK#.G           | 156.17 | 63.93  | 2.44  | 0.41 |
| Q922D8_C_Mthfd1  | C-1-tetrah K.TPVSADIAIR.S              | 43.88  | 74.05  | 0.59  | 1.69 |
| Q922D8_C_Mthfd1  | C-1-tetrah K.VLLSALDR.L                | 33.34  | 64.07  | 0.52  | 1.92 |
| Q922D8_C_Mthfd1  | C-1-tetrah K.VVGDVAYDEAK#.E            | 71.65  | 26.07  | 2.75  | 0.36 |
| Q922D8_C_Mthfd1  | C-1-tetrah K.WTIQYNK#.L                | 73.36  | 28.85  | 2.54  | 0.39 |
| Q922D8_C_Mthfd1  | C-1-tetrah R.YSGLQPHVVVAVVTR.V.A       | 9.55   | 18.74  | 0.51  | 1.96 |
| Q922D8_C_Mthfd1  | C-1-tetrah K.YVVVTGITPTPLGEGK#.S       | 126.44 | 58.06  | 2.18  | 0.46 |
| Q922D8_C_Mthfd1  | C-1-tetrah R.ASQAPSSFQLLYDLK#.L        | 43.95  | 14.41  | 3.05  | 0.33 |
| Q922D8_C_Mthfd1  | C-1-tetrah K.AYTEEDLDLVEK#.G           | 35.38  | 16.86  | 2.10  | 0.48 |
| Q922D8_C_Mthfd1  | C-1-tetrah R.EIGLLTEEVLYGETK#.A        | 26.15  | 8.71   | 3.00  | 0.33 |
| Q922D8_C_Mthfd1  | C-1-tetrah K.GVPTGVFLPIR.D             | 9.97   | 24.06  | 0.41  | 2.41 |
| Q922D8_C_Mthfd1  | C-1-tetrah K.ITIGQSPTEK#.G             | 20.95  | 7.48   | 2.80  | 0.36 |
| Q922D8_C_Mthfd1  | C-1-tetrah R.IYVADDIELLEPAQNK#.A       | 26.66  | 12.24  | 2.18  | 0.46 |
| Q922D8_C_Mthfd1  | C-1-tetrah R.K#VGDVAYDEAK#.E           | 8.45   | 1.46   | 5.78  | 0.17 |
| Q922D8_C_Mthfd1  | C-1-tetrah R.LDIDPETIWRQ.V             | 5.99   | 11.24  | 0.53  | 1.88 |
| Q922D8_C_Mthfd1  | C-1-tetrah K.LVGPGEFVTEAGFGADIGM*EK#.F | 37.04  | 14.52  | 2.55  | 0.39 |
| Q922D8_C_Mthfd1  | C-1-tetrah R.M*FGVPVVAVNVFK#.T         | 28.22  | 12.88  | 2.19  | 0.46 |
| Q922D8_C_Mthfd1  | C-1-tetrah K.TDPTDAELDLVSR.L           | 7.61   | 16.98  | 0.45  | 2.23 |
| Q922D8_C_Mthfd1  | C-1-tetrah K.VLLSALDR.L                | 8.97   | 33.46  | 0.27  | 3.73 |
| Q922D8_C_Mthfd1  | C-1-tetrah K.VVGDVAYDEAK#.E            | 16.56  | 7.19   | 2.30  | 0.43 |
| Q922D8_C_Mthfd1  | C-1-tetrah K.YVVVTGITPTPLGEGK#.S       | 38.38  | 14.91  | 2.57  | 0.39 |
| Q3V3R1_C_Mthfd1  | Monofunct K.DIELSPAQSK#.I              | 18.52  | 6.06   | 3.06  | 0.33 |
| Q3V3R1_C_Mthfd1  | Monofunct K.EIGLLADEIEIYGK#.S          | 20.17  | 6.20   | 3.25  | 0.31 |
| Q3V3R1_C_Mthfd1  | Monofunct K.EVLSLQEK#.N                | 15.73  | 4.43   | 3.55  | 0.28 |
| Q3V3R1_C_Mthfd1  | Monofunct R.FQFLYDVLQPIVEK#.I          | 19.84  | 4.96   | 4.00  | 0.25 |
| Q3V3R1_C_Mthfd1  | Monofunct K.LIAEESVSLAALR.I            | 10.12  | 8.92   | 1.13  | 0.88 |
| Q3V3R1_C_Mthfd1  | Monofunct R.LNIDPATITWRQ.V             | 3.52   | 8.09   | 0.43  | 2.30 |
| Q3V3R1_C_Mthfd1  | Monofunct K.LQPLSPVPSDIEIR.G           | 6.05   | 7.57   | 0.80  | 1.25 |
| Q3V3R1_C_Mthfd1  | Monofunct K.LSGSGPVPVVK#.L             | 34.34  | 18.92  | 1.82  | 0.55 |
| Q3V3R1_C_Mthfd1  | Monofunct R.VHGLTLQISEDSLNSK#.V        | 15.28  | 6.83   | 2.24  | 0.45 |
| Q3V3R1_C_Mthfd1  | Monofunct R.VIAQTVYGAK#.D              | 42.43  | 13.55  | 3.13  | 0.32 |
| Q3V3R1_C_Mthfd1  | Monofunct K.YVLVAGITPTPLGEGK#.S        | 22.67  | 9.68   | 2.34  | 0.43 |
| Q3V3R1_C_Mthfd1  | Monofunct K.EIGLLADEIEIYGK#.S          | 8.04   | 2.43   | 3.30  | 0.30 |
| Q3V3R1_C_Mthfd1  | Monofunct K.YVLVAGITPTPLGEGK#.S        | 9.69   | 4.63   | 2.09  | 0.48 |
| P18155_M_Mthfd2  | Bifunction: K.LVGDVFEVQK#.K            | 14.48  | 6.61   | 2.19  | 0.46 |
| Q9JLN9_M_Mtor    | Serine/thre K.GPTPAILESINNK#.L         | 9.78   | 4.86   | 2.01  | 0.50 |
| Q5HZ11_Mi_Mtus1  | Microtubul K.GEPTNM*PK#NPLGK#.S        | 36.23  | 1.19   | 30.42 | 0.03 |
| Q5HZ11_Mi_Mtus1  | Microtubul K.HMAISR@QLSTEQAALQESLEK.E  | 1.84   | 5.01   | 0.37  | 2.73 |
| Q6DID5_M_Murm1   | PWWP don R.LDGGQNPTR.Q                 | 2.08   | 9.43   | 0.22  | 4.54 |
| A2AMM0_M_Murc    | Muscle-rela K.GGYSQEGGDPTPEPLK.V       | 5.25   | 6.77   | 0.78  | 1.29 |
| A2AMM0_M_Murc    | Muscle-rela K.LSQSHSNTGYVVK#.L         | 7.85   | 14.03  | 0.56  | 1.79 |
| A2AMM0_M_Murc    | Muscle-rela R.LSSVTEDEQDAALITIVLDR.V   | 1.95   | 11.87  | 0.16  | 6.07 |
| A2AMM0_M_Murc    | Muscle-rela R.VASVDSVQASQK.R           | 20.07  | 28.81  | 0.70  | 1.44 |
| A2AMM0_M_Murc    | Muscle-rela R.VEDDESLLLEK.Q            | 9.09   | 10.73  | 0.85  | 1.18 |
| Q9EQK5_M_Mvp     | Major vault K.ALQPLEEGEGEEK#.V         | 15.91  | 3.86   | 4.12  | 0.24 |
| Q9EQK5_M_Mvp     | Major vault K.AQLQADVEAK#.K            | 22.80  | 12.53  | 1.82  | 0.55 |
| Q9EQK5_M_Mvp     | Major vault R.AVIGSTYM*LTQDEVLWEEK#.E  | 2.40   | 1.80   | 1.33  | 0.75 |
| Q9EQK5_M_Mvp     | Major vault K.DITPLQVLPNTALHLK#.A      | 18.49  | 6.72   | 2.75  | 0.36 |
| Q9EQK5_M_Mvp     | Major vault K.EVEVEIHAQTVK#.Q          | 9.30   | 2.76   | 3.37  | 0.30 |
| Q9EQK5_M_Mvp     | Major vault R.GAVASVTFDDFHK#.N         | 28.96  | 16.06  | 1.80  | 0.55 |
| Q9EQK5_M_Mvp     | Major vault R.QIDQVYVLEQQQLLK#.A       | 11.13  | 2.19   | 5.09  | 0.20 |
| Q9EQK5_M_Mvp     | Major vault R.IEGEGSVLQAK#.L           | 23.45  | 7.55   | 3.11  | 0.32 |
| Q9EQK5_M_Mvp     | Major vault R.LAQDPFPLVPELLEK.D        | 16.88  | 11.59  | 1.46  | 0.69 |
| Q9EQK5_M_Mvp     | Major vault R.QAIPLDQNEGIYQDVK#.T      | 5.29   | 3.17   | 1.67  | 0.60 |
| Q35682_M_Myadm   | Myeloid-as: R.TITTTTTSTTVGSAR.A        | 9.20   | 36.54  | 0.25  | 3.97 |
| Q35682_M_Myadm   | Myeloid-as: R.TITTTTTSTTVGSAR.A        | 8.51   | 34.05  | 0.25  | 4.00 |
| Q7TPV4_M_Mybbp1a | Myb-bindir K.AEPAPEAAQSDR.H            | 3.06   | 9.63   | 0.32  | 3.15 |
| Q7TPV4_M_Mybbp1a | Myb-bindir R.ALDLIEVLVTK#.Q            | 12.81  | 2.80   | 4.58  | 0.22 |
| Q7TPV4_M_Mybbp1a | Myb-bindir K.ATQTLQTLGEOQSK#.G         | 13.74  | 3.95   | 3.48  | 0.29 |
| Q7TPV4_M_Mybbp1a | Myb-bindir K.LPNVALDLR.L               | 4.51   | 11.43  | 0.39  | 2.53 |
| Q7TPV4_M_Mybbp1a | Myb-bindir K.LSVDLTAPLGLVQSK#.Q        | 12.84  | 7.71   | 1.67  | 0.60 |
| Q7TPV4_M_Mybbp1a | Myb-bindir K.NAASQDQAVTEGAMPAATGK#.D   | 6.99   | 3.64   | 1.92  | 0.52 |
| Q7TPV4_M_Mybbp1a | Myb-bindir R.NVTSVTSLTQQR.Q            | 5.95   | 4.60   | 1.29  | 0.77 |
| Q7TPV4_M_Mybbp1a | Myb-bindir K.SPAPSNPTLSPSTPAK.T        | 9.41   | 9.35   | 1.01  | 0.99 |
| Q7TPV4_M_Mybbp1a | Myb-bindir K.YLELFLAK#.Q               | 13.22  | 5.56   | 2.38  | 0.42 |
| Q7TPV4_M_Mybbp1a | Myb-bindir K.AEPAPEAAQSDR.H            | 11.82  | 33.77  | 0.35  | 2.86 |
| Q7TPV4_M_Mybbp1a | Myb-bindir R.ALDLIEVLVTK#.Q            | 95.55  | 51.18  | 1.87  | 0.54 |
| Q7TPV4_M_Mybbp1a | Myb-bindir R.AQDASLNVPER.A             | 17.03  | 52.91  | 0.32  | 3.11 |
| Q7TPV4_M_Mybbp1a | Myb-bindir K.ATQTLQTLGEOQSK#.G         | 70.71  | 36.50  | 1.94  | 0.52 |
| Q7TPV4_M_Mybbp1a | Myb-bindir R.EFLDFWDAKPDQETR.L         | 7.87   | 20.16  | 0.39  | 2.56 |
| Q7TPV4_M_Mybbp1a | Myb-bindir R.FELFWK#.K                 | 28.85  | 12.46  | 2.31  | 0.43 |
| Q7TPV4_M_Mybbp1a | Myb-bindir R.FLNAELQSYVAWLR.D          | 3.49   | 11.29  | 0.31  | 3.23 |
| Q7TPV4_M_Mybbp1a | Myb-bindir R.HFGENM*VISK#QNLFK#.I      | 20.02  | 10.32  | 1.94  | 0.52 |
| Q7TPV4_M_Mybbp1a | Myb-bindir R.HFGENM*VISK#QNLFK.I       | 15.40  | 6.54   | 2.35  | 0.42 |
| Q7TPV4_M_Mybbp1a | Myb-bindir K.LSQHPNHLOGQIK#.A          | 39.55  | 24.29  | 1.63  | 0.61 |
| Q7TPV4_M_Mybbp1a | Myb-bindir R.K#SPHPQSALPK#.K           | 3.90   | 1.47   | 2.65  | 0.38 |
| Q7TPV4_M_Mybbp1a | Myb-bindir R.LITGLVGR.E                | 15.84  | 41.33  | 0.38  | 2.61 |
| Q7TPV4_M_Mybbp1a | Myb-bindir R.LLGASLPLSLEQLQVM*RG       | 13.05  | 25.14  | 0.52  | 1.93 |
| Q7TPV4_M_Mybbp1a | Myb-bindir K.LPNVALDLR.L               | 13.14  | 37.02  | 0.35  | 2.82 |
| Q7TPV4_M_Mybbp1a | Myb-bindir K.LSVDLTAPLGLVQSK#.Q        | 89.18  | 50.10  | 1.78  | 0.56 |
| Q7TPV4_M_Mybbp1a | Myb-bindir R.LVQLADMNLNHN.R.N          | 7.11   | 16.98  | 0.42  | 2.39 |
| Q7TPV4_M_Mybbp1a | Myb-bindir K.NAASQDQAVTEGAM*PAATGK#.D  | 12.43  | 8.39   | 1.48  | 0.67 |
| Q7TPV4_M_Mybbp1a | Myb-bindir K.NAASQDQAVTEGAMPAATGK#.D   | 14.49  | 8.09   | 1.79  | 0.56 |
| Q7TPV4_M_Mybbp1a | Myb-bindir R.NVTSVTSLTQQR.Q            | 25.62  | 54.02  | 0.47  | 2.11 |
| Q7TPV4_M_Mybbp1a | Myb-bindir K.SPAPSNPTLSPSTPAK.T        | 43.37  | 34.92  | 1.24  | 0.81 |
| Q7TPV4_M_Mybbp1a | Myb-bindir K.VLEEGLLK#.N               | 45.91  | 23.89  | 1.92  | 0.52 |
| Q7TPV4_M_Mybbp1a | Myb-bindir K.YLELFLAK#.Q               | 24.98  | 10.05  | 2.49  | 0.40 |
| Q7TPV4_M_Mybbp1a | Myb-bindir K.YLQAM*NK#.A               | 20.68  | 10.81  | 1.91  | 0.52 |
| Q7TPV4_M_Mybbp1a | Myb-bindir K.AEPAPEAAQSDR.H            | 42.28  | 117.16 | 0.36  | 2.77 |
| Q7TPV4_M_Mybbp1a | Myb-bindir R.ALDLIEVLVTK#.Q            | 250.04 | 119.83 | 2.09  | 0.48 |
| Q7TPV4_M_Mybbp1a | Myb-bindir R.AQDASLNVPER.A             | 58.52  | 144.41 | 0.41  | 2.47 |
| Q7TPV4_M_Mybbp1a | Myb-bindir K.ATQPETK#.Q                | 172.80 | 105.18 | 1.64  | 0.61 |
| Q7TPV4_M_Mybbp1a | Myb-bindir K.ATQTLQTLGEOQSK#.G         | 232.53 | 113.46 | 2.05  | 0.49 |
| Q7TPV4_M_Mybbp1a | Myb-bindir K.DIPSDTQSPVSTK#.R          | 133.00 | 65.05  | 2.04  | 0.49 |

|                  |                                                       |        |        |      |      |
|------------------|-------------------------------------------------------|--------|--------|------|------|
| Q7TPV4_M Mybbp1a | Myb-bindir R.DM*FLQPLDNLVDFSTANQK#R                   | 110.84 | 53.32  | 2.08 | 0.48 |
| Q7TPV4_M Mybbp1a | Myb-bindir R.DMFLOPDLNLSVDFSTANQK#R                   | 23.56  | 20.86  | 1.13 | 0.89 |
| Q7TPV4_M Mybbp1a | Myb-bindir R.FELFWK#K                                 | 45.87  | 25.81  | 1.78 | 0.56 |
| Q7TPV4_M Mybbp1a | Myb-bindir R.FLNAEALQSYVAWL.R                         | 11.40  | 30.78  | 0.37 | 2.70 |
| Q7TPV4_M Mybbp1a | Myb-bindir K.GSTK#EQDQLLHK#T                          | 11.42  | 16.40  | 0.70 | 1.44 |
| Q7TPV4_M Mybbp1a | Myb-bindir R.HFGENM*VSK#PNQNLK#I                      | 58.05  | 35.06  | 1.66 | 0.60 |
| Q7TPV4_M Mybbp1a | Myb-bindir K.ILSQHPNHLGQOPIK#A                        | 136.45 | 70.06  | 1.95 | 0.51 |
| Q7TPV4_M Mybbp1a | Myb-bindir K.K#ATPQIPETK#Q                            | 55.92  | 26.17  | 2.14 | 0.47 |
| Q7TPV4_M Mybbp1a | Myb-bindir K.K#GFLPETK#K                              | 45.79  | 16.42  | 2.79 | 0.36 |
| Q7TPV4_M Mybbp1a | Myb-bindir K.K#VLEEGLLK#N                             | 48.31  | 23.58  | 2.05 | 0.49 |
| Q7TPV4_M Mybbp1a | Myb-bindir R.LITGLGVGR.E                              | 59.28  | 144.41 | 0.41 | 2.44 |
| Q7TPV4_M Mybbp1a | Myb-bindir K.LK#SEGTPEK#N                             | 23.68  | 15.04  | 1.57 | 0.64 |
| Q7TPV4_M Mybbp1a | Myb-bindir K.LLEYLR.T                                 | 35.73  | 74.26  | 0.48 | 2.08 |
| Q7TPV4_M Mybbp1a | Myb-bindir R.LLGASLPLLSEEQQLVLM#R.G                   | 46.73  | 108.46 | 0.43 | 2.32 |
| Q7TPV4_M Mybbp1a | Myb-bindir K.LPNVALDLLR.L                             | 66.05  | 140.55 | 0.47 | 2.13 |
| Q7TPV4_M Mybbp1a | Myb-bindir K.LSQVNGATVPSPIEPEK#K                      | 14.80  | 6.70   | 2.21 | 0.45 |
| Q7TPV4_M Mybbp1a | Myb-bindir K.LLSDVLTAPLGLVLSK#Q                       | 325.85 | 181.38 | 1.80 | 0.56 |
| Q7TPV4_M Mybbp1a | Myb-bindir K.LLSDVLTAPLGLVLSK#Q                       | 35.84  | 21.29  | 1.68 | 0.59 |
| Q7TPV4_M Mybbp1a | Myb-bindir R.LVQLADMLLNHN.R                           | 14.06  | 34.12  | 0.41 | 2.43 |
| Q7TPV4_M Mybbp1a | Myb-bindir R.LYDLYQAMR.M                              | 5.96   | 13.77  | 0.43 | 2.31 |
| Q7TPV4_M Mybbp1a | Myb-bindir R.M#LGVQRPK.S                              | 6.52   | 19.68  | 0.33 | 3.02 |
| Q7TPV4_M Mybbp1a | Myb-bindir K.NAASQDDAVTEGAM#PAATGK#D                  | 28.91  | 15.17  | 1.91 | 0.52 |
| Q7TPV4_M Mybbp1a | Myb-bindir K.NAASQDDAVTEGAM#PAATGK#D                  | 37.51  | 22.29  | 1.68 | 0.59 |
| Q7TPV4_M Mybbp1a | Myb-bindir K.NAASQDDAVTEGAM#PAATGK#DQDPPSTGK#K        | 14.89  | 10.77  | 1.38 | 0.72 |
| Q7TPV4_M Mybbp1a | Myb-bindir R.NVTSVSLTQQ.R                             | 62.70  | 142.09 | 0.44 | 2.27 |
| Q7TPV4_M Mybbp1a | Myb-bindir R.QAWDQM#M#STLK#E                          | 39.38  | 16.23  | 2.43 | 0.41 |
| Q7TPV4_M Mybbp1a | Myb-bindir K.SPAPSNPPLSPSTPAK#T                       | 240.18 | 133.23 | 1.80 | 0.55 |
| Q7TPV4_M Mybbp1a | Myb-bindir R.SPSSLQSGVK#K                             | 184.90 | 87.81  | 2.11 | 0.47 |
| Q7TPV4_M Mybbp1a | Myb-bindir K.SPTEKAPAPAEAAQDOR.H                      | 11.22  | 27.79  | 0.40 | 2.48 |
| Q7TPV4_M Mybbp1a | Myb-bindir K.VLEEGLLK#N                               | 123.32 | 60.88  | 2.03 | 0.49 |
| Q7TPV4_M Mybbp1a | Myb-bindir R.VYSASLESLLTK#R                           | 229.86 | 105.74 | 2.17 | 0.46 |
| Q7TPV4_M Mybbp1a | Myb-bindir K.VSLQAM#NK#A                              | 82.02  | 42.63  | 1.92 | 0.52 |
| Q7TPV4_M Mybbp1a | Myb-bindir K.VSLQAMNK#A                               | 39.28  | 5.62   | 6.99 | 0.14 |
| Q9EQS3_M Mycbp   | C-Myc-bind K.HHLGAATPENIEILLR.L                       | 3.37   | 10.22  | 0.33 | 3.04 |
| Q9EQS3_M Mycbp   | C-Myc-bind K.LVQYEPQEEK#R                             | 70.78  | 54.43  | 1.30 | 0.77 |
| Q9EQS3_M Mycbp   | C-Myc-bind K.SGVLTLTK#V                               | 59.16  | 35.75  | 1.65 | 0.60 |
| Q9EQS3_M Mycbp   | C-Myc-bind K.VLVALYEEPEK#PTSALDFLK#H                  | 75.91  | 50.61  | 1.50 | 0.67 |
| Q9EQS3_M Mycbp   | C-Myc-bind K.VLVALYEEPEK#PTSALDFLK.H                  | 4.94   | 1.94   | 2.55 | 0.39 |
| Q8C854_M Myef2   | Myelin expi R.EK#VGEVTVVLFK#D                         | 23.31  | 21.67  | 1.08 | 0.93 |
| Q8C854_M Myef2   | Myelin expi R.EK#VGEVTVVLFK.D                         | 10.04  | 9.01   | 1.11 | 0.90 |
| Q8C854_M Myef2   | Myelin expi R.EK#VGEVTVVLFK#DAEGK#S                   | 8.82   | 6.49   | 1.36 | 0.74 |
| Q8C854_M Myef2   | Myelin expi K.EFVSIAGTVK#R                            | 47.37  | 48.98  | 0.97 | 1.03 |
| Q8C854_M Myef2   | Myelin expi R.FESAESA#A                               | 55.60  | 56.99  | 0.98 | 1.02 |
| Q8C854_M Myef2   | Myelin expi R.GFLSGPM#GSGM#R.D                        | 13.50  | 55.29  | 0.24 | 4.10 |
| Q8C854_M Myef2   | Myelin expi K.GNQIFVR.N                               | 30.82  | 138.88 | 0.22 | 4.51 |
| Q8C854_M Myef2   | Myelin expi R.IGGVGVGGLEAMNSM#AGFGVGR.M               | 1.66   | 3.61   | 0.46 | 2.17 |
| Q8C854_M Myef2   | Myelin expi R.IGGVGVGGLEAMNSMAGFGVGR.M                | 2.16   | 5.91   | 0.37 | 2.74 |
| Q8C854_M Myef2   | Myelin expi R.IMNGIK#SGR.E                            | 4.75   | 14.78  | 0.32 | 3.12 |
| Q8C854_M Myef2   | Myelin expi R.LGSA#IGGFAGR.I                          | 8.05   | 41.63  | 0.19 | 5.17 |
| Q8C854_M Myef2   | Myelin expi R.LGSA#IGGFAGR.I                          | 4.51   | 21.03  | 0.21 | 4.67 |
| Q8C854_M Myef2   | Myelin expi R.LGSTIFVANLDFK#V                         | 119.70 | 100.62 | 1.19 | 0.84 |
| Q8C854_M Myef2   | Myelin expi K.LK#EVFVSIAGTVK#R                        | 26.30  | 27.36  | 0.96 | 1.04 |
| Q8C854_M Myef2   | Myelin expi K.M#ENDES#K#E#S                           | 5.35   | 6.83   | 0.78 | 1.28 |
| Q8C854_M Myef2   | Myelin expi K.MENDES#K#E#S                            | 14.46  | 10.71  | 1.35 | 0.74 |
| Q8C854_M Myef2   | Myelin expi R.M#GPGIGAILER.S                          | 27.69  | 137.47 | 0.20 | 4.96 |
| Q8C854_M Myef2   | Myelin expi R.MGPGIGAILER.S                           | 11.50  | 64.42  | 0.18 | 5.60 |
| Q8C854_M Myef2   | Myelin expi R.NLPFDLTVQK#L                            | 101.23 | 99.35  | 1.02 | 0.98 |
| Q8C854_M Myef2   | Myelin expi K.SEAAGDDGSSQQQPAEPR.R                    | 3.57   | 12.32  | 0.29 | 3.45 |
| Q8C854_M Myef2   | Myelin expi R.TGTSFQGS#DVGSLVNLPPSLNPNIPPEVISNLQAGR.L | 2.21   | 2.87   | 0.77 | 1.30 |
| Q8C854_M Myef2   | Myelin expi R.VFISNIPYDM#K#W                          | 68.27  | 67.32  | 1.01 | 0.99 |
| Q8C854_M Myef2   | Myelin expi R.VFISNIPYDMK#W                           | 59.34  | 56.62  | 1.05 | 0.95 |
| Q8C854_M Myef2   | Myelin expi K.VGEVTVVLFK#D                            | 87.90  | 93.45  | 0.94 | 1.06 |
| Q8C854_M Myef2   | Myelin expi K.VGEVTVVLFK#DAEGK#S                      | 20.39  | 19.86  | 1.03 | 0.97 |
| Q8C854_M Myef2   | Myelin expi R.FESAESA#A                               | 17.96  | 18.44  | 0.97 | 1.03 |
| Q8C854_M Myef2   | Myelin expi R.GFGDSFGR.L                              | 5.31   | 29.51  | 0.18 | 5.56 |
| Q8C854_M Myef2   | Myelin expi R.LGSA#IGGFAGR.I                          | 3.78   | 13.94  | 0.27 | 3.68 |
| Q8C854_M Myef2   | Myelin expi R.LGSTIFVANLDFK#V                         | 30.41  | 30.60  | 0.99 | 1.01 |
| Q8C854_M Myef2   | Myelin expi R.M#GPGIGAILER.S                          | 6.32   | 28.83  | 0.22 | 4.56 |
| Q8C854_M Myef2   | Myelin expi R.MGPGIGAILER.S                           | 3.97   | 12.68  | 0.31 | 3.20 |
| Q8C854_M Myef2   | Myelin expi R.VFISNIPYDMK.W                           | 14.36  | 15.73  | 0.91 | 1.10 |
| Q8C854_M Myef2   | Myelin expi K.VGEVTVVLFK.D                            | 19.29  | 20.54  | 0.94 | 1.07 |
| Q3U898_M Myeov2  | Myeloma-o K.AVHADFFNDFFDFDDDDVQ-                      | 22.38  | 22.38  | 1.00 | 1.00 |
| Q61879_M Myh10   | Myosin-10 K.ADEWLM#K#N                                | 137.58 | 80.26  | 1.71 | 0.58 |
| Q61879_M Myh10   | Myosin-10 K.ADEWLMK#N                                 | 41.39  | 22.17  | 1.87 | 0.54 |
| Q61879_M Myh10   | Myosin-10 R.ADM#EDLM#SSK#D                            | 20.94  | 16.47  | 1.27 | 0.79 |
| Q61879_M Myh10   | Myosin-10 R.AGVL#HEERDLK.I                            | 135.80 | 344.84 | 0.39 | 2.54 |
| Q61879_M Myh10   | Myosin-10 K.AK#LQLEGAVK#S                             | 33.71  | 21.34  | 1.58 | 0.63 |
| Q61879_M Myh10   | Myosin-10 K.ALEDETK#NHEAQIDM#R.Q                      | 14.12  | 60.60  | 0.23 | 4.29 |
| Q61879_M Myh10   | Myosin-10 K.ALEDETK#NHEAQIDMR.Q                       | 10.48  | 44.68  | 0.23 | 4.27 |
| Q61879_M Myh10   | Myosin-10 R.ALEEALEAK#E                               | 48.91  | 43.77  | 1.12 | 0.89 |
| Q61879_M Myh10   | Myosin-10 R.ALEEDPNLYR.I                              | 41.53  | 154.70 | 0.27 | 3.72 |
| Q61879_M Myh10   | Myosin-10 R.ALEQQVEEM#R.T                             | 46.31  | 69.09  | 0.67 | 1.49 |
| Q61879_M Myh10   | Myosin-10 R.ALEQQVEEMR.T                              | 18.06  | 60.54  | 0.30 | 3.35 |
| Q61879_M Myh10   | Myosin-10 K.ATDK#TFVEK#L                              | 21.55  | 22.62  | 0.95 | 1.05 |
| Q61879_M Myh10   | Myosin-10 K.ATISALEAK#I                               | 183.05 | 145.75 | 1.26 | 0.80 |
| Q61879_M Myh10   | Myosin-10 R.AVINYPATQADWTAK#K                         | 122.32 | 97.70  | 1.25 | 0.80 |
| Q61879_M Myh10   | Myosin-10 K.DAAGLESQDQQLQEQETR.Q                      | 49.69  | 163.86 | 0.30 | 3.30 |
| Q61879_M Myh10   | Myosin-10 K.DDVGK#NVHELEK#S                           | 61.57  | 50.09  | 1.23 | 0.81 |
| Q61879_M Myh10   | Myosin-10 R.DEFAQSK#E                                 | 35.96  | 28.69  | 1.25 | 0.80 |
| Q61879_M Myh10   | Myosin-10 R.DELADEIANSASGK#S                          | 26.79  | 23.68  | 1.13 | 0.88 |
| Q61879_M Myh10   | Myosin-10 K.DHNP#GELER.Q                              | 18.07  | 59.30  | 0.30 | 3.28 |
| Q61879_M Myh10   | Myosin-10 K.DLEAQIEAANK#A                             | 58.35  | 54.18  | 1.08 | 0.93 |
| Q61879_M Myh10   | Myosin-10 R.DLQTRDEQNEEK.K                            | 1.53   | 8.21   | 0.19 | 5.36 |
| Q61879_M Myh10   | Myosin-10 R.DLSEELK#T                                 | 21.41  | 16.28  | 1.32 | 0.76 |
| Q61879_M Myh10   | Myosin-10 K.DVEALSQR.L                                | 19.36  | 64.01  | 0.30 | 3.31 |
| Q61879_M Myh10   | Myosin-10 R.ELDDATEANEGLSR.E                          | 66.62  | 220.69 | 0.30 | 3.31 |
| Q61879_M Myh10   | Myosin-10 R.ELEAELEDER.K                              | 18.04  | 66.63  | 0.27 | 3.69 |
| Q61879_M Myh10   | Myosin-10 R.ELEAELEDER.K                              | 8.23   | 28.43  | 0.29 | 3.46 |
| Q61879_M Myh10   | Myosin-10 R.ELQAI#AELQEDFESEK#A                       | 61.32  | 45.60  | 1.34 | 0.74 |
| Q61879_M Myh10   | Myosin-10 R.ELQAI#AELQEDFESEK#A                       | 161.56 | 118.51 | 1.36 | 0.73 |
| Q61879_M Myh10   | Myosin-10 K.EQADFVALEAK#A                             | 160.82 | 148.30 | 1.08 | 0.92 |
| Q61879_M Myh10   | Myosin-10 K.FDQL#AEEK#G                               | 281.59 | 155.06 | 1.82 | 0.55 |
| Q61879_M Myh10   | Myosin-10 K.FK#ATISALEAK#I                            | 11.40  | 13.11  | 0.87 | 1.15 |

|                |                                            |        |        |      |      |
|----------------|--------------------------------------------|--------|--------|------|------|
| Q61879_M Myh10 | Myosin-10 R.FVAELWK#D                      | 93.91  | 77.85  | 1.21 | 0.83 |
| Q61879_M Myh10 | Myosin-10 R.GGPIFSSRS.S                    | 20.27  | 69.29  | 0.29 | 3.42 |
| Q61879_M Myh10 | Myosin-10 R.HAEQERDELADIEANSASGK.S         | 27.97  | 81.96  | 0.34 | 2.93 |
| Q61879_M Myh10 | Myosin-10 R.HATALEELSEQLEQAK#R             | 88.89  | 66.45  | 1.34 | 0.75 |
| Q61879_M Myh10 | Myosin-10 R.HATALEELSEQLEQAKR.F            | 26.41  | 86.08  | 0.31 | 3.26 |
| Q61879_M Myh10 | Myosin-10 R.HEM*PPHYAISEAYR.C              | 8.35   | 20.36  | 0.41 | 2.44 |
| Q61879_M Myh10 | Myosin-10 R.HGFEAASIK#E                    | 34.20  | 35.54  | 0.96 | 1.04 |
| Q61879_M Myh10 | Myosin-10 R.HGFEAASIKER.G                  | 23.31  | 86.66  | 0.27 | 3.72 |
| Q61879_M Myh10 | Myosin-10 K.HQQLLEEK#N                     | 91.82  | 64.72  | 1.42 | 0.70 |
| Q61879_M Myh10 | Myosin-10 R.IAQLEEELEEQSNM*ELLNDR.F        | 16.67  | 49.47  | 0.34 | 2.97 |
| Q61879_M Myh10 | Myosin-10 R.IAQLEEELEEQSNMELLNDR.F         | 9.19   | 35.16  | 0.26 | 3.83 |
| Q61879_M Myh10 | Myosin-10 R.IAQLEEELEEQSNM*ELLNDRFR.K      | 1.59   | 6.49   | 0.25 | 4.07 |
| Q61879_M Myh10 | Myosin-10 K.IGQLEEQLEQAK#E                 | 222.16 | 174.04 | 1.28 | 0.78 |
| Q61879_M Myh10 | Myosin-10 R.IVQFEFR.Q                      | 43.14  | 130.47 | 0.33 | 3.02 |
| Q61879_M Myh10 | Myosin-10 R.IVGLDQVTGM*TETAFGSAYK#T        | 103.78 | 75.93  | 1.37 | 0.73 |
| Q61879_M Myh10 | Myosin-10 R.IVGLDQVTGM*TETAFGSAYK.T        | 78.89  | 57.31  | 1.38 | 0.73 |
| Q61879_M Myh10 | Myosin-10 R.IVGLDQVTGMTETAFGSAYK#T         | 24.72  | 16.35  | 1.51 | 0.66 |
| Q61879_M Myh10 | Myosin-10 K.KEELQGALAR.G                   | 23.04  | 111.41 | 0.21 | 4.84 |
| Q61879_M Myh10 | Myosin-10 K.K#FDQLLAEK#G                   | 469.94 | 250.39 | 1.88 | 0.53 |
| Q61879_M Myh10 | Myosin-10 R.K#HQQLLEEK#N                   | 124.24 | 117.43 | 1.06 | 0.95 |
| Q61879_M Myh10 | Myosin-10 R.KKLDAAQVQELHAK.V               | 174.02 | 104.49 | 1.67 | 0.60 |
| Q61879_M Myh10 | Myosin-10 K.K#HVDDDLGTIESLEAK#K            | 106.27 | 85.20  | 1.25 | 0.80 |
| Q61879_M Myh10 | Myosin-10 K.K#LDAQVQELHAK#V                | 133.09 | 121.78 | 1.09 | 0.92 |
| Q61879_M Myh10 | Myosin-10 R.K#LQGETTDLQDQIAELQAOQVDELK#V   | 175.34 | 104.95 | 1.67 | 0.60 |
| Q61879_M Myh10 | Myosin-10 R.K#LQAOQ#K#D                    | 14.91  | 10.98  | 1.36 | 0.74 |
| Q61879_M Myh10 | Myosin-10 K.K#M*EEVLLLEDQNSK#F             | 47.20  | 20.95  | 2.25 | 0.44 |
| Q61879_M Myh10 | Myosin-10 K.KMQAHQDLEEQDDEEGAR.Q           | 3.11   | 4.65   | 0.67 | 1.49 |
| Q61879_M Myh10 | Myosin-10 K.KQLEELHDLRESR.V                | 36.51  | 104.50 | 0.35 | 2.86 |
| Q61879_M Myh10 | Myosin-10 K.K#QQLSALK#V                    | 94.07  | 71.42  | 1.32 | 0.76 |
| Q61879_M Myh10 | Myosin-10 R.KTTLDVTLNTELAER.S              | 18.83  | 61.55  | 0.31 | 3.27 |
| Q61879_M Myh10 | Myosin-10 K.K#VDDLGTIESLEAK#K              | 70.95  | 63.10  | 1.12 | 0.89 |
| Q61879_M Myh10 | Myosin-10 K.KVDDLGTIESLEAK.K               | 106.27 | 85.20  | 1.25 | 0.80 |
| Q61879_M Myh10 | Myosin-10 K.KVQIYLAHVASHK.G                | 67.86  | 33.43  | 2.03 | 0.49 |
| Q61879_M Myh10 | Myosin-10 K.LDPHLVDQLR.C                   | 189.20 | 480.73 | 0.39 | 2.54 |
| Q61879_M Myh10 | Myosin-10 R.LEVNMQAM#K#A                   | 15.58  | 15.36  | 1.01 | 0.99 |
| Q61879_M Myh10 | Myosin-10 R.LEVNMQAMK#A                    | 10.53  | 9.31   | 1.13 | 0.88 |
| Q61879_M Myh10 | Myosin-10 R.LEVNM*QAM#K#A                  | 49.00  | 47.93  | 1.02 | 0.98 |
| Q61879_M Myh10 | Myosin-10 K.LLKDVEALSQR.L                  | 10.67  | 34.20  | 0.31 | 3.21 |
| Q61879_M Myh10 | Myosin-10 K.LQLEGAVK#S                     | 233.99 | 161.94 | 1.44 | 0.69 |
| Q61879_M Myh10 | Myosin-10 K.LQNELDNVSTLEEAKE#K             | 55.59  | 47.06  | 1.18 | 0.85 |
| Q61879_M Myh10 | Myosin-10 K.LQNELDNVSTLEEAKE#G             | 283.88 | 215.29 | 1.32 | 0.76 |
| Q61879_M Myh10 | Myosin-10 R.LQQLDLDLTVLDLHQR.Q             | 72.59  | 240.99 | 0.30 | 3.32 |
| Q61879_M Myh10 | Myosin-10 K.LQQLFNHTM*FILEQEYQR.E          | 34.56  | 80.42  | 0.43 | 2.33 |
| Q61879_M Myh10 | Myosin-10 K.LQQLFNHTM*FILEQEYQR.E          | 1.62   | 3.07   | 0.53 | 1.90 |
| Q61879_M Myh10 | Myosin-10 K.LQQLFNHTMFILEQEYQR.E           | 16.03  | 30.14  | 0.53 | 1.88 |
| Q61879_M Myh10 | Myosin-10 R.LRVELAEK.A                     | 11.77  | 34.62  | 0.34 | 2.94 |
| Q61879_M Myh10 | Myosin-10 K.LVQEQGSHSK#F                   | 18.77  | 16.92  | 1.11 | 0.90 |
| Q61879_M Myh10 | Myosin-10 K.LVWIPSER.H                     | 29.78  | 90.03  | 0.33 | 3.02 |
| Q61879_M Myh10 | Myosin-10 K.M*EEVLLLEDQNSK#F               | 33.47  | 26.84  | 1.25 | 0.80 |
| Q61879_M Myh10 | Myosin-10 K.MEEVLLLEDQNSK#F                | 11.52  | 11.46  | 1.01 | 0.99 |
| Q61879_M Myh10 | Myosin-10 K.M*EIDLK#DLQAQEAANK#A           | 15.59  | 12.89  | 1.21 | 0.83 |
| Q61879_M Myh10 | Myosin-10 K.M*QAHIQDLEEQDDEEGAR.Q          | 16.31  | 54.22  | 0.30 | 3.32 |
| Q61879_M Myh10 | Myosin-10 K.MQAHIQDLEEQDDEEGAR.Q           | 12.02  | 43.91  | 0.27 | 3.65 |
| Q61879_M Myh10 | Myosin-10 K.NHEAQDMD#R.Q                   | 3.51   | 8.10   | 0.43 | 2.30 |
| Q61879_M Myh10 | Myosin-10 K.NILAEQLQAFELFAEEM#R.A          | 24.36  | 82.65  | 0.29 | 3.39 |
| Q61879_M Myh10 | Myosin-10 K.NILAEQLQAFELFAEEMR.A           | 14.18  | 40.30  | 0.35 | 2.84 |
| Q61879_M Myh10 | Myosin-10 R.NKQEV#M*SDLEER.L               | 18.21  | 47.44  | 0.38 | 2.60 |
| Q61879_M Myh10 | Myosin-10 R.NKQEV#M*SDLEER.L               | 7.49   | 18.08  | 0.41 | 2.42 |
| Q61879_M Myh10 | Myosin-10 K.NLPIYSENIEM#YR.G               | 16.55  | 56.62  | 0.29 | 3.42 |
| Q61879_M Myh10 | Myosin-10 K.NLPIYSENIEM#YR.G               | 9.08   | 38.46  | 0.24 | 4.24 |
| Q61879_M Myh10 | Myosin-10 K.NM*DPLNDNVATLHQSSDR.F          | 26.70  | 94.13  | 0.28 | 3.53 |
| Q61879_M Myh10 | Myosin-10 R.NQILQNEK#K                     | 49.89  | 41.47  | 1.20 | 0.83 |
| Q61879_M Myh10 | Myosin-10 K.NSLQEQEQEEEAR.K                | 125.19 | 35.88  | 3.49 | 0.29 |
| Q61879_M Myh10 | Myosin-10 R.NTDQASMPENTVAQK#L              | 28.03  | 23.22  | 1.21 | 0.83 |
| Q61879_M Myh10 | Myosin-10 R.NTDQASMPENTVAQK#L              | 116.03 | 77.61  | 1.49 | 0.67 |
| Q61879_M Myh10 | Myosin-10 R.NTNPVFR.C                      | 194.27 | 455.76 | 0.43 | 2.35 |
| Q61879_M Myh10 | Myosin-10 R.QEELQAKDELLK.V                 | 117.46 | 98.04  | 1.20 | 0.83 |
| Q61879_M Myh10 | Myosin-10 R.QGFPNR.I                       | 52.58  | 124.71 | 0.42 | 2.37 |
| Q61879_M Myh10 | Myosin-10 R.QIVSNLEK#K                     | 114.30 | 84.14  | 1.36 | 0.74 |
| Q61879_M Myh10 | Myosin-10 R.QLEEEAEEATR.A                  | 30.15  | 103.76 | 0.29 | 3.44 |
| Q61879_M Myh10 | Myosin-10 R.QLEEEKNSLQEQEQEEEAR.K          | 4.91   | 17.22  | 0.28 | 3.51 |
| Q61879_M Myh10 | Myosin-10 R.QLHIEGASLELSDDDTESK#T          | 16.42  | 14.00  | 1.17 | 0.85 |
| Q61879_M Myh10 | Myosin-10 R.QLQANPILFSGNAK#T               | 134.07 | 102.24 | 1.31 | 0.76 |
| Q61879_M Myh10 | Myosin-10 R.QRYEILTPNAIPK.G                | 9.53   | 28.77  | 0.33 | 3.02 |
| Q61879_M Myh10 | Myosin-10 K.QVLQALQSLADTK#K                | 114.73 | 93.04  | 1.23 | 0.81 |
| Q61879_M Myh10 | Myosin-10 R.RGGPIFSSRS.S                   | 9.37   | 37.83  | 0.25 | 4.04 |
| Q61879_M Myh10 | Myosin-10 K.SALLDEK#R                      | 105.35 | 65.58  | 1.61 | 0.62 |
| Q61879_M Myh10 | Myosin-10 K.SALLDEK#R                      | 19.03  | 44.25  | 0.43 | 2.33 |
| Q61879_M Myh10 | Myosin-10 K.SDLLLEGFNRYR.F                 | 37.98  | 130.05 | 0.29 | 3.42 |
| Q61879_M Myh10 | Myosin-10 K.SLEAEILQLQEELASSER.A           | 83.15  | 323.56 | 0.26 | 3.89 |
| Q61879_M Myh10 | Myosin-10 K.TELEDLDTAAQQLR.T               | 2.59   | 11.47  | 0.23 | 4.43 |
| Q61879_M Myh10 | Myosin-10 R.TGLEDPER.Y                     | 31.70  | 113.71 | 0.28 | 3.59 |
| Q61879_M Myh10 | Myosin-10 R.TQLEEELELQATEDAK#L             | 260.08 | 161.48 | 1.61 | 0.62 |
| Q61879_M Myh10 | Myosin-10 K.TSDVNDTOPPOSE.-                | 59.70  | 59.70  | 1.00 | 1.00 |
| Q61879_M Myh10 | Myosin-10 K.TTLQVDTLNTELAER.S              | 14.43  | 54.62  | 0.26 | 3.79 |
| Q61879_M Myh10 | Myosin-10 R.TVGLQYK#E                      | 827.31 | 466.88 | 1.77 | 0.56 |
| Q61879_M Myh10 | Myosin-10 K.VDDDLGTIESLEEAKE#K             | 31.64  | 22.44  | 1.41 | 0.71 |
| Q61879_M Myh10 | Myosin-10 K.VDYKHADEWLM#K#N                | 152.03 | 87.26  | 1.74 | 0.57 |
| Q61879_M Myh10 | Myosin-10 K.VDYKHADEWLM#K#N                | 51.46  | 21.96  | 2.34 | 0.43 |
| Q61879_M Myh10 | Myosin-10 R.VEEEEER.N                      | 5.02   | 10.93  | 0.46 | 2.18 |
| Q61879_M Myh10 | Myosin-10 R.VEEEEERNQILQNEK.K              | 24.85  | 103.91 | 0.24 | 4.18 |
| Q61879_M Myh10 | Myosin-10 K.VEGELEEM#ER.K                  | 24.55  | 107.16 | 0.23 | 4.36 |
| Q61879_M Myh10 | Myosin-10 K.VIQLYLAHVASSHK#G               | 652.52 | 348.56 | 1.87 | 0.53 |
| Q61879_M Myh10 | Myosin-10 R.YLFDVR.A                       | 34.16  | 124.04 | 0.28 | 3.63 |
| Q6URW6_M Myh14 | Myosin-14 R.DEM*AEEVAGNSLKS#AATLEEK.R      | 7.95   | 1.70   | 4.69 | 0.21 |
| Q6URW6_M Myh14 | Myosin-14 K.ATDKHSFVEK#L                   | 34.13  | 15.91  | 2.15 | 0.47 |
| Q6URW6_M Myh14 | Myosin-14 K.EQADFALAK#A                    | 826.50 | 367.04 | 2.25 | 0.44 |
| Q6URW6_M Myh14 | Myosin-14 R.NWQWWR.L                       | 9.30   | 18.21  | 0.51 | 1.96 |
| Q6URW6_M Myh14 | Myosin-14 K.QLLQANPILEAFGNAK#T             | 962.58 | 497.21 | 1.94 | 0.52 |
| Q02566_M Myh6  | Myosin-6 O.K.EDQVM*QONPK.F                 | 5.48   | 17.66  | 0.31 | 3.22 |
| Q8VDD5_N Myh9  | Myosin-9 O.R.ALEEM*EQK#A                   | 6.85   | 2.69   | 2.55 | 0.39 |
| Q8VDD5_N Myh9  | Myosin-9 O.R.ALEEQVEEMK#TQLEEELELQATEDAK#L | 5.29   | 1.37   | 3.86 | 0.26 |
| Q8VDD5_N Myh9  | Myosin-9 O.R.ELEADATADAM#NR.E              | 6.00   | 9.89   | 0.61 | 1.65 |

|               |                                                |        |        |      |      |
|---------------|------------------------------------------------|--------|--------|------|------|
| Q8VDD5_V_Myh9 | Myosin-9 O K.GALALEEK#R                        | 23.44  | 7.91   | 2.96 | 0.34 |
| Q8VDD5_V_Myh9 | Myosin-9 O R.IAQLLEEEQGNTELINDR.L              | 4.40   | 5.59   | 0.79 | 1.27 |
| Q8VDD5_V_Myh9 | Myosin-9 O K.IAQLLEQLDNETK#.E                  | 17.92  | 8.81   | 2.03 | 0.49 |
| Q8VDD5_V_Myh9 | Myosin-9 O R.IIGLDQVAGM*SETALPGAFK#.T          | 5.49   | 3.86   | 1.42 | 0.70 |
| Q8VDD5_V_Myh9 | Myosin-9 O K.LQEM*ESAVK#.S                     | 19.43  | 7.04   | 2.76 | 0.36 |
| Q8VDD5_V_Myh9 | Myosin-9 O R.NTDQASM*PDNTAAQK#.V               | 3.02   | 2.73   | 1.11 | 0.90 |
| Q8VDD5_V_Myh9 | Myosin-9 O K.AKHLQEMESAVK#.S                   | 74.06  | 35.72  | 2.07 | 0.48 |
| Q8VDD5_V_Myh9 | Myosin-9 O K.AKHLQEM*ESAVK#.S                  | 96.94  | 49.25  | 1.97 | 0.51 |
| Q8VDD5_V_Myh9 | Myosin-9 O K.AKHLQEM*ESAVK#.S                  | 130.21 | 87.15  | 1.49 | 0.67 |
| Q8VDD5_V_Myh9 | Myosin-9 O K.AKQTLENERGELANEVK.A               | 78.20  | 130.60 | 0.60 | 1.67 |
| Q8VDD5_V_Myh9 | Myosin-9 O R.ALEEAEMQK#.A                      | 264.41 | 138.81 | 1.90 | 0.52 |
| Q8VDD5_V_Myh9 | Myosin-9 O R.ALEEAEM*EQK#.A                    | 356.29 | 179.63 | 1.98 | 0.50 |
| Q8VDD5_V_Myh9 | Myosin-9 O R.ALEEAEMQKALER.L                   | 25.29  | 54.79  | 0.46 | 2.17 |
| Q8VDD5_V_Myh9 | Myosin-9 O K.ALELDSNLRYR.I                     | 200.13 | 471.55 | 0.42 | 2.36 |
| Q8VDD5_V_Myh9 | Myosin-9 O R.ALEQQVEEM*K#.T                    | 210.27 | 93.64  | 2.25 | 0.45 |
| Q8VDD5_V_Myh9 | Myosin-9 O R.ALEQQVEEMK#.T                     | 255.27 | 125.78 | 2.03 | 0.49 |
| Q8VDD5_V_Myh9 | Myosin-9 O R.ALEQQVEEM*K#TQLEEELEDELQATEDAK#.L | 143.19 | 107.87 | 1.33 | 0.75 |
| Q8VDD5_V_Myh9 | Myosin-9 O K.ANLQDQJNTDLNLER.S                 | 49.28  | 118.29 | 0.42 | 2.40 |
| Q8VDD5_V_Myh9 | Myosin-9 O K.ASIAALEAK#.I                      | 877.72 | 436.08 | 2.01 | 0.50 |
| Q8VDD5_V_Myh9 | Myosin-9 O R.ASREEILAQAK.E                     | 139.48 | 352.43 | 0.40 | 2.53 |
| Q8VDD5_V_Myh9 | Myosin-9 O R.ASREEILAQAKENEK.K                 | 13.72  | 42.57  | 0.32 | 3.10 |
| Q8VDD5_V_Myh9 | Myosin-9 O R.DELAEIANSQK#.G                    | 222.11 | 130.57 | 1.70 | 0.59 |
| Q8VDD5_V_Myh9 | Myosin-9 O K.DFSALESQLODQTOELLQENR.Q           | 207.64 | 392.71 | 0.53 | 1.89 |
| Q8VDD5_V_Myh9 | Myosin-9 O K.DFSALESQLODQTOELLQENRQK.L         | 27.23  | 43.88  | 0.62 | 1.61 |
| Q8VDD5_V_Myh9 | Myosin-9 O K.DLEAHDITANK#.N                    | 230.03 | 108.19 | 2.13 | 0.47 |
| Q8VDD5_V_Myh9 | Myosin-9 O K.DLEGLSQR.L                        | 183.26 | 392.34 | 0.47 | 2.14 |
| Q8VDD5_V_Myh9 | Myosin-9 O R.DGLEELAK#.T                       | 77.33  | 41.92  | 1.84 | 0.54 |
| Q8VDD5_V_Myh9 | Myosin-9 O R.DLQGRDEQSEK.K                     | 21.38  | 52.96  | 0.40 | 2.48 |
| Q8VDD5_V_Myh9 | Myosin-9 O K.DM*FQETM*EAM#.R.I                 | 6.09   | 13.58  | 0.45 | 2.23 |
| Q8VDD5_V_Myh9 | Myosin-9 O R.EEILAQAK#.E                       | 315.77 | 167.19 | 1.89 | 0.53 |
| Q8VDD5_V_Myh9 | Myosin-9 O K.EEGVEEIAIVLVEGK#.K                | 38.16  | 19.32  | 1.98 | 0.51 |
| Q8VDD5_V_Myh9 | Myosin-9 O R.ELEDATETADAM*NR.E                 | 136.91 | 318.03 | 0.43 | 2.32 |
| Q8VDD5_V_Myh9 | Myosin-9 O R.ELEDATETADAMNR.E                  | 77.66  | 186.96 | 0.42 | 2.41 |
| Q8VDD5_V_Myh9 | Myosin-9 O R.ELETQISELQEDLESER.A               | 48.03  | 107.47 | 0.45 | 2.24 |
| Q8VDD5_V_Myh9 | Myosin-9 O R.EM*EALEEDER.K                     | 66.27  | 159.04 | 0.42 | 2.40 |
| Q8VDD5_V_Myh9 | Myosin-9 O R.EMEALEEDER.K                      | 27.42  | 76.07  | 0.36 | 2.77 |
| Q8VDD5_V_Myh9 | Myosin-9 O R.FLSNGHVITPGQQDK#.D                | 11.61  | 4.03   | 2.88 | 0.35 |
| Q8VDD5_V_Myh9 | Myosin-9 O R.FLSNGHVITPGQQDKM*FQETM*EAMR.I     | 4.16   | 11.94  | 0.35 | 2.87 |
| Q8VDD5_V_Myh9 | Myosin-9 O K.FVSELWK#.D                        | 201.32 | 94.74  | 2.13 | 0.47 |
| Q8VDD5_V_Myh9 | Myosin-9 O K.GALALEEK#.R                       | 613.82 | 297.71 | 2.06 | 0.49 |
| Q8VDD5_V_Myh9 | Myosin-9 O K.GALALEEK#.R                       | 40.85  | 102.18 | 0.40 | 2.50 |
| Q8VDD5_V_Myh9 | Myosin-9 O R.GDLFPVTR.R                        | 46.24  | 117.94 | 0.39 | 2.55 |
| Q8VDD5_V_Myh9 | Myosin-9 O R.GELANEVK#.A                       | 221.47 | 129.55 | 1.71 | 0.58 |
| Q8VDD5_V_Myh9 | Myosin-9 O K.HEAM*ITDLEER.L                    | 16.19  | 33.11  | 0.49 | 2.05 |
| Q8VDD5_V_Myh9 | Myosin-9 O R.HEDELLAK#.E                       | 768.94 | 370.65 | 2.07 | 0.48 |
| Q8VDD5_V_Myh9 | Myosin-9 O R.HEM*PHIYAITDTAYR.S                | 30.92  | 62.36  | 0.50 | 2.02 |
| Q8VDD5_V_Myh9 | Myosin-9 O K.HLAENR.L                          | 17.86  | 47.37  | 0.38 | 2.65 |
| Q8VDD5_V_Myh9 | Myosin-9 O K.HSQAVEELADQLEQTK#.R               | 244.67 | 110.51 | 2.21 | 0.45 |
| Q8VDD5_V_Myh9 | Myosin-9 O K.HSQAVEELADQLEQTKR.V               | 170.21 | 312.40 | 0.54 | 1.84 |
| Q8VDD5_V_Myh9 | Myosin-9 O R.IAQLLEEEQGNTELINDR.L              | 108.38 | 230.23 | 0.47 | 2.12 |
| Q8VDD5_V_Myh9 | Myosin-9 O K.IAQLLEQLDNETK#.E                  | 527.16 | 242.01 | 2.18 | 0.46 |
| Q8VDD5_V_Myh9 | Myosin-9 O K.IAQLLEQLDNETKER.Q                 | 165.61 | 366.47 | 0.45 | 2.21 |
| Q8VDD5_V_Myh9 | Myosin-9 O R.IIGLDQVAGM*SETALPGAFK#.T          | 464.55 | 201.90 | 2.30 | 0.43 |
| Q8VDD5_V_Myh9 | Myosin-9 O R.IIGLDQVAGMSETALPGAFK#.T           | 122.04 | 55.91  | 2.18 | 0.46 |
| Q8VDD5_V_Myh9 | Myosin-9 O R.IIM*GIPEDEQM*GLLR.V               | 85.83  | 191.92 | 0.45 | 2.24 |
| Q8VDD5_V_Myh9 | Myosin-9 O R.IIM*GIPEDEQMGLLR.V                | 24.14  | 55.09  | 0.44 | 2.28 |
| Q8VDD5_V_Myh9 | Myosin-9 O R.IIMGIPEDEQM*GLLR.V                | 24.14  | 55.09  | 0.44 | 2.28 |
| Q8VDD5_V_Myh9 | Myosin-9 O R.IIMGIPEDEQMGLLR.V                 | 22.59  | 29.02  | 0.78 | 1.28 |
| Q8VDD5_V_Myh9 | Myosin-9 O K.IRELETQISELQEDLESER.A             | 19.84  | 150.14 | 0.13 | 7.57 |
| Q8VDD5_V_Myh9 | Myosin-9 O K.KANLQDQJNTDLNLER.S                | 81.85  | 166.73 | 0.49 | 2.04 |
| Q8VDD5_V_Myh9 | Myosin-9 O K.KEEELQAALAR.L                     | 88.47  | 202.39 | 0.44 | 2.29 |
| Q8VDD5_V_Myh9 | Myosin-9 O R.K#HVEAQLQELQVK#.F                 | 65.82  | 33.19  | 1.98 | 0.50 |
| Q8VDD5_V_Myh9 | Myosin-9 O R.KKVEAQLQELQVK#.F                  | 630.62 | 276.73 | 2.28 | 0.44 |
| Q8VDD5_V_Myh9 | Myosin-9 O R.K#LEGDSTLSDQJAEQAELK#.M           | 477.18 | 229.52 | 2.08 | 0.48 |
| Q8VDD5_V_Myh9 | Myosin-9 O K.K#LEMDLK#.D                       | 46.05  | 21.97  | 2.10 | 0.48 |
| Q8VDD5_V_Myh9 | Myosin-9 O K.K#LEMDLK#.D                       | 56.64  | 30.93  | 1.83 | 0.55 |
| Q8VDD5_V_Myh9 | Myosin-9 O K.K#LVVVPSSK#.N                     | 402.05 | 160.79 | 2.50 | 0.40 |
| Q8VDD5_V_Myh9 | Myosin-9 O K.KM*QQNIQEELEEEESAR.Q              | 24.97  | 45.29  | 0.55 | 1.81 |
| Q8VDD5_V_Myh9 | Myosin-9 O K.KMQQNIQEELEEEESAR.Q               | 16.01  | 32.36  | 0.49 | 2.02 |
| Q8VDD5_V_Myh9 | Myosin-9 O K.K#LEDEAK#.T                       | 38.37  | 21.24  | 1.81 | 0.55 |
| Q8VDD5_V_Myh9 | Myosin-9 O K.K#HVEAQLQELQVK#.F                 | 118.04 | 57.05  | 2.07 | 0.48 |
| Q8VDD5_V_Myh9 | Myosin-9 O K.LEGDSTLSDQJAEQAELK#.M             | 147.62 | 69.38  | 2.13 | 0.47 |
| Q8VDD5_V_Myh9 | Myosin-9 O R.LEVNLQAM*K#.A                     | 270.52 | 124.92 | 2.17 | 0.46 |
| Q8VDD5_V_Myh9 | Myosin-9 O R.LEVNLQAMK#.A                      | 170.67 | 79.01  | 2.16 | 0.46 |
| Q8VDD5_V_Myh9 | Myosin-9 O K.LKDVLVLLQVEDER.R                  | 12.51  | 26.97  | 0.46 | 2.16 |
| Q8VDD5_V_Myh9 | Myosin-9 O K.LKDVLVLLQVEDERR.N                 | 21.94  | 148.99 | 0.15 | 6.79 |
| Q8VDD5_V_Myh9 | Myosin-9 O K.LKNKHEAM*ITDLEER.L                | 5.01   | 11.83  | 0.42 | 2.36 |
| Q8VDD5_V_Myh9 | Myosin-9 O K.LKSM*EAEM*IQLEELAAER.A            | 10.61  | 24.83  | 0.43 | 2.34 |
| Q8VDD5_V_Myh9 | Myosin-9 O K.LQEMESAVK#.S                      | 411.80 | 176.42 | 2.33 | 0.43 |
| Q8VDD5_V_Myh9 | Myosin-9 O K.LQEM*ESAVK#.S                     | 599.88 | 298.22 | 2.01 | 0.50 |
| Q8VDD5_V_Myh9 | Myosin-9 O R.LQQLDLDLVDLHDHQR.Q                | 347.18 | 734.48 | 0.47 | 2.12 |
| Q8VDD5_V_Myh9 | Myosin-9 O K.LQVELDVTGLLSQSSK#.S               | 280.37 | 129.89 | 2.16 | 0.46 |
| Q8VDD5_V_Myh9 | Myosin-9 O R.LTEM*ETM*QSQLMAEK#.L              | 100.66 | 51.62  | 1.95 | 0.51 |
| Q8VDD5_V_Myh9 | Myosin-9 O R.LTEM*ETM*QSQLMAEK#.L              | 100.66 | 51.62  | 1.95 | 0.51 |
| Q8VDD5_V_Myh9 | Myosin-9 O R.LTEM*ETM*QSQLMAEK#.L              | 13.49  | 8.03   | 1.68 | 0.59 |
| Q8VDD5_V_Myh9 | Myosin-9 O R.LTEM*ETM*QSQLMAEK#.L              | 29.86  | 14.49  | 2.06 | 0.49 |
| Q8VDD5_V_Myh9 | Myosin-9 O R.LTEM*ETM*QSQLMAEK#.L              | 11.81  | 6.33   | 1.87 | 0.54 |
| Q8VDD5_V_Myh9 | Myosin-9 O R.LTEM*ETM*QSQLMAEK#.L              | 17.23  | 9.06   | 1.90 | 0.53 |
| Q8VDD5_V_Myh9 | Myosin-9 O R.LTEM*ETM*QSQLMAEK#.L              | 30.44  | 14.90  | 2.04 | 0.49 |
| Q8VDD5_V_Myh9 | Myosin-9 O K.LVWVPSK#.N                        | 327.88 | 178.87 | 1.83 | 0.55 |
| Q8VDD5_V_Myh9 | Myosin-9 O K.M*QQNIQEELEEEESAR.Q               | 65.05  | 122.60 | 0.53 | 1.88 |
| Q8VDD5_V_Myh9 | Myosin-9 O K.MQQQNIQEELEEEESAR.Q               | 8.50   | 18.93  | 0.45 | 2.23 |
| Q8VDD5_V_Myh9 | Myosin-9 O R.NAEQKQADK.A                       | 274.07 | 134.75 | 2.03 | 0.49 |
| Q8VDD5_V_Myh9 | Myosin-9 O R.NAEQKQADKASTR.L                   | 32.04  | 76.20  | 0.42 | 2.38 |
| Q8VDD5_V_Myh9 | Myosin-9 O K.NFINPLAQADWAAK#.K                 | 430.13 | 214.11 | 2.01 | 0.50 |
| Q8VDD5_V_Myh9 | Myosin-9 O K.NGFEPASLK#.E                      | 23.91  | 8.49   | 2.82 | 0.35 |
| Q8VDD5_V_Myh9 | Myosin-9 O K.NGFEPASLK#HEEVGEEAIVLVEGK#.K      | 11.94  | 7.27   | 1.64 | 0.61 |
| Q8VDD5_V_Myh9 | Myosin-9 O K.NGFEPASLK#HEEVGEEAIVLVEGK#K#.V    | 13.40  | 4.80   | 2.79 | 0.36 |
| Q8VDD5_V_Myh9 | Myosin-9 O K.NKHEAM*ITDLEER.L                  | 36.45  | 100.09 | 0.36 | 2.75 |
| Q8VDD5_V_Myh9 | Myosin-9 O K.NKHEAMITDLEER.L                   | 29.41  | 69.83  | 0.42 | 2.37 |
| Q8VDD5_V_Myh9 | Myosin-9 O K.NLPIYSEIIVEM*YK#.G                | 288.40 | 150.90 | 1.91 | 0.52 |
| Q8VDD5_V_Myh9 | Myosin-9 O K.NLPIYSEIIVEM*YK#.G                | 218.65 | 109.60 | 2.00 | 0.50 |
| Q8VDD5_V_Myh9 | Myosin-9 O K.NM*DPLNDNIATLLHQSSDK#.F           | 221.93 | 121.34 | 1.83 | 0.55 |



|                 |                                                |         |         |      |      |
|-----------------|------------------------------------------------|---------|---------|------|------|
| Q8VDD5_N_Myh9   | Myosin-9 O R.NTDQASM*PDNTAAQK#.V               | 295.61  | 179.32  | 1.65 | 0.61 |
| Q8VDD5_N_Myh9   | Myosin-9 O R.NTDQASMPDNTAAQK#.V                | 242.12  | 114.31  | 2.12 | 0.47 |
| Q8VDD5_N_Myh9   | Myosin-9 O R.QAQQRDELDAEIANSSGK.G              | 154.58  | 338.85  | 0.46 | 2.19 |
| Q8VDD5_N_Myh9   | Myosin-9 O K.QIATLHAQVTD*M*K#.K                | 131.68  | 63.76   | 2.07 | 0.48 |
| Q8VDD5_N_Myh9   | Myosin-9 O K.QIATLHAQVTD*M*K#.K                | 18.75   | 5.16    | 3.63 | 0.28 |
| Q8VDD5_N_Myh9   | Myosin-9 O R.QK#HSQAVEELADQLEQTK#.R            | 14.27   | 9.54    | 1.50 | 0.67 |
| Q8VDD5_N_Myh9   | Myosin-9 O R.QLEEEEAQR.A                       | 172.08  | 289.61  | 0.59 | 1.68 |
| Q8VDD5_N_Myh9   | Myosin-9 O R.QQLTAM*K#.V                       | 196.29  | 92.45   | 2.12 | 0.47 |
| Q8VDD5_N_Myh9   | Myosin-9 O R.QRYELTPNSIPK.G                    | 40.88   | 101.29  | 0.40 | 2.48 |
| Q8VDD5_N_Myh9   | Myosin-9 O K.REQEVSILK.K                       | 4.17    | 14.80   | 0.28 | 3.55 |
| Q8VDD5_N_Myh9   | Myosin-9 O R.RGDLFPVTR.R                       | 30.71   | 226.75  | 0.14 | 7.38 |
| Q8VDD5_N_Myh9   | Myosin-9 O R.RKLEGDSTLSDQIAELQAIAELK.M         | 49.78   | 88.72   | 0.56 | 1.78 |
| Q8VDD5_N_Myh9   | Myosin-9 O K.RQAQQRDELDAEIANSSGK.G             | 6.63    | 37.43   | 0.18 | 5.65 |
| Q8VDD5_N_Myh9   | Myosin-9 O K.RQLEEEEAQR.A                      | 12.97   | 102.79  | 0.13 | 7.93 |
| Q8VDD5_N_Myh9   | Myosin-9 O K.SM*EAEM*QLQEELAAAER.A             | 19.46   | 36.61   | 0.53 | 1.88 |
| Q8VDD5_N_Myh9   | Myosin-9 O K.SM*EAEM*QLQEELAAAER.A             | 3.64    | 6.34    | 0.57 | 1.74 |
| Q8VDD5_N_Myh9   | Myosin-9 O K.SM*EAEM*QLQEELAAAER.A             | 20.65   | 49.07   | 0.42 | 2.38 |
| Q8VDD5_N_Myh9   | Myosin-9 O K.SM*EAEM*QLQEELAAAER.A             | 47.47   | 104.62  | 0.45 | 2.20 |
| Q8VDD5_N_Myh9   | Myosin-9 O K.SVHELEK#.S                        | 211.06  | 108.41  | 1.95 | 0.51 |
| Q8VDD5_N_Myh9   | Myosin-9 O K.TLLELPPYK#.Y                      | 583.08  | 276.12  | 2.11 | 0.47 |
| Q8VDD5_N_Myh9   | Myosin-9 O R.TELADK#VTK#.L                     | 184.04  | 106.13  | 1.73 | 0.58 |
| Q8VDD5_N_Myh9   | Myosin-9 O K.TELEDLSTAAQQLR.S                  | 20.64   | 46.13   | 0.45 | 2.23 |
| Q8VDD5_N_Myh9   | Myosin-9 O R.TEMEDLM*SSK#.D                    | 25.72   | 13.26   | 1.94 | 0.52 |
| Q8VDD5_N_Myh9   | Myosin-9 O R.TEMEDLMSSK#.D                     | 38.42   | 15.64   | 2.46 | 0.41 |
| Q8VDD5_N_Myh9   | Myosin-9 O R.TEM*EDLM*SSK#.D                   | 106.50  | 57.81   | 1.84 | 0.54 |
| Q8VDD5_N_Myh9   | Myosin-9 O R.TEMEDLM*SSKDVGK.S                 | 27.52   | 14.61   | 1.88 | 0.53 |
| Q8VDD5_N_Myh9   | Myosin-9 O R.TEM*EDLM*SSKDVGK.S                | 794.69  | 419.40  | 1.89 | 0.53 |
| Q8VDD5_N_Myh9   | Myosin-9 O K.THEAQIQEMR.Q                      | 41.58   | 109.41  | 0.38 | 2.63 |
| Q8VDD5_N_Myh9   | Myosin-9 O K.THEAQIQEM*R.Q                     | 33.23   | 87.63   | 0.38 | 2.64 |
| Q8VDD5_N_Myh9   | Myosin-9 O K.TLEDEAK#.T                        | 224.36  | 126.61  | 1.77 | 0.56 |
| Q8VDD5_N_Myh9   | Myosin-9 O K.TLEDEAKTHEAQIQEM*R.Q              | 34.69   | 65.65   | 0.53 | 1.89 |
| Q8VDD5_N_Myh9   | Myosin-9 O K.TLEDEAKTHEAQIQEMR.Q               | 36.61   | 63.57   | 0.58 | 1.74 |
| Q8VDD5_N_Myh9   | Myosin-9 O R.TVGLYK#EQLAK#.L                   | 26.58   | 8.38    | 3.17 | 0.32 |
| Q8VDD5_N_Myh9   | Myosin-9 O K.VAAVDK#LEK#.T                     | 427.65  | 212.27  | 2.01 | 0.50 |
| Q8VDD5_N_Myh9   | Myosin-9 O R.VAEFTNLN*EEEEK#.S                 | 178.91  | 102.14  | 1.75 | 0.57 |
| Q8VDD5_N_Myh9   | Myosin-9 O R.VAEFTNLMEEEEK#.S                  | 116.33  | 57.50   | 2.02 | 0.49 |
| Q8VDD5_N_Myh9   | Myosin-9 O K.VEAQLQELQV#.F                     | 307.13  | 136.79  | 2.25 | 0.45 |
| Q8VDD5_N_Myh9   | Myosin-9 O R.VEEEAQK#.N                        | 53.76   | 26.51   | 2.03 | 0.49 |
| Q8VDD5_N_Myh9   | Myosin-9 O R.VISGLVQLGNIQAFK#.K                | 657.34  | 316.13  | 2.08 | 0.48 |
| Q8VDD5_N_Myh9   | Myosin-9 O K.VK#NKHDDIQK#.M                    | 53.20   | 24.90   | 2.14 | 0.47 |
| Q8VDD5_N_Myh9   | Myosin-9 O K.VNK#DDIQK#.M                      | 112.42  | 64.77   | 1.74 | 0.58 |
| Q8VDD5_N_Myh9   | Myosin-9 O R.VRTELADKVTK#.L                    | 52.25   | 135.69  | 0.39 | 2.60 |
| Q8VDD5_N_Myh9   | Myosin-9 O K.VSHLLGINVTDFTTR.G                 | 186.25  | 405.10  | 0.46 | 2.18 |
| Q8VDD5_N_Myh9   | Myosin-9 O R.VVQEFR.Q                          | 246.66  | 537.03  | 0.46 | 2.18 |
| Q8VDD5_N_Myh9   | Myosin-9 O K.VVQEQFTRPK#.F                     | 218.61  | 111.19  | 1.97 | 0.51 |
| Q8VDD5_N_Myh9   | Myosin-9 O R.YEILTPNSIPK#.G                    | 284.50  | 136.56  | 2.08 | 0.48 |
| Q8VDD5_N_Myh9   | Myosin-9 O K.YK#ASIAALEAK#.I                   | 59.65   | 32.24   | 1.85 | 0.54 |
| Q8VDD5_N_Myh9   | Myosin-9 O K.YLYVDK#.N                         | 266.72  | 147.60  | 1.81 | 0.55 |
| Q8VDD5_N_Myh9   | Myosin-9 O K.YLYVDK#NFNNPLAQADWAAK#.K          | 124.30  | 65.27   | 1.90 | 0.53 |
| Q6ZWQ9_C_Myl12a | MCG5400 ( R.DGFIDKEDLHDM*LASM*GK.N             | 215.28  | 131.60  | 1.64 | 0.61 |
| Q6ZWQ9_C_Myl12a | MCG5400 ( R.DGFIDKEDLHDM*LASM*GK.N             | 18.66   | 11.15   | 1.67 | 0.60 |
| Q6ZWQ9_C_Myl12a | MCG5400 ( R.DGFIDKEDLHDM*LASM*GK.N             | 27.45   | 16.97   | 1.62 | 0.62 |
| Q6ZWQ9_C_Myl12a | MCG5400 ( R.DGFIDKEDLHDM*LASM*GK.N             | 85.47   | 48.39   | 1.77 | 0.57 |
| Q6ZWQ9_C_Myl12a | MCG5400 ( R.DGFIDKEDLHDM*LASM*GK.N             | 111.48  | 60.24   | 1.85 | 0.54 |
| Q6ZWQ9_C_Myl12a | MCG5400 ( R.ELLTMM*GDRFTEEVDELVR.E             | 29.39   | 211.30  | 0.14 | 7.19 |
| Q6ZWQ9_C_Myl12a | MCG5400 ( R.ELLTMM*GDRFTEEVDELVR.E             | 40.43   | 270.35  | 0.15 | 6.69 |
| Q6ZWQ9_C_Myl12a | MCG5400 ( R.FTDEEVDELVR.E                      | 236.31  | 706.12  | 0.33 | 2.99 |
| Q6ZWQ9_C_Myl12a | MCG5400 ( R.FTDEEVDELVR.E                      | 3.12    | 8.16    | 0.38 | 2.61 |
| Q6ZWQ9_C_Myl12a | MCG5400 ( K.GNFNIEFTR.I                        | 373.60  | 962.58  | 0.39 | 2.58 |
| Q6ZWQ9_C_Myl12a | MCG5400 ( K.GNFNIEFTR.I                        | 11.81   | 30.29   | 0.39 | 2.56 |
| Q6ZWQ9_C_Myl12a | MCG5400 ( K.GNFNIEFTR.I                        | 5.05    | 18.71   | 0.27 | 3.71 |
| Q60605_M_Myl6   | Myosin Iigh K.EAFQLFDR.T                       | 9.35    | 28.20   | 0.33 | 3.02 |
| Q60605_M_Myl6   | Myosin Iigh R.HVLTVLGEK#.M                     | 69.55   | 43.49   | 1.60 | 0.63 |
| Q60605_M_Myl6   | Myosin Iigh K.NKDQGYEDVYGLR.V                  | 3.59    | 9.16    | 0.39 | 2.55 |
| Q60605_M_Myl6   | Myosin Iigh K.VLDFEHFLPM*LTQVAK#.N             | 29.63   | 95.45   | 0.31 | 3.22 |
| Q60605_M_Myl6   | Myosin Iigh K.DQGYEDVYGLR.V                    | 116.92  | 335.40  | 0.35 | 2.87 |
| Q60605_M_Myl6   | Myosin Iigh K.EAFQLFDR.T                       | 260.81  | 683.85  | 0.38 | 2.62 |
| Q60605_M_Myl6   | Myosin Iigh R.HVLTVLGEK#.M                     | 964.50  | 475.83  | 2.03 | 0.49 |
| Q60605_M_Myl6   | Myosin Iigh K.NKDQGYEDVYGLR.V                  | 227.71  | 600.79  | 0.38 | 2.64 |
| Q60605_M_Myl6   | Myosin Iigh K.SDEMNVK#.V                       | 44.60   | 22.02   | 2.03 | 0.49 |
| Q60605_M_Myl6   | Myosin Iigh K.VLDFEHFLPM*LTQVAK#.N             | 1724.18 | 997.07  | 1.73 | 0.58 |
| Q60605_M_Myl6   | Myosin Iigh K.VLDFEHFLPM*LTQVAK#.N             | 392.19  | 252.88  | 1.55 | 0.64 |
| Q60605_M_Myl6   | Myosin Iigh K.VLGNPK#SDEM*NVK#.V               | 3.62    | 14.81   | 0.24 | 4.09 |
| Q60605_M_Myl6   | Myosin Iigh R.HVLTVLGEK#.M                     | 34.02   | 23.76   | 1.43 | 0.70 |
| Q60605_M_Myl6   | Myosin Iigh K.VLDFEHFLPM*LTQVAK#.N             | 18.62   | 71.82   | 0.26 | 3.86 |
| Q8C143_M_Myl6b  | Myosin Iigh R.ALGNQPTNAEVLK#.V                 | 116.28  | 63.46   | 1.83 | 0.55 |
| Q8C143_M_Myl6b  | Myosin Iigh R.ALGNQPTNAEVLK#.V                 | 2105.55 | 1318.02 | 1.60 | 0.63 |
| Q8C143_M_Myl6b  | Myosin Iigh R.HVLTVLGEK#.M                     | 7.92    | 8.81    | 0.90 | 1.11 |
| Q8C143_M_Myl6b  | Myosin Iigh K.IIYSCQGDLM*R.A                   | 3.67    | 9.57    | 0.38 | 2.61 |
| Q8C143_M_Myl6b  | Myosin Iigh R.ALGNQPTNAEVLK#.V                 | 49.23   | 24.52   | 2.01 | 0.50 |
| Q9CQ19_N_Myl9   | Myosin regi R.ATSNVFAMFDQSQIQEFK#.E            | 10.82   | 4.10    | 2.64 | 0.38 |
| Q9CQ19_N_Myl9   | Myosin regi K.EAFNM*IQNR.D                     | 5.34    | 15.42   | 0.35 | 2.89 |
| Q9CQ19_N_Myl9   | Myosin regi R.ATSNVFAM*FDQSQIQEFK#.E           | 714.59  | 370.25  | 1.93 | 0.52 |
| Q9CQ19_N_Myl9   | Myosin regi R.ATSNVFAM*FDQSQIQEFK#.E           | 490.39  | 248.80  | 1.97 | 0.51 |
| Q9CQ19_N_Myl9   | Myosin regi R.ATSNVFAMFDQSQIQEFK#.E            | 162.89  | 106.96  | 1.52 | 0.66 |
| Q9CQ19_N_Myl9   | Myosin regi R.ATSNVFAMFDQSQIQEFK#.E            | 113.85  | 71.66   | 1.59 | 0.63 |
| Q9CQ19_N_Myl9   | Myosin regi R.ATSNVFAM*FDQSQIQEFK#EAFNM*IQNR.D | 12.21   | 23.61   | 0.52 | 1.93 |
| Q9CQ19_N_Myl9   | Myosin regi R.ATSNVFAM*FDQSQIQEFK#EAFNM*IQNR.D | 9.89    | 21.82   | 0.45 | 2.21 |
| Q9CQ19_N_Myl9   | Myosin regi R.ATSNVFAMFDQSQIQEFK#EAFNM*IQNR.D  | 9.89    | 21.82   | 0.45 | 2.21 |
| Q9CQ19_N_Myl9   | Myosin regi R.DGFIDKEDLHDM*LASLGK#.N           | 43.30   | 23.58   | 1.84 | 0.54 |
| Q9CQ19_N_Myl9   | Myosin regi R.DGFIDKEDLHDM*LASLGK#.N           | 36.92   | 23.53   | 1.57 | 0.64 |
| Q9CQ19_N_Myl9   | Myosin regi K.EAFNM*IQNR.D                     | 183.95  | 545.26  | 0.34 | 2.96 |
| Q9CQ19_N_Myl9   | Myosin regi K.EAFNM*IQNR.D                     | 50.08   | 149.66  | 0.33 | 2.99 |
| Q9CQ19_N_Myl9   | Myosin regi R.EAPIDK.G                         | 33.57   | 24.14   | 1.39 | 0.72 |
| Q9CQ19_N_Myl9   | Myosin regi R.ELLTMM*GDR.F                     | 132.24  | 323.93  | 0.41 | 2.45 |
| Q9CQ19_N_Myl9   | Myosin regi R.ELLTMM*GDR.F                     | 45.13   | 127.89  | 0.35 | 2.83 |
| Q9CQ19_N_Myl9   | Myosin regi K.GNFNIEFTR.I                      | 2.21    | 10.36   | 0.21 | 4.69 |
| Q9CQ19_N_Myl9   | Myosin regi K.LNGTDPEDVIR.N                    | 139.84  | 424.36  | 0.33 | 3.03 |
| Q9CQ19_N_Myl9   | Myosin regi R.ATSNVFAM*FDQSQIQEFK#.E           | 5.71    | 6.47    | 0.88 | 1.13 |
| Q6PDN3_N_Mylk   | Myosin Iigh R.K#IQESEHK.V                      | 4.20    | 30.71   | 0.14 | 7.30 |
| Q9JMH9_N_Myo18a | Unconvent R.AVEELLESLEK.S                      | 10.95   | 10.89   | 1.01 | 0.99 |
| Q9JMH9_N_Myo18a | Unconvent K.IISNLFGR.A                         | 3.78    | 18.38   | 0.21 | 4.86 |
| Q9JMH9_N_Myo18a | Unconvent K.LK#QM*EVQLEEEYEDK.Q                | 14.17   | 10.92   | 1.30 | 0.77 |

|                 |                                               |        |        |      |      |
|-----------------|-----------------------------------------------|--------|--------|------|------|
| Q9JMH9_N Myo18a | Unconvent R.LPALVPPPPALR.E                    | 3.90   | 32.55  | 0.12 | 8.35 |
| Q9JMH9_N Myo18a | Unconvent K.LTSLSDQVNR.D                      | 4.70   | 29.84  | 0.16 | 6.35 |
| Q9JMH9_N Myo18a | Unconvent R.NTGESASQLLDAETAER.L               | 1.60   | 6.28   | 0.26 | 3.92 |
| Q9JMH9_N Myo18a | Unconvent R.QDOSVLLGSSGSGK#.T                 | 10.63  | 9.36   | 1.14 | 0.88 |
| Q9JMH9_N Myo18a | Unconvent R.QGPEESGLGEGTK.L                   | 14.50  | 16.19  | 0.90 | 1.12 |
| Q9JMH9_N Myo18a | Unconvent K.SEELSLPEGK.A                      | 14.25  | 16.97  | 0.84 | 1.19 |
| Q9JMH9_N Myo18a | Unconvent K.TALEEQLSR.L                       | 5.16   | 25.02  | 0.21 | 4.85 |
| Q9JMH9_N Myo18a | Unconvent K.VKDQEEELDEQAGSIQM*LEQAK.L         | 4.73   | 9.10   | 0.52 | 1.92 |
| Q9JMH9_N Myo18a | Unconvent K.VKDQEEELDEQAGSIQMLEQAK.L          | 6.43   | 7.66   | 0.84 | 1.19 |
| Q9JMH9_N Myo18a | Unconvent K.VLAISPQQ#.T                       | 10.48  | 14.95  | 0.70 | 1.43 |
| Q9JMH9_N Myo18a | Unconvent R.YGASLLHTYAGPSLLVLR.G              | 2.58   | 14.69  | 0.18 | 5.70 |
| P46735_M Myo1b  | Unconvent K.EQLLOSNPVLEAFGNAK#.T              | 14.68  | 7.41   | 1.98 | 0.50 |
| P46735_M Myo1b  | Unconvent R.FLLTNNLLADQK#.S                   | 15.50  | 8.92   | 1.74 | 0.58 |
| P46735_M Myo1b  | Unconvent K.IIIAEVVK#.I                       | 42.67  | 15.64  | 2.73 | 0.37 |
| P46735_M Myo1b  | Unconvent K.LEASELFK#.D                       | 16.01  | 6.36   | 2.52 | 0.40 |
| P46735_M Myo1b  | Unconvent K.SEVPLVDVTK#.V                     | 18.25  | 10.13  | 1.80 | 0.56 |
| P46735_M Myo1b  | Unconvent R.SGVEVLFNEIIPVEEHSFGR.S            | 3.46   | 19.14  | 0.18 | 5.53 |
| Q9WTI7_M Myo1c  | Unconvent R.ASFLNLR.R                         | 7.72   | 10.15  | 0.76 | 1.32 |
| Q9WTI7_M Myo1c  | Unconvent R.DGIHFTSGSELLTK#.A                 | 31.92  | 10.34  | 3.09 | 0.32 |
| Q9WTI7_M Myo1c  | Unconvent R.DQAVM*ISGESGAGK#.T                | 18.01  | 38.29  | 0.47 | 2.13 |
| Q9WTI7_M Myo1c  | Unconvent R.DQAVMISGESGAGK#.T                 | 17.28  | 2.03   | 8.51 | 0.12 |
| Q9WTI7_M Myo1c  | Unconvent R.LGTEEISPR.V                       | 14.28  | 19.18  | 0.74 | 1.34 |
| Q9WTI7_M Myo1c  | Unconvent R.NPOSYLVK#.G                       | 40.05  | 12.02  | 3.33 | 0.30 |
| Q9WTI7_M Myo1c  | Unconvent R.NVLDTSWPTPPALR.E                  | 6.08   | 7.00   | 0.87 | 1.15 |
| Q9WTI7_M Myo1c  | Unconvent R.QLLTPSAVVIVEDAK#.V                | 26.90  | 10.11  | 2.66 | 0.38 |
| Q9WTI7_M Myo1c  | Unconvent R.VLOSLGSEPIQYAVPVVK#.Y             | 35.86  | 9.85   | 3.64 | 0.27 |
| Q9WTI7_M Myo1c  | Unconvent R.ASFLNLR.R                         | 18.82  | 25.87  | 0.73 | 1.37 |
| Q9WTI7_M Myo1c  | Unconvent K.AVASEIFK#.G                       | 150.76 | 41.95  | 3.59 | 0.28 |
| Q9WTI7_M Myo1c  | Unconvent R.DGIHFTSGSELLTK#.A                 | 150.52 | 42.71  | 3.52 | 0.28 |
| Q9WTI7_M Myo1c  | Unconvent R.DQAVM*ISGESGAGK#.T                | 71.82  | 111.29 | 0.65 | 1.55 |
| Q9WTI7_M Myo1c  | Unconvent R.DQAVMISGESGAGK#.T                 | 21.59  | 7.46   | 2.89 | 0.35 |
| Q9WTI7_M Myo1c  | Unconvent R.EDNKHQ#GDDVQLSDHVIETLTK#.T        | 15.55  | 3.58   | 4.34 | 0.23 |
| Q9WTI7_M Myo1c  | Unconvent R.FDEVLR.H                          | 13.38  | 15.81  | 0.85 | 1.18 |
| Q9WTI7_M Myo1c  | Unconvent K.GDVVLQSDHVIETLTK#.T               | 109.90 | 31.03  | 3.54 | 0.28 |
| Q9WTI7_M Myo1c  | Unconvent K.GEELLSPLLEQAAYAR.D                | 28.08  | 36.17  | 0.78 | 1.29 |
| Q9WTI7_M Myo1c  | Unconvent R.HLGYK#PEYK#.M                     | 114.79 | 24.19  | 4.75 | 0.21 |
| Q9WTI7_M Myo1c  | Unconvent R.LGTEEISPR.V                       | 53.56  | 74.59  | 0.72 | 1.39 |
| Q9WTI7_M Myo1c  | Unconvent R.LLGVGTTLR.E                       | 67.29  | 72.39  | 0.93 | 1.08 |
| Q9WTI7_M Myo1c  | Unconvent R.LLHYAGEVTSYVGFGLDK#.N             | 19.05  | 5.24   | 3.63 | 0.28 |
| Q9WTI7_M Myo1c  | Unconvent R.LLQSNPVLEAFGNAK#.T                | 160.20 | 44.15  | 3.63 | 0.28 |
| Q9WTI7_M Myo1c  | Unconvent R.NPOSYLVK#.G                       | 172.09 | 41.60  | 4.14 | 0.24 |
| Q9WTI7_M Myo1c  | Unconvent R.NVLDTSWPTPPALR.E                  | 24.70  | 37.55  | 0.66 | 1.52 |
| Q9WTI7_M Myo1c  | Unconvent K.QK#GDDVQLSDHVIETLTK#.T            | 28.90  | 8.71   | 3.32 | 0.30 |
| Q9WTI7_M Myo1c  | Unconvent R.QLLTPSAVVIVEDAK#.V                | 124.10 | 26.81  | 4.63 | 0.22 |
| Q9WTI7_M Myo1c  | Unconvent K.RPETVATQFK.M                      | 5.81   | 9.25   | 0.63 | 1.59 |
| Q9WTI7_M Myo1c  | Unconvent R.TFTWLVLR.K                        | 14.52  | 17.18  | 0.85 | 1.18 |
| Q9WTI7_M Myo1c  | Unconvent K.TLFATEDSLEVR.R                    | 22.68  | 25.63  | 0.88 | 1.13 |
| Q9WTI7_M Myo1c  | Unconvent R.VLOSLGSEPIQYAVPVVK#.Y             | 150.93 | 38.18  | 3.95 | 0.25 |
| Q9WTI7_M Myo1c  | Unconvent R.VNNININQGSITFAGGPPGR.D            | 9.45   | 12.06  | 0.78 | 1.28 |
| Q9WTI7_M Myo1c  | Unconvent K.YM*DVQDFDK#.G                     | 80.56  | 21.48  | 3.75 | 0.27 |
| Q5SYD0_M Myo1d  | Unconvent R.AWEGNVLASK#PDTPTQTSIGTVPVANELK#.R | 2.78   | 2.60   | 1.07 | 0.94 |
| Q5SYD0_M Myo1d  | Unconvent R.IGELVGLVNHFK#.S                   | 10.82  | 6.50   | 1.66 | 0.60 |
| Q5SYD0_M Myo1d  | Unconvent K.VVSVIAELLSK#.A                    | 13.74  | 8.59   | 1.60 | 0.63 |
| E9Q634_M Myo1e  | Unconvent K.FSNTLEL#.L                        | 8.53   | 5.76   | 1.48 | 0.67 |
| E9Q634_M Myo1e  | Unconvent R.SFHIFYQLIEGASPEQK#.Q              | 5.43   | 6.19   | 0.88 | 1.14 |
| E9Q634_M Myo1e  | Unconvent K.DIILQSNPLLEAFGNAK#.T              | 33.77  | 20.37  | 1.66 | 0.60 |
| E9Q634_M Myo1e  | Unconvent K.FSNTLEL#.L                        | 13.10  | 12.22  | 1.07 | 0.93 |
| E9Q634_M Myo1e  | Unconvent K.TEFLSLAK#.R                       | 20.01  | 9.04   | 2.21 | 0.45 |
| E9Q634_M Myo1e  | Unconvent K.VLQVSIQVGLPK#.N                   | 19.56  | 11.94  | 1.64 | 0.61 |
| E9Q634_M Myo1e  | Unconvent K.YFEIQSPGPEPDK#.I                  | 9.42   | 4.39   | 2.14 | 0.47 |
| Q99104_M Myo5a  | Unconvent R.NPDIIVGENDLTALSYLHEPAVLHNL.R.V    | 2.92   | 9.49   | 0.31 | 3.25 |
| Q99104_M Myo5a  | Unconvent K.SAPEVTAPGAPAVR.V                  | 1.61   | 6.53   | 0.25 | 4.05 |
| Q99104_M Myo5a  | Unconvent K.VLNLTYPVNEFER.V                   | 2.61   | 7.25   | 0.36 | 2.78 |
| P97479_M Myo7a  | Unconvent K.VVVALQDNPNAGEESGFLSFAK#.G         | 4.71   | 3.69   | 1.28 | 0.78 |
| Q9QY06_M Myo9b  | Unconvent K.FLDEFLLNK#.R                      | 11.88  | 8.58   | 1.39 | 0.72 |
| Q9QY06_M Myo9b  | Unconvent K.LILPYSLEAITAR.D                   | 1.23   | 8.18   | 0.15 | 6.67 |
| Q9QY06_M Myo9b  | Unconvent R.TILGAGPVLEAFGNAK#.T               | 15.10  | 10.44  | 1.45 | 0.69 |
| Q9QY06_M Myo9b  | Unconvent K.TPIESLFIATER.F                    | 3.52   | 8.88   | 0.40 | 2.52 |
| Q9CQ25_M Mzt2   | Mitotic-spi R.LASDPQDSVLSLSTSETR.G            | 2.02   | 4.30   | 0.47 | 2.13 |
| G3X8Y3_G: Naa15 | N-alpha-acc K.FGALKK#.C                       | 27.42  | 13.58  | 2.02 | 0.50 |
| G3X8Y3_G: Naa15 | N-alpha-acc K.IYEEAWTK#.Y                     | 41.41  | 13.84  | 2.99 | 0.33 |
| G3X8Y3_G: Naa15 | N-alpha-acc R.LEDAADVYR.G                     | 14.38  | 24.50  | 0.59 | 1.70 |
| G3X8Y3_G: Naa15 | N-alpha-acc K.M*VYVLDSSSQK#.R                 | 25.15  | 5.86   | 4.29 | 0.23 |
| G3X8Y3_G: Naa15 | N-alpha-acc R.NPENWYK#.G                      | 31.33  | 9.41   | 3.33 | 0.30 |
| G3X8Y3_G: Naa15 | N-alpha-acc K.TQQTSPDKVDYESELLYQVQLR.E        | 6.12   | 8.89   | 0.69 | 1.45 |
| G3X8Y3_G: Naa15 | N-alpha-acc K.VAIVEELVGVYETSLK#.S             | 11.17  | 2.92   | 3.82 | 0.26 |
| G3X8Y3_G: Naa15 | N-alpha-acc K.VAIVEELVGVYETSLK#.S             | 22.83  | 7.28   | 3.14 | 0.32 |
| G3X8Y3_G: Naa15 | N-alpha-acc K.VETPLEAIAK#.F                   | 57.57  | 20.73  | 2.78 | 0.36 |
| G3X8Y3_G: Naa15 | N-alpha-acc R.AIELATTLDGSLTNR.N               | 12.12  | 16.28  | 0.74 | 1.34 |
| G3X8Y3_G: Naa15 | N-alpha-acc K.ITVNGDSSAETEELANEI.-            | 9.15   | 9.15   | 1.00 | 1.00 |
| G3X8Y3_G: Naa15 | N-alpha-acc K.IYEEAWTK#.Y                     | 63.44  | 21.53  | 2.95 | 0.34 |
| G3X8Y3_G: Naa15 | N-alpha-acc K.K#H#DDDEEIGGPK#.E               | 2.76   | 2.82   | 0.98 | 1.02 |
| G3X8Y3_G: Naa15 | N-alpha-acc R.LFGATNPK#.N                     | 123.02 | 31.77  | 3.87 | 0.26 |
| G3X8Y3_G: Naa15 | N-alpha-acc K.LHDNPLDENK#HEADTANM*SDK#.E      | 33.76  | 8.75   | 3.86 | 0.26 |
| G3X8Y3_G: Naa15 | N-alpha-acc K.M*VYVLDSSSQK#.R                 | 44.08  | 12.44  | 3.54 | 0.28 |
| G3X8Y3_G: Naa15 | N-alpha-acc K.MVYVLDSSSQK#.R                  | 12.93  | 4.44   | 2.91 | 0.34 |
| G3X8Y3_G: Naa15 | N-alpha-acc K.NFNFTFLK#.R                     | 74.31  | 16.33  | 4.55 | 0.22 |
| G3X8Y3_G: Naa15 | N-alpha-acc R.NPENWYK#.G                      | 69.96  | 18.78  | 3.73 | 0.27 |
| G3X8Y3_G: Naa15 | N-alpha-acc R.SYVDLLK#.L                      | 59.38  | 11.79  | 5.04 | 0.20 |
| G3X8Y3_G: Naa15 | N-alpha-acc K.TQQTSPDKVDYESELLYQVQLR.E        | 10.45  | 10.94  | 0.96 | 1.05 |
| G3X8Y3_G: Naa15 | N-alpha-acc K.VAIVEELVGVYETSLK#.S             | 23.24  | 4.80   | 4.84 | 0.21 |
| G3X8Y3_G: Naa15 | N-alpha-acc K.VETPLEAIAK#.F                   | 124.11 | 37.17  | 3.34 | 0.30 |
| G3X8Y3_G: Naa15 | N-alpha-acc R.WM*DEAQALDTADR.F                | 8.21   | 9.15   | 0.90 | 1.11 |
| Q9DBB4_N Naa16  | N-alpha-acc K.FAEHGETLAM*K#.G                 | 29.78  | 11.65  | 2.56 | 0.39 |
| Q9DBB4_N Naa16  | N-alpha-acc K.FLLM*LOSVK#.R                   | 14.37  | 5.44   | 2.64 | 0.38 |
| Q9DBB4_N Naa16  | N-alpha-acc K.FLLMLQSVK#.R                    | 10.78  | 4.45   | 2.42 | 0.41 |
| Q9DBB4_N Naa16  | N-alpha-acc K.FAEHGETLAM*K#.G                 | 65.94  | 18.01  | 3.66 | 0.27 |
| Q9DBB4_N Naa16  | N-alpha-acc K.FLLM*LOSVK#.R                   | 24.86  | 8.37   | 2.97 | 0.34 |
| Q9DBB4_N Naa16  | N-alpha-acc K.FLLMLQSVK#.R                    | 14.54  | 5.35   | 2.72 | 0.37 |
| Q9DBB4_N Naa16  | N-alpha-acc R.VDNPLEAIAK#.F                   | 8.82   | 3.57   | 2.47 | 0.40 |
| Q6PHQ8_N Naa35  | N-alpha-acc K.VLNFEQAIK#.D                    | 16.48  | 6.59   | 2.50 | 0.40 |
| Q8VE10_N Naa40  | N-alpha-acc R.VSGLEPATVDWAFDLTK.T             | 3.62   | 4.72   | 0.77 | 1.30 |
| Q8VE10_N Naa40  | N-alpha-acc K.FLIQLQLM*ANSTQM*K.K             | 1.54   | 4.44   | 0.35 | 2.88 |

|                   |                                                 |        |        |      |      |
|-------------------|-------------------------------------------------|--------|--------|------|------|
| Q8VE10_N/ Naa40   | N-alpha-acc R.LGDPLEAFVFK.K                     | 11.08  | 21.80  | 0.51 | 1.97 |
| Q8VE10_N/ Naa40   | N-alpha-acc R.VSGLEPATVDWAFDLTK.T               | 9.33   | 9.59   | 0.97 | 1.03 |
| Q8VE10_N/ Naa40   | N-alpha-acc R.VSGLEPATVDWAFDLTK.T               | 2.89   | 4.53   | 0.64 | 1.57 |
| Q6PGB6_N/ Naa50   | N-alpha-acc K.FGFIEIETK#.K                      | 5.01   | 4.61   | 1.09 | 0.92 |
| Q61127_N/ Nab2    | NGFI-A-binr R.GDTGEIASLLK#.L                    | 38.58  | 28.83  | 1.34 | 0.75 |
| Q61127_N/ Nab2    | NGFI-A-binr R.HILQQTLM*DEGLR.L                  | 2.26   | 5.28   | 0.43 | 2.33 |
| Q61127_N/ Nab2    | NGFI-A-binr R.M*VVESVER.I                       | 8.69   | 22.98  | 0.38 | 2.64 |
| Q61127_N/ Nab2    | NGFI-A-binr K.SPLELGEK#.L                       | 21.15  | 20.37  | 1.04 | 0.96 |
| Q61127_N/ Nab2    | NGFI-A-binr K.YSVIVGR.L                         | 6.67   | 20.26  | 0.33 | 3.04 |
| P70670_N/ Naca    | Nascent po K.IEDLSQQAQLAAAEK#.F                 | 90.22  | 33.53  | 2.69 | 0.37 |
| P70670_N/ Naca    | Nascent po K.IEDLSQQAQLAAAEK#.F                 | 25.28  | 9.35   | 2.70 | 0.37 |
| P70670_N/ Naca    | Nascent po K.KAPKHTVDPK.Q                       | 3.53   | 2.47   | 1.43 | 0.70 |
| P70670_N/ Naca    | Nascent po K.NILFVITKPDVYK.S                    | 26.13  | 11.59  | 2.25 | 0.44 |
| P70670_N/ Naca    | Nascent po K.NNSNDIVNAIM*ELTM*.-                | 16.92  | 16.92  | 1.00 | 1.00 |
| P70670_N/ Naca    | Nascent po K.SPASDTIVVFGAEK#.I                  | 96.95  | 41.71  | 2.32 | 0.43 |
| P70670_N/ Naca    | Nascent po R.LLAVDSGAAPSDDK#.G                  | 20.31  | 2.76   | 7.36 | 0.14 |
| Q7TSZ8_NA/ Nacc1  | Nucleus acr R.AVLAASSVFR.D                      | 1.92   | 5.57   | 0.34 | 2.91 |
| Q99KQ4_N/ Nampt   | Nicotinami K.APEVGSVPR.G                        | 24.04  | 36.52  | 0.66 | 1.52 |
| Q99KQ4_N/ Nampt   | Nicotinami R.EHFQDDVFNER.G                      | 7.13   | 16.72  | 0.43 | 2.35 |
| Q99KQ4_N/ Nampt   | Nicotinami K.GTDTVAGIALIK#.K                    | 158.24 | 60.38  | 2.62 | 0.38 |
| Q99KQ4_N/ Nampt   | Nicotinami R.GWNYLEK#.Y                         | 73.89  | 27.22  | 2.71 | 0.37 |
| Q99KQ4_N/ Nampt   | Nicotinami K.K#W#SIENVSFGSGGALLQK#.L            | 19.28  | 8.21   | 2.35 | 0.43 |
| Q99KQ4_N/ Nampt   | Nicotinami K.NAQLNIEQDVAPH.-                    | 113.08 | 113.08 | 1.00 | 1.00 |
| Q99KQ4_N/ Nampt   | Nicotinami K.SYSFDEVK#.N                        | 7.95   | 9.38   | 0.85 | 1.18 |
| Q99KQ4_N/ Nampt   | Nicotinami R.VIQGDGVDINTLQEIVEGM*#K#.Q          | 41.81  | 10.21  | 4.09 | 0.24 |
| Q99KQ4_N/ Nampt   | Nicotinami R.VIQGDGVDINTLQEIVEGM*#K#.Q          | 20.79  | 6.37   | 3.27 | 0.31 |
| Q99KQ4_N/ Nampt   | Nicotinami K.VK#YEETVYGLQYLNK#.Y                | 37.67  | 17.42  | 2.16 | 0.46 |
| Q99KQ4_N/ Nampt   | Nicotinami K.VLDILGK#.K                         | 71.54  | 25.87  | 2.77 | 0.36 |
| Q99KQ4_N/ Nampt   | Nicotinami K.WSIENVSFGSGGALLQK#.L               | 36.64  | 11.63  | 3.15 | 0.32 |
| Q99KQ4_N/ Nampt   | Nicotinami K.YDGHLEPIEVK#.A                     | 111.28 | 49.29  | 2.26 | 0.44 |
| Q99KQ4_N/ Nampt   | Nicotinami K.YEETVYGLQYLNK#.Y                   | 39.39  | 13.63  | 2.89 | 0.35 |
| Q99KQ4_N/ Nampt   | Nicotinami K.VLLETSGNLDGLEEK#.L                 | 98.06  | 33.08  | 2.96 | 0.34 |
| Q99KQ4_N/ Nampt   | Nicotinami K.K#W#SIENVSFGSGGALLQK#.L            | 32.16  | 15.22  | 2.11 | 0.47 |
| Q99KQ4_N/ Nampt   | Nicotinami K.NAQLNIEQDVAPH.-                    | 119.61 | 119.61 | 1.00 | 1.00 |
| Q99KQ4_N/ Nampt   | Nicotinami R.STEAPLIIRPDGSGNPLDVLK.V            | 74.64  | 182.86 | 0.41 | 2.45 |
| Q99KQ4_N/ Nampt   | Nicotinami K.SYSFDEVK#.N                        | 6.28   | 11.40  | 0.55 | 1.82 |
| Q99KQ4_N/ Nampt   | Nicotinami R.TPAGNFVTLLEEGK#GDLLEEYGHDLHTVFK#.N | 43.08  | 17.05  | 2.53 | 0.40 |
| Q99KQ4_N/ Nampt   | Nicotinami R.VIQGDGVDINTLQEIVEGM*#K#.Q          | 24.81  | 12.78  | 1.94 | 0.51 |
| Q99KQ4_N/ Nampt   | Nicotinami R.VIQGDGVDINTLQEIVEGM*#K#.Q          | 19.56  | 7.42   | 2.64 | 0.38 |
| Q99KQ4_N/ Nampt   | Nicotinami K.VLDILGK#.K                         | 47.64  | 17.37  | 2.74 | 0.36 |
| Q99KQ4_N/ Nampt   | Nicotinami K.WSIENVSFGSGGALLQK#.L               | 57.78  | 24.85  | 2.33 | 0.43 |
| Q99KQ4_N/ Nampt   | Nicotinami K.VLLETSGNLDGLEEK#.L                 | 5.60   | 4.48   | 1.25 | 0.80 |
| Q99KQ4_N/ Nampt   | Nicotinami R.GWNYLEK#.Y                         | 18.04  | 6.18   | 2.92 | 0.34 |
| Q99KQ4_N/ Nampt   | Nicotinami K.NAQLNIEQDVAPH.-                    | 25.13  | 25.13  | 1.00 | 1.00 |
| Q99KQ4_N/ Nampt   | Nicotinami R.STEAPLIIRPDGSGNPLDVLK.V            | 9.65   | 14.31  | 0.67 | 1.48 |
| Q99KQ4_N/ Nampt   | Nicotinami R.TPAGNFVTLLEEGK#GDLLEEYGHDLHTVFK#.N | 19.56  | 10.93  | 1.79 | 0.56 |
| Q99KQ4_N/ Nampt   | Nicotinami R.VIQGDGVDINTLQEIVEGM*#K#.Q          | 13.24  | 5.00   | 2.65 | 0.38 |
| Q99KQ4_N/ Nampt   | Nicotinami K.VK#YEETVYGLQYLNK#.Y                | 10.21  | 9.15   | 1.12 | 0.90 |
| Q99KQ4_N/ Nampt   | Nicotinami K.VLDILGK#.K                         | 16.69  | 5.83   | 2.86 | 0.35 |
| Q99KQ4_N/ Nampt   | Nicotinami K.WSIENVSFGSGGALLQK#.L               | 9.52   | 3.57   | 2.67 | 0.37 |
| Q99KQ4_N/ Nampt   | Nicotinami K.YDGHLEPIEVK#.A                     | 17.01  | 6.35   | 2.68 | 0.37 |
| Q99KQ4_N/ Nampt   | Nicotinami K.VLLETSGNLDGLEEK#.L                 | 20.45  | 4.74   | 4.32 | 0.23 |
| Q99KQ4_N/ Nampt   | Nicotinami R.GWNYLEK#.Y                         | 16.42  | 4.71   | 3.48 | 0.29 |
| Q99KQ4_N/ Nampt   | Nicotinami K.NAQLNIEQDVAPH.-                    | 29.86  | 29.86  | 1.00 | 1.00 |
| Q99KQ4_N/ Nampt   | Nicotinami R.STEAPLIIRPDGSGNPLDVLK.V            | 15.00  | 21.14  | 0.71 | 1.41 |
| Q99KQ4_N/ Nampt   | Nicotinami R.VIQGDGVDINTLQEIVEGM*#K#.Q          | 12.93  | 7.18   | 1.80 | 0.56 |
| Q99KQ4_N/ Nampt   | Nicotinami R.VIQGDGVDINTLQEIVEGM*#K#.Q          | 4.07   | 4.01   | 1.02 | 0.98 |
| Q99KQ4_N/ Nampt   | Nicotinami K.VLDILGK#.K                         | 29.80  | 9.69   | 3.08 | 0.33 |
| Q99KQ4_N/ Nampt   | Nicotinami K.WSIENVSFGSGGALLQK#.L               | 13.19  | 3.98   | 3.32 | 0.30 |
| Q99KQ4_N/ Nampt   | Nicotinami K.YDGHLEPIEVK#.A                     | 30.39  | 12.10  | 2.51 | 0.40 |
| Q99J77_Q8/ Nans   | N-acetylne K.VGSGDTNFPYLEK#.T                   | 13.06  | 2.35   | 5.57 | 0.18 |
| Q99J77_Q8/ Nans   | N-acetylne K.K#H#PAGTTLTDM*LVTK#.V              | 8.21   | 2.86   | 2.87 | 0.35 |
| P28656_Nf/ Nap111 | Nucleosom K.FSDAGQPM*SFVLEHFEPNDYFTNEVLTK#.T    | 13.27  | 3.59   | 3.69 | 0.27 |
| P28656_Nf/ Nap111 | Nucleosom K.FYEEVHDLER.K                        | 7.60   | 11.08  | 0.69 | 1.46 |
| P28656_Nf/ Nap111 | Nucleosom R.LDGLVDTPTGYESLPK#.V                 | 132.67 | 31.84  | 4.17 | 0.24 |
| P28656_Nf/ Nap111 | Nucleosom K.NVDLSDM*VQEHDEPILK#.H               | 60.56  | 14.09  | 4.30 | 0.23 |
| P28656_Nf/ Nap111 | Nucleosom K.NVDLSDM*VQEHDEPILK#.H               | 43.81  | 10.97  | 3.99 | 0.25 |
| P28656_Nf/ Nap111 | Nucleosom K.YAVLYQPLFDK#.R                      | 18.53  | 5.07   | 3.65 | 0.27 |
| P28656_Nf/ Nap111 | Nucleosom R.LDGLVDTPTGYESLPK#.V                 | 13.35  | 5.88   | 2.27 | 0.44 |
| Q78ZA7_Nf/ Nap114 | Nucleosom R.LDNVSHTPSSYIETLPK#.A                | 15.00  | 3.53   | 4.26 | 0.24 |
| Q78ZA7_Nf/ Nap114 | Nucleosom K.QVNPESFNFFSPK#.A                    | 13.10  | 4.96   | 2.64 | 0.38 |
| Q78ZA7_Nf/ Nap114 | Nucleosom K.YAALYQPLFDK#.R                      | 7.92   | 2.34   | 3.38 | 0.30 |
| Q9DB05_Sf/ Napa   | Alpha-solut K.AIAHYEQSADYK#GEENSANK#.C          | 18.18  | 2.58   | 7.06 | 0.14 |
| Q9DB05_Sf/ Napa   | Alpha-solut K.AIDIEYQVGTSM*DSPLLK#.Y            | 13.82  | 5.18   | 2.67 | 0.37 |
| Q9DB05_Sf/ Napa   | Alpha-solut K.AIDIEYQVGTSM*DSPLLK#.Y            | 10.39  | 2.54   | 4.09 | 0.24 |
| Q9DB05_Sf/ Napa   | Alpha-solut K.HHISIAEYETELVVEK#.A               | 11.89  | 5.70   | 2.09 | 0.48 |
| Q9DB05_Sf/ Napa   | Alpha-solut K.LLEAEHQNVDSYTEAVK#.E              | 23.18  | 9.76   | 2.37 | 0.42 |
| Q9DB05_Sf/ Napa   | Alpha-solut K.NSQSFFSGLFGSSK#.I                 | 53.24  | 14.31  | 3.72 | 0.27 |
| Q9DB05_Sf/ Napa   | Alpha-solut K.VAGYAAQLEQYQK#.A                  | 52.66  | 15.03  | 3.50 | 0.29 |
| Q9DB05_Sf/ Napa   | Alpha-solut K.VAGYAAQLEQYQK#.A                  | 12.61  | 6.02   | 2.09 | 0.48 |
| Q9DB05_Sf/ Napa   | Alpha-solut K.NSQSFFSGLFGSSK#.I                 | 11.55  | 4.32   | 2.67 | 0.37 |
| Q9DB05_Sf/ Napa   | Alpha-solut K.VAGYAAQLEQYQK#.A                  | 14.18  | 4.77   | 2.97 | 0.34 |
| Q9CWZ7_S/ Nappg   | Gamma-sol K.LGLSLVVPGGGK#.K                     | 7.34   | 3.49   | 2.11 | 0.47 |
| Q8BP47_Sy/ Nars   | Asparagine- K.SPVAISIVYELNPNFK#PPK#.R           | 17.22  | 4.35   | 3.96 | 0.25 |
| Q8BP47_Sy/ Nars   | Asparagine- R.MNYSDAIEWL#.E                     | 19.64  | 6.50   | 3.02 | 0.33 |
| Q8BP47_Sy/ Nars   | Asparagine- K.SPVAISIVYELNPNFK#PPK#.R           | 52.69  | 7.97   | 6.62 | 0.15 |
| Q8BP47_Sy/ Nars   | Asparagine- R.SWDSEELLEGYK#.R                   | 8.16   | 2.52   | 3.23 | 0.31 |
| Q99MD9_h/ Nasp    | Nuclear aut R.SGNVAELALK#.A                     | 27.38  | 6.27   | 4.37 | 0.23 |
| Q99MD9_h/ Nasp    | Nuclear aut R.SGNVAELALK#.A                     | 18.92  | 3.66   | 5.17 | 0.19 |
| Q8K224_N/ Nat10   | N-acetyltra R.QQSAQSVSTTAENK#.T                 | 10.76  | 4.92   | 2.18 | 0.46 |
| Q8K224_N/ Nat10   | N-acetyltra K.AQGNASIVSLK#.S                    | 27.06  | 15.43  | 1.75 | 0.57 |
| Q8K224_N/ Nat10   | N-acetyltra K.FIEGISEK#.T                       | 23.06  | 10.18  | 2.26 | 0.44 |
| Q8K224_N/ Nat10   | N-acetyltra R.K#DLPPLLLK#.L                     | 9.35   | 6.49   | 1.44 | 0.69 |
| Q8K224_N/ Nat10   | N-acetyltra R.LDVLGVSYGLTPR.L                   | 7.86   | 8.83   | 0.89 | 1.12 |
| Q8K224_N/ Nat10   | N-acetyltra K.SGTLNKQDDPFELVAATNIR.Y            | 3.98   | 5.00   | 0.80 | 1.26 |
| Q8BVG8_N/ Nat14   | N-acetyltra R.AWAGSMGEPRAR.L                    | 1.77   | 10.85  | 0.16 | 6.14 |
| Q8K224_Cf/ Ncapd2 | Condensin- K.GFAAFLTEAER.I                      | 3.58   | 6.96   | 0.52 | 1.94 |
| Q8K224_Cf/ Ncapd2 | Condensin- K.GNAIYNLPLDIJR.L                    | 3.11   | 11.08  | 0.28 | 3.56 |
| Q8K224_Cf/ Ncapd2 | Condensin- K.ITEAIGISK#.M                       | 22.02  | 15.05  | 1.46 | 0.68 |
| Q8K224_Cf/ Ncapd2 | Condensin- K.LPQEEGHQJADAETAEEVK#.G             | 14.08  | 7.35   | 1.91 | 0.52 |
| Q8K224_Cf/ Ncapd2 | Condensin- K.LSDIDLGLPQK#.E                     | 11.22  | 7.10   | 1.58 | 0.63 |
| Q8K224_Cf/ Ncapd2 | Condensin- K.STLQQLK#.L                         | 15.00  | 8.29   | 1.81 | 0.55 |
| Q8K224_Cf/ Ncapd2 | Condensin- K.AIDIEFEQK#.L                       | 87.01  | 43.96  | 1.98 | 0.51 |

|                  |                                                  |        |       |      |      |
|------------------|--------------------------------------------------|--------|-------|------|------|
| Q8K2Z4_C1 Ncapd2 | Condensin - K.DK#QTESLVEK#.L                     | 28.31  | 15.66 | 1.81 | 0.55 |
| Q8K2Z4_C1 Ncapd2 | Condensin - R.DQFLDILQAHGHVNSFVR.S               | 7.07   | 19.52 | 0.36 | 2.76 |
| Q8K2Z4_C1 Ncapd2 | Condensin - K.DSPSVPEPEGHDSQNSDELVK#.Q           | 14.78  | 9.70  | 1.52 | 0.66 |
| Q8K2Z4_C1 Ncapd2 | Condensin - R.EAVLNAYR.Q                         | 17.90  | 35.06 | 0.51 | 1.96 |
| Q8K2Z4_C1 Ncapd2 | Condensin - R.FPNLVDPWTPHLYAR.L                  | 8.50   | 24.17 | 0.35 | 2.85 |
| Q8K2Z4_C1 Ncapd2 | Condensin - K.GFAAFLTELAER.I                     | 12.27  | 34.20 | 0.36 | 2.79 |
| Q8K2Z4_C1 Ncapd2 | Condensin - K.GFAHPDPLWIPFK#.E                   | 30.68  | 22.73 | 1.35 | 0.74 |
| Q8K2Z4_C1 Ncapd2 | Condensin - R.GM*DGIEFETGGGGSQR.A                | 5.61   | 12.21 | 0.46 | 2.18 |
| Q8K2Z4_C1 Ncapd2 | Condensin - K.GNAYNLLPDIISR.L                    | 13.66  | 49.67 | 0.27 | 3.64 |
| Q8K2Z4_C1 Ncapd2 | Condensin - K.ITEAIIISK#.M                       | 88.28  | 55.09 | 1.60 | 0.62 |
| Q8K2Z4_C1 Ncapd2 | Condensin - R.LLESFENMSTQSLSLDLIDGGK#.G          | 4.28   | 1.84  | 2.32 | 0.43 |
| Q8K2Z4_C1 Ncapd2 | Condensin - R.LLFTM*LEK#.S                       | 27.90  | 16.83 | 1.66 | 0.60 |
| Q8K2Z4_C1 Ncapd2 | Condensin - R.LLFTMLEK#.S                        | 11.56  | 11.40 | 1.01 | 0.99 |
| Q8K2Z4_C1 Ncapd2 | Condensin - K.LPQEEGDHQJADAEAEVK#.G              | 58.76  | 38.89 | 1.51 | 0.66 |
| Q8K2Z4_C1 Ncapd2 | Condensin - K.LPQEEGDHQJADAEAEVKGR.I             | 3.23   | 11.74 | 0.28 | 3.63 |
| Q8K2Z4_C1 Ncapd2 | Condensin - K.LSDIDLQAGPLQK#.E                   | 44.23  | 28.44 | 1.56 | 0.64 |
| Q8K2Z4_C1 Ncapd2 | Condensin - R.LSDPEGVVEEFPHTIM*#.Q               | 56.49  | 31.32 | 1.80 | 0.55 |
| Q8K2Z4_C1 Ncapd2 | Condensin - R.LSDPEGVVEEFPHTIMK#.Q               | 27.37  | 18.19 | 1.50 | 0.66 |
| Q8K2Z4_C1 Ncapd2 | Condensin - R.M*LPILWISK#.E                      | 21.13  | 13.47 | 1.57 | 0.64 |
| Q8K2Z4_C1 Ncapd2 | Condensin - K.NFFNLSHK#.G                        | 19.07  | 6.93  | 2.75 | 0.36 |
| Q8K2Z4_C1 Ncapd2 | Condensin - K.QLLSYITK#.D                        | 39.79  | 24.01 | 1.66 | 0.60 |
| Q8K2Z4_C1 Ncapd2 | Condensin - R.SAAATAALDPEEWDAM*LPLEK#.S          | 5.11   | 2.00  | 2.55 | 0.39 |
| Q8K2Z4_C1 Ncapd2 | Condensin - K.SGGVNVYVVR.E                       | 15.15  | 39.93 | 0.38 | 2.64 |
| Q8K2Z4_C1 Ncapd2 | Condensin - K.STLQQLK#.L                         | 61.48  | 31.97 | 1.92 | 0.52 |
| Q8K2Z4_C1 Ncapd2 | Condensin - K.TASSETM*EEELVGGATADDTEALIR.S       | 5.35   | 11.53 | 0.46 | 2.15 |
| Q8K2Z4_C1 Ncapd2 | Condensin - K.VK#GVQSEM*AVLLIDPVPQJALAK#.N       | 21.15  | 10.11 | 2.09 | 0.48 |
| Q8K2Z4_C1 Ncapd2 | Condensin - R.VLQLFAR.I                          | 8.70   | 23.69 | 0.37 | 2.72 |
| Q6ZQK0_C1 Ncapd3 | Condensin - R.SNFPTPLPPISENGPLK#.I               | 4.36   | 1.95  | 2.24 | 0.45 |
| Q6ZQK0_C1 Ncapd3 | Condensin - K.TVLEEQGLK#.Q                       | 19.82  | 15.64 | 1.27 | 0.79 |
| Q6ZQK0_C1 Ncapd3 | Condensin - R.TYAAQSLVLLTK#.L                    | 18.76  | 9.23  | 2.03 | 0.49 |
| Q6ZQK0_C1 Ncapd3 | Condensin - K.YNEQAQEQALTEHANATK#.G              | 12.11  | 5.94  | 2.04 | 0.49 |
| E9PWG6_E Ncapg   | Protein Ncc - K.ALSLVELSNVTK#.D                  | 20.11  | 9.84  | 2.04 | 0.49 |
| E9PWG6_E Ncapg   | Protein Ncc - R.EFIGQQLIM*#.S                    | 9.16   | 5.77  | 1.59 | 0.63 |
| E9PWG6_E Ncapg   | Protein Ncc - R.EFIGQQLIMK#.S                    | 13.88  | 8.82  | 1.57 | 0.64 |
| E9PWG6_E Ncapg   | Protein Ncc - R.IQAVLALS.R.L                     | 3.97   | 13.02 | 0.30 | 3.28 |
| E9PWG6_E Ncapg   | Protein Ncc - R.IQVTEISEIR.A                     | 4.87   | 7.76  | 0.63 | 1.59 |
| E9PWG6_E Ncapg   | Protein Ncc - R.K#LAYQVLAEK#.V                   | 16.80  | 7.69  | 2.19 | 0.46 |
| E9PWG6_E Ncapg   | Protein Ncc - K.LAYQVLAEK#.V                     | 14.78  | 10.31 | 1.43 | 0.70 |
| E9PWG6_E Ncapg   | Protein Ncc - K.LLGNM*PENAQJDDDFDKINEAM*LIR.L    | 8.53   | 4.69  | 1.82 | 0.55 |
| E9PWG6_E Ncapg   | Protein Ncc - K.LLSDFLDSEVSELR.T                 | 16.74  | 36.36 | 0.46 | 2.17 |
| E9PWG6_E Ncapg   | Protein Ncc - K.LNLAEFLNEDTS.-                   | 11.96  | 11.96 | 1.00 | 1.00 |
| E9PWG6_E Ncapg   | Protein Ncc - K.SK#LNLAEFLNEDTS.-                | 19.99  | 10.84 | 1.84 | 0.54 |
| E9PWG6_E Ncapg   | Protein Ncc - R.VLLQQLNDR.S                      | 12.01  | 32.55 | 0.37 | 2.71 |
| E9PWG6_E Ncapg   | Protein Ncc - K.AILDQLM*MGIEPFK#.T               | 18.13  | 7.77  | 2.33 | 0.43 |
| E9PWG6_E Ncapg   | Protein Ncc - K.ALSLVELSNVTK#.D                  | 25.85  | 12.95 | 2.00 | 0.50 |
| E9PWG6_E Ncapg   | Protein Ncc - R.EAFQAQQPHQOAK#.L                 | 6.73   | 4.14  | 1.63 | 0.61 |
| E9PWG6_E Ncapg   | Protein Ncc - R.EFIGQQLIM*#.S                    | 19.78  | 9.78  | 2.02 | 0.49 |
| E9PWG6_E Ncapg   | Protein Ncc - R.EFIGQQLIMK#.S                    | 12.63  | 5.61  | 2.25 | 0.44 |
| E9PWG6_E Ncapg   | Protein Ncc - K.ESDPVQVQDVNTTAVLQNEEYM*TPVR.D    | 2.68   | 5.07  | 0.53 | 1.89 |
| E9PWG6_E Ncapg   | Protein Ncc - R.FTEGNILEFLHR.L                   | 12.31  | 32.56 | 0.38 | 2.65 |
| E9PWG6_E Ncapg   | Protein Ncc - K.GDFTFIDGLM*#.R                   | 9.92   | 6.42  | 1.54 | 0.65 |
| E9PWG6_E Ncapg   | Protein Ncc - R.IQAVLALS.R.L                     | 9.17   | 16.49 | 0.56 | 1.80 |
| E9PWG6_E Ncapg   | Protein Ncc - R.K#LAYQVLAEK#.V                   | 18.48  | 12.09 | 1.53 | 0.65 |
| E9PWG6_E Ncapg   | Protein Ncc - K.LAYQVLAEK#.V                     | 29.80  | 12.55 | 2.37 | 0.42 |
| E9PWG6_E Ncapg   | Protein Ncc - K.LLSDFLDSEVSELR.T                 | 20.04  | 39.74 | 0.50 | 1.98 |
| E9PWG6_E Ncapg   | Protein Ncc - K.LNLAEFLNEDTS.-                   | 19.24  | 19.24 | 1.00 | 1.00 |
| E9PWG6_E Ncapg   | Protein Ncc - K.NSODYQALTVHDNLAIK#.I             | 36.62  | 15.59 | 2.35 | 0.43 |
| E9PWG6_E Ncapg   | Protein Ncc - K.SK#LNLAEFLNEDTS.-                | 30.21  | 12.09 | 2.50 | 0.40 |
| E9PWG6_E Ncapg   | Protein Ncc - K.SLDTSEGG.R.K                     | 6.91   | 9.67  | 0.71 | 1.40 |
| E9PWG6_E Ncapg   | Protein Ncc - R.VLLQQLNDR.S                      | 21.17  | 42.08 | 0.50 | 1.99 |
| Q6DFV1_C1 Ncapg2 | Condensin - K.FAAVLPYLK.V                        | 7.87   | 6.88  | 1.14 | 0.87 |
| Q6DFV1_C1 Ncapg2 | Condensin - R.LKDLLTETLLESPVDR.W                 | 2.75   | 10.94 | 0.25 | 3.97 |
| Q6DFV1_C1 Ncapg2 | Condensin - R.VAFVLLLLK#.I                       | 18.63  | 17.67 | 1.05 | 0.95 |
| Q6DFV1_C1 Ncapg2 | Condensin - K.VLPLLEDQEEYK#.L                    | 7.99   | 8.09  | 0.99 | 1.01 |
| Q6DFV1_C1 Ncapg2 | Condensin - K.FAAVLPYLK#.V                       | 15.10  | 15.72 | 0.96 | 1.04 |
| Q6DFV1_C1 Ncapg2 | Condensin - R.LKDLLTETLLESPVDR.W                 | 2.56   | 14.89 | 0.17 | 5.82 |
| Q6DFV1_C1 Ncapg2 | Condensin - R.VAFVLLLLK#.I                       | 29.15  | 23.39 | 1.25 | 0.80 |
| Q6DFV1_C1 Ncapg2 | Condensin - K.VLPLLEDQEEYK#.L                    | 14.81  | 12.96 | 1.14 | 0.87 |
| Q8C156_C1 Ncaph  | Condensin - K.VAAGTLDASTK#.I                     | 32.50  | 35.40 | 0.92 | 1.09 |
| Q8C156_C1 Ncaph  | Condensin - K.AATILTK#.S                         | 57.36  | 41.19 | 1.39 | 0.72 |
| Q8C156_C1 Ncaph  | Condensin - K.EADTEANHTESGQEGAPEEVADEK.K         | 10.81  | 14.40 | 0.75 | 1.33 |
| Q8C156_C1 Ncaph  | Condensin - K.EADTEANHTESGQEGAPEEVADEK.L         | 17.73  | 7.66  | 2.32 | 0.43 |
| Q8C156_C1 Ncaph  | Condensin - R.GQDQVLSPLER.V                      | 15.33  | 42.03 | 0.36 | 2.74 |
| Q8C156_C1 Ncaph  | Condensin - R.NIDVSTISK#.F                       | 80.25  | 50.19 | 1.60 | 0.63 |
| Q8C156_C1 Ncaph  | Condensin - R.SETM*NSFFLK#.A                     | 28.73  | 40.01 | 0.72 | 1.39 |
| Q8C156_C1 Ncaph  | Condensin - K.TTOENGHISPENQGVDDITYQELNLVAEPQK#.V | 3.01   | 1.92  | 1.57 | 0.64 |
| Q8C156_C1 Ncaph  | Condensin - K.VAAGTLDASTK#.I                     | 111.27 | 67.48 | 1.65 | 0.61 |
| Q8C156_C1 Ncaph  | Condensin - R.VFDLQFSTDSHSLASPNR.N               | 10.94  | 31.15 | 0.35 | 2.85 |
| Q8C156_C1 Ncaph  | Condensin - K.WDSETHNESVSALVDK#.F                | 36.32  | 22.86 | 1.59 | 0.63 |
| Q8C156_C1 Ncaph  | Condensin - K.VAAGTLDASTK#.I                     | 18.91  | 11.31 | 1.67 | 0.60 |
| Q8BSP2_C1 Ncaph2 | Condensin - K.FIQETLSQR.I                        | 5.81   | 18.87 | 0.31 | 3.25 |
| Q8BSP2_C1 Ncaph2 | Condensin - R.LQETPDWQSLDPFDSLESK.V              | 6.42   | 6.01  | 1.07 | 0.94 |
| Q8BSP2_C1 Ncaph2 | Condensin - R.SQKDPEDAEEQPM*EVS.R.N              | 3.00   | 12.84 | 0.23 | 4.28 |
| Q8BSP2_C1 Ncaph2 | Condensin - R.TSQQSAILP.R.R                      | 6.66   | 20.94 | 0.32 | 3.14 |
| Q3UYV9_N Ncbp1   | Nuclear caç - K.ANNYNEAVYLR.F                    | 7.39   | 17.10 | 0.43 | 2.31 |
| Q3UYV9_N Ncbp1   | Nuclear caç - K.ATNDEIFSLK#.D                    | 60.42  | 36.51 | 1.65 | 0.60 |
| Q3UYV9_N Ncbp1   | Nuclear caç - R.FSTTESYLK#.R                     | 68.36  | 27.06 | 2.53 | 0.40 |
| Q3UYV9_N Ncbp1   | Nuclear caç - K.ANNYNEAVYLR.F                    | 9.73   | 20.50 | 0.47 | 2.11 |
| Q3UYV9_N Ncbp1   | Nuclear caç - K.ATNDEIFSLK#.D                    | 105.02 | 41.25 | 2.55 | 0.39 |
| Q3UYV9_N Ncbp1   | Nuclear caç - K.DGALLEQJER.L                     | 23.29  | 23.48 | 0.99 | 1.01 |
| Q3UYV9_N Ncbp1   | Nuclear caç - K.DVPPNPQVDDDDDEGFR.F              | 5.68   | 8.35  | 0.68 | 1.47 |
| Q3UYV9_N Ncbp1   | Nuclear caç - K.FHEVFK#.T                        | 26.03  | 8.18  | 3.18 | 0.31 |
| Q3UYV9_N Ncbp1   | Nuclear caç - R.FSTTESYLK#.R                     | 78.78  | 31.34 | 2.51 | 0.40 |
| Q3UYV9_N Ncbp1   | Nuclear caç - R.M*FDYTDDEGPPVM*PGSHSVER.F        | 3.64   | 9.33  | 0.39 | 2.56 |
| Q3UYV9_N Ncbp1   | Nuclear caç - R.NHPQMIADVLDK#.M                  | 9.45   | 3.10  | 3.05 | 0.33 |
| Q9CQ49_N Ncbp2   | Nuclear caç - K.IIM*GLDK#.M                      | 29.19  | 22.58 | 1.29 | 0.77 |
| Q9CQ49_N Ncbp2   | Nuclear caç - R.SDSYVELSEYR.D                    | 14.43  | 54.39 | 0.27 | 3.77 |
| Q9CQ49_N Ncbp2   | Nuclear caç - R.TDWDAGFK#.E                      | 26.32  | 22.63 | 1.16 | 0.86 |
| Q9CQ49_N Ncbp2   | Nuclear caç - R.TDWDAGFKEGR.Q                    | 2.15   | 7.39  | 0.29 | 3.43 |
| P28660_N Nckap1  | Nck-associac - K.ELATVLSQDQGLGPK#.A              | 10.15  | 2.05  | 4.96 | 0.20 |
| P28660_N Nckap1  | Nck-associac - R.NNNQQLAQLK#.E                   | 13.37  | 4.48  | 2.98 | 0.34 |
| P28660_N Nckap1  | Nck-associac - R.SVLQPSQQK#.L                    | 12.59  | 2.40  | 5.25 | 0.19 |
| P28660_N Nckap1  | Nck-associac - K.AINQIAAALFTIHK#.G               | 28.58  | 4.50  | 6.35 | 0.16 |

|                 |                                                     |        |        |      |       |
|-----------------|-----------------------------------------------------|--------|--------|------|-------|
| P28660_N Nckap1 | Nck-associ K.ELATVLSQPGLGPK#.A                      | 22.59  | 6.82   | 3.31 | 0.30  |
| P28660_N Nckap1 | Nck-associ R.NNNQQLAQK#.E                           | 39.07  | 7.48   | 5.22 | 0.19  |
| P28660_N Nckap1 | Nck-associ R.SVLQPQQ#.L                             | 32.93  | 10.07  | 3.27 | 0.31  |
| P09405_N Ncl    | Nucleolin C.K.FAISELFAK#.N                          | 18.21  | 4.87   | 3.74 | 0.27  |
| P09405_N Ncl    | Nucleolin C.K.GFGVDFNSEEDAK#.A                      | 9.21   | 1.66   | 5.56 | 0.18  |
| P09405_N Ncl    | Nucleolin C.K.GYAFIEFASFEDAK#.E                     | 7.82   | 2.19   | 3.56 | 0.28  |
| P09405_N Ncl    | Nucleolin C.K.SEADEAK#NLEEK#.Q                      | 4.70   | 2.01   | 2.34 | 0.43  |
| P09405_N Ncl    | Nucleolin C.K.ALELTGLK#.V                           | 126.73 | 70.16  | 1.81 | 0.55  |
| P09405_N Ncl    | Nucleolin C.K.EAM*EDGEIDGNKVTLDWAKPK.G              | 20.57  | 7.27   | 2.83 | 0.35  |
| P09405_N Ncl    | Nucleolin C.K.ETLEEFK#.A                            | 112.72 | 55.44  | 2.03 | 0.49  |
| P09405_N Ncl    | Nucleolin C.K.FAISELFAK#.N                          | 235.63 | 120.77 | 1.95 | 0.51  |
| P09405_N Ncl    | Nucleolin C.K.FGVDFESAEDLEK#.A                      | 75.59  | 41.61  | 1.82 | 0.55  |
| P09405_N Ncl    | Nucleolin C.K.GFGVDFNSEEDAK#.A                      | 127.65 | 69.98  | 1.82 | 0.55  |
| P09405_N Ncl    | Nucleolin C.K.GLSEDTTEETLKEFEGSVR.A                 | 30.43  | 64.12  | 0.47 | 2.11  |
| P09405_N Ncl    | Nucleolin C.K.GYAFIEFASFEDAK#.E                     | 71.27  | 33.29  | 2.14 | 0.47  |
| P09405_N Ncl    | Nucleolin C.R.IVTDRETGSSK.G                         | 4.41   | 10.32  | 0.43 | 2.34  |
| P09405_N Ncl    | Nucleolin C.R.K#GGYVDFESAEDLEK#.A                   | 50.80  | 20.76  | 2.45 | 0.41  |
| P09405_N Ncl    | Nucleolin C.R.LELQGSNSR.S                           | 33.63  | 59.69  | 0.56 | 1.77  |
| P09405_N Ncl    | Nucleolin C.K.NLSFNITEDELK#.E                       | 17.87  | 8.48   | 2.11 | 0.47  |
| P09405_N Ncl    | Nucleolin C.K.NLSFNITEDELKEVFEDAM*EIR.L             | 9.34   | 16.52  | 0.57 | 1.77  |
| P09405_N Ncl    | Nucleolin C.K.QK#VEGSEPTTFNLFIGNLNPKN#.S            | 20.74  | 13.75  | 1.51 | 0.66  |
| P09405_N Ncl    | Nucleolin C.K.SEADEAK#NLEEK#.Q                      | 77.41  | 37.35  | 2.07 | 0.48  |
| P09405_N Ncl    | Nucleolin C.R.SVSLYYTEK#.G                          | 178.78 | 83.94  | 2.13 | 0.47  |
| P09405_N Ncl    | Nucleolin C.K.TLVLSNLSYATK#.E                       | 148.44 | 67.14  | 2.21 | 0.45  |
| P09405_N Ncl    | Nucleolin C.K.TLVLSNLSYATK#ETLEEFK#.A               | 18.63  | 6.75   | 2.76 | 0.36  |
| P09405_N Ncl    | Nucleolin C.K.VEGSEPTTFNLFIGNLNPKN#.S               | 72.92  | 36.70  | 1.99 | 0.50  |
| P09405_N Ncl    | Nucleolin C.K.FAISELFAK#.N                          | 17.75  | 7.42   | 2.39 | 0.42  |
| P09405_N Ncl    | Nucleolin C.K.FGVDFESAEDLEK#.A                      | 5.05   | 2.56   | 1.97 | 0.51  |
| P09405_N Ncl    | Nucleolin C.K.GFGVDFNSEEDAK#.A                      | 13.73  | 2.58   | 5.32 | 0.19  |
| O09000_N Ncoa3  | Nuclear rec K.ELQPQADSGDSK.L                        | 2.18   | 3.03   | 0.72 | 1.39  |
| Q91W39_N Ncoa5  | Nuclear rec R.GHPHAIQSLINLLADNR.Y                   | 2.96   | 22.60  | 0.13 | 7.63  |
| Q91W39_N Ncoa5  | Nuclear rec R.GPPGPESQSR.A                          | 4.20   | 20.53  | 0.20 | 4.89  |
| Q91W39_N Ncoa5  | Nuclear rec R.YFEIQR.R                              | 2.89   | 14.13  | 0.20 | 4.89  |
| Q60974_N Ncor1  | Nuclear rec R.GTAGAVQEGSITR.G                       | 2.93   | 11.11  | 0.26 | 3.79  |
| Q60974_N Ncor1  | Nuclear rec K.ISETISSLR.G                           | 2.50   | 12.02  | 0.21 | 4.80  |
| Q60974_N Ncor1  | Nuclear rec R.SAAVSEQQLQEQ#.N                       | 10.78  | 10.11  | 1.07 | 0.94  |
| F8VQL9_F8 Ncor2 | Nuclear rec K.EAEKPAFFAPFTEGPK.L                    | 21.87  | 36.90  | 0.59 | 1.69  |
| F8VQL9_F8 Ncor2 | Nuclear rec K.EGSITQGPLK#.Y                         | 21.03  | 28.34  | 0.74 | 1.35  |
| F8VQL9_F8 Ncor2 | Nuclear rec R.ESSLALNYAAGPR.G                       | 2.13   | 12.61  | 0.17 | 5.93  |
| F8VQL9_F8 Ncor2 | Nuclear rec R.GHPLAFDPTSPIR.G                       | 4.53   | 33.33  | 0.14 | 7.37  |
| F8VQL9_F8 Ncor2 | Nuclear rec R.GIIDLQVPHLPVLPPTPGPTATAIDR.L          | 2.32   | 15.09  | 0.15 | 6.51  |
| F8VQL9_F8 Ncor2 | Nuclear rec R.GQAGPPESLGVPTAQETSIVLR.G              | 5.66   | 6.91   | 0.82 | 1.22  |
| F8VQL9_F8 Ncor2 | Nuclear rec R.GTALGSATSISITK#.G                     | 41.34  | 47.55  | 0.87 | 1.15  |
| F8VQL9_F8 Ncor2 | Nuclear rec K.GTAEITVSEAPLKHVEEAGSK#.A              | 36.12  | 44.84  | 0.81 | 1.24  |
| F8VQL9_F8 Ncor2 | Nuclear rec R.GVTGVLDLYR.G                          | 4.59   | 21.78  | 0.21 | 4.74  |
| F8VQL9_F8 Ncor2 | Nuclear rec K.GVTVSEVPPTVLR.W                       | 2.85   | 15.24  | 0.19 | 5.34  |
| F8VQL9_F8 Ncor2 | Nuclear rec R.GYPTAALENR.Q                          | 5.71   | 24.23  | 0.24 | 4.25  |
| F8VQL9_F8 Ncor2 | Nuclear rec R.ILEGLQPQVPLYNQPSDTR.Q                 | 8.18   | 20.39  | 0.40 | 2.49  |
| F8VQL9_F8 Ncor2 | Nuclear rec K.LILYFK#.R                             | 17.36  | 3.77   | 4.60 | 0.22  |
| F8VQL9_F8 Ncor2 | Nuclear rec K.NFGLIASFLEK.K                         | 0.88   | 14.77  | 0.06 | 16.87 |
| F8VQL9_F8 Ncor2 | Nuclear rec K.SEAEEIDVKGPEEPSEASEPPESVK.S           | 5.48   | 8.42   | 0.65 | 1.54  |
| F8VQL9_F8 Ncor2 | Nuclear rec R.SGTSSGAGSITR.G                        | 4.93   | 17.72  | 0.28 | 3.59  |
| F8VQL9_F8 Ncor2 | Nuclear rec K.SPGNSQPPAFFSK.L                       | 8.69   | 11.15  | 0.78 | 1.28  |
| F8VQL9_F8 Ncor2 | Nuclear rec K.TQSKPFSIQLELR.S                       | 1.39   | 11.18  | 0.12 | 8.02  |
| F8VQL9_F8 Ncor2 | Nuclear rec R.VTLAQHISEVITQDYTR.H                   | 2.71   | 15.64  | 0.17 | 5.76  |
| F8VQL9_F8 Ncor2 | Nuclear rec K.YDSGAPSTGK.K                          | 6.98   | 8.62   | 0.81 | 1.23  |
| Q8BNY6_N Ncs1   | Neuronal c1.K.LYDLNDGYTR.N                          | 6.25   | 10.77  | 0.58 | 1.72  |
| Q9D0F1_N Ndc80  | Kinetochor K.ASLAQDVQNYK.A                          | 5.25   | 13.08  | 0.40 | 2.49  |
| Q9D0F1_N Ndc80  | Kinetochor K.SASELSEK.H                             | 6.75   | 12.37  | 0.55 | 1.83  |
| Q9CPR8_M Ndn12  | Melanoma-R.DVYPNLLK#.L                              | 8.60   | 5.64   | 1.53 | 0.66  |
| Q9CPR8_M Ndn12  | Melanoma-K.VAELVQFLIK#.D                            | 33.76  | 19.45  | 1.74 | 0.58  |
| Q62433_N Ndr1   | Protein ND R.LNITPNSGATGNNAGPK#.S                   | 13.41  | 8.18   | 1.64 | 0.61  |
| P33215_N Nedd1  | Protein NEI K.AASSVTAGVASSLEK#.E                    | 20.68  | 11.86  | 1.74 | 0.57  |
| P46935_N Nedd4  | E3 ubiquiti R.DDFLGQVDVPLYPPTENPR.M                 | 2.10   | 8.66   | 0.24 | 4.13  |
| P46935_N Nedd4  | E3 ubiquiti K.DILGASDPYVR.V                         | 3.45   | 10.19  | 0.34 | 2.96  |
| P46935_N Nedd4  | E3 ubiquiti R.QISEVDGPDNR.E                         | 2.09   | 8.14   | 0.26 | 3.90  |
| P46935_N Nedd4  | E3 ubiquiti R.DDFLGQVDVPLYPPTENPR.M                 | 4.27   | 18.26  | 0.23 | 4.28  |
| P46935_N Nedd4  | E3 ubiquiti K.EGFFELIQDLIK#.I                       | 23.20  | 13.55  | 1.71 | 0.58  |
| P46935_N Nedd4  | E3 ubiquiti R.EWFFLLSK#.E                           | 16.75  | 7.07   | 2.37 | 0.42  |
| P46935_N Nedd4  | E3 ubiquiti K.GLDYGGVAR.E                           | 6.95   | 19.49  | 0.36 | 2.80  |
| P46935_N Nedd4  | E3 ubiquiti R.LLFEVFDENR.L                          | 10.53  | 24.62  | 0.43 | 2.34  |
| P46935_N Nedd4  | E3 ubiquiti R.LQNVAITGPAVPSYR.D                     | 3.81   | 17.04  | 0.22 | 4.47  |
| P46935_N Nedd4  | E3 ubiquiti R.LWIEFDGEK#.G                          | 23.87  | 12.83  | 1.86 | 0.54  |
| P46935_N Nedd4  | E3 ubiquiti K.RPSPDDLTDEDNDDM*QLQAQR.A              | 3.75   | 12.46  | 0.30 | 3.33  |
| P46935_N Nedd4  | E3 ubiquiti K.TGGSEIVVTNK#.N                        | 38.63  | 25.37  | 1.52 | 0.66  |
| P46935_N Nedd4  | E3 ubiquiti K.VIAGIGLAK#.K                          | 22.38  | 12.73  | 1.76 | 0.57  |
| P46935_N Nedd4  | E3 ubiquiti R.VTLYDPM*SGILTSVQTK#.T                 | 7.41   | 5.66   | 1.31 | 0.76  |
| P46935_N Nedd4  | E3 ubiquiti R.VTLYDPM*SGILTSVQTK#.T                 | 7.28   | 3.98   | 1.83 | 0.55  |
| P46935_N Nedd4  | E3 ubiquiti K.WNEEILFR.V                            | 6.03   | 13.50  | 0.45 | 2.24  |
| P46935_N Nedd4  | E3 ubiquiti R.DDFLGQVDVPLYPPTENPR.M                 | 1.70   | 5.71   | 0.30 | 3.36  |
| Q9E574_N Nek7   | Serine/thre R.DIK#ANVFITATGVVK#.L                   | 9.86   | 2.76   | 3.57 | 0.28  |
| Q8K1R7_N Nek9   | Serine/thre R.LGLDSEEDYPTQQR.V                      | 4.32   | 6.85   | 0.63 | 1.59  |
| Q8K1R7_N Nek9   | Serine/thre R.TSEVYVWGGGK#.S                        | 12.87  | 4.59   | 2.80 | 0.36  |
| Q8K1R7_N Nek9   | Serine/thre K.VTLLNAPTK#.R                          | 13.75  | 7.78   | 1.77 | 0.57  |
| Q8BG30_N Nelfa  | Negative eli R.EASRPPEPSAPSPTLPTQFK.Q               | 3.59   | 5.88   | 0.61 | 1.64  |
| Q8BG30_N Nelfa  | Negative eli K.LLDISELNTVGAGR.E                     | 4.53   | 10.38  | 0.44 | 2.29  |
| Q8BG30_N Nelfa  | Negative eli R.EASRPPEPSAPSPTLPTQFK.Q               | 4.60   | 11.07  | 0.42 | 2.41  |
| Q8BG30_N Nelfa  | Negative eli K.LLDISELNTVGAGR.E                     | 7.03   | 15.19  | 0.46 | 2.16  |
| Q8BG30_N Nelfa  | Negative eli K.NALTTLAGLPTPVK#.H                    | 11.08  | 5.34   | 2.08 | 0.48  |
| Q8BG30_N Nelfa  | Negative eli R.SPTTSPVSPSGNR.T                      | 4.18   | 12.22  | 0.34 | 2.92  |
| Q8BG30_N Nelfa  | Negative eli K.TLDTVEVVKPTK#EETVENATPDYAAGLVSTQK#.L | 13.18  | 4.88   | 2.70 | 0.37  |
| Q8C4Y3_N Nelfb  | Negative eli K.ALEPTGQSGEAVK#.E                     | 35.55  | 15.27  | 2.33 | 0.43  |
| Q8C4Y3_N Nelfb  | Negative eli K.ASVTYPNTLPESTFK#.F                   | 16.55  | 7.04   | 2.35 | 0.43  |
| Q8C4Y3_N Nelfb  | Negative eli R.DSPDLLLRL.L                          | 6.22   | 13.87  | 0.45 | 2.23  |
| Q8C4Y3_N Nelfb  | Negative eli R.VSAIASEGK#.A                         | 17.42  | 8.05   | 2.16 | 0.46  |
| Q8C4Y3_N Nelfb  | Negative eli K.ALEPTGQSGEAVK#.E                     | 19.33  | 7.04   | 2.75 | 0.36  |
| Q8C4Y3_N Nelfb  | Negative eli K.ASVTYPNTLPESTFK#.F                   | 16.99  | 4.96   | 3.43 | 0.29  |
| Q8C4Y3_N Nelfb  | Negative eli R.LLALGQGAWDLIDSOVFK#EPK#.M            | 27.90  | 11.50  | 2.43 | 0.41  |
| Q8C4Y3_N Nelfb  | Negative eli K.ALEPTGQSGEAVK#.E                     | 53.33  | 22.51  | 2.37 | 0.42  |
| Q8C4Y3_N Nelfb  | Negative eli K.ASVTYPNTLPESTFK#.F                   | 28.20  | 12.64  | 2.23 | 0.45  |
| Q8C4Y3_N Nelfb  | Negative eli R.DSPDLLLRL.L                          | 15.05  | 23.29  | 0.65 | 1.55  |
| Q8C4Y3_N Nelfb  | Negative eli R.ELQGLDGVK#.K                         | 13.91  | 6.90   | 2.02 | 0.50  |
| Q922L6_N Nelfcd | Negative eli R.GALNPADITLVFK#.M                     | 17.45  | 7.86   | 2.22 | 0.45  |

|                    |                                                   |       |       |      |       |
|--------------------|---------------------------------------------------|-------|-------|------|-------|
| Q922L6_Nf Nelfcd   | Negative eli R.GALNPADITLVFK#M                    | 21.13 | 10.52 | 2.01 | 0.50  |
| Q922L6_Nf Nelfcd   | Negative eli R.TSLATLDGGEENLEK#N                  | 12.72 | 82.60 | 0.15 | 6.49  |
| Q922L6_Nf Nelfcd   | Negative eli R.DYIM*EPSIFNTLK#R                   | 13.36 | 8.17  | 1.64 | 0.61  |
| Q922L6_Nf Nelfcd   | Negative eli R.FPVVMAGVLK#W                       | 8.37  | 3.39  | 2.47 | 0.40  |
| Q922L6_Nf Nelfcd   | Negative eli R.GALNPADITLVFK#M                    | 52.69 | 24.12 | 2.18 | 0.46  |
| Q922L6_Nf Nelfcd   | Negative eli R.TSLATLDGGEENLEK#N                  | 7.24  | 94.28 | 0.08 | 13.03 |
| Q922L6_Nf Nelfcd   | Negative eli R.VSIQK#DELK#S                       | 18.92 | 7.86  | 2.41 | 0.42  |
| P19426_Nf Nelfe    | Negative eli R.SLSEQPVVDTATATEQAK#Q               | 22.23 | 9.17  | 2.43 | 0.41  |
| P19426_Nf Nelfe    | Negative eli R.SLYESVSSDDR.L                      | 4.59  | 6.82  | 0.67 | 1.49  |
| P19426_Nf Nelfe    | Negative eli R.SM*SADELDQEPSR.R                   | 4.98  | 7.48  | 0.67 | 1.50  |
| P19426_Nf Nelfe    | Negative eli R.SVWGSGLAVQNSPK#G                   | 20.70 | 7.19  | 2.88 | 0.35  |
| Q8CCP0_Nf Nemf     | Nuclear exp R.LTEVIAAPK#G                         | 9.21  | 2.69  | 3.43 | 0.29  |
| Q6P5H2_Nf Nes      | Nestin OS= R.AVEEGELLQDVAWEAWSLGSSEPK#E           | 29.65 | 28.36 | 1.05 | 0.96  |
| Q6P5H2_Nf Nes      | Nestin OS= R.EAGALDSGIPELPK#T                     | 20.44 | 5.88  | 3.48 | 0.29  |
| Q6P5H2_Nf Nes      | Nestin OS= R.SLDENQETLVLESK#N                     | 11.83 | 5.32  | 2.22 | 0.45  |
| Q6P5H2_Nf Nes      | Nestin OS= R.SLDK#ENQESLVSLNEGGM*ETVK#S           | 13.33 | 5.40  | 2.47 | 0.41  |
| Q04690_Nf Nf1      | Neurofibro R.FINPAIVSPYEAIGLDK#K                  | 4.55  | 4.38  | 1.04 | 0.96  |
| Q04690_Nf Nf1      | Neurofibro K.I.LQQGTEFDLAETVADRFR.L               | 2.12  | 6.53  | 0.32 | 3.08  |
| Q9WV30_Nf Nfat5    | Nuclear fac R.SHDVQPFYTPDPAAGALNVNWK#K            | 7.41  | 6.00  | 1.24 | 0.81  |
| Q9WV30_Nf Nfat5    | Nuclear fac K.VIFQENVSDENSWK#S                    | 7.69  | 4.18  | 1.84 | 0.54  |
| Q80TRO_Qf Nfat5    | MKIAA0821.R.SHDVQPFYTPDPAAGALNVNWK#K              | 6.52  | 3.11  | 2.10 | 0.48  |
| Q9WV30_Nf Nfat5    | Nuclear fac R.SHDVQPFYTPDPAAGALNVNWK#K            | 5.91  | 6.38  | 0.93 | 1.08  |
| O09130_Nf Nfatc2ip | NFATC2-int R.LLLLPESELSPTATPSTLK#L                | 8.18  | 5.00  | 1.63 | 0.61  |
| O09130_Nf Nfatc2ip | NFATC2-int R.LLDLPEGEAPVVPVYSGK#V                 | 8.05  | 4.25  | 1.89 | 0.53  |
| O09130_Nf Nfatc2ip | NFATC2-int K.VQSLNLIPIVNSLSLK#L                   | 8.99  | 3.27  | 2.75 | 0.36  |
| P97863_Nf Nfib     | Nuclear fac K.NPPGYLEDSFVK#S                      | 7.48  | 9.43  | 0.79 | 1.26  |
| P97863_Nf Nfib     | Nuclear fac K.SGVFNVSVELVR.V                      | 2.86  | 12.23 | 0.23 | 4.28  |
| P70255_Nf Nfic     | Nuclear fac R.NWTEDEIGISSPVK#K                    | 8.58  | 6.00  | 1.43 | 0.70  |
| P70255_Nf Nfic     | Nuclear fac R.TPVVTGTGPNFSLGELQGHAYDLNPASAGM#R.R  | 3.13  | 6.49  | 0.48 | 2.08  |
| P70255_Nf Nfic     | Nuclear fac R.TPVVTGTGPNFSLGELQGHAYDLNPASAGM#R.R  | 2.15  | 2.20  | 0.98 | 1.02  |
| P70255_Nf Nfic     | Nuclear fac R.TPVVTGTGPNFSLGELQGHAYDLNPASAGM#R.R  | 3.09  | 5.46  | 0.57 | 1.77  |
| O08750_Nf Nf13     | Nuclear fac R.FIATQPISASDR.-                      | 4.22  | 9.44  | 0.45 | 2.24  |
| P70257_Nf Nfix     | Nuclear fac R.AFSYVFNQLQAR.K                      | 2.16  | 6.30  | 0.34 | 2.92  |
| P70257_Nf Nfix     | Nuclear fac R.SITSPSTSTK.R                        | 11.22 | 17.68 | 0.63 | 1.58  |
| P70257_Nf Nfix     | Nuclear fac R.VSQTPVATASGPNFSLADLESPSYNINQVTLGR.R | 2.61  | 6.06  | 0.43 | 2.32  |
| P70257_Nf Nfix     | Nuclear fac R.AVK#DELLGEK#PEIK#Q                  | 14.10 | 20.29 | 0.69 | 1.44  |
| P70257_Nf Nfix     | Nuclear fac R.AVKDELLGEK#PEIK.Q                   | 15.86 | 22.97 | 0.69 | 1.45  |
| P70257_Nf Nfix     | Nuclear fac R.SITSPSTSTK.R                        | 9.16  | 10.15 | 0.90 | 1.11  |
| P70257_Nf Nfix     | Nuclear fac R.SPAAGSSQSSGWPNDVDAGPASLKK.S         | 2.54  | 6.51  | 0.39 | 2.57  |
| P70257_Nf Nfix     | Nuclear fac R.VSQTPVATASGPNFSLADLESPSYNINQVTLGR.R | 3.04  | 12.26 | 0.25 | 4.03  |
| P70257_Nf Nfix     | Nuclear fac R.SITSPSTSTK.R                        | 15.00 | 15.97 | 0.94 | 1.06  |
| P70257_Nf Nfix     | Nuclear fac R.SPAAGSSQSSGWPNDVDAGPASLKK.S         | 2.78  | 8.03  | 0.35 | 2.89  |
| P70257_Nf Nfix     | Nuclear fac R.VSQTPVATASGPNFSLADLESPSYNINQVTLGR.R | 3.35  | 12.54 | 0.27 | 3.75  |
| P25799_Nf Nfkb1    | Nuclear fac R.GYNPGLLVHSDLAYLQAEQGGDR.Q           | 4.59  | 16.35 | 0.28 | 3.56  |
| P25799_Nf Nfkb1    | Nuclear fac R.K#SDLETSEPK#PFLYYPEIK#D             | 3.68  | 5.60  | 0.66 | 1.52  |
| P25799_Nf Nfkb1    | Nuclear fac R.RLEPVSDAIYDSK.A                     | 4.44  | 10.53 | 0.42 | 2.37  |
| P25799_Nf Nfkb1    | Nuclear fac K.VFETLEAR.M                          | 8.05  | 17.83 | 0.45 | 2.22  |
| P25799_Nf Nfkb1    | Nuclear fac R.GYNPGLLVHSDLAYLQAEQGGDR.Q           | 2.66  | 6.55  | 0.41 | 2.46  |
| P25799_Nf Nfkb1    | Nuclear fac K.LGLGILNNAFR.L                       | 4.31  | 11.13 | 0.39 | 2.58  |
| P25799_Nf Nfkb1    | Nuclear fac K.TLM*DNYESGGTIK#E                    | 4.53  | 3.57  | 1.27 | 0.79  |
| P25799_Nf Nfkb1    | Nuclear fac R.VGADLSLDR.W                         | 2.25  | 11.03 | 0.20 | 4.90  |
| Q9WTK5_Nf Nfkb2    | Nuclear fac K.DPAPETADGPVLIIVEQPK.Q               | 7.51  | 7.21  | 1.04 | 0.96  |
| Q9WTK5_Nf Nfkb2    | Nuclear fac K.DPAPETADGPVLIIVEQPK#Q               | 7.01  | 8.64  | 0.81 | 1.23  |
| Q9WTK5_Nf Nfkb2    | Nuclear fac R.LFGLAQR.S                           | 5.87  | 13.32 | 0.44 | 2.27  |
| Q9WTK5_Nf Nfkb2    | Nuclear fac R.THALHATEMEELGLVTHLVTK#L             | 8.24  | 8.37  | 0.98 | 1.02  |
| Q9WTK5_Nf Nfkb2    | Nuclear fac R.TFAGNTPHLHAAGLSVPTLR.L              | 4.76  | 16.17 | 0.29 | 3.40  |
| Q9WTK5_Nf Nfkb2    | Nuclear fac R.ALDDYGVTDAR.A                       | 2.58  | 11.42 | 0.23 | 4.42  |
| Q6PI4_Nf Nfkrb     | Nuclear fac K.APSASVPSAPAGTTVVK#V                 | 7.09  | 5.73  | 1.24 | 0.81  |
| Q6PI4_Nf Nfkrb     | Nuclear fac R.AVPSFSPFVFEK#E                      | 12.44 | 9.27  | 1.34 | 0.75  |
| P70353_Nf Nfyc     | Nuclear tra K.AAQFITELTR.A                        | 5.92  | 14.67 | 0.40 | 2.48  |
| P70353_Nf Nfyc     | Nuclear tra K.M*ISAEAPVLFK#A                      | 9.02  | 3.64  | 2.48 | 0.40  |
| Q9DB96_Nf NgdN     | Neuroguidi K.NLQEQVM*AVTAQIQALTTK#V               | 8.34  | 5.38  | 1.55 | 0.64  |
| Q9D0T1_Nf Nhp211   | NHP2-like K.AYPLADAHLTRK#L                        | 5.57  | 3.86  | 1.44 | 0.69  |
| Q9D0T1_Nf Nhp211   | NHP2-like K.QJ.QSIOQSIER.L                        | 17.77 | 50.89 | 0.35 | 2.86  |
| O88322_Nf Nid2     | Nidogen-2 I.R.ITQTAEGLDPENYSIK#T                  | 2.11  | 4.12  | 0.51 | 1.95  |
| Q9CXK8_Nf Nip7     | 60S ribosor K.LAANISGDK#L                         | 32.99 | 9.15  | 3.61 | 0.28  |
| Q9CXK8_Nf Nip7     | 60S ribosor R.LHVTALDYLPYAK#Y                     | 25.11 | 24.42 | 1.03 | 0.97  |
| Q9CXK8_Nf Nip7     | 60S ribosor R.LHVTALDYLPYAK.Y                     | 5.66  | 6.25  | 0.90 | 1.11  |
| Q9CXK8_Nf Nip7     | 60S ribosor R.VVYVSEM*MLK#L                       | 3.99  | 4.86  | 0.82 | 1.22  |
| Q6KCD5_Nf Nipbl    | Nipped-B-II K.AVIEDVIER.V                         | 3.38  | 14.05 | 0.24 | 4.16  |
| Q6KCD5_Nf Nipbl    | Nipped-B-II K.HQLNLEGESAK#I                       | 23.58 | 15.82 | 1.49 | 0.67  |
| Q6KCD5_Nf Nipbl    | Nipped-B-II K.LLM*EHLDPDEEEEGEVASASTNAR.N         | 2.09  | 5.43  | 0.38 | 2.60  |
| Q6KCD5_Nf Nipbl    | Nipped-B-II K.LVNETFQK#L                          | 16.61 | 15.26 | 1.09 | 0.92  |
| Q6KCD5_Nf Nipbl    | Nipped-B-II R.NK#ADQQLVEIDK#K#Y                   | 18.14 | 10.78 | 1.68 | 0.59  |
| Q6KCD5_Nf Nipbl    | Nipped-B-II K.QVSGGEDEIQLQK#A                     | 10.59 | 6.18  | 1.71 | 0.58  |
| Q6KCD5_Nf Nipbl    | Nipped-B-II R.TAQNFSLFLK#K                        | 22.40 | 13.54 | 1.65 | 0.60  |
| Q6KCD5_Nf Nipbl    | Nipped-B-II R.VLGENAIAVR.T                        | 6.17  | 18.98 | 0.32 | 3.08  |
| Q80TM9_Nf Nisch    | Nischarin C R.EVQWQVFPVSAESR.E                    | 2.11  | 6.91  | 0.31 | 3.28  |
| Q80TM9_Nf Nisch    | Nischarin C R.GPAPAGGAPAEALAQAEVPAQYPSER.L        | 4.34  | 14.68 | 0.30 | 3.38  |
| Q80TM9_Nf Nisch    | Nischarin C R.VPLSTVLDLPT.RS                      | 4.14  | 19.76 | 0.21 | 4.77  |
| Q9D0F4_Nf Nkap     | NF-kappa-B R.ALASFNQEER.R                         | 5.84  | 25.62 | 0.23 | 4.39  |
| Q9D0F4_Nf Nkap     | NF-kappa-B R.SKAEEPDLGPEAPK.T                     | 20.48 | 20.19 | 1.01 | 0.99  |
| Q9D0F4_Nf Nkap     | NF-kappa-B K.TLASQDDK#PLNYGHALLPGEGAAM*AEYVK#A    | 8.60  | 7.43  | 1.16 | 0.86  |
| Q9D0F4_Nf Nkap     | NF-kappa-B K.TLASQDDK#PLNYGHALLPGEGAAM*AEYVK#A    | 2.00  | 3.12  | 0.64 | 1.56  |
| Q8BY02_Nf Nkrf     | NF-kappa-B K.YEAGEAVK#T                           | 51.50 | 25.87 | 1.99 | 0.50  |
| P30415_Nf Nktr     | NK-tumor r R.DMPATVPEQNIQDPAVPSVQDKPQSVK.S        | 3.47  | 5.02  | 0.69 | 1.45  |
| P30415_Nf Nktr     | NK-tumor r K.TTHLLPVOSTVLSNIAK.A                  | 10.57 | 12.39 | 0.85 | 1.17  |
| Q8VEI4_Nf Nle1     | Notchless p K.TLESQSVETEK#I                       | 12.94 | 7.36  | 1.76 | 0.57  |
| Q2LKV8_Qf Nlrp1b   | NACHT-, LR R.TLEENLTK#L                           | 18.77 | 4.26  | 4.40 | 0.23  |
| Q99L48_Nf Nmd3     | 60S ribosor R.DATIPVESDDEGAPR.I                   | 2.22  | 7.96  | 0.28 | 3.59  |
| Q99L48_Nf Nmd3     | 60S ribosor R.DATIPVESDDEGAPR.I                   | 3.12  | 14.62 | 0.21 | 4.69  |
| O35309_Nf Nmi      | N-myc-inte R.SAVITFVETGVVDK#I                     | 9.07  | 6.77  | 1.34 | 0.75  |
| Q8K2T1_Nf Nmr1     | NmrA-like f R.HTAEEYAALLSK#H                      | 10.91 | 7.03  | 1.55 | 0.64  |
| Q9WV70_Nf Noc21    | Nucleolar c R.LEDLNFPEIK#R                        | 19.05 | 12.18 | 1.56 | 0.64  |
| Q8R5K4_Nf Nol6     | Nucleolar p R.EAVVWEAELFEK.R                      | 5.67  | 8.31  | 0.68 | 1.47  |
| Q8R5K4_Nf Nol6     | Nucleolar p R.LQVEELK#E                           | 19.01 | 13.66 | 1.39 | 0.72  |
| Q8R5K4_Nf Nol6     | Nucleolar p R.TEPPAEGLLOPNVLSR.E                  | 1.71  | 7.00  | 0.24 | 4.09  |
| Q8R5K4_Nf Nol6     | Nucleolar p K.VPPVPEALTDOSWLPAGVR.V               | 3.78  | 12.18 | 0.31 | 3.22  |
| Q9D7Z3_Nf Nol7     | Nucleolar p K.AAAQFLTSTWGAQK#Q                    | 7.75  | 3.15  | 2.46 | 0.41  |
| Q9D7Z3_Nf Nol7     | Nucleolar p K.LLPDAVLEQLTASEADIK#K                | 3.69  | 3.76  | 0.98 | 1.02  |
| Q3TZ8_Nf Nol9      | Polynucleo K.FTPTLSEVELTDGLYTK#S                  | 5.35  | 5.48  | 0.98 | 1.02  |
| Q3TZ8_Nf Nol9      | Polynucleo R.LVLDLIR.V                            | 3.18  | 10.18 | 0.31 | 3.20  |
| Q3TZ8_Nf Nol9      | Polynucleo K.FTPTLSEVELTDGLYTK#S                  | 5.87  | 4.75  | 1.24 | 0.81  |

|                  |                                                  |        |        |      |       |
|------------------|--------------------------------------------------|--------|--------|------|-------|
| Q99K48_Ni Nono   | Non-POU d K.AFNLEK#.Q                            | 124.71 | 72.30  | 1.72 | 0.58  |
| Q99K48_Ni Nono   | Non-POU d K.AGEVFIHK#.D                          | 160.22 | 91.84  | 1.74 | 0.57  |
| Q99K48_Ni Nono   | Non-POU d K.AGEVFIHK#DK#.G                       | 6.71   | 3.83   | 1.75 | 0.57  |
| Q99K48_Ni Nono   | Non-POU d K.ALIEMEK#.Q                           | 46.16  | 24.45  | 1.89 | 0.53  |
| Q99K48_Ni Nono   | Non-POU d R.AVVIVDDR.G                           | 30.38  | 80.96  | 0.38 | 2.66  |
| Q99K48_Ni Nono   | Non-POU d K.DKGGFIR.L                            | 22.11  | 54.12  | 0.41 | 2.45  |
| Q99K48_Ni Nono   | Non-POU d R.EKLEMEM*EAAR.H                       | 4.38   | 10.88  | 0.40 | 2.48  |
| Q99K48_Ni Nono   | Non-POU d R.EKLEMEMEAAR.H                        | 3.51   | 15.13  | 0.23 | 4.31  |
| Q99K48_Ni Nono   | Non-POU d R.EKLEM*EM*EAAR.H                      | 6.42   | 18.01  | 0.36 | 2.80  |
| Q99K48_Ni Nono   | Non-POU d R.FAQPQSFYEYAM*R.W                     | 13.51  | 31.07  | 0.43 | 2.30  |
| Q99K48_Ni Nono   | Non-POU d R.FAQPQSFYEYAMR.W                      | 19.46  | 48.30  | 0.40 | 2.48  |
| Q99K48_Ni Nono   | Non-POU d R.FGQAATM*EGIGAGGTPPAPFNRPAPGAEFAPNK.R | 3.19   | 3.80   | 0.84 | 1.19  |
| Q99K48_Ni Nono   | Non-POU d R.LFVGNLPPDITEEM*R.K                   | 5.15   | 16.42  | 0.31 | 3.19  |
| Q99K48_Ni Nono   | Non-POU d R.MEELHNQEVQK#.R                       | 22.13  | 10.76  | 2.06 | 0.49  |
| Q99K48_Ni Nono   | Non-POU d R.MEELHNQEVQK.R                        | 22.19  | 65.50  | 0.34 | 2.95  |
| Q99K48_Ni Nono   | Non-POU d K.VELDNM*PLR.G                         | 37.44  | 103.25 | 0.36 | 2.76  |
| Q99K48_Ni Nono   | Non-POU d R.AVVIVDDR.G                           | 32.47  | 82.87  | 0.39 | 2.55  |
| Q9CQS2_Ni Nop10  | H/ACA ribo -.M*FLQYLYNEQDGR.V                    | 1.96   | 3.66   | 0.53 | 1.87  |
| Q9CQS2_Ni Nop10  | H/ACA ribo K.VLM*TQQRPV.L-                       | 3.60   | 10.74  | 0.34 | 2.98  |
| Q8R3N1_Ni Nop14  | Nucleolar p K.AVAALPYVFAAPSEFEEK#.F              | 9.27   | 5.46   | 1.70 | 0.59  |
| Q8R3N1_Ni Nop14  | Nucleolar p K.AVAALPYVFAAPSEFEEK#.F              | 14.57  | 12.79  | 1.14 | 0.88  |
| Q8R3N1_Ni Nop14  | Nucleolar p K.AVAALPYVFAAPSEFEEK.F               | 20.04  | 17.17  | 1.17 | 0.86  |
| Q9CPTS_Ni Nop16  | Nucleolar p R.DEK#NYYQDTPK#.Q                    | 4.92   | 1.41   | 3.49 | 0.29  |
| Q9CPTS_Ni Nop16  | Nucleolar p R.K#P#YVNDLEAEASLEPKH#.G             | 27.83  | 17.58  | 1.58 | 0.63  |
| Q9CPTS_Ni Nop16  | Nucleolar p R.QNLAEM*GLAM*DPNK#.A                | 6.85   | 4.06   | 1.69 | 0.59  |
| E9QN31_E5 Nop2   | Probable 21 K.AQDATAGVLWNEEDTDEDDEDDGVSPESHPR.K  | 2.16   | 6.20   | 0.35 | 2.87  |
| E9QN31_E5 Nop2   | Probable 21 R.DLAQALINR.G                        | 11.80  | 46.53  | 0.25 | 3.94  |
| E9QN31_E5 Nop2   | Probable 21 K.DLATYYSYDGFLLSK#.L                 | 26.55  | 21.11  | 1.26 | 0.79  |
| E9QN31_E5 Nop2   | Probable 21 K.ELLLSAIDSVNAASK#.T                 | 24.35  | 20.01  | 1.22 | 0.82  |
| E9QN31_E5 Nop2   | Probable 21 K.ELLLSAIDSVNAASK.T                  | 52.55  | 36.94  | 1.42 | 0.70  |
| E9QN31_E5 Nop2   | Probable 21 K.FNSIPQPHAGNSAATPTPELDKQDQVTPK.S    | 4.65   | 4.36   | 1.07 | 0.94  |
| E9QN31_E5 Nop2   | Probable 21 R.LVPTGLDFGQEGFTR.F                  | 7.47   | 39.26  | 0.19 | 5.25  |
| E9QN31_E5 Nop2   | Probable 21 K.NTGVLANDANADR.L                    | 6.82   | 30.41  | 0.22 | 4.46  |
| E9QN31_E5 Nop2   | Probable 21 R.TPPVPTPEIR.A                       | 3.58   | 54.58  | 0.07 | 15.26 |
| E9QN31_E5 Nop2   | Probable 21 K.TSYIAOLMK#.N                       | 11.24  | 7.11   | 1.58 | 0.63  |
| E9QN31_E5 Nop2   | Probable 21 K.ELLLSAIDSVNAASK#.T                 | 16.53  | 9.77   | 1.69 | 0.59  |
| E9QN31_E5 Nop2   | Probable 21 R.LVPTGLDFGQEGFTR.F                  | 8.70   | 12.69  | 0.69 | 1.46  |
| Q9D6Z1_Ni Nop56  | Nucleolar p K.EAVVQAEAAAIEITR.K                  | 1.69   | 10.87  | 0.16 | 6.41  |
| Q9D6Z1_Ni Nop56  | Nucleolar p K.M*SQVAPSLSALIGEAVGAR.L             | 1.72   | 11.05  | 0.16 | 6.42  |
| Q9D6Z1_Ni Nop56  | Nucleolar p K.YPASTVQILGAEK#.A                   | 9.23   | 9.05   | 1.02 | 0.98  |
| Q9D6Z1_Ni Nop56  | Nucleolar p K.EAVVQAEAAAIEITR.K                  | 3.12   | 9.54   | 0.33 | 3.06  |
| Q9D6Z1_Ni Nop56  | Nucleolar p K.FSEEPVAAANFTK#.S                   | 9.69   | 8.13   | 1.19 | 0.84  |
| Q9D6Z1_Ni Nop56  | Nucleolar p R.LLLETYLPK.K                        | 9.14   | 10.54  | 0.87 | 1.15  |
| Q9D6Z1_Ni Nop56  | Nucleolar p R.VVSLSEVR.Q                         | 2.93   | 16.18  | 0.18 | 5.52  |
| Q9D6Z1_Ni Nop56  | Nucleolar p K.YPASTVQILGAEK#.A                   | 15.08  | 16.30  | 0.92 | 1.08  |
| Q9D6Z1_Ni Nop56  | Nucleolar p K.EAVVQAEAAAIEITR.K                  | 4.87   | 22.04  | 0.22 | 4.53  |
| Q9D6Z1_Ni Nop56  | Nucleolar p K.FSEEPVAAANFTK#.S                   | 15.92  | 9.79   | 1.63 | 0.62  |
| Q9D6Z1_Ni Nop56  | Nucleolar p R.LAQFIGNR.R                         | 7.36   | 23.71  | 0.31 | 3.22  |
| Q9D6Z1_Ni Nop56  | Nucleolar p K.LLEITM*DGAK#.A                     | 13.94  | 17.02  | 0.82 | 1.22  |
| Q9D6Z1_Ni Nop56  | Nucleolar p R.LIAHAGSLNLAK#.Y                    | 44.28  | 36.60  | 1.21 | 0.83  |
| Q9D6Z1_Ni Nop56  | Nucleolar p R.LLLETYLPK#.K                       | 18.31  | 16.22  | 1.13 | 0.89  |
| Q9D6Z1_Ni Nop56  | Nucleolar p R.LLLETYLPK#K#.K                     | 25.46  | 13.84  | 1.84 | 0.54  |
| Q9D6Z1_Ni Nop56  | Nucleolar p R.LSFYETGEIPR.K                      | 2.81   | 17.66  | 0.16 | 6.28  |
| Q9D6Z1_Ni Nop56  | Nucleolar p K.M*SQVAPSLSALIGEAVGAR.L             | 6.17   | 37.96  | 0.16 | 6.15  |
| Q9D6Z1_Ni Nop56  | Nucleolar p K.M*SQVAPSLSALIGEAVGAR.L             | 6.02   | 33.87  | 0.18 | 5.62  |
| Q9D6Z1_Ni Nop56  | Nucleolar p R.SSM*GM*DISAIDINIESFSR.V            | 4.22   | 10.01  | 0.42 | 2.37  |
| Q9D6Z1_Ni Nop56  | Nucleolar p K.SSPK#EEVASEEAAASPTTPK#.K           | 19.34  | 10.78  | 1.79 | 0.56  |
| Q9D6Z1_Ni Nop56  | Nucleolar p K.VLLGVGDPK#.I                       | 80.99  | 14.93  | 5.42 | 0.18  |
| Q9D6Z1_Ni Nop56  | Nucleolar p R.VVSLSEVR.Q                         | 9.62   | 25.78  | 0.37 | 2.68  |
| Q9D6Z1_Ni Nop56  | Nucleolar p K.YPASTVQILGAEK#.A                   | 43.95  | 32.49  | 1.35 | 0.74  |
| Q6DFW4_Ni Nop58  | Nucleolar p K.FQDTAEALAAFTALM*EGK#.I             | 7.80   | 5.36   | 1.45 | 0.69  |
| Q6DFW4_Ni Nop58  | Nucleolar p K.IKAEVEEEM*EEEEEEQVVEEPTVK.K        | 3.61   | 2.78   | 1.30 | 0.77  |
| Q6DFW4_Ni Nop58  | Nucleolar p K.IK#AEVEEEMEEEEEEQVVEEPTVK#.K       | 3.52   | 2.79   | 1.26 | 0.79  |
| Q6DFW4_Ni Nop58  | Nucleolar p R.K#EEVDK#HEDITEK#.K                 | 28.09  | 30.26  | 0.93 | 1.08  |
| Q6DFW4_Ni Nop58  | Nucleolar p K.K#QEVDSLWK#.E                      | 14.24  | 12.25  | 1.16 | 0.86  |
| Q6DFW4_Ni Nop58  | Nucleolar p R.LIAHAGSLNLAK#.H                    | 17.19  | 10.12  | 1.70 | 0.59  |
| Q6DFW4_Ni Nop58  | Nucleolar p K.NYASASLSEFLSEVEAEVK#.A             | 11.07  | 5.53   | 2.00 | 0.50  |
| Q6DFW4_Ni Nop58  | Nucleolar p R.SQM*DGILPGVEPR.E                   | 2.44   | 13.03  | 0.19 | 5.34  |
| Q6DFW4_Ni Nop58  | Nucleolar p R.SQMDLPGVEPR.E                      | 2.67   | 9.29   | 0.29 | 3.48  |
| Q6DFW4_Ni Nop58  | Nucleolar p R.TQLEYELQNR.M                       | 8.47   | 20.45  | 0.41 | 2.41  |
| Q6DFW4_Ni Nop58  | Nucleolar p R.YDAFGEDESSSANGIENR.A               | 2.14   | 6.32   | 0.34 | 2.95  |
| Q6DFW4_Ni Nop58  | Nucleolar p K.YGLIYHSLVGSQSPK#.H                 | 5.30   | 3.95   | 1.34 | 0.75  |
| Q6DFW4_Ni Nop58  | Nucleolar p K.NYASASLSEFLSEVEAEVK#.A             | 9.03   | 4.36   | 2.07 | 0.48  |
| Q6DFW4_Ni Nop58  | Nucleolar p R.YDAFGEDESSSANGIENR.A               | 2.09   | 5.12   | 0.41 | 2.45  |
| Q6DFW4_Ni Nop58  | Nucleolar p K.FQDTAEALAAFTALM*EGK.I              | 7.14   | 3.98   | 1.79 | 0.56  |
| Q6DFW4_Ni Nop58  | Nucleolar p K.HAASTVQILGAEK#.A                   | 14.38  | 10.48  | 1.37 | 0.73  |
| Q6DFW4_Ni Nop58  | Nucleolar p R.K#EEVDK#HEDITEK#.K                 | 20.64  | 18.41  | 1.12 | 0.89  |
| Q6DFW4_Ni Nop58  | Nucleolar p K.NYASASLSEFLSEVEAEVK#.A             | 10.10  | 7.24   | 1.39 | 0.72  |
| Q6DFW4_Ni Nop58  | Nucleolar p K.YGLIYHSLVGSQSPK#.H                 | 19.88  | 8.58   | 2.32 | 0.43  |
| Q8BMC4_Ni Nop9   | Nucleolar p R.TLLQVLGGTLLESER.G                  | 2.88   | 7.35   | 0.39 | 2.55  |
| Q8BMC4_Ni Nop9   | Nucleolar p R.AEQAPALPHLSPEALGYFR.R              | 8.39   | 23.56  | 0.36 | 2.81  |
| Q8BMC4_Ni Nop9   | Nucleolar p R.NVALTFLK#.R                        | 21.59  | 10.54  | 2.05 | 0.49  |
| Q8BMC4_Ni Nop9   | Nucleolar p R.VLDIWSGAALGAR.K                    | 3.87   | 10.68  | 0.36 | 2.76  |
| Q9D6T0_Ni Nosp   | Nitric oxide K.AATLPTGEQPGPSVGPVKG.D             | 8.35   | 15.23  | 0.55 | 1.82  |
| Q9D6T0_Ni Nosp   | Nitric oxide K.ALPSFWIPSLTPEAK.A                 | 12.53  | 18.26  | 0.69 | 1.46  |
| P60670_Ni Nploc4 | Nuclear prc K.ESSSEQVVPDVFK#.D                   | 25.76  | 8.40   | 3.07 | 0.33  |
| P60670_Ni Nploc4 | Nuclear prc K.HGDLFLFSSLAGPSSEM*ETSTSVGLK#.A     | 11.67  | 5.91   | 1.97 | 0.51  |
| P60670_Ni Nploc4 | Nuclear prc K.AFGAPNVVEIDQYLSK#.Q                | 39.50  | 15.05  | 2.62 | 0.38  |
| P60670_Ni Nploc4 | Nuclear prc K.ESSSEQVVPDVFK#.D                   | 26.92  | 7.35   | 3.66 | 0.27  |
| P60670_Ni Nploc4 | Nuclear prc K.HGDLFLFSSLAGPSSEM*ETSTSVGLK#.A     | 13.41  | 3.74   | 3.59 | 0.28  |
| P60670_Ni Nploc4 | Nuclear prc K.HGDLFLFSSLAGPSSEM*ETSTSVGLK#.A     | 7.32   | 5.34   | 1.37 | 0.73  |
| P60670_Ni Nploc4 | Nuclear prc K.SLHLLK#.I                          | 12.32  | 5.51   | 2.23 | 0.45  |
| Q61937_Ni Npm1   | Nucleopho K.DELHIEAEAM*NYEGSPIK#.V               | 14.12  | 8.01   | 1.76 | 0.57  |
| Q61937_Ni Npm1   | Nucleopho K.FINIVK#.N                            | 145.36 | 82.90  | 1.75 | 0.57  |
| Q61937_Ni Npm1   | Nucleopho K.GPSSVEDIK#.A                         | 195.44 | 141.68 | 1.38 | 0.72  |
| Q61937_Ni Npm1   | Nucleopho K.M*QASIEK#.G                          | 42.65  | 26.58  | 1.60 | 0.62  |
| Q61937_Ni Npm1   | Nucleopho K.MQASIEK#.G                           | 77.98  | 44.52  | 1.75 | 0.57  |
| Q61937_Ni Npm1   | Nucleopho K.M*SVQPTVSLGGFEITPPVVL.R.L            | 28.57  | 77.42  | 0.37 | 2.71  |
| Q61937_Ni Npm1   | Nucleopho K.MSVQPTVSLGGFEITPPVVL.R.L             | 18.65  | 51.30  | 0.36 | 2.75  |
| Q61937_Ni Npm1   | Nucleopho R.M*TDQEAIQDLWQWR.K                    | 8.58   | 15.95  | 0.54 | 1.86  |
| Q61937_Ni Npm1   | Nucleopho R.MTDQEAIQDLWQWR.K                     | 6.55   | 17.33  | 0.38 | 2.65  |
| Q61937_Ni Npm1   | Nucleopho R.SAPGGGNK#VPQK#.K                     | 35.32  | 29.07  | 1.21 | 0.82  |
| Q61937_Ni Npm1   | Nucleopho R.SAPGGGNK#VPQK#.K                     | 9.72   | 8.46   | 1.15 | 0.87  |

|                    |                                               |        |        |       |      |
|--------------------|-----------------------------------------------|--------|--------|-------|------|
| Q61937_NI Npm1     | Nucleopho R.TVSLGAGAK#DELHIVEAEAM*NYEGSPIK#.V | 15.00  | 7.48   | 2.01  | 0.50 |
| Q61937_NI Npm1     | Nucleopho R.TVSLGAGAK#DELHIVEAEAMNYEGSPIK#.V  | 35.81  | 22.74  | 1.57  | 0.64 |
| Q61937_NI Npm1     | Nucleopho K.VDNDENEHQLSLR.T                   | 11.33  | 30.80  | 0.37  | 2.72 |
| Q61937_NI Npm1     | Nucleopho K.VTLATLKR.M                        | 170.10 | 127.07 | 1.34  | 0.75 |
| Q61937_NI Npm1     | Nucleopho K.DELHIVEAEAM*NYEGSPIK#.V           | 9.87   | 11.12  | 0.89  | 1.13 |
| Q61937_NI Npm1     | Nucleopho K.DELHIVEAEAMNYEGSPIK#.V            | 7.01   | 5.46   | 1.28  | 0.78 |
| Q61937_NI Npm1     | Nucleopho K.M*SVQPTVSLGGFEITPPVVL.R.L         | 1.78   | 8.03   | 0.22  | 4.51 |
| Q61937_NI Npm1     | Nucleopho K.MSVQPTVSLGGFEITPPVVL.R.L          | 5.13   | 18.61  | 0.28  | 3.62 |
| Q61937_NI Npm1     | Nucleopho R.TVSLGAGAK#DELHIVEAEAM*NYEGSPIK#.V | 28.09  | 24.45  | 1.15  | 0.87 |
| Q61937_NI Npm1     | Nucleopho R.TVSLGAGAK#DELHIVEAEAM*NYEGSPIK.V  | 8.07   | 5.62   | 1.43  | 0.70 |
| Q61937_NI Npm1     | Nucleopho R.TVSLGAGAK#DELHIVEAEAM*NYEGSPIK.V  | 7.32   | 4.66   | 1.57  | 0.64 |
| P49117_Nf Nr2c2    | Nuclear rec R.IQVTDQQTGQK#.I                  | 6.27   | 2.33   | 2.69  | 0.37 |
| Q60632_Cf Nr2f1    | COUP trans R.TVSSVIEQLFFV.R.L                 | 3.27   | 17.61  | 0.19  | 5.38 |
| Q60632_Cf Nr2f1    | COUP trans R.IFQEVEK#.L                       | 31.97  | 25.16  | 1.27  | 0.79 |
| Q60632_Cf Nr2f1    | COUP trans K.TPIETLR.D                        | 7.27   | 20.57  | 0.35  | 2.83 |
| Q99J45_Nf Nrbbp1   | Nuclear rec R.ELLFHPALFEVSLK#.L               | 21.18  | 5.64   | 3.76  | 0.27 |
| Q9WU00_Nf Nr1      | Nuclear res K.VFGAAPLENVVR.K                  | 3.95   | 8.20   | 0.48  | 2.08 |
| Q9WU00_Nf Nr1      | Nuclear res K.VFGAAPLENVVR.K                  | 3.81   | 15.86  | 0.24  | 4.16 |
| Q9WU00_Nf Nr1      | Nuclear res R.VSWTQALR.T                      | 3.59   | 12.74  | 0.28  | 3.55 |
| P46460_Nf Nsf      | Vesicle-fusi R.GSMAGSTGVHDVTVVNQLLSK#.I       | 5.28   | 5.97   | 0.89  | 1.13 |
| P46460_Nf Nsf      | Vesicle-fusi K.IAESNFPFIK#.I                  | 30.57  | 22.17  | 1.38  | 0.73 |
| P46460_Nf Nsf      | Vesicle-fusi K.LFGLLVK#.D                     | 10.72  | 11.71  | 0.91  | 1.09 |
| P46460_Nf Nsf      | Vesicle-fusi R.LLDVYVPIGR.F                   | 9.95   | 54.60  | 0.18  | 5.49 |
| P46460_Nf Nsf      | Vesicle-fusi K.M*GIGGLDKFESDIFR.R             | 4.66   | 13.46  | 0.35  | 2.89 |
| P46460_Nf Nsf      | Vesicle-fusi K.NFSGAELEGLVR.A                 | 9.82   | 42.78  | 0.23  | 4.36 |
| P46460_Nf Nsf      | Vesicle-fusi R.QSIIINPDWNFEK.M                | 11.74  | 16.09  | 0.73  | 1.37 |
| P46460_Nf Nsf      | Vesicle-fusi R.TPLVSVLLEGGPPHSGK#.T           | 23.15  | 25.98  | 0.89  | 1.12 |
| P46460_Nf Nsf      | Vesicle-fusi R.VLDDGELLVQQT#.N                | 17.35  | 6.08   | 2.85  | 0.35 |
| P46460_Nf Nsf      | Vesicle-fusi R.VLDDGELLVQQT#.N                | 111.68 | 58.42  | 1.91  | 0.52 |
| P46460_Nf Nsf      | Vesicle-fusi K.VVNGPEILNK#.Y                  | 17.60  | 15.86  | 1.11  | 0.90 |
| P46460_Nf Nsf      | Vesicle-fusi K.VVNGPEILNK#.Y                  | 15.65  | 32.72  | 0.48  | 2.09 |
| P46460_Nf Nsf      | Vesicle-fusi K.IAESNFPFIK.I                   | 9.13   | 8.01   | 1.14  | 0.88 |
| P46460_Nf Nsf      | Vesicle-fusi K.NFSGAELEGLVR.A                 | 15.92  | 8.45   | 1.88  | 0.53 |
| Q9CZ44_Nf Nsf1c    | NSFL1 cofai R.HSGQDVHVHLK#.L                  | 16.97  | 2.20   | 7.73  | 0.13 |
| Q9CZ44_Nf Nsf1c    | NSFL1 cofai R.LGAAPPEESAYAGER.R               | 9.82   | 7.68   | 1.28  | 0.78 |
| Q9CZ44_Nf Nsf1c    | NSFL1 cofai K.LGSTAPQVLTSSPAQQAENAK#.A        | 24.55  | 3.95   | 6.21  | 0.16 |
| Q9CZ44_Nf Nsf1c    | NSFL1 cofai K.SPNELVDDLKFK#.G                 | 26.27  | 3.11   | 8.46  | 0.12 |
| Q9D720_Nf Nsmce1   | Non-struct R.AILEM*EQFIR.E                    | 3.10   | 11.45  | 0.27  | 3.69 |
| Q9D720_Nf Nsmce1   | Non-struct R.AILEMEQFIR.E                     | 4.86   | 12.17  | 0.40  | 2.50 |
| Q91VT1_Nf Nsmce2   | E3 SUMO-p.R.M*SDILIPDEALR.R                   | 2.30   | 14.77  | 0.16  | 6.41 |
| G3XA30_Gf Nsmce4a  | MCG1618, R.ALINSDVQQR.E                       | 5.29   | 18.17  | 0.29  | 3.43 |
| G3XA30_Gf Nsmce4a  | MCG1618, R.EAVLDAQFLVSLADLKG#.E               | 15.13  | 12.66  | 1.19  | 0.84 |
| G3XA30_Gf Nsmce4a  | MCG1618, R.IGLLQTYFR.E                        | 2.85   | 12.21  | 0.23  | 4.28 |
| Q1HFZ0_Nf Nsun2    | tRNA (cytos K.SEGALELADVSAELPGLK#.W           | 5.31   | 2.46   | 2.16  | 0.46 |
| Q1HFZ0_Nf Nsun2    | tRNA (cytos K.EILFYDR.I                       | 7.82   | 18.42  | 0.42  | 2.36 |
| Q1HFZ0_Nf Nsun2    | tRNA (cytos K.FHQVLSVETESGNI.SR.Q             | 8.17   | 29.14  | 0.28  | 3.57 |
| Q1HFZ0_Nf Nsun2    | tRNA (cytos R.FQQPPQPEGEDASDGR.K              | 6.24   | 15.86  | 0.39  | 2.54 |
| Q1HFZ0_Nf Nsun2    | tRNA (cytos K.FYALDPSFPR.M                    | 9.89   | 27.39  | 0.36  | 2.77 |
| Q1HFZ0_Nf Nsun2    | tRNA (cytos R.GAEQLAEGGR.M                    | 23.93  | 38.89  | 0.62  | 1.62 |
| Q1HFZ0_Nf Nsun2    | tRNA (cytos R.GQAGWEGGYPEIVK#.E               | 25.56  | 16.75  | 1.53  | 0.66 |
| Q1HFZ0_Nf Nsun2    | tRNA (cytos R.IITVSM*EDVK#.T                  | 64.44  | 40.10  | 1.61  | 0.62 |
| Q1HFZ0_Nf Nsun2    | tRNA (cytos R.IITVSMEDVK#.T                   | 37.31  | 22.61  | 1.65  | 0.61 |
| Q1HFZ0_Nf Nsun2    | tRNA (cytos R.K.LSSEAYSQVK#.D                 | 44.93  | 30.76  | 1.46  | 0.68 |
| Q1HFZ0_Nf Nsun2    | tRNA (cytos R.LAQEYGLTYPFINSR.I               | 6.16   | 15.27  | 0.40  | 2.48 |
| Q1HFZ0_Nf Nsun2    | tRNA (cytos K.LFEHYQELK#.I                    | 20.49  | 9.36   | 2.19  | 0.46 |
| Q1HFZ0_Nf Nsun2    | tRNA (cytos R.LTVDVDGR.K                      | 9.06   | 17.66  | 0.51  | 1.95 |
| Q1HFZ0_Nf Nsun2    | tRNA (cytos R.M*MGLEVLGEK#.K                  | 28.28  | 15.29  | 1.85  | 0.54 |
| Q1HFZ0_Nf Nsun2    | tRNA (cytos K.NIDVWK#.K                       | 25.87  | 12.28  | 2.11  | 0.47 |
| Q1HFZ0_Nf Nsun2    | tRNA (cytos R.NVLLNNEK#.M                     | 64.92  | 45.31  | 1.43  | 0.70 |
| Q1HFZ0_Nf Nsun2    | tRNA (cytos K.SEGALELADVSAELPGLK#.W           | 63.65  | 34.94  | 1.82  | 0.55 |
| Q1HFZ0_Nf Nsun2    | tRNA (cytos K.TLLTOENPFPR.K                   | 22.35  | 51.13  | 0.44  | 2.29 |
| Q1HFZ0_Nf Nsun2    | tRNA (cytos K.SEGALELADVSAELPGLK#.W           | 9.11   | 5.07   | 1.80  | 0.56 |
| Q8R2U4_Nf Ntmt1    | N-terminal R.LLLPLFR.V                        | 3.94   | 8.06   | 0.49  | 2.04 |
| Q8R2U4_Nf Ntmt1    | N-terminal R.TAGLSLAER.Q                      | 6.22   | 18.76  | 0.33  | 3.02 |
| Q8R2U4_Nf Ntmt1    | N-terminal R.VVDM*VDVTEFLAK#.A                | 24.30  | 9.42   | 2.58  | 0.39 |
| P54729_Nf Nub1     | NEDD8 ulti K.SLEEQGVTHNVK#.A                  | 5.27   | 3.69   | 1.43  | 0.70 |
| P54729_Nf Nub1     | NEDD8 ulti K.AM*VLELK#.Q                      | 12.12  | 7.39   | 1.64  | 0.61 |
| P54729_Nf Nub1     | NEDD8 ulti K.SLEEQGVTHNVK#.A                  | 30.25  | 16.35  | 1.85  | 0.54 |
| P54729_Nf Nub1     | NEDD8 ulti K.VHNLQLGFTAQEAR.L                 | 4.17   | 14.24  | 0.29  | 3.41 |
| P54729_Nf Nub1     | NEDD8 ulti K.VLLSNPHMWVWLDQADPENNSR.Q         | 6.95   | 4.13   | 1.68  | 0.59 |
| P54729_Nf Nub1     | NEDD8 ulti K.AMVLELK#QSEEDVR@.K               | 100.76 | 2.68   | 37.61 | 0.03 |
| P54729_Nf Nub1     | NEDD8 ulti R.GNLDLQK#.V                       | 16.41  | 13.63  | 1.20  | 0.83 |
| P54729_Nf Nub1     | NEDD8 ulti K.NLQLEEEQNEAEK#.E                 | 6.20   | 3.03   | 2.04  | 0.49 |
| Q9R061_Nf Nubp2    | Cytosolic Ff R.LAGVPFLGSVPLDSQLTR.S           | 2.58   | 8.47   | 0.30  | 3.28 |
| Q35685_Nf Nudc     | Nuclear mij K.DAEDQEAQLK#.N                   | 15.38  | 3.59   | 4.29  | 0.23 |
| Q35685_Nf Nudc     | Nuclear mij K.GQPPVVDGELYNEVK#.V              | 27.02  | 6.75   | 4.00  | 0.25 |
| Q35685_Nf Nudc     | Nuclear mij K.GQPPVVDGELYNEVK#VESSWLIEDGK#.V  | 3.20   | 1.93   | 1.65  | 0.60 |
| Q35685_Nf Nudc     | Nuclear mij R.K#TDFFIGGEEGM*AEK#.L            | 7.29   | 2.42   | 3.01  | 0.33 |
| Q35685_Nf Nudc     | Nuclear mij R.LQLEIDQK#.K                     | 20.57  | 5.82   | 3.53  | 0.28 |
| Q35685_Nf Nudc     | Nuclear mij R.LQLEIDQK#.K                     | 85.97  | 22.01  | 3.91  | 0.26 |
| Q35685_Nf Nudc     | Nuclear mij K.SM*GLPTSDEQK#.K                 | 22.64  | 5.52   | 4.10  | 0.24 |
| Q35685_Nf Nudc     | Nuclear mij K.TDFFIGGEEGM*AEK#.L              | 14.25  | 3.15   | 4.52  | 0.22 |
| Q35685_Nf Nudc     | Nuclear mij K.VEESWLIEDGK#.V                  | 12.26  | 3.86   | 3.17  | 0.32 |
| Q35685_Nf Nudc     | Nuclear mij R.WTQLLAELDLAVPFR.V               | 5.61   | 5.90   | 0.95  | 1.05 |
| Q6P1P5_Nf Nudcd1   | NudC domc K.EDIQQLPDNINIK#.L                  | 11.33  | 5.19   | 2.18  | 0.46 |
| Q6P1P5_Nf Nudcd1   | NudC domc K.ENDSLEISLK#.K                     | 16.79  | 6.07   | 2.77  | 0.36 |
| Q6P1P5_Nf Nudcd1   | NudC domc R.FDGNLQTHVNLGSNQYLFVVDPK#.E        | 6.11   | 1.44   | 4.23  | 0.24 |
| Q6P1P5_Nf Nudcd1   | NudC domc R.LFVLTTR.K                         | 28.51  | 7.68   | 3.71  | 0.27 |
| Q6P1P5_Nf Nudcd1   | NudC domc R.LPESSTK#EDIQQLPDNINIK#.L          | 14.50  | 3.74   | 3.87  | 0.26 |
| Q8VHN8_Nf Nudt1611 | Protein syn K.YQLFALK#.V                      | 24.30  | 7.72   | 3.15  | 0.32 |
| Q9CQF3_Cf Nudt21   | Cleavage an K.LFLVQLQEK#.A                    | 9.80   | 4.48   | 2.19  | 0.46 |
| Q9CQF3_Cf Nudt21   | Cleavage an K.LPGGELNPGEVEGLKR.L              | 5.78   | 7.50   | 0.77  | 1.30 |
| Q9CQF3_Cf Nudt21   | Cleavage an R.FNFIVN.-                        | 11.92  | 11.92  | 1.00  | 1.00 |
| Q9CQF3_Cf Nudt21   | Cleavage an R.GVNOFGNK#.Y                     | 68.02  | 27.42  | 2.48  | 0.40 |
| Q9CQF3_Cf Nudt21   | Cleavage an K.K#FLVQLQEK#.A                   | 31.16  | 13.61  | 2.29  | 0.44 |
| Q9CQF3_Cf Nudt21   | Cleavage an K.LFLVQLQEK#.A                    | 235.27 | 105.54 | 2.23  | 0.45 |
| Q9CQF3_Cf Nudt21   | Cleavage an R.LM*TEILGR.Q                     | 15.08  | 24.95  | 0.60  | 1.65 |
| Q9CQF3_Cf Nudt21   | Cleavage an K.LPGGELNPGEVEGLK#.R              | 14.77  | 8.77   | 1.68  | 0.59 |
| Q9CQF3_Cf Nudt21   | Cleavage an K.LPGGELNPGEVEGLKR.L              | 65.14  | 166.07 | 0.39  | 2.55 |
| Q9CQF3_Cf Nudt21   | Cleavage an R.TINLVLTNTYFTGTR#.E              | 148.96 | 75.08  | 1.98  | 0.50 |
| Q9CQF3_Cf Nudt21   | Cleavage an K.VIQQTKPLTLR.T                   | 8.29   | 16.05  | 0.52  | 1.94 |
| Q9JKX6_Nf Nudt5    | ADP-sugar f K.VYAGDLALK#.H                    | 12.39  | 5.56   | 2.23  | 0.45 |
| Q5F2E7_Nf Nufip2   | Nuclear fraj K.GAENDGSGSESYTTPK#.K            | 5.53   | 4.59   | 1.21  | 0.83 |



|                  |                                                   |        |        |      |       |
|------------------|---------------------------------------------------|--------|--------|------|-------|
| Q5F2E7_NL Nufip2 | Nuclear frag K.IMQETSVPAK#.Q                      | 6.45   | 7.45   | 0.87 | 1.16  |
| Q5F2E7_NL Nufip2 | Nuclear frag R.LSOVPM*SALK#.S                     | 9.41   | 7.97   | 1.18 | 0.85  |
| Q5F2E7_NL Nufip2 | Nuclear frag R.LSOVPM*SALK#.S                     | 6.68   | 7.25   | 0.92 | 1.09  |
| Q5F2E7_NL Nufip2 | Nuclear frag K.SLSSDEATNPISR.V                    | 3.82   | 15.30  | 0.25 | 4.00  |
| Q5F2E7_NL Nufip2 | Nuclear frag K.ADTSSQGLVFLSK#.D                   | 3.75   | 3.05   | 1.23 | 0.81  |
| Q5F2E7_NL Nufip2 | Nuclear frag K.DYEIENQNP.LASPTNTLLGSAK#.E         | 10.76  | 5.21   | 2.06 | 0.48  |
| Q5F2E7_NL Nufip2 | Nuclear frag R.IITYNEAM*DSPDQ.-                   | 11.09  | 11.09  | 1.00 | 1.00  |
| Q5F2E7_NL Nufip2 | Nuclear frag K.DYEIENQNP.LASPTNTLLGSAK#.E         | 3.08   | 4.12   | 0.75 | 1.34  |
| Q5F2E7_NL Nufip2 | Nuclear frag R.IITYNEAM*DSPDQ.-                   | 9.26   | 9.26   | 1.00 | 1.00  |
| Q5F2E7_NL Nufip2 | Nuclear frag K.SLSSDEATNPISR.V                    | 3.63   | 12.07  | 0.30 | 3.32  |
| E9Q7G0_ES Numa1  | Protein Nui R.IATTTGTATVATTPR.A                   | 1.37   | 7.30   | 0.19 | 5.32  |
| E9Q7G0_ES Numa1  | Protein Nui R.VSSEHQGGPTPEK.K                     | 2.58   | 3.26   | 0.79 | 1.26  |
| E9Q7G0_ES Numa1  | Protein Nui R.AEELGQELK#.A                        | 22.40  | 16.71  | 1.34 | 0.75  |
| E9Q7G0_ES Numa1  | Protein Nui K.AGEQQTASLELLKEPPR.A                 | 3.63   | 11.99  | 0.30 | 3.30  |
| E9Q7G0_ES Numa1  | Protein Nui K.AIQQVQEK.E                          | 16.26  | 18.27  | 0.89 | 1.12  |
| E9Q7G0_ES Numa1  | Protein Nui K.ALETLOGQLEEK#.A                     | 40.82  | 28.28  | 1.44 | 0.69  |
| E9Q7G0_ES Numa1  | Protein Nui K.AQLQELR.A                           | 13.86  | 28.03  | 0.49 | 2.02  |
| E9Q7G0_ES Numa1  | Protein Nui R.DNAQVTSVQAQK#.A                     | 45.71  | 37.18  | 1.23 | 0.81  |
| E9Q7G0_ES Numa1  | Protein Nui R.EAQMGGELER.L                        | 2.14   | 9.87   | 0.22 | 4.61  |
| E9Q7G0_ES Numa1  | Protein Nui R.EAQM*GGELER.L                       | 5.52   | 18.41  | 0.30 | 3.34  |
| E9Q7G0_ES Numa1  | Protein Nui R.ELGELGSLR.Q                         | 5.84   | 19.64  | 0.30 | 3.36  |
| E9Q7G0_ES Numa1  | Protein Nui R.ELGHNQASASQR.E                      | 1.48   | 13.03  | 0.11 | 8.78  |
| E9Q7G0_ES Numa1  | Protein Nui R.ELQQAGLK#.T                         | 38.92  | 30.50  | 1.28 | 0.78  |
| E9Q7G0_ES Numa1  | Protein Nui K.FM*LDHEESLNLTDESLEFLEK#.V           | 16.70  | 8.62   | 1.94 | 0.52  |
| E9Q7G0_ES Numa1  | Protein Nui K.FQVATDALK#.S                        | 45.80  | 33.38  | 1.37 | 0.73  |
| E9Q7G0_ES Numa1  | Protein Nui R.GQAQADLAQEK#.A                      | 43.38  | 31.81  | 1.36 | 0.73  |
| E9Q7G0_ES Numa1  | Protein Nui R.IATTTGTATVATTPR.A                   | 4.90   | 20.03  | 0.24 | 4.09  |
| E9Q7G0_ES Numa1  | Protein Nui R.IDHLLALLNEK#.Q                      | 48.05  | 21.57  | 2.23 | 0.45  |
| E9Q7G0_ES Numa1  | Protein Nui K.KLELEPDSANSSFYSTQSPASQANLR.A        | 4.03   | 12.71  | 0.32 | 3.15  |
| E9Q7G0_ES Numa1  | Protein Nui R.KSSLSLEEEVSILNR.Q                   | 3.43   | 9.77   | 0.35 | 2.85  |
| E9Q7G0_ES Numa1  | Protein Nui K.LATDNTQLQTR.V                       | 13.61  | 33.90  | 0.40 | 2.49  |
| E9Q7G0_ES Numa1  | Protein Nui K.LKEQLEAAKQEQATR.Q                   | 7.20   | 20.34  | 0.35 | 2.82  |
| E9Q7G0_ES Numa1  | Protein Nui R.LLQVETASNSAR.A                      | 15.46  | 44.13  | 0.35 | 2.85  |
| E9Q7G0_ES Numa1  | Protein Nui R.LPPKVESLESYFPTPAR.G                 | 4.14   | 11.23  | 0.37 | 2.71  |
| E9Q7G0_ES Numa1  | Protein Nui K.LQEQLQDLEELQK#.E                    | 13.03  | 9.68   | 1.35 | 0.74  |
| E9Q7G0_ES Numa1  | Protein Nui R.LQESPAPEKHGEVLDALQDLDLTK#.Q         | 8.43   | 6.84   | 1.23 | 0.81  |
| E9Q7G0_ES Numa1  | Protein Nui R.LQESPAPEKHGEVLDALQDLDLTK#.QEAAK#.L  | 22.79  | 12.59  | 1.81 | 0.55  |
| E9Q7G0_ES Numa1  | Protein Nui R.LQNTLNEQR.V                         | 12.43  | 40.46  | 0.31 | 3.26  |
| E9Q7G0_ES Numa1  | Protein Nui K.LSQLEDQATR.L                        | 9.68   | 27.17  | 0.36 | 2.81  |
| E9Q7G0_ES Numa1  | Protein Nui R.QFLEVELDQAR.E                       | 20.74  | 11.97  | 1.73 | 0.58  |
| E9Q7G0_ES Numa1  | Protein Nui R.QQVEQLSSSLK#.L                      | 20.99  | 16.50  | 1.27 | 0.79  |
| E9Q7G0_ES Numa1  | Protein Nui K.SSLSSLEEEVSILNR.Q                   | 4.72   | 16.16  | 0.29 | 3.42  |
| E9Q7G0_ES Numa1  | Protein Nui R.TELK#ELQQLQLEK#.I                   | 11.27  | 9.07   | 1.24 | 0.80  |
| E9Q7G0_ES Numa1  | Protein Nui K.TGQVEQEAIVEHSEGGPQQQSQALQLHASLAK#.A | 27.82  | 12.67  | 2.20 | 0.46  |
| E9Q7G0_ES Numa1  | Protein Nui R.TQPDGTSVPEPASPISQR.L                | 3.06   | 10.47  | 0.29 | 3.42  |
| E9Q7G0_ES Numa1  | Protein Nui K.VIEGSEM*ELAK#.M                     | 42.48  | 32.25  | 1.32 | 0.76  |
| E9Q7G0_ES Numa1  | Protein Nui R.VSSEHQGGPTPEK#.K                    | 7.37   | 4.72   | 1.56 | 0.64  |
| E9Q7G0_ES Numa1  | Protein Nui R.AEELGQELK#.A                        | 72.61  | 64.24  | 1.13 | 0.88  |
| E9Q7G0_ES Numa1  | Protein Nui R.AEQDKALETLQGGLEEK.A                 | 20.40  | 17.56  | 1.16 | 0.86  |
| E9Q7G0_ES Numa1  | Protein Nui K.AGEQQTASLELLK#.E                    | 17.05  | 15.80  | 1.08 | 0.93  |
| E9Q7G0_ES Numa1  | Protein Nui K.AGEQQTASLELLKEPPR.A                 | 13.56  | 86.60  | 0.16 | 6.39  |
| E9Q7G0_ES Numa1  | Protein Nui K.AIQQVQEK.E                          | 60.61  | 71.21  | 0.85 | 1.17  |
| E9Q7G0_ES Numa1  | Protein Nui R.ALEESLK#.I                          | 84.58  | 83.82  | 1.01 | 0.99  |
| E9Q7G0_ES Numa1  | Protein Nui K.ALETLOGQLEEK#.A                     | 86.52  | 99.40  | 0.87 | 1.15  |
| E9Q7G0_ES Numa1  | Protein Nui K.AQLQELR.A                           | 32.73  | 143.91 | 0.23 | 4.40  |
| E9Q7G0_ES Numa1  | Protein Nui R.ASM*QPAQIAEGVGITTR.Q                | 17.74  | 18.38  | 0.97 | 1.04  |
| E9Q7G0_ES Numa1  | Protein Nui R.ASMQPAQIAEGVGITTR.Q                 | 2.92   | 11.51  | 0.25 | 3.94  |
| E9Q7G0_ES Numa1  | Protein Nui K.ASQEVAEK#.Q                         | 20.17  | 22.60  | 0.89 | 1.12  |
| E9Q7G0_ES Numa1  | Protein Nui R.ATSSQSLAR.L                         | 10.10  | 48.64  | 0.21 | 4.81  |
| E9Q7G0_ES Numa1  | Protein Nui K.DAKLESQQQLQAANDAR.D                 | 1.10   | 21.20  | 0.05 | 19.33 |
| E9Q7G0_ES Numa1  | Protein Nui K.DAQIAMMQQR.I                        | 1.84   | 8.29   | 0.22 | 4.50  |
| E9Q7G0_ES Numa1  | Protein Nui K.DAQIAM*MQQR.I                       | 7.52   | 26.87  | 0.28 | 3.57  |
| E9Q7G0_ES Numa1  | Protein Nui R.DNAQVTSVQAQK#.A                     | 158.15 | 142.61 | 1.11 | 0.90  |
| E9Q7G0_ES Numa1  | Protein Nui R.DQELASLKEQAK.K                      | 22.33  | 27.62  | 0.81 | 1.24  |
| E9Q7G0_ES Numa1  | Protein Nui R.EAQMGGELER.L                        | 6.22   | 34.17  | 0.18 | 5.49  |
| E9Q7G0_ES Numa1  | Protein Nui R.EAQM*GGELER.L                       | 10.92  | 59.28  | 0.18 | 5.43  |
| E9Q7G0_ES Numa1  | Protein Nui R.EFANHLQQLQGFANDLIEHSK#.A            | 22.81  | 19.33  | 1.18 | 0.85  |
| E9Q7G0_ES Numa1  | Protein Nui K.EGQQLQQLPER.L                       | 8.15   | 34.55  | 0.24 | 4.24  |
| E9Q7G0_ES Numa1  | Protein Nui K.EDQDELAK.L                          | 21.32  | 23.16  | 0.92 | 1.09  |
| E9Q7G0_ES Numa1  | Protein Nui K.EHPAGGASGEDASGPGTOSAGK#.T           | 29.54  | 38.48  | 0.77 | 1.30  |
| E9Q7G0_ES Numa1  | Protein Nui K.EHPEHPAGGASGEDASGPGTOSAGK#.T        | 20.16  | 21.47  | 0.94 | 1.06  |
| E9Q7G0_ES Numa1  | Protein Nui R.EKYQELAAVR.T                        | 4.54   | 12.32  | 0.37 | 2.71  |
| E9Q7G0_ES Numa1  | Protein Nui R.ELGELGSLR.Q                         | 14.83  | 72.54  | 0.20 | 4.89  |
| E9Q7G0_ES Numa1  | Protein Nui R.ELGHNQASASQR.E                      | 33.50  | 118.32 | 0.28 | 3.53  |
| E9Q7G0_ES Numa1  | Protein Nui R.ELQQAGLK#.T                         | 101.06 | 122.06 | 0.83 | 1.21  |
| E9Q7G0_ES Numa1  | Protein Nui K.ELQQLQLEK#.I                        | 67.06  | 56.05  | 1.20 | 0.84  |
| E9Q7G0_ES Numa1  | Protein Nui K.EQALSALQLEHTSQALVSELLPAK#.H         | 115.03 | 102.21 | 1.13 | 0.89  |
| E9Q7G0_ES Numa1  | Protein Nui K.EQAQMLQTMQEQAQGLR.Q                 | 3.52   | 8.92   | 0.39 | 2.54  |
| E9Q7G0_ES Numa1  | Protein Nui R.FLEIQR.I                            | 22.62  | 101.90 | 0.22 | 4.50  |
| E9Q7G0_ES Numa1  | Protein Nui K.FM*LDHEESLNLTDESLEFLEK#.V           | 15.34  | 20.22  | 0.76 | 1.32  |
| E9Q7G0_ES Numa1  | Protein Nui K.FQVATDALK#.S                        | 108.58 | 89.49  | 1.21 | 0.82  |
| E9Q7G0_ES Numa1  | Protein Nui R.GESQVEQR.L                          | 3.16   | 14.15  | 0.22 | 4.48  |
| E9Q7G0_ES Numa1  | Protein Nui R.GKQEAQLAER.S                        | 13.03  | 60.20  | 0.22 | 4.62  |
| E9Q7G0_ES Numa1  | Protein Nui R.GQAPLETSLDGLDFAFPDSSGR.K            | 2.71   | 15.72  | 0.17 | 5.79  |
| E9Q7G0_ES Numa1  | Protein Nui R.GQAPLETSLDGLDFAFPDSSGR.K            | 2.04   | 13.70  | 0.15 | 6.73  |
| E9Q7G0_ES Numa1  | Protein Nui R.GQAQADLAQEK#.A                      | 125.80 | 136.70 | 0.92 | 1.09  |
| E9Q7G0_ES Numa1  | Protein Nui R.HLTAQVR.S                           | 20.44  | 91.25  | 0.22 | 4.46  |
| E9Q7G0_ES Numa1  | Protein Nui R.IASSSSENNFLSGSPSSP*GDILQTPQFQM*.R   | 2.53   | 8.44   | 0.30 | 3.33  |
| E9Q7G0_ES Numa1  | Protein Nui R.IASSSSENNFLSGSPSSP*GDILQTPQFQM*.R   | 2.56   | 2.48   | 1.03 | 0.97  |
| E9Q7G0_ES Numa1  | Protein Nui R.IASSSSENNFLSGSPSSP*MGDILQTPQFQM*.R  | 1.51   | 3.84   | 0.39 | 2.54  |
| E9Q7G0_ES Numa1  | Protein Nui R.IATTTGTATVATTPR.A                   | 10.87  | 57.87  | 0.19 | 5.33  |
| E9Q7G0_ES Numa1  | Protein Nui R.IDHLLALLNEK#.Q                      | 93.15  | 107.21 | 0.87 | 1.15  |
| E9Q7G0_ES Numa1  | Protein Nui K.ISQLSENGDLSFK#.V                    | 21.36  | 26.98  | 0.79 | 1.26  |
| E9Q7G0_ES Numa1  | Protein Nui K.KEQAQM*LQTM*QEQAQAQGLR.Q            | 3.65   | 17.03  | 0.21 | 4.67  |
| E9Q7G0_ES Numa1  | Protein Nui K.KEQAQMLQTMQEQAQAQGLR.Q              | 3.37   | 13.35  | 0.25 | 3.96  |
| E9Q7G0_ES Numa1  | Protein Nui K.KLELEPDSANSSFYSTQSPASQANLR.A        | 7.88   | 46.16  | 0.17 | 5.86  |
| E9Q7G0_ES Numa1  | Protein Nui R.KSSLSLEEEVSILNR.Q                   | 9.83   | 39.48  | 0.25 | 4.02  |
| E9Q7G0_ES Numa1  | Protein Nui K.LATDNTQLQTR.V                       | 43.98  | 193.53 | 0.23 | 4.40  |
| E9Q7G0_ES Numa1  | Protein Nui R.LENELSTALQDK.K                      | 19.47  | 26.33  | 0.74 | 1.35  |
| E9Q7G0_ES Numa1  | Protein Nui R.LENELSTALQDK#.C                     | 119.16 | 101.40 | 1.18 | 0.85  |
| E9Q7G0_ES Numa1  | Protein Nui K.LESLQQLQAANDAR.D                    | 11.84  | 48.24  | 0.25 | 4.08  |
| E9Q7G0_ES Numa1  | Protein Nui K.LKEEQLEAAKQEQATR.Q                  | 15.64  | 24.95  | 0.63 | 1.60  |
| E9Q7G0_ES Numa1  | Protein Nui K.LKEEQLEAAKQEQATR.Q                  | 17.05  | 69.17  | 0.25 | 4.06  |

|                  |                                                  |        |        |      |       |
|------------------|--------------------------------------------------|--------|--------|------|-------|
| E9Q7G0_E5 Numa1  | Protein Nui R.LLQVETASNSAR.A                     | 31.13  | 143.77 | 0.22 | 4.62  |
| E9Q7G0_E5 Numa1  | Protein Nui K.LLQVETASNSAR.A                     | 10.28  | 37.86  | 0.27 | 3.68  |
| E9Q7G0_E5 Numa1  | Protein Nui R.LPPKVESLESFYTPPAR.G                | 7.71   | 41.15  | 0.19 | 5.34  |
| E9Q7G0_E5 Numa1  | Protein Nui K.LQEQQLDLEELQKHNK#.E                | 81.70  | 111.28 | 0.73 | 1.36  |
| E9Q7G0_E5 Numa1  | Protein Nui R.LQESPAPEK#GEVLDGALQDLTLK#.Q        | 26.13  | 32.33  | 0.81 | 1.24  |
| E9Q7G0_E5 Numa1  | Protein Nui R.LQESPAPEK#GEVLDGALQDLTLK#QEAAK#.L  | 14.08  | 13.08  | 1.08 | 0.93  |
| E9Q7G0_E5 Numa1  | Protein Nui R.LQNTLNEQR.V                        | 19.82  | 103.43 | 0.19 | 5.22  |
| E9Q7G0_E5 Numa1  | Protein Nui R.LQTLNELQALQSQR#.E                  | 38.75  | 41.17  | 0.94 | 1.06  |
| E9Q7G0_E5 Numa1  | Protein Nui K.LSQLDEQATR.L                       | 39.50  | 173.82 | 0.23 | 4.40  |
| E9Q7G0_E5 Numa1  | Protein Nui K.LVDDLALQEK#.M                      | 122.82 | 161.57 | 0.76 | 1.32  |
| E9Q7G0_E5 Numa1  | Protein Nui R.LVVAESEK.S                         | 90.61  | 94.76  | 0.96 | 1.05  |
| E9Q7G0_E5 Numa1  | Protein Nui K.QAAGLQALM#R.A                      | 5.79   | 23.27  | 0.25 | 4.02  |
| E9Q7G0_E5 Numa1  | Protein Nui K.QAASSQEPSELELR.G                   | 10.38  | 31.76  | 0.33 | 3.06  |
| E9Q7G0_E5 Numa1  | Protein Nui K.QAASSQEPSELELRGK.N                 | 10.25  | 50.75  | 0.20 | 4.95  |
| E9Q7G0_E5 Numa1  | Protein Nui R.QDHAQQLAVAEAR.E                    | 9.01   | 55.98  | 0.16 | 6.21  |
| E9Q7G0_E5 Numa1  | Protein Nui R.QDHAQQLAVAEAR.E                    | 3.68   | 16.25  | 0.23 | 4.41  |
| E9Q7G0_E5 Numa1  | Protein Nui R.QFLEVELDQAR.E                      | 13.91  | 35.13  | 0.40 | 2.53  |
| E9Q7G0_E5 Numa1  | Protein Nui R.QFLEVELDQAR.E                      | 98.57  | 75.90  | 1.30 | 0.77  |
| E9Q7G0_E5 Numa1  | Protein Nui R.QSM#AFSILNTPK#.K                   | 11.36  | 17.03  | 0.67 | 1.50  |
| E9Q7G0_E5 Numa1  | Protein Nui R.QSM#AFSILNTPK.K                    | 5.45   | 8.78   | 0.62 | 1.61  |
| E9Q7G0_E5 Numa1  | Protein Nui R.SLEAQVAHADQQLR.D                   | 7.92   | 46.25  | 0.17 | 5.84  |
| E9Q7G0_E5 Numa1  | Protein Nui R.SNRDDLLELSESLK.L                   | 11.52  | 49.95  | 0.23 | 4.34  |
| E9Q7G0_E5 Numa1  | Protein Nui K.SSLISLEEEVSILNR.Q                  | 9.83   | 41.10  | 0.24 | 4.18  |
| E9Q7G0_E5 Numa1  | Protein Nui R.TDAETHLAEM#R.Q                     | 14.33  | 25.40  | 0.56 | 1.77  |
| E9Q7G0_E5 Numa1  | Protein Nui K.TDAPGPELQALR.A                     | 15.00  | 100.85 | 0.15 | 6.73  |
| E9Q7G0_E5 Numa1  | Protein Nui R.TELKELQQTLEQL.K.I                  | 30.49  | 31.14  | 0.98 | 1.02  |
| E9Q7G0_E5 Numa1  | Protein Nui K.TGQVEQEEAVIHEGQPGQQQSLAQLHASLAK#.A | 8.19   | 5.55   | 1.47 | 0.68  |
| E9Q7G0_E5 Numa1  | Protein Nui R.TQPDGTSVPEPASPISQR.L               | 6.14   | 30.37  | 0.20 | 4.95  |
| E9Q7G0_E5 Numa1  | Protein Nui R.TTQJINITM#TK.K                     | 26.60  | 24.31  | 1.09 | 0.91  |
| E9Q7G0_E5 Numa1  | Protein Nui R.VFAALQALAHALTEKEGTQELAK.L          | 16.24  | 17.66  | 0.92 | 1.09  |
| E9Q7G0_E5 Numa1  | Protein Nui K.VESLESFYTPPAR.G                    | 3.30   | 22.53  | 0.15 | 6.83  |
| E9Q7G0_E5 Numa1  | Protein Nui K.VIEGSEMELAK#.M                     | 35.16  | 32.77  | 1.07 | 0.93  |
| E9Q7G0_E5 Numa1  | Protein Nui R.VTELEAQLK#.A                       | 65.44  | 80.47  | 0.81 | 1.23  |
| E9Q7G0_E5 Numa1  | Protein Nui R.YGAMFQEQLMALK#.G                   | 7.28   | 6.64   | 1.10 | 0.91  |
| E9Q7G0_E5 Numa1  | Protein Nui K.YVQELAARV.T                        | 23.36  | 98.22  | 0.24 | 4.20  |
| F6ZQA3_F6 Numa1  | Protein Nui K.LTAQVEQLEVFQR.E                    | 9.02   | 44.19  | 0.20 | 4.90  |
| F6ZQA3_F6 Numa1  | Protein Nui R.QKLTAAQVEQLEVFQR.E                 | 3.90   | 17.06  | 0.23 | 4.38  |
| E9Q3G8_E5 Nup153 | Protein Nui K.FGIPSSSSLSQTLTSTGNFK#.F            | 6.35   | 4.42   | 1.44 | 0.70  |
| E9Q3G8_E5 Nup153 | Protein Nui K.FGFTSSSLNPAPSAFK#.F                | 13.01  | 12.16  | 1.07 | 0.93  |
| E9Q3G8_E5 Nup153 | Protein Nui K.SGFNGFGLDTLTK#.S                   | 12.17  | 5.52   | 2.20 | 0.45  |
| E9Q3G8_E5 Nup153 | Protein Nui R.SGIDNTVFAK#.K                      | 17.47  | 15.21  | 1.15 | 0.87  |
| E9Q3G8_E5 Nup153 | Protein Nui K.TEFGSSNSSETSSSAQDITAVNSSYK#.K      | 3.94   | 2.60   | 1.52 | 0.66  |
| Q6ZQH8_N Nup188  | Nucleopori R.SDGPGEQGGQQLL#.T                    | 5.60   | 2.98   | 1.88 | 0.53  |
| B9E154_B9 Nup205 | MCG21756 K.ASSEGAIVAQOQGT.R.L                    | 6.06   | 21.78  | 0.28 | 3.59  |
| B9E154_B9 Nup205 | MCG21756 R.DPPVFIPTVDR.Y                         | 5.11   | 9.45   | 0.54 | 1.85  |
| B9E154_B9 Nup205 | MCG21756 K.LLDIEGLYSK#.V                         | 12.03  | 6.82   | 1.76 | 0.57  |
| B9E154_B9 Nup205 | MCG21756 R.SGLSQVNHQDIDQLQSDAVNAFGESLQK#.K       | 10.71  | 5.71   | 1.88 | 0.53  |
| B9E154_B9 Nup205 | MCG21756 K.VLTLSSQDVNNEFEK#.L                    | 6.61   | 4.15   | 1.59 | 0.63  |
| Q80U93_N Nup214  | Nuclear poi R.AAPGSGTSTFAPPSPK#.G                | 9.66   | 6.69   | 1.44 | 0.69  |
| Q80U93_N Nup214  | Nuclear poi R.LNQLVDSLQQLR.L                     | 2.12   | 10.60  | 0.20 | 4.99  |
| Q80U93_N Nup214  | Nuclear poi R.STQTAPPSPASTGQK#.S                 | 11.83  | 8.68   | 1.36 | 0.73  |
| Q91H2_NU Nup50   | Nuclear poi K.AASSLFAK#.A                        | 32.81  | 16.37  | 2.00 | 0.50  |
| Q91H2_NU Nup50   | Nuclear poi K.AEDTSEKVEFAEK.K                    | 11.47  | 7.75   | 1.48 | 0.68  |
| Q91H2_NU Nup50   | Nuclear poi R.ATAGM#EPPSLFGSTK#.L                | 14.85  | 8.70   | 1.71 | 0.59  |
| Q91H2_NU Nup50   | Nuclear poi R.ATAGMEPPLFGSTK#.L                  | 43.15  | 9.19   | 4.70 | 0.21  |
| Q91H2_NU Nup50   | Nuclear poi K.LQESPFSSHGNK#.A                    | 15.78  | 5.35   | 2.95 | 0.34  |
| Q91H2_NU Nup50   | Nuclear poi R.NVGFESDSGGAFK#.G                   | 38.60  | 22.76  | 1.70 | 0.59  |
| Q91H2_NU Nup50   | Nuclear poi R.SDAAGGATSAPFSFGK#.K                | 10.52  | 7.02   | 1.50 | 0.67  |
| Q91H2_NU Nup50   | Nuclear poi K.TSEDADLHK#.I                       | 6.46   | 2.73   | 2.36 | 0.42  |
| Q8BTS4_NL Nup54  | Nuclear poi R.LDISELQK#.N                        | 26.55  | 11.29  | 2.35 | 0.43  |
| Q8BTS4_NL Nup54  | Nuclear poi K.LLQNPAPAGVDPHWEQAK#.V              | 6.45   | 3.30   | 1.96 | 0.51  |
| Q8BTS4_NL Nup54  | Nuclear poi K.VLGGNQLTLVNVGK#.T                  | 14.69  | 5.11   | 2.87 | 0.35  |
| Q8BTS4_NL Nup54  | Nuclear poi R.VQLDTIQELNTOFK#.G                  | 12.53  | 4.26   | 2.94 | 0.34  |
| Q8CECO_NI Nup88  | Nuclear poi K.FLGSDEEDK#DSELQELTAEQK#.C          | 6.05   | 3.25   | 1.86 | 0.54  |
| Q8CECO_NI Nup88  | Nuclear poi R.LLAETPDSFK#.H                      | 14.94  | 7.36   | 2.03 | 0.49  |
| Q8B171_NL Nup93  | Nuclear poi K.ASVLLGSR.G                         | 6.65   | 16.29  | 0.41 | 2.45  |
| Q8B171_NL Nup93  | Nuclear poi R.EALQYFVFLR.D                       | 5.21   | 10.85  | 0.48 | 2.08  |
| Q8B171_NL Nup93  | Nuclear poi R.LELSAATTFEPVVK#DTDIQGLK#.N         | 34.59  | 21.81  | 1.59 | 0.63  |
| Q8B171_NL Nup93  | Nuclear poi K.LLSPVVPQSAPOSNK#.E                 | 17.83  | 10.28  | 1.73 | 0.58  |
| Q8B171_NL Nup93  | Nuclear poi K.LVPLNQESVEER.V                     | 12.44  | 31.92  | 0.39 | 2.57  |
| Q8B171_NL Nup93  | Nuclear poi K.QM#TDVVLTPATDALK#.S                | 10.93  | 5.44   | 2.01 | 0.50  |
| Q8B171_NL Nup93  | Nuclear poi R.LELSAATTFEPVVK#DTDIQGLK#.N         | 27.12  | 16.65  | 1.63 | 0.61  |
| Q8B171_NL Nup93  | Nuclear poi K.LLSPVVPQSAPOSNK#.E                 | 9.88   | 2.91   | 3.40 | 0.29  |
| Q8B171_NL Nup93  | Nuclear poi K.LVPLNQESVEER.V                     | 10.71  | 22.95  | 0.47 | 2.14  |
| Q8B171_NL Nup93  | Nuclear poi K.QM#TDVVLTPATDALK#.S                | 6.85   | 6.80   | 1.01 | 0.99  |
| Q6PFD9_NI Nup98  | Nuclear poi R.FSFLSKPVDENNQQGEDDSLVS.R.F         | 2.33   | 7.83   | 0.30 | 3.36  |
| Q6PFD9_NI Nup98  | Nuclear poi R.LADINVEGR.L                        | 4.13   | 12.74  | 0.32 | 3.09  |
| Q9ERH4_NI Nusap1 | Nucleolar a K.LIM#TEATQTPSSK#.K                  | 6.52   | 2.58   | 2.52 | 0.40  |
| Q9DBY8_N Nvl     | Nuclear val K.AVANESGLNFISVK.G                   | 9.83   | 18.67  | 0.53 | 1.90  |
| Q9DBY8_N Nvl     | Nuclear val R.EATTSTPLTSTK.T                     | 19.30  | 23.95  | 0.81 | 1.24  |
| Q9DBY8_N Nvl     | Nuclear val R.ESEGGWFIDK.T                       | 2.29   | 7.79   | 0.29 | 3.40  |
| Q9DBY8_N Nvl     | Nuclear val K.GPELLNM#YVGESER.A                  | 2.33   | 13.87  | 0.17 | 5.95  |
| Q9DBY8_N Nvl     | Nuclear val K.KKPEIEGLPSEGDQER.L                 | 1.94   | 22.05  | 0.09 | 11.34 |
| Q9DBY8_N Nvl     | Nuclear val R.LGAETSETQDELQRL.L                  | 3.44   | 37.73  | 0.09 | 10.97 |
| Q9DBY8_N Nvl     | Nuclear val R.STELQISNVK.F                       | 14.70  | 27.41  | 0.54 | 1.87  |
| Q9DBY8_N Nvl     | Nuclear val K.TLLAHAIAAGELDLPLK.V                | 14.24  | 18.24  | 0.78 | 1.28  |
| Q9DBY8_N Nvl     | Nuclear val K.VAAPEIVSGVSESEK.L                  | 10.74  | 21.68  | 0.50 | 2.02  |
| Q805Z6_Q8 Nx7    | Nuclear RN.K.EEMEQLKLAMR@K.R                     | 33.32  | 5.12   | 6.51 | 0.15  |
| P11926_OI Oas1a  | 2'-5'-oligoa K.FIEDYLPDITFGADVVK#.S              | 7.46   | 9.65   | 0.77 | 1.29  |
| Q8VI93_OA Oas3   | 2'-5'-oligoa R.AGILDGLHPYQGNQALEDNK#HGLAVQSK#.E  | 15.95  | 2.25   | 7.09 | 0.14  |
| Q8VI93_OA Oas3   | 2'-5'-oligoa R.HFLTQVK#.R                        | 13.71  | 10.44  | 1.31 | 0.76  |
| Q8VI93_OA Oas3   | 2'-5'-oligoa K.IPAM#PNPANK#.T                    | 11.75  | 6.72   | 1.75 | 0.57  |
| Q8VI93_OA Oas3   | 2'-5'-oligoa R.VDLSVLPADFVAVGPKL#.S              | 28.52  | 7.20   | 3.96 | 0.25  |
| Q8VI93_OA Oas3   | 2'-5'-oligoa R.HFLTQVK#.R                        | 73.22  | 15.42  | 4.75 | 0.21  |
| Q8VI93_OA Oas3   | 2'-5'-oligoa K.IPAM#PNPANK#.T                    | 66.41  | 16.67  | 3.98 | 0.25  |
| Q8VI93_OA Oas3   | 2'-5'-oligoa R.M#LLESWGGHPGGLTFEFSQSK#.A         | 14.38  | 4.45   | 3.23 | 0.31  |
| Q8VI93_OA Oas3   | 2'-5'-oligoa K.QASGVLPQWEGPGLP.R.A               | 7.92   | 7.33   | 1.08 | 0.93  |
| Q8VI93_OA Oas3   | 2'-5'-oligoa R.SQK#SNSAPGFPEAATK#.I              | 75.70  | 18.03  | 4.20 | 0.24  |
| Q8VI93_OA Oas3   | 2'-5'-oligoa R.TVLALIQHSK#.Y                     | 27.14  | 5.39   | 5.03 | 0.20  |
| Q8VI93_OA Oas3   | 2'-5'-oligoa R.VDLSVLPADFVAVGPKL#.S              | 91.55  | 21.36  | 4.29 | 0.23  |
| Q8VI94_OA Oas11  | 2'-5'-oligoa R.GQRPIILDPAADPTNNVAEGYR.W          | 2.42   | 9.53   | 0.25 | 3.94  |
| Q8VI94_OA Oas11  | 2'-5'-oligoa K.HWYQQYV.R.D                       | 6.07   | 7.50   | 0.81 | 1.23  |
| Q8VI94_OA Oas11  | 2'-5'-oligoa K.LDSFVAQVWLQPTR.E                  | 11.96  | 12.30  | 0.97 | 1.03  |

|                  |                                                |       |       |       |      |
|------------------|------------------------------------------------|-------|-------|-------|------|
| Q8V194_OA Oasl1  | 2'-5'-oligoa R.LEFQGHILEDFWDFK#.S              | 37.10 | 13.40 | 2.77  | 0.36 |
| Q8V194_OA Oasl1  | 2'-5'-oligoa R.SHAYAIHPLDYVNLK#.Q              | 15.76 | 5.22  | 3.02  | 0.33 |
| Q8V194_OA Oasl1  | 2'-5'-oligoa K.SYGIQDSVTVLSK#.T                | 26.17 | 3.53  | 7.41  | 0.14 |
| Q8V194_OA Oasl1  | 2'-5'-oligoa R.VPSSLIFTQTR.E                   | 6.60  | 10.76 | 0.61  | 1.63 |
| Q8V194_OA Oasl1  | 2'-5'-oligoa R.GQRPIILDADPTNNVAEGYR.W          | 2.67  | 7.12  | 0.37  | 2.67 |
| Q8V194_OA Oasl1  | 2'-5'-oligoa K.LDSFVAQWLQPTR.E                 | 9.22  | 8.98  | 1.03  | 0.97 |
| Q8V194_OA Oasl1  | 2'-5'-oligoa R.LEFQGHILEDFWDFK#.S              | 23.07 | 4.71  | 4.89  | 0.20 |
| Q8V194_OA Oasl1  | 2'-5'-oligoa R.LSFQEPGGER.Q                    | 14.12 | 15.54 | 0.91  | 1.10 |
| Q8V194_OA Oasl1  | 2'-5'-oligoa R.SHAYAIHPLDYVNLK#.Q              | 18.50 | 6.84  | 2.70  | 0.37 |
| Q8V194_OA Oasl1  | 2'-5'-oligoa K.SYGIQDSVTVLSK#.T                | 31.37 | 5.15  | 6.10  | 0.16 |
| Q8V194_OA Oasl1  | 2'-5'-oligoa R.GQRPIILDADPTNNVAEGYR.W          | 5.67  | 20.21 | 0.28  | 3.56 |
| Q8V194_OA Oasl1  | 2'-5'-oligoa K.IQLSQGLGLQ.R.L                  | 16.35 | 24.92 | 0.66  | 1.52 |
| Q8V194_OA Oasl1  | 2'-5'-oligoa K.LDSFVAQWLQPTR.E                 | 21.61 | 22.44 | 0.96  | 1.04 |
| Q8V194_OA Oasl1  | 2'-5'-oligoa R.LSFQEPGGER.Q                    | 12.93 | 28.97 | 0.45  | 2.24 |
| Q8V194_OA Oasl1  | 2'-5'-oligoa R.SHAYAIHPLDYVNLK#.Q              | 30.05 | 10.29 | 2.92  | 0.34 |
| Q8V194_OA Oasl1  | 2'-5'-oligoa K.SYGIQDSVTVLSK#.T                | 60.28 | 11.56 | 5.22  | 0.19 |
| Q9Z2F2_OA Oasl2  | 2'-5'-oligoa R.DSKPAPAIETLIR.S                 | 12.16 | 28.52 | 0.43  | 2.35 |
| Q9Z2F2_OA Oasl2  | 2'-5'-oligoa R.DWKEEGQDAWER.I                  | 5.18  | 16.46 | 0.31  | 3.18 |
| Q9Z2F2_OA Oasl2  | 2'-5'-oligoa R.EVVISFIK#.K                     | 46.57 | 27.05 | 1.72  | 0.58 |
| Q9Z2F2_OA Oasl2  | 2'-5'-oligoa K.GYPGDFSPFTELQR.H                | 5.99  | 19.59 | 0.31  | 3.27 |
| Q9Z2F2_OA Oasl2  | 2'-5'-oligoa R.K#TLADYIGFSK#.V                 | 17.52 | 9.78  | 1.79  | 0.56 |
| Q9Z2F2_OA Oasl2  | 2'-5'-oligoa K.QTGVVDWTLWTPNPSPIR.K            | 1.88  | 4.07  | 0.46  | 2.17 |
| Q9Z2F2_OA Oasl2  | 2'-5'-oligoa K.YPGGQSK#PFTIDPDDTLLDK#.E        | 39.89 | 27.41 | 1.46  | 0.69 |
| Q9Z2F2_OA Oasl2  | 2'-5'-oligoa K.YYFQNEVVR.N                     | 14.65 | 33.43 | 0.44  | 2.28 |
| Q9Z2F2_OA Oasl2  | 2'-5'-oligoa K.GYPGDFSPFTELQR.H                | 4.16  | 10.57 | 0.39  | 2.54 |
| Q9Z2F2_OA Oasl2  | 2'-5'-oligoa R.K#TLADYIGFSK#.V                 | 11.68 | 5.94  | 1.97  | 0.51 |
| Q9Z2F2_OA Oasl2  | 2'-5'-oligoa K.YPGGQSK#PFTIDPDDTLLDK#.E        | 15.32 | 12.06 | 1.27  | 0.79 |
| Q9Z2F2_OA Oasl2  | 2'-5'-oligoa K.YYFQNEVVR.N                     | 8.64  | 21.85 | 0.40  | 2.53 |
| Q9Z2F2_OA Oasl2  | 2'-5'-oligoa R.EVVISFIK#.K                     | 38.02 | 14.30 | 2.66  | 0.38 |
| Q9Z2F2_OA Oasl2  | 2'-5'-oligoa R.K#TLADYIGFSK#.V                 | 14.61 | 5.04  | 2.90  | 0.34 |
| Q9Z2F2_OA Oasl2  | 2'-5'-oligoa K.YPGGQSK#PFTIDPDDTLLDK#.E        | 30.05 | 16.54 | 1.82  | 0.55 |
| Q9Z2F2_OA Oasl2  | 2'-5'-oligoa K.YYFQNEVVR.N                     | 12.01 | 15.80 | 0.76  | 1.31 |
| Q8K2X3_ST Oibf1  | CST comple K.K#LQETIEQK#.T                     | 3.84  | 2.19  | 1.75  | 0.57 |
| Q8K2X3_ST Oibf1  | CST comple R.NPALQEEALNNK#DNLDLAAGLTLSEK#.I    | 11.42 | 2.49  | 4.58  | 0.22 |
| Q8K2X3_ST Oibf1  | CST comple R.LELLEDQSDIVSTADHYAAE.F            | 4.25  | 4.25  | 1.00  | 1.00 |
| Q60597_OI Ogdh   | 2-oxoglutar K.YAELLVQGVVNOPEYEEIK#VDK#.I       | 3.15  | 1.97  | 1.60  | 0.63 |
| Q60597_OI Ogdh   | 2-oxoglutar R.GHHVAQLDPLGLDADLSSVPADIISSTDK#.L | 17.63 | 2.93  | 6.02  | 0.17 |
| Q60597_OI Ogdh   | 2-oxoglutar K.LEAAEDGSDGM*#K#.Y                | 6.40  | 1.64  | 3.92  | 0.26 |
| Q99PG2_O Ogrf    | Opioid grov K.SQVGPEDPK#.S                     | 14.47 | 6.08  | 2.38  | 0.42 |
| Q8CGY8_O Ogt     | UDP-N-acet K.AFLDSLDPVK#.I                     | 29.10 | 29.54 | 0.98  | 1.02 |
| Q8CGY8_O Ogt     | UDP-N-acet R.EQGNIEEAVR.L                      | 12.51 | 28.40 | 0.44  | 2.27 |
| Q8CGY8_O Ogt     | UDP-N-acet R.EYQAGFEAAER.H                     | 3.69  | 17.87 | 0.21  | 4.84 |
| Q8CGY8_O Ogt     | UDP-N-acet R.FPAVGEPNIQYAGNM*GLPQNR.I          | 2.54  | 6.62  | 0.38  | 2.61 |
| Q8CGY8_O Ogt     | UDP-N-acet K.IDPSTLQMWANILK#.R                 | 8.01  | 6.55  | 1.22  | 0.82 |
| Q8CGY8_O Ogt     | UDP-N-acet R.IIFSPVAPK#.E                      | 22.15 | 15.91 | 1.39  | 0.72 |
| Q8CGY8_O Ogt     | UDP-N-acet R.ISPTFADAYSNM*GNTLK.E              | 10.69 | 7.80  | 1.37  | 0.73 |
| Q8CGY8_O Ogt     | UDP-N-acet R.ISPTFADAYSNM*GNTLK.E              | 6.88  | 3.62  | 1.90  | 0.53 |
| Q8CGY8_O Ogt     | UDP-N-acet K.LVSVIAEQLK#.N                     | 36.89 | 26.16 | 1.41  | 0.71 |
| Q8CGY8_O Ogt     | UDP-N-acet K.QNPLLAEAYSNLGNVYK#.E              | 5.73  | 2.52  | 2.27  | 0.44 |
| Q8CGY8_O Ogt     | UDP-N-acet K.AFLDSLDPVK#.I                     | 17.55 | 9.77  | 1.80  | 0.56 |
| Q8CGY8_O Ogt     | UDP-N-acet K.ALEVPEFAAAHNSLASVLQQQGK#.L        | 10.50 | 7.24  | 1.45  | 0.69 |
| Q8CGY8_O Ogt     | UDP-N-acet R.IIFSPVAPK#.E                      | 9.58  | 10.76 | 0.89  | 1.12 |
| Q8CGY8_O Ogt     | UDP-N-acet R.ISPTFADAYSNM*GNTLK#.E             | 4.14  | 5.30  | 0.78  | 1.28 |
| Q9CZ30_OI Oa1    | Obg-like AT K.IGIVGLPNVGHK#.S                  | 22.67 | 3.94  | 5.75  | 0.17 |
| Q9CZ30_OI Oa1    | Obg-like AT R.NYVEDGDIIFK#.F                   | 8.88  | 1.66  | 5.34  | 0.19 |
| Q9CZ30_OI Oa1    | Obg-like AT K.YLEANM*#QSALPK#.I                | 6.27  | 2.70  | 2.32  | 0.43 |
| Q8C195_OS Osbp11 | Oxysterol-b K.GALPSGTIEWLEPK#.I                | 11.13 | 3.75  | 2.97  | 0.34 |
| Q8C195_OS Osbp11 | Oxysterol-b R.SILTVPVWELGGK#.V                 | 27.08 | 8.22  | 3.29  | 0.30 |
| Q8C195_OS Osbp11 | Oxysterol-b R.SVLHLQLK#.L                      | 13.47 | 5.32  | 2.53  | 0.40 |
| Q8C195_OS Osbp11 | Oxysterol-b K.VSNCAN#.T                        | 35.65 | 3.59  | 9.92  | 0.10 |
| Q8C195_OS Osbp11 | Oxysterol-b R.VVLPFTILEK#.R                    | 53.79 | 17.94 | 3.00  | 0.33 |
| Q8C195_OS Osbp11 | Oxysterol-b K.GALPSGTIEWLEPK#.I                | 12.52 | 1.12  | 11.22 | 0.09 |
| Q8C195_OS Osbp11 | Oxysterol-b R.GTLQLAGAVISPEDESHFTVNAASGEQYK#.L | 6.14  | 3.08  | 1.99  | 0.50 |
| Q8C195_OS Osbp11 | Oxysterol-b R.SILTVPVWELGGK#.V                 | 26.45 | 8.46  | 3.13  | 0.32 |
| Q8C195_OS Osbp11 | Oxysterol-b R.VVLPFTILEK#.R                    | 53.97 | 18.30 | 2.95  | 0.34 |
| Q9DBS9_OI Osbp13 | Oxysterol-b R.LLEEGNIEAEVQK#.Q                 | 12.76 | 8.91  | 1.43  | 0.70 |
| Q9DBS9_OI Osbp13 | Oxysterol-b K.NLGVSQK#.L                       | 71.91 | 28.44 | 2.53  | 0.40 |
| Q9DBS9_OI Osbp13 | Oxysterol-b K.SYSDGSEASEFSK#.M                 | 11.00 | 4.56  | 2.41  | 0.41 |
| A2A8Z1_OS Osbp19 | Oxysterol-b K.YATGENTVFDTK#.K                  | 8.41  | 1.21  | 6.98  | 0.14 |
| Q62422_O Osth1   | Osteoclast- K.GYADIVQLLAK#.G                   | 10.58 | 22.67 | 0.47  | 2.14 |
| Q7TQ13_OT Otb1   | Ubiquitin t.R.AFGFSHLEALLDSKELQR.F             | 5.72  | 8.37  | 0.68  | 1.46 |
| Q7TQ13_OT Otb1   | Ubiquitin t.R.IQEQIHAVQNLVSR.L                 | 3.25  | 7.43  | 0.44  | 2.29 |
| Q7TQ13_OT Otb1   | Ubiquitin t.R.LELSVLK#.E                       | 14.66 | 7.76  | 1.89  | 0.53 |
| B2RRE7_OT Otd4   | OTU domai K.TAADVSPGANSVDR.L                   | 4.28  | 13.45 | 0.32  | 3.14 |
| B2RRE7_OT Otd4   | OTU domai R.VEGAHLSAASVSK#.H                   | 25.76 | 16.09 | 1.60  | 0.62 |
| B2RUR8_OT Otd7b  | OTU domai K.KPEPDGGEDQPSDSPAEPK.A              | 3.13  | 3.36  | 0.93  | 1.07 |
| B2RUR8_OT Otd7b  | OTU domai K.GPK#PGLGSGSGISSGTETLEK#.K          | 33.01 | 12.52 | 2.64  | 0.38 |
| B2RUR8_OT Otd7b  | OTU domai K.K#PEPDGGEDQPSDSPAEPK#.A            | 12.33 | 4.85  | 2.55  | 0.39 |
| B2RUR8_OT Otd7b  | OTU domai R.SPLVLAQDAHFSALVSM*EQK#.E           | 7.73  | 2.40  | 3.23  | 0.31 |
| B2RUR8_OT Otd7b  | OTU domai K.YIFVGTLLK#.M                       | 19.12 | 5.78  | 3.31  | 0.30 |
| B2RUR8_OT Otd7b  | OTU domai K.GPK#PGLGSGSGISSGTETLEK#.K          | 22.14 | 6.28  | 3.53  | 0.28 |
| B2RUR8_OT Otd7b  | OTU domai R.SPLVLAQDAHFSALVSM*EQK#.E           | 5.53  | 2.07  | 2.66  | 0.38 |
| Q9DOK2_S Oxc11   | Succinyl-Cc R.AGGAGVPFAYTSTGYTLVQEGGSPK#.Y     | 16.24 | 6.33  | 2.56  | 0.39 |
| Q9DOK2_S Oxc11   | Succinyl-Cc K.GM*GGAM*DLVSSK#.T                | 10.37 | 3.32  | 3.13  | 0.32 |
| Q9DOK2_S Oxc11   | Succinyl-Cc K.YGDLANW#*IPGK#.M                 | 7.71  | 1.80  | 4.28  | 0.23 |
| Q6P9R2_O Oxsr1   | Serine/thre K.IPISLVLR.L                       | 9.52  | 20.07 | 0.47  | 2.11 |
| Q6P9R2_O Oxsr1   | Serine/thre K.LLGGSVLDDIHK#.H                  | 56.34 | 18.95 | 2.97  | 0.34 |
| Q6P9R2_O Oxsr1   | Serine/thre R.DLVIAANLQK#.I                    | 12.09 | 2.26  | 5.36  | 0.19 |
| Q6P9R2_O Oxsr1   | Serine/thre K.IPISLVLR.L                       | 12.57 | 11.95 | 1.05  | 0.95 |
| Q6P9R2_O Oxsr1   | Serine/thre K.LLGGSVLDDIHK#.H                  | 27.76 | 6.12  | 4.53  | 0.22 |
| Q6P9R2_O Oxsr1   | Serine/thre R.LEVLEGLYVLRK#.N                  | 11.18 | 3.59  | 3.11  | 0.32 |
| Q6P9R2_O Oxsr1   | Serine/thre K.LLGGSVLDDIHK#.H                  | 52.34 | 10.84 | 4.83  | 0.21 |
| Q6P9R2_O Oxsr1   | Serine/thre K.SGVLEDEPTIATLIR.E                | 13.72 | 21.47 | 0.64  | 1.57 |
| Q60715_P4 P4ha1  | Prolyl 4-hyi K.AEEDKLEQIK#.W                   | 89.97 | 68.56 | 1.31  | 0.76 |
| Q60715_P4 P4ha1  | Prolyl 4-hyi K.AEEDKLEQIK#.W                   | 20.84 | 13.65 | 1.53  | 0.66 |
| Q60715_P4 P4ha1  | Prolyl 4-hyi K.DPEGFVGHVFNFAFK#.L              | 52.91 | 42.10 | 1.26  | 0.80 |
| Q60715_P4 P4ha1  | Prolyl 4-hyi K.DPEGFVGHVFNFAFK#.L              | 21.12 | 14.40 | 1.47  | 0.68 |
| Q60715_P4 P4ha1  | Prolyl 4-hyi R.FHDIISDAEIEIVK#.D               | 16.07 | 9.30  | 1.73  | 0.58 |
| Q60715_P4 P4ha1  | Prolyl 4-hyi K.FILAPAK#.Q                      | 17.76 | 8.27  | 2.15  | 0.47 |
| Q60715_P4 P4ha1  | Prolyl 4-hyi K.GIADVLYPER.Q                    | 18.51 | 66.64 | 0.28  | 3.60 |
| Q60715_P4 P4ha1  | Prolyl 4-hyi R.KDEPDAFR.E                      | 11.58 | 29.72 | 0.39  | 2.57 |
| Q60715_P4 P4ha1  | Prolyl 4-hyi K.KLELDEPHQR.A                    | 10.25 | 18.12 | 0.57  | 1.77 |
| Q60715_P4 P4ha1  | Prolyl 4-hyi R.LNTEWSELENLILK#.D               | 83.18 | 54.42 | 1.53  | 0.65 |

|                  |                                            |        |        |      |      |
|------------------|--------------------------------------------|--------|--------|------|------|
| Q60715_P4P4ha1   | Prolyl 4-hyi R.LQDTYNLDTNTISK#.G           | 89.85  | 51.78  | 1.74 | 0.58 |
| Q60715_P4P4ha1   | Prolyl 4-hyi R.LTSTATKDPGEFVGHVPVNAFK.L    | 23.18  | 10.94  | 2.12 | 0.47 |
| Q60715_P4P4ha1   | Prolyl 4-hyi R.QYFPNDEQVGAAG#.A            | 19.71  | 12.32  | 1.60 | 0.62 |
| Q60715_P4P4ha1   | Prolyl 4-hyi K.RLNTWESELENLILK.D           | 5.89   | 13.41  | 0.44 | 2.28 |
| Q60715_P4P4ha1   | Prolyl 4-hyi K.VSVDLYSYAVYQQGDLDK#.A       | 33.90  | 24.97  | 1.36 | 0.74 |
| Q60715_P4P4ha1   | Prolyl 4-hyi R.FHDISDAEIEIVK.D             | 3.98   | 4.75   | 0.84 | 1.19 |
| Q60715_P4P4ha1   | Prolyl 4-hyi R.LNTEWSELENLILK#.D           | 15.90  | 8.90   | 1.79 | 0.56 |
| Q60715_P4P4ha1   | Prolyl 4-hyi R.LQDTYNLDTNTISK#.G           | 19.11  | 11.46  | 1.67 | 0.60 |
| Q60715_P4P4ha1   | Prolyl 4-hyi R.LQDTYNLDTNTISK#.G           | 7.03   | 3.47   | 2.03 | 0.49 |
| Q60716_P4P4ha2   | Prolyl 4-hyi K.QLDAGEEATVK#.S              | 18.77  | 12.78  | 1.47 | 0.68 |
| Q60716_P4P4ha2   | Prolyl 4-hyi K.SSWLEEDDPVVAR.V             | 4.50   | 6.99   | 0.64 | 1.55 |
| P09103_P4P4hb    | Protein disi R.EADDIVNWLK#.K               | 104.36 | 55.14  | 1.89 | 0.53 |
| P09103_P4P4hb    | Protein disi K.HNQLPLVIEFTEQTAPK#.I        | 12.02  | 7.76   | 1.55 | 0.65 |
| P09103_P4P4hb    | Protein disi K.IK#PHLMSQEVPEWDK#QHPVK#.V   | 39.51  | 27.54  | 1.43 | 0.70 |
| P09103_P4P4hb    | Protein disi R.ILEFFGLK#.K                 | 157.68 | 77.63  | 2.03 | 0.49 |
| P09103_P4P4hb    | Protein disi K.K#SNFEALAAHK#.Y             | 42.57  | 25.71  | 1.66 | 0.60 |
| P09103_P4P4hb    | Protein disi K.LGETYKDHENIIAK.M            | 82.36  | 39.34  | 2.09 | 0.48 |
| P09103_P4P4hb    | Protein disi R.LITLEEM*TK#.Y               | 95.78  | 48.56  | 1.97 | 0.51 |
| P09103_P4P4hb    | Protein disi K.M*DSTANEVEAVK#.V            | 67.38  | 38.78  | 1.74 | 0.58 |
| P09103_P4P4hb    | Protein disi K.MDSTANEVEAVK#.V             | 47.58  | 22.99  | 2.07 | 0.48 |
| P09103_P4P4hb    | Protein disi K.QLAPIWVK#.L                 | 76.19  | 46.85  | 1.63 | 0.61 |
| P09103_P4P4hb    | Protein disi K.SNFEALAAHK#.Y               | 86.03  | 44.79  | 1.92 | 0.52 |
| P09103_P4P4hb    | Protein disi K.THILLFLPK#.S                | 55.77  | 33.34  | 1.67 | 0.60 |
| P09103_P4P4hb    | Protein disi K.VDATEESLQAQQVGR.G           | 21.79  | 48.45  | 0.45 | 2.22 |
| P09103_P4P4hb    | Protein disi K.VLVGANFEVAFEK#.K            | 58.37  | 35.89  | 1.63 | 0.61 |
| P09103_P4P4hb    | Protein disi K.YK#PESDELTAEK#.I            | 74.02  | 55.62  | 1.33 | 0.75 |
| P09103_P4P4hb    | Protein disi K.YK#PESDELTAEK.I             | 61.57  | 42.53  | 1.45 | 0.69 |
| P09103_P4P4hb    | Protein disi K.YQLDK#DGVVLFK#.K            | 35.05  | 18.57  | 1.89 | 0.53 |
| P09103_P4P4hb    | Protein disi R.EADDIVNWLK#.K               | 11.46  | 7.52   | 1.52 | 0.66 |
| P09103_P4P4hb    | Protein disi K.HNQLPLVIEFTEQTAPK#.I        | 7.48   | 5.10   | 1.46 | 0.68 |
| P09103_P4P4hb    | Protein disi R.ILEFFGLK#.K                 | 13.88  | 7.85   | 1.77 | 0.57 |
| P09103_P4P4hb    | Protein disi K.M*DSTANEVEAVK#.V            | 7.44   | 5.51   | 1.35 | 0.74 |
| P29341_P4Pabpc1  | Polyadenyl R.AK#EFTNVYK#.N                 | 43.89  | 28.71  | 1.53 | 0.65 |
| P29341_P4Pabpc1  | Polyadenyl R.ALDTM*NFVVIK#.G               | 81.67  | 55.88  | 1.46 | 0.68 |
| P29341_P4Pabpc1  | Polyadenyl R.ALDTMNFVVIK#.G                | 37.21  | 23.81  | 1.56 | 0.64 |
| P29341_P4Pabpc1  | Polyadenyl K.EFSPFGTISAK#.V                | 51.37  | 30.90  | 1.66 | 0.60 |
| P29341_P4Pabpc1  | Polyadenyl K.FGPALSVK#.V                   | 105.76 | 67.54  | 1.57 | 0.64 |
| P29341_P4Pabpc1  | Polyadenyl K.FSPAGPILSIR.V                 | 39.03  | 100.40 | 0.39 | 2.57 |
| P29341_P4Pabpc1  | Polyadenyl K.GFGVFSFER.H                   | 35.39  | 53.91  | 0.66 | 1.52 |
| P29341_P4Pabpc1  | Polyadenyl K.GYGFVHFTEQEAER.A              | 20.67  | 55.81  | 0.37 | 2.70 |
| P29341_P4Pabpc1  | Polyadenyl R.IVATKPLVVALAQR.K              | 34.96  | 94.73  | 0.37 | 2.71 |
| P29341_P4Pabpc1  | Polyadenyl R.K#SGVGNIFIK#.N                | 11.43  | 8.70   | 1.31 | 0.76 |
| P29341_P4Pabpc1  | Polyadenyl K.NFGEDM*DDER.L                 | 8.11   | 18.03  | 0.45 | 2.22 |
| P29341_P4Pabpc1  | Polyadenyl K.NLDDGIDDER.L                  | 16.98  | 41.63  | 0.41 | 2.45 |
| P29341_P4Pabpc1  | Polyadenyl K.SGVGNIFIK#.N                  | 66.44  | 35.20  | 1.89 | 0.53 |
| P29341_P4Pabpc1  | Polyadenyl R.SK#VDEAVAVLQAHQAK#.E          | 85.13  | 60.25  | 1.41 | 0.71 |
| P29341_P4Pabpc1  | Polyadenyl R.YQGVNLYVK#.N                  | 131.42 | 63.35  | 2.07 | 0.48 |
| P29341_P4Pabpc1  | Polyadenyl R.AK#EFTNVYK#.N                 | 127.79 | 77.41  | 1.65 | 0.61 |
| P29341_P4Pabpc1  | Polyadenyl R.AK#EFTNVYK#.N                 | 100.50 | 56.85  | 1.77 | 0.57 |
| P29341_P4Pabpc1  | Polyadenyl R.ALDTM*NFVVIK#.G               | 179.36 | 111.53 | 1.61 | 0.62 |
| P29341_P4Pabpc1  | Polyadenyl R.ALDTMNFVVIK#.G                | 78.35  | 43.20  | 1.81 | 0.55 |
| P29341_P4Pabpc1  | Polyadenyl K.AVNSATGVPVTV.-                | 123.22 | 123.22 | 1.00 | 1.00 |
| P29341_P4Pabpc1  | Polyadenyl R.AVPNVPINYPQAPPSGYFMAAIPQTRN.A | 1.86   | 3.74   | 0.50 | 2.01 |
| P29341_P4Pabpc1  | Polyadenyl K.EFSPFGTISAK#.V                | 125.92 | 83.95  | 1.50 | 0.67 |
| P29341_P4Pabpc1  | Polyadenyl K.FGPALSVK#.V                   | 223.60 | 137.94 | 1.62 | 0.62 |
| P29341_P4Pabpc1  | Polyadenyl K.FSPAGPILSIR.V                 | 53.83  | 153.72 | 0.35 | 2.86 |
| P29341_P4Pabpc1  | Polyadenyl K.GFGVFSFER.H                   | 41.07  | 124.39 | 0.33 | 3.03 |
| P29341_P4Pabpc1  | Polyadenyl K.GYGFVHFTEQEAER.A              | 47.43  | 139.55 | 0.34 | 2.94 |
| P29341_P4Pabpc1  | Polyadenyl K.ITGMLEIDNSELHM*LESPELRS.S     | 11.36  | 27.34  | 0.42 | 2.41 |
| P29341_P4Pabpc1  | Polyadenyl R.IVATKPLVVALAQR.K              | 54.47  | 139.28 | 0.39 | 2.56 |
| P29341_P4Pabpc1  | Polyadenyl R.K#EFSPFGTISAK#.V              | 90.78  | 75.41  | 1.20 | 0.83 |
| P29341_P4Pabpc1  | Polyadenyl R.K#SGVGNIFIK#.N                | 40.00  | 22.80  | 1.75 | 0.57 |
| P29341_P4Pabpc1  | Polyadenyl K.NLDDGIDDER.L                  | 27.30  | 79.08  | 0.35 | 2.90 |
| P29341_P4Pabpc1  | Polyadenyl R.QAHLTNQYM*QR.M                | 22.29  | 53.68  | 0.42 | 2.41 |
| P29341_P4Pabpc1  | Polyadenyl R.RSLGYAVNFQOPADAER.A           | 3.20   | 20.57  | 0.16 | 6.44 |
| P29341_P4Pabpc1  | Polyadenyl K.SGVGNIFIK#.N                  | 187.63 | 102.99 | 1.82 | 0.55 |
| P29341_P4Pabpc1  | Polyadenyl R.SK#VDEAVAVLQAHQAK#.E          | 325.85 | 177.95 | 1.83 | 0.55 |
| P29341_P4Pabpc1  | Polyadenyl R.SLGYAVNFQOPADAER.A            | 28.99  | 84.95  | 0.34 | 2.93 |
| P29341_P4Pabpc1  | Polyadenyl K.VDEAVAVLQAHQAK#.E             | 32.15  | 18.90  | 1.70 | 0.59 |
| P29341_P4Pabpc1  | Polyadenyl R.YQGVNLYVK#.N                  | 251.32 | 151.96 | 1.65 | 0.60 |
| Q6PHO9_Q Pabpc4  | MCG5546, R.ALDTM*NFVVM*#.G                 | 36.07  | 17.06  | 2.11 | 0.47 |
| Q6PHO9_Q Pabpc4  | MCG5546, R.EFSPFGTISAK#.V                  | 57.75  | 38.60  | 1.50 | 0.67 |
| Q6PHO9_Q Pabpc4  | MCG5546, R.IVGSKPLVVALAQR.K                | 9.41   | 36.20  | 0.26 | 3.85 |
| Q6PHO9_Q Pabpc4  | MCG5546, K.NFGEEVDGNLKH#ELFSQFGK#.T        | 89.30  | 46.32  | 1.93 | 0.52 |
| Q6PHO9_Q Pabpc4  | MCG5546, K.NFGEEVDGNLKH#ELFSQFGK#.T        | 9.09   | 5.69   | 1.60 | 0.63 |
| Q6PHO9_Q Pabpc4  | MCG5546, K.SGVGNIFIK#.N                    | 56.10  | 32.80  | 1.71 | 0.58 |
| Q6PHO9_Q Pabpc4  | MCG5546, R.YQGVNLYVK#.N                    | 71.22  | 31.44  | 2.27 | 0.44 |
| Q8CCS6_P4Pabpn1  | Polyadenyl K.ELQNEVEK#.Q                   | 61.42  | 58.68  | 1.05 | 0.96 |
| Q8CCS6_P4Pabpn1  | Polyadenyl K.GFAMIEFSDK.E                  | 18.99  | 27.42  | 0.69 | 1.44 |
| Q8CCS6_P4Pabpn1  | Polyadenyl R.TSLALDESFLR.G                 | 24.01  | 95.46  | 0.25 | 3.98 |
| Q8CCS6_P4Pabpn1  | Polyadenyl R.TSLALDESFLR.G                 | 9.07   | 39.05  | 0.23 | 4.31 |
| Q8K212_P4Pacs1   | Phosphofu K.FIFPIGVVK#.V                   | 12.57  | 7.80   | 1.61 | 0.62 |
| Q8K212_P4Pacs1   | Phosphofu K.VAAVGSQSYLSSILR.F              | 2.40   | 6.03   | 0.40 | 2.51 |
| Q9WVVE_P Pascin2 | Protein kin K.ADPSLNPEQLK#.K               | 73.55  | 26.08  | 2.82 | 0.35 |
| Q9WVVE_P Pascin2 | Protein kin R.ANHGPGM*AM*NWPQFEWWSADLNR.T  | 2.73   | 5.70   | 0.48 | 2.09 |
| Q9WVVE_P Pascin2 | Protein kin K.ASLM*NEDFEK#.I               | 99.56  | 43.13  | 2.31 | 0.43 |
| Q9WVVE_P Pascin2 | Protein kin K.ASLM*NEDFEK#.I               | 57.79  | 14.24  | 4.06 | 0.25 |
| Q9WVVE_P Pascin2 | Protein kin K.AWIAVM*SEAER.V               | 10.30  | 10.57  | 0.97 | 1.03 |
| Q9WVVE_P Pascin2 | Protein kin K.AWIAVM*SEAER.V               | 13.34  | 19.42  | 0.69 | 1.46 |
| Q9WVVE_P Pascin2 | Protein kin R.EVLLEVK#.H                   | 111.31 | 27.22  | 4.09 | 0.24 |
| Q9WVVE_P Pascin2 | Protein kin K.GPQYGTVEK#.A                 | 233.25 | 59.49  | 3.92 | 0.26 |
| Q9WVVE_P Pascin2 | Protein kin K.GRLDSGQVGLYPANYVEAIQ.-       | 3.44   | 10.31  | 0.33 | 3.00 |
| Q9WVVE_P Pascin2 | Protein kin K.HLDSLNVAQYK#.T               | 206.33 | 43.45  | 4.75 | 0.21 |
| Q9WVVE_P Pascin2 | Protein kin R.VSELHLEVK#.A                 | 107.22 | 29.33  | 3.66 | 0.27 |
| Q9WVVE_P Pascin2 | Protein kin K.AADVAEDLR.W                  | 8.32   | 10.22  | 0.81 | 1.23 |
| Q9WVVE_P Pascin2 | Protein kin K.ADPSLNPEQLK#.K               | 15.15  | 10.39  | 1.46 | 0.69 |
| Q9WVVE_P Pascin2 | Protein kin K.ASLM*NEDFEK#.I               | 22.07  | 4.57   | 4.83 | 0.21 |
| Q9WVVE_P Pascin2 | Protein kin R.EVLLEVK#.H                   | 35.38  | 9.60   | 3.69 | 0.27 |
| Q9WVVE_P Pascin2 | Protein kin K.GPQYGTVEK#.A                 | 46.44  | 12.28  | 3.78 | 0.26 |
| Q9WVVE_P Pascin2 | Protein kin K.HLDSLNVAQYK#.T               | 57.79  | 15.76  | 3.67 | 0.27 |
| Q8K2T8_P4Paf1    | RNA polym K.AGVQSGTNALLVVK#.H              | 42.55  | 28.71  | 1.48 | 0.67 |
| Q8K2T8_P4Paf1    | RNA polym R.EDGQVYVNELETR.V                | 11.28  | 23.31  | 0.48 | 2.07 |
| Q8K2T8_P4Paf1    | RNA polym R.IDPNVLLDPADEK#LLEEEIQAPTSSK#.R | 18.58  | 20.72  | 0.90 | 1.12 |

|                    |                                                    |        |        |       |       |
|--------------------|----------------------------------------------------|--------|--------|-------|-------|
| Q8K2T8_P_Paf1      | RNA polym K.LLEEEIQAPTSK#R                         | 9.96   | 13.47  | 0.74  | 1.35  |
| Q8K2T8_P_Paf1      | RNA polym K.TEYTSFNFR.Y                            | 5.63   | 14.29  | 0.39  | 2.54  |
| P63005_L1_Pafah1b1 | Platelet-act K.EEFTSGGGLGQK#R                      | 13.01  | 5.28   | 2.46  | 0.41  |
| P63005_L1_Pafah1b1 | Platelet-act K.GHTDSVQDISFDHSGK#L                  | 66.14  | 16.51  | 4.00  | 0.25  |
| P63005_L1_Pafah1b1 | Platelet-act K.LNEAK#EEFTSGGGLGQK#R                | 65.34  | 15.23  | 4.29  | 0.23  |
| P63005_L1_Pafah1b1 | Platelet-act K.TAPYVVTGSVDQTVK#V                   | 39.73  | 9.69   | 4.10  | 0.24  |
| P63005_L1_Pafah1b1 | Platelet-act R.VIFHPVSMVMSASEDATIK#V               | 6.45   | 3.01   | 2.15  | 0.47  |
| P63005_L1_Pafah1b1 | Platelet-act K.VWDYETGDFER.T                       | 11.40  | 11.51  | 0.99  | 1.01  |
| P63005_L1_Pafah1b1 | Platelet-act R.VVWVATK#E                           | 59.27  | 11.55  | 5.13  | 0.19  |
| P63005_L1_Pafah1b1 | Platelet-act K.YAGLLEK#K                           | 50.41  | 14.05  | 3.59  | 0.28  |
| P63005_L1_Pafah1b1 | Platelet-act K.GHTDSVQDISFDHSGK#L                  | 47.81  | 6.66   | 7.18  | 0.14  |
| P63005_L1_Pafah1b1 | Platelet-act K.K#M#ELESK#L                         | 8.10   | 5.44   | 1.49  | 0.67  |
| P63005_L1_Pafah1b1 | Platelet-act K.LNEAK#EEFTSGGGLGQK#R                | 57.94  | 7.13   | 8.13  | 0.12  |
| P63005_L1_Pafah1b1 | Platelet-act K.TAPYVVTGSVDQTVK#V                   | 42.01  | 8.06   | 5.21  | 0.19  |
| P63005_L1_Pafah1b1 | Platelet-act R.VVWVATK#E                           | 29.17  | 3.64   | 8.02  | 0.12  |
| P63005_L1_Pafah1b1 | Platelet-act K.YAGLLEK#K                           | 27.47  | 5.01   | 5.49  | 0.18  |
| P63005_L1_Pafah1b1 | Platelet-act K.GHTDSVQDISFDHSGK#L                  | 65.92  | 4.03   | 16.35 | 0.06  |
| P63005_L1_Pafah1b1 | Platelet-act K.K#M#ELESK#L                         | 14.50  | 22.74  | 0.64  | 1.57  |
| P63005_L1_Pafah1b1 | Platelet-act K.LNEAK#EEFTSGGGLGQK#R                | 59.49  | 10.58  | 5.62  | 0.18  |
| P63005_L1_Pafah1b1 | Platelet-act K.TAPYVVTGSVDQTVK#V                   | 75.20  | 18.38  | 4.09  | 0.24  |
| P63005_L1_Pafah1b1 | Platelet-act K.YAGLLEK#K                           | 42.87  | 7.19   | 5.96  | 0.17  |
| Q9DCL9_P1 Paics    | Multifuncti K.DDANNDPQWSEEQLIAAK#F                 | 3.21   | 2.68   | 1.20  | 0.84  |
| Q9DCL9_P1 Paics    | Multifuncti R.IATGSFLK#R                           | 40.44  | 13.55  | 2.98  | 0.34  |
| Q9DCL9_P1 Paics    | Multifuncti K.IEFGVDVTTK#E                         | 25.86  | 8.21   | 3.15  | 0.32  |
| Q9DCL9_P1 Paics    | Multifuncti R.NPGVQEGYK#F                          | 48.18  | 17.39  | 2.77  | 0.36  |
| Q9DCL9_P1 Paics    | Multifuncti K.VEMFFK#D DANNDPQWSEEQLIAAK#F         | 5.93   | 9.10   | 0.65  | 1.53  |
| Q9DCL9_P1 Paics    | Multifuncti R.ASLNTWISLK#Q                         | 16.32  | 4.24   | 3.85  | 0.26  |
| Q9DCL9_P1 Paics    | Multifuncti K.IEFGVDVTTK#E                         | 21.69  | 3.08   | 7.03  | 0.14  |
| Q9DCL9_P1 Paics    | Multifuncti R.NPGVQEGYK#F                          | 24.96  | 7.70   | 3.24  | 0.31  |
| Q9DCL9_P1 Paics    | Multifuncti R.ASLNTWISLK#Q                         | 24.31  | 4.52   | 5.38  | 0.19  |
| Q9DCL9_P1 Paics    | Multifuncti K.EIVLADINDNSWR.L                      | 8.10   | 9.31   | 0.87  | 1.15  |
| Q9DCL9_P1 Paics    | Multifuncti K.EVTPEGLQM#VK#K                       | 37.03  | 8.70   | 4.26  | 0.24  |
| Q9DCL9_P1 Paics    | Multifuncti K.EVYELLDTPGR.V                        | 3.69   | 6.07   | 0.61  | 1.64  |
| Q9DCL9_P1 Paics    | Multifuncti K.IEFGVDVTTK#E                         | 28.80  | 6.97   | 4.13  | 0.24  |
| Q9DCL9_P1 Paics    | Multifuncti R.IKAEYEGDGIPTVFSVAGR.S                | 7.47   | 9.90   | 0.75  | 1.32  |
| Q9DCL9_P1 Paics    | Multifuncti R.NPGVQEGYK#F                          | 35.66  | 6.99   | 5.10  | 0.20  |
| Q9D6V8_P_Paip2     | Polyadenyl R.DLPQTM#DQIQDQFNDLVISDGSSELDLVK#S      | 16.81  | 10.39  | 1.62  | 0.62  |
| Q8CIN4_PA Pak2     | Serine/thre K.IISIFSGTEK#G                         | 16.63  | 6.95   | 2.39  | 0.42  |
| Q8CIN4_PA Pak2     | Serine/thre R.LLQTSNITK#S                          | 43.40  | 16.89  | 2.57  | 0.39  |
| Q8CIN4_PA Pak2     | Serine/thre K.SDNVLGM#EGSVK#L                      | 12.89  | 1.96   | 6.58  | 0.15  |
| Q8CIN4_PA Pak2     | Serine/thre R.SVIDPIAPVGVSDVSDGAK#S                | 8.16   | 32.52  | 0.25  | 3.99  |
| Q9ET54_PA Pallid   | Palladin OS K.AAFQPEASPSHLTNSGLVSEDL-              | 8.85   | 8.85   | 1.00  | 1.00  |
| Q9ET54_PA Pallid   | Palladin OS K.AAFQPEASPSHLTNSGLVSEDL-              | 2.77   | 2.77   | 1.00  | 1.00  |
| Q9ET54_PA Pallid   | Palladin OS R.IASDEIQGTK#D                         | 22.85  | 15.08  | 1.52  | 0.66  |
| Q9ET54_PA Pallid   | Palladin OS R.LISEIEYR.L                           | 4.86   | 13.95  | 0.35  | 2.87  |
| Q9ET54_PA Pallid   | Palladin OS K.LQNTGVADGYPVR.L                      | 4.35   | 11.07  | 0.39  | 2.55  |
| Q9ET54_PA Pallid   | Palladin OS R.YAALSDQGLDIK#A                       | 10.67  | 8.52   | 1.25  | 0.80  |
| Q61183_P_Papola    | Poly(A) pol K.LFEAPNFFQK#Y                         | 18.40  | 3.32   | 5.55  | 0.18  |
| Q60967_P_Paps1     | Bifunctionz K.TDAEALPAK#I                          | 12.15  | 2.44   | 4.98  | 0.20  |
| Q99XL0_P_Park7     | Protein deg R.ALVLAK#G                             | 15.56  | 4.79   | 3.25  | 0.31  |
| Q8VDG3_P_Parn      | Poly(A)-spe K.LM#ASTQPK#DIINNTSLAELEK#R            | 4.96   | 3.34   | 1.48  | 0.67  |
| Q8VDG3_P_Parn      | Poly(A)-spe R.VM#DIPYLNLEGPDLQPK#R                 | 6.08   | 4.34   | 1.40  | 0.71  |
| Q921K2_Q_Parp1     | Poly (ADP-r K.K#GDEVDTGDEVAK#K                     | 8.54   | 5.45   | 1.57  | 0.64  |
| Q921K2_Q_Parp1     | Poly (ADP-r K.TLGDFLAEYAK#S                        | 35.11  | 22.52  | 1.56  | 0.64  |
| Q921K2_Q_Parp1     | Poly (ADP-r K.TLGDFLAEYAK#S                        | 63.78  | 29.77  | 2.14  | 0.47  |
| Q921K2_Q_Parp1     | Poly (ADP-r K.AEPGEVAVPK#G                         | 78.34  | 77.43  | 1.01  | 0.99  |
| Q921K2_Q_Parp1     | Poly (ADP-r K.ALVEYEDLQK#M                         | 85.62  | 71.76  | 1.19  | 0.84  |
| Q921K2_Q_Parp1     | Poly (ADP-r K.AQNELIWNK#DELK#K#A                   | 61.33  | 51.30  | 1.20  | 0.84  |
| Q921K2_Q_Parp1     | Poly (ADP-r K.ELLIFNQQVPSGESAILDR.V                | 9.29   | 37.30  | 0.25  | 4.01  |
| Q921K2_Q_Parp1     | Poly (ADP-r K.GAVK#EEGVN#KSEK#R                    | 1.44   | 2.86   | 0.50  | 1.99  |
| Q921K2_Q_Parp1     | Poly (ADP-r R.GGSDSSK#DPIDVNYEK#L                  | 81.08  | 70.92  | 1.14  | 0.87  |
| Q921K2_Q_Parp1     | Poly (ADP-r K.GIFYADM#VSK#S                        | 24.38  | 19.31  | 1.26  | 0.79  |
| Q921K2_Q_Parp1     | Poly (ADP-r K.K#FYPLEIDYGQDEEAVK#K                 | 29.10  | 25.82  | 1.13  | 0.89  |
| Q921K2_Q_Parp1     | Poly (ADP-r K.K#FYPLEIDYGQDEEAVK#K#L               | 42.10  | 30.39  | 1.39  | 0.72  |
| Q921K2_Q_Parp1     | Poly (ADP-r R.K#GDEVDTGDEVAK#K                     | 31.06  | 23.65  | 1.31  | 0.76  |
| Q921K2_Q_Parp1     | Poly (ADP-r K.K#PPLNNADSVQAK#V                     | 64.92  | 67.13  | 0.97  | 1.03  |
| Q921K2_Q_Parp1     | Poly (ADP-r K.LQLLEDDKESR.Y                        | 7.02   | 20.21  | 0.35  | 2.88  |
| Q921K2_Q_Parp1     | Poly (ADP-r K.NTHATTHNAYDLEVIDIFK#I                | 42.84  | 23.88  | 1.79  | 0.56  |
| Q921K2_Q_Parp1     | Poly (ADP-r R.RKGDEVDTGDEVAK.K                     | 12.02  | 59.54  | 0.20  | 4.95  |
| Q921K2_Q_Parp1     | Poly (ADP-r R.RQQAAYSILSEVQAVSQGSSQSLDLSNR.F       | 2.59   | 17.27  | 0.15  | 6.67  |
| Q921K2_Q_Parp1     | Poly (ADP-r K.SLQELLSAHSLSWGAEVK#A                 | 5.91   | 5.43   | 1.09  | 0.92  |
| Q921K2_Q_Parp1     | Poly (ADP-r K.TLGDFLAEYAK#S                        | 115.61 | 89.22  | 1.30  | 0.77  |
| Q921K2_Q_Parp1     | Poly (ADP-r R.TTNFAGLSQGLR.I                       | 24.13  | 84.43  | 0.29  | 3.50  |
| Q921K2_Q_Parp1     | Poly (ADP-r K.VFSATLGLDVIK#G                       | 131.44 | 100.36 | 1.31  | 0.76  |
| Q921K2_Q_Parp1     | Poly (ADP-r R.VGTVGSNK#L                           | 36.78  | 24.55  | 1.50  | 0.67  |
| Q921K2_Q_Parp1     | Poly (ADP-r K.VVDRDSEAEVIR.K                       | 10.17  | 62.59  | 0.16  | 6.16  |
| Q921K2_Q_Parp1     | Poly (ADP-r K.VVDRDSEAEVIR.Y                       | 1.22   | 69.81  | 0.02  | 57.10 |
| Q921K2_Q_Parp1     | Poly (ADP-r K.FYPLEIDYGQDEEAVK#K                   | 3.67   | 2.01   | 1.82  | 0.55  |
| Q921K2_Q_Parp1     | Poly (ADP-r K.GGAAVDPDGLSESAHVLEK#G                | 22.27  | 17.52  | 1.27  | 0.79  |
| Q921K2_Q_Parp1     | Poly (ADP-r R.GGSDSSK#DPIDVNYEK#L                  | 37.16  | 25.90  | 1.44  | 0.70  |
| Q921K2_Q_Parp1     | Poly (ADP-r K.K#FYPLEIDYGQDEEAVK#K                 | 7.81   | 8.00   | 0.98  | 1.02  |
| Q921K2_Q_Parp1     | Poly (ADP-r K.K#FYPLEIDYGQDEEAVK#K#L               | 8.00   | 11.27  | 0.71  | 1.41  |
| Q921K2_Q_Parp1     | Poly (ADP-r K.K#PPLNNADSVQAK#V                     | 31.69  | 26.05  | 1.22  | 0.82  |
| Q921K2_Q_Parp1     | Poly (ADP-r R.RKGDEVDTGDEVAK.K                     | 5.32   | 22.71  | 0.23  | 4.27  |
| Q921K2_Q_Parp1     | Poly (ADP-r K.SLQELLSAHSLSWGAEVK#A                 | 20.07  | 17.95  | 1.12  | 0.89  |
| Q921K2_Q_Parp1     | Poly (ADP-r K.TLGDFLAEYAK#S                        | 37.30  | 26.75  | 1.39  | 0.72  |
| Q921K2_Q_Parp1     | Poly (ADP-r R.TTNFAGLSQGLR.I                       | 9.80   | 22.11  | 0.44  | 2.26  |
| Q921K2_Q_Parp1     | Poly (ADP-r K.VFSATLGLDVIK#G                       | 42.06  | 29.67  | 1.42  | 0.71  |
| Q8CIE4_Q8 Parp10   | Plec1 prote K.EKPGGPGETVVEQQEIIPTLEAEPPPVALSTGAR.G | 1.75   | 1.88   | 0.93  | 1.08  |
| Q8BZ20_P_Parp12    | Poly [ADP-r R.LGLSSDLVSR.L                         | 3.99   | 14.44  | 0.28  | 3.62  |
| Q2EMV9_P_Parp14    | Poly [ADP-r K.AIDAIEFFVQK#K                        | 32.02  | 14.16  | 2.26  | 0.44  |
| Q2EMV9_P_Parp14    | Poly [ADP-r R.DASAVLSGK#S                          | 24.55  | 21.67  | 1.13  | 0.88  |
| Q2EMV9_P_Parp14    | Poly [ADP-r K.DHENIQAFSDFDKR.N                     | 8.07   | 22.24  | 0.36  | 2.76  |
| Q2EMV9_P_Parp14    | Poly [ADP-r K.DVQVSEVFEFLQQVDSQR.L                 | 18.81  | 43.73  | 0.43  | 2.32  |
| Q2EMV9_P_Parp14    | Poly [ADP-r K.EGGVPLGNVAVIK#A                      | 42.86  | 26.67  | 1.61  | 0.62  |
| Q2EMV9_P_Parp14    | Poly [ADP-r R.FPVDVVNANENLK#H                      | 13.61  | 8.89   | 1.53  | 0.65  |
| Q2EMV9_P_Parp14    | Poly [ADP-r K.GTALFLVGSFK#D                        | 42.75  | 22.31  | 1.92  | 0.52  |
| Q2EMV9_P_Parp14    | Poly [ADP-r K.HISGLAQLSK#A                         | 32.58  | 19.38  | 1.68  | 0.59  |
| Q2EMV9_P_Parp14    | Poly [ADP-r K.IASFLGFPK#Q                          | 26.20  | 13.94  | 1.88  | 0.53  |
| Q2EMV9_P_Parp14    | Poly [ADP-r K.IKPSLIVLYR.T                         | 8.71   | 30.35  | 0.29  | 3.48  |
| Q2EMV9_P_Parp14    | Poly [ADP-r K.IYLVGLPAK#V                          | 35.59  | 17.19  | 2.07  | 0.48  |
| Q2EMV9_P_Parp14    | Poly [ADP-r K.K#N#TLVLEK#K                         | 19.31  | 13.53  | 1.43  | 0.70  |
| Q2EMV9_P_Parp14    | Poly [ADP-r K.LPASFQESLDLPLWK#F                    | 31.66  | 16.79  | 1.89  | 0.53  |

|                 |                                                   |        |        |      |      |
|-----------------|---------------------------------------------------|--------|--------|------|------|
| Q2EMV9_P.Parp14 | Poly [ADP-r K.LTVLM*PTDPEEASAK#K#.S               | 10.92  | 9.46   | 1.15 | 0.87 |
| Q2EMV9_P.Parp14 | Poly [ADP-r K.M*PLSVPPYPSLGTALYGEK#PLIK#.L        | 20.33  | 16.86  | 1.21 | 0.83 |
| Q2EMV9_P.Parp14 | Poly [ADP-r K.QGSLVSPGLR.I                        | 5.17   | 11.52  | 0.45 | 2.23 |
| Q2EMV9_P.Parp14 | Poly [ADP-r K.SLFEAQNLAIYELK#.G                   | 29.67  | 17.94  | 1.65 | 0.60 |
| Q2EMV9_P.Parp14 | Poly [ADP-r K.SNSAWSLK#.I                         | 13.22  | 7.27   | 1.82 | 0.55 |
| Q2EMV9_P.Parp14 | Poly [ADP-r R.SNQQQLQAPR.L                        | 7.79   | 28.23  | 0.28 | 3.63 |
| Q2EMV9_P.Parp14 | Poly [ADP-r K.TLQEVQLLHPK#.D                      | 20.31  | 14.23  | 1.43 | 0.70 |
| Q2EMV9_P.Parp14 | Poly [ADP-r K.TTENLSLQSIAPPAIGTGNLR.F             | 6.36   | 25.10  | 0.25 | 3.95 |
| Q2EMV9_P.Parp14 | Poly [ADP-r R.VLFSPEDEV.R.Q                       | 62.11  | 25.95  | 2.39 | 0.42 |
| Q2EMV9_P.Parp14 | Poly [ADP-r R.VLVEFEK#.E                          | 14.46  | 13.39  | 1.08 | 0.93 |
| Q3ULW8_C.Parp3  | Protein Par K.ALSPQVSGPVR.T                       | 1.82   | 11.91  | 0.15 | 6.53 |
| Q3ULW8_C.Parp3  | Protein Par K.GIFYASENSK#.S                       | 22.44  | 16.60  | 1.35 | 0.74 |
| Q3ULW8_C.Parp3  | Protein Par K.NAM*TLM*NLDVK.K                     | 10.72  | 16.32  | 0.66 | 1.52 |
| Q3ULW8_C.Parp3  | Protein Par R.QGTEEDSFR.S                         | 5.48   | 17.61  | 0.31 | 3.21 |
| Q3ULW8_C.Parp3  | Protein Par R.SPPSGFDSVIR.G                       | 12.94  | 48.28  | 0.27 | 3.73 |
| Q3ULW8_C.Parp3  | Protein Par R.SRPPPIPSDVLQAK.K                    | 8.79   | 41.15  | 0.21 | 4.68 |
| Q3ULW8_C.Parp3  | Protein Par K.SSFSQSEYLYK#.E                      | 37.13  | 26.78  | 1.39 | 0.72 |
| Q3ULW8_C.Parp3  | Protein Par R.YLLEIHL.-                           | 14.20  | 14.20  | 1.00 | 1.00 |
| Q3ULW8_C.Parp3  | Protein Par K.YTLIEVQGEAESQEAUVK#.A               | 17.39  | 18.56  | 0.94 | 1.07 |
| Q3ULW8_C.Parp3  | Protein Par K.SSFSQSEYLYK#.E                      | 9.19   | 8.13   | 1.13 | 0.88 |
| Q3ULW8_C.Parp3  | Protein Par K.AIQTYLK#.Q                          | 17.66  | 16.57  | 1.07 | 0.94 |
| Q3ULW8_C.Parp3  | Protein Par R.FVAQPNK#.Y                          | 15.66  | 17.29  | 0.91 | 1.10 |
| Q3ULW8_C.Parp3  | Protein Par K.FYIQLLEEGSR.F                       | 4.00   | 12.31  | 0.33 | 3.08 |
| Q3ULW8_C.Parp3  | Protein Par K.GIFYASENSK#.S                       | 16.63  | 5.92   | 2.81 | 0.36 |
| Q3ULW8_C.Parp3  | Protein Par K.YTLIEVQGEAESQEAUVK#.A               | 4.84   | 3.84   | 1.26 | 0.79 |
| Q8CAS9_P.Parp9  | Poly [ADP-r R.DLSSWGGPETDPASTM*TLR.I              | 4.97   | 7.29   | 0.68 | 1.47 |
| Q8CAS9_P.Parp9  | Poly [ADP-r R.EIHLVSNEDPTVASFK#.S                 | 37.69  | 26.43  | 1.43 | 0.70 |
| Q8CAS9_P.Parp9  | Poly [ADP-r R.EIHLVSNEDPTVASFK#.S                 | 8.10   | 4.76   | 1.70 | 0.59 |
| Q8CAS9_P.Parp9  | Poly [ADP-r R.GGLEAGSPAINLM*GVK#.V                | 12.37  | 7.70   | 1.61 | 0.62 |
| Q8CAS9_P.Parp9  | Poly [ADP-r K.GPQADLIDAVMR.I                      | 3.88   | 10.46  | 0.37 | 2.70 |
| Q8CAS9_P.Parp9  | Poly [ADP-r K.HNVFEILK#.S                         | 35.20  | 22.26  | 1.58 | 0.63 |
| Q8CAS9_P.Parp9  | Poly [ADP-r K.IVGFYIAGTGAQR.L                     | 36.64  | 21.99  | 1.67 | 0.60 |
| Q8CAS9_P.Parp9  | Poly [ADP-r K.IVIFPVDVETK#.I                      | 58.05  | 44.02  | 1.32 | 0.76 |
| Q8CAS9_P.Parp9  | Poly [ADP-r R.M*YSTYSPNVPYAGIYFTK#.S              | 7.51   | 3.30   | 2.27 | 0.44 |
| Q8CAS9_P.Parp9  | Poly [ADP-r R.MYSTYSPNVPYAGIYFTK#.S               | 4.56   | 3.17   | 1.44 | 0.70 |
| Q8CAS9_P.Parp9  | Poly [ADP-r K.SASESILGR.D                         | 11.86  | 27.77  | 0.43 | 2.34 |
| Q8CAS9_P.Parp9  | Poly [ADP-r R.SNELNSGNSGALALQWSSGEQR.R            | 2.54   | 5.19   | 0.49 | 2.04 |
| Q8CAS9_P.Parp9  | Poly [ADP-r R.VAGSLR.Q                            | 14.17  | 30.21  | 0.47 | 2.13 |
| Q8CAS9_P.Parp9  | Poly [ADP-r K.VLLAAFAQEK#.K                       | 44.31  | 26.97  | 1.64 | 0.61 |
| Q8CAS9_P.Parp9  | Poly [ADP-r R.VSISETVSPR.T                        | 10.93  | 38.67  | 0.28 | 3.54 |
| Q8CAS9_P.Parp9  | Poly [ADP-r R.WTVTNSQTAIELLK#.F                   | 24.59  | 21.43  | 1.15 | 0.87 |
| Q8CAS9_P.Parp9  | Poly [ADP-r R.YPASLTQELQDR.K                      | 7.42   | 40.44  | 0.18 | 5.45 |
| Q8CAS9_P.Parp9  | Poly [ADP-r R.EIHLVSNEDPTVASFK#.S                 | 23.84  | 19.55  | 1.22 | 0.82 |
| Q8CAS9_P.Parp9  | Poly [ADP-r K.HNVFEILK#.S                         | 18.17  | 19.70  | 0.92 | 1.08 |
| Q8CAS9_P.Parp9  | Poly [ADP-r K.IVIFPVDVETK#.I                      | 46.42  | 26.13  | 1.78 | 0.56 |
| Q8CAS9_P.Parp9  | Poly [ADP-r K.VLLAAFAQEK#.K                       | 26.65  | 15.92  | 1.67 | 0.60 |
| Q8CAS9_P.Parp9  | Poly [ADP-r R.WTVTNSQTAIELLK#.F                   | 14.90  | 8.63   | 1.73 | 0.58 |
| Q9EPC1_P.Parva  | Alpha-parvi R.DAFDFTLDHAPDK#LNVVK#.K              | 58.66  | 21.25  | 2.76 | 0.36 |
| Q9EPC1_P.Parva  | Alpha-parvi K.DLAEDLYDQVQLQK#.L                   | 79.01  | 45.88  | 1.72 | 0.58 |
| Q9EPC1_P.Parva  | Alpha-parvi R.IIVK#DLAEDLYDQVQLQK#.L              | 9.14   | 6.32   | 1.45 | 0.69 |
| Q9EPC1_P.Parva  | Alpha-parvi K.K#LITFVNK#.H                        | 14.48  | 5.91   | 2.45 | 0.41 |
| Q9EPC1_P.Parva  | Alpha-parvi K.LESEKHLNVAEVTQSEIAQK#.Q             | 31.63  | 14.98  | 2.11 | 0.47 |
| Q9EPC1_P.Parva  | Alpha-parvi K.LNVAEVTQSEIAQK#.Q                   | 76.42  | 33.42  | 2.29 | 0.44 |
| Q9EPC1_P.Parva  | Alpha-parvi R.QIQEITGNTAELSQR.H                   | 12.73  | 28.85  | 0.44 | 2.27 |
| Q9EPC1_P.Parva  | Alpha-parvi K.TLITFVNK#.H                         | 52.05  | 21.81  | 2.39 | 0.42 |
| Q9EPC1_P.Parva  | Alpha-parvi R.VLYNFTK#.Y                          | 61.47  | 31.25  | 1.97 | 0.51 |
| Q9ES46_PA.Parvb | Beta-parvi K.LNVAEVTQSEIGQK#.Q                    | 13.52  | 2.94   | 4.59 | 0.22 |
| Q925B0_P.Pawr   | PRKC apopt R.DANAPAFSSSSTLEK#.R                   | 19.65  | 13.62  | 1.44 | 0.69 |
| Q925B0_P.Pawr   | PRKC apopt R.KREDAITQNTIQNEAATLPDPGTSYLPQDPSR.T   | 3.22   | 5.44   | 0.59 | 1.69 |
| Q925B0_P.Pawr   | PRKC apopt R.SGGSTTDFLEEWK#.A                     | 18.01  | 11.01  | 1.63 | 0.61 |
| Q00288_P.Pax8   | Paired box K.ATLTSSTNPLGR.N                       | 3.18   | 11.19  | 0.28 | 3.51 |
| Q00288_P.Pax8   | Paired box R.LSIDSSQSSGPR.K                       | 2.38   | 19.33  | 0.12 | 8.13 |
| P58501_P.Paxbp1 | PAX3-and f R.ASLFSQDEEENEVEFK#.V                  | 4.67   | 3.88   | 1.20 | 0.83 |
| P58501_P.Paxbp1 | PAX3-and f R.LQLLWTPLEAK#.C                       | 19.53  | 13.55  | 1.44 | 0.69 |
| P58501_P.Paxbp1 | PAX3-and f K.TDNTVPFK#.T                          | 14.64  | 11.31  | 1.29 | 0.77 |
| Q9D086_P.Pbdc1  | Protein PBI K.AVSVSIQDKHEGEEGAGNK#EEAAEK#.G       | 8.01   | 2.27   | 3.54 | 0.28 |
| Q9D086_P.Pbdc1  | Protein PBI R.AM*QHAEVYK#.L                       | 10.02  | 3.30   | 3.04 | 0.33 |
| Q9D086_P.Pbdc1  | Protein PBI R.IQFFAIEIAR.N                        | 14.87  | 27.62  | 0.54 | 1.86 |
| Q9D086_P.Pbdc1  | Protein PBI K.LISSVDPOGFLK#.L                     | 62.77  | 28.54  | 2.20 | 0.45 |
| Q9D086_P.Pbdc1  | Protein PBI K.VDDQYSEFR.E                         | 10.11  | 18.77  | 0.54 | 1.86 |
| Q8BSQ9_P.Pbrm1  | Protein pol K.LINEVEAVK#.N                        | 19.92  | 15.60  | 1.28 | 0.78 |
| Q8BSQ9_P.Pbrm1  | Protein pol K.AQHPDYSGELSR.L                      | 5.90   | 25.17  | 0.23 | 4.27 |
| Q8BSQ9_P.Pbrm1  | Protein pol R.DGAAVYGFIFHPEETEHEPTK.M             | 5.20   | 6.08   | 0.85 | 1.17 |
| Q8BSQ9_P.Pbrm1  | Protein pol R.EAKSEDSGTTGLSGLHR.T                 | 3.93   | 28.06  | 0.14 | 7.14 |
| Q8BSQ9_P.Pbrm1  | Protein pol K.ELGPLPDDDM*ASP.K.L                  | 27.95  | 20.82  | 1.34 | 0.75 |
| Q8BSQ9_P.Pbrm1  | Protein pol K.IILEPMD*DLK#.I                      | 19.39  | 13.74  | 1.41 | 0.71 |
| Q8BSQ9_P.Pbrm1  | Protein pol R.K#PIIPQK#EPSPLLEK#.K                | 21.90  | 24.35  | 0.90 | 1.11 |
| Q8BSQ9_P.Pbrm1  | Protein pol R.LLHSEAYLK#.Y                        | 18.27  | 21.17  | 0.86 | 1.16 |
| Q8BSQ9_P.Pbrm1  | Protein pol K.LINEVEAVK#.N                        | 59.85  | 37.55  | 1.59 | 0.63 |
| Q8BSQ9_P.Pbrm1  | Protein pol R.LSAIFLR.L                           | 6.16   | 23.23  | 0.27 | 3.77 |
| Q8BSQ9_P.Pbrm1  | Protein pol K.MPILSLQJR.T                         | 1.29   | 8.84   | 0.15 | 6.86 |
| Q8BSQ9_P.Pbrm1  | Protein pol K.NGELLSPALSYYTK#.H                   | 7.05   | 5.31   | 1.33 | 0.75 |
| Q8BSQ9_P.Pbrm1  | Protein pol R.NHQQLIAEPFFHLPSK.K                  | 9.77   | 12.54  | 0.78 | 1.28 |
| Q8BSQ9_P.Pbrm1  | Protein pol R.NQPDYIEVSPQIDLM*#K.I                | 7.76   | 8.27   | 0.94 | 1.07 |
| Q8BSQ9_P.Pbrm1  | Protein pol R.RDDIEDGDSM*ISSATSDTGSAAK.R          | 2.78   | 18.05  | 0.15 | 6.50 |
| Q8BSQ9_P.Pbrm1  | Protein pol K.TYNEPGSQVFK#.D                      | 31.90  | 30.86  | 1.03 | 0.97 |
| Q8BSQ9_P.Pbrm1  | Protein pol K.VLLETR.R                            | 7.34   | 32.75  | 0.22 | 4.46 |
| Q8BSQ9_P.Pbrm1  | Protein pol K.VQYDPIYAIK#.E                       | 6.27   | 7.86   | 0.80 | 1.25 |
| Q8BSQ9_P.Pbrm1  | Protein pol K.VVDEIYIFR.K                         | 7.36   | 31.80  | 0.23 | 4.32 |
| Q8BSQ9_P.Pbrm1  | Protein pol R.YEEGESEAESITFSM*DVSNPFHQYLDVTR.V    | 2.90   | 4.93   | 0.59 | 1.70 |
| Q8BSQ9_P.Pbrm1  | Protein pol K.YIEGLSAESNISIK#.W                   | 27.36  | 24.85  | 1.10 | 0.91 |
| Q035984_P.Pbx2  | Pre-B-cell Ie R.LDNM*LLAEGVAGPEK#.G               | 7.05   | 4.17   | 1.69 | 0.59 |
| Q05920_P.Pc     | Pyruvate ca R.GANAVGTYNVDNVVFK#.F                 | 7.04   | 1.89   | 3.72 | 0.27 |
| Q05920_P.Pc     | Pyruvate ca R.LDNASAFQGAVISPHYDLSLLK#.V           | 16.48  | 4.40   | 3.75 | 0.27 |
| P60335_P.Pcbp1  | Poly(C)-bir K.AFAM*IIDKLEEDINSSM*TNSTAASRPPVTLR.L | 4.60   | 29.53  | 0.16 | 6.43 |
| P60335_P.Pcbp1  | Poly(C)-bir K.AFAMIIDKLEEDINSSM*TNSTAASRPPVTLR.L  | 9.45   | 42.33  | 0.22 | 4.48 |
| P60335_P.Pcbp1  | Poly(C)-bir K.AFAM*IIDKLEEDINSSMTNSTAASRPPVTLR.L  | 4.38   | 22.03  | 0.20 | 5.03 |
| P60335_P.Pcbp1  | Poly(C)-bir K.AFAMIIDKLEEDINSSMTNSTAASRPPVTLR.L   | 92.77  | 42.36  | 2.19 | 0.46 |
| P60335_P.Pcbp1  | Poly(C)-bir R.ESGAQVQVAGDM*LPNSTER.A              | 40.81  | 103.99 | 0.39 | 2.55 |
| P60335_P.Pcbp1  | Poly(C)-bir R.ESGAQVQVAGDM*LPNSTER.A              | 20.06  | 49.96  | 0.40 | 2.49 |
| P60335_P.Pcbp1  | Poly(C)-bir K.IANPVEGSSGR.Q                       | 113.99 | 343.53 | 0.33 | 3.01 |
| P60335_P.Pcbp1  | Poly(C)-bir R.IITLGTPTNAIFK#.A                    | 746.25 | 452.63 | 1.65 | 0.61 |
| P60335_P.Pcbp1  | Poly(C)-bir R.LVVPATQCSGLIGK#.G                   | 32.53  | 18.51  | 1.76 | 0.57 |

|                 |                                                  |        |        |      |       |
|-----------------|--------------------------------------------------|--------|--------|------|-------|
| P60335_PC Pcbp1 | Poly(C)-bir R.QGANINEIR.Q                        | 85.98  | 221.27 | 0.39 | 2.57  |
| P60335_PC Pcbp1 | Poly(C)-bir R.QM*SGAQIK#.I                       | 51.53  | 35.49  | 1.45 | 0.69  |
| P60335_PC Pcbp1 | Poly(C)-bir R.QMSGQAIK#.I                        | 135.79 | 76.74  | 1.77 | 0.57  |
| P60335_PC Pcbp1 | Poly(C)-bir R.QVITIGSAASISLAQYLINAR.L            | 22.64  | 57.02  | 0.40 | 2.52  |
| P60335_PC Pcbp1 | Poly(C)-bir R.ESTGAQVQVAGDM*LPNSTER.A            | 2.81   | 9.73   | 0.29 | 3.47  |
| P60335_PC Pcbp1 | Poly(C)-bir R.ESTGAQVQVAGDM*LPNSTER.A            | 2.54   | 5.69   | 0.45 | 2.24  |
| P60335_PC Pcbp1 | Poly(C)-bir R.IANPVEGSSGR.Q                      | 4.76   | 14.20  | 0.34 | 2.98  |
| P60335_PC Pcbp1 | Poly(C)-bir R.IITLTGPTNAIFK#.A                   | 159.23 | 101.26 | 1.57 | 0.64  |
| P60335_PC Pcbp1 | Poly(C)-bir R.QVITIGSAASISLAQYLINAR.L            | 3.70   | 5.37   | 0.69 | 1.45  |
| P60335_PC Pcbp1 | Poly(C)-bir R.ESTGAQVQVAGDM*LPNSTER.A            | 11.24  | 22.63  | 0.50 | 2.01  |
| P60335_PC Pcbp1 | Poly(C)-bir R.IANPVEGSSGR.Q                      | 19.62  | 53.30  | 0.37 | 2.72  |
| P60335_PC Pcbp1 | Poly(C)-bir R.IITLTGPTNAIFK#.A                   | 128.81 | 68.25  | 1.89 | 0.53  |
| P60335_PC Pcbp1 | Poly(C)-bir R.QQSHFAM*M*HGGTGFAGIDSSSPEVK#.G     | 7.83   | 4.36   | 1.80 | 0.56  |
| P60335_PC Pcbp1 | Poly(C)-bir R.QVITIGSAASISLAQYLINAR.L            | 5.34   | 12.22  | 0.44 | 2.29  |
| P60335_PC Pcbp1 | Poly(C)-bir R.ESTGAQVQVAGDM*LPNSTER.A            | 9.73   | 31.82  | 0.31 | 3.27  |
| P60335_PC Pcbp1 | Poly(C)-bir R.ESTGAQVQVAGDM*LPNSTER.A            | 2.76   | 6.42   | 0.43 | 2.33  |
| P60335_PC Pcbp1 | Poly(C)-bir R.IANPVEGSSGR.Q                      | 21.62  | 32.09  | 0.67 | 1.48  |
| P60335_PC Pcbp1 | Poly(C)-bir R.IITLTGPTNAIFK#.A                   | 128.09 | 83.46  | 1.53 | 0.65  |
| P60335_PC Pcbp1 | Poly(C)-bir R.QGANINEIR.Q                        | 11.64  | 27.52  | 0.42 | 2.36  |
| Q61990_PC Pcbp2 | Poly(C)-bir K.AFAM*IIDKLEEDISSM*TNSTAASRPPVTLR.L | 5.76   | 19.40  | 0.30 | 3.37  |
| Q61990_PC Pcbp2 | Poly(C)-bir K.AFAMIIDKLEEDISSM*TNSTAASRPPVTLR.L  | 2.16   | 7.34   | 0.29 | 3.41  |
| Q61990_PC Pcbp2 | Poly(C)-bir K.AFAM*IIDKLEEDISSM*TNSTAASRPPVTLR.L | 6.60   | 21.93  | 0.30 | 3.32  |
| Q61990_PC Pcbp2 | Poly(C)-bir K.IANPVEGSTDR.Q                      | 120.93 | 330.47 | 0.37 | 2.73  |
| Q61990_PC Pcbp2 | Poly(C)-bir R.IITLAGPTNAIFK#.A                   | 785.85 | 398.48 | 1.97 | 0.51  |
| Q61990_PC Pcbp2 | Poly(C)-bir K.LEEDISSM*TNSTAASRPPVTLR.L          | 1.30   | 8.81   | 0.15 | 6.80  |
| Q61990_PC Pcbp2 | Poly(C)-bir K.LHQLAM*QOSHFP*THGNTGFSGISSSPEVK#.G | 8.32   | 3.54   | 2.35 | 0.43  |
| Q61990_PC Pcbp2 | Poly(C)-bir K.LHQLAMQOSHFP*THGNTGFSGISSSPEVK#.G  | 6.79   | 2.89   | 2.35 | 0.43  |
| Q61990_PC Pcbp2 | Poly(C)-bir R.QVITIGSAASISLAQYLINAR.L            | 9.61   | 20.86  | 0.46 | 2.17  |
| Q61990_PC Pcbp2 | Poly(C)-bir R.IITLAGPTNAIFK#.A                   | 33.58  | 21.25  | 1.58 | 0.63  |
| Q61990_PC Pcbp2 | Poly(C)-bir K.IANPVEGSTDR.Q                      | 21.45  | 48.73  | 0.44 | 2.27  |
| Q61990_PC Pcbp2 | Poly(C)-bir R.IITLAGPTNAIFK#.A                   | 132.50 | 72.76  | 1.82 | 0.55  |
| Q61990_PC Pcbp2 | Poly(C)-bir K.LHQLAM*QOSHFP*THGNTGFSGISSSPEVK#.G | 6.28   | 4.14   | 1.52 | 0.66  |
| Q61990_PC Pcbp2 | Poly(C)-bir K.IANPVEGSTDR.Q                      | 30.22  | 82.28  | 0.37 | 2.72  |
| Q61990_PC Pcbp2 | Poly(C)-bir R.IITLAGPTNAIFK#.A                   | 194.63 | 108.47 | 1.79 | 0.56  |
| Q61990_PC Pcbp2 | Poly(C)-bir K.LHQLAM*QOSHFP*THGNTGFSGISSSPEVK#.G | 12.54  | 5.43   | 2.31 | 0.43  |
| P57722_PC Pcbp3 | Poly(C)-bir K.LHQLAM*QQTFFPLGQTNPAFFGEK#.L       | 2.48   | 3.68   | 0.67 | 1.48  |
| P57722_PC Pcbp3 | Poly(C)-bir K.LHQLAMQQTFFPLGQTNPAFFGEK#.L        | 5.12   | 2.47   | 2.08 | 0.48  |
| Q3UK78_PC Pcgf5 | Polycomb 5 R.LDNTLEIIFK.L                        | 3.67   | 2.93   | 1.25 | 0.80  |
| Q8BH04_PI Pck2  | Phosphoen R.DEGWLAHEM*LILGITNPAKG#.K             | 7.40   | 3.27   | 2.26 | 0.44  |
| Q8BH04_PI Pck2  | Phosphoen K.EGALDLSGLSAVDSQLFSIPK#.D             | 12.09  | 2.86   | 4.23 | 0.24  |
| Q8BH04_PI Pck2  | Phosphoen R.EIVSFGSGYGGNSLLGK#.K                 | 33.55  | 9.86   | 3.40 | 0.29  |
| Q8BH04_PI Pck2  | Phosphoen R.GYLTEQVNDLPK#.E                      | 16.73  | 6.00   | 2.79 | 0.36  |
| Q8BH04_PI Pck2  | Phosphoen R.LGTPVLAQALGDGFIK#.C                  | 42.81  | 14.94  | 2.87 | 0.35  |
| Q8BH04_PI Pck2  | Phosphoen R.RLEGEDSAQETPIGLVPK.E                 | 5.49   | 11.97  | 0.46 | 2.18  |
| Q8BH04_PI Pck2  | Phosphoen R.GYLTEQVNDLPK#.E                      | 7.61   | 2.80   | 2.72 | 0.37  |
| Q8BH04_PI Pck2  | Phosphoen K.EGALDLSGLSAVDSQLFSIPK#.D             | 11.65  | 2.99   | 3.89 | 0.26  |
| Q8BH04_PI Pck2  | Phosphoen R.EIVSFGSGYGGNSLLGK#.K                 | 12.61  | 5.35   | 2.36 | 0.42  |
| Q8BH04_PI Pck2  | Phosphoen R.GYLTEQVNDLPK#.E                      | 13.62  | 5.23   | 2.61 | 0.38  |
| Q8BH04_PI Pck2  | Phosphoen R.LGTPVLAQALGDGFIK#.C                  | 23.13  | 7.34   | 3.15 | 0.32  |
| Q8BH04_PI Pck2  | Phosphoen K.EGALDLSGLSAVDSQLFSIPK#.D             | 12.31  | 2.00   | 6.17 | 0.16  |
| Q8BH04_PI Pck2  | Phosphoen R.EIVSFGSGYGGNSLLGK#.K                 | 10.39  | 2.10   | 4.95 | 0.20  |
| Q8BH04_PI Pck2  | Phosphoen R.GYLTEQVNDLPK#.E                      | 11.29  | 3.54   | 3.19 | 0.31  |
| Q8BH04_PI Pck2  | Phosphoen R.LGTPVLAQALGDGFIK#.C                  | 20.05  | 8.50   | 2.36 | 0.42  |
| P23506_PI Pcm1  | Protein-L-is K.ELVDSITNVK#.K                     | 27.76  | 6.00   | 4.63 | 0.22  |
| P17918_PC Pcn1  | Proliferatin R.AEDNADTLALVFAPNQEK.V              | 12.40  | 23.22  | 0.53 | 1.87  |
| P17918_PC Pcn1  | Proliferatin K.ATPLSPTVLSM*SADVPLVVEYK.I         | 7.58   | 29.00  | 0.26 | 3.82  |
| P17918_PC Pcn1  | Proliferatin K.FSASGELGNGNIK.L                   | 8.66   | 28.34  | 0.31 | 3.27  |
| P17918_PC Pcn1  | Proliferatin K.MPSGFAFR.I                        | 3.22   | 33.88  | 0.10 | 10.52 |
| P17918_PC Pcn1  | Proliferatin R.NLAMGVNLTSM*SK.I                  | 3.28   | 9.46   | 0.35 | 2.88  |
| P17918_PC Pcn1  | Proliferatin R.SEGFDTYR.C                        | 3.39   | 36.25  | 0.09 | 10.69 |
| P17918_PC Pcn1  | Proliferatin R.VLNFFTK.A                         | 29.54  | 81.64  | 0.36 | 2.76  |
| P17918_PC Pcn1  | Proliferatin R.AEDNADTLALVFAPNQEK.V              | 2.72   | 3.44   | 0.79 | 1.26  |
| P17918_PC Pcn1  | Proliferatin R.AEDNADTLALVFAPNQEK.V              | 3.13   | 6.34   | 0.49 | 2.03  |
| P49586_PC Pcy1a | Choline-ph K.ELNVFINEK#.K                        | 38.41  | 20.76  | 1.85 | 0.54  |
| P49586_PC Pcy1a | Choline-ph R.IDFVAHDDIPYSAGSDVYK#.H              | 29.64  | 13.89  | 2.13 | 0.47  |
| P49586_PC Pcy1a | Choline-ph R.TEGISTSIIIR.I                       | 8.12   | 18.73  | 0.43 | 2.31  |
| Q8VE70_PI Pdc10 | Programme R.VNLSAQTLR.A                          | 5.78   | 8.01   | 0.72 | 1.39  |
| Q8VE70_PI Pdc10 | Programme K.AEK#ENPGLTQDIIM*K#.I                 | 3.41   | 1.70   | 2.01 | 0.50  |
| Q8VE70_PI Pdc10 | Programme R.LIHQTLNLITQFK#.T                     | 27.31  | 11.91  | 2.29 | 0.44  |
| Q8VE70_PI Pdc10 | Programme R.M*AADDVEEYMIERPEPEFDLNEK.A           | 2.00   | 3.98   | 0.50 | 1.99  |
| Q6NS46_RI Pdc11 | Protein RRF K.AIFENTLSTYK#.R                     | 42.89  | 21.83  | 1.96 | 0.51  |
| Q6NS46_RI Pdc11 | Protein RRF R.AVQNEPLK#.V                        | 26.13  | 29.03  | 0.90 | 1.11  |
| Q6NS46_RI Pdc11 | Protein RRF R.EDGEVEGPK#.L                       | 15.21  | 14.78  | 1.03 | 0.97  |
| Q6NS46_RI Pdc11 | Protein RRF K.EYGVFVQPSGLSGLSPK.T                | 5.29   | 7.09   | 0.75 | 1.34  |
| Q6NS46_RI Pdc11 | Protein RRF K.FAQLFQLGDVER.A                     | 5.67   | 15.02  | 0.38 | 2.65  |
| Q6NS46_RI Pdc11 | Protein RRF K.FQVQQAIEATVDPDVPRA                 | 3.98   | 18.78  | 0.21 | 4.72  |
| Q6NS46_RI Pdc11 | Protein RRF R.GLTVSFPFGK#.I                      | 32.46  | 32.71  | 0.99 | 1.01  |
| Q6NS46_RI Pdc11 | Protein RRF K.GTVLAIK#PFGILVK#.V                 | 13.38  | 11.83  | 1.13 | 0.88  |
| Q6NS46_RI Pdc11 | Protein RRF K.HELSQHPDPEVTFYTGQVVK#.H            | 11.73  | 4.90   | 2.39 | 0.42  |
| Q6NS46_RI Pdc11 | Protein RRF R.IGQLVDVK.V                         | 28.57  | 30.25  | 0.94 | 1.06  |
| Q6NS46_RI Pdc11 | Protein RRF R.I.LDDVPVGTSPSTTLK#.A               | 41.06  | 36.40  | 1.13 | 0.89  |
| Q6NS46_RI Pdc11 | Protein RRF R.I.PLLTSLFSK#.V                     | 20.27  | 17.47  | 1.16 | 0.86  |
| Q6NS46_RI Pdc11 | Protein RRF R.LEEGEVAM*GR.V                      | 3.96   | 16.96  | 0.23 | 4.29  |
| Q6NS46_RI Pdc11 | Protein RRF R.LKDGLVYAR.V                        | 2.09   | 17.63  | 0.12 | 8.45  |
| Q6NS46_RI Pdc11 | Protein RRF K.LNEQVQAEPLDLLR.L                   | 2.98   | 9.52   | 0.31 | 3.19  |
| Q6NS46_RI Pdc11 | Protein RRF K.M*GYSNQTVK.A                       | 6.95   | 4.75   | 1.46 | 0.68  |
| Q6NS46_RI Pdc11 | Protein RRF K.SIIAFLR.Y                          | 13.38  | 28.72  | 0.47 | 2.15  |
| Q6NS46_RI Pdc11 | Protein RRF K.SSQVVEQDNLDFVSTEEGPIK#.R           | 5.75   | 3.74   | 1.54 | 0.65  |
| Q6NS46_RI Pdc11 | Protein RRF K.SSQVVEQDNLDFVSTEEGPIK#.K           | 11.03  | 16.96  | 0.65 | 1.54  |
| Q6NS46_RI Pdc11 | Protein RRF K.TTEPVTGLLAVEGPAK.R                 | 21.66  | 24.32  | 0.89 | 1.12  |
| Q6NS46_RI Pdc11 | Protein RRF K.FLHLDIYTK#.S                       | 17.44  | 16.50  | 1.06 | 0.95  |
| Q6NS46_RI Pdc11 | Protein RRF K.YGAFVLR.S                          | 4.79   | 15.70  | 0.31 | 3.27  |
| Q61823_PI Pdc11 | Programme R.IYNEPIDNLDPVSHVSLYR.F                | 4.29   | 30.84  | 0.14 | 7.19  |
| Q61823_PI Pdc11 | Programme K.SGVPVLAVALLEGK#.A                    | 13.49  | 7.84   | 1.72 | 0.58  |
| P12815_PI Pdc11 | Programme K.AGVNFSEFTGVWK#.Y                     | 18.46  | 7.29   | 2.53 | 0.40  |
| P12815_PI Pdc11 | Programme K.YTDVQNVFR.T                          | 6.78   | 15.10  | 0.45 | 2.23  |
| Q9WU78_F Pdc11  | Programme K.ATLVK#PTVNVPSQK#.F                   | 38.48  | 22.77  | 1.69 | 0.59  |
| Q9WU78_F Pdc11  | Programme K.EVFP TLAAK#.Q                        | 29.72  | 17.56  | 1.69 | 0.59  |
| Q9WU78_F Pdc11  | Programme K.FLTALAQDGVINEEALSVTELD.R.I           | 5.13   | 7.88   | 0.65 | 1.54  |
| Q9WU78_F Pdc11  | Programme K.FYNELTELV.R.F                        | 9.31   | 16.35  | 0.57 | 1.76  |
| Q9WU78_F Pdc11  | Programme K.LALASLGEYK#.S                        | 41.97  | 15.66  | 2.68 | 0.37  |
| Q9WU78_F Pdc11  | Programme K.LANQAADYFGDAFK#.Q                    | 20.15  | 6.44   | 3.13 | 0.32  |
| Q9WU78_F Pdc11  | Programme R.LLEDEEATDNDLR.A                      | 9.53   | 20.90  | 0.46 | 2.19  |

|                  |                                                      |        |        |      |       |
|------------------|------------------------------------------------------|--------|--------|------|-------|
| Q9WU78_F Pdc6ip  | Programme K.NIQVSHQEFSK#.M                           | 25.25  | 10.83  | 2.33 | 0.43  |
| Q9WU78_F Pdc6ip  | Programme K.STSVVEQGGIQTVDQLIK#.E                    | 14.27  | 7.80   | 1.83 | 0.55  |
| Q9WU78_F Pdc6ip  | Programme K.STSVVEQGGIQTVDQLIK#.E                    | 22.87  | 9.62   | 2.38 | 0.42  |
| Q9WU78_F Pdc6ip  | Programme K.TM*QGSEVSVLKH#.S                         | 19.46  | 11.11  | 1.75 | 0.57  |
| Q9WU78_F Pdc6ip  | Programme K.TMQGSEVSVLKH#.S                          | 10.44  | 8.96   | 1.17 | 0.86  |
| Q9WU78_F Pdc6ip  | Programme K.ATLVK#PTPVNVPVSK#.F                      | 28.50  | 12.98  | 2.19 | 0.46  |
| Q9WU78_F Pdc6ip  | Programme K.FLTALAQDGVINEEALSVTLEDR.I                | 2.92   | 8.75   | 0.33 | 2.99  |
| Q9WU78_F Pdc6ip  | Programme K.FYNELTEILVR.F                            | 4.29   | 8.36   | 0.51 | 1.95  |
| Q9WU78_F Pdc6ip  | Programme R.LLDEEETDNDLR.A                           | 4.56   | 6.90   | 0.66 | 1.51  |
| Q9WU78_F Pdc6ip  | Programme K.STSVVEQGGIQTVDQLIK#.E                    | 8.86   | 2.82   | 3.14 | 0.32  |
| Q9WU78_F Pdc6ip  | Programme K.TM*QGSEVSVLKH#.S                         | 8.58   | 7.09   | 1.21 | 0.83  |
| Q8BFV2_PI Pdc13  | Phosducin- K.ELEEEAEK#EEQLLQOSVVK#.T                 | 10.71  | 8.60   | 1.24 | 0.80  |
| Q8BFV2_PI Pdc13  | Phosducin- K.ESLKEEEAEKEEQLLQOSVVK.T                 | 13.43  | 8.99   | 1.49 | 0.67  |
| Q8BFQ8_PI Pddc1  | Parkinson c K.DSGAGFSASEPDAHVVLDR.H                  | 8.50   | 21.90  | 0.39 | 2.58  |
| Q8BFQ8_PI Pddc1  | Parkinson c R.LPLIVFDVK#.D                           | 38.37  | 16.04  | 2.39 | 0.42  |
| Q8BFQ8_PI Pddc1  | Parkinson c R.SWVFGVSLTGPVVELIR.A                    | 3.91   | 4.60   | 0.85 | 1.18  |
| O5S057_PI Pde6d  | Retinal rod R.ELNFSSAEQM*EK#.F                       | 6.51   | 4.16   | 1.56 | 0.64  |
| Q9D051_O Pdhb    | Pyruvate de K.D1IFAVK#.K                             | 31.41  | 6.93   | 4.54 | 0.22  |
| Q9D051_O Pdhb    | Pyruvate de K.VFLGEEVAQYDGYK#.V                      | 12.35  | 5.70   | 2.17 | 0.46  |
| Q9D051_O Pdhb    | Pyruvate de K.VLEDNSVPQVK#.D                         | 55.44  | 9.67   | 5.73 | 0.17  |
| Q9D051_O Pdhb    | Pyruvate de R.VTGADVPM*PYAK#.V                       | 10.86  | 1.44   | 7.52 | 0.13  |
| Q9D051_O Pdhb    | Pyruvate de R.VTGADVPMPYAK#.V                        | 12.19  | 6.56   | 1.86 | 0.54  |
| Q9D051_O Pdhb    | Pyruvate de K.VVSPWNSEDAK#.G                         | 42.28  | 12.40  | 3.41 | 0.29  |
| P27773_PI Pdia3  | Protein disi K.ALEQFLQEFYFDGNLKH#.R                  | 11.80  | 8.57   | 1.38 | 0.73  |
| P27773_PI Pdia3  | Protein disi R.DGEEAGAYDGRP.T                        | 4.18   | 10.81  | 0.39 | 2.59  |
| P27773_PI Pdia3  | Protein disi R.EATNPIIQEKKPK.K                       | 6.85   | 6.67   | 1.03 | 0.97  |
| P27773_PI Pdia3  | Protein disi R.ELNDFISYLR.E                          | 9.52   | 25.55  | 0.37 | 2.68  |
| P27773_PI Pdia3  | Protein disi R.FAHTNIESLVK#.E                        | 12.65  | 13.11  | 0.97 | 1.04  |
| P27773_PI Pdia3  | Protein disi K.FVM*QEFSR.D                           | 22.35  | 18.79  | 1.19 | 0.84  |
| P27773_PI Pdia3  | Protein disi K.FVMQEFSR.D                            | 7.39   | 17.13  | 0.43 | 2.32  |
| P27773_PI Pdia3  | Protein disi K.GPPTIYSPANK#.K                        | 16.09  | 14.72  | 1.09 | 0.91  |
| P27773_PI Pdia3  | Protein disi R.LAPEYEAATR.L                          | 18.50  | 69.36  | 0.27 | 3.75  |
| P27773_PI Pdia3  | Protein disi K.M*DATANDVSPYEVK#.G                    | 13.14  | 12.92  | 1.02 | 0.98  |
| P27773_PI Pdia3  | Protein disi K.MDATANDVSPYEVK#.G                     | 12.44  | 8.28   | 1.50 | 0.67  |
| P27773_PI Pdia3  | Protein disi K.SEPITESNEGPVK#.V                      | 49.57  | 44.25  | 1.12 | 0.89  |
| Q3TML0_Q Pdia6   | Protein disi K.AATALKHDVVK#.V                        | 124.12 | 41.68  | 2.98 | 0.34  |
| Q3TML0_Q Pdia6   | Protein disi K.DGELPVEDDIDLSDVELDDLEK#.D             | 20.51  | 9.19   | 2.23 | 0.45  |
| Q3TML0_Q Pdia6   | Protein disi K.DVVELTDDTDFDK#.D                      | 24.25  | 9.00   | 2.69 | 0.37  |
| Q3TML0_Q Pdia6   | Protein disi R.EPWVKGK#DGELPVEDDIDLSDVELDDLEK#.D     | 63.28  | 18.45  | 3.43 | 0.29  |
| Q3TML0_Q Pdia6   | Protein disi K.GESPVYDGGRT                           | 86.64  | 146.15 | 0.59 | 1.69  |
| Q3TML0_Q Pdia6   | Protein disi K.GSFSEQINEFLR.E                        | 66.99  | 94.60  | 0.71 | 1.41  |
| Q3TML0_Q Pdia6   | Protein disi K.HQSLGGQYGVQGFPTIK#.I                  | 29.91  | 10.31  | 2.90 | 0.34  |
| Q3TML0_Q Pdia6   | Protein disi K.KHDVVELTDDTDFDK#.N                    | 5.67   | 2.62   | 2.16 | 0.46  |
| Q3TML0_Q Pdia6   | Protein disi K.LAAVDATM*NQVLASR.Y                    | 34.96  | 51.05  | 0.68 | 1.46  |
| Q3TML0_Q Pdia6   | Protein disi K.LAAVDATMNQVLASR.Y                     | 39.85  | 49.89  | 0.80 | 1.25  |
| Q3TML0_Q Pdia6   | Protein disi K.NLEPEWAAAATEVK#.E                     | 260.39 | 75.81  | 3.43 | 0.29  |
| Q3TML0_Q Pdia6   | Protein disi R.NSYLEVLLK#.L                          | 251.45 | 65.92  | 3.81 | 0.26  |
| Q3TML0_Q Pdia6   | Protein disi R.TGEAIVDAALSALR.Q                      | 62.32  | 95.78  | 0.65 | 1.54  |
| Q3TML0_Q Pdia6   | Protein disi K.VGAVNADK#.H                           | 71.64  | 21.64  | 3.31 | 0.30  |
| Q3TML0_Q Pdia6   | Protein disi K.VGAVNADK#HQSLGGQYGVQGFPTIK#.I         | 56.04  | 16.60  | 3.38 | 0.30  |
| Q3TML0_Q Pdia6   | Protein disi R.GSTAPVGGSFPTIPR.E                     | 7.16   | 6.35   | 1.13 | 0.89  |
| Q3TML0_Q Pdia6   | Protein disi K.NLEPEWAAAATEVK#.E                     | 10.40  | 3.69   | 2.82 | 0.35  |
| Q3TML0_Q Pdia6   | Protein disi R.NSYLEVLLK#.L                          | 13.49  | 3.93   | 3.43 | 0.29  |
| Q3TML0_Q Pdia6   | Protein disi K.VGAVNADK#HQSLGGQYGVQGFPTIK#.I         | 3.82   | 1.82   | 2.10 | 0.48  |
| O70400_PI Pdlim1 | PDZ and LIM K.DFEQPLAISR.V                           | 14.48  | 35.08  | 0.41 | 2.42  |
| O70400_PI Pdlim1 | PDZ and LIM R.LVGGKDFEOPLAISR.V                      | 11.09  | 23.13  | 0.48 | 2.09  |
| O70400_PI Pdlim1 | PDZ and LIM K.QSTSLVLQLEIESDGKDPNPKPSGFR.S           | 7.80   | 23.60  | 0.33 | 3.03  |
| O70400_PI Pdlim1 | PDZ and LIM R.SAM*PFTASAPSTR.V                       | 10.66  | 21.31  | 0.50 | 2.00  |
| O70400_PI Pdlim1 | PDZ and LIM R.SAMPFTASAPSTR.V                        | 5.80   | 12.17  | 0.48 | 2.10  |
| O70400_PI Pdlim1 | PDZ and LIM K.VAASVGNQK#.L                           | 41.06  | 32.29  | 1.27 | 0.79  |
| O70400_PI Pdlim1 | PDZ and LIM R.VITNQYNSPTGLYSSENISFNNAVESK#.T         | 25.73  | 14.53  | 1.77 | 0.56  |
| P70271_PI Pdlim4 | PDZ and LIM R.DFSAPLISR.V                            | 7.36   | 34.34  | 0.21 | 4.66  |
| P70271_PI Pdlim4 | PDZ and LIM R.GYFLDLR.L                              | 4.73   | 17.02  | 0.28 | 3.60  |
| P70271_PI Pdlim4 | PDZ and LIM R.MLREPAETASEPK.Q                        | 1.30   | 12.28  | 0.11 | 9.44  |
| P70271_PI Pdlim4 | PDZ and LIM R.SGLGSPYQPPR.L                          | 6.55   | 43.28  | 0.15 | 6.61  |
| P70271_PI Pdlim4 | PDZ and LIM R.SVSGISLEDNR.S                          | 3.15   | 17.81  | 0.18 | 5.65  |
| P70271_PI Pdlim4 | PDZ and LIM R.VDLGSEVYR.M                            | 9.92   | 42.08  | 0.24 | 4.24  |
| P70271_PI Pdlim4 | PDZ and LIM R.VKPPEGYDVAVVPNAK.V                     | 15.83  | 16.69  | 0.95 | 1.05  |
| Q8C151_PD Pdlim5 | PDZ and LIM R.GPFLVALGK#.S                           | 22.89  | 23.85  | 0.96 | 1.04  |
| Q8C151_PD Pdlim5 | PDZ and LIM K.ILGEVINALK#.Q                          | 15.47  | 12.16  | 1.27 | 0.79  |
| Q8C151_PD Pdlim5 | PDZ and LIM K.NTM*AYIGVEEK#.G                        | 8.11   | 10.64  | 0.76 | 1.31  |
| Q8C151_PD Pdlim5 | PDZ and LIM R.SAAAFK#PVGTSVK#.S                      | 30.56  | 27.53  | 1.11 | 0.90  |
| Q8C151_PD Pdlim5 | PDZ and LIM R.GPFLVALGK#.S                           | 9.74   | 12.88  | 0.76 | 1.32  |
| Q8C151_PD Pdlim5 | PDZ and LIM K.DFNMLPTISSLK#.D                        | 7.25   | 6.63   | 1.09 | 0.92  |
| Q8C151_PD Pdlim5 | PDZ and LIM K.EVVK#PVPITSPAVSK#.V                    | 17.68  | 17.32  | 1.02 | 0.98  |
| Q8C151_PD Pdlim5 | PDZ and LIM R.GPFLVALGK#.S                           | 36.73  | 35.36  | 1.04 | 0.96  |
| Q8C151_PD Pdlim5 | PDZ and LIM R.GDVVLSIDIGISAQGM*THLEAQNK#.I           | 9.04   | 6.12   | 1.48 | 0.68  |
| Q8C151_PD Pdlim5 | PDZ and LIM K.ILGEVINALK#.Q                          | 15.75  | 15.94  | 0.99 | 1.01  |
| Q8C151_PD Pdlim5 | PDZ and LIM K.KANSTQEPSQPASSGASPLSASEGSPGSRSPVAGLR.S | 3.11   | 12.18  | 0.26 | 3.92  |
| Q8C151_PD Pdlim5 | PDZ and LIM R.NTEFYHIPHTSDASK#.K                     | 25.43  | 15.15  | 1.68 | 0.60  |
| Q8C151_PD Pdlim5 | PDZ and LIM K.NTMAYIGVEEK#.G                         | 9.24   | 10.47  | 0.88 | 1.13  |
| Q8C151_PD Pdlim5 | PDZ and LIM R.SAAAFK#PVGTSVK#.S                      | 32.28  | 31.37  | 1.03 | 0.97  |
| Q8C151_PD Pdlim5 | PDZ and LIM K.SPSWQRPNQAAPSTR.G                      | 1.52   | 37.49  | 0.04 | 24.69 |
| Q8C151_PD Pdlim5 | PDZ and LIM R.SSGTGVASVPPQSDQTLVQR.A                 | 2.15   | 10.74  | 0.20 | 4.99  |
| Q8C151_PD Pdlim5 | PDZ and LIM K.VTSTTNMAYNK#.A                         | 13.15  | 11.45  | 1.15 | 0.87  |
| Q8C151_PD Pdlim5 | PDZ and LIM R.GPFLVALGK#.S                           | 19.73  | 21.87  | 0.90 | 1.11  |
| Q8C151_PD Pdlim5 | PDZ and LIM R.LAQGTGTEHTESENDNTK#.K                  | 5.90   | 17.40  | 0.34 | 2.95  |
| Q3TJD7_PC Pdlim7 | PDZ and LIM K.AAQAGVAVGDVWVLLNIDGENAGSLTHIEAQNK#.I   | 16.99  | 10.51  | 1.62 | 0.62  |
| Q3TJD7_PC Pdlim7 | PDZ and LIM K.ALTTPADPPR.Y                           | 1.53   | 10.05  | 0.15 | 6.57  |
| Q3TJD7_PC Pdlim7 | PDZ and LIM K.DFNVPPLISR.L                           | 7.45   | 24.46  | 0.30 | 3.28  |
| Q3TJD7_PC Pdlim7 | PDZ and LIM R.HSQAPTPPLQNR.T                         | 4.06   | 19.15  | 0.21 | 4.72  |
| Q3TJD7_PC Pdlim7 | PDZ and LIM R.LLAHLTGTEFMQDPDEEFMK#.K.S              | 6.10   | 8.85   | 0.69 | 1.45  |
| Q3TJD7_PC Pdlim7 | PDZ and LIM K.VLEEGGFEEK#.G                          | 49.62  | 40.32  | 1.23 | 0.81  |
| Q3TJD7_PC Pdlim7 | PDZ and LIM K.VVLEGPAPWGR.L                          | 10.85  | 44.10  | 0.25 | 4.06  |
| Q3TJD7_PC Pdlim7 | PDZ and LIM K.VLEEGGFEEK#.G                          | 2.76   | 3.13   | 0.88 | 1.13  |
| Q3TJD7_PC Pdlim7 | PDZ and LIM K.VLEEGGFEEK#.G                          | 16.30  | 13.32  | 1.22 | 0.82  |
| Q3TJD7_PC Pdlim7 | PDZ and LIM K.VVLEGPAPWGR.L                          | 4.80   | 15.28  | 0.31 | 3.18  |
| Q3TJD7_PC Pdlim7 | PDZ and LIM K.AAQAGVAVGDVWVLLNIDGENAGSLTHIEAQNK#.I   | 8.22   | 3.06   | 2.68 | 0.37  |
| Q3TJD7_PC Pdlim7 | PDZ and LIM K.VLEEGGFEEK#.G                          | 15.41  | 14.15  | 1.09 | 0.92  |
| Q3TJD7_PC Pdlim7 | PDZ and LIM K.VVLEGPAPWGR.L                          | 4.39   | 10.02  | 0.44 | 2.28  |
| Q9Z2A0_PI Pdpk1  | 3-phosphoi R.FYTAIEVSALEYLHGK#.G                     | 19.14  | 4.13   | 4.63 | 0.22  |
| Q9Z2A0_PI Pdpk1  | 3-phosphoi K.ILGEFSSTVVLAR.E                         | 5.01   | 7.31   | 0.69 | 1.46  |
| P59048_PI Pdrgr1 | p53 and DN K.GFNLPSPDVK#.A                           | 13.46  | 8.93   | 1.51 | 0.66  |



|                  |                                           |        |        |       |      |
|------------------|-------------------------------------------|--------|--------|-------|------|
| Q6A026_PI Pds5a  | Sister chr0r R.AAGSQESLEAGNAK#.A          | 4.57   | 1.52   | 3.01  | 0.33 |
| Q6A026_PI Pds5a  | Sister chr0r R.AAGSQESLEAGNAK#.A          | 13.27  | 4.70   | 2.82  | 0.35 |
| Q6A026_PI Pds5a  | Sister chr0r R.DLALVNDQLLGFVR.E           | 6.55   | 17.29  | 0.38  | 2.64 |
| Q6A026_PI Pds5a  | Sister chr0r R.IAPVHIDEAISALVK#.L         | 54.92  | 17.19  | 3.19  | 0.31 |
| Q6A026_PI Pds5a  | Sister chr0r K.IFAQYLPHNLEETER.M          | 4.71   | 5.64   | 0.83  | 1.20 |
| Q6A026_PI Pds5a  | Sister chr0r K.LWSPDEEVSPVLAK#.V          | 12.09  | 4.68   | 2.58  | 0.39 |
| Q6A026_PI Pds5a  | Sister chr0r K.SIEGTADDEEGVSPDSAIR.S      | 3.12   | 8.47   | 0.37  | 2.71 |
| Q6A026_PI Pds5a  | Sister chr0r K.SVVANFIVK#.D               | 20.87  | 7.60   | 2.75  | 0.36 |
| Q6A026_PI Pds5a  | Sister chr0r R.AAGSQESLEAGNAK#.A          | 24.16  | 13.86  | 1.74  | 0.57 |
| Q6A026_PI Pds5a  | Sister chr0r K.ALNEM*WK#.C                | 17.24  | 72.03  | 0.24  | 4.18 |
| Q6A026_PI Pds5a  | Sister chr0r R.DLALVNDQLLGFVR.E           | 17.98  | 47.97  | 0.37  | 2.67 |
| Q6A026_PI Pds5a  | Sister chr0r K.DLTEYLK.V                  | 79.49  | 35.51  | 2.24  | 0.45 |
| Q6A026_PI Pds5a  | Sister chr0r K.EINSOQSTQGNISSDR.G         | 4.13   | 9.43   | 0.44  | 2.28 |
| Q6A026_PI Pds5a  | Sister chr0r R.IAPVHIDEAISALVK#.L         | 107.68 | 50.43  | 2.14  | 0.47 |
| Q6A026_PI Pds5a  | Sister chr0r K.IAYPPGVK#.E                | 17.55  | 7.47   | 2.35  | 0.43 |
| Q6A026_PI Pds5a  | Sister chr0r K.LLHHYYQNSIDDK#.L           | 14.59  | 5.45   | 2.68  | 0.37 |
| Q6A026_PI Pds5a  | Sister chr0r K.NDDLNK#PVS#.G              | 10.48  | 6.60   | 1.59  | 0.63 |
| Q6A026_PI Pds5a  | Sister chr0r K.NKEINSOQSTQGNISSDR.G       | 6.19   | 20.22  | 0.31  | 3.26 |
| Q6A026_PI Pds5a  | Sister chr0r K.SIEGTADDEEGVSPDSAIR.S      | 11.03  | 27.40  | 0.40  | 2.48 |
| Q6A026_PI Pds5a  | Sister chr0r K.SVVANFIVK#.D               | 36.84  | 16.52  | 2.23  | 0.45 |
| Q6A026_PI Pds5a  | Sister chr0r R.TLFSVINNSHNTK#.V           | 11.83  | 7.66   | 1.54  | 0.65 |
| Q4VA53_PI Pds5b  | Sister chr0r K.FTQVLEDEK#.I               | 12.16  | 9.05   | 1.34  | 0.74 |
| Q4VA53_PI Pds5b  | Sister chr0r R.IAPVHIDEAISALIK#.Q         | 45.18  | 28.03  | 1.61  | 0.62 |
| Q4VA53_PI Pds5b  | Sister chr0r R.IYAPEYTPSPDK#.L            | 8.26   | 8.23   | 1.00  | 1.00 |
| Q4VA53_PI Pds5b  | Sister chr0r R.LAAGSAIVK#.L               | 38.24  | 21.35  | 1.79  | 0.56 |
| Q4VA53_PI Pds5b  | Sister chr0r R.LLTTILHSDGDLTEQK#.I        | 11.74  | 5.63   | 2.08  | 0.48 |
| Q4VA53_PI Pds5b  | Sister chr0r K.LWVPEEVSPETM*VK#.I         | 6.09   | 3.46   | 1.76  | 0.57 |
| Q4VA53_PI Pds5b  | Sister chr0r K.QTPNFLEMIK#.F              | 7.23   | 6.52   | 1.11  | 0.90 |
| Q4VA53_PI Pds5b  | Sister chr0r K.SIDGTADEDEGVPTDQAIR.A      | 4.84   | 15.96  | 0.30  | 3.30 |
| Q4VA53_PI Pds5b  | Sister chr0r K.SLVATFIVK#.D               | 15.69  | 7.26   | 2.16  | 0.46 |
| Q4VA53_PI Pds5b  | Sister chr0r K.YLSQSAAGK#.D               | 25.57  | 19.44  | 1.32  | 0.76 |
| Q4VA53_PI Pds5b  | Sister chr0r R.AGLELLK#.V                 | 59.88  | 45.31  | 1.32  | 0.76 |
| Q4VA53_PI Pds5b  | Sister chr0r K.APVTDPEEK#.L               | 20.46  | 16.71  | 1.22  | 0.82 |
| Q4VA53_PI Pds5b  | Sister chr0r K.DIFM*FITR.Q                | 4.24   | 13.03  | 0.33  | 3.07 |
| Q4VA53_PI Pds5b  | Sister chr0r R.FFTQPK#.N                  | 20.04  | 13.35  | 1.50  | 0.67 |
| Q4VA53_PI Pds5b  | Sister chr0r R.FFTQPKNFSNTK.N             | 38.18  | 30.93  | 1.23  | 0.81 |
| Q4VA53_PI Pds5b  | Sister chr0r K.FTQVLEDEK#.I               | 51.57  | 34.80  | 1.48  | 0.67 |
| Q4VA53_PI Pds5b  | Sister chr0r R.HKREELLENEDQNSPPK#.K       | 9.68   | 4.57   | 2.12  | 0.47 |
| Q4VA53_PI Pds5b  | Sister chr0r R.IAPVHIDEAISALIK#.Q         | 212.16 | 136.25 | 1.56  | 0.64 |
| Q4VA53_PI Pds5b  | Sister chr0r K.IEEDFPHIR.S                | 22.69  | 77.18  | 0.29  | 3.40 |
| Q4VA53_PI Pds5b  | Sister chr0r R.IYAPEYTPSPDK#.L            | 31.65  | 27.52  | 1.15  | 0.87 |
| Q4VA53_PI Pds5b  | Sister chr0r K.#APVTDPEEK#.L              | 11.60  | 10.88  | 1.07  | 0.94 |
| Q4VA53_PI Pds5b  | Sister chr0r K.KDILLVNDHLLNFVR.E          | 5.42   | 18.64  | 0.29  | 3.44 |
| Q4VA53_PI Pds5b  | Sister chr0r R.K.#APVTDPEEK#.L            | 26.12  | 18.63  | 1.40  | 0.71 |
| Q4VA53_PI Pds5b  | Sister chr0r R.KKAPVTDPEEK#.L             | 3.89   | 5.05   | 0.77  | 1.30 |
| Q4VA53_PI Pds5b  | Sister chr0r R.LAAGSAIVK#.L               | 108.35 | 75.81  | 1.43  | 0.70 |
| Q4VA53_PI Pds5b  | Sister chr0r K.LGM*DDLT#.L                | 31.06  | 23.06  | 1.35  | 0.74 |
| Q4VA53_PI Pds5b  | Sister chr0r R.LLTTILHSDGDLTEQK#.I        | 146.32 | 99.81  | 1.47  | 0.68 |
| Q4VA53_PI Pds5b  | Sister chr0r R.LLTTILHSDGDLTEQK#.I        | 18.58  | 11.82  | 1.57  | 0.64 |
| Q4VA53_PI Pds5b  | Sister chr0r K.LWVPEEVSPETM*VK#.I         | 12.14  | 9.78   | 1.24  | 0.81 |
| Q4VA53_PI Pds5b  | Sister chr0r K.LWVPEEVSPETM*VK#.I         | 15.41  | 10.72  | 1.44  | 0.70 |
| Q4VA53_PI Pds5b  | Sister chr0r K.M*DDEK#VAEALQIFK#.N        | 12.09  | 7.07   | 1.71  | 0.58 |
| Q4VA53_PI Pds5b  | Sister chr0r K.SIDGTADEDEGVPTDQAIR.A      | 12.69  | 51.88  | 0.24  | 4.09 |
| Q4VA53_PI Pds5b  | Sister chr0r K.SLVATFIVK#.D               | 41.00  | 22.31  | 1.84  | 0.54 |
| Q4VA53_PI Pds5b  | Sister chr0r K.VAEALQIFK#.N               | 24.03  | 18.83  | 1.28  | 0.78 |
| Q4VA53_PI Pds5b  | Sister chr0r K.YLSQSAAGK#.D               | 65.49  | 50.79  | 1.29  | 0.78 |
| Q99K01_PI Pdxdc1 | Pyridoxal-d K.AVPVSNIAAAGR.E              | 4.99   | 12.44  | 0.40  | 2.49 |
| Q99K01_PI Pdxdc1 | Pyridoxal-d K.GIQEQVQLQK#.A               | 14.32  | 7.98   | 1.79  | 0.56 |
| Q99K01_PI Pdxdc1 | Pyridoxal-d K.ILVEELSSPVVFR.F             | 4.40   | 8.03   | 0.55  | 1.82 |
| Q99K01_PI Pdxdc1 | Pyridoxal-d R.YEDFVVDGDFNLVYK.K           | 11.08  | 5.81   | 1.91  | 0.52 |
| Q99K01_PI Pdxdc1 | Pyridoxal-d K.HDDPALTVALGTSNK#PADK#.L     | 11.18  | 3.41   | 3.28  | 0.30 |
| Q99K01_PI Pdxdc1 | Pyridoxal-d K.ILVEELSSPVVFR.F             | 1.94   | 6.84   | 0.28  | 3.53 |
| Q99K01_PI Pdxdc1 | Pyridoxal-d R.YEDFVVDGDFNLVYK.K           | 7.00   | 4.60   | 1.52  | 0.66 |
| Q9CZG9_PI Pdzd11 | PDZ domaii R.AGLQEGDQVLAVNDVDFQDIEHSHK#.A | 8.26   | 5.20   | 1.59  | 0.63 |
| Q9CZG9_PI Pdzd11 | PDZ domaii R.VYHPDYNELTOFLPR.I            | 1.89   | 6.94   | 0.27  | 3.67 |
| Q80X73_PI Pclo   | Protein pel K.GTNIQENEYVK#.M              | 15.73  | 13.51  | 1.16  | 0.86 |
| Q80X73_PI Pclo   | Protein pel R.HINFVVK#.C                  | 11.58  | 15.81  | 0.73  | 1.36 |
| Q9DBD5_P Pelp1   | Proline, gli R.GSSDGLQSGK#PSAPK#.K        | 6.63   | 6.68   | 0.99  | 1.01 |
| Q9DBD5_P Pelp1   | Proline, gli R.LPSLGAGFSQGLK#.H           | 14.02  | 10.95  | 1.28  | 0.78 |
| Q9DBD5_P Pelp1   | Proline, gli R.FGALISR.L                  | 9.29   | 23.11  | 0.40  | 2.49 |
| Q9DBD5_P Pelp1   | Proline, gli K.LASFLSR.L                  | 9.45   | 24.81  | 0.38  | 2.63 |
| Q9DBD5_P Pelp1   | Proline, gli K.LDM*GEALAPPSQR.K           | 8.93   | 31.73  | 0.28  | 3.55 |
| Q9DBD5_P Pelp1   | Proline, gli R.LLPQLVNAWSTGR.D            | 5.74   | 24.93  | 0.23  | 4.34 |
| Q9DBD5_P Pelp1   | Proline, gli R.LPSLGAGFSQGLK#.H           | 44.37  | 35.62  | 1.25  | 0.80 |
| Q9DBD5_P Pelp1   | Proline, gli K.NINLLGDGPLR.L              | 9.49   | 34.56  | 0.27  | 3.64 |
| Q9CWM4_PI Pfdn1  | Prefoldin s1 K.LADIQEQLN.R.T              | 24.91  | 8.61   | 2.89  | 0.35 |
| Q70591_PI Pfdn2  | Prefoldin s1 K.GAVSAEQVIAGFNR.L           | 2.66   | 5.32   | 0.50  | 2.00 |
| Q70591_PI Pfdn2  | Prefoldin s1 K.IIETLSQQLQAK#.G            | 40.54  | 15.00  | 2.70  | 0.37 |
| Q3UWL8_C Pfdn4   | Protein Pfd K.AAAEDVNVITFEDQQK#.I         | 25.23  | 8.47   | 2.98  | 0.34 |
| Q3UWL8_C Pfdn4   | Protein Pfd K.TLQEEIDALESR.V              | 4.86   | 6.42   | 0.76  | 1.32 |
| Q9WU28_F Pfdn5   | Prefoldin s1 K.ELLVPLTSSM**VPGK#.L        | 12.02  | 7.57   | 1.59  | 0.63 |
| Q9WU28_F Pfdn5   | Prefoldin s1 K.ELLVPLTSSM**VPGK#.L        | 10.26  | 2.96   | 3.47  | 0.29 |
| Q9WU28_F Pfdn5   | Prefoldin s1 K.IQLTALGAAQATVK#.A          | 32.27  | 12.25  | 2.63  | 0.38 |
| Q9WU28_F Pfdn5   | Prefoldin s1 K.IQLTALGAAQATVK#.A          | 20.75  | 6.71   | 3.09  | 0.32 |
| Q9WU28_F Pfdn5   | Prefoldin s1 R.K#DFLT#.Q                  | 16.19  | 4.87   | 3.33  | 0.30 |
| Q9WU28_F Pfdn5   | Prefoldin s1 K.LHDVHVLIDVGTGYVEK#.T       | 17.68  | 6.99   | 2.53  | 0.40 |
| Q9WU28_F Pfdn5   | Prefoldin s1 K.NQLDQEVFLSTSIQAK#.V        | 67.30  | 21.83  | 3.08  | 0.32 |
| P12382_FF Pflk   | ATP-depenc K.AIGVLTSGGDAQGM*NAAVR.A       | 12.31  | 10.92  | 1.13  | 0.89 |
| P12382_FF Pflk   | ATP-depenc K.AM*LWVSEK#.L                 | 21.21  | 7.17   | 2.96  | 0.34 |
| P12382_FF Pflk   | ATP-depenc K.AMLWVSEK#.L                  | 14.12  | 1.17   | 12.05 | 0.08 |
| P12382_FF Pflk   | ATP-depenc R.EQWVNLN.R.L                  | 10.10  | 9.15   | 1.10  | 0.91 |
| P12382_FF Pflk   | ATP-depenc K.GQVQEVGHDVAGWLGR.G           | 16.04  | 16.78  | 0.96  | 1.05 |
| P12382_FF Pflk   | ATP-depenc R.NEWGSLLEELVK#.E              | 75.78  | 15.19  | 4.99  | 0.20 |
| P12382_FF Pflk   | ATP-depenc R.TGISEGHTVYVHDGFEGELAK#.G     | 28.02  | 2.45   | 11.45 | 0.09 |
| P12382_FF Pflk   | ATP-depenc R.TNVLHQQQGAPTFDR.N            | 12.17  | 13.94  | 0.87  | 1.15 |
| P12382_FF Pflk   | ATP-depenc K.AIGVLTSGGDAQGM*NAAVR.A       | 15.36  | 15.71  | 0.98  | 1.02 |
| P12382_FF Pflk   | ATP-depenc K.AM*LWVSEK#.L                 | 36.29  | 8.18   | 4.44  | 0.23 |
| P12382_FF Pflk   | ATP-depenc K.K#VAFSPVTELK#.E              | 21.26  | 3.44   | 6.18  | 0.16 |
| P12382_FF Pflk   | ATP-depenc R.NEWGSLLEELVK#.E              | 99.93  | 26.30  | 3.80  | 0.26 |
| Q9WUA3_F Pflkp   | ATP-depenc R.DLLFQPVALK#.K                | 29.78  | 9.04   | 3.29  | 0.30 |
| Q9WUA3_F Pflkp   | ATP-depenc K.EIGWADVGGWGTQGGSLGTGK#.R     | 17.44  | 4.95   | 3.52  | 0.28 |
| Q9WUA3_F Pflkp   | ATP-depenc R.LNIIIVSEGAI DM*QNK#PITSEK#.I | 22.69  | 6.16   | 3.68  | 0.27 |
| Q9WUA3_F Pflkp   | ATP-depenc R.NGDIDNDVTK#.Y                | 19.23  | 4.23   | 4.54  | 0.22 |

|                 |                                                   |        |        |       |      |
|-----------------|---------------------------------------------------|--------|--------|-------|------|
| Q9WUA3_F_Pfkp   | ATP-depend K.VYFIYEGYQGLVDGGSNIVEAK#.W            | 19.88  | 2.86   | 6.96  | 0.14 |
| Q9WUA3_F_Pfkp   | ATP-depend K.YEASDY*SDSGK#LESQKHHEEL.-            | 6.58   | 2.05   | 3.21  | 0.31 |
| Q9WUA3_F_Pfkp   | ATP-depend K.AM*EWISAK#.L                         | 13.32  | 3.88   | 3.44  | 0.29 |
| Q9WUA3_F_Pfkp   | ATP-depend R.DLLFQPAELK#.K                        | 37.73  | 9.72   | 3.88  | 0.26 |
| Q9WUA3_F_Pfkp   | ATP-depend R.LNIIIVSEGAIDM*QNK#PITSEK#.I          | 16.97  | 3.31   | 5.13  | 0.19 |
| Q9WUA3_F_Pfkp   | ATP-depend R.NGDIINDTVQK#.Y                       | 17.69  | 4.38   | 4.04  | 0.25 |
| Q9WUA3_F_Pfkp   | ATP-depend K.VYFIYEGYQGLVDGGSNIVEAK#.W            | 21.43  | 5.74   | 3.74  | 0.27 |
| Q8BX10_P_Pgam5  | Serine/thre R.NVESGEDELTSR.L                      | 7.54   | 16.88  | 0.45  | 2.24 |
| Q8BX10_P_Pgam5  | Serine/thre R.TLGDTEGFM*PPDK#.I                   | 10.17  | 5.75   | 1.77  | 0.57 |
| O55022_P_Pgrmc1 | Membrane-K.EALK#DEVDLSDLTPAQQETLSDWDSQFTFK#.Y     | 2.59   | 2.90   | 0.89  | 1.12 |
| O55022_P_Pgrmc1 | Membrane-K.EEGEPTVSDDEEPK#.D                      | 3.39   | 2.83   | 1.19  | 0.84 |
| O55022_P_Pgrmc1 | Membrane-R.KFYGPEGYPVGFAGR.D                      | 4.47   | 20.87  | 0.21  | 4.67 |
| Q80UU9_P_Pgrmc2 | Membrane-R.DFSLQLR.Q                              | 3.34   | 9.59   | 0.35  | 2.87 |
| Q80UU9_P_Pgrmc2 | Membrane-K.FYGPAGPYGIFAGR.D                       | 4.47   | 13.15  | 0.34  | 2.94 |
| Q9J1T9_PH.Phax  | Phosphoryl R.TPGGVLNLLK#.N                        | 18.07  | 13.10  | 1.38  | 0.72 |
| Q9QWH1_J_Phc2   | Polyhomeo R.AQEIDGQALLLK#.E                       | 8.94   | 10.62  | 0.84  | 1.19 |
| Q9QWH1_J_Phc2   | Polyhomeo R.DLVGVGHFLPSEPTK#.W                    | 25.90  | 20.24  | 1.28  | 0.78 |
| Q9QWH1_J_Phc2   | Polyhomeo R.SLLVLGNL#.K                           | 18.74  | 16.81  | 1.11  | 0.90 |
| Q9QWH1_J_Phc2   | Polyhomeo K.WNVEDVYEFIR.S                         | 5.44   | 19.44  | 0.28  | 3.57 |
| Q8CHP6_PI_Phc3  | Polyhomeo R.GEDLTSEHPLEQVELPAVASVASVIK.S          | 12.84  | 9.09   | 1.41  | 0.71 |
| Q9D8M7_P_Phf10  | PHD finger K.VSYPVALIPGQFEYK#.R                   | 10.17  | 6.34   | 1.60  | 0.62 |
| A6H5X4_P_Phf11  | PHD finger R.GDSPIELK.M                           | 63.60  | 71.90  | 0.88  | 1.13 |
| A6H5X4_P_Phf11  | PHD finger R.HMTEEPHGHTDAAVK#.S                   | 4.39   | 2.67   | 1.64  | 0.61 |
| A6H5X4_P_Phf11  | PHD finger K.K#DQAILQVDGNHGTYK#.L                 | 59.01  | 72.75  | 0.81  | 1.23 |
| A6H5X4_P_Phf11  | PHD finger R.KFQEVK.S                             | 109.82 | 89.59  | 1.23  | 0.82 |
| A6H5X4_P_Phf11  | PHD finger R.LSSGPPAQPK#.T                        | 199.89 | 233.94 | 0.85  | 1.17 |
| A6H5X4_P_Phf11  | PHD finger R.SQSEPEVQAGSGDSL.-                    | 10.25  | 10.25  | 1.00  | 1.00 |
| Q9D4H9_P_Phf14  | PHD finger R.KAELM*GISTDFPVDNSDTSSSVDGR.R         | 2.52   | 6.59   | 0.38  | 2.62 |
| Q9D4H9_P_Phf14  | PHD finger K.LNVPAILR.A                           | 3.02   | 16.56  | 0.18  | 5.48 |
| Q9D4H9_P_Phf14  | PHD finger R.NSADDELTNDSLTLSSQK.S                 | 3.77   | 5.66   | 0.67  | 1.50 |
| Q9D4H9_P_Phf14  | PHD finger K.NSTEEIM*PSDK.Q                       | 4.71   | 8.47   | 0.56  | 1.80 |
| Q9D4H9_P_Phf14  | PHD finger R.SEGQGIWALLGR.I                       | 3.19   | 20.82  | 0.15  | 6.53 |
| Q9D4H9_P_Phf14  | PHD finger K.SNEDSLILEK#.S                        | 9.88   | 14.99  | 0.66  | 1.52 |
| Q9WTU0_P_Phf2   | Lysine-spec R.VASIEGLAAAAAK#.L                    | 13.42  | 8.25   | 1.63  | 0.61 |
| Q9WTU0_P_Phf2   | Lysine-spec R.LVNLTNLFSDTR.M                      | 254.96 | 9.31   | 27.39 | 0.04 |
| Q9WTU0_P_Phf2   | Lysine-spec R.VPGSQLTVGYM*EEHGFTEPILVPK#.K        | 5.26   | 3.28   | 1.60  | 0.62 |
| Q9WTU0_P_Phf2   | Lysine-spec R.VPGSQLTVGYMEEHGFTEPILVPK#.K         | 6.69   | 6.78   | 0.99  | 1.01 |
| Q9WTU0_P_Phf2   | Lysine-spec R.VASIEGLAAAAAK#.L                    | 13.00  | 11.10  | 1.17  | 0.85 |
| Q9WTU0_P_Phf2   | Lysine-spec R.VPGSQLTVGYMEEHGFTEPILVPK#.K         | 6.32   | 2.76   | 2.29  | 0.44 |
| Q8BSN5_P_Phf23  | PHD finger K.LGGGGAGGVLNR.R                       | 2.18   | 13.19  | 0.17  | 6.04 |
| Q8BSN5_P_Phf23  | PHD finger R.AVQSGTQPGRPR.S                       | 3.72   | 10.86  | 0.34  | 2.92 |
| B2RQG2_B_Phf3   | PHD finger K.EGSDQITSIK#.Y                        | 4.15   | 2.93   | 1.42  | 0.71 |
| B2RQG2_B_Phf3   | PHD finger K.EGSDQITSIK#.Y                        | 8.92   | 10.29  | 0.87  | 1.15 |
| B2RQG2_B_Phf3   | PHD finger R.SFSLDEPFLIPDNIATVK#.K                | 9.92   | 10.19  | 0.97  | 1.03 |
| P83870_P_Phf5a  | PHD finger-K.IVNLGSSK#.T                          | 84.03  | 67.86  | 1.24  | 0.81 |
| P83870_P_Phf5a  | PHD finger-K.TDLFYER.K                            | 20.58  | 74.08  | 0.28  | 3.60 |
| Q9D4J7_P_Phf6   | PHD finger R.AEFGDFDIK#.T                         | 35.27  | 40.28  | 0.88  | 1.14 |
| Q9D4J7_P_Phf6   | PHD finger K.TAHNSEADLEESFNEHELEPSSPK.T           | 5.78   | 5.63   | 1.03  | 0.97 |
| Q61753_SE_Phgdh | D-3-phosph R.AGTGVNDVLEAATR.K                     | 102.22 | 149.69 | 0.68  | 1.46 |
| Q61753_SE_Phgdh | D-3-phosph R.GGIVDEGALLR.A                        | 112.28 | 141.49 | 0.79  | 1.26 |
| Q61753_SE_Phgdh | D-3-phosph R.GQPLLVFR.A                           | 70.80  | 95.06  | 0.74  | 1.34 |
| Q61753_SE_Phgdh | D-3-phosph K.GTIQVVTQGTSLK#.N                     | 402.01 | 125.45 | 3.20  | 0.31 |
| Q61753_SE_Phgdh | D-3-phosph K.I.LQDGGQLQVVEK#.Q                    | 293.98 | 91.98  | 3.20  | 0.31 |
| Q61753_SE_Phgdh | D-3-phosph R.K#LQDGGQLQVVEK#.Q                    | 22.56  | 7.69   | 2.93  | 0.34 |
| Q61753_SE_Phgdh | D-3-phosph R.MQSGGMK#.T                           | 25.02  | 7.99   | 3.13  | 0.32 |
| Q61753_SE_Phgdh | D-3-phosph K.QADVNLVNAK#.L                        | 269.23 | 94.03  | 2.86  | 0.35 |
| Q61753_SE_Phgdh | D-3-phosph R.QIQQATASM*#K#.D                      | 138.82 | 47.80  | 2.90  | 0.34 |
| Q61753_SE_Phgdh | D-3-phosph R.RGQPLLVFR.A                          | 2.14   | 11.11  | 0.19  | 5.18 |
| Q61753_SE_Phgdh | D-3-phosph K.TLGLLGR.I                            | 67.97  | 90.06  | 0.75  | 1.33 |
| Q61753_SE_Phgdh | D-3-phosph K.VTADVINAEEK#.L                       | 589.41 | 212.32 | 2.78  | 0.36 |
| Q61753_SE_Phgdh | D-3-phosph R.GGIVDEGALLR.A                        | 10.66  | 14.74  | 0.72  | 1.38 |
| Q61753_SE_Phgdh | D-3-phosph K.GTIQVVTQGTSLK#.N                     | 64.85  | 17.01  | 3.81  | 0.26 |
| Q61753_SE_Phgdh | D-3-phosph K.I.LQDGGQLQVVEK#.Q                    | 47.53  | 16.19  | 2.94  | 0.34 |
| Q61753_SE_Phgdh | D-3-phosph R.QIQQATASM*#K#.D                      | 15.08  | 6.76   | 2.23  | 0.45 |
| Q61753_SE_Phgdh | D-3-phosph K.TLGLLGR.I                            | 13.78  | 13.60  | 1.01  | 0.99 |
| Q61753_SE_Phgdh | D-3-phosph K.VTADVINAEEK#.L                       | 96.59  | 34.18  | 2.83  | 0.35 |
| Q61753_SE_Phgdh | D-3-phosph R.AGTGVNDVLEAATR.K                     | 11.35  | 19.35  | 0.59  | 1.70 |
| Q61753_SE_Phgdh | D-3-phosph R.GQPLLVFR.A                           | 7.00   | 14.54  | 0.48  | 2.08 |
| Q61753_SE_Phgdh | D-3-phosph K.GTIQVVTQGTSLK#.N                     | 91.03  | 31.54  | 2.89  | 0.35 |
| Q61753_SE_Phgdh | D-3-phosph K.I.LQDGGQLQVVEK#.Q                    | 59.12  | 15.49  | 3.82  | 0.26 |
| Q61753_SE_Phgdh | D-3-phosph R.QIQQATASM*#K#.D                      | 63.03  | 4.76   | 13.23 | 0.08 |
| Q61753_SE_Phgdh | D-3-phosph K.VTADVINAEEK#.L                       | 136.44 | 47.53  | 2.87  | 0.35 |
| Q8VDD9_P_Phip   | PH-interact R.DANNFLVDEQIQQAPHLM*PPFLVDVGNPHPSR.Y | 2.53   | 5.18   | 0.49  | 2.05 |
| Q8VDD9_P_Phip   | PH-interact R.SLIVKPLDGEWGANPR.D                  | 1.32   | 8.48   | 0.16  | 6.42 |
| Q8VDD9_P_Phip   | PH-interact R.TFNPEGSPVVK#.S                      | 16.31  | 22.13  | 0.74  | 1.36 |
| Q8VDD9_P_Phip   | PH-interact R.VAVDPVTEQPSTSSATK.A                 | 16.87  | 17.52  | 0.96  | 1.04 |
| Q8VDD9_P_Phip   | PH-interact R.VLFSAGHDGNVIVWDLAR.G                | 8.02   | 11.92  | 0.67  | 1.49 |
| Q8VDD9_P_Phip   | PH-interact R.VYFFSGQPEK.I                        | 17.60  | 14.48  | 1.22  | 0.82 |
| Q9WV95_P_Phlda3 | Pleckstrin f R.SGGLLQLWK#.R                       | 45.43  | 19.68  | 2.31  | 0.43 |
| Q6PDH0_P_Phldb1 | Pleckstrin f R.ADGGPETGELPSIGEATAALAGR.R          | 4.25   | 5.83   | 0.73  | 1.37 |
| Q8K1N2_P_Phldb2 | Pleckstrin f K.DLPHSLVSDNYLNFSSLSGASPYK#.T        | 5.74   | 5.37   | 1.07  | 0.94 |
| Q8K1N2_P_Phldb2 | Pleckstrin f K.EGLYLDLPR.K                        | 4.21   | 12.48  | 0.34  | 2.96 |
| Q8K1N2_P_Phldb2 | Pleckstrin f R.LQELYSEQ#.T                        | 11.27  | 12.61  | 0.89  | 1.12 |
| Q8K1N2_P_Phldb2 | Pleckstrin f R.M*VILNLEELEQK#.I                   | 4.80   | 4.86   | 0.99  | 1.01 |
| Q8K1N2_P_Phldb2 | Pleckstrin f K.SPNPLTFSVK.T                       | 10.36  | 11.05  | 0.94  | 1.07 |
| Q8K1N2_P_Phldb2 | Pleckstrin f K.TPEDIQEER.T                        | 2.97   | 13.92  | 0.21  | 4.69 |
| Q8K1N2_P_Phldb2 | Pleckstrin f K.DLPHSLVSDNYLNFSSLSGASPYK.T         | 6.49   | 6.84   | 0.95  | 1.05 |
| Q8K1N2_P_Phldb2 | Pleckstrin f R.LQELYSEQ#.T                        | 10.74  | 7.92   | 1.36  | 0.74 |
| Q8K1N2_P_Phldb2 | Pleckstrin f K.SPNPLTFSVK.T                       | 11.34  | 8.49   | 1.34  | 0.75 |
| Q8C5D8_P_Pias2  | E3 SUMO-p K.LTADPDEIATSLR.V                       | 3.54   | 4.31   | 0.82  | 1.22 |
| Q9JM05_P_Pias4  | E3 SUMO-p R.TPLSGPTVDVPLVYK#.Y                    | 3.50   | 4.38   | 0.80  | 1.25 |
| Q7M6Y3_P_Picalm | Phosphatid R.ATLNSAVSSLASTGLSLTK#.V               | 51.34  | 28.53  | 1.80  | 0.56 |
| Q7M6Y3_P_Picalm | Phosphatid R.FIQYLASR.N                           | 7.58   | 15.51  | 0.49  | 2.05 |
| Q7M6Y3_P_Picalm | Phosphatid R.LFAAYNEGIIINLEK#.Y                   | 51.45  | 25.82  | 1.99  | 0.50 |
| Q7M6Y3_P_Picalm | Phosphatid R.NTLNFSNFLDK#.S                       | 95.28  | 36.53  | 2.61  | 0.38 |
| Q7M6Y3_P_Picalm | Phosphatid K.QAALEEEQAR.L                         | 5.55   | 10.76  | 0.52  | 1.94 |
| Q7M6Y3_P_Picalm | Phosphatid K.SGLQGYDM*STFIR.R                     | 8.87   | 22.21  | 0.40  | 2.50 |
| Q7M6Y3_P_Picalm | Phosphatid K.SGLQGYDM*STFIR.R                     | 7.43   | 14.08  | 0.53  | 1.89 |
| Q7M6Y3_P_Picalm | Phosphatid K.STNVAVDSGGFDELGLLK#PTVASQNSLPAVK#.L  | 7.35   | 3.29   | 2.23  | 0.45 |
| Q7M6Y3_P_Picalm | Phosphatid R.TTNSSVVVVFVK#.S                      | 42.88  | 16.36  | 2.62  | 0.38 |
| Q7M6Y3_P_Picalm | Phosphatid K.VAQVQIDR.G                           | 10.64  | 25.86  | 0.41  | 2.43 |
| Q7M6Y3_P_Picalm | Phosphatid R.ATLNSAVSSLASTGLSLTK#.V               | 24.45  | 50.77  | 0.48  | 2.08 |
| Q7M6Y3_P_Picalm | Phosphatid R.FIQYLASR.N                           | 6.14   | 11.00  | 0.56  | 1.79 |

|                    |                                                   |        |        |       |       |
|--------------------|---------------------------------------------------|--------|--------|-------|-------|
| Q7M6Y3_P Picalm    | Phosphatid R.LFAAYNEGIINLLEK#.Y                   | 32.48  | 18.04  | 1.80  | 0.56  |
| Q7M6Y3_P Picalm    | Phosphatid K.NDVSVSQPEK#.K                        | 11.93  | 8.12   | 1.47  | 0.68  |
| Q7M6Y3_P Picalm    | Phosphatid R.NTLNLSNFDLK#.S                       | 54.89  | 30.89  | 1.78  | 0.56  |
| Q7M6Y3_P Picalm    | Phosphatid K.QAALEEQAR.L                          | 3.36   | 15.28  | 0.22  | 4.55  |
| Q7M6Y3_P Picalm    | Phosphatid K.SGLQGYDM*STFIR.R                     | 3.73   | 8.88   | 0.42  | 2.38  |
| Q7M6Y3_P Picalm    | Phosphatid K.STNVAVDSSGGFDELGLLK#PTVASQNSLPVAK#.L | 5.97   | 1.80   | 3.32  | 0.30  |
| Q7M6Y3_P Picalm    | Phosphatid R.TTNSSVVVVF#.S                        | 24.80  | 15.50  | 1.60  | 0.62  |
| Q7M6Y3_P Picalm    | Phosphatid R.ATLNSAVSSLASTGLSLTK#.V               | 23.07  | 33.78  | 0.68  | 1.46  |
| Q7M6Y3_P Picalm    | Phosphatid R.LFAAYNEGIINLLEK#.Y                   | 18.00  | 6.86   | 2.63  | 0.38  |
| Q7M6Y3_P Picalm    | Phosphatid R.NTLNLSNFDLK#.S                       | 43.64  | 22.89  | 1.91  | 0.52  |
| Q9CQJ2_P Pih1d1    | PIH1 doma R.FQELLLK#.A                            | 31.47  | 19.57  | 1.61  | 0.62  |
| Q9CQJ2_P Pih1d1    | PIH1 doma R.LVIGGPOQLVHLDATVPLR.L                 | 10.35  | 26.84  | 0.39  | 2.59  |
| Q9CQJ2_P Pih1d1    | PIH1 doma R.SFLGSIQQNIR.S                         | 5.37   | 18.69  | 0.29  | 3.48  |
| Q61194_P: Pik3c2a  | Phosphatid - MAQISNNSEFK#.Q                       | 26.31  | 1.44   | 18.26 | 0.05  |
| Q61194_P: Pik3c2a  | Phosphatid R.LIESSLGSIATK#.F                      | 9.45   | 7.18   | 1.32  | 0.76  |
| Q61194_P: Pik3c2a  | Phosphatid R.TAEDDEAPVDLNK#.Y                     | 11.50  | 6.22   | 1.85  | 0.54  |
| P26450_P8 Pik3r1   | Phosphatid R.TAIEAFNETIK#.I                       | 21.38  | 8.97   | 2.38  | 0.42  |
| P26450_P8 Pik3r1   | Phosphatid K.TATGYFAEPYNYLSSLK#.E                 | 5.67   | 3.57   | 1.59  | 0.63  |
| Q8VD65_P1 Pik3r4   | Phosphoin: R.FLELVQLK#.T                          | 13.38  | 7.77   | 1.72  | 0.58  |
| Q8VD65_P1 Pik3r4   | Phosphoin: K.VVTLSDPENIVK#.Q                      | 28.11  | 10.94  | 2.57  | 0.39  |
| Q9QUR7_P Pin1      | Peptidyl-pr R.GQM*QKPFEDASFALR.T                  | 32.76  | 90.57  | 0.36  | 2.76  |
| Q9QUR7_P Pin1      | Peptidyl-pr R.GQM*QKPFEDASFALR.T                  | 10.50  | 23.02  | 0.46  | 2.19  |
| Q9QUR7_P Pin1      | Peptidyl-pr R.SKEEALJLGIYQI.K                     | 100.56 | 57.08  | 1.76  | 0.57  |
| Q9QUR7_P Pin1      | Peptidyl-pr R.TGEMSPGFVFTDSGIHILR.T               | 18.77  | 10.67  | 1.76  | 0.57  |
| Q9QUR7_P Pin1      | Peptidyl-pr R.VYFHITNASQWERPSGGSTVGGSSK.N         | 9.01   | 15.90  | 0.57  | 1.77  |
| Q9CZX5_P1 Pinx1    | PIN2/TERF1 K.NKPQASAPGSDLSETPVER.K                | 2.37   | 10.69  | 0.22  | 4.51  |
| Q80X14_P1: P1p4k2b | Phosphatid R.FGIDDQDYQNSVTR.S                     | 2.77   | 3.84   | 0.72  | 1.38  |
| Q91XU3_P1 P1p4k2c  | Phosphatid K.HGAGAEISTVHPEQYAK#.R                 | 37.29  | 12.17  | 3.06  | 0.33  |
| E9PX91_E9 Pisd     | Phosphatid R.ALGPLSQVQWWR#PMSR.V                  | 1.65   | 5.05   | 0.33  | 3.07  |
| P52480_KF Pkm      | Pyruvate ki R.APIAVTR.N                           | 8.10   | 16.34  | 0.50  | 2.02  |
| P52480_KF Pkm      | Pyruvate ki R.GADFLVTEVGGSLGSK#.K                 | 7.82   | 2.06   | 3.80  | 0.26  |
| P52480_KF Pkm      | Pyruvate ki R.GDLGIEPIAEK#.V                      | 21.91  | 18.04  | 1.21  | 0.82  |
| P52480_KF Pkm      | Pyruvate ki R.LAPITSDPEAAVGAVEASF#.C              | 10.73  | 4.39   | 2.44  | 0.41  |
| P52480_KF Pkm      | Pyruvate ki R.LDIDSAPITAR.N                       | 9.05   | 14.25  | 0.63  | 1.57  |
| P70268_P1 Pkn1     | Serine/thre K.LNLGADSDSSSQK#.S                    | 8.43   | 2.51   | 3.36  | 0.30  |
| P70268_P1 Pkn1     | Serine/thre K.LNLGADSDSSSQK#.S                    | 9.15   | 4.23   | 2.16  | 0.46  |
| Q8BWW9_Pkn2        | Serine/thre R.DLKHLDNLLDTEGFVK#.I                 | 13.75  | 4.59   | 2.99  | 0.33  |
| Q8BWW9_Pkn2        | Serine/thre R.IPDLAPPASDSTVKLDFOLEPEPPAPP.R       | 1.88   | 3.54   | 0.53  | 1.89  |
| Q8BWW9_Pkn2        | Serine/thre K.LDNTVVGQTSWKHPISQNSWDQK#.F          | 6.50   | 4.21   | 1.55  | 0.65  |
| P47713_P1: Pla2g4a | Cytosolic p.K.YGTFM*APDLFGSK#.F                   | 6.29   | 2.96   | 2.13  | 0.47  |
| P27612_PL Plaa     | Phospholip K.EALTFDQANPTQLGK#.L                   | 7.78   | 2.77   | 2.81  | 0.36  |
| P27612_PL Plaa     | Phospholip K.FGTLSSGSDTTAK#.V                     | 14.47  | 2.74   | 5.27  | 0.19  |
| P27612_PL Plaa     | Phospholip K.IGDVVGSSGANQQTSGK#.V                 | 20.27  | 3.55   | 5.72  | 0.17  |
| P27612_PL Plaa     | Phospholip K.IGDVVGSSGANQQTSGK#.V                 | 22.81  | 4.00   | 5.71  | 0.18  |
| P27612_PL Plaa     | Phospholip K.TVNIYFPK#.K                          | 13.05  | 1.84   | 7.09  | 0.14  |
| Q62077_P1 Plcg1    | 1-phosphat R.FVYVEEDM*FSDQNFQAQTFPVK#.G           | 3.97   | 2.01   | 1.97  | 0.51  |
| Q4KWH5_F Plch1     | 1-phosphat K.I.LIDSIYK#.V                         | 43.13  | 9.38   | 4.60  | 0.22  |
| Q9QXS1_P1 Plec     | Plectin OS= R.FLEEEAKM*TK#.Q                      | 2.54   | 51.50  | 0.05  | 20.25 |
| Q9QXS1_P1 Plec     | Plectin OS= K.LAAIEATR.L                          | 2.19   | 7.13   | 0.31  | 3.26  |
| Q9QXS1_P1 Plec     | Plectin OS= K.ALLEIEER.H                          | 1.88   | 9.27   | 0.20  | 4.93  |
| Q9QXS1_P1 Plec     | Plectin OS= K.AQLPEVASPAK#.K                      | 12.70  | 8.10   | 1.57  | 0.64  |
| Q9QXS1_P1 Plec     | Plectin OS= K.AQVEQELTLR.L                        | 3.67   | 8.17   | 0.45  | 2.23  |
| Q9QXS1_P1 Plec     | Plectin OS= R.ESADPLSAWLDQAK#.R                   | 6.47   | 7.58   | 0.85  | 1.17  |
| Q9QXS1_P1 Plec     | Plectin OS= R.IISLETYNLR.E                        | 3.31   | 7.72   | 0.43  | 2.33  |
| Q9QXS1_P1 Plec     | Plectin OS= R.EDLQDQDEK#EQLNEYK#.G                | 8.72   | 5.21   | 1.67  | 0.60  |
| Q9QXS1_P1 Plec     | Plectin OS= R.LLDPEDVDVQPPDEK#.S                  | 9.65   | 7.54   | 1.28  | 0.78  |
| Q9QXS1_P1 Plec     | Plectin OS= R.LQAEEVAQK#.S                        | 16.62  | 12.06  | 1.38  | 0.73  |
| Q9QXS1_P1 Plec     | Plectin OS= R.SDQLTGLSLPLSEK#.A                   | 6.05   | 6.53   | 0.93  | 1.08  |
| Q9QXS1_P1 Plec     | Plectin OS= R.VLADPSDDTK#.G                       | 21.49  | 7.82   | 2.75  | 0.36  |
| Q9QXS1_P1 Plec     | Plectin OS= K.VLALPEPSAAPTLR.S                    | 2.79   | 11.29  | 0.25  | 4.04  |
| Q9QXS1_P1 Plec     | Plectin OS= R.VHDPSTQEPVTSYQLQQR.C                | 1.99   | 7.47   | 0.27  | 3.75  |
| E9Q6H8_E5 Plekha5  | Protein Ple R.LGEVQESAGIQR.A                      | 5.40   | 13.24  | 0.41  | 2.45  |
| Q91WB4_P Plekhf2   | Pleckstrin † K.SFAVYAATEK.S                       | 5.26   | 3.65   | 1.44  | 0.69  |
| Q66T02_P1 Plekhg5  | Pleckstrin † K.SLGEVLLPVFER.K                     | 3.00   | 6.58   | 0.46  | 2.19  |
| Q66T02_P1 Plekhg5  | Pleckstrin † K.SLGEVLLPVFER.K                     | 3.81   | 21.65  | 0.18  | 5.68  |
| Q8K124_P1 Plekha2  | Pleckstrin † R.DLGEVLLPVFER.K                     | 10.29  | 6.56   | 1.57  | 0.64  |
| Q9DBG5_P Plin3     | Perilipin-3 K.LTTLTAAVSTAQPILSK#.L                | 7.29   | 4.74   | 1.54  | 0.65  |
| Q9DBG5_P Plin3     | Perilipin-3 R.LQESLPIQOPTK#.V                     | 7.50   | 3.21   | 2.34  | 0.43  |
| Q9DBG5_P Plin3     | Perilipin-3 K.LTTLTAAVSTAQPILSK#.L                | 12.67  | 4.20   | 3.01  | 0.33  |
| Q9R1Q7_P1 P1p2     | Proteolipid R.HTAAPTDPDTPG.-                      | 183.08 | 183.08 | 1.00  | 1.00  |
| Q922V4_P1 Plrg1    | Pleiotropic R.AVHLPLLYFASGSDPNK.Q                 | 29.71  | 31.74  | 0.94  | 1.07  |
| Q922V4_P1 Plrg1    | Pleiotropic K.QYPANQGDQVDEVLVTHPAGPVALTADTK#.I    | 9.89   | 11.08  | 0.89  | 1.12  |
| Q922V4_P1 Plrg1    | Pleiotropic R.SQPTANMSIM*ETGNTK.N                 | 3.34   | 4.13   | 0.81  | 1.24  |
| Q922V4_P1 Plrg1    | Pleiotropic R.TGYNFOR.V                           | 2.91   | 21.54  | 0.14  | 7.40  |
| Q9CPV5_P1 Pmf1     | Polyamine- R.DSEAAERGPEGSSPEAVGDATIPR.V           | 1.67   | 5.21   | 0.32  | 3.12  |
| Q9CPV5_P1 Pmf1     | Polyamine- R.ELLSVLR.A                            | 6.17   | 16.84  | 0.37  | 2.73  |
| Q60953_P1 Pml      | Protein PM R.ELLEAVNDR.Y                          | 2.62   | 15.00  | 0.17  | 5.72  |
| Q60953_P1 Pml      | Protein PM K.EVQSQQAQALELSK.T                     | 5.94   | 9.58   | 0.62  | 1.61  |
| Q60953_P1 Pml      | Protein PM R.TLVFFDLK#.I                          | 8.99   | 9.36   | 0.96  | 1.04  |
| Q60953_P1 Pml      | Protein PM R.VLIQPEAFVSYSK#.A                     | 9.61   | 12.53  | 0.77  | 1.30  |
| Q60953_P1 Pml      | Protein PM K.APGQADANGEALDNVFFESLQR.R             | 2.86   | 12.43  | 0.23  | 4.34  |
| Q60953_P1 Pml      | Protein PM K.EVQSQQAQALELSK.T                     | 9.00   | 9.78   | 0.92  | 1.09  |
| Q60953_P1 Pml      | Protein PM K.ISQLAAVNR.E                          | 4.02   | 19.10  | 0.21  | 4.75  |
| Q60953_P1 Pml      | Protein PM R.QVVDVYQAGER.E                        | 1.73   | 12.66  | 0.14  | 7.32  |
| Q60953_P1 Pml      | Protein PM R.TLVFFDLK#.I                          | 15.02  | 12.39  | 1.21  | 0.82  |
| Q60953_P1 Pml      | Protein PM R.VLIQPEAFVSYSK#.A                     | 19.67  | 23.64  | 0.83  | 1.20  |
| A2A1T4_PN Pn1sr    | Arginine/se R.TPNEAPSVLPEK#.R                     | 22.75  | 21.45  | 1.06  | 0.94  |
| Q35691_P1 Pnn      | Pinin OS=M R.ALQEQLEK#.A                          | 27.12  | 14.32  | 1.89  | 0.53  |
| Q35691_P1 Pnn      | Pinin OS=M R.DLIQDQNM*DEK#.G                      | 18.56  | 7.34   | 2.53  | 0.40  |
| Q35691_P1 Pnn      | Pinin OS=M R.FKQESTVATER.Q                        | 5.89   | 12.61  | 0.47  | 2.14  |
| Q35691_P1 Pnn      | Pinin OS=M R.GFSDSGGGPPAK#.Q                      | 26.41  | 13.38  | 1.97  | 0.51  |
| Q35691_P1 Pnn      | Pinin OS=M R.IFGLLM*GTLQK#.F                      | 14.39  | 8.40   | 1.71  | 0.58  |
| Q35691_P1 Pnn      | Pinin OS=M R.IFGLLM*GTLQK#.F                      | 10.35  | 5.57   | 1.86  | 0.54  |
| Q35691_P1 Pnn      | Pinin OS=M K.LEVQAEER.K                           | 9.73   | 29.23  | 0.33  | 3.00  |
| Q35691_P1 Pnn      | Pinin OS=M R.RIEFAEQINK.M                         | 4.53   | 11.38  | 0.40  | 2.51  |
| Q35691_P1 Pnn      | Pinin OS=M R.ALQEQLEK.A                           | 103.61 | 106.72 | 0.97  | 1.03  |
| Q35691_P1 Pnn      | Pinin OS=M R.DLEGAVS.R.L                          | 20.15  | 76.54  | 0.26  | 3.80  |
| Q35691_P1 Pnn      | Pinin OS=M R.DLIQDQNM*DEK#.G                      | 32.94  | 36.51  | 0.90  | 1.11  |
| Q35691_P1 Pnn      | Pinin OS=M K.FKQESTVATER.Q                        | 13.66  | 77.31  | 0.18  | 5.66  |
| Q35691_P1 Pnn      | Pinin OS=M R.GFSDSGGGPPAK#.Q                      | 32.87  | 48.08  | 0.68  | 1.46  |
| Q35691_P1 Pnn      | Pinin OS=M R.IFGLLM*GTLQK#.F                      | 62.30  | 66.54  | 0.94  | 1.07  |
| Q35691_P1 Pnn      | Pinin OS=M R.IFGLLM*GTLQK#.F                      | 23.63  | 25.39  | 0.93  | 1.07  |
| Q35691_P1 Pnn      | Pinin OS=M R.KM*NALFEGR.R                         | 1.97   | 14.27  | 0.14  | 7.23  |

|                   |                                                 |       |        |      |       |
|-------------------|-------------------------------------------------|-------|--------|------|-------|
| O35691_PI Pnn     | Pinin OS=M.K.LEVOAEER.K                         | 21.84 | 134.50 | 0.16 | 6.16  |
| O35691_PI Pnn     | Pinin OS=M.R.NEEOKEQEGK.V                       | 4.69  | 6.15   | 0.76 | 1.31  |
| O35691_PI Pnn     | Pinin OS=M.R.RGFSDSGGGPPAK.Q                    | 3.86  | 15.73  | 0.25 | 4.07  |
| O35691_PI Pnn     | Pinin OS=M.R.RIEFAEQINK.M                       | 12.60 | 34.49  | 0.37 | 2.74  |
| O35691_PI Pnn     | Pinin OS=M.K.TKPHLFYIPGR.M                      | 12.93 | 62.31  | 0.21 | 4.82  |
| O35691_PI Pnn     | Pinin OS=M.K.VELAQLQEEWNEHNAK#.I                | 10.87 | 8.25   | 1.32 | 0.76  |
| O35691_PI Pnn     | Pinin OS=M.K.DPFLSEIK#LPEVSEVPLTVHSENK#.S       | 23.09 | 16.43  | 1.41 | 0.71  |
| O35691_PI Pnn     | Pinin OS=M.R.DLIQDQNM*DEK.G                     | 7.65  | 11.80  | 0.65 | 1.54  |
| O35691_PI Pnn     | Pinin OS=M.K.FKQESTVATER.Q                      | 3.13  | 18.27  | 0.17 | 5.84  |
| O35691_PI Pnn     | Pinin OS=M.R.GFSDSGGGPPAK#.Q                    | 13.47 | 21.74  | 0.62 | 1.61  |
| O35691_PI Pnn     | Pinin OS=M.R.FGLLLM*GTLQK.F                     | 16.88 | 19.68  | 0.86 | 1.17  |
| O35691_PI Pnn     | Pinin OS=M.K.LEVOAEER@.K                        | 16.28 | 35.07  | 0.46 | 2.15  |
| Q8BZH4_P Pogz     | Pogo transR.FANVPDSILLEAK#.D                    | 18.91 | 18.36  | 1.03 | 0.97  |
| Q8BZH4_P Pogz     | Pogo transR.FQASQGENLEK.Y                       | 12.37 | 13.53  | 0.91 | 1.09  |
| Q8BZH4_P Pogz     | Pogo transR.RPGVTEGENSNEVAK.L                   | 1.50  | 6.62   | 0.23 | 4.43  |
| Q8BZH4_P Pogz     | Pogo transR.R.SFLVASVLPDPGNVNSPTR.N             | 1.46  | 7.62   | 0.19 | 5.21  |
| Q8BZH4_P Pogz     | Pogo transR.K.VPEPENAGDAVQTK.L                  | 5.54  | 8.11   | 0.68 | 1.46  |
| Q8BZH4_P Pogz     | Pogo transR.R.EQQLVNEETLFQK.A                   | 18.02 | 18.14  | 0.99 | 1.01  |
| Q8BZH4_P Pogz     | Pogo transR.R.FANVPDSILLEAK.D                   | 35.31 | 44.32  | 0.80 | 1.26  |
| Q8BZH4_P Pogz     | Pogo transR.R.FQASQGENLEK#.Y                    | 23.79 | 28.06  | 0.85 | 1.18  |
| Q8BZH4_P Pogz     | Pogo transR.K.ISYEWAVR.F                        | 1.06  | 16.78  | 0.06 | 15.85 |
| Q8BZH4_P Pogz     | Pogo transR.K.LAEWVLIQR.E                       | 2.99  | 21.62  | 0.14 | 7.24  |
| Q8BZH4_P Pogz     | Pogo transR.R.LQFLFAK#.D                        | 18.49 | 20.59  | 0.90 | 1.11  |
| Q8BZH4_P Pogz     | Pogo transR.R.SFLVASVLPDPGNVNSPTR.N             | 2.72  | 13.25  | 0.21 | 4.87  |
| Q8BZH4_P Pogz     | Pogo transR.K.VPEPENAGDAVQTK#.L                 | 13.46 | 15.55  | 0.87 | 1.16  |
| Q8BZH4_P Pogz     | Pogo transR.K.VTSSIPVFDLQDGR.K                  | 4.36  | 23.25  | 0.19 | 5.33  |
| Q8BZH4_P Pogz     | Pogo transR.K.YLSEFAEEK.L                       | 13.62 | 20.99  | 0.65 | 1.54  |
| P33609_DF Pola1   | DNA polym K.DTGNFVIGQLSDQSR.D                   | 9.01  | 22.07  | 0.41 | 2.45  |
| P33609_DF Pola1   | DNA polym R.DTIVENIQK#.R                        | 36.09 | 19.86  | 1.82 | 0.55  |
| P33609_DF Pola1   | DNA polym K.DVYEEFDSK#.I                        | 13.96 | 6.95   | 2.01 | 0.50  |
| P33609_DF Pola1   | DNA polym R.FYAK#PALAALVYTK#.G                  | 18.14 | 12.32  | 1.47 | 0.68  |
| P33609_DF Pola1   | DNA polym K.LDNLAIQDQYVLAQQHPVVAR.I             | 14.54 | 34.28  | 0.42 | 2.36  |
| P33609_DF Pola1   | DNA polym K.LGDEEIDGDTNK#.Y                     | 33.73 | 22.89  | 1.47 | 0.68  |
| P33609_DF Pola1   | DNA polym R.LIEIGENVLNGSVPSQFQINK#.A            | 9.15  | 6.67   | 1.37 | 0.73  |
| P33609_DF Pola1   | DNA polym R.NEPLLTPIPK#.R                       | 12.35 | 7.89   | 1.57 | 0.64  |
| P33609_DF Pola1   | DNA polym K.NIAEQFLSWSYSEVNLK#.L                | 4.69  | 5.52   | 0.85 | 1.18  |
| P33609_DF Pola1   | DNA polym K.NYAFEIPDVPEKSEYEVLR.Y               | 5.64  | 21.21  | 0.27 | 3.76  |
| P33609_DF Pola1   | DNA polym K.QQDLNPLDLVQDIR.Q                    | 1.59  | 5.12   | 0.31 | 3.21  |
| P33609_DF Pola1   | DNA polym R.TLIGFFLAK#.V                        | 52.01 | 24.81  | 2.10 | 0.48  |
| P33609_DF Pola1   | DNA polym K.TWQDETPEVER.V                       | 5.28  | 19.72  | 0.27 | 3.74  |
| P33609_DF Pola1   | DNA polym K.VEIAATER.T                          | 10.28 | 29.31  | 0.35 | 2.85  |
| P33609_DF Pola1   | DNA polym K.YAALVVEPTSDGNYITK#.Q                | 29.63 | 15.75  | 1.88 | 0.53  |
| P33609_DF Pola1   | DNA polym R.YSAEVQPLQNLK#.G                     | 33.92 | 20.13  | 1.69 | 0.59  |
| P33611_DF Pola2   | DNA polym R.QLLSPSSFSATPSQK#.Y                  | 6.52  | 4.92   | 1.32 | 0.76  |
| P33611_DF Pola2   | DNA polym K.SVILEGDDQHSYGAQIPVDLSELK#.E         | 13.62 | 6.37   | 2.14 | 0.47  |
| P33611_DF Pola2   | DNA polym K.VVGDPPELTSYK#.A                     | 51.62 | 340.48 | 0.15 | 6.60  |
| P33611_DF Pola2   | DNA polym R.QLLSPSSFSATPSQK#.Y                  | 6.78  | 3.73   | 1.82 | 0.55  |
| P33611_DF Pola2   | DNA polym K.SVILEGDDQHSYGAQIPVDLSELK#.E         | 10.28 | 5.53   | 1.86 | 0.54  |
| P33611_DF Pola2   | DNA polym K.VVGDPPELTSYK#.A                     | 26.44 | 26.78  | 0.99 | 1.01  |
| P52431_DF Pold1   | DNA polym R.ALDPSTEPLIFQQLIEDHYVGSAPPLPEGLPSR.N | 2.30  | 3.72   | 0.62 | 1.62  |
| P52431_DF Pold1   | DNA polym K.VYFPYLISK#.K                        | 10.51 | 6.54   | 1.61 | 0.62  |
| P52431_DF Pold1   | DNA polym R.ALDPSTEPLIFQQLIEDHYVGSAPPLPEGLPSR.N | 3.31  | 4.01   | 0.83 | 1.21  |
| P52431_DF Pold1   | DNA polym K.TEGSEDTYGTAVIEPLK#.G                | 9.40  | 6.25   | 1.50 | 0.66  |
| P52431_DF Pold1   | DNA polym K.VSANSVYGTGAQVVK#.L                  | 7.13  | 5.72   | 1.25 | 0.80  |
| P52431_DF Pold1   | DNA polym K.VYFPYLISK#.K                        | 21.31 | 15.86  | 1.34 | 0.74  |
| O35654_DI Pold2   | DNA polym R.FLGTSGQNSVDIFR.Y                    | 3.83  | 8.15   | 0.47 | 2.13  |
| O35654_DI Pold2   | DNA polym K.K#TQAASVEAVK#.M                     | 8.41  | 3.41   | 2.46 | 0.41  |
| O35654_DI Pold2   | DNA polym K.LVTGTVALVLSAK#.D                    | 15.83 | 7.78   | 2.03 | 0.49  |
| O35654_DI Pold2   | DNA polym R.VPVATYNSQPFRL                       | 5.29  | 6.47   | 0.82 | 1.22  |
| Q9EQ28_DI Pold3   | DNA polym K.DSGPLFNTDYDILK#.S                   | 5.43  | 3.42   | 1.59 | 0.63  |
| Q9EQ28_DI Pold3   | DNA polym K.TVEQPVPSTPEK#.L                     | 9.16  | 7.15   | 1.28 | 0.78  |
| Q8BG81_PI Poldip3 | Polymerase K.IGLSDAR.L                          | 9.67  | 25.14  | 0.38 | 2.60  |
| Q8BG81_PI Poldip3 | Polymerase R.INVNNHQAK#.Q                       | 9.94  | 8.32   | 1.19 | 0.84  |
| Q8BG81_PI Poldip3 | Polymerase R.LVHPGVAEVFVK#.K                    | 36.95 | 24.38  | 1.52 | 0.66  |
| Q8BG81_PI Poldip3 | Polymerase R.RGNPASNPAEVDPTVLR.A                | 2.79  | 19.03  | 0.15 | 6.83  |
| Q8BG81_PI Poldip3 | Polymerase R.SPAAFSPPIGTVPALK.L                 | 8.73  | 8.87   | 0.98 | 1.02  |
| Q8BG81_PI Poldip3 | Polymerase K.SSGASVTTQPTFK#.I                   | 30.67 | 23.75  | 1.29 | 0.77  |
| Q8BG81_PI Poldip3 | Polymerase K.TIQVQQK#.A                         | 20.71 | 14.01  | 1.48 | 0.68  |
| Q8BG81_PI Poldip3 | Polymerase K.VQNDAYATVPLVSSVR.T                 | 3.51  | 10.25  | 0.34 | 2.92  |
| Q9WVF7_D Pole     | DNA polym K.I.FQSVFEAFK.G                       | 17.30 | 6.82   | 2.54 | 0.39  |
| Q9WVF7_D Pole     | DNA polym K.IITIPAALQVVK#.N                     | 12.57 | 7.77   | 1.62 | 0.62  |
| O54956_DI Pole2   | DNA polym K.TIETLGGTSK#.V                       | 7.78  | 10.31  | 0.75 | 1.33  |
| Q9JKP7_DF Pole3   | DNA polym K.EALPDGVNSK#.E                       | 25.19 | 15.29  | 1.65 | 0.61  |
| Q9JKP7_DF Pole3   | DNA polym R.LEDDQNEEIEDN.-                      | 19.74 | 19.74  | 1.00 | 1.00  |
| Q9CQ36_D Pole4    | DNA polym R.AAEFVETIAK#.D                       | 40.73 | 20.58  | 1.98 | 0.51  |
| O35134_RF Polr1a  | DNA-direct R.DSDGSVQFLYGEDGLDIPK#.T             | 3.88  | 4.75   | 0.82 | 1.22  |
| O35134_RF Polr1a  | DNA-direct K.TPM*#M*SVVFDTK#.K                  | 3.45  | 1.88   | 1.84 | 0.54  |
| P52432_RF Polr1c  | DNA-direct K.DSSDPNELYNHKK#.V                   | 7.26  | 5.09   | 1.43 | 0.70  |
| P52432_RF Polr1c  | DNA-direct R.I.LLAEVPTM*AVEK#.V                 | 23.73 | 16.60  | 1.43 | 0.70  |
| P52432_RF Polr1c  | DNA-direct R.I.LLAEVPTM*AVEK#.V                 | 13.55 | 6.32   | 2.14 | 0.47  |
| P52432_RF Polr1c  | DNA-direct R.LGLIPIADPR.L                       | 7.89  | 24.43  | 0.32 | 3.09  |
| P52432_RF Polr1c  | DNA-direct R.NQGEETEDTLQFR.L                    | 5.09  | 11.22  | 0.45 | 2.20  |
| P08775_RF Polr2a  | DNA-direct R.AEIQELAM*VPR.M                     | 3.75  | 33.61  | 0.11 | 8.96  |
| P08775_RF Polr2a  | DNA-direct K.AHNNELETPGNLQR.Q                   | 3.27  | 11.88  | 0.28 | 3.63  |
| P08775_RF Polr2a  | DNA-direct K.AKHQDVIEVK#.A                      | 28.59 | 30.19  | 0.95 | 1.06  |
| P08775_RF Polr2a  | DNA-direct K.AKHQDVIEVK#.A                      | 12.14 | 10.63  | 1.14 | 0.88  |
| P08775_RF Polr2a  | DNA-direct K.ALQEWILETDGVSMLR*.V                | 4.94  | 11.34  | 0.44 | 2.29  |
| P08775_RF Polr2a  | DNA-direct K.ALQEWILETDGVSMLR*.V                | 1.77  | 7.50   | 0.24 | 4.23  |
| P08775_RF Polr2a  | DNA-direct R.DVFLER.G                           | 6.87  | 29.78  | 0.23 | 4.34  |
| P08775_RF Polr2a  | DNA-direct R.EGLIDTAVK#.T                       | 33.23 | 34.30  | 0.97 | 1.03  |
| P08775_RF Polr2a  | DNA-direct K.FGVEQPEGEDLTK.E                    | 20.99 | 30.24  | 0.69 | 1.44  |
| P08775_RF Polr2a  | DNA-direct R.GFVENSYLAGLTPTEFFHAM*GGR.E         | 4.32  | 14.34  | 0.30 | 3.32  |
| P08775_RF Polr2a  | DNA-direct K.IIITEDGEFK#.A                      | 45.14 | 50.84  | 0.89 | 1.13  |
| P08775_RF Polr2a  | DNA-direct K.INISQVIADVQQNVEGK.R                | 21.12 | 20.44  | 1.03 | 0.97  |
| P08775_RF Polr2a  | DNA-direct K.INISQVIADVQQNVEGK#.R               | 85.40 | 90.72  | 0.94 | 1.06  |
| P08775_RF Polr2a  | DNA-direct R.KLTM*EQIAEK.I                      | 18.39 | 19.37  | 0.95 | 1.05  |
| P08775_RF Polr2a  | DNA-direct R.KLTM*EQIAEK.I                      | 45.27 | 38.68  | 1.17 | 0.85  |
| P08775_RF Polr2a  | DNA-direct K.LLOFHVATM*VDNELPGLPR.A             | 3.92  | 10.67  | 0.37 | 2.72  |
| P08775_RF Polr2a  | DNA-direct K.LLVDSNNPK#.I                       | 55.60 | 56.87  | 0.98 | 1.02  |
| P08775_RF Polr2a  | DNA-direct R.LPSDLHPK.V                         | 20.64 | 18.99  | 1.09 | 0.92  |
| P08775_RF Polr2a  | DNA-direct K.LTM*EQIAEK#.I                      | 14.18 | 15.30  | 0.93 | 1.08  |
| P08775_RF Polr2a  | DNA-direct R.NSINQVQLR.Y                        | 11.58 | 47.94  | 0.24 | 4.14  |
| P08775_RF Polr2a  | DNA-direct R.SIAANM*TFAEIVTFNIDR.L              | 2.50  | 11.63  | 0.21 | 4.65  |

|                  |                                            |       |        |      |       |
|------------------|--------------------------------------------|-------|--------|------|-------|
| P08775_RF Polr2a | DNA-direct K.SLSEYNNFK#.S                  | 38.23 | 34.47  | 1.11 | 0.90  |
| P08775_RF Polr2a | DNA-direct K.TAETGYIQR.R                   | 13.88 | 68.58  | 0.20 | 4.94  |
| P08775_RF Polr2a | DNA-direct R.TLQEDLVK#.D                   | 19.32 | 18.17  | 1.06 | 0.94  |
| P08775_RF Polr2a | DNA-direct K.TPSTLVLFLGQSR.D               | 5.14  | 29.25  | 0.18 | 5.69  |
| P08775_RF Polr2a | DNA-direct R.TVITPDPNLSIDQVGVP.R.S         | 4.93  | 38.50  | 0.13 | 7.82  |
| P08775_RF Polr2a | DNA-direct K.TYQDIQNTIK#.K                 | 35.71 | 32.24  | 1.11 | 0.90  |
| P08775_RF Polr2a | DNA-direct R.VLSEKDVDPVR.T                 | 3.15  | 11.22  | 0.28 | 3.56  |
| P08775_RF Polr2a | DNA-direct R.VQFGLSPDELK#.R                | 12.06 | 11.47  | 1.05 | 0.95  |
| P08775_RF Polr2a | DNA-direct R.VQFGLSPDELK#.M                | 5.93  | 29.16  | 0.20 | 4.91  |
| P08775_RF Polr2a | DNA-direct R.YEGEDLAGESVEFQNLATLKPNSK.A    | 40.31 | 46.80  | 0.86 | 1.16  |
| P08775_RF Polr2a | DNA-direct K.YSPTSPTSPTSYPK.Y              | 53.00 | 54.54  | 0.97 | 1.03  |
| P08775_RF Polr2a | DNA-direct K.YSPTSPTSPTSYPVTPTSYPK#.Y      | 9.67  | 7.89   | 1.22 | 0.82  |
| P08775_RF Polr2a | DNA-direct K.YSPTSPTSPTSYPK#.Y             | 25.11 | 30.03  | 0.84 | 1.20  |
| P08775_RF Polr2a | DNA-direct R.YTPQSPYTPSPSSPSYSPSPK.Y       | 5.06  | 4.47   | 1.13 | 0.88  |
| P08775_RF Polr2a | DNA-direct K.YTPTSPTSPTSYPK#.Y             | 7.96  | 8.82   | 0.90 | 1.11  |
| Q8CF17_RP Polr2b | DNA-direct R.AGVSQVLR.L                    | 6.68  | 32.80  | 0.20 | 4.91  |
| Q8CF17_RP Polr2b | DNA-direct R.GPIQLNR.Q                     | 6.03  | 20.45  | 0.29 | 3.39  |
| Q8CF17_RP Polr2b | DNA-direct K.IJNSLLSDYGYHLR.G              | 3.68  | 24.29  | 0.15 | 6.59  |
| Q8CF17_RP Polr2b | DNA-direct R.IVATLPYIK.Q                   | 16.78 | 19.95  | 0.84 | 1.19  |
| Q8CF17_RP Polr2b | DNA-direct K.KGFQDEQVEFKPTR.E              | 3.40  | 22.06  | 0.15 | 6.49  |
| Q8CF17_RP Polr2b | DNA-direct K.M*ATNTVYVFAK.K                | 13.96 | 12.73  | 1.10 | 0.91  |
| Q8CF17_RP Polr2b | DNA-direct R.NLTYASPLVVDITK#.T             | 13.20 | 19.87  | 0.66 | 1.50  |
| Q8CF17_RP Polr2b | DNA-direct K.QEVPPIVFR.A                   | 4.19  | 19.44  | 0.22 | 4.64  |
| Q8CF17_RP Polr2b | DNA-direct K.TVKEGEEQLQTOHQK.T             | 22.58 | 24.05  | 0.94 | 1.06  |
| Q8CF17_RP Polr2b | DNA-direct K.TVLPENEDLESTNR.R              | 2.27  | 6.50   | 0.35 | 2.87  |
| Q8CF17_RP Polr2b | DNA-direct K.VSANK#GEIGDATPFNDAVNVQK#.I    | 12.26 | 10.75  | 1.14 | 0.88  |
| Q8CF17_RP Polr2b | DNA-direct R.VSGDDVIGK#.T                  | 20.82 | 23.47  | 0.89 | 1.13  |
| Q8CF17_RP Polr2b | DNA-direct K.YSLATGNWGDQK#.K               | 10.60 | 9.02   | 1.17 | 0.85  |
| Q8CF17_RP Polr2b | DNA-direct R.AGVSQVLR.L                    | 9.17  | 39.82  | 0.23 | 4.34  |
| Q8CF17_RP Polr2b | DNA-direct K.GEIGDATPFNDAVNVQK#.I          | 14.82 | 10.87  | 1.36 | 0.73  |
| Q8CF17_RP Polr2b | DNA-direct R.GPIQLNR.Q                     | 4.14  | 20.41  | 0.20 | 4.94  |
| Q8CF17_RP Polr2b | DNA-direct R.IPQIDGK#.F                    | 43.79 | 36.99  | 1.18 | 0.84  |
| Q8CF17_RP Polr2b | DNA-direct K.IJNSLLSDYGYHLR.G              | 11.69 | 45.15  | 0.26 | 3.86  |
| Q8CF17_RP Polr2b | DNA-direct R.IVATLPYIK#.Q                  | 29.72 | 23.01  | 1.29 | 0.77  |
| Q8CF17_RP Polr2b | DNA-direct K.KGFQDEQVEFKPTR.E              | 8.40  | 27.74  | 0.30 | 3.30  |
| Q8CF17_RP Polr2b | DNA-direct K.LDDGLIAPGVR.V                 | 6.23  | 19.19  | 0.32 | 3.08  |
| Q8CF17_RP Polr2b | DNA-direct R.LLLAALGR.R                    | 5.80  | 30.64  | 0.19 | 5.29  |
| Q8CF17_RP Polr2b | DNA-direct R.NLTYASPLVVDITK.T              | 30.34 | 24.85  | 1.22 | 0.82  |
| Q8CF17_RP Polr2b | DNA-direct K.QEVPPIVFR.A                   | 3.67  | 19.71  | 0.19 | 5.37  |
| Q8CF17_RP Polr2b | DNA-direct K.TVKEGEEQLQTOHQK#.T            | 39.62 | 31.44  | 1.26 | 0.79  |
| Q8CF17_RP Polr2b | DNA-direct K.TVLPENEDLESTNR.R              | 2.20  | 13.31  | 0.17 | 6.04  |
| Q8CF17_RP Polr2b | DNA-direct K.VLIAQEK#.M                    | 33.94 | 28.11  | 1.21 | 0.83  |
| Q8CF17_RP Polr2b | DNA-direct K.VSANK#GEIGDATPFNDAVNVQK#.I    | 24.54 | 20.59  | 1.19 | 0.84  |
| Q8CF17_RP Polr2b | DNA-direct R.VSGDDVIGK#.T                  | 43.83 | 42.21  | 1.04 | 0.96  |
| Q99M46_C Polr2c  | DNA-direct K.FIENDDLAVANSIR.R              | 13.45 | 50.95  | 0.26 | 3.79  |
| Q99M46_C Polr2c  | DNA-direct R.IJTELEENVK#.F                 | 79.50 | 61.19  | 1.30 | 0.77  |
| Q99M46_C Polr2c  | DNA-direct R.LGLIPLTSDDIVDK#.L             | 28.48 | 32.43  | 0.88 | 1.14  |
| Q99M46_C Polr2c  | DNA-direct R.NRNDPNPNDYVEQDDILIVK.L        | 4.71  | 18.67  | 0.25 | 3.96  |
| Q99M46_C Polr2c  | DNA-direct K.SEYSELEDEQAPYDPNGKPER.F       | 3.37  | 8.20   | 0.41 | 2.43  |
| Q99M46_C Polr2c  | DNA-direct K.WNPTAGVAFYDPPDNALR.H          | 5.50  | 20.15  | 0.27 | 3.67  |
| Q9D7M8_R Polr2d  | DNA-direct R.AGDVEEDASQLFPK#.E             | 83.62 | 84.38  | 0.99 | 1.01  |
| Q9D7M8_R Polr2d  | DNA-direct R.FEDELQQLDDIQTQ.R              | 27.58 | 35.02  | 0.79 | 1.27  |
| Q9D7M8_R Polr2d  | DNA-direct R.KHQQNEAEDEQELSEVFM*#.K.T      | 14.15 | 18.68  | 0.76 | 1.32  |
| Q9D7M8_R Polr2d  | DNA-direct R.KQQNEAEDEQELSEVFM.K.T         | 16.61 | 7.15   | 2.32 | 0.43  |
| Q80UW8_F Polr2e  | DNA-direct R.ALIVVQQGM*TPSAK#.Q            | 53.05 | 62.18  | 0.85 | 1.17  |
| Q80UW8_F Polr2e  | DNA-direct R.ALIVVQQGM*TPSAK#.Q            | 7.46  | 8.31   | 0.90 | 1.11  |
| Q80UW8_F Polr2e  | DNA-direct R.GYLVQDELQTLLEFK#.A            | 31.26 | 38.16  | 0.82 | 1.22  |
| Q80UW8_F Polr2e  | DNA-direct R.IQAGDPVAR.Y                   | 17.43 | 107.99 | 0.16 | 6.19  |
| P62488_RF Polr2g | DNA-direct K.AIVFRPFKGEVVDVAVTVQNK.V       | 5.64  | 28.77  | 0.20 | 5.10  |
| P62488_RF Polr2g | DNA-direct R.GFVLPVK#.Y                    | 32.93 | 21.76  | 1.51 | 0.66  |
| P62488_RF Polr2g | DNA-direct K.TM*DEDIVIQDDIQR.L             | 2.88  | 11.77  | 0.24 | 4.09  |
| P62488_RF Polr2g | DNA-direct R.VDK#NDIFAGSLM*DDYGLGLVS.-     | 11.06 | 10.26  | 1.08 | 0.93  |
| P62488_RF Polr2g | DNA-direct R.YFGPNLLNTVK#.Q                | 87.26 | 82.45  | 1.06 | 0.94  |
| P62488_RF Polr2g | DNA-direct K.YGFVIAVTTDNIAGVGIQVPR.G       | 2.09  | 14.77  | 0.14 | 7.07  |
| Q923G2_RI Polr2h | DNA-direct R.IEGDETSTAAR.L                 | 6.09  | 24.34  | 0.25 | 4.00  |
| Q923G2_RI Polr2h | DNA-direct R.LSAYVYSGLLM*#.R.L             | 7.48  | 32.05  | 0.23 | 4.29  |
| Q923G2_RI Polr2h | DNA-direct R.LVIASTLYGTLDDGEYNTDTRPSR.A    | 2.46  | 27.85  | 0.09 | 11.32 |
| Q923G2_RI Polr2h | DNA-direct R.VYLLMK#.K                     | 14.08 | 8.44   | 1.67 | 0.60  |
| Q923G2_RI Polr2h | DNA-direct K.VYRIEGDETSTAAR.L              | 4.63  | 63.93  | 0.07 | 13.81 |
| P60898_RF Polr2i | DNA-direct K.EAVFFQHSAR.A                  | 4.15  | 7.94   | 0.52 | 1.91  |
| P60898_RF Polr2i | DNA-direct K.I.THEVEDLQIADVSQDPTLPR.T      | 11.14 | 79.66  | 0.14 | 7.15  |
| Q6P163_Q6 Polr2j | DNA-direct K.DPQVLFAGYK#.V                 | 14.87 | 15.63  | 0.95 | 1.05  |
| Q6P163_Q6 Polr2j | DNA-direct K.SQLLK#DPQVLFAGYK#.V           | 38.47 | 39.64  | 0.97 | 1.03  |
| Q6P163_Q6 Polr2j | DNA-direct K.SQLLK#DPQVLFAGYK#.V           | 4.32  | 4.91   | 0.88 | 1.14  |
| Q6P163_Q6 Polr2j | DNA-direct R.VAIK#DK#QEGIE.-               | 14.51 | 18.36  | 0.79 | 1.26  |
| Q63871_RI Polr2k | DNA-direct R.LVVFAR.-                      | 12.32 | 45.47  | 0.27 | 3.69  |
| P62876_RF Polr2l | DNA-direct K.LLNYPLEK#.-                   | 35.27 | 36.27  | 0.97 | 1.03  |
| B2RXC6_B2 Polr3a | Polymerase R.GFSIGIGDVTGQGLLK#.A           | 12.03 | 6.36   | 1.89 | 0.53  |
| Q8K205_QI Pop1   | Blood vesse R.LGWGSGWDVLIPK#.G             | 7.20  | 4.20   | 1.71 | 0.58  |
| P37040_NI Por    | NADPH-cyt K.DVQNTFYDIAVEFGPM*EHTQAVDYVK#.K | 7.53  | 4.32   | 1.74 | 0.57  |
| P37040_NI Por    | NADPH-cyt R.TNVLVYELAQSESEQELHKK#.M        | 8.90  | 6.64   | 1.34 | 0.75  |
| Q91YU8_SS Ppan   | Suppressor R.LPQGP*TLTQSK#.Y               | 14.34 | 6.30   | 2.28 | 0.44  |
| Q91YU8_SS Ppan   | Suppressor R.NLESYAAQPHSFVTR.G             | 6.05  | 9.93   | 0.61 | 1.64  |
| Q91YU8_SS Ppan   | Suppressor R.QAVGEPEDEDLPTAAK#.R           | 9.87  | 3.01   | 3.28 | 0.31  |
| Q8C8U0_LI Ppfbp1 | Liprin-beta R.LENDK#ESLVQVSLTDQVEAQGEK#.I  | 4.42  | 6.09   | 0.73 | 1.38  |
| Q8C8U0_LI Ppfbp1 | Liprin-beta R.SPASITDEDSNV.-               | 10.58 | 10.58  | 1.00 | 1.00  |
| Q8C8U0_LI Ppfbp1 | Liprin-beta R.WLDDIGLPQYK#.T               | 14.23 | 13.95  | 1.02 | 0.98  |
| G3X959_G Pphln1  | Periphilin 1R.FITEYNSAQDFGDPF.-            | 20.18 | 20.18  | 1.00 | 1.00  |
| G3X959_G Pphln1  | Periphilin 1K.WANETLEK.S                   | 16.21 | 20.98  | 0.77 | 1.29  |
| P17742_FF Ppia   | Peptidyl-pr K.FEDENFILK.H                  | 7.45  | 11.25  | 0.66 | 1.51  |
| P24369_FF Ppib   | Peptidyl-pr K.TVDNFVALATGEK#.G             | 8.07  | 9.27   | 0.87 | 1.15  |
| P24369_FF Ppib   | Peptidyl-pr R.VVFLGFK#.T                   | 19.30 | 16.39  | 1.18 | 0.85  |
| P30412_FF Ppic   | Peptidyl-pr R.DGTGM*SIYGETPDPDENFK#.L      | 3.05  | 2.01   | 1.52 | 0.66  |
| Q9QZH3_PI Ppie   | Peptidyl-pr K.HVVFGEVTEGLDVLQR.Q           | 2.01  | 11.30  | 0.18 | 5.61  |
| Q9QZH3_PI Ppie   | Peptidyl-pr K.KFDFENFILK.H                 | 20.46 | 14.72  | 1.39 | 0.72  |
| Q9QZH3_PI Ppie   | Peptidyl-pr K.TLEENKEEGPEPPKAEAQEGEPTAK.K  | 21.42 | 27.83  | 0.77 | 1.30  |
| Q9QZH3_PI Ppie   | Peptidyl-pr K.TLEENKEEGPEPPKAEAQEGEPTAK.K  | 8.38  | 9.75   | 0.86 | 1.16  |
| Q9QZH3_PI Ppie   | Peptidyl-pr R.VLYVGLAEVDDK#.V              | 11.04 | 13.40  | 0.82 | 1.21  |
| A2AR02_FF Ppig   | Peptidyl-pr R.GGESIYGGFFEDSFAVK#.H         | 5.83  | 2.03   | 2.87 | 0.35  |
| A2AR02_FF Ppig   | Peptidyl-pr R.GGESIYGGFFEDSFAVK#.H         | 24.34 | 16.91  | 1.44 | 0.69  |
| A2BG18_A2 Ppih   | Peptidyl-pr R.GPFADENFK#.L                 | 88.70 | 49.99  | 1.77 | 0.56  |
| A2BG18_A2 Ppih   | Peptidyl-pr K.IELFADVVPK#.T                | 67.10 | 41.44  | 1.62 | 0.62  |
| A2BG18_A2 Ppih   | Peptidyl-pr K.IENVTGPNNKPK.L               | 13.66 | 11.60  | 1.18 | 0.85  |

|                   |                                                 |        |        |      |      |
|-------------------|-------------------------------------------------|--------|--------|------|------|
| A2BG18_A2 Ppjh    | Peptidyl-pr K.IIDGLLVM*R.K                      | 21.30  | 41.21  | 0.52 | 1.93 |
| A2BG18_A2 Ppjh    | Peptidyl-pr K.IIDGLLVM.R.K                      | 6.02   | 18.67  | 0.32 | 3.10 |
| A2BG18_A2 Ppjh    | Peptidyl-pr R.K#ENVPTGPNNK#PK#.L                | 93.99  | 72.94  | 1.29 | 0.78 |
| A2BG18_A2 Ppjh    | Peptidyl-pr R.K#ENVPTGPNNK#PK#.L                | 2.62   | 3.12   | 0.84 | 1.19 |
| A2BG18_A2 Ppjh    | Peptidyl-pr R.M*K#ELFADVVPK#.T                  | 34.55  | 18.13  | 1.91 | 0.52 |
| A2BG18_A2 Ppjh    | Peptidyl-pr R.MK#ELFADVVPK#.T                   | 21.50  | 10.37  | 2.07 | 0.48 |
| Q9D0W5_F Pp11     | Peptidyl-pr K.DFM*IQGGDPTGTGR.G                 | 2.40   | 13.52  | 0.18 | 5.64 |
| Q9D0W5_F Pp11     | Peptidyl-pr R.IIKDFM*IQGGDPTGTGR.G              | 7.56   | 23.40  | 0.32 | 3.09 |
| Q9D787_P1 Pp12    | Peptidyl-pr R.GVLSM*ANSGDPNTNK.S                | 7.11   | 10.22  | 0.70 | 1.44 |
| Q9D787_P1 Pp12    | Peptidyl-pr R.GVLSMANSNPNTNK.S                  | 2.77   | 4.87   | 0.57 | 1.76 |
| Q9D787_P1 Pp12    | Peptidyl-pr R.IIDPDEEK#.A                       | 14.62  | 25.19  | 0.58 | 1.72 |
| Q9D787_P1 Pp12    | Peptidyl-pr R.NFVIQGGDPTGTGTGGESFWGPKFK.D       | 5.38   | 6.20   | 0.87 | 1.15 |
| Q9D787_P1 Pp12    | Peptidyl-pr R.SAEEEPSTSTATPAK.K                 | 15.06  | 20.41  | 0.74 | 1.36 |
| Q9D787_P1 Pp12    | Peptidyl-pr K.SQFFITFR.S                        | 6.79   | 12.55  | 0.54 | 1.85 |
| Q9D787_P1 Pp12    | Peptidyl-pr R.TTGNVYTYEAEQLNIK.A                | 4.13   | 7.96   | 0.52 | 1.93 |
| Q9D6L8_P1 Pp13    | Peptidyl-pr K.DITIHANPFAQ.                      | 28.46  | 28.46  | 1.00 | 1.00 |
| Q9D6L8_P1 Pp13    | Peptidyl-pr K.GFM*VQTGDPDTGTGR.G                | 2.36   | 10.69  | 0.22 | 4.52 |
| Q9D6L8_P1 Pp13    | Peptidyl-pr K.#FEDEYSEYLK#.H                    | 6.36   | 4.34   | 1.47 | 0.68 |
| Q9D6L8_P1 Pp13    | Peptidyl-pr K.VIDGLELTDLEK#LPVNEK#.T            | 31.56  | 26.96  | 1.17 | 0.85 |
| Q9CXG3_P1 Pp14    | Peptidyl-pr K.LNPVTTDELELHFSR.F                 | 2.44   | 9.02   | 0.27 | 3.69 |
| Q9CXG3_P1 Pp14    | Peptidyl-pr R.SAEVEEIK#AEK#.E                   | 9.30   | 6.17   | 1.51 | 0.66 |
| Q9CXG3_P1 Pp14    | Peptidyl-pr K.YDLIDQEGEDSK#.S                   | 7.58   | 7.13   | 1.06 | 0.94 |
| Q5ZQB6_VI Ppp15k2 | Inositol hε K.ALADIVIPQYGITK#.A                 | 6.83   | 1.76   | 3.88 | 0.26 |
| P63087_P1 Ppp1cc  | Serine/thre R.AHQVVEDGYEFFAK#.R                 | 10.13  | 8.43   | 1.20 | 0.83 |
| P63087_P1 Ppp1cc  | Serine/thre R.AHQVVEDGYEFFAK.R                  | 13.96  | 16.06  | 0.87 | 1.15 |
| P63087_P1 Ppp1cc  | Serine/thre K.NVQLQENEIR.G                      | 2.36   | 13.05  | 0.18 | 5.52 |
| P63087_P1 Ppp1cc  | Serine/thre R.YPENFLLR.G                        | 2.30   | 8.08   | 0.28 | 3.51 |
| P63087_P1 Ppp1cc  | Serine/thre R.AHQVVEDGYEFFAK#.R                 | 7.59   | 5.64   | 1.35 | 0.74 |
| P63087_P1 Ppp1cc  | Serine/thre R.AHQVVEDGYEFFAK#.R                 | 3.84   | 3.83   | 1.00 | 1.00 |
| P63087_P1 Ppp1cc  | Serine/thre R.AHQVVEDGYEFFAK#.R                 | 15.84  | 7.74   | 2.05 | 0.49 |
| P63087_P1 Ppp1cc  | Serine/thre K.NVQLQENEIR.G                      | 2.57   | 11.19  | 0.23 | 4.35 |
| Q80W00_P Ppp1r10  | Serine/thre R.APEVLVK#.F                        | 28.00  | 25.72  | 1.09 | 0.92 |
| Q80W00_P Ppp1r10  | Serine/thre R.EVYFELDETER.V                     | 1.76   | 6.54   | 0.27 | 3.71 |
| Q80W00_P Ppp1r10  | Serine/thre K.FIDVGGYK.L                        | 25.26  | 26.05  | 0.97 | 1.03 |
| Q80W00_P Ppp1r10  | Serine/thre K.GIQLQELNK#.E                      | 32.22  | 37.60  | 0.86 | 1.17 |
| Q80W00_P Ppp1r10  | Serine/thre K.IJPPQPM*EGLGFLDALNSAPVPGIK#.I     | 20.53  | 16.77  | 1.22 | 0.82 |
| Q80W00_P Ppp1r10  | Serine/thre K.LPPVLANLM*GSM*GAGK.S              | 4.26   | 5.38   | 0.79 | 1.26 |
| Q80W00_P Ppp1r10  | Serine/thre R.QSATAAPGDAAPPAEK.K                | 12.08  | 15.93  | 0.76 | 1.32 |
| Q80W00_P Ppp1r10  | Serine/thre R.QSATAAPGDAAPPAEK.Y                | 15.29  | 24.48  | 0.62 | 1.60 |
| Q80W00_P Ppp1r10  | Serine/thre R.STGLELDTPSLVVK#.N                 | 43.20  | 36.31  | 1.19 | 0.84 |
| Q9DBR7_M Ppp1r12a | Protein phc K.AQLHDTNM*ELTDLK#.L                | 34.19  | 13.59  | 2.52 | 0.40 |
| Q9DBR7_M Ppp1r12a | Protein phc R.LAYVTPTR.R                        | 13.25  | 36.79  | 0.36 | 2.78 |
| Q9DBR7_M Ppp1r12a | Protein phc K.NK#ETLIEPEK#.N                    | 6.46   | 3.92   | 1.65 | 0.61 |
| Q9DBR7_M Ppp1r12a | Protein phc R.SASYSLEDR.K                       | 7.12   | 21.09  | 0.34 | 2.96 |
| Q9DBR7_M Ppp1r12a | Protein phc K.SGGTALHVAALK#.G                   | 38.29  | 15.39  | 2.49 | 0.40 |
| Q9DBR7_M Ppp1r12a | Protein phc K.SPLIESTANM*ENNOQPK#.A             | 9.67   | 6.26   | 1.54 | 0.65 |
| Q9DBR7_M Ppp1r12a | Protein phc K.TGSGALAEISASK#.E                  | 27.91  | 16.27  | 1.72 | 0.58 |
| Q9DBR7_M Ppp1r12a | Protein phc R.TYEDTYR.Y                         | 6.85   | 14.25  | 0.48 | 2.08 |
| Q8BQ30_P1 Ppp1r18 | Phostensin K.EVLESILSPGEGDQK#.A                 | 14.58  | 5.12   | 2.85 | 0.35 |
| Q8BQ30_P1 Ppp1r18 | Phostensin R.LSPGETPEESL.L                      | 17.42  | 19.58  | 0.89 | 1.12 |
| Q3TDD9_P1 Ppp1r21 | Protein phc R.IQFPVSDAIDTSLNQK#.F               | 5.96   | 2.85   | 2.09 | 0.48 |
| P63330_P1 Ppp2ca  | Serine/thre K.SPDNYLFM*GDYVDR.G                 | 2.78   | 8.34   | 0.33 | 3.00 |
| P63330_P1 Ppp2ca  | Serine/thre K.SPDNYLFM*GDYVDR.G                 | 5.89   | 5.91   | 1.00 | 1.00 |
| P63330_P1 Ppp2ca  | Serine/thre K.YGNANVVK#.Y                       | 31.20  | 7.27   | 4.29 | 0.23 |
| P63330_P1 Ppp2ca  | Serine/thre K.YSFLQDFPAPR.R                     | 12.72  | 13.60  | 0.94 | 1.07 |
| Q76M23_2_Ppp2r1a  | Serine/thre R.AISHEHSPSLEAHFVPLVK#.R            | 21.19  | 9.03   | 2.35 | 0.43 |
| Q76M23_2_Ppp2r1a  | Serine/thre K.IGPILDNSTLQSEVK#PILEK#.L          | 143.51 | 50.27  | 2.85 | 0.35 |
| Q76M23_2_Ppp2r1a  | Serine/thre R.LAGGDWFTSR.T                      | 22.40  | 34.77  | 0.64 | 1.55 |
| Q76M23_2_Ppp2r1a  | Serine/thre K.LSTIALALGVER.T                    | 14.29  | 19.40  | 0.74 | 1.36 |
| Q76M23_2_Ppp2r1a  | Serine/thre K.LTQDDQVDVK#.Y                     | 215.34 | 77.51  | 2.78 | 0.36 |
| Q76M23_2_Ppp2r1a  | Serine/thre R.MAGDPVANVR.F                      | 7.42   | 14.33  | 0.52 | 1.93 |
| Q76M23_2_Ppp2r1a  | Serine/thre R.NEDVQLR.L                         | 34.14  | 37.63  | 0.91 | 1.10 |
| Q76M23_2_Ppp2r1a  | Serine/thre K.SALASVIM*GLSPILGK#.D              | 47.10  | 16.37  | 2.88 | 0.35 |
| Q76M23_2_Ppp2r1a  | Serine/thre K.SEIIPM*FNSLASDEQDSVR.L            | 4.55   | 7.02   | 0.65 | 1.54 |
| Q76M23_2_Ppp2r1a  | Serine/thre K.SEIIPM*FNSLASDEQDSVR.L            | 4.41   | 6.20   | 0.71 | 1.40 |
| Q76M23_2_Ppp2r1a  | Serine/thre K.TDLVPAFQNLK*#.D                   | 24.04  | 9.56   | 2.52 | 0.40 |
| Q76M23_2_Ppp2r1a  | Serine/thre K.VLELDNVK#.S                       | 129.57 | 36.32  | 3.57 | 0.28 |
| Q76M23_2_Ppp2r1a  | Serine/thre K.IGPILDNSTLQSEVKPILEK.L            | 9.78   | 5.43   | 1.80 | 0.55 |
| Q76M23_2_Ppp2r1a  | Serine/thre K.LSTIALALGVER.T                    | 5.75   | 14.75  | 0.39 | 2.57 |
| Q76M23_2_Ppp2r1a  | Serine/thre R.AISHEHSPSLEAHFVPLVK#.R            | 52.22  | 15.36  | 3.40 | 0.29 |
| Q76M23_2_Ppp2r1a  | Serine/thre K.AVGPEITK#.T                       | 56.68  | 12.27  | 4.62 | 0.22 |
| Q76M23_2_Ppp2r1a  | Serine/thre K.ELVSDANQHVK#.S                    | 24.62  | 2.69   | 9.14 | 0.11 |
| Q76M23_2_Ppp2r1a  | Serine/thre K.IGPILDNSTLQSEVKPILEK.L            | 76.84  | 24.06  | 3.19 | 0.31 |
| Q76M23_2_Ppp2r1a  | Serine/thre K.IGPILDNSTLQSEVK#PILEK#.L          | 4.63   | 2.01   | 2.30 | 0.43 |
| Q76M23_2_Ppp2r1a  | Serine/thre K.LSTIALALGVER.T                    | 6.43   | 7.86   | 0.82 | 1.22 |
| Q76M23_2_Ppp2r1a  | Serine/thre K.LTQDDQVDVK#.Y                     | 107.83 | 24.87  | 4.34 | 0.23 |
| Q76M23_2_Ppp2r1a  | Serine/thre K.SALASVIM*GLSPILGK#.D              | 36.52  | 5.78   | 6.32 | 0.16 |
| Q76M23_2_Ppp2r1a  | Serine/thre K.SEIIPM*FNSLASDEQDSVR.L            | 3.18   | 3.63   | 0.88 | 1.14 |
| Q76M23_2_Ppp2r1a  | Serine/thre K.VLELDNVK#.S                       | 71.71  | 19.68  | 3.64 | 0.27 |
| Q76M23_2_Ppp2r1a  | Serine/thre R.AISHEHSPSLEAHFVPLVK#.R            | 72.51  | 25.32  | 2.86 | 0.35 |
| Q76M23_2_Ppp2r1a  | Serine/thre K.AVGPEITK#.T                       | 90.97  | 28.42  | 3.20 | 0.31 |
| Q76M23_2_Ppp2r1a  | Serine/thre K.FG#EWAHATIPK#.V                   | 12.12  | 6.79   | 1.78 | 0.56 |
| Q76M23_2_Ppp2r1a  | Serine/thre K.IGPILDNSTLQSEVK#PILEK#.L          | 173.01 | 47.20  | 3.67 | 0.27 |
| Q76M23_2_Ppp2r1a  | Serine/thre R.LAGGDWFTSR.T                      | 16.88  | 18.10  | 0.93 | 1.07 |
| Q76M23_2_Ppp2r1a  | Serine/thre K.LSTIALALGVER.T                    | 8.77   | 13.27  | 0.66 | 1.51 |
| Q76M23_2_Ppp2r1a  | Serine/thre K.LTQDDQVDVK#.Y                     | 264.00 | 68.35  | 3.86 | 0.26 |
| Q76M23_2_Ppp2r1a  | Serine/thre R.M*AGDPVANVR.F                     | 20.48  | 37.69  | 0.54 | 1.84 |
| Q76M23_2_Ppp2r1a  | Serine/thre K.SALASVIM*GLSPILGK#.D              | 98.51  | 24.90  | 3.96 | 0.25 |
| Q76M23_2_Ppp2r1a  | Serine/thre K.SEIIPM*FNSLASDEQDSVR.L            | 3.28   | 6.00   | 0.55 | 1.83 |
| Q76M23_2_Ppp2r1a  | Serine/thre K.TDLVPAFQNLK*#.D                   | 29.33  | 7.80   | 3.76 | 0.27 |
| Q76M23_2_Ppp2r1a  | Serine/thre K.VLELDNVK#.S                       | 107.83 | 31.84  | 3.39 | 0.30 |
| Q77NP2_2_Ppp2r1b  | Serine/thre R.ETVIM*NQILPYIK#.E                 | 16.73  | 2.59   | 6.46 | 0.15 |
| Q77NP2_2_Ppp2r1b  | Serine/thre K.IGPILDNSTLQGEVK#VLQK#.L           | 17.51  | 8.75   | 2.00 | 0.50 |
| Q6P1F6_2_Ppp2r2a  | Serine/thre R.DYLSVK#.I                         | 25.46  | 5.08   | 5.01 | 0.20 |
| Q6P1F6_2_Ppp2r2a  | Serine/thre K.ENIIVATTNNLYIFQDK#.V              | 6.79   | 2.45   | 2.77 | 0.36 |
| Q6P1F6_2_Ppp2r2a  | Serine/thre K.GAVDDVDAEADIISTVEFNHSGELLATGDK#.G | 13.32  | 4.89   | 2.72 | 0.37 |
| Q6P1F6_2_Ppp2r2a  | Serine/thre K.NAAQFLLSTNDK#.T                   | 32.61  | 16.81  | 1.94 | 0.52 |
| Q6P1F6_2_Ppp2r2a  | Serine/thre R.VVIFQEQENK#.I                     | 51.62  | 340.48 | 0.15 | 6.60 |
| Q6P1F6_2_Ppp2r2a  | Serine/thre K.GAVDDVDAEADIISTVEFNHSGELLATGDK#.G | 6.47   | 1.78   | 3.63 | 0.28 |
| Q6P1F6_2_Ppp2r2a  | Serine/thre R.VVIFQEQENK#.I                     | 10.34  | 2.43   | 4.26 | 0.23 |
| Q6P1F6_2_Ppp2r2a  | Serine/thre K.NAAQFLLSTNDK#.T                   | 2.45   | 11.21  | 0.22 | 4.57 |
| P58389_P1 Ppp2r4  | Serine/thre K.FGSLPIHPTVSG.-                    | 20.85  | 20.85  | 1.00 | 1.00 |
| P58389_P1 Ppp2r4  | Serine/thre K.TGPFALHNSQLWNISAVPSWSK#.V         | 3.83   | 3.03   | 1.26 | 0.79 |

|                   |                                              |        |        |      |       |
|-------------------|----------------------------------------------|--------|--------|------|-------|
| P58389_P1 Ppp2r4  | Serine/thre R.VDDQVAIVFK#V                   | 38.98  | 4.27   | 9.13 | 0.11  |
| P58389_P1 Ppp2r4  | Serine/thre K.FGSLPIHPIVTSG.-                | 11.25  | 11.25  | 1.00 | 1.00  |
| P58389_P1 Ppp2r4  | Serine/thre K.FGSLPIHPIVTSG.-                | 10.85  | 10.85  | 1.00 | 1.00  |
| Q91V89_Q1 Ppp2r5d | Protein Ppj K.ESSLTEPVIVGLLK#F               | 15.76  | 5.57   | 2.83 | 0.35  |
| Q91V89_Q1 Ppp2r5d | Protein Ppj R.FLESPDFQPNIAK#K                | 32.33  | 11.63  | 2.78 | 0.36  |
| Q91V89_Q1 Ppp2r5d | Protein Ppj R.TVETEAVQMLK#D                  | 11.28  | 4.87   | 2.32 | 0.43  |
| Q91V89_Q1 Ppp2r5d | Protein Ppj R.AEEFLTASQEAL.-                 | 12.73  | 12.73  | 1.00 | 1.00  |
| Q91V89_Q1 Ppp2r5d | Protein Ppj K.ESSLTEPVIVGLLK#F               | 26.32  | 12.91  | 2.04 | 0.49  |
| Q91V89_Q1 Ppp2r5d | Protein Ppj R.FLESPDFQPNIAK#K                | 37.77  | 16.04  | 2.36 | 0.42  |
| Q91V89_Q1 Ppp2r5d | Protein Ppj R.TVETEAVQMLK#D                  | 17.66  | 6.43   | 2.75 | 0.36  |
| Q91V89_Q1 Ppp2r5d | Protein Ppj R.TVETEAVQMLK#D                  | 17.07  | 6.69   | 2.55 | 0.39  |
| Q91V89_Q1 Ppp2r5d | Protein Ppj K.YSGGQJVK#K                     | 20.61  | 9.54   | 2.16 | 0.46  |
| Q91V89_Q1 Ppp2r5d | Protein Ppj K.DGGGENTDEAQPQPQSQSPSSNK#R      | 10.81  | 3.61   | 2.99 | 0.33  |
| Q91V89_Q1 Ppp2r5d | Protein Ppj K.ESSLTEPVIVGLLK#F               | 44.04  | 17.20  | 2.56 | 0.39  |
| Q91V89_Q1 Ppp2r5d | Protein Ppj R.FLESPDFQPNIAK#K                | 30.03  | 16.13  | 1.86 | 0.54  |
| Q91V89_Q1 Ppp2r5d | Protein Ppj R.IILPIM*FPALYR.N                | 7.37   | 14.94  | 0.49 | 2.03  |
| Q91V89_Q1 Ppp2r5d | Protein Ppj R.KHSELQPDVYTIK#A                | 10.21  | 117.26 | 0.09 | 11.49 |
| Q91V89_Q1 Ppp2r5d | Protein Ppj K.TIHGLIYNALK#L                  | 12.91  | 4.50   | 2.87 | 0.35  |
| Q91V89_Q1 Ppp2r5d | Protein Ppj R.FLVEAVQMLK#D                   | 19.58  | 12.89  | 1.52 | 0.66  |
| Q91V89_Q1 Ppp2r5d | Protein Ppj R.TVETEAVQMLK#D                  | 12.59  | 6.36   | 1.98 | 0.51  |
| Q61151_Z1 Ppp2r5e | Serine/thre R.FLESEFQPSIAK#K                 | 8.36   | 1.98   | 4.23 | 0.24  |
| P63328_FF Ppp3ca  | Serine/thre K.FLVEGQSPANTRY                  | 4.97   | 10.70  | 0.46 | 2.15  |
| Q63810_C1 Ppp3r1  | Calcineurin K.DGYISNGELFQVLK#M               | 8.97   | 82.19  | 0.11 | 9.16  |
| Q63810_C1 Ppp3r1  | Calcineurin K.DTQLQVVDK#T                    | 12.95  | 8.98   | 1.44 | 0.69  |
| Q63810_C1 Ppp3r1  | Calcineurin K.LDLNDSGLSVEEFM*SLPELQQNPLVQR.V | 2.60   | 3.03   | 0.86 | 1.17  |
| Q922D4_P1 Ppp6r3  | Serine/thre K.ETGWASFSFTSLSLK#E              | 6.49   | 3.13   | 2.07 | 0.48  |
| Q91VJ5_PC Pqb1    | Polyglutam K.HLEPEEEHIAEDYDDDPVDEATRI        | 1.52   | 2.89   | 0.52 | 1.91  |
| Q91G8_PR Praf2    | PRA1 famil R.ALDDFVLGSAR.L                   | 1.99   | 7.79   | 0.26 | 3.92  |
| Q91G8_PR Praf2    | PRA1 famil R.TPM*GALLLEALGQEQEAGS.-          | 7.47   | 7.47   | 1.00 | 1.00  |
| Q99K43_P1 Prc1    | Protein reg K.LLQEQLR.D                      | 4.00   | 8.36   | 0.48 | 2.09  |
| Q9EQC8_Q1 Prcc    | Papillary re K.VK*PSLAPVLTITTTTPSPAIAK#A     | 12.91  | 8.56   | 1.51 | 0.66  |
| Q9EQC8_Q1 Prcc    | Papillary re K.VLQSGEGTGLSALLPOPK#N          | 4.73   | 2.65   | 1.78 | 0.56  |
| P35700_FF Prdx1   | Peroxirodo K.ATAVM*PDGQFK#D                  | 9.89   | 7.20   | 1.37 | 0.73  |
| P35700_FF Prdx1   | Peroxirodo K.ADEGISFR.G                      | 18.69  | 22.88  | 0.82 | 1.22  |
| P35700_FF Prdx1   | Peroxirodo K.ATAVM*PDGQFK#D                  | 101.67 | 31.35  | 3.24 | 0.31  |
| P35700_FF Prdx1   | Peroxirodo K.ATAVMPDGQFK#D                   | 22.60  | 8.65   | 2.61 | 0.38  |
| P35700_FF Prdx1   | Peroxirodo R.GLFHDDK#G                       | 73.93  | 19.80  | 3.73 | 0.27  |
| P35700_FF Prdx1   | Peroxirodo K.IGYAPANFK#A                     | 39.59  | 14.75  | 2.68 | 0.37  |
| P35700_FF Prdx1   | Peroxirodo R.QITINDLPVGR.S                   | 21.23  | 37.28  | 0.57 | 1.76  |
| P35700_FF Prdx1   | Peroxirodo R.TIAQDYGLK#A                     | 82.16  | 24.47  | 3.36 | 0.30  |
| P35700_FF Prdx1   | Peroxirodo K.ATAVM*PDGQFK#D                  | 14.98  | 4.86   | 3.08 | 0.32  |
| Q61171_P1 Prdx2   | Peroxirodo R.KEGGLGPLNPLLADVTK#S             | 37.04  | 7.65   | 4.84 | 0.21  |
| Q61171_P1 Prdx2   | Peroxirodo R.QITVNDLPVGR.S                   | 1.37   | 2.83   | 0.49 | 2.06  |
| Q61171_P1 Prdx2   | Peroxirodo K.SAPDFTATAVVDGAFK#E              | 28.51  | 7.17   | 3.97 | 0.25  |
| P20108_FF Prdx3   | Thioredoxin R.DYGVLESAGIALR.G                | 6.49   | 8.08   | 0.80 | 1.24  |
| P20108_FF Prdx3   | Thioredoxin K.ELSLDDFK#G                     | 12.25  | 4.31   | 2.84 | 0.35  |
| P20108_FF Prdx3   | Thioredoxin R.GLFHDPNGVVK#H                  | 18.74  | 8.32   | 2.25 | 0.44  |
| P99029_FF Prdx5   | Peroxirodo K.KHNLAELEFK#G                    | 5.90   | 1.71   | 3.45 | 0.29  |
| P99029_FF Prdx5   | Peroxirodo R.LLADPTGAFGK#A                   | 24.45  | 7.96   | 3.07 | 0.33  |
| P99029_FF Prdx5   | Peroxirodo K.VGDALPSVEVEFEGEPK#K             | 18.33  | 6.19   | 2.96 | 0.34  |
| P99029_FF Prdx5   | Peroxirodo K.VNLAELEFK#G                     | 8.13   | 5.63   | 1.44 | 0.69  |
| P20664_FF Prim1   | DNA prima: K.LGAFQAQEK#E                     | 19.45  | 19.32  | 1.01 | 0.99  |
| P20664_FF Prim1   | DNA prima: R.SGIVLESLVK#G                    | 22.00  | 14.32  | 1.54 | 0.65  |
| P20664_FF Prim1   | DNA prima: K.TSLAPVVK#V                      | 14.90  | 3.75   | 3.97 | 0.25  |
| P20664_FF Prim1   | DNA prima: R.SGIVLESLVK#G                    | 14.05  | 9.06   | 1.55 | 0.64  |
| P20664_FF Prim1   | DNA prima: K.LGAFQAQEK#E                     | 16.24  | 14.72  | 1.10 | 0.91  |
| P20664_FF Prim1   | DNA prima: K.VFEQFLENLDK#S                   | 17.44  | 10.89  | 1.60 | 0.62  |
| P33610_FF Prim2   | DNA prima: R.EQDIM*ASSPSLSGIK#L              | 15.83  | 12.47  | 1.27 | 0.79  |
| P33610_FF Prim2   | DNA prima: R.EQDIMASSPSLSGIK#L               | 5.15   | 3.11   | 1.66 | 0.60  |
| P33610_FF Prim2   | DNA prima: K.IPASGISQLDLVK#G                 | 58.52  | 39.78  | 1.47 | 0.68  |
| P33610_FF Prim2   | DNA prima: K.VPFADALDLFR.G                   | 7.96   | 28.35  | 0.28 | 3.56  |
| P33610_FF Prim2   | DNA prima: R.EQDIM*ASSPSLSGIK#L              | 4.92   | 4.44   | 1.11 | 0.90  |
| P33610_FF Prim2   | DNA prima: K.VPFADALDLFR.G                   | 2.88   | 11.16  | 0.26 | 3.87  |
| P33610_FF Prim2   | DNA prima: K.AIENLGSVVK#G                    | 18.19  | 11.39  | 1.60 | 0.63  |
| P33610_FF Prim2   | DNA prima: K.DSHLHFEAISDEEK#T                | 15.21  | 8.25   | 1.84 | 0.54  |
| P33610_FF Prim2   | DNA prima: R.HSDAELLK#Q                      | 11.87  | 8.42   | 1.41 | 0.71  |
| P33610_FF Prim2   | DNA prima: K.IPASGISQLDLVK#G                 | 41.97  | 28.91  | 1.45 | 0.69  |
| P33610_FF Prim2   | DNA prima: K.VPFADALDLFR.G                   | 6.29   | 15.18  | 0.41 | 2.41  |
| Q5EG47_A1 Prkaa1  | 5'-AMP-acti R.HTDELNPQK#S                    | 19.27  | 14.98  | 1.29 | 0.78  |
| Q5EG47_A1 Prkaa1  | 5'-AMP-acti K.IADFGLSNM*MSDGEFLR.T           | 3.21   | 5.22   | 0.62 | 1.62  |
| Q5EG47_A1 Prkaa1  | 5'-AMP-acti K.IGHYLGDTLGVGTFGK#V             | 23.74  | 14.85  | 1.60 | 0.63  |
| Q5EG47_A1 Prkaa1  | 5'-AMP-acti R.VPFLVAETPR.#                   | 10.97  | 29.88  | 0.37 | 2.72  |
| Q5EG47_A1 Prkaa1  | 5'-AMP-acti R.HTDELNPQK#S                    | 11.88  | 7.00   | 1.70 | 0.59  |
| Q5EG47_A1 Prkaa1  | 5'-AMP-acti K.IGHYLGDTLGVGTFGK#V             | 12.43  | 9.72   | 1.28 | 0.78  |
| Q5EG47_A1 Prkaa1  | 5'-AMP-acti R.SIDDETEAK#S                    | 13.35  | 9.25   | 1.44 | 0.69  |
| Q5EG47_A1 Prkaa1  | 5'-AMP-acti R.HTDELNPQK#S                    | 13.69  | 8.44   | 1.62 | 0.62  |
| Q5EG47_A1 Prkaa1  | 5'-AMP-acti K.IGHYLGDTLGVGTFGK#V             | 25.75  | 9.80   | 2.63 | 0.38  |
| Q9R078_A1 Prkab1  | 5'-AMP-acti K.K#DFEFDALM*VDSQK#C             | 13.87  | 8.31   | 1.67 | 0.60  |
| Q9R078_A1 Prkab1  | 5'-AMP-acti R.SQNNFVAILDLPEGEHQYK#F          | 17.06  | 12.10  | 1.41 | 0.71  |
| Q9R078_A1 Prkab1  | 5'-AMP-acti K.YVTLLYK#PI.-                   | 17.49  | 11.35  | 1.54 | 0.65  |
| P05132_K1 Prkaca  | cAMP-depe R.DLK#PENLLIDQQGYIQVDFGFAK#R       | 22.05  | 5.74   | 3.84 | 0.26  |
| P05132_K1 Prkaca  | cAMP-depe R.LLQAVNFPFLVK#L                   | 28.81  | 8.28   | 3.48 | 0.29  |
| P05132_K1 Prkaca  | cAMP-depe R.NLLQVDLTK#R                      | 25.41  | 6.69   | 3.80 | 0.26  |
| P68181_K1 Prkacb  | cAMP-depe K.ATEQYAM*#K.I                     | 10.43  | 3.14   | 3.32 | 0.30  |
| P68181_K1 Prkacb  | cAMP-depe R.LLQAVNFPFLVK#L                   | 10.19  | 7.92   | 1.29 | 0.78  |
| P68181_K1 Prkacb  | cAMP-depe R.LEYSFK#D                         | 21.32  | 3.94   | 5.42 | 0.18  |
| O54950_A1 Prkag1  | 5'-AMP-acti K.FDVINLAAEK#T                   | 62.02  | 46.00  | 1.35 | 0.74  |
| O54950_A1 Prkag1  | 5'-AMP-acti R.LPVIDPESGNTLYLTHK#R            | 33.80  | 25.39  | 1.33 | 0.75  |
| O54950_A1 Prkag1  | 5'-AMP-acti K.LVVFDTSLQVK#K                  | 22.69  | 13.30  | 1.71 | 0.59  |
| O54950_A1 Prkag1  | 5'-AMP-acti K.TYNNLDVSVTK#A                  | 45.69  | 33.41  | 1.37 | 0.73  |
| O54950_A1 Prkag1  | 5'-AMP-acti R.VSALPVVDEK#G                   | 30.06  | 22.92  | 1.31 | 0.76  |
| O54950_A1 Prkag1  | 5'-AMP-acti R.VVDIYSK#F                      | 38.51  | 26.21  | 1.47 | 0.68  |
| O54950_A1 Prkag1  | 5'-AMP-acti R.LPVIDPESGNTLYLTHK#R            | 12.45  | 5.46   | 2.28 | 0.44  |
| O54950_A1 Prkag1  | 5'-AMP-acti K.LVVFDTSLQVK#K                  | 8.46   | 4.28   | 1.98 | 0.51  |
| O54950_A1 Prkag1  | 5'-AMP-acti K.FDVINLAAEK#T                   | 11.66  | 6.50   | 1.79 | 0.56  |
| O54950_A1 Prkag1  | 5'-AMP-acti R.LPVIDPESGNTLYLTHK#R            | 14.54  | 6.05   | 2.40 | 0.42  |
| Q9DBC7_K1 Prkar1a | cAMP-depe K.HNIQALLK#D                       | 20.41  | 7.08   | 2.88 | 0.35  |
| Q9DBC7_K1 Prkar1a | cAMP-depe R.LTVADALEPVQFEDGQK#I              | 43.74  | 12.04  | 3.63 | 0.28  |
| P12849_K1 Prkar1b | cAMP-depe R.LTVADALEPVQFEDGQK#I              | 4.97   | 1.80   | 2.76 | 0.36  |
| P12367_K1 Prkar2a | cAMP-depe K.NLDQEQSLQVLDAMFEK#I              | 9.68   | 4.44   | 2.18 | 0.46  |
| P31324_K1 Prkar2b | cAMP-depe R.AASAHAIQTVK#C                    | 15.22  | 5.73   | 2.66 | 0.38  |
| P31324_K1 Prkar2b | cAMP-depe R.GTFDVIYK#C                       | 9.69   | 4.13   | 2.35 | 0.43  |
| P31324_K1 Prkar2b | cAMP-depe R.TWGDAGAAAGGIPSK#G                | 21.23  | 8.74   | 2.43 | 0.41  |

|                   |                                                               |        |        |      |      |
|-------------------|---------------------------------------------------------------|--------|--------|------|------|
| P20444_KF Prkca   | Protein kin K.LTDFNFLM*VLGK#.G                                | 13.45  | 18.21  | 0.74 | 1.35 |
| P20444_KF Prkca   | Protein kin K.LTDFNFLM*VLGK#.G                                | 18.03  | 11.22  | 1.61 | 0.62 |
| P28867_KF Prkcd   | Protein kin K.AEFLDLQPOQAK#.V                                 | 11.27  | 4.36   | 2.58 | 0.39 |
| P28867_KF Prkcd   | Protein kin K.FEQFLDI.-                                       | 9.27   | 9.27   | 1.00 | 1.00 |
| P28867_KF Prkcd   | Protein kin K.AEFLDLQPOQAK#.V                                 | 11.39  | 2.57   | 4.44 | 0.23 |
| P28867_KF Prkcd   | Protein kin K.FEQFLDI.-                                       | 9.82   | 9.82   | 1.00 | 1.00 |
| P28867_KF Prkcd   | Protein kin R.K#LDTTESVGIYQGFKE#.K                            | 18.92  | 2.06   | 9.20 | 0.11 |
| Q62074_Kf Prkci   | Protein kin K.ASSSLGLQDFD.LLR.V                               | 2.96   | 9.40   | 0.31 | 3.18 |
| Q62074_Kf Prkci   | Protein kin K.ASSSLGLQDFD.LLR.V                               | 9.23   | 17.04  | 0.54 | 1.84 |
| Q62074_Kf Prkci   | Protein kin R.DLK#LDNVLLDSEGHK#.L                             | 25.47  | 12.27  | 2.08 | 0.48 |
| Q62074_Kf Prkci   | Protein kin K.ELVNDDEDIDWVQTEK#.H                             | 9.95   | 5.29   | 1.88 | 0.53 |
| Q62074_Kf Prkci   | Protein kin K.ASSSLGLQDFD.LLR.V                               | 5.79   | 19.17  | 0.30 | 3.31 |
| Q62074_Kf Prkci   | Protein kin R.DLK#LDNVLLDSEGHK#.L                             | 28.28  | 21.20  | 1.33 | 0.75 |
| Q62074_Kf Prkci   | Protein kin K.ELVNDDEDIDWVQTEK#.H                             | 8.85   | 6.89   | 1.28 | 0.78 |
| Q62101_Kf Prkd1   | Serine/thre R.SVVGTPAYLAEPLVR.N                               | 4.10   | 8.89   | 0.46 | 2.17 |
| Q9W7X2_P Prkra    | Interferon-i R.AAEAAINILK#.A                                  | 17.14  | 10.06  | 1.70 | 0.59 |
| Q9W7X2_P Prkra    | Interferon-i K.NQLNPIGSLQELAHHGWR.L                           | 6.27   | 10.37  | 0.61 | 1.65 |
| Q9J1F0_ANI Prmt1  | Protein arg K.ANK#LDHVVTIHK#.G                                | 98.89  | 29.20  | 3.39 | 0.30 |
| Q9J1F0_ANI Prmt1  | Protein arg R.ATLYVTIADR.Q                                    | 36.45  | 49.13  | 0.74 | 1.35 |
| Q9J1F0_ANI Prmt1  | Protein arg R.DKWLAPDGLIFPDR.A                                | 15.96  | 20.85  | 0.77 | 1.31 |
| Q9J1F0_ANI Prmt1  | Protein arg K.DVAIK#EPLVDVDPK#.Q                              | 48.77  | 10.92  | 4.47 | 0.22 |
| Q9J1F0_ANI Prmt1  | Protein arg K.GK#VEEVLPEK#.V                                  | 66.55  | 11.27  | 5.91 | 0.17 |
| Q9J1F0_ANI Prmt1  | Protein arg K.LDHVVTIHK#.G                                    | 25.10  | 4.29   | 5.85 | 0.17 |
| Q9J1F0_ANI Prmt1  | Protein arg K.QTVFYM*EDLYTVK#.T                               | 21.05  | 5.26   | 4.00 | 0.25 |
| Q9J1F0_ANI Prmt1  | Protein arg K.QTVFYMEDLYTVK#.T                                | 42.66  | 7.41   | 5.76 | 0.17 |
| Q9J1F0_ANI Prmt1  | Protein arg R.TGFSTSPESPYTHWK#.Q                              | 160.47 | 40.30  | 3.98 | 0.25 |
| Q9J1F0_ANI Prmt1  | Protein arg K.VEEVELPEK#.V                                    | 30.51  | 14.20  | 2.15 | 0.47 |
| Q9J1F0_ANI Prmt1  | Protein arg K.WLAPDGLIFPDR.A                                  | 15.66  | 18.40  | 0.85 | 1.17 |
| Q9J1F0_ANI Prmt1  | Protein arg K.ANK#LDHVVTIHK#.G                                | 125.23 | 21.21  | 5.90 | 0.17 |
| Q9J1F0_ANI Prmt1  | Protein arg R.ATLYVTIADR.Q                                    | 37.93  | 39.35  | 0.96 | 1.04 |
| Q9J1F0_ANI Prmt1  | Protein arg R.DKWLAPDGLIFPDR.A                                | 18.74  | 23.65  | 0.79 | 1.26 |
| Q9J1F0_ANI Prmt1  | Protein arg K.DVAIK#EPLVDVDPK#.Q                              | 44.58  | 11.69  | 3.81 | 0.26 |
| Q9J1F0_ANI Prmt1  | Protein arg K.EVDIYTVK#.V                                     | 106.57 | 23.73  | 4.49 | 0.22 |
| Q9J1F0_ANI Prmt1  | Protein arg K.GK#VEEVLPEK#.V                                  | 35.82  | 12.14  | 2.95 | 0.34 |
| Q9J1F0_ANI Prmt1  | Protein arg R.TGFSTSPESPYTHWK#.Q                              | 23.60  | 5.73   | 4.12 | 0.24 |
| Q9J1F0_ANI Prmt1  | Protein arg K.ANK#LDHVVTIHK#.G                                | 213.61 | 46.23  | 4.62 | 0.22 |
| Q9J1F0_ANI Prmt1  | Protein arg R.ATLYVTIADR.Q                                    | 70.35  | 73.94  | 0.95 | 1.05 |
| Q9J1F0_ANI Prmt1  | Protein arg R.DKWLAPDGLIFPDR.A                                | 23.80  | 27.12  | 0.88 | 1.14 |
| Q9J1F0_ANI Prmt1  | Protein arg K.DVAIK#EPLVDVDPK#.Q                              | 85.77  | 21.83  | 3.93 | 0.25 |
| Q9J1F0_ANI Prmt1  | Protein arg K.EVDIYTVK#.V                                     | 119.89 | 33.76  | 3.55 | 0.28 |
| Q9J1F0_ANI Prmt1  | Protein arg K.GK#VEEVLPEK#.V                                  | 51.30  | 12.87  | 3.99 | 0.25 |
| Q9J1F0_ANI Prmt1  | Protein arg K.KVEEVELPEK#.V                                   | 119.32 | 27.79  | 4.29 | 0.23 |
| Q9J1F0_ANI Prmt1  | Protein arg K.LDHVVTIHK#.G                                    | 19.54  | 4.52   | 4.32 | 0.23 |
| Q9J1F0_ANI Prmt1  | Protein arg K.QTVFYM*EDLYTVK#.T                               | 34.32  | 8.12   | 4.22 | 0.24 |
| Q8CIG8_AA Prmt5   | Protein arg K.AAILPTSIFLTK#.K                                 | 19.81  | 6.70   | 2.96 | 0.34 |
| Q8CIG8_AA Prmt5   | Protein arg R.DWNTLVGK#.L                                     | 17.44  | 8.63   | 2.02 | 0.49 |
| Q8CIG8_AA Prmt5   | Protein arg K.DDGVSIPEYTSFLAPISSSK#.L                         | 8.03   | 4.04   | 1.99 | 0.50 |
| Q8CIG8_AA Prmt5   | Protein arg R.DWNTLVGK#.L                                     | 30.57  | 7.88   | 3.88 | 0.26 |
| Q8CIG8_AA Prmt5   | Protein arg R.GPLVNASLR.A                                     | 7.70   | 10.91  | 0.71 | 1.42 |
| Q8CIG8_AA Prmt5   | Protein arg K.VSQYQQAIVK#.C                                   | 26.74  | 8.76   | 3.05 | 0.33 |
| Q9Z2Y8_PR Prosc   | Proline syn R.TFGENVQELLEK#.A                                 | 9.34   | 4.00   | 2.33 | 0.43 |
| Q99KP6_Pf Prpf19  | Pre-mRNA-1 R.AHESAVTGLSLHATGDYLLSSDDQYWFSDIQTGR.V             | 3.22   | 2.75   | 1.17 | 0.85 |
| Q99KP6_Pf Prpf19  | Pre-mRNA-1 K.ALQDEWDVAVMLHSFTLR.Q                             | 35.32  | 84.88  | 0.42 | 2.40 |
| Q99KP6_Pf Prpf19  | Pre-mRNA-1 K.ALQDEWDVAVMLHSFTLR.L                             | 2.94   | 8.98   | 0.33 | 3.06 |
| Q99KP6_Pf Prpf19  | Pre-mRNA-1 K.ATVLTTER.K                                       | 54.21  | 126.48 | 0.43 | 2.33 |
| Q99KP6_Pf Prpf19  | Pre-mRNA-1 R.EALATLKPOAGLIVPQAVPSSQSVVGAGEPM*DLGLVGM*TPEIQK.L | 9.72   | 6.73   | 1.44 | 0.69 |
| Q99KP6_Pf Prpf19  | Pre-mRNA-1 K.FIASTGM*DR.S                                     | 31.08  | 78.81  | 0.39 | 2.54 |
| Q99KP6_Pf Prpf19  | Pre-mRNA-1 K.ILTGGADK#NVVVFDDK#.S                             | 69.12  | 54.03  | 1.28 | 0.78 |
| Q99KP6_Pf Prpf19  | Pre-mRNA-1 K.KVTSVVFHPSQELVFSASPDATIR.I                       | 12.15  | 39.93  | 0.30 | 3.29 |
| Q99KP6_Pf Prpf19  | Pre-mRNA-1 K.NVVVFDDK#.S                                      | 111.87 | 60.28  | 1.86 | 0.54 |
| Q99KP6_Pf Prpf19  | Pre-mRNA-1 K.STEQIATLTK#.G                                    | 277.93 | 166.00 | 1.67 | 0.60 |
| Q99KP6_Pf Prpf19  | Pre-mRNA-1 K.TLQLDNFVFK#.S                                    | 201.71 | 124.29 | 1.62 | 0.62 |
| Q99KP6_Pf Prpf19  | Pre-mRNA-1 R.TNVANFPGHSGPITSIAFSENGYLYLATAADSSVK#.L           | 50.33  | 10.28  | 4.90 | 0.20 |
| Q99KP6_Pf Prpf19  | Pre-mRNA-1 K.YIAENGTDPINNQP.LSEEQI.DIK#.V                     | 38.40  | 25.15  | 1.53 | 0.66 |
| Q99KP6_Pf Prpf19  | Pre-mRNA-1 K.YIAENGTDPINNQP.LSEEQI.DIK#.V                     | 9.98   | 4.64   | 2.15 | 0.47 |
| Q99KP6_Pf Prpf19  | Pre-mRNA-1 R.TNVANFPGHSGPITSIAFSENGYLYLATAADSSVK#.L           | 4.40   | 3.51   | 1.25 | 0.80 |
| Q922U1_Pf Prpf3   | U4/U6 sma K.DVNVVVVEGGPK#.A                                   | 20.31  | 10.80  | 1.88 | 0.53 |
| Q922U1_Pf Prpf3   | U4/U6 sma R.LALIAPK#.K                                        | 32.03  | 18.03  | 1.78 | 0.56 |
| Q922U1_Pf Prpf3   | U4/U6 sma R.LGLTPPPEK#.V                                      | 52.16  | 36.69  | 1.42 | 0.70 |
| Q922U1_Pf Prpf3   | U4/U6 sma R.VLGTAVQDPTK#.V                                    | 22.87  | 9.02   | 2.54 | 0.39 |
| Q922U1_Pf Prpf3   | U4/U6 sma R.VLGTAVQDPTK#VAHVH.R.A                             | 2.60   | 7.45   | 0.35 | 2.86 |
| Q922U1_Pf Prpf3   | U4/U6 sma K.LQAEISQAAR.K                                      | 4.25   | 12.26  | 0.35 | 2.88 |
| Q922U1_Pf Prpf3   | U4/U6 sma K.DVNVVVVEGGPK#.A                                   | 14.22  | 9.49   | 1.50 | 0.67 |
| Q922U1_Pf Prpf3   | U4/U6 sma R.LGLTPPPEK#.V                                      | 30.18  | 20.00  | 1.51 | 0.66 |
| Q922U1_Pf Prpf3   | U4/U6 sma K.LQAEISQAAR.K                                      | 5.35   | 19.67  | 0.27 | 3.67 |
| Q922U1_Pf Prpf3   | U4/U6 sma R.VLGTAVQDPTK#.V                                    | 13.96  | 5.46   | 2.56 | 0.39 |
| Q8CCF0_Pf Prpf31  | U4/U6 sma K.IEYISK#.Q                                         | 79.50  | 48.34  | 1.64 | 0.61 |
| Q8CCF0_Pf Prpf31  | U4/U6 sma K.IM*GVAGGLTNLSK#.M                                 | 42.21  | 29.05  | 1.45 | 0.69 |
| Q8CCF0_Pf Prpf31  | U4/U6 sma R.IEYVESR.M                                         | 15.76  | 36.87  | 0.43 | 2.34 |
| Q8CCF0_Pf Prpf31  | U4/U6 sma R.LGLTTER.K                                         | 12.80  | 32.04  | 0.40 | 2.50 |
| Q8CCF0_Pf Prpf31  | U4/U6 sma R.M*SGEIEEDAYQEDLGSFHLGK#.S                         | 43.59  | 21.95  | 1.99 | 0.50 |
| Q8CCF0_Pf Prpf31  | U4/U6 sma R.M*SFIAPNLSIIIGASTAAK#.I                           | 9.14   | 9.39   | 0.97 | 1.03 |
| Q8CCF0_Pf Prpf31  | U4/U6 sma K.QANVSEVM*GPVEAAPEYR.V                             | 5.18   | 11.98  | 0.43 | 2.31 |
| Q8CCF0_Pf Prpf31  | U4/U6 sma K.RFPELESLVNALDYIR.T                                | 8.82   | 52.99  | 0.17 | 6.01 |
| Q8CCF0_Pf Prpf31  | U4/U6 sma R.SSGTASSVAFTPLQGLEIVNPQAAEK#.K                     | 43.92  | 25.82  | 1.70 | 0.59 |
| Q8CCF0_Pf Prpf31  | U4/U6 sma R.SSGTASSVAFTPLQGLEIVNPQAAEK#.V                     | 13.08  | 7.96   | 1.64 | 0.61 |
| Q8CCF0_Pf Prpf31  | U4/U6 sma K.TLSGFSSTVLPHTGGYIYHSDVQSLPPDLR.R                  | 2.34   | 2.69   | 0.87 | 1.15 |
| Q8CCF0_Pf Prpf31  | U4/U6 sma K.VGYELKDEIER.K                                     | 4.89   | 16.26  | 0.30 | 3.32 |
| Q8CCF0_Pf Prpf31  | U4/U6 sma R.VIVDANNLTVIENELNIIHK#.F                           | 83.24  | 42.90  | 1.94 | 0.52 |
| Q8CCF0_Pf Prpf31  | U4/U6 sma K.YFSSMAEFLK#.V                                     | 27.79  | 21.38  | 1.30 | 0.77 |
| Q8CCF0_Pf Prpf31  | U4/U6 sma R.M*SGEIEEDAYQEDLGSFHLGK#.S                         | 9.51   | 5.45   | 1.75 | 0.57 |
| Q8CCF0_Pf Prpf31  | U4/U6 sma R.VIVDANNLTVIENELNIIHK#.F                           | 15.34  | 8.64   | 1.78 | 0.56 |
| Q8CCF0_Pf Prpf31  | U4/U6 sma R.M*SGEIEEDAYQEDLGSFHLGK#.S                         | 10.12  | 5.71   | 1.77 | 0.56 |
| Q4FK66_Pf Prpf38a | Pre-mRNA-1 K.DAHSIHGTNPQYLVEK#.I                              | 20.33  | 16.38  | 1.24 | 0.81 |
| Q4FK66_Pf Prpf38a | Pre-mRNA-1 K.VLEPLYNDYR.K                                     | 3.05   | 12.34  | 0.25 | 4.05 |
| Q4FK66_Pf Prpf38a | Pre-mRNA-1 R.VVLEAEQLEPR.V                                    | 11.50  | 14.65  | 0.79 | 1.27 |
| Q4FK66_Pf Prpf38a | Pre-mRNA-1 K.DAHSIHGTNPQYLVEK.I                               | 15.86  | 10.69  | 1.48 | 0.67 |
| Q4FK66_Pf Prpf38a | Pre-mRNA-1 K.DAHSIHGTNPQYLVEK.I                               | 21.53  | 17.36  | 1.24 | 0.81 |
| Q4FK66_Pf Prpf38a | Pre-mRNA-1 R.VVLEAEQLEPR.V                                    | 3.71   | 11.26  | 0.33 | 3.03 |
| Q80SYS_PR Prpf38b | Pre-mRNA-1 R.IPVVQK#.N                                        | 33.09  | 18.91  | 1.75 | 0.57 |
| Q80SYS_PR Prpf38b | Pre-mRNA-1 K.LEWVSTLFPR.I                                     | 4.11   | 12.08  | 0.34 | 2.94 |
| Q80SYS_PR Prpf38b | Pre-mRNA-1 K.QGNVLPWLGNEK#.T                                  | 12.11  | 4.57   | 2.65 | 0.38 |
| Q80SYS_PR Prpf38b | Pre-mRNA-1 K.VQLYELK#.T                                       | 22.69  | 14.02  | 1.62 | 0.62 |



|                  |                                           |        |        |      |      |
|------------------|-------------------------------------------|--------|--------|------|------|
| Q80S5_PR Prp38b  | Pre-mRNA-K.LEWFSTLFR.I                    | 2.92   | 9.25   | 0.32 | 3.17 |
| Q80S5_PR Prp38b  | Pre-mRNA-K.VQLVELK#.T                     | 16.26  | 11.52  | 1.41 | 0.71 |
| Q8K222_FF Prp39  | Pre-mRNA-K.SNNESSFYAIK#.L                 | 10.22  | 3.54   | 2.88 | 0.35 |
| Q9DAW6_F Prp4    | U4/U6 sma K.AGIEAGNINITSGEVFEIEHISER.Q    | 8.60   | 13.83  | 0.62 | 1.61 |
| Q9DAW6_F Prp4    | U4/U6 sma R.ALGEPITLFGEGPAER.R            | 23.57  | 50.87  | 0.46 | 2.16 |
| Q9DAW6_F Prp4    | U4/U6 sma K.FEPIHGDFLLTGAYDNTAK#.I        | 89.71  | 40.45  | 2.22 | 0.45 |
| Q9DAW6_F Prp4    | U4/U6 sma R.GHNTNVGAIVFHPK#.S             | 6.07   | 4.44   | 1.37 | 0.73 |
| Q9DAW6_F Prp4    | U4/U6 sma K.K#PHYIGSLLEK#.E               | 83.84  | 49.35  | 1.70 | 0.59 |
| Q9DAW6_F Prp4    | U4/U6 sma R.NILSVGTDALK#.K                | 42.64  | 21.85  | 1.95 | 0.51 |
| Q9DAW6_F Prp4    | U4/U6 sma R.QINVTDDSEVK#.A                | 67.04  | 33.56  | 2.00 | 0.50 |
| Q9DAW6_F Prp4    | U4/U6 sma K.SKEEYQQTWYHGPNSLK.V           | 30.84  | 15.30  | 2.02 | 0.50 |
| Q9DAW6_F Prp4    | U4/U6 sma K.STVSLDQK#.D                   | 71.24  | 18.20  | 3.91 | 0.26 |
| Q9DAW6_F Prp4    | U4/U6 sma K.TKHAPDDLVPVVK#.K              | 31.97  | 16.83  | 1.90 | 0.53 |
| Q9DAW6_F Prp4    | U4/U6 sma K.TKHAPDDLVPVVK#.K              | 17.87  | 7.73   | 2.31 | 0.43 |
| Q9DAW6_F Prp4    | U4/U6 sma R.GHNTNVGAIVFHPK#.S             | 15.10  | 8.06   | 1.87 | 0.53 |
| Q9R1C7_P1 Prp40a | Pre-mRNA-K.AEQMFGEMEVDNAISER.D            | 2.46   | 7.28   | 0.34 | 2.96 |
| Q9R1C7_P1 Prp40a | Pre-mRNA-R.ALEK#EEEEK#QK#.T               | 21.14  | 21.60  | 0.98 | 1.02 |
| Q9R1C7_P1 Prp40a | Pre-mRNA-K.ELEDLEGQNTVAGGLITK#.S          | 43.23  | 29.79  | 1.45 | 0.69 |
| Q9R1C7_P1 Prp40a | Pre-mRNA-K.ELEDLEGQNTVAGGLITK#.S          | 29.36  | 24.29  | 1.21 | 0.83 |
| Q9R1C7_P1 Prp40a | Pre-mRNA-R.FLENHEK#.M                     | 33.24  | 24.71  | 1.35 | 0.74 |
| Q9R1C7_P1 Prp40a | Pre-mRNA-R.FTNM*LGQPGSTALDLFK#.F          | 49.69  | 32.27  | 1.54 | 0.65 |
| Q9R1C7_P1 Prp40a | Pre-mRNA-R.FTNMLGQPGSTALDLFK#.F           | 25.51  | 19.81  | 1.29 | 0.78 |
| Q9R1C7_P1 Prp40a | Pre-mRNA-R.FVKEPAFEDITLESER.K             | 32.66  | 104.79 | 0.31 | 3.21 |
| Q9R1C7_P1 Prp40a | Pre-mRNA-K.FYVEDLK#.A                     | 98.05  | 62.02  | 1.58 | 0.63 |
| Q9R1C7_P1 Prp40a | Pre-mRNA-K.IIK#DLK#.D                     | 17.29  | 14.05  | 1.23 | 0.81 |
| Q9R1C7_P1 Prp40a | Pre-mRNA-K.KAEQMFGEVWNAISER.D             | 4.38   | 6.97   | 0.63 | 1.59 |
| Q9R1C7_P1 Prp40a | Pre-mRNA-K.K#QAFNAYK#.V                   | 19.88  | 21.05  | 0.94 | 1.06 |
| Q9R1C7_P1 Prp40a | Pre-mRNA-K.LAFNSLLEK#.A                   | 163.05 | 103.04 | 1.58 | 0.63 |
| Q9R1C7_P1 Prp40a | Pre-mRNA-K.M#IINDPR.Y                     | 7.64   | 29.89  | 0.26 | 3.91 |
| Q9R1C7_P1 Prp40a | Pre-mRNA-K.QATPIELDAVWEDIRE               | 4.46   | 11.04  | 0.40 | 2.48 |
| Q9R1C7_P1 Prp40a | Pre-mRNA-K.QSTWEPKDLKPAEQLLSK.C           | 13.53  | 13.61  | 0.99 | 1.01 |
| Q9R1C7_P1 Prp40a | Pre-mRNA-R.RTLLEQLDDQ.-                   | 5.02   | 13.98  | 0.36 | 2.78 |
| Q9R1C7_P1 Prp40a | Pre-mRNA-K.RVPSNASWEQAM*K.M               | 2.63   | 10.19  | 0.26 | 3.87 |
| Q9R1C7_P1 Prp40a | Pre-mRNA-K.SDSGKPYYSQTK.E                 | 44.68  | 34.74  | 1.29 | 0.78 |
| Q9R1C7_P1 Prp40a | Pre-mRNA-K.SNLHAM#IK#.A                   | 22.54  | 11.37  | 1.98 | 0.50 |
| Q9R1C7_P1 Prp40a | Pre-mRNA-R.STLTDAGNIK#.L                  | 164.88 | 121.10 | 1.36 | 0.73 |
| Q9R1C7_P1 Prp40a | Pre-mRNA-R.TLLEQLDDQ.-                    | 82.06  | 82.06  | 1.00 | 1.00 |
| Q9R1C7_P1 Prp40a | Pre-mRNA-K.KPAEQLLSK#.C                   | 20.71  | 15.89  | 1.30 | 0.77 |
| Q9R1C7_P1 Prp40a | Pre-mRNA-R.TYYNTETK#.Q                    | 70.94  | 38.76  | 1.83 | 0.55 |
| Q9R1C7_P1 Prp40a | Pre-mRNA-R.VPSNASWEQAM*K#.M               | 20.37  | 12.37  | 1.65 | 0.61 |
| Q9R1C7_P1 Prp40a | Pre-mRNA-R.VPSNASWEQAMK#.M                | 14.74  | 10.52  | 1.40 | 0.71 |
| Q9R1C7_P1 Prp40a | Pre-mRNA-K.VQTEKEEKAR.S                   | 1.18   | 1.62   | 0.73 | 1.37 |
| Q9R1C7_P1 Prp40a | Pre-mRNA-R.ALEK#EEEEK#QK#.T               | 3.70   | 3.37   | 1.10 | 0.91 |
| Q9R1C7_P1 Prp40a | Pre-mRNA-K.ELEDLEGQNTVAGGLITK#.S          | 9.13   | 5.42   | 1.69 | 0.59 |
| Q9R1C7_P1 Prp40a | Pre-mRNA-R.FTNM*LGQPGSTALDLFK#.F          | 14.20  | 9.36   | 1.52 | 0.66 |
| Q9R1C7_P1 Prp40a | Pre-mRNA-R.FVKEPAFEDITLESER.K             | 9.05   | 22.36  | 0.40 | 2.47 |
| Q9R1C7_P1 Prp40a | Pre-mRNA-K.LAFNSLLEK#.A                   | 41.91  | 29.31  | 1.43 | 0.70 |
| Q9R1C7_P1 Prp40a | Pre-mRNA-R.STLTDAGNIK#.L                  | 34.11  | 24.48  | 1.39 | 0.72 |
| Q9R1C7_P1 Prp40a | Pre-mRNA-R.TLLEQLDDQ.-                    | 14.85  | 14.85  | 1.00 | 1.00 |
| Q61136_P1 Prp4b  | Serine/thre R.DNWTDAEGYR.V                | 3.86   | 8.53   | 0.45 | 2.21 |
| Q61136_P1 Prp4b  | Serine/thre R.ENVDTFEASVK#.A              | 12.74  | 8.26   | 1.54 | 0.65 |
| Q61136_P1 Prp4b  | Serine/thre K.MPN#M#IR@.K                 | 10.03  | 1.46   | 6.89 | 0.15 |
| Q61136_P1 Prp4b  | Serine/thre R.YNVVYGTGGVFSNVVR.A          | 3.04   | 7.86   | 0.39 | 2.59 |
| Q61136_P1 Prp4b  | Serine/thre K.AELDNELM#EGK.V              | 9.78   | 10.62  | 0.92 | 1.09 |
| Q61136_P1 Prp4b  | Serine/thre R.ANQEVAVK#.I                 | 19.06  | 7.80   | 2.44 | 0.41 |
| Q61136_P1 Prp4b  | Serine/thre R.ENVDTFEASVK#.A              | 12.23  | 9.07   | 1.35 | 0.74 |
| Q61136_P1 Prp4b  | Serine/thre R.YNVVYGTGGVFSNVVR.A          | 5.46   | 9.06   | 0.60 | 1.66 |
| Q91YR7_FF Prp6   | Pre-mRNA-R.AAELETDIR.A                    | 11.84  | 35.31  | 0.34 | 2.98 |
| Q91YR7_FF Prp6   | Pre-mRNA-K.AAELEEPEDAR.I                  | 15.13  | 34.74  | 0.44 | 2.30 |
| Q91YR7_FF Prp6   | Pre-mRNA-K.AEVLWLM#GAK#.S                 | 10.45  | 3.33   | 3.13 | 0.32 |
| Q91YR7_FF Prp6   | Pre-mRNA-K.AEVLWLMGAK#.S                  | 6.46   | 6.46   | 3.15 | 0.32 |
| Q91YR7_FF Prp6   | Pre-mRNA-K.FELOHQTEEQEEVR.K               | 12.92  | 28.28  | 0.46 | 2.19 |
| Q91YR7_FF Prp6   | Pre-mRNA-K.GQIEEQGELM#EK#.A               | 25.40  | 15.11  | 1.68 | 0.59 |
| Q91YR7_FF Prp6   | Pre-mRNA-R.HIWITAAK#.L                    | 36.12  | 22.20  | 1.63 | 0.61 |
| Q91YR7_FF Prp6   | Pre-mRNA-R.HYEDFPK#.L                     | 22.78  | 11.72  | 1.94 | 0.51 |
| Q91YR7_FF Prp6   | Pre-mRNA-K.IDSDLGDWAFFYK#.F               | 31.67  | 19.76  | 1.60 | 0.62 |
| Q91YR7_FF Prp6   | Pre-mRNA-K.LEEANGNTQM#VEK#.I              | 8.56   | 2.93   | 2.92 | 0.34 |
| Q91YR7_FF Prp6   | Pre-mRNA-K.LESENNEVER.A                   | 9.46   | 21.27  | 0.44 | 2.25 |
| Q91YR7_FF Prp6   | Pre-mRNA-R.LSQVSDSVSQTVDPK#.G             | 21.96  | 8.40   | 2.61 | 0.38 |
| Q91YR7_FF Prp6   | Pre-mRNA-K.NPGLWLESVR.L                   | 8.24   | 21.56  | 0.38 | 2.62 |
| Q91YR7_FF Prp6   | Pre-mRNA-K.WLAGDVPAAR.S                   | 8.42   | 30.78  | 0.27 | 3.66 |
| Q91YR7_FF Prp6   | Pre-mRNA-K.AEVLWLMGAK#.S                  | 13.57  | 6.80   | 2.00 | 0.50 |
| Q91YR7_FF Prp6   | Pre-mRNA-K.GQIEEQGELM#EK#.A               | 31.37  | 17.26  | 1.82 | 0.55 |
| Q91YR7_FF Prp6   | Pre-mRNA-K.GQIEEQGELMEK#.A                | 12.59  | 4.24   | 2.97 | 0.34 |
| Q91YR7_FF Prp6   | Pre-mRNA-R.HIWITAAK#.L                    | 30.21  | 11.32  | 2.67 | 0.37 |
| Q91YR7_FF Prp6   | Pre-mRNA-K.IDSDLGDWAFFYK#.F               | 29.24  | 14.30  | 2.04 | 0.49 |
| Q91YR7_FF Prp6   | Pre-mRNA-K.IQQQFSDLK#.R                   | 16.73  | 8.86   | 1.89 | 0.53 |
| Q91YR7_FF Prp6   | Pre-mRNA-K.LEEANGNTQM#VEK#.I              | 11.13  | 5.56   | 2.00 | 0.50 |
| Q91YR7_FF Prp6   | Pre-mRNA-K.LESENNEVER.A                   | 7.93   | 19.06  | 0.42 | 2.40 |
| Q91YR7_FF Prp6   | Pre-mRNA-R.LSQVSDSVSQTVDPK#.G             | 33.09  | 16.06  | 2.06 | 0.49 |
| Q99PVO_P1 Prp8   | Pre-mRNA-R.ALDIPLVK#.N                    | 73.91  | 47.17  | 1.57 | 0.64 |
| Q99PVO_P1 Prp8   | Pre-mRNA-K.ALNM#AIPGGPK.F                 | 66.05  | 41.20  | 1.60 | 0.62 |
| Q99PVO_P1 Prp8   | Pre-mRNA-K.ANIPWK#.V                      | 54.96  | 28.40  | 1.94 | 0.52 |
| Q99PVO_P1 Prp8   | Pre-mRNA-K.ANPAVYLR.E                     | 26.65  | 53.97  | 0.49 | 2.03 |
| Q99PVO_P1 Prp8   | Pre-mRNA-R.AQIAGLYGVSPDNPQVK#.E           | 26.69  | 15.65  | 1.71 | 0.59 |
| Q99PVO_P1 Prp8   | Pre-mRNA-R.AQIAGLYGVSPDNPQVK#.E           | 35.93  | 18.86  | 1.91 | 0.52 |
| Q99PVO_P1 Prp8   | Pre-mRNA-R.ASEM#AGPPQM#PNDLFSQDITEAAHPH.R | 12.52  | 33.86  | 0.37 | 2.70 |
| Q99PVO_P1 Prp8   | Pre-mRNA-K.ASGFEESM#K#.W                  | 26.09  | 16.94  | 1.54 | 0.65 |
| Q99PVO_P1 Prp8   | Pre-mRNA-R.AVFWDIK#.N                     | 67.26  | 33.59  | 2.00 | 0.50 |
| Q99PVO_P1 Prp8   | Pre-mRNA-R.DIILGM#EISAPSQR.Q              | 4.66   | 14.55  | 0.32 | 3.12 |
| Q99PVO_P1 Prp8   | Pre-mRNA-R.DINLQDEDWNEFNINDK#.I           | 30.99  | 21.92  | 1.41 | 0.71 |
| Q99PVO_P1 Prp8   | Pre-mRNA-R.DINLQDEDWNEFNINDK#.I           | 14.97  | 9.53   | 1.57 | 0.64 |
| Q99PVO_P1 Prp8   | Pre-mRNA-K.DM#NHTNSYGIH.G                 | 9.15   | 18.91  | 0.48 | 2.07 |
| Q99PVO_P1 Prp8   | Pre-mRNA-K.DVM#DSTTTQK#.Y                 | 12.05  | 8.78   | 1.37 | 0.73 |
| Q99PVO_P1 Prp8   | Pre-mRNA-K.EQSGGLM#LSM#GHVLIQSDLR.W       | 13.96  | 33.69  | 0.41 | 2.41 |
| Q99PVO_P1 Prp8   | Pre-mRNA-K.EQSQTATQTR.T                   | 27.64  | 74.60  | 0.37 | 2.70 |
| Q99PVO_P1 Prp8   | Pre-mRNA-K.ETGYTILPK#.N                   | 55.18  | 32.71  | 1.69 | 0.59 |
| Q99PVO_P1 Prp8   | Pre-mRNA-K.EVGIEFM#DLYSHLVPVVDVEPLEK#.I   | 67.17  | 44.06  | 1.52 | 0.66 |
| Q99PVO_P1 Prp8   | Pre-mRNA-K.FGDLILK#.A                     | 102.96 | 57.94  | 1.78 | 0.56 |
| Q99PVO_P1 Prp8   | Pre-mRNA-K.FGVVDAQK#.E                    | 15.63  | 7.43   | 2.10 | 0.48 |
| Q99PVO_P1 Prp8   | Pre-mRNA-R.FNTGVPVK#.G                    | 134.63 | 81.16  | 1.66 | 0.60 |
| Q99PVO_P1 Prp8   | Pre-mRNA-R.FPPVVFYTPK#.E                  | 37.86  | 24.02  | 1.58 | 0.63 |
| Q99PVO_P1 Prp8   | Pre-mRNA-R.FSPIFPPLSVK#.H                 | 63.61  | 44.03  | 1.44 | 0.69 |

|                  |                                                          |        |       |      |      |
|------------------|----------------------------------------------------------|--------|-------|------|------|
| Q99PVO_Pf PrpF8  | Pre-mRNA-1.R.FTLWWSPNTNR.A                               | 6.42   | 15.12 | 0.42 | 2.35 |
| Q99PVO_Pf PrpF8  | Pre-mRNA-1.R.GPGNVPVGPLAPLDPYM*SEEK.L                    | 7.09   | 5.42  | 1.31 | 0.76 |
| Q99PVO_Pf PrpF8  | Pre-mRNA-1.R.GPGNVPVGPLAPLDPYMSEEK#.L                    | 4.41   | 3.62  | 1.22 | 0.82 |
| Q99PVO_Pf PrpF8  | Pre-mRNA-1.R.GPGNVPVGPLAPLDPYM*SEEK#LQEK#.A              | 28.54  | 20.20 | 1.41 | 0.71 |
| Q99PVO_Pf PrpF8  | Pre-mRNA-1.R.GPGNVPVGPLAPLDPYMSEEK#LQEK#.A               | 15.67  | 20.15 | 0.78 | 1.29 |
| Q99PVO_Pf PrpF8  | Pre-mRNA-1.K.GTYFFTWEGLFWEK#.A                           | 32.20  | 18.92 | 1.70 | 0.59 |
| Q99PVO_Pf PrpF8  | Pre-mRNA-1.R.HDPNM*KYELQLANPK.E                          | 44.83  | 32.57 | 1.38 | 0.73 |
| Q99PVO_Pf PrpF8  | Pre-mRNA-1.K.HGDEIHTSTTSNYETQTFSSK#.T                    | 96.13  | 53.10 | 1.81 | 0.55 |
| Q99PVO_Pf PrpF8  | Pre-mRNA-1.K.IDLTLNLR.L                                  | 29.75  | 79.08 | 0.38 | 2.66 |
| Q99PVO_Pf PrpF8  | Pre-mRNA-1.K.IIHTSVWAGQK#.R                              | 51.23  | 32.53 | 1.57 | 0.63 |
| Q99PVO_Pf PrpF8  | Pre-mRNA-1.K.IIM*ADNPSWDGKE#.T                           | 24.18  | 19.88 | 1.22 | 0.82 |
| Q99PVO_Pf PrpF8  | Pre-mRNA-1.K.IMADNPSWDGKE#.T                             | 9.79   | 4.68  | 2.09 | 0.48 |
| Q99PVO_Pf PrpF8  | Pre-mRNA-1.K.ISLIQFR.A                                   | 19.82  | 50.83 | 0.39 | 2.56 |
| Q99PVO_Pf PrpF8  | Pre-mRNA-1.K.ITDAYLDQYLWYADK#.R                          | 7.95   | 5.35  | 1.49 | 0.67 |
| Q99PVO_Pf PrpF8  | Pre-mRNA-1.R.K#GM*LDPLVHLLDFPNVIVK#.G                    | 26.06  | 12.75 | 2.04 | 0.49 |
| Q99PVO_Pf PrpF8  | Pre-mRNA-1.R.K#WQQLQAK#.R                                | 43.77  | 27.09 | 1.62 | 0.62 |
| Q99PVO_Pf PrpF8  | Pre-mRNA-1.R.LIVDHNIADYMTAK#.N                           | 105.45 | 71.89 | 1.47 | 0.68 |
| Q99PVO_Pf PrpF8  | Pre-mRNA-1.R.LIVDHNIADYMTAK.N                            | 8.20   | 5.96  | 1.37 | 0.73 |
| Q99PVO_Pf PrpF8  | Pre-mRNA-1.R.LKEAVSK.S                                   | 39.55  | 18.72 | 2.11 | 0.47 |
| Q99PVO_Pf PrpF8  | Pre-mRNA-1.K.LLENM*PM*PWEQIR.D                           | 3.58   | 8.98  | 0.40 | 2.51 |
| Q99PVO_Pf PrpF8  | Pre-mRNA-1.K.LLILALER.L                                  | 21.00  | 61.66 | 0.34 | 2.94 |
| Q99PVO_Pf PrpF8  | Pre-mRNA-1.R.LNGSQRELEGLQAYDNPEALS.R.I                   | 4.62   | 15.32 | 0.30 | 3.32 |
| Q99PVO_Pf PrpF8  | Pre-mRNA-1.R.LTLEDLESDWR.G                               | 10.00  | 24.03 | 0.42 | 2.40 |
| Q99PVO_Pf PrpF8  | Pre-mRNA-1.K.LTPSGYEWGR.Q                                | 18.22  | 48.09 | 0.38 | 2.64 |
| Q99PVO_Pf PrpF8  | Pre-mRNA-1.K.LWNLNMYR.T                                  | 10.03  | 29.85 | 0.34 | 2.98 |
| Q99PVO_Pf PrpF8  | Pre-mRNA-1.K.NNVVNASLTQSEIR.D                            | 8.91   | 24.72 | 0.36 | 2.77 |
| Q99PVO_Pf PrpF8  | Pre-mRNA-1.K.NNVVINYK#.D                                 | 79.08  | 44.97 | 1.76 | 0.57 |
| Q99PVO_Pf PrpF8  | Pre-mRNA-1.R.QILM*ASGTTFTK#.I                            | 34.18  | 25.45 | 1.34 | 0.74 |
| Q99PVO_Pf PrpF8  | Pre-mRNA-1.R.QQIAIEK#.Q                                  | 71.05  | 38.52 | 1.84 | 0.54 |
| Q99PVO_Pf PrpF8  | Pre-mRNA-1.R.RALDPLVK.N                                  | 3.97   | 14.31 | 0.28 | 3.60 |
| Q99PVO_Pf PrpF8  | Pre-mRNA-1.R.RLTLEDLESDWR.G                              | 1.78   | 11.75 | 0.15 | 6.61 |
| Q99PVO_Pf PrpF8  | Pre-mRNA-1.R.SGM*SHEEDQLIPNLRY.Y                         | 13.47  | 39.94 | 0.34 | 2.97 |
| Q99PVO_Pf PrpF8  | Pre-mRNA-1.R.SVPEEQK#.Q                                  | 84.29  | 57.19 | 1.47 | 0.68 |
| Q99PVO_Pf PrpF8  | Pre-mRNA-1.R.SVTTQWENSFVSYSK#.D                          | 33.44  | 20.17 | 1.66 | 0.60 |
| Q99PVO_Pf PrpF8  | Pre-mRNA-1.K.TAEVAALR.S                                  | 27.81  | 73.66 | 0.38 | 2.65 |
| Q99PVO_Pf PrpF8  | Pre-mRNA-1.R.TGQLFK#.I                                   | 60.15  | 35.59 | 1.69 | 0.59 |
| Q99PVO_Pf PrpF8  | Pre-mRNA-1.K.TISSYAFSR.L                                 | 16.82  | 53.26 | 0.32 | 3.17 |
| Q99PVO_Pf PrpF8  | Pre-mRNA-1.R.TNHYVSSDDIK#.E                              | 55.14  | 42.20 | 1.31 | 0.77 |
| Q99PVO_Pf PrpF8  | Pre-mRNA-1.R.TNHYVSSDDIK#ETGYTILPK#.N                    | 20.08  | 7.28  | 2.76 | 0.36 |
| Q99PVO_Pf PrpF8  | Pre-mRNA-1.R.TNHYVSSDDIK#ETGYTILPK.N                     | 5.36   | 2.26  | 2.37 | 0.42 |
| Q99PVO_Pf PrpF8  | Pre-mRNA-1.R.TSYEETHK#.D                                 | 47.24  | 21.50 | 2.20 | 0.46 |
| Q99PVO_Pf PrpF8  | Pre-mRNA-1.R.TVNHGDEIHTSTTSNYETQTFSSK#.T                 | 15.32  | 10.06 | 1.52 | 0.66 |
| Q99PVO_Pf PrpF8  | Pre-mRNA-1.R.TVNHGDEIHTSTTSNYETQTFSSK#.T                 | 7.02   | 3.67  | 1.91 | 0.52 |
| Q99PVO_Pf PrpF8  | Pre-mRNA-1.K.VPGLPTPIENMILR.Y                            | 8.99   | 26.95 | 0.33 | 3.00 |
| Q99PVO_Pf PrpF8  | Pre-mRNA-1.K.VPGLPTPIENMILR.Y                            | 8.36   | 28.75 | 0.29 | 3.44 |
| Q99PVO_Pf PrpF8  | Pre-mRNA-1.R.VQM*LLSDF.F                                 | 17.27  | 19.22 | 0.90 | 1.11 |
| Q99PVO_Pf PrpF8  | Pre-mRNA-1.R.VVAEYALK#.R                                 | 55.61  | 42.84 | 1.30 | 0.77 |
| Q99PVO_Pf PrpF8  | Pre-mRNA-1.R.VYLGAALK#.Y                                 | 91.72  | 48.60 | 1.89 | 0.53 |
| Q99PVO_Pf PrpF8  | Pre-mRNA-1.R.WLGNLLAR.Q                                  | 9.42   | 28.22 | 0.33 | 3.00 |
| Q99PVO_Pf PrpF8  | Pre-mRNA-1.R.WQFTLPM*MTSLYR.L                            | 6.91   | 13.01 | 0.53 | 1.88 |
| Q99PVO_Pf PrpF8  | Pre-mRNA-1.R.YIQPWESEFISDQR.V                            | 10.41  | 30.06 | 0.35 | 2.89 |
| Q99PVO_Pf PrpF8  | Pre-mRNA-1.R.YLTEHPDPNENIVGYNK#.K                        | 38.19  | 22.75 | 1.68 | 0.60 |
| Q99PVO_Pf PrpF8  | Pre-mRNA-1.R.YLTEHPDPNENIVGYNK#.K                        | 16.69  | 8.67  | 1.92 | 0.52 |
| E9PYL2_E9I Prr12 | Protein Prr K.GLGGSGGAGGAGTPYELAK.E                      | 14.97  | 8.73  | 1.72 | 0.58 |
| E9PYL2_E9I Prr12 | Protein Prr R.IRPLEGAM*AGPASITDGAQ.K                     | 1.74   | 8.65  | 0.20 | 4.97 |
| E9PYL2_E9I Prr12 | Protein Prr R.LDEELK#.R                                  | 19.97  | 6.64  | 3.01 | 0.33 |
| E9Q7C4_E9 Prr14I | Protein Prr R.IDTEYK#.H                                  | 23.76  | 13.78 | 1.72 | 0.58 |
| Q3UPH1_P Prrc1   | Protein Prr R.QDDAPAGGIWGFIK#.G                          | 13.10  | 3.99  | 3.28 | 0.30 |
| Q3UPH1_P Prrc1   | Protein Prr K.GVAGNPMVK#.S                               | 6.46   | 5.18  | 1.25 | 0.80 |
| Q77PM1_P Prrc2b  | Protein Prr R.LLSFSPEEFTLK.A                             | 5.27   | 9.56  | 0.55 | 1.81 |
| Q3TLH4_Pf Prrc2c | Protein Prr K.AQSGLAFOQTSNPQIPILVDHQLQASGLGSSQLDTHLQAR.A | 4.09   | 4.68  | 0.88 | 1.14 |
| Q3TLH4_Pf Prrc2c | Protein Prr K.LPDLISLVENK#.E                             | 26.02  | 16.68 | 1.56 | 0.64 |
| Q3TLH4_Pf Prrc2c | Protein Prr K.M*EDTLVNNVPLPNTLPLPK#.R                    | 4.64   | 3.41  | 1.36 | 0.73 |
| Q3TLH4_Pf Prrc2c | Protein Prr K.SSSQIPAQPPVTK#.S                           | 11.81  | 4.30  | 2.75 | 0.36 |
| Q3TLH4_Pf Prrc2c | Protein Prr K.LPDLISLVENK#.E                             | 20.49  | 11.86 | 1.73 | 0.58 |
| Q3TLH4_Pf Prrc2c | Protein Prr R.LPSAQTSTNGTDFVAAGK#.S                      | 8.45   | 4.68  | 1.81 | 0.55 |
| Q3TLH4_Pf Prrc2c | Protein Prr R.SQAFM*QSSLSQPSVLSGTAINHFPVQHQELAK#.A       | 9.98   | 5.64  | 1.77 | 0.57 |
| Q3TLH4_Pf Prrc2c | Protein Prr K.VAAPAVLNDISK#.K                            | 16.04  | 15.98 | 1.00 | 1.00 |
| Q99K85_SE Psat1  | Phosphoser R.ASLYNAVTTEDVEK#.L                           | 173.46 | 27.43 | 6.32 | 0.16 |
| Q99K85_SE Psat1  | Phosphoser K.AVELNM*ISLK#.G                              | 57.68  | 12.70 | 4.54 | 0.22 |
| Q99K85_SE Psat1  | Phosphoser K.AVELNMISLK#.G                               | 92.19  | 13.28 | 6.94 | 0.14 |
| Q99K85_SE Psat1  | Phosphoser R.DDLGFLSLR.E                                 | 17.03  | 8.73  | 1.95 | 0.51 |
| Q99K85_SE Psat1  | Phosphoser K.FGTVINIVHPK#.L                              | 88.23  | 65.91 | 1.34 | 0.75 |
| Q99K85_SE Psat1  | Phosphoser K.FGVIFAGAQAQ#.N                              | 357.96 | 51.36 | 6.97 | 0.14 |
| Q99K85_SE Psat1  | Phosphoser K.IIGNTENLVR.E                                | 80.88  | 56.10 | 1.44 | 0.69 |
| Q99K85_SE Psat1  | Phosphoser K.LPHSVLLEIQK#.Q                              | 113.67 | 23.37 | 4.86 | 0.21 |
| Q99K85_SE Psat1  | Phosphoser K.NFLEMHLQ.-                                  | 50.38  | 50.38 | 1.00 | 1.00 |
| Q99K85_SE Psat1  | Phosphoser K.NVGSAGVTVVIVR.D                             | 16.33  | 11.85 | 1.38 | 0.73 |
| Q99K85_SE Psat1  | Phosphoser K.QVNFVFGPAPAK#.L                             | 82.73  | 14.57 | 5.68 | 0.18 |
| Q99K85_SE Psat1  | Phosphoser R.SADYVVTGAWSAK#.A                            | 127.22 | 29.12 | 4.37 | 0.23 |
| Q99K85_SE Psat1  | Phosphoser R.ASLYNAVTTEDVEK#.L                           | 19.97  | 8.68  | 2.30 | 0.43 |
| Q99K85_SE Psat1  | Phosphoser R.ASLYNAVTTEDVEK#.L                           | 57.27  | 8.95  | 6.40 | 0.16 |
| Q99K85_SE Psat1  | Phosphoser K.AVELNMISLK#.G                               | 29.51  | 3.34  | 8.83 | 0.11 |
| Q99K85_SE Psat1  | Phosphoser R.ELLAVPNNYK#.V                               | 38.65  | 30.53 | 1.27 | 0.79 |
| Q99K85_SE Psat1  | Phosphoser K.FGTVINIVHPK#.L                              | 73.63  | 22.95 | 3.21 | 0.31 |
| Q99K85_SE Psat1  | Phosphoser K.FGVIFAGAQAQ#.N                              | 80.06  | 9.51  | 8.42 | 0.12 |
| Q99K85_SE Psat1  | Phosphoser K.LPHSVLLEIQK#.Q                              | 79.86  | 13.59 | 5.88 | 0.17 |
| Q99K85_SE Psat1  | Phosphoser K.QVNFVFGPAPAK#.L                             | 55.45  | 57.25 | 0.97 | 1.03 |
| Q99K85_SE Psat1  | Phosphoser R.SADYVVTGAWSAK#.A                            | 30.17  | 5.06  | 5.96 | 0.17 |
| Q99K85_SE Psat1  | Phosphoser R.ASLYNAVTTEDVEK#.L                           | 82.84  | 10.55 | 7.86 | 0.13 |
| Q99K85_SE Psat1  | Phosphoser K.AVELNM*ISLK#.G                              | 28.99  | 4.28  | 6.77 | 0.15 |
| Q99K85_SE Psat1  | Phosphoser K.AVELNMISLK#.G                               | 24.31  | 3.43  | 7.09 | 0.14 |
| Q99K85_SE Psat1  | Phosphoser R.ELLAVPNNYK#.V                               | 51.02  | 27.12 | 1.88 | 0.53 |
| Q99K85_SE Psat1  | Phosphoser K.FGTVINIVHPK#.L                              | 58.90  | 26.78 | 2.20 | 0.45 |
| Q99K85_SE Psat1  | Phosphoser K.FGVIFAGAQAQ#.N                              | 110.33 | 14.58 | 7.57 | 0.13 |
| Q99K85_SE Psat1  | Phosphoser K.K#GTVINIVHPK#.L                             | 14.24  | 5.86  | 2.43 | 0.41 |
| Q99K85_SE Psat1  | Phosphoser K.LPHSVLLEIQK#.Q                              | 65.62  | 11.35 | 5.78 | 0.17 |
| Q99K85_SE Psat1  | Phosphoser K.QVNFVFGPAPAK#.L                             | 63.77  | 10.52 | 6.06 | 0.16 |
| Q99K85_SE Psat1  | Phosphoser R.SADYVVTGAWSAK#.A                            | 44.69  | 6.52  | 6.85 | 0.15 |
| Q99JF8_PS Pslp1  | PC4 and SFI K.FGNEGLWEIDNPNK#.V                          | 5.67   | 1.05  | 5.42 | 0.18 |
| Q9R1P4_Ps Psm1   | Proteasom R.ETLPAEQDLTK#.N                               | 13.04  | 6.73  | 1.94 | 0.52 |
| P49722_PS Psm2   | Proteasom R.GYSFSLTTFSPSGK#.L                            | 16.39  | 11.53 | 1.42 | 0.70 |
| P49722_PS Psm2   | Proteasom R.KLAQQYLYVQEPIPTAQLVQR.V                      | 2.66   | 6.73  | 0.40 | 2.52 |

|                 |                                          |        |       |       |      |
|-----------------|------------------------------------------|--------|-------|-------|------|
| P49722_P5 Psm2  | Proteasom: K.LAQQYVYQEPPIPTAQLVQR.V      | 1.54   | 3.05  | 0.50  | 1.98 |
| P49722_P5 Psm2  | Proteasom: K.LVQVEALAAVAGGAPVSGIK#.A     | 3.31   | 3.67  | 0.90  | 1.11 |
| P49722_P5 Psm2  | Proteasom: R.YNEDELEDAIHTALT.LK#.E       | 17.28  | 13.27 | 1.30  | 0.77 |
| Q9R1P0_P5 Psm4  | Proteasom: K.LLDEVFFSEK#.I               | 20.95  | 6.95  | 3.01  | 0.33 |
| Q9R1P0_P5 Psm4  | Proteasom: K.SALALAVK#.V                 | 11.70  | 3.73  | 3.14  | 0.32 |
| Q9Z2U1_P5 Psm5  | Proteasom: R.AIGSASEGASLSLQEVYHK#.S      | 26.85  | 15.02 | 1.79  | 0.56 |
| Q9Z2U1_P5 Psm5  | Proteasom: R.ITSPMLM*EPSSIEK#.I          | 26.05  | 14.58 | 1.79  | 0.56 |
| Q9Z2U1_P5 Psm5  | Proteasom: R.LFQVEYAEIAIK#.L             | 58.70  | 26.83 | 2.19  | 0.46 |
| Q9Z2U1_P5 Psm5  | Proteasom: K.SSLILK#.Q                   | 18.93  | 11.04 | 1.71  | 0.58 |
| Q9QUM9_F Psm6   | Proteasom: R.LYQVEYAFK#.A                | 27.65  | 9.85  | 2.81  | 0.36 |
| Q9Z2U0_P5 Psm7  | Proteasom: K.ALLEVQSGGK#.N               | 13.64  | 2.09  | 6.53  | 0.15 |
| Q9Z2U0_P5 Psm7  | Proteasom: R.AITVSPDGLHFQVEYAQEAVK#.K    | 15.47  | 3.87  | 4.00  | 0.25 |
| Q9Z2U0_P5 Psm7  | Proteasom: K.ALLEVQSGGK#.N               | 31.51  | 10.88 | 2.90  | 0.35 |
| Q9Z2U0_P5 Psm7  | Proteasom: R.GK#DIVLVGVEK#.K             | 7.64   | 3.47  | 2.20  | 0.45 |
| Q9Z2U0_P5 Psm7  | Proteasom: K.LTVDEPVTVEYITR.F            | 7.51   | 6.74  | 1.11  | 0.90 |
| Q9Z2U0_P5 Psm7  | Proteasom: K.NYTDDAIETDLDLTK#.L          | 27.01  | 11.70 | 2.31  | 0.43 |
| Q9R1P3_P5 Psm2  | Proteasom: R.FILNLPFVSVR.V               | 2.76   | 9.19  | 0.30  | 3.33 |
| Q9R1P1_P5 Psm3  | Proteasom: R.FGQIQM*VTTFDFQK#.I          | 4.92   | 1.09  | 4.49  | 0.22 |
| Q9R1P1_P5 Psm3  | Proteasom: R.LYGLAGLATDVQTVQVR.L         | 3.67   | 7.04  | 0.52  | 1.92 |
| P28063_P5 Psm8  | Proteasom: K.VESSDVLDDL#.Y               | 4.21   | 3.05  | 1.38  | 0.73 |
| P62192_P5 Psmc1 | 26S protea: K.APQETYADIGGLDNQIQEIK#.E    | 33.06  | 5.01  | 6.60  | 0.15 |
| P62192_P5 Psmc1 | 26S protea: K.AVANQTSATFLR.V             | 46.05  | 62.56 | 0.74  | 1.36 |
| P62192_P5 Psmc1 | 26S protea: K.DDLSGADIK#.A               | 63.87  | 14.73 | 4.34  | 0.23 |
| P62192_P5 Psmc1 | 26S protea: K.ESELPLTHEPEYEEEMGIK#PPK#.G | 9.07   | 1.91  | 4.76  | 0.21 |
| P62192_P5 Psmc1 | 26S protea: K.IEFPDDEK#.T                | 28.26  | 11.26 | 2.51  | 0.40 |
| P62192_P5 Psmc1 | 26S protea: R.IKDYLMEEFIR.N              | 14.17  | 7.48  | 1.89  | 0.53 |
| P62192_P5 Psmc1 | 26S protea: K.KHQETPEGLY.L-              | 78.85  | 14.54 | 5.42  | 0.18 |
| P62192_P5 Psmc1 | 26S protea: R.M*TLADDVTLDDLIM*AK#.D      | 33.09  | 4.72  | 7.02  | 0.14 |
| P62192_P5 Psmc1 | 26S protea: R.MTLADDVTLDDLIM*AK#.D       | 16.85  | 3.53  | 4.77  | 0.21 |
| P62192_P5 Psmc1 | 26S protea: R.NEQEM*K#PLEEK#.Q           | 14.13  | 2.26  | 6.27  | 0.16 |
| P62192_P5 Psmc1 | 26S protea: K.SK#ENVLYK#.K               | 98.25  | 10.34 | 9.51  | 0.11 |
| P62192_P5 Psmc1 | 26S protea: R.TM*LELLNQLDGFDSR.G         | 10.61  | 6.95  | 1.53  | 0.66 |
| P62192_P5 Psmc1 | 26S protea: R.TMLELLNQLDGFDSR.G          | 19.22  | 15.96 | 1.20  | 0.83 |
| P62192_P5 Psmc1 | 26S protea: R.VAEHAPSIVFIDEIDAIGTK#.R    | 134.60 | 24.73 | 5.44  | 0.18 |
| P62192_P5 Psmc1 | 26S protea: K.VHAVIGVLM*DDTDPLVTVM*#.V   | 21.36  | 2.72  | 7.85  | 0.13 |
| P62192_P5 Psmc1 | 26S protea: K.VHAVIGVLM*DDTDPLVTVM*#.V   | 27.30  | 6.82  | 4.00  | 0.25 |
| P62192_P5 Psmc1 | 26S protea: K.VHAVIGVLMDDTDPLVTVM*#.V    | 45.60  | 6.07  | 7.51  | 0.13 |
| P62192_P5 Psmc1 | 26S protea: K.VTNEDFK#.S                 | 42.02  | 5.28  | 7.96  | 0.13 |
| P62192_P5 Psmc1 | 26S protea: R.VVGSELIQK#.Y               | 441.32 | 64.17 | 6.88  | 0.15 |
| P62192_P5 Psmc1 | 26S protea: K.APQETYADIGGLDNQIQEIK#.E    | 11.46  | 3.48  | 3.29  | 0.30 |
| P62192_P5 Psmc1 | 26S protea: K.GVILYGPPTGK#.T             | 22.12  | 5.43  | 4.07  | 0.25 |
| P62192_P5 Psmc1 | 26S protea: R.VAEHAPSIVFIDEIDAIGTK#.R    | 28.07  | 7.09  | 3.96  | 0.25 |
| P46471_P5 Psmc2 | 26S protea: R.ALDEGDIALLK#.T             | 204.51 | 32.91 | 6.21  | 0.16 |
| P46471_P5 Psmc2 | 26S protea: K.DFLAVNK#.V                 | 54.12  | 3.05  | 17.72 | 0.06 |
| P46471_P5 Psmc2 | 26S protea: K.ESDTLAPPALWDLAADK#.Q       | 102.76 | 22.64 | 4.54  | 0.22 |
| P46471_P5 Psmc2 | 26S protea: R.FDDGAGDNEVQR.T             | 46.88  | 25.76 | 1.82  | 0.55 |
| P46471_P5 Psmc2 | 26S protea: R.FVNLGIEPPK#.G              | 95.88  | 15.23 | 6.30  | 0.16 |
| P46471_P5 Psmc2 | 26S protea: R.FVNLGIEPPK#GVLLFGPPGTGK#.T | 20.73  | 2.36  | 8.78  | 0.11 |
| P46471_P5 Psmc2 | 26S protea: K.FVVDLSDQVAPDIEEGMR.V       | 3.68   | 5.13  | 0.72  | 1.40 |
| P46471_P5 Psmc2 | 26S protea: K.GVLLFGPPGTGK#.T            | 138.97 | 18.93 | 7.34  | 0.14 |
| P46471_P5 Psmc2 | 26S protea: K.IATEKDFLEAVNK#.V           | 41.21  | 4.86  | 8.48  | 0.12 |
| P46471_P5 Psmc2 | 26S protea: K.IINADSEDPK#YINVK#.Q        | 9.04   | 2.47  | 3.66  | 0.27 |
| P46471_P5 Psmc2 | 26S protea: K.INELTGIK#.E                | 23.43  | 5.18  | 4.52  | 0.22 |
| P46471_P5 Psmc2 | 26S protea: R.K#IATEKDFLEAVNK#.V         | 57.07  | 8.74  | 6.53  | 0.15 |
| P46471_P5 Psmc2 | 26S protea: K.K#NELTGIK#.E               | 92.40  | 13.34 | 6.93  | 0.14 |
| P46471_P5 Psmc2 | 26S protea: K.YQIHPLPK#.I                | 21.46  | 5.80  | 3.70  | 0.27 |
| P46471_P5 Psmc2 | 26S protea: R.ALDEGDIALLK#.T             | 14.05  | 4.33  | 3.25  | 0.31 |
| P46471_P5 Psmc2 | 26S protea: R.FVNLGIEPPK#GVLLFGPPGTGK#.T | 7.68   | 2.42  | 3.18  | 0.31 |
| P46471_P5 Psmc2 | 26S protea: R.TM*LELLNQLDGFDPK#.G        | 2.20   | 5.82  | 0.38  | 2.65 |
| P46471_P5 Psmc2 | 26S protea: R.ALDEGDIALLK#.T             | 18.99  | 3.67  | 5.17  | 0.19 |
| P46471_P5 Psmc2 | 26S protea: K.GVLLFGPPGTGK#.T            | 20.00  | 3.83  | 5.22  | 0.19 |
| O88685_P5 Psmc3 | 26S protea: K.AM*VEDERTEQYSDIGGLDK.Q     | 34.73  | 21.77 | 1.60  | 0.63 |
| O88685_P5 Psmc3 | 26S protea: K.APSIIFIDELDAIGTK#.R        | 61.92  | 9.72  | 6.37  | 0.16 |
| O88685_P5 Psmc3 | 26S protea: K.EK#APSIIFIDELDAIGTK#.R     | 191.93 | 27.56 | 6.96  | 0.14 |
| O88685_P5 Psmc3 | 26S protea: K.EK#FENLGIQPPK#.G           | 24.58  | 3.95  | 6.22  | 0.16 |
| O88685_P5 Psmc3 | 26S protea: R.GATELTHEYVM*EGILEVQAK#.K   | 48.86  | 6.24  | 7.82  | 0.13 |
| O88685_P5 Psmc3 | 26S protea: R.GATELTHEYMEGILEVQAK#.K     | 4.99   | 2.40  | 2.08  | 0.48 |
| O88685_P5 Psmc3 | 26S protea: K.GVLM*YGGPPGTGK#.T          | 78.40  | 14.73 | 5.32  | 0.19 |
| O88685_P5 Psmc3 | 26S protea: K.GVLM*YGGPPGTGK#.T          | 64.02  | 11.11 | 5.76  | 0.17 |
| O88685_P5 Psmc3 | 26S protea: R.KM*NVSPDVNVEELAR.C         | 22.30  | 18.49 | 1.21  | 0.83 |
| O88685_P5 Psmc3 | 26S protea: K.LAGPQLVQMFIDGAK#.L         | 42.56  | 8.68  | 4.90  | 0.20 |
| O88685_P5 Psmc3 | 26S protea: K.LAGPQLVQMFIDGAK#.L         | 63.80  | 10.42 | 6.13  | 0.16 |
| O88685_P5 Psmc3 | 26S protea: R.LLDSK#.I                   | 236.52 | 32.01 | 7.39  | 0.14 |
| O88685_P5 Psmc3 | 26S protea: K.M*ATVWDEAEQDGIGEEVLK#.M    | 26.53  | 3.27  | 8.11  | 0.12 |
| O88685_P5 Psmc3 | 26S protea: K.MATVWDEAEQDGIGEEVLK#.M     | 12.18  | 2.34  | 5.21  | 0.19 |
| O88685_P5 Psmc3 | 26S protea: K.M*STEEVQR.T                | 22.57  | 12.29 | 1.84  | 0.54 |
| O88685_P5 Psmc3 | 26S protea: K.MSTEEVQR.T                 | 20.57  | 12.69 | 1.62  | 0.62 |
| O88685_P5 Psmc3 | 26S protea: K.QIQELVEAIVLP*#NHHK#.E      | 27.77  | 5.56  | 5.00  | 0.20 |
| O88685_P5 Psmc3 | 26S protea: K.QIQELVEAIVLP*#NHHK#.E      | 12.98  | 2.64  | 4.92  | 0.20 |
| O88685_P5 Psmc3 | 26S protea: R.QTYFLPVIQVDAEK#.L          | 132.50 | 18.42 | 7.19  | 0.14 |
| O88685_P5 Psmc3 | 26S protea: R.TM*LELLNQLDGFQNPNTQVK#.V   | 50.05  | 8.06  | 6.21  | 0.16 |
| O88685_P5 Psmc3 | 26S protea: R.TMLELLNQLDGFQNPNTQVK#.V    | 61.56  | 5.95  | 10.35 | 0.10 |
| O88685_P5 Psmc3 | 26S protea: R.VDILDPALLR.S               | 49.95  | 41.94 | 1.19  | 0.84 |
| O88685_P5 Psmc3 | 26S protea: R.VTHELOQAM*#K.D             | 19.27  | 2.89  | 6.68  | 0.15 |
| O88685_P5 Psmc3 | 26S protea: R.VTHELOQAM*#K.D             | 18.19  | 2.86  | 6.36  | 0.16 |
| O88685_P5 Psmc3 | 26S protea: R.VTHELOQAM*#K.I             | 28.60  | 6.03  | 4.74  | 0.21 |
| O88685_P5 Psmc3 | 26S protea: R.VTHELOQAM*#K.I             | 5.30   | 1.37  | 3.87  | 0.26 |
| O88685_P5 Psmc3 | 26S protea: K.EK#APSIIFIDELDAIGTK#.R     | 16.81  | 2.80  | 6.00  | 0.17 |
| P54775_P5 Psmc4 | 26S protea: K.DEQEHEFYK#.-               | 28.04  | 6.10  | 4.60  | 0.22 |
| P54775_P5 Psmc4 | 26S protea: K.EFLHAQEEVK#.R              | 13.29  | 4.29  | 3.10  | 0.32 |
| P54775_P5 Psmc4 | 26S protea: R.ILELLNQM*DGFDQNVNVK#.V     | 70.16  | 10.38 | 6.76  | 0.15 |
| P54775_P5 Psmc4 | 26S protea: R.ILELLNQM*DGFDQNVNVK#.V     | 26.53  | 5.25  | 3.32  | 0.30 |
| P54775_P5 Psmc4 | 26S protea: R.ILELLNQMDGFDQNVNVK#.V      | 65.33  | 6.19  | 10.56 | 0.09 |
| P54775_P5 Psmc4 | 26S protea: K.K#HQEHEFYK#.-              | 177.17 | 34.68 | 5.11  | 0.20 |
| P54775_P5 Psmc4 | 26S protea: R.LIFSTISK#.M                | 248.88 | 54.64 | 4.55  | 0.22 |
| P54775_P5 Psmc4 | 26S protea: K.M*NLSEVDLEDYVARDK.I        | 3.22   | 5.58  | 0.58  | 1.73 |
| P54775_P5 Psmc4 | 26S protea: R.VVGSFVQK#.Y                | 137.78 | 29.26 | 4.71  | 0.21 |
| P54775_P5 Psmc4 | 26S protea: R.YIVLAK#.D                  | 257.58 | 34.19 | 7.53  | 0.13 |
| P54775_P5 Psmc4 | 26S protea: K.LQEQLEFLVQEEYK#DEQK#.N     | 15.09  | 3.94  | 3.83  | 0.26 |
| P62196_P5 Psmc5 | 26S protea: R.EHAPSIIF*DEIDSIGSSR.L      | 12.36  | 11.36 | 1.09  | 0.92 |
| P62196_P5 Psmc5 | 26S protea: K.EVILPVK#.H                 | 16.69  | 1.77  | 9.41  | 0.11 |
| P62196_P5 Psmc5 | 26S protea: K.EVILPVK#HPLEFALGIAQPK#.G   | 56.38  | 10.78 | 5.23  | 0.19 |
| P62196_P5 Psmc5 | 26S protea: K.FVVDVVK#.N                 | 30.44  | 5.29  | 5.76  | 0.17 |

|                  |                                                        |        |       |       |      |
|------------------|--------------------------------------------------------|--------|-------|-------|------|
| P62196_Pf Psmc5  | 26S protease: K.HPELFEALGIAQPK#.G                      | 20.70  | 4.78  | 4.33  | 0.23 |
| P62196_Pf Psmc5  | 26S protease: K.IAELM*PGASGAEVK#.G                     | 68.01  | 13.99 | 4.86  | 0.21 |
| P62196_Pf Psmc5  | 26S protease: K.IAELMPGASGAEVK#.G                      | 61.35  | 14.22 | 4.31  | 0.23 |
| P62196_Pf Psmc5  | 26S protease: K.IEELQLIVNDK#.S                         | 112.31 | 30.02 | 3.74  | 0.27 |
| P62196_Pf Psmc5  | 26S protease: K.IILPNK#VDPLVSLMMVEK#.V                 | 37.32  | 38.02 | 0.98  | 1.02 |
| P62196_Pf Psmc5  | 26S protease: R.LEGGSGDSEVQR.T                         | 37.34  | 36.34 | 1.03  | 0.97 |
| P62196_Pf Psmc5  | 26S protease: R.LLREELQLLQEQGSYVGEVWR.A                | 4.86   | 6.16  | 0.79  | 1.27 |
| P62196_Pf Psmc5  | 26S protease: R.TM*LELLNQLDGFATK#.N                    | 64.94  | 9.11  | 7.13  | 0.14 |
| P62196_Pf Psmc5  | 26S protease: R.TM*LELLNQLDGFATK#.N                    | 17.64  | 2.04  | 8.64  | 0.12 |
| P62196_Pf Psmc5  | 26S protease: R.TMLELLNQLDGFATK#.N                     | 85.24  | 17.75 | 4.80  | 0.21 |
| P62196_Pf Psmc5  | 26S protease: R.VHVTQEDFEM*AVAK#.V                     | 27.04  | 5.97  | 4.53  | 0.22 |
| P62196_Pf Psmc5  | 26S protease: R.VHVTQEDFEMAVAK#.V                      | 22.35  | 3.32  | 6.74  | 0.15 |
| P62196_Pf Psmc5  | 26S protease: K.VPDSTYEM*IGGLDK#.Q                     | 98.12  | 16.95 | 5.79  | 0.17 |
| P62196_Pf Psmc5  | 26S protease: R.VSGSELVQK#.F                           | 244.18 | 42.04 | 5.81  | 0.17 |
| P62196_Pf Psmc5  | 26S protease: K.EVIELVK#HPPELFEALGIAQPK#.G             | 5.47   | 1.30  | 4.21  | 0.24 |
| P62196_Pf Psmc5  | 26S protease: K.VPDSTYEM*IGGLDK#.Q                     | 5.12   | 1.42  | 3.59  | 0.28 |
| P62334_Pf Psmc6  | 26S protease: R.ADHDVQEDFM*#.A                         | 76.34  | 15.72 | 4.86  | 0.21 |
| P62334_Pf Psmc6  | 26S protease: K.ALQSGVQIVGEVLK#.Q                      | 174.07 | 35.39 | 4.92  | 0.20 |
| P62334_Pf Psmc6  | 26S protease: R.EVDPLVYNN*SHEDPGNVSYSEIGGLSEQR.E       | 12.06  | 9.24  | 1.31  | 0.77 |
| P62334_Pf Psmc6  | 26S protease: R.EVDPLVNNMSHEDPGNVSYSEIGGLSEQR.E        | 7.48   | 6.64  | 1.13  | 0.89 |
| P62334_Pf Psmc6  | 26S protease: K.HGEIDYEAIVK#.L                         | 147.73 | 51.54 | 2.87  | 0.35 |
| P62334_Pf Psmc6  | 26S protease: K.IHAGPITK#.H                            | 124.47 | 29.64 | 4.20  | 0.24 |
| P62334_Pf Psmc6  | 26S protease: K.LSDGFNGADLR.N                          | 20.49  | 21.06 | 0.97  | 1.03 |
| P62334_Pf Psmc6  | 26S protease: R.VALDMTTLTIMR.Y                         | 12.46  | 14.74 | 0.84  | 1.18 |
| P62334_Pf Psmc6  | 26S protease: R.VGIIPPK#.G                             | 32.70  | 11.89 | 2.75  | 0.36 |
| P62334_Pf Psmc6  | 26S protease: K.VSSSIVDK#.Y                            | 207.90 | 39.39 | 5.28  | 0.19 |
| P62334_Pf Psmc6  | 26S protease: K.ALQSGVQIVGEVLK#.Q                      | 24.59  | 2.64  | 9.31  | 0.11 |
| P62334_Pf Psmc6  | 26S protease: K.HGEIDYEAIVK#.L                         | 25.28  | 12.02 | 2.10  | 0.48 |
| P62334_Pf Psmc6  | 26S protease: K.ALQSGVQIVGEVLK#.Q                      | 11.95  | 10.06 | 1.19  | 0.84 |
| Q3TXS7_P5 Psmc6  | 26S protease: K.DTSEDEVLEPVAHAGPK#.I                   | 115.00 | 20.44 | 5.63  | 0.18 |
| Q3TXS7_P5 Psmc6  | 26S protease: K.EALQLM*ATYLPK#.D                       | 49.13  | 13.02 | 3.77  | 0.26 |
| Q3TXS7_P5 Psmc6  | 26S protease: K.EALQLMATYLPK#.D                        | 37.87  | 5.40  | 7.01  | 0.14 |
| Q3TXS7_P5 Psmc6  | 26S protease: K.IEEEEQEPEPPEFYIDD.-                    | 30.54  | 30.54 | 1.00  | 1.00 |
| Q3TXS7_P5 Psmc6  | 26S protease: R.LEGIVNK#.M                             | 158.51 | 16.43 | 9.65  | 0.10 |
| Q3TXS7_P5 Psmc6  | 26S protease: -M*ITSAAGIISLLDEEPEQLK#.E                | 16.05  | 2.35  | 6.83  | 0.15 |
| Q3TXS7_P5 Psmc6  | 26S protease: R.NNNTDMLMK#.N                           | 19.63  | 21.48 | 0.91  | 1.09 |
| Q3TXS7_P5 Psmc6  | 26S protease: R.QDVYDLLK#.T                            | 61.45  | 11.98 | 5.13  | 0.19 |
| Q3TXS7_P5 Psmc6  | 26S protease: K.TILENSDVPGM*LAYSLK#.L                  | 13.40  | 2.27  | 5.91  | 0.17 |
| Q3TXS7_P5 Psmc6  | 26S protease: K.TILENSDVPGLMAYSLK#.L                   | 9.75   | 2.68  | 3.63  | 0.28 |
| Q3TXS7_P5 Psmc6  | 26S protease: K.TNLQDDAVTGAAGLALGLVM*LGSK#.N           | 43.20  | 7.34  | 5.89  | 0.17 |
| Q3TXS7_P5 Psmc6  | 26S protease: K.TPDASPEPK#.D                           | 65.17  | 12.14 | 5.37  | 0.19 |
| Q3TXS7_P5 Psmc6  | 26S protease: R.TVGTPIASVPGSTNTGTVPSGEK#DSDPM*ETEEK#.T | 29.69  | 5.72  | 5.19  | 0.19 |
| Q3TXS7_P5 Psmc6  | 26S protease: K.VINDK#HDDVM*AK#.F                      | 15.21  | 4.06  | 3.74  | 0.27 |
| Q3TXS7_P5 Psmc6  | 26S protease: K.VSTAVLSITAK#.A                         | 130.53 | 20.99 | 6.22  | 0.16 |
| Q3TXS7_P5 Psmc6  | 26S protease: R.AAVESLGFILFR.T                         | 17.83  | 12.17 | 1.47  | 0.68 |
| Q3TXS7_P5 Psmc6  | 26S protease: K.DTSEDEVLEPVAHAGPK#.I                   | 113.46 | 15.78 | 7.19  | 0.14 |
| Q3TXS7_P5 Psmc6  | 26S protease: K.EALQLM*ATYLPK#.D                       | 28.01  | 5.87  | 4.77  | 0.21 |
| Q3TXS7_P5 Psmc6  | 26S protease: K.IEEEEQEPEPPEFYIDD.-                    | 23.01  | 23.01 | 1.00  | 1.00 |
| Q3TXS7_P5 Psmc6  | 26S protease: -M*ITSAAGIISLLDEEPEQLK#.E                | 18.81  | 2.65  | 7.11  | 0.14 |
| Q3TXS7_P5 Psmc6  | 26S protease: K.NAQAIEDM*VGYAQETOHEK#.I                | 67.98  | 7.02  | 9.68  | 0.10 |
| Q3TXS7_P5 Psmc6  | 26S protease: K.NAQAIEDMVGYAQETOHEK#.I                 | 33.49  | 4.27  | 7.85  | 0.13 |
| Q3TXS7_P5 Psmc6  | 26S protease: R.NNNTDMLMK#.N                           | 23.11  | 15.38 | 1.50  | 0.67 |
| Q3TXS7_P5 Psmc6  | 26S protease: R.NNNTDMLMK#.N                           | 9.96   | 3.16  | 3.15  | 0.32 |
| Q3TXS7_P5 Psmc6  | 26S protease: R.QDVYDLLK#.T                            | 30.08  | 6.52  | 4.62  | 0.22 |
| Q3TXS7_P5 Psmc6  | 26S protease: K.TILENSDVPGM*LAYSLK#.L                  | 12.34  | 1.67  | 7.40  | 0.14 |
| Q3TXS7_P5 Psmc6  | 26S protease: K.TNLQDDAVTGAAGLALGLVM*LGSK#.N           | 38.29  | 6.01  | 6.38  | 0.16 |
| Q3TXS7_P5 Psmc6  | 26S protease: K.TPDASPEPK#.D                           | 75.19  | 13.52 | 5.56  | 0.18 |
| Q3TXS7_P5 Psmc6  | 26S protease: K.VINDK#HDDVM*AK#.F                      | 8.51   | 1.27  | 6.72  | 0.15 |
| Q3TXS7_P5 Psmc6  | 26S protease: K.VSTAVLSITAK#.A                         | 68.05  | 8.44  | 8.07  | 0.12 |
| Q9Z2X2_P5 Psmc10 | 26S protease: K.FLVTOGASIVYENK#.E                      | 9.67   | 2.95  | 3.28  | 0.30 |
| Q9Z2X2_P5 Psmc10 | 26S protease: K.FLVTOGASIVYENK#EEK#.T                  | 3.08   | 2.03  | 1.52  | 0.66 |
| Q9Z2X2_P5 Psmc10 | 26S protease: K.GGLGLILK#.R                            | 12.96  | 4.61  | 2.81  | 0.36 |
| Q8BG32_P1 Psmc11 | 26S protease: R.AELRDPDIISTHLAK.L                      | 19.28  | 14.47 | 1.33  | 0.75 |
| Q8BG32_P1 Psmc11 | 26S protease: K.ALLVEVQLLESK#.T                        | 21.52  | 4.16  | 5.17  | 0.19 |
| Q8BG32_P1 Psmc11 | 26S protease: R.DIQENDEEAVQVK#.E                       | 122.30 | 12.86 | 9.51  | 0.11 |
| Q8BG32_P1 Psmc11 | 26S protease: K.EQSILELGSLLAK#.T                       | 231.95 | 32.03 | 7.24  | 0.14 |
| Q8BG32_P1 Psmc11 | 26S protease: K.FHGILDQEGVLIFDEPPVDK#.T                | 37.86  | 10.35 | 3.66  | 0.27 |
| Q8BG32_P1 Psmc11 | 26S protease: K.IIM*LNTPEVQALVSGK#.L                   | 60.34  | 9.63  | 6.27  | 0.16 |
| Q8BG32_P1 Psmc11 | 26S protease: R.KL#QMLDKK#.F                           | 56.70  | 6.66  | 8.52  | 0.12 |
| Q8BG32_P1 Psmc11 | 26S protease: K.LQATLDM*OSGIIHAAEEK#.D                 | 33.49  | 6.88  | 4.87  | 0.21 |
| Q8BG32_P1 Psmc11 | 26S protease: K.LQATLDMQSGIIHAAEEK#DHWK#.T             | 24.13  | 3.48  | 6.94  | 0.14 |
| Q8BG32_P1 Psmc11 | 26S protease: R.LVSLFDTK#.R                            | 99.39  | 15.33 | 6.48  | 0.15 |
| Q8BG32_P1 Psmc11 | 26S protease: K.LYDNLLEQLNLR.V                         | 33.25  | 26.36 | 1.26  | 0.79 |
| Q8BG32_P1 Psmc11 | 26S protease: R.SLADFEK#.A                             | 80.02  | 19.27 | 4.15  | 0.24 |
| Q8BG32_P1 Psmc11 | 26S protease: K.TAYSIFYAFEGYDSIDSPK#.A                 | 21.51  | 4.08  | 5.27  | 0.19 |
| Q8BG32_P1 Psmc11 | 26S protease: K.TYAALETIQNM*SK#.V                      | 14.59  | 1.63  | 8.94  | 0.11 |
| Q8BG32_P1 Psmc11 | 26S protease: K.TYAALETIQNM*SK#.V                      | 11.81  | 2.89  | 4.08  | 0.24 |
| Q8BG32_P1 Psmc11 | 26S protease: K.TYHASNLPK#.A                           | 91.82  | 13.68 | 6.71  | 0.15 |
| Q8BG32_P1 Psmc11 | 26S protease: K.VVDSLYSK#.A                            | 115.07 | 14.31 | 8.04  | 0.12 |
| Q8BG32_P1 Psmc11 | 26S protease: K.YVRPFLNSIK.A                           | 28.87  | 17.86 | 1.62  | 0.62 |
| Q8BG32_P1 Psmc11 | 26S protease: R.DIQENDEEAVQVK#.E                       | 23.22  | 5.99  | 3.87  | 0.26 |
| Q8BG32_P1 Psmc11 | 26S protease: K.EQSILELGSLLAK#.T                       | 42.56  | 5.00  | 8.52  | 0.12 |
| Q8BG32_P1 Psmc11 | 26S protease: K.FHGILDQEGVLIFDEPPVDK#.T                | 3.49   | 1.24  | 2.82  | 0.35 |
| Q8BG32_P1 Psmc11 | 26S protease: K.TAYSIFYAFEGYDSIDSPK#.A                 | 4.32   | 1.67  | 2.58  | 0.39 |
| Q8BG32_P1 Psmc11 | 26S protease: R.DIQENDEEAVQVK#.E                       | 30.37  | 5.44  | 5.58  | 0.18 |
| Q8BG32_P1 Psmc11 | 26S protease: K.EQSILELGSLLAK#.T                       | 54.09  | 11.19 | 4.83  | 0.21 |
| Q8BG32_P1 Psmc11 | 26S protease: K.IIM*LNTPEVQALVSGK#.L                   | 15.64  | 2.16  | 7.25  | 0.14 |
| Q8BG32_P1 Psmc11 | 26S protease: K.LYDNLLEQLNLR.V                         | 6.56   | 5.75  | 1.14  | 0.88 |
| Q8BG32_P1 Psmc11 | 26S protease: R.SLADFEK#.A                             | 25.51  | 5.02  | 5.09  | 0.20 |
| Q8BG32_P1 Psmc11 | 26S protease: K.TAYSIFYAFEGYDSIDSPK#.A                 | 4.32   | 1.38  | 3.13  | 0.32 |
| Q8BG32_P1 Psmc11 | 26S protease: K.VVDSLYSK#.A                            | 28.39  | 10.74 | 2.64  | 0.38 |
| Q9D8W5_F Psmc12  | 26S protease: K.DPNLLNDWSQK#.L                         | 57.63  | 1.51  | 38.20 | 0.03 |
| Q9D8W5_F Psmc12  | 26S protease: K.EAASILQELQVETGYSM*EK#.K                | 14.95  | 2.13  | 7.01  | 0.14 |
| Q9D8W5_F Psmc12  | 26S protease: K.EAASILQELQVETGYSMEK#.K                 | 12.45  | 2.77  | 4.49  | 0.22 |
| Q9D8W5_F Psmc12  | 26S protease: K.EWDLLENIM*LLSK#.R                      | 24.42  | 4.61  | 5.30  | 0.19 |
| Q9D8W5_F Psmc12  | 26S protease: K.EWDLLENIM*LLSK#.R                      | 10.45  | 2.69  | 3.88  | 0.26 |
| Q9D8W5_F Psmc12  | 26S protease: K.FFOEENTENLIK#.L                        | 83.77  | 12.43 | 6.74  | 0.15 |
| Q9D8W5_F Psmc12  | 26S protease: R.ILVAVK#.M                              | 59.11  | 76.48 | 0.77  | 1.29 |
| Q9D8W5_F Psmc12  | 26S protease: K.IYVEIER.A                              | 25.76  | 16.18 | 1.59  | 0.63 |
| Q9D8W5_F Psmc12  | 26S protease: K.LNSLM*SLVVK#.T                         | 48.06  | 7.32  | 6.56  | 0.15 |
| Q9D8W5_F Psmc12  | 26S protease: K.LNSLMSLVVK#.T                          | 8.44   | 3.33  | 2.54  | 0.39 |
| Q9D8W5_F Psmc12  | 26S protease: R.LQEVITLLEK#.Q                          | 116.04 | 16.82 | 6.90  | 0.14 |
| Q9D8W5_F Psmc12  | 26S protease: R.WSTLVEDYGVLEL.R                        | 14.44  | 8.67  | 1.66  | 0.60 |

|                  |                                            |        |       |       |      |
|------------------|--------------------------------------------|--------|-------|-------|------|
| Q9D8W5_F Psmid12 | 26S protease: K.EAASILQELQVETGYSM*EK#.K    | 12.04  | 2.08  | 5.80  | 0.17 |
| Q9D8W5_F Psmid12 | 26S protease: K.EWDLLENINIM*LLSK#.R        | 9.58   | 3.35  | 2.86  | 0.35 |
| Q9D8W5_F Psmid12 | 26S protease: K.FFOEENTENLK#.L             | 63.39  | 8.11  | 7.82  | 0.13 |
| Q9D8W5_F Psmid12 | 26S protease: R.ILVAVVK#.M                 | 35.23  | 41.76 | 0.84  | 1.19 |
| Q9D8W5_F Psmid12 | 26S protease: K.LNSLM*SLVKN#.T             | 18.42  | 3.22  | 5.72  | 0.17 |
| Q9D8W5_F Psmid12 | 26S protease: R.LQEVETLLSLEK#.Q            | 72.38  | 10.74 | 6.74  | 0.15 |
| Q9D8W5_F Psmid12 | 26S protease: K.DPNLLNDVWSQK#.L            | 28.33  | 6.27  | 4.52  | 0.22 |
| Q9D8W5_F Psmid12 | 26S protease: K.EAASILQELQVETGYSM*EK#.K    | 22.70  | 4.01  | 5.66  | 0.18 |
| Q9D8W5_F Psmid12 | 26S protease: K.EWDLLENINIM*LLSK#.R        | 15.55  | 3.66  | 4.25  | 0.24 |
| Q9D8W5_F Psmid12 | 26S protease: K.FFOEENTENLK#.L             | 83.23  | 12.73 | 6.54  | 0.15 |
| Q9D8W5_F Psmid12 | 26S protease: R.ILVAVVK#.M                 | 69.17  | 35.89 | 1.93  | 0.52 |
| Q9D8W5_F Psmid12 | 26S protease: K.K#LEEIPK#.Y                | 59.71  | 7.47  | 8.00  | 0.13 |
| Q9D8W5_F Psmid12 | 26S protease: K.LNSLM*SLVKN#.T             | 22.98  | 3.37  | 6.82  | 0.15 |
| Q9D8W5_F Psmid12 | 26S protease: K.LNSLMSLVKN#.T              | 14.24  | 1.55  | 9.21  | 0.11 |
| Q9D8W5_F Psmid12 | 26S protease: R.LQEVETLLSLEK#.Q            | 63.63  | 6.26  | 10.16 | 0.10 |
| Q9WV12_P Psmid13 | 26S protease: K.ALSVGLVR.G                 | 20.89  | 15.73 | 1.33  | 0.75 |
| Q9WV12_P Psmid13 | 26S protease: K.DLPVSEQQER.A               | 30.74  | 20.85 | 1.47  | 0.68 |
| Q9WV12_P Psmid13 | 26S protease: K.ITVKN#VELLM*#K#.A          | 30.75  | 3.77  | 8.16  | 0.12 |
| Q9WV12_P Psmid13 | 26S protease: K.ITVKN#VELLM*#K#.A          | 24.17  | 6.86  | 3.52  | 0.28 |
| Q9WV12_P Psmid13 | 26S protease: K.LNIGDLQATK#.E              | 123.80 | 18.84 | 6.57  | 0.15 |
| Q9WV12_P Psmid13 | 26S protease: R.QM*#TDPNVALTFLEK#.T        | 58.82  | 4.12  | 14.28 | 0.07 |
| Q9WV12_P Psmid13 | 26S protease: R.QM*#TDPNVALTFLEK#.T        | 11.67  | 8.67  | 1.35  | 0.74 |
| Q9WV12_P Psmid13 | 26S protease: K.SM*EM*LVHQADILT.-          | 9.72   | 9.72  | 1.00  | 1.00 |
| Q9WV12_P Psmid13 | 26S protease: K.SM*EM*LVHQADILT.-          | 5.97   | 5.97  | 1.00  | 1.00 |
| Q9WV12_P Psmid13 | 26S protease: K.SMEMLVHQADILT.-            | 19.29  | 19.29 | 1.00  | 1.00 |
| Q9WV12_P Psmid13 | 26S protease: R.VLDLQK#.G                  | 156.66 | 22.98 | 6.82  | 0.15 |
| Q9WV12_P Psmid13 | 26S protease: R.LEELYTK#.K                 | 22.14  | 1.73  | 12.78 | 0.08 |
| Q9WV12_P Psmid13 | 26S protease: K.LNIGDLQATK#.E              | 56.90  | 4.96  | 11.48 | 0.09 |
| Q9WV12_P Psmid13 | 26S protease: R.QM*#TDPNVALTFLEK#.T        | 9.58   | 3.39  | 2.83  | 0.35 |
| Q9WV12_P Psmid13 | 26S protease: R.QM*#TDPNVALTFLEK#.T        | 6.04   | 4.15  | 1.45  | 0.69 |
| Q9WV12_P Psmid13 | 26S protease: R.VLDLQK#.G                  | 57.97  | 9.61  | 6.03  | 0.17 |
| Q9WV12_P Psmid13 | 26S protease: K.YQVTIGNHASYK#.D            | 12.08  | 1.40  | 8.62  | 0.12 |
| Q9WV12_P Psmid13 | 26S protease: K.DLPVSEQQER.A               | 17.17  | 13.00 | 1.32  | 0.76 |
| Q9WV12_P Psmid13 | 26S protease: K.ITVKN#VELLM*#K#.A          | 25.21  | 3.02  | 8.34  | 0.12 |
| Q9WV12_P Psmid13 | 26S protease: K.ITVKN#VELLM*#K#.A          | 14.28  | 1.66  | 8.61  | 0.12 |
| Q9WV12_P Psmid13 | 26S protease: K.LNIGDLQATK#.E              | 74.37  | 14.26 | 5.21  | 0.19 |
| Q9WV12_P Psmid13 | 26S protease: R.QM*#TDPNVALTFLEK#.T        | 19.54  | 3.44  | 5.67  | 0.18 |
| Q9WV12_P Psmid13 | 26S protease: R.QM*#TDPNVALTFLEK#.T        | 6.69   | 7.63  | 0.88  | 1.14 |
| Q9WV12_P Psmid13 | 26S protease: R.VLDLQK#.G                  | 95.38  | 13.10 | 7.28  | 0.14 |
| Q35593_P Psmid14 | 26S protease: R.AVAVVDPVQSVK#.G            | 158.22 | 31.54 | 5.02  | 0.20 |
| Q35593_P Psmid14 | 26S protease: K.AVEEDK#M*#TPEQLAIK#.N      | 48.80  | 9.14  | 5.34  | 0.19 |
| Q35593_P Psmid14 | 26S protease: K.AVEEDK#M*#TPEQLAIK#.N      | 13.30  | 4.70  | 2.83  | 0.35 |
| Q35593_P Psmid14 | 26S protease: K.MLDMLK#.Q                  | 10.34  | 2.31  | 4.48  | 0.22 |
| Q35593_P Psmid14 | 26S protease: R.VIDVAMPQSGTGVSEAVDPVQAK#.M | 78.08  | 13.20 | 5.92  | 0.17 |
| Q35593_P Psmid14 | 26S protease: R.VIDVAMPQSGTGVSEAVDPVQAK#.M | 11.36  | 2.06  | 5.51  | 0.18 |
| Q8VDM4_P Psmid2  | 26S protease: R.AVPLALALISVNP.R            | 14.63  | 12.87 | 1.14  | 0.88 |
| Q8VDM4_P Psmid2  | 26S protease: R.DK#TPVQSQPSATTPSGADEK#.S   | 68.65  | 14.49 | 4.74  | 0.21 |
| Q8VDM4_P Psmid2  | 26S protease: K.DPNLFMVR.L                 | 9.34   | 7.42  | 1.26  | 0.79 |
| Q8VDM4_P Psmid2  | 26S protease: R.EDVLLTLLPV*GDSK#.S         | 28.99  | 40.07 | 0.72  | 1.38 |
| Q8VDM4_P Psmid2  | 26S protease: R.ELDIM*EPK#.V               | 58.07  | 10.81 | 5.37  | 0.19 |
| Q8VDM4_P Psmid2  | 26S protease: R.EPLTLLVK#.E                | 49.68  | 6.87  | 7.23  | 0.14 |
| Q8VDM4_P Psmid2  | 26S protease: K.EWQELDDAEK#.A              | 78.35  | 12.63 | 6.20  | 0.16 |
| Q8VDM4_P Psmid2  | 26S protease: R.FGSGSQVDSAR.M              | 58.73  | 45.33 | 1.30  | 0.77 |
| Q8VDM4_P Psmid2  | 26S protease: R.HLAGEVAK#.E                | 73.16  | 13.12 | 5.58  | 0.18 |
| Q8VDM4_P Psmid2  | 26S protease: R.LAQGLTLHGK#.G              | 106.47 | 12.14 | 8.77  | 0.11 |
| Q8VDM4_P Psmid2  | 26S protease: K.LK#EYENM*#APGENK#.C        | 12.15  | 1.84  | 6.60  | 0.15 |
| Q8VDM4_P Psmid2  | 26S protease: K.LLTDGKN#.W                 | 19.76  | 2.94  | 6.73  | 0.15 |
| Q8VDM4_P Psmid2  | 26S protease: R.LNILDLSK#.F                | 218.16 | 39.05 | 5.59  | 0.18 |
| Q8VDM4_P Psmid2  | 26S protease: R.M*#NASSFVNGFVNAAGQDK#.L    | 18.23  | 2.16  | 8.44  | 0.12 |
| Q8VDM4_P Psmid2  | 26S protease: R.SSTSM*#SVPK#PLK#.F         | 40.29  | 5.86  | 6.87  | 0.15 |
| Q8VDM4_P Psmid2  | 26S protease: K.TPVQSQPSATTPSGADEK#.S      | 61.05  | 11.00 | 5.55  | 0.18 |
| Q8VDM4_P Psmid2  | 26S protease: R.VGQAVDVVGQAGK#PK#.T        | 278.52 | 38.22 | 7.29  | 0.14 |
| Q8VDM4_P Psmid2  | 26S protease: K.VPDIIYK#.T                 | 115.25 | 86.21 | 1.34  | 0.75 |
| Q8VDM4_P Psmid2  | 26S protease: K.YL#SSEYIK#.S               | 99.54  | 16.93 | 5.88  | 0.17 |
| Q8VDM4_P Psmid2  | 26S protease: R.DK#TPVQSQPSATTPSGADEK#.S   | 32.29  | 3.90  | 8.29  | 0.12 |
| Q8VDM4_P Psmid2  | 26S protease: R.ELDIM*EPK#.V               | 14.84  | 2.92  | 5.09  | 0.20 |
| Q8VDM4_P Psmid2  | 26S protease: K.EWQELDDAEK#.A              | 19.03  | 3.17  | 6.00  | 0.17 |
| Q8VDM4_P Psmid2  | 26S protease: R.HLAGEVAK#.E                | 29.54  | 3.63  | 8.14  | 0.12 |
| Q8VDM4_P Psmid2  | 26S protease: R.LAQGLTLHGK#.G              | 36.01  | 7.06  | 5.10  | 0.20 |
| Q8VDM4_P Psmid2  | 26S protease: R.LNILDLSK#.F                | 78.10  | 10.19 | 7.67  | 0.13 |
| Q8VDM4_P Psmid2  | 26S protease: K.TPVQSQPSATTPSGADEK#.S      | 19.93  | 3.39  | 5.89  | 0.17 |
| Q8VDM4_P Psmid2  | 26S protease: R.VGQAVDVVGQAGK#PK#.T        | 104.73 | 14.72 | 7.11  | 0.14 |
| Q8VDM4_P Psmid2  | 26S protease: K.YL#SSEYIK#.S               | 34.19  | 6.36  | 5.37  | 0.19 |
| P14685_P5 Psmid3 | 26S protease: K.AIQLEYSEAR.R               | 122.07 | 13.37 | 9.13  | 0.11 |
| P14685_P5 Psmid3 | 26S protease: K.AK#PPPGGEQEP#PAPQDVEK#.E   | 6.83   | 2.71  | 2.52  | 0.40 |
| P14685_P5 Psmid3 | 26S protease: R.ALDLVAK#.C                 | 71.35  | 13.01 | 5.48  | 0.18 |
| P14685_P5 Psmid3 | 26S protease: R.DGVIEASINHEK#.G            | 60.10  | 21.19 | 2.84  | 0.35 |
| P14685_P5 Psmid3 | 26S protease: R.ELDTVTLEDIK#.E             | 26.35  | 8.41  | 3.13  | 0.32 |
| P14685_P5 Psmid3 | 26S protease: K.FNQVLDQFGEK#.F             | 94.40  | 15.53 | 6.08  | 0.16 |
| P14685_P5 Psmid3 | 26S protease: K.FQTDGTYLII.R               | 22.97  | 48.49 | 0.47  | 2.11 |
| P14685_P5 Psmid3 | 26S protease: K.ISDDLMOQ#.I                | 40.76  | 5.83  | 6.99  | 0.14 |
| P14685_P5 Psmid3 | 26S protease: K.ISDDLMOQ#.I                | 61.41  | 9.18  | 6.69  | 0.15 |
| P14685_P5 Psmid3 | 26S protease: R.ISLADIAQK#.L               | 119.63 | 16.27 | 7.35  | 0.14 |
| P14685_P5 Psmid3 | 26S protease: R.LNHVLYK#.A                 | 65.12  | 13.35 | 4.88  | 0.21 |
| P14685_P5 Psmid3 | 26S protease: K.LQLD#SPEDA#FVAK#.A         | 126.37 | 18.35 | 6.89  | 0.15 |
| P14685_P5 Psmid3 | 26S protease: R.VYEFDK#.L                  | 20.05  | 3.50  | 5.73  | 0.17 |
| P14685_P5 Psmid3 | 26S protease: R.VYEFDKLDVVR.S              | 19.36  | 13.21 | 1.47  | 0.68 |
| P14685_P5 Psmid3 | 26S protease: R.YLYTGR.I                   | 17.11  | 16.57 | 1.03  | 0.97 |
| P14685_P5 Psmid3 | 26S protease: R.DGVIEASINHEK#.G            | 14.38  | 2.95  | 4.88  | 0.21 |
| P14685_P5 Psmid3 | 26S protease: R.ISLADIAQK#.L               | 35.33  | 6.07  | 5.82  | 0.17 |
| P14685_P5 Psmid3 | 26S protease: K.LQLD#SPEDA#FVAK#.A         | 46.23  | 41.44 | 1.12  | 0.90 |
| P14685_P5 Psmid3 | 26S protease: R.ALDLVAK#.C                 | 23.60  | 6.04  | 3.91  | 0.26 |
| P14685_P5 Psmid3 | 26S protease: R.ELDTVTLEDIK#.E             | 9.78   | 1.75  | 5.61  | 0.18 |
| P14685_P5 Psmid3 | 26S protease: K.FNQVLDQFGEK#.F             | 44.43  | 9.69  | 4.58  | 0.22 |
| P14685_P5 Psmid3 | 26S protease: K.ISDDLMOQ#.I                | 26.14  | 8.31  | 3.14  | 0.32 |
| P14685_P5 Psmid3 | 26S protease: R.ISLADIAQK#.L               | 53.69  | 11.30 | 4.75  | 0.21 |
| P14685_P5 Psmid3 | 26S protease: K.LQLD#SPEDA#FVAK#.A         | 65.95  | 25.92 | 2.54  | 0.39 |
| P14685_P5 Psmid3 | 26S protease: R.NYH#SLYDQAEK#.L            | 6.96   | 2.49  | 2.80  | 0.36 |
| F7A187_F7 Psmid4 | 26S protease: R.AAAASAAEAGIATPGTEGER.D     | 4.32   | 6.66  | 0.65  | 1.54 |
| F7A187_F7 Psmid4 | 26S protease: R.DSDALLK#.M                 | 16.69  | 4.38  | 3.81  | 0.26 |
| O35226_P5 Psmid4 | 26S protease: K.EK#NVNDIINFGEVEV#NTEK#.L   | 56.50  | 15.55 | 3.63  | 0.28 |
| O35226_P5 Psmid4 | 26S protease: R.IIAFVGS#PVDEK#.D           | 19.28  | 7.85  | 2.46  | 0.41 |
| O35226_P5 Psmid4 | 26S protease: K.LTAFVNTLNGK#.D             | 12.13  | 26.09 | 0.47  | 2.15 |

|                 |                                                       |        |        |       |      |
|-----------------|-------------------------------------------------------|--------|--------|-------|------|
| O35226_P5 Psm4  | 26S protea: R.SVM*GALASQATK#D                         | 67.54  | 24.29  | 2.78  | 0.36 |
| O35226_P5 Psm4  | 26S protea: R.SVMGALASQATK#D                          | 63.99  | 14.73  | 4.34  | 0.23 |
| O35226_P5 Psm4  | 26S protea: K.VNVDIINFGEVEEIVNTEK#L                   | 54.33  | 13.20  | 4.11  | 0.24 |
| O35226_P5 Psm4  | 26S protea: K.EK#VNVDIINFGEVEEIVNTEK#L                | 19.46  | 3.45   | 5.65  | 0.18 |
| O35226_P5 Psm4  | 26S protea: R.IIAFVGSVPVEDNEK#D                       | 12.38  | 2.07   | 6.00  | 0.17 |
| O35226_P5 Psm4  | 26S protea: K.VNVDIINFGEVEEIVNTEK#L                   | 28.72  | 4.48   | 6.42  | 0.16 |
| Q8BJY1_PS Psm5  | 26S protea: R.AYLSEGPYVVK#PVATTAVEGAD,-               | 10.79  | 1.77   | 6.11  | 0.16 |
| Q8BJY1_PS Psm5  | 26S protea: R.IVENSEAVTEILNNAELLK#Q                   | 21.71  | 2.11   | 10.28 | 0.10 |
| Q8BJY1_PS Psm5  | 26S protea: R.GLTHPDSDSK#T                            | 18.24  | 2.85   | 6.40  | 0.16 |
| Q8BJY1_PS Psm5  | 26S protea: R.IVENSEAVTEILNNAELLK#Q                   | 35.10  | 5.09   | 6.89  | 0.15 |
| Q8BJY1_PS Psm5  | 26S protea: K.VFEM*ADSDPTM*IGAVAVDTVGLGSSVEGK#Q       | 7.97   | 2.26   | 3.52  | 0.28 |
| Q99J14_PSI Psm6 | 26S protea: K.SLDWQM*DVDLLSK#M                        | 16.37  | 2.76   | 5.93  | 0.17 |
| Q99J14_PSI Psm6 | 26S protea: K.NWQYQETIK#K                             | 31.89  | 6.54   | 4.87  | 0.21 |
| Q99J14_PSI Psm6 | 26S protea: K.SLDWQM*DVDLLSK#M                        | 13.46  | 5.78   | 2.33  | 0.43 |
| Q99J14_PSI Psm6 | 26S protea: K.ANEEELK#R                               | 8.54   | 1.31   | 6.54  | 0.15 |
| Q99J14_PSI Psm6 | 26S protea: K.GAEILEVLHSLPAVR.Q                       | 29.53  | 19.44  | 1.52  | 0.66 |
| Q99J14_PSI Psm6 | 26S protea: R.LDEELEDAEK#N                            | 22.38  | 2.72   | 8.24  | 0.12 |
| Q99J14_PSI Psm6 | 26S protea: K.NWQYQETIK#K                             | 39.71  | 5.62   | 7.07  | 0.14 |
| Q99J14_PSI Psm6 | 26S protea: K.SLDWQM*DVDLLSK#M                        | 17.93  | 4.50   | 3.98  | 0.25 |
| P26516_P5 Psm7  | 26S protea: R.DIKDITVGLTSLQR.I                        | 19.51  | 11.72  | 1.66  | 0.60 |
| P26516_P5 Psm7  | 26S protea: R.ITNQVHGLK#G                             | 55.79  | 9.11   | 6.13  | 0.16 |
| P26516_P5 Psm7  | 26S protea: R.SVVALHNLNKK#I                           | 79.25  | 17.76  | 4.46  | 0.22 |
| P26516_P5 Psm7  | 26S protea: R.VVGLLGSWQK#K                            | 148.18 | 26.12  | 5.67  | 0.18 |
| P26516_P5 Psm7  | 26S protea: R.SVVALHNLNKK#I                           | 8.51   | 12.44  | 0.68  | 1.46 |
| P26516_P5 Psm7  | 26S protea: R.VVGLLGSWQK#K                            | 15.76  | 28.54  | 0.55  | 1.81 |
| Q9CX56_P5 Psm8  | 26S protea: K.DIQTNVYIK#H                             | 71.77  | 8.59   | 8.35  | 0.12 |
| Q9CX56_P5 Psm8  | 26S protea: K.HPVSLQYLM*EGSYNK#V                      | 20.31  | 7.06   | 2.88  | 0.35 |
| Q9CX56_P5 Psm8  | 26S protea: K.HPVSLQYLM*EGSYNK#V                      | 13.81  | 3.26   | 4.24  | 0.24 |
| Q9CX56_P5 Psm8  | 26S protea: K.I.LFAEATR.I                             | 26.95  | 27.76  | 0.97  | 1.03 |
| Q9CX56_P5 Psm8  | 26S protea: R.I.LFFSTPK#K                             | 124.16 | 17.06  | 7.28  | 0.14 |
| Q9CR00_P5 Psm9  | 26S protea: K.ANYDVLESQK#G                            | 25.54  | 8.09   | 3.16  | 0.32 |
| P97371_PS Psm1  | Proteasom: K.APLDIPVPDPVK#E                           | 23.80  | 7.66   | 3.11  | 0.32 |
| P97371_PS Psm1  | Proteasom: K.APLDIPVPDPVK#EK#E                        | 113.23 | 18.70  | 6.05  | 0.17 |
| P97371_PS Psm1  | Proteasom: R.IEDGNNGFVAVQEK#V                         | 141.54 | 25.65  | 5.52  | 0.18 |
| P97371_PS Psm1  | Proteasom: K.ISELDAFLK#EPALNEANLNK#A                  | 82.26  | 9.92   | 8.29  | 0.12 |
| P97371_PS Psm1  | Proteasom: K.K#SELDAFLK#EPALNEANLNK#A                 | 81.86  | 10.98  | 7.46  | 0.13 |
| P97371_PS Psm1  | Proteasom: R.NAYAVLYDIILK#N                           | 233.34 | 31.28  | 7.46  | 0.13 |
| P97371_PS Psm1  | Proteasom: K.TENLLSYFVK#K                             | 97.20  | 16.57  | 5.87  | 0.17 |
| P97371_PS Psm1  | Proteasom: K.VFELMTNLHTK#L                            | 48.75  | 5.98   | 8.15  | 0.12 |
| P97371_PS Psm1  | Proteasom: K.APLDIPVPDPVK#EK#E                        | 26.38  | 7.17   | 3.68  | 0.27 |
| P97371_PS Psm1  | Proteasom: R.IEDGNNGFVAVQEK#V                         | 72.64  | 13.19  | 5.51  | 0.18 |
| P97371_PS Psm1  | Proteasom: K.ISELDAFLK#EPALNEANLNK#A                  | 7.65   | 2.63   | 2.91  | 0.34 |
| P97372_PS Psm2  | Proteasom: R.AFYAELYHIISSLEK#I                        | 140.26 | 26.35  | 5.32  | 0.19 |
| P97372_PS Psm2  | Proteasom: K.GEEK#PSM*Y,-                             | 16.08  | 2.20   | 7.32  | 0.14 |
| P97372_PS Psm2  | Proteasom: K.IEDGNDFGVAIQEK#V                         | 86.07  | 15.54  | 5.54  | 0.18 |
| P97372_PS Psm2  | Proteasom: K.TK#VEAFQTTISK#Y                          | 57.69  | 9.03   | 6.39  | 0.16 |
| P97372_PS Psm2  | Proteasom: K.VEAFQTTISK#Y                             | 25.48  | 4.17   | 6.11  | 0.16 |
| P97372_PS Psm2  | Proteasom: K.IEDGNDFGVAIQEK#V                         | 27.91  | 4.63   | 6.03  | 0.17 |
| P97372_PS Psm2  | Proteasom: K.TK#VEAFQTTISK#Y                          | 27.73  | 3.41   | 8.12  | 0.12 |
| P97372_PS Psm2  | Proteasom: K.VEAFQTTISK#Y                             | 9.26   | 1.77   | 5.24  | 0.19 |
| P97372_PS Psm2  | Proteasom: R.AFYAELYHIISSLEK#I                        | 104.89 | 18.72  | 5.60  | 0.18 |
| P97372_PS Psm2  | Proteasom: K.IEDGNDFGVAIQEK#V                         | 34.47  | 6.81   | 5.06  | 0.20 |
| P97372_PS Psm2  | Proteasom: R.KIISLQLLEDLSLNVADLSLR.A                  | 19.46  | 16.42  | 1.18  | 0.84 |
| P97372_PS Psm2  | Proteasom: K.TK#VEAFQTTISK#Y                          | 36.77  | 5.26   | 6.99  | 0.14 |
| P97372_PS Psm2  | Proteasom: R.AFYAELYHIISSLEK#I                        | 71.45  | 16.27  | 4.39  | 0.23 |
| P97372_PS Psm2  | Proteasom: K.IEDGNDFGVAIQEK#V                         | 53.68  | 9.87   | 5.44  | 0.18 |
| P97372_PS Psm2  | Proteasom: R.KIISLQLLEDLSLNVADLSLR.A                  | 11.71  | 8.00   | 1.46  | 0.68 |
| P97372_PS Psm2  | Proteasom: K.TK#VEAFQTTISK#Y                          | 54.32  | 14.40  | 3.77  | 0.27 |
| P97372_PS Psm2  | Proteasom: K.VEAFQTTISK#Y                             | 17.32  | 11.47  | 1.51  | 0.66 |
| P61290_PS Psm3  | Proteasom: R.ITSEAEADVANFFPK#K                        | 11.96  | 5.92   | 2.02  | 0.50 |
| P61290_PS Psm3  | Proteasom: K.SNQLVDHIEK#V                             | 34.45  | 11.74  | 2.93  | 0.34 |
| P61290_PS Psm3  | Proteasom: R.TVSEEAASYLDQISR.Y                        | 4.16   | 5.65   | 0.74  | 1.36 |
| Q9CZH3_P5 Psm3  | Proteasom: K.M*GTLVLEPSNVANDISKVPLTR.V                | 1.73   | 2.91   | 0.59  | 1.69 |
| Q8R326_P5 Pspc1 | Paraspeckle: K.AELDTLTK#S                             | 62.30  | 19.83  | 3.14  | 0.32 |
| Q8R326_P5 Pspc1 | Paraspeckle: K.AVVVVDDR.G                             | 12.46  | 16.91  | 0.74  | 1.36 |
| Q8R326_P5 Pspc1 | Paraspeckle: R.FAQPTGFEFYASR.W                        | 19.13  | 22.90  | 0.84  | 1.20 |
| Q8R326_P5 Pspc1 | Paraspeckle: R.LFVGNLPTDI TEEDFK.R                    | 14.79  | 7.48   | 1.98  | 0.51 |
| Q8R326_P5 Pspc1 | Paraspeckle: K.NLSPVVSNELLEQAFSQGPVEK#A               | 30.62  | 11.65  | 2.63  | 0.38 |
| Q8R326_P5 Pspc1 | Paraspeckle: R.YGEPSEVFN.R.D                          | 13.33  | 24.53  | 0.54  | 1.84 |
| Q99LS3_SE PspH  | Phosphoser: R.LALIQPSR.D                              | 11.40  | 13.87  | 0.82  | 1.22 |
| Q8BGJ5_Q8 Ptb1  | MCG13402.R.AQAALQAVNSVQSGNLAASAADVAGM*AM*AGQSPVLR.I   | 14.04  | 16.00  | 0.88  | 1.14 |
| Q8BGJ5_Q8 Ptb1  | MCG13402.R.AQAALQAVNSVQSGNLAASAADVAGM*AM*AGQSPVLR.I   | 5.56   | 8.22   | 0.68  | 1.48 |
| Q8BGJ5_Q8 Ptb1  | MCG13402.K.DYGSPLHR.F                                 | 146.45 | 315.60 | 0.46  | 2.16 |
| Q8BGJ5_Q8 Ptb1  | MCG13402.K.GKNQAFIEM*NTEEAANTM*VNYTYSVAPVLR.G         | 2.48   | 5.66   | 0.44  | 2.28 |
| Q8BGJ5_Q8 Ptb1  | MCG13402.K.GKNQAFIEM*NTEEAANTM*VNYTYSVAPVLR.G         | 3.45   | 4.23   | 0.82  | 1.23 |
| Q8BGJ5_Q8 Ptb1  | MCG13402.K.GKNQAFIEM*NTEEAANTM*VNYTYSVAPVLR.G         | 2.27   | 5.05   | 0.45  | 2.22 |
| Q8BGJ5_Q8 Ptb1  | MCG13402.K.HQSVQLPR.E                                 | 121.59 | 236.68 | 0.51  | 1.95 |
| Q8BGJ5_Q8 Ptb1  | MCG13402.R.IAIPGLAGAGNSVLLVSNLNP.R.V                  | 131.29 | 260.34 | 0.50  | 1.98 |
| Q8BGJ5_Q8 Ptb1  | MCG13402.R.IIVENLFYPTLDLVLHQIFSK#F                    | 151.00 | 52.28  | 2.89  | 0.35 |
| Q8BGJ5_Q8 Ptb1  | MCG13402.R.KLPDSDVTEGEVLSGLPFGK.V                     | 746.98 | 319.78 | 2.34  | 0.43 |
| Q8BGJ5_Q8 Ptb1  | MCG13402.R.K#LPSDVTGEVLSGLPFGK#V                      | 89.76  | 40.27  | 2.23  | 0.45 |
| Q8BGJ5_Q8 Ptb1  | MCG13402.R.KM*ALIQM*GSVEEAVALIELHNHDLGHHHLR.V         | 2.10   | 6.96   | 0.30  | 3.31 |
| Q8BGJ5_Q8 Ptb1  | MCG13402.K.LPSDVTGEVLSGLPFGK#V                        | 76.69  | 38.84  | 1.97  | 0.51 |
| Q8BGJ5_Q8 Ptb1  | MCG13402.K.NFQNIFFPSATLHLSNPPSVSSEDDLK#S              | 176.88 | 76.54  | 2.31  | 0.43 |
| Q8BGJ5_Q8 Ptb1  | MCG13402.K.NNOFQALLQYADPVSQAQHA#L                     | 657.21 | 282.12 | 2.33  | 0.43 |
| Q8BGJ5_Q8 Ptb1  | MCG13402.K.NNOFQALLQYADPVSQAQHA#L                     | 10.72  | 5.54   | 1.93  | 0.52 |
| Q8BGJ5_Q8 Ptb1  | MCG13402.K.NNOFQALLQYADPVSQAQHA#L                     | 45.94  | 17.55  | 2.62  | 0.38 |
| Q8BGJ5_Q8 Ptb1  | MCG13402.K.NQAFIEM*NTEEAANTM*VNYTYSVAPVLR.G           | 3.17   | 4.03   | 0.79  | 1.27 |
| Q8BGJ5_Q8 Ptb1  | MCG13402.K.TDSSPNQAR.A                                | 6.21   | 10.72  | 0.58  | 1.73 |
| Q8BGJ5_Q8 Ptb1  | MCG13402.R.IAIPGLAGAGNSVLLVSNLNP.R.V                  | 3.72   | 10.59  | 0.35  | 2.85 |
| Q8BGJ5_Q8 Ptb1  | MCG13402.R.KLPDSDVTEGEVLSGLPFGK.V                     | 57.70  | 26.21  | 2.20  | 0.45 |
| Q8BGJ5_Q8 Ptb1  | MCG13402.K.NNOFQALLQYADPVSQAQHA#L                     | 3.21   | 1.96   | 1.63  | 0.61 |
| Q8BGJ5_Q8 Ptb1  | MCG13402.R.IAIPGLAGAGNSVLLVSNLNP.R.V                  | 21.67  | 46.66  | 0.46  | 2.15 |
| Q8BGJ5_Q8 Ptb1  | MCG13402.R.K#LPSDVTGEVLSGLPFGK#V                      | 110.84 | 49.90  | 2.22  | 0.45 |
| Q8BGJ5_Q8 Ptb1  | MCG13402.K.LPSDVTGEVLSGLPFGK#V                        | 7.31   | 3.13   | 2.34  | 0.43 |
| Q8BGJ5_Q8 Ptb1  | MCG13402.K.NFQNIFFPSATLHLSNPPSVSSEDDLK#S              | 13.27  | 6.17   | 2.15  | 0.46 |
| Q8BGJ5_Q8 Ptb1  | MCG13402.K.NNOFQALLQYADPVSQAQHA#L                     | 52.92  | 19.70  | 2.69  | 0.37 |
| Q91231_P1 Ptb2  | Polypyrimi: R.AQVVLQAVTAVQTANTPLSGTTSSESAVTPAQSPVLR.I | 3.76   | 5.73   | 0.66  | 1.52 |
| Q91231_P1 Ptb2  | Polypyrimi: R.DYTRPDLPSGDGPALDPAIAAFAK.E              | 11.45  | 32.61  | 0.35  | 2.85 |
| Q91231_P1 Ptb2  | Polypyrimi: R.K#LPGTEVTEVIALGLPFGK.V                  | 73.72  | 48.35  | 1.52  | 0.66 |
| Q91231_P1 Ptb2  | Polypyrimi: K.LVNLNVK#Y                               | 87.45  | 56.86  | 1.54  | 0.65 |
| Q91231_P1 Ptb2  | Polypyrimi: K.NNOFQALLQYADPVSQAQHA#L                  | 25.32  | 13.64  | 1.86  | 0.54 |
| Q91231_P1 Ptb2  | Polypyrimi: R.NQPIYQSNHKK#E                           | 23.82  | 15.97  | 1.49  | 0.67 |

|                  |                                                        |         |        |       |       |
|------------------|--------------------------------------------------------|---------|--------|-------|-------|
| Q91231_P1 Ptpb2  | Polypyrimidi K.TDNLTNQR.A                              | 114.81  | 16.68  | 6.88  | 0.15  |
| Q91231_P1 Ptpb2  | Polypyrimidi R.TLFANTGGTVK#.A                          | 63.47   | 43.32  | 1.47  | 0.68  |
| Q91231_P1 Ptpb2  | Polypyrimidi R.EGLDDQGLTK#.D                           | 35.82   | 8.37   | 4.28  | 0.23  |
| Q91231_P1 Ptpb2  | Polypyrimidi R.TLFANTGGTVK#.A                          | 57.66   | 17.17  | 3.36  | 0.30  |
| Q91231_P1 Ptpb2  | Polypyrimidi K.VTNLLM*LK#.G                            | 43.52   | 14.89  | 2.92  | 0.34  |
| Q91231_P1 Ptpb2  | Polypyrimidi K.IITFTK#.N                               | 78.99   | 40.97  | 1.93  | 0.52  |
| Q91231_P1 Ptpb2  | Polypyrimidi K.VTNLLM*LK#.G                            | 35.86   | 14.08  | 2.55  | 0.39  |
| Q91231_P1 Ptpb2  | Polypyrimidi K.VTNLLM*LK#.G                            | 22.16   | 11.46  | 1.93  | 0.52  |
| Q8BHD7_P Ptpb3   | Polypyrimidi R.AQAALQAVASVQSGNLSLPGATANEGTLLPGQSPVLR.I | 9.51    | 19.15  | 0.50  | 2.01  |
| Q8BHD7_P Ptpb3   | Polypyrimidi K.DFSNSPLHR.F                             | 15.97   | 40.78  | 0.39  | 2.55  |
| Q8BHD7_P Ptpb3   | Polypyrimidi R.EGQEDQGLTK#.D                           | 379.98  | 178.70 | 2.13  | 0.47  |
| Q8BHD7_P Ptpb3   | Polypyrimidi R.ELKTDNLPNQAR.A                          | 6.43    | 18.86  | 0.34  | 2.93  |
| Q8BHD7_P Ptpb3   | Polypyrimidi K.ENALVQMQADASAQALMNHLSGGQR.L             | 7.66    | 15.58  | 0.49  | 2.03  |
| Q8BHD7_P Ptpb3   | Polypyrimidi K.LTSLNVK#.Y                              | 1198.58 | 499.10 | 2.40  | 0.42  |
| Q8BHD7_P Ptpb3   | Polypyrimidi K.NFQNIFFPSATLHLSNIPPSVMT*DLDL#.N         | 10.68   | 7.61   | 1.40  | 0.71  |
| Q8BHD7_P Ptpb3   | Polypyrimidi K.NFQNIFFPSATLHLSNIPPSVMTDLDL#.N          | 11.29   | 5.54   | 2.04  | 0.49  |
| Q8BHD7_P Ptpb3   | Polypyrimidi K.NNQFQALLQYADPVNAQYAK#.M                 | 94.19   | 61.86  | 1.52  | 0.66  |
| Q8BHD7_P Ptpb3   | Polypyrimidi K.TDNLPNQAR.A                             | 16.19   | 51.60  | 0.31  | 3.19  |
| Q8BHD7_P Ptpb3   | Polypyrimidi R.EGQEDQGLTK#.D                           | 30.48   | 12.58  | 2.42  | 0.41  |
| P34152_FA Ptk2   | Focal adhes K.GFLNFQFTEK#PTLNFFYQQVK#.S                | 9.17    | 3.13   | 2.93  | 0.34  |
| P34152_FA Ptk2   | Focal adhes K.LLNSDLGELISK#.M                          | 14.81   | 4.03   | 3.67  | 0.27  |
| P34152_FA Ptk2   | Focal adhes K.GFLNFQFTEK#PTLNFFYQQVK#.S                | 14.16   | 5.80   | 2.44  | 0.41  |
| P34152_FA Ptk2   | Focal adhes K.LLNSDLGELISK#.M                          | 15.96   | 5.23   | 3.05  | 0.33  |
| Q8BK3_P Ptk7     | Inactive tyr K.AQGVVEGATLVLVK#.S                       | 11.81   | 1.67   | 7.09  | 0.14  |
| Q8BK3_P Ptk7     | Inactive tyr R.ASLQPIITLTK#.S                          | 29.40   | 10.37  | 2.84  | 0.35  |
| P35235_P1 Ptpn11 | Tyrosine-pr R.FDSLTDLVEHYK#.K                          | 13.52   | 2.91   | 4.65  | 0.22  |
| P35235_P1 Ptpn11 | Tyrosine-pr R.VVLHGDGPNPEVSDYINANIIM*PEFETK#.C         | 3.73    | 2.04   | 1.83  | 0.55  |
| P35235_P1 Ptpn11 | Tyrosine-pr R.VVLHGDGPNPEVSDYINANIIMPEFETK#.C          | 5.03    | 1.90   | 2.65  | 0.38  |
| P35235_P1 Ptpn11 | Tyrosine-pr R.VVLHGDGPNPEVSDYINANIIM*PEFETK#.C         | 5.93    | 2.41   | 2.46  | 0.41  |
| P35235_P1 Ptpn11 | Tyrosine-pr K.LAETTDK#.Q                               | 8.11    | 7.98   | 1.02  | 0.98  |
| P35235_P1 Ptpn11 | Tyrosine-pr R.VVLHGDGPNPEVSDYINANIIM*PEFETK#.C         | 8.54    | 2.09   | 4.08  | 0.24  |
| P35235_P1 Ptpn11 | Tyrosine-pr R.VVLHGDGPNPEVSDYINANIIMPEFETK#.C          | 3.27    | 4.61   | 0.71  | 1.41  |
| P35831_P1 Ptpn12 | Tyrosine-pr K.TPSQSDYINANIFK#.G                        | 4.95    | 3.40   | 1.46  | 0.69  |
| Q6PB44_P1 Ptpn23 | Tyrosine-pr R.AALPTALPEDK#.A                           | 37.06   | 22.33  | 1.66  | 0.60  |
| Q6PB44_P1 Ptpn23 | Tyrosine-pr R.ALENPTASLGR.I                            | 9.73    | 22.95  | 0.42  | 2.36  |
| Q6PB44_P1 Ptpn23 | Tyrosine-pr R.DLLEEDLQEQK#.L                           | 14.27   | 5.17   | 2.76  | 0.36  |
| Q6PB44_P1 Ptpn23 | Tyrosine-pr K.DNDFIYHEAVPALDTLQPVK#.G                  | 12.99   | 8.20   | 1.58  | 0.63  |
| Q6PB44_P1 Ptpn23 | Tyrosine-pr R.FAMDVIGGK#.Y                             | 15.87   | 5.71   | 2.78  | 0.36  |
| Q6PB44_P1 Ptpn23 | Tyrosine-pr R.GAAADLLSSPESQHGQTQPPGGGQPLLQPTK#.V       | 13.41   | 4.91   | 2.73  | 0.37  |
| Q6PB44_P1 Ptpn23 | Tyrosine-pr K.GAPLVK#PLVNPNTDPAVTGPDIFAK#.L            | 54.05   | 30.42  | 1.78  | 0.56  |
| Q6PB44_P1 Ptpn23 | Tyrosine-pr R.HGVPPGK#K#PVASVNIQK#.N                   | 16.64   | 10.84  | 1.54  | 0.65  |
| Q6PB44_P1 Ptpn23 | Tyrosine-pr R.HQDVM*PYDSNR.V                           | 2.49    | 4.16   | 0.60  | 1.67  |
| Q6PB44_P1 Ptpn23 | Tyrosine-pr K.K#DNDFIYHEAVPALDTLQPVK#.G                | 10.69   | 4.17   | 2.56  | 0.39  |
| Q6PB44_P1 Ptpn23 | Tyrosine-pr K.LQETLQAGAGGPPVAK#.A                      | 25.79   | 13.24  | 1.95  | 0.51  |
| Q6PB44_P1 Ptpn23 | Tyrosine-pr R.LQLQLEAEFR.G                             | 7.56    | 22.02  | 0.34  | 2.91  |
| Q6PB44_P1 Ptpn23 | Tyrosine-pr R.M*PM*IWLDLK#.E                           | 9.91    | 6.56   | 1.51  | 0.66  |
| Q6PB44_P1 Ptpn23 | Tyrosine-pr K.NHLPQDSQDLVGGDVPISSIQATIAK#.L            | 36.65   | 20.39  | 1.80  | 0.56  |
| Q6PB44_P1 Ptpn23 | Tyrosine-pr K.NYGENPEAYNEELK#.K                        | 15.69   | 10.27  | 1.53  | 0.65  |
| Q6PB44_P1 Ptpn23 | Tyrosine-pr R.REEGEAVEAGDTPLEER.S                      | 2.37    | 33.69  | 0.07  | 14.22 |
| Q6PB44_P1 Ptpn23 | Tyrosine-pr K.SQEGK#DFYADLESK#.V                       | 19.97   | 8.59   | 2.33  | 0.43  |
| Q6PB44_P1 Ptpn23 | Tyrosine-pr R.VLSLQFR.D                                | 7.81    | 15.47  | 0.50  | 1.98  |
| Q6PB44_P1 Ptpn23 | Tyrosine-pr R.VPM*GSGQEAAVAVTWEIFSGK#.S                | 23.32   | 10.33  | 2.26  | 0.44  |
| Q6PB44_P1 Ptpn23 | Tyrosine-pr K.VLYQLNLAQDNVLR.A                         | 5.34    | 14.46  | 0.37  | 2.71  |
| Q6487_P1 Ptpn23  | Receptor-ty K.TVDIYGHVLTLM*#R@.A                       | 113.09  | 2.09   | 54.20 | 0.02  |
| Q54724_P1 Ptrf   | Polymerase K.AHATSTNTSK#.L                             | 16.36   | 14.04  | 1.17  | 0.86  |
| Q54724_P1 Ptrf   | Polymerase R.ATEPSGTGSDELIK#.S                         | 163.79  | 110.85 | 1.48  | 0.68  |
| Q54724_P1 Ptrf   | Polymerase K.ATEM*VEVGPEDDEVGAER.G                     | 7.93    | 31.53  | 0.25  | 3.97  |
| Q54724_P1 Ptrf   | Polymerase K.ATEM*VEVGPEDDEVGAER.G                     | 6.07    | 29.65  | 0.20  | 4.89  |
| Q54724_P1 Ptrf   | Polymerase K.ATEM*VEVGPEDDEVGAERGEATDLR.G              | 4.68    | 27.19  | 0.17  | 5.81  |
| Q54724_P1 Ptrf   | Polymerase R.EGEVEVLK#.A                               | 65.20   | 51.77  | 1.26  | 0.79  |
| Q54724_P1 Ptrf   | Polymerase R.GEATDLR.G                                 | 11.45   | 38.59  | 0.30  | 3.37  |
| Q54724_P1 Ptrf   | Polymerase K.IIGAVDQIQLTQAQLEER.Q                      | 58.55   | 179.45 | 0.33  | 3.06  |
| Q54724_P1 Ptrf   | Polymerase K.IIGAVDQIQLTQAQLEER.Q                      | 16.10   | 63.04  | 0.26  | 3.91  |
| Q54724_P1 Ptrf   | Polymerase K.IREGVEVLK#.A                              | 65.40   | 62.87  | 1.04  | 0.96  |
| Q54724_P1 Ptrf   | Polymerase K.KLEVEAEELLR.R                             | 35.61   | 138.12 | 0.26  | 3.88  |
| Q54724_P1 Ptrf   | Polymerase R.KSFTPDHVVYAR.S                            | 24.00   | 84.61  | 0.28  | 3.53  |
| Q54724_P1 Ptrf   | Polymerase R.QAEM*EGAVQSIQELSK#.L                      | 47.14   | 30.27  | 1.56  | 0.64  |
| Q54724_P1 Ptrf   | Polymerase R.QAEMEGAVQSIQELSK#.L                       | 11.89   | 6.61   | 1.80  | 0.56  |
| Q54724_P1 Ptrf   | Polymerase K.SDQVNGVLSLDDK#.I                          | 76.64   | 61.65  | 1.24  | 0.80  |
| Q54724_P1 Ptrf   | Polymerase K.VMIYQDEVK.L                               | 54.18   | 46.64  | 1.16  | 0.86  |
| Q54724_P1 Ptrf   | Polymerase K.VMIYQDEVK.L                               | 74.41   | 57.30  | 1.30  | 0.77  |
| Q8R2Y8_P1 Pthr2  | Peptidyl-tyr K.APEDTLIQLLTHAK#.T                       | 15.55   | 10.00  | 1.55  | 0.64  |
| D3Z4S3_PT Pthr1  | Putative pe K.EEVSQYLK#.K                              | 22.51   | 9.48   | 2.37  | 0.42  |
| D3Z4S3_PT Pthr1  | Putative pe K.VVLEAADETLK#.E                           | 17.19   | 6.83   | 2.52  | 0.40  |
| D3Z4S3_PT Pthr1  | Putative pe K.VVLEAADETLK#ELAETLQK#.N                  | 21.82   | 11.06  | 1.97  | 0.51  |
| Q3UEB3_P1 Puf60  | Poly(U)-bin K.AQSSQDVAVSSM*NLFDLGGQYLR.V               | 2.17    | 4.45   | 0.49  | 2.05  |
| Q3UEB3_P1 Puf60  | Poly(U)-bin K.AQSSQDVAVSSM*NLFDLGGQYLR.V               | 13.34   | 20.73  | 0.64  | 1.55  |
| Q3UEB3_P1 Puf60  | Poly(U)-bin K.AQSSQDVAVSSMNLFDLGGQYLR.V                | 13.48   | 17.33  | 0.78  | 1.29  |
| Q3UEB3_P1 Puf60  | Poly(U)-bin K.AVTPPMPLLPATPGGLPPAAVAATAK#.I            | 135.78  | 61.43  | 2.21  | 0.45  |
| Q3UEB3_P1 Puf60  | Poly(U)-bin K.GYGFIEYK#.A                              | 97.53   | 42.07  | 2.32  | 0.43  |
| Q3UEB3_P1 Puf60  | Poly(U)-bin R.IYVAVHQDLSDDDIK#SVFEAFGK#.I              | 10.85   | 2.99   | 3.63  | 0.28  |
| Q3UEB3_P1 Puf60  | Poly(U)-bin R.KVVAEVDQER.F                             | 9.85    | 20.21  | 0.49  | 2.05  |
| Q3UEB3_P1 Puf60  | Poly(U)-bin K.LGLPPLPEQEQALQK#.A                       | 124.14  | 57.21  | 2.17  | 0.46  |
| Q3UEB3_P1 Puf60  | Poly(U)-bin R.QAFAPFGPIK#.S                            | 118.39  | 45.13  | 2.62  | 0.38  |
| Q3UEB3_P1 Puf60  | Poly(U)-bin K.QGEEDEAIEVK#.I                           | 92.47   | 18.20  | 5.08  | 0.20  |
| Q3UEB3_P1 Puf60  | Poly(U)-bin K.SIDM*SWDSVTM*#K#.H                       | 18.19   | 8.13   | 2.24  | 0.45  |
| Q3UEB3_P1 Puf60  | Poly(U)-bin K.SIDM*SWDSVTM*#K#.H                       | 9.29    | 3.49   | 2.66  | 0.38  |
| Q3UEB3_P1 Puf60  | Poly(U)-bin K.SIDMSWDSVTM*#K#.H                        | 19.25   | 6.53   | 2.95  | 0.34  |
| Q3UEB3_P1 Puf60  | Poly(U)-bin K.SIDMSWDSVTM*#K#.H                        | 22.51   | 7.94   | 2.84  | 0.35  |
| Q3UEB3_P1 Puf60  | Poly(U)-bin K.VGRPSNIGQAQPIIDQLAEAR.A                  | 9.35    | 51.39  | 0.18  | 5.49  |
| Q3UEB3_P1 Puf60  | Poly(U)-bin R.VIIQEK#.Q                                | 141.52  | 49.74  | 2.85  | 0.35  |
| Q3UEB3_P1 Puf60  | Poly(U)-bin K.VVAEVDQER.F                              | 12.83   | 20.22  | 0.63  | 1.58  |
| Q3UEB3_P1 Puf60  | Poly(U)-bin R.VYVGSYIELGEDTIR.Q                        | 18.81   | 31.63  | 0.59  | 1.68  |
| Q3UEB3_P1 Puf60  | Poly(U)-bin K.YAMESQIK#.S                              | 54.55   | 17.70  | 3.08  | 0.32  |
| Q3UEB3_P1 Puf60  | Poly(U)-bin K.YAM*EQSIK#.S                             | 203.20  | 27.93  | 7.28  | 0.14  |
| Q3UEB3_P1 Puf60  | Poly(U)-bin K.GYGFIEYK#.A                              | 18.07   | 7.04   | 2.57  | 0.39  |
| Q3UEB3_P1 Puf60  | Poly(U)-bin K.LGLPPLPEQEQALQK#.A                       | 3.34    | 1.70   | 1.96  | 0.51  |
| Q3UEB3_P1 Puf60  | Poly(U)-bin K.VGRPSNIGQAQPIIDQLAEAR.A                  | 2.70    | 7.51   | 0.36  | 2.78  |
| Q3UEB3_P1 Puf60  | Poly(U)-bin K.LGLPPLPEQEQALQK#.A                       | 18.34   | 6.95   | 2.64  | 0.38  |
| Q3UEB3_P1 Puf60  | Poly(U)-bin R.QAFAPFGPIK#.S                            | 13.54   | 7.77   | 1.74  | 0.57  |
| Q3UEB3_P1 Puf60  | Poly(U)-bin K.VGRPSNIGQAQPIIDQLAEAR.A                  | 3.03    | 12.57  | 0.24  | 4.14  |
| Q3UR91_Q Pum2    | Pumilio ho K.ALESISSDQSEMVK#.E                         | 8.19    | 5.51   | 1.49  | 0.67  |
| Q3UR91_Q Pum2    | Pumilio ho R.DLIGHIVFSQDQHGSR.F                        | 4.64    | 16.98  | 0.27  | 3.66  |

|                  |                                                |        |        |       |      |
|------------------|------------------------------------------------|--------|--------|-------|------|
| Q3UR91_Q_Pum2    | Pumilio ho K.DQYANYVQK#.M                      | 230.00 | 18.19  | 12.65 | 0.08 |
| Q3UR91_Q_Pum2    | Pumilio ho R.YISAAPGAEK#.Y                     | 49.86  | 43.83  | 1.14  | 0.88 |
| Q3UR91_Q_Pum2    | Pumilio ho K.DQYANYVQK#.M                      | 22.27  | 26.30  | 0.85  | 1.18 |
| Q3UR91_Q_Pum2    | Pumilio ho R.YISAAPGAEK#.Y                     | 27.02  | 21.54  | 1.25  | 0.80 |
| P42669_PL_Pura   | Transcriptii R.DYLGDFIEHYAQLGPSQPPDLAQADEPR.R  | 3.00   | 13.12  | 0.23  | 4.37 |
| P42669_PL_Pura   | Transcriptii R.DYLGDFIEHYAQLGPSQPPDLAQADEPRR.A | 2.04   | 6.05   | 0.34  | 2.96 |
| P42669_PL_Pura   | Transcriptii R.FFFDVGSNK.Y                     | 63.13  | 57.62  | 1.10  | 0.91 |
| P42669_PL_Pura   | Transcriptii R.GPGLGSTQGQTIALPAQGLIEFR.D       | 15.80  | 64.36  | 0.25  | 4.07 |
| P42669_PL_Pura   | Transcriptii K.IAEVGGAGNK#.S                   | 85.13  | 86.99  | 0.98  | 1.02 |
| P42669_PL_Pura   | Transcriptii K.LIDDYGVEEPAELPEGTSLTVDNKR.F     | 11.85  | 72.42  | 0.16  | 6.11 |
| P42669_PL_Pura   | Transcriptii R.NSITVPYK#.V                     | 29.29  | 35.54  | 0.82  | 1.21 |
| P42669_PL_Pura   | Transcriptii K.SEFLVR.E                        | 20.38  | 110.34 | 0.18  | 5.41 |
| P42669_PL_Pura   | Transcriptii K.YGVFMR.V                        | 3.87   | 18.54  | 0.21  | 4.80 |
| P42669_PL_Pura   | Transcriptii R.FFFDVGSNK#.Y                    | 13.37  | 13.37  | 1.00  | 1.00 |
| P42669_PL_Pura   | Transcriptii R.FYLDVK.Q                        | 16.40  | 18.44  | 0.89  | 1.12 |
| P42669_PL_Pura   | Transcriptii R.GPGLGSTQGQTIALPAQGLIEFR.D       | 5.41   | 20.73  | 0.26  | 3.83 |
| P42669_PL_Pura   | Transcriptii K.LIDDYGVEEPAELPEGTSLTVDNKR.F     | 3.03   | 10.50  | 0.29  | 3.47 |
| O35295_PL_Purb   | Transcriptii R.DSLGDFIEHYAQLGPSPEQLAAGEEGGPR.R | 3.71   | 12.97  | 0.29  | 3.49 |
| O35295_PL_Purb   | Transcriptii R.GGGGGGGGGPQFQAPR.G              | 15.38  | 81.92  | 0.19  | 5.33 |
| O35295_PL_Purb   | Transcriptii R.GGGGGGGGGPGEQETQLASK#.R         | 53.63  | 67.20  | 0.80  | 1.25 |
| O35295_PL_Purb   | Transcriptii R.GGGGGGGGDESEGEVDED.-            | 3.15   | 3.15   | 1.00  | 1.00 |
| O35295_PL_Purb   | Transcriptii K.IAEVGGAGNK#.S                   | 252.54 | 117.80 | 2.14  | 0.47 |
| O35295_PL_Purb   | Transcriptii R.K.#YLDL#.E                      | 17.61  | 20.51  | 0.86  | 1.16 |
| O35295_PL_Purb   | Transcriptii K.YGVFLR.V                        | 6.29   | 34.77  | 0.18  | 5.53 |
| O35295_PL_Purb   | Transcriptii K.YYLDL#.E                        | 8.64   | 9.97   | 0.87  | 1.15 |
| O35295_PL_Purb   | Transcriptii R.GGGGGGGGGPQFQAPR.G              | 2.23   | 9.35   | 0.24  | 4.18 |
| O35295_PL_Purb   | Transcriptii K.IAEVGGAGNK#.S                   | 209.26 | 125.42 | 1.67  | 0.60 |
| Q8K094_Qi_Pvr    | Nectin-2 O: K.NTAEALEPSPTLIQDVAK#.C            | 7.10   | 5.49   | 1.29  | 0.77 |
| Q8B003_Pi_Pwp2   | Periodic trj R.AGQLPVVQFLQK#.G                 | 15.96  | 14.07  | 1.13  | 0.88 |
| Q8V136_PA_Pxn    | Paxillin OS- R.ELDELM*ASLSDFK#.M               | 13.70  | 12.53  | 1.09  | 0.91 |
| Q8V136_PA_Pxn    | Paxillin OS- R.ELDELMASLSDFK#.M                | 9.19   | 3.14   | 2.93  | 0.34 |
| Q8V136_PA_Pxn    | Paxillin OS- K.LGVATVAK#.G                     | 35.96  | 19.82  | 1.81  | 0.55 |
| Q8V136_PA_Pxn    | Paxillin OS- R.YAHQQPPSPVYSSAK#.N              | 21.33  | 16.50  | 1.29  | 0.77 |
| Q922W5_P Pycr1   | Pyrroline-5 R.LGAQALLGAAK#.M                   | 92.02  | 12.97  | 7.10  | 0.14 |
| Q9DCC4_Pi_Pycr1  | Pyrroline-5 R.IAAQTLGTAQ#.M                    | 64.72  | 30.44  | 2.13  | 0.47 |
| Q9DCC4_Pi_Pycr1  | Pyrroline-5 R.IAAQTLGTAQ#.M                    | 236.05 | 93.42  | 2.53  | 0.40 |
| Q9DCC4_Pi_Pycr1  | Pyrroline-5 R.RVGFVAGR.M                       | 4.43   | 28.05  | 0.16  | 6.33 |
| Q8C194_PY_Pygb   | Glycogen p R.IGEGFLDLSQK#.K                    | 11.60  | 4.82   | 2.41  | 0.42 |
| Q8C194_PY_Pygb   | Glycogen p R.IGEGFLDLSQK#.L                    | 41.71  | 10.63  | 3.92  | 0.25 |
| Q8C194_PY_Pygb   | Glycogen p R.VEVDALDQK#.G                      | 31.78  | 13.22  | 2.40  | 0.42 |
| Q8C194_PY_Pygb   | Glycogen p R.VEHTPDGVLWLDTQVVLAM*PYDTPVPGYK#.N | 6.86   | 2.40   | 2.86  | 0.35 |
| Q8C194_PY_Pygb   | Glycogen p R.EIWGVEPDLQPPNPK#.D.-              | 7.96   | 4.44   | 1.79  | 0.56 |
| Q8C194_PY_Pygb   | Glycogen p R.GIAGLDVAEVR.K                     | 7.50   | 9.94   | 0.75  | 1.32 |
| Q8C194_PY_Pygb   | Glycogen p R.IGEGFLDLSQK#.K                    | 15.42  | 4.64   | 3.32  | 0.30 |
| Q8C194_PY_Pygb   | Glycogen p R.IGEGFLDLSQK#.L                    | 61.82  | 17.26  | 3.58  | 0.28 |
| Q8C194_PY_Pygb   | Glycogen p R.QAVDQSSGFFSPK#.D                  | 10.33  | 2.94   | 3.51  | 0.28 |
| Q8C194_PY_Pygb   | Glycogen p R.VEVDALDQK#.G                      | 35.95  | 9.44   | 3.81  | 0.26 |
| Q8C194_PY_Pygb   | Glycogen p R.YEFGFNQK#.I                       | 25.15  | 4.45   | 5.65  | 0.18 |
| Q8BML9_Q Qars    | Glutaminyl K.AGVLVLDLVS.R.L                    | 11.76  | 12.03  | 0.98  | 1.02 |
| Q8BML9_Q Qars    | Glutaminyl R.FDDTNPKEEAK#.F                    | 16.24  | 3.41   | 4.77  | 0.21 |
| Q8BML9_Q Qars    | Glutaminyl R.LNLHYAVVSK#.R                     | 33.10  | 2.55   | 12.97 | 0.08 |
| Q8BML9_Q Qars    | Glutaminyl K.TPGVITPYTM*DLLK#.Q                | 15.60  | 4.31   | 3.62  | 0.28 |
| Q8BML9_Q Qars    | Glutaminyl K.TPGVITPYTM*DLLK#.Q                | 5.99   | 3.24   | 1.85  | 0.54 |
| Q8BML9_Q Qars    | Glutaminyl R.VPNFPADETK#.G                     | 20.72  | 3.88   | 5.34  | 0.19 |
| Q8BML9_Q Qars    | Glutaminyl K.AINFVGYAK#.A                      | 43.49  | 9.14   | 4.76  | 0.21 |
| Q8BML9_Q Qars    | Glutaminyl K.ATGVLLDVLVS.R.L                   | 30.78  | 17.92  | 1.72  | 0.58 |
| Q8BML9_Q Qars    | Glutaminyl R.LNLHYAVVSK#.R                     | 35.60  | 9.37   | 3.80  | 0.26 |
| Q8BML9_Q Qars    | Glutaminyl R.SFLVSIANK#.K                      | 17.48  | 9.89   | 1.77  | 0.57 |
| Q8BML9_Q Qars    | Glutaminyl R.SHPQDIDTK#.D                      | 17.73  | 3.48   | 5.10  | 0.20 |
| Q8BML9_Q Qars    | Glutaminyl K.TPGVITPYTM*DLLK#.Q                | 25.94  | 3.84   | 6.75  | 0.15 |
| Q8BML9_Q Qars    | Glutaminyl R.VPNFPADETK#.G                     | 41.64  | 9.61   | 4.33  | 0.23 |
| Q9QYS9_Q Qki     | Protein qu: K.EYDFNFVGR.I                      | 4.10   | 12.28  | 0.33  | 2.99 |
| Q9QYS9_Q Qki     | Protein qu: R.SAELPDVAGPIVQLQEK#.L             | 28.52  | 21.24  | 1.34  | 0.74 |
| Q9QYS9_Q Qki     | Protein qu: R.SAELPDVAGPIVQLQEK#.L             | 9.59   | 9.40   | 1.02  | 0.98 |
| Q9QYS9_Q Qki     | Protein qu: K.LVYPKVEPDPFNVGR.I                | 3.48   | 20.23  | 0.17  | 5.81 |
| Q9QYS9_Q Qki     | Protein qu: R.SAELPDVAGPIVQLQEK#.L             | 15.32  | 13.18  | 1.16  | 0.86 |
| Q3UA37_Q Qrich1  | Glutamine- R.EIQEIAVANATTM*H.-                 | 5.85   | 5.85   | 1.00  | 1.00 |
| Q3UA37_Q Qrich1  | Glutamine- K.LYDFYLFK#.C                       | 10.61  | 7.99   | 1.33  | 0.75 |
| Q3UA37_Q Qrich1  | Glutamine- K.NAELEDAQNR.L                      | 2.65   | 3.55   | 0.74  | 1.34 |
| P61027_Rf Rab10  | Ras-related K.AFLTLAEDILR.K                    | 1.68   | 15.00  | 0.11  | 8.92 |
| P61027_Rf Rab10  | Ras-related K.IKQLQWDTAGQER.F                  | 4.75   | 9.22   | 0.52  | 1.94 |
| P61027_Rf Rab10  | Ras-related K.LLLIGDSGVGK#.S                   | 30.41  | 19.53  | 1.56  | 0.64 |
| P61027_Rf Rab10  | Ras-related K.LIQWDTAGQER.F                    | 3.75   | 23.35  | 0.16  | 6.23 |
| P61027_Rf Rab10  | Ras-related K.TPVK#EPNSENVDISSGGVGTGWK#.S      | 4.85   | 3.04   | 1.59  | 0.63 |
| P46638_RE Rab11b | Ras-related K.AQIWDTAGQER.Y                    | 9.32   | 36.78  | 0.25  | 3.95 |
| P46638_RE Rab11b | Ras-related R.DHADSNIVMLVGNK.S                 | 16.19  | 19.89  | 0.81  | 1.23 |
| P46638_RE Rab11b | Ras-related R.GAVGALLVYDIK.H                   | 147.84 | 140.77 | 1.05  | 0.95 |
| P46638_RE Rab11b | Ras-related K.HLYENVER.W                       | 6.61   | 41.82  | 0.16  | 6.33 |
| P46638_RE Rab11b | Ras-related R.NEFNLESK#.S                      | 65.10  | 60.44  | 1.08  | 0.93 |
| P46638_RE Rab11b | Ras-related K.NILTEYR.I                        | 2.01   | 10.56  | 0.19  | 5.26 |
| P46638_RE Rab11b | Ras-related K.NNLSFIETSDLNVEEAFK#.N            | 15.06  | 10.94  | 1.38  | 0.73 |
| P46638_RE Rab11b | Ras-related K.NNLSFIETSDLNVEEAFK#.N            | 25.04  | 18.07  | 1.39  | 0.72 |
| P46638_RE Rab11b | Ras-related K.STIGVEFATR.S                     | 23.28  | 114.41 | 0.20  | 4.92 |
| P46638_RE Rab11b | Ras-related K.VLIGDSGVGK#.S                    | 36.83  | 22.53  | 1.63  | 0.61 |
| P35283_Rf Rab12  | Ras-related K.DNFVDEIFLK#.L                    | 14.15  | 5.14   | 2.75  | 0.36 |
| Q91V41_Rf Rab14  | Ras-related R.GAAGALM*YVDITR.R                 | 2.92   | 4.67   | 0.62  | 1.60 |
| Q91V41_Rf Rab14  | Ras-related R.IIEVSGQK#.I                      | 26.36  | 16.77  | 1.57  | 0.64 |
| Q91V41_Rf Rab14  | Ras-related R.NLTNPNTVILIGNK#.A                | 54.53  | 44.57  | 1.22  | 0.82 |
| Q91V41_Rf Rab14  | Ras-related K.TGENVEDAFLEAAK#.K                | 7.00   | 8.18   | 0.86  | 1.17 |
| Q91V41_Rf Rab14  | Ras-related K.TGENVEDAFLEAAK#.I                | 38.09  | 27.76  | 1.37  | 0.73 |
| P35293_Rf Rab18  | Ras-related R.FDITDFPELAATIGVDFK#.V            | 5.93   | 5.48   | 1.08  | 0.92 |
| P35293_Rf Rab18  | Ras-related R.GAQVILVYDVT.R                    | 57.23  | 10.27  | 5.57  | 0.18 |
| P35293_Rf Rab18  | Ras-related K.IIQTPGLWSEENQNK#.G               | 8.46   | 6.55   | 1.29  | 0.77 |
| P35293_Rf Rab18  | Ras-related K.LIIGESGVGK#.S                    | 39.66  | 36.62  | 1.08  | 0.92 |
| P35293_Rf Rab18  | Ras-related K.LAIWDTAGQER.F                    | 4.54   | 14.70  | 0.31  | 3.24 |
| P62821_Rf Rab1A  | Ras-related K.EFADSLGIPFLETSK#.N               | 59.90  | 37.84  | 1.58  | 0.63 |
| P62821_Rf Rab1A  | Ras-related R.FADDTYTESYISTIGVDFK#.I           | 33.72  | 23.81  | 1.42  | 0.71 |
| P62821_Rf Rab1A  | Ras-related R.GAHGIVYDVTDOESFNVVK#.Q           | 38.06  | 21.77  | 1.75  | 0.57 |
| P62821_Rf Rab1A  | Ras-related R.M*GPGATAGAEK#.S                  | 5.68   | 4.23   | 1.34  | 0.75 |
| P62821_Rf Rab1A  | Ras-related K.NATNVEQSM*TM*AAEIK#.K            | 11.55  | 7.63   | 1.51  | 0.66 |
| P62821_Rf Rab1A  | Ras-related K.QWLQEIDR.Y                       | 13.17  | 42.51  | 0.31  | 3.23 |
| P62821_Rf Rab1A  | Ras-related K.EFADSLGIPFLETSK#.N               | 7.88   | 5.94   | 1.33  | 0.75 |
| P62821_Rf Rab1A  | Ras-related R.FADDTYTESYISTIGVDFK#.I           | 6.11   | 2.82   | 2.17  | 0.46 |



|                    |                                                 |       |       |      |       |
|--------------------|-------------------------------------------------|-------|-------|------|-------|
| Q9D1G1_R Rab1b     | Ras-related K.EFADSLVGPFLSETS#N.K               | 26.15 | 20.81 | 1.26 | 0.80  |
| Q9D1G1_R Rab1b     | Ras-related R.GAHGIVVYDVTQESYANVK#.Q            | 13.48 | 5.99  | 2.25 | 0.44  |
| Q9D1G1_R Rab1b     | Ras-related R.M*GPGAASGERPNLK.I                 | 2.49  | 5.16  | 0.48 | 2.08  |
| Q9D1G1_R Rab1b     | Ras-related K.NATNVQAFM*TM*AAEIK#.K             | 5.83  | 2.75  | 2.12 | 0.47  |
| P35288_R Rab23     | Ras-related K.VVAEVDGIPALVONK#.I                | 5.51  | 3.20  | 1.72 | 0.58  |
| P53994_R Rab2a     | Ras-related R.DTFNHLTTWLEDAR.Q                  | 4.76  | 27.00 | 0.18 | 5.67  |
| P53994_R Rab2a     | Ras-related R.EHGLIFM*ETS#K.T                   | 2.58  | 3.54  | 0.73 | 1.37  |
| P53994_R Rab2a     | Ras-related R.GAAGALLVYDITR.R                   | 8.33  | 34.26 | 0.24 | 4.11  |
| P53994_R Rab2a     | Ras-related K.LQIWDTAGQESFR@.S                  | 3.51  | 13.26 | 0.26 | 3.78  |
| P53994_R Rab2a     | Ras-related K.TASNVVEAFINTAK#.E                 | 42.57 | 29.99 | 1.42 | 0.70  |
| P53994_R Rab2a     | Ras-related K.YIIGDITGVGK#.S                    | 17.86 | 12.55 | 1.42 | 0.70  |
| Q921E2_R Rab31     | Ras-related K.NAINIEELFQGISR.Q                  | 6.65  | 6.62  | 1.00 | 1.00  |
| Q9CZT8_R Rab3b     | Ras-related R.YADDTFPAFVSTVGDIFK#.V             | 6.59  | 2.48  | 2.66 | 0.38  |
| Q80UJ7_RE Rab3gap1 | Rab3 GTPas R.LAGAFSSDTSFF.-                     | 10.66 | 10.66 | 1.00 | 1.00  |
| Q80UJ7_RE Rab3gap1 | Rab3 GTPas R.STFEEGREAVADITHALS#L               | 3.69  | 7.28  | 0.51 | 1.97  |
| Q80UJ7_RE Rab3gap1 | Rab3 GTPas K.TSLSDSSTSAVPGDAGK#.T               | 14.78 | 6.66  | 2.22 | 0.45  |
| Q80UJ7_RE Rab3gap1 | Rab3 GTPas K.VPSQYTHLSGLLDIFK#.S                | 7.56  | 5.87  | 1.29 | 0.78  |
| Q8BMG7_R Rab3gap2  | Rab3 GTPas K.AM*NPQDLQNTGVPIAATAK#.L            | 8.77  | 2.89  | 3.03 | 0.33  |
| Q8BMG7_R Rab3gap2  | Rab3 GTPas R.FSAATYLM*DK#.I                     | 11.04 | 4.45  | 2.48 | 0.40  |
| Q8BMG7_R Rab3gap2  | Rab3 GTPas K.GGFSFPGNTQGPSR.V                   | 5.04  | 12.08 | 0.42 | 2.40  |
| Q8BMG7_R Rab3gap2  | Rab3 GTPas R.VILLDVAR.G                         | 5.83  | 16.93 | 0.34 | 2.90  |
| Q68EFO_R Rab3ip    | Rab-3A-inte K.IDVLQAEVAALK#.T                   | 9.02  | 1.21  | 7.46 | 0.13  |
| Q9CQD1_R Rab5a     | Ras-related R.GVDLTPAQPAR.S                     | 15.73 | 26.51 | 0.59 | 1.69  |
| Q9CQD1_R Rab5a     | Ras-related K.LVLLGESAVGK#.S                    | 59.11 | 56.68 | 1.04 | 0.96  |
| Q9CQD1_R Rab5a     | Ras-related K.TSMNVNEIFMAIAK#.K                 | 2.87  | 3.23  | 0.89 | 1.13  |
| P61021_R Rab5b     | Ras-related R.QASPSIVIALAGNK#.A                 | 10.91 | 6.87  | 1.59 | 0.63  |
| P61021_R Rab5b     | Ras-related K.TAM*NVNDLFLAIAK#.K                | 15.57 | 10.94 | 1.42 | 0.70  |
| P35278_R Rab5c     | Ras-related R.AVEFQEAQAYADDNSLLFM*ETS#K.T       | 10.93 | 8.29  | 1.32 | 0.76  |
| P35278_R Rab5c     | Ras-related R.GAAQAVVYDITNTDTFAR.A              | 1.91  | 15.13 | 0.13 | 7.91  |
| P35278_R Rab5c     | Ras-related R.GVDLQESNAPSR.S                    | 7.30  | 30.51 | 0.24 | 4.18  |
| P35278_R Rab5c     | Ras-related K.NEPQAAAGAPGR.T                    | 2.84  | 12.68 | 0.22 | 4.47  |
| P35278_R Rab5c     | Ras-related R.QASPNIVIALAGNK.A                  | 19.87 | 22.99 | 0.86 | 1.16  |
| P35278_R Rab5c     | Ras-related K.TAM*NVNEIFMAIAK#.K                | 5.44  | 5.87  | 0.93 | 1.08  |
| P35279_R Rab6a     | Ras-related K.ELNVMI*FIETS#K#.A                 | 7.70  | 9.73  | 0.79 | 1.26  |
| P35279_R Rab6a     | Ras-related K.ELNVMIETS#K#.A                    | 16.22 | 6.48  | 2.50 | 0.40  |
| P35279_R Rab6a     | Ras-related R.GSDVIM*LVGNK#.T                   | 11.79 | 9.13  | 1.29 | 0.77  |
| P35279_R Rab6a     | Ras-related R.GSDVIMLVGNK#.T                    | 28.18 | 22.69 | 1.24 | 0.81  |
| P35279_R Rab6a     | Ras-related K.LVLGEGSQVSK#.T                    | 56.93 | 17.01 | 3.35 | 0.30  |
| P35279_R Rab6a     | Ras-related R.VAAALPGM*ESTQDR.S                 | 1.36  | 21.74 | 0.06 | 16.00 |
| P51150_R Rab7a     | Ras-related K.ATIADGDLTK#.E                     | 26.87 | 20.55 | 1.31 | 0.76  |
| P51150_R Rab7a     | Ras-related R.DPENFPVVLGNK#.I                   | 66.05 | 53.47 | 1.24 | 0.81  |
| P51150_R Rab7a     | Ras-related K.EAINVEAQFQIAR.N                   | 14.65 | 52.22 | 0.28 | 3.56  |
| P51150_R Rab7a     | Ras-related R.FQSLGVAFYR.G                      | 9.64  | 47.09 | 0.20 | 4.88  |
| P51150_R Rab7a     | Ras-related R.LVTM*QIWDTAGQER.F                 | 1.55  | 4.44  | 0.35 | 2.86  |
| P51150_R Rab7a     | Ras-related R.NALK#QETEVELYNEFPEPIK#.L          | 6.41  | 5.72  | 1.12 | 0.89  |
| P51150_R Rab7a     | Ras-related R.NALK#QETEVELYNEFPEPIK#LDK#.N      | 9.06  | 6.43  | 1.41 | 0.71  |
| P51150_R Rab7a     | Ras-related K.NNIPYFETS#K#.E                    | 29.98 | 21.30 | 1.41 | 0.71  |
| P51150_R Rab7a     | Ras-related K.QETEVELYNEFPEPIK.L                | 3.14  | 3.26  | 0.96 | 1.04  |
| P51150_R Rab7a     | Ras-related K.TLDSWRDEFLQIASPR.D                | 3.37  | 36.12 | 0.09 | 10.72 |
| P51150_R Rab7a     | Ras-related K.VIILGDSGVGK.T                     | 52.49 | 40.53 | 1.29 | 0.77  |
| P55258_R Rab8a     | Ras-related K.ANINVENAFFTLAR.D                  | 6.29  | 10.28 | 0.61 | 1.63  |
| P55258_R Rab8a     | Ras-related R.NIEEHASADVEK#.M                   | 10.99 | 7.89  | 1.39 | 0.72  |
| P61028_R Rab8b     | Ras-related K.SSTNVEEAFTLAR.D                   | 4.07  | 8.28  | 0.49 | 2.03  |
| Q3551_R Rabep1     | Rab GTPase R.AQSDSLGSSLSQSK#.A                  | 8.85  | 4.34  | 2.04 | 0.49  |
| A2AWA9_R Rabgap1   | Rab GTPase R.LLDPTNTIANYPIYK#.I                 | 5.21  | 2.26  | 2.31 | 0.43  |
| A2AWA9_R Rabgap1   | Rab GTPase K.TSK#DLDLTDFFEGALK#.F               | 9.97  | 3.50  | 2.85 | 0.35  |
| A2AWA9_R Rabgap1   | Rab GTPase K.DDLLLLTDFEGALK#.F                  | 10.42 | 4.53  | 2.30 | 0.43  |
| A2AWA9_R Rabgap1   | Rab GTPase K.DTGGDGDQDSLK#.I                    | 16.19 | 3.71  | 4.36 | 0.23  |
| A2AWA9_R Rabgap1   | Rab GTPase R.EM*ELELQTK#.L                      | 23.09 | 4.81  | 4.80 | 0.21  |
| A2AWA9_R Rabgap1   | Rab GTPase R.EQQAQEQEDPIER.F                    | 3.55  | 7.68  | 0.46 | 2.16  |
| A2AWA9_R Rabgap1   | Rab GTPase K.GVSEDETDDEEK#ETLK#.N               | 6.49  | 9.77  | 0.66 | 1.50  |
| A2AWA9_R Rabgap1   | Rab GTPase K.ILETWGELLSK#.W                     | 22.89 | 4.22  | 5.43 | 0.18  |
| A2AWA9_R Rabgap1   | Rab GTPase K.IQDLHHLGLALSEVQAAK.K               | 9.74  | 2.08  | 4.68 | 0.21  |
| A2AWA9_R Rabgap1   | Rab GTPase K.IVGNSEQQLQK#.E                     | 11.10 | 3.04  | 3.65 | 0.27  |
| A2AWA9_R Rabgap1   | Rab GTPase R.LEEESAQK#.E                        | 10.82 | 6.64  | 1.63 | 0.61  |
| A2AWA9_R Rabgap1   | Rab GTPase R.LFWPFSK#.R                         | 12.40 | 3.08  | 4.03 | 0.25  |
| A2AWA9_R Rabgap1   | Rab GTPase R.LLDPTNTIANYPIYK#.I                 | 15.08 | 4.44  | 3.39 | 0.29  |
| A2AWA9_R Rabgap1   | Rab GTPase K.NSSIIGDYK#.Q                       | 20.97 | 6.59  | 3.18 | 0.31  |
| A2AWA9_R Rabgap1   | Rab GTPase K.SPHFQVNEETPK#HDK#.V                | 29.04 | 4.20  | 6.92 | 0.14  |
| A2AWA9_R Rabgap1   | Rab GTPase K.TSK#DLDLTDFFEGALK#.F               | 54.14 | 10.76 | 5.03 | 0.20  |
| Q9JM13_R Rabgef1   | Rab5 GDP/(K.DLDIWDTGIAK#.E                      | 12.34 | 7.09  | 1.74 | 0.57  |
| Q9JM13_R Rabgef1   | Rab5 GDP/(R.LQREEEAFASSQSQAGSLTFSK.F            | 2.59  | 2.83  | 0.92 | 1.09  |
| P63001_R Rac1      | Ras-related K.LTPITYPQGLAM*AK#.E                | 8.26  | 14.64 | 0.56 | 1.77  |
| Q9WVVM1_R Racgap1  | Rac GTPase R.LSTIDESGSLSDISFDK#DTESLDWDSSLVK#.N | 3.69  | 4.93  | 0.75 | 1.34  |
| Q9WVVM1_R Racgap1  | Rac GTPase K.VSLLPVTPPEFLVK.T                   | 4.55  | 10.42 | 0.44 | 2.29  |
| Q9QXK2_R Rad18     | E3 ubiiquiti R.THLLQFALESPPISVSSTSK#.K          | 3.56  | 4.75  | 0.75 | 1.34  |
| Q61550_R Rad21     | Double-strc R.AQLSDYSYDITVTLDLAPPTK.K           | 7.66  | 7.47  | 1.02 | 0.98  |
| Q61550_R Rad21     | Double-strc R.DVIDEPIIEPSR.L                    | 10.01 | 43.63 | 0.23 | 4.36  |
| Q61550_R Rad21     | Double-strc R.EGSFEDDDMLVSTASNLLEPEQSTSNLNEK#.M | 5.08  | 4.55  | 1.12 | 0.90  |
| Q61550_R Rad21     | Double-strc K.FYSFLVLK.K                        | 38.96 | 29.33 | 1.33 | 0.75  |
| Q61550_R Rad21     | Double-strc K.KQQIELTQEEPYSIIATPGPR.F           | 3.20  | 7.65  | 0.42 | 2.39  |
| Q61550_R Rad21     | Double-strc K.LFFLPAQLWNNR.L                    | 8.91  | 42.21 | 0.21 | 4.74  |
| Q61550_R Rad21     | Double-strc K.LIVDSVK#.E                        | 45.63 | 27.96 | 1.63 | 0.61  |
| Q61550_R Rad21     | Double-strc K.MAFRPGVVDLPEENR.E                 | 2.45  | 22.33 | 0.11 | 9.13  |
| Q61550_R Rad21     | Double-strc K.QQAIETQEEPYSIIATPGPR.F            | 3.27  | 6.00  | 0.55 | 1.83  |
| Q61550_R Rad21     | Double-strc R.TSGHLLGVVRJ                       | 11.66 | 36.56 | 0.32 | 3.14  |
| Q61550_R Rad21     | Double-strc R.TTIEESAM*PPPPQGVK#.R              | 9.22  | 8.31  | 1.11 | 0.90  |
| Q61550_R Rad21     | Double-strc R.AQLSDYSYDITVTLDLAPPTK#.K          | 6.45  | 9.11  | 0.71 | 1.41  |
| Q61550_R Rad21     | Double-strc R.EGSFEDDDMLVSTASNLLEPEQSTSNLNEK#.M | 12.44 | 6.35  | 1.96 | 0.51  |
| Q61550_R Rad21     | Double-strc K.GGEADNLEDFEFENPEVPREEQPQQQQPQQR.D | 4.73  | 4.62  | 1.02 | 0.98  |
| Q61550_R Rad21     | Double-strc K.LFFLPAQLWNNR.L                    | 7.07  | 28.86 | 0.25 | 4.08  |
| Q61550_R Rad21     | Double-strc K.LIVDSVK#.E                        | 30.84 | 21.10 | 1.46 | 0.68  |
| Q61550_R Rad21     | Double-strc R.TTIEESAM*PPPPQGVK#.R              | 7.25  | 7.84  | 0.93 | 1.08  |
| P70388_R Rad50     | DNA repair R.DSLIQSLATHLELDGFER.G               | 5.62  | 20.09 | 0.28 | 3.58  |
| P70388_R Rad50     | DNA repair K.EQISPLEALEK#.L                     | 29.32 | 16.66 | 1.76 | 0.57  |
| P70388_R Rad50     | DNA repair R.GQDIEYIEIR.S                       | 8.49  | 18.82 | 0.45 | 2.22  |
| P70388_R Rad50     | DNA repair R.HSDELTSLGYPFNK#K#.Q                | 33.95 | 17.96 | 1.89 | 0.53  |
| P70388_R Rad50     | DNA repair R.VFQTEAELQEVISDLQSK#.L              | 43.73 | 25.98 | 1.68 | 0.59  |
| P70388_R Rad50     | DNA repair R.VFQTEAELQEVISDLQSK#.L              | 6.60  | 11.68 | 0.57 | 1.77  |
| P70388_R Rad50     | DNA repair K.AEVM*SLQNEK#.A                     | 12.43 | 4.80  | 2.59 | 0.39  |
| P70388_R Rad50     | DNA repair K.DLDIYYK#.T                         | 13.88 | 5.04  | 2.75 | 0.36  |
| P70388_R Rad50     | DNA repair K.EQISPLEALEK#.L                     | 23.82 | 20.51 | 1.16 | 0.86  |
| P70388_R Rad50     | DNA repair R.HSDELTSLGYPFNK#K#.Q                | 26.05 | 9.40  | 2.77 | 0.36  |

|                   |                                                    |        |        |       |       |
|-------------------|----------------------------------------------------|--------|--------|-------|-------|
| P70388_Rf Rad50   | DNA repair R.ILELDQELTK#.A                         | 59.55  | 18.98  | 3.14  | 0.32  |
| P70388_Rf Rad50   | DNA repair R.K#I#IQDQEQEQIHLK#.S                   | 22.92  | 12.00  | 1.91  | 0.52  |
| P70388_Rf Rad50   | DNA repair R.SDADENVSASDK#.R                       | 7.64   | 6.09   | 1.25  | 0.80  |
| P70388_Rf Rad50   | DNA repair K.TLDDQAIM*#.F                          | 21.88  | 23.66  | 0.92  | 1.08  |
| P70388_Rf Rad50   | DNA repair R.VFQTEAELEQVSDLQSK#.L                  | 50.09  | 28.09  | 1.78  | 0.56  |
| Q8C570_Rf Rae1    | mRNA expo K.DNFFFK#.C                              | 17.18  | 12.81  | 1.34  | 0.75  |
| Q8C570_Rf Rae1    | mRNA expo R.NAAELKPR.N                             | 3.04   | 15.74  | 0.19  | 5.17  |
| Q8C570_Rf Rae1    | mRNA expo R.VAIHYINPPNPAK#.D                       | 16.22  | 10.96  | 1.48  | 0.68  |
| Q9EP71_Rf Rai14   | Ankyrin K.LQASLESEVNALATK#.L                       | 7.32   | 5.50   | 1.33  | 0.75  |
| Q9EP71_Rf Rai14   | Ankyrin K.LSEENAGIQNLLLSK#.I                       | 9.38   | 4.24   | 2.21  | 0.45  |
| Q9EP71_Rf Rai14   | Ankyrin K.YQQAQEEIM*#.L                            | 16.08  | 12.09  | 1.33  | 0.75  |
| Q9EP71_Rf Rai14   | Ankyrin K.LQASLESEVNALATK#.L                       | 8.39   | 8.52   | 0.99  | 1.01  |
| P63321_Rf Rala    | Ras-related R.ADQVNVNIVVETSAK#.T                   | 5.73   | 6.96   | 0.82  | 1.22  |
| P63321_Rf Rala    | Ras-related K.SALTQFM*YDEFVEDYEPTKADSYR.K          | 2.01   | 4.89   | 0.41  | 2.44  |
| P63321_Rf Rala    | Ras-related K.VIM*YVSGGGVVK#.S                     | 30.46  | 24.14  | 1.26  | 0.79  |
| P63321_Rf Rala    | Ras-related R.VKEDENVPFLVGNK#.S                    | 3.38   | 4.14   | 0.82  | 1.22  |
| Q9J1W9_Rf Raib    | Ras-related R.GK#AEWGVQYVETSAK#.T                  | 5.98   | 5.34   | 1.12  | 0.89  |
| Q9J1W9_Rf Raib    | Ras-related K.SQGSVLVHK#.V                         | 11.73  | 11.10  | 1.06  | 0.95  |
| Q64012_Rf Raly    | RNA-bindin R.DDGEELGTHSEEEHESQD2DAEDGALQ.-         | 40.58  | 40.58  | 1.00  | 1.00  |
| Q64012_Rf Raly    | RNA-bindin K.GYAFVQYANR.H                          | 38.81  | 205.39 | 0.19  | 5.29  |
| Q64012_Rf Raly    | RNA-bindin K.IQTSNVTK#.N                           | 131.96 | 187.12 | 0.71  | 1.42  |
| Q64012_Rf Raly    | RNA-bindin K.K#SDVETIFSK#.Y                        | 98.58  | 121.98 | 0.81  | 1.24  |
| Q64012_Rf Raly    | RNA-bindin R.LEQAEQK#.A                            | 342.90 | 356.96 | 0.96  | 1.04  |
| Q64012_Rf Raly    | RNA-bindin R.LEQAEQK#ANPDGK#.K                     | 13.68  | 18.86  | 0.73  | 1.38  |
| Q64012_Rf Raly    | RNA-bindin R.LPAPQEDTASEAGTPQGEVQTR.D              | 15.50  | 73.87  | 0.21  | 4.77  |
| Q64012_Rf Raly    | RNA-bindin K.SDVETIFSK#.Y                          | 24.29  | 30.05  | 0.81  | 1.24  |
| Q64012_Rf Raly    | RNA-bindin K.SNIDALLGR.L                           | 38.93  | 204.25 | 0.19  | 5.25  |
| Q64012_Rf Raly    | RNA-bindin K.SSELQTIK.T                            | 176.28 | 180.17 | 0.98  | 1.02  |
| Q64012_Rf Raly    | RNA-bindin R.STAVTIGSAK.I                          | 40.61  | 56.99  | 0.71  | 1.40  |
| Q64012_Rf Raly    | RNA-bindin K.TELTQIK#.S                            | 131.68 | 179.20 | 0.73  | 1.36  |
| Q64012_Rf Raly    | RNA-bindin R.VFIGNLNTAVVK#.K                       | 250.18 | 278.98 | 0.90  | 1.12  |
| Q64012_Rf Raly    | RNA-bindin R.VLAGQTLDINM*AGEPKPNRPK.G              | 34.37  | 154.60 | 0.22  | 4.50  |
| Q64012_Rf Raly    | RNA-bindin R.VLAGQTLDINMAGEPKPNRPK.G               | 10.50  | 71.51  | 0.15  | 6.81  |
| Q64012_Rf Raly    | RNA-bindin R.VTVPVLR.R                             | 36.20  | 210.07 | 0.17  | 5.80  |
| Q64012_Rf Raly    | RNA-bindin K.GYAFVQYANR.H                          | 2.09   | 8.64   | 0.24  | 4.14  |
| Q64012_Rf Raly    | RNA-bindin K.IQTSNVTKNDPK#.S                       | 7.13   | 11.05  | 0.65  | 1.55  |
| Q64012_Rf Raly    | RNA-bindin R.LPAPQEDTASEAGTPQGEVQTR.D              | 2.72   | 16.27  | 0.17  | 5.99  |
| Q64012_Rf Raly    | RNA-bindin K.SSELQTIK.T                            | 25.46  | 30.24  | 0.84  | 1.19  |
| Q64012_Rf Raly    | RNA-bindin R.VFIGNLNTAVVK.K                        | 23.26  | 27.29  | 0.85  | 1.17  |
| Q64012_Rf Raly    | RNA-bindin R.VTVPVLR.R                             | 10.88  | 63.69  | 0.17  | 5.86  |
| Q64012_Rf Raly    | RNA-bindin K.KSDVETIFSK.Y                          | 9.20   | 11.61  | 0.79  | 1.26  |
| Q64012_Rf Raly    | RNA-bindin R.LEQAEQK#.A                            | 18.74  | 25.92  | 0.72  | 1.38  |
| Q64012_Rf Raly    | RNA-bindin R.LPAPQEDTASEAGTPQGEVQTR.D              | 4.08   | 19.86  | 0.21  | 4.87  |
| Q64012_Rf Raly    | RNA-bindin R.VFIGNLNTAVVK#.K                       | 25.81  | 28.13  | 0.92  | 1.09  |
| Q64012_Rf Raly    | RNA-bindin R.VLAGQTLDINM*AGEPKPNRPK.G              | 4.05   | 24.68  | 0.16  | 6.10  |
| P62827_Rf Ran     | GTP-bindin K.LVLVGGDGTGK#.T                        | 99.81  | 45.30  | 2.20  | 0.45  |
| P62827_Rf Ran     | GTP-bindin K.NLQYDYSK#.S                           | 106.63 | 15.70  | 6.79  | 0.15  |
| P62827_Rf Ran     | GTP-bindin K.SNYPFKPFLWLR.K                        | 44.92  | 29.15  | 1.54  | 0.65  |
| P62827_Rf Ran     | GTP-bindin K.LVLVGGDGTGK#.T                        | 19.52  | 5.04   | 3.88  | 0.26  |
| P62827_Rf Ran     | GTP-bindin K.NLQYDYSK#.S                           | 12.73  | 2.90   | 4.38  | 0.23  |
| P34022_Rf Ranbp1  | Ran-specific R.TLEEDDEELFK#.M                      | 14.70  | 1.41   | 10.45 | 0.10  |
| Q6VN19_Rf Ranbp10 | Ran-bindin R.VGEAIETQR.F                           | 6.98   | 95.90  | 0.07  | 13.73 |
| Q6VN19_Rf Ranbp10 | Ran-bindin R.M*#TETPIQEEQASIK#.N                   | 10.03  | 4.96   | 2.02  | 0.49  |
| Q6VN19_Rf Ranbp10 | Ran-bindin R.VGEAIETQR.F                           | 4.41   | 16.31  | 0.27  | 3.70  |
| Q9ERU9_Rf Ranbp2  | E3 SUMO-p K.SK#P#EDPSDNDLIVYELTPTPEQK#.A           | 4.59   | 3.64   | 1.26  | 0.79  |
| P69566_Rf Ranbp9  | Ran-bindin R.LYP#AVDEQETPLPR.S                     | 4.80   | 10.35  | 0.46  | 2.16  |
| P69566_Rf Ranbp9  | Ran-bindin R.NPNLLFTLK#.V                          | 17.50  | 10.86  | 1.61  | 0.62  |
| P69566_Rf Ranbp9  | Ran-bindin R.STDQVLEELASIK#.N                      | 17.93  | 10.49  | 1.71  | 0.59  |
| P46061_Rf Rangap1 | Ran GTPase K.DVIKEIEEFDGLEALR.L                    | 5.02   | 8.90   | 0.56  | 1.77  |
| P46061_Rf Rangap1 | Ran GTPase K.GAVAIADAVR.G                          | 11.58  | 38.65  | 0.30  | 3.34  |
| P46061_Rf Rangap1 | Ran GTPase R.GFEALLK.S                             | 23.36  | 21.25  | 1.10  | 0.91  |
| P46061_Rf Rangap1 | Ran GTPase K.GGVAM*#AETLK#.T                       | 20.39  | 9.66   | 2.11  | 0.47  |
| P46061_Rf Rangap1 | Ran GTPase R.GSGEEPATPSR.K                         | 4.59   | 15.81  | 0.29  | 3.44  |
| P46061_Rf Rangap1 | Ran GTPase R.HNLLQTLYNI.-                          | 40.33  | 40.33  | 1.00  | 1.00  |
| P46061_Rf Rangap1 | Ran GTPase K.I#LDPNSGEPAPV#SSPTPTDLSTLFLSPSPEK#.L  | 14.21  | 3.71   | 3.82  | 0.26  |
| P46061_Rf Rangap1 | Ran GTPase R.LEGNTVGEAAR.V                         | 13.60  | 47.24  | 0.29  | 3.47  |
| P46061_Rf Rangap1 | Ran GTPase K.SSAQK#P#LALK#.V                       | 7.80   | 8.06   | 0.97  | 1.03  |
| P46061_Rf Rangap1 | Ran GTPase K.TAVLDAIDALMK#.K                       | 28.25  | 28.41  | 0.99  | 1.01  |
| P46061_Rf Rangap1 | Ran GTPase K.TQVAGGQLSFK#.G                        | 54.65  | 47.42  | 1.15  | 0.87  |
| P46061_Rf Rangap1 | Ran GTPase R.VINLNDNTFTEK#.G                       | 64.08  | 35.70  | 1.80  | 0.56  |
| P46061_Rf Rangap1 | Ran GTPase K.VSVLIVQQDTS#DPEK#.V                   | 14.41  | 12.01  | 1.20  | 0.83  |
| P46061_Rf Rangap1 | Ran GTPase K.VSVLIVQQDTS#DPEK#VVSAFLK#.V           | 10.70  | 6.67   | 1.60  | 0.62  |
| P46061_Rf Rangap1 | Ran GTPase K.GAVAIADAVR.G                          | 9.96   | 20.91  | 0.48  | 2.10  |
| P46061_Rf Rangap1 | Ran GTPase R.GFEALLK.S                             | 33.98  | 15.80  | 2.15  | 0.47  |
| P46061_Rf Rangap1 | Ran GTPase K.GGVAM*#AETLK.T                        | 44.26  | 22.63  | 1.96  | 0.51  |
| P46061_Rf Rangap1 | Ran GTPase R.HNLLQTLYNI.-                          | 55.75  | 55.75  | 1.00  | 1.00  |
| P46061_Rf Rangap1 | Ran GTPase K.#L#LDPNSGEPAPV#SSPTPTDLSTLFLSPSPEK#.L | 3.35   | 3.23   | 1.04  | 0.96  |
| P46061_Rf Rangap1 | Ran GTPase K.LAETLAK#.T                            | 58.71  | 43.55  | 1.35  | 0.74  |
| P46061_Rf Rangap1 | Ran GTPase K.TAVLDAIDALM*#.K                       | 18.94  | 13.30  | 1.42  | 0.70  |
| P46061_Rf Rangap1 | Ran GTPase K.TQVAGGQLSFK#.G                        | 62.93  | 34.49  | 1.82  | 0.55  |
| P46061_Rf Rangap1 | Ran GTPase R.VINLNDNTFTEK#.G                       | 81.57  | 50.64  | 1.61  | 0.62  |
| P46061_Rf Rangap1 | Ran GTPase K.VSVLIVQQDTS#DPEK#.V                   | 13.96  | 7.99   | 1.75  | 0.57  |
| P46061_Rf Rangap1 | Ran GTPase K.VSVLIVQQDTS#DPEK#VVSAFLK#.V           | 23.21  | 18.64  | 1.25  | 0.80  |
| P46061_Rf Rangap1 | Ran GTPase R.HNLLQTLYNI.-                          | 13.29  | 13.29  | 1.00  | 1.00  |
| P62835_Rf Rap1a   | Ras-related K.INVNEIFYDLVR.Q                       | 11.09  | 48.19  | 0.23  | 4.34  |
| P62835_Rf Rap1a   | Ras-related K.LVLVGGGGVSK#.S                       | 75.02  | 81.17  | 0.92  | 1.08  |
| P62835_Rf Rap1a   | Ras-related K.NGQFALVYSITAQSTFNDLQDLR.E            | 4.98   | 7.54   | 0.66  | 1.52  |
| P62835_Rf Rap1a   | Ras-related K.SALTVOFVQGFVEK#.Y                    | 17.07  | 15.14  | 1.13  | 0.89  |
| P62835_Rf Rap1a   | Ras-related K.SKINVNEIFYDLVR.Q                     | 5.76   | 19.90  | 0.29  | 3.46  |
| P62835_Rf Rap1a   | Ras-related K.YDPTIEDSYR.K                         | 6.42   | 22.53  | 0.28  | 3.51  |
| Q80Z1_RA Rap2a    | Ras-related K.VVLVGGGGVSK#.S                       | 23.98  | 19.84  | 1.21  | 0.83  |
| Q8CHG7_R Rapgef2  | Rap guanin R.NIEPTEYIDDLFK#.L                      | 12.22  | 10.18  | 1.20  | 0.83  |
| Q8CHG7_R Rapgef2  | Rap guanin K.VDGLVNFKE#.L                          | 10.98  | 18.48  | 0.59  | 1.68  |
| Q9D019_SY Rars    | Arginine-tf R.LNDYIFSDK#.M                         | 15.43  | 2.41   | 6.40  | 0.16  |
| Q9D019_SY Rars    | Arginine-tf K.SDGGYTYDSDLAAIK#.Q                   | 13.01  | 2.53   | 5.15  | 0.19  |
| Q9D019_SY Rars    | Arginine-tf R.AAYPDLNPLIVTPSQPK#.F                 | 7.24   | 1.69   | 4.27  | 0.23  |
| Q9D019_SY Rars    | Arginine-tf R.DK#V#TEELK#.A                        | 26.61  | 3.49   | 7.63  | 0.13  |
| Q9D019_SY Rars    | Arginine-tf R.EIAENITK#.H                          | 24.45  | 8.49   | 2.88  | 0.35  |
| Q9D019_SY Rars    | Arginine-tf R.FPEILQK#.I                           | 20.49  | 3.04   | 6.74  | 0.15  |
| Q9D019_SY Rars    | Arginine-tf R.LFEFAGYDVLRL                         | 13.31  | 9.28   | 1.43  | 0.70  |
| Q9D019_SY Rars    | Arginine-tf R.LNDYIFSDK#.M                         | 27.91  | 3.32   | 8.41  | 0.12  |
| Q9D019_SY Rars    | Arginine-tf K.SDGGYTYDSDLAAIK#.Q                   | 26.44  | 4.07   | 6.50  | 0.15  |
| Q9D019_SY Rars    | Arginine-tf K.VIVDFSPNIAK#.E                       | 42.79  | 17.81  | 2.40  | 0.42  |

|                   |                                                              |        |        |      |       |
|-------------------|--------------------------------------------------------------|--------|--------|------|-------|
| Q9D019_SY Rars    | Arginine-tf R.AAYPDLENPLIVTPSQPK#.F                          | 43.85  | 9.54   | 4.60 | 0.22  |
| Q9D019_SY Rars    | Arginine-tf R.EIAENITK#.H                                    | 77.60  | 9.85   | 7.88 | 0.13  |
| Q9D019_SY Rars    | Arginine-tf R.FPEILQK#.I                                     | 63.24  | 12.86  | 4.92 | 0.20  |
| Q9D019_SY Rars    | Arginine-tf R.LFEFAGYDVL.R.L                                 | 20.49  | 19.31  | 1.06 | 0.94  |
| Q9D019_SY Rars    | Arginine-tf R.LNDYIFSDK#.M                                   | 81.66  | 12.81  | 6.38 | 0.16  |
| Q9D019_SY Rars    | Arginine-tf K.VLTEEELK#.A                                    | 48.28  | 9.10   | 5.31 | 0.19  |
| E9PYG6_E9 Rasa1   | Protein Ras K.LLATTELLQK#.Q                                  | 6.85   | 1.34   | 5.12 | 0.20  |
| Q6PFQ7_R/Rasa4    | Ras GTPase K.AVQIGNM*TPVSR.A                                 | 1.54   | 7.99   | 0.19 | 5.19  |
| Q61820_R/Ras12-9  | GTP-bindin K.FNVWDTAGQEK#.F                                  | 13.24  | 2.52   | 5.25 | 0.19  |
| Q61820_R/Ras12-9  | GTP-bindin K.FNVWDTAGQEK#.F                                  | 109.79 | 17.83  | 6.16 | 0.16  |
| Q61820_R/Ras12-9  | GTP-bindin R.GPIK#FNVWDTAGQEK#.F                             | 35.36  | 5.82   | 6.08 | 0.16  |
| Q61820_R/Ras12-9  | GTP-bindin K.FNVWDTAGQEK#.F                                  | 7.10   | 2.05   | 3.46 | 0.29  |
| Q61820_R/Ras12-9  | GTP-bindin K.VDVKDM*K#.V                                     | 3.48   | 191.79 | 0.02 | 55.04 |
| Q9CW46_R Raver1   | Ribonucleo K.GFAVLEYETAEMEAQAQR.A                            | 5.38   | 10.60  | 0.51 | 1.97  |
| Q9CW46_R Raver1   | Ribonucleo K.GYGFAEYMK#.K                                    | 21.36  | 9.78   | 2.18 | 0.46  |
| Q9CW46_R Raver1   | Ribonucleo K.GYGFAEYMK#.K                                    | 15.31  | 5.72   | 2.68 | 0.37  |
| Q9CW46_R Raver1   | Ribonucleo R.SMLAALIAAQATLNR.G                               | 5.32   | 15.29  | 0.35 | 2.88  |
| Q9CW46_R Raver1   | Ribonucleo R.SGGGSGGGLSHFYSGSPTSYSFSLGLOAGLK.Q               | 9.48   | 8.55   | 1.11 | 0.90  |
| Q60972_Rf Rbbp4   | Histone-bir K.GEGGFGVSGK#.I                                  | 104.01 | 62.60  | 1.66 | 0.60  |
| Q60972_Rf Rbbp4   | Histone-bir K.IGEEQSPEDAEDGPELLFIHGGHTAK#.I                  | 125.56 | 71.61  | 1.75 | 0.57  |
| Q60972_Rf Rbbp4   | Histone-bir K.IGEEQSPEDAEDGPELLFIHGGHTAK#.I                  | 28.64  | 21.62  | 1.32 | 0.75  |
| Q60972_Rf Rbbp4   | Histone-bir K.LM#IWDTR.S                                     | 12.65  | 34.27  | 0.37 | 2.71  |
| Q60972_Rf Rbbp4   | Histone-bir K.LM#IWDTR.S                                     | 28.03  | 52.72  | 0.53 | 1.88  |
| Q60972_Rf Rbbp4   | Histone-bir K.LM#IWDTR.S                                     | 16.49  | 39.38  | 0.42 | 2.39  |
| Q60972_Rf Rbbp4   | Histone-bir R.LNVWDLK#.I                                     | 88.49  | 50.80  | 1.74 | 0.57  |
| Q60972_Rf Rbbp4   | Histone-bir R.LVLGTHSTDEQNHLVIASVQLPNDDAQFDASHYDSEK#.G       | 11.18  | 3.82   | 2.92 | 0.34  |
| Q60972_Rf Rbbp4   | Histone-bir R.RLNWDLK#.I                                     | 40.02  | 124.36 | 0.32 | 3.11  |
| Q60972_Rf Rbbp4   | Histone-bir K.TIFTGHTAVVEDVSWHLLHESLFGSVADDQK#.L             | 42.87  | 21.63  | 1.98 | 0.50  |
| Q60972_Rf Rbbp4   | Histone-bir K.TIFTGHTAVVEDVSWHLLHESLFGSVADDQK#.L             | 5.05   | 2.46   | 2.05 | 0.49  |
| Q60972_Rf Rbbp4   | Histone-bir K.TPSSDVLVFDYTK#.H                               | 304.47 | 188.86 | 1.61 | 0.62  |
| Q60972_Rf Rbbp4   | Histone-bir K.TVALWDLR.N                                     | 67.51  | 187.57 | 0.36 | 2.78  |
| Q60972_Rf Rbbp4   | Histone-bir R.VINEEYK#.I                                     | 346.48 | 164.13 | 2.11 | 0.47  |
| Q8BX09_Rf Rbbp5   | Retinoblast K.SAPVM*LTLSDSK#.H                               | 7.94   | 4.21   | 1.89 | 0.53  |
| Q8BX09_Rf Rbbp5   | Retinoblast R.VTIGTSNTAIK#.S                                 | 15.19  | 8.93   | 1.70 | 0.59  |
| Q8BX09_Rf Rbbp5   | Retinoblast K.HVLPVDDSDLVNVAFD.R                             | 3.09   | 8.96   | 0.34 | 2.90  |
| Q8BX09_Rf Rbbp5   | Retinoblast R.VIIVDFLTR.G                                    | 4.60   | 18.01  | 0.26 | 3.91  |
| Q8BX09_Rf Rbbp5   | Retinoblast K.SAPVM*LTLSDSK#.H                               | 11.77  | 13.96  | 0.84 | 1.19  |
| Q8BX09_Rf Rbbp5   | Retinoblast K.TTNIELQGVNDEVHPLLGVK#.G                        | 14.35  | 16.16  | 0.89 | 1.13  |
| Q8BX09_Rf Rbbp5   | Retinoblast R.VTIGTSNTAIK#.S                                 | 34.49  | 28.81  | 1.20 | 0.84  |
| P97868_RE Rbbp6   | E3 ubiquiti K.AIDDASASISLAQLTK#.T                            | 14.23  | 11.24  | 1.27 | 0.79  |
| P97868_RE Rbbp6   | E3 ubiquiti K.GASSIAITLM*EEK#.G                              | 12.49  | 6.65   | 1.88 | 0.53  |
| P97868_RE Rbbp6   | E3 ubiquiti K.LGYLVPPQQR.R                                   | 6.90   | 14.46  | 0.48 | 2.10  |
| P97868_RE Rbbp6   | E3 ubiquiti K.AIDDASASISLAQLTK.T                             | 6.36   | 11.48  | 0.55 | 1.81  |
| Q60973_Rf Rbbp7   | Histone-bir K.DYALHWLVLGTHSTDEQNHLVWAR.V                     | 1.77   | 4.64   | 0.38 | 2.63  |
| Q60973_Rf Rbbp7   | Histone-bir K.EM#FEDTVEER.V                                  | 12.33  | 28.08  | 0.44 | 2.28  |
| Q60973_Rf Rbbp7   | Histone-bir K.LHTFESHKDEIQVHSPHNETLASSGTR.D.R                | 2.87   | 5.74   | 0.50 | 2.00  |
| Q60973_Rf Rbbp7   | Histone-bir R.YM#PONPHIATK#.T                                | 23.06  | 10.85  | 2.13 | 0.47  |
| Q8BP71_Rf Rbfox2  | RNA bindin R.ESEVELPVGAGADGPEPGLSK.R                         | 5.99   | 6.61   | 0.91 | 1.10  |
| Q8BP71_Rf Rbfox2  | RNA bindin K.GFGVTFENSADADR.A                                | 10.13  | 60.03  | 0.17 | 5.92  |
| Q8BP71_Rf Rbfox2  | RNA bindin K.ILDVEIFNER.G                                    | 4.16   | 18.07  | 0.23 | 4.34  |
| Q8BP71_Rf Rbfox2  | RNA bindin R.KIEVNNATAR.V                                    | 8.40   | 35.49  | 0.24 | 4.23  |
| Q8BP71_Rf Rbfox2  | RNA bindin K.RLHVSNIPFR.F                                    | 2.91   | 56.10  | 0.05 | 19.28 |
| Q8BP71_Rf Rbfox2  | RNA bindin R.YAQPATAATAAAAAAASDGYGR.V                        | 7.75   | 23.50  | 0.33 | 3.03  |
| Q64701_Rf Rbl1    | Retinoblast K.EAVTTPVASATQSVR.L                              | 2.14   | 7.16   | 0.30 | 3.35  |
| Q64701_Rf Rbl1    | Retinoblast K.LSLIQFFSK#.M                                   | 22.96  | 12.37  | 1.86 | 0.54  |
| Q99KG3_Rf Rbm10   | RNA-bindin R.DGLSDNIGSR.R                                    | 8.59   | 52.23  | 0.16 | 6.08  |
| Q99KG3_Rf Rbm10   | RNA-bindin R.ESATADAGYALEK#.K                                | 18.06  | 18.45  | 0.98 | 1.02  |
| Q99KG3_Rf Rbm10   | RNA-bindin K.GDPAGTPEASLEAGADSVLQAFSR.A                      | 3.06   | 10.95  | 0.28 | 3.58  |
| Q99KG3_Rf Rbm10   | RNA-bindin R.GSSYGVSTESYK.E                                  | 8.74   | 13.59  | 0.64 | 1.55  |
| Q99KG3_Rf Rbm10   | RNA-bindin R.KYGGISTASVDFEQPTR.D                             | 1.72   | 13.92  | 0.12 | 8.11  |
| Q99KG3_Rf Rbm10   | RNA-bindin R.NLPHSTM#DSILGALAPAYLVLSNVR.V                    | 3.79   | 13.51  | 0.28 | 3.56  |
| Q99KG3_Rf Rbm10   | RNA-bindin K.NSFQISALR.D                                     | 2.64   | 24.12  | 0.11 | 9.12  |
| Q99KG3_Rf Rbm10   | RNA-bindin K.QGIVPIEAQTR.V                                   | 8.03   | 26.90  | 0.30 | 3.35  |
| Q99KG3_Rf Rbm10   | RNA-bindin K.TINVEFAK.G                                      | 37.74  | 41.29  | 0.91 | 1.09  |
| Q99KG3_Rf Rbm10   | RNA-bindin K.YGGISTASVDFEQPTR.D                              | 5.12   | 21.29  | 0.24 | 4.16  |
| Q8R4X3_Rf Rbm12   | RNA-bindin R.EIEK#NPPAQGK#.K                                 | 5.10   | 1.58   | 3.22 | 0.31  |
| Q8R4X3_Rf Rbm12   | RNA-bindin R.ELVNPGEVSSAK#.V                                 | 44.82  | 10.42  | 4.30 | 0.23  |
| Q8R4X3_Rf Rbm12   | RNA-bindin R.LQNFSYDQR.E                                     | 10.49  | 10.66  | 0.98 | 1.02  |
| Q8R4X3_Rf Rbm12   | RNA-bindin K.VTLSSK#.T                                       | 13.77  | 5.71   | 2.41 | 0.41  |
| Q80YR9_R1 Rbm12b1 | RNA-bindin K.AENPYLFR.G                                      | 2.36   | 8.71   | 0.27 | 3.70  |
| Q8C2Q3_Rf Rbm14   | RNA-bindin R.LSESLSFR.R                                      | 2.89   | 7.24   | 0.40 | 2.51  |
| Q8C2Q3_Rf Rbm14   | RNA-bindin R.AQPSASLVGVR.T                                   | 40.90  | 67.09  | 0.61 | 1.64  |
| Q8C2Q3_Rf Rbm14   | RNA-bindin R.AQPSVSLGAAAR.A                                  | 25.97  | 54.01  | 0.48 | 2.08  |
| Q8C2Q3_Rf Rbm14   | RNA-bindin R.AQPSVSLGAPAR.G                                  | 14.54  | 56.39  | 0.26 | 3.88  |
| Q8C2Q3_Rf Rbm14   | RNA-bindin R.ASYDDPYK#.A                                     | 22.64  | 19.92  | 1.14 | 0.88  |
| Q8C2Q3_Rf Rbm14   | RNA-bindin R.ASYVAPLTAQATYR.A                                | 15.59  | 65.60  | 0.24 | 4.21  |
| Q8C2Q3_Rf Rbm14   | RNA-bindin R.INVELSTK#.G                                     | 67.90  | 62.60  | 1.08 | 0.92  |
| Q8C2Q3_Rf Rbm14   | RNA-bindin K.K#GPAIAIQSGDK#.T                                | 33.32  | 36.41  | 0.92 | 1.09  |
| Q8C2Q3_Rf Rbm14   | RNA-bindin K.KGPAIAIQSGDKTK.K                                | 24.44  | 19.08  | 1.28 | 0.78  |
| Q8C2Q3_Rf Rbm14   | RNA-bindin K.KPGAGDTAPPGTGGFSATFDYQQAFGNSTGGFDGQAR.Q         | 2.42   | 9.29   | 0.26 | 3.83  |
| Q8C2Q3_Rf Rbm14   | RNA-bindin R.LAELSDYR.R                                      | 5.63   | 14.09  | 0.40 | 2.50  |
| Q8C2Q3_Rf Rbm14   | RNA-bindin R.LSESLSFR.R                                      | 21.85  | 89.33  | 0.24 | 4.09  |
| Q8C2Q3_Rf Rbm14   | RNA-bindin R.TQSSASLAASYAAQQHPQAAASR.G                       | 21.59  | 81.09  | 0.27 | 3.76  |
| Q8C2Q3_Rf Rbm14   | RNA-bindin R.YSGSYNDYLR.A                                    | 15.32  | 56.73  | 0.27 | 3.70  |
| Q0VBL3_Qf Rbm15   | Protein Rbr R.AATSAVTAYEPLDSLDR.R                            | 5.48   | 13.63  | 0.40 | 2.49  |
| Q0VBL3_Qf Rbm15   | Protein Rbr R.EVDIEISPEDDQR.A                                | 3.84   | 11.83  | 0.32 | 3.08  |
| Q0VBL3_Qf Rbm15   | Protein Rbr R.FGVITEVDIK#.R                                  | 17.44  | 9.91   | 1.76 | 0.57  |
| Q0VBL3_Qf Rbm15   | Protein Rbr R.QAAGVISLPVGGNK#.D                              | 10.76  | 8.25   | 1.30 | 0.77  |
| Q0VBL3_Qf Rbm15   | Protein Rbr R.SDGNAPSASTSSK#.Q                               | 1.57   | 3.72   | 0.42 | 2.37  |
| Q0VBL3_Qf Rbm15   | Protein Rbr R.VAFVNR.R                                       | 5.56   | 17.31  | 0.32 | 3.11  |
| Q0VBL3_Qf Rbm15   | Protein Rbr R.VGAGAGAAPFR.E                                  | 7.25   | 23.29  | 0.31 | 3.21  |
| Q0VBL3_Qf Rbm15   | Protein Rbr R.VGAGAGAAPFREVIDEISPEDDQR.A                     | 1.42   | 9.10   | 0.16 | 6.42  |
| Q6PHZ5_Rf Rbm15b  | Putative RN R.ALDYGLYDDR.G                                   | 1.78   | 7.46   | 0.24 | 4.19  |
| Q6PHZ5_Rf Rbm15b  | Putative RN R.LWVGLGPNLTLAALAR.E                             | 2.62   | 10.28  | 0.26 | 3.92  |
| Q6PHZ5_Rf Rbm15b  | Putative RN R.NLVSYLK#.Q                                     | 14.79  | 11.31  | 1.31 | 0.76  |
| Q8JZX4_SP Rbm17   | Splicing fac R.DFPYEEDSRPR.S                                 | 2.05   | 9.46   | 0.22 | 4.62  |
| Q8JZX4_SP Rbm17   | Splicing fac K.HEQGLSTALSVEK#.T                              | 24.83  | 14.09  | 1.76 | 0.57  |
| Q8JZX4_SP Rbm17   | Splicing fac K.K#SDSNPLTEILK#.C                              | 14.34  | 9.09   | 1.58 | 0.63  |
| Q8JZX4_SP Rbm17   | Splicing fac K.LLQSQLVK#.K                                   | 114.57 | 70.45  | 1.63 | 0.61  |
| Q8JZX4_SP Rbm17   | Splicing fac R.QIADTPPHVAAGLKVPVSGSAGEVILPLADEYDPM#FPNDYEK.V | 8.73   | 3.72   | 2.35 | 0.43  |
| Q8JZX4_SP Rbm17   | Splicing fac K.QSTVLPVLDL#.R                                 | 56.46  | 44.30  | 1.27 | 0.78  |
| Q8JZX4_SP Rbm17   | Splicing fac K.SDSNPLTEILK#.C                                | 15.53  | 10.05  | 1.55 | 0.65  |
| Q8JZX4_SP Rbm17   | Splicing fac R.SM#GGAANIAPLTVLEK#.D                          | 28.28  | 22.45  | 1.26 | 0.79  |

|                 |                                                 |        |        |      |       |
|-----------------|-------------------------------------------------|--------|--------|------|-------|
| Q8J2X4_SP Rbm17 | Splicing fac R.SMGAAIAPPTSLVEK#.D               | 19.00  | 7.25   | 2.62 | 0.38  |
| Q8J2X4_SP Rbm17 | Splicing fac R.VLDLAEQV.-                       | 36.85  | 36.85  | 1.00 | 1.00  |
| Q8R3C6_Rf Rbm19 | Probable RI K.EAQEANAPGSSVYK#.K                 | 8.97   | 5.58   | 1.61 | 0.62  |
| Q8R3C6_Rf Rbm19 | Probable RI R.GFGVFDITK#.Q                      | 17.67  | 17.12  | 1.03 | 0.97  |
| Q8R3C6_Rf Rbm19 | Probable RI K.NLNFSTTEELK#.G                    | 10.76  | 8.25   | 1.30 | 0.77  |
| Q8R3C6_Rf Rbm19 | Probable RI K.NL.PAGTLAAEIQETFSR.F              | 5.86   | 24.19  | 0.24 | 4.13  |
| Q8R3C6_Rf Rbm19 | Probable RI R.TLGENEEDLADSDGR.L                 | 5.20   | 14.50  | 0.36 | 2.79  |
| Q8R3C6_Rf Rbm19 | Probable RI R.TQVATWANDALEAK#.L                 | 7.57   | 5.92   | 1.28 | 0.78  |
| Q8R3C6_Rf Rbm19 | Probable RI R.VALGETQLVQEV.R                    | 2.67   | 15.06  | 0.18 | 5.64  |
| Q8BH53_Rf Rbm22 | Pre-mRNA- K.ATSTSDM*LLK#.L                      | 16.53  | 23.24  | 0.71 | 1.41  |
| Q8BH53_Rf Rbm22 | Pre-mRNA- K.ATSTSDMLL.L                         | 17.07  | 20.55  | 0.83 | 1.20  |
| Q8BH53_Rf Rbm22 | Pre-mRNA- R.EISNSDGRTPVGM*LGK.A                 | 1.98   | 9.61   | 0.21 | 4.85  |
| Q8BH53_Rf Rbm22 | Pre-mRNA- R.NHFYQFGEIR.T                        | 5.27   | 83.45  | 0.06 | 15.84 |
| Q8BH53_Rf Rbm22 | Pre-mRNA- K.SDVNKYYTQNM*ER.E                    | 7.15   | 31.08  | 0.23 | 4.35  |
| Q8BH53_Rf Rbm22 | Pre-mRNA- K.TITLVYVGLGDITITETDLR.N              | 2.28   | 14.45  | 0.16 | 6.33  |
| Q8BH53_Rf Rbm22 | Pre-mRNA- R.YYGINDPVADK.L                       | 47.38  | 52.76  | 0.90 | 1.11  |
| B2RY56_RB Rbm25 | RNA-bindin R.LLIYETAK#.K                        | 13.31  | 5.76   | 2.31 | 0.43  |
| B2RY56_RB Rbm25 | RNA-bindin K.LPVDSVFNKFEDESDDDVPR.K             | 3.59   | 18.78  | 0.19 | 5.23  |
| B2RY56_RB Rbm25 | RNA-bindin R.DREDEEDAYER.R                      | 2.91   | 20.01  | 0.15 | 6.88  |
| B2RY56_RB Rbm25 | RNA-bindin R.DREDEEDAYER.R                      | 2.34   | 42.27  | 0.06 | 18.06 |
| B2RY56_RB Rbm25 | RNA-bindin K.EDINAIEM*EEDKR.D                   | 2.57   | 9.26   | 0.28 | 3.61  |
| B2RY56_RB Rbm25 | RNA-bindin R.EKEELEIR.Q                         | 14.95  | 47.96  | 0.31 | 3.21  |
| B2RY56_RB Rbm25 | RNA-bindin K.GAIEVLIR.E                         | 16.23  | 50.21  | 0.32 | 3.09  |
| B2RY56_RB Rbm25 | RNA-bindin K.LGASNSVFNKFEDESDDDVPR.K            | 3.55   | 6.56   | 0.54 | 1.85  |
| B2RY56_RB Rbm25 | RNA-bindin K.LGASNSVFNKFEDESDDDVPR.K            | 56.18  | 30.11  | 1.87 | 0.54  |
| B2RY56_RB Rbm25 | RNA-bindin R.LLAEGHPDPAELQR.M                   | 41.17  | 129.57 | 0.32 | 3.15  |
| B2RY56_RB Rbm25 | RNA-bindin R.LLHDLQGEK#.K                       | 105.50 | 78.33  | 1.35 | 0.74  |
| B2RY56_RB Rbm25 | RNA-bindin K.LPVDSVFNKFEDESDDDVPR.K             | 5.09   | 13.40  | 0.38 | 2.63  |
| B2RY56_RB Rbm25 | RNA-bindin R.FPVPAPLPIPLTK.E                    | 7.60   | 18.64  | 0.41 | 2.45  |
| B2RY56_RB Rbm25 | RNA-bindin K.TK#AQLEWVK#.A                      | 11.81  | 6.79   | 1.74 | 0.57  |
| B2RY56_RB Rbm25 | RNA-bindin K.LGASNSVFNKFEDESDDDVPR.K            | 11.76  | 7.74   | 1.52 | 0.66  |
| Q6NZNO_Rf Rbm26 | RNA-bindin K.AISSTEALNLR.F                      | 7.86   | 23.62  | 0.33 | 3.00  |
| Q6NZNO_Rf Rbm26 | RNA-bindin R.EGTTQQLQTSPPK.V                    | 31.55  | 12.51  | 2.52 | 0.40  |
| Q6NZNO_Rf Rbm26 | RNA-bindin R.LGVPSPATTEPAEQSATELQPNVTK#.L       | 13.91  | 6.93   | 2.01 | 0.50  |
| Q6NZNO_Rf Rbm26 | RNA-bindin K.TLVSSTPAVDNNEAQK#.K                | 10.31  | 3.80   | 2.72 | 0.37  |
| Q6NZNO_Rf Rbm26 | RNA-bindin K.VIQPLVQQLPLPVVK#.Q                 | 13.79  | 5.28   | 2.61 | 0.38  |
| Q6NZNO_Rf Rbm26 | RNA-bindin K.YLVALVK#.K                         | 11.64  | 3.23   | 3.60 | 0.28  |
| Q5SFM8_Rf Rbm27 | RNA-bindin R.LLQGLPPPLLAAR.L                    | 4.07   | 15.58  | 0.26 | 3.82  |
| Q5SFM8_Rf Rbm27 | RNA-bindin K.LSGLQVEAAR.L                       | 3.52   | 10.31  | 0.34 | 2.93  |
| Q5SFM8_Rf Rbm27 | RNA-bindin K.VPISSTEEEEVEEETSDLFLHDDDEDEEYESR.S | 2.50   | 3.00   | 0.83 | 1.20  |
| Q8CGC6_Rf Rbm28 | RNA-bindin K.AAEGVSAADMAK#.R                    | 26.56  | 10.80  | 2.46 | 0.41  |
| Q8CGC6_Rf Rbm28 | RNA-bindin K.AAEGVSAADMAK#.R                    | 59.75  | 28.88  | 2.07 | 0.48  |
| Q8CGC6_Rf Rbm28 | RNA-bindin K.AGTSWSVGFQTK#.A                    | 42.52  | 22.75  | 1.87 | 0.54  |
| Q8CGC6_Rf Rbm28 | RNA-bindin K.AVFTHYVTLVNIPIK#.K                 | 29.23  | 14.72  | 1.99 | 0.50  |
| Q8CGC6_Rf Rbm28 | RNA-bindin R.FNQLVEQYK#.Q                       | 51.60  | 34.31  | 1.50 | 0.66  |
| Q8CGC6_Rf Rbm28 | RNA-bindin R.GFAYVQK#.N                         | 29.58  | 15.96  | 1.85 | 0.54  |
| Q8CGC6_Rf Rbm28 | RNA-bindin R.GFGYVTFSM*LEDVQR.A                 | 2.41   | 5.06   | 0.48 | 2.10  |
| Q8CGC6_Rf Rbm28 | RNA-bindin R.HFNNNPEIFSQK#.R                    | 19.50  | 8.62   | 2.26 | 0.44  |
| Q8CGC6_Rf Rbm28 | RNA-bindin R.K.HLPSDVTGK#.T                     | 26.03  | 18.87  | 1.38 | 0.72  |
| Q8CGC6_Rf Rbm28 | RNA-bindin K.K#QQLASSVQAPK#.R                   | 7.18   | 3.83   | 1.87 | 0.53  |
| Q8CGC6_Rf Rbm28 | RNA-bindin K.QQLASSVQAPK#.R                     | 34.00  | 19.22  | 1.77 | 0.57  |
| Q8CGC6_Rf Rbm28 | RNA-bindin R.SDQLEELFSQVGPVK#.Q                 | 18.86  | 9.86   | 1.91 | 0.52  |
| Q8CGC6_Rf Rbm28 | RNA-bindin R.TVAVDWAVAK#.D                      | 52.54  | 20.64  | 2.55 | 0.39  |
| Q8CGC6_Rf Rbm28 | RNA-bindin K.VVQSATQDSK#.A                      | 10.30  | 7.25   | 1.42 | 0.70  |
| Q8C5L7_RE Rbm34 | RNA-bindin R.LAALFSTAEPAPPVFPVQETS#.K           | 16.03  | 7.67   | 2.09 | 0.48  |
| Q8C5L7_RE Rbm34 | RNA-bindin R.SVFNLPYK#.I                        | 22.70  | 19.62  | 1.16 | 0.86  |
| Q8C5L7_RE Rbm34 | RNA-bindin K.VADGEALDVALSLAK#.D                 | 12.50  | 10.48  | 1.19 | 0.84  |
| Q8VH51_Rf Rbm39 | RNA-bindin R.AAAM*ANNLQK#.G                     | 42.54  | 33.03  | 1.29 | 0.78  |
| Q8VH51_Rf Rbm39 | RNA-bindin R.AAAMANNLQK#.G                      | 36.70  | 37.67  | 0.97 | 1.03  |
| Q8VH51_Rf Rbm39 | RNA-bindin R.DLEEFFTVGK#.V                      | 157.30 | 122.03 | 1.29 | 0.78  |
| Q8VH51_Rf Rbm39 | RNA-bindin R.GIFEPFGR.I                         | 20.68  | 69.52  | 0.30 | 3.36  |
| Q8VH51_Rf Rbm39 | RNA-bindin K.HGGVIHYVDK#.N                      | 32.36  | 26.66  | 1.21 | 0.82  |
| Q8VH51_Rf Rbm39 | RNA-bindin R.IESIQLM**DSETGR.S                  | 5.34   | 14.90  | 0.36 | 2.79  |
| Q8VH51_Rf Rbm39 | RNA-bindin R.IESIQLM**DSETGR.S                  | 4.34   | 10.96  | 0.40 | 2.53  |
| Q8VH51_Rf Rbm39 | RNA-bindin R.IESIQLMMDSETGR.S                   | 5.72   | 12.33  | 0.46 | 2.16  |
| Q8VH51_Rf Rbm39 | RNA-bindin K.IGLPMSIK#.L                        | 28.43  | 14.61  | 1.95 | 0.51  |
| Q8VH51_Rf Rbm39 | RNA-bindin K.M*ITAAVYVPLPYHNLFPDSMTATQLLVPSR.R  | 1.50   | 3.84   | 0.39 | 2.55  |
| Q8VH51_Rf Rbm39 | RNA-bindin K.NSAQGNVYK#.C                       | 43.59  | 32.61  | 1.34 | 0.75  |
| Q8VH51_Rf Rbm39 | RNA-bindin R.TDASSASSFLDSELER.T                 | 23.10  | 81.33  | 0.28 | 3.52  |
| Q8VH51_Rf Rbm39 | RNA-bindin R.TGIDLTTGR.L                        | 50.02  | 151.07 | 0.33 | 3.02  |
| Q8VH51_Rf Rbm39 | RNA-bindin R.VLGVPIIVQASQAEK#.N                 | 199.78 | 152.77 | 1.31 | 0.76  |
| Q8VH51_Rf Rbm39 | RNA-bindin R.IESIQLM**DSETGR.S                  | 3.12   | 3.62   | 0.86 | 1.16  |
| Q8VH51_Rf Rbm39 | RNA-bindin K.NSAQGNVYK#.C                       | 82.20  | 40.55  | 2.03 | 0.49  |
| Q8VH51_Rf Rbm39 | RNA-bindin R.TDASSASSFLDSELER.T                 | 4.66   | 16.97  | 0.27 | 3.64  |
| Q8VH51_Rf Rbm39 | RNA-bindin R.VLGVPIIVQASQAEK#.N                 | 5.78   | 9.46   | 0.61 | 1.64  |
| Q8VH51_Rf Rbm39 | RNA-bindin R.AAAM*ANNLQK#.G                     | 32.31  | 14.56  | 2.22 | 0.45  |
| Q8VH51_Rf Rbm39 | RNA-bindin R.DLEEFFTVGK#.V                      | 108.88 | 68.68  | 1.59 | 0.63  |
| Q8VH51_Rf Rbm39 | RNA-bindin R.GIFEPFGR.I                         | 17.99  | 41.68  | 0.43 | 2.32  |
| Q8VH51_Rf Rbm39 | RNA-bindin K.HGGVIHYVDK#.N                      | 26.51  | 10.91  | 2.43 | 0.41  |
| Q8VH51_Rf Rbm39 | RNA-bindin R.IESIQLM**DSETGR.S                  | 4.39   | 8.82   | 0.50 | 2.01  |
| Q8VH51_Rf Rbm39 | RNA-bindin R.IESIQLM**DSETGR.S                  | 3.25   | 7.87   | 0.41 | 2.42  |
| Q8VH51_Rf Rbm39 | RNA-bindin R.IESIQLMMDSETGR.S                   | 3.57   | 7.71   | 0.46 | 2.16  |
| Q8VH51_Rf Rbm39 | RNA-bindin K.IGLPMSIK#.L                        | 10.68  | 14.43  | 0.74 | 1.35  |
| Q8VH51_Rf Rbm39 | RNA-bindin K.NSAQGNVYK#.C                       | 43.44  | 22.62  | 1.92 | 0.52  |
| Q8VH51_Rf Rbm39 | RNA-bindin R.SKGIAVYEVFVDSVPLAIGLTGQR.V         | 2.55   | 9.86   | 0.26 | 3.87  |
| Q8VH51_Rf Rbm39 | RNA-bindin R.TDASSASSFLDSELER.T                 | 16.83  | 45.59  | 0.37 | 2.71  |
| Q8VH51_Rf Rbm39 | RNA-bindin R.TGIDLTTGR.L                        | 24.29  | 65.56  | 0.37 | 2.70  |
| Q8VH51_Rf Rbm39 | RNA-bindin R.VLGVPIIVQASQAEK#.N                 | 152.28 | 90.68  | 1.68 | 0.60  |
| Q8VH51_Rf Rbm39 | RNA-bindin R.DLEEFFTVGK#.V                      | 12.51  | 13.66  | 0.92 | 1.09  |
| Q8VH51_Rf Rbm39 | RNA-bindin R.TDASSASSFLDSELER.T                 | 1.71   | 6.52   | 0.26 | 3.81  |
| Q8VH51_Rf Rbm39 | RNA-bindin R.VLGVPIIVQASQAEK#.N                 | 12.73  | 9.22   | 1.38 | 0.72  |
| Q8C7Q4_Rf Rbm4  | RNA-bindin R.ATGPVLTGEGYVGHDSLSQASAAAR.N        | 2.40   | 7.25   | 0.33 | 3.02  |
| Q8C7Q4_Rf Rbm4  | RNA-bindin R.GLDNTEFGK.R                        | 16.49  | 18.58  | 0.89 | 1.13  |
| Q8C7Q4_Rf Rbm4  | RNA-bindin K.LFIGNLPR.E                         | 2.52   | 15.72  | 0.16 | 6.24  |
| Q8C7Q4_Rf Rbm4  | RNA-bindin R.VADLTEQYNEQYQAVR.T                 | 2.30   | 8.40   | 0.27 | 3.65  |
| Q91V81_Rf Rbm42 | RNA-bindin R.ELGLGLGLK#.D                       | 16.95  | 16.57  | 1.02 | 0.98  |
| Q91V81_Rf Rbm42 | RNA-bindin R.GHLDSPEAR.E                        | 2.49   | 13.44  | 0.18 | 5.41  |
| Q91V81_Rf Rbm42 | RNA-bindin K.GYGFVSKDPPSYVYR.A                  | 2.92   | 15.73  | 0.19 | 5.38  |
| Q91V81_Rf Rbm42 | RNA-bindin R.TAAGSSWEDPSSLEWDADDFR.I            | 2.79   | 7.16   | 0.39 | 2.56  |
| Q91YE7_RB Rbm5  | RNA-bindin K.DLVLDPGNR.V                        | 2.73   | 12.78  | 0.21 | 4.69  |
| Q91YE7_RB Rbm5  | RNA-bindin R.ESAAADAGFALFEK.K                   | 9.78   | 12.91  | 0.76 | 1.32  |
| Q91YE7_RB Rbm5  | RNA-bindin R.GLPITITTESDIR.E                    | 4.43   | 30.07  | 0.15 | 6.78  |
| Q91YE7_RB Rbm5  | RNA-bindin R.HQQLSDLHK#.Q                       | 198.47 | 43.10  | 4.60 | 0.22  |

|                  |                                          |        |        |      |       |
|------------------|------------------------------------------|--------|--------|------|-------|
| Q91YE7_RB Rbm5   | RNA-bindin K.QFDAGTVNYEQPTK#.D           | 7.79   | 11.08  | 0.70 | 1.42  |
| S4R1W5_S_ Rbm6   | Protein Rbr R.DAQDLDQDQYR.T              | 4.06   | 15.36  | 0.26 | 3.79  |
| S4R1W5_S_ Rbm6   | Protein Rbr R.GGDFSSDFQSR.D              | 1.75   | 11.12  | 0.16 | 6.37  |
| S4R1W5_S_ Rbm6   | Protein Rbr K.I.LQNLDPPFSDIGK.M          | 9.93   | 9.59   | 1.03 | 0.97  |
| S4R1W5_S_ Rbm6   | Protein Rbr R.LPGNQIFGYGQSK#.S           | 11.72  | 6.55   | 1.79 | 0.56  |
| Q9CQT2_Rf Rbm7   | RNA-bindin R.EDFYDDR.N                   | 1.35   | 6.43   | 0.21 | 4.76  |
| Q9CQT2_Rf Rbm7   | RNA-bindin R.SFSSPEDYQR.Q                | 11.60  | 30.35  | 0.38 | 2.62  |
| Q9CQT2_Rf Rbm7   | RNA-bindin R.TL.FVGNLETK#.V              | 37.12  | 32.42  | 1.14 | 0.87  |
| Q9CQT2_Rf Rbm7   | RNA-bindin R.TVGNVSPTAQM*VQR.S           | 5.74   | 23.09  | 0.25 | 4.02  |
| Q9CQT2_Rf Rbm7   | RNA-bindin R.TVGNVSPTAQM*VQR.S           | 3.59   | 10.81  | 0.33 | 3.01  |
| Q9CQT2_Rf Rbm7   | RNA-bindin K.VTEELLFELFHQAGPVIK#.V       | 65.10  | 32.91  | 1.98 | 0.51  |
| Q9CWZ3_R Rbm8a   | RNA-bindin K.FAEYGEIK#.N                 | 73.56  | 71.27  | 1.03 | 0.97  |
| Q9CWZ3_R Rbm8a   | RNA-bindin K.GYTLVEYTK#.E                | 85.18  | 85.10  | 1.00 | 1.00  |
| Q9CWZ3_R Rbm8a   | RNA-bindin R.M*REDYDVSVDQDEPGPQR.S       | 7.62   | 178.66 | 0.04 | 23.46 |
| Q91W59_R Rbms1   | RNA-bindin R.GLPPNITDQDLVK.L             | 54.00  | 11.22  | 4.81 | 0.21  |
| Q91W59_R Rbms1   | RNA-bindin K.GYGFVDFDSPAQAQK.A           | 28.09  | 40.61  | 0.69 | 1.45  |
| Q8VC70_Rf Rbms2  | RNA-bindin K.ASGVQAQM*AK#.Q              | 11.26  | 12.69  | 0.89 | 1.13  |
| Q8VC70_Rf Rbms2  | RNA-bindin K.ASGVQAQMAK.Q                | 31.20  | 39.17  | 0.80 | 1.26  |
| Q8VC70_Rf Rbms2  | RNA-bindin K.GYGFVDFDSPAQAQK#.A          | 49.58  | 50.23  | 0.99 | 1.01  |
| Q8VC70_Rf Rbms2  | RNA-bindin K.LYVAQQM*APPSPR.N            | 3.37   | 18.52  | 0.18 | 5.50  |
| Q8R0F5_RE Rbmx2  | RNA-bindin R.APQESDVEDDTR.E              | 8.16   | 27.70  | 0.29 | 3.40  |
| Q91VM5_R Rbmx1   | RNA bindin K.AIKVEQATKPSFESGR.R          | 13.21  | 55.21  | 0.24 | 4.18  |
| Q91VM5_R Rbmx1   | RNA bindin K.ALEAVFGK#.Y                 | 183.98 | 212.43 | 0.87 | 1.15  |
| Q91VM5_R Rbmx1   | RNA bindin R.DSYESVGNRS.S                | 20.26  | 111.04 | 0.18 | 5.48  |
| Q91VM5_R Rbmx1   | RNA bindin R.GFAVTFESPADAK#.D            | 151.29 | 194.57 | 0.78 | 1.29  |
| Q91VM5_R Rbmx1   | RNA bindin R.GGYM*DDGGYSM*NFM*SSSR.G     | 2.71   | 14.25  | 0.19 | 5.26  |
| Q91VM5_R Rbmx1   | RNA bindin R.IVEILLM*K#.D                | 43.59  | 43.90  | 0.99 | 1.01  |
| Q91VM5_R Rbmx1   | RNA bindin R.IVEILLMK#.D                 | 52.23  | 60.11  | 0.87 | 1.15  |
| Q91VM5_R Rbmx1   | RNA bindin K.L.FIGLINTTNEK.A             | 174.25 | 206.49 | 0.84 | 1.19  |
| Q91VM5_R Rbmx1   | RNA bindin R.REPLPSR.R                   | 4.50   | 136.07 | 0.03 | 30.21 |
| Q91VM5_R Rbmx1   | RNA bindin R.RGPPPPR.S                   | 4.20   | 83.13  | 0.05 | 19.79 |
| Q91VM5_R Rbmx1   | RNA bindin R.SDLYSSGR.D                  | 30.75  | 162.75 | 0.19 | 5.29  |
| Q91VM5_R Rbmx1   | RNA bindin R.YDDYSSR.D                   | 16.22  | 24.73  | 0.66 | 1.52  |
| Q05186_Rf Rcn1   | Reticulocal K.ASDLDGLTATR.E              | 5.25   | 27.04  | 0.19 | 5.15  |
| Q05186_Rf Rcn1   | Reticulocal R.HWILPQDYDHAQAEAR.H         | 1.81   | 14.28  | 0.13 | 7.88  |
| Q05186_Rf Rcn1   | Reticulocal R.IDSDGDLVITTEELK.L          | 6.37   | 12.76  | 0.50 | 2.00  |
| Q05186_Rf Rcn1   | Reticulocal K.IVDRIDSDGDLVITTEELK.L      | 1.20   | 13.52  | 0.09 | 11.29 |
| Q8BP92_Rf Rcn2   | Reticulocal R.DPTANDEDPEWLVKE.D          | 5.86   | 5.36   | 1.09 | 0.92  |
| Q8BP92_Rf Rcn2   | Reticulocal R.EALLGVQEDVDEYK.L           | 27.05  | 20.02  | 1.35 | 0.74  |
| Q8BP92_Rf Rcn2   | Reticulocal K.LSEEEILENDLFLTSEATDYGR.Q   | 3.11   | 4.51   | 0.69 | 1.45  |
| Q8BP92_Rf Rcn2   | Reticulocal R.VIDFENTALDDTEGSFR.Q        | 2.69   | 10.17  | 0.26 | 3.78  |
| Q8BH97_Rf Rcn3   | Reticulocal R.DIVVAETLEDLK.N             | 2.85   | 7.04   | 0.40 | 2.47  |
| Q8BH97_Rf Rcn3   | Reticulocal R.M*DLAGSDGWSVLAELR.A        | 2.59   | 7.72   | 0.34 | 2.98  |
| Q8BH97_Rf Rcn3   | Reticulocal R.MDLAGSDGWSVLAELR.A         | 1.97   | 7.21   | 0.27 | 3.67  |
| Q8CFE3_RC Rcor1  | REST corepi R.DFQAISDVIGNK#.S            | 29.18  | 17.33  | 1.68 | 0.59  |
| Q8CFE3_RC Rcor1  | REST corepi R.DNLGLMLVSNPQSLSEAK#.L      | 6.59   | 2.42   | 2.73 | 0.37  |
| Q8CFE3_RC Rcor1  | REST corepi K.LDEYIAIAK#.E               | 34.54  | 35.32  | 0.98 | 1.02  |
| Q8CFE3_RC Rcor1  | REST corepi K.NFFVNYR.R                  | 3.82   | 12.22  | 0.31 | 3.20  |
| Q8CFE3_RC Rcor1  | REST corepi K.SIASLVK#.F                 | 25.89  | 18.40  | 1.41 | 0.71  |
| Q8CFE3_RC Rcor1  | REST corepi R.VGPQYQAAVPDFPAK#.L         | 25.30  | 18.56  | 1.36 | 0.73  |
| Q8CFE3_RC Rcor1  | REST corepi R.WTTEQLAVQAIR.K             | 3.27   | 8.37   | 0.39 | 2.56  |
| G3X8R0_G: Reep5  | Receptor ak K.ATVNLGDEK#.K               | 13.99  | 9.13   | 1.53 | 0.65  |
| O54916_Rf Reeps1 | RalBP1-assx K.TATNPANVSK#.G              | 7.52   | 2.76   | 2.72 | 0.37  |
| Q9CQU3_Rf Rer1   | Protein REF R.LGQIYQSWLDK#.S             | 20.53  | 10.43  | 1.97 | 0.51  |
| Q9CQU3_Rf Rer1   | Protein REF K.VDPSLM*EDSDGSPKPTK#.Q      | 10.93  | 8.34   | 1.31 | 0.76  |
| Q9D854_Ol Rexo2  | Oligoribon R.ALDDISESIK#.E               | 10.01  | 7.35   | 1.36 | 0.73  |
| P35601_RF Rfc1   | Replication R.GGIQELGLIK#.H              | 11.85  | 12.17  | 0.97 | 1.03  |
| P35601_RF Rfc1   | Replication R.GYM*TFQPSFSPWLGK#.H        | 5.85   | 3.24   | 1.81 | 0.55  |
| P35601_RF Rfc1   | Replication K.AALLSGPPGVGK#.T            | 45.67  | 38.11  | 1.20 | 0.83  |
| P35601_RF Rfc1   | Replication K.AKEESSNETELLAAR.R          | 8.15   | 35.24  | 0.23 | 4.32  |
| P35601_RF Rfc1   | Replication K.ALTYDQAK#.A                | 28.97  | 17.21  | 1.68 | 0.59  |
| P35601_RF Rfc1   | Replication K.AVVAELNNTSIK#.G            | 57.46  | 51.40  | 1.12 | 0.89  |
| P35601_RF Rfc1   | Replication K.EAHLTPSLQVVK#.T            | 5.14   | 38.96  | 0.13 | 7.58  |
| P35601_RF Rfc1   | Replication K.EAHLTPSLQVVK#.T            | 22.44  | 23.29  | 0.96 | 1.04  |
| P35601_RF Rfc1   | Replication K.GFYTSGAAPSVSAR.H           | 12.34  | 53.87  | 0.23 | 4.36  |
| P35601_RF Rfc1   | Replication R.GGIQELGLIK#.H              | 83.82  | 62.93  | 1.33 | 0.75  |
| P35601_RF Rfc1   | Replication R.GYM*TFQPSFSPWLGK#.H        | 12.45  | 12.79  | 0.97 | 1.03  |
| P35601_RF Rfc1   | Replication K.ILDEDEGLLDLIR.T            | 14.03  | 68.24  | 0.21 | 4.86  |
| P35601_RF Rfc1   | Replication R.K.HDEEGEESFSSQDLSK#.A      | 8.96   | 8.32   | 1.08 | 0.93  |
| P35601_RF Rfc1   | Replication K.LTPTSVDLYFGTESVQR.S        | 5.70   | 17.58  | 0.32 | 3.08  |
| P35601_RF Rfc1   | Replication K.QLQLDEDAELER.Q             | 4.46   | 18.70  | 0.24 | 4.19  |
| P35601_RF Rfc1   | Replication K.SAMLSIAFK.E                | 7.26   | 8.02   | 0.91 | 1.10  |
| P35601_RF Rfc1   | Replication R.TLALLDEEPK#.I              | 27.26  | 27.80  | 0.98 | 1.02  |
| P35601_RF Rfc1   | Replication R.DALVRPLTSQVGAQHVIK.L       | 4.64   | 9.53   | 0.49 | 2.06  |
| P35601_RF Rfc1   | Replication K.GFYTSGAAPSVSAR.H           | 3.71   | 18.39  | 0.20 | 4.96  |
| P35601_RF Rfc1   | Replication R.GGIQELGLIK#.H              | 27.69  | 20.10  | 1.38 | 0.73  |
| P35601_RF Rfc1   | Replication K.ILDEDEGLLDLIR.T            | 3.77   | 19.55  | 0.19 | 5.19  |
| Q9WUK4_F Rfc2    | Replication R.EGNVPNIIAGPPGTGK#.T        | 52.17  | 30.35  | 1.72 | 0.58  |
| Q9WUK4_F Rfc2    | Replication K.EKVPYTDGLEAIFTAQGDMM*#R.Q  | 4.21   | 9.26   | 0.45 | 2.20  |
| Q9WUK4_F Rfc2    | Replication K.IIILDEADSMTDGAQALR.R       | 2.70   | 5.33   | 0.51 | 1.97  |
| Q9WUK4_F Rfc2    | Replication K.LINEIVGNEDTVSR.L           | 19.93  | 58.63  | 0.34 | 2.94  |
| Q9WUK4_F Rfc2    | Replication K.LTDAQVLR.L                 | 15.39  | 57.39  | 0.27 | 3.73  |
| Q9WUK4_F Rfc2    | Replication K.TAGHYELPWVEK#.Y            | 29.94  | 18.62  | 1.61 | 0.62  |
| Q9WUK4_F Rfc2    | Replication R.EGNVPNIIAGPPGTGK#.T        | 6.26   | 3.90   | 1.60 | 0.62  |
| Q9WUK4_F Rfc2    | Replication R.EGNVPNIIAGPPGTGK#.T        | 13.88  | 8.34   | 1.66 | 0.60  |
| Q9WUK4_F Rfc2    | Replication K.LINEIVGNEDTVSR.L           | 4.42   | 10.17  | 0.43 | 2.30  |
| Q8R323_Rf Rfc3   | Replication K.EGLALPSTLAR.R              | 4.79   | 19.97  | 0.24 | 4.17  |
| Q8R323_Rf Rfc3   | Replication R.ETANAVSQQTQR.L             | 4.72   | 15.85  | 0.30 | 3.36  |
| Q8R323_Rf Rfc3   | Replication K.TVAQSQLETSQR.D             | 8.72   | 28.72  | 0.30 | 3.29  |
| Q8R323_Rf Rfc3   | Replication R.VQQYPTFEDQIEPETDWEVYLR.E   | 3.23   | 8.14   | 0.40 | 2.52  |
| Q8R323_Rf Rfc3   | Replication R.ETANAVSQQTQR.L             | 3.35   | 8.57   | 0.39 | 2.56  |
| Q8R323_Rf Rfc3   | Replication K.TVAQSQLETSQR.D             | 4.67   | 14.14  | 0.33 | 3.02  |
| Q8R323_Rf Rfc3   | Replication R.ETANAVSQQTQR.L             | 5.81   | 18.01  | 0.32 | 3.10  |
| Q8R323_Rf Rfc3   | Replication K.TVAQSQLETSQR.D             | 10.07  | 30.70  | 0.33 | 3.05  |
| Q9J62_RF Rfc4    | Replication K.AITFLQSATR.L               | 12.76  | 28.67  | 0.45 | 2.25  |
| Q9J62_RF Rfc4    | Replication K.DRGTATAGSSGETK.K           | 1.34   | 3.76   | 0.36 | 2.80  |
| Q9J62_RF Rfc4    | Replication R.ELFGPELFR.L                | 25.22  | 60.70  | 0.42 | 2.41  |
| Q9J62_RF Rfc4    | Replication R.GTPATAGSSGETK.K            | 8.49   | 6.18   | 1.37 | 0.73  |
| Q9J62_RF Rfc4    | Replication K.IGNEEYLVK#.I               | 71.59  | 43.22  | 1.66 | 0.60  |
| Q9J62_RF Rfc4    | Replication K.IVILDEADSM*TSAAQAALR.R     | 2.38   | 5.72   | 0.42 | 2.40  |
| Q9J62_RF Rfc4    | Replication K.IVILDEADSM*TSAAQAALR.R     | 8.60   | 26.09  | 0.33 | 3.03  |
| Q9J62_RF Rfc4    | Replication R.K.#LEGADLPLNLLFYGPPGTGK#.T | 39.59  | 21.78  | 1.82 | 0.55  |
| Q9J62_RF Rfc4    | Replication R.LLDIAEKHENVK#.I            | 108.13 | 65.56  | 1.65 | 0.61  |

|                    |                                                        |        |        |       |       |
|--------------------|--------------------------------------------------------|--------|--------|-------|-------|
| Q99J62_RF Rfc4     | Replication K.NFAQLTVSGSR.S                            | 16.68  | 40.38  | 0.41  | 2.42  |
| Q99J62_RF Rfc4     | Replication K.SLEGADLPNLLFYGPPGTGK#.T                  | 55.54  | 41.63  | 1.33  | 0.75  |
| Q99J62_RF Rfc4     | Replication K.TSTILAAAR.E                              | 21.02  | 45.91  | 0.46  | 2.18  |
| Q99J62_RF Rfc4     | Replication R.VLELNASDER.G                             | 47.90  | 116.15 | 0.41  | 2.42  |
| Q99J62_RF Rfc4     | Replication K.SLEGADLPNLLFYGPPGTGK#.T                  | 3.57   | 4.13   | 0.86  | 1.16  |
| Q99J62_RF Rfc4     | Replication K.IGNEEIIAYLVK#.I                          | 9.98   | 6.71   | 1.49  | 0.67  |
| Q99J62_RF Rfc4     | Replication K.SLEGADLPNLLFYGPPGTGK#.T                  | 5.59   | 4.55   | 1.23  | 0.81  |
| Q9D0F6_RF Rfc5     | Replication R.ALNILQSTNM*AFGK#.V                       | 17.46  | 11.67  | 1.50  | 0.67  |
| Q9D0F6_RF Rfc5     | Replication K.ALVTLSGDM*MR.R                           | 10.46  | 29.37  | 0.36  | 2.81  |
| Q9D0F6_RF Rfc5     | Replication K.ALVTLSGDM*MR.R                           | 4.08   | 11.05  | 0.37  | 2.71  |
| Q9D0F6_RF Rfc5     | Replication R.FGPLTPELM*VPR.L                          | 10.07  | 27.18  | 0.37  | 2.70  |
| Q9D0F6_RF Rfc5     | Replication R.FGPLTPELM*VPR.L                          | 6.45   | 14.11  | 0.46  | 2.19  |
| Q9D0F6_RF Rfc5     | Replication R.GPILSFASTR.T                             | 21.28  | 40.83  | 0.52  | 1.92  |
| Q9D0F6_RF Rfc5     | Replication K.IQLSSIIAFAQVTR.D                         | 3.93   | 10.78  | 0.36  | 2.74  |
| Q9D0F6_RF Rfc5     | Replication R.LPHLLVGGPPTGK#.T                         | 13.05  | 7.86   | 1.66  | 0.60  |
| Q9D0F6_RF Rfc5     | Replication R.LSVGTSEK#.I                              | 44.31  | 29.88  | 1.48  | 0.67  |
| Q9D0F6_RF Rfc5     | Replication K.LVILDEADAM*TQDAQNALR.R                   | 1.63   | 4.17   | 0.39  | 2.55  |
| Q9D0F6_RF Rfc5     | Replication R.ALNILQSTNM*AFGK#.V                       | 7.31   | 5.42   | 1.35  | 0.74  |
| Q9D0F6_RF Rfc5     | Replication R.FGPLTPELM*VPR.L                          | 4.19   | 11.02  | 0.38  | 2.63  |
| Q9D0F6_RF Rfc5     | Replication R.GPILSFASTR.T                             | 7.31   | 11.06  | 0.66  | 1.51  |
| Q9D0F6_RF Rfc5     | Replication R.LEHVQEENVDISEGDM*K#.A                    | 15.06  | 18.37  | 0.82  | 1.22  |
| Q9D0F6_RF Rfc5     | Replication R.ALNILQSTNM*AFGK#.V                       | 12.69  | 6.64   | 1.91  | 0.52  |
| Q9D0F6_RF Rfc5     | Replication R.FGPLTPELM*VPR.L                          | 9.88   | 28.31  | 0.35  | 2.86  |
| Q9D0F6_RF Rfc5     | Replication R.GPILSFASTR.T                             | 11.12  | 28.09  | 0.40  | 2.53  |
| Q9D0F6_RF Rfc5     | Replication K.IQLSSIIAFAQVTR.D                         | 3.58   | 6.89   | 0.52  | 1.93  |
| Q9D0F6_RF Rfc5     | Replication R.LEHVQEENVDISEGDM*K#.A                    | 45.01  | 35.30  | 1.28  | 0.78  |
| Q9D0F6_RF Rfc5     | Replication R.LEHVQEENVDISEGDMK#.A                     | 11.73  | 6.26   | 1.87  | 0.53  |
| Q9D0F6_RF Rfc5     | Replication R.VDFPSSVR.I                               | 4.30   | 14.46  | 0.30  | 3.36  |
| Q9D0F6_RF Rfc5     | Replication K.YRQQLADLISHQDLSTIQK.F                    | 3.03   | 7.65   | 0.40  | 2.53  |
| P48377_RF Rfx1     | MHC class I R.ASPATVQWLLDNYETAQGSVLRP.S                | 3.23   | 11.58  | 0.28  | 3.59  |
| P48377_RF Rfx1     | MHC class I R.SVQVATPQTK#.A                            | 15.83  | 11.27  | 1.40  | 0.71  |
| P48377_RF Rfx1     | MHC class I R.SLDPFAELDLQGK#.V                         | 11.31  | 5.36   | 2.11  | 0.47  |
| Q99PG4_Rf Rgs18    | Regulator o K.EPQQLI.K.A                               | 13.48  | 14.48  | 0.93  | 1.07  |
| Q921J2_RF Rheb     | GTP-bindin K.ALAEWNAAFLESSAK#.E                        | 92.15  | 34.64  | 2.66  | 0.38  |
| Q921J2_RF Rheb     | GTP-bindin R.IILAEAK#DGAASQGGK#.H                      | 128.54 | 44.93  | 2.86  | 0.35  |
| Q921J2_RF Rheb     | GTP-bindin K.SSLTIOFVQGFVDSYDPTIENTFTK#.L              | 33.32  | 11.60  | 2.87  | 0.35  |
| Q9QUI0_RF Rhox     | Transformii K.QVELALWDTAGQEDYDR.L                      | 3.15   | 9.33   | 0.34  | 2.96  |
| P84096_RF Rhog     | Rho-relatec K.EYIPTFDNYSAGSVDGRT                       | 1.69   | 3.79   | 0.45  | 2.24  |
| P84096_RF Rhog     | Rho-relatec R.LLHEQGAQIPITQQGQALAK#.Q                  | 16.07  | 15.51  | 1.76  | 0.57  |
| Q3TIR3_Rf Ric8a    | Synembryn K.LLVSVLEQGLSPK#.H                           | 14.62  | 3.17   | 4.61  | 0.22  |
| Q6PR54_Rf Rf1      | Telomere-a R.FASDLIEPVTLDTPLSK#.N                      | 13.68  | 7.48   | 1.83  | 0.55  |
| Q6PR54_Rf Rf1      | Telomere-a R.AQM*STEIDSR.V                             | 29.52  | 4.85   | 6.09  | 0.16  |
| Q6PR54_Rf Rf1      | Telomere-a R.FASDLIEPVTLDTPLSK#.N                      | 9.44   | 10.71  | 0.88  | 1.13  |
| Q6PR54_Rf Rf1      | Telomere-a K.SPQRSSDWSR.K                              | 17.11  | 16.99  | 1.01  | 0.99  |
| Q6PR54_Rf Rf1      | Telomere-a R.SQEDEISPVNK#.I                            | 10.92  | 12.14  | 0.90  | 1.11  |
| Q6PR54_Rf Rf1      | Telomere-a R.FASDLIEPVTLDTPLSK#.N                      | 13.22  | 15.26  | 0.87  | 1.15  |
| Q6PR54_Rf Rf1      | Telomere-a K.FDGSETRPFPSPPLNNSISVTVR.N                 | 6.01   | 5.63   | 1.07  | 0.94  |
| Q6PR54_Rf Rf1      | Telomere-a R.GATALEM*GM*PPLLQK#.Q                      | 7.87   | 7.50   | 1.05  | 0.95  |
| Q6PR54_Rf Rf1      | Telomere-a R.GLEEIPFIDISEK#.A                          | 16.14  | 16.24  | 0.99  | 1.01  |
| Q6PR54_Rf Rf1      | Telomere-a K.I.LLLEPLGLENVEM*M*DESSEPEYSESTENSQLNVK#.I | 7.26   | 5.44   | 1.33  | 0.75  |
| Q6PR54_Rf Rf1      | Telomere-a K.I.VLSEPLEHPLISSPFFSK#.Y                   | 34.39  | 29.97  | 1.15  | 0.87  |
| Q6PR54_Rf Rf1      | Telomere-a R.LIEQAPVQM*GEESVR.W                        | 1.92   | 6.11   | 0.31  | 3.18  |
| Q6PR54_Rf Rf1      | Telomere-a K.LTDESPIQENLEK#.G                          | 13.64  | 16.84  | 0.81  | 1.23  |
| Q6PR54_Rf Rf1      | Telomere-a R.NDAFVAADSEK#.S                            | 12.80  | 8.13   | 1.57  | 0.64  |
| Q6PR54_Rf Rf1      | Telomere-a K.SGSEVTLTKL#.S                             | 29.95  | 23.19  | 1.29  | 0.77  |
| Q6PR54_Rf Rf1      | Telomere-a R.SQEDEISPVNK#.I                            | 13.70  | 15.37  | 0.89  | 1.12  |
| Q6PR54_Rf Rf1      | Telomere-a K.TIGDLSTLASEK#.T                           | 8.88   | 10.21  | 0.87  | 1.15  |
| Q9JJC6_Rf Rf1p1    | RILP-like pr R.DDGYEQGQALQHL.-                         | 10.34  | 10.34  | 1.00  | 1.00  |
| Q9JJC6_Rf Rf1p1    | RILP-like pr K.VELADLQTK#.E                            | 21.67  | 11.40  | 1.90  | 0.53  |
| Q9JJC6_Rf Rf1p1    | RILP-like pr K.VFLLEELQYK#.S                           | 14.23  | 7.78   | 1.83  | 0.55  |
| Q9JJC6_Rf Rf1p1    | RILP-like pr R.TSQPESGIR#@.L                           | 77.59  | 1.81   | 42.83 | 0.02  |
| Q99LE1_Rf Rf1p2    | RILP-like pr K.AGVSQACVNLGPKD#.M                       | 8.86   | 8.30   | 1.07  | 0.94  |
| Q921Q7_Rf Rin1     | Ras and Rat R.VTQPDFAFLYDK#.D                          | 9.95   | 3.78   | 2.63  | 0.38  |
| Q35730_Rf Ring1    | E3 ubiquiti R.GVAGGEGPEEPALPSLEGVSEK#.Q                | 5.51   | 4.95   | 1.11  | 0.90  |
| Q35730_Rf Ring1    | E3 ubiquiti R.GVAGGEGPEEPALPSLEGVSEK#.Q                | 5.71   | 7.63   | 0.75  | 1.34  |
| Q35730_Rf Ring1    | E3 ubiquiti R.SLRPDPNFDALSK.I                          | 10.56  | 32.26  | 0.33  | 3.05  |
| Q922Q2_Rf Riok1    | Serine/thre K.LNVDTSVTNK#.V                            | 25.14  | 7.83   | 3.21  | 0.31  |
| Q9CQ55_Rf Riok2    | Serine/thre K.ESDIYIVANEAGQQLALK#.L                    | 17.22  | 5.07   | 3.40  | 0.29  |
| Q9CQ55_Rf Riok2    | Serine/thre R.LTNAGYDYALK#.T                           | 19.16  | 9.14   | 2.10  | 0.48  |
| Q9CQ55_Rf Riok2    | Serine/thre R.QVVEVGNQM*GVGK#.E                        | 12.20  | 5.45   | 2.24  | 0.45  |
| Q9CQ55_Rf Riok2    | Serine/thre R.SVTEFSESR.R                              | 3.11   | 9.38   | 0.33  | 3.02  |
| Q60855_Rf Ripk1    | Receptor-ir R.AEYNEVLEEGK#.M                           | 8.40   | 5.70   | 1.47  | 0.68  |
| Q60855_Rf Ripk1    | Receptor-ir R.AEYNEVLEEGK#.M                           | 8.46   | 5.76   | 1.47  | 0.68  |
| Q9QZL0_Rf Ripk3    | Receptor-ir K.DK#DAVAEVEK#.H                           | 18.97  | 13.02  | 1.46  | 0.69  |
| Q9CWY8_Rf Rnaseh2a | Ribonuclea R.FSWTAQAILEK#.E                            | 18.91  | 3.40   | 5.57  | 0.18  |
| Q9CWY8_Rf Rnaseh2a | Ribonuclea R.LADLEALK#.V                               | 21.60  | 2.21   | 9.76  | 0.10  |
| Q9CWY8_Rf Rnaseh2a | Ribonuclea R.LQQHFGIEVTYK#.A                           | 18.18  | 6.16   | 2.95  | 0.34  |
| Q9CQE0_Rf Rnf138   | E3 ubiquiti R.ALDLENIM*MR.R                            | 2.68   | 7.57   | 0.35  | 2.82  |
| Q9CQE0_Rf Rnf138   | E3 ubiquiti R.ALDLENIM*MR.R                            | 18.52  | 48.69  | 0.38  | 2.63  |
| Q9CQJ4_Rf Rnf2     | E3 ubiquiti K.HNNQALHSIEGLK#.I                         | 25.78  | 23.25  | 1.11  | 0.90  |
| Q9CQJ4_Rf Rnf2     | E3 ubiquiti R.SK#GEGSNQM*NLDTASEK#.Q                   | 10.46  | 5.53   | 1.89  | 0.53  |
| Q9CQJ4_Rf Rnf2     | E3 ubiquiti R.TPQEAITDGLIIVVSPR.S                      | 6.25   | 18.33  | 0.34  | 2.93  |
| Q5DTM8_B Rnf20     | E3 ubiquiti R.AVEEQIYLVK#.K                            | 24.37  | 25.37  | 0.96  | 1.04  |
| Q5DTM8_B Rnf20     | E3 ubiquiti K.LGGVSTEELEDIR.K                          | 6.23   | 21.36  | 0.29  | 3.43  |
| Q5DTM8_B Rnf20     | E3 ubiquiti K.LHDFQDEIVENSVTK.E                        | 12.87  | 15.83  | 0.81  | 1.23  |
| Q5DTM8_B Rnf20     | E3 ubiquiti K.LLKEEKEELADQVLT.K.T                      | 12.09  | 12.36  | 0.98  | 1.02  |
| Q5DTM8_B Rnf20     | E3 ubiquiti R.LQELTDLLQEK#.H                           | 22.05  | 16.71  | 1.32  | 0.76  |
| Q5DTM8_B Rnf20     | E3 ubiquiti K.LRTEVIQLEDTLAQVR.K                       | 1.25   | 14.66  | 0.09  | 11.76 |
| Q5DTM8_B Rnf20     | E3 ubiquiti R.SG5ALLQSQSSTEDPKDETELKQDSEDLATHSSALK.A   | 4.27   | 5.93   | 0.72  | 1.39  |
| Q5DTM8_B Rnf20     | E3 ubiquiti K.TAVEDSGTTVETIK#.L                        | 22.80  | 19.35  | 1.18  | 0.85  |
| Q5DTM8_B Rnf20     | E3 ubiquiti R.TEVIQLEDTLAQVR.K                         | 3.29   | 12.75  | 0.26  | 3.87  |
| E9Q555_Rf Rnf213   | E3 ubiquiti K.DLNITSK#PSVDK#.G                         | 17.20  | 10.59  | 1.62  | 0.62  |
| E9Q555_Rf Rnf213   | E3 ubiquiti K.DNIQALSIFTASPEAR.Y                       | 2.01   | 13.47  | 0.15  | 6.71  |
| E9Q555_Rf Rnf213   | E3 ubiquiti K.FGTLLSAVITK#.S                           | 38.87  | 17.77  | 2.19  | 0.46  |
| E9Q555_Rf Rnf213   | E3 ubiquiti K.FPEILALQR.D                              | 7.94   | 33.48  | 0.24  | 4.22  |
| E9Q555_Rf Rnf213   | E3 ubiquiti K.FSEVFSNM*QR.L                            | 2.32   | 5.09   | 0.46  | 2.19  |
| E9Q555_Rf Rnf213   | E3 ubiquiti K.GLPDGGPALSFAFK#.G                        | 25.56  | 20.16  | 1.27  | 0.79  |
| E9Q555_Rf Rnf213   | E3 ubiquiti R.GM*EFVQSFQK.Q                            | 14.04  | 19.00  | 0.74  | 1.35  |
| E9Q555_Rf Rnf213   | E3 ubiquiti R.IASVEYLQEVAR.V                           | 5.25   | 21.60  | 0.24  | 4.12  |
| E9Q555_Rf Rnf213   | E3 ubiquiti R.ILTIHPQLVSLSQAAEK#.H                     | 27.28  | 19.19  | 1.42  | 0.70  |
| E9Q555_Rf Rnf213   | E3 ubiquiti K.QFPVPLINR.L                              | 5.21   | 11.71  | 0.45  | 2.25  |
| E9Q555_Rf Rnf213   | E3 ubiquiti K.SLSPFDVVDQTPVIR.S                        | 2.34   | 10.67  | 0.22  | 4.55  |
| E9Q555_Rf Rnf213   | E3 ubiquiti R.SLVDNTPLLPK#.I                           | 29.56  | 23.53  | 1.26  | 0.80  |

|                  |                                                   |         |        |      |       |
|------------------|---------------------------------------------------|---------|--------|------|-------|
| E9Q555_Rf Rnf213 | E3 ubiquiti R.SPGHLYLVEIPQGLSVQPK.R               | 19.38   | 11.69  | 1.66 | 0.60  |
| E9Q555_Rf Rnf213 | E3 ubiquiti R.TDAQSNLAPSDLAEVK#.D                 | 13.52   | 11.70  | 1.16 | 0.87  |
| E9Q555_Rf Rnf213 | E3 ubiquiti K.TQQAAPQQAAPPTSANPR.D                | 3.67    | 8.31   | 0.44 | 2.26  |
| E9Q555_Rf Rnf213 | E3 ubiquiti R.TQTGHVLGSSQSSGVAEVS.DR.G            | 6.72    | 19.78  | 0.34 | 2.94  |
| E9Q555_Rf Rnf213 | E3 ubiquiti K.VGFVGSINWALDPAK#.M                  | 17.54   | 14.96  | 1.17 | 0.85  |
| E9Q555_Rf Rnf213 | E3 ubiquiti K.VPLVPQAPLPNIQALQSHYQVPK#.R          | 16.17   | 10.00  | 1.62 | 0.62  |
| E9Q555_Rf Rnf213 | E3 ubiquiti R.YKEEVSTVELIK.Q                      | 12.96   | 6.69   | 1.94 | 0.52  |
| E9Q555_Rf Rnf213 | E3 ubiquiti K.YTAINEINK#.T                        | 19.05   | 12.41  | 1.54 | 0.65  |
| Q3U319_Bf Rnf40  | E3 ubiquiti R.EGPSLGGPPAAASTLSR.A                 | 3.07    | 13.84  | 0.22 | 4.51  |
| Q3U319_Bf Rnf40  | E3 ubiquiti R.ISLEYSLODK.V                        | 10.56   | 10.70  | 0.99 | 1.01  |
| Q3U319_Bf Rnf40  | E3 ubiquiti R.K#VEVYADADEILQEEIK#EYK#.A           | 6.69    | 7.84   | 0.85 | 1.17  |
| Q3U319_Bf Rnf40  | E3 ubiquiti K.LLREEKDELGEQVLGLK.S                 | 6.18    | 11.37  | 0.54 | 1.84  |
| O55236_M Rngtt   | mRNA-capr K.GVTQVTTQPK#.L                         | 12.32   | 5.57   | 2.21 | 0.45  |
| O55236_M Rngtt   | mRNA-capr K.LGAIFFLEGITVK#.G                      | 14.24   | 5.85   | 2.43 | 0.41  |
| Q99M28_R Rnps1   | RNA-bindin K.DHIM*EIFSTYK#.I                      | 29.79   | 27.09  | 1.10 | 0.91  |
| Q99M28_R Rnps1   | RNA-bindin K.DHIMEIFSTYK#.I                       | 33.81   | 35.56  | 0.95 | 1.05  |
| Q99M28_R Rnps1   | RNA-bindin K.GYAYEFENPDEAEK#.A                    | 123.13  | 120.22 | 1.02 | 0.98  |
| Q99M28_R Rnps1   | RNA-bindin K.HM*DDGGQDGGQITATAVLAPWPRPPR.R        | 2.87    | 41.98  | 0.07 | 14.65 |
| Q99M28_R Rnps1   | RNA-bindin K.HMDGGQDGGQITATAVLAPWPRPPR.R          | 2.01    | 6.85   | 0.29 | 3.41  |
| Q99M28_R Rnps1   | RNA-bindin K.MIDM*PVER.M                          | 7.25    | 27.47  | 0.26 | 3.79  |
| Q99M28_R Rnps1   | RNA-bindin K.M*IDMPPVER.M                         | 5.86    | 27.89  | 0.21 | 4.76  |
| Q99M28_R Rnps1   | RNA-bindin K.M*IDM*PVER.M                         | 14.17   | 67.12  | 0.21 | 4.74  |
| Q99M28_R Rnps1   | RNA-bindin R.M*LPMPMWR.R                          | 6.09    | 27.61  | 0.22 | 4.53  |
| Q99M28_R Rnps1   | RNA-bindin R.NVTKDHIM*EIFSTYK#.I                  | 19.88   | 12.99  | 1.53 | 0.65  |
| Q99M28_R Rnps1   | RNA-bindin R.NVTKDHIMEIFSTYK#.I                   | 14.08   | 9.36   | 1.50 | 0.67  |
| Q99M28_R Rnps1   | RNA-bindin K.GYAYEFENPDEAEK#.A                    | 24.77   | 26.36  | 0.94 | 1.06  |
| P70335_RC Rock1  | Rho-associ R.LLEFELQTLK#.Q                        | 7.34    | 10.24  | 0.72 | 1.39  |
| P70335_RC Rock1  | Rho-associ R.ELQDQLEAEQVSTLYK#.T                  | 5.95    | 3.05   | 1.95 | 0.51  |
| P70335_RC Rock1  | Rho-associ R.GAFGEVQLVR.H                         | 7.79    | 11.59  | 0.67 | 1.49  |
| P70335_RC Rock1  | Rho-associ R.LLEFELQTLK#.Q                        | 11.94   | 4.65   | 2.57 | 0.39  |
| P70336_RC Rock2  | Rho-associ K.EQSNPYM*VLIDID.K                     | 3.31    | 1.82   | 1.82 | 0.55  |
| P70336_RC Rock2  | Rho-associ K.NLLLANSTEEQQ#.W                      | 7.10    | 3.21   | 2.22 | 0.45  |
| Q8VEE4_RF Rpa1   | Replication R.ATAFNEQVDK#.F                       | 45.23   | 25.03  | 1.81 | 0.55  |
| Q8VEE4_RF Rpa1   | Replication R.ATAFNEQVDK#FFPLIEVNK#.V             | 30.16   | 19.64  | 1.54 | 0.65  |
| Q8VEE4_RF Rpa1   | Replication K.AYGASK#PFGK#PAGTGLLPQSGTQSK#.V      | 6.64    | 5.46   | 1.22 | 0.82  |
| Q8VEE4_RF Rpa1   | Replication K.EKNEQAEFEVQANFR.S                   | 7.04    | 12.31  | 0.57 | 1.75  |
| Q8VEE4_RF Rpa1   | Replication K.LFSLVDESSEIR.A                      | 8.96    | 22.70  | 0.39 | 2.53  |
| Q8VEE4_RF Rpa1   | Replication R.NIYLM*DM*SGK#.V                     | 10.21   | 6.09   | 1.68 | 0.60  |
| Q8VEE4_RF Rpa1   | Replication K.SENLQGDKADYFSTVAVVFLR.K             | 6.01    | 12.90  | 0.47 | 2.15  |
| Q8VEE4_RF Rpa1   | Replication R.SLSVLSSTVIVNPDIPAYK#.L              | 27.14   | 13.02  | 2.08 | 0.48  |
| Q8VEE4_RF Rpa1   | Replication R.VKLETYNDESR.I                       | 4.47    | 12.74  | 0.35 | 2.85  |
| Q8VEE4_RF Rpa1   | Replication K.VVPIASLTPYQSK#.W                    | 48.51   | 32.40  | 1.50 | 0.67  |
| Q8VEE4_RF Rpa1   | Replication K.VVLMDLVEM*#K.S                      | 6.23    | 4.29   | 1.45 | 0.69  |
| Q8VEE4_RF Rpa1   | Replication K.VVLMDLVEMK#.S                       | 7.64    | 4.94   | 1.55 | 0.65  |
| Q8VEE4_RF Rpa1   | Replication K.LFSLVDESSEIRATAFNEQVDK#FFPLIEVNK#.V | 2.56    | 5.36   | 0.48 | 2.09  |
| Q8VEE4_RF Rpa1   | Replication R.ATAFNEQVDK#.F                       | 24.00   | 11.86  | 2.02 | 0.49  |
| Q8VEE4_RF Rpa1   | Replication R.ATAFNEQVDK#FFPLIEVNK#.V             | 47.68   | 32.81  | 1.45 | 0.69  |
| Q8VEE4_RF Rpa1   | Replication K.LFSLVDESSEIR.A                      | 7.73    | 22.25  | 0.35 | 2.88  |
| Q8VEE4_RF Rpa1   | Replication K.NEQAEFEVQANFR.S                     | 2.63    | 4.57   | 0.57 | 1.74  |
| Q8VEE4_RF Rpa1   | Replication R.SGGAGGNTNWK#.T                      | 17.00   | 7.58   | 2.24 | 0.45  |
| Q8VEE4_RF Rpa1   | Replication R.SLSVLSSTVIVNPDIPAYK#.L              | 21.82   | 12.43  | 1.76 | 0.57  |
| Q8VEE4_RF Rpa1   | Replication K.SYEDSIK#.I                          | 23.38   | 9.15   | 2.56 | 0.39  |
| Q8VEE4_RF Rpa1   | Replication R.VKLETYNDESR.I                       | 4.03    | 10.76  | 0.37 | 2.67  |
| Q8VEE4_RF Rpa1   | Replication K.VVPIASLTPYQSK#.W                    | 64.68   | 28.03  | 2.31 | 0.43  |
| Q8VEE4_RF Rpa1   | Replication R.ATAFNEQVDK#FFPLIEVNK#.V             | 21.97   | 10.90  | 2.02 | 0.50  |
| Q8VEE4_RF Rpa1   | Replication K.LFSLVDESSEIR.A                      | 5.07    | 12.24  | 0.41 | 2.41  |
| Q8VEE4_RF Rpa1   | Replication R.SLSVLSSTVIVNPDIPAYK#.L              | 7.13    | 4.53   | 1.57 | 0.64  |
| Q8VEE4_RF Rpa1   | Replication R.SLSVLSSTVIVNPDIPAYK#.L              | 4.71    | 3.08   | 1.53 | 0.65  |
| Q8VEE4_RF Rpa1   | Replication K.VVPIASLTPYQSK#.W                    | 13.35   | 5.79   | 2.30 | 0.43  |
| Q62193_Rf Rpa2   | Replication K.APTNIVYK#.I                         | 131.66  | 53.76  | 2.45 | 0.41  |
| Q62193_Rf Rpa2   | Replication K.IDDM*TAPP#DVR.Q                     | 8.83    | 17.41  | 0.51 | 1.97  |
| Q62193_Rf Rpa2   | Replication R.IGDVEISQVTVGIIR.H                   | 7.83    | 23.83  | 0.33 | 3.04  |
| Q62193_Rf Rpa2   | Replication R.QWVDDTADSGENAVVPPETVYK#.V           | 6.39    | 2.67   | 2.39 | 0.42  |
| Q62193_Rf Rpa2   | Replication R.SLQOHMPVPSIK#.Q                     | 6.52    | 4.35   | 1.50 | 0.67  |
| Q62193_Rf Rpa2   | Replication K.IDDM*TAPP#DVR.Q                     | 2.16    | 3.80   | 0.57 | 1.76  |
| Q62193_Rf Rpa2   | Replication R.QWVDDTADSGENAVVPPETVYK#.V           | 3.41    | 1.64   | 2.09 | 0.48  |
| Q9CQ71_Rf Rpa3   | Replication R.FDLELVNVAEK#.I                      | 25.41   | 11.19  | 2.27 | 0.44  |
| Q9CQ71_Rf Rpa3   | Replication K.IINELPQFFVGLPQHE.-                  | 131.10  | 131.10 | 1.00 | 1.00  |
| Q9CQ71_Rf Rpa3   | Replication K.M*FILSDGEGK#.N                      | 44.42   | 20.75  | 2.14 | 0.47  |
| Q9D706_Rf Rpa3   | RNA polym K.AVELQLQVK#.H                          | 14.80   | 9.99   | 1.48 | 0.68  |
| Q9D706_Rf Rpa3   | RNA polym R.EKPAFLFEVLER.L                        | 5.68    | 12.13  | 0.47 | 2.14  |
| Q9D706_Rf Rpa3   | RNA polym K.IEAVSDTSAPQAQGVK#.Q                   | 38.32   | 19.81  | 1.93 | 0.52  |
| Q9D706_Rf Rpa3   | RNA polym K.LLHDFVIER.E                           | 4.73    | 10.98  | 0.43 | 2.32  |
| Q9D706_Rf Rpa3   | RNA polym K.INQALTSK#.E                           | 14.70   | 8.99   | 1.64 | 0.61  |
| Q9D706_Rf Rpa3   | RNA polym K.NLDPDFVQGIK#.I                        | 22.02   | 15.34  | 1.44 | 0.70  |
| Q9D706_Rf Rpa3   | RNA polym K.SDLK#EDSVEELK#.R                      | 16.59   | 8.63   | 1.92 | 0.52  |
| Q6ZWV3_R Rpl10   | 60S ribosor K.FNADEFEDM*VAEK#.R                   | 20.84   | 6.28   | 3.32 | 0.30  |
| Q6ZWV3_R Rpl10   | 60S ribosor K.FNADEFEDMVAEK#.R                    | 13.43   | 9.29   | 1.45 | 0.69  |
| Q6ZWV3_R Rpl10   | 60S ribosor K.DGFHIR.V                            | 30.52   | 53.33  | 0.57 | 1.75  |
| Q6ZWV3_R Rpl10   | 60S ribosor K.EHVIEALR.R                          | 35.44   | 55.08  | 0.64 | 1.55  |
| Q6ZWV3_R Rpl10   | 60S ribosor K.FNADEFEDM*VAEK#.R                   | 200.43  | 81.96  | 2.45 | 0.41  |
| Q6ZWV3_R Rpl10   | 60S ribosor K.FNADEFEDMVAEK#.R                    | 112.23  | 48.35  | 2.32 | 0.43  |
| Q6ZWV3_R Rpl10   | 60S ribosor K.FNADEFEDM*VAEK#.R                   | 62.16   | 97.16  | 0.64 | 1.56  |
| Q6ZWV3_R Rpl10   | 60S ribosor K.FNADEFEDM*VAEK#.R                   | 9.11    | 11.61  | 0.78 | 1.27  |
| Q6ZWV3_R Rpl10   | 60S ribosor K.FNADEFEDMVAEK#.R                    | 66.57   | 96.79  | 0.69 | 1.45  |
| Q6ZWV3_R Rpl10   | 60S ribosor R.GAFGKPGQTVAR.V                      | 70.70   | 125.55 | 0.56 | 1.78  |
| Q6ZWV3_R Rpl10   | 60S ribosor R.IFDLGR.K                            | 234.07  | 411.56 | 0.57 | 1.76  |
| Q6ZWV3_R Rpl10   | 60S ribosor K.K#N#VFTK#.F                         | 59.18   | 19.18  | 3.09 | 0.32  |
| Q6ZWV3_R Rpl10   | 60S ribosor K.FNADEFEDM*VAEK#.R                   | 14.04   | 6.94   | 2.02 | 0.49  |
| Q6ZWV3_R Rpl10   | 60S ribosor K.FNADEFEDM*VAEK#.R                   | 21.56   | 7.24   | 2.98 | 0.34  |
| Q6ZWV3_R Rpl10   | 60S ribosor K.FNADEFEDMVAEK#.R                    | 13.59   | 4.38   | 3.10 | 0.32  |
| P53026_Rf Rpl10a | 60S ribosor K.AGK#PSSLTHNENM*VAK#.V               | 18.98   | 9.79   | 3.98 | 0.25  |
| P53026_Rf Rpl10a | 60S ribosor R.DTYEAVR.E                           | 33.23   | 58.75  | 0.57 | 1.77  |
| P53026_Rf Rpl10a | 60S ribosor K.FPSSLTHNENM*VAK#.V                  | 11.06   | 5.18   | 2.14 | 0.47  |
| P53026_Rf Rpl10a | 60S ribosor R.I.LGPGLNK#.A                        | 213.27  | 76.61  | 2.78 | 0.36  |
| P53026_Rf Rpl10a | 60S ribosor K.K#YDAFLASESLIK#.Q                   | 100.60  | 36.76  | 2.74 | 0.37  |
| P53026_Rf Rpl10a | 60S ribosor K.KYDAFLASESLIK.Q                     | 71.83   | 28.66  | 2.51 | 0.40  |
| P53026_Rf Rpl10a | 60S ribosor K.AGK#PSSLTHNENM*VAK.V                | 331.29  | 96.20  | 3.44 | 0.29  |
| P53026_Rf Rpl10a | 60S ribosor K.AGK#PSSLTHNENM*VAK#.V               | 79.17   | 23.57  | 3.36 | 0.30  |
| P53026_Rf Rpl10a | 60S ribosor R.DTYEAVR.E                           | 267.80  | 384.35 | 0.70 | 1.44  |
| P53026_Rf Rpl10a | 60S ribosor K.FLETVELQSLK#.N                      | 30.66   | 11.18  | 2.74 | 0.36  |
| P53026_Rf Rpl10a | 60S ribosor R.I.LGPGLNK#.A                        | 1438.58 | 533.44 | 2.70 | 0.37  |
| P53026_Rf Rpl10a | 60S ribosor K.K#YDAFLASESLIK#.Q                   | 248.40  | 84.87  | 2.93 | 0.34  |

|                  |                                            |         |        |      |      |
|------------------|--------------------------------------------|---------|--------|------|------|
| P53026_RL Rpl10a | 60S ribosor K.KYDAFLASESLIKQIPR.I          | 4.23    | 6.37   | 0.66 | 1.50 |
| P53026_RL Rpl10a | 60S ribosor K.YDAFLASESLIK#.Q              | 323.24  | 113.33 | 2.85 | 0.35 |
| P53026_RL Rpl10a | 60S ribosor R.DTLYEAVR.E                   | 37.02   | 53.41  | 0.69 | 1.44 |
| P53026_RL Rpl10a | 60S ribosor R.I.LPGPLNK#.A                 | 236.71  | 89.72  | 2.64 | 0.38 |
| P53026_RL Rpl10a | 60S ribosor K.K#YDAFLASESLIK#.Q            | 66.83   | 20.55  | 3.25 | 0.31 |
| P53026_RL Rpl10a | 60S ribosor K.YDAFLASESLIK#.Q              | 15.27   | 4.48   | 3.41 | 0.29 |
| P53026_RL Rpl10a | 60S ribosor K.AGK#PSSLTHNENM*VAK#.V        | 44.19   | 11.45  | 3.86 | 0.26 |
| P53026_RL Rpl10a | 60S ribosor R.I.LGQGLNK#.A                 | 325.92  | 109.64 | 2.97 | 0.34 |
| P53026_RL Rpl10a | 60S ribosor K.K#YDAFLASESLIK#.Q            | 116.39  | 37.07  | 3.14 | 0.32 |
| P53026_RL Rpl10a | 60S ribosor K.KYDAFLASESLIK#.Q             | 54.46   | 23.02  | 2.37 | 0.42 |
| P53026_RL Rpl10a | 60S ribosor K.YDAFLASESLIK#.Q              | 29.55   | 11.42  | 2.59 | 0.39 |
| Q9CXW4_R Rpl11   | 60S ribosor K.AEILEK#.G                    | 34.93   | 88.19  | 4.00 | 2.52 |
| Q9CXW4_R Rpl11   | 60S ribosor K.VLEQLTGQTPVFSK#.A            | 34.26   | 16.36  | 2.09 | 0.48 |
| Q9CXW4_R Rpl11   | 60S ribosor R.AAK#VLEQLTGQTPVFSK#.A        | 6.00    | 3.53   | 1.70 | 0.59 |
| Q9CXW4_R Rpl11   | 60S ribosor K.AEILEK#.G                    | 884.04  | 365.94 | 2.42 | 0.41 |
| Q9CXW4_R Rpl11   | 60S ribosor R.GAK#AEILEK#.G                | 154.92  | 62.84  | 2.47 | 0.41 |
| Q9CXW4_R Rpl11   | 60S ribosor R.KNNFSDTGNFGFIQEHIDLGIK.Y     | 22.74   | 9.28   | 2.45 | 0.41 |
| Q9CXW4_R Rpl11   | 60S ribosor K.NNFSDTGNFGFIQEHIDLGIK#.Y     | 115.08  | 38.27  | 3.01 | 0.33 |
| Q9CXW4_R Rpl11   | 60S ribosor K.VLEQLTGQTPVFSK#.A            | 1908.83 | 662.75 | 2.88 | 0.35 |
| Q9CXW4_R Rpl11   | 60S ribosor K.VREYELR.K                    | 11.18   | 54.90  | 0.20 | 4.91 |
| Q9CXW4_R Rpl11   | 60S ribosor K.YDGIILPGK#.-                 | 1722.17 | 670.35 | 2.57 | 0.39 |
| Q9CXW4_R Rpl11   | 60S ribosor K.VLEQLTGQTPVFSK#.A            | 36.62   | 15.56  | 2.35 | 0.42 |
| Q9CXW4_R Rpl11   | 60S ribosor K.YDGIILPGK#.-                 | 48.20   | 22.27  | 2.16 | 0.46 |
| Q9CXW4_R Rpl11   | 60S ribosor K.VLEQLTGQTPVFSK#.A            | 55.96   | 20.28  | 2.76 | 0.36 |
| Q9CXW4_R Rpl11   | 60S ribosor K.YDGIILPGK#.-                 | 39.99   | 13.07  | 3.06 | 0.33 |
| P35979_RL Rpl12  | 60S ribosor K.HSGNITFDEIVNIAR.Q            | 13.73   | 19.28  | 0.71 | 1.40 |
| P35979_RL Rpl12  | 60S ribosor R.QAQIEVPSASALIHK#.A           | 40.36   | 13.62  | 2.96 | 0.34 |
| P35979_RL Rpl12  | 60S ribosor R.ELSGTIK#.E                   | 346.92  | 128.83 | 2.69 | 0.37 |
| P35979_RL Rpl12  | 60S ribosor K.HSGNITFDEIVNIAR.Q            | 314.35  | 542.10 | 0.58 | 1.72 |
| P35979_RL Rpl12  | 60S ribosor K.I.GPLGLSPK#.K                | 1516.87 | 671.91 | 2.26 | 0.44 |
| P35979_RL Rpl12  | 60S ribosor K.K#HGDJIAK#.A                 | 486.58  | 210.73 | 2.31 | 0.43 |
| P35979_RL Rpl12  | 60S ribosor R.QAQIEVPSASALIHK#.A           | 1071.57 | 360.05 | 2.98 | 0.34 |
| P35979_RL Rpl12  | 60S ribosor K.VGDDIAK#.A                   | 113.78  | 55.64  | 2.05 | 0.49 |
| P35979_RL Rpl12  | 60S ribosor K.HSGNITFDEIVNIAR.Q            | 7.42    | 14.71  | 0.50 | 1.98 |
| P35979_RL Rpl12  | 60S ribosor R.QAQIEVPSASALIHK#.A           | 30.54   | 8.99   | 3.40 | 0.29 |
| P35979_RL Rpl12  | 60S ribosor R.QAQIEVPSASALIHK#.A           | 19.07   | 10.40  | 1.83 | 0.55 |
| P47963_RL Rpl13  | 60S ribosor R.AKEAAEQDVEK#.K               | 86.94   | 35.29  | 2.46 | 0.41 |
| P47963_RL Rpl13  | 60S ribosor K.EAAEQDVEK#.K                 | 109.16  | 32.95  | 3.31 | 0.30 |
| P47963_RL Rpl13  | 60S ribosor R.GFSLLELR.V                   | 104.51  | 126.26 | 0.83 | 1.21 |
| P47963_RL Rpl13  | 60S ribosor K.K.GDSSAEELK.L                | 122.23  | 34.84  | 3.51 | 0.29 |
| P47963_RL Rpl13  | 60S ribosor K.LATQLTGPVM*PIR.N             | 78.73   | 103.63 | 0.76 | 1.32 |
| P47963_RL Rpl13  | 60S ribosor K.LATQLTGPVMPIR.N              | 56.78   | 67.60  | 0.84 | 1.19 |
| P47963_RL Rpl13  | 60S ribosor K.STESLQANVOR.L                | 176.27  | 197.38 | 0.89 | 1.12 |
| P47963_RL Rpl13  | 60S ribosor R.TIGISVDPR.R                  | 50.56   | 57.71  | 0.88 | 1.14 |
| P47963_RL Rpl13  | 60S ribosor R.VDTWFNQPAR.K                 | 62.40   | 75.97  | 0.82 | 1.22 |
| P47963_RL Rpl13  | 60S ribosor R.VITEEEK#.N                   | 120.95  | 41.43  | 2.92 | 0.34 |
| P47963_RL Rpl13  | 60S ribosor R.AK#EAAEQDVEK#.K              | 37.64   | 11.98  | 3.14 | 0.32 |
| P47963_RL Rpl13  | 60S ribosor K.EAAEQDVEK#.K                 | 50.28   | 14.11  | 3.56 | 0.28 |
| P47963_RL Rpl13  | 60S ribosor R.GFSLLELR.V                   | 164.16  | 196.23 | 0.84 | 1.20 |
| P47963_RL Rpl13  | 60S ribosor K.K.GDSSAEELK.L                | 45.71   | 14.80  | 3.09 | 0.32 |
| P47963_RL Rpl13  | 60S ribosor K.K.GDSSAEELK.LATQLTGPVM*PIR.N | 49.49   | 46.91  | 1.05 | 0.95 |
| P47963_RL Rpl13  | 60S ribosor K.LATQLTGPVM*PIR.N             | 126.41  | 165.64 | 0.76 | 1.31 |
| P47963_RL Rpl13  | 60S ribosor K.LATQLTGPVMPIR.N              | 39.16   | 57.23  | 0.68 | 1.46 |
| P47963_RL Rpl13  | 60S ribosor K.LILFPR.K                     | 125.59  | 147.10 | 0.85 | 1.17 |
| P47963_RL Rpl13  | 60S ribosor R.NKSTESLQANVOR.L              | 3.94    | 3.31   | 1.19 | 0.84 |
| P47963_RL Rpl13  | 60S ribosor K.STESLQANVOR.L                | 211.71  | 256.98 | 0.82 | 1.21 |
| P47963_RL Rpl13  | 60S ribosor R.TIGISVDPR.R                  | 123.40  | 173.96 | 0.71 | 1.41 |
| P47963_RL Rpl13  | 60S ribosor R.VDTWFNQPAR.K                 | 122.33  | 163.02 | 0.75 | 1.33 |
| P47963_RL Rpl13  | 60S ribosor R.VITEEEK#.N                   | 75.89   | 20.94  | 3.62 | 0.28 |
| P47963_RL Rpl13  | 60S ribosor R.VITEEEK#NFK#.A               | 222.83  | 52.32  | 4.26 | 0.23 |
| P47963_RL Rpl13  | 60S ribosor R.AK#EAAEQDVEK#.K              | 3.97    | 3.26   | 1.22 | 0.82 |
| P19253_RL Rpl13a | 60S ribosor R.LAHEVGW#K.Y                  | 54.52   | 14.58  | 3.74 | 0.27 |
| P19253_RL Rpl13a | 60S ribosor R.M*VVPAALK#.V                 | 78.56   | 25.11  | 3.13 | 0.32 |
| P19253_RL Rpl13a | 60S ribosor R.MVVPAALK#.V                  | 43.22   | 12.65  | 3.42 | 0.29 |
| P19253_RL Rpl13a | 60S ribosor K.VLDGIPPPYDK#.K               | 25.16   | 9.37   | 2.69 | 0.37 |
| P19253_RL Rpl13a | 60S ribosor K.YQAVTATLEEK#.R               | 216.67  | 48.55  | 4.46 | 0.22 |
| P19253_RL Rpl13a | 60S ribosor R.LAHEVGW#K.Y                  | 78.95   | 18.33  | 4.31 | 0.23 |
| P19253_RL Rpl13a | 60S ribosor R.M*VVPAALK#.V                 | 218.41  | 68.27  | 3.20 | 0.31 |
| P19253_RL Rpl13a | 60S ribosor R.MVVPAALK#.V                  | 68.03   | 14.31  | 4.76 | 0.21 |
| P19253_RL Rpl13a | 60S ribosor K.VLDGIPPPYDK#.K               | 75.72   | 22.78  | 3.32 | 0.30 |
| P19253_RL Rpl13a | 60S ribosor K.YLAFLR.K                     | 32.58   | 36.19  | 0.90 | 1.11 |
| P19253_RL Rpl13a | 60S ribosor K.YQAVTATLEEK#.R               | 316.76  | 87.08  | 3.64 | 0.27 |
| P19253_RL Rpl13a | 60S ribosor R.LAHEVGW#K.Y                  | 26.22   | 19.92  | 1.32 | 0.76 |
| P19253_RL Rpl13a | 60S ribosor K.YQAVTATLEEK#.R               | 124.18  | 42.15  | 2.95 | 0.34 |
| P19253_RL Rpl13a | 60S ribosor R.MVVPAALK#.V                  | 13.99   | 3.98   | 3.52 | 0.28 |
| P19253_RL Rpl13a | 60S ribosor K.YQAVTATLEEK#.R               | 100.91  | 29.27  | 3.45 | 0.29 |
| Q9CR57_RI Rpl14  | 60S ribosor K.AAIAAAAAAAAAAK#.A            | 270.62  | 81.75  | 3.31 | 0.30 |
| Q9CR57_RI Rpl14  | 60S ribosor K.LVAIVDVIDQNR.A               | 47.87   | 57.47  | 0.83 | 1.20 |
| Q9CR57_RI Rpl14  | 60S ribosor K.AAIAAAAAAAAAAK#.A            | 1999.66 | 514.52 | 3.89 | 0.26 |
| Q9CR57_RI Rpl14  | 60S ribosor R.IIK#TEVK#.K                  | 14.04   | 3.12   | 4.50 | 0.22 |
| Q9CR57_RI Rpl14  | 60S ribosor K.LVAIVDVIDQNR.A               | 393.67  | 474.65 | 0.83 | 1.21 |
| Q9CR57_RI Rpl14  | 60S ribosor R.VAIVFGPHAGK#.L               | 742.65  | 200.66 | 3.70 | 0.27 |
| Q9CR57_RI Rpl14  | 60S ribosor K.AAIAAAAAAAAAAK#.A            | 100.51  | 27.62  | 3.64 | 0.27 |
| Q9CR57_RI Rpl14  | 60S ribosor K.LVAIVDVIDQNR.A               | 14.03   | 13.48  | 1.04 | 0.96 |
| Q9CR57_RI Rpl14  | 60S ribosor K.AAIAAAAAAAAAAK#.A            | 108.28  | 32.52  | 3.33 | 0.30 |
| Q9CR57_RI Rpl14  | 60S ribosor K.LVAIVDVIDQNR.A               | 19.81   | 18.74  | 1.06 | 0.95 |
| Q9CZM2_R Rpl15   | 60S ribosor K.FFEVLIDPFHK#.A               | 129.17  | 37.75  | 3.42 | 0.29 |
| Q9CZM2_R Rpl15   | 60S ribosor K.FHHTIGGSR.R                  | 15.47   | 21.39  | 0.72 | 1.38 |
| Q9CZM2_R Rpl15   | 60S ribosor K.GATYK#PVHHGVNQLK#.F          | 168.89  | 38.28  | 4.41 | 0.23 |
| Q9CZM2_R Rpl15   | 60S ribosor R.SLQSAEER.A                   | 104.22  | 116.54 | 0.89 | 1.12 |
| Q9CZM2_R Rpl15   | 60S ribosor R.VLNSYWVGEDSTYK#.F            | 235.41  | 67.46  | 3.49 | 0.29 |
| Q9CZM2_R Rpl15   | 60S ribosor K.FFEVLIDPFHK#.A               | 94.80   | 35.89  | 2.64 | 0.38 |
| Q9CZM2_R Rpl15   | 60S ribosor K.GATYK#PVHHGVNQLK#.F          | 118.17  | 29.79  | 3.97 | 0.25 |
| Q9CZM2_R Rpl15   | 60S ribosor R.NTLQHLR.Y                    | 13.03   | 15.29  | 0.85 | 1.17 |
| Q9CZM2_R Rpl15   | 60S ribosor R.SLQSAEER.A                   | 108.44  | 150.35 | 0.72 | 1.39 |
| Q9CZM2_R Rpl15   | 60S ribosor R.VLNSYWVGEDSTYK#.F            | 173.02  | 59.40  | 2.91 | 0.34 |
| Q9CZM2_R Rpl15   | 60S ribosor K.FFEVLIDPFHK#.A               | 85.50   | 17.91  | 4.77 | 0.21 |
| Q9CZM2_R Rpl15   | 60S ribosor K.GATYK#PVHHGVNQLK#.F          | 10.62   | 2.74   | 3.88 | 0.26 |
| Q9CZM2_R Rpl15   | 60S ribosor K.GATYK#PVHHGVNQLK#.F          | 66.27   | 17.04  | 3.89 | 0.26 |
| Q9CZM2_R Rpl15   | 60S ribosor R.SLQSAEER.A                   | 75.77   | 91.00  | 0.83 | 1.20 |
| Q9CZM2_R Rpl15   | 60S ribosor R.VLNSYWVGEDSTYK#.F            | 103.89  | 34.01  | 3.06 | 0.33 |
| Q9CZM2_R Rpl15   | 60S ribosor K.GATYK#PVHHGVNQLK#.F          | 94.25   | 28.67  | 3.29 | 0.30 |
| Q9CZM2_R Rpl15   | 60S ribosor R.SLQSAEER.A                   | 49.41   | 69.43  | 0.71 | 1.41 |



|                  |                                               |         |        |      |      |
|------------------|-----------------------------------------------|---------|--------|------|------|
| Q9CZM2_R Rpl15   | 60S ribosor R.VLNSYVWGEDSTYK#.F               | 103.78  | 29.78  | 3.49 | 0.29 |
| Q9CPR4_RI Rpl17  | 60S ribosor K.EQVPK#PEEEVAQK#.K               | 13.42   | 4.35   | 3.08 | 0.32 |
| Q9CPR4_RI Rpl17  | 60S ribosor K.NAESNAEL#.G                     | 14.68   | 8.87   | 1.66 | 0.60 |
| Q9CPR4_RI Rpl17  | 60S ribosor R.YSLDPENPTK#.S                   | 46.11   | 20.45  | 2.26 | 0.44 |
| Q9CPR4_RI Rpl17  | 60S ribosor K.EQVPK#PEEEVAQK#.K               | 235.49  | 93.13  | 2.53 | 0.40 |
| Q9CPR4_RI Rpl17  | 60S ribosor R.ETAQAIK#.G                      | 251.88  | 91.79  | 2.74 | 0.36 |
| Q9CPR4_RI Rpl17  | 60S ribosor K.GLDVDSLVEHIQVKN#.A              | 1371.91 | 494.48 | 2.77 | 0.36 |
| Q9CPR4_RI Rpl17  | 60S ribosor K.K#SAEFLHLM*#L#.N                | 241.65  | 81.24  | 2.97 | 0.34 |
| Q9CPR4_RI Rpl17  | 60S ribosor K.K#SAEFLHMLK#.N                  | 171.15  | 62.16  | 2.75 | 0.36 |
| Q9CPR4_RI Rpl17  | 60S ribosor K.NAESNAEL#.G                     | 404.01  | 135.59 | 2.98 | 0.34 |
| Q9CPR4_RI Rpl17  | 60S ribosor K.NAESNAEL#GLDVDSLVEHIQVKN#.A     | 11.77   | 6.92   | 1.70 | 0.59 |
| Q9CPR4_RI Rpl17  | 60S ribosor K.NAESNAEL#GLDVDSLVEHIQVKN#APK#.M | 16.39   | 2.91   | 5.63 | 0.18 |
| Q9CPR4_RI Rpl17  | 60S ribosor K.QWGWTOGR.W                      | 74.59   | 116.90 | 0.64 | 1.57 |
| Q9CPR4_RI Rpl17  | 60S ribosor K.SAEFLHLM*#L#.N                  | 112.73  | 42.94  | 2.63 | 0.38 |
| Q9CPR4_RI Rpl17  | 60S ribosor K.YLKH#DVTLK#.K                   | 366.48  | 140.22 | 2.61 | 0.38 |
| Q9CPR4_RI Rpl17  | 60S ribosor K.YLKH#DVTLK#.Q                   | 347.93  | 96.36  | 3.61 | 0.28 |
| Q9CPR4_RI Rpl17  | 60S ribosor R.YSLDPENPTK#.S                   | 1084.69 | 419.41 | 2.59 | 0.39 |
| Q9CPR4_RI Rpl17  | 60S ribosor K.GLDVDSLVEHIQVKN#.A              | 34.04   | 14.92  | 2.28 | 0.44 |
| Q9CPR4_RI Rpl17  | 60S ribosor R.YSLDPENPTK#.S                   | 21.34   | 9.57   | 2.23 | 0.45 |
| P35980_RL Rpl18  | 60S ribosor K.APGTPHSHTKPYVR.S                | 1.59    | 2.58   | 0.62 | 1.62 |
| P35980_RL Rpl18  | 60S ribosor K.ILTFDQLALESQK#.G                | 143.86  | 42.11  | 3.42 | 0.29 |
| P35980_RL Rpl18  | 60S ribosor K.TAVVVGTVTDDVR.I                 | 53.86   | 62.48  | 0.86 | 1.16 |
| P35980_RL Rpl18  | 60S ribosor R.TNRPPLSLR.M                     | 32.45   | 51.74  | 0.63 | 1.59 |
| P35980_RL Rpl18  | 60S ribosor R.TNSTFNQVVLK#.R                  | 64.17   | 121.63 | 0.53 | 1.90 |
| P35980_RL Rpl18  | 60S ribosor K.AGGK#ILTFDQLALESQK#.G           | 17.97   | 2.76   | 6.50 | 0.15 |
| P35980_RL Rpl18  | 60S ribosor R.GTVLLSGPR.K                     | 93.13   | 138.00 | 0.67 | 1.48 |
| P35980_RL Rpl18  | 60S ribosor K.ILTFDQLALESQK#.G                | 829.79  | 241.98 | 3.43 | 0.29 |
| P35980_RL Rpl18  | 60S ribosor R.RTNSTFNQVVLK#.R                 | 6.85    | 8.68   | 0.79 | 1.27 |
| P35980_RL Rpl18  | 60S ribosor R.RTNSTFNQVVLK#.L                 | 7.74    | 23.03  | 0.34 | 2.98 |
| P35980_RL Rpl18  | 60S ribosor K.SQDIYLR.L                       | 169.22  | 204.08 | 0.83 | 1.21 |
| P35980_RL Rpl18  | 60S ribosor K.TAVVVGTVTDDVR.I                 | 260.44  | 302.09 | 0.86 | 1.16 |
| P35980_RL Rpl18  | 60S ribosor R.TNRPPLSLR.M                     | 112.60  | 438.42 | 0.26 | 3.89 |
| P35980_RL Rpl18  | 60S ribosor R.TNSTFNQVVLK#.R                  | 770.17  | 217.37 | 3.54 | 0.28 |
| P35980_RL Rpl18  | 60S ribosor K.ILTFDQLALESQK#.G                | 67.29   | 25.17  | 2.67 | 0.37 |
| P35980_RL Rpl18  | 60S ribosor K.TAVVVGTVTDDVR.I                 | 18.30   | 20.23  | 0.90 | 1.11 |
| P35980_RL Rpl18  | 60S ribosor R.TNSTFNQVVLK#.R                  | 21.79   | 15.33  | 1.42 | 0.70 |
| P35980_RL Rpl18  | 60S ribosor K.ILTFDQLALESQK#.G                | 110.85  | 37.77  | 2.94 | 0.34 |
| P35980_RL Rpl18  | 60S ribosor K.TAVVVGTVTDDVR.I                 | 18.72   | 27.67  | 0.68 | 1.48 |
| P35980_RL Rpl18  | 60S ribosor R.TNSTFNQVVLK#.R                  | 34.22   | 10.53  | 3.25 | 0.31 |
| P62717_RL Rpl18a | 60S ribosor R.AHSIQIMK#.V                     | 13.68   | 7.38   | 1.85 | 0.54 |
| P62717_RL Rpl18a | 60S ribosor R.FWYFVSQLK#.K                    | 18.29   | 8.23   | 2.22 | 0.45 |
| P62717_RL Rpl18a | 60S ribosor K.NFGIWL.R.Y                      | 13.85   | 16.25  | 0.85 | 1.17 |
| P62717_RL Rpl18a | 60S ribosor R.AHSIQIM*#VEEIAAGK#.C            | 47.36   | 18.21  | 2.60 | 0.38 |
| P62717_RL Rpl18a | 60S ribosor R.FWYFVSQLK#.K                    | 114.12  | 45.58  | 2.50 | 0.40 |
| P62717_RL Rpl18a | 60S ribosor R.FWYFVSQLK#K#.M                  | 61.57   | 21.38  | 2.88 | 0.35 |
| P62717_RL Rpl18a | 60S ribosor K.NFGIWL.R.Y                      | 97.20   | 146.75 | 0.66 | 1.51 |
| P62717_RL Rpl18a | 60S ribosor K.SRFWYFVSQLK#.M                  | 13.00   | 12.44  | 1.05 | 0.96 |
| P62717_RL Rpl18a | 60S ribosor K.VEEIAAGK#.C                     | 512.94  | 188.87 | 2.72 | 0.37 |
| P62717_RL Rpl18a | 60S ribosor R.AHSIQIMK#.V                     | 23.87   | 46.66  | 0.51 | 1.95 |
| P62717_RL Rpl18a | 60S ribosor R.IFAPNHVAK#.S                    | 50.59   | 16.35  | 3.09 | 0.32 |
| P62717_RL Rpl18a | 60S ribosor K.NFGIWL.R.Y                      | 11.84   | 16.69  | 0.71 | 1.41 |
| P62717_RL Rpl18a | 60S ribosor K.VEEIAAGK#.C                     | 59.37   | 20.45  | 2.90 | 0.34 |
| P62717_RL Rpl18a | 60S ribosor R.AHSIQIM*#K#.V                   | 152.44  | 38.30  | 3.98 | 0.25 |
| P62717_RL Rpl18a | 60S ribosor R.FWYFVSQLK#.K                    | 19.54   | 17.64  | 1.11 | 0.90 |
| P62717_RL Rpl18a | 60S ribosor R.IFAPNHVAK#.S                    | 111.42  | 33.74  | 3.30 | 0.30 |
| P62717_RL Rpl18a | 60S ribosor K.NFGIWL.R.Y                      | 21.36   | 24.10  | 0.89 | 1.13 |
| P62717_RL Rpl18a | 60S ribosor K.RPNTFF.-                        | 34.93   | 47.46  | 0.74 | 1.36 |
| P62717_RL Rpl18a | 60S ribosor K.VEEIAAGK#.C                     | 206.05  | 52.37  | 3.93 | 0.25 |
| P84099_RL Rpl19  | 60S ribosor R.HM*YHSLYK#.V                    | 55.23   | 16.98  | 3.25 | 0.31 |
| P84099_RL Rpl19  | 60S ribosor R.HMYSYLYK#.V                     | 37.60   | 15.70  | 2.40 | 0.42 |
| P84099_RL Rpl19  | 60S ribosor R.ILM*EHIIK#.L                    | 21.97   | 11.90  | 1.85 | 0.54 |
| P84099_RL Rpl19  | 60S ribosor K.TLSK#EETK#K#.-                  | 5.88    | 2.89   | 2.04 | 0.49 |
| P84099_RL Rpl19  | 60S ribosor K.VWLDPNETNEIANANSR.Q             | 24.47   | 31.98  | 0.77 | 1.31 |
| P84099_RL Rpl19  | 60S ribosor R.HMYSYLYK#.V                     | 145.35  | 35.54  | 4.09 | 0.24 |
| P84099_RL Rpl19  | 60S ribosor R.HM*YHSLYK#.V                    | 127.29  | 27.57  | 4.62 | 0.22 |
| P84099_RL Rpl19  | 60S ribosor R.ILM*EHIIK#.L                    | 64.99   | 19.05  | 3.41 | 0.29 |
| P84099_RL Rpl19  | 60S ribosor R.ILMEHIK#.L                      | 24.67   | 8.58   | 2.88 | 0.35 |
| P84099_RL Rpl19  | 60S ribosor K.KLLADQAEAR.R                    | 9.19    | 17.31  | 0.53 | 1.88 |
| P84099_RL Rpl19  | 60S ribosor K.KVWLDPNETNEIANANSR.Q            | 39.90   | 50.70  | 0.79 | 1.27 |
| P84099_RL Rpl19  | 60S ribosor R.LASSVLR.C                       | 33.81   | 38.60  | 0.88 | 1.14 |
| P84099_RL Rpl19  | 60S ribosor K.LLADQAEAR.R                     | 324.43  | 432.56 | 0.75 | 1.33 |
| P84099_RL Rpl19  | 60S ribosor K.TLSK#EETK#K#.-                  | 14.08   | 4.65   | 3.03 | 0.33 |
| P84099_RL Rpl19  | 60S ribosor K.VK#GNVFK#.N                     | 142.71  | 46.48  | 3.07 | 0.33 |
| P84099_RL Rpl19  | 60S ribosor K.VWLDPNETNEIANANSR.Q             | 116.82  | 159.25 | 0.73 | 1.36 |
| P84099_RL Rpl19  | 60S ribosor K.LLADQAEAR.R                     | 8.56    | 19.53  | 0.44 | 2.28 |
| O09167_RI Rpl21  | 60S ribosor K.GTWVQLK#.R                      | 47.74   | 19.73  | 2.42 | 0.41 |
| O09167_RI Rpl21  | 60S ribosor R.VYNVTOHAVGIIVKN#.Q              | 19.82   | 7.58   | 2.61 | 0.38 |
| O09167_RI Rpl21  | 60S ribosor R.VYNVTOHAVGIIVKN#.Q              | 79.65   | 30.08  | 2.65 | 0.38 |
| O09167_RI Rpl21  | 60S ribosor K.EK#GTWVQLK#.R                   | 87.70   | 22.65  | 3.87 | 0.26 |
| O09167_RI Rpl21  | 60S ribosor K.EPELLEPIPYEFM*#A.-              | 185.99  | 185.99 | 1.00 | 1.00 |
| O09167_RI Rpl21  | 60S ribosor K.GDIVDIKGM*#GTVQK.G              | 10.82   | 3.60   | 3.01 | 0.33 |
| O09167_RI Rpl21  | 60S ribosor K.GTWVQLK#.R                      | 441.63  | 110.89 | 3.98 | 0.25 |
| O09167_RI Rpl21  | 60S ribosor K.HGVVPLATYMR.I                   | 36.05   | 71.81  | 0.50 | 1.99 |
| O09167_RI Rpl21  | 60S ribosor K.HGVVPLATYMR.I                   | 45.00   | 65.08  | 0.69 | 1.45 |
| O09167_RI Rpl21  | 60S ribosor K.K#GDIVDIK#.G                    | 1271.74 | 388.01 | 3.28 | 0.31 |
| O09167_RI Rpl21  | 60S ribosor R.TNGKHEPELLEPIPYEFM*#A.-         | 216.39  | 81.62  | 2.65 | 0.38 |
| O09167_RI Rpl21  | 60S ribosor R.TNGKHEPELLEPIPYEFMA.-           | 38.27   | 16.00  | 2.39 | 0.42 |
| O09167_RI Rpl21  | 60S ribosor R.VYNVTOHAVGIIVKN#.Q              | 1488.81 | 541.27 | 2.75 | 0.36 |
| O09167_RI Rpl21  | 60S ribosor R.VYNVTOHAVGIIVKN#.Q              | 62.66   | 24.52  | 2.56 | 0.39 |
| P67984_RL Rpl22  | 60S ribosor K.AGNLGGGVVTIER.S                 | 8.82    | 11.90  | 0.74 | 1.35 |
| P67984_RL Rpl22  | 60S ribosor R.YFQINQDEEEDEED.-                | 5.71    | 5.71   | 1.00 | 1.00 |
| P67984_RL Rpl22  | 60S ribosor K.AGNLGGGVVTIER.S                 | 232.10  | 360.39 | 0.64 | 1.55 |
| P67984_RL Rpl22  | 60S ribosor K.ITVSEVPFSK#.R                   | 248.09  | 99.27  | 2.50 | 0.40 |
| P67984_RL Rpl22  | 60S ribosor K.SK#ITVSEVPFSK#.R                | 79.91   | 33.76  | 2.37 | 0.42 |
| P67984_RL Rpl22  | 60S ribosor K.SKITVSEVPFSK#.R                 | 17.28   | 27.02  | 0.64 | 1.56 |
| P67984_RL Rpl22  | 60S ribosor R.VVANSKESYELR.Y                  | 4.73    | 7.23   | 0.65 | 1.53 |
| P67984_RL Rpl22  | 60S ribosor R.YFQINQDEEEDEED.-                | 190.55  | 190.55 | 1.00 | 1.00 |
| Q9D757_RI Rpl211 | 60S ribosor R.YFQINQDEEESESD.-                | 12.64   | 12.64  | 1.00 | 1.00 |
| P62830_RL Rpl23  | 60S ribosor R.LPAAGVDM*#VM*#ATVK#.K           | 14.63   | 10.39  | 1.41 | 0.71 |
| P62830_RL Rpl23  | 60S ribosor K.DGVLYFEDNAGVIVNNK#.G            | 8.75    | 4.29   | 2.04 | 0.49 |
| P62830_RL Rpl23  | 60S ribosor K.DGVLYFEDNAGVIVNNK#GEM*#K#.G     | 40.77   | 25.81  | 1.58 | 0.63 |
| P62830_RL Rpl23  | 60S ribosor K.GSAITGPVAK#.E                   | 301.95  | 152.70 | 1.98 | 0.51 |
| P62830_RL Rpl23  | 60S ribosor R.IASNAGSIA.-                     | 62.62   | 62.62  | 1.00 | 1.00 |

|                  |                                              |         |        |      |      |
|------------------|----------------------------------------------|---------|--------|------|------|
| P62830_RL Rpl23  | 60S ribosor R.K#DGVFLYFEDNAGVIVNNK#.G        | 10.81   | 2.23   | 4.85 | 0.21 |
| P62830_RL Rpl23  | 60S ribosor R.LNRLPAAGVGDMM*VM*ATVK.K        | 4.38    | 9.43   | 0.46 | 2.15 |
| P62830_RL Rpl23  | 60S ribosor R.LNRLPAAGVGDMM*VMATVK.K         | 6.57    | 12.62  | 0.52 | 1.92 |
| P62830_RL Rpl23  | 60S ribosor R.LNRLPAAGVGDMM*VMATVK.K         | 14.17   | 33.70  | 0.42 | 2.38 |
| P62830_RL Rpl23  | 60S ribosor R.LPAAGVGDMM*VM*ATVK#.K          | 515.43  | 272.96 | 1.89 | 0.53 |
| P62830_RL Rpl23  | 60S ribosor R.LPAAGVGDMM*VM*ATVK#.K          | 52.18   | 31.56  | 1.65 | 0.60 |
| P62830_RL Rpl23  | 60S ribosor R.LPAAGVGDMM*VMATVK#.K           | 89.98   | 47.17  | 1.91 | 0.52 |
| P62830_RL Rpl23  | 60S ribosor K.NLYISVK#.G                     | 1858.11 | 553.46 | 3.36 | 0.30 |
| P62830_RL Rpl23  | 60S ribosor R.LPAAGVGDMM*VM*ATVK#.K          | 8.39    | 6.31   | 1.33 | 0.75 |
| P62830_RL Rpl23  | 60S ribosor K.NLYISVK#.G                     | 20.11   | 8.64   | 2.33 | 0.43 |
| P62751_RL Rpl23a | 60S ribosor K.EAPAPPKAEAK.A                  | 300.71  | 74.02  | 0.06 | 0.25 |
| P62751_RL Rpl23a | 60S ribosor K.FPLTTESAM*#K.K                 | 353.40  | 477.17 | 4.74 | 1.35 |
| P62751_RL Rpl23a | 60S ribosor K.FPLTTESAM*#K                   | 138.67  | 41.95  | 3.31 | 0.30 |
| P62751_RL Rpl23a | 60S ribosor K.FPLTTESAM*#K#.#I               | 162.53  | 48.12  | 3.38 | 0.30 |
| P62751_RL Rpl23a | 60S ribosor K.IEDNNTLVFIVDVK#.A              | 397.91  | 112.92 | 3.52 | 0.28 |
| P62751_RL Rpl23a | 60S ribosor K.IEDNNTLVFIVDVK#.A              | 68.80   | 16.97  | 4.06 | 0.25 |
| P62751_RL Rpl23a | 60S ribosor K.K#EAPAPPK#EAK#.A               | 273.93  | 48.48  | 5.65 | 0.18 |
| P62751_RL Rpl23a | 60S ribosor K.K#IEDNNTLVFIVDVK#.A            | 686.75  | 170.93 | 4.02 | 0.25 |
| P62751_RL Rpl23a | 60S ribosor K.K#LYIDIVAK#.V                  | 501.67  | 154.79 | 3.24 | 0.31 |
| P62751_RL Rpl23a | 60S ribosor R.LAPDYDALDVANK#.I               | 1971.99 | 506.02 | 3.90 | 0.26 |
| P62751_RL Rpl23a | 60S ribosor R.LAPDYDALDVANK#IGII.-           | 18.56   | 5.94   | 3.12 | 0.32 |
| P62751_RL Rpl23a | 60S ribosor K.LDHYAIK#.F                     | 143.04  | 39.02  | 3.67 | 0.27 |
| P62751_RL Rpl23a | 60S ribosor K.LDHYAIK#FPLTTESAM*#K.K         | 44.25   | 9.51   | 4.65 | 0.22 |
| P62751_RL Rpl23a | 60S ribosor K.LDHYAIK#FPLTTESAM*.K           | 23.76   | 16.22  | 1.46 | 0.68 |
| P62751_RL Rpl23a | 60S ribosor K.LYDIDVAK#.V                    | 532.43  | 178.04 | 2.99 | 0.33 |
| P62751_RL Rpl23a | 60S ribosor R.NK#LDHYAIK#.F                  | 501.30  | 132.14 | 3.79 | 0.26 |
| P62751_RL Rpl23a | 60S ribosor R.NK#LDHYAIK#FPLTTESAM*#K        | 57.39   | 14.85  | 3.86 | 0.26 |
| P62751_RL Rpl23a | 60S ribosor K.VNTLIRPDGEK.K                  | 59.22   | 79.93  | 0.74 | 1.35 |
| P62751_RL Rpl23a | 60S ribosor K.VNTLIRPDGEK.A                  | 17.33   | 22.52  | 0.77 | 1.30 |
| Q8BP67_RI Rpl24  | 60S ribosor R.AITGASLADIM*AK#.R              | 32.20   | 10.04  | 3.21 | 0.31 |
| Q8BP67_RI Rpl24  | 60S ribosor R.AITGASLADIMAK#.R               | 26.81   | 6.74   | 3.98 | 0.25 |
| Q8BP67_RI Rpl24  | 60S ribosor K.VFQFLNAK#.C                    | 37.59   | 10.69  | 3.52 | 0.28 |
| Q8BP67_RI Rpl24  | 60S ribosor R.AITGASLADIM*AK#.R              | 806.15  | 263.93 | 3.05 | 0.33 |
| Q8BP67_RI Rpl24  | 60S ribosor R.AITGASLADIMAK#.R               | 701.30  | 218.02 | 3.22 | 0.31 |
| Q8BP67_RI Rpl24  | 60S ribosor K.GQSEIQK#.K                     | 27.32   | 11.93  | 2.29 | 0.44 |
| Q8BP67_RI Rpl24  | 60S ribosor R.QJNWTVLYR.R                    | 209.08  | 308.63 | 0.68 | 1.48 |
| Q8BP67_RI Rpl24  | 60S ribosor R.TDGG#VFQFLNAK#.C               | 29.82   | 9.18   | 3.25 | 0.31 |
| Q8BP67_RI Rpl24  | 60S ribosor K.VFQFLNAK#.C                    | 695.71  | 248.14 | 2.80 | 0.36 |
| Q8BP67_RI Rpl24  | 60S ribosor R.AITGASLADIMAK#.R               | 10.07   | 3.37   | 2.99 | 0.33 |
| Q8BP67_RI Rpl24  | 60S ribosor K.VFQFLNAK#.C                    | 14.50   | 6.35   | 2.28 | 0.44 |
| Q8BP67_RI Rpl24  | 60S ribosor K.VFQFLNAK#.C                    | 9.43    | 5.63   | 1.67 | 0.60 |
| P61255_RL Rpl26  | 60S ribosor K.DDEVQVVR.G                     | 285.67  | 472.07 | 0.61 | 1.65 |
| P61255_RL Rpl26  | 60S ribosor K.EETIEK#M*QE.-                  | 8.11    | 4.04   | 2.01 | 0.50 |
| P61255_RL Rpl26  | 60S ribosor K.FNPFVTSDR.S                    | 166.16  | 273.95 | 0.61 | 1.65 |
| P61255_RL Rpl26  | 60S ribosor K.GK#YK#EETIEK#.M                | 43.75   | 13.42  | 3.26 | 0.31 |
| P61255_RL Rpl26  | 60S ribosor R.HFNAPSHIR.R                    | 66.50   | 108.62 | 0.61 | 1.63 |
| P61255_RL Rpl26  | 60S ribosor R.HFNAPSHIR.R                    | 11.59   | 22.23  | 0.52 | 1.92 |
| P61255_RL Rpl26  | 60S ribosor K.IIM*SSPLSK#.E                  | 712.04  | 293.20 | 2.43 | 0.41 |
| P61255_RL Rpl26  | 60S ribosor R.K#IMSSPLSK#.E                  | 64.23   | 22.49  | 2.86 | 0.35 |
| P61255_RL Rpl26  | 60S ribosor R.K#IM*SSPLSK#.E                 | 757.72  | 291.61 | 2.60 | 0.38 |
| P61255_RL Rpl26  | 60S ribosor K.KYVIVIER.V                     | 20.14   | 38.06  | 0.53 | 1.89 |
| P61255_RL Rpl26  | 60S ribosor -.MKFNPFVTSDR.S                  | 2.62    | 4.05   | 0.65 | 1.54 |
| P61255_RL Rpl26  | 60S ribosor K.YK#EETIEK#.M                   | 557.65  | 185.21 | 3.01 | 0.33 |
| P61255_RL Rpl26  | 60S ribosor K.YK#EETIEK#.M                   | 120.41  | 37.05  | 3.25 | 0.31 |
| P61255_RL Rpl26  | 60S ribosor K.YVIVIER.V                      | 174.77  | 237.66 | 0.74 | 1.36 |
| P61358_RL Rpl27  | 60S ribosor K.DVFRDPALK.R                    | 38.24   | 80.03  | 0.48 | 2.09 |
| P61358_RL Rpl27  | 60S ribosor K.NK#WFFQK#.L                    | 100.55  | 37.36  | 2.69 | 0.37 |
| P61358_RL Rpl27  | 60S ribosor K.VLVLAGR.Y                      | 455.84  | 785.85 | 0.58 | 1.72 |
| P61358_RL Rpl27  | 60S ribosor R.YSDVPLDK#.T                    | 1696.88 | 642.12 | 2.64 | 0.38 |
| P14115_RL Rpl27a | 60S ribosor R.IINFDK#HPGYGK#.V               | 240.12  | 67.21  | 3.57 | 0.28 |
| P14115_RL Rpl27a | 60S ribosor K.LWTLVSEQTR.V                   | 122.61  | 176.63 | 0.69 | 1.44 |
| P14115_RL Rpl27a | 60S ribosor K.NKTGVAPIDVVR.S                 | 64.95   | 53.51  | 1.21 | 0.82 |
| P14115_RL Rpl27a | 60S ribosor K.TGVAPIDVVR.S                   | 427.75  | 700.26 | 0.61 | 1.64 |
| P41105_RL Rpl28  | 60S ribosor R.K#TVGVEPAADGK#.G               | 14.11   | 9.13   | 1.55 | 0.65 |
| P41105_RL Rpl28  | 60S ribosor K.QTYSTEPNNLK#.A                 | 42.89   | 14.53  | 2.95 | 0.34 |
| P41105_RL Rpl28  | 60S ribosor R.SQK#PVVVK#.R                   | 25.68   | 7.53   | 3.41 | 0.29 |
| P41105_RL Rpl28  | 60S ribosor K.TVGVPEPAADGK#.G                | 105.07  | 32.73  | 3.21 | 0.31 |
| P41105_RL Rpl28  | 60S ribosor K.GVVVMK#.R                      | 66.75   | 50.79  | 1.31 | 0.76 |
| P41105_RL Rpl28  | 60S ribosor K.GVVVMK*#.R                     | 991.41  | 234.33 | 4.23 | 0.24 |
| P41105_RL Rpl28  | 60S ribosor R.K#PATSIVR.T                    | 89.03   | 97.37  | 0.91 | 1.09 |
| P41105_RL Rpl28  | 60S ribosor R.K#TVGVEPAADGK#.G               | 57.19   | 12.83  | 4.46 | 0.22 |
| P41105_RL Rpl28  | 60S ribosor R.NK#QTYSTEPNNLK#.A              | 313.68  | 69.62  | 4.51 | 0.22 |
| P41105_RL Rpl28  | 60S ribosor K.QTYSTEPNNLK#.A                 | 493.78  | 140.89 | 3.50 | 0.29 |
| P41105_RL Rpl28  | 60S ribosor R.RASAILR.S                      | 19.51   | 89.23  | 0.22 | 4.57 |
| P41105_RL Rpl28  | 60S ribosor R.SQK#PVVVK#.R                   | 121.04  | 35.13  | 3.45 | 0.29 |
| P41105_RL Rpl28  | 60S ribosor K.TVGVPEPAADGK#.G                | 1029.41 | 290.88 | 3.54 | 0.28 |
| P47915_RL Rpl29  | 60S ribosor K.AQASAPAQPK#.G                  | 247.09  | 65.15  | 3.79 | 0.26 |
| P47915_RL Rpl29  | 60S ribosor K.GAQAPVK#AP.-                   | 67.98   | 20.27  | 3.35 | 0.30 |
| P47915_RL Rpl29  | 60S ribosor R.LAFIAHPK#.L                    | 88.33   | 21.02  | 4.20 | 0.24 |
| P47915_RL Rpl29  | 60S ribosor K.AQASAPAQPK#.G                  | 1291.43 | 427.05 | 3.02 | 0.33 |
| P47915_RL Rpl29  | 60S ribosor K.GAQAPVK#AP.-                   | 760.10  | 220.60 | 3.45 | 0.29 |
| P47915_RL Rpl29  | 60S ribosor R.LAFIAHPK#.L                    | 714.65  | 203.31 | 3.52 | 0.28 |
| P47915_RL Rpl29  | 60S ribosor R.YESLKHGVPK#.F                  | 76.97   | 16.51  | 4.66 | 0.21 |
| P47915_RL Rpl29  | 60S ribosor K.AQASAPAQPK#.G                  | 29.16   | 19.89  | 1.47 | 0.68 |
| P27659_RL Rpl3   | 60S ribosor K.AFM*GPLK#.K                    | 30.14   | 11.37  | 2.65 | 0.38 |
| P27659_RL Rpl3   | 60S ribosor K.AFMGPLK#.K                     | 15.78   | 4.45   | 3.54 | 0.28 |
| P27659_RL Rpl3   | 60S ribosor K.AFM*GPLK#.#D                   | 55.27   | 18.56  | 2.98 | 0.34 |
| P27659_RL Rpl3   | 60S ribosor K.AFMGPLK#.#D                    | 23.68   | 29.73  | 0.80 | 1.26 |
| P27659_RL Rpl3   | 60S ribosor K.AHLM*EIQVNGGTVAEK#.L           | 28.49   | 7.97   | 3.58 | 0.28 |
| P27659_RL Rpl3   | 60S ribosor K.AHLM*EIQVNGGTVAEK#.L           | 24.49   | 8.45   | 2.90 | 0.35 |
| P27659_RL Rpl3   | 60S ribosor K.DDASK#PVHLTAFLYGK#.A           | 47.52   | 13.97  | 3.40 | 0.29 |
| P27659_RL Rpl3   | 60S ribosor R.ERLEQQVQVNVQVFGQDEM*IDVIGVTK.G | 30.74   | 45.01  | 0.68 | 1.46 |
| P27659_RL Rpl3   | 60S ribosor R.ERLEQQVQVNVQVFGQDEMIDVIGVTK.G  | 28.48   | 35.76  | 0.80 | 1.26 |
| P27659_RL Rpl3   | 60S ribosor R.FQTMEEK#.K                     | 143.45  | 42.17  | 3.40 | 0.29 |
| P27659_RL Rpl3   | 60S ribosor R.FQTM*EEK#.#A                   | 15.76   | 7.81   | 2.02 | 0.50 |
| P27659_RL Rpl3   | 60S ribosor R.HGSLGFLPR.K                    | 114.58  | 146.19 | 0.78 | 1.28 |
| P27659_RL Rpl3   | 60S ribosor K.IQGQYLIK#.D                    | 695.40  | 233.78 | 2.97 | 0.34 |
| P27659_RL Rpl3   | 60S ribosor K.K#AHLM*EIQVNGGTVAEK#.L         | 26.47   | 10.12  | 2.62 | 0.38 |
| P27659_RL Rpl3   | 60S ribosor R.K#SLLVQTK#.R                   | 198.29  | 54.26  | 3.65 | 0.27 |
| P27659_RL Rpl3   | 60S ribosor R.LEQQVQVNVQVFGQDEM*IDVIGVTK#.G  | 149.38  | 44.35  | 3.37 | 0.30 |
| P27659_RL Rpl3   | 60S ribosor R.LEQQVQVNVQVFGQDEMIDVIGVTK#.G   | 108.13  | 32.99  | 3.28 | 0.31 |
| P27659_RL Rpl3   | 60S ribosor K.NNASTDYDLSK#.S                 | 642.80  | 166.53 | 3.86 | 0.26 |
| P27659_RL Rpl3   | 60S ribosor K.SFPK#DDASK#PVHLTAFLYGK#.A      | 13.87   | 2.60   | 5.33 | 0.19 |

|                  |                                              |         |        |       |      |
|------------------|----------------------------------------------|---------|--------|-------|------|
| P27659_RL Rpl3   | 60S ribosor K.SINPLGGFVHYGEVTFNDIFIM*LK#.G   | 193.05  | 52.99  | 3.64  | 0.27 |
| P27659_RL Rpl3   | 60S ribosor K.SINPLGGFVHYGEVTFNDIFIM*LK#.G   | 13.54   | 2.94   | 4.61  | 0.22 |
| P27659_RL Rpl3   | 60S ribosor K.SINPLGGFVHYGEVTFNDIFIMLK#.G    | 249.14  | 75.61  | 3.29  | 0.30 |
| P27659_RL Rpl3   | 60S ribosor K.SLLVQTK#.R                     | 463.94  | 218.28 | 2.13  | 0.47 |
| P27659_RL Rpl3   | 60S ribosor R.VAFSVAR.A                      | 119.74  | 164.75 | 0.73  | 1.38 |
| P27659_RL Rpl3   | 60S ribosor K.AFM*GPLK#K#.D                  | 24.27   | 27.02  | 0.90  | 1.11 |
| P27659_RL Rpl3   | 60S ribosor K.DDASK#PVHLTAFGLYK#.A           | 89.09   | 28.80  | 3.09  | 0.32 |
| P27659_RL Rpl3   | 60S ribosor R.ERLEQQVQVNVQVFGQDEM*IDVIGVTK.G | 12.34   | 13.71  | 0.90  | 1.11 |
| P27659_RL Rpl3   | 60S ribosor R.ERLEQQVQVNVQVFGQDEMIDVIGVTK.G  | 6.92    | 11.15  | 0.62  | 1.61 |
| P27659_RL Rpl3   | 60S ribosor R.FQTMEEK#.K                     | 22.49   | 6.95   | 3.24  | 0.31 |
| P27659_RL Rpl3   | 60S ribosor K.IGQGVLK#.D                     | 175.35  | 51.68  | 3.39  | 0.29 |
| P27659_RL Rpl3   | 60S ribosor R.K#SLLVQTK#.R                   | 37.51   | 10.01  | 3.75  | 0.27 |
| P27659_RL Rpl3   | 60S ribosor R.LEQQVQVNVQVFGQDEM*IDVIGVTK#.G  | 35.39   | 17.06  | 2.07  | 0.48 |
| P27659_RL Rpl3   | 60S ribosor R.LEQQVQVNVQVFGQDEMIDVIGVTK#.G   | 18.78   | 4.14   | 4.54  | 0.22 |
| P27659_RL Rpl3   | 60S ribosor K.NNASTDYDLSDK#.S                | 125.76  | 36.65  | 3.43  | 0.29 |
| P27659_RL Rpl3   | 60S ribosor K.SINPLGGFVHYGEVTFNDIFIM*LK#.G   | 104.08  | 24.31  | 4.28  | 0.23 |
| P27659_RL Rpl3   | 60S ribosor K.SINPLGGFVHYGEVTFNDIFIMLK#.G    | 70.71   | 24.36  | 2.90  | 0.34 |
| P27659_RL Rpl3   | 60S ribosor K.SLLVQTK#.R                     | 53.59   | 5.01   | 10.69 | 0.09 |
| P27659_RL Rpl3   | 60S ribosor R.VAFSVAR.A                      | 44.15   | 51.45  | 0.86  | 1.17 |
| P27659_RL Rpl3   | 60S ribosor K.DDASK#PVHLTAFGLYK#.A           | 67.70   | 22.49  | 3.01  | 0.33 |
| P27659_RL Rpl3   | 60S ribosor R.ERLEQQVQVNVQVFGQDEM*IDVIGVTK.G | 14.84   | 16.99  | 0.87  | 1.15 |
| P27659_RL Rpl3   | 60S ribosor R.ERLEQQVQVNVQVFGQDEMIDVIGVTK.G  | 5.98    | 9.41   | 0.64  | 1.57 |
| P27659_RL Rpl3   | 60S ribosor K.FIDTTSK#.F                     | 165.31  | 59.42  | 2.78  | 0.36 |
| P27659_RL Rpl3   | 60S ribosor K.IGQGVLK#.D                     | 130.34  | 37.36  | 3.49  | 0.29 |
| P27659_RL Rpl3   | 60S ribosor R.LEQQVQVNVQVFGQDEM*IDVIGVTK#.G  | 62.64   | 15.90  | 3.94  | 0.25 |
| P27659_RL Rpl3   | 60S ribosor K.NNASTDYDLSDK#.S                | 126.05  | 44.42  | 2.84  | 0.35 |
| P27659_RL Rpl3   | 60S ribosor K.SINPLGGFVHYGEVTFNDIFIM*LK#.G   | 101.16  | 35.77  | 2.83  | 0.35 |
| P27659_RL Rpl3   | 60S ribosor K.SINPLGGFVHYGEVTFNDIFIMLK#.G    | 40.87   | 13.51  | 3.03  | 0.33 |
| P27659_RL Rpl3   | 60S ribosor K.SLLVQTK#.R                     | 112.80  | 21.59  | 5.23  | 0.19 |
| P27659_RL Rpl3   | 60S ribosor R.VAFSVAR.A                      | 43.55   | 54.92  | 0.79  | 1.26 |
| P62889_RL Rpl30  | 60S ribosor R.K#SEIEYAM*LAK#.T               | 158.67  | 62.65  | 2.53  | 0.39 |
| P62889_RL Rpl30  | 60S ribosor R.K#SEIEYAM*LAK.T                | 180.87  | 55.61  | 3.25  | 0.31 |
| P62889_RL Rpl30  | 60S ribosor R.K#SEIEYAMLAK.T                 | 74.90   | 21.03  | 3.56  | 0.28 |
| P62889_RL Rpl30  | 60S ribosor K.K#LESINSR.L                    | 36.77   | 49.30  | 0.75  | 1.34 |
| P62889_RL Rpl30  | 60S ribosor R.LQLVM*#K#.S                    | 1820.64 | 648.31 | 2.81  | 0.36 |
| P62889_RL Rpl30  | 60S ribosor R.LQLVMK#.S                      | 281.93  | 97.37  | 2.90  | 0.35 |
| P62889_RL Rpl30  | 60S ribosor K.#SEIEYAM*LAK#.T                | 166.37  | 60.54  | 2.75  | 0.36 |
| P62889_RL Rpl30  | 60S ribosor K.#SEIEYAMLAK#.T                 | 103.71  | 31.90  | 3.25  | 0.31 |
| P62889_RL Rpl30  | 60S ribosor K.SLESINSR.L                     | 178.29  | 278.07 | 0.64  | 1.56 |
| P62889_RL Rpl30  | 60S ribosor R.LQLVMK#.S                      | 13.45   | 4.97   | 2.71  | 0.37 |
| P62900_RL Rpl31  | 60S ribosor K.EM*GTPDVR.I                    | 129.77  | 237.35 | 0.55  | 1.83 |
| P62900_RL Rpl31  | 60S ribosor R.EYTIH#K#.R                     | 238.49  | 102.43 | 2.33  | 0.43 |
| P62900_RL Rpl31  | 60S ribosor K.LYTLVTVPVVTFK#.N               | 529.17  | 204.20 | 2.59  | 0.39 |
| P62900_RL Rpl31  | 60S ribosor R.NEDEDSPNK#LYTLVTVPVVTFK#.N     | 140.46  | 59.32  | 2.37  | 0.42 |
| P62900_RL Rpl31  | 60S ribosor K.NLQTVNVDEN-                    | 922.16  | 922.16 | 1.00  | 1.00 |
| P62900_RL Rpl31  | 60S ribosor R.RNEDEDSPNK#LYTLVTVPVVTFK#.N    | 10.01   | 13.32  | 0.75  | 1.33 |
| P62900_RL Rpl31  | 60S ribosor R.SAINEVVTR.E                    | 499.45  | 920.42 | 0.54  | 1.84 |
| P62911_RL Rpl32  | 60S ribosor R.AAQLAIR.V                      | 123.71  | 141.40 | 0.87  | 1.14 |
| P62911_RL Rpl32  | 60S ribosor R.FK#GQILM*PNIGYGSNK#.K          | 148.63  | 41.83  | 3.55  | 0.28 |
| P62911_RL Rpl32  | 60S ribosor R.FK#GQILM*PNIGYGSNK.K           | 19.75   | 5.09   | 3.88  | 0.26 |
| P62911_RL Rpl32  | 60S ribosor R.FK#GQILMPNIGYGSNK#.K           | 33.64   | 11.87  | 2.83  | 0.35 |
| P62911_RL Rpl32  | 60S ribosor R.FK#GQILM*PNIGYGSNK.K.T         | 90.71   | 29.85  | 3.04  | 0.33 |
| P62911_RL Rpl32  | 60S ribosor R.FK#GQILMPNIGYGSNK#K#.T         | 45.43   | 12.59  | 3.61  | 0.28 |
| P62911_RL Rpl32  | 60S ribosor K.FLVHNVK#.E                     | 397.49  | 72.82  | 5.46  | 0.18 |
| P62911_RL Rpl32  | 60S ribosor K.GQILM*PNIGYGSNK#.K             | 72.36   | 25.62  | 2.82  | 0.35 |
| P62911_RL Rpl32  | 60S ribosor K.GQILMPNIGYGSNK#.K              | 43.01   | 14.79  | 2.91  | 0.34 |
| P62911_RL Rpl32  | 60S ribosor K.GQILM*PNIGYGSNK#K#.T           | 11.37   | 3.45   | 3.30  | 0.30 |
| P62911_RL Rpl32  | 60S ribosor K.HMLPSGFR.K                     | 20.02   | 20.62  | 0.97  | 1.03 |
| P62911_RL Rpl32  | 60S ribosor K.HM*LPSPFR.K                    | 63.00   | 35.57  | 1.77  | 0.56 |
| Q9D1R9_Rl Rpl34  | 60S ribosor R.AFLIEEQK#.I                    | 13.97   | 5.40   | 2.59  | 0.39 |
| Q9D1R9_Rl Rpl34  | 60S ribosor R.LSYNTASNK#.T                   | 19.47   | 7.68   | 2.53  | 0.39 |
| Q9D1R9_Rl Rpl34  | 60S ribosor R.AFLIEEQK#.I                    | 875.27  | 288.93 | 3.03  | 0.33 |
| Q9D1R9_Rl Rpl34  | 60S ribosor R.AFLIEEQK#IVV#K.V               | 6.68    | 2.30   | 2.91  | 0.34 |
| Q9D1R9_Rl Rpl34  | 60S ribosor K.AQAQSQK#.A                     | 14.33   | 4.11   | 3.49  | 0.29 |
| Q9D1R9_Rl Rpl34  | 60S ribosor R.IVLYLTK#.K                     | 1013.75 | 325.91 | 3.11  | 0.32 |
| Q9D1R9_Rl Rpl34  | 60S ribosor R.IVLYLTK#K#.V                   | 25.43   | 7.71   | 3.30  | 0.30 |
| Q9D1R9_Rl Rpl34  | 60S ribosor R.LSYNTASNK#.T                   | 264.51  | 81.34  | 3.25  | 0.31 |
| Q9D1R9_Rl Rpl34  | 60S ribosor R.RLSYNTASNK.T                   | 38.88   | 43.14  | 0.90  | 1.11 |
| Q6ZWV7_R Rpl35   | 60S ribosor K.K#EELK#.Q                      | 101.09  | 28.66  | 3.53  | 0.28 |
| Q6ZWV7_R Rpl35   | 60S ribosor K.KYKPLDLRPK.K                   | 36.08   | 32.50  | 1.11  | 0.90 |
| Q6ZWV7_R Rpl35   | 60S ribosor R.VLTVINQTK#E                    | 1476.39 | 352.17 | 4.19  | 0.24 |
| Q6ZWV7_R Rpl35   | 60S ribosor R.VLTVINQTKENLRK.F               | 3.08    | 3.11   | 0.99  | 1.01 |
| Q6ZWV7_R Rpl35   | 60S ribosor K.YKPLDLRPK.K                    | 27.08   | 34.26  | 0.79  | 1.27 |
| O55142_Rl Rpl35a | 60S ribosor K.AIFAGYK#.R                     | 302.77  | 101.10 | 2.99  | 0.33 |
| O55142_Rl Rpl35a | 60S ribosor R.DETEFYLGK#.R                   | 112.93  | 56.19  | 2.01  | 0.50 |
| O55142_Rl Rpl35a | 60S ribosor R.DETEFYLGK#.C                   | 68.54   | 117.12 | 0.59  | 1.71 |
| O55142_Rl Rpl35a | 60S ribosor K.IEGVYAR.D                      | 125.05  | 218.87 | 0.57  | 1.75 |
| O55142_Rl Rpl35a | 60S ribosor K.IEGVYARDETEFYLGK#.C            | 2.39    | 10.73  | 0.22  | 4.48 |
| O55142_Rl Rpl35a | 60S ribosor K.NNTVTPGGK#PNK#.T               | 75.73   | 37.17  | 2.04  | 0.49 |
| O55142_Rl Rpl35a | 60S ribosor R.VM*LYPSRI.-                    | 175.69  | 320.36 | 0.55  | 1.82 |
| O55142_Rl Rpl35a | 60S ribosor R.VMLYPSRI.-                     | 24.42   | 43.61  | 0.56  | 1.79 |
| O55142_Rl Rpl35a | 60S ribosor K.NNTVTPGGK#PNK#.T               | 8.15    | 4.08   | 2.00  | 0.50 |
| Q6ZWZ4_Q Rpl36   | 60S ribosor R.YPM*AVGLNK#.G                  | 63.42   | 15.01  | 4.23  | 0.24 |
| Q6ZWZ4_Q Rpl36   | 60S ribosor R.YPM*AVGLNK#.G                  | 29.29   | 7.85   | 3.73  | 0.27 |
| Q6ZWZ4_Q Rpl36   | 60S ribosor R.EELS#VLAAM*.R.K                | 96.78   | 129.23 | 0.75  | 1.34 |
| Q6ZWZ4_Q Rpl36   | 60S ribosor R.EELS#VLAAMR.K                  | 31.00   | 40.37  | 0.77  | 1.30 |
| Q6ZWZ4_Q Rpl36   | 60S ribosor R.KREELS#VLAAM*.R.K              | 34.83   | 167.72 | 0.21  | 4.82 |
| Q6ZWZ4_Q Rpl36   | 60S ribosor R.KREELS#VLAAMR.K                | 15.14   | 78.48  | 0.19  | 5.18 |
| Q6ZWZ4_Q Rpl36   | 60S ribosor R.YPM*AVGLNK#.G                  | 422.61  | 142.79 | 2.96  | 0.34 |
| Q6ZWZ4_Q Rpl36   | 60S ribosor R.YPM*AVGLNK#.G                  | 101.43  | 25.95  | 3.91  | 0.26 |
| P83882_Rl Rpl36a | 60S ribosor K.DSLYAQGK#.R                    | 248.48  | 85.74  | 2.90  | 0.35 |
| P83882_Rl Rpl36a | 60S ribosor K.GK#DSLVAQGK#.R                 | 151.85  | 53.56  | 2.83  | 0.35 |
| P83882_Rl Rpl36a | 60S ribosor K.HFELGGDK#.K                    | 84.29   | 29.93  | 2.82  | 0.36 |
| P83882_Rl Rpl36a | 60S ribosor R.HGQVIQF.-                      | 378.43  | 113.39 | 3.34  | 0.30 |
| P61514_Rl Rpl37a | 60S ribosor K.TVAGGAWTYNTTS#AVTVK#.S         | 6.09    | 2.72   | 2.24  | 0.45 |
| P61514_Rl Rpl37a | 60S ribosor K.#EISQAK#.Y                     | 33.79   | 12.41  | 2.72  | 0.37 |
| P61514_Rl Rpl37a | 60S ribosor K.#EISQAK#.Y                     | 705.83  | 326.03 | 2.16  | 0.46 |
| P61514_Rl Rpl37a | 60S ribosor K.#EISQAK#.Y                     | 179.59  | 87.04  | 2.06  | 0.48 |
| P61514_Rl Rpl37a | 60S ribosor K.KVGI#V#K.Y                     | 219.63  | 103.57 | 2.12  | 0.47 |
| P61514_Rl Rpl37a | 60S ribosor K.TVAGGAWTYNTTS#AVTVK#.S         | 375.25  | 120.32 | 3.12  | 0.32 |
| P61514_Rl Rpl37a | 60S ribosor R.YGASLRK.M                      | 49.28   | 82.64  | 0.60  | 1.68 |
| P61514_Rl Rpl37a | 60S ribosor K.TVAGGAWTYNTTS#AVTVK#.S         | 10.94   | 3.54   | 3.09  | 0.32 |
| Q9J18_RL3 Rpl38  | 60S ribosor K.IEIKDFLLTAR.R                  | 15.58   | 47.07  | 0.33  | 3.02 |

|                 |                                        |         |        |      |      |
|-----------------|----------------------------------------|---------|--------|------|------|
| Q9J18_RL3 Rpl38 | 60S ribosor R.KIEEKDFLLTAR.R           | 85.25   | 238.55 | 0.36 | 2.80 |
| Q9J18_RL3 Rpl38 | 60S ribosor K.LK#QSLPPGLAVK#.D         | 3.96    | 3.01   | 1.31 | 0.76 |
| P62892_RL Rpl39 | 60S ribosor K.QNRPIPOWIR.M             | 2.82    | 18.91  | 0.15 | 6.70 |
| Q9D8E6_RL Rpl4  | 60S ribosor K.APIRPDIVNFVHTNLR.K       | 20.17   | 118.99 | 0.17 | 5.90 |
| Q9D8E6_RL Rpl4  | 60S ribosor K.APIRPDIVNFVHTNLR.K       | 11.38   | 43.46  | 0.26 | 3.82 |
| Q9D8E6_RL Rpl4  | 60S ribosor K.EAVQLLK#K#.L             | 72.61   | 22.92  | 3.17 | 0.32 |
| Q9D8E6_RL Rpl4  | 60S ribosor K.GHRIEVEPELVVEDK.V        | 9.83    | 15.95  | 0.62 | 1.62 |
| Q9D8E6_RL Rpl4  | 60S ribosor R.IEEVEPELVVEDK#K#.V       | 259.33  | 86.70  | 2.99 | 0.33 |
| Q9D8E6_RL Rpl4  | 60S ribosor R.IEEVEPELVVEDK#VEGYK#K#.T | 444.01  | 133.96 | 3.31 | 0.30 |
| Q9D8E6_RL Rpl4  | 60S ribosor R.KLDELGYTWR.K             | 74.64   | 83.49  | 0.89 | 1.12 |
| Q9D8E6_RL Rpl4  | 60S ribosor K.K#LEAAATALATK#.S         | 579.92  | 195.14 | 2.97 | 0.34 |
| Q9D8E6_RL Rpl4  | 60S ribosor K.LDELGYTWR.K              | 17.75   | 22.83  | 0.78 | 1.29 |
| Q9D8E6_RL Rpl4  | 60S ribosor K.LEAAATALATK#.S           | 477.23  | 137.09 | 3.48 | 0.29 |
| Q9D8E6_RL Rpl4  | 60S ribosor K.MMNTLSR.I                | 19.87   | 20.76  | 0.96 | 1.04 |
| Q9D8E6_RL Rpl4  | 60S ribosor K.M#M#NTLSR.I              | 56.98   | 66.28  | 0.86 | 1.16 |
| Q9D8E6_RL Rpl4  | 60S ribosor R.NIPGITLLNVSK#.L          | 1207.67 | 327.29 | 3.69 | 0.27 |
| Q9D8E6_RL Rpl4  | 60S ribosor K.NVTLPVAFK#.A             | 525.77  | 164.28 | 3.20 | 0.31 |
| Q9D8E6_RL Rpl4  | 60S ribosor R.QPYAVSELAGHQTSAESWGTR.A  | 71.68   | 82.95  | 0.86 | 1.16 |
| Q9D8E6_RL Rpl4  | 60S ribosor K.SNYNLPMHK#.M             | 46.78   | 16.44  | 2.85 | 0.35 |
| Q9D8E6_RL Rpl4  | 60S ribosor K.TKEAVQLLK#.K             | 91.69   | 24.80  | 3.70 | 0.27 |
| Q9D8E6_RL Rpl4  | 60S ribosor K.APIRPDIVNFVHTNLR.K       | 4.79    | 31.12  | 0.15 | 6.50 |
| Q9D8E6_RL Rpl4  | 60S ribosor K.EAVQLLK#K#.L             | 21.96   | 5.32   | 4.13 | 0.24 |
| Q9D8E6_RL Rpl4  | 60S ribosor R.IEEVEPELVVEDK#.V         | 39.83   | 14.30  | 2.79 | 0.36 |
| Q9D8E6_RL Rpl4  | 60S ribosor R.IEEVEPELVVEDK#VEGYK#K#.T | 140.62  | 44.37  | 3.17 | 0.32 |
| Q9D8E6_RL Rpl4  | 60S ribosor K.K#LEAAATALATK#.S         | 205.12  | 50.22  | 4.08 | 0.24 |
| Q9D8E6_RL Rpl4  | 60S ribosor K.K#PTTEEK#.K              | 5.02    | 6.27   | 0.80 | 1.25 |
| Q9D8E6_RL Rpl4  | 60S ribosor K.LEAAATALATK#.S           | 156.90  | 43.25  | 3.63 | 0.28 |
| Q9D8E6_RL Rpl4  | 60S ribosor K.M#M#NTLSR.I              | 12.52   | 12.79  | 0.98 | 1.02 |
| Q9D8E6_RL Rpl4  | 60S ribosor R.NIPGITLLNVSK#.L          | 276.20  | 79.57  | 3.47 | 0.29 |
| Q9D8E6_RL Rpl4  | 60S ribosor K.NVTLPVAFK#.A             | 156.79  | 45.05  | 3.48 | 0.29 |
| Q9D8E6_RL Rpl4  | 60S ribosor K.TK#EAVQLLK#.K            | 30.53   | 9.05   | 3.37 | 0.30 |
| Q9D8E6_RL Rpl4  | 60S ribosor R.IEEVEPELVVEDK#.V         | 37.96   | 16.04  | 2.37 | 0.42 |
| Q9D8E6_RL Rpl4  | 60S ribosor K.K#LEAAATALATK#.S         | 70.88   | 22.89  | 3.10 | 0.32 |
| Q9D8E6_RL Rpl4  | 60S ribosor K.LEAAATALATK#.S           | 55.41   | 15.96  | 3.47 | 0.29 |
| Q9D8E6_RL Rpl4  | 60S ribosor R.NIPGITLLNVSK#.L          | 142.08  | 52.10  | 2.73 | 0.37 |
| Q9D8E6_RL Rpl4  | 60S ribosor K.NVTLPVAFK#.A             | 87.54   | 32.72  | 2.68 | 0.37 |
| Q9D8E6_RL Rpl4  | 60S ribosor K.TK#EAVQLLK#.K            | 12.26   | 4.07   | 3.02 | 0.33 |
| P47962_RL Rpl5  | 60S ribosor K.EFNAEVRH.K               | 25.38   | 41.67  | 0.61 | 1.64 |
| P47962_RL Rpl5  | 60S ribosor R.FPGYDSESK#.E             | 87.28   | 26.65  | 3.28 | 0.31 |
| P47962_RL Rpl5  | 60S ribosor K.HIMGQNVADYMR#.Y          | 10.07   | 8.34   | 1.21 | 0.83 |
| P47962_RL Rpl5  | 60S ribosor K.HIM#GQNVADYMR#.Y         | 15.36   | 15.75  | 0.97 | 1.03 |
| P47962_RL Rpl5  | 60S ribosor K.HIMGQNVADYMR#.Y          | 8.42    | 7.13   | 1.18 | 0.85 |
| P47962_RL Rpl5  | 60S ribosor K.HIM#GQNVADYMR#.Y         | 28.96   | 38.14  | 0.76 | 1.32 |
| P47962_RL Rpl5  | 60S ribosor K.NNVTPDM#M#EEM#YK#.K      | 7.06    | 2.00   | 3.54 | 0.28 |
| P47962_RL Rpl5  | 60S ribosor K.NNVTPDM#M#EEM#YK#.K      | 11.05   | 5.44   | 2.03 | 0.49 |
| P47962_RL Rpl5  | 60S ribosor K.NNVTPDM#M#EEM#YK#.K      | 12.06   | 4.46   | 2.71 | 0.37 |
| P47962_RL Rpl5  | 60S ribosor K.QFSQYIK#.N               | 280.96  | 102.30 | 2.75 | 0.36 |
| P47962_RL Rpl5  | 60S ribosor K.RFPGYDSESK#.E            | 40.26   | 52.20  | 0.77 | 1.30 |
| P47962_RL Rpl5  | 60S ribosor R.YLM#EDEDAYK#.K           | 7.91    | 2.59   | 3.05 | 0.33 |
| P47962_RL Rpl5  | 60S ribosor R.YLM#EDEDAYK#K#.Q         | 140.21  | 39.45  | 3.55 | 0.28 |
| P47962_RL Rpl5  | 60S ribosor R.YLM#EDEDAYK#K#.Q         | 412.09  | 113.66 | 3.63 | 0.28 |
| P47962_RL Rpl5  | 60S ribosor K.HIM#GQNVADYMR#.Y         | 13.31   | 15.14  | 0.88 | 1.14 |
| P47962_RL Rpl5  | 60S ribosor K.NNVTPDM#M#EEM#YK#.A      | 8.49    | 2.85   | 2.98 | 0.34 |
| P47962_RL Rpl5  | 60S ribosor K.QFSQYIK#.N               | 126.78  | 34.45  | 3.68 | 0.27 |
| P47962_RL Rpl5  | 60S ribosor K.RFPGYDSESK#.E            | 16.22   | 17.93  | 0.90 | 1.11 |
| P47962_RL Rpl5  | 60S ribosor R.YLM#EDEDAYK#.Q           | 37.20   | 8.58   | 4.34 | 0.23 |
| P47962_RL Rpl5  | 60S ribosor R.FPGYDSESK#.E             | 27.44   | 9.30   | 2.95 | 0.34 |
| P47962_RL Rpl5  | 60S ribosor K.GAVDGLSIPHSTK#.R         | 260.43  | 89.97  | 2.89 | 0.35 |
| P47962_RL Rpl5  | 60S ribosor K.QFSQYIK#.N               | 143.35  | 38.97  | 3.68 | 0.27 |
| P47962_RL Rpl5  | 60S ribosor K.RFPGYDSESK#.E            | 23.32   | 18.51  | 1.26 | 0.79 |
| P47962_RL Rpl5  | 60S ribosor R.YLM#EDEDAYK#.Q           | 133.22  | 44.43  | 3.00 | 0.33 |
| P47911_RL Rpl6  | 60S ribosor K.AVDLQJLPK#.I             | 836.30  | 272.01 | 3.07 | 0.33 |
| P47911_RL Rpl6  | 60S ribosor K.AVPQLQGYLR.S             | 214.73  | 337.16 | 0.64 | 1.57 |
| P47911_RL Rpl6  | 60S ribosor K.EKVLATVTK.T              | 114.84  | 31.78  | 3.61 | 0.28 |
| P47911_RL Rpl6  | 60S ribosor K.EKYEITEQR.K              | 51.31   | 59.46  | 0.86 | 1.16 |
| P47911_RL Rpl6  | 60S ribosor K.FVIATSTK#.V              | 670.18  | 207.11 | 3.24 | 0.31 |
| P47911_RL Rpl6  | 60S ribosor K.HLTDAYFK#.K              | 844.62  | 250.32 | 3.37 | 0.30 |
| P47911_RL Rpl6  | 60S ribosor R.HQEGEIFDTEK#.E           | 112.51  | 43.46  | 2.59 | 0.39 |
| P47911_RL Rpl6  | 60S ribosor R.HQEGEIFDTEK#E#.K         | 607.85  | 200.33 | 3.03 | 0.33 |
| P47911_RL Rpl6  | 60S ribosor R.HQEGEIFDTEKYEITEQR.K     | 108.94  | 179.79 | 0.61 | 1.65 |
| P47911_RL Rpl6  | 60S ribosor K.QLDSGLLVPLVINR.V         | 40.28   | 56.63  | 0.71 | 1.41 |
| P47911_RL Rpl6  | 60S ribosor R.SQFSLTNGM#YPHK#.L        | 12.69   | 3.84   | 3.31 | 0.30 |
| P47911_RL Rpl6  | 60S ribosor R.SSITPGLIILITGR.H         | 53.61   | 73.77  | 0.73 | 1.38 |
| P47911_RL Rpl6  | 60S ribosor K.VDISDVK#.I               | 895.66  | 258.29 | 3.47 | 0.29 |
| P47911_RL Rpl6  | 60S ribosor K.YEITEQR.K                | 84.63   | 119.33 | 0.71 | 1.41 |
| P47911_RL Rpl6  | 60S ribosor R.YPTEDVPR.K               | 169.45  | 236.95 | 0.72 | 1.40 |
| P47911_RL Rpl6  | 60S ribosor K.HLTDAYFK#.K              | 66.32   | 25.99  | 2.55 | 0.39 |
| P47911_RL Rpl6  | 60S ribosor K.VDISDVK#.I               | 47.94   | 19.97  | 2.40 | 0.42 |
| P47911_RL Rpl6  | 60S ribosor R.YPTEDVPR.K               | 15.21   | 22.45  | 0.68 | 1.48 |
| P47911_RL Rpl6  | 60S ribosor K.VDISDVK#.I               | 30.53   | 6.38   | 4.79 | 0.21 |
| P14148_RL Rpl7  | 60S ribosor K.AGNFVPAEPK#.L            | 227.01  | 77.09  | 2.94 | 0.34 |
| P14148_RL Rpl7  | 60S ribosor K.ASIN#LR.I                | 52.64   | 78.59  | 0.67 | 1.49 |
| P14148_RL Rpl7  | 60S ribosor K.ASINMLR.I                | 46.70   | 60.68  | 0.77 | 1.30 |
| P14148_RL Rpl7  | 60S ribosor K.EANNFLWPFK#.L            | 286.60  | 87.62  | 3.27 | 0.31 |
| P14148_RL Rpl7  | 60S ribosor R.FK#EANNFLWPFK#.L         | 166.98  | 45.02  | 3.71 | 0.27 |
| P14148_RL Rpl7  | 60S ribosor R.IALTDNSLIAR.S            | 228.54  | 309.43 | 0.74 | 1.35 |
| P14148_RL Rpl7  | 60S ribosor R.IVEPYIAWGYPNLK#.S        | 415.83  | 141.61 | 2.94 | 0.34 |
| P14148_RL Rpl7  | 60S ribosor R.K#AGNFVPAEPK#.L          | 150.66  | 41.77  | 3.61 | 0.28 |
| P14148_RL Rpl7  | 60S ribosor K.K#THFVEGGDAGNREDQINR.L   | 5.96    | 22.11  | 0.27 | 3.71 |
| P14148_RL Rpl7  | 60S ribosor K.K#VATVPGLTK#K#.K         | 131.55  | 114.36 | 1.15 | 0.87 |
| P14148_RL Rpl7  | 60S ribosor K.K#VAVPETLK.K             | 246.87  | 91.43  | 2.70 | 0.37 |
| P14148_RL Rpl7  | 60S ribosor K.K#VAVPETLK#K#.K          | 117.48  | 53.57  | 2.19 | 0.46 |
| P14148_RL Rpl7  | 60S ribosor K.LAFVIR.I                 | 102.28  | 113.31 | 0.90 | 1.11 |
| P14148_RL Rpl7  | 60S ribosor R.NFAELK#.V                | 369.96  | 104.53 | 3.54 | 0.28 |
| P14148_RL Rpl7  | 60S ribosor K.SVNELYK#.R               | 230.08  | 86.88  | 2.65 | 0.38 |
| P14148_RL Rpl7  | 60S ribosor K.TTHFVEGGDAGNR.E          | 2.47    | 3.73   | 0.66 | 1.51 |
| P14148_RL Rpl7  | 60S ribosor K.TTHFVEGGDAGNREDQINR.L    | 30.79   | 139.27 | 0.22 | 4.52 |
| P14148_RL Rpl7  | 60S ribosor K.VATVPGLTK#.K             | 193.74  | 84.30  | 2.30 | 0.44 |
| P14148_RL Rpl7  | 60S ribosor K.VATVPGLTK#K#.K           | 109.92  | 39.86  | 2.76 | 0.36 |
| P14148_RL Rpl7  | 60S ribosor K.VAVPETLK#K#.K            | 132.04  | 52.71  | 2.51 | 0.40 |
| P14148_RL Rpl7  | 60S ribosor K.EANNFLWPFK#.L            | 7.84    | 3.18   | 2.46 | 0.41 |
| P14148_RL Rpl7  | 60S ribosor R.IALTDNSLIAR.S            | 8.38    | 10.15  | 0.83 | 1.21 |
| P14148_RL Rpl7  | 60S ribosor R.IVEPYIAWGYPNLK#.S        | 30.87   | 8.48   | 3.64 | 0.27 |

|                 |                                           |        |        |       |      |
|-----------------|-------------------------------------------|--------|--------|-------|------|
| P14148_RL Rpl7  | 60S ribosor K.SVNELIYK#.R                 | 4.84   | 1.51   | 3.20  | 0.31 |
| P14148_RL Rpl7  | 60S ribosor K.AGNFVYPAEPK#.L              | 32.22  | 9.57   | 3.37  | 0.30 |
| P14148_RL Rpl7  | 60S ribosor K.EANNFLWPFK#.L               | 41.12  | 8.99   | 4.57  | 0.22 |
| P14148_RL Rpl7  | 60S ribosor R.FK#EANNFLWPFK#.L            | 21.90  | 6.79   | 3.22  | 0.31 |
| P14148_RL Rpl7  | 60S ribosor R.IALTDNSLIAR.S               | 26.73  | 37.24  | 0.72  | 1.39 |
| P14148_RL Rpl7  | 60S ribosor R.IVEPYIAWGYPNLK#.S           | 68.77  | 21.47  | 3.20  | 0.31 |
| P14148_RL Rpl7  | 60S ribosor K.K#VPVAVPETLK#.K             | 50.99  | 15.28  | 3.34  | 0.30 |
| P14148_RL Rpl7  | 60S ribosor K.LAFVIR.I                    | 13.43  | 20.04  | 0.67  | 1.49 |
| P14148_RL Rpl7  | 60S ribosor K.EANNFLWPFK#.L               | 32.15  | 11.82  | 2.72  | 0.37 |
| P14148_RL Rpl7  | 60S ribosor R.FK#EANNFLWPFK#.L            | 13.13  | 6.26   | 2.10  | 0.48 |
| P14148_RL Rpl7  | 60S ribosor R.IALTDNSLIAR.S               | 19.44  | 26.91  | 0.72  | 1.38 |
| P14148_RL Rpl7  | 60S ribosor R.IVEPYIAWGYPNLK#.S           | 47.48  | 15.52  | 3.06  | 0.33 |
| P14148_RL Rpl7  | 60S ribosor R.K#AGNFVYPAEPK#.L            | 13.24  | 5.16   | 2.57  | 0.39 |
| P14148_RL Rpl7  | 60S ribosor K.LAFVIR.I                    | 10.15  | 16.61  | 0.61  | 1.64 |
| P14148_RL Rpl7  | 60S ribosor K.TTHFVEGGDAGNREDQINR.L       | 27.83  | 26.08  | 1.07  | 0.94 |
| P14148_RL Rpl7  | 60S ribosor K.VPVPVAVPETLK#.K             | 18.55  | 5.03   | 3.69  | 0.27 |
| P12970_RL Rpl7a | 60S ribosor R.AGVNTVTTLVENK#.K            | 858.38 | 291.92 | 2.94  | 0.34 |
| P12970_RL Rpl7a | 60S ribosor R.AGVNTVTTLVENK#.A            | 118.96 | 27.36  | 4.35  | 0.23 |
| P12970_RL Rpl7a | 60S ribosor R.HWGGNVLGPK#.S               | 382.66 | 144.66 | 2.65  | 0.38 |
| P12970_RL Rpl7a | 60S ribosor K.K#APAPAVK#.K                | 90.60  | 36.30  | 2.50  | 0.40 |
| P12970_RL Rpl7a | 60S ribosor K.K#VVNPLFEK#.R               | 750.35 | 185.18 | 4.05  | 0.25 |
| P12970_RL Rpl7a | 60S ribosor R.LKVPAINQFTQALDR.Q           | 149.31 | 207.21 | 0.72  | 1.39 |
| P12970_RL Rpl7a | 60S ribosor R.LKVPAINQFTQALDR.Q           | 16.03  | 22.16  | 0.72  | 1.38 |
| P12970_RL Rpl7a | 60S ribosor K.NFGIGQDIQPK#.R              | 854.14 | 281.51 | 3.03  | 0.33 |
| P12970_RL Rpl7a | 60S ribosor R.RHWGGNVLGPK.S               | 25.44  | 27.69  | 0.92  | 1.09 |
| P12970_RL Rpl7a | 60S ribosor K.RPPVLR.A                    | 98.05  | 551.79 | 0.18  | 5.63 |
| P12970_RL Rpl7a | 60S ribosor R.TNNDRYDEIR.R                | 11.78  | 49.66  | 0.24  | 4.22 |
| P12970_RL Rpl7a | 60S ribosor K.VPPAINQFTQALDR.Q            | 23.18  | 34.36  | 0.67  | 1.48 |
| P12970_RL Rpl7a | 60S ribosor K.VVNPVLEK#.R                 | 269.75 | 85.09  | 3.17  | 0.32 |
| P12970_RL Rpl7a | 60S ribosor R.AGVNTVTTLVENK#.K            | 192.72 | 60.46  | 3.19  | 0.31 |
| P12970_RL Rpl7a | 60S ribosor R.AGVNTVTTLVENK#.A            | 260.66 | 89.62  | 2.91  | 0.34 |
| P12970_RL Rpl7a | 60S ribosor R.AGVNTVTTLVENK#.K#A          | 30.83  | 13.63  | 2.26  | 0.44 |
| P12970_RL Rpl7a | 60S ribosor K.K#APAPAVK#.K                | 17.39  | 6.02   | 2.89  | 0.35 |
| P12970_RL Rpl7a | 60S ribosor K.K#VVNPLFEK#.R               | 26.29  | 5.73   | 4.59  | 0.22 |
| P12970_RL Rpl7a | 60S ribosor K.KVNPVLEK#.R                 | 49.06  | 23.99  | 2.04  | 0.49 |
| P12970_RL Rpl7a | 60S ribosor R.LKVPAINQFTQALDR.Q           | 38.50  | 69.91  | 0.55  | 1.82 |
| P12970_RL Rpl7a | 60S ribosor K.NFGIGQDIQPK#.R              | 267.74 | 90.57  | 2.96  | 0.34 |
| P12970_RL Rpl7a | 60S ribosor K.VPPAINQFTQALDR.Q            | 4.64   | 6.20   | 0.75  | 1.34 |
| P12970_RL Rpl7a | 60S ribosor R.AGVNTVTTLVENK#.K            | 88.47  | 24.64  | 3.59  | 0.28 |
| P12970_RL Rpl7a | 60S ribosor R.HWGGNVLGPK#.S               | 59.48  | 20.62  | 2.88  | 0.35 |
| P12970_RL Rpl7a | 60S ribosor R.LKVPAINQFTQALDR.Q           | 15.23  | 26.15  | 0.58  | 1.72 |
| P12970_RL Rpl7a | 60S ribosor K.NFGIGQDIQPK#.R              | 96.78  | 31.11  | 3.11  | 0.32 |
| P12970_RL Rpl7a | 60S ribosor K.VVNPVLEK#.R                 | 20.87  | 6.95   | 3.00  | 0.33 |
| P12970_RL Rpl7a | 60S ribosor R.AGVNTVTTLVENK#.K            | 70.18  | 18.11  | 3.88  | 0.26 |
| P12970_RL Rpl7a | 60S ribosor K.K#VVNPLFEK#.R               | 37.29  | 11.31  | 3.30  | 0.30 |
| P12970_RL Rpl7a | 60S ribosor R.LKVPAINQFTQALDR.Q           | 19.03  | 19.99  | 0.95  | 1.05 |
| P12970_RL Rpl7a | 60S ribosor K.NFGIGQDIQPK#.R              | 79.94  | 21.42  | 3.73  | 0.27 |
| P12970_RL Rpl7a | 60S ribosor K.VVNPVLEK#.R                 | 28.41  | 8.15   | 3.49  | 0.29 |
| P62918_RL Rpl8  | 60S ribosor R.AVDFAER.H                   | 174.40 | 201.87 | 0.86  | 1.16 |
| P62918_RL Rpl8  | 60S ribosor R.AVVGVVAGGGR.I               | 300.67 | 384.44 | 0.78  | 1.28 |
| P62918_RL Rpl8  | 60S ribosor K.DIIHDPR.G                   | 46.54  | 64.76  | 0.72  | 1.39 |
| P62918_RL Rpl8  | 60S ribosor R.IDK#PILK#.A                 | 289.73 | 111.58 | 2.60  | 0.39 |
| P62918_RL Rpl8  | 60S ribosor K.VGLJAAR.R                   | 81.22  | 109.20 | 0.74  | 1.34 |
| P62918_RL Rpl8  | 60S ribosor R.ASGNYATVISHNPETK#.K         | 221.83 | 85.01  | 2.61  | 0.38 |
| P62918_RL Rpl8  | 60S ribosor R.ASGNYATVISHNPETK#.T         | 11.16  | 3.58   | 3.12  | 0.32 |
| P62918_RL Rpl8  | 60S ribosor R.AVDFAER.H                   | 104.57 | 192.86 | 0.54  | 1.84 |
| P62918_RL Rpl8  | 60S ribosor R.AVVGVVAGGGR.I               | 127.46 | 236.12 | 0.54  | 1.85 |
| P62918_RL Rpl8  | 60S ribosor R.ASGNYATVISHNPETK#.K         | 13.16  | 2.71   | 4.85  | 0.21 |
| P51410_RL Rpl9  | 60S ribosor K.FLDGIYSEK#.G                | 33.77  | 11.45  | 2.95  | 0.34 |
| P51410_RL Rpl9  | 60S ribosor K.GVTLGFR.Y                   | 8.36   | 16.60  | 0.50  | 1.99 |
| P51410_RL Rpl9  | 60S ribosor K.TILSNQTVDIPENVEITLK#.G      | 8.29   | 3.81   | 2.18  | 0.46 |
| P51410_RL Rpl9  | 60S ribosor R.DFNHINVELSLGK#.K            | 52.68  | 19.16  | 2.75  | 0.36 |
| P51410_RL Rpl9  | 60S ribosor R.DFNHINVELSLGK#.K            | 32.62  | 10.66  | 3.06  | 0.33 |
| P51410_RL Rpl9  | 60S ribosor K.FLDGIYSEK#.G                | 984.71 | 306.69 | 3.21  | 0.31 |
| P51410_RL Rpl9  | 60S ribosor K.GVTLGFR.Y                   | 93.67  | 153.33 | 0.61  | 1.64 |
| P51410_RL Rpl9  | 60S ribosor R.K#FLDGIYSEK#.G              | 255.66 | 82.59  | 3.10  | 0.32 |
| P51410_RL Rpl9  | 60S ribosor -.M*#HTILSNQTVDIPENVEITLK#.G  | 34.23  | 11.96  | 2.86  | 0.35 |
| P51410_RL Rpl9  | 60S ribosor R.SVYAHFPINVIQENGLVEIR.N      | 17.83  | 32.81  | 0.54  | 1.84 |
| P51410_RL Rpl9  | 60S ribosor K.TILSNQTVDIPENVEITLK#.G      | 292.82 | 118.55 | 2.47  | 0.40 |
| P51410_RL Rpl9  | 60S ribosor K.TILSNQTVDIPENVEITLK#.G      | 188.52 | 72.79  | 2.59  | 0.39 |
| P51410_RL Rpl9  | 60S ribosor R.DFNHINVELSLGK#.K            | 14.32  | 5.63   | 2.55  | 0.39 |
| P51410_RL Rpl9  | 60S ribosor K.FLDGIYSEK#.G                | 29.45  | 9.18   | 3.21  | 0.31 |
| P51410_RL Rpl9  | 60S ribosor R.NFLGEK#.Y                   | 32.98  | 9.33   | 3.53  | 0.28 |
| P51410_RL Rpl9  | 60S ribosor K.TILSNQTVDIPENVEITLK#.G      | 9.15   | 2.11   | 4.34  | 0.23 |
| P51410_RL Rpl9  | 60S ribosor R.DFNHINVELSLGK#.K            | 10.16  | 1.54   | 6.59  | 0.15 |
| P51410_RL Rpl9  | 60S ribosor K.FLDGIYSEK#.G                | 67.89  | 19.51  | 3.48  | 0.29 |
| P51410_RL Rpl9  | 60S ribosor K.GVTLGFR.Y                   | 13.76  | 16.03  | 0.86  | 1.16 |
| P14869_RL Rplp0 | 60S acidic r K.AEAK#EESSEDED#M*GFLGFD.-   | 10.98  | 5.67   | 1.94  | 0.52 |
| P14869_RL Rplp0 | 60S acidic r K.AEAK#EESSEDED#M*GFLGFD.-   | 6.31   | 2.46   | 2.57  | 0.39 |
| P14869_RL Rplp0 | 60S acidic r K.AFLADPSAFAAAAAATAAPAAAAA#A | 458.44 | 261.58 | 1.75  | 0.57 |
| P14869_RL Rplp0 | 60S acidic r K.AFLADPSAFAAAAAATAAPAAAAA#A | 18.21  | 10.64  | 1.71  | 0.58 |
| P14869_RL Rplp0 | 60S acidic r K.AVLLM*GK#.N                | 195.85 | 98.30  | 1.99  | 0.50 |
| P14869_RL Rplp0 | 60S acidic r K.AVLLMGK#.N                 | 187.90 | 91.21  | 2.06  | 0.49 |
| P14869_RL Rplp0 | 60S acidic r R.DMLLANK#.V                 | 72.46  | 35.69  | 2.03  | 0.49 |
| P14869_RL Rplp0 | 60S acidic r K.EESSEDED#M*GFLGFD.-        | 10.41  | 10.41  | 1.00  | 1.00 |
| P14869_RL Rplp0 | 60S acidic r R.GHLENNPALEK#.L             | 544.05 | 210.58 | 2.58  | 0.39 |
| P14869_RL Rplp0 | 60S acidic r R.GNVGFVTK#.E                | 384.30 | 149.83 | 2.56  | 0.39 |
| P14869_RL Rplp0 | 60S acidic r R.GNVGFVTK#EDLEIR.D          | 30.89  | 58.51  | 0.53  | 1.89 |
| P14869_RL Rplp0 | 60S acidic r R.GTEILSDVQLK#.T             | 490.55 | 258.91 | 1.89  | 0.53 |
| P14869_RL Rplp0 | 60S acidic r K.IIQLLDYPK#.C               | 644.58 | 294.73 | 2.19  | 0.46 |
| P14869_RL Rplp0 | 60S acidic r K.TSFFQALGITTK#.I            | 745.89 | 293.01 | 2.55  | 0.39 |
| P14869_RL Rplp0 | 60S acidic r K.AEAK#EESSEDED#M*GFLGFD.-   | 4.26   | 2.22   | 1.92  | 0.52 |
| P14869_RL Rplp0 | 60S acidic r K.AFLADPSAFAAAAAATAAPAAAAA#A | 36.83  | 20.92  | 1.76  | 0.57 |
| P14869_RL Rplp0 | 60S acidic r K.AFLADPSAFAAAAAATAAPAAAAA#A | 103.88 | 41.09  | 2.53  | 0.40 |
| P14869_RL Rplp0 | 60S acidic r K.AVLLMGK#.N                 | 52.45  | 7.29   | 7.19  | 0.14 |
| P14869_RL Rplp0 | 60S acidic r K.AVLLM*GK#.N                | 153.23 | 27.79  | 5.51  | 0.18 |
| P14869_RL Rplp0 | 60S acidic r R.DM*LLANK#.V                | 20.45  | 4.76   | 4.30  | 0.23 |
| P14869_RL Rplp0 | 60S acidic r R.DM*LLANKVPAAR.A            | 2.28   | 6.72   | 0.34  | 2.95 |
| P14869_RL Rplp0 | 60S acidic r K.EDLEIR.D                   | 46.72  | 49.20  | 0.95  | 1.05 |
| P14869_RL Rplp0 | 60S acidic r R.FLEGVR.N                   | 185.23 | 141.90 | 1.31  | 0.77 |
| P14869_RL Rplp0 | 60S acidic r R.GHLENNPALEK#.L             | 348.68 | 14.80  | 23.56 | 0.04 |
| P14869_RL Rplp0 | 60S acidic r R.GK#AVLLM*GK#.N             | 9.08   | 1.78   | 5.10  | 0.20 |
| P14869_RL Rplp0 | 60S acidic r R.GNVGFVTK#.E                | 168.59 | 41.34  | 4.08  | 0.25 |

|                  |                                                          |         |         |      |      |
|------------------|----------------------------------------------------------|---------|---------|------|------|
| P14869_RL Rplp0  | 60S acidic r R.GTIELSDVQLIK#.T                           | 724.88  | 135.52  | 5.35 | 0.19 |
| P14869_RL Rplp0  | 60S acidic r K.IIQLLDDYPK#.C                             | 714.06  | 133.71  | 5.34 | 0.19 |
| P14869_RL Rplp0  | 60S acidic r K.TSFFQALGITTK#.I                           | 1399.34 | 224.27  | 6.24 | 0.16 |
| P14869_RL Rplp0  | 60S acidic r K.AFLADPSAFAAAAAATAAPAAAAAPAK#.A            | 76.60   | 33.05   | 2.32 | 0.43 |
| P14869_RL Rplp0  | 60S acidic r K.AFLADPSAFAAAAAATAAPAAAAAPAK#AEAK#.E       | 5.90    | 2.35    | 2.51 | 0.40 |
| P14869_RL Rplp0  | 60S acidic r R.GHLENNPALEK#.L                            | 160.27  | 48.41   | 3.31 | 0.30 |
| P14869_RL Rplp0  | 60S acidic r R.GNVGFVFTK#.E                              | 86.86   | 27.04   | 3.21 | 0.31 |
| P14869_RL Rplp0  | 60S acidic r R.GNVGFVFTKEDLTEIR.D                        | 11.78   | 19.08   | 0.62 | 1.62 |
| P14869_RL Rplp0  | 60S acidic r R.GTIELSDVQLIK#.T                           | 243.89  | 66.05   | 3.69 | 0.27 |
| P14869_RL Rplp0  | 60S acidic r K.IIQLLDDYPK#.C                             | 173.61  | 53.72   | 3.23 | 0.31 |
| P14869_RL Rplp0  | 60S acidic r K.TSFFQALGITTK#.I                           | 207.29  | 50.45   | 4.11 | 0.24 |
| P14869_RL Rplp0  | 60S acidic r K.AFLADPSAFAAAAAATAAPAAAAAPAK#.A            | 117.42  | 49.11   | 2.39 | 0.42 |
| P14869_RL Rplp0  | 60S acidic r R.GHLENNPALEK#.L                            | 241.44  | 72.61   | 3.33 | 0.30 |
| P14869_RL Rplp0  | 60S acidic r R.GNVGFVFTK#.E                              | 101.34  | 25.91   | 3.91 | 0.26 |
| P14869_RL Rplp0  | 60S acidic r R.GNVGFVFTKEDLTEIR.D                        | 14.50   | 11.91   | 1.22 | 0.82 |
| P14869_RL Rplp0  | 60S acidic r R.GTIELSDVQLIK#.T                           | 230.31  | 55.15   | 4.18 | 0.24 |
| P14869_RL Rplp0  | 60S acidic r K.IIQLLDDYPK#.C                             | 271.07  | 69.82   | 3.88 | 0.26 |
| P14869_RL Rplp0  | 60S acidic r K.TSFFQALGITTK#.I                           | 312.00  | 87.43   | 3.57 | 0.28 |
| P47955_RL Rplp1  | 60S acidic r K.AAGVSVEPFVWGLFAK#.A                       | 49.23   | 25.89   | 1.90 | 0.53 |
| P47955_RL Rplp1  | 60S acidic r K.AAGVSVEPFVWGLFAK#.A                       | 1576.40 | 1181.32 | 1.33 | 0.75 |
| P47955_RL Rplp1  | 60S acidic r K.#E#E#E#E#D#M*#G#F#L#D#-                   | 160.72  | 103.84  | 1.55 | 0.65 |
| P47955_RL Rplp1  | 60S acidic r K.#E#E#E#E#D#M#G#F#L#D#-                    | 42.56   | 30.20   | 1.41 | 0.71 |
| P47955_RL Rplp1  | 60S acidic r K.AAGVSVEPFVWGLFAK#.A                       | 20.37   | 12.92   | 1.58 | 0.63 |
| P47955_RL Rplp1  | 60S acidic r K.AAGVSVEPFVWGLFAK#.A                       | 21.17   | 10.88   | 1.95 | 0.51 |
| P99027_RL Rplp2  | 60S acidic r K.EE#E#E#D#M*#G#F#L#D#-                     | 13.95   | 13.95   | 1.00 | 1.00 |
| P99027_RL Rplp2  | 60S acidic r K.IILDSVGEADDDR.L                           | 43.52   | 177.02  | 0.25 | 4.07 |
| P99027_RL Rplp2  | 60S acidic r K.EE#E#E#D#M*#G#F#L#D#-                     | 50.34   | 40.92   | 1.23 | 0.81 |
| P99027_RL Rplp2  | 60S acidic r K.EE#E#E#D#M#G#F#L#D#-                      | 14.53   | 14.79   | 0.98 | 1.02 |
| P99027_RL Rplp2  | 60S acidic r K.KILDSVGEADDDR.L                           | 3.93    | 3.25    | 1.21 | 0.83 |
| P99027_RL Rplp2  | 60S acidic r K.KILDSVGEADDDR.LNK.V                       | 46.85   | 212.17  | 0.22 | 4.53 |
| P99027_RL Rplp2  | 60S acidic r K.KILDSVGEADDDR.LNK.V                       | 2.81    | 10.48   | 0.27 | 3.73 |
| P99027_RL Rplp2  | 60S acidic r K.LASVPAGGAVAVSAAPGSAAPGSAAPAAAEKK.D        | 91.94   | 90.68   | 1.01 | 0.99 |
| P99027_RL Rplp2  | 60S acidic r K.LASVPAGGAVAVSAAPGSAAPGSAAPAAAEKK.D        | 203.19  | 186.67  | 1.09 | 0.92 |
| P99027_RL Rplp2  | 60S acidic r K.LASVPAGGAVAVSAAPGSAAPGSAAPAAAEKK#H#DEK#.K | 29.27   | 35.61   | 0.82 | 1.22 |
| P99027_RL Rplp2  | 60S acidic r .M*RYVASYLLAALGNS#PSAK.D                    | 18.34   | 39.50   | 0.46 | 2.15 |
| P99027_RL Rplp2  | 60S acidic r K.NIEDVIAQGVGK#.L                           | 1579.59 | 1369.67 | 1.15 | 0.87 |
| P99027_RL Rplp2  | 60S acidic r K.VISELNGK#NIEDVIAQGVGK#.L                  | 10.51   | 9.72    | 1.08 | 0.92 |
| P99027_RL Rplp2  | 60S acidic r R.YVASYLLAALGNS#PSAK#.D                     | 473.31  | 420.57  | 1.13 | 0.89 |
| P99027_RL Rplp2  | 60S acidic r R.YVASYLLAALGNS#PSAK#.D                     | 3.69    | 5.50    | 0.67 | 1.49 |
| Q8R040_RL Rpp21  | Ribonuclea K.ENIQQTALNTSE.-                              | 8.40    | 8.40    | 1.00 | 1.00 |
| Q99JH1_RL Rpp25l | Ribonuclea R.NLLGLALGR.L                                 | 6.38    | 20.61   | 0.31 | 3.23 |
| Q8VDS4_RL Rprd1a | Regulation K.DFAPVIVEAFK#.H                              | 50.65   | 28.87   | 1.75 | 0.57 |
| Q8VDS4_RL Rprd1a | Regulation R.IASLPVEQEVSLEK#.I                           | 43.68   | 27.62   | 1.58 | 0.63 |
| Q8VDS4_RL Rprd1a | Regulation R.IASLPVEQEVSLEK#.I                           | 9.79    | 6.82    | 1.43 | 0.70 |
| Q8VDS4_RL Rprd1a | Regulation R.K#L#TFLYLANDVIQNSK#.R                       | 73.05   | 18.31   | 3.99 | 0.25 |
| Q8VDS4_RL Rprd1a | Regulation K.LTFLYLANDVIQNSK#.R                          | 21.08   | 10.46   | 2.02 | 0.50 |
| Q8VDS4_RL Rprd1a | Regulation K.LTFLYLANDVIQNSK#.R                          | 31.67   | 12.85   | 2.47 | 0.41 |
| Q8VDS4_RL Rprd1a | Regulation R.SVYENDVLEQLK#.H                             | 33.27   | 21.92   | 1.52 | 0.66 |
| Q9CSU0_RL Rprd1b | Regulation K.ALQDLENAAGSDATVR.Q                          | 12.26   | 21.04   | 0.58 | 1.72 |
| Q9CSU0_RL Rprd1b | Regulation K.IASLPVEQEVSLEK#.I                           | 60.83   | 17.27   | 3.52 | 0.28 |
| Q9CSU0_RL Rprd1b | Regulation R.LLNIVQER.S                                  | 16.38   | 26.38   | 0.62 | 1.61 |
| Q9CSU0_RL Rprd1b | Regulation R.M*LVYEQNQK#.E                               | 47.77   | 15.44   | 3.09 | 0.32 |
| Q9CSU0_RL Rprd1b | Regulation R.MLVYEQNQK#.E                                | 22.37   | 7.74    | 2.89 | 0.35 |
| Q9CSU0_RL Rprd1b | Regulation R.SVYGEFIIQQLK#.L                             | 69.57   | 23.89   | 2.91 | 0.34 |
| Q6NX16_RP Rprd2  | Regulation K.ASVGQSPVLPSTTFK#.L                          | 8.07    | 4.44    | 1.82 | 0.55 |
| Q6NX16_RP Rprd2  | Regulation K.VEITPESLSALS.K                              | 16.79   | 11.87   | 1.41 | 0.71 |
| Q6NX16_RP Rprd2  | Regulation R.APOFQESVTSFR.S                              | 2.46    | 18.87   | 0.13 | 7.67 |
| Q6NX16_RP Rprd2  | Regulation K.ASVGQSPVLPSTTFK#.L                          | 14.28   | 13.29   | 1.07 | 0.93 |
| Q6NX16_RP Rprd2  | Regulation R.ESFADVLPAAALVK#.D                           | 18.64   | 13.63   | 1.37 | 0.73 |
| Q6NX16_RP Rprd2  | Regulation K.GTSSDGVLSLNTQPSLPTDQQQEEHYR.I               | 1.65    | 5.36    | 0.31 | 3.26 |
| Q6NX16_RP Rprd2  | Regulation K.ISSLSLTSVMK.N                               | 9.06    | 9.39    | 0.96 | 1.04 |
| Q6NX16_RP Rprd2  | Regulation R.NLLSSTQFIPK#.S                              | 12.06   | 11.50   | 1.05 | 0.95 |
| P63325_RS Rps10  | 40S ribosor R.AIAVELLKF#.E                               | 16.02   | 9.60    | 1.67 | 0.60 |
| P63325_RS Rps10  | 40S ribosor K.AEAGSATEFQFR.G                             | 105.23  | 227.04  | 0.46 | 2.16 |
| P63325_RS Rps10  | 40S ribosor R.DYHLPEIIVATLR.R                            | 43.97   | 98.50   | 0.45 | 2.24 |
| P63325_RS Rps10  | 40S ribosor K.EQAFWAR.H                                  | 51.74   | 117.14  | 0.44 | 2.26 |
| P63325_RS Rps10  | 40S ribosor R.HFYWVLTNEGIQYL.R                           | 28.08   | 58.02   | 0.48 | 2.07 |
| P63325_RS Rps10  | 40S ribosor K.HPELADK#NVPNLHVM*#K#.A                     | 119.72  | 67.00   | 1.79 | 0.56 |
| P63325_RS Rps10  | 40S ribosor K.HPELADK#NVPNLHVM*#K#.A                     | 18.29   | 10.95   | 1.67 | 0.60 |
| P63325_RS Rps10  | 40S ribosor R.AIAVELLKF#.E                               | 1707.00 | 770.86  | 2.21 | 0.45 |
| P63325_RS Rps10  | 40S ribosor K.AEAGSATEFQFR.G                             | 81.63   | 175.57  | 0.46 | 2.15 |
| P62281_RS Rps11  | 40S ribosor K.EAIEGTIDK#K#.C                             | 19.86   | 10.44   | 1.90 | 0.53 |
| P62281_RS Rps11  | 40S ribosor R.AYQK#QPTIFQNK#.K                           | 65.83   | 100.46  | 0.66 | 1.53 |
| P62281_RS Rps11  | 40S ribosor R.DYHLHYR.K                                  | 81.30   | 140.75  | 0.58 | 1.73 |
| P62281_RS Rps11  | 40S ribosor K.EAIEGTIDK#.K                               | 211.40  | 87.76   | 2.41 | 0.42 |
| P62281_RS Rps11  | 40S ribosor K.EAIEGTIDK#K#.C                             | 196.71  | 82.16   | 2.39 | 0.42 |
| P62281_RS Rps11  | 40S ribosor R.ILSGVFTK#.M                                | 1058.42 | 389.78  | 2.72 | 0.37 |
| P62281_RS Rps11  | 40S ribosor K.#QFQK#F.-                                  | 35.43   | 294.54  | 0.12 | 8.31 |
| P62281_RS Rps11  | 40S ribosor K.NIGLGFK#.T                                 | 805.19  | 301.09  | 2.67 | 0.37 |
| P62281_RS Rps11  | 40S ribosor R.VLLGETGK#.E                                | 255.62  | 100.06  | 2.55 | 0.39 |
| P62281_RS Rps11  | 40S ribosor R.VLLGETGK#EK#.L                             | 328.76  | 158.05  | 2.08 | 0.48 |
| P63323_RS Rps12  | 40S ribosor K.DVIEEYFK#.C                                | 423.47  | 149.48  | 2.83 | 0.35 |
| P63323_RS Rps12  | 40S ribosor K.DYGK#ESQAK#DVIEEYFK#.C                     | 20.91   | 8.21    | 2.55 | 0.39 |
| P63323_RS Rps12  | 40S ribosor K.ESQAK#DVIEEYFK#.C                          | 130.85  | 43.28   | 3.02 | 0.33 |
| P63323_RS Rps12  | 40S ribosor K.ESQAK#DVIEEYFK#.C                          | 37.91   | 18.40   | 2.06 | 0.49 |
| P62301_RS Rps13  | 40S ribosor K.GLTPSQGVILR.D                              | 334.32  | 628.78  | 0.53 | 1.88 |
| P62301_RS Rps13  | 40S ribosor K.GLTPSQGVILR.D                              | 158.98  | 320.18  | 0.50 | 2.01 |
| P62301_RS Rps13  | 40S ribosor K.KGLTPSQGVILR.D                             | 248.98  | 401.03  | 0.62 | 1.61 |
| P62301_RS Rps13  | 40S ribosor R.LILIES.I                                   | 414.89  | 709.29  | 0.58 | 1.71 |
| P62301_RS Rps13  | 40S ribosor K.LTSDDVK#EQIYK#.L                           | 277.43  | 112.75  | 2.46 | 0.41 |
| P62301_RS Rps13  | 40S ribosor K.SK#GLAPLDPEDLYHLIK#.K                      | 207.42  | 93.60   | 2.22 | 0.45 |
| P62301_RS Rps13  | 40S ribosor K.YESSASALVA.-                               | 315.15  | 315.15  | 1.00 | 1.00 |
| P62264_RS Rps14  | 40S ribosor K.ADRDESSPYAAM*LAQDVAQR.C                    | 15.62   | 78.75   | 0.20 | 5.04 |
| P62264_RS Rps14  | 40S ribosor K.ADRDESSPYAAM*LAQDVAQR.C                    | 16.61   | 82.55   | 0.20 | 4.97 |
| P62264_RS Rps14  | 40S ribosor R.DESSPYAAM*LAQDVAQR.C                       | 5.59    | 8.86    | 0.63 | 1.58 |
| P62264_RS Rps14  | 40S ribosor R.DESSPYAAM*LAQDVAQR.C                       | 3.86    | 10.02   | 0.39 | 2.60 |
| P62264_RS Rps14  | 40S ribosor K.ELGITALHIK#.L                              | 111.53  | 58.92   | 1.89 | 0.53 |
| P62264_RS Rps14  | 40S ribosor R.IEDVTPIPSDSTR.R                            | 227.86  | 494.23  | 0.46 | 2.17 |
| P62264_RS Rps14  | 40S ribosor R.TKTPGPAQSALR.A                             | 37.92   | 73.05   | 0.52 | 1.93 |
| P62264_RS Rps14  | 40S ribosor K.TPGPAQSALR.A                               | 220.90  | 477.36  | 0.46 | 2.16 |
| P62264_RS Rps14  | 40S ribosor K.VKADRESSPYAAM*LAQDVAQR.C                   | 7.23    | 33.07   | 0.22 | 4.57 |
| P62264_RS Rps14  | 40S ribosor R.IEDVTPIPSDSTR.R                            | 5.04    | 17.13   | 0.29 | 3.40 |
| P62843_RS Rps15  | 40S ribosor R.DM*ILLPEMVGSMVGVYNGK#.T                    | 7.93    | 2.81    | 2.82 | 0.36 |

|                    |                                             |         |        |      |       |
|--------------------|---------------------------------------------|---------|--------|------|-------|
| P62843_RS Rps15    | 40S ribosor K.KEAPPMEKPEVVK.T               | 89.97   | 47.09  | 1.91 | 0.52  |
| P62843_RS Rps15    | 40S ribosor K.KEAPPMEKPEVVK.H.T             | 29.61   | 16.18  | 1.83 | 0.55  |
| P62843_RS Rps15    | 40S ribosor K.TFNQVEIKPEM*IGHYLGFSITKPKV.H  | 18.35   | 9.53   | 1.93 | 0.52  |
| P62843_RS Rps15    | 40S ribosor K.TFNQVEIKPEMIGHYLGFSITKPKV.H.H | 8.22    | 3.51   | 2.34 | 0.43  |
| P62245_RS Rps15a   | 40S ribosor R.FDVQLK#D                      | 89.12   | 25.47  | 3.50 | 0.29  |
| P62245_RS Rps15a   | 40S ribosor K.HGYGFEFIEDDHR.A               | 18.62   | 29.71  | 0.63 | 1.60  |
| P62245_RS Rps15a   | 40S ribosor R.M*NVLADALK#S                  | 53.92   | 28.03  | 1.92 | 0.52  |
| P62245_RS Rps15a   | 40S ribosor R.MNVLADALK#S                   | 17.68   | 9.98   | 1.77 | 0.56  |
| P62245_RS Rps15a   | 40S ribosor R.FDVQLK#D                      | 348.86  | 80.79  | 4.32 | 0.23  |
| P62245_RS Rps15a   | 40S ribosor R.FDVQLK#DLEK#W                 | 179.91  | 64.04  | 2.81 | 0.36  |
| P62245_RS Rps15a   | 40S ribosor R.FDVQLK#DLEK#WQNNLLPSR.Q       | 4.92    | 16.78  | 0.29 | 3.41  |
| P62245_RS Rps15a   | 40S ribosor K.HGYGFEFIEDDHR.A               | 44.23   | 64.55  | 0.69 | 1.46  |
| P62245_RS Rps15a   | 40S ribosor K.IVVNLTGR.L                    | 116.76  | 189.45 | 0.62 | 1.62  |
| P62245_RS Rps15a   | 40S ribosor R.M*NVLADALK#S                  | 493.47  | 198.43 | 2.49 | 0.40  |
| P62245_RS Rps15a   | 40S ribosor R.MNVLADALK#S                   | 82.86   | 21.26  | 3.90 | 0.26  |
| P62245_RS Rps15a   | 40S ribosor R.QFGFVLTSAGIM*DHEEAR.R         | 18.41   | 26.61  | 0.69 | 1.45  |
| P62245_RS Rps15a   | 40S ribosor R.QFGFVLTSAGIMDHEEAR.R          | 6.62    | 11.15  | 0.59 | 1.68  |
| P62245_RS Rps15a   | 40S ribosor K.WQNNLLPSR.Q                   | 85.97   | 178.75 | 0.48 | 2.08  |
| P62245_RS Rps15a   | 40S ribosor R.FDVQLK#D                      | 81.00   | 22.33  | 3.63 | 0.28  |
| P62245_RS Rps15a   | 40S ribosor R.FDVQLK#DLEK#W                 | 37.86   | 15.08  | 2.51 | 0.40  |
| P62245_RS Rps15a   | 40S ribosor K.HGYGFEFIEDDHR.A               | 23.94   | 43.60  | 0.55 | 1.82  |
| P62245_RS Rps15a   | 40S ribosor K.IVVNLTGR.L                    | 25.44   | 47.45  | 0.54 | 1.87  |
| P62245_RS Rps15a   | 40S ribosor R.M*NVLADALK#S                  | 58.32   | 19.88  | 2.93 | 0.34  |
| P62245_RS Rps15a   | 40S ribosor R.MNVLADALK#S                   | 24.03   | 8.85   | 2.72 | 0.37  |
| P62245_RS Rps15a   | 40S ribosor K.WQNNLLPSR.Q                   | 14.31   | 35.38  | 0.40 | 2.47  |
| P62245_RS Rps15a   | 40S ribosor R.FDVQLK#D                      | 117.00  | 42.69  | 2.74 | 0.36  |
| P62245_RS Rps15a   | 40S ribosor R.FDVQLK#DLEK#W                 | 43.28   | 13.86  | 3.12 | 0.32  |
| P62245_RS Rps15a   | 40S ribosor K.HGYGFEFIEDDHR.A               | 12.47   | 19.20  | 0.65 | 1.54  |
| P62245_RS Rps15a   | 40S ribosor K.IVVNLTGR.L                    | 34.09   | 48.26  | 0.71 | 1.42  |
| P62245_RS Rps15a   | 40S ribosor R.M*NVLADALK#S                  | 73.84   | 26.21  | 2.82 | 0.35  |
| P62245_RS Rps15a   | 40S ribosor K.WQNNLLPSR.Q                   | 19.84   | 24.83  | 0.80 | 1.25  |
| P14131_RS Rps16    | 40S ribosor K.ALVAAYQK#Y                    | 16.41   | 5.00   | 3.28 | 0.30  |
| P14131_RS Rps16    | 40S ribosor R.FAGVDIR.V                     | 10.64   | 16.93  | 0.63 | 1.59  |
| P14131_RS Rps16    | 40S ribosor K.LLEPVLGK#E                    | 76.67   | 35.97  | 2.13 | 0.47  |
| P14131_RS Rps16    | 40S ribosor K.ALVAAYQK#Y                    | 630.77  | 227.10 | 2.78 | 0.36  |
| P14131_RS Rps16    | 40S ribosor K.DILI QYDR.T                   | 48.46   | 110.23 | 0.44 | 2.27  |
| P14131_RS Rps16    | 40S ribosor K.EIKDILIQYDR.T                 | 90.39   | 137.44 | 0.66 | 1.52  |
| P14131_RS Rps16    | 40S ribosor R.FAGVDIR.V                     | 130.21  | 219.34 | 0.59 | 1.68  |
| P14131_RS Rps16    | 40S ribosor K.GPLQSQVQVFR.K                 | 138.94  | 260.33 | 0.53 | 1.87  |
| P14131_RS Rps16    | 40S ribosor K.LLEPVLGK#E                    | 1091.57 | 414.43 | 2.63 | 0.38  |
| P14131_RS Rps16    | 40S ribosor R.TLLVADPR.R                    | 96.54   | 192.72 | 0.50 | 2.00  |
| P14131_RS Rps16    | 40S ribosor R.VKGGGHVAQYAIR.Q               | 71.56   | 111.65 | 0.64 | 1.56  |
| P14131_RS Rps16    | 40S ribosor K.VNGRPLEM*IEPR.T               | 3.31    | 49.78  | 0.07 | 15.02 |
| P14131_RS Rps16    | 40S ribosor K.VNGRPLEMIEPR.T                | 1.24    | 11.37  | 0.11 | 9.16  |
| P14131_RS Rps16    | 40S ribosor K.ALVAAYQK#Y                    | 19.11   | 9.96   | 1.92 | 0.52  |
| P14131_RS Rps16    | 40S ribosor K.LLEPVLGK#E                    | 50.89   | 21.04  | 2.42 | 0.41  |
| P14131_RS Rps16    | 40S ribosor K.ALVAAYQK#Y                    | 25.71   | 14.21  | 1.81 | 0.55  |
| P14131_RS Rps16    | 40S ribosor K.LLEPVLGK#E                    | 101.88  | 44.99  | 2.26 | 0.44  |
| P63276_RS Rps17    | 40S ribosor R.DNYVPEVALDQIEVDPDK#E          | 5.39    | 6.49   | 0.83 | 1.20  |
| P63276_RS Rps17    | 40S ribosor K.IAGYVTHLM*#K.R                | 19.97   | 5.95   | 3.36 | 0.30  |
| P63276_RS Rps17    | 40S ribosor K.LLDFGSLSNLQVTOPTVGM*#NFK#T    | 4.47    | 3.21   | 1.39 | 0.72  |
| P63276_RS Rps17    | 40S ribosor R.DNYVPEVALDQIEVDPDK#E          | 60.29   | 28.05  | 2.15 | 0.47  |
| P63276_RS Rps17    | 40S ribosor R.DNYVPEVALDQIEVDPDK#EM*#LK#L   | 539.39  | 240.17 | 2.25 | 0.45  |
| P63276_RS Rps17    | 40S ribosor K.IAGYVTHLMK#R                  | 47.00   | 22.00  | 2.14 | 0.47  |
| P63276_RS Rps17    | 40S ribosor R.LGNDFHTNKR.V                  | 20.10   | 33.74  | 0.60 | 1.68  |
| P63276_RS Rps17    | 40S ribosor K.LLDFGSLSNLQVTOPTVGM*#NFK#T    | 463.77  | 178.73 | 2.59 | 0.39  |
| P63276_RS Rps17    | 40S ribosor K.LLDFGSLSNLQVTOPTVGM#NFK#T     | 368.69  | 132.35 | 2.79 | 0.36  |
| P63276_RS Rps17    | 40S ribosor K.LLDFGSLSNLQVTOPTVGM*#NFKTPR.G | 1.88    | 5.13   | 0.37 | 2.72  |
| P63276_RS Rps17    | 40S ribosor K.LLDFGSLSNLQVTOPTVGM*#NFK#T    | 13.69   | 6.60   | 2.07 | 0.48  |
| P62270_RS Rps18    | 40S ribosor R.AGELTEDEVER.V                 | 178.82  | 316.90 | 0.56 | 1.77  |
| P62270_RS Rps18    | 40S ribosor R.HFWGLR.V                      | 138.22  | 226.18 | 0.61 | 1.64  |
| P62270_RS Rps18    | 40S ribosor K.IAFAITAIK#G                   | 1019.26 | 295.06 | 3.45 | 0.29  |
| P62270_RS Rps18    | 40S ribosor K.IPDWFLNR.Q                    | 524.18  | 944.57 | 0.55 | 1.80  |
| P62270_RS Rps18    | 40S ribosor R.#ADILTK#R                     | 539.75  | 181.17 | 2.98 | 0.34  |
| P62270_RS Rps18    | 40S ribosor R.KADILTKR.A                    | 3.43    | 5.04   | 0.68 | 1.47  |
| P62270_RS Rps18    | 40S ribosor R.K#IAFAITAIK#G                 | 249.72  | 77.32  | 3.23 | 0.31  |
| P62270_RS Rps18    | 40S ribosor K.LREDLER.L                     | 30.77   | 182.31 | 0.17 | 5.92  |
| P62270_RS Rps18    | 40S ribosor K.RAGELTEDEVER.V                | 20.53   | 132.24 | 0.16 | 6.44  |
| P62270_RS Rps18    | 40S ribosor R.VITIM*QNPR.Q                  | 200.70  | 375.09 | 0.54 | 1.87  |
| P62270_RS Rps18    | 40S ribosor R.VITIMQNPR.Q                   | 36.65   | 61.74  | 0.59 | 1.68  |
| P62270_RS Rps18    | 40S ribosor R.VLNTNIDGR.R                   | 305.85  | 503.63 | 0.61 | 1.65  |
| P62270_RS Rps18    | 40S ribosor K.YSQVLANGLDNK#L                | 358.04  | 127.13 | 2.82 | 0.36  |
| Q9CZ8_RS Rps19     | 40S ribosor R.ALAFLK#K                      | 314.84  | 161.24 | 1.95 | 0.51  |
| Q9CZ8_RS Rps19     | 40S ribosor R.ALAFLK#K#S                    | 75.62   | 37.74  | 2.00 | 0.50  |
| Q9CZ8_RS Rps19     | 40S ribosor K.DVNOQEFVR.A                   | 237.56  | 467.18 | 0.51 | 1.97  |
| Q9CZ8_RS Rps19     | 40S ribosor K.ELAPYDENWFYTR.A               | 58.50   | 111.72 | 0.52 | 1.91  |
| Q9CZ8_RS Rps19     | 40S ribosor K.HKELAPYDENWFYTR.A             | 25.41   | 46.89  | 0.54 | 1.85  |
| Q9CZ8_RS Rps19     | 40S ribosor R.IAGQVAANK#K                   | 81.53   | 36.84  | 2.21 | 0.45  |
| Q9CZ8_RS Rps19     | 40S ribosor R.IAGQVAANK#K#H                 | 43.00   | 18.66  | 2.30 | 0.43  |
| Q9CZ8_RS Rps19     | 40S ribosor K.LK#VPEVVDTVK#L                | 615.58  | 294.04 | 2.09 | 0.48  |
| Q9CZ8_RS Rps19     | 40S ribosor R.RVLQALEGLK.M                  | 20.28   | 33.64  | 0.60 | 1.66  |
| Q9CZ8_RS Rps19     | 40S ribosor R.VLQALEGLK.M                   | 1057.36 | 440.14 | 2.40 | 0.42  |
| Q8C6B9_Af Rps19bp1 | Active regu K.AEGVTFTEEDFOK#F               | 15.38   | 36.19  | 0.42 | 2.35  |
| Q8C6B9_Af Rps19bp1 | Active regu R.AVPGVQASGTPAK#R               | 13.46   | 13.61  | 0.99 | 1.01  |
| Q8C6B9_Af Rps19bp1 | Active regu R.STVPSVTQQLIQNQGR.K            | 11.17   | 32.86  | 0.34 | 2.94  |
| P25444_RS Rps2     | 40S ribosor K.AEDKHEWIPVK#L                 | 374.18  | 142.34 | 2.63 | 0.38  |
| P25444_RS Rps2     | 40S ribosor K.ATFDAISK#T                    | 479.89  | 161.21 | 2.98 | 0.34  |
| P25444_RS Rps2     | 40S ribosor R.GTGIVSAPVPK#K                 | 533.95  | 196.10 | 2.72 | 0.37  |
| P25444_RS Rps2     | 40S ribosor R.GYWGNK#I                      | 75.41   | 31.13  | 2.42 | 0.41  |
| P25444_RS Rps2     | 40S ribosor K.IIM*PVQK#Q                    | 218.61  | 92.65  | 2.36 | 0.42  |
| P25444_RS Rps2     | 40S ribosor K.IIMPVQK#Q                     | 181.70  | 62.77  | 2.89 | 0.35  |
| P25444_RS Rps2     | 40S ribosor K.LSIVPVR.R                     | 54.84   | 97.93  | 0.56 | 1.79  |
| P25444_RS Rps2     | 40S ribosor K.LSIVPVR.R                     | 9.99    | 44.03  | 0.23 | 4.41  |
| P25444_RS Rps2     | 40S ribosor K.SLEEYLFSLPIK#E                | 851.79  | 328.18 | 2.60 | 0.39  |
| P25444_RS Rps2     | 40S ribosor K.SPYQEFTHLVK#T                 | 375.22  | 146.68 | 2.56 | 0.39  |
| P25444_RS Rps2     | 40S ribosor K.TYSYLPDLWK#E                  | 339.17  | 132.97 | 2.55 | 0.39  |
| P25444_RS Rps2     | 40S ribosor R.GTGIVSAPVPK#K                 | 93.57   | 24.76  | 3.78 | 0.26  |
| P25444_RS Rps2     | 40S ribosor K.LSIVPVR.R                     | 9.19    | 13.73  | 0.67 | 1.49  |
| P25444_RS Rps2     | 40S ribosor K.SLEEYLFSLPIK#E                | 31.60   | 7.02   | 4.50 | 0.22  |
| P25444_RS Rps2     | 40S ribosor K.AEDKHEWIPVK#L                 | 48.46   | 17.24  | 2.81 | 0.36  |
| P25444_RS Rps2     | 40S ribosor K.ATFDAISK#T                    | 47.22   | 20.14  | 2.34 | 0.43  |
| P25444_RS Rps2     | 40S ribosor R.GTGIVSAPVPK#K                 | 58.87   | 24.92  | 2.36 | 0.42  |
| P25444_RS Rps2     | 40S ribosor K.SLEEYLFSLPIK#E                | 63.80   | 28.31  | 2.25 | 0.44  |

|                 |                                           |         |        |      |      |
|-----------------|-------------------------------------------|---------|--------|------|------|
| P25444_RS Rps2  | 40S ribosor K.SPYQEFTDHLVK#.T             | 70.93   | 25.49  | 2.78 | 0.36 |
| P25444_RS Rps2  | 40S ribosor K.TYSYLPDLWK#.E               | 40.28   | 17.51  | 2.30 | 0.43 |
| P25444_RS Rps2  | 40S ribosor K.AEDKHEWIPVTK#.L             | 61.64   | 24.71  | 2.49 | 0.40 |
| P25444_RS Rps2  | 40S ribosor K.ATFDAISK#.T                 | 46.97   | 15.28  | 3.07 | 0.33 |
| P25444_RS Rps2  | 40S ribosor R.GTGVASAPVPK#.K              | 85.33   | 32.00  | 2.67 | 0.37 |
| P25444_RS Rps2  | 40S ribosor K.SPYQEFTDHLVK#.T             | 83.38   | 29.46  | 2.83 | 0.35 |
| P25444_RS Rps2  | 40S ribosor K.TYSYLPDLWK#.E               | 44.94   | 17.32  | 2.59 | 0.39 |
| P60867_RS Rps20 | 40S ribosor K.DTGTPTPEVEVAHR.I            | 76.13   | 148.64 | 0.51 | 1.95 |
| P60867_RS Rps20 | 40S ribosor R.LIDLHSPSEIVK#.Q             | 427.65  | 205.72 | 2.08 | 0.48 |
| P60867_RS Rps20 | 40S ribosor K.QTISISIEPGVEVEVTIADA.-      | 11.56   | 11.56  | 1.00 | 1.00 |
| P60867_RS Rps20 | 40S ribosor K.TPPEVEVAHR.I                | 98.73   | 215.59 | 0.46 | 2.18 |
| Q9CQR2_R Rps21  | 40S ribosor K.DHASIQM*NVAEVD.R.T          | 8.69    | 16.35  | 0.53 | 1.88 |
| Q9CQR2_R Rps21  | 40S ribosor K.DHASIQMVAEVD.R.T            | 2.66    | 6.19   | 0.43 | 2.33 |
| Q9CQR2_R Rps21  | 40S ribosor R.FNGQFK#.T                   | 29.28   | 60.97  | 0.48 | 2.08 |
| Q9CQR2_R Rps21  | 40S ribosor R.M*GESDLSLR.L                | 46.36   | 77.75  | 0.60 | 1.68 |
| P62267_RS Rps23 | 40S ribosor R.VANVSLLLYK#.G               | 72.22   | 24.66  | 2.93 | 0.34 |
| P62267_RS Rps23 | 40S ribosor K.ANPFGGASHAK#.G              | 583.51  | 251.44 | 2.32 | 0.43 |
| P62267_RS Rps23 | 40S ribosor K.GHAVGDIPIGVR.F              | 16.15   | 97.45  | 0.17 | 6.04 |
| P62267_RS Rps23 | 40S ribosor K.K#AHLGTALK#.A               | 27.09   | 4.91   | 5.52 | 0.18 |
| P62267_RS Rps23 | 40S ribosor R.KGHAVGDIPIGVR.F             | 22.92   | 60.32  | 0.38 | 2.63 |
| P62267_RS Rps23 | 40S ribosor K.VANVSLLLYK#.G               | 2124.38 | 813.30 | 2.61 | 0.38 |
| P62267_RS Rps23 | 40S ribosor K.VANVSLLLYK#.G               | 25.55   | 11.90  | 2.15 | 0.47 |
| P62267_RS Rps23 | 40S ribosor K.VANVSLLLYK#.G               | 24.55   | 8.44   | 2.91 | 0.34 |
| P62849_RS Rps24 | 40S ribosor R.K#QM*VIDLHHPGK#.A           | 53.45   | 14.43  | 3.70 | 0.27 |
| P62849_RS Rps24 | 40S ribosor R.K#QM*VIDLHHPGK#.A           | 2.22    | 1.61   | 1.38 | 0.73 |
| P62849_RS Rps24 | 40S ribosor R.K#QMVIDLHHPGK#.A            | 68.99   | 26.72  | 2.58 | 0.39 |
| P62849_RS Rps24 | 40S ribosor K.QM*VIDLHHPGK#.A             | 60.30   | 27.49  | 2.19 | 0.46 |
| P62849_RS Rps24 | 40S ribosor K.TTGFQM*YDLSLYAK#.K          | 413.42  | 120.15 | 3.44 | 0.29 |
| P62849_RS Rps24 | 40S ribosor K.TTGFQM*YDLSLYAK#.K          | 186.69  | 59.54  | 3.14 | 0.32 |
| P62849_RS Rps24 | 40S ribosor K.TTDPVIFVGFGR.T              | 74.17   | 102.45 | 0.72 | 1.38 |
| P62852_RS Rps25 | 40S ribosor R.DKLNLLVDFDK#.A              | 15.31   | 5.80   | 2.64 | 0.38 |
| P62852_RS Rps25 | 40S ribosor K.LNNLLVDFDK#.A               | 12.57   | 4.56   | 2.76 | 0.36 |
| P62852_RS Rps25 | 40S ribosor R.AALQELLSK#.G                | 1000.78 | 447.51 | 2.24 | 0.45 |
| P62852_RS Rps25 | 40S ribosor R.AQVIYTR.N                   | 118.98  | 239.64 | 0.50 | 2.01 |
| P62852_RS Rps25 | 40S ribosor R.DKLNLLVDFDK.A               | 81.97   | 20.46  | 4.01 | 0.25 |
| P62852_RS Rps25 | 40S ribosor K.LITPAVVSER.L                | 307.16  | 592.66 | 0.52 | 1.93 |
| P62852_RS Rps25 | 40S ribosor K.LNNLLVDFDK#.A               | 218.59  | 99.56  | 2.20 | 0.46 |
| P62852_RS Rps25 | 40S ribosor R.NTK#GGDAPAAGEDA.-           | 9.93    | 3.84   | 2.59 | 0.39 |
| P62852_RS Rps25 | 40S ribosor K.VRDKLNLLVDFDK.A             | 18.08   | 42.88  | 0.42 | 2.37 |
| P62855_RS Rps26 | 40S ribosor R.DISEASVFDAYVLPK#.L          | 41.35   | 9.87   | 4.19 | 0.24 |
| P62855_RS Rps26 | 40S ribosor R.DISEASVFDAYVLPK#.L          | 1173.03 | 475.98 | 2.46 | 0.41 |
| P62855_RS Rps26 | 40S ribosor R.GHVQPIR.C                   | 28.79   | 50.13  | 0.57 | 1.74 |
| P62855_RS Rps26 | 40S ribosor R.NIVEAAVR.D                  | 233.78  | 359.78 | 0.65 | 1.54 |
| P62855_RS Rps26 | 40S ribosor R.NIVEAAVR.D                  | 14.03   | 22.68  | 0.62 | 1.62 |
| Q6ZU9_R Rps27   | 40S ribosor K.DLLHPSPEEEK#.R              | 49.71   | 25.45  | 1.95 | 0.51 |
| Q6ZU9_R Rps27   | 40S ribosor K.DLLHPSPEEEK#.R              | 7.63    | 4.52   | 1.69 | 0.59 |
| Q6ZU9_R Rps27   | 40S ribosor R.LVQSPNSYFM*DVK#.C           | 15.68   | 6.92   | 2.27 | 0.44 |
| Q6ZU9_R Rps27   | 40S ribosor R.DLLHPSPEEEK#.K              | 26.83   | 10.68  | 2.51 | 0.40 |
| Q6ZU9_R Rps27   | 40S ribosor R.DLLHPSPEEEK#.K#K#.H         | 64.19   | 27.21  | 2.36 | 0.42 |
| Q6ZU9_R Rps27   | 40S ribosor R.LVQSPNSYFM*DVK#.C           | 366.79  | 150.70 | 2.43 | 0.41 |
| Q6ZU9_R Rps27   | 40S ribosor R.LVQSPNSYFM*DVK#.C           | 63.54   | 28.00  | 2.27 | 0.44 |
| Q6ZU9_R Rps27   | 40S ribosor R.LVQSPNSYFM*DVK#.C           | 20.69   | 8.21   | 2.52 | 0.40 |
| Q6ZU9_R Rps27   | 40S ribosor R.LVQSPNSYFM*DVK#.C           | 14.97   | 7.76   | 1.93 | 0.52 |
| Q6ZU9_R Rps27   | 40S ribosor R.LVQSPNSYFM*DVK#.C           | 44.18   | 18.09  | 2.44 | 0.41 |
| Q6ZU9_R Rps27   | 40S ribosor R.LVQSPNSYFM*DVK#.C           | 16.23   | 8.58   | 1.89 | 0.53 |
| P62858_RS Rps28 | 40S ribosor R.EGDVLTLESER.E               | 142.52  | 293.95 | 0.48 | 2.06 |
| P62858_RS Rps28 | 40S ribosor K.GPVREGDVLTLLESER.E          | 11.52   | 65.34  | 0.18 | 5.67 |
| P62858_RS Rps28 | 40S ribosor R.VEFMDTSR.S                  | 14.52   | 27.82  | 0.52 | 1.92 |
| P62858_RS Rps28 | 40S ribosor R.VEFM*DDTSR.S                | 48.20   | 104.63 | 0.46 | 2.17 |
| P62274_RS Rps29 | 40S ribosor K.DIGFIK#L.D                  | 588.35  | 289.06 | 2.04 | 0.49 |
| P62908_RS Rps3  | 40S ribosor K.AELNEFLTR.E                 | 136.08  | 245.98 | 0.55 | 1.81 |
| P62908_RS Rps3  | 40S ribosor K.DELPTTPISEQK#.G             | 361.28  | 173.99 | 2.08 | 0.48 |
| P62908_RS Rps3  | 40S ribosor R.ELAEDGYSYGEVVR.V            | 114.47  | 209.47 | 0.55 | 1.83 |
| P62908_RS Rps3  | 40S ribosor R.ELTAVVQK#.R                 | 295.14  | 140.00 | 2.11 | 0.47 |
| P62908_RS Rps3  | 40S ribosor R.FGPEGSVELYAEK#.V            | 433.60  | 176.74 | 2.45 | 0.41 |
| P62908_RS Rps3  | 40S ribosor R.FIM*ESGAK#.G                | 326.98  | 122.07 | 2.68 | 0.37 |
| P62908_RS Rps3  | 40S ribosor K.FVADGIFK#.A                 | 270.90  | 94.11  | 2.88 | 0.35 |
| P62908_RS Rps3  | 40S ribosor K.FVDGLM*IHSGDPVNYVDVAVR.H    | 37.05   | 53.76  | 0.69 | 1.45 |
| P62908_RS Rps3  | 40S ribosor K.FVDGLM*IHSGDPVNYVDVAVR.H    | 14.89   | 26.52  | 0.56 | 1.78 |
| P62908_RS Rps3  | 40S ribosor K.GGK#PEPPAM*PQPVPPTA.-       | 216.00  | 101.32 | 2.13 | 0.47 |
| P62908_RS Rps3  | 40S ribosor K.GGK#PEPPAM*PQPVPPTA.-       | 190.67  | 110.58 | 1.72 | 0.58 |
| P62908_RS Rps3  | 40S ribosor K.IM*LPWDPSGK#.I              | 115.52  | 52.65  | 2.19 | 0.46 |
| P62908_RS Rps3  | 40S ribosor R.IRELTAVVQK.R                | 18.95   | 35.99  | 0.53 | 1.90 |
| P62908_RS Rps3  | 40S ribosor R.K#FVADGIFK#.A               | 282.33  | 117.36 | 2.41 | 0.42 |
| P62908_RS Rps3  | 40S ribosor K.K#LPDHVSIPEPK#.D            | 167.91  | 85.90  | 1.95 | 0.51 |
| P62908_RS Rps3  | 40S ribosor K.K#LPDHVSIPEPK#.D            | 18.13   | 8.67   | 2.09 | 0.48 |
| P62908_RS Rps3  | 40S ribosor K.K#LPDHVSIPEKDEILPTTPISEQK.G | 89.59   | 38.91  | 2.30 | 0.43 |
| P62908_RS Rps3  | 40S ribosor K.K#LPDHVSIPEKDEILPTTPISEQK.G | 12.16   | 3.79   | 3.21 | 0.31 |
| P62908_RS Rps3  | 40S ribosor R.QGVLGIK#.V                  | 339.15  | 130.00 | 2.61 | 0.38 |
| P62908_RS Rps3  | 40S ribosor K.RFGFPEGSVELYAEK.V           | 9.43    | 20.82  | 0.45 | 2.21 |
| P62908_RS Rps3  | 40S ribosor R.TEIIILATR.T                 | 158.20  | 276.78 | 0.57 | 1.75 |
| P62908_RS Rps3  | 40S ribosor R.TQNVLGEK#.G                 | 359.01  | 149.73 | 2.40 | 0.42 |
| P62908_RS Rps3  | 40S ribosor R.ELAEDGYSYGEVVR.V            | 15.39   | 27.52  | 0.56 | 1.79 |
| P62908_RS Rps3  | 40S ribosor R.ELTAVVQK#.R                 | 28.43   | 11.19  | 2.54 | 0.39 |
| P62908_RS Rps3  | 40S ribosor R.FGPEGSVELYAEK#.V            | 43.90   | 13.91  | 3.16 | 0.32 |
| P62908_RS Rps3  | 40S ribosor K.FVADGIFK#.A                 | 30.18   | 9.54   | 3.16 | 0.32 |
| P62908_RS Rps3  | 40S ribosor K.FVDGLM*IHSGDPVNYVDVAVR.H    | 7.62    | 11.80  | 0.65 | 1.55 |
| P62908_RS Rps3  | 40S ribosor K.GGK#PEPPAM*PQPVPPTA.-       | 17.93   | 9.60   | 1.87 | 0.54 |
| P62908_RS Rps3  | 40S ribosor K.IMLPWPDPGK#.I               | 14.12   | 5.96   | 2.37 | 0.42 |
| P62908_RS Rps3  | 40S ribosor R.K#FVADGIFK#.A               | 22.63   | 11.30  | 2.00 | 0.50 |
| P62908_RS Rps3  | 40S ribosor K.K#LPDHVSIPEPK#.D            | 15.08   | 11.59  | 1.30 | 0.77 |
| P62908_RS Rps3  | 40S ribosor R.TEIIILATR.T                 | 10.86   | 15.29  | 0.71 | 1.41 |
| P62908_RS Rps3  | 40S ribosor K.DELPTTPISEQK#.G             | 35.43   | 11.38  | 3.11 | 0.32 |
| P62908_RS Rps3  | 40S ribosor R.ELAEDGYSYGEVVR.V            | 17.80   | 28.63  | 0.62 | 1.61 |
| P62908_RS Rps3  | 40S ribosor R.FGPEGSVELYAEK#.V            | 56.54   | 19.67  | 2.87 | 0.35 |
| P62908_RS Rps3  | 40S ribosor K.FVDGLM*IHSGDPVNYVDVAVR.H    | 7.66    | 11.98  | 0.64 | 1.56 |
| P62908_RS Rps3  | 40S ribosor K.GGK#PEPPAM*PQPVPPTA.-       | 28.09   | 16.18  | 1.74 | 0.58 |
| P62908_RS Rps3  | 40S ribosor K.GGK#PEPPAM*PQPVPPTA.-       | 69.18   | 35.48  | 1.95 | 0.51 |
| P62908_RS Rps3  | 40S ribosor K.K#LPDHVSIPEPK#.D            | 18.27   | 11.17  | 1.64 | 0.61 |
| P62908_RS Rps3  | 40S ribosor R.TEIIILATR.T                 | 11.41   | 19.81  | 0.58 | 1.74 |
| P97351_RS Rps3a | 40S ribosor R.ADGEPYVQESV.-               | 239.21  | 239.21 | 1.00 | 1.00 |
| P97351_RS Rps3a | 40S ribosor K.APAM*FNIR.N                 | 61.68   | 131.59 | 0.47 | 2.13 |
| P97351_RS Rps3a | 40S ribosor K.APAMFNIR.N                  | 29.57   | 54.23  | 0.55 | 1.83 |



|                   |                                       |         |        |      |      |
|-------------------|---------------------------------------|---------|--------|------|------|
| P97351_RS Rps3a   | 40S ribosor K.DWYDVK#.A               | 156.61  | 54.16  | 2.89 | 0.35 |
| P97351_RS Rps3a   | 40S ribosor R.EVQTNLTK#.E             | 423.30  | 182.40 | 2.32 | 0.43 |
| P97351_RS Rps3a   | 40S ribosor R.EVQTNLTK#EUVN#.L        | 51.01   | 21.81  | 2.34 | 0.43 |
| P97351_RS Rps3a   | 40S ribosor K.K#DWYDVK#.A             | 97.05   | 43.67  | 2.22 | 0.45 |
| P97351_RS Rps3a   | 40S ribosor K.K#WVDPFSK#.K            | 34.46   | 18.30  | 1.88 | 0.53 |
| P97351_RS Rps3a   | 40S ribosor K.K#WQTMIEAHVDVK#.T       | 28.65   | 10.82  | 2.65 | 0.38 |
| P97351_RS Rps3a   | 40S ribosor K.LITEDVQGG#.N            | 561.05  | 275.84 | 2.03 | 0.49 |
| P97351_RS Rps3a   | 40S ribosor K.LIM*ELHGEHGGSSGK#.A     | 13.51   | 2.99   | 4.52 | 0.22 |
| P97351_RS Rps3a   | 40S ribosor K.M*EIM*TR.E              | 16.67   | 32.21  | 0.52 | 1.93 |
| P97351_RS Rps3a   | 40S ribosor K.TSYAQHQVQV.R.Q          | 22.83   | 41.46  | 0.55 | 1.82 |
| P97351_RS Rps3a   | 40S ribosor K.TTDGYLLR.L              | 128.77  | 217.15 | 0.59 | 1.69 |
| P97351_RS Rps3a   | 40S ribosor R.VFEVSLADLQNDVAFR.K      | 55.43   | 109.46 | 0.51 | 1.97 |
| P97351_RS Rps3a   | 40S ribosor R.VFEVSLADLQNDVAFR.K.F    | 32.37   | 66.37  | 0.49 | 2.05 |
| P97351_RS Rps3a   | 40S ribosor K.VVDPFSK#.K              | 405.43  | 183.53 | 2.21 | 0.45 |
| P97351_RS Rps3a   | 40S ribosor K.WQTMIEAHVDVK#.T         | 12.72   | 21.41  | 0.59 | 1.68 |
| P97351_RS Rps3a   | 40S ribosor K.LITEDVQGG#.N            | 59.72   | 20.16  | 2.96 | 0.34 |
| P97351_RS Rps3a   | 40S ribosor K.LM*ELHGEHGGSSGK#.A      | 9.43    | 4.16   | 2.26 | 0.44 |
| P97351_RS Rps3a   | 40S ribosor K.TTDGYLLR.L              | 13.39   | 40.20  | 0.33 | 3.00 |
| P97351_RS Rps3a   | 40S ribosor R.EVQTNLTK#.E             | 17.98   | 8.46   | 2.13 | 0.47 |
| P97351_RS Rps3a   | 40S ribosor K.LITEDVQGG#.N            | 60.97   | 16.79  | 3.63 | 0.28 |
| P97351_RS Rps3a   | 40S ribosor R.VFEVSLADLQNDVAFR.K      | 41.68   | 4.91   | 8.49 | 0.12 |
| P97351_RS Rps3a   | 40S ribosor R.VFEVSLADLQNDVAFR.K      | 3.81    | 9.96   | 0.38 | 2.61 |
| P62702_RS Rps4x   | 40S ribosor R.ERHPGSFVHVVK.D          | 13.34   | 25.82  | 0.52 | 1.94 |
| P62702_RS Rps4x   | 40S ribosor K.GIPLVTHDAR.T            | 27.50   | 16.45  | 1.67 | 0.60 |
| P62702_RS Rps4x   | 40S ribosor K.GNKPWISLPR.G            | 31.33   | 55.70  | 0.56 | 1.78 |
| P62702_RS Rps4x   | 40S ribosor R.HPGSFVHVHVVK#.D         | 108.64  | 38.84  | 2.80 | 0.36 |
| P62702_RS Rps4x   | 40S ribosor R.IGVITNR.E               | 109.61  | 184.81 | 0.59 | 1.69 |
| P62702_RS Rps4x   | 40S ribosor R.K#FVGTG#.G              | 120.08  | 70.05  | 1.71 | 0.58 |
| P62702_RS Rps4x   | 40S ribosor R.LIYDTK#.G               | 306.86  | 103.84 | 2.96 | 0.34 |
| P62702_RS Rps4x   | 40S ribosor R.LSNIFVIGK#.G            | 361.29  | 112.88 | 3.20 | 0.31 |
| P62702_RS Rps4x   | 40S ribosor R.TDITYPAGFM*DVISIDK#.T   | 62.31   | 21.43  | 2.91 | 0.34 |
| P62702_RS Rps4x   | 40S ribosor R.TDITYPAGFMDVVISIDK#.T   | 68.01   | 29.42  | 2.31 | 0.43 |
| P62702_RS Rps4x   | 40S ribosor K.VNDTIQDLETKG#.I         | 85.69   | 36.84  | 2.33 | 0.43 |
| P62702_RS Rps4x   | 40S ribosor K.VNDTIQDLETKG#TDFIK#.F   | 8.99    | 5.99   | 1.50 | 0.67 |
| P62702_RS Rps4x   | 40S ribosor K.YALTDGEVVK#.K           | 152.78  | 62.45  | 2.45 | 0.41 |
| P62702_RS Rps4x   | 40S ribosor K.YALTDGEVVK#.I           | 67.15   | 33.38  | 2.01 | 0.50 |
| P62702_RS Rps4x   | 40S ribosor R.YDPPLIK#.V              | 86.81   | 27.86  | 3.12 | 0.32 |
| P62702_RS Rps4x   | 40S ribosor K.DANGNSFATR.L            | 9.06    | 16.09  | 0.56 | 1.78 |
| P62702_RS Rps4x   | 40S ribosor R.ERHPGSFVHVVK.D          | 26.46   | 36.51  | 0.72 | 1.38 |
| P62702_RS Rps4x   | 40S ribosor R.FIK#DGK#.V              | 13.71   | 1.51   | 9.06 | 0.11 |
| P62702_RS Rps4x   | 40S ribosor K.GNKPWISLPR.G            | 38.32   | 61.60  | 0.62 | 1.61 |
| P62702_RS Rps4x   | 40S ribosor R.HPGSFVHVHVVK#.D         | 167.09  | 53.99  | 3.09 | 0.32 |
| P62702_RS Rps4x   | 40S ribosor K.HWM*LDK#.L              | 83.36   | 31.80  | 2.62 | 0.38 |
| P62702_RS Rps4x   | 40S ribosor R.IGVITNR.E               | 197.27  | 390.08 | 0.51 | 1.98 |
| P62702_RS Rps4x   | 40S ribosor R.K#FVGTG#.G              | 71.05   | 31.35  | 2.27 | 0.44 |
| P62702_RS Rps4x   | 40S ribosor R.LK#YALTDGEVVK#.K        | 14.55   | 5.62   | 2.59 | 0.39 |
| P62702_RS Rps4x   | 40S ribosor R.LSNIFVIGK#.G            | 1032.65 | 378.77 | 2.73 | 0.37 |
| P62702_RS Rps4x   | 40S ribosor R.LTIAEER.D               | 104.46  | 201.25 | 0.52 | 1.93 |
| P62702_RS Rps4x   | 40S ribosor R.TDITYPAGFM*DVISIDK#.T   | 113.19  | 54.27  | 2.09 | 0.48 |
| P62702_RS Rps4x   | 40S ribosor R.TDITYPAGFMDVVISIDK#.T   | 79.24   | 35.26  | 2.25 | 0.44 |
| P62702_RS Rps4x   | 40S ribosor K.VNDTIQDLETKG#.I         | 137.49  | 82.39  | 1.67 | 0.60 |
| P62702_RS Rps4x   | 40S ribosor K.VNDTIQDLETKG#TDFIK#.F   | 29.25   | 14.91  | 1.96 | 0.51 |
| P62702_RS Rps4x   | 40S ribosor K.VRTDITYPAGFM*DVISIDK.T  | 12.65   | 23.36  | 0.54 | 1.85 |
| P62702_RS Rps4x   | 40S ribosor K.VRTDITYPAGFMDVVISIDK.T  | 13.07   | 18.32  | 0.71 | 1.40 |
| P62702_RS Rps4x   | 40S ribosor K.YALTDGEVVK#.K           | 202.24  | 83.64  | 2.42 | 0.41 |
| P62702_RS Rps4x   | 40S ribosor R.YDPPLIK#.V              | 221.04  | 115.25 | 1.92 | 0.52 |
| P62702_RS Rps4x   | 40S ribosor K.GNKPWISLPR.G            | 9.51    | 16.06  | 0.59 | 1.69 |
| P62702_RS Rps4x   | 40S ribosor R.HPGSFVHVHVVK#.D         | 29.62   | 13.67  | 2.17 | 0.46 |
| P62702_RS Rps4x   | 40S ribosor R.IGVITNR.E               | 35.09   | 51.16  | 0.69 | 1.46 |
| P62702_RS Rps4x   | 40S ribosor R.K#FVGTG#.G              | 25.61   | 9.12   | 2.81 | 0.36 |
| P62702_RS Rps4x   | 40S ribosor R.LSNIFVIGK#.G            | 80.45   | 27.72  | 2.90 | 0.34 |
| P62702_RS Rps4x   | 40S ribosor R.TDITYPAGFM*DVISIDK#.T   | 9.16    | 4.71   | 1.95 | 0.51 |
| P62702_RS Rps4x   | 40S ribosor K.VNDTIQDLETKG#.I         | 19.24   | 17.14  | 1.12 | 0.89 |
| P62702_RS Rps4x   | 40S ribosor K.YALTDGEVVK#.K           | 40.99   | 18.17  | 2.26 | 0.44 |
| P62702_RS Rps4x   | 40S ribosor R.HPGSFVHVHVVK#.D         | 25.98   | 7.50   | 3.46 | 0.29 |
| P62702_RS Rps4x   | 40S ribosor R.LSNIFVIGK#.G            | 87.53   | 30.12  | 2.91 | 0.34 |
| P62702_RS Rps4x   | 40S ribosor R.TDITYPAGFM*DVISIDK#.T   | 10.29   | 4.12   | 2.50 | 0.40 |
| P62702_RS Rps4x   | 40S ribosor R.TDITYPAGFMDVVISIDK#.T   | 13.55   | 5.06   | 2.68 | 0.37 |
| P62702_RS Rps4x   | 40S ribosor K.YALTDGEVVK#.K           | 28.37   | 12.37  | 2.29 | 0.44 |
| P97461_RS Rps5    | 40S ribosor K.GSSNSYAIK#.K            | 16.86   | 5.48   | 3.08 | 0.33 |
| P97461_RS Rps5    | 40S ribosor K.WSTDDVQINDISLQDYIAVK#.E | 9.80    | 3.02   | 3.25 | 0.31 |
| P97461_RS Rps5    | 40S ribosor K.GSSNSYAIK#.K            | 240.51  | 107.01 | 2.25 | 0.44 |
| P97461_RS Rps5    | 40S ribosor K.GSSNSYAIK#.K            | 11.55   | 4.76   | 2.42 | 0.41 |
| P97461_RS Rps5    | 40S ribosor R.QAVDVSLR.R              | 57.47   | 103.22 | 0.56 | 1.80 |
| P97461_RS Rps5    | 40S ribosor K.WSTDDVQINDISLQDYIAVK#.E | 72.91   | 27.56  | 2.65 | 0.38 |
| P97461_RS Rps5    | 40S ribosor K.WSTDDVQINDISLQDYIAVK#.E | 10.58   | 2.99   | 3.54 | 0.28 |
| P97461_RS Rps5    | 40S ribosor K.WSTDDVQINDISLQDYIAVK#.E | 11.44   | 4.06   | 2.82 | 0.36 |
| P97461_RS Rps5    | 40S ribosor K.WSTDDVQINDISLQDYIAVK#.E | 18.97   | 6.26   | 3.03 | 0.33 |
| P62754_RS Rps6    | 40S ribosor K.KGEKDIPGLTDTTVP.R       | 13.48   | 23.28  | 0.58 | 1.73 |
| P62754_RS Rps6    | 40S ribosor R.K#LFNLSK#.E             | 31.39   | 40.97  | 0.77 | 1.31 |
| P62754_RS Rps6    | 40S ribosor K.K#NK#HEEAAYAK#.L        | 3.42    | 1.36   | 2.52 | 0.40 |
| P62754_RS Rps6    | 40S ribosor K.LIEVDDER.K              | 130.34  | 161.42 | 0.81 | 1.24 |
| P62754_RS Rps6    | 40S ribosor R.M*ATEVAADALGEEWK#.G     | 201.13  | 55.56  | 3.62 | 0.28 |
| P62754_RS Rps6    | 40S ribosor R.MATEVAADALGEEWK#.G      | 99.95   | 29.93  | 3.34 | 0.30 |
| P62754_RS Rps6    | 40S ribosor R.M*ATEVAADALGEEWK#YVVR.I | 7.43    | 6.22   | 1.20 | 0.84 |
| P62754_RS Rps6    | 40S ribosor K.NK#HEEAAYAK#.L          | 166.56  | 50.47  | 3.30 | 0.30 |
| P62754_RS Rps6    | 40S ribosor R.M*ATEVAADALGEEWK#.G     | 22.66   | 6.50   | 3.49 | 0.29 |
| P62754_RS Rps6    | 40S ribosor R.M*ATEVAADALGEEWK#YVVR.I | 3.85    | 5.93   | 0.65 | 1.54 |
| P18653_KS Rps6ka1 | Ribosomal K.ADPSQFELLK#.V             | 37.04   | 12.11  | 3.06 | 0.33 |
| P18653_KS Rps6ka1 | Ribosomal K.DK#LPQSQLSHQDLQVQK#.G     | 22.72   | 8.46   | 2.68 | 0.37 |
| P18653_KS Rps6ka1 | Ribosomal R.DLK#PENILLDEEGHIK#.L      | 64.27   | 37.50  | 1.71 | 0.58 |
| P18653_KS Rps6ka1 | Ribosomal K.EVM*FTEEDVK#.F            | 18.26   | 6.98   | 2.62 | 0.38 |
| P18653_KS Rps6ka1 | Ribosomal K.FTSLGGWNTVSETAK#.D        | 13.45   | 7.10   | 1.89 | 0.53 |
| P18653_KS Rps6ka1 | Ribosomal R.DLK#PENILLDEEGHIK#.L      | 36.18   | 13.72  | 2.64 | 0.38 |
| P18653_KS Rps6ka1 | Ribosomal K.FTSLGGWNTVSETAK#.D        | 7.60    | 4.19   | 1.81 | 0.55 |
| P18654_KS Rps6ka3 | Ribosomal R.DLK#PNILYVDESIGNPESIR.I   | 4.32    | 5.95   | 0.73 | 1.38 |
| P18654_KS Rps6ka3 | Ribosomal R.EASAVLFTITK#.T            | 50.00   | 19.27  | 2.59 | 0.39 |
| P18654_KS Rps6ka3 | Ribosomal K.FSLSGGYWNSVSDTA#.D        | 17.22   | 4.55   | 3.79 | 0.26 |
| P18654_KS Rps6ka3 | Ribosomal R.HSFSTIDWVKN#.L            | 13.96   | 6.27   | 2.23 | 0.45 |
| P18654_KS Rps6ka3 | Ribosomal K.LGM*PQLSPEAQSLLR.M        | 2.27    | 6.58   | 0.35 | 2.90 |
| P18654_KS Rps6ka3 | Ribosomal R.EASAVLFTITK#.T            | 19.65   | 7.93   | 2.48 | 0.40 |
| Q922B9_KS Rps6ka4 | Ribosomal R.DLK#PENILYADDTGPAPVK#.I   | 6.23    | 7.58   | 0.82 | 1.22 |
| Q8C050_K: Rps6ka5 | Ribosomal K.TLQPSNPTEGSDPDLFQFSD.-    | 4.48    | 4.48   | 1.00 | 1.00 |

|                 |                                                  |        |        |      |      |
|-----------------|--------------------------------------------------|--------|--------|------|------|
| P62082_RS Rps7  | 40S ribosor K.AIIIFVVPQLK#.S                     | 784.02 | 322.67 | 2.43 | 0.41 |
| P62082_RS Rps7  | 40S ribosor K.AQONNVEHK#VETFSGVYK.K              | 72.58  | 29.91  | 2.43 | 0.41 |
| P62082_RS Rps7  | 40S ribosor K.AQONNVEHK#VETFSGVYK#K#.L           | 15.32  | 4.43   | 3.46 | 0.29 |
| P62082_RS Rps7  | 40S ribosor R.ELNITAAK#.E                        | 325.71 | 101.64 | 3.20 | 0.31 |
| P62082_RS Rps7  | 40S ribosor K.HVVVIAQR.R                         | 76.85  | 141.84 | 0.54 | 1.85 |
| P62082_RS Rps7  | 40S ribosor K.IVKNPGEK#PDEFESGISQALLELEM*NSDLK.A | 16.10  | 6.33   | 2.54 | 0.39 |
| P62082_RS Rps7  | 40S ribosor K.IVKNPGEK#PDEFESGISQALLELEMNSDLK#.A | 103.80 | 39.01  | 2.66 | 0.38 |
| P62082_RS Rps7  | 40S ribosor K.IVKNPGEK#PDEFESGISQALLELEMNSDLK#.A | 10.77  | 3.28   | 3.29 | 0.30 |
| P62082_RS Rps7  | 40S ribosor R.K#AIIIFVVPQLK#.S                   | 35.89  | 13.91  | 2.58 | 0.39 |
| P62082_RS Rps7  | 40S ribosor K.LTGV#DVFPEFQK#.-                   | 90.54  | 38.83  | 2.33 | 0.43 |
| P62082_RS Rps7  | 40S ribosor R.TLTAVHDAILEDLVFPSEIVGK#.R          | 619.41 | 247.29 | 2.50 | 0.40 |
| P62082_RS Rps7  | 40S ribosor K.VETFSGVYK#.K                       | 126.59 | 49.06  | 2.58 | 0.39 |
| P62242_RS Rps8  | 40S ribosor R.ADGYVLEK#.E                        | 128.96 | 42.92  | 3.00 | 0.33 |
| P62242_RS Rps8  | 40S ribosor R.IIDVVYNNASNNELVR.T                 | 26.50  | 37.24  | 0.71 | 1.41 |
| P62242_RS Rps8  | 40S ribosor K.ISSLLEEFQ#QGK#.L                   | 178.03 | 82.01  | 2.17 | 0.46 |
| P62242_RS Rps8  | 40S ribosor K.LTPEEEELNK#.K                      | 222.26 | 149.37 | 1.49 | 0.67 |
| P62242_RS Rps8  | 40S ribosor R.ADGYVLEK#.E                        | 383.67 | 96.43  | 3.98 | 0.25 |
| P62242_RS Rps8  | 40S ribosor R.ADGYVLEK#ELEYFLR.K                 | 13.86  | 21.93  | 0.63 | 1.58 |
| P62242_RS Rps8  | 40S ribosor K.ELEYFLR.K                          | 53.60  | 68.16  | 0.79 | 1.27 |
| P62242_RS Rps8  | 40S ribosor R.IIDVVYNNASNNELVR.T                 | 44.12  | 61.68  | 0.72 | 1.40 |
| P62242_RS Rps8  | 40S ribosor R.IIDVVYNNASNNELVR@.T                | 2.99   | 6.58   | 0.45 | 2.20 |
| P62242_RS Rps8  | 40S ribosor K.ISSLLEEFQ#QGK#.L                   | 757.26 | 231.63 | 3.27 | 0.31 |
| P62242_RS Rps8  | 40S ribosor K.LTPEEEELNK#.K                      | 754.30 | 267.93 | 2.82 | 0.36 |
| P62242_RS Rps8  | 40S ribosor K.YELGRPAANT.K                       | 18.56  | 43.04  | 0.43 | 2.32 |
| P62242_RS Rps8  | 40S ribosor R.ADGYVLEK#.E                        | 24.46  | 6.17   | 3.96 | 0.25 |
| P62242_RS Rps8  | 40S ribosor K.ISSLLEEFQ#QGK#.L                   | 41.77  | 13.49  | 3.10 | 0.32 |
| P62242_RS Rps8  | 40S ribosor R.ADGYVLEK#.E                        | 33.11  | 7.24   | 4.57 | 0.22 |
| P62242_RS Rps8  | 40S ribosor K.ISSLLEEFQ#QGK#.L                   | 28.09  | 10.27  | 2.74 | 0.37 |
| Q6ZWN5_R Rps9   | 40S ribosor K.IEDFLER.R                          | 22.51  | 26.29  | 0.86 | 1.17 |
| Q6ZWN5_R Rps9   | 40S ribosor K.LDYILGLK#.I                        | 13.83  | 6.80   | 2.03 | 0.49 |
| Q6ZWN5_R Rps9   | 40S ribosor R.LFEGNALLR.R                        | 11.89  | 18.34  | 0.65 | 1.54 |
| Q6ZWN5_R Rps9   | 40S ribosor K.QVNIPIFVIR.L                       | 6.37   | 10.39  | 0.61 | 1.63 |
| Q6ZWN5_R Rps9   | 40S ribosor K.HIDFSLR.S                          | 101.59 | 162.12 | 0.63 | 1.60 |
| Q6ZWN5_R Rps9   | 40S ribosor K.IEDFLER.R                          | 113.11 | 163.92 | 0.69 | 1.45 |
| Q6ZWN5_R Rps9   | 40S ribosor R.IGVLEDEK#.M                        | 889.59 | 293.20 | 3.03 | 0.33 |
| Q6ZWN5_R Rps9   | 40S ribosor R.IGVLEDEK#*K.L                      | 20.62  | 21.61  | 0.95 | 1.05 |
| Q6ZWN5_R Rps9   | 40S ribosor K.K#GQGGAGAGDDEED.-                  | 9.99   | 4.42   | 2.26 | 0.44 |
| Q6ZWN5_R Rps9   | 40S ribosor R.KQVNIPIFVIR.L                      | 32.91  | 53.33  | 0.62 | 1.62 |
| Q6ZWN5_R Rps9   | 40S ribosor K.LDYILGLK#.I                        | 417.50 | 144.81 | 2.88 | 0.35 |
| Q6ZWN5_R Rps9   | 40S ribosor R.LFEGNALLR.R                        | 245.50 | 388.16 | 0.63 | 1.58 |
| Q6ZWN5_R Rps9   | 40S ribosor K.LIGEYGLR.N                         | 216.17 | 321.65 | 0.67 | 1.49 |
| Q6ZWN5_R Rps9   | 40S ribosor R.LQQTQVFK#.L                        | 500.48 | 183.04 | 2.73 | 0.37 |
| Q6ZWN5_R Rps9   | 40S ribosor K.M*#K#LDYILGLK#.I                   | 318.95 | 119.98 | 2.66 | 0.38 |
| Q6ZWN5_R Rps9   | 40S ribosor K.M*#K#LDYILGLK#.I                   | 185.61 | 69.63  | 2.67 | 0.38 |
| Q6ZWN5_R Rps9   | 40S ribosor K.MK#LDYILGLK#.I                     | 52.56  | 20.02  | 2.63 | 0.38 |
| Q6ZWN5_R Rps9   | 40S ribosor K.MK#LDYILGLK#.I                     | 66.48  | 24.03  | 2.77 | 0.36 |
| Q6ZWN5_R Rps9   | 40S ribosor K.QVNIPIFVIR.L                       | 48.57  | 80.74  | 0.60 | 1.66 |
| Q6ZWN5_R Rps9   | 40S ribosor R.LFEGNALLR.R                        | 11.58  | 71.32  | 0.16 | 6.16 |
| Q6ZWN5_R Rps9   | 40S ribosor R.RLQQTQVFK.L                        | 103.29 | 186.96 | 0.55 | 1.81 |
| Q6ZWN5_R Rps9   | 40S ribosor R.SPYGGGPRG.V                        | 5.09   | 22.85  | 0.22 | 4.49 |
| Q6ZWN5_R Rps9   | 40S ribosor K.SRLDQELK.L                         | 92.23  | 145.21 | 0.64 | 1.57 |
| Q6ZWN5_R Rps9   | 40S ribosor R.VK#FTLAK#.I                        | 89.14  | 19.84  | 4.49 | 0.22 |
| Q6ZWN5_R Rps9   | 40S ribosor K.IEDFLER.R                          | 12.64  | 22.53  | 0.56 | 1.78 |
| Q6ZWN5_R Rps9   | 40S ribosor R.IGVLEDEK#.M                        | 35.27  | 19.60  | 1.80 | 0.56 |
| Q6ZWN5_R Rps9   | 40S ribosor K.LDYILGLK#.I                        | 25.49  | 10.41  | 2.45 | 0.41 |
| Q6ZWN5_R Rps9   | 40S ribosor R.LFEGNALLR.R                        | 9.40   | 16.26  | 0.58 | 1.73 |
| Q6ZWN5_R Rps9   | 40S ribosor K.M*#K#LDYILGLK#.I                   | 12.46  | 5.23   | 2.38 | 0.42 |
| Q6ZWN5_R Rps9   | 40S ribosor K.IEDFLER.R                          | 18.14  | 30.78  | 0.59 | 1.70 |
| Q6ZWN5_R Rps9   | 40S ribosor R.IGVLEDEK#.M                        | 92.49  | 33.16  | 2.79 | 0.36 |
| Q6ZWN5_R Rps9   | 40S ribosor K.LDYILGLK#.I                        | 38.02  | 14.30  | 2.66 | 0.38 |
| Q6ZWN5_R Rps9   | 40S ribosor R.LFEGNALLR.R                        | 20.73  | 28.38  | 0.73 | 1.37 |
| Q6ZWN5_R Rps9   | 40S ribosor R.LQQTQVFK#.L                        | 76.19  | 21.22  | 3.59 | 0.28 |
| Q6ZWN5_R Rps9   | 40S ribosor K.M*#K#LDYILGLK#.I                   | 17.97  | 6.35   | 2.83 | 0.35 |
| Q6ZWN5_R Rps9   | 40S ribosor K.QVNIPIFVIR.L                       | 17.08  | 24.25  | 0.70 | 1.42 |
| P14206_RS Rpsa  | 40S ribosor R.AIVAIENP#ADSVISSR.N                | 87.38  | 131.97 | 0.66 | 1.51 |
| P14206_RS Rpsa  | 40S ribosor R.DPEEIKHEEQAAAEK#.A                 | 14.81  | 8.83   | 1.68 | 0.60 |
| P14206_RS Rpsa  | 40S ribosor K.FAAGTATPIAGR.F                     | 161.20 | 265.60 | 0.61 | 1.65 |
| P14206_RS Rpsa  | 40S ribosor K.FLAAGTHLGGT#NDFQM*EQYIYK#.R        | 164.56 | 45.24  | 3.64 | 0.27 |
| P14206_RS Rpsa  | 40S ribosor K.FLAAGTHLGGT#NDFQM*EQYIYK#.R        | 81.31  | 25.64  | 3.17 | 0.32 |
| P14206_RS Rpsa  | 40S ribosor R.FTPGTFTN#QAAFR.E                   | 53.83  | 85.38  | 0.63 | 1.59 |
| P14206_RS Rpsa  | 40S ribosor R.K#SDGIYIINLK#.R                    | 90.71  | 22.95  | 3.95 | 0.25 |
| P14206_RS Rpsa  | 40S ribosor R.LLVVTDPR.A                         | 78.67  | 123.44 | 0.64 | 1.57 |
| P14206_RS Rpsa  | 40S ribosor K.SDGIYIINLK#.R                      | 158.15 | 49.11  | 3.22 | 0.31 |
| P14206_RS Rpsa  | 40S ribosor R.AIVAIENP#ADSVISSR.N                | 5.79   | 12.32  | 0.47 | 2.13 |
| P14206_RS Rpsa  | 40S ribosor K.FLAAGTHLGGT#NDFQM*EQYIYK#.R        | 9.22   | 2.23   | 4.13 | 0.24 |
| P14206_RS Rpsa  | 40S ribosor R.FTPGTFTN#QAAFR.E                   | 6.49   | 6.54   | 0.99 | 1.01 |
| P14206_RS Rpsa  | 40S ribosor R.K#SDGIYIINLK#.R                    | 10.30  | 3.77   | 2.73 | 0.37 |
| P14206_RS Rpsa  | 40S ribosor R.LLVVTDPR.A                         | 9.39   | 13.23  | 0.71 | 1.41 |
| P14206_RS Rpsa  | 40S ribosor R.AIVAIENP#ADSVISSR.N                | 7.17   | 15.12  | 0.47 | 2.11 |
| P14206_RS Rpsa  | 40S ribosor K.FLAAGTHLGGT#NDFQM*EQYIYK#.R        | 7.52   | 4.13   | 1.82 | 0.55 |
| Q9JKY0_RC Rqcd1 | Cell differer K.LTSLGVIGALVK#.T                  | 42.89  | 26.13  | 1.64 | 0.61 |
| Q9JKY0_RC Rqcd1 | Cell differer K.TVATFILQK#.I                     | 19.54  | 12.42  | 1.57 | 0.64 |
| Q9JKY0_RC Rqcd1 | Cell differer R.ENALLESK#.K                      | 20.75  | 14.25  | 1.46 | 0.69 |
| Q9JKY0_RC Rqcd1 | Cell differer R.IM*ESGSELSK#.T                   | 10.46  | 7.72   | 1.35 | 0.74 |
| Q9JKY0_RC Rqcd1 | Cell differer R.LTSLGVIGALVK#.T                  | 51.20  | 32.52  | 1.57 | 0.64 |
| Q9JKY0_RC Rqcd1 | Cell differer K.TVATFILQK#.I                     | 39.56  | 25.34  | 1.56 | 0.64 |
| Q9JKY0_RC Rqcd1 | Cell differer R.LTSLGVIGALVK#.T                  | 18.54  | 8.00   | 2.32 | 0.43 |
| Q9JKY0_RC Rqcd1 | Cell differer K.TVATFILQK#.I                     | 31.15  | 16.42  | 1.90 | 0.53 |
| Q9JKY0_RC Rqcd1 | Cell differer K.TVATFILQK#.I                     | 19.55  | 11.71  | 1.67 | 0.60 |
| Q99K70_RF Rragc | Ras-related K.AFLFDVVS#K.I                       | 22.79  | 10.40  | 2.19 | 0.46 |
| Q99K70_RF Rragc | Ras-related R.ANDLADAGLEK#.L                     | 15.95  | 3.56   | 4.49 | 0.22 |
| Q99K70_RF Rragc | Ras-related K.M#SPNETLFLESTNK#.I                 | 4.11   | 1.70   | 2.42 | 0.41 |
| Q99K70_RF Rragc | Ras-related K.MSPNETLFLESTNK#.I                  | 6.08   | 4.24   | 1.43 | 0.70 |
| Q99K70_RF Rragc | Ras-related K.AFLFDVVS#K.I                       | 17.00  | 6.60   | 2.57 | 0.39 |
| Q99K70_RF Rragc | Ras-related K.AFLFDVVS#K.I                       | 25.10  | 11.58  | 2.17 | 0.46 |
| P62071_RF Rras2 | Ras-related R.LDILD#TAGQEEFGAM*.R.E              | 1.23   | 10.68  | 0.11 | 8.70 |
| P62071_RF Rras2 | Ras-related R.LLVVGGGGVVGK#.S                    | 37.04  | 10.68  | 3.47 | 0.29 |
| P62071_RF Rras2 | Ras-related R.QVTQEEGQLAR.Q                      | 1.44   | 10.07  | 0.14 | 6.99 |
| Q99PL5_RF Rrbp1 | Ribosome-t K.ASM*VQSQEAPK#.Q                     | 6.57   | 3.50   | 1.88 | 0.53 |
| Q99PL5_RF Rrbp1 | Ribosome-t R.DALNQATSQVESK#.Q                    | 38.31  | 11.22  | 3.41 | 0.29 |
| Q99PL5_RF Rrbp1 | Ribosome-t R.LLIEILSEK#.T                        | 25.30  | 6.86   | 3.69 | 0.27 |
| Q99PL5_RF Rrbp1 | Ribosome-t K.LLATEQEDA#AAVAK#.S                  | 45.38  | 10.87  | 4.17 | 0.24 |
| Q99PL5_RF Rrbp1 | Ribosome-t R.DALNQATSQVESK#.Q                    | 14.36  | 4.75   | 3.02 | 0.33 |

|                   |                                                |        |        |      |      |
|-------------------|------------------------------------------------|--------|--------|------|------|
| Q99PL5_RF Rrp1    | Ribosome-t K.LQSSEVEVK#.S                      | 13.09  | 1.48   | 8.85 | 0.11 |
| P07742_RI Rrm1    | Ribonucleo R.GAFIDQSQSLNIHIAEPNYGK#.L          | 22.99  | 11.21  | 2.05 | 0.49 |
| P07742_RI Rrm1    | Ribonucleo K.GILQYDM*WNVAPTDLWDWK#PLK#.E       | 6.97   | 6.73   | 1.03 | 0.97 |
| P07742_RI Rrm1    | Ribonucleo K.SNOQNLGK#.C                       | 23.01  | 25.41  | 0.91 | 1.10 |
| P07742_RI Rrm1    | Ribonucleo R.VSGIHKHEDIDAAIETYNLLSEK#.W        | 4.10   | 4.41   | 0.93 | 1.08 |
| P07742_RI Rrm1    | Ribonucleo R.YPFESPEAQLLNK#.Q                  | 22.37  | 16.84  | 1.33 | 0.75 |
| P07742_RI Rrm1    | Ribonucleo R.GAFIDQSQSLNIHIAEPNYGK#.L          | 20.61  | 9.62   | 2.14 | 0.47 |
| P07742_RI Rrm1    | Ribonucleo K.GILQYDM*WNVAPTDLWDWK#PLK#.E       | 2.79   | 3.53   | 0.79 | 1.27 |
| P07742_RI Rrm1    | Ribonucleo K.SNOQNLGK#.C                       | 25.87  | 17.22  | 1.50 | 0.67 |
| P07742_RI Rrm1    | Ribonucleo R.VSGIHKHEDIDAAIETYNLLSEK#.W        | 4.14   | 3.76   | 1.10 | 0.91 |
| P07742_RI Rrm1    | Ribonucleo R.YPFESPEAQLLNK#.Q                  | 22.04  | 26.23  | 0.84 | 1.19 |
| P56183_RF Rrp1    | Ribosomal R.ATGGFTPELLEK#.V                    | 19.46  | 11.57  | 1.68 | 0.59 |
| P56183_RF Rrp1    | Ribosomal R.ELAGGTFPEDDVPEK#.A                 | 8.72   | 6.61   | 1.32 | 0.76 |
| P56183_RF Rrp1    | Ribosomal R.M*VLSLKA                           | 17.34  | 10.85  | 1.60 | 0.63 |
| Q6P5B0_RI Rrp12   | RRP12-like R.ALSQAAVEEEEEEEEPVQSK#.G           | 14.34  | 5.89   | 2.43 | 0.41 |
| Q6P5B0_RI Rrp12   | RRP12-like K.AM*DLAQAGSTVESK#.I                | 9.49   | 7.65   | 1.24 | 0.81 |
| Q6P5B0_RI Rrp12   | RRP12-like K.EGGGDEPLNLFDPK#.V                 | 8.70   | 6.26   | 1.39 | 0.72 |
| Q6P5B0_RI Rrp12   | RRP12-like K.SDLTVDAVK#.L                      | 17.10  | 5.87   | 2.91 | 0.34 |
| Q6P5B0_RI Rrp12   | RRP12-like K.VLDPASSDFTR.L                     | 3.45   | 12.29  | 0.28 | 3.56 |
| Q9CYX7_RF Rrp15   | RRP15-like R.GVVQLFNAVQK#.H                    | 24.48  | 10.49  | 2.33 | 0.43 |
| Q91YK2_RF Rrp1b   | Ribosomal K.LGALPDSDDLVPQK#.S                  | 8.52   | 3.18   | 2.68 | 0.37 |
| Q91YK2_RF Rrp1b   | Ribosomal K.VPDESEPTAQR#.Q                     | 2.28   | 5.95   | 0.38 | 2.61 |
| Q9D1C9_RI Rrp7a   | Ribosomal K.GPLLVESTHLSK#.S                    | 16.69  | 8.34   | 2.00 | 0.50 |
| Q9D1C9_RI Rrp7a   | Ribosomal K.TVELQEK#DLAESPTEPK#.S              | 39.24  | 39.09  | 1.00 | 1.00 |
| Q9D1C9_RI Rrp7a   | Ribosomal K.WISDYEDSVLDPALR.M                  | 2.56   | 7.73   | 0.33 | 3.02 |
| Q91WM3_RI Rrp9    | U3 small nu R.AK#PAPGGAAPVAGK#.R               | 7.88   | 3.09   | 2.55 | 0.39 |
| Q91WM3_RI Rrp9    | U3 small nu K.EIQAPAPDIR.V                     | 2.54   | 9.36   | 0.27 | 3.69 |
| Q91WM3_RI Rrp9    | U3 small nu R.K#EEEEEELEETAQEK#.K              | 15.10  | 5.22   | 2.89 | 0.35 |
| E9PWW9_RI Rsf1    | Protein Rsf: R.DSQSALPSEQESSK#.K               | 8.90   | 5.22   | 1.71 | 0.59 |
| E9PWW9_RI Rsf1    | Protein Rsf: R.NSTASENTEISER.K                 | 4.62   | 12.01  | 0.38 | 2.60 |
| E9PWW9_RI Rsf1    | Protein Rsf: K.AQIDPVLLK#.N                    | 32.06  | 21.80  | 1.47 | 0.68 |
| E9PWW9_RI Rsf1    | Protein Rsf: R.DSQSALPSEQESSK#.K               | 20.21  | 24.26  | 0.83 | 1.20 |
| E9PWW9_RI Rsf1    | Protein Rsf: R.FDEFAIDAEIDIKAEADGGVGR.G        | 4.34   | 17.57  | 0.25 | 4.04 |
| E9PWW9_RI Rsf1    | Protein Rsf: K.GIDSVPIEISLQK#.A                | 29.43  | 24.60  | 1.20 | 0.84 |
| E9PWW9_RI Rsf1    | Protein Rsf: K.LDNAQSGM*EDTSETK#.G             | 14.15  | 17.92  | 0.79 | 1.27 |
| E9PWW9_RI Rsf1    | Protein Rsf: K.LEK#LPETEEK#.K                  | 27.77  | 19.22  | 1.44 | 0.69 |
| E9PWW9_RI Rsf1    | Protein Rsf: K.LSPIEEVVR.K                     | 5.23   | 36.80  | 0.14 | 7.03 |
| E9PWW9_RI Rsf1    | Protein Rsf: R.NRNLAETLALK.A                   | 2.76   | 17.30  | 0.16 | 6.27 |
| E9PWW9_RI Rsf1    | Protein Rsf: R.NSTASENTEISER.K                 | 11.69  | 38.95  | 0.30 | 3.33 |
| E9PWW9_RI Rsf1    | Protein Rsf: R.RADGDEGVEGASLQATADK#.D          | 1.39   | 11.37  | 0.12 | 8.19 |
| Q8BVY0_RL Rsl1d1  | Ribosomal K.ALLATETPEASAPGTSQK#.K              | 58.16  | 45.83  | 1.27 | 0.79 |
| Q8BVY0_RL Rsl1d1  | Ribosomal K.ATSLTQSGGLASSAPAK#.S               | 49.75  | 28.30  | 1.76 | 0.57 |
| Q8BVY0_RL Rsl1d1  | Ribosomal K.AVEVISNR.S                         | 12.64  | 19.12  | 0.66 | 1.51 |
| Q8BVY0_RL Rsl1d1  | Ribosomal K.DEFDSPEQTEGFYK#.K                  | 6.14   | 2.87   | 2.14 | 0.47 |
| Q8BVY0_RL Rsl1d1  | Ribosomal K.GSASESPASVAEATTTDQVTPALLQLDR.E     | 3.00   | 7.19   | 0.42 | 2.40 |
| Q8BVY0_RL Rsl1d1  | Ribosomal K.HGVNTSQIIPFK#.T                    | 32.96  | 21.59  | 1.53 | 0.66 |
| Q8BVY0_RL Rsl1d1  | Ribosomal R.K#ALLATETPEASAPGTSQK#.Q            | 4.57   | 3.59   | 1.27 | 0.78 |
| Q8BVY0_RL Rsl1d1  | Ribosomal K.K#ATSLTQSGGLASSAPAK#.S             | 14.03  | 7.78   | 1.80 | 0.55 |
| Q8BVY0_RL Rsl1d1  | Ribosomal K.K#HGVNTSQIIPFK#.T                  | 14.35  | 9.10   | 1.58 | 0.63 |
| Q8BVY0_RL Rsl1d1  | Ribosomal R.K#KVPVSNLLAK#.N                    | 37.66  | 26.75  | 1.41 | 0.71 |
| Q8BVY0_RL Rsl1d1  | Ribosomal K.K#KVPVSNLLAK#.N                    | 24.22  | 15.31  | 1.58 | 0.63 |
| Q8BVY0_RL Rsl1d1  | Ribosomal R.LLGSFEVITDAR.I                     | 8.97   | 21.12  | 0.42 | 2.35 |
| Q8BVY0_RL Rsl1d1  | Ribosomal K.SVSLPIFSSVTSQDENAVSLR.S            | 4.45   | 12.73  | 0.35 | 2.86 |
| Q8BVY0_RL Rsl1d1  | Ribosomal K.GSASESPASVAEATTTDQVTPALLQLDR.E     | 2.34   | 4.12   | 0.57 | 1.76 |
| Q8BVY0_RL Rsl1d1  | Ribosomal K.HGVNTSQIIPFK#.T                    | 14.20  | 9.51   | 1.49 | 0.67 |
| Q8BVY0_RL Rsl1d1  | Ribosomal K.VPVSNNLAK#.N                       | 10.80  | 6.86   | 1.57 | 0.64 |
| Q8BVY0_RL Rsl1d1  | Ribosomal K.ALLATETPEASAPGTSQK#.K              | 13.86  | 8.55   | 1.62 | 0.62 |
| Q8BVY0_RL Rsl1d1  | Ribosomal K.ATSLTQSGGLASSAPAK#.S               | 18.75  | 8.02   | 2.34 | 0.43 |
| Q8BVY0_RL Rsl1d1  | Ribosomal K.HGVNTSQIIPFK#.T                    | 21.26  | 8.30   | 2.56 | 0.39 |
| Q8BVY0_RL Rsl1d1  | Ribosomal K.ALLATETPEASAPGTSQK#.K              | 18.22  | 9.84   | 1.85 | 0.54 |
| Q8BVY0_RL Rsl1d1  | Ribosomal K.ATSLTQSGGLASSAPAK#.S               | 16.64  | 9.98   | 1.67 | 0.60 |
| Q8BVY0_RL Rsl1d1  | Ribosomal K.GSASESPASVAEATTTDQVTPALLQLDR.E     | 3.94   | 2.79   | 1.41 | 0.71 |
| Q8BVY0_RL Rsl1d1  | Ribosomal K.HGVNTSQIIPFK#.T                    | 12.51  | 5.88   | 2.13 | 0.47 |
| Q8BVY0_RL Rsl1d1  | Ribosomal K.SVSLPIFSSVTSQDENAVSLR.S            | 11.66  | 18.38  | 0.63 | 1.58 |
| Q99L28_RL Rsl24d1 | Probable ri K.ELTVNDSFEFEK#.R                  | 25.16  | 19.16  | 1.31 | 0.76 |
| Q99L28_RL Rsl24d1 | Probable ri K.M*VQQLQEDVDM*EEAS.-              | 8.76   | 8.76   | 1.00 | 1.00 |
| Q99L28_RL Rsl24d1 | Probable ri K.MVQQLQEDVDM*EEAS.-               | 2.97   | 2.97   | 1.00 | 1.00 |
| A2RTL5_RS Rsrc2   | Arginine/se K.ALAETGIAVPSYYPAAVNP#K.F          | 13.95  | 19.39  | 0.72 | 1.39 |
| A2RTL5_RS Rsrc2   | Arginine/se K.ALAETGIAVPSYYPAAVNP#K.F          | 4.78   | 6.51   | 0.73 | 1.36 |
| A2RTL5_RS Rsrc2   | Arginine/se R.GM*GLGFTSSM*.R.G                 | 2.61   | 14.49  | 0.18 | 5.56 |
| A2RTL5_RS Rsrc2   | Arginine/se R.NLDAQYEMAR.S                     | 1.57   | 9.73   | 0.16 | 6.20 |
| A2RTL5_RS Rsrc2   | Arginine/se R.NTAM*DAQEALAR.R                  | 84.79  | 65.17  | 1.30 | 0.77 |
| A2RTL5_RS Rsrc2   | Arginine/se R.NTAMDAQEALAR.R                   | 80.92  | 30.74  | 2.63 | 0.38 |
| A2RTL5_RS Rsrc2   | Arginine/se K.SQSAEIWEL.L                      | 22.37  | 36.22  | 0.62 | 1.62 |
| Q01730_RI Rsu1    | Ras suppres R.DNDLISLPK#.E                     | 24.29  | 6.50   | 3.74 | 0.27 |
| Q01730_RI Rsu1    | Ras suppres R.LTVLPEGLNLDLTDGQK#.Q             | 12.88  | 3.35   | 3.84 | 0.26 |
| Q01730_RI Rsu1    | Ras suppres R.ALYLSDNDLFDLPPDIGK#.L            | 6.96   | 3.55   | 1.96 | 0.51 |
| Q01730_RI Rsu1    | Ras suppres R.DNDLISLPK#.E                     | 24.68  | 6.08   | 4.06 | 0.25 |
| Q01730_RI Rsu1    | Ras suppres K.EIGELTQK#.E                      | 29.22  | 6.80   | 4.29 | 0.23 |
| Q9D7H3_R RtcA     | RNA 3'-term R.AFVAGVPLK#.V                     | 40.39  | 23.77  | 1.70 | 0.59 |
| Q9D7H3_R RtcA     | RNA 3'-term K.GGGEVIVR.V                       | 5.61   | 15.59  | 0.36 | 2.78 |
| Q9D7H3_R RtcA     | RNA 3'-term K.TGSVTLTQTAIHFAEQLAK#.A           | 9.04   | 6.32   | 1.43 | 0.70 |
| Q9D7H3_R RtcA     | RNA 3'-term R.VEVDGIM*EGGQQLR.V                | 3.17   | 7.97   | 0.40 | 2.51 |
| Q9D7H3_R RtcA     | RNA 3'-term R.VEVDGIMEGGGQLR.V                 | 3.08   | 7.17   | 0.43 | 2.33 |
| Q9D7H3_R RtcA     | RNA 3'-term R.AFVAGVPLK#.V                     | 12.89  | 4.65   | 2.77 | 0.36 |
| Q99LF4_RT RtcB    | tRNA-splici K.DLEALEM*GVDWSLR.E                | 2.24   | 12.21  | 0.18 | 5.46 |
| Q99LF4_RT RtcB    | tRNA-splici K.GFVPM*QVEGVFVYNDALEK#.L          | 12.41  | 2.50   | 4.97 | 0.20 |
| Q99LF4_RT RtcB    | tRNA-splici K.GFVPMQVEGVFVYNDALEK#.L           | 5.79   | 5.44   | 1.06 | 0.94 |
| Q99LF4_RT RtcB    | tRNA-splici R.GGGVGGFLPAM*#K.Q                 | 71.78  | 41.41  | 1.73 | 0.58 |
| Q99LF4_RT RtcB    | tRNA-splici R.GGGVGGFLPAMK#.Q                  | 27.47  | 12.87  | 2.13 | 0.47 |
| Q99LF4_RT RtcB    | tRNA-splici R.GLGHQVATDALVAM*EK#.A             | 68.27  | 39.12  | 1.75 | 0.57 |
| Q99LF4_RT RtcB    | tRNA-splici R.GLGHQVATDALVAMEK#.A              | 75.43  | 143.99 | 0.52 | 1.91 |
| Q99LF4_RT RtcB    | tRNA-splici R.GLPLQGTLAGNHYAEIQVVDVDFEYNAAK#.K | 95.96  | 47.12  | 2.04 | 0.49 |
| Q99LF4_RT RtcB    | tRNA-splici K.GMAAGNYAVVNR.S                   | 5.60   | 15.64  | 0.36 | 2.79 |
| Q99LF4_RT RtcB    | tRNA-splici R.IASPGEQDYLK#.G                   | 180.93 | 105.26 | 1.72 | 0.58 |
| Q99LF4_RT RtcB    | tRNA-splici K.KGFVPM*QVEGVFVYNDALEK.L          | 7.63   | 6.29   | 1.21 | 0.82 |
| Q99LF4_RT RtcB    | tRNA-splici K.LADMGIAIR.V                      | 11.14  | 21.19  | 0.53 | 1.90 |
| Q99LF4_RT RtcB    | tRNA-splici K.LVM*EEAPESYK#.N                  | 91.37  | 60.14  | 1.52 | 0.66 |
| Q99LF4_RT RtcB    | tRNA-splici K.LVMEEAPESYK#.N                   | 51.27  | 39.00  | 1.31 | 0.76 |
| Q99LF4_RT RtcB    | tRNA-splici R.NLDFQDVLDK#.L                    | 72.08  | 36.46  | 1.98 | 0.51 |
| Q99LF4_RT RtcB    | tRNA-splici R.NYNDELQFLDK#.I                   | 56.35  | 35.53  | 1.59 | 0.63 |
| Q99LF4_RT RtcB    | tRNA-splici K.QIGNVAALPGIVHR.S                 | 16.57  | 53.86  | 0.31 | 3.25 |
| Q99LF4_RT RtcB    | tRNA-splici R.SSM*TLTR.Q                       | 9.25   | 31.22  | 0.30 | 3.38 |

|                   |                                                               |        |        |      |       |
|-------------------|---------------------------------------------------------------|--------|--------|------|-------|
| Q99LF4_RT Rtcb    | tRNA-splici R.TNLDESVDQPVK#EQLAQAM*FDHIPVGVGSK#.G             | 9.50   | 4.12   | 2.30 | 0.43  |
| Q99LF4_RT Rtcb    | tRNA-splici R.TNLDESVDQPVK#EQLAQAM*FDHIPVGVGSK#.G             | 4.09   | 3.38   | 1.21 | 0.83  |
| Q99LF4_RT Rtcb    | tRNA-splici K.VEQHVVDGK#.E                                    | 62.58  | 35.91  | 1.74 | 0.57  |
| Q99LF4_RT Rtcb    | tRNA-splici K.VFNITPDDLDLHVIVSHNIAK#.V                        | 141.24 | 72.55  | 1.95 | 0.51  |
| A2AQ19_R1 Rtf1    | RNA polym K.AM*AEDLGDQDK#.A                                   | 6.09   | 2.41   | 2.53 | 0.40  |
| A2AQ19_R1 Rtf1    | RNA polym K.FNDQDIEIVK#.E                                     | 9.30   | 4.83   | 1.92 | 0.52  |
| A2AQ19_R1 Rtf1    | RNA polym K.IDLQVPSSEK#.A                                     | 26.59  | 14.66  | 1.81 | 0.55  |
| A2AQ19_R1 Rtf1    | RNA polym R.LEFVSNQEFSEFM*K#.W                                | 9.84   | 2.52   | 3.90 | 0.26  |
| A2AQ19_R1 Rtf1    | RNA polym R.LEFVSNQEFSEFMK#.W                                 | 8.50   | 3.02   | 2.81 | 0.36  |
| A2AQ19_R1 Rtf1    | RNA polym R.VAETGVVETAK#.V                                    | 67.79  | 20.96  | 3.23 | 0.31  |
| A2AQ19_R1 Rtf1    | RNA polym K.YGSGVLPDAPK#.E                                    | 22.36  | 7.68   | 2.91 | 0.34  |
| Q99K95_R1 Rtfcd1  | Protein RTF R.SIADSESEETK.S                                   | 7.24   | 9.11   | 0.79 | 1.26  |
| Q8BH78_Q Rtn4     | RTN4 OS=M R.AYLESEVAISELVQK#.Y                                | 11.94  | 9.31   | 1.28 | 0.78  |
| Q8BH78_Q Rtn4     | RTN4 OS=M R.AYLESEVAISELVQK.Y                                 | 9.57   | 10.01  | 0.96 | 1.05  |
| Q8BH78_Q Rtn4     | RTN4 OS=M R.GPLPAAPP TAPER.Q                                  | 21.28  | 70.86  | 0.30 | 3.33  |
| Q8BH78_Q Rtn4     | RTN4 OS=M R.GSGSVVVDLLYWR.D                                   | 9.01   | 18.64  | 0.48 | 2.07  |
| Q8BH78_Q Rtn4     | RTN4 OS=M K.GVIQAIQK#.S                                       | 51.54  | 32.74  | 1.57 | 0.64  |
| Q8BH78_Q Rtn4     | RTN4 OS=M R.HQAQIDHYLGLANK#.S                                 | 65.05  | 48.04  | 1.35 | 0.74  |
| Q8BH78_Q Rtn4     | RTN4 OS=M R.SPAASAPLPPAAAVLPSK#.L                             | 8.74   | 5.57   | 1.57 | 0.64  |
| Q9ER80_RT Rtp4    | Receptor-tr K.IALTSNASLGEK#.V                                 | 14.09  | 14.14  | 1.00 | 1.00  |
| P60122_RL Ruvb1   | RuvB-like 1 R.ALESSIAPIVIFASN.R.G                             | 21.19  | 65.30  | 0.32 | 3.08  |
| P60122_RL Ruvb1   | RuvB-like 1 R.AVLLAGPPGTGK#.T                                 | 290.35 | 197.38 | 1.47 | 0.68  |
| P60122_RL Ruvb1   | RuvB-like 1 K.DSIEKHEHVEISELFDYAK#.S                          | 34.76  | 21.08  | 1.65 | 0.61  |
| P60122_RL Ruvb1   | RuvB-like 1 K.DSIEKHEHVEISELFDYAK#.S                          | 3.70   | 2.54   | 1.46 | 0.69  |
| P60122_RL Ruvb1   | RuvB-like 1 K.EHVEEISELFDYAK#.S                               | 13.22  | 3.84   | 3.44 | 0.29  |
| P60122_RL Ruvb1   | RuvB-like 1 K.GLGLDESGLAK#.Q                                  | 212.46 | 126.27 | 1.68 | 0.59  |
| P60122_RL Ruvb1   | RuvB-like 1 K.IIADQQDK#.Y                                     | 77.12  | 52.43  | 1.47 | 0.68  |
| P60122_RL Ruvb1   | RuvB-like 1 K.KTEVLM*ENFR.R                                   | 8.34   | 39.28  | 0.21 | 4.71  |
| P60122_RL Ruvb1   | RuvB-like 1 K.LDPSIFESLQK#.E                                  | 165.86 | 115.59 | 1.43 | 0.70  |
| P60122_RL Ruvb1   | RuvB-like 1 K.QAASGLVGOENAR.E                                 | 27.60  | 99.96  | 0.28 | 3.62  |
| P60122_RL Ruvb1   | RuvB-like 1 K.TALALAIQELGSK#.V                                | 52.09  | 39.00  | 1.34 | 0.75  |
| P60122_RL Ruvb1   | RuvB-like 1 K.TEVLN*ENFR.R                                    | 8.28   | 14.79  | 0.56 | 1.79  |
| P60122_RL Ruvb1   | RuvB-like 1 K.TEVLNENFR.R                                     | 5.45   | 11.90  | 0.46 | 2.18  |
| P60122_RL Ruvb1   | RuvB-like 1 R.TM*LYTPOEM*K#.Q                                 | 45.96  | 33.04  | 1.39 | 0.72  |
| P60122_RL Ruvb1   | RuvB-like 1 R.TMLYTPQEM*K#.Q                                  | 26.37  | 17.27  | 1.53 | 0.65  |
| P60122_RL Ruvb1   | RuvB-like 1 R.TM*LYTPOEMK#.Q                                  | 17.78  | 9.95   | 1.79 | 0.56  |
| P60122_RL Ruvb1   | RuvB-like 1 R.VEAGDVIYEANS GAVK#.R                            | 48.30  | 30.14  | 1.60 | 0.62  |
| P60122_RL Ruvb1   | RuvB-like 1 R.VEAGDVIYEANS GAVK#.R                            | 17.47  | 5.90   | 2.96 | 0.34  |
| P60122_RL Ruvb1   | RuvB-like 1 R.YSVQLTPANLLAK#.I                                | 134.75 | 90.92  | 1.48 | 0.67  |
| P60122_RL Ruvb1   | RuvB-like 1 R.ALESSIAPIVIFASN.R.G                             | 2.06   | 4.81   | 0.43 | 2.34  |
| P60122_RL Ruvb1   | RuvB-like 1 K.GLGLDESGLAK#.Q                                  | 25.12  | 10.95  | 2.29 | 0.44  |
| P60122_RL Ruvb1   | RuvB-like 1 K.LDPSIFESLQK#.E                                  | 12.48  | 11.88  | 1.05 | 0.95  |
| P60122_RL Ruvb1   | RuvB-like 1 K.QAASGLVGOENAR.E                                 | 1.67   | 6.29   | 0.27 | 3.76  |
| P60122_RL Ruvb1   | RuvB-like 1 R.YSVQLTPANLLAK#.I                                | 16.77  | 9.76   | 1.72 | 0.58  |
| P60122_RL Ruvb1   | RuvB-like 1 R.ALESSIAPIVIFASN.R.G                             | 2.90   | 7.13   | 0.41 | 2.46  |
| P60122_RL Ruvb1   | RuvB-like 1 K.LDPSIFESLQK#.E                                  | 10.79  | 7.79   | 1.39 | 0.72  |
| P60122_RL Ruvb1   | RuvB-like 1 K.TALALAIQELGSK#.V                                | 17.81  | 8.48   | 2.10 | 0.48  |
| P60122_RL Ruvb1   | RuvB-like 1 R.YSVQLTPANLLAK#.I                                | 17.56  | 11.46  | 1.53 | 0.65  |
| Q9WMT5_f Ruvb2    | RuvB-like 2 R.AAGVLEMER.E                                     | 15.73  | 44.94  | 0.35 | 2.86  |
| Q9WMT5_f Ruvb2    | RuvB-like 2 R.ALESDM*APVLM*ATNR.G                             | 4.38   | 7.28   | 0.60 | 1.66  |
| Q9WMT5_f Ruvb2    | RuvB-like 2 R.ALESDM*APVLM*ATNR.G                             | 4.82   | 23.66  | 0.20 | 4.91  |
| Q9WMT5_f Ruvb2    | RuvB-like 2 R.ALESDMAPVLM*ATNR.G                              | 3.69   | 6.22   | 0.59 | 1.68  |
| Q9WMT5_f Ruvb2    | RuvB-like 2 R.AVLIAQPGPTGK#.T                                 | 253.36 | 149.76 | 1.69 | 0.59  |
| Q9WMT5_f Ruvb2    | RuvB-like 2 K.DK#VQAGDVITDK#.A                                | 77.55  | 54.00  | 1.44 | 0.70  |
| Q9WMT5_f Ruvb2    | RuvB-like 2 R.DYDAM*GSQTK#.F                                  | 11.76  | 5.37   | 2.19 | 0.46  |
| Q9WMT5_f Ruvb2    | RuvB-like 2 R.DYDAMGSQTK#.F                                   | 11.48  | 7.25   | 1.58 | 0.63  |
| Q9WMT5_f Ruvb2    | RuvB-like 2 K.EYQDAFLFNLK#.G                                  | 12.59  | 7.94   | 1.59 | 0.63  |
| Q9WMT5_f Ruvb2    | RuvB-like 2 K.EYQDAFLFNLK#GETM*DTS.-                          | 17.94  | 11.11  | 1.61 | 0.62  |
| Q9WMT5_f Ruvb2    | RuvB-like 2 K.EYQDAFLFNLK#GETMDS.-                            | 11.52  | 8.34   | 1.38 | 0.72  |
| Q9WMT5_f Ruvb2    | RuvB-like 2 R.IGLETSLR.Y                                      | 36.51  | 125.46 | 0.29 | 3.44  |
| Q9WMT5_f Ruvb2    | RuvB-like 2 R.KGTEVQDDIKR.V                                   | 20.79  | 108.34 | 0.19 | 5.21  |
| Q9WMT5_f Ruvb2    | RuvB-like 2 R.LLIVSTPSYSEK#.D                                 | 129.86 | 91.64  | 1.42 | 0.71  |
| Q9WMT5_f Ruvb2    | RuvB-like 2 R.QASQGM*VGLAAR.R                                 | 17.76  | 47.31  | 0.38 | 2.66  |
| Q9WMT5_f Ruvb2    | RuvB-like 2 R.QASQGMVGLAAR.R                                  | 11.62  | 35.53  | 0.33 | 3.06  |
| Q9WMT5_f Ruvb2    | RuvB-like 2 R.RAAGVLEEM*IR.E                                  | 1.29   | 17.26  | 0.07 | 13.43 |
| Q9WMT5_f Ruvb2    | RuvB-like 2 K.TEALTOAFR.R                                     | 49.55  | 103.77 | 0.48 | 2.09  |
| Q9WMT5_f Ruvb2    | RuvB-like 2 R.TQGFALFSGDTGEIK#.S                              | 120.41 | 63.84  | 1.89 | 0.53  |
| Q9WMT5_f Ruvb2    | RuvB-like 2 R.TQGFALFSGDTGEIKSEVR.E                           | 7.01   | 8.38   | 0.84 | 1.20  |
| Q9WMT5_f Ruvb2    | RuvB-like 2 K.TTEM*ETIYDLGTR#.M                               | 91.98  | 54.31  | 1.69 | 0.59  |
| Q9WMT5_f Ruvb2    | RuvB-like 2 K.TTEMETIYDLGTR#.M                                | 52.71  | 37.86  | 1.39 | 0.72  |
| Q9WMT5_f Ruvb2    | RuvB-like 2 K.VQAGDVITDK#.A                                   | 61.94  | 41.36  | 1.50 | 0.67  |
| Q9WMT5_f Ruvb2    | RuvB-like 2 R.VYSLFDES.R                                      | 34.96  | 95.16  | 0.37 | 2.72  |
| Q9WMT5_f Ruvb2    | RuvB-like 2 R.TQGFALFSGDTGEIK.S                               | 6.11   | 5.78   | 1.06 | 0.95  |
| Q9WMT5_f Ruvb2    | RuvB-like 2 R.TQGFALFSGDTGEIK#.S                              | 9.34   | 16.14  | 0.58 | 1.73  |
| Q9CQK7_R1 Rwd1    | RWD doma K.AK#DAELLEIK#.K                                     | 19.95  | 7.70   | 2.59 | 0.39  |
| Q9CQK7_R1 Rwd1    | RWD doma K.LFHGTPTVITENFLSWK#.A                               | 66.37  | 17.82  | 3.72 | 0.27  |
| Q9CQK7_R1 Rwd1    | RWD doma K.LNEIVDQIK#.T                                       | 129.28 | 34.10  | 3.79 | 0.26  |
| Q9CPR1_R1 Rwd4    | RWD doma K.DHK#EQFM*ENHHPGNSATPVANIIVETPTTAPSSK#.K            | 10.16  | 3.34   | 3.04 | 0.33  |
| Q9CPR1_R1 Rwd4    | RWD doma R.ELSPVSFQYR.I                                       | 10.19  | 27.41  | 0.37 | 2.69  |
| Q9CPR1_R1 Rwd4    | RWD doma R.GWNWVDVVK#.H                                       | 57.01  | 29.40  | 1.94 | 0.52  |
| P50543_S1 S100a11 | Protein S1C.K.DPGVLDL.R.M                                     | 10.26  | 17.84  | 0.58 | 1.74  |
| P50543_S1 S100a11 | Protein S1C.K.TEFLSFM*NTLAAFTK#.N                             | 6.36   | 3.02   | 2.10 | 0.48  |
| P50543_S1 S100a11 | Protein S1C.K.TEFLSFM*NTLAAFTK#.N                             | 36.85  | 14.64  | 2.52 | 0.40  |
| Q9D708_Q S100a16  | Protein S1C.K.AVVLVNENFYK#.Y                                  | 12.41  | 10.30  | 1.21 | 0.83  |
| Q9R1T2_SA Sae1    | SUMO-actin R.AK#LDSSETM*VK#.K                                 | 8.41   | 4.42   | 1.90 | 0.53  |
| Q9R1T2_SA Sae1    | SUMO-actin R.AQNLPN*VDVK#.V                                   | 15.48  | 8.37   | 1.85 | 0.54  |
| Q9R1T2_SA Sae1    | SUMO-actin R.DPPHNFFFDGM*K#.G                                 | 10.52  | 5.94   | 1.77 | 0.57  |
| Q9R1T2_SA Sae1    | SUMO-actin K.FFTGDVFGYHYGTANLGEHEFEVEEK#.T                    | 5.95   | 2.49   | 2.39 | 0.42  |
| Q9R1T2_SA Sae1    | SUMO-actin K.GLTM*LDHEQVSPEDPGAQFIQTGSVGR.N                   | 2.00   | 3.60   | 0.55 | 1.80  |
| Q9R1T2_SA Sae1    | SUMO-actin K.LDSSETM*VK#.K                                    | 21.37  | 7.27   | 2.94 | 0.34  |
| Q9R1T2_SA Sae1    | SUMO-actin K.VDTEFVEK#K#ESFFTK#.F                             | 13.38  | 6.99   | 1.91 | 0.52  |
| Q9R1T2_SA Sae1    | SUMO-actin K.LDSSETM*VK#.K                                    | 4.94   | 2.00   | 2.48 | 0.40  |
| D3YXK2_SA Safb    | Scaffold att R.APTAASPEPQDSK#EDVVK#.K#.F                      | 35.93  | 28.69  | 1.25 | 0.80  |
| D3YXK2_SA Safb    | Scaffold att R.AWQGTADGGM*M*ER.D                              | 4.17   | 16.55  | 0.25 | 3.97  |
| D3YXK2_SA Safb    | Scaffold att R.LQAQWER.E                                      | 13.77  | 57.76  | 0.24 | 4.19  |
| D3YXK2_SA Safb    | Scaffold att K.MSSVEEDSSTR.L                                  | 19.32  | 7.42   | 2.60 | 0.38  |
| D3YXK2_SA Safb    | Scaffold att R.NFVWVGLSSTR.A                                  | 11.44  | 45.59  | 0.25 | 3.99  |
| D3YXK2_SA Safb    | Scaffold att K.REPADAPGGGTGM*DREPVGLEEPVEQSSTAAQLPEATSQELVR.A | 2.64   | 11.39  | 0.23 | 4.31  |
| D3YXK2_SA Safb    | Scaffold att K.SEPVKEGSELEQFPAQATSSVGPDR.K                    | 2.65   | 18.86  | 0.14 | 7.13  |
| D3YXK2_SA Safb    | Scaffold att K.SEPVKEGSELEQFPAQATSSVGPDR.K                    | 1.69   | 10.82  | 0.16 | 6.41  |
| D3YXK2_SA Safb    | Scaffold att K.SKDADDQKPGPSEK.S                               | 1.55   | 2.87   | 0.54 | 1.84  |
| D3YXK2_SA Safb    | Scaffold att R.SVVSFDK#.V                                     | 48.92  | 52.64  | 0.93 | 1.08  |
| D3YXK2_SA Safb    | Scaffold att K.SEPVKEGSELEQFPAQATSSVGPDR.K                    | 1.77   | 6.86   | 0.26 | 3.89  |

|                  |                                              |        |        |      |       |
|------------------|----------------------------------------------|--------|--------|------|-------|
| Q80YR5_SA Safb2  | Scaffold att K.EKDQDELTPGAAGHSR.V            | 7.66   | 20.92  | 0.37 | 2.73  |
| Q80YR5_SA Safb2  | Scaffold att R.ELADAPGGGGGTR.H               | 3.45   | 23.81  | 0.15 | 6.89  |
| Q80YR5_SA Safb2  | Scaffold att R.LDAFOER.R                     | 4.16   | 16.42  | 0.25 | 3.95  |
| Q80YR5_SA Safb2  | Scaffold att R.LEGGGM*ASQDQGG.R.V            | 1.30   | 3.92   | 0.33 | 3.01  |
| Q80YR5_SA Safb2  | Scaffold att R.NLWVSLSSSTR.A                 | 2.60   | 14.81  | 0.18 | 5.70  |
| F7ARK3_F7 Sail2  | Sal-like pro -.XSPHYQLSR.S                   | 1.36   | 44.54  | 0.03 | 32.72 |
| Q8BX22_SA Sail4  | Sal-like pro K.SRSPGKHAEVESCRC@.V            | 2.07   | 1.67   | 1.24 | 0.81  |
| Q8C8Y1_S1 Samd4a | Protein Sm R.DQVGLAGWFK#.G                   | 10.01  | 4.13   | 2.43 | 0.41  |
| Q69Z37_SA Samd9l | Sterile alph R.ETGQNEEQEPLTK#.G              | 8.39   | 2.80   | 3.00 | 0.33  |
| Q69Z37_SA Samd9l | Sterile alph K.LFAVLDFDPYSHIK#.E             | 14.31  | 6.84   | 2.09 | 0.48  |
| Q69Z37_SA Samd9l | Sterile alph K.ATDFVEIQVSK#.L                | 59.66  | 14.77  | 4.04 | 0.25  |
| Q69Z37_SA Samd9l | Sterile alph K.DK#PHGEIVGVQVTSK#.D           | 61.79  | 16.52  | 3.74 | 0.27  |
| Q69Z37_SA Samd9l | Sterile alph K.EHGAETDLTFSPLIEELQNEETEK#.V   | 68.11  | 21.09  | 3.23 | 0.31  |
| Q69Z37_SA Samd9l | Sterile alph K.ELDEDSTLUEK#.Y                | 30.51  | 6.82   | 4.47 | 0.22  |
| Q69Z37_SA Samd9l | Sterile alph K.ELTELLSK#.K                   | 52.27  | 13.80  | 3.79 | 0.26  |
| Q69Z37_SA Samd9l | Sterile alph K.ESM*AEFLSGK#.G                | 25.20  | 5.72   | 4.41 | 0.23  |
| Q69Z37_SA Samd9l | Sterile alph R.GPALLIK#.R                    | 33.95  | 12.83  | 2.65 | 0.38  |
| Q69Z37_SA Samd9l | Sterile alph K.HS1STLNIELVNTLTK#.L           | 24.71  | 4.15   | 5.95 | 0.17  |
| Q69Z37_SA Samd9l | Sterile alph K.LANSLSLK#.Y                   | 45.56  | 8.23   | 5.54 | 0.18  |
| Q69Z37_SA Samd9l | Sterile alph R.LISFLDENIIVK#.G               | 36.56  | 5.03   | 7.27 | 0.14  |
| Q69Z37_SA Samd9l | Sterile alph K.NFSTALVWVANLAK#.R             | 24.32  | 8.75   | 2.78 | 0.36  |
| Q69Z37_SA Samd9l | Sterile alph K.NSVISDLGQVYK.S                | 36.86  | 7.62   | 4.84 | 0.21  |
| Q69Z37_SA Samd9l | Sterile alph K.TKNEEENSVSNSDHLGR.E           | 8.54   | 8.04   | 1.06 | 0.94  |
| Q69Z37_SA Samd9l | Sterile alph R.VAETGPLNLDIPEFK#.A            | 108.94 | 25.32  | 4.30 | 0.23  |
| Q69Z37_SA Samd9l | Sterile alph K.YFEDSEISER.A                  | 8.66   | 17.39  | 0.50 | 2.01  |
| Q69Z37_SA Samd9l | Sterile alph K.YILPFSTLK#.K                  | 49.77  | 12.98  | 3.84 | 0.26  |
| Q60710_S1 Samhd1 | Deoxynucl K.FAEQLIR.V                        | 8.96   | 21.18  | 0.42 | 2.36  |
| Q60710_S1 Samhd1 | Deoxynucl K.IAGSFLPFLDEDR.L                  | 5.90   | 14.54  | 0.41 | 2.46  |
| Q60710_S1 Samhd1 | Deoxynucl R.IIDTPQFOR.L                      | 14.03  | 37.72  | 0.37 | 2.69  |
| Q60710_S1 Samhd1 | Deoxynucl R.INK#EQVSQLPEK#.F                 | 12.71  | 7.87   | 1.62 | 0.62  |
| Q60710_S1 Samhd1 | Deoxynucl R.ISTAIIDM*EAFK#.L                 | 34.81  | 26.32  | 1.32 | 0.76  |
| Q60710_S1 Samhd1 | Deoxynucl R.LEDLGVSSLEER.K                   | 6.05   | 11.38  | 0.53 | 1.88  |
| Q60710_S1 Samhd1 | Deoxynucl K.NYGLPEEDITFIK#.E                 | 33.64  | 20.83  | 1.61 | 0.62  |
| Q60710_S1 Samhd1 | Deoxynucl K.ADPYVEITGTAGK#.K                 | 89.26  | 43.40  | 2.06 | 0.49  |
| Q60710_S1 Samhd1 | Deoxynucl K.APDVELK#.A                       | 30.19  | 17.81  | 1.70 | 0.59  |
| Q60710_S1 Samhd1 | Deoxynucl K.APDVELKAEDFIVDINVYGM*EDKKNPIDR.V | 9.48   | 16.09  | 0.59 | 1.70  |
| Q60710_S1 Samhd1 | Deoxynucl K.APDVELKAEDFIVDINVYGM*EDKKNPIDR.V | 1.73   | 5.44   | 0.32 | 3.14  |
| Q60710_S1 Samhd1 | Deoxynucl K.APDVELKAEDFIVDINVYGMEDKKNPIDR.V  | 2.88   | 6.84   | 0.42 | 2.38  |
| Q60710_S1 Samhd1 | Deoxynucl R.DFTKPDQGDIIAPLITPLK.W            | 83.24  | 42.63  | 1.95 | 0.51  |
| Q60710_S1 Samhd1 | Deoxynucl R.EKEVGNLYDMFHTR.N                 | 2.94   | 8.22   | 0.36 | 2.79  |
| Q60710_S1 Samhd1 | Deoxynucl K.EQVSQLPEK#.F                     | 39.66  | 23.71  | 1.67 | 0.60  |
| Q60710_S1 Samhd1 | Deoxynucl K.FAEQLIR.V                        | 28.39  | 70.03  | 0.41 | 2.47  |
| Q60710_S1 Samhd1 | Deoxynucl K.HEQGSIM*FEHLVNSNELK#.L           | 9.80   | 4.93   | 1.99 | 0.50  |
| Q60710_S1 Samhd1 | Deoxynucl K.HEQGSIMFEHLVNSNELK#.L            | 8.15   | 4.27   | 1.91 | 0.52  |
| Q60710_S1 Samhd1 | Deoxynucl K.IAGSFLPFLDEDRLEDLGVSSLEER.K      | 26.66  | 134.43 | 0.20 | 5.04  |
| Q60710_S1 Samhd1 | Deoxynucl R.IIDTPQFOR.L                      | 41.35  | 90.50  | 0.46 | 2.19  |
| Q60710_S1 Samhd1 | Deoxynucl R.INK#EQVSQLPEK#.F                 | 64.22  | 34.59  | 1.86 | 0.54  |
| Q60710_S1 Samhd1 | Deoxynucl K.ISNLIDIM*ITDAFLK#.A              | 44.08  | 22.59  | 1.95 | 0.51  |
| Q60710_S1 Samhd1 | Deoxynucl R.ISTAIIDM*EAFK#.L                 | 102.82 | 58.64  | 1.75 | 0.57  |
| Q60710_S1 Samhd1 | Deoxynucl R.ISTAIIDMEAFK#.L                  | 50.10  | 26.24  | 1.91 | 0.52  |
| Q60710_S1 Samhd1 | Deoxynucl R.LPQEVAK#.A                       | 165.75 | 93.74  | 1.77 | 0.57  |
| Q60710_S1 Samhd1 | Deoxynucl R.NGIDVDKWDYFAR.D                  | 4.04   | 9.28   | 0.43 | 2.30  |
| Q60710_S1 Samhd1 | Deoxynucl K.NYGLPEEDITFIK#.E                 | 92.00  | 41.31  | 2.23 | 0.45  |
| Q60710_S1 Samhd1 | Deoxynucl K.QLGGYVFPGASHNR.F                 | 11.30  | 34.42  | 0.33 | 3.05  |
| Q60710_S1 Samhd1 | Deoxynucl K.WK#HEQGSIMFEHLVNSNELK#.L         | 14.58  | 8.34   | 1.75 | 0.57  |
| Q60710_S1 Samhd1 | Deoxynucl K.YLGETQPK#.R                      | 136.15 | 60.23  | 2.26 | 0.44  |
| Q60710_S1 Samhd1 | Deoxynucl K.ADPYVEITGTAGK#.K                 | 53.84  | 20.51  | 2.62 | 0.38  |
| Q60710_S1 Samhd1 | Deoxynucl R.DFTKPDQGDIIAPLITPLK#.W           | 36.47  | 20.33  | 1.79 | 0.56  |
| Q60710_S1 Samhd1 | Deoxynucl K.EQVSQLPEK#.F                     | 13.11  | 8.64   | 1.52 | 0.66  |
| Q60710_S1 Samhd1 | Deoxynucl K.FAEQLIR.V                        | 11.59  | 19.68  | 0.59 | 1.70  |
| Q60710_S1 Samhd1 | Deoxynucl K.IAGSFLPFLDEDRLEDLGVSSLEER.K      | 9.21   | 36.10  | 0.26 | 3.92  |
| Q60710_S1 Samhd1 | Deoxynucl R.IIDTPQFOR.L                      | 11.66  | 27.68  | 0.42 | 2.37  |
| Q60710_S1 Samhd1 | Deoxynucl R.INK#EQVSQLPEK#.F                 | 32.12  | 9.62   | 3.34 | 0.30  |
| Q60710_S1 Samhd1 | Deoxynucl R.ISTAIIDM*EAFK#.L                 | 42.12  | 22.69  | 1.86 | 0.54  |
| Q60710_S1 Samhd1 | Deoxynucl R.ISTAIIDMEAFK#.L                  | 12.80  | 9.16   | 1.40 | 0.72  |
| Q60710_S1 Samhd1 | Deoxynucl K.NYGLPEEDITFIK#.E                 | 59.11  | 23.68  | 2.50 | 0.40  |
| Q60710_S1 Samhd1 | Deoxynucl K.YLGETQPK#.R                      | 37.78  | 15.69  | 2.41 | 0.42  |
| Q8BIHO_SP Sap130 | Histone dex R.INELIQGNM*QR.C                 | 2.42   | 6.64   | 0.36 | 2.74  |
| Q8BIHO_SP Sap130 | Histone dex R.LTNLQEGIIK#.K                  | 15.41  | 14.23  | 1.08 | 0.92  |
| O55128_S1 Sap18  | Histone dex K.ELTSLV.K.E                     | 87.55  | 77.42  | 1.13 | 0.88  |
| O55128_S1 Sap18  | Histone dex K.FQGDYLDIAITPPNR.A              | 33.51  | 167.35 | 0.20 | 4.99  |
| O55128_S1 Sap18  | Histone dex K.FQGDYLDIAITPPNR.A              | 15.94  | 82.15  | 0.19 | 5.15  |
| O55128_S1 Sap18  | Histone dex R.GNVPSELQIYTWWM*DATLK#.E        | 52.91  | 50.27  | 1.05 | 0.95  |
| O55128_S1 Sap18  | Histone dex R.GNVPSELQIYTWWM*DATLK#.E        | 28.06  | 29.75  | 0.94 | 1.06  |
| O55128_S1 Sap18  | Histone dex R.GNVPSELQIYTWMDATLK#.E          | 38.11  | 32.43  | 1.17 | 0.85  |
| O55128_S1 Sap18  | Histone dex R.GNVPSELQIYTWMDATLK#.E          | 43.78  | 42.67  | 1.03 | 0.97  |
| O55128_S1 Sap18  | Histone dex K.GTDDSMTLQSQK#.F                | 27.54  | 10.84  | 2.54 | 0.39  |
| O55128_S1 Sap18  | Histone dex K.GTHFAIVFM*DLK.R                | 9.14   | 15.59  | 0.59 | 1.71  |
| O55128_S1 Sap18  | Histone dex R.KGTDSDM*TLQSQK.F               | 26.95  | 29.11  | 0.93 | 1.08  |
| O55128_S1 Sap18  | Histone dex R.KGTDSDM*TLQSQK#.F              | 14.81  | 14.39  | 1.03 | 0.97  |
| O55128_S1 Sap18  | Histone dex R.VFTTNGR.H                      | 4.45   | 16.16  | 0.28 | 3.63  |
| O99J24_O9 Sar1a  | GTP-bindin R.EIFGLYQITGK#.G                  | 27.07  | 23.47  | 1.15 | 0.87  |
| O99J24_O9 Sar1a  | GTP-bindin K.LVFLGLDNAGK#.T                  | 93.99  | 88.08  | 1.07 | 0.94  |
| O99J24_O9 Sar1a  | GTP-bindin K.VELNLM*TDTISNPIILGNK#.I         | 29.50  | 17.25  | 1.71 | 0.58  |
| O99J24_O9 Sar1a  | GTP-bindin K.LVFLGLDNAGK#.T                  | 6.71   | 8.20   | 0.82 | 1.22  |
| O99J24_O9 Sar1a  | GTP-bindin K.LVFLGLDNAGK#.T                  | 13.33  | 14.93  | 0.89 | 1.12  |
| O9D1J3_SA Sarnp  | SAP domair R.FGIVTSSAGTGTEDTEAK#.K           | 6.89   | 3.38   | 2.04 | 0.49  |
| O9Z315_S1 Sart1  | U4/U6.U5 t K.ADDLPLGDQDQDGFGRS.L             | 6.60   | 17.67  | 0.37 | 2.68  |
| O9Z315_S1 Sart1  | U4/U6.U5 t K.ASSGDASSLSEITNK#.L              | 26.83  | 24.70  | 1.09 | 0.92  |
| O9Z315_S1 Sart1  | U4/U6.U5 t K.DKGVLDQGEDVLVNNMVMVDK.R.A       | 3.83   | 5.64   | 0.68 | 1.47  |
| O9Z315_S1 Sart1  | U4/U6.U5 t K.EAAGTAAAGTGGTTEQPPR.H           | 11.90  | 48.32  | 0.25 | 4.06  |
| O9Z315_S1 Sart1  | U4/U6.U5 t K.EAGTKEPVAADVINPM*ALR.Q          | 4.24   | 19.78  | 0.21 | 4.66  |
| O9Z315_S1 Sart1  | U4/U6.U5 t K.GLETTVQK#.V                     | 52.89  | 38.48  | 1.37 | 0.73  |
| O9Z315_S1 Sart1  | U4/U6.U5 t K.IEYVDETRG.K                     | 31.10  | 30.08  | 1.03 | 0.97  |
| O9Z315_S1 Sart1  | U4/U6.U5 t K.IKTLGEDDPLDLDAAWIER.S           | 5.55   | 2.91   | 1.91 | 0.52  |
| O9Z315_S1 Sart1  | U4/U6.U5 t K.KKPDYLPYAEDESVDLDAQK.P.R.S      | 2.86   | 5.20   | 0.55 | 1.82  |
| O9Z315_S1 Sart1  | U4/U6.U5 t K.K#LDEALLK#.K.M                  | 41.74  | 51.69  | 0.81 | 1.24  |
| O9Z315_S1 Sart1  | U4/U6.U5 t R.LASEYLSPEEM*VTFK.K              | 6.41   | 8.39   | 0.76 | 1.31  |
| O9Z315_S1 Sart1  | U4/U6.U5 t R.LEQGGM*ADGLR.E                  | 9.31   | 38.81  | 0.24 | 4.17  |
| O9Z315_S1 Sart1  | U4/U6.U5 t K.LGLK#PLEVNAVK#.K                | 23.73  | 26.72  | 0.89 | 1.13  |
| O9Z315_S1 Sart1  | U4/U6.U5 t K.LLEEMDQEFVSTLVEEFQPR.R          | 3.59   | 3.32   | 1.08 | 0.93  |
| O9Z315_S1 Sart1  | U4/U6.U5 t R.LQAQSSVGR.P.L                   | 15.59  | 71.31  | 0.22 | 4.57  |
| O9Z315_S1 Sart1  | U4/U6.U5 t R.M*SSSDTLPTGVALLQEK#.Q           | 14.85  | 14.03  | 1.06 | 0.94  |

|                  |                                                       |       |       |       |       |
|------------------|-------------------------------------------------------|-------|-------|-------|-------|
| Q9Z315_S1 Sart1  | U4/U6_U5 t K.MSSSDTPLGTVALLOEK.Q                      | 7.79  | 8.39  | 0.93  | 1.08  |
| Q9Z315_S1 Sart1  | U4/U6_U5 t K.QHDFASSTTLDEEPIVNR.G                     | 4.80  | 13.44 | 0.36  | 2.80  |
| Q9Z315_S1 Sart1  | U4/U6_U5 t R.QLQLQQLR.D                               | 11.95 | 39.08 | 0.31  | 3.27  |
| Q9Z315_S1 Sart1  | U4/U6_U5 t K.RDDGYEAASSK.A                            | 1.63  | 4.07  | 0.40  | 2.49  |
| Q9Z315_S1 Sart1  | U4/U6_U5 t R.RQDLVSAR.D                               | 1.67  | 27.13 | 0.06  | 16.25 |
| Q9Z315_S1 Sart1  | U4/U6_U5 t K.TPYVLSGSGK#.S                            | 48.74 | 52.07 | 0.94  | 1.07  |
| Q9JL18_SAF Sart3 | Squamous i R.ALEYLQVEEER.F                            | 14.03 | 12.85 | 1.09  | 0.92  |
| Q9JL18_SAF Sart3 | Squamous i K.DSVTVFVSNLPSYIEPEVK#.L                   | 9.34  | 3.13  | 2.98  | 0.34  |
| Q9JL18_SAF Sart3 | Squamous i K.DSVTVFVSNLPSYIEPEVK#.L                   | 3.47  | 3.16  | 1.10  | 0.91  |
| Q9JL18_SAF Sart3 | Squamous i R.K#VLSGAVAAEA#K#.G                        | 14.66 | 2.88  | 5.09  | 0.20  |
| Q9JL18_SAF Sart3 | Squamous i R.LAEYQAYIDFEM*#K#.I                       | 7.95  | 1.58  | 5.02  | 0.20  |
| Q9JL18_SAF Sart3 | Squamous i R.LAEYQAYIDFEM*#K#.I                       | 3.91  | 1.77  | 2.20  | 0.45  |
| Q9JL18_SAF Sart3 | Squamous i R.QGAAPQAEANGPAPGPAVAPSVATEAPK#.M          | 6.39  | 3.63  | 1.76  | 0.57  |
| Q9JL18_SAF Sart3 | Squamous i R.TEGTLEDWDLAIQK#.T                        | 54.39 | 6.67  | 8.16  | 0.12  |
| Q9JL18_SAF Sart3 | Squamous i K.VLSGAVAAEA#K#.G                          | 55.93 | 8.45  | 6.62  | 0.15  |
| Q9JL18_SAF Sart3 | Squamous i R.ALEYLQVEEER.F                            | 10.84 | 7.18  | 1.51  | 0.66  |
| Q9JL18_SAF Sart3 | Squamous i K.ALQLEK#.Y                                | 39.50 | 7.95  | 4.97  | 0.20  |
| Q9JL18_SAF Sart3 | Squamous i K.GLAYVEYENESQASQAVM*#K#.M                 | 12.12 | 2.51  | 4.83  | 0.21  |
| Q9JL18_SAF Sart3 | Squamous i R.LAEYQAYIDFEM*#K#.I                       | 6.76  | 2.08  | 3.25  | 0.31  |
| Q9JL18_SAF Sart3 | Squamous i R.TEGTLEDWDLAIQK#.T                        | 42.33 | 4.08  | 10.37 | 0.10  |
| Q9JL18_SAF Sart3 | Squamous i K.VLSGAVAAEA#K#.G                          | 68.40 | 10.13 | 6.75  | 0.15  |
| Q689Z5_SB Sbn01  | Protein str: R.FQQAADLDAEQR.M                         | 1.86  | 6.24  | 0.30  | 3.36  |
| Q689Z5_SB Sbn01  | Protein str: K.GVLQSLIEK#.H                           | 19.61 | 6.31  | 3.11  | 0.32  |
| Q689Z5_SB Sbn01  | Protein str: R.SELDVPEILNITEK#.Q                      | 13.77 | 15.27 | 0.90  | 1.11  |
| Q689Z5_SB Sbn01  | Protein str: K.SIDPDSIQSALLASGLSK#.R                  | 9.92  | 10.58 | 0.94  | 1.07  |
| Q689Z5_SB Sbn01  | Protein str: K.TGLAVLELQNK#.L                         | 17.67 | 10.44 | 1.69  | 0.59  |
| Q689Z5_SB Sbn01  | Protein str: R.TLEALEEGGELNDVSTAK#.G                  | 6.23  | 8.78  | 0.71  | 1.41  |
| Q689Z5_SB Sbn01  | Protein str: R.VVSNDDGSIYESR.S                        | 2.57  | 9.05  | 0.28  | 3.53  |
| Q689Z5_SB Sbn01  | Protein str: R.VVYASATGASEPR.N                        | 4.18  | 20.43 | 0.20  | 4.88  |
| Q6DID3_SC ScaF8  | Protein SC: R.FSNNIISTFQNLVYR.C                       | 1.35  | 2.92  | 0.46  | 2.16  |
| Q6DID3_SC ScaF8  | Protein SC: R.VLNLWQK#.N                              | 12.01 | 7.04  | 1.71  | 0.59  |
| Q6DID3_SC ScaF8  | Protein SC: K.VPGLVVIDSVR.Q                           | 7.54  | 20.72 | 0.36  | 2.75  |
| O35609_SC Scamp3 | Secretory c: K.AQEQEAAAGVFNPAVR.T                     | 2.24  | 4.25  | 0.53  | 1.90  |
| O35609_SC Scamp3 | Secretory c: R.NYGSYSTQASAAAATAELK#.K                 | 6.14  | 4.56  | 1.35  | 0.74  |
| O35609_SC Scamp3 | Secretory c: R.TAAANAAGAAENAFR.A                      | 6.04  | 15.00 | 0.40  | 2.48  |
| Q8BRF7_SC Scdf1  | Sec1 family R.FGQDIISPLLSVK#.E                        | 9.96  | 8.34  | 1.19  | 0.84  |
| Q8BRF7_SC Scdf1  | Sec1 family K.LTSAVSSLPELLEK#.K                       | 9.34  | 11.92 | 0.78  | 1.28  |
| Q8BRF7_SC Scdf1  | Sec1 family K.SLDDVSDPDAGTPEDK.M                      | 3.16  | 5.82  | 0.54  | 1.84  |
| Q8BRF7_SC Scdf1  | Sec1 family K.LTSAVSSLPELLEK.K                        | 10.19 | 11.18 | 0.91  | 1.10  |
| Q8BRF7_SC Scdf1  | Sec1 family R.SKLEIDIANAASAASVTVQAK.V                 | 8.39  | 10.30 | 0.81  | 1.23  |
| Q8BRF7_SC Scdf1  | Sec1 family R.VM*NTGSQFVM*EGVK#.N                     | 7.14  | 4.98  | 1.43  | 0.70  |
| Q8BTY8_SC Scdf2  | Sec1 family R.VIATDLANYAPAK#.N                        | 11.07 | 3.51  | 3.15  | 0.32  |
| Q78YZ6_SC Scoc   | Short coilei: R.LINQVLEQHTLEDLSAR.V                   | 7.99  | 22.27 | 0.36  | 2.79  |
| Q8OU72_SC Scrib  | Protein scri: R.FQTEDDAQTGEK#.V                       | 3.55  | 1.26  | 2.82  | 0.36  |
| Q8OU72_SC Scrib  | Protein scri: R.FQTEDDAQTGEK#.V                       | 7.91  | 4.89  | 1.62  | 0.62  |
| Q9J1S0_SC Scube2 | Signal pept: K.EVTASCNLSCVVK#.R                       | 16.44 | 15.04 | 1.09  | 0.92  |
| Q64124_SC Scx    | Basic helix- R.TNSVNTAFTALR.T                         | 14.61 | 10.94 | 1.34  | 0.75  |
| O9EQC5_N Scyl1   | N-terminal R.AEAGGLK#EQELSWGHLHQV#K#.A                | 7.62  | 6.31  | 1.21  | 0.83  |
| O9EQC5_N Scyl1   | N-terminal K.ATGSAVSFVYDV#K#GAEQEQVAK#.A              | 15.30 | 9.73  | 1.57  | 0.64  |
| O9EQC5_N Scyl1   | N-terminal R.DPVRDPFPELSPPEGGPPGPWILHR.G              | 2.70  | 2.31  | 1.17  | 0.86  |
| O9EQC5_N Scyl1   | N-terminal K.DVHAASPTGGAAASWAGWAVTGVSSLTSK#.L         | 3.99  | 4.72  | 0.85  | 1.18  |
| O9EQC5_N Scyl1   | N-terminal R.FVETNLFLEEIQK#EPK#.Q                     | 20.52 | 19.87 | 1.03  | 0.97  |
| O9EQC5_N Scyl1   | N-terminal K.GIPELQYDPELADSSSR.A                      | 1.51  | 5.55  | 0.27  | 3.67  |
| O9EQC5_N Scyl1   | N-terminal K.IGYSYLASTR.H                             | 3.56  | 15.14 | 0.23  | 4.26  |
| O9EQC5_N Scyl1   | N-terminal R.LLQQM*EQFIQYLEDPTVNTQIFPHVTHGFLDTPAIR.E  | 1.60  | 2.76  | 0.58  | 1.72  |
| O9EQC5_N Scyl1   | N-terminal K.LINEANLNVELM*#K#.H                       | 16.20 | 14.33 | 1.13  | 0.88  |
| O9EQC5_N Scyl1   | N-terminal R.AEAGGLK#EQELSWGHLHQV#K#.A                | 5.78  | 5.96  | 0.97  | 1.03  |
| O9EQC5_N Scyl1   | N-terminal K.ATGSAVSFVYDV#K#GAEQEQVAK#.A              | 10.50 | 9.57  | 1.10  | 0.91  |
| O9EQC5_N Scyl1   | N-terminal K.IGYSYLASTR.H                             | 3.58  | 10.63 | 0.34  | 2.97  |
| O9EQC5_N Scyl1   | N-terminal K.LINEANLNVELM*#K#.H                       | 13.63 | 8.18  | 1.67  | 0.60  |
| Q8CFE4_SC Scyl2  | SCY1-like pi: K.LILPELGPVFK#.Q                        | 27.97 | 18.33 | 1.53  | 0.66  |
| Q8CFE4_SC Scyl2  | SCY1-like pi: K.VTADVTSAVM*GNPVTR.E                   | 1.23  | 5.01  | 0.25  | 4.07  |
| Q8CFE4_SC Scyl2  | SCY1-like pi: K.YGLLQVSEGLSFLSHSVK#.M                 | 17.01 | 7.83  | 2.17  | 0.46  |
| Q8CFE4_SC Scyl2  | SCY1-like pi: K.LILPELGPVFK#.Q                        | 34.89 | 15.46 | 2.26  | 0.44  |
| Q8CFE4_SC Scyl2  | SCY1-like pi: K.VTADVTSAVM*GNPVTR.E                   | 3.46  | 6.30  | 0.55  | 1.82  |
| Q8OUZ25_SC Sdf1  | Protein SD: R.VLTQDDFQK#.I                            | 11.45 | 8.67  | 1.32  | 0.76  |
| Q9DCT5_SC Sdf2   | Stromal cel: R.AEVHHAEL.-                             | 8.32  | 8.32  | 1.00  | 1.00  |
| Q9DCT5_SC Sdf2   | Stromal cel: K.HSSTDVLLSVTGEQYGRIPISGQK.E             | 2.06  | 4.82  | 0.43  | 2.35  |
| Q9ESP1_SD Sdf21  | Stromal cel: K.AM*EGIFIK#PADLSTGHDEL.-                | 43.59 | 15.16 | 2.88  | 0.35  |
| Q9ESP1_SD Sdf21  | Stromal cel: K.AMEGIFIK#PADLSTGHDEL.-                 | 11.65 | 7.59  | 1.54  | 0.65  |
| Q9ESP1_SD Sdf21  | Stromal cel: R.FHQHTVSFVLSVTGEQYGNPIR.G               | 6.10  | 9.73  | 0.63  | 1.59  |
| Q9ESP1_SD Sdf21  | Stromal cel: K.YGSGSGQSQSVTGEESDDANSYWR.I             | 1.95  | 3.87  | 0.50  | 1.99  |
| Q63918_SC Sdpr   | Serum depr: R.DNSQNAVTVHTLLDK#.L                      | 28.93 | 15.02 | 1.93  | 0.52  |
| Q63918_SC Sdpr   | Serum depr: K.GIQNDLTK#.L                             | 45.08 | 21.96 | 2.05  | 0.49  |
| Q63918_SC Sdpr   | Serum depr: K.LVNMLDAVR.E                             | 6.14  | 13.55 | 0.45  | 2.21  |
| Q63918_SC Sdpr   | Serum depr: K.VLIFQESEIPASVFK#.E                      | 36.18 | 18.49 | 1.96  | 0.51  |
| Q63918_SC Sdpr   | Serum depr: K.YQASTSNTVSK#.L                          | 52.76 | 22.75 | 2.32  | 0.43  |
| Q63918_SC Sdpr   | Serum depr: K.EPVPSAAEGK#EELADENK#.S                  | 47.88 | 26.83 | 1.79  | 0.56  |
| Q63918_SC Sdpr   | Serum depr: K.GIQNDLTK#.L                             | 65.59 | 30.01 | 2.19  | 0.46  |
| Q63918_SC Sdpr   | Serum depr: K.QVQPAVLHVQDQA.-                         | 67.57 | 67.57 | 1.00  | 1.00  |
| Q63918_SC Sdpr   | Serum depr: R.RGNNSAVGSNADLTIIEDEEPEEVALQQAQQR.V      | 1.95  | 6.62  | 0.29  | 3.39  |
| Q63918_SC Sdpr   | Serum depr: K.VLIFQESEIPASVFK#.E                      | 47.17 | 29.07 | 1.62  | 0.62  |
| Q63918_SC Sdpr   | Serum depr: K.VLIFQESEIPASVFK#E#PVPSAAEGK#EELADENK#.S | 7.31  | 3.07  | 2.38  | 0.42  |
| Q63918_SC Sdpr   | Serum depr: K.YQASTSNTVSK#.L                          | 63.95 | 35.27 | 1.81  | 0.55  |
| Q9D1M0_S Sec13   | Protein SEC: K.GQGSVASITGEQQNEQ.-                     | 61.17 | 61.17 | 1.00  | 1.00  |
| Q9D1M0_S Sec13   | Protein SEC: R.NGGQILADIAR.LG                         | 12.75 | 18.19 | 0.70  | 1.43  |
| Q9D1M0_S Sec13   | Protein SEC: K.GQGSVASITGEQQNEQ.-                     | 7.56  | 7.56  | 1.00  | 1.00  |
| Q9D1M0_S Sec13   | Protein SEC: K.GQGSVASITGEQQNEQ.-                     | 10.87 | 10.87 | 1.00  | 1.00  |
| O08547_SC Sec22b | Vesicle-traf: R.IWMANIEEVLQR.G                        | 1.98  | 8.17  | 0.24  | 4.12  |
| O08547_SC Sec22b | Vesicle-traf: R.NLGSINTELODVQR.I                      | 1.79  | 4.24  | 0.42  | 2.37  |
| Q01405_SC Sec23a | Protein trai: R.AETEEGDPVLR.W                         | 12.13 | 17.15 | 0.71  | 1.41  |
| Q01405_SC Sec23a | Protein trai: R.FLQPQVQK#.I                           | 36.37 | 12.77 | 2.85  | 0.35  |
| Q01405_SC Sec23a | Protein trai: R.FSVNWWPSSR.L                          | 11.95 | 13.36 | 0.89  | 1.12  |
| Q01405_SC Sec23a | Protein trai: R.GPQVQPPPSNR.F                         | 9.83  | 15.37 | 0.64  | 1.56  |
| Q01405_SC Sec23a | Protein trai: K.IDMNLDTLLGELQR.D                      | 3.51  | 8.53  | 0.41  | 2.43  |
| Q01405_SC Sec23a | Protein trai: K.MGFGTLEIK#.T                          | 15.49 | 3.78  | 4.10  | 0.24  |
| Q01405_SC Sec23a | Protein trai: R.M*VVPVAALFTPLK#.E                     | 39.78 | 10.18 | 3.91  | 0.26  |
| Q01405_SC Sec23a | Protein trai: R.SPFLOVFNNSPDESSYR.H                   | 9.32  | 12.03 | 0.77  | 1.29  |
| Q01405_SC Sec23a | Protein trai: R.FLQPQVQK#.I                           | 32.92 | 7.01  | 4.69  | 0.21  |
| Q01405_SC Sec23a | Protein trai: R.GPQVQPPPSNR.F                         | 9.47  | 9.73  | 0.97  | 1.03  |
| Q01405_SC Sec23a | Protein trai: K.IDM*NLDTLLGELQR.D                     | 5.30  | 6.02  | 0.88  | 1.14  |
| Q01405_SC Sec23a | Protein trai: R.M*VVPVAALFTPLK#.E                     | 37.51 | 10.20 | 3.68  | 0.27  |
| Q9D662_SC Sec23b | Protein trai: R.AESEEGDPVLR.W                         | 12.82 | 18.15 | 0.71  | 1.42  |

|                  |                                                          |       |       |      |      |
|------------------|----------------------------------------------------------|-------|-------|------|------|
| Q9D662_S Sec23b  | Protein trai K.AGYQDM*PEYENFK#.H                         | 11.48 | 5.44  | 2.11 | 0.47 |
| Q9D662_S Sec23b  | Protein trai R.DPWVPTQK#.R                               | 12.75 | 5.22  | 2.44 | 0.41 |
| Q9D662_S Sec23b  | Protein trai K.FGQYKEDPTFSR.L                            | 11.59 | 19.29 | 0.60 | 1.66 |
| Q9D662_S Sec23b  | Protein trai R.GAIQVTVQYQHSSTQK#.R                       | 13.56 | 5.01  | 2.71 | 0.37 |
| Q9D662_S Sec23b  | Protein trai K.HLLQAPLDDAQEILQAR.F                       | 19.31 | 26.52 | 0.73 | 1.37 |
| Q9D662_S Sec23b  | Protein trai R.M*AFGATLDVK#.T                            | 26.65 | 9.18  | 2.90 | 0.34 |
| Q9D662_S Sec23b  | Protein trai R.MAFGATLDVK#.T                             | 17.91 | 5.40  | 3.31 | 0.30 |
| Q9D662_S Sec23b  | Protein trai K.AGYQDM*PEYENFK#.H                         | 8.41  | 3.37  | 2.49 | 0.40 |
| Q9D662_S Sec23b  | Protein trai K.HLLQAPLDDAQEILQAR.F                       | 12.49 | 21.29 | 0.59 | 1.71 |
| Q9D662_S Sec23b  | Protein trai R.I.M*LFTGGPPTQGPQM*VVGDELK#.T              | 9.95  | 11.38 | 0.87 | 1.14 |
| Q9D662_S Sec23b  | Protein trai R.M*AFGATLDVK#.T                            | 18.84 | 7.34  | 2.57 | 0.39 |
| G3X928_G Sec23ip | SEC23-inter R.AHTSTTQLQEELK#.V                           | 39.10 | 9.99  | 3.92 | 0.26 |
| G3X928_G Sec23ip | SEC23-inter R.LEPM*IPADLDLK#.A                           | 21.57 | 6.15  | 3.51 | 0.28 |
| G3X928_G Sec23ip | SEC23-inter K.SAWQTLNEFAR.A                              | 8.98  | 8.06  | 1.11 | 0.90 |
| G3X928_G Sec23ip | SEC23-inter R.TM*NISPEQPQH.-                             | 18.90 | 18.90 | 1.00 | 1.00 |
| G3X928_G Sec23ip | SEC23-inter R.TM*NISPEQPQH.-                             | 12.44 | 12.44 | 1.00 | 1.00 |
| G3X928_G Sec23ip | SEC23-inter K.VANQIK#EEEEKQVVEAEK#.I                     | 28.71 | 7.35  | 3.91 | 0.26 |
| G3X928_G Sec23ip | SEC23-inter R.AHTSTTQLQEELK#.V                           | 47.60 | 8.99  | 5.30 | 0.19 |
| G3X928_G Sec23ip | SEC23-inter R.LEPM*IPADLDLK#.A                           | 24.33 | 6.34  | 3.84 | 0.26 |
| G3X928_G Sec23ip | SEC23-inter R.TM*NISPEQPQH.-                             | 17.55 | 17.55 | 1.00 | 1.00 |
| Q3U2P1_S Sec24a  | Protein trai K.TLETQSALGPALQAAFK#.L                      | 5.30  | 4.33  | 1.23 | 0.82 |
| Q3U2P1_S Sec24a  | Protein trai K.ELVQDLK#.T                                | 16.78 | 9.37  | 1.79 | 0.56 |
| Q3U2P1_S Sec24a  | Protein trai R.TESALSYEFLLHIQQVKNK#.-                    | 5.18  | 17.69 | 0.29 | 3.42 |
| Q3U2P1_S Sec24a  | Protein trai K.TLETQSALGPALQAAFK#.L                      | 9.59  | 5.78  | 1.66 | 0.60 |
| Q80ZX0_Q Sec24b  | Protein Sec R.DALVNAVDPPLSAVSAVASVPR.S                   | 9.05  | 11.23 | 0.81 | 1.24 |
| Q80ZX0_Q Sec24b  | Protein Sec R.ETHSALGPALQAAFK#.L                         | 12.51 | 3.45  | 3.63 | 0.28 |
| Q80ZX0_Q Sec24b  | Protein Sec R.VNDVPEEFLYNPLTR.S                          | 7.53  | 6.59  | 1.14 | 0.88 |
| Q80ZX0_Q Sec24b  | Protein Sec K.VVHHLGPDYFYK#.K                            | 28.34 | 3.27  | 8.67 | 0.12 |
| Q80ZX0_Q Sec24b  | Protein Sec R.DALVNAVDPPLSAVSAVASVPR.S                   | 11.79 | 11.19 | 1.05 | 0.95 |
| Q80ZX0_Q Sec24b  | Protein Sec R.M*PPAPSHVPGVPSAPPPPEQM*QTK#.G              | 6.61  | 3.69  | 1.79 | 0.56 |
| Q80ZX0_Q Sec24b  | Protein Sec R.NQM*GLSANTSHPTNNENVQPPK#.S                 | 7.49  | 3.23  | 2.32 | 0.43 |
| Q80ZX0_Q Sec24b  | Protein Sec R.VNDVPEEFLYNPLTR.S                          | 7.52  | 8.16  | 0.92 | 1.09 |
| G3X972_G Sec24c  | Protein Sec R.GQVPLVTTNLFVK#.D                           | 19.60 | 4.33  | 4.53 | 0.22 |
| G3X972_G Sec24c  | Protein Sec K.LFLFHSLPIAEAPGK#.L                         | 17.96 | 5.59  | 3.22 | 0.31 |
| G3X972_G Sec24c  | Protein Sec R.VGFVTYK#.V                                 | 14.37 | 6.44  | 2.23 | 0.45 |
| G3X972_G Sec24c  | Protein Sec R.ETETVFPVQAGM*EALK#.A                       | 5.55  | 2.84  | 1.95 | 0.51 |
| G3X972_G Sec24c  | Protein Sec R.GQVPLVTTNLFVK#.D                           | 43.10 | 10.41 | 4.14 | 0.24 |
| G3X972_G Sec24c  | Protein Sec K.LFLFHSLPIAEAPGK#.L                         | 51.44 | 14.65 | 3.51 | 0.28 |
| G3X972_G Sec24c  | Protein Sec K.TLFPQQTGYTLAK#.E                           | 18.45 | 4.69  | 3.94 | 0.25 |
| G3X972_G Sec24c  | Protein Sec R.VGFVTYK#.V                                 | 22.89 | 18.70 | 1.22 | 0.82 |
| Q6NXL1_Q Sec24d  | Protein Sec R.KLDPDPSIPSIQVIENDR.A                       | 6.64  | 8.69  | 0.76 | 1.31 |
| Q6NXL1_Q Sec24d  | Protein Sec K.LFIFHSSLPATAEAPGK#.L                       | 46.23 | 15.12 | 3.06 | 0.33 |
| Q6NXL1_Q Sec24d  | Protein Sec R.M*IM*NNIQK#.K                              | 8.03  | 2.91  | 2.76 | 0.36 |
| Q6NXL1_Q Sec24d  | Protein Sec R.VGFITYK#.V                                 | 38.36 | 11.71 | 3.28 | 0.31 |
| Q6NXL1_Q Sec24d  | Protein Sec K.AVLNQPLK#.A                                | 39.27 | 8.25  | 4.76 | 0.21 |
| Q6NXL1_Q Sec24d  | Protein Sec K.LLFPQQTAVESLAK#.D                          | 27.24 | 9.40  | 2.90 | 0.34 |
| Q6NXL1_Q Sec24d  | Protein Sec K.LFIFHSSLPATAEAPGK#.L                       | 46.71 | 11.09 | 4.21 | 0.24 |
| Q3UPL0_S Sec31a  | Protein trai K.AQDGSPLSLQDLIEK#.V                        | 8.93  | 12.30 | 0.73 | 1.38 |
| Q3UPL0_S Sec31a  | Protein trai R.IIAGDK#EVIQAQK#.D                         | 14.36 | 6.69  | 2.15 | 0.47 |
| Q3UPL0_S Sec31a  | Protein trai K.TTFEDLIQR.C                               | 5.56  | 17.93 | 0.31 | 3.23 |
| Q3UPL0_S Sec31a  | Protein trai K.VVLSQASK#.L                               | 26.21 | 12.50 | 2.10 | 0.48 |
| Q3UPL0_S Sec31a  | Protein trai K.AQDGSPLSLQDLIEK#.V                        | 79.87 | 40.36 | 1.98 | 0.51 |
| Q3UPL0_S Sec31a  | Protein trai K.AQDKPVSQESQSPYER.Q                        | 25.38 | 50.03 | 0.51 | 1.97 |
| Q3UPL0_S Sec31a  | Protein trai R.ATVWDLR.K                                 | 12.88 | 27.13 | 0.47 | 2.11 |
| Q3UPL0_S Sec31a  | Protein trai K.AVQLTQALDNTVQALLAEK#.M                    | 24.87 | 8.71  | 2.86 | 0.35 |
| Q3UPL0_S Sec31a  | Protein trai K.GDVSGLVIAGGENGNIYDPSK#.I                  | 9.90  | 3.28  | 3.02 | 0.33 |
| Q3UPL0_S Sec31a  | Protein trai K.IALALNK#.V                                | 65.75 | 21.58 | 3.05 | 0.33 |
| Q3UPL0_S Sec31a  | Protein trai K.IALALNK#VDGPDVALK#.D                      | 41.01 | 17.72 | 2.31 | 0.43 |
| Q3UPL0_S Sec31a  | Protein trai K.IALALNKVDGPDVALKDSDQVAQSDGEESPAEEQLLGER.I | 2.21  | 2.87  | 0.77 | 1.30 |
| Q3UPL0_S Sec31a  | Protein trai K.IEASQTEFEK#.N                             | 57.47 | 20.93 | 2.75 | 0.36 |
| Q3UPL0_S Sec31a  | Protein trai R.ISVYSIM*GGSIDGLR.Q                        | 12.40 | 23.48 | 0.53 | 1.89 |
| Q3UPL0_S Sec31a  | Protein trai R.K#AVQLTQALDNTVQALLAEK#.M                  | 49.13 | 18.35 | 2.68 | 0.37 |
| Q3UPL0_S Sec31a  | Protein trai K.K#EASQTEFEK#.N                            | 47.97 | 22.38 | 2.14 | 0.47 |
| Q3UPL0_S Sec31a  | Protein trai R.K#EPIIK#.V                                | 11.72 | 6.51  | 1.80 | 0.56 |
| Q3UPL0_S Sec31a  | Protein trai K.K#PIPEHLILK#.T                            | 63.76 | 28.41 | 2.24 | 0.45 |
| Q3UPL0_S Sec31a  | Protein trai R.LITAVVM*Kh.N                              | 37.36 | 18.32 | 2.04 | 0.49 |
| Q3UPL0_S Sec31a  | Protein trai K.LSSSGNLDPFGTGQPLPQIQQSAQHSIVLPLK#.K       | 17.15 | 6.13  | 2.80 | 0.36 |
| Q3UPL0_S Sec31a  | Protein trai K.LVTFESVAVPLQQAQEQQR.R                     | 25.15 | 56.17 | 0.45 | 2.23 |
| Q3UPL0_S Sec31a  | Protein trai R.M*ADAILAIAGQELLAQTKQ#K#.Y                 | 16.60 | 4.94  | 3.36 | 0.30 |
| Q3UPL0_S Sec31a  | Protein trai R.NPAVLSAASFDGR.I                           | 13.11 | 26.92 | 0.49 | 2.05 |
| Q3UPL0_S Sec31a  | Protein trai K.NVWVFLK#.V                                | 65.00 | 21.09 | 3.08 | 0.32 |
| Q3UPL0_S Sec31a  | Protein trai R.QVQHILASASPSGR.A                          | 6.70  | 9.80  | 0.68 | 1.46 |
| Q3UPL0_S Sec31a  | Protein trai R.RPVGASFSFGK.L                             | 10.76 | 22.06 | 0.49 | 2.05 |
| Q3UPL0_S Sec31a  | Protein trai R.RQPVFISQVTEKDFLNR.S                       | 4.19  | 24.87 | 0.17 | 5.94 |
| Q3UPL0_S Sec31a  | Protein trai K.TTFEDLIQR.C                               | 14.52 | 23.51 | 0.62 | 1.62 |
| Q3UPL0_S Sec31a  | Protein trai K.VNFEEDSR.G                                | 17.65 | 28.64 | 0.62 | 1.62 |
| Q3UPL0_S Sec31a  | Protein trai K.VVLSQASK#.L                               | 54.96 | 28.80 | 1.91 | 0.52 |
| Q3UPL0_S Sec31a  | Protein trai K.YLELLGYR.K                                | 19.26 | 28.04 | 0.69 | 1.46 |
| S4R2A9_S4 Sec31a | Protein trai R.IAPTVTWVSNK#.T                            | 8.63  | 3.35  | 2.57 | 0.39 |
| Q3UPL0_S Sec31a  | Protein trai K.AQDGSPLSLQDLIEK#.V                        | 60.13 | 27.70 | 2.17 | 0.46 |
| Q3UPL0_S Sec31a  | Protein trai K.AQDKPVSQESQSPYER.Q                        | 13.93 | 29.35 | 0.47 | 2.11 |
| Q3UPL0_S Sec31a  | Protein trai K.AVQLTQALDNTVQALLAEK#.M                    | 36.59 | 14.57 | 2.51 | 0.40 |
| Q3UPL0_S Sec31a  | Protein trai K.IALALNK#.V                                | 37.50 | 15.54 | 2.41 | 0.41 |
| Q3UPL0_S Sec31a  | Protein trai K.IEASQTEFEK#.N                             | 28.28 | 20.10 | 1.41 | 0.71 |
| Q3UPL0_S Sec31a  | Protein trai R.ISVYSIM*GGSIDGLR.Q                        | 5.53  | 12.15 | 0.45 | 2.20 |
| Q3UPL0_S Sec31a  | Protein trai R.K#AVQLTQALDNTVQALLAEK#.M                  | 33.17 | 10.08 | 3.29 | 0.30 |
| Q3UPL0_S Sec31a  | Protein trai K.K#PIPEHLILK#.T                            | 33.26 | 18.45 | 1.80 | 0.55 |
| Q3UPL0_S Sec31a  | Protein trai K.LVTFESVAVPLQQAQEQQR.R                     | 20.60 | 25.19 | 0.82 | 1.22 |
| Q3UPL0_S Sec31a  | Protein trai R.M*ADAILAIAGQELLAQTKQ#K#.Y                 | 11.55 | 4.99  | 2.32 | 0.43 |
| Q3UPL0_S Sec31a  | Protein trai R.NPAVLSAASFDGR.I                           | 13.65 | 22.37 | 0.61 | 1.64 |
| Q3UPL0_S Sec31a  | Protein trai R.QVQHILASASPSGR.A                          | 3.61  | 7.30  | 0.49 | 2.02 |
| Q3UPL0_S Sec31a  | Protein trai R.RQPVFISQVTEKDFLNR.S                       | 1.26  | 10.60 | 0.12 | 8.38 |
| Q3UPL0_S Sec31a  | Protein trai K.VNFEEDSR.G                                | 10.75 | 19.64 | 0.55 | 1.83 |
| Q3UQA7_S Selh    | Selenoprot K.FPEPEVVEELK#K#.Y                            | 9.99  | 21.22 | 0.47 | 2.12 |
| Q3UQA7_S Selh    | Selenoprot R.HAAALQALQLEAPLQVQVQNSKPR.R                  | 9.14  | 25.61 | 0.36 | 2.80 |
| Q3UQA7_S Selh    | Selenoprot R.VELWTGK.K                                   | 15.23 | 34.13 | 0.45 | 2.24 |
| Q9W1M3_S Sema6c  | Semaphorin R.IIIGLELDTGHR.L                              | 2.65  | 7.19  | 0.37 | 2.71 |
| Q8EP97_SE Snp3   | Sentrin-spe K.SGGGFGPDGDSGTTVPTR.R                       | 1.91  | 13.01 | 0.15 | 6.81 |
| Q8BUH8_S Snp7    | Sentrin-spe R.SFAAQEPDASAASGR.A                          | 5.02  | 7.31  | 0.69 | 1.46 |
| Q8BH69_S Snp1    | Selenide, w R.ESFNPETELDK#.S                             | 12.75 | 1.90  | 6.70 | 0.15 |
| Q8BH69_S Snp1    | Selenide, w R.NEVSFVHNLPLVAK#.M                          | 15.02 | 4.29  | 3.50 | 0.29 |
| Q8C1B7_SE Sept11 | Septin-11 C.K.AAAQLQSQAQSQGAQTK#.K                       | 56.25 | 20.27 | 2.78 | 0.36 |
| Q8C1B7_SE Sept11 | Septin-11 C.K.DTDPDSK#PFLSQTEYAEK#.R                     | 8.41  | 6.85  | 1.23 | 0.81 |

|                    |                                              |        |        |      |       |
|--------------------|----------------------------------------------|--------|--------|------|-------|
| Q8C1B7_SE Sept11   | Septin-11 C.K.ELEEEVSNFOK#.K                 | 25.33  | 9.02   | 2.81 | 0.36  |
| Q8C1B7_SE Sept11   | Septin-11 C.K.KAAAQLQSOAQOSGAQTK#.K          | 14.99  | 4.12   | 3.64 | 0.27  |
| Q8C1B7_SE Sept11   | Septin-11 C.K.LTIVDTVGFVDQINK#.D             | 6.14   | 3.06   | 2.01 | 0.50  |
| Q8C1B7_SE Sept11   | Septin-11 C.K.STLM*DTLFTNK#.F                | 15.13  | 10.86  | 1.39 | 0.72  |
| Q8C1B7_SE Sept11   | Septin-11 C.K.STLMDTLFTNK#.F                 | 19.28  | 7.50   | 2.57 | 0.39  |
| Q9ERR7_SE Sept15   | 15 kDa sele K.LLDDNGNIAEELSILK#.W            | 30.03  | 17.62  | 1.70 | 0.59  |
| Q9ERR7_SE Sept15   | 15 kDa sele K.WNTDSVEEFLSEK#.L               | 30.36  | 16.82  | 1.80 | 0.55  |
| P42208_SE Sept2    | Septin-2 OS.K.ADLTLK#.E                      | 54.65  | 15.72  | 3.48 | 0.29  |
| P42208_SE Sept2    | Septin-2 OS.K.ASIPFVSVGNSQLIEAK#.G           | 79.76  | 18.89  | 4.22 | 0.24  |
| P42208_SE Sept2    | Septin-2 OS.K.GFEFTLMVVGVESGLGK#.S           | 6.47   | 1.86   | 3.48 | 0.29  |
| P42208_SE Sept2    | Septin-2 OS.K.#VENEDMNK#DQJLLEK#.E           | 46.93  | 10.80  | 4.34 | 0.23  |
| P42208_SE Sept2    | Septin-2 OS.K.QOPTQFINPETPGVGFANLPNQVHR.K    | 9.11   | 10.47  | 0.87 | 1.15  |
| P42208_SE Sept2    | Septin-2 OS.K.TIISYDQEFER.Y                  | 17.46  | 18.87  | 0.93 | 1.08  |
| P42208_SE Sept2    | Septin-2 OS.K.VNIVPVIK#.A                    | 92.27  | 21.10  | 4.37 | 0.23  |
| Q922Q6_SE Sept5    | Septin-5 OS.K.ESAPFAVIGSNTVVEAK#.G           | 7.84   | 4.79   | 1.64 | 0.61  |
| Q922Q6_SE Sept5    | Septin-5 OS.K.HTVDIEEK#.G                    | 44.50  | 13.12  | 3.39 | 0.29  |
| Q922Q6_SE Sept5    | Septin-5 OS.K.LATPEDK#QDIDK#.Q               | 5.96   | 1.97   | 3.03 | 0.33  |
| Q922Q6_SE Sept5    | Septin-5 OS.K.STLVSLFLFDLVK#.D               | 12.95  | 2.68   | 4.82 | 0.21  |
| O55131_SE Sept7    | Septin-7 OS.K.FEDYLNRES.V                    | 12.03  | 10.71  | 1.12 | 0.89  |
| O55131_SE Sept7    | Septin-7 OS.K.IYEPETDDEEENK#LVK#.K           | 6.75   | 11.54  | 0.58 | 1.71  |
| O55131_SE Sept7    | Septin-7 OS.K.LAAPTNGVDNKN#.N                | 7.46   | 9.34   | 0.80 | 1.25  |
| O55131_SE Sept7    | Septin-7 OS.K.STLINSFLDLYSPEYGPSPHR.I        | 10.90  | 7.24   | 1.51 | 0.66  |
| Q80UG5_SI Sept9    | Septin-9 OS.K.FINDQYK#.Y                     | 50.21  | 10.69  | 4.70 | 0.21  |
| Q80UG5_SI Sept9    | Septin-9 OS.K.IPEGSAPVPTDAAPK#.R             | 50.90  | 12.28  | 4.15 | 0.24  |
| Q80UG5_SI Sept9    | Septin-9 OS.K.SITHDIEEK#.G                   | 56.56  | 11.18  | 5.06 | 0.20  |
| Q80UG5_SI Sept9    | Septin-9 OS.K.STLINTLTK#.S                   | 50.52  | 10.38  | 4.87 | 0.21  |
| Q80UG5_SI Sept9    | Septin-9 OS.K.VNIVPVIK#.A                    | 66.38  | 10.16  | 6.53 | 0.15  |
| Q80UG5_SI Sept9    | Septin-9 OS.K.YLQEEVINR.K                    | 6.68   | 6.58   | 1.02 | 0.99  |
| Q80UG5_SI Sept9    | Septin-9 OS.K.FINDQYK#.Y                     | 55.49  | 15.94  | 3.48 | 0.29  |
| Q80UG5_SI Sept9    | Septin-9 OS.K.IPEGSAPVPTDAAPK#.R             | 70.49  | 17.21  | 4.10 | 0.24  |
| Q80UG5_SI Sept9    | Septin-9 OS.K.SITHDIEEK#.G                   | 73.10  | 14.51  | 5.04 | 0.20  |
| Q80UG5_SI Sept9    | Septin-9 OS.K.STLINTLTK#.S                   | 75.46  | 15.65  | 4.82 | 0.21  |
| Q80UG5_SI Sept9    | Septin-9 OS.K.VNIVPVIK#.A                    | 92.80  | 19.64  | 4.73 | 0.21  |
| Q80UG5_SI Sept9    | Septin-9 OS.K.IPEGSAPVPTDAAPK#.R             | 10.88  | 3.93   | 2.76 | 0.36  |
| Q80UG5_SI Sept9    | Septin-9 OS.K.STLINTLTK#.S                   | 22.28  | 2.36   | 9.45 | 0.11  |
| Q80UG5_SI Sept9    | Septin-9 OS.K.VNIVPVIK#.A                    | 15.52  | 3.95   | 3.93 | 0.25  |
| Q9CY58_P/ Serbp1   | Plasminoge K.EAGGGVGGPGAK#.S                 | 9.86   | 10.22  | 0.96 | 1.04  |
| Q9CY58_P/ Serbp1   | Plasminoge R.FDQLFDESDPEFLK#.A               | 11.37  | 8.22   | 1.38 | 0.72  |
| Q9CY58_P/ Serbp1   | Plasminoge K.SAAQAAQTSNNAAGK#.Q              | 29.62  | 18.88  | 1.57 | 0.64  |
| Q9CY58_P/ Serbp1   | Plasminoge K.SSASAPVDDEAPFALA.-              | 20.89  | 20.89  | 1.00 | 1.00  |
| P19324_SE Serpinh1 | Serpin H1 C.K.AVAISLPK#.G                    | 348.01 | 246.06 | 1.41 | 0.71  |
| P19324_SE Serpinh1 | Serpin H1 C.K.AVLSAEK#.L                     | 327.04 | 249.08 | 1.31 | 0.76  |
| P19324_SE Serpinh1 | Serpin H1 C.R.DNOSGSLIFGR.L                  | 117.96 | 429.04 | 0.27 | 3.64  |
| P19324_SE Serpinh1 | Serpin H1 C.K.GVVEVTHDLQK#.H                 | 411.70 | 263.57 | 1.56 | 0.64  |
| P19324_SE Serpinh1 | Serpin H1 C.K.HLAGLGLTEAIDK#.N               | 155.12 | 112.58 | 1.38 | 0.73  |
| P19324_SE Serpinh1 | Serpin H1 C.K.HLAGLGLTEAIDK#.N               | 127.31 | 90.92  | 1.40 | 0.71  |
| P19324_SE Serpinh1 | Serpin H1 C.K.HLAGLGLTEAIDK#NK#.A            | 608.16 | 451.55 | 1.35 | 0.74  |
| P19324_SE Serpinh1 | Serpin H1 C.K.K#AVAILPK#.G                   | 158.22 | 124.48 | 1.27 | 0.79  |
| P19324_SE Serpinh1 | Serpin H1 C.K.K#LEAAPGTEAK#.L                | 23.20  | 87.20  | 0.27 | 3.76  |
| P19324_SE Serpinh1 | Serpin H1 C.K.LQM*VEM*PLAHK#.L               | 36.64  | 25.03  | 1.46 | 0.68  |
| P19324_SE Serpinh1 | Serpin H1 C.K.LQM*VEM*PLAHK#.L               | 156.47 | 113.20 | 1.38 | 0.72  |
| P19324_SE Serpinh1 | Serpin H1 C.K.LQM*VEM*PLAHK#.L               | 30.85  | 18.16  | 1.70 | 0.59  |
| P19324_SE Serpinh1 | Serpin H1 C.K.LQM*VEM*PLAHK#.L               | 82.05  | 56.67  | 1.45 | 0.69  |
| P19324_SE Serpinh1 | Serpin H1 C.K.LQM*VEM*PLAHK#.L               | 16.76  | 15.55  | 1.08 | 0.93  |
| P19324_SE Serpinh1 | Serpin H1 C.K.LQM*VEM*PLAHK#.L               | 171.12 | 110.50 | 1.55 | 0.65  |
| P19324_SE Serpinh1 | Serpin H1 C.K.LQM*VEM*PLAHK#.L               | 44.96  | 53.81  | 0.84 | 1.20  |
| P19324_SE Serpinh1 | Serpin H1 C.K.LRDEEVHTGLGELLR.S              | 23.98  | 351.29 | 0.07 | 14.65 |
| P19324_SE Serpinh1 | Serpin H1 C.K.LSSLILMPHHVEPLER.L             | 22.58  | 85.59  | 0.26 | 3.79  |
| P19324_SE Serpinh1 | Serpin H1 C.K.LSSLILMPHHVEPLER.L             | 35.93  | 128.50 | 0.28 | 3.58  |
| P19324_SE Serpinh1 | Serpin H1 C.R.LYGPSSVFADDFVR.S               | 133.62 | 480.85 | 0.28 | 3.60  |
| P19324_SE Serpinh1 | Serpin H1 C.R.SALQSINEWASQTTDQK#.L           | 53.22  | 36.31  | 1.47 | 0.68  |
| P19324_SE Serpinh1 | Serpin H1 C.R.SALQSINEWASQTTDQK#PEVTK#.D     | 508.95 | 317.41 | 1.60 | 0.62  |
| P19324_SE Serpinh1 | Serpin H1 C.R.STGLAFSLYQAM*AK#.D             | 148.07 | 118.79 | 1.25 | 0.80  |
| P19324_SE Serpinh1 | Serpin H1 C.R.STGLAFSLYQAM*AK#.D             | 170.33 | 118.33 | 1.44 | 0.69  |
| P19324_SE Serpinh1 | Serpin H1 C.R.SYTVGVTM*MM*HR.T               | 28.61  | 70.03  | 0.41 | 2.45  |
| P19324_SE Serpinh1 | Serpin H1 C.R.SYTVGVTM*MM*HR.T               | 7.52   | 23.71  | 0.32 | 3.15  |
| P19324_SE Serpinh1 | Serpin H1 C.R.SYTVGVTM*MM*HR.T               | 8.19   | 26.31  | 0.31 | 3.21  |
| P19324_SE Serpinh1 | Serpin H1 C.R.TDGALLVNAMFFK#PHWDEK#.F        | 82.69  | 58.64  | 1.41 | 0.71  |
| P19324_SE Serpinh1 | Serpin H1 C.R.TDGALLVNAMFFK#PHWDEK#.F        | 65.40  | 57.94  | 1.13 | 0.89  |
| P19324_SE Serpinh1 | Serpin H1 C.R.TGLYNYDDEK#.E                  | 71.08  | 60.94  | 1.17 | 0.86  |
| P19324_SE Serpinh1 | Serpin H1 C.R.TGLYNYDDEK#EK#.L               | 499.99 | 341.82 | 1.46 | 0.68  |
| P19324_SE Serpinh1 | Serpin H1 C.R.TGLYNYDDEK#EK#.L               | 162.66 | 116.09 | 1.40 | 0.71  |
| P19324_SE Serpinh1 | Serpin H1 C.K.AVAISLPK#.G                    | 249.25 | 191.88 | 1.30 | 0.77  |
| P19324_SE Serpinh1 | Serpin H1 C.R.DNOSGSLIFGR.L                  | 161.98 | 503.00 | 0.32 | 3.11  |
| P19324_SE Serpinh1 | Serpin H1 C.K.GVVEVTHDLQK#.H                 | 423.84 | 280.53 | 1.51 | 0.66  |
| P19324_SE Serpinh1 | Serpin H1 C.K.HLAGLGLTEAIDK#.N               | 64.56  | 48.97  | 1.32 | 0.76  |
| P19324_SE Serpinh1 | Serpin H1 C.K.HLAGLGLTEAIDK#NK#.A            | 415.45 | 239.08 | 1.74 | 0.58  |
| P19324_SE Serpinh1 | Serpin H1 C.K.K#AVAILPK#.G                   | 62.16  | 35.49  | 1.75 | 0.57  |
| P19324_SE Serpinh1 | Serpin H1 C.K.LQM*VEM*PLAHK#.L               | 24.07  | 20.08  | 1.20 | 0.83  |
| P19324_SE Serpinh1 | Serpin H1 C.K.LQM*VEM*PLAHK#.L               | 21.33  | 15.76  | 1.35 | 0.74  |
| P19324_SE Serpinh1 | Serpin H1 C.K.LRDEEVHTGLGELLR.S              | 4.53   | 98.46  | 0.05 | 21.73 |
| P19324_SE Serpinh1 | Serpin H1 C.K.LSSLILMPHHVEPLER.L             | 15.67  | 60.98  | 0.26 | 3.89  |
| P19324_SE Serpinh1 | Serpin H1 C.K.LSSLILMPHHVEPLER.L             | 23.70  | 74.09  | 0.32 | 3.13  |
| P19324_SE Serpinh1 | Serpin H1 C.R.LYGPSSVFADDFVR.S               | 17.93  | 86.87  | 0.21 | 4.84  |
| P19324_SE Serpinh1 | Serpin H1 C.R.SALQSINEWASQTTDQK#PEVTK.D      | 45.10  | 38.63  | 1.17 | 0.86  |
| P19324_SE Serpinh1 | Serpin H1 C.R.STGLAFSLYQAM*AK#.D             | 20.44  | 18.88  | 1.08 | 0.92  |
| P19324_SE Serpinh1 | Serpin H1 C.R.SYTVGVTM*MM*HR.T               | 34.21  | 8.18   | 4.18 | 0.24  |
| P19324_SE Serpinh1 | Serpin H1 C.R.SYTVGVTM*MM*HR.T               | 7.51   | 25.51  | 0.29 | 3.40  |
| P19324_SE Serpinh1 | Serpin H1 C.R.SYTVGVTM*MM*HR.T               | 14.21  | 48.93  | 0.29 | 3.44  |
| P19324_SE Serpinh1 | Serpin H1 C.R.TGLYNYDDEK#.E                  | 49.21  | 34.44  | 1.43 | 0.70  |
| P19324_SE Serpinh1 | Serpin H1 C.R.TGLYNYDDEK#EK#.L               | 33.95  | 15.59  | 2.18 | 0.46  |
| P19324_SE Serpinh1 | Serpin H1 C.R.TGLYNYDDEK#EK#LQM*VEM*PLAHK#.L | 26.97  | 20.58  | 1.31 | 0.76  |
| P19324_SE Serpinh1 | Serpin H1 C.R.TGLYNYDDEK#EK#LQM*VEM*PLAHK#.L | 10.26  | 7.15   | 1.43 | 0.70  |
| P19324_SE Serpinh1 | Serpin H1 C.K.AVAISLPK#.G                    | 40.84  | 28.44  | 1.44 | 0.70  |
| P19324_SE Serpinh1 | Serpin H1 C.R.DNOSGSLIFGR.L                  | 16.57  | 60.50  | 0.27 | 3.65  |
| P19324_SE Serpinh1 | Serpin H1 C.K.GVVEVTHDLQK#.H                 | 91.05  | 76.94  | 1.18 | 0.84  |
| P19324_SE Serpinh1 | Serpin H1 C.K.HLAGLGLTEAIDK#.N               | 15.44  | 46.47  | 0.33 | 3.01  |
| P19324_SE Serpinh1 | Serpin H1 C.K.HLAGLGLTEAIDK#NK#.A            | 102.62 | 84.95  | 1.21 | 0.83  |
| P19324_SE Serpinh1 | Serpin H1 C.K.KAVAILPK#.G                    | 23.01  | 21.05  | 1.09 | 0.91  |
| P19324_SE Serpinh1 | Serpin H1 C.R.LYGPSSVFADDFVR.S               | 28.33  | 85.05  | 0.33 | 3.00  |
| P19324_SE Serpinh1 | Serpin H1 C.R.STGLAFSLYQAM*AK#.D             | 18.21  | 11.59  | 1.57 | 0.64  |
| P19324_SE Serpinh1 | Serpin H1 C.R.TDGALLVNAMFFK#PHWDEK#.F        | 12.89  | 9.44   | 1.37 | 0.73  |
| P19324_SE Serpinh1 | Serpin H1 C.K.AVAISLPK#.G                    | 23.74  | 20.92  | 1.13 | 0.88  |



|                    |                                                 |        |       |      |      |
|--------------------|-------------------------------------------------|--------|-------|------|------|
| P19324_SE Serpinh1 | Serpin H1 C.R.DNOSGSLFLIGR.L                    | 8.83   | 27.20 | 0.32 | 3.08 |
| P19324_SE Serpinh1 | Serpin H1 C.K.DQAVENILLSPLVAVASSLGLVSLGGK#.A    | 47.45  | 63.75 | 0.74 | 1.34 |
| P19324_SE Serpinh1 | Serpin H1 C.K.HLAGLGLTEADK.NK.A                 | 53.40  | 29.92 | 1.78 | 0.56 |
| P19324_SE Serpinh1 | Serpin H1 C.R.LYVSSGFADDFVR.S                   | 12.06  | 38.02 | 0.32 | 3.15 |
| P19324_SE Serpinh1 | Serpin H1 C.R.STGLAFSLYOAM*AK#.D                | 9.97   | 8.19  | 1.22 | 0.82 |
| Q9EQU5_SF Set      | Protein SET R.IDFYFDENPYFENK#.V                 | 5.05   | 2.05  | 2.47 | 0.41 |
| E9PYH6_E9 Setd1a   | Protein Set K.FQSGSAAAATEAR.R                   | 4.18   | 10.96 | 0.38 | 2.62 |
| E9PYH6_E9 Setd1a   | Protein Set R.EAYHPLPM*AAEPLPSSVSGEEAR.L        | 2.65   | 6.37  | 0.42 | 2.40 |
| E9PYH6_E9 Setd1a   | Protein Set K.FQSGSAAAATEAR.R                   | 7.11   | 18.81 | 0.38 | 2.64 |
| E9PYH6_E9 Setd1a   | Protein Set K.LIVDPALDPAALR.R                   | 6.54   | 20.07 | 0.33 | 3.07 |
| E9PYH6_E9 Setd1a   | Protein Set R.LLSAIGTSAIM*DSLLK#.L              | 9.67   | 8.69  | 1.11 | 0.90 |
| E9PYH6_E9 Setd1a   | Protein Set R.VLATLVQEM*#.S                     | 32.11  | 21.45 | 1.50 | 0.67 |
| E9PYH6_E9 Setd1a   | Protein Set R.VVQEGIGSSVLF.R.V                  | 3.79   | 8.01  | 0.47 | 2.11 |
| E9Q5F9_SE Setd2    | Histone-lys R.HAVEEYESK.G                       | 3.73   | 5.04  | 0.74 | 1.35 |
| E9Q5F9_SE Setd2    | Histone-lys K.LFQEVAQR.E                        | 2.75   | 16.10 | 0.17 | 5.85 |
| E9Q5F9_SE Setd2    | Histone-lys K.LPTSEPADTETEPK.D                  | 7.43   | 10.45 | 0.71 | 1.41 |
| E9Q5F9_SE Setd2    | Histone-lys K.LVPSGSELTFDYQFOR.Y                | 1.62   | 7.42  | 0.22 | 4.57 |
| E9Q5F9_SE Setd2    | Histone-lys K.TSRPQLPVSDDFDLPNK.S               | 6.53   | 17.41 | 0.38 | 2.67 |
| E9Q5F9_SE Setd2    | Histone-lys K.VESEATIEVSK.L                     | 6.15   | 13.66 | 0.45 | 2.22 |
| Q91WC0_S Setd3     | Histone-lys K.EILNLSELLQK#.C                    | 9.23   | 4.29  | 2.15 | 0.47 |
| Q91WC0_S Setd3     | Histone-lys R.FTLGNAEFPVSWDNEVK#.L              | 4.34   | 3.94  | 1.10 | 0.91 |
| Q64213_SF Sf1      | Splicing fac R.HLITLITEMVALNPDFKPPADYKPPATR.V   | 4.20   | 10.72 | 0.39 | 2.55 |
| Q64213_SF Sf1      | Splicing fac K.TVIPGMPVTIIPGLTR.E               | 2.55   | 5.12  | 0.50 | 2.01 |
| Q64213_SF Sf1      | Splicing fac R.WNQDTEMQK#.T                     | 11.46  | 5.89  | 1.95 | 0.51 |
| Q64213_SF Sf1      | Splicing fac R.AYIVLQIEDLTR.K                   | 3.60   | 13.75 | 0.26 | 3.82 |
| Q64213_SF Sf1      | Splicing fac K.FQRPQDQSAQDK.A                   | 10.57  | 17.87 | 0.59 | 1.69 |
| Q64213_SF Sf1      | Splicing fac R.HLITLITEM*VALNPDFKPPADYKPPATR.V  | 7.27   | 4.69  | 1.55 | 0.65 |
| Q64213_SF Sf1      | Splicing fac R.HLITLITEMVALNPDFKPPADYKPPATR.V   | 8.64   | 26.52 | 0.33 | 3.07 |
| Q64213_SF Sf1      | Splicing fac K.TVIPGMPVTIIPGLTR.E               | 3.88   | 10.79 | 0.36 | 2.78 |
| Q8K4Z5_SF Sf3a1    | Splicing fac K.VQAQVQIETIVPK#.E                 | 22.82  | 4.78  | 4.78 | 0.21 |
| Q8K4Z5_SF Sf3a1    | Splicing fac K.AQEPSAIPK#.V                     | 70.81  | 28.44 | 2.49 | 0.40 |
| Q8K4Z5_SF Sf3a1    | Splicing fac K.ASK#PLPPAPAPDEYLVSPITGEK#.I      | 64.18  | 38.16 | 1.68 | 0.59 |
| Q8K4Z5_SF Sf3a1    | Splicing fac R.EK#QSDDEYVAPGLDIESSLK#.Q         | 30.27  | 12.29 | 2.46 | 0.41 |
| Q8K4Z5_SF Sf3a1    | Splicing fac K.FNFLNPNDPYHAYR.H                 | 12.60  | 23.42 | 0.54 | 1.86 |
| Q8K4Z5_SF Sf3a1    | Splicing fac K.IGEEIQKPEEK.V                    | 26.70  | 12.01 | 2.22 | 0.45 |
| Q8K4Z5_SF Sf3a1    | Splicing fac R.IGLLDP.R.W                       | 13.19  | 26.57 | 0.50 | 2.01 |
| Q8K4Z5_SF Sf3a1    | Splicing fac K.IHEATGM*PAGK#.Q                  | 11.65  | 9.09  | 1.28 | 0.78 |
| Q8K4Z5_SF Sf3a1    | Splicing fac R.IRQNEINPK.F                      | 6.10   | 12.16 | 0.50 | 1.99 |
| Q8K4Z5_SF Sf3a1    | Splicing fac K.K#GEEIQK#PEEK#.V                 | 40.03  | 16.18 | 2.47 | 0.40 |
| Q8K4Z5_SF Sf3a1    | Splicing fac K.LQYEGIFK#.D                      | 44.57  | 22.60 | 1.97 | 0.51 |
| Q8K4Z5_SF Sf3a1    | Splicing fac K.LTAQVFR.N                        | 29.11  | 58.18 | 0.50 | 2.00 |
| Q8K4Z5_SF Sf3a1    | Splicing fac R.QFLTQLM*QK#.E                    | 25.34  | 9.70  | 2.61 | 0.38 |
| Q8K4Z5_SF Sf3a1    | Splicing fac R.QFLTQLM*QK#.E                    | 24.98  | 11.63 | 2.15 | 0.47 |
| Q8K4Z5_SF Sf3a1    | Splicing fac K.QSDDEYVAPGLDIESSLK#.Q            | 16.22  | 5.59  | 2.90 | 0.34 |
| Q8K4Z5_SF Sf3a1    | Splicing fac R.RTDIFGVEETAIGK.K                 | 5.65   | 4.34  | 1.30 | 0.77 |
| Q8K4Z5_SF Sf3a1    | Splicing fac R.RTDIFGVEETAIGK.I                 | 14.71  | 29.36 | 0.50 | 2.00 |
| Q8K4Z5_SF Sf3a1    | Splicing fac R.TDIFGVEETAIGK#.K                 | 16.60  | 5.30  | 3.13 | 0.32 |
| Q8K4Z5_SF Sf3a1    | Splicing fac R.TDIFGVEETAIGK#.I                 | 22.83  | 12.07 | 1.89 | 0.53 |
| Q8K4Z5_SF Sf3a1    | Splicing fac R.TQQAQANITLQEQEIAHK#.A            | 93.44  | 32.56 | 2.87 | 0.35 |
| Q8K4Z5_SF Sf3a1    | Splicing fac K.VM*QQQQQATQQQLPQK#.V             | 74.66  | 24.63 | 3.03 | 0.33 |
| Q8K4Z5_SF Sf3a1    | Splicing fac K.VM*QQQQQATQQQLPQK#.V             | 25.12  | 7.77  | 3.23 | 0.31 |
| Q8K4Z5_SF Sf3a1    | Splicing fac K.VQAQVQIETIVPK#.E                 | 140.13 | 59.92 | 2.34 | 0.43 |
| Q8K4Z5_SF Sf3a1    | Splicing fac K.ASK#PLPPAPAPDEYLVSPITGEK#.I      | 10.94  | 4.70  | 2.33 | 0.43 |
| Q8K4Z5_SF Sf3a1    | Splicing fac K.VM*QQQQQATQQQLPQK#.V             | 7.30   | 8.43  | 0.87 | 1.15 |
| Q8K4Z5_SF Sf3a1    | Splicing fac K.VQAQVQIETIVPK#.E                 | 16.25  | 6.88  | 2.36 | 0.42 |
| G3UVU2_G Sf3a2     | Splicing fac K.EAPAQPAPEK#.V                    | 57.97  | 36.41 | 1.59 | 0.63 |
| G3UVU2_G Sf3a2     | Splicing fac R.FM*SAEQR.I                       | 11.11  | 22.24 | 0.50 | 2.00 |
| G3UVU2_G Sf3a2     | Splicing fac K.MEK#PPAPPPLPAGPPGVK#.R           | 35.94  | 16.83 | 2.13 | 0.47 |
| G3UVU2_G Sf3a2     | Splicing fac R.QLALETIDINK#DPYFMK#.N            | 19.11  | 9.00  | 2.12 | 0.47 |
| G3UVU2_G Sf3a2     | Splicing fac K.TGSGGVASSSESNR.D                 | 2.57   | 7.51  | 0.34 | 2.92 |
| G3UVU2_G Sf3a2     | Splicing fac R.WQYLLM*AAEPYETIAFK#.V            | 15.13  | 9.27  | 1.63 | 0.61 |
| G3UVU2_G Sf3a2     | Splicing fac R.WQYLLMAAEPYETIAFK#.V             | 19.91  | 10.93 | 1.82 | 0.55 |
| G3UVU2_G Sf3a2     | Splicing fac K.EAPAQPAPEK#.V                    | 17.37  | 11.03 | 1.57 | 0.64 |
| G3UVU2_G Sf3a2     | Splicing fac R.WQYLLM*AAEPYETIAFK#.V            | 4.82   | 3.33  | 1.45 | 0.69 |
| Q9D554_SF Sf3a3    | Splicing fac K.EELNAISGPNFEAFYNR.L              | 5.65   | 8.54  | 0.66 | 1.51 |
| Q9D554_SF Sf3a3    | Splicing fac R.ENPSEEAQNLVEFTDEEGYGR.Y          | 5.10   | 6.48  | 0.79 | 1.27 |
| Q9D554_SF Sf3a3    | Splicing fac K.ETSSALTHGAHLDSLAFSSWEELASGLDR.L  | 1.91   | 2.66  | 0.72 | 1.39 |
| Q9D554_SF Sf3a3    | Splicing fac K.IQTDFEK#.K                       | 95.21  | 30.68 | 3.10 | 0.32 |
| Q9D554_SF Sf3a3    | Splicing fac R.KEELNAISGPNFEAFYNR.L             | 13.51  | 17.99 | 0.75 | 1.33 |
| Q9D554_SF Sf3a3    | Splicing fac K.NLPLWDGK#PIPYWLYK#.L             | 6.00   | 2.55  | 2.35 | 0.43 |
| Q9D554_SF Sf3a3    | Splicing fac K.SALLALGLK#.C                     | 73.06  | 25.61 | 2.85 | 0.35 |
| Q9D554_SF Sf3a3    | Splicing fac K.SLESLDLSLFAK#.N                  | 179.00 | 55.72 | 3.21 | 0.31 |
| Q9D554_SF Sf3a3    | Splicing fac R.VK#PLQDQNELFGK#.I                | 143.38 | 54.26 | 2.64 | 0.38 |
| Q9D554_SF Sf3a3    | Splicing fac R.WQPTDEEYEDSSGNVVK#.K             | 10.92  | 2.80  | 3.90 | 0.26 |
| Q9D554_SF Sf3a3    | Splicing fac R.YMEVSGNLR.D                      | 10.26  | 17.11 | 0.60 | 1.67 |
| Q9D554_SF Sf3a3    | Splicing fac K.SALLALGLK#.C                     | 12.83  | 4.79  | 2.68 | 0.37 |
| Q9D554_SF Sf3a3    | Splicing fac R.VK#PLQDQNELFGK#.I                | 19.56  | 5.01  | 3.90 | 0.26 |
| Q99NB9_SF Sf3b1    | Splicing fac K.AAGLATM*ISTM*RPDIDNM*DEYR.N      | 2.87   | 12.90 | 0.22 | 4.49 |
| Q99NB9_SF Sf3b1    | Splicing fac K.AIGPHDVLATLNNLK#.V               | 83.42  | 54.30 | 1.54 | 0.65 |
| Q99NB9_SF Sf3b1    | Splicing fac R.AK#GSETPGATPGSK#.I               | 4.27   | 3.42  | 1.25 | 0.80 |
| Q99NB9_SF Sf3b1    | Splicing fac R.ATVNTFGYIAK#.A                   | 60.21  | 41.60 | 1.45 | 0.69 |
| Q99NB9_SF Sf3b1    | Splicing fac R.EFQSPDEEM*#K#.I                  | 9.52   | 6.14  | 1.55 | 0.65 |
| Q99NB9_SF Sf3b1    | Splicing fac R.EVM*LILIR.E                      | 1.63   | 13.81 | 0.12 | 8.49 |
| Q99NB9_SF Sf3b1    | Splicing fac R.FAGVYTSIAATELEDDDDYSSYSSLLGQK#.K | 24.69  | 10.83 | 2.28 | 0.44 |
| Q99NB9_SF Sf3b1    | Splicing fac R.GDTPGHATPGHGATSSAR.K             | 8.71   | 19.22 | 0.45 | 2.21 |
| Q99NB9_SF Sf3b1    | Splicing fac R.GGDSIGETPTPGASK#.R               | 38.53  | 29.77 | 1.29 | 0.77 |
| Q99NB9_SF Sf3b1    | Splicing fac R.GK#GLAFLK#.A                     | 12.82  | 6.69  | 1.92 | 0.52 |
| Q99NB9_SF Sf3b1    | Splicing fac K.GLAFLK#.A                        | 19.08  | 9.80  | 1.95 | 0.51 |
| Q99NB9_SF Sf3b1    | Splicing fac K.GSETPGATPGSK#.I                  | 8.43   | 5.41  | 1.56 | 0.64 |
| Q99NB9_SF Sf3b1    | Splicing fac K.IYNSIYIGSQDALIAHYPR.I            | 6.13   | 19.91 | 0.31 | 3.25 |
| Q99NB9_SF Sf3b1    | Splicing fac K.KAALDEAQVGLDSTGYDQEIYGGSDSR.F    | 2.97   | 6.98  | 0.43 | 2.35 |
| Q99NB9_SF Sf3b1    | Splicing fac K.LLVDDDESTLSPEEQK#.E              | 10.48  | 8.42  | 1.24 | 0.80 |
| Q99NB9_SF Sf3b1    | Splicing fac R.NRPLSDEELDAM*FPEGYK.V            | 3.89   | 19.56 | 0.20 | 5.03 |
| Q99NB9_SF Sf3b1    | Splicing fac R.NRPLSDEELDAMFPEGYK.V             | 11.70  | 15.64 | 0.75 | 1.34 |
| Q99NB9_SF Sf3b1    | Splicing fac R.QLVDTVELANK#.V                   | 35.41  | 21.06 | 1.68 | 0.59 |
| Q99NB9_SF Sf3b1    | Splicing fac R.SLVEIEHGLVDEQK#.K                | 114.70 | 81.68 | 1.40 | 0.71 |
| Q99NB9_SF Sf3b1    | Splicing fac K.SRWDETPASQM*GGSTPVLTPGK.T        | 3.18   | 9.07  | 0.35 | 2.85 |
| Q99NB9_SF Sf3b1    | Splicing fac R.TDRGGDSIGETPTPGASK.R             | 3.35   | 9.84  | 0.34 | 2.94 |
| Q99NB9_SF Sf3b1    | Splicing fac K.TEILPPFFK#.H                     | 65.29  | 49.77 | 1.31 | 0.76 |
| Q99NB9_SF Sf3b1    | Splicing fac K.THEDIAQR.E                       | 10.45  | 30.72 | 0.34 | 2.94 |
| Q99NB9_SF Sf3b1    | Splicing fac K.VGAAEISR.I                       | 24.36  | 68.34 | 0.36 | 2.81 |
| Q99NB9_SF Sf3b1    | Splicing fac R.VPELVQVQVGLK#.S                  | 17.88  | 14.98 | 1.19 | 0.84 |
| Q99NB9_SF Sf3b1    | Splicing fac R.WDQTADQTPGATPK#.K                | 24.64  | 17.59 | 1.40 | 0.71 |

|                |                                                |        |        |      |      |
|----------------|------------------------------------------------|--------|--------|------|------|
| Q99NB9_Sf3b1   | Splicing fac K.AAGLATM*ISTM*RPDIDNM*DEYVR.N    | 4.73   | 28.61  | 0.17 | 6.04 |
| Q99NB9_Sf3b1   | Splicing fac K.AALDEAQGVLDSTGYVDQEIYGGSDSR.F   | 4.42   | 12.02  | 0.37 | 2.72 |
| Q99NB9_Sf3b1   | Splicing fac K.AIGPHDVLATLNLNK#.V              | 149.01 | 69.68  | 2.14 | 0.47 |
| Q99NB9_Sf3b1   | Splicing fac K.AIGYLIPLM*DAEYANYTR.E           | 2.30   | 6.08   | 0.38 | 2.65 |
| Q99NB9_Sf3b1   | Splicing fac K.AIGYLIPLM*DAEYANYTR.E           | 3.09   | 7.95   | 0.39 | 2.57 |
| Q99NB9_Sf3b1   | Splicing fac K.AIGYLIPLMDAEYANYTR.E            | 3.30   | 6.19   | 0.53 | 1.88 |
| Q99NB9_Sf3b1   | Splicing fac R.AKRGSETPGATPGSK#.I              | 6.84   | 3.92   | 1.74 | 0.57 |
| Q99NB9_Sf3b1   | Splicing fac R.ATVNTFYIAK#.A                   | 111.43 | 55.71  | 2.00 | 0.50 |
| Q99NB9_Sf3b1   | Splicing fac R.DTPGHGSGWAETPR.T                | 17.47  | 57.15  | 0.31 | 3.27 |
| Q99NB9_Sf3b1   | Splicing fac R.EFQSPDEEM*#K#.I                 | 14.93  | 9.32   | 1.60 | 0.62 |
| Q99NB9_Sf3b1   | Splicing fac R.EVM*LILR.E                      | 9.08   | 21.35  | 0.43 | 2.35 |
| Q99NB9_Sf3b1   | Splicing fac R.FAGVTSIAATELEDDDDYSSTSLGQK#.K   | 59.58  | 25.64  | 2.32 | 0.43 |
| Q99NB9_Sf3b1   | Splicing fac R.GDTPGHATPGHGATSSAR.K            | 15.40  | 43.79  | 0.35 | 2.84 |
| Q99NB9_Sf3b1   | Splicing fac R.GGDSIGETPTPGASK#.R              | 112.36 | 60.32  | 1.86 | 0.54 |
| Q99NB9_Sf3b1   | Splicing fac R.GKHLAFLK#.A                     | 17.03  | 9.27   | 1.84 | 0.54 |
| Q99NB9_Sf3b1   | Splicing fac K.GLAFLK#.A                       | 38.08  | 17.74  | 2.15 | 0.47 |
| Q99NB9_Sf3b1   | Splicing fac K.KAALDEAQGVLDSTGYVDQEIYGGSDSR.F  | 5.13   | 10.61  | 0.48 | 2.07 |
| Q99NB9_Sf3b1   | Splicing fac K.LLVVDDESTLPEEQK#.E              | 34.73  | 25.37  | 1.37 | 0.73 |
| Q99NB9_Sf3b1   | Splicing fac K.M*VM*ETIEK#.I                   | 59.03  | 33.03  | 1.79 | 0.56 |
| Q99NB9_Sf3b1   | Splicing fac R.NRPLSDEELDAM*FPEGYK.V           | 11.94  | 28.15  | 0.42 | 2.36 |
| Q99NB9_Sf3b1   | Splicing fac R.NRPLSDEELDAMFPEGYK.V            | 5.82   | 14.22  | 0.41 | 2.44 |
| Q99NB9_Sf3b1   | Splicing fac R.QLVDTTVELANK#.V                 | 70.46  | 30.77  | 2.29 | 0.44 |
| Q99NB9_Sf3b1   | Splicing fac R.QQAADLISR.T                     | 19.00  | 41.91  | 0.45 | 2.21 |
| Q99NB9_Sf3b1   | Splicing fac R.SLVEIIEHGLVDEQQK#.V             | 162.35 | 81.54  | 1.99 | 0.50 |
| Q99NB9_Sf3b1   | Splicing fac K.SRWDETPASQM*GGSTPLVTPGK.T       | 4.83   | 16.37  | 0.30 | 3.39 |
| Q99NB9_Sf3b1   | Splicing fac R.TDRGGDSIGETPTPGASK.R            | 8.59   | 18.12  | 0.47 | 2.11 |
| Q99NB9_Sf3b1   | Splicing fac K.TEILPPFFK#.H                    | 232.14 | 119.44 | 1.94 | 0.51 |
| Q99NB9_Sf3b1   | Splicing fac K.THEDIAQR.E                      | 11.55  | 40.43  | 0.29 | 3.50 |
| Q99NB9_Sf3b1   | Splicing fac K.VGAAEILR.I                      | 40.64  | 93.29  | 0.44 | 2.30 |
| Q99NB9_Sf3b1   | Splicing fac R.VPELVNQVGLK#.S                  | 53.88  | 22.98  | 2.35 | 0.43 |
| Q99NB9_Sf3b1   | Splicing fac R.WDETPASQMGGSTPLVTPGK.T          | 4.08   | 4.91   | 0.83 | 1.20 |
| Q99NB9_Sf3b1   | Splicing fac R.WDQADQTPGATPK#.K                | 50.18  | 33.35  | 1.50 | 0.66 |
| Q3UJB0_Q:3f3b2 | Protein Sf3 R.EALQEK#EEQK#.T                   | 9.37   | 10.06  | 0.93 | 1.07 |
| Q3UJB0_Q:3f3b2 | Protein Sf3 R.GIEK#PPFELPDFIK#.R               | 31.62  | 38.41  | 0.82 | 1.21 |
| Q3UJB0_Q:3f3b2 | Protein Sf3 K.IDIDYQK#.L                       | 39.92  | 35.43  | 1.13 | 0.89 |
| Q3UJB0_Q:3f3b2 | Protein Sf3 R.ISLGMVGPNAHK#.V                  | 15.05  | 11.98  | 1.26 | 0.80 |
| Q3UJB0_Q:3f3b2 | Protein Sf3 R.YGPPSPYPLNK#.I                   | 16.35  | 16.51  | 0.99 | 1.01 |
| Q3UJB0_Q:3f3b2 | Protein Sf3 R.EALQEK#EEQK#.T                   | 27.19  | 14.35  | 1.89 | 0.53 |
| Q3UJB0_Q:3f3b2 | Protein Sf3 R.EQQAQVEK#EDFSDM*VAEHAHK#.Q       | 20.87  | 11.83  | 1.77 | 0.57 |
| Q3UJB0_Q:3f3b2 | Protein Sf3 R.EQQAQVEK#EDFSDMVAEHAHK.Q         | 17.41  | 7.78   | 2.24 | 0.45 |
| Q3UJB0_Q:3f3b2 | Protein Sf3 R.FTVAELK#.Q                       | 143.57 | 68.21  | 2.10 | 0.48 |
| Q3UJB0_Q:3f3b2 | Protein Sf3 R.GIEK#PPFELPDFIK#.R               | 129.38 | 88.50  | 1.46 | 0.68 |
| Q3UJB0_Q:3f3b2 | Protein Sf3 R.GPPPPGSDENR.E                    | 5.19   | 11.19  | 0.46 | 2.15 |
| Q3UJB0_Q:3f3b2 | Protein Sf3 K.IDIDYQK#.L                       | 154.25 | 82.43  | 1.87 | 0.53 |
| Q3UJB0_Q:3f3b2 | Protein Sf3 R.IFEAFK#.L                        | 122.04 | 60.00  | 2.03 | 0.49 |
| Q3UJB0_Q:3f3b2 | Protein Sf3 K.IPQALEK#.I                       | 144.18 | 87.11  | 1.66 | 0.60 |
| Q3UJB0_Q:3f3b2 | Protein Sf3 R.KGPAPQLQGEVALAPEELEDPM*AM*TK.Q.Y | 17.64  | 9.76   | 1.81 | 0.55 |
| Q3UJB0_Q:3f3b2 | Protein Sf3 R.KGPAPQLQGEVALAPEELEDPM*AMTK.Q.Y  | 10.39  | 6.28   | 1.65 | 0.60 |
| Q3UJB0_Q:3f3b2 | Protein Sf3 R.KGPAPQLQGEVALAPEELEDPMAMTK.Q.Y   | 13.45  | 8.78   | 1.53 | 0.65 |
| Q3UJB0_Q:3f3b2 | Protein Sf3 K.KPGDLSDEL.R.I                    | 16.79  | 46.54  | 0.36 | 2.77 |
| Q3UJB0_Q:3f3b2 | Protein Sf3 R.LAEIAGIQGSR.E                    | 33.25  | 95.02  | 0.35 | 2.86 |
| Q3UJB0_Q:3f3b2 | Protein Sf3 K.LAQQAALLM*QOEER.A                | 4.59   | 14.68  | 0.31 | 3.20 |
| Q3UJB0_Q:3f3b2 | Protein Sf3 K.LAQQAALLMQEER.A                  | 6.78   | 27.57  | 0.25 | 4.06 |
| Q3UJB0_Q:3f3b2 | Protein Sf3 K.LHDFAFK#.W                       | 82.30  | 62.13  | 1.32 | 0.75 |
| Q3UJB0_Q:3f3b2 | Protein Sf3 K.LLHLK#.A                         | 44.88  | 21.67  | 2.07 | 0.48 |
| Q3UJB0_Q:3f3b2 | Protein Sf3 K.LTHGDLYEGK#.E                    | 61.16  | 37.88  | 1.61 | 0.62 |
| Q3UJB0_Q:3f3b2 | Protein Sf3 K.MESSAVPK#.K                      | 22.61  | 14.04  | 1.61 | 0.62 |
| Q3UJB0_Q:3f3b2 | Protein Sf3 K.QAAVLMEQER.Q                     | 10.76  | 25.91  | 0.42 | 2.41 |
| Q3UJB0_Q:3f3b2 | Protein Sf3 R.SSLGQSASEETEDTVSISK#.K           | 31.42  | 17.85  | 1.76 | 0.57 |
| Q3UJB0_Q:3f3b2 | Protein Sf3 K.TEEEEIDR.T                       | 8.44   | 11.19  | 0.75 | 1.33 |
| Q3UJB0_Q:3f3b2 | Protein Sf3 R.VAAPVGPVPTPTVLP*GAPVPRR.G        | 1.48   | 3.99   | 0.37 | 2.70 |
| Q3UJB0_Q:3f3b2 | Protein Sf3 R.VGEPVSEELER.L                    | 30.90  | 84.34  | 0.37 | 2.73 |
| Q3UJB0_Q:3f3b2 | Protein Sf3 K.VPPPWLIAQMR.Y                    | 12.75  | 28.94  | 0.44 | 2.27 |
| Q3UJB0_Q:3f3b2 | Protein Sf3 R.YGPPSPYPLNK#.I                   | 66.64  | 47.09  | 1.42 | 0.71 |
| Q3UJB0_Q:3f3b2 | Protein Sf3 R.EALQEK#EEQK#.T                   | 3.48   | 1.55   | 2.24 | 0.45 |
| Q3UJB0_Q:3f3b2 | Protein Sf3 R.GIEK#PPFELPDFIK#.R               | 17.32  | 9.25   | 1.87 | 0.53 |
| Q921M3_Sf3b3   | Splicing fac K.AEVIM*NYHVGETVLSLQK#.T          | 18.93  | 27.46  | 0.69 | 1.45 |
| Q921M3_Sf3b3   | Splicing fac K.AEVIMNYHVGETVLSLQK.T            | 15.66  | 18.39  | 0.85 | 1.17 |
| Q921M3_Sf3b3   | Splicing fac R.AVM*ISAEK#.Q                    | 16.16  | 20.06  | 0.81 | 1.24 |
| Q921M3_Sf3b3   | Splicing fac R.AVMISAEK#.Q                     | 20.15  | 23.36  | 0.86 | 1.16 |
| Q921M3_Sf3b3   | Splicing fac K.DYIVVSDSGSR.I                   | 15.71  | 31.25  | 0.50 | 1.99 |
| Q921M3_Sf3b3   | Splicing fac R.FLAVGLVDNTR.I                   | 20.32  | 134.53 | 0.15 | 6.62 |
| Q921M3_Sf3b3   | Splicing fac R.FSNTGEDWVYLVGVAK.D              | 17.90  | 22.24  | 0.80 | 1.24 |
| Q921M3_Sf3b3   | Splicing fac R.HGLVESEM*AVSELPGNPNAVWTVR.R     | 4.54   | 12.81  | 0.35 | 2.82 |
| Q921M3_Sf3b3   | Splicing fac R.HGLVESEM*AVSELPGNPNAVWTVR.R     | 2.72   | 16.87  | 0.16 | 6.21 |
| Q921M3_Sf3b3   | Splicing fac K.HIANYISGIQIGHR.V                | 7.64   | 49.87  | 0.15 | 6.53 |
| Q921M3_Sf3b3   | Splicing fac K.ITLETEDM*VTEIR.L                | 5.62   | 27.73  | 0.20 | 4.93 |
| Q921M3_Sf3b3   | Splicing fac K.ITLETEDM*VTEIR.L                | 1.92   | 7.48   | 0.26 | 3.90 |
| Q921M3_Sf3b3   | Splicing fac R.IVPGQFLAVDPK.G                  | 40.16  | 153.44 | 0.26 | 3.82 |
| Q921M3_Sf3b3   | Splicing fac R.KFVIHPESNLIIHIEDHNAYTEATK.A     | 25.02  | 29.24  | 0.86 | 1.17 |
| Q921M3_Sf3b3   | Splicing fac K.LGAVFNQVAFPLQYTPR.K             | 29.85  | 28.89  | 1.03 | 0.97 |
| Q921M3_Sf3b3   | Splicing fac R.LPPNTNDEVEDPTGNK.A              | 11.68  | 17.53  | 0.67 | 1.50 |
| Q921M3_Sf3b3   | Splicing fac K.LVYLNR.D                        | 10.29  | 61.52  | 0.17 | 5.98 |
| Q921M3_Sf3b3   | Splicing fac R.M*QGQEAFLAM*SSR.S               | 2.55   | 14.52  | 0.18 | 5.70 |
| Q921M3_Sf3b3   | Splicing fac R.NENQLIFADDTYPR.W                | 4.09   | 22.34  | 0.18 | 5.47 |
| Q921M3_Sf3b3   | Splicing fac R.SVAGGFVYTYK#.L                  | 54.81  | 52.81  | 1.04 | 0.96 |
| Q921M3_Sf3b3   | Splicing fac R.SWLSVYQSR.F                     | 4.49   | 23.20  | 0.19 | 5.17 |
| Q921M3_Sf3b3   | Splicing fac R.SYFFVK.N                        | 30.46  | 30.44  | 1.00 | 1.00 |
| Q921M3_Sf3b3   | Splicing fac K.TPVEEVPAAIAPFQGR.V              | 6.80   | 38.01  | 0.18 | 5.59 |
| Q921M3_Sf3b3   | Splicing fac R.TVLDPVTGDLSDTR.T                | 12.67  | 74.49  | 0.17 | 5.88 |
| Q921M3_Sf3b3   | Splicing fac R.VIVSDVQESFIWVR.Y                | 4.29   | 26.20  | 0.16 | 6.11 |
| Q921M3_Sf3b3   | Splicing fac R.WVTASLLDYDTVAGADK.F             | 9.82   | 9.48   | 1.04 | 0.97 |
| Q921M3_Sf3b3   | Splicing fac R.FLAVGLVDNTR.I                   | 12.34  | 52.99  | 0.23 | 4.29 |
| Q921M3_Sf3b3   | Splicing fac R.HGLVESEM*AVSELPGNPNAVWTVR.R     | 3.59   | 12.05  | 0.30 | 3.36 |
| Q921M3_Sf3b3   | Splicing fac K.ITLETEDM*VTEIR.L                | 5.54   | 21.44  | 0.26 | 3.87 |
| Q921M3_Sf3b3   | Splicing fac R.VILEYQPSK#.N                    | 39.99  | 39.31  | 1.02 | 0.98 |
| Q921M3_Sf3b3   | Splicing fac K.LGAVFNQVAFPLQYTPR.K             | 9.58   | 31.12  | 0.31 | 3.25 |
| Q921M3_Sf3b3   | Splicing fac R.LPPNTNDEVEDPTGNK#.A             | 10.79  | 13.10  | 0.82 | 1.21 |
| Q921M3_Sf3b3   | Splicing fac K.LVYLNR.D                        | 6.80   | 37.66  | 0.18 | 5.54 |
| Q921M3_Sf3b3   | Splicing fac R.M*QGQEAFLAM*SSR.S               | 1.87   | 9.09   | 0.21 | 4.86 |
| Q921M3_Sf3b3   | Splicing fac R.NENQLIFADDTYPR.W                | 5.53   | 17.74  | 0.31 | 3.21 |
| Q921M3_Sf3b3   | Splicing fac K.SM*FFFLAQTEQGDIFK#.I            | 11.02  | 10.62  | 1.04 | 0.96 |
| Q921M3_Sf3b3   | Splicing fac R.SVAGGFVYTYK#.L                  | 36.00  | 32.12  | 1.12 | 0.89 |

|                   |                                                   |        |        |       |       |
|-------------------|---------------------------------------------------|--------|--------|-------|-------|
| Q921M3_S Sf3b3    | Splicing fac R.SYFFPVK#.N                         | 17.29  | 17.44  | 0.99  | 1.01  |
| Q921M3_S Sf3b3    | Splicing fac R.TVLDVGTGDSLTR.T                    | 10.00  | 53.32  | 0.19  | 5.33  |
| Q8QZY9_SF Sf3b4   | Splicing fac K.NLDVGANIFGNLDPIDEKH.L              | 14.02  | 11.83  | 1.18  | 0.84  |
| Q8QZY9_SF Sf3b4   | Splicing fac R.NQDATTVYVGLDEK#.V                  | 89.54  | 67.39  | 1.33  | 0.75  |
| Q8QZY9_SF Sf3b4   | Splicing fac R.VTGHQHYGVFVLEEDADYAIK#.I           | 60.73  | 45.49  | 1.33  | 0.75  |
| Q923D4_Sf Sf3b5   | Splicing fac K.MLQPSGPPADK#PEEN.-                 | 11.78  | 16.18  | 0.73  | 1.37  |
| Q923D4_Sf Sf3b5   | Splicing fac K.M*LQPSGPPADK#PEEN.-                | 29.86  | 42.65  | 0.70  | 1.43  |
| Q923D4_Sf Sf3b5   | Splicing fac R.YTHSQLEHLQSK#.Y                    | 22.26  | 26.31  | 0.85  | 1.18  |
| P59708_SF Sf3b6   | Splicing fac R.GTAYVYVDFADK#.N                    | 137.06 | 82.55  | 1.66  | 0.60  |
| P59708_SF Sf3b6   | Splicing fac K.ITAEEM*YDIFGK#.Y                   | 58.11  | 34.84  | 1.67  | 0.60  |
| P59708_SF Sf3b6   | Splicing fac K.ITAEEM*YDIFGK#.Y                   | 122.36 | 79.27  | 1.54  | 0.65  |
| P59708_SF Sf3b6   | Splicing fac K.YGINTDPPK#.-                       | 130.51 | 88.81  | 1.47  | 0.68  |
| P59708_SF Sf3b6   | Splicing fac R.YLVVLYNANR.A                       | 10.50  | 21.20  | 0.50  | 2.02  |
| Q8VIJ6_SFF Sfpq   | Splicing fac K.AELDDTPM*.R.G                      | 29.87  | 74.61  | 0.40  | 2.50  |
| Q8VIJ6_SFF Sfpq   | Splicing fac K.AELDDTPM.R.G                       | 8.49   | 10.56  | 0.80  | 1.24  |
| Q8VIJ6_SFF Sfpq   | Splicing fac R.FAQHGTFEYYSQR.W                    | 25.63  | 59.63  | 0.43  | 2.33  |
| Q8VIJ6_SFF Sfpq   | Splicing fac R.FATHAAALSVR.N                      | 28.30  | 55.92  | 0.51  | 1.98  |
| Q8VIJ6_SFF Sfpq   | Splicing fac R.FGQGGAGPVGGQGR.G                   | 43.48  | 91.38  | 0.48  | 2.10  |
| Q8VIJ6_SFF Sfpq   | Splicing fac R.GM*GPTGPAGYGR.G                    | 6.27   | 24.87  | 0.25  | 3.97  |
| Q8VIJ6_SFF Sfpq   | Splicing fac K.I.SDSEGF#.A                        | 87.68  | 42.51  | 2.06  | 0.48  |
| Q8VIJ6_SFF Sfpq   | Splicing fac R.LFVGNLPAIDTEDEFK#.R                | 20.71  | 13.17  | 1.57  | 0.64  |
| Q8VIJ6_SFF Sfpq   | Splicing fac R.MGGGGTM*NM*GDPYGGGQK#.F            | 4.66   | 2.23   | 2.09  | 0.48  |
| Q8VIJ6_SFF Sfpq   | Splicing fac K.QQR@EQVEK#NMK#.D                   | 10.62  | 1.87   | 5.69  | 0.18  |
| Q8VIJ6_SFF Sfpq   | Splicing fac K.YGEPGEVFNK#.G                      | 163.80 | 84.78  | 1.93  | 0.52  |
| Q3USH5_Sf Sfswap  | Splicing fac R.EKHNENLENEEPFIAPLGLSVSDVELPPTAK#.M | 4.28   | 1.91   | 2.24  | 0.45  |
| Q3USH5_Sf Sfswap  | Splicing fac K.SGPTSDNEEDDEEDGSYLHPSLFASK#.K      | 4.38   | 2.01   | 2.18  | 0.46  |
| Q8BJUO_Sc Sgta    | Small gluta R.AIGIDPGYSK#.A                       | 31.75  | 11.60  | 2.74  | 0.37  |
| Q8BJUO_Sc Sgta    | Small gluta K.HAEAVAYK#.K                         | 138.55 | 10.09  | 13.74 | 0.07  |
| Q8BJUO_Sc Sgta    | Small gluta K.LENFEAAVHLVGK#.A                    | 24.35  | 8.89   | 2.74  | 0.37  |
| Q8BJUO_Sc Sgta    | Small gluta R.MGLALLSLNK#.H                       | 16.48  | 6.82   | 2.42  | 0.41  |
| Q8BJUO_Sc Sgta    | Small gluta K.AELDPNDNTYK#.S                      | 11.16  | 4.36   | 2.56  | 0.39  |
| A2ASV4_A2 Sh3bp1  | SH3 domaii K.FLALLAEQDVNK#.M                      | 23.21  | 9.13   | 2.54  | 0.39  |
| A2ASV4_A2 Sh3bp1  | SH3 domaii K.SLTDALAEALR.D                        | 6.12   | 8.52   | 0.72  | 1.39  |
| A2ASV4_A2 Sh3bp1  | SH3 domaii R.DVLQPLSR.L                           | 19.26  | 7.45   | 2.59  | 0.39  |
| A2ASV4_A2 Sh3bp1  | SH3 domaii R.LSEELPAILK#.H                        | 25.58  | 13.05  | 1.96  | 0.51  |
| A2ASV4_A2 Sh3bp1  | SH3 domaii R.TPETAFLGEDLLQVEQR.L                  | 16.56  | 28.66  | 0.58  | 1.73  |
| A2ASV4_A2 Sh3bp1  | SH3 domaii K.FLALLAEQDVNK#.M                      | 48.57  | 15.69  | 3.09  | 0.32  |
| A2ASV4_A2 Sh3bp1  | SH3 domaii R.LAAGASVLK#.R                         | 45.78  | 17.80  | 2.57  | 0.39  |
| A2ASV4_A2 Sh3bp1  | SH3 domaii R.LSEELPAILK#.H                        | 65.35  | 18.05  | 3.62  | 0.28  |
| A2ASV4_A2 Sh3bp1  | SH3 domaii K.LVSDWNTLK#.S                         | 64.23  | 17.85  | 3.60  | 0.28  |
| A2ASV4_A2 Sh3bp1  | SH3 domaii R.NPTETAASAEDMTR.K                     | 7.59   | 11.27  | 0.67  | 1.48  |
| A2ASV4_A2 Sh3bp1  | SH3 domaii R.NPTETAASAEDM*TR.K                    | 9.09   | 19.89  | 0.46  | 2.19  |
| A2ASV4_A2 Sh3bp1  | SH3 domaii R.RLPASPVSNM*PAQVDQGVATEDR.G           | 3.02   | 7.58   | 0.40  | 2.51  |
| A2ASV4_A2 Sh3bp1  | SH3 domaii R.RLPASPVSNM*PAQVDQGVATEDR.G           | 2.74   | 4.46   | 0.62  | 1.62  |
| A2ASV4_A2 Sh3bp1  | SH3 domaii R.TPETAFLGEDLLQVEQR.L                  | 15.83  | 23.67  | 0.67  | 1.50  |
| A2ASV4_A2 Sh3bp1  | SH3 domaii K.VSSQVSEELPPVTPAPATPAPTAPASM*AVR.E    | 2.26   | 3.17   | 0.72  | 1.40  |
| A2ASV4_A2 Sh3bp1  | SH3 domaii K.FLALLAEQDVNK#.M                      | 11.51  | 5.79   | 1.99  | 0.50  |
| Q62419_Sf Sh3gl1  | Endophilin K.ALYDFEPENDGELGFR.E                   | 20.50  | 48.39  | 0.42  | 2.36  |
| Q62419_Sf Sh3gl1  | Endophilin K.ASQLVSEK#.V                          | 133.21 | 62.63  | 2.13  | 0.47  |
| Q62419_Sf Sh3gl1  | Endophilin K.AVAEVLVR.T                           | 21.90  | 814.61 | 0.03  | 37.20 |
| Q62419_Sf Sh3gl1  | Endophilin K.DSLDIEVK#.Q                          | 46.45  | 23.99  | 1.94  | 0.52  |
| Q62419_Sf Sh3gl1  | Endophilin K.ELGGESNFGDALLDAGESM*K#.R             | 22.99  | 10.82  | 2.12  | 0.47  |
| Q62419_Sf Sh3gl1  | Endophilin K.ELGGESNFGDALLDAGESM*K#.R             | 24.08  | 8.85   | 2.72  | 0.37  |
| Q62419_Sf Sh3gl1  | Endophilin K.ITASSFR.S                            | 40.31  | 73.25  | 0.55  | 1.82  |
| Q62419_Sf Sh3gl1  | Endophilin R.LAEVK#DSL DIEVK#.Q                   | 6.45   | 2.35   | 2.75  | 0.36  |
| Q62419_Sf Sh3gl1  | Endophilin K.LTM*LNVTSK#.I                        | 76.07  | 34.02  | 2.24  | 0.45  |
| Q62419_Sf Sh3gl1  | Endophilin K.LTMLNVTSK#.I                         | 100.68 | 41.42  | 2.43  | 0.41  |
| Q62419_Sf Sh3gl1  | Endophilin R.QAVQLEELADK#.L                       | 45.21  | 24.56  | 1.84  | 0.54  |
| Q62419_Sf Sh3gl1  | Endophilin R.QAVQLEELADK#K#.R                     | 97.16  | 50.37  | 1.93  | 0.52  |
| Q62419_Sf Sh3gl1  | Endophilin R.TIEVLPNPNASR.A                       | 28.17  | 60.68  | 0.46  | 2.15  |
| Q62419_Sf Sh3gl1  | Endophilin K.VGGAETK#LDDDFK#DMEK#.K               | 26.92  | 12.16  | 2.21  | 0.45  |
| Q9JK48_SH Sh3glb1 | Endophilin R.ELIQSALNFLTPLR.N                     | 8.19   | 19.50  | 0.42  | 2.38  |
| Q9JK48_SH Sh3glb1 | Endophilin K.GK#VITYLELLN.-                       | 24.32  | 14.73  | 1.65  | 0.61  |
| Q9JK48_SH Sh3glb1 | Endophilin K.LAAGADFTLSR.A                        | 7.54   | 18.13  | 0.42  | 2.40  |
| A2AA5_Sp Sh3pxd2b | SH3 and PX R.GAVVEVQK#.N                          | 24.65  | 4.30   | 5.73  | 0.17  |
| P98083_Sf Shc1    | SHC-transfc R.ELFDDPSVNIQNLDK#.A                  | 24.85  | 14.50  | 1.71  | 0.58  |
| P98083_Sf Shc1    | SHC-transfc R.ESTTTPGQYVLTQLSGQPK#.H              | 10.24  | 4.38   | 2.34  | 0.43  |
| P98083_Sf Shc1    | SHC-transfc R.VEGGQLGGEWTR.H                      | 7.32   | 11.30  | 0.65  | 1.54  |
| P98083_Sf Shc1    | SHC-transfc K.VM*PGVSYLVR.Y                       | 2.49   | 5.99   | 0.41  | 2.41  |
| P98083_Sf Shc1    | SHC-transfc K.VMGPVSYLVR.Y                        | 64.80  | 2.28   | 28.40 | 0.04  |
| P50431_Gl Shmt1   | Serine hydr R.ALSDALTELG#.I                       | 21.74  | 5.87   | 3.70  | 0.27  |
| P50431_Gl Shmt1   | Serine hydr K.ISATSIFFESM*PYK#.V                  | 63.73  | 16.22  | 3.93  | 0.25  |
| P50431_Gl Shmt1   | Serine hydr K.ISATSIFFESM*PYK#.V                  | 102.55 | 23.73  | 4.32  | 0.23  |
| P50431_Gl Shmt1   | Serine hydr K.ISATSIFFESM*PYK#.V                  | 9.58   | 2.97   | 3.23  | 0.31  |
| P50431_Gl Shmt1   | Serine hydr K.ISATSIFFESM*PYK#.V                  | 15.19  | 3.20   | 4.75  | 0.21  |
| Q9CZ7_Q Shmt2     | Protein Shr R.AHLLADM*AHISGLVAAK#.V               | 36.39  | 12.34  | 2.95  | 0.34  |
| Q9CZ7_Q Shmt2     | Protein Shr R.GFPM*PGFDER.-                       | 12.59  | 14.92  | 0.84  | 1.19  |
| Q9CZ7_Q Shmt2     | Protein Shr R.LGAPALTSR.Q                         | 73.34  | 76.92  | 0.95  | 1.05  |
| Q9CZ7_Q Shmt2     | Protein Shr R.LIIAGTSAYAR.L                       | 63.42  | 68.70  | 0.92  | 1.08  |
| Q9CZ7_Q Shmt2     | Protein Shr K.LINPQTGLIDYDQLALTAR.L               | 22.15  | 27.18  | 0.81  | 1.23  |
| Q9CZ7_Q Shmt2     | Protein Shr R.NAQAM*ADALLK#.R                     | 45.21  | 14.14  | 3.20  | 0.31  |
| Q9CZ7_Q Shmt2     | Protein Shr R.NAQAMADALLK#.R                      | 42.65  | 11.80  | 3.61  | 0.28  |
| Q9CZ7_Q Shmt2     | Protein Shr R.QQVEQFAR.G                          | 22.02  | 27.04  | 0.81  | 1.23  |
| Q9CZ7_Q Shmt2     | Protein Shr R.SAITPGGLR.L                         | 36.50  | 45.15  | 0.81  | 1.24  |
| Q9CZ7_Q Shmt2     | Protein Shr R.SGLIFYR.K                           | 23.51  | 34.01  | 0.69  | 1.45  |
| Q9CZ7_Q Shmt2     | Protein Shr K.VAQTOAGEAAGGWGTQESLSDSDPEM*WELLQR.E | 4.47   | 4.47   | 1.00  | 1.00  |
| Q9CZ7_Q Shmt2     | Protein Shr K.VAQTOAGEAAGGWGTQESLSDSDPEM*WELLQR.E | 4.96   | 5.71   | 0.87  | 1.15  |
| Q9CZ7_Q Shmt2     | Protein Shr R.VLELVISITANK#.N                     | 179.77 | 48.20  | 3.73  | 0.27  |
| Q9CZ7_Q Shmt2     | Protein Shr R.VVDFIDEGVNIQLEVK#.R                 | 40.35  | 8.62   | 4.68  | 0.21  |
| Q9CZ7_Q Shmt2     | Protein Shr K.YADVTTTTTHK#.T                      | 118.72 | 27.17  | 4.37  | 0.23  |
| Q9CZ7_Q Shmt2     | Protein Shr K.YSEGYPGK#.R                         | 37.32  | 12.07  | 3.09  | 0.32  |
| Q9CZ7_Q Shmt2     | Protein Shr R.VLELVISITANK#.N                     | 20.19  | 6.56   | 3.08  | 0.32  |
| Q9CZ7_Q Shmt2     | Protein Shr R.VVDFIDEGVNIQLEVK#.R                 | 8.17   | 2.31   | 3.54  | 0.28  |
| Q9CZ7_Q Shmt2     | Protein Shr R.VLELVISITANK#.N                     | 30.79  | 6.94   | 4.44  | 0.23  |
| O88520_Sf Shoc2   | Leucine-ric R.LEENK#ESLNEIAYLK#.D                 | 13.82  | 11.00  | 1.26  | 0.80  |
| O88520_Sf Shoc2   | Leucine-ric K.ESSAAQPGVAFSVDNTIK#.R               | 11.92  | 6.31   | 1.89  | 0.53  |
| O88520_Sf Shoc2   | Leucine-ric K.LVLTNNQLSTLPR.G                     | 2.18   | 6.34   | 0.34  | 2.92  |
| O88520_Sf Shoc2   | Leucine-ric K.ESSAAQPGVAFSVDNTIK#.R               | 5.67   | 3.46   | 1.64  | 0.61  |
| O88520_Sf Shoc2   | Leucine-ric K.LVLTNNQLSTLPR.G                     | 4.06   | 7.64   | 0.53  | 1.88  |
| Q60520_Sl Sin3a   | Paired amp K.LLFSNTAAQK#.L                        | 16.98  | 9.12   | 1.86  | 0.54  |
| Q60520_Sl Sin3a   | Paired amp K.EAGGNYPALTEQEVYQVAR.L                | 3.07   | 7.21   | 0.43  | 2.35  |
| Q60520_Sl Sin3a   | Paired amp R.HSGTATPPVYK#.K                       | 14.32  | 9.73   | 1.47  | 0.68  |
| Q60520_Sl Sin3a   | Paired amp R.LK#VEDALSYLDQVK#.L                   | 4.62   | 2.09   | 2.21  | 0.45  |

|                    |                                                      |        |       |       |       |
|--------------------|------------------------------------------------------|--------|-------|-------|-------|
| Q60520_Sl Sin3a    | Paired amp R.LKVEDALSYLQVQK.L                        | 19.01  | 11.98 | 1.59  | 0.63  |
| Q60520_Sl Sin3a    | Paired amp R.SLLESAYQR.K                             | 8.98   | 15.41 | 0.58  | 1.72  |
| Q60520_Sl Sin3a    | Paired amp K.SLLNEIESYDER.Q                          | 2.15   | 5.69  | 0.38  | 2.64  |
| Q60520_Sl Sin3a    | Paired amp R.SPPVQHPPTVITSLGTAPSLQNNQPVFNHAINVYVK#.I | 5.57   | 4.08  | 1.37  | 0.73  |
| Q60520_Sl Sin3a    | Paired amp R.YM*SSDITSPELR.E                         | 3.24   | 9.49  | 0.34  | 2.93  |
| P46062_Sl Sipa1    | Signal-indu R.EGQPISESGDPK#.E                        | 7.80   | 5.21  | 1.50  | 0.67  |
| P59941_Sl Sirt6    | NAD-depen R.LVIVNLQPTK#.H                            | 9.23   | 6.20  | 1.49  | 0.67  |
| Q6NZR5_Ql Skiv21   | Protein Ski R.FLLSDOSLLELPEYHQ.R.V                   | 5.95   | 5.54  | 1.07  | 0.93  |
| Q6NZR5_Ql Skiv21   | Protein Ski R.LIPOPFAFWAFEPDVFQK#.Q                  | 6.02   | 2.75  | 2.19  | 0.46  |
| Q6NZR5_Ql Skiv21   | Protein Ski K.LQPQGDVAIASTK#.V                       | 24.16  | 10.43 | 2.32  | 0.43  |
| Q6NZR5_Ql Skiv21   | Protein Ski R.TLGVYDEAGTVK#.L                        | 10.35  | 3.34  | 3.10  | 0.32  |
| Q6NZR5_Ql Skiv21   | Protein Ski K.TVVAEYAIALAQK#.H                       | 11.67  | 4.32  | 2.70  | 0.37  |
| Q6NZR5_Ql Skiv21   | Protein Ski R.DKHGPA TPDPVHPDDLIGFK#.L               | 16.89  | 5.88  | 2.87  | 0.35  |
| Q6NZR5_Ql Skiv21   | Protein Ski R.LAQSPYAGPPTLDPINDLQK#.D                | 15.62  | 8.35  | 1.87  | 0.53  |
| Q6NZR5_Ql Skiv21   | Protein Ski R.LIPOPFAFWAFEPDVFQK#.Q                  | 10.92  | 4.05  | 2.69  | 0.37  |
| Q6NZR5_Ql Skiv21   | Protein Ski R.LIPOPFAFWAFEPDVFQK#.Q                  | 28.49  | 12.71 | 2.24  | 0.45  |
| Q6NZR5_Ql Skiv21   | Protein Ski R.TLGVYDEAGTVK#.L                        | 25.85  | 11.85 | 2.18  | 0.46  |
| Q6NZR5_Ql Skiv21   | Protein Ski K.TVVAEYAIALAQK#.H                       | 22.04  | 6.22  | 3.54  | 0.28  |
| Q9CZU3_Sk Skiv212  | Superkiller K.AIGNTELENK#.F                          | 59.10  | 34.34 | 1.72  | 0.58  |
| Q9CZU3_Sk Skiv212  | Superkiller R.DLDVEGTDEPIFGK#.K                      | 45.22  | 26.43 | 1.71  | 0.58  |
| Q9CZU3_Sk Skiv212  | Superkiller K.ETIEIFSEGLIK#.A                        | 28.49  | 15.47 | 1.84  | 0.54  |
| Q9CZU3_Sk Skiv212  | Superkiller K.EYFILDARFQ.E                           | 13.24  | 32.38 | 0.41  | 2.44  |
| Q9CZU3_Sk Skiv212  | Superkiller R.GIVILMVDEK#.M                          | 18.46  | 8.48  | 2.18  | 0.46  |
| Q9CZU3_Sk Skiv212  | Superkiller K.VIPNEENVVYK#.I                         | 63.29  | 37.06 | 1.71  | 0.59  |
| Q9CZU3_Sk Skiv212  | Superkiller R.K#AQJALDIK#.S                          | 39.10  | 19.98 | 1.96  | 0.51  |
| Q9CZU3_Sk Skiv212  | Superkiller R.LGFATSSDVIEM*#K.G                      | 27.38  | 9.61  | 2.85  | 0.35  |
| Q9CZU3_Sk Skiv212  | Superkiller R.LGFATSSDVIEM*#K.G                      | 15.52  | 7.81  | 1.99  | 0.50  |
| Q9CZU3_Sk Skiv212  | Superkiller K.LPQVEHVLP LLLK#.R                      | 15.75  | 11.60 | 1.36  | 0.74  |
| Q9CZU3_Sk Skiv212  | Superkiller K.M*TDVFEQSIR.C                          | 5.67   | 9.47  | 0.60  | 1.67  |
| Q9CZU3_Sk Skiv212  | Superkiller R.RLEELLR.Q                              | 3.53   | 20.35 | 0.17  | 5.77  |
| Q9CZU3_Sk Skiv212  | Superkiller R.TVLQM*DELK#.C                          | 19.67  | 10.36 | 1.90  | 0.53  |
| Q9CZU3_Sk Skiv212  | Superkiller R.VEEINPEYM*LEK#.S                       | 15.82  | 12.34 | 1.28  | 0.78  |
| Q9CZU3_Sk Skiv212  | Superkiller R.VIFTSPIK#.A                            | 48.38  | 22.89 | 2.11  | 0.47  |
| Q9CZU3_Sk Skiv212  | Superkiller K.VKHNEGDFGWVWVNFSK#.K                   | 18.54  | 11.33 | 1.64  | 0.61  |
| Q9CZU3_Sk Skiv212  | Superkiller R.WISSGEYIQM*SGR.A                       | 6.54   | 9.64  | 0.68  | 1.47  |
| Q9CZU3_Sk Skiv212  | Superkiller K.AIGNTELENK#.F                          | 82.33  | 37.24 | 2.21  | 0.45  |
| Q9CZU3_Sk Skiv212  | Superkiller R.DLDVEGTDEPIFGK#.K                      | 54.23  | 28.20 | 1.92  | 0.52  |
| Q9CZU3_Sk Skiv212  | Superkiller K.EYFILDARFQ.E                           | 11.74  | 28.04 | 0.42  | 2.39  |
| Q9CZU3_Sk Skiv212  | Superkiller K.FAEGITK#.I                             | 61.93  | 35.67 | 1.74  | 0.58  |
| Q9CZU3_Sk Skiv212  | Superkiller R.GIVILMVDEK#.M                          | 9.61   | 4.92  | 1.95  | 0.51  |
| Q9CZU3_Sk Skiv212  | Superkiller R.IEDSINEDLSLADLM*PR.V                   | 2.33   | 7.66  | 0.30  | 3.29  |
| Q9CZU3_Sk Skiv212  | Superkiller K.VIPNEENVVYK#.I                         | 52.72  | 26.22 | 2.01  | 0.50  |
| Q9CZU3_Sk Skiv212  | Superkiller R.K#AQJALDIK#.S                          | 18.83  | 8.36  | 2.25  | 0.44  |
| Q9CZU3_Sk Skiv212  | Superkiller R.LGFATSSDVIEM*#K.G                      | 27.70  | 10.23 | 2.71  | 0.37  |
| Q9CZU3_Sk Skiv212  | Superkiller R.LGFATSSDVIEM*#K.G                      | 15.74  | 6.61  | 2.38  | 0.42  |
| Q9CZU3_Sk Skiv212  | Superkiller K.LPQVEHVLP LLLK#.R                      | 17.25  | 8.64  | 2.00  | 0.50  |
| Q9CZU3_Sk Skiv212  | Superkiller K.LITELAGPLR.Q                           | 9.53   | 20.47 | 0.47  | 2.15  |
| Q9CZU3_Sk Skiv212  | Superkiller R.NFQPVIFFSK#.K                          | 22.23  | 8.98  | 2.48  | 0.40  |
| Q9CZU3_Sk Skiv212  | Superkiller R.TVLQM*DELK#.C                          | 22.25  | 11.98 | 1.86  | 0.54  |
| Q9CZU3_Sk Skiv212  | Superkiller R.VEEINPEYM*LEK#.S                       | 17.35  | 7.97  | 2.18  | 0.46  |
| Q9CZU3_Sk Skiv212  | Superkiller R.VEEINPEYMLEK#.S                        | 12.50  | 7.89  | 1.58  | 0.63  |
| Q9WTX5_S Skp1      | S-phase kin K.LQSSDGEIFVDVEIAK#.Q                    | 30.04  | 15.52 | 1.94  | 0.52  |
| Q9WTX5_S Skp1      | S-phase kin K.NDFTIEEAQVR.K                          | 23.31  | 66.99 | 0.35  | 2.87  |
| Q9WTX5_S Skp1      | S-phase kin K.RTDIPVWDQEFK.V                         | 13.25  | 52.92 | 0.25  | 3.99  |
| Q9WTX5_S Skp1      | S-phase kin R.TDDIPVWDQEFK#.V                        | 77.42  | 61.55 | 1.26  | 0.80  |
| Q9WTX5_S Skp1      | S-phase kin K.TM*LEDLGM*DEGGDDPVLPVLPVNAAILK#.K      | 26.66  | 19.19 | 1.39  | 0.72  |
| Q9WTX5_S Skp1      | S-phase kin K.TM*LEDLGM*DEGGDDPVLPVLPVNAAILK#.K      | 4.71   | 3.43  | 1.37  | 0.73  |
| Q9WTX5_S Skp1      | S-phase kin K.TMLEDLGM*DEGGDDPVLPVLPVNAAILK#.K       | 9.69   | 4.27  | 2.27  | 0.44  |
| Q8CI08_Sl Slain2   | SLAIN moti R.VGVSTPSSGAASPR.G                        | 15.52  | 21.37 | 0.73  | 1.38  |
| Q8CI08_Sl Slain2   | SLAIN moti K.LINDVTDVQLAR.M                          | 1.43   | 15.47 | 0.09  | 10.85 |
| P53986_M Slc16a1   | Monocarb K.AAOSQHQHSSGDPTEESPV.-                     | 21.64  | 21.64 | 1.00  | 1.00  |
| P53986_M Slc16a1   | Monocarb K.SDANTLDIGGSPK#.G                          | 10.12  | 10.30 | 0.98  | 1.02  |
| Q8VEM8_N Slc25a3   | Phosphate- K.FGVYVFK#.A                              | 7.09   | 7.82  | 0.91  | 1.10  |
| Q8VEM8_N Slc25a3   | Phosphate- R.IQTQPGYANTLR.E                          | 8.88   | 15.41 | 0.58  | 1.74  |
| P48962_AC Slc25a4  | ADP/ATP tr R.YFPTQALNFAFK#.D                         | 29.67  | 15.79 | 1.88  | 0.53  |
| P48962_AC Slc25a4  | ADP/ATP tr K.DFLAGIAAAVSK#.T                         | 12.72  | 1.47  | 8.68  | 0.12  |
| P48962_AC Slc25a4  | ADP/ATP tr R.YFPTQALNFAFK#.D                         | 28.02  | 10.37 | 2.70  | 0.37  |
| P51881_AC Slc25a5  | ADP/ATP tr K.DFLAGVAAAISK#.T                         | 20.82  | 8.63  | 2.41  | 0.41  |
| P51881_AC Slc25a5  | ADP/ATP tr K.DFLAGVAAAISK#.T                         | 17.88  | 7.51  | 2.38  | 0.42  |
| P17809_Gl Slc2a1   | Solute carri K.VTILELFR.S                            | 4.07   | 14.07 | 0.29  | 3.45  |
| P10852_4f Slc3a2   | 4F2 cell-sur R.DAGGIAGLK#.S                          | 15.05  | 9.67  | 1.56  | 0.64  |
| P10852_4f Slc3a2   | 4F2 cell-sur K.FTGLSK#EELLK#.V                       | 11.42  | 6.63  | 1.72  | 0.58  |
| P10852_4f Slc3a2   | 4F2 cell-sur K.GLVLPPIHK#.N                          | 14.62  | 9.94  | 1.47  | 0.68  |
| P10852_4f Slc3a2   | 4F2 cell-sur R.LGASNLPAAGILPASAK#.L                  | 28.17  | 22.40 | 1.26  | 0.80  |
| P10852_4f Slc3a2   | 4F2 cell-sur K.VAEDTEAGVK#.F                         | 34.02  | 14.87 | 2.29  | 0.44  |
| P10852_4f Slc3a2   | 4F2 cell-sur K.GLVLPPIHK#.N                          | 17.66  | 10.22 | 1.73  | 0.58  |
| P10852_4f Slc3a2   | 4F2 cell-sur R.LGASNLPAAGILPASAK#.L                  | 25.36  | 21.51 | 1.18  | 0.85  |
| P10852_4f Slc3a2   | 4F2 cell-sur K.NQK#DEINETDLK#.Q                      | 8.28   | 5.38  | 1.54  | 0.65  |
| P10852_4f Slc3a2   | 4F2 cell-sur K.QINPTLGSQEDFK#D LLSQAK#.K             | 21.86  | 24.17 | 0.90  | 1.11  |
| E9Q585_E9 Slc4a1ap | Protein Slc- K.TELQTTNAENK#.T                        | 5.34   | 2.91  | 1.84  | 0.54  |
| Q9Z127_LA Slc7a5   | Large neutr K.DM*GGGDASN LQQK.L                      | 4.13   | 5.10  | 0.81  | 1.23  |
| B1ARD6_B: Slfn9    | Protein Slfr K.GVYTLNTEEVVR.M                        | 3.18   | 10.09 | 0.31  | 3.18  |
| B1ARD6_B: Slfn9    | Protein Slfr K.SLESNPAFEIFQSK.K                      | 413.24 | 33.87 | 12.20 | 0.08  |
| B1ARD6_B: Slfn9    | Protein Slfr R.SYDPLIYAGEVTLGK.V                     | 4.72   | 6.67  | 0.71  | 1.41  |
| B1ARD6_B: Slfn9    | Protein Slfr R.DAFYFLK.K                             | 9.51   | 11.97 | 0.79  | 1.26  |
| B1ARD6_B: Slfn9    | Protein Slfr R.FQHIIIDEAQNFR.T                       | 1.56   | 15.20 | 0.10  | 9.75  |
| B1ARD6_B: Slfn9    | Protein Slfr R.NADKIAEFLQLELQK.I                     | 9.97   | 17.83 | 0.56  | 1.79  |
| B1ARD6_B: Slfn9    | Protein Slfr K.SLESNPAFEIFQSK.K                      | 16.35  | 22.53 | 0.73  | 1.38  |
| O54988_SL Slk      | STE20-like K.AGNILFTLDGDIK#.L                        | 9.31   | 2.15  | 4.33  | 0.23  |
| O54988_SL Slk      | STE20-like K.LADFGVSAK#.N                            | 8.37   | 5.32  | 1.57  | 0.64  |
| O54988_SL Slk      | STE20-like R.SSEVGTDEALDDTQK#.A                      | 20.32  | 4.41  | 4.61  | 0.22  |
| O54988_SL Slk      | STE20-like K.AEVTVEVEDGKHEDEEEEAENALPIPANK#.R        | 12.01  | 4.57  | 2.63  | 0.38  |
| O54988_SL Slk      | STE20-like K.AGNILFTLDGDIK#.L                        | 58.61  | 14.53 | 4.03  | 0.25  |
| O54988_SL Slk      | STE20-like R.ALGSEGAATEVVDLER.K                      | 8.59   | 12.81 | 0.67  | 1.49  |
| O54988_SL Slk      | STE20-like K.DSGSVLSQETR.R                           | 12.07  | 9.01  | 1.34  | 0.75  |
| O54988_SL Slk      | STE20-like K.EADFOAVDNEVLTK#.E                       | 8.83   | 4.02  | 2.20  | 0.45  |
| O54988_SL Slk      | STE20-like K.IVTDSDSKTEELR.F                         | 4.09   | 8.96  | 0.46  | 2.19  |
| O54988_SL Slk      | STE20-like R.K#LQEQEVFFK#.M                          | 16.27  | 23.55 | 0.69  | 1.45  |
| O54988_SL Slk      | STE20-like K.LADFGVSAK#.N                            | 55.40  | 20.90 | 2.65  | 0.38  |
| O54988_SL Slk      | STE20-like K.LIQSEINDTHIQTM*DLVSQETGEK#.E            | 6.52   | 2.65  | 2.46  | 0.41  |
| O54988_SL Slk      | STE20-like R.QYDQEIENLEK#.Q                          | 23.36  | 5.65  | 4.14  | 0.24  |
| O54988_SL Slk      | STE20-like R.SSEVGTDEALDDTQK#.A                      | 87.44  | 21.47 | 4.07  | 0.25  |
| O54988_SL Slk      | STE20-like R.TEOSTSEDK#FSNK#.I                       | 16.04  | 3.83  | 4.19  | 0.24  |

|                  |                                                   |        |        |      |       |
|------------------|---------------------------------------------------|--------|--------|------|-------|
| Q8CH25_SlSltm    | SAFB-like tr K.DVQDAIAQSPK#.E                     | 8.52   | 4.99   | 1.71 | 0.59  |
| Q8CH25_SlSltm    | SAFB-like tr R.IVQM*SGNSLPR.G                     | 5.33   | 9.53   | 0.56 | 1.79  |
| Q8CH25_SlSltm    | SAFB-like tr K.NIIVSLGSSNTK#.A                    | 14.70  | 7.61   | 1.93 | 0.52  |
| Q8CH25_SlSltm    | SAFB-like tr R.TELHQQLSVEK#.V                     | 29.59  | 21.45  | 1.38 | 0.72  |
| Q8BHJ9_SlSlu7    | Pre-mRNA-; K.YGQEHLDAPAEALLAQTEDYVEYSR.H          | 2.56   | 5.90   | 0.43 | 2.30  |
| Q3TKT4_SlSmarca4 | Transcriptii K.EVDYDSDLTEK#.Q                     | 15.15  | 8.20   | 1.85 | 0.54  |
| Q3TKT4_SlSmarca4 | Transcriptii K.FNVLLTTEYIYK#.D                    | 12.27  | 7.22   | 1.70 | 0.59  |
| Q3TKT4_SlSmarca4 | Transcriptii K.AENAEQTPAIGPDGPELDETSQM*SDLPVK.V   | 3.76   | 2.17   | 1.73 | 0.58  |
| Q3TKT4_SlSmarca4 | Transcriptii R.AFLQAILEHEEQDEEVEPDDETVNMQ*IAH.H   | 3.15   | 5.81   | 0.54 | 1.84  |
| Q3TKT4_SlSmarca4 | Transcriptii R.AFLQAILEHEEQDEEVEPDDETVNMQ*IAH.H   | 2.29   | 2.61   | 0.88 | 1.14  |
| Q3TKT4_SlSmarca4 | Transcriptii K.AIEEGTLEIEEVEV.R                   | 18.45  | 45.45  | 0.41 | 2.46  |
| Q3TKT4_SlSmarca4 | Transcriptii K.AVATYHANTER.E                      | 4.38   | 13.84  | 0.32 | 3.16  |
| Q3TKT4_SlSmarca4 | Transcriptii R.DSEAGSPTTTR.S                      | 10.72  | 28.70  | 0.37 | 2.68  |
| Q3TKT4_SlSmarca4 | Transcriptii R.DTALETALNAK#.A                     | 77.27  | 57.86  | 1.34 | 0.75  |
| Q3TKT4_SlSmarca4 | Transcriptii K.ELPEYELIR.K                        | 17.64  | 52.96  | 0.33 | 3.00  |
| Q3TKT4_SlSmarca4 | Transcriptii K.EVDYDSDLTEK#.Q                     | 76.52  | 48.63  | 1.57 | 0.64  |
| Q3TKT4_SlSmarca4 | Transcriptii R.GLDPVVELQER.E                      | 21.07  | 73.29  | 0.29 | 3.48  |
| Q3TKT4_SlSmarca4 | Transcriptii K.HQEYLNLSLQHAH#.D                   | 28.39  | 18.47  | 1.54 | 0.65  |
| Q3TKT4_SlSmarca4 | Transcriptii R.IGQQNEV.R                          | 23.12  | 41.68  | 0.55 | 1.80  |
| Q3TKT4_SlSmarca4 | Transcriptii R.LLTTGTLQNK#.L                      | 25.11  | 17.41  | 1.44 | 0.69  |
| Q3TKT4_SlSmarca4 | Transcriptii K.IPDPDSDVSEVDAR.H                   | 5.40   | 15.75  | 0.34 | 2.92  |
| Q3TKT4_SlSmarca4 | Transcriptii R.IQLENLPGSLAGDLR.T                  | 10.40  | 38.58  | 0.27 | 3.71  |
| Q3TKT4_SlSmarca4 | Transcriptii K.IVDAVIK#.Y                         | 54.88  | 50.71  | 1.08 | 0.92  |
| Q3TKT4_SlSmarca4 | Transcriptii K.KAENAEQTPAIGPDGPELDETSQM*SDLPVK.V  | 6.70   | 5.90   | 1.13 | 0.88  |
| Q3TKT4_SlSmarca4 | Transcriptii K.KAENAEQTPAIGPDGPELDETSQM*SDLPVK#.V | 2.90   | 2.70   | 1.07 | 0.93  |
| Q3TKT4_SlSmarca4 | Transcriptii R.LM*EEDELPSWIKDDAEVER.L             | 8.08   | 22.68  | 0.36 | 2.81  |
| Q3TKT4_SlSmarca4 | Transcriptii K.QDVEDYGVQALAR.G                    | 6.65   | 12.76  | 0.52 | 1.92  |
| Q3TKT4_SlSmarca4 | Transcriptii R.QLSEVFIQLPSR.K                     | 4.40   | 20.56  | 0.21 | 4.68  |
| Q3TKT4_SlSmarca4 | Transcriptii R.RAFVPLQR.S                         | 2.24   | 23.99  | 0.09 | 10.70 |
| Q3TKT4_SlSmarca4 | Transcriptii K.TLM*NTIM*QLR.K                     | 7.50   | 21.72  | 0.35 | 2.90  |
| Q3TKT4_SlSmarca4 | Transcriptii R.VDLNEETILIR.R                      | 9.39   | 29.91  | 0.31 | 3.18  |
| Q3TKT4_SlSmarca4 | Transcriptii K.VIQAGM*FDQK#.S                     | 51.87  | 38.45  | 1.35 | 0.74  |
| Q3TKT4_SlSmarca4 | Transcriptii K.YK#LNVQDK#.V                       | 15.32  | 14.40  | 1.06 | 0.94  |
| Q91ZW3_S_Smarca5 | SWI/SNF-re R.ANRFYLLK.Q                           | 12.29  | 17.63  | 0.70 | 1.43  |
| Q91ZW3_S_Smarca5 | SWI/SNF-re K.ANYAVDAYFR.E                         | 3.32   | 20.81  | 0.16 | 6.26  |
| Q91ZW3_S_Smarca5 | SWI/SNF-re R.DFNQFIK#.A                           | 43.80  | 40.04  | 1.09 | 0.91  |
| Q91ZW3_S_Smarca5 | SWI/SNF-re K.DIDILNSAGK.M                         | 35.27  | 61.50  | 0.57 | 1.74  |
| Q91ZW3_S_Smarca5 | SWI/SNF-re K.EIQEPDPTTEEK#.M                      | 38.48  | 42.80  | 0.90 | 1.11  |
| Q91ZW3_S_Smarca5 | SWI/SNF-re R.ENM*ELEEKEK#.A                       | 5.07   | 3.42   | 1.48 | 0.67  |
| Q91ZW3_S_Smarca5 | SWI/SNF-re K.ESEITDEDIDGILER.G                    | 17.25  | 70.35  | 0.25 | 4.08  |
| Q91ZW3_S_Smarca5 | SWI/SNF-re R.FDWFIK#.S                            | 34.95  | 30.49  | 1.15 | 0.87  |
| Q91ZW3_S_Smarca5 | SWI/SNF-re R.FEDSPSYK#.W                          | 80.75  | 78.62  | 1.03 | 0.97  |
| Q91ZW3_S_Smarca5 | SWI/SNF-re R.FEYLLK#.Q                            | 12.72  | 10.76  | 1.18 | 0.85  |
| Q91ZW3_S_Smarca5 | SWI/SNF-re R.FITDNTVEER.I                         | 26.48  | 114.89 | 0.23 | 4.34  |
| Q91ZW3_S_Smarca5 | SWI/SNF-re R.HGATHVFASK#.E                        | 44.64  | 39.96  | 1.12 | 0.90  |
| Q91ZW3_S_Smarca5 | SWI/SNF-re R.ILM*KHDIIDILNSAGK#.M                 | 15.55  | 9.46   | 1.64 | 0.61  |
| Q91ZW3_S_Smarca5 | SWI/SNF-re R.KANYAVDAYFR.E                        | 7.83   | 25.65  | 0.31 | 3.28  |
| Q91ZW3_S_Smarca5 | SWI/SNF-re R.LDGGTPHDER.Q                         | 2.16   | 8.66   | 0.25 | 4.00  |
| Q91ZW3_S_Smarca5 | SWI/SNF-re R.LDSIVIQQGR.L                         | 7.62   | 25.97  | 0.29 | 3.41  |
| Q91ZW3_S_Smarca5 | SWI/SNF-re R.LFELLEK#.E                           | 50.98  | 54.31  | 0.94 | 1.07  |
| Q91ZW3_S_Smarca5 | SWI/SNF-re R.LLNILM*QLR.K                         | 8.42   | 28.31  | 0.30 | 3.36  |
| Q91ZW3_S_Smarca5 | SWI/SNF-re K.LLTQGFNWNK#.R                        | 20.12  | 20.33  | 0.99 | 1.01  |
| Q91ZW3_S_Smarca5 | SWI/SNF-re K.LRLDSIVIQQGR.L                       | 1.92   | 23.18  | 0.08 | 12.06 |
| Q91ZW3_S_Smarca5 | SWI/SNF-re R.LVDQNLNK#.I                          | 104.06 | 99.26  | 1.05 | 0.95  |
| Q91ZW3_S_Smarca5 | SWI/SNF-re R.QDSINAYNEPNSTK#.F                    | 17.59  | 17.77  | 0.99 | 1.01  |
| Q91ZW3_S_Smarca5 | SWI/SNF-re K.QTELFHFQIQAQK#.T                     | 21.81  | 18.41  | 1.18 | 0.84  |
| Q91ZW3_S_Smarca5 | SWI/SNF-re R.SPDLPNAAQAQK.E                       | 15.88  | 15.95  | 1.00 | 1.00  |
| Q91ZW3_S_Smarca5 | SWI/SNF-re R.TEQEEDELLTESSK#.A                    | 34.33  | 35.96  | 0.95 | 1.05  |
| Q91ZW3_S_Smarca5 | SWI/SNF-re K.TLQTSLLGYMK#.H                       | 25.21  | 23.04  | 1.09 | 0.91  |
| Q91ZW3_S_Smarca5 | SWI/SNF-re K.TLQTSLLGYMK#.H                       | 15.44  | 12.14  | 1.27 | 0.79  |
| Q91ZW3_S_Smarca5 | SWI/SNF-re K.TPEEVEIYSAVFWER.C                    | 2.59   | 15.24  | 0.17 | 5.88  |
| Q91ZW3_S_Smarca5 | SWI/SNF-re K.TPTSPLK#.M                           | 31.92  | 21.70  | 1.47 | 0.68  |
| Q91ZW3_S_Smarca5 | SWI/SNF-re R.VLIFSOM*TR.L                         | 13.87  | 43.21  | 0.32 | 3.12  |
| Q91ZW3_S_Smarca5 | SWI/SNF-re R.VLIFSOM*TR.L                         | 8.14   | 20.29  | 0.40 | 2.49  |
| Q91ZW3_S_Smarca5 | SWI/SNF-re K.WGRDDIENIAR.E                        | 3.86   | 26.20  | 0.15 | 6.79  |
| Q91ZW3_S_Smarca5 | SWI/SNF-re R.ANRFYLLK.Q                           | 14.90  | 46.04  | 0.32 | 3.09  |
| Q91ZW3_S_Smarca5 | SWI/SNF-re K.ANYAVDAYFR.E                         | 7.73   | 30.00  | 0.26 | 3.88  |
| Q91ZW3_S_Smarca5 | SWI/SNF-re R.DFNQFIK#.A                           | 94.00  | 72.72  | 1.29 | 0.77  |
| Q91ZW3_S_Smarca5 | SWI/SNF-re K.DIDILNSAGK#.M                        | 80.46  | 89.53  | 0.90 | 1.11  |
| Q91ZW3_S_Smarca5 | SWI/SNF-re K.EIQEPDPTTEEK#.M                      | 69.32  | 72.81  | 0.95 | 1.05  |
| Q91ZW3_S_Smarca5 | SWI/SNF-re R.ENM*ELEEKEK#.A                       | 7.86   | 9.44   | 0.83 | 1.20  |
| Q91ZW3_S_Smarca5 | SWI/SNF-re K.ESEITDEDIDGILER.G                    | 26.65  | 109.87 | 0.24 | 4.12  |
| Q91ZW3_S_Smarca5 | SWI/SNF-re R.FDWFIK#.S                            | 82.74  | 64.42  | 1.28 | 0.78  |
| Q91ZW3_S_Smarca5 | SWI/SNF-re R.FEDSPSYK#.W                          | 142.32 | 107.97 | 1.32 | 0.76  |
| Q91ZW3_S_Smarca5 | SWI/SNF-re R.FEYLLK#.Q                            | 30.80  | 25.87  | 1.19 | 0.84  |
| Q91ZW3_S_Smarca5 | SWI/SNF-re R.FITDNTVEER.I                         | 51.39  | 185.09 | 0.28 | 3.60  |
| Q91ZW3_S_Smarca5 | SWI/SNF-re K.FVFM*LSTR.A                          | 4.24   | 9.26   | 0.46 | 2.19  |
| Q91ZW3_S_Smarca5 | SWI/SNF-re R.HGATHVFASK#.E                        | 122.56 | 90.89  | 1.35 | 0.74  |
| Q91ZW3_S_Smarca5 | SWI/SNF-re K.IDEAEPLNDELEEK#.E                    | 40.56  | 33.69  | 1.20 | 0.83  |
| Q91ZW3_S_Smarca5 | SWI/SNF-re R.ILM*KHDIIDILNSAGK#.M                 | 23.29  | 15.58  | 1.49 | 0.67  |
| Q91ZW3_S_Smarca5 | SWI/SNF-re K.IM*AQJER.G                           | 17.44  | 59.35  | 0.29 | 3.40  |
| Q91ZW3_S_Smarca5 | SWI/SNF-re K.IYVGLSK#.M                           | 149.58 | 106.89 | 1.40 | 0.71  |
| Q91ZW3_S_Smarca5 | SWI/SNF-re R.KANYAVDAYFR.E                        | 16.48  | 69.53  | 0.24 | 4.22  |
| Q91ZW3_S_Smarca5 | SWI/SNF-re R.LDSIVIQQGR.L                         | 17.47  | 63.66  | 0.27 | 3.64  |
| Q91ZW3_S_Smarca5 | SWI/SNF-re R.LFELLEK#.E                           | 79.88  | 65.12  | 1.23 | 0.82  |
| Q91ZW3_S_Smarca5 | SWI/SNF-re K.LGFDKENYVDEL.R                       | 14.19  | 48.68  | 0.29 | 3.43  |
| Q91ZW3_S_Smarca5 | SWI/SNF-re R.LLNILM*QLR.K                         | 12.37  | 55.07  | 0.22 | 4.45  |
| Q91ZW3_S_Smarca5 | SWI/SNF-re K.LLTQGFNWNK#.R                        | 55.36  | 46.68  | 1.19 | 0.84  |
| Q91ZW3_S_Smarca5 | SWI/SNF-re K.LRLDSIVIQQGR.L                       | 2.91   | 48.87  | 0.06 | 16.78 |
| Q91ZW3_S_Smarca5 | SWI/SNF-re K.LSEIVR.E                             | 24.46  | 103.09 | 0.24 | 4.22  |
| Q91ZW3_S_Smarca5 | SWI/SNF-re R.LVDQNLNK#.I                          | 235.53 | 209.55 | 1.12 | 0.89  |
| Q91ZW3_S_Smarca5 | SWI/SNF-re K.M*VLDK#.L                            | 34.56  | 30.52  | 1.13 | 0.88  |
| Q91ZW3_S_Smarca5 | SWI/SNF-re R.NFTM*DESSVYVFEDEYREK.Q               | 12.56  | 43.62  | 0.29 | 3.47  |
| Q91ZW3_S_Smarca5 | SWI/SNF-re R.QDSINAYNEPNSTK#.F                    | 40.21  | 35.08  | 1.15 | 0.87  |
| Q91ZW3_S_Smarca5 | SWI/SNF-re K.QNLLSVDGYR.H                         | 18.12  | 64.32  | 0.28 | 3.55  |
| Q91ZW3_S_Smarca5 | SWI/SNF-re R.RTEQEEDELLTESSK.A                    | 60.43  | 81.89  | 0.74 | 1.36  |
| Q91ZW3_S_Smarca5 | SWI/SNF-re R.SPDLPNAAQAQK#.E                      | 42.60  | 42.37  | 1.01 | 0.99  |
| Q91ZW3_S_Smarca5 | SWI/SNF-re K.STLHNW*SEFK#.K                       | 28.24  | 18.66  | 1.51 | 0.66  |
| Q91ZW3_S_Smarca5 | SWI/SNF-re R.TEQEEDELLTESSK#.A                    | 79.62  | 53.08  | 1.50 | 0.67  |
| Q91ZW3_S_Smarca5 | SWI/SNF-re K.TLQTSLLGYMK#.H                       | 63.59  | 44.86  | 1.42 | 0.71  |
| Q91ZW3_S_Smarca5 | SWI/SNF-re K.TLQTSLLGYMK#.H                       | 30.29  | 33.01  | 0.92 | 1.09  |
| Q91ZW3_S_Smarca5 | SWI/SNF-re R.VLIFSOM*TR.L                         | 29.93  | 78.95  | 0.38 | 2.64  |
| Q91ZW3_S_Smarca5 | SWI/SNF-re R.VLIFSOM*TR.L                         | 8.33   | 42.54  | 0.20 | 5.10  |

|                  |                                               |        |        |      |       |
|------------------|-----------------------------------------------|--------|--------|------|-------|
| Q912W3_S_Smarca5 | SWI/SNF-re K.WGRDDIENIAR.E                    | 2.28   | 15.54  | 0.15 | 6.83  |
| Q912W3_S_Smarca5 | SWI/SNF-re R.YKAPFHQLR.I                      | 10.55  | 56.28  | 0.19 | 5.34  |
| Q04692_S_Smarcd1 | SWI/SNF-re K.LISQGTIEESM*LK#.I                | 9.19   | 7.20   | 1.28 | 0.78  |
| Q04692_S_Smarcd1 | SWI/SNF-re K.LKLEQDM*TTVDEADEGSM*PADIATLLK.T  | 2.64   | 3.17   | 0.83 | 1.20  |
| Q920H3_S_Smarcb1 | SWI/SNF-re K.ASEVEILDGNDEK#.Y                 | 14.79  | 11.49  | 1.29 | 0.78  |
| Q920H3_S_Smarcb1 | SWI/SNF-re K.ASEVEILDGNDEK#.Y                 | 32.81  | 21.41  | 1.53 | 0.65  |
| Q920H3_S_Smarcb1 | SWI/SNF-re K.AVSIPEPPYLR.E                    | 18.10  | 75.23  | 0.24 | 4.16  |
| Q920H3_S_Smarcb1 | SWI/SNF-re K.DHGTYTLATSVLLK#.A                | 5.63   | 2.47   | 2.28 | 0.44  |
| Q920H3_S_Smarcb1 | SWI/SNF-re K.FQLEDDEGFY*IGSEVGNLYR.M          | 3.69   | 4.85   | 0.76 | 1.32  |
| Q920H3_S_Smarcb1 | SWI/SNF-re R.GQLSWHQ#.T                       | 30.58  | 19.13  | 1.60 | 0.63  |
| Q920H3_S_Smarcb1 | SWI/SNF-re R.LDM*EIDGQK#.L                    | 22.99  | 16.39  | 1.40 | 0.71  |
| Q920H3_S_Smarcb1 | SWI/SNF-re R.QQIESYPTDSILEDCSDQR.V            | 3.51   | 5.34   | 0.66 | 1.52  |
| Q920H3_S_Smarcb1 | SWI/SNF-re K.TFGQK#PVK#.F                     | 22.38  | 23.04  | 0.97 | 1.03  |
| P97496_S_Smarcc1 | SWI/SNF-co K.AALEEFSR.V                       | 15.05  | 55.45  | 0.27 | 3.68  |
| P97496_S_Smarcc1 | SWI/SNF-co R.FDLQNPZR.M                       | 1.91   | 12.96  | 0.15 | 6.80  |
| P97496_S_Smarcc1 | SWI/SNF-co K.FWESPDTVSQDLSVR.V                | 8.52   | 22.53  | 0.38 | 2.64  |
| P97496_S_Smarcc1 | SWI/SNF-co K.HLAAVEER.K                       | 29.36  | 113.69 | 0.26 | 3.87  |
| P97496_S_Smarcc1 | SWI/SNF-co R.HQGTFTDEK#.S                     | 8.95   | 9.28   | 0.96 | 1.04  |
| P97496_S_Smarcc1 | SWI/SNF-co K.HVTNPAFTK#.L                     | 53.59  | 46.14  | 1.16 | 0.86  |
| P97496_S_Smarcc1 | SWI/SNF-co K.K#VEHEISEGNVATAAAAAASAATK.A      | 12.47  | 13.58  | 0.92 | 1.09  |
| P97496_S_Smarcc1 | SWI/SNF-co K.K#VEHEISEGNVATAAAAAASAATK#.A     | 9.73   | 15.45  | 0.63 | 1.59  |
| P97496_S_Smarcc1 | SWI/SNF-co R.NFM*IDTYR.L                      | 16.50  | 49.06  | 0.34 | 2.97  |
| P97496_S_Smarcc1 | SWI/SNF-co R.NFMIDTYR.L                       | 6.64   | 17.62  | 0.38 | 2.65  |
| P97496_S_Smarcc1 | SWI/SNF-co R.NVEM*FMNIEK#.T                   | 7.28   | 2.81   | 2.59 | 0.39  |
| P97496_S_Smarcc1 | SWI/SNF-co K.SKTPEIYLR.N                      | 18.13  | 53.04  | 0.34 | 2.93  |
| P97496_S_Smarcc1 | SWI/SNF-co K.SLVALLVETQM*K#.K                 | 45.42  | 38.90  | 1.17 | 0.86  |
| P97496_S_Smarcc1 | SWI/SNF-co K.SLVALLVETQM#.K                   | 45.72  | 40.61  | 1.13 | 0.89  |
| P97496_S_Smarcc1 | SWI/SNF-co R.SPOLVPAQQM*LNFPK#.N              | 14.42  | 16.52  | 0.87 | 1.15  |
| P97496_S_Smarcc1 | SWI/SNF-co R.SPOLVPAQQM*LNFPK#.N              | 8.76   | 7.99   | 1.10 | 0.91  |
| P97496_S_Smarcc1 | SWI/SNF-co R.SPOLVPAQQMLNFPK#.N               | 7.63   | 8.61   | 0.89 | 1.13  |
| P97496_S_Smarcc1 | SWI/SNF-co K.TPEIYLR.N                        | 12.63  | 35.76  | 0.35 | 2.83  |
| P97496_S_Smarcc1 | SWI/SNF-co R.VREVEPLELVEAHV.K                 | 12.17  | 41.04  | 0.30 | 3.37  |
| P97496_S_Smarcc1 | SWI/SNF-co K.FWESPDTVSQDLSVR.V                | 3.78   | 9.87   | 0.38 | 2.61  |
| P97496_S_Smarcc1 | SWI/SNF-co K.HLAAVEER.K                       | 8.41   | 32.72  | 0.26 | 3.89  |
| P97496_S_Smarcc1 | SWI/SNF-co R.NFM*IDTYR.L                      | 4.80   | 14.82  | 0.32 | 3.09  |
| P97496_S_Smarcc1 | SWI/SNF-co K.SLVALLVETQM*K#.K                 | 20.10  | 16.24  | 1.24 | 0.81  |
| Q6PDG5_S_Smarcc2 | SWI/SNF-co R.DIGEGNLSTAAAAALAAAVK#.A          | 93.42  | 53.99  | 1.73 | 0.58  |
| Q6PDG5_S_Smarcc2 | SWI/SNF-co R.DIGEGNLSTAAAAALAAAVK#.A          | 40.41  | 21.76  | 1.86 | 0.54  |
| Q6PDG5_S_Smarcc2 | SWI/SNF-co R.EGGGAVEEAKEEISEVPK.K             | 26.45  | 18.58  | 1.42 | 0.70  |
| Q6PDG5_S_Smarcc2 | SWI/SNF-co K.HVSNAPLTK#.L                     | 49.44  | 26.38  | 1.87 | 0.53  |
| Q6PDG5_S_Smarcc2 | SWI/SNF-co K.K#GSPPTYTK#.S                    | 34.31  | 24.81  | 1.38 | 0.72  |
| Q6PDG5_S_Smarcc2 | SWI/SNF-co R.NVEM*FM*TIK#.S                   | 23.55  | 10.06  | 2.34 | 0.43  |
| Q6PDG5_S_Smarcc2 | SWI/SNF-co R.NVEMFM*TIK#.S                    | 9.75   | 5.46   | 1.79 | 0.56  |
| Q6PDG5_S_Smarcc2 | SWI/SNF-co K.SALEEFSK#.M                      | 48.53  | 27.41  | 1.77 | 0.56  |
| Q6PDG5_S_Smarcc2 | SWI/SNF-co K.WILDTDTFNEWM*NEEDYEVSDDKSPVSR.R  | 1.56   | 3.43   | 0.46 | 2.19  |
| Q6PDG5_S_Smarcc2 | SWI/SNF-co K.YIQAEPTNK#.S                     | 42.87  | 24.51  | 1.75 | 0.57  |
| Q6PDG5_S_Smarcc2 | SWI/SNF-co K.YYEAADVTQFDNVR.L                 | 7.97   | 19.56  | 0.41 | 2.45  |
| Q6PDG5_S_Smarcc2 | SWI/SNF-co R.DIGEGNLSTAAAAALAAAVK#.A          | 55.48  | 29.61  | 1.87 | 0.53  |
| Q6PDG5_S_Smarcc2 | SWI/SNF-co R.DIGEGNLSTAAAAALAAAVK#.A          | 21.02  | 14.00  | 1.50 | 0.67  |
| Q6PDG5_S_Smarcc2 | SWI/SNF-co K.K#GSPPTYTK#.S                    | 17.98  | 13.07  | 1.38 | 0.73  |
| Q6PDG5_S_Smarcc2 | SWI/SNF-co R.NVEM*FM*TIK#.S                   | 14.00  | 6.52   | 2.15 | 0.47  |
| Q6PDG5_S_Smarcc2 | SWI/SNF-co R.YDFQNPZR.M                       | 4.29   | 9.90   | 0.43 | 2.31  |
| Q6PDG5_S_Smarcc2 | SWI/SNF-co K.YIQAEPTNK#.S                     | 27.76  | 19.00  | 1.46 | 0.68  |
| Q6PDG5_S_Smarcc2 | SWI/SNF-co K.YYEAADVTQFDNVR.L                 | 5.71   | 14.53  | 0.39 | 2.55  |
| Q61466_S_Smarcd1 | SWI/SNF-re K.FSEIQR.L                         | 3.50   | 14.98  | 0.23 | 4.28  |
| Q61466_S_Smarcd1 | SWI/SNF-re R.LLEDAALSK#.Y                     | 18.92  | 12.66  | 1.49 | 0.67  |
| Q99JR8_S_Smarcd2 | SWI/SNF-re K.ADGDNAGTAGTGGTAAADK#.V           | 16.55  | 13.10  | 1.26 | 0.79  |
| Q99JR8_S_Smarcd2 | SWI/SNF-re K.IHETESINQLK#.T                   | 42.07  | 25.60  | 1.64 | 0.61  |
| Q99JR8_S_Smarcd2 | SWI/SNF-re R.M*PTTQETDGFQVK.R                 | 7.41   | 7.77   | 0.95 | 1.05  |
| Q6P921_S_Smarcd3 | SWI/SNF-re R.LYISNTFNPAKDAEDSDGSIASWELR.V     | 2.52   | 5.49   | 0.46 | 2.18  |
| Q6P921_S_Smarcd3 | SWI/SNF-re R.SAIVQALWQVVK#.T                  | 11.56  | 8.73   | 1.32 | 0.76  |
| Q6P921_S_Smarcd3 | SWI/SNF-re R.TPTTQETDGFQVK#.R                 | 16.11  | 9.61   | 1.68 | 0.60  |
| Q6P921_S_Smarcd3 | SWI/SNF-re K.VM*TDVAGNPEER.R                  | 2.52   | 7.61   | 0.33 | 3.02  |
| Q54941_S_Smarce1 | SWI/SNF-re K.AYHNSPAYLAYINAK#.S               | 11.94  | 9.04   | 1.32 | 0.76  |
| Q54941_S_Smarce1 | SWI/SNF-re R.DLTDEEK#QEYLNEYEAKE#.I           | 5.08   | 5.85   | 0.87 | 1.15  |
| Q54941_S_Smarce1 | SWI/SNF-re R.DLTDEEK#QEYLNEYEAKE#I#EYNESMK#.A | 2.82   | 1.89   | 1.49 | 0.67  |
| Q54941_S_Smarce1 | SWI/SNF-re K.FLESTDSFNELK.R                   | 9.39   | 11.16  | 0.84 | 1.19  |
| Q54941_S_Smarce1 | SWI/SNF-re R.KLEAELLQJER.H                    | 23.38  | 18.86  | 1.24 | 0.81  |
| Q54941_S_Smarce1 | SWI/SNF-re R.K#WVQVKK#.A                      | 19.27  | 22.72  | 0.85 | 1.18  |
| Q54941_S_Smarce1 | SWI/SNF-re R.LGGNPGTNSR.V                     | 3.65   | 17.31  | 0.21 | 4.74  |
| Q54941_S_Smarce1 | SWI/SNF-re K.LWEIGK#.I                        | 32.89  | 22.54  | 1.46 | 0.69  |
| Q54941_S_Smarce1 | SWI/SNF-re R.SQSSM*APEEEQVANK#.A              | 6.64   | 4.41   | 1.51 | 0.66  |
| Q9CU62_S_Smc1a   | Structural r R.AATLAQLEK#.F                   | 115.85 | 84.50  | 1.37 | 0.73  |
| Q9CU62_S_Smc1a   | Structural r K.ADQDRDLLEER.K                  | 3.50   | 63.99  | 0.05 | 18.30 |
| Q9CU62_S_Smc1a   | Structural r R.AFVSM*VYSEGAEDR.T              | 3.78   | 15.39  | 0.25 | 4.07  |
| Q9CU62_S_Smc1a   | Structural r R.AFVSM*VYSEGAEDR.T              | 7.93   | 22.23  | 0.36 | 2.80  |
| Q9CU62_S_Smc1a   | Structural r R.AQVQLQLFK#.L                   | 41.76  | 37.00  | 1.13 | 0.89  |
| Q9CU62_S_Smc1a   | Structural r R.DKFFQETSDFEFAAR.K              | 12.41  | 56.09  | 0.22 | 4.52  |
| Q9CU62_S_Smc1a   | Structural r R.DLTLEENQVKK#.K                 | 42.74  | 40.98  | 1.04 | 0.96  |
| Q9CU62_S_Smc1a   | Structural r R.DLTLEENQVKK#.Y                 | 26.33  | 21.25  | 1.24 | 0.81  |
| Q9CU62_S_Smc1a   | Structural r K.EM*VKAEDTQFNHVR.K              | 2.48   | 11.06  | 0.22 | 4.45  |
| Q9CU62_S_Smc1a   | Structural r K.EVTAIETK#.L                    | 67.80  | 45.92  | 1.48 | 0.68  |
| Q9CU62_S_Smc1a   | Structural r K.FQETSDFEFAAR.K                 | 3.63   | 8.80   | 0.41 | 2.42  |
| Q9CU62_S_Smc1a   | Structural r R.FRPM*DNLSGGEK.T                | 2.61   | 15.07  | 0.17 | 5.77  |
| Q9CU62_S_Smc1a   | Structural r R.GEPETFLPLDYLEVK#PTDEK#.L       | 5.83   | 6.66   | 0.88 | 1.14  |
| Q9CU62_S_Smc1a   | Structural r K.GTM*DDISQEEGSSQEEVSGSQR.T      | 6.99   | 18.65  | 0.37 | 2.67  |
| Q9CU62_S_Smc1a   | Structural r R.HLALNLEK#.S                    | 99.58  | 65.76  | 1.51 | 0.66  |
| Q9CU62_S_Smc1a   | Structural r R.IAAPNMK#.A                     | 38.16  | 26.77  | 1.43 | 0.70  |
| Q9CU62_S_Smc1a   | Structural r R.IAAPNMK#.A                     | 45.49  | 43.40  | 1.05 | 0.95  |
| Q9CU62_S_Smc1a   | Structural r R.IEK#LEEYITTSK#.Q               | 53.46  | 37.98  | 1.41 | 0.71  |
| Q9CU62_S_Smc1a   | Structural r K.IIDETM*AOQLQDLK#.N             | 51.83  | 40.93  | 1.27 | 0.79  |
| Q9CU62_S_Smc1a   | Structural r K.IIDETMAOQLQDLK#.N              | 32.35  | 26.93  | 1.20 | 0.83  |
| Q9CU62_S_Smc1a   | Structural r K.K#DENEIEK#.L                   | 16.04  | 11.47  | 1.40 | 0.72  |
| Q9CU62_S_Smc1a   | Structural r K.K#LEGELETEEVEM*AK#.R           | 17.36  | 13.77  | 1.26 | 0.79  |
| Q9CU62_S_Smc1a   | Structural r K.KLEGELETEEVEM*AK#.R            | 7.32   | 9.26   | 0.79 | 1.26  |
| Q9CU62_S_Smc1a   | Structural r K.KLEEYITTSK#.Q                  | 26.35  | 27.91  | 0.94 | 1.06  |
| Q9CU62_S_Smc1a   | Structural r R.LIGIQLDFEK#.N                  | 51.45  | 41.43  | 1.24 | 0.81  |
| Q9CU62_S_Smc1a   | Structural r K.LIEIENFK#.S                    | 116.79 | 96.15  | 1.21 | 0.82  |
| Q9CU62_S_Smc1a   | Structural r R.LK#YQSQDLEQTK#.T               | 32.87  | 19.57  | 1.68 | 0.60  |
| Q9CU62_S_Smc1a   | Structural r K.LNEQSQVLR.I                    | 26.62  | 95.07  | 0.28 | 3.57  |
| Q9CU62_S_Smc1a   | Structural r K.LREIENQK.R                     | 5.16   | 44.27  | 0.12 | 8.58  |
| Q9CU62_S_Smc1a   | Structural r R.LTEELQEQM*K#.A                 | 60.80  | 45.97  | 1.32 | 0.76  |
| Q9CU62_S_Smc1a   | Structural r R.LTEELQEQM#.A                   | 21.55  | 17.99  | 1.20 | 0.83  |

|                |                                               |        |        |       |       |
|----------------|-----------------------------------------------|--------|--------|-------|-------|
| Q9CU62_Sf5mc1a | Structural r K.LVIDVIR.Y                      | 26.56  | 72.86  | 0.36  | 2.74  |
| Q9CU62_Sf5mc1a | Structural r K.LYHNEVEIEK#.L                  | 110.60 | 86.21  | 1.28  | 0.78  |
| Q9CU62_Sf5mc1a | Structural r R.NFLVFQGAIVESIAM*K#.N           | 27.15  | 21.06  | 1.29  | 0.78  |
| Q9CU62_Sf5mc1a | Structural r K.NM*DAIIVDSEK#.T                | 57.98  | 51.51  | 1.13  | 0.89  |
| Q9CU62_Sf5mc1a | Structural r R.QIIGPFQR.F                     | 16.89  | 44.05  | 0.38  | 2.61  |
| Q9CU62_Sf5mc1a | Structural r K.RLEFENQK.T                     | 13.73  | 60.48  | 0.23  | 4.40  |
| Q9CU62_Sf5mc1a | Structural r R.SGELAQEYDKR.K                  | 9.70   | 29.48  | 0.33  | 3.04  |
| Q9CU62_Sf5mc1a | Structural r K.SGVISGGASDLK#.A                | 165.96 | 92.06  | 1.80  | 0.55  |
| Q9CU62_Sf5mc1a | Structural r K.SKLESELANFGPR.I                | 8.88   | 35.48  | 0.25  | 3.99  |
| Q9CU62_Sf5mc1a | Structural r K.SKLESELANFGPR.I                | 6.82   | 26.34  | 0.26  | 3.86  |
| Q9CU62_Sf5mc1a | Structural r K.SNLM*DAISFVLGEK#.T             | 32.83  | 33.68  | 0.97  | 1.03  |
| Q9CU62_Sf5mc1a | Structural r K.SNLM*DAISFVLGEK#.T             | 21.31  | 15.45  | 1.38  | 0.73  |
| Q9CU62_Sf5mc1a | Structural r R.TALFEIERS.S                    | 27.73  | 80.81  | 0.34  | 2.91  |
| Q9CU62_Sf5mc1a | Structural r K.TVALDGTFLQK#.S                 | 90.87  | 70.80  | 1.28  | 0.78  |
| Q9CU62_Sf5mc1a | Structural r K.VANVYK#.E                      | 60.04  | 48.43  | 1.24  | 0.81  |
| Q9CU62_Sf5mc1a | Structural r R.VIVGSSEYK#.I                   | 147.21 | 123.14 | 1.20  | 0.84  |
| Q9CU62_Sf5mc1a | Structural r K.VLTFDLTK#.Y                    | 34.36  | 25.79  | 1.33  | 0.75  |
| Q9CU62_Sf5mc1a | Structural r K.VLTFDLTK#YPDANPNPNEQ.-         | 38.63  | 29.14  | 1.33  | 0.75  |
| Q9CU62_Sf5mc1a | Structural r K.VLTFDLTK#YPDANPNPNEQ.-         | 23.09  | 19.97  | 1.16  | 0.86  |
| Q9CU62_Sf5mc1a | Structural r K.YPDANPNPNEQ.-                  | 9.93   | 9.93   | 1.00  | 1.00  |
| Q9CU62_Sf5mc1a | Structural r K.YSQSDLEQTK#.T                  | 129.05 | 96.91  | 1.33  | 0.75  |
| Q9CU62_Sf5mc1a | Structural r R.AATLAQLEK#.F                   | 32.87  | 22.76  | 1.44  | 0.69  |
| Q9CU62_Sf5mc1a | Structural r K.ADQDRDLLEER.K                  | 1.12   | 13.59  | 0.08  | 12.08 |
| Q9CU62_Sf5mc1a | Structural r R.AFVSM*VYSEEGAEDR.T             | 2.54   | 9.31   | 0.27  | 3.67  |
| Q9CU62_Sf5mc1a | Structural r R.DKFQETSDFEAFAR.K               | 6.79   | 24.29  | 0.28  | 3.58  |
| Q9CU62_Sf5mc1a | Structural r R.DLTLEENQVK#.K                  | 18.25  | 15.69  | 1.16  | 0.86  |
| Q9CU62_Sf5mc1a | Structural r R.DLTLEENQVK#.Y                  | 10.48  | 4.51   | 2.32  | 0.43  |
| Q9CU62_Sf5mc1a | Structural r K.GTM*DDISQEEGSSQGEESVSGSQR.T    | 2.46   | 8.19   | 0.30  | 3.33  |
| Q9CU62_Sf5mc1a | Structural r R.HLALNLQEK#.S                   | 33.16  | 31.33  | 1.06  | 0.94  |
| Q9CU62_Sf5mc1a | Structural r K.IIDETM*AQQLDLK#.N              | 12.68  | 10.77  | 1.18  | 0.85  |
| Q9CU62_Sf5mc1a | Structural r K.IIDETMAQLQDLK#.N               | 12.97  | 7.22   | 1.80  | 0.56  |
| Q9CU62_Sf5mc1a | Structural r R.LGIQLDFEK#.N                   | 15.92  | 8.23   | 1.93  | 0.52  |
| Q9CU62_Sf5mc1a | Structural r K.LIEINFK#.S                     | 27.18  | 27.55  | 0.99  | 1.01  |
| Q9CU62_Sf5mc1a | Structural r K.LINEQQSVLQR.I                  | 13.37  | 37.42  | 0.36  | 2.80  |
| Q9CU62_Sf5mc1a | Structural r K.LVIDVIR.Y                      | 7.57   | 25.67  | 0.29  | 3.39  |
| Q9CU62_Sf5mc1a | Structural r R.NFLVFQGAIVESIAM*K#.N           | 5.02   | 5.40   | 0.93  | 1.08  |
| Q9CU62_Sf5mc1a | Structural r K.NM*DAIIVDSEK#.T                | 17.35  | 14.10  | 1.23  | 0.81  |
| Q9CU62_Sf5mc1a | Structural r R.SGELAQEYDKR.K                  | 2.64   | 10.64  | 0.25  | 4.03  |
| Q9CU62_Sf5mc1a | Structural r K.SKLESELANFGPR.I                | 1.55   | 8.04   | 0.19  | 5.18  |
| Q9CU62_Sf5mc1a | Structural r K.SNLM*DAISFVLGEK#.T             | 10.66  | 7.91   | 1.35  | 0.74  |
| Q9CU62_Sf5mc1a | Structural r R.TALFEIERS.S                    | 12.91  | 26.07  | 0.49  | 2.02  |
| Q9CU62_Sf5mc1a | Structural r K.TVALDGTFLQK#.S                 | 30.93  | 24.92  | 1.24  | 0.81  |
| Q9CU62_Sf5mc1a | Structural r R.VIVGSSEYK#.I                   | 44.65  | 27.60  | 1.62  | 0.62  |
| Q9CU62_Sf5mc1a | Structural r K.VLTFDLTK#.Y                    | 10.70  | 7.12   | 1.50  | 0.67  |
| Q9CU62_Sf5mc1a | Structural r K.VLTFDLTK#YPDANPNPNEQ.-         | 9.16   | 7.08   | 1.29  | 0.77  |
| Q9CU62_Sf5mc1a | Structural r K.VVQLHEYSSELEK#.L               | 39.95  | 39.55  | 1.01  | 0.99  |
| Q9CU62_Sf5mc1a | Structural r K.YQAVTK#.V                      | 16.86  | 8.71   | 1.94  | 0.52  |
| Q9CU62_Sf5mc1a | Structural r K.YSQSDLEQTK#.T                  | 31.19  | 25.69  | 1.21  | 0.82  |
| Q8CG48_Sf5mc2  | Structural r K.AEEKYEALENK.M                  | 24.00  | 10.81  | 2.22  | 0.45  |
| Q8CG48_Sf5mc2  | Structural r R.AM*NVLTEAER.Y                  | 11.13  | 26.57  | 0.42  | 2.39  |
| Q8CG48_Sf5mc2  | Structural r R.ASNLQDLVYK#.N                  | 86.21  | 54.23  | 1.59  | 0.63  |
| Q8CG48_Sf5mc2  | Structural r K.AYEQJQK#.M                     | 51.50  | 25.87  | 1.99  | 0.50  |
| Q8CG48_Sf5mc2  | Structural r K.DNSTATALEVJAGER.L              | 11.90  | 32.13  | 0.37  | 2.70  |
| Q8CG48_Sf5mc2  | Structural r K.DQDAFEAVK#.K                   | 20.05  | 34.11  | 0.59  | 1.70  |
| Q8CG48_Sf5mc2  | Structural r R.EHASNEQQDLAVNEAIK#.A           | 110.63 | 60.17  | 1.84  | 0.54  |
| Q8CG48_Sf5mc2  | Structural r K.ELQNSMAEDSK#.A                 | 24.33  | 12.22  | 1.99  | 0.50  |
| Q8CG48_Sf5mc2  | Structural r K.ENLTELSSGGQR.S                 | 20.92  | 59.75  | 0.35  | 2.86  |
| Q8CG48_Sf5mc2  | Structural r K.FPNLQFAYK#.D                   | 10.43  | 6.86   | 1.52  | 0.66  |
| Q8CG48_Sf5mc2  | Structural r K.FPNLQFAYK#DPEK#.N              | 35.14  | 22.97  | 1.53  | 0.65  |
| Q8CG48_Sf5mc2  | Structural r K.FQEV#DQVDEL@TK#.E              | 9.48   | 10.45  | 0.91  | 1.10  |
| Q8CG48_Sf5mc2  | Structural r K.FVDGVSTVAR.F                   | 35.91  | 45.01  | 0.80  | 1.25  |
| Q8CG48_Sf5mc2  | Structural r K.GLVASLINVK#.D                  | 84.82  | 33.03  | 2.57  | 0.39  |
| Q8CG48_Sf5mc2  | Structural r K.HLFGQPNAYDFK#.T                | 21.27  | 9.81   | 2.17  | 0.46  |
| Q8CG48_Sf5mc2  | Structural r K.HNLQNNESQLK#.I                 | 50.16  | 27.73  | 1.81  | 0.55  |
| Q8CG48_Sf5mc2  | Structural r K.IK#ELDHHSISK#.H                | 80.50  | 38.32  | 2.10  | 0.48  |
| Q8CG48_Sf5mc2  | Structural r K.I.LATIETDLQK#.K                | 40.33  | 23.27  | 1.73  | 0.58  |
| Q8CG48_Sf5mc2  | Structural r K.IVNLQEVLSENEK#.K               | 35.12  | 16.28  | 2.16  | 0.46  |
| Q8CG48_Sf5mc2  | Structural r K.K#AEEK#YEALENK#.M              | 79.23  | 38.72  | 2.05  | 0.49  |
| Q8CG48_Sf5mc2  | Structural r R.K#DKHETGGK#.L                  | 70.37  | 5.80   | 12.13 | 0.08  |
| Q8CG48_Sf5mc2  | Structural r K.K#N#QALNIAWQK#.V               | 6.78   | 4.46   | 1.52  | 0.66  |
| Q8CG48_Sf5mc2  | Structural r R.LYNVVVDTEVTAK#.H               | 44.06  | 22.03  | 2.00  | 0.50  |
| Q8CG48_Sf5mc2  | Structural r K.M*LSDYDWINAEK#.K               | 28.01  | 18.23  | 1.54  | 0.65  |
| Q8CG48_Sf5mc2  | Structural r K.MLSDYDWINAEK#.H                | 12.45  | 5.70   | 2.19  | 0.46  |
| Q8CG48_Sf5mc2  | Structural r K.QITAQDNIIK#.D                  | 21.96  | 10.65  | 2.06  | 0.48  |
| Q8CG48_Sf5mc2  | Structural r R.SAGELK#EM*QDK#.I               | 8.81   | 4.76   | 1.85  | 0.54  |
| Q8CG48_Sf5mc2  | Structural r K.SIILEGFK#.S                    | 68.14  | 37.27  | 1.83  | 0.55  |
| Q8CG48_Sf5mc2  | Structural r R.SQAASILTK#.F                   | 91.91  | 46.11  | 1.99  | 0.50  |
| Q8CG48_Sf5mc2  | Structural r R.SSYLEYQK#.V                    | 61.40  | 34.67  | 1.77  | 0.56  |
| Q8CG48_Sf5mc2  | Structural r K.TEEGDLQTK#.L                   | 47.10  | 28.19  | 1.67  | 0.60  |
| Q8CG48_Sf5mc2  | Structural r K.TEESEETLK#.S                   | 125.52 | 65.95  | 1.90  | 0.53  |
| Q8CG48_Sf5mc2  | Structural r K.TILEEITPTIQK#.L                | 85.65  | 46.20  | 1.85  | 0.54  |
| Q8CG48_Sf5mc2  | Structural r K.VALGNWTWK#.E                   | 44.19  | 23.81  | 1.86  | 0.54  |
| Q8CG48_Sf5mc2  | Structural r R.VAQNLVGPDVNHVALSLVDYK#PELQK#.G | 11.14  | 7.53   | 1.48  | 0.68  |
| Q8CG48_Sf5mc2  | Structural r K.VLNM*KPPEILSM*IEEAAGTR.M       | 4.23   | 10.55  | 0.40  | 2.50  |
| Q8CG48_Sf5mc2  | Structural r K.VLNM*KPPEILSM*IEEAAGTR.M       | 4.43   | 6.28   | 0.71  | 1.42  |
| Q8CG48_Sf5mc2  | Structural r R.ALEELAGLK#.N                   | 52.22  | 21.53  | 2.43  | 0.41  |
| Q8CG48_Sf5mc2  | Structural r R.ASNLQDLVYK#.N                  | 32.08  | 15.42  | 2.08  | 0.48  |
| Q8CG48_Sf5mc2  | Structural r K.DNSTATALEVJAGER.L              | 5.57   | 14.24  | 0.39  | 2.56  |
| Q8CG48_Sf5mc2  | Structural r R.EHASNEQQDLAVNEAIK#.A           | 38.00  | 15.53  | 2.45  | 0.41  |
| Q8CG48_Sf5mc2  | Structural r K.ELQNSM*AEEDSK#.A               | 5.12   | 2.75   | 1.86  | 0.54  |
| Q8CG48_Sf5mc2  | Structural r K.ENLTELSSGGQR.S                 | 7.14   | 17.78  | 0.40  | 2.49  |
| Q8CG48_Sf5mc2  | Structural r K.FVDGVSTVAR.F                   | 29.77  | 15.09  | 1.97  | 0.51  |
| Q8CG48_Sf5mc2  | Structural r K.GLVASLINVK#.D                  | 32.44  | 19.24  | 1.69  | 0.59  |
| Q8CG48_Sf5mc2  | Structural r K.HNLQNNESQLK#.I                 | 31.75  | 15.81  | 2.01  | 0.50  |
| Q8CG48_Sf5mc2  | Structural r K.I.LATIETDLQK#.K                | 15.42  | 9.97   | 1.55  | 0.65  |
| Q8CG48_Sf5mc2  | Structural r K.IVNLQEVLSENEK#.K               | 15.75  | 9.66   | 1.63  | 0.61  |
| Q8CG48_Sf5mc2  | Structural r K.K#AEEK#YEALENK#.M              | 20.65  | 18.37  | 1.12  | 0.89  |
| Q8CG48_Sf5mc2  | Structural r R.LYNVVVDTEVTAK#.K               | 18.07  | 11.18  | 1.62  | 0.62  |
| Q8CG48_Sf5mc2  | Structural r K.M*LSDYDWINAEK#.H               | 13.23  | 6.62   | 2.00  | 0.50  |
| Q8CG48_Sf5mc2  | Structural r R.SAGELK#EM*QDK#.I               | 3.41   | 1.64   | 2.07  | 0.48  |
| Q8CG48_Sf5mc2  | Structural r K.SIILEGFK#.S                    | 39.53  | 19.12  | 2.07  | 0.48  |
| Q8CG48_Sf5mc2  | Structural r R.SQAASILTK#.F                   | 32.98  | 15.65  | 2.11  | 0.47  |
| Q8CG48_Sf5mc2  | Structural r R.SSYLEYQK#.V                    | 23.76  | 13.15  | 1.81  | 0.55  |

|               |                                         |        |       |      |      |
|---------------|-----------------------------------------|--------|-------|------|------|
| Q8CG48_S1Smc2 | Structural r K.TIEESEETLK#.S            | 60.86  | 31.07 | 1.96 | 0.51 |
| Q8CG48_S1Smc2 | Structural r K.TILEEETPTIQK#.L          | 44.05  | 23.73 | 1.86 | 0.54 |
| Q9CW03_S5mc3  | Structural r K.AELGTDLLSQLSLEDQK#.R     | 11.01  | 10.27 | 1.07 | 0.93 |
| Q9CW03_S5mc3  | Structural r K.AELGTDLLSQLSLEDQK#.R     | 11.20  | 5.86  | 1.91 | 0.52 |
| Q9CW03_S5mc3  | Structural r K.AKDLQDELAGNSEQR.K        | 7.32   | 30.30 | 0.24 | 4.14 |
| Q9CW03_S5mc3  | Structural r R.AK#LDELSAK#.R            | 58.81  | 37.85 | 1.55 | 0.64 |
| Q9CW03_S5mc3  | Structural r K.ALDQVNFVSEQK#.E          | 54.45  | 47.91 | 1.14 | 0.88 |
| Q9CW03_S5mc3  | Structural r R.ALEYTYNQELNETR.A         | 7.92   | 27.62 | 0.29 | 3.49 |
| Q9CW03_S5mc3  | Structural r K.DFVEDTTHG.-              | 80.33  | 80.33 | 1.00 | 1.00 |
| Q9CW03_S5mc3  | Structural r R.DKMEIDIER.Q              | 5.37   | 11.72 | 0.46 | 2.18 |
| Q9CW03_S5mc3  | Structural r K.DLEDTEANK#EK#.N          | 18.30  | 13.50 | 1.36 | 0.74 |
| Q9CW03_S5mc3  | Structural r K.DLQDELAGNSEQR.K          | 10.32  | 24.42 | 0.42 | 2.37 |
| Q9CW03_S5mc3  | Structural r R.DQTIVDPFSSK#.H           | 33.29  | 27.10 | 1.23 | 0.81 |
| Q9CW03_S5mc3  | Structural r R.DSILSEM#K.M              | 18.17  | 12.55 | 1.45 | 0.69 |
| Q9CW03_S5mc3  | Structural r R.DTAYPETNDAIPM*ISK#.L     | 22.40  | 15.51 | 1.44 | 0.69 |
| Q9CW03_S5mc3  | Structural r R.EENAEQQALAAK#.R          | 112.69 | 83.46 | 1.35 | 0.74 |
| Q9CW03_S5mc3  | Structural r R.ELGSLPQEAPEK#.Y          | 80.54  | 69.86 | 1.15 | 0.87 |
| Q9CW03_S5mc3  | Structural r R.EMQQLSGGQK#.S            | 11.06  | 7.69  | 1.44 | 0.70 |
| Q9CW03_S5mc3  | Structural r R.ESLKAELGTDLLSQLSLEDQK.R  | 7.35   | 5.81  | 1.27 | 0.79 |
| Q9CW03_S5mc3  | Structural r R.GSGSQSSVPSVDQFTGVGIR.V   | 9.01   | 34.14 | 0.26 | 3.79 |
| Q9CW03_S5mc3  | Structural r R.GSQFTSKEER.D             | 5.25   | 6.01  | 0.87 | 1.14 |
| Q9CW03_S5mc3  | Structural r R.K.LEGITR.V               | 9.07   | 32.05 | 0.28 | 3.53 |
| Q9CW03_S5mc3  | Structural r K.I.LM*EFNK#.M             | 58.24  | 39.56 | 1.47 | 0.68 |
| Q9CW03_S5mc3  | Structural r K.I.LMEFNK#.M              | 24.61  | 15.79 | 1.56 | 0.64 |
| Q9CW03_S5mc3  | Structural r R.INNEIDQLM*MQM*QQIETQQR.K | 1.68   | 6.75  | 0.25 | 4.03 |
| Q9CW03_S5mc3  | Structural r R.INNEIDQLM*MQM*QQIETQQR.K | 7.44   | 25.85 | 0.29 | 3.48 |
| Q9CW03_S5mc3  | Structural r R.INQMATAPDSQR.L           | 4.20   | 11.79 | 0.36 | 2.81 |
| Q9CW03_S5mc3  | Structural r K.INQM*ATAPDSQR.L          | 18.83  | 61.21 | 0.31 | 3.25 |
| Q9CW03_S5mc3  | Structural r K.ISAMKEEKEQLSAER.Q        | 10.97  | 16.11 | 0.68 | 1.47 |
| Q9CW03_S5mc3  | Structural r R.K#AEEELGLEAK#.L          | 35.09  | 35.21 | 1.00 | 1.00 |
| Q9CW03_S5mc3  | Structural r K.K#DQYFLDK#K#.M           | 52.38  | 41.62 | 1.26 | 0.79 |
| Q9CW03_S5mc3  | Structural r R.K#EESISLM*E              | 38.00  | 22.98 | 1.65 | 0.60 |
| Q9CW03_S5mc3  | Structural r K.KGDVEGSSQSDQEGEGSGESER.G | 5.67   | 19.44 | 0.29 | 3.43 |
| Q9CW03_S5mc3  | Structural r R.K#YEAIQLTFK#.Q           | 26.27  | 24.61 | 1.07 | 0.94 |
| Q9CW03_S5mc3  | Structural r R.K.YEAIQLTFK.Q            | 38.68  | 24.01 | 1.61 | 0.62 |
| Q9CW03_S5mc3  | Structural r R.LAQATQER.T               | 4.31   | 19.24 | 0.22 | 4.46 |
| Q9CW03_S5mc3  | Structural r K.LDQDLNEVK#.A             | 25.35  | 19.57 | 1.30 | 0.77 |
| Q9CW03_S5mc3  | Structural r R.LFYHIVDSDEVSTK#.I        | 101.76 | 80.34 | 1.27 | 0.79 |
| Q9CW03_S5mc3  | Structural r R.LHTEEEKEELAQYQK.W        | 8.70   | 9.01  | 0.97 | 1.04 |
| Q9CW03_S5mc3  | Structural r K.M*NLPGEVTFPLPNK#.L       | 37.51  | 30.11 | 1.25 | 0.80 |
| Q9CW03_S5mc3  | Structural r K.MNLPGEVTFPLPNK#.L        | 30.85  | 21.34 | 1.45 | 0.69 |
| Q9CW03_S5mc3  | Structural r K.NDVM*NLLESAGFSR.S        | 4.48   | 11.76 | 0.38 | 2.63 |
| Q9CW03_S5mc3  | Structural r K.NDVMNLLSAGFSR.S          | 4.88   | 11.24 | 0.43 | 2.30 |
| Q9CW03_S5mc3  | Structural r K.NFSEVFK#.L               | 60.40  | 45.35 | 1.33 | 0.75 |
| Q9CW03_S5mc3  | Structural r K.NLEQYNKLDQDLNEVK.A       | 72.07  | 50.88 | 1.42 | 0.71 |
| Q9CW03_S5mc3  | Structural r R.NLEQYNKLDQDLNEVK#.A      | 13.78  | 8.14  | 1.69 | 0.59 |
| Q9CW03_S5mc3  | Structural r R.SEDLDNSIDKTEAGIK.E       | 26.04  | 19.22 | 1.35 | 0.74 |
| Q9CW03_S5mc3  | Structural r K.SIM*ELM*NVLELR.K         | 2.94   | 11.75 | 0.25 | 4.00 |
| Q9CW03_S5mc3  | Structural r K.SIM*ELMNVLELR.K          | 2.15   | 6.19  | 0.35 | 2.87 |
| Q9CW03_S5mc3  | Structural r K.SLDQAINDK#.K             | 73.81  | 57.42 | 1.29 | 0.78 |
| Q9CW03_S5mc3  | Structural r R.SM*EVSTQLAR.A            | 15.65  | 32.72 | 0.48 | 2.09 |
| Q9CW03_S5mc3  | Structural r R.SMEVSTQLAR.A             | 7.16   | 20.62 | 0.35 | 2.88 |
| Q9CW03_S5mc3  | Structural r R.SNPYYIVK#.Q              | 45.82  | 33.40 | 1.37 | 0.73 |
| Q9CW03_S5mc3  | Structural r R.VDALNDEIR.Q              | 17.10  | 57.44 | 0.30 | 3.36 |
| Q9CW03_S5mc3  | Structural r R.VETYLNENLR.K             | 21.72  | 70.69 | 0.31 | 3.26 |
| Q9CW03_S5mc3  | Structural r K.VSHIDVITAE#AK#.D         | 9.28   | 6.25  | 1.48 | 0.67 |
| Q9CW03_S5mc3  | Structural r K.AILNGIDSINK#.V           | 11.92  | 5.04  | 2.36 | 0.42 |
| Q9CW03_S5mc3  | Structural r K.ALDQVNFVSEQK#.E          | 28.25  | 16.23 | 1.74 | 0.57 |
| Q9CW03_S5mc3  | Structural r R.ALEYTYNQELNETR.A         | 5.26   | 11.32 | 0.46 | 2.15 |
| Q9CW03_S5mc3  | Structural r K.DFVEDTTHG.-              | 33.68  | 33.68 | 1.00 | 1.00 |
| Q9CW03_S5mc3  | Structural r K.DLQDELAGNSEQR.K          | 5.35   | 9.45  | 0.57 | 1.77 |
| Q9CW03_S5mc3  | Structural r R.DQTIVDPFSSK#.H           | 21.55  | 13.94 | 1.55 | 0.65 |
| Q9CW03_S5mc3  | Structural r R.DTAYPETNDAIPM*ISK#.L     | 8.17   | 9.36  | 0.87 | 1.15 |
| Q9CW03_S5mc3  | Structural r R.DTAYPETNDAIPMISK#.L      | 6.83   | 4.35  | 1.57 | 0.64 |
| Q9CW03_S5mc3  | Structural r R.EENAEQQALAAK#.R          | 58.46  | 32.37 | 1.81 | 0.55 |
| Q9CW03_S5mc3  | Structural r R.ELGSLPQEAPEK#.Y          | 28.35  | 22.43 | 1.26 | 0.79 |
| Q9CW03_S5mc3  | Structural r R.GSGSQSSVPSVDQFTGVGIR.V   | 7.11   | 13.86 | 0.51 | 1.95 |
| Q9CW03_S5mc3  | Structural r K.INQM*ATAPDSQR.L          | 15.32  | 44.50 | 0.34 | 2.90 |
| Q9CW03_S5mc3  | Structural r K#AEEELGLEAK#.L            | 21.39  | 21.06 | 1.02 | 0.98 |
| Q9CW03_S5mc3  | Structural r K.K#DQYFLDK#K#.M           | 21.55  | 16.13 | 1.34 | 0.75 |
| Q9CW03_S5mc3  | Structural r K.LDQDLNEVK#.A             | 16.29  | 22.79 | 0.71 | 1.40 |
| Q9CW03_S5mc3  | Structural r R.LFYHIVDSDEVSTK#.I        | 56.13  | 35.71 | 1.57 | 0.64 |
| Q9CW03_S5mc3  | Structural r R.LHTEEEKEELAQYQK#.W       | 34.16  | 25.44 | 1.34 | 0.74 |
| Q9CW03_S5mc3  | Structural r K.M*NLPGEVTFPLPNK#.L       | 19.71  | 15.93 | 1.24 | 0.81 |
| Q9CW03_S5mc3  | Structural r K.NLEQYNKLDQDLNEVK.A       | 37.26  | 22.03 | 1.69 | 0.59 |
| Q9CW03_S5mc3  | Structural r K.SLDQAINDK#.K             | 35.70  | 28.43 | 1.26 | 0.80 |
| Q9CW03_S5mc3  | Structural r R.SYRDQTIQVDPFSSK.H        | 3.93   | 9.16  | 0.43 | 2.33 |
| Q9CW03_S5mc3  | Structural r R.VDALNDEIR.Q              | 8.06   | 25.16 | 0.32 | 3.12 |
| Q8CG47_S1Smc4 | Structural r K.AK#REALITASETK#.E        | 17.85  | 11.15 | 1.60 | 0.62 |
| Q8CG47_S1Smc4 | Structural r R.DTLVANNLDQATR.V          | 10.37  | 28.23 | 0.37 | 2.72 |
| Q8CG47_S1Smc4 | Structural r R.FLILQGEVEQIAMMK#PK#.G    | 9.54   | 3.81  | 2.50 | 0.40 |
| Q8CG47_S1Smc4 | Structural r K.FTQLDLEDVQVR.E           | 8.06   | 18.99 | 0.42 | 2.36 |
| Q8CG47_S1Smc4 | Structural r K.HNIGIATFGLDK#.M          | 13.91  | 9.17  | 1.52 | 0.66 |
| Q8CG47_S1Smc4 | Structural r R.HNTAVSQLSK#.A            | 94.23  | 50.31 | 1.87 | 0.53 |
| Q8CG47_S1Smc4 | Structural r R.IAEITQK#.E               | 58.22  | 22.93 | 2.54 | 0.39 |
| Q8CG47_S1Smc4 | Structural r K.I.FNLSGGEK#.T            | 28.55  | 14.74 | 1.94 | 0.52 |
| Q8CG47_S1Smc4 | Structural r K.I.HEDTK#EITEK#.S         | 4.55   | 3.48  | 1.30 | 0.77 |
| Q8CG47_S1Smc4 | Structural r R.IIDKEGDDYEVLPNSNFVYSR.T  | 9.66   | 15.18 | 0.64 | 1.57 |
| Q8CG47_S1Smc4 | Structural r R.IPGIYGR.L                | 10.58  | 35.56 | 0.30 | 3.36 |
| Q8CG47_S1Smc4 | Structural r R.LDGLGAIDEK#.Y            | 27.37  | 6.03  | 4.54 | 0.22 |
| Q8CG47_S1Smc4 | Structural r R.LM*ITHIVNQNFK#.S         | 7.26   | 5.54  | 1.31 | 0.76 |
| Q8CG47_S1Smc4 | Structural r R.LNEFMAGFYVITNK#.L        | 7.20   | 4.12  | 1.75 | 0.57 |
| Q8CG47_S1Smc4 | Structural r K.LTQEEINLK#.S             | 62.22  | 35.20 | 1.77 | 0.57 |
| Q8CG47_S1Smc4 | Structural r K.NIAIEFTLLENEM*FK#.K      | 13.92  | 9.67  | 1.44 | 0.69 |
| Q8CG47_S1Smc4 | Structural r K.NIEDK#AEVEINNTK#.T       | 32.80  | 22.41 | 1.46 | 0.68 |
| Q8CG47_S1Smc4 | Structural r R.NLLQELK#.V               | 32.46  | 16.51 | 1.97 | 0.51 |
| Q8CG47_S1Smc4 | Structural r R.QAFYALR.D                | 5.56   | 14.21 | 0.39 | 2.55 |
| Q8CG47_S1Smc4 | Structural r K.SLVHDLFQK#.V             | 19.51  | 13.53 | 1.44 | 0.69 |
| Q8CG47_S1Smc4 | Structural r K.SNVDSM*LPVFGYR.A         | 4.01   | 7.05  | 0.57 | 1.76 |
| Q8CG47_S1Smc4 | Structural r K.SNVDSNEM*K#.A            | 18.36  | 9.88  | 1.86 | 0.54 |
| Q8CG47_S1Smc4 | Structural r K.TAETSLEPEIQK#.E          | 18.36  | 28.38 | 1.79 | 0.56 |
| Q8CG47_S1Smc4 | Structural r K.TVINETTR.N               | 18.40  | 47.63 | 0.39 | 2.59 |
| Q8CG47_S1Smc4 | Structural r K.VLDALIQEK#.K             | 59.32  | 34.55 | 1.72 | 0.58 |



|                |                                              |        |       |      |      |
|----------------|----------------------------------------------|--------|-------|------|------|
| Q8CG47_S1Smc4  | Structural r K.VQHEEAVV#L                    | 19.04  | 9.71  | 1.96 | 0.51 |
| Q8CG47_S1Smc4  | Structural r R.VVTLQGIIEQSGTM*SGGSK#V        | 19.03  | 52.87 | 0.36 | 2.78 |
| Q8CG47_S1Smc4  | Structural r R.VVTLQGIIEQSGTM*SGGSK#V        | 9.29   | 7.11  | 1.31 | 0.76 |
| Q8CG47_S1Smc4  | Structural r K.DK#E#VEELK#S                  | 7.58   | 6.47  | 1.17 | 0.85 |
| Q8CG47_S1Smc4  | Structural r R.DSTS#VHISGK#K                 | 40.17  | 21.29 | 1.89 | 0.53 |
| Q8CG47_S1Smc4  | Structural r K.DTEK#EINDLK#TELK#N            | 7.78   | 4.38  | 1.78 | 0.56 |
| Q8CG47_S1Smc4  | Structural r R.DTLVANNLDQATR.V               | 20.06  | 51.70 | 0.39 | 2.58 |
| Q8CG47_S1Smc4  | Structural r K.ELEANVLTAPDR.K                | 7.66   | 17.67 | 0.43 | 2.30 |
| Q8CG47_S1Smc4  | Structural r K.ELM*GFNK#S                    | 39.11  | 21.21 | 1.84 | 0.54 |
| Q8CG47_S1Smc4  | Structural r K.FTQLDLEDVQVR.E                | 15.42  | 30.44 | 0.51 | 1.97 |
| Q8CG47_S1Smc4  | Structural r K.HNIGIATFGLDK#M                | 22.14  | 13.21 | 1.68 | 0.60 |
| Q8CG47_S1Smc4  | Structural r R.HNTAVSQLSK#A                  | 124.65 | 85.85 | 1.45 | 0.69 |
| Q8CG47_S1Smc4  | Structural r R.IAEITQK#E                     | 81.17  | 44.48 | 1.82 | 0.55 |
| Q8CG47_S1Smc4  | Structural r K.IFNLSGGEK#T                   | 60.47  | 27.30 | 2.21 | 0.45 |
| Q8CG47_S1Smc4  | Structural r K.IHEDTK#EITEK#S                | 93.61  | 38.06 | 2.46 | 0.41 |
| Q8CG47_S1Smc4  | Structural r K.IIDKEGDDYEVLPNSNFVSR.T        | 11.09  | 21.41 | 0.52 | 1.93 |
| Q8CG47_S1Smc4  | Structural r R.IPGYGR.L                      | 17.35  | 44.36 | 0.39 | 2.56 |
| Q8CG47_S1Smc4  | Structural r K.IQTPENTPR.L                   | 24.37  | 72.92 | 0.33 | 2.99 |
| Q8CG47_S1Smc4  | Structural r K.K#FNLSGGEK#T                  | 13.56  | 6.34  | 2.14 | 0.47 |
| Q8CG47_S1Smc4  | Structural r R.LIGIYK#T                      | 60.73  | 35.86 | 1.69 | 0.59 |
| Q8CG47_S1Smc4  | Structural r K.LLEENVSVFK#K                  | 41.07  | 26.98 | 1.52 | 0.66 |
| Q8CG47_S1Smc4  | Structural r R.LM*ITHIVNQNF#S                | 28.48  | 13.63 | 2.09 | 0.48 |
| Q8CG47_S1Smc4  | Structural r R.LM*ITHIVNQNF#S                | 10.07  | 7.05  | 1.43 | 0.70 |
| Q8CG47_S1Smc4  | Structural r R.LNEFMAGFYVITNK#L              | 6.31   | 3.45  | 1.83 | 0.55 |
| Q8CG47_S1Smc4  | Structural r K.LPQIQQLK#E                    | 129.00 | 68.37 | 1.89 | 0.53 |
| Q8CG47_S1Smc4  | Structural r K.LTQEEINLK#S                   | 122.97 | 59.76 | 2.06 | 0.49 |
| Q8CG47_S1Smc4  | Structural r R.M*GSSVIDEISVEEVNK#M           | 14.96  | 7.13  | 2.10 | 0.48 |
| Q8CG47_S1Smc4  | Structural r K.NIAIEFLLENEM*FK#K             | 19.89  | 8.58  | 2.32 | 0.43 |
| Q8CG47_S1Smc4  | Structural r K.NIEDK#AEVINNTK#T              | 47.95  | 34.42 | 1.39 | 0.72 |
| Q8CG47_S1Smc4  | Structural r K.NIEDK#AEVINNTK#T              | 24.41  | 16.84 | 1.45 | 0.69 |
| Q8CG47_S1Smc4  | Structural r R.NLQELK#V                      | 72.39  | 42.04 | 1.72 | 0.58 |
| Q8CG47_S1Smc4  | Structural r K.SLVHDLFQK#V                   | 29.07  | 19.74 | 1.47 | 0.68 |
| Q8CG47_S1Smc4  | Structural r K.SLVHDLFQK#VEEAK#S             | 29.95  | 16.40 | 1.83 | 0.55 |
| Q8CG47_S1Smc4  | Structural r K.SNVIDSM*LVFGYR.A              | 7.32   | 7.02  | 1.04 | 0.96 |
| Q8CG47_S1Smc4  | Structural r K.SNVLNEM*#K#A                  | 34.75  | 18.18 | 1.91 | 0.52 |
| Q8CG47_S1Smc4  | Structural r K.TAETSLPEIQK#E                 | 72.84  | 49.92 | 1.46 | 0.69 |
| Q8CG47_S1Smc4  | Structural r K.TVINETTR.N                    | 30.14  | 60.18 | 0.50 | 2.00 |
| Q8CG47_S1Smc4  | Structural r K.VIQENHALQK#D                  | 31.44  | 19.47 | 1.61 | 0.62 |
| Q8CG47_S1Smc4  | Structural r K.VLD#AIOEK#K                   | 80.86  | 51.05 | 1.58 | 0.63 |
| Q8CG47_S1Smc4  | Structural r R.VVTLQGIIEQSGTM*SGGSK#V        | 19.33  | 10.07 | 1.92 | 0.52 |
| Q8CG47_S1Smc4  | Structural r R.VVTLQGIIEQSGTM*SGGSK#V        | 16.21  | 9.24  | 1.76 | 0.57 |
| Q8CG46_S1Smc5  | Structural r R.EVEIQQLTEELQK#K               | 5.44   | 8.11  | 1.67 | 1.49 |
| Q8CG46_S1Smc5  | Structural r K.ELQQLTVK#Q                    | 11.23  | 9.82  | 1.14 | 0.87 |
| Q8CG46_S1Smc5  | Structural r R.EVEIQQLTEELQK#K               | 13.50  | 14.54 | 0.93 | 1.08 |
| Q8CG46_S1Smc5  | Structural r K.IELLEATEK.S                   | 12.45  | 12.63 | 0.99 | 1.01 |
| Q8CG46_S1Smc5  | Structural r R.TSGNLIITR.E                   | 3.37   | 9.30  | 0.36 | 2.76 |
| Q924W5_S5Smc6  | Structural r R.EAFTADGDQVFAGR.Y              | 2.12   | 9.12  | 0.23 | 4.30 |
| Q924W5_S5Smc6  | Structural r R.ELENIEHQSVDIATLEDEAENK#M      | 1.54   | 2.81  | 0.55 | 1.82 |
| Q924W5_S5Smc6  | Structural r K.SAVLTAI#VGLGGK.A              | 9.04   | 10.57 | 0.86 | 1.17 |
| Q924W5_S5Smc6  | Structural r R.DVDEISDLETEENK#K              | 7.70   | 6.02  | 1.28 | 0.78 |
| Q924W5_S5Smc6  | Structural r R.FQI#NIALGSTM*#K#T             | 8.54   | 4.60  | 1.85 | 0.54 |
| Q924W5_S5Smc6  | Structural r R.GQTLPRFPVQTEEDDSAS.-          | 1.89   | 9.32  | 0.20 | 4.94 |
| Q924W5_S5Smc6  | Structural r K.INQLSELADPLKDELNLADSEVDSQKR.G | 4.23   | 14.79 | 0.29 | 3.50 |
| Q924W5_S5Smc6  | Structural r K.SAVLTAI#VGLGGK.A              | 12.44  | 14.01 | 0.89 | 1.13 |
| Q924W5_S5Smc6  | Structural r R.SIETLLIK#N                    | 12.86  | 10.36 | 1.24 | 0.81 |
| Q6P5D8_S1Smcd1 | Structural r K.AHVEGDGVVEGIR.V               | 12.50  | 15.71 | 0.80 | 1.26 |
| Q6P5D8_S1Smcd1 | Structural r R.AYDETQGR.Q                    | 25.13  | 31.09 | 0.81 | 1.24 |
| Q6P5D8_S1Smcd1 | Structural r K.AYNDIPATQQTTHIEALLEK#K        | 120.07 | 37.26 | 3.22 | 0.31 |
| Q6P5D8_S1Smcd1 | Structural r R.EINIPSLAEK#I                  | 18.69  | 5.40  | 3.46 | 0.29 |
| Q6P5D8_S1Smcd1 | Structural r K.FSGLLDSPPR.V                  | 30.79  | 40.57 | 0.76 | 1.32 |
| Q6P5D8_S1Smcd1 | Structural r R.GM*VFGAPVK#Q                  | 28.57  | 11.62 | 2.46 | 0.41 |
| Q6P5D8_S1Smcd1 | Structural r K.HQDEVTVVAGDVIR.N              | 10.96  | 13.89 | 0.79 | 1.27 |
| Q6P5D8_S1Smcd1 | Structural r R.IDFLPHYDVLV#S                 | 50.52  | 18.83 | 2.68 | 0.37 |
| Q6P5D8_S1Smcd1 | Structural r R.IJSGALFNDK#QVSTNK#L           | 45.52  | 11.20 | 4.06 | 0.25 |
| Q6P5D8_S1Smcd1 | Structural r K.ITLEANSQDS#VQOGR.F            | 6.21   | 11.72 | 0.53 | 1.89 |
| Q6P5D8_S1Smcd1 | Structural r K.K#ITEQNELK#K                  | 23.68  | 12.63 | 1.87 | 0.53 |
| Q6P5D8_S1Smcd1 | Structural r K.LGNLYLK#L                     | 56.51  | 17.10 | 3.30 | 0.30 |
| Q6P5D8_S1Smcd1 | Structural r K.LLFDQTKPAVA#VDNGR.G           | 12.02  | 11.94 | 1.01 | 0.99 |
| Q6P5D8_S1Smcd1 | Structural r K.LLLM*DWPELK#E                 | 25.04  | 9.71  | 2.58 | 0.39 |
| Q6P5D8_S1Smcd1 | Structural r R.LSITDNGNHTGM*DLVGT#VATIK#G    | 30.04  | 12.24 | 2.45 | 0.41 |
| Q6P5D8_S1Smcd1 | Structural r R.LSITDNGNHTGMDLVGT#VATIK#G     | 11.18  | 5.69  | 1.96 | 0.51 |
| Q6P5D8_S1Smcd1 | Structural r R.LSSVEDLDNLQQLVHTDMK#K         | 19.36  | 5.88  | 3.29 | 0.30 |
| Q6P5D8_S1Smcd1 | Structural r R.LVSTGTEESVLPFM*FYNDVK#K       | 4.89   | 2.24  | 2.18 | 0.46 |
| Q6P5D8_S1Smcd1 | Structural r K.LTFM*DLEK#L                   | 14.97  | 71.56 | 0.21 | 4.78 |
| Q6P5D8_S1Smcd1 | Structural r K.LVDPDQATPAVSNVR.S             | 18.19  | 29.76 | 0.61 | 1.64 |
| Q6P5D8_S1Smcd1 | Structural r R.NLIFQM*YDEGERINIPSLAEK.I      | 4.46   | 9.37  | 0.48 | 2.10 |
| Q6P5D8_S1Smcd1 | Structural r R.SLNSDISVFGVGGK#Q              | 47.48  | 17.26 | 2.75 | 0.36 |
| Q6P5D8_S1Smcd1 | Structural r K.STIEGPTIK#L                   | 45.02  | 10.13 | 4.44 | 0.23 |
| Q6P5D8_S1Smcd1 | Structural r K.TNILLSQVIVDVLPNQPM*#K#L       | 13.21  | 3.88  | 3.40 | 0.29 |
| Q6P5D8_S1Smcd1 | Structural r R.VNWTPVKN#EHLVQGLLPDQVQPTS#K#D | 29.60  | 14.07 | 2.10 | 0.48 |
| Q6P5D8_S1Smcd1 | Structural r R.VQLVSGPPTK#L                  | 107.61 | 35.35 | 3.04 | 0.33 |
| Q6P2K6_P2Smek1 | Serine/thre R.AESDGLLESK#I                   | 19.93  | 5.20  | 3.84 | 0.26 |
| Q6P2K6_P2Smek1 | Serine/thre K.ALEDVDYVQTFK#G                 | 12.42  | 48.00 | 0.26 | 3.87 |
| Q6P2K6_P2Smek1 | Serine/thre K.SFLFEPVVK#A                    | 13.53  | 5.21  | 2.60 | 0.38 |
| Q6P2K6_P2Smek1 | Serine/thre K.STSQTAIATK#G                   | 10.00  | 3.51  | 2.85 | 0.35 |
| Q6P2K6_P2Smek1 | Serine/thre R.AESDGLLESK#I                   | 20.43  | 5.37  | 3.80 | 0.26 |
| Q6P2K6_P2Smek1 | Serine/thre K.FKHEVIPSIPDLK#Q                | 14.57  | 2.55  | 5.70 | 0.18 |
| Q6P2K6_P2Smek1 | Serine/thre K.SFLFEPVVK#A                    | 16.94  | 3.60  | 4.70 | 0.21 |
| Q6P2K6_P2Smek1 | Serine/thre R.TLVDPENM#LATANK#T              | 6.57   | 2.10  | 3.13 | 0.32 |
| Q922R5_P2Smek2 | Serine/thre K.ALESIEYVQTFK#G                 | 7.03   | 7.46  | 0.94 | 1.06 |
| Q922R5_P2Smek2 | Serine/thre K.SVVQTPASSNVASSK#T              | 11.91  | 1.56  | 7.62 | 0.13 |
| Q8VE18_S#Smg8  | Protein SM K.LYVEAIDGKHEEDLGSPTGELTSK#I      | 5.35   | 4.74  | 1.13 | 0.89 |
| Q8VE18_S#Smg8  | Protein SM K.LYVEAIDGKHEEDLGSPTGELTSK#I      | 14.71  | 3.43  | 4.29 | 0.23 |
| P97801_S#Snn1  | Survival mc K.AAPWTSFLPPPPMP*PGSLGPGK#GLK#F  | 6.73   | 7.59  | 0.89 | 1.13 |
| P97801_S#Snn1  | Survival mc K.AAPWTSFLPPPPMP*PGSLGPGK#GLK#F  | 7.13   | 6.45  | 1.11 | 0.90 |
| P97801_S#Snn1  | Survival mc R.GTQSDSDIWDOTALIK.A             | 5.37   | 4.54  | 1.19 | 0.84 |
| P97801_S#Snn1  | Survival mc K.AAPWTSFLPPPPMP*PGSLGPGK#GLK#F  | 5.19   | 11.45 | 0.45 | 2.21 |
| Q3UKJ7_S#Snu1  | WD40 repe R.DTEM*LATGAQDGK#I                 | 5.68   | 4.85  | 1.17 | 0.85 |
| Q3UKJ7_S#Snu1  | WD40 repe R.GHSSFVNEAFTQDGHYIASSDGTVK#I      | 13.24  | 6.96  | 1.90 | 0.53 |
| Q3UKJ7_S#Snu1  | WD40 repe R.LM*ALLGQALK#W                    | 9.26   | 5.85  | 1.58 | 0.63 |
| Q3UKJ7_S#Snu1  | WD40 repe R.AAI#ALAGEVSVVPPSR.L              | 7.61   | 19.66 | 0.39 | 2.58 |
| Q3UKJ7_S#Snu1  | WD40 repe R.LM*ALLGQALK#W                    | 18.23  | 15.45 | 1.18 | 0.85 |
| Q3UKJ7_S#Snu1  | WD40 repe R.LMALLGQALK#W                     | 8.90   | 6.83  | 1.30 | 0.77 |

|                    |                                                |        |        |      |      |
|--------------------|------------------------------------------------|--------|--------|------|------|
| Q3UKJ7_S8 Smu1     | WD40 repe R.YHLENLLAR.S                        | 9.24   | 18.62  | 0.50 | 2.02 |
| O09044_S1 Snap23   | Synaptosor K.ATWGGDGNPSNVVSK.Q                 | 5.02   | 7.18   | 0.70 | 1.43 |
| O09044_S1 Snap23   | Synaptosor R.LGLAESQDAGIK.T                    | 7.51   | 7.73   | 0.97 | 1.03 |
| Q8R570_S1 Snap47   | Synaptosor R.ELPTGGQEQQLQK#.N                  | 5.84   | 3.51   | 1.66 | 0.60 |
| Q9Z266_S8 Snapin   | SNARE-asso R.AM*LDSGVVPPGSPSK#-                | 4.18   | 2.39   | 1.75 | 0.57 |
| Q9Z266_S8 Snapin   | SNARE-asso K.VALDLDPPYK.K                      | 28.89  | 26.74  | 1.08 | 0.93 |
| Q9Z266_S8 Snapin   | SNARE-asso K.VALDLDPPYK#.L                     | 11.46  | 4.67   | 2.45 | 0.41 |
| Q9Z266_S8 Snapin   | SNARE-asso R.VLVNLLQNAQER.L                    | 10.15  | 23.83  | 0.43 | 2.35 |
| Q78PY7_S8 Snd1     | Staphyloco R.ETDGETPEPFAAEAK#.F                | 22.89  | 3.59   | 6.38 | 0.16 |
| Q78PY7_S8 Snd1     | Staphyloco R.EVEVESM*D#.K#.A                   | 24.12  | 2.96   | 8.15 | 0.12 |
| Q78PY7_S8 Snd1     | Staphyloco R.LEGDNIDQK#.N                      | 25.20  | 4.73   | 5.32 | 0.19 |
| Q78PY7_S8 Snd1     | Staphyloco R.NLPLVQEGEPFEATLFTK#.E             | 16.62  | 4.44   | 3.75 | 0.27 |
| Q78PY7_S8 Snd1     | Staphyloco R.SAYK#P.LLSAEAAK#.Q                | 7.79   | 2.25   | 3.45 | 0.29 |
| Q78PY7_S8 Snd1     | Staphyloco R.VADISGDTQK#.A                     | 31.90  | 12.93  | 2.47 | 0.41 |
| Q78PY7_S8 Snd1     | Staphyloco K.VITEYLNQESAK#.S                   | 28.87  | 4.69   | 6.16 | 0.16 |
| Q78PY7_S8 Snd1     | Staphyloco K.VM*QVLNADAVV#.L                   | 10.71  | 34.54  | 0.31 | 3.23 |
| Q78PY7_S8 Snd1     | Staphyloco K.VMQVLNADAVV#.L                    | 17.50  | 2.33   | 7.52 | 0.13 |
| Q78PY7_S8 Snd1     | Staphyloco R.ETDGETPEPFAAEAK#.F                | 11.40  | 1.89   | 6.03 | 0.17 |
| Q78PY7_S8 Snd1     | Staphyloco R.EVEVESM*D#.K#.A                   | 7.30   | 1.92   | 3.80 | 0.26 |
| Q78PY7_S8 Snd1     | Staphyloco R.VADISGDTQK#.A                     | 22.76  | 11.40  | 2.00 | 0.50 |
| Q78PY7_S8 Snd1     | Staphyloco K.VITEYLNQESAK#.S                   | 13.07  | 2.69   | 4.86 | 0.21 |
| Q9CZ28_S8 Snf8     | Vacuolar-sc K.FAQQDQDLIR.A                     | 3.69   | 8.15   | 0.45 | 2.21 |
| Q9CZ28_S8 Snf8     | Vacuolar-sc R.GTVLAEQQAQM*SK#.Q                | 3.58   | 2.32   | 1.54 | 0.65 |
| Q9CZ28_S8 Snf8     | Vacuolar-sc K.TNLEEFASK#.H                     | 13.59  | 5.27   | 2.58 | 0.39 |
| Q8BIZ6_S8 Snp1     | Smad nucle R.DSQNLQAQEER.D                     | 5.33   | 15.85  | 0.34 | 2.97 |
| Q8BIZ6_S8 Snp1     | Smad nucle K.EKPSFELSGALLETNTFR.G              | 3.70   | 11.70  | 0.32 | 3.16 |
| Q6P4T2_U1 Snrnp200 | U5 small nu K.ADEVLK#.T                        | 30.58  | 18.11  | 1.69 | 0.59 |
| Q6P4T2_U1 Snrnp200 | U5 small nu R.AIFEVLNR.G                       | 9.78   | 19.82  | 0.49 | 2.03 |
| Q6P4T2_U1 Snrnp200 | U5 small nu K.ANSNLVQADR.S                     | 32.15  | 74.63  | 0.43 | 2.32 |
| Q6P4T2_U1 Snrnp200 | U5 small nu R.DEPTEGLVLSGK#.L                  | 118.29 | 65.79  | 1.80 | 0.56 |
| Q6P4T2_U1 Snrnp200 | U5 small nu R.DIDAFVLR.Q                       | 28.83  | 69.22  | 0.42 | 2.40 |
| Q6P4T2_U1 Snrnp200 | U5 small nu K.DTLGFLR.E                        | 10.75  | 30.34  | 0.35 | 2.82 |
| Q6P4T2_U1 Snrnp200 | U5 small nu R.EEEK#LELQK#.L                    | 58.83  | 25.46  | 2.31 | 0.43 |
| Q6P4T2_U1 Snrnp200 | U5 small nu R.EEGVWVVGDAK#.S                   | 63.98  | 29.09  | 2.20 | 0.45 |
| Q6P4T2_U1 Snrnp200 | U5 small nu R.EGSASTEVL.R.T                    | 41.00  | 71.74  | 0.57 | 1.75 |
| Q6P4T2_U1 Snrnp200 | U5 small nu R.EIDLLGQTDTR.Y                    | 14.00  | 33.16  | 0.42 | 2.37 |
| Q6P4T2_U1 Snrnp200 | U5 small nu K.ESIEPSAK#.I                      | 103.92 | 55.00  | 1.89 | 0.53 |
| Q6P4T2_U1 Snrnp200 | U5 small nu R.FQJM*NEIVYK#.I                   | 40.48  | 20.19  | 2.00 | 0.50 |
| Q6P4T2_U1 Snrnp200 | U5 small nu R.FYDDAIVSQK#.K                    | 179.55 | 63.33  | 2.84 | 0.35 |
| Q6P4T2_U1 Snrnp200 | U5 small nu K.GLYFDNSFRPPELQTYVIGTEK.K         | 20.39  | 40.34  | 0.51 | 1.98 |
| Q6P4T2_U1 Snrnp200 | U5 small nu R.GLIEISNAEYENIPIR.H               | 65.63  | 130.59 | 0.50 | 1.99 |
| Q6P4T2_U1 Snrnp200 | U5 small nu K.GNIIISTPEK#.W                    | 79.34  | 36.74  | 2.16 | 0.46 |
| Q6P4T2_U1 Snrnp200 | U5 small nu K.GNIIISTPEKWDILSR.R               | 14.93  | 30.01  | 0.50 | 2.01 |
| Q6P4T2_U1 Snrnp200 | U5 small nu K.GTQVYSEPK#.G                     | 108.26 | 54.63  | 1.98 | 0.50 |
| Q6P4T2_U1 Snrnp200 | U5 small nu K.GVESVDIM*EM*EDEER.N              | 2.27   | 5.90   | 0.39 | 2.60 |
| Q6P4T2_U1 Snrnp200 | U5 small nu R.GWAQLTDK#.T                      | 56.14  | 24.07  | 2.33 | 0.43 |
| Q6P4T2_U1 Snrnp200 | U5 small nu K.GYEEVHPALK#PK#PFGSEQLLPVEK#.L    | 32.92  | 12.30  | 2.68 | 0.37 |
| Q6P4T2_U1 Snrnp200 | U5 small nu R.HLILPEK#.Y                       | 53.44  | 23.84  | 2.24 | 0.45 |
| Q6P4T2_U1 Snrnp200 | U5 small nu R.HLILPEK#PPTLLELQPLVPSALR.N       | 11.32  | 21.43  | 0.53 | 1.89 |
| Q6P4T2_U1 Snrnp200 | U5 small nu R.IASHYITNDTVQTYNQLLKP.LSEIELFR.V  | 9.07   | 14.46  | 0.63 | 1.59 |
| Q6P4T2_U1 Snrnp200 | U5 small nu R.IVALLSSLSNAK#.D                  | 160.43 | 70.51  | 2.28 | 0.44 |
| Q6P4T2_U1 Snrnp200 | U5 small nu K.KADEVLEILK#.T                    | 88.86  | 46.94  | 1.89 | 0.53 |
| Q6P4T2_U1 Snrnp200 | U5 small nu K.KADEVLEILK.T                     | 52.31  | 23.09  | 2.27 | 0.44 |
| Q6P4T2_U1 Snrnp200 | U5 small nu K.KADEVLEILK#TASDDR.E              | 1.99   | 15.42  | 0.13 | 7.73 |
| Q6P4T2_U1 Snrnp200 | U5 small nu R.KGYEVHPALKPKPFGSEQLLPVEK.L       | 13.17  | 25.68  | 0.51 | 1.95 |
| Q6P4T2_U1 Snrnp200 | U5 small nu K.KPVIIVFVPSR.K                    | 14.73  | 33.51  | 0.44 | 2.27 |
| Q6P4T2_U1 Snrnp200 | U5 small nu K.LPDM*LNAEIVLGNVQNAK#.D           | 32.28  | 17.67  | 1.83 | 0.55 |
| Q6P4T2_U1 Snrnp200 | U5 small nu R.M*DTLETM*DLDDQGGALAPR.Q          | 9.98   | 20.44  | 0.49 | 2.05 |
| Q6P4T2_U1 Snrnp200 | U5 small nu K.MEADPELSK#.F                     | 33.49  | 18.11  | 1.85 | 0.54 |
| Q6P4T2_U1 Snrnp200 | U5 small nu K.M*EADPELSK#.F                    | 73.69  | 38.34  | 1.92 | 0.52 |
| Q6P4T2_U1 Snrnp200 | U5 small nu R.M*QLSAEQSDTEILSK#.A              | 55.29  | 26.94  | 2.05 | 0.49 |
| Q6P4T2_U1 Snrnp200 | U5 small nu R.MQLSAEQSDTEILSK#.A               | 17.36  | 28.45  | 0.61 | 1.64 |
| Q6P4T2_U1 Snrnp200 | U5 small nu R.NALLQLTDSQIADVAR.F               | 15.72  | 27.94  | 0.56 | 1.78 |
| Q6P4T2_U1 Snrnp200 | U5 small nu R.NIEM*TOEDVLR.L                   | 36.45  | 83.04  | 0.44 | 2.28 |
| Q6P4T2_U1 Snrnp200 | U5 small nu R.NIEM*TOEDVLR.L                   | 6.86   | 14.86  | 0.46 | 2.16 |
| Q6P4T2_U1 Snrnp200 | U5 small nu K.NQVLVHVHSR.K                     | 11.85  | 21.68  | 0.55 | 1.83 |
| Q6P4T2_U1 Snrnp200 | U5 small nu R.SLQVEYK#.A                       | 77.73  | 40.39  | 1.92 | 0.52 |
| Q6P4T2_U1 Snrnp200 | U5 small nu R.SLVQEM*VGSFGK#.R                 | 92.96  | 37.79  | 2.46 | 0.41 |
| Q6P4T2_U1 Snrnp200 | U5 small nu K.SNSLISIK#.R                      | 105.63 | 43.20  | 2.45 | 0.41 |
| Q6P4T2_U1 Snrnp200 | U5 small nu K.TGNFQVTELGR.I                    | 44.15  | 89.39  | 0.49 | 2.02 |
| Q6P4T2_U1 Snrnp200 | U5 small nu K.VITLTPDFQWDEK#.V                 | 71.99  | 32.41  | 2.22 | 0.45 |
| Q6P4T2_U1 Snrnp200 | U5 small nu R.VFSLSEFK#.N                      | 174.67 | 74.09  | 2.36 | 0.42 |
| Q6P4T2_U1 Snrnp200 | U5 small nu K.VLLTGETSTDLK#.L                  | 219.49 | 99.41  | 2.21 | 0.45 |
| Q6P4T2_U1 Snrnp200 | U5 small nu K.YAQAQFEGFK#.T                    | 194.72 | 91.37  | 2.13 | 0.47 |
| Q6P4T2_U1 Snrnp200 | U5 small nu R.YHVLVNLGK#.K                     | 21.93  | 12.66  | 1.73 | 0.58 |
| Q6P4T2_U1 Snrnp200 | U5 small nu R.YPNIELSEYVVDKDSIR.S              | 6.43   | 15.02  | 0.43 | 2.33 |
| Q6P4T2_U1 Snrnp200 | U5 small nu K.YPPTELLDQLPLVSALR.N              | 4.52   | 11.68  | 0.39 | 2.59 |
| Q8K194_S1 Snrnp27  | U4/U6_U5 s K.VDGSVNAYAINVSK#.R                 | 5.87   | 3.80   | 1.54 | 0.65 |
| Q6PE01_S8 Snrnp40  | U5 small nu R.FVYVWDTTSR.R                     | 16.20  | 63.66  | 0.25 | 3.93 |
| Q6PE01_S8 Snrnp40  | U5 small nu R.GHADSVTLGSLSSEGSYLLSNAM*DNTVR.V  | 7.62   | 17.77  | 0.43 | 2.33 |
| Q6PE01_S8 Snrnp40  | U5 small nu K.GHSGAVM*ELHYNTDGSMM*LFSASTDK#.T  | 7.11   | 3.41   | 2.08 | 0.48 |
| Q6PE01_S8 Snrnp40  | U5 small nu K.GPELPLVPVK#.R                    | 11.55  | 9.60   | 1.20 | 0.83 |
| Q6PE01_S8 Snrnp40  | U5 small nu R.HELLGAAGAGPQAGPQQATPQALLQAGPPR.C | 17.89  | 52.58  | 0.34 | 2.94 |
| Q6PE01_S8 Snrnp40  | U5 small nu K.IFQGNVHFEK#.N                    | 60.18  | 33.97  | 1.77 | 0.56 |
| Q6PE01_S8 Snrnp40  | U5 small nu R.KHGPPELPLVPVK#.R                 | 68.04  | 40.79  | 1.67 | 0.60 |
| Q6PE01_S8 Snrnp40  | U5 small nu K.LPGHAGSINEVAFHPDEPIILSASSDK.R    | 2.38   | 3.32   | 0.72 | 1.40 |
| Q6PE01_S8 Snrnp40  | U5 small nu K.LPGHAGSINEVAFHPDEPIILSASSDK.R    | 2.66   | 5.00   | 0.53 | 1.88 |
| Q6PE01_S8 Snrnp40  | U5 small nu K.TVAVWVDETGER.V                   | 20.09  | 58.02  | 0.35 | 2.89 |
| Q62376_R1 Snrnp70  | U1 small nu R.DPIYPLPLEK#.L                    | 74.65  | 58.01  | 1.29 | 0.78 |
| Q62376_R1 Snrnp70  | U1 small nu R.GGGSGQDNGLEGLGSDGR.D             | 4.47   | 10.14  | 0.44 | 2.27 |
| Q62376_R1 Snrnp70  | U1 small nu R.LGGGLGGTR.R                      | 33.26  | 38.54  | 0.86 | 1.16 |
| Q62376_R1 Snrnp70  | U1 small nu K.M*WDPHNDPNAQGDFAK#.T             | 22.41  | 12.10  | 1.85 | 0.54 |
| Q62376_R1 Snrnp70  | U1 small nu R.VNYDTTESK#.L                     | 43.78  | 19.46  | 2.25 | 0.44 |
| Q62189_S1 Snrnp4   | U1 small nu R.ANHTYINLNNEK#.I                  | 43.54  | 9.32   | 4.67 | 0.21 |
| Q62189_S1 Snrnp4   | U1 small nu K.KAVQGGAAAVVGAQVPPGM*PPM*PQAPR.I  | 1.93   | 3.23   | 0.60 | 1.67 |
| Q62189_S1 Snrnp4   | U1 small nu K.TDSDIK#.M                        | 84.91  | 21.54  | 3.94 | 0.25 |
| P57784_RL Snrnpa1  | U2 small nu K.GGSPAGDVEAIK#.N                  | 45.63  | 23.84  | 1.91 | 0.52 |
| P57784_RL Snrnpa1  | U2 small nu K.GLLQSGQIPGR.E                    | 12.88  | 22.99  | 0.56 | 1.78 |
| P57784_RL Snrnpa1  | U2 small nu K.LTAEIEQAAQYTNNAVR.D              | 3.06   | 9.68   | 0.32 | 3.16 |
| P57784_RL Snrnpa1  | U2 small nu K.NAIANASTLAEVER.L                 | 11.78  | 28.83  | 0.41 | 2.45 |
| P57784_RL Snrnpa1  | U2 small nu K.SLYLSILR.N                       | 4.61   | 13.22  | 0.35 | 2.87 |
| P57784_RL Snrnpa1  | U2 small nu K.GGSPAGDVEAIK#.N                  | 41.55  | 24.34  | 1.71 | 0.59 |
| P57784_RL Snrnpa1  | U2 small nu K.GLLQSGQIPGR.E                    | 16.19  | 26.22  | 0.62 | 1.62 |

|                  |                                                 |        |        |      |       |
|------------------|-------------------------------------------------|--------|--------|------|-------|
| P57784_RL_Snrpa1 | U2 small nu.K.LTAELEEQAAQYTNVAVR.D              | 3.92   | 5.32   | 0.74 | 1.36  |
| P57784_RL_Snrpa1 | U2 small nu.K.LTAELEEQAAQYTNVAVR.D              | 1.82   | 2.99   | 0.61 | 1.65  |
| P57784_RL_Snrpa1 | U2 small nu.K.NAIANASTLAEVER.L                  | 13.72  | 29.97  | 0.46 | 2.18  |
| P27048_RS_Snrpb  | Small nucle R.GENLVSM**TVEGPPPK#.D              | 6.30   | 3.99   | 1.58 | 0.63  |
| P27048_RS_Snrpb  | Small nucle R.FIGTFK#.A                         | 195.91 | 27.73  | 7.06 | 0.14  |
| P27048_RS_Snrpb  | Small nucle R.VLGLVLLR.G                        | 6.56   | 22.80  | 0.29 | 3.48  |
| P27048_RS_Snrpb  | Small nucle R.GENLVSM**TVEGPPPK#.D              | 27.68  | 19.02  | 1.46 | 0.69  |
| P27048_RS_Snrpb  | Small nucle R.GENLVSM**TVEGPPPK#.D              | 20.95  | 27.62  | 0.76 | 1.32  |
| P27048_RS_Snrpb  | Small nucle R.GENLVSM**TVEGPPPKDTGIAR.V         | 23.73  | 54.20  | 0.44 | 2.28  |
| P27048_RS_Snrpb  | Small nucle R.GENLVSM**TVEGPPPKDTGIAR.V         | 17.56  | 82.39  | 0.21 | 4.69  |
| P27048_RS_Snrpb  | Small nucle R.FIGTFK#.A                         | 327.02 | 165.43 | 1.98 | 0.51  |
| P27048_RS_Snrpb  | Small nucle K.RVGLVLLR.G                        | 8.59   | 72.48  | 0.12 | 8.44  |
| P27048_RS_Snrpb  | Small nucle R.VLGLVLLR.G                        | 86.61  | 189.11 | 0.46 | 2.18  |
| P27048_RS_Snrpb  | Small nucle R.VLGLVLLR.G                        | 4.62   | 16.63  | 0.28 | 3.60  |
| Q9CQ17_RL_Snrpb2 | U2 small nu.R.DALQGFK#.I                        | 62.02  | 20.62  | 3.01 | 0.33  |
| Q9CQ17_RL_Snrpb2 | U2 small nu.R.GQAFVIFK#.E                       | 95.31  | 28.12  | 3.39 | 0.30  |
| Q9CQ17_RL_Snrpb2 | U2 small nu.K.TMEQAAAAAN#K                      | 12.27  | 8.93   | 1.37 | 0.73  |
| Q62241_RL_Snrpc  | U1 small nu.K.WM**EEQAQSLDK.T                   | 12.95  | 16.89  | 0.77 | 1.30  |
| Q62241_RL_Snrpc  | U1 small nu.K.WM**EEQAQSLDKTTAAFPQQGK.I         | 6.28   | 7.24   | 0.87 | 1.15  |
| P62315_SA_Snrpd1 | Small nucle R.EPVQLETLSIR.G                     | 3.87   | 11.02  | 0.35 | 2.85  |
| P62315_SA_Snrpd1 | Small nucle K.LSHETVIELK#.N                     | 154.22 | 94.46  | 1.63 | 0.61  |
| P62315_SA_Snrpd1 | Small nucle K.LSHETVIELK#.N                     | 51.45  | 29.71  | 1.73 | 0.58  |
| P62315_SA_Snrpd1 | Small nucle K.NGTQVHGTTGVDVSM*NTHLK.A           | 9.92   | 11.51  | 0.86 | 1.16  |
| P62315_SA_Snrpd1 | Small nucle K.NGTQVHGTTGVDVSMNTHLK#.A           | 9.93   | 3.50   | 2.84 | 0.35  |
| P62315_SA_Snrpd1 | Small nucle K.NREPVQLETLSIR.G                   | 4.03   | 41.56  | 0.10 | 10.31 |
| P62315_SA_Snrpd1 | Small nucle K.NREPVQLETLSIR.G                   | 13.20  | 139.24 | 0.09 | 10.55 |
| P62315_SA_Snrpd1 | Small nucle K.LSHETVIELK#.N                     | 26.28  | 24.24  | 1.08 | 0.92  |
| P62315_SA_Snrpd1 | Small nucle K.NREPVQLETLSIR.G                   | 2.22   | 31.15  | 0.07 | 14.04 |
| P62317_SA_Snrpd2 | Small nucle R.EEEFNTPGLSVLTQSVK#.N              | 38.23  | 24.10  | 1.59 | 0.63  |
| P62317_SA_Snrpd2 | Small nucle R.EEEFNTPGLSVLTQSVK#.N              | 25.27  | 20.74  | 1.22 | 0.82  |
| P62317_SA_Snrpd2 | Small nucle K.EM**WTEVPK#.S                     | 62.04  | 40.11  | 1.55 | 0.65  |
| P62317_SA_Snrpd2 | Small nucle R.GDSVIVVLR.N                       | 68.26  | 138.21 | 0.49 | 2.02  |
| P62317_SA_Snrpd2 | Small nucle K.M*FLRGDSVIVVLR.N                  | 3.85   | 17.96  | 0.21 | 4.67  |
| P62317_SA_Snrpd2 | Small nucle R.NPLIAGK#.-                        | 389.18 | 252.79 | 1.54 | 0.65  |
| P62317_SA_Snrpd2 | Small nucle K.REEEFNTPGLSVLTQSVK.N              | 71.89  | 125.23 | 0.57 | 1.74  |
| P62317_SA_Snrpd2 | Small nucle K.SEMTPEELQK#.R                     | 59.12  | 42.98  | 1.38 | 0.73  |
| P62317_SA_Snrpd2 | Small nucle K.SEMTPEELQK#.R                     | 175.76 | 97.73  | 1.80 | 0.56  |
| P62317_SA_Snrpd2 | Small nucle K.SEMTPEELQK#.E                     | 3.14   | 6.93   | 0.45 | 2.20  |
| P62317_SA_Snrpd2 | Small nucle K.SEMTPEELQKREEEFNTPGLSVLTQSVK.N    | 11.67  | 18.52  | 0.63 | 1.59  |
| P62317_SA_Snrpd2 | Small nucle K.SEMTPEELQKREEEFNTPGLSVLTQSVK.N    | 1.92   | 4.91   | 0.39 | 2.56  |
| P62317_SA_Snrpd2 | Small nucle K.SEMTPEELQKREEEFNTPGLSVLTQSVK.N    | 3.01   | 6.52   | 0.46 | 2.17  |
| P62317_SA_Snrpd2 | Small nucle R.EEEFNTPGLSVLTQSVK#.N              | 3.55   | 4.76   | 0.75 | 1.34  |
| P62317_SA_Snrpd2 | Small nucle R.NPLIAGK#.-                        | 33.87  | 22.99  | 1.47 | 0.68  |
| P62317_SA_Snrpd2 | Small nucle K.REEEFNTPGLSVLTQSVK.N              | 2.48   | 8.23   | 0.30 | 3.32  |
| P62317_SA_Snrpd2 | Small nucle K.SEMTPEELQK#.R                     | 15.62  | 16.23  | 0.96 | 1.04  |
| P62320_SA_Snrpd3 | Small nucle R.FLILPDM*LK#.N                     | 308.18 | 188.82 | 1.63 | 0.61  |
| P62320_SA_Snrpd3 | Small nucle R.FLILPDM*LK#.N                     | 143.88 | 81.59  | 1.76 | 0.57  |
| P62320_SA_Snrpd3 | Small nucle R.VAQLEQYIR.G                       | 107.95 | 279.27 | 0.39 | 2.59  |
| P62320_SA_Snrpd3 | Small nucle R.FLILPDM*LK#.N                     | 32.68  | 24.75  | 1.32 | 0.76  |
| P62320_SA_Snrpd3 | Small nucle R.VAQLEQYIR.G                       | 11.37  | 47.32  | 0.24 | 4.16  |
| P62305_RL_Snrpe  | Small nucle K.GDNITLQSVN.-                      | 7.02   | 7.02   | 1.00 | 1.00  |
| P62305_RL_Snrpe  | Small nucle K.VM**VQPINLIFR.Y                   | 3.64   | 10.84  | 0.34 | 2.98  |
| P62305_RL_Snrpe  | Small nucle K.GDNITLQSVN.-                      | 87.42  | 87.42  | 1.00 | 1.00  |
| P62305_RL_Snrpe  | Small nucle R.IM*LK#GDNITLQSVN.-                | 38.45  | 22.72  | 1.69 | 0.59  |
| P62305_RL_Snrpe  | Small nucle R.IM*LK#GDNITLQSVN.-                | 7.28   | 3.10   | 2.35 | 0.43  |
| P62305_RL_Snrpe  | Small nucle R.IQVWLVQVNM*RI                     | 4.80   | 15.56  | 0.31 | 3.24  |
| P62305_RL_Snrpe  | Small nucle K.VM**VQPINLIFR.Y                   | 118.47 | 302.96 | 0.39 | 2.56  |
| P62305_RL_Snrpe  | Small nucle K.VM**VQPINLIFR.Y                   | 18.32  | 49.37  | 0.37 | 2.69  |
| P62305_RL_Snrpe  | Small nucle K.GDNITLQSVN.-                      | 14.81  | 14.81  | 1.00 | 1.00  |
| P62305_RL_Snrpe  | Small nucle K.VM**VQPINLIFR.Y                   | 11.22  | 42.17  | 0.27 | 3.76  |
| P62305_RL_Snrpe  | Small nucle K.VM**VQPINLIFR.Y                   | 7.21   | 25.30  | 0.29 | 3.51  |
| P62305_RL_Snrpe  | Small nucle K.VM**VQPINLIFR.Y                   | 1.91   | 7.92   | 0.24 | 4.16  |
| P62307_RL_Snrpf  | Small nucle R.GVEEEEDGEM*RE.-                   | 14.63  | 31.16  | 0.47 | 2.13  |
| P62307_RL_Snrpf  | Small nucle R.GVEEEEDGEM*RE.-                   | 5.02   | 13.77  | 0.36 | 2.74  |
| P62307_RL_Snrpf  | Small nucle R.GVEEEEDGEM*RE.-                   | 4.05   | 15.78  | 0.26 | 3.90  |
| P62309_RL_Snrpg  | Small nucle R.GNSIIM*LEALER.V                   | 10.72  | 29.81  | 0.36 | 2.78  |
| P62309_RL_Snrpg  | Small nucle R.GNSIIM*LEALER.V                   | 3.17   | 7.97   | 0.40 | 2.52  |
| P62309_RL_Snrpg  | Small nucle R.GNSIIM*LEALER.V                   | 7.50   | 11.35  | 0.66 | 1.51  |
| P62309_RL_Snrpg  | Small nucle R.GNSIIM*LEALER.V                   | 11.72  | 25.73  | 0.46 | 2.20  |
| Q61234_SA_Snta1  | Alpha-1-syr R.HGVDTHLFSVESQELAAWTR.Q            | 2.06   | 3.86   | 0.53 | 1.88  |
| Q61234_SA_Snta1  | Alpha-1-syr K.#ADAGGLGSIK#.G                    | 7.81   | 3.63   | 2.15 | 0.46  |
| Q61235_SA_Sntb2  | Beta-2-synt K.K.#PSLVSLPWEGASPOSPFSGSEDSGSPK#.H | 1.89   | 2.69   | 0.70 | 1.42  |
| Q61235_SA_Sntb2  | Beta-2-synt R.SP#SLGDLTAFATR.T                  | 2.39   | 5.54   | 0.43 | 2.32  |
| Q61235_SA_Sntb2  | Beta-2-synt K.K.#PSLVSLPWEGASPOSPFSGSEDSGSPK#.H | 4.61   | 3.06   | 1.51 | 0.66  |
| Q9CSN1_SA_Snw1   | SNW doma R.GREGVQFEEDPFLDKFLLEAK.Q              | 1.29   | 9.39   | 0.14 | 7.25  |
| Q9CSN1_SA_Snw1   | SNW doma K.LAEALYADR.K                          | 6.85   | 35.66  | 0.19 | 5.21  |
| Q9CSN1_SA_Snw1   | SNW doma K.LAEALYADR.K                          | 7.38   | 26.45  | 0.28 | 3.59  |
| Q9CSN1_SA_Snw1   | SNW doma R.LLEDFGDGGAFPEIHVAQYPLDM*GR.K         | 5.38   | 18.28  | 0.29 | 3.40  |
| Q9CSN1_SA_Snw1   | SNW doma R.LLEDFGDGGAFPEIHVAQYPLDM*GR.K         | 2.97   | 13.85  | 0.21 | 4.66  |
| Q9CSN1_SA_Snw1   | SNW doma K.M*SNALAIQVDEPGK#.I                   | 22.71  | 24.81  | 0.92 | 1.09  |
| Q9CSN1_SA_Snw1   | SNW doma K.MSNALAIQVDEPGK#.I                    | 9.95   | 9.78   | 1.02 | 0.98  |
| Q9CSN1_SA_Snw1   | SNW doma R.SLQTSLVSSR.R                         | 13.92  | 53.30  | 0.26 | 3.83  |
| Q9CSN1_SA_Snw1   | SNW doma R.TSNEVQYDQR.L                         | 10.46  | 42.31  | 0.25 | 4.04  |
| Q9CSN1_SA_Snw1   | SNW doma K.VAAAMPV.R                            | 5.84   | 24.20  | 0.24 | 4.15  |
| Q9CSN1_SA_Snw1   | SNW doma K.YTDLVPK#.E                           | 17.53  | 205.41 | 0.09 | 11.72 |
| Q9CSN1_SA_Snw1   | SNW doma R.YTPSQQGVAFNSGAK.Q                    | 60.37  | 63.93  | 0.94 | 1.06  |
| Q9CSN1_SA_Snw1   | SNW doma R.DISEVIALGVNPR.T                      | 5.39   | 12.61  | 0.43 | 2.34  |
| Q9CSN1_SA_Snw1   | SNW doma K.LAEALYADR.K                          | 45.52  | 22.61  | 2.01 | 0.50  |
| Q9CSN1_SA_Snw1   | SNW doma R.LLEDFGDGGAFPEIHVAQYPLDM*GR.K         | 3.10   | 10.28  | 0.30 | 3.31  |
| Q9CSN1_SA_Snw1   | SNW doma R.LLEDFGDGGAFPEIHVAQYPLDM*GR.K         | 2.11   | 9.48   | 0.22 | 4.48  |
| Q9CSN1_SA_Snw1   | SNW doma K.M*SNALAIQVDEPGK#.I                   | 6.79   | 9.24   | 0.73 | 1.36  |
| Q9CSN1_SA_Snw1   | SNW doma R.SLQTSLVSSR.R                         | 19.70  | 50.19  | 0.39 | 2.55  |
| Q9CSN1_SA_Snw1   | SNW doma R.TSNEVQYDQR.L                         | 5.75   | 16.22  | 0.35 | 2.82  |
| Q9WV80_SA_Snx1   | Sorting nex R.ALSQLAEVEEK#.I                    | 54.08  | 23.65  | 2.29 | 0.44  |
| Q9WV80_SA_Snx1   | Sorting nex R.AVGTQALSAGLLK#.M                  | 69.76  | 29.44  | 2.37 | 0.42  |
| Q9WV80_SA_Snx1   | Sorting nex K.EDSSSAEFLEK#.R                    | 18.27  | 4.86   | 3.76 | 0.27  |
| Q9WV80_SA_Snx1   | Sorting nex K.ELALNTALFAK#.S                    | 31.15  | 15.15  | 2.06 | 0.49  |
| Q9WV80_SA_Snx1   | Sorting nex R.FSDFLGLYEK#.L                     | 26.86  | 12.95  | 2.07 | 0.48  |
| Q9WV80_SA_Snx1   | Sorting nex K.IGDGM*NAYVAYK#.V                  | 12.87  | 8.09   | 1.59 | 0.63  |
| Q9WV80_SA_Snx1   | Sorting nex R.LLWANK#PDK#.L                     | 12.96  | 6.41   | 2.02 | 0.49  |
| Q9WV80_SA_Snx1   | Sorting nex K.M*NESDIWFEEK#.L                   | 11.95  | 4.87   | 2.45 | 0.41  |
| Q9WV80_SA_Snx1   | Sorting nex K.SLAM*LGSEDNALSR.A                 | 4.29   | 10.40  | 0.41 | 2.42  |
| Q9WV80_SA_Snx1   | Sorting nex K.VGK#EDSSSAEFLEK#.R                | 7.60   | 3.69   | 2.06 | 0.49  |

|                |                                                               |        |        |      |       |
|----------------|---------------------------------------------------------------|--------|--------|------|-------|
| Q9WV80_S5nx1   | Sorting nex R.WQDAQATLQK#.K                                   | 51.59  | 21.28  | 2.42 | 0.41  |
| Q9WV80_S5nx1   | Sorting nex K.YWEAFLEPEAK#.A                                  | 54.25  | 18.14  | 2.99 | 0.33  |
| Q9WV80_S5nx1   | Sorting nex R.ALSQLAEEVEK#.I                                  | 7.89   | 3.62   | 2.18 | 0.46  |
| Q9WV80_S5nx1   | Sorting nex R.AVGTOQLSGAGLLK#.M                               | 7.82   | 4.72   | 1.66 | 0.60  |
| Q9WV80_S5nx1   | Sorting nex R.FSDFLGLYEK#.L                                   | 8.52   | 3.60   | 2.37 | 0.42  |
| Q9WV80_S5nx1   | Sorting nex K.M*NESDIWFEEK#.L                                 | 1.85   | 2.17   | 0.85 | 1.17  |
| Q9WV80_S5nx1   | Sorting nex K.SLAM*LGSSSEDNTALSR.A                            | 1.28   | 4.23   | 0.30 | 3.31  |
| Q9WV80_S5nx1   | Sorting nex R.ALSQLAEEVEK#.I                                  | 97.72  | 27.29  | 3.58 | 0.28  |
| Q9WV80_S5nx1   | Sorting nex R.AVGTOQLSGAGLLK#.M                               | 39.62  | 16.84  | 2.35 | 0.42  |
| Q9WV80_S5nx1   | Sorting nex K.ELALNTALFAK#.S                                  | 24.02  | 10.38  | 2.31 | 0.43  |
| Q9WV80_S5nx1   | Sorting nex R.FSDFLGLYEK#.L                                   | 24.19  | 12.61  | 1.92 | 0.52  |
| Q9WV80_S5nx1   | Sorting nex K.SLAM*LGSSSEDNTALSR.A                            | 3.62   | 6.36   | 0.57 | 1.76  |
| Q9WV80_S5nx1   | Sorting nex K.VGK#EDSSAEFLK#.R                                | 18.77  | 8.05   | 2.33 | 0.43  |
| Q9WV80_S5nx1   | Sorting nex R.WQDAQATLQK#.K                                   | 21.76  | 7.12   | 3.05 | 0.33  |
| Q9WV80_S5nx1   | Sorting nex K.YWEAFLEPEAK#.A                                  | 45.57  | 17.82  | 2.56 | 0.39  |
| Q9WV80_S5nx1   | Sorting nex R.ALSQLAEEVEK#.I                                  | 14.20  | 4.54   | 3.13 | 0.32  |
| O70493_S15nx12 | Sorting nex R.GDEGIFEEFIEER.R                                 | 6.46   | 18.13  | 0.36 | 2.81  |
| O70493_S15nx12 | Sorting nex R.LNSKPDQTDAYGPPSNFLEIDIFNPQTGVGVR.A              | 2.40   | 13.76  | 0.17 | 5.74  |
| O70493_S15nx12 | Sorting nex R.RLNSKPDQTDAYGPPSNFLEIDIFNPQTGVGVR.A             | 1.71   | 10.75  | 0.16 | 6.28  |
| O70493_S15nx12 | Sorting nex R.RQGLEQFINK.I                                    | 10.07  | 29.96  | 0.34 | 2.98  |
| O70493_S15nx12 | Sorting nex R.TNLPIFK#.L                                      | 48.92  | 47.54  | 1.03 | 0.97  |
| O70493_S15nx12 | Sorting nex R.YSDFEWLK#.N                                     | 5.89   | 4.36   | 1.35 | 0.74  |
| O70493_S15nx12 | Sorting nex R.YSDFEWLKNELER.D                                 | 7.00   | 34.84  | 0.20 | 4.98  |
| Q8BVL3_S5nx17  | Sorting nex K.VLTVLTSDDQTEVLEAFAK#.L                          | 7.55   | 5.30   | 1.42 | 0.70  |
| Q8C788_Q15nx18 | Sorting nex K.SGGAEAFVLEASGFVK#.D                             | 9.29   | 6.97   | 1.33 | 0.75  |
| Q8C788_Q15nx18 | Sorting nex R.APEPGPPADGGPGAPAR.Y                             | 2.81   | 19.22  | 0.15 | 6.83  |
| Q8C788_Q15nx18 | Sorting nex R.GLFPASYVQVIR.A                                  | 8.62   | 28.00  | 0.31 | 3.25  |
| Q8C788_Q15nx18 | Sorting nex K.SENPGEISLR.E                                    | 6.28   | 24.58  | 0.26 | 3.91  |
| Q8C788_Q15nx18 | Sorting nex K.SGGAEAFVLEASGFVK#.D                             | 21.79  | 16.70  | 1.30 | 0.77  |
| Q9CWX8_S5nx2   | Sorting nex R.AVNTQALSGAGILR.M                                | 14.58  | 19.30  | 0.76 | 1.32  |
| Q9CWX8_S5nx2   | Sorting nex K.EDSSSTEFVEK#.R                                  | 15.00  | 2.73   | 5.49 | 0.18  |
| Q9CWX8_S5nx2   | Sorting nex R.ELLSSESPAVTPVTTIAPR.I                           | 6.48   | 16.92  | 0.38 | 2.61  |
| Q9CWX8_S5nx2   | Sorting nex K.M*NESDAWFEK#.Q                                  | 17.39  | 3.30   | 5.27 | 0.19  |
| Q9CWX8_S5nx2   | Sorting nex K.VGK#EDSSSTEFVEK#.R                              | 27.25  | 5.94   | 4.59 | 0.22  |
| Q9CWX8_S5nx2   | Sorting nex K.WEDAQTLK#.K                                     | 33.88  | 6.96   | 4.87 | 0.21  |
| Q9CWX8_S5nx2   | Sorting nex K.YLESVYQQQLK#.Y                                  | 21.67  | 5.85   | 3.71 | 0.27  |
| Q78ZM0_Q5nx3   | Sorting nex R.FTTYEIR.V                                       | 11.60  | 64.49  | 0.18 | 5.56  |
| Q78ZM0_Q5nx3   | Sorting nex R.GDDGIFDDNFIEER.K                                | 10.08  | 45.98  | 0.22 | 4.56  |
| Q78ZM0_Q5nx3   | Sorting nex R.K#QGLEQFINK#.V                                  | 56.08  | 56.74  | 0.99 | 1.01  |
| Q78ZM0_Q5nx3   | Sorting nex R.K#QGLEQFINK#.V                                  | 67.63  | 60.11  | 1.13 | 0.89  |
| Q78ZM0_Q5nx3   | Sorting nex R.QLFRGGDDGIFDDNFIEER.K                           | 2.49   | 29.32  | 0.09 | 11.76 |
| Q78ZM0_Q5nx3   | Sorting nex R.VKTNLPIFK#.L                                    | 6.48   | 5.27   | 1.23 | 0.81  |
| Q78ZM0_Q5nx3   | Sorting nex R.YSDFEWLR.S                                      | 14.89  | 73.08  | 0.20 | 4.91  |
| Q91Y12_SN5nx4  | Sorting nex R.DK#IFYSFLTOEGNWK#.E                             | 8.26   | 3.41   | 2.42 | 0.41  |
| Q91Y12_SN5nx4  | Sorting nex K.ETVNETGFQLK#.A                                  | 39.35  | 16.64  | 2.37 | 0.42  |
| Q91Y12_SN5nx4  | Sorting nex R.HYSDLEQVISHLLR.V                                | 15.82  | 24.48  | 0.65 | 1.55  |
| Q91Y12_SN5nx4  | Sorting nex K.IFYSFLTQEGNWK#.E                                | 11.66  | 5.56   | 2.10 | 0.48  |
| Q91Y12_SN5nx4  | Sorting nex R.K#HELMLQYDLETAQDLAAK#.K                         | 9.49   | 4.53   | 2.10 | 0.48  |
| Q91Y12_SN5nx4  | Sorting nex K.LFGQETPEQR.E                                    | 14.70  | 23.95  | 0.61 | 1.63  |
| Q91Y12_SN5nx4  | Sorting nex K.LLQPGPLEPLGGPVALEAAVGEENEGTREDGSGVDTM*GGNFWLK.K | 1.90   | 5.20   | 0.37 | 2.73  |
| Q91Y12_SN5nx4  | Sorting nex K.LSADNM*DPDFVER.R                                | 4.70   | 12.83  | 0.37 | 2.73  |
| Q91Y12_SN5nx4  | Sorting nex R.NAVNMQYDTYAVLETR.S                              | 2.71   | 2.43   | 1.12 | 0.89  |
| Q91Y12_SN5nx4  | Sorting nex R.NYLVYYPHVVPPLPEK#.R                             | 9.53   | 7.85   | 1.21 | 0.82  |
| Q91Y12_SN5nx4  | Sorting nex R.VGLEFLLR.V                                      | 18.59  | 37.54  | 0.50 | 2.02  |
| Q91Y12_SN5nx4  | Sorting nex K.LEEQINEGEQQLK#.S                                | 51.00  | 20.90  | 2.44 | 0.41  |
| Q9D8U8_S15nx5  | Sorting nex K.ALIODYENSNK#.A                                  | 32.44  | 12.91  | 2.51 | 0.40  |
| Q9D8U8_S15nx5  | Sorting nex K.EVDDFFEQEK#.N                                   | 34.96  | 9.88   | 3.54 | 0.28  |
| Q9D8U8_S15nx5  | Sorting nex K.LGEGEGSM*TK#.E                                  | 7.29   | 3.47   | 2.10 | 0.48  |
| Q9D8U8_S15nx5  | Sorting nex K.LGEGEGSM*TK#.E                                  | 15.66  | 6.83   | 2.29 | 0.44  |
| Q9D8U8_S15nx5  | Sorting nex K.M*QLEAEYLAVFK#.K                                | 12.35  | 7.91   | 1.56 | 0.64  |
| Q9D8U8_S15nx5  | Sorting nex K.SADEVLSGVK#.E                                   | 41.24  | 20.68  | 1.99 | 0.50  |
| Q9D8U8_S15nx5  | Sorting nex K.TLSTFQSPFVSVTR.Q                                | 17.81  | 32.18  | 0.55 | 1.81  |
| Q9D8U8_S15nx5  | Sorting nex K.TVSTHEVFLQR.L                                   | 3.67   | 8.65   | 0.42 | 2.35  |
| Q9D8U8_S15nx5  | Sorting nex K.VAELEK#.L                                       | 38.73  | 13.62  | 2.84 | 0.35  |
| Q9D8U8_S15nx5  | Sorting nex R.YYMLNIEAAK#.D                                   | 17.74  | 5.83   | 3.04 | 0.33  |
| Q6P8X1_S15nx6  | Sorting nex K.LGEGEGSM*TK#EEFTK#.M                            | 13.24  | 2.70   | 4.90 | 0.20  |
| Q6P8X1_S15nx6  | Sorting nex K.M*QLEAEYLAIFK#.K                                | 19.48  | 4.39   | 4.44 | 0.23  |
| Q6P8X1_S15nx6  | Sorting nex K.NLVELAELEK#.H                                   | 67.65  | 19.52  | 3.47 | 0.29  |
| Q6P8X1_S15nx6  | Sorting nex K.SADGVIVSGVK#.D                                  | 50.76  | 22.54  | 2.25 | 0.44  |
| Q6P8X1_S15nx6  | Sorting nex R.SLVYDENANK#.A                                   | 67.21  | 23.25  | 2.89 | 0.35  |
| Q6P8X1_S15nx6  | Sorting nex R.VSAEDELK#.L                                     | 60.85  | 16.73  | 3.64 | 0.27  |
| Q6P8X1_S15nx6  | Sorting nex K.NLVELAELEK#.H                                   | 7.84   | 1.27   | 6.18 | 0.16  |
| F8W130_F85nx7  | Sorting nex K.GKHLEAHPILLPPLPEK#.F                            | 17.49  | 8.99   | 1.94 | 0.51  |
| F8W130_F85nx7  | Sorting nex R.IADHPTLTFNDFK#.V                                | 28.75  | 15.96  | 1.80 | 0.56  |
| F8W130_F85nx7  | Sorting nex K.INLIDK#.I                                       | 33.65  | 14.52  | 2.32 | 0.43  |
| F8W130_F85nx7  | Sorting nex R.LASGSSELAVGESPR.G                               | 10.10  | 25.07  | 0.40 | 2.48  |
| F8W130_F85nx7  | Sorting nex R.SAFDTAEQNI.R.Y                                  | 11.98  | 26.28  | 0.46 | 2.19  |
| F8W130_F85nx7  | Sorting nex K.VEALTYK#.K                                      | 21.86  | 4.95   | 4.42 | 0.23  |
| F8W130_F85nx7  | Sorting nex K.VFLTAQAEELSSYK#.K                               | 11.97  | 5.34   | 2.24 | 0.45  |
| Q8CFD4_S15nx8  | Sorting nex R.AIDNAADLIFGK#.E                                 | 13.79  | 7.51   | 1.84 | 0.54  |
| Q91VH2_S15nx9  | Sorting nex K.ALQSLAAVSSSGYQGETDLNDAIEAGK#.T                  | 7.60   | 2.77   | 2.74 | 0.36  |
| Q91VH2_S15nx9  | Sorting nex R.LYLEQQQVQVETIAEK#.L                             | 3.21   | 1.97   | 1.63 | 0.61  |
| Q91VH2_S15nx9  | Sorting nex K.FGSAIPIPSLPDK#.Q                                | 73.03  | 21.47  | 3.40 | 0.29  |
| Q91VH2_S15nx9  | Sorting nex R.LYLEQQQVQVETIAEK#.L                             | 9.24   | 2.93   | 3.16 | 0.32  |
| Q91VH2_S15nx9  | Sorting nex K.TYEEIASLVAEQPK#.K                               | 14.69  | 2.73   | 5.38 | 0.19  |
| P09671_SC5od2  | Superoxide K.GDVYVQVQALQALK#.F                                | 7.46   | 1.31   | 5.71 | 0.18  |
| Q9QX47_S15on   | Protein SOI R.AGIEGPLLASEVER.D                                | 6.10   | 25.85  | 0.24 | 4.24  |
| Q9QX47_S15on   | Protein SOI K.GFEFVSALISESK#.Y                                | 10.02  | 9.95   | 1.01 | 0.99  |
| Q9QX47_S15on   | Protein SOI R.AGIEGPLLASEVER.D                                | 4.81   | 32.39  | 0.15 | 6.74  |
| Q9QX47_S15on   | Protein SOI K.GM*NLGGDENLGPVEVM*QETLLHPGEEPR.D                | 3.13   | 9.82   | 0.32 | 3.13  |
| Q9QX47_S15on   | Protein SOI K.GM*NLGGDENLGPVEVMQETLLHPGEEPR.D                 | 2.26   | 3.23   | 0.70 | 1.43  |
| Q9QX47_S15on   | Protein SOI K.GMNLGGDENLGPVEVMQETLLHPGEEPR.D                  | 2.13   | 6.21   | 0.34 | 2.92  |
| Q9QX47_S15on   | Protein SOI K.IEVLGSVLDTELR.Y                                 | 4.83   | 33.60  | 0.14 | 6.95  |
| Q9QX47_S15on   | Protein SOI R.LAQDPYR.L                                       | 103.58 | 130.33 | 0.79 | 1.26  |
| Q9QX47_S15on   | Protein SOI R.LGQDPYR.L                                       | 4.26   | 49.14  | 0.09 | 11.53 |
| Q9QX47_S15on   | Protein SOI R.LPEQPVEAPSEIADSMTRPQESLEPK.T                    | 4.90   | 38.48  | 0.13 | 7.85  |
| Q9QX47_S15on   | Protein SOI R.SEGQLNETNPPIEGNQAGDTAASAR.S                     | 1.24   | 7.51   | 0.17 | 6.04  |
| Q9QX47_S15on   | Protein SOI K.SGGATIEELTEK.C                                  | 12.95  | 14.58  | 0.89 | 1.13  |
| Q9QX47_S15on   | Protein SOI K.SLETM*PPETSK.T                                  | 28.36  | 29.75  | 0.95 | 1.05  |
| Q9QX47_S15on   | Protein SOI R.SLPNEEIVQK#.I                                   | 26.39  | 36.12  | 0.73 | 1.37  |
| Q9QX47_S15on   | Protein SOI R.SLSSQLALELDTVTSK.G                              | 13.70  | 17.91  | 0.77 | 1.31  |
| Q9QX47_S15on   | Protein SOI R.SM*MM*SYAER.S                                   | 2.99   | 9.20   | 0.32 | 3.08  |
| Q9QX47_S15on   | Protein SOI R.SM*MM*SPM*AER.S                                 | 3.12   | 15.01  | 0.21 | 4.81  |

|                  |                                              |        |        |         |         |
|------------------|----------------------------------------------|--------|--------|---------|---------|
| Q9QX47_Son       | Protein SOf R.SM*M*SSYSAADR.S                | 8.94   | 26.24  | 0.34    | 2.93    |
| Q9QX47_Son       | Protein SOf K.SPEPVVTVMSVEYK.S               | 11.73  | 18.75  | 0.63    | 1.60    |
| Q9QX47_Son       | Protein SOf K.TTLVELPIAK#.V                  | 75.43  | 87.18  | 0.87    | 1.16    |
| Q89090_SF Sp1    | Transcriptin R.VGGLOGSDSLIQNQTSGGSLQGSQQK#.E | 21.44  | 9.37   | 2.29    | 0.44    |
| E9PUD1_ES Spag9  | C-Jun-amin K.AGSSAQEPPSSQTPLK#.S             | 10.17  | 1.54   | 6.62    | 0.15    |
| E9PUD1_ES Spag9  | C-Jun-amin R.DGGSVVGASVFK#.D                 | 12.35  | 5.69   | 2.17    | 0.46    |
| E9PUD1_ES Spag9  | C-Jun-amin R.EVENLILENTQLLETK#.N             | 13.44  | 3.68   | 3.65    | 0.27    |
| E9PUD1_ES Spag9  | C-Jun-amin R.SSTLSQLPGDK#.S                  | 20.83  | 6.72   | 3.10    | 0.32    |
| E9PUD1_ES Spag9  | C-Jun-amin R.VQAFGWSLPQK#.Y                  | 8.72   | 1.28   | 6.79    | 0.15    |
| E9PUD1_ES Spag9  | C-Jun-amin K.AGSSAQEPPSSQTPLK#.S             | 21.28  | 2.54   | 8.37    | 0.12    |
| E9PUD1_ES Spag9  | C-Jun-amin R.DGGSVVGASVFK#.D                 | 17.35  | 6.19   | 2.80    | 0.36    |
| E9PUD1_ES Spag9  | C-Jun-amin R.ETDYPAGEELSESGQVDK#.A           | 19.04  | 3.95   | 4.83    | 0.21    |
| E9PUD1_ES Spag9  | C-Jun-amin R.EVENLILENTQLLETK#.N             | 24.27  | 4.55   | 5.33    | 0.19    |
| E9PUD1_ES Spag9  | C-Jun-amin K.FFVAVPQQVSPQSSSGGADLTADK#.A     | 15.75  | 3.39   | 4.65    | 0.22    |
| E9PUD1_ES Spag9  | C-Jun-amin K.IYVYVQPK#.A                     | 23.01  | 4.10   | 5.61    | 0.18    |
| E9PUD1_ES Spag9  | C-Jun-amin R.M*GDEGSELLGEDLPLEPSVTK#.A       | 4.13   | 1.80   | 2.29    | 0.44    |
| E9PUD1_ES Spag9  | C-Jun-amin R.SHTSLK#DELSDISOGGSK#.A          | 20.54  | 5.86   | 3.51    | 0.29    |
| E9PUD1_ES Spag9  | C-Jun-amin R.VQAFGWSLPQK#.Y                  | 14.26  | 3.03   | 4.70    | 0.21    |
| P07214_SP Sparc  | SPARC OS=K.NVLVTLYER.D                       | 3.02   | 20.01  | 0.15    | 6.62    |
| Q9QY8_SF Spast   | Spastin OS=K.FDDIAGQELAK#.Q                  | 10.68  | 5.23   | 2.04    | 0.49    |
| Q3UMCO_S Spata5  | Spermatogi K.AGEVLDVQSPR.D                   | 2.26   | 13.82  | 0.16    | 6.13    |
| Q3UMCO_S Spata5  | Spermatogi K.ALANESGLNFLAIK#.G               | 13.35  | 14.04  | 0.95    | 1.05    |
| Q3UMCO_S Spata5  | Spermatogi R.DGSGLLEESTGLK#.C                | 9.66   | 8.29   | 1.16    | 0.86    |
| Q3UMCO_S Spata5  | Spermatogi K.EGAEASPPLSAAPSR.S               | 7.50   | 4.33   | 1.73    | 0.58    |
| Q3UMCO_S Spata5  | Spermatogi R.EVAIDVPNVSWSDIGLENIK#.L         | 4.67   | 5.27   | 0.89    | 1.13    |
| Q3UMCO_S Spata5  | Spermatogi R.SGTSTPFAQPSAPAGMLVVTNFLEK#.V    | 10.86  | 10.10  | 1.08    | 0.93    |
| Q8K1N4_SF Spats2 | Spermatogi K.SAPIQEEQPASSEK#.G               | 23.95  | 18.78  | 1.28    | 0.78    |
| Q8K1N4_SF Spats2 | Spermatogi K.SK#PK#PASEASGAPDSSK#.S          | 7.35   | 8.10   | 0.91    | 1.10    |
| Q8K1N4_SF Spats2 | Spermatogi K.SK#PK#PASEASGAPDSSK#.S          | 2.87   | 1.51   | 1.90    | 0.53    |
| Q8K1N4_SF Spats2 | Spermatogi K.SAPIQEEQPASSEK#.G               | 31.87  | 18.54  | 1.72    | 0.58    |
| Q9D083_SF Spc24  | Kinetochor R.QGDTLQQLLEVELQR.T               | 1.13   | 6.10   | 0.18    | 5.42    |
| Q9D083_SF Spc24  | Kinetochor R.QLITELQELR.E                    | 2.41   | 10.42  | 0.23    | 4.33    |
| Q3UA16_SF Spc25  | Kinetochor K.GK#QESEELTAK#.I                 | 4.05   | 2.62   | 1.54    | 0.65    |
| Q3UA16_SF Spc25  | Kinetochor K.LQFIFTSIDPK#.N                  | 14.07  | 18.87  | 0.75    | 1.34    |
| Q6ZW07_C Spcc3   | Signal pept K.NNALNQVVLWDK#.I                | 7.95   | 7.69   | 1.03    | 0.97    |
| Q2KN98_C Spccc1  | Cytosplin-A K.SFDSASQVNPAAAAIPIR.T           | 4.35   | 5.18   | 0.84    | 1.19    |
| Q8R1X6_SF Spg20  | Spartin OS= R.NDLQDVPK#.L                    | 14.72  | 10.14  | 1.45    | 0.69    |
| Q8R1X6_SF Spg20  | Spartin OS= K.VAHNILSGASVWSVGLVK#.G          | 6.96   | 1.56   | 4.46    | 0.22    |
| Q61142_SF Spin1  | Spindlin-1 (K.GTVLDQVVPVNSLYLIK#.Y           | 6.70   | 14.65  | 0.46    | 2.19    |
| Q61142_SF Spin1  | Spindlin-1 (R.VSALEVPDR.V                    | 109.20 | 11.82  | 9.24    | 0.11    |
| Q61142_SF Spin1  | Spindlin-1 (K.GTVLDQVVPVNSLYLIK#.Y           | 4.70   | 9.89   | 0.48    | 2.10    |
| Q61142_SF Spin1  | Spindlin-1 (R.VSALEVPDR.V                    | 3.37   | 8.81   | 0.38    | 2.61    |
| P08032_SP Spta1  | Spectrin alj - M*ETPK#ETAVESGPK#VLETAEEIQR.R | 0.00   | 0.00   | #DIV/0! | #DIV/0! |
| P08032_SP Spta1  | Spectrin alj K.ADVVESWIGEK#.E                | 46.83  | 18.74  | 2.50    | 0.40    |
| P08032_SP Spta1  | Spectrin alj K.EASLTKT.S                     | 17.63  | 8.33   | 2.12    | 0.47    |
| P16546_SP Sptan1 | Spectrin alj K.IAALQAFADQLIADVHYAK#.G        | 21.09  | 6.74   | 3.13    | 0.32    |
| P16546_SP Sptan1 | Spectrin alj R.AGTFQAFQFGQQLLAHGHYASPEIK#.E  | 137.35 | 56.66  | 2.42    | 0.41    |
| P16546_SP Sptan1 | Spectrin alj K.AINVQEEK#.I                   | 169.75 | 68.82  | 2.47    | 0.41    |
| P16546_SP Sptan1 | Spectrin alj K.KHLNDEFANSFLOFNWK#.A          | 12.51  | 6.64   | 1.88    | 0.53    |
| P16546_SP Sptan1 | Spectrin alj K.ALINADELANDVAGAEALLDR.H       | 68.18  | 141.68 | 0.48    | 2.08    |
| P16546_SP Sptan1 | Spectrin alj R.LASSEGPPVYKELLYQLNTR.E        | 6.24   | 14.06  | 0.44    | 2.25    |
| P16546_SP Sptan1 | Spectrin alj K.ASASFNSWFENAEEDLTPVPR.C       | 7.04   | 12.37  | 0.57    | 1.76    |
| P16546_SP Sptan1 | Spectrin alj R.DADETK#EWIEEK#.N              | 59.40  | 33.76  | 1.76    | 0.57    |
| P16546_SP Sptan1 | Spectrin alj R.DADETK#EWIEEK#.N              | 31.49  | 19.28  | 1.63    | 0.61    |
| P16546_SP Sptan1 | Spectrin alj R.DAELEK#WQIEK#.L               | 12.47  | 6.06   | 2.06    | 0.49    |
| P16546_SP Sptan1 | Spectrin alj R.DLAALDK#WV#.A                 | 82.14  | 40.95  | 2.01    | 0.50    |
| P16546_SP Sptan1 | Spectrin alj R.DLAALGDK#.V                   | 43.79  | 19.38  | 2.26    | 0.44    |
| P16546_SP Sptan1 | Spectrin alj R.DLAALGDKVNSLGETAQR.L          | 16.48  | 44.63  | 0.37    | 2.71    |
| P16546_SP Sptan1 | Spectrin alj K.DLASVNNLLK#.K                 | 18.91  | 10.44  | 1.81    | 0.55    |
| P16546_SP Sptan1 | Spectrin alj R.DLASVQALLR.K                  | 35.78  | 41.01  | 0.87    | 1.15    |
| P16546_SP Sptan1 | Spectrin alj K.DLIGVQNLK#.K                  | 41.32  | 14.99  | 2.76    | 0.36    |
| P16546_SP Sptan1 | Spectrin alj K.DLNSQADSLM*TSFAFDTSQVK#.E     | 15.12  | 8.54   | 1.77    | 0.56    |
| P16546_SP Sptan1 | Spectrin alj K.DLNSQADSLM*TSFAFDTSQVK#.E     | 7.92   | 4.30   | 1.84    | 0.54    |
| P16546_SP Sptan1 | Spectrin alj K.DLNSQADSLM*TSFAFDTSQVK#.E     | 6.65   | 2.33   | 2.86    | 0.35    |
| P16546_SP Sptan1 | Spectrin alj R.DLSSVQTLTK#.Q                 | 145.74 | 68.45  | 2.13    | 0.47    |
| P16546_SP Sptan1 | Spectrin alj R.DLTGVQNLK#.K                  | 38.04  | 63.75  | 0.60    | 1.68    |
| P16546_SP Sptan1 | Spectrin alj K.DLTNVQNLQK#.K                 | 70.61  | 28.31  | 2.49    | 0.40    |
| P16546_SP Sptan1 | Spectrin alj R.DLTSWVTEM*#.A                 | 43.07  | 20.47  | 2.10    | 0.48    |
| P16546_SP Sptan1 | Spectrin alj R.DLTSWVTEMK#.A                 | 36.04  | 14.31  | 2.52    | 0.40    |
| P16546_SP Sptan1 | Spectrin alj K.DQLLAAK#.H                    | 34.01  | 16.83  | 2.02    | 0.49    |
| P16546_SP Sptan1 | Spectrin alj R.DSDLEK#SWVNEK#.M              | 16.26  | 5.49   | 2.96    | 0.34    |
| P16546_SP Sptan1 | Spectrin alj R.DTEQVDNWM*SK#.Q               | 36.11  | 19.70  | 1.83    | 0.55    |
| P16546_SP Sptan1 | Spectrin alj R.DTEQVDNWM*SK#.Q               | 10.65  | 4.80   | 2.22    | 0.45    |
| P16546_SP Sptan1 | Spectrin alj R.DVDEIAEWISEK#.L               | 93.76  | 43.96  | 2.13    | 0.47    |
| P16546_SP Sptan1 | Spectrin alj R.DVDEIAGWIK#.E                 | 65.67  | 22.79  | 2.88    | 0.35    |
| P16546_SP Sptan1 | Spectrin alj R.DVEEETWIR.E                   | 16.85  | 37.42  | 0.45    | 2.22    |
| P16546_SP Sptan1 | Spectrin alj K.EAALTNEEVGADLEQVEVLQK#.K      | 114.67 | 42.64  | 2.69    | 0.37    |
| P16546_SP Sptan1 | Spectrin alj R.EAFLNTEDEK#GDSLDSVEALIK#.K    | 188.54 | 75.32  | 2.50    | 0.40    |
| P16546_SP Sptan1 | Spectrin alj R.EANELQQWITEK#.E               | 91.93  | 45.02  | 2.04    | 0.49    |
| P16546_SP Sptan1 | Spectrin alj R.EANQQQFNR.N                   | 13.26  | 30.51  | 0.43    | 2.30    |
| P16546_SP Sptan1 | Spectrin alj R.EELITNWEQIR.T                 | 3.75   | 11.33  | 0.33    | 3.02    |
| P16546_SP Sptan1 | Spectrin alj R.ELPTAFDYEFTR.S                | 20.63  | 36.26  | 0.57    | 1.76    |
| P16546_SP Sptan1 | Spectrin alj R.ENLLEEQGIALR.Q                | 29.00  | 62.05  | 0.47    | 2.14    |
| P16546_SP Sptan1 | Spectrin alj K.EQLM*ASDDFGR.D                | 4.58   | 9.24   | 0.50    | 2.02    |
| P16546_SP Sptan1 | Spectrin alj R.FLADFDR.D                     | 18.58  | 38.88  | 0.48    | 2.09    |
| P16546_SP Sptan1 | Spectrin alj R.FLADFDR.D                     | 12.20  | 38.27  | 0.32    | 3.14    |
| P16546_SP Sptan1 | Spectrin alj R.FNRDVEDTIGWIK.E               | 6.26   | 11.66  | 0.54    | 1.86    |
| P16546_SP Sptan1 | Spectrin alj R.GK#DLIGVQNLK#.K               | 45.38  | 17.97  | 2.52    | 0.40    |
| P16546_SP Sptan1 | Spectrin alj R.GLVSSDELAK#.D                 | 56.78  | 23.06  | 2.46    | 0.41    |
| P16546_SP Sptan1 | Spectrin alj K.GNAM*VEEGHFAAEDVK#.A          | 81.64  | 32.16  | 2.54    | 0.39    |
| P16546_SP Sptan1 | Spectrin alj R.GVIMD*GNSLIER.G               | 16.97  | 41.75  | 0.41    | 2.46    |
| P16546_SP Sptan1 | Spectrin alj R.GVIMD*GNSLIER.G               | 8.22   | 21.16  | 0.39    | 2.57    |
| P16546_SP Sptan1 | Spectrin alj K.HEAFTEFDTVHK#.D               | 16.08  | 11.36  | 1.42    | 0.71    |
| P16546_SP Sptan1 | Spectrin alj K.HQAFEAELHANADR.I              | 26.87  | 59.76  | 0.45    | 2.22    |
| P16546_SP Sptan1 | Spectrin alj K.HQAFEAELSANQSR.I              | 28.60  | 37.86  | 0.76    | 1.32    |
| P16546_SP Sptan1 | Spectrin alj K.HQAFEAQVANSQAIVK#.L           | 44.46  | 18.98  | 2.34    | 0.43    |
| P16546_SP Sptan1 | Spectrin alj K.HQALQAEIAGHEPR.I              | 22.32  | 44.09  | 0.51    | 1.98    |
| P16546_SP Sptan1 | Spectrin alj K.HQLLEADISAHEDR.L              | 18.61  | 29.48  | 0.63    | 1.58    |
| P16546_SP Sptan1 | Spectrin alj K.IAALQAFADQLIADVHYAK#.G        | 354.27 | 163.09 | 2.17    | 0.46    |
| P16546_SP Sptan1 | Spectrin alj R.IDGITQAR.Q                    | 12.42  | 20.36  | 0.61    | 1.64    |
| P16546_SP Sptan1 | Spectrin alj K.IEDLGAAM*EEALLDNKK#.Y         | 8.20   | 3.75   | 2.19    | 0.46    |
| P16546_SP Sptan1 | Spectrin alj K.ITALDEFATK#.L                 | 145.46 | 63.29  | 2.30    | 0.44    |
| P16546_SP Sptan1 | Spectrin alj K.K#FDDFOK#.D                   | 76.89  | 40.44  | 1.90    | 0.53    |

|                  |                                                                               |        |        |      |      |
|------------------|-------------------------------------------------------------------------------|--------|--------|------|------|
| P16546_SP Sptan1 | Spectrin alj K.K.FEEFQDLAAHEER.V                                              | 8.15   | 25.43  | 0.32 | 3.12 |
| P16546_SP Sptan1 | Spectrin alj K.K.#G#D#L#LN#STN#K#.D                                           | 6.09   | 3.45   | 1.77 | 0.57 |
| P16546_SP Sptan1 | Spectrin alj K.K.#G#D#L#LN#STN#K#D#W#K#.V                                     | 27.10  | 12.70  | 2.13 | 0.47 |
| P16546_SP Sptan1 | Spectrin alj K.K.#E#L#G#A#M#*E#A#L#D#N#K#.Y                                   | 28.05  | 9.70   | 2.89 | 0.35 |
| P16546_SP Sptan1 | Spectrin alj K.K.#L#L#E#A#T#L#K#.G                                            | 32.90  | 13.14  | 2.50 | 0.40 |
| P16546_SP Sptan1 | Spectrin alj K.K.#L#S#D#N#T#G#Q#E#I#Q#R#.L                                    | 4.82   | 10.27  | 0.47 | 2.13 |
| P16546_SP Sptan1 | Spectrin alj R.#K#V#E#D#L#F#L#F#A#K#.K                                        | 62.18  | 27.28  | 2.28 | 0.44 |
| P16546_SP Sptan1 | Spectrin alj R.#K#V#E#D#L#F#L#F#A#K#.K                                        | 56.43  | 30.95  | 1.82 | 0.55 |
| P16546_SP Sptan1 | Spectrin alj R.#L#A#L#A#D#Q#W#Q#L#V#Q#K#.S                                    | 117.19 | 53.52  | 2.19 | 0.46 |
| P16546_SP Sptan1 | Spectrin alj K.#L#D#E#N#L#M#*I#S#E#G#F#A#S#E#T#.R                             | 33.73  | 16.16  | 2.09 | 0.48 |
| P16546_SP Sptan1 | Spectrin alj R.#L#E#A#L#A#H#E#P#A#I#Q#V#L#D#T#G#K#.K                          | 16.29  | 24.60  | 0.66 | 1.51 |
| P16546_SP Sptan1 | Spectrin alj R.#L#E#A#L#A#H#E#P#A#I#Q#V#L#D#T#G#K#.K                          | 18.96  | 7.37   | 2.57 | 0.39 |
| P16546_SP Sptan1 | Spectrin alj R.#L#E#S#L#E#Y#Q#Q#F#V#A#N#E#E#A#W#I#N#E#K#.#M                   | 39.55  | 14.17  | 2.79 | 0.36 |
| P16546_SP Sptan1 | Spectrin alj K.#L#F#G#A#E#V#Q#R#.F                                            | 39.40  | 69.89  | 0.56 | 1.77 |
| P16546_SP Sptan1 | Spectrin alj K.#L#G#D#S#H#D#L#Q#R#.F                                          | 10.18  | 20.27  | 0.50 | 1.99 |
| P16546_SP Sptan1 | Spectrin alj K.#L#G#E#S#T#L#Q#F#S#R#.D                                        | 14.51  | 46.23  | 0.31 | 3.19 |
| P16546_SP Sptan1 | Spectrin alj R.#L#I#Q#H#P#E#S#A#E#D#L#K#.E                                    | 36.79  | 15.03  | 2.45 | 0.41 |
| P16546_SP Sptan1 | Spectrin alj R.#L#K#H#D#L#N#S#Q#A#D#S#L#M#*T#S#A#F#D#T#S#Q#V#K#.E             | 33.49  | 14.67  | 2.28 | 0.44 |
| P16546_SP Sptan1 | Spectrin alj R.#L#K#H#D#L#N#S#Q#A#D#S#L#M#*T#S#A#F#D#T#S#Q#V#K#.E             | 12.59  | 4.16   | 3.03 | 0.33 |
| P16546_SP Sptan1 | Spectrin alj K.#L#L#E#A#T#L#K#.G                                              | 89.97  | 37.37  | 2.41 | 0.42 |
| P16546_SP Sptan1 | Spectrin alj K.#L#L#V#S#S#E#Y#G#R#.D                                          | 14.74  | 42.71  | 0.35 | 2.90 |
| P16546_SP Sptan1 | Spectrin alj R.#L#Q#S#H#P#L#S#A#Q#I#Q#V#K#.R                                  | 111.49 | 54.14  | 2.06 | 0.49 |
| P16546_SP Sptan1 | Spectrin alj K.#L#Q#T#A#S#D#E#S#Y#K#P#T#N#I#O#S#K#.H                          | 194.30 | 104.47 | 1.86 | 0.54 |
| P16546_SP Sptan1 | Spectrin alj K.#L#S#D#N#T#G#Q#E#I#Q#R#.L                                      | 23.32  | 56.53  | 0.41 | 2.42 |
| P16546_SP Sptan1 | Spectrin alj K.#L#S#E#L#N#Q#K#.W                                              | 73.71  | 30.01  | 2.46 | 0.41 |
| P16546_SP Sptan1 | Spectrin alj K.#L#S#I#S#E#R#.T                                                | 17.98  | 34.09  | 0.53 | 1.90 |
| P16546_SP Sptan1 | Spectrin alj R.#M#*N#E#V#I#S#L#W#K#.K                                         | 34.86  | 20.55  | 1.70 | 0.59 |
| P16546_SP Sptan1 | Spectrin alj R.#M#N#E#V#I#S#L#W#K#.K                                          | 17.71  | 11.27  | 1.57 | 0.64 |
| P16546_SP Sptan1 | Spectrin alj R.#M#*Q#H#N#L#E#Q#I#Q#A#R#.N                                     | 17.30  | 44.33  | 0.39 | 2.56 |
| P16546_SP Sptan1 | Spectrin alj K.#M#*T#L#V#A#S#E#Y#G#D#T#L#A#I#Q#L#K#.#K                        | 102.77 | 44.48  | 2.31 | 0.43 |
| P16546_SP Sptan1 | Spectrin alj K.#N#Q#A#L#N#D#N#Y#H#D#L#A#S#V#A#L#Q#R#.K                        | 28.39  | 60.89  | 0.47 | 2.14 |
| P16546_SP Sptan1 | Spectrin alj R.#N#T#G#V#T#E#L#K#.E                                            | 73.51  | 23.84  | 3.08 | 0.32 |
| P16546_SP Sptan1 | Spectrin alj K.#Q#E#V#N#A#A#W#Q#R#.L                                          | 8.56   | 11.10  | 0.77 | 1.30 |
| P16546_SP Sptan1 | Spectrin alj K.#Q#E#F#D#A#G#L#A#Q#F#Q#E#G#I#A#N#I#A#L#K#.#D                   | 18.99  | 13.30  | 1.43 | 0.70 |
| P16546_SP Sptan1 | Spectrin alj R.#Q#F#V#P#A#A#Y#V#K#.K                                          | 80.30  | 44.58  | 1.80 | 0.56 |
| P16546_SP Sptan1 | Spectrin alj R.#Q#V#A#P#M#*D#E#T#G#K#.E                                       | 12.22  | 6.60   | 1.85 | 0.54 |
| P16546_SP Sptan1 | Spectrin alj R.#Q#V#A#P#M#*D#E#T#G#K#H#E#L#V#L#A#Y#D#Y#Q#E#.#S                | 24.27  | 12.04  | 2.02 | 0.50 |
| P16546_SP Sptan1 | Spectrin alj R.#Q#V#E#D#L#S#Q#A#Q#Q#F#A#D#A#N#E#S#W#M#*R#.E                   | 3.06   | 8.88   | 0.34 | 2.90 |
| P16546_SP Sptan1 | Spectrin alj K.#S#A#D#E#G#Q#A#L#A#A#H#Y#A#S#D#E#V#R#.E                        | 32.23  | 66.28  | 0.49 | 2.06 |
| P16546_SP Sptan1 | Spectrin alj R.#S#L#Q#Q#L#A#E#R#.S                                            | 46.92  | 89.61  | 0.52 | 1.91 |
| P16546_SP Sptan1 | Spectrin alj K.#S#E#E#I#S#A#F#R#.A                                            | 22.30  | 48.32  | 0.46 | 2.17 |
| P16546_SP Sptan1 | Spectrin alj R.#S#L#S#A#Q#A#D#F#N#Q#L#A#E#L#D#R#.Q                            | 16.22  | 34.78  | 0.47 | 2.14 |
| P16546_SP Sptan1 | Spectrin alj K.#T#A#T#D#E#A#Y#K#D#P#S#N#L#O#G#K#.#V                           | 163.89 | 66.88  | 2.45 | 0.41 |
| P16546_SP Sptan1 | Spectrin alj K.#T#K#Q#E#V#N#A#A#W#Q#R#.L                                      | 4.75   | 9.28   | 0.51 | 1.95 |
| P16546_SP Sptan1 | Spectrin alj K.#V#A#E#D#E#S#L#M#*A#E#V#Q#A#V#Q#Q#E#V#Y#G#M#*P#R#.D            | 5.81   | 9.83   | 0.59 | 1.69 |
| P16546_SP Sptan1 | Spectrin alj K.#V#A#E#D#E#S#L#M#*A#E#V#Q#A#V#Q#Q#E#V#Y#G#M#*P#R#.D            | 3.12   | 5.06   | 0.62 | 1.62 |
| P16546_SP Sptan1 | Spectrin alj K.#V#E#D#L#F#L#F#A#K#.K                                          | 14.20  | 7.69   | 1.85 | 0.54 |
| P16546_SP Sptan1 | Spectrin alj K.#V#E#T#A#E#D#I#Q#E#R#.R                                        | 40.49  | 77.13  | 0.52 | 1.90 |
| P16546_SP Sptan1 | Spectrin alj R.#V#N#E#V#S#G#F#A#A#K#.L                                        | 127.84 | 49.49  | 2.58 | 0.39 |
| P16546_SP Sptan1 | Spectrin alj K.#Y#T#E#H#S#T#V#G#L#A#Q#W#D#Q#L#D#Q#L#G#M#*R#.M                 | 14.08  | 18.23  | 0.77 | 1.29 |
| P16546_SP Sptan1 | Spectrin alj K.#Y#T#E#H#S#T#V#G#L#A#Q#W#D#Q#L#D#Q#L#G#M#*R#.M                 | 2.90   | 7.07   | 0.41 | 2.44 |
| E9Q447_E9 Sptan1 | Spectrin alj R.#Q#G#I#D#N#Q#S#L#L#E#L#G#E#K#.R                                | 17.96  | 12.00  | 1.50 | 0.67 |
| Q62261_SF Sptbn1 | Spectrin be R.#A#F#E#D#M#*S#G#R#.S                                            | 9.72   | 20.90  | 0.47 | 2.15 |
| Q62261_SF Sptbn1 | Spectrin be K.#A#K#D#E#Q#S#A#V#S#M#*L#K#.K                                    | 26.05  | 11.38  | 2.29 | 0.44 |
| Q62261_SF Sptbn1 | Spectrin be K.#A#L#Q#F#L#K#.E                                                 | 74.75  | 34.60  | 2.16 | 0.46 |
| Q62261_SF Sptbn1 | Spectrin be K.#A#Q#Y#F#D#A#E#A#E#W#M#S#E#Q#L#Y#M#*M#*S#E#K#.#A                | 4.21   | 1.50   | 2.80 | 0.36 |
| Q62261_SF Sptbn1 | Spectrin be R.#A#Q#T#L#P#T#S#V#T#I#S#E#S#P#G#K#.R                             | 14.33  | 6.93   | 2.07 | 0.48 |
| Q62261_SF Sptbn1 | Spectrin be R.#D#A#S#V#A#E#A#W#L#G#Q#E#P#L#S#R#.E                             | 19.23  | 35.76  | 0.54 | 1.86 |
| Q62261_SF Sptbn1 | Spectrin be R.#D#G#M#*A#F#N#A#L#H#K#.H                                        | 41.63  | 14.42  | 2.89 | 0.35 |
| Q62261_SF Sptbn1 | Spectrin be R.#D#L#D#F#Q#S#W#L#S#.T                                           | 19.87  | 34.34  | 0.58 | 1.73 |
| Q62261_SF Sptbn1 | Spectrin be R.#D#L#M#*L#W#M#*E#D#V#R#.Q                                       | 4.29   | 7.65   | 0.56 | 1.78 |
| Q62261_SF Sptbn1 | Spectrin be R.#D#L#V#A#E#K#.L                                                 | 104.38 | 56.32  | 1.85 | 0.54 |
| Q62261_SF Sptbn1 | Spectrin be R.#D#Q#N#T#V#E#L#Q#R#.M                                           | 26.22  | 52.90  | 1.50 | 2.02 |
| Q62261_SF Sptbn1 | Spectrin be R.#D#T#G#N#I#G#O#E#R#.V                                           | 11.46  | 24.97  | 0.46 | 2.18 |
| Q62261_SF Sptbn1 | Spectrin be K.#D#V#A#E#I#T#N#Y#R#P#T#I#D#L#H#E#Q#A#S#L#P#Q#A#H#A#S#P#D#V#K#.G | 5.45   | 18.96  | 0.29 | 3.48 |
| Q62261_SF Sptbn1 | Spectrin be R.#D#V#E#D#I#V#V#G#E#R#.M                                         | 11.45  | 25.72  | 0.45 | 2.25 |
| Q62261_SF Sptbn1 | Spectrin be R.#E#A#E#L#M#*R#.L                                                | 12.19  | 23.14  | 0.53 | 1.90 |
| Q62261_SF Sptbn1 | Spectrin be K.#E#A#E#L#E#S#H#P#D#A#Q#I#L#S#.L                                 | 19.19  | 41.32  | 0.46 | 2.15 |
| Q62261_SF Sptbn1 | Spectrin be R.#E#A#S#L#G#E#A#S#K#.L                                           | 44.70  | 24.57  | 1.82 | 0.55 |
| Q62261_SF Sptbn1 | Spectrin be K.#E#G#M#I#Q#E#L#H#P#E#T#A#V#V#K#.E                               | 61.01  | 33.52  | 1.82 | 0.55 |
| Q62261_SF Sptbn1 | Spectrin be K.#E#I#E#L#Q#S#A#Q#A#L#S#Q#E#G#K#.S                               | 43.34  | 21.87  | 1.98 | 0.50 |
| Q62261_SF Sptbn1 | Spectrin be R.#E#I#G#O#S#V#E#K#.L                                             | 137.75 | 75.80  | 1.82 | 0.55 |
| Q62261_SF Sptbn1 | Spectrin be R.#E#N#E#V#E#A#W#K#.S                                             | 76.48  | 39.30  | 1.95 | 0.51 |
| Q62261_SF Sptbn1 | Spectrin be R.#E#Q#W#A#N#L#E#Q#L#S#A#I#R#.K                                   | 19.00  | 36.17  | 0.53 | 1.90 |
| Q62261_SF Sptbn1 | Spectrin be R.#E#V#D#L#E#Q#W#A#E#R#.E                                         | 18.23  | 45.61  | 0.40 | 2.50 |
| Q62261_SF Sptbn1 | Spectrin be R.#E#V#A#G#S#H#E#L#G#D#Y#E#H#V#T#M#L#Q#E#R#.F                     | 5.35   | 6.66   | 0.80 | 1.25 |
| Q62261_SF Sptbn1 | Spectrin be K.#F#A#N#S#L#V#G#V#Q#Q#L#A#F#N#Y#R#.T                             | 3.48   | 7.47   | 0.47 | 2.15 |
| Q62261_SF Sptbn1 | Spectrin be R.#F#E#S#L#E#P#M#*N#N#Q#A#S#R#.V                                  | 14.51  | 29.35  | 0.49 | 2.02 |
| Q62261_SF Sptbn1 | Spectrin be R.#F#Q#Q#D#I#S#V#E#T#D#N#K#.E                                     | 23.22  | 9.17   | 2.53 | 0.40 |
| Q62261_SF Sptbn1 | Spectrin be K.#H#L#G#V#E#D#L#Q#K#.H                                           | 64.68  | 25.68  | 2.52 | 0.40 |
| Q62261_SF Sptbn1 | Spectrin be K.#H#Q#A#F#M#A#L#S#N#K#H#E#W#L#D#K#H#E#K#.#E                      | 12.37  | 5.58   | 2.22 | 0.45 |
| Q62261_SF Sptbn1 | Spectrin be K.#H#Q#I#E#Q#A#V#E#Y#A#E#T#V#H#Q#L#S#K#.#T                        | 85.30  | 44.32  | 1.92 | 0.52 |
| Q62261_SF Sptbn1 | Spectrin be K.#H#R#P#D#I#D#F#K#.L                                             | 20.33  | 36.15  | 0.56 | 1.78 |
| Q62261_SF Sptbn1 | Spectrin be K.#H#Y#A#S#E#I#K#.E                                               | 8.34   | 4.70   | 1.78 | 0.56 |
| Q62261_SF Sptbn1 | Spectrin be R.#I#D#I#F#E#R#.S                                                 | 18.25  | 40.51  | 0.45 | 2.22 |
| Q62261_SF Sptbn1 | Spectrin be K.#I#N#A#V#V#E#T#G#R#.R                                           | 9.65   | 16.06  | 0.60 | 1.66 |
| Q62261_SF Sptbn1 | Spectrin be K.#I#V#S#N#D#V#G#H#D#E#Y#T#S#Q#S#L#V#K#.#K                        | 239.61 | 109.69 | 2.18 | 0.46 |
| Q62261_SF Sptbn1 | Spectrin be K.#K#H#E#A#I#E#D#I#A#Y#E#R#.V                                     | 70.66  | 31.25  | 2.26 | 0.44 |
| Q62261_SF Sptbn1 | Spectrin be R.#K#H#Y#A#S#E#I#K#H#E#K#.L                                       | 3.15   | 5.12   | 0.61 | 1.63 |
| Q62261_SF Sptbn1 | Spectrin be R.#K#H#E#I#E#L#Q#S#Q#A#L#S#Q#E#G#K#.S                             | 62.37  | 39.19  | 1.59 | 0.63 |
| Q62261_SF Sptbn1 | Spectrin be R.#L#A#E#I#S#D#V#W#E#M#*K#.T                                      | 39.43  | 15.51  | 2.54 | 0.39 |
| Q62261_SF Sptbn1 | Spectrin be R.#L#A#E#I#S#D#V#W#E#M#*K#.T                                      | 49.57  | 20.18  | 2.46 | 0.41 |
| Q62261_SF Sptbn1 | Spectrin be R.#L#E#M#*N#L#G#L#Q#K#.I                                          | 46.09  | 23.67  | 1.95 | 0.51 |
| Q62261_SF Sptbn1 | Spectrin be R.#L#E#M#N#L#G#L#Q#K#.I                                           | 20.85  | 6.18   | 3.37 | 0.30 |
| Q62261_SF Sptbn1 | Spectrin be K.#L#L#Q#H#E#N#I#K#H#E#I#D#N#Y#E#E#Y#Q#K#.#M                      | 40.28  | 13.20  | 3.05 | 0.33 |
| Q62261_SF Sptbn1 | Spectrin be R.#L#Q#A#Y#A#G#D#K#.A                                             | 55.86  | 22.17  | 2.52 | 0.40 |
| Q62261_SF Sptbn1 | Spectrin be R.#L#Q#A#Y#A#G#D#K#H#I#Q#K#.#R                                    | 4.90   | 3.61   | 1.36 | 0.74 |
| Q62261_SF Sptbn1 | Spectrin be R.#L#Q#A#D#T#G#W#N#L#H#K#.#M                                      | 175.11 | 68.47  | 2.56 | 0.39 |
| Q62261_SF Sptbn1 | Spectrin be R.#L#T#L#L#L#L#V#R#.R                                             | 27.21  | 64.46  | 0.42 | 2.37 |
| Q62261_SF Sptbn1 | Spectrin be R.#L#V#S#D#N#I#N#S#R#.I                                           | 25.74  | 62.61  | 0.41 | 2.43 |
| Q62261_SF Sptbn1 | Spectrin be R.#L#V#S#Q#N#F#G#D#L#P#A#V#E#A#T#K#.#K                            | 87.63  | 40.72  | 2.15 | 0.46 |
| Q62261_SF Sptbn1 | Spectrin be R.#L#V#S#Q#N#F#G#D#L#P#A#V#E#A#T#K#.#K                            | 66.30  | 33.50  | 1.98 | 0.51 |
| Q62261_SF Sptbn1 | Spectrin be R.#M#*H#T#F#E#H#D#I#Q#L#G#T#Q#R#.Q                                | 10.55  | 21.00  | 0.50 | 1.99 |

|                  |                                                    |        |       |       |       |
|------------------|----------------------------------------------------|--------|-------|-------|-------|
| Q62261_SF Sptbn1 | Spectrin be K.M*LTAQDM*SYDEAR.N                    | 7.55   | 13.25 | 0.57  | 1.76  |
| Q62261_SF Sptbn1 | Spectrin be R.M*PLATSTDHGHNLQTVQLLIK#.K            | 21.92  | 10.81 | 2.03  | 0.49  |
| Q62261_SF Sptbn1 | Spectrin be R.MPLATSTDHGHNLQTVQLLIK#.K             | 11.89  | 4.20  | 2.83  | 0.35  |
| Q62261_SF Sptbn1 | Spectrin be K.M*WVELESTQTK#.A                      | 29.44  | 14.06 | 2.09  | 0.48  |
| Q62261_SF Sptbn1 | Spectrin be K.NEIDNYEEDYQK#.M                      | 18.03  | 5.98  | 3.01  | 0.33  |
| Q62261_SF Sptbn1 | Spectrin be K.QAEAFNNQEVLAHTEM*PTTLGEGAAIK#.K      | 17.07  | 7.19  | 2.37  | 0.42  |
| Q62261_SF Sptbn1 | Spectrin be K.QALQDTLALYK#.M                       | 64.11  | 21.58 | 2.97  | 0.34  |
| Q62261_SF Sptbn1 | Spectrin be R.QJEAQEKPR.D                          | 4.80   | 11.58 | 0.41  | 2.41  |
| Q62261_SF Sptbn1 | Spectrin be R.QLM*HNGHPSEK#.E                      | 4.00   | 1.64  | 2.44  | 0.41  |
| Q62261_SF Sptbn1 | Spectrin be R.QNLLSQSHAYQQFLR.D                    | 19.80  | 43.35 | 0.46  | 2.19  |
| Q62261_SF Sptbn1 | Spectrin be K.SAASGPIHYHSEVPVSLK#.E                | 50.72  | 27.18 | 1.87  | 0.54  |
| Q62261_SF Sptbn1 | Spectrin be K.SALPAQSAATL.PAR.T                    | 17.48  | 43.95 | 0.40  | 2.51  |
| Q62261_SF Sptbn1 | Spectrin be R.SGHFEQAIK#HGEDM*IAEHFGSEK#.I         | 16.34  | 8.86  | 1.84  | 0.54  |
| Q62261_SF Sptbn1 | Spectrin be K.SNAHYNLQNAFNLAEQHLGLTK#.L            | 22.28  | 7.54  | 2.96  | 0.34  |
| Q62261_SF Sptbn1 | Spectrin be K.SNAHYNLQNAFNLAEQHLGLTK#.L            | 67.44  | 26.19 | 2.57  | 0.39  |
| Q62261_SF Sptbn1 | Spectrin be R.SQNIITDSSSLNAEAI.R                   | 16.18  | 35.59 | 0.45  | 2.20  |
| Q62261_SF Sptbn1 | Spectrin be R.TLETAAQMEGFLNR.K                     | 10.99  | 11.46 | 0.96  | 1.04  |
| Q62261_SF Sptbn1 | Spectrin be R.TQLLAASYELHK#.F                      | 102.95 | 44.56 | 2.31  | 0.43  |
| Q62261_SF Sptbn1 | Spectrin be R.TQTIAIASEDM*PNTLTAEEK#.L             | 31.23  | 13.94 | 2.24  | 0.45  |
| Q62261_SF Sptbn1 | Spectrin be R.TQTIAIASEDM*PNTLTAEEK#.L             | 30.71  | 11.52 | 2.67  | 0.38  |
| Q62261_SF Sptbn1 | Spectrin be R.VAVVNQIAR.Q                          | 34.53  | 71.13 | 0.49  | 2.06  |
| Q62261_SF Sptbn1 | Spectrin be R.VDVTNNM*ADELINSGHSDAATAIEWK#.D       | 49.92  | 16.93 | 2.95  | 0.34  |
| Q62261_SF Sptbn1 | Spectrin be R.VDVTNNM*ADELINSGHSDAATAIEWK#.D       | 34.00  | 16.09 | 2.11  | 0.47  |
| Q62261_SF Sptbn1 | Spectrin be K.VIESTQDLGNDLAGVM*ALQR.K              | 9.99   | 24.19 | 0.41  | 2.42  |
| Q62261_SF Sptbn1 | Spectrin be K.VIESTQDLGNDLAGVMALQR.K               | 3.48   | 7.37  | 0.47  | 2.12  |
| Q62261_SF Sptbn1 | Spectrin be K.VIESTQDLGNDLAGVMALQR.K               | 7.03   | 21.60 | 0.33  | 3.07  |
| Q62261_SF Sptbn1 | Spectrin be K.VLDNAIETEK#.M                        | 114.02 | 55.00 | 2.07  | 0.48  |
| Q62261_SF Sptbn1 | Spectrin be K.VLLSQDYGK#.H                         | 164.21 | 75.48 | 2.18  | 0.46  |
| Q62261_SF Sptbn1 | Spectrin be R.VQAVAVAR.E                           | 25.43  | 53.28 | 0.48  | 2.10  |
| Q62261_SF Sptbn1 | Spectrin be K.VSEAEQSQWDTSK#.G                     | 15.97  | 5.07  | 3.15  | 0.32  |
| Q9R112_C Sqrld   | Sulfide:quii K.EGNALFTFPNTPVK#.C                   | 6.89   | 1.63  | 4.23  | 0.24  |
| Q64337_C Sqsstm1 | Sequestoso K.EVDPSTGELQSLQMPSEEGPSSLDPSQEGPTGLK#.E | 3.65   | 1.72  | 2.13  | 0.47  |
| Q64337_C Sqsstm1 | Sequestoso R.LTPTPESSSTGTEK#.S                     | 20.16  | 10.49 | 1.92  | 0.52  |
| Q64337_C Sqsstm1 | Sequestoso K.NYDIGAALDTIOYSK#.H                    | 36.82  | 17.50 | 2.10  | 0.48  |
| Q497V5_SF Srpbd1 | S1 RNA-bin R.LQTTVHTLQVLDILOGSK#.T                 | 14.39  | 5.93  | 2.43  | 0.41  |
| A0A087WC Srcap   | Protein Src K.DLLPVAVDLPESEK#.T                    | 18.33  | 14.24 | 1.29  | 0.78  |
| A0A087WC Srcap   | Protein Src R.LEQLSEIER.F                          | 2.86   | 29.39 | 0.10  | 10.26 |
| A0A087WC Srcap   | Protein Src R.SPFYLDSEEK#.R                        | 9.89   | 7.22  | 1.37  | 0.73  |
| A0A087WC Srcap   | Protein Src K.TPIPLLLR.G                           | 4.99   | 15.46 | 0.32  | 3.10  |
| Q8B2X4_SR Srek1  | Splicing reg R.EAQSFIASAIPESGK#.S                  | 8.40   | 3.70  | 2.27  | 0.44  |
| Q91269_SR Srgap1 | SLIT-ROBO I K.QJGR*SGDPVFFHIR.L                    | 3.80   | 3.65  | 1.04  | 0.96  |
| Q91267_SR Srgap2 | SLIT-ROBO I R.NEYLLALEATNASVFK#.Y                  | 5.94   | 1.56  | 3.82  | 0.26  |
| Q91267_SR Srgap2 | SLIT-ROBO I K.VLNELYSVM*#.T                        | 13.90  | 14.77 | 0.94  | 1.06  |
| Q6P069_C Srci    | Sorcin OS-R.SGTVDPQELQK#.A                         | 19.49  | 7.78  | 2.50  | 0.40  |
| P16254_SR Srp14  | Signal recoj R.K#STVSSK#.E                         | 50.92  | 16.16 | 3.15  | 0.32  |
| P16254_SR Srp14  | Signal recoj R.K#SSVEGLEPAENK#.C                   | 12.58  | 5.27  | 2.38  | 0.42  |
| G5E8T3_G5 Srp19  | Signal recoj K.SGGADPSLQQGEGSK#.K                  | 3.37   | 1.64  | 2.05  | 0.49  |
| G5E8T3_G5 Srp19  | Signal recoj K.SGGADPSLQQGEGSK#.K                  | 98.74  | 36.76 | 2.69  | 0.37  |
| G5E8T3_G5 Srp19  | Signal recoj K.SGGADPSLQQGEGSK#.K                  | 1.73   | 2.24  | 0.77  | 1.30  |
| G5E8T3_G5 Srp19  | Signal recoj K.SVM*LYVAEM*IPK#.L                   | 9.36   | 2.84  | 3.30  | 0.30  |
| G5E8T3_G5 Srp19  | Signal recoj K.SVM*LYVAEM*IPK#.L                   | 20.99  | 8.42  | 2.49  | 0.40  |
| G5E8T3_G5 Srp19  | Signal recoj K.SVM*LYVAEM*IPK#.L                   | 4.67   | 2.21  | 2.12  | 0.47  |
| P14576_SR Srp54  | Signal recoj K.AFK#DK#VDVASVITK#.L                 | 14.75  | 3.96  | 3.73  | 0.27  |
| P14576_SR Srp54  | Signal recoj R.AGAFDQK#.Q                          | 71.70  | 24.36 | 2.94  | 0.34  |
| P14576_SR Srp54  | Signal recoj K.DK#HVDVASVITK#.L                    | 71.84  | 20.59 | 3.49  | 0.29  |
| P14576_SR Srp54  | Signal recoj R.DM*YEQFQNM*#.M                      | 23.20  | 7.51  | 3.09  | 0.32  |
| P14576_SR Srp54  | Signal recoj R.DM*YEQFQNM*#.M                      | 5.89   | 1.87  | 3.16  | 0.32  |
| P14576_SR Srp54  | Signal recoj R.DM*YEQFQNM*#.M                      | 9.17   | 1.87  | 4.89  | 0.20  |
| P14576_SR Srp54  | Signal recoj R.DM*YEQFQNM*#.M                      | 12.58  | 3.35  | 3.75  | 0.27  |
| P14576_SR Srp54  | Signal recoj R.DVQELLTQYK#.F                       | 76.09  | 25.82 | 2.95  | 0.34  |
| P14576_SR Srp54  | Signal recoj K.FAQMVK#.K                           | 30.51  | 18.12 | 1.68  | 0.59  |
| P14576_SR Srp54  | Signal recoj K.FKNENFEIIVDTSGR.H                   | 9.06   | 11.59 | 0.78  | 1.28  |
| P14576_SR Srp54  | Signal recoj K.GGGALSAAVATK#.S                     | 143.91 | 53.65 | 2.68  | 0.37  |
| P14576_SR Srp54  | Signal recoj K.GGGALSAAVATK#.S                     | 8.31   | 1.16  | 7.14  | 0.14  |
| P14576_SR Srp54  | Signal recoj R.IPFYGSYTEM*DPVIIASEGVEK#.F          | 20.37  | 7.24  | 2.81  | 0.36  |
| P14576_SR Srp54  | Signal recoj R.IPFYGSYTEM*DPVIIASEGVEK#.F          | 8.25   | 2.91  | 2.83  | 0.35  |
| P14576_SR Srp54  | Signal recoj R.IPFYGSYTEM*DPVIIASEGVEK#.F          | 17.27  | 4.35  | 3.97  | 0.25  |
| P14576_SR Srp54  | Signal recoj K.LAYYYQR.K                           | 11.53  | 19.07 | 0.60  | 1.65  |
| P14576_SR Srp54  | Signal recoj K.LDDNEALIEK#.L                       | 57.60  | 28.50 | 2.02  | 0.49  |
| P14576_SR Srp54  | Signal recoj K.LLGM*GDIELIDK#.V                    | 7.86   | 5.24  | 1.50  | 0.67  |
| P14576_SR Srp54  | Signal recoj K.LLGM*GDIELIDK#NVLK#.L               | 19.95  | 5.63  | 3.54  | 0.28  |
| P14576_SR Srp54  | Signal recoj K.MIQHAFVK#.E                         | 16.28  | 3.26  | 5.00  | 0.20  |
| P14576_SR Srp54  | Signal recoj K.QNVIMFVLOGSGK#.T                    | 11.86  | 8.06  | 1.47  | 0.68  |
| P14576_SR Srp54  | Signal recoj K.SAIDLEEM*ASGLNK#.R                  | 22.18  | 16.69 | 1.33  | 0.75  |
| P14576_SR Srp54  | Signal recoj K.SAIDLEEMASGLNK#.R                   | 26.34  | 9.13  | 2.89  | 0.35  |
| P14576_SR Srp54  | Signal recoj R.SLSNATIINEEVLNAM*LK#.E              | 8.22   | 2.78  | 2.96  | 0.34  |
| P14576_SR Srp54  | Signal recoj R.SLSNATIINEEVLNAM*LK#.E              | 24.22  | 7.60  | 3.19  | 0.31  |
| P14576_SR Srp54  | Signal recoj K.SPIIFGTGEHIDDFEPFK#.T               | 81.41  | 26.67 | 3.05  | 0.33  |
| P14576_SR Srp54  | Signal recoj K.VDVASVITK#.L                        | 55.99  | 18.14 | 3.09  | 0.32  |
| P14576_SR Srp54  | Signal recoj K.VNELK#LDDNEALIEK#.L                 | 3.98   | 1.94  | 2.05  | 0.49  |
| P14576_SR Srp54  | Signal recoj K.GGGALSAAVATK#.S                     | 11.76  | 4.66  | 2.53  | 0.40  |
| P14576_SR Srp54  | Signal recoj K.SPIIFGTGEHIDDFEPFK#.T               | 17.22  | 8.08  | 2.13  | 0.47  |
| P14576_SR Srp54  | Signal recoj R.DVQELLTQYK#.F                       | 10.16  | 4.26  | 2.39  | 0.42  |
| P14576_SR Srp54  | Signal recoj K.GGGALSAAVATK#.S                     | 18.05  | 3.48  | 5.18  | 0.19  |
| P14576_SR Srp54  | Signal recoj R.IPFYGSYTEM*DPVIIASEGVEK#.F          | 5.76   | 3.95  | 1.46  | 0.69  |
| Q8BMA6_S Srp68   | Signal recoj R.ALLQQQPEDDSK#.R                     | 6.08   | 2.66  | 2.28  | 0.44  |
| Q8BMA6_S Srp68   | Signal recoj K.ANK#EFGDLSLEILQIK#.E                | 25.33  | 14.80 | 1.71  | 0.58  |
| Q8BMA6_S Srp68   | Signal recoj R.AWSYAM*QLK#.Q                       | 26.28  | 6.89  | 3.82  | 0.26  |
| Q8BMA6_S Srp68   | Signal recoj R.IFLGLADNEAAIVQAESEETK#.E            | 15.57  | 7.83  | 1.99  | 0.50  |
| Q8BMA6_S Srp68   | Signal recoj R.IFLGLADNEAAIVQAESEETK#.E            | 12.23  | 14.02 | 0.87  | 1.15  |
| Q8BMA6_S Srp68   | Signal recoj K.LASAFTEAAVLYNQR.V                   | 5.02   | 5.68  | 0.88  | 1.13  |
| Q8BMA6_S Srp68   | Signal recoj K.NSLKLDLPDQELITQVR.S                 | 3.63   | 10.92 | 0.33  | 3.01  |
| Q8BMA6_S Srp68   | Signal recoj K.SAIFAFNK#.C                         | 27.37  | 15.91 | 1.72  | 0.58  |
| Q8BMA6_S Srp68   | Signal recoj R.SGGTEGLLAEKLEALITQTR.A              | 4.45   | 3.97  | 1.12  | 0.89  |
| Q8BMA6_S Srp68   | Signal recoj K.VTEELLTDRN.Y                        | 8.37   | 10.94 | 0.77  | 1.31  |
| Q8BMA6_S Srp68   | Signal recoj K.YANEVSSHGGASK#.N                    | 17.97  | 7.05  | 2.55  | 0.39  |
| Q8BMA6_S Srp68   | Signal recoj K.ANK#EFGDLSLEILQIK#.E                | 26.02  | 3.34  | 7.79  | 0.13  |
| Q8BMA6_S Srp68   | Signal recoj K.NSLKLDLPDQELITQVR.S                 | 3.32   | 8.72  | 0.38  | 2.63  |
| Q8BMA6_S Srp68   | Signal recoj R.SGGTEGLLAEK#.L                      | 17.29  | 1.70  | 10.17 | 0.10  |
| Q8BMA6_S Srp68   | Signal recoj R.SGGTEGLLAEKLEALITQTR.A              | 6.34   | 9.69  | 0.65  | 1.53  |
| Q8BMA6_S Srp68   | Signal recoj K.YANEVSSHGGASK#.N                    | 7.11   | 4.10  | 1.74  | 0.58  |
| Q8BMA6_S Srp68   | Signal recoj K.DLPDQELITQVR.S                      | 6.42   | 14.77 | 0.43  | 2.30  |
| Q8BMA6_S Srp68   | Signal recoj R.IFLGLADNEAAIVQAESEETK#.E            | 23.36  | 4.54  | 5.15  | 0.19  |

|                  |                                                  |        |       |      |       |
|------------------|--------------------------------------------------|--------|-------|------|-------|
| Q8BMA6_S_Srp68   | Signal recoj R.IFLLGLADNAAIVQAESEETKER.L         | 22.90  | 26.62 | 0.86 | 1.16  |
| F8VQC1_F8_Srp72  | Signal recoj K.AIELLQEFSDQHPENAAEIK#.L           | 57.32  | 23.41 | 2.45 | 0.41  |
| F8VQC1_F8_Srp72  | Signal recoj K.DIHTLAQLISAYSVDPEK#AK#.A          | 4.79   | 3.36  | 1.43 | 0.70  |
| F8VQC1_F8_Srp72  | Signal recoj K.EAVSDLEQLW#K.Q                    | 24.67  | 12.45 | 1.98 | 0.50  |
| F8VQC1_F8_Srp72  | Signal recoj K.GTQGATAGASSELDAK#.A               | 46.18  | 22.40 | 2.06 | 0.49  |
| F8VQC1_F8_Srp72  | Signal recoj K.LTNAEGVEFK#.L                     | 48.46  | 25.34 | 1.91 | 0.52  |
| F8VQC1_F8_Srp72  | Signal recoj K.TIESATQQTDK#.L                    | 13.98  | 3.54  | 3.94 | 0.25  |
| F8VQC1_F8_Srp72  | Signal recoj K.VLANNLSFEK#.A                     | 23.00  | 8.14  | 2.82 | 0.35  |
| F8VQC1_F8_Srp72  | Signal recoj R.K.#NLSAVVAAGSNWEK#.V              | 13.48  | 5.70  | 2.37 | 0.42  |
| F8VQC1_F8_Srp72  | Signal recoj K.TIESATQQTDK#.L                    | 10.54  | 4.81  | 2.19 | 0.46  |
| F8VQC1_F8_Srp72  | Signal recoj K.AIELLQEFSDQHPENAAEIK#.L           | 90.49  | 38.98 | 2.32 | 0.43  |
| F8VQC1_F8_Srp72  | Signal recoj K.AIELLQEFSDQHPENAAEIK#.L           | 5.43   | 2.27  | 2.39 | 0.42  |
| F8VQC1_F8_Srp72  | Signal recoj K.DIHTLAQLISAYSVDPEK#AK#.A          | 24.10  | 6.14  | 3.92 | 0.25  |
| F8VQC1_F8_Srp72  | Signal recoj K.EAVSDLEQLW#K.Q                    | 41.32  | 16.87 | 2.45 | 0.41  |
| F8VQC1_F8_Srp72  | Signal recoj K.GTQGATAGASSELDAK#.A               | 116.61 | 41.02 | 2.84 | 0.35  |
| F8VQC1_F8_Srp72  | Signal recoj K.ISQGNISK#.A                       | 44.54  | 13.28 | 3.35 | 0.30  |
| F8VQC1_F8_Srp72  | Signal recoj R.K.#NLSAVVAAGSNWEK#.V              | 8.88   | 4.01  | 2.22 | 0.45  |
| F8VQC1_F8_Srp72  | Signal recoj K.LTMA*AKL#.I                       | 33.43  | 10.62 | 3.15 | 0.32  |
| F8VQC1_F8_Srp72  | Signal recoj K.LTMA*AKL#.I                       | 33.07  | 17.91 | 1.85 | 0.54  |
| F8VQC1_F8_Srp72  | Signal recoj K.LTNAEGVEFK#.L                     | 108.75 | 38.64 | 2.81 | 0.36  |
| F8VQC1_F8_Srp72  | Signal recoj R.QLQAIEFNK#.A                      | 43.65  | 14.19 | 3.08 | 0.33  |
| F8VQC1_F8_Srp72  | Signal recoj R.TEEALQLYQIK#.L                    | 13.60  | 6.06  | 2.25 | 0.45  |
| F8VQC1_F8_Srp72  | Signal recoj K.TIESATQQTDK#.L                    | 40.57  | 13.58 | 2.99 | 0.33  |
| F8VQC1_F8_Srp72  | Signal recoj K.TIESATQQTDK#.L                    | 21.47  | 7.81  | 2.75 | 0.36  |
| F8VQC1_F8_Srp72  | Signal recoj K.VLANNLSFEK#.A                     | 89.14  | 56.86 | 1.57 | 0.64  |
| F8VQC1_F8_Srp72  | Signal recoj R.YGQNSDFTR.A                       | 12.91  | 20.74 | 0.62 | 1.61  |
| F8VQC1_F8_Srp72  | Signal recoj K.AIELLQEFSDQHPENAAEIK#.L           | 37.57  | 10.32 | 3.64 | 0.27  |
| F8VQC1_F8_Srp72  | Signal recoj K.EAVSDLEQLW#K.Q                    | 13.60  | 3.27  | 4.16 | 0.24  |
| F8VQC1_F8_Srp72  | Signal recoj K.GTQGATAGASSELDAK#.A               | 30.47  | 11.21 | 2.72 | 0.37  |
| F8VQC1_F8_Srp72  | Signal recoj K.LTNAEGVEFK#.L                     | 31.90  | 9.50  | 3.36 | 0.30  |
| F8VQC1_F8_Srp72  | Signal recoj R.TEEALQLYQIK#.L                    | 14.70  | 3.62  | 4.06 | 0.25  |
| F8VQC1_F8_Srp72  | Signal recoj K.VLANNLSFEK#.A                     | 26.38  | 33.42 | 0.79 | 1.27  |
| O70551_SF_SrpK1  | SRSF protei K.LK#PWLGLVLEVEK#.Y                  | 11.50  | 7.06  | 1.63 | 0.61  |
| O70551_SF_SrpK1  | SRSF protei K.FSAGNFLLNLEPK#.N                   | 15.91  | 13.78 | 1.15 | 0.87  |
| O70551_SF_SrpK1  | SRSF protei R.LAAEATVQR.S                        | 5.15   | 11.02 | 0.47 | 2.14  |
| O70551_SF_SrpK1  | SRSF protei K.LEESNSIGQDQTLTER.G                 | 2.99   | 6.88  | 0.44 | 2.30  |
| O54781_SF_SrpK2  | SRSF protei R.AADLLVNPDP.R.N                     | 4.91   | 8.53  | 0.58 | 1.74  |
| O54781_SF_SrpK2  | SRSF protei K.LK#PWLGLVLEVEK#.Y                  | 31.44  | 8.49  | 3.70 | 0.27  |
| O54781_SF_SrpK2  | SRSF protei R.TVSASSTGDLPK#.T                    | 43.27  | 7.24  | 5.97 | 0.17  |
| Q52K18_SR_Srrm1  | Serine/argi R.APQTSPPPPV.R.R                     | 10.09  | 24.22 | 0.42 | 2.40  |
| Q52K18_SR_Srrm1  | Serine/argi K.AVTIATPATAAPAAVSAATTTSAQEEPAAPPR.K | 14.20  | 29.56 | 0.48 | 2.08  |
| Q52K18_SR_Srrm1  | Serine/argi K.DSSVEATSDILK#.A                    | 41.01  | 21.20 | 1.93 | 0.52  |
| Q52K18_SR_Srrm1  | Serine/argi R.KETSEAEEDNLDL.R.H                  | 25.85  | 78.08 | 0.33 | 3.02  |
| Q52K18_SR_Srrm1  | Serine/argi R.K.#VLESEEDK#GSK#.M                 | 141.73 | 53.34 | 2.66 | 0.38  |
| Q52K18_SR_Srrm1  | Serine/argi R.KVLESEEDK#GSK#.M                   | 29.40  | 12.47 | 2.36 | 0.42  |
| Q52K18_SR_Srrm1  | Serine/argi K.M*AAADSVQQR.R                      | 12.68  | 33.97 | 0.37 | 2.68  |
| Q52K18_SR_Srrm1  | Serine/argi K.MAAADSVQQR.R                       | 24.44  | 60.33 | 0.41 | 2.47  |
| Q52K18_SR_Srrm1  | Serine/argi R.M.*K#DSSVEATSDILK#.A               | 65.93  | 32.63 | 2.02 | 0.49  |
| Q52K18_SR_Srrm1  | Serine/argi R.MK#DSSVEATSDILK#.A                 | 10.00  | 5.50  | 1.82 | 0.55  |
| Q52K18_SR_Srrm1  | Serine/argi K.M*MQNLTGLNGK#.N                    | 6.85   | 3.78  | 1.81 | 0.55  |
| Q52K18_SR_Srrm1  | Serine/argi R.SVSGSPEPAK#.K                      | 38.73  | 15.96 | 2.43 | 0.41  |
| Q52K18_SR_Srrm1  | Serine/argi K.VNLEVIK#PWITK#.R                   | 106.26 | 49.21 | 2.16 | 0.46  |
| Q52K18_SR_Srrm1  | Serine/argi K.DSSVEATSDILK#.A                    | 9.63   | 5.21  | 1.85 | 0.54  |
| Q8BT18_SRI_Srrm2 | Serine/argi R.SVVQTPVAGSQSLSSGTVAK.S             | 5.86   | 7.07  | 0.83 | 1.21  |
| Q8BT18_SRI_Srrm2 | Serine/argi R.TPAASAVNLGAGAR.T                   | 5.50   | 21.51 | 0.26 | 3.91  |
| Q8BT18_SRI_Srrm2 | Serine/argi R.TPAGLAPNTLSSSR.M                   | 2.67   | 12.33 | 0.22 | 4.61  |
| Q8BT18_SRI_Srrm2 | Serine/argi R.AAFGISDSYVDGSSFPDQR.R              | 3.83   | 17.54 | 0.22 | 4.58  |
| Q8BT18_SRI_Srrm2 | Serine/argi K.GHTQTPDSSPEVMQTVQESPLQSK.S         | 11.59  | 9.25  | 1.25 | 0.80  |
| Q8BT18_SRI_Srrm2 | Serine/argi R.HLEALVK#.R                         | 54.18  | 55.98 | 0.97 | 1.03  |
| Q8BT18_SRI_Srrm2 | Serine/argi R.HSGSTSPYLK.S                       | 15.19  | 25.27 | 0.60 | 1.66  |
| Q8BT18_SRI_Srrm2 | Serine/argi R.IPAASAAAM*NLASAR.T                 | 5.70   | 19.78 | 0.29 | 3.47  |
| Q8BT18_SRI_Srrm2 | Serine/argi R.IPAASAAAMNLASAR.T                  | 1.68   | 15.74 | 0.11 | 9.37  |
| Q8BT18_SRI_Srrm2 | Serine/argi K.MELGTPLR.H                         | 5.29   | 10.74 | 0.49 | 2.03  |
| Q8BT18_SRI_Srrm2 | Serine/argi R.M*SQVPAPVPLM*SLR.T                 | 3.95   | 16.77 | 0.24 | 4.24  |
| Q8BT18_SRI_Srrm2 | Serine/argi R.M*SQVPAPVPLM*SLR.T                 | 1.21   | 10.90 | 0.11 | 9.02  |
| Q8BT18_SRI_Srrm2 | Serine/argi K.NSGPSEVNTGFSPVVK#.E                | 23.81  | 27.95 | 0.85 | 1.17  |
| Q8BT18_SRI_Srrm2 | Serine/argi K.RPNPDLIDHER.K                      | 2.00   | 62.33 | 0.03 | 31.14 |
| Q8BT18_SRI_Srrm2 | Serine/argi K.SEISTDPK.L                         | 44.52  | 44.65 | 1.00 | 1.00  |
| Q8BT18_SRI_Srrm2 | Serine/argi K.SFLVQSR.L                          | 13.94  | 65.42 | 0.21 | 4.69  |
| Q8BT18_SRI_Srrm2 | Serine/argi R.SGSSQELDGKPSASPOER.S               | 7.21   | 37.98 | 0.19 | 5.27  |
| Q8BT18_SRI_Srrm2 | Serine/argi K.SLLPNSSQELM*EVEK.S                 | 10.54  | 10.55 | 1.00 | 1.00  |
| Q8BT18_SRI_Srrm2 | Serine/argi K.SLLPNSSQELM*EVEK.S                 | 12.82  | 11.73 | 1.09 | 0.92  |
| Q8BT18_SRI_Srrm2 | Serine/argi K.SM*LTQPPDQNLGSK.S                  | 11.86  | 18.16 | 0.65 | 1.53  |
| Q8BT18_SRI_Srrm2 | Serine/argi R.SPGM*LEPLGASAR.T                   | 17.90  | 25.71 | 0.70 | 1.44  |
| Q8BT18_SRI_Srrm2 | Serine/argi R.SSELSPVEVEK#.V                     | 28.21  | 25.99 | 1.09 | 0.92  |
| Q8BT18_SRI_Srrm2 | Serine/argi R.SVSPENHAQSR.I                      | 1.94   | 7.27  | 0.27 | 3.75  |
| Q8BT18_SRI_Srrm2 | Serine/argi R.SVVQTPVAGSQSLSSGTVAK#.S            | 7.25   | 7.75  | 0.94 | 1.07  |
| Q8BT18_SRI_Srrm2 | Serine/argi R.TAPAANLASR.I                       | 6.33   | 48.51 | 0.13 | 7.66  |
| Q8BT18_SRI_Srrm2 | Serine/argi R.TAVAPSAVNLDPR.T                    | 2.70   | 26.48 | 0.10 | 9.79  |
| Q8BT18_SRI_Srrm2 | Serine/argi K.TK#PDSSIYPLVDSK#.S                 | 55.84  | 60.71 | 0.92 | 1.09  |
| Q8BT18_SRI_Srrm2 | Serine/argi K.TK#PDSSIYPLVDSK#.S                 | 21.01  | 25.35 | 0.83 | 1.21  |
| Q8BT18_SRI_Srrm2 | Serine/argi R.TPAAAAAM*NLASPR.T                  | 4.27   | 12.87 | 0.33 | 3.01  |
| Q8BT18_SRI_Srrm2 | Serine/argi R.TPAAALALSLTSGTPTAANYPSSSR.T        | 3.74   | 13.50 | 0.28 | 3.61  |
| Q8BT18_SRI_Srrm2 | Serine/argi R.TPAAAVNLGAGAR.T                    | 9.67   | 58.70 | 0.16 | 6.07  |
| Q8BT18_SRI_Srrm2 | Serine/argi R.TPAGLAPNTLSSSR.M                   | 7.40   | 22.56 | 0.33 | 3.05  |
| Q8BT18_SRI_Srrm2 | Serine/argi R.TPM*SVLQQTGGSM*MDGPGPR.I           | 4.84   | 24.55 | 0.20 | 5.07  |
| Q8BT18_SRI_Srrm2 | Serine/argi R.TPPVALSSSR.M                       | 2.77   | 21.14 | 0.13 | 7.62  |
| Q8BT18_SRI_Srrm2 | Serine/argi R.TPQAPVANLVGPR.S                    | 2.60   | 21.62 | 0.12 | 8.33  |
| Q8BT18_SRI_Srrm2 | Serine/argi K.VGLFSSQK#.V                        | 91.69  | 83.84 | 1.09 | 0.91  |
| Q8BT18_SRI_Srrm2 | Serine/argi K.VSSPVLVQQR.T                       | 8.72   | 41.06 | 0.21 | 4.71  |
| Q99MR6_S_Srrt    | Serrate RN# R.ILEQEEEEQAGK#.T                    | 13.11  | 7.05  | 1.86 | 0.54  |
| Q99MR6_S_Srrt    | Serrate RN# R.AGPALGEGEK.K                       | 27.89  | 46.60 | 0.60 | 1.67  |
| Q99MR6_S_Srrt    | Serrate RN# R.DLDAPDDVDF.-                       | 94.01  | 94.01 | 1.00 | 1.00  |
| Q99MR6_S_Srrt    | Serrate RN# R.EESLSEEAQK#.M                      | 196.94 | 70.41 | 2.80 | 0.36  |
| Q99MR6_S_Srrt    | Serrate RN# K.EVAFNNFLDQK#.R                     | 198.20 | 73.51 | 2.70 | 0.37  |
| Q99MR6_S_Srrt    | Serrate RN# K.FVTSNTQELGK#.D                     | 150.22 | 46.64 | 3.22 | 0.31  |
| Q99MR6_S_Srrt    | Serrate RN# K.HAEKIEVKK.E                        | 7.48   | 2.59  | 2.88 | 0.35  |
| Q99MR6_S_Srrt    | Serrate RN# R.ILEQEEEEQAGK#.T                    | 182.88 | 74.80 | 2.44 | 0.41  |
| Q99MR6_S_Srrt    | Serrate RN# R.ILEQEEEEQAGK#TGEASK#.K             | 15.27  | 4.40  | 3.47 | 0.29  |
| Q99MR6_S_Srrt    | Serrate RN# R.ISHGVEVLEWQK#.T                    | 107.15 | 48.30 | 2.22 | 0.45  |
| Q99MR6_S_Srrt    | Serrate RN# R.K#DPEQVEK#.F                       | 82.71  | 31.49 | 2.63 | 0.38  |
| Q99MR6_S_Srrt    | Serrate RN# R.LGSAIEIDLVPPPIM#K#.S               | 23.23  | 10.01 | 2.32 | 0.43  |
| Q99MR6_S_Srrt    | Serrate RN# R.LGSAIEIDLVPPPIM#K#.S               | 19.38  | 7.61  | 2.55 | 0.39  |



|                  |                                             |        |        |      |       |
|------------------|---------------------------------------------|--------|--------|------|-------|
| Q99MR6_S Srrt    | Serrate RNf K.LIHTLDDR.T                    | 17.96  | 18.42  | 0.98 | 1.03  |
| Q99MR6_S Srrt    | Serrate RNf K.LLLYL.R.I                     | 20.52  | 29.90  | 0.69 | 1.46  |
| Q99MR6_S Srrt    | Serrate RNf K.M*EGTENDLR.I                  | 11.86  | 18.92  | 0.63 | 1.60  |
| Q99MR6_S Srrt    | Serrate RNf K.M*LDAAVVK#.M                  | 49.05  | 20.81  | 2.36 | 0.42  |
| Q99MR6_S Srrt    | Serrate RNf K.SFKFELSLDSDVETEAVKR.Y         | 5.83   | 10.55  | 0.55 | 1.81  |
| Q99MR6_S Srrt    | Serrate RNf R.SK#YHPDEVGK#.R                | 8.36   | 4.38   | 1.91 | 0.52  |
| Q99MR6_S Srrt    | Serrate RNf R.VALSEPQPR.R                   | 15.31  | 26.11  | 0.59 | 1.70  |
| Q99MR6_S Srrt    | Serrate RNf R.DLDAPDDVDF.F.                 | 26.09  | 26.09  | 1.00 | 1.00  |
| Q99MR6_S Srrt    | Serrate RNf R.ESLSEEAQK#.M                  | 35.17  | 13.96  | 2.52 | 0.40  |
| Q99MR6_S Srrt    | Serrate RNf K.EVAFNNFLTDAK#.R               | 42.20  | 15.62  | 2.70 | 0.37  |
| Q99MR6_S Srrt    | Serrate RNf K.FVTSNTQELGK#.D                | 28.11  | 9.96   | 2.82 | 0.35  |
| Q99MR6_S Srrt    | Serrate RNf R.LEQEELQAGK#.T                 | 40.16  | 17.24  | 2.33 | 0.43  |
| Q99MR6_S Srrt    | Serrate RNf R.K#DPEQVEK#.F                  | 19.80  | 8.51   | 2.33 | 0.43  |
| Q99MR6_S Srrt    | Serrate RNf R.TQLWASEPGTPPVPTSLPSQNPILK#.N  | 12.45  | 5.14   | 2.42 | 0.41  |
| Q6PDM2_S Srsf1   | Serine/argii R.DAEDAVYGR.D                  | 68.85  | 275.24 | 0.25 | 4.00  |
| Q6PDM2_S Srsf1   | Serine/argii R.DGTGVVEFVR.K                 | 84.60  | 282.42 | 0.30 | 3.34  |
| Q6PDM2_S Srsf1   | Serine/argii R.DGYDYDGYR.L                  | 42.00  | 135.98 | 0.31 | 3.24  |
| Q6PDM2_S Srsf1   | Serine/argii K.DIEDVFKY#.Y                  | 53.52  | 43.76  | 1.22 | 0.82  |
| Q6PDM2_S Srsf1   | Serine/argii R.GGPPFAFVEFEDPR.D             | 32.36  | 119.99 | 0.27 | 3.71  |
| Q6PDM2_S Srsf1   | Serine/argii R.GGPPFAFVEFEDPRDAEDAVYGR.D    | 4.00   | 28.97  | 0.14 | 7.25  |
| Q6PDM2_S Srsf1   | Serine/argii R.IYVGNLPPDIR.T                | 16.92  | 64.27  | 0.26 | 3.80  |
| Q6PDM2_S Srsf1   | Serine/argii R.KEDM*TYAVR.K                 | 21.91  | 65.78  | 0.33 | 3.00  |
| Q6PDM2_S Srsf1   | Serine/argii R.RGGPPFAFVEFEDPR.D            | 3.26   | 22.84  | 0.14 | 7.02  |
| Q6PDM2_S Srsf1   | Serine/argii R.SHEGETAVIR.V                 | 50.45  | 172.84 | 0.29 | 3.43  |
| Q6PDM2_S Srsf1   | Serine/argii R.TK#DIEDVFKY#.Y               | 109.36 | 79.96  | 1.37 | 0.73  |
| Q6PDM2_S Srsf1   | Serine/argii R.TK#DIEDVFKY.Y                | 122.48 | 72.43  | 1.69 | 0.59  |
| Q6PDM2_S Srsf1   | Serine/argii R.VVVGSLPPSGSWQDLK#.D          | 50.93  | 42.96  | 1.19 | 0.84  |
| Q9ROU0_Sf Srsf10 | Serine/argii R.DAEDALHNLDR.K                | 4.83   | 18.51  | 0.26 | 3.83  |
| Q9ROU0_Sf Srsf10 | Serine/argii R.GFAYVQFEDVR.D                | 20.75  | 104.95 | 0.20 | 5.06  |
| Q9ROU0_Sf Srsf10 | Serine/argii R.QEIQFAGQDR.K                 | 13.37  | 57.99  | 0.23 | 4.34  |
| Q9ROU0_Sf Srsf10 | Serine/argii R.YGPIVDVYVPLDFYTR.R           | 14.51  | 90.94  | 0.16 | 6.27  |
| Q9ROU0_Sf Srsf10 | Serine/argii R.YLRPPNLSLVR.N                | 12.80  | 82.24  | 0.16 | 6.42  |
| Q9ROU0_Sf Srsf10 | Serine/argii R.GFAYVQFEDVR.D                | 31.05  | 141.52 | 0.22 | 4.56  |
| Q9ROU0_Sf Srsf10 | Serine/argii R.YGPIVDVYVPLDFYTR.R           | 6.72   | 33.91  | 0.20 | 5.04  |
| Q9ROU0_Sf Srsf10 | Serine/argii R.YLRPPNLSLVR.N                | 4.37   | 129.71 | 0.03 | 29.65 |
| Q3UIX4_Q3 Srsf11 | Protein Srsi R.ALI#VVPYAE#V#PDEK#.A         | 29.22  | 14.04  | 2.08 | 0.48  |
| Q3UIX4_Q2 Srsf11 | Protein Srsi K.FHDPDSAAVQAHLTNTVFVDR.A      | 6.99   | 9.57   | 0.73 | 1.37  |
| Q3UIX4_Q2 Srsf11 | Protein Srsi K.LNHVAAGLVPSLK#.S             | 54.21  | 26.63  | 2.04 | 0.49  |
| Q3UIX4_Q2 Srsf11 | Protein Srsi R.TLFGFLGK#.I                  | 45.82  | 19.99  | 2.29 | 0.44  |
| Q3UIX4_Q2 Srsf11 | Protein Srsi R.ALI#VVPYAE#V#PDEK#.A         | 102.38 | 37.03  | 2.77 | 0.36  |
| Q3UIX4_Q2 Srsf11 | Protein Srsi K.FHDPDSAAVQAHLTNTVFVDR.A      | 2.66   | 2.72   | 0.98 | 1.02  |
| Q3UIX4_Q2 Srsf11 | Protein Srsi R.LFPPDPSL#PVSSR.V             | 6.36   | 12.99  | 0.49 | 2.04  |
| Q3UIX4_Q2 Srsf11 | Protein Srsi R.ALI#VVPYAE#V#PDEK#.A         | 21.99  | 9.59   | 2.29 | 0.44  |
| Q3UIX4_Q2 Srsf11 | Protein Srsi K.FHDPDSAAVQAHLTNTVFVDR.A      | 3.93   | 6.90   | 0.57 | 1.76  |
| Q3UIX4_Q2 Srsf11 | Protein Srsi K.LNHVAAGLVPSLK#.S             | 41.32  | 15.12  | 2.73 | 0.37  |
| Q62093_SF Srsf2  | Serine/argii R.DAEDAM*DAM*DGAVLDGR.E        | 3.64   | 15.34  | 0.24 | 4.21  |
| Q62093_SF Srsf2  | Serine/argii R.DAEDAM*DAMDGAVLDGR.E         | 1.64   | 3.83   | 0.43 | 2.33  |
| Q62093_SF Srsf2  | Serine/argii K.VDNLTYR.T                    | 47.97  | 60.87  | 0.79 | 1.27  |
| Q62093_SF Srsf2  | Serine/argii R.VGDVYPR.D                    | 41.43  | 107.89 | 0.38 | 2.60  |
| P84104_SR Srsf3  | Serine/argii R.NPPGFAPVEFEDPR.D             | 15.87  | 65.37  | 0.24 | 4.12  |
| P84104_SR Srsf3  | Serine/argii R.AFGYGLR.S                    | 144.01 | 592.43 | 0.24 | 4.11  |
| P84104_SR Srsf3  | Serine/argii R.NPPGFAPVEFEDPR.D             | 151.59 | 785.31 | 0.19 | 5.18  |
| P84104_SR Srsf3  | Serine/argii R.NPPGFAPVEFEDPRDAADAVR.E      | 40.09  | 564.05 | 0.07 | 14.07 |
| P84104_SR Srsf3  | Serine/argii R.NRGGPPS#WGR.R                | 2.95   | 24.42  | 0.12 | 8.28  |
| P84104_SR Srsf3  | Serine/argii R.VELSN#GK.R                   | 15.75  | 17.98  | 0.88 | 1.14  |
| P84104_SR Srsf3  | Serine/argii R.VELSN#GK.S                   | 3.39   | 9.93   | 0.34 | 2.93  |
| P84104_SR Srsf3  | Serine/argii R.VRVELSN#GK.R                 | 9.63   | 57.88  | 0.17 | 6.01  |
| P84104_SR Srsf3  | Serine/argii K.VYVGNLGNNGNK#.T              | 56.04  | 64.39  | 0.87 | 1.15  |
| Q8VE97_SR Srsf4  | Serine/argii R.LIVENLSSR.C                  | 96.08  | 323.53 | 0.30 | 3.37  |
| Q8VE97_SR Srsf4  | Serine/argii R.QAGEVYDA#H.K                 | 34.12  | 38.29  | 0.89 | 1.12  |
| Q8VE97_SR Srsf4  | Serine/argii R.AEGESEAN#PEPR.A              | 24.32  | 69.58  | 0.35 | 2.86  |
| Q8VE97_SR Srsf4  | Serine/argii K.I#LEVDL#K.N                  | 77.55  | 53.45  | 1.45 | 0.69  |
| Q8VE97_SR Srsf4  | Serine/argii K.LDGT#VNGR.K                  | 3.93   | 10.21  | 0.38 | 2.60  |
| Q8VE97_SR Srsf4  | Serine/argii R.LIVENLSSR.C                  | 30.72  | 123.02 | 0.25 | 4.00  |
| Q8VE97_SR Srsf4  | Serine/argii R.L#VEDK#PGR.R                 | 5.91   | 23.07  | 0.26 | 3.90  |
| Q8VE97_SR Srsf4  | Serine/argii K.NGYGFVEFEDDLR.D              | 3.11   | 8.51   | 0.37 | 2.73  |
| Q8VE97_SR Srsf4  | Serine/argii K.SKD#AEDKLN#D#SAGK.A          | 5.81   | 6.17   | 0.94 | 1.06  |
| Q35326_SF Srsf5  | Serine/argii R.DADDAYELDGK#.E               | 92.74  | 58.35  | 1.59 | 0.63  |
| Q35326_SF Srsf5  | Serine/argii K.L#NEGVEF#V#S#GDLK#.N         | 92.04  | 59.83  | 1.54 | 0.65  |
| Q35326_SF Srsf5  | Serine/argii R.QAGEVTFAD#HRPK.L             | 2.88   | 5.77   | 0.50 | 2.00  |
| Q35326_SF Srsf5  | Serine/argii R.VSWQDLK#.D                   | 109.54 | 86.70  | 1.26 | 0.79  |
| Q35326_SF Srsf5  | Serine/argii R.DADDAYELDGK#.E               | 12.50  | 10.24  | 1.22 | 0.82  |
| Q3TWW8_ Srsf6    | Serine/argii R.ALDKLDGTEINGR.N              | 2.77   | 15.16  | 0.18 | 5.46  |
| Q3TWW8_ Srsf6    | Serine/argii R.DADDAYVELNSK#.E              | 100.24 | 93.78  | 1.07 | 0.94  |
| Q3TWW8_ Srsf6    | Serine/argii R.F#FSYGR.L                    | 27.30  | 86.34  | 0.32 | 3.16  |
| Q3TWW8_ Srsf6    | Serine/argii R.LLEIDLK#.N                   | 55.96  | 51.48  | 1.09 | 0.92  |
| Q3TWW8_ Srsf6    | Serine/argii K.NGYGFVEFEDSR.D               | 3.88   | 16.97  | 0.23 | 4.38  |
| Q3TWW8_ Srsf6    | Serine/argii R.TNEG#VIEFR.S                 | 39.25  | 149.28 | 0.26 | 3.80  |
| Q3TWW8_ Srsf6    | Serine/argii R.LLEIDLK#.N                   | 17.07  | 12.65  | 1.35 | 0.74  |
| Q3TWW8_ Srsf6    | Serine/argii R.TNEG#VIEFR.S                 | 6.55   | 20.86  | 0.31 | 3.18  |
| Q8BL97_SR Srsf7  | Serine/argii R.A#FSYGLR.T                   | 21.85  | 96.73  | 0.23 | 4.43  |
| Q8BL97_SR Srsf7  | Serine/argii R.VELSTGM*PR.R                 | 15.39  | 57.95  | 0.27 | 3.76  |
| Q8BL97_SR Srsf7  | Serine/argii R.VELSTGM*PR.R                 | 5.18   | 24.33  | 0.21 | 4.69  |
| Q8BL97_SR Srsf7  | Serine/argii K.VYVGNLGTGAGK#.G              | 208.28 | 166.19 | 1.25 | 0.80  |
| Q8BL97_SR Srsf7  | Serine/argii K.VYVGNLGTGAGK#.G              | 12.97  | 12.62  | 1.03 | 0.97  |
| Q9D080_SF Srsf9  | Serine/argii R.HGLVPFAFVR.F                 | 2.55   | 17.47  | 0.15 | 6.86  |
| Q9D080_SF Srsf9  | Serine/argii R.IYVGNLPSDVR.E                | 4.79   | 34.56  | 0.14 | 7.21  |
| Q9D080_SF Srsf9  | Serine/argii R.DAEDAIYGR.N                  | 2.72   | 15.31  | 0.18 | 5.63  |
| Q9D080_SF Srsf9  | Serine/argii K.DGM*GM*V#EYLR.K              | 4.15   | 28.55  | 0.15 | 6.89  |
| Q9D080_SF Srsf9  | Serine/argii K.DLEDL#FYK.Y                  | 14.47  | 18.24  | 0.79 | 1.26  |
| Q9D080_SF Srsf9  | Serine/argii R.EK#DLEDL#FYK.Y               | 40.27  | 44.57  | 0.90 | 1.11  |
| Q9D080_SF Srsf9  | Serine/argii R.EK#DLEDL#FYK.Y               | 67.21  | 74.13  | 0.91 | 1.10  |
| Q9D080_SF Srsf9  | Serine/argii R.FEDPRDAEDAIYGR.N             | 2.33   | 79.10  | 0.03 | 33.91 |
| Q9D080_SF Srsf9  | Serine/argii R.HGLVPFAFVR.F                 | 15.42  | 95.12  | 0.16 | 6.17  |
| Q9D080_SF Srsf9  | Serine/argii R.IYVGNLPSDVR.E                | 31.71  | 209.48 | 0.15 | 6.61  |
| Q9D080_SF Srsf9  | Serine/argii R.SHEGETSVIR.V                 | 3.13   | 24.58  | 0.13 | 7.85  |
| Q9D080_SF Srsf9  | Serine/argii R.STSYGYSR.S                   | 3.58   | 16.21  | 0.22 | 4.52  |
| Q9D080_SF Srsf9  | Serine/argii R.VL#V#G#L#P#S#G#S#W#Q#D#L#K#D | 17.61  | 28.58  | 0.62 | 1.62  |
| P32067_LA Ssb    | Lupus La pr K.DTNLLILFK#.E                  | 13.92  | 9.28   | 1.50 | 0.67  |
| P32067_LA Ssb    | Lupus La pr K.GNR#P#G#Y#A#G#P#K             | 8.54   | 26.08  | 0.33 | 3.05  |
| P32067_LA Ssb    | Lupus La pr K.GSIFAVFDSIQSAK#.K             | 177.96 | 134.78 | 1.32 | 0.76  |
| P32067_LA Ssb    | Lupus La pr K.ITDDQ#E#L#N#K#.W              | 109.79 | 93.79  | 1.17 | 0.85  |
| P32067_LA Ssb    | Lupus La pr K.K#F#V#E#P#Q#K#.Y              | 62.67  | 47.58  | 1.32 | 0.76  |

|                  |                                                |        |        |      |      |
|------------------|------------------------------------------------|--------|--------|------|------|
| P32067_LA Ssb    | Lupus La pr K.K#TDDQQLNK#W                     | 11.15  | 10.54  | 1.06 | 0.95 |
| P32067_LA Ssb    | Lupus La pr K.LDEGVVPLETM#K.F                  | 52.27  | 42.21  | 1.24 | 0.81 |
| P32067_LA Ssb    | Lupus La pr K.LM#EVSADK#T                      | 25.81  | 29.24  | 0.88 | 1.13 |
| P32067_LA Ssb    | Lupus La pr K.LM#EVSADK#T.I                    | 7.97   | 8.22   | 0.97 | 1.03 |
| P32067_LA Ssb    | Lupus La pr R.LTTDFNVIVQALS#S                  | 97.35  | 75.24  | 1.29 | 0.77 |
| P32067_LA Ssb    | Lupus La pr K.MTALEAK#.I                       | 34.71  | 35.17  | 0.99 | 1.01 |
| P32067_LA Ssb    | Lupus La pr R.NANNGNLLLR.N                     | 4.19   | 20.46  | 0.20 | 4.89 |
| P32067_LA Ssb    | Lupus La pr R.SPSRPLPEVDEYKNDVK.N              | 9.26   | 34.67  | 0.27 | 3.74 |
| P32067_LA Ssb    | Lupus La pr K.YK#DNTLNLIFK#.E                  | 58.31  | 39.69  | 1.47 | 0.68 |
| P32067_LA Ssb    | Lupus La pr K.ITDDQQLNK#W                      | 11.50  | 6.44   | 1.79 | 0.56 |
| P32067_LA Ssb    | Lupus La pr K.GSIFAVFDSIQSAK#.K                | 5.74   | 3.49   | 1.65 | 0.61 |
| Q9CYR0_S5 Ssbp1  | Single-strar R.SGDSEVYQM#GDVSOQ.T              | 8.32   | 11.38  | 0.73 | 1.37 |
| Q9CY50_S5 Ssr1   | Translocon K.GTEDFIVESLDAFR.Y                  | 3.22   | 11.36  | 0.28 | 3.52 |
| Q9DFC9_S5 Ssr3   | Translocon K.QQSEEDLLQDFSR.N                   | 2.38   | 8.38   | 0.28 | 3.52 |
| Q62186_S5 Ssr4   | Translocon R.FFDEESYLLR.K                      | 1.62   | 4.32   | 0.37 | 2.67 |
| Q08943_S5 Ssrp1  | FACT comp K.LLDFVNAK#.K                        | 12.84  | 5.42   | 2.37 | 0.42 |
| Q08943_S5 Ssrp1  | FACT comp R.SDFFEIETK#.Q                       | 10.02  | 3.75   | 2.67 | 0.37 |
| Q08943_S5 Ssrp1  | FACT comp K.ASSGLLYPLER.G                      | 11.17  | 56.79  | 0.20 | 5.09 |
| Q08943_S5 Ssrp1  | FACT comp R.FDEISVNFAR.G                       | 11.34  | 48.82  | 0.23 | 4.30 |
| Q08943_S5 Ssrp1  | FACT comp R.FVYPTQEDGVDPVEAFAQNVLSK.A          | 30.58  | 25.45  | 1.20 | 0.83 |
| Q08943_S5 Ssrp1  | FACT comp K.GWNWGTVK#.F                        | 17.58  | 18.46  | 0.95 | 1.05 |
| Q08943_S5 Ssrp1  | FACT comp K.IKSDHPGISITDLSK.K                  | 21.63  | 30.41  | 0.71 | 1.41 |
| Q08943_S5 Ssrp1  | FACT comp K.IPYTTVLR.L                         | 11.67  | 59.11  | 0.20 | 5.06 |
| Q08943_S5 Ssrp1  | FACT comp K.LDFVNAK#.K                         | 60.70  | 47.68  | 1.27 | 0.79 |
| Q08943_S5 Ssrp1  | FACT comp K.LSDFFK#.T                          | 34.52  | 37.80  | 0.91 | 1.10 |
| Q08943_S5 Ssrp1  | FACT comp K.NM#SGSLYEM#VSR.V                   | 3.38   | 12.39  | 0.27 | 3.67 |
| Q08943_S5 Ssrp1  | FACT comp K.SDHPGISITDLSK#.K                   | 22.28  | 21.76  | 1.02 | 0.98 |
| Q08943_S5 Ssrp1  | FACT comp R.SDFFEIETK#.Q                       | 48.99  | 36.09  | 1.36 | 0.74 |
| Q08943_S5 Ssrp1  | FACT comp K.TGKVDNIQAGELTEGIWR.R               | 2.81   | 16.90  | 0.17 | 6.02 |
| Q08943_S5 Ssrp1  | FACT comp K.VDNIQAGELTEGIWR.R                  | 11.83  | 26.51  | 0.45 | 2.24 |
| P56873_S5 Ssca1  | Sjogren sy K.AAQPPLPAAPPNTDAVASTQALLQK#.L      | 35.95  | 30.76  | 1.17 | 0.86 |
| Q9CY97_S5 Ssu72  | RNA polym K.TTYDOM#YNDLLR.K                    | 3.91   | 5.35   | 0.73 | 1.37 |
| Q9CY97_S5 Ssu72  | RNA polym R.YQVQVEDLNSR.E                      | 3.03   | 7.74   | 0.39 | 2.55 |
| Q99L47_F1 St13   | Hsc70-intei K.AIDLFTA#K.L                      | 30.75  | 5.36   | 5.74 | 0.17 |
| Q99L47_F1 St13   | Hsc70-intei R.AEINPDSAPYK#.W                   | 17.78  | 4.57   | 3.89 | 0.26 |
| Q8BZ71_ST Stac3  | SH3 and cy: K.GDEAGGVK#WYVTR@#.K               | 48.50  | 5.54   | 8.75 | 0.11 |
| Q9D3E6_ST Stag1  | Cohesin sut R.FALTFGLDQIK#.T                   | 12.22  | 10.73  | 1.14 | 0.88 |
| Q9D3E6_ST Stag1  | Cohesin sut R.HDPAEALAK#.R                     | 20.39  | 21.74  | 0.94 | 1.07 |
| Q9D3E6_ST Stag1  | Cohesin sut R.LELLQK#.R                        | 32.73  | 18.42  | 1.78 | 0.56 |
| Q9D3E6_ST Stag1  | Cohesin sut R.FALTFGLDQIK#.T                   | 18.89  | 12.97  | 1.46 | 0.69 |
| Q9D3E6_ST Stag1  | Cohesin sut R.FNHSEVDELLQEGEADDIYVNLSTLK#.R    | 9.24   | 3.67   | 2.51 | 0.40 |
| Q9D3E6_ST Stag1  | Cohesin sut R.HDPAEALAK#.R                     | 27.49  | 23.97  | 1.15 | 0.87 |
| Q9D3E6_ST Stag1  | Cohesin sut K.M#YSDAFLNDSYLK#.Y                | 16.89  | 8.69   | 1.94 | 0.51 |
| Q9D3E6_ST Stag1  | Cohesin sut K.MYSDAFLNDSYLK#.Y                 | 6.10   | 3.91   | 1.56 | 0.64 |
| Q9D3E6_ST Stag1  | Cohesin sut R.SQLIDEFVDR.F                     | 4.94   | 19.48  | 0.25 | 3.95 |
| Q9D3E6_ST Stag1  | Cohesin sut R.TDNIQTPPLPTPQLTSTVLR.E           | 2.34   | 6.80   | 0.34 | 2.91 |
| O35638_ST Stag2  | Cohesin sut R.IVSM#TLDEKEYDVAVQAIK.L           | 25.88  | 15.58  | 1.66 | 0.60 |
| O35638_ST Stag2  | Cohesin sut R.IVSM#TLDEKEYDVAVQAIK#.L          | 8.05   | 4.04   | 1.99 | 0.50 |
| O35638_ST Stag2  | Cohesin sut R.LLEDFLQEGEDEDAYQLVSTLK#.R        | 19.38  | 11.79  | 1.64 | 0.61 |
| P70297_ST Stam   | Signal trans K.AGEITVLDSDPNWVK#.G              | 6.96   | 4.14   | 1.68 | 0.59 |
| P70297_ST Stam   | Signal trans R.AVDFEAAEDNELTFK#.A              | 9.13   | 4.05   | 2.25 | 0.44 |
| P70297_ST Stam   | Signal trans K.GETHQGVGLFNSPNTVADLTAEPEN#IK#.T | 7.73   | 7.44   | 1.04 | 0.96 |
| P70297_ST Stam   | Signal trans K.VM#EALSLYK.L                    | 11.51  | 8.42   | 1.37 | 0.73 |
| P70297_ST Stam   | Signal trans R.DFAEVSNVLNK#.G                  | 352.66 | 133.90 | 2.63 | 0.38 |
| O88811_ST Stam2  | Signal trans K.AIELSQEQK#.Q                    | 10.78  | 6.93   | 1.56 | 0.64 |
| O88811_ST Stam2  | Signal trans R.ALQILOSIDPK#.E                  | 9.94   | 6.72   | 1.48 | 0.68 |
| O88811_ST Stam2  | Signal trans R.ALYDFEAVEDNELTFK#.H             | 25.30  | 3.70   | 6.83 | 0.15 |
| O88811_ST Stam2  | Signal trans K.LVNEAPVYSYSK#.L                 | 29.20  | 52.46  | 0.56 | 1.80 |
| O88811_ST Stam2  | Signal trans K.SM#KHEEGVTFPSAGSQVAAAAX#.N      | 5.74   | 7.96   | 0.72 | 1.39 |
| O88811_ST Stam2  | Signal trans K.VLEALDLYNK#.L                   | 13.56  | 5.71   | 2.38 | 0.42 |
| Q9CQ26_ST Stambp | STAM-bindin R.SLKPGALSVIENVPTIEGLR.H           | 3.64   | 8.26   | 0.44 | 2.27 |
| Q8C3V4_Qi Stat1  | Signal trans K.ELSAVTFPDIIR.N                  | 6.19   | 17.36  | 0.36 | 2.80 |
| Q8C3V4_Qi Stat1  | Signal trans K.FTYEPPDITK#.N                   | 15.31  | 11.83  | 1.29 | 0.77 |
| Q8C3V4_Qi Stat1  | Signal trans R.GLNADQLSM#LGEK#.L               | 9.90   | 8.17   | 1.21 | 0.83 |
| Q8C3V4_Qi Stat1  | Signal trans K.K#LEELQEK#.F                    | 20.14  | 18.55  | 1.09 | 0.92 |
| Q8C3V4_Qi Stat1  | Signal trans K.SDQK#QEQLLHK#.M                 | 19.61  | 15.56  | 1.26 | 0.79 |
| Q8C3V4_Qi Stat1  | Signal trans K.TGVQFTVK#.S                     | 23.99  | 15.58  | 1.54 | 0.65 |
| Q8C3V4_Qi Stat1  | Signal trans K.TLEELQDEYDFK#.C                 | 8.38   | 6.29   | 1.33 | 0.75 |
| Q8C3V4_Qi Stat1  | Signal trans K.VSFDK#DVNEK#.N                  | 10.41  | 6.51   | 1.60 | 0.62 |
| Q8C3V4_Qi Stat1  | Signal trans K.ELSAVTFPDIIR.N                  | 4.53   | 21.25  | 0.21 | 4.69 |
| Q8C3V4_Qi Stat1  | Signal trans R.FHDLQLDQYR.F                    | 4.06   | 11.87  | 0.34 | 2.93 |
| Q8C3V4_Qi Stat1  | Signal trans K.FLEQVHLYDSDFFPM#EIR.Q           | 8.91   | 21.56  | 0.41 | 2.42 |
| Q8C3V4_Qi Stat1  | Signal trans R.FNQAQEGNIQNTVM#LDK#.Q           | 14.76  | 10.70  | 1.38 | 0.72 |
| Q8C3V4_Qi Stat1  | Signal trans R.FNQAQEGNIQNTVM#LDK#.Q           | 8.87   | 4.87   | 1.82 | 0.55 |
| Q8C3V4_Qi Stat1  | Signal trans R.IVGPEDFSM#M#STV.-               | 8.06   | 8.06   | 1.00 | 1.00 |
| Q8C3V4_Qi Stat1  | Signal trans R.QYLAQWLEK#.Q                    | 19.29  | 14.22  | 1.36 | 0.74 |
| Q8C3V4_Qi Stat1  | Signal trans K.TLEELQDEYDFK#.C                 | 20.41  | 14.74  | 1.38 | 0.72 |
| Q8C3V4_Qi Stat1  | Signal trans K.VM#AAENIPENPLK#.Y               | 7.85   | 7.43   | 1.06 | 0.95 |
| Q8C3V4_Qi Stat1  | Signal trans R.ALLKQDQPGTFLLR.F                | 20.40  | 36.24  | 0.56 | 1.78 |
| Q8C3V4_Qi Stat1  | Signal trans K.DQDQGTFLLR.F                    | 13.60  | 36.20  | 0.38 | 2.66 |
| Q8C3V4_Qi Stat1  | Signal trans R.EGAIPTWVER.S                    | 16.11  | 52.60  | 0.31 | 3.26 |
| Q8C3V4_Qi Stat1  | Signal trans R.ELLSIELQNTLINDELVEWKR.R         | 3.42   | 4.96   | 0.69 | 1.45 |
| Q8C3V4_Qi Stat1  | Signal trans K.ELSAVTFPDIIR.N                  | 41.48  | 96.43  | 0.43 | 2.32 |
| Q8C3V4_Qi Stat1  | Signal trans R.FHDLQLDQYR.F                    | 11.59  | 38.47  | 0.30 | 3.32 |
| Q8C3V4_Qi Stat1  | Signal trans K.FLEQVHLYDSDFFPM#EIR.Q           | 12.31  | 20.77  | 0.59 | 1.69 |
| Q8C3V4_Qi Stat1  | Signal trans K.FLEQVHLYDSDFFMEIR.Q             | 9.55   | 15.59  | 0.61 | 1.63 |
| Q8C3V4_Qi Stat1  | Signal trans K.FNILGHTK#.V                     | 38.96  | 14.49  | 2.69 | 0.37 |
| Q8C3V4_Qi Stat1  | Signal trans R.FNQAQEGNIQNTVM#LDK#.Q           | 33.17  | 13.33  | 2.49 | 0.40 |
| Q8C3V4_Qi Stat1  | Signal trans R.FNQAQEGNIQNTVM#LDK#.Q           | 20.10  | 10.98  | 1.83 | 0.55 |
| Q8C3V4_Qi Stat1  | Signal trans K.FTYEPPDITK#.N                   | 140.74 | 72.34  | 1.95 | 0.51 |
| Q8C3V4_Qi Stat1  | Signal trans R.GLNADQLSM#LGEK#.L               | 82.24  | 62.70  | 1.31 | 0.76 |
| Q8C3V4_Qi Stat1  | Signal trans R.GLNADQLSM#LGEK#.L               | 33.86  | 7.55   | 4.49 | 0.22 |
| Q8C3V4_Qi Stat1  | Signal trans K.IRELLNSIELQNTLINDELVEWKR.R      | 5.10   | 8.78   | 0.58 | 1.72 |
| Q8C3V4_Qi Stat1  | Signal trans R.K#FNILGHTK#.V                   | 66.31  | 26.28  | 2.52 | 0.40 |
| Q8C3V4_Qi Stat1  | Signal trans K.K#LEELQEK#.F                    | 127.77 | 57.10  | 2.24 | 0.45 |
| Q8C3V4_Qi Stat1  | Signal trans K.LQELNYLNK#.V                    | 130.96 | 66.84  | 1.96 | 0.51 |
| Q8C3V4_Qi Stat1  | Signal trans K.M#FLM#LDNK#.R                   | 63.83  | 25.49  | 2.50 | 0.40 |
| Q8C3V4_Qi Stat1  | Signal trans K.MFLMLDNK#.R                     | 10.90  | 4.20   | 2.60 | 0.39 |
| Q8C3V4_Qi Stat1  | Signal trans K.QDWEHAAAYVDFATIR.F              | 14.81  | 30.84  | 0.48 | 2.08 |
| Q8C3V4_Qi Stat1  | Signal trans R.QYLAQWLEK#.Q                    | 53.52  | 21.50  | 2.49 | 0.40 |
| Q8C3V4_Qi Stat1  | Signal trans K.SDQK#QEQLLHK#.M                 | 170.86 | 73.38  | 2.33 | 0.43 |
| Q8C3V4_Qi Stat1  | Signal trans K.TGVQFTVK#.S                     | 96.91  | 48.56  | 2.00 | 0.50 |
| Q8C3V4_Qi Stat1  | Signal trans K.TLEELQDEYDFK#.C                 | 64.61  | 28.34  | 2.28 | 0.44 |

|                  |                                                  |        |        |      |       |
|------------------|--------------------------------------------------|--------|--------|------|-------|
| Q8C3V4_Q1 Stat1  | Signal trans K.VM*AAENIPENPLK#.Y                 | 96.56  | 48.08  | 2.01 | 0.50  |
| Q8C3V4_Q1 Stat1  | Signal trans K.VMAAENIPENPLK#.Y                  | 45.98  | 24.70  | 1.86 | 0.54  |
| Q8C3V4_Q1 Stat1  | Signal trans K.VSFDKDVNEK.N                      | 66.82  | 39.97  | 1.67 | 0.60  |
| Q8C3V4_Q1 Stat1  | Signal trans K.YLVPNIKD#HAFGK#.Y                 | 15.63  | 5.41   | 2.89 | 0.35  |
| Q8C3V4_Q1 Stat1  | Signal trans K.DQOPGTFLLR.F                      | 16.66  | 55.68  | 0.30 | 3.34  |
| Q8C3V4_Q1 Stat1  | Signal trans R.EGAITFTWVER.S                     | 35.43  | 79.69  | 0.44 | 2.25  |
| Q8C3V4_Q1 Stat1  | Signal trans R.ELLSIELTQNTLINDELVEWK#.R          | 73.63  | 31.32  | 2.35 | 0.43  |
| Q8C3V4_Q1 Stat1  | Signal trans K.ELSAVTFPDIIR.N                    | 74.07  | 156.74 | 0.47 | 2.12  |
| Q8C3V4_Q1 Stat1  | Signal trans R.FHDLQLDQYYSR.F                    | 25.65  | 41.39  | 0.62 | 1.61  |
| Q8C3V4_Q1 Stat1  | Signal trans K.FLEQVHQLYDYSFPM*EIR.Q             | 13.48  | 23.06  | 0.58 | 1.71  |
| Q8C3V4_Q1 Stat1  | Signal trans K.FLEQVHQLYDYSFPM*EIR.Q             | 5.41   | 15.99  | 0.34 | 2.96  |
| Q8C3V4_Q1 Stat1  | Signal trans K.FNILGTHTK#.V                      | 64.77  | 26.42  | 2.45 | 0.41  |
| Q8C3V4_Q1 Stat1  | Signal trans R.FNQAQEGNIQNTVM*LDK#.Q             | 45.42  | 19.92  | 2.28 | 0.44  |
| Q8C3V4_Q1 Stat1  | Signal trans R.FNQAQEGNIQNTVM*LDK#.Q             | 25.68  | 14.33  | 1.79 | 0.56  |
| Q8C3V4_Q1 Stat1  | Signal trans K.FTYEPDPTIK#.N                     | 173.22 | 89.89  | 1.93 | 0.52  |
| Q8C3V4_Q1 Stat1  | Signal trans R.GLNADQLSM*LGEK#.L                 | 101.26 | 48.81  | 2.07 | 0.48  |
| Q8C3V4_Q1 Stat1  | Signal trans K.ILENAQR.F                         | 9.94   | 26.36  | 0.38 | 2.65  |
| Q8C3V4_Q1 Stat1  | Signal trans R.K#FNILGTHTK#.V                    | 102.36 | 47.23  | 2.17 | 0.46  |
| Q8C3V4_Q1 Stat1  | Signal trans K.K#LEELQK#.F                       | 231.32 | 109.36 | 2.12 | 0.47  |
| Q8C3V4_Q1 Stat1  | Signal trans K.LQELNLYLK#.V                      | 166.00 | 72.07  | 2.30 | 0.43  |
| Q8C3V4_Q1 Stat1  | Signal trans K.QDWEHAAYDVSFATIR.F                | 10.45  | 23.30  | 0.45 | 2.23  |
| Q8C3V4_Q1 Stat1  | Signal trans R.QYLQWLEK#.Q                       | 72.37  | 29.80  | 2.43 | 0.41  |
| Q8C3V4_Q1 Stat1  | Signal trans K.SDQK#QQLLHK#.M                    | 215.25 | 97.82  | 2.20 | 0.45  |
| Q8C3V4_Q1 Stat1  | Signal trans K.TELISVEVHPSR.L                    | 7.88   | 17.42  | 0.45 | 2.21  |
| Q8C3V4_Q1 Stat1  | Signal trans K.TGVQFTVK#.S                       | 125.45 | 43.47  | 2.89 | 0.35  |
| Q8C3V4_Q1 Stat1  | Signal trans K.TLEELQDEYDFK#.C                   | 104.36 | 54.58  | 1.91 | 0.52  |
| Q8C3V4_Q1 Stat1  | Signal trans K.VM*AAENIPENPLK#.Y                 | 170.85 | 88.26  | 1.94 | 0.52  |
| Q8C3V4_Q1 Stat1  | Signal trans K.VM*NM*EESTNGSLAAEFR.H             | 4.11   | 6.85   | 0.60 | 1.67  |
| Q9QXJ2_Q1 Stat2  | Signal trans K.EVLQSLPLTEIIR.H                   | 24.81  | 38.38  | 0.65 | 1.55  |
| Q9QXJ2_Q1 Stat2  | Signal trans K.FNILTNSQK#.T                      | 24.13  | 12.80  | 1.88 | 0.53  |
| Q9QXJ2_Q1 Stat2  | Signal trans R.QVDELQQLLEK#.Q                    | 9.35   | 6.05   | 1.55 | 0.65  |
| Q9QXJ2_Q1 Stat2  | Signal trans K.TSSSDPHQSQQAQLVQATANK#.V          | 16.00  | 5.88   | 2.72 | 0.37  |
| Q9QXJ2_Q1 Stat2  | Signal trans R.YKGDMM*FGQGVLDLQNAQVM*ELLQR.L     | 5.03   | 10.59  | 0.48 | 2.10  |
| Q9QXJ2_Q1 Stat2  | Signal trans R.YTVFSLKH#.T                       | 11.85  | 4.70   | 2.52 | 0.40  |
| Q9QXJ2_Q1 Stat2  | Signal trans R.AQEVOPPPAPEAVVESQQLLEIENR.I       | 3.15   | 9.00   | 0.35 | 2.86  |
| Q9QXJ2_Q1 Stat2  | Signal trans R.EAALGSDDAK#.A                     | 20.33  | 7.82   | 2.60 | 0.38  |
| Q9QXJ2_Q1 Stat2  | Signal trans K.EVLQSLPLTEIIR.H                   | 18.39  | 39.74  | 0.46 | 2.16  |
| Q9QXJ2_Q1 Stat2  | Signal trans K.FNILTNSQK#.T                      | 22.83  | 11.98  | 1.91 | 0.52  |
| Q9QXJ2_Q1 Stat2  | Signal trans R.GLDSEQLGM*LR.T                    | 10.98  | 17.19  | 0.64 | 1.57  |
| Q9QXJ2_Q1 Stat2  | Signal trans R.HYQVLAENIPENPLR.F                 | 8.94   | 14.25  | 0.63 | 1.59  |
| Q9QXJ2_Q1 Stat2  | Signal trans R.QVDELQQLLEK#.Q                    | 10.33  | 5.50   | 1.88 | 0.53  |
| Q9QXJ2_Q1 Stat2  | Signal trans K.TSSSDPHQSQQAQLVQATANK#.V          | 26.64  | 11.74  | 2.27 | 0.44  |
| Q9QXJ2_Q1 Stat2  | Signal trans R.YKGDMM*FGQGVLDLQNAQVM*ELLQR.L     | 7.20   | 6.87   | 1.05 | 0.96  |
| Q9QXJ2_Q1 Stat2  | Signal trans R.YTVFSLKH#.K                       | 14.79  | 6.36   | 2.32 | 0.43  |
| P42227_ST Stat3  | Signal trans K.EGGVFTVVEK.D                      | 6.33   | 8.19   | 0.77 | 1.29  |
| P42227_ST Stat3  | Signal trans K.VVENLQDDDFDFNYK#.T                | 6.70   | 7.09   | 0.95 | 1.06  |
| P42227_ST Stat3  | Signal trans K.ESHATLVFHNLLGEIDQQYSR.F           | 4.67   | 12.32  | 0.38 | 2.64  |
| P42227_ST Stat3  | Signal trans K.FPPELNYQLK.I                      | 23.52  | 19.81  | 1.19 | 0.84  |
| P42227_ST Stat3  | Signal trans R.GLSIEQLTLAEK#.L                   | 28.66  | 27.91  | 1.03 | 0.97  |
| P42227_ST Stat3  | Signal trans R.K#FNILGTHTK#.V                    | 13.94  | 297.78 | 0.05 | 21.36 |
| P42227_ST Stat3  | Signal trans R.LLQTAATAAQGGQANHPAAVTEK#.Q        | 50.88  | 33.78  | 1.51 | 0.66  |
| P42227_ST Stat3  | Signal trans R.QLPAWIESQDWAYAASK.E               | 6.55   | 3.50   | 1.87 | 0.53  |
| P42227_ST Stat3  | Signal trans K.SAFVVER.Q                         | 24.49  | 16.25  | 1.51 | 0.66  |
| P42227_ST Stat3  | Signal trans K.TLDEELADWK#.R                     | 17.65  | 15.11  | 1.17 | 0.86  |
| P42227_ST Stat3  | Signal trans K.TIQQVPEPTYK.Q                     | 36.51  | 40.72  | 0.90 | 1.12  |
| P42227_ST Stat3  | Signal trans K.VVENLQDDDFDFNYK#.T                | 23.85  | 17.91  | 1.33 | 0.75  |
| P42227_ST Stat3  | Signal trans R.YLEQLHQLYDYSFPM*ELR.Q             | 3.70   | 9.71   | 0.38 | 2.62  |
| P42227_ST Stat3  | Signal trans R.YLEQLHQLYDYSFPM*ELR.Q             | 3.17   | 8.01   | 0.40 | 2.53  |
| P42227_ST Stat3  | Signal trans K.FPPELNYQLK#.I                     | 12.06  | 8.23   | 1.47 | 0.68  |
| P42227_ST Stat3  | Signal trans R.GLSIEQLTLAEK#.L                   | 14.25  | 12.49  | 1.14 | 0.88  |
| P42227_ST Stat3  | Signal trans K.TIQQVPEPTYK#.Q                    | 18.29  | 12.66  | 1.44 | 0.69  |
| P42232_ST Stat5b | Signal trans K.ATQLLEGLVQELQK#.K                 | 14.02  | 6.22   | 2.26 | 0.44  |
| P42232_ST Stat5b | Signal trans R.FSDSEIGGIATWAK#.F                 | 9.92   | 6.48   | 1.53 | 0.65  |
| P42232_ST Stat5b | Signal trans R.IQAQFALQGLNPOER.M                 | 2.34   | 5.42   | 0.43 | 2.32  |
| Q9DBE7_Q1 Stau1  | Double-str: R.EAEENLNKSEISQVFEIALK.R             | 8.16   | 9.47   | 0.86 | 1.16  |
| Q9DBE7_Q1 Stau1  | Double-str: R.ELLYGTSPTAETILK#.S                 | 23.60  | 19.81  | 1.19 | 0.84  |
| Q9DBE7_Q1 Stau1  | Double-str: K.LLSELDQOSTEM*PR.T                  | 2.24   | 8.37   | 0.27 | 3.74  |
| Q9DBE7_Q1 Stau1  | Double-str: K.LLQTPADYGGMNPISR.L                 | 1.81   | 7.01   | 0.26 | 3.88  |
| Q9DBE7_Q1 Stau1  | Double-str: R.NAAENM*LEILGFK#.V                  | 6.24   | 7.92   | 0.79 | 1.27  |
| Q9DBE7_Q1 Stau1  | Double-str: R.NAAENMLEILGFK#.V                   | 19.60  | 17.92  | 1.09 | 0.91  |
| Q9DBE7_Q1 Stau1  | Double-str: R.TLQSEPLPER.L                       | 31.52  | 49.60  | 0.64 | 1.57  |
| Q9DBE7_Q1 Stau1  | Double-str: R.VSVEGFEVGEK#.S                     | 31.37  | 27.98  | 1.12 | 0.89  |
| Q60864_ST1p1     | Stress-indu K.DPQALSEHLK#.N                      | 16.02  | 4.94   | 3.24 | 0.31  |
| Q60864_ST1p1     | Stress-indu K.DPQALSEHLK#N#VIAQK#.I              | 16.90  | 2.88   | 5.87 | 0.17  |
| Q60864_ST1p1     | Stress-indu R.IGNSYFHEEK#.Y                      | 11.71  | 1.43   | 8.18 | 0.12  |
| Q60864_ST1p1     | Stress-indu R.LAYINPDLALLEK#.N                   | 50.86  | 10.21  | 4.98 | 0.20  |
| Q60864_ST1p1     | Stress-indu K.YKDAHFYK#.S                        | 20.21  | 4.42   | 4.57 | 0.22  |
| Q60864_ST1p1     | Stress-indu R.LAYINPDLALLEK#.N                   | 12.44  | 3.46   | 3.60 | 0.28  |
| O55098_ST1 Stk10 | Serine/thre K.FYDVELENLER.Q                      | 2.57   | 7.53   | 0.34 | 2.93  |
| O99KH8_S1 Stk24  | Serine/thre K.GSFGVFK#.G                         | 22.98  | 8.01   | 2.87 | 0.35  |
| O99KH8_S1 Stk24  | Serine/thre K.LADFGVAGQLTDTIQIK#.R               | 24.68  | 7.50   | 3.29 | 0.30  |
| O99KH8_S1 Stk24  | Serine/thre K.NLENGTLQSLDR.N                     | 3.02   | 4.71   | 0.64 | 1.56  |
| O99KH8_S1 Stk24  | Serine/thre R.NTFVGTPEFWM*APEVIK#.Q              | 11.04  | 4.02   | 2.74 | 0.36  |
| O99KH8_S1 Stk24  | Serine/thre R.NTFVGTPEFWM*MAPEVIK#.Q             | 9.81   | 5.84   | 1.68 | 0.60  |
| O99KH8_S1 Stk24  | Serine/thre K.VLFLIPK#.N                         | 39.03  | 9.87   | 3.95 | 0.25  |
| O99KH8_S1 Stk24  | Serine/thre K.LADFGVAGQLTDTIQIK#.R               | 6.87   | 2.25   | 3.06 | 0.33  |
| O99KH8_S1 Stk24  | Serine/thre K.LADFGVAGQLTDTIQIK#.R               | 5.42   | 2.22   | 2.44 | 0.41  |
| O9J110_STx Stk3  | Serine/thre K.LADFGVAGQLTDTIQIK#.R               | 14.57  | 6.72   | 2.17 | 0.46  |
| O9J110_STx Stk3  | Serine/thre K.LADFGVAGQLTDTIQIK#.R               | 7.06   | 4.54   | 1.56 | 0.64  |
| O9J110_STx Stk3  | Serine/thre K.LSEDSLTK#QPEEVFDVLEK#.L            | 7.74   | 6.79   | 1.14 | 0.88  |
| O9J110_STx Stk3  | Serine/thre K.TLTEDAETILK#.S                     | 20.41  | 9.40   | 2.17 | 0.46  |
| O9J110_STx Stk3  | Serine/thre K.LADFGVAGQLTDTIQIK#.R               | 6.25   | 3.72   | 1.68 | 0.59  |
| O9J110_STx Stk3  | Serine/thre K.LGEGSYGVFK#.A                      | 7.51   | 16.85  | 0.45 | 2.24  |
| O9J110_STx Stk3  | Serine/thre K.TLTEDAETILK#.S                     | 7.46   | 2.09   | 3.58 | 0.28  |
| O91VJ4_ST Stk38  | Serine/thre R.LGLEDFESLK#.V                      | 8.40   | 15.72  | 0.53 | 1.87  |
| O91VJ4_ST Stk38  | Serine/thre R.NLNHSLPDDFTFQNM*NSK.R              | 14.26  | 8.36   | 1.71 | 0.59  |
| O91VJ4_ST Stk38  | Serine/thre K.SIDDTNDFEPPESDILK#VTVTTSSHPEPTYK.N | 4.22   | 5.73   | 0.74 | 1.36  |
| P54116_ST Stom   | Erythrocyt K.VIAAEGEM*NASR.A                     | 2.70   | 8.45   | 0.32 | 3.13  |
| Q8CDJ8_ST Ston1  | Stonin-1 O: R.SLGVESDAQPK#.H                     | 15.11  | 10.38  | 1.46 | 0.69  |
| O92122_ST Strap  | Serine-thre K.AATAAADFTAK#.V                     | 48.33  | 26.82  | 1.80 | 0.55  |
| O92122_ST Strap  | Serine-thre K.EFLVAGGEDFK#.L                     | 12.93  | 9.11   | 1.42 | 0.70  |
| O92122_ST Strap  | Serine-thre R.FSPDGEVYAGSSEDGTLR.L               | 5.45   | 13.01  | 0.42 | 2.39  |
| O92122_ST Strap  | Serine-thre R.IYDLNK#PEAPK#.E                    | 12.92  | 6.67   | 1.94 | 0.52  |

|                    |                                                      |        |        |      |      |
|--------------------|------------------------------------------------------|--------|--------|------|------|
| Q9Z1Z2_ST Strap    | Serine-thre R.LWQTVVVGK.T                            | 21.47  | 19.30  | 1.11 | 0.90 |
| Q9Z1Z2_ST Strap    | Serine-thre R.QGDTGDWIGTFLGHK#.G                     | 15.60  | 12.91  | 1.21 | 0.83 |
| Q9Z1Z2_ST Strap    | Serine-thre K.SFEAPATINSASLHPEK#.E                   | 1.29   | 2.60   | 0.50 | 2.01 |
| Q9Z1Z2_ST Strap    | Serine-thre K.SFEAPATINSASLHPEK#EFLVAGGEDFK#.L       | 5.32   | 4.81   | 1.11 | 0.90 |
| Q9Z1Z2_ST Strap    | Serine-thre K.TVDFTQDSNYLLTGGQDK#.L                  | 20.49  | 18.34  | 1.12 | 0.89 |
| Q9Z1Z2_ST Strap    | Serine-thre K.YDYNSSGEELESYK#.G                      | 19.66  | 12.97  | 1.52 | 0.66 |
| Q8C079_S1 Strip1   | Striatin-int R.EVFSK#PISWEELLQ.-                     | 10.34  | 6.05   | 1.71 | 0.59 |
| Q8C079_S1 Strip1   | Striatin-int K.I.LLAAAPTSK#.A                        | 14.61  | 7.88   | 1.85 | 0.54 |
| Q8C079_S1 Strip1   | Striatin-int R.LLDGLEVTA.R                           | 8.91   | 15.26  | 0.58 | 1.71 |
| Q8C079_S1 Strip1   | Striatin-int R.AAGGLLPGGK#.A                         | 14.44  | 30.44  | 0.47 | 2.11 |
| Q8C079_S1 Strip1   | Striatin-int R.EVFSK#PISWEELLQ.-                     | 7.73   | 21.87  | 0.35 | 2.83 |
| Q8C079_S1 Strip1   | Striatin-int K.I.LLAAAPTSK#.A                        | 14.40  | 9.41   | 1.53 | 0.65 |
| Q55106_S1 Strn     | Striatin OS- R.ALAFHPPEVPLVASEDHTLK#.M               | 10.18  | 4.37   | 2.33 | 0.43 |
| Q55106_S1 Strn     | Striatin OS- K.EALKFEFLVTSSEGDNSER.S                 | 2.17   | 6.19   | 0.35 | 2.86 |
| Q55106_S1 Strn     | Striatin OS- R.LPEQLSR.A                             | 5.57   | 12.44  | 0.45 | 2.23 |
| Q9ERG2_S1 Strn3    | Striatin-3 C.R.ALAFHPPEVPLVASEDHTLK#.L               | 8.79   | 3.91   | 2.25 | 0.44 |
| Q9ERG2_S1 Strn3    | Striatin-3 C.K.AYASAGADALAK#.V                       | 28.85  | 10.57  | 2.73 | 0.37 |
| Q9ERG2_S1 Strn3    | Striatin-3 C.R.IAFLQGER.K                            | 3.42   | 14.23  | 0.24 | 4.15 |
| P58404_S1 Strn4    | Striatin-4 C.K.ALIASAGADALAK#.V                      | 22.86  | 15.30  | 1.49 | 0.67 |
| P58404_S1 Strn4    | Striatin-4 C.R.ASPGPGGLSGGESLLVK#.Q                  | 13.90  | 11.29  | 1.23 | 0.81 |
| P58404_S1 Strn4    | Striatin-4 C.K.#DLSQESVNGPVSLENSPLVWV#.E             | 2.68   | 3.36   | 0.80 | 1.25 |
| Q9ER00_ST Stx12    | Syntaxin-1; K.ELGSLPLPLSASEQR.Q                      | 2.18   | 9.31   | 0.23 | 4.28 |
| Q9ER00_ST Stx12    | Syntaxin-1; R.ISQATAQIK#.N                           | 33.14  | 35.29  | 0.94 | 1.06 |
| Q8K1E0_ST Stx5     | Syntaxin-5 R.APVALPLAPNLLGGGPIILGAESR.A              | 0.90   | 4.82   | 0.19 | 5.35 |
| Q70439_S1 Stx7     | Syntaxin-7 R.LVAEFTSLTNFQK#.A                        | 4.44   | 2.49   | 1.78 | 0.56 |
| O08599_S1 Stxbp1   | Syntaxin-bi R.AIVPILLDANVSTYDK#.I                    | 19.70  | 9.36   | 2.11 | 0.47 |
| O08599_S1 Stxbp1   | Syntaxin-bi K.DIM*EDTIEDK#LDTK#.H                    | 16.67  | 4.15   | 4.02 | 0.25 |
| O08599_S1 Stxbp1   | Syntaxin-bi R.EPLPSEAVYLITPSEK#.S                    | 90.20  | 197.92 | 0.46 | 2.19 |
| O08599_S1 Stxbp1   | Syntaxin-bi R.ISEQYQLSR.W                            | 11.13  | 17.88  | 0.62 | 1.61 |
| O08599_S1 Stxbp1   | Syntaxin-bi K.LNK#TDEEISS.-                          | 26.10  | 5.13   | 5.09 | 0.20 |
| O08599_S1 Stxbp1   | Syntaxin-bi R.REPLPSEAVYLITPSEK.S                    | 6.83   | 7.16   | 0.95 | 1.05 |
| O08599_S1 Stxbp1   | Syntaxin-bi R.VEQDLAM*GTAEGEK#.I                     | 20.82  | 4.61   | 4.52 | 0.22 |
| O08599_S1 Stxbp1   | Syntaxin-bi R.AIVPILLDANVSTYDK#.I                    | 9.91   | 1.62   | 6.10 | 0.16 |
| O08599_S1 Stxbp1   | Syntaxin-bi K.LNK#TDEEISS.-                          | 13.11  | 23.28  | 0.56 | 1.78 |
| O08599_S1 Stxbp1   | Syntaxin-bi R.REPLPSEAVYLITPSEK.S                    | 6.36   | 3.67   | 1.73 | 0.58 |
| O08599_S1 Stxbp1   | Syntaxin-bi R.VEQDLAM*GTAEGEK#.I                     | 9.54   | 1.61   | 5.94 | 0.17 |
| Q64324_S1 Stxbp2   | Syntaxin-bi R.K#GPEDTAQLAHAVLAK#.L                   | 9.99   | 13.06  | 0.77 | 1.31 |
| Q64324_S1 Stxbp2   | Syntaxin-bi K.SVQALADQFGPTTFYK#.A                    | 6.39   | 2.59   | 2.47 | 0.41 |
| Q60770_S1 Stxbp3   | Syntaxin-bi K.I.M*LLDEFITK#.L                        | 17.42  | 3.90   | 4.47 | 0.22 |
| Q9Z219_SU Sucla2   | Succinyl-Cc K.AVSSQM*IGQK#.L                         | 10.63  | 3.34   | 3.18 | 0.31 |
| Q9Z219_SU Sucla2   | Succinyl-Cc K.EQAVTLAQK#.M                           | 22.15  | 5.74   | 3.86 | 0.26 |
| Q9Z219_SU Sucla2   | Succinyl-Cc K.LHGQTPANFLDVGGGATVQQVTEAFK#.L          | 18.09  | 5.25   | 3.44 | 0.29 |
| Q9Z219_SU Sucla2   | Succinyl-Cc K.LYNLFLK#.Y                             | 10.72  | 4.63   | 2.32 | 0.43 |
| Q9WUM5_S1 Suclg1   | Succinyl-Cc K.HLGLPVFNVT#.E                          | 22.89  | 6.56   | 3.49 | 0.29 |
| Q9WUM5_S1 Suclg1   | Succinyl-Cc K.QGTFHSQLALEYGTK#.L                     | 23.01  | 5.84   | 3.94 | 0.25 |
| Q9Z218_SU Suclg2   | Succinyl-Cc R.M*ENLGLFGLSK#.N                        | 13.19  | 2.70   | 4.88 | 0.20 |
| Q9Z218_SU Suclg2   | Succinyl-Cc R.SHNGPVIVGSPQGVVDEEVAASSPELIFK#.E       | 7.62   | 1.22   | 6.24 | 0.16 |
| Q9Z218_SU Suclg2   | Succinyl-Cc R.SHNGPVIVGSPQGVVDEEVAASSPELIFK#.E       | 2.87   | 1.41   | 2.04 | 0.49 |
| Q8BR65_S1 Suds3    | Sin3 histon R.QLQQLEGTLEQYQK#.R                      | 6.02   | 3.66   | 1.64 | 0.61 |
| Q9CX34_S1 Sugt1    | Suppressor K.DYASALETFAEQK#.L                        | 8.55   | 3.02   | 2.83 | 0.35 |
| Q9CX34_S1 Sugt1    | Suppressor K.LEGQGDPEPTK#.Q                          | 32.03  | 15.83  | 2.02 | 0.49 |
| P61957_S1 Sumo2    | Small ubiqi K.VAGQDGSVVFQK#.I                        | 54.59  | 35.60  | 1.53 | 0.65 |
| P61957_S1 Sumo2    | Small ubiqi K.VAGQDGSVVFQK#.I                        | 52.46  | 30.49  | 1.72 | 0.58 |
| P61957_S1 Sumo2    | Small ubiqi K.VAGQDGSVVFQK#.I                        | 41.17  | 25.68  | 1.60 | 0.62 |
| Q920B9_SF Supt16h  | FACT comp R.AALLTER.T                                | 7.07   | 31.29  | 0.23 | 4.42 |
| Q920B9_SF Supt16h  | FACT comp K.AASITSEVFNK#.F                           | 29.37  | 17.79  | 1.65 | 0.61 |
| Q920B9_SF Supt16h  | FACT comp K.APGEQTPALNLQNAFR.I                       | 3.33   | 16.28  | 0.20 | 4.88 |
| Q920B9_SF Supt16h  | FACT comp K.ELAAQLNEAK#.R                            | 30.24  | 26.69  | 1.13 | 0.88 |
| Q920B9_SF Supt16h  | FACT comp R.HTDVQYFTEVGEITDLDGK#.H                   | 24.84  | 16.86  | 1.47 | 0.68 |
| Q920B9_SF Supt16h  | FACT comp R.LTEQK#GEQIQK#.A                          | 8.08   | 31.92  | 0.25 | 3.95 |
| Q920B9_SF Supt16h  | FACT comp K.NEDDEEEEEKDEAEDLLGR.G                    | 3.18   | 11.05  | 0.29 | 3.47 |
| Q920B9_SF Supt16h  | FACT comp R.NEGNIFPNPEATFVK.E                        | 19.40  | 21.21  | 0.91 | 1.09 |
| Q920B9_SF Supt16h  | FACT comp K.VEALTKEELEFVFR.D                         | 6.11   | 17.17  | 0.36 | 2.81 |
| Q920B9_SF Supt16h  | FACT comp K.YTEGVQSLNWTK#.I                          | 20.29  | 11.37  | 1.78 | 0.56 |
| Q920B9_SF Supt16h  | FACT comp R.AALLTER.T                                | 11.29  | 21.60  | 0.52 | 1.91 |
| Q920B9_SF Supt16h  | FACT comp K.AASITSEVFNK#.F                           | 37.68  | 24.97  | 1.51 | 0.66 |
| Q920B9_SF Supt16h  | FACT comp K.APGEQTPALNLQNAFR.I                       | 3.76   | 19.82  | 0.19 | 5.27 |
| Q920B9_SF Supt16h  | FACT comp K.ELAAQLNEAK#.R                            | 37.95  | 28.09  | 1.35 | 0.74 |
| Q920B9_SF Supt16h  | FACT comp R.HTDVQYFTEVGEITDLDGK#.H                   | 18.03  | 16.62  | 1.08 | 0.92 |
| Q920B9_SF Supt16h  | FACT comp R.LTEQK#GEQIQK#.A                          | 5.69   | 4.51   | 1.26 | 0.79 |
| Q920B9_SF Supt16h  | FACT comp K.NEDDEEEEEKDEAEDLLGR.G                    | 4.41   | 12.77  | 0.35 | 2.89 |
| Q920B9_SF Supt16h  | FACT comp R.NEGNIFPNPEATFVK.E                        | 31.54  | 27.28  | 1.16 | 0.86 |
| Q920B9_SF Supt16h  | FACT comp K.NISM*SVGEQDYTLR.I                        | 4.33   | 8.64   | 0.50 | 1.99 |
| Q920B9_SF Supt16h  | FACT comp K.YETVIM*PVFGIATPFHIATIK#.N                | 15.53  | 15.12  | 1.03 | 0.97 |
| Q920B9_SF Supt16h  | FACT comp K.YTEGVQSLNWTK#.I                          | 23.83  | 15.44  | 1.54 | 0.65 |
| Q9Z199_SP Supt4h1b | Transcriptii R.VSNFKPVYAVSVTGR.L                     | 16.41  | 40.56  | 0.40 | 2.47 |
| O55201_SF Supt5h   | Transcriptii R.DVTNLTVGGFTPM*SPR.I                   | 3.92   | 12.14  | 0.32 | 3.10 |
| O55201_SF Supt5h   | Transcriptii R.FAVALDSQNNIHWK#.D                     | 103.40 | 30.38  | 3.40 | 0.29 |
| O55201_SF Supt5h   | Transcriptii K.FIAYQFTDPLQIK#.S                      | 23.30  | 8.79   | 2.65 | 0.38 |
| O55201_SF Supt5h   | Transcriptii R.GIYKDDIAQVDYVEPSQNTSLK#.M             | 36.53  | 12.15  | 3.01 | 0.33 |
| O55201_SF Supt5h   | Transcriptii K.GIYVVEAYK#.Q                          | 42.36  | 19.14  | 2.21 | 0.45 |
| O55201_SF Supt5h   | Transcriptii R.K.#FIAYQFTDPLQIK#.S                   | 37.46  | 18.73  | 2.00 | 0.50 |
| O55201_SF Supt5h   | Transcriptii R.LGYWNQQM*VPIK#.E                      | 8.11   | 3.65   | 2.22 | 0.45 |
| O55201_SF Supt5h   | Transcriptii R.SLGGDVASDGLFIFEGNR.Y                  | 7.65   | 16.05  | 0.48 | 2.10 |
| O55201_SF Supt5h   | Transcriptii R.SSEAEAEVEEDQR.S                       | 5.70   | 12.06  | 0.47 | 2.11 |
| O55201_SF Supt5h   | Transcriptii K.SVGEQTYVGSDELSDITQQLLPGVK#DPNLWTVK#.C | 11.39  | 6.67   | 1.71 | 0.59 |
| O55201_SF Supt5h   | Transcriptii K.SVAPVHVK#.G                           | 21.51  | 7.85   | 2.74 | 0.36 |
| O55201_SF Supt5h   | Transcriptii R.TPM*YGSQTPLDGSR.T                     | 6.84   | 11.67  | 0.59 | 1.71 |
| O55201_SF Supt5h   | Transcriptii K.VLSVDGNK#.I                           | 44.95  | 19.49  | 2.31 | 0.43 |
| O55201_SF Supt5h   | Transcriptii R.GIYKDDIAQVDYVEPSQNTSLK#.M             | 21.32  | 10.05  | 2.12 | 0.47 |
| O55201_SF Supt5h   | Transcriptii K.GIYVVEAYK#.Q                          | 16.64  | 4.80   | 3.46 | 0.29 |
| O55201_SF Supt5h   | Transcriptii R.K.#FIAYQFTDPLQIK#.S                   | 15.17  | 7.88   | 1.93 | 0.52 |
| O55201_SF Supt5h   | Transcriptii R.SLGGDVASDGLFIFEGNR.Y                  | 3.15   | 5.42   | 0.58 | 1.72 |
| Q62383_SF Supt6h   | Transcriptii K.AAEDDEEAEADWIYR.N                     | 5.58   | 14.02  | 0.40 | 2.51 |
| Q62383_SF Supt6h   | Transcriptii K.ETPETYFK#.L                           | 44.12  | 33.43  | 1.32 | 0.76 |
| Q62383_SF Supt6h   | Transcriptii K.FGLTPEQFGENLR.D                       | 8.61   | 28.10  | 0.31 | 3.26 |
| Q62383_SF Supt6h   | Transcriptii K.FLLGYQPR.G                            | 8.79   | 35.81  | 0.25 | 4.07 |
| Q62383_SF Supt6h   | Transcriptii K.FVEEEDDEEEENLDDQDER.G                 | 1.99   | 7.05   | 0.28 | 3.55 |
| Q62383_SF Supt6h   | Transcriptii K.GVEGYGNDQTYFEEIK#.Q                   | 19.66  | 14.56  | 1.35 | 0.74 |
| Q62383_SF Supt6h   | Transcriptii R.HETEQFAPELEAK#.D                      | 7.02   | 5.24   | 1.34 | 0.75 |
| Q62383_SF Supt6h   | Transcriptii K.IDTASLGDSTDSYIEVLVDSGR.V              | 4.00   | 17.76  | 0.23 | 4.44 |
| Q62383_SF Supt6h   | Transcriptii R.IEYVTVPEGFR.Y                         | 9.27   | 29.05  | 0.32 | 3.13 |
| Q62383_SF Supt6h   | Transcriptii R.IKEDGDEEGEAEDEEQRGPGLK.Q              | 9.69   | 54.02  | 0.18 | 5.57 |

|                   |                                                   |       |       |      |      |
|-------------------|---------------------------------------------------|-------|-------|------|------|
| Q62383_SF Supt6h  | Transcriptii K.KFGLTPEQFGENLR.D                   | 7.62  | 22.55 | 0.34 | 2.96 |
| Q62383_SF Supt6h  | Transcriptii K.KFVEEEDDEEEENLDQDER.G              | 3.66  | 13.08 | 0.28 | 3.57 |
| Q62383_SF Supt6h  | Transcriptii K.K#LEELLIK#.T                       | 40.19 | 25.32 | 1.59 | 0.63 |
| Q62383_SF Supt6h  | Transcriptii R.KM*AVDALEYDESAEDANPAGALEEILENPER.L | 4.49  | 16.32 | 0.28 | 3.63 |
| Q62383_SF Supt6h  | Transcriptii K.KPHVVTIAGENR.D                     | 18.62 | 48.71 | 0.38 | 2.62 |
| Q62383_SF Supt6h  | Transcriptii R.LKDLDLDAFAEELER.Q                  | 12.87 | 39.80 | 0.32 | 3.09 |
| Q62383_SF Supt6h  | Transcriptii K.M*AEQWLQEK#.E                      | 14.41 | 16.10 | 0.89 | 1.12 |
| Q62383_SF Supt6h  | Transcriptii K.M*AVDALEYDESAEDANPAGALEEILENPER.L  | 4.58  | 8.90  | 0.51 | 1.94 |
| Q62383_SF Supt6h  | Transcriptii K.M*M*ETM*QDGDVIRPSK.G               | 5.04  | 25.68 | 0.20 | 5.09 |
| Q62383_SF Supt6h  | Transcriptii K.M*QAYQEIQSADPKPLADGIR.A            | 5.95  | 19.25 | 0.31 | 3.24 |
| Q62383_SF Supt6h  | Transcriptii K.MQAYQEIQSADPKPLADGIR.A             | 3.58  | 10.12 | 0.35 | 2.83 |
| Q62383_SF Supt6h  | Transcriptii R.NQHFEVPIAFYR.K                     | 4.12  | 22.07 | 0.19 | 5.35 |
| Q62383_SF Supt6h  | Transcriptii R.RPQGESYDQAIR.N                     | 2.86  | 28.07 | 0.10 | 9.81 |
| Q62383_SF Supt6h  | Transcriptii R.SIFEMYPESESSHLTDQNEIR.A            | 2.83  | 7.77  | 0.36 | 2.74 |
| Q62383_SF Supt6h  | Transcriptii R.SPNTTEIFNM*LTk#.E                  | 21.96 | 23.35 | 0.94 | 1.06 |
| Q62383_SF Supt6h  | Transcriptii R.TPASNATPANINLADLTR.A               | 3.94  | 16.87 | 0.23 | 4.28 |
| Q62383_SF Supt6h  | Transcriptii R.TRTPASINATPANINLADLTR.A            | 2.92  | 7.55  | 0.39 | 2.59 |
| Q62383_SF Supt6h  | Transcriptii R.VAPYRPDQVEEDDDFM*DENQKG.G          | 10.14 | 35.92 | 0.28 | 3.54 |
| Q62383_SF Supt6h  | Transcriptii R.VAPYRPDQVEEDDDFMENQKG.G            | 2.15  | 7.07  | 0.30 | 3.28 |
| Q62383_SF Supt6h  | Transcriptii R.VLGIASFAR.D                        | 4.63  | 13.23 | 0.35 | 2.86 |
| Q62383_SF Supt6h  | Transcriptii R.VNEGVVDVNR.A                       | 76.36 | 54.99 | 1.39 | 0.72 |
| Q62383_SF Supt6h  | Transcriptii R.YM*VALQJAR.E                       | 3.23  | 9.56  | 0.34 | 2.96 |
| Q64310_SL Surf4   | Surfeit locu K.SM*FAGVPTM*.E                      | 9.55  | 35.63 | 0.27 | 3.73 |
| O54864_SL Suv39h1 | Histone-lys K.FAYNDQGVRL                          | 5.52  | 19.09 | 0.29 | 3.46 |
| Q80U70_SL Suz12   | Polycomb f K.ALETLDGVSVPK#.Q                      | 49.83 | 30.40 | 1.64 | 0.61 |
| Q80U70_SL Suz12   | Polycomb f K.ETLTTELQTR.K                         | 6.31  | 16.14 | 0.39 | 2.56 |
| Q80U70_SL Suz12   | Polycomb f K.HGGGGGGSGSAGSGGGGGGSAVAVAASGGK#.S    | 8.63  | 3.10  | 2.78 | 0.36 |
| Q80U70_SL Suz12   | Polycomb f K.ALETLDGVSVPK#.Q                      | 33.13 | 19.00 | 1.74 | 0.57 |
| Q80U70_SL Suz12   | Polycomb f R.ATWETLIDGK#.R                        | 9.37  | 4.76  | 1.97 | 0.51 |
| Q80U70_SL Suz12   | Polycomb f K.ETLTTELQTR.K                         | 7.56  | 17.42 | 0.43 | 2.30 |
| Q80U70_SL Suz12   | Polycomb f K.HGGGGGGSGSAGSGGGGGGSAVAVAASGGK#.S    | 15.28 | 9.61  | 1.59 | 0.63 |
| Q80U70_SL Suz12   | Polycomb f R.NESLHQNKGVSVPKPAQTIK#.E              | 35.62 | 17.60 | 2.02 | 0.49 |
| Q6A028_SL Swap70  | Switch-assc K.K#QEWIQAIVSTIHLK#.L                 | 7.13  | 2.91  | 2.45 | 0.41 |
| Q6A028_SL Swap70  | Switch-assc K.LLAEQEELER.Q                        | 6.63  | 18.49 | 0.36 | 2.79 |
| Q6A028_SL Swap70  | Switch-assc R.QTVSM*AINVEFNELIDLVLK#.Q            | 14.66 | 4.28  | 3.43 | 0.29 |
| Q6A028_SL Swap70  | Switch-assc K.SPLLEDIDFAFK#.V                     | 22.14 | 8.07  | 2.74 | 0.36 |
| Q6A028_SL Swap70  | Switch-assc R.GLKHDELLK#.A                        | 9.88  | 6.31  | 1.57 | 0.64 |
| Q6A028_SL Swap70  | Switch-assc K.K#LTEAM*GGGWQEQFEHYK#.I             | 8.06  | 2.16  | 3.74 | 0.27 |
| Q6A028_SL Swap70  | Switch-assc K.K#LTEAM*GGGWQEQFEHYK#.I             | 4.60  | 3.55  | 1.30 | 0.77 |
| Q6A028_SL Swap70  | Switch-assc K.LQEALEDER.Q                         | 13.20 | 25.49 | 0.52 | 1.93 |
| Q6A028_SL Swap70  | Switch-assc R.LQTQVELQTR.F                        | 15.91 | 24.94 | 0.64 | 1.57 |
| A0A0A0MC Swi5     | DNA repair K.ELYPDFDLNLND.-                       | 23.18 | 23.18 | 1.00 | 1.00 |
| A0A0A0MC Swi5     | DNA repair R.SPQRPFMINDENNDVSEALSSDIK.K           | 2.50  | 4.48  | 0.56 | 1.79 |
| P48025_KS Syk     | Tyrosine-pr R.SLTTLEDNELGSGNFGTVK#.K              | 4.01  | 2.32  | 1.72 | 0.58 |
| Q80X82_SY Sympk   | Symplekin i K.AAVEQLLK#.F                         | 12.28 | 6.79  | 1.81 | 0.55 |
| Q80X82_SY Sympk   | Symplekin i R.AYLGM*STLGDILFK#.R                  | 10.20 | 5.60  | 1.82 | 0.55 |
| Q80X82_SY Sympk   | Symplekin i R.DHPYIQYNVLWEEGK#.A                  | 7.35  | 4.58  | 1.60 | 0.62 |
| Q80X82_SY Sympk   | Symplekin i R.LSDVLK#PLTDAQVEAM*K#.L              | 9.13  | 6.08  | 1.50 | 0.67 |
| Q80X82_SY Sympk   | Symplekin i R.SQALLFIK#.R                         | 9.89  | 10.93 | 0.91 | 1.10 |
| Q80X82_SY Sympk   | Symplekin i K.VVLEAPLITESALEVIR.K                 | 2.85  | 14.57 | 0.20 | 5.11 |
| Q80X82_SY Sympk   | Symplekin i K.AAVEQLLK#.F                         | 31.13 | 13.95 | 2.23 | 0.45 |
| Q80X82_SY Sympk   | Symplekin i R.AYLGMLTDLGILFK#.R                   | 7.99  | 3.23  | 2.47 | 0.40 |
| Q80X82_SY Sympk   | Symplekin i R.DHPYIQYNVLWEEGK#.A                  | 9.20  | 7.07  | 1.30 | 0.77 |
| Q80X82_SY Sympk   | Symplekin i K.EVIQALPK#.L                         | 18.85 | 12.64 | 1.49 | 0.67 |
| Q80X82_SY Sympk   | Symplekin i K.LLASLTFQDFSGFK#.A                   | 8.27  | 9.17  | 0.90 | 1.11 |
| Q80X82_SY Sympk   | Symplekin i K.LNPVIVK#.E                          | 19.75 | 18.94 | 1.04 | 0.96 |
| Q80X82_SY Sympk   | Symplekin i R.LSDVLK#PLTDAQVEAM*K#.L              | 23.97 | 14.65 | 1.64 | 0.61 |
| Q80X82_SY Sympk   | Symplekin i R.SQALLFIK#.R                         | 21.15 | 16.18 | 1.31 | 0.76 |
| Q80X82_SY Sympk   | Symplekin i R.VDVLNQAALITNDSK#.I                  | 16.03 | 8.73  | 1.84 | 0.54 |
| Q77MK9_H Syncrip  | Heterogene R.AIEALKEFNEDGALAVLQQFK#.D             | 21.71 | 18.80 | 1.15 | 0.87 |
| Q77MK9_H Syncrip  | Heterogene R.DLFEDELVP LFEK#.A                    | 47.45 | 36.59 | 1.30 | 0.77 |
| Q77MK9_H Syncrip  | Heterogene K.DSDLSHVQNK#.S                        | 18.25 | 14.15 | 1.29 | 0.78 |
| Q77MK9_H Syncrip  | Heterogene R.LFVGSIPK#.S                          | 38.94 | 27.80 | 1.40 | 0.71 |
| Q77MK9_H Syncrip  | Heterogene R.LM*LM*DLPTGLNLR.G                    | 15.35 | 12.30 | 1.25 | 0.80 |
| Q77MK9_H Syncrip  | Heterogene K.SFSQFGK#.L                           | 26.66 | 12.75 | 2.09 | 0.48 |
| Q77MK9_H Syncrip  | Heterogene R.TGYTLDVTTGQR.K                       | 11.04 | 25.11 | 0.44 | 2.27 |
| Q77MK9_H Syncrip  | Heterogene K.TK#EQLEEFK#.V                        | 10.34 | 7.58  | 1.37 | 0.73 |
| Q77MK9_H Syncrip  | Heterogene K.VTEGLTDVILYHQPDCK#.K                 | 31.93 | 20.25 | 1.58 | 0.63 |
| Q77MK9_H Syncrip  | Heterogene K.AGPIWDLR.L                           | 11.72 | 35.02 | 0.33 | 2.99 |
| Q77MK9_H Syncrip  | Heterogene R.AIEALKEFNEDGALAVLQQFK#.D             | 37.09 | 28.07 | 1.32 | 0.76 |
| Q77MK9_H Syncrip  | Heterogene R.DLFEDELVP LFEK#.A                    | 63.02 | 42.47 | 1.48 | 0.67 |
| Q77MK9_H Syncrip  | Heterogene K.DSDLSHVQNK#.S                        | 12.71 | 7.13  | 1.78 | 0.56 |
| Q77MK9_H Syncrip  | Heterogene R.K#YGGPPPSVSGQQPSVGTVEIFVKG#.I        | 5.10  | 3.88  | 1.31 | 0.76 |
| Q77MK9_H Syncrip  | Heterogene R.LFVGSIPK#.S                          | 56.89 | 40.08 | 1.42 | 0.70 |
| Q77MK9_H Syncrip  | Heterogene R.LM*LM*DLPTGLNLR.G                    | 5.12  | 9.20  | 0.56 | 1.80 |
| Q77MK9_H Syncrip  | Heterogene R.NLANTVTEILEK#.S                      | 61.91 | 47.22 | 1.31 | 0.76 |
| Q77MK9_H Syncrip  | Heterogene R.TGYTLDVTTGQR.K                       | 12.78 | 43.16 | 0.30 | 3.38 |
| Q77MK9_H Syncrip  | Heterogene K.TK#EQLEEFK#.V                        | 19.30 | 11.04 | 1.75 | 0.57 |
| Q77MK9_H Syncrip  | Heterogene K.TK#EQLEEFK#.V                        | 18.91 | 7.83  | 2.42 | 0.41 |
| Q77MK9_H Syncrip  | Heterogene K.VAEKLDEIVAGLVAHSDLDER.A              | 2.43  | 4.30  | 0.56 | 1.77 |
| Q77MK9_H Syncrip  | Heterogene K.VWGNVGVVEWADPIEDPPEVM*AK#.V          | 4.76  | 2.99  | 1.59 | 0.63 |
| O55101_SF Syngr2  | Synaptogyr R.FLSQPQVTR.L                          | 7.45  | 10.57 | 0.70 | 1.42 |
| Q8CHC4_S1 Synj1   | Synaptojan K.GPAVLPEPLK#PQAAPQPSLPTPAQK#.L        | 6.99  | 2.10  | 3.33 | 0.30 |
| Q8CHC4_S1 Synj1   | Synaptojan K.NQTLTDWLLDAPK#.L                     | 6.47  | 3.44  | 1.88 | 0.53 |
| Q8CHC4_S1 Synj1   | Synaptojan R.SAEDLDDLNASFQDESK#.I                 | 7.84  | 2.63  | 2.98 | 0.34 |
| Q8CF89_TA Tab1    | TGF-beta-ak K.YGYTDIDLSAAK#.S                     | 7.08  | 7.71  | 0.92 | 1.09 |
| Q9JJG0_TA Tacc2   | Transformin R.GSTEVKPPGLLFQPPDLSALQVAR.A          | 1.74  | 6.17  | 0.28 | 3.54 |
| D3Z4Z0_D3 Tada2b  | MCG49644 K.M*EESAEEAAR.H                          | 2.90  | 5.22  | 0.56 | 1.80 |
| Q8ROL9_TA Tada3   | Transcriptii K.GLIGLETLDTK.D                      | 9.54  | 10.85 | 0.88 | 1.14 |
| Q8ROL9_TA Tada3   | Transcriptii R.WAQEDLLEEQK.D                      | 6.51  | 6.91  | 0.94 | 1.06 |
| Q8KOH5_T1 Taf10   | Transcriptii K.ASPAGTAGGVPAGVATAGTGPVAAR.A        | 1.57  | 6.40  | 0.24 | 4.08 |
| P61216_TA Taf13   | Transcriptii R.VQVEDIVFLIR.K                      | 5.27  | 13.20 | 0.40 | 2.50 |
| E9QAP7_E9 Taf4a   | Protein Taf K.ALSTVSAQAAAQK.N                     | 12.37 | 21.08 | 0.59 | 1.70 |
| E9QAP7_E9 Taf4a   | Protein Taf K.FFEQLDQIEK.Q                        | 8.62  | 11.80 | 0.73 | 1.37 |
| E9QAP7_E9 Taf4a   | Protein Taf R.LATNSVLTGTR.S                       | 8.15  | 11.87 | 0.69 | 1.46 |
| Q91W05_T1 Taf5I   | TAF5-like Ri K.VLASAGEDQR.L                       | 2.34  | 9.10  | 0.26 | 3.89 |
| Q8R2K4_T7 Taf6I   | TAF6-like Ri K.GNLAPQGSVPASVSSLLDILLK#.Y          | 7.52  | 5.55  | 1.35 | 0.74 |
| Q8R2K4_T7 Taf6I   | TAF6-like Ri K.VALQDLQTNK#.I                      | 8.03  | 7.01  | 1.15 | 0.87 |
| Q8V133_TA Taf9    | Transcriptii R.DFLLDIAR.Q                         | 2.74  | 10.58 | 0.26 | 3.87 |
| Q9WVA4_T TagIn2   | Transgelin-.R.DDGLFSGDPNFWPK#.K                   | 32.08 | 16.65 | 1.93 | 0.52 |
| Q9WVA4_T TagIn2   | Transgelin-.K.IQASSM*AFK#.Q                       | 28.57 | 11.97 | 2.39 | 0.42 |
| Q9WVA4_T TagIn2   | Transgelin-.K.LINSLYPEGQAPVK#.K                   | 9.74  | 3.92  | 2.49 | 0.40 |
| Q9WVA4_T TagIn2   | Transgelin-.K.NIVGLQM*GTNR.G                      | 7.07  | 10.50 | 0.67 | 1.48 |

|                   |                                                      |        |        |         |       |
|-------------------|------------------------------------------------------|--------|--------|---------|-------|
| Q9WVA4_T TagIn2   | Transgelin-; R.YGINTTDFQTVDLWEKG#.N                  | 13.37  | 6.04   | 2.21    | 0.45  |
| Q0VGY8_T7 Tanc1   | Protein TAI R.ETVAQSLVM*QPTK#.Q                      | 9.55   | 2.86   | 3.34    | 0.30  |
| Q0VGY8_T7 Tanc1   | Protein TAI K.LVEEAGVLM*YK#.K                        | 10.39  | 5.27   | 1.97    | 0.51  |
| Q0VGY8_T7 Tanc1   | Protein TAI R.QIASSPSLSPK#.S                         | 7.83   | 2.55   | 3.07    | 0.33  |
| Q5F2E8_TA Taok1   | Serine/thre K.AGNILLTEPGQVK#.L                       | 41.62  | 21.61  | 1.93    | 0.52  |
| Q5F2E8_TA Taok1   | Serine/thre R.LQHQTTELTNQLYNYK#.R                    | 22.07  | 11.80  | 1.87    | 0.53  |
| Q5F2E8_TA Taok1   | Serine/thre K.AGNILLTEPGQVK#.L                       | 13.27  | 5.41   | 2.45    | 0.41  |
| Q8BYC6_TA Taok3   | Serine/thre R.LQHQTTELTNQLYNYK#.R                    | 13.65  | 4.41   | 3.10    | 0.32  |
| Q9R233_TF Tapbp   | Tapasin OS- K.ATAASLTIPR.N                           | 3.17   | 13.15  | 0.24    | 4.15  |
| Q921F2_TA Tardbp  | TAR DNA-bi R.AFAVTFADDK.V                            | 148.64 | 243.06 | 0.61    | 1.64  |
| Q921F2_TA Tardbp  | TAR DNA-bi K.DYFSTFGEVLM*VQVK.K                      | 22.76  | 32.81  | 0.69    | 1.44  |
| Q921F2_TA Tardbp  | TAR DNA-bi K.DYFSTFGEVLM*VQVK.K                      | 14.54  | 16.52  | 0.88    | 1.14  |
| Q921F2_TA Tardbp  | TAR DNA-bi K.DYFSTFGEVLMVQVK.K                       | 10.67  | 31.62  | 0.34    | 2.96  |
| Q921F2_TA Tardbp  | TAR DNA-bi K.DYFSTFGEVLMVQVK#.K                      | 22.22  | 30.94  | 0.72    | 1.39  |
| Q921F2_TA Tardbp  | TAR DNA-bi R.FGGNPGGFGNQGGFGNSR.G                    | 58.79  | 387.15 | 0.15    | 6.59  |
| Q921F2_TA Tardbp  | TAR DNA-bi R.FTEYEQVK#.V                             | 555.70 | 701.17 | 0.79    | 1.26  |
| Q921F2_TA Tardbp  | TAR DNA-bi K.GISVHISNAEPK#.H                         | 166.27 | 236.52 | 0.70    | 1.42  |
| Q921F2_TA Tardbp  | TAR DNA-bi R.KHM*DETDASSAVK#.V                       | 182.00 | 292.81 | 0.62    | 1.61  |
| Q921F2_TA Tardbp  | TAR DNA-bi R.KHM*DETDASSAVK#.V                       | 76.76  | 114.56 | 0.67    | 1.49  |
| Q921F2_TA Tardbp  | TAR DNA-bi R.LVEGLHAPDAGWGNLVVYVYVYK.D               | 349.92 | 384.90 | 0.91    | 1.10  |
| Q921F2_TA Tardbp  | TAR DNA-bi R.LVEGLHAPDAGWGNLVVYVYVYK.D               | 23.26  | 33.52  | 0.69    | 1.44  |
| Q921F2_TA Tardbp  | TAR DNA-bi K.M*DETDASSAVK#.V                         | 64.58  | 122.11 | 0.53    | 1.89  |
| Q921F2_TA Tardbp  | TAR DNA-bi K.M*DETDASSAVK#.V                         | 93.51  | 116.05 | 0.81    | 1.24  |
| Q921F2_TA Tardbp  | TAR DNA-bi K.QSPDEPLR.S                              | 68.48  | 524.76 | 0.13    | 7.66  |
| Q921F2_TA Tardbp  | TAR DNA-bi K.TSDLVVLGWPVK.T                          | 433.32 | 678.22 | 0.64    | 1.57  |
| Q921F2_TA Tardbp  | TAR DNA-bi K.TTEQDKDYFSTFGEVLM*VQVK.K                | 54.29  | 96.23  | 0.56    | 1.77  |
| Q921F2_TA Tardbp  | TAR DNA-bi R.FGGNPGGFGNQGGFGNSR.G                    | 3.43   | 18.03  | 0.19    | 5.26  |
| Q921F2_TA Tardbp  | TAR DNA-bi R.FTEYEQVK.V                              | 11.84  | 13.24  | 0.89    | 1.12  |
| Q921F2_TA Tardbp  | TAR DNA-bi R.FGGNPGGFGNQGGFGNSR.G                    | 4.56   | 30.23  | 0.15    | 6.62  |
| Q921F2_TA Tardbp  | TAR DNA-bi R.FTEYEQVK.V                              | 32.56  | 54.57  | 0.60    | 1.68  |
| Q921F2_TA Tardbp  | TAR DNA-bi R.KM*DETDASSAVK#.V                        | 8.17   | 12.51  | 0.65    | 1.53  |
| Q921F2_TA Tardbp  | TAR DNA-bi R.KHM*DETDASSAVK#.V                       | 5.03   | 6.25   | 0.80    | 1.24  |
| Q921F2_TA Tardbp  | TAR DNA-bi R.LVEGLHAPDAGWGNLVVYVYVYK.D               | 29.20  | 22.62  | 1.29    | 0.77  |
| Q921F2_TA Tardbp  | TAR DNA-bi K.TSDLVVLGWPVK.T                          | 38.65  | 42.36  | 0.91    | 1.10  |
| Q921F2_TA Tardbp  | TAR DNA-bi R.FTEYEQVK.V                              | 19.08  | 35.07  | 0.54    | 1.84  |
| Q921F2_TA Tardbp  | TAR DNA-bi R.KM*DETDASSAVK#.V                        | 7.91   | 9.41   | 0.84    | 1.19  |
| Q921F2_TA Tardbp  | TAR DNA-bi R.LVEGLHAPDAGWGNLVVYVYVYK.D               | 14.59  | 20.31  | 0.72    | 1.39  |
| Q921F2_TA Tardbp  | TAR DNA-bi K.TSDLVVLGWPVK.T                          | 17.64  | 28.40  | 0.62    | 1.61  |
| Q9D0R2_S1 Tars    | Threonine- K.FLGDIEIWNQAEK#.Q                        | 12.19  | 1.46   | 8.35    | 0.12  |
| Q9D0R2_S1 Tars    | Threonine- R.M*AILTENYGGK#.W                         | 6.37   | 5.86   | 1.09    | 0.92  |
| Q9D0R2_S1 Tars    | Threonine- R.NAQLAQYNFVVGKE#.E                       | 4.46   | 0.00   | #DIV/0! | 0.00  |
| Q9D0R2_S1 Tars    | Threonine- K.FLGDIEIWNQAEK#.Q                        | 27.42  | 14.27  | 1.92    | 0.52  |
| Q9D0R2_S1 Tars    | Threonine- R.IYGSFDPDK#.L                            | 44.01  | 4.30   | 10.24   | 0.10  |
| Q9D0R2_S1 Tars    | Threonine- K.LK#AEHDSILAEL#.A                        | 64.57  | 4.09   | 15.79   | 0.06  |
| Q9D0R2_S1 Tars    | Threonine- K.LL#WEWVK#.F                             | 20.41  | 1.89   | 10.80   | 0.09  |
| Q9D0R2_S1 Tars    | Threonine- R.M*AILTENYGGK#.W                         | 16.38  | 1.39   | 11.82   | 0.08  |
| Q9D0R2_S1 Tars    | Threonine- K.QLENLNEFGEK#.W                          | 11.46  | 1.24   | 9.26    | 0.11  |
| Q9D0R2_S1 Tars    | Threonine- K.WELNPGDGAFYGPKE#.I                      | 9.41   | 3.45   | 2.73    | 0.37  |
| Q9D0R2_S1 Tars    | Threonine- K.ETLEMFK#.Y                              | 31.84  | 3.05   | 10.45   | 0.10  |
| Q9D0R2_S1 Tars    | Threonine- K.ETLEMFK#.Y                              | 27.25  | 2.62   | 10.39   | 0.10  |
| Q9D0R2_S1 Tars    | Threonine- K.FLGDIEIWNQAEK#.Q                        | 123.59 | 7.44   | 16.62   | 0.06  |
| Q9D0R2_S1 Tars    | Threonine- R.IYGSFDPDK#.L                            | 117.65 | 10.64  | 11.06   | 0.09  |
| Q9D0R2_S1 Tars    | Threonine- K.LK#AEHDSILAEL#.A                        | 26.59  | 1.44   | 18.44   | 0.05  |
| Q9D0R2_S1 Tars    | Threonine- K.LL#WEWVK#.F                             | 42.36  | 11.40  | 3.72    | 0.27  |
| Q9D0R2_S1 Tars    | Threonine- R.M*AILTENYGGK#.W                         | 50.86  | 3.86   | 13.18   | 0.08  |
| Q9D0R2_S1 Tars    | Threonine- R.NAQLAQYNFVVGKE#.E                       | 27.80  | 2.39   | 11.61   | 0.09  |
| Q9D0R2_S1 Tars    | Threonine- R.NELSGALGLTR.V                           | 49.49  | 20.14  | 2.46    | 0.41  |
| Q9D0R2_S1 Tars    | Threonine- K.NSSTYVEGK#.A                            | 46.07  | 8.12   | 5.67    | 0.18  |
| Q9D0R2_S1 Tars    | Threonine- K.QLENLNEFGEK#.W                          | 16.93  | 4.27   | 3.96    | 0.25  |
| Q9D0R2_S1 Tars    | Threonine- K.QVDAESWK#.T                             | 50.83  | 4.44   | 11.45   | 0.09  |
| Q9D0R2_S1 Tars    | Threonine- R.SK#QAEFEF.-                             | 19.65  | 2.35   | 8.37    | 0.12  |
| Q9D0R2_S1 Tars    | Threonine- K.WELNPGDGAFYGPKE#.I                      | 26.21  | 2.63   | 9.96    | 0.10  |
| Q60949_TE Tbc1d1  | TBC1 doma K.HLTLTNQEQTAFEEVQK#.L                     | 7.39   | 2.63   | 2.81    | 0.36  |
| Q60949_TE Tbc1d1  | TBC1 doma K.QAFTVAAVQQTAK#.A                         | 7.67   | 40.82  | 1.59    | 5.32  |
| Q60949_TE Tbc1d1  | TBC1 doma K.ANHLDGTDGTPVK#.T                         | 7.45   | 4.94   | 1.51    | 0.66  |
| Q60949_TE Tbc1d1  | TBC1 doma R.GLQDHSASVDLDSSTSLNNTSK#.E                | 19.19  | 7.93   | 2.42    | 0.41  |
| Q60949_TE Tbc1d1  | TBC1 doma K.HLTLTNQEQTAFEEVQK#.L                     | 15.91  | 3.14   | 5.07    | 0.20  |
| Q60949_TE Tbc1d1  | TBC1 doma R.IQSLAATVEK#.L                            | 23.03  | 8.74   | 2.63    | 0.38  |
| Q60949_TE Tbc1d1  | TBC1 doma K.QAFTVAAVQQTAK#.A                         | 6.57   | 86.52  | 0.08    | 13.18 |
| Q60949_TE Tbc1d1  | TBC1 doma R.SLTESLESLSR.G                            | 8.96   | 11.11  | 0.81    | 1.24  |
| Q60949_TE Tbc1d1  | TBC1 doma K.TISQVFEM*DIK#.Q                          | 11.95  | 8.23   | 1.45    | 0.69  |
| Q9CXF4_TB Tbc1d15 | TBC1 doma K.ANDQDLSIGLIR.V                           | 22.79  | 13.38  | 1.70    | 0.59  |
| Q9CXF4_TB Tbc1d15 | TBC1 doma K.TQLIQLTLLR.L                             | 3.75   | 7.78   | 0.48    | 2.07  |
| A3KGB4_TE Tbc1d8b | TBC1 doma R.LYVIQLEETK#.Q                            | 10.87  | 5.31   | 2.05    | 0.49  |
| A3KGB4_TE Tbc1d8b | TBC1 doma K.TLVSFDSNEDITNFVQK#.I                     | 6.58   | 3.04   | 2.16    | 0.46  |
| Q5SVR0_TB Tbc1d9b | TBC1 doma R.VVGALVDCGIFEELTR.D                       | 5.41   | 11.32  | 0.48    | 2.09  |
| Q9QXE7_TE Tbl1x   | F-box-like\ K.GNYLSAGVDK#.T                          | 13.83  | 8.99   | 1.54    | 0.65  |
| Q9QXE7_TE Tbl1x   | F-box-like\ K.HQEPVYSVAFSPDGK#.Y                     | 11.94  | 6.52   | 1.83    | 0.55  |
| Q9QXE7_TE Tbl1x   | F-box-like\ K.LAQQQANAAAAAAAAATATSTATTPAAAAAQPNPK#.N | 14.12  | 7.10   | 1.99    | 0.50  |
| Q8BHJ5_TB Tbl1xr1 | F-box-like\ K.GPIFALK#.W                             | 44.47  | 36.08  | 1.23    | 0.81  |
| Q8BHJ5_TB Tbl1xr1 | F-box-like\ K.LAQQAIAAAAAAAAAATNQQGSAK#.N            | 14.29  | 12.91  | 1.11    | 0.90  |
| Q8BHJ5_TB Tbl1xr1 | F-box-like\ R.YLASGSFDK#.C                           | 26.93  | 40.50  | 0.66    | 1.50  |
| Q8C4J7_TB Tbl3    | Transducin K.VNILDVASGALLR.S                         | 1.42   | 5.71   | 0.25    | 4.02  |
| Q8C4J7_TB Tbl3    | Transducin R.TVPVFESVAVLLPEQPAPALGVK#.S              | 20.80  | 10.27  | 2.02    | 0.49  |
| Q8C4J7_TB Tbl3    | Transducin K.VNILDVASGALLR.S                         | 2.97   | 16.31  | 0.18    | 5.49  |
| P29037_TB Tbp     | TATA-box-b R.AEYEFENYPIPK#.G                         | 9.04   | 8.49   | 1.06    | 0.94  |
| P29037_TB Tbp     | TATA-box-b R.TTALIFSSGK#.V                           | 14.56  | 8.34   | 1.74    | 0.57  |
| P29037_TB Tbp     | TATA-box-b R.AEYEFENYPIPK#.G                         | 13.48  | 10.80  | 1.25    | 0.80  |
| Q810F8_TB Tbx10   | T-box trans K.LTNMLDDNGHILNSM*HR.Y                   | 2.44   | 17.46  | 0.14    | 7.16  |
| O70306_TE Tbx15   | T-box trans R.TPSSLISGIPPTPLSPNSK.M                  | 3.46   | 6.24   | 0.55    | 1.80  |
| P83940_EL Tceb1   | Transcriptin K.AM*LSLPGQGFENETNEVNF.R.E              | 14.36  | 38.20  | 0.38    | 2.66  |
| P83940_EL Tceb1   | Transcriptin K.AMLSGPGQGFENETNEVNF.R.E               | 2.38   | 5.06   | 0.47    | 2.13  |
| P83940_EL Tceb1   | Transcriptin R.EHALTSGTIK#.A                         | 48.56  | 18.48  | 2.63    | 0.38  |
| P62869_EL Tceb2   | Transcriptin R.ADDTFEALR.I                           | 14.35  | 42.64  | 0.34    | 2.97  |
| P62869_EL Tceb2   | Transcriptin K.ESSTVFELK#.R                          | 40.05  | 23.87  | 1.68    | 0.60  |
| P62869_EL Tceb2   | Transcriptin R.IEPPSSPELDPVM*K#PQDSSGGSANEQAVQ.-     | 32.69  | 16.52  | 1.98    | 0.51  |
| P62869_EL Tceb2   | Transcriptin R.IVEGLIK#.R                            | 70.57  | 36.51  | 1.93    | 0.52  |
| P62869_EL Tceb2   | Transcriptin R.LYKDDQLLDDGK.T                        | 37.74  | 30.85  | 1.22    | 0.82  |
| P62869_EL Tceb2   | Transcriptin R.LYKDDQLLDDGK#.T                       | 12.31  | 9.80   | 1.26    | 0.80  |
| P62869_EL Tceb2   | Transcriptin K.TTIFDAK#.E                            | 71.69  | 41.07  | 1.75    | 0.57  |
| Q8CB77_EL Tceb3   | Transcriptin K.AFPSPQEEEEAGFTGR.R                    | 3.44   | 8.59   | 0.40    | 2.49  |
| Q8CB77_EL Tceb3   | Transcriptin K.FGTGGAAVPEK#.V                        | 25.23  | 10.04  | 2.51    | 0.40  |
| Q61286_H Tcf12    | Transcriptin R.GNAAGSSQGDALGK.A                      | 2.48   | 4.77   | 0.52    | 1.93  |

|                   |                                          |        |        |      |      |
|-------------------|------------------------------------------|--------|--------|------|------|
| Q61286_H_Tcf12    | Transcriptin R.GNAAGSSQTGDALGK.A         | 6.07   | 11.01  | 0.55 | 1.81 |
| Q9EP08_TC Tcf20   | Transcriptin R.LYGLQEALEIAR.E            | 21.14  | 6.99   | 3.02 | 0.33 |
| Q9EP08_TC Tcf20   | Transcriptin K.NVAPVIGILAPEANPK#.A       | 4.06   | 5.64   | 0.72 | 1.39 |
| Q00417_TC Tcf7    | Transcriptin K.K#PLNAFM*LYM*KEMRAK.V     | 1.42   | 2.20   | 0.65 | 1.55 |
| Q08784_TC Tcof1   | Treacle pro R.LLEQAWPLSEAQVQASVVK#.V     | 5.45   | 2.95   | 1.85 | 0.54 |
| Q08784_TC Tcof1   | Treacle pro K.VLTELLEQER.L               | 5.42   | 18.14  | 0.30 | 3.35 |
| Q08784_TC Tcof1   | Treacle pro K.AGAVTSSASLSPALAK#.G        | 6.11   | 3.95   | 1.55 | 0.65 |
| P11983_TC Tcpc1   | T-complex J R.AFHNEAQVNPERR.K            | 14.38  | 22.46  | 0.64 | 1.56 |
| P11983_TC Tcpc1   | T-complex J R.AFHNEAQVNPERR.N            | 40.59  | 45.38  | 0.89 | 1.12 |
| P11983_TC Tcpc1   | T-complex J R.AFHNEAQVNPERR.N            | 1.63   | 3.96   | 0.41 | 2.43 |
| P11983_TC Tcpc1   | T-complex J K.DDK#HGSYENAVHSGALDD.-      | 230.65 | 61.65  | 3.74 | 0.27 |
| P11983_TC Tcpc1   | T-complex J R.EQLAIAEFAR.S               | 124.03 | 170.85 | 0.73 | 1.38 |
| P11983_TC Tcpc1   | T-complex J K.FATEAAITLR.I               | 93.93  | 127.43 | 0.74 | 1.36 |
| P11983_TC Tcpc1   | T-complex J K.HGSYENAVHSGALDD.-          | 98.66  | 98.66  | 1.00 | 1.00 |
| P11983_TC Tcpc1   | T-complex J K.ILATGANVILTTGGIDDM*YLK#.Y  | 185.19 | 52.85  | 3.50 | 0.29 |
| P11983_TC Tcpc1   | T-complex J K.ILATGANVILTTGGIDDM*YLK#.Y  | 76.72  | 23.33  | 3.29 | 0.30 |
| P11983_TC Tcpc1   | T-complex J K.ILATGANVILTTGGIDDMYLK#.Y   | 80.43  | 21.64  | 3.72 | 0.27 |
| P11983_TC Tcpc1   | T-complex J K.LGVQVITDPEK#.L             | 31.37  | 10.08  | 3.11 | 0.32 |
| P11983_TC Tcpc1   | T-complex J K.LGVQVITDPEKLDQJR.Q         | 58.45  | 58.74  | 1.00 | 1.00 |
| P11983_TC Tcpc1   | T-complex J K.LLEVEHPAAK#.V              | 161.21 | 42.21  | 3.82 | 0.26 |
| P11983_TC Tcpc1   | T-complex J K.M*LVDDIGDVTITNDGATILK#.L   | 67.67  | 18.79  | 3.60 | 0.28 |
| P11983_TC Tcpc1   | T-complex J K.M*LVDDIGDVTITNDGATILK#.L   | 54.76  | 17.92  | 3.06 | 0.33 |
| P11983_TC Tcpc1   | T-complex J K.MLVDDIGDVTITNDGATILK#.L    | 60.98  | 16.92  | 3.60 | 0.28 |
| P11983_TC Tcpc1   | T-complex J K.NADELVK#.Q                 | 265.01 | 79.50  | 3.33 | 0.30 |
| P11983_TC Tcpc1   | T-complex J K.QAGVFPEPTIVK#.V            | 393.13 | 104.01 | 3.78 | 0.26 |
| P11983_TC Tcpc1   | T-complex J R.SLLVIPNTLAVNAAQDSTDLVAK#.L | 451.69 | 137.79 | 3.28 | 0.31 |
| P11983_TC Tcpc1   | T-complex J R.SLLVIPNTLAVNAAQDSTDLVAK#.L | 139.42 | 39.49  | 3.53 | 0.28 |
| P11983_TC Tcpc1   | T-complex J R.SQNVM*AAASIANIVK#.S        | 192.44 | 57.06  | 3.37 | 0.30 |
| P11983_TC Tcpc1   | T-complex J R.SQNVM*AAASIANIVK#.S        | 116.99 | 33.70  | 3.47 | 0.29 |
| P11983_TC Tcpc1   | T-complex J K.SSFGPVGLDK#.M              | 310.78 | 103.58 | 3.00 | 0.33 |
| P11983_TC Tcpc1   | T-complex J R.TSASILR.G                  | 92.20  | 112.86 | 0.82 | 1.22 |
| P11983_TC Tcpc1   | T-complex J K.YFVEAGAM*AVR.R             | 39.27  | 50.09  | 0.78 | 1.28 |
| P11983_TC Tcpc1   | T-complex J K.YFVEAGAM*AVR.R             | 37.55  | 43.83  | 0.86 | 1.17 |
| P11983_TC Tcpc1   | T-complex J R.YINENLIINTDELGR.D          | 26.07  | 35.95  | 0.73 | 1.38 |
| P11983_TC Tcpc1   | T-complex J R.YPVNSVNLK#.A               | 477.58 | 118.31 | 4.04 | 0.25 |
| P11983_TC Tcpc1   | T-complex J K.DDK#HGSYENAVHSGALDD.-      | 9.02   | 2.87   | 3.15 | 0.32 |
| P11983_TC Tcpc1   | T-complex J R.EQLAIAEFAR.S               | 21.13  | 25.61  | 0.83 | 1.21 |
| P11983_TC Tcpc1   | T-complex J K.FATEAAITLR.I               | 27.31  | 26.79  | 1.02 | 0.98 |
| P11983_TC Tcpc1   | T-complex J K.HGSYENAVHSGALDD.-          | 10.67  | 10.67  | 1.00 | 1.00 |
| P11983_TC Tcpc1   | T-complex J R.IDDLIK#.L                  | 78.75  | 18.90  | 4.17 | 0.24 |
| P11983_TC Tcpc1   | T-complex J K.ILATGANVILTTGGIDDM*YLK#.Y  | 10.85  | 4.93   | 2.20 | 0.45 |
| P11983_TC Tcpc1   | T-complex J K.ILATGANVILTTGGIDDMYLK#.Y   | 13.11  | 17.64  | 0.74 | 1.35 |
| P11983_TC Tcpc1   | T-complex J K.LGVQVITDPEKLDQJR.Q         | 11.13  | 22.98  | 0.48 | 2.06 |
| P11983_TC Tcpc1   | T-complex J K.LLEVEHPAAK#.V              | 36.35  | 8.81   | 4.13 | 0.24 |
| P11983_TC Tcpc1   | T-complex J K.M*LVDDIGDVTITNDGATILK#.L   | 11.57  | 3.89   | 2.98 | 0.34 |
| P11983_TC Tcpc1   | T-complex J K.NADELVK#.Q                 | 40.31  | 5.76   | 7.00 | 0.14 |
| P11983_TC Tcpc1   | T-complex J R.SLLVIPNTLAVNAAQDSTDLVAK#.L | 133.78 | 38.62  | 3.46 | 0.29 |
| P11983_TC Tcpc1   | T-complex J R.SQNVM*AAASIANIVK#.S        | 41.69  | 14.01  | 2.97 | 0.34 |
| P11983_TC Tcpc1   | T-complex J R.SQNVM*AAASIANIVK#.S        | 21.64  | 9.91   | 2.18 | 0.46 |
| P11983_TC Tcpc1   | T-complex J K.SSFGPVGLDK#.M              | 75.55  | 23.91  | 3.16 | 0.32 |
| P11983_TC Tcpc1   | T-complex J R.TSASILR.G                  | 19.84  | 20.46  | 0.97 | 1.03 |
| P11983_TC Tcpc1   | T-complex J K.YFVEAGAM*AVR.R             | 9.46   | 12.97  | 0.73 | 1.37 |
| P11983_TC Tcpc1   | T-complex J R.YPVNSVNLK#.A               | 96.23  | 27.07  | 3.55 | 0.28 |
| P11983_TC Tcpc1   | T-complex J K.DDK#HGSYENAVHSGALDD.-      | 49.85  | 14.43  | 3.45 | 0.29 |
| P11983_TC Tcpc1   | T-complex J R.EQLAIAEFAR.S               | 19.44  | 30.19  | 0.64 | 1.55 |
| P11983_TC Tcpc1   | T-complex J R.IDDLIK#.L                  | 81.68  | 28.10  | 2.91 | 0.34 |
| P11983_TC Tcpc1   | T-complex J K.ILATGANVILTTGGIDDM*YLK#.Y  | 47.81  | 15.48  | 3.09 | 0.32 |
| P11983_TC Tcpc1   | T-complex J K.LGVQVITDPEK#.L             | 7.03   | 5.61   | 1.25 | 0.80 |
| P11983_TC Tcpc1   | T-complex J K.LLEVEHPAAK#.V              | 27.86  | 12.21  | 2.28 | 0.44 |
| P11983_TC Tcpc1   | T-complex J K.M*LVDDIGDVTITNDGATILK#.L   | 19.33  | 6.45   | 3.00 | 0.33 |
| P11983_TC Tcpc1   | T-complex J K.NADELVK#.Q                 | 43.53  | 13.57  | 3.21 | 0.31 |
| P11983_TC Tcpc1   | T-complex J K.QAGVFPEPTIVK#.V            | 63.53  | 18.99  | 3.35 | 0.30 |
| P11983_TC Tcpc1   | T-complex J R.SLLVIPNTLAVNAAQDSTDLVAK#.L | 191.68 | 53.82  | 3.56 | 0.28 |
| P11983_TC Tcpc1   | T-complex J R.SQNVM*AAASIANIVK#.S        | 51.68  | 14.91  | 3.47 | 0.29 |
| P11983_TC Tcpc1   | T-complex J K.SSFGPVGLDK#.M              | 74.17  | 23.23  | 3.19 | 0.31 |
| P11983_TC Tcpc1   | T-complex J R.YPVNSVNLK#.A               | 80.33  | 23.40  | 3.43 | 0.29 |
| Q8K1H1_TI Tdtd7   | Tudor dom R.ALDVQFLDSGNSTSVK#.V          | 10.81  | 4.42   | 2.44 | 0.41 |
| Q8K1H1_TI Tdtd7   | Tudor dom R.AQIISTDENK#.I                | 15.44  | 9.74   | 1.59 | 0.63 |
| Q8K1H1_TI Tdtd7   | Tudor dom K.LAGLEVNDPDLVK#.A             | 13.00  | 7.21   | 1.80 | 0.55 |
| Q8K1H1_TI Tdtd7   | Tudor dom R.SLTGDWIPFK#.Q                | 8.96   | 4.42   | 2.03 | 0.49 |
| Q8K1H1_TI Tdtd7   | Tudor dom K.YSSGLWASALPK#.A              | 8.37   | 5.51   | 1.52 | 0.66 |
| Q8K1H1_TI Tdtd7   | Tudor dom R.ALDVQFLDSGNSTSVK#.V          | 7.93   | 4.21   | 1.89 | 0.53 |
| Q8K1H1_TI Tdtd7   | Tudor dom R.AQIISTDENK#.I                | 14.51  | 8.20   | 1.77 | 0.57 |
| Q8K1H1_TI Tdtd7   | Tudor dom K.IL#DEGQAGQDFDIK#.S           | 11.47  | 6.24   | 1.84 | 0.54 |
| Q8K1H1_TI Tdtd7   | Tudor dom K.LAGLEVNDPDLVK#.A             | 13.37  | 7.94   | 1.68 | 0.59 |
| P30051_TE Tead1   | Transcriptin K.GPONAFFLVK.F              | 12.67  | 20.04  | 0.63 | 1.58 |
| P70210_TE Tead3   | Transcriptin K.ALQSM*ASM*SSAQVSAVSLQNK.F | 4.15   | 3.85   | 1.08 | 0.93 |
| O35144_TE Terf2   | Telomeric r R.ALNQPHPEK#.K               | 4.95   | 1.96   | 2.52 | 0.40 |
| O35144_TE Terf2   | Telomeric r K.ALSTAQDSEAFK#.L            | 16.53  | 11.03  | 1.50 | 0.67 |
| O35144_TE Terf2   | Telomeric r R.LLEEDSQSTPSPGLNSSHK#.A     | 7.30   | 4.45   | 1.64 | 0.61 |
| O35144_TE Terf2   | Telomeric r K.NLAHPVIQNFSEYEVQK#.M       | 16.14  | 6.71   | 2.40 | 0.42 |
| O35144_TE Terf2   | Telomeric r R.TDLLNIIR.E                 | 1.63   | 7.83   | 0.21 | 4.79 |
| Q91VL8_TE Terf2ip | Telomeric r R.IAYTDAEDVAILTVK#.E         | 5.68   | 2.55   | 2.22 | 0.45 |
| Q91VL8_TE Terf2ip | Telomeric r K.VSTQEVGTAK#.V              | 11.93  | 6.04   | 1.98 | 0.51 |
| P47226_TE Tes     | Testin OS=N K.FPSEM*NAQGDK.V             | 6.55   | 8.12   | 0.81 | 1.24 |
| P47226_TE Tes     | Testin OS=N R.NVM*ILTNPAVK.K             | 18.19  | 19.03  | 0.96 | 1.05 |
| P47226_TE Tes     | Testin OS=N R.NVMILTNPAVK#.K             | 16.09  | 12.52  | 1.29 | 0.78 |
| P47226_TE Tes     | Testin OS=N K.SEALGVGDVK.F               | 6.10   | 6.81   | 0.90 | 1.12 |
| Q3URQ0_TI Tex10   | Testis-expre R.ASPEELPVVQQLR.L           | 1.64   | 10.06  | 0.16 | 6.14 |
| Q3URQ0_TI Tex10   | Testis-expre K.NFVELISHQQLSK#.G          | 6.85   | 6.56   | 1.04 | 0.96 |
| Q3URQ0_TI Tex10   | Testis-expre K.VLDILLEHYPALITGR.S        | 2.92   | 9.26   | 0.32 | 3.17 |
| Q3URQ0_TI Tex10   | Testis-expre R.ASPEELPVVQQLR.L           | 3.47   | 19.21  | 0.18 | 5.54 |
| Q3URQ0_TI Tex10   | Testis-expre R.IYDPEQAGAVVLP.AESQQR.L    | 6.48   | 3.36   | 1.93 | 0.52 |
| Q3URQ0_TI Tex10   | Testis-expre K.LENATATNF#.T              | 16.46  | 13.45  | 1.22 | 0.82 |
| Q3URQ0_TI Tex10   | Testis-expre R.NPELSTQLIDIHTAASQANK#.D   | 12.31  | 11.30  | 1.09 | 0.92 |
| P40630_TF Tfam    | Transcriptin R.SAYNIYSESFQEAH#DSDAQK#.L  | 4.48   | 5.46   | 0.82 | 1.22 |
| Q9ERA6_TF Tfip11  | Tuftelin-int R.ADLAVAIYPLVK#.D           | 14.03  | 8.82   | 1.59 | 0.63 |
| Q9ERA6_TF Tfip11  | Tuftelin-int K.LILQVWK#.E                | 13.30  | 9.37   | 1.42 | 0.70 |
| Q9ERA6_TF Tfip11  | Tuftelin-int R.TEQEIIQSDR.Q              | 2.91   | 14.46  | 0.20 | 4.97 |
| Q9ERA6_TF Tfip11  | Tuftelin-int K.VYYSYSQSHK#.H             | 29.31  | 14.96  | 1.96 | 0.51 |
| Q9ERA6_TF Tfip11  | Tuftelin-int R.ADLAVAIYPLVK#.D           | 22.47  | 11.50  | 1.95 | 0.51 |
| Q9ERA6_TF Tfip11  | Tuftelin-int K.AEHNIVFM*PVIGK#.R         | 16.40  | 8.26   | 1.99 | 0.50 |
| Q9ERA6_TF Tfip11  | Tuftelin-int R.AVSSNVGAYM*QPGAR.E        | 4.67   | 7.47   | 0.63 | 1.60 |

|                    |                                               |        |        |      |       |
|--------------------|-----------------------------------------------|--------|--------|------|-------|
| Q9ERA6_TF Tfip11   | Tuftelin-int R.DYSAPVNFISAGLK#.K              | 11.84  | 5.71   | 2.07 | 0.48  |
| Q9ERA6_TF Tfip11   | Tuftelin-int K.LILOPWK#.E                     | 14.07  | 13.22  | 1.06 | 0.94  |
| Q9ERA6_TF Tfip11   | Tuftelin-int K.SLLEQDQLSHSSQDLSSDAFHR.L       | 7.78   | 5.99   | 1.30 | 0.77  |
| Q9ERA6_TF Tfip11   | Tuftelin-int R.TTOSLQDPVADSEEEAEFQK#.E        | 4.49   | 4.67   | 0.96 | 1.04  |
| Q62219_TC Tgfb1i1  | Transformii K.GSLDTMLGLLQSDLSR.R              | 2.73   | 7.56   | 0.36 | 2.77  |
| Q9JJDO_TH Thap11   | THAP dome R.VPTIFPLR.G                        | 1.37   | 10.93  | 0.13 | 7.96  |
| Q8R3N6_TI Thoc1    | THO compl R.DK#PITGEQESFANK#.L                | 14.14  | 4.33   | 3.27 | 0.31  |
| Q8R3N6_TI Thoc1    | THO compl K.YSEEVLAVK#.S                      | 17.41  | 5.14   | 3.39 | 0.30  |
| Q8R3N6_TI Thoc1    | THO compl R.DK#PITGEQESFANK#.L                | 3.83   | 2.15   | 1.78 | 0.56  |
| Q8R3N6_TI Thoc1    | THO compl K.LLIGNEELTR.L                      | 8.96   | 15.55  | 0.58 | 1.74  |
| Q8R3N6_TI Thoc1    | THO compl K.SSNVYLTDEQSLWIEDTTK#.S            | 6.12   | 2.58   | 2.37 | 0.42  |
| Q8R3N6_TI Thoc1    | THO compl K.YSEEVLAVK#.S                      | 13.26  | 6.75   | 1.96 | 0.51  |
| Q8R3N6_TI Thoc1    | THO compl R.DK#PITGEQESFANK#.L                | 17.48  | 10.46  | 1.67 | 0.60  |
| Q8R3N6_TI Thoc1    | THO compl K.SGLNLTQSQFNLENVTFNTEQESTLGQK#.H   | 6.78   | 3.01   | 2.26 | 0.44  |
| Q8R3N6_TI Thoc1    | THO compl K.SGLSDLAESLTDNDTETNS.-             | 10.39  | 10.39  | 1.00 | 1.00  |
| B1AZI6_THI Thoc2   | THO compl R.LDPETLESGLIK#.Q                   | 15.05  | 6.88   | 2.19 | 0.46  |
| B1AZI6_THI Thoc2   | THO compl K.LGLLEALLK#.V                      | 19.74  | 10.43  | 1.89 | 0.53  |
| B1AZI6_THI Thoc2   | THO compl K.SFDLLILK#.E                       | 13.86  | 4.67   | 2.97 | 0.34  |
| B1AZI6_THI Thoc2   | THO compl R.ATGFDGKADQDLVYENFR.H              | 6.22   | 10.18  | 0.61 | 1.64  |
| B1AZI6_THI Thoc2   | THO compl R.DFQQALVELSYHVK#.G                 | 45.78  | 21.82  | 2.10 | 0.48  |
| B1AZI6_THI Thoc2   | THO compl K.FYOQSGPETSLLYR.V                  | 8.77   | 6.41   | 1.37 | 0.73  |
| B1AZI6_THI Thoc2   | THO compl R.LDPETLESGLIK#.Q                   | 59.01  | 20.30  | 2.91 | 0.34  |
| B1AZI6_THI Thoc2   | THO compl K.LGLLEALLK#.V                      | 75.73  | 24.75  | 3.06 | 0.33  |
| B1AZI6_THI Thoc2   | THO compl K.LIAELGQDLSGNITSDULIENIK#.S        | 26.31  | 12.55  | 2.10 | 0.48  |
| B1AZI6_THI Thoc2   | THO compl R.NILVITK#.I                        | 31.79  | 8.63   | 3.69 | 0.27  |
| B1AZI6_THI Thoc2   | THO compl K.SFDLLILK#.E                       | 42.44  | 15.58  | 2.72 | 0.37  |
| B1AZI6_THI Thoc2   | THO compl K.VLNLGQALER.R                      | 15.23  | 25.50  | 0.60 | 1.67  |
| B1AZI6_THI Thoc2   | THO compl K.YDNLITPVVDSLK#.Y                  | 15.69  | 5.59   | 2.81 | 0.36  |
| Q8BKT7_TI Thoc5    | THO compl K.TPNPANQYQFDK#.V                   | 12.47  | 3.58   | 3.48 | 0.29  |
| Q8BKT7_TI Thoc5    | THO compl R.LNSIM*QASLPVQYELFM*PFDQAHK#.Q     | 5.88   | 3.50   | 1.68 | 0.59  |
| Q8BKT7_TI Thoc5    | THO compl K.TLSVAIEGSDVDEAK#.A                | 12.14  | 6.43   | 1.89 | 0.53  |
| Q8BKT7_TI Thoc5    | THO compl K.TPNPANQYQFDK#.V                   | 18.52  | 8.94   | 2.07 | 0.48  |
| Q5U4D9_TI Thoc6    | THO compl K.GWLWAEIK#.K                       | 20.49  | 4.64   | 4.42 | 0.23  |
| Q5U4D9_TI Thoc6    | THO compl R.HLLSAGDGEVK#.G                    | 44.17  | 19.83  | 2.23 | 0.45  |
| Q5U4D9_TI Thoc6    | THO compl R.SPEVLGGEDGAVR.L                   | 9.34   | 18.80  | 0.50 | 2.01  |
| Q5U4D9_TI Thoc6    | THO compl R.TSLEVPEINALLVPK#.E                | 9.00   | 4.46   | 2.02 | 0.50  |
| Q5U4D9_TI Thoc6    | THO compl R.VDVFTNLGYR.A                      | 4.46   | 14.99  | 0.30 | 3.36  |
| Q7TMY4_TI Thoc7    | THO compl R.INLLVK#.S                         | 38.64  | 16.85  | 2.29 | 0.44  |
| Q7TMY4_TI Thoc7    | THO compl K.LSEVDEAQESTM*EADPK#.P.-           | 2.98   | 1.36   | 2.19 | 0.46  |
| Q7TMY4_TI Thoc7    | THO compl K.TLLVYDMNLR.E                      | 5.12   | 12.93  | 0.40 | 2.53  |
| Q7TMY4_TI Thoc7    | THO compl K.TLLVYDMNLR.E                      | 7.38   | 11.97  | 0.62 | 1.62  |
| Q8C1A5_TI Thop1    | Thimet olig R.EELGPELDFLSLEK#.A               | 13.33  | 1.80   | 7.41 | 0.14  |
| Q8C1A5_TI Thop1    | Thimet olig R.TGSEAPDQDLEK#.L                 | 10.84  | 2.63   | 4.11 | 0.24  |
| Q8C1A5_TI Thop1    | Thimet olig K.TSQTVAFLDELAK#.L                | 10.42  | 4.50   | 2.32 | 0.43  |
| Q8C1A5_TI Thop1    | Thimet olig R.VGAQNDFVSYESTLK#.A              | 11.14  | 2.47   | 4.52 | 0.22  |
| Q56926_TR Thrap3   | Thyroid hoi K.AEEM*EDEFPTER.S                 | 4.81   | 19.07  | 0.25 | 3.97  |
| Q56926_TR Thrap3   | Thyroid hoi R.ASVSDLSR.P                      | 20.11  | 54.43  | 0.37 | 2.71  |
| Q56926_TR Thrap3   | Thyroid hoi K.DSRPSQAAGDNQGDQEA.E             | 2.70   | 13.35  | 0.20 | 4.95  |
| Q56926_TR Thrap3   | Thyroid hoi R.EAQVNVV.R                       | 38.44  | 154.13 | 0.25 | 4.01  |
| Q56926_TR Thrap3   | Thyroid hoi K.EESAASGGAAYSK#.R                | 16.41  | 20.45  | 0.80 | 1.25  |
| Q56926_TR Thrap3   | Thyroid hoi R.EESTSGDFK#.S                    | 69.25  | 67.28  | 1.03 | 0.97  |
| Q56926_TR Thrap3   | Thyroid hoi K.EPEFDEPK#.F                     | 13.55  | 17.43  | 0.78 | 1.29  |
| Q56926_TR Thrap3   | Thyroid hoi K.EQTFSGGTSQDIK#.G                | 83.96  | 70.58  | 1.19 | 0.84  |
| Q56926_TR Thrap3   | Thyroid hoi K.GGFSADVVK#.M                    | 176.01 | 162.40 | 1.08 | 0.92  |
| Q56926_TR Thrap3   | Thyroid hoi K.GRKEPEFDEPK.F                   | 25.17  | 89.50  | 0.28 | 3.56  |
| Q56926_TR Thrap3   | Thyroid hoi K.GSESSKPW/DATTYAGSASR.A          | 32.88  | 137.37 | 0.24 | 4.18  |
| Q56926_TR Thrap3   | Thyroid hoi R.KAEEM*EDEFPTER.S                | 27.39  | 99.37  | 0.28 | 3.63  |
| Q56926_TR Thrap3   | Thyroid hoi R.K#EPEFDEPK#.F                   | 17.96  | 49.68  | 0.36 | 2.77  |
| Q56926_TR Thrap3   | Thyroid hoi R.K#HGLTHEELK#.S                  | 6.98   | 5.20   | 1.34 | 0.75  |
| Q56926_TR Thrap3   | Thyroid hoi K.LRDFEKK.M                       | 11.31  | 41.95  | 0.27 | 3.71  |
| Q56926_TR Thrap3   | Thyroid hoi R.M*DSFDEDLARPSGLLAQER.K          | 7.65   | 111.15 | 0.07 | 14.54 |
| Q56926_TR Thrap3   | Thyroid hoi R.MDSFDEDLARPSGLLAQER.K           | 2.45   | 36.69  | 0.07 | 15.00 |
| Q56926_TR Thrap3   | Thyroid hoi K.M#K#SDPFAPK#.T                  | 20.00  | 26.68  | 0.75 | 1.33  |
| Q56926_TR Thrap3   | Thyroid hoi K.MK#SDPFAPK#.T                   | 14.03  | 10.85  | 1.29 | 0.77  |
| Q56926_TR Thrap3   | Thyroid hoi K.SGK#VESLHTGK#.E                 | 62.59  | 40.30  | 1.55 | 0.64  |
| Q56926_TR Thrap3   | Thyroid hoi R.SIFQHQIQASQSR.S                 | 52.01  | 227.42 | 0.23 | 4.37  |
| Q56926_TR Thrap3   | Thyroid hoi R.SNWNQYR.Q                       | 2.41   | 28.72  | 0.08 | 11.90 |
| Q56926_TR Thrap3   | Thyroid hoi K.SPLQSVVVR.R                     | 41.89  | 228.63 | 0.18 | 5.46  |
| Q56926_TR Thrap3   | Thyroid hoi K.SPPATGSAYGSSQK#.E               | 13.04  | 12.93  | 1.01 | 0.99  |
| Q56926_TR Thrap3   | Thyroid hoi K.SPPATGSAYGSSQK#EESAASGGAAYSK#.R | 52.08  | 42.24  | 1.23 | 0.81  |
| Q56926_TR Thrap3   | Thyroid hoi R.SPSELFQAQHVTVVHVK#.E            | 63.80  | 58.53  | 1.09 | 0.92  |
| Q56926_TR Thrap3   | Thyroid hoi K.TDSEKFR.G                       | 18.20  | 76.34  | 0.24 | 4.19  |
| Q56926_TR Thrap3   | Thyroid hoi K.WESLHTGK.E                      | 17.31  | 21.70  | 0.80 | 1.25  |
| Q56926_TR Thrap3   | Thyroid hoi K.YKDPVDLR.L                      | 10.56  | 71.06  | 0.15 | 6.73  |
| Q56926_TR Thrap3   | Thyroid hoi K.EQTFSGGTSQDIK#.G                | 17.66  | 13.86  | 1.27 | 0.78  |
| Q56926_TR Thrap3   | Thyroid hoi K.GGFSADVVK#.M                    | 22.49  | 18.85  | 1.19 | 0.84  |
| Q56926_TR Thrap3   | Thyroid hoi K.GSESSKPW/DATTYAGSASR.A          | 4.18   | 25.77  | 0.16 | 6.16  |
| Q56926_TR Thrap3   | Thyroid hoi R.KAEEM*EDEFPTER.S                | 2.67   | 11.23  | 0.24 | 4.21  |
| Q56926_TR Thrap3   | Thyroid hoi R.M*DSFDEDLARPSGLLAQER.K          | 2.37   | 15.84  | 0.15 | 6.68  |
| Q56926_TR Thrap3   | Thyroid hoi K.SPPATGSAYGSSQK.E                | 4.79   | 4.95   | 0.97 | 1.03  |
| P97770_TI Thumpd3  | THUMP dor R.DFGGAIQYFK#.W                     | 8.36   | 3.76   | 2.22 | 0.45  |
| P52912_TI Tia1     | Nucleolysin R.QTFSPFQIM*EIR.V                 | 5.84   | 10.07  | 0.58 | 1.72  |
| P52912_TI Tia1     | Nucleolysin R.SQDFHFVFGDLSPEITEDIK#.A         | 4.78   | 1.55   | 3.08 | 0.32  |
| P52912_TI Tia1     | Nucleolysin K.TLYVGNLSR.D                     | 21.83  | 48.52  | 0.45 | 2.22  |
| P52912_TI Tia1     | Nucleolysin K.VNWWATPSSQK#.K                  | 70.23  | 34.65  | 2.03 | 0.49  |
| P70318_TI Tial1    | Nucleolysin R.FEDVWQSSPK#.N                   | 107.94 | 49.92  | 2.16 | 0.46  |
| P70318_TI Tial1    | Nucleolysin K.GYGVFSYK#.L                     | 14.90  | 6.87   | 2.17 | 0.46  |
| P70318_TI Tial1    | Nucleolysin K.LDAENAVHMGQWLGGR.Q              | 6.15   | 19.18  | 0.32 | 3.12  |
| P70318_TI Tial1    | Nucleolysin K.SAFAPFGK#.I                     | 30.55  | 18.44  | 1.66 | 0.60  |
| Q9R1X4_TI Timeless | Protein tim R.FGGSYIVQGLK#.S                  | 10.08  | 4.31   | 2.34 | 0.43  |
| Q9R1X4_TI Timeless | Protein tim K.EFNFLYK#.R                      | 21.57  | 13.10  | 1.65 | 0.61  |
| Q9R1X4_TI Timeless | Protein tim R.EVWPEGNAFGSPVSPGEEEM*QLLK#.Q    | 6.58   | 4.17   | 1.58 | 0.63  |
| Q9R1X4_TI Timeless | Protein tim R.FGGSYIVQGLK#.S                  | 24.10  | 11.33  | 2.13 | 0.47  |
| Q9R1X4_TI Timeless | Protein tim K.LLALGLVSR.R                     | 8.71   | 20.27  | 0.43 | 2.33  |
| Q9R1X4_TI Timeless | Protein tim R.NILHVPANLEQEK#.S                | 23.76  | 11.80  | 2.01 | 0.50  |
| Q9WVA2_T Timm8a1   | Mitochond K.SK#PVFESLSD.-                     | 6.87   | 3.22   | 2.13 | 0.47  |
| Q99JRS_TII Tinagl1 | Tubulointe R.LDGAWWFLR.R                      | 5.38   | 9.48   | 0.57 | 1.76  |
| P39447_ZC Tjp1     | Tight juncti R.AEQLASVQYTLPK#.T               | 6.60   | 4.10   | 1.61 | 0.62  |
| P39447_ZC Tjp1     | Tight juncti R.AEQLASVQYTLPK#.T               | 22.94  | 19.36  | 1.18 | 0.84  |
| P39447_ZC Tjp1     | Tight juncti R.DGNIQEGDVLK#.I                 | 29.37  | 29.94  | 0.98 | 1.02  |
| P39447_ZC Tjp1     | Tight juncti R.EAGFLRPVTFIPIADVAR.E           | 4.33   | 45.82  | 0.09 | 10.59 |
| P39447_ZC Tjp1     | Tight juncti K.EAIQQQQLVWVSEK#.A              | 7.45   | 8.39   | 0.89 | 1.13  |
| P39447_ZC Tjp1     | Tight juncti K.EAIQQQQLVWVSEK#.A              | 8.66   | 7.69   | 1.13 | 0.89  |



|                |                                                     |        |       |       |      |
|----------------|-----------------------------------------------------|--------|-------|-------|------|
| P39447_ZC Tjp1 | Tight juncti R.EEPDIYQIAK#.S                        | 13.45  | 12.19 | 1.10  | 0.91 |
| P39447_ZC Tjp1 | Tight juncti K.EEGLEDQJLR.V                         | 8.22   | 27.03 | 0.30  | 3.29 |
| P39447_ZC Tjp1 | Tight juncti K.EISODSLAAR.D                         | 11.17  | 40.33 | 0.28  | 3.61 |
| P39447_ZC Tjp1 | Tight juncti R.FEEPAPLSYDSR.T                       | 4.91   | 20.71 | 0.24  | 4.21 |
| P39447_ZC Tjp1 | Tight juncti K.GGPAEQQLQENDR.V                      | 5.00   | 28.70 | 0.17  | 5.74 |
| P39447_ZC Tjp1 | Tight juncti R.HEEQPAPAYEVHNR.V                     | 9.60   | 49.79 | 0.19  | 5.18 |
| P39447_ZC Tjp1 | Tight juncti R.IVESDVGDSFYR.T                       | 9.48   | 21.28 | 0.45  | 2.25 |
| P39447_ZC Tjp1 | Tight juncti R.LAGGNDVGFVAGVLEDSPAAK#.E             | 11.17  | 10.17 | 1.10  | 0.91 |
| P39447_ZC Tjp1 | Tight juncti K.LGWSWLAI.R                           | 3.82   | 13.48 | 0.28  | 3.53 |
| P39447_ZC Tjp1 | Tight juncti K.SREDSLQAQPVQTK.F                     | 5.28   | 20.14 | 0.26  | 3.82 |
| P39447_ZC Tjp1 | Tight juncti R.SVASSQAPKPTK.V                       | 9.39   | 11.82 | 0.79  | 1.26 |
| P39447_ZC Tjp1 | Tight juncti R.YEVSSYDQFQR.N                        | 4.65   | 21.39 | 0.22  | 4.60 |
| P39447_ZC Tjp1 | Tight juncti K.YQM*NNISTM*PK#.A                     | 12.72  | 12.11 | 1.05  | 0.95 |
| Q920U1_ZC Tjp2 | Tight juncti R.EDAVLYLLEIPKGETVTLAQSR.A             | 2.31   | 15.90 | 0.15  | 6.89 |
| Q920U1_ZC Tjp2 | Tight juncti R.GFEVFEEDGR.S                         | 2.83   | 8.87  | 0.32  | 3.14 |
| Q920U1_ZC Tjp2 | Tight juncti K.IAAIVVK#.R                           | 26.49  | 16.41 | 1.61  | 0.62 |
| Q920U1_ZC Tjp2 | Tight juncti R.LATELPDFLQTAQ#.T                     | 25.64  | 17.11 | 1.50  | 0.67 |
| Q920U1_ZC Tjp2 | Tight juncti R.LGSSQFIK#.E                          | 34.66  | 18.53 | 1.87  | 0.53 |
| Q920U1_ZC Tjp2 | Tight juncti R.LISDFEDTDGEGGAYTDNELEEPAEEPLVSSITR.S | 2.24   | 5.66  | 0.39  | 2.53 |
| Q920U1_ZC Tjp2 | Tight juncti K.RPVVLFPGIADIAM*ER.L                  | 1.75   | 14.04 | 0.12  | 8.03 |
| Q920U1_ZC Tjp2 | Tight juncti R.RQQYSDQYHSSTEK.L                     | 1.52   | 3.31  | 0.46  | 2.18 |
| Q920U1_ZC Tjp2 | Tight juncti K.SNLPATAGSEIPGGSTK#.G                 | 23.95  | 21.56 | 1.11  | 0.90 |
| Q920U1_ZC Tjp2 | Tight juncti K.STGDITAAGVTEASR.E                    | 40.21  | 10.02 | 4.02  | 0.25 |
| Q920U1_ZC Tjp2 | Tight juncti R.VVDLYDYGK#.L                         | 28.16  | 17.90 | 1.57  | 0.64 |
| Q920U1_ZC Tjp2 | Tight juncti R.VVDLYDYGK#.L                         | 18.20  | 14.25 | 1.28  | 0.78 |
| P40142_TK Tkt  | Transketol a K.AVELAANTK#.G                         | 114.72 | 20.27 | 5.66  | 0.18 |
| P40142_TK Tkt  | Transketol a K.HQPTAIK#.T                           | 239.67 | 57.39 | 4.18  | 0.24 |
| P40142_TK Tkt  | Transketol a R.IIALDGDGDK#.N                        | 200.65 | 33.63 | 5.97  | 0.17 |
| P40142_TK Tkt  | Transketol a K.I.LATPPQEDAPSPVDIANIR.M              | 23.21  | 20.90 | 1.11  | 0.90 |
| P40142_TK Tkt  | Transketol a K.ISSDLDGHPVPK#.Q                      | 29.70  | 3.74  | 7.95  | 0.13 |
| P40142_TK Tkt  | Transketol a R.K#AYGLALAK#.L                        | 141.38 | 26.31 | 5.37  | 0.19 |
| P40142_TK Tkt  | Transketol a R.K#SSDLDGHPVPK#.Q                     | 61.37  | 11.67 | 5.26  | 0.19 |
| P40142_TK Tkt  | Transketol a R.LAVSQVPR.S                           | 53.91  | 35.17 | 1.53  | 0.65 |
| P40142_TK Tkt  | Transketol a K.LDNLVAIFDINR.L                       | 77.50  | 29.68 | 2.61  | 0.38 |
| P40142_TK Tkt  | Transketol a R.LGQSDPAPLQHQVDIYQK#.R                | 152.19 | 28.92 | 5.26  | 0.19 |
| P40142_TK Tkt  | Transketol a K.M*FGIDK#DAIVQAVK#.G                  | 70.45  | 18.36 | 3.84  | 0.26 |
| P40142_TK Tkt  | Transketol a K.MFGIDK#DAIVQAVK#.G                   | 48.21  | 4.44  | 10.86 | 0.09 |
| P40142_TK Tkt  | Transketol a R.M*PTPPSYK#.V                         | 48.46  | 13.73 | 3.53  | 0.28 |
| P40142_TK Tkt  | Transketol a K.NM*AEQIQEISYQVQSK#.K                 | 95.27  | 12.89 | 7.39  | 0.14 |
| P40142_TK Tkt  | Transketol a K.NSTFSELFK#.K                         | 155.05 | 24.85 | 6.24  | 0.16 |
| P40142_TK Tkt  | Transketol a K.SKHDDQVTIVGAGVTLHEALAAESLK#K#.D      | 92.68  | 16.84 | 5.50  | 0.18 |
| P40142_TK Tkt  | Transketol a R.SVPM*STVFYPSDGVATEK#.A               | 50.75  | 9.29  | 5.47  | 0.18 |
| P40142_TK Tkt  | Transketol a R.SVPM*STVFYPSDGVATEK#.A               | 35.77  | 7.72  | 4.63  | 0.22 |
| P40142_TK Tkt  | Transketol a R.TSRPENAIYSNNEFDQVQQAQ.V              | 37.95  | 24.13 | 1.57  | 0.64 |
| P40142_TK Tkt  | Transketol a K.HQPTAIK#.T                           | 12.98  | 2.98  | 4.35  | 0.23 |
| P40142_TK Tkt  | Transketol a R.TSRPENAIYSNNEFDQVQQAQ.V              | 3.99   | 4.40  | 0.91  | 1.10 |
| P40142_TK Tkt  | Transketol a K.AVELAANTK#.G                         | 121.62 | 18.89 | 6.44  | 0.16 |
| P40142_TK Tkt  | Transketol a K.AYGLALAK#.L                          | 39.77  | 5.36  | 7.42  | 0.13 |
| P40142_TK Tkt  | Transketol a K.HQPTAIK#.T                           | 237.47 | 37.48 | 6.34  | 0.16 |
| P40142_TK Tkt  | Transketol a R.IIALDGDGDK#.N                        | 116.15 | 19.18 | 6.06  | 0.17 |
| P40142_TK Tkt  | Transketol a K.I.LATPPQEDAPSPVDIANIR.M              | 17.12  | 16.06 | 1.07  | 0.94 |
| P40142_TK Tkt  | Transketol a R.K#AYGLALAK#.L                        | 83.42  | 15.62 | 5.34  | 0.19 |
| P40142_TK Tkt  | Transketol a R.K#SSDLDGHPVPK#.Q                     | 44.45  | 8.54  | 5.20  | 0.19 |
| P40142_TK Tkt  | Transketol a K.LDNLVAIFDINR.L                       | 47.68  | 31.59 | 1.51  | 0.66 |
| P40142_TK Tkt  | Transketol a R.LGQSDPAPLQHQVDIYQK#.R                | 101.99 | 15.81 | 6.45  | 0.16 |
| P40142_TK Tkt  | Transketol a K.M*FGIDK#DAIVQAVK#.G                  | 18.81  | 3.60  | 5.23  | 0.19 |
| P40142_TK Tkt  | Transketol a K.M*FGIDK#DAIVQAVK#.G                  | 51.66  | 7.97  | 6.48  | 0.15 |
| P40142_TK Tkt  | Transketol a K.MFGIDK#DAIVQAVK#.G                   | 45.23  | 4.51  | 10.03 | 0.10 |
| P40142_TK Tkt  | Transketol a R.M*PTPPSYK#.V                         | 53.03  | 14.86 | 3.57  | 0.28 |
| P40142_TK Tkt  | Transketol a R.MPTPPSYK#.V                          | 36.26  | 10.43 | 3.48  | 0.29 |
| P40142_TK Tkt  | Transketol a K.NM*AEQIQEISYQVQSK#.K                 | 83.53  | 12.46 | 6.70  | 0.15 |
| P40142_TK Tkt  | Transketol a K.NSTFSELFK#.K                         | 92.09  | 16.48 | 5.59  | 0.18 |
| P40142_TK Tkt  | Transketol a K.NSTFSELFK#.E                         | 15.37  | 6.35  | 2.42  | 0.41 |
| P40142_TK Tkt  | Transketol a R.SGK#PAELK#.M                         | 77.24  | 10.45 | 7.39  | 0.14 |
| P40142_TK Tkt  | Transketol a K.SKHDDQVTIVGAGVTLHEALAAESLK#.K        | 6.84   | 2.14  | 3.19  | 0.31 |
| P40142_TK Tkt  | Transketol a K.SKHDDQVTIVGAGVTLHEALAAESLK#K#.D      | 107.77 | 24.11 | 4.47  | 0.22 |
| P40142_TK Tkt  | Transketol a R.SVPM*STVFYPSDGVATEK#.A               | 33.10  | 5.51  | 6.01  | 0.17 |
| P40142_TK Tkt  | Transketol a R.SVPM*STVFYPSDGVATEK#.A               | 24.34  | 7.57  | 3.22  | 0.31 |
| P40142_TK Tkt  | Transketol a R.TSRPENAIYSNNEFDQVQQAQ.V              | 26.59  | 15.64 | 1.70  | 0.59 |
| P40142_TK Tkt  | Transketol a K.AVELAANTK#.G                         | 103.52 | 19.17 | 5.40  | 0.19 |
| P40142_TK Tkt  | Transketol a K.HQPTAIK#.T                           | 260.78 | 46.33 | 5.63  | 0.18 |
| P40142_TK Tkt  | Transketol a R.IIALDGDGDK#.N                        | 150.82 | 18.07 | 8.35  | 0.12 |
| P40142_TK Tkt  | Transketol a K.I.LATPPQEDAPSPVDIANIR.M              | 13.06  | 11.50 | 1.14  | 0.88 |
| P40142_TK Tkt  | Transketol a K.ISSDLDGHPVPK#.Q                      | 19.35  | 5.96  | 3.24  | 0.31 |
| P40142_TK Tkt  | Transketol a R.K#AYGLALAK#.L                        | 55.10  | 11.09 | 4.97  | 0.20 |
| P40142_TK Tkt  | Transketol a R.LAVSQVPR.S                           | 33.33  | 26.45 | 1.26  | 0.79 |
| P40142_TK Tkt  | Transketol a K.LDNLVAIFDINR.L                       | 31.32  | 26.75 | 1.17  | 0.85 |
| P40142_TK Tkt  | Transketol a K.M*FGIDK#DAIVQAVK#.G                  | 65.46  | 9.84  | 6.65  | 0.15 |
| P40142_TK Tkt  | Transketol a K.MFGIDK#DAIVQAVK#.G                   | 28.24  | 4.50  | 6.28  | 0.16 |
| P40142_TK Tkt  | Transketol a R.M*PTPPSYK#.V                         | 53.30  | 12.54 | 4.25  | 0.24 |
| P40142_TK Tkt  | Transketol a K.NM*AEQIQEISYQVQSK#.K                 | 83.61  | 15.98 | 5.23  | 0.19 |
| P40142_TK Tkt  | Transketol a K.NSTFSELFK#.K                         | 81.19  | 14.23 | 5.71  | 0.18 |
| P40142_TK Tkt  | Transketol a K.SKHDDQVTIVGAGVTLHEALAAESLK#.K        | 6.00   | 1.71  | 3.51  | 0.28 |
| P40142_TK Tkt  | Transketol a K.SKHDDQVTIVGAGVTLHEALAAESLK#K#.D      | 55.23  | 8.07  | 6.85  | 0.15 |
| P40142_TK Tkt  | Transketol a R.SVPM*STVFYPSDGVATEK#.A               | 39.96  | 70.98 | 0.56  | 1.78 |
| P40142_TK Tkt  | Transketol a R.SVPM*STVFYPSDGVATEK#.A               | 18.87  | 2.83  | 6.66  | 0.15 |
| P40142_TK Tkt  | Transketol a R.TSRPENAIYSNNEFDQVQQAQ.V              | 26.64  | 20.04 | 1.33  | 0.75 |
| P26039_TL Tln1 | Talin-1 OS= K.AAAFEDQENETVVVK#.E                    | 14.57  | 41.21 | 0.35  | 2.83 |
| P26039_TL Tln1 | Talin-1 OS= K.LAQAAQSSVATITR.L                      | 3.22   | 6.40  | 0.50  | 1.99 |
| P26039_TL Tln1 | Talin-1 OS= K.LGAASLGAEDPETQTVLINVAK#.D             | 6.25   | 5.40  | 1.16  | 0.86 |
| P26039_TL Tln1 | Talin-1 OS= K.TYGVVFLVK#.E                          | 28.24  | 6.39  | 4.42  | 0.23 |
| P26039_TL Tln1 | Talin-1 OS= R.VAGSVTELIQAAEAM*K#.G                  | 5.53   | 24.72 | 0.22  | 4.47 |
| P26039_TL Tln1 | Talin-1 OS= R.VAGSVTELIQAAEAMK#.G                   | 7.02   | 4.78  | 1.47  | 0.68 |
| P26039_TL Tln1 | Talin-1 OS= K.VGDPAVWQLK#.N                         | 8.35   | 8.25  | 1.01  | 0.99 |
| P26039_TL Tln1 | Talin-1 OS= K.VMVTNVTSLK#.T                         | 9.59   | 6.11  | 1.57  | 0.64 |
| P26039_TL Tln1 | Talin-1 OS= K.AAAFEDQENETVVVK#.E                    | 28.81  | 8.08  | 3.56  | 0.28 |
| P26039_TL Tln1 | Talin-1 OS= R.AAMEPVIK#.T                           | 14.03  | 4.49  | 3.12  | 0.32 |
| P26039_TL Tln1 | Talin-1 OS= K.AIAVTVQEMVTK#.S                       | 28.92  | 7.01  | 4.13  | 0.24 |
| P26039_TL Tln1 | Talin-1 OS= K.ALGDLSATK#.A                          | 44.93  | 13.07 | 3.44  | 0.29 |
| P26039_TL Tln1 | Talin-1 OS= K.ALSTDPASPVLK#.S                       | 48.69  | 16.10 | 3.02  | 0.33 |
| P26039_TL Tln1 | Talin-1 OS= K.AVASAAAALVK#.A                        | 38.08  | 11.07 | 3.44  | 0.29 |
| P26039_TL Tln1 | Talin-1 OS= K.EADESLNFEEQLLEAAK#.S                  | 31.82  | 8.52  | 3.73  | 0.27 |
| P26039_TL Tln1 | Talin-1 OS= K.EVANSTANLVK#.T                        | 54.55  | 18.39 | 2.97  | 0.34 |

|                |                                               |        |        |      |       |
|----------------|-----------------------------------------------|--------|--------|------|-------|
| P26039_TL Tln1 | Talin-1 OS= R.GSQAQPDSPSAQLALIAASQSFLOPGGK#.M | 24.32  | 12.14  | 2.00 | 0.50  |
| P26039_TL Tln1 | Talin-1 OS= R.LAQATSDLVNNAIK#.A               | 37.93  | 13.23  | 2.87 | 0.35  |
| P26039_TL Tln1 | Talin-1 OS= R.IPEALAGPPNDFGLFLSDDDPK#.K       | 4.58   | 2.36   | 1.95 | 0.51  |
| P26039_TL Tln1 | Talin-1 OS= K.ISIGNVVK#.T                     | 25.14  | 9.95   | 2.53 | 0.40  |
| P26039_TL Tln1 | Talin-1 OS= K.LAQAAQSSVATITR.L                | 13.83  | 21.56  | 0.64 | 1.56  |
| P26039_TL Tln1 | Talin-1 OS= R.LASQAQ#PAAVAEENEIEGAHIK#.H      | 28.74  | 7.42   | 3.88 | 0.26  |
| P26039_TL Tln1 | Talin-1 OS= K.LGASLGAEDPETQVLLINAVK#.D        | 29.42  | 9.43   | 3.12 | 0.32  |
| P26039_TL Tln1 | Talin-1 OS= K.LLGEIAQGNENYAGIAAR.D            | 3.69   | 10.69  | 0.35 | 2.90  |
| P26039_TL Tln1 | Talin-1 OS= R.LNEAAAGLNQAATELVQASR.G          | 3.87   | 5.39   | 0.72 | 1.39  |
| P26039_TL Tln1 | Talin-1 OS= R.M*ATNAAQNAIK#.K                 | 20.42  | 8.20   | 2.49 | 0.40  |
| P26039_TL Tln1 | Talin-1 OS= K.NLGTALAEELR.T                   | 8.26   | 15.46  | 0.53 | 1.87  |
| P26039_TL Tln1 | Talin-1 OS= K.QAAASATQIAAAQHAASAPK#.A         | 49.13  | 19.74  | 2.49 | 0.40  |
| P26039_TL Tln1 | Talin-1 OS= R.SGASGPNFQVQSM*PPAQQTSGQM*HR.G   | 3.82   | 4.24   | 0.90 | 1.11  |
| P26039_TL Tln1 | Talin-1 OS= K.SIAAATSALVK.A                   | 39.58  | 70.02  | 0.57 | 1.77  |
| P26039_TL Tln1 | Talin-1 OS= K.TLAEALQLLYTAK#.E                | 78.44  | 30.21  | 2.60 | 0.39  |
| P26039_TL Tln1 | Talin-1 OS= K.TYGVSFLLVK#.E                   | 32.68  | 11.11  | 2.94 | 0.34  |
| P26039_TL Tln1 | Talin-1 OS= R.VAGSVTELIQAAEAM*K#.G            | 7.98   | 4.96   | 1.61 | 0.62  |
| P26039_TL Tln1 | Talin-1 OS= R.VAGSVTELIQAAEAMK#.G             | 14.55  | 4.61   | 3.16 | 0.32  |
| P26039_TL Tln1 | Talin-1 OS= K.VGAIPANALDDGQWSQLGISAAR.M       | 7.19   | 7.51   | 0.96 | 1.05  |
| P26039_TL Tln1 | Talin-1 OS= K.VGDDPAVWQLK#.N                  | 29.94  | 5.99   | 5.00 | 0.20  |
| P26039_TL Tln1 | Talin-1 OS= K.VLGEAM*TGISQNAK#.N              | 29.86  | 10.48  | 2.85 | 0.35  |
| P26039_TL Tln1 | Talin-1 OS= K.VLQNAAGSQEK#.L                  | 101.80 | 25.25  | 4.03 | 0.25  |
| P26039_TL Tln1 | Talin-1 OS= K.VM*VTNVTLLK#.T                  | 16.54  | 13.46  | 1.23 | 0.81  |
| P26039_TL Tln1 | Talin-1 OS= K.VMVTNVTLLK#.T                   | 34.52  | 13.13  | 2.63 | 0.38  |
| P26039_TL Tln1 | Talin-1 OS= K.VSQM*AQVFEPLTLAAVGAASK#.T       | 17.02  | 5.96   | 2.85 | 0.35  |
| P26039_TL Tln1 | Talin-1 OS= K.AAAFQENETVVK#.E                 | 369.18 | 139.63 | 2.64 | 0.38  |
| P26039_TL Tln1 | Talin-1 OS= K.AAAFQENETVVK#.E                 | 83.78  | 26.61  | 3.15 | 0.32  |
| P26039_TL Tln1 | Talin-1 OS= R.AAM*EPIVISAQ#.T                 | 471.63 | 204.82 | 2.30 | 0.43  |
| P26039_TL Tln1 | Talin-1 OS= R.AAM*EPIVISAQ#.T                 | 162.76 | 66.79  | 2.44 | 0.41  |
| P26039_TL Tln1 | Talin-1 OS= K.ADAEGSDLENSR.K                  | 59.36  | 117.07 | 0.51 | 1.97  |
| P26039_TL Tln1 | Talin-1 OS= R.AEASQLGHK#.V                    | 58.35  | 23.44  | 2.49 | 0.40  |
| P26039_TL Tln1 | Talin-1 OS= K.AGFLDLK#DFLPK#.E                | 294.61 | 116.37 | 2.53 | 0.39  |
| P26039_TL Tln1 | Talin-1 OS= K.AIAVTQEM*VTK#.S                 | 334.68 | 141.75 | 2.36 | 0.42  |
| P26039_TL Tln1 | Talin-1 OS= K.AIAVTQEMVTK#.S                  | 262.49 | 107.54 | 2.44 | 0.41  |
| P26039_TL Tln1 | Talin-1 OS= K.ALDGDFTEENR.A                   | 88.86  | 152.62 | 0.58 | 1.72  |
| P26039_TL Tln1 | Talin-1 OS= K.ALDYYM*LR.N                     | 51.51  | 84.09  | 0.61 | 1.63  |
| P26039_TL Tln1 | Talin-1 OS= K.ALDYYMLR.N                      | 14.83  | 14.52  | 1.02 | 0.98  |
| P26039_TL Tln1 | Talin-1 OS= K.ALGDLISATK#.A                   | 478.36 | 161.65 | 2.96 | 0.34  |
| P26039_TL Tln1 | Talin-1 OS= K.ALSTDPASPNLK#.S                 | 560.35 | 184.79 | 3.03 | 0.33  |
| P26039_TL Tln1 | Talin-1 OS= R.AQVSNLK#.G                      | 675.71 | 230.40 | 2.93 | 0.34  |
| P26039_TL Tln1 | Talin-1 OS= R.ASDNLVK#.A                      | 132.67 | 118.90 | 1.12 | 0.90  |
| P26039_TL Tln1 | Talin-1 OS= K.ASGHPGDPESQQR.L                 | 6.11   | 10.40  | 0.59 | 1.70  |
| P26039_TL Tln1 | Talin-1 OS= K.ASSLIEAK#.K                     | 102.91 | 38.71  | 2.66 | 0.38  |
| P26039_TL Tln1 | Talin-1 OS= K.AVAEQJLLVQGV.R                  | 79.40  | 152.91 | 0.52 | 1.93  |
| P26039_TL Tln1 | Talin-1 OS= K.AVASAAAALVLK#.A                 | 441.33 | 164.80 | 2.68 | 0.37  |
| P26039_TL Tln1 | Talin-1 OS= K.AVEDEATK#.G                     | 63.45  | 23.71  | 2.68 | 0.37  |
| P26039_TL Tln1 | Talin-1 OS= K.AVTQALNR.C                      | 125.73 | 220.10 | 0.57 | 1.75  |
| P26039_TL Tln1 | Talin-1 OS= K.DHFGLEGDEESTM*LEDSVPK#.K        | 58.58  | 23.77  | 2.46 | 0.41  |
| P26039_TL Tln1 | Talin-1 OS= R.DLDQASLAASVQQLAPR.E             | 31.69  | 62.34  | 0.51 | 1.97  |
| P26039_TL Tln1 | Talin-1 OS= R.DPVQLNLLVQAR.D                  | 19.86  | 28.90  | 0.69 | 1.46  |
| P26039_TL Tln1 | Talin-1 OS= K.EADSLNFEELQLEAAK#.S             | 127.64 | 50.16  | 2.54 | 0.39  |
| P26039_TL Tln1 | Talin-1 OS= R.EGAETFADHR.E                    | 38.45  | 74.81  | 0.51 | 1.95  |
| P26039_TL Tln1 | Talin-1 OS= R.ERIPALGPPNDFGLFLSDDDPK#.K       | 9.24   | 29.52  | 0.31 | 3.20  |
| P26039_TL Tln1 | Talin-1 OS= K.EVANSTANLVK#.T                  | 686.01 | 227.00 | 3.02 | 0.33  |
| P26039_TL Tln1 | Talin-1 OS= K.EVIOEWSLNTNIK#.R                | 63.43  | 28.69  | 2.21 | 0.45  |
| P26039_TL Tln1 | Talin-1 OS= K.FFYSDQNVDSR.D                   | 15.57  | 38.16  | 0.41 | 2.45  |
| P26039_TL Tln1 | Talin-1 OS= R.FGQDFSTFLGAVEM*AGQAPSQEDR.A     | 25.10  | 38.12  | 0.66 | 1.52  |
| P26039_TL Tln1 | Talin-1 OS= K.GAAAHDPDSEQQQR.L                | 23.34  | 51.67  | 0.45 | 2.21  |
| P26039_TL Tln1 | Talin-1 OS= K.GITM*ATAK#.A                    | 169.47 | 58.47  | 2.90 | 0.35  |
| P26039_TL Tln1 | Talin-1 OS= K.GIWLEAGK#.A                     | 154.05 | 61.21  | 2.52 | 0.40  |
| P26039_TL Tln1 | Talin-1 OS= R.GSQAQPDSPSAQLALIAASQSFLOPGGK#.M | 501.55 | 205.39 | 2.44 | 0.41  |
| P26039_TL Tln1 | Talin-1 OS= R.GVAALTSQPAVQAVLDTASVDLKD#.A     | 44.55  | 15.93  | 2.80 | 0.36  |
| P26039_TL Tln1 | Talin-1 OS= R.GITNHDVSLVR.E                   | 124.05 | 196.68 | 0.63 | 1.59  |
| P26039_TL Tln1 | Talin-1 OS= K.LLADATK#.M                      | 538.00 | 183.92 | 2.93 | 0.34  |
| P26039_TL Tln1 | Talin-1 OS= R.LLAQATSDLVNNAIK#.A              | 255.62 | 114.14 | 2.24 | 0.45  |
| P26039_TL Tln1 | Talin-1 OS= R.LLAQATSDLVNNAIKADAEGSDLENSR.K   | 6.42   | 6.38   | 1.01 | 0.99  |
| P26039_TL Tln1 | Talin-1 OS= R.IPEALAGPPNDFGLFLSDDDPK#.K       | 80.91  | 41.23  | 1.96 | 0.51  |
| P26039_TL Tln1 | Talin-1 OS= R.IPEALAGPPNDFGLFLSDDDPK#.K       | 120.44 | 50.83  | 2.37 | 0.42  |
| P26039_TL Tln1 | Talin-1 OS= K.ISIGNVVK#.T                     | 227.06 | 100.42 | 2.26 | 0.44  |
| P26039_TL Tln1 | Talin-1 OS= K.KGIWLEAGK#.A                    | 81.74  | 28.34  | 2.88 | 0.35  |
| P26039_TL Tln1 | Talin-1 OS= K.KLEQLKPR.A                      | 9.65   | 20.19  | 0.48 | 2.09  |
| P26039_TL Tln1 | Talin-1 OS= K.KSTVLQQYNR.V                    | 57.04  | 81.51  | 0.70 | 1.43  |
| P26039_TL Tln1 | Talin-1 OS= K.LAQAAQSSVATITR.L                | 166.12 | 322.71 | 0.51 | 1.94  |
| P26039_TL Tln1 | Talin-1 OS= R.LASQAQ#PAAVAEENEIEGAHIK#.H      | 432.11 | 134.66 | 3.21 | 0.31  |
| P26039_TL Tln1 | Talin-1 OS= R.LASQAQ#PAAVAEENEIEGAHIK.H       | 142.35 | 42.97  | 3.31 | 0.30  |
| P26039_TL Tln1 | Talin-1 OS= K.LGASLGAEDPETQVLLINAVK#.D        | 474.77 | 187.37 | 2.53 | 0.39  |
| P26039_TL Tln1 | Talin-1 OS= K.LK#PLPGETM*EK#.C                | 171.69 | 69.43  | 2.47 | 0.40  |
| P26039_TL Tln1 | Talin-1 OS= K.LK#PLPGETM*EK#.C                | 69.60  | 34.52  | 2.02 | 0.50  |
| P26039_TL Tln1 | Talin-1 OS= K.LLAALLEDEGGNRP LLQAAK.G         | 60.70  | 99.74  | 0.61 | 1.64  |
| P26039_TL Tln1 | Talin-1 OS= K.LLGEIAQGNENYAGIAAR.D            | 60.18  | 120.88 | 0.50 | 2.01  |
| P26039_TL Tln1 | Talin-1 OS= R.LLSDSLPSTGTQEAQSR.L             | 11.35  | 19.17  | 0.59 | 1.69  |
| P26039_TL Tln1 | Talin-1 OS= R.LNEAAAGLNQAATELVQASR.G          | 39.59  | 65.41  | 0.61 | 1.65  |
| P26039_TL Tln1 | Talin-1 OS= R.LNEAAAGLNQAATELVQASR.G          | 75.06  | 140.93 | 0.53 | 1.88  |
| P26039_TL Tln1 | Talin-1 OS= R.LQAAGNAVK#.R                    | 356.44 | 151.17 | 2.36 | 0.42  |
| P26039_TL Tln1 | Talin-1 OS= R.LREAAEGLR.M                     | 8.70   | 36.46  | 0.24 | 4.19  |
| P26039_TL Tln1 | Talin-1 OS= R.MATNAAQNAIK#.K                  | 207.31 | 81.37  | 2.55 | 0.39  |
| P26039_TL Tln1 | Talin-1 OS= R.M*ATNAAQNAIK#.K                 | 300.42 | 108.57 | 2.77 | 0.36  |
| P26039_TL Tln1 | Talin-1 OS= R.M*ATNAAQNAIK#.K                 | 22.37  | 9.60   | 2.33 | 0.43  |
| P26039_TL Tln1 | Talin-1 OS= R.M*LDGTVK#.T                     | 156.86 | 446.03 | 0.35 | 2.84  |
| P26039_TL Tln1 | Talin-1 OS= K.M*VGGIAQIIAAQEEEM*LR.K          | 10.05  | 14.47  | 0.69 | 1.44  |
| P26039_TL Tln1 | Talin-1 OS= K.M*VGGIAQIIAAQEEEMLR.K           | 7.43   | 13.63  | 0.55 | 1.83  |
| P26039_TL Tln1 | Talin-1 OS= K.NGNLPEFGAIATASK#.A              | 167.69 | 62.66  | 2.68 | 0.37  |
| P26039_TL Tln1 | Talin-1 OS= K.NLGTALAEELR.T                   | 132.22 | 210.43 | 0.63 | 1.59  |
| P26039_TL Tln1 | Talin-1 OS= K.QAAASATQIAAAQHAASAPK#.A         | 829.62 | 291.71 | 2.84 | 0.35  |
| P26039_TL Tln1 | Talin-1 OS= R.QEDVIATANLSR.R                  | 50.46  | 83.03  | 0.61 | 1.65  |
| P26039_TL Tln1 | Talin-1 OS= R.RAIADMLR.A                      | 3.47   | 239.20 | 0.01 | 68.95 |
| P26039_TL Tln1 | Talin-1 OS= K.RVAGSVTELIQAAEAM*K#.G           | 12.00  | 20.17  | 0.59 | 1.68  |
| P26039_TL Tln1 | Talin-1 OS= K.RVAGSVTELIQAAEAMK#.G            | 4.84   | 14.81  | 0.33 | 3.06  |
| P26039_TL Tln1 | Talin-1 OS= R.SAQPASAEPR.Q                    | 47.23  | 94.27  | 0.50 | 2.00  |
| P26039_TL Tln1 | Talin-1 OS= R.SGASGPNFQVQSM*PPAQQTSGQM*HR.G   | 42.05  | 67.17  | 0.63 | 1.60  |
| P26039_TL Tln1 | Talin-1 OS= R.SGASGPNFQVQSM*PPAQQTSGQM*HR.G   | 7.94   | 11.48  | 0.69 | 1.45  |
| P26039_TL Tln1 | Talin-1 OS= R.SGASGPNFQVQSM*PPAQQTSGQMHR.G    | 14.36  | 26.38  | 0.54 | 1.84  |
| P26039_TL Tln1 | Talin-1 OS= R.SGASGPNFQVQSMPPAQQTSGQM*HR.G    | 5.22   | 7.50   | 0.70 | 1.44  |

|                    |                                                         |         |        |      |       |
|--------------------|---------------------------------------------------------|---------|--------|------|-------|
| P26039_TL Tln1     | Talin-1 OS= R.SGASGPENFQVGSMPPAQQQITSGQMHR.G            | 5.78    | 9.62   | 0.60 | 1.66  |
| P26039_TL Tln1     | Talin-1 OS= K.SIAAATSALVK#.A                            | 497.40  | 183.08 | 2.72 | 0.37  |
| P26039_TL Tln1     | Talin-1 OS= K.SKDHFGLGDEESTM*LEDSVSPK.K                 | 54.35   | 20.60  | 2.64 | 0.38  |
| P26039_TL Tln1     | Talin-1 OS= K.SKDHFGLEGEESTMLEDSVSPK.K                  | 36.75   | 15.33  | 2.40 | 0.42  |
| P26039_TL Tln1     | Talin-1 OS= K.SKDHFGLGDEESTMLEDSVSPK.K                  | 17.47   | 7.76   | 2.25 | 0.44  |
| P26039_TL Tln1     | Talin-1 OS= K.SNTPSPEELGPLANQLTSDYGR.L                  | 23.67   | 50.08  | 0.47 | 2.12  |
| P26039_TL Tln1     | Talin-1 OS= K.SQLAAAR.A                                 | 39.10   | 104.62 | 0.37 | 2.68  |
| P26039_TL Tln1     | Talin-1 OS= K.STVLQQQYNR.V                              | 47.41   | 97.13  | 0.49 | 2.05  |
| P26039_TL Tln1     | Talin-1 OS= K.TIM*VDDSK#.T                              | 155.28  | 60.45  | 2.57 | 0.39  |
| P26039_TL Tln1     | Talin-1 OS= K.TK#EVIQEWSLTNIK#.R                        | 75.57   | 21.61  | 3.50 | 0.29  |
| P26039_TL Tln1     | Talin-1 OS= K.TLAESALQLLYTAK#.E                         | 1177.05 | 444.71 | 2.65 | 0.38  |
| P26039_TL Tln1     | Talin-1 OS= K.TLSHPQQM*ALLDQTK#.T                       | 374.36  | 149.80 | 2.50 | 0.40  |
| P26039_TL Tln1     | Talin-1 OS= K.TLSHPQQMALLDQTK#.T                        | 158.53  | 55.98  | 2.83 | 0.35  |
| P26039_TL Tln1     | Talin-1 OS= K.TM*LESAGLIQTAR.A                          | 39.39   | 80.84  | 0.49 | 2.05  |
| P26039_TL Tln1     | Talin-1 OS= K.TMLESAGLIQTAR.A                           | 34.19   | 56.04  | 0.61 | 1.64  |
| P26039_TL Tln1     | Talin-1 OS= K.TSTPEDFIR.M                               | 103.70  | 177.28 | 0.58 | 1.71  |
| P26039_TL Tln1     | Talin-1 OS= R.TVSDSIK#.L                                | 76.13   | 29.37  | 2.59 | 0.39  |
| P26039_TL Tln1     | Talin-1 OS= K.TYGVSVFLVK#.E                             | 286.83  | 94.78  | 3.03 | 0.33  |
| P26039_TL Tln1     | Talin-1 OS= R.VAGSVTELIQAAEAM*K#.G                      | 192.53  | 78.72  | 2.45 | 0.41  |
| P26039_TL Tln1     | Talin-1 OS= R.VAGSVTELIQAAEAM*K#.G                      | 159.14  | 67.72  | 2.35 | 0.43  |
| P26039_TL Tln1     | Talin-1 OS= R.VAGSVTELIQAAEAM#.G                        | 156.85  | 56.87  | 2.76 | 0.36  |
| P26039_TL Tln1     | Talin-1 OS= K.VGAIANALDDGQWSQGLISAAR.M                  | 19.37   | 38.09  | 0.51 | 1.97  |
| P26039_TL Tln1     | Talin-1 OS= K.VGDPAVWVQLK#.N                            | 439.22  | 160.15 | 2.74 | 0.36  |
| P26039_TL Tln1     | Talin-1 OS= K.VLGEAM*TGISQNAK#.N                        | 400.50  | 153.88 | 2.60 | 0.38  |
| P26039_TL Tln1     | Talin-1 OS= K.VLGEAM*TGISQNAK#.N                        | 154.65  | 51.87  | 2.98 | 0.34  |
| P26039_TL Tln1     | Talin-1 OS= K.VLVEDTK#.V                                | 470.44  | 177.17 | 2.66 | 0.38  |
| P26039_TL Tln1     | Talin-1 OS= K.VLVQNAAGSQEK#.L                           | 1394.95 | 505.68 | 2.76 | 0.36  |
| P26039_TL Tln1     | Talin-1 OS= K.VM*VTNVTSLK#.T                            | 219.53  | 80.30  | 2.73 | 0.37  |
| P26039_TL Tln1     | Talin-1 OS= K.VMVTNVTSLK#.T                             | 540.29  | 177.38 | 3.05 | 0.33  |
| P26039_TL Tln1     | Talin-1 OS= K.VSHVLAALQAGNR.G                           | 62.55   | 109.65 | 0.57 | 1.75  |
| P26039_TL Tln1     | Talin-1 OS= K.VSQM*AQYFELTLAAVGAASK#.T                  | 287.67  | 118.09 | 2.44 | 0.41  |
| P26039_TL Tln1     | Talin-1 OS= K.VSQMAQYFELTLAAVGAASK#.T                   | 281.28  | 104.21 | 2.70 | 0.37  |
| P26039_TL Tln1     | Talin-1 OS= R.VSVLGHASR.T                               | 25.76   | 37.11  | 0.69 | 1.44  |
| P26039_TL Tln1     | Talin-1 OS= R.YDQATDITLVTENIFSSM*GDAGEM*VR.Q            | 57.67   | 93.13  | 0.62 | 1.61  |
| Q71LX4_TL Tln2     | Talin-2 OS= R.GSGELAASGK#.F                             | 10.55   | 1.37   | 7.70 | 0.13  |
| Q9D1D4_Tl Tmed10   | Transmemt R.IPDQLVLDM*K#.H                              | 21.43   | 17.75  | 1.21 | 0.83  |
| Q9D1D4_Tl Tmed10   | Transmemt R.IPDQLVLDM.K.H                               | 5.55    | 8.52   | 0.65 | 1.53  |
| Q9D1D4_Tl Tmed10   | Transmemt K.ITDSAGHLYAK#.E                              | 8.37    | 9.23   | 0.91 | 1.10  |
| Q9D1D4_Tl Tmed10   | Transmemt K.LKPLEVELER.R                                | 14.07   | 47.70  | 0.29 | 3.39  |
| Q9D1D4_Tl Tmed10   | Transmemt R.LEDLESIVNDFAYM*K.K                          | 29.53   | 15.85  | 1.86 | 0.54  |
| Q9D1D4_Tl Tmed10   | Transmemt R.LEDLESIVNDFAYM.K                            | 3.65    | 7.24   | 0.50 | 1.98  |
| Q9R0Q3_Tl Tmed2    | Transmemt K.IVM*FTIDIGEAPK#.G                           | 17.22   | 9.85   | 1.75 | 0.57  |
| Q9R0Q3_Tl Tmed2    | Transmemt K.IVMFTIDIGEAPK#.G                            | 11.61   | 10.36  | 1.12 | 0.89  |
| Q9CXE7_Tl Tmed5    | Transmemt K.LEDLESINSIK#.S                              | 9.64    | 6.78   | 1.42 | 0.70  |
| Q3UBX0_Tl Tmem109  | Transmemt K.ETSADILTQIGR.S                              | 1.65    | 69.76  | 0.02 | 42.31 |
| Q9DAM7_T Tmem263   | Transmemt K.GAVGATIGVAVWIGGK.S                          | 3.84    | 23.32  | 0.16 | 6.07  |
| Q9DAM7_T Tmem263   | Transmemt K.TAVTVPVSM*GIGLVK.G                          | 6.30    | 11.78  | 0.54 | 1.87  |
| Q9DAM7_T Tmem263   | Transmemt R.VTGGIFVTK.G                                 | 6.80    | 16.82  | 0.40 | 2.47  |
| Q9JHJ0_Tv Tmod3    | Tropomodt K.DLGDYKDLDEDELLGK#.L                         | 26.49   | 71.54  | 0.37 | 2.70  |
| Q9JHJ0_Tv Tmod3    | Tropomodt R.DNETLM*ELK.I                                | 3.71    | 11.36  | 0.33 | 3.06  |
| Q9JHJ0_Tv Tmod3    | Tropomodt K.DRDDYVPYTGK.K                               | 3.71    | 29.51  | 0.13 | 7.96  |
| Q9JHJ0_Tv Tmod3    | Tropomodt K.HFSLAATR.S                                  | 4.05    | 57.34  | 0.07 | 14.14 |
| Q9JHJ0_Tv Tmod3    | Tropomodt K.LSESELK.Q                                   | 30.97   | 81.70  | 0.38 | 2.64  |
| Q9JHJ0_Tv Tmod3    | Tropomodt R.LVEVNLNLIK.N                                | 36.34   | 63.72  | 0.57 | 1.75  |
| Q9JHJ0_Tv Tmod3    | Tropomodt K.M*LEENTLIK.F                                | 12.41   | 19.88  | 0.62 | 1.60  |
| Q9JHJ0_Tv Tmod3    | Tropomodt R.QQLGTSVELEM*AK.M                            | 7.59    | 16.35  | 0.46 | 2.15  |
| Q9JHJ0_Tv Tmod3    | Tropomodt R.QQLGTSVELEM.K.M                             | 2.85    | 8.47   | 0.34 | 2.97  |
| Q9JHJ0_Tv Tmod3    | Tropomodt R.SNDPVAFAFADMLK.V                            | 6.66    | 14.45  | 0.46 | 2.17  |
| Q9JHJ0_Tv Tmod3    | Tropomodt K.DLDEDELLGK.L                                | 18.79   | 54.74  | 0.34 | 2.91  |
| Q9JHJ0_Tv Tmod3    | Tropomodt K.DLGDYKDLDEDELLGK.L                          | 117.61  | 407.69 | 0.29 | 3.47  |
| Q9JHJ0_Tv Tmod3    | Tropomodt K.DLGDYKDLDEDELLGKSESELK.Q                    | 8.34    | 28.03  | 0.30 | 3.36  |
| Q9JHJ0_Tv Tmod3    | Tropomodt K.DRDDYVPYTGK.K                               | 4.56    | 55.58  | 0.08 | 12.19 |
| Q9JHJ0_Tv Tmod3    | Tropomodt R.KDLGDYKDLDEDELLGK.L                         | 5.76    | 20.14  | 0.29 | 3.50  |
| Q9JHJ0_Tv Tmod3    | Tropomodt K.LSESELK.Q                                   | 126.46  | 342.72 | 0.37 | 2.71  |
| Q9JHJ0_Tv Tmod3    | Tropomodt R.LVEVNLNLIK#.N                               | 9.80    | 4.26   | 2.30 | 0.44  |
| Q9JHJ0_Tv Tmod3    | Tropomodt K.QLETVLDDLPENALLPAGFR.Q                      | 6.31    | 43.88  | 0.14 | 6.96  |
| Q9JHJ0_Tv Tmod3    | Tropomodt K.SATGPFDR.E                                  | 7.51    | 107.86 | 0.07 | 14.37 |
| Q61033_Lf Tmpo     | Lamina-assi R.AEPPGVSDQSVFSSER.E                        | 4.41    | 11.68  | 0.38 | 2.65  |
| Q61033_Lf Tmpo     | Lamina-assi R.AQPLRAEPPGVSDQSVFSSER.E                   | 2.30    | 11.42  | 0.20 | 4.97  |
| Q61033_Lf Tmpo     | Lamina-assi K.LTVAPFK#.G                                | 26.69   | 20.35  | 1.31 | 0.76  |
| Q61033_Lf Tmpo     | Lamina-assi R.LVSAASPILR.E                              | 17.05   | 45.42  | 0.38 | 2.66  |
| Q61033_Lf Tmpo     | Lamina-assi R.SLFIPESSYDR.C                             | 4.69    | 13.34  | 0.35 | 2.84  |
| Q61033_Lf Tmpo     | Lamina-assi K.SLQADISQAAQIINSDPAQQAALR.I                | 5.18    | 10.61  | 0.49 | 2.05  |
| Q61033_Lf Tmpo     | Lamina-assi R.SQVISPPLAQAIR.D                           | 6.38    | 18.85  | 0.34 | 2.96  |
| Q61033_Lf Tmpo     | Lamina-assi R.SSTPLPTVSSAENTR.Q                         | 4.25    | 9.32   | 0.46 | 2.20  |
| Q61033_Lf Tmpo     | Lamina-assi K.SVVSLSLTLGVEVSK#PPQHDK#EASEPSFPLHESILK#.V | 4.87    | 1.71   | 2.85 | 0.35  |
| Q61033_Lf Tmpo     | Lamina-assi R.SVEAASALQJAAHTAFVAK#.S                    | 29.98   | 19.43  | 1.54 | 0.65  |
| Q61033_Lf Tmpo     | Lamina-assi K.VDDEILGFISEATPR.A                         | 2.65    | 9.41   | 0.28 | 3.55  |
| Q61033_Lf Tmpo     | Lamina-assi K.VVEEWWQIQDR.Q                             | 6.79    | 20.03  | 0.34 | 2.95  |
| Q61033_Lf Tmpo     | Lamina-assi R.YPVSSIEAAR.I                              | 11.37   | 25.99  | 0.44 | 2.29  |
| Q61029_Lf Tmpo     | Lamina-assi R.IDGAVISESTPIAETIK#.A                      | 10.13   | 8.73   | 1.16 | 0.86  |
| Q61033_Lf Tmpo     | Lamina-assi R.AEPPGVSDQSVFSSER.E                        | 3.01    | 8.03   | 0.38 | 2.66  |
| Q61033_Lf Tmpo     | Lamina-assi K.GPPDFSSDEERPTPLVSGASVGR.G                 | 3.49    | 8.58   | 0.41 | 2.46  |
| Q61033_Lf Tmpo     | Lamina-assi R.LVSAASPILR.E                              | 2.26    | 4.01   | 0.56 | 1.78  |
| Q61033_Lf Tmpo     | Lamina-assi R.LVSAASPILR.E                              | 11.57   | 42.60  | 0.27 | 3.68  |
| Q61033_Lf Tmpo     | Lamina-assi R.NRPPLAAGANSK.G                            | 3.71    | 9.74   | 0.38 | 2.62  |
| Q61033_Lf Tmpo     | Lamina-assi K.SELVANNVTLPAGEQR.K                        | 2.31    | 7.44   | 0.31 | 3.22  |
| Q61033_Lf Tmpo     | Lamina-assi R.SQVISPPLAQAIR.D                           | 5.81    | 18.18  | 0.32 | 3.13  |
| Q61033_Lf Tmpo     | Lamina-assi R.SSTPLPTVSSAENTR.Q                         | 4.14    | 20.18  | 0.21 | 4.87  |
| Q61033_Lf Tmpo     | Lamina-assi R.SVEAASALQJAAHTAFVAK#.S                    | 25.43   | 24.38  | 1.04 | 0.96  |
| Q61033_Lf Tmpo     | Lamina-assi K.VDDEILGFISEATPR.A                         | 5.38    | 14.21  | 0.38 | 2.64  |
| Q61033_Lf Tmpo     | Lamina-assi K.VVEEWWQIQDR.Q                             | 4.97    | 33.99  | 0.15 | 6.84  |
| Q61033_Lf Tmpo     | Lamina-assi R.YPVSSIEAAR.I                              | 11.04   | 32.15  | 0.34 | 2.91  |
| Q921Z5_Tf TnfaiP8  | Tumor necr R.NNQFNQDELALM*EK#.F                         | 3.43    | 2.31   | 1.49 | 0.67  |
| Q9WU08_T Tnjp1     | TNFaip3-in K.GKM*QGKIM*LGELLEESQMEASR@.L                | 1.66    | 2.06   | 0.81 | 1.24  |
| Q9WU08_T Tnjp1     | TNFaip3-in K.GVAGQQQASVM*ASK#.V                         | 4.23    | 2.38   | 1.77 | 0.56  |
| P58871_TB Tnks1bp1 | 182 kDa tar R.APAIRPGGLTGLSETADSDTR.L                   | 1.87    | 19.54  | 0.10 | 10.43 |
| P58871_TB Tnks1bp1 | 182 kDa tar R.ATAQONQEGFK#.S                            | 40.57   | 13.58  | 2.99 | 0.33  |
| P58871_TB Tnks1bp1 | 182 kDa tar R.DVGHLEEGASGLLSPSTPHSR.D                   | 1.86    | 7.39   | 0.25 | 3.98  |
| P58871_TB Tnks1bp1 | 182 kDa tar R.ELGVGQVDWDDGLGLR.N                        | 3.56    | 9.19   | 0.39 | 2.58  |
| P58871_TB Tnks1bp1 | 182 kDa tar R.ESGVGEPDWSGAEGEFLK#.S                     | 9.11    | 7.06   | 1.29 | 0.78  |
| P58871_TB Tnks1bp1 | 182 kDa tar R.VGPDLELDPK#.S                             | 14.77   | 9.90   | 1.49 | 0.67  |
| P58871_TB Tnks1bp1 | 182 kDa tar R.VLLEEGLAAGAGQGEPEQPSR.A                   | 5.86    | 7.88   | 0.74 | 1.34  |

|                    |                                                |        |        |      |       |
|--------------------|------------------------------------------------|--------|--------|------|-------|
| P58871_TB Tnks1bp1 | 182 kDa tar K.VNLFPGLSALK#A                    | 21.24  | 11.45  | 1.85 | 0.54  |
| P58871_TB Tnks1bp1 | 182 kDa tar K.AGAVDWDQLGLR.N                   | 9.19   | 32.04  | 0.29 | 3.49  |
| P58871_TB Tnks1bp1 | 182 kDa tar R.APAIRPGTGLSETADSDTR.L            | 4.76   | 38.95  | 0.12 | 8.19  |
| P58871_TB Tnks1bp1 | 182 kDa tar R.APLPSRPPQDGEASQVEEDVGTWLSLGAAR.Q | 1.81   | 10.47  | 0.17 | 5.80  |
| P58871_TB Tnks1bp1 | 182 kDa tar R.ATAQONQEFQ#S                     | 34.67  | 23.54  | 1.47 | 0.68  |
| P58871_TB Tnks1bp1 | 182 kDa tar K.DEGSWQDGDSSQEI#R.L               | 4.20   | 14.82  | 0.28 | 3.53  |
| P58871_TB Tnks1bp1 | 182 kDa tar R.DSLGFSFTR.D                      | 6.26   | 22.09  | 0.28 | 3.53  |
| P58871_TB Tnks1bp1 | 182 kDa tar R.DSVLDIHGSR.A                     | 4.24   | 16.67  | 0.25 | 3.93  |
| P58871_TB Tnks1bp1 | 182 kDa tar R.DVGHLEEGAGSGLLSPSTPHSR.D         | 3.88   | 17.05  | 0.23 | 4.39  |
| P58871_TB Tnks1bp1 | 182 kDa tar R.ESGVGEPDWSGAEGEFLK#S             | 27.40  | 18.95  | 1.45 | 0.69  |
| P58871_TB Tnks1bp1 | 182 kDa tar R.FSEGLVQPPSQDQEK#L                | 7.09   | 7.65   | 0.93 | 1.08  |
| P58871_TB Tnks1bp1 | 182 kDa tar R.GVGQADWTPDLGLR.N                 | 4.07   | 22.82  | 0.18 | 5.60  |
| P58871_TB Tnks1bp1 | 182 kDa tar R.KPISGVQGNPDGSLPQR.D              | 4.95   | 13.88  | 0.36 | 2.81  |
| P58871_TB Tnks1bp1 | 182 kDa tar R.LANISVPAESPR.L                   | 12.45  | 44.86  | 0.28 | 3.60  |
| P58871_TB Tnks1bp1 | 182 kDa tar R.SAEGEVTE#K.S                     | 17.69  | 14.07  | 1.26 | 0.80  |
| P58871_TB Tnks1bp1 | 182 kDa tar K.SAWFQDYSSGGGSR.V                 | 4.06   | 11.59  | 0.35 | 2.86  |
| P58871_TB Tnks1bp1 | 182 kDa tar R.SPALLPSTVEGPPGAPLLOAK.E          | 17.31  | 10.25  | 1.69 | 0.59  |
| P58871_TB Tnks1bp1 | 182 kDa tar R.SPALLPSTVEGPPGAPLLOAK#E          | 32.90  | 28.03  | 1.17 | 0.85  |
| P58871_TB Tnks1bp1 | 182 kDa tar R.SPPSGSGLLEGI#TASSK#G             | 8.59   | 5.98   | 1.44 | 0.70  |
| P58871_TB Tnks1bp1 | 182 kDa tar K.SGSLSPLETEDPLEAR.E               | 5.35   | 15.81  | 0.34 | 2.96  |
| P58871_TB Tnks1bp1 | 182 kDa tar R.VGPDLELDPK.S                     | 35.82  | 31.19  | 1.15 | 0.87  |
| P58871_TB Tnks1bp1 | 182 kDa tar R.LLEEEGLAAGAGQGEPEPSR.A           | 8.14   | 21.39  | 0.38 | 2.63  |
| P58871_TB Tnks1bp1 | 182 kDa tar K.VNLFPGLSALK#A                    | 64.74  | 48.01  | 1.35 | 0.74  |
| P58871_TB Tnks1bp1 | 182 kDa tar R.VPSSVEEVVEPQSR.R                 | 1.38   | 7.09   | 0.20 | 5.12  |
| P58871_TB Tnks1bp1 | 182 kDa tar R.VSGAGLSPSR.K                     | 81.11  | 13.55  | 5.99 | 0.17  |
| P58871_TB Tnks1bp1 | 182 kDa tar R.WLDDLASPPPPNGSAR.R               | 4.33   | 6.55   | 0.66 | 1.51  |
| Q8BFY9_TN Tnp01    | Transportir R.ATVGLIITIAK#G                    | 8.56   | 4.61   | 1.86 | 0.54  |
| Q8BFY9_TN Tnp01    | Transportir K.GELQNWPDLLPK#L                   | 7.59   | 3.15   | 2.41 | 0.41  |
| Q8BFY9_TN Tnp01    | Transportir K.YSDIIDLK#G                       | 14.00  | 5.40   | 2.59 | 0.39  |
| Q8BFY9_TN Tnp01    | Transportir R.ATVGLIITIAK#G                    | 17.53  | 6.54   | 2.68 | 0.37  |
| Q8BFY9_TN Tnp01    | Transportir K.ESQSDPTIQR.T                     | 11.97  | 16.66  | 0.72 | 1.39  |
| Q8BFY9_TN Tnp01    | Transportir R.FSDQPLPK#E                       | 29.43  | 10.15  | 2.90 | 0.34  |
| Q8BFY9_TN Tnp01    | Transportir K.GELQNWPDLLPK#L                   | 13.02  | 8.48   | 1.54 | 0.65  |
| Q8BFY9_TN Tnp01    | Transportir R.QSSFALLGDLTK#A                   | 31.46  | 12.59  | 2.50 | 0.40  |
| Q8BFY9_TN Tnp01    | Transportir K.YSDIIDLK#G                       | 27.11  | 6.93   | 3.91 | 0.26  |
| Q6P2B1_T Tnp03     | Transportir K.ETVGAVTVTHK#Q                    | 23.24  | 11.29  | 2.06 | 0.49  |
| Q6P2B1_T Tnp03     | Transportir R.SVHAWEISDQLLR.Q                  | 8.62   | 9.51   | 0.91 | 1.10  |
| Q6P2B1_T Tnp03     | Transportir K.VIQEIVPVLSETLNK#H                | 18.37  | 5.84   | 3.15 | 0.32  |
| Q8BK12_TN Tnrc6b   | Trinucleoti R.VLSNTGWGQTQIK#Q                  | 4.88   | 4.02   | 1.21 | 0.82  |
| Q9QZ06_TC Tollip   | Toll-interac R.GPVVIGELPQDLR.I                 | 3.78   | 12.58  | 0.30 | 3.33  |
| Q9QZ06_TC Tollip   | Toll-interac R.LSITVQAK#L                      | 9.28   | 4.18   | 2.22 | 0.45  |
| O88746_TC Tom1     | Target of M R.GDLSQHATPLPTAVLPGDSPITPEQIGK#L   | 11.17  | 5.00   | 2.23 | 0.45  |
| Q5SRX1_TN Tom112   | TOM1-like f R.DFIDSLVK#I                       | 9.47   | 2.96   | 3.20 | 0.31  |
| Q5SRX1_TN Tom112   | TOM1-like f R.VNSVEETELHVNDDLN#VFLR.Y          | 4.73   | 6.90   | 0.69 | 1.46  |
| Q9CYG7_TC Tomm34   | Mitochond R.LK#LPPIPVVPVSAQK#R                 | 8.33   | 2.45   | 3.39 | 0.29  |
| Q9CYG7_TC Tomm34   | Mitochond K.YALAYVDYK#T                        | 16.05  | 4.52   | 3.55 | 0.28  |
| Q9CQN3_T Tomm6     | Mitochond R.NLSDIDL#APQGV.-                    | 5.69   | 5.69   | 1.00 | 1.00  |
| Q04750_TC Top1     | DNA topois K.ELTAPDENVPK#I                     | 42.76  | 48.64  | 0.88 | 1.14  |
| Q04750_TC Top1     | DNA topois K.FAWAIDM#TDEYEF.-                  | 11.22  | 11.22  | 1.00 | 1.00  |
| Q04750_TC Top1     | DNA topois K.FYDYGK.V                          | 17.85  | 20.43  | 0.87 | 1.14  |
| Q04750_TC Top1     | DNA topois K.GPVVAPPYEPPLPESV.F                | 34.37  | 42.76  | 0.80 | 1.24  |
| Q04750_TC Top1     | DNA topois K.HLQDL#EGLTAK#V                    | 12.17  | 10.46  | 1.16 | 0.86  |
| Q04750_TC Top1     | DNA topois R.LEEQLM#K#L                        | 37.09  | 36.57  | 1.01 | 0.99  |
| Q04750_TC Top1     | DNA topois R.LRDEDADYKPK.K                     | 5.66   | 44.57  | 0.13 | 7.88  |
| Q04750_TC Top1     | DNA topois R.TYNASITLQQLK#E                    | 16.24  | 16.84  | 0.96 | 1.04  |
| Q04750_TC Top1     | DNA topois R.VEHINLHPELDGEVVEFDPPGKDSIR.Y      | 2.94   | 4.77   | 0.62 | 1.62  |
| Q04750_TC Top1     | DNA topois K.WGVPIEK.I                         | 13.90  | 14.64  | 0.95 | 1.05  |
| Q04750_TC Top1     | DNA topois K.WVEEERYPEGIK.W                    | 5.73   | 7.09   | 0.81 | 1.24  |
| Q04750_TC Top1     | DNA topois K.YIM#LNPSR.I                       | 3.32   | 16.73  | 0.20 | 5.03  |
| Q04750_TC Top1     | DNA topois K.AEEVATF#K#M                       | 13.49  | 13.73  | 0.98 | 1.02  |
| Q04750_TC Top1     | DNA topois K.GPVVAPPYEPPLPESV.F                | 12.63  | 17.77  | 0.71 | 1.41  |
| Q01320_TC Top2a    | DNA topois K.IFDEILVNAADNK#Q                   | 11.28  | 10.36  | 1.09 | 0.92  |
| Q01320_TC Top2a    | DNA topois K.DKVDVETGNSLK.V                    | 12.63  | 9.57   | 1.32 | 0.76  |
| Q01320_TC Top2a    | DNA topois R.FLEEFITPVK#V                      | 15.20  | 12.06  | 1.26 | 0.79  |
| Q01320_TC Top2a    | DNA topois R.HVDYVADQVSK.L                     | 12.26  | 11.84  | 1.04 | 0.97  |
| Q01320_TC Top2a    | DNA topois K.IFDEILVNAADNK#Q                   | 14.43  | 36.13  | 0.40 | 2.50  |
| Q01320_TC Top2a    | DNA topois K.IKSENVEGTPAEDGAEPGSLR.Q           | 2.46   | 11.77  | 0.21 | 4.78  |
| Q01320_TC Top2a    | DNA topois K.IIM#IM#TDQDQDGS#K#G               | 13.10  | 12.45  | 1.05 | 0.95  |
| Q01320_TC Top2a    | DNA topois K.IVGLQYK#K                         | 26.72  | 15.21  | 1.76 | 0.57  |
| Q01320_TC Top2a    | DNA topois K.NKQIEAFYSLPEFEWK.S                | 7.94   | 11.34  | 0.70 | 1.43  |
| Q01320_TC Top2a    | DNA topois K.QIM#ENAEINNIK#I                   | 8.29   | 4.87   | 1.70 | 0.59  |
| Q01320_TC Top2a    | DNA topois K.TLAVSGLGVGR.D                     | 4.18   | 19.66  | 0.21 | 4.70  |
| Q01320_TC Top2a    | DNA topois K.YSGPEDDAI#LAFS#K                  | 6.35   | 8.03   | 0.79 | 1.26  |
| Q01320_TC Top2a    | DNA topois K.AKGEEQFPVDLEDTIAPR.A              | 4.66   | 20.23  | 0.23 | 4.34  |
| Q01320_TC Top2a    | DNA topois K.DK#VDVETGNSLK#V                   | 45.77  | 49.95  | 0.92 | 1.09  |
| Q01320_TC Top2a    | DNA topois K.ELILFNSDN#R.S                     | 28.75  | 91.10  | 0.32 | 3.17  |
| Q01320_TC Top2a    | DNA topois K.EQELN#K#Q                         | 28.22  | 27.14  | 1.04 | 0.96  |
| Q01320_TC Top2a    | DNA topois R.EVTFVPGLYK#I                      | 108.39 | 82.68  | 1.31 | 0.76  |
| Q01320_TC Top2a    | DNA topois K.EWLLGM#LGAESSK.L                  | 2.45   | 46.40  | 0.05 | 18.92 |
| Q01320_TC Top2a    | DNA topois R.FLEEFITPVK#V                      | 142.65 | 117.23 | 1.22 | 0.82  |
| Q01320_TC Top2a    | DNA topois K.FVETASR.E                         | 23.34  | 84.95  | 0.27 | 3.64  |
| Q01320_TC Top2a    | DNA topois K.GEEQFPVDLEDTIAPR.A                | 12.18  | 9.51   | 1.28 | 0.78  |
| Q01320_TC Top2a    | DNA topois R.GFQISFVNSIATSK#G                  | 48.99  | 37.35  | 1.31 | 0.76  |
| Q01320_TC Top2a    | DNA topois R.GFQISFVNSIATSK.G                  | 25.26  | 21.72  | 1.16 | 0.86  |
| Q01320_TC Top2a    | DNA topois R.HVDYVADQVSK#L                     | 67.40  | 56.67  | 1.19 | 0.84  |
| Q01320_TC Top2a    | DNA topois K.IFDEILVNAADNK#Q                   | 55.07  | 29.89  | 1.84 | 0.54  |
| Q01320_TC Top2a    | DNA topois K.IKSENVEGTPAEDGAEPGSLR.Q           | 18.26  | 76.36  | 0.24 | 4.18  |
| Q01320_TC Top2a    | DNA topois K.IIM#IM#TDQDQDGS#K#G               | 103.02 | 76.19  | 1.35 | 0.74  |
| Q01320_TC Top2a    | DNA topois K.IIM#IM#TDQDQDGS#K#G               | 9.81   | 4.56   | 2.15 | 0.46  |
| Q01320_TC Top2a    | DNA topois K.IVIENK#K#K                        | 40.70  | 31.35  | 1.30 | 0.77  |
| Q01320_TC Top2a    | DNA topois K.LDDANDAGSR.N                      | 4.02   | 13.88  | 0.29 | 3.45  |
| Q01320_TC Top2a    | DNA topois R.LLDGEEPLM#LPSYK#N                 | 24.87  | 26.23  | 0.95 | 1.05  |
| Q01320_TC Top2a    | DNA topois R.LLDGEEPLM#LPSYK#N                 | 10.03  | 11.02  | 0.91 | 1.10  |
| Q01320_TC Top2a    | DNA topois K.M#QSLDKD#I#V#L#M#R                | 2.88   | 11.45  | 0.25 | 3.97  |
| Q01320_TC Top2a    | DNA topois R.NEK#QELN#K#Q                      | 16.27  | 12.86  | 1.27 | 0.79  |
| Q01320_TC Top2a    | DNA topois K.NK#QIEAFYSLPEFEWK#S               | 26.47  | 29.33  | 0.90 | 1.11  |
| Q01320_TC Top2a    | DNA topois K.NYEDESLK#T                        | 54.68  | 43.93  | 1.24 | 0.80  |
| Q01320_TC Top2a    | DNA topois K.QIM#ENAEINNIK#I                   | 33.75  | 25.17  | 1.34 | 0.75  |
| Q01320_TC Top2a    | DNA topois K.SENVEGTPAEDGAEPGSLR.Q             | 8.82   | 31.57  | 0.28 | 3.58  |
| Q01320_TC Top2a    | DNA topois K.SQSSVSTAGTK#K                     | 12.62  | 11.06  | 1.14 | 0.88  |
| Q01320_TC Top2a    | DNA topois R.SYVDLYL#D                         | 48.10  | 29.75  | 1.62 | 0.62  |
| Q01320_TC Top2a    | DNA topois R.SYVDLYL#D#K#V#D#E#T#G#N#S#K#V     | 9.74   | 7.75   | 1.26 | 0.80  |
| Q01320_TC Top2a    | DNA topois K.TLAVSGLGVGR.D                     | 29.56  | 110.70 | 0.27 | 3.75  |

|                     |                                                     |        |        |      |       |
|---------------------|-----------------------------------------------------|--------|--------|------|-------|
| Q01320_TC Top2a     | DNA topois K.TPSLITDYE                              | 19.93  | 69.81  | 0.29 | 3.50  |
| Q01320_TC Top2a     | DNA topois K.VDEGTNSLK#V                            | 10.06  | 8.22   | 1.22 | 0.82  |
| Q01320_TC Top2a     | DNA topois K.VIHEQVNPWR                             | 36.59  | 158.37 | 0.23 | 4.33  |
| Q01320_TC Top2a     | DNA topois R.VTIQENNVISWNNKG#G                      | 11.26  | 11.63  | 0.97 | 1.03  |
| Q01320_TC Top2a     | DNA topois K.YDTVLDIR.D                             | 4.31   | 22.91  | 0.19 | 5.32  |
| Q01320_TC Top2a     | DNA topois K.YGVFPLR.G                              | 8.76   | 25.68  | 0.34 | 2.93  |
| Q01320_TC Top2a     | DNA topois R.YIFMLSPRAR.L                           | 7.35   | 18.68  | 0.39 | 2.54  |
| Q01320_TC Top2a     | DNA topois K.YSGPEDDAIISLAFSK#K                     | 46.93  | 50.07  | 0.94 | 1.07  |
| Q64511_TC Top2b     | DNA topois R.LLFPVDDNLLK#F                          | 22.92  | 11.30  | 2.03 | 0.49  |
| Q64511_TC Top2b     | DNA topois K.SLAVSGLGVIGR.D                         | 2.76   | 7.78   | 0.35 | 2.82  |
| Q64511_TC Top2b     | DNA topois K.ASGSENEGDPYGR.K                        | 1.71   | 4.30   | 0.40 | 2.52  |
| Q64511_TC Top2b     | DNA topois K.ASPITNDGEDEFVPSDGLDKDEYAFSSGK.S        | 14.78  | 5.86   | 2.52 | 0.40  |
| Q64511_TC Top2b     | DNA topois K.DK#LEDGVALK#V                          | 45.74  | 38.49  | 1.19 | 0.84  |
| Q64511_TC Top2b     | DNA topois K.DLIQM*LVQR.G                           | 6.83   | 15.70  | 0.44 | 2.30  |
| Q64511_TC Top2b     | DNA topois K.DLIQMLVQR.G                            | 6.02   | 20.25  | 0.30 | 3.37  |
| Q64511_TC Top2b     | DNA topois K.EK#VEELIK#Q                            | 52.97  | 26.12  | 2.03 | 0.49  |
| Q64511_TC Top2b     | DNA topois K.FDSNEEDTASVFAPSFGLK#K.Q                | 12.04  | 6.11   | 1.97 | 0.51  |
| Q64511_TC Top2b     | DNA topois K.GFQQISFVNISATTK#G                      | 30.85  | 18.91  | 1.63 | 0.61  |
| Q64511_TC Top2b     | DNA topois K.GTIQELGQNGYAVSGEIFVVDNR                | 12.34  | 19.87  | 0.62 | 1.61  |
| Q64511_TC Top2b     | DNA topois K.HGFEFIPVVK#A                           | 28.70  | 13.49  | 2.13 | 0.47  |
| Q64511_TC Top2b     | DNA topois K.HLYNDIFINK#E                           | 26.19  | 14.42  | 1.82 | 0.55  |
| Q64511_TC Top2b     | DNA topois R.HVDYVQVQVSK#L                          | 40.55  | 23.57  | 1.72 | 0.58  |
| Q64511_TC Top2b     | DNA topois K.K#ELETANK#NDSTK#K                      | 18.03  | 13.05  | 1.38 | 0.72  |
| Q64511_TC Top2b     | DNA topois K.KTSDQDSDVDIFPSDFTSEPPALPR.T            | 7.60   | 11.69  | 0.65 | 1.54  |
| Q64511_TC Top2b     | DNA topois K.K#YETVQDILK#E                          | 13.94  | 9.03   | 1.54 | 0.65  |
| Q64511_TC Top2b     | DNA topois K.LAQAEAGLHK#V                           | 30.01  | 18.27  | 1.64 | 0.61  |
| Q64511_TC Top2b     | DNA topois R.LHGLPEQFLYGTATK#H                      | 42.22  | 23.54  | 1.79 | 0.56  |
| Q64511_TC Top2b     | DNA topois R.LLFPVDDNLLK#F                          | 162.33 | 80.32  | 2.02 | 0.49  |
| Q64511_TC Top2b     | DNA topois K.LLQETEM*PSPYGR.R                       | 5.69   | 7.01   | 0.81 | 1.23  |
| Q64511_TC Top2b     | DNA topois R.LSYYGLR.K                              | 7.59   | 19.25  | 0.39 | 2.54  |
| Q64511_TC Top2b     | DNA topois K.NK#QELFSYIPFEDEWKHK#H                  | 9.48   | 9.32   | 1.02 | 0.98  |
| Q64511_TC Top2b     | DNA topois R.NTVETELPVR.T                           | 16.72  | 47.18  | 0.35 | 2.82  |
| Q64511_TC Top2b     | DNA topois K.SEDDSAK#FDSNEEDTASVFAPSFGLK#Q          | 18.14  | 9.38   | 1.93 | 0.52  |
| Q64511_TC Top2b     | DNA topois K.SLAVSGLGVIGR.D                         | 20.80  | 46.85  | 0.44 | 2.25  |
| Q64511_TC Top2b     | DNA topois K.SQDFGNLFFSPYSQK#S                      | 38.25  | 21.47  | 1.78 | 0.56  |
| Q64511_TC Top2b     | DNA topois K.SSLAGSDGALTVVNNATK#K                   | 22.40  | 13.59  | 1.65 | 0.61  |
| Q64511_TC Top2b     | DNA topois K.SYDDAESLK#T                            | 44.58  | 25.54  | 1.75 | 0.57  |
| Q64511_TC Top2b     | DNA topois R.YAGPEDDAIISLAFSK#K                     | 45.98  | 24.82  | 1.85 | 0.54  |
| Q64511_TC Top2b     | DNA topois K.YFAESDEEDVDFAFAM*FN.-                  | 5.35   | 5.35   | 1.00 | 1.00  |
| Q64511_TC Top2b     | DNA topois R.YIFTM*LSLAR.L                          | 7.93   | 10.78  | 0.74 | 1.36  |
| Q64511_TC Top2b     | DNA topois K.YTFDFSEEDDDAAAADDSNDLEELK#V            | 6.32   | 4.99   | 1.27 | 0.79  |
| Q64511_TC Top2b     | DNA topois K.YTFDFSEEDDDAAAADDSNDLEELK#V#K.A        | 4.88   | 3.56   | 1.37 | 0.73  |
| O70157_TC Top3a     | DNA topois K.LYQGYISYPR.T                           | 2.29   | 7.93   | 0.29 | 3.46  |
| Q6ZQF0_TC Topbp1    | DNA topois R.FNQLNEDVTHIVGDYDDVDR.Q                 | 1.73   | 5.39   | 0.32 | 3.12  |
| Q6ZQF0_TC Topbp1    | DNA topois K.LFKPSFDVTDALAELETPNAASQK.R             | 3.80   | 4.71   | 0.81 | 1.24  |
| Q6ZQF0_TC Topbp1    | DNA topois R.FNQLNEDVTHIVGDYDDVDR.Q                 | 1.11   | 8.07   | 0.14 | 7.29  |
| Q6ZQF0_TC Topbp1    | DNA topois R.FVQEEDEYWGSSILDALPDVTEHQK#L            | 3.91   | 3.25   | 1.20 | 0.83  |
| Q6ZQF0_TC Topbp1    | DNA topois K.LFK#PSFDVTDALAELETPNAASQK#R            | 7.73   | 7.29   | 1.06 | 0.94  |
| Q6ZQF0_TC Topbp1    | DNA topois K.MPDSDSPSR.K                            | 1.11   | 11.45  | 0.10 | 10.35 |
| Q9ER81_iFi Tor1aip2 | Torsin-1A-i R.VAGFNALQLILSR.T                       | 5.54   | 20.99  | 0.26 | 3.79  |
| Q8BU11_T Tox4       | TOX high m K.DPNEPQKPVSAVALFR.D                     | 2.84   | 12.20  | 0.23 | 4.29  |
| Q8BU11_T Tox4       | TOX high m R.DVFLAWVASR.N                           | 2.76   | 14.92  | 0.18 | 5.41  |
| Q8BU11_T Tox4       | TOX high m R.GLQVQGTSTATIQSQQAQVTR.S                | 4.19   | 15.59  | 0.27 | 3.72  |
| Q8BU11_T Tox4       | TOX high m K.GQNPNTATFGEVSK#I                       | 33.04  | 40.95  | 0.81 | 1.24  |
| Q8BU11_T Tox4       | TOX high m R.INLQQPPLQSK#I                          | 15.83  | 18.42  | 0.86 | 1.16  |
| P02340_P5 Tp53      | Cellular tur R.ELNEALELK#D                          | 111.28 | 137.02 | 0.81 | 1.23  |
| P02340_P5 Tp53      | Cellular tur R.HSVVVPYEPPEAGSEYTHYK.Y               | 65.27  | 70.18  | 0.93 | 1.08  |
| P02340_P5 Tp53      | Cellular tur K.KPLDGEYFTLK.I                        | 40.15  | 55.96  | 0.72 | 1.39  |
| P02340_P5 Tp53      | Cellular tur K.K#KPLDGEYFTLK.I                      | 48.54  | 55.52  | 0.87 | 1.14  |
| P02340_P5 Tp53      | Cellular tur R.RPILITLEDSSGNLLGR.D                  | 5.46   | 164.92 | 0.03 | 30.21 |
| P02340_P5 Tp53      | Cellular tur R.RTEENFR.K                            | 1.63   | 39.96  | 0.04 | 24.52 |
| P02340_P5 Tp53      | Cellular tur K.SQHM*TEVVR.R                         | 7.70   | 33.92  | 0.23 | 4.40  |
| P02340_P5 Tp53      | Cellular tur K.SQHMTEVVR.R                          | 17.03  | 120.64 | 0.14 | 7.09  |
| P02340_P5 Tp53      | Cellular tur R.TEENFR.K                             | 15.78  | 80.66  | 0.20 | 5.11  |
| P02340_P5 Tp53      | Cellular tur R.VEGNLYPEYLED.R.Q                     | 33.49  | 194.73 | 0.17 | 5.81  |
| P02340_P5 Tp53      | Cellular tur R.VSGAPAAQDPVTETPGVPAPATPWPLSSFVPSQK.T | 36.82  | 30.48  | 1.21 | 0.83  |
| P02340_P5 Tp53      | Cellular tur R.AM*AIYK#K                            | 23.67  | 33.74  | 0.70 | 1.43  |
| P02340_P5 Tp53      | Cellular tur R.ELNEALELK.D                          | 46.83  | 68.10  | 0.69 | 1.45  |
| P02340_P5 Tp53      | Cellular tur R.HSVVVPYEPPEAGSEYTHYK.Y               | 46.63  | 54.21  | 0.86 | 1.16  |
| P02340_P5 Tp53      | Cellular tur K.K#KPLDGEYFTLK.I                      | 7.04   | 10.44  | 0.67 | 1.48  |
| P02340_P5 Tp53      | Cellular tur K.KPLDGEYFTLK.I                        | 18.85  | 33.59  | 0.56 | 1.78  |
| P02340_P5 Tp53      | Cellular tur R.RPILITLEDSSGNLLGR.D                  | 6.52   | 146.22 | 0.04 | 22.43 |
| P02340_P5 Tp53      | Cellular tur R.RTEENFR.K                            | 3.20   | 31.63  | 0.10 | 9.89  |
| P02340_P5 Tp53      | Cellular tur K.SQHMTEVVR.R                          | 4.66   | 17.80  | 0.26 | 3.82  |
| P02340_P5 Tp53      | Cellular tur R.TEENFR.K                             | 8.38   | 49.02  | 0.17 | 5.85  |
| P02340_P5 Tp53      | Cellular tur K.TYQNGYFHLGFLQGTAK#S                  | 5.67   | 7.06   | 0.80 | 1.25  |
| P02340_P5 Tp53      | Cellular tur R.VEGNLYPEYLED.R.Q                     | 21.65  | 152.55 | 0.14 | 7.05  |
| P02340_P5 Tp53      | Cellular tur R.VSGAPAAQDPVTETPGVPAPATPWPLSSFVPSQK.T | 25.33  | 18.56  | 1.37 | 0.73  |
| P02340_P5 Tp53      | Cellular tur R.ELNEALELK.D                          | 31.08  | 42.28  | 0.73 | 1.36  |
| P02340_P5 Tp53      | Cellular tur R.HSVVVPYEPPEAGSEYTHYK.Y               | 22.91  | 42.69  | 0.54 | 1.86  |
| P02340_P5 Tp53      | Cellular tur K.K#KPLDGEYFTLK.I                      | 34.93  | 57.28  | 0.61 | 1.64  |
| P02340_P5 Tp53      | Cellular tur K.KPLDGEYFTLK.I                        | 25.25  | 31.88  | 0.79 | 1.26  |
| P02340_P5 Tp53      | Cellular tur R.RTEENFR.K                            | 1.84   | 27.79  | 0.07 | 15.10 |
| P02340_P5 Tp53      | Cellular tur R.VEGNLYPEYLED.R.Q                     | 16.77  | 100.82 | 0.17 | 6.01  |
| P02340_P5 Tp53      | Cellular tur R.VSGAPAAQDPVTETPGVPAPATPWPLSSFVPSQK.T | 22.00  | 19.58  | 1.12 | 0.89  |
| P70399_TP Tp53bp1   | Tumor supj K.AADISLDNLVEGK#R                        | 52.83  | 22.22  | 2.38 | 0.42  |
| P70399_TP Tp53bp1   | Tumor supj K.ASGTEADFALPSSR.G                       | 10.63  | 19.08  | 0.56 | 1.79  |
| P70399_TP Tp53bp1   | Tumor supj R.ASQEPSPAEDVIM*ETDLEGLAANQDRPSK.M       | 3.71   | 6.43   | 0.58 | 1.73  |
| P70399_TP Tp53bp1   | Tumor supj K.ASSSHHTSSGTSLSAIHSSGSSGR.G             | 16.12  | 33.65  | 0.48 | 2.09  |
| P70399_TP Tp53bp1   | Tumor supj R.DEPVPRDQEQTQQVQEQE.E                   | 15.96  | 47.60  | 0.34 | 2.98  |
| P70399_TP Tp53bp1   | Tumor supj K.EAQSEAPPSAPDR.A                        | 3.95   | 14.56  | 0.27 | 3.69  |
| P70399_TP Tp53bp1   | Tumor supj K.ENPVLIDVSNPEQSAVEQGDNSNSFNEHLK#E       | 6.42   | 8.31   | 1.79 | 0.56  |
| P70399_TP Tp53bp1   | Tumor supj R.EQQLGPEYAVTPTK#A                       | 12.99  | 8.31   | 1.56 | 0.64  |
| P70399_TP Tp53bp1   | Tumor supj K.ESGELYSEIK#E                           | 36.75  | 14.80  | 2.48 | 0.40  |
| P70399_TP Tp53bp1   | Tumor supj R.ETVSGPLGVEDISPSM*SPDDK#S               | 5.96   | 3.76   | 1.59 | 0.63  |
| P70399_TP Tp53bp1   | Tumor supj R.ETVSGPLGVEDISPSM*SPDDKSFTR.I           | 1.90   | 3.99   | 0.48 | 2.10  |
| P70399_TP Tp53bp1   | Tumor supj K.LLDGPTGSSEEEFLEIPPFNK#Q                | 17.06  | 7.23   | 2.36 | 0.42  |
| P70399_TP Tp53bp1   | Tumor supj K.LM*ISTSEYQSSK#M                        | 14.23  | 4.82   | 2.95 | 0.34  |
| P70399_TP Tp53bp1   | Tumor supj K.LMLSTSEYQSSK#M                         | 20.59  | 7.40   | 2.78 | 0.36  |
| P70399_TP Tp53bp1   | Tumor supj R.LREQVGLGPEYAVTPTK.A                    | 6.47   | 21.03  | 0.31 | 3.25  |
| P70399_TP Tp53bp1   | Tumor supj R.QSEQVKVPGVPM*DAAAPEDSASPVSQQR.A        | 2.48   | 5.15   | 0.48 | 2.07  |
| P70399_TP Tp53bp1   | Tumor supj R.SEALSSVLDQEEAM*DTK#E                   | 11.15  | 3.57   | 3.12 | 0.32  |
| P70399_TP Tp53bp1   | Tumor supj R.SEALSSVLDQEEAMDTK#E                    | 8.02   | 3.97   | 2.02 | 0.50  |

|                    |                                                |        |        |      |      |
|--------------------|------------------------------------------------|--------|--------|------|------|
| P70399_TP Tp53bp1  | Tumor supj R.SNISSPVTPTAASSSTTPTR.K            | 6.01   | 10.16  | 0.59 | 1.69 |
| P70399_TP Tp53bp1  | Tumor supj R.VITDYYVDGTEVER.K                  | 10.63  | 20.31  | 0.52 | 1.91 |
| Q62393_TF Tpd52    | Tumor prot K.ASAFSSVSGVITK#.K                  | 11.91  | 5.52   | 2.16 | 0.46 |
| Q62393_TF Tpd52    | Tumor prot K.LGSSIQEFK#.Q                      | 5.05   | 6.00   | 0.84 | 1.19 |
| Q62393_TF Tpd52    | Tumor prot K.SFEK#VENLK#.S                     | 7.29   | 1.92   | 3.79 | 0.26 |
| Q62393_TF Tpd52    | Tumor prot K.TSETLSQAGQK#.A                    | 7.42   | 1.33   | 5.60 | 0.18 |
| Q9CY22_TP Tpd52I2  | Tumor prot R.LGLSTLGLK#.Q                      | 27.06  | 17.00  | 1.59 | 0.63 |
| Q9CY22_TP Tpd52I2  | Tumor prot K.TQETLSQAGQK#.T                    | 23.94  | 15.70  | 1.52 | 0.66 |
| Q9CY22_TP Tpd52I2  | Tumor prot R.LGLSTLGLK#.Q                      | 64.29  | 20.10  | 3.20 | 0.31 |
| Q9CY22_TP Tpd52I2  | Tumor prot K.TSAALSTM*GSAISR.K                 | 2.89   | 6.50   | 0.44 | 2.25 |
| P17751_TP Tpi1     | Triosephosj R.HVFGSEDELIGQK#.V                 | 26.60  | 5.07   | 5.24 | 0.19 |
| P17751_TP Tpi1     | Triosephosj K.SNVNDGVAQSTR.I                   | 8.43   | 11.88  | 0.71 | 1.41 |
| P17751_TP Tpi1     | Triosephosj K.TATPQQAQEVHEK#.L                 | 14.13  | 3.78   | 3.74 | 0.27 |
| P17751_TP Tpi1     | Triosephosj K.VIADNVK#DWSK#.V                  | 10.59  | 2.01   | 5.27 | 0.19 |
| P17751_TP Tpi1     | Triosephosj K.VVLAYEPVVAIGTGK#.T               | 125.38 | 27.24  | 4.60 | 0.22 |
| E9Q450_E9 Tpm1     | Tropomyos R.AELSEGQVR.Q                        | 13.20  | 30.98  | 0.43 | 2.35 |
| E9Q450_E9 Tpm1     | Tropomyos K.ATDAEADVASLNR.R                    | 39.01  | 66.91  | 0.58 | 1.72 |
| E9Q450_E9 Tpm1     | Tropomyos K.GTEDELKYSALKDAQEK.L                | 44.78  | 15.73  | 2.85 | 0.35 |
| E9Q450_E9 Tpm1     | Tropomyos K.QLEDELVSLQK#.K                     | 60.59  | 38.66  | 1.57 | 0.64 |
| E9Q450_E9 Tpm1     | Tropomyos R.SK#QLEDELVSLQK#.K                  | 61.97  | 19.28  | 3.21 | 0.31 |
| G5E8R1_G! Tpm1     | Tropomyos R.AQK#DEEK#MEIQEIQK#.E               | 12.91  | 5.05   | 2.56 | 0.39 |
| G5E8R1_G! Tpm1     | Tropomyos K.EENLSM*HQMLDQTLLELNNM*.-           | 4.18   | 4.18   | 1.00 | 1.00 |
| G5E8R1_G! Tpm1     | Tropomyos R.ETAEADVASLNR.R                     | 4.65   | 10.08  | 0.46 | 2.17 |
| G5E8R1_G! Tpm1     | Tropomyos K.HIAEADRA.K                         | 11.97  | 22.77  | 0.53 | 1.90 |
| G5E8R1_G! Tpm1     | Tropomyos R.IQLVEELDR.A                        | 73.81  | 158.18 | 0.47 | 2.14 |
| G5E8R1_G! Tpm1     | Tropomyos R.KLVIESDLER.A                       | 34.71  | 66.12  | 0.52 | 1.90 |
| G5E8R1_G! Tpm1     | Tropomyos K.LEEAKAADSEER.G                     | 27.29  | 42.85  | 0.64 | 1.57 |
| G5E8R1_G! Tpm1     | Tropomyos K.LVIESDLER.A                        | 21.93  | 45.57  | 0.48 | 2.08 |
| G5E8R1_G! Tpm1     | Tropomyos R.IQLVEELDR.A                        | 2.47   | 17.42  | 0.14 | 7.07 |
| G5E8R1_G! Tpm1     | Tropomyos K.SIDDEEK#.V                         | 221.06 | 110.61 | 2.00 | 0.50 |
| G5E8R1_G! Tpm1     | Tropomyos K.SLEAQAK#.V                         | 105.06 | 43.78  | 2.40 | 0.42 |
| G5E8R1_G! Tpm1     | Tropomyos R.SLQEQADAEER.A                      | 23.73  | 35.80  | 0.66 | 1.51 |
| G5E8R1_G! Tpm1     | Tropomyos K.YSQK#EDK#YEEIEK#.V                 | 331.74 | 147.36 | 2.25 | 0.44 |
| G5E8R1_G! Tpm1     | Tropomyos K.YSQKEDKYEEIEK.V                    | 123.61 | 44.11  | 2.80 | 0.36 |
| G5E8R1_G! Tpm1     | Tropomyos R.LATALQK#.L                         | 42.21  | 14.01  | 3.01 | 0.33 |
| A2AIM4_A2 Tpm2     | Tropomyos K.DAQEK#LEQAEK#.K                    | 14.32  | 4.33   | 3.30 | 0.30 |
| A2AIM4_A2 Tpm2     | Tropomyos K.GTEDEVEK#YSESVK#.D                 | 6.68   | 3.15   | 2.13 | 0.47 |
| A2AIM4_A2 Tpm2     | Tropomyos K.LVILEGELER.S                       | 5.63   | 12.77  | 0.44 | 2.27 |
| A2AIM4_A2 Tpm2     | Tropomyos K.QLEEEQALQK#.K                      | 40.46  | 45.99  | 0.88 | 1.14 |
| A2AIM4_A2 Tpm2     | Tropomyos K.SLIAEEYESTK#.E                     | 21.08  | 8.04   | 2.62 | 0.38 |
| A2AIM4_A2 Tpm2     | Tropomyos K.YSESVK#DAQEK#.L                    | 8.61   | 3.79   | 2.27 | 0.44 |
| D3Z2H9_D! Tpm3-rs7 | Uncharacter R.ALDEEKM*ELQEQK#.E                | 50.52  | 21.25  | 2.38 | 0.42 |
| D3Z2H9_D! Tpm3-rs7 | Uncharacter K.HIAEADR.K                        | 15.62  | 21.03  | 0.74 | 1.35 |
| D3Z2H9_D! Tpm3-rs7 | Uncharacter K.IQVLLQQAADAEER.A                 | 28.07  | 53.75  | 0.52 | 1.91 |
| D3Z2H9_D! Tpm3-rs7 | Uncharacter R.KIQVLLQQAADAEER.A                | 13.47  | 22.63  | 0.60 | 1.68 |
| D3Z2H9_D! Tpm3-rs7 | Uncharacter R.KLVIEGDLER.T                     | 30.57  | 48.06  | 0.64 | 1.57 |
| D3Z2H9_D! Tpm3-rs7 | Uncharacter R.M*LDQTLDDLNEEM*.-                | 50.61  | 50.61  | 1.00 | 1.00 |
| D3Z2H9_D! Tpm3-rs7 | Uncharacter R.MLDQTLDDLNEEM*.-                 | 23.91  | 23.91  | 1.00 | 1.00 |
| D3Z2H9_D! Tpm3-rs7 | Uncharacter R.MLDQTLDDLNEEM*.-                 | 5.80   | 5.80   | 1.00 | 1.00 |
| D3Z2H9_D! Tpm3-rs7 | Uncharacter K.TIDDEDK#K#.C                     | 97.87  | 35.97  | 2.72 | 0.37 |
| D3Z2H9_D! Tpm3-rs7 | Uncharacter K.IQVLLQQAADAEER.A                 | 5.55   | 9.03   | 0.62 | 1.63 |
| Q6IRU2_TP Tpm4     | Tropomyos K.AEGDAALNR.R                        | 10.38  | 14.45  | 0.72 | 1.39 |
| Q6IRU2_TP Tpm4     | Tropomyos R.AEVSEK#.C                          | 97.83  | 32.63  | 3.00 | 0.33 |
| Q6IRU2_TP Tpm4     | Tropomyos R.AEQELATALQNLLEAEK#.A               | 28.52  | 10.28  | 2.77 | 0.36 |
| Q6IRU2_TP Tpm4     | Tropomyos R.EKAEQDAALNR.R                      | 10.92  | 20.11  | 0.54 | 1.84 |
| Q6IRU2_TP Tpm4     | Tropomyos R.IQLVEELDR.A                        | 11.12  | 19.35  | 0.57 | 1.74 |
| Q6IRU2_TP Tpm4     | Tropomyos R.KIQALQQAADAEER.A                   | 16.85  | 28.70  | 0.59 | 1.70 |
| Q6IRU2_TP Tpm4     | Tropomyos R.K#LVILEGELK#.R                     | 76.94  | 23.75  | 3.24 | 0.31 |
| Q6IRU2_TP Tpm4     | Tropomyos R.KLVILEGELK#.R                      | 13.71  | 19.70  | 0.70 | 1.44 |
| Q6IRU2_TP Tpm4     | Tropomyos K.LVILEGELK#.R                       | 26.63  | 8.33   | 3.20 | 0.31 |
| Q6IRU2_TP Tpm4     | Tropomyos K.M*EILEM*QLK#.E                     | 15.38  | 4.94   | 3.11 | 0.32 |
| Q6IRU2_TP Tpm4     | Tropomyos K.MEILEM*QLK#.E                      | 21.96  | 5.08   | 4.32 | 0.23 |
| Q6IRU2_TP Tpm4     | Tropomyos K.MEILEMQLK#.E                       | 28.03  | 8.79   | 3.19 | 0.31 |
| Q6IRU2_TP Tpm4     | Tropomyos K.YSEK#EDK#YEEIEK#.L                 | 105.94 | 32.86  | 3.22 | 0.31 |
| Q6IRU2_TP Tpm4     | Tropomyos R.AEQELATALQNLLEAEK#.A               | 4.65   | 3.45   | 1.34 | 0.74 |
| Q6IRU2_TP Tpm4     | Tropomyos K.IQALQQAADAEER.A                    | 9.62   | 12.21  | 0.79 | 1.27 |
| Q6IRU2_TP Tpm4     | Tropomyos R.K#LVILEGELK#.R                     | 17.75  | 5.62   | 3.16 | 0.32 |
| Q6IRU2_TP Tpm4     | Tropomyos K.LVILEGELK#.R                       | 6.28   | 8.10   | 0.78 | 1.29 |
| Q6IRU2_TP Tpm4     | Tropomyos K.YSEK#EDK#YEEIEK#.L                 | 23.04  | 12.63  | 1.82 | 0.55 |
| Q64514_TF Tpp2     | Tripeptidyl R.DPVQVAAPSDHGVGVEFPFENTENSEK#.I   | 6.44   | 1.90   | 3.39 | 0.29 |
| Q64514_TF Tpp2     | Tripeptidyl K.IIDIDTTGSGVDNTATEVEPK#.D         | 7.59   | 1.98   | 3.83 | 0.26 |
| Q64514_TF Tpp2     | Tripeptidyl K.LIK#EELQSQVLLNSFEK#.K            | 10.04  | 3.12   | 3.21 | 0.31 |
| Q64514_TF Tpp2     | Tripeptidyl K.VLIFAYK#.H                       | 18.06  | 2.50   | 7.23 | 0.14 |
| Q64514_TF Tpp2     | Tripeptidyl R.VPITAVIAAK#.V                    | 46.60  | 8.36   | 5.58 | 0.18 |
| Q64514_TF Tpp2     | Tripeptidyl K.GTLIEAFVLGGK#.A                  | 57.91  | 8.93   | 6.49 | 0.15 |
| Q64514_TF Tpp2     | Tripeptidyl R.GVLIAVLDTGVDGAPGM*QVTTDGGK#PK#.I | 12.89  | 3.77   | 3.42 | 0.29 |
| Q64514_TF Tpp2     | Tripeptidyl R.GVLIAVLDTGVDGAPGMQVTTDGGK#PK#.I  | 10.27  | 4.85   | 2.12 | 0.47 |
| Q64514_TF Tpp2     | Tripeptidyl K.IPANWNTPLGK#.Y                   | 25.95  | 5.00   | 5.19 | 0.19 |
| Q64514_TF Tpp2     | Tripeptidyl K.LIK#EELQSQVLLNSFEK#.K            | 11.99  | 2.12   | 5.65 | 0.18 |
| Q64514_TF Tpp2     | Tripeptidyl K.VLIFAYK#.H                       | 31.46  | 7.08   | 4.44 | 0.23 |
| Q64514_TF Tpp2     | Tripeptidyl R.VPITAVIAAK#.V                    | 74.83  | 10.46  | 7.16 | 0.14 |
| F6ZDS4_TP Tpr      | Nucleoprot R.NLGIQSOFTR@.A                     | 11.74  | 2.18   | 5.38 | 0.19 |
| F6ZDS4_TP Tpr      | Nucleoprot R.ASTALSNEQQAR.R                    | 2.83   | 5.09   | 0.56 | 1.80 |
| F6ZDS4_TP Tpr      | Nucleoprot R.ASTALSNEQQAR.R                    | 10.55  | 22.22  | 0.47 | 2.11 |
| F6ZDS4_TP Tpr      | Nucleoprot K.DAVQAPLNVSLNEEGK#.S               | 16.01  | 7.99   | 2.00 | 0.50 |
| F6ZDS4_TP Tpr      | Nucleoprot K.ELENANDLLSATK#.R                  | 20.86  | 22.95  | 0.91 | 1.10 |
| F6ZDS4_TP Tpr      | Nucleoprot K.GAILSEELAAMSPTAAVAK#.I            | 5.55   | 5.78   | 0.96 | 1.04 |
| F6ZDS4_TP Tpr      | Nucleoprot R.GIASTDPPTANIK#PTPVSTPSK#.V        | 30.92  | 13.35  | 2.32 | 0.43 |
| F6ZDS4_TP Tpr      | Nucleoprot K.HVEDLLTK#.L                       | 25.10  | 19.52  | 1.29 | 0.78 |
| F6ZDS4_TP Tpr      | Nucleoprot K.IIDIQEK#.V                        | 57.87  | 28.24  | 2.05 | 0.49 |
| F6ZDS4_TP Tpr      | Nucleoprot R.K#LELDLPLQEAELSEK#.S              | 58.08  | 29.27  | 1.98 | 0.50 |
| F6ZDS4_TP Tpr      | Nucleoprot K.LENSLAELQLR.E                     | 4.79   | 17.99  | 0.27 | 3.76 |
| F6ZDS4_TP Tpr      | Nucleoprot R.LEQNQQM*QAK#.V                    | 27.82  | 13.21  | 2.11 | 0.47 |
| F6ZDS4_TP Tpr      | Nucleoprot R.LK#ESAFTQLEK#.K                   | 29.84  | 14.16  | 2.11 | 0.47 |
| F6ZDS4_TP Tpr      | Nucleoprot R.LSQEVEYLEDVLR.L                   | 10.87  | 28.13  | 0.39 | 2.59 |
| F6ZDS4_TP Tpr      | Nucleoprot K.LTELYNAYVETQDQLLLEK#.Q            | 18.27  | 6.08   | 3.01 | 0.33 |
| F6ZDS4_TP Tpr      | Nucleoprot R.NQQLNQK#.D                        | 13.76  | 5.98   | 2.30 | 0.43 |
| F6ZDS4_TP Tpr      | Nucleoprot K.SLEGOVENLQK#.T                    | 54.38  | 20.28  | 2.68 | 0.37 |
| F6ZDS4_TP Tpr      | Nucleoprot R.SLQEQTVLQSELSR.L                  | 8.61   | 8.64   | 1.00 | 1.00 |
| F6ZDS4_TP Tpr      | Nucleoprot R.SSTSQVSTPAPEVIDSTEIAEK#.A         | 15.04  | 13.41  | 1.12 | 0.89 |
| F6ZDS4_TP Tpr      | Nucleoprot K.TETM*NVVM*ETNK#.M                 | 28.23  | 12.74  | 2.22 | 0.45 |
| F6ZDS4_TP Tpr      | Nucleoprot K.TLSEKETEAR.S                      | 4.87   | 8.28   | 0.59 | 1.70 |
| F6ZDS4_TP Tpr      | Nucleoprot K.TSTSNVEQYR.A                      | 9.35   | 13.66  | 0.68 | 1.46 |

|                    |                                                      |        |        |      |       |
|--------------------|------------------------------------------------------|--------|--------|------|-------|
| Q8QZ7_TP Tprkb     | EKC/KEOPS K.FGISETNTSLVIVIEDGSK#.Q                   | 4.61   | 2.77   | 1.66 | 0.60  |
| Q8QZ7_TP Tprkb     | EKC/KEOPS R.TLSTEIIFNLSPNNNISEALK#.F                 | 20.98  | 4.90   | 4.28 | 0.23  |
| Q8QZ7_TP Tprkb     | EKC/KEOPS R.VTLLLFK#.D                               | 25.67  | 5.05   | 5.08 | 0.20  |
| A2APB8_TP Tpx2     | Targeting p R.IFESGPIPK#.R                           | 12.01  | 10.27  | 1.17 | 0.85  |
| A2APB8_TP Tpx2     | Targeting p R.FDEAASYPIAQQVEAFHK#.R                  | 5.98   | 6.25   | 0.96 | 1.05  |
| Q6PFR5_TR Tra2a    | Transforme R.GYDRYEDYDR.R                            | 1.52   | 26.83  | 0.06 | 17.61 |
| Q6PFR5_TR Tra2a    | Transforme R.IRVDSITK.R                              | 14.20  | 57.95  | 0.25 | 4.08  |
| Q6PFR5_TR Tra2a    | Transforme R.YGPLSGVNVVYDQR.T                        | 30.63  | 158.68 | 0.19 | 5.18  |
| Q6PFR5_TR Tra2a    | Transforme R.GFAFVYF.R                               | 1.46   | 5.88   | 0.25 | 4.03  |
| Q6PFR5_TR Tra2a    | Transforme R.YGPLSGVNVVYDQR.T                        | 2.52   | 7.33   | 0.34 | 2.91  |
| P62996_TR Tra2b    | Transforme R.GFAFVYFENVDDAK#.E                       | 390.99 | 354.31 | 1.10 | 0.91  |
| P62996_TR Tra2b    | Transforme R.IRVDSITK.R                              | 17.18  | 65.31  | 0.26 | 3.80  |
| P62996_TR Tra2b    | Transforme R.VDFSITK#.R                              | 169.49 | 154.60 | 1.10 | 0.91  |
| P62996_TR Tra2b    | Transforme K.YGPIADVSIVYDQQR.R                       | 42.08  | 175.99 | 0.24 | 4.18  |
| P62996_TR Tra2b    | Transforme R.GFAFVYFENVDDAK#.E                       | 31.57  | 21.30  | 1.48 | 0.67  |
| P62996_TR Tra2b    | Transforme K.YGPIADVSIVYDQQR.R                       | 4.24   | 16.59  | 0.26 | 3.91  |
| Q9CQN1_TI Trap1    | Heat shock K.AFLAALQNAETS#.I                         | 12.00  | 27.21  | 0.44 | 2.27  |
| Q9CQN1_TI Trap1    | Heat shock K.AFLAALQNAETS#.I                         | 7.26   | 52.48  | 0.14 | 7.23  |
| Q3TL10_TP Trappc10 | Trafficking R.LADLLDVK#DEALVESEYFSTK#.L              | 4.37   | 3.42   | 1.28 | 0.78  |
| B2RXC1_TP Trappc11 | Trafficking R.ASEVLENLQGG#.M                         | 17.31  | 5.50   | 3.15 | 0.32  |
| B2RXC1_TP Trappc11 | Trafficking R.QFQAFGLDFDEAIK#.L                      | 7.61   | 3.69   | 2.06 | 0.48  |
| B2RXC1_TP Trappc11 | Trafficking R.VAVVLQK#.K                             | 15.89  | 5.10   | 3.12 | 0.32  |
| Q8K2L8_TP Trappc12 | Trafficking R.LLQIQDIK#.T                            | 16.30  | 3.49   | 4.67 | 0.21  |
| Q9CQP2_TI Trappc2  | Trafficking R.FAM*NPFYEPNSPIR.S                      | 2.36   | 3.56   | 0.66 | 1.51  |
| O55013_TF Trappc3  | Trafficking R.K.FVQDTLKGVDGTEIR.M                    | 10.17  | 40.90  | 0.25 | 4.02  |
| O55013_TF Trappc3  | Trafficking R.GALEM*VQM*AVEAK#.F                     | 5.26   | 5.10   | 1.03 | 0.97  |
| O55013_TF Trappc3  | Trafficking R.RIEDNLPAGEE.-                          | 8.06   | 24.45  | 0.33 | 3.03  |
| Q9E556_TP Trappc4  | Trafficking R.AGGLIYQWDSYSPR.A                       | 3.28   | 8.49   | 0.39 | 2.59  |
| Q9E556_TP Trappc4  | Trafficking R.YTADGKEVLELGNPANYPVSI.F                | 1.62   | 5.19   | 0.31 | 3.20  |
| Q9CQA1_TI Trappc5  | Trafficking R.VLDALVAR.E                             | 5.80   | 7.57   | 0.77 | 1.30  |
| Q9CQA1_TI Trappc5  | Trafficking R.K.VGALLVFK#.G                          | 41.00  | 21.00  | 1.95 | 0.51  |
| E9PWG2_E Trappc8   | Protein Tra R.ASDEQIPDPVSYLQK#.N                     | 5.11   | 1.99   | 2.57 | 0.39  |
| Q99PP9_TF Trim16   | Tripartite n R.VLDGEEPEK#PAGSSVEAPE.-                | 5.77   | 5.12   | 1.13 | 0.89  |
| Q64127_TI Trim24   | Transcriptii K.FPTQISLAQLR.L                         | 1.23   | 8.26   | 0.15 | 6.72  |
| Q64127_TI Trim24   | Transcriptii R.YQFIEEAFQK#.V                         | 8.74   | 7.77   | 1.12 | 0.89  |
| Q61510_TF Trim25   | E3 ubiquiti K.ASAAQPDVSGVK#.A                        | 16.57  | 16.43  | 1.01 | 0.99  |
| Q61510_TF Trim25   | E3 ubiquiti K.AVIDAAETSSLR.K                         | 5.50   | 9.72   | 0.57 | 1.77  |
| Q62318_TI Trim28   | Transcriptii K.DIVENYFMR.D                           | 10.01  | 31.24  | 0.32 | 3.12  |
| Q62318_TI Trim28   | Transcriptii K.DIVENYFMR.D                           | 4.00   | 20.87  | 0.19 | 5.22  |
| Q62318_TI Trim28   | Transcriptii R.FASWALESDNNTALLSK.K                   | 17.19  | 16.73  | 1.03 | 0.97  |
| Q62318_TI Trim28   | Transcriptii K.FSVAVLEPPPLNLPAGLSQELSGPDDGP.-        | 22.25  | 22.25  | 1.00 | 1.00  |
| Q62318_TI Trim28   | Transcriptii K.IVAERPGTNSGPGPM*APPR.A                | 2.13   | 33.82  | 0.06 | 15.90 |
| Q62318_TI Trim28   | Transcriptii K.IVAERPGTNSGPGPM*APPR.A                | 2.49   | 28.12  | 0.09 | 11.31 |
| Q62318_TI Trim28   | Transcriptii R.LDLDLTSDSQPFVK#.V                     | 46.02  | 55.84  | 0.82 | 1.21  |
| Q62318_TI Trim28   | Transcriptii K.LSPPYSSPQEFADQVGR.M                   | 3.27   | 19.24  | 0.17 | 5.88  |
| Q62318_TI Trim28   | Transcriptii K.M*AILQIMK.E                           | 11.46  | 16.56  | 0.69 | 1.44  |
| Q62318_TI Trim28   | Transcriptii K.M*AILQIMK.E                           | 11.15  | 9.83   | 1.13 | 0.88  |
| Q62318_TI Trim28   | Transcriptii K.M*IVDPVEPHGEM*K.F                     | 24.47  | 31.37  | 0.78 | 1.28  |
| Q62318_TI Trim28   | Transcriptii R.M*NDAFGDTK.F                          | 23.16  | 16.35  | 1.42 | 0.71  |
| Q62318_TI Trim28   | Transcriptii R.SGEGEVGLLR.K                          | 17.73  | 101.74 | 0.17 | 5.74  |
| Q62318_TI Trim28   | Transcriptii K.VFPSTTEDYNLVIER.G                     | 2.67   | 8.34   | 0.32 | 3.12  |
| Q62318_TI Trim28   | Transcriptii K.LSPPYSSPQEFADQVGR.M                   | 1.79   | 8.15   | 0.22 | 4.55  |
| Q62318_TI Trim28   | Transcriptii K.ADVQSIGLQR.F                          | 104.76 | 103.77 | 1.01 | 0.99  |
| Q62318_TI Trim28   | Transcriptii K.DHQYQFLEDAVR.N                        | 9.85   | 43.45  | 0.23 | 4.41  |
| Q62318_TI Trim28   | Transcriptii K.DIVENYFMR.D                           | 71.28  | 175.60 | 0.41 | 2.46  |
| Q62318_TI Trim28   | Transcriptii K.DIVENYFMR.D                           | 14.18  | 43.59  | 0.33 | 3.07  |
| Q62318_TI Trim28   | Transcriptii K.EEDGSLSDGADSTGVVAK#.L                 | 15.56  | 18.83  | 0.83 | 1.21  |
| Q62318_TI Trim28   | Transcriptii R.FASWALESDNNTALLSK#.K                  | 131.27 | 105.79 | 1.24 | 0.81  |
| Q62318_TI Trim28   | Transcriptii R.FASWALESDNNTALLSK.K                   | 73.72  | 64.46  | 1.14 | 0.87  |
| Q62318_TI Trim28   | Transcriptii K.FQWDLNAWTK#.S                         | 227.95 | 195.10 | 1.17 | 0.86  |
| Q62318_TI Trim28   | Transcriptii R.GAAAAAQAGTVPVPGAPPLPGMAIVK.E          | 10.62  | 6.15   | 1.73 | 0.58  |
| Q62318_TI Trim28   | Transcriptii K.IVAERPGTNSGPGPM*APPR.A                | 9.99   | 231.33 | 0.04 | 23.16 |
| Q62318_TI Trim28   | Transcriptii K.IVAERPGTNSGPGPM*APPR.A                | 10.10  | 147.53 | 0.07 | 14.61 |
| Q62318_TI Trim28   | Transcriptii K.KLIYFQLHR.A                           | 10.28  | 31.38  | 0.33 | 3.05  |
| Q62318_TI Trim28   | Transcriptii R.K#LLASLVK#.R                          | 271.27 | 223.92 | 1.21 | 0.83  |
| Q62318_TI Trim28   | Transcriptii R.LDLDLTSDSQPFVK#.V                     | 355.80 | 327.04 | 1.09 | 0.92  |
| Q62318_TI Trim28   | Transcriptii R.LGDGK#HATLQK#.N                       | 12.45  | 8.05   | 1.55 | 0.65  |
| Q62318_TI Trim28   | Transcriptii K.LIYFQLHR.A                            | 16.19  | 26.29  | 0.62 | 1.62  |
| Q62318_TI Trim28   | Transcriptii K.LLASLVK#.R                            | 167.17 | 131.27 | 1.27 | 0.79  |
| Q62318_TI Trim28   | Transcriptii K.LSPPYSSPQEFADQVGR.M                   | 37.23  | 175.94 | 0.21 | 4.73  |
| Q62318_TI Trim28   | Transcriptii K.LTEDKADVQSIGLQR.F                     | 8.79   | 37.38  | 0.24 | 4.25  |
| Q62318_TI Trim28   | Transcriptii K.LTEDKADVQSIGLQR.F                     | 52.49  | 187.91 | 0.28 | 3.58  |
| Q62318_TI Trim28   | Transcriptii K.M*AILQIMK#.E                          | 104.12 | 90.90  | 1.15 | 0.87  |
| Q62318_TI Trim28   | Transcriptii K.M*AILQIMK#.E                          | 53.13  | 45.24  | 1.17 | 0.85  |
| Q62318_TI Trim28   | Transcriptii K.M*AILQIMK#.E                          | 56.65  | 62.25  | 0.91 | 1.10  |
| Q62318_TI Trim28   | Transcriptii K.M*AILQIMK#.E                          | 50.63  | 58.46  | 0.87 | 1.15  |
| Q62318_TI Trim28   | Transcriptii K.M*IVDPVEPHGEM*K#.F                    | 135.35 | 149.16 | 0.91 | 1.10  |
| Q62318_TI Trim28   | Transcriptii K.M*IVDPVEPHGEM*K#.F                    | 39.81  | 34.32  | 1.16 | 0.86  |
| Q62318_TI Trim28   | Transcriptii K.MIVDPVEPHGEM*K#.F                     | 59.68  | 49.20  | 1.21 | 0.82  |
| Q62318_TI Trim28   | Transcriptii R.MNDAFGDTK#.F                          | 65.27  | 48.00  | 1.36 | 0.74  |
| Q62318_TI Trim28   | Transcriptii R.M*NDAFGDTK#.F                         | 90.76  | 84.88  | 1.07 | 0.94  |
| Q62318_TI Trim28   | Transcriptii K.QSGSSQPM*EVQEGYFGSDDPYSSAEPHVSVMK#.R  | 21.83  | 12.18  | 1.79 | 0.56  |
| Q62318_TI Trim28   | Transcriptii K.QSGSSQPM*EVQEGYFGSDDPYSSAEPHVSVMK#.R  | 21.83  | 12.18  | 1.79 | 0.56  |
| Q62318_TI Trim28   | Transcriptii K.QSGSSQPM*EVQEGYFGSDDPYSSAEPHVSVM*K#.S | 5.04   | 24.09  | 0.21 | 4.78  |
| Q62318_TI Trim28   | Transcriptii K.QSGSSQPM*EVQEGYFGSDDPYSSAEPHVSVM*K#.S | 2.51   | 6.29   | 0.40 | 2.50  |
| Q62318_TI Trim28   | Transcriptii K.SAEAFGK#.I                            | 155.56 | 150.26 | 1.04 | 0.97  |
| Q62318_TI Trim28   | Transcriptii R.SGEGEVGLLR.K                          | 84.41  | 358.37 | 0.24 | 4.25  |
| Q62318_TI Trim28   | Transcriptii K.VFPSTTEDYNLVIER.G                     | 32.19  | 127.81 | 0.25 | 3.97  |
| Q62318_TI Trim28   | Transcriptii R.VLVNDAQK#.V                           | 341.81 | 313.27 | 1.09 | 0.92  |
| Q62318_TI Trim28   | Transcriptii K.VTEGQQR.L                             | 4.75   | 15.12  | 0.31 | 3.18  |
| Q62318_TI Trim28   | Transcriptii K.DHQYQFLEDAVR.N                        | 3.38   | 13.73  | 0.25 | 4.06  |
| Q62318_TI Trim28   | Transcriptii K.DIVENYFMR.D                           | 4.44   | 26.01  | 0.17 | 5.86  |
| Q62318_TI Trim28   | Transcriptii K.EEDGSLSDGADSTGVVAK.L                  | 4.90   | 6.76   | 0.72 | 1.38  |
| Q62318_TI Trim28   | Transcriptii R.FASWALESDNNTALLSK#.K                  | 22.01  | 22.29  | 0.99 | 1.01  |
| Q62318_TI Trim28   | Transcriptii K.FQWDLNAWTK#.S                         | 21.22  | 19.26  | 1.10 | 0.91  |
| Q62318_TI Trim28   | Transcriptii R.K#LLASLVK#.R                          | 30.37  | 26.24  | 1.16 | 0.86  |
| Q62318_TI Trim28   | Transcriptii R.LDLDLTSDSQPFVK#.V                     | 64.24  | 70.66  | 0.91 | 1.10  |
| Q62318_TI Trim28   | Transcriptii K.LLASLVK#.R                            | 22.74  | 23.12  | 0.98 | 1.02  |
| Q62318_TI Trim28   | Transcriptii K.LSPPYSSPQEFADQVGR.M                   | 6.24   | 30.62  | 0.20 | 4.91  |
| Q62318_TI Trim28   | Transcriptii K.LTEDKADVQSIGLQR.F                     | 15.98  | 56.68  | 0.28 | 3.55  |
| Q62318_TI Trim28   | Transcriptii K.M*AILQIMK#.E                          | 20.51  | 13.54  | 1.52 | 0.66  |
| Q62318_TI Trim28   | Transcriptii R.M*NDAFGDTK#.F                         | 14.85  | 14.55  | 1.02 | 0.98  |
| Q62318_TI Trim28   | Transcriptii R.SGEGEVGLLR.K                          | 12.86  | 66.48  | 0.19 | 5.17  |

|                   |                                                |         |         |      |       |
|-------------------|------------------------------------------------|---------|---------|------|-------|
| Q62318_T1 Trim28  | Transcriptin K.VFPGSTEDYNLIVIER.G              | 4.65    | 18.72   | 0.25 | 4.02  |
| Q62318_T1 Trim28  | Transcriptin R.VLVNDQAK#.V                     | 69.91   | 66.45   | 1.05 | 0.95  |
| Q9R1R2_TF Trim3   | Tripartite n R.QALVGPQASLVTTK#.D               | 8.38    | 5.75    | 1.46 | 0.69  |
| Q9R1R2_TF Trim3   | Tripartite n K.VLQQLDITLR.Q                    | 4.64    | 11.15   | 0.42 | 2.40  |
| Q99PP7_TF Trim33  | E3 ubiquitin K.LLQQQNDITGLSR.Q                 | 3.45    | 19.38   | 0.18 | 5.61  |
| Q99PP7_TF Trim33  | E3 ubiquitin K.LLQQQNDITGLSR.Q                 | 2.75    | 10.16   | 0.27 | 3.69  |
| Q8CJ53_C11 Trip10 | Cdc42-inte R.HTQWGLDLDLQ#VVK#.F                | 8.32    | 4.26    | 1.96 | 0.51  |
| Q8CJ53_C11 Trip10 | Cdc42-inte R.IAETLGNIER.L                      | 16.34   | 14.97   | 1.09 | 0.92  |
| Q8CJ53_C11 Trip10 | Cdc42-inte R.LDQDINATK#.A                      | 32.30   | 12.65   | 2.55 | 0.39  |
| Q8CJ53_C11 Trip10 | Cdc42-inte K.VAAESVDAK#.N                      | 20.24   | 15.64   | 1.29 | 0.77  |
| G5E870_TR Trip12  | E3 ubiquitin K.IDPLALVQAIER.Y                  | 2.98    | 11.37   | 0.26 | 3.81  |
| G5E870_TR Trip12  | E3 ubiquitin R.LVDNFQHEENLLQQVASK#.D           | 9.22    | 5.80    | 1.59 | 0.63  |
| G5E870_TR Trip12  | E3 ubiquitin R.SSAVVVDAIPVLEK#.L               | 8.48    | 7.45    | 1.14 | 0.88  |
| G5E870_TR Trip12  | E3 ubiquitin R.EGQOSFHLS.-                     | 26.05   | 26.05   | 1.00 | 1.00  |
| G5E870_TR Trip12  | E3 ubiquitin K.EIIPTEFINSK#.L                  | 18.52   | 8.66    | 2.14 | 0.47  |
| G5E870_TR Trip12  | E3 ubiquitin R.FLHVFFSSPLGEEPVG.R.V            | 13.13   | 10.54   | 1.25 | 0.80  |
| G5E870_TR Trip12  | E3 ubiquitin K.IDPLALVQAIER.Y                  | 14.09   | 36.31   | 0.39 | 2.58  |
| G5E870_TR Trip12  | E3 ubiquitin R.IIEAAHQVGEDEISLTLGR.V           | 3.77    | 68.35   | 0.06 | 18.14 |
| G5E870_TR Trip12  | E3 ubiquitin R.LLDTNPEINQSDSQDSR.V             | 6.41    | 13.24   | 0.48 | 2.07  |
| G5E870_TR Trip12  | E3 ubiquitin R.LVDLPLGLPFYK#.W                 | 59.57   | 35.34   | 1.69 | 0.59  |
| G5E870_TR Trip12  | E3 ubiquitin R.LVDNFQHEENLLQQVASK#.D           | 47.00   | 21.74   | 2.16 | 0.46  |
| G5E870_TR Trip12  | E3 ubiquitin K.M*ADPSEQNETVSSAAR.T             | 4.23    | 6.15    | 0.69 | 1.45  |
| G5E870_TR Trip12  | E3 ubiquitin K.NHAVSSHASIM*LSQDLK#.I           | 5.94    | 2.11    | 2.81 | 0.36  |
| G5E870_TR Trip12  | E3 ubiquitin R.QFSVQAEERESTDESINPLGR.A         | 1.92    | 5.81    | 0.33 | 3.02  |
| G5E870_TR Trip12  | E3 ubiquitin K.SETSK#HGPSGLQAK#.L              | 8.45    | 18.05   | 0.47 | 2.14  |
| G5E870_TR Trip12  | E3 ubiquitin R.SLNPLTLVR.K                     | 5.13    | 15.10   | 0.34 | 2.95  |
| G5E870_TR Trip12  | E3 ubiquitin R.SSAVVVDAIPVLEK#.L               | 51.01   | 23.17   | 2.20 | 0.45  |
| G5E870_TR Trip12  | E3 ubiquitin K.SSFLSLNPK#.T                    | 21.97   | 18.60   | 1.18 | 0.85  |
| G5E870_TR Trip12  | E3 ubiquitin K.TLFGVLVEYSSSAGPAVR.H            | 6.55    | 15.46   | 0.42 | 2.36  |
| Q3UA06_P1 Trip13  | Pachytene i R.HSNVLLTTSNITEK#.I                | 10.60   | 2.58    | 4.11 | 0.24  |
| Q3UA06_P1 Trip13  | Pachytene i R.NVQSVIVDTLTK#.A                  | 16.35   | 4.18    | 3.91 | 0.26  |
| Q3UA06_P1 Trip13  | Pachytene i K.QYIGPPSAIAIFK#.I                 | 14.14   | 7.20    | 1.96 | 0.51  |
| Q3UA06_P1 Trip13  | Pachytene i K.SHLLDVYMTTLFSDK#.N               | 6.58    | 2.29    | 2.87 | 0.35  |
| Q3UA06_P1 Trip13  | Pachytene i R.VVNAVLTQDQK#.R                   | 6.90    | 2.24    | 3.08 | 0.33  |
| Q3UA06_P1 Trip13  | Pachytene i R.NVQSVIVDTLTK#.A                  | 15.53   | 4.57    | 3.39 | 0.29  |
| Q3UA06_P1 Trip13  | Pachytene i K.QYIGPPSAIAIFK#.I                 | 9.05    | 5.95    | 1.52 | 0.66  |
| Q9QXN3_T1 Trip4   | Activating s K.GQFIEDLTK#.W                    | 9.27    | 4.59    | 2.02 | 0.49  |
| Q9QXN3_T1 Trip4   | Activating s R.LDFTIQAIASGLNQLVTLDR.S          | 2.51    | 7.06    | 0.36 | 2.81  |
| Q9QXN3_T1 Trip4   | Activating s R.NKHQVEVPAPPEPDVAVEVK#.T         | 14.01   | 14.92   | 0.94 | 1.07  |
| Q8C1Z8_T1 Trmt10a | tRNA methi K.KEDLVTSYSDPNVLK#.D                | 16.95   | 6.81    | 2.49 | 0.40  |
| Q8C1Z8_T1 Trmt10a | tRNA methi R.VDGAEPISK#.R                      | 17.85   | 3.27    | 5.45 | 0.18  |
| Q9DCG9_T1 Trmt112 | Multifuncti R.GIPNM*LNDEETET.-                 | 24.97   | 24.97   | 1.00 | 1.00  |
| Q9DCG9_T1 Trmt112 | Multifuncti R.INPVEFNPEFVAR.M                  | 29.83   | 72.86   | 0.41 | 2.44  |
| Q9DCG9_T1 Trmt112 | Multifuncti R.LQATEVR.I                        | 1058.82 | 5964.56 | 0.18 | 5.63  |
| A2RSY6_TR Trmt11  | TRMT1-like R.NLGIIVSTSDISSLYAK#.A              | 13.45   | 7.45    | 1.80 | 0.55  |
| A2RSY6_TR Trmt11  | TRMT1-like K.TTDDTTDIYSAQGK#.R                 | 8.21    | 5.73    | 1.43 | 0.70  |
| A2RSY6_TR Trmt11  | TRMT1-like K.VTINDLNENSVTLIQK#.N               | 6.02    | 2.52    | 2.39 | 0.42  |
| A2RSY6_TR Trmt11  | TRMT1-like R.NLGIIVSTSDISSLYAK#.A              | 15.19   | 9.18    | 1.66 | 0.60  |
| A2RSY6_TR Trmt11  | TRMT1-like K.TTDDTTDIYSAQGK#.R                 | 12.71   | 7.81    | 1.63 | 0.61  |
| A2RSY6_TR Trmt11  | TRMT1-like K.VTINDLNENSVTLIQK#.N               | 10.26   | 5.12    | 2.01 | 0.50  |
| A2RSY6_TR Trmt11  | TRMT1-like K.VVDEEKEEGDALEDGTLGDIQVTR.M        | 3.19    | 7.60    | 0.42 | 2.38  |
| Q8BNV1_T1 Trmt2a  | tRNA (uraci K.AFQEFIR.S                        | 3.02    | 7.46    | 0.41 | 2.47  |
| Q8BNV1_T1 Trmt2a  | tRNA (uraci K.LSSEEVAGLK#.A                    | 12.54   | 10.01   | 1.25 | 0.80  |
| Q8BNV1_T1 Trmt2a  | tRNA (uraci K.AFQEFIR.S                        | 4.36    | 9.28    | 0.47 | 2.13  |
| Q8BNV1_T1 Trmt2a  | tRNA (uraci K.ASGVTSLVVEEQR.K                  | 1.86    | 6.73    | 0.28 | 3.62  |
| O08848_R1 Trove2  | 60 kDa SS-A.R.LSHLKHPSSEGLAIVTK#.Y             | 9.20    | 2.04    | 4.51 | 0.22  |
| Q925H1_T1 Trps1   | Zinc finger I R.LNPEALQAEQLNK.Q                | 7.66    | 14.57   | 0.53 | 1.90  |
| Q80YV3_TR Trrap   | Transforma R.LVEDNPSSLVLEIYK#.Q                | 6.46    | 4.25    | 1.52 | 0.66  |
| Q8R3W5_S Tsen15   | tRNA-splici K.LTDGFM*LPDPQNLISLR.R             | 2.12    | 5.51    | 0.38 | 2.60  |
| Q8BMZ5_S Tsen34   | tRNA-splici K.FGGDFLVYVPGDPLR.F                | 2.10    | 9.11    | 0.23 | 4.34  |
| Q61187_TS Tsg101  | Tumor susc R.ASLISAVSDK#.L                     | 36.30   | 14.69   | 2.47 | 0.40  |
| Q61187_TS Tsg101  | Tumor susc R.DGTISDETIR.A                      | 7.33    | 22.39   | 0.33 | 3.06  |
| Q61187_TS Tsg101  | Tumor susc R.ELVNLGTIPVR.Y                     | 11.70   | 35.53   | 0.33 | 3.04  |
| Q61187_TS Tsg101  | Tumor susc R.GVIDLDFLKH.H                      | 28.14   | 15.19   | 1.85 | 0.54  |
| Q61187_TS Tsg101  | Tumor susc R.LDQEAEDVK#NIELLK#.K               | 37.17   | 21.51   | 1.73 | 0.58  |
| Q62348_TS Tsn     | Translin OS R.EILTLLQGVQGTGFQDIPK#.R           | 10.31   | 4.27    | 2.41 | 0.41  |
| Q5SWD9_T Tsr1     | Pre-rRNA-p R.AYLFAHVADFPSEESDLVGLTK#.I         | 12.85   | 6.78    | 1.89 | 0.53  |
| Q5SWD9_T Tsr1     | Pre-rRNA-p R.IFQFQNFVNT.R                      | 3.94    | 8.13    | 0.48 | 2.07  |
| Q5SWD9_T Tsr1     | Pre-rRNA-p R.ISLPEAFK#.L                       | 19.55   | 4.69    | 4.16 | 0.24  |
| Q8CD92_T1 Ttc27   | Tetratricop R.AM*R@QTOALADQFEDK.A              | 2.93    | 2.25    | 1.30 | 0.77  |
| Q8CD92_T1 Ttc27   | Tetratricop K.NLELNDDTVLNEIK#.L                | 16.51   | 5.19    | 3.18 | 0.31  |
| Q8CD92_T1 Ttc27   | Tetratricop R.SPQLFALAK#.N                     | 19.72   | 5.85    | 3.37 | 0.30  |
| F8VPK0_F8 Ttc37   | Protein Ttc K.VALVDFLDGK#.A                    | 13.23   | 3.97    | 3.33 | 0.30  |
| F8VPK0_F8 Ttc37   | Protein Ttc K.AALNELLK#.H                      | 24.93   | 17.55   | 1.42 | 0.70  |
| F8VPK0_F8 Ttc37   | Protein Ttc K.ASELNPDSYVFK#.V                  | 25.26   | 6.54    | 3.86 | 0.26  |
| F8VPK0_F8 Ttc37   | Protein Ttc K.AVDYEQALGYFTR.A                  | 6.01    | 6.99    | 0.86 | 1.16  |
| F8VPK0_F8 Ttc37   | Protein Ttc K.AVHSNPADPALWLLSR.I               | 3.62    | 9.47    | 0.38 | 2.62  |
| F8VPK0_F8 Ttc37   | Protein Ttc K.IM*EDLVTSYDPAEAHALEGR.V          | 7.39    | 9.23    | 0.80 | 1.25  |
| F8VPK0_F8 Ttc37   | Protein Ttc K.SNPDQPAVILLR.Q                   | 11.07   | 15.19   | 0.73 | 1.37  |
| F8VPK0_F8 Ttc37   | Protein Ttc K.VAAIQQLGR.Y                      | 11.08   | 10.74   | 1.03 | 0.97  |
| F8VPK0_F8 Ttc37   | Protein Ttc K.VALVDFLDGK#.A                    | 56.13   | 15.13   | 3.71 | 0.27  |
| F8VPK0_F8 Ttc37   | Protein Ttc R.YSEAIQQLIK#.M                    | 10.76   | 1.58    | 6.79 | 0.15  |
| Q8BY4_TT Ttc39b   | Tetratricop K.AAILSM*LPREEVAATK#.E             | 5.94    | 2.78    | 2.13 | 0.47  |
| Q8BY4_TT Ttc39b   | Tetratricop K.AAILSM*LPREEVAATK#.E             | 13.15   | 4.36    | 3.02 | 0.33  |
| Q5NC05_T1 Ttf2    | Transcriptin K.QVLSGSEGPVTK#.L                 | 7.80    | 6.57    | 1.19 | 0.84  |
| Q5NC05_T1 Ttf2    | Transcriptin K.VSSLLAEALQK#.G                  | 10.74   | 6.06    | 1.77 | 0.56  |
| A2ASS6_T1 Ttn     | Titin OS-Mi K.DVTVPEK#.R                       | 34.04   | 17.04   | 2.00 | 0.50  |
| P68369_TB Tuba1a  | Tubulin alp R.AFVHWVYVGGEM*EEGEFSEAR.E         | 78.42   | 177.68  | 0.44 | 2.27  |
| P68369_TB Tuba1a  | Tubulin alp R.AFVHWVYVGGEM*EEGEFSEAR.E         | 6.60    | 17.51   | 0.38 | 2.65  |
| P68369_TB Tuba1a  | Tubulin alp R.AFVHWVYVGGEMEEGEFSEAR.E          | 38.48   | 119.02  | 0.32 | 3.09  |
| P68369_TB Tuba1a  | Tubulin alp R.AFVFDLEPTVIDEVR.T                | 73.21   | 212.50  | 0.34 | 2.90  |
| P68369_TB Tuba1a  | Tubulin alp R.AFVFDLEPTVIDEVR.T                | 196.32  | 604.81  | 0.32 | 3.08  |
| P68369_TB Tuba1a  | Tubulin alp K.DVNAEAIATIK#.T                   | 585.18  | 415.56  | 1.41 | 0.71  |
| P68369_TB Tuba1a  | Tubulin alp K.DYEEVGVDSVEGEEGEEGEE.-           | 79.68   | 79.68   | 1.00 | 1.00  |
| P68369_TB Tuba1a  | Tubulin alp K.EDAANNYAR.G                      | 30.73   | 86.07   | 0.36 | 2.80  |
| P68369_TB Tuba1a  | Tubulin alp R.EDMAALEK#.D                      | 115.24  | 70.15   | 1.64 | 0.61  |
| P68369_TB Tuba1a  | Tubulin alp R.EDM*AALEK#.D                     | 247.23  | 179.95  | 1.37 | 0.73  |
| P68369_TB Tuba1a  | Tubulin alp R.EDM*AALEK#DYEEVGVDSVEGEEGEEGEE.- | 19.20   | 7.88    | 2.44 | 0.41  |
| P68369_TB Tuba1a  | Tubulin alp K.EIIDLVLDL.R                      | 113.37  | 356.97  | 0.32 | 3.15  |
| P68369_TB Tuba1a  | Tubulin alp R.FDGALNVLDTEFQTNLNPYPR.I          | 68.33   | 233.92  | 0.29 | 3.42  |
| P68369_TB Tuba1a  | Tubulin alp K.FDLM*YAK#.R                      | 220.84  | 132.79  | 1.66 | 0.60  |
| P68369_TB Tuba1a  | Tubulin alp K.FDLMYAK#.R                       | 80.34   | 59.40   | 1.35 | 0.74  |
| P68369_TB Tuba1a  | Tubulin alp R.IHFPLATYAPVISAQK#.A              | 352.94  | 248.27  | 1.42 | 0.70  |



|                  |                                               |        |        |      |       |
|------------------|-----------------------------------------------|--------|--------|------|-------|
| P68369_TB Tuba1a | Tubulin alp R.LDHK#FDLM*YAK#.R                | 127.66 | 85.94  | 1.49 | 0.67  |
| P68369_TB Tuba1a | Tubulin alp R.LDHK#FDLM*YAK#.R                | 3.27   | 59.63  | 0.05 | 18.26 |
| P68369_TB Tuba1a | Tubulin alp R.LDHK#FDLM*YAK#.R                | 85.62  | 56.65  | 1.51 | 0.66  |
| P68369_TB Tuba1a | Tubulin alp R.LIGQVSSITASLR.F                 | 15.35  | 37.55  | 0.41 | 2.45  |
| P68369_TB Tuba1a | Tubulin alp R.LSVDYGK#.K                      | 370.44 | 268.51 | 1.38 | 0.72  |
| P68369_TB Tuba1a | Tubulin alp R.LSVDYGK#.S                      | 214.77 | 100.31 | 2.14 | 0.47  |
| P68369_TB Tuba1a | Tubulin alp K.TIGGGDDSFNTFFSETGAGK#.H         | 521.68 | 317.27 | 1.64 | 0.61  |
| P68369_TB Tuba1a | Tubulin alp K.VGINYQPPTVVPDGLAK#.V            | 371.93 | 246.67 | 1.51 | 0.66  |
| P68369_TB Tuba1a | Tubulin alp K.VGINYQPPTVVPDGLAK#.V            | 71.53  | 57.88  | 1.24 | 0.81  |
| P68369_TB Tuba1a | Tubulin alp R.AFVHWYVYVGGM*EEGEFSEAR.E        | 7.63   | 23.18  | 0.33 | 3.04  |
| P68369_TB Tuba1a | Tubulin alp R.AFVHWYVYVGGM*EEGEFSEAR.E        | 2.77   | 8.50   | 0.33 | 3.07  |
| P68369_TB Tuba1a | Tubulin alp R.AFVVDLEPTVIDEVR.T               | 26.26  | 115.73 | 0.23 | 4.41  |
| P68369_TB Tuba1a | Tubulin alp K.DVNAAIATIK#.T                   | 95.70  | 72.78  | 1.31 | 0.76  |
| P68369_TB Tuba1a | Tubulin alp K.DYEEVGDSVEGEGEEGEEY.-           | 8.67   | 8.67   | 1.00 | 1.00  |
| P68369_TB Tuba1a | Tubulin alp R.EDMAALEK#.D                     | 11.65  | 7.59   | 1.53 | 0.65  |
| P68369_TB Tuba1a | Tubulin alp K.EIIDLVLDL.R                     | 77.69  | 38.49  | 2.02 | 0.50  |
| P68369_TB Tuba1a | Tubulin alp R.LDHK#FDLM*YAK#.R                | 9.18   | 6.46   | 1.42 | 0.70  |
| P68369_TB Tuba1a | Tubulin alp K.TIGGGDDSFNTFFSETGAGK#.H         | 69.15  | 58.72  | 1.18 | 0.85  |
| P68369_TB Tuba1a | Tubulin alp K.VGINYQPPTVVPDGLAK#.V            | 105.76 | 90.33  | 1.17 | 0.85  |
| P68369_TB Tuba1a | Tubulin alp R.AFVHWYVYVGGM*EEGEFSEAR.E        | 18.96  | 50.14  | 0.38 | 2.64  |
| P68369_TB Tuba1a | Tubulin alp R.AFVHWYVYVGGM*EEGEFSEAR.E        | 3.93   | 5.35   | 0.73 | 1.36  |
| P68369_TB Tuba1a | Tubulin alp R.AFVHWYVYVGGM*EEGEFSEAR.E        | 12.97  | 35.20  | 0.37 | 2.71  |
| P68369_TB Tuba1a | Tubulin alp R.AFVVDLEPTVIDEVR.T               | 131.00 | 342.80 | 0.38 | 2.62  |
| P68369_TB Tuba1a | Tubulin alp K.DVNAAIATIK#.T                   | 463.42 | 376.11 | 1.23 | 0.81  |
| P68369_TB Tuba1a | Tubulin alp K.DYEEVGDSVEGEGEEGEEY.-           | 21.22  | 21.22  | 1.00 | 1.00  |
| P68369_TB Tuba1a | Tubulin alp R.EDMAALEK#.D                     | 40.97  | 19.57  | 2.09 | 0.48  |
| P68369_TB Tuba1a | Tubulin alp K.EIIDLVLDL.R                     | 103.33 | 255.61 | 0.40 | 2.47  |
| P68369_TB Tuba1a | Tubulin alp R.FDGLNVDLTFEQTLNLPYPR.I          | 56.31  | 129.80 | 0.43 | 2.31  |
| P68369_TB Tuba1a | Tubulin alp K.FDLM*YAK#.R                     | 83.68  | 43.81  | 1.91 | 0.52  |
| P68369_TB Tuba1a | Tubulin alp K.FDLM*YAK#.R                     | 47.62  | 24.02  | 1.98 | 0.50  |
| P68369_TB Tuba1a | Tubulin alp R.IHFPLATYAPVISAEL#.A             | 327.96 | 201.15 | 1.63 | 0.61  |
| P68369_TB Tuba1a | Tubulin alp R.LDHK#FDLM*YAK#.R                | 81.54  | 38.76  | 2.10 | 0.48  |
| P68369_TB Tuba1a | Tubulin alp R.LDHK#FDLM*YAK#.R                | 70.43  | 27.75  | 2.54 | 0.39  |
| P68369_TB Tuba1a | Tubulin alp R.LIGQVSSITASLR.F                 | 9.29   | 21.04  | 0.44 | 2.26  |
| P68369_TB Tuba1a | Tubulin alp R.LSVDYGK#.K                      | 162.27 | 99.87  | 1.62 | 0.62  |
| P68369_TB Tuba1a | Tubulin alp R.LSVDYGK#.S                      | 174.69 | 82.11  | 2.13 | 0.47  |
| P68369_TB Tuba1a | Tubulin alp R.QLFHPPEQLITGK#.E                | 43.55  | 31.94  | 1.36 | 0.73  |
| P68369_TB Tuba1a | Tubulin alp K.TIGGGDDSFNTFFSETGAGK#.H         | 270.18 | 154.49 | 1.75 | 0.57  |
| P68369_TB Tuba1a | Tubulin alp K.VGINYQPPTVVPDGLAK#.V            | 284.25 | 173.07 | 1.64 | 0.61  |
| P68369_TB Tuba1a | Tubulin alp R.AFVHWYVYVGGM*EEGEFSEAR.E        | 41.93  | 102.13 | 0.41 | 2.44  |
| P68369_TB Tuba1a | Tubulin alp R.AFVHWYVYVGGM*EEGEFSEAR.E        | 8.07   | 13.90  | 0.58 | 1.72  |
| P68369_TB Tuba1a | Tubulin alp R.AFVVDLEPTVIDEVR.T               | 268.05 | 675.75 | 0.40 | 2.52  |
| P68369_TB Tuba1a | Tubulin alp K.DVNAAIATIK#.T                   | 871.92 | 532.74 | 1.64 | 0.61  |
| P68369_TB Tuba1a | Tubulin alp K.DYEEVGDSVEGEGEEGEEY.-           | 58.06  | 58.06  | 1.00 | 1.00  |
| P68369_TB Tuba1a | Tubulin alp K.EDANNYAR.G                      | 21.73  | 58.02  | 0.37 | 2.67  |
| P68369_TB Tuba1a | Tubulin alp R.EDM*AALKE#DYEEVGDSVEGEGEEGEEY.- | 44.31  | 26.68  | 1.66 | 0.60  |
| P68369_TB Tuba1a | Tubulin alp K.EIIDLVLDL.R                     | 206.14 | 572.32 | 0.36 | 2.78  |
| P68369_TB Tuba1a | Tubulin alp R.FDGLNVDLTFEQTLNLPYPR.I          | 81.07  | 196.85 | 0.41 | 2.43  |
| P68369_TB Tuba1a | Tubulin alp K.FDLM*YAK#.R                     | 179.79 | 95.46  | 1.88 | 0.53  |
| P68369_TB Tuba1a | Tubulin alp K.FDLM*YAK#.R                     | 66.45  | 40.62  | 1.64 | 0.61  |
| P68369_TB Tuba1a | Tubulin alp R.GHYTIGK#.E                      | 285.65 | 164.20 | 1.74 | 0.57  |
| P68369_TB Tuba1a | Tubulin alp R.IHFPLATYAPVISAEL#.A             | 685.69 | 402.99 | 1.70 | 0.59  |
| P68369_TB Tuba1a | Tubulin alp R.IHFPLATYAPVISAEL#.A             | 81.10  | 52.22  | 1.55 | 0.64  |
| P68369_TB Tuba1a | Tubulin alp R.LDHK#FDLM*YAK#.R                | 77.86  | 37.01  | 2.10 | 0.48  |
| P68369_TB Tuba1a | Tubulin alp R.LIGQVSSITASLR.F                 | 15.30  | 32.99  | 0.46 | 2.16  |
| P68369_TB Tuba1a | Tubulin alp R.LSVDYGK#.K                      | 497.16 | 279.93 | 1.78 | 0.56  |
| P68369_TB Tuba1a | Tubulin alp R.LSVDYGK#.S                      | 336.81 | 151.54 | 2.22 | 0.45  |
| P68369_TB Tuba1a | Tubulin alp R.QLFHPPEQLITGK#.E                | 90.27  | 50.67  | 1.78 | 0.56  |
| P68369_TB Tuba1a | Tubulin alp R.RNLDIERPTYNLNR.L                | 1.19   | 32.95  | 0.04 | 27.79 |
| P68369_TB Tuba1a | Tubulin alp K.TIGGGDDSFNTFFSETGAGK#.H         | 741.97 | 384.11 | 1.93 | 0.52  |
| P68369_TB Tuba1a | Tubulin alp K.VGINYQPPTVVPDGLAK#.V            | 667.33 | 369.39 | 1.81 | 0.55  |
| P68373_TB Tuba1c | Tubulin alp K.DYEEVGADSAEGDDEGEY.-            | 15.67  | 15.67  | 1.00 | 1.00  |
| P68373_TB Tuba1c | Tubulin alp R.LISQVSSITASLR.F                 | 59.47  | 203.63 | 0.29 | 3.42  |
| P68373_TB Tuba1c | Tubulin alp K.DYEEVGADSAEGDDEGEY.-            | 6.79   | 6.79   | 1.00 | 1.00  |
| P68373_TB Tuba1c | Tubulin alp R.LISQVSSITASLR.F                 | 24.08  | 62.06  | 0.39 | 2.58  |
| P68373_TB Tuba1c | Tubulin alp K.DYEEVGADSAEGDDEGEY.-            | 14.81  | 14.81  | 1.00 | 1.00  |
| P68373_TB Tuba1c | Tubulin alp R.EDM*AALKE#DYEEVGADSAEGDDEGEY.-  | 12.45  | 5.89   | 2.11 | 0.47  |
| P68373_TB Tuba1c | Tubulin alp R.LISQVSSITASLR.F                 | 42.82  | 108.25 | 0.40 | 2.53  |
| P68368_TB Tuba4a | Tubulin alp R.AFVVDLEPTVIDEIR.N               | 8.96   | 16.77  | 0.53 | 1.87  |
| P68368_TB Tuba4a | Tubulin alp K.DVNAAIAIK#.T                    | 29.60  | 25.71  | 1.15 | 0.87  |
| P68368_TB Tuba4a | Tubulin alp K.EIIDPVLDR.I                     | 7.22   | 16.19  | 0.45 | 2.24  |
| P68368_TB Tuba4a | Tubulin alp R.AFVVDLEPTVIDEIR.N               | 3.64   | 8.70   | 0.42 | 2.39  |
| Q3UX10_TI Tuba3  | Tubulin alp R.SFGGGTSGFTSLLM*ER.L             | 3.18   | 9.98   | 0.32 | 3.14  |
| Q3UX10_TI Tuba3  | Tubulin alp R.SFGGGTSGFTSLLM*ER.L             | 4.27   | 6.42   | 0.66 | 1.50  |
| Q7TMM9_T Tubb2a  | Tubulin bet R.AILVDLEPTGTM*DSVR.S             | 102.18 | 316.81 | 0.32 | 3.10  |
| Q7TMM9_T Tubb2a  | Tubulin bet R.AILVDLEPTGTM*DSVR.S             | 66.57  | 225.76 | 0.29 | 3.39  |
| Q7TMM9_T Tubb2a  | Tubulin bet R.ALTVPELTQQM*FDSK#.N             | 47.45  | 42.57  | 1.11 | 0.90  |
| Q7TMM9_T Tubb2a  | Tubulin bet R.ALTVPELTQQM*FDSK#.N             | 43.04  | 35.85  | 1.20 | 0.83  |
| Q7TMM9_T Tubb2a  | Tubulin bet K.EVDEQMLNVQNK#.N                 | 455.30 | 335.27 | 1.36 | 0.74  |
| Q7TMM9_T Tubb2a  | Tubulin bet K.EVDEQMLNVQNK#.N                 | 383.94 | 292.50 | 1.31 | 0.76  |
| Q7TMM9_T Tubb2a  | Tubulin bet R.FPQQLNADLR.K                    | 51.67  | 168.83 | 0.31 | 3.27  |
| Q7TMM9_T Tubb2a  | Tubulin bet R.FPQQLNADLR.L                    | 7.90   | 22.65  | 0.35 | 2.87  |
| Q7TMM9_T Tubb2a  | Tubulin bet K.FWEVISDEHIDPTGSHYDSDQLQLER.I    | 7.16   | 20.98  | 0.34 | 2.93  |
| Q7TMM9_T Tubb2a  | Tubulin bet K.GHYTEGAELVSDVLDVVR.K            | 149.10 | 437.18 | 0.34 | 2.93  |
| Q7TMM9_T Tubb2a  | Tubulin bet K.GHYTEGAELVSDVLDVVR.K            | 26.43  | 64.44  | 0.41 | 2.44  |
| Q7TMM9_T Tubb2a  | Tubulin bet K.GHYTEGAELVSDVLDVVR.K            | 33.93  | 82.31  | 0.41 | 2.43  |
| Q7TMM9_T Tubb2a  | Tubulin bet R.IIM*NTFSVM*PSPK#.V              | 79.24  | 47.74  | 1.66 | 0.60  |
| Q7TMM9_T Tubb2a  | Tubulin bet R.IIM*NTFSVM*PSPK#.V              | 35.50  | 27.17  | 1.31 | 0.77  |
| Q7TMM9_T Tubb2a  | Tubulin bet R.IIM*NTFSVM*PSPK#.V              | 29.85  | 23.83  | 1.25 | 0.80  |
| Q7TMM9_T Tubb2a  | Tubulin bet R.IIMNTFSVM*PSPK#.V               | 31.72  | 31.77  | 1.00 | 1.00  |
| Q7TMM9_T Tubb2a  | Tubulin bet R.IINVYNEAAGNK#.Y                 | 134.26 | 113.47 | 1.18 | 0.85  |
| Q7TMM9_T Tubb2a  | Tubulin bet K.IREYPRD.R                       | 27.16  | 270.10 | 0.10 | 9.94  |
| Q7TMM9_T Tubb2a  | Tubulin bet R.ISEQFTAM*FR.R                   | 136.67 | 409.87 | 0.33 | 3.00  |
| Q7TMM9_T Tubb2a  | Tubulin bet R.ISEQFTAM*FR.R                   | 68.61  | 243.32 | 0.28 | 3.55  |
| Q7TMM9_T Tubb2a  | Tubulin bet K.LAVNM*VFPFR.L                   | 64.80  | 207.38 | 0.31 | 3.20  |
| Q7TMM9_T Tubb2a  | Tubulin bet K.LAVNM*VFPFR.L                   | 105.35 | 358.34 | 0.29 | 3.40  |
| Q7TMM9_T Tubb2a  | Tubulin bet R.LHFFM*PGFAPLTSR.G               | 59.44  | 149.83 | 0.40 | 2.52  |
| Q7TMM9_T Tubb2a  | Tubulin bet R.LHFFM*PGFAPLTSR.G               | 72.78  | 247.58 | 0.29 | 3.40  |
| Q7TMM9_T Tubb2a  | Tubulin bet K.MSATFIGNSTAIQELFKR.I            | 4.43   | 3.99   | 1.11 | 0.90  |
| Q7TMM9_T Tubb2a  | Tubulin bet R.M*SM*KEVDEQMLNVQNK#.N           | 25.71  | 18.93  | 1.36 | 0.74  |
| Q7TMM9_T Tubb2a  | Tubulin bet R.M*SM*KEVDEQMLNVQNK#.N           | 28.22  | 17.63  | 1.60 | 0.62  |
| Q7TMM9_T Tubb2a  | Tubulin bet K.NSSYFVWIPNNVK#.T                | 295.22 | 232.83 | 1.27 | 0.79  |
| Q7TMM9_T Tubb2a  | Tubulin bet K.RISEQFTAM*FR.R                  | 5.19   | 8.27   | 0.63 | 1.59  |

|                 |                                            |        |        |      |      |
|-----------------|--------------------------------------------|--------|--------|------|------|
| Q7TMM9_T Tubb2a | Tubulin bet R.SGPFQJFRPDNFVFGQSGAGNNWAK.G  | 91.34  | 245.63 | 0.37 | 2.69 |
| Q7TMM9_T Tubb2a | Tubulin bet R.YLTVAAIFR.G                  | 21.45  | 78.99  | 0.27 | 3.68 |
| Q7TMM9_T Tubb2a | Tubulin bet R.AILVDLEPGTM*DSVR.S           | 44.08  | 171.45 | 0.26 | 3.89 |
| Q7TMM9_T Tubb2a | Tubulin bet R.AILVDLEPGTMDSVR.S            | 5.72   | 28.85  | 0.20 | 5.05 |
| Q7TMM9_T Tubb2a | Tubulin bet K.EVDEQM*LNQNK#.N              | 5.37   | 4.97   | 1.08 | 0.93 |
| Q7TMM9_T Tubb2a | Tubulin bet K.EVDEQMLNQNK#.N               | 4.56   | 2.18   | 2.10 | 0.48 |
| Q7TMM9_T Tubb2a | Tubulin bet K.GHYTEGAELVSDVDVVR.K          | 13.31  | 63.86  | 0.21 | 4.80 |
| Q7TMM9_T Tubb2a | Tubulin bet K.GHYTEGAELVSDVDVVR.K.E        | 8.58   | 23.18  | 0.37 | 2.70 |
| Q7TMM9_T Tubb2a | Tubulin bet R.INVYNEAAGNK.Y                | 15.88  | 15.23  | 1.04 | 0.96 |
| Q7TMM9_T Tubb2a | Tubulin bet K.IREEYDR.I                    | 3.28   | 10.21  | 0.32 | 3.11 |
| Q7TMM9_T Tubb2a | Tubulin bet R.ISEQFTAM*FR.R                | 8.63   | 16.71  | 0.52 | 1.94 |
| Q7TMM9_T Tubb2a | Tubulin bet K.LAVNM*VPFPR.L                | 11.87  | 5.47   | 2.17 | 0.46 |
| Q7TMM9_T Tubb2a | Tubulin bet K.LAVNMVPFPR.L                 | 9.56   | 6.33   | 1.51 | 0.66 |
| Q7TMM9_T Tubb2a | Tubulin bet R.LHFFM*PGFAPLTSR.G            | 4.64   | 9.84   | 0.47 | 2.12 |
| Q7TMM9_T Tubb2a | Tubulin bet K.MSATFIGNSTAIQELFK#.R         | 4.41   | 3.08   | 1.43 | 0.70 |
| Q7TMM9_T Tubb2a | Tubulin bet K.NSSYFVEV*IPNNVK#.T           | 33.09  | 24.63  | 1.34 | 0.74 |
| Q7TMM9_T Tubb2a | Tubulin bet R.SGPFQJFRPDNFVFGQSGAGNNWAK.G  | 10.77  | 30.27  | 0.36 | 2.81 |
| Q7TMM9_T Tubb2a | Tubulin bet R.AILVDLEPGTM*DSVR.S           | 73.07  | 166.51 | 0.44 | 2.28 |
| Q7TMM9_T Tubb2a | Tubulin bet R.AILVDLEPGTMDSVR.S            | 38.07  | 90.00  | 0.42 | 2.36 |
| Q7TMM9_T Tubb2a | Tubulin bet R.ALTVPQLTQQM*FDSK#.N          | 16.36  | 11.30  | 1.45 | 0.69 |
| Q7TMM9_T Tubb2a | Tubulin bet R.ALTVPQLTQQMFDSK#.N           | 17.03  | 13.35  | 1.28 | 0.78 |
| Q7TMM9_T Tubb2a | Tubulin bet K.EVDEQM*LNQNK#.N              | 167.42 | 108.59 | 1.54 | 0.65 |
| Q7TMM9_T Tubb2a | Tubulin bet K.EVDEQMLNQNK#.N               | 91.57  | 65.62  | 1.40 | 0.72 |
| Q7TMM9_T Tubb2a | Tubulin bet R.FPGQLNADLRK.L                | 12.32  | 36.82  | 0.33 | 2.99 |
| Q7TMM9_T Tubb2a | Tubulin bet K.GHYTEGAELVSDVDVVR.K          | 86.09  | 248.73 | 0.35 | 2.89 |
| Q7TMM9_T Tubb2a | Tubulin bet K.GHYTEGAELVSDVDVVR.K.E        | 28.11  | 89.37  | 0.31 | 3.18 |
| Q7TMM9_T Tubb2a | Tubulin bet R.IMNTFSVM*PSPK#.V             | 11.05  | 6.55   | 1.69 | 0.59 |
| Q7TMM9_T Tubb2a | Tubulin bet R.IM*NTFSVMPSPK#.V             | 8.98   | 6.55   | 1.37 | 0.73 |
| Q7TMM9_T Tubb2a | Tubulin bet R.INVYNEAAGNK#.Y               | 42.16  | 34.85  | 1.21 | 0.83 |
| Q7TMM9_T Tubb2a | Tubulin bet K.IREEYDR.I                    | 32.28  | 319.58 | 0.10 | 9.90 |
| Q7TMM9_T Tubb2a | Tubulin bet R.ISEQFTAM*FR.R                | 71.04  | 209.36 | 0.34 | 2.95 |
| Q7TMM9_T Tubb2a | Tubulin bet R.ISEQFTAMFR.R                 | 26.95  | 80.19  | 0.34 | 2.98 |
| Q7TMM9_T Tubb2a | Tubulin bet K.LAVNM*VPFPR.L                | 37.72  | 110.65 | 0.34 | 2.93 |
| Q7TMM9_T Tubb2a | Tubulin bet K.LAVNMVPFPR.L                 | 40.09  | 132.59 | 0.30 | 3.31 |
| Q7TMM9_T Tubb2a | Tubulin bet R.LHFFM*PGFAPLTSR.G            | 43.86  | 108.51 | 0.40 | 2.47 |
| Q7TMM9_T Tubb2a | Tubulin bet K.M*STFIGNSTAIQELFK#.R         | 29.34  | 21.38  | 1.37 | 0.73 |
| Q7TMM9_T Tubb2a | Tubulin bet R.M*SM*KEVDEQM*LNQNK.N         | 60.27  | 48.15  | 1.25 | 0.80 |
| Q7TMM9_T Tubb2a | Tubulin bet R.M*SM*KEVDEQMLNQNK.N          | 21.73  | 14.02  | 1.55 | 0.65 |
| Q7TMM9_T Tubb2a | Tubulin bet K.NSSYFVEV*IPNNVK#.T           | 199.57 | 131.34 | 1.52 | 0.66 |
| Q7TMM9_T Tubb2a | Tubulin bet R.SGPFQJFRPDNFVFGQSGAGNNWAK.G  | 28.75  | 90.49  | 0.32 | 3.15 |
| Q7TMM9_T Tubb2a | Tubulin bet R.YLTVAAIFR.G                  | 9.59   | 31.70  | 0.30 | 3.31 |
| Q7TMM9_T Tubb2a | Tubulin bet R.AILVDLEPGTM*DSVR.S           | 130.31 | 304.15 | 0.43 | 2.33 |
| Q7TMM9_T Tubb2a | Tubulin bet R.AILVDLEPGTMDSVR.S            | 42.55  | 93.08  | 0.46 | 2.19 |
| Q7TMM9_T Tubb2a | Tubulin bet R.ALTVPQLTQQM*FDSK#.N          | 29.11  | 22.76  | 1.28 | 0.78 |
| Q7TMM9_T Tubb2a | Tubulin bet R.ALTVPQLTQQMFDSK#.N           | 33.80  | 16.25  | 2.08 | 0.48 |
| Q7TMM9_T Tubb2a | Tubulin bet K.EVDEQM*LNQNK#.N              | 372.25 | 245.85 | 1.51 | 0.66 |
| Q7TMM9_T Tubb2a | Tubulin bet K.EVDEQMLNQNK#.N               | 147.02 | 81.33  | 1.81 | 0.55 |
| Q7TMM9_T Tubb2a | Tubulin bet R.FPGQLNADLRK.K                | 30.92  | 99.76  | 0.31 | 3.23 |
| Q7TMM9_T Tubb2a | Tubulin bet R.FPGQLNADLRK.L                | 22.48  | 57.49  | 0.39 | 2.56 |
| Q7TMM9_T Tubb2a | Tubulin bet K.GHYTEGAELVSDVDVVR.K          | 148.88 | 352.19 | 0.42 | 2.37 |
| Q7TMM9_T Tubb2a | Tubulin bet K.GHYTEGAELVSDVDVVR.K.E        | 34.50  | 66.74  | 0.52 | 1.93 |
| Q7TMM9_T Tubb2a | Tubulin bet R.IM*NTFSVM*PSPK#.V            | 34.53  | 25.16  | 1.37 | 0.73 |
| Q7TMM9_T Tubb2a | Tubulin bet R.IMNTFSVM*PSPK#.V             | 14.67  | 7.68   | 1.91 | 0.52 |
| Q7TMM9_T Tubb2a | Tubulin bet R.IM*NTFSVMPSPK#.V             | 9.53   | 7.09   | 1.34 | 0.74 |
| Q7TMM9_T Tubb2a | Tubulin bet R.INVYNEAAGNK#.Y               | 54.19  | 39.34  | 1.38 | 0.73 |
| Q7TMM9_T Tubb2a | Tubulin bet R.ISEQFTAM*FR.R                | 92.05  | 242.64 | 0.38 | 2.64 |
| Q7TMM9_T Tubb2a | Tubulin bet R.ISEQFTAMFR.R                 | 35.75  | 110.25 | 0.32 | 3.08 |
| Q7TMM9_T Tubb2a | Tubulin bet K.LAVNM*VPFPR.L                | 75.81  | 203.09 | 0.37 | 2.68 |
| Q7TMM9_T Tubb2a | Tubulin bet K.LAVNMVPFPR.L                 | 62.13  | 201.29 | 0.31 | 3.24 |
| Q7TMM9_T Tubb2a | Tubulin bet R.LHFFM*PGFAPLTSR.G            | 69.73  | 195.53 | 0.36 | 2.80 |
| Q7TMM9_T Tubb2a | Tubulin bet R.LHFFM*PGFAPLTSR.G            | 36.47  | 80.71  | 0.45 | 2.21 |
| Q7TMM9_T Tubb2a | Tubulin bet R.M*SM*KEVDEQM*LNQNK.N         | 144.00 | 95.11  | 1.51 | 0.66 |
| Q7TMM9_T Tubb2a | Tubulin bet R.MSM*KEVDEQM*LNQNK.N          | 22.16  | 11.70  | 1.89 | 0.53 |
| Q7TMM9_T Tubb2a | Tubulin bet R.M*SM*KEVDEQMLNQNK.N          | 36.61  | 19.05  | 1.92 | 0.52 |
| Q7TMM9_T Tubb2a | Tubulin bet R.MSM*KEVDEQMLNQNK#.N          | 5.58   | 3.44   | 1.62 | 0.62 |
| Q7TMM9_T Tubb2a | Tubulin bet K.NSSYFVEV*IPNNVK#.T           | 316.66 | 190.27 | 1.66 | 0.60 |
| Q7TMM9_T Tubb2a | Tubulin bet R.SGPFQJFRPDNFVFGQSGAGNNWAK.G  | 45.98  | 115.26 | 0.40 | 2.51 |
| Q7TMM9_T Tubb2a | Tubulin bet R.YLTVAAIFR.G                  | 9.22   | 32.95  | 0.28 | 3.57 |
| Q9CWF2_T Tubb2b | Tubulin bet R.INVYNEATGNK#.Y               | 153.57 | 118.16 | 1.30 | 0.77 |
| Q9CWF2_T Tubb2b | Tubulin bet R.INVYNEATGNK#.Y               | 18.43  | 13.71  | 1.34 | 0.74 |
| Q9CWF2_T Tubb2b | Tubulin bet R.INVYNEATGNK#.Y               | 48.84  | 36.31  | 1.34 | 0.74 |
| Q9CWF2_T Tubb2b | Tubulin bet R.INVYNEATGNK#.Y               | 96.67  | 63.97  | 1.51 | 0.66 |
| Q9ERD7_T Tubb3  | Tubulin bet R.ALTVPQLTQQM*FDAK#.N          | 85.20  | 47.33  | 1.80 | 0.56 |
| Q9ERD7_T Tubb3  | Tubulin bet R.ALTVPQLTQQMFDAK#.N           | 77.12  | 49.79  | 1.55 | 0.65 |
| Q9ERD7_T Tubb3  | Tubulin bet K.EVDEQMLAIQSK#.N              | 9.29   | 2.45   | 3.79 | 0.26 |
| Q9ERD7_T Tubb3  | Tubulin bet K.FWEVISDEHGIDPSGNYGDSDLQLER.I | 2.59   | 4.37   | 0.59 | 1.69 |
| Q9ERD7_T Tubb3  | Tubulin bet R.IM*NTFSVMPSPK#.V             | 399.56 | 300.89 | 1.33 | 0.75 |
| Q9ERD7_T Tubb3  | Tubulin bet R.IMNTFSVMPSPK#.V              | 260.95 | 185.32 | 1.41 | 0.71 |
| Q9ERD7_T Tubb3  | Tubulin bet K.LATPTYGDLNHLVSATMSGVTTSLR.F  | 2.70   | 4.58   | 0.59 | 1.70 |
| Q9ERD7_T Tubb3  | Tubulin bet R.LHFFM*PGFAPLTSR.G            | 9.78   | 21.51  | 0.45 | 2.20 |
| Q9ERD7_T Tubb3  | Tubulin bet K.M*STFIGNSTAIQELFK#.R         | 9.23   | 6.06   | 1.52 | 0.66 |
| Q9ERD7_T Tubb3  | Tubulin bet R.YLTVATVFR.G                  | 28.43  | 75.72  | 0.38 | 2.66 |
| Q9ERD7_T Tubb3  | Tubulin bet R.ALTVPQLTQQM*FDAK#.N          | 20.68  | 11.34  | 1.82 | 0.55 |
| Q9ERD7_T Tubb3  | Tubulin bet R.ALTVPQLTQQMFDAK#.N           | 20.47  | 12.88  | 1.59 | 0.63 |
| Q9ERD7_T Tubb3  | Tubulin bet R.IM*NTFSVMPSPK#.V             | 179.45 | 119.09 | 1.51 | 0.66 |
| Q9ERD7_T Tubb3  | Tubulin bet R.IMNTFSVMPSPK#.V              | 99.75  | 70.16  | 1.42 | 0.70 |
| Q9ERD7_T Tubb3  | Tubulin bet R.YLTVATVFR.G                  | 5.47   | 11.27  | 0.49 | 2.06 |
| Q9ERD7_T Tubb3  | Tubulin bet R.ALTVPQLTQQM*FDAK#.N          | 39.24  | 24.38  | 1.61 | 0.62 |
| Q9ERD7_T Tubb3  | Tubulin bet R.ALTVPQLTQQMFDAK#.N           | 33.04  | 19.14  | 1.73 | 0.58 |
| Q9ERD7_T Tubb3  | Tubulin bet R.ALTVPQLTQQMFDAK#.N           | 21.35  | 6.69   | 3.19 | 0.31 |
| Q9ERD7_T Tubb3  | Tubulin bet R.IM*NTFSVMPSPK#.V             | 293.95 | 190.02 | 1.55 | 0.65 |
| Q9ERD7_T Tubb3  | Tubulin bet R.IMNTFSVMPSPK#.V              | 123.60 | 78.55  | 1.57 | 0.64 |
| Q9ERD7_T Tubb3  | Tubulin bet R.LHFFM*PGFAPLTSR.G            | 5.56   | 9.54   | 0.58 | 1.72 |
| Q9ERD7_T Tubb3  | Tubulin bet K.MSSTFIGNSTAIQELFK#.R         | 69.47  | 49.87  | 1.39 | 0.72 |
| Q9ERD7_T Tubb3  | Tubulin bet K.M*STFIGNSTAIQELFK#.R         | 7.49   | 7.99   | 0.94 | 1.07 |
| Q9ERD7_T Tubb3  | Tubulin bet R.YLTVATVFR.G                  | 9.70   | 18.41  | 0.53 | 1.90 |
| Q9D6F9_T Tubb4a | Tubulin bet R.AVLVDLEPGTM*DSVR.S           | 25.47  | 78.55  | 0.32 | 3.08 |
| Q9D6F9_T Tubb4a | Tubulin bet R.AVLVDLEPGTMDSVR.S            | 47.59  | 44.28  | 1.07 | 0.93 |
| Q9D6F9_T Tubb4a | Tubulin bet R.YLTVAAVFR.G                  | 115.54 | 297.12 | 0.39 | 2.57 |
| Q9D6F9_T Tubb4a | Tubulin bet R.AVLVDLEPGTM*DSVR.S           | 6.83   | 25.52  | 0.27 | 3.74 |
| Q9D6F9_T Tubb4a | Tubulin bet R.AVLVDLEPGTM*DSVR.S           | 13.17  | 30.69  | 0.43 | 2.33 |
| Q9D6F9_T Tubb4a | Tubulin bet K.M*AATFIGNSTAIQELFK#.R        | 37.98  | 26.90  | 1.41 | 0.71 |
| Q9D6F9_T Tubb4a | Tubulin bet R.YLTVAAVFR.G                  | 38.30  | 121.61 | 0.31 | 3.18 |

|                  |                                               |        |        |      |       |
|------------------|-----------------------------------------------|--------|--------|------|-------|
| Q9D6F9_TE Tubb4a | Tubulin bet R.AVLVLEPGTM*DSVR.S               | 25.00  | 68.56  | 0.36 | 2.74  |
| Q9D6F9_TE Tubb4a | Tubulin bet K.M*AATFIGNSTAIQELFK#R            | 59.18  | 24.15  | 2.45 | 0.41  |
| Q9D6F9_TE Tubb4a | Tubulin bet R.VLTVAAVFR.G                     | 63.34  | 169.51 | 0.37 | 2.68  |
| P68372_TB Tubb4b | Tubulin bet R.INVYNEATGGK#.Y                  | 183.13 | 105.33 | 1.74 | 0.58  |
| P68372_TB Tubb4b | Tubulin bet R.INVYNEATGGK#.Y                  | 32.64  | 27.95  | 1.17 | 0.86  |
| P68372_TB Tubb4b | Tubulin bet R.INVYNEATGGK#.Y                  | 93.99  | 51.84  | 1.81 | 0.55  |
| P68372_TB Tubb4b | Tubulin bet R.INVYNEATGGK#.Y                  | 164.50 | 88.64  | 1.86 | 0.54  |
| P68372_TB Tubb4b | Tubulin bet K.YVPRAVLVLEPGTMDSVR@.S           | 2.88   | 1.43   | 2.01 | 0.50  |
| P99024_TB Tubb5  | Tubulin bet R.ALTVPQLTQQVDAK#.N               | 188.55 | 120.64 | 1.56 | 0.64  |
| P99024_TB Tubb5  | Tubulin bet R.ALTVPQLTQQVDAK#.N               | 382.34 | 247.87 | 1.54 | 0.65  |
| P99024_TB Tubb5  | Tubulin bet K.FWEVISEHGDIDPTGYHGDSDLQLDR.I    | 17.80  | 35.79  | 0.50 | 2.01  |
| P99024_TB Tubb5  | Tubulin bet R.ISVYNEATGGK#.Y                  | 637.09 | 397.06 | 1.60 | 0.62  |
| P99024_TB Tubb5  | Tubulin bet K.M*AVTFIGNSTAIQELFK#R            | 129.86 | 101.24 | 1.28 | 0.78  |
| P99024_TB Tubb5  | Tubulin bet K.MAVTFIGNSTAIQELFK.R             | 98.82  | 58.37  | 1.69 | 0.59  |
| P99024_TB Tubb5  | Tubulin bet K.MAVTFIGNSTAIQELFK#R             | 172.94 | 110.62 | 1.56 | 0.64  |
| P99024_TB Tubb5  | Tubulin bet R.ALTVPQLTQQVDAK#.N               | 4.91   | 4.77   | 1.03 | 0.97  |
| P99024_TB Tubb5  | Tubulin bet K.FWEVISEHGDIDPTGYHGDSDLQLDR@.I   | 13.27  | 8.72   | 1.52 | 0.66  |
| P99024_TB Tubb5  | Tubulin bet R.ISVYNEATGGK#.Y                  | 147.31 | 127.29 | 1.16 | 0.86  |
| P99024_TB Tubb5  | Tubulin bet R.ALTVPQLTQQVDAK#.N               | 234.28 | 157.79 | 1.48 | 0.67  |
| P99024_TB Tubb5  | Tubulin bet R.ALTVPQLTQQVDAK#.N               | 119.16 | 83.75  | 1.42 | 0.70  |
| P99024_TB Tubb5  | Tubulin bet R.ISVYNEATGGK#.Y                  | 490.00 | 377.60 | 1.30 | 0.77  |
| P99024_TB Tubb5  | Tubulin bet K.M*AVTFIGNSTAIQELFK#R            | 83.33  | 49.94  | 1.67 | 0.60  |
| P99024_TB Tubb5  | Tubulin bet K.MAVTFIGNSTAIQELFK#R             | 92.05  | 55.38  | 1.66 | 0.60  |
| P99024_TB Tubb5  | Tubulin bet R.ALTVPQLTQQVDAK#.N               | 460.53 | 280.39 | 1.64 | 0.61  |
| P99024_TB Tubb5  | Tubulin bet R.ISVYNEATGGK#.Y                  | 883.94 | 514.80 | 1.72 | 0.58  |
| P99024_TB Tubb5  | Tubulin bet K.M*AVTFIGNSTAIQELFK#R            | 93.16  | 53.58  | 1.74 | 0.58  |
| P99024_TB Tubb5  | Tubulin bet K.M*AVTFIGNSTAIQELFK#R            | 182.95 | 92.17  | 1.98 | 0.50  |
| P99024_TB Tubb5  | Tubulin bet K.MAVTFIGNSTAIQELFK#R             | 77.22  | 47.06  | 1.64 | 0.61  |
| P99024_TB Tubb5  | Tubulin bet K.MAVTFIGNSTAIQELFK.R             | 2.77   | 11.28  | 0.25 | 4.07  |
| Q922F4_TB Tubb6  | Tubulin bet R.AALVLEPGTM*DSVR.S               | 13.91  | 42.54  | 0.33 | 3.06  |
| Q922F4_TB Tubb6  | Tubulin bet R.AALVLEPGTMDSVR.S                | 6.69   | 19.96  | 0.34 | 2.98  |
| Q922F4_TB Tubb6  | Tubulin bet K.EVDEQM*LAIQNK#.N                | 33.53  | 27.66  | 1.21 | 0.83  |
| Q922F4_TB Tubb6  | Tubulin bet K.FWEVISEHGDIDQAGGYVGDSDLQLER.I   | 10.35  | 30.24  | 0.34 | 2.92  |
| Q922F4_TB Tubb6  | Tubulin bet R.ISEQFSAMFR.R                    | 7.63   | 20.77  | 0.37 | 2.72  |
| Q922F4_TB Tubb6  | Tubulin bet R.ISVYNESSSK#.K                   | 73.44  | 46.55  | 1.58 | 0.63  |
| Q922F4_TB Tubb6  | Tubulin bet K.LTTPTYGDLNHLVSATM*SGVTSLR.F     | 4.43   | 12.33  | 0.36 | 2.78  |
| Q922F4_TB Tubb6  | Tubulin bet K.LTTPTYGDLNHLVSATM*SGVTSLR.F     | 9.23   | 23.78  | 0.39 | 2.57  |
| Q922F4_TB Tubb6  | Tubulin bet K.M*ASTFIGNSTAIQELFK#R            | 28.75  | 20.64  | 1.39 | 0.72  |
| Q922F4_TB Tubb6  | Tubulin bet R.SGPFQGLFRPDNFIFGQAGNNWAK.G      | 21.65  | 36.61  | 0.59 | 1.69  |
| Q922F4_TB Tubb6  | Tubulin bet R.AALVLEPGTM*DSVR.S               | 2.62   | 11.00  | 0.24 | 4.20  |
| Q922F4_TB Tubb6  | Tubulin bet R.AALVLEPGTM*DSVR.S               | 3.29   | 6.95   | 0.47 | 2.11  |
| Q922F4_TB Tubb6  | Tubulin bet K.EVDEQM*LAIQNK#.N                | 7.76   | 4.63   | 1.68 | 0.60  |
| Q922F4_TB Tubb6  | Tubulin bet K.FWEVISEHGDIDQAGGYVGDSDLQLER.I   | 2.03   | 5.62   | 0.36 | 2.77  |
| Q922F4_TB Tubb6  | Tubulin bet R.ISVYNESSSK#.K                   | 18.97  | 22.19  | 0.85 | 1.17  |
| Q922F4_TB Tubb6  | Tubulin bet K.M*ASTFIGNSTAIQELFK.R            | 29.34  | 21.38  | 1.37 | 0.73  |
| Q922F4_TB Tubb6  | Tubulin bet R.AALVLEPGTM*DSVR.S               | 4.78   | 17.07  | 0.28 | 3.57  |
| Q922F4_TB Tubb6  | Tubulin bet K.EVDEQM*LAIQNK#.N                | 11.00  | 10.67  | 1.03 | 0.97  |
| Q922F4_TB Tubb6  | Tubulin bet K.EVDEQMLAIQNK#.N                 | 10.25  | 6.25   | 1.64 | 0.61  |
| Q922F4_TB Tubb6  | Tubulin bet K.FWEVISEHGDIDQAGGYVGDSDLQLER.I   | 3.30   | 7.33   | 0.45 | 2.22  |
| Q922F4_TB Tubb6  | Tubulin bet R.ISVYNESSSK#.K                   | 23.22  | 17.18  | 1.35 | 0.74  |
| P83887_TB Tubg1  | Tubulin gar R.AVLLEDR.V                       | 7.41   | 18.20  | 0.41 | 2.46  |
| P83887_TB Tubg1  | Tubulin gar R.EIVQQLIDEHAATRPDIYSWGTOEQE-     | 5.36   | 6.62   | 0.81 | 1.23  |
| P83887_TB Tubg1  | Tubulin gar K.HIFEDIFDI.R                     | 4.48   | 8.69   | 0.52 | 1.94  |
| P83887_TB Tubg1  | Tubulin gar K.KHLVQTVSVPNQDEMSVVVQPNYSLTLK#.R | 4.85   | 3.66   | 1.32 | 0.76  |
| P83887_TB Tubg1  | Tubulin gar R.LHFLM*GTYPLTTDQSVASVR.K         | 3.32   | 8.85   | 0.37 | 2.67  |
| P83887_TB Tubg1  | Tubulin gar R.LHIQNPFSQINQLVSTIM*SASITTLR.Y   | 4.66   | 4.91   | 0.95 | 1.05  |
| P83887_TB Tubg1  | Tubulin gar R.AVLLEDR.V                       | 4.88   | 11.22  | 0.44 | 2.30  |
| P83887_TB Tubg1  | Tubulin gar R.LHFLM*GTYPLTTDQSVASVR.K         | 15.79  | 9.49   | 1.66 | 0.60  |
| P83887_TB Tubg1  | Tubulin gar K.LYNPENILSEHGGAGNNWASGFSQGEK#.I  | 3.96   | 3.21   | 1.23 | 0.81  |
| Q921G8_G Tubgcp2 | Gamma-tu R.I.LPVAASVTVTR.F                    | 3.96   | 7.04   | 0.56 | 1.78  |
| Q921G8_G Tubgcp2 | Gamma-tu R.TFLVDPNLDLSIR.E                    | 2.85   | 8.19   | 0.35 | 2.88  |
| Q921G8_G Tubgcp2 | Gamma-tu K.VLDFLM*EEK#.E                      | 7.18   | 4.91   | 1.46 | 0.68  |
| Q921G8_G Tubgcp2 | Gamma-tu R.YTVLQQIPFLQK#.V                    | 9.42   | 5.94   | 1.59 | 0.63  |
| Q921G8_G Tubgcp2 | Gamma-tu K.AASAPYFEILEK.W                     | 13.08  | 9.04   | 1.45 | 0.69  |
| Q921G8_G Tubgcp2 | Gamma-tu R.LPVAASVTVTR.F                      | 4.80   | 11.05  | 0.43 | 2.30  |
| Q921G8_G Tubgcp2 | Gamma-tu K.L.TEDKHETLQFLQNAK#.E               | 13.47  | 6.14   | 2.20 | 0.46  |
| Q921G8_G Tubgcp2 | Gamma-tu R.NLDPLVLLYSK#.L                     | 22.15  | 12.23  | 1.81 | 0.55  |
| Q921G8_G Tubgcp2 | Gamma-tu R.TFLVDPNLDLSIR.E                    | 3.11   | 8.68   | 0.36 | 2.79  |
| Q921G8_G Tubgcp2 | Gamma-tu K.VLDFLM*EEK#.E                      | 8.50   | 6.63   | 1.28 | 0.78  |
| Q8BFR5_EF Tufm   | Elongation R.AEAGDNLGALVR.G                   | 28.44  | 14.13  | 2.01 | 0.50  |
| Q8BFR5_EF Tufm   | Elongation R.DLDKPFLLPVESVYIPGR.G             | 9.40   | 10.23  | 0.92 | 1.09  |
| Q8BFR5_EF Tufm   | Elongation R.GTVVTGTLER.G                     | 17.83  | 19.50  | 0.91 | 1.09  |
| Q8BFR5_EF Tufm   | Elongation K.LLDAVDYIPVPT.R                   | 8.85   | 11.71  | 0.76 | 1.32  |
| Q8BFR5_EF Tufm   | Elongation K.TIGTGLVDPVAMP*TEEDK#NIK#.W       | 19.56  | 5.80   | 3.37 | 0.30  |
| Q8BFR5_EF Tufm   | Elongation K.VEAQVYLSK#.E                     | 20.27  | 29.03  | 0.70 | 1.43  |
| Q8BFR5_EF Tufm   | Elongation R.I.SLLLR.L                        | 8.35   | 23.89  | 0.35 | 2.86  |
| Q91YR1_TV Twf1   | Twinfilin-1 K.I.NEVQTDVSDTK#.H                | 24.50  | 5.76   | 4.25 | 0.24  |
| Q920P5_TV Twf2   | Twinfilin-2 K.K#EIGDGAELTAFLYDEVHPK#.Q        | 5.46   | 2.92   | 1.87 | 0.53  |
| A5D6P6_A1 Twist2 | Twist homc K.GSPSAQSFEELQSQR.I                | 1.70   | 2.48   | 0.68 | 1.46  |
| A5D6P6_A1 Twist2 | Twist homc R.LSYAFSVWR.M                      | 1.15   | 8.91   | 0.13 | 7.74  |
| Q6PAM1_T Txlna   | Alpha-taxilin R.VQDLTAGGITDISGER.R            | 2.65   | 5.83   | 0.46 | 2.20  |
| P10639_Tx Txn    | Thioredoxin K.EAFQLEAALAAAGDK.L               | 13.23  | 18.48  | 0.72 | 1.40  |
| P10639_Tx Txn    | Thioredoxin K.VGEFSGANK.E                     | 8.01   | 4.31   | 1.86 | 0.54  |
| Q9CQU0_T Txndc12 | Thioredoxin R.DEDFSPDGGYPR.I                  | 2.24   | 12.01  | 0.19 | 5.37  |
| Q9CQU0_T Txndc12 | Thioredoxin R.LFLDPSGK#.V                     | 20.34  | 237.95 | 0.09 | 11.70 |
| Q9CQU0_T Txndc12 | Thioredoxin K.VRPEIENESGNPSKY.Y               | 8.29   | 24.53  | 0.34 | 2.96  |
| Q9CQU0_T Txndc12 | Thioredoxin K.YFYSAEQVVGQM*K#.E               | 4.59   | 3.09   | 1.48 | 0.67  |
| Q91W90_T Txndc5  | Thioredoxin K.GTYLALTEK#.S                    | 43.31  | 12.77  | 3.39 | 0.29  |
| Q91W90_T Txndc5  | Thioredoxin R.GYPTLLFR.G                      | 27.55  | 34.49  | 0.80 | 1.25  |
| Q91W90_T Txndc5  | Thioredoxin R.GYPTLLFR.D                      | 14.55  | 14.99  | 0.97 | 1.03  |
| Q91W90_T Txndc5  | Thioredoxin K.NLAPTWEELSK#.K                  | 40.80  | 12.98  | 3.14 | 0.32  |
| Q91W90_T Txndc5  | Thioredoxin K.QGLYELSANNFELHVSQGNHFH#.F       | 30.13  | 7.80   | 3.86 | 0.26  |
| Q91W90_T Txndc5  | Thioredoxin K.SFEDTIAQGITFK#.F                | 86.27  | 26.61  | 3.24 | 0.31  |
| Q9CQ79_T Txndc9  | Thioredoxin K.LDQI GEDELLEK.E                 | 4.39   | 5.69   | 0.77 | 1.30  |
| Q9CQ79_T Txndc9  | Thioredoxin K.VIPTLLLR.D                      | 4.99   | 27.11  | 0.18 | 5.43  |
| P07607_TY Tyms   | Thymidylat R.HFGAEYK#DM*DSYSGQGVQDLQK#.V      | 2.21   | 2.12   | 1.04 | 0.96  |
| Q9D883_U U2af1   | Splicing fac K.AVIDLNNR.W                     | 48.78  | 185.07 | 0.26 | 3.79  |
| Q9D883_U U2af1   | Splicing fac R.NPQNSSQASADGLR.C               | 53.19  | 221.92 | 0.24 | 4.17  |
| Q9D883_U U2af1   | Splicing fac R.WFNGQPIHAELSPVDFR.E            | 11.70  | 54.43  | 0.21 | 4.65  |
| Q9D883_U U2af1   | Splicing fac R.NPQNSSQASADGLR.C               | 1.56   | 15.76  | 0.10 | 10.08 |
| Q9D883_U U2af1   | Splicing fac R.NPQNSSQASADGLR.C               | 3.02   | 8.51   | 0.36 | 2.82  |
| P26369_U U2af2   | Splicing fac K.ELTTSFGPLK#.A                  | 90.74  | 65.63  | 1.38 | 0.72  |
| P26369_U U2af2   | Splicing fac K.LFIGGLPNLYNDQVK#.E             | 64.74  | 54.79  | 1.18 | 0.85  |

|                  |                                                   |         |         |      |      |
|------------------|---------------------------------------------------|---------|---------|------|------|
| P26369_U; U2af2  | Splicing fac R.LGGLTOAGPNVLAVQINQDK#.N            | 13.06   | 9.03    | 1.45 | 0.69 |
| P26369_U; U2af2  | Splicing fac K.NFALEFR.S                          | 14.11   | 30.25   | 0.47 | 2.14 |
| P26369_U; U2af2  | Splicing fac R.RPHDYQLPGM*SENPSVYVPGVSTVVPDSAHL.L | 8.19    | 24.27   | 0.34 | 2.96 |
| P26369_U; U2af2  | Splicing fac R.RPHDYQLPGMSENPSVYVPGVSTVVPDSAHL.L  | 3.23    | 11.56   | 0.28 | 3.58 |
| P26369_U; U2af2  | Splicing fac R.SVDETTQAM*AFDGIIFQGSLK.I           | 4.81    | 3.22    | 1.50 | 0.67 |
| P26369_U; U2af2  | Splicing fac R.SVDETTQAMAFDGIIFQGSLK.I            | 45.69   | 22.44   | 2.04 | 0.49 |
| Q6NV83_Sf U2surp | U2 snRNP-ε R.AWEDWAYPEFLIK#.L                     | 42.99   | 31.91   | 1.35 | 0.74 |
| Q6NV83_Sf U2surp | U2 snRNP-ε R.DKLEELR.G                            | 25.03   | 66.81   | 0.37 | 2.67 |
| Q6NV83_Sf U2surp | U2 snRNP-ε R.FQDELESGK#.R                         | 63.50   | 38.71   | 1.64 | 0.61 |
| Q6NV83_Sf U2surp | U2 snRNP-ε R.GGVVNAAKDEHETDEKR.G                  | 3.44    | 10.27   | 0.33 | 2.99 |
| Q6NV83_Sf U2surp | U2 snRNP-ε R.KPGQSFQEQVEHYR.D                     | 10.77   | 54.89   | 0.20 | 5.10 |
| Q6NV83_Sf U2surp | U2 snRNP-ε R.LK#NPNAPM*LPPPK#.N                   | 19.27   | 20.80   | 0.93 | 1.08 |
| Q6NV83_Sf U2surp | U2 snRNP-ε R.LYLVSDLVLYSSAK#.V                    | 70.21   | 41.24   | 1.70 | 0.59 |
| Q6NV83_Sf U2surp | U2 snRNP-ε R.LYSILQGDSPTK#.W                      | 82.65   | 53.35   | 1.55 | 0.65 |
| Q6NV83_Sf U2surp | U2 snRNP-ε R.MIEFVVR.E                            | 5.49    | 23.69   | 0.23 | 4.32 |
| Q6NV83_Sf U2surp | U2 snRNP-ε R.NLLALIHR.M                           | 15.24   | 50.35   | 0.30 | 3.30 |
| Q6NV83_Sf U2surp | U2 snRNP-ε R.SLDDDLGVPLDATEDSK#.K                 | 19.15   | 13.46   | 1.42 | 0.70 |
| Q6NV83_Sf U2surp | U2 snRNP-ε R.SLDDDLGVPLDATEDSK#.K#.N              | 18.91   | 13.49   | 1.40 | 0.71 |
| Q6NV83_Sf U2surp | U2 snRNP-ε R.SLDDDLGVPLDATEDSK#.KNEPIFK.V         | 6.56    | 4.89    | 1.34 | 0.75 |
| Q6NV83_Sf U2surp | U2 snRNP-ε R.SNLELFHEELK#.Q                       | 25.04   | 20.81   | 1.20 | 0.83 |
| Q6NV83_Sf U2surp | U2 snRNP-ε R.TLSQAIVK#.V                          | 81.66   | 48.75   | 1.68 | 0.60 |
| Q6NV83_Sf U2surp | U2 snRNP-ε R.VANASYR.K                            | 11.78   | 34.17   | 0.34 | 2.90 |
| Q6NV83_Sf U2surp | U2 snRNP-ε K.VAPSK#WEAVDESELEAQAVTTSK#.W          | 27.44   | 19.57   | 1.40 | 0.71 |
| Q6NV83_Sf U2surp | U2 snRNP-ε K.WEAVDESELEAQAVTTSK#.W                | 8.55    | 6.00    | 1.42 | 0.70 |
| Q6NV83_Sf U2surp | U2 snRNP-ε R.FGPLASVK#.I                          | 30.41   | 20.03   | 1.52 | 0.66 |
| Q6NV83_Sf U2surp | U2 snRNP-ε K.FQDELESGK#.R                         | 27.29   | 20.66   | 1.32 | 0.76 |
| Q6NV83_Sf U2surp | U2 snRNP-ε R.GGVVNAAKDEHETDEK#.R                  | 16.59   | 12.78   | 1.30 | 0.77 |
| Q6NV83_Sf U2surp | U2 snRNP-ε R.LK#NPNAPM*LPPPK#.N                   | 9.04    | 11.59   | 0.78 | 1.28 |
| Q6NV83_Sf U2surp | U2 snRNP-ε R.LYLVSDLVLYSSAK#.V                    | 25.01   | 22.14   | 1.13 | 0.88 |
| Q6NV83_Sf U2surp | U2 snRNP-ε K.LYSILQGDSPTK#.W                      | 34.93   | 26.71   | 1.31 | 0.76 |
| Q6NV83_Sf U2surp | U2 snRNP-ε R.NLLALIHR.M                           | 4.54    | 24.32   | 0.19 | 5.36 |
| Q6NV83_Sf U2surp | U2 snRNP-ε K.SLDDDLGVPLDATEDSK#.K                 | 11.79   | 8.64    | 1.37 | 0.73 |
| Q6NV83_Sf U2surp | U2 snRNP-ε K.VAPSK#WEAVDESELEAQAVTTSK#.W          | 25.17   | 12.94   | 1.95 | 0.51 |
| Q8CGB3_U; Uaca   | Uveal autox: R.IGDNLDLILNK#.T                     | 11.97   | 8.09    | 1.48 | 0.68 |
| Q02053_U; Uba1   | Ubiquitin-I R.AAVASLLOSQVPEFTP#.S                 | 65.31   | 17.97   | 3.63 | 0.28 |
| Q02053_U; Uba1   | Ubiquitin-I K.GNVQVIVPFLTESYSSQDPEK#.S            | 19.01   | 6.36    | 2.99 | 0.33 |
| Q02053_U; Uba1   | Ubiquitin-I R.K#LAYVAAGDLAPINAFIGGLAAQEVN*#.K.A   | 9.52    | 2.68    | 3.56 | 0.28 |
| Q02053_U; Uba1   | Ubiquitin-I R.LAGTQPLEVLEAVQR.S                   | 19.50   | 15.06   | 1.29 | 0.77 |
| Q02053_U; Uba1   | Ubiquitin-I R.NEEDATELVGLAQAVNAR.S                | 19.25   | 8.01    | 2.40 | 0.42 |
| Q02053_U; Uba1   | Ubiquitin-I K.QPAENVNQYLTDSK#.F                   | 20.41   | 3.40    | 6.01 | 0.17 |
| Q02053_U; Uba1   | Ubiquitin-I K.SLPASLVPEPDM*TFK#.Y                 | 16.94   | 5.09    | 3.33 | 0.30 |
| Q02053_U; Uba1   | Ubiquitin-I R.YDGVAVFSDFOEK#.L                    | 34.72   | 9.83    | 3.53 | 0.28 |
| Q02053_U; Uba1   | Ubiquitin-I R.AAVASLLOSQVPEFTP#.S                 | 96.30   | 22.95   | 4.20 | 0.24 |
| Q02053_U; Uba1   | Ubiquitin-I R.AENVISPADR.H                        | 12.22   | 11.62   | 1.05 | 0.95 |
| Q02053_U; Uba1   | Ubiquitin-I R.DEFGLFK#.Q                          | 19.38   | 5.06    | 3.83 | 0.26 |
| Q02053_U; Uba1   | Ubiquitin-I R.DEFGLFK#QPAENVNQYLTDSK#.F           | 5.14    | 1.66    | 3.10 | 0.32 |
| Q02053_U; Uba1   | Ubiquitin-I K.GNVQVIVPFLTESYSSQDPEK#.S            | 25.45   | 6.79    | 3.75 | 0.27 |
| Q02053_U; Uba1   | Ubiquitin-I R.K#LAYVAAGDLAPINAFIGGLAAQEVN*#.K.A   | 8.64    | 4.26    | 2.03 | 0.49 |
| Q02053_U; Uba1   | Ubiquitin-I R.K#LLESGTGTK#.G                      | 32.41   | 6.07    | 5.34 | 0.19 |
| Q02053_U; Uba1   | Ubiquitin-I R.LAGTQPLEVLEAVQR.S                   | 20.10   | 18.71   | 1.07 | 0.93 |
| Q02053_U; Uba1   | Ubiquitin-I R.NEEDATELVGLAQAVNAR.S                | 6.68    | 5.95    | 1.12 | 0.89 |
| Q02053_U; Uba1   | Ubiquitin-I K.NILGGVK#.A                          | 39.45   | 10.98   | 3.59 | 0.28 |
| Q02053_U; Uba1   | Ubiquitin-I K.QPAENVNQYLTDSK#.F                   | 20.36   | 2.94    | 6.93 | 0.14 |
| Q02053_U; Uba1   | Ubiquitin-I K.SLPASLVPEPDM*TFK#.Y                 | 21.57   | 4.68    | 4.60 | 0.22 |
| Q02053_U; Uba1   | Ubiquitin-I K.SLPASLVPEPDM*TFK#.Y                 | 10.39   | 1.81    | 5.74 | 0.17 |
| Q02053_U; Uba1   | Ubiquitin-I R.YDGVAVFSDFOEK#.L                    | 38.01   | 7.24    | 5.25 | 0.19 |
| Q9Z1F9_SA; Uba2  | SUMO-activ K.SYASLFSK#.S                          | 22.80   | 6.41    | 3.56 | 0.28 |
| Q9Z1F9_SA; Uba2  | SUMO-activ K.VTVLTLQDK#.I                         | 35.59   | 12.87   | 2.76 | 0.36 |
| Q9Z1F9_SA; Uba2  | SUMO-activ K.VTVLTLQDK#.I                         | 24.98   | 6.19    | 4.04 | 0.25 |
| P62984_RL; Uba52 | Ubiquitin-ε K.ESTLHLVLR.L                         | 18.78   | 66.56   | 0.28 | 3.55 |
| P62984_RL; Uba52 | Ubiquitin-ε K.IQDKGIPPDQQR.L                      | 2.18    | 10.74   | 2.20 | 4.93 |
| P62984_RL; Uba52 | Ubiquitin-ε -M*QIFVK#.T                           | 74.14   | 67.01   | 1.11 | 0.90 |
| P62984_RL; Uba52 | Ubiquitin-ε -MQIFVK#.T                            | 149.06  | 134.85  | 1.11 | 0.90 |
| P62984_RL; Uba52 | Ubiquitin-ε K.TITLVEPSDTIENVK.A                   | 171.79  | 173.16  | 0.99 | 1.01 |
| P62984_RL; Uba52 | Ubiquitin-ε R.TLSDYNIQK#.E                        | 292.57  | 224.93  | 1.30 | 0.77 |
| P62984_RL; Uba52 | Ubiquitin-ε K.EGIPPDQQR.L                         | 67.32   | 497.91  | 0.14 | 7.40 |
| P62984_RL; Uba52 | Ubiquitin-ε K.ESTLHLVLR.L                         | 133.17  | 857.06  | 0.16 | 6.44 |
| P62984_RL; Uba52 | Ubiquitin-ε K.IQDKGIPPDQQR.L                      | 58.81   | 448.63  | 0.13 | 7.63 |
| P62984_RL; Uba52 | Ubiquitin-ε K.IQDKGIPPDQQR.L                      | 17.99   | 132.34  | 0.14 | 7.36 |
| P62984_RL; Uba52 | Ubiquitin-ε -MQIFVK#.T                            | 567.79  | 793.80  | 0.72 | 1.40 |
| P62984_RL; Uba52 | Ubiquitin-ε K.TITLVEPSDTIENVK#.A                  | 1072.50 | 1660.28 | 0.65 | 1.55 |
| P62984_RL; Uba52 | Ubiquitin-ε K.TITLVEPSDTIENVK#.A#.I               | 65.61   | 103.12  | 0.64 | 1.57 |
| P62984_RL; Uba52 | Ubiquitin-ε R.TLSDYNIQK#.E                        | 1542.95 | 1987.69 | 0.78 | 1.29 |
| P62984_RL; Uba52 | Ubiquitin-ε K.TLTKG#TITLVEPSDTIENVK#.A            | 18.56   | 27.82   | 0.67 | 1.50 |
| P62984_RL; Uba52 | Ubiquitin-ε -M*QIFVK#.T                           | 63.13   | 21.74   | 2.90 | 0.34 |
| P62984_RL; Uba52 | Ubiquitin-ε K.TITLVEPSDTIENVK#.A                  | 125.73  | 58.93   | 2.13 | 0.47 |
| P62984_RL; Uba52 | Ubiquitin-ε R.TLSDYNIQK#.E                        | 232.59  | 101.80  | 2.28 | 0.44 |
| P62984_RL; Uba52 | Ubiquitin-ε -M*QIFVK#.T                           | 95.32   | 34.97   | 2.73 | 0.37 |
| P62984_RL; Uba52 | Ubiquitin-ε -MQIFVK#.T                            | 119.87  | 55.73   | 2.15 | 0.46 |
| P62984_RL; Uba52 | Ubiquitin-ε R.TLSDYNIQK#.E                        | 317.29  | 142.65  | 2.22 | 0.45 |
| Q8C7R4_U; Uba6   | Ubiquitin-I K.FWQAYPSAEDVLQK#.I                   | 8.39    | 4.11    | 2.04 | 0.49 |
| Q8C7R4_U; Uba6   | Ubiquitin-I R.NAVQLEALSNN#.A                      | 8.13    | 4.99    | 1.63 | 0.61 |
| Q8C7R4_U; Uba6   | Ubiquitin-I K.FWQAYPSAEDVLQK#.I                   | 6.88    | 5.52    | 1.25 | 0.80 |
| Q91VX2_U; Uba2   | Ubiquitin-ε K.AINILLEGNSDTTWSWETVGGK#.K           | 7.64    | 5.21    | 1.47 | 0.68 |
| Q91VX2_U; Uba2   | Ubiquitin-ε K.AINILLEGNSDTTWSWETVGGK#.K           | 6.14    | 5.42    | 1.13 | 0.88 |
| Q91VX2_U; Uba2   | Ubiquitin-ε R.ATLVTSKG.A                          | 31.01   | 29.04   | 1.07 | 0.94 |
| Q91VX2_U; Uba2   | Ubiquitin-ε R.DGNLANNPYSVDVTK#.F                  | 33.98   | 38.35   | 0.89 | 1.13 |
| Q91VX2_U; Uba2   | Ubiquitin-ε R.ESTAGDPSTVSR.L                      | 10.89   | 40.11   | 0.27 | 3.68 |
| Q91VX2_U; Uba2   | Ubiquitin-ε K.GYVGSQAPNK#.S                       | 9.90    | 10.87   | 0.91 | 1.10 |
| Q91VX2_U; Uba2   | Ubiquitin-ε K.GVSVSGTGLPDM*TGSVYNN#.T             | 12.08   | 9.51    | 1.27 | 0.79 |
| Q91VX2_U; Uba2   | Ubiquitin-ε K.GVSVSGTGLPDM*TGSVYNN#.T             | 6.52    | 5.62    | 1.16 | 0.86 |
| Q91VX2_U; Uba2   | Ubiquitin-ε R.LAQVIFDK#NDSDFEAK#.V                | 22.95   | 17.61   | 1.30 | 0.77 |
| Q91VX2_U; Uba2   | Ubiquitin-ε R.LPM*DYGGIPFAAPTALASR.D              | 3.36    | 12.02   | 0.28 | 3.58 |
| Q91VX2_U; Uba2   | Ubiquitin-ε R.LPMDYGGIPFAAPTALASR.D               | 3.32    | 10.26   | 0.32 | 3.09 |
| Q91VX2_U; Uba2   | Ubiquitin-ε K.NSVEEWTEDWEDLSETK#.V                | 9.47    | 7.17    | 1.32 | 0.76 |
| Q91VX2_U; Uba2   | Ubiquitin-ε K.QVVQATEQM*.R.L                      | 3.73    | 14.48   | 0.26 | 3.88 |
| Q91VX2_U; Uba2   | Ubiquitin-ε K.SQASK#PTYGSAPIYWTN.-                | 15.98   | 67.68   | 0.24 | 4.24 |
| Q91VX2_U; Uba2   | Ubiquitin-ε R.SQHTVDTTSSVPAPK#.K                  | 10.87   | 11.71   | 0.93 | 1.08 |
| Q91VX2_U; Uba2   | Ubiquitin-ε K.SQPEPSPVLSQLSQR.Q                   | 9.27    | 37.07   | 0.25 | 4.00 |
| Q80X50_U; Uba2I  | Ubiquitin-ε R.AINVLLEGNDTSSWEM*VGGK#.K            | 18.12   | 10.83   | 1.67 | 0.60 |
| Q80X50_U; Uba2I  | Ubiquitin-ε R.DGSLANPYSGLTK#.F                    | 11.49   | 12.85   | 0.89 | 1.12 |
| Q80X50_U; Uba2I  | Ubiquitin-ε K.GFGDVGAK#.G                         | 16.83   | 17.09   | 0.98 | 1.02 |
| Q80X50_U; Uba2I  | Ubiquitin-ε K.GGSTGSOFLQFK#.T                     | 41.33   | 17.72   | 2.33 | 0.43 |

|                   |                                                |        |        |      |      |
|-------------------|------------------------------------------------|--------|--------|------|------|
| Q80X50_Ul Ubp2l   | Ubiquitin-z R.IDLAVLLGK#.T                     | 38.32  | 22.73  | 1.69 | 0.59 |
| Q80X50_Ul Ubp2l   | Ubiquitin-z K.IFTASNVSVPPLPAENVITAGQR.I        | 6.43   | 22.45  | 0.29 | 3.49 |
| Q80X50_Ul Ubp2l   | Ubiquitin-z R.LAQMISDHDNADFEK#.V               | 15.50  | 11.03  | 1.41 | 0.71 |
| Q80X50_Ul Ubp2l   | Ubiquitin-z R.LDFIVGVEGNSYPR.K                 | 6.59   | 23.10  | 0.29 | 3.50 |
| Q80X50_Ul Ubp2l   | Ubiquitin-z R.TATEEWGTEDWNEDELSETK#.I          | 15.97  | 9.83   | 1.63 | 0.62 |
| Q80X50_Ul Ubp2l   | Ubiquitin-z K.TPSSM*ENDSSNLDPSQAPSLAQLVFSNSK.Q | 7.16   | 3.51   | 2.04 | 0.49 |
| Q80X50_Ul Ubp2l   | Ubiquitin-z R.AINVLLEGNPDTHSWEM*VGK#.K         | 26.17  | 24.45  | 1.07 | 0.93 |
| Q80X50_Ul Ubp2l   | Ubiquitin-z R.AINVLLEGNPDTHSWEM*VGK#.K         | 19.45  | 16.49  | 1.18 | 0.85 |
| Q80X50_Ul Ubp2l   | Ubiquitin-z R.DGSLSNPYSGDLTGK#.F               | 58.74  | 48.82  | 1.20 | 0.83 |
| Q80X50_Ul Ubp2l   | Ubiquitin-z R.FPLDYISIPFPPTPTTLTGR.D           | 10.90  | 34.75  | 0.31 | 3.19 |
| Q80X50_Ul Ubp2l   | Ubiquitin-z K.GFGDVGKAK#.G                     | 45.02  | 43.04  | 1.05 | 0.96 |
| Q80X50_Ul Ubp2l   | Ubiquitin-z K.GGSTGSGFLEQFK#.T                 | 56.51  | 33.67  | 1.68 | 0.60 |
| Q80X50_Ul Ubp2l   | Ubiquitin-z R.IDLAVLLGK#.T                     | 84.00  | 62.10  | 1.35 | 0.74 |
| Q80X50_Ul Ubp2l   | Ubiquitin-z K.IFTASNVSVPPLPAENVITAGQR.I        | 13.01  | 47.61  | 0.27 | 3.66 |
| Q80X50_Ul Ubp2l   | Ubiquitin-z K.IFTASNVSVPPLPAENVITAGQR.I        | 2.86   | 4.85   | 0.59 | 1.70 |
| Q80X50_Ul Ubp2l   | Ubiquitin-z R.LAQM*ISDHDNADFEK#.V              | 41.29  | 35.06  | 1.18 | 0.85 |
| Q80X50_Ul Ubp2l   | Ubiquitin-z R.LAQMISDHDNADFEK#.V               | 23.35  | 21.45  | 1.09 | 0.92 |
| Q80X50_Ul Ubp2l   | Ubiquitin-z R.LDFIVGVEGNSYPR.K                 | 8.40   | 37.69  | 0.22 | 4.49 |
| Q80X50_Ul Ubp2l   | Ubiquitin-z R.RYPSSISSPQK.D                    | 7.49   | 21.79  | 0.34 | 2.91 |
| Q80X50_Ul Ubp2l   | Ubiquitin-z K.SANDSTVHSPFTK.R                  | 11.69  | 14.16  | 0.83 | 1.21 |
| Q80X50_Ul Ubp2l   | Ubiquitin-z R.SQTSSIPKQPTNK.S                  | 8.09   | 6.65   | 1.22 | 0.82 |
| Q80X50_Ul Ubp2l   | Ubiquitin-z K.STAPQM*SPGSSDNQSSPQAQK#.L        | 7.45   | 4.50   | 1.65 | 0.60 |
| Q80X50_Ul Ubp2l   | Ubiquitin-z R.TATEEWGTEDWNEDELSETK#.I          | 20.52  | 16.13  | 1.27 | 0.79 |
| Q80X50_Ul Ubp2l   | Ubiquitin-z R.DGSLSNPYSGDLTGK#.F               | 14.39  | 10.66  | 1.35 | 0.74 |
| Q80X50_Ul Ubp2l   | Ubiquitin-z R.FPLDYISIPFPPTPTTLTGR.D           | 3.24   | 4.68   | 0.69 | 1.44 |
| Q80X50_Ul Ubp2l   | Ubiquitin-z R.IDLAVLLGK#.T                     | 13.42  | 11.20  | 1.20 | 0.83 |
| Q80X50_Ul Ubp2l   | Ubiquitin-z K.IFTASNVSVPPLPAENVITAGQR.I        | 4.51   | 10.95  | 0.41 | 2.43 |
| Q9D1C1_Ul Ube2c   | Ubiquitin-c R.DPAAASVAAR.V                     | 2.21   | 5.95   | 0.37 | 2.69 |
| Q9D1C1_Ul Ube2c   | Ubiquitin-c K.GISAFPESDNLFK.W                  | 5.25   | 13.23  | 0.40 | 2.52 |
| Q9D1C1_Ul Ube2c   | Ubiquitin-c K.LSLEFSPGYPNATPK.F                | 6.55   | 13.26  | 0.49 | 2.03 |
| Q6ZWY6_Ul Ube2d2b | Ubiquitin-c R.SQVSPALTSK.V                     | 26.96  | 18.36  | 1.47 | 0.68 |
| P60605_Ul Ube2g2  | Ubiquitin-c K.LLSVSM*LAEPNDESGANVDASK#.M       | 12.96  | 7.68   | 1.69 | 0.59 |
| P62257_Ul Ube2h   | Ubiquitin-c K.FYGPQGTPEYGVWVK#.V               | 22.06  | 10.33  | 2.14 | 0.47 |
| P62257_Ul Ube2h   | Ubiquitin-c K.HEVTLGLLNEFVVK#.F                | 89.88  | 45.98  | 1.95 | 0.51 |
| P62257_Ul Ube2h   | Ubiquitin-c K.SPSIGFM*NK#.I                    | 23.67  | 10.91  | 2.17 | 0.46 |
| P62257_Ul Ube2h   | Ubiquitin-c K.SPSIGFM*NK#.I                    | 12.52  | 3.78   | 3.31 | 0.30 |
| P62257_Ul Ube2h   | Ubiquitin-c R.VDLPDK*HYPFK#.S                  | 39.19  | 14.94  | 2.62 | 0.38 |
| P61087_Ul Ube2k   | Ubiquitin-c K.IPETYFPNPK#.V                    | 9.30   | 10.48  | 0.89 | 1.13 |
| P61087_Ul Ube2k   | Ubiquitin-c R.NAVIVALSK#.S                     | 58.61  | 33.95  | 1.73 | 0.58 |
| P61087_Ul Ube2k   | Ubiquitin-c K.SWDVETATELLS.N-                  | 30.58  | 30.58  | 1.00 | 1.00 |
| P61089_Ul Ube2n   | Ubiquitin-c K.LELFLPEEYPM*AAPK#.V              | 92.01  | 45.14  | 2.04 | 0.49 |
| P61089_Ul Ube2n   | Ubiquitin-c K.LELFLPEEYPM*AAPK#.V              | 10.41  | 4.97   | 2.10 | 0.48 |
| P61089_Ul Ube2n   | Ubiquitin-c R.LLAEVPGIK#.A                     | 188.61 | 103.23 | 1.83 | 0.55 |
| P61089_Ul Ube2n   | Ubiquitin-c K.TNEAQAIETAR.A                    | 50.43  | 98.23  | 0.51 | 1.95 |
| P61089_Ul Ube2n   | Ubiquitin-c R.YFHVIAGQDPSFEGGTFFK#.L           | 87.75  | 48.84  | 1.80 | 0.56 |
| Q921J4_Ul Ube2s   | Ubiquitin-c R.LLLENYEYEAAR.A                   | 3.91   | 7.41   | 0.53 | 1.89 |
| Q921J4_Ul Ube2s   | Ubiquitin-c K.EVTLTADPPDGK.V                   | 4.41   | 6.37   | 0.69 | 1.44 |
| Q921J4_Ul Ube2s   | Ubiquitin-c R.LLLENYEYEAAR.A                   | 8.32   | 18.13  | 0.46 | 2.18 |
| Q9CZY3_Ul Ube2v1  | Ubiquitin-c R.LLELEEGQK#.G                     | 54.89  | 9.92   | 5.53 | 0.18 |
| Q9CZY3_Ul Ube2v1  | Ubiquitin-c K.VILOQLR.R                        | 8.73   | 12.31  | 0.71 | 1.41 |
| Q9CZY3_Ul Ube2v1  | Ubiquitin-c K.YPEAPPSVR.F                      | 5.21   | 4.79   | 1.09 | 0.92 |
| O08759_Ul Ube3a   | Ubiquitin-ç K.GASSAYLENSK#.G                   | 7.77   | 3.08   | 2.52 | 0.40 |
| O08759_Ul Ube3a   | Ubiquitin-ç R.NLVNDDAIVAAASK#.C                | 15.04  | 5.00   | 3.01 | 0.33 |
| O08759_Ul Ube3a   | Ubiquitin-ç R.VDPLETELGVK#.T                   | 13.62  | 5.07   | 2.69 | 0.37 |
| Q9ES00_Ul Ube4b   | Ubiquitin c K.ELFEEVISK#.M                     | 29.29  | 4.54   | 6.45 | 0.15 |
| Q9ES00_Ul Ube4b   | Ubiquitin c R.LTELYGQQPPSEPK#.F                | 12.92  | 3.37   | 3.83 | 0.26 |
| P21126_Ul Ubl4a   | Ubiquitin-l R.HFSVADASR.V                      | 8.60   | 10.59  | 0.81 | 1.23 |
| P21126_Ul Ubl4a   | Ubiquitin-l R.LSDYINGPNSK#.L                   | 35.44  | 14.17  | 2.50 | 0.40 |
| P21126_Ul Ubl4a   | Ubiquitin-l R.LVDSPATPIWLIKSH#.V               | 10.96  | 3.69   | 2.97 | 0.34 |
| Q8BGR9_Ul Ublcp1  | Ubiquitin-l K.FSEFYSK#.K                       | 21.95  | 3.53   | 6.21 | 0.16 |
| Q8BGR9_Ul Ublcp1  | Ubiquitin-l R.GLIDVK*PLGVIVGK#.F               | 20.31  | 2.34   | 8.67 | 0.12 |
| Q8BGR9_Ul Ublcp1  | Ubiquitin-l K.M*#ELGVSTNANYK#.I                | 2.17   | 4.31   | 0.50 | 1.99 |
| Q811S7_Ul Ubp1    | Upstream-t R.K.FSNFSGADLLK.L                   | 14.12  | 19.18  | 0.74 | 1.36 |
| Q6WKZ8_Ul Ubr2    | E3 ubiquali R.FELQYLFSTPDYGK#.R                | 5.97   | 2.83   | 2.11 | 0.47 |
| Q6WKZ8_Ul Ubr2    | E3 ubiquali R.YAVDILTWEK#ESELPEDEVAEK#.S       | 3.98   | 3.83   | 1.04 | 0.96 |
| A2AN08_Ul Ubr4    | E3 ubiquali K.ELPQLVASVIESEELHHEK#.Q           | 8.59   | 6.54   | 1.31 | 0.76 |
| A2AN08_Ul Ubr4    | E3 ubiquali K.SVFIAQNVASLQELGGSEK#.L           | 8.81   | 2.18   | 4.04 | 0.25 |
| A2AN08_Ul Ubr4    | E3 ubiquali K.SVFIAQNVASLQELGGSEK#.L           | 5.09   | 1.57   | 3.25 | 0.31 |
| A2AN08_Ul Ubr4    | E3 ubiquali R.TGSTSSK#REDYSDAATVQK#.C          | 12.24  | 2.45   | 4.99 | 0.20 |
| A2AN08_Ul Ubr4    | E3 ubiquali R.AYLQNLNEEGSTEK#PSQEK#.L          | 16.02  | 4.21   | 3.80 | 0.26 |
| A2AN08_Ul Ubr4    | E3 ubiquali K.HAAQELATLLSLPAPASVQQSK#.S        | 72.32  | 132.93 | 0.54 | 1.84 |
| A2AN08_Ul Ubr4    | E3 ubiquali R.LLAEEATLSTDLQQGVYALK#.S          | 10.37  | 5.44   | 1.91 | 0.52 |
| A2AN08_Ul Ubr4    | E3 ubiquali R.LLQTLPLQR.N                      | 14.26  | 12.28  | 1.16 | 0.86 |
| A2AN08_Ul Ubr4    | E3 ubiquali K.SVFIAQNVASLQELGGSEK#.L           | 7.25   | 2.40   | 3.02 | 0.33 |
| A2AN08_Ul Ubr4    | E3 ubiquali R.TLLPLLSSTESAEEISNSLER.I          | 10.86  | 13.04  | 0.83 | 1.20 |
| A2AN08_Ul Ubr4    | E3 ubiquali R.TVPSPPISQALVEGENDEQSSPDQVSAAK#.T | 11.49  | 6.39   | 1.80 | 0.56 |
| A2AN08_Ul Ubr4    | E3 ubiquali K.VNEAPEKQEDSGTAGISSTASVNR.Y       | 3.94   | 6.17   | 0.64 | 1.57 |
| A2AN08_Ul Ubr4    | E3 ubiquali R.YTTTQVVK#.L                      | 15.36  | 5.71   | 2.69 | 0.37 |
| E9Q2H1_E5 Ubr5    | E3 ubiquali R.AASTAPSTSTPAASSAGLIYDPSNLR.R     | 3.76   | 7.55   | 0.50 | 2.01 |
| E9Q2H1_E5 Ubr5    | E3 ubiquali R.AYPAATLLETAQK#.I                 | 8.90   | 5.52   | 1.61 | 0.62 |
| E9Q2H1_E5 Ubr5    | E3 ubiquali K.EGEEQSLAAEADSSKPGPSAPDVAAQLK.S   | 7.25   | 8.41   | 0.86 | 1.16 |
| E9Q2H1_E5 Ubr5    | E3 ubiquali R.IDELQVVK#.T                      | 15.68  | 8.83   | 1.78 | 0.56 |
| E9Q2H1_E5 Ubr5    | E3 ubiquali K.IVLLSANSR.A                      | 15.20  | 11.69  | 1.30 | 0.77 |
| E9Q2H1_E5 Ubr5    | E3 ubiquali K.LHTAQTYSELOGER.I                 | 5.02   | 16.86  | 0.30 | 3.36 |
| E9Q2H1_E5 Ubr5    | E3 ubiquali K.LTYQDAVNQLQNYVEEK#.L             | 6.72   | 5.41   | 1.24 | 0.80 |
| E9Q2H1_E5 Ubr5    | E3 ubiquali R.SVAIFTAGQESPIVLR.D               | 7.46   | 7.95   | 0.94 | 1.07 |
| E9Q2H1_E5 Ubr5    | E3 ubiquali K.VATVWDETSSVASK#.L                | 12.65  | 6.29   | 2.01 | 0.50 |
| P25976_Ul Ubtf    | Nucleolar t R.FLESPLPEEQQR.V                   | 4.18   | 9.23   | 0.45 | 2.21 |
| P25976_Ul Ubtf    | Nucleolar t K.HPELNISEGITK#.S                  | 11.90  | 4.62   | 2.58 | 0.39 |
| Q99PL6_Ul Ubxn6   | UBX domai K.ELQAEATSSNPGAGTNSVPEPK#.E          | 3.04   | 1.25   | 2.43 | 0.41 |
| Q99PL6_Ul Ubxn6   | UBX domai K.LGVDTIAK#.Y                        | 25.67  | 13.98  | 1.84 | 0.54 |
| Q99PL6_Ul Ubxn6   | UBX domai K.SVLRPELLAAEQLS.-                   | 7.48   | 12.52  | 0.60 | 1.67 |
| Q6P5G6_Ul Ubxn7   | UBX domai R.DVWSNEAVK#.N                       | 13.77  | 4.68   | 2.95 | 0.34 |
| Q6P5G6_Ul Ubxn7   | UBX domai R.EQITLPEQAK#.L                      | 21.10  | 6.21   | 3.40 | 0.29 |
| Q6P5G6_Ul Ubxn7   | UBX domai K.GLIQFTAGASESVGK#.H                 | 11.21  | 3.82   | 2.94 | 0.34 |
| Q6P5G6_Ul Ubxn7   | UBX domai K.LGDFPYVSLDPR.T                     | 4.42   | 7.67   | 0.58 | 1.74 |
| Q9JKB1_UC Uch13   | Ubiquitin c K.FLENYDAIR.V                      | 4.49   | 11.10  | 0.40 | 2.47 |
| Q9JKB1_UC Uch13   | Ubiquitin c K.SQGQDVTSVYFM*#K#.Q               | 5.02   | 3.96   | 1.27 | 0.79 |
| Q9JKB1_UC Uch13   | Ubiquitin c R.VYHETSAHEGQTEAPSIDEK#.V          | 3.49   | 1.95   | 1.79 | 0.56 |
| Q9WUP7_Ul Uchl5   | Ubiquitin c K.EFSQSFDAAM*#K#.G                 | 14.05  | 4.28   | 3.28 | 0.30 |
| Q9WUP7_Ul Uchl5   | Ubiquitin c R.GAQVEEIVSLEPESFEK#.L             | 24.34  | 8.19   | 2.97 | 0.34 |
| Q9WUP7_Ul Uchl5   | Ubiquitin c R.GAQVEEIVSLEPESFEK#.L             | 17.04  | 3.45   | 4.94 | 0.20 |
| Q9WUP7_Ul Uchl5   | Ubiquitin c R.LETIFFAK#.Q                      | 54.00  | 12.63  | 4.28 | 0.23 |

|                 |                                                 |       |       |       |      |
|-----------------|-------------------------------------------------|-------|-------|-------|------|
| Q9WUP7_U Uchi5  | Ubiquitin c R.NQM*LIEEEVQK#L                    | 31.75 | 7.24  | 4.38  | 0.23 |
| Q9WUP7_U Uchi5  | Ubiquitin c R.NQMLEEEVQK#L                      | 20.09 | 4.51  | 4.45  | 0.22 |
| Q9WUP7_U Uchi5  | Ubiquitin c K.WQPGEPEGAGVQDSR.L                 | 6.20  | 7.21  | 0.86  | 1.16 |
| Q9WUP7_U Uchi5  | Ubiquitin c R.GAQVEEIVLEPESFEK#L                | 9.51  | 2.49  | 3.82  | 0.26 |
| Q9WUP7_U Uchi5  | Ubiquitin c R.NQM*LIEEEVQK#L                    | 9.22  | 3.06  | 3.02  | 0.33 |
| P70362_Uf Ufd1l | Ubiquitin fr K.AVLENALR.N                       | 9.06  | 20.48 | 0.44  | 2.26 |
| P70362_Uf Ufd1l | Ubiquitin fr R.FIAPSGEGQSLR.K                   | 11.62 | 30.06 | 0.39  | 2.59 |
| P70362_Uf Ufd1l | Ubiquitin fr K.FQPQSPDFLDITNPK#A                | 30.60 | 18.16 | 1.68  | 0.59 |
| P70362_Uf Ufd1l | Ubiquitin fr R.LNITYPMLFK#L                     | 12.72 | 5.32  | 2.39  | 0.42 |
| P70362_Uf Ufd1l | Ubiquitin fr R.SDVEK#GGK#I                      | 34.10 | 2.34  | 14.58 | 0.07 |
| P61961_Uf Ufm1  | Ubiquitin-f K.VLSPVETPPTAVL#K.F                 | 15.24 | 8.06  | 1.89  | 0.53 |
| Q6P5E4_U Ugg1   | UDP-glucos R.AIWAAALQTOASSAK#N                  | 14.82 | 15.75 | 0.94  | 1.06 |
| Q6P5E4_U Ugg1   | UDP-glucos R.AVYLGELSHDQDVVEYIM*NOQNVVPR.I      | 3.20  | 7.26  | 0.44  | 2.27 |
| Q6P5E4_U Ugg1   | UDP-glucos R.AYNYVAQEVDGYHAFQTLTQJYK#V          | 41.71 | 26.15 | 1.60  | 0.63 |
| Q6P5E4_U Ugg1   | UDP-glucos K.DISQNFPTK#A                        | 36.85 | 32.04 | 1.15  | 0.87 |
| Q6P5E4_U Ugg1   | UDP-glucos K.EGETYDVAVAVDPVTR.E                 | 3.91  | 18.68 | 0.21  | 4.77 |
| Q6P5E4_U Ugg1   | UDP-glucos K.ELGTLHTEETQEGSQK#HEEL.-            | 14.32 | 13.63 | 1.05  | 0.95 |
| Q6P5E4_U Ugg1   | UDP-glucos R.EYLPALLEGQLK#E                     | 24.34 | 24.84 | 0.98  | 1.02 |
| Q6P5E4_U Ugg1   | UDP-glucos R.EYLDLTASNIFYVDDFAR.F               | 1.88  | 7.90  | 0.24  | 4.20 |
| Q6P5E4_U Ugg1   | UDP-glucos K.FLFDVADQJVR.T                      | 6.81  | 34.79 | 0.20  | 5.11 |
| Q6P5E4_U Ugg1   | UDP-glucos R.FLSPLQQLNLLK.F                     | 31.80 | 40.14 | 0.79  | 1.26 |
| Q6P5E4_U Ugg1   | UDP-glucos R.GQYGLSQDPNLSNLDQDLNPNMIHQVPIK#S    | 3.90  | 1.99  | 1.96  | 0.51 |
| Q6P5E4_U Ugg1   | UDP-glucos R.HYISNPSK#EPVYLSGYGVELAIK#S         | 8.57  | 3.10  | 2.77  | 0.36 |
| Q6P5E4_U Ugg1   | UDP-glucos R.HYISNPSK#EPVYLSGYGVELAIK.S         | 4.97  | 5.49  | 0.91  | 1.10 |
| Q6P5E4_U Ugg1   | UDP-glucos K.ILETTFFQR.A                        | 12.52 | 46.50 | 0.27  | 3.71 |
| Q6P5E4_U Ugg1   | UDP-glucos K.INVYFR.H                           | 6.00  | 30.52 | 0.20  | 5.08 |
| Q6P5E4_U Ugg1   | UDP-glucos R.ISM*INNPQSQEISDSTPIFR.A            | 2.43  | 6.25  | 0.39  | 2.57 |
| Q6P5E4_U Ugg1   | UDP-glucos R.ISMINNPSQEISDSTPIFR.A              | 2.11  | 4.64  | 0.45  | 2.20 |
| Q6P5E4_U Ugg1   | UDP-glucos R.IVPEVQDYQEI#K.Q                    | 26.39 | 29.34 | 0.90  | 1.11 |
| Q6P5E4_U Ugg1   | UDP-glucos R.IYSHDGTSDPPDANDVVLNLFNK#S          | 29.54 | 28.93 | 1.02  | 0.98 |
| Q6P5E4_U Ugg1   | UDP-glucos K.KADM*ANEDLLSDGTNENESGFWDSFK.W      | 5.41  | 8.16  | 0.66  | 1.51 |
| Q6P5E4_U Ugg1   | UDP-glucos K.K#ADM*ANEDLLSDGTNENESGFWDSFK.W     | 16.86 | 13.71 | 1.23  | 0.81 |
| Q6P5E4_U Ugg1   | UDP-glucos K.KYNFQYELVQYK.W                     | 5.16  | 6.67  | 0.77  | 1.29 |
| Q6P5E4_U Ugg1   | UDP-glucos R.LIGIEGLSHNLK#L                     | 40.64 | 36.15 | 1.12  | 0.89 |
| Q6P5E4_U Ugg1   | UDP-glucos R.LIGIEGLSHNLK#L                     | 14.37 | 11.03 | 1.30  | 0.77 |
| Q6P5E4_U Ugg1   | UDP-glucos K.LNIQPSSETDYAVDIR.S                 | 9.61  | 37.13 | 0.26  | 3.87 |
| Q6P5E4_U Ugg1   | UDP-glucos K.NYLSPTFK#E                         | 30.77 | 30.07 | 1.02  | 0.98 |
| Q6P5E4_U Ugg1   | UDP-glucos R.QLYDAIK.H                          | 16.49 | 17.91 | 0.92  | 1.09 |
| Q6P5E4_U Ugg1   | UDP-glucos K.QLQTLFQEEK.E                       | 12.01 | 12.17 | 0.99  | 1.01 |
| Q6P5E4_U Ugg1   | UDP-glucos R.SPAINWVNNLEVDNR.Y                  | 4.08  | 15.66 | 0.26  | 3.84 |
| Q6P5E4_U Ugg1   | UDP-glucos K.TAAIANSM*NYLTK#K                   | 26.31 | 23.20 | 1.13  | 0.88 |
| Q6P5E4_U Ugg1   | UDP-glucos K.TAVSAQLR.A                         | 8.60  | 38.53 | 0.22  | 4.48 |
| Q6P5E4_U Ugg1   | UDP-glucos R.TGETVK#VEHVVSLEK#K                 | 24.35 | 18.55 | 1.31  | 0.76 |
| Q6P5E4_U Ugg1   | UDP-glucos K.VDALLSAQPK.G                       | 35.55 | 40.90 | 0.87  | 1.15 |
| Q6P5E4_U Ugg1   | UDP-glucos K.VWQLQDLSFQTAAR.I                   | 8.60  | 13.26 | 0.65  | 1.54 |
| Q6P5E4_U Ugg1   | UDP-glucos K.YNFQYELVQYK.W                      | 11.11 | 9.77  | 1.14  | 0.88 |
| Q6P5E4_U Ugg1   | UDP-glucos R.YVLEPEISFTADSSFAK#G                | 40.80 | 33.73 | 1.21  | 0.83 |
| Q6P5E4_U Ugg1   | UDP-glucos K.AEYKQDKDIIINIFVASGHLRY.F           | 4.53  | 6.79  | 0.67  | 1.50 |
| Q6P5E4_U Ugg1   | UDP-glucos K.AITSLTTK#W                         | 95.31 | 72.13 | 1.32  | 0.76 |
| Q6P5E4_U Ugg1   | UDP-glucos R.AIWAAALQTOASSAK#N                  | 33.19 | 29.74 | 1.12  | 0.90 |
| Q6P5E4_U Ugg1   | UDP-glucos R.AVYLGELSHDQDVVEYIMNOQNVVPR.I       | 1.20  | 10.45 | 0.11  | 8.70 |
| Q6P5E4_U Ugg1   | UDP-glucos R.AYNYVAQEVDGYHAFQTLTQJYK#V          | 68.90 | 46.03 | 1.50  | 0.67 |
| Q6P5E4_U Ugg1   | UDP-glucos K.DISQNFPTK#A                        | 56.77 | 50.87 | 1.12  | 0.90 |
| Q6P5E4_U Ugg1   | UDP-glucos K.EGETYDVAVAVDPVTR.E                 | 8.58  | 29.54 | 0.29  | 3.44 |
| Q6P5E4_U Ugg1   | UDP-glucos R.EYLDLTASNIFYVDDFAR.F               | 5.73  | 14.28 | 0.40  | 2.49 |
| Q6P5E4_U Ugg1   | UDP-glucos K.FLFDVADQJVR.T                      | 12.77 | 49.58 | 0.26  | 3.88 |
| Q6P5E4_U Ugg1   | UDP-glucos R.FLSPLQQLNLLK#F                     | 71.20 | 68.36 | 1.04  | 0.96 |
| Q6P5E4_U Ugg1   | UDP-glucos R.GQYGLSQDPNLSNLDQDLNPNMIHQVPIK#S    | 10.06 | 7.13  | 1.41  | 0.71 |
| Q6P5E4_U Ugg1   | UDP-glucos R.GYETQVGPPLVPLFNGM*PFEK.E           | 17.76 | 15.92 | 1.12  | 0.90 |
| Q6P5E4_U Ugg1   | UDP-glucos R.HYISNPSK#E                         | 12.88 | 14.38 | 0.90  | 1.12 |
| Q6P5E4_U Ugg1   | UDP-glucos R.IEYQFEDK#H                         | 35.85 | 30.57 | 1.17  | 0.85 |
| Q6P5E4_U Ugg1   | UDP-glucos R.IGFVFNVDSEVDGM*QDAGVAVLR.A         | 2.59  | 5.78  | 0.45  | 2.23 |
| Q6P5E4_U Ugg1   | UDP-glucos R.ILAASGASLVVM*K#D                   | 8.91  | 7.89  | 1.13  | 0.89 |
| Q6P5E4_U Ugg1   | UDP-glucos K.ILETTFFQR.A                        | 24.34 | 93.51 | 0.26  | 3.84 |
| Q6P5E4_U Ugg1   | UDP-glucos R.ISMINNPSQEISDSTPIFR.A              | 6.82  | 7.69  | 0.89  | 1.13 |
| Q6P5E4_U Ugg1   | UDP-glucos R.IVPEVQDYQEI#K.Q                    | 70.87 | 58.03 | 1.22  | 0.82 |
| Q6P5E4_U Ugg1   | UDP-glucos R.IYSHDGTSDPPDANDVVLNLFNK#S          | 76.74 | 61.25 | 1.25  | 0.80 |
| Q6P5E4_U Ugg1   | UDP-glucos K.K#ADM*ANEDLLSDGTNENESGFWDSFK#W     | 14.33 | 12.62 | 1.14  | 0.88 |
| Q6P5E4_U Ugg1   | UDP-glucos K.K#ADM*ANEDLLSDGTNENESGFWDSFK#W     | 5.80  | 4.51  | 1.28  | 0.78 |
| Q6P5E4_U Ugg1   | UDP-glucos K.KYNFQYELVQYK.W                     | 17.19 | 15.26 | 1.13  | 0.89 |
| Q6P5E4_U Ugg1   | UDP-glucos K.KYVVEVNSILGIDSAQYDQNR.K            | 2.40  | 6.84  | 0.35  | 2.84 |
| Q6P5E4_U Ugg1   | UDP-glucos R.LIGIEGLSHNLK#L                     | 95.71 | 62.40 | 1.53  | 0.65 |
| Q6P5E4_U Ugg1   | UDP-glucos K.LNIQPSSETDYAVDIR.S                 | 50.66 | 80.60 | 0.63  | 1.59 |
| Q6P5E4_U Ugg1   | UDP-glucos K.LRELPALLEGQLK.E                    | 1.11  | 4.65  | 0.24  | 4.18 |
| Q6P5E4_U Ugg1   | UDP-glucos K.LSDM*PLK#S                         | 34.90 | 28.79 | 1.21  | 0.82 |
| Q6P5E4_U Ugg1   | UDP-glucos K.NYLSPTFK#E                         | 75.47 | 65.09 | 1.16  | 0.86 |
| Q6P5E4_U Ugg1   | UDP-glucos R.QLYDAIK#H                          | 45.35 | 39.61 | 1.14  | 0.87 |
| Q6P5E4_U Ugg1   | UDP-glucos K.QLQTLFQEEK.E                       | 25.51 | 25.88 | 0.99  | 1.01 |
| Q6P5E4_U Ugg1   | UDP-glucos K.QLQTLFQEEK#ELGTLHTEETQEGSQK#HEEL.- | 7.14  | 5.94  | 1.20  | 0.83 |
| Q6P5E4_U Ugg1   | UDP-glucos R.SPAINWVNNLEVDNR.Y                  | 7.07  | 24.52 | 0.29  | 3.47 |
| Q6P5E4_U Ugg1   | UDP-glucos K.TAAIANSM*NYLTK#K                   | 51.78 | 43.65 | 1.19  | 0.84 |
| Q6P5E4_U Ugg1   | UDP-glucos K.TAVSAQLR.A                         | 19.35 | 74.48 | 0.26  | 3.85 |
| Q6P5E4_U Ugg1   | UDP-glucos R.TGETVK#VEHVVSLEK#K                 | 66.73 | 60.13 | 1.11  | 0.90 |
| Q6P5E4_U Ugg1   | UDP-glucos K.VDALLSAQPK.G                       | 57.67 | 55.20 | 1.04  | 0.96 |
| Q6P5E4_U Ugg1   | UDP-glucos R.VEEDVADSLVM*K#V                    | 51.00 | 39.89 | 1.28  | 0.78 |
| Q6P5E4_U Ugg1   | UDP-glucos R.VEEDVADSLVMK#V                     | 14.42 | 10.94 | 1.32  | 0.76 |
| Q6P5E4_U Ugg1   | UDP-glucos K.VEHVVSLEK#K                        | 16.69 | 17.74 | 0.94  | 1.06 |
| Q6P5E4_U Ugg1   | UDP-glucos K.VWQLQDLSFQTAAR.I                   | 11.09 | 30.48 | 0.36  | 2.75 |
| Q6P5E4_U Ugg1   | UDP-glucos K.YNFQYELVQYK#W                      | 23.19 | 18.25 | 1.27  | 0.79 |
| Q6P5E4_U Ugg1   | UDP-glucos R.YVLEPEISFTADSSFAK#G                | 80.10 | 63.92 | 1.25  | 0.80 |
| Q6P5E4_U Ugg1   | UDP-glucos R.YVLEPEISFTADSSFAK.G                | 10.60 | 12.95 | 0.82  | 1.22 |
| Q91ZJ5_Uc Ugp2  | UTP-glucos R.LVEIAQVPK#A                        | 36.49 | 7.22  | 5.05  | 0.20 |
| Q91ZJ5_Uc Ugp2  | UTP-glucos R.NENTFLDLTQVQIEHLNK#T               | 33.56 | 5.95  | 5.64  | 0.18 |
| Q91ZJ5_Uc Ugp2  | UTP-glucos K.TLDGGLNVIQLETAVGAIAK#S             | 8.12  | 2.71  | 2.99  | 0.33 |
| Q8VDF2_Ui Uhrf1 | E3 ubiquiti K.SGFLVWR.Y                         | 3.82  | 12.97 | 0.29  | 3.40 |
| Q8VDF2_Ui Uhrf1 | E3 ubiquiti K.SKLEPYLSEQQANLIK.E                | 3.35  | 7.27  | 0.46  | 2.17 |
| Q8VDF2_Ui Uhrf1 | E3 ubiquiti R.TDSSEVQAGEK.L                     | 19.94 | 39.19 | 0.51  | 1.97 |
| Q8VDF2_Ui Uhrf1 | E3 ubiquiti R.DDTEPEWTR.E                       | 1.73  | 11.53 | 0.15  | 6.68 |
| Q8VDF2_Ui Uhrf1 | E3 ubiquiti R.DNIFGAWFEAQVQVQK.R                | 9.38  | 17.81 | 0.53  | 1.90 |
| Q8VDF2_Ui Uhrf1 | E3 ubiquiti K.LEPYLSEQQANLIK.E                  | 5.93  | 8.41  | 0.71  | 1.42 |
| Q8VDF2_Ui Uhrf1 | E3 ubiquiti R.LINDTIQLVLR.Q                     | 9.35  | 56.62 | 0.17  | 6.06 |
| Q8VDF2_Ui Uhrf1 | E3 ubiquiti R.QLGLTM*QYPEGYLEALANK.E            | 2.63  | 3.64  | 0.72  | 1.38 |
| Q8VDF2_Ui Uhrf1 | E3 ubiquiti R.QLGLTM*QYPEGYLEALANK.E            | 5.18  | 10.73 | 0.48  | 2.07 |

|                   |                                              |        |       |      |       |
|-------------------|----------------------------------------------|--------|-------|------|-------|
| Q8VDF2_U1 Uhrf1   | E3 ubiquitin R.RDDTEPEPWTR.E                 | 1.81   | 14.67 | 0.12 | 8.09  |
| Q8VDF2_U1 Uhrf1   | E3 ubiquitin R.RPLIASPQPALR.N                | 1.48   | 44.64 | 0.03 | 30.18 |
| Q8VDF2_U1 Uhrf1   | E3 ubiquitin K.SGFLVWR.Y                     | 7.90   | 43.38 | 0.18 | 5.49  |
| Q8VDF2_U1 Uhrf1   | E3 ubiquitin K.SKLEPYLSEQQANLIK.E            | 13.57  | 26.36 | 0.51 | 1.94  |
| Q8VDF2_U1 Uhrf1   | E3 ubiquitin K.SKLEPYLSEQQANLIKED.K.G        | 8.16   | 15.25 | 0.54 | 1.87  |
| Q8VDF2_U1 Uhrf1   | E3 ubiquitin K.SSTHGEGAAEADK#TVWEDTDLGLYK#.V | 7.21   | 7.32  | 0.99 | 1.02  |
| Q8VDF2_U1 Uhrf1   | E3 ubiquitin K.STGTPLSRPP.A                  | 12.36  | 78.31 | 0.16 | 6.34  |
| Q8VDF2_U1 Uhrf1   | E3 ubiquitin R.TDSSEVVQAGEK#.L               | 40.51  | 70.37 | 0.58 | 1.74  |
| Q8VDF2_U1 Uhrf1   | E3 ubiquitin R.TM*DGKETHVNSLSR.L             | 3.04   | 22.98 | 0.13 | 7.56  |
| Q8VDF2_U1 Uhrf1   | E3 ubiquitin K.VNEVVDVR.D                    | 7.55   | 66.88 | 0.11 | 8.86  |
| Q8VDF2_U1 Uhrf1   | E3 ubiquitin K.YDDYPEHGVIVK#.A               | 37.29  | 68.55 | 0.54 | 1.84  |
| Q8VDF2_U1 Uhrf1   | E3 ubiquitin K.YDDYPEHGVIVK#.A               | 8.67   | 16.78 | 0.52 | 1.94  |
| Q77MI3_U1 Uhrf2   | E3 ubiquitin K.ASDSTDAVEAFQLTPQQQR.L         | 1.72   | 3.12  | 0.55 | 1.82  |
| Q77MI3_U1 Uhrf2   | E3 ubiquitin R.GFWYDAEITLK#.T                | 11.32  | 9.31  | 1.22 | 0.82  |
| P13439_U1 Umps    | Uridine 5'-r K.FGSFVLR#.S                    | 17.15  | 5.93  | 2.89 | 0.35  |
| P13439_U1 Umps    | Uridine 5'-r K.IASWADIVNAHVPGSGVVK#.G        | 29.78  | 13.07 | 2.28 | 0.44  |
| P13439_U1 Umps    | Uridine 5'-r K.R#ADIGINTVK#.K                | 19.68  | 8.55  | 2.30 | 0.43  |
| P13439_U1 Umps    | Uridine 5'-r K.SGLSPVYDLR.G                  | 4.83   | 9.44  | 0.51 | 1.96  |
| P13439_U1 Umps    | Uridine 5'-r K.VTDIALLDR.E                   | 6.45   | 11.07 | 0.58 | 1.72  |
| Q8C4B4_U1 Unc119b | Protein unc R.SDSFYVDNK#.L                   | 9.12   | 4.53  | 2.01 | 0.50  |
| Q99KD5_U1 Unc45a  | Protein unc K.ALLPLALEGTDVGGTK#.A            | 12.05  | 4.14  | 2.91 | 0.34  |
| Q99KD5_U1 Unc45a  | Protein unc R.ALVLGCKLGSAGGTDFSMK#.Q         | 25.08  | 2.71  | 9.26 | 0.11  |
| Q99KD5_U1 Unc45a  | Protein unc K.DPNNSLTWVIDQGLK#.I             | 8.65   | 2.67  | 3.24 | 0.31  |
| Q99KD5_U1 Unc45a  | Protein unc K.ALLPLALEGTDVGGTK#.A            | 18.65  | 5.13  | 3.63 | 0.28  |
| Q99KD5_U1 Unc45a  | Protein unc R.GTVVVLNM*MQSK#.E               | 6.51   | 2.43  | 2.68 | 0.37  |
| Q9EPU0_R1 Urf1    | Regulator c K.AGAKPDQGIITPYEQQR.S            | 17.55  | 54.65 | 0.32 | 3.11  |
| Q9EPU0_R1 Urf1    | Regulator c K.AGSLQSLFER.L                   | 23.63  | 70.79 | 0.33 | 3.00  |
| Q9EPU0_R1 Urf1    | Regulator c K.ALVEGLPNLR.E                   | 19.55  | 66.15 | 0.30 | 3.38  |
| Q9EPU0_R1 Urf1    | Regulator c R.AYHQHGGTGLSQY.-                | 75.02  | 75.02 | 1.00 | 1.00  |
| Q9EPU0_R1 Urf1    | Regulator c K.DINWDSQWQPLIQDR.C              | 5.19   | 12.62 | 0.41 | 2.43  |
| Q9EPU0_R1 Urf1    | Regulator c R.EAIPGVSVDYR.S                  | 25.44  | 72.94 | 0.35 | 2.87  |
| Q9EPU0_R1 Urf1    | Regulator c K.ENPSATLEDLEKGVDEEPQHVLLR.Y     | 6.18   | 25.19 | 0.25 | 4.07  |
| Q9EPU0_R1 Urf1    | Regulator c K.ESQTODNITVR.W                  | 9.89   | 33.73 | 0.29 | 3.41  |
| Q9EPU0_R1 Urf1    | Regulator c R.FM*TTAM*YDAR.E                 | 5.35   | 22.45 | 0.24 | 4.20  |
| Q9EPU0_R1 Urf1    | Regulator c K.GIGHVVK#.V                     | 38.70  | 19.05 | 2.03 | 0.49  |
| Q9EPU0_R1 Urf1    | Regulator c R.IAFFLTK#.T                     | 115.79 | 72.17 | 1.60 | 0.62  |
| Q9EPU0_R1 Urf1    | Regulator c K.IPSEEQLR.A                     | 20.57  | 67.45 | 0.30 | 3.28  |
| Q9EPU0_R1 Urf1    | Regulator c R.KLVNTVNPGR.F                   | 11.73  | 35.11 | 0.33 | 2.99  |
| Q9EPU0_R1 Urf1    | Regulator c K.LEADYDK#.K#.L                  | 34.64  | 18.14 | 1.91 | 0.52  |
| Q9EPU0_R1 Urf1    | Regulator c K.LEELWK#.E                      | 46.93  | 11.36 | 4.13 | 0.24  |
| Q9EPU0_R1 Urf1    | Regulator c K.LKESQTDNITVR.W                 | 18.24  | 44.33 | 0.41 | 2.43  |
| Q9EPU0_R1 Urf1    | Regulator c K.LLGHVEVDVVK#.C                 | 37.30  | 21.52 | 1.73 | 0.58  |
| Q9EPU0_R1 Urf1    | Regulator c K.LLQQLKDETGELSSADEK.R           | 22.15  | 12.45 | 1.78 | 0.56  |
| Q9EPU0_R1 Urf1    | Regulator c K.LYQVEIASVDAFQGR.E              | 9.91   | 28.76 | 0.34 | 2.90  |
| Q9EPU0_R1 Urf1    | Regulator c R.NM*DSMPPELQK#.L                | 11.38  | 6.26  | 1.82 | 0.55  |
| Q9EPU0_R1 Urf1    | Regulator c R.NVFLGFIIPAK#.A                 | 70.54  | 50.08 | 1.41 | 0.71  |
| Q9EPU0_R1 Urf1    | Regulator c R.NVFLGFIIPAK#.A                 | 135.09 | 67.56 | 2.00 | 0.50  |
| Q9EPU0_R1 Urf1    | Regulator c R.QITAQINK#.L                    | 41.40  | 23.01 | 1.80 | 0.56  |
| Q9EPU0_R1 Urf1    | Regulator c K.RFTAQGLPDLNHSQVYAVK.T          | 5.29   | 14.81 | 0.36 | 2.80  |
| Q9EPU0_R1 Urf1    | Regulator c K.SQIDVALSQDSTYQGER.A            | 4.20   | 9.73  | 0.43 | 2.32  |
| Q9EPU0_R1 Urf1    | Regulator c R.SSVGAPVEVTHNFQVDFVWK.S         | 4.94   | 4.50  | 1.10 | 0.91  |
| Q9EPU0_R1 Urf1    | Regulator c R.SYLVQYM*QFSGSLHTK#.L           | 9.43   | 7.75  | 1.22 | 0.82  |
| Q9EPU0_R1 Urf1    | Regulator c K.TFAVDETSVGYIHK#.L              | 14.92  | 10.10 | 1.48 | 0.68  |
| Q9EPU0_R1 Urf1    | Regulator c K.TSLLLAELNFEEDTYTTR#.D          | 11.66  | 3.43  | 3.39 | 0.29  |
| Q9EPU0_R1 Urf1    | Regulator c K.TSLLLAELNFEEDTYTTR#.D          | 12.14  | 8.73  | 1.39 | 0.72  |
| Q9EPU0_R1 Urf1    | Regulator c K.TVLQRPLSLIQGPPGTGK.T           | 20.01  | 70.74 | 0.28 | 3.54  |
| Q9EPU0_R1 Urf1    | Regulator c K.VPDNYGDEIAELR.S                | 22.41  | 24.33 | 0.92 | 1.09  |
| Q9EPU0_R1 Urf1    | Regulator c R.YEDAYQYQIFGLVK#.L              | 28.35  | 20.31 | 1.40 | 0.72  |
| Q9EPU0_R1 Urf1    | Regulator c R.YGVIIIGNPK#.A                  | 78.94  | 53.67 | 1.47 | 0.68  |
| Q9EPU0_R1 Urf1    | Regulator c R.AYHQHGGTGLSQY.-                | 25.94  | 25.94 | 1.00 | 1.00  |
| Q9EPU0_R1 Urf1    | Regulator c R.FM*TTAM*YDAR.E                 | 3.23   | 8.33  | 0.39 | 2.58  |
| Q9EPU0_R1 Urf1    | Regulator c R.IAFFLTK#.T                     | 35.62  | 19.50 | 1.83 | 0.55  |
| Q9EPU0_R1 Urf1    | Regulator c R.KLVNTVNPGR.F                   | 2.31   | 12.38 | 0.19 | 5.35  |
| Q9EPU0_R1 Urf1    | Regulator c K.LLQQLKDETGELSSADEK.R           | 3.91   | 11.41 | 0.34 | 2.92  |
| Q9EPU0_R1 Urf1    | Regulator c R.NM*DSMPPELQK#.L                | 21.91  | 16.58 | 1.32 | 0.76  |
| Q9EPU0_R1 Urf1    | Regulator c R.NVFLGFIIPAK#.A                 | 32.35  | 27.59 | 1.17 | 0.85  |
| Q9EPU0_R1 Urf1    | Regulator c K.TVLQRPLSLIQGPPGTGK.T           | 6.98   | 17.34 | 0.40 | 2.48  |
| Q9EPU0_R1 Urf1    | Regulator c K.VPDNYGDEIAELR.S                | 7.31   | 7.54  | 0.97 | 1.03  |
| Q9EPU0_R1 Urf1    | Regulator c R.YEDAYQYQIFGLVK#.L              | 13.41  | 8.21  | 1.63 | 0.61  |
| Q9EPU0_R1 Urf1    | Regulator c R.YGVIIIGNPK#.A                  | 29.02  | 17.66 | 1.64 | 0.61  |
| A2AT37_A2 Urf2    | Protein Upl K.AFVPAILFK#.D                   | 38.89  | 14.28 | 2.72 | 0.37  |
| A2AT37_A2 Urf2    | Protein Upl K.FNLSPFSEISPEK#.Q               | 7.80   | 2.92  | 2.67 | 0.37  |
| A2AT37_A2 Urf2    | Protein Upl K.YIAEAVASIVEAK#.L               | 18.63  | 9.18  | 2.03 | 0.49  |
| A2AT37_A2 Urf2    | Protein Upl R.YSDFAPSLQVWVK#.K               | 17.81  | 5.82  | 3.06 | 0.33  |
| Q3ULL6_Q2 Urf3b   | Protein Upl K.FLESYATDNEK#.M                 | 11.13  | 5.13  | 2.17 | 0.46  |
| Q3ULL6_Q2 Urf3b   | Protein Upl K.M*STPTLEEEIEAK#.N              | 8.43   | 7.33  | 1.15 | 0.87  |
| Q3ULL6_Q2 Urf3b   | Protein Upl R.TTPLLFLK#.N                    | 11.75  | 5.33  | 2.21 | 0.45  |
| Q9CQY6_U1 Uqcc2   | Ubiquitinol-1 K.LILSTDLEEFQEM*NK#.S          | 8.35   | 2.34  | 3.56 | 0.28  |
| Q9DB77_Q Uqcc2    | Cytochrom K.AVAQGNLSSADVQAAK#.N              | 7.01   | 7.18  | 0.98 | 1.02  |
| Q9Z120_US Uso1    | General ves R.LSALLQETK#.E                   | 18.51  | 7.80  | 2.37 | 0.42  |
| Q9Z120_US Uso1    | General ves R.ASQK#PQPNFSPPEYM*IFDHEFTK.L    | 13.34  | 6.59  | 2.02 | 0.49  |
| Q9Z120_US Uso1    | General ves R.ASQK#PQPNFSPPEYM*IFDHEFTK#.L   | 12.02  | 5.69  | 2.11 | 0.47  |
| Q9Z120_US Uso1    | General ves K.DSLIENLK#.S                    | 17.19  | 7.59  | 2.26 | 0.44  |
| Q9Z120_US Uso1    | General ves R.EIIRNDGVLLLQALTR.S             | 3.61   | 29.91 | 0.12 | 8.29  |
| Q9Z120_US Uso1    | General ves K.ELEGVITK#.A                    | 137.74 | 54.25 | 2.54 | 0.39  |
| Q9Z120_US Uso1    | General ves K.EQDDLVLADQDQK#.I               | 26.50  | 11.99 | 2.21 | 0.45  |
| Q9Z120_US Uso1    | General ves R.EQDLQLEELK#.Q                  | 63.05  | 26.97 | 2.34 | 0.43  |
| Q9Z120_US Uso1    | General ves K.IVAFENAFER.L                   | 57.41  | 96.52 | 0.59 | 1.68  |
| Q9Z120_US Uso1    | General ves K.K#EQDDLVLADQDQK#.I             | 13.75  | 3.02  | 4.56 | 0.22  |
| Q9Z120_US Uso1    | General ves R.LLTSLLK#.Q                     | 149.27 | 63.16 | 2.36 | 0.42  |
| Q9Z120_US Uso1    | General ves R.LIM*DLADSR.E                   | 16.33  | 32.31 | 0.51 | 1.98  |
| Q9Z120_US Uso1    | General ves R.LMDLLADSR.E                    | 11.57  | 15.01 | 0.77 | 1.30  |
| Q9Z120_US Uso1    | General ves R.LREEIEELK.S                    | 8.88   | 26.21 | 0.34 | 2.95  |
| Q9Z120_US Uso1    | General ves R.LSALLQETK#.E                   | 194.74 | 68.85 | 2.83 | 0.35  |
| Q9Z120_US Uso1    | General ves R.M*#PWFVEEENSGWSAQK#.V          | 38.54  | 12.60 | 3.06 | 0.33  |
| Q9Z120_US Uso1    | General ves R.NDGVLLLQALTR.S                 | 37.65  | 59.65 | 0.63 | 1.58  |
| Q9Z120_US Uso1    | General ves K.QLGPPVQVQLVSPM*GVSRL           | 3.13   | 5.13  | 0.61 | 1.64  |
| Q9Z120_US Uso1    | General ves R.QSEDLGSQFTEIFIK#.Q             | 71.98  | 35.38 | 2.03 | 0.49  |
| Q9Z120_US Uso1    | General ves K.SQQLLQGLAEK#.D                 | 13.59  | 4.82  | 2.82 | 0.35  |
| Q9Z120_US Uso1    | General ves K.SQQLLQGLAEK#DSLIEENLK#.S       | 62.92  | 25.84 | 2.43 | 0.41  |
| Q9Z120_US Uso1    | General ves K.TLEQHDNIVHYK#.N                | 121.58 | 50.19 | 2.42 | 0.41  |
| Q9Z120_US Uso1    | General ves R.ASQK#PQPNFSPPEYM*IFDHEFTK#.L   | 4.19   | 4.48  | 0.94 | 1.07  |
| Q9Z120_US Uso1    | General ves K.DSLIENLK#.S                    | 13.54  | 5.35  | 2.53 | 0.40  |

|                 |                                                         |       |       |      |      |
|-----------------|---------------------------------------------------------|-------|-------|------|------|
| Q9Z120_U0 Uso1  | General ves K.ELEGVITK#.A                               | 58.62 | 24.63 | 2.38 | 0.42 |
| Q9Z120_U0 Uso1  | General ves R.EQDQLQLEELK#.Q                            | 33.19 | 11.32 | 2.93 | 0.34 |
| Q9Z120_U0 Uso1  | General ves R.LSALLOETK#.E                              | 75.54 | 25.67 | 2.94 | 0.34 |
| Q9Z120_U0 Uso1  | General ves R.M*K#*WFVEVGEENSGWSAQK#.V                  | 14.07 | 4.48  | 3.14 | 0.32 |
| Q9Z120_U0 Uso1  | General ves R.NDGVLLQLALTR.S                            | 16.30 | 27.43 | 0.59 | 1.68 |
| Q9Z120_U0 Uso1  | General ves K.QLGGPPVQIQLVSPM*GVSR.L                    | 5.74  | 7.42  | 0.77 | 1.29 |
| Q9Z120_U0 Uso1  | General ves K.SQQLLQGLQAEK#.D                           | 13.54 | 5.33  | 2.54 | 0.39 |
| Q9Z120_U0 Uso1  | General ves K.SVPVGESEHVSAAK#.T                         | 33.98 | 12.48 | 2.72 | 0.37 |
| Q9Z120_U0 Uso1  | General ves K.TNNSNQNFVK#.E                             | 37.06 | 17.80 | 2.08 | 0.48 |
| P52479_Uf Usp10 | Ubiquitin c K.EGLVPVSEDPAVAK#.I                         | 26.41 | 14.46 | 1.83 | 0.55 |
| P52479_Uf Usp10 | Ubiquitin c R.ELLSPGIK#.N                               | 19.43 | 8.70  | 2.23 | 0.45 |
| P52479_Uf Usp10 | Ubiquitin c R.ESVOGYTTK#.T                              | 18.10 | 9.47  | 1.91 | 0.52 |
| P52479_Uf Usp10 | Ubiquitin c K.IAELLEVTLIHKPVSLQPR.G                     | 10.66 | 23.29 | 0.46 | 2.18 |
| P52479_Uf Usp10 | Ubiquitin c K.NIDYPVDLEISR.E                            | 6.19  | 11.71 | 0.53 | 1.89 |
| P52479_Uf Usp10 | Ubiquitin c R.QADVQTPITGIFGGHIR.S                       | 4.86  | 10.10 | 0.48 | 2.08 |
| P52479_Uf Usp10 | Ubiquitin c R.SDLIEDELEDTGK#GSEDEWEQVGPK#.N             | 5.41  | 2.29  | 2.37 | 0.42 |
| P52479_Uf Usp10 | Ubiquitin c R.TVQDALESVAR.E                             | 9.10  | 22.16 | 0.41 | 2.44 |
| P52479_Uf Usp10 | Ubiquitin c R.DIRPGAFAEPYTYR.L                          | 14.31 | 18.07 | 0.79 | 1.26 |
| P52479_Uf Usp10 | Ubiquitin c K.EGLVPVSEDPAVAK#.I                         | 28.57 | 12.85 | 2.22 | 0.45 |
| P52479_Uf Usp10 | Ubiquitin c R.ESVOGYTTK#.T                              | 28.96 | 11.89 | 2.44 | 0.41 |
| P52479_Uf Usp10 | Ubiquitin c K.NIDYPVDLEISR.E                            | 8.57  | 14.60 | 0.59 | 1.70 |
| P52479_Uf Usp10 | Ubiquitin c R.SDLIEDELEDTGK#GSEDEWEQVGPK#.N             | 9.50  | 2.49  | 3.82 | 0.26 |
| P52479_Uf Usp10 | Ubiquitin c R.TVQDALESVAR.E                             | 7.71  | 17.47 | 0.44 | 2.26 |
| Q9JMA1_U Usp14  | Ubiquitin c K.AQLFALTVGQPAR.Q                           | 11.48 | 13.75 | 0.83 | 1.20 |
| Q9JMA1_U Usp14  | Ubiquitin c K.EK#FEGVELNTDEPPM#FK#.A                    | 14.04 | 3.06  | 4.59 | 0.22 |
| Q9JMA1_U Usp14  | Ubiquitin c K.GGTLK#DDDWGNIK#.M                         | 15.05 | 2.62  | 5.74 | 0.17 |
| Q9JMA1_U Usp14  | Ubiquitin c K.#V#NQPNANDK#N#SPPK#.E                     | 7.09  | 2.25  | 3.15 | 0.32 |
| Q9JMA1_U Usp14  | Ubiquitin c R.RVEIMEESEQ.-                              | 7.83  | 7.99  | 0.98 | 1.02 |
| Q9JMA1_U Usp14  | Ubiquitin c R.RVEIM*EESEQ.-                             | 2.11  | 4.30  | 0.49 | 2.04 |
| Q9JMA1_U Usp14  | Ubiquitin c K.EK#FEGVELNTDEPPM*VFK#.A                   | 13.53 | 2.68  | 5.05 | 0.20 |
| Q9JMA1_U Usp14  | Ubiquitin c R.ETDSSAPAVTSPK#.K                          | 12.90 | 2.26  | 5.72 | 0.17 |
| Q9JMA1_U Usp14  | Ubiquitin c K.LEAIEDSGRETDSSAPAVTSPK.K                  | 7.40  | 7.23  | 1.02 | 0.98 |
| Q8R5H1_U Usp15  | Ubiquitin c R.SFLALDWDPDLK#.K                           | 11.88 | 3.58  | 3.31 | 0.30 |
| Q99LG0_U Usp16  | Ubiquitin c R.TPDVQESPEDLVGK#.S                         | 9.48  | 5.66  | 1.68 | 0.60 |
| Q9WTV6_U Usp18  | Ubl carbonyl K.DQITDTLR.L                               | 3.96  | 11.12 | 0.36 | 2.81 |
| Q3UJD6_U Usp19  | Ubiquitin c R.GEVSGAGPTGQGPSAK#.R                       | 9.16  | 4.80  | 1.91 | 0.52 |
| B1AY13_UF Usp24 | Ubiquitin c K.GIHELLGSK#.L                              | 10.92 | 3.05  | 3.59 | 0.28 |
| B1AY13_UF Usp24 | Ubiquitin c K.QQHDLEDVQQQLFK#.E                         | 14.80 | 6.00  | 2.47 | 0.41 |
| B1AY13_UF Usp24 | Ubiquitin c K.IQSQSSTVENIHIIAAA#K#.F                    | 11.62 | 6.43  | 1.81 | 0.55 |
| B1AY13_UF Usp24 | Ubiquitin c K.LIEDSTLSK#.S                              | 20.44 | 6.21  | 3.29 | 0.30 |
| B1AY13_UF Usp24 | Ubiquitin c K.LQYVVPENFWK#.I                            | 9.48  | 3.07  | 3.09 | 0.32 |
| B1AY13_UF Usp24 | Ubiquitin c K.NTFQGIYSQDK#.I                            | 12.17 | 6.14  | 1.98 | 0.50 |
| B1AY13_UF Usp24 | Ubiquitin c K.TLLSETSSQSK#.S                            | 19.57 | 5.26  | 3.72 | 0.27 |
| B1AY13_UF Usp24 | Ubiquitin c R.VAVATILEK#.T                              | 16.29 | 7.18  | 2.27 | 0.44 |
| B1AY13_UF Usp24 | Ubiquitin c R.VLYNLELVSSK#.L                            | 11.64 | 4.78  | 2.43 | 0.41 |
| Q91W36_U Usp3   | Ubiquitin c R.SAILGENSTLSASN#.C                         | 7.48  | 3.34  | 2.24 | 0.45 |
| Q3TIX9_SN Usp39 | U4/U6_U5 t.R.AYDGTTPYLP.GIVGLNNIK#.A                    | 6.75  | 3.98  | 1.70 | 0.59 |
| Q3TIX9_SN Usp39 | U4/U6_U5 t.K.NPTIVNFPI#NVDLR.E                          | 5.55  | 7.60  | 0.73 | 1.37 |
| Q3TIX9_SN Usp39 | U4/U6_U5 t.R.AYDGTTPYLP.GIVGLNNIK#.A                    | 10.61 | 3.47  | 3.05 | 0.33 |
| Q3TIX9_SN Usp39 | U4/U6_U5 t.K.NPTIVNFPI#NVDLR.E                          | 5.91  | 4.82  | 1.23 | 0.82 |
| Q3TIX9_SN Usp39 | U4/U6_U5 t.R.NYFLEEDNYK#.N                              | 14.85 | 2.97  | 4.99 | 0.20 |
| Q3TIX9_SN Usp39 | U4/U6_U5 t.R.AYDGTTPYLP.GIVGLNNIK#.A                    | 25.03 | 6.13  | 4.08 | 0.25 |
| Q3TIX9_SN Usp39 | U4/U6_U5 t.R.EVPAPALPVVR.V                              | 8.82  | 10.53 | 0.84 | 1.19 |
| Q3TIX9_SN Usp39 | U4/U6_U5 t.K.NPTIVNFPI#NVDLR.E                          | 7.77  | 9.59  | 0.81 | 1.23 |
| Q3TIX9_SN Usp39 | U4/U6_U5 t.R.NYFLEEDNYK#.N                              | 21.34 | 5.77  | 3.70 | 0.27 |
| P35123_Uf Usp4  | Ubiquitin c K.ADTIATIEK#.E                              | 17.21 | 12.50 | 1.38 | 0.73 |
| P35123_Uf Usp4  | Ubiquitin c K.EHLIDELDYVLP.AEAWNK#.L                    | 13.70 | 4.92  | 2.79 | 0.36 |
| P35123_Uf Usp4  | Ubiquitin c K.GEIAEAYALIK#.Q                            | 15.98 | 8.32  | 1.92 | 0.52 |
| P35123_Uf Usp4  | Ubiquitin c R.LRNDVIVDTFHGLFK.S                         | 8.67  | 8.77  | 0.99 | 1.01 |
| P35123_Uf Usp4  | Ubiquitin c K.YM#SNTYQLSK#.L                            | 7.54  | 3.11  | 2.42 | 0.41 |
| P35123_Uf Usp4  | Ubiquitin c K.YM*#SNTYQLSK#.L                           | 11.74 | 4.15  | 2.83 | 0.35 |
| Q8BY87_Uf Usp47 | Ubiquitin c R.LFVLLPEQSPGYSKY#.R                        | 12.52 | 5.38  | 2.33 | 0.43 |
| Q8BY87_Uf Usp47 | Ubiquitin c K.LSEISGIPLEDIEFAK#.G                       | 20.17 | 3.46  | 5.83 | 0.17 |
| Q3VOC5_Uf Usp48 | Ubiquitin c K.ALGLDTGQQDAQEFK#.L                        | 10.37 | 7.22  | 1.44 | 0.70 |
| Q3VOC5_Uf Usp48 | Ubiquitin c R.ISEYAA#FYR.Y                              | 4.53  | 8.85  | 0.51 | 1.95 |
| Q3VOC5_Uf Usp48 | Ubiquitin c R.LPAGAEYEFYLEWLQK#.W                       | 5.68  | 5.93  | 0.96 | 1.04 |
| Q3VOC5_Uf Usp48 | Ubiquitin c K.ALGLDTGQQDAQEFK#.L                        | 18.00 | 8.25  | 2.18 | 0.46 |
| Q3VOC5_Uf Usp48 | Ubiquitin c K.LFM*#SLEDTLK#.Q                           | 10.22 | 3.23  | 3.16 | 0.32 |
| Q3VOC5_Uf Usp48 | Ubiquitin c R.LPAGAEYEFYLEWLQK.W                        | 7.96  | 11.64 | 0.68 | 1.46 |
| P56399_Uf Usp5  | Ubiquitin c R.DGLGLPDI#VIR.D                            | 6.84  | 17.84 | 0.38 | 2.61 |
| P56399_Uf Usp5  | Ubiquitin c R.FASFPDYLVQIK#.K                           | 21.97 | 13.14 | 1.67 | 0.60 |
| P56399_Uf Usp5  | Ubiquitin c K.IFQNPADPTQDFSTQVAK#.L                     | 8.64  | 7.26  | 1.19 | 0.84 |
| P56399_Uf Usp5  | Ubiquitin c R.IGEWELIQESGPLKPLFGPYGTGIR.N               | 7.27  | 19.85 | 0.37 | 2.73 |
| P56399_Uf Usp5  | Ubiquitin c K.IVLPDYLEIAR.D                             | 8.25  | 20.76 | 0.40 | 2.52 |
| P56399_Uf Usp5  | Ubiquitin c K.LGITPDGADVYSYDEDDM*VLDPSLAELSHFGIDM*LK#.M | 9.20  | 2.62  | 3.52 | 0.28 |
| P56399_Uf Usp5  | Ubiquitin c R.VDYIMQLPVPMDALN#HEELLEYEK#.K              | 3.07  | 4.51  | 0.68 | 1.47 |
| Q6A4J8_Uf Usp7  | Ubiquitin c R.AGFIQDTSLLIEVVKPNLTER.I                   | 6.70  | 4.65  | 1.44 | 0.69 |
| Q6A4J8_Uf Usp7  | Ubiquitin c K.INDRFEFFPEQLPLDEFLLQK.T                   | 4.29  | 9.58  | 0.45 | 2.23 |
| Q6A4J8_Uf Usp7  | Ubiquitin c R.LNTDPM*LLQFFK#.S                          | 6.84  | 2.82  | 2.43 | 0.41 |
| Q6A4J8_Uf Usp7  | Ubiquitin c K.LSEVLQAVTDHDI#PQQLVER.L                   | 7.24  | 10.39 | 0.70 | 1.44 |
| Q6A4J8_Uf Usp7  | Ubiquitin c R.VLLEDNVEN#.M                              | 27.64 | 12.13 | 2.28 | 0.44 |
| Q6A4J8_Uf Usp7  | Ubiquitin c R.LLEIVSYK#.I                               | 13.20 | 5.43  | 2.43 | 0.41 |
| Q6A4J8_Uf Usp7  | Ubiquitin c R.VLLEDNVEN#.M                              | 14.28 | 9.83  | 1.45 | 0.69 |
| P70398_Uf Usp9x | Probable ul K.#EAK#NEAK#.N                              | 4.99  | 1.72  | 2.91 | 0.34 |
| P70398_Uf Usp9x | Probable ul K.ALTLQDLDNWAAQAGK#.H                       | 12.36 | 6.57  | 1.88 | 0.53 |
| P70398_Uf Usp9x | Probable ul R.AQENVEEGEEVSPQTK#.G                       | 11.04 | 3.38  | 3.27 | 0.31 |
| P70398_Uf Usp9x | Probable ul R.DDVFYQVQDFDK#PPLSK#.T                     | 17.49 | 4.95  | 3.53 | 0.28 |
| P70398_Uf Usp9x | Probable ul R.ELDM*EYTYVAGVAK#.L                        | 14.76 | 5.81  | 2.54 | 0.39 |
| P70398_Uf Usp9x | Probable ul K.#EAK#NEAK#.N                              | 2.33  | 1.46  | 1.59 | 0.63 |
| P70398_Uf Usp9x | Probable ul R.LAQQISDEASR.Y                             | 13.46 | 16.38 | 0.82 | 1.22 |
| P70398_Uf Usp9x | Probable ul K.LEGDNVNPESQLIQNEQSEK#.A                   | 16.98 | 6.04  | 2.81 | 0.36 |
| P70398_Uf Usp9x | Probable ul K.LIGQLNL#.D                                | 23.01 | 4.29  | 5.36 | 0.19 |
| P70398_Uf Usp9x | Probable ul K.LM*#PDSSTIEK#.L                           | 19.08 | 7.24  | 2.63 | 0.38 |
| P70398_Uf Usp9x | Probable ul K.LPPVLAIQK#.R                              | 14.86 | 6.01  | 2.47 | 0.40 |
| P70398_Uf Usp9x | Probable ul K.LSVPATFM*VLSLDEGPPPIK#.Y                  | 14.01 | 10.96 | 1.28 | 0.78 |
| P70398_Uf Usp9x | Probable ul K.M*#NALVENK#.V                             | 21.80 | 4.20  | 5.19 | 0.19 |
| P70398_Uf Usp9x | Probable ul R.NHQNLDSLSEQYVK#.G                         | 17.81 | 5.46  | 3.26 | 0.31 |
| P70398_Uf Usp9x | Probable ul K.VLGGSFADQK#.I                             | 31.90 | 12.99 | 2.46 | 0.41 |
| P70398_Uf Usp9x | Probable ul R.VPGQETVK#.N                               | 31.52 | 9.94  | 3.17 | 0.32 |
| P70398_Uf Usp9x | Probable ul R.WVVPVLPK#.G                               | 16.84 | 7.76  | 2.17 | 0.46 |
| Q640M1_U Utp14a | U3 small nt.K.LALSDDLGLK#PSSSLAAVK#.K                   | 8.84  | 11.25 | 0.79 | 1.27 |
| Q640M1_U Utp14a | U3 small nt.R.TPQEVEFNLLHK#.N                           | 14.81 | 10.52 | 1.41 | 0.71 |
| Q8C7V3_U Utp15  | U3 small nt.K.FVILQELVEK#.E                             | 12.62 | 15.05 | 0.84 | 1.19 |



|                  |                                                   |        |       |       |      |
|------------------|---------------------------------------------------|--------|-------|-------|------|
| Q55S16_UTI Utp18 | U3 small nt.R.IAASFSSDSK#.R                       | 3.89   | 1.86  | 2.09  | 0.48 |
| Q9CX11_U' Utp23  | rRNA-proce K.AVEAGQLVSVHEK#.Q                     | 7.20   | 1.36  | 5.30  | 0.19 |
| E9Q6R7_E9 Utrn   | Protein Utr R.ELGQTLIDGGDDIISEK.L                 | 10.39  | 14.38 | 0.72  | 1.38 |
| E9Q6R7_E9 Utrn   | Protein Utr R.EVETSLQR.C                          | 1.38   | 10.37 | 0.13  | 7.50 |
| E9Q6R7_E9 Utrn   | Protein Utr R.IDAFQLPQEAQK.I                      | 4.00   | 7.88  | 0.51  | 1.97 |
| E9Q6R7_E9 Utrn   | Protein Utr R.LDELNQTGQTLR.E                      | 23.26  | 17.22 | 1.35  | 0.74 |
| E9Q6R7_E9 Utrn   | Protein Utr R.LEDDSNQVTOAVAK.E                    | 15.71  | 17.37 | 0.90  | 1.11 |
| E9Q6R7_E9 Utrn   | Protein Utr K.LLDELLEGLTGTSLPK.E                  | 16.39  | 18.23 | 0.90  | 1.11 |
| E9Q6R7_E9 Utrn   | Protein Utr R.LLSELDASLQVENVR.E                   | 1.81   | 7.61  | 0.24  | 4.20 |
| E9Q6R7_E9 Utrn   | Protein Utr R.LVDYQSQLEK.F                        | 12.39  | 19.69 | 0.63  | 1.59 |
| E9Q6R7_E9 Utrn   | Protein Utr K.M*ESLPDGLDPLSLQK#.L                 | 7.48   | 6.88  | 1.09  | 0.92 |
| E9Q6R7_E9 Utrn   | Protein Utr K.SLQNDLEAEQVK#.V                     | 11.11  | 9.31  | 1.19  | 0.84 |
| E9Q6R7_E9 Utrn   | Protein Utr R.STPDPEESQELTDLAQETVEQAEIK.W         | 9.19   | 9.26  | 0.99  | 1.01 |
| E9Q6R7_E9 Utrn   | Protein Utr R.VLQVLHONNVLDLVNIGGTDIVDGNPK.L       | 3.96   | 5.08  | 0.78  | 1.28 |
| E9Q6R7_E9 Utrn   | Protein Utr K.YGDLLEARDGQNEFSDIHK.S               | 5.91   | 11.93 | 0.50  | 2.02 |
| E9Q6R7_E9 Utrn   | Protein Utr K.YGDLLEARDGQNEFSDIHK.S               | 2.18   | 9.28  | 0.23  | 4.26 |
| Q8CEJ2_Q8 Uxt    | MCG11770 R.ELQGLQNFPEPSPH.-                       | 10.99  | 10.99 | 1.00  | 1.00 |
| Q8CEJ2_Q8 Uxt    | MCG11770 K.SSLTLESDLSLTK#.D                       | 18.40  | 6.70  | 2.74  | 0.36 |
| Q8CEJ2_Q8 Uxt    | MCG11770 R.YETFISDLQR.D                           | 6.98   | 16.93 | 0.41  | 2.43 |
| Q80WQ2_V Vac14   | Protein VAK R.GAVLPHFNLFDFGLSK#.L                 | 16.78  | 10.87 | 1.54  | 0.65 |
| Q80WQ2_V Vac14   | Protein VAK K.LAADPDPNVK#.S                       | 74.32  | 30.21 | 2.46  | 0.41 |
| Q80WQ2_V Vac14   | Protein VAK K.LVTPDEDEPDK#.S                      | 12.67  | 13.38 | 0.95  | 1.06 |
| Q80WQ2_V Vac14   | Protein VAK R.HAYDLIQK#.F                         | 11.63  | 39.23 | 0.30  | 3.37 |
| Q80WQ2_V Vac14   | Protein VAK K.LAADPDPNVK#.S                       | 141.43 | 48.94 | 2.89  | 0.35 |
| P63044_V Vamp2   | Vesicle-assc K.LSELDLDRADALQAGASQFETSAAK.L        | 10.22  | 43.69 | 0.23  | 4.28 |
| O70404_V Vamp8   | Vesicle-assc R.NK#TEDLEATSEHF#.T                  | 8.61   | 6.50  | 1.32  | 0.76 |
| Q9Z1O9_S1 Vars   | Valine-trn R.DPGVITYDLPTPPGEK#.K                  | 7.22   | 3.23  | 2.24  | 0.45 |
| Q9Z1O9_S1 Vars   | Valine-trn K.GALINVPPLGLPR.F                      | 5.13   | 6.90  | 0.74  | 1.34 |
| Q9Z1O9_S1 Vars   | Valine-trn R.GPGDQPAAALGALGK#.A                   | 62.99  | 13.71 | 4.60  | 0.22 |
| Q9Z1O9_S1 Vars   | Valine-trn R.IETM*LGDVAVAVHPK#.D                  | 15.38  | 4.20  | 3.66  | 0.27 |
| Q9Z1O9_S1 Vars   | Valine-trn R.SLPVDFDFVDM*EFGTGAVK#.I              | 27.29  | 7.33  | 3.72  | 0.27 |
| Q9Z1O9_S1 Vars   | Valine-trn R.SVTQPGSEVIAPQK#.D                    | 63.40  | 13.75 | 4.61  | 0.22 |
| Q9Z1O9_S1 Vars   | Valine-trn R.TLLPVPYK#.E                          | 21.73  | 4.35  | 4.99  | 0.20 |
| Q9Z1O9_S1 Vars   | Valine-trn K.VPLEVQEADEAK#.L                      | 51.99  | 15.81 | 3.29  | 0.30 |
| Q9Z1O9_S1 Vars   | Valine-trn K.VQGSDSDEEVVATTR.I                    | 9.18   | 10.23 | 0.90  | 1.11 |
| Q9Z1O9_S1 Vars   | Valine-trn K.ALNPLEDWLR.L                         | 34.58  | 21.28 | 1.63  | 0.62 |
| Q9Z1O9_S1 Vars   | Valine-trn R.DPGVITYDLPTPPGEK#.K                  | 42.93  | 8.44  | 5.09  | 0.20 |
| Q9Z1O9_S1 Vars   | Valine-trn R.EAFLEEVK#.W                          | 110.94 | 19.98 | 5.55  | 0.18 |
| Q9Z1O9_S1 Vars   | Valine-trn R.EFGVSPDK#.I                          | 74.76  | 14.21 | 5.26  | 0.19 |
| Q9Z1O9_S1 Vars   | Valine-trn K.GALINVPPLGLPR.F                      | 29.06  | 24.32 | 1.07  | 0.93 |
| Q9Z1O9_S1 Vars   | Valine-trn R.GPGDQPAAALGALGK#.A                   | 194.25 | 33.01 | 5.88  | 0.17 |
| Q9Z1O9_S1 Vars   | Valine-trn R.IETM*LGDVAVAVHPK#.D                  | 74.90  | 13.47 | 5.56  | 0.18 |
| Q9Z1O9_S1 Vars   | Valine-trn R.IETMLGDVAVAVHPK#.D                   | 26.25  | 5.94  | 4.42  | 0.23 |
| Q9Z1O9_S1 Vars   | Valine-trn R.K#AVLAALK#.E                         | 79.56  | 18.64 | 4.27  | 0.23 |
| Q9Z1O9_S1 Vars   | Valine-trn R.K#VDEAIAALFQK#.M                     | 58.88  | 11.58 | 5.08  | 0.20 |
| Q9Z1O9_S1 Vars   | Valine-trn K.LGSSLDWR.D                           | 11.66  | 11.82 | 0.99  | 1.01 |
| Q9Z1O9_S1 Vars   | Valine-trn R.M*VM*LGK#.L                          | 28.14  | 2.01  | 14.02 | 0.07 |
| Q9Z1O9_S1 Vars   | Valine-trn R.SLPVDFDFVDM*EFGTGAVK#.I              | 36.83  | 21.40 | 1.72  | 0.58 |
| Q9Z1O9_S1 Vars   | Valine-trn R.SVTQPGSEVIAPQK#.T                    | 197.80 | 35.56 | 5.56  | 0.18 |
| Q9Z1O9_S1 Vars   | Valine-trn K.VPLEVQEADEAK#.L                      | 185.41 | 31.66 | 5.86  | 0.17 |
| Q9Z1O9_S1 Vars   | Valine-trn K.VQGSDSDEEVVATTR.I                    | 31.16  | 19.99 | 1.56  | 0.64 |
| Q62465_V Vat1    | Synaptic ve K.GVDIVM*DLGGSDTAK#.G                 | 57.18  | 13.68 | 4.18  | 0.24 |
| Q62465_V Vat1    | Synaptic ve K.GVDIVMDPLGGSDTAK#.G                 | 32.94  | 8.95  | 3.68  | 0.27 |
| Q62465_V Vat1    | Synaptic ve R.IDSVWPFEK#.V                        | 104.74 | 19.11 | 5.48  | 0.18 |
| Q62465_V Vat1    | Synaptic ve R.LPPLVTPGM*EGAGVWVAVGEGVGD.R.K       | 7.69   | 7.95  | 0.97  | 1.03 |
| Q62465_V Vat1    | Synaptic ve R.LPPLVTPGM*EGAGVWVAVGEGVGD.R.K       | 4.74   | 7.86  | 0.60  | 1.66 |
| Q62465_V Vat1    | Synaptic ve R.TVENVTVFGTASASK#.H                  | 84.79  | 19.57 | 4.33  | 0.23 |
| Q62465_V Vat1    | Synaptic ve K.VLLVPGPEK#.E                        | 40.77  | 9.54  | 4.28  | 0.23 |
| Q62465_V Vat1    | Synaptic ve K.VLLVPGPEK#ET.-                      | 112.86 | 27.22 | 4.15  | 0.24 |
| Q62465_V Vat1    | Synaptic ve K.VVTYGM*ANLLTGPK#.R                  | 74.04  | 16.91 | 4.38  | 0.23 |
| Q62465_V Vat1    | Synaptic ve K.VVTYGMANLLTGPK#.R                   | 39.09  | 8.41  | 4.65  | 0.22 |
| Q62465_V Vat1    | Synaptic ve K.GVDIVM*DLGGSDTAK#.G                 | 5.45   | 1.83  | 2.97  | 0.34 |
| Q62465_V Vat1    | Synaptic ve R.IDSVWPFEK#.V                        | 17.30  | 15.96 | 1.08  | 0.92 |
| Q62465_V Vat1    | Synaptic ve K.GVDIVM*DLGGSDTAK#.G                 | 31.45  | 6.89  | 4.57  | 0.22 |
| Q62465_V Vat1    | Synaptic ve R.IDSVWPFEK#.V                        | 43.23  | 10.84 | 3.99  | 0.25 |
| Q62465_V Vat1    | Synaptic ve R.TVENVTVFGTASASK#.H                  | 34.21  | 7.30  | 4.69  | 0.21 |
| Q62465_V Vat1    | Synaptic ve K.VLLVPGPEK#ET.-                      | 80.07  | 19.28 | 4.15  | 0.24 |
| Q62465_V Vat1    | Synaptic ve K.VVTYGM*ANLLTGPK#.R                  | 49.27  | 8.47  | 5.82  | 0.17 |
| Q62465_V Vat1    | Synaptic ve K.VVTYGMANLLTGPK#.R                   | 18.95  | 2.22  | 8.53  | 0.12 |
| Q62465_V Vat1    | Synaptic ve K.ENGVTHPIDYHTTDYVDEIK#.I             | 17.55  | 4.68  | 3.75  | 0.27 |
| Q62465_V Vat1    | Synaptic ve K.GVDIVM*DLGGSDTAK#.G                 | 64.57  | 13.59 | 4.75  | 0.21 |
| Q62465_V Vat1    | Synaptic ve K.GVDIVMDPLGGSDTAK#.G                 | 18.63  | 5.95  | 3.13  | 0.32 |
| Q62465_V Vat1    | Synaptic ve R.IDSVWPFEK#.V                        | 95.73  | 20.05 | 4.77  | 0.21 |
| Q62465_V Vat1    | Synaptic ve R.LPPLVTPGM*EGAGVWVAVGEGVGD.R.K       | 9.88   | 11.76 | 0.84  | 1.19 |
| Q62465_V Vat1    | Synaptic ve R.TVENVTVFGTASASK#.H                  | 84.97  | 15.28 | 5.56  | 0.18 |
| Q62465_V Vat1    | Synaptic ve K.VLLVPGPEK#.E                        | 39.53  | 8.22  | 4.81  | 0.21 |
| Q62465_V Vat1    | Synaptic ve K.VLLVPGPEK#ET.-                      | 143.58 | 28.64 | 5.01  | 0.20 |
| Q62465_V Vat1    | Synaptic ve K.VVTYGM*ANLLTGPK#.R                  | 92.16  | 19.23 | 4.79  | 0.21 |
| Q62465_V Vat1    | Synaptic ve K.VVTYGMANLLTGPK#.R                   | 28.96  | 7.27  | 3.99  | 0.25 |
| P61759_PF Vbp1   | Prefoldin si K.FM*ELNLAQK#.K                      | 23.23  | 11.57 | 2.01  | 0.50 |
| P61759_PF Vbp1   | Prefoldin si K.FMELNLAQK#.K                       | 16.25  | 4.94  | 3.29  | 0.30 |
| P61759_PF Vbp1   | Prefoldin si K.#L#DEQYQK#.Y                       | 15.79  | 6.42  | 2.46  | 0.41 |
| P61759_PF Vbp1   | Prefoldin si R.LHLGPIPAVFVEDVDSFM*#K#.Q           | 16.22  | 3.39  | 4.78  | 0.21 |
| P61759_PF Vbp1   | Prefoldin si R.LHLGPIPAVFVEDVDSFM#QPGNETADTVLK#.K | 9.41   | 3.08  | 3.06  | 0.33 |
| P61759_PF Vbp1   | Prefoldin si K.NLSDLEEDLFLRDQFTTVENM*AR.V         | 6.67   | 11.72 | 0.57  | 1.76 |
| P61759_PF Vbp1   | Prefoldin si R.VYNVDVK#.R                         | 19.45  | 5.48  | 3.55  | 0.28 |
| Q64727_VI Vcl    | Vinculin OS K.AAVHLEGK#.I                         | 43.82  | 17.65 | 2.48  | 0.40 |
| Q64727_VI Vcl    | Vinculin OS K.AGEVINQPM*#M*#AAR.Q                 | 9.79   | 17.26 | 0.57  | 1.76 |
| Q64727_VI Vcl    | Vinculin OS R.ALASIDSK#.L                         | 97.18  | 44.54 | 2.18  | 0.46 |
| Q64727_VI Vcl    | Vinculin OS R.ALASQLQDSLK#.D                      | 157.33 | 43.85 | 3.59  | 0.28 |
| Q64727_VI Vcl    | Vinculin OS K.AQM*QEAM*TEQVSDVFSDDTTPIK#.L        | 11.34  | 4.64  | 2.44  | 0.41 |
| Q64727_VI Vcl    | Vinculin OS K.AQM*QEAM*TEQVSDVFSDDTTPIK#.L        | 3.80   | 2.10  | 1.81  | 0.55 |
| Q64727_VI Vcl    | Vinculin OS K.AQVQSQGLDVLTK#.S                    | 111.68 | 58.42 | 1.91  | 0.52 |
| Q64727_VI Vcl    | Vinculin OS K.AVAGNISDPLGQK#.S                    | 158.52 | 55.77 | 2.84  | 0.35 |
| Q64727_VI Vcl    | Vinculin OS R.EEAASIK#.I                          | 85.43  | 69.83 | 1.22  | 0.82 |
| Q64727_VI Vcl    | Vinculin OS K.ELLPLVISAM*#K#.I                    | 93.39  | 32.20 | 2.90  | 0.34 |
| Q64727_VI Vcl    | Vinculin OS K.ELLPLVISAMK#.I                      | 123.55 | 54.67 | 2.26  | 0.44 |
| Q64727_VI Vcl    | Vinculin OS R.GILSGTSDLLTFDEAEVR.K                | 16.53  | 28.38 | 0.58  | 1.72 |
| Q64727_VI Vcl    | Vinculin OS K.GNDIAAAK#.R                         | 129.68 | 48.26 | 2.69  | 0.37 |
| Q64727_VI Vcl    | Vinculin OS R.GQGASPVAMQK#.A                      | 46.98  | 15.22 | 3.09  | 0.32 |
| Q64727_VI Vcl    | Vinculin OS R.GQGASPVAM*QK#.A                     | 41.22  | 1.44  | 28.71 | 0.03 |
| Q64727_VI Vcl    | Vinculin OS R.IPTISLQK#.I                         | 133.85 | 54.87 | 2.44  | 0.41 |
| Q64727_VI Vcl    | Vinculin OS K.KIDAAQNWLADPNNGGPEGEEQJR.G          | 3.42   | 6.49  | 0.53  | 1.90 |

|                  |                                                   |        |        |      |      |
|------------------|---------------------------------------------------|--------|--------|------|------|
| Q64727_VI Vcl    | Vinculin OS R.LANVM*M*GPYR.Q                      | 8.42   | 17.37  | 0.48 | 2.06 |
| Q64727_VI Vcl    | Vinculin OS K.LLAAVATAPADPNREEVFDER.A             | 5.55   | 29.45  | 0.19 | 5.31 |
| Q64727_VI Vcl    | Vinculin OS R.LTDELAPKPLPEGEVPPRPPPEEKDEEFPQK.A   | 4.64   | 6.75   | 0.69 | 1.46 |
| Q64727_VI Vcl    | Vinculin OS K.LVQAQMLQSDPSVSPAR.D                 | 3.24   | 7.01   | 0.46 | 2.16 |
| Q64727_VI Vcl    | Vinculin OS K.M*LGQM*TDQVADLR.A                   | 9.99   | 18.23  | 0.55 | 1.83 |
| Q64727_VI Vcl    | Vinculin OS K.M*SAEINEIR.V                        | 16.16  | 20.63  | 0.78 | 1.28 |
| Q64727_VI Vcl    | Vinculin OS K.MSAEINEIR.V                         | 16.29  | 21.60  | 0.75 | 1.33 |
| Q64727_VI Vcl    | Vinculin OS K.M*TLVDEAIDTK#.S                     | 22.96  | 12.81  | 1.79 | 0.56 |
| Q64727_VI Vcl    | Vinculin OS K.MTGLVDEAIDTK#.S                     | 27.34  | 6.06   | 4.51 | 0.22 |
| Q64727_VI Vcl    | Vinculin OS K.NQGIIEALK#.N                        | 124.70 | 55.67  | 2.24 | 0.45 |
| Q64727_VI Vcl    | Vinculin OS K.QVATALQNLQTK#.T                     | 49.56  | 21.05  | 2.35 | 0.42 |
| Q64727_VI Vcl    | Vinculin OS R.SLGEIAALTSK#.L                      | 72.10  | 26.29  | 2.74 | 0.36 |
| Q64727_VI Vcl    | Vinculin OS K.STVEGIQASVK#.T                      | 107.32 | 51.70  | 2.08 | 0.48 |
| Q64727_VI Vcl    | Vinculin OS R.TDAGFTLR.W                          | 21.46  | 31.00  | 0.69 | 1.44 |
| Q64727_VI Vcl    | Vinculin OS K.TISPM*VM*DAK#.A                     | 28.33  | 9.17   | 3.09 | 0.32 |
| Q64727_VI Vcl    | Vinculin OS R.TNISDEESEQATEM*LVHNAQNLQMSVK#.E     | 11.90  | 3.11   | 3.83 | 0.26 |
| Q64727_VI Vcl    | Vinculin OS R.TNISDEESEQATEM*LVHNAQNLQMSVK#.E     | 15.32  | 6.36   | 2.41 | 0.42 |
| Q64727_VI Vcl    | Vinculin OS R.LQLTSDWEDAWASK#.D                   | 72.62  | 26.97  | 2.69 | 0.37 |
| Q64727_VI Vcl    | Vinculin OS R.VM*LNSMNTVK#.E                      | 14.13  | 40.19  | 0.35 | 2.84 |
| Q64727_VI Vcl    | Vinculin OS R.VMLVNSMNTVK#.E                      | 20.58  | 7.62   | 2.70 | 0.37 |
| Q64727_VI Vcl    | Vinculin OS R.GQGASPVAM*QK#.A                     | 7.42   | 2.96   | 2.51 | 0.40 |
| Q64727_VI Vcl    | Vinculin OS R.IPTISTQLK#.I                        | 16.45  | 6.01   | 2.74 | 0.37 |
| Q64727_VI Vcl    | Vinculin OS R.VLQTSWDEDAWASK#.D                   | 8.86   | 2.60   | 3.40 | 0.29 |
| Q01853_TE Vcp    | Transitiona K.DVDLEFLAK#.M                        | 28.32  | 10.01  | 2.83 | 0.35 |
| Q01853_TE Vcp    | Transitiona R.IVSQLLTM*DLGK#.Q                    | 9.65   | 5.25   | 1.84 | 0.54 |
| Q01853_TE Vcp    | Transitiona R.IVSQLLTM*DLGK#.Q                    | 25.68  | 8.55   | 3.00 | 0.33 |
| Q01853_TE Vcp    | Transitiona R.LDQLIYIPLDEK#.S                     | 38.50  | 13.46  | 2.86 | 0.35 |
| Q01853_TE Vcp    | Transitiona R.LIVDEAINEDNSVLSQPK#.M               | 40.26  | 15.97  | 2.52 | 0.40 |
| Q01853_TE Vcp    | Transitiona R.LIVDEAINEDNSVLSQPK#.M               | 16.69  | 4.46   | 3.74 | 0.27 |
| Q8CDG3_V Vcpip1  | Deubiquitin K.APYSPTTSK#.E                        | 8.96   | 5.97   | 1.50 | 0.67 |
| Q8CDG3_V Vcpip1  | Deubiquitin R.TGVIGQPEEVTAAAK#.K                  | 9.66   | 6.19   | 1.56 | 0.64 |
| Q8CDG3_V Vcpip1  | Deubiquitin R.VGDVQGOELESQPTK#.I                  | 13.63  | 7.11   | 1.92 | 0.52 |
| Q8CDG3_V Vcpip1  | Deubiquitin R.SGDSYATFLPLPAEK#.C                  | 7.13   | 2.79   | 2.55 | 0.39 |
| Q8CDG3_V Vcpip1  | Deubiquitin R.TGVIGVQPEEVTAAAK#.K                 | 9.03   | 4.95   | 1.83 | 0.55 |
| Q60932_VI Vdac1  | Voltage-dep K.TDFELHTNVNDGTEFGSIIYQK#.V           | 7.34   | 4.85   | 1.51 | 0.66 |
| Q60932_VI Vdac1  | Voltage-dep R.VTOSNFVAGYK#.T                      | 25.13  | 19.83  | 1.27 | 0.79 |
| Q60932_VI Vdac1  | Voltage-dep R.WTEYGLTFTEK#.W                      | 14.14  | 8.62   | 1.64 | 0.61 |
| Q60930_VI Vdac2  | Voltage-dep K.YQLDPTASISAK.V                      | 9.84   | 7.91   | 1.24 | 0.80 |
| P40338_VI Vhl    | Von Hippel R.SLYEDLEDYPSVR.K                      | 2.34   | 7.01   | 0.33 | 2.99 |
| P20152_VI Vim    | Vimentin O K.FADLSEAAAN.N                         | 4.21   | 33.78  | 0.12 | 8.02 |
| P20152_VI Vim    | Vimentin O K.ILLAELEQLK.G                         | 21.33  | 33.61  | 0.63 | 1.58 |
| P20152_VI Vim    | Vimentin O R.KVESLQOEIAPLK.K                      | 6.89   | 22.70  | 0.30 | 3.30 |
| P20152_VI Vim    | Vimentin O R.KVESLQOEIAPLK.L                      | 10.15  | 11.59  | 0.88 | 1.14 |
| P20152_VI Vim    | Vimentin O R.LGDLYEEEM*R.E                        | 1.73   | 12.47  | 0.14 | 7.19 |
| P20152_VI Vim    | Vimentin O R.LLQDSVDFSLADAITEFK.N                 | 4.80   | 8.53   | 0.56 | 1.78 |
| P20152_VI Vim    | Vimentin O R.SLYSSPGGAYYTR.S                      | 4.14   | 31.39  | 0.13 | 7.58 |
| Q920Q4_VI Vps16  | Vacuolar pr K.ALLLVGDVAQAEVAIEHR.N                | 1.88   | 15.31  | 0.12 | 8.15 |
| Q920Q4_VI Vps16  | Vacuolar pr K.LAALADLEDWEEK.F                     | 8.18   | 4.83   | 1.69 | 0.59 |
| Q920Q4_VI Vps16  | Vacuolar pr K.LGDPDGVSYSDIAAR.A                   | 2.03   | 7.28   | 0.28 | 3.59 |
| Q9CQ80_VI Vps25  | Vacuolar pr R.SGQNNVFTLYELTSGEDTEEEFHLDEATLLR.A   | 1.69   | 3.35   | 0.51 | 1.98 |
| P40336_VF Vps26a | Vacuolar pr K.EITGIPSTTTTETIAK#.Y                 | 123.30 | 67.51  | 1.83 | 0.55 |
| P40336_VF Vps26a | Vacuolar pr K.ELALPGLTQSR.S                       | 42.58  | 111.63 | 0.38 | 2.62 |
| P40336_VF Vps26a | Vacuolar pr K.EYDLVHQLATPDVNNSIK#.M               | 110.89 | 53.78  | 2.06 | 0.48 |
| P40336_VF Vps26a | Vacuolar pr R.FESPDSQASAEQPEM*.-                  | 81.94  | 81.94  | 1.00 | 1.00 |
| P40336_VF Vps26a | Vacuolar pr R.FESPDSQASAEQPEM*.-                  | 10.12  | 10.12  | 1.00 | 1.00 |
| P40336_VF Vps26a | Vacuolar pr K.HYLFYDGSVSGK#.V                     | 47.10  | 17.34  | 2.72 | 0.37 |
| P40336_VF Vps26a | Vacuolar pr R.IEFVGOELFNDK#.S                     | 44.69  | 20.98  | 2.13 | 0.47 |
| P40336_VF Vps26a | Vacuolar pr K.IQHMEQLIK#.K                        | 35.93  | 18.82  | 1.91 | 0.52 |
| P40336_VF Vps26a | Vacuolar pr K.IYFLVLR.I                           | 27.85  | 60.34  | 0.46 | 2.17 |
| P40336_VF Vps26a | Vacuolar pr R.LFLAGYDPTPTM*.R.D                   | 18.18  | 51.93  | 0.35 | 2.86 |
| P40336_VF Vps26a | Vacuolar pr R.LFLAGYDPTPTM*.R.D                   | 14.09  | 32.14  | 0.44 | 2.28 |
| P40336_VF Vps26a | Vacuolar pr K.QQEILWR.K                           | 23.58  | 45.46  | 0.52 | 1.93 |
| P40336_VF Vps26a | Vacuolar pr K.SNTHFVNLVK#.E                       | 38.35  | 22.53  | 1.70 | 0.59 |
| P40336_VF Vps26a | Vacuolar pr R.SYDFEFM*QVEKPYESYGANVR.L            | 7.57   | 13.70  | 0.55 | 1.81 |
| P40336_VF Vps26a | Vacuolar pr K.EITGIPSTTTTETIAK#.Y                 | 23.46  | 10.68  | 2.20 | 0.46 |
| P40336_VF Vps26a | Vacuolar pr K.EYDLVHQLATPDVNNSIK#.M               | 14.53  | 6.28   | 2.31 | 0.43 |
| P40336_VF Vps26a | Vacuolar pr R.FESPDSQASAEQPEM*.-                  | 11.96  | 11.96  | 1.00 | 1.00 |
| P40336_VF Vps26a | Vacuolar pr K.HYLFYDGSVSGK#.V                     | 9.80   | 3.84   | 2.55 | 0.39 |
| P40336_VF Vps26a | Vacuolar pr R.LFLAGYDPTPTM*.R.D                   | 8.08   | 9.05   | 0.89 | 1.12 |
| P40336_VF Vps26a | Vacuolar pr K.EITGIPSTTTTETIAK#.Y                 | 12.22  | 6.51   | 1.88 | 0.53 |
| Q8COE2_VF Vps26b | Vacuolar pr K.DLARPGEITQSAQDFEFTHVEKPYESYTGQNVK.L | 3.93   | 6.04   | 0.65 | 1.53 |
| Q8COE2_VF Vps26b | Vacuolar pr K.EMDIVVHTLSTYPELNSSIK#.M             | 14.33  | 7.64   | 1.87 | 0.53 |
| Q8COE2_VF Vps26b | Vacuolar pr R.FEGTSLGGEVR.T                       | 23.02  | 39.99  | 0.58 | 1.74 |
| Q8COE2_VF Vps26b | Vacuolar pr R.GNHHEFVSLVK#.D                      | 23.37  | 11.38  | 2.05 | 0.49 |
| Q8COE2_VF Vps26b | Vacuolar pr K.SM*SHQAIAASQR.F                     | 1.52   | 4.45   | 0.34 | 2.93 |
| Q8COE2_VF Vps26b | Vacuolar pr R.TPGQLSDNNSR.Q                       | 3.72   | 8.67   | 0.43 | 2.33 |
| Q8COE2_VF Vps26b | Vacuolar pr K.YFLFYDGETVSGK#.V                    | 37.32  | 18.20  | 2.05 | 0.49 |
| Q9D1C8_VI Vps28  | Vacuolar pr R.EK*YDNN*AELFAVVK#.T                 | 13.54  | 7.03   | 1.92 | 0.52 |
| Q9D1C8_VI Vps28  | Vacuolar pr R.LLVQYK#.A                           | 47.77  | 16.80  | 2.84 | 0.35 |
| Q9D1C8_VI Vps28  | Vacuolar pr R.QM*LFDESAYNAFNR.F                   | 7.63   | 16.75  | 0.46 | 2.20 |
| Q9D1C8_VI Vps28  | Vacuolar pr K.YDNN*AELFAVVK#.T                    | 28.97  | 15.64  | 1.85 | 0.54 |
| Q9D1C8_VI Vps28  | Vacuolar pr K.YDNN*AELFAVVK#.T                    | 17.10  | 9.99   | 1.71 | 0.58 |
| Q9QZ88_VI Vps29  | Vacuolar pr R.GDFDENLVPEQK#.V                     | 203.46 | 89.56  | 2.27 | 0.44 |
| Q9QZ88_VI Vps29  | Vacuolar pr K.IGLIHGHQVWPWGDMA*ASLALLQR.Q         | 16.72  | 36.96  | 0.45 | 2.21 |
| Q9QZ88_VI Vps29  | Vacuolar pr K.IGLIHGHQVWPWGDMA*ASLALLQR.Q         | 6.27   | 8.95   | 0.70 | 1.43 |
| Q9QZ88_VI Vps29  | Vacuolar pr K.K#LLVPGK#.I                         | 44.73  | 22.48  | 1.99 | 0.50 |
| Q9QZ88_VI Vps29  | Vacuolar pr R.GDFDENLVPEQK#.V                     | 8.79   | 4.49   | 1.96 | 0.51 |
| Q9QZ88_VI Vps29  | Vacuolar pr R.GDFDENLVPEQK#.V                     | 14.84  | 6.15   | 2.41 | 0.41 |
| Q9EQH3_VI Vps35  | Vacuolar pr K.AELAEPLR.L                          | 8.60   | 15.77  | 0.55 | 1.83 |
| Q9EQH3_VI Vps35  | Vacuolar pr R.ILVGTNLVR.L                         | 11.64  | 21.13  | 0.55 | 1.82 |
| Q9EQH3_VI Vps35  | Vacuolar pr K.IPVDTYNNILTVLK#.L                   | 40.74  | 20.55  | 1.98 | 0.50 |
| Q9EQH3_VI Vps35  | Vacuolar pr K.LFDIFSQQVATVQSR.Q                   | 8.41   | 11.73  | 0.72 | 1.40 |
| Q9EQH3_VI Vps35  | Vacuolar pr K.LLDEAIAQAVK#.V                      | 24.76  | 10.19  | 2.43 | 0.41 |
| Q9EQH3_VI Vps35  | Vacuolar pr K.NIILALDR.L                          | 4.02   | 10.10  | 0.40 | 2.51 |
| Q9EQH3_VI Vps35  | Vacuolar pr R.SDDPDQYLLNLTAR.K                    | 4.08   | 9.92   | 0.41 | 2.43 |
| Q9EQH3_VI Vps35  | Vacuolar pr K.VLETTVEIFNK#.L                      | 28.23  | 10.84  | 2.61 | 0.38 |
| Q9EQH3_VI Vps35  | Vacuolar pr K.IREDLPNLSSEETEIQNK.H                | 8.33   | 18.42  | 0.45 | 2.21 |
| Q9EQH3_VI Vps35  | Vacuolar pr K.AELAEPLR.L                          | 20.34  | 45.30  | 0.45 | 2.23 |
| Q9EQH3_VI Vps35  | Vacuolar pr R.EDGPGIPAEIK#.L                      | 36.58  | 13.99  | 2.61 | 0.38 |
| Q9EQH3_VI Vps35  | Vacuolar pr R.ESESEGPYIEG.LL.-                    | 61.99  | 61.99  | 1.00 | 1.00 |
| Q9EQH3_VI Vps35  | Vacuolar pr K.HASNMLGELR.L                        | 10.59  | 14.46  | 0.73 | 1.37 |
| Q9EQH3_VI Vps35  | Vacuolar pr R.ILVGTNLVR.L                         | 39.06  | 73.24  | 0.53 | 1.88 |
| Q9EQH3_VI Vps35  | Vacuolar pr K.IPVDTYNNILTVLK#.L                   | 149.34 | 58.16  | 2.57 | 0.39 |

|                  |                                                        |        |        |       |      |
|------------------|--------------------------------------------------------|--------|--------|-------|------|
| Q9EQH3_VI Vps35  | Vacuolar pr K.IREDLPNLESSEETEQNK.H                     | 20.06  | 34.23  | 0.59  | 1.71 |
| Q9EQH3_VI Vps35  | Vacuolar pr R.KVADLYELVQYAGNIP.R.L                     | 15.69  | 32.03  | 0.49  | 2.04 |
| Q9EQH3_VI Vps35  | Vacuolar pr K.LFDIFSQQVATVIQSR.Q                       | 34.88  | 52.02  | 0.67  | 1.49 |
| Q9EQH3_VI Vps35  | Vacuolar pr K.LLDEAIQAVK#.V                            | 72.41  | 26.93  | 2.69  | 0.37 |
| Q9EQH3_VI Vps35  | Vacuolar pr R.LLK#IPVDTYNNILTVLK#.L                    | 9.70   | 3.55   | 2.73  | 0.37 |
| Q9EQH3_VI Vps35  | Vacuolar pr K.LNLEHIATSSAVSK#.E                        | 116.52 | 44.62  | 2.61  | 0.38 |
| Q9EQH3_VI Vps35  | Vacuolar pr R.LSLEQGVNVER.Y                            | 33.37  | 70.71  | 0.47  | 2.12 |
| Q9EQH3_VI Vps35  | Vacuolar pr K.NIILALIDR.L                              | 17.97  | 23.99  | 0.75  | 1.34 |
| Q9EQH3_VI Vps35  | Vacuolar pr R.NILPDEGEPTDEETGDISDSM**DFVLLNFAEM**NK#.L | 6.11   | 4.72   | 1.29  | 0.77 |
| Q9EQH3_VI Vps35  | Vacuolar pr R.SDDPDQQLYLINTAR.K                        | 14.34  | 26.65  | 0.54  | 1.86 |
| Q9EQH3_VI Vps35  | Vacuolar pr K.VLETTVEIFNK#.L                           | 77.42  | 37.03  | 2.09  | 0.48 |
| Q9EQH3_VI Vps35  | Vacuolar pr K.VQSFQM**K.R                              | 28.06  | 10.31  | 2.72  | 0.37 |
| Q9EQH3_VI Vps35  | Vacuolar pr R.YIFYFEK#ENDAVTIQVLNLIQK#.I               | 7.52   | 4.95   | 1.52  | 0.66 |
| Q9EQH3_VI Vps35  | Vacuolar pr K.AELAEPLR.L                               | 38.19  | 72.01  | 0.53  | 1.89 |
| Q9EQH3_VI Vps35  | Vacuolar pr R.EDGPGIPAEIK#.L                           | 81.95  | 33.48  | 2.45  | 0.41 |
| Q9EQH3_VI Vps35  | Vacuolar pr R.EDLPNLESSEETEQNK#.H                      | 11.96  | 4.25   | 2.81  | 0.36 |
| Q9EQH3_VI Vps35  | Vacuolar pr K.ENDAVTIQVLNLIQK#.I                       | 15.79  | 8.40   | 1.88  | 0.53 |
| Q9EQH3_VI Vps35  | Vacuolar pr R.ESPESEGGPIYEG.LL.-                       | 156.05 | 156.05 | 1.00  | 1.00 |
| Q9EQH3_VI Vps35  | Vacuolar pr K.HASNMLGELR.L                             | 13.80  | 25.33  | 0.54  | 1.84 |
| Q9EQH3_VI Vps35  | Vacuolar pr K.HASNMLGELR.T                             | 8.90   | 13.34  | 0.67  | 1.50 |
| Q9EQH3_VI Vps35  | Vacuolar pr R.LLVGTNLVR.L                              | 63.32  | 110.06 | 0.58  | 1.74 |
| Q9EQH3_VI Vps35  | Vacuolar pr K.IPVDTYNNILTVLK#.L                        | 207.53 | 97.96  | 2.12  | 0.47 |
| Q9EQH3_VI Vps35  | Vacuolar pr K.IREDLPNLESSEETEQNK.H                     | 30.97  | 60.50  | 0.51  | 1.95 |
| Q9EQH3_VI Vps35  | Vacuolar pr R.LALFAHREDGPGIPAEIK.L                     | 9.67   | 23.00  | 0.42  | 2.38 |
| Q9EQH3_VI Vps35  | Vacuolar pr K.LFDIFSQQVATVIQSR.Q                       | 49.64  | 88.70  | 0.56  | 1.79 |
| Q9EQH3_VI Vps35  | Vacuolar pr K.LLDEAIQAVK#.V                            | 76.36  | 30.92  | 2.47  | 0.40 |
| Q9EQH3_VI Vps35  | Vacuolar pr K.LNLEHIATSSAVSK#.E                        | 225.31 | 89.77  | 2.51  | 0.40 |
| Q9EQH3_VI Vps35  | Vacuolar pr R.LSLEQGVNVER.Y                            | 50.91  | 89.76  | 0.57  | 1.76 |
| Q9EQH3_VI Vps35  | Vacuolar pr K.NIILALIDR.L                              | 20.73  | 29.31  | 0.71  | 1.41 |
| Q9EQH3_VI Vps35  | Vacuolar pr R.NILPDEGEPTDEETGDISDSM**DFVLLNFAEM**NK#.L | 21.75  | 7.66   | 2.84  | 0.35 |
| Q9EQH3_VI Vps35  | Vacuolar pr R.QDM**PSEDVSLVQSLINLAM**K.C               | 16.67  | 6.89   | 2.42  | 0.41 |
| Q9EQH3_VI Vps35  | Vacuolar pr R.SDDPDQQLYLINTAR.K                        | 25.83  | 45.95  | 0.56  | 1.78 |
| Q9EQH3_VI Vps35  | Vacuolar pr R.TSM**LSPK#.S                             | 57.72  | 36.10  | 1.60  | 0.63 |
| Q9EQH3_VI Vps35  | Vacuolar pr K.VLETTVEIFNK#.L                           | 81.13  | 34.90  | 2.32  | 0.43 |
| Q9EQH3_VI Vps35  | Vacuolar pr K.VQSFQM**K.R                              | 34.20  | 15.00  | 2.28  | 0.44 |
| Q8CH58_VI Vps37a | Vacuolar pr K.SASSAAGSPAGSLTSLQQK#.Q                   | 5.29   | 3.46   | 1.53  | 0.65 |
| Q8R0J7_VI Vps37b | Vacuolar pr R.GM**EACTVQLNK#.E                         | 18.65  | 11.79  | 1.58  | 0.63 |
| Q8R0J7_VI Vps37b | Vacuolar pr K.IEEDTENM**AEK#.F                         | 7.83   | 4.25   | 1.84  | 0.54 |
| Q8R0J7_VI Vps37b | Vacuolar pr R.SLAEGNLLYQPLDAQK#.A                      | 9.61   | 3.79   | 2.54  | 0.39 |
| P46467_VI Vps4b  | Vacuolar pr K.AVATEANNSTFFSISSDLVSK#.W                 | 13.46  | 7.58   | 1.78  | 0.56 |
| P46467_VI Vps4b  | Vacuolar pr K.AVATEANNSTFFSISSDLVSK#.W                 | 6.07   | 2.71   | 2.24  | 0.45 |
| P46467_VI Vps4b  | Vacuolar pr K.GILLFGPPTGK#.T                           | 52.86  | 28.63  | 1.85  | 0.54 |
| P46467_VI Vps4b  | Vacuolar pr R.LHLGSTQNSLTDADFOELGR.K                   | 8.35   | 16.40  | 0.51  | 1.96 |
| Q3UVL4_VI Vps51  | Vacuolar pr R.IDVSPVFENK#.V                            | 11.90  | 7.33   | 1.62  | 0.62 |
| Q62481_VI Vps72  | Vacuolar pr K.AYK#EPLK#.S                              | 9.05   | 14.80  | 0.61  | 1.64 |
| Q62481_VI Vps72  | Vacuolar pr R.DPVTDIPIYATAR.A                          | 4.92   | 10.34  | 0.48  | 2.10 |
| Q62481_VI Vps72  | Vacuolar pr K.YITAHGLPPTASALGPGPPPEPLPGSGPR.A          | 1.63   | 4.94   | 0.33  | 3.03 |
| Q9CR26_VI Vta1   | Vacuolar pr K.YAGSALQYEDVGTAVGNLQK#.A                  | 8.62   | 2.55   | 3.38  | 0.30 |
| Q99KC8_VI Vwa5a  | von Willebr K.LSVNPAVFG.-                              | 10.09  | 10.09  | 1.00  | 1.00 |
| Q99KC8_VI Vwa5a  | von Willebr K.VSGGTAVFITGK#.D                          | 26.56  | 9.97   | 2.66  | 0.38 |
| Q99KC8_VI Vwa5a  | von Willebr K.VTSLQPK#.A                               | 11.26  | 3.11   | 3.62  | 0.28 |
| Q99KC8_VI Vwa5a  | von Willebr K.VSGGTAVFITGK#.D                          | 19.91  | 9.89   | 2.01  | 0.50 |
| Q65240_W Wapal   | Wings apar K.DSQLISSAK.A                               | 10.80  | 21.20  | 0.51  | 1.96 |
| Q65240_W Wapal   | Wings apar K.LEFFGFEDHDEGGDEGSGSSNYK#.I                | 7.50   | 4.43   | 1.69  | 0.59 |
| Q65240_W Wapal   | Wings apar R.LLELEQDASSAK#.L                           | 12.25  | 10.42  | 1.18  | 0.85 |
| Q65240_W Wapal   | Wings apar R.LLELEQDASSAK#.L                           | 27.20  | 17.45  | 1.56  | 0.64 |
| Q65240_W Wapal   | Wings apar K.RPNFKPDIQEI.PK.K                          | 3.15   | 8.79   | 0.36  | 2.80 |
| Q65240_W Wapal   | Wings apar R.SM**DEFTASTPADLGEAGR.L                    | 3.79   | 5.62   | 0.67  | 1.48 |
| Q65240_W Wapal   | Wings apar R.VLESVTHNPNQSYLIAYK#.D                     | 15.71  | 10.18  | 1.54  | 0.65 |
| P32921_SY Wars   | Tryptophar K.ISFPAVQAAPFSNSFPK#.I                      | 5.10   | 1.75   | 2.91  | 0.34 |
| Q8BH43_W Wasf2   | WisKott-Alc K.MGQEFVESK#.E                             | 10.97  | 2.16   | 5.07  | 0.20 |
| Q8BH43_W Wasf2   | WisKott-Alc R.TNITLANVR.Q                              | 10.05  | 11.68  | 0.86  | 1.16 |
| Q8BH43_W Wasf2   | WisKott-Alc K.VTQLDPKEEVSLOGINTR.K                     | 4.89   | 7.83   | 0.62  | 1.60 |
| Q923D5_W Wbp11   | WW domai R.SEDSAPVPAK#.A                               | 29.01  | 16.58  | 1.75  | 0.57 |
| Q61048_W Wbp4    | WW domai R.LGLPLPSDISEPTVSPVISTVQPTPTSNQQK#.E          | 12.27  | 7.70   | 1.59  | 0.63 |
| Q61048_W Wbp4    | WW domai K.TVSSLGVAADGVAPVFK#.K                        | 16.73  | 15.47  | 1.08  | 0.92 |
| Q61048_W Wbp4    | WW domai K.TVSSLGVAADGVAPVFK#.K                        | 5.48   | 4.06   | 1.35  | 0.74 |
| P59328_W Wdhd1   | WD repeat K.ADLSHKEEGDDQAR.S                           | 6.03   | 11.65  | 0.52  | 1.93 |
| P59328_W Wdhd1   | WD repeat K.LLAVPVEK.S                                 | 20.71  | 21.76  | 0.95  | 1.05 |
| P59328_W Wdhd1   | WD repeat K.SGAVFSSSGWVNPVK#.V                         | 7.22   | 11.06  | 0.65  | 1.53 |
| P59328_W Wdhd1   | WD repeat R.SQILSDNPDISEDTIIK.E                        | 5.72   | 5.01   | 1.14  | 0.88 |
| P59328_W Wdhd1   | WD repeat R.VEKDYNDLFDGDDTSSAGDFLNDNAVEIPFSK.G         | 3.26   | 3.58   | 0.91  | 1.10 |
| P59328_W Wdhd1   | WD repeat K.ADLSHKEEGDDQAR.S                           | 3.66   | 8.29   | 0.44  | 2.27 |
| P59328_W Wdhd1   | WD repeat K.SGAVFSSSGWVNPVK#.V                         | 8.70   | 12.11  | 0.72  | 1.39 |
| P59328_W Wdhd1   | WD repeat R.SQILSDNPDISEDTIIK#.E                       | 4.94   | 5.87   | 0.84  | 1.19 |
| P59328_W Wdhd1   | WD repeat R.VEKDYNDLFDGDDTSSAGDFLNDNAVEIPFSK#.G        | 4.18   | 4.89   | 0.85  | 1.17 |
| P59328_W Wdhd1   | WD repeat K.VVDVM**DNSQQQTRF.G                         | 2.95   | 6.90   | 0.43  | 2.34 |
| O88342_W Wdr1    | WD repeat R.DYSGQGVVK#.L                               | 83.96  | 9.13   | 9.20  | 0.11 |
| O88342_W Wdr1    | WD repeat R.FATASADGQFIYDQK#.T                         | 66.30  | 9.25   | 7.17  | 0.14 |
| O88342_W Wdr1    | WD repeat K.FGAVFLWDTGSSVGEITGHNK#.V                   | 93.28  | 14.02  | 6.66  | 0.15 |
| O88342_W Wdr1    | WD repeat R.IAVVGEGR.E                                 | 47.48  | 26.40  | 1.80  | 0.56 |
| O88342_W Wdr1    | WD repeat R.LHHVSSSLAWLDEHLTVTSHDASVK#.E               | 41.90  | 6.09   | 6.88  | 0.15 |
| O88342_W Wdr1    | WD repeat K.SYVSSHDGHINYWDSSETGENDSFGK#.G              | 14.71  | 2.93   | 5.02  | 0.20 |
| O88342_W Wdr1    | WD repeat K.VFASLPQVER.G                               | 38.44  | 24.83  | 1.55  | 0.65 |
| O88342_W Wdr1    | WD repeat K.VINSVDIK#.Q                                | 113.55 | 12.86  | 8.83  | 0.11 |
| O88342_W Wdr1    | WD repeat K.VTVFVSVADGYSENNVFGHHAH#.I                  | 24.38  | 3.91   | 6.24  | 0.16 |
| O88342_W Wdr1    | WD repeat K.YAPSGFYASGDISGK#.L                         | 61.51  | 7.71   | 7.98  | 0.13 |
| O88342_W Wdr1    | WD repeat K.YEQPFAGK#.I                                | 66.79  | 11.81  | 5.66  | 0.18 |
| O88342_W Wdr1    | WD repeat K.YAPSGFYASGDISGK#.L                         | 4.32   | 1.73   | 2.49  | 0.40 |
| O88342_W Wdr1    | WD repeat R.DYSGQGVVK#.L                               | 73.48  | 8.62   | 8.52  | 0.12 |
| O88342_W Wdr1    | WD repeat R.FATASADGQFIYDQK#.T                         | 37.19  | 4.13   | 9.01  | 0.11 |
| O88342_W Wdr1    | WD repeat K.FGAVFLWDTGSSVGEITGHNK#.V                   | 64.66  | 8.06   | 8.02  | 0.12 |
| O88342_W Wdr1    | WD repeat R.LHHVSSSLAWLDEHLTVTSHDASVK#.E               | 37.57  | 3.64   | 10.32 | 0.10 |
| O88342_W Wdr1    | WD repeat K.VTVFVSVADGYSENNVFGHHAH#.I                  | 73.18  | 8.76   | 8.35  | 0.12 |
| O88342_W Wdr1    | WD repeat K.YAPSGFYASGDISGK#.L                         | 67.43  | 8.02   | 8.40  | 0.12 |
| O88342_W Wdr1    | WD repeat K.YEQPFAGK#.I                                | 90.26  | 10.11  | 8.93  | 0.11 |
| O88342_W Wdr1    | WD repeat R.DYSGQGVVK#.L                               | 83.34  | 9.28   | 8.98  | 0.11 |
| O88342_W Wdr1    | WD repeat R.FATASADGQFIYDQK#.T                         | 58.13  | 8.47   | 6.86  | 0.15 |
| O88342_W Wdr1    | WD repeat K.FGAVFLWDTGSSVGEITGHNK#.V                   | 57.31  | 13.86  | 4.14  | 0.24 |
| O88342_W Wdr1    | WD repeat R.IAVVGEGR.E                                 | 35.52  | 18.64  | 1.91  | 0.52 |
| O88342_W Wdr1    | WD repeat K.VFASLPQVER.G                               | 24.87  | 15.86  | 1.57  | 0.64 |
| O88342_W Wdr1    | WD repeat K.VINSVDIK#.Q                                | 90.30  | 11.20  | 8.07  | 0.12 |
| O88342_W Wdr1    | WD repeat K.VTVFVSVADGYSENNVFGHHAH#.I                  | 43.14  | 4.14   | 10.42 | 0.10 |

|                 |                                             |        |       |      |       |
|-----------------|---------------------------------------------|--------|-------|------|-------|
| O88342_W Wdr1   | WD repeat-K.YAPSGFYASGDISGK#.L              | 68.45  | 9.38  | 7.30 | 0.14  |
| O88342_W Wdr1   | WD repeat-K.YEQPFAGK#.I                     | 85.38  | 11.20 | 7.63 | 0.13  |
| Q8K1X1_W Wdr11  | WD repeat-R.DLLNELGSK#EELTES.-              | 5.10   | 2.58  | 1.98 | 0.50  |
| Q8K1X1_W Wdr11  | WD repeat-K.LLLDPDFSLQR.C                   | 5.55   | 7.05  | 0.79 | 1.27  |
| Q8K1X1_W Wdr11  | WD repeat-R.VNLQEVK#.R                      | 10.93  | 7.71  | 1.42 | 0.71  |
| Q8K1X1_W Wdr11  | WD repeat-R.DLLLAHPNIVLWNADGTGK#.L          | 3.73   | 8.66  | 0.43 | 2.32  |
| Q8K1X1_W Wdr11  | WD repeat-K.LLLDPDFSLQR.C                   | 5.74   | 15.76 | 0.36 | 2.75  |
| Q8K1X1_W Wdr11  | WD repeat-K.LPDLSLDNM*IGQSAIAGEEHPK#.G      | 6.12   | 4.62  | 1.32 | 0.76  |
| Q8K1X1_W Wdr11  | WD repeat-K.LPDLSLDNMIGQSAIAGEEHPK#.G       | 7.06   | 5.94  | 1.19 | 0.84  |
| Q8K1X1_W Wdr11  | WD repeat-R.YSLDISHIDYPENEIK#.T             | 9.90   | 5.77  | 1.71 | 0.58  |
| Q8K1X1_W Wdr11  | WD repeat-K.GDTLVLGDM*DGMLNFWDL.K.A         | 6.04   | 3.19  | 1.89 | 0.53  |
| Q8K1X1_W Wdr11  | WD repeat-K.LLLDPDFSLQR.C                   | 5.86   | 18.39 | 0.32 | 3.14  |
| Q8K1X1_W Wdr11  | WD repeat-K.LPDLSLDNM*IGQSAIAGEEHPK#.G      | 10.06  | 4.11  | 2.45 | 0.41  |
| Q8K1X1_W Wdr11  | WD repeat-R.YSLDISHIDYPENEIK#.T             | 9.40   | 5.07  | 1.85 | 0.54  |
| Q9JJA4_W Wdr12  | Ribosome t.K.LYSYSPTTSHVGA.-                | 18.70  | 18.70 | 1.00 | 1.00  |
| Q4VBE8_W Wdr18  | WD repeat-K.HLLGAEHGDEAQGGGLR.L             | 7.54   | 20.19 | 0.37 | 2.68  |
| Q4VBE8_W Wdr18  | WD repeat-R.LEQLQAVLSSYLEK.N                | 6.63   | 5.23  | 1.27 | 0.79  |
| Q4VBE8_W Wdr18  | WD repeat-R.VATASLDQTVK#.L                  | 43.00  | 51.39 | 0.84 | 1.20  |
| Q4VBE8_W Wdr18  | WD repeat-R.VFDELEVR.S                      | 8.22   | 30.62 | 0.27 | 3.72  |
| Q4VBE8_W Wdr18  | WD repeat-R.EHFSQPEQNTGK#.V                 | 2.65   | 2.94  | 0.90 | 1.11  |
| Q4VBE8_W Wdr18  | WD repeat-R.VATASLDQTVK#.L                  | 25.13  | 17.09 | 1.47 | 0.68  |
| Q4VBE8_W Wdr18  | WD repeat-R.VFDELEVR.S                      | 1.69   | 13.61 | 0.12 | 8.06  |
| Q4VBE8_W Wdr18  | WD repeat-R.VATASLDQTVK#.L                  | 31.59  | 24.42 | 1.29 | 0.77  |
| Q4VBE8_W Wdr18  | WD repeat-R.VFDELEVR.S                      | 6.35   | 13.06 | 0.49 | 2.06  |
| Q8C6G8_W Wdr26  | WD repeat-R.GYNFEDLDR.N                     | 2.50   | 8.98  | 0.28 | 3.59  |
| Q8C6G8_W Wdr26  | WD repeat-R.LALLNVATQGVHLWDLQDR.V           | 5.06   | 14.91 | 0.34 | 2.95  |
| Q8C6G8_W Wdr26  | WD repeat-K.YLEYLEDGKLEALQVLR.C             | 2.18   | 4.48  | 0.49 | 2.06  |
| Q3TAQ9_Q Wdr36  | Protein Wd K.LEEGLLNQYEAALNLLK#.E           | 5.42   | 3.73  | 1.45 | 0.69  |
| Q3TAQ9_Q Wdr36  | Protein Wd R.TLPSEPALLEELVK#.L              | 13.75  | 9.43  | 1.46 | 0.69  |
| Q8CBE3_W Wdr37  | WD repeat-R.LAGEGQAIDGAELSK#.G              | 18.55  | 12.53 | 1.48 | 0.68  |
| Q6ZQL4_W Wdr43  | WD repeat-K.LGSTEATEER.L                    | 3.02   | 16.04 | 0.19 | 5.32  |
| Q6ZQL4_W Wdr43  | WD repeat-K.LILLVTQTAASEK#.S                | 7.13   | 6.59  | 1.08 | 0.92  |
| Q6ZQL4_W Wdr43  | WD repeat-R.VIPLQLQELTK#.R                  | 9.08   | 6.62  | 1.37 | 0.73  |
| P61965_W Wdr5   | WD repeat-K.FSPNGEWLASSADK#.L               | 8.20   | 9.64  | 0.85 | 1.18  |
| P61965_W Wdr5   | WD repeat-K.LIGSDVAVSSDNLVVSADK#.T          | 7.90   | 5.80  | 1.36 | 0.73  |
| P61965_W Wdr5   | WD repeat-K.TLIDDDNPPVPSFK.F                | 26.19  | 34.08 | 0.77 | 1.30  |
| P61965_W Wdr5   | WD repeat-K.WIVSGEDNLVYIWNLQTK.E            | 5.84   | 6.13  | 0.95 | 1.05  |
| P61965_W Wdr5   | WD repeat-K.YLAATLDNLLK#.L                  | 120.41 | 50.61 | 2.38 | 0.42  |
| Q99ME2_W Wdr6   | WD repeat-R.GYPGLGVSSLSFK#.S                | 8.39   | 5.40  | 1.55 | 0.64  |
| Q99ME2_W Wdr6   | WD repeat-R.LLAGEGPDLLVYNLDLGGHLR.M         | 4.13   | 8.22  | 0.50 | 1.99  |
| Q99ME2_W Wdr6   | WD repeat-K.VVPINTPTAAVEQK#.L               | 10.76  | 6.26  | 1.72 | 0.58  |
| Q99ME2_W Wdr6   | WD repeat-R.VLAVDTGSLYLYLEVVK#.S            | 14.06  | 6.41  | 2.19 | 0.46  |
| Q99ME2_W Wdr6   | WD repeat-K.VVPINTPTAAVEQK#.L               | 22.86  | 11.67 | 1.96 | 0.51  |
| Q9ERF3_W Wdr61  | WD repeat-K.ENIETVGTGLDLDLVK#.V             | 49.22  | 18.48 | 2.66 | 0.38  |
| Q9ERF3_W Wdr61  | WD repeat-K.FILSIAYSPDGK#.Y                 | 19.61  | 8.04  | 2.44 | 0.41  |
| Q9ERF3_W Wdr61  | WD repeat-K.QEQAGDDAIWVAVWETNKHK#.E         | 12.53  | 3.84  | 3.26 | 0.31  |
| Q9ERF3_W Wdr61  | WD repeat-K.SIDAGPVDAWTLAFSPDQSLATGTHMGK#.V | 17.10  | 5.38  | 3.18 | 0.31  |
| Q9ERF3_W Wdr61  | WD repeat-R.SLTFSPDSQLVTASDDGYIK#.I         | 27.76  | 11.28 | 2.46 | 0.41  |
| Q9ERF3_W Wdr61  | WD repeat-K.VNIFGVESGK#.K                   | 44.64  | 8.32  | 5.36 | 0.19  |
| Q9ERF3_W Wdr61  | WD repeat-K.VNIFGVESGKHK#.E                 | 25.68  | 9.90  | 2.59 | 0.39  |
| Q3TWf6_W Wdr70  | WD repeat-R.LVTGGYDYDVK#.F                  | 20.72  | 9.62  | 2.15 | 0.46  |
| A6PWY4_W Wdr76  | WD repeat-R.ENANFFASLQLEASAR.L              | 1.57   | 5.74  | 0.27 | 3.67  |
| A6PWY4_W Wdr76  | WD repeat-K.GAISSVALHPSEVR.T                | 2.73   | 11.43 | 0.24 | 4.18  |
| A6PWY4_W Wdr76  | WD repeat-K.SGQJGLWDLTQOSEDAM*YVYFAHSR.Y    | 2.14   | 4.11  | 0.52 | 1.92  |
| A6PWY4_W Wdr76  | WD repeat-K.SIASYFSPVTGNR.V                 | 4.44   | 8.80  | 0.50 | 1.98  |
| A6PWY4_W Wdr76  | WD repeat-K.SSVDAYTESTR.L                   | 2.25   | 15.82 | 0.14 | 7.02  |
| A6PWY4_W Wdr76  | WD repeat-K.TWAEM*SQTSNEK.T                 | 4.33   | 8.02  | 0.54 | 1.85  |
| A6PWY4_W Wdr76  | WD repeat-R.VFDSSISQLPLSTIR.H               | 1.25   | 8.44  | 0.15 | 6.75  |
| Q99J09_MI Wdr77 | Methylsor K.YEHDDIVSTVLLSSGTAQVSGSK#.D      | 19.86  | 4.14  | 4.79 | 0.21  |
| Q8BFQ4_W Wdr82  | WD repeat-R.VVALSM*SPVDDTFISGLDK.T          | 11.05  | 11.52 | 0.96 | 1.04  |
| Q8BFQ4_W Wdr82  | WD repeat-R.VVALSMSPVDDTFISGLDK#.T          | 10.67  | 9.92  | 1.08 | 0.93  |
| Q8BFQ4_W Wdr82  | WD repeat-K.YGVDLIR.Y                       | 4.20   | 18.98 | 0.22 | 4.52  |
| Q8BFQ4_W Wdr82  | WD repeat-R.YTHAANTVYSSNKH.I                | 166.58 | 48.02 | 3.47 | 0.29  |
| Q8BVE8_N Whsc1  | Histone-lys K.AIEAASLK.S                    | 15.84  | 17.62 | 0.90 | 1.11  |
| Q8BVE8_N Whsc1  | Histone-lys K.FTFLYVGDQLHLPQVAK.E           | 15.67  | 13.02 | 1.20 | 0.83  |
| Q8BVE8_N Whsc1  | Histone-lys R.SIKYDLSLEQLVEAALVSK.I         | 12.93  | 10.16 | 1.27 | 0.79  |
| Q8BVE8_N Whsc1  | Histone-lys K.VQIYADISEPK#.C                | 9.19   | 10.47 | 0.88 | 1.14  |
| Q8BVE8_N Whsc1  | Histone-lys K.YNNGDLVWSK#.V                 | 12.94  | 8.37  | 1.55 | 0.65  |
| Q8BVE8_N Whsc1  | Histone-lys K.VQIYADISEPK#.C                | 7.64   | 8.33  | 0.92 | 1.09  |
| Q6P2L6_N Whsc11 | Histone-lys K.EAIPVQPIQLSSVPTTETSTGVK#.F    | 11.54  | 8.18  | 1.41 | 0.71  |
| Q6P2L6_N Whsc11 | Histone-lys K.EAIPVQPIQLSSVPTTETSTGVK#.F    | 4.51   | 2.83  | 1.59 | 0.63  |
| Q6P2L6_N Whsc11 | Histone-lys K.FIDQVYSTK#.G                  | 15.02  | 9.97  | 1.51 | 0.66  |
| Q6P2L6_N Whsc11 | Histone-lys K.FQVGDVWSK#.V                  | 11.17  | 8.78  | 1.27 | 0.79  |
| Q6P2L6_N Whsc11 | Histone-lys R.SVLNSQEQTNAGEVASSQSTDLRR.Q    | 1.96   | 19.02 | 0.10 | 9.70  |
| Q6P2L6_N Whsc11 | Histone-lys R.VEQYFIYDK#QPEASSQAK#.K        | 5.84   | 6.03  | 0.97 | 1.03  |
| F6ZBR8_F6 Wiz   | Protein Wi: R.AADSGERPLATSPPTGVK.S          | 5.01   | 30.76 | 0.16 | 6.14  |
| F6ZBR8_F6 Wiz   | Protein Wi: R.EDM*APLNLRSAR.A               | 3.71   | 11.04 | 0.34 | 2.97  |
| F6ZBR8_F6 Wiz   | Protein Wi: R.ELSLSPITGSK#PSAASVLPVATK#.R   | 19.14  | 24.33 | 0.79 | 1.27  |
| F6ZBR8_F6 Wiz   | Protein Wi: R.GGEEVNDLQK.L                  | 37.68  | 25.70 | 1.47 | 0.68  |
| F6ZBR8_F6 Wiz   | Protein Wi: K.GLPDAPLGLTPSLTK#.K            | 20.91  | 28.31 | 0.74 | 1.35  |
| F6ZBR8_F6 Wiz   | Protein Wi: K.GSPIDLHLGLIR.R                | 1.36   | 8.13  | 0.17 | 5.98  |
| F6ZBR8_F6 Wiz   | Protein Wi: K.KAPLTLAGSPTPK.N               | 14.76  | 16.70 | 0.88 | 1.13  |
| F6ZBR8_F6 Wiz   | Protein Wi: R.SAGGEPGLEAGR.A                | 5.41   | 25.79 | 0.21 | 4.77  |
| F6ZBR8_F6 Wiz   | Protein Wi: K.SLPVSGTLEQVARS.L              | 3.05   | 12.91 | 0.24 | 4.24  |
| F6ZBR8_F6 Wiz   | Protein Wi: R.SPSDLHISPLTK.K                | 9.05   | 15.31 | 0.59 | 1.69  |
| F6ZBR8_F6 Wiz   | Protein Wi: K.TIYQTELPFK#.A                 | 21.14  | 22.34 | 0.95 | 1.06  |
| F6ZBR8_F6 Wiz   | Protein Wi: K.VLSTGGPGSSLEAR.S              | 13.48  | 48.16 | 0.28 | 3.57  |
| P83741_W Wnk1   | Serine/thre R.FQVTTANK#.V                   | 12.42  | 4.91  | 2.53 | 0.40  |
| P83741_W Wnk1   | Serine/thre R.SQQQDDIEELETK#.A              | 27.79  | 10.51 | 2.64 | 0.38  |
| Q91XU0_W Wrnip1 | ATPase WRI K.AVDTLAYLSDGDAR.T               | 6.14   | 22.60 | 0.27 | 3.68  |
| Q91XU0_W Wrnip1 | ATPase WRI R.FVTLSTANAK#.T                  | 25.09  | 17.74 | 1.41 | 0.71  |
| Q91XU0_W Wrnip1 | ATPase WRI K.SIEVSYANNVVK#.A                | 13.79  | 20.22 | 0.68 | 1.47  |
| Q91XU0_W Wrnip1 | ATPase WRI K.TTLAHIANNK#.K                  | 12.61  | 5.72  | 2.20 | 0.45  |
| Q91XU0_W Wrnip1 | ATPase WRI K.SIEVSYANNVVK#.A                | 11.42  | 5.79  | 1.97 | 0.51  |
| Q9ER69_FL Wtap  | Pre-mRNA: R.M*LIQENQELGR.Q                  | 3.53   | 7.40  | 0.48 | 2.09  |
| Q9ER69_FL Wtap  | Pre-mRNA: R.STM*VDPAINFLK#.M                | 12.50  | 7.76  | 1.61 | 0.62  |
| Q9ER69_FL Wtap  | Pre-mRNA: R.TTSSEVDQAEVTSK.D                | 11.33  | 15.27 | 0.74 | 1.35  |
| Q9ER69_FL Wtap  | Pre-mRNA: K.YTDLNSNDVTLGLR.E                | 3.72   | 13.47 | 0.28 | 3.62  |
| Q9DCD2_S Xab2   | Pre-mRNA: R.EIINTYEAQTVDPFK#.A              | 5.21   | 7.51  | 0.69 | 1.44  |
| Q9DCD2_S Xab2   | Pre-mRNA: R.HENYDEALK#.L                    | 14.46  | 13.41 | 1.08 | 0.93  |
| Q9DCD2_S Xab2   | Pre-mRNA: K.LSPESAEEYELK.S                  | 8.55   | 9.39  | 0.91 | 1.10  |
| Q9DCD2_S Xab2   | Pre-mRNA: K.SSDRLDEAAQR.L                   | 1.33   | 5.76  | 0.23 | 4.32  |
| Q9DCD2_S Xab2   | Pre-mRNA: R.AEQLAAEARDQPPR.A                | 1.44   | 22.96 | 0.06 | 15.90 |

|                 |                                                       |        |        |       |      |
|-----------------|-------------------------------------------------------|--------|--------|-------|------|
| Q9DCD2_S' Xab2  | Pre-mRNA-R.DFTQVFDYSAQFEESM*IAAK#.M                   | 9.12   | 7.40   | 1.23  | 0.81 |
| Q9DCD2_S' Xab2  | Pre-mRNA-R.EIINTYEAQVTDVDFK.A                         | 17.32  | 15.15  | 1.14  | 0.87 |
| Q9DCD2_S' Xab2  | Pre-mRNA-R.HENYDEALK#.L                               | 22.27  | 16.64  | 1.34  | 0.75 |
| Q9DCD2_S' Xab2  | Pre-mRNA-R.LATVYNDEER.F                               | 7.21   | 22.37  | 0.32  | 3.10 |
| Q9DCD2_S' Xab2  | Pre-mRNA-K.LSPESAEEYIEYK#.S                           | 19.80  | 18.02  | 1.10  | 0.91 |
| Q9DCD2_S' Xab2  | Pre-mRNA-K.M*ETASELGRREEEDVDLELR.L                    | 3.69   | 13.04  | 0.28  | 3.53 |
| Q9DCD2_S' Xab2  | Pre-mRNA-R.SERPDLVFEEDLPEYEEIM*.N                     | 2.82   | 14.04  | 0.20  | 4.97 |
| Q9DCD2_S' Xab2  | Pre-mRNA-R.SERPDLVFEEDLPEYEEIMR.N                     | 1.75   | 4.32   | 0.40  | 2.47 |
| Q9DCD2_S' Xab2  | Pre-mRNA-K.VWSM*LADLEESLGTQSTK#.A                     | 11.07  | 4.24   | 2.61  | 0.38 |
| Q6P1B1_Xf Xpnp1 | Xaa-Pro am R.GSLTFEPLTLVPIQTK#.M                      | 20.30  | 2.93   | 6.94  | 0.14 |
| Q6P1B1_Xf Xpnp1 | Xaa-Pro am R.TLSLDEVLDISGAQYK#.D                      | 5.38   | 4.80   | 1.12  | 0.89 |
| Q6P1B1_Xf Xpnp1 | Xaa-Pro am R.VGVDFPLIPDYLWK#.K                        | 14.86  | 2.64   | 5.64  | 0.18 |
| Q6P5F9_Xf Xpo1  | Exportin-1 K.EFAGEDTSDLFLEER.E                        | 2.89   | 4.86   | 0.59  | 1.68 |
| Q6P5F9_Xf Xpo1  | Exportin-1 K.AVGHPFVQLGR.I                            | 7.61   | 12.99  | 0.59  | 1.71 |
| Q6P5F9_Xf Xpo1  | Exportin-1 R.ETLVVLTLDYVDEIIM*TK#.K                   | 8.64   | 4.51   | 1.91  | 0.52 |
| Q6P5F9_Xf Xpo1  | Exportin-1 K.LLSEEVDFSSGQITQVK#.A                     | 35.06  | 16.51  | 2.12  | 0.47 |
| Q6P5F9_Xf Xpo1  | Exportin-1 R.VDTILEFSQNM*NTK#.Y                       | 10.19  | 3.66   | 2.79  | 0.36 |
| Q6P5F9_Xf Xpo1  | Exportin-1 K.YYGLQILENVIK#.T                          | 65.71  | 19.50  | 3.37  | 0.30 |
| Q6P5F9_Xf Xpo1  | Exportin-1 K.AIIASNIM*YIVGQYR.F                       | 3.72   | 7.44   | 0.50  | 2.00 |
| Q6P5F9_Xf Xpo1  | Exportin-1 K.AIIASNIMYIVGQYR.F                        | 5.68   | 9.88   | 0.58  | 1.74 |
| Q6P5F9_Xf Xpo1  | Exportin-1 K.AVGHPFVQLGR.I                            | 18.13  | 37.53  | 0.48  | 2.07 |
| Q6P5F9_Xf Xpo1  | Exportin-1 K.DTDSINLYK#.N                             | 32.57  | 15.42  | 2.11  | 0.47 |
| Q6P5F9_Xf Xpo1  | Exportin-1 K.EFAGEDTSDLFLEER.E                        | 11.16  | 18.96  | 0.59  | 1.70 |
| Q6P5F9_Xf Xpo1  | Exportin-1 R.EPEVLTSM*AIIVNK#.L                       | 18.07  | 11.25  | 1.61  | 0.62 |
| Q6P5F9_Xf Xpo1  | Exportin-1 R.EPEVLTSM*AIIVNK#.L                       | 18.84  | 9.88   | 1.91  | 0.52 |
| Q6P5F9_Xf Xpo1  | Exportin-1 R.FLVTVIK#.D                               | 16.18  | 7.84   | 2.06  | 0.48 |
| Q6P5F9_Xf Xpo1  | Exportin-1 R.IYLDMLNVYK#.C                            | 29.00  | 16.30  | 1.78  | 0.56 |
| Q6P5F9_Xf Xpo1  | Exportin-1 K.LIYLDMLNVYK#.C                           | 63.50  | 31.29  | 2.03  | 0.49 |
| Q6P5F9_Xf Xpo1  | Exportin-1 K.LLSEEVDFSSGQITQVK#.A                     | 105.46 | 42.36  | 2.49  | 0.40 |
| Q6P5F9_Xf Xpo1  | Exportin-1 R.M*AEQVLTSLK#.E                           | 39.51  | 17.75  | 2.23  | 0.45 |
| Q6P5F9_Xf Xpo1  | Exportin-1 R.QLVTLVSK#.V                              | 37.28  | 15.26  | 2.44  | 0.41 |
| Q6P5F9_Xf Xpo1  | Exportin-1 R.VDTILEFSQNM*NTK#.Y                       | 33.05  | 14.25  | 2.32  | 0.43 |
| Q6P5F9_Xf Xpo1  | Exportin-1 R.VDTILEFSQNMNTK#.Y                        | 10.63  | 5.17   | 2.06  | 0.49 |
| Q6P5F9_Xf Xpo1  | Exportin-1 K.YVGLIJK#.T                               | 32.53  | 10.22  | 3.18  | 0.31 |
| Q6P5F9_Xf Xpo1  | Exportin-1 K.YYGLQILENVIK#.T                          | 134.31 | 59.69  | 2.25  | 0.44 |
| Q924C1_Xf Xpo5  | Exportin-5 K.ALDIVSEK#.T                              | 28.38  | 14.44  | 1.97  | 0.51 |
| Q924C1_Xf Xpo5  | Exportin-5 R.AVM*EQIPEINK#.E                          | 8.40   | 3.43   | 2.45  | 0.41 |
| Q924C1_Xf Xpo5  | Exportin-5 K.AVTVM*MPDSSSTQR.Y                        | 3.90   | 8.05   | 0.48  | 2.06 |
| Q924C1_Xf Xpo5  | Exportin-5 R.DPALLAMVPK#.Y                            | 29.07  | 12.73  | 2.28  | 0.44 |
| Q924C1_Xf Xpo5  | Exportin-5 K.LFSPVTFESVGESK#.A                        | 40.08  | 12.17  | 3.29  | 0.30 |
| Q924C1_Xf Xpo5  | Exportin-5 R.LLDNLLALVR.T                             | 7.99   | 14.90  | 0.54  | 1.87 |
| Q924C1_Xf Xpo5  | Exportin-5 K.TADHTAAPTADGDDEEM*M*ATEVAPSSVVELTDLGK#.C | 3.48   | 2.36   | 1.47  | 0.68 |
| Q924C1_Xf Xpo5  | Exportin-5 K.TAILGLPQLLEFNDHPVYR.T                    | 14.32  | 34.72  | 0.41  | 2.43 |
| Q9EPK7_Xf Xpo7  | Exportin-7 R.LAASVPYK#.A                              | 13.96  | 4.40   | 3.17  | 0.32 |
| Q9EPK7_Xf Xpo7  | Exportin-7 R.LYGGDDALENALQTFIK#.L                     | 14.22  | 4.45   | 3.19  | 0.31 |
| Q9EPK7_Xf Xpo7  | Exportin-7 K.ATEPHM*LETYTPVTK#.A                      | 15.76  | 3.92   | 4.02  | 0.25 |
| Q9EPK7_Xf Xpo7  | Exportin-7 R.LAASVPYK#.A                              | 45.84  | 10.59  | 4.33  | 0.23 |
| Q9EPK7_Xf Xpo7  | Exportin-7 R.LYGGDDALENALQTFIK#.L                     | 29.19  | 5.14   | 5.67  | 0.18 |
| Q9EPK7_Xf Xpo7  | Exportin-7 R.NSIVSNQPPK#.Q                            | 30.04  | 7.98   | 3.77  | 0.27 |
| Q9EPK7_Xf Xpo7  | Exportin-7 K.SNYQLGELVK#.V                            | 25.31  | 7.71   | 3.28  | 0.30 |
| Q9CRT8_Xf Xpot  | Exportin-T1 K.NAQEALEAIETK#.V                         | 11.51  | 0.99   | 11.58 | 0.09 |
| Q9CRT8_Xf Xpot  | Exportin-T1 K.ANVEAIMLAVMK#.K                         | 11.97  | 3.06   | 3.91  | 0.26 |
| Q9CRT8_Xf Xpot  | Exportin-T1 K.QLPVLSDQK#.A                            | 16.87  | 1.45   | 11.63 | 0.09 |
| Q60596_Xf Xrcc1 | DNA repair K.LLPHQLYGVVQA.-                           | 20.95  | 20.95  | 1.00  | 1.00 |
| Q60596_Xf Xrcc1 | DNA repair R.TPAAAPASTPAQR.A                          | 4.34   | 14.42  | 0.30  | 3.33 |
| Q60596_Xf Xrcc1 | DNA repair K.DSPYGLSFVK#.F                            | 12.49  | 9.44   | 1.32  | 0.76 |
| Q60596_Xf Xrcc1 | DNA repair K.LLPHQLYGVVQA.-                           | 29.57  | 29.57  | 1.00  | 1.00 |
| Q60596_Xf Xrcc1 | DNA repair R.TPAAAPASTPAQR.A                          | 10.05  | 30.80  | 0.33  | 3.06 |
| P27641_Xf Xrcc5 | X-ray repair K.DEGPGSSITAEATK#.F                      | 23.08  | 6.93   | 3.33  | 0.30 |
| P27641_Xf Xrcc5 | X-ray repair R.FNSFLAER.E                             | 10.55  | 15.64  | 0.67  | 1.48 |
| P27641_Xf Xrcc5 | X-ray repair R.HLM*LPDFLLEDIGNK#.I                    | 45.00  | 15.79  | 2.85  | 0.35 |
| P27641_Xf Xrcc5 | X-ray repair K.K#NEEEDIVEDLFPTSK#.I                   | 21.23  | 7.19   | 2.95  | 0.34 |
| P27641_Xf Xrcc5 | X-ray repair R.QVSESK#DEIALVYGTGDNALAGK#.D            | 5.65   | 2.27   | 2.49  | 0.40 |
| P27641_Xf Xrcc5 | X-ray repair R.SNPQGVAFPIYK#.D                        | 24.68  | 8.65   | 2.85  | 0.35 |
| P27641_Xf Xrcc5 | X-ray repair K.TLFLTEVIK#.K                           | 67.21  | 18.46  | 3.64  | 0.27 |
| P27641_Xf Xrcc5 | X-ray repair K.VGSVNPVENFR.F                          | 17.42  | 22.89  | 0.76  | 1.31 |
| P27641_Xf Xrcc5 | X-ray repair K.K#NEEEDIVEDLFPTSK#.I                   | 11.26  | 4.06   | 2.77  | 0.36 |
| P27641_Xf Xrcc5 | X-ray repair K.TLFLTEVIK#.K                           | 30.29  | 8.45   | 3.58  | 0.28 |
| P23475_Xf Xrcc6 | X-ray repair R.DTGIFLDLMLHLK#.K                       | 22.08  | 5.47   | 4.03  | 0.25 |
| P23475_Xf Xrcc6 | X-ray repair K.ELVYPPGYNPEGK#.V                       | 13.96  | 4.94   | 2.82  | 0.35 |
| P23475_Xf Xrcc6 | X-ray repair R.LGSLADEFK#.E                           | 30.35  | 9.33   | 3.25  | 0.31 |
| P23475_Xf Xrcc6 | X-ray repair K.NIYQLDLDNPGAK#.R                       | 31.10  | 12.75  | 2.44  | 0.41 |
| P23475_Xf Xrcc6 | X-ray repair K.VELSEELK#.A                            | 85.99  | 22.31  | 3.86  | 0.26 |
| P23475_Xf Xrcc6 | X-ray repair R.VLELDQFK#.G                            | 51.43  | 14.94  | 3.44  | 0.29 |
| P23475_Xf Xrcc6 | X-ray repair K.VTANQEQJDK#.M                          | 79.77  | 30.59  | 2.61  | 0.38 |
| P97789_Xf Xrn1  | 5'-3' exorib R.APELSFYAK#.N                           | 46.05  | 20.44  | 2.25  | 0.44 |
| P97789_Xf Xrn1  | 5'-3' exorib K.EAQQSQATPLQTNK#PGSSEATK#.M             | 19.49  | 10.03  | 1.94  | 0.51 |
| P97789_Xf Xrn1  | 5'-3' exorib R.EYIDYFSAK#.E                           | 9.92   | 3.24   | 3.06  | 0.33 |
| P97789_Xf Xrn1  | 5'-3' exorib K.FYIEPPGTQK#.V                          | 24.59  | 10.38  | 2.37  | 0.42 |
| P97789_Xf Xrn1  | 5'-3' exorib K.QLPFPVQTVK#.D                          | 18.52  | 9.64   | 1.92  | 0.52 |
| P97789_Xf Xrn1  | 5'-3' exorib K.VQEITWLK#.G                            | 25.30  | 10.17  | 2.49  | 0.40 |
| P97789_Xf Xrn1  | 5'-3' exorib K.YLNEAAGAAEEAK#.N                       | 25.85  | 14.72  | 1.76  | 0.57 |
| P97789_Xf Xrn1  | 5'-3' exorib K.YNPGYVLAGR.L                           | 7.07   | 14.33  | 0.49  | 2.03 |
| Q9DBR1_XI Xrn2  | 5'-3' exorib R.DLQNTAVSINFK#DPQFAEDYVFK#.A            | 19.20  | 7.65   | 2.51  | 0.40 |
| Q9DBR1_XI Xrn2  | 5'-3' exorib R.ELTM*ASLPFPFDVER.S                     | 3.76   | 7.85   | 0.48  | 2.09 |
| Q9DBR1_XI Xrn2  | 5'-3' exorib K.NK#FDVADEK#.F                          | 19.20  | 5.41   | 3.55  | 0.28 |
| Q9DBR1_XI Xrn2  | 5'-3' exorib K.NLTVLSDASAPGEGEHK#.I                   | 17.50  | 12.56  | 1.39  | 0.72 |
| Q9DBR1_XI Xrn2  | 5'-3' exorib R.NSLGGDVLVFGK#.L                        | 44.36  | 14.90  | 2.98  | 0.34 |
| Q9DBR1_XI Xrn2  | 5'-3' exorib K.TGGYLTESGYVNLQR.V                      | 3.88   | 6.28   | 0.62  | 1.62 |
| Q9DBR1_XI Xrn2  | 5'-3' exorib K.YAWGVALLPFDVER.S                       | 7.62   | 10.56  | 0.72  | 1.38 |
| Q9DBR1_XI Xrn2  | 5'-3' exorib R.DLQNTAVSINFK#DPQFAEDYVFK#.A            | 7.77   | 3.04   | 2.56  | 0.39 |
| Q9DBR1_XI Xrn2  | 5'-3' exorib R.ELTM*ASLPFPFDVER.S                     | 4.20   | 5.99   | 0.70  | 1.42 |
| Q9DBR1_XI Xrn2  | 5'-3' exorib R.K#PVLK#GDWEK#.S                        | 11.16  | 1.68   | 6.63  | 0.15 |
| Q9DBR1_XI Xrn2  | 5'-3' exorib K.NLTVLSDASAPGEGEHK#.I                   | 14.37  | 6.72   | 2.14  | 0.47 |
| Q9DBR1_XI Xrn2  | 5'-3' exorib R.NSLGGDVLVFGK#.L                        | 17.57  | 5.30   | 3.32  | 0.30 |
| P62960_YB Ybx1  | Nuclease-se K.AADPPAENSAPAEQGGAE.-                    | 134.16 | 134.16 | 1.00  | 1.00 |
| P62960_YB Ybx1  | Nuclease-se R.EDGNEEDKENQDDETQGGQPPQR.R               | 43.91  | 140.72 | 0.31  | 3.20 |
| P62960_YB Ybx1  | Nuclease-se K.ENQDDETQGGQPPQR.R                       | 1.36   | 9.15   | 0.15  | 6.71 |
| P62960_YB Ybx1  | Nuclease-se K.GAEAAVNTGPGVVPVQGSK#.Y                  | 607.17 | 367.87 | 1.65  | 0.61 |
| P62960_YB Ybx1  | Nuclease-se R.NDTKHEDVHVQTAIK#.K                      | 268.60 | 190.53 | 1.41  | 0.71 |
| P62960_YB Ybx1  | Nuclease-se R.NDTKHEDVHVQTAIK#.N                      | 314.83 | 191.13 | 1.65  | 0.61 |
| P62960_YB Ybx1  | Nuclease-se K.NEGESAPQGAQQR.R                         | 8.66   | 25.78  | 0.34  | 2.98 |
| P62960_YB Ybx1  | Nuclease-se R.NYQQYQNSQESGK#.N                        | 19.28  | 11.65  | 1.65  | 0.60 |

|                  |                                                            |        |        |      |       |
|------------------|------------------------------------------------------------|--------|--------|------|-------|
| P62960_YB Ybx1   | Nuclease-se R.NYQQNYQNSSESGEKNESSESAPEGQAQQR.R             | 49.37  | 101.41 | 0.49 | 2.05  |
| P62960_YB Ybx1   | Nuclease-se R.RPQYSNPVQGEVVM*EGADNQGAGEQGRPV.R             | 4.96   | 41.71  | 0.12 | 8.40  |
| P62960_YB Ybx1   | Nuclease-se R.RPQYSNPVQGEVVM*EGADNQGAGEQGRPV.R             | 9.63   | 174.02 | 0.06 | 18.07 |
| P62960_YB Ybx1   | Nuclease-se R.RPQYSNPVQGEVVM*EGADNQGAGEQGRPV.R             | 3.82   | 73.59  | 0.05 | 19.27 |
| P62960_YB Ybx1   | Nuclease-se R.SVGDGETVEFDVVEGK#G                           | 788.97 | 300.88 | 2.62 | 0.38  |
| P62960_YB Ybx1   | Nuclease-se R.SVGDGETVEFDVVEGK#GAEAAANVTGPGGVPVQGSK.Y      | 34.10  | 17.25  | 1.98 | 0.51  |
| P62960_YB Ybx1   | Nuclease-se R.GAEAAANVTGPGGVPVQGSK#Y                       | 40.64  | 29.84  | 1.36 | 0.73  |
| P62960_YB Ybx1   | Nuclease-se R.NDTKHEDVVFHQTAIK#H.N                         | 9.04   | 4.13   | 2.19 | 0.46  |
| P62960_YB Ybx1   | Nuclease-se R.SVGDGETVEFDVVEGK#GAEAAANVTGPGGVPVQGSK.Y      | 2.84   | 2.43   | 1.17 | 0.86  |
| Q9JKB3_YB Ybx3   | Y-box-bindin K.AGEAPTENPAPATEQSSAE.-                       | 31.62  | 31.62  | 1.00 | 1.00  |
| Q9JKB3_YB Ybx3   | Y-box-bindin K.DGVPETGLQQAHR.N                             | 2.43   | 12.76  | 0.19 | 5.26  |
| Q9JKB3_YB Ybx3   | Y-box-bindin K.GAEAAANVTGPDGVPVVEGSR.Y                     | 19.95  | 98.76  | 0.20 | 4.95  |
| Q9JKB3_YB Ybx3   | Y-box-bindin R.SRPLNAVSDQDK.E                              | 4.89   | 21.63  | 0.23 | 4.42  |
| Q3TUF7_YE Yeats2 | YEATS dom: K.LLLPQGAIRL.A                                  | 2.47   | 15.36  | 0.16 | 6.23  |
| Q3TUF7_YE Yeats2 | YEATS dom: K.TTLFTQAATGQASLLK.L                            | 2.69   | 5.75   | 0.47 | 2.14  |
| Q9CR11_YE Yeats4 | YEATS dom: R.K#LEEDDQTK#DI.-                               | 5.44   | 4.37   | 1.25 | 0.80  |
| Q9CR11_YE Yeats4 | YEATS dom: K.LFQSDTNAM*LGK#K                               | 3.87   | 2.87   | 1.35 | 0.74  |
| Q9CR11_YE Yeats4 | YEATS dom: R.K#LEEDDQTK#DI.-                               | 21.04  | 15.72  | 1.34 | 0.75  |
| Q9CR11_YE Yeats4 | YEATS dom: K.TSFEIALK#E                                    | 20.42  | 12.07  | 1.69 | 0.59  |
| Q9CR11_YE Yeats4 | YEATS dom: R.VKGTIVKPIVYGNVAR.Y                            | 2.72   | 10.32  | 0.26 | 3.79  |
| Q9CR11_YE Yeats4 | YEATS dom: R.VTK#PPYEITETGWFGEFIIK#I                       | 6.81   | 7.35   | 0.93 | 1.08  |
| Q9CQW1_Y Ykt6    | Synaptobre K.AAYDVSF5FQR.S                                 | 4.95   | 19.07  | 0.26 | 3.86  |
| Q9CQW1_Y Ykt6    | Synaptobre R.SDSLAVIADSEYPSR.V                             | 1.85   | 6.24   | 0.30 | 3.37  |
| Q9CQW1_Y Ykt6    | Synaptobre R.VAFTLLEK#V                                    | 8.70   | 8.08   | 1.08 | 0.93  |
| D3YWX2_D Ylpm1   | YLP motif-c K.AAOSNENLSDSQEPTK#S                           | 4.17   | 5.51   | 0.76 | 1.32  |
| D3YWX2_D Ylpm1   | YLP motif-c R.AIGFVVGQTDWEK#I                              | 5.89   | 4.37   | 1.35 | 0.74  |
| D3YWX2_D Ylpm1   | YLP motif-c R.AIGFVVGQTDWEK#I                              | 14.59  | 20.62  | 0.71 | 1.41  |
| D3YWX2_D Ylpm1   | YLP motif-c K.ATVGGQHQQQPK.Q                               | 1.69   | 3.24   | 0.52 | 1.92  |
| D3YWX2_D Ylpm1   | YLP motif-c R.DKEVEFGGPA.PR.V                              | 5.97   | 18.70  | 0.32 | 3.13  |
| D3YWX2_D Ylpm1   | YLP motif-c R.GPASQFYITPNTLSLSP.R                          | 1.57   | 7.67   | 0.20 | 4.90  |
| D3YWX2_D Ylpm1   | YLP motif-c K.IQSAFASADVK#D                                | 11.25  | 16.64  | 0.68 | 1.48  |
| D3YWX2_D Ylpm1   | YLP motif-c R.M*EYVLQQLPDDYETR.A                           | 1.53   | 7.97   | 0.19 | 5.20  |
| D3YWX2_D Ylpm1   | YLP motif-c R.M*PLPAPALGHQPPVPR.V                          | 3.79   | 19.72  | 0.19 | 5.20  |
| D3YWX2_D Ylpm1   | YLP motif-c R.MPLPAPALGHQPPVPR.V                           | 2.94   | 8.39   | 0.35 | 2.85  |
| D3YWX2_D Ylpm1   | YLP motif-c R.SLQQAIAEEVEM*EDFDANIEDQK#EEK#K               | 1.95   | 4.47   | 0.44 | 2.29  |
| D3YWX2_D Ylpm1   | YLP motif-c K.SQAEPISGNKEPLADTSNNQK.N                      | 24.68  | 28.88  | 0.85 | 1.17  |
| D3YWX2_D Ylpm1   | YLP motif-c R.SSQGSK#PQLPPPSIPSGNK#T                       | 16.69  | 18.53  | 0.90 | 1.11  |
| D3YWX2_D Ylpm1   | YLP motif-c K.TAIQVLESGAK#N                                | 37.51  | 42.66  | 0.88 | 1.14  |
| D3YWX2_D Ylpm1   | YLP motif-c K.VFSSEQGLGESSALSQSIIAAK#D                     | 24.87  | 22.57  | 1.10 | 0.91  |
| D3YWX2_D Ylpm1   | YLP motif-c K.VFSSEQGLGESSALSQSIIAAK.D                     | 10.06  | 7.36   | 1.37 | 0.73  |
| D3YWX2_D Ylpm1   | YLP motif-c K.VGSM*EGGAAAAALADDFKPLGVGLSHSENHQEKDLPQDPSR.E | 3.29   | 1.96   | 1.67 | 0.60  |
| D3YWX2_D Ylpm1   | YLP motif-c K.VNSFQTVK#S                                   | 29.46  | 19.31  | 1.53 | 0.66  |
| P62700_YP Ypel5  | Protein yip R.ESEGFEEHVPDSDNS.-                            | 45.65  | 45.65  | 1.00 | 1.00  |
| P62700_YP Ypel5  | Protein yip K.LGWIVYEFATEDSQR.Y                            | 2.21   | 8.80   | 0.25 | 3.99  |
| P62700_YP Ypel5  | Protein yip K.VVNLQYSEVQDR.V                               | 6.37   | 15.78  | 0.40 | 2.48  |
| Q3U5F4_YF Yrdc   | YrdC domai R.LPESEVPEAASPER.S                              | 1.38   | 5.27   | 0.26 | 3.80  |
| B2R883_YT Ythdc2 | Probable A' K.VLIVGETGSGK#T                                | 10.12  | 3.58   | 2.83 | 0.35  |
| P59326_YT Ythd1  | YTH domai R.DTQEVPLEK#A                                    | 63.77  | 56.93  | 1.12 | 0.89  |
| P59326_YT Ythd1  | YTH domai R.LENNDNKPVNSR.D                                 | 5.91   | 7.99   | 0.74 | 1.35  |
| P59326_YT Ythd1  | YTH domai K.SGPIVGGALPPPPIK.H                              | 5.22   | 4.99   | 1.04 | 0.96  |
| P59326_YT Ythd1  | YTH domai K.SYSEDDIHR.S                                    | 6.50   | 23.97  | 0.27 | 3.69  |
| P59326_YT Ythd1  | YTH domai K.HTSIFDDFHYEK#R                                 | 19.79  | 18.71  | 1.06 | 0.95  |
| P59326_YT Ythd1  | YTH domai R.LENNDNKPVNSR.D                                 | 5.68   | 3.93   | 1.44 | 0.69  |
| P59326_YT Ythd1  | YTH domai K.SGPIVGGALPPPPIK.H                              | 3.76   | 5.87   | 0.64 | 1.56  |
| P59326_YT Ythd1  | YTH domai K.SYSEDDIHR.S                                    | 3.95   | 18.40  | 0.21 | 4.65  |
| Q91Y77_YT Ythd2  | YTH domai K.APGM*NTIQGM*AALK.L                             | 5.84   | 7.47   | 0.78 | 1.28  |
| Q91Y77_YT Ythd2  | YTH domai K.LGSTEVASSVPK#V                                 | 26.06  | 33.48  | 0.78 | 1.28  |
| Q91Y77_YT Ythd2  | YTH domai K.LGSTEVASSVPK#V                                 | 30.25  | 28.99  | 1.04 | 0.96  |
| Q8BYK6_YT Ythd3  | YTH domai K.AINNYNPK#D                                     | 11.16  | 9.52   | 1.17 | 0.85  |
| Q8BYK6_YT Ythd3  | YTH domai R.AITDQAGFGNDTLK.V                               | 21.65  | 22.96  | 0.94 | 1.06  |
| Q8BYK6_YT Ythd3  | YTH domai K.GNVGIGGSVAVPPPPIK.H                            | 12.15  | 16.06  | 0.76 | 1.32  |
| Q8BYK6_YT Ythd3  | YTH domai K.HTSIFDDFAHYEK#R                                | 24.36  | 21.49  | 1.13 | 0.88  |
| Q8BYK6_YT Ythd3  | YTH domai K.IGGDLTAAVTK.T                                  | 17.63  | 23.26  | 0.76 | 1.32  |
| Q8BYK6_YT Ythd3  | YTH domai K.VPGIISIEQGM*TLGL.I                             | 14.02  | 14.01  | 1.00 | 1.00  |
| Q8BYK6_YT Ythd3  | YTH domai K.VPGIISIEQGM*TLGL.I                             | 6.85   | 8.85   | 0.77 | 1.29  |
| Q8BYK6_YT Ythd3  | YTH domai R.AITDQAGFGNDTLK.V                               | 4.16   | 7.63   | 0.55 | 1.83  |
| Q8BYK6_YT Ythd3  | YTH domai R.AITDQAGFGNDTLK#V                               | 28.52  | 19.93  | 1.43 | 0.70  |
| Q8BYK6_YT Ythd3  | YTH domai K.GNVGIGGSVAVPPPPIK#H                            | 10.33  | 10.88  | 0.95 | 1.05  |
| Q8BYK6_YT Ythd3  | YTH domai K.HTSIFDDFAHYEK#R                                | 23.20  | 19.27  | 1.20 | 0.83  |
| Q8BYK6_YT Ythd3  | YTH domai K.IGGDLTAAVTK.T                                  | 17.33  | 20.48  | 0.85 | 1.18  |
| Q8BYK6_YT Ythd3  | YTH domai K.VPGIISIEQGM*TLGL#I                             | 13.73  | 8.86   | 1.55 | 0.64  |
| Q9CQV8_1_Ywhab   | 14-3-3 prot K.DSTLIM*QLLR.D                                | 28.45  | 37.67  | 0.76 | 1.32  |
| Q9CQV8_1_Ywhab   | 14-3-3 prot K.DSTLIMQLLR.D                                 | 69.17  | 78.32  | 0.88 | 1.13  |
| Q9CQV8_1_Ywhab   | 14-3-3 prot K.LAEQAEY.Y                                    | 54.92  | 65.35  | 0.84 | 1.19  |
| Q9CQV8_1_Ywhab   | 14-3-3 prot R.NLLSVAYK#N                                   | 494.89 | 155.24 | 3.19 | 0.31  |
| Q9CQV8_1_Ywhab   | 14-3-3 prot K.QTTVNSQQAYQAEFISK#K                          | 12.96  | 2.43   | 5.33 | 0.19  |
| Q9CQV8_1_Ywhab   | 14-3-3 prot K.TAFDEAIAELDTLNEESYK#D                        | 13.67  | 7.99   | 1.71 | 0.58  |
| Q9CQV8_1_Ywhab   | 14-3-3 prot R.YDDMAAAMK#A                                  | 22.79  | 8.12   | 2.81 | 0.36  |
| Q9CQV8_1_Ywhab   | 14-3-3 prot R.YDDM*AAAM*K#A                                | 33.39  | 10.86  | 3.07 | 0.33  |
| Q9CQV8_1_Ywhab   | 14-3-3 prot R.YDDMAAAM*K#A                                 | 38.41  | 13.56  | 2.83 | 0.35  |
| Q9CQV8_1_Ywhab   | 14-3-3 prot K.YLILNATAESK#V                                | 29.55  | 7.44   | 3.97 | 0.25  |
| Q9CQV8_1_Ywhab   | 14-3-3 prot R.YLSEVASENPK#Q                                | 79.45  | 21.24  | 3.74 | 0.27  |
| Q9CQV8_1_Ywhab   | 14-3-3 prot K.AVTEQGHLSNEER.N                              | 12.55  | 22.01  | 0.57 | 1.75  |
| Q9CQV8_1_Ywhab   | 14-3-3 prot R.DNLLTWSNQGDEGDAGEGEN.-                       | 3.55   | 3.55   | 1.00 | 1.00  |
| Q9CQV8_1_Ywhab   | 14-3-3 prot K.LAEQAEY.Y                                    | 17.06  | 20.64  | 0.83 | 1.21  |
| Q9CQV8_1_Ywhab   | 14-3-3 prot K.M*KGYDFR.Y                                   | 10.87  | 8.63   | 1.26 | 0.79  |
| Q9CQV8_1_Ywhab   | 14-3-3 prot R.NLLSVAYK#N                                   | 684.71 | 162.46 | 4.21 | 0.24  |
| Q9CQV8_1_Ywhab   | 14-3-3 prot K.QTTVNSQQAYQAEFISK#K                          | 24.89  | 7.83   | 3.18 | 0.31  |
| Q9CQV8_1_Ywhab   | 14-3-3 prot K.QTTVNSQQAYQAEFISK#K#E                        | 16.08  | 5.28   | 3.04 | 0.33  |
| Q9CQV8_1_Ywhab   | 14-3-3 prot R.VISSIEQK#T                                   | 511.48 | 198.37 | 2.58 | 0.39  |
| Q9CQV8_1_Ywhab   | 14-3-3 prot R.YDDM*AAAM*K#A                                | 13.90  | 5.62   | 2.47 | 0.40  |
| Q9CQV8_1_Ywhab   | 14-3-3 prot K.YLILNATAESK#V                                | 17.84  | 6.11   | 2.92 | 0.34  |
| Q9CQV8_1_Ywhab   | 14-3-3 prot R.YLSEVASENPK#Q                                | 96.62  | 45.55  | 2.12 | 0.47  |
| Q9CQV8_1_Ywhab   | 14-3-3 prot R.NLLSVAYK#N                                   | 78.76  | 20.92  | 3.76 | 0.27  |
| Q9CQV8_1_Ywhab   | 14-3-3 prot R.VISSIEQK#T                                   | 58.22  | 22.93  | 2.54 | 0.39  |
| Q9CQV8_1_Ywhab   | 14-3-3 prot R.YLSEVASENPK#Q                                | 21.82  | 3.78   | 5.78 | 0.17  |
| Q9CQV8_1_Ywhab   | 14-3-3 prot -.MTM*DKSELVQKAK.L                             | 2.02   | 10.94  | 0.18 | 5.43  |
| Q9CQV8_1_Ywhab   | 14-3-3 prot R.NLLSVAYK#N                                   | 99.30  | 30.97  | 3.21 | 0.31  |
| Q9CQV8_1_Ywhab   | 14-3-3 prot R.VISSIEQK#T                                   | 81.17  | 44.48  | 1.82 | 0.55  |
| P62259_14 Ywhae  | 14-3-3 prot K.AAFDDAIAELDTLSEESYK#D                        | 181.50 | 42.52  | 4.27 | 0.23  |
| P62259_14 Ywhae  | 14-3-3 prot K.AAFDDAIAELDTLSEESYK#D                        | 89.76  | 24.35  | 3.69 | 0.27  |
| P62259_14 Ywhae  | 14-3-3 prot K.AASDIAM*TELPPTHPIR.L                         | 22.20  | 24.89  | 0.89 | 1.12  |
| P62259_14 Ywhae  | 14-3-3 prot R.DNLLTWSNQM*QDGEENK#E                         | 12.79  | 4.83   | 2.65 | 0.38  |

|                  |                                                 |        |        |       |      |
|------------------|-------------------------------------------------|--------|--------|-------|------|
| P62259_14 Ywhae  | 14-3-3 prot R.DNLTWTSMDMQGDGEEQNK# E            | 6.07   | 2.07   | 2.94  | 0.34 |
| P62259_14 Ywhae  | 14-3-3 prot R.DNLTWTSMDMQGDGEEQNK#EALQDVEDENQ.- | 16.63  | 4.36   | 3.81  | 0.26 |
| P62259_14 Ywhae  | 14-3-3 prot K.EAENSLVAYK#A                      | 430.51 | 104.60 | 4.12  | 0.24 |
| P62259_14 Ywhae  | 14-3-3 prot K.EALQDVEDENQ.-                     | 71.80  | 71.80  | 1.00  | 1.00 |
| P62259_14 Ywhae  | 14-3-3 prot R.EDLVYQAK#L                        | 47.90  | 8.95   | 5.35  | 0.19 |
| P62259_14 Ywhae  | 14-3-3 prot K.EENK#GGEDK#L#K.M                  | 3.20   | 2.59   | 1.23  | 0.81 |
| P62259_14 Ywhae  | 14-3-3 prot K.HLIPAANTGESK#V                    | 188.59 | 60.23  | 3.13  | 0.32 |
| P62259_14 Ywhae  | 14-3-3 prot R.IIISIEQK#E                        | 347.07 | 79.35  | 4.37  | 0.23 |
| P62259_14 Ywhae  | 14-3-3 prot R.K#EAENSLVAYK#A                    | 17.10  | 7.56   | 2.26  | 0.44 |
| P62259_14 Ywhae  | 14-3-3 prot K.LAEQAERYDEM#VESM#KK.V             | 8.48   | 10.95  | 0.77  | 1.29 |
| P62259_14 Ywhae  | 14-3-3 prot R.QM#VETELK#L                       | 106.70 | 23.84  | 4.47  | 0.22 |
| P62259_14 Ywhae  | 14-3-3 prot K.VAGMDVLTVEER.N                    | 8.69   | 11.23  | 0.77  | 1.29 |
| P62259_14 Ywhae  | 14-3-3 prot K.VFYK#M                            | 285.61 | 62.58  | 4.56  | 0.22 |
| P62259_14 Ywhae  | 14-3-3 prot R.YDEMVESM#K#K                      | 16.94  | 2.38   | 7.12  | 0.14 |
| P62259_14 Ywhae  | 14-3-3 prot R.YLAEFAGNDR.K                      | 88.40  | 30.80  | 2.87  | 0.35 |
| P62259_14 Ywhae  | 14-3-3 prot K.AAFDDAIAELDTLSEESYK#D             | 2.54   | 2.69   | 0.95  | 1.06 |
| P62259_14 Ywhae  | 14-3-3 prot K.EAENSLVAYK#A                      | 59.03  | 20.06  | 2.94  | 0.34 |
| P62259_14 Ywhae  | 14-3-3 prot K.EALQDVEDENQ.-                     | 3.78   | 3.78   | 1.00  | 1.00 |
| P62259_14 Ywhae  | 14-3-3 prot R.IIISIEQK#E                        | 15.99  | 4.71   | 3.39  | 0.29 |
| P62259_14 Ywhae  | 14-3-3 prot K.VAGM#DVELTVEER.N                  | 6.63   | 6.71   | 0.99  | 1.01 |
| P62259_14 Ywhae  | 14-3-3 prot K.EAENSLVAYK#A                      | 24.85  | 6.49   | 3.83  | 0.26 |
| P61982_14 Ywhag  | 14-3-3 prot R.ATVVESEK#A                        | 60.59  | 22.48  | 2.70  | 0.37 |
| P61982_14 Ywhag  | 14-3-3 prot K.AYSEAEISK#E                       | 96.54  | 35.08  | 2.75  | 0.36 |
| P61982_14 Ywhag  | 14-3-3 prot R.DNLTWTSDDQDDGGEGNN.-              | 18.65  | 18.65  | 1.00  | 1.00 |
| P61982_14 Ywhag  | 14-3-3 prot K.NVTELNEPLSNEER.N                  | 45.05  | 69.92  | 0.64  | 1.55 |
| P61982_14 Ywhag  | 14-3-3 prot K.TAFDDAIAELDTLNEDSYK#D             | 51.84  | 14.49  | 3.58  | 0.28 |
| P61982_14 Ywhag  | 14-3-3 prot R.YLAEVATGEK#R                      | 214.46 | 73.89  | 2.90  | 0.34 |
| P61982_14 Ywhag  | 14-3-3 prot R.ATVVESEK#A                        | 33.92  | 23.58  | 1.44  | 0.70 |
| P61982_14 Ywhag  | 14-3-3 prot K.AYSEAEISK#E                       | 31.02  | 9.88   | 3.14  | 0.32 |
| P61982_14 Ywhag  | 14-3-3 prot R.DNLTWTSDDQDDGGEGNN.-              | 21.93  | 21.93  | 1.00  | 1.00 |
| P61982_14 Ywhag  | 14-3-3 prot K.NVTELNEPLSNEER.N                  | 27.84  | 44.64  | 0.62  | 1.60 |
| P61982_14 Ywhag  | 14-3-3 prot K.TAFDDAIAELDTLNEDSYK#D             | 14.31  | 4.64   | 3.08  | 0.32 |
| P61982_14 Ywhag  | 14-3-3 prot R.YLAEVATGEK#R                      | 113.17 | 43.36  | 2.61  | 0.38 |
| P61982_14 Ywhag  | 14-3-3 prot R.YLAEVATGEK#R                      | 7.23   | 11.29  | 0.64  | 1.56 |
| P68510_14 Ywhah  | 14-3-3 prot R.YLAEVASEGK#K                      | 57.68  | 21.39  | 2.70  | 0.37 |
| P68510_14 Ywhah  | 14-3-3 prot K.AVTELNEPLSNEDR.N                  | 14.20  | 20.99  | 0.68  | 1.48 |
| P68510_14 Ywhah  | 14-3-3 prot R.DNLTWTSDDQDDQEEAGEGN.-            | 17.13  | 17.13  | 1.00  | 1.00 |
| P68510_14 Ywhah  | 14-3-3 prot K.#NSVVEASEAAYK#E                   | 11.82  | 4.29   | 2.76  | 0.36 |
| P68510_14 Ywhah  | 14-3-3 prot K.#NSVVEASEAAYK#EAFEISK#E           | 9.86   | 2.36   | 4.17  | 0.24 |
| P68510_14 Ywhah  | 14-3-3 prot K.#NSVVEASEAAYK#E                   | 94.36  | 32.49  | 2.90  | 0.34 |
| P68510_14 Ywhah  | 14-3-3 prot K.#NSVVEASEAAYK#EAFEISK#E           | 73.97  | 19.82  | 3.73  | 0.27 |
| P68510_14 Ywhah  | 14-3-3 prot K.QAFDDAIAELDTLNEDSYK#D             | 9.23   | 2.14   | 4.32  | 0.23 |
| P68510_14 Ywhah  | 14-3-3 prot K.QAFDDAIAELDTLNEDSYK#D             | 6.25   | 2.26   | 2.77  | 0.36 |
| P68510_14 Ywhah  | 14-3-3 prot R.YDDM#ASAM#K#A                     | 5.02   | 1.34   | 3.76  | 0.27 |
| P68510_14 Ywhah  | 14-3-3 prot R.YLAEVASEGK#K                      | 114.55 | 44.13  | 2.60  | 0.39 |
| P68510_14 Ywhah  | 14-3-3 prot R.YLAEVASEGK#K#N                    | 43.48  | 2.54   | 17.09 | 0.06 |
| P68510_14 Ywhah  | 14-3-3 prot K.AVTELNEPLSNEDR.N                  | 4.72   | 7.10   | 0.66  | 1.51 |
| P68254_14 Ywhaq  | 14-3-3 prot K.AVTEQGAELSNEER.N                  | 15.55  | 20.82  | 0.75  | 1.34 |
| P68254_14 Ywhaq  | 14-3-3 prot R.#QTIENSQGAQYQAEAFDISK#K#E         | 5.68   | 13.02  | 0.44  | 2.29 |
| P68254_14 Ywhaq  | 14-3-3 prot K.YLIANATNPESK#V                    | 15.09  | 4.65   | 3.25  | 0.31 |
| P68254_14 Ywhaq  | 14-3-3 prot K.AVTEQGAELSNEER.N                  | 18.47  | 32.67  | 0.57  | 1.77 |
| P68254_14 Ywhaq  | 14-3-3 prot R.#QTIENSQGAQYQAEAFDISK#K           | 4.37   | 1.76   | 2.48  | 0.40 |
| P68254_14 Ywhaq  | 14-3-3 prot R.#QTIENSQGAQYQAEAFDISK#K#E         | 10.57  | 2.72   | 3.88  | 0.26 |
| P68254_14 Ywhaq  | 14-3-3 prot K.QTIENSQGAQYQAEAFDISK#K#E          | 13.59  | 3.68   | 3.69  | 0.27 |
| P68254_14 Ywhaq  | 14-3-3 prot K.AVTEQGAELSNEER.N                  | 7.32   | 10.34  | 0.71  | 1.41 |
| P63101_14 Ywhaz  | 14-3-3 prot R.DNLTWTSQTQGDQEEAGEGGEN.-          | 8.08   | 8.08   | 1.00  | 1.00 |
| P63101_14 Ywhaz  | 14-3-3 prot K.FLIPNASQPESK#V                    | 289.54 | 82.80  | 3.50  | 0.29 |
| P63101_14 Ywhaz  | 14-3-3 prot K.GIVDQSQAYQAEAFDISK#K              | 132.92 | 38.63  | 3.44  | 0.29 |
| P63101_14 Ywhaz  | 14-3-3 prot K.#GIVDQSQAYQAEAFDISK#K             | 13.93  | 2.27   | 6.13  | 0.16 |
| P63101_14 Ywhaz  | 14-3-3 prot K.SVTEQGAELSNEER.N                  | 70.37  | 85.14  | 0.83  | 1.21 |
| P63101_14 Ywhaz  | 14-3-3 prot K.TAFDDAIAELDTLSEESYK#D             | 98.79  | 30.64  | 3.22  | 0.31 |
| P63101_14 Ywhaz  | 14-3-3 prot R.VVSSIEQK#T                        | 258.18 | 63.17  | 4.09  | 0.24 |
| P63101_14 Ywhaz  | 14-3-3 prot R.YLAEVAAAGDDK#K#G                  | 157.71 | 35.03  | 4.50  | 0.22 |
| P63101_14 Ywhaz  | 14-3-3 prot R.DNLTWTSQTQGDQEEAGEGGEN.-          | 7.88   | 7.88   | 1.00  | 1.00 |
| P63101_14 Ywhaz  | 14-3-3 prot K.FLIPNASQPESK#V                    | 428.27 | 116.84 | 3.67  | 0.27 |
| P63101_14 Ywhaz  | 14-3-3 prot K.GIVDQSQAYQAEAFDISK#K              | 138.19 | 39.31  | 3.52  | 0.28 |
| P63101_14 Ywhaz  | 14-3-3 prot K.GIVDQSQAYQAEAFDISK#K              | 65.54  | 16.22  | 4.04  | 0.25 |
| P63101_14 Ywhaz  | 14-3-3 prot K.#GIVDQSQAYQAEAFDISK#K             | 18.55  | 5.37   | 3.46  | 0.29 |
| P63101_14 Ywhaz  | 14-3-3 prot K.SVTEQGAELSNEER.N                  | 111.92 | 145.15 | 0.77  | 1.30 |
| P63101_14 Ywhaz  | 14-3-3 prot K.TAFDDAIAELDTLSEESYK#D             | 96.51  | 27.56  | 3.50  | 0.29 |
| P63101_14 Ywhaz  | 14-3-3 prot R.VVSSIEQK#T                        | 314.39 | 87.87  | 3.58  | 0.28 |
| P63101_14 Ywhaz  | 14-3-3 prot R.YLAEVAAAGDDK#K#G                  | 113.34 | 28.70  | 3.95  | 0.25 |
| P63101_14 Ywhaz  | 14-3-3 prot K.FLIPNASQPESK#V                    | 34.53  | 9.10   | 3.79  | 0.26 |
| P63101_14 Ywhaz  | 14-3-3 prot K.GIVDQSQAYQAEAFDISK#K              | 16.38  | 5.70   | 2.87  | 0.35 |
| P63101_14 Ywhaz  | 14-3-3 prot K.GIVDQSQAYQAEAFDISK#K#E            | 16.81  | 2.72   | 6.18  | 0.16 |
| P63101_14 Ywhaz  | 14-3-3 prot K.SVTEQGAELSNEER.N                  | 13.03  | 12.17  | 1.07  | 0.93 |
| P63101_14 Ywhaz  | 14-3-3 prot K.TAFDDAIAELDTLSEESYK#D             | 21.30  | 5.84   | 3.65  | 0.27 |
| P63101_14 Ywhaz  | 14-3-3 prot R.VVSSIEQK#T                        | 37.02  | 9.66   | 3.83  | 0.26 |
| P63101_14 Ywhaz  | 14-3-3 prot R.YLAEVAAAGDDK#K#G                  | 16.55  | 3.58   | 4.63  | 0.22 |
| P63101_14 Ywhaz  | 14-3-3 prot K.GIVDQSQAYQAEAFDISK#K              | 16.21  | 6.34   | 2.56  | 0.39 |
| P63101_14 Ywhaz  | 14-3-3 prot K.SVTEQGAELSNEER.N                  | 11.95  | 17.03  | 0.70  | 1.43 |
| P63101_14 Ywhaz  | 14-3-3 prot K.TAFDDAIAELDTLSEESYK#D             | 20.28  | 3.18   | 6.38  | 0.16 |
| P63101_14 Ywhaz  | 14-3-3 prot R.YLAEVAAAGDDK#K#G                  | 17.63  | 4.85   | 3.64  | 0.27 |
| Q00899_TY Yy1    | Transcripti R.FSLDFNLR.T                        | 1.69   | 13.24  | 0.13  | 7.86 |
| Q00899_TY Yy1    | Transcripti K.SYLGGAAGAGGGADPGNK#K              | 21.64  | 17.91  | 1.21  | 0.83 |
| Q00899_TY Yy1    | Transcripti K.SYLGGAAGAGGGADPGNK#K#W            | 5.04   | 2.45   | 2.05  | 0.49 |
| Q9QY24_Zf2bp1    | Z-DNA-bind K.IQLVLSDDGGPVK#I                    | 20.94  | 8.08   | 2.59  | 0.39 |
| Q8K0L9_ZB2btb20  | Zinc finger i K.LLLGYSDEIPEVSVVQSQVQK#L         | 12.06  | 11.57  | 1.04  | 0.96 |
| Q8K0L9_ZB2btb20  | Zinc finger i K.LLLGYSDEIPEVSVVQSQVQK#L         | 3.77   | 2.80   | 1.35  | 0.74 |
| Q8BJH1_ZC2c3hc1a | Zinc finger i R.AIAAPQAGANTK#A                  | 29.32  | 24.58  | 1.19  | 0.84 |
| Q6NZF1_ZC2c3h11a | Zinc finger i K.#AEEPESGADDSPSGTK#S             | 9.74   | 14.94  | 0.65  | 1.53 |
| Q6NZF1_ZC2c3h11a | Zinc finger i K.DSSVLSQAASEPLPEGSGPSSSQATKPR.R  | 1.49   | 3.20   | 0.47  | 2.14 |
| Q6NZF1_ZC2c3h11a | Zinc finger i K.GEVETSGIDSLNVK#K                | 12.36  | 11.72  | 1.05  | 0.95 |
| Q6NZF1_ZC2c3h11a | Zinc finger i K.#K#ESPETNIDK#APK#K              | 25.34  | 21.11  | 1.20  | 0.83 |
| Q6NZF1_ZC2c3h11a | Zinc finger i K.LK#AEEPESGADDSPSGTK#S           | 49.75  | 39.29  | 1.27  | 0.79 |
| Q6NZF1_ZC2c3h11a | Zinc finger i K.LSVQSNPQLR.S                    | 8.94   | 29.62  | 0.30  | 3.31 |
| Q6NZF1_ZC2c3h11a | Zinc finger i K.M#EANETSDEITSDPTK#L             | 11.71  | 13.91  | 0.84  | 1.19 |
| Q6NZF1_ZC2c3h11a | Zinc finger i K.M#EANETSDEITSDPTK#L             | 5.75   | 6.14   | 0.94  | 1.07 |
| Q6NZF1_ZC2c3h11a | Zinc finger i R.RLSSASTGKPPSLVEDDFEK.L          | 1.84   | 6.11   | 0.30  | 3.32 |
| Q6NZF1_ZC2c3h11a | Zinc finger i K.LLEILLER.A                      | 29.51  | 31.36  | 0.94  | 1.06 |
| Q6NZF1_ZC2c3h11a | Zinc finger i K.TVLPVTPVQEEVK#T                 | 10.39  | 12.78  | 0.81  | 1.23 |
| Q6NZF1_ZC2c3h11a | Zinc finger i K.TVSLPTVAVSK#G                   | 27.75  | 22.57  | 1.23  | 0.81 |
| Q6NZF1_ZC2c3h11a | Zinc finger i R.VAGKPLTAVSGVTR.H                | 10.77  | 23.48  | 0.46  | 2.18 |

|                   |                                                         |        |       |       |      |
|-------------------|---------------------------------------------------------|--------|-------|-------|------|
| Q6NZF1_ZC2c3h11a  | Zinc finger I R.YVDGLFLPPSK#T                           | 11.54  | 10.30 | 1.12  | 0.89 |
| Q8B05_ZC2c3h14    | Zinc finger I K.AISEAQVSK#T                             | 52.93  | 55.85 | 0.95  | 1.06 |
| Q8BJ05_ZC2c3h14   | Zinc finger I R.FSHDGEDEEDYGR.I                         | 3.01   | 16.15 | 0.19  | 5.37 |
| Q8BJ05_ZC2c3h14   | Zinc finger I R.KLPLVWSSVVK.V                           | 16.63  | 17.85 | 0.93  | 1.07 |
| Q8BJ05_ZC2c3h14   | Zinc finger I K.LSEIIVVTPNQDSGM*K#T                     | 7.38   | 9.44  | 0.78  | 1.28 |
| Q8BJ05_ZC2c3h14   | Zinc finger I K.QLQDVQSSQVSEAGR.L                       | 3.17   | 12.64 | 0.25  | 3.98 |
| Q8BJ05_ZC2c3h14   | Zinc finger I K.SPDAISFDHSVSNK#S                        | 15.75  | 18.02 | 0.87  | 1.14 |
| Q8BJ05_ZC2c3h14   | Zinc finger I K.TTNYSAVPQK.Q                            | 27.97  | 28.34 | 0.99  | 1.01 |
| Q3TIV5_ZC2c3h15   | Zinc finger I R.DVEETGITVASVER.F                        | 11.88  | 36.84 | 0.32  | 3.10 |
| Q3TIV5_ZC2c3h15   | Zinc finger I R.EVFEFRPELVNDDEEADDTR.Y                  | 4.55   | 21.69 | 0.21  | 4.77 |
| Q3TIV5_ZC2c3h15   | Zinc finger I R.FSTYAPDK#DENK#L                         | 17.98  | 11.72 | 1.53  | 0.65 |
| Q3TIV5_ZC2c3h15   | Zinc finger I R.HFLAEIENK#Y                             | 13.92  | 8.34  | 1.67  | 0.60 |
| Q3TIV5_ZC2c3h15   | Zinc finger I K.IDKLEQDM*ER.R                           | 5.78   | 12.90 | 0.45  | 2.23 |
| Q3TIV5_ZC2c3h15   | Zinc finger I K.ITLESFLAW#K.K                           | 60.76  | 33.90 | 1.79  | 0.56 |
| Q3TIV5_ZC2c3h15   | Zinc finger I R.SALGPVNTK#J                             | 62.38  | 42.05 | 1.48  | 0.67 |
| Q3TIV5_ZC2c3h15   | Zinc finger I R.DVEETGITVASVER.F                        | 3.16   | 13.77 | 0.23  | 4.35 |
| Q0P678_ZC2c3h18   | Zinc finger I K.AGAEETEKHGEGAPGEGEK#P DVQSVGEQEPTEAAK#E | 14.60  | 13.91 | 1.05  | 0.95 |
| Q0P678_ZC2c3h18   | Zinc finger I R.ASDLEEENATR.V                           | 12.59  | 46.81 | 0.27  | 3.72 |
| Q0P678_ZC2c3h18   | Zinc finger I K.ASQQAAPQAVPQGPQQGQSFVAHK#E              | 102.64 | 81.67 | 1.26  | 0.80 |
| Q0P678_ZC2c3h18   | Zinc finger I K.AVEDAIAR.K                              | 9.98   | 37.09 | 0.27  | 3.72 |
| Q0P678_ZC2c3h18   | Zinc finger I R.DTLEPYADPYDYEIER.F                      | 5.89   | 22.45 | 0.26  | 3.81 |
| Q0P678_ZC2c3h18   | Zinc finger I R.ELDEHLDYDEEVEEPPAAQEAAK#A               | 11.19  | 8.29  | 1.35  | 0.74 |
| Q0P678_ZC2c3h18   | Zinc finger I K.ESTSVGPQVK#R                            | 54.89  | 52.71 | 1.04  | 0.96 |
| Q0P678_ZC2c3h18   | Zinc finger I R.GGQYENFR.V                              | 753.82 | 11.76 | 64.08 | 0.02 |
| Q0P678_ZC2c3h18   | Zinc finger I K.GNYSLITK#A                              | 37.64  | 20.55 | 1.83  | 0.55 |
| Q0P678_ZC2c3h18   | Zinc finger I R.KEQEPDFEKR.F                            | 4.92   | 17.48 | 0.28  | 3.55 |
| Q0P678_ZC2c3h18   | Zinc finger I K.KPAPPAPPQATK.T                          | 23.37  | 29.83 | 0.78  | 1.28 |
| Q0P678_ZC2c3h18   | Zinc finger I K.K#APPAPPQATK#T                          | 42.75  | 54.81 | 0.78  | 1.28 |
| Q0P678_ZC2c3h18   | Zinc finger I K.SQDQDEASEHLSR.G                         | 2.95   | 7.87  | 0.38  | 2.66 |
| Q0P678_ZC2c3h18   | Zinc finger I R.TK#GEPAPPKG#A                           | 17.32  | 23.15 | 0.75  | 1.34 |
| Q0P678_ZC2c3h18   | Zinc finger I K.AGAEETEKHGEGAPGEGEK#P DVQSVGEQEPTEAAK#E | 8.98   | 6.26  | 1.43  | 0.70 |
| Q0P678_ZC2c3h18   | Zinc finger I K.ASQQAAPQAVPQGPQQGQSFVAHK#E              | 25.02  | 17.84 | 1.40  | 0.71 |
| Q0P678_ZC2c3h18   | Zinc finger I R.DTLEPYADPYDYEIER.F                      | 2.27   | 8.46  | 0.27  | 3.73 |
| Q0P678_ZC2c3h18   | Zinc finger I K.ESTSVGPQVK#R                            | 31.66  | 17.58 | 1.80  | 0.56 |
| Q6ZP23_ZC2c3h4    | Zinc finger I K.GOPPAEEEGEA.R                           | 3.55   | 9.36  | 0.38  | 2.64 |
| Q6ZP23_ZC2c3h4    | Zinc finger I R.HAETSGSGSPDSDPR.L                       | 2.01   | 8.73  | 0.23  | 4.35 |
| Q6ZP23_ZC2c3h4    | Zinc finger I R.VLAAGGLQGSSSGLSISLSDPR.T                | 3.32   | 5.22  | 0.64  | 1.57 |
| Q6ZP23_ZC2c3h4    | Zinc finger I K.AEGSLHSSPAGPSSSK#G                      | 5.50   | 6.25  | 0.88  | 1.14 |
| Q6ZP23_ZC2c3h4    | Zinc finger I K.AGAGVPDFLPSAQR.A                        | 4.08   | 11.61 | 0.35  | 2.84 |
| Q6ZP23_ZC2c3h4    | Zinc finger I K.IPSLFELVVRPQLAEK.L                      | 4.32   | 16.13 | 0.27  | 3.73 |
| Q6ZP23_ZC2c3h4    | Zinc finger I R.QRPGSTDPSTSGNSLPDFELLSR.I               | 2.14   | 11.39 | 0.19  | 5.32 |
| Q6ZP23_ZC2c3h4    | Zinc finger I K.TAEPASDTSAPQK#G                         | 18.39  | 21.93 | 0.84  | 1.19 |
| Q6ZP23_ZC2c3h4    | Zinc finger I R.VLAAGGLQGSSSGLSISLSDPR.T                | 4.60   | 15.48 | 0.30  | 3.37 |
| F8VPP8_F82c3h7b   | Protein Zc3 R.DLFLPLGQVK.R                              | 10.10  | 34.09 | 0.30  | 3.37 |
| F8VPP8_F82c3h7b   | Protein Zc3 K.GLQIFQSLPLKHQEEYEAFLK#L                   | 7.44   | 9.47  | 0.79  | 1.27 |
| F8VPP8_F82c3h7b   | Protein Zc3 K.VFTSDSDASGAYR.F                           | 1.36   | 6.57  | 0.21  | 4.82 |
| Q3UPF5_ZC2c3hav1  | Zinc finger I R.ASQEFLEDGDPDGLFSR.N                     | 2.09   | 4.20  | 0.50  | 2.01 |
| Q3UPF5_ZC2c3hav1  | Zinc finger I K.YSHDLSEQNFVLK#N                         | 8.80   | 6.30  | 1.40  | 0.72 |
| Q3UPF5_ZC2c3hav1  | Zinc finger I R.FVLTGEDQAGITR.S                         | 3.00   | 10.53 | 0.28  | 3.51 |
| Q3UPF5_ZC2c3hav1  | Zinc finger I R.FVLTGEDQAGITR.S                         | 2.00   | 10.97 | 0.18  | 5.49 |
| Q3UPF5_ZC2c3hav1  | Zinc finger I R.SAAGFPLVAAQR.N                          | 5.50   | 12.11 | 0.45  | 2.20 |
| Q3UPF5_ZC2c3hav1  | Zinc finger I R.ASQEFLEDGDPDGLFSR.N                     | 2.86   | 7.45  | 0.38  | 2.61 |
| Q3UPF5_ZC2c3hav1  | Zinc finger I R.SAAGFPLVAAQR.N                          | 1.88   | 13.99 | 0.13  | 7.46 |
| Q80YV2_NI2c3hc1   | Nuclear-int R.ELIDEGIVPEEGTEPK#D                        | 9.41   | 9.30  | 1.01  | 0.99 |
| Q80YV2_NI2c3hc1   | Nuclear-int R.SNQPATDSMSLSSEK#S                         | 6.90   | 5.55  | 1.24  | 0.80 |
| Q80YV2_NI2c3hc1   | Nuclear-int R.SNQPATDSM*SLSEK#S                         | 10.45  | 7.86  | 1.33  | 0.75 |
| Q80YV2_NI2c3hc1   | Nuclear-int R.SQDATVSPGSEQSEK#S                         | 8.09   | 4.07  | 1.99  | 0.50 |
| B2RX14_TL2c3hc11  | Terminal ur K.SALENSLSQK#Q                              | 16.81  | 19.98 | 0.84  | 1.19 |
| B2RX14_TL2c3hc11  | Terminal ur R.SPLEPENVPSLLLK#E                          | 18.29  | 4.68  | 3.91  | 0.26 |
| Q8VD24_ZC2c3hc18  | Zinc finger I -M*ASLLAR.M                               | 22.10  | 39.12 | 0.56  | 1.77 |
| B2RVL6_ZC2c3hc24  | Zinc finger I R.GEALSSVVR.N                             | 5.27   | 12.82 | 0.41  | 2.43 |
| Q9CYA6_ZC2c3hc8   | Zinc finger I R.FK#PVISEELQDALGVTDK#S                   | 21.29  | 11.55 | 1.84  | 0.54 |
| Q9CYA6_ZC2c3hc8   | Zinc finger I K.YQQVFSHVPLEGQEM*QVK#A                   | 11.07  | 4.73  | 2.34  | 0.43 |
| Q9CYA6_ZC2c3hc8   | Zinc finger I K.EAELENSGLAYDGNDDADGETETGEIQNK#N         | 7.96   | 3.34  | 2.38  | 0.42 |
| Q9CYA6_ZC2c3hc8   | Zinc finger I R.FK#PVISEELQDALGVTDK#S                   | 62.93  | 47.89 | 1.31  | 0.76 |
| Q9CYA6_ZC2c3hc8   | Zinc finger I K.LGQPLLNEPQLTEGWEPK#Y                    | 5.52   | 4.18  | 1.32  | 0.76 |
| Q9CYA6_ZC2c3hc8   | Zinc finger I K.LGQPLLNEPQLTEGWEPK#Y                    | 15.05  | 9.33  | 1.61  | 0.62 |
| Q9CYA6_ZC2c3hc8   | Zinc finger I K.LVNYPGFNISTPR.G                         | 11.01  | 24.90 | 0.44  | 2.26 |
| Q9CYA6_ZC2c3hc8   | Zinc finger I R.KLQYGPWLK#E                             | 9.04   | 6.06  | 1.49  | 0.67 |
| Q9CYA6_ZC2c3hc8   | Zinc finger I K.QYHIEIEFVSNLVK#R                        | 18.64  | 13.82 | 1.35  | 0.74 |
| Q9CYA6_ZC2c3hc8   | Zinc finger I R.FK#PVISEELQDALGVTDK#S                   | 21.51  | 15.42 | 1.40  | 0.72 |
| Q8R1J3_ZC2c3hc9   | Zinc finger I R.ANVDPALGEEFPK#C                         | 7.30   | 3.31  | 2.21  | 0.45 |
| Q61329_Zf2fhx3    | Zinc finger I K.GLPEEDELQGITR.R                         | 2.03   | 8.95  | 0.23  | 4.40 |
| E9QML5_E2Zfml     | Zinc finger I R.NKHETLSNETVSNVSDYGHASK#Y                | 6.09   | 3.85  | 1.58  | 0.63 |
| E9QML5_E2Zfml     | Zinc finger I K.QSSVTQVTEQSPK.V                         | 11.17  | 13.34 | 0.84  | 1.19 |
| E9QML5_E2Zfml     | Zinc finger I K.SENLEDDTLPEGK#Q                         | 14.95  | 10.38 | 1.44  | 0.69 |
| E9QML5_E2Zfml     | Zinc finger I K.SM*TSVDPGDLDFLVK#A                      | 5.65   | 5.60  | 1.01  | 0.99 |
| E9QML5_E2Zfml     | Zinc finger I R.SPFGIVK#A                               | 19.98  | 15.00 | 1.33  | 0.75 |
| E9QML5_E2Zfml     | Zinc finger I K.SSVLTVSNVSSK#S                          | 10.82  | 50.25 | 0.22  | 4.64 |
| E9QML5_E2Zfml     | Zinc finger I K.TMETVSSSSAK#S                           | 6.02   | 7.17  | 0.84  | 1.19 |
| E9QML5_E2Zfml     | Zinc finger I K.DYQSEADLPIR.S                           | 2.55   | 10.75 | 0.24  | 4.22 |
| E9QML5_E2Zfml     | Zinc finger I K.GVDQTSKPDETGK.S                         | 3.37   | 3.28  | 1.03  | 0.97 |
| E9QML5_E2Zfml     | Zinc finger I K.LDSFSQVGPSETVTQK#D                      | 8.27   | 6.93  | 1.19  | 0.84 |
| E9QML5_E2Zfml     | Zinc finger I K.M*SGLHSGQVLEPK.S                        | 12.24  | 8.31  | 1.47  | 0.68 |
| E9QML5_E2Zfml     | Zinc finger I K.QSSVTQVTEQSPK.V                         | 16.11  | 19.81 | 0.81  | 1.23 |
| E9QML5_E2Zfml     | Zinc finger I K.SAEESPGTLEATEHEPVNK#E                   | 7.87   | 12.56 | 0.63  | 1.60 |
| E9QML5_E2Zfml     | Zinc finger I K.SAEESPGTLEATEHEPVNK#EEM*VVVISNLPK.G     | 37.36  | 2.46  | 15.21 | 0.07 |
| E9QML5_E2Zfml     | Zinc finger I K.SENLEDDTLPEGK#Q                         | 11.82  | 14.06 | 0.84  | 1.19 |
| E9QML5_E2Zfml     | Zinc finger I K.SM*TSVDPGDLDFLVK#A                      | 8.60   | 10.70 | 0.80  | 1.24 |
| E9QML5_E2Zfml     | Zinc finger I R.SPFGIVK#A                               | 13.70  | 18.51 | 0.74  | 1.35 |
| E9QML5_E2Zfml     | Zinc finger I K.TM*ETVSSSSAK#S                          | 6.49   | 5.21  | 1.25  | 0.80 |
| E9QML5_E2Zfml     | Zinc finger I R.WDDESHITPPEVK.Q                         | 8.92   | 12.43 | 0.72  | 1.39 |
| E9QML5_E2Zfml     | Zinc finger I K.YIETM*PLVK.G                            | 9.60   | 8.22  | 1.17  | 0.86 |
| P23949_TI2fzp3612 | Zinc finger I K.AVGTPEVAAAAPSSFTPGFLR.R                 | 5.64   | 6.72  | 0.84  | 1.19 |
| E9Q1A5_E92fzp384  | Protein Zfp R.AYTSETYLM*K.H                             | 10.52  | 13.00 | 0.81  | 1.23 |
| Q923D1_Q2fzp61    | Protein Zfp R.SNLIHHR.J                                 | 3.70   | 15.98 | 0.23  | 4.31 |
| I7HJ54_I7H2fzp683 | Protein Zfp R.HQPPSLYK#ASTDSEK#L                        | 6.42   | 2.76  | 2.33  | 0.43 |
| O88532_Zf2fzr     | Zinc finger I K.AGYSOGATQYTAQQAAR.Q                     | 3.03   | 8.29  | 0.37  | 2.73 |
| O88532_Zf2fzr     | Zinc finger I K.AISSASSQSPGDALR.R                       | 11.47  | 31.17 | 0.37  | 2.72 |
| O88532_Zf2fzr     | Zinc finger I K.GLSTTGNSLNSTNSNK#V                      | 37.93  | 16.41 | 2.31  | 0.43 |
| O88532_Zf2fzr     | Zinc finger I K.HATIYPTEEELQAVQK#I                      | 32.37  | 20.51 | 1.58  | 0.63 |
| O88532_Zf2fzr     | Zinc finger I R.IAENLPK#Q                               | 48.60  | 28.38 | 1.71  | 0.58 |
| O88532_Zf2fzr     | Zinc finger I K.INFVGGNK#L                              | 40.06  | 17.02 | 2.35  | 0.42 |



|                  |                                                        |        |        |      |       |
|------------------|--------------------------------------------------------|--------|--------|------|-------|
| O88532_ZfZfr     | Zinc finger I K.LQSTGNKTEDLK.G                         | 8.42   | 4.39   | 1.92 | 0.52  |
| O88532_ZfZfr     | Zinc finger I K.LVSDLSSEHEK#.S                         | 28.38  | 16.38  | 1.73 | 0.58  |
| O88532_ZfZfr     | Zinc finger I K.NTPAASAVQIPEVK.Q                       | 27.67  | 20.74  | 1.33 | 0.75  |
| O88532_ZfZfr     | Zinc finger I K.VLGM*DPQLQM*NQR.F                      | 2.86   | 10.02  | 0.29 | 3.50  |
| O88532_ZfZfr     | Zinc finger I K.VSAIPTNM*AAK#.K                        | 22.99  | 13.17  | 1.75 | 0.57  |
| O88532_ZfZfr     | Zinc finger I K.AISSASSPQSPGDALR.R                     | 4.65   | 10.14  | 0.46 | 2.18  |
| O88532_ZfZfr     | Zinc finger I K.GLSTTGNSSLNSTNPK#.V                    | 17.67  | 11.42  | 1.55 | 0.65  |
| Q9CPW7_ZZmat2    | Zinc finger I R.RAEDLTFEEDDEM*AAVM*GFSGFGSTK.K         | 1.90   | 13.44  | 0.14 | 7.07  |
| Q9CU65_ZZmym2    | Zinc finger I K.GAGNNVLVDGQQK#.R                       | 9.01   | 7.09   | 1.27 | 0.79  |
| Q9CU65_ZZmym2    | Zinc finger I K.QQGVDSLSPVSLPK.Q                       | 6.10   | 6.74   | 0.90 | 1.11  |
| A2A791_ZN2mym4   | Zinc finger I K.DVISAQFENSTSK#.D                       | 8.58   | 7.63   | 1.12 | 0.89  |
| A2A791_ZN2mym4   | Zinc finger I K.ESIGSELGNSFASNIR.I                     | 2.25   | 6.34   | 0.36 | 2.81  |
| Q3UH28_QZmymd8   | Protein Zm K.SSQGNSSNTQASSEPASAPK.E                    | 6.17   | 15.23  | 0.41 | 2.47  |
| Q3UH28_QZmymd8   | Protein Zm R.VVWVNSTVQQK#.E                            | 161.53 | 77.56  | 2.08 | 0.48  |
| Q61624_ZfZnf148  | Zinc finger I K.FLQQLADR.T                             | 4.48   | 27.83  | 0.16 | 6.21  |
| Q61624_ZfZnf148  | Zinc finger I K.GGLLTSEEDSGFSTSPK.D                    | 13.10  | 10.26  | 1.28 | 0.78  |
| Q61624_ZfZnf148  | Zinc finger I K.ILTINEDGSLGLK.T                        | 17.84  | 20.75  | 0.86 | 1.16  |
| Q61624_ZfZnf148  | Zinc finger I R.LPQGLQYALNVPISVK.Q                     | 10.02  | 11.68  | 0.86 | 1.17  |
| Q61624_ZfZnf148  | Zinc finger I R.SLK#QPLEQSQTISPLSSYEDSK#.V             | 8.57   | 8.51   | 1.01 | 0.99  |
| Q61624_ZfZnf148  | Zinc finger I K.YAFELVDK#.Q                            | 14.83  | 13.22  | 1.12 | 0.89  |
| Q61624_ZfZnf148  | Zinc finger I R.YLQAASNNR.E                            | 4.17   | 9.97   | 0.42 | 2.39  |
| Q9JMD0_ZfZnf207  | BUB3-inter K.LIQHQK#.A                                 | 22.44  | 4.78   | 4.69 | 0.21  |
| Q6P3Y5_ZZnf280c  | Zinc finger I R.ASSPSSSTIPSTLSLQVSPK#.S                | 4.51   | 2.60   | 1.74 | 0.58  |
| Q99L15_ZN2nf281  | Zinc finger I K.SSGKPGGSLGIVSNNSVETISLLQSTSGK.Q        | 4.17   | 6.57   | 0.63 | 1.58  |
| Q99L15_ZN2nf281  | Zinc finger I K.SYLNFPVPLDVIDVQK.S                     | 7.77   | 7.47   | 1.04 | 0.96  |
| O88291_ZfZnf326  | DBIRD com R.ESVLTATSLNPNIVK#.A                         | 41.18  | 45.66  | 0.90 | 1.11  |
| O88291_ZfZnf326  | DBIRD com R.FGPYSYDSR.S                                | 6.61   | 27.91  | 0.24 | 4.22  |
| O88291_ZfZnf326  | DBIRD com K.GENPFIEQDHPQDQIQEGDEEEDK#.I                | 9.95   | 8.93   | 1.11 | 0.90  |
| O88291_ZfZnf326  | DBIRD com R.NQGGSSWEAPYSR.S                            | 6.17   | 20.52  | 0.30 | 3.33  |
| O88291_ZfZnf326  | DBIRD com R.NSLDSFGR.N                                 | 4.95   | 28.88  | 0.17 | 5.84  |
| O88291_ZfZnf326  | DBIRD com R.SYGVFNEPEQTR.F                             | 11.24  | 44.63  | 0.25 | 3.97  |
| O88291_ZfZnf326  | DBIRD com R.SM*DSYLNQSYGM*DNHSGGGGGR.F                 | 3.95   | 11.48  | 0.34 | 2.91  |
| O88291_ZfZnf326  | DBIRD com R.FTEEK#DIELHLESSHQETLDHIQK#.Q               | 22.56  | 19.15  | 1.18 | 0.85  |
| Q922H9_ZfZnf330  | Zinc finger I R.QTGGGEDGASGYDAYWK#.N                   | 7.50   | 4.50   | 1.67 | 0.60  |
| Q922H9_ZfZnf330  | Zinc finger I R.TYASGYAHYEQES.-                        | 27.12  | 27.12  | 1.00 | 1.00  |
| Q9R0B7_ZfZnf346  | Zinc finger I R.LADPAVSDLPAGK#.G                       | 14.96  | 15.35  | 0.97 | 1.03  |
| Q9R0B7_ZfZnf346  | Zinc finger I K.TLVTLSGQTPVQIQTPK#.D                   | 7.75   | 4.98   | 1.56 | 0.64  |
| Q8VD12_ZfZnf385a | Zinc finger I R.GAAELAGLTFK#.E                         | 14.22  | 14.52  | 0.98 | 1.02  |
| Q8VD12_ZfZnf385a | Zinc finger I R.LGPPPTGPEEAPAQDR.T                     | 4.84   | 6.91   | 0.70 | 1.43  |
| Q8VD12_ZfZnf385a | Zinc finger I R.TAHGPIILFSPY.-                         | 26.99  | 26.99  | 1.00 | 1.00  |
| Q69299_ZfZnf512  | Zinc finger I K.AGDEVDEPSEK.E                          | 6.06   | 18.06  | 0.34 | 2.98  |
| Q69299_ZfZnf512  | Zinc finger I K.IAVYHLQELASAEITK#.E                    | 26.82  | 48.24  | 0.56 | 1.80  |
| Q69299_ZfZnf512  | Zinc finger I R.IKPAATQVEGAGEK.E                       | 7.46   | 7.81   | 0.96 | 1.05  |
| Q69299_ZfZnf512  | Zinc finger I R.KEPVYVYAGSM*EEK.W                      | 3.91   | 5.39   | 0.73 | 1.38  |
| Q69299_ZfZnf512  | Zinc finger I K.AGDEVDEPSEK.E                          | 5.03   | 11.90  | 0.42 | 2.37  |
| Q69299_ZfZnf512  | Zinc finger I K.IAVYHLQELASAEITK.E                     | 2.90   | 6.26   | 0.46 | 2.16  |
| Q69299_ZfZnf512  | Zinc finger I R.LGAVTATPGPTSLK#.Q                      | 27.65  | 25.21  | 1.10 | 0.91  |
| Q69299_ZfZnf512  | Zinc finger I K.YTRPGLPTFQEVHLK.W                      | 1.11   | 7.59   | 0.15 | 6.83  |
| B2RRF6_Z5Znf518a | Zinc finger I K.ESSNDSLNFIASINPLNGTLKIK.T              | 5.21   | 20.27  | 0.26 | 3.89  |
| Q9DB42_ZfZnf593  | Zinc finger I R.AAGM*GSYVQPR.L                         | 7.15   | 11.18  | 0.64 | 1.56  |
| Q91VY9_ZfZnf622  | Zinc finger I R.AVAEAAEAK#.G                           | 12.85  | 7.57   | 1.70 | 0.59  |
| Q91VY9_ZfZnf622  | Zinc finger I K.EGQDPALEALSTDK#.I                      | 5.67   | 2.51   | 2.26 | 0.44  |
| Q91VY9_ZfZnf622  | Zinc finger I R.LQWFFQQAQ#.K                           | 18.80  | 10.39  | 1.81 | 0.55  |
| Q91VY9_ZfZnf622  | Zinc finger I K.VHSFPIPDIEVLDLTK#.G                    | 42.84  | 16.55  | 2.59 | 0.39  |
| Q9D2D7_ZfZnf687  | Zinc finger I K.SATGPATGAGVISR.T                       | 4.64   | 19.78  | 0.23 | 4.27  |
| Q9D2D7_ZfZnf687  | Zinc finger I K.SVLGLVPQTLPK.A                         | 16.00  | 20.06  | 0.80 | 1.25  |
| Q9D2D7_ZfZnf687  | Zinc finger I K.VWSVQLGDGTR.L                          | 4.71   | 24.60  | 0.19 | 5.22  |
| Q9D2D7_ZfZnf687  | Zinc finger I K.SATGPATGAGVISR.T                       | 3.39   | 10.02  | 0.34 | 2.96  |
| Q8R151_ZfZnfX1   | NFX1-type: K.ELAIQPPGTGK.T                             | 10.17  | 7.15   | 1.42 | 0.70  |
| Q8R151_ZfZnfX1   | NFX1-type: R.IVNFDFGQWPSK#.E                           | 8.66   | 11.67  | 0.74 | 1.35  |
| Q8R151_ZfZnfX1   | NFX1-type: K.IQSGAGEISTSQEQLK#.A                       | 7.45   | 12.82  | 0.58 | 1.72  |
| Q62384_ZfZpr1    | Zinc finger I R.IPELDFEIPAFSQK#.G                      | 12.25  | 3.86   | 3.17 | 0.32  |
| Q9R020_ZfZranb2  | Zinc finger I K.AGGTEIGK.T                             | 19.22  | 33.13  | 0.58 | 1.72  |
| Q9R020_ZfZranb2  | Zinc finger I R.ENVEYIER.E                             | 35.93  | 157.76 | 0.23 | 4.39  |
| Q9R020_ZfZranb2  | Zinc finger I K.ESEGEEDDEDLSK.Y                        | 15.53  | 32.84  | 0.47 | 2.12  |
| Q9R020_ZfZranb2  | Zinc finger I K.EVEDKESEGEEDDEDLSK.Y                   | 41.90  | 89.78  | 0.47 | 2.14  |
| Q9R020_ZfZranb2  | Zinc finger I K.LDEDEDEDADLSK.Y                        | 6.89   | 13.76  | 0.50 | 2.00  |
| Q9R020_ZfZranb2  | Zinc finger I R.TGYGGGFNER.E                           | 24.13  | 144.81 | 0.17 | 6.00  |
| Q9R020_ZfZranb2  | Zinc finger I K.YKLEDEDEDDEDADLSK.Y                    | 36.01  | 53.93  | 0.67 | 1.50  |
| Q9R020_ZfZranb2  | Zinc finger I K.YNLDAEEDSNK.K                          | 8.38   | 6.62   | 1.27 | 0.79  |
| Q9R020_ZfZranb2  | Zinc finger I K.YNLDAEEDSNK.K                          | 5.17   | 3.64   | 1.42 | 0.70  |
| Q9R020_ZfZranb2  | Zinc finger I K.ESEGEEDDEDLSK.Y                        | 2.70   | 5.48   | 0.49 | 2.03  |
| Q9R020_ZfZranb2  | Zinc finger I K.EVEDKESEGEEDDEDLSK.Y                   | 6.22   | 15.58  | 0.40 | 2.51  |
| Q9R020_ZfZranb2  | Zinc finger I K.LDEDEDEDADLSK#.Y                       | 2.32   | 3.17   | 0.73 | 1.36  |
| Q9R020_ZfZranb2  | Zinc finger I K.YKLEDEDEDDEDADLSK.Y                    | 2.28   | 3.87   | 0.59 | 1.70  |
| Q9R020_ZfZranb2  | Zinc finger I K.YKLEDEDEDDEDADLSK.Y                    | 1.37   | 2.52   | 0.54 | 1.84  |
| Q8R060_ZfZwlich  | Protein zwi R.GFAQVELFK#.S                             | 10.73  | 9.01   | 1.19 | 0.84  |
| Q8R060_ZfZwlich  | Protein zwi K.NLYQSEK#PQK#.W                           | 4.04   | 4.00   | 1.01 | 0.99  |
| Q8R060_ZfZwlich  | Protein zwi K.TILNENDSVFLVEK#.V                        | 7.92   | 6.36   | 1.25 | 0.80  |
| Q9CQU5_ZfZwint   | ZW10 inter K.EVLAAEAALPEVGLQEEAELPAK#.I                | 7.98   | 5.01   | 1.59 | 0.63  |
| Q62523_ZfZyx     | Zyxin OS=M K.FSPGAPSGPGQPQNK#.M                        | 19.54  | 18.82  | 1.04 | 0.96  |
| Q62523_ZfZyx     | Zyxin OS=M R.GPLSQAPTPAK.F                             | 27.29  | 43.67  | 0.62 | 1.60  |
| Q62523_ZfZyx     | Zyxin OS=M K.FSPGAPSGPGQPQNK#.M                        | 66.77  | 47.86  | 1.40 | 0.72  |
| Q62523_ZfZyx     | Zyxin OS=M R.GPLSQAPTPAK.F                             | 84.03  | 65.21  | 1.29 | 0.78  |
| Q62523_ZfZyx     | Zyxin OS=M K.MVPPDAPSSVSTGSPQPPSFYAAQK#.E              | 6.62   | 4.10   | 1.61 | 0.62  |
| Q62523_ZfZyx     | Zyxin OS=M K.QHPQPPAQNQNQVR.S                          | 3.65   | 11.72  | 0.31 | 3.21  |
| Q62523_ZfZyx     | Zyxin OS=M K.VNFRPGESEPPVAAGQA.R                       | 4.43   | 48.59  | 0.09 | 10.97 |
| Q8R3Y5_CS047_MOU | Uncharacter K.AAVVSEAQDSQVSTK#.S                       | 14.89  | 280.71 | 0.05 | 18.85 |
| Q9CQE8_CN166_MOU | UPF0568 p R.HDDVYVLMK#.A                               | 4.84   | 4.88   | 0.99 | 1.01  |
| Q9CQE8_CN166_MOU | UPF0568 p R.NFVWLEDQK#.I                               | 13.94  | 10.84  | 1.29 | 0.78  |
| Q8C3W1_CA198_MOU | Uncharacter K.ATPTESEKPPPPAVQRDEDDALFSEPALAQISSNVLLK.T | 1.53   | 2.08   | 0.74 | 1.36  |
| Q8C3W1_CA198_MOU | Uncharacter R.FGDEDITWQDEHSAPFSWETR.S                  | 2.41   | 2.96   | 0.81 | 1.23  |
| Q9CXL3_CG050_MOU | Uncharacter K.LDEAEPEDSGSPGK#.V                        | 21.30  | 11.37  | 1.87 | 0.53  |
| Q9CXL3_CG050_MOU | Uncharacter K.VQTLPAK#SAATLAEVLOGWAQK#.Q               | 13.20  | 4.55   | 2.90 | 0.34  |
| Q8VDP2_CX056_MOU | UPF0428 p K.NAPVTFIVDGAUVK#.F                          | 13.25  | 8.68   | 1.53 | 0.65  |
| Q80X32_CE024_MOU | UPF0461 p R.AADQFDLYSSQNK#.Y                           | 11.26  | 13.33  | 0.84 | 1.18  |
| Q80X32_CE024_MOU | UPF0461 p R.VVHGLQETSSEVKKPPE.-                        | 41.27  | 76.32  | 0.54 | 1.85  |
| Q80X32_CE024_MOU | UPF0461 p R.VVHGLQETSSEVKKPPE.-                        | 6.61   | 11.22  | 0.59 | 1.70  |
| Q9D937_CK098_MOU | Uncharacter K.AAM*EVEAPSK#.S                           | 15.25  | 8.47   | 1.80 | 0.56  |
| Q9D937_CK098_MOU | Uncharacter K.APQDVAM*EDLEDK#.S.-                      | 14.80  | 10.54  | 1.40 | 0.71  |
| Q9D937_CK098_MOU | Uncharacter K.APQDVAM*EDLEDK#.S.-                      | 5.93   | 1.94   | 3.05 | 0.33  |
| Q9D937_CK098_MOU | Uncharacter R.QVGVAVIDELTK#.H                          | 71.62  | 32.00  | 2.24 | 0.45  |
| Q9CQE8_CN166_MOU | UPF0568 p K.AGVM*ALANLLQQR.H                           | 25.31  | 69.43  | 0.36 | 2.74  |

|                                                                   |        |        |      |      |
|-------------------------------------------------------------------|--------|--------|------|------|
| Q9CQE8_CN166_MOUSE UPF0568 p K.AGVM*ALANLLQQR.H                   | 6.38   | 25.41  | 0.25 | 3.98 |
| Q9CQE8_CN166_MOUSE UPF0568 p K.AGVMALANLLQQR.H                    | 20.51  | 47.76  | 0.43 | 2.33 |
| Q9CQE8_CN166_MOUSE UPF0568 p K.EGLPVALEK#.H                       | 186.73 | 128.37 | 1.45 | 0.69 |
| Q9CQE8_CN166_MOUSE UPF0568 p R.HDDYLVNMLK#.A                      | 52.74  | 162.97 | 0.32 | 3.09 |
| Q9CQE8_CN166_MOUSE UPF0568 p R.HDDYLVNMLK#.A                      | 71.31  | 44.65  | 1.60 | 0.63 |
| Q9CQE8_CN166_MOUSE UPF0568 p K.HILGFDGDAVLNEAAQJLR.L              | 56.57  | 141.20 | 0.40 | 2.50 |
| Q9CQE8_CN166_MOUSE UPF0568 p K.IINEAIVAVQAIADPK#.T                | 59.71  | 34.49  | 1.73 | 0.58 |
| Q9CQE8_CN166_MOUSE UPF0568 p R.LLHIEELR.E                         | 22.49  | 57.90  | 0.39 | 2.57 |
| Q9CQE8_CN166_MOUSE UPF0568 p R.LTQDAVAK#.A                        | 176.14 | 96.46  | 1.83 | 0.55 |
| Q9CQE8_CN166_MOUSE UPF0568 p K.NAEPILINLDVNNPDFK#.A               | 127.25 | 85.26  | 1.49 | 0.67 |
| Q9CQE8_CN166_MOUSE UPF0568 p R.NFVWLIEDQK#.I                      | 113.31 | 71.15  | 1.59 | 0.63 |
| Q9CXL3_CG050_MOUSE Uncharacter K.EAGIAATQAK#.V                    | 157.78 | 73.86  | 2.14 | 0.47 |
| Q9CXL3_CG050_MOUSE Uncharacter K.LDEAEPEDSGSGPK#.V                | 111.84 | 65.17  | 1.72 | 0.58 |
| Q9CXL3_CG050_MOUSE Uncharacter K.VQTLPAK#PSAATLAEYLQGWAK#.Q       | 183.33 | 75.03  | 2.44 | 0.41 |
| Q9CR55_CP087_MOUSE UPF0547 p K.EIDIYANLSDEK#.A                    | 5.52   | 2.36   | 2.34 | 0.43 |
| P10404_ENV1_MOUSE MLV-relater R.GLDLFLK#.E                        | 14.08  | 9.90   | 1.42 | 0.70 |
| P10404_ENV1_MOUSE MLV-relater R.ISVVQALVLTQQYHQLK#.S              | 14.57  | 14.86  | 0.98 | 1.02 |
| P10404_ENV1_MOUSE MLV-relater K.SLTSLEVVQLNR.R                    | 3.27   | 11.16  | 0.29 | 3.41 |
| Q5XFZ0_CR021_MOUSE UPF0711 p R.SFLWALK#.S                         | 11.11  | 5.95   | 1.87 | 0.54 |
| Q8BZR9_CQ085_MOUSE Uncharacter R.ADSISTSNIK#.N                    | 30.00  | 16.43  | 1.83 | 0.55 |
| Q8BZR9_CQ085_MOUSE Uncharacter R.AEVLNLAQR.N                      | 8.74   | 17.00  | 0.51 | 1.95 |
| Q8BZR9_CQ085_MOUSE Uncharacter K.AGSEFITGIDVTSK#.E                | 38.39  | 21.63  | 1.77 | 0.56 |
| Q8BZR9_CQ085_MOUSE Uncharacter R.ALIGDDVGLTSYK#.H                 | 35.89  | 21.20  | 1.69 | 0.59 |
| Q8BZR9_CQ085_MOUSE Uncharacter R.ALINM*SSLPAQDK#.M                | 21.60  | 9.81   | 2.20 | 0.45 |
| Q8BZR9_CQ085_MOUSE Uncharacter R.ASGAEEDDSELQR.A                  | 7.11   | 19.04  | 0.37 | 2.68 |
| Q8BZR9_CQ085_MOUSE Uncharacter K.M*TM*YAEVEESQLK#.S               | 13.68  | 6.80   | 2.01 | 0.50 |
| Q8BZR9_CQ085_MOUSE Uncharacter K.YGNPNYGGM*K#.G                   | 14.37  | 7.35   | 1.95 | 0.51 |
| Q6PIU9_YJ005_MOUSE Uncharacter R.ASDDLGEPDVFATAPFR.S              | 4.67   | 10.88  | 0.43 | 2.33 |
| Q6PIU9_YJ005_MOUSE Uncharacter R.SSLVPADDVDIFSK#.A                | 24.85  | 15.65  | 1.59 | 0.63 |
| Q6PIU9_YJ005_MOUSE Uncharacter K.TQNTLASDSLAR.E                   | 5.89   | 18.64  | 0.32 | 3.17 |
| Q6PIU9_YJ005_MOUSE Uncharacter R.ASDDLGEPDVFATAPFR.S              | 6.08   | 14.73  | 0.41 | 2.42 |
| Q6PIU9_YJ005_MOUSE Uncharacter R.HYSPEDLSAEAQPIAAYK#.I            | 9.39   | 6.72   | 1.40 | 0.72 |
| Q6PIU9_YJ005_MOUSE Uncharacter K.TQNTLASDSLAR.E                   | 8.01   | 18.73  | 0.43 | 2.34 |
| Q8BWQ6_CP062_MOUSE UPF0505 p K.FLPFLDM*FQK#.E                     | 8.45   | 8.31   | 1.02 | 0.98 |
| Q8BWQ6_CP062_MOUSE UPF0505 p K.LLSDTSVIQFVPSK#.F                  | 30.34  | 24.85  | 1.22 | 0.82 |
| Q9CY10_NJMU_MOUSE Protein Njn R.SGGINAETPSGDDFSLSLVDTNLPSEPEL.R.S | 1.79   | 3.33   | 0.54 | 1.87 |
