# Supplementary material
Source: PubMed Central journal article supplement (PMC11345869)
Supplement: NIHMS2014975-supplement-Supplementary_Table_5.pdf [file NIHMS2014975-supplement-Supplementary_Table_5.pdf]

Supplementary Table 5. List of 33 common proteins detected in two orthogonal SILAC experiments as shown in Fig 1a

| No. | Cellular Function              | (MBT WT/MT x MLL WT/KO) | Protein Head                                                     | Gene Symbol | MBT SILAC ratio | MLL1 SILAC Ratio |
|-----|--------------------------------|-------------------------|------------------------------------------------------------------|-------------|-----------------|------------------|
| 1   | adaptor protein                | A6PWY4_WDR76_MOUSE      | WD repeat domain 76                                              | Wdr76       | 4.94            | 4.06             |
| 2   | adaptor protein                | Q6VN19_RBP10_MOUSE      | RAN binding protein 10                                           | Ranbp10     | 2.18            | 6.66             |
| 3   | ATP genesis                    | Q9D3D9_ATPD_MOUSE       | ATP synthase, H+ transporting, mitochondrial F1 complex, delta s | Atp5d       | 3.36            | 2.96             |
| 4   | DNA replication, damage        | P17918_PCNA_MOUSE       | proliferating cell nuclear antigen                               | Pcna        | 6.46            | 4.14             |
| 5   | histone                        | Q6ZWY9_H2B1C_MOUSE      | Histone H2B                                                      | Hist1h2bc   | 9.69            | 6.42             |
| 6   | histone                        | P62806_H4_MOUSE         | Histone 4                                                        | Hist1h4a    | 5.48            | 2.31             |
| 7   | histone                        | Q3THW5_H2AV_MOUSE       | H2A histone family member V                                      | H2afv       | 11.39           | 2.22             |
| 8   | histone                        | P68433_H31_MOUSE        | Histone 3.1                                                      | Hist1h3a    | 5.63            | 2.15             |
| 9   | heterochromatin                | P23198_CBX3_MOUSE       | chromobox 3                                                      | Cbx3        | 10.23           | 2.97             |
| 10  | heterochromatin                | P83917_CBX1_MOUSE       | chromobox 1                                                      | Cbx1        | 5.49            | 2.67             |
| 11  | heterochromatin                | Q61686_CBX5_MOUSE       | chromobox 5                                                      | Cbx5        | 6.4             | 2.34             |
| 12  | immune                         | Q99JR5_TINAL_MOUSE      | tubulointerstitial nephritis antigen-like 1                      | Tinagl1     | 2.42            | 2.14             |
| 13  | metablism                      | Q9CQ65_MTAP_MOUSE       | methylthioadenosine phosphorylase                                | Mtap        | 2.6             | 5.14             |
| 14  | metablism                      | P19157_GSTP1_MOUSE      | glutathione S-transferase pi 1                                   | Gstp1       | 3.6             | 2.64             |
| 15  | mitosis                        | Q9WU62_INCE_MOUSE       | inner centromere protein                                         | Incenp      | 2.16            | 3.58             |
| 16  | mitosis                        | Q8BHX3_BOREA_MOUSE      | cell division cycle associated 8                                 | Cdca8       | 3.28            | 16.26            |
| 17  | mitosis                        | Q9CQ25_MZT2_MOUSE       | mitotic spindle organizing protein 2A                            | Mzt2        | 2.18            | 2.59             |
| 18  | onco-protein                   | Q8K2B0_SC65_MOUSE       | Synaptonemal complex protein SC65                                | Leprel4     | 2.49            | 5.55             |
| 19  | protein trafficking            | Q9CQU0_TXD12_MOUSE      | thioredoxin domain containing 12                                 | Txndc12     | 2.19            | 9.53             |
| 20  | protein trafficking            | Q64310_SURF4_MOUSE      | surfeit 4                                                        | Surf4       | 2.54            | 4.54             |
| 21  | rRNA binding                   | Q8BG05_ROA3_MOUSE       | heterogeneous nuclear ribonucleoprotein A3                       | Hnrnpa3     | 2.24            | 4.27             |
| 22  | rRNA binding                   | Q9CQS2_NOP10_MOUSE      | NOP10 ribonucleoprotein                                          | Nop10       | 3.03            | 3.15             |
| 23  | rRNA binding                   | Q99020_ROAA_MOUSE       | heterogeneous nuclear ribonucleoprotein A/B                      | Hnrnpab     | 5               | 2.86             |
| 24  | rRNA binding                   | Q60668_HNRPD_MOUSE      | heterogeneous nuclear ribonucleoprotein D                        | Hnrnpd      | 5               | 2.68             |
| 25  | rRNA binding                   | Q9CY66_GAR1_MOUSE       | GAR1 homolog, ribonucleoprotein                                  | Gar1        | 3.17            | 2.34             |
| 26  | transcription                  | P28574_MAX_MOUSE        | MYC associated factor X                                          | Max         | 4.76            | 3.75             |
| 27  | transcription                  | P28033_CEBPB_MOUSE      | CCAAT/enhancer binding protein beta                              | Cebpb       | 2.14            | 3.73             |
| 28  | transcription                  | Q9JKB3_YBOX3_MOUSE      | Y-box binding protein 3                                          | Ybx3        | 2.22            | 3.41             |
| 29  | transcription                  | P52927_HMGA2_MOUSE      | high mobility group AT-hook 2                                    | Hmga2       | 4.43            | 3.16             |
| 30  | transcription, DNA replication | P97863_NFIB_MOUSE       | nuclear factor I/B                                               | Nfib        | 2.41            | 2.55             |
| 31  | transcription, DNA replication | P42669_PURA_MOUSE       | Purine-rich element binding protein A                            | Pura        | 4.14            | 2.36             |
| 32  | unknown function               | Q3UQA7_SELH_MOUSE       | Selenoprotein H                                                  | Selh        | 2.68            | 2.87             |
| 33  | unknown function               | Q80X32_CE024_MOUSE      | UPF0461 protein C5orf24                                          | Ce024       | 8.59            | 2.08             |
