# Supplementary material
Source: PubMed Central journal article supplement (PMC11345869)
Supplement: NIHMS2014975-supplement-Supplementary_Table_6.pdf [file NIHMS2014975-supplement-Supplementary_Table_6.pdf]

Supplementary Table 6. Data collection and refinement statistics for structural model of co-crystallized MLL1-SET and Borealin K143 peptide

|                                                          | MLL1-SET <sub>3785-3969</sub> + Borealin peptide <sub>137-145</sub> |
|----------------------------------------------------------|---------------------------------------------------------------------|
| <b>Data collection</b>                                   |                                                                     |
| Wavelength (Å)                                           | 1.12705                                                             |
| Space group                                              | P31 2 1                                                             |
| Cell dimensions                                          |                                                                     |
| <i>a</i> , <i>b</i> , <i>c</i> (Å)                       | 54.48, 54.48, 105.63                                                |
| $\alpha$ , $\beta$ , $\gamma$ (°)                        | 90, 90, 120                                                         |
| Resolution (Å)                                           | 47.18 - 2.59 (2.63 - 2.59)                                          |
| <i>R</i> <sub>sym</sub> or <i>R</i> <sub>merge</sub> (%) | 4.6 (78.9)                                                          |
| <i>I</i> / $\sigma$ <i>I</i>                             | 11.2 (0.8)                                                          |
| Completeness (%)                                         | 97.96 (79.46)                                                       |
| Redundancy                                               | 5.7                                                                 |
| <b>Refinement</b>                                        |                                                                     |
| Resolution (Å)                                           | 43.08 - 2.59 (2.68 - 2.59)                                          |
| No. reflections                                          | 5878                                                                |
| <i>R</i> <sub>work</sub> / <i>R</i> <sub>free</sub>      | 24.77 / 30.36                                                       |
| No. atoms                                                |                                                                     |
| Protein                                                  | 1000                                                                |
| Ligand/ion                                               | 1 (Zn <sup>2+</sup> ), 26 (AdoHcy),                                 |
| <i>B</i> -factors                                        |                                                                     |
| Protein                                                  | 61.12                                                               |
| Ligand/ion                                               | 142.86 (Zn <sup>2+</sup> ), 61.92 (AdoHcy)                          |
| R.m.s. deviations                                        |                                                                     |
| Bond lengths (Å)                                         | 0.01                                                                |
| Bond angles (°)                                          | 1.16                                                                |
| Ramachandran plot (%)                                    |                                                                     |
| Favored                                                  | 93                                                                  |
| Outliers                                                 | 0                                                                   |
| <b>Protein Data Bank code</b>                            | 7U5V                                                                |
