# Supplementary material
Source: PubMed Central journal article supplement (PMC11345869)
Supplement: NIHMS2014975-supplement-Supplementary_Table_7.pdf [file NIHMS2014975-supplement-Supplementary_Table_7.pdf]

**Supplementary Table 7. Gene dependency results from DepMap Portal.**

List of correlation coefficients and corresponding P values used in Extended Data Fig. 8a-c.

All correlation coefficients and P values were derived from Spearman's rank test and linear regression, respectively.

**MLL1 dependency vs Borealin expression in different cancer types, related to Extended Data Fig. 8a**

|                                             | correlation | p value |
|---------------------------------------------|-------------|---------|
| AML                                         | 0.269       | 0.225   |
| Alveolar rhabdomyosarcoma                   | 0.486       | 0.694   |
| anaplastic thyroid cancer                   | 0           | 0.734   |
| Astrocytoma                                 | 0.064       | 0.462   |
| atypical teratoid tumor                     | -0.233      | 0.383   |
| B cell leukemia                             | 0.706       | 0.0903  |
| biliary tract                               | -0.164      | 0.399   |
| bladder urothelial carcinoma                | -0.409      | 0.0334  |
| bone                                        | -0.325      | 0.0916  |
| bowel                                       | -0.01       | 0.709   |
| breast                                      | 0.105       | 0.485   |
| burkitt lymphoma                            | 0.1         | 0.419   |
| cervix                                      | 0.348       | 0.159   |
| CML                                         | -0.6        | 0.301   |
| colon                                       | 0.005       | 0.853   |
| diffuse glioma                              | 0.253       | 0.0596  |
| DLBCL                                       | -0.33       | 0.324   |
| embryonal tumor                             | 0.065       | 0.96    |
| endometrial carcinoma                       | -0.184      | 0.283   |
| esophageal squamous cell carcinoma          | 0.23        | 0.527   |
| esophagogastric adenocarcinoma              | 0.017       | 0.949   |
| ewing sarcoma                               | -0.434      | 0.254   |
| gallbladder adenocarcinoma                  | 0.6         | 0.329   |
| glioblastoma                                | 0.212       | 0.201   |
| head and neck squamous cell carcinoma       | 0.202       | 0.278   |
| high grade serous ovarian cancer            | 0.684       | 0.00706 |
| intrahepatic papillary neoplasm             | 0.6         | 0.237   |
| intraductal papillary neoplasm of bile duct | -0.308      | 0.125   |
| intrahepatic cholangiocarcinoma             | -0.224      | 0.343   |
| renal cell carcinoma                        | 0.238       | 0.192   |
| large cell lung carcinoma                   | -0.233      | 0.999   |
| lyposarcoma                                 | 0.048       | 0.801   |
| HCC                                         | -0.565      | 0.02    |
| lung adenocarcinoma                         | -0.168      | 0.409   |
| lung neuroendocrine tumor                   | 0.194       | 0.0952  |
| lung squamous cell carcinoma                | -0.179      | 0.391   |
| medulloblastoma                             | 0.107       | 0.788   |
| melanoma                                    | 0.134       | 0.192   |
| myeloproliferative neoplasms                | -0.503      | 0.402   |
| neuroblastoma                               | 0.088       | 0.904   |
| non-hodgkin lymphoma                        | 0.017       | 0.967   |
| oral cavity squamous cell carcinoma         | 0.101       | 0.792   |
| osteosarcoma                                | -0.225      | 0.329   |
| ovarian epithelial tumor                    | 0.289       | 0.134   |
| ovary fallopian tube                        | 0.286       | 0.13    |
| pancreatic adenocarcinoma                   | 0.218       | 0.972   |
| peripheral nervous system                   | 0.152       | 0.992   |
| plasma cell myeloma                         | 0.042       | 0.563   |
| pleura mesothelioma                         | 0.693       | 0.0288  |
| primitive neuroectodermal tumor             | 0.7         | 0.35    |
| prostate adenocarcinoma                     | -0.333      | 0.398   |
| rectal adenocarcinoma                       | 0.091       | 0.544   |

|                            |        |        |
|----------------------------|--------|--------|
| renal clear cell carcinoma | 0.318  | 0.255  |
| rhabdomyosarcoma           | 0.187  | 0.816  |
| serious ovarian cancer     | -0.147 | 0.668  |
| small cell lung cancer     | 0.12   | 0.0655 |
| soft tissue                | 0.17   | 0.832  |
| stomach adenocarcinoma     | -0.193 | 0.71   |
| synovial sarcoma           | 0.429  | 0.201  |
| T cell leukemia            | 0.8    | 0.33   |
| thyroid                    | 0.009  | 0.94   |
| uterine carcinoma          | -0.075 | 0.542  |

### Dependency of epigenetic regulatory vs Borealin expression in HCC, related to Extended Data Fig. 8b

| gene     | correlation | P value |
|----------|-------------|---------|
| Gcn5     | 0.481       | 0.00634 |
| Phf8     | 0.454       | 0.00913 |
| Jmjd8    | 0.463       | 0.0123  |
| Trim28   | 0.409       | 0.0135  |
| MLL1     | -0.565      | 0.02    |
| Kdm3b    | -0.49       | 0.0289  |
| Ep300    | 0.379       | 0.0343  |
| PRMT3    | -0.595      | 0.0425  |
| Brd9     | 0.298       | 0.065   |
| Hdac3    | -0.447      | 0.0678  |
| Kdm8     | -0.478      | 0.0747  |
| Actr     | 0.457       | 0.0904  |
| Smarca1  | 0.402       | 0.0906  |
| MLL3     | 0.394       | 0.108   |
| Kdm5c    | -0.278      | 0.12    |
| Brpf3    | -0.397      | 0.128   |
| Hbo1     | -0.248      | 0.134   |
| Rad54l2  | -0.365      | 0.142   |
| Smyd2    | 0.164       | 0.152   |
| Zmynd8   | -0.305      | 0.161   |
| Taf1     | 0.432       | 0.172   |
| Chd5     | -0.481      | 0.178   |
| Brd4     | 0.317       | 0.179   |
| Smyd5    | 0.359       | 0.183   |
| Prdm2    | 0.405       | 0.186   |
| Nat10    | 0.31        | 0.196   |
| Jmjd4    | -0.346      | 0.197   |
| Kdm5a    | -0.299      | 0.2     |
| Chd7     | 0.352       | 0.206   |
| Morf     | -0.326      | 0.21    |
| Jmjd1c   | 0.226       | 0.227   |
| Rad54l   | -0.295      | 0.228   |
| Hdac1    | 0.226       | 0.239   |
| Chd4     | 0.25        | 0.24    |
| Atf2     | 0.259       | 0.244   |
| Tet1     | -0.236      | 0.26    |
| Ehmt1    | 0.245       | 0.274   |
| Ash1l    | -0.263      | 0.283   |
| Nsd1     | -0.203      | 0.285   |
| Smarca1  | -0.044      | 0.309   |
| MLL4     | -0.257      | 0.312   |
| Suv420h1 | 0.087       | 0.317   |
| Brd8     | -0.418      | 0.317   |

|          |        |       |
|----------|--------|-------|
| Smarca1  | -0.256 | 0.319 |
| Hdac6    | -0.141 | 0.328 |
| Sirt3    | 0.215  | 0.336 |
| Kdm4b    | 0.203  | 0.344 |
| Tip60    | -0.15  | 0.362 |
| Jmjd6    | -0.242 | 0.363 |
| Ino80    | -0.233 | 0.363 |
| Smarca2  | -0.104 | 0.363 |
| Kdm2a    | -0.281 | 0.375 |
| Kdm4a    | 0.218  | 0.378 |
| Kdm6b    | 0.203  | 0.381 |
| Moz      | -0.359 | 0.392 |
| Hdac5    | -0.278 | 0.397 |
| Ep400    | 0.161  | 0.409 |
| Setdb2   | -0.192 | 0.416 |
| Tet2     | -0.182 | 0.42  |
| Sirt2    | 0.116  | 0.424 |
| Suv39h2  | 0.165  | 0.425 |
| Pcaf     | -0.189 | 0.425 |
| Smarca4  | 0.086  | 0.43  |
| Chd2     | -0.251 | 0.439 |
| Src1     | 0.296  | 0.442 |
| Hdac10   | -0.198 | 0.444 |
| Chd1L    | 0.155  | 0.446 |
| Trim33   | 0.128  | 0.448 |
| Tet3     | 0.132  | 0.45  |
| Phf2     | -0.138 | 0.456 |
| Atat     | 0.042  | 0.464 |
| PRMT6    | -0.227 | 0.473 |
| Brpf1    | -0.173 | 0.479 |
| Chd1     | -0.248 | 0.482 |
| Smyd1    | -0.161 | 0.491 |
| Dot1L    | -0.002 | 0.499 |
| Kdm2b    | 0.186  | 0.505 |
| MLL2     | -0.214 | 0.513 |
| Nds2     | 0.116  | 0.514 |
| Setd1b   | -0.036 | 0.518 |
| Kdm1a    | 0.183  | 0.534 |
| PRMT8    | 0.138  | 0.574 |
| Sirt4    | -0.162 | 0.577 |
| Hat1     | 0.062  | 0.577 |
| Chd6     | 0.054  | 0.58  |
| Prdm9    | 0.114  | 0.583 |
| Crebbp   | -0.232 | 0.584 |
| Kmd1b    | -0.167 | 0.601 |
| Bptf     | -0.053 | 0.606 |
| Hdac9    | -0.28  | 0.607 |
| Prdm8    | -0.206 | 0.609 |
| Acat1    | 0.057  | 0.609 |
| Brd2     | -0.128 | 0.622 |
| Sirt1    | 0.146  | 0.623 |
| Brd7     | 0.251  | 0.644 |
| PRMT5    | -0.003 | 0.648 |
| Chd3     | 0.194  | 0.664 |
| Ncoa2    | 0.077  | 0.665 |
| Suv420h2 | -0.011 | 0.668 |
| Hdac8    | 0.155  | 0.678 |
| Zmynd11  | -0.126 | 0.679 |

|         |        |       |
|---------|--------|-------|
| Setd1a  | 0.206  | 0.68  |
| Sirt6   | -0.006 | 0.687 |
| Kdm3a   | 0.182  | 0.708 |
| Hdac4   | 0.107  | 0.724 |
| Ehmt2   | 0.009  | 0.725 |
| PRMT1   | 0.123  | 0.73  |
| Kdm7a   | -0.045 | 0.732 |
| Brd1    | 0.086  | 0.734 |
| Atrx    | 0.122  | 0.747 |
| MLL5    | -0.068 | 0.751 |
| Ezh1    | 0.173  | 0.764 |
| Brd3    | 0.203  | 0.775 |
| Setd2   | -0.03  | 0.786 |
| Mof     | -0.039 | 0.787 |
| Setd6   | 0.164  | 0.791 |
| Kdm6a   | 0.003  | 0.792 |
| Smyd3   | -0.027 | 0.794 |
| Setd7   | -0.003 | 0.808 |
| Ezh2    | 0.006  | 0.809 |
| Suv39h1 | -0.03  | 0.818 |
| Setd8   | -0.078 | 0.836 |
| Sirt5   | 0.132  | 0.837 |
| Hdac7   | 0.119  | 0.854 |
| Kdm4c   | 0.045  | 0.857 |
| CARM1   | 0.092  | 0.858 |
| Kdm5b   | -0.029 | 0.859 |
| Jmjd7   | 0.056  | 0.931 |
| Trim24  | 0.12   | 0.933 |
| Elp3    | 0.05   | 0.95  |
| Sirt7   | -0.03  | 0.963 |
| PRMT2   | -0.027 | 0.964 |
| PRMT7   | 0.09   | 0.966 |
| Kdm4d   | -0.107 | 0.97  |
| Erc6    | -0.026 | 0.972 |
| Setdb1  | -0.087 | 0.978 |
| Nsd3    | -0.108 | 0.989 |
| Jarid2  | -0.026 | 0.993 |
| Hdac2   | -0.08  | 0.994 |

### MLL1 dependency vs expression of cell cycle regulator genes in HCC, related to Extended Data Fig. 8c

| gene     | correlation | p value  |
|----------|-------------|----------|
| mad1     | 0.701       | 0.000916 |
| cdk6     | -0.436      | 0.022    |
| survivin | -0.585      | 0.0225   |
| borealin | -0.519      | 0.0347   |
| ccnb1    | -0.514      | 0.035    |
| cdk7     | -0.45       | 0.052    |
| cdc25b   | -0.432      | 0.061    |
| ccnh     | -0.451      | 0.062    |
| cdc25c   | -0.429      | 0.07     |
| ccna2    | -0.429      | 0.076    |
| cdc20    | -0.496      | 0.084    |
| bub1     | -0.417      | 0.088    |
| cdk1     | -0.453      | 0.1      |
| bub3     | -0.379      | 0.112    |
| atr      | -0.436      | 0.118    |

|        |        |       |
|--------|--------|-------|
| mps1   | -0.302 | 0.119 |
| ccne2  | -0.478 | 0.134 |
| chk2   | 0.338  | 0.165 |
| c-myc  | 0.308  | 0.178 |
| mad2   | -0.383 | 0.211 |
| cdc45  | -0.386 | 0.211 |
| atm    | -0.433 | 0.245 |
| chk1   | -0.359 | 0.266 |
| cdc6   | -0.281 | 0.28  |
| cdk2   | -0.284 | 0.297 |
| anapc1 | 0.226  | 0.314 |
| rad21  | -0.328 | 0.324 |
| ccnd1  | -0.289 | 0.325 |
| cdc52a | 0.183  | 0.376 |
| cdc7   | -0.254 | 0.4   |
| smc1b  | 0.163  | 0.418 |
| rb     | -0.123 | 0.435 |
| cdc14b | 0.317  | 0.437 |
| mad1l1 | 0.135  | 0.492 |
| scf    | -0.183 | 0.502 |
| bubr1  | -0.18  | 0.524 |
| skp2   | 0.059  | 0.576 |
| ccna1  | -0.117 | 0.578 |
| ccnd2  | 0.125  | 0.684 |
| myt1   | 0.039  | 0.7   |
| cdk4   | -0.143 | 0.731 |
| cdc14a | -0.118 | 0.737 |
| ccne1  | 0.057  | 0.89  |
| cdc14c | -0.027 | 0.899 |
| wee1   | -0.056 | 0.911 |
| tp53   | -0.056 | 0.968 |
