# Supplementary material
Source: PubMed Central journal article supplement (PMC11345869)
Supplement: NIHMS2014975-supplement-Supplementary_Table_8.pdf [file NIHMS2014975-supplement-Supplementary_Table_8.pdf]

**Supplementary Table 8. Statistics for differential expression of KMT2A/MLL1 between HCC patients and control samples**

| Study     | HCC tumors |        |         | Controls |        |          | SMD <sup>a</sup> | 95%-CI       | Weight  |
|-----------|------------|--------|---------|----------|--------|----------|------------------|--------------|---------|
|           | Total      | Mean   | SD      | Total    | Mean   | SD       |                  |              |         |
| GSE57957  | 39         | 198.86 | 30.8567 | 39       | 179.9  | 31.9238  | 0.6              | [0.14; 1.05] | 7.20%   |
| GSE22058  | 100        | 811.72 | 400.418 | 97       | 643.75 | 223.9431 | 0.51             | [0.23; 0.80] | 18.30%  |
| GSE25097  | 268        | 1.5    | 0.8035  | 243      | 1.21   | 0.4733   | 0.43             | [0.25; 0.60] | 47.90%  |
| GSE76297  | 153        | 8.33   | 0.4134  | 151      | 7.77   | 0.239    | 1.65             | [1.39; 1.91] | 21.70%  |
| GSE112790 | 183        | 5.26   | 0.6573  | 14       | 4.82   | 0.4165   | 0.68             | [0.14; 1.23] | 4.90%   |
| Summary   | 743        |        |         | 544      |        |          | 0.73             | [0.61; 0.85] | 100.00% |

<sup>a</sup>standardized mean difference (SMD), used to standardize the outcome scale of individual study before calculating the combined effect.
