# Supplementary material
Source: PubMed Central journal article supplement (PMC11345869)
Supplement: NIHMS2014975-supplement-Supplementary_Table_9_qPCR_primers.pdf [file NIHMS2014975-supplement-Supplementary_Table_9_qPCR_primers.pdf]

| name            | sequence or source       |
|-----------------|--------------------------|
| Mm_Borealin fwd | GGTGCAAGTTCGAACCAAGCA    |
| Mm_Borealin rev | GCGAAGTAGTCAAGCCACTTCATC |
| Hs_Borealin fwd | CTTCGCCCTTGGAGGAAACAA    |
| Hs_Borealin rev | GGTGTCTGAATAGCTTCTGCTG   |
| Hs_Aurora B fwd | CAGTGGGACACCCGACATC      |
| Hs_Aurora B rev | GTACACGTTTCCAAACTTGCC    |
| Hs_INCENP fwd   | AAGCTCATGGAGTTTCTCTGC    |
| Hs_INCENP rev   | CGTCTCTTCTCCGTCGGTTC     |
| Hs_Survivin fwd | AGGACCACCGCATCTCTACAT    |
| Hs_Survivin rev | AAGTCTGGCTCGTTCTCAGTG    |
| Hs_KMT2D fwd    | GAGCTACGGCGCTTTGAGTT     |
| Hs_KMT2D rev    | AGGGAAACCAATCTGTGATAGGT  |
| Hs_EZH2 fwd     | AATCAGAGTACATGCGACTGAGA  |
| Hs_EZH2 rev     | GCTGTATCCTTCGCTGTTTCC    |
| Hs_G9a fwd      | CTGTCAGAGGAGTTAGGTTCTGC  |
| Hs_G9a rev      | CTTGCTGTCGGAGTCCACG      |
