# Supplementary material
Source: PubMed Central journal article supplement (PMC11345869)
Supplement: NIHMS2014975-supplement-Supplementary_Table_9_shRNAs.pdf [file NIHMS2014975-supplement-Supplementary_Table_9_shRNAs.pdf]

| name          | sequence or source    |
|---------------|-----------------------|
| control shRNA | CCTAAGGTTAAGTCGCCCTCG |
| shMLL1 #1     | GATTATGACCCTCCAATTAAA |
| shMLL1 #2     | ACGACTGGCATCCCATAATTT |
| shKMT2D       | AGCACATGGAGTGCGAAATTA |
| shEZH2        | CCCAACATAGATGGACCAAAT |
| shG9a         | CGAGAGAGTTCATGGCTCTTT |
| shBorealin    | TAGGTAGAGCTGTCTGTTAC  |
