# Supplementary material
Source: PubMed Central journal article supplement (PMC11345869)
Supplement: NIHMS2014975-supplement-Supplementary_Table_9_siRNAs.pdf [file NIHMS2014975-supplement-Supplementary_Table_9_siRNAs.pdf]

| name                     | sequence or source  |
|--------------------------|---------------------|
| siBorealin               | AGGUAGAGCUGUCUGUUCA |
| siMLL1                   | GGUCAUAACCAGACAGAAU |
| siKMT2B                  | GCUAUGAAGACAACGACUA |
| Non-targeting ctrl siRNA | Dharmacon           |
